# Supplementary material for: Modelling the future evolution of glaciers in the European Alps under the EURO-CORDEX RCM ensemble
Source: Copernicus journal article supplement (doi:10.5194/tc-13-1125-2019), 2019-04-09
Supplement: Supplementary file 162 [file tc-13-1125-2019-supplement.zip]

## **SUPPLEMENTARY MATERIAL:**

### **Modelling the future evolution of glaciers in the European Alps under the EURO-CORDEX RCM ensemble**

Harry Zekollari<sup>1,2\*</sup>, Matthias Huss<sup>1,3</sup> and Daniel Farinotti<sup>1,2</sup>

<sup>1</sup> Laboratory of Hydraulics, Hydrology and Glaciology (VAW), ETH Zürich, Zürich, Switzerland

<sup>2</sup> Swiss Federal Institute for Forest, Snow and Landscape Research (WSL), Birmensdorf, Switzerland

<sup>3</sup> Department of Geosciences, University of Fribourg, Fribourg, Switzerland

\* corresponding author: [zharry@ethz.ch](mailto:zharry@ethz.ch)

**The supplementary material consists of 6 tables and 5 figures**

## Tables

| GCM<br>RCM | CNRM-<br>CERFACS-<br>CNRM-<br>CM5        | ICHEC-<br>EC-<br>EARTH                                                     | IPSL-IPSL-<br>CM5A-MR         | MOHC-<br>HadGEM2-<br>ES                  | MPI-M-<br>MPI-ESM-<br>LR                                                              | NCC-<br>NorESM1-<br>M        |
|------------|------------------------------------------|----------------------------------------------------------------------------|-------------------------------|------------------------------------------|---------------------------------------------------------------------------------------|------------------------------|
| ALADIN53   | rep2.6,<br>rep4.5,<br>rep8.5<br>(r1i1p1) |                                                                            |                               |                                          |                                                                                       |                              |
| ALARO-0    | rep2.6,<br>rep4.5,<br>rep8.5<br>(r1i1p1) |                                                                            |                               |                                          |                                                                                       |                              |
| CCLM4-8-17 | rep4.5<br>rep8.5<br>(r1i1p1)             | rep2.6,<br>rep4.5,<br>rep8.5<br>(r12i1p1)                                  |                               | rep4.5<br>rep8.5<br>(r1i1p1)             | rep4.5<br>rep8.5<br>(r1i1p1)                                                          |                              |
| HIRHAM5    |                                          | rep2.6,<br>rep4.5,<br>rep8.5<br>(r3i1p1)                                   |                               | rep8.5<br>(r1i1p1)                       |                                                                                       | rep4.5<br>rep8.5<br>(r1i1p1) |
| RACMO22E   |                                          | rep2.6,<br>rep4.5,<br>rep8.5<br>(r12i1p1);<br>rep4.5<br>rep8.5<br>(r1i1p1) |                               | rep2.6,<br>rep4.5,<br>rep8.5<br>(r1i1p1) |                                                                                       |                              |
| RCA4       | rep4.5,<br>rep8.5<br>(r1i1p1)            | rep2.6,<br>rep4.5,<br>rep8.5<br>(r12i1p1)                                  | rep4.5,<br>rep8.5<br>(r1i1p1) | rep2.6,<br>rep4.5,<br>rep8.5<br>(r1i1p1) | rep2.6,<br>rep4.5,<br>rep8.5<br>(r1i1p1)                                              |                              |
| REMO2009   |                                          |                                                                            |                               |                                          | rep2.6,<br>rep4.5,<br>rep8.5<br>(r1i1p1);<br>rep2.6,<br>rep4.5,<br>rep8.5<br>(r2i1p1) |                              |
| WRF331F    |                                          |                                                                            | rep4.5<br>rep8.5<br>(r1i1p1)  |                                          |                                                                                       |                              |
| WRF361H    |                                          |                                                                            |                               |                                          | rep8.5<br>(r1i1p1)                                                                    |                              |

**Table S1.** Overview of the 51 EURO-CORDEX RCM simulations utilised in this study. All available simulations at a 0.11° resolution (ca. 12 km) and with monthly temperature and precipitation series are considered. The simulations in red are the ones with a future volume evolution that is the closest to the multi-model mean.

| Glacier name                           | Location             | Area at RGI inventory date (2003) |                                                                                                                                                                                                                                                |
|----------------------------------------|----------------------|-----------------------------------|------------------------------------------------------------------------------------------------------------------------------------------------------------------------------------------------------------------------------------------------|
| Grosser Aletschgletscher (Switzerland) | 8.019°E<br>46.503°N  | 82.2 km <sup>2</sup>              | Three values correspond to (i) near-front, (ii) first velocity peak, and (iii) peak velocities (Fig. 5a). Observations are 1950/85 point measurements from Zoller (2010).                                                                      |
| Mer de Glace (France)                  | 6.934°E<br>45.883°N  | 24.2 km <sup>2</sup>              | Four values correspond to four peaks in surface velocities (Fig. 5b). Observations from SPOT imagery for the years 2000/2001 (Berthier and Vincent, 2012).                                                                                     |
| Rhonegletscher (Switzerland)           | 8.396°E<br>46.624°N  | 15.8 km <sup>2</sup>              | Values correspond to peak velocity. Visually interpolated between the 1981-82 and the 1999-2000 velocities from Fig. 8 in Nishimura et al. (2013).                                                                                             |
| Vadret da Morteratsch (Switzerland)    | 9.925°E<br>46.3893°N | 15.8 km <sup>2</sup>              | Value corresponds to peak velocity. Observation from stake network, taken from Table 1 from Zekollari et al. (2013).                                                                                                                           |
| Unteraargletscher (Switzerland)        | 8.219°E<br>46.564°N  | 23.8 km <sup>2</sup>              | Peak velocity under the confluence (4 km from the front at inventory date). Observation from 1996/97 from Fig. 5.1. in Bauder (2001)                                                                                                           |
| Hintereisferner (Austria)              | 10.758°E<br>46.800°N | 8.0 km <sup>2</sup>               | Two values correspond 'line 6' and 'line 7' from Stocker-Waldhuber et al. (2018, Fig.3, which were visually interpolated to 2003), and are respectively located at about 1 km upstream and 2 km upstream from the front at the inventory date. |
| Kesselwandferner (Austria)             | 10.791°E<br>46.842°N | 4.0 km <sup>2</sup>               | Peak velocity for the 1990-2010 period (Fig.4 in Stocker-Waldhuber et al., 2018)                                                                                                                                                               |
| Taschachferner (Austria)               | 10.855°E<br>46.896°N | 5.4 km <sup>2</sup>               | Peak velocity in the 2000s (Fig.5 in Stocker-Waldhuber et al., 2018)                                                                                                                                                                           |
| Gepatschferner (Austria)               | 10.757°E<br>46.849°N | 16.6 km <sup>2</sup>              | Peak velocity in the 2000s (Fig.5 in Stocker-Waldhuber et al., 2018)                                                                                                                                                                           |
| Careser (Italy)                        | 10.708°E<br>46.451°N | 2.8 km <sup>2</sup>               | Peak velocity in the 1970s (Carturan et al., 2013)                                                                                                                                                                                             |
| Argentière (France)                    | 6.985°E<br>45.951°N  | 13.8 km <sup>2</sup>              | Peak velocity in the summer of 2003 (Fig. 2 in Rabatel et al., 2018)                                                                                                                                                                           |

**Table S2.** Information and references for surface velocities used for model evaluation (Fig. 5 and Fig. 6)

|                                       | <b>RCP2.6</b>                           | <b>RCP4.5</b>                           | <b>RCP8.5</b>                           |
|---------------------------------------|-----------------------------------------|-----------------------------------------|-----------------------------------------|
| <b>Glacier characteristic in 2017</b> | <b>2017-2100 relative volume change</b> | <b>2017-2100 relative volume change</b> | <b>2017-2100 relative volume change</b> |
| <b>volume</b>                         | $r^2 = 0.03$                            | $r^2 = 0.06$                            | $r^2 = 0.06$                            |
| <b>area</b>                           | $r^2 = 0.06$                            | $r^2 = 0.11$                            | $r^2 = 0.11$                            |
| <b>length</b>                         | $r^2 = 0.13$                            | $r^2 = 0.23$                            | $r^2 = 0.20$                            |
| <b>median elevation</b>               | $r^2 = 0.07$                            | $r^2 = 0.07$                            | $r^2 = 0.03$                            |
| <b>mean elevation</b>                 | $r^2 = 0.07$                            | $r^2 = 0.07$                            | $r^2 = 0.03$                            |
| <b>minimum elevation</b>              | $r^2 = 0.18$                            | $r^2 = 0.20$                            | $r^2 = 0.19$                            |
| <b>maximum elevation</b>              | $r^2 = 0.38$                            | $r^2 = 0.41$                            | $r^2 = 0.30$                            |
| <b>centre of mass</b>                 | $r^2 = 0.06$                            | $r^2 = 0.05$                            | $r^2 = 0.02$                            |
| <b>elevation range</b>                | $r^2 = 0.57$                            | $r^2 = 0.63$                            | $r^2 = 0.51$                            |

**Table S3.** Correlation ( $r^2$ ) between modelled present-day (2017) glacier characteristics and relative future volume changes (2100 vs. 2017). The values are based on the RCM multi-simulation mean for the respective RCP.

|                                               | <b>Ice flow</b> | <b><math>\Delta h</math></b> | <b>SMB calibration</b> | <b>Calibration</b> | <b>RCP 2.6</b> | <b>RCP 4.5</b> | <b>RCP 8.5</b> |
|-----------------------------------------------|-----------------|------------------------------|------------------------|--------------------|----------------|----------------|----------------|
| <b>Standard</b>                               | ✓               |                              | local                  | V-L                | 36.5<br>(-70%) | 21.1<br>(-83%) | 5.5<br>(-95%)  |
| <b><math>\Delta h</math>-parameterization</b> |                 | ✓                            | local                  |                    | 31.9<br>(-74%) | 18.4<br>(-85%) | 6.1<br>(-95%)  |
| <b>region-wide MB calibration</b>             |                 |                              | regional               | V-L                | 42.3<br>(-65%) | 23.1<br>(-81%) | 6.5<br>(-95%)  |

**Table S4.** 2100 glacier volume and relative loss (vs. 2003) for (i) the standard (dynamic) model, (ii) the model forced with the  $\Delta h$  parameterization and (iii) the dynamic model for which the SMB component is calibrated with a regional SMB estimation. All numbers correspond to the RCM multi-simulation mean values.

|                    | <b>Sum Sq.</b> | <b>Degrees of Freedom</b> | <b>Mean Sq.</b> | <b>F</b> | <b>p-value</b>         |
|--------------------|----------------|---------------------------|-----------------|----------|------------------------|
| <b>GCM</b>         | 1092.8         | 5                         | 218.6           | 6.9639   | $1.68 \times 10^{-4}$  |
| <b>RCP</b>         | 6654.7         | 2                         | 3327.4          | 106.02   | $7.64 \times 10^{-15}$ |
| <b>Realization</b> | 188.1          | 3                         | 62.7            | 1.9976   | 0.134                  |
| <b>RCM</b>         | 593.6          | 8                         | 74.2            | 2.3643   | 0.040                  |
| <b>Error</b>       | 1004.3         | 32                        | 31.4            |          |                        |

**Table S5.** Analysis of variance (ANOVA) of linear model with categorical data for describing 2017-2100 volume change based on EURO-CORDEX data. For every category (GCM, RCP, Realization, RCM) the degrees of freedom correspond to the number of possible values minus 1.

| Glacier and study                                 | Ice flow model type | Scenario considered in detailed study and corresponding scenario here                                           | Modelled glacier changes (detailed 3-D study vs. our flowline model)                                     | Notes                                                                                                                                                                        |
|---------------------------------------------------|---------------------|-----------------------------------------------------------------------------------------------------------------|----------------------------------------------------------------------------------------------------------|------------------------------------------------------------------------------------------------------------------------------------------------------------------------------|
| Rhonegletscher;<br>(Jouvet et al., 2009)          | full-stokes model   | median scenario (+4°C vs. 1990); between RCP4.5 and RCP8.5                                                      | -95% volume change over 2007-2100<br>vs. -90±6% under RCP4.5                                             | In Jouvet et al. (2009), two scenarios without major precipitation changes are considered.<br><br>Good (qualitative) agreement between changes from 3-D model and our study. |
|                                                   |                     | Strong warming scenario (+6°C vs. 1990): warmer than RCP8.5                                                     | 95% of the 2007 volume is lost by 2075<br>vs. 95% of the 2007 volume is lost by 2079.5±11.5 under RCP8.5 |                                                                                                                                                                              |
| Grosser Aletschgletscher<br>(Jouvet et al., 2011) | full-stokes model   | +2°C (1980-2009 → 2100); close to RCP2.6                                                                        | 1999-2100 volume change: -66%<br>vs. -60±19% under RCP2.6                                                | Good (qualitative) agreement between changes from 3-D model and our study.                                                                                                   |
|                                                   |                     | ‘ENSmin’ (+2.9/+3.7°C annual/summer temperature increase in 2100 vs. 1980-2009); between RCP4.5 and RCP8.5      | 1999-2100 volume change: -76%<br>vs. -68±14% under RCP4.5 and -90±10% under RCP8.5                       |                                                                                                                                                                              |
|                                                   |                     | ‘ENSmed’ scenario (annual/summer temperatures increase by +4.3°C/+5.5°C by 2100 vs. 1980-2009); close to RCP8.5 | 1999-2100 volume change: -90%<br>vs. -90±10% under RCP8.5                                                |                                                                                                                                                                              |
| Vadret da Morteratsch<br>(Zekollari et al., 2014) | higher-order model  | +1°C over period 2010-2100;<br>approx. RCP2.6                                                                   | 2010-2100 volume change: -48%;<br>vs. -63±14% under RCP2.6                                               | (Qualitative) comparison suggests that simulations with our flowline model result in higher mass losses compared to those from detailed modelling study.                     |
|                                                   |                     | +2.5°C over period 2010-2100;<br>approx. RCP4.5                                                                 | 2010-2100 volume change: -69%;<br>vs. -80±8% under RCP4.5                                                |                                                                                                                                                                              |
|                                                   |                     | +4°C over period 2010-2100;<br>approx. RCP8.5                                                                   | 2010-2100 volume change: -80%;<br>vs. -95±4% under RCP8.5                                                |                                                                                                                                                                              |

**Table S6.** Modelled glacier changes compared to other 3-D detailed studies including non-local stresses. All values from our study corresponds to RCM multi-simulation means for a specific RCP.

**Figures**

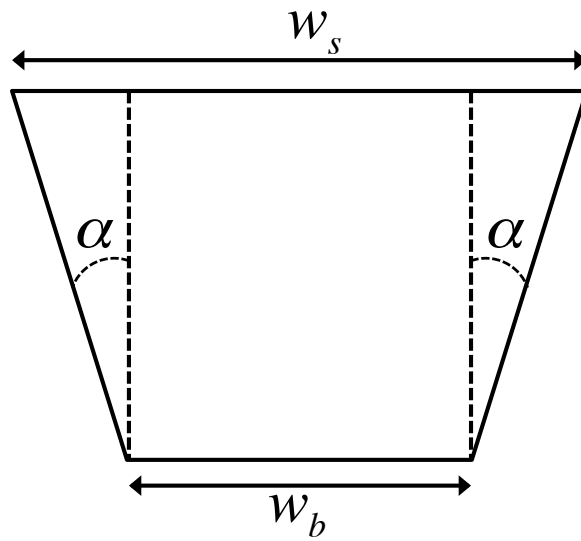

**Fig. S1.** Parameterization of glacier cross section with slope angle  $\alpha$

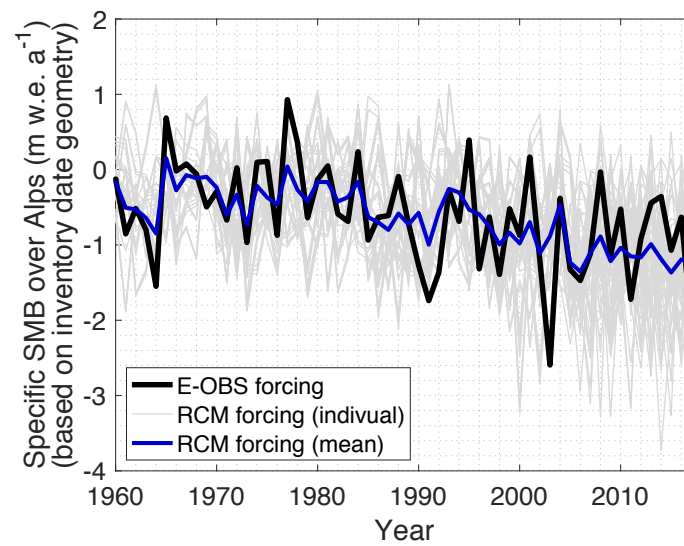

**Fig. S2.** Past specific surface mass balance (SMB) over glaciers in the European Alps, as derived from E-OBS data and from historical RCM simulations. SMB calculations are based on reference geometry at inventory date.

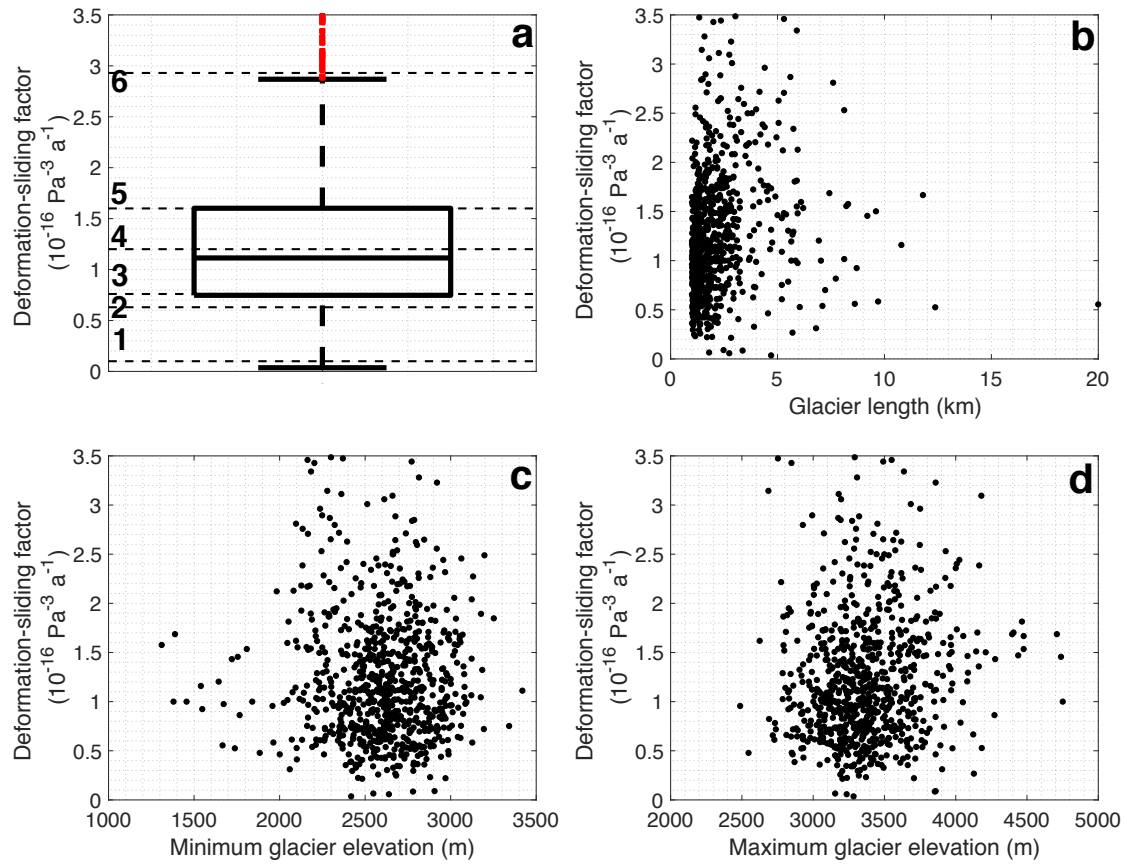

**Fig. S3.** Deformation-sliding factor obtained from model calibration (a) boxplot and as a function of various glacier characteristics: (b): glacier length, (c): minimum glacier elevation, (d): maximum glacier elevation. In panel (a), the horizontal dotted lines correspond to selected values from the literature: (1) Modelling of Pasterze (Austria) (Zuo and Oerlemans, 1997), (2) Glacier de Saint-Sorlin (France) (Le Meur and Vincent, 2003), (3) Model mean from various calibrated numerical models (Cuffey and Paterson, 2010), similar value value obtained for Unteraargletscher (Gudmundsson, 1999); (4) Mean from various borehole tilt measurements (Cuffey and Paterson, 2010), (5) Modelling of Findelengletscher (Iken and Truffer, 1997); similar value obtained for Vadret da Morteratsch (Zekollari et al., 2013); (6) value obtained from various lab experiments (Budd and Jacka, 1989)

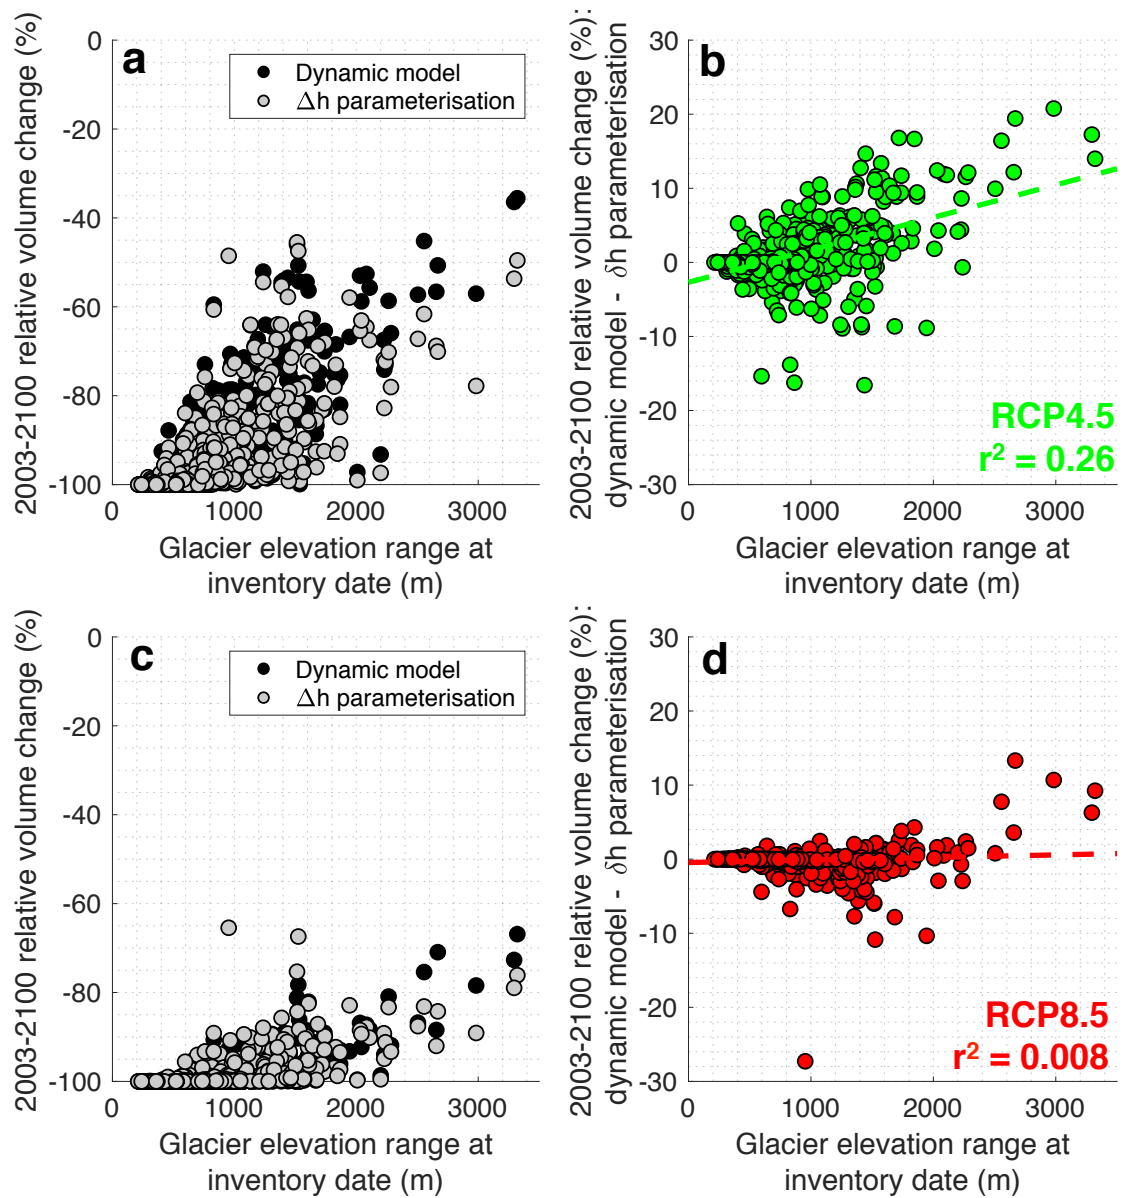

**Fig. S4.** Future glacier evolution for individual glaciers with dynamic model and corresponding glacier simulation with  $\Delta h$ -parameterisation. All values correspond to RCP4.5 multi-simulation mean values (a,b) and RCP8.5 multi-simulation mean values (c,d).



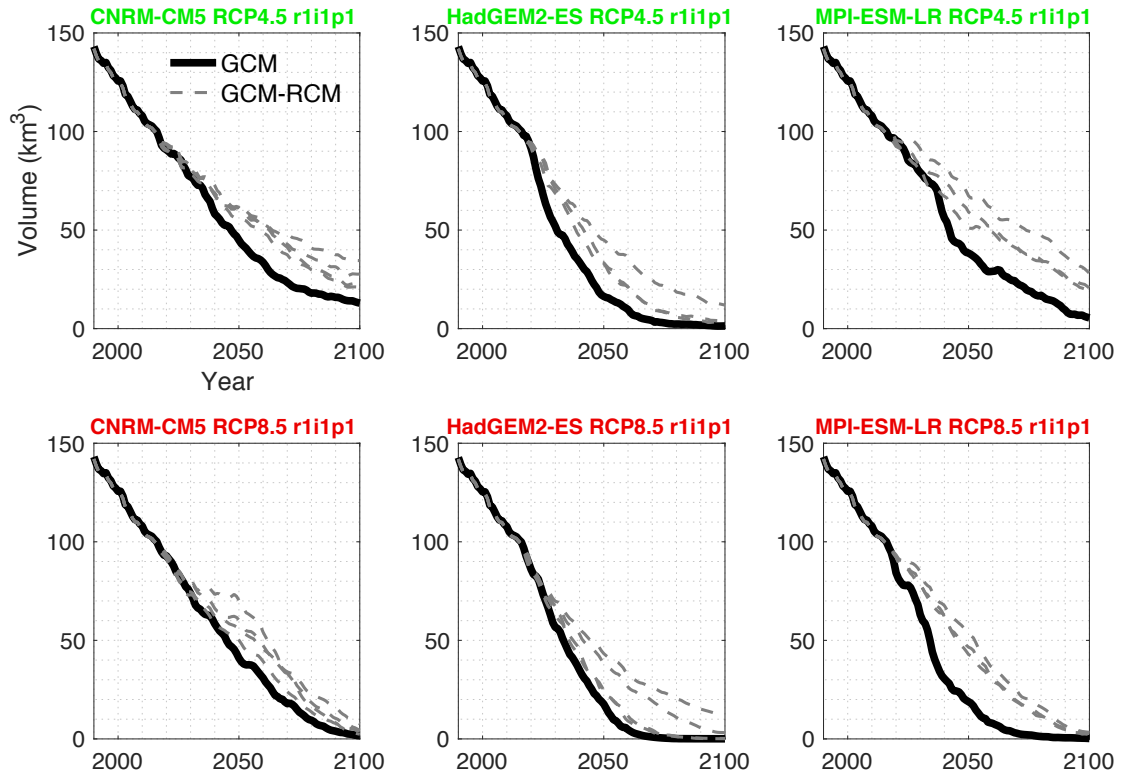

**Fig. S5.** Future evolution of glacier volume when the model is forced directly with GCMs vs. EURO-CORDEX GCM-RCM simulations. Results are shown for the GCMs that have the most corresponding RCM simulations in the EURO-CORDEX ensemble for a given realisation (CNRM-CM5 r1i1p1, HadGEM2-ES r1i1p1, MPI-ESM-LR r1i1p1).

## References supplementary material

- Bauder: Bestimmung der Massenbilanz von Gletschern mit Fernerkundungsmethoden und Fließmodellierungen, ETH Zürich., 2001.
- Berthier, E. and Vincent, C.: Relative contribution of surface mass-balance and ice-flux changes to the accelerated thinning of Mer de Glace, French Alps, over 1979-2008, *J. Glaciol.*, 58(209), 501–512, doi:10.3189/2012JoG11J083, 2012.
- Budd, W. F. and Jacka, T. H.: A Review of Ice Rheology for Ice Sheet Modelling, *Cold Reg. Sci. Technol.*, 16, 107–144, 1989.
- Carturan, L., Baroni, C., Becker, M., Bellin, A., Cainelli, O., Carton, A., Casarotto, C. and Fontana, G. D.: The Cryosphere Decay of a long-term monitored glacier: Careser Glacier (Ortles-Cevedale, European Alps), *Cryosph.*, 7, 1819–1838, doi:10.5194/tc-7-1819-2013, 2013.
- Cuffey, K. M. and Paterson, W. S. B.: The physics of glaciers, Butterworth-Heinemann, Oxford., 2010.
- Gudmundsson, G. H.: A three-dimensional numerical model of the confluence area of Unteraargletscher, Bernese Alps, Switzerland, *J. Glaciol.*, 45(150), 219–230, doi:10.3189/002214399793377086, 1999.
- Iken, A. and Truffer, M.: The relationship between subglacial water pressure and velocity of Findelengletscher, Switzerland, during its advance and retreat, *J. Glaciol.*, 43(144), 328–338, doi:10.1017/CBO9781107415324.004, 1997.
- Jouvet, G., Huss, M., Blatter, H., Picasso, M. and Rappaz, J.: Numerical simulation of Rhonegletscher from 1874 to 2100, *J. Comput. Phys.*, 228(17), 6426–6439, doi:10.1016/j.jcp.2009.05.033, 2009.
- Jouvet, G., Huss, M., Funk, M. and Blatter, H.: Modelling the retreat of Grosser Aletschgletscher, Switzerland, in a changing climate, *J. Glaciol.*, 57(206), 1033–1045, doi:10.3189/002214311798843359, 2011.
- Le Meur, E. and Vincent, C.: A two-dimensional shallow ice-flow model of Glacier de Saint-Sorlin, France, *J. Glaciol.*, 49(167), 527–538, doi:10.3189/172756503781830421, 2003.
- Nishimura, D., Sugiyama, S., Bauder, A., Funk, M., Bauder, A. and Funk, M.: Changes in Ice-Flow Velocity and Surface Elevation from 1874 to 2006 in Changes in Ice-Flow Velocity and Surface Elevation from 1874 to 2006 in Rhonegletscher, Switzerland, *Arctic, Antarct. Alp. Res.*, 45(4), 552–562, 2013.
- Rabatel, A., Sanchez, O., Vincent, C. and Six, D.: Estimation of Glacier Thickness From Surface Mass Balance and Ice Flow Velocities: A Case Study on Argentièrre Glacier, France, *Front. Earth Sci.*, 6, 112, doi:10.3389/feart.2018.00112, 2018.
- Stocker-Waldhuber, M., Fischer, A., Helfricht, K. and Kuhn, M.: Ice flow velocity as a sensitive indicator of glacier state, *Cryosph. Discuss.*, doi:10.5194/tc-2018-37, 2018.
- Zekollari, H., Huybrechts, P., Fürst, J. J., Rybak, O. and Eisen, O.: Calibration of a higher-order 3-D ice-flow model of the Morteratsch glacier complex, Engadin, Switzerland, *Ann. Glaciol.*, 54(63), 343–351, doi:10.3189/2013AoG63A434, 2013.
- Zekollari, H., Fürst, J. J. and Huybrechts, P.: Modelling the evolution of Vadret da Morteratsch, Switzerland, since the Little Ice Age and into the future, *J. Glaciol.*, 60(224), 1208–1220, doi:10.3189/2014JoG14J053, 2014.
- Zoller, N.: Fließbewegung des Grossen Aletschgletschers, Bachelor thesis, ETH Zürich., 2010.
- Zuo, Z. and Oerlemans, J.: Numerical modelling of the historic front variation and the future behaviour of the Pasterze glacier, Austria, *Ann. Glaciol.*, 24, 234–241, 1997.
