# Supplementary material for: Modelling the future evolution of glaciers in the European Alps under the EURO-CORDEX RCM ensemble
Source: Copernicus journal article supplement (doi:10.5194/tc-13-1125-2019), 2019-04-09
Supplement: Supplementary file 586 [file tc-13-1125-2019-supplement.zip]

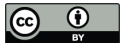

## *Supplement of*

# **Modelling the future evolution of glaciers in the European Alps under the EURO-CORDEX RCM ensemble**

**Harry Zekollari et al.**

*Correspondence to:* Harry Zekollari (zharry@ethz.ch)

- tc-13-1125-2019-supplement-title-page.pdf
- supplement\_Zekollari\_et\_al\_TC2019\_hz02APR2019
  - .DS\_Store
  - Modelled geometry at inventory date (figures)
    - \* .DS\_Store
    - \* 00002\_2003\_tr.pdf
    - \* 00003\_2003\_tr.pdf
    - \* 00006\_2003\_tr.pdf
    - \* 00014\_2003\_tr.pdf
    - \* 00021\_2003\_tr.pdf
    - \* 00025\_2003\_tr.pdf
    - \* 00028\_2003\_tr.pdf
    - \* 00041\_2003\_tr.pdf
    - \* 00047\_2003\_tr.pdf
    - \* 00049\_2003\_tr.pdf
    - \* 00054\_2003\_tr.pdf
    - \* 00062\_2003\_tr.pdf
    - \* 00066\_2003\_tr.pdf
    - \* 00067\_2003\_tr.pdf
    - \* 00068\_2003\_tr.pdf
    - \* 00070\_2003\_tr.pdf
    - \* 00072\_2003\_tr.pdf
    - \* 00078\_2003\_tr.pdf
    - \* 00080\_2003\_tr.pdf
    - \* 00088\_2003\_tr.pdf
    - \* 00094\_2003\_tr.pdf
    - \* 00106\_2003\_tr.pdf

- \* 00110\_2003\_tr.pdf
- \* 00114\_2003\_tr.pdf
- \* 00116\_2003\_tr.pdf
- \* 00122\_2003\_tr.pdf
- \* 00124\_2003\_tr.pdf
- \* 00127\_2003\_tr.pdf
- \* 00135\_2003\_tr.pdf
- \* 00141\_2003\_tr.pdf
- \* 00159\_2003\_tr.pdf
- \* 00161\_2003\_tr.pdf
- \* 00164\_2003\_tr.pdf
- \* 00168\_2003\_tr.pdf
- \* 00181\_2003\_tr.pdf
- \* 00182\_2003\_tr.pdf
- \* 00189\_2003\_tr.pdf
- \* 00190\_2003\_tr.pdf
- \* 00193\_2003\_tr.pdf
- \* 00197\_2003\_tr.pdf
- \* 00199\_2003\_tr.pdf
- \* 00200\_2003\_tr.pdf
- \* 00204\_2003\_tr.pdf
- \* 00213\_2003\_tr.pdf
- \* 00220\_2003\_tr.pdf
- \* 00221\_2003\_tr.pdf
- \* 00223\_2003\_tr.pdf
- \* 00233\_2003\_tr.pdf
- \* 00245\_2003\_tr.pdf
- \* 00246\_2003\_tr.pdf
- \* 00251\_2003\_tr.pdf
- \* 00257\_2003\_tr.pdf
- \* 00263\_2003\_tr.pdf
- \* 00264\_2003\_tr.pdf
- \* 00278\_2003\_tr.pdf
- \* 00286\_2003\_tr.pdf
- \* 00289\_2003\_tr.pdf
- \* 00291\_2003\_tr.pdf
- \* 00295\_2003\_tr.pdf
- \* 00303\_2003\_tr.pdf
- \* 00311\_2003\_tr.pdf
- \* 00312\_2003\_tr.pdf
- \* 00323\_2003\_tr.pdf
- \* 00325\_2003\_tr.pdf
- \* 00326\_2003\_tr.pdf
- \* 00338\_2003\_tr.pdf
- \* 00342\_2003\_tr.pdf
- \* 00343\_2003\_tr.pdf
- \* 00345\_2003\_tr.pdf

- \* 00348\_2003\_tr.pdf
- \* 00360\_2003\_tr.pdf
- \* 00362\_2003\_tr.pdf
- \* 00364\_2003\_tr.pdf
- \* 00373\_2003\_tr.pdf
- \* 00376\_2003\_tr.pdf
- \* 00380\_2003\_tr.pdf
- \* 00386\_2003\_tr.pdf
- \* 00391\_2003\_tr.pdf
- \* 00392\_2003\_tr.pdf
- \* 00399\_2003\_tr.pdf
- \* 00408\_2003\_tr.pdf
- \* 00411\_2003\_tr.pdf
- \* 00415\_2003\_tr.pdf
- \* 00434\_2003\_tr.pdf
- \* 00450\_2003\_tr.pdf
- \* 00457\_2003\_tr.pdf
- \* 00458\_2003\_tr.pdf
- \* 00459\_2003\_tr.pdf
- \* 00463\_2003\_tr.pdf
- \* 00469\_2003\_tr.pdf
- \* 00471\_2003\_tr.pdf
- \* 00476\_2003\_tr.pdf
- \* 00487\_2003\_tr.pdf
- \* 00497\_2003\_tr.pdf
- \* 00502\_2003\_tr.pdf
- \* 00505\_2003\_tr.pdf
- \* 00514\_2003\_tr.pdf
- \* 00518\_2003\_tr.pdf
- \* 00520\_2003\_tr.pdf
- \* 00524\_2003\_tr.pdf
- \* 00535\_2003\_tr.pdf
- \* 00538\_2003\_tr.pdf
- \* 00539\_2003\_tr.pdf
- \* 00541\_2003\_tr.pdf
- \* 00546\_2003\_tr.pdf
- \* 00548\_2003\_tr.pdf
- \* 00550\_2003\_tr.pdf
- \* 00551\_2003\_tr.pdf
- \* 00554\_2003\_tr.pdf
- \* 00562\_2003\_tr.pdf
- \* 00574\_2003\_tr.pdf
- \* 00577\_2003\_tr.pdf
- \* 00587\_2003\_tr.pdf
- \* 00590\_2003\_tr.pdf
- \* 00593\_2003\_tr.pdf
- \* 00597\_2003\_tr.pdf

- \* 00603\_2003\_tr.pdf
- \* 00604\_2003\_tr.pdf
- \* 00608\_2003\_tr.pdf
- \* 00619\_2003\_tr.pdf
- \* 00627\_2003\_tr.pdf
- \* 00628\_2003\_tr.pdf
- \* 00634\_2003\_tr.pdf
- \* 00637\_2003\_tr.pdf
- \* 00647\_2003\_tr.pdf
- \* 00648\_2003\_tr.pdf
- \* 00658\_2003\_tr.pdf
- \* 00659\_2003\_tr.pdf
- \* 00663\_2003\_tr.pdf
- \* 00666\_2003\_tr.pdf
- \* 00670\_2003\_tr.pdf
- \* 00673\_2003\_tr.pdf
- \* 00674\_2003\_tr.pdf
- \* 00687\_2003\_tr.pdf
- \* 00689\_2003\_tr.pdf
- \* 00691\_2003\_tr.pdf
- \* 00695\_2003\_tr.pdf
- \* 00697\_2003\_tr.pdf
- \* 00698\_2003\_tr.pdf
- \* 00701\_2003\_tr.pdf
- \* 00719\_2003\_tr.pdf
- \* 00720\_2003\_tr.pdf
- \* 00731\_2003\_tr.pdf
- \* 00739\_2003\_tr.pdf
- \* 00746\_2003\_tr.pdf
- \* 00752\_2003\_tr.pdf
- \* 00755\_2003\_tr.pdf
- \* 00770\_2003\_tr.pdf
- \* 00774\_2003\_tr.pdf
- \* 00778\_2003\_tr.pdf
- \* 00779\_2003\_tr.pdf
- \* 00781\_2003\_tr.pdf
- \* 00782\_2003\_tr.pdf
- \* 00784\_2003\_tr.pdf
- \* 00787\_2003\_tr.pdf
- \* 00791\_2003\_tr.pdf
- \* 00793\_2003\_tr.pdf
- \* 00797\_2003\_tr.pdf
- \* 00803\_2003\_tr.pdf
- \* 00804\_2003\_tr.pdf
- \* 00807\_2003\_tr.pdf
- \* 00817\_2003\_tr.pdf
- \* 00819\_2003\_tr.pdf

- \* 00826\_2003\_tr.pdf
- \* 00828\_2003\_tr.pdf
- \* 00830\_2003\_tr.pdf
- \* 00833\_2003\_tr.pdf
- \* 00834\_2003\_tr.pdf
- \* 00836\_2003\_tr.pdf
- \* 00841\_2003\_tr.pdf
- \* 00843\_2003\_tr.pdf
- \* 00844\_2003\_tr.pdf
- \* 00846\_2003\_tr.pdf
- \* 00848\_2003\_tr.pdf
- \* 00852\_2003\_tr.pdf
- \* 00855\_2003\_tr.pdf
- \* 00862\_2003\_tr.pdf
- \* 00868\_2003\_tr.pdf
- \* 00871\_2003\_tr.pdf
- \* 00872\_2003\_tr.pdf
- \* 00878\_2003\_tr.pdf
- \* 00880\_2003\_tr.pdf
- \* 00885\_2003\_tr.pdf
- \* 00886\_2003\_tr.pdf
- \* 00887\_2003\_tr.pdf
- \* 00892\_2003\_tr.pdf
- \* 00893\_2003\_tr.pdf
- \* 00894\_2003\_tr.pdf
- \* 00895\_2003\_tr.pdf
- \* 00897\_2003\_tr.pdf
- \* 00899\_2003\_tr.pdf
- \* 00903\_2003\_tr.pdf
- \* 00905\_2003\_tr.pdf
- \* 00906\_2003\_tr.pdf
- \* 00907\_2003\_tr.pdf
- \* 00917\_2003\_tr.pdf
- \* 00918\_2003\_tr.pdf
- \* 00919\_2003\_tr.pdf
- \* 00923\_2003\_tr.pdf
- \* 00924\_2003\_tr.pdf
- \* 00925\_2003\_tr.pdf
- \* 00929\_2003\_tr.pdf
- \* 00932\_2003\_tr.pdf
- \* 00940\_2003\_tr.pdf
- \* 00943\_2003\_tr.pdf
- \* 00944\_2003\_tr.pdf
- \* 00945\_2003\_tr.pdf
- \* 00950\_2003\_tr.pdf
- \* 00954\_2003\_tr.pdf
- \* 00957\_2003\_tr.pdf

- \* 00958\_2003\_tr.pdf
- \* 00962\_2003\_tr.pdf
- \* 00964\_2003\_tr.pdf
- \* 00975\_2003\_tr.pdf
- \* 00979\_2003\_tr.pdf
- \* 00981\_2003\_tr.pdf
- \* 00991\_2003\_tr.pdf
- \* 00992\_2003\_tr.pdf
- \* 00994\_2003\_tr.pdf
- \* 01006\_2003\_tr.pdf
- \* 01007\_2003\_tr.pdf
- \* 01019\_2003\_tr.pdf
- \* 01024\_2003\_tr.pdf
- \* 01030\_2003\_tr.pdf
- \* 01038\_2003\_tr.pdf
- \* 01041\_2003\_tr.pdf
- \* 01046\_2003\_tr.pdf
- \* 01048\_2003\_tr.pdf
- \* 01067\_2003\_tr.pdf
- \* 01068\_2003\_tr.pdf
- \* 01076\_2003\_tr.pdf
- \* 01078\_2003\_tr.pdf
- \* 01085\_2003\_tr.pdf
- \* 01099\_2003\_tr.pdf
- \* 01102\_2003\_tr.pdf
- \* 01104\_2003\_tr.pdf
- \* 01107\_2003\_tr.pdf
- \* 01108\_2003\_tr.pdf
- \* 01111\_2003\_tr.pdf
- \* 01116\_2003\_tr.pdf
- \* 01120\_2003\_tr.pdf
- \* 01143\_2003\_tr.pdf
- \* 01144\_2003\_tr.pdf
- \* 01146\_2003\_tr.pdf
- \* 01156\_2003\_tr.pdf
- \* 01161\_2003\_tr.pdf
- \* 01165\_2003\_tr.pdf
- \* 01166\_2003\_tr.pdf
- \* 01173\_2003\_tr.pdf
- \* 01176\_2003\_tr.pdf
- \* 01177\_2003\_tr.pdf
- \* 01187\_2003\_tr.pdf
- \* 01193\_2003\_tr.pdf
- \* 01198\_2003\_tr.pdf
- \* 01199\_2003\_tr.pdf
- \* 01202\_2003\_tr.pdf
- \* 01203\_2003\_tr.pdf

- \* 01208\_2003\_tr.pdf
- \* 01215\_2003\_tr.pdf
- \* 01222\_2003\_tr.pdf
- \* 01224\_2003\_tr.pdf
- \* 01234\_2003\_tr.pdf
- \* 01237\_2003\_tr.pdf
- \* 01238\_2003\_tr.pdf
- \* 01246\_2003\_tr.pdf
- \* 01248\_2003\_tr.pdf
- \* 01257\_2003\_tr.pdf
- \* 01258\_2003\_tr.pdf
- \* 01261\_2003\_tr.pdf
- \* 01267\_2003\_tr.pdf
- \* 01269\_2003\_tr.pdf
- \* 01270\_2003\_tr.pdf
- \* 01275\_2003\_tr.pdf
- \* 01280\_2003\_tr.pdf
- \* 01283\_2003\_tr.pdf
- \* 01288\_2003\_tr.pdf
- \* 01290\_2003\_tr.pdf
- \* 01293\_2003\_tr.pdf
- \* 01296\_2003\_tr.pdf
- \* 01302\_2003\_tr.pdf
- \* 01318\_2003\_tr.pdf
- \* 01328\_2003\_tr.pdf
- \* 01335\_2003\_tr.pdf
- \* 01338\_2003\_tr.pdf
- \* 01346\_2003\_tr.pdf
- \* 01358\_2003\_tr.pdf
- \* 01362\_2003\_tr.pdf
- \* 01378\_2003\_tr.pdf
- \* 01379\_2003\_tr.pdf
- \* 01383\_2003\_tr.pdf
- \* 01387\_2003\_tr.pdf
- \* 01394\_2003\_tr.pdf
- \* 01419\_2003\_tr.pdf
- \* 01427\_2003\_tr.pdf
- \* 01431\_2003\_tr.pdf
- \* 01445\_2003\_tr.pdf
- \* 01450\_2003\_tr.pdf
- \* 01453\_2003\_tr.pdf
- \* 01468\_2003\_tr.pdf
- \* 01473\_2003\_tr.pdf
- \* 01478\_2003\_tr.pdf
- \* 01489\_2003\_tr.pdf
- \* 01500\_2003\_tr.pdf
- \* 01505\_2003\_tr.pdf

- \* 01509\_2003\_tr.pdf
- \* 01522\_2003\_tr.pdf
- \* 01524\_2003\_tr.pdf
- \* 01527\_2003\_tr.pdf
- \* 01544\_2003\_tr.pdf
- \* 01545\_2003\_tr.pdf
- \* 01549\_2003\_tr.pdf
- \* 01550\_2003\_tr.pdf
- \* 01556\_2003\_tr.pdf
- \* 01557\_2003\_tr.pdf
- \* 01565\_2003\_tr.pdf
- \* 01567\_2003\_tr.pdf
- \* 01570\_2003\_tr.pdf
- \* 01575\_2003\_tr.pdf
- \* 01576\_2003\_tr.pdf
- \* 01582\_2003\_tr.pdf
- \* 01587\_2003\_tr.pdf
- \* 01604\_2003\_tr.pdf
- \* 01619\_2003\_tr.pdf
- \* 01621\_2003\_tr.pdf
- \* 01622\_2003\_tr.pdf
- \* 01623\_2003\_tr.pdf
- \* 01627\_2003\_tr.pdf
- \* 01629\_2003\_tr.pdf
- \* 01631\_2003\_tr.pdf
- \* 01635\_2003\_tr.pdf
- \* 01642\_2003\_tr.pdf
- \* 01648\_2003\_tr.pdf
- \* 01656\_2003\_tr.pdf
- \* 01663\_2003\_tr.pdf
- \* 01666\_2003\_tr.pdf
- \* 01669\_2003\_tr.pdf
- \* 01671\_2003\_tr.pdf
- \* 01678\_2003\_tr.pdf
- \* 01688\_2003\_tr.pdf
- \* 01690\_2003\_tr.pdf
- \* 01698\_2003\_tr.pdf
- \* 01701\_2003\_tr.pdf
- \* 01702\_2003\_tr.pdf
- \* 01704\_2003\_tr.pdf
- \* 01710\_2003\_tr.pdf
- \* 01715\_2003\_tr.pdf
- \* 01716\_2003\_tr.pdf
- \* 01719\_2003\_tr.pdf
- \* 01737\_2003\_tr.pdf
- \* 01738\_2003\_tr.pdf
- \* 01743\_2003\_tr.pdf



- \* 01745\_2003\_tr.pdf
- \* 01746\_2003\_tr.pdf
- \* 01750\_2003\_tr.pdf
- \* 01753\_2003\_tr.pdf
- \* 01755\_2003\_tr.pdf
- \* 01757\_2003\_tr.pdf
- \* 01760\_2003\_tr.pdf
- \* 01762\_2003\_tr.pdf
- \* 01765\_2003\_tr.pdf
- \* 01766\_2003\_tr.pdf
- \* 01768\_2003\_tr.pdf
- \* 01769\_2003\_tr.pdf
- \* 01773\_2003\_tr.pdf
- \* 01776\_2003\_tr.pdf
- \* 01783\_2003\_tr.pdf
- \* 01786\_2003\_tr.pdf
- \* 01790\_2003\_tr.pdf
- \* 01791\_2003\_tr.pdf
- \* 01797\_2003\_tr.pdf
- \* 01800\_2003\_tr.pdf
- \* 01806\_2003\_tr.pdf
- \* 01813\_2003\_tr.pdf
- \* 01814\_2003\_tr.pdf
- \* 01817\_2003\_tr.pdf
- \* 01824\_2003\_tr.pdf
- \* 01827\_2003\_tr.pdf
- \* 01833\_2003\_tr.pdf
- \* 01834\_2003\_tr.pdf
- \* 01839\_2003\_tr.pdf
- \* 01840\_2003\_tr.pdf
- \* 01863\_2003\_tr.pdf
- \* 01868\_2003\_tr.pdf
- \* 01876\_2003\_tr.pdf
- \* 01885\_2003\_tr.pdf
- \* 01892\_2003\_tr.pdf
- \* 01902\_2003\_tr.pdf
- \* 01912\_2003\_tr.pdf
- \* 01920\_2003\_tr.pdf
- \* 01925\_2003\_tr.pdf
- \* 01928\_2003\_tr.pdf
- \* 01934\_2003\_tr.pdf
- \* 01935\_2003\_tr.pdf
- \* 01942\_2003\_tr.pdf
- \* 01943\_2003\_tr.pdf
- \* 01946\_2003\_tr.pdf
- \* 01948\_2003\_tr.pdf
- \* 01952\_2003\_tr.pdf

- \* 01958\_2003\_tr.pdf
- \* 01961\_2003\_tr.pdf
- \* 01962\_2003\_tr.pdf
- \* 01968\_2003\_tr.pdf
- \* 01971\_2003\_tr.pdf
- \* 01974\_2003\_tr.pdf
- \* 01980\_2003\_tr.pdf
- \* 01986\_2003\_tr.pdf
- \* 01987\_2003\_tr.pdf
- \* 01990\_2003\_tr.pdf
- \* 01999\_2003\_tr.pdf
- \* 02000\_2003\_tr.pdf
- \* 02006\_2003\_tr.pdf
- \* 02011\_2003\_tr.pdf
- \* 02012\_2003\_tr.pdf
- \* 02039\_2003\_tr.pdf
- \* 02051\_2003\_tr.pdf
- \* 02064\_2003\_tr.pdf
- \* 02069\_2003\_tr.pdf
- \* 02072\_2003\_tr.pdf
- \* 02073\_2003\_tr.pdf
- \* 02075\_2003\_tr.pdf
- \* 02078\_2003\_tr.pdf
- \* 02094\_2003\_tr.pdf
- \* 02095\_2003\_tr.pdf
- \* 02102\_2003\_tr.pdf
- \* 02113\_2003\_tr.pdf
- \* 02119\_2003\_tr.pdf
- \* 02136\_2003\_tr.pdf
- \* 02144\_2003\_tr.pdf
- \* 02151\_2003\_tr.pdf
- \* 02165\_2003\_tr.pdf
- \* 02168\_2003\_tr.pdf
- \* 02172\_2003\_tr.pdf
- \* 02173\_2003\_tr.pdf
- \* 02187\_2003\_tr.pdf
- \* 02194\_2003\_tr.pdf
- \* 02195\_2003\_tr.pdf
- \* 02197\_2003\_tr.pdf
- \* 02208\_2003\_tr.pdf
- \* 02209\_2003\_tr.pdf
- \* 02222\_2003\_tr.pdf
- \* 02242\_2003\_tr.pdf
- \* 02245\_2003\_tr.pdf
- \* 02249\_2003\_tr.pdf
- \* 02261\_2003\_tr.pdf
- \* 02268\_2003\_tr.pdf

- \* 02282\_2003\_tr.pdf
- \* 02285\_2003\_tr.pdf
- \* 02291\_2003\_tr.pdf
- \* 02293\_2003\_tr.pdf
- \* 02319\_2003\_tr.pdf
- \* 02337\_2003\_tr.pdf
- \* 02351\_2003\_tr.pdf
- \* 02353\_2003\_tr.pdf
- \* 02357\_2003\_tr.pdf
- \* 02366\_2003\_tr.pdf
- \* 02370\_2003\_tr.pdf
- \* 02385\_2003\_tr.pdf
- \* 02388\_2003\_tr.pdf
- \* 02389\_2003\_tr.pdf
- \* 02400\_2003\_tr.pdf
- \* 02419\_2003\_tr.pdf
- \* 02421\_2003\_tr.pdf
- \* 02426\_2003\_tr.pdf
- \* 02427\_2003\_tr.pdf
- \* 02432\_2003\_tr.pdf
- \* 02437\_2003\_tr.pdf
- \* 02440\_2003\_tr.pdf
- \* 02442\_2003\_tr.pdf
- \* 02443\_2003\_tr.pdf
- \* 02450\_2003\_tr.pdf
- \* 02460\_2003\_tr.pdf
- \* 02463\_2003\_tr.pdf
- \* 02464\_2003\_tr.pdf
- \* 02474\_2003\_tr.pdf
- \* 02477\_2003\_tr.pdf
- \* 02483\_2003\_tr.pdf
- \* 02488\_2003\_tr.pdf
- \* 02490\_2003\_tr.pdf
- \* 02495\_2003\_tr.pdf
- \* 02496\_2003\_tr.pdf
- \* 02504\_2003\_tr.pdf
- \* 02507\_2003\_tr.pdf
- \* 02515\_2003\_tr.pdf
- \* 02525\_2003\_tr.pdf
- \* 02529\_2003\_tr.pdf
- \* 02534\_2003\_tr.pdf
- \* 02536\_2003\_tr.pdf
- \* 02540\_2003\_tr.pdf
- \* 02544\_2003\_tr.pdf
- \* 02549\_2003\_tr.pdf
- \* 02558\_2003\_tr.pdf
- \* 02566\_2003\_tr.pdf

- \* 02568\_2003\_tr.pdf
- \* 02569\_2003\_tr.pdf
- \* 02570\_2003\_tr.pdf
- \* 02578\_2003\_tr.pdf
- \* 02584\_2003\_tr.pdf
- \* 02586\_2003\_tr.pdf
- \* 02590\_2003\_tr.pdf
- \* 02591\_2003\_tr.pdf
- \* 02593\_2003\_tr.pdf
- \* 02594\_2003\_tr.pdf
- \* 02596\_2003\_tr.pdf
- \* 02598\_2003\_tr.pdf
- \* 02599\_2003\_tr.pdf
- \* 02600\_2003\_tr.pdf
- \* 02607\_2003\_tr.pdf
- \* 02623\_2003\_tr.pdf
- \* 02624\_2003\_tr.pdf
- \* 02627\_2003\_tr.pdf
- \* 02628\_2003\_tr.pdf
- \* 02629\_2003\_tr.pdf
- \* 02630\_2003\_tr.pdf
- \* 02634\_2003\_tr.pdf
- \* 02640\_2003\_tr.pdf
- \* 02642\_2003\_tr.pdf
- \* 02643\_2003\_tr.pdf
- \* 02645\_2003\_tr.pdf
- \* 02652\_2003\_tr.pdf
- \* 02663\_2003\_tr.pdf
- \* 02665\_2003\_tr.pdf
- \* 02669\_2003\_tr.pdf
- \* 02670\_2003\_tr.pdf
- \* 02673\_2003\_tr.pdf
- \* 02675\_2003\_tr.pdf
- \* 02676\_2003\_tr.pdf
- \* 02679\_2003\_tr.pdf
- \* 02680\_2003\_tr.pdf
- \* 02691\_2003\_tr.pdf
- \* 02695\_2003\_tr.pdf
- \* 02704\_2003\_tr.pdf
- \* 02706\_2003\_tr.pdf
- \* 02709\_2003\_tr.pdf
- \* 02711\_2003\_tr.pdf
- \* 02714\_2003\_tr.pdf
- \* 02715\_2003\_tr.pdf
- \* 02718\_2003\_tr.pdf
- \* 02726\_2003\_tr.pdf
- \* 02730\_2003\_tr.pdf

- \* 02734\_2003\_tr.pdf
- \* 02736\_2003\_tr.pdf
- \* 02737\_2003\_tr.pdf
- \* 02739\_2003\_tr.pdf
- \* 02740\_2003\_tr.pdf
- \* 02742\_2003\_tr.pdf
- \* 02743\_2003\_tr.pdf
- \* 02746\_2003\_tr.pdf
- \* 02749\_2003\_tr.pdf
- \* 02750\_2003\_tr.pdf
- \* 02752\_2003\_tr.pdf
- \* 02754\_2003\_tr.pdf
- \* 02755\_2003\_tr.pdf
- \* 02760\_2003\_tr.pdf
- \* 02762\_2003\_tr.pdf
- \* 02764\_2003\_tr.pdf
- \* 02766\_2003\_tr.pdf
- \* 02769\_2003\_tr.pdf
- \* 02771\_2003\_tr.pdf
- \* 02773\_2003\_tr.pdf
- \* 02774\_2003\_tr.pdf
- \* 02775\_2003\_tr.pdf
- \* 02780\_2003\_tr.pdf
- \* 02781\_2003\_tr.pdf
- \* 02782\_2003\_tr.pdf
- \* 02785\_2003\_tr.pdf
- \* 02787\_2003\_tr.pdf
- \* 02793\_2003\_tr.pdf
- \* 02796\_2003\_tr.pdf
- \* 02797\_2003\_tr.pdf
- \* 02801\_2003\_tr.pdf
- \* 02802\_2003\_tr.pdf
- \* 02803\_2003\_tr.pdf
- \* 02805\_2003\_tr.pdf
- \* 02810\_2003\_tr.pdf
- \* 02812\_2003\_tr.pdf
- \* 02813\_2003\_tr.pdf
- \* 02814\_2003\_tr.pdf
- \* 02818\_2003\_tr.pdf
- \* 02819\_2003\_tr.pdf
- \* 02822\_2003\_tr.pdf
- \* 02827\_2003\_tr.pdf
- \* 02838\_2003\_tr.pdf
- \* 02843\_2003\_tr.pdf
- \* 02851\_2003\_tr.pdf
- \* 02855\_2003\_tr.pdf
- \* 02858\_2003\_tr.pdf

- \* 02860\_2003\_tr.pdf
- \* 02861\_2003\_tr.pdf
- \* 02863\_2003\_tr.pdf
- \* 02864\_2003\_tr.pdf
- \* 02866\_2003\_tr.pdf
- \* 02867\_2003\_tr.pdf
- \* 02869\_2003\_tr.pdf
- \* 02872\_2003\_tr.pdf
- \* 02879\_2003\_tr.pdf
- \* 02883\_2003\_tr.pdf
- \* 02884\_2003\_tr.pdf
- \* 02890\_2003\_tr.pdf
- \* 02898\_2003\_tr.pdf
- \* 02901\_2003\_tr.pdf
- \* 02902\_2003\_tr.pdf
- \* 02909\_2003\_tr.pdf
- \* 02910\_2003\_tr.pdf
- \* 02914\_2003\_tr.pdf
- \* 02916\_2003\_tr.pdf
- \* 02918\_2003\_tr.pdf
- \* 02920\_2003\_tr.pdf
- \* 02922\_2003\_tr.pdf
- \* 02924\_2003\_tr.pdf
- \* 02925\_2003\_tr.pdf
- \* 02927\_2003\_tr.pdf
- \* 02928\_2003\_tr.pdf
- \* 02929\_2003\_tr.pdf
- \* 02930\_2003\_tr.pdf
- \* 02934\_2003\_tr.pdf
- \* 02939\_2003\_tr.pdf
- \* 02947\_2003\_tr.pdf
- \* 02950\_2003\_tr.pdf
- \* 02964\_2003\_tr.pdf
- \* 02968\_2003\_tr.pdf
- \* 02970\_2003\_tr.pdf
- \* 02973\_2003\_tr.pdf
- \* 02978\_2003\_tr.pdf
- \* 02979\_2003\_tr.pdf
- \* 02991\_2003\_tr.pdf
- \* 03000\_2003\_tr.pdf
- \* 03001\_2003\_tr.pdf
- \* 03002\_2003\_tr.pdf
- \* 03005\_2003\_tr.pdf
- \* 03013\_2003\_tr.pdf
- \* 03014\_2003\_tr.pdf
- \* 03020\_2003\_tr.pdf
- \* 03022\_2003\_tr.pdf

- \* 03028\_2003\_tr.pdf
- \* 03039\_2003\_tr.pdf
- \* 03045\_2003\_tr.pdf
- \* 03047\_2003\_tr.pdf
- \* 03066\_2003\_tr.pdf
- \* 03077\_2003\_tr.pdf
- \* 03081\_2003\_tr.pdf
- \* 03090\_2003\_tr.pdf
- \* 03100\_2003\_tr.pdf
- \* 03101\_2003\_tr.pdf
- \* 03102\_2003\_tr.pdf
- \* 03103\_2003\_tr.pdf
- \* 03110\_2003\_tr.pdf
- \* 03111\_2003\_tr.pdf
- \* 03114\_2003\_tr.pdf
- \* 03118\_2003\_tr.pdf
- \* 03120\_2003\_tr.pdf
- \* 03124\_2003\_tr.pdf
- \* 03146\_2003\_tr.pdf
- \* 03147\_2003\_tr.pdf
- \* 03148\_2003\_tr.pdf
- \* 03154\_2003\_tr.pdf
- \* 03164\_2003\_tr.pdf
- \* 03166\_2003\_tr.pdf
- \* 03182\_2003\_tr.pdf
- \* 03184\_2003\_tr.pdf
- \* 03232\_2011\_tr.pdf
- \* 03254\_2003\_tr.pdf
- \* 03259\_2003\_tr.pdf
- \* 03261\_2003\_tr.pdf
- \* 03262\_2003\_tr.pdf
- \* 03263\_2003\_tr.pdf
- \* 03264\_2003\_tr.pdf
- \* 03272\_2003\_tr.pdf
- \* 03280\_2003\_tr.pdf
- \* 03284\_2003\_tr.pdf
- \* 03290\_2003\_tr.pdf
- \* 03292\_2003\_tr.pdf
- \* 03295\_2003\_tr.pdf
- \* 03297\_2003\_tr.pdf
- \* 03303\_2003\_tr.pdf
- \* 03308\_2003\_tr.pdf
- \* 03312\_2003\_tr.pdf
- \* 03339\_2003\_tr.pdf
- \* 03341\_2003\_tr.pdf
- \* 03347\_2004\_tr.pdf
- \* 03356\_2003\_tr.pdf

- \* 03359\_2003\_tr.pdf
- \* 03369\_2003\_tr.pdf
- \* 03373\_2003\_tr.pdf
- \* 03376\_2003\_tr.pdf
- \* 03377\_2003\_tr.pdf
- \* 03384\_2003\_tr.pdf
- \* 03385\_2003\_tr.pdf
- \* 03389\_2003\_tr.pdf
- \* 03393\_2003\_tr.pdf
- \* 03400\_2004\_tr.pdf
- \* 03411\_2003\_tr.pdf
- \* 03427\_2003\_tr.pdf
- \* 03437\_2003\_tr.pdf
- \* 03447\_2003\_tr.pdf
- \* 03451\_2003\_tr.pdf
- \* 03452\_2003\_tr.pdf
- \* 03464\_2003\_tr.pdf
- \* 03466\_2003\_tr.pdf
- \* 03473\_2003\_tr.pdf
- \* 03475\_2003\_tr.pdf
- \* 03482\_2003\_tr.pdf
- \* 03484\_2003\_tr.pdf
- \* 03488\_2003\_tr.pdf
- \* 03493\_2003\_tr.pdf
- \* 03503\_2003\_tr.pdf
- \* 03518\_2003\_tr.pdf
- \* 03520\_2003\_tr.pdf
- \* 03522\_2003\_tr.pdf
- \* 03524\_2003\_tr.pdf
- \* 03527\_2003\_tr.pdf
- \* 03529\_2003\_tr.pdf
- \* 03536\_2003\_tr.pdf
- \* 03539\_2003\_tr.pdf
- \* 03546\_2003\_tr.pdf
- \* 03547\_2003\_tr.pdf
- \* 03553\_2003\_tr.pdf
- \* 03556\_2003\_tr.pdf
- \* 03558\_2003\_tr.pdf
- \* 03561\_2003\_tr.pdf
- \* 03569\_2003\_tr.pdf
- \* 03588\_2003\_tr.pdf
- \* 03601\_2003\_tr.pdf
- \* 03605\_2004\_tr.pdf
- \* 03609\_2003\_tr.pdf
- \* 03614\_2003\_tr.pdf
- \* 03625\_2003\_tr.pdf
- \* 03638\_2003\_tr.pdf



- \* 03640\_2003\_tr.pdf
- \* 03642\_2003\_tr.pdf
- \* 03643\_2003\_tr.pdf
- \* 03645\_2003\_tr.pdf
- \* 03646\_2003\_tr.pdf
- \* 03647\_2003\_tr.pdf
- \* 03648\_2003\_tr.pdf
- \* 03649\_2003\_tr.pdf
- \* 03650\_2003\_tr.pdf
- \* 03651\_2003\_tr.pdf
- \* 03652\_2003\_tr.pdf
- \* 03653\_2003\_tr.pdf
- \* 03654\_2003\_tr.pdf
- \* 03655\_2003\_tr.pdf
- \* 03656\_2003\_tr.pdf
- \* 03657\_2003\_tr.pdf
- \* 03659\_2003\_tr.pdf
- \* 03660\_2003\_tr.pdf
- \* 03662\_2003\_tr.pdf
- \* 03663\_2003\_tr.pdf
- \* 03664\_2003\_tr.pdf
- \* 03667\_2003\_tr.pdf
- \* 03668\_2003\_tr.pdf
- \* 03669\_2003\_tr.pdf
- \* 03670\_2003\_tr.pdf
- \* 03671\_2003\_tr.pdf
- \* 03672\_2003\_tr.pdf
- \* 03674\_2003\_tr.pdf
- \* 03675\_2003\_tr.pdf
- \* 03676\_2003\_tr.pdf
- \* 03677\_2003\_tr.pdf
- \* 03679\_2003\_tr.pdf
- \* 03680\_2003\_tr.pdf
- \* 03682\_2003\_tr.pdf
- \* 03683\_2003\_tr.pdf
- \* 03684\_2003\_tr.pdf
- \* 03685\_2003\_tr.pdf
- \* 03686\_2003\_tr.pdf
- \* 03687\_2003\_tr.pdf
- \* 03688\_2003\_tr.pdf
- \* 03689\_2003\_tr.pdf
- \* 03690\_2003\_tr.pdf
- \* 03691\_2003\_tr.pdf
- \* 03693\_2003\_tr.pdf
- \* 03694\_2003\_tr.pdf
- \* 03698\_2003\_tr.pdf
- \* 03699\_2003\_tr.pdf

- \* 03701\_2003\_tr.pdf
- \* 03724\_2003\_tr.pdf
- \* 03731\_2003\_tr.pdf
- \* 03732\_2003\_tr.pdf
- \* 03733\_2003\_tr.pdf
- \* 03734\_2003\_tr.pdf
- \* 03740\_2003\_tr.pdf
- \* 03758\_2003\_tr.pdf
- \* 03760\_2003\_tr.pdf
- \* 03772\_2003\_tr.pdf
- \* 03791\_2003\_tr.pdf
- \* 03796\_2003\_tr.pdf
- \* 03809\_2003\_tr.pdf
- \* 03810\_2003\_tr.pdf
- \* 03813\_2003\_tr.pdf
- \* 03816\_2003\_tr.pdf
- \* 03817\_2003\_tr.pdf
- \* 03843\_2007\_tr.pdf
- \* 03887\_2009\_tr.pdf
- README.rtf
- ZekollariHussFarinotti\_TC2019\_Supplementary\_Tables\_Figures.pdf
- ZekollariHussFarinotti\_TC2019\_volume\_rcp26.csv
- ZekollariHussFarinotti\_TC2019\_volume\_rcp45.csv
- ZekollariHussFarinotti\_TC2019\_volume\_rcp85.csv

The copyright of individual parts of the supplement might differ from the CC BY 4.0 License.
