# Supplementary figures and images for: Modelling the future evolution of glaciers in the European Alps under the EURO-CORDEX RCM ensemble (part 1 of 8)
Source: Copernicus journal article supplement (doi:10.5194/tc-13-1125-2019), 2019-04-09

**Modelled geometry (Glacier ID = 01318;  $A = 6.9051\text{e-}17 \text{ Pa}^{-3} \text{ a}^{-1}$ ;  $dx = 11 \text{ m}$ )**

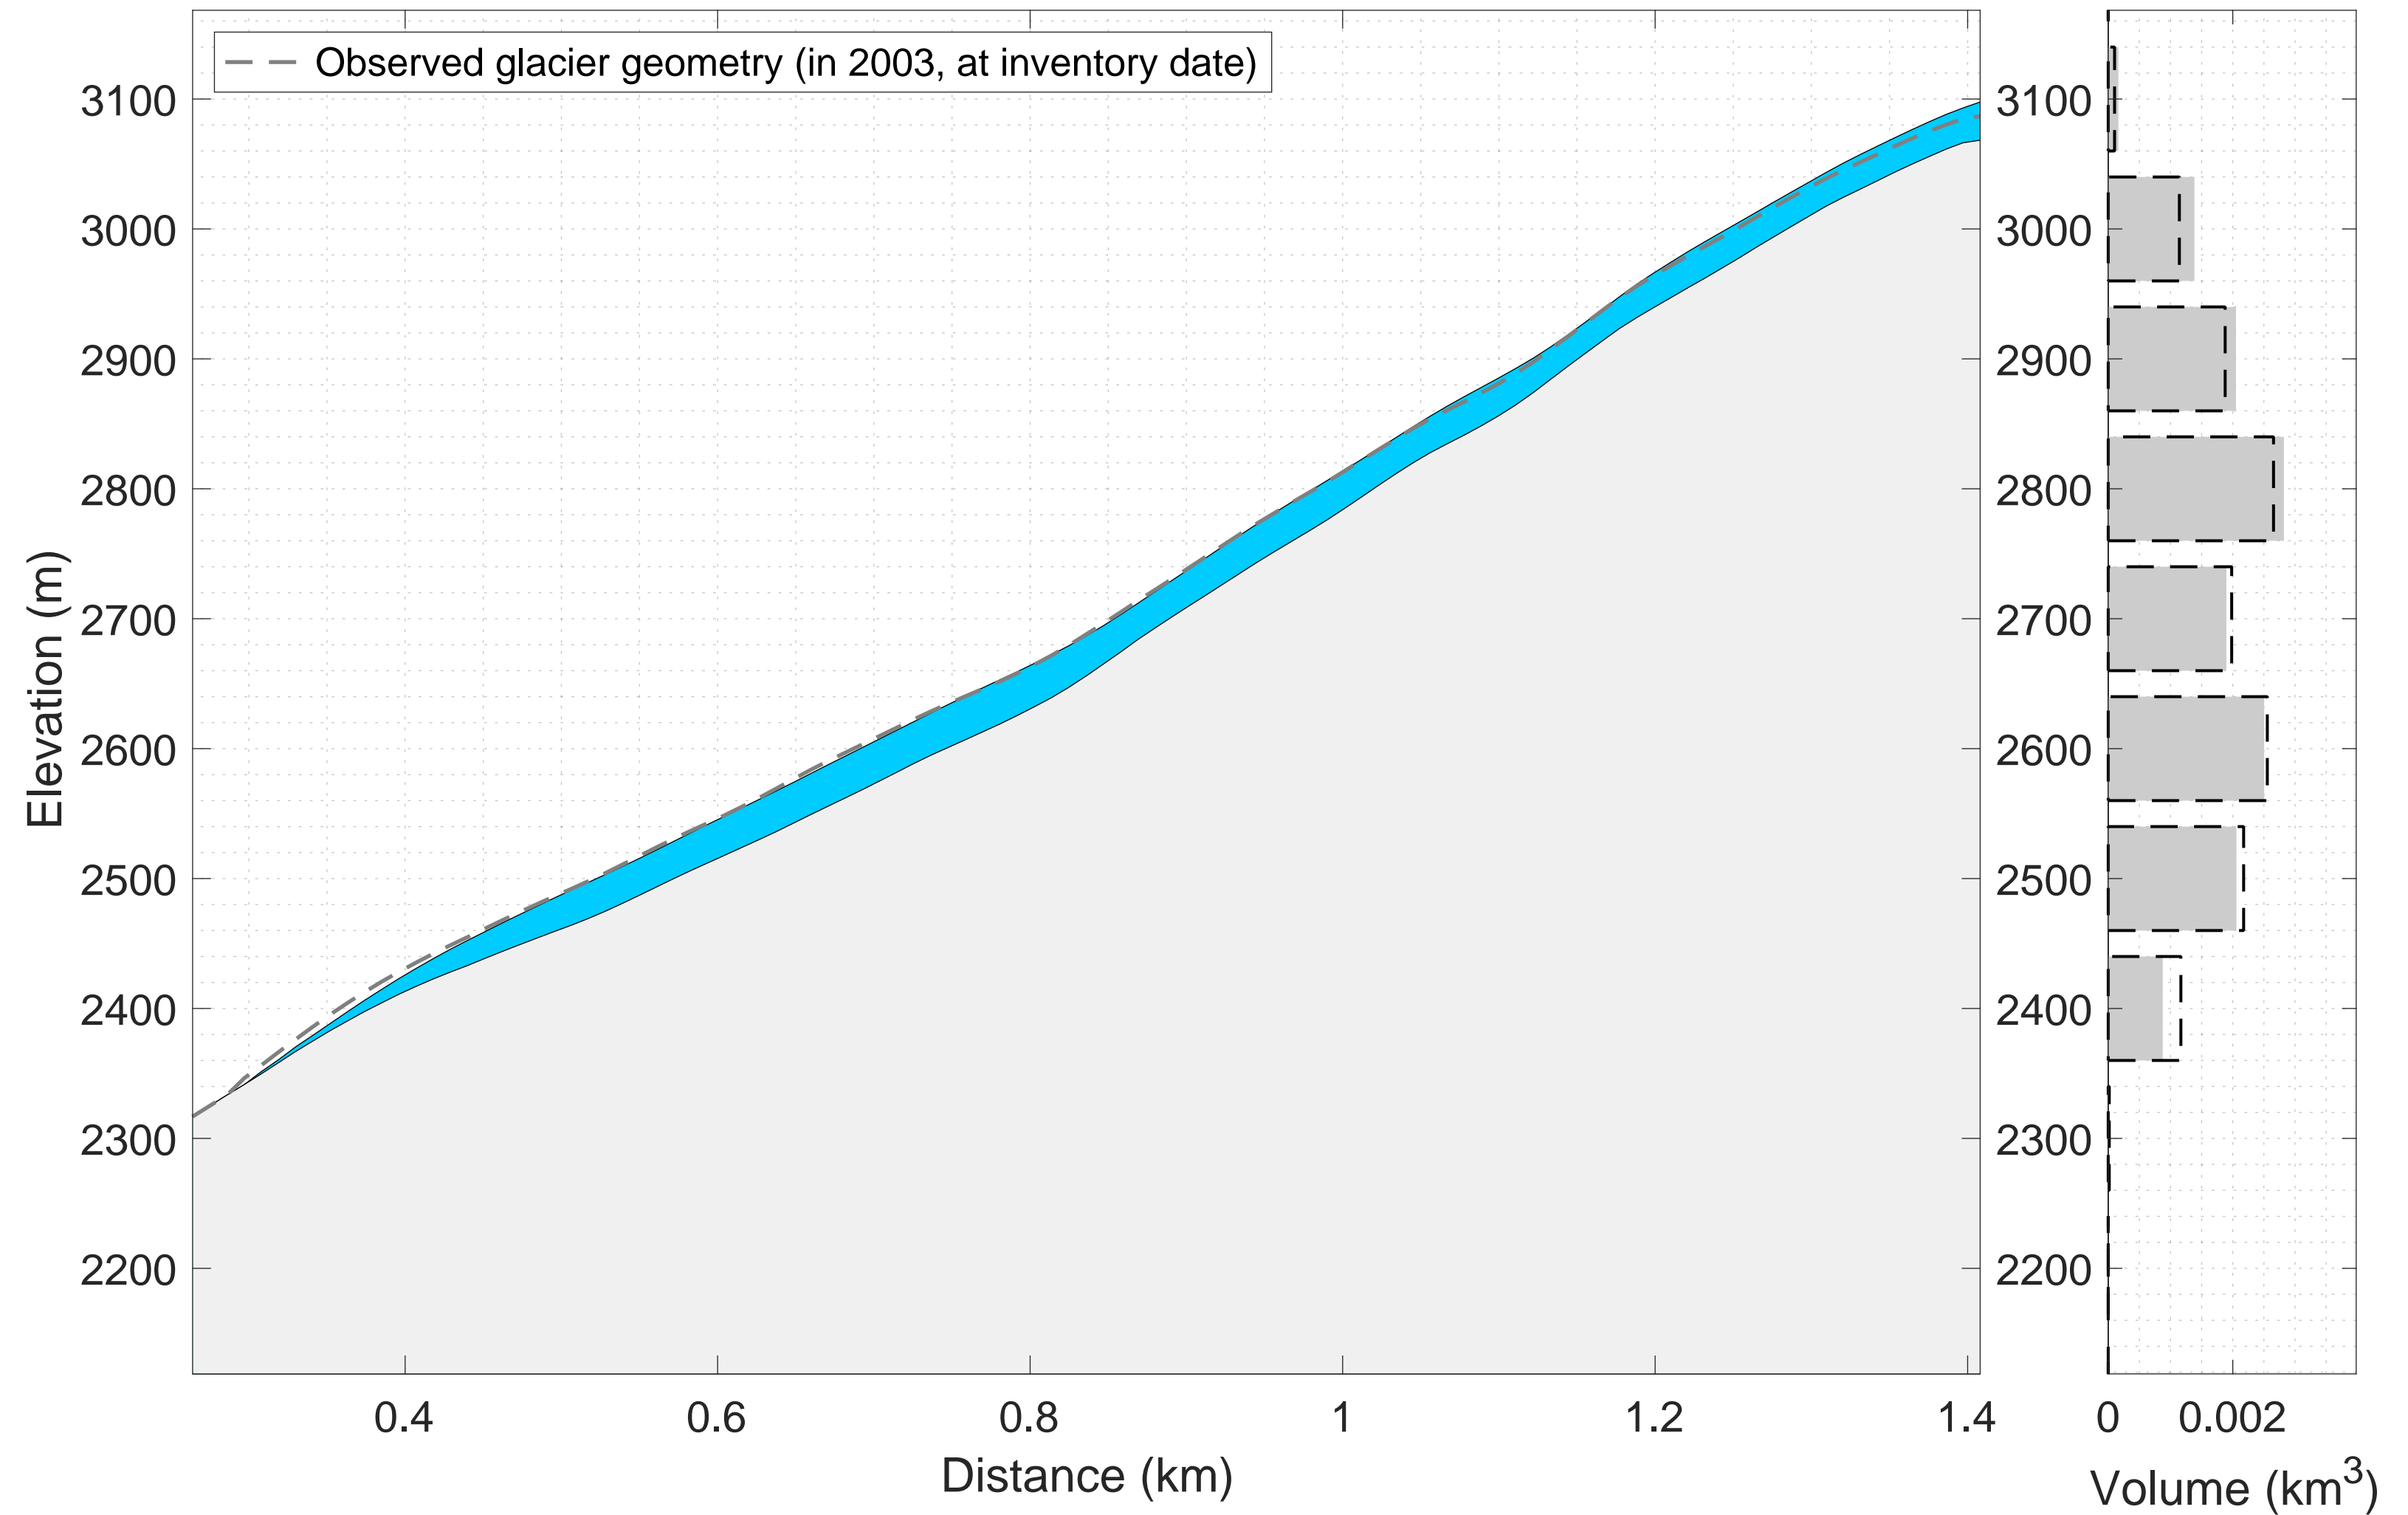

Supplement: Supplementary file 1 [file tc-13-1125-2019-supplement.zip]

**Modelled geometry (Glacier ID = 01797;  $A = 1.1842\text{e-}16 \text{ Pa}^{-3} \text{ a}^{-1}$ ;  $dx = 48 \text{ m}$ )**

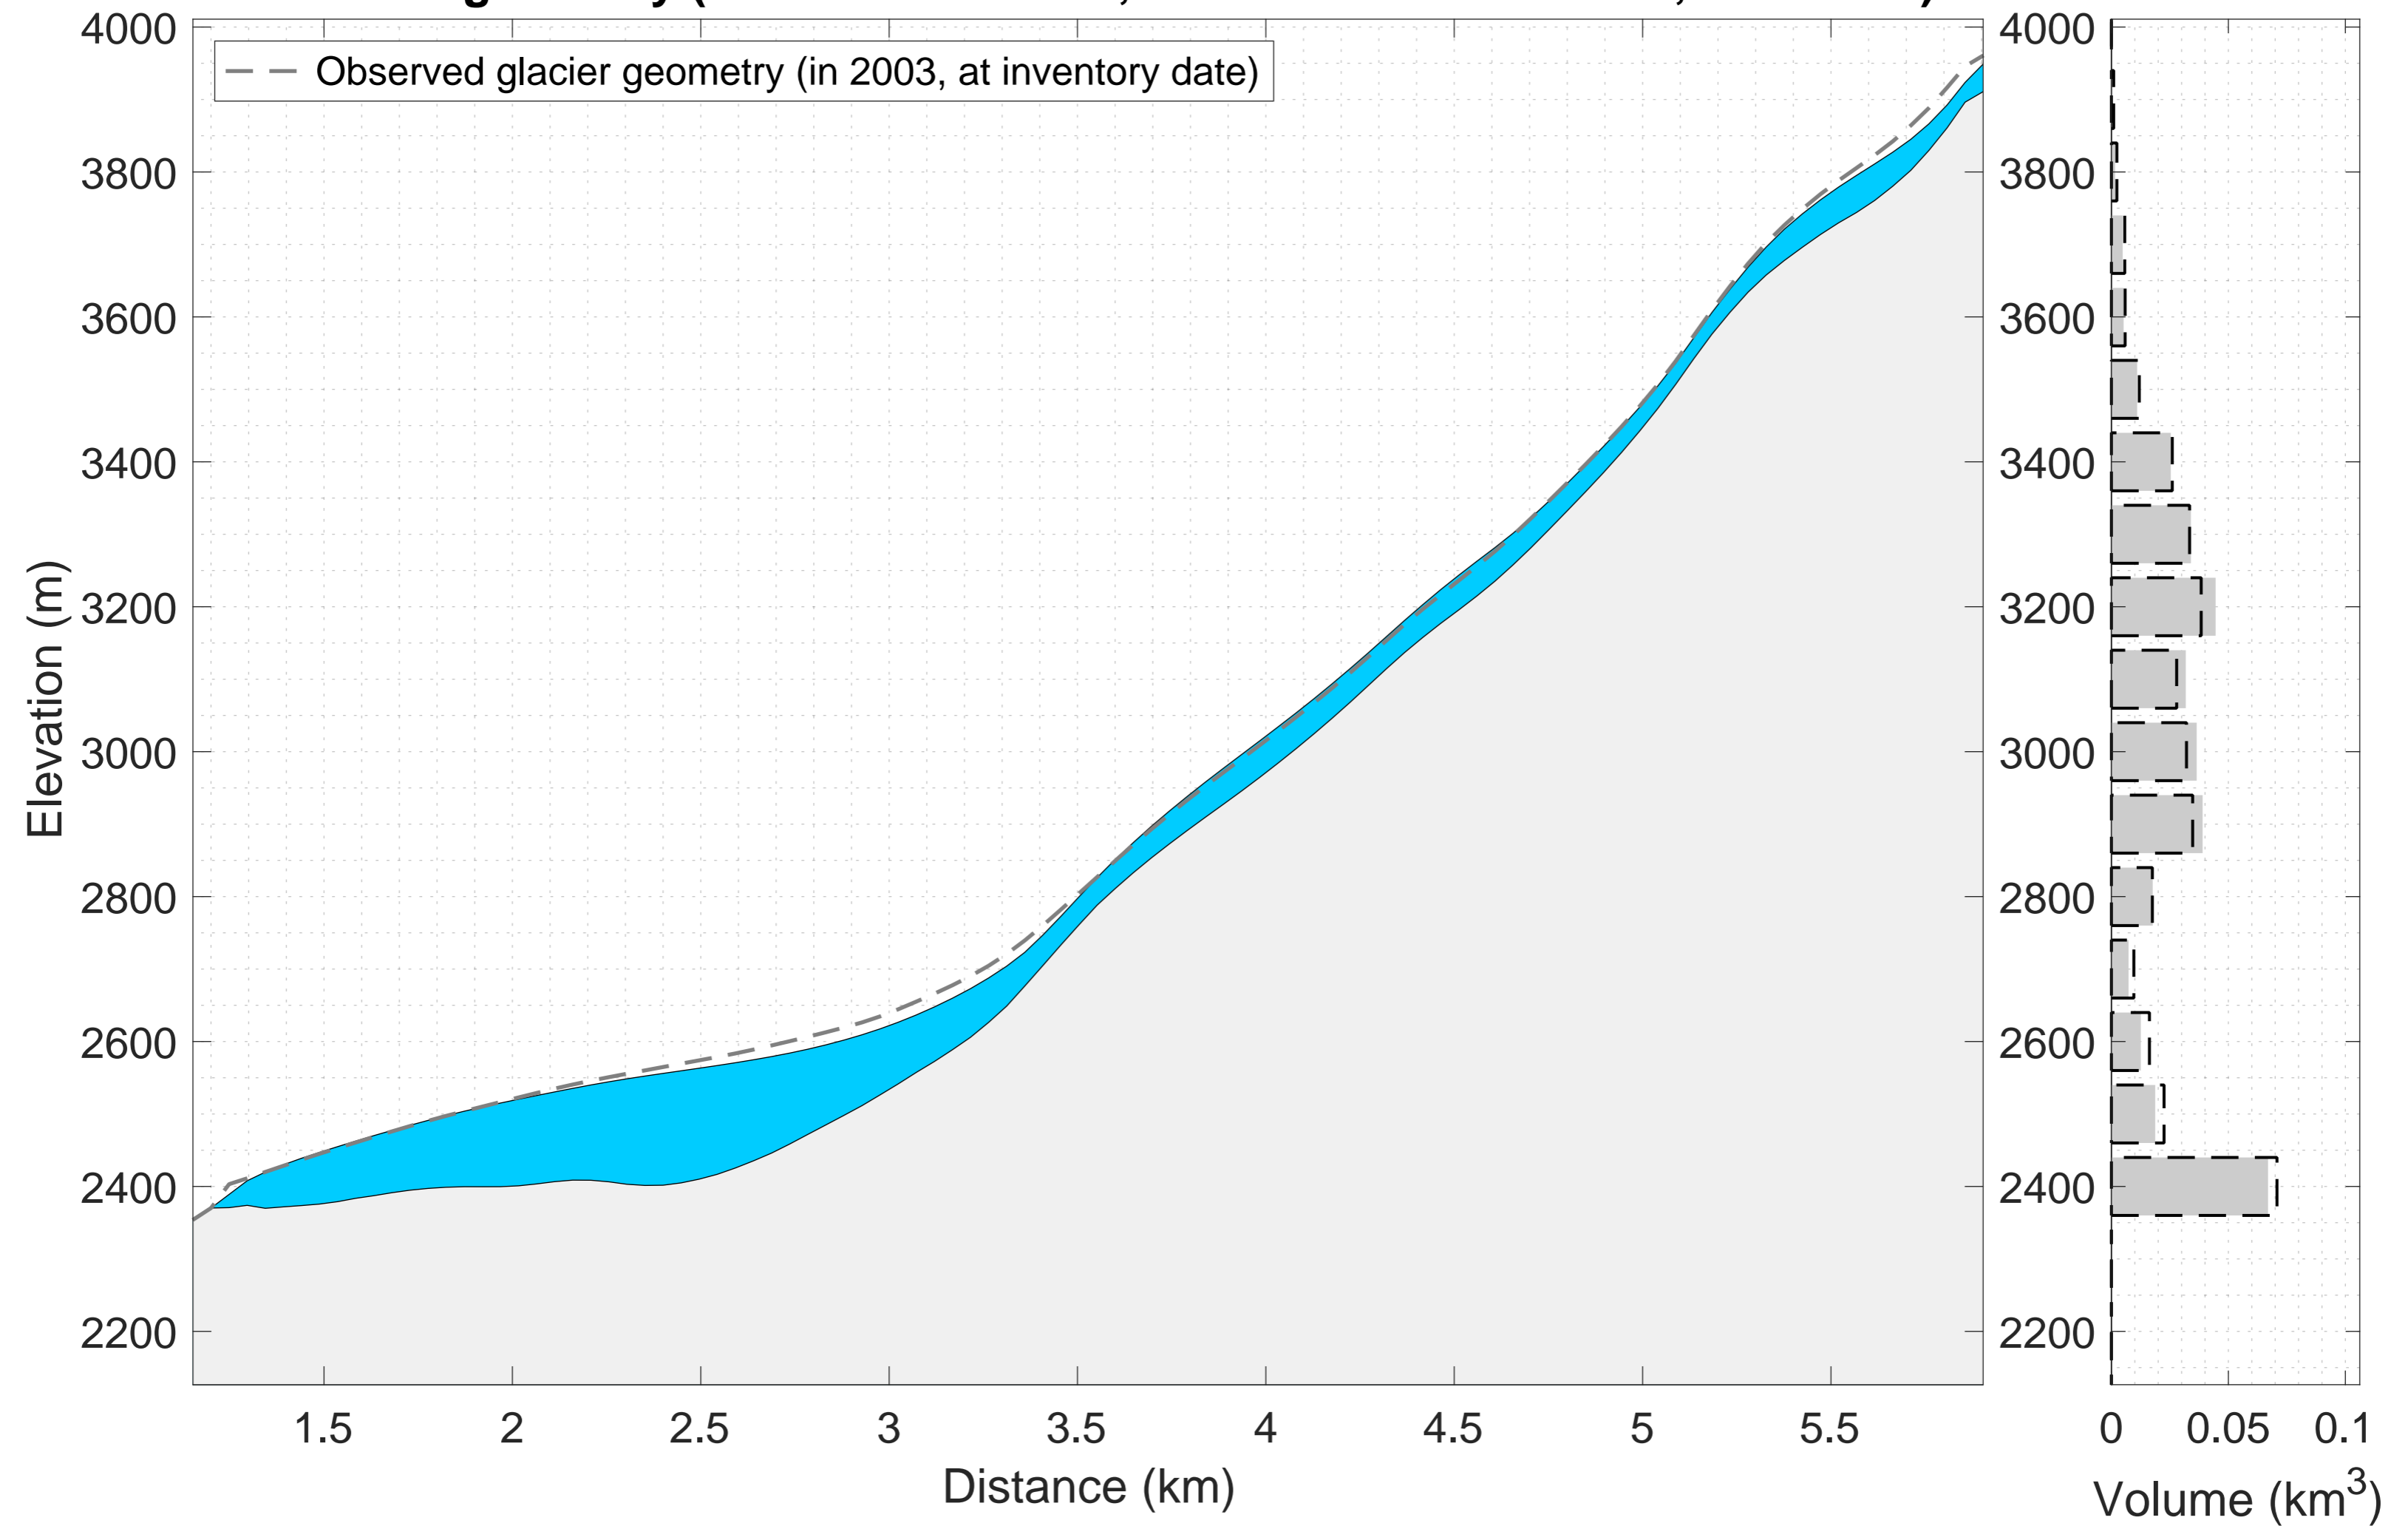

Supplement: Supplementary file 2 [file tc-13-1125-2019-supplement.zip]

**Modelled geometry (Glacier ID = 01980;  $A = 3.7899\text{e-}17 \text{ Pa}^{-3} \text{ a}^{-1}$ ;  $dx = 21 \text{ m}$ )**

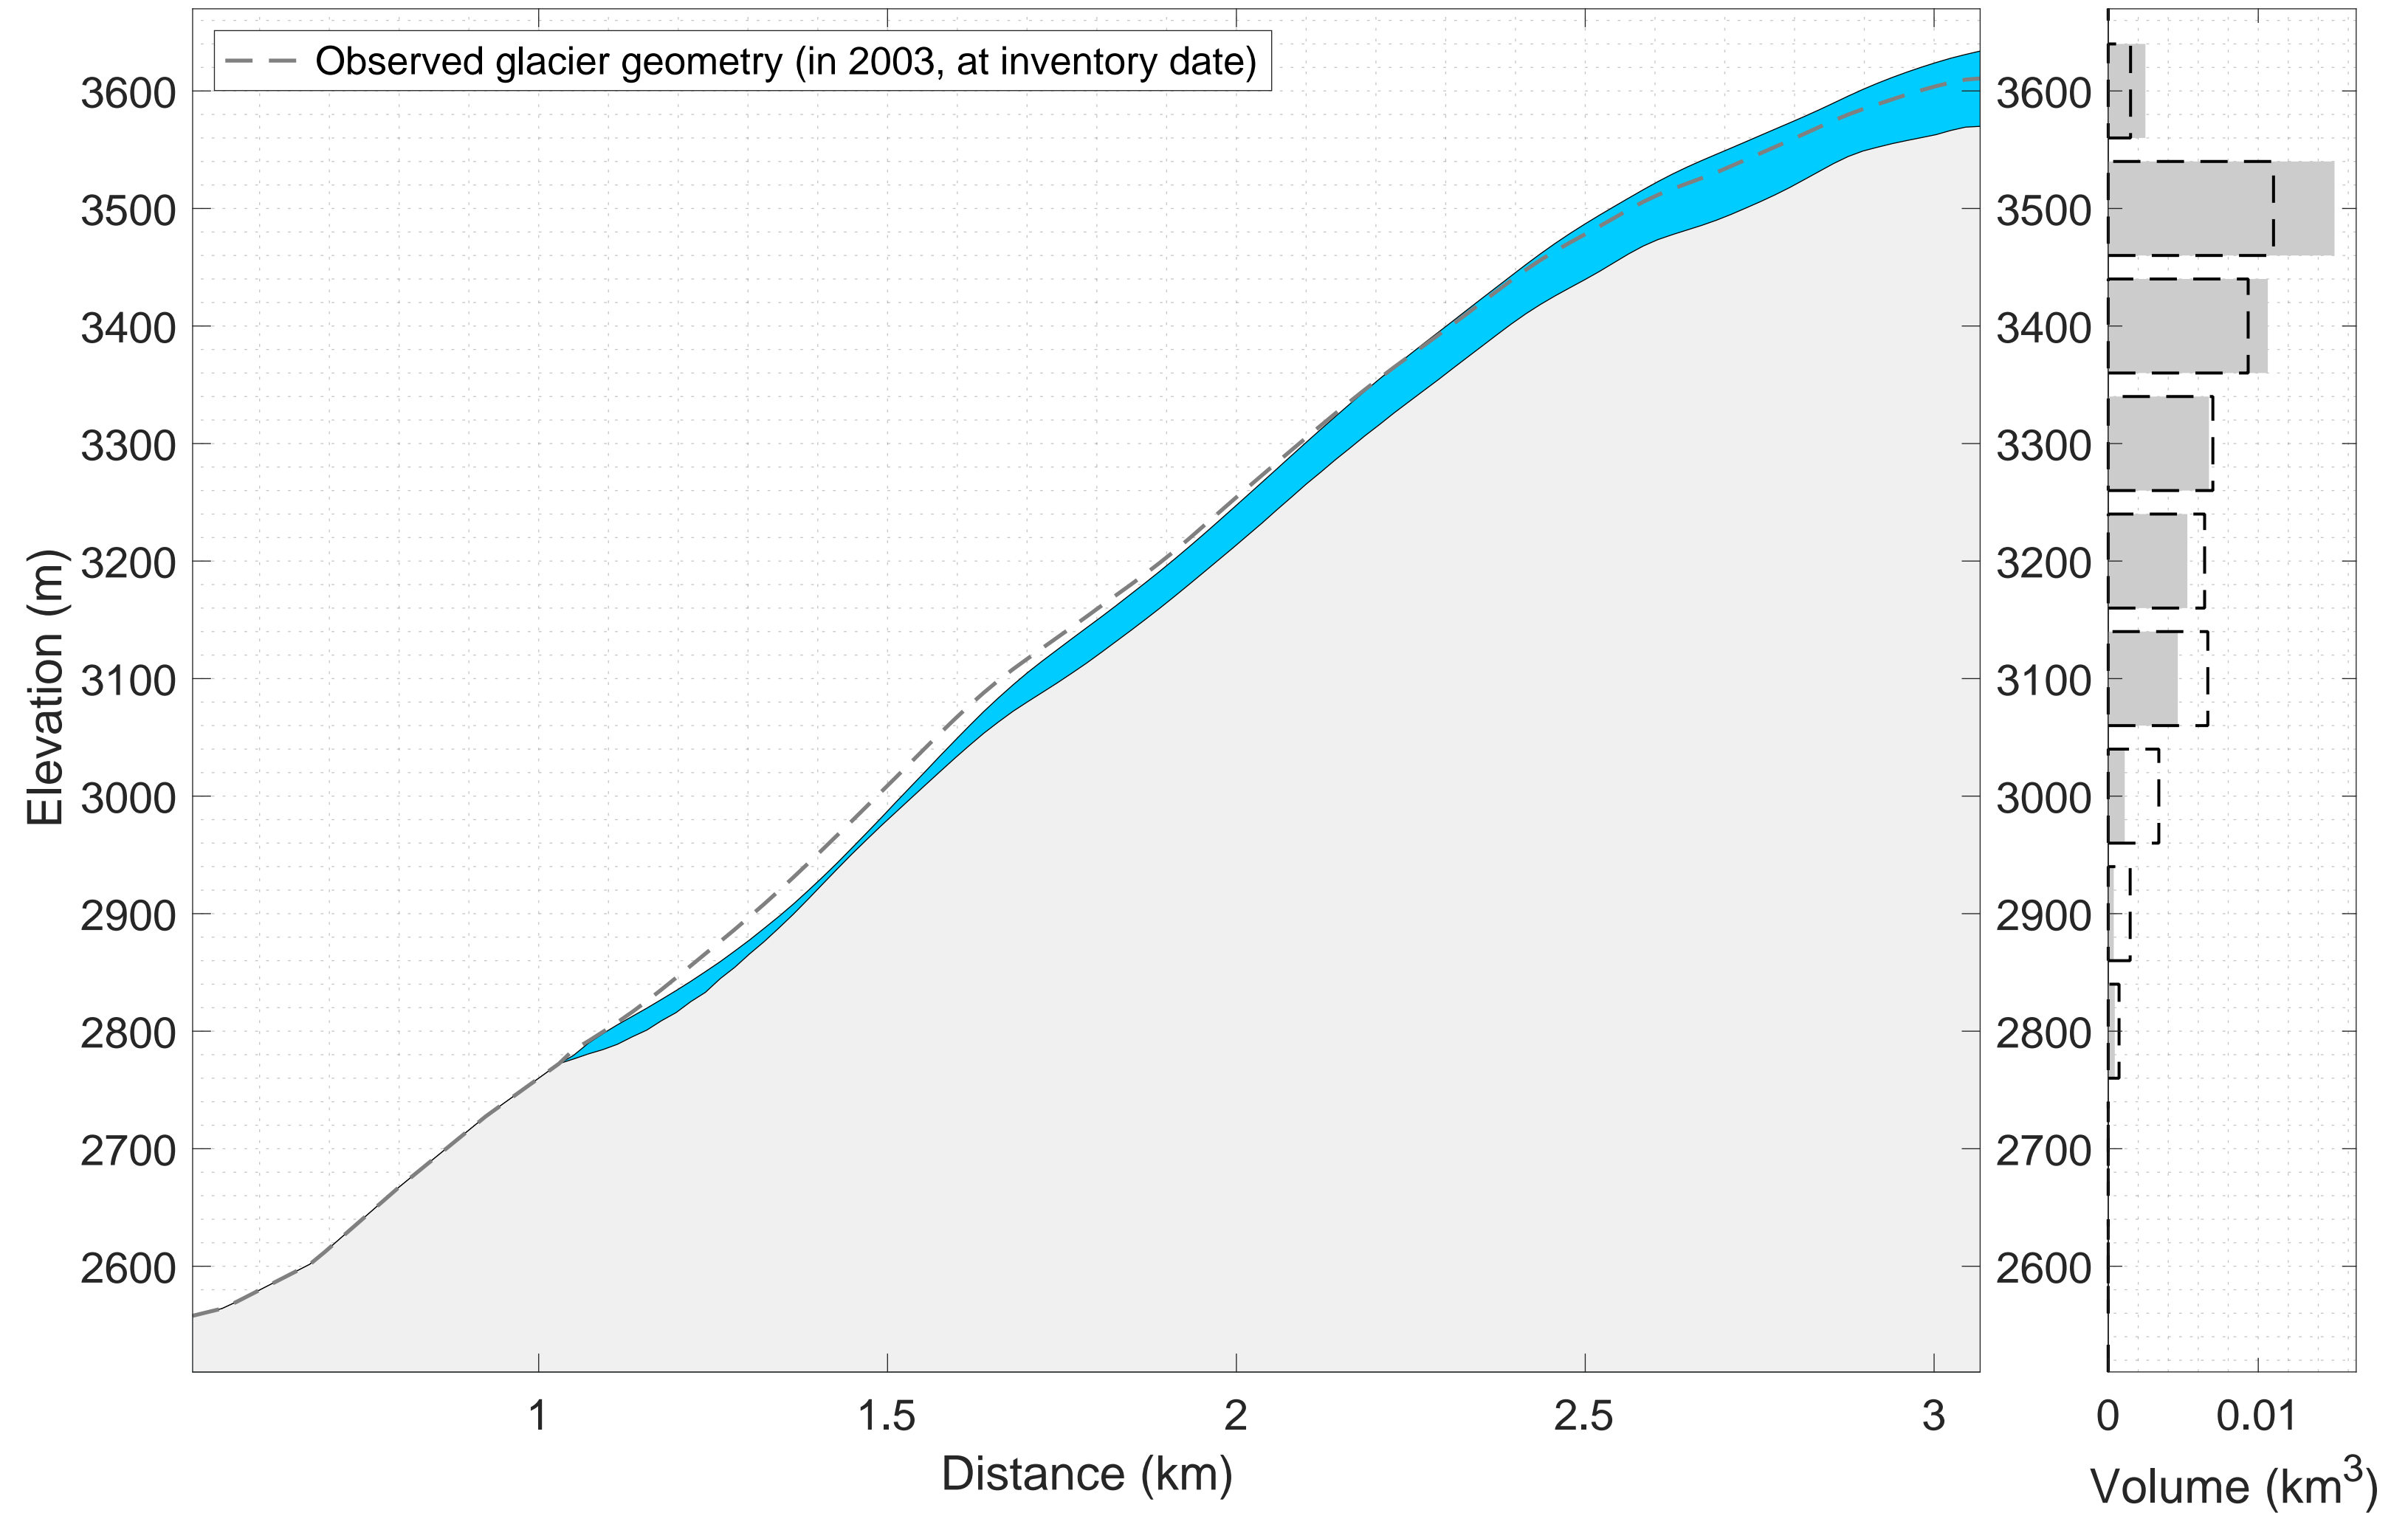

Supplement: Supplementary file 3 [file tc-13-1125-2019-supplement.zip]

**Modelled geometry (Glacier ID = 03182;  $A = 1.6002\text{e-}16 \text{ Pa}^{-3} \text{ a}^{-1}$ ;  $dx = 25 \text{ m}$ )**

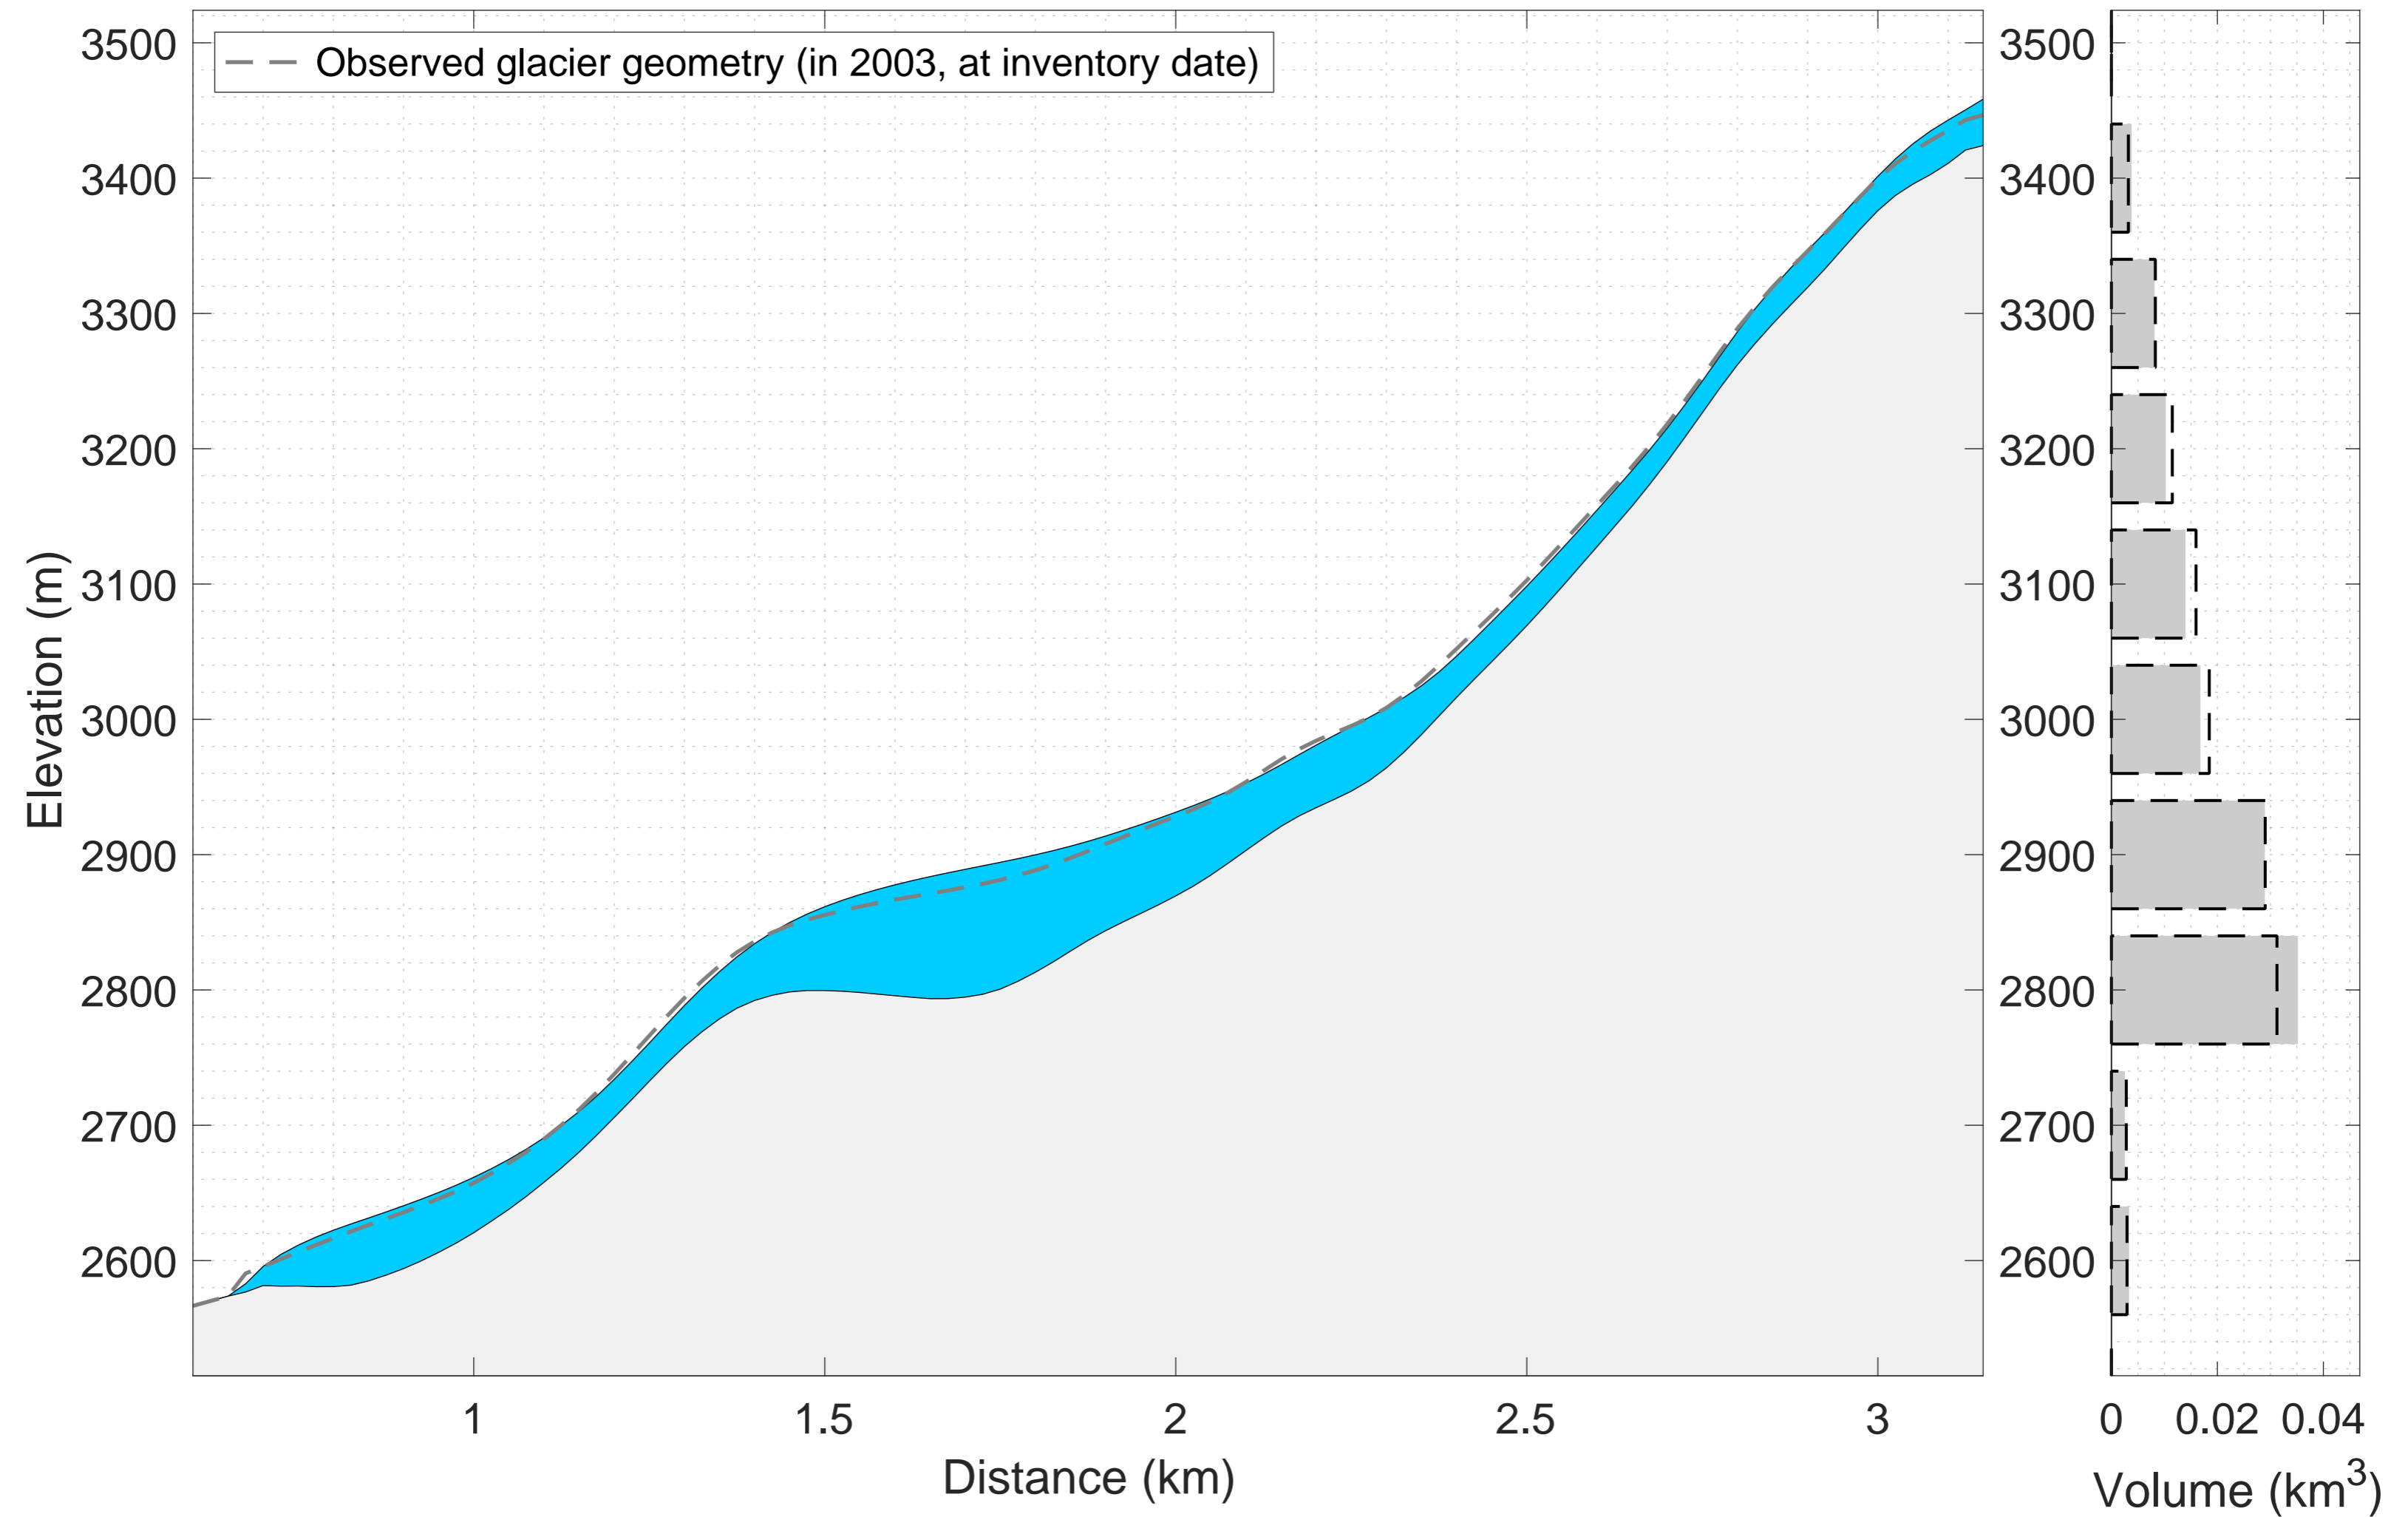

Supplement: Supplementary file 4 [file tc-13-1125-2019-supplement.zip]

**Modelled geometry (Glacier ID = 03660;  $A = 1.15\text{e-}16 \text{ Pa}^{-3} \text{ a}^{-1}$ ;  $dx = 11 \text{ m}$ )**

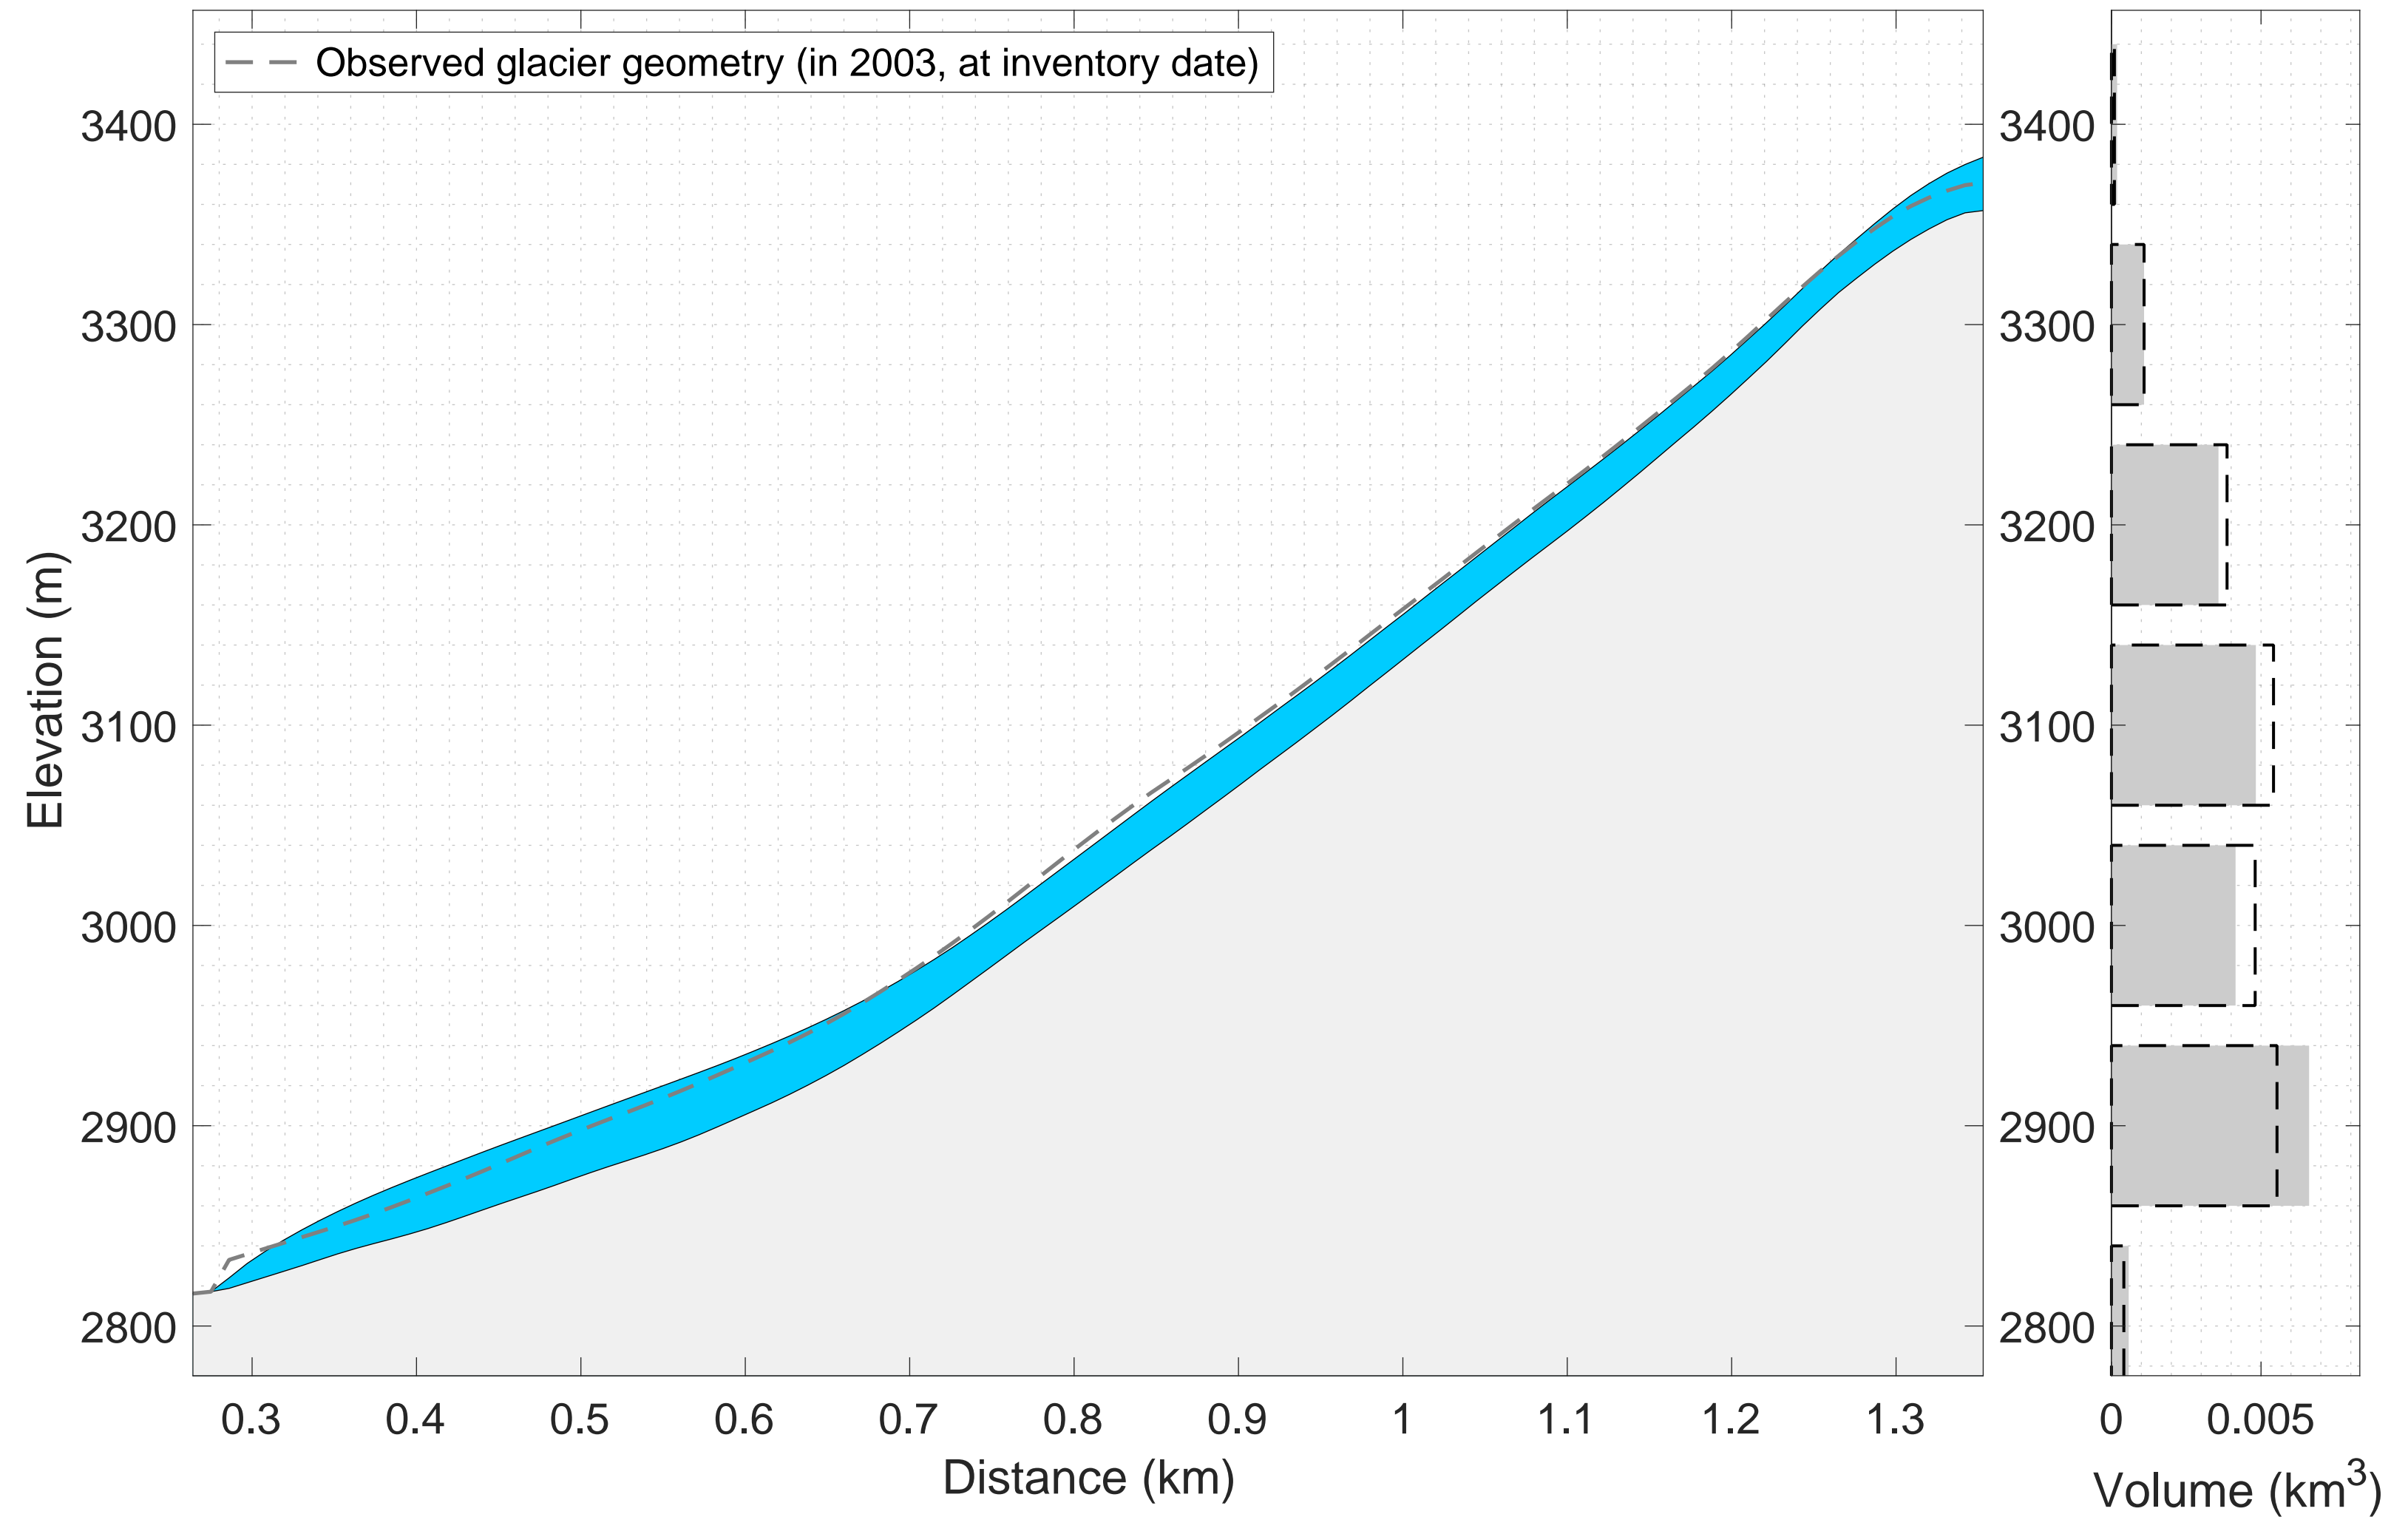

Supplement: Supplementary file 5 [file tc-13-1125-2019-supplement.zip]

**Modelled geometry (Glacier ID = 02642;  $A = 9.7812\text{e-}17 \text{ Pa}^{-3} \text{ a}^{-1}$ ;  $dx = 11 \text{ m}$ )**

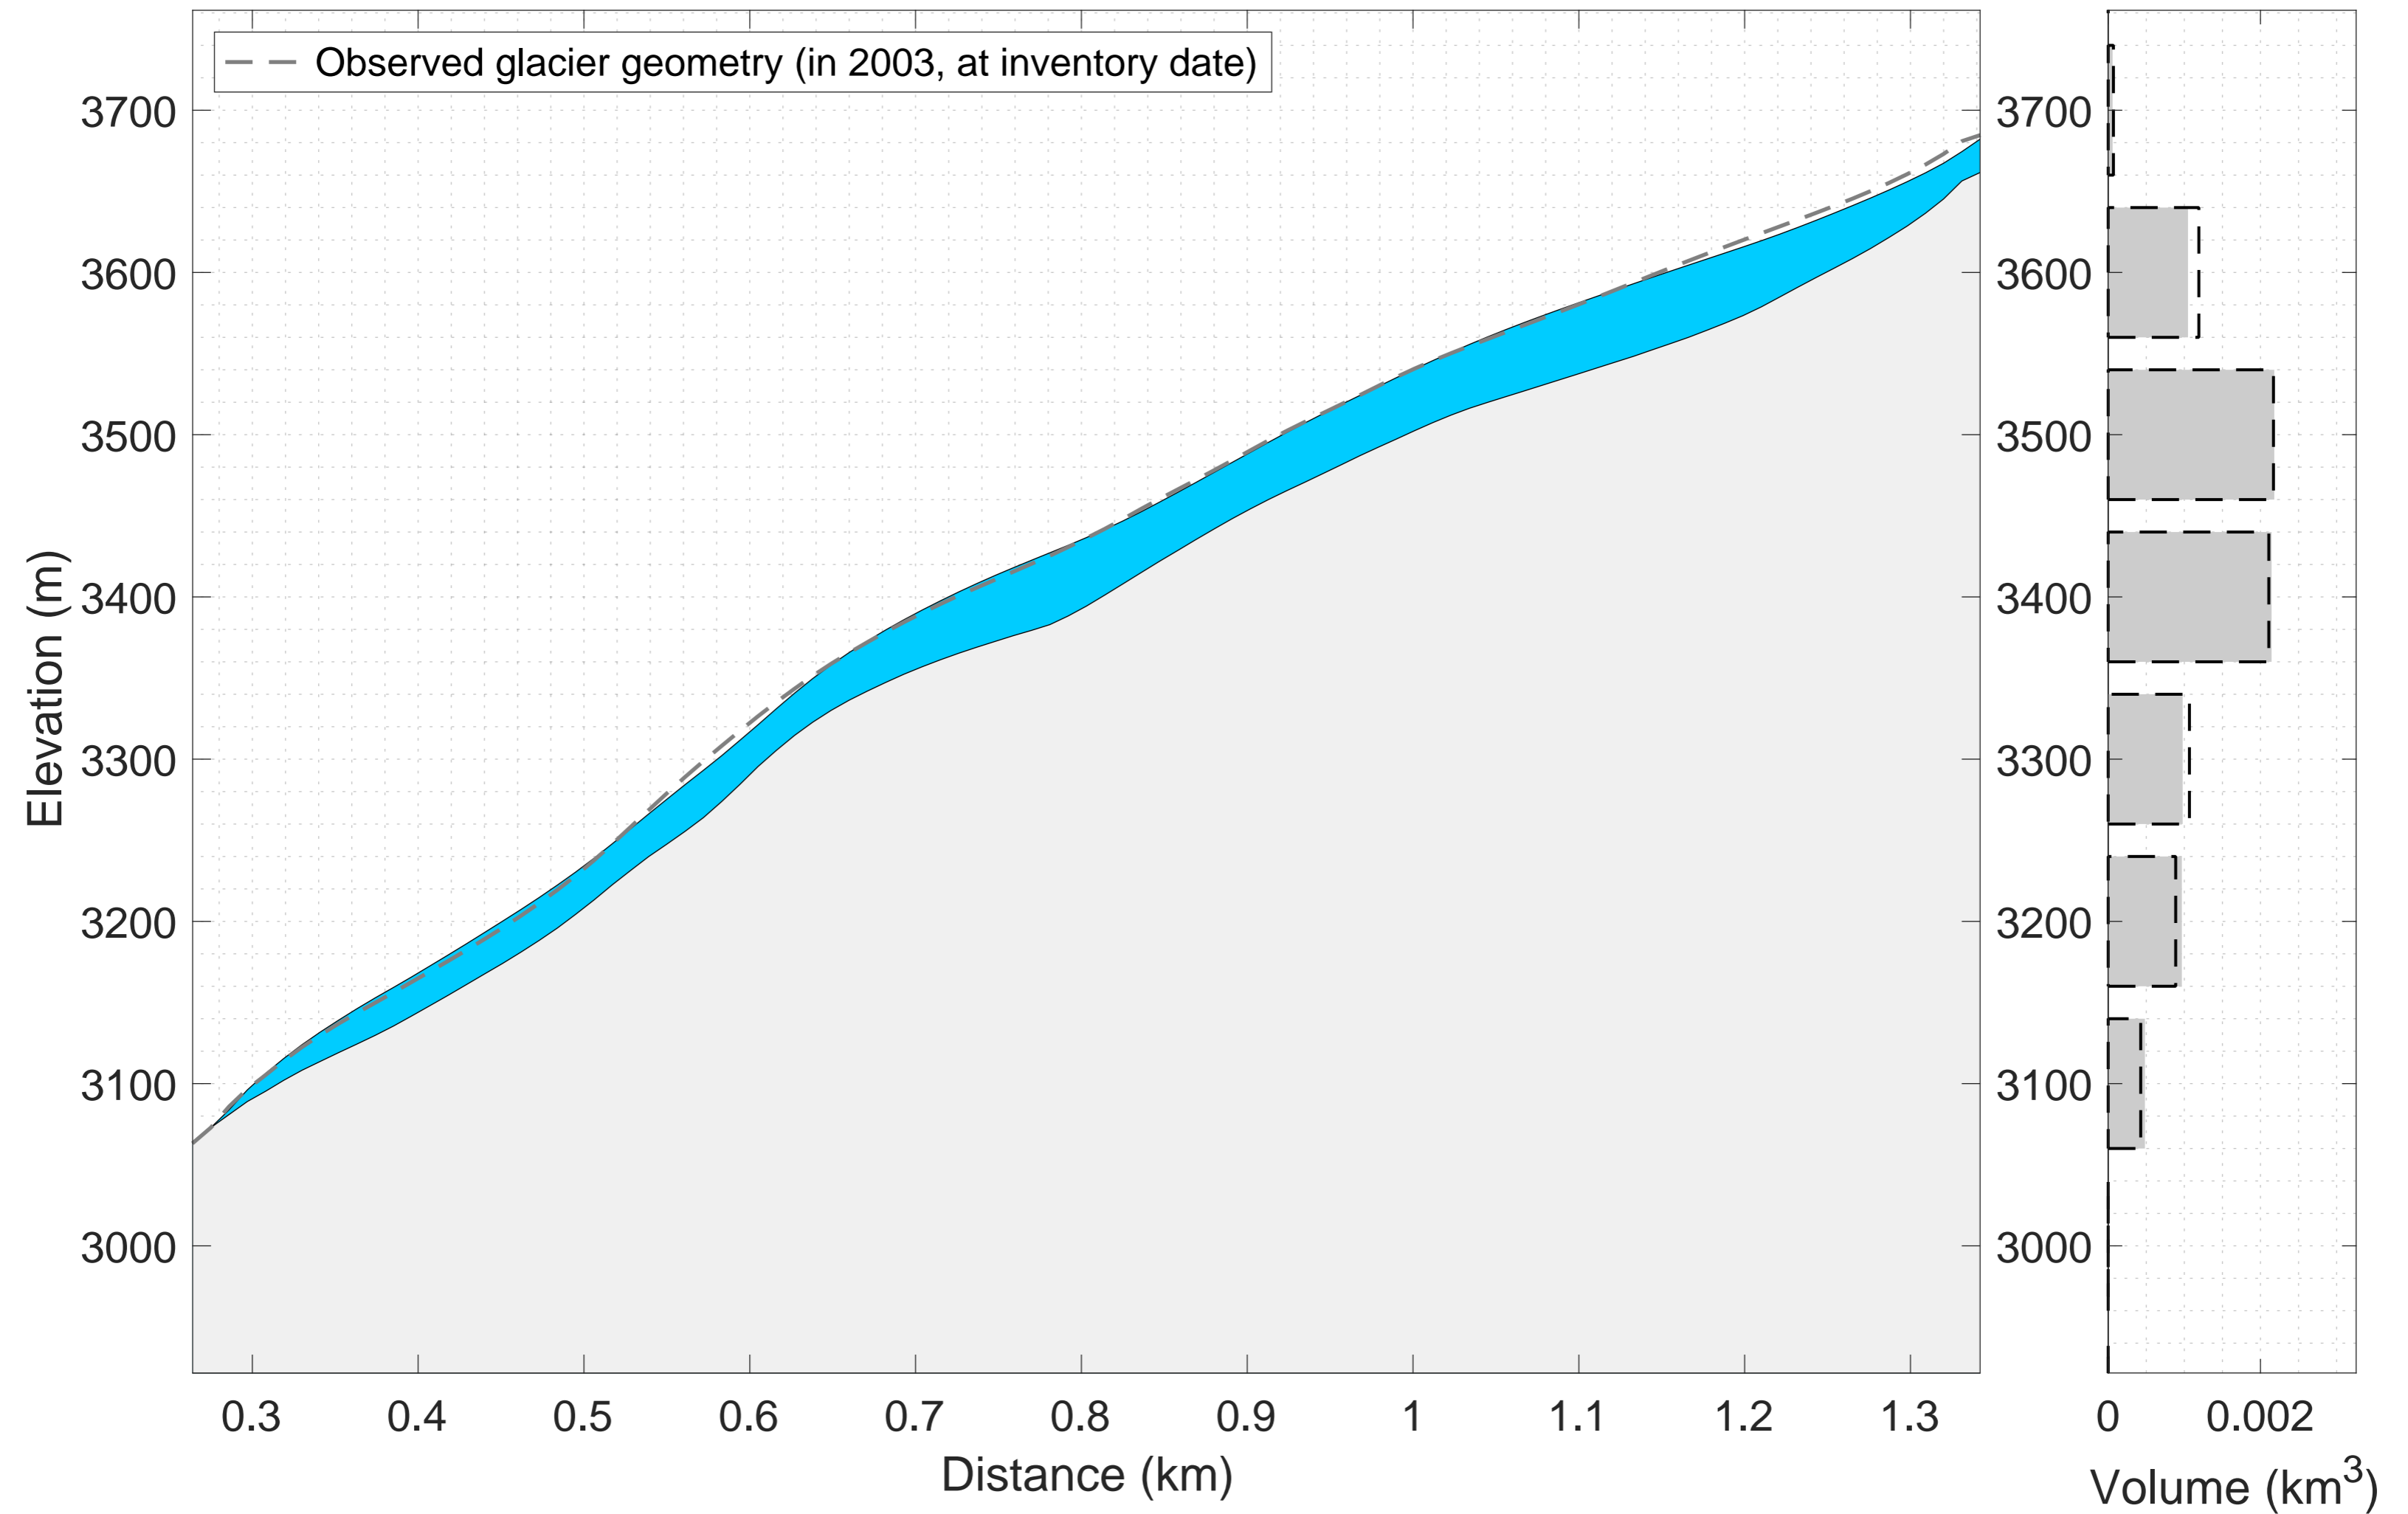

Supplement: Supplementary file 6 [file tc-13-1125-2019-supplement.zip]

**Modelled geometry (Glacier ID = 00587;  $A = 5.6249\text{e-}17 \text{ Pa}^{-3} \text{ a}^{-1}$ ;  $dx = 11 \text{ m}$ )**

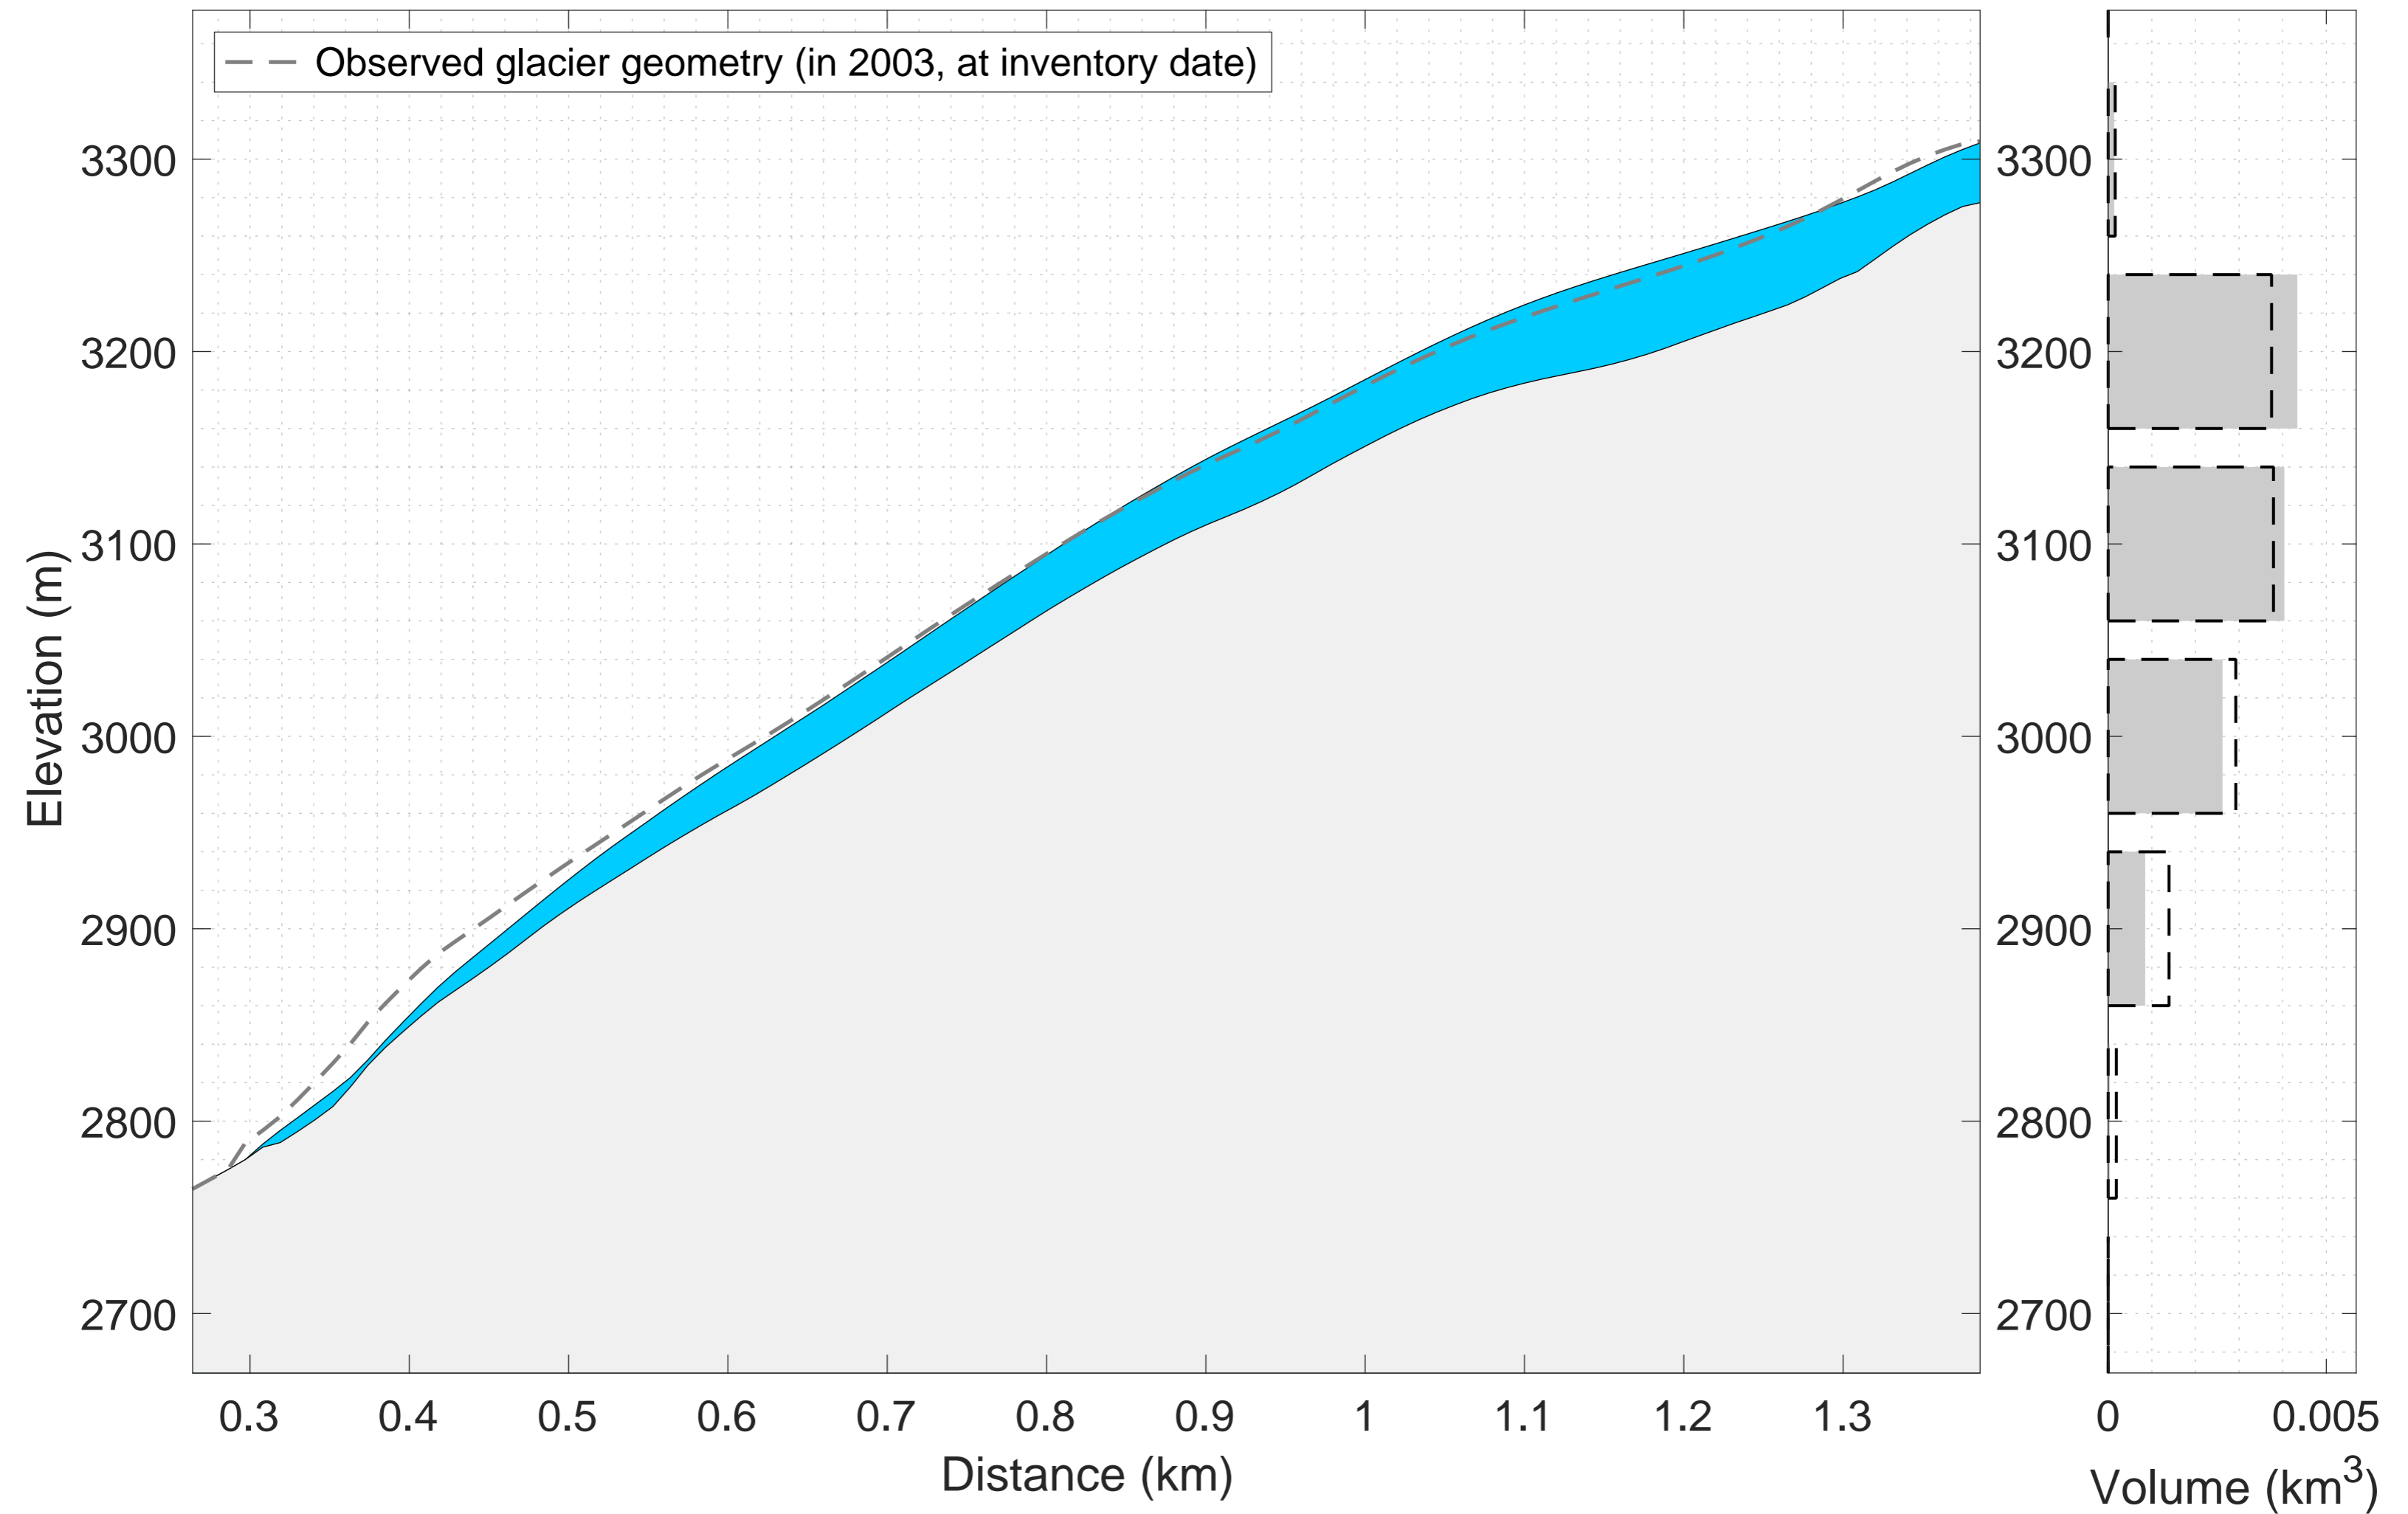

Supplement: Supplementary file 7 [file tc-13-1125-2019-supplement.zip]

**Modelled geometry (Glacier ID = 01076;  $A = 9.3617\text{e-}17 \text{ Pa}^{-3} \text{ a}^{-1}$ ;  $dx = 10 \text{ m}$ )**

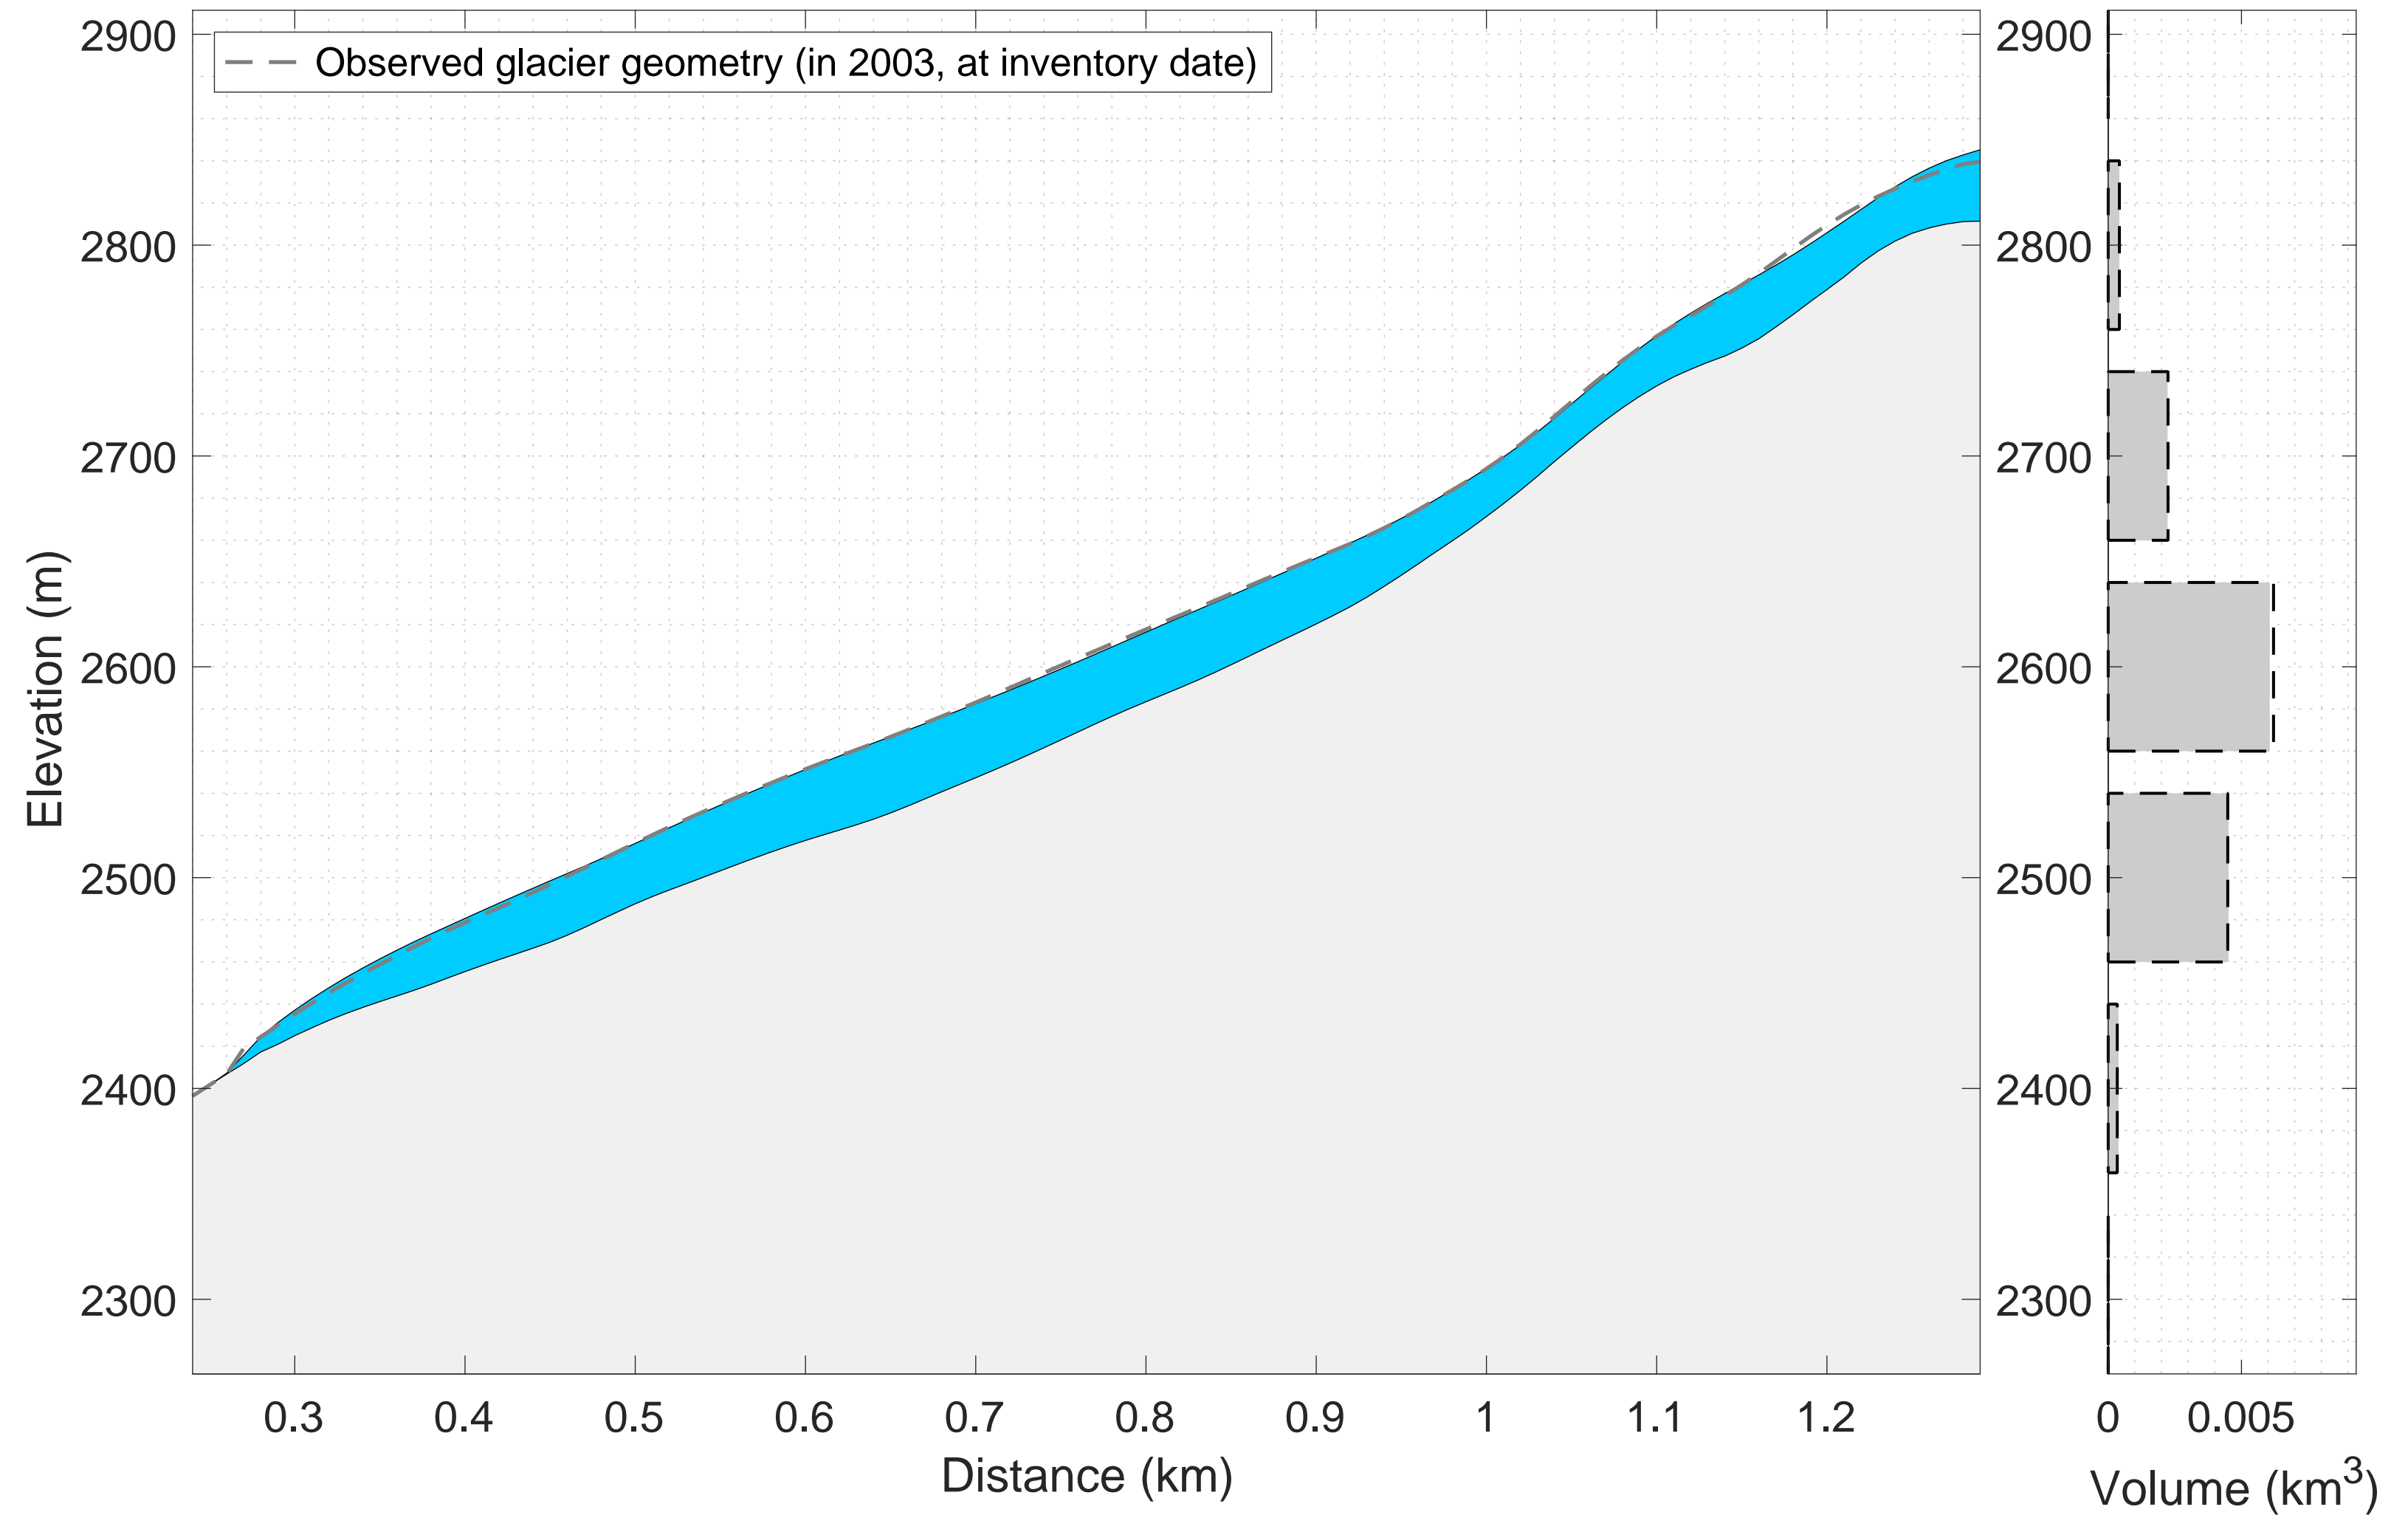

Supplement: Supplementary file 8 [file tc-13-1125-2019-supplement.zip]

**Modelled geometry (Glacier ID = 00161;  $A = 2.3073\text{e-}16 \text{ Pa}^{-3} \text{ a}^{-1}$ ;  $dx = 33 \text{ m}$ )**

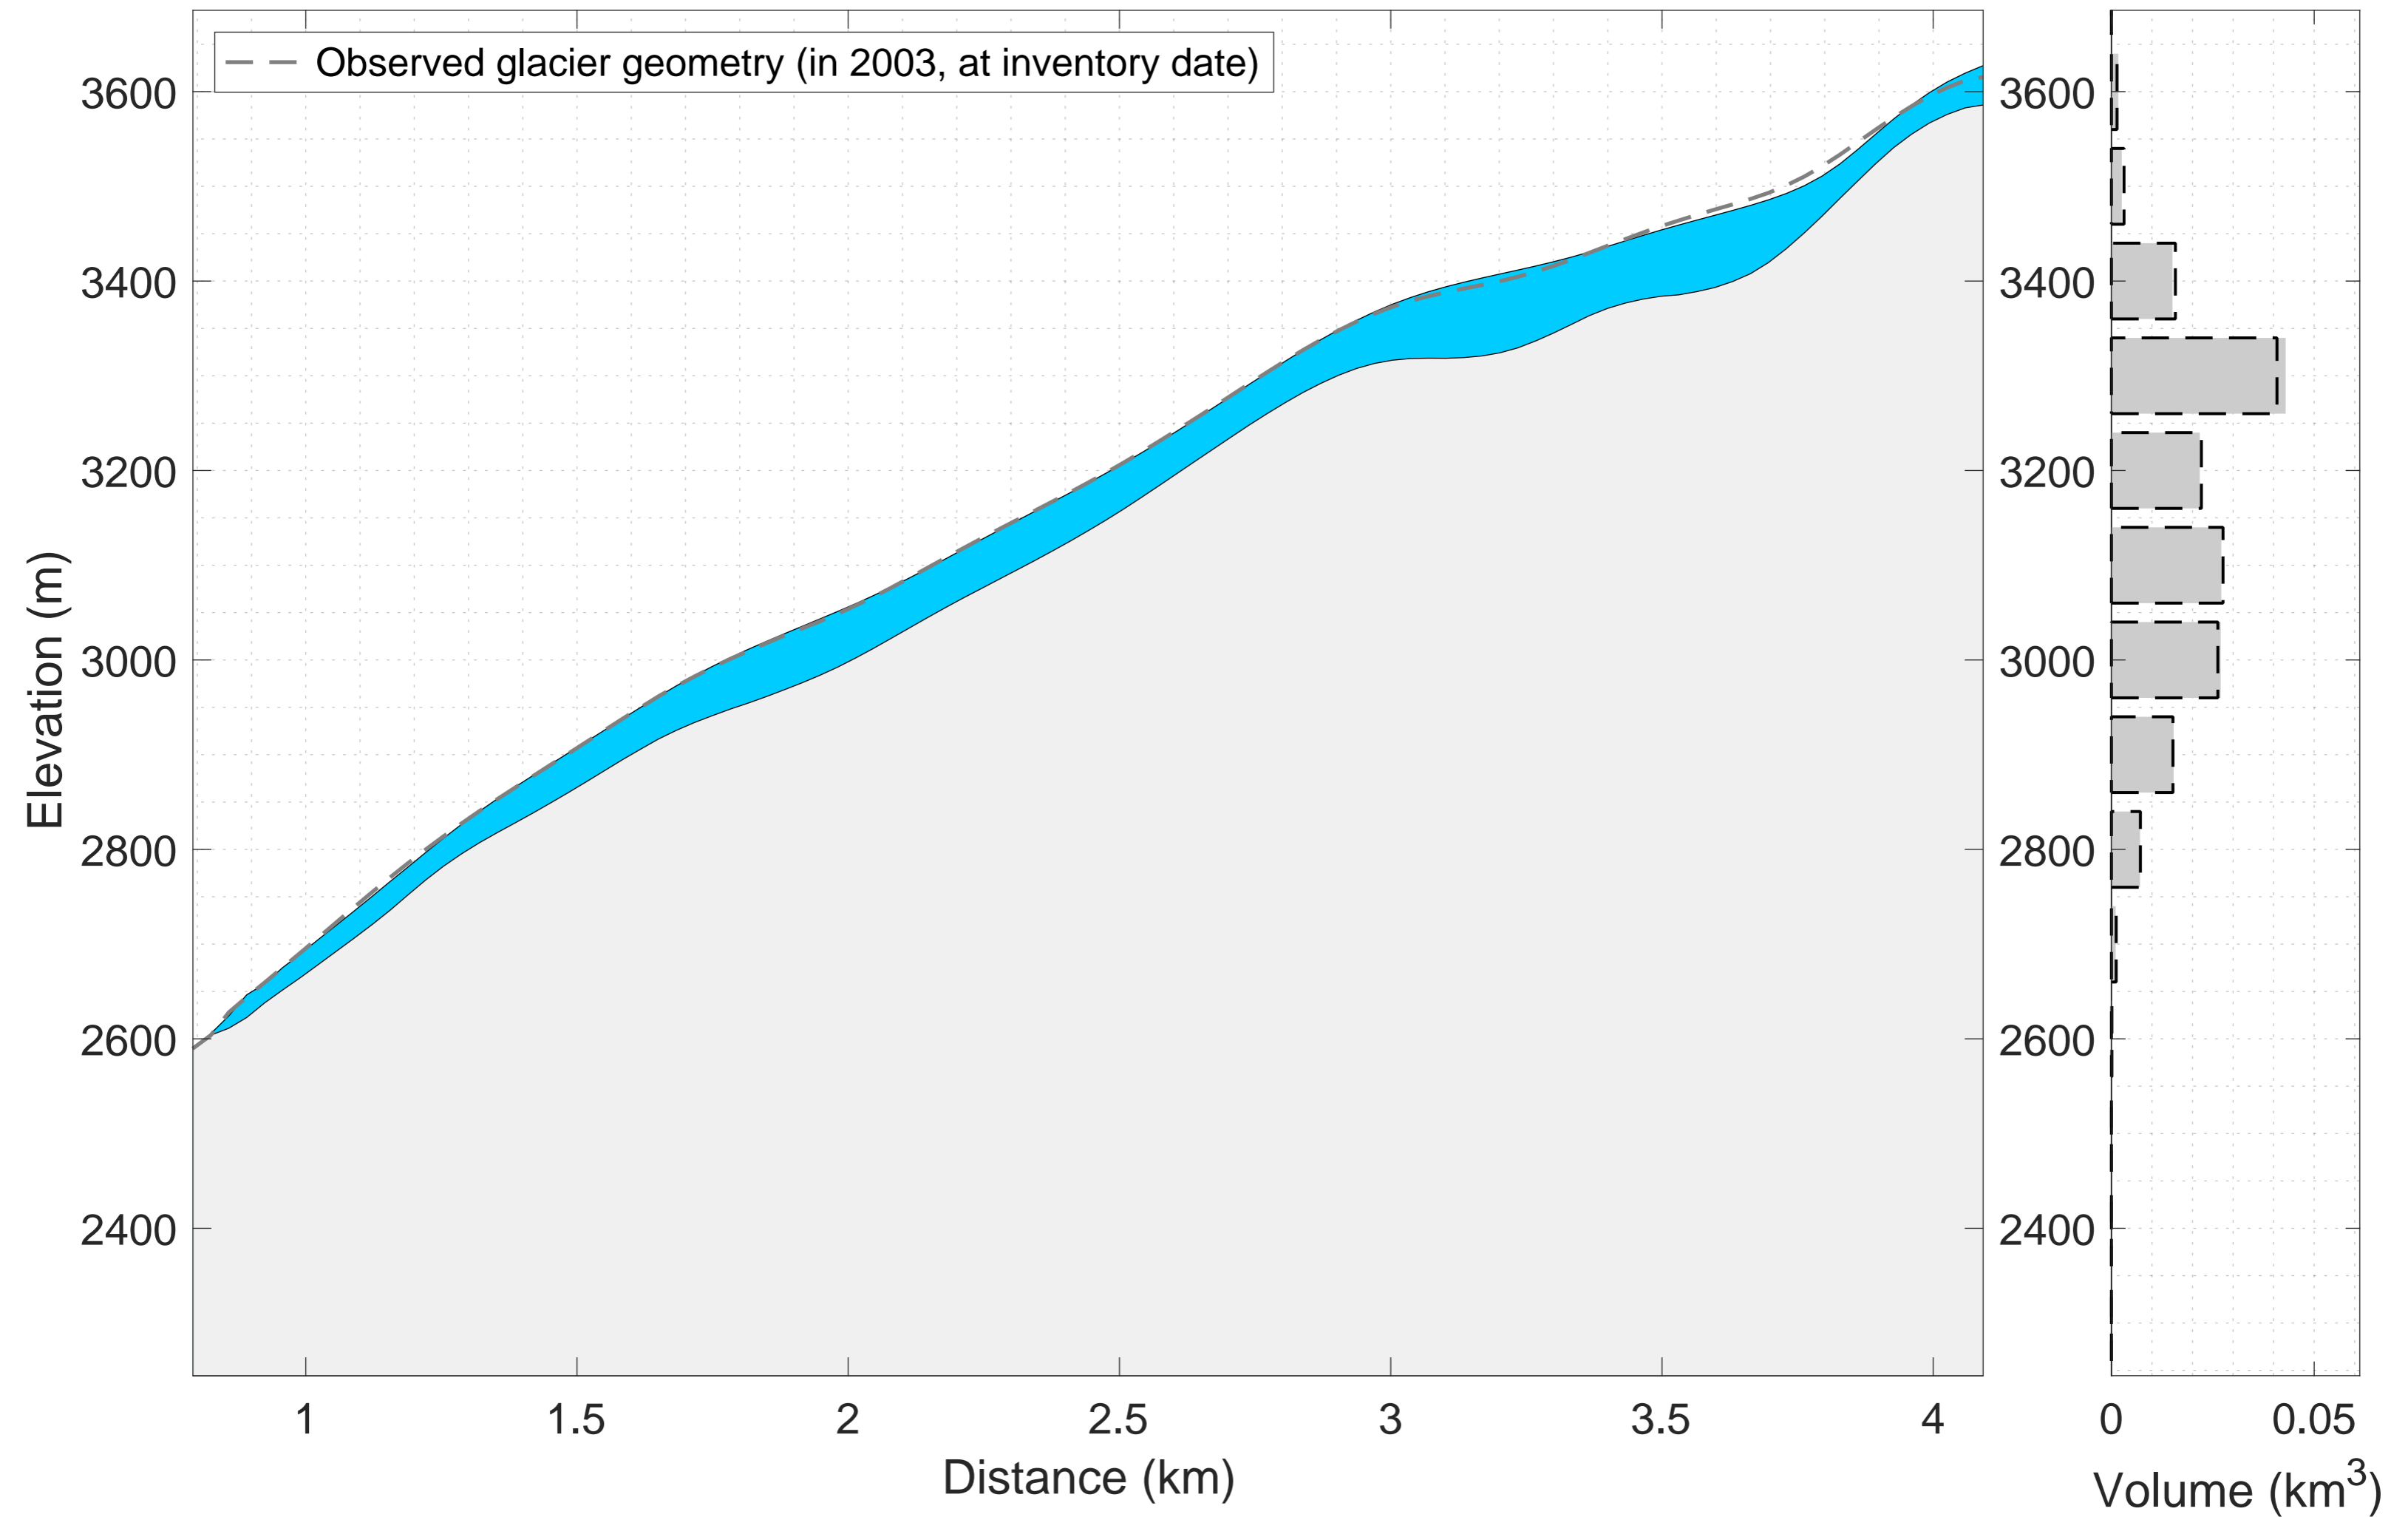

Supplement: Supplementary file 9 [file tc-13-1125-2019-supplement.zip]

**Modelled geometry (Glacier ID = 03124;  $A = 2.0821\text{e-}16 \text{ Pa}^{-3} \text{ a}^{-1}$ ;  $dx = 29 \text{ m}$ )**

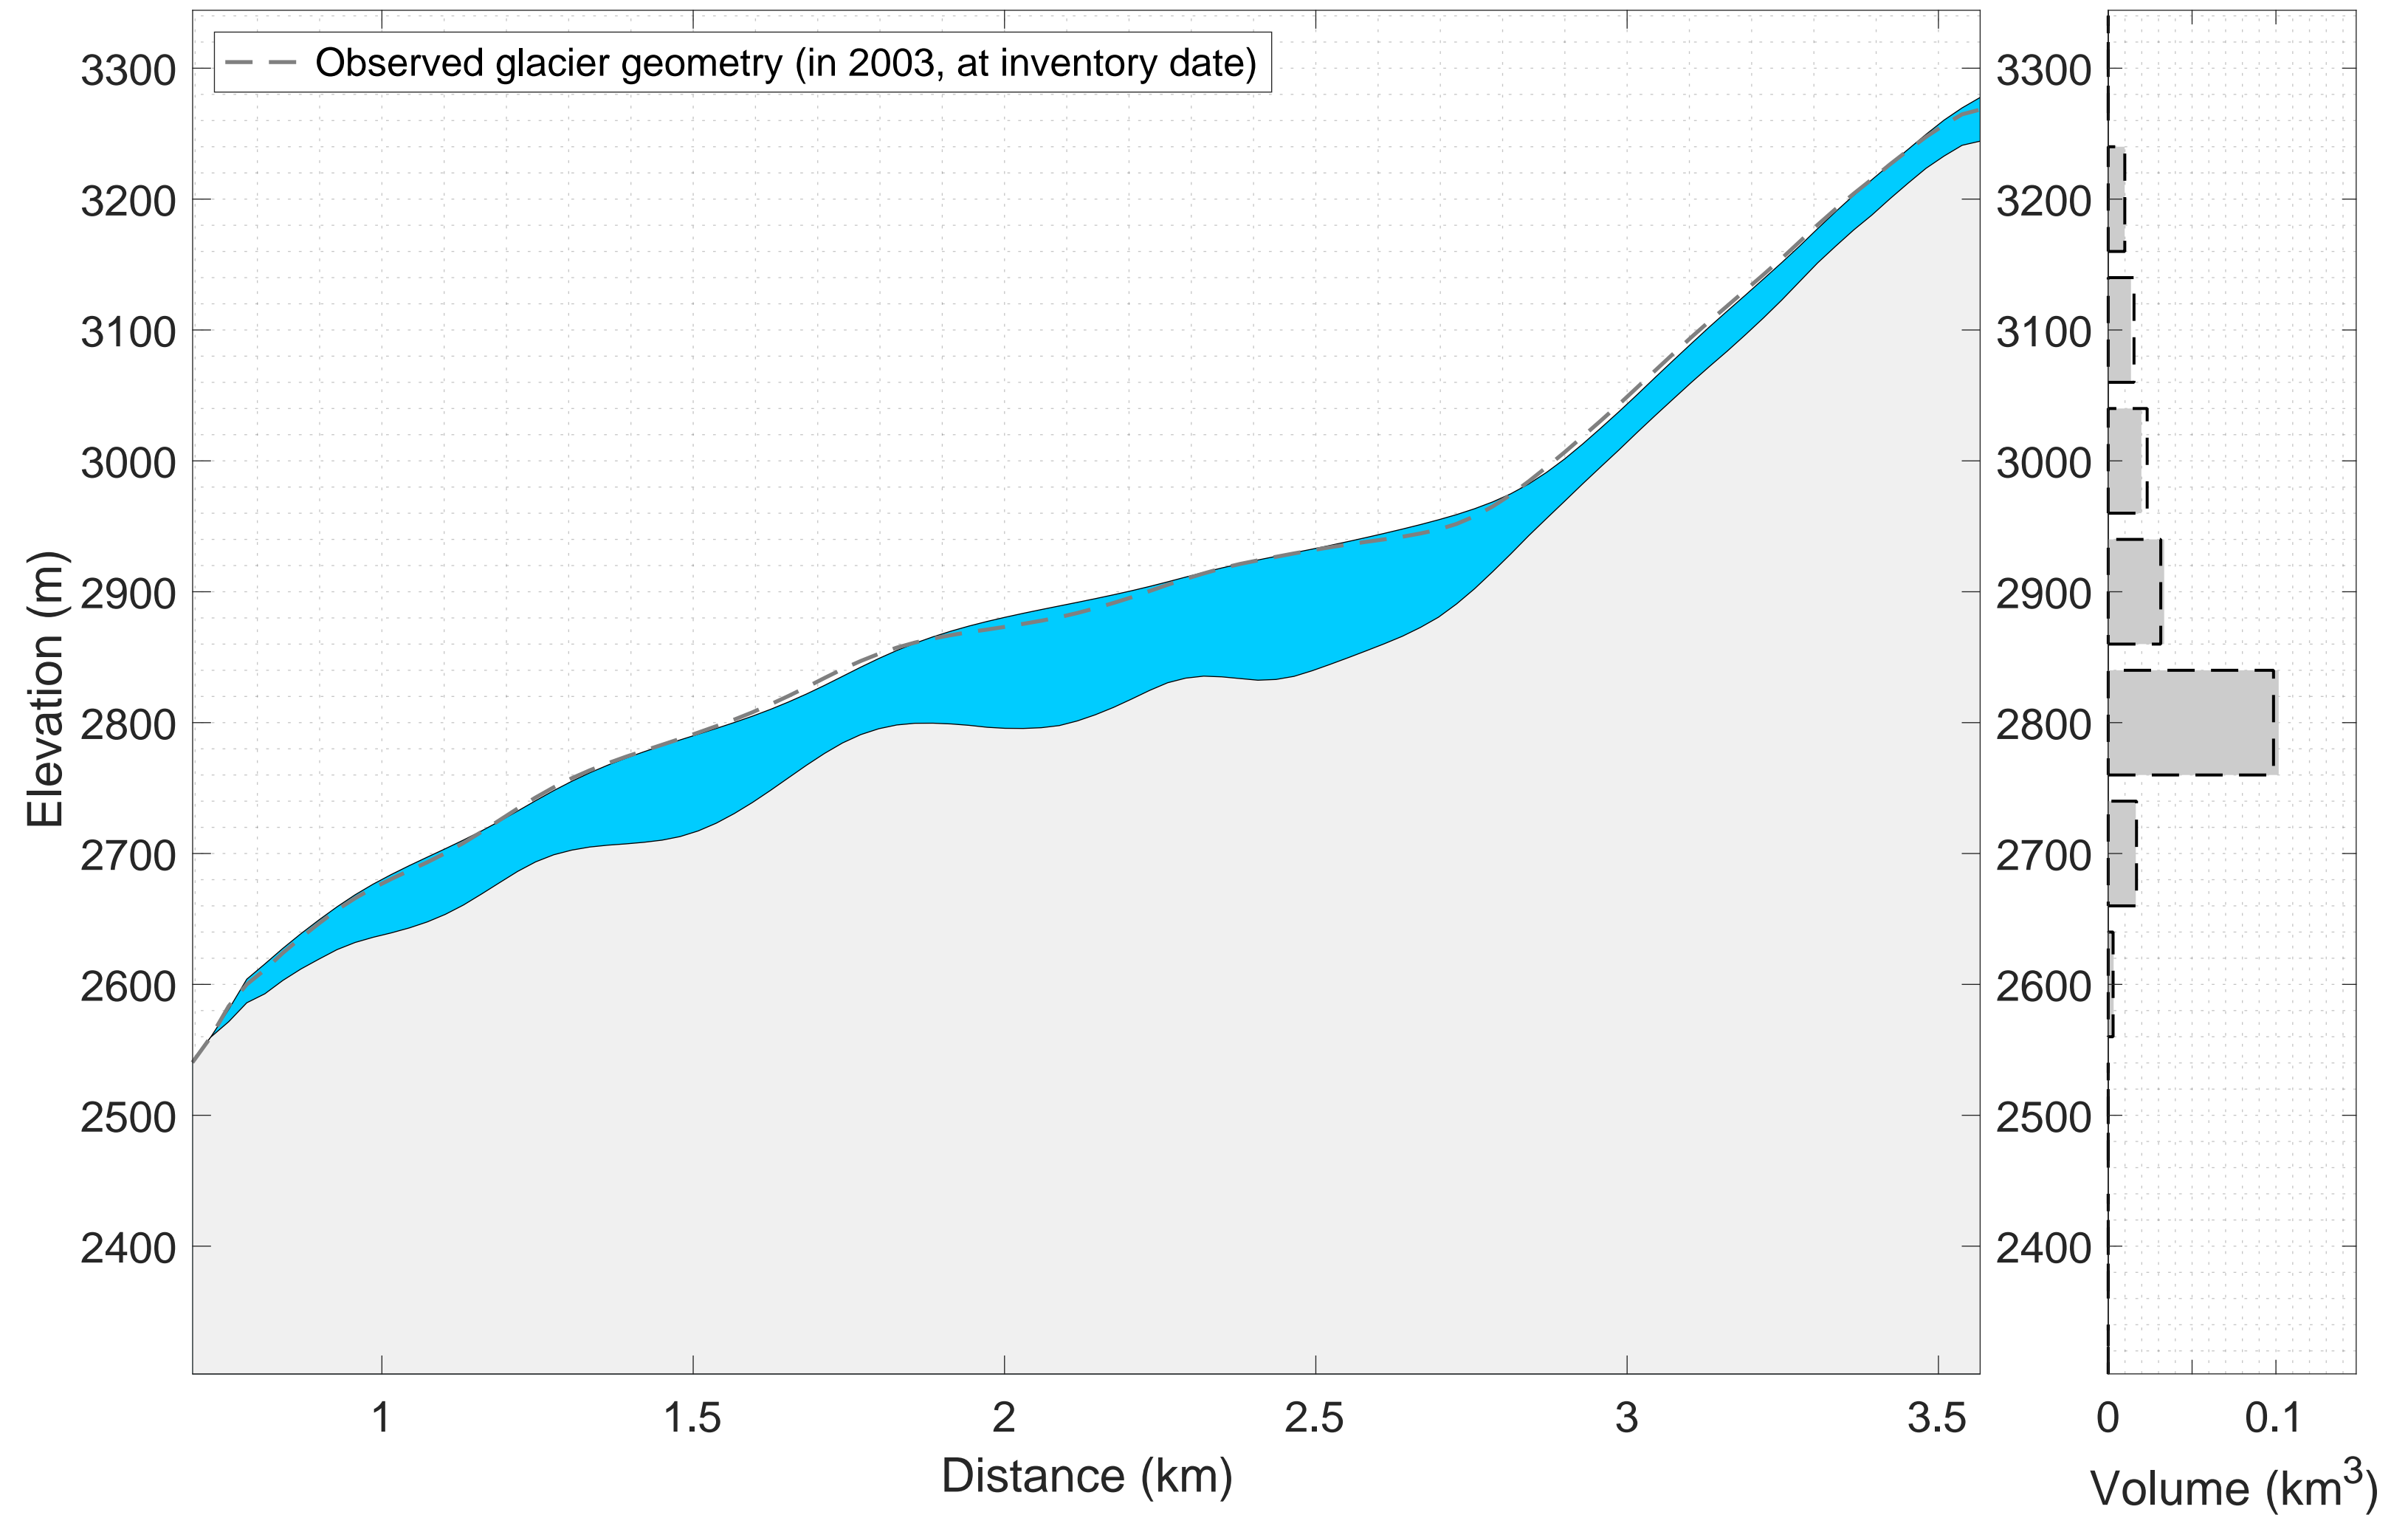

Supplement: Supplementary file 10 [file tc-13-1125-2019-supplement.zip]

**Modelled geometry (Glacier ID = 03733;  $A = 1.1\text{e-}16 \text{ Pa}^{-3} \text{ a}^{-1}$ ;  $dx = 22 \text{ m}$ )**

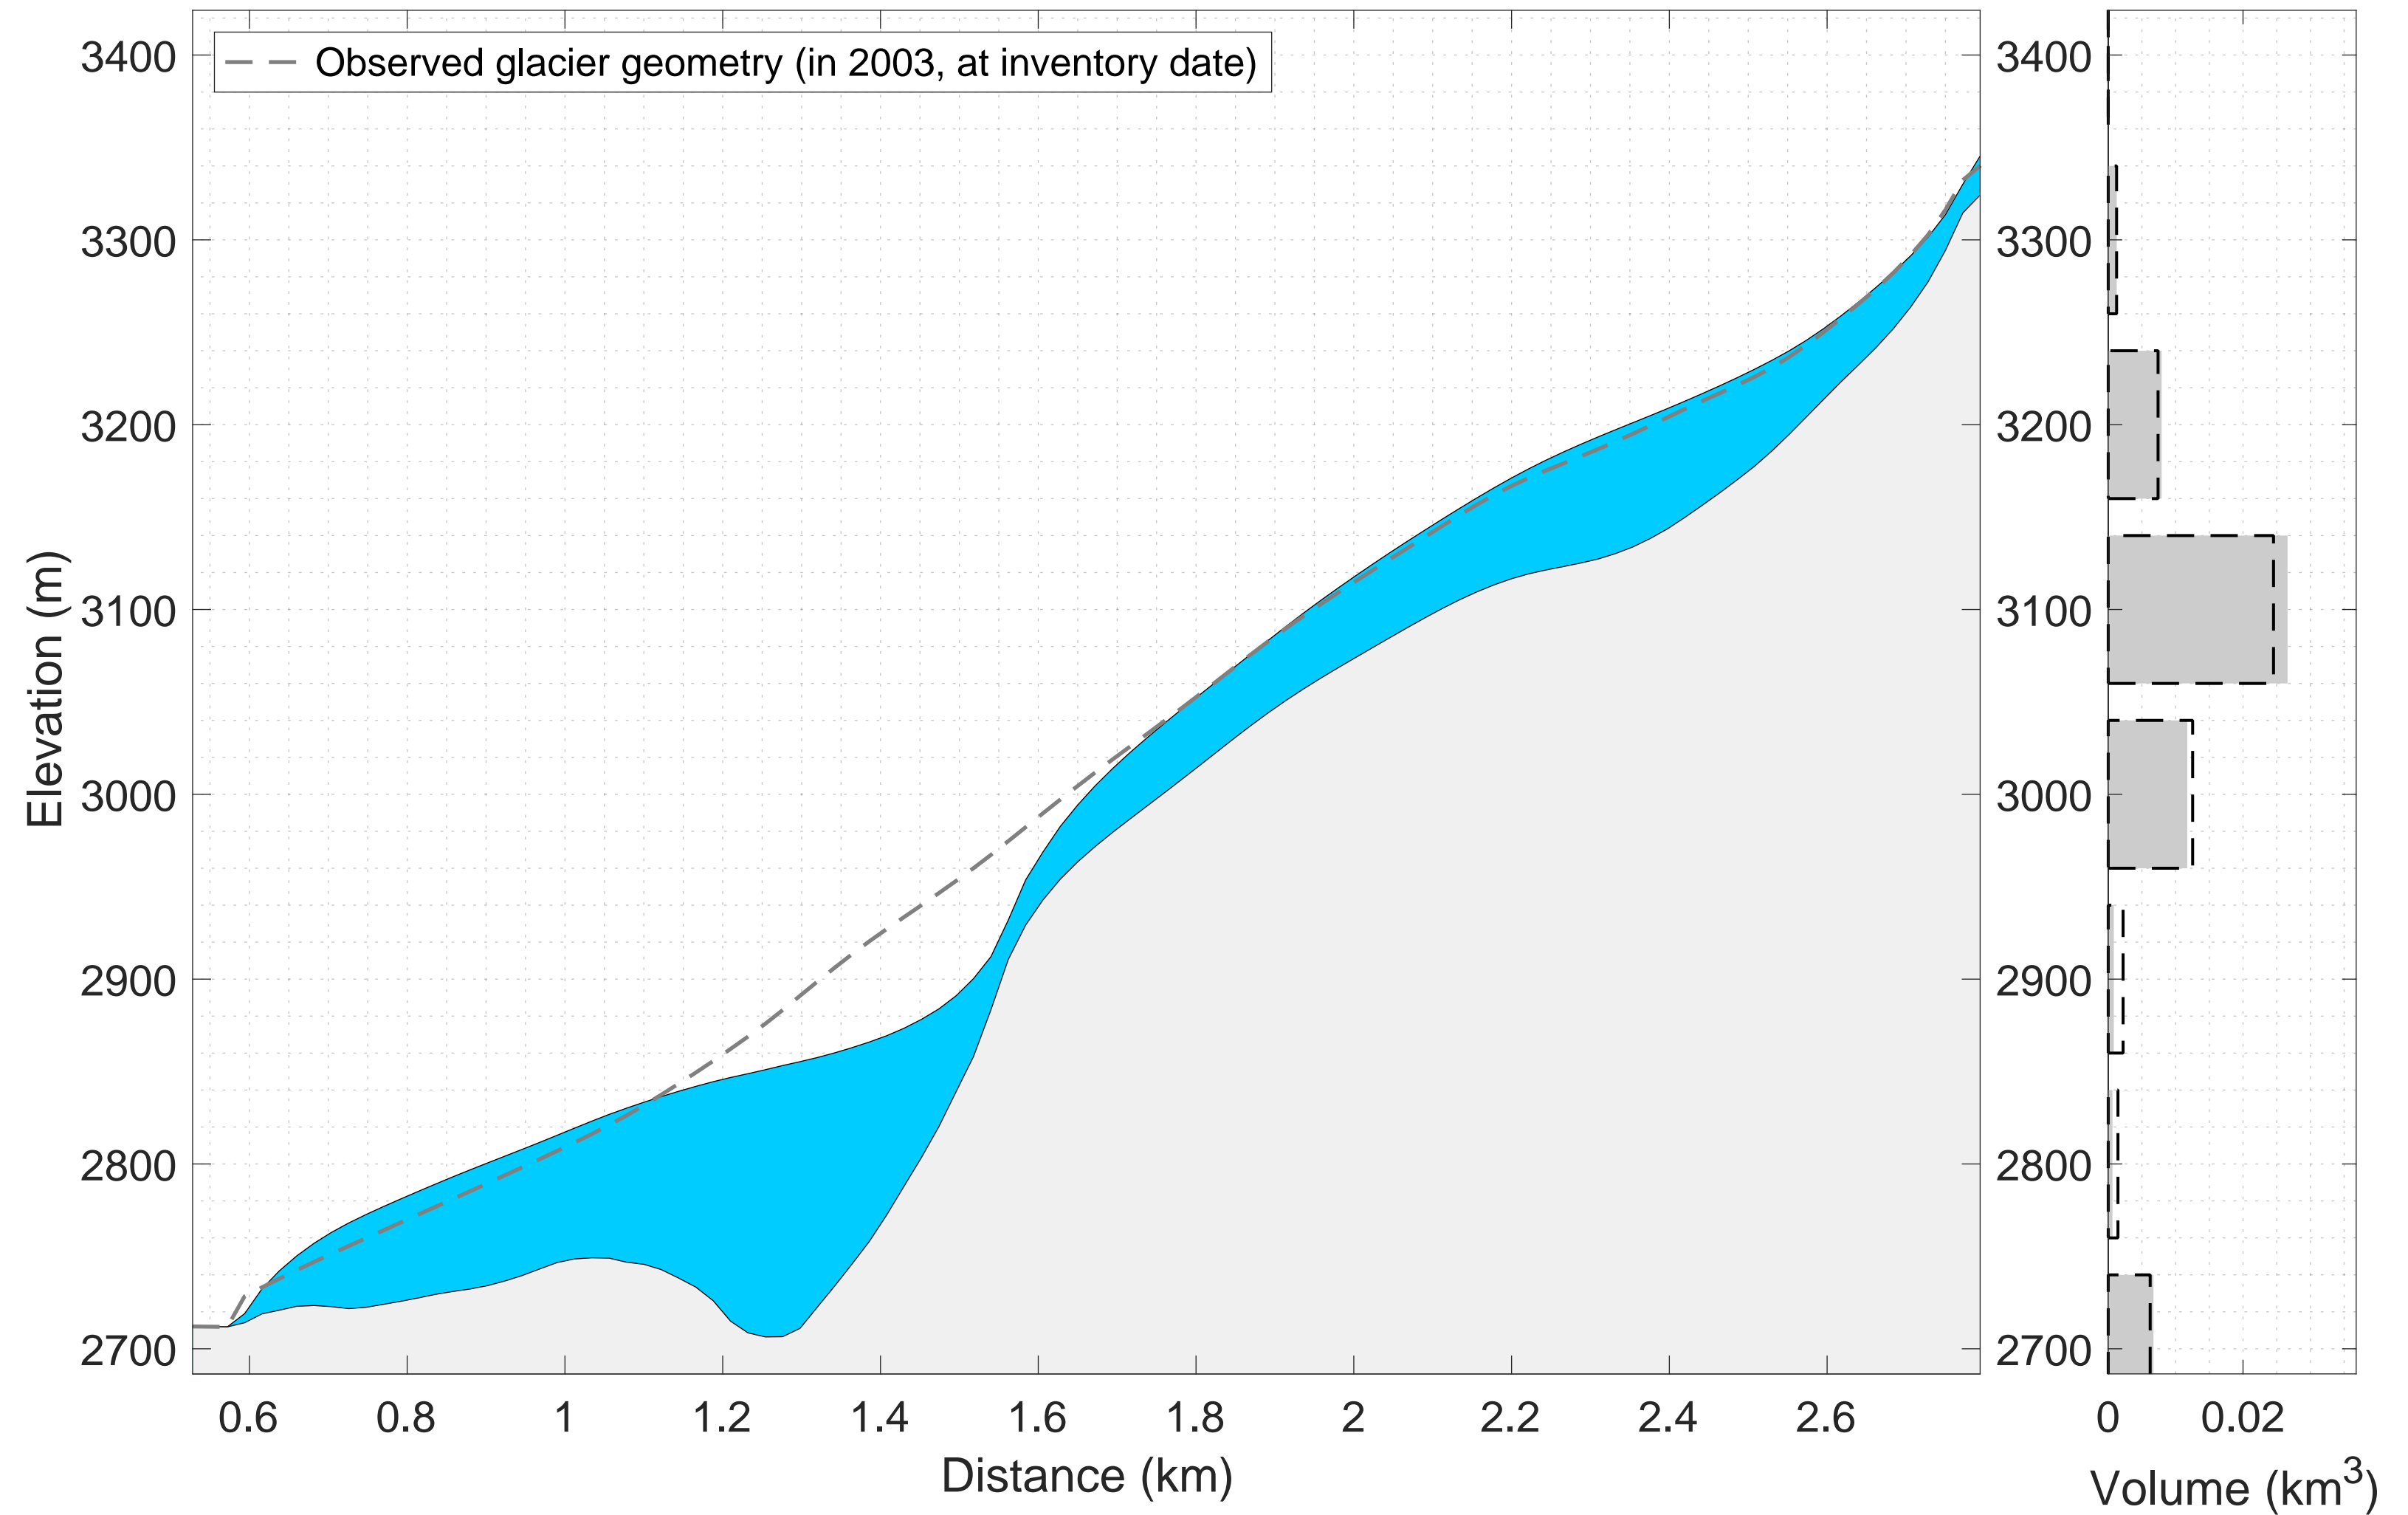

Supplement: Supplementary file 11 [file tc-13-1125-2019-supplement.zip]

**Modelled geometry (Glacier ID = 03005;  $A = 1.4559\text{e-}16 \text{ Pa}^{-3} \text{ a}^{-1}$ ;  $dx = 92 \text{ m}$ )**

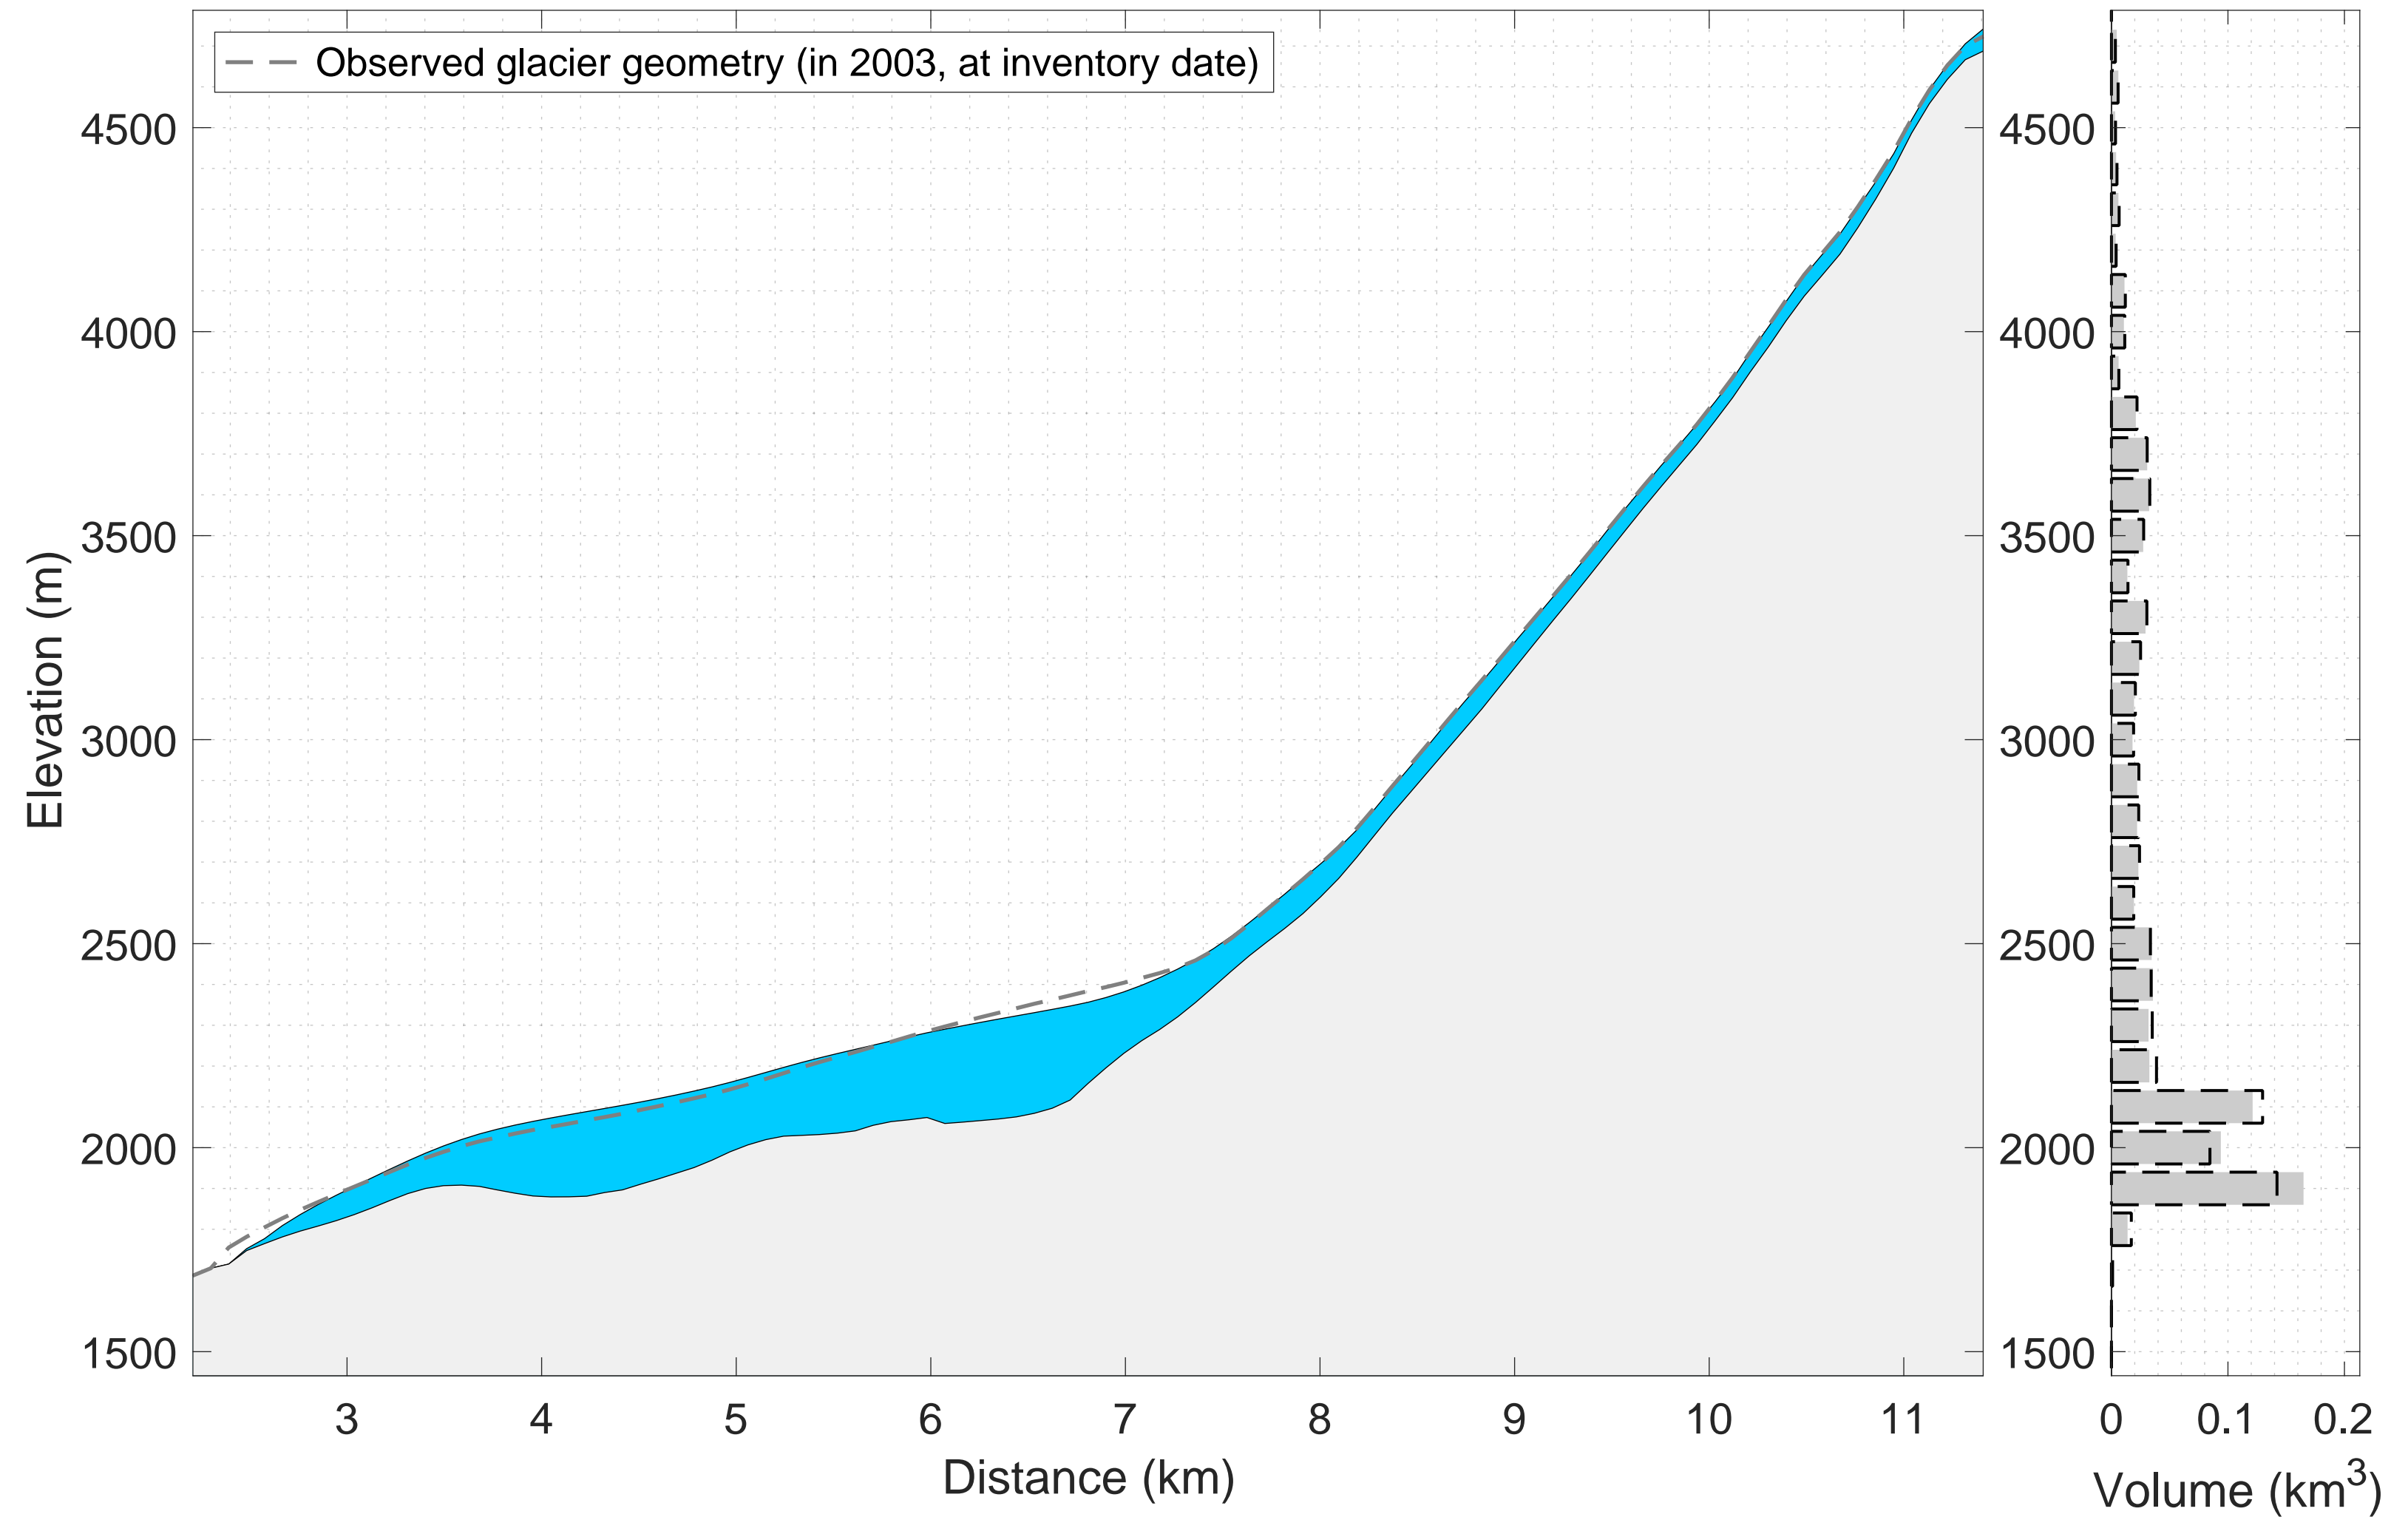

Supplement: Supplementary file 12 [file tc-13-1125-2019-supplement.zip]

**Modelled geometry (Glacier ID = 01773;  $A = 4.9649\text{e-}17 \text{ Pa}^{-3} \text{ a}^{-1}$ ;  $dx = 12 \text{ m}$ )**

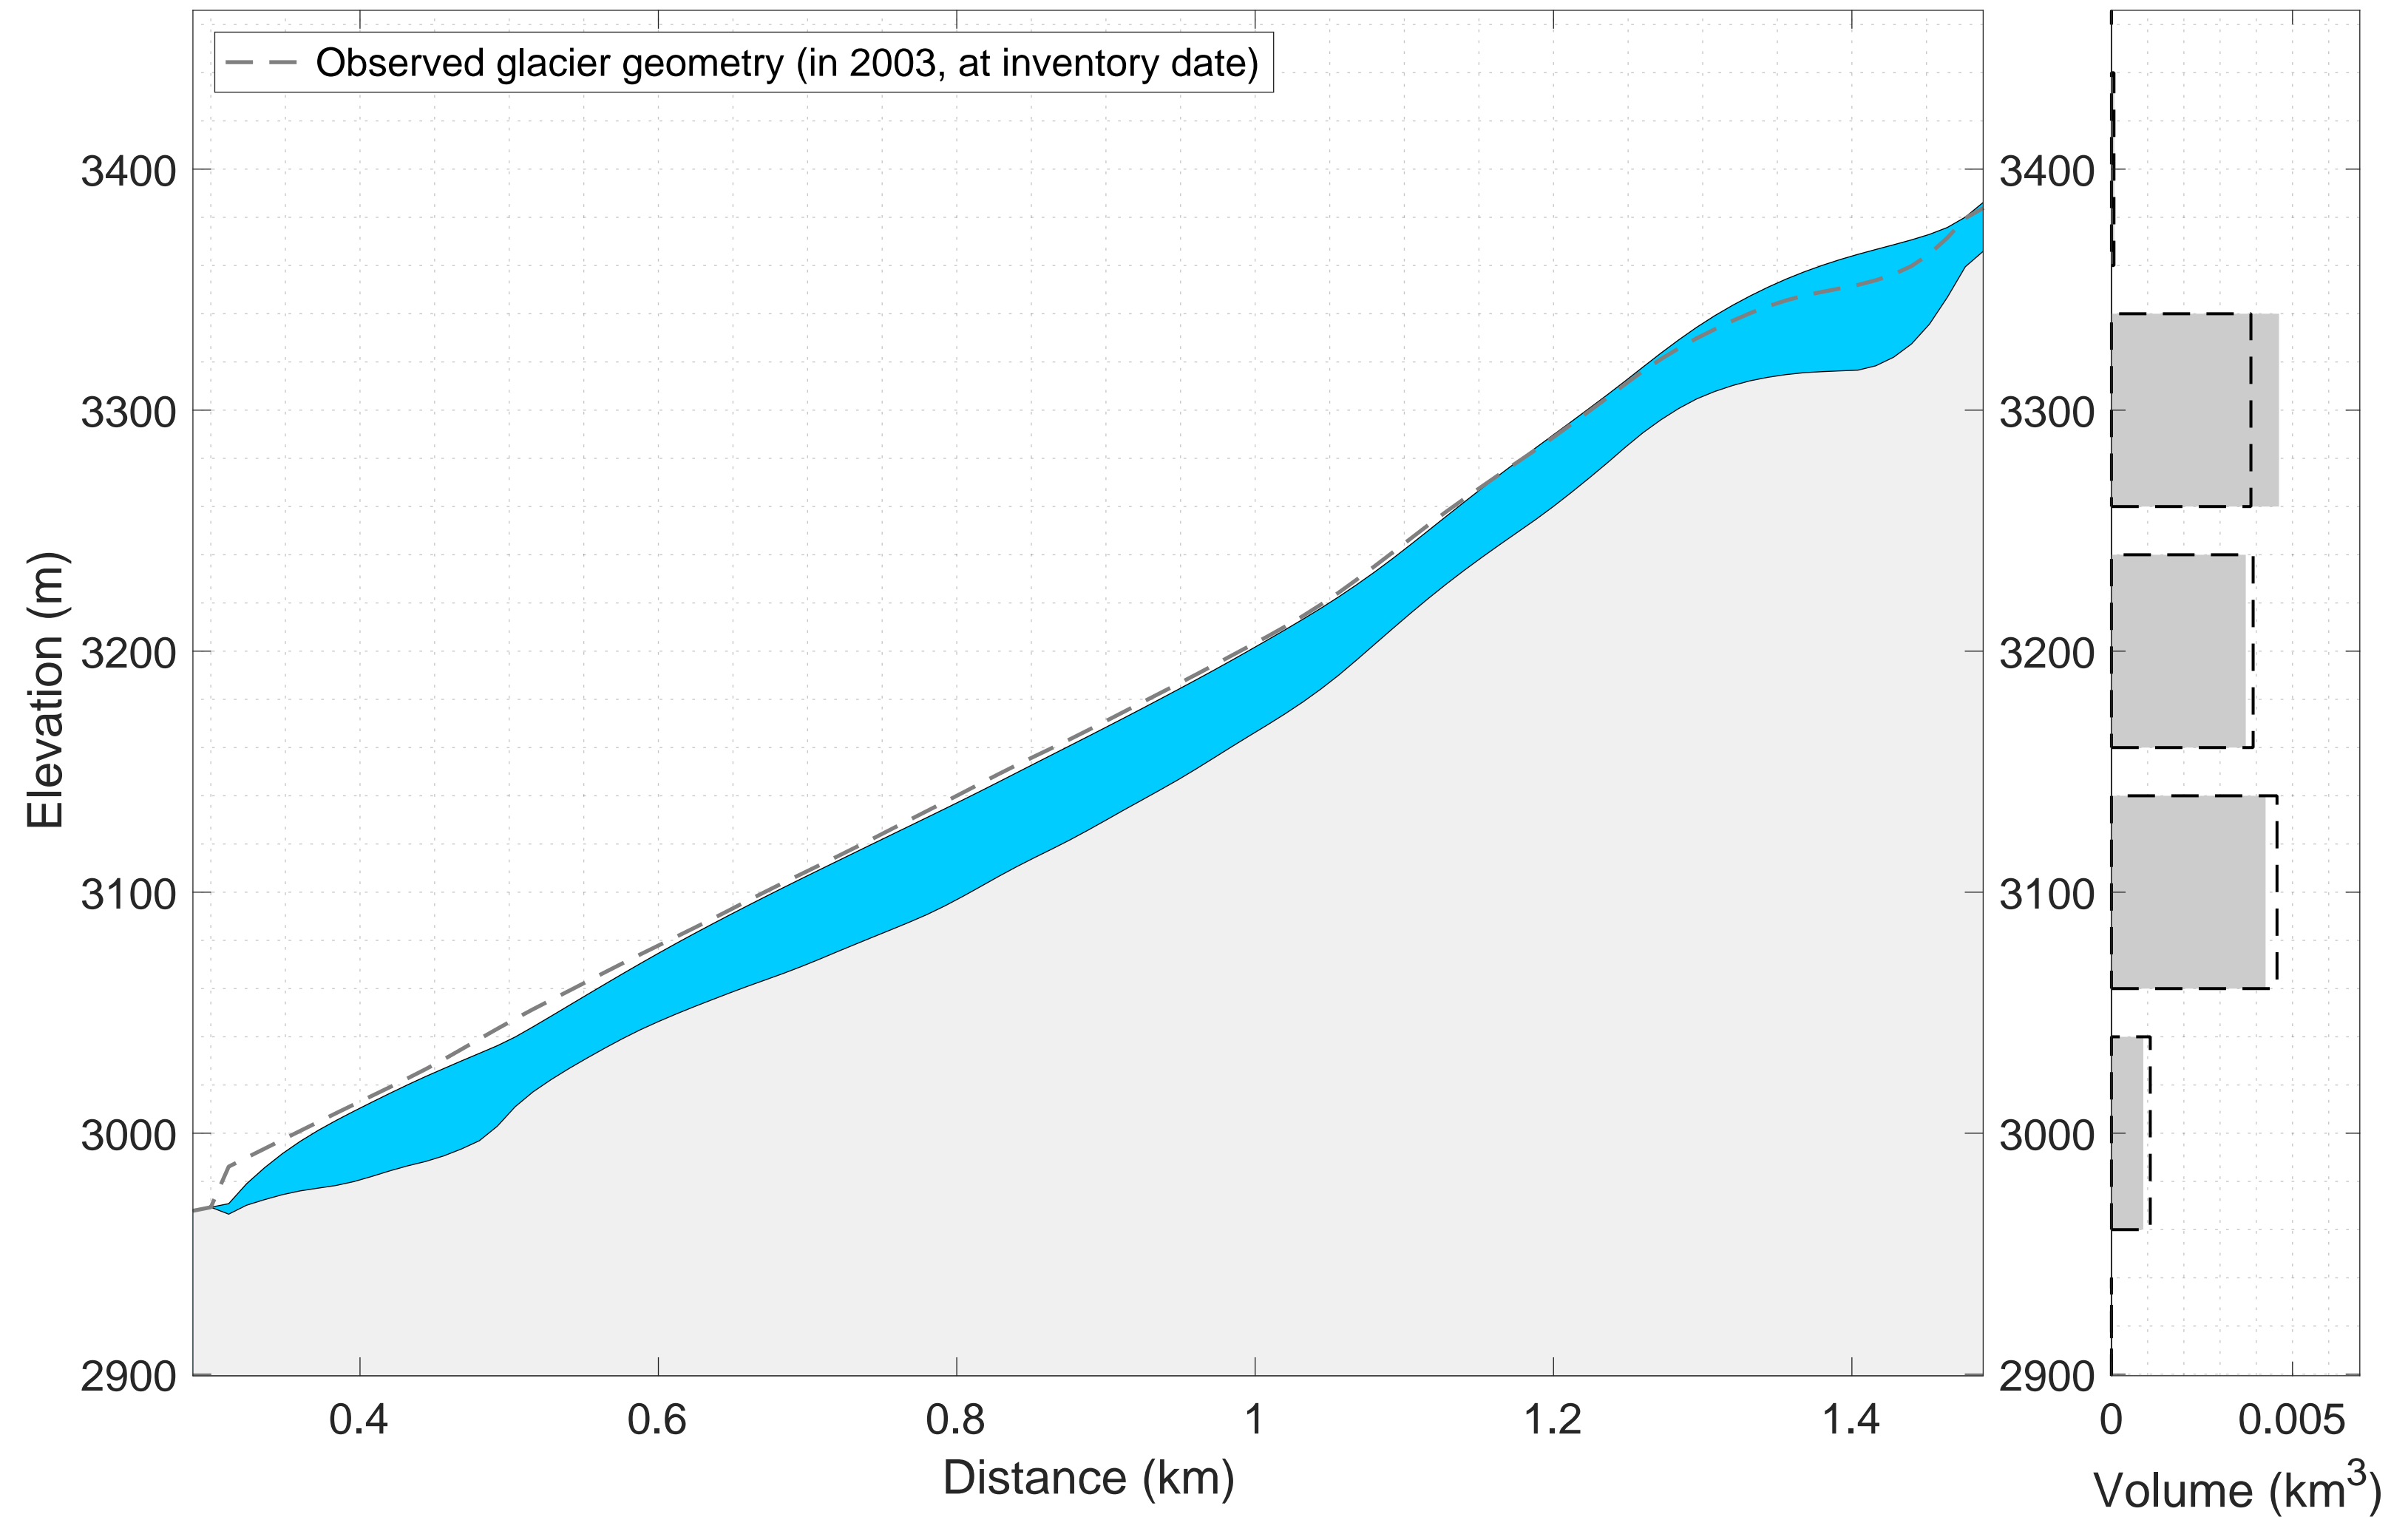

Supplement: Supplementary file 13 [file tc-13-1125-2019-supplement.zip]

**Modelled geometry (Glacier ID = 00841;  $A = 5.7981\text{e-}17 \text{ Pa}^{-3} \text{ a}^{-1}$ ;  $dx = 15 \text{ m}$ )**

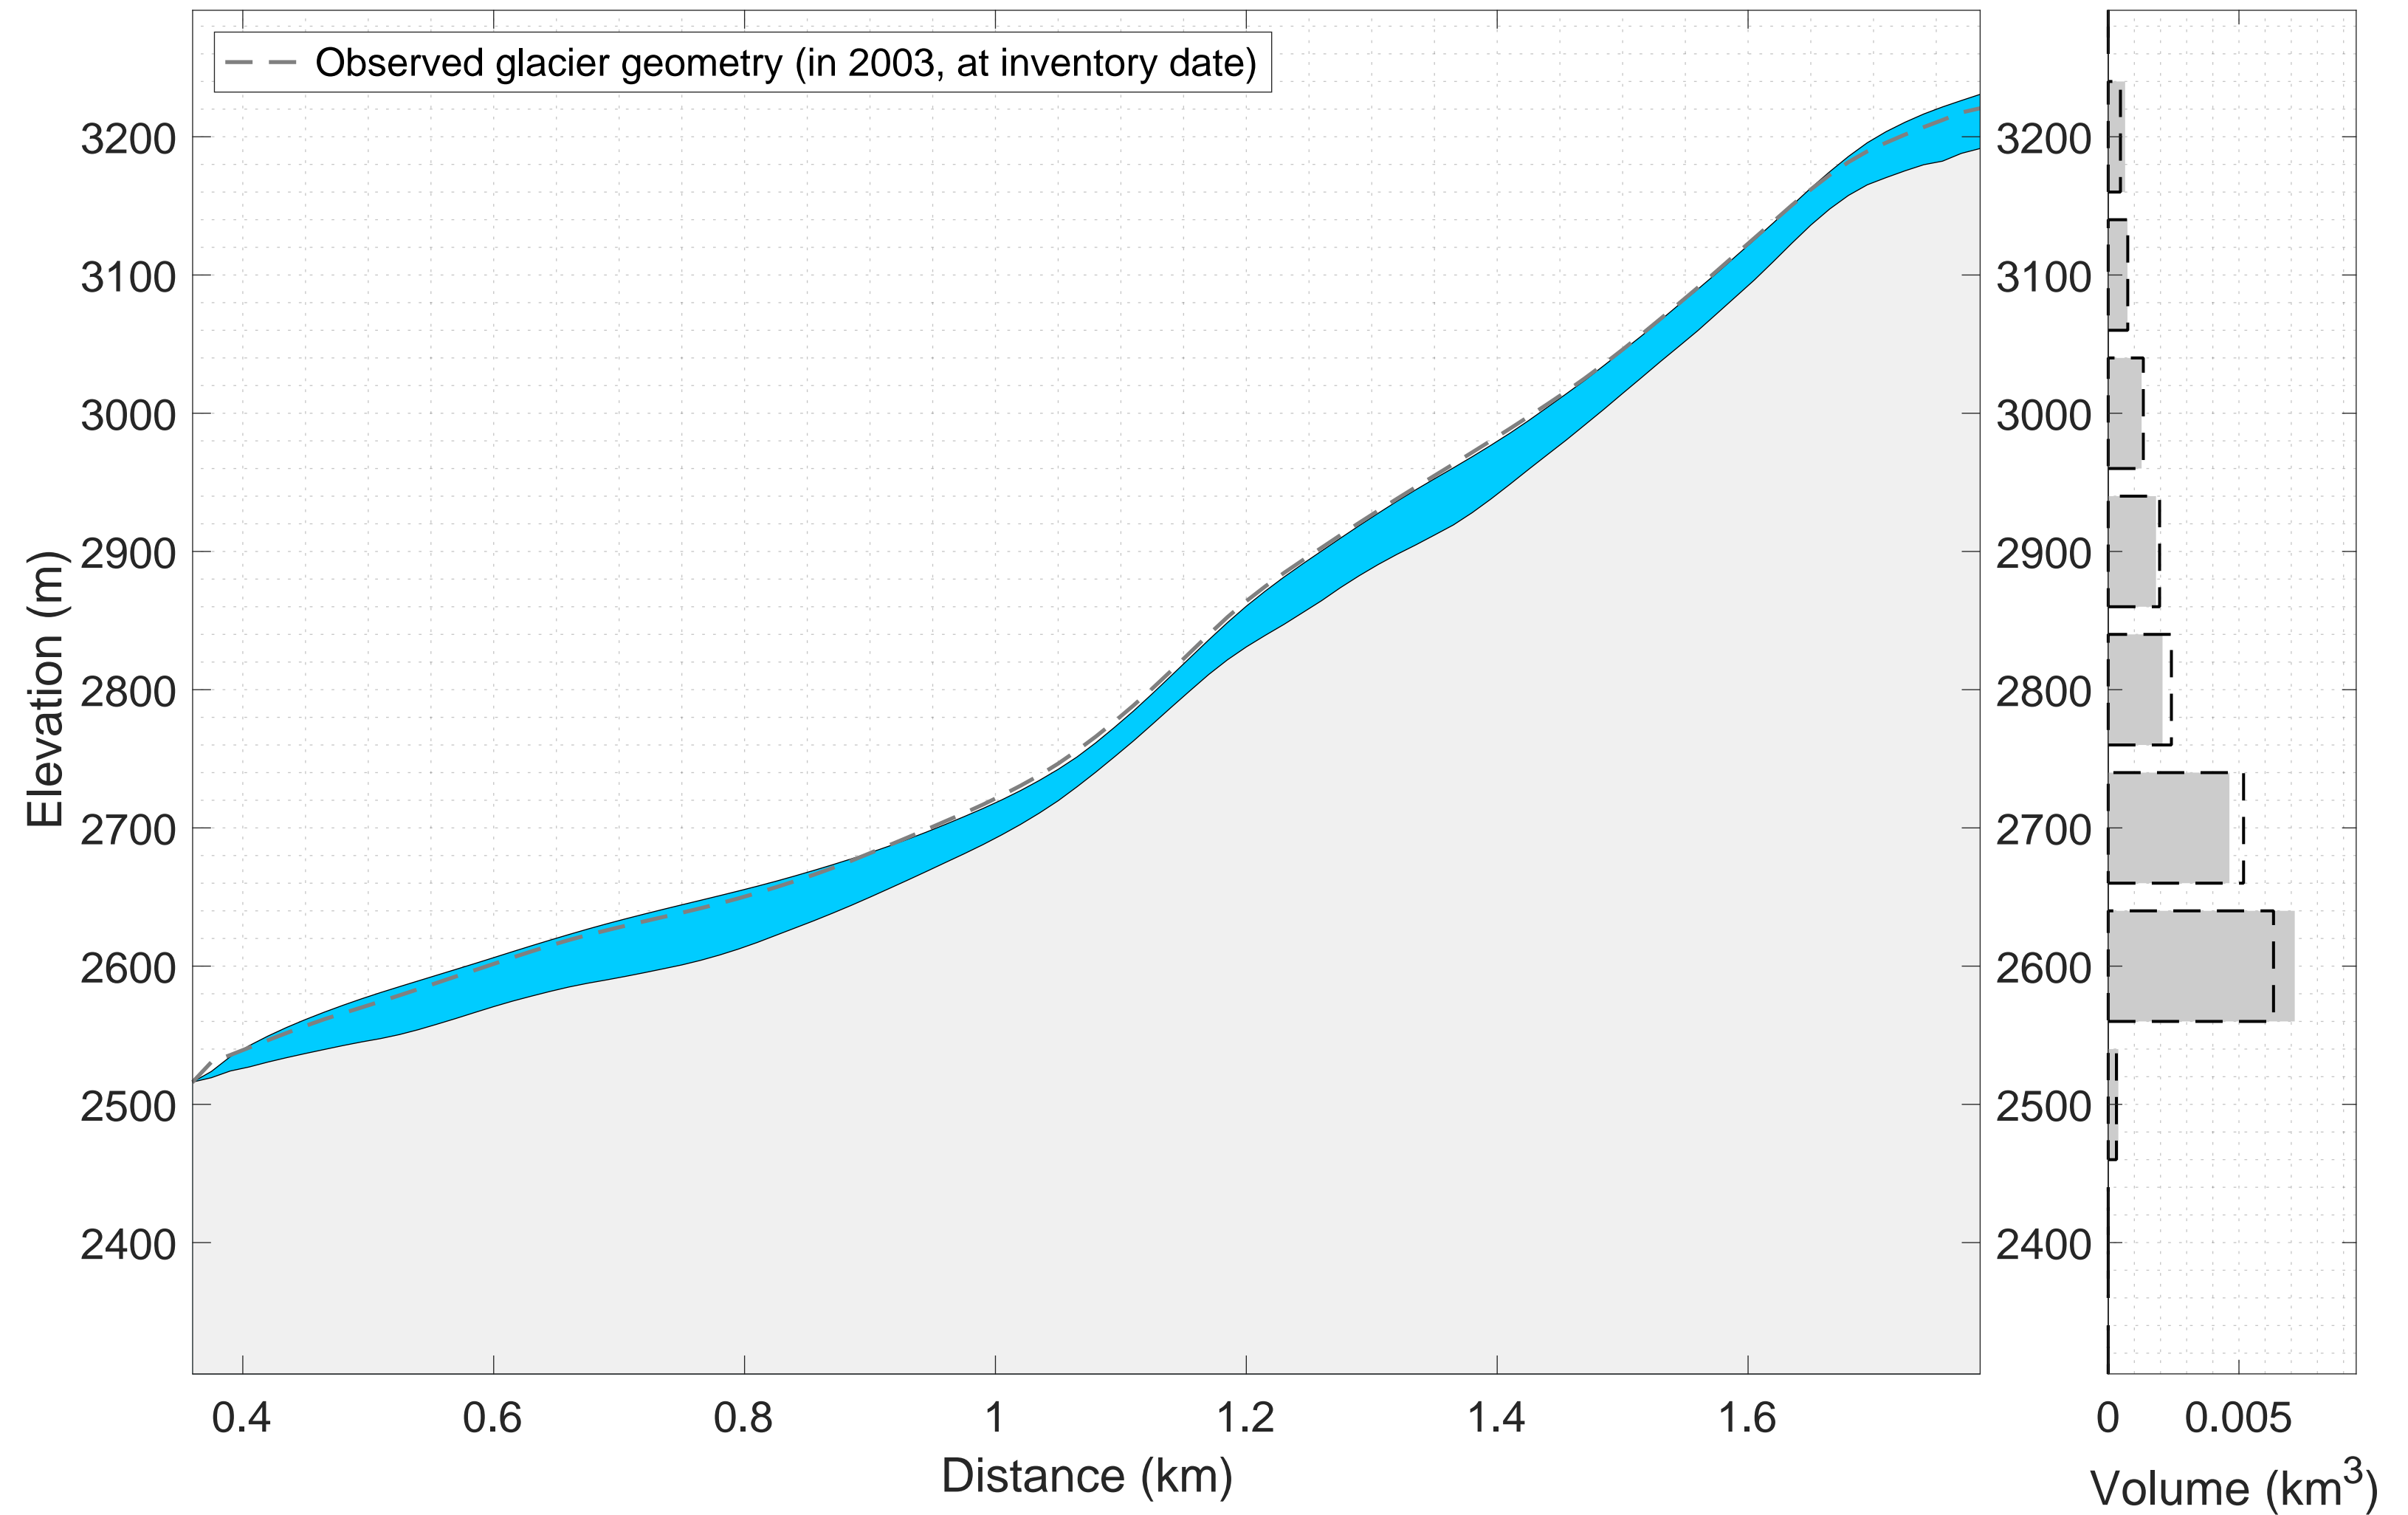

Supplement: Supplementary file 14 [file tc-13-1125-2019-supplement.zip]

**Modelled geometry (Glacier ID = 03652;  $A = 1.9609\text{e-}16 \text{ Pa}^{-3} \text{ a}^{-1}$ ;  $dx = 11 \text{ m}$ )**

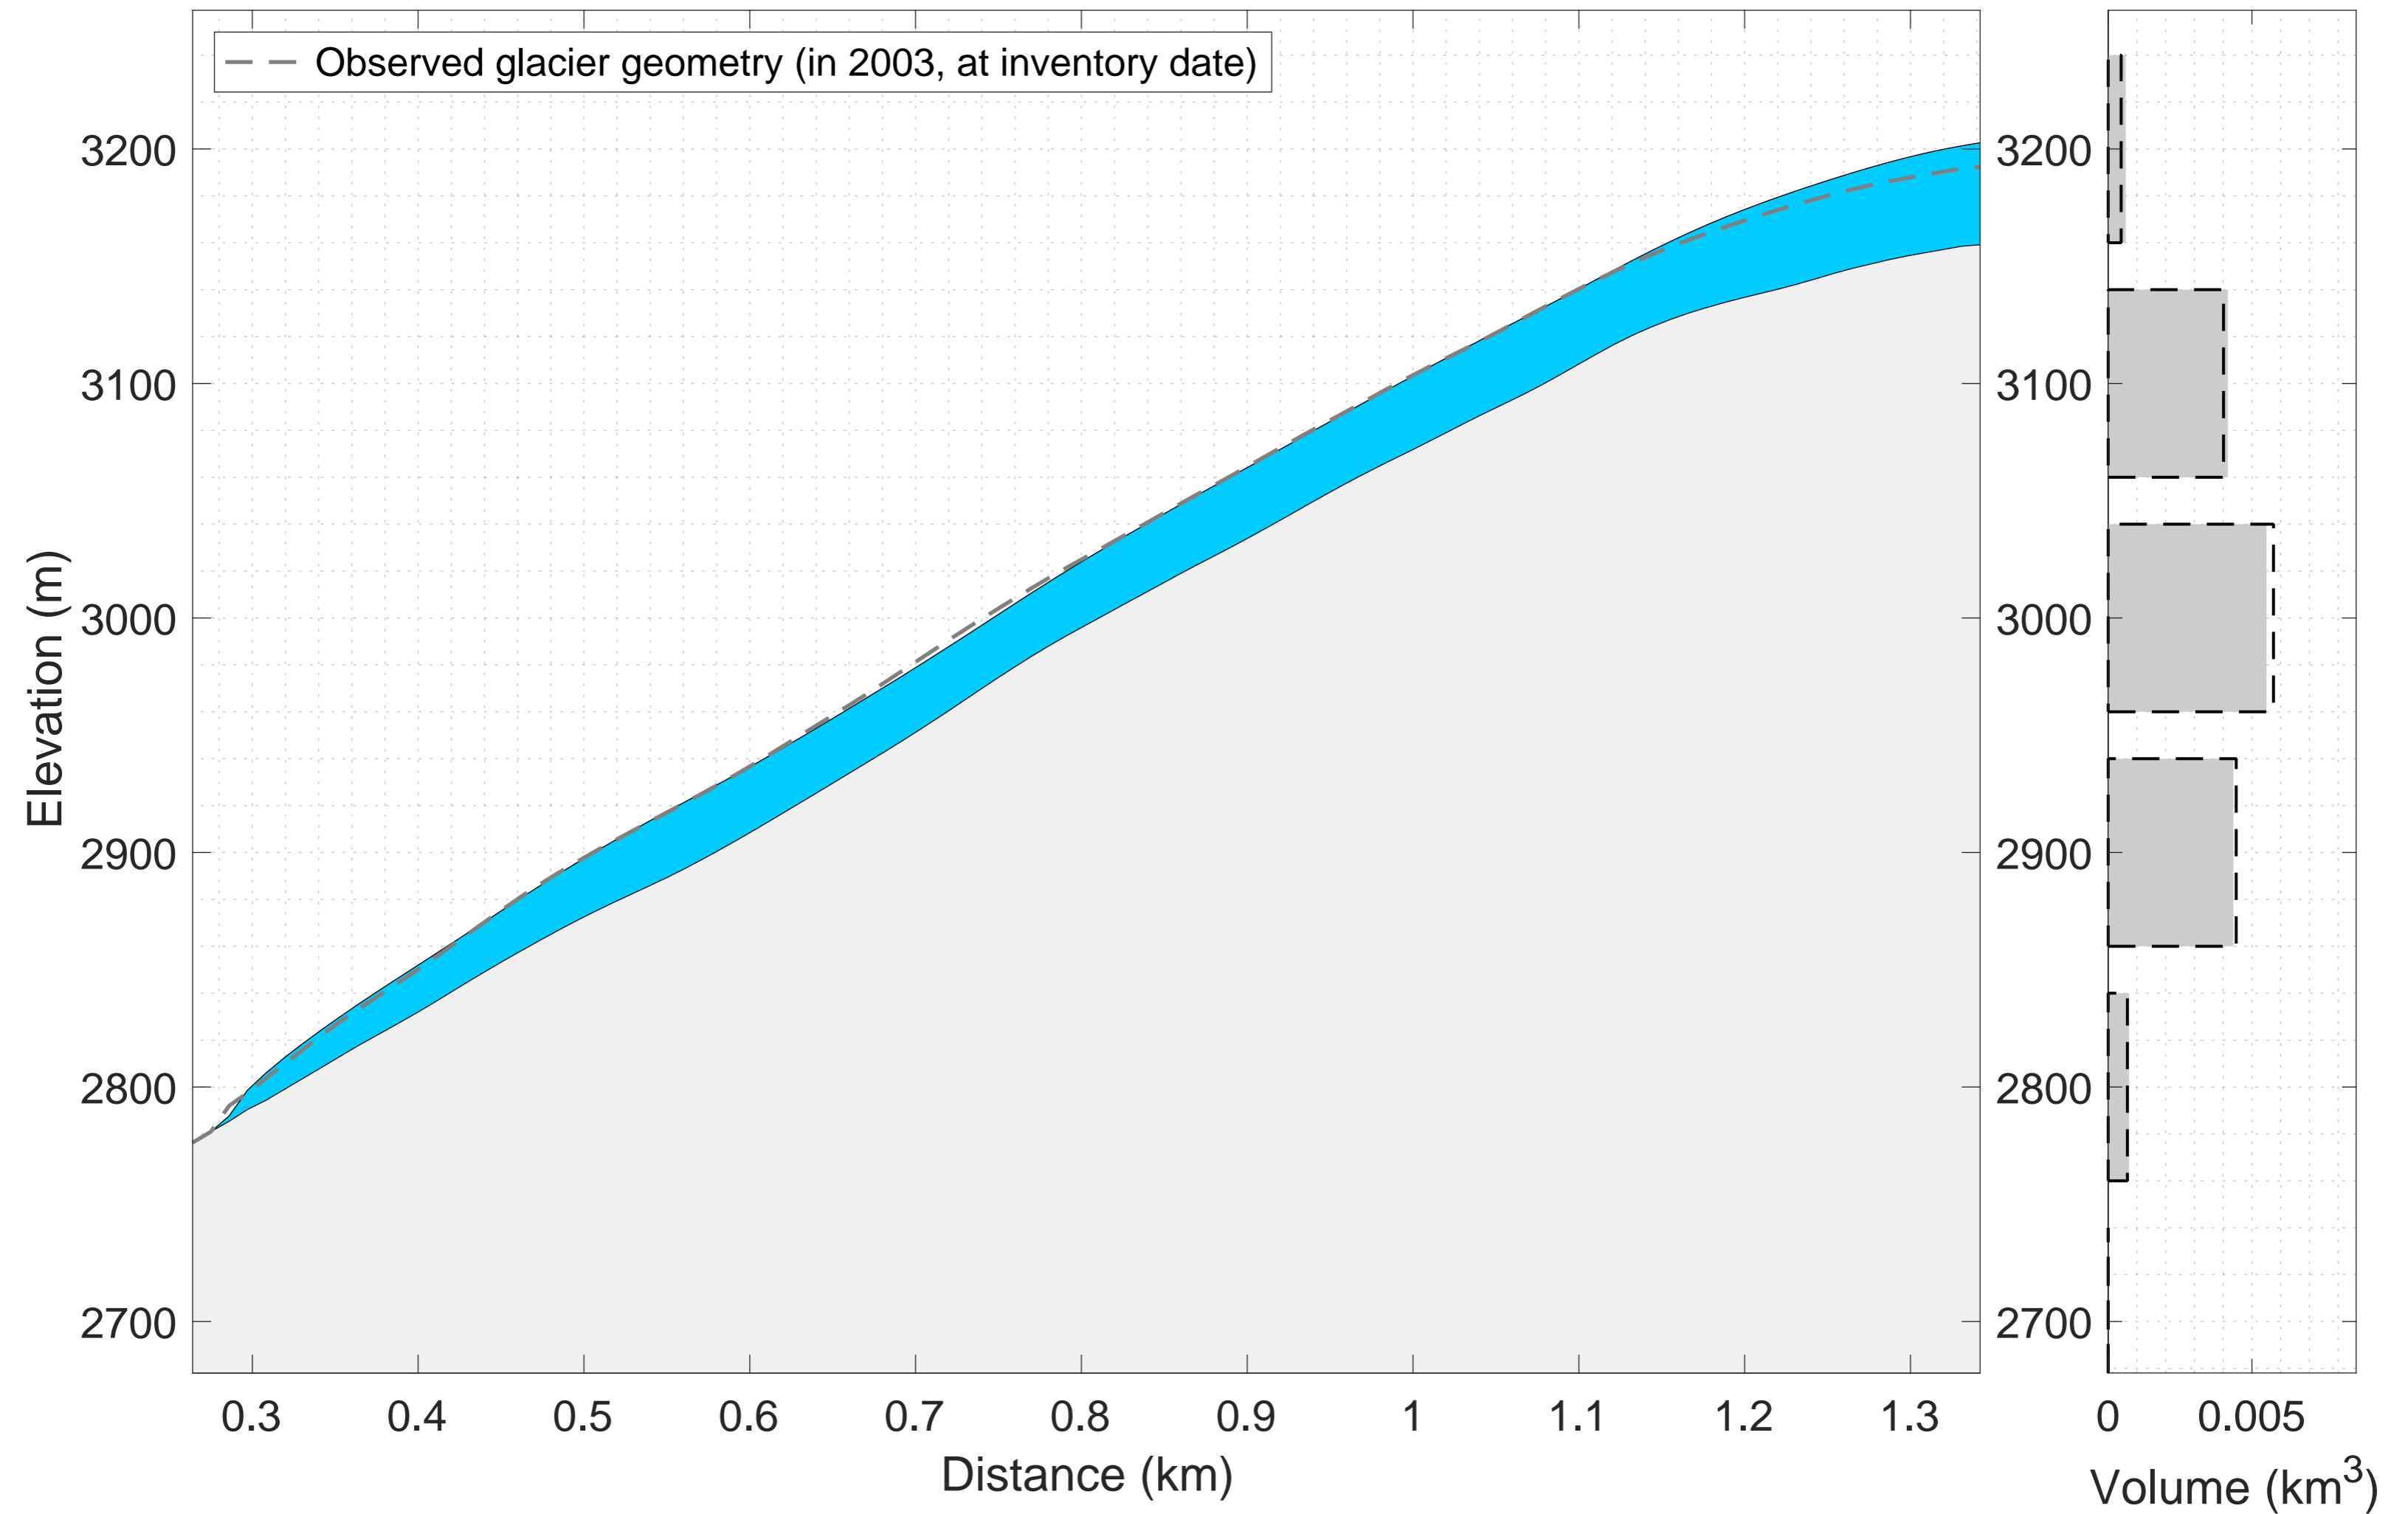

Supplement: Supplementary file 15 [file tc-13-1125-2019-supplement.zip]

**Modelled geometry (Glacier ID = 00323;  $A = 7.368\text{e-}17 \text{ Pa}^{-3} \text{ a}^{-1}$ ;  $dx = 15 \text{ m}$ )**

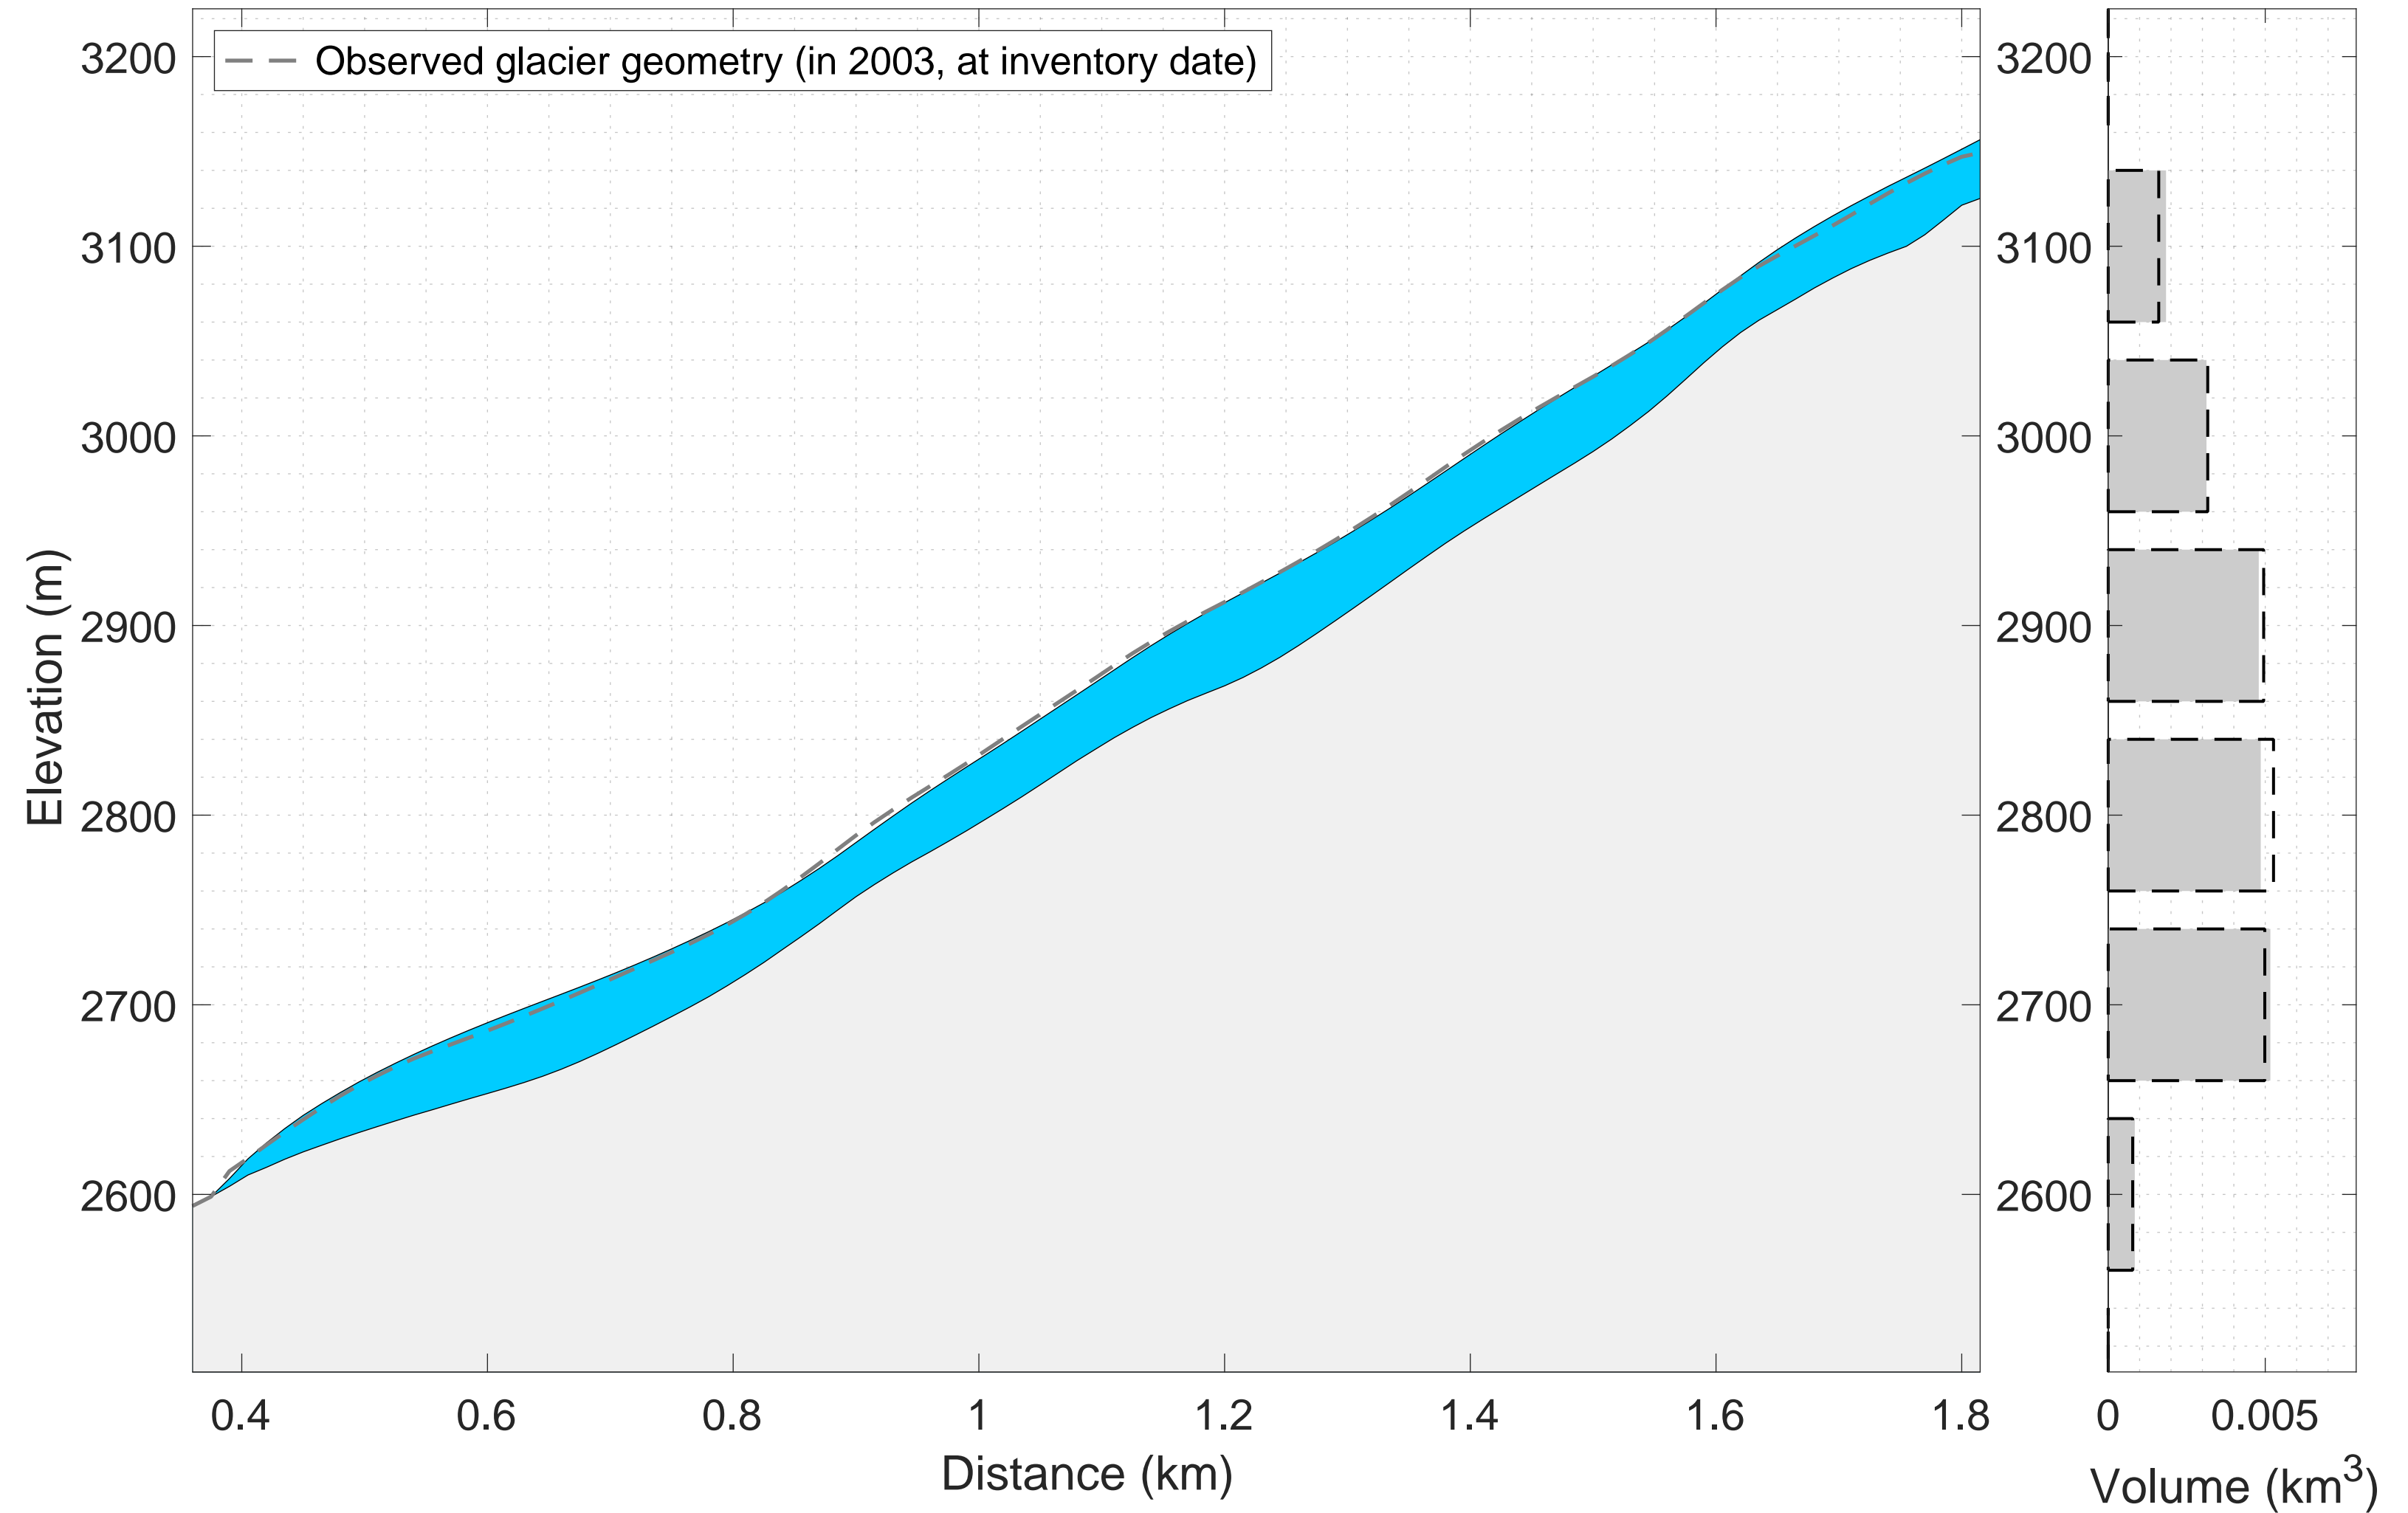

Supplement: Supplementary file 16 [file tc-13-1125-2019-supplement.zip]

**Modelled geometry (Glacier ID = 00791;  $A = 7.1487\text{e-}17 \text{ Pa}^{-3} \text{ a}^{-1}$ ;  $dx = 14 \text{ m}$ )**

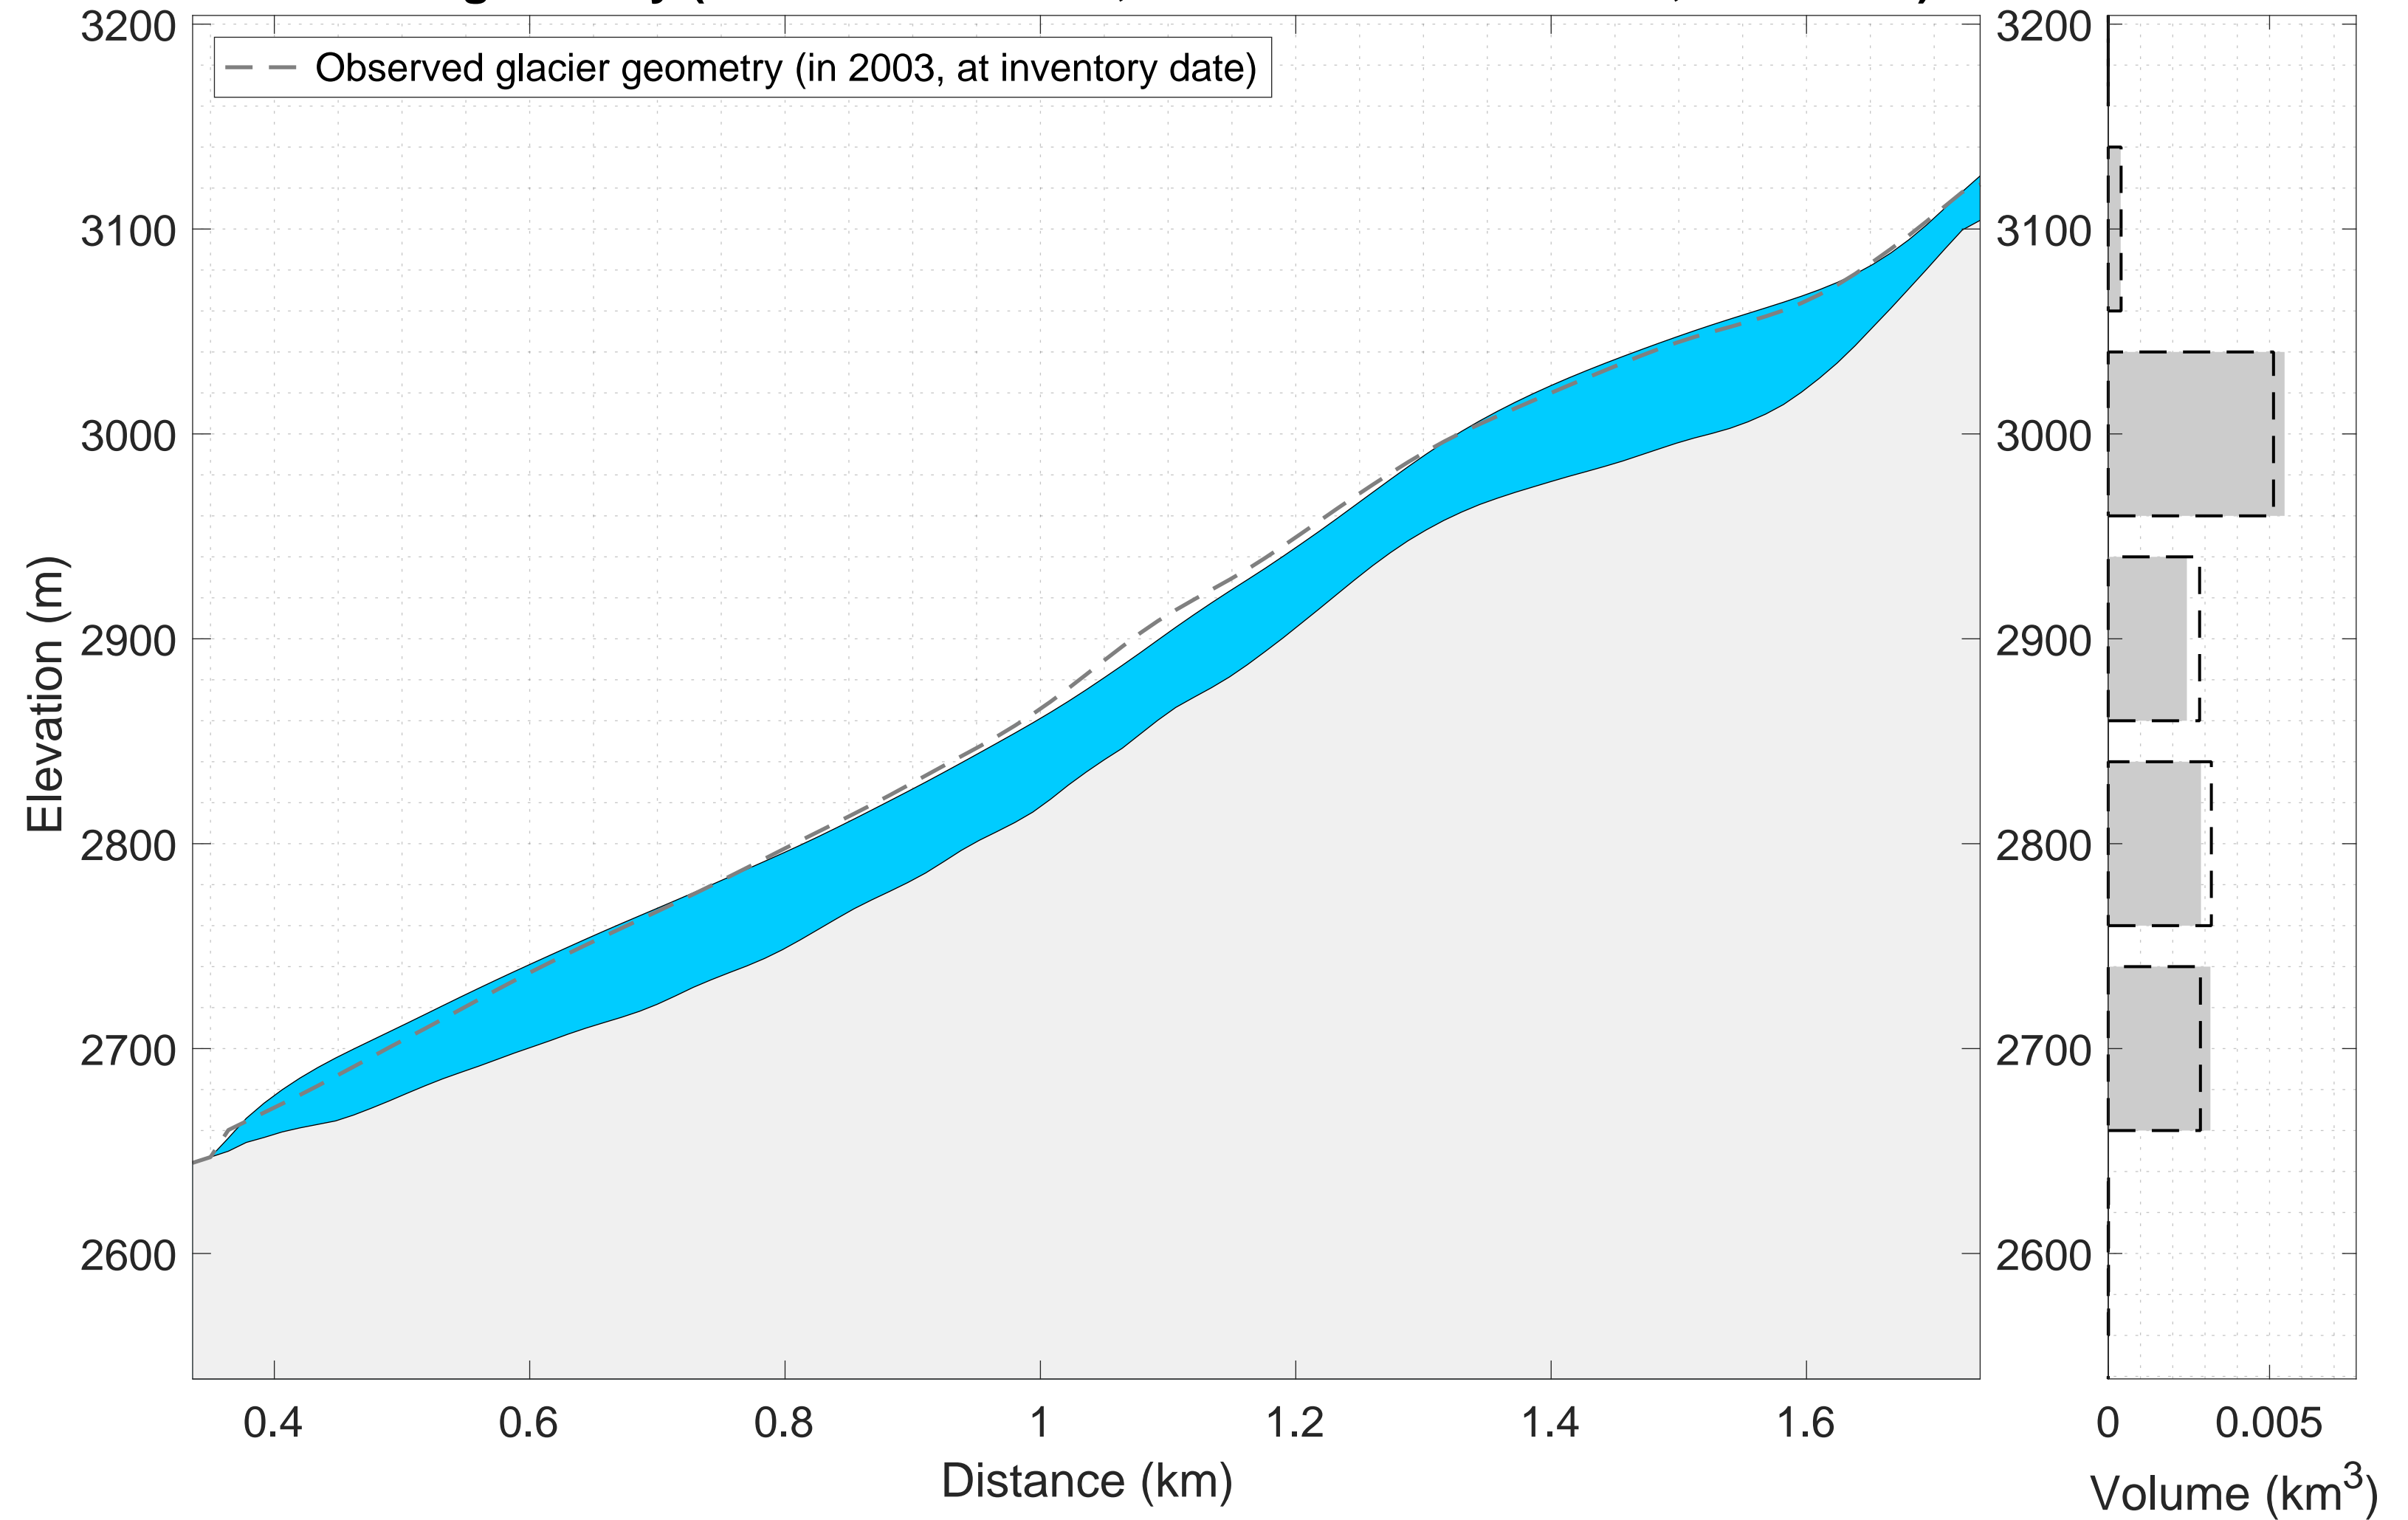

Supplement: Supplementary file 17 [file tc-13-1125-2019-supplement.zip]

**Modelled geometry (Glacier ID = 03772;  $A = 1.1514\text{e-}16 \text{ Pa}^{-3} \text{ a}^{-1}$ ;  $dx = 25 \text{ m}$ )**

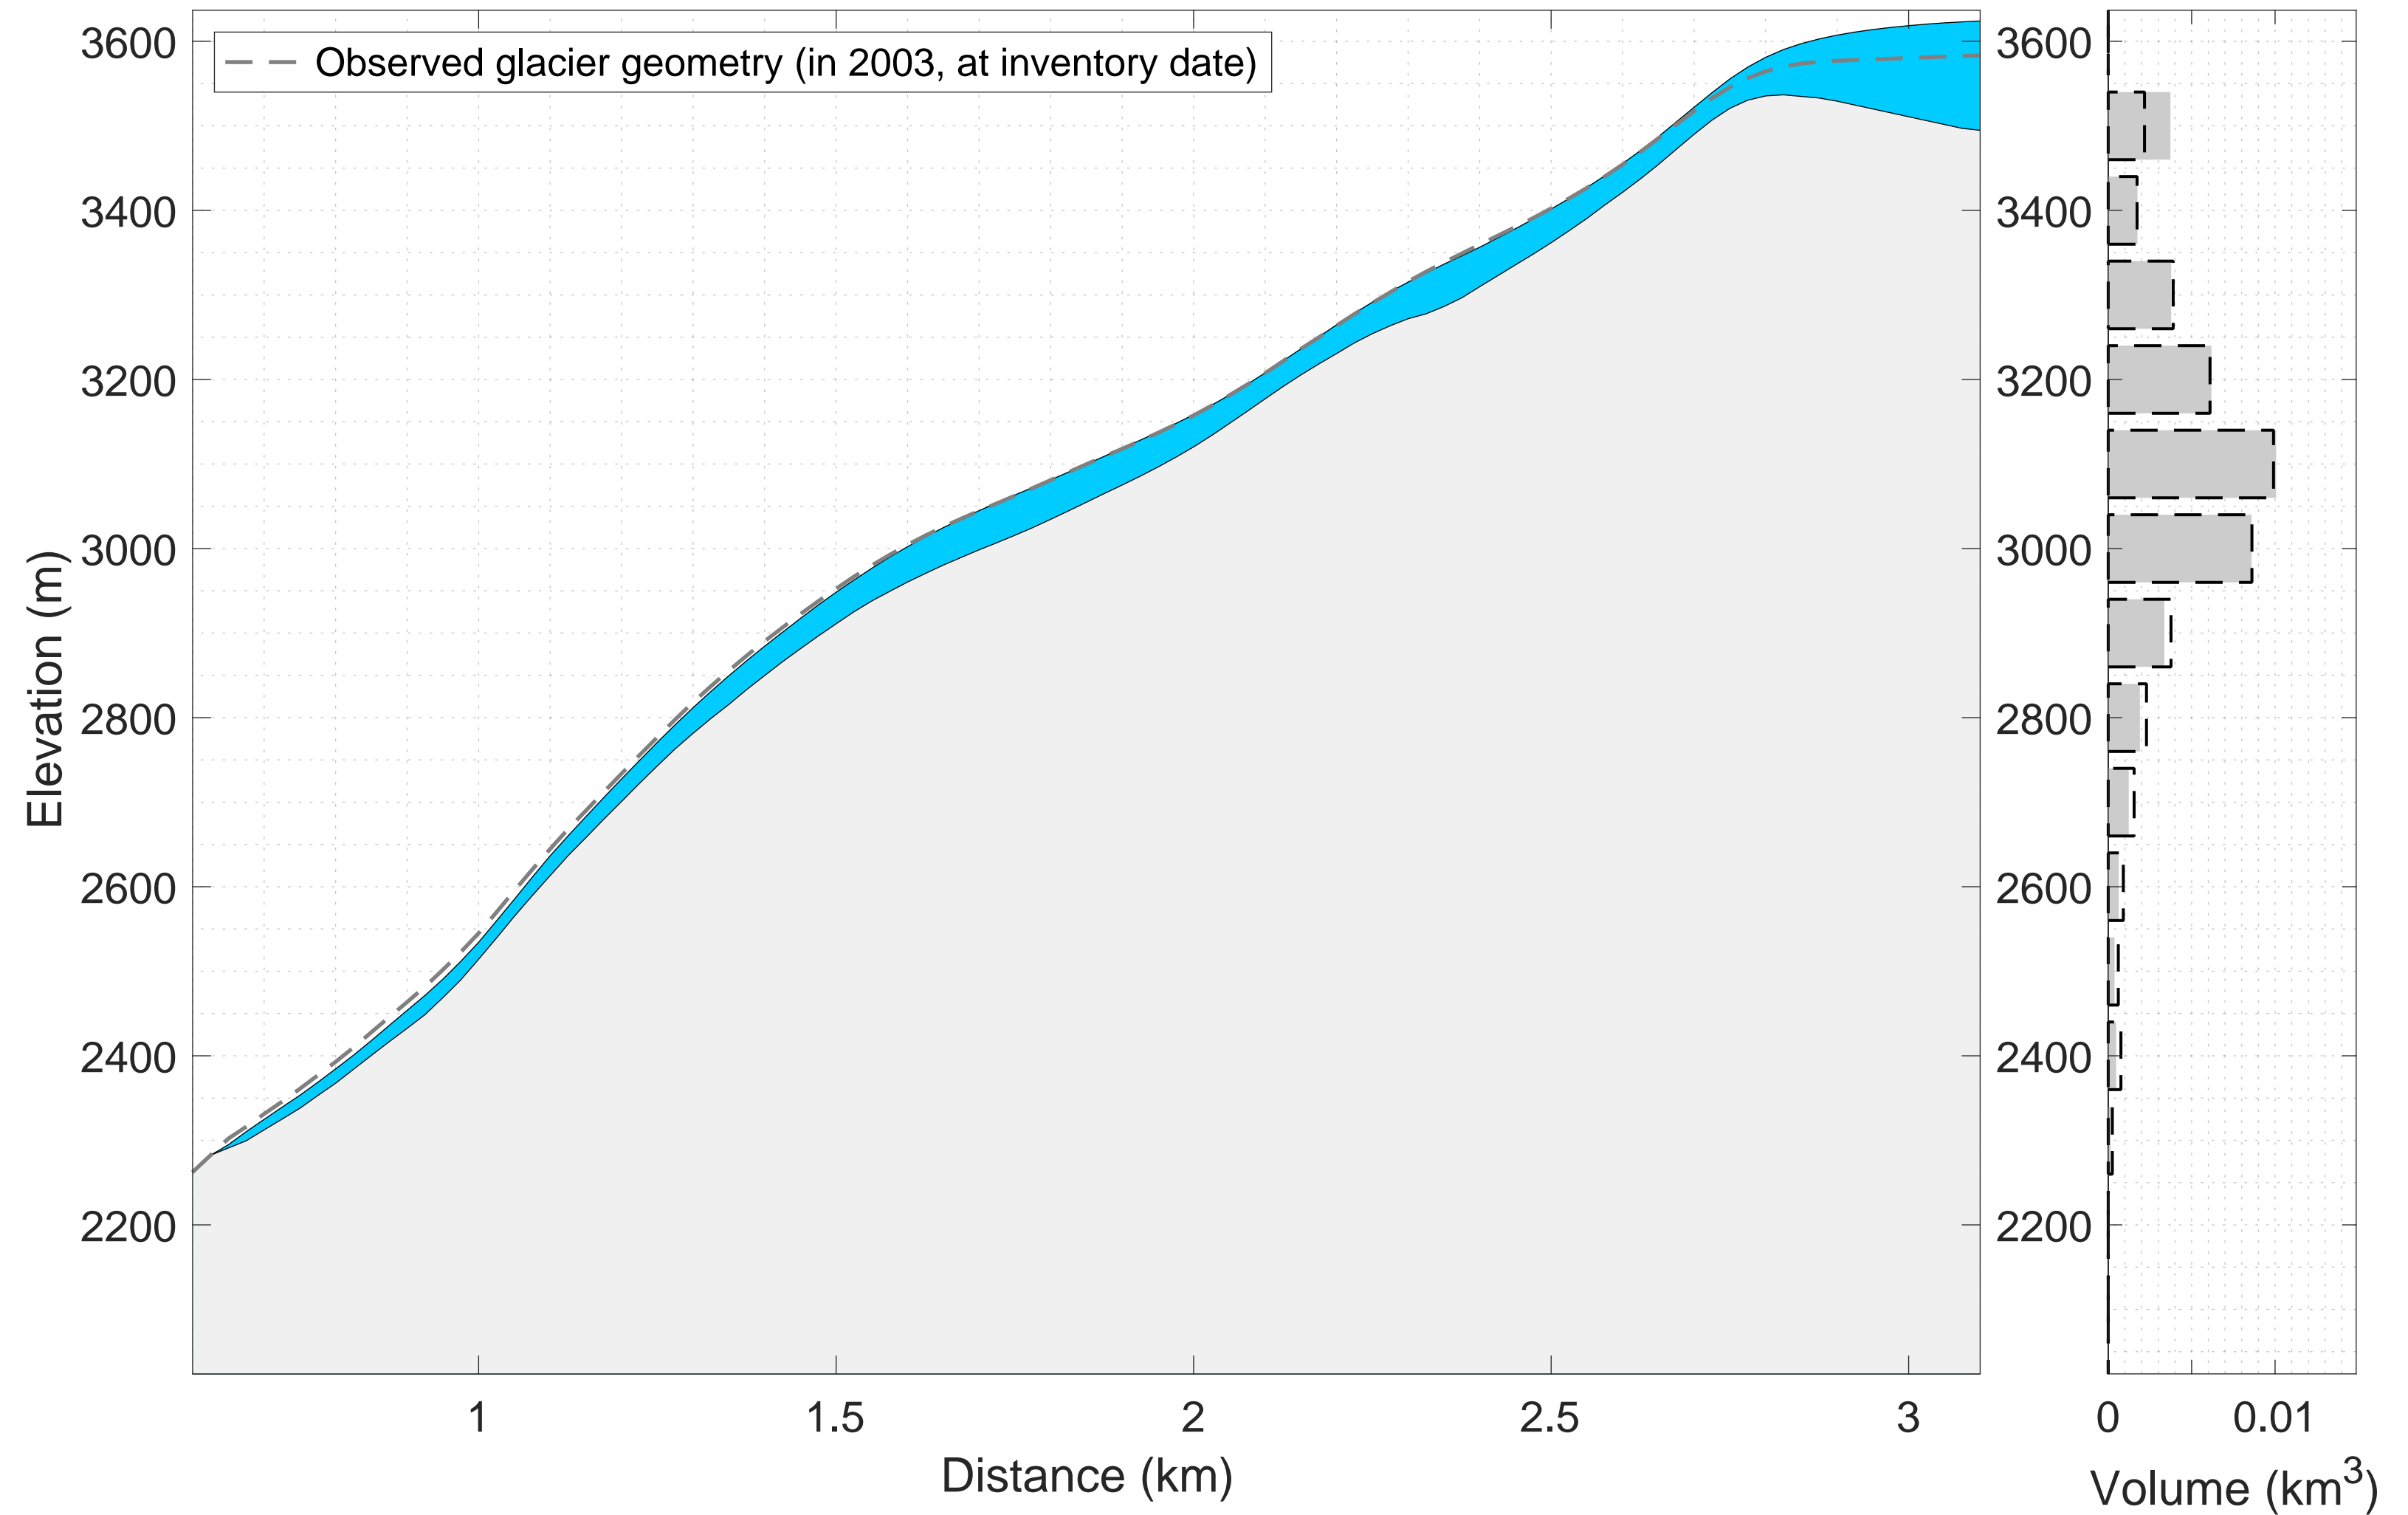

Supplement: Supplementary file 18 [file tc-13-1125-2019-supplement.zip]

**Modelled geometry (Glacier ID = 01104;  $A = 3.5271\text{e-}17 \text{ Pa}^{-3} \text{ a}^{-1}$ ;  $dx = 14 \text{ m}$ )**

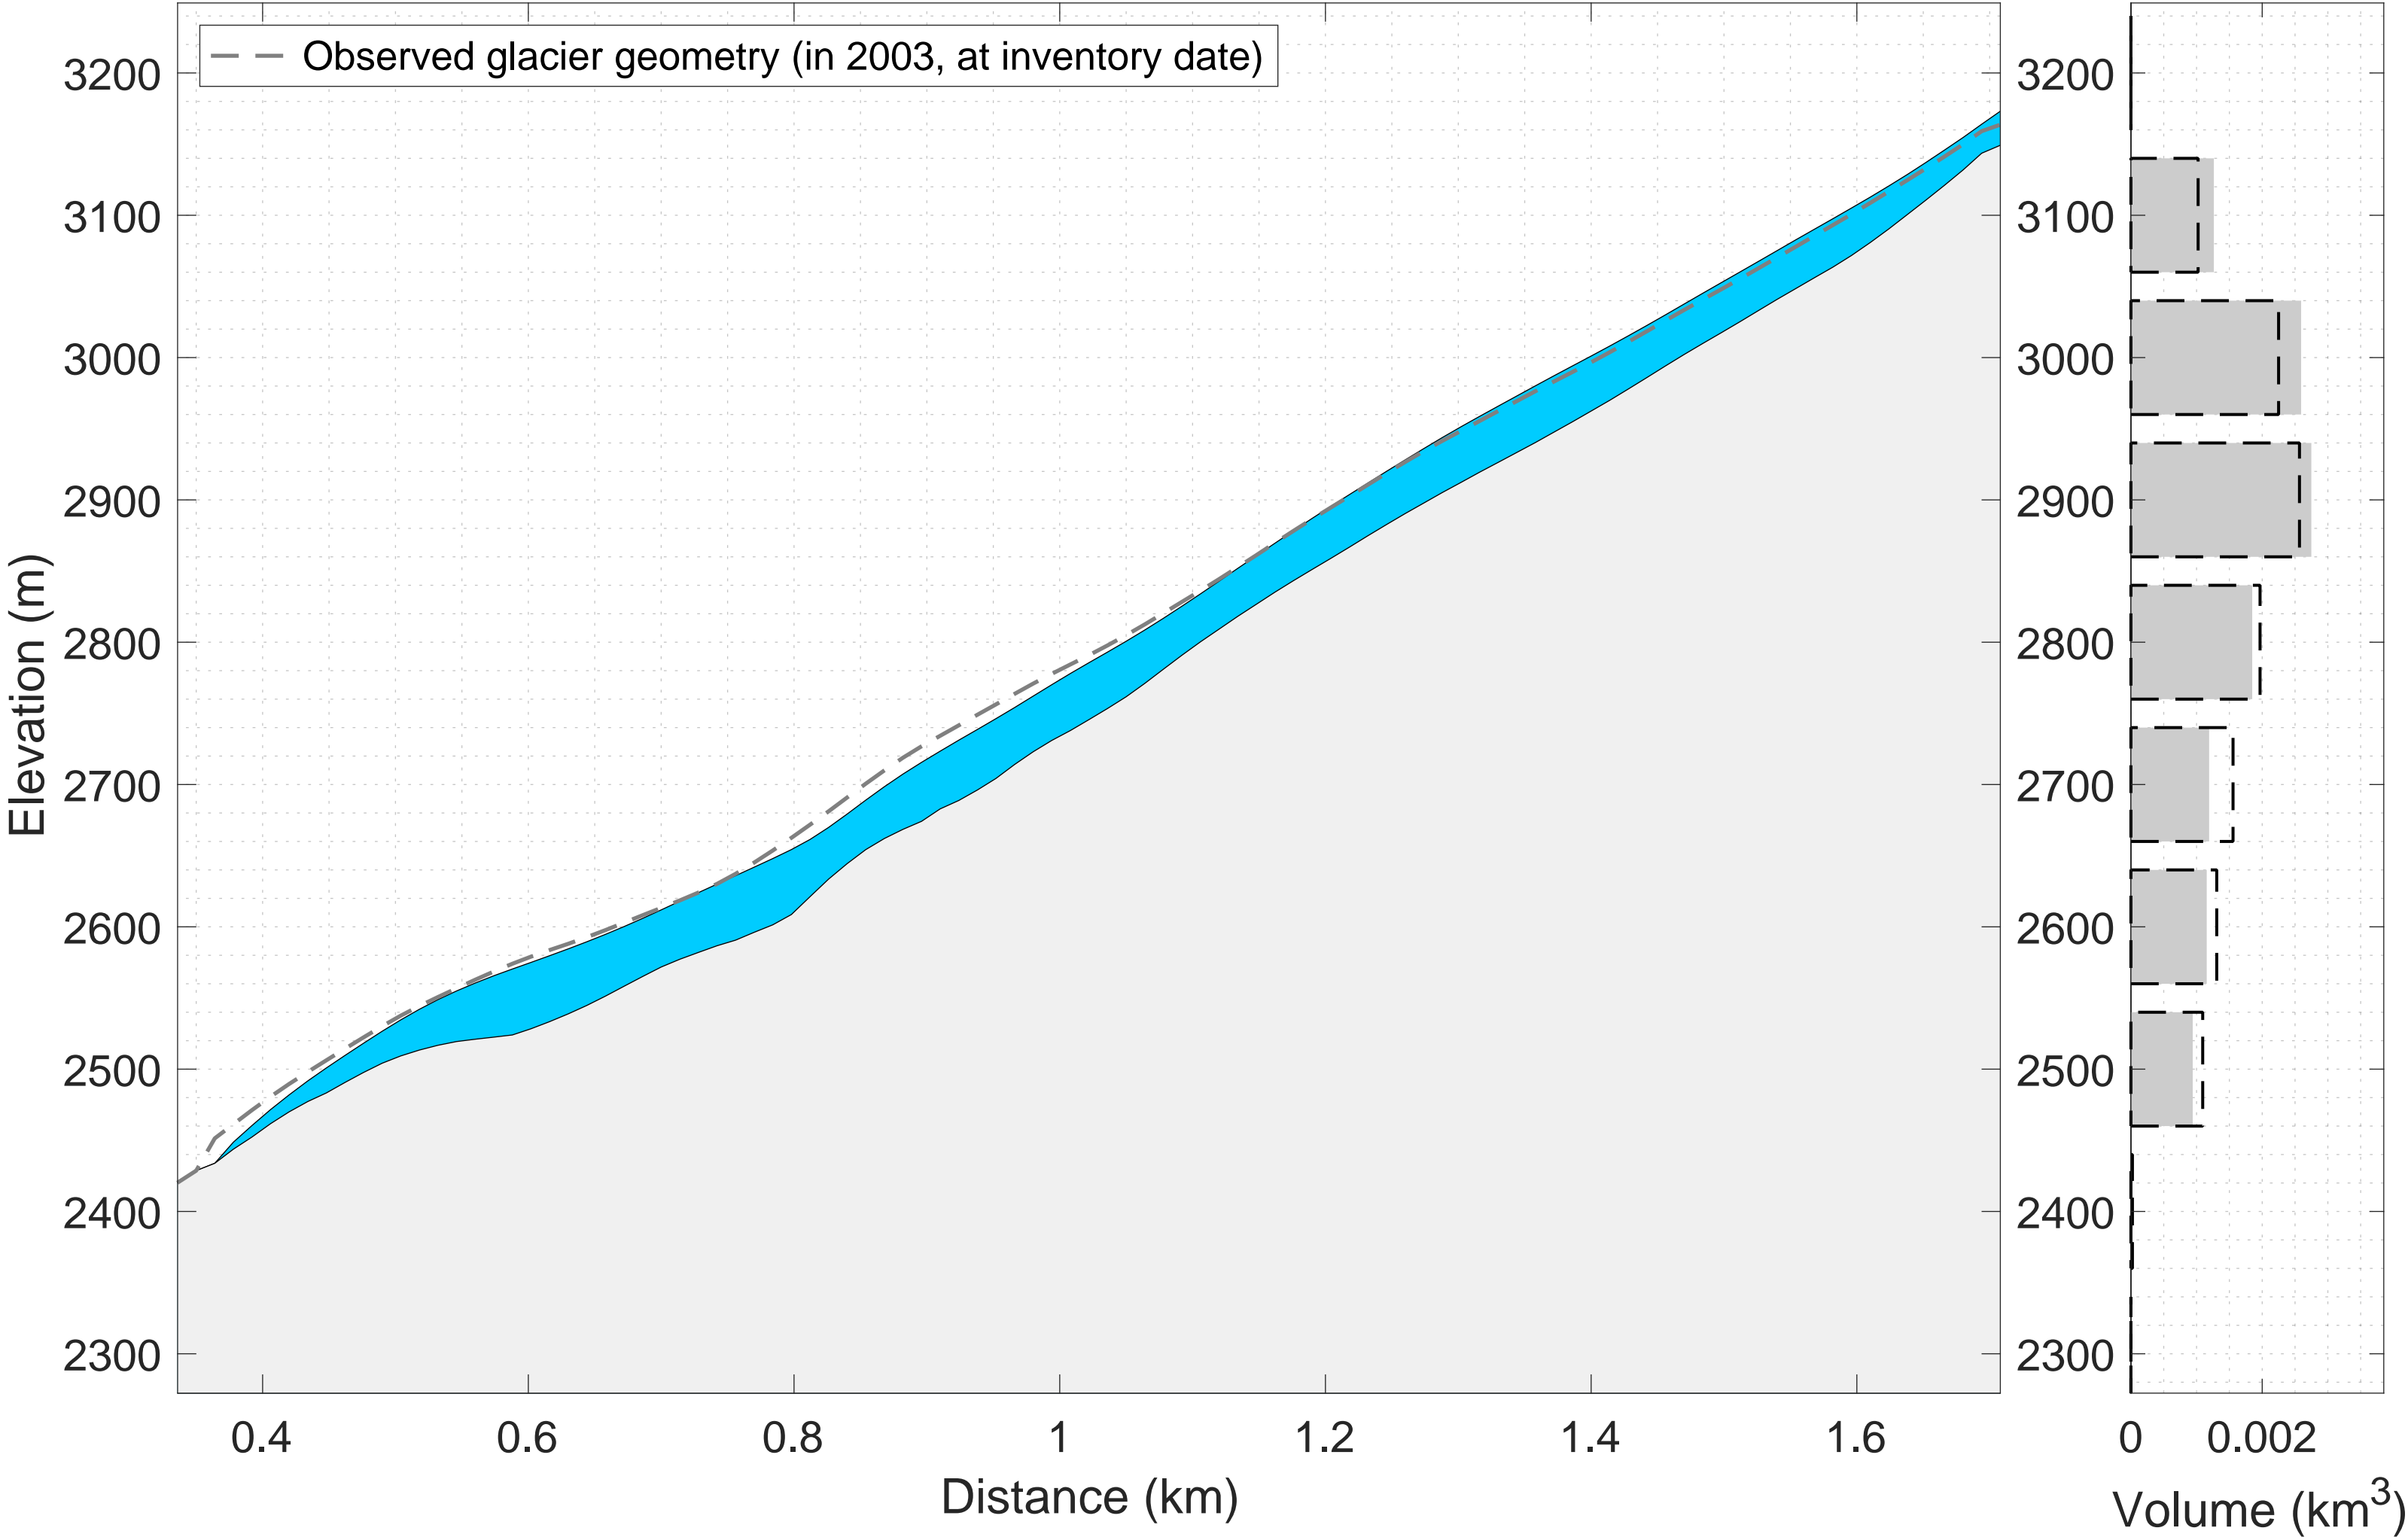

Supplement: Supplementary file 19 [file tc-13-1125-2019-supplement.zip]

**Modelled geometry (Glacier ID = 00885;  $A = 9.1784\text{e-}17 \text{ Pa}^{-3} \text{ a}^{-1}$ ;  $dx = 13 \text{ m}$ )**

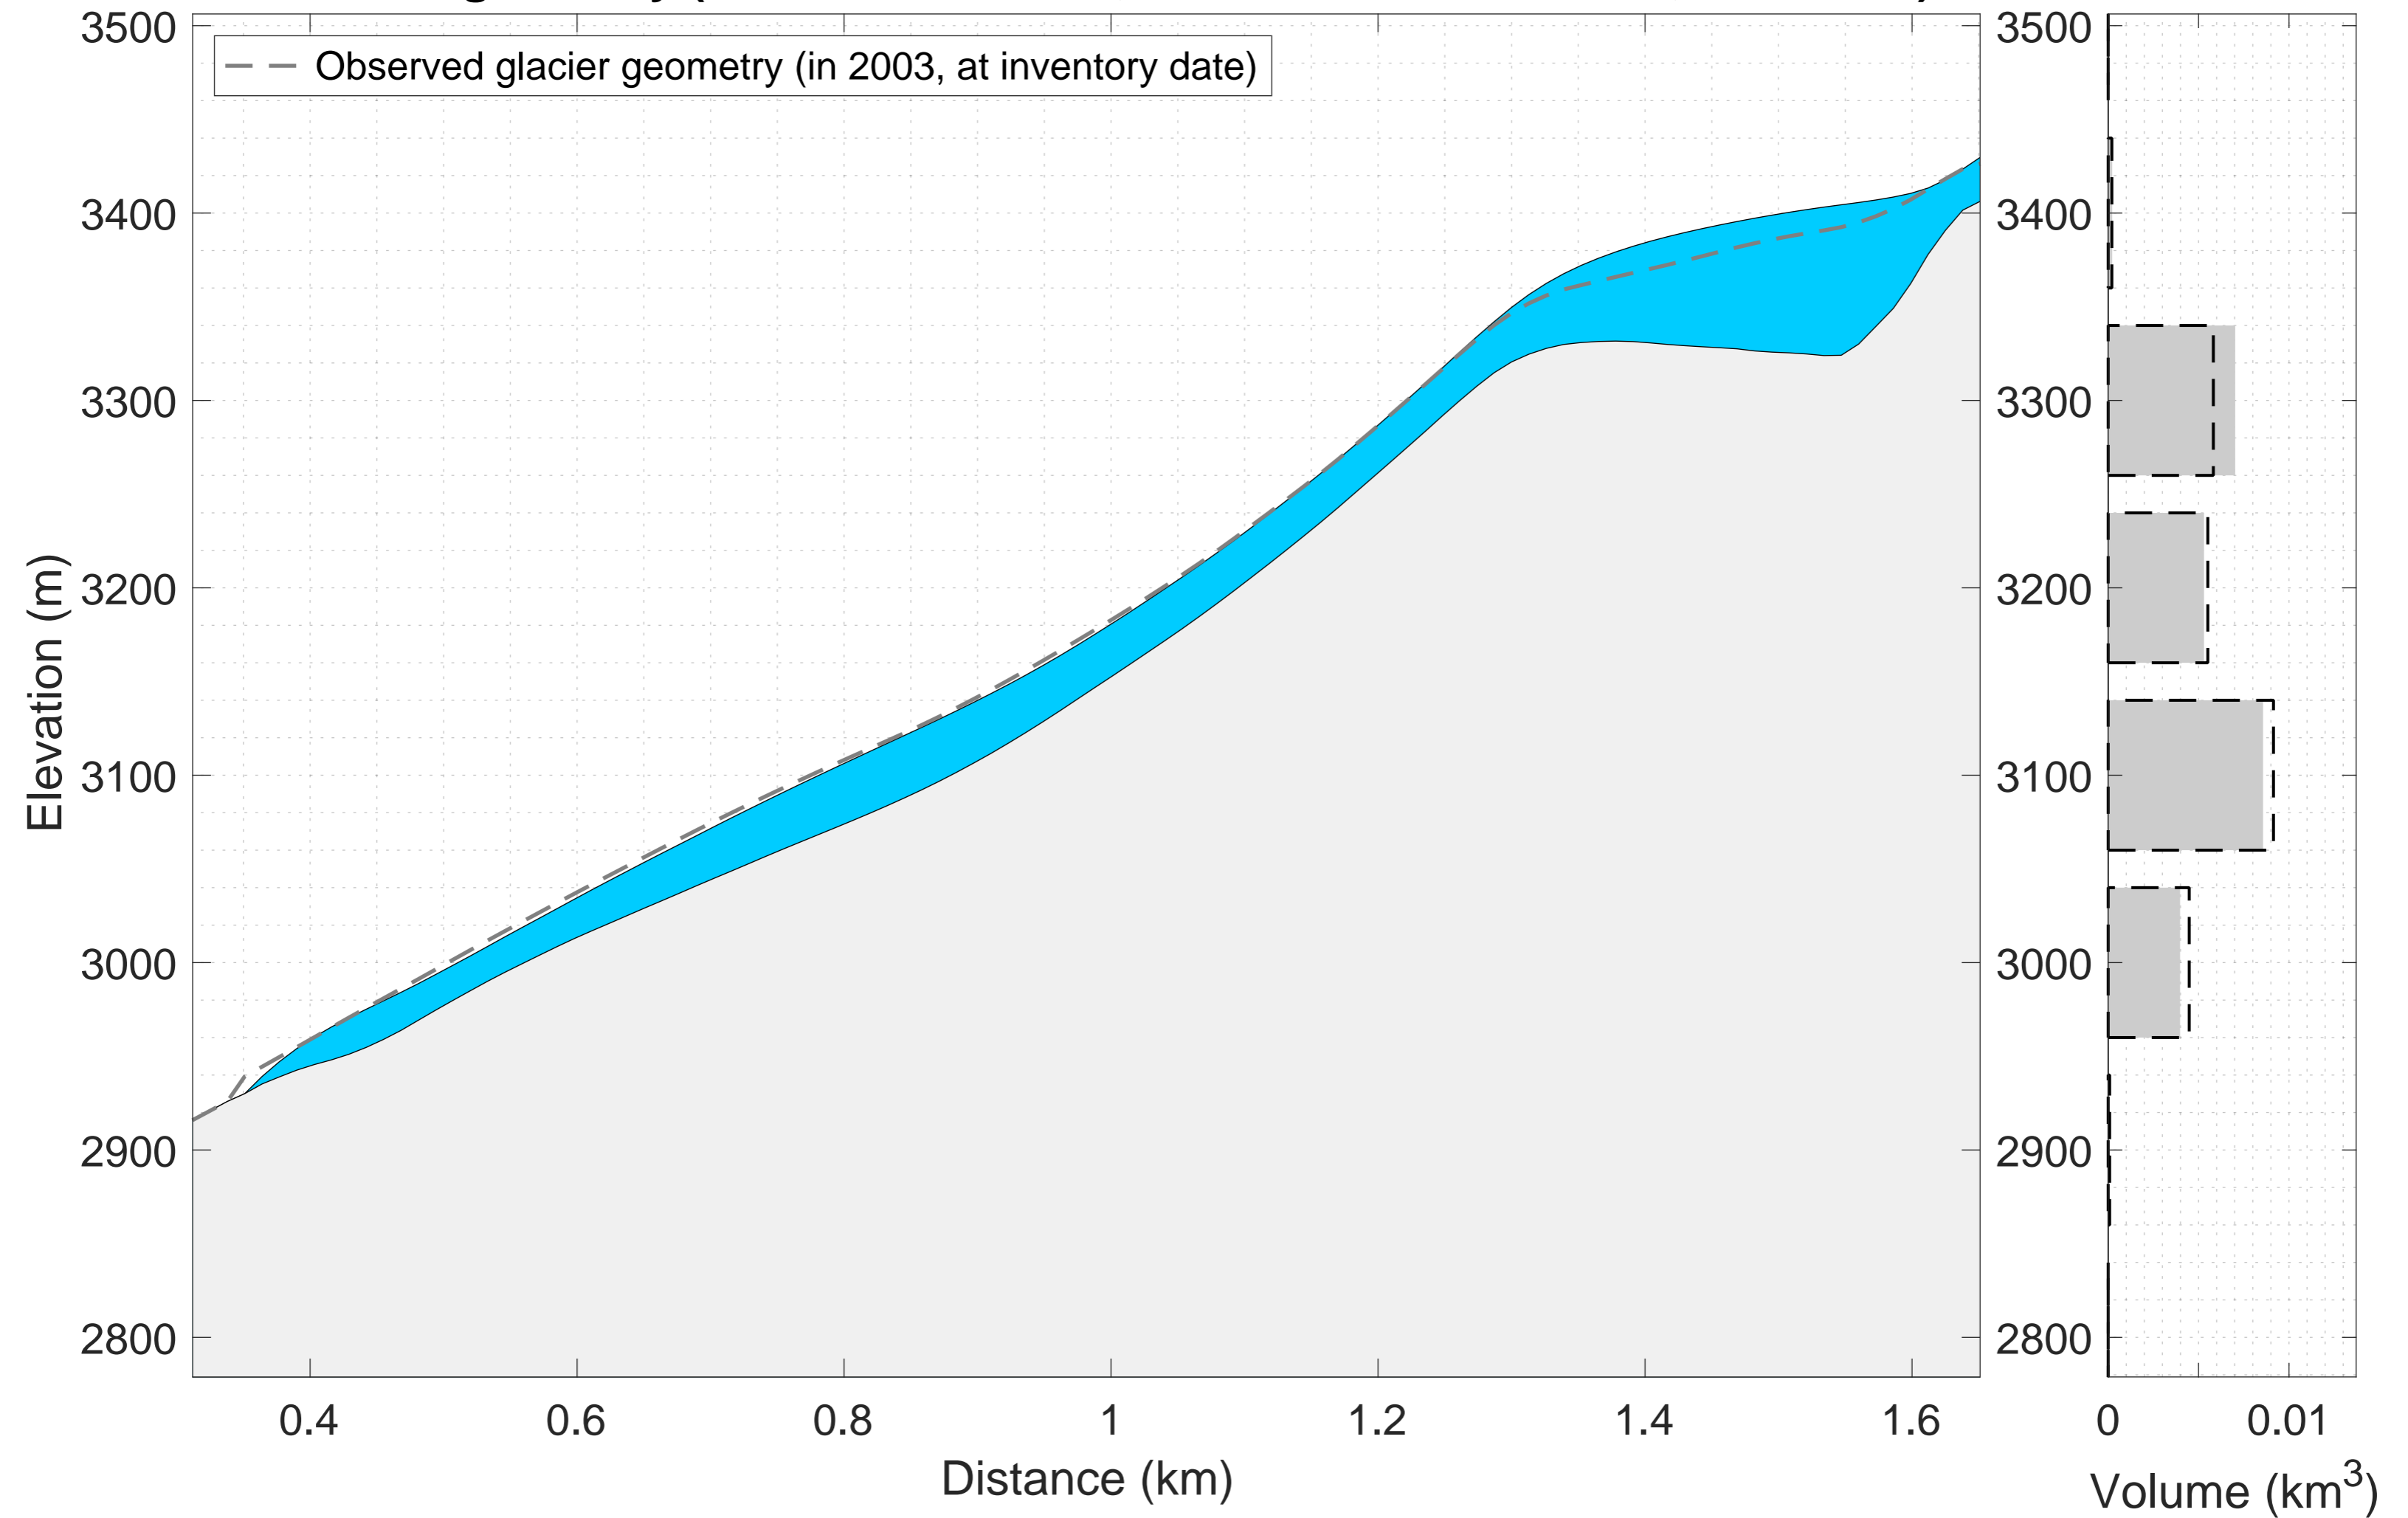

Supplement: Supplementary file 20 [file tc-13-1125-2019-supplement.zip]

**Modelled geometry (Glacier ID = 02675;  $A = 1.0785\text{e-}16 \text{ Pa}^{-3} \text{ a}^{-1}$ ;  $dx = 10 \text{ m}$ )**

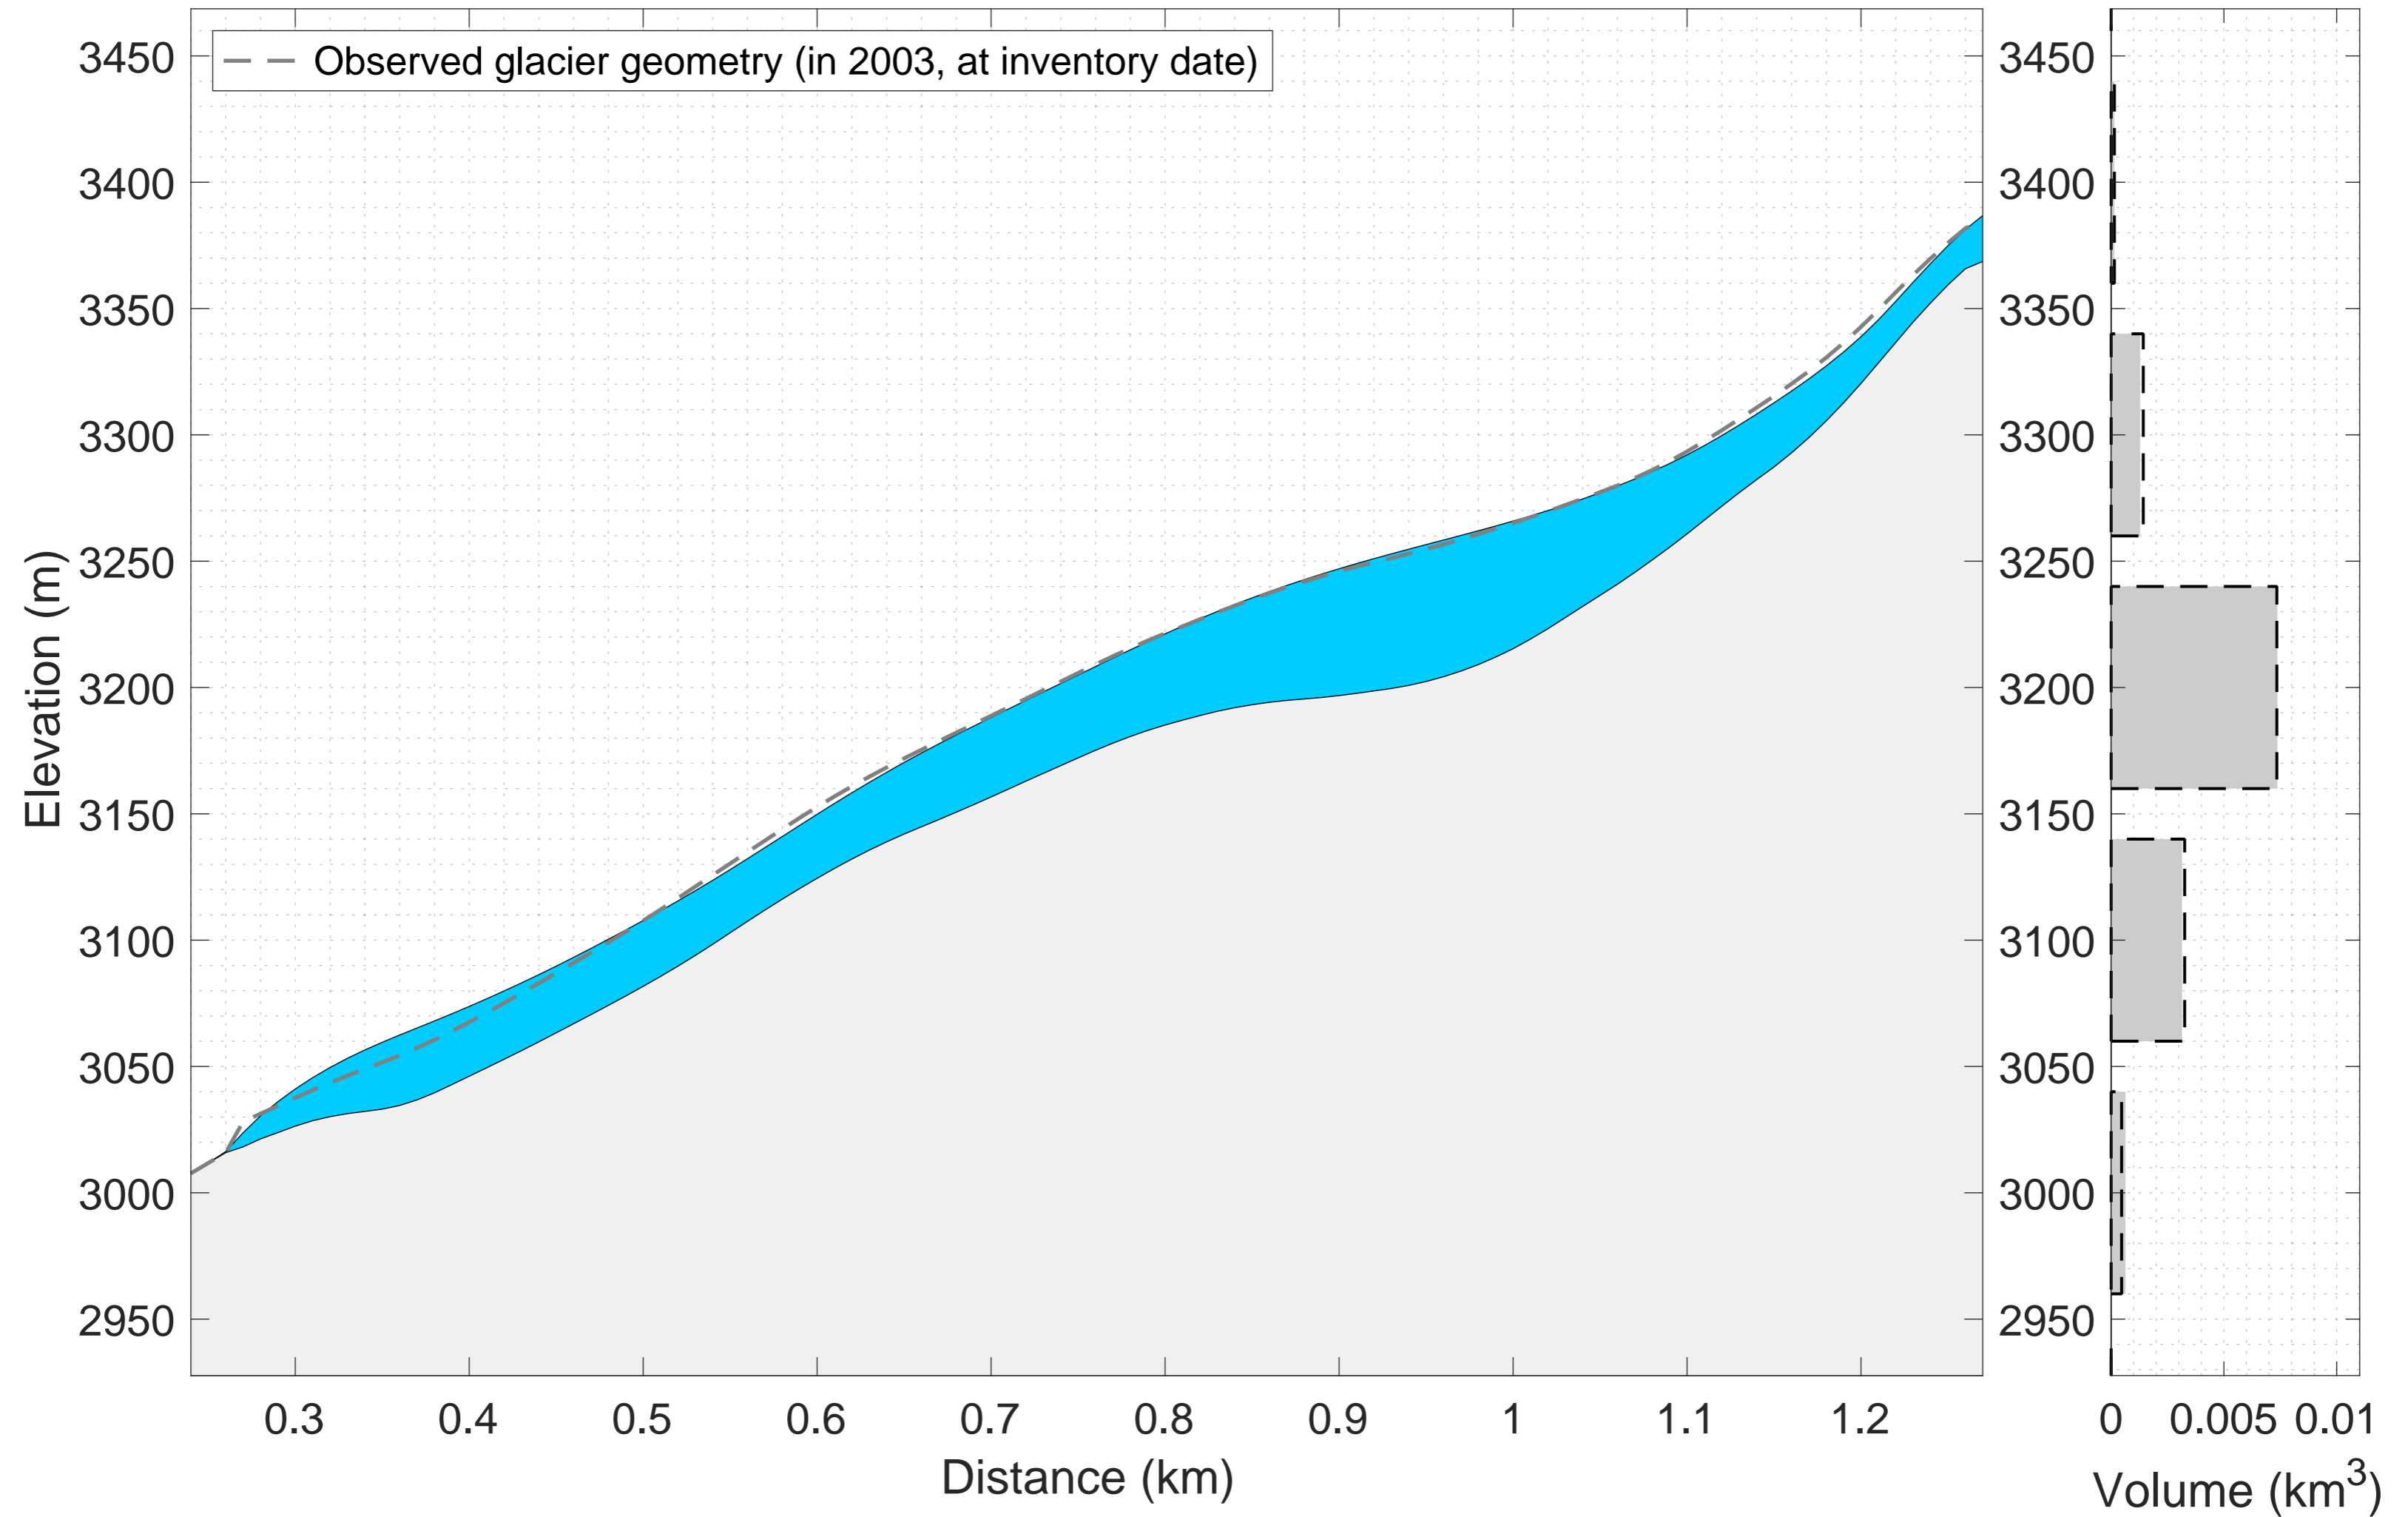

Supplement: Supplementary file 21 [file tc-13-1125-2019-supplement.zip]

**Modelled geometry (Glacier ID = 02785;  $A = 1.0208\text{e-}16 \text{ Pa}^{-3} \text{ a}^{-1}$ ;  $dx = 15 \text{ m}$ )**

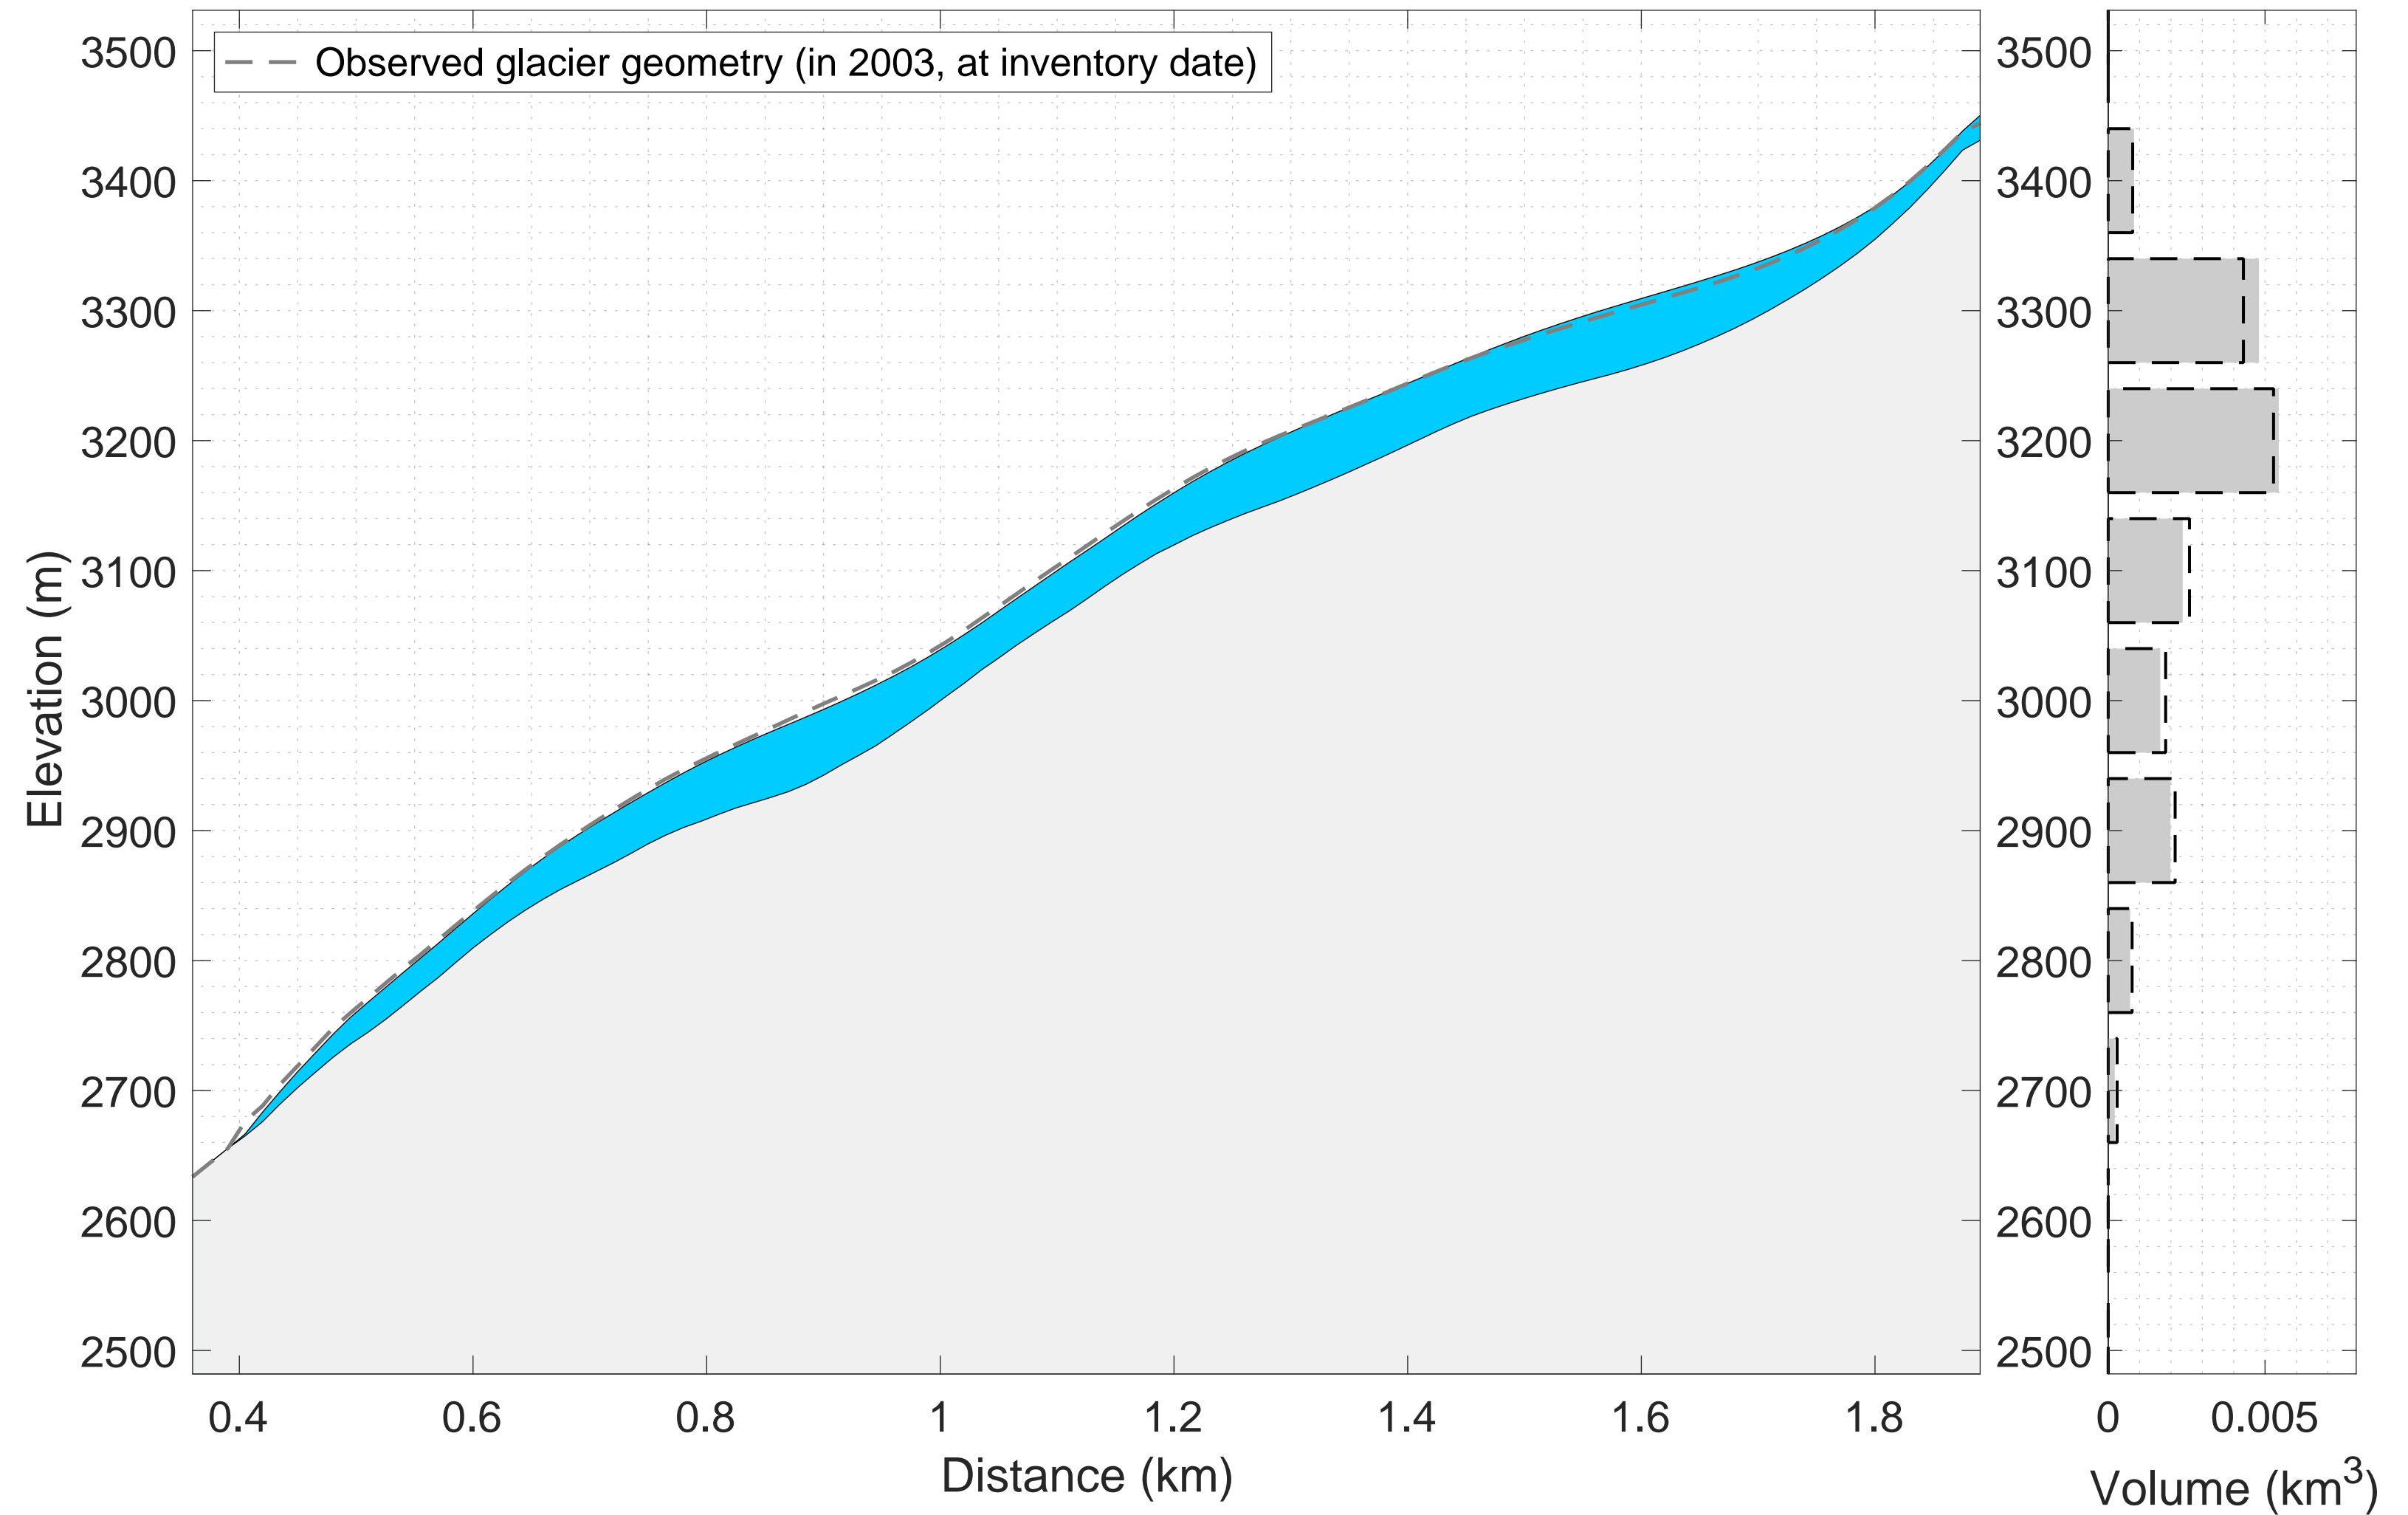

Supplement: Supplementary file 22 [file tc-13-1125-2019-supplement.zip]

**Modelled geometry (Glacier ID = 02812;  $A = 2.594\text{e-}16 \text{ Pa}^{-3} \text{ a}^{-1}$ ;  $dx = 35 \text{ m}$ )**

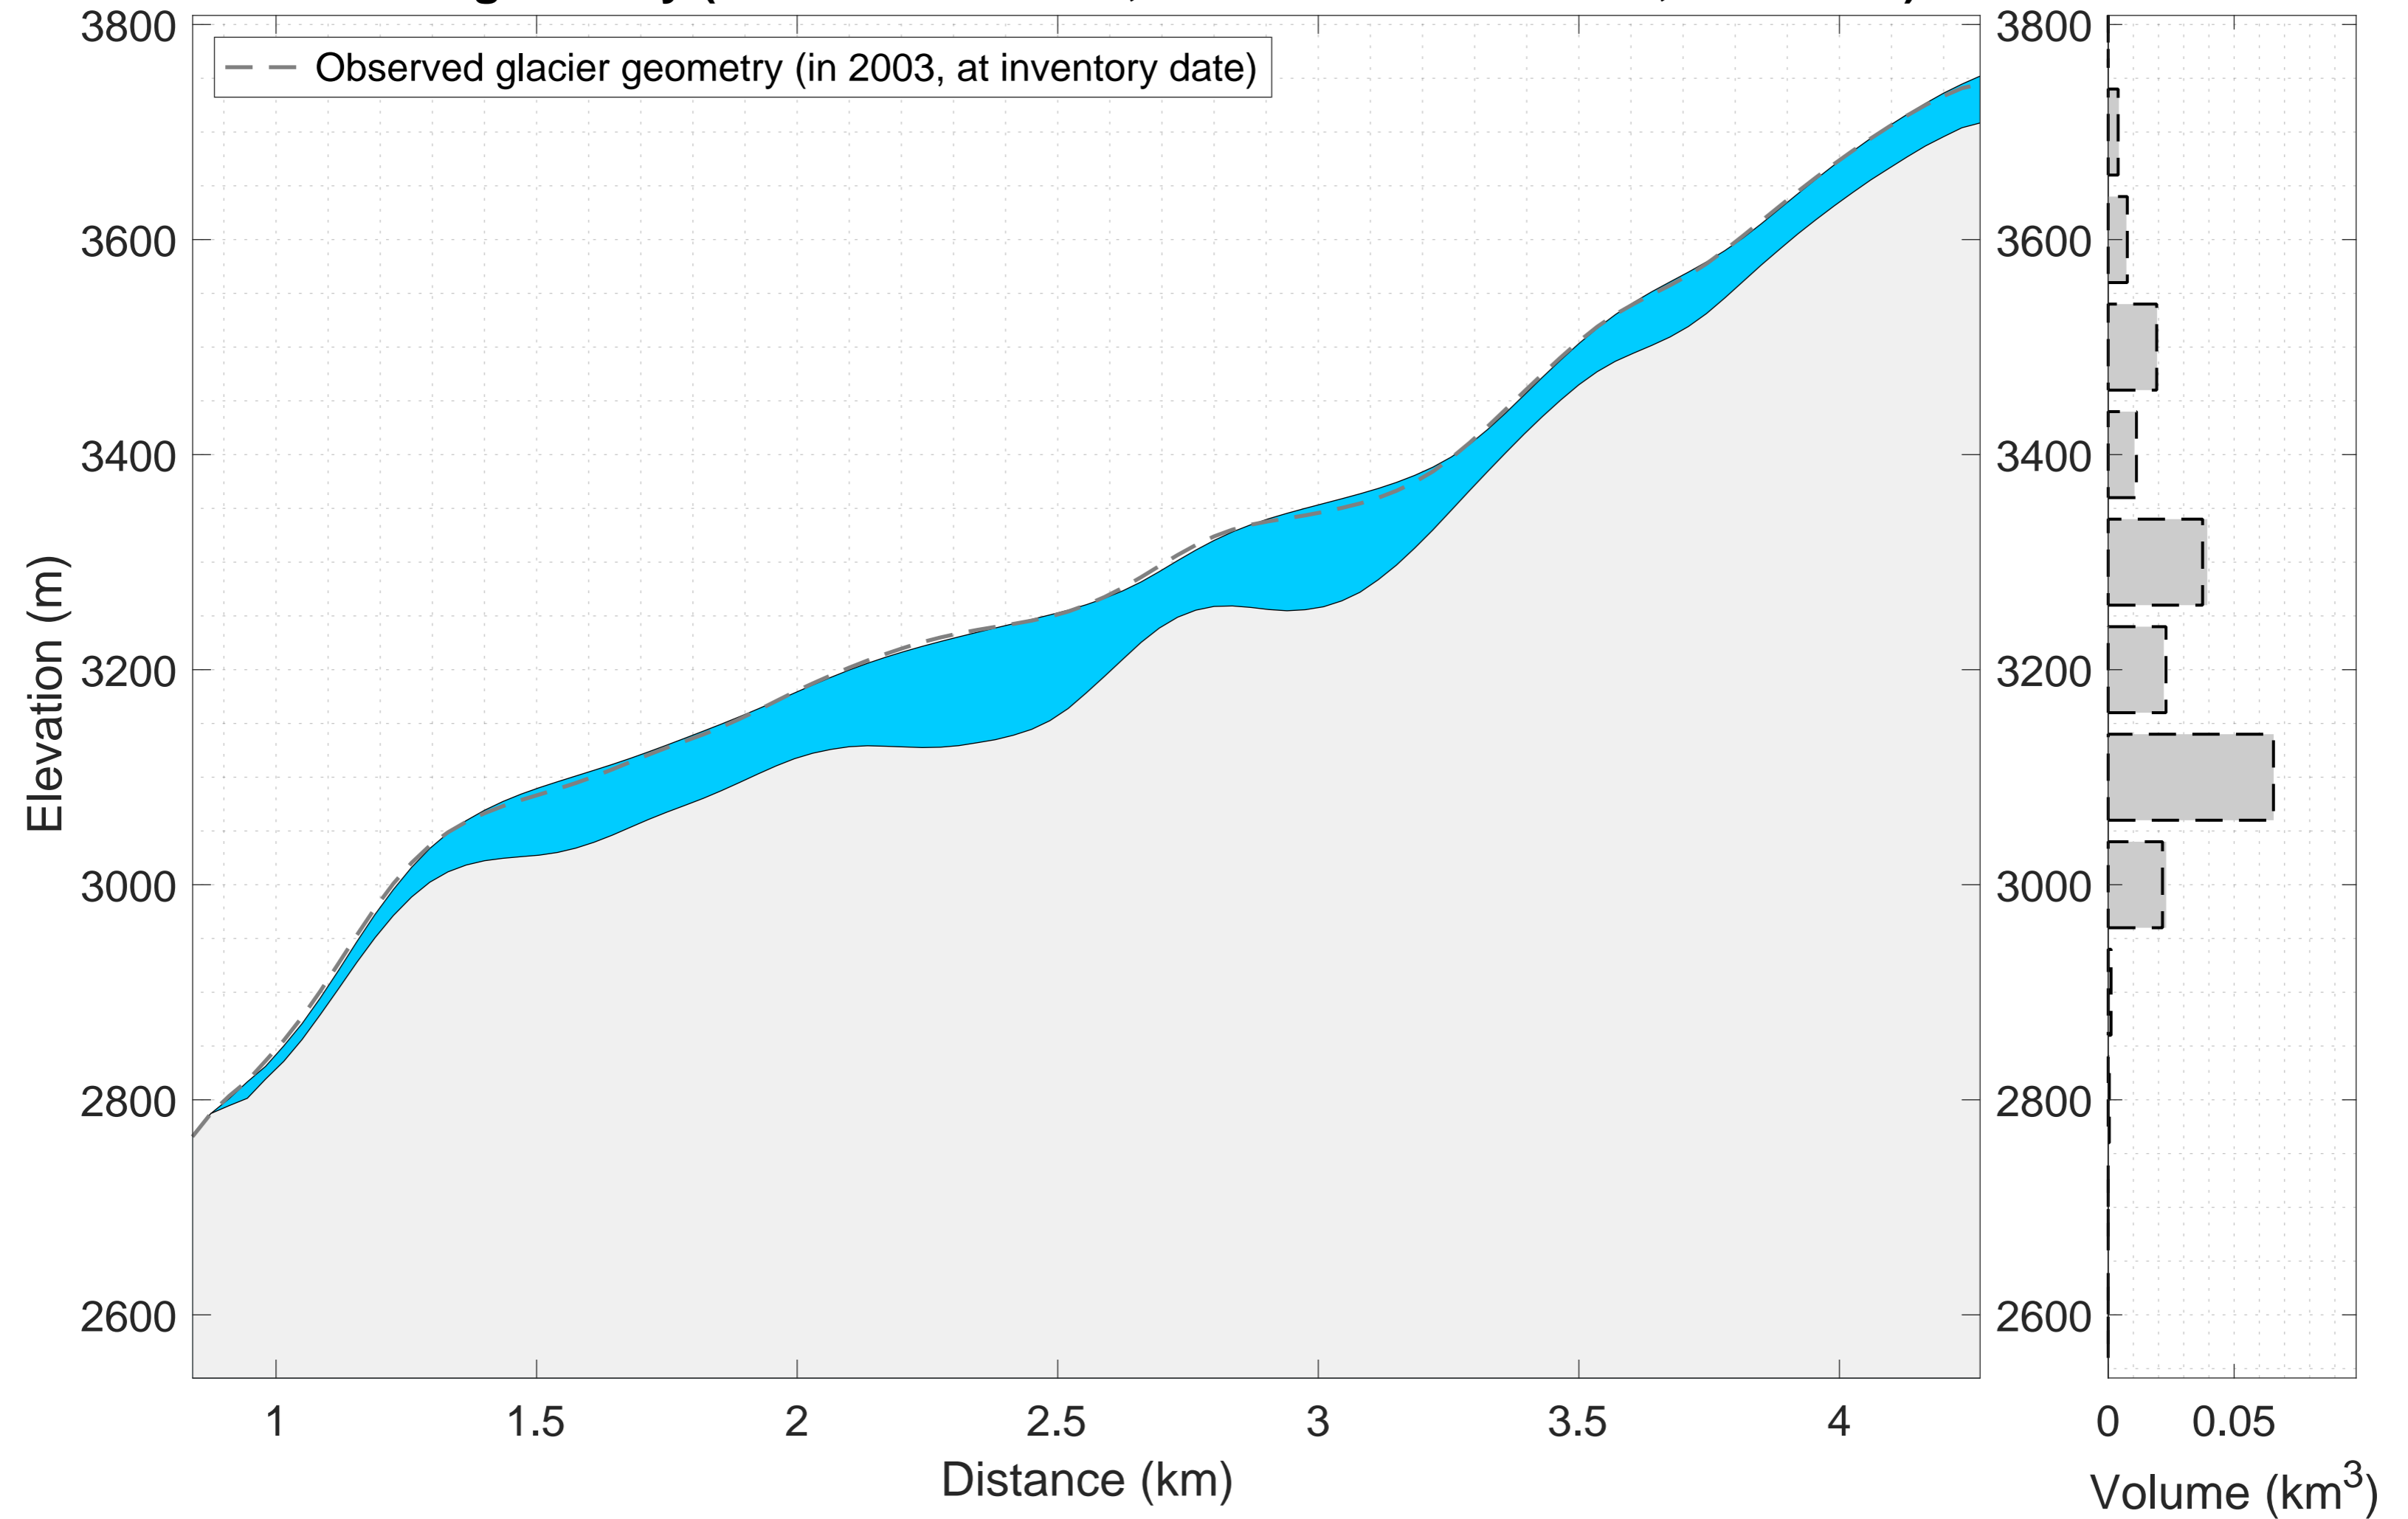

Supplement: Supplementary file 23 [file tc-13-1125-2019-supplement.zip]

**Modelled geometry (Glacier ID = 01378;  $A = 1.0446\text{e-}16 \text{ Pa}^{-3} \text{ a}^{-1}$ ;  $dx = 21 \text{ m}$ )**

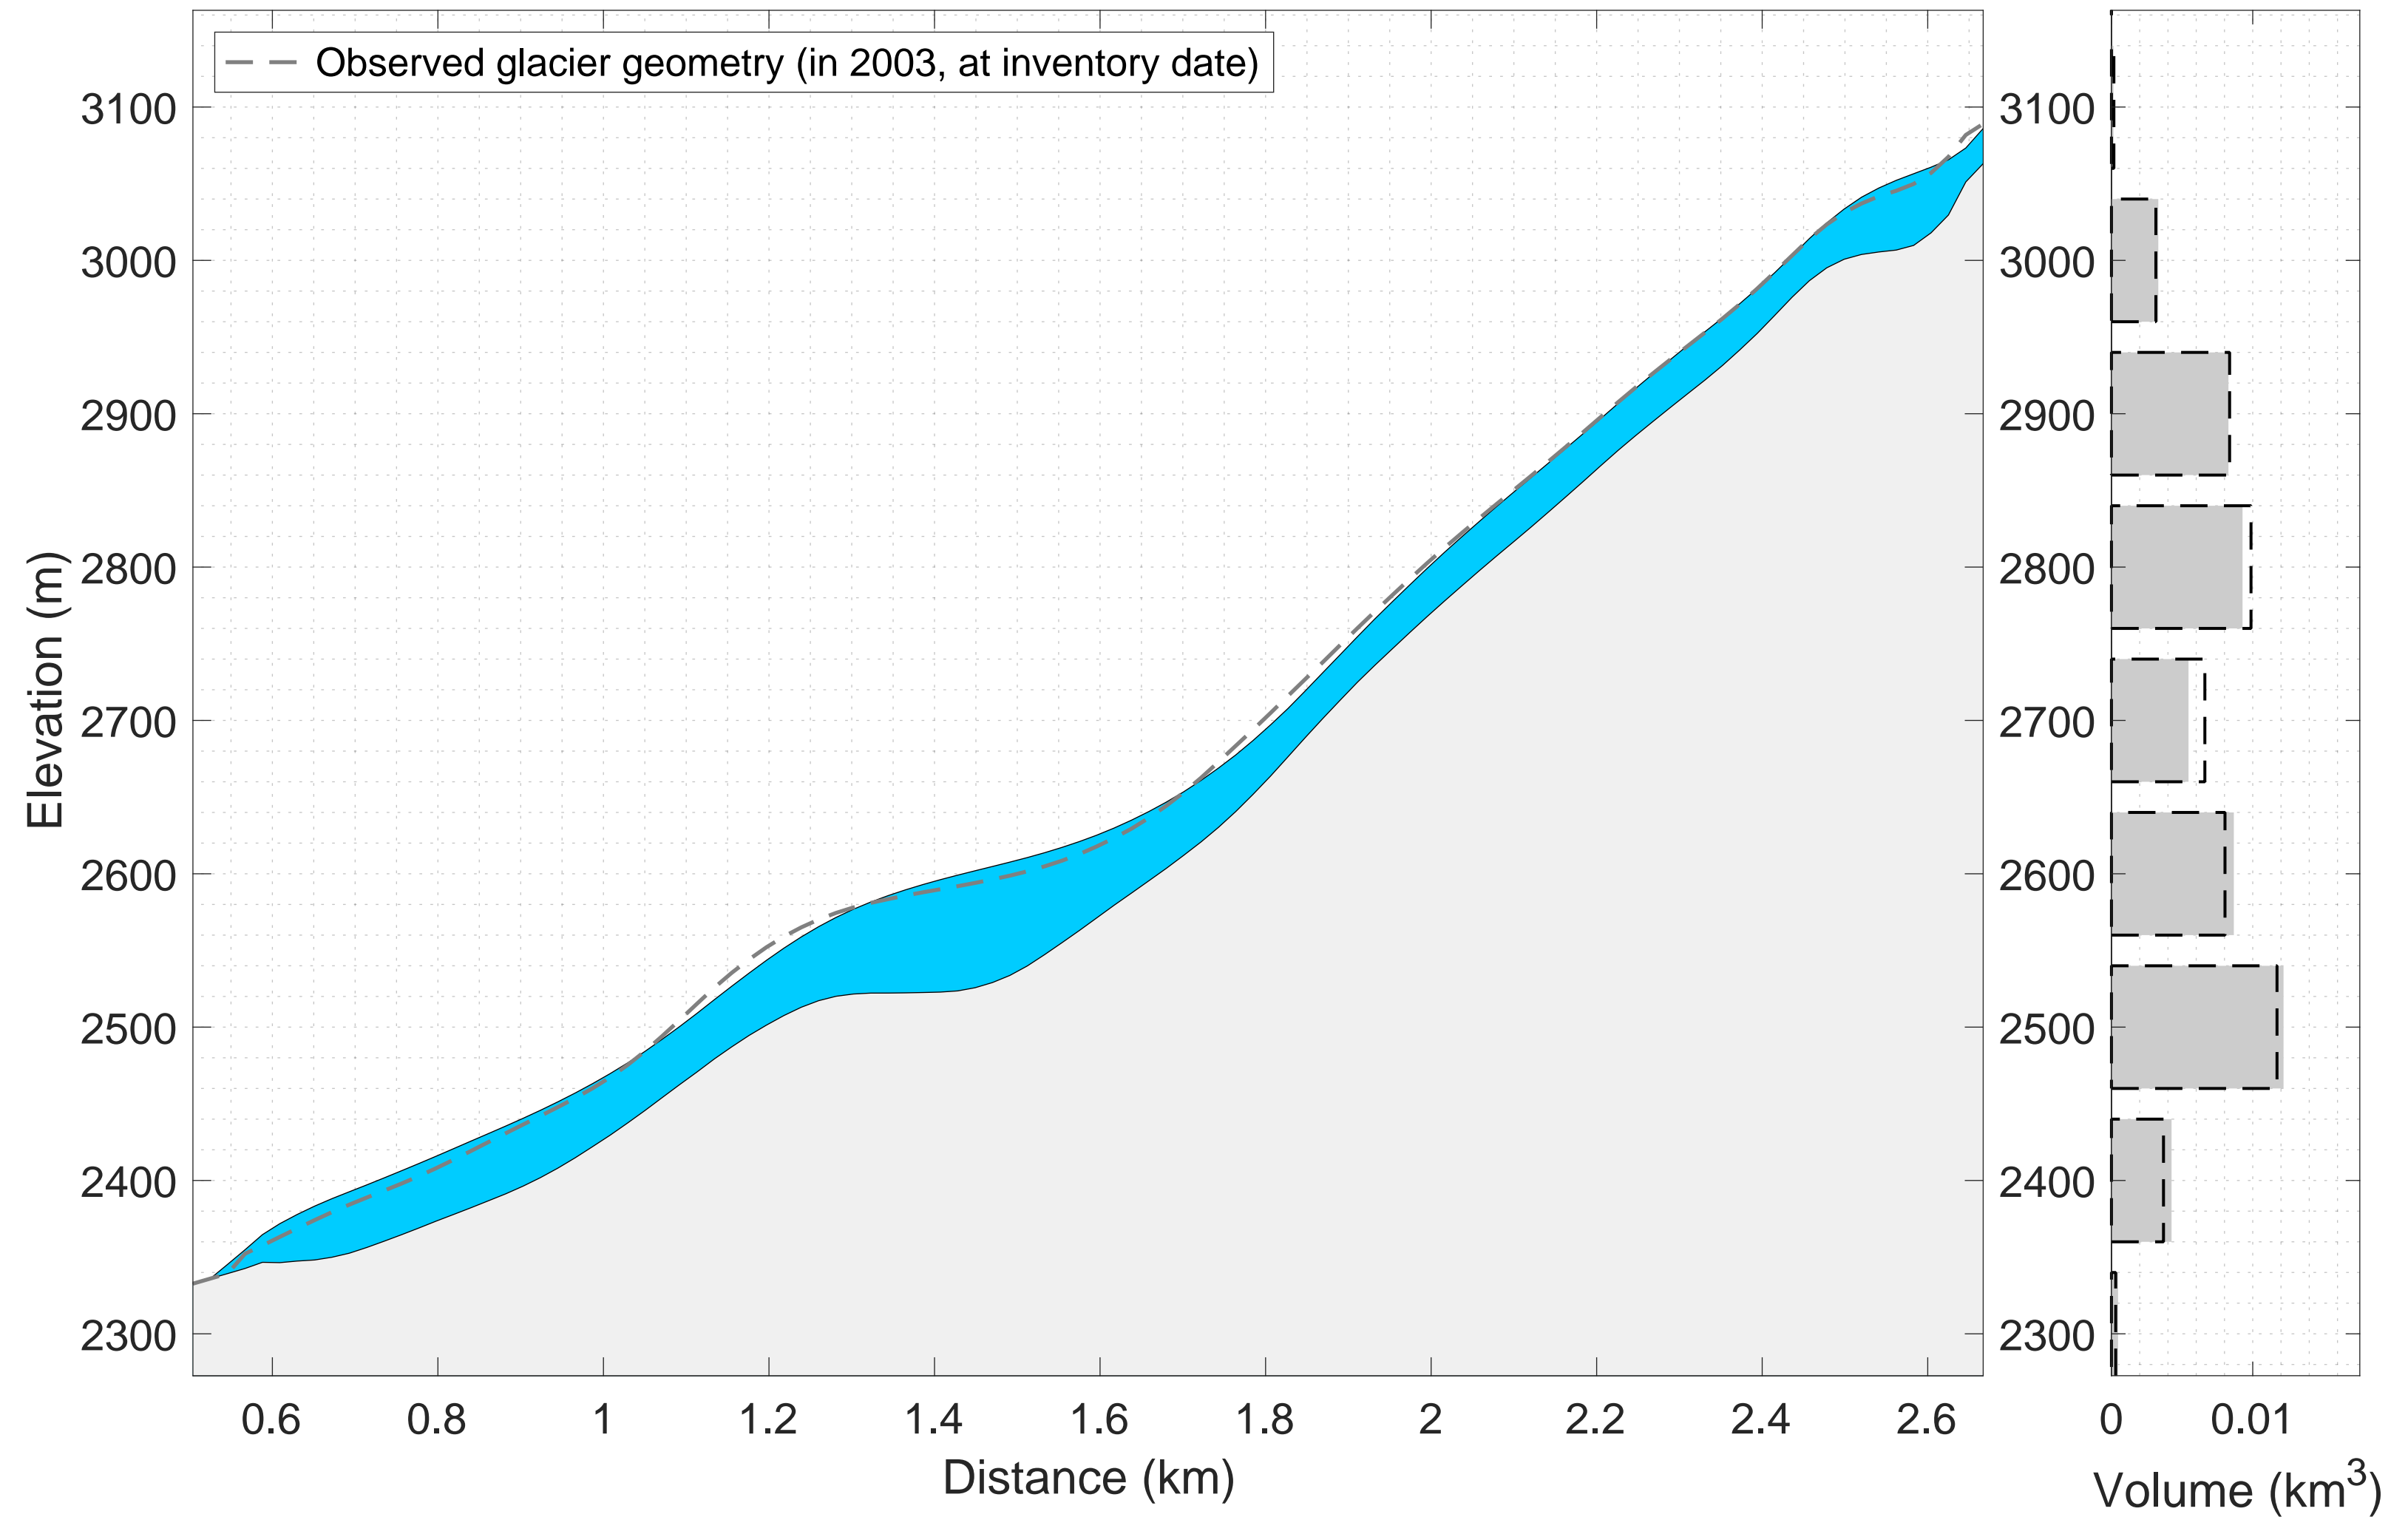

Supplement: Supplementary file 24 [file tc-13-1125-2019-supplement.zip]

**Modelled geometry (Glacier ID = 01248;  $A = 1\text{e-}16 \text{ Pa}^{-3} \text{ a}^{-1}$ ;  $dx = 11 \text{ m}$ )**

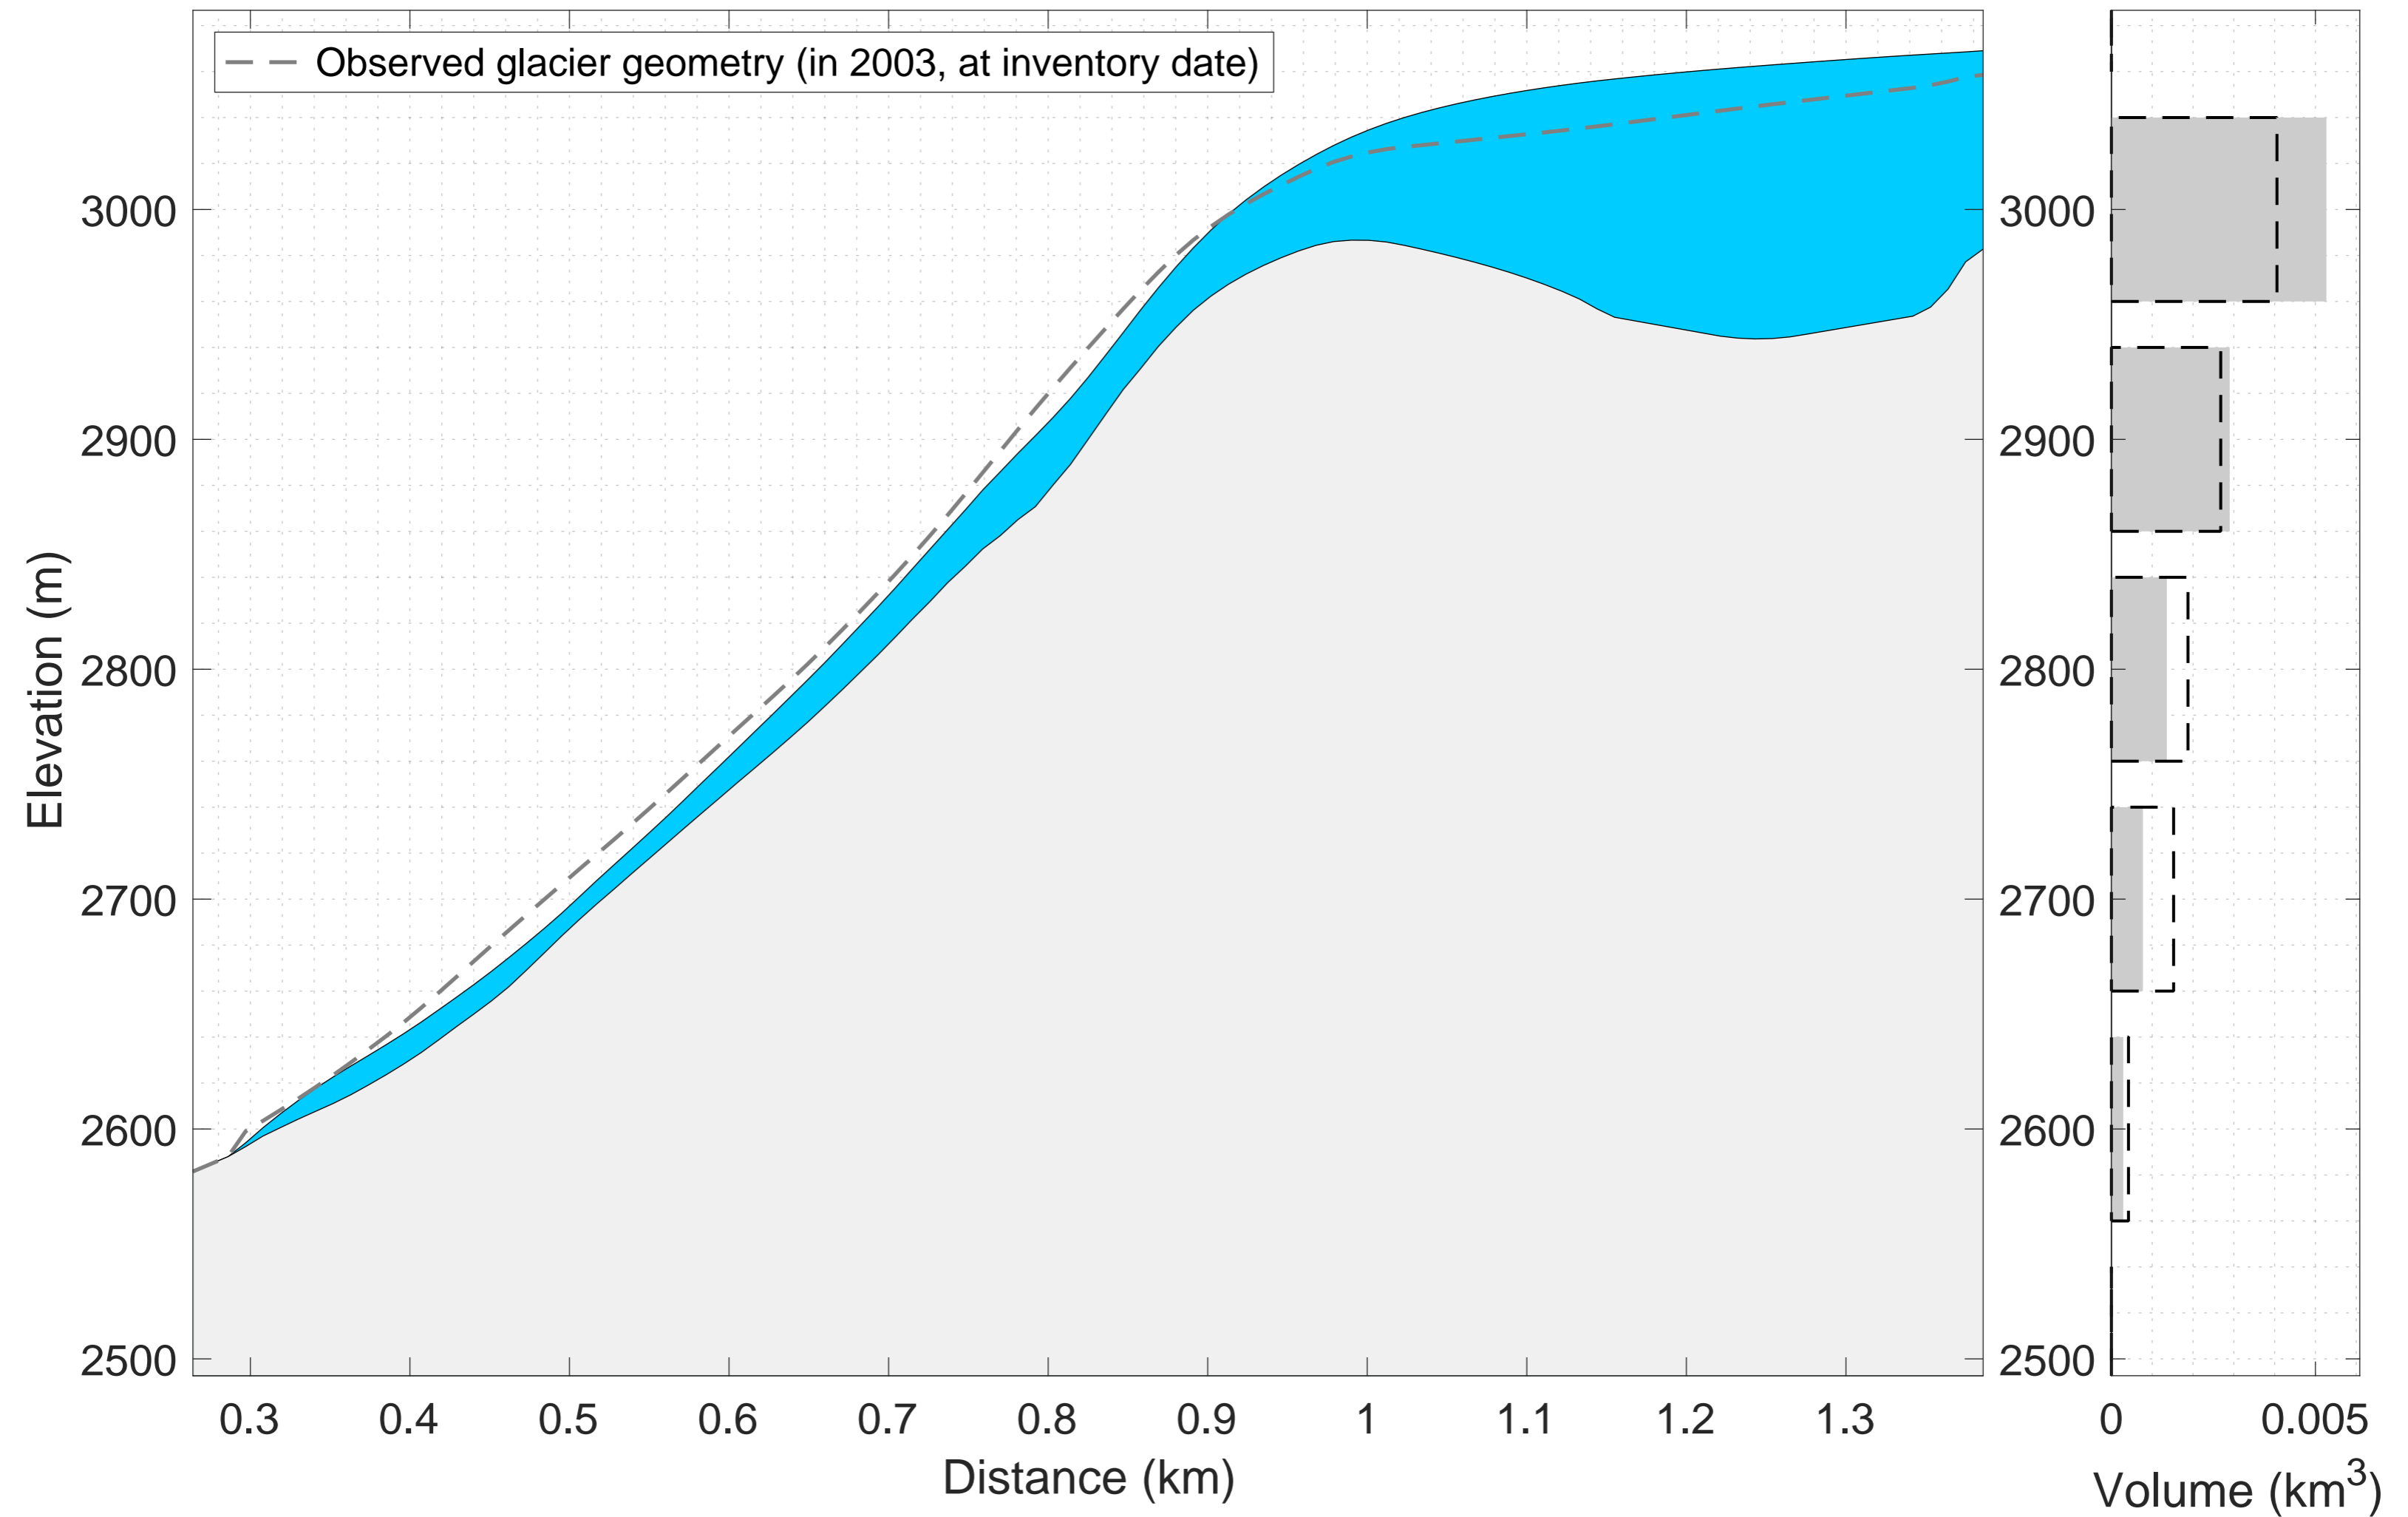

Supplement: Supplementary file 25 [file tc-13-1125-2019-supplement.zip]

**Modelled geometry (Glacier ID = 03002;  $A = 9.0461\text{e-}17 \text{ Pa}^{-3} \text{ a}^{-1}$ ;  $dx = 13 \text{ m}$ )**

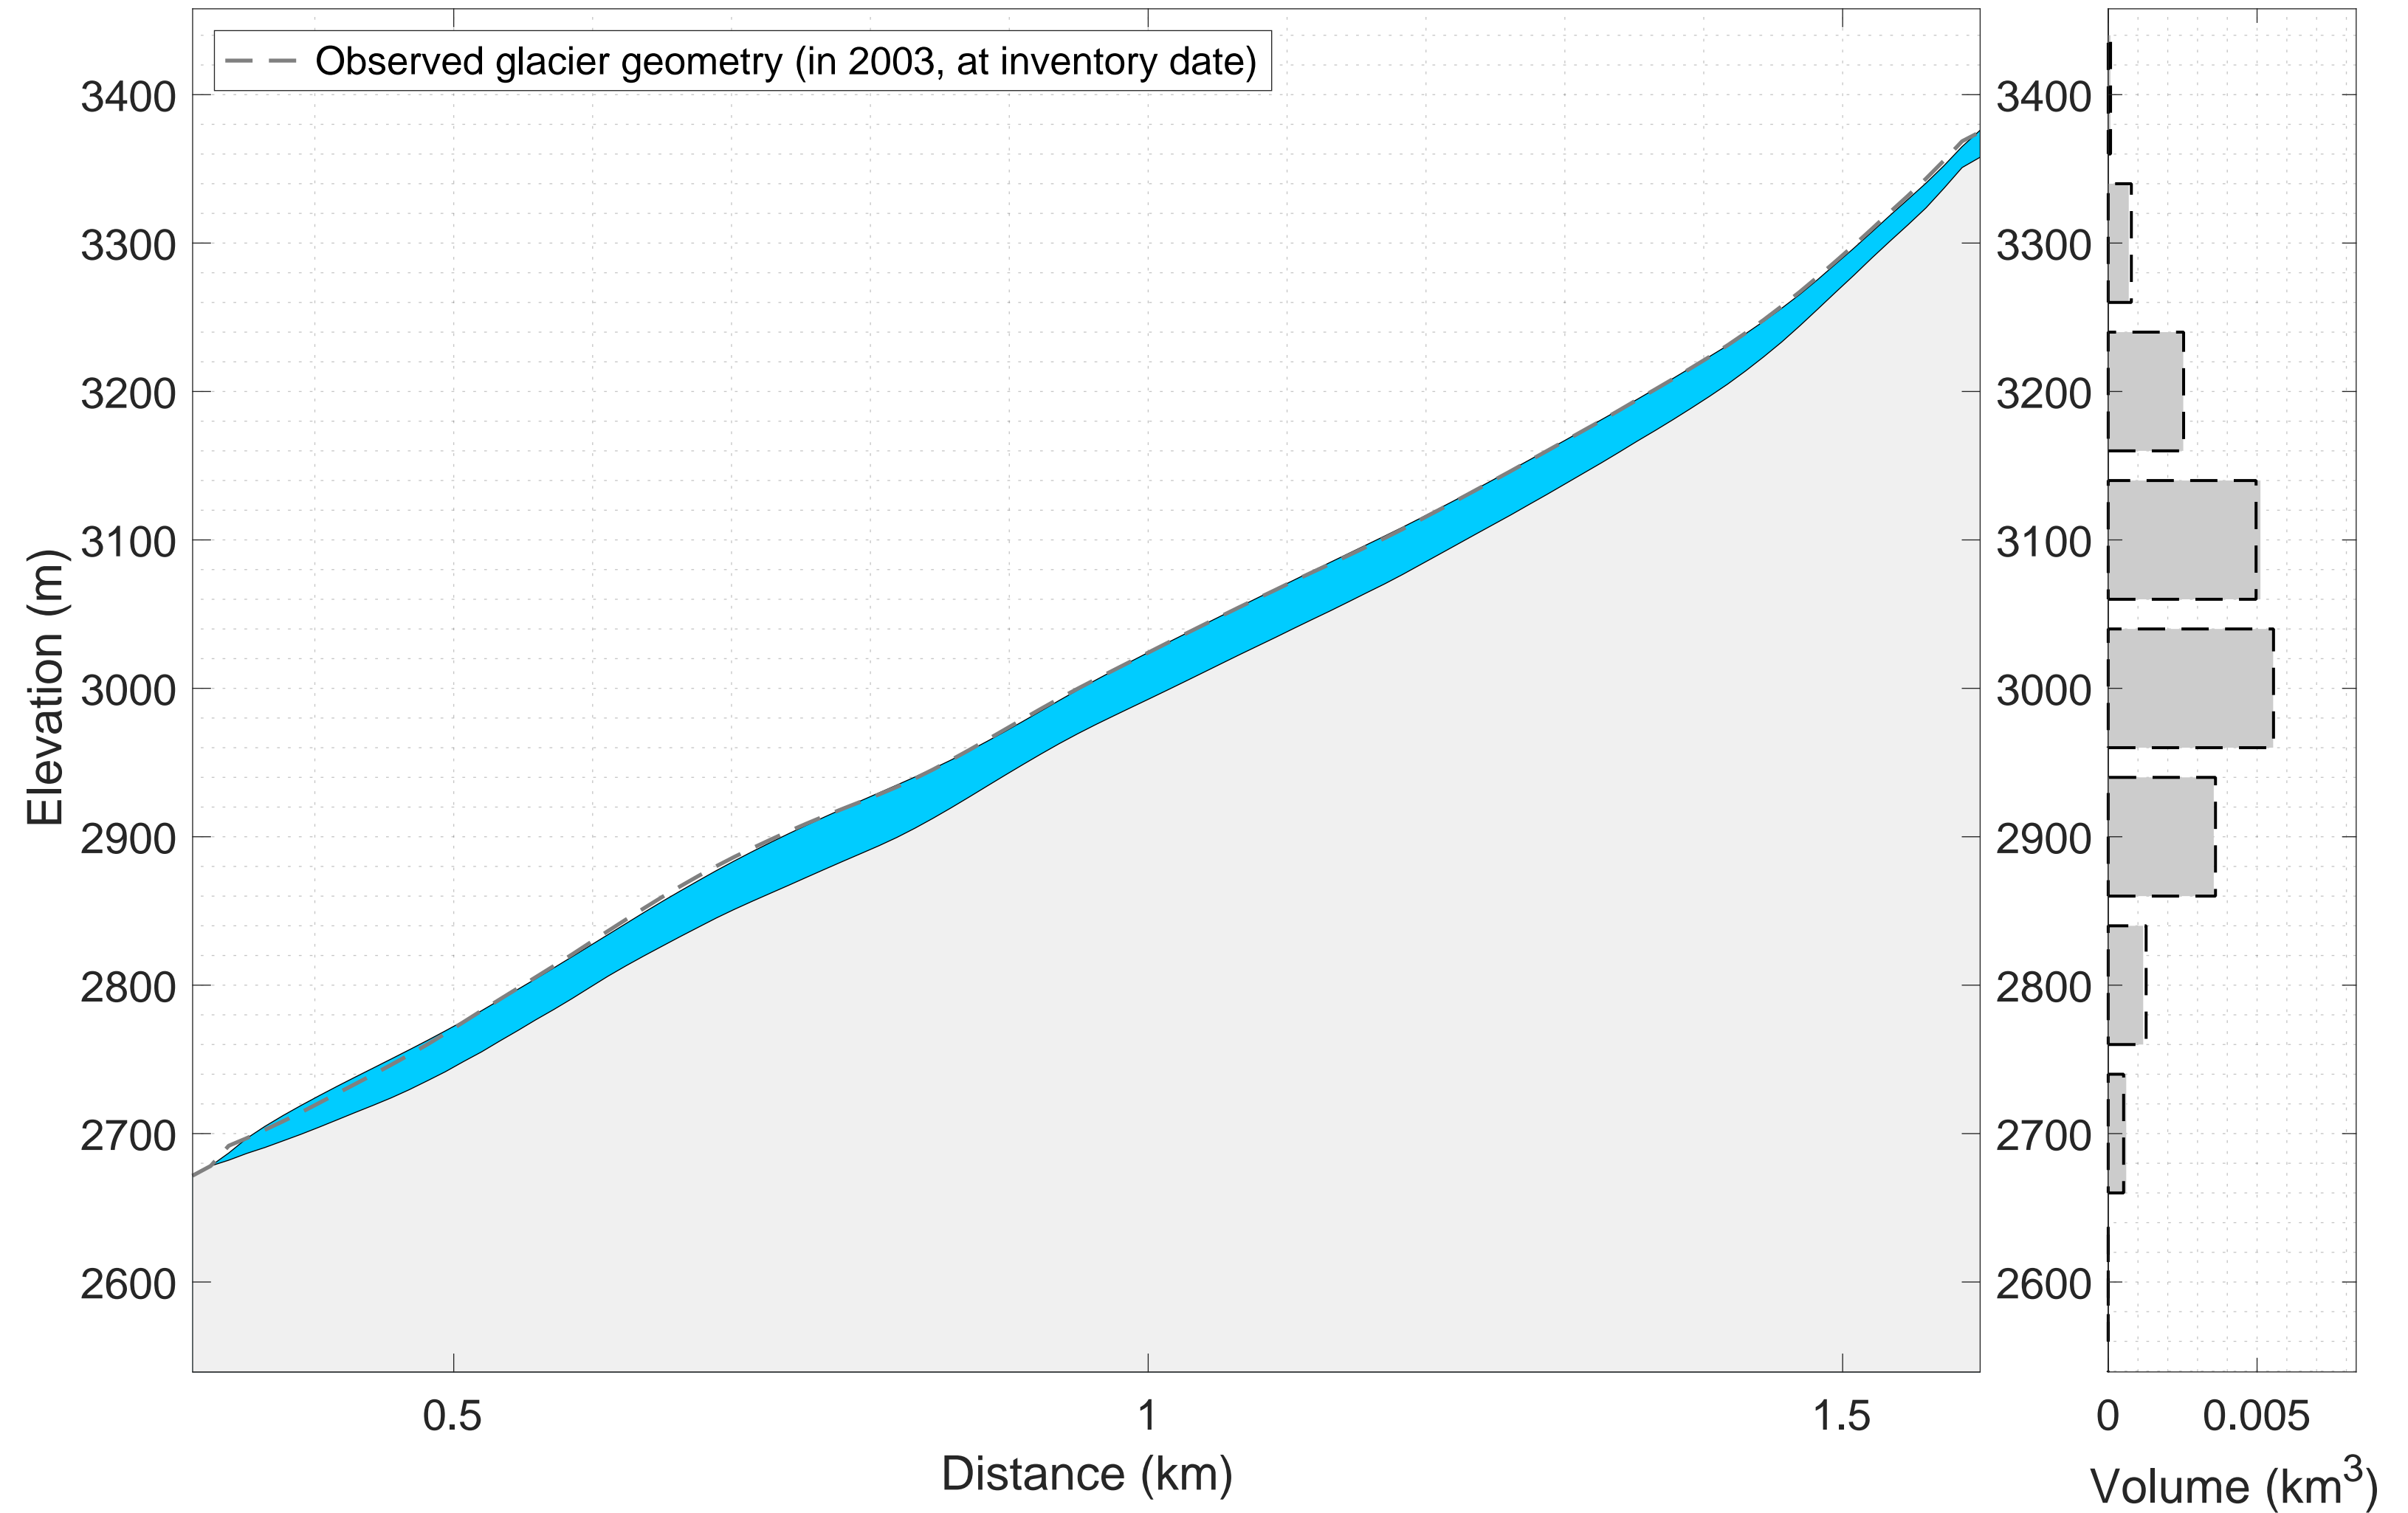

Supplement: Supplementary file 26 [file tc-13-1125-2019-supplement.zip]

**Modelled geometry (Glacier ID = 01962;  $A = 7.4301\text{e-}17 \text{ Pa}^{-3} \text{ a}^{-1}$ ;  $dx = 13 \text{ m}$ )**

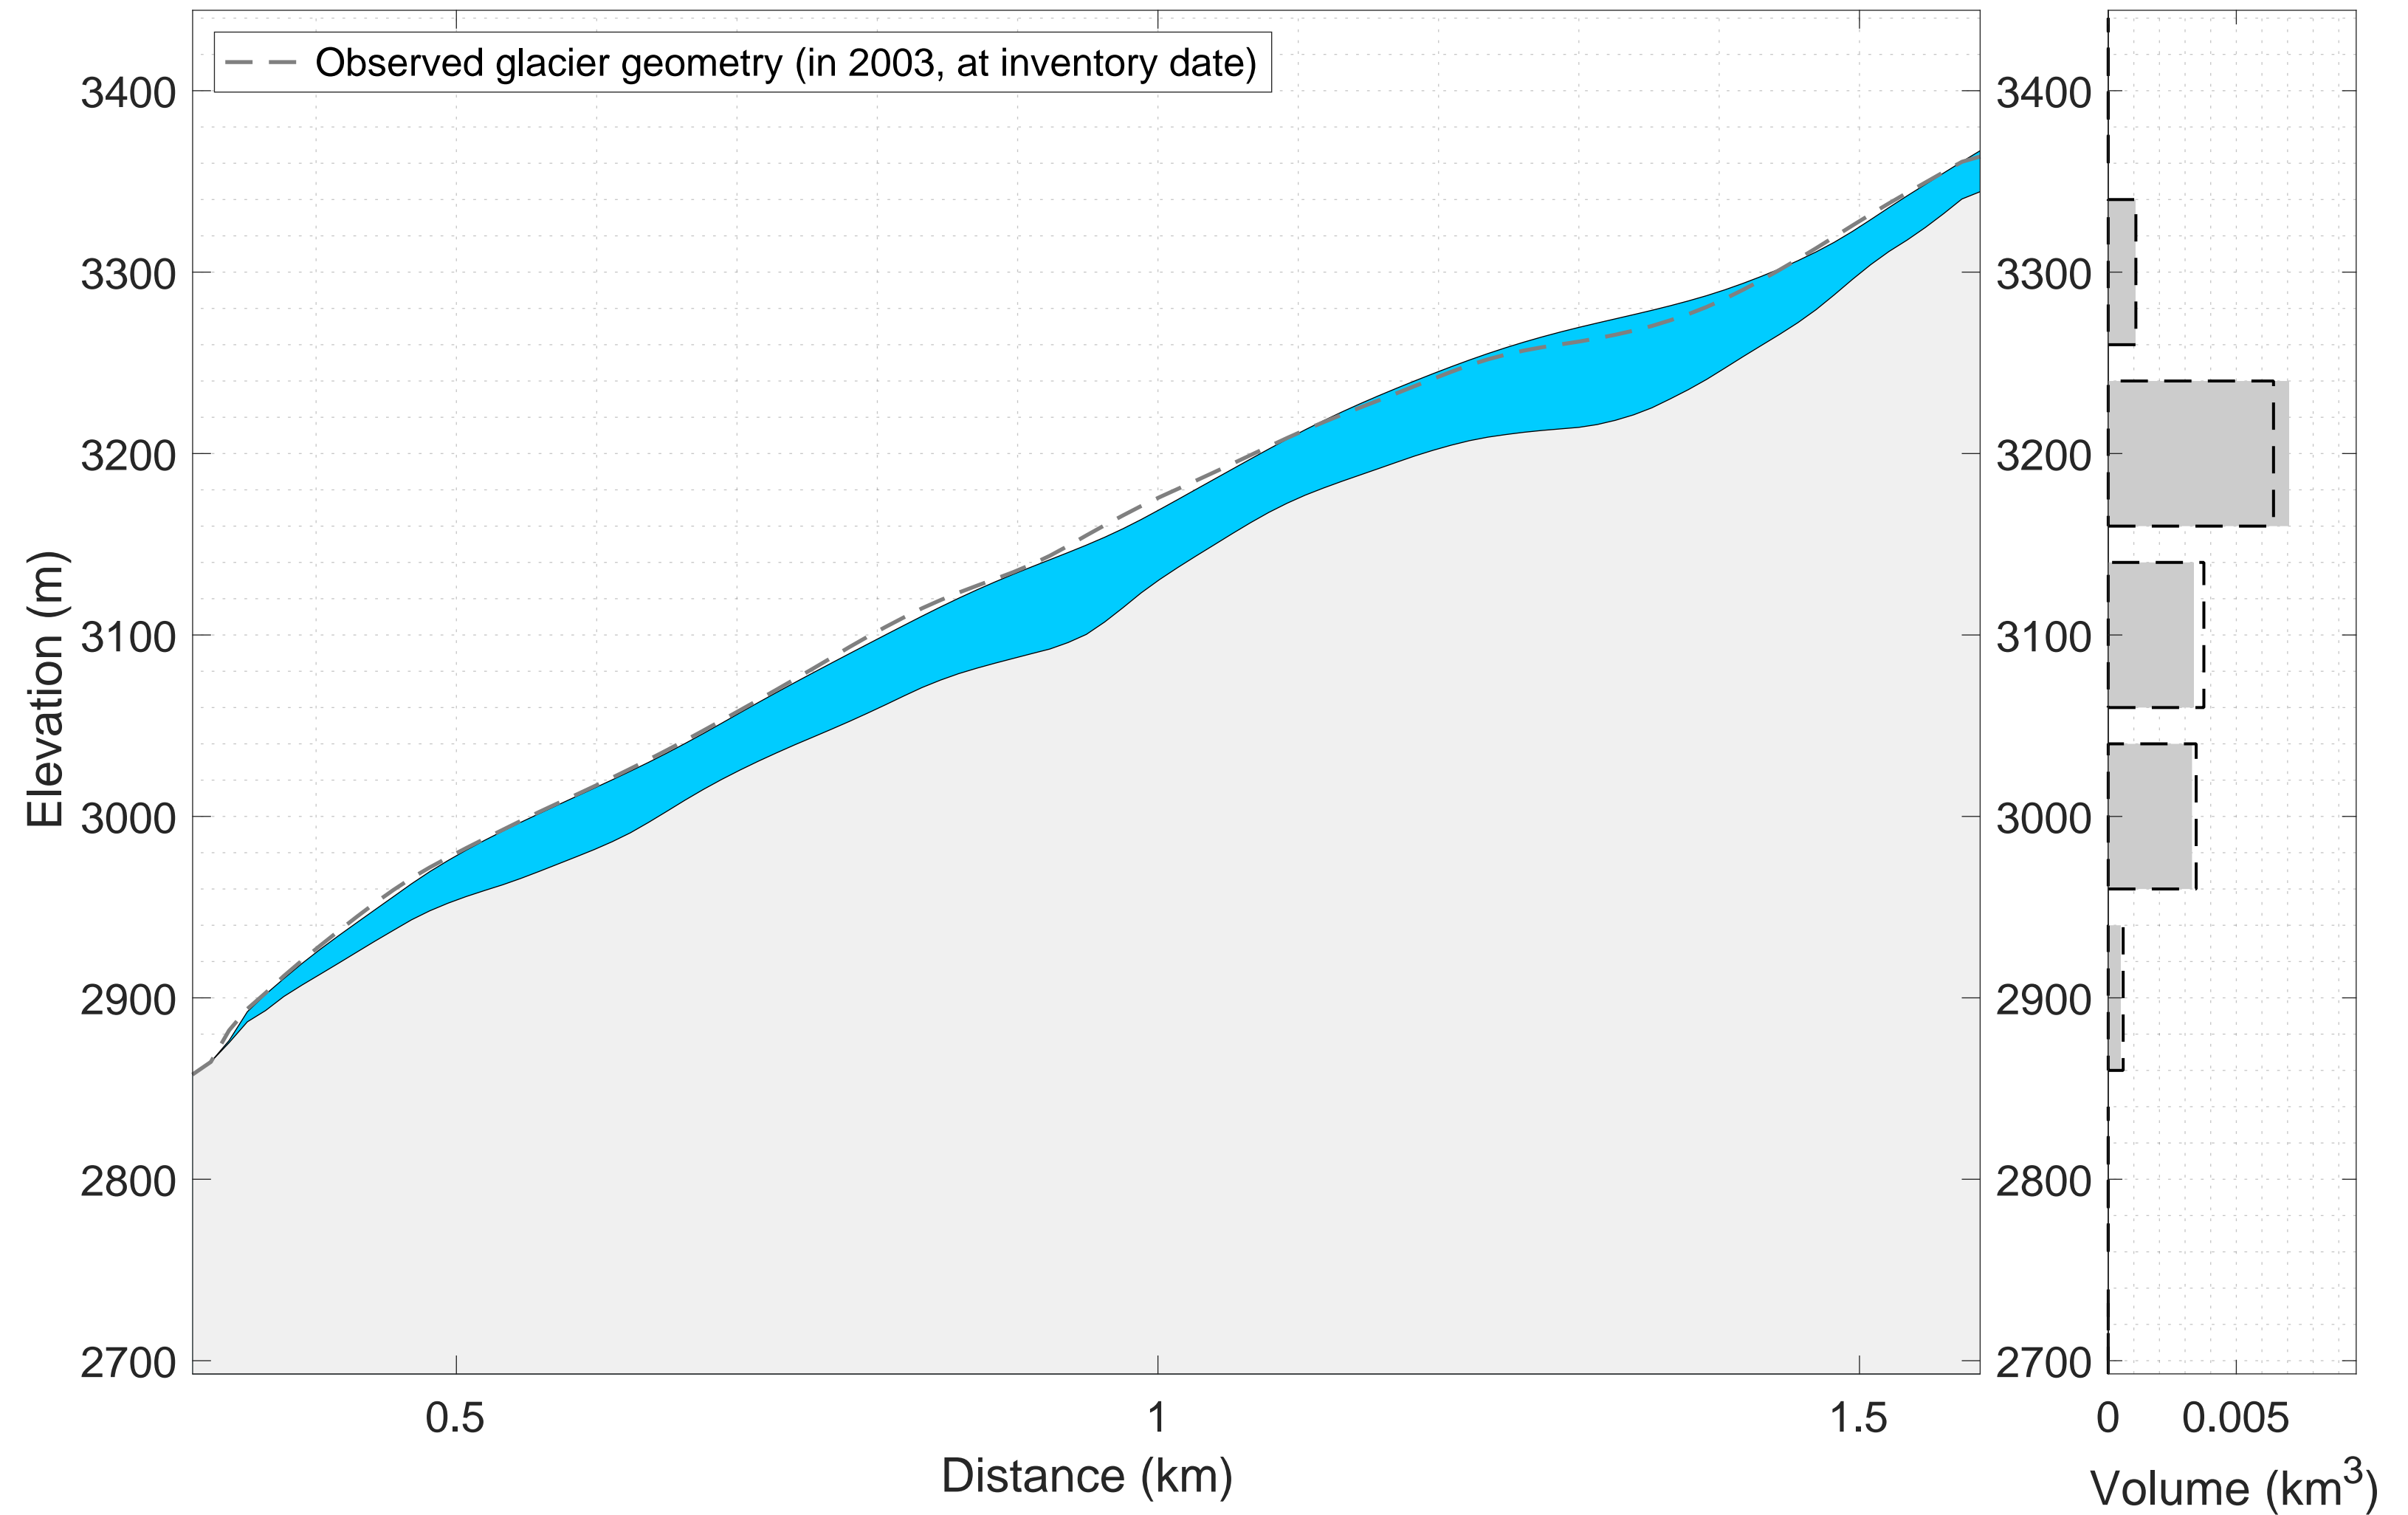

Supplement: Supplementary file 27 [file tc-13-1125-2019-supplement.zip]

**Modelled geometry (Glacier ID = 02172;  $A = 1.683\text{e-}16 \text{ Pa}^{-3} \text{ a}^{-1}$ ;  $dx = 31 \text{ m}$ )**

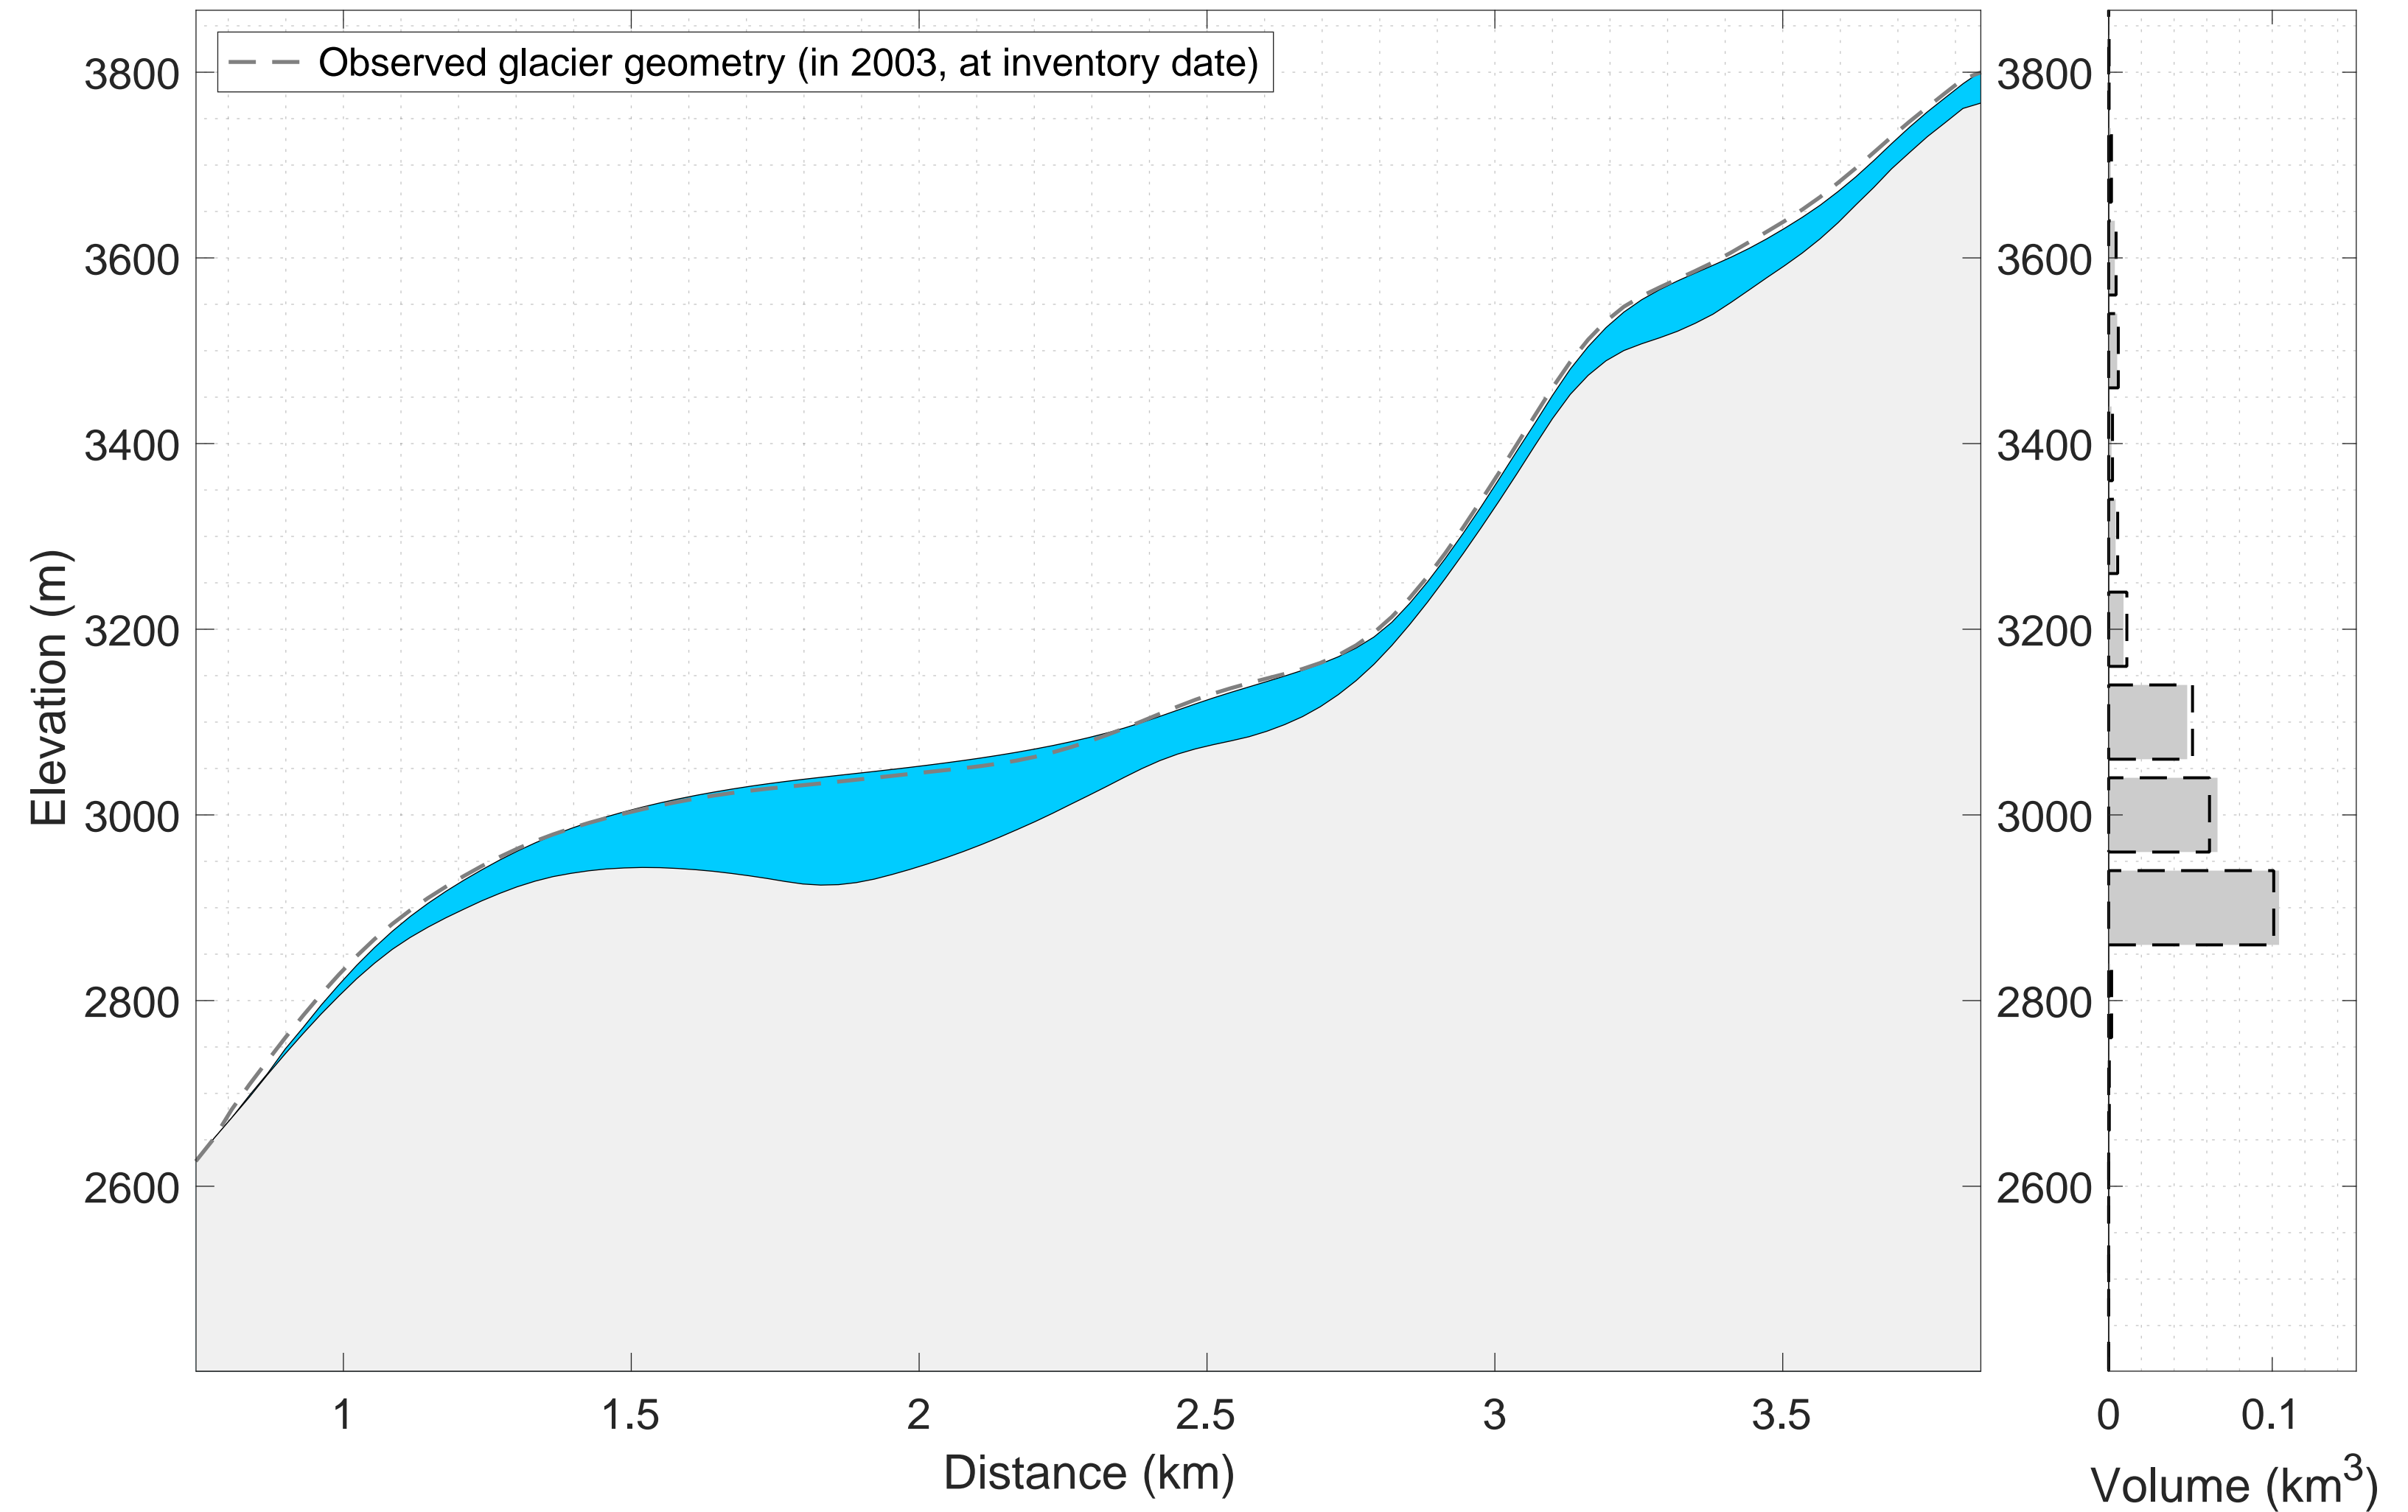

Supplement: Supplementary file 28 [file tc-13-1125-2019-supplement.zip]

**Modelled geometry (Glacier ID = 03734;  $A = 2.3172\text{e-}16 \text{ Pa}^{-3} \text{ a}^{-1}$ ;  $dx = 21 \text{ m}$ )**

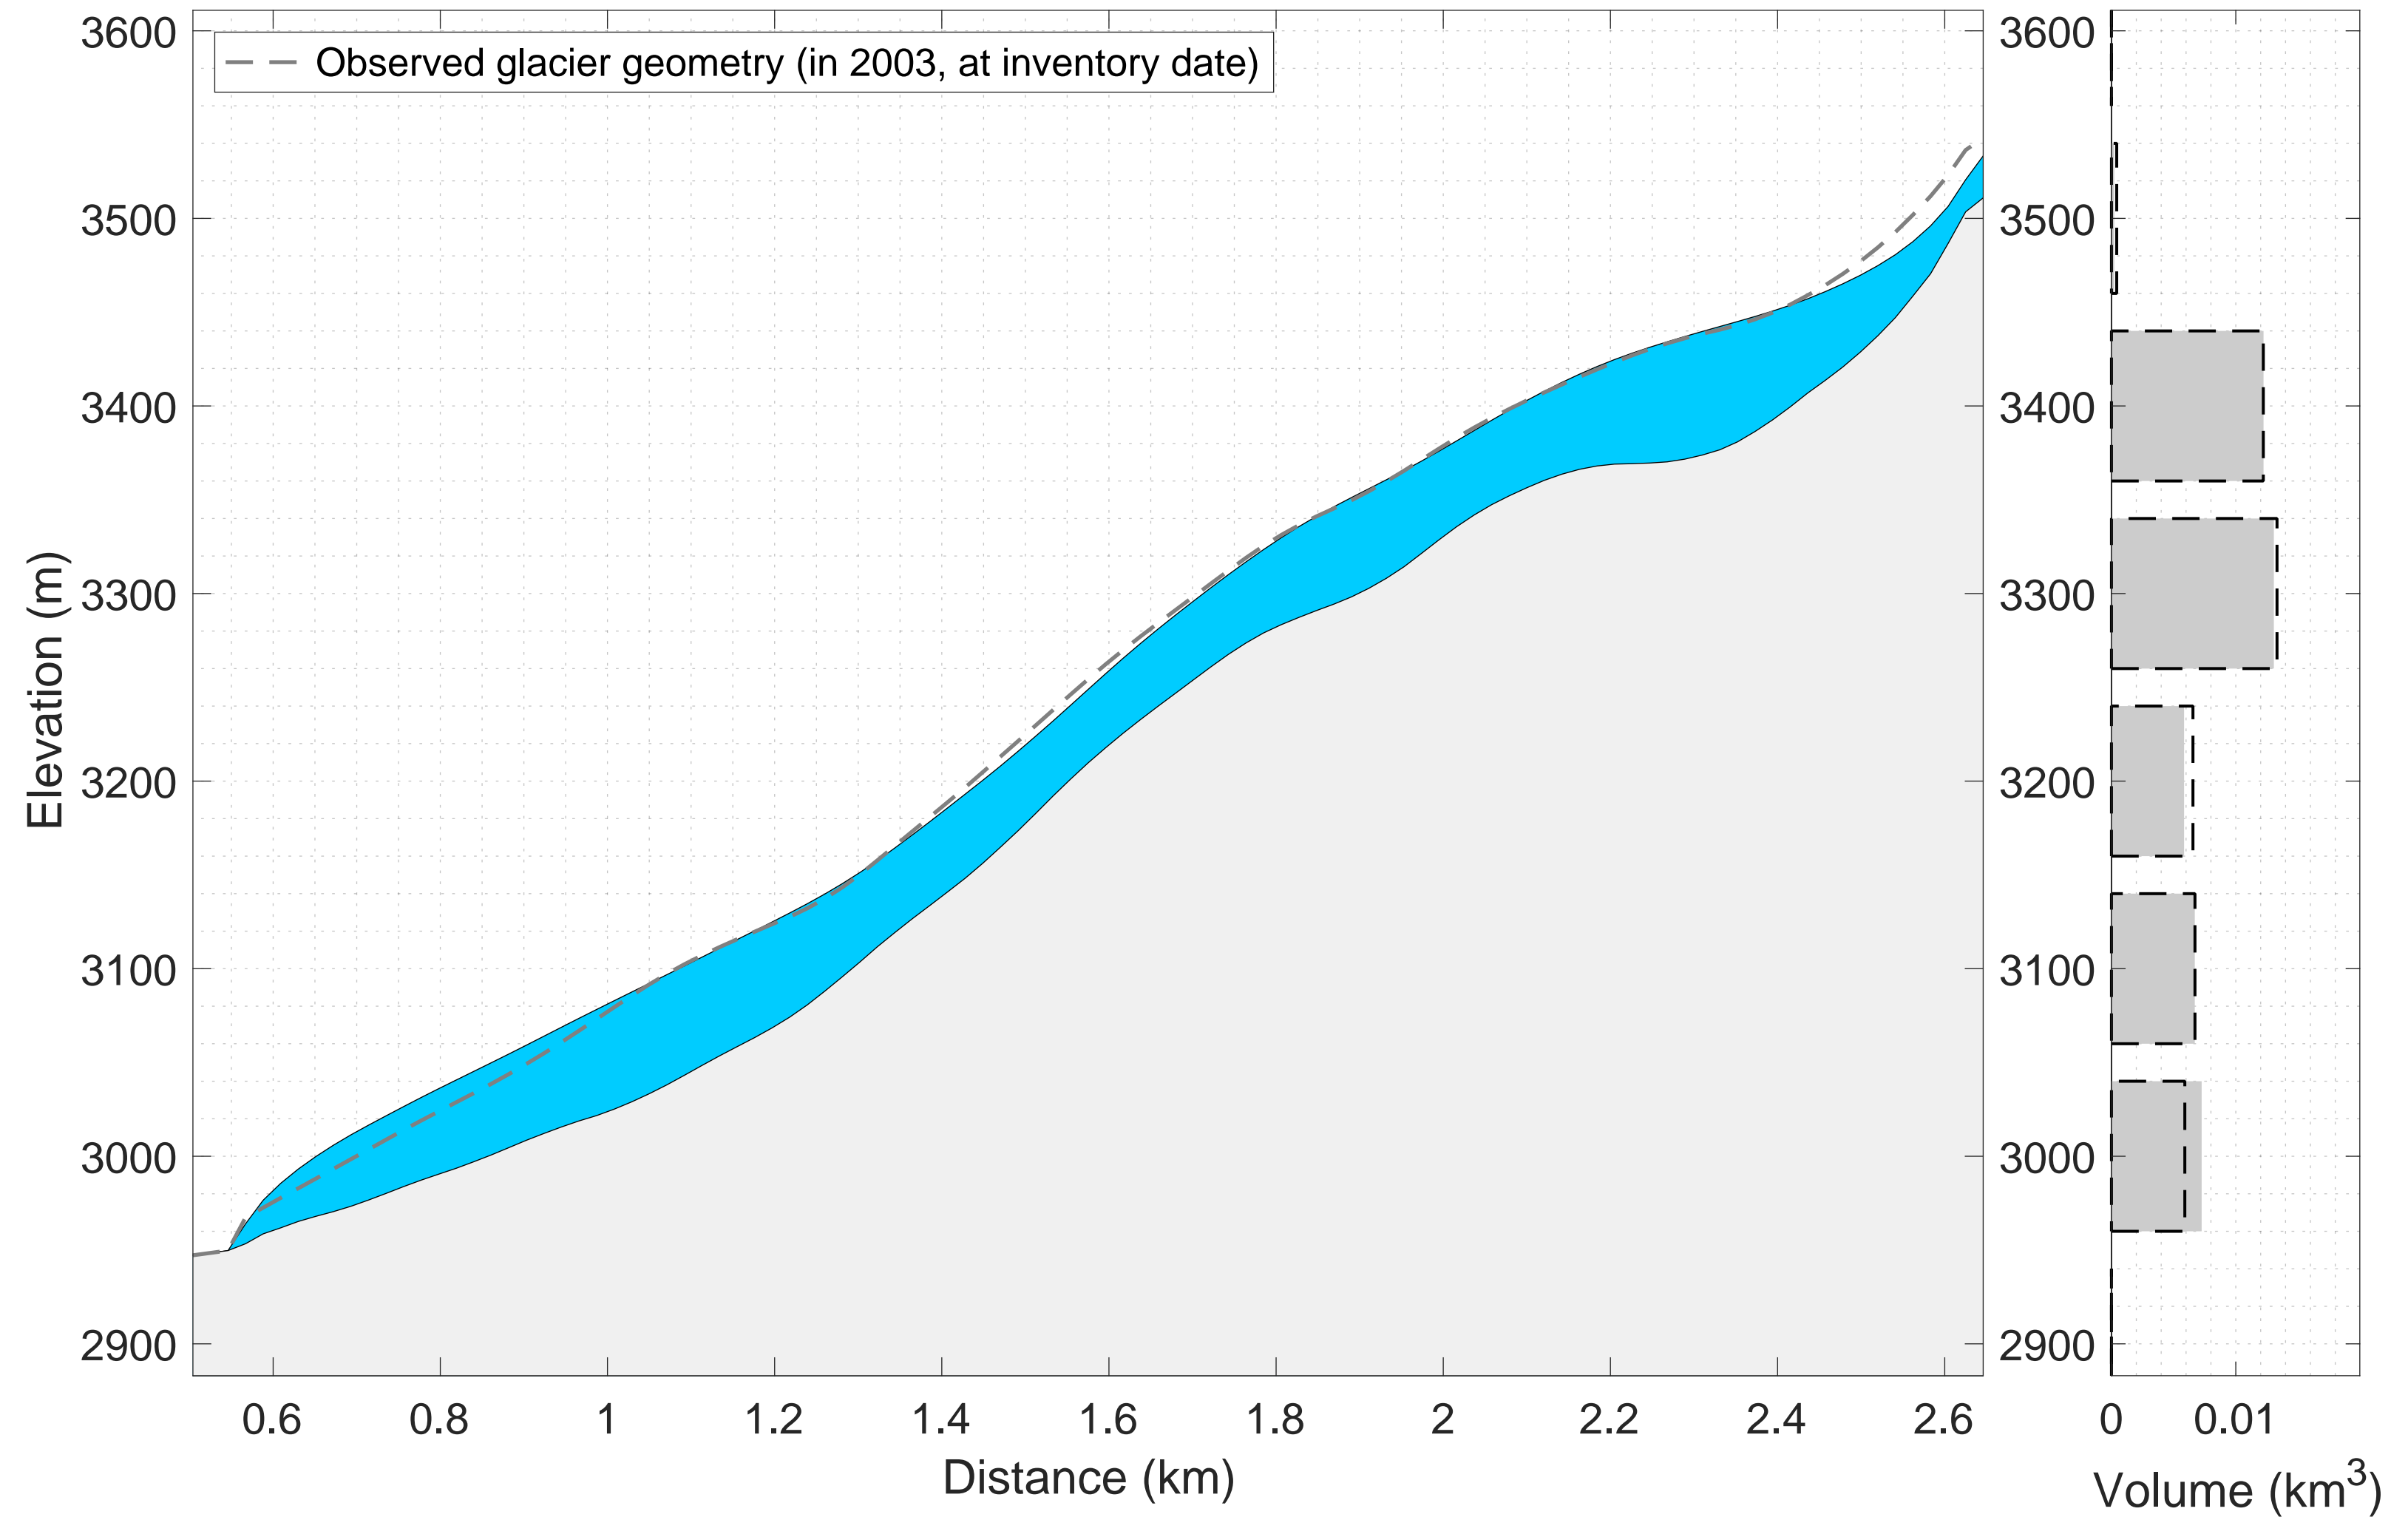

Supplement: Supplementary file 29 [file tc-13-1125-2019-supplement.zip]

**Modelled geometry (Glacier ID = 02427;  $A = 4.9432\text{e-}17 \text{ Pa}^{-3} \text{ a}^{-1}$ ;  $dx = 28 \text{ m}$ )**

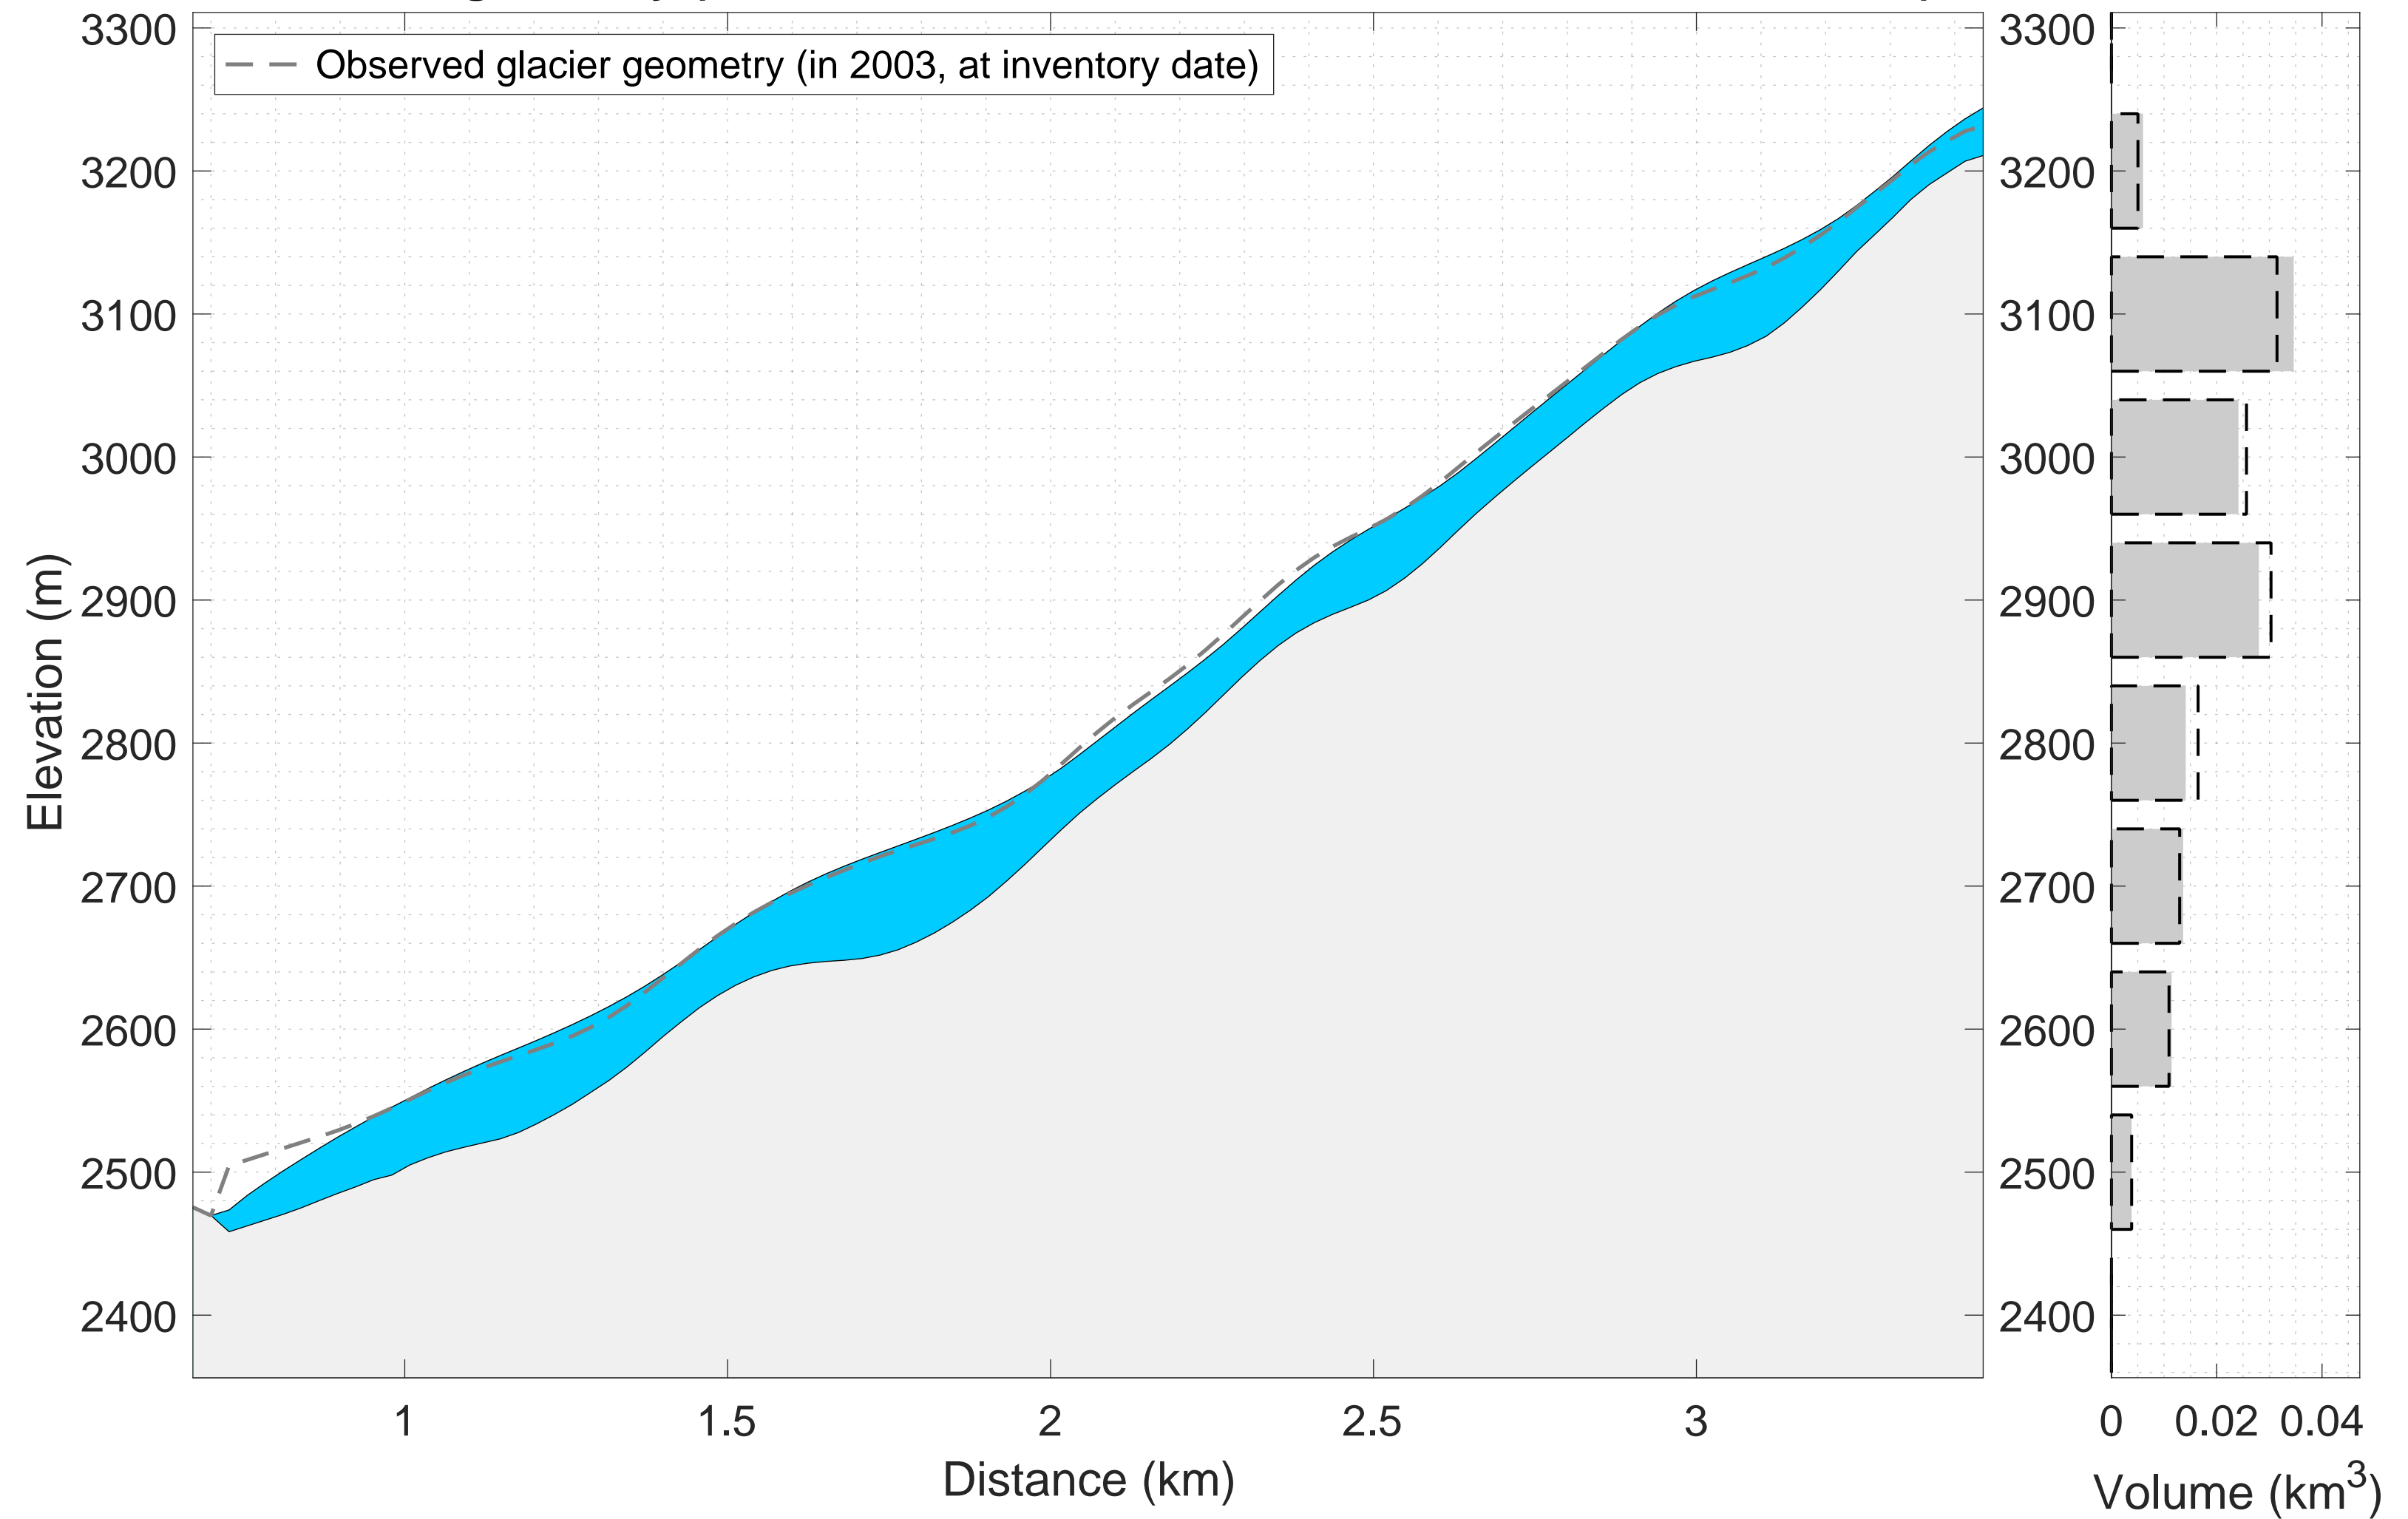

Supplement: Supplementary file 30 [file tc-13-1125-2019-supplement.zip]

**Modelled geometry (Glacier ID = 03393;  $A = 4.6655\text{e-}16 \text{ Pa}^{-3} \text{ a}^{-1}$ ;  $dx = 11 \text{ m}$ )**

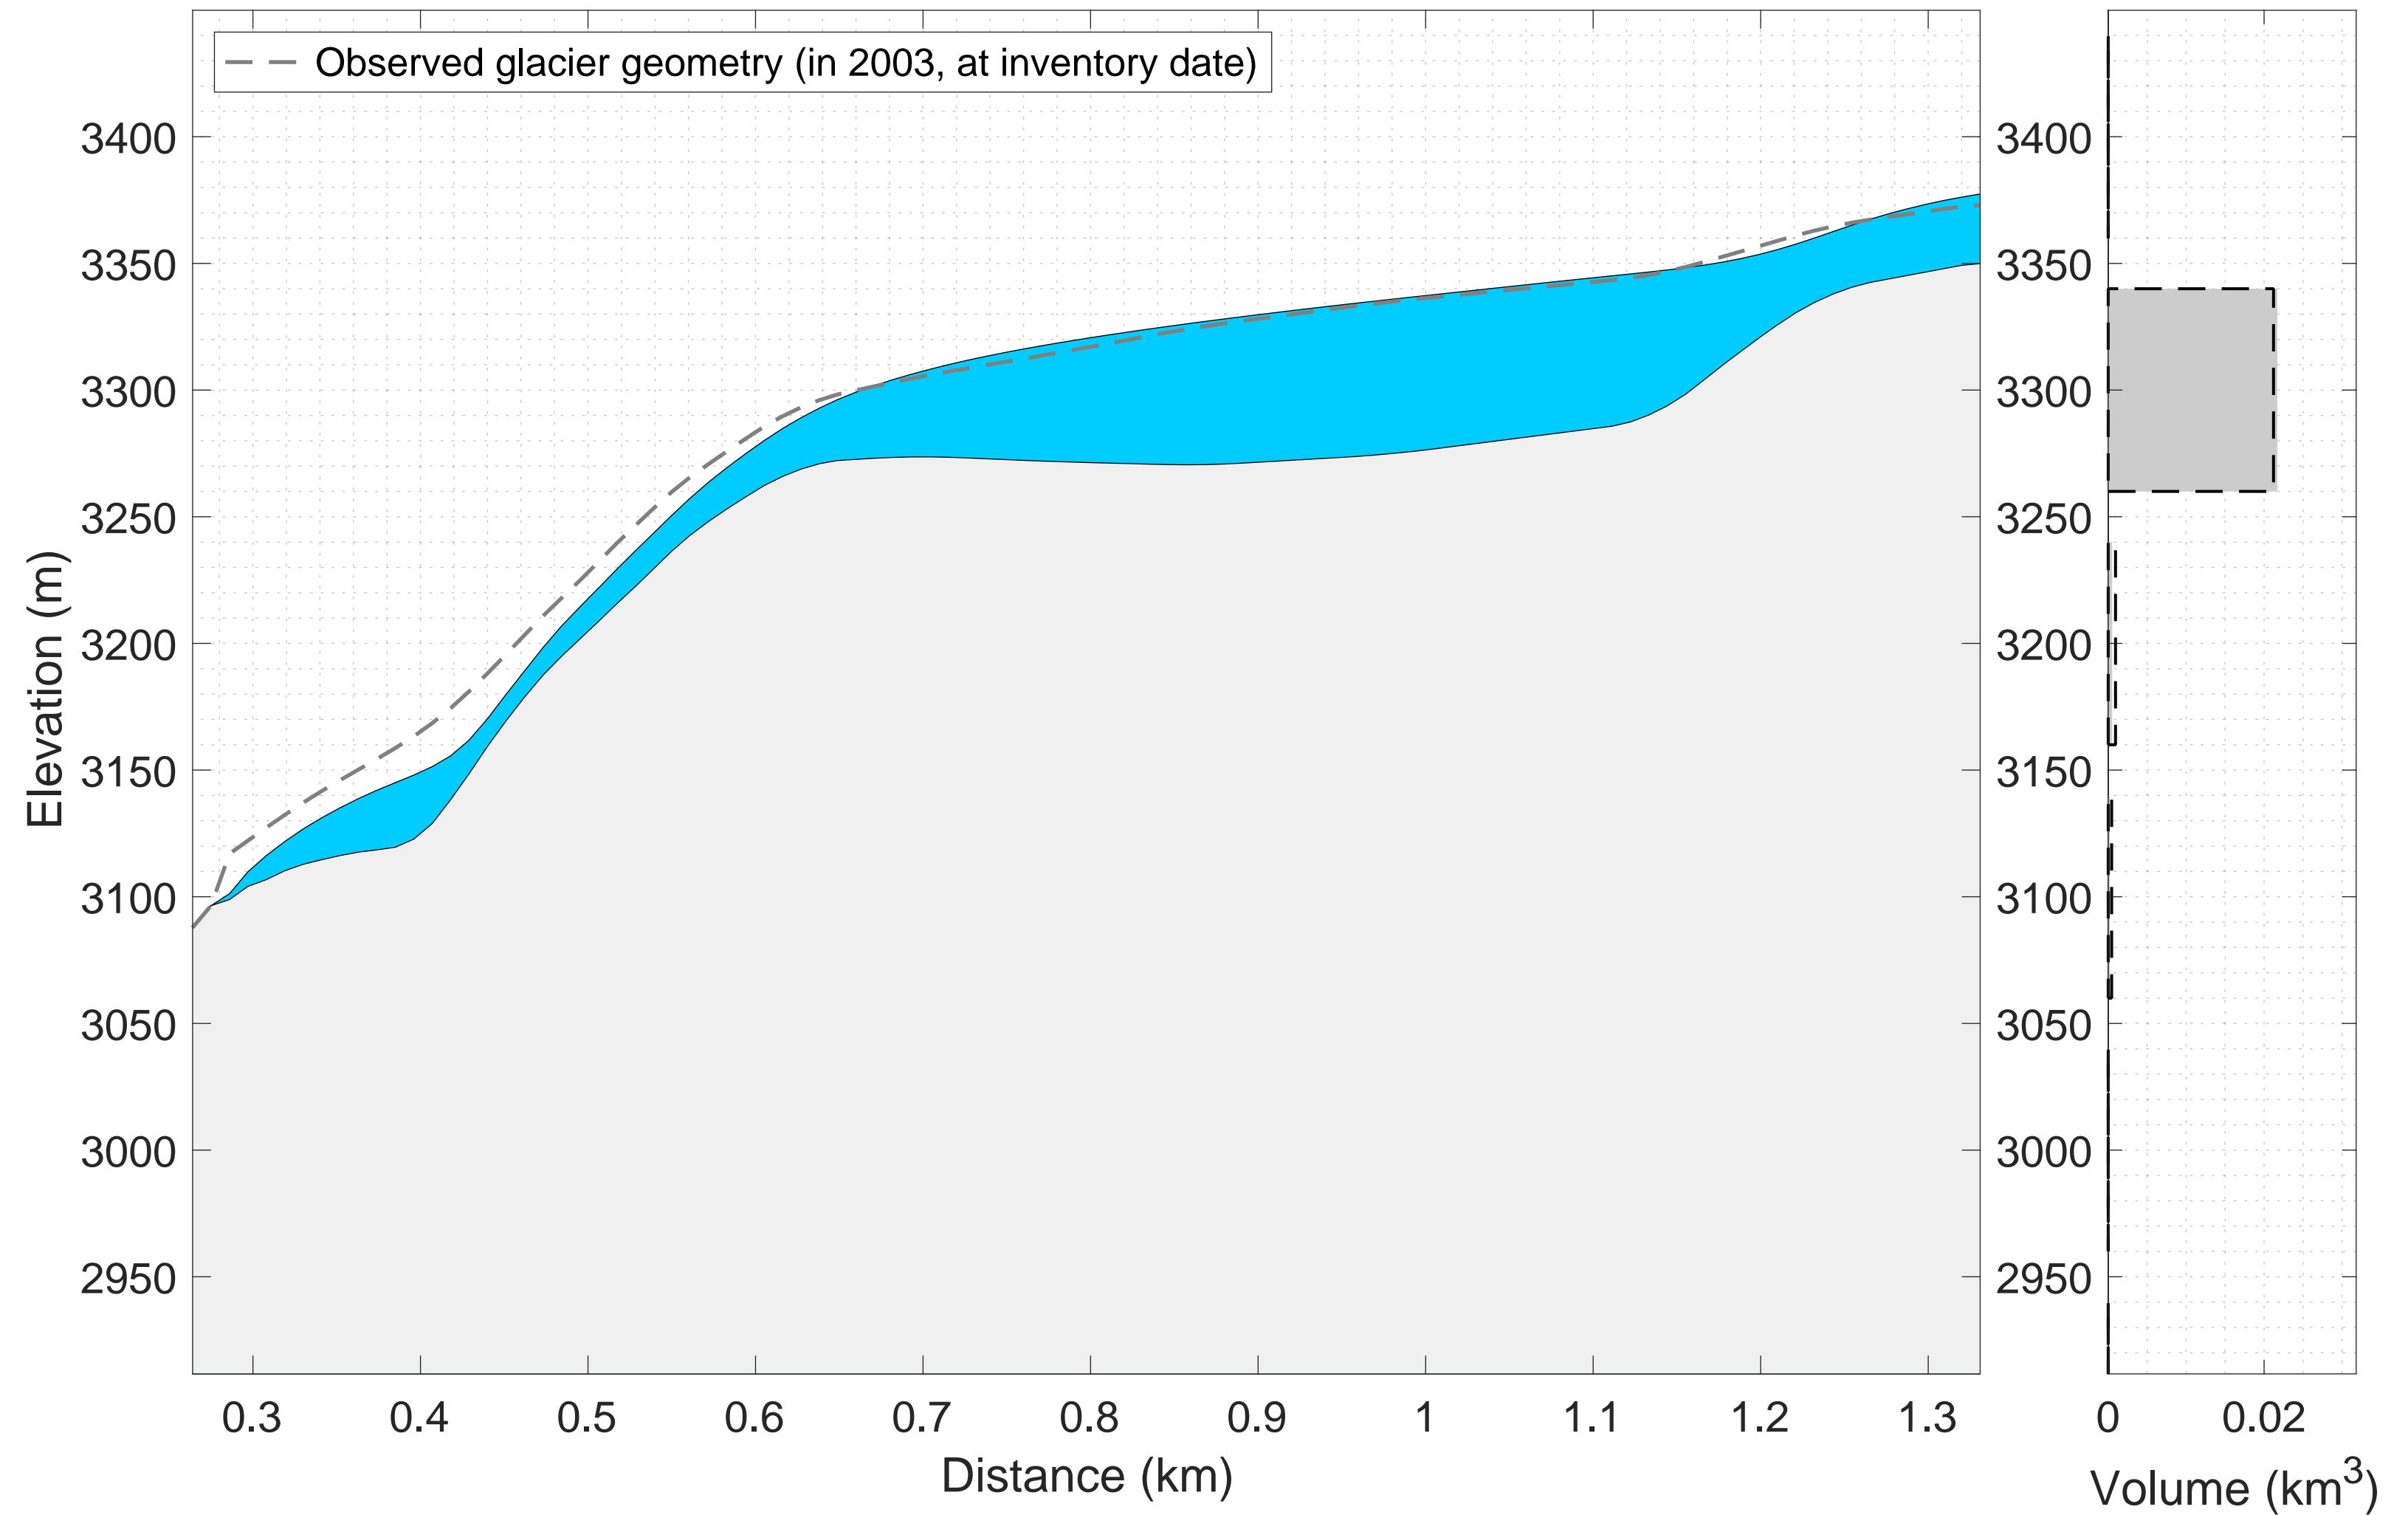

Supplement: Supplementary file 31 [file tc-13-1125-2019-supplement.zip]

**Modelled geometry (Glacier ID = 03674;  $A = 2.5232\text{e-}16 \text{ Pa}^{-3} \text{ a}^{-1}$ ;  $dx = 27 \text{ m}$ )**

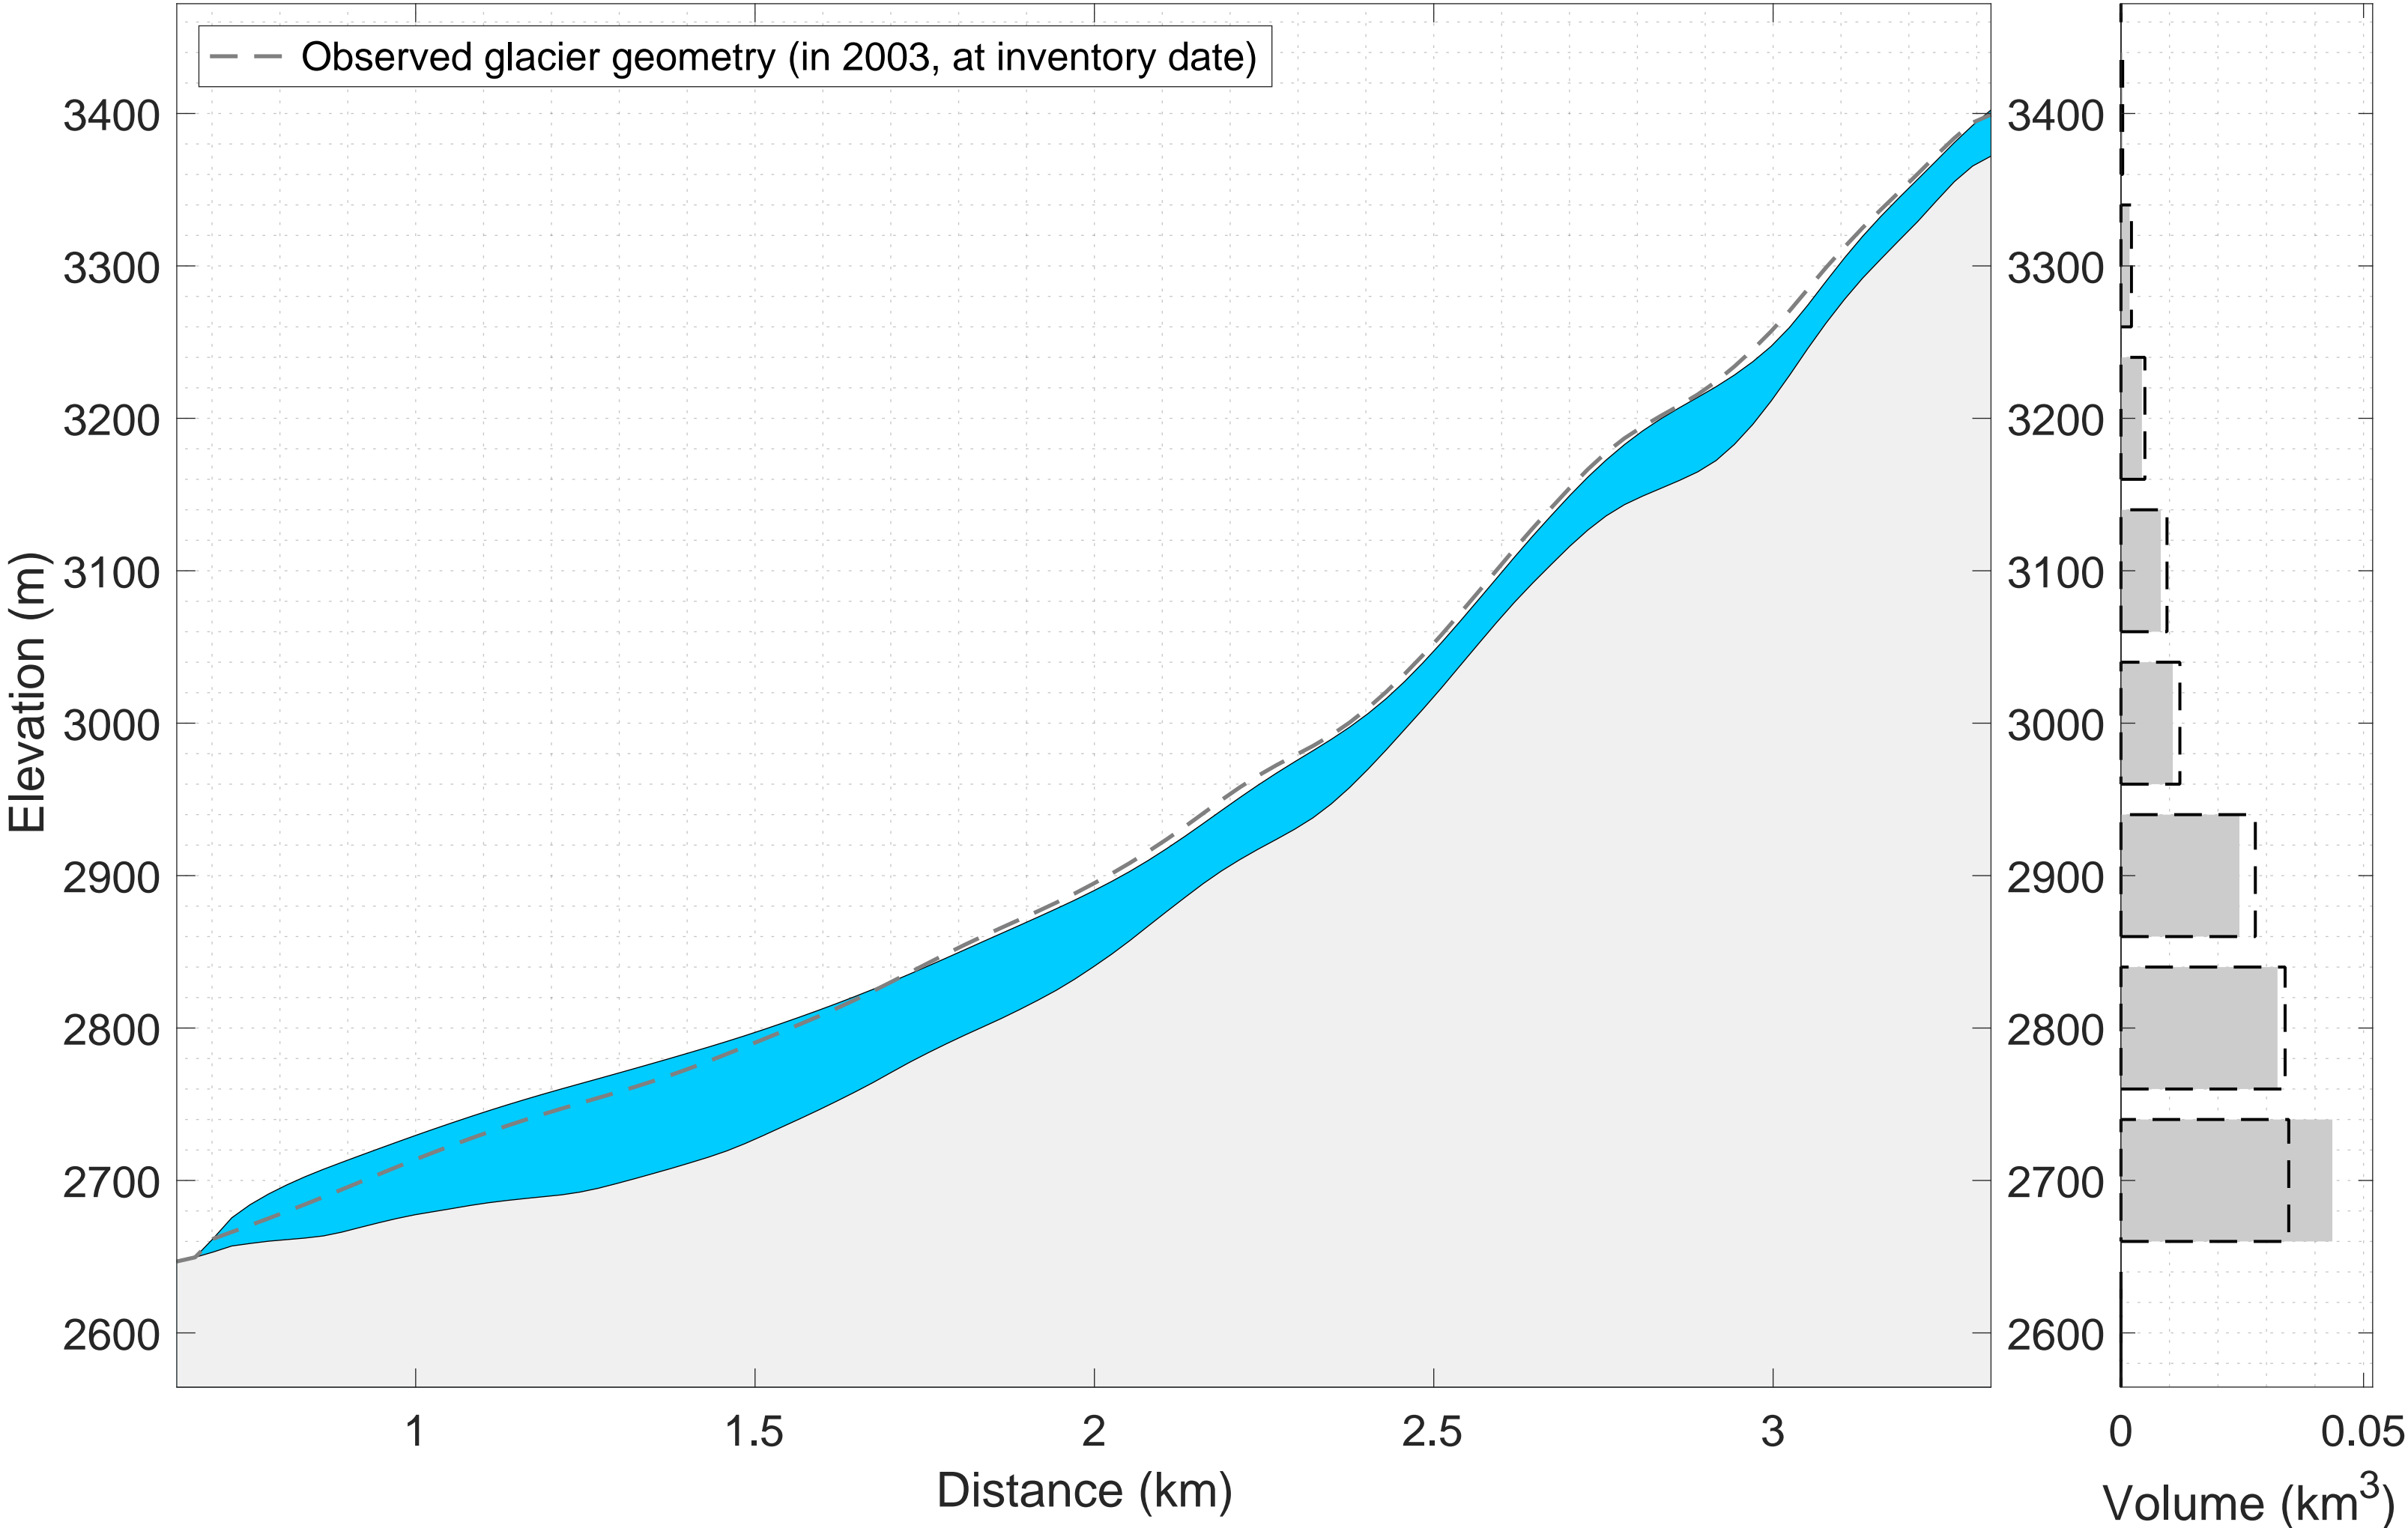

Supplement: Supplementary file 32 [file tc-13-1125-2019-supplement.zip]

**Modelled geometry (Glacier ID = 00739;  $A = 4.2858\text{e-}17 \text{ Pa}^{-3} \text{ a}^{-1}$ ;  $dx = 14 \text{ m}$ )**

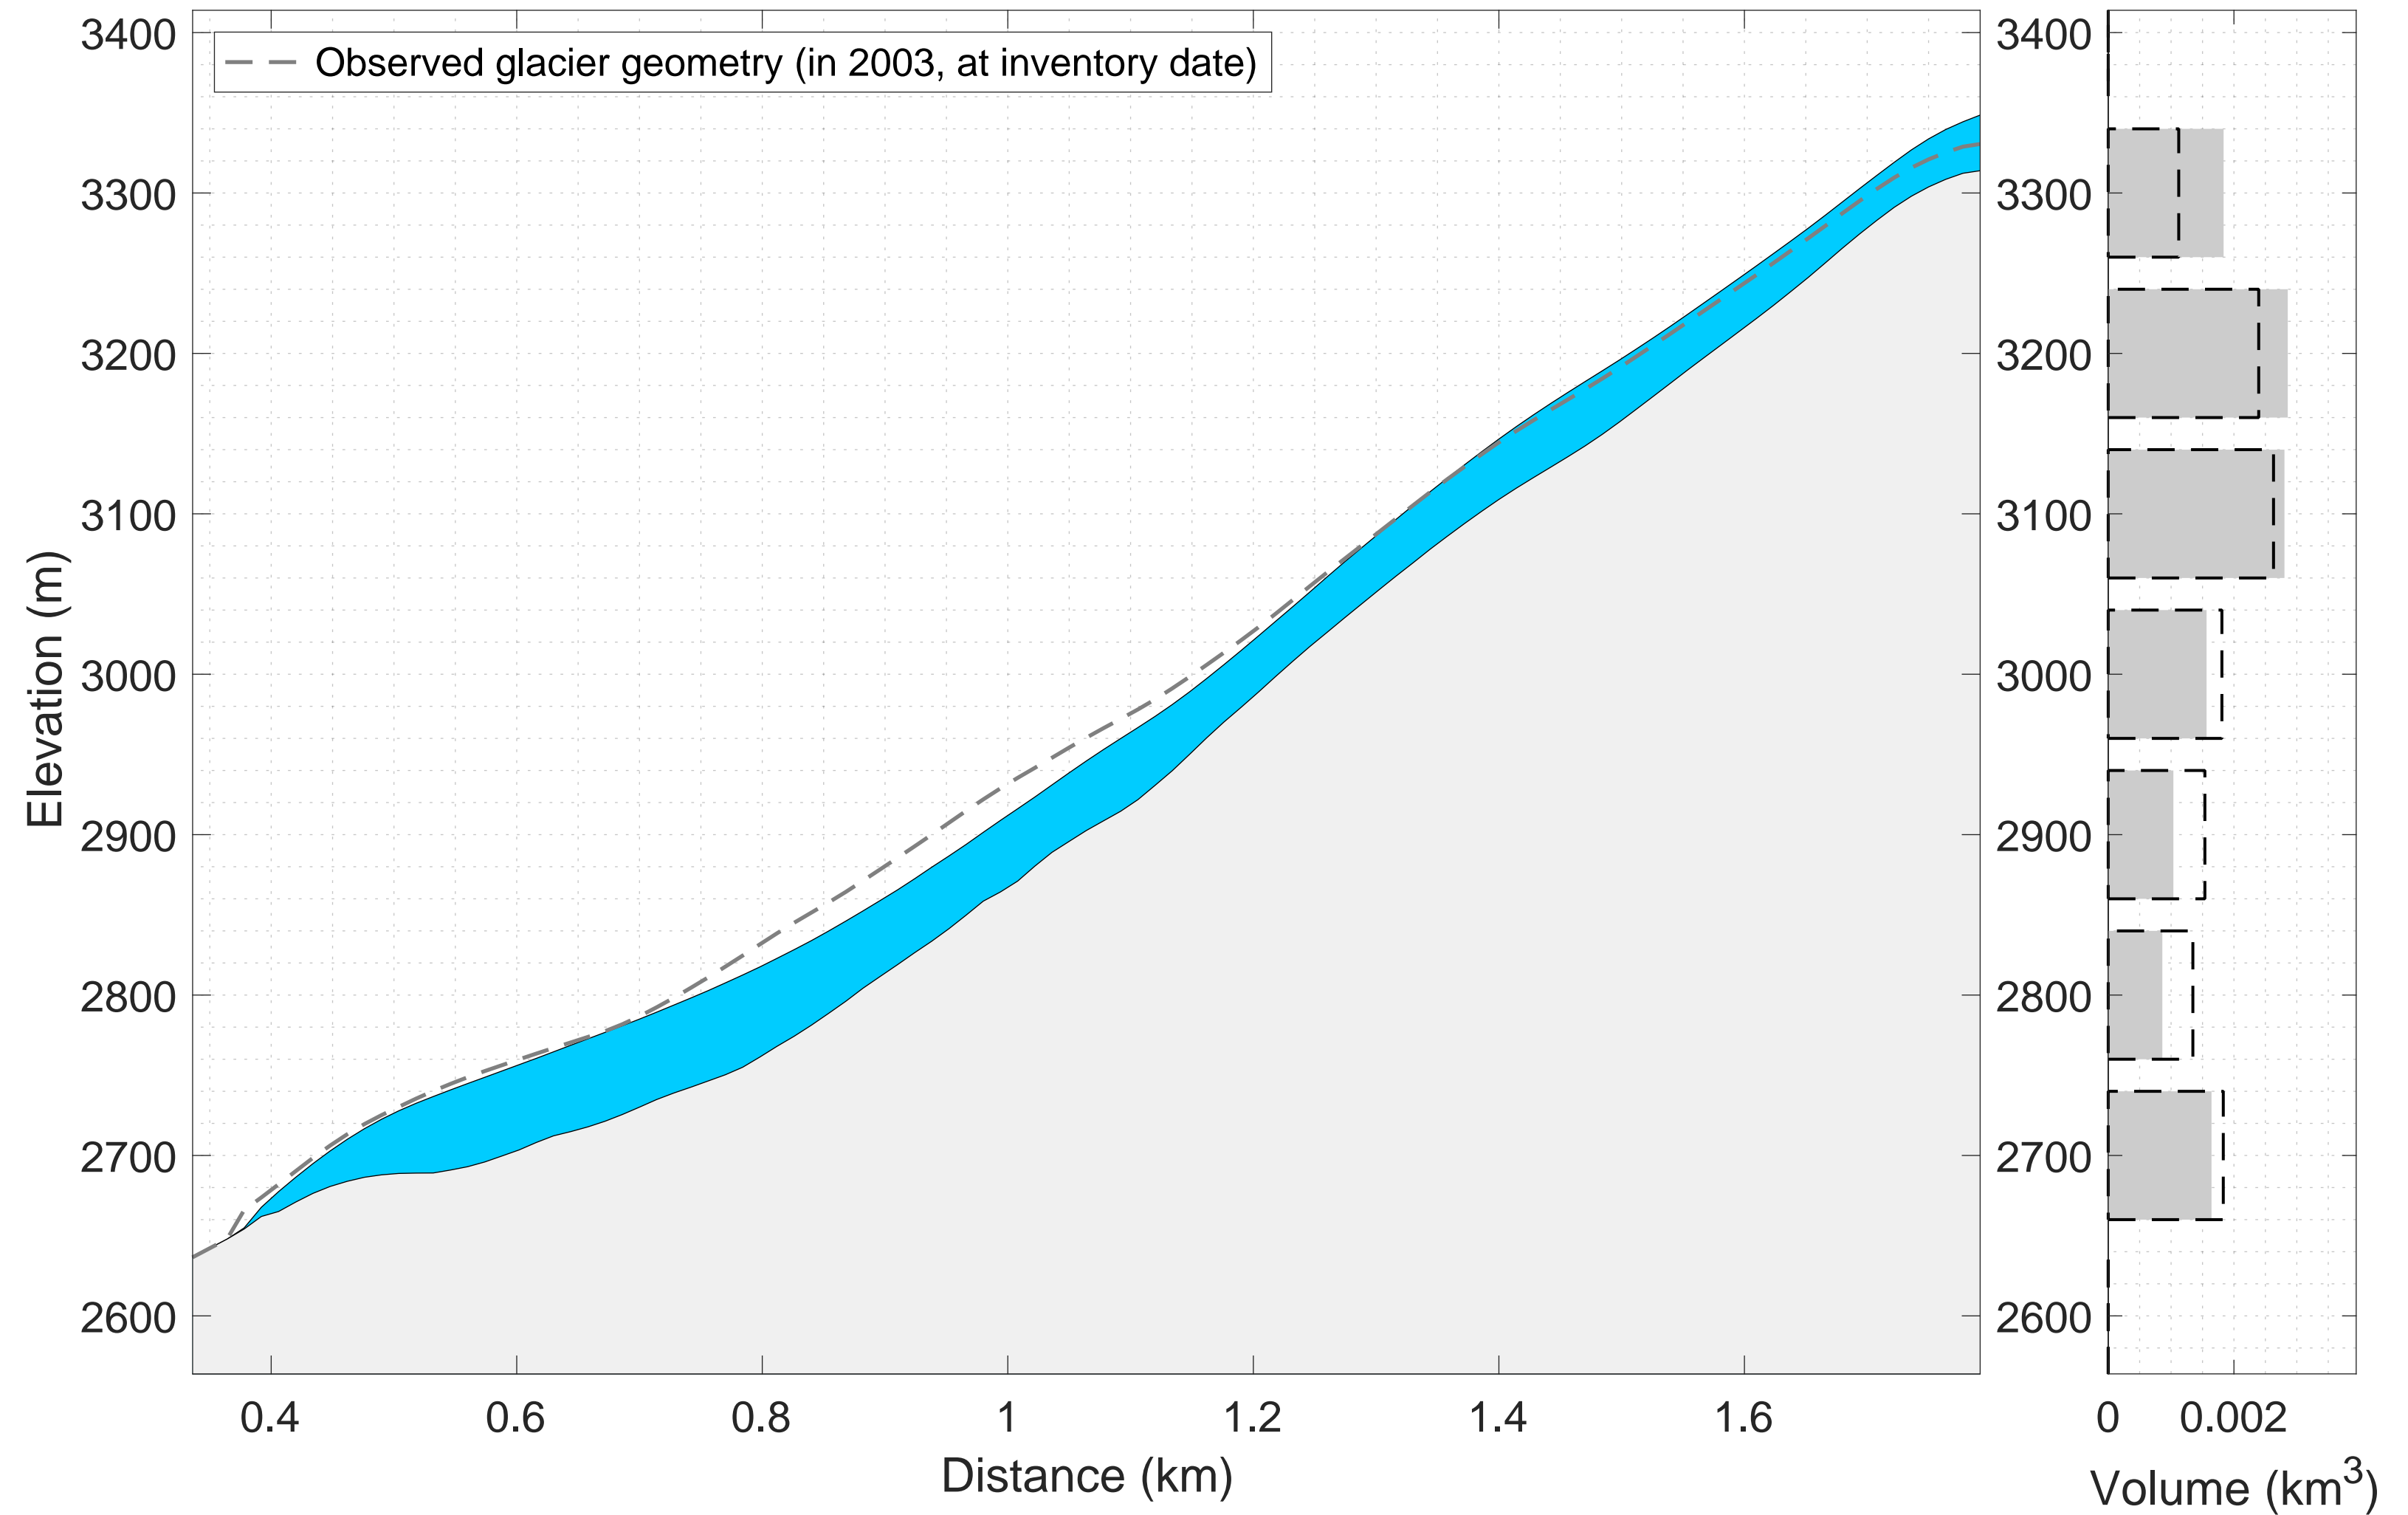

Supplement: Supplementary file 33 [file tc-13-1125-2019-supplement.zip]

**Modelled geometry (Glacier ID = 00459;  $A = 9.248\text{e-}17 \text{ Pa}^{-3} \text{ a}^{-1}$ ;  $dx = 26 \text{ m}$ )**

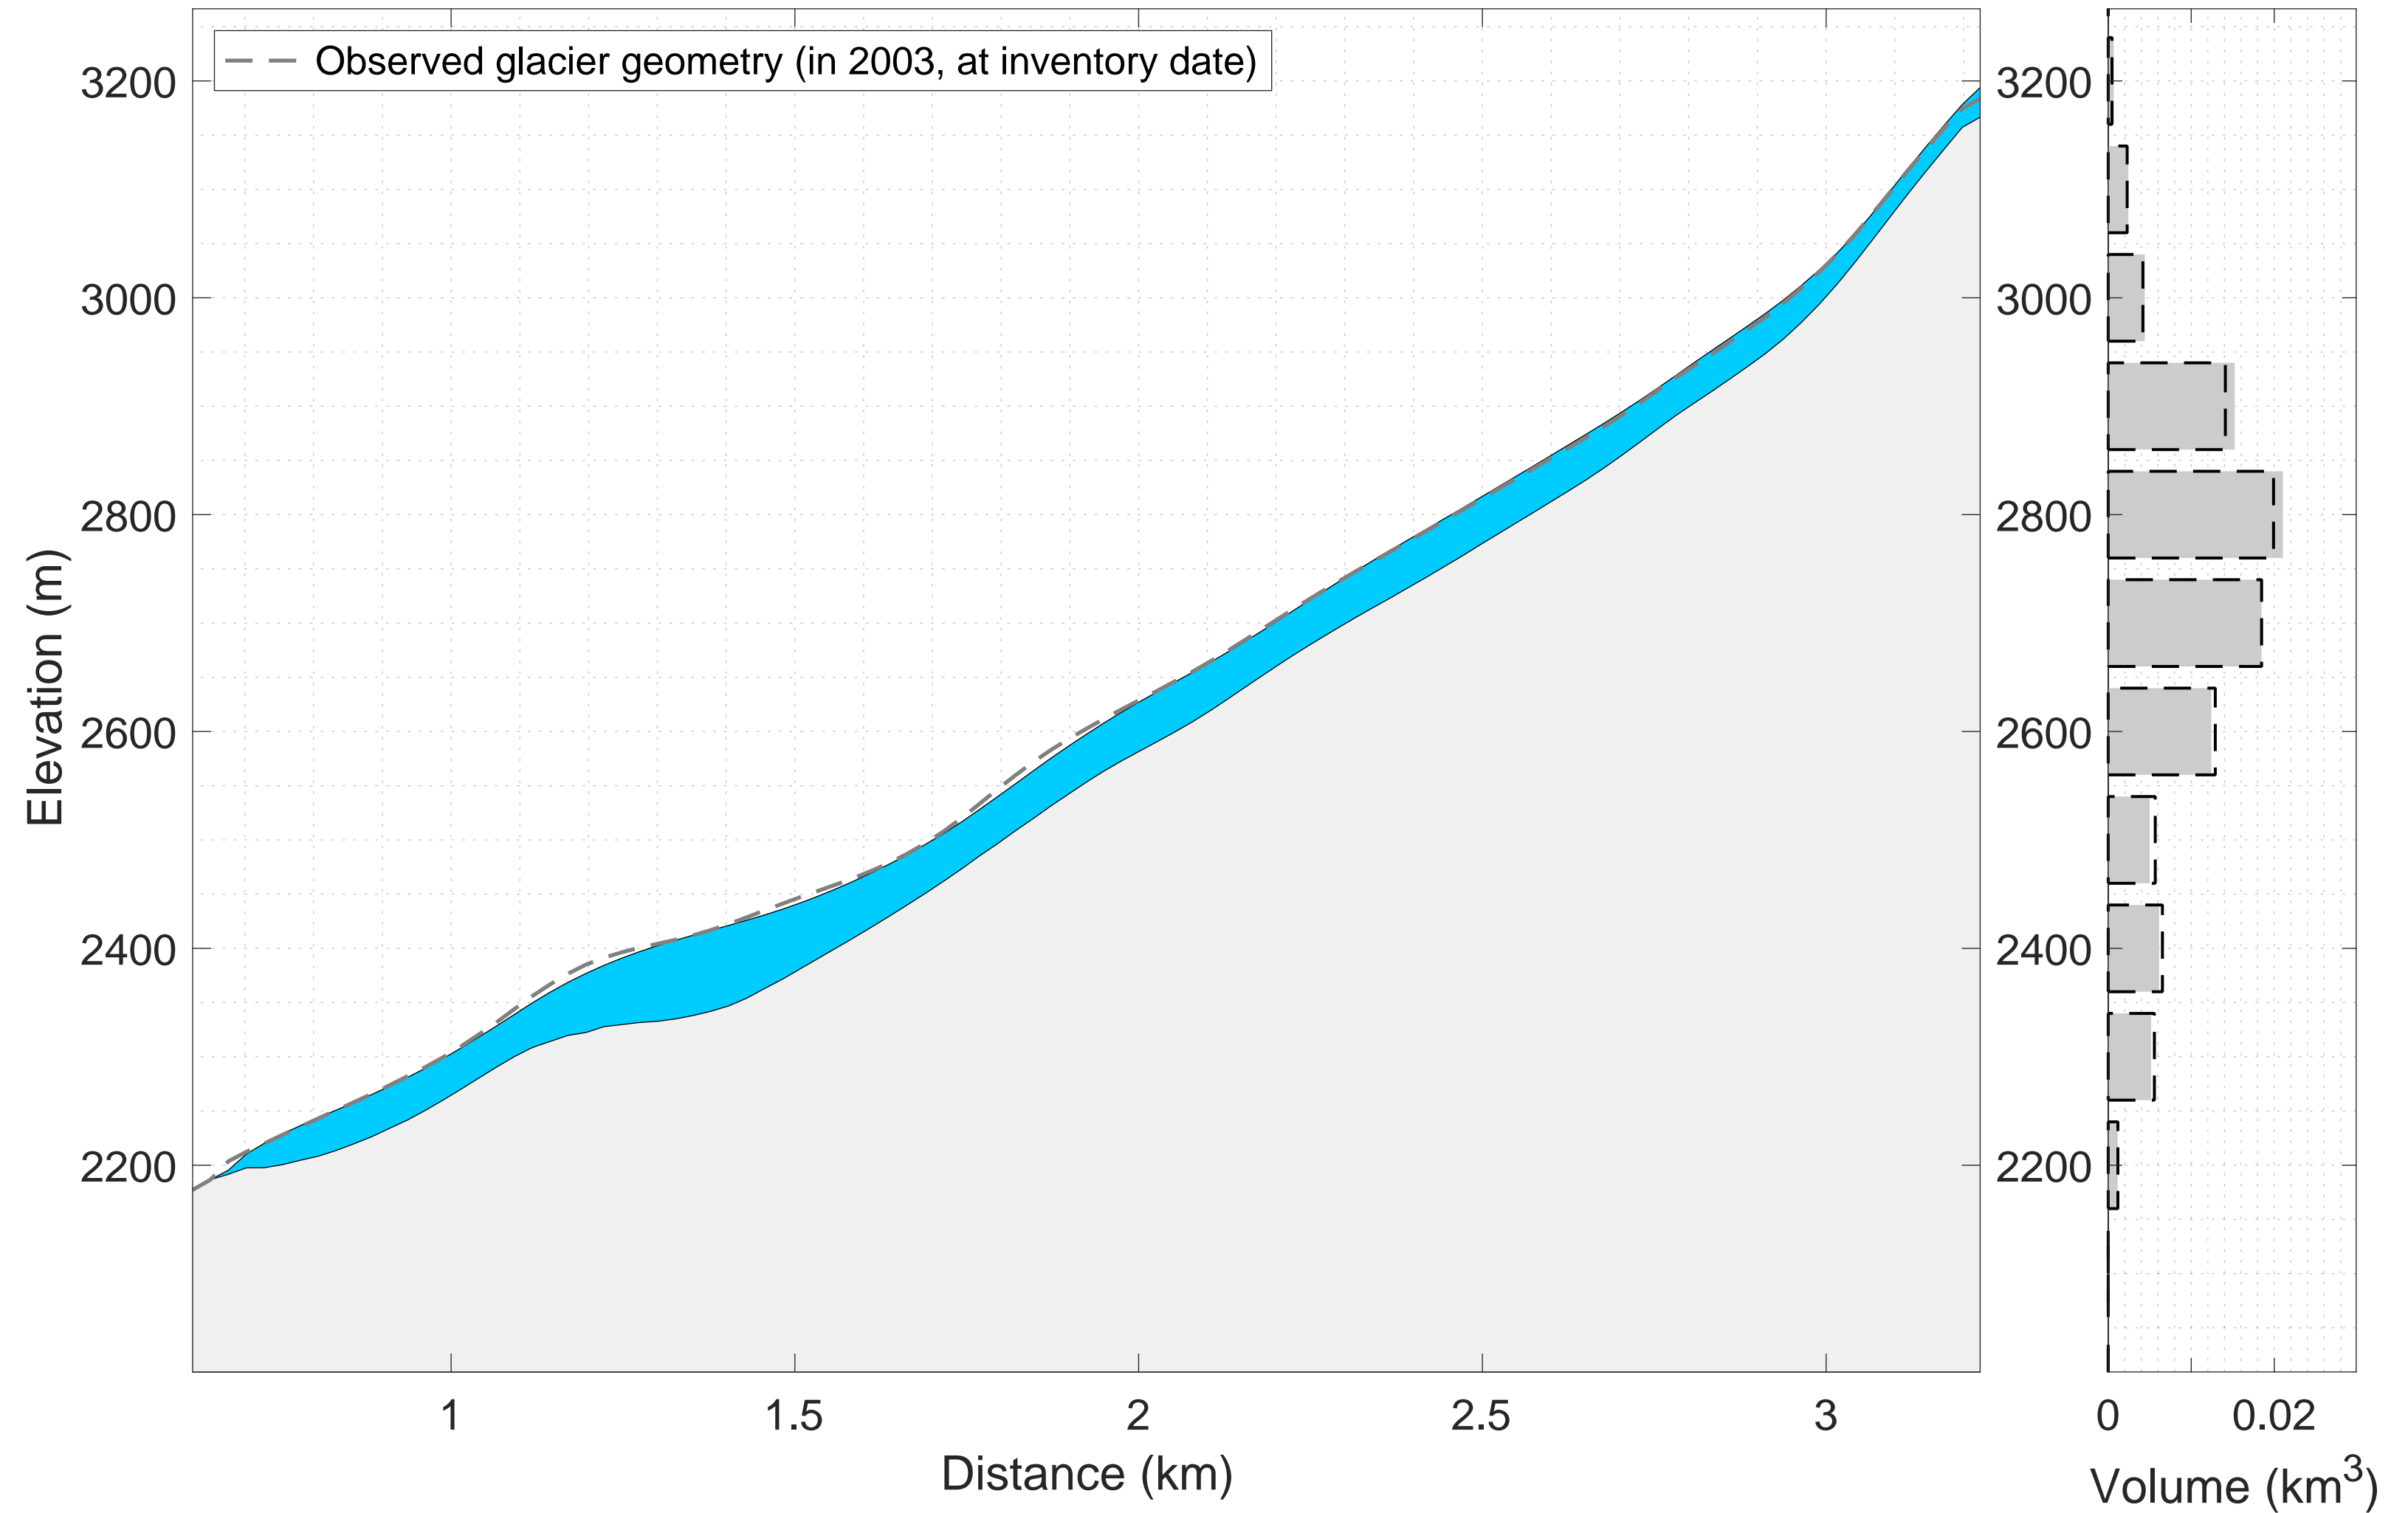

Supplement: Supplementary file 34 [file tc-13-1125-2019-supplement.zip]

**Modelled geometry (Glacier ID = 02496;  $A = 1.508\text{e-}16 \text{ Pa}^{-3} \text{ a}^{-1}$ ;  $dx = 25 \text{ m}$ )**

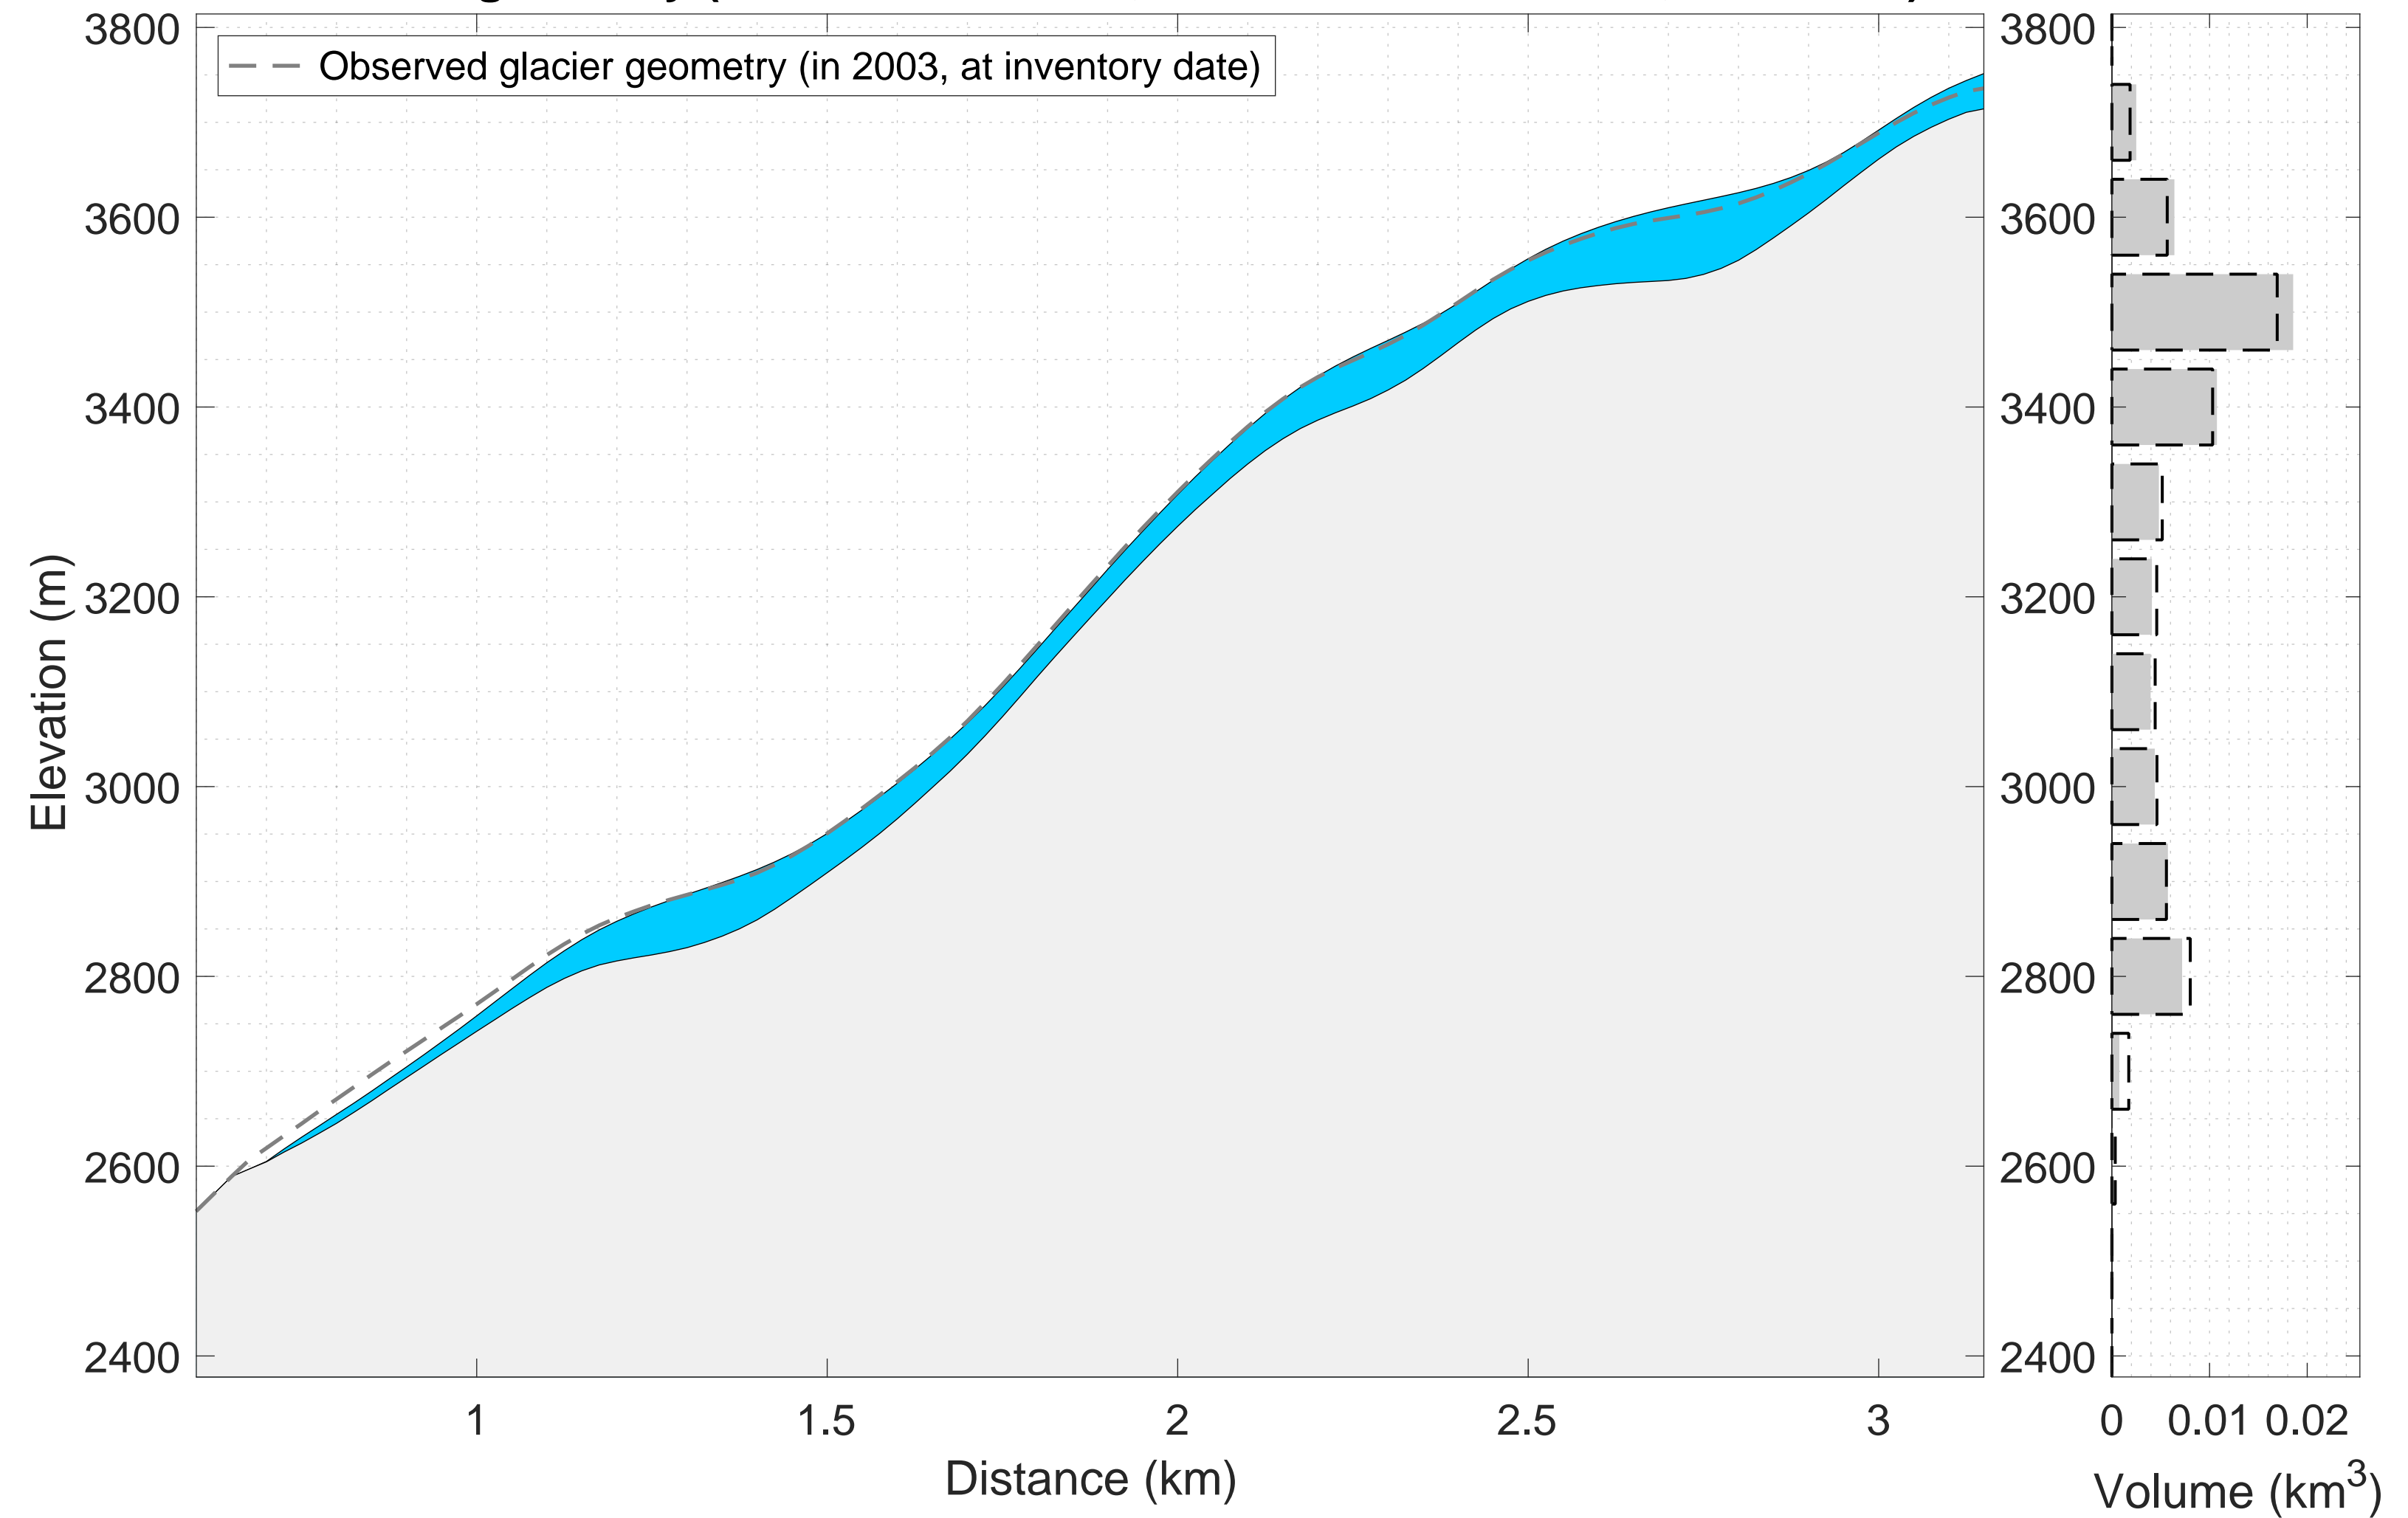

Supplement: Supplementary file 35 [file tc-13-1125-2019-supplement.zip]

**Modelled geometry (Glacier ID = 03118;  $A = 2.1732\text{e-}16 \text{ Pa}^{-3} \text{ a}^{-1}$ ;  $dx = 17 \text{ m}$ )**

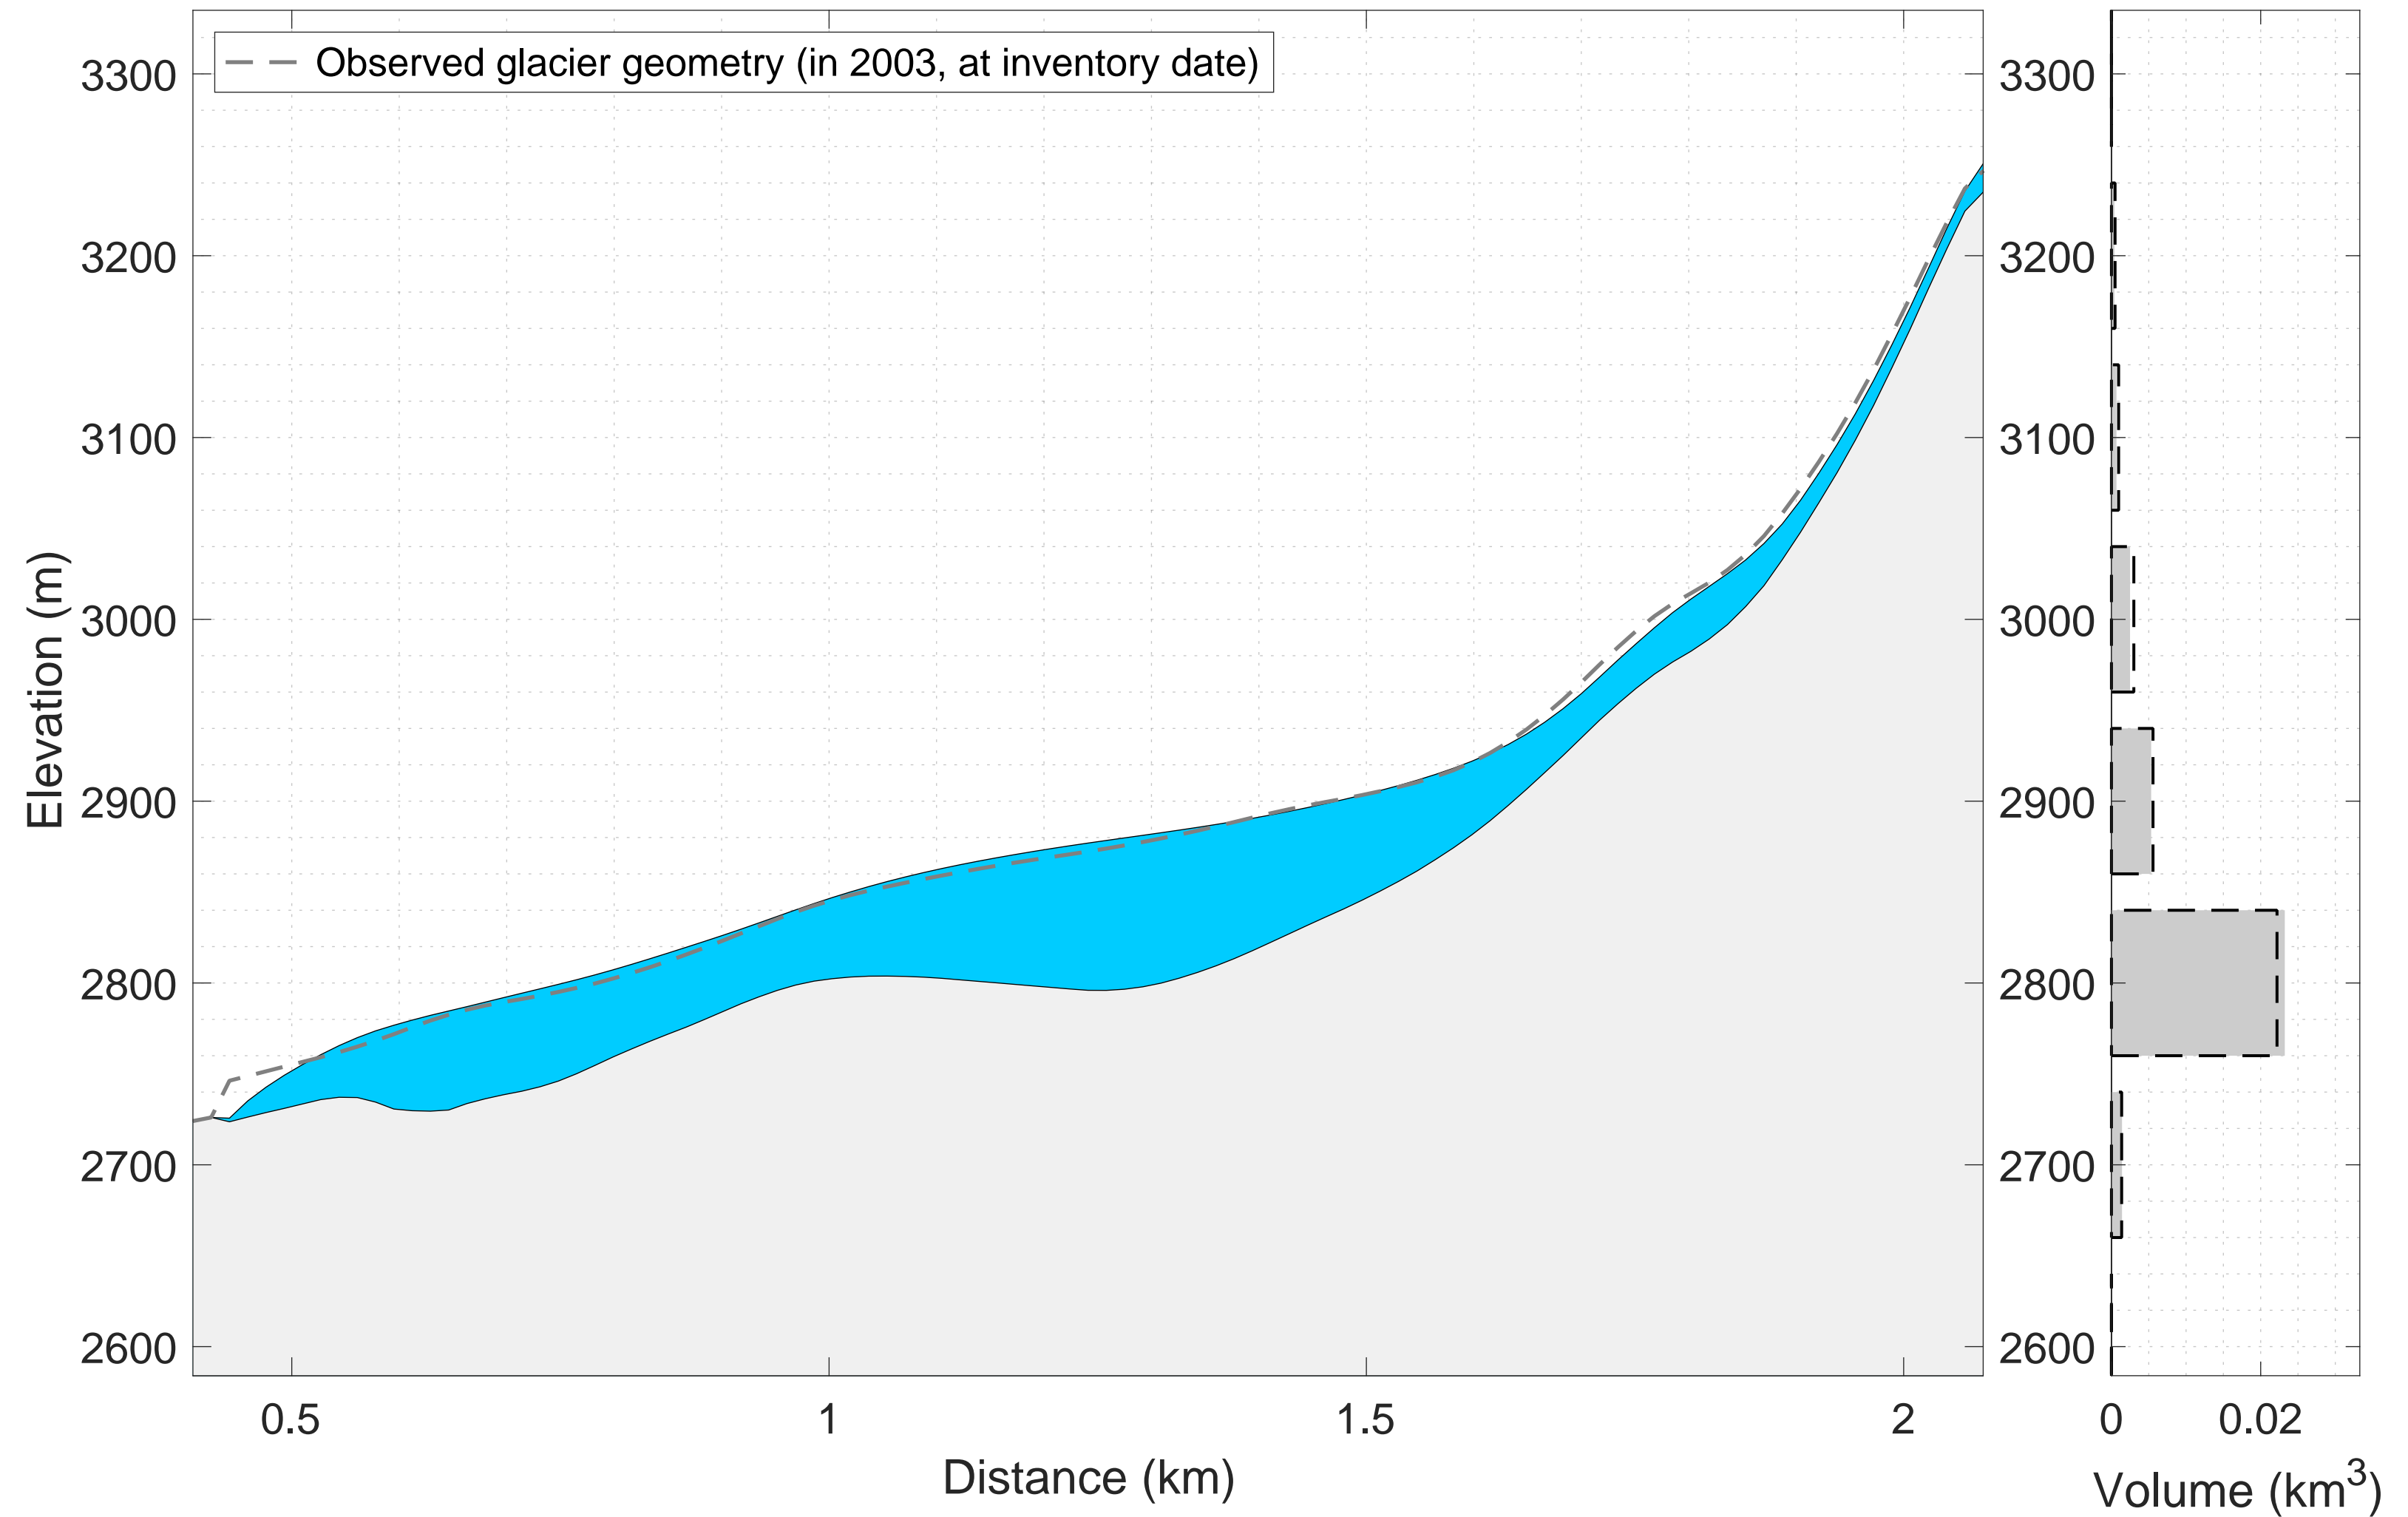

Supplement: Supplementary file 36 [file tc-13-1125-2019-supplement.zip]

**Modelled geometry (Glacier ID = 03022;  $A = 1.4087\text{e-}16 \text{ Pa}^{-3} \text{ a}^{-1}$ ;  $dx = 15 \text{ m}$ )**

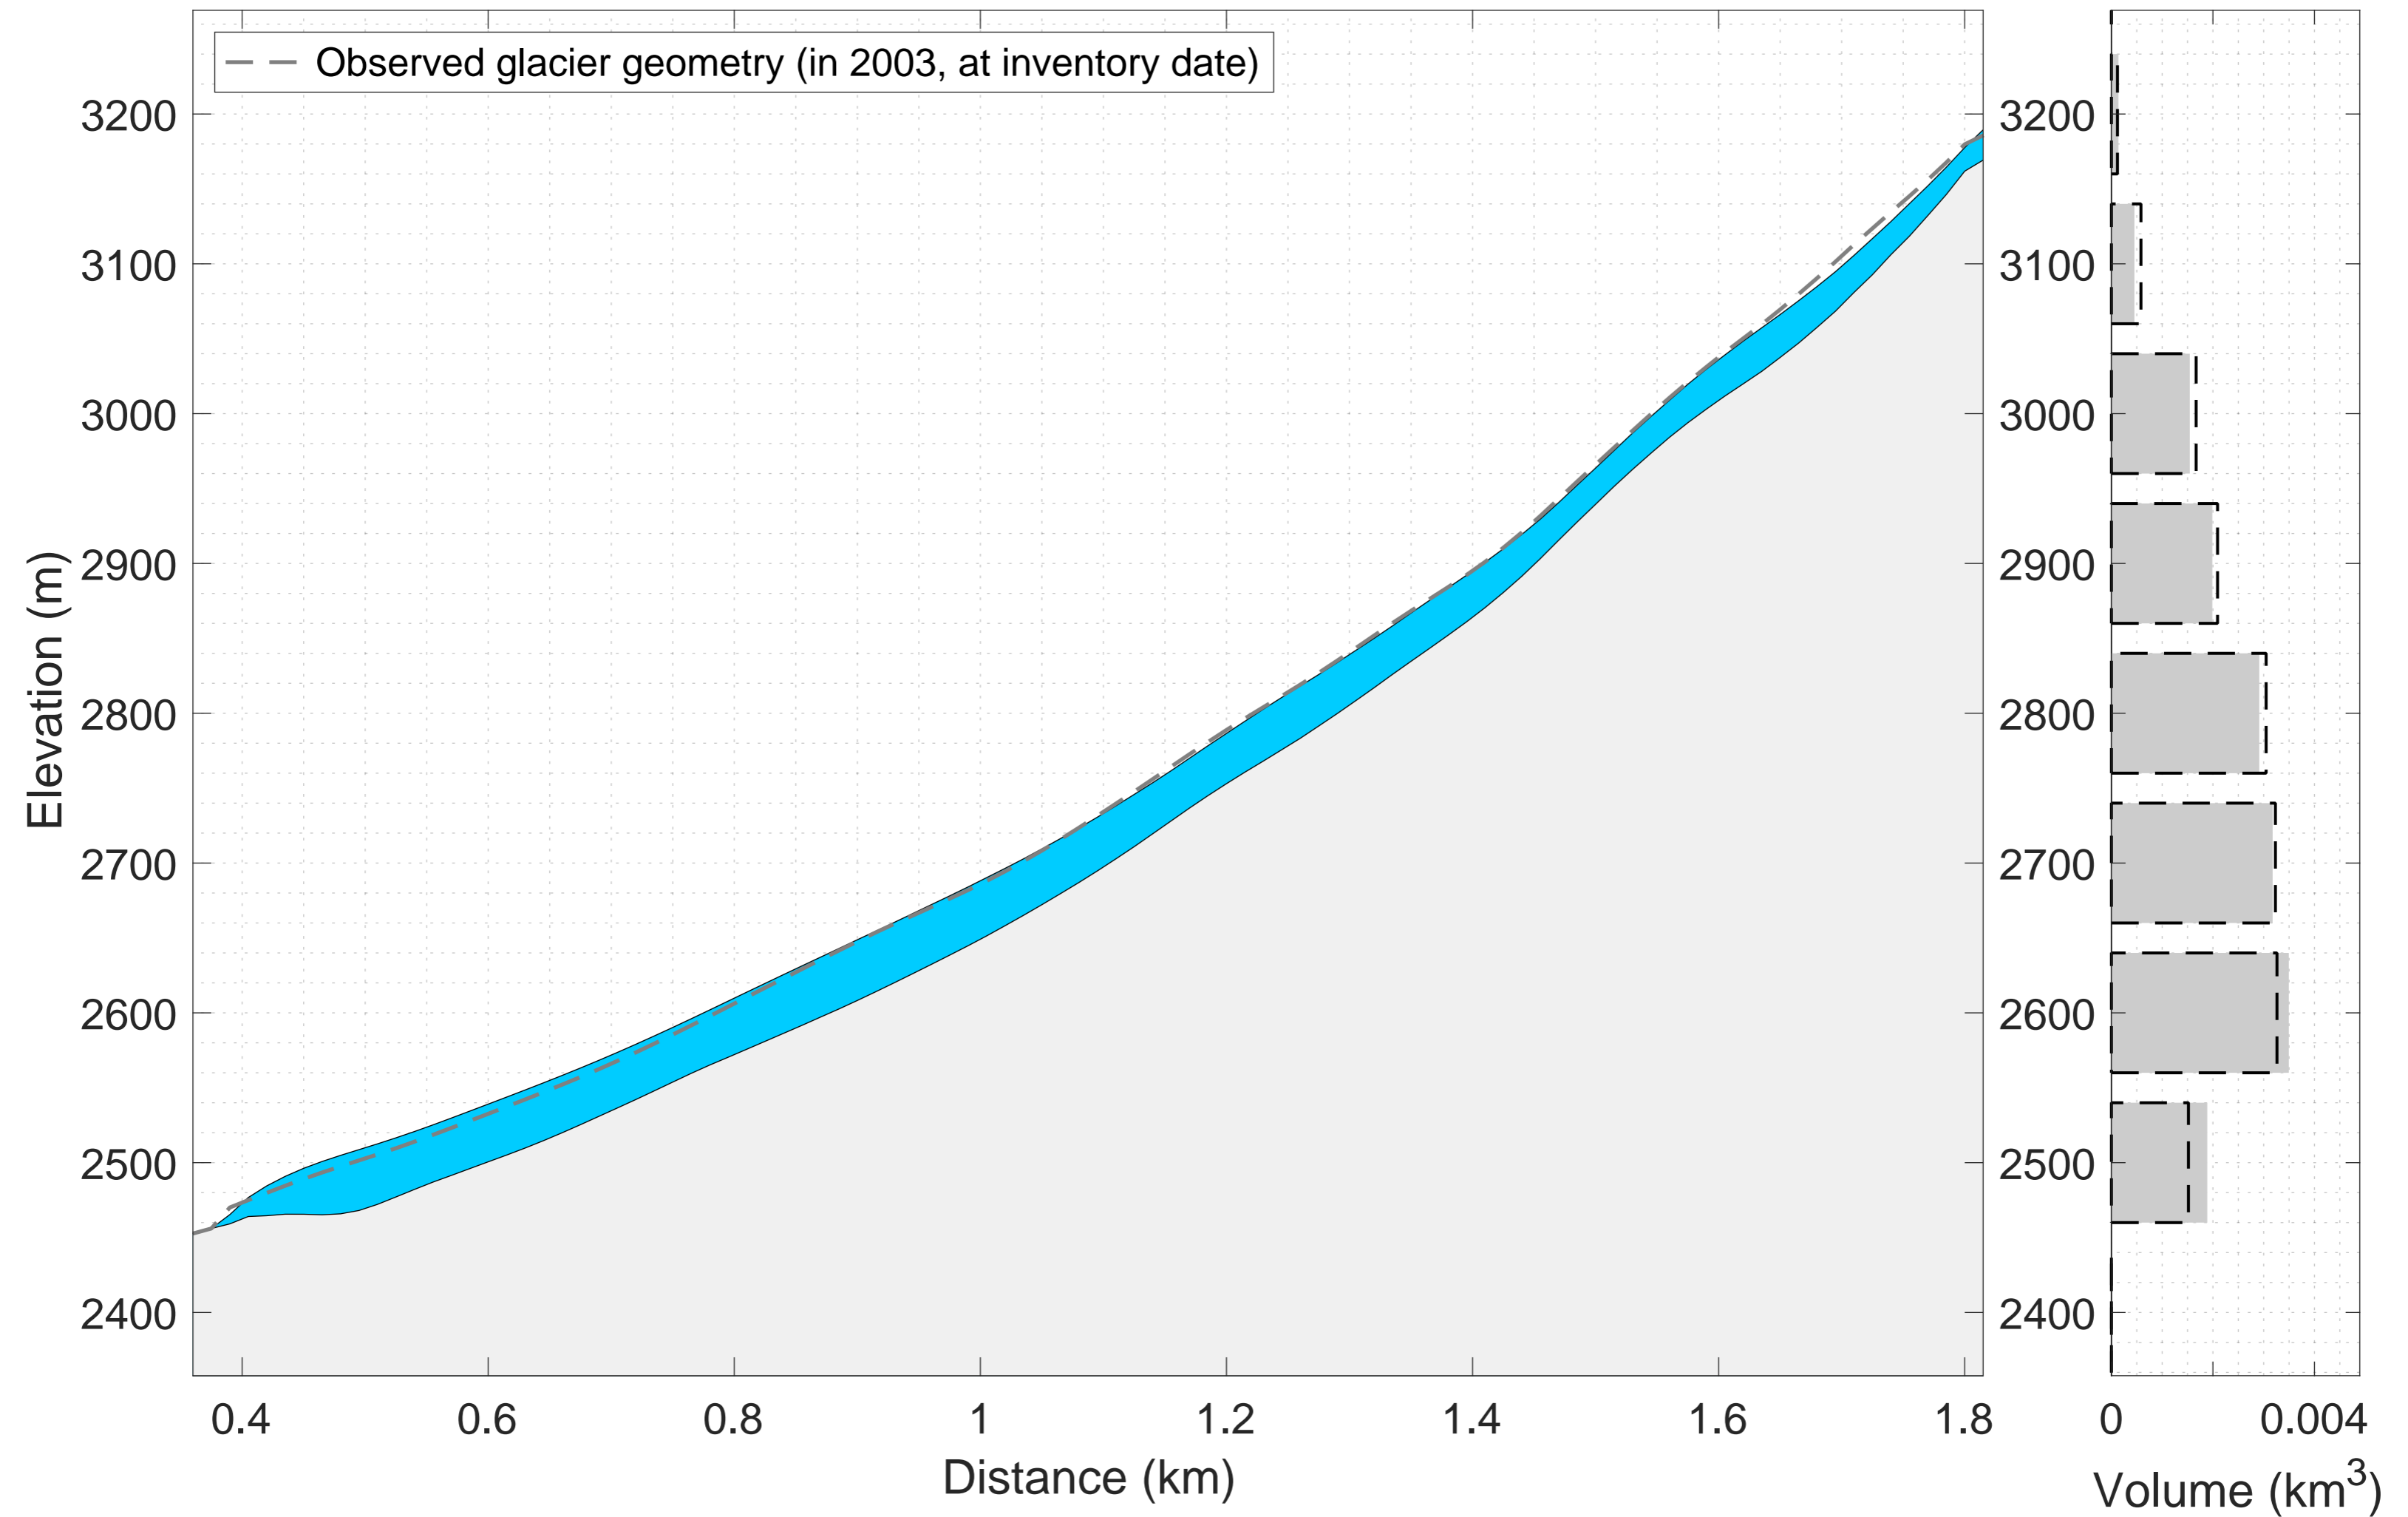

Supplement: Supplementary file 37 [file tc-13-1125-2019-supplement.zip]

**Modelled geometry (Glacier ID = 00514;  $A = 5.4268\text{e-}17 \text{ Pa}^{-3} \text{ a}^{-1}$ ;  $dx = 13 \text{ m}$ )**

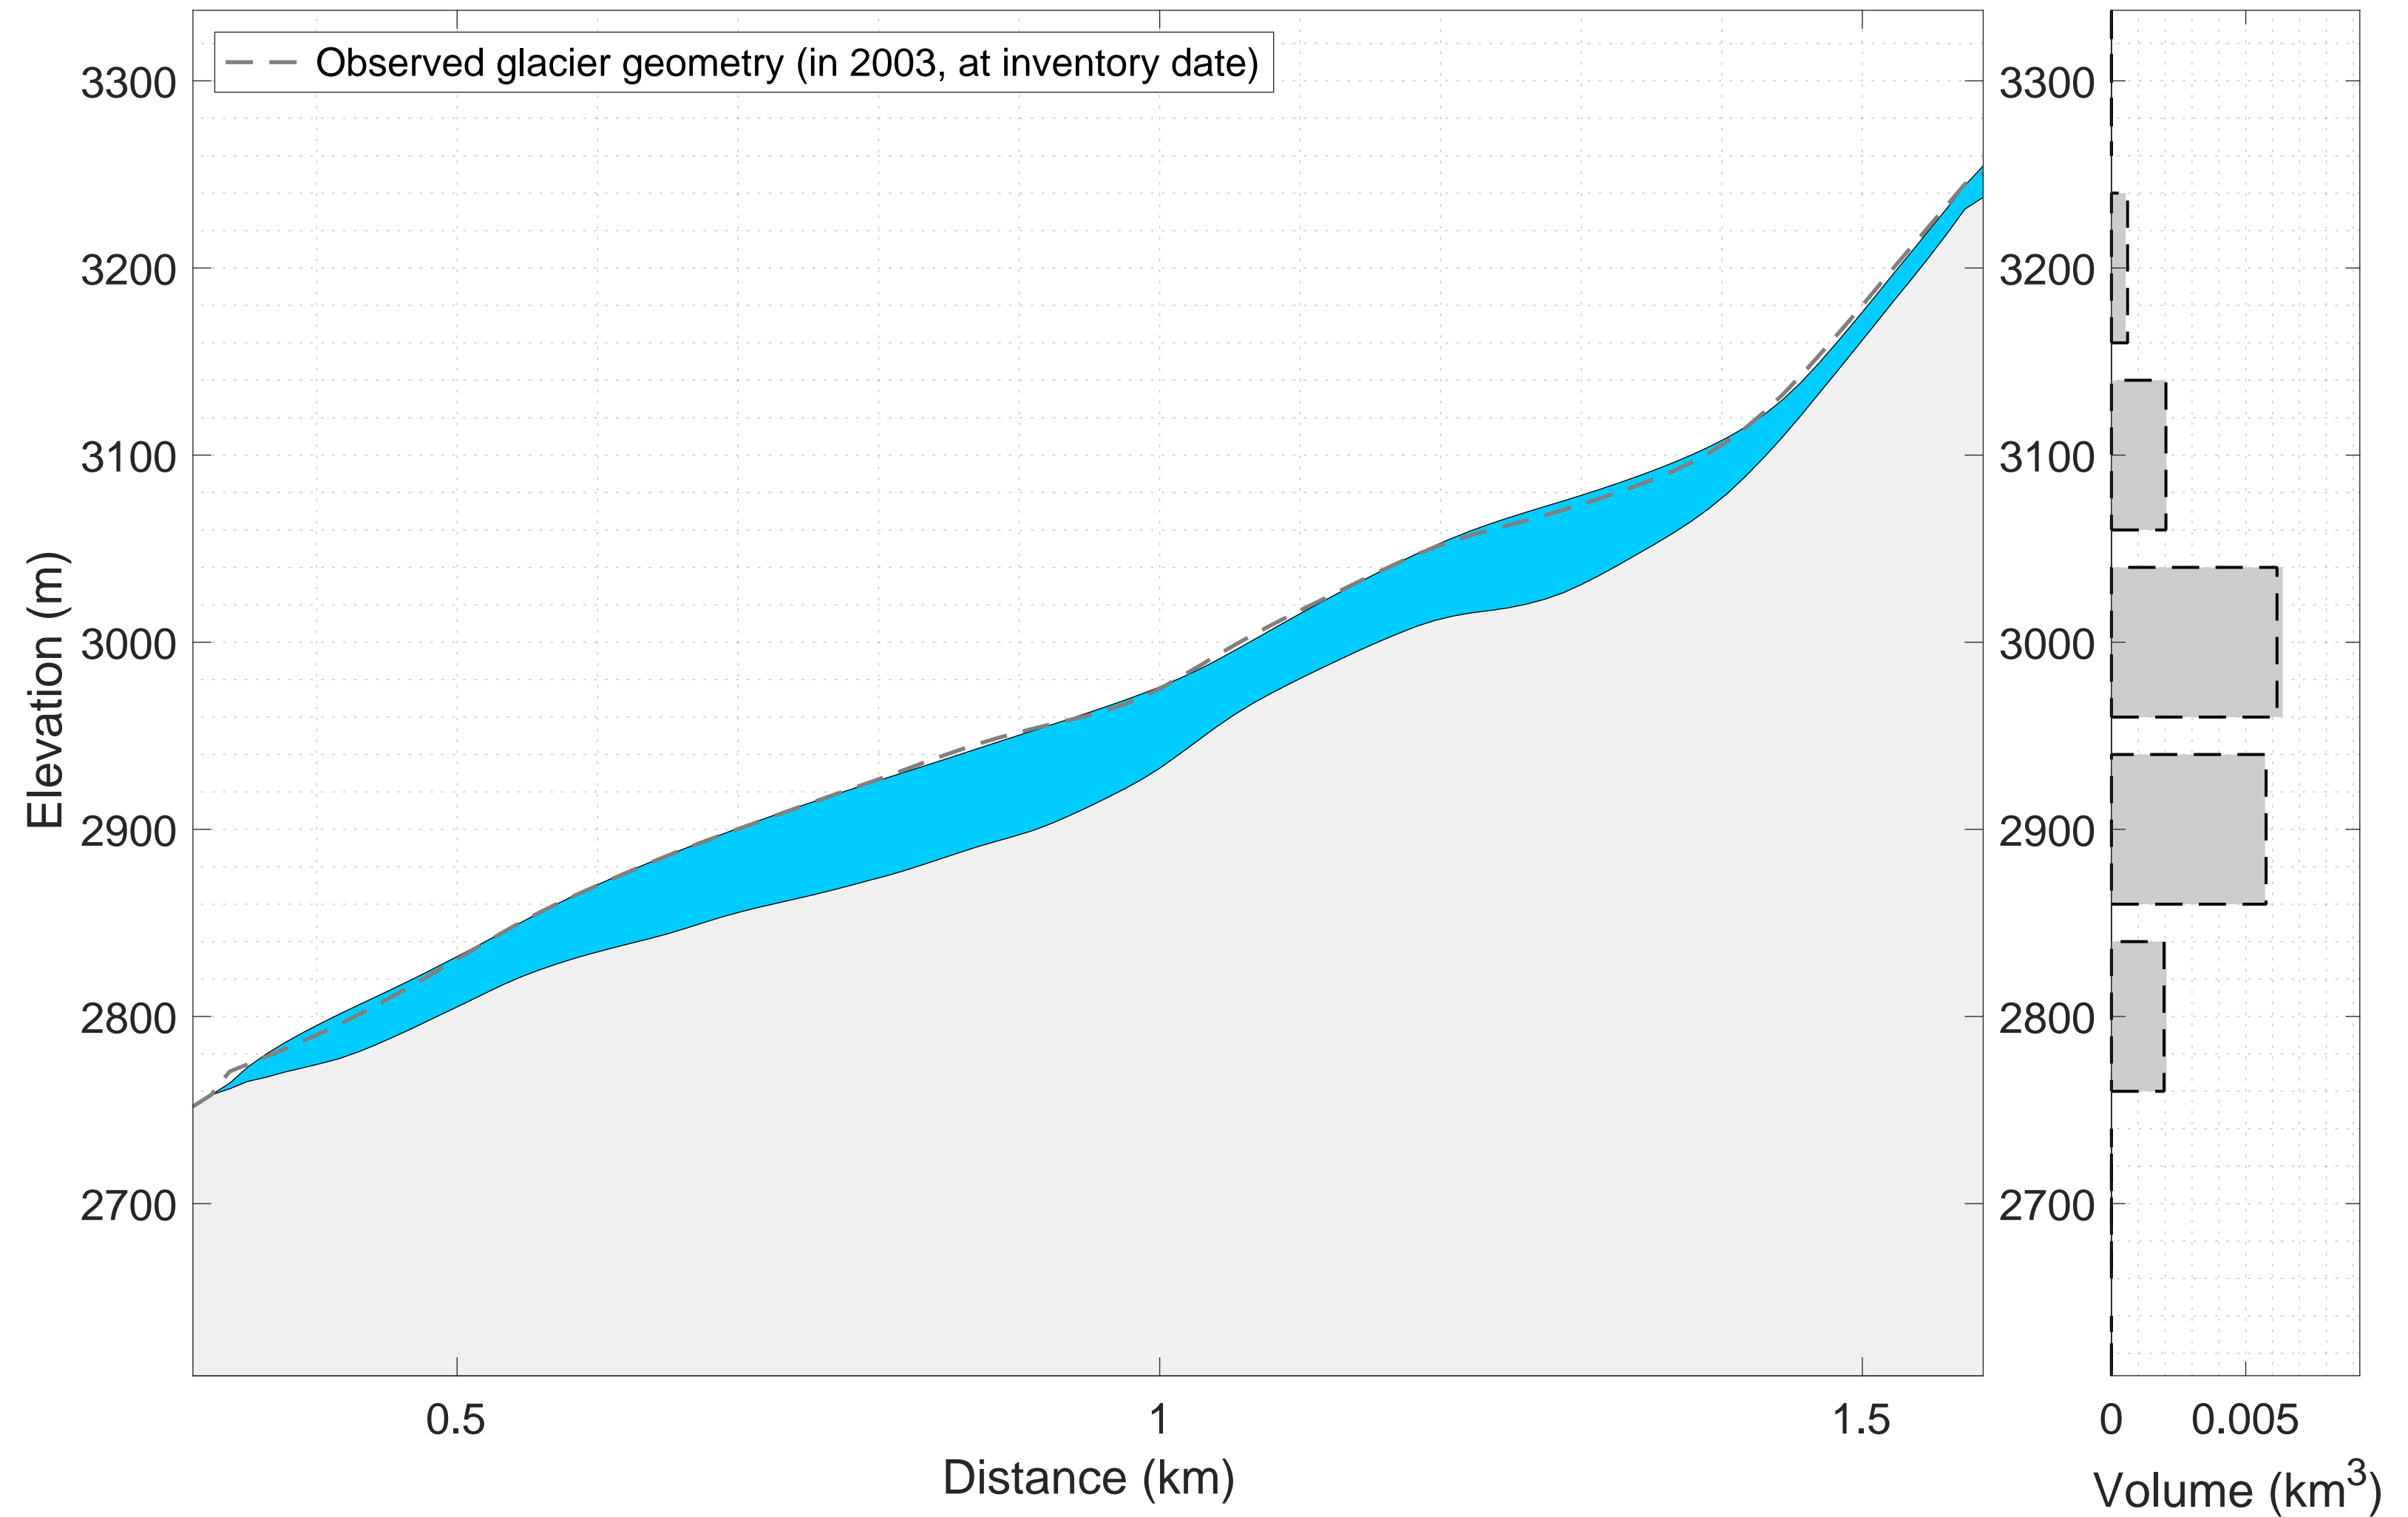

Supplement: Supplementary file 38 [file tc-13-1125-2019-supplement.zip]

**Modelled geometry (Glacier ID = 00197;  $A = 9.2577\text{e-}17 \text{ Pa}^{-3} \text{ a}^{-1}$ ;  $dx = 18 \text{ m}$ )**

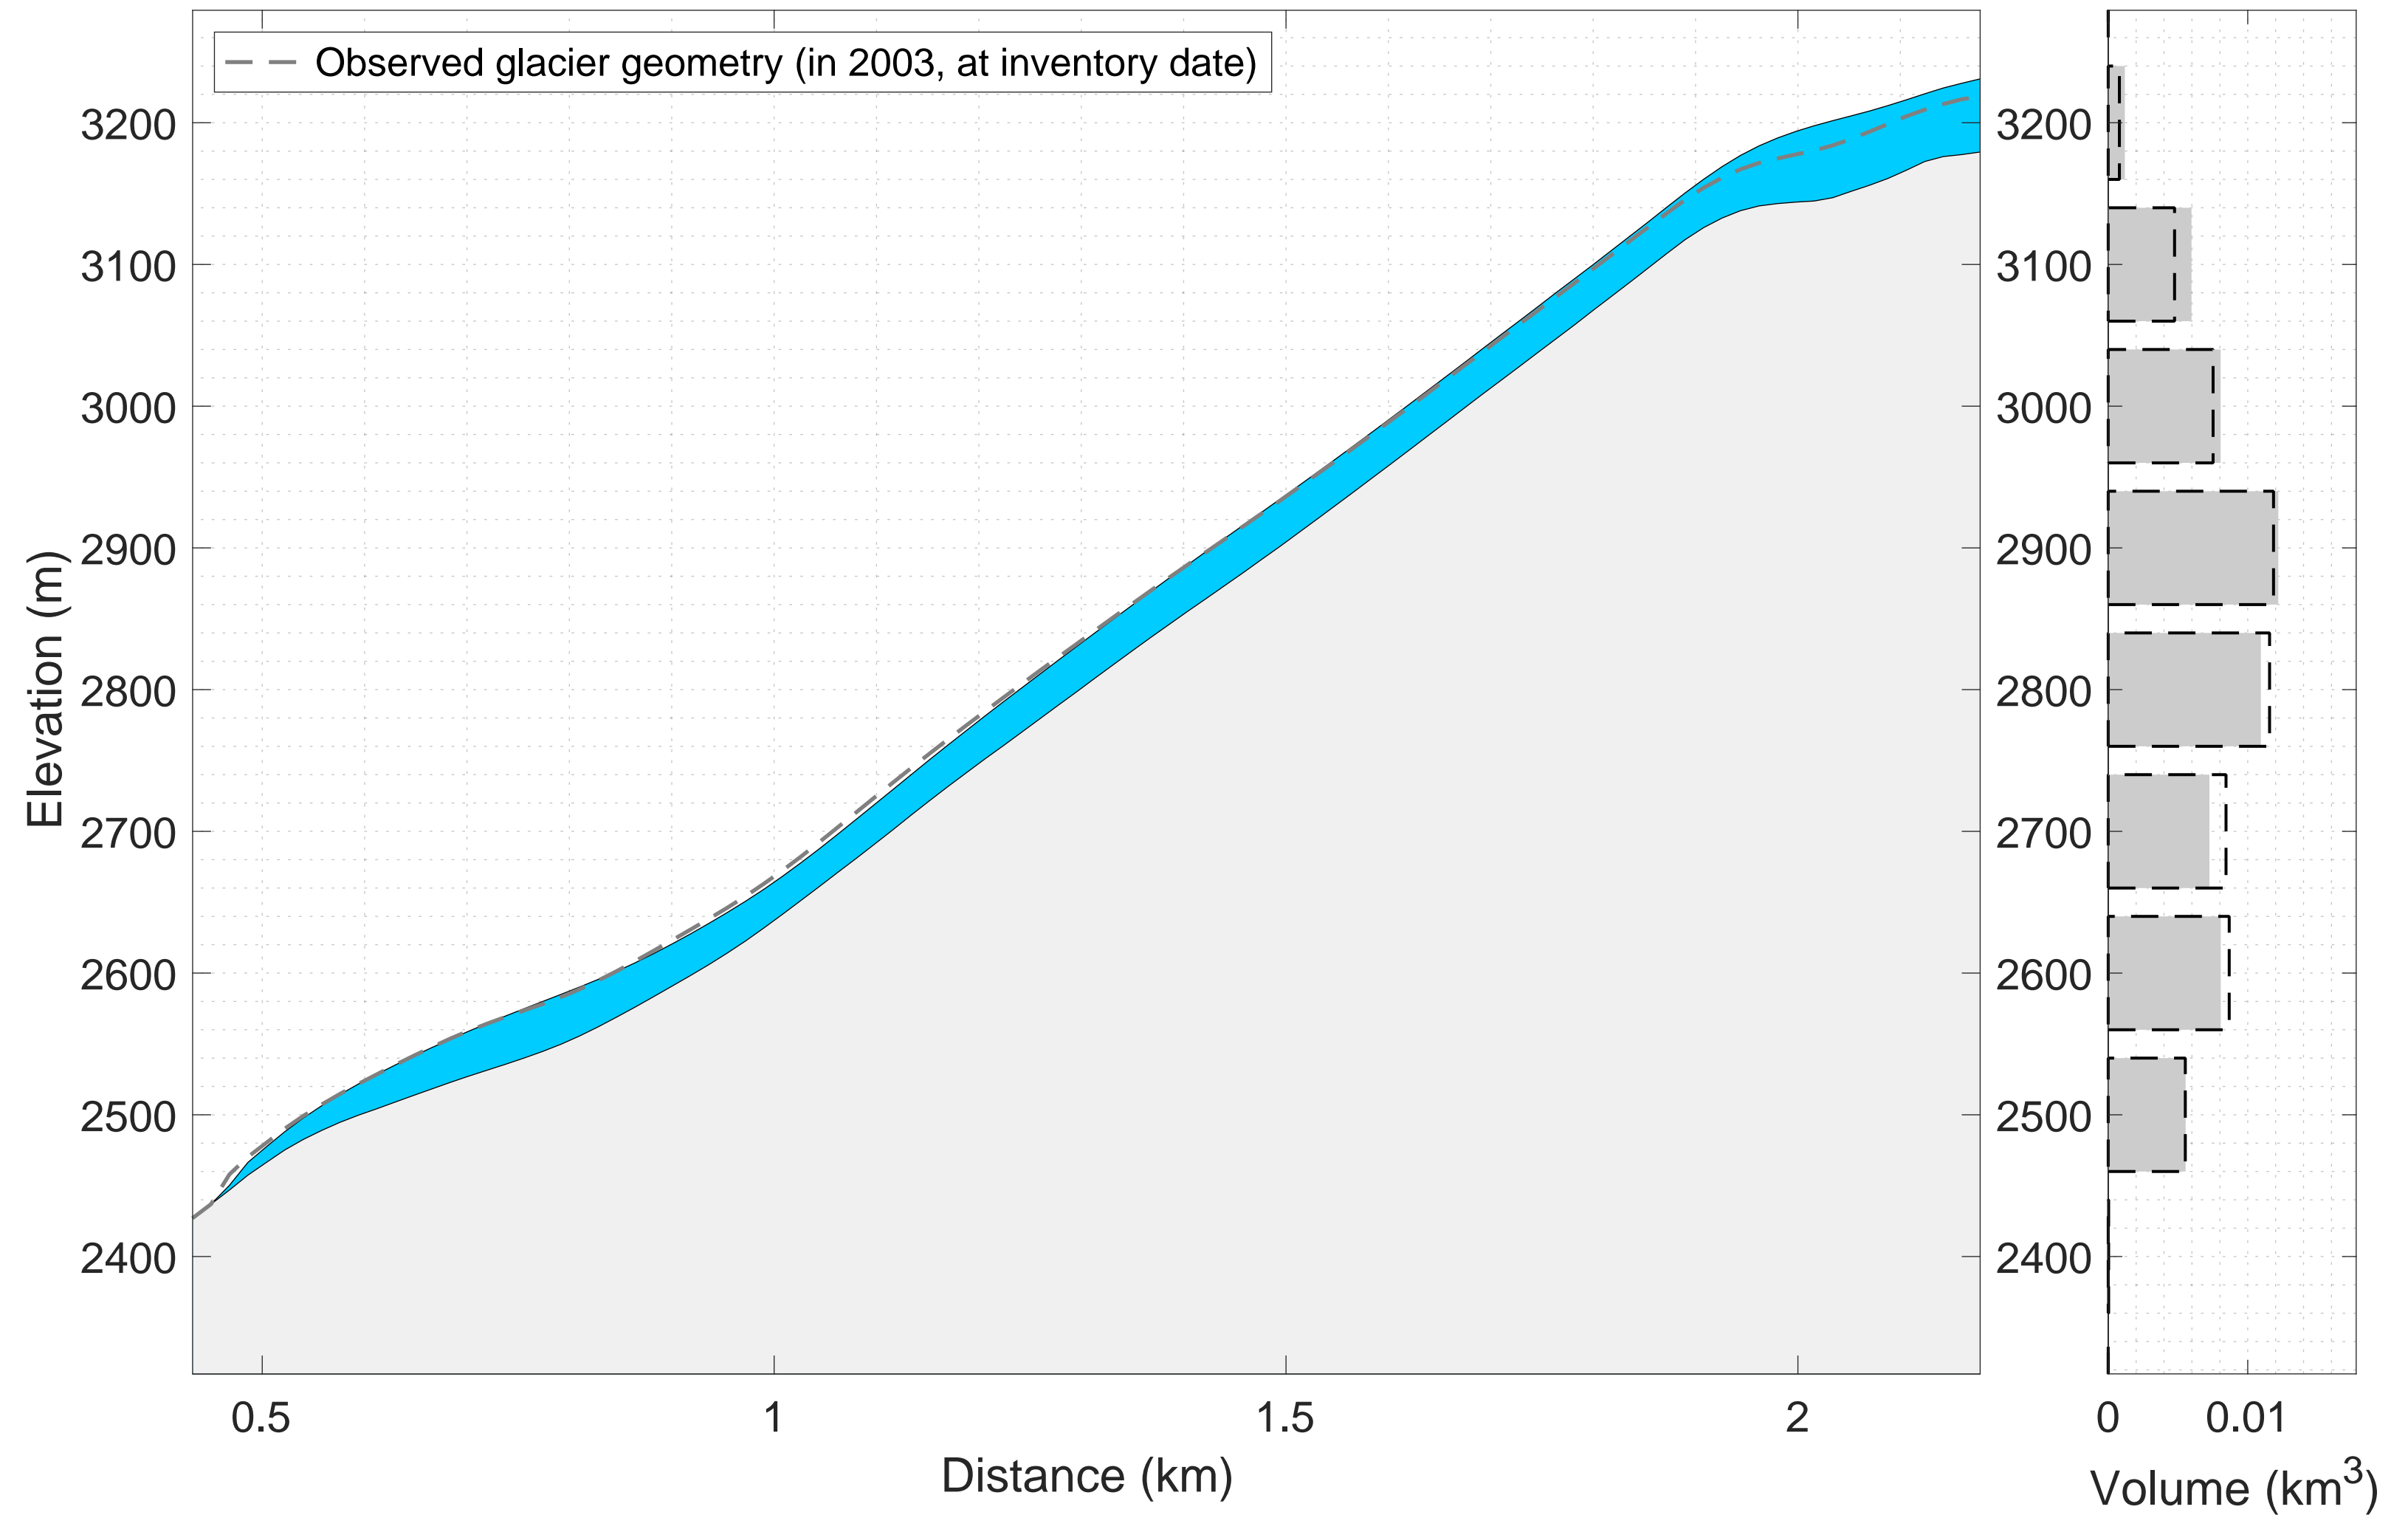

Supplement: Supplementary file 39 [file tc-13-1125-2019-supplement.zip]

**Modelled geometry (Glacier ID = 03148;  $A = 1.977\text{e-}16 \text{ Pa}^{-3} \text{ a}^{-1}$ ;  $dx = 16 \text{ m}$ )**

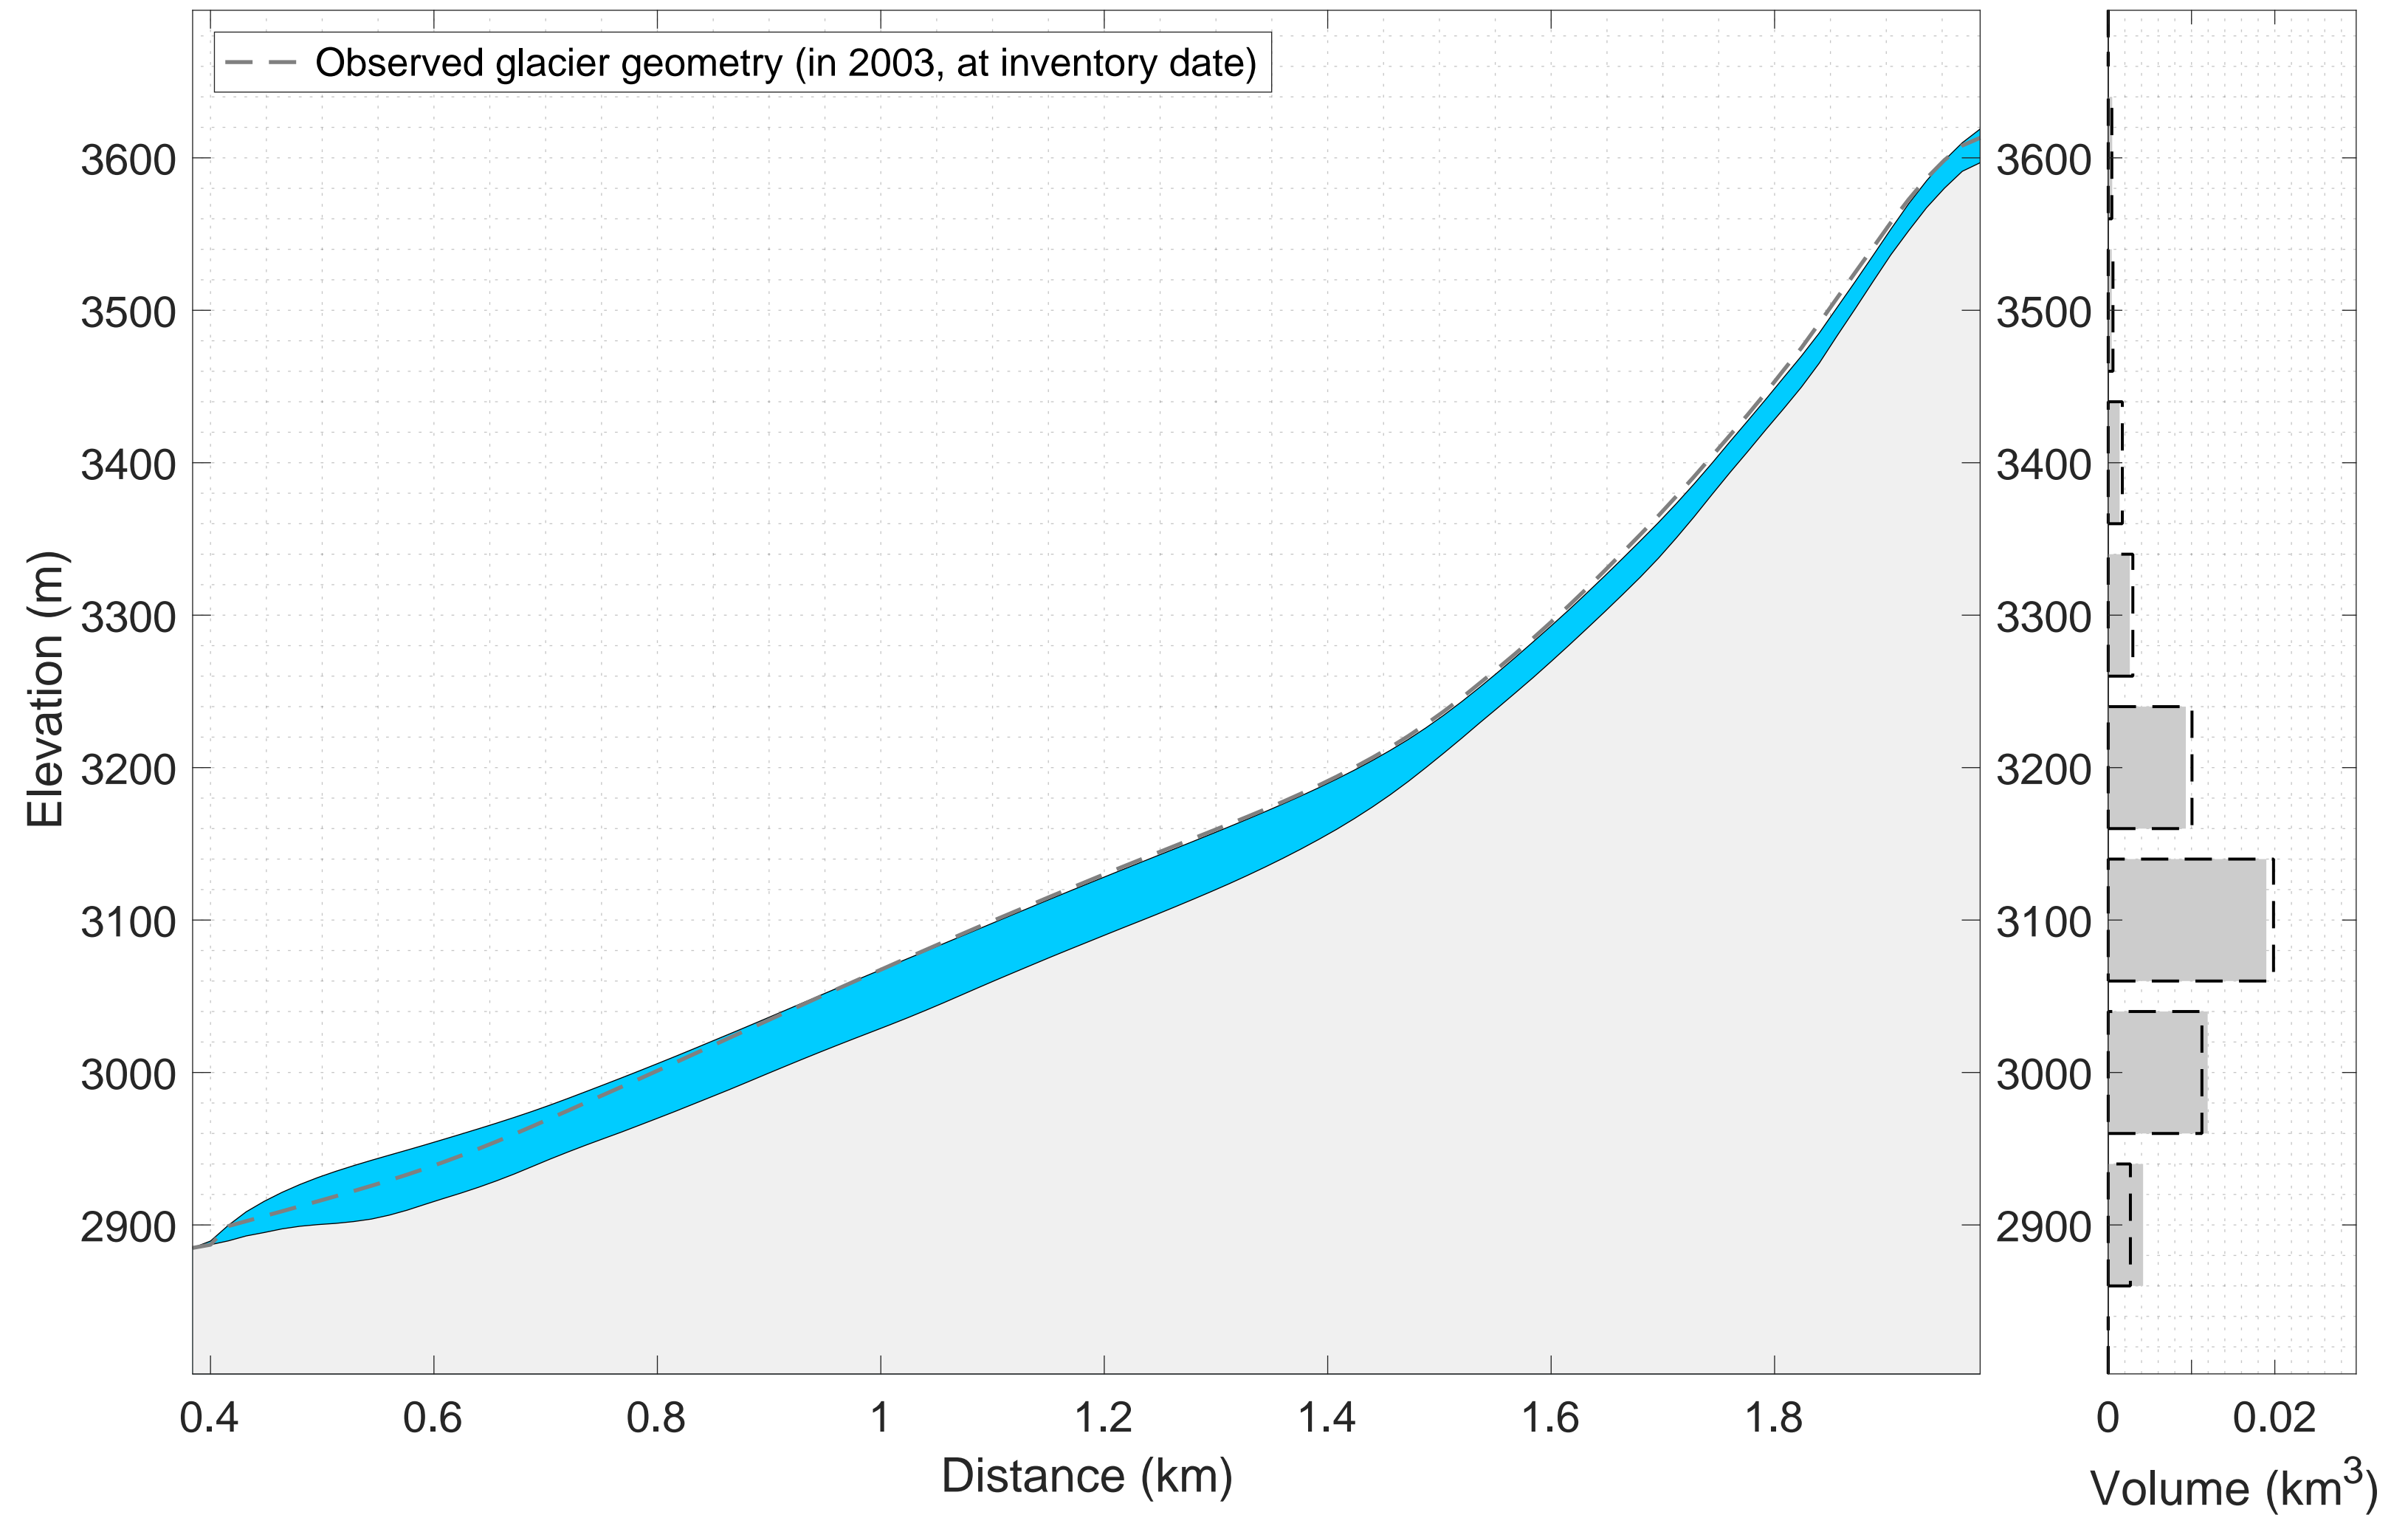

Supplement: Supplementary file 40 [file tc-13-1125-2019-supplement.zip]

**Modelled geometry (Glacier ID = 02814;  $A = 1.4842\text{e-}16 \text{ Pa}^{-3} \text{ a}^{-1}$ ;  $dx = 25 \text{ m}$ )**

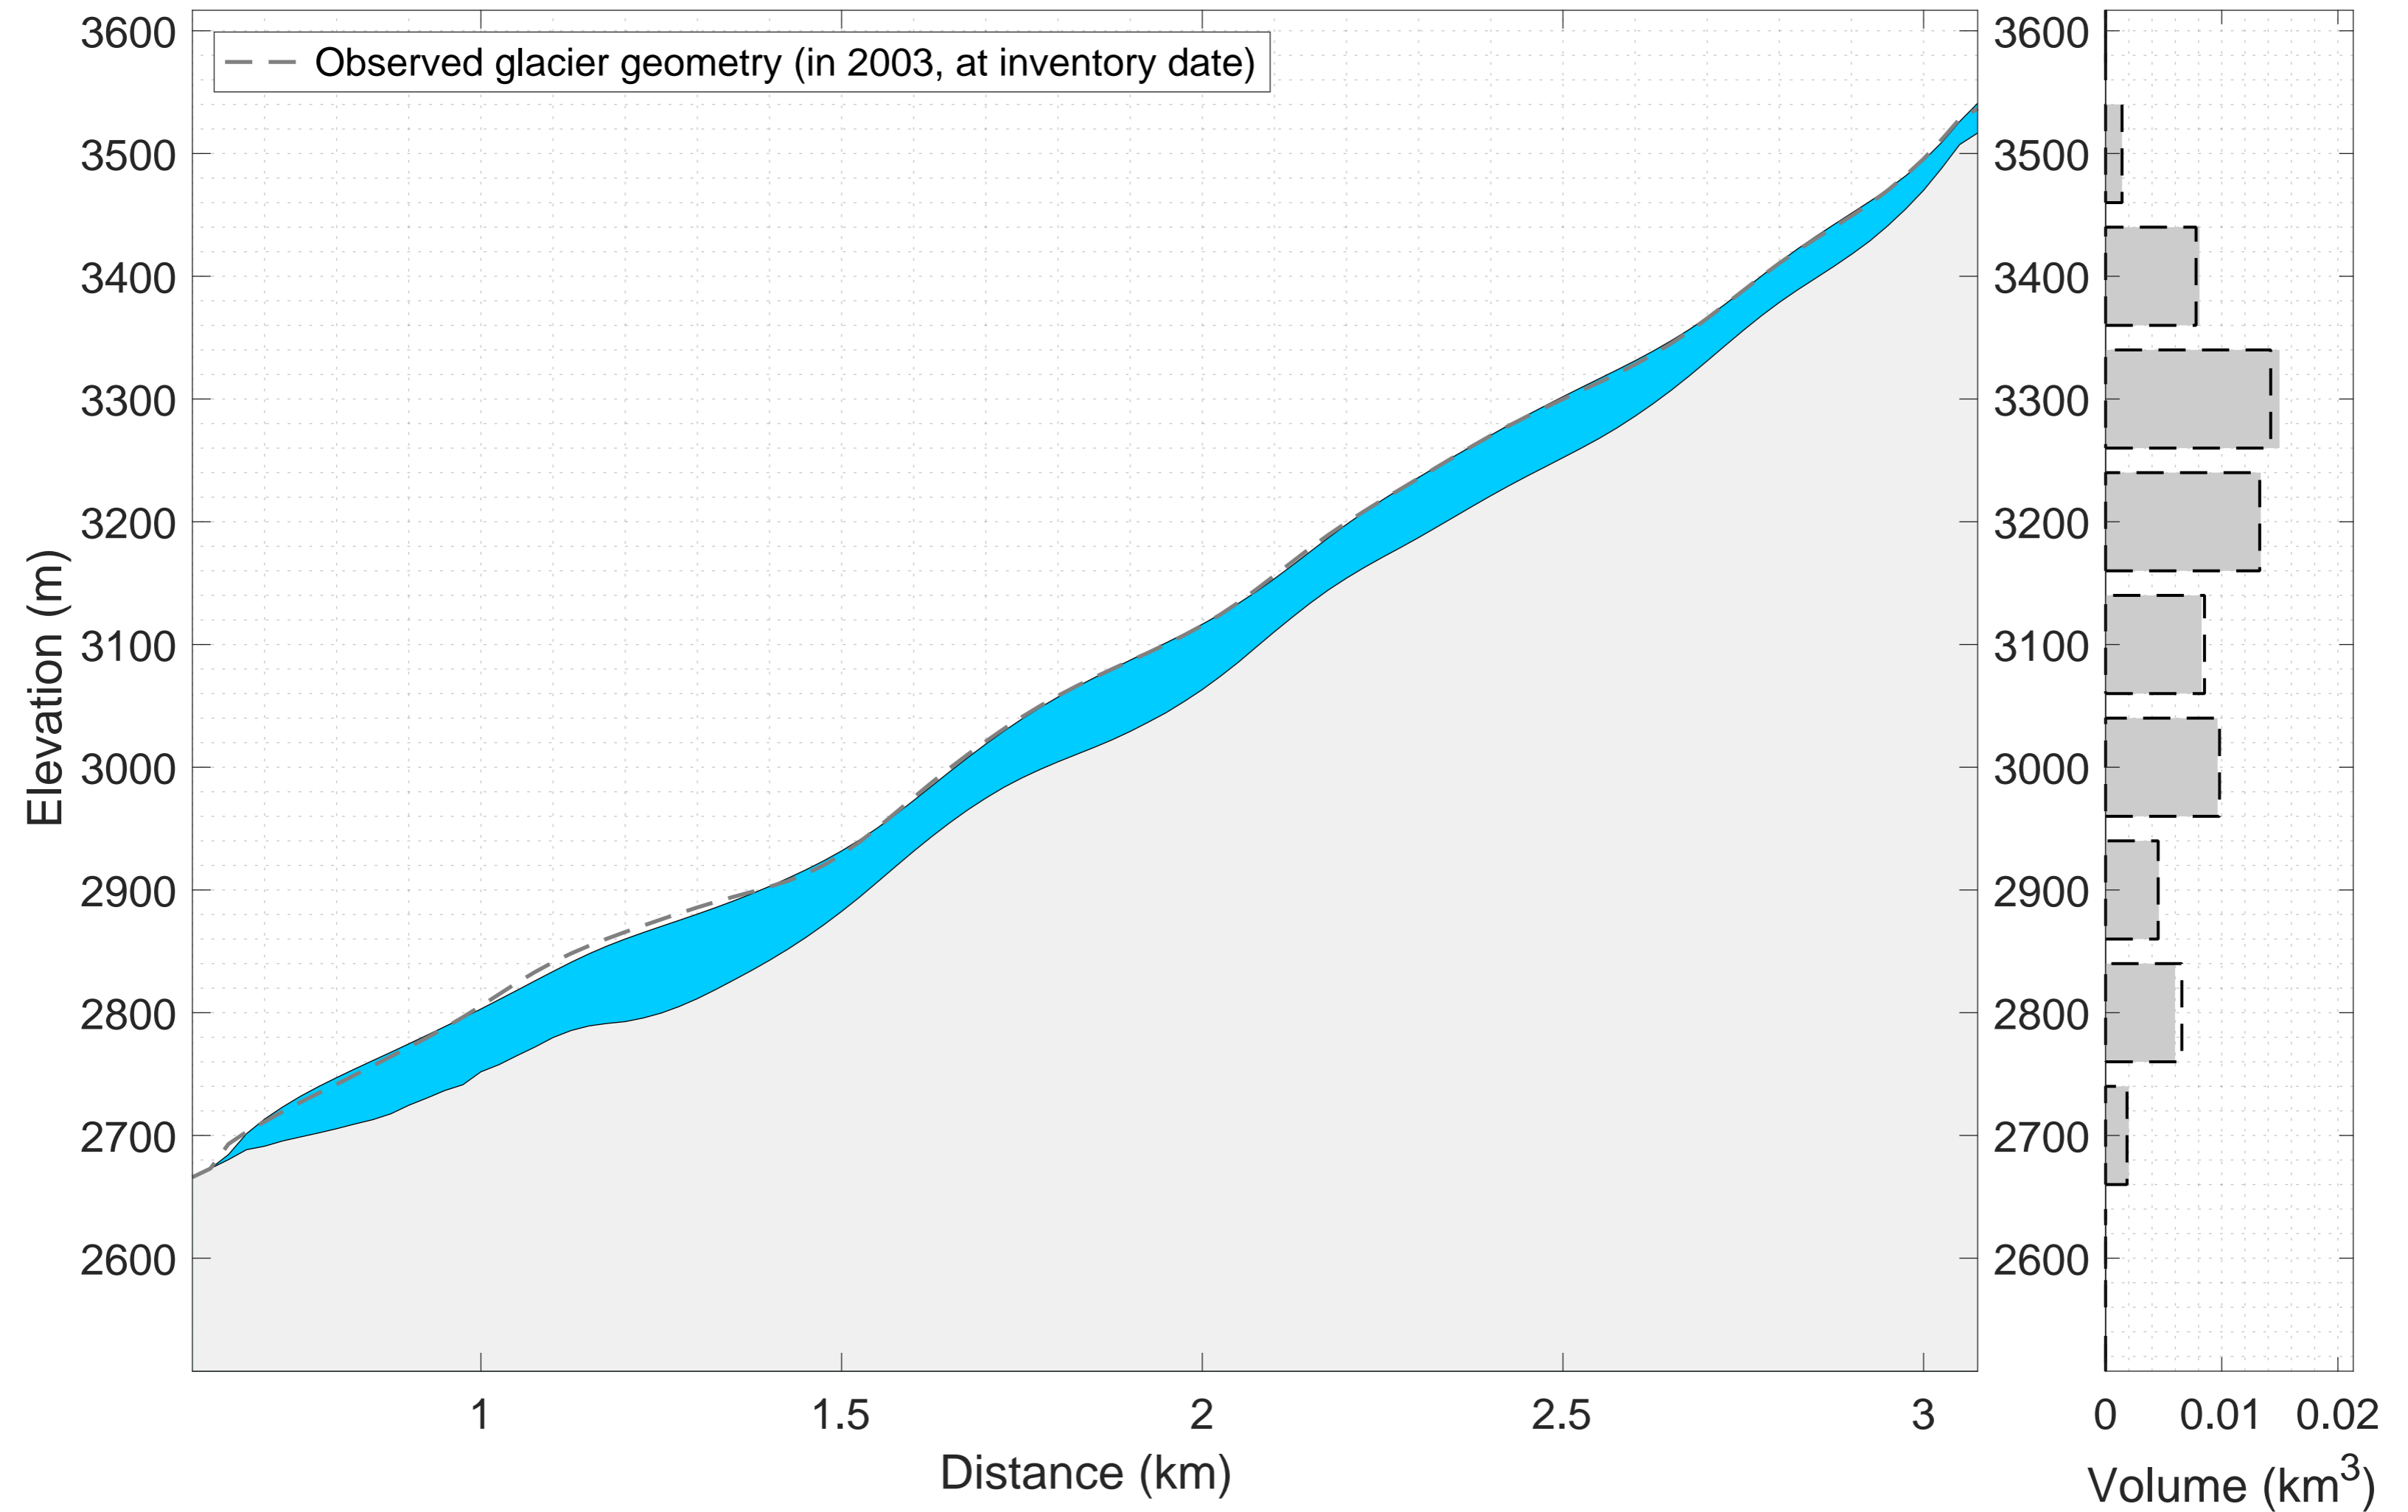

Supplement: Supplementary file 41 [file tc-13-1125-2019-supplement.zip]

**Modelled geometry (Glacier ID = 01358;  $A = 1.114\text{e-}16 \text{ Pa}^{-3} \text{ a}^{-1}$ ;  $dx = 19 \text{ m}$ )**

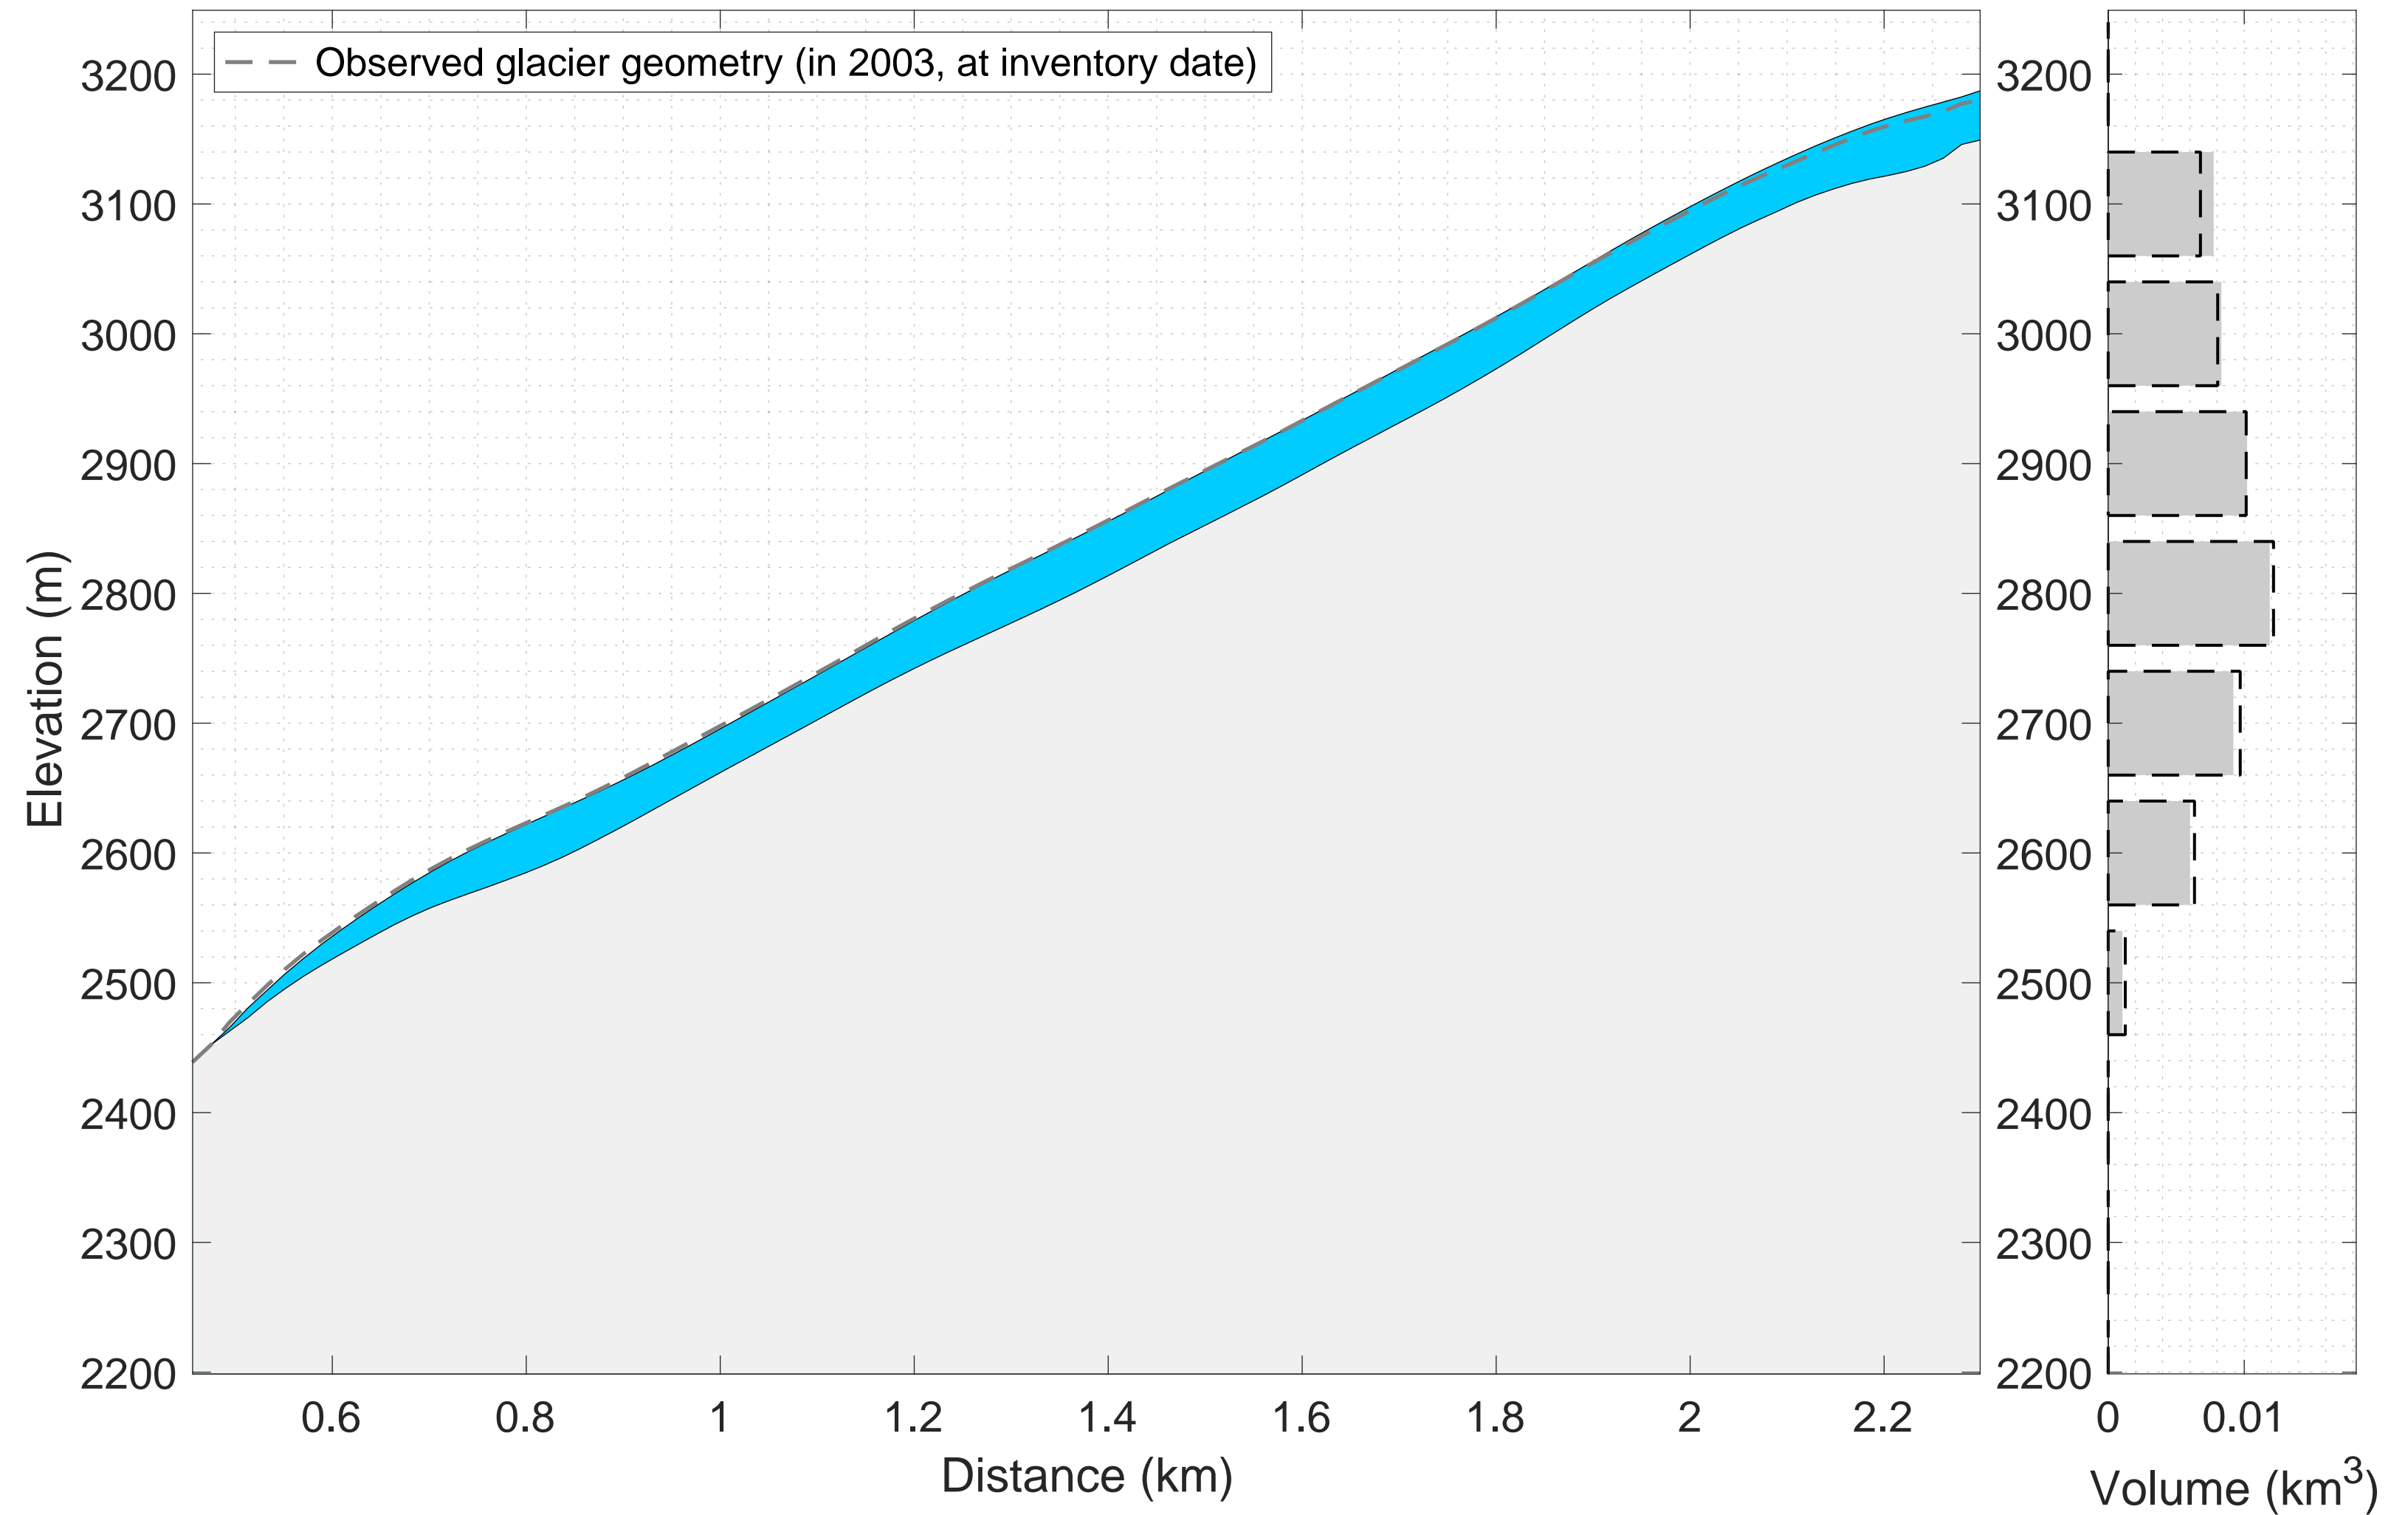

Supplement: Supplementary file 42 [file tc-13-1125-2019-supplement.zip]

**Modelled geometry (Glacier ID = 03569;  $A = 9.6164\text{e-}17 \text{ Pa}^{-3} \text{ a}^{-1}$ ;  $dx = 14 \text{ m}$ )**

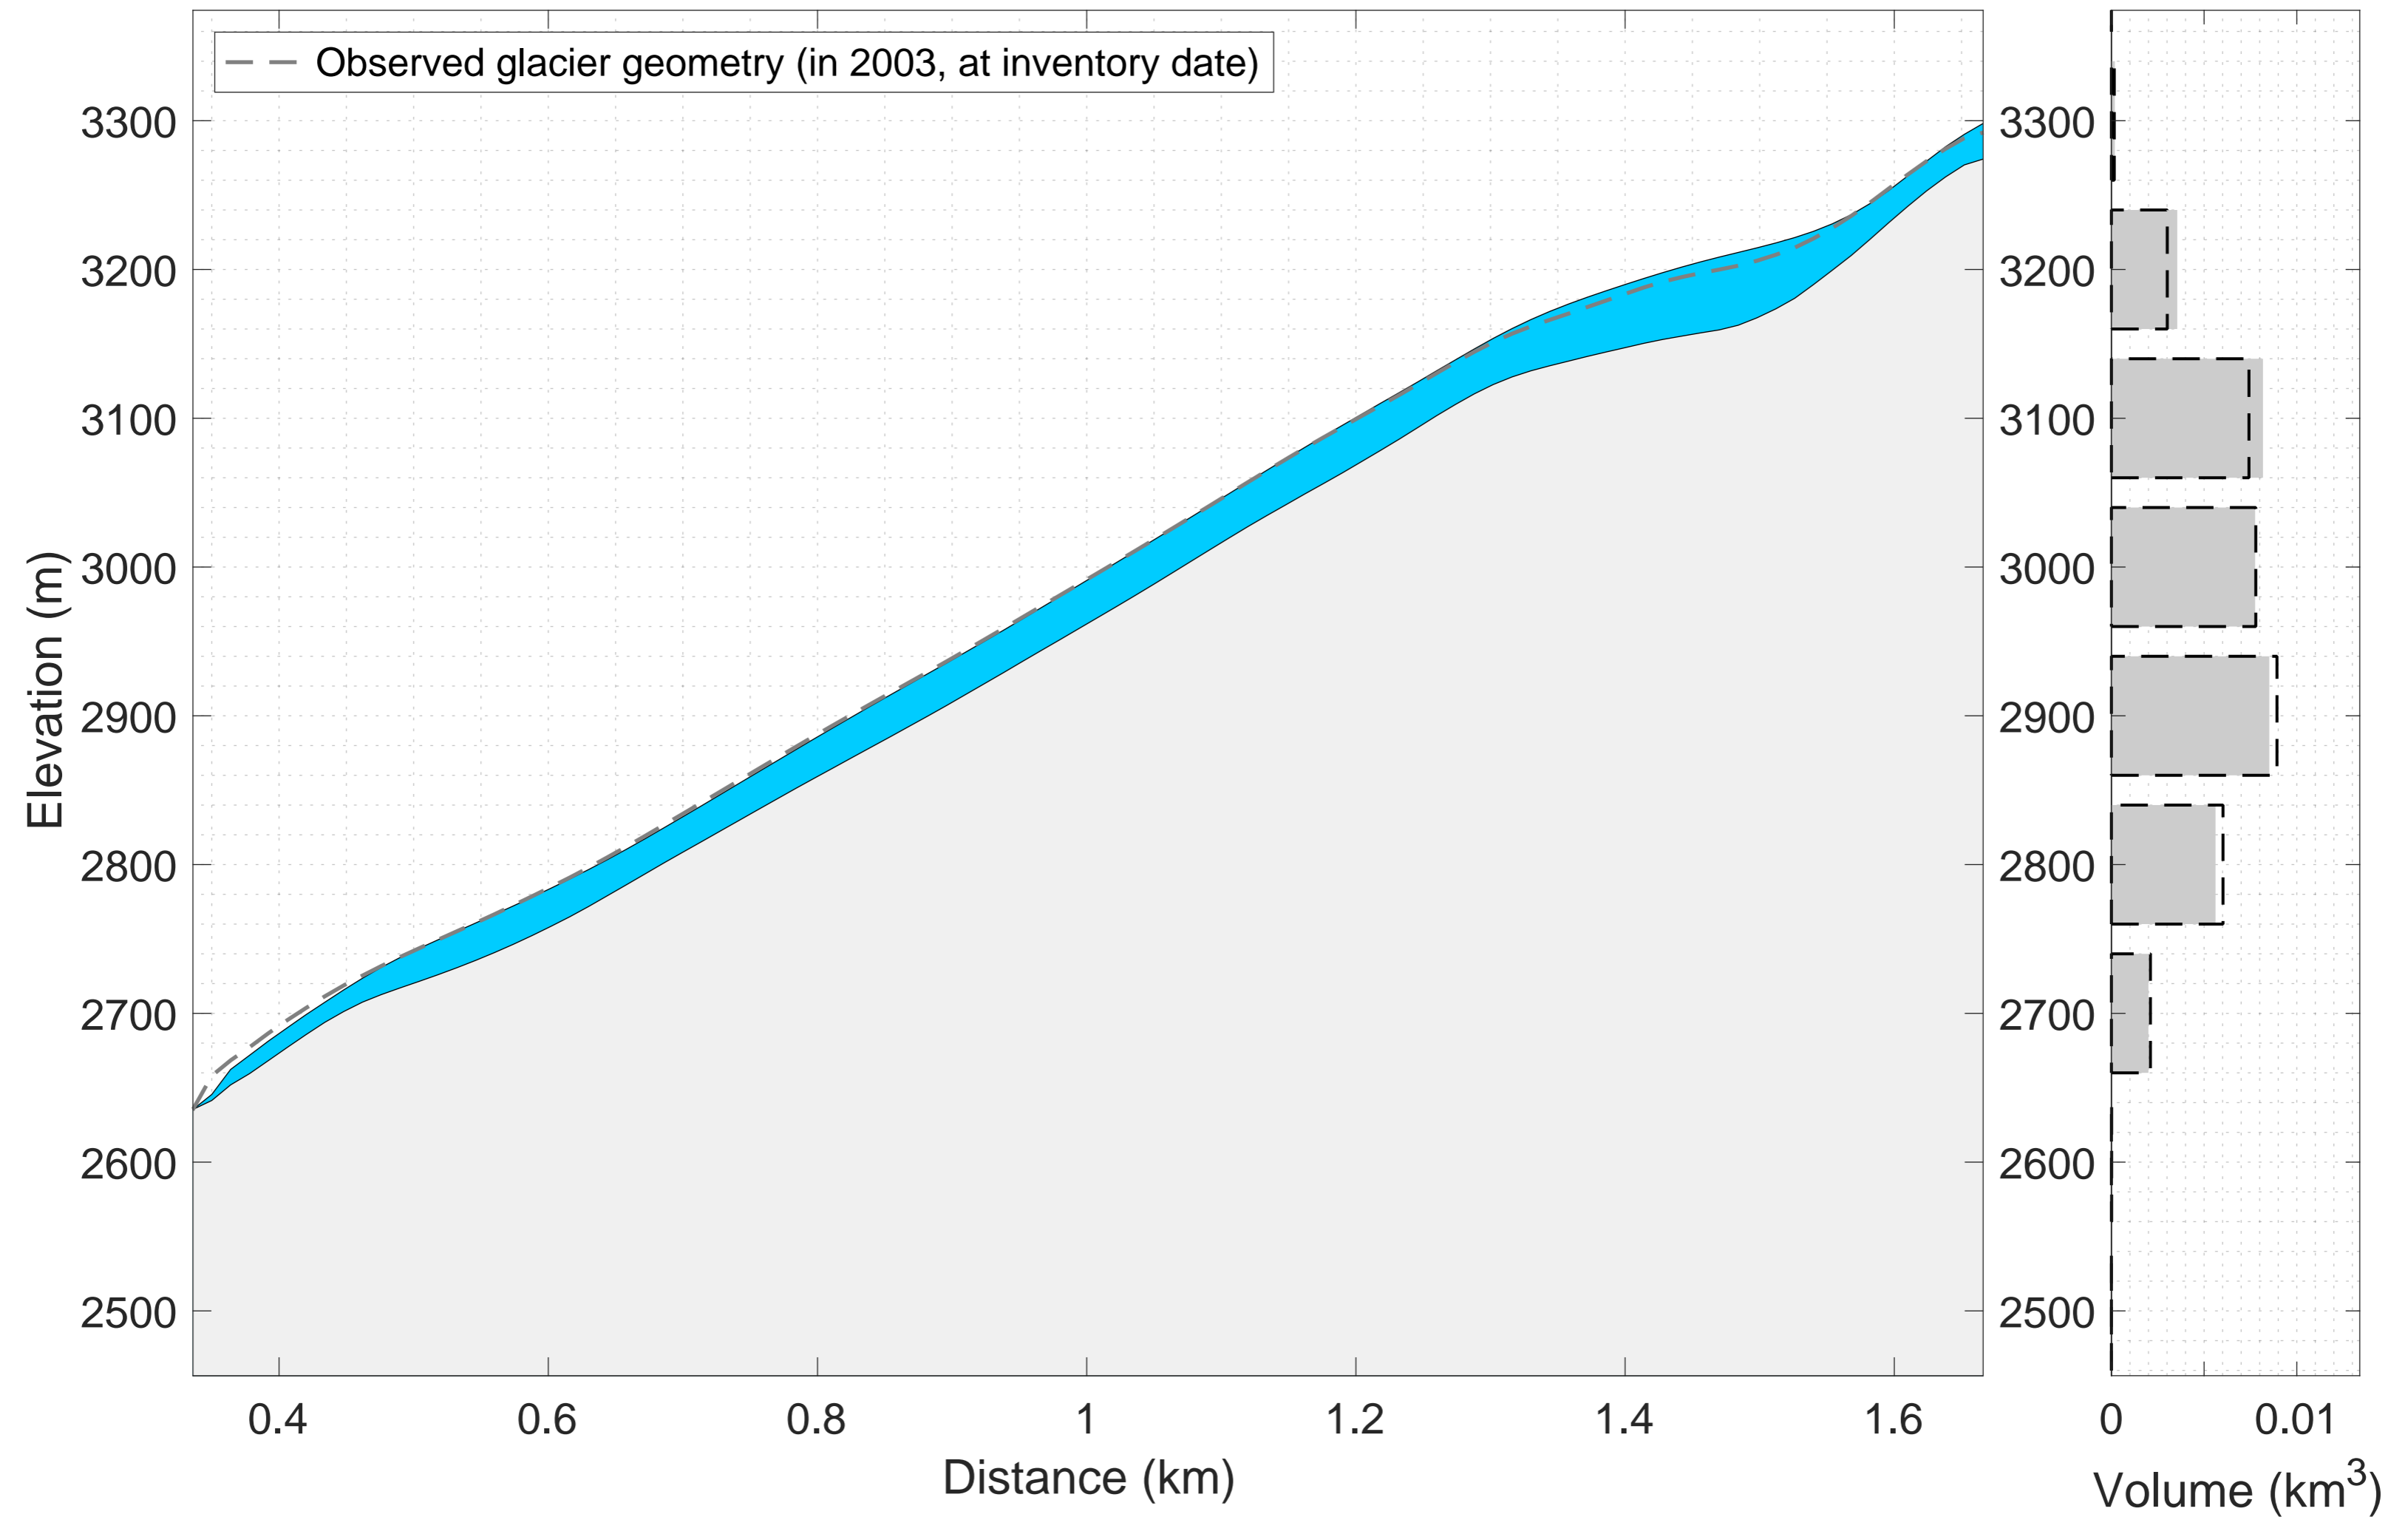

Supplement: Supplementary file 43 [file tc-13-1125-2019-supplement.zip]

**Modelled geometry (Glacier ID = 01176;  $A = 6.2137\text{e-}17 \text{ Pa}^{-3} \text{ a}^{-1}$ ;  $dx = 16 \text{ m}$ )**

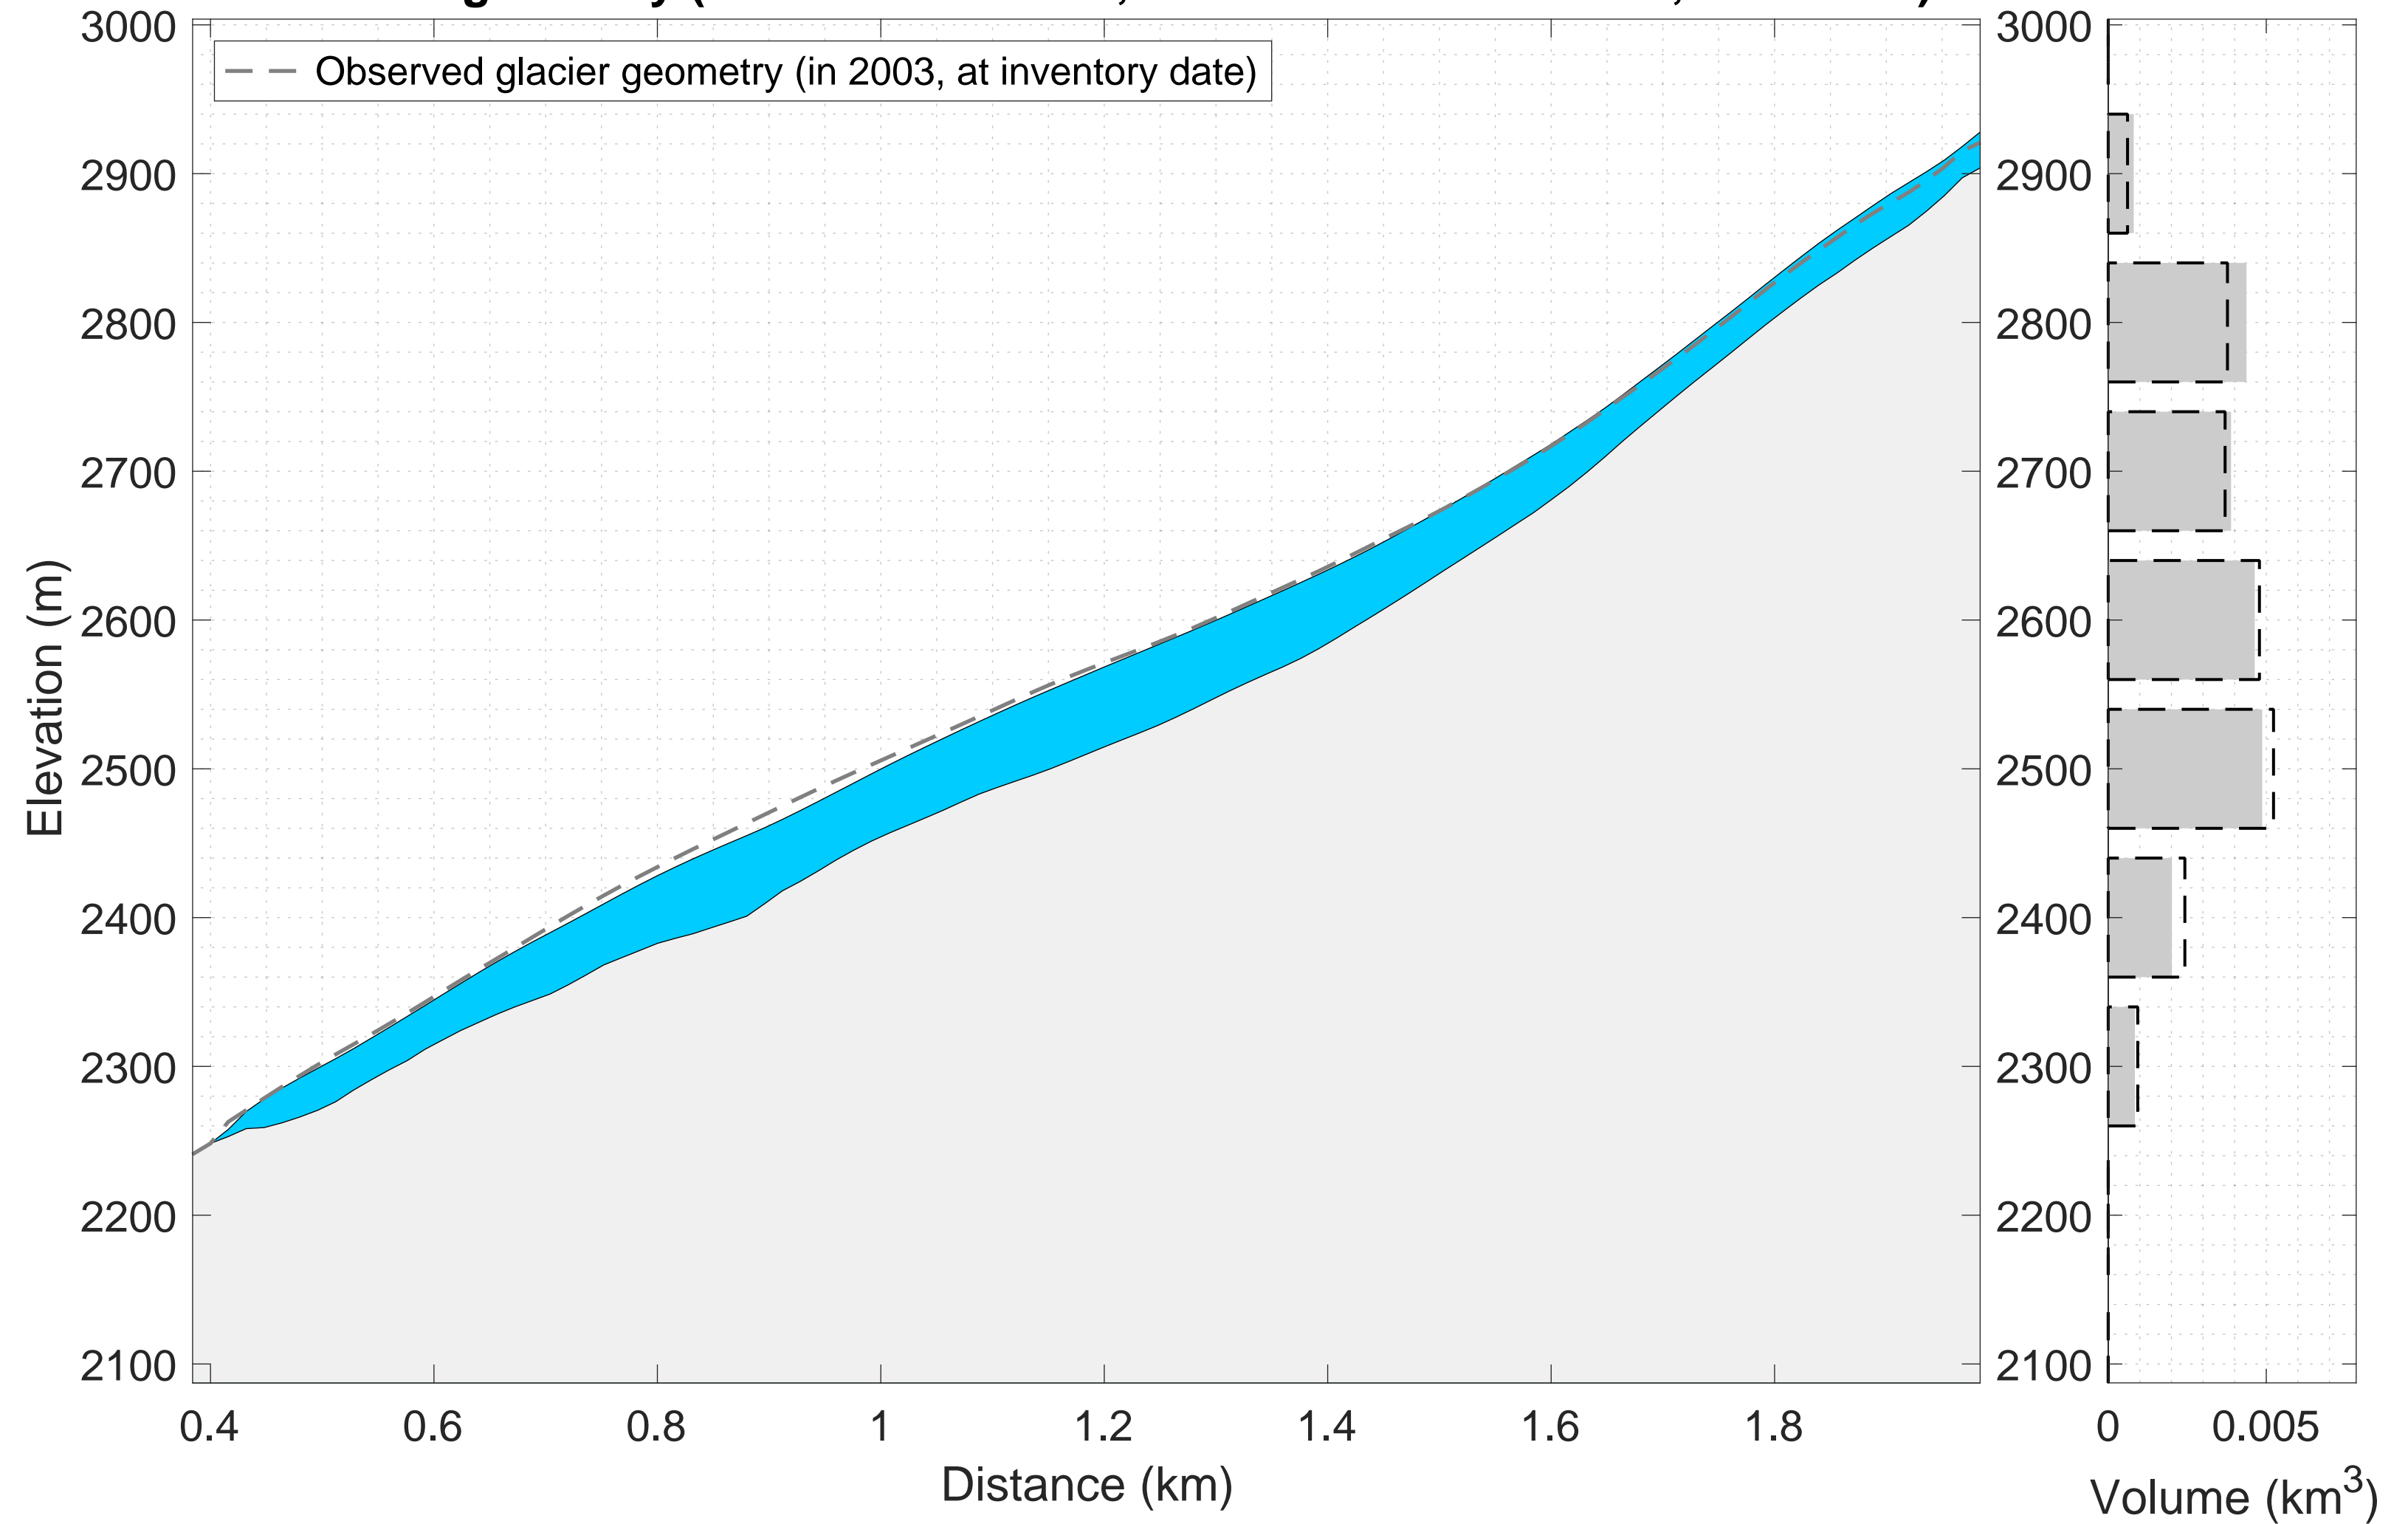

Supplement: Supplementary file 44 [file tc-13-1125-2019-supplement.zip]

**Modelled geometry (Glacier ID = 02623;  $A = 1.8238\text{e-}16 \text{ Pa}^{-3} \text{ a}^{-1}$ ;  $dx = 24 \text{ m}$ )**

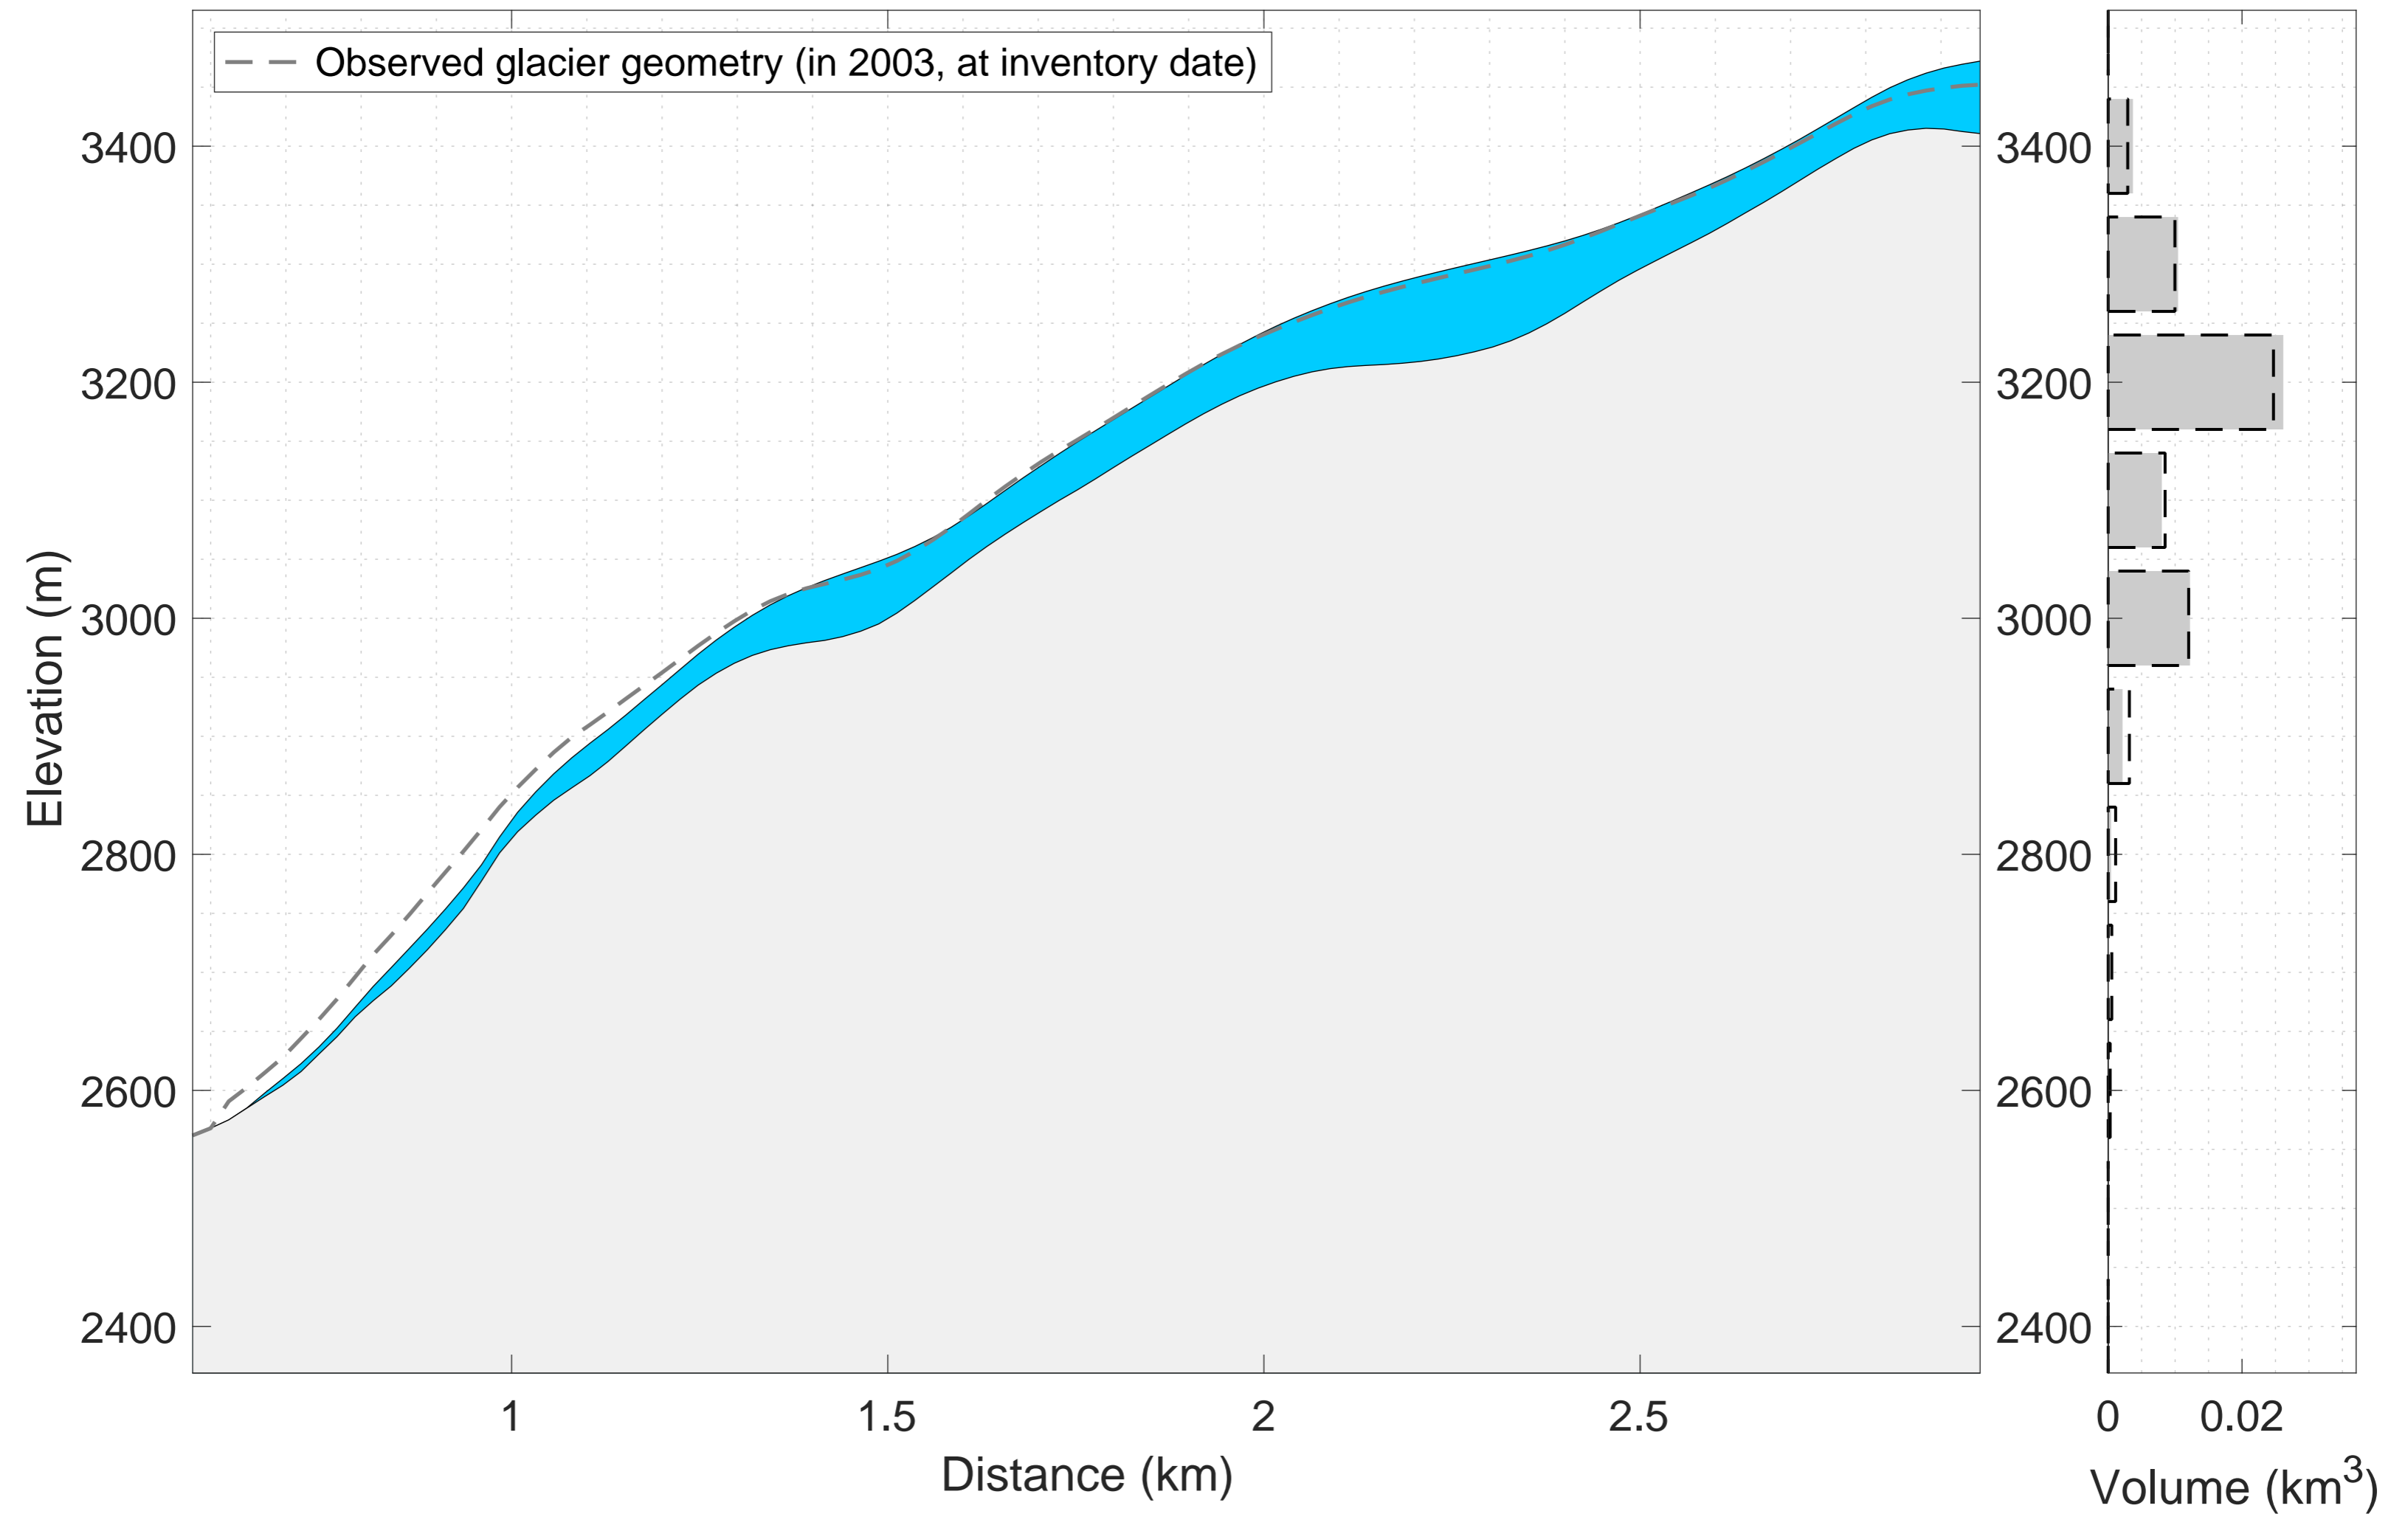

Supplement: Supplementary file 45 [file tc-13-1125-2019-supplement.zip]

**Modelled geometry (Glacier ID = 00720;  $A = 9.2731\text{e-}17 \text{ Pa}^{-3} \text{ a}^{-1}$ ;  $dx = 17 \text{ m}$ )**

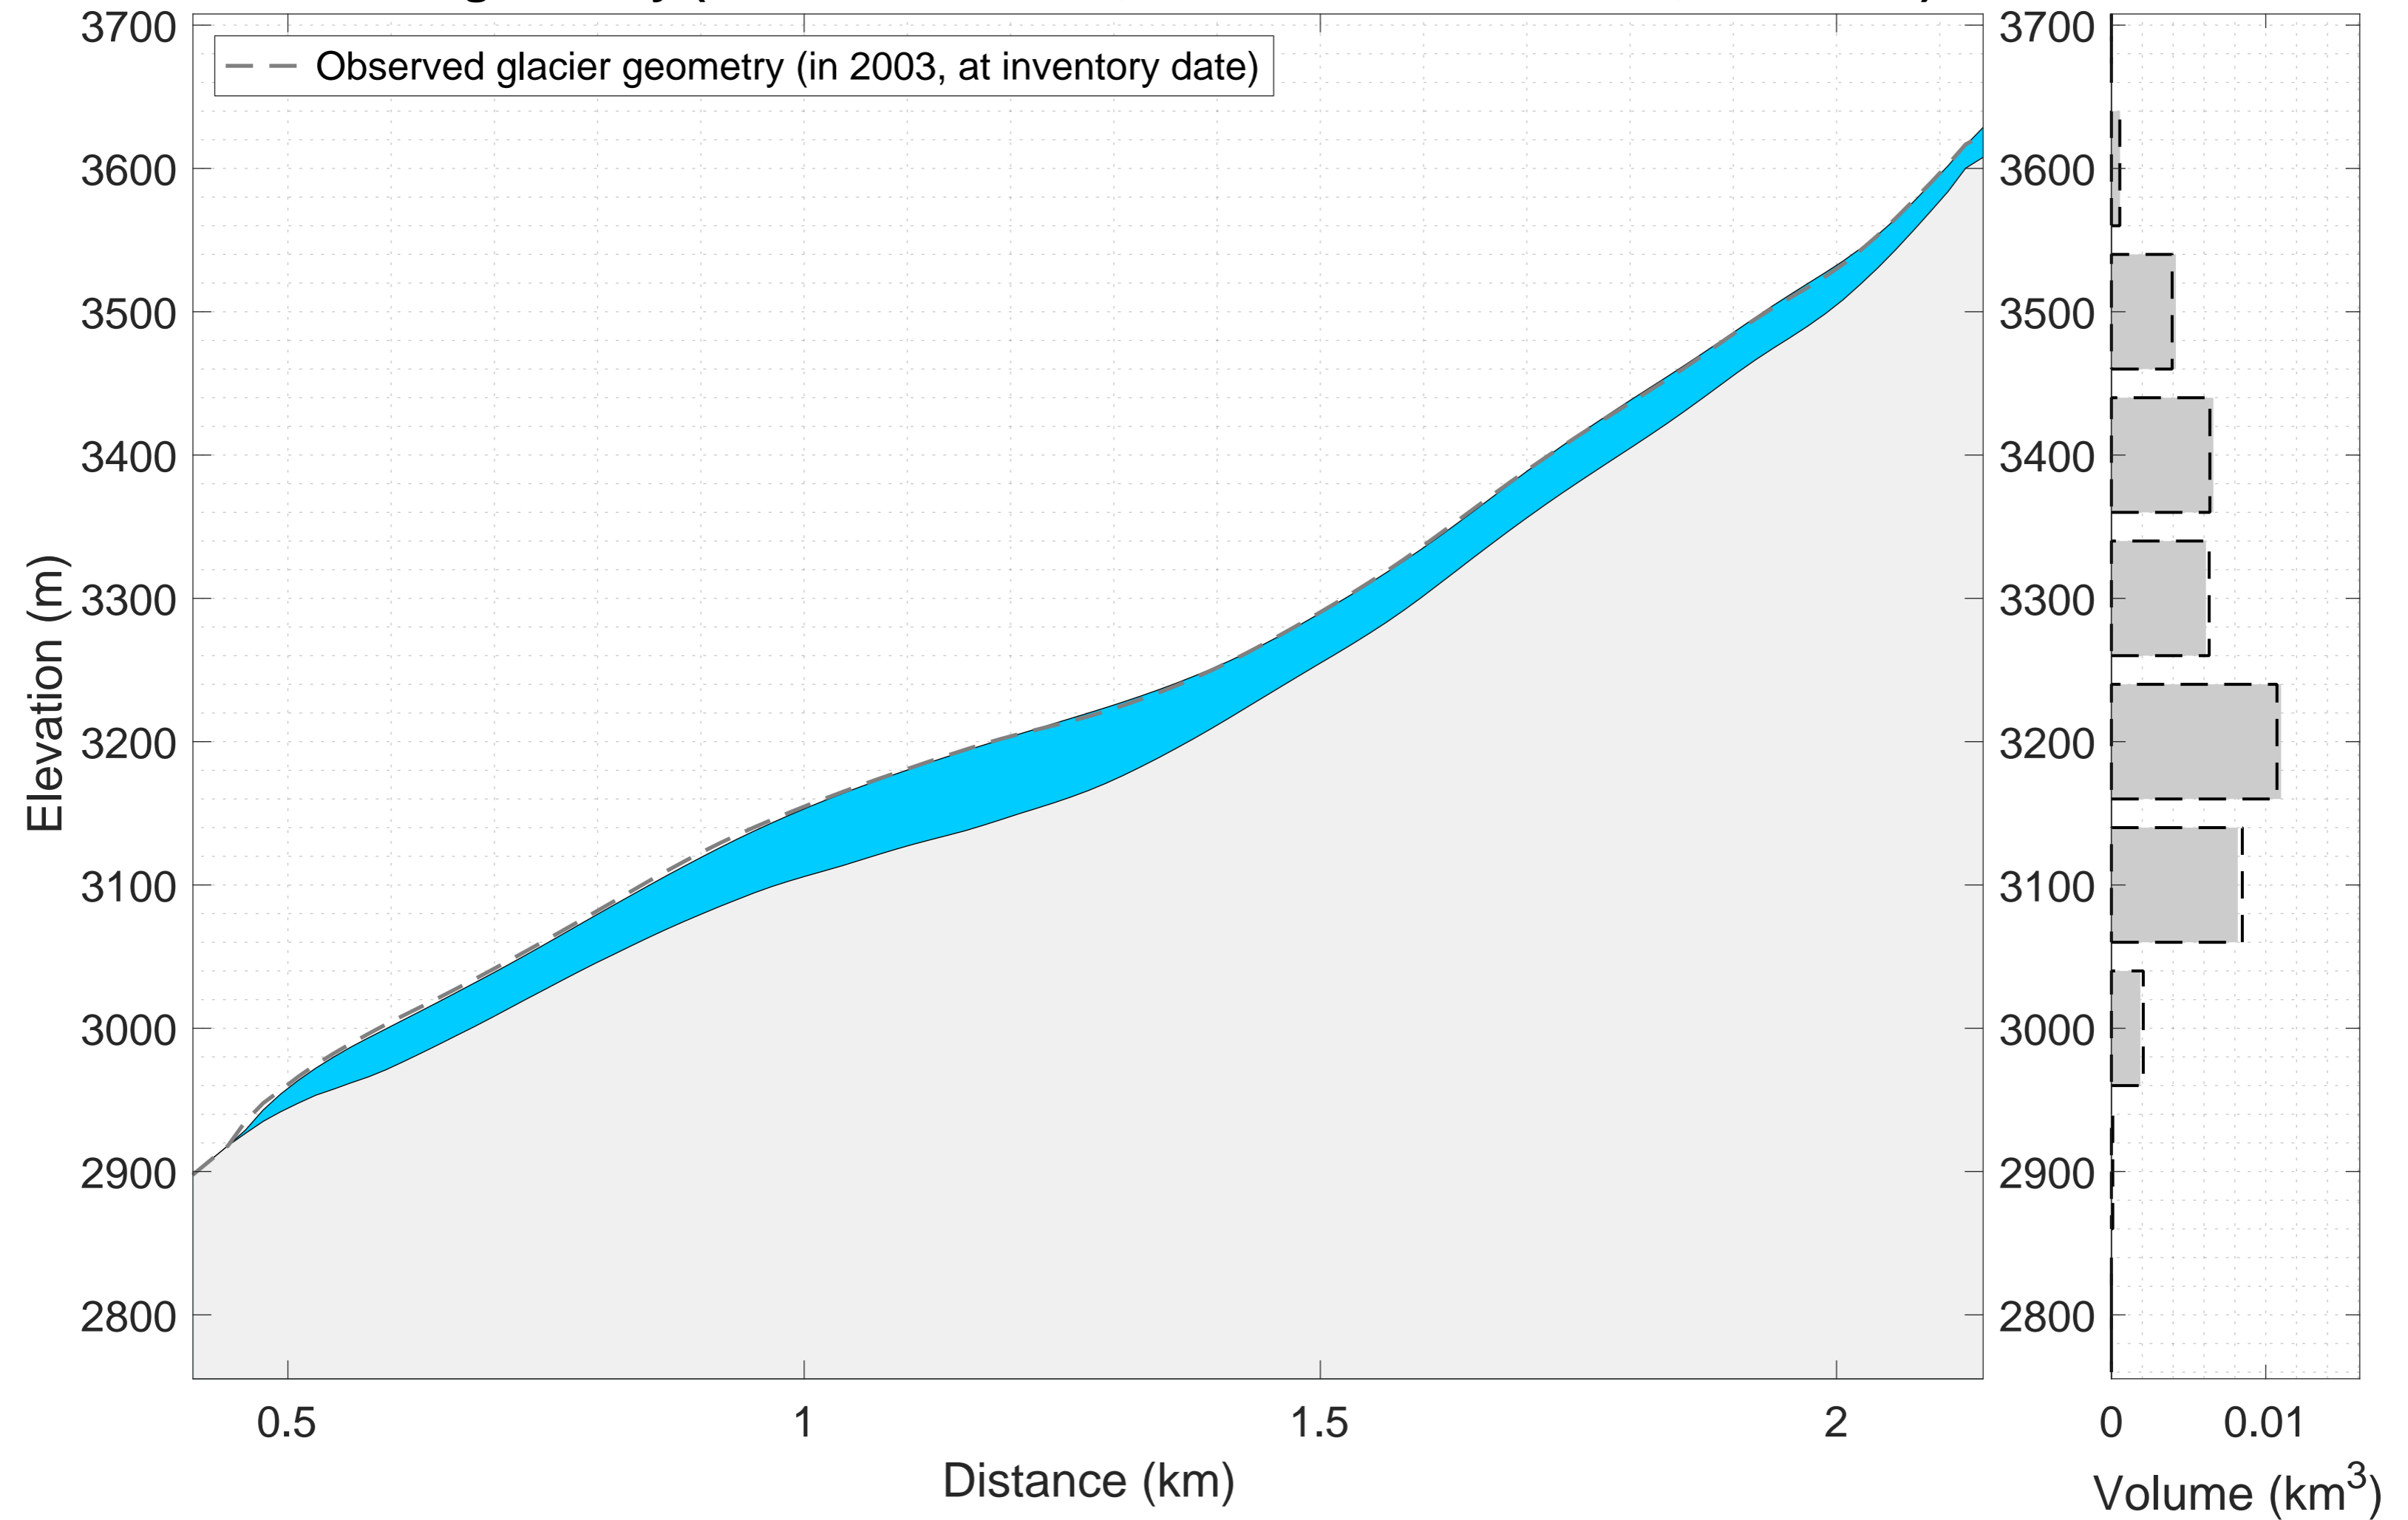

Supplement: Supplementary file 46 [file tc-13-1125-2019-supplement.zip]

**Modelled geometry (Glacier ID = 00701;  $A = 4.6336\text{e-}17 \text{ Pa}^{-3} \text{ a}^{-1}$ ;  $dx = 10 \text{ m}$ )**

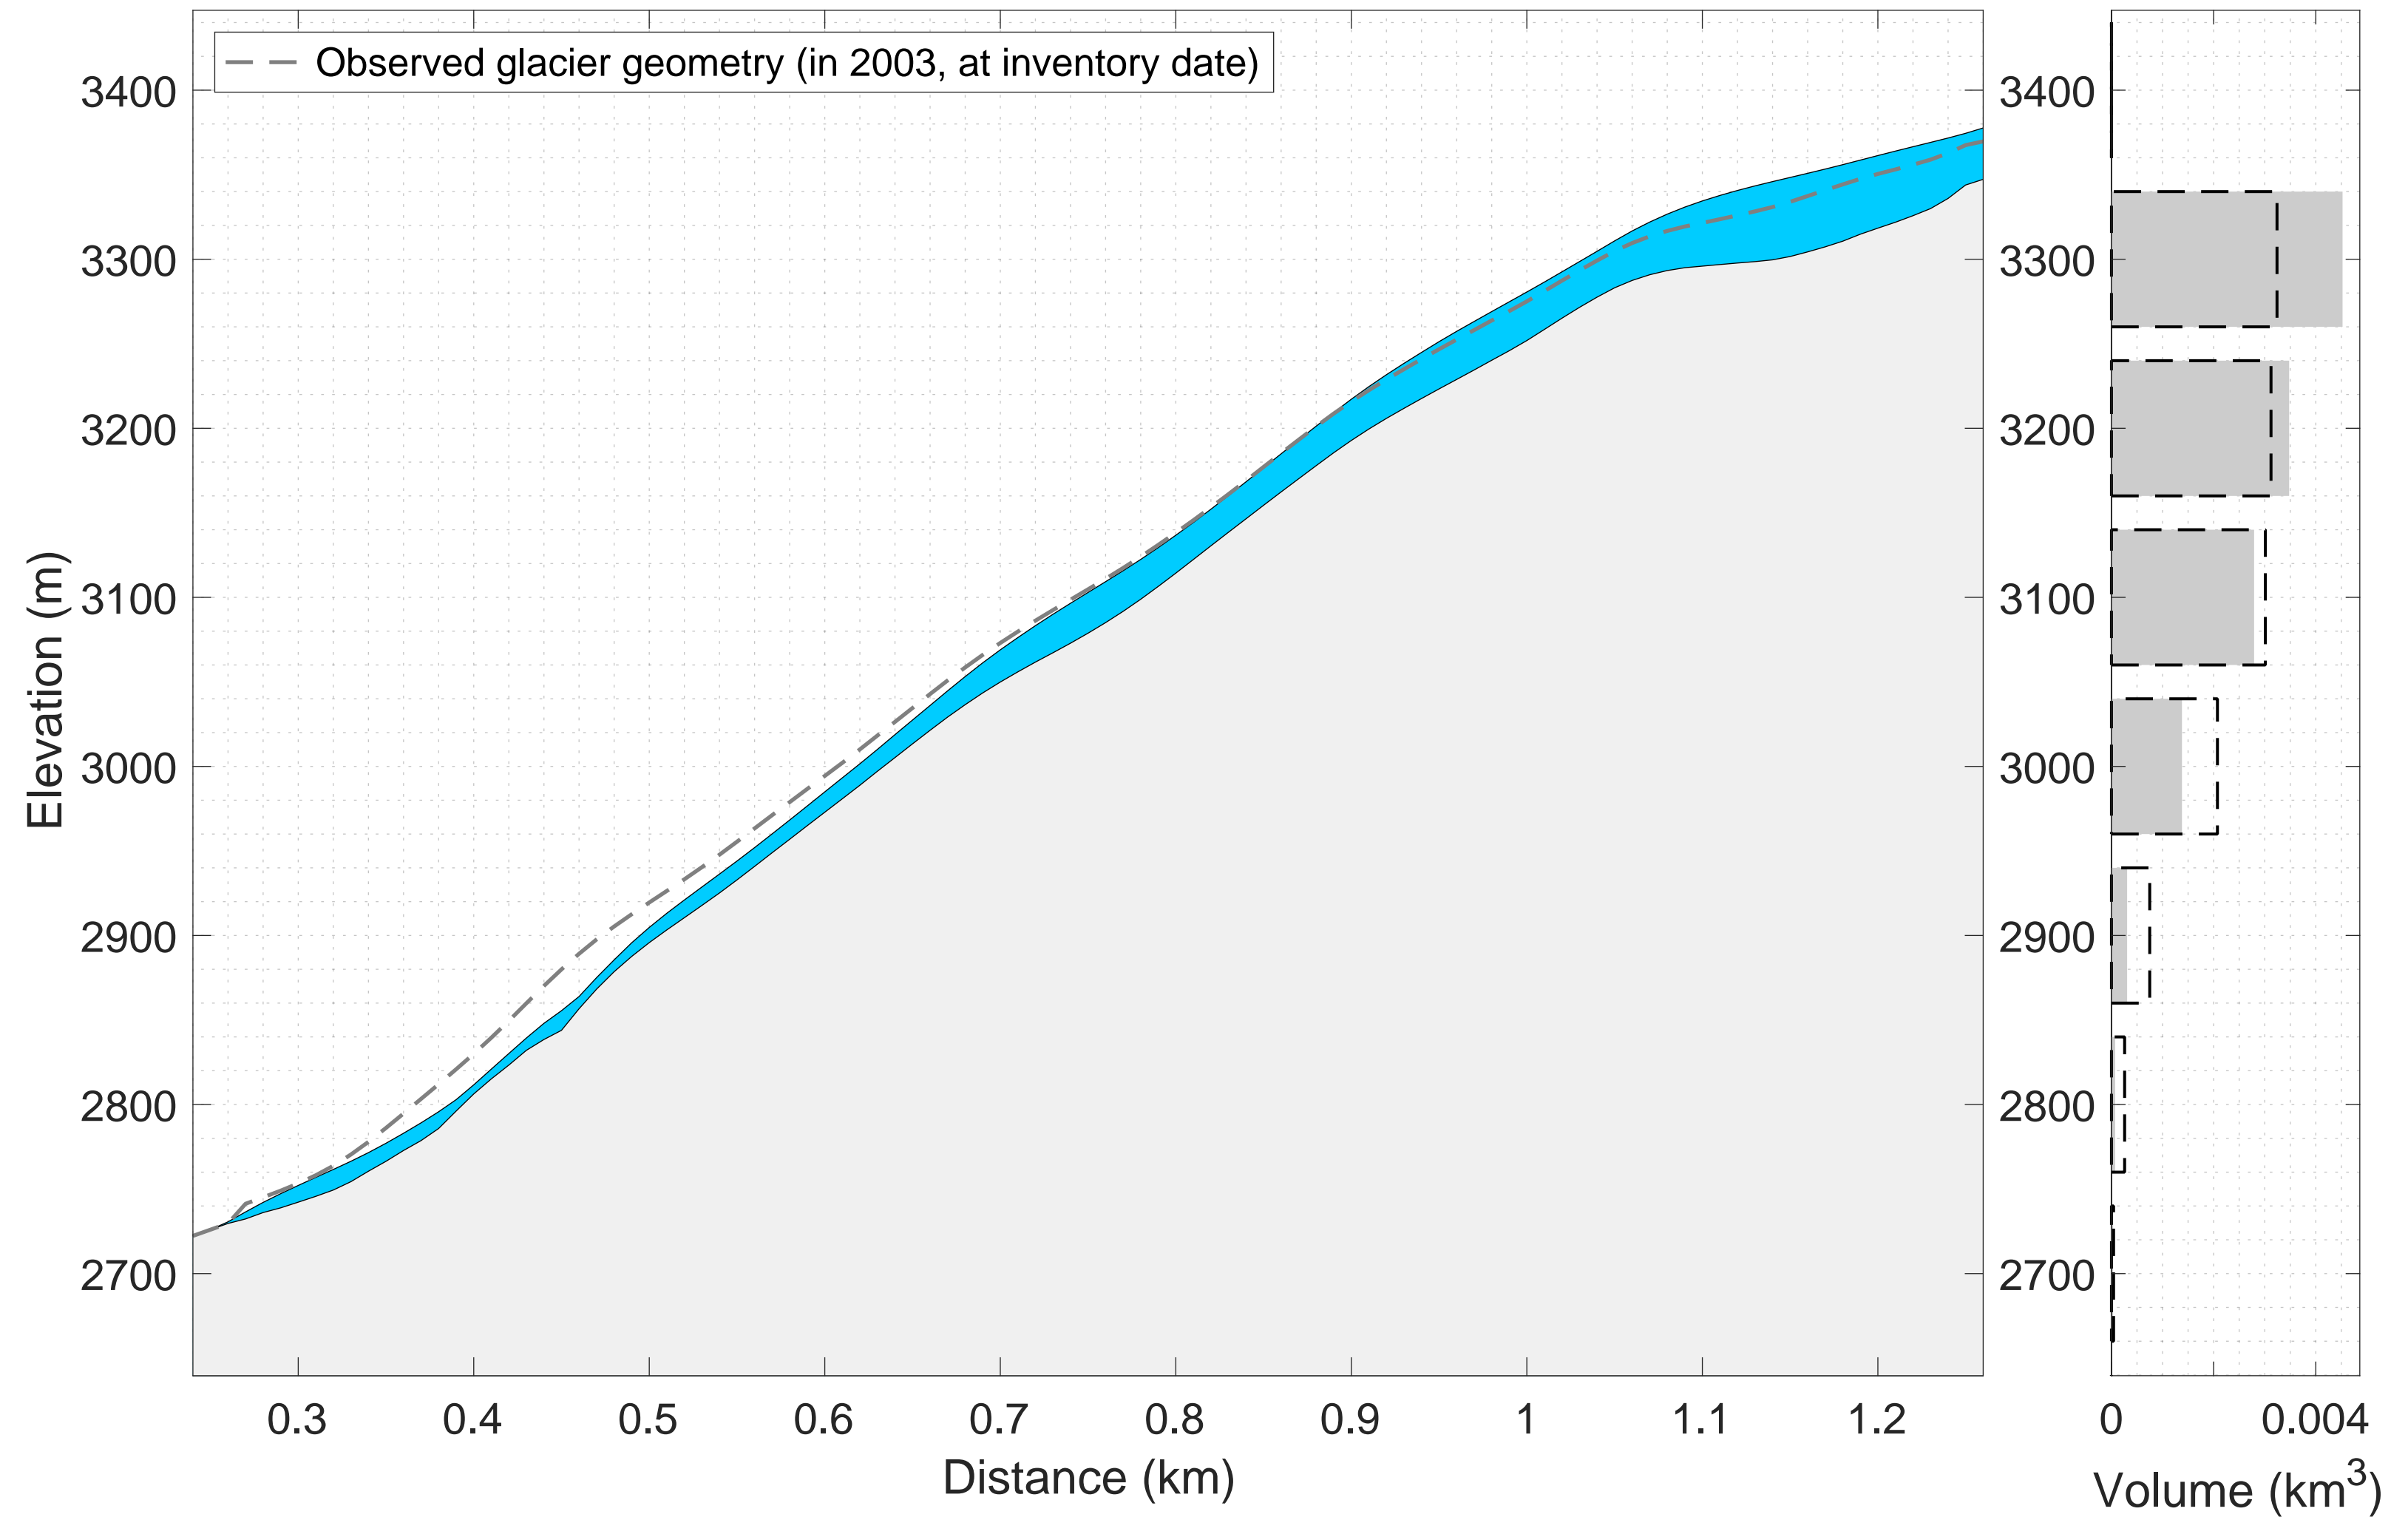

Supplement: Supplementary file 47 [file tc-13-1125-2019-supplement.zip]

**Modelled geometry (Glacier ID = 01768;  $A = 2.4762\text{e-}17 \text{ Pa}^{-3} \text{ a}^{-1}$ ;  $dx = 11 \text{ m}$ )**

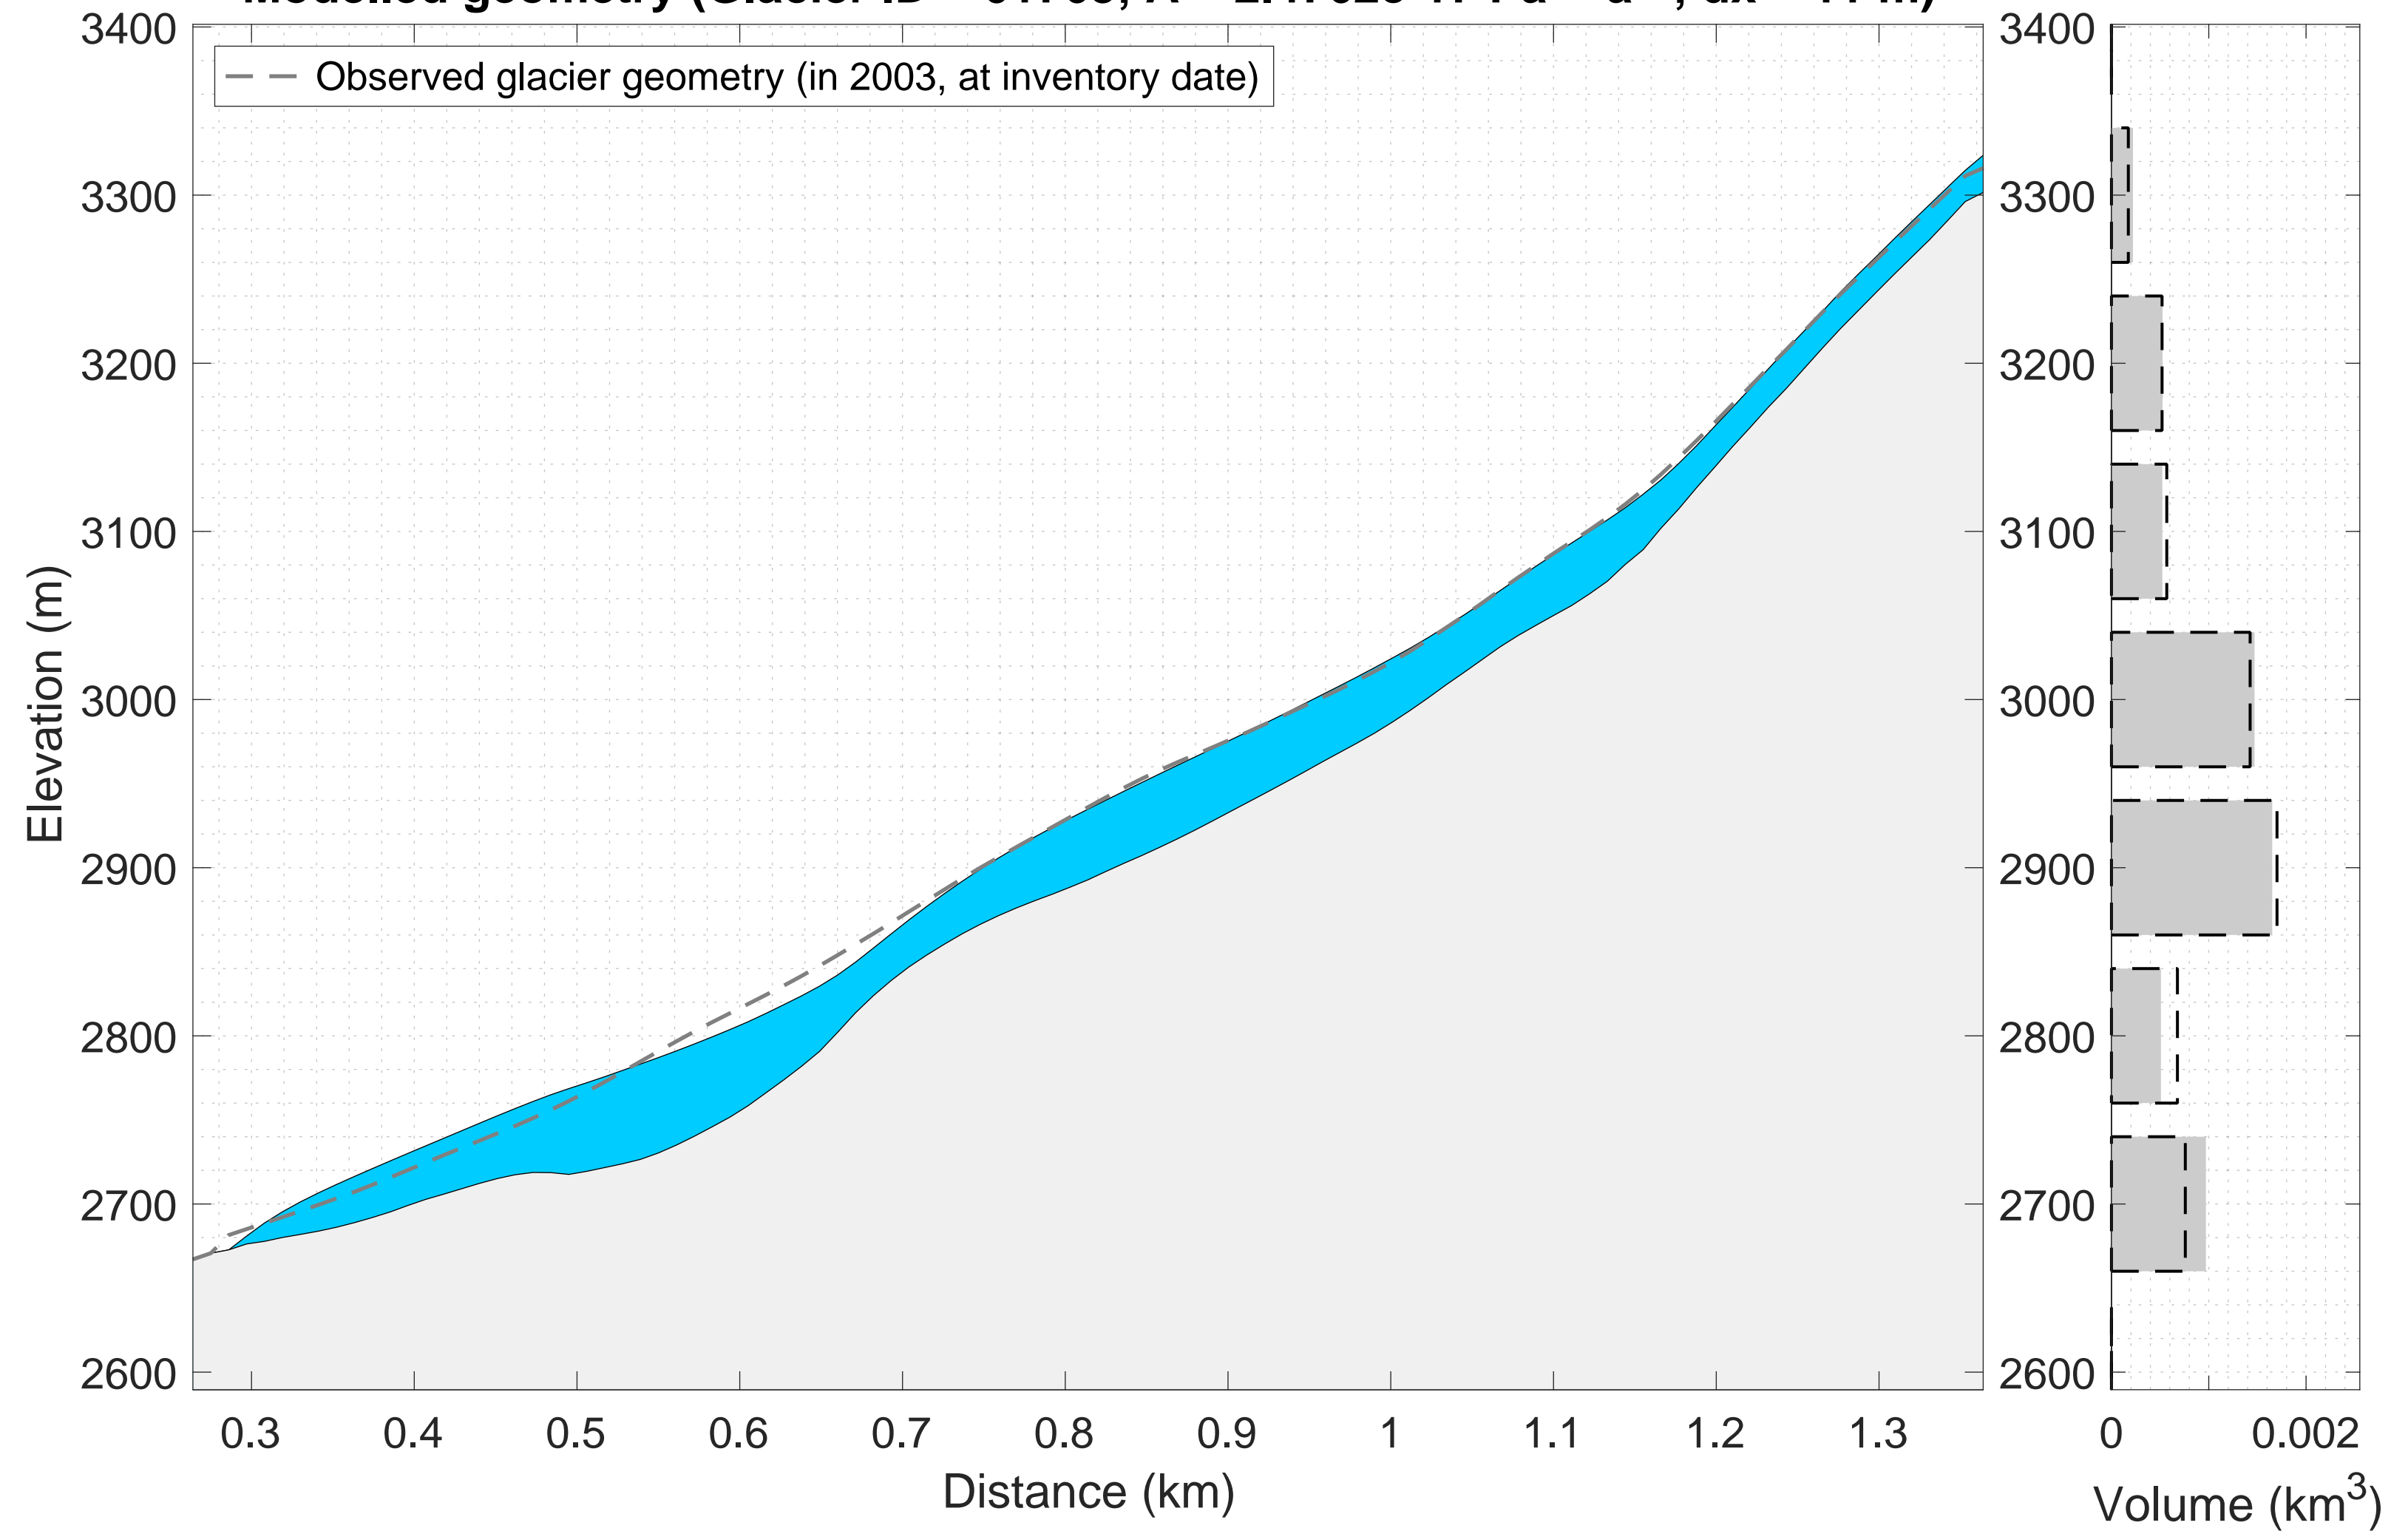

Supplement: Supplementary file 48 [file tc-13-1125-2019-supplement.zip]

**Modelled geometry (Glacier ID = 02797;  $A = 9.8898\text{e-}17 \text{ Pa}^{-3} \text{ a}^{-1}$ ;  $dx = 11 \text{ m}$ )**

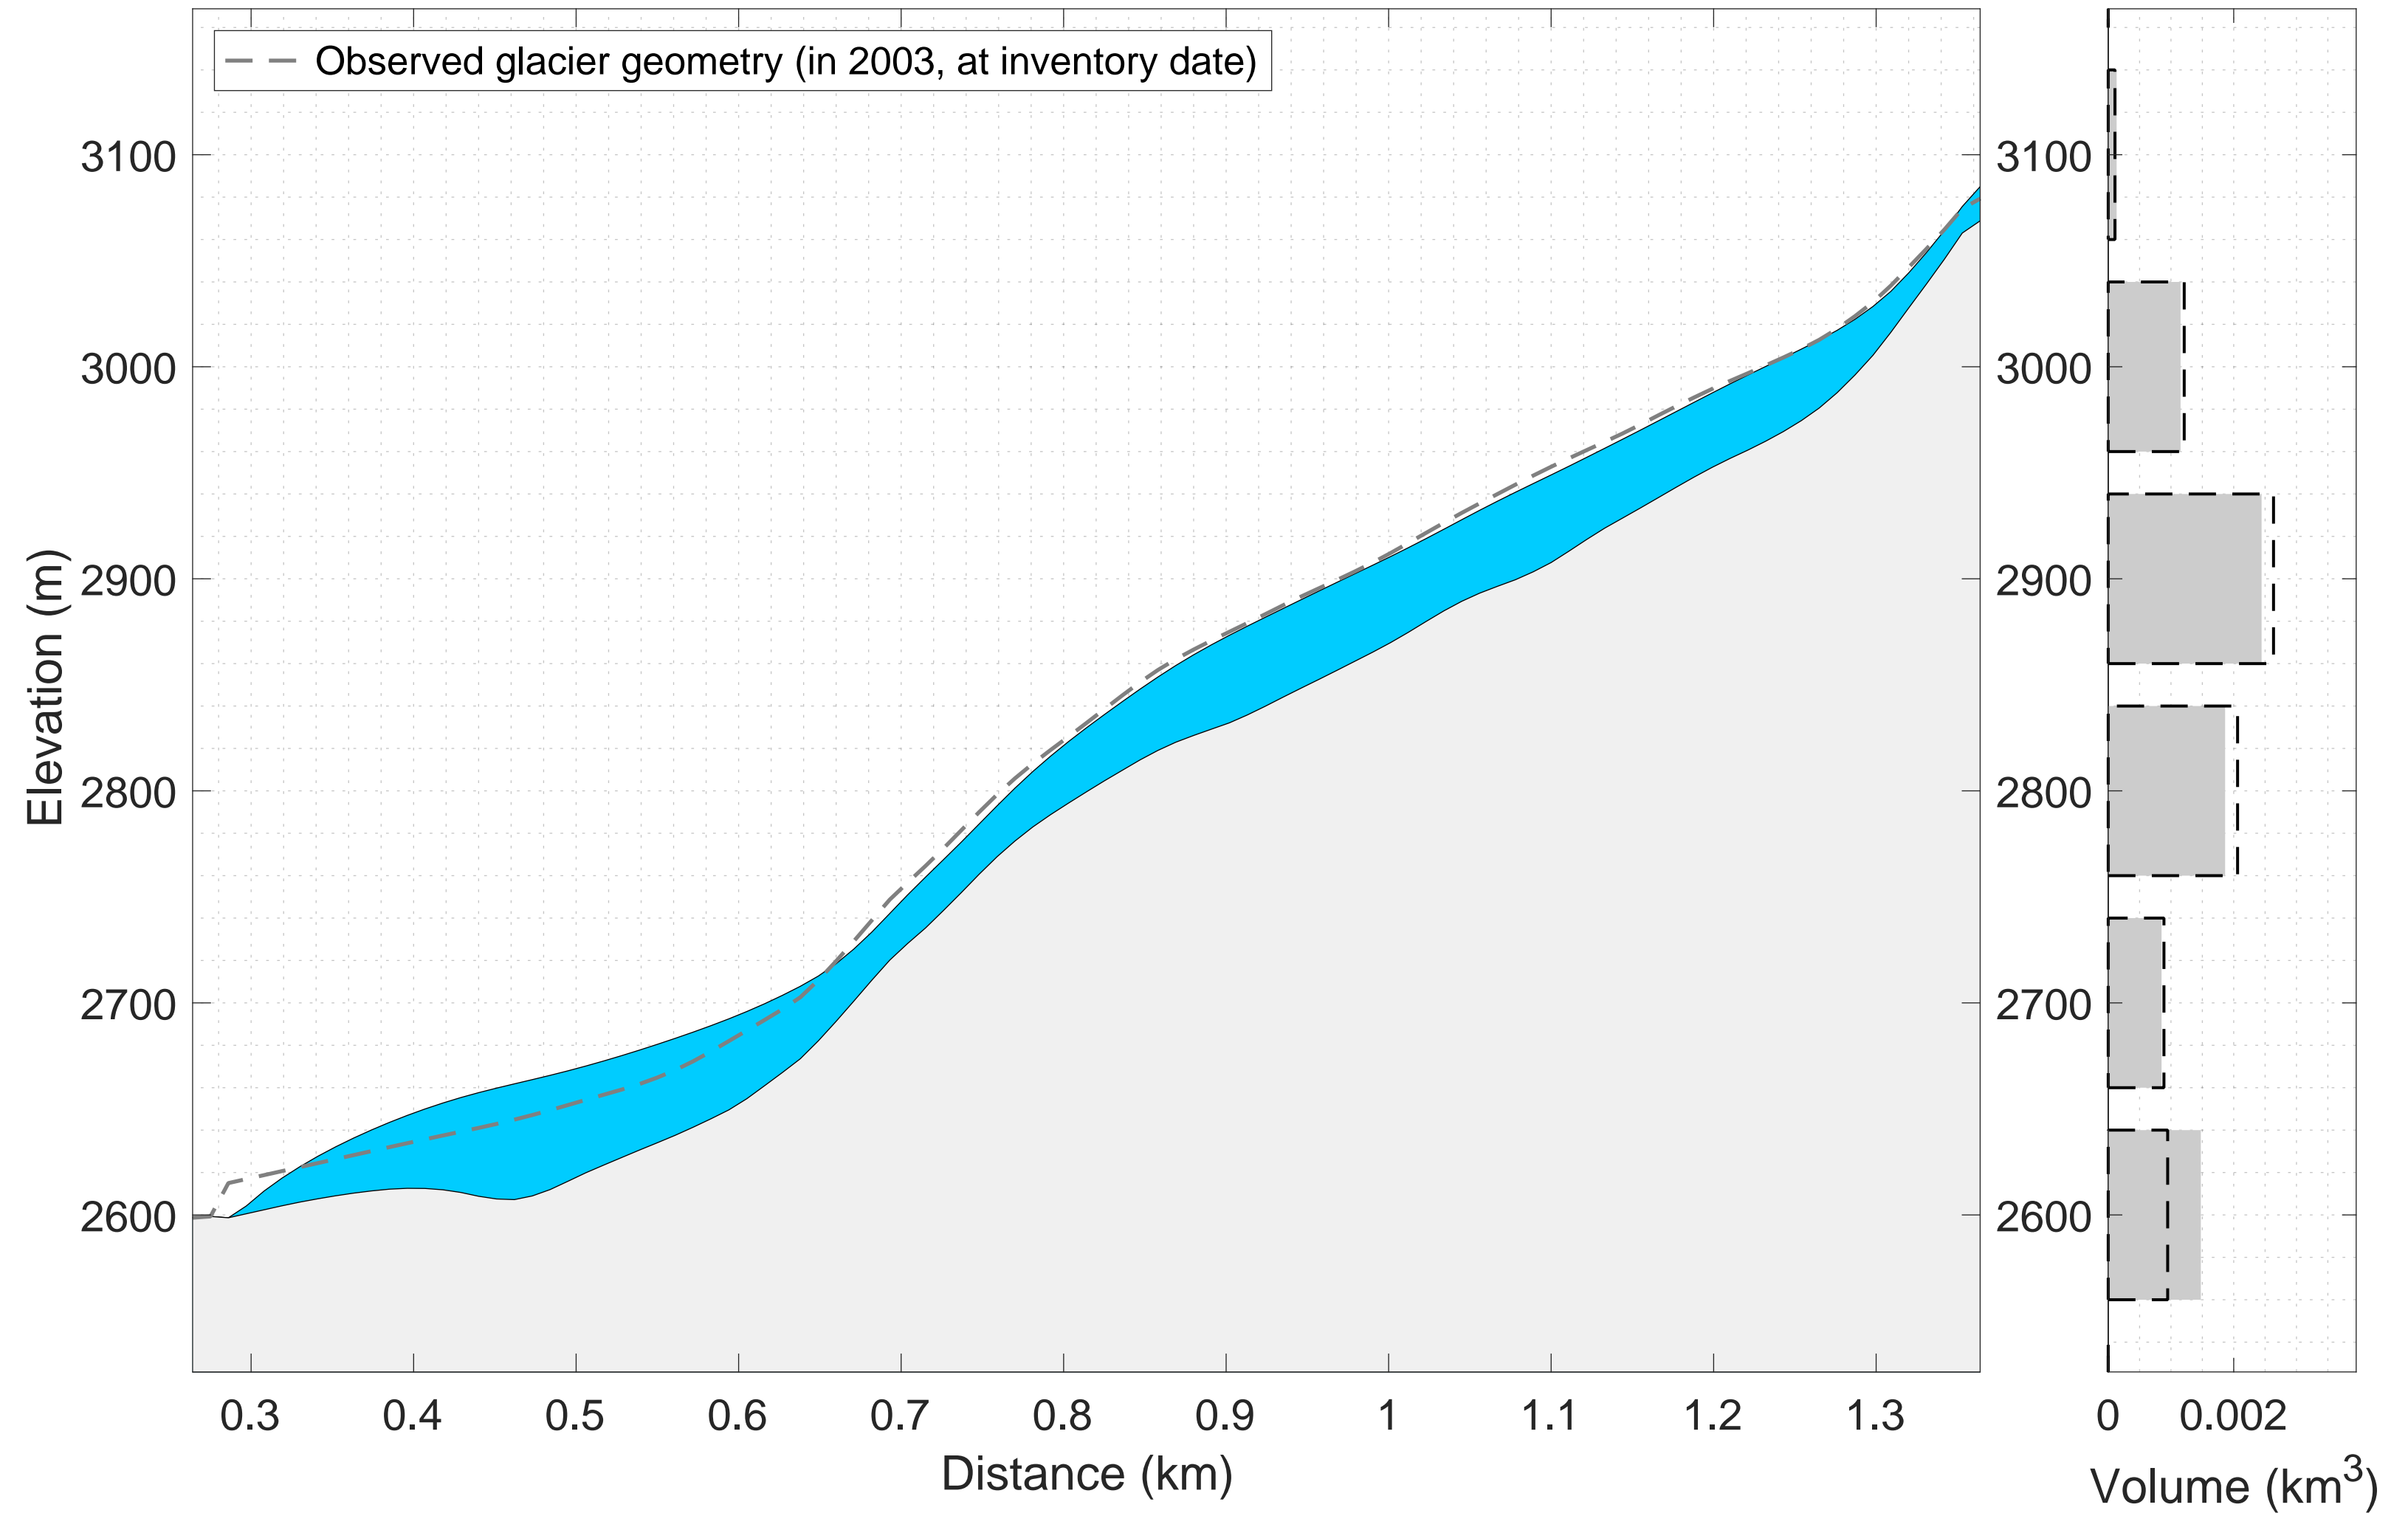

Supplement: Supplementary file 49 [file tc-13-1125-2019-supplement.zip]

**Modelled geometry (Glacier ID = 02245;  $A = 1.1945\text{e-}16 \text{ Pa}^{-3} \text{ a}^{-1}$ ;  $dx = 57 \text{ m}$ )**

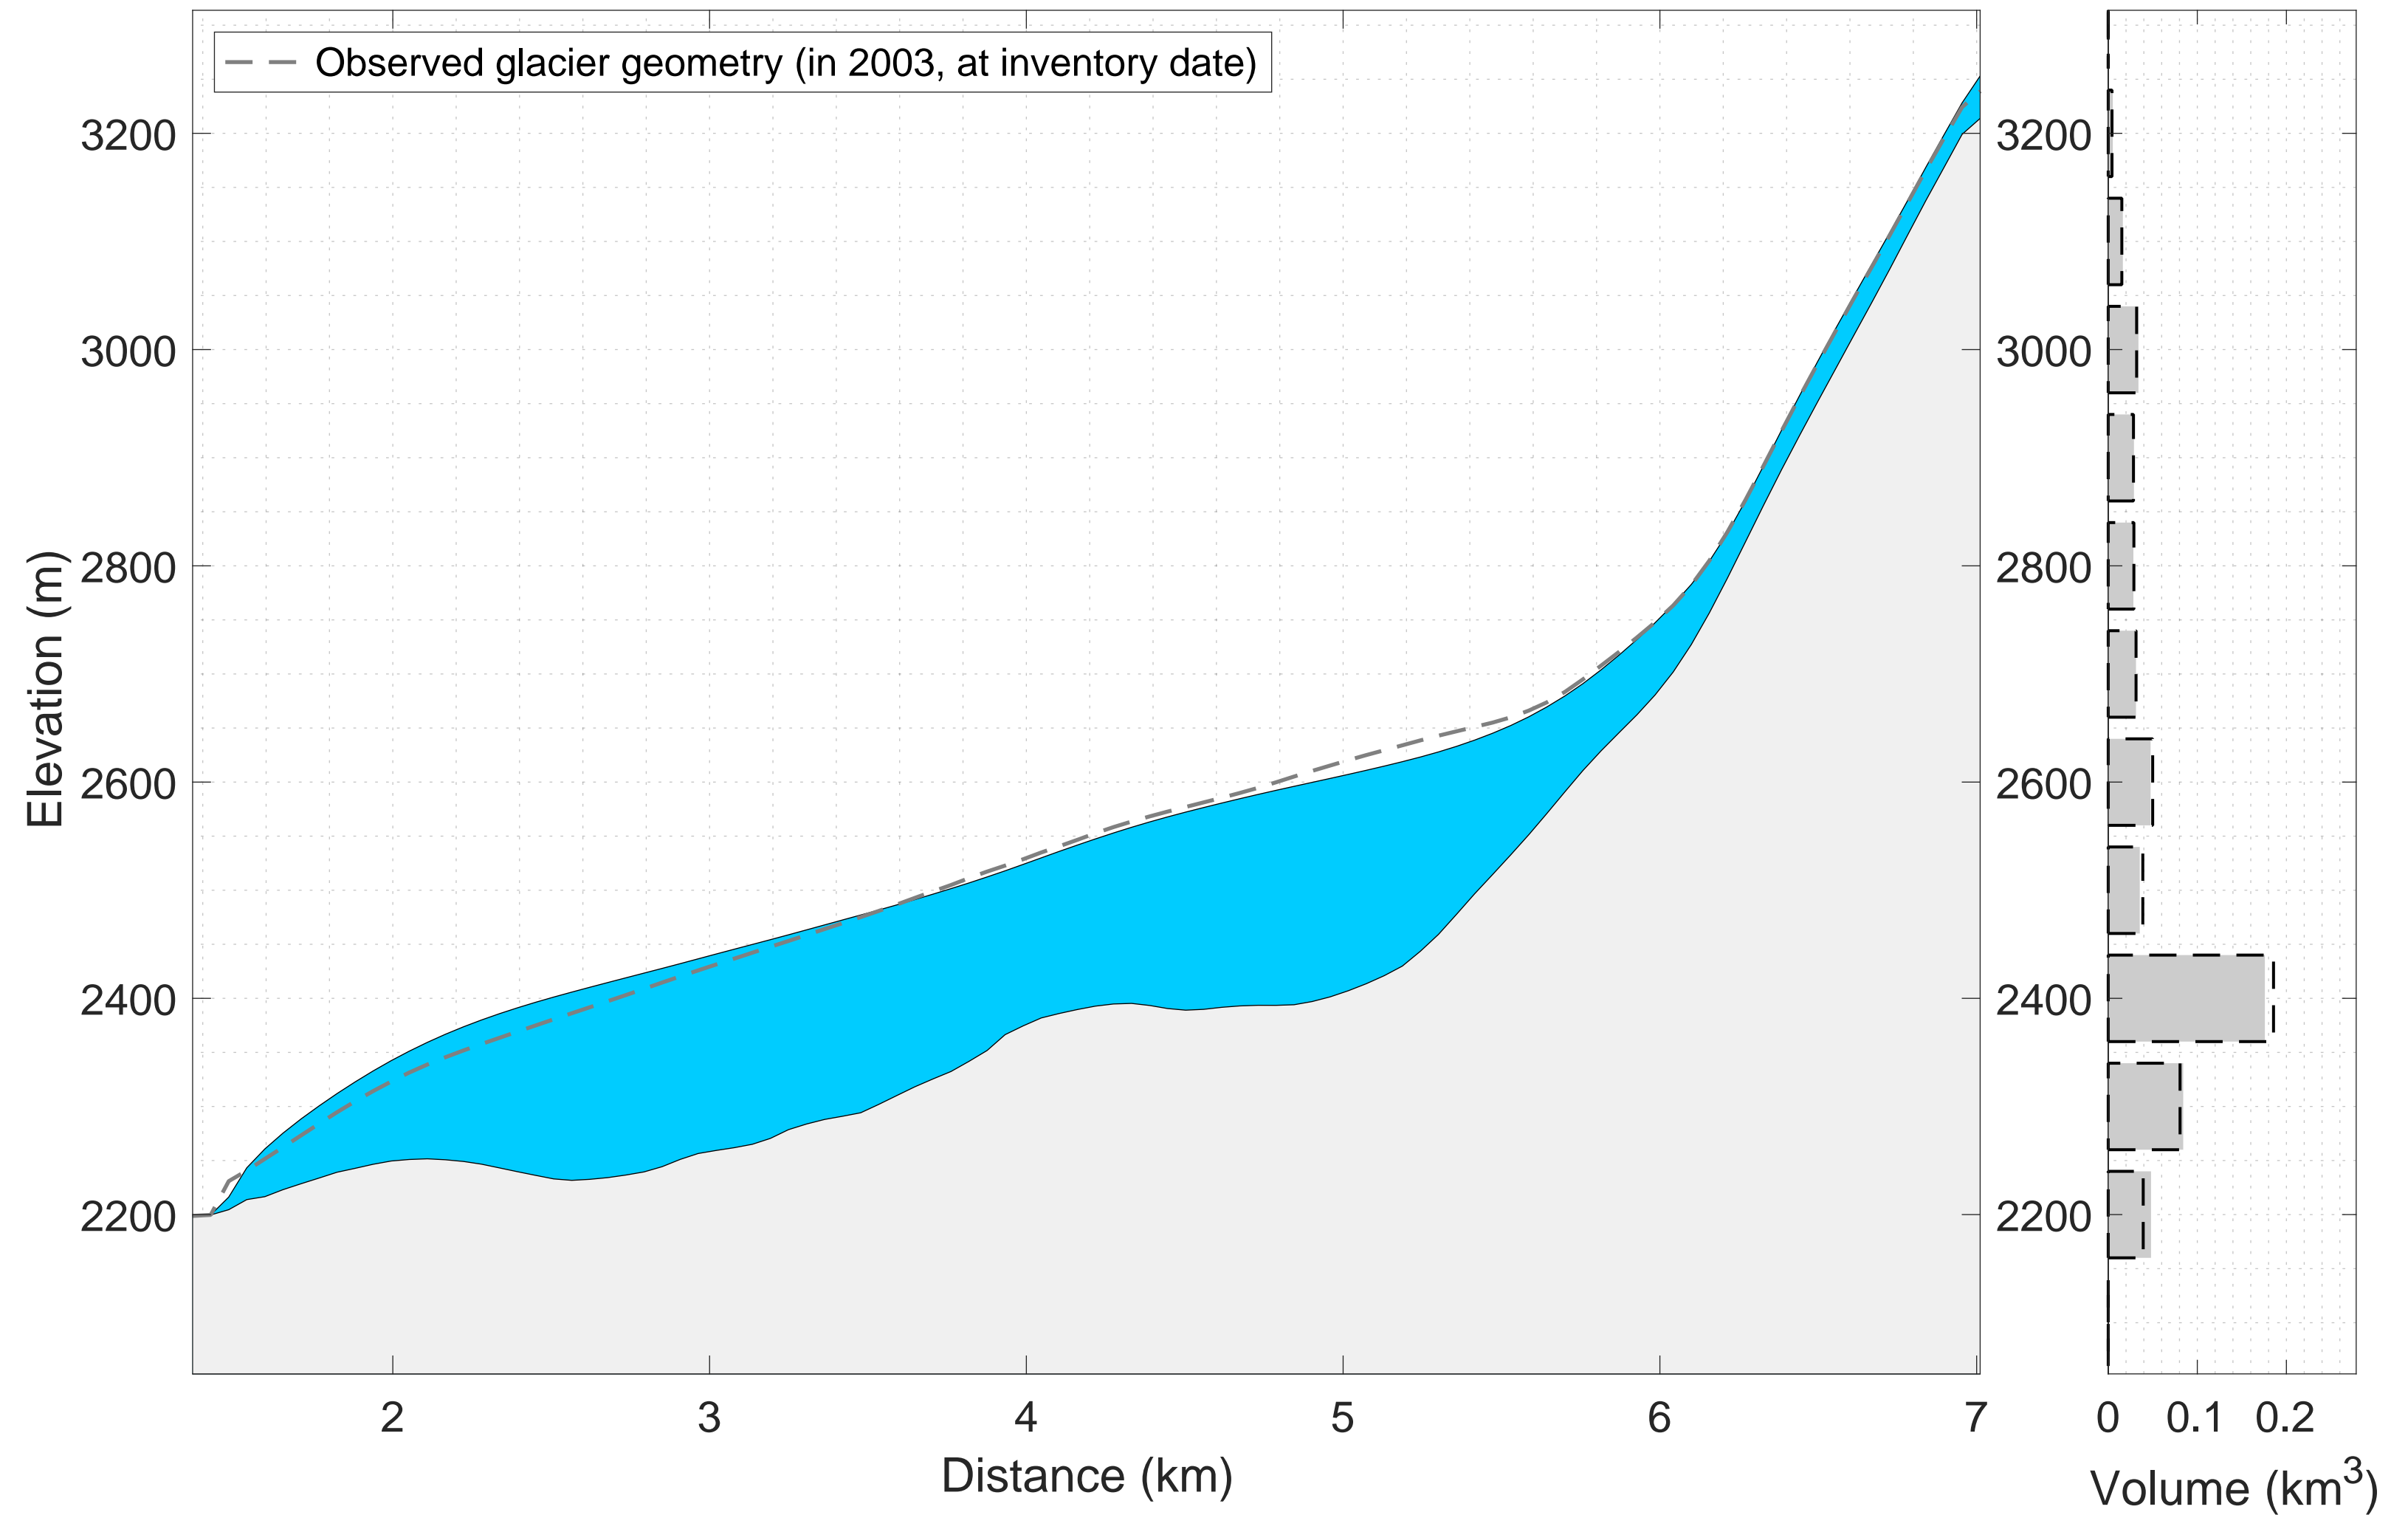

Supplement: Supplementary file 50 [file tc-13-1125-2019-supplement.zip]

**Modelled geometry (Glacier ID = 01669;  $A = 9.0065\text{e-}17 \text{ Pa}^{-3} \text{ a}^{-1}$ ;  $dx = 16 \text{ m}$ )**

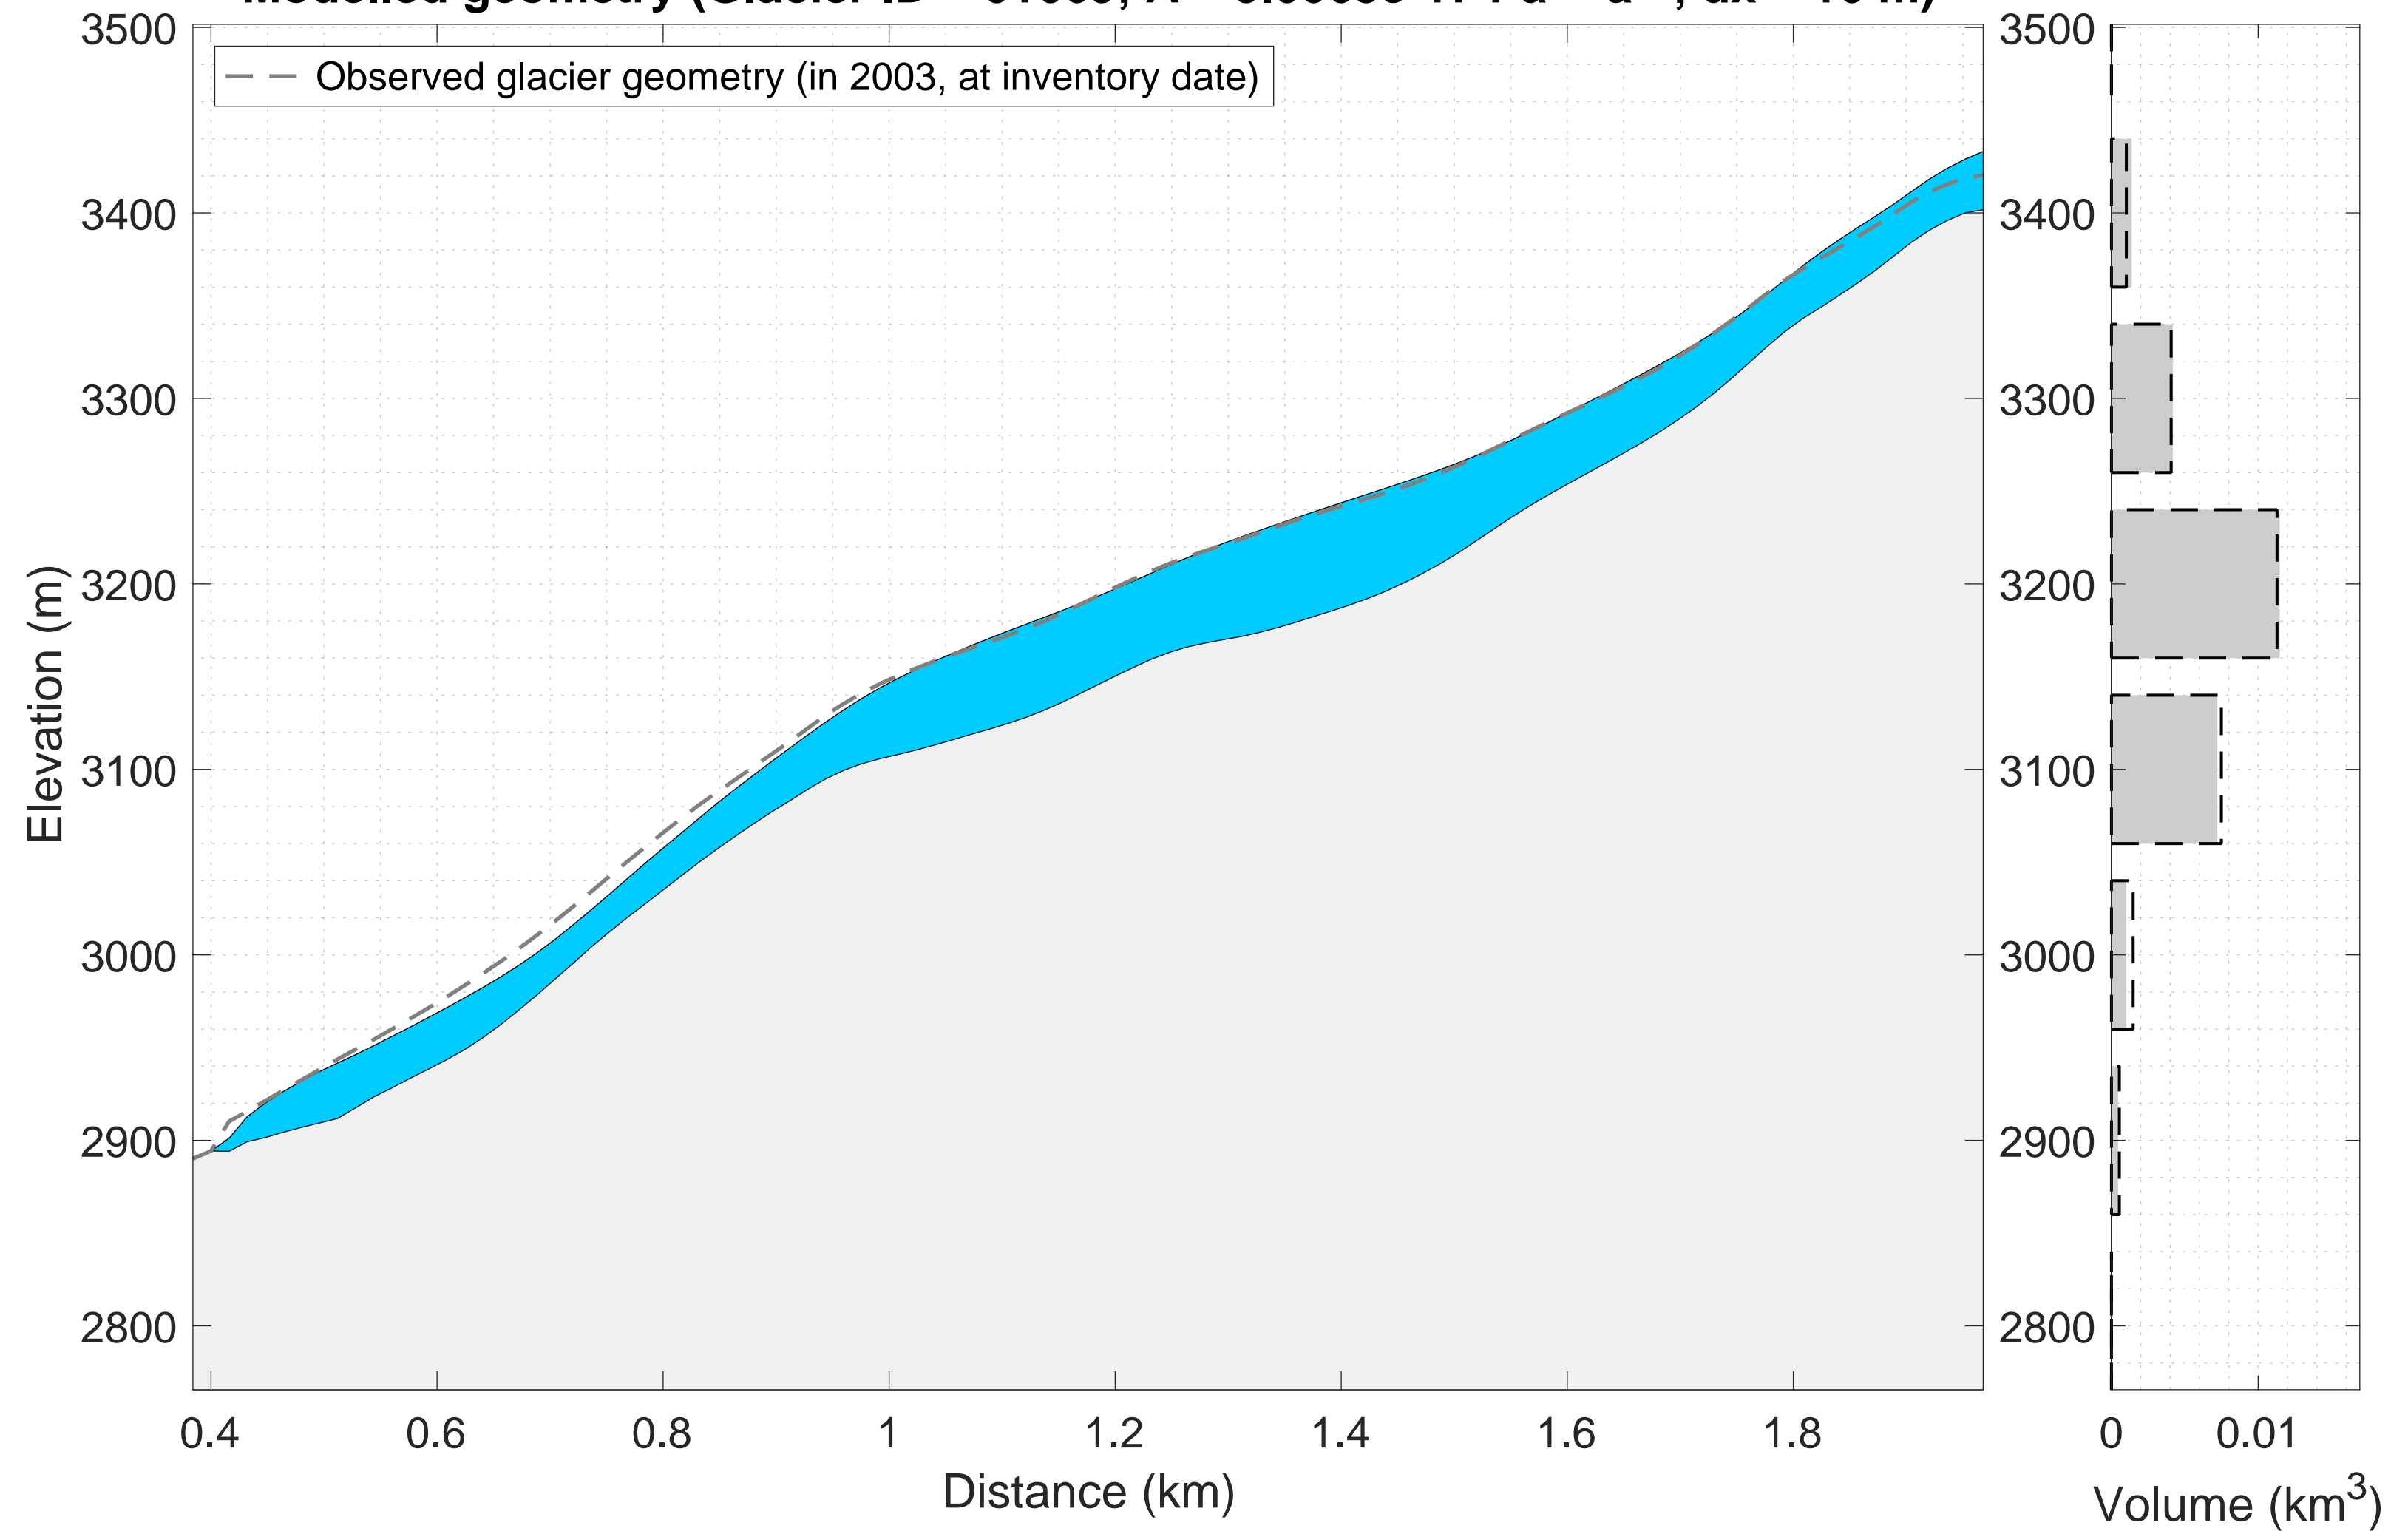

Supplement: Supplementary file 51 [file tc-13-1125-2019-supplement.zip]

**Modelled geometry (Glacier ID = 00463;  $A = 8.7881\text{e-}17 \text{ Pa}^{-3} \text{ a}^{-1}$ ;  $dx = 12 \text{ m}$ )**

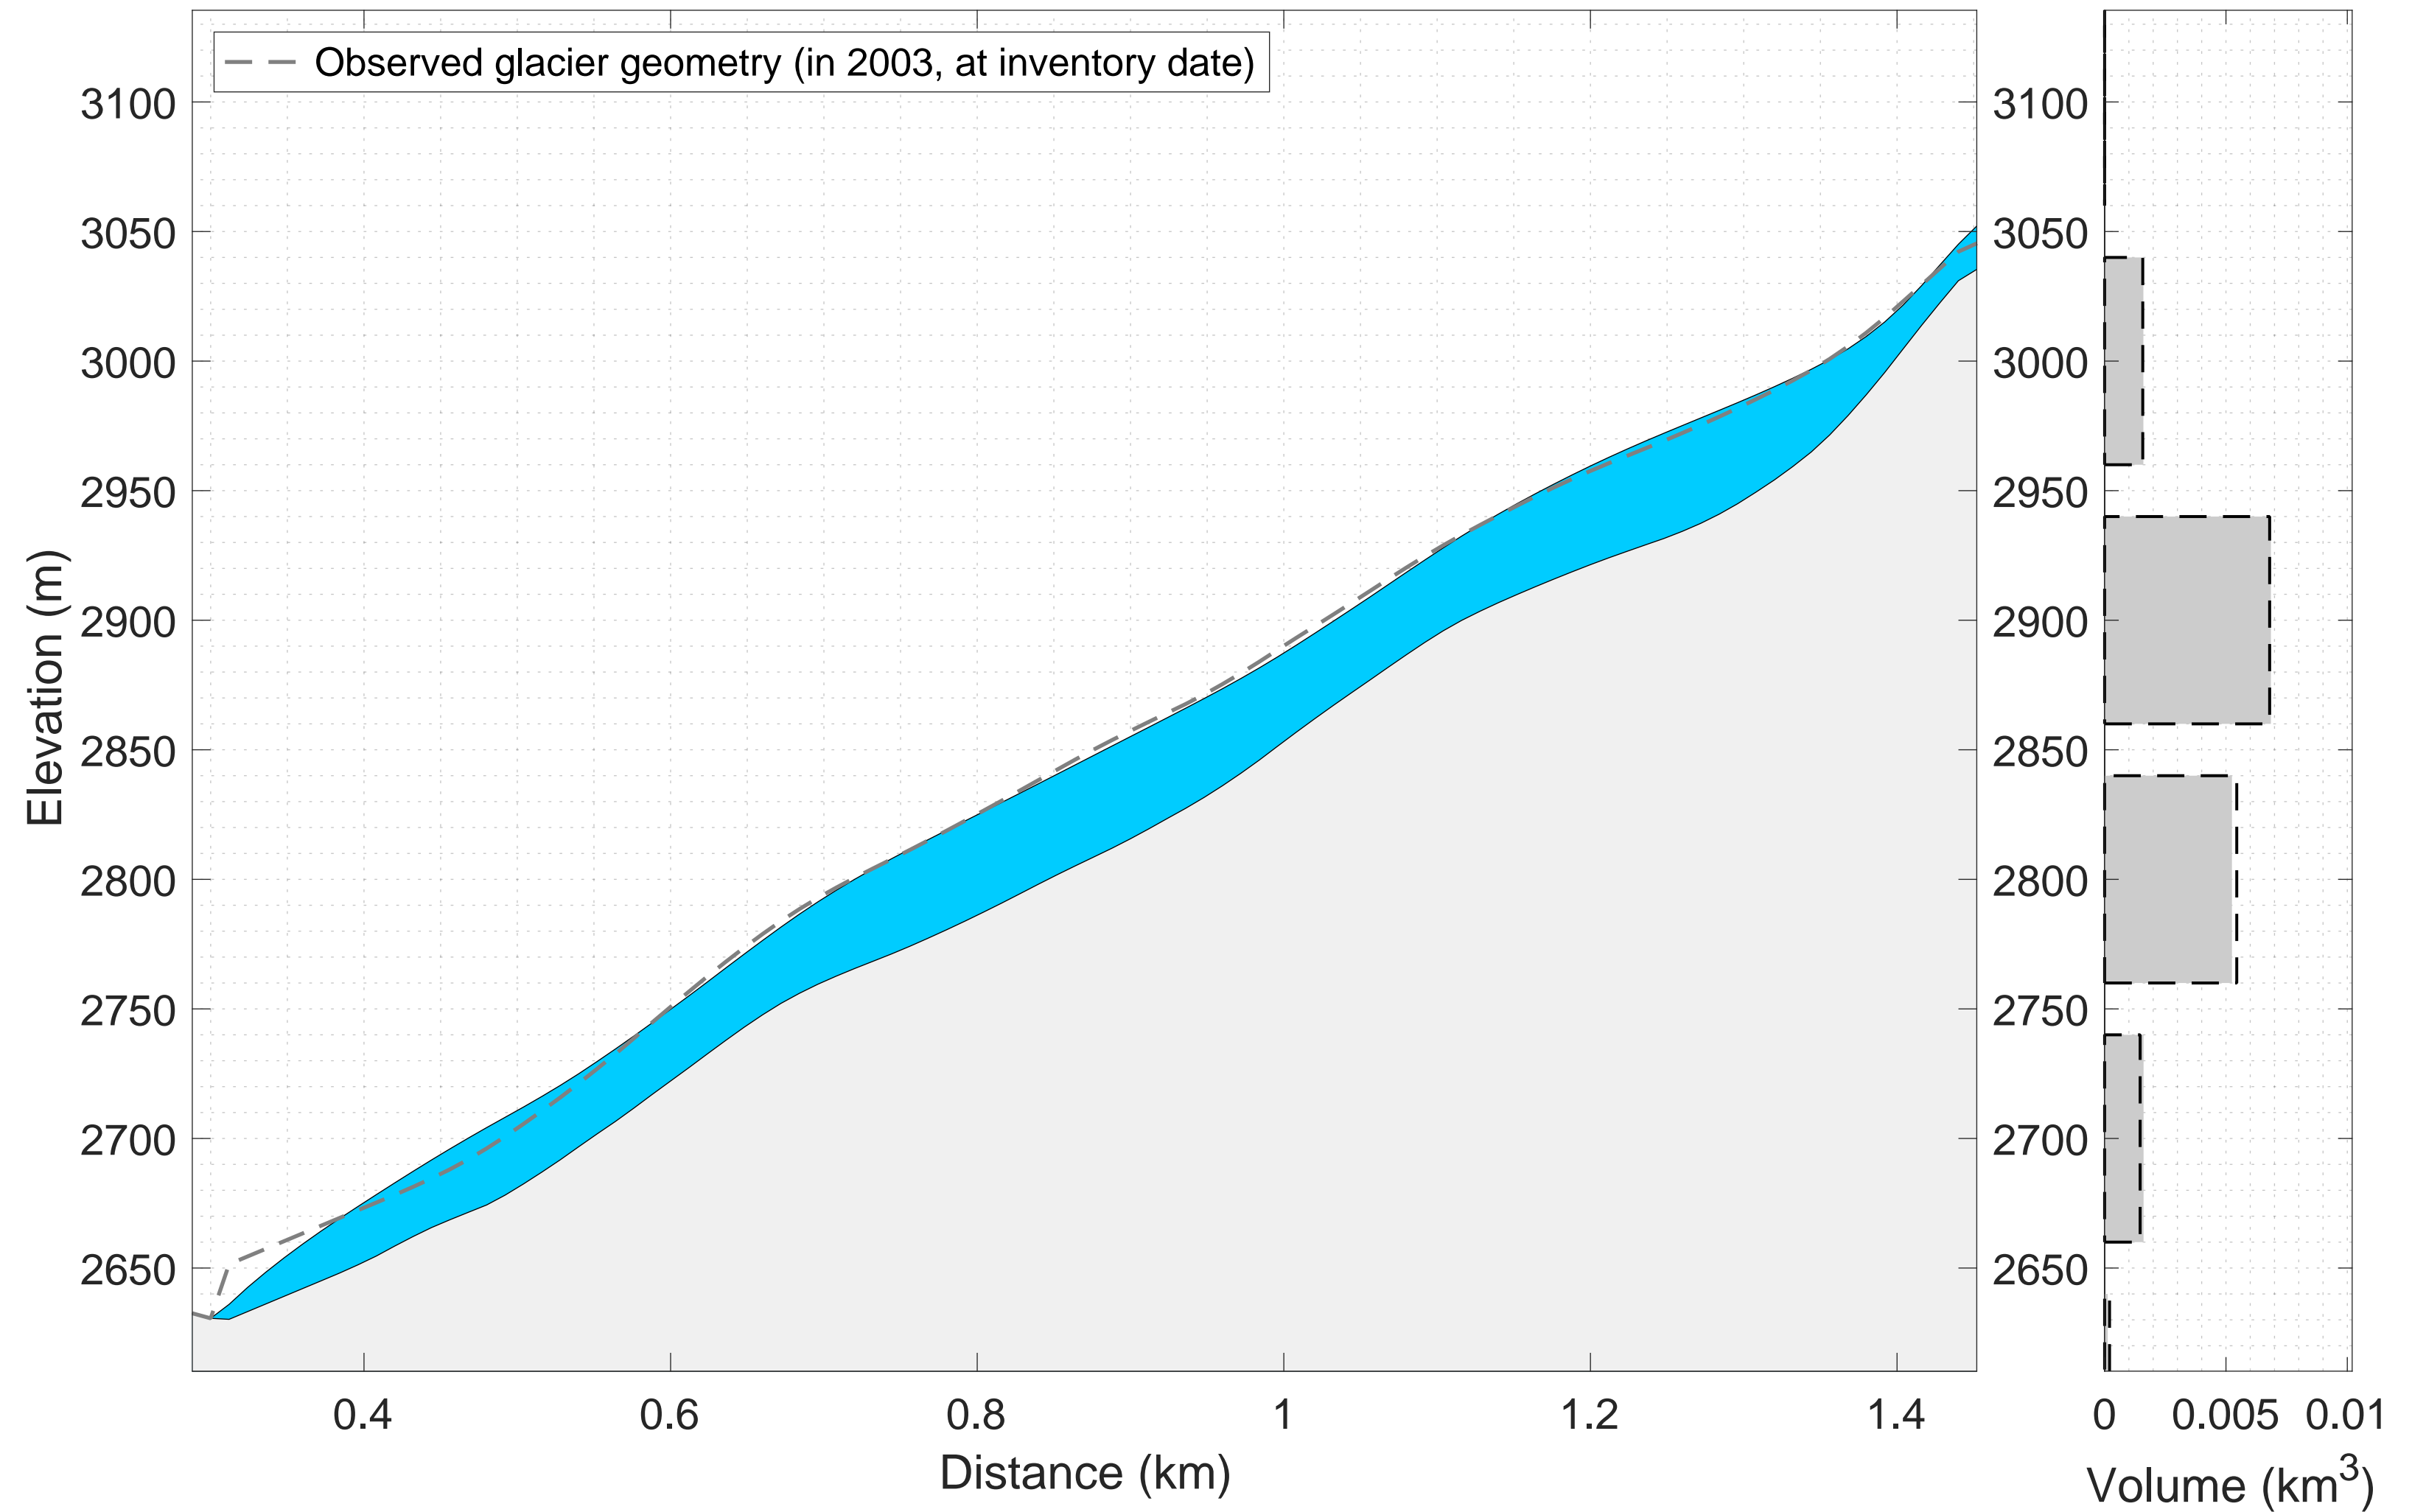

Supplement: Supplementary file 52 [file tc-13-1125-2019-supplement.zip]

**Modelled geometry (Glacier ID = 02898;  $A = 1.6491\text{e-}16 \text{ Pa}^{-3} \text{ a}^{-1}$ ;  $dx = 20 \text{ m}$ )**

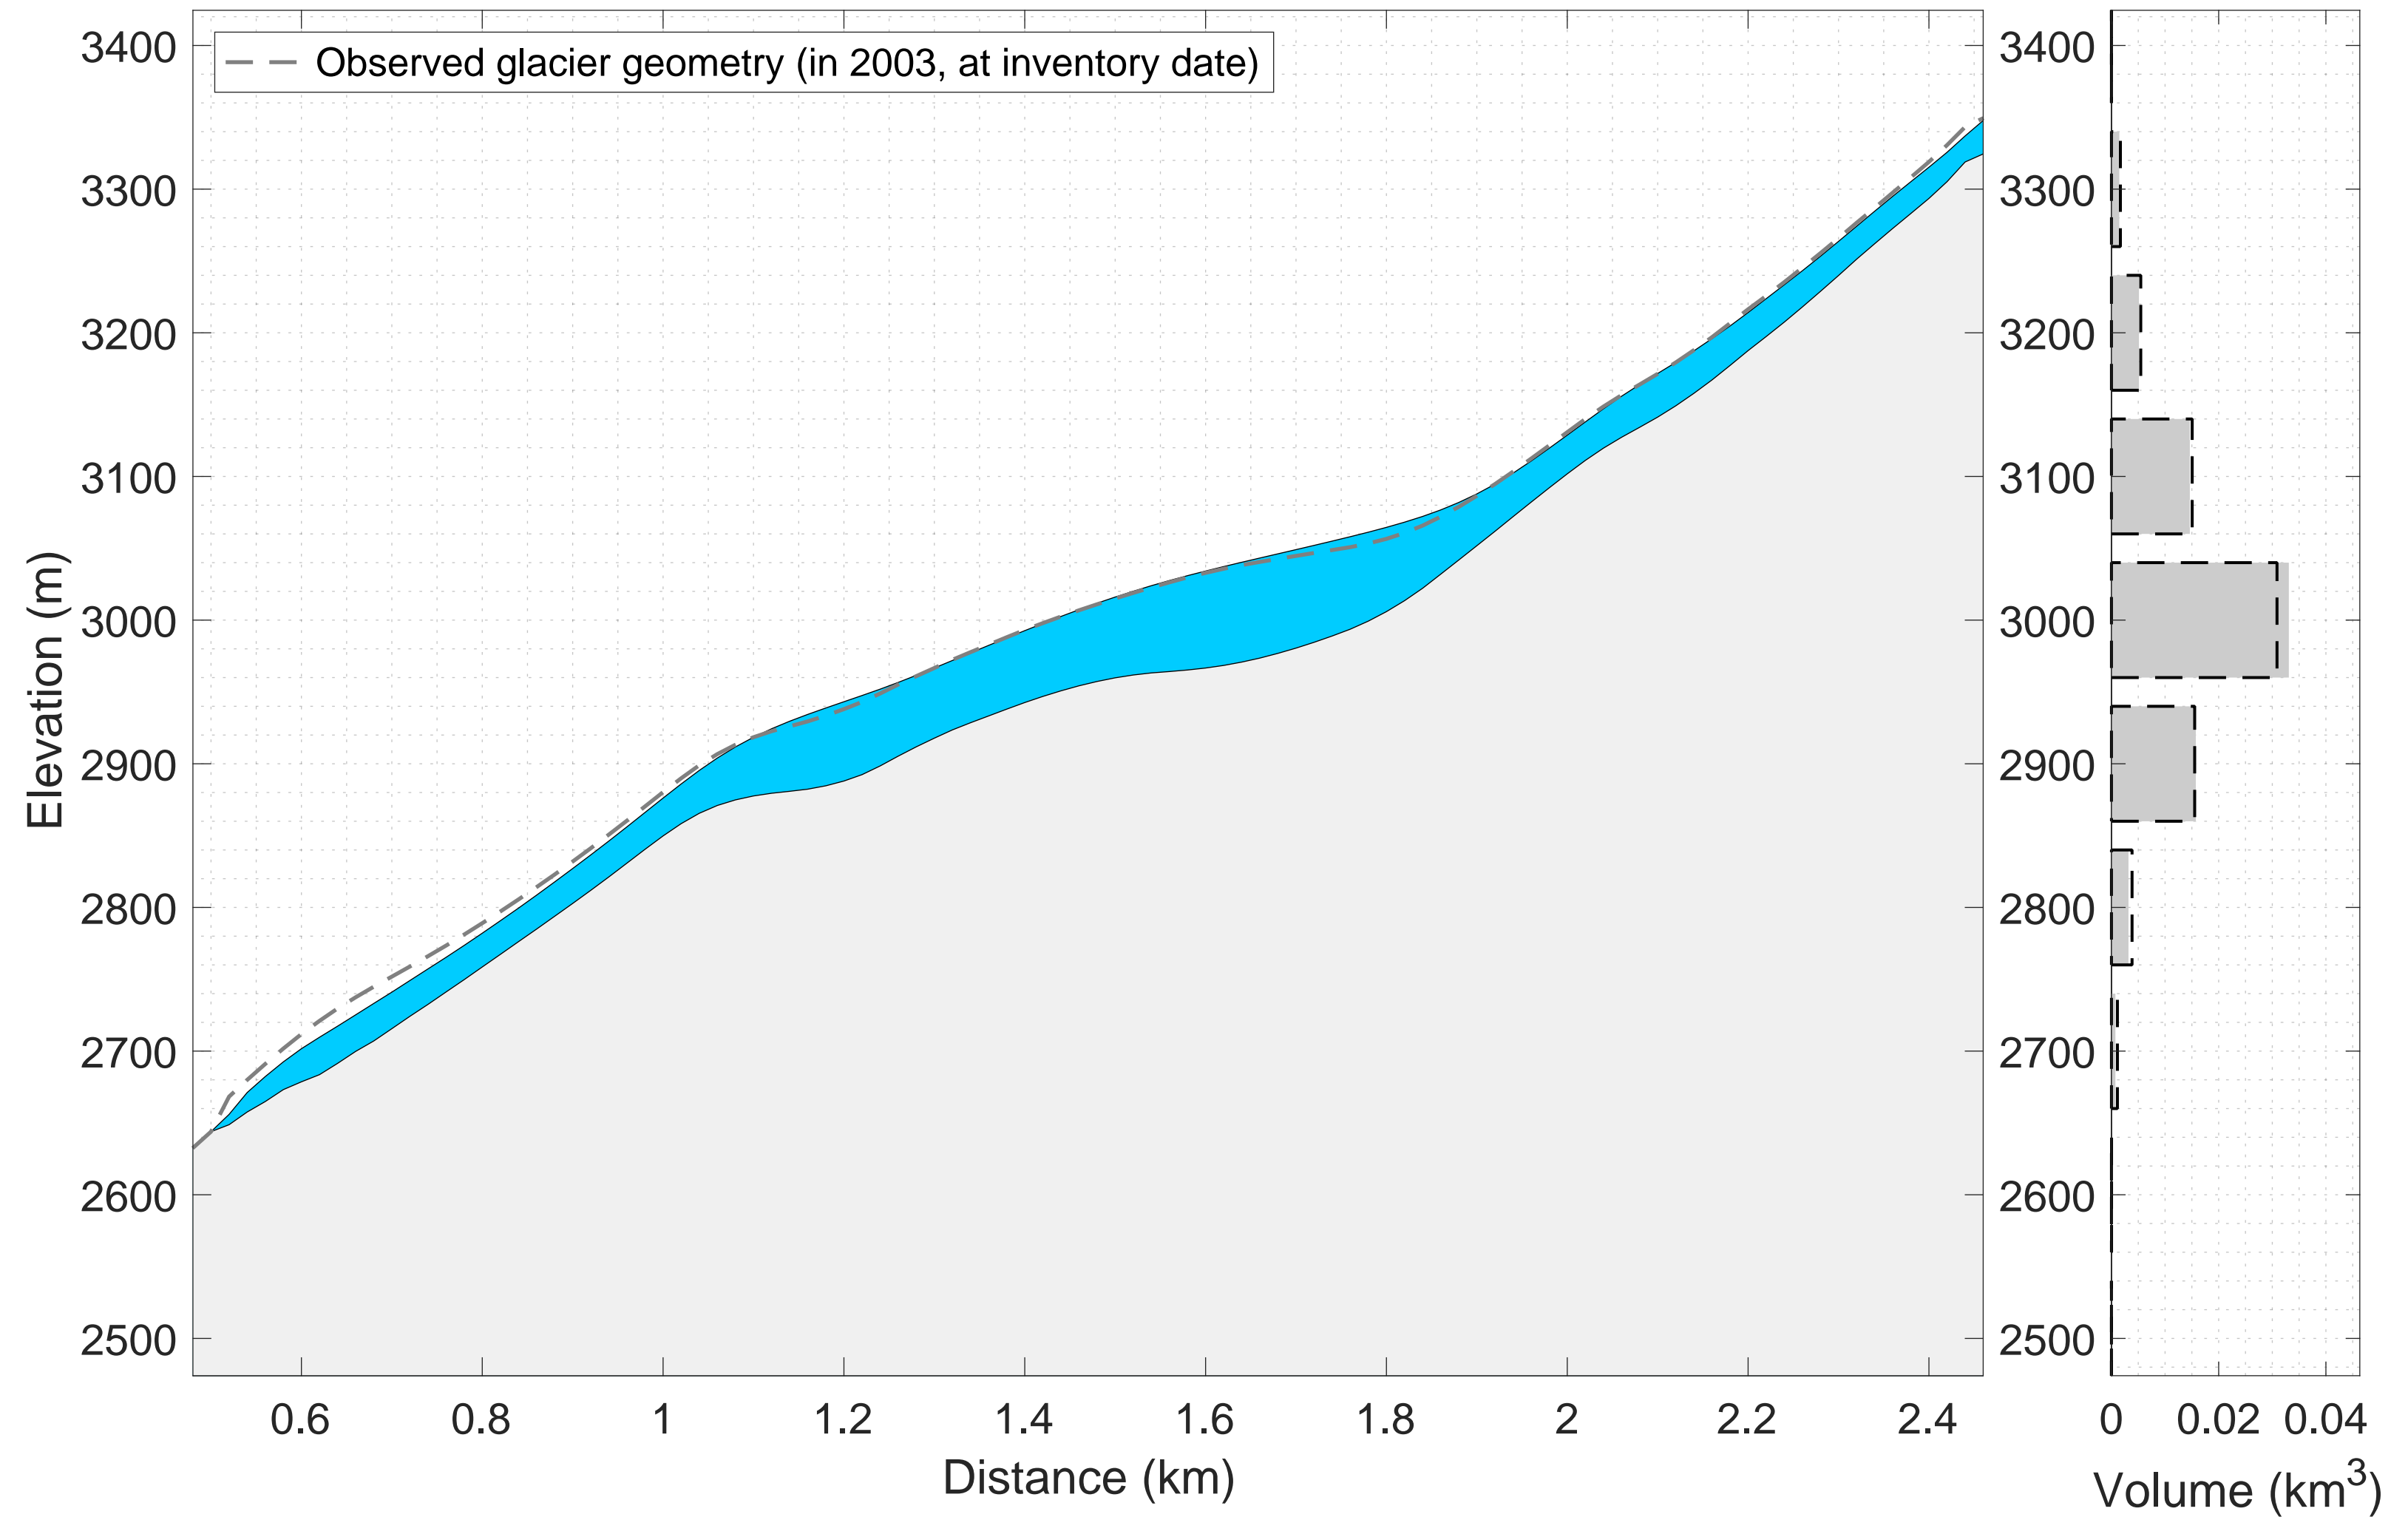

Supplement: Supplementary file 53 [file tc-13-1125-2019-supplement.zip]

**Modelled geometry (Glacier ID = 00797;  $A = 1.7363\text{e-}16 \text{ Pa}^{-3} \text{ a}^{-1}$ ;  $dx = 24 \text{ m}$ )**

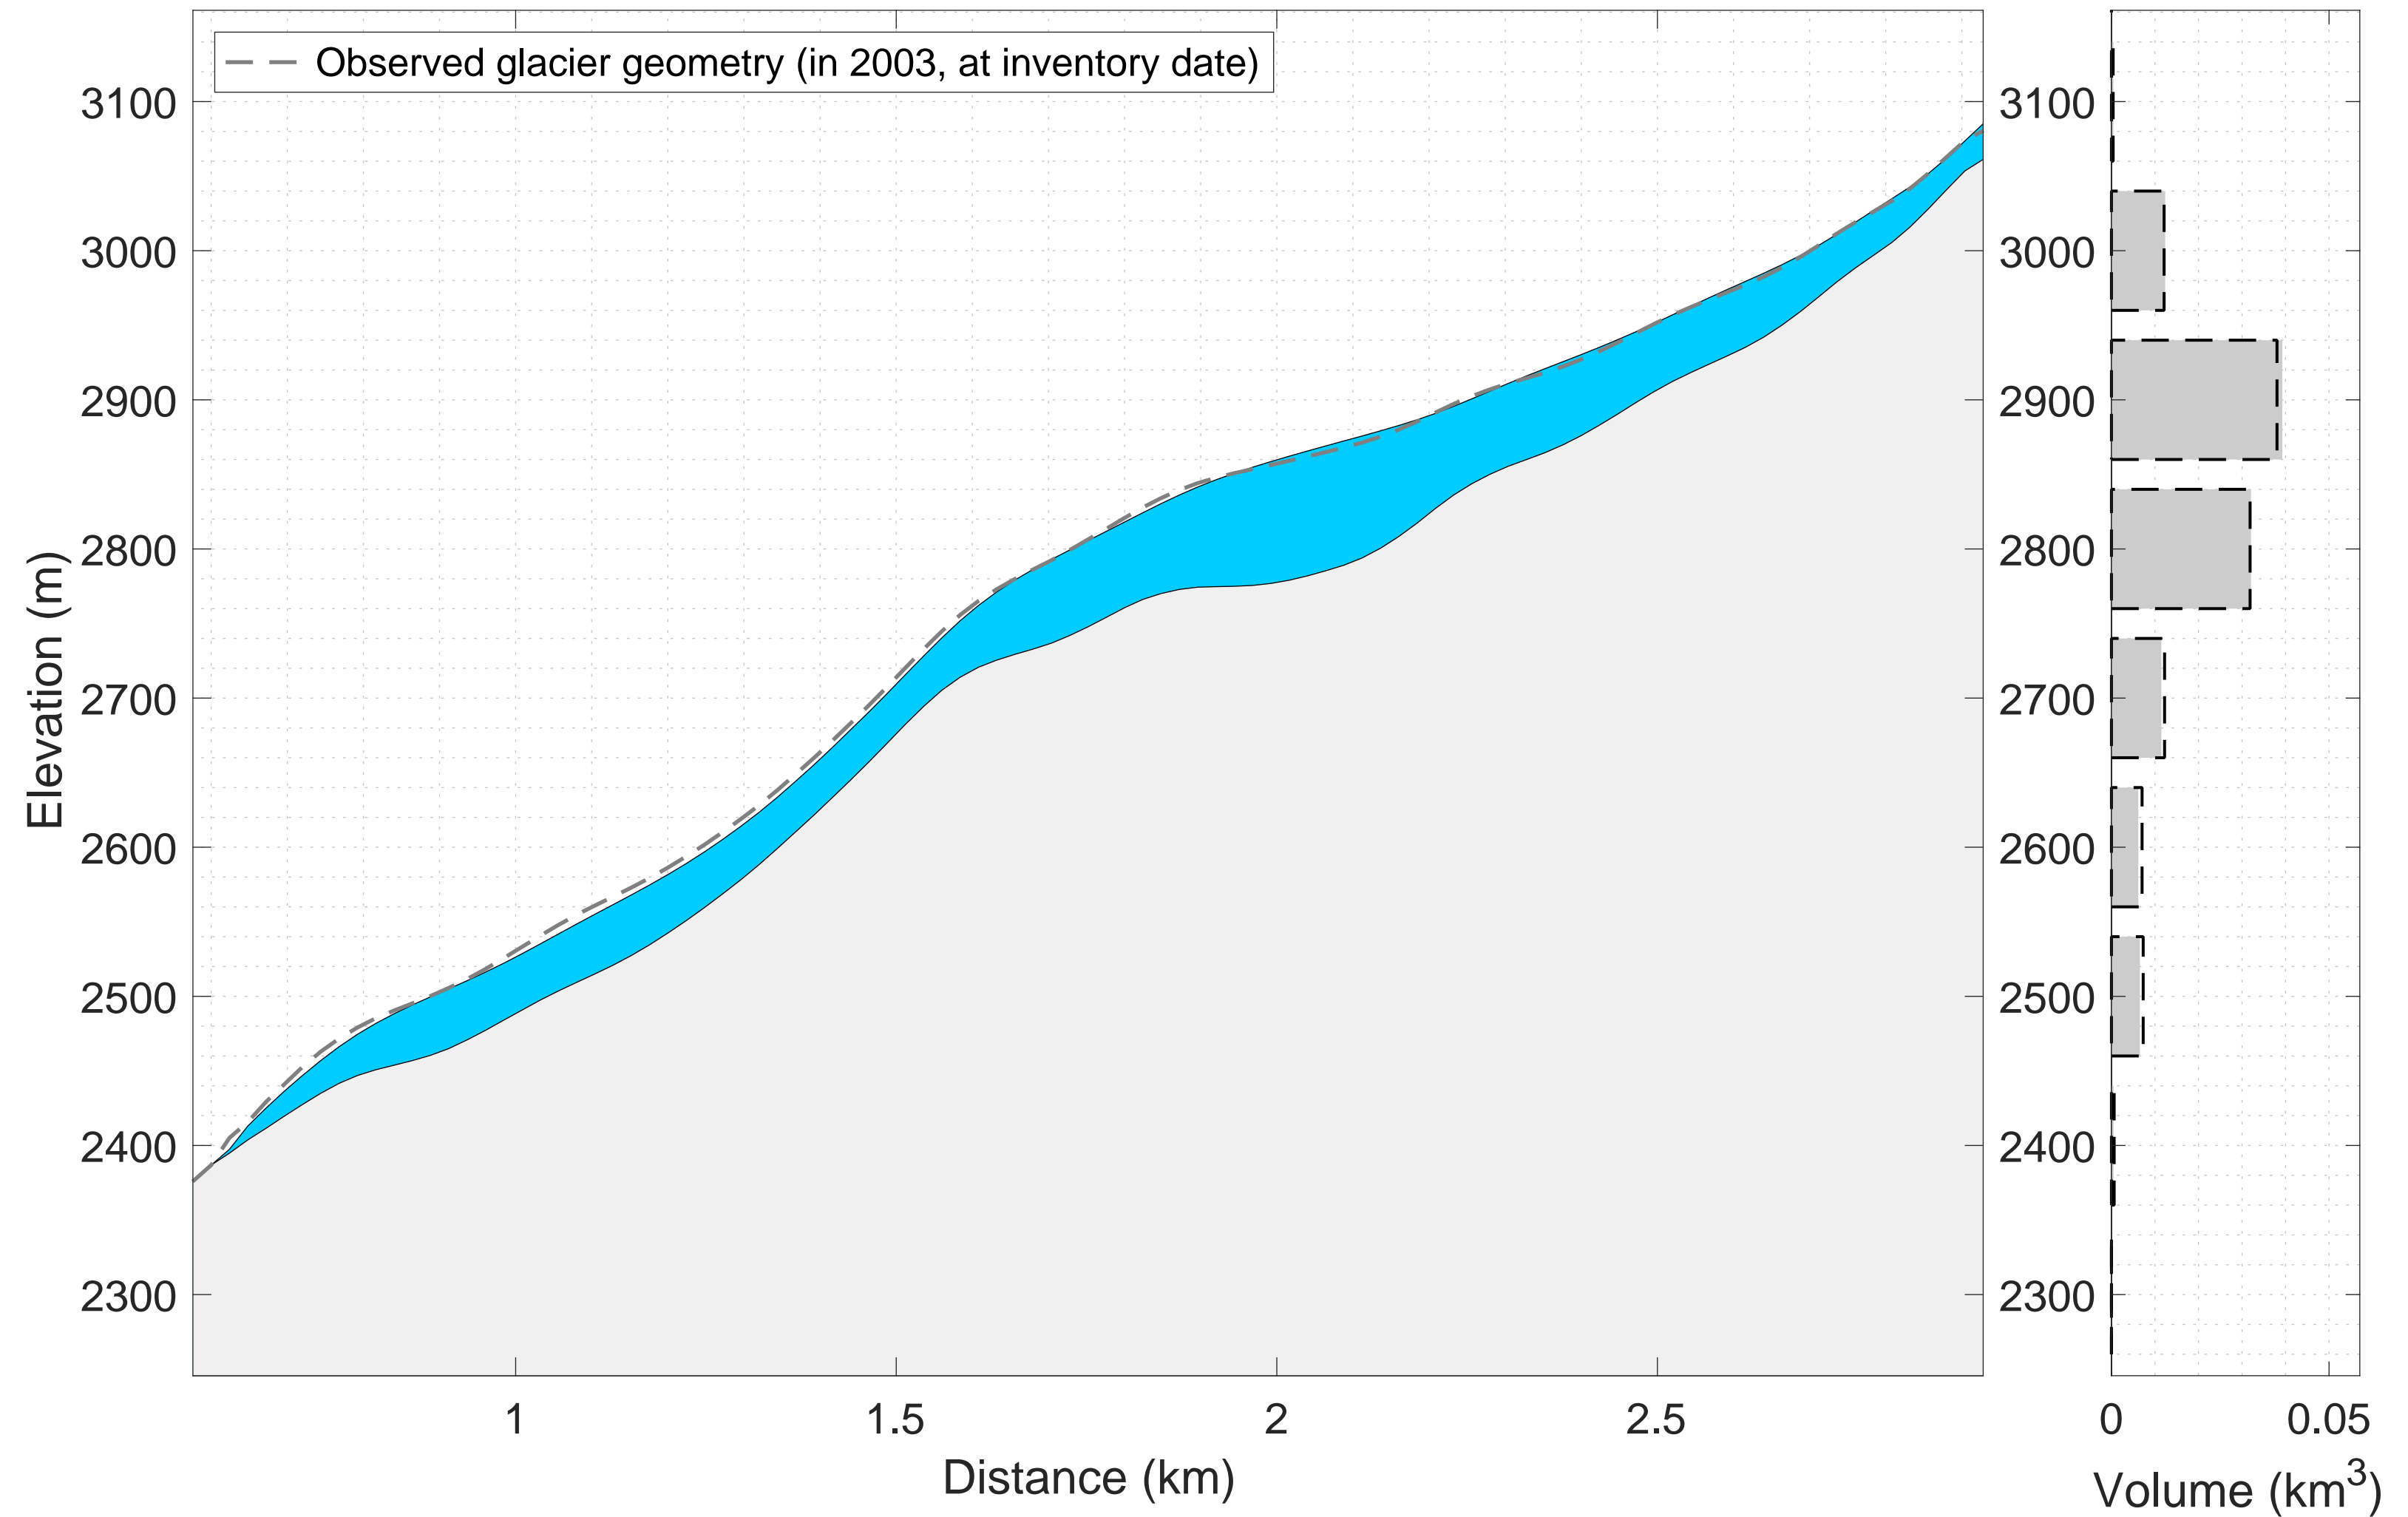

Supplement: Supplementary file 54 [file tc-13-1125-2019-supplement.zip]

**Modelled geometry (Glacier ID = 02663;  $A = 1.0293\text{e-}16 \text{ Pa}^{-3} \text{ a}^{-1}$ ;  $dx = 11 \text{ m}$ )**

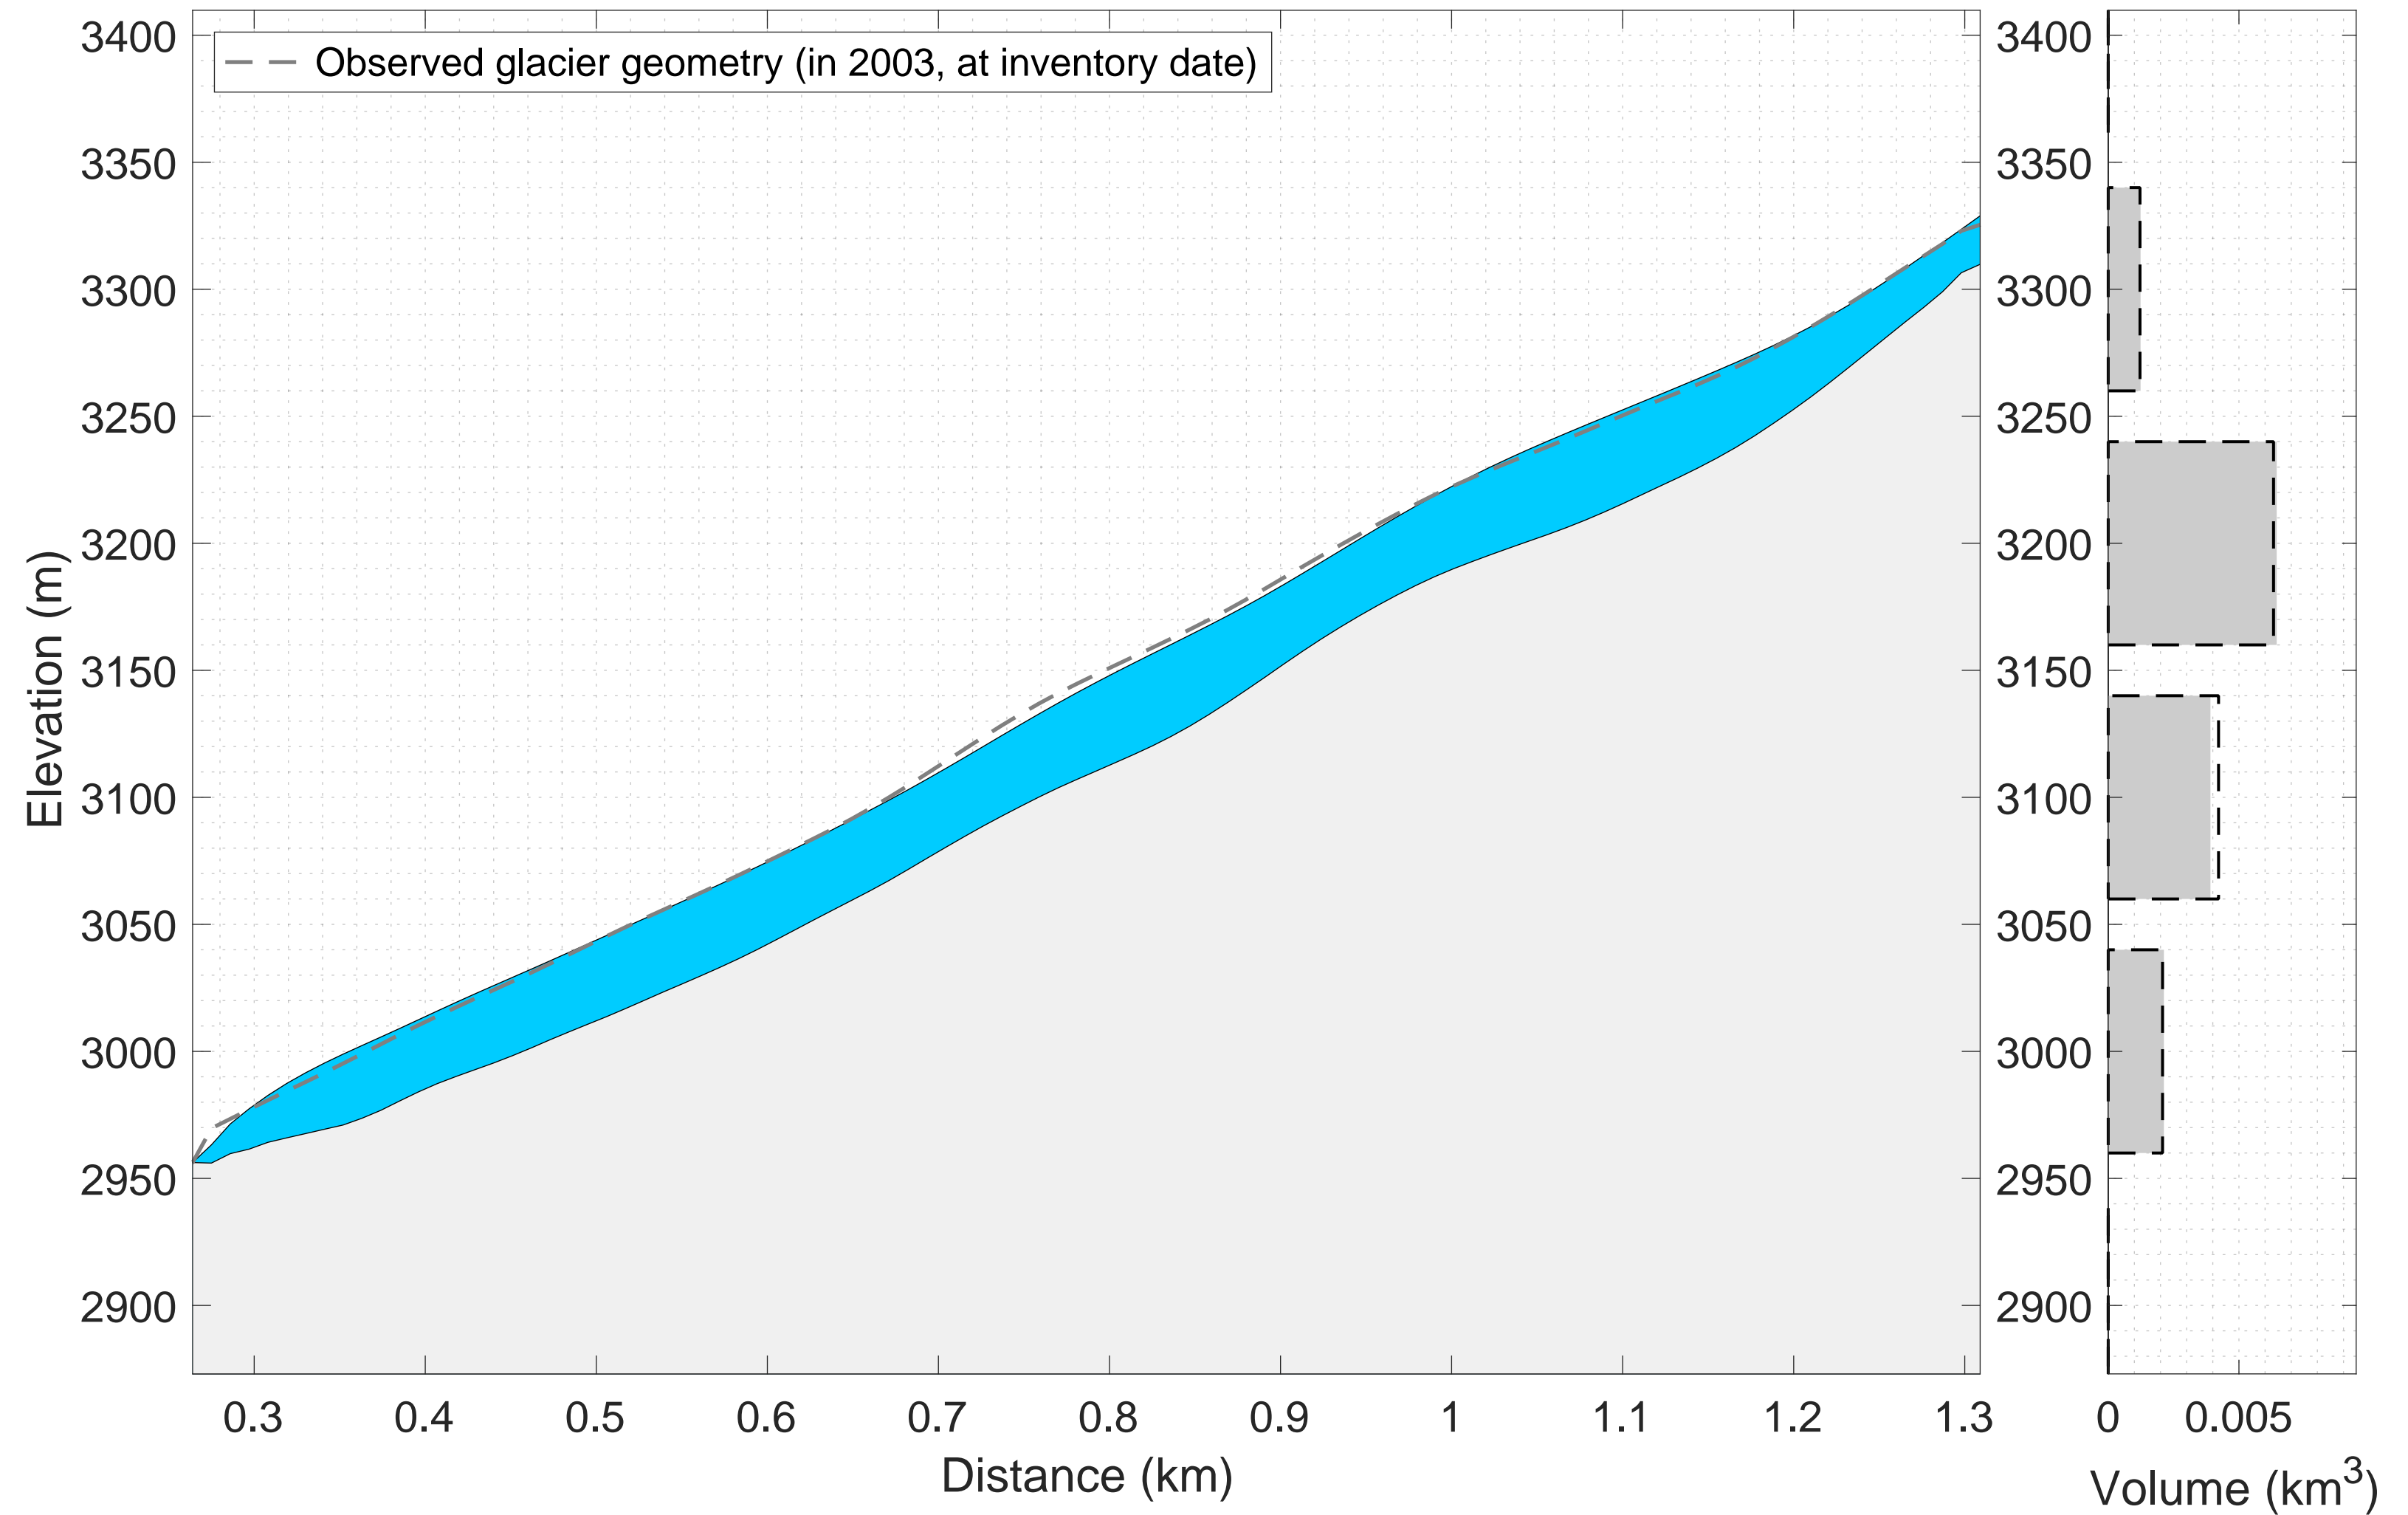

Supplement: Supplementary file 55 [file tc-13-1125-2019-supplement.zip]

**Modelled geometry (Glacier ID = 00597;  $A = 1.7605\text{e-}16 \text{ Pa}^{-3} \text{ a}^{-1}$ ;  $dx = 46 \text{ m}$ )**

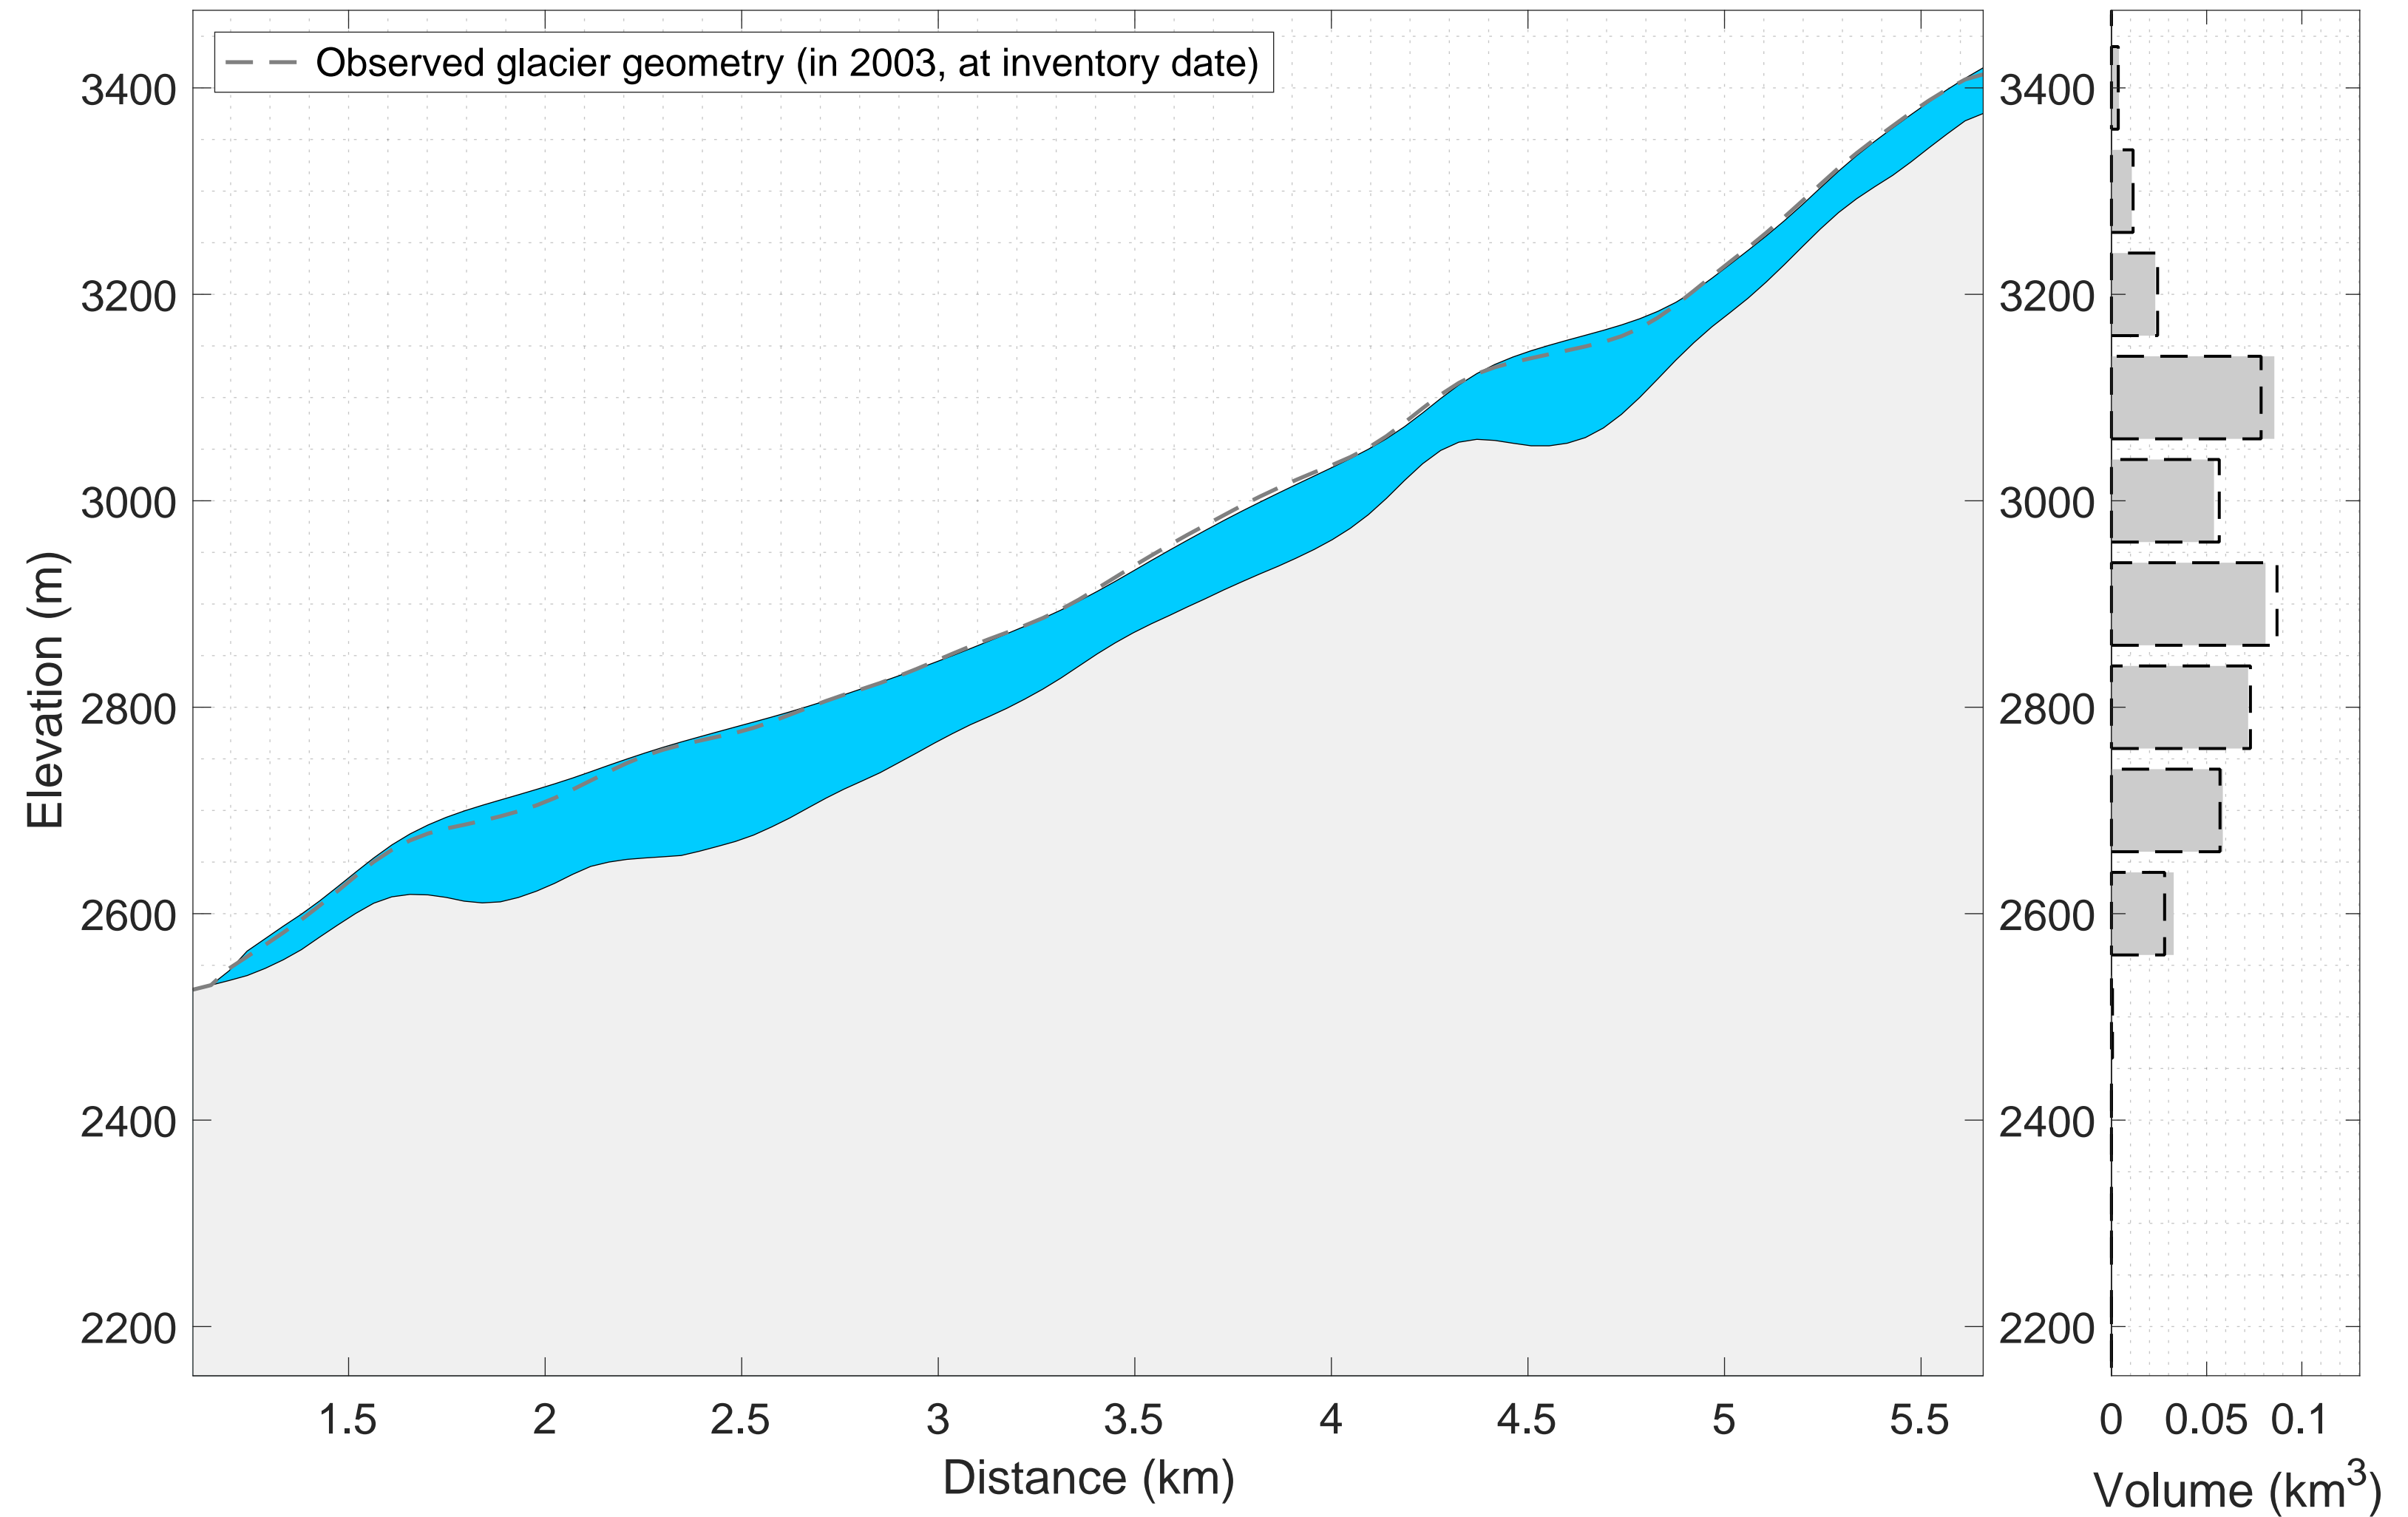

Supplement: Supplementary file 56 [file tc-13-1125-2019-supplement.zip]

**Modelled geometry (Glacier ID = 02584;  $A = 2.628\text{e-}16 \text{ Pa}^{-3} \text{ a}^{-1}$ ;  $dx = 51 \text{ m}$ )**

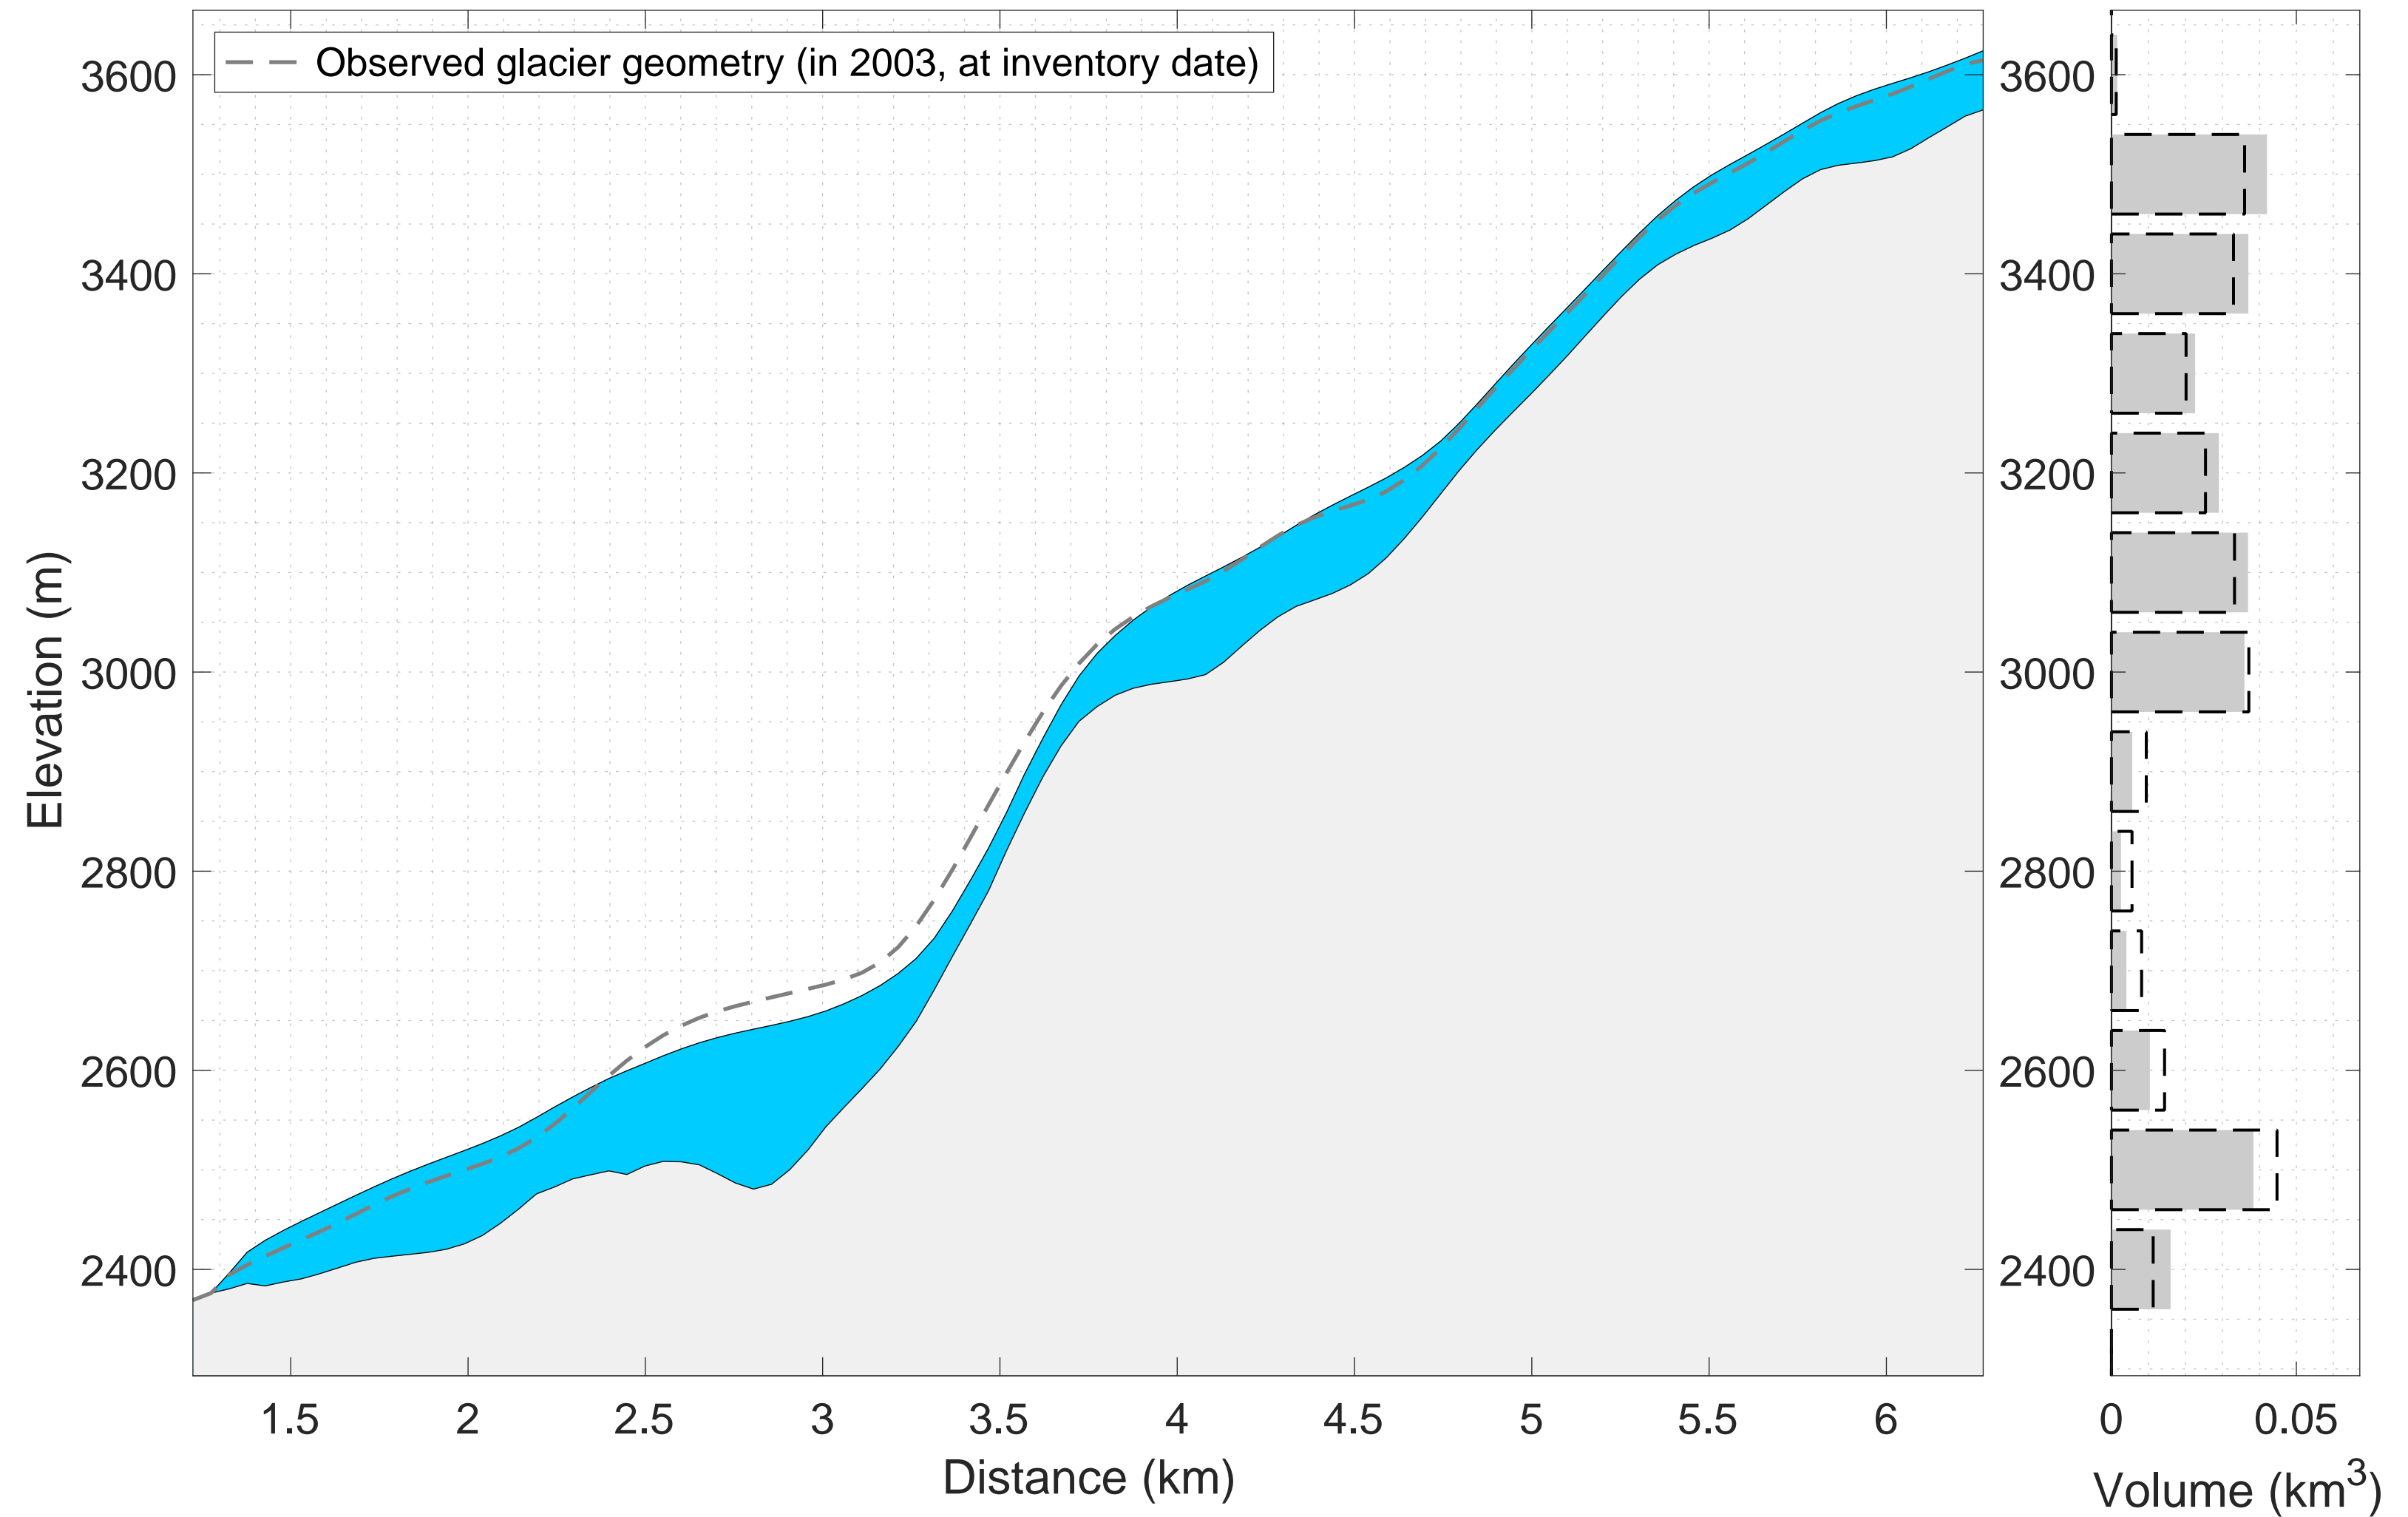

Supplement: Supplementary file 57 [file tc-13-1125-2019-supplement.zip]

**Modelled geometry (Glacier ID = 00551;  $A = 2.7116\text{e-}16 \text{ Pa}^{-3} \text{ a}^{-1}$ ;  $dx = 17 \text{ m}$ )**

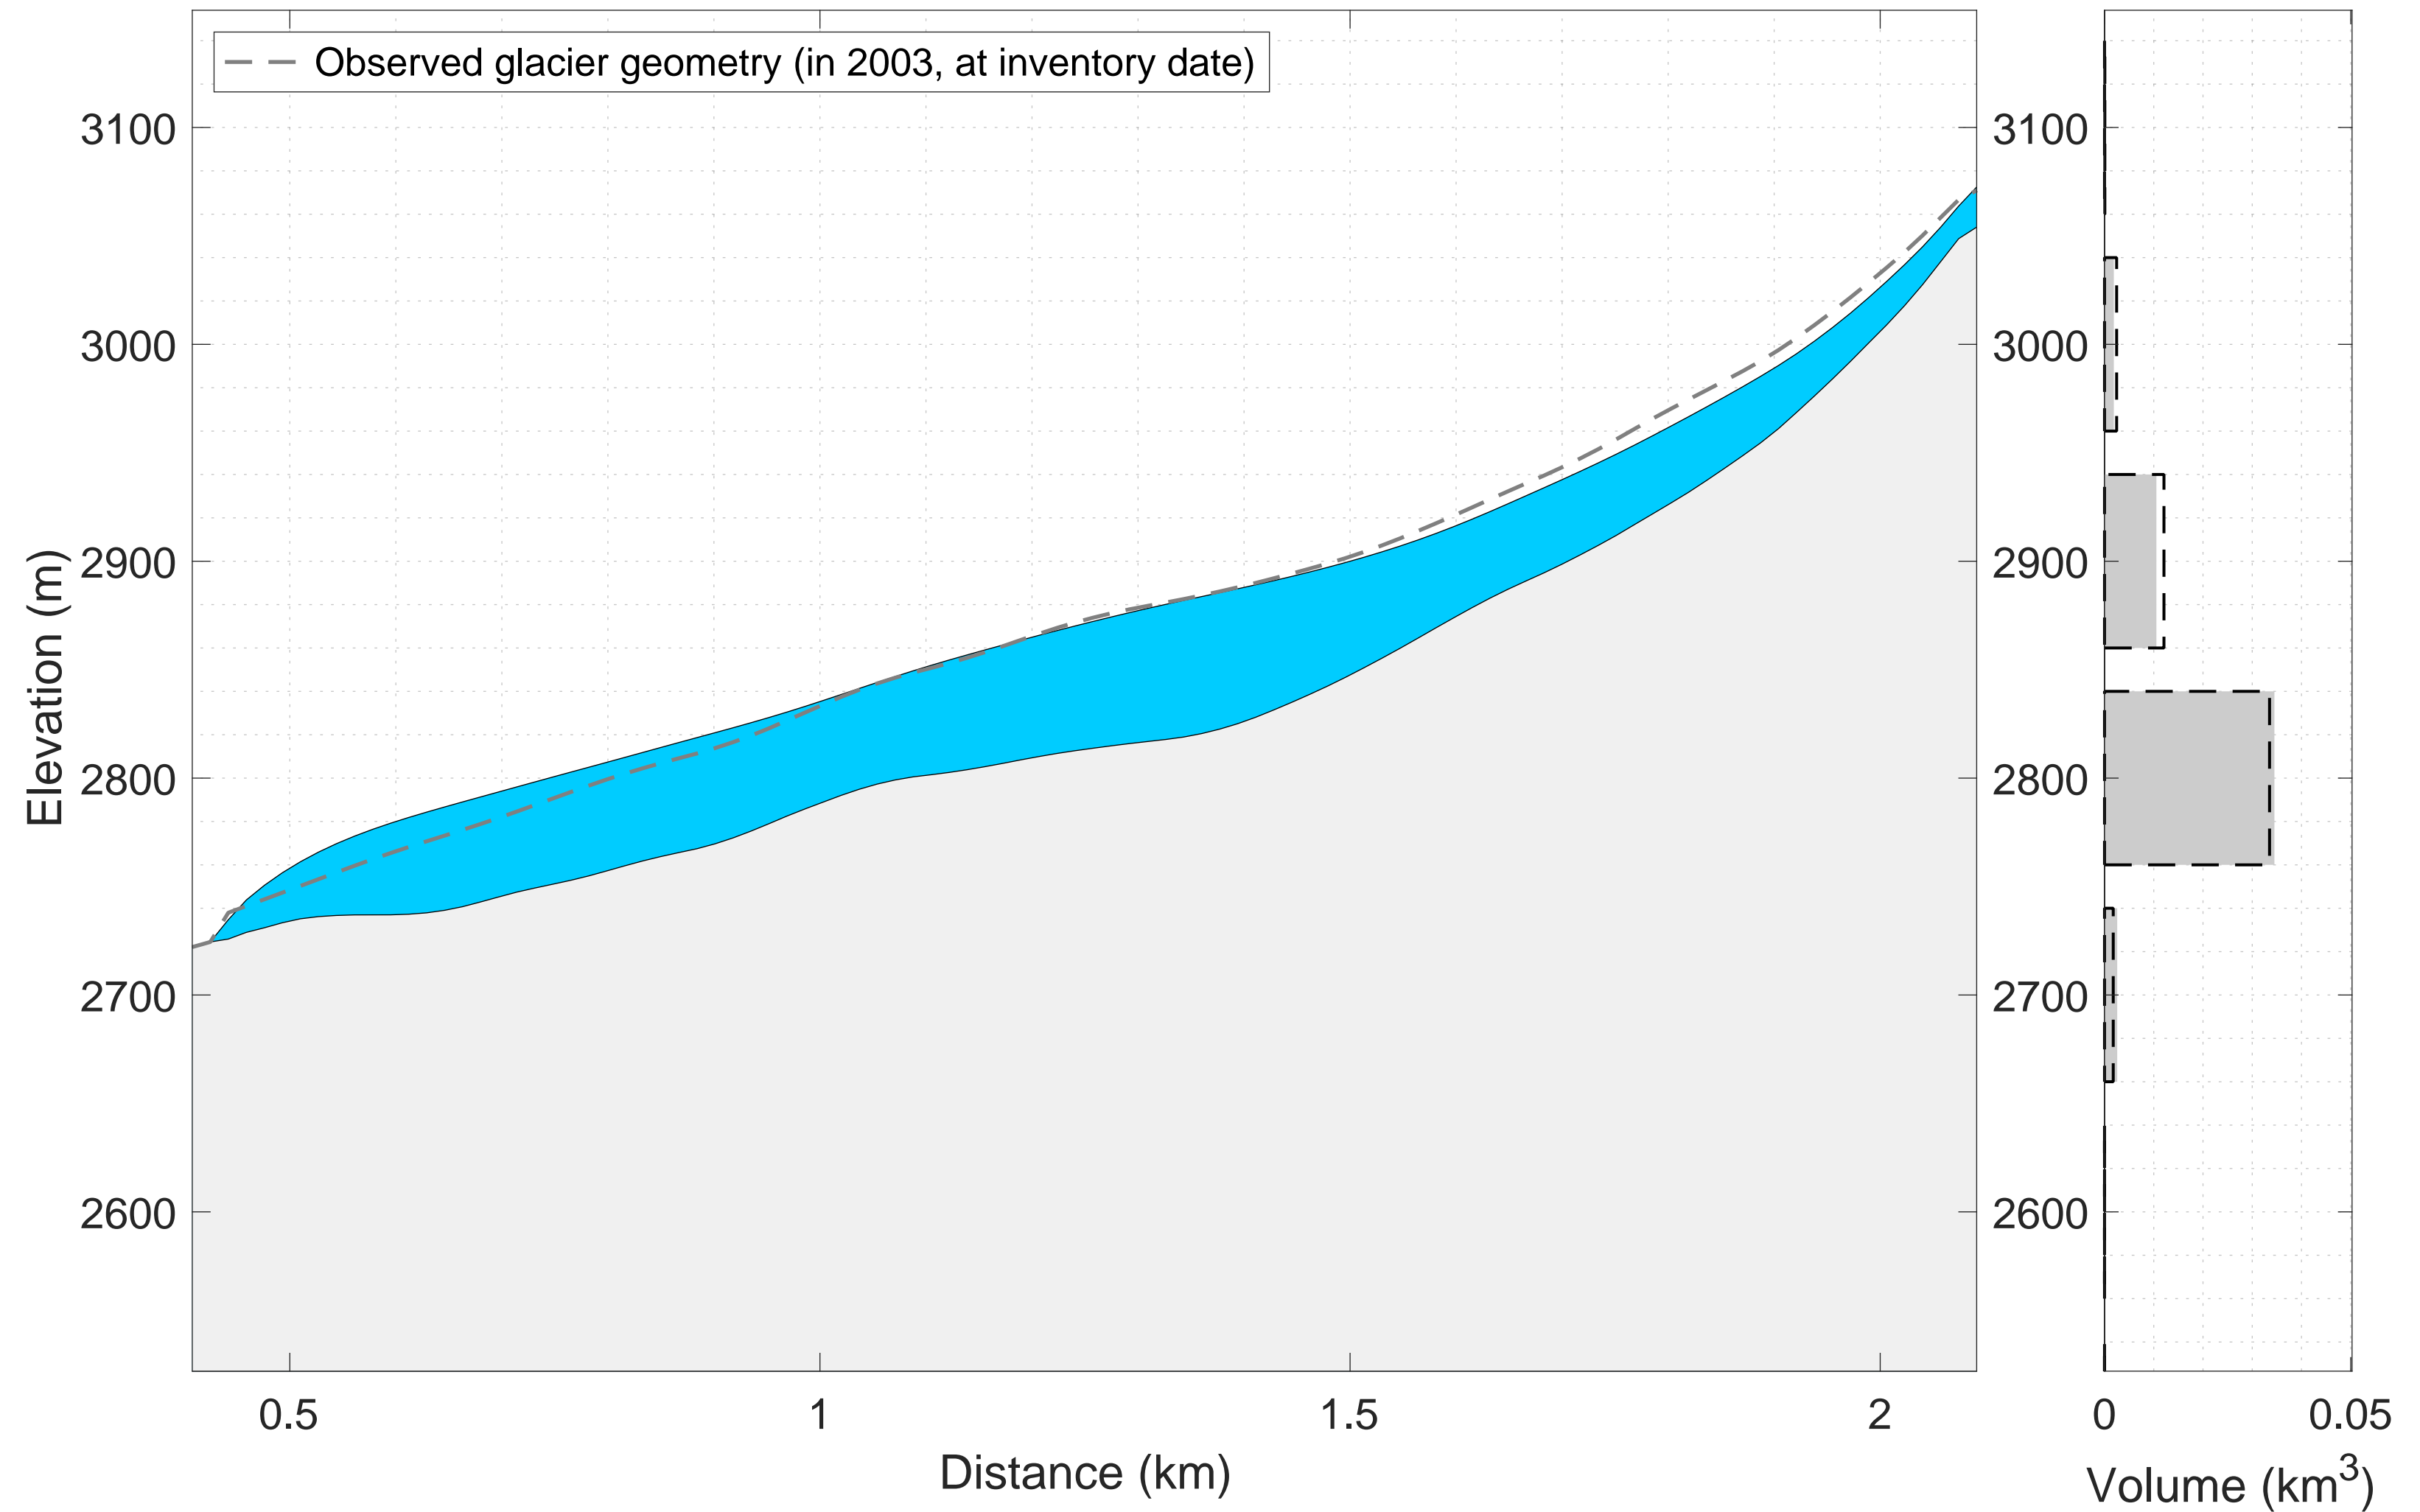

Supplement: Supplementary file 58 [file tc-13-1125-2019-supplement.zip]

**Modelled geometry (Glacier ID = 00245;  $A = 7.6518\text{e-}17 \text{ Pa}^{-3} \text{ a}^{-1}$ ;  $dx = 13 \text{ m}$ )**

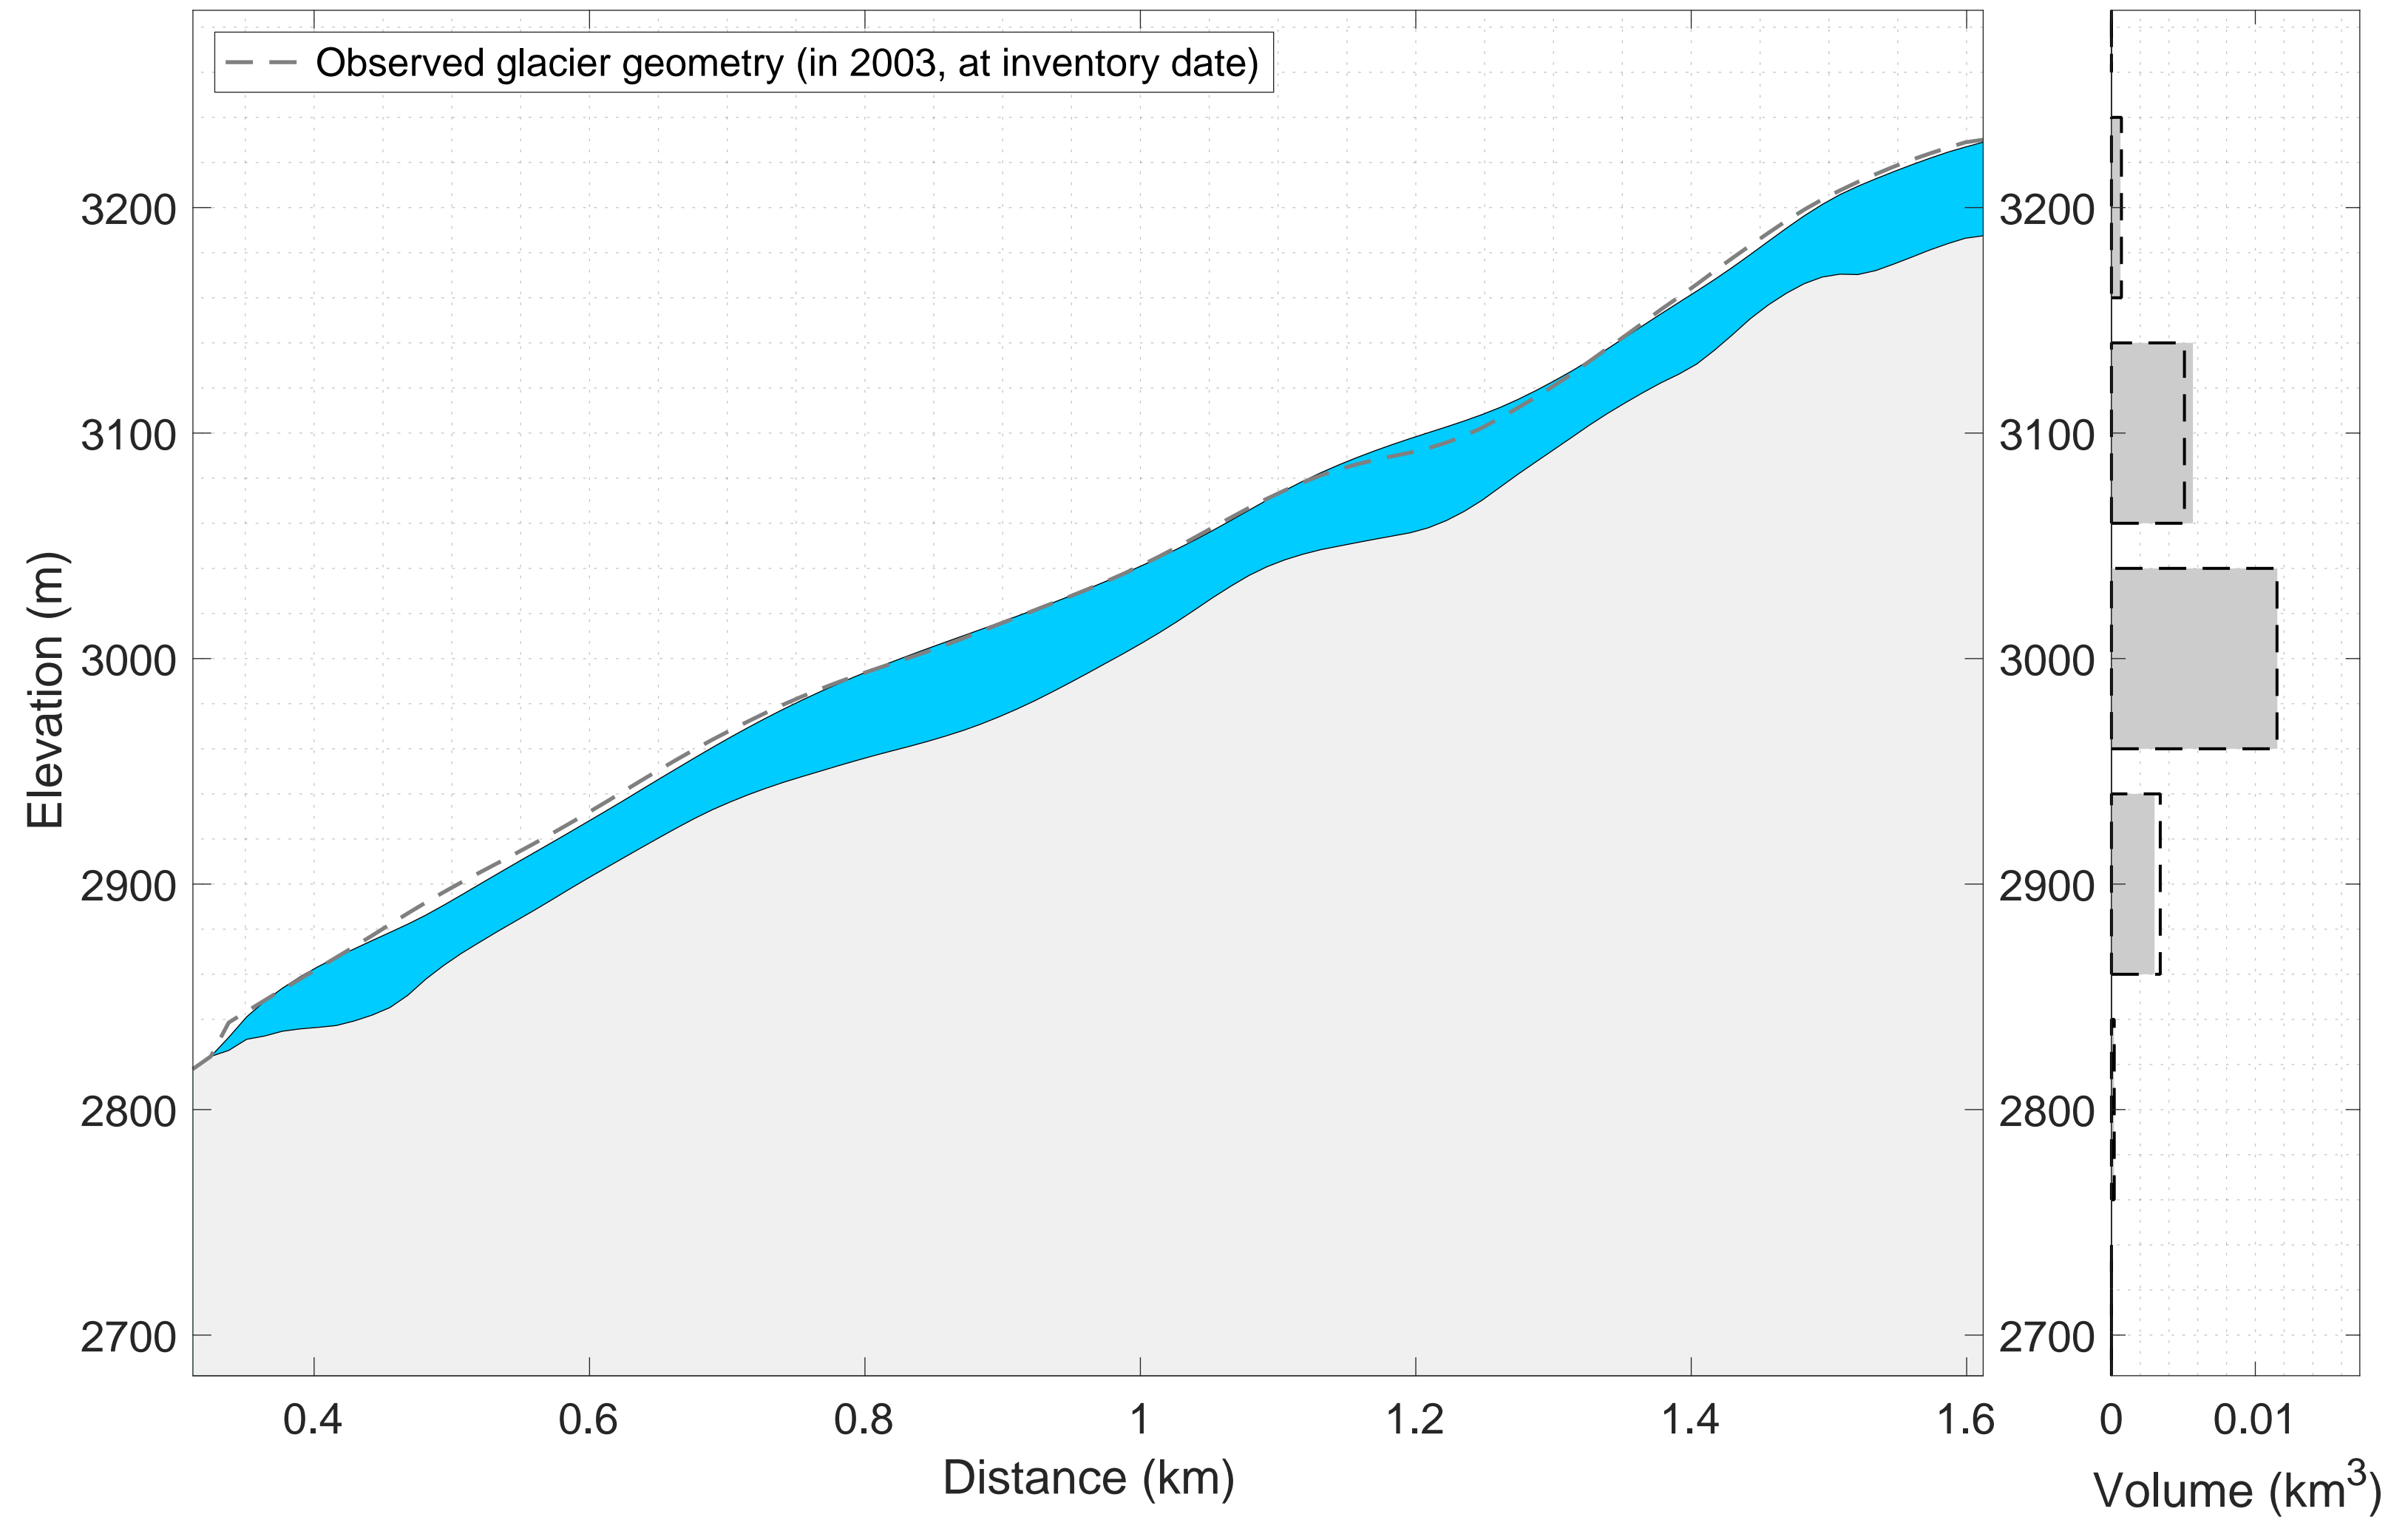

Supplement: Supplementary file 59 [file tc-13-1125-2019-supplement.zip]

**Modelled geometry (Glacier ID = 01383;  $A = 6.457\text{e-}17 \text{ Pa}^{-3} \text{ a}^{-1}$ ;  $dx = 13 \text{ m}$ )**

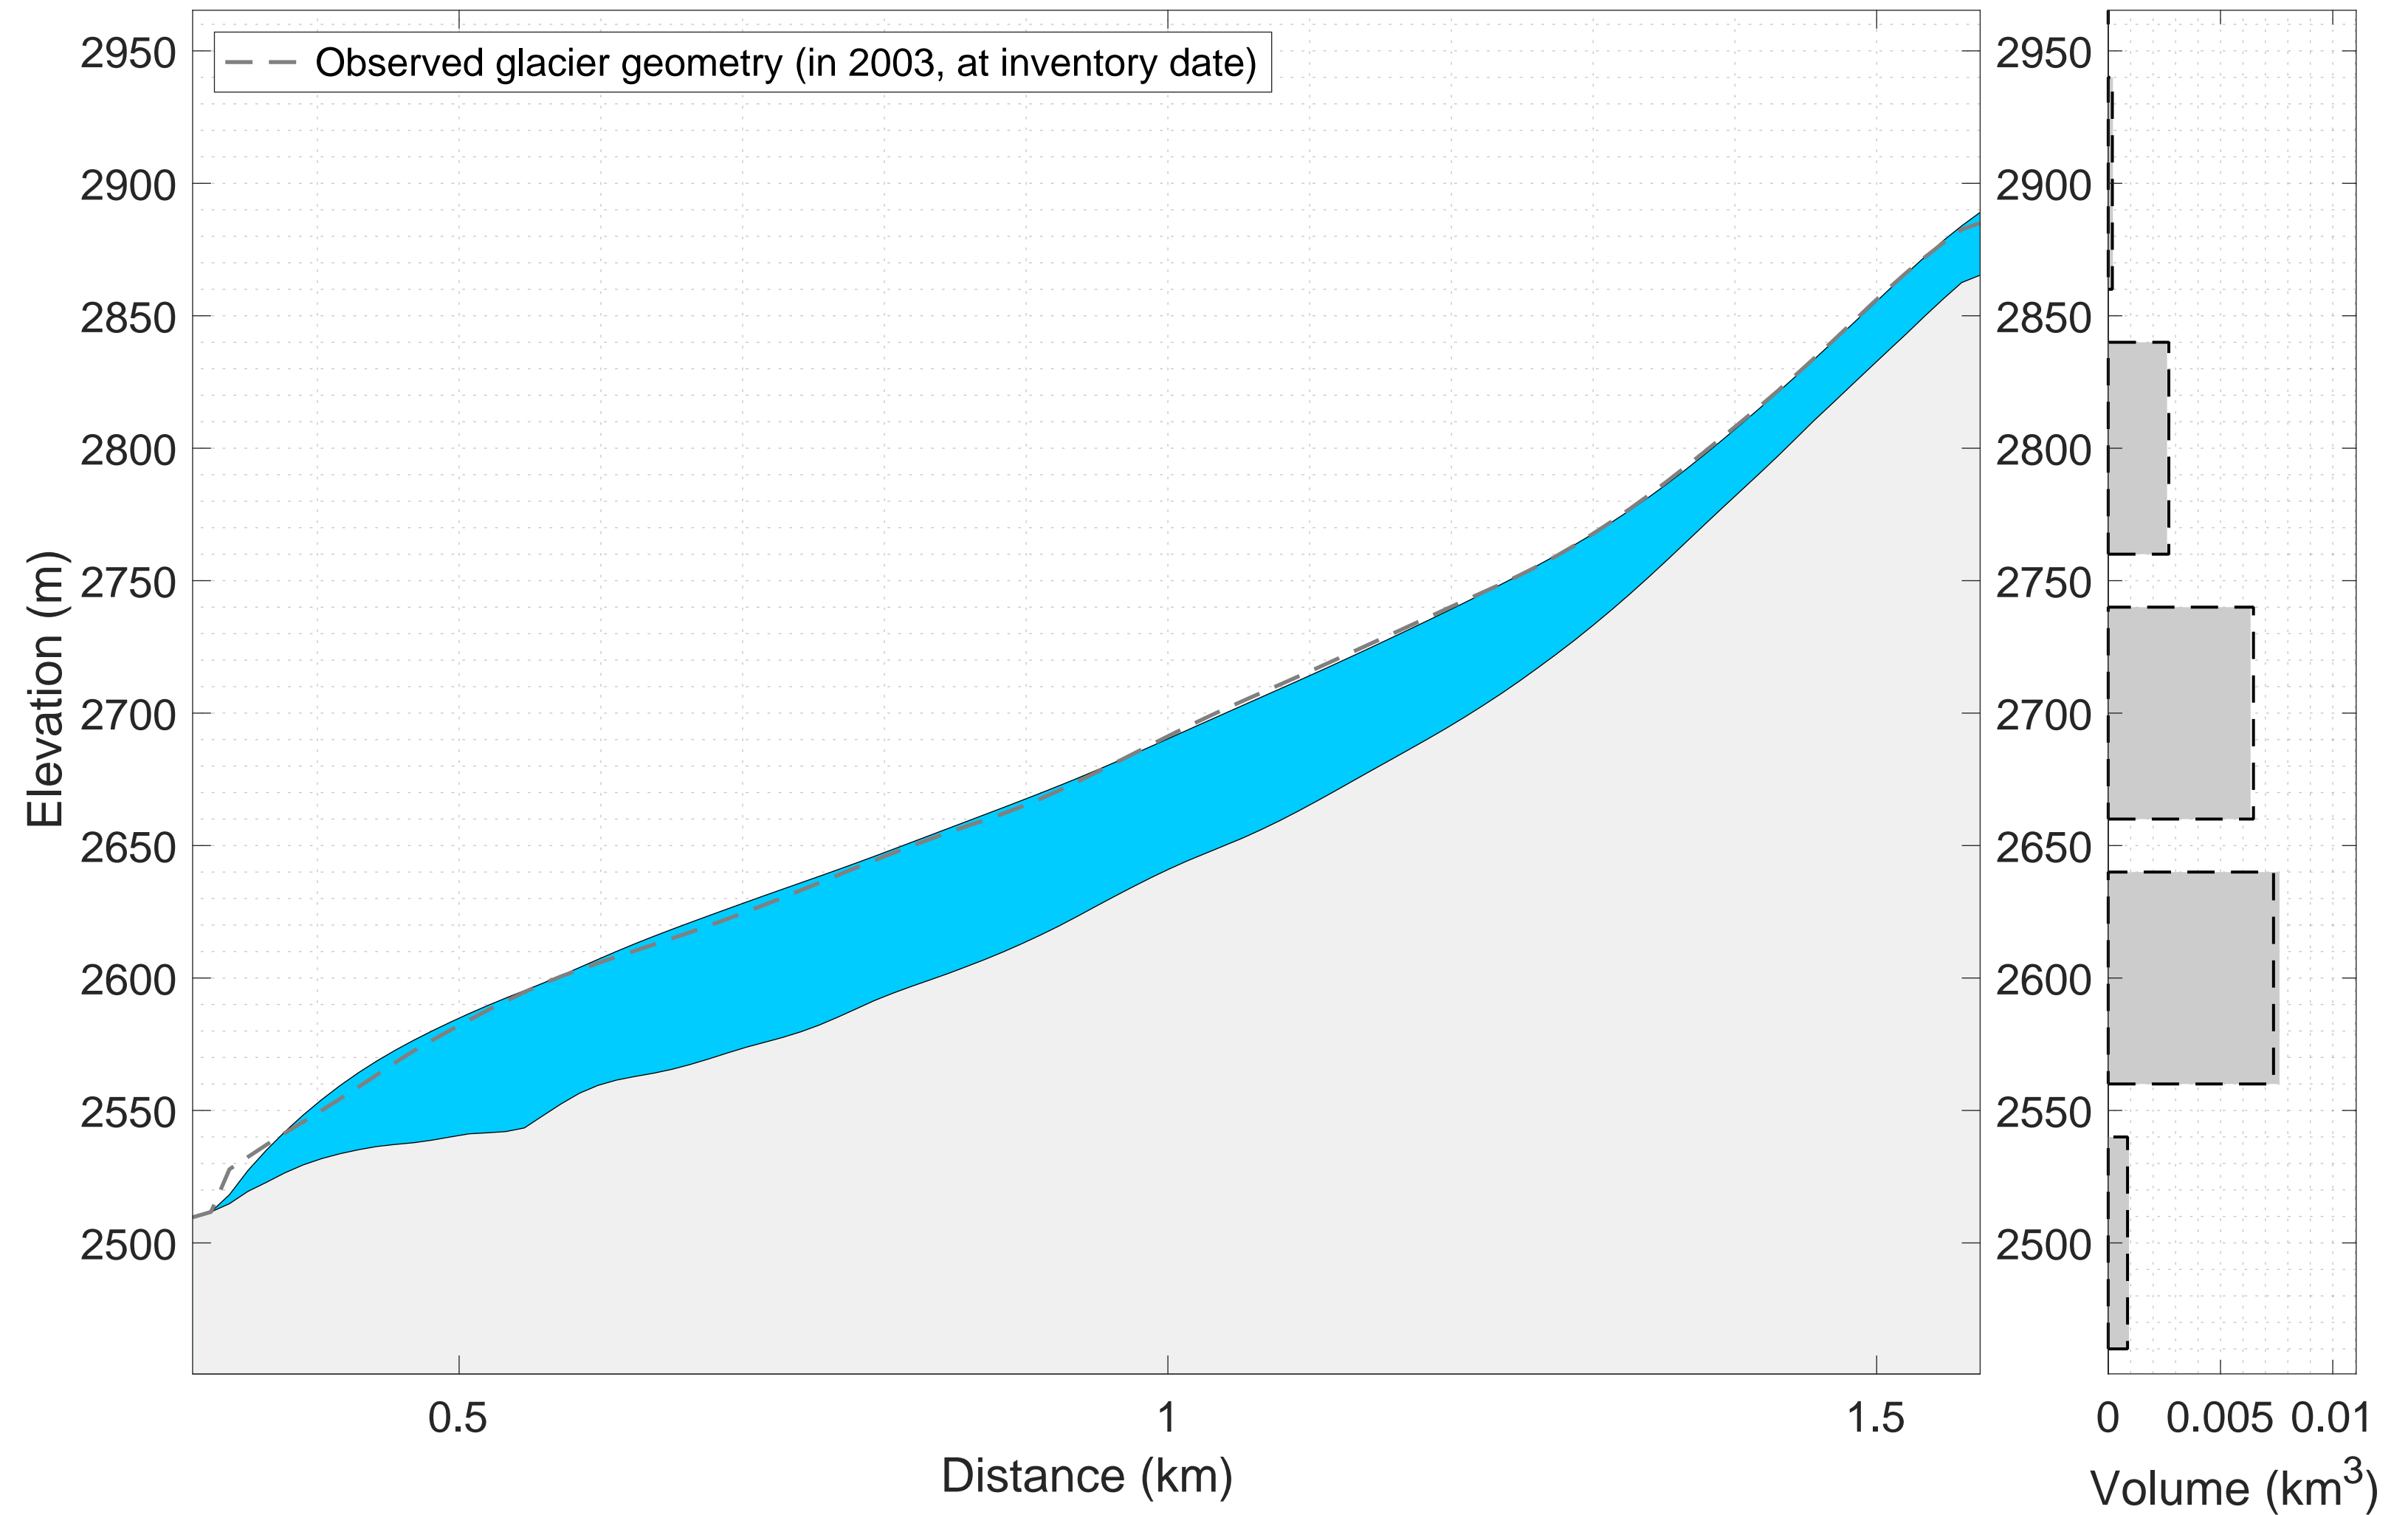

Supplement: Supplementary file 60 [file tc-13-1125-2019-supplement.zip]

**Modelled geometry (Glacier ID = 01710;  $A = 8.9225\text{e-}17 \text{ Pa}^{-3} \text{ a}^{-1}$ ;  $dx = 11 \text{ m}$ )**

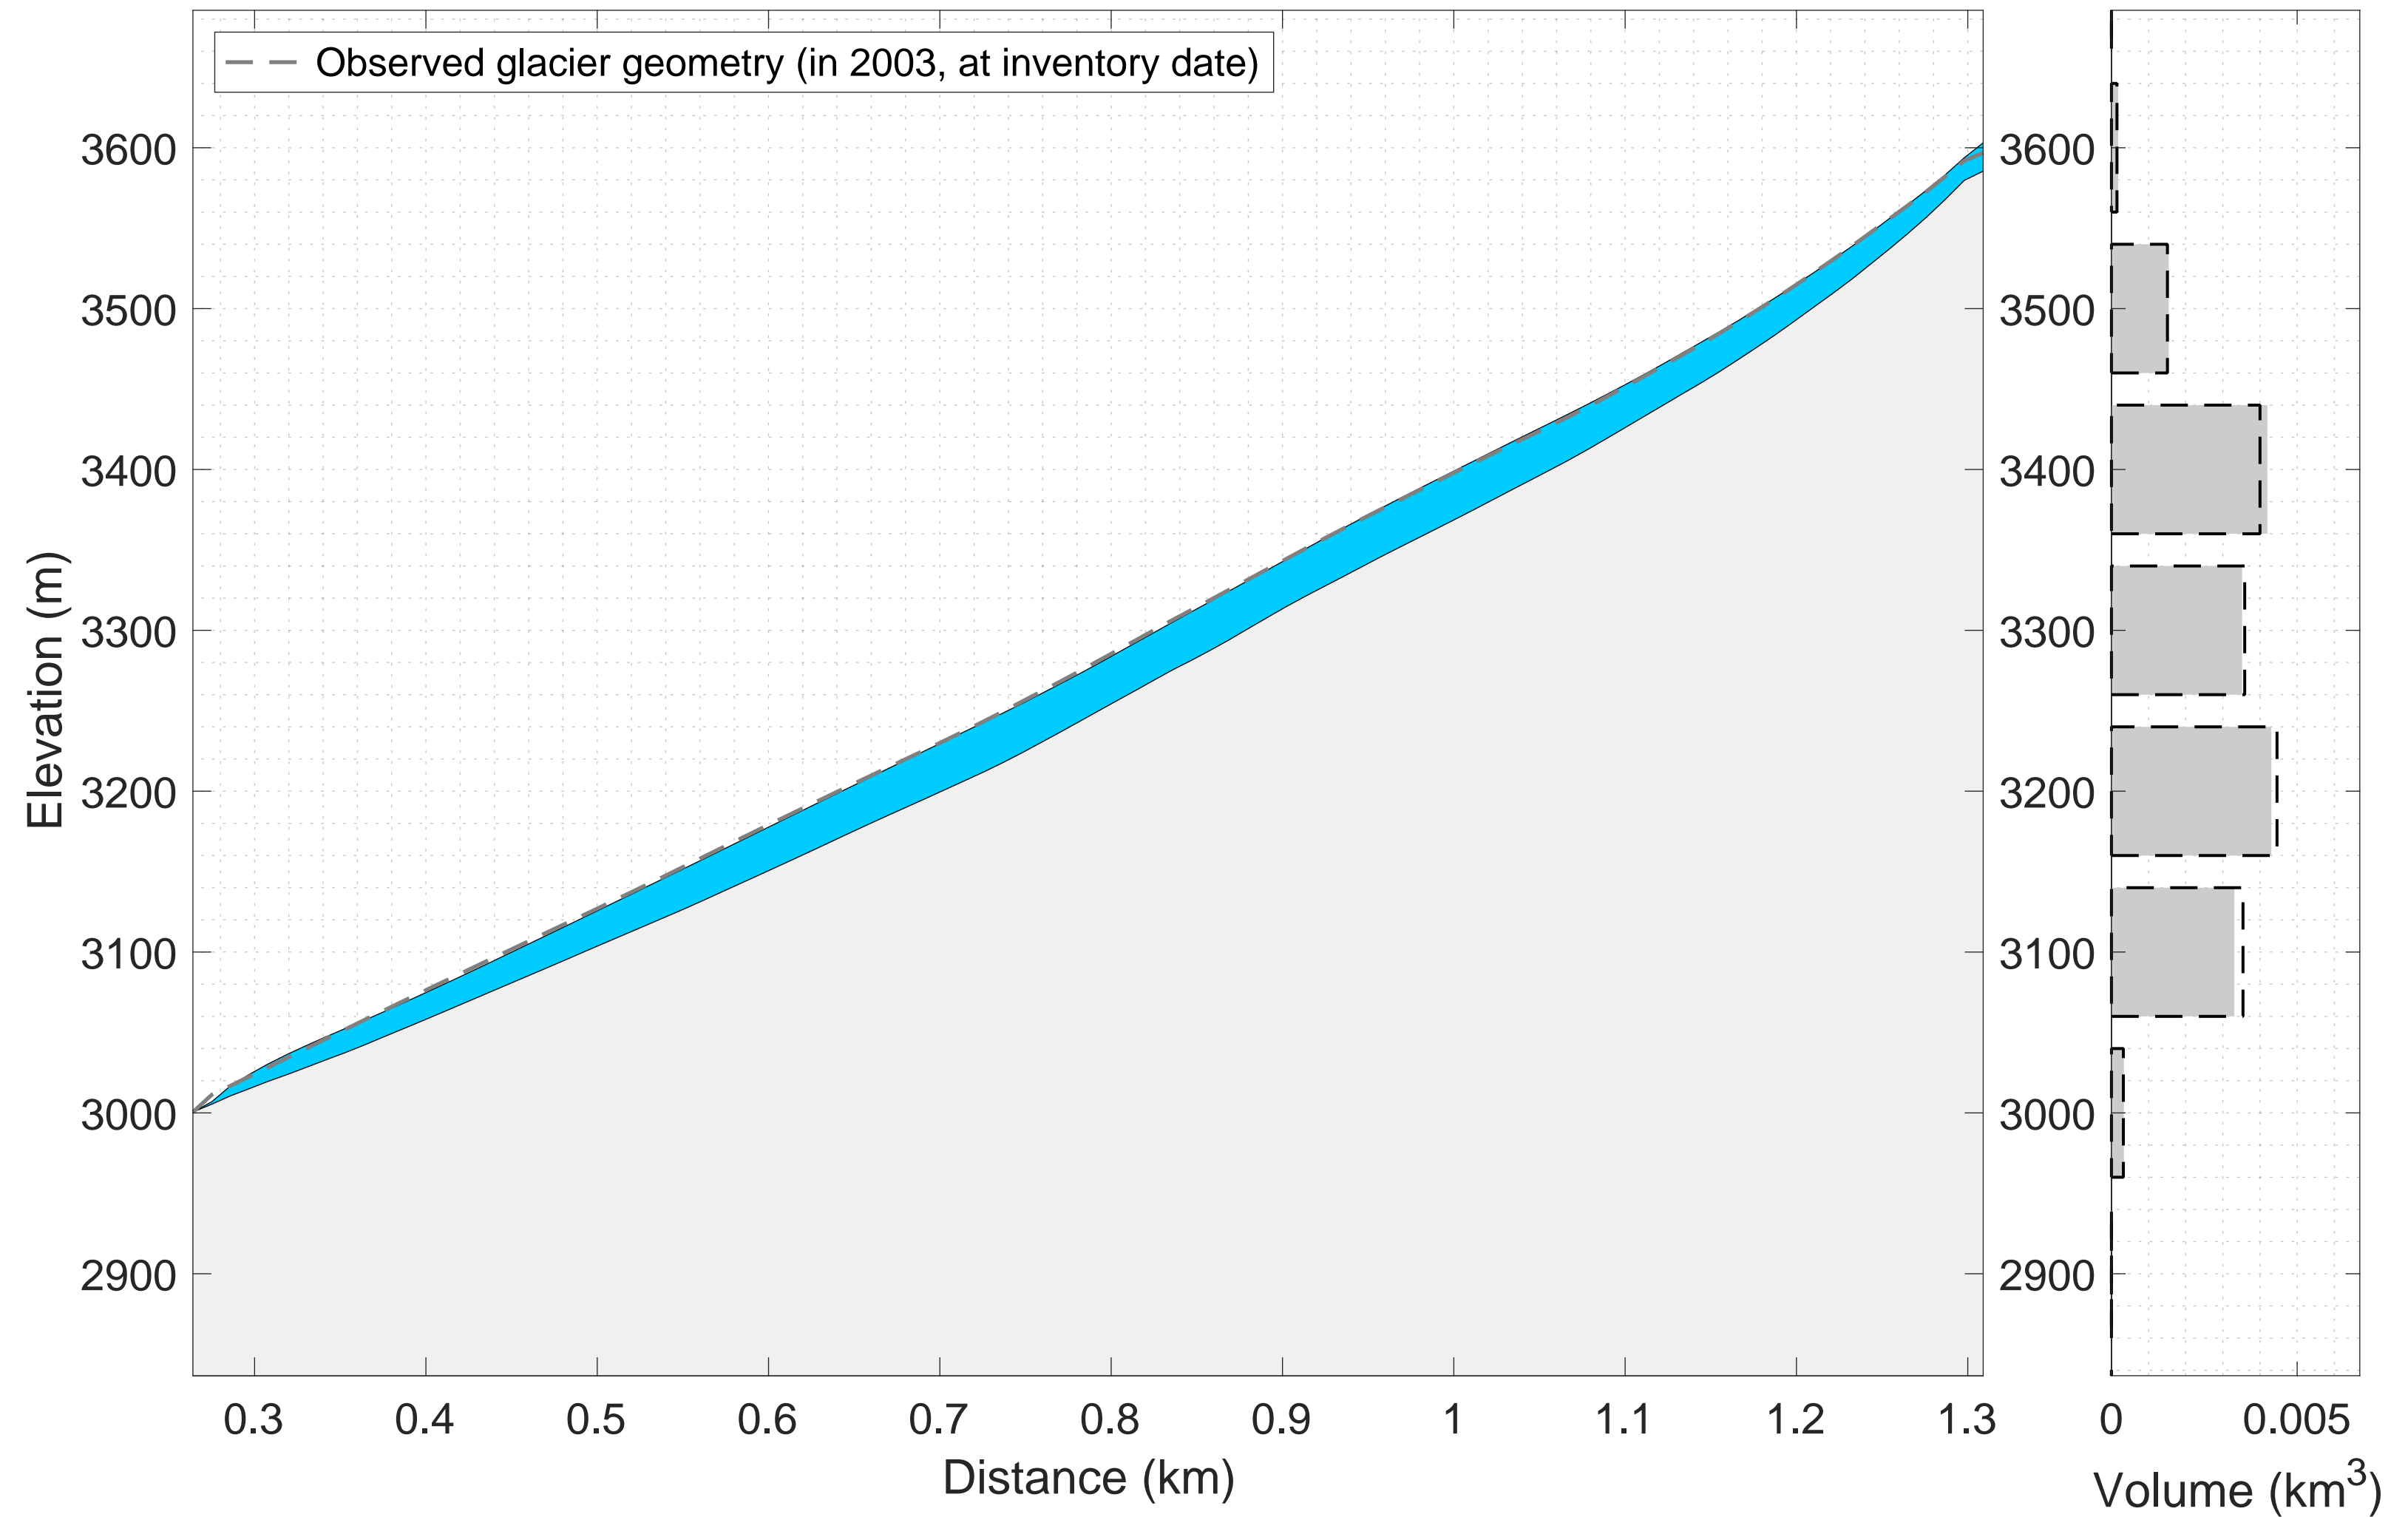

Supplement: Supplementary file 61 [file tc-13-1125-2019-supplement.zip]

**Modelled geometry (Glacier ID = 00094;  $A = 1.2841\text{e-}16 \text{ Pa}^{-3} \text{ a}^{-1}$ ;  $dx = 12 \text{ m}$ )**

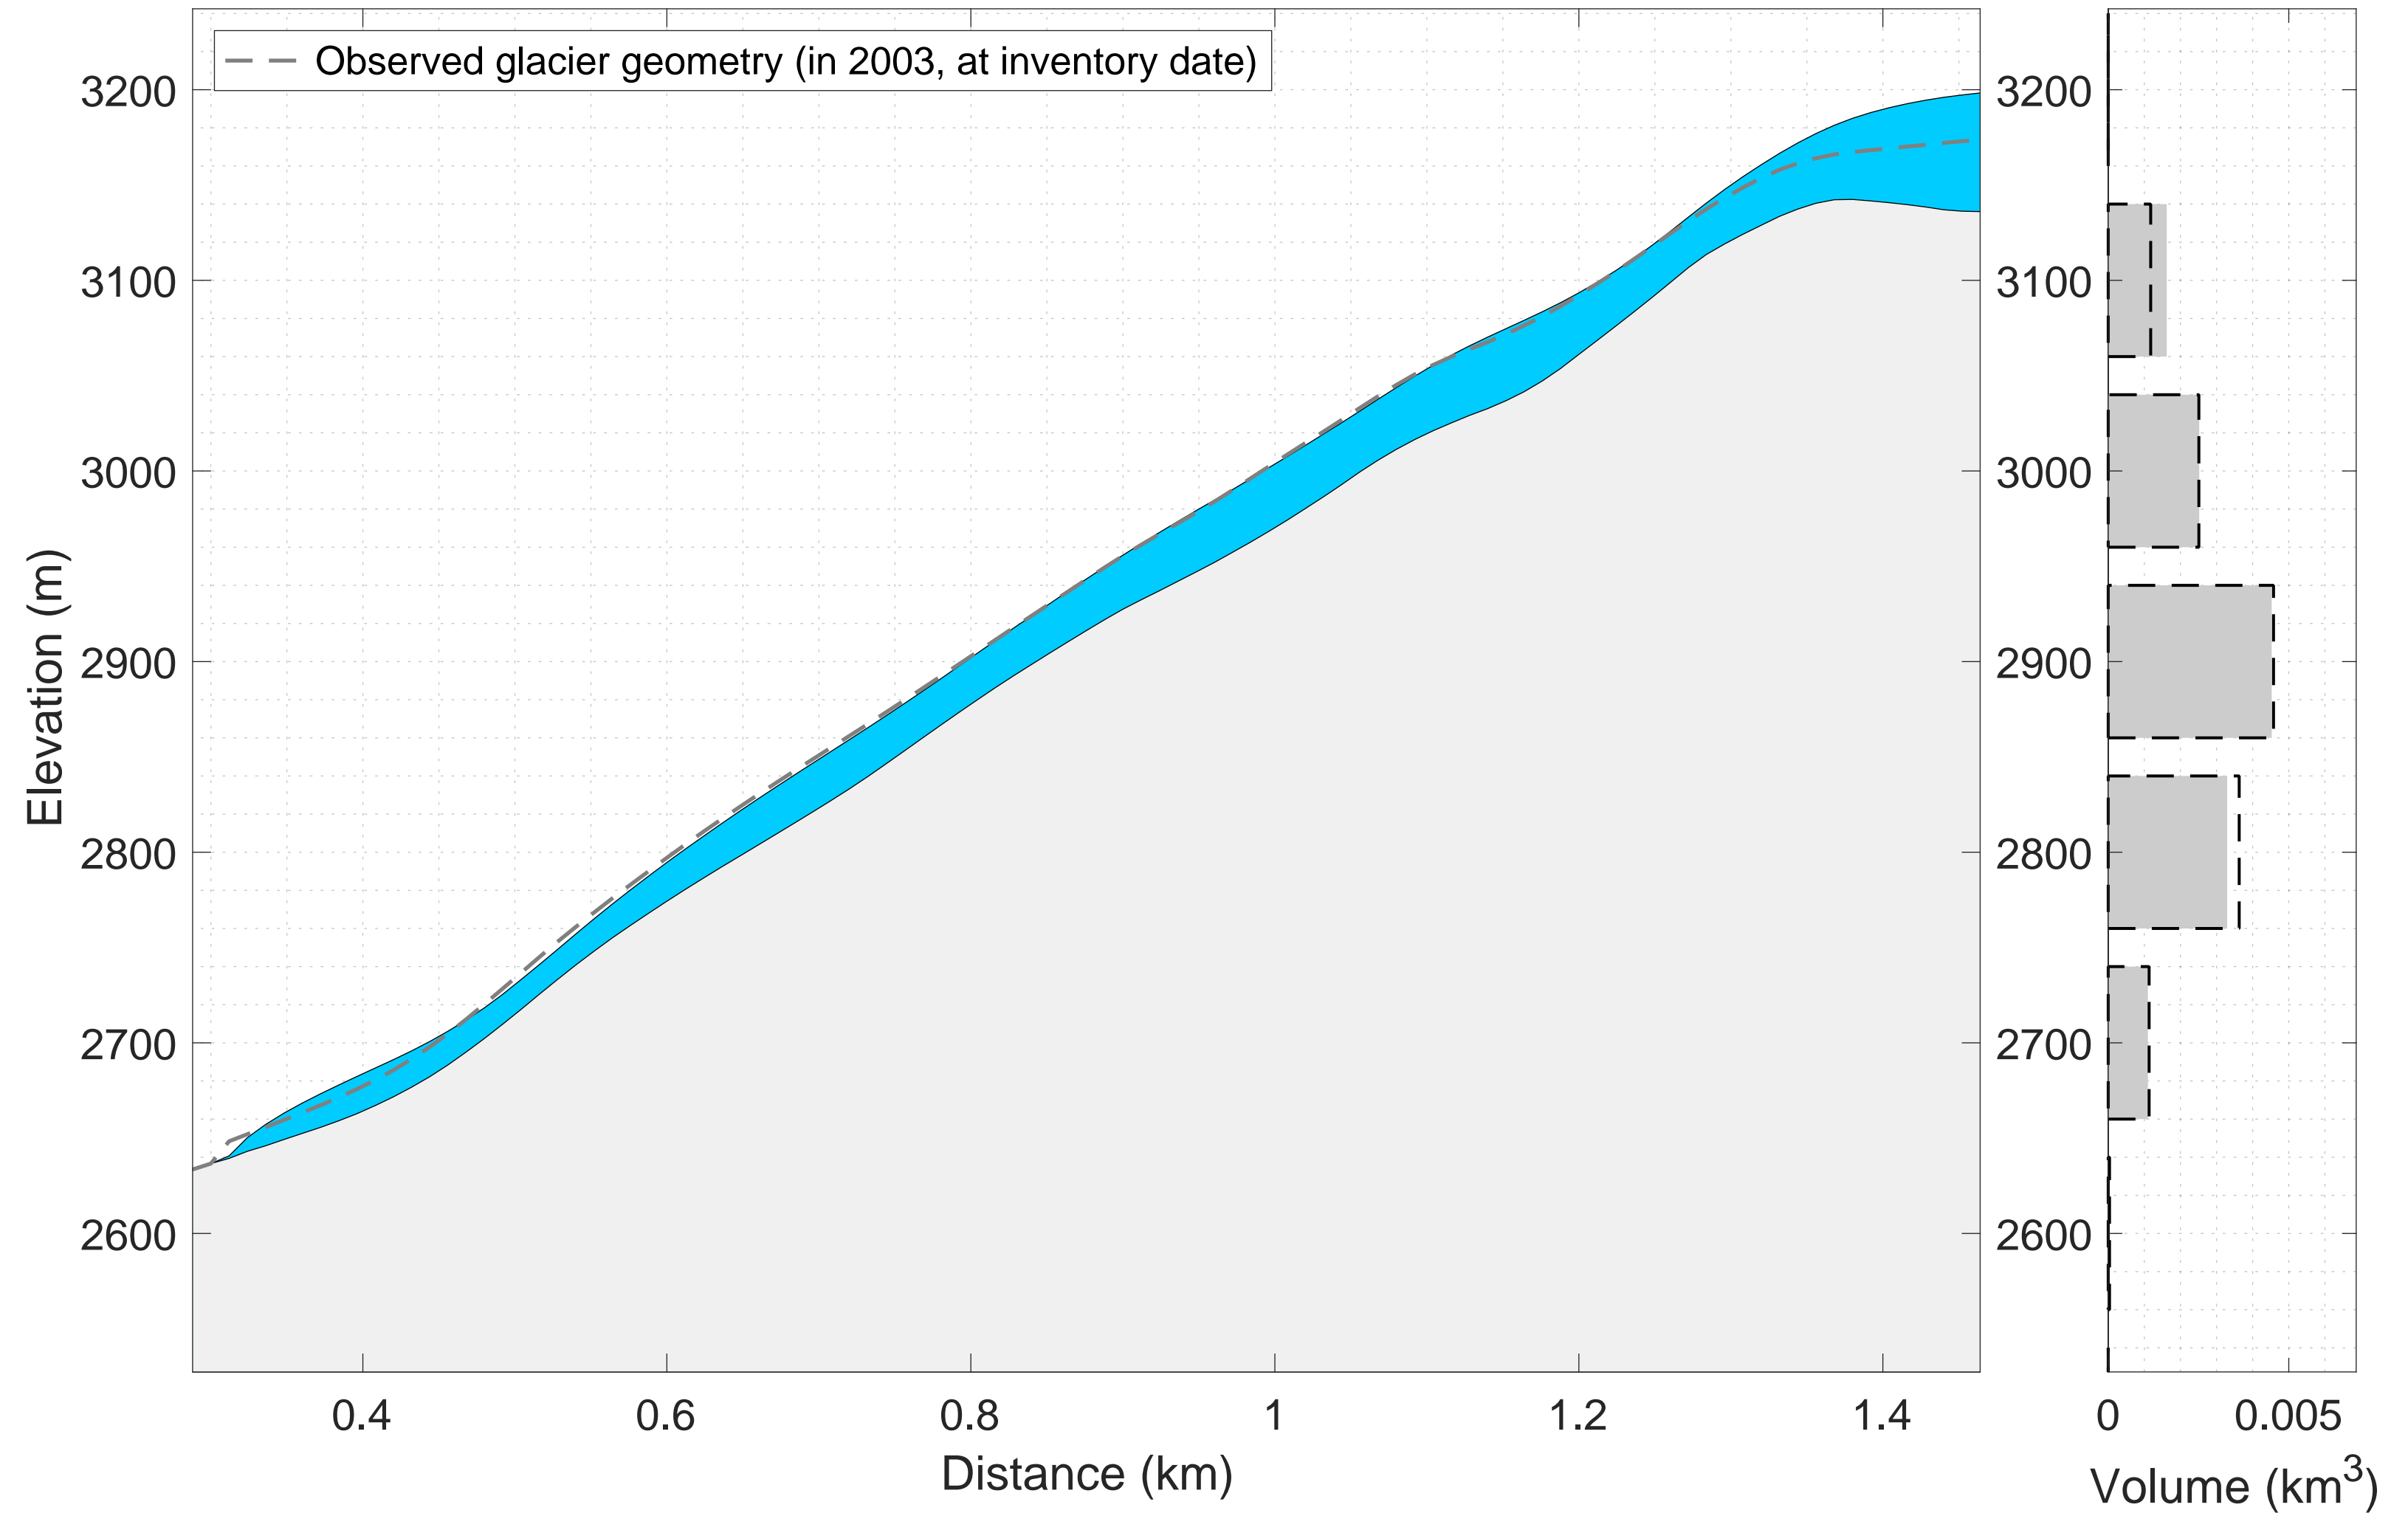

Supplement: Supplementary file 62 [file tc-13-1125-2019-supplement.zip]

**Modelled geometry (Glacier ID = 00386;  $A = 1.4578\text{e-}16 \text{ Pa}^{-3} \text{ a}^{-1}$ ;  $dx = 14 \text{ m}$ )**

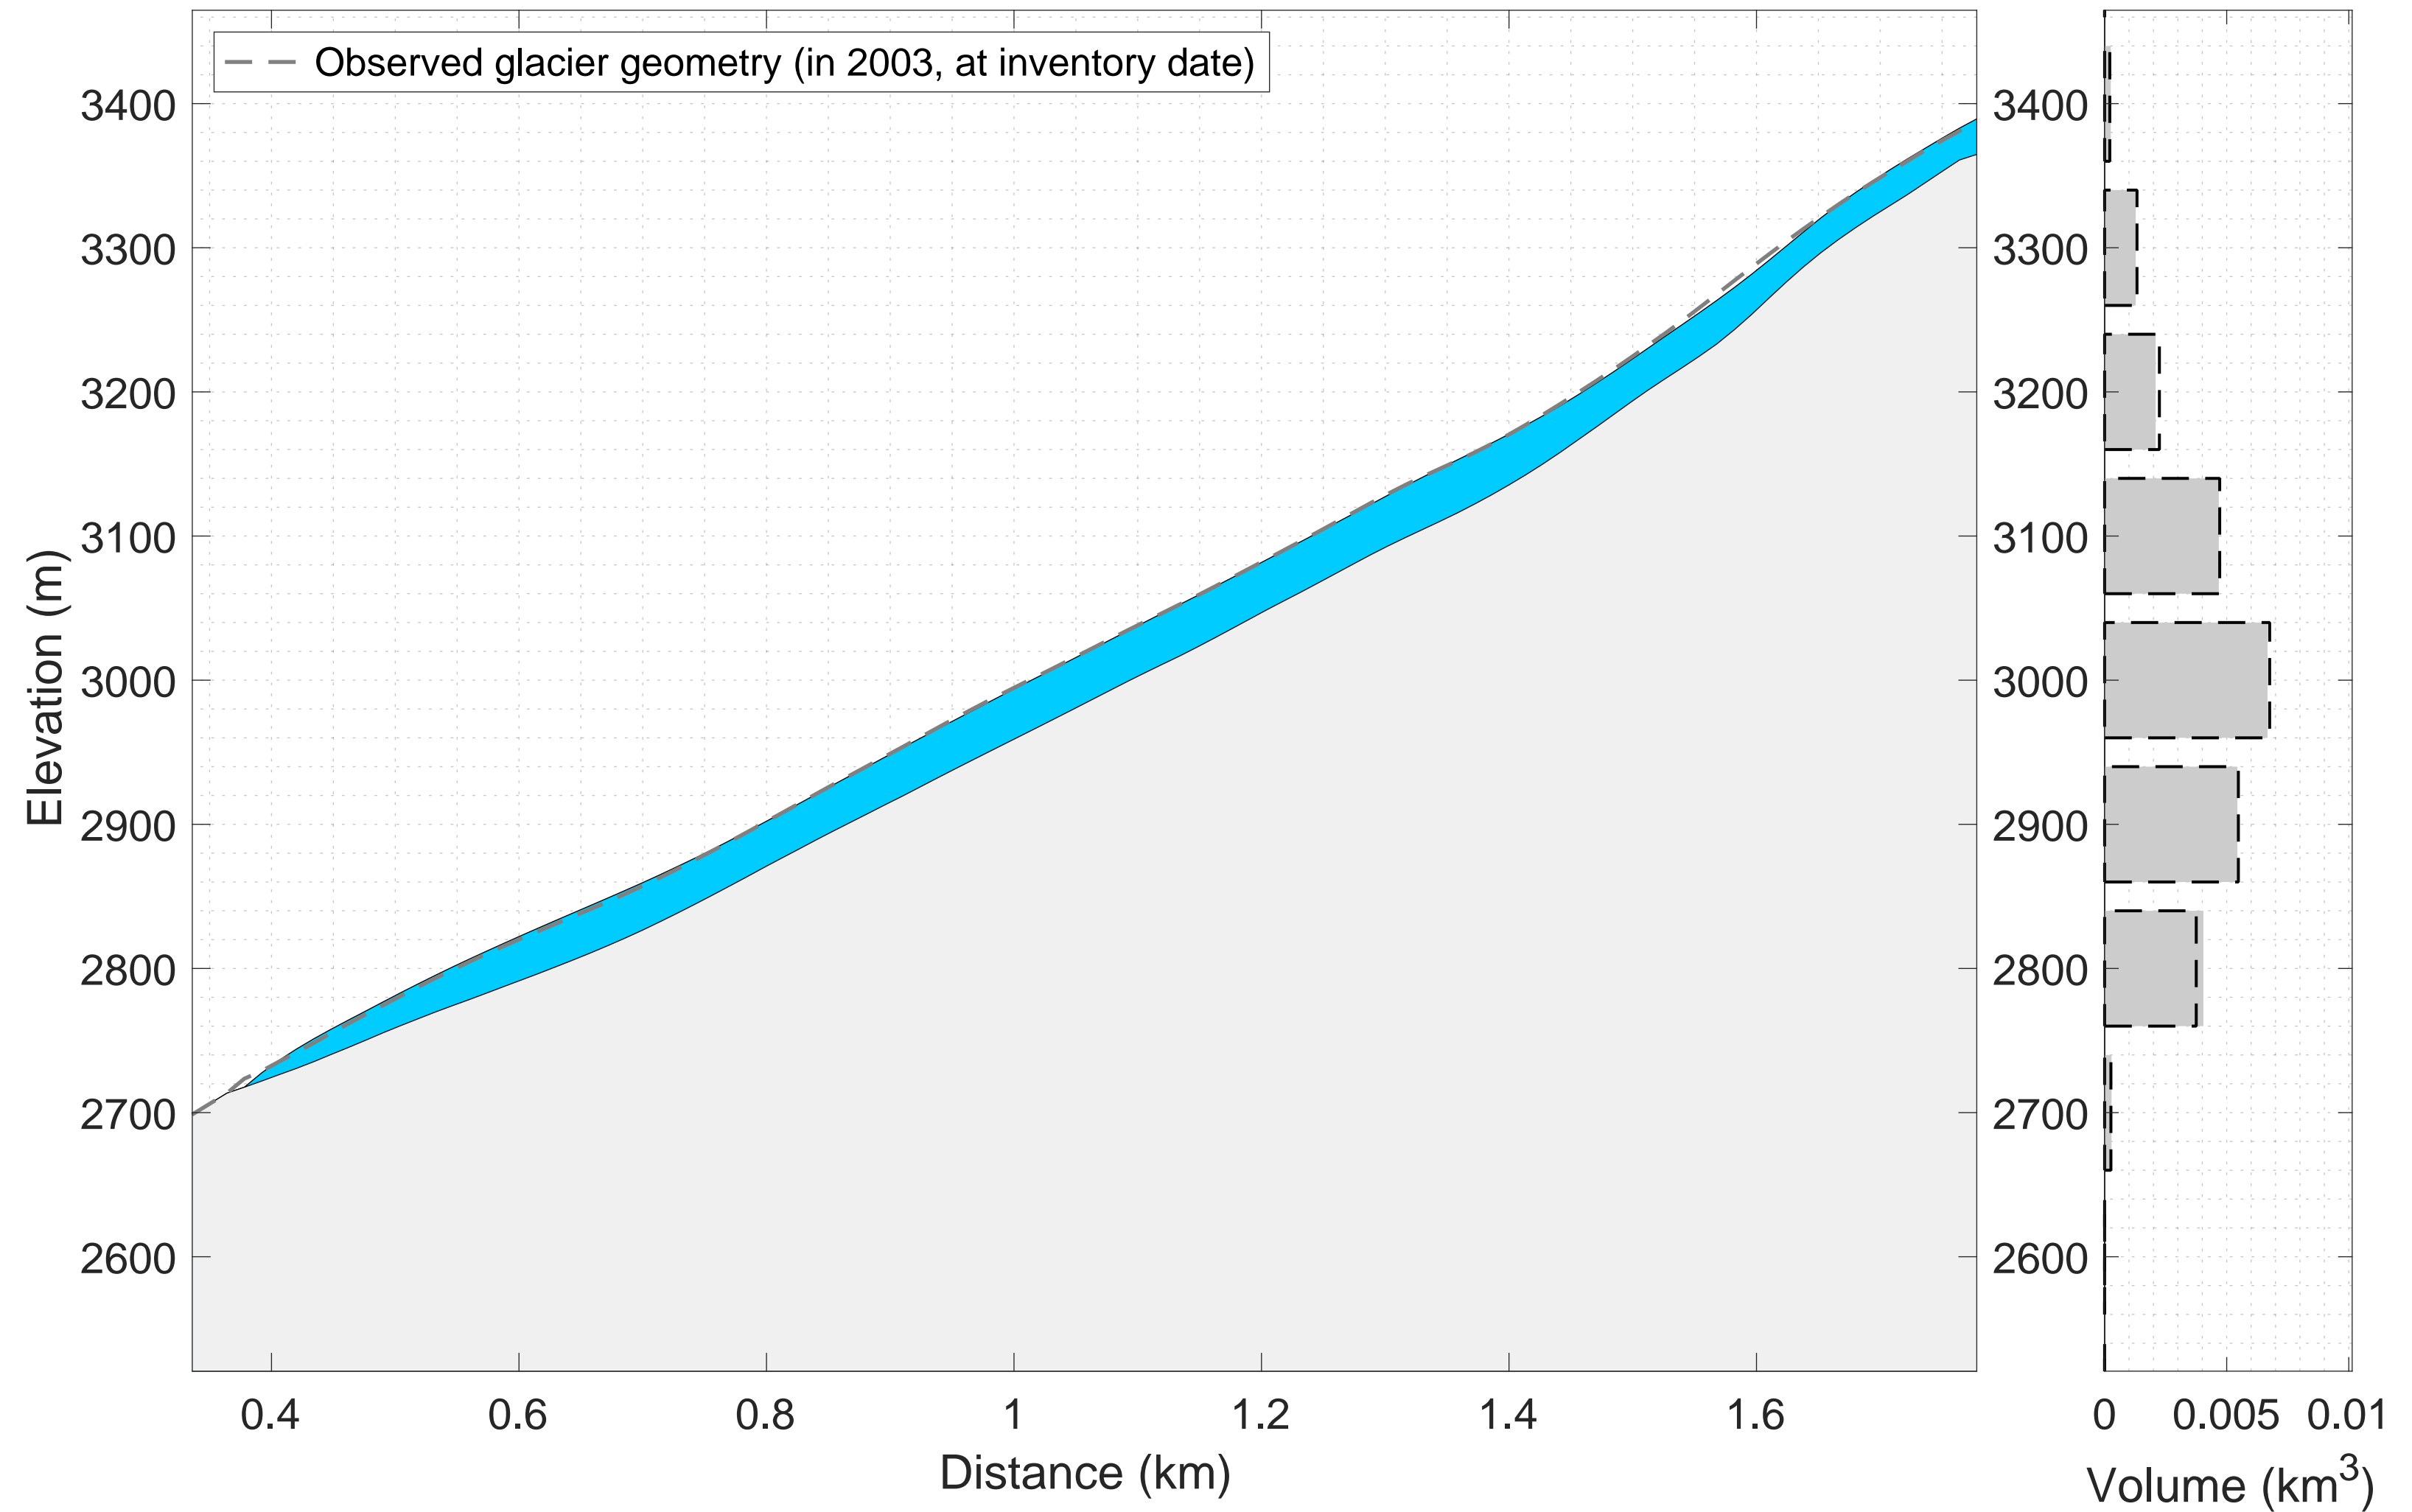

Supplement: Supplementary file 63 [file tc-13-1125-2019-supplement.zip]

Modelled geometry (Glacier ID = 01567;  $A = 6.3097\text{e-}17 \text{ Pa}^{-3} \text{ a}^{-1}$ ;  $dx = 18 \text{ m}$ )

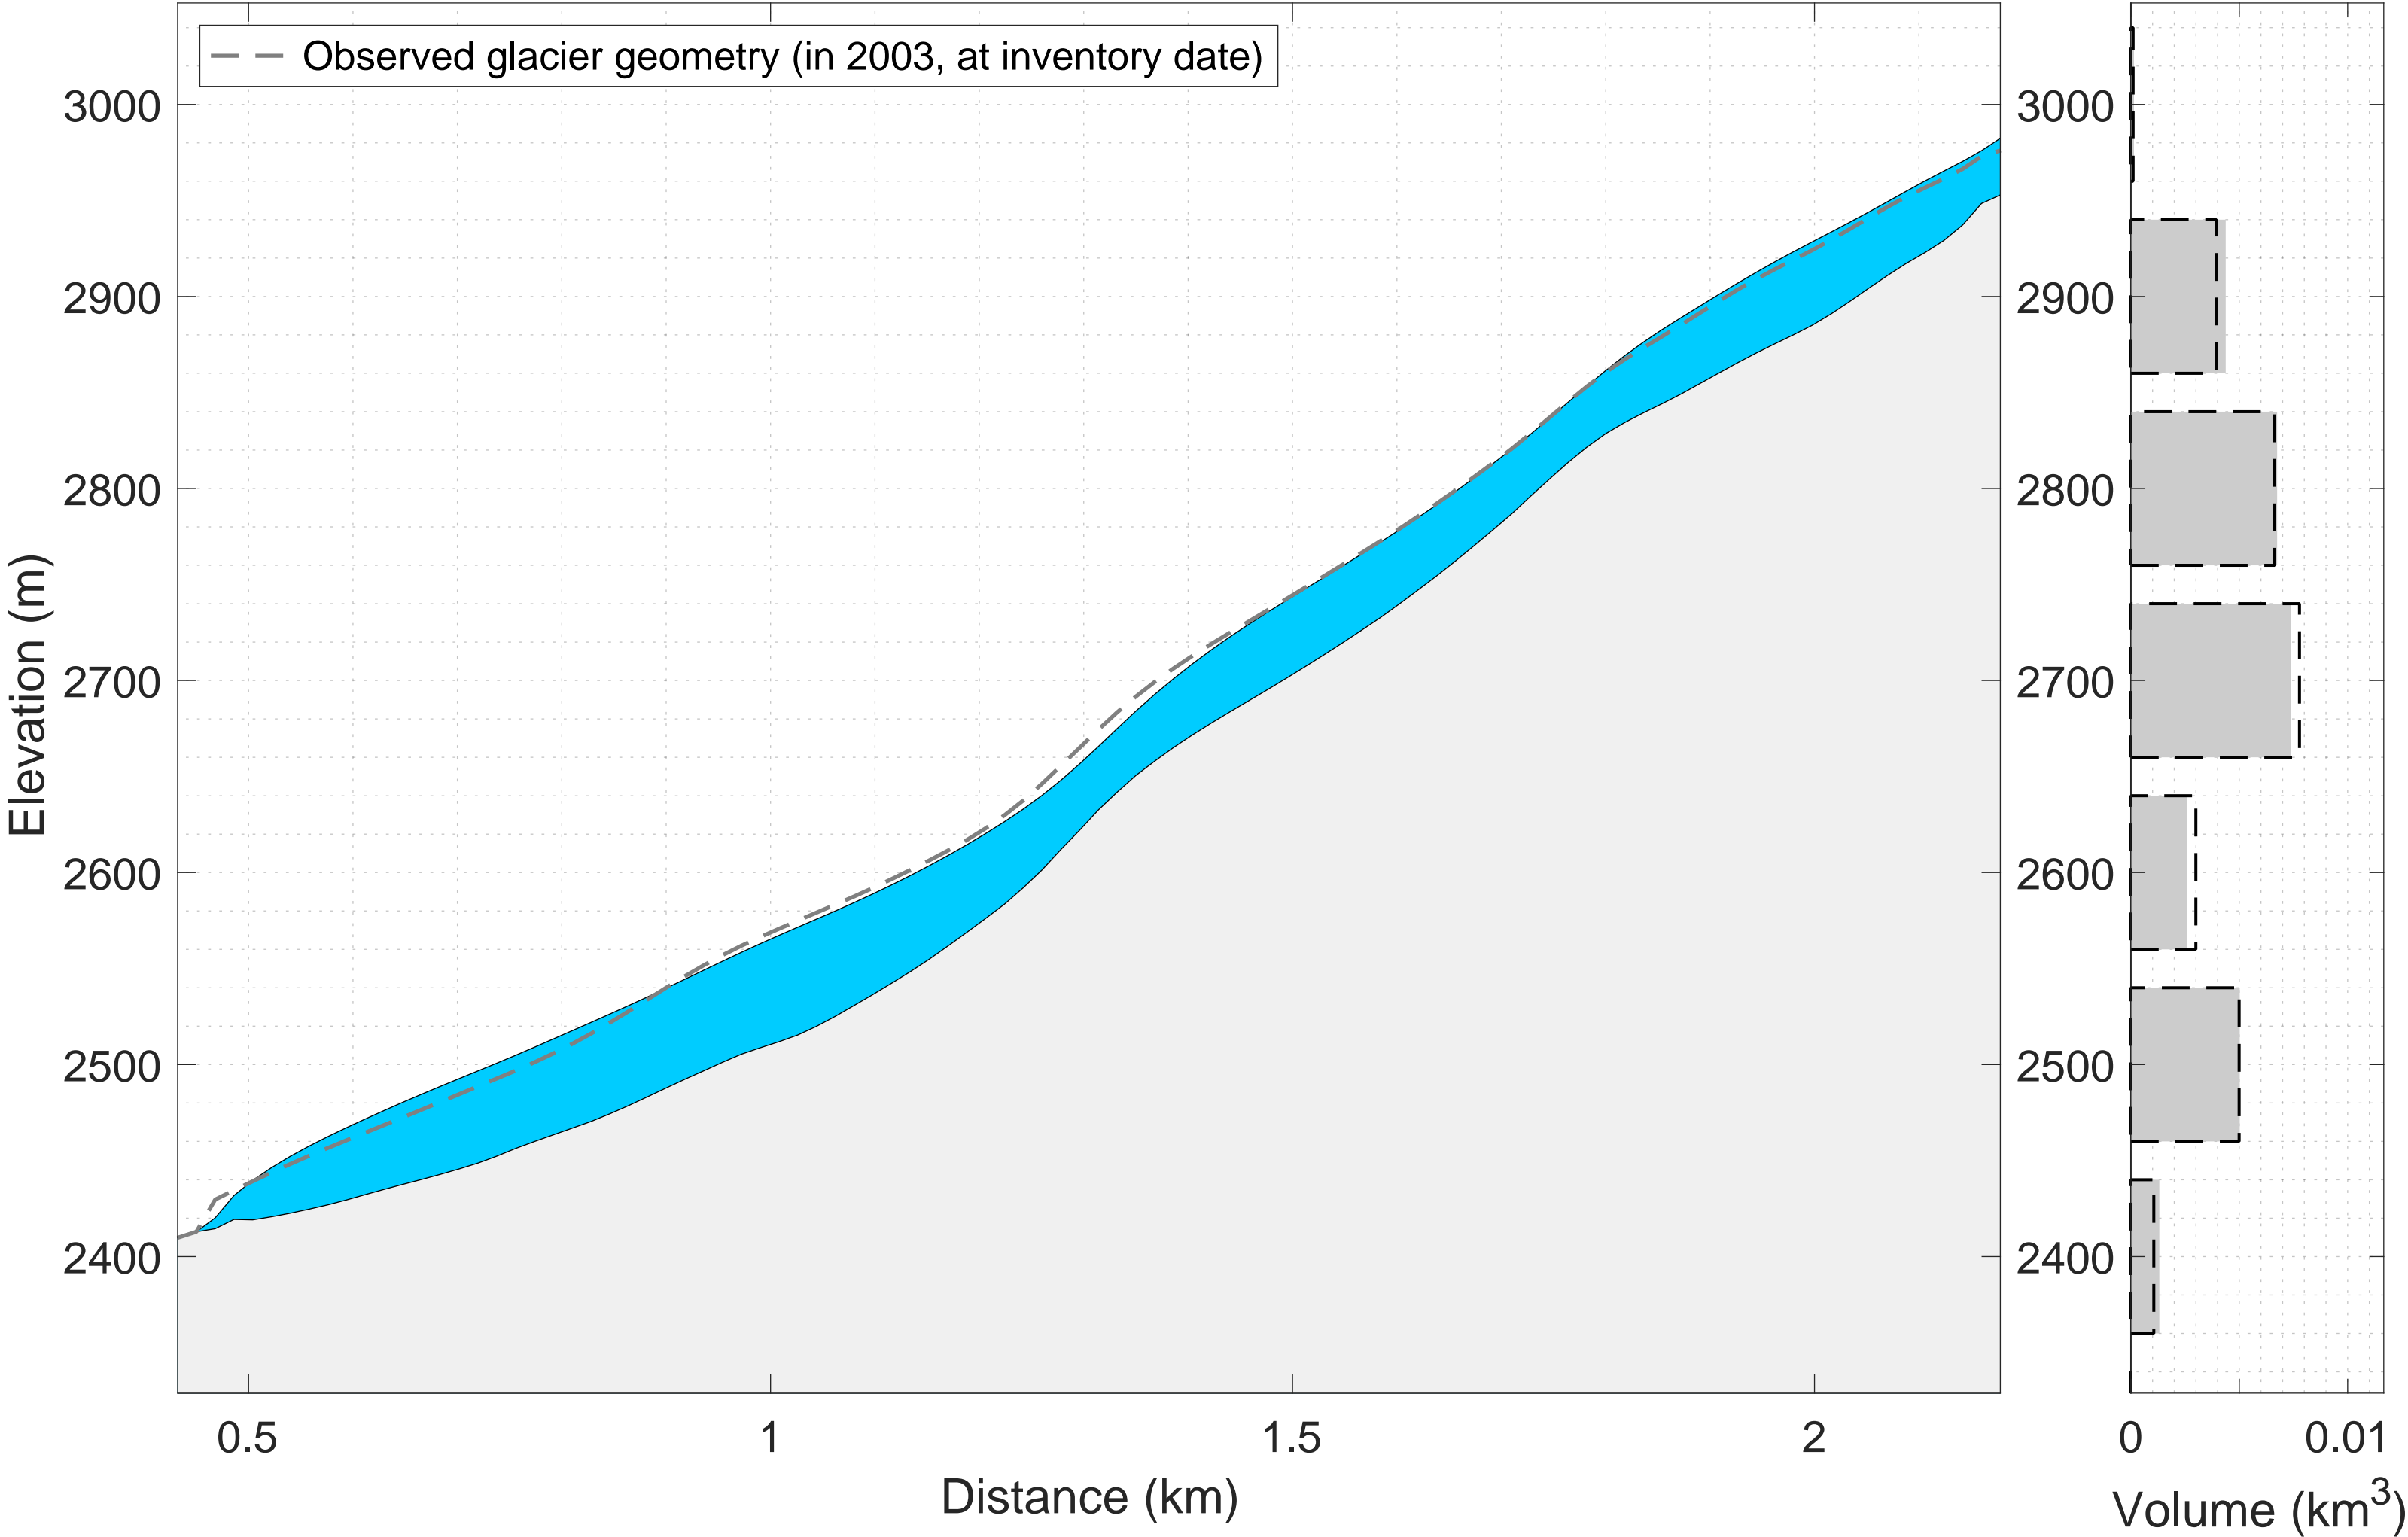

Supplement: Supplementary file 64 [file tc-13-1125-2019-supplement.zip]

**Modelled geometry (Glacier ID = 01769;  $A = 1.1138\text{e-}16 \text{ Pa}^{-3} \text{ a}^{-1}$ ;  $dx = 10 \text{ m}$ )**

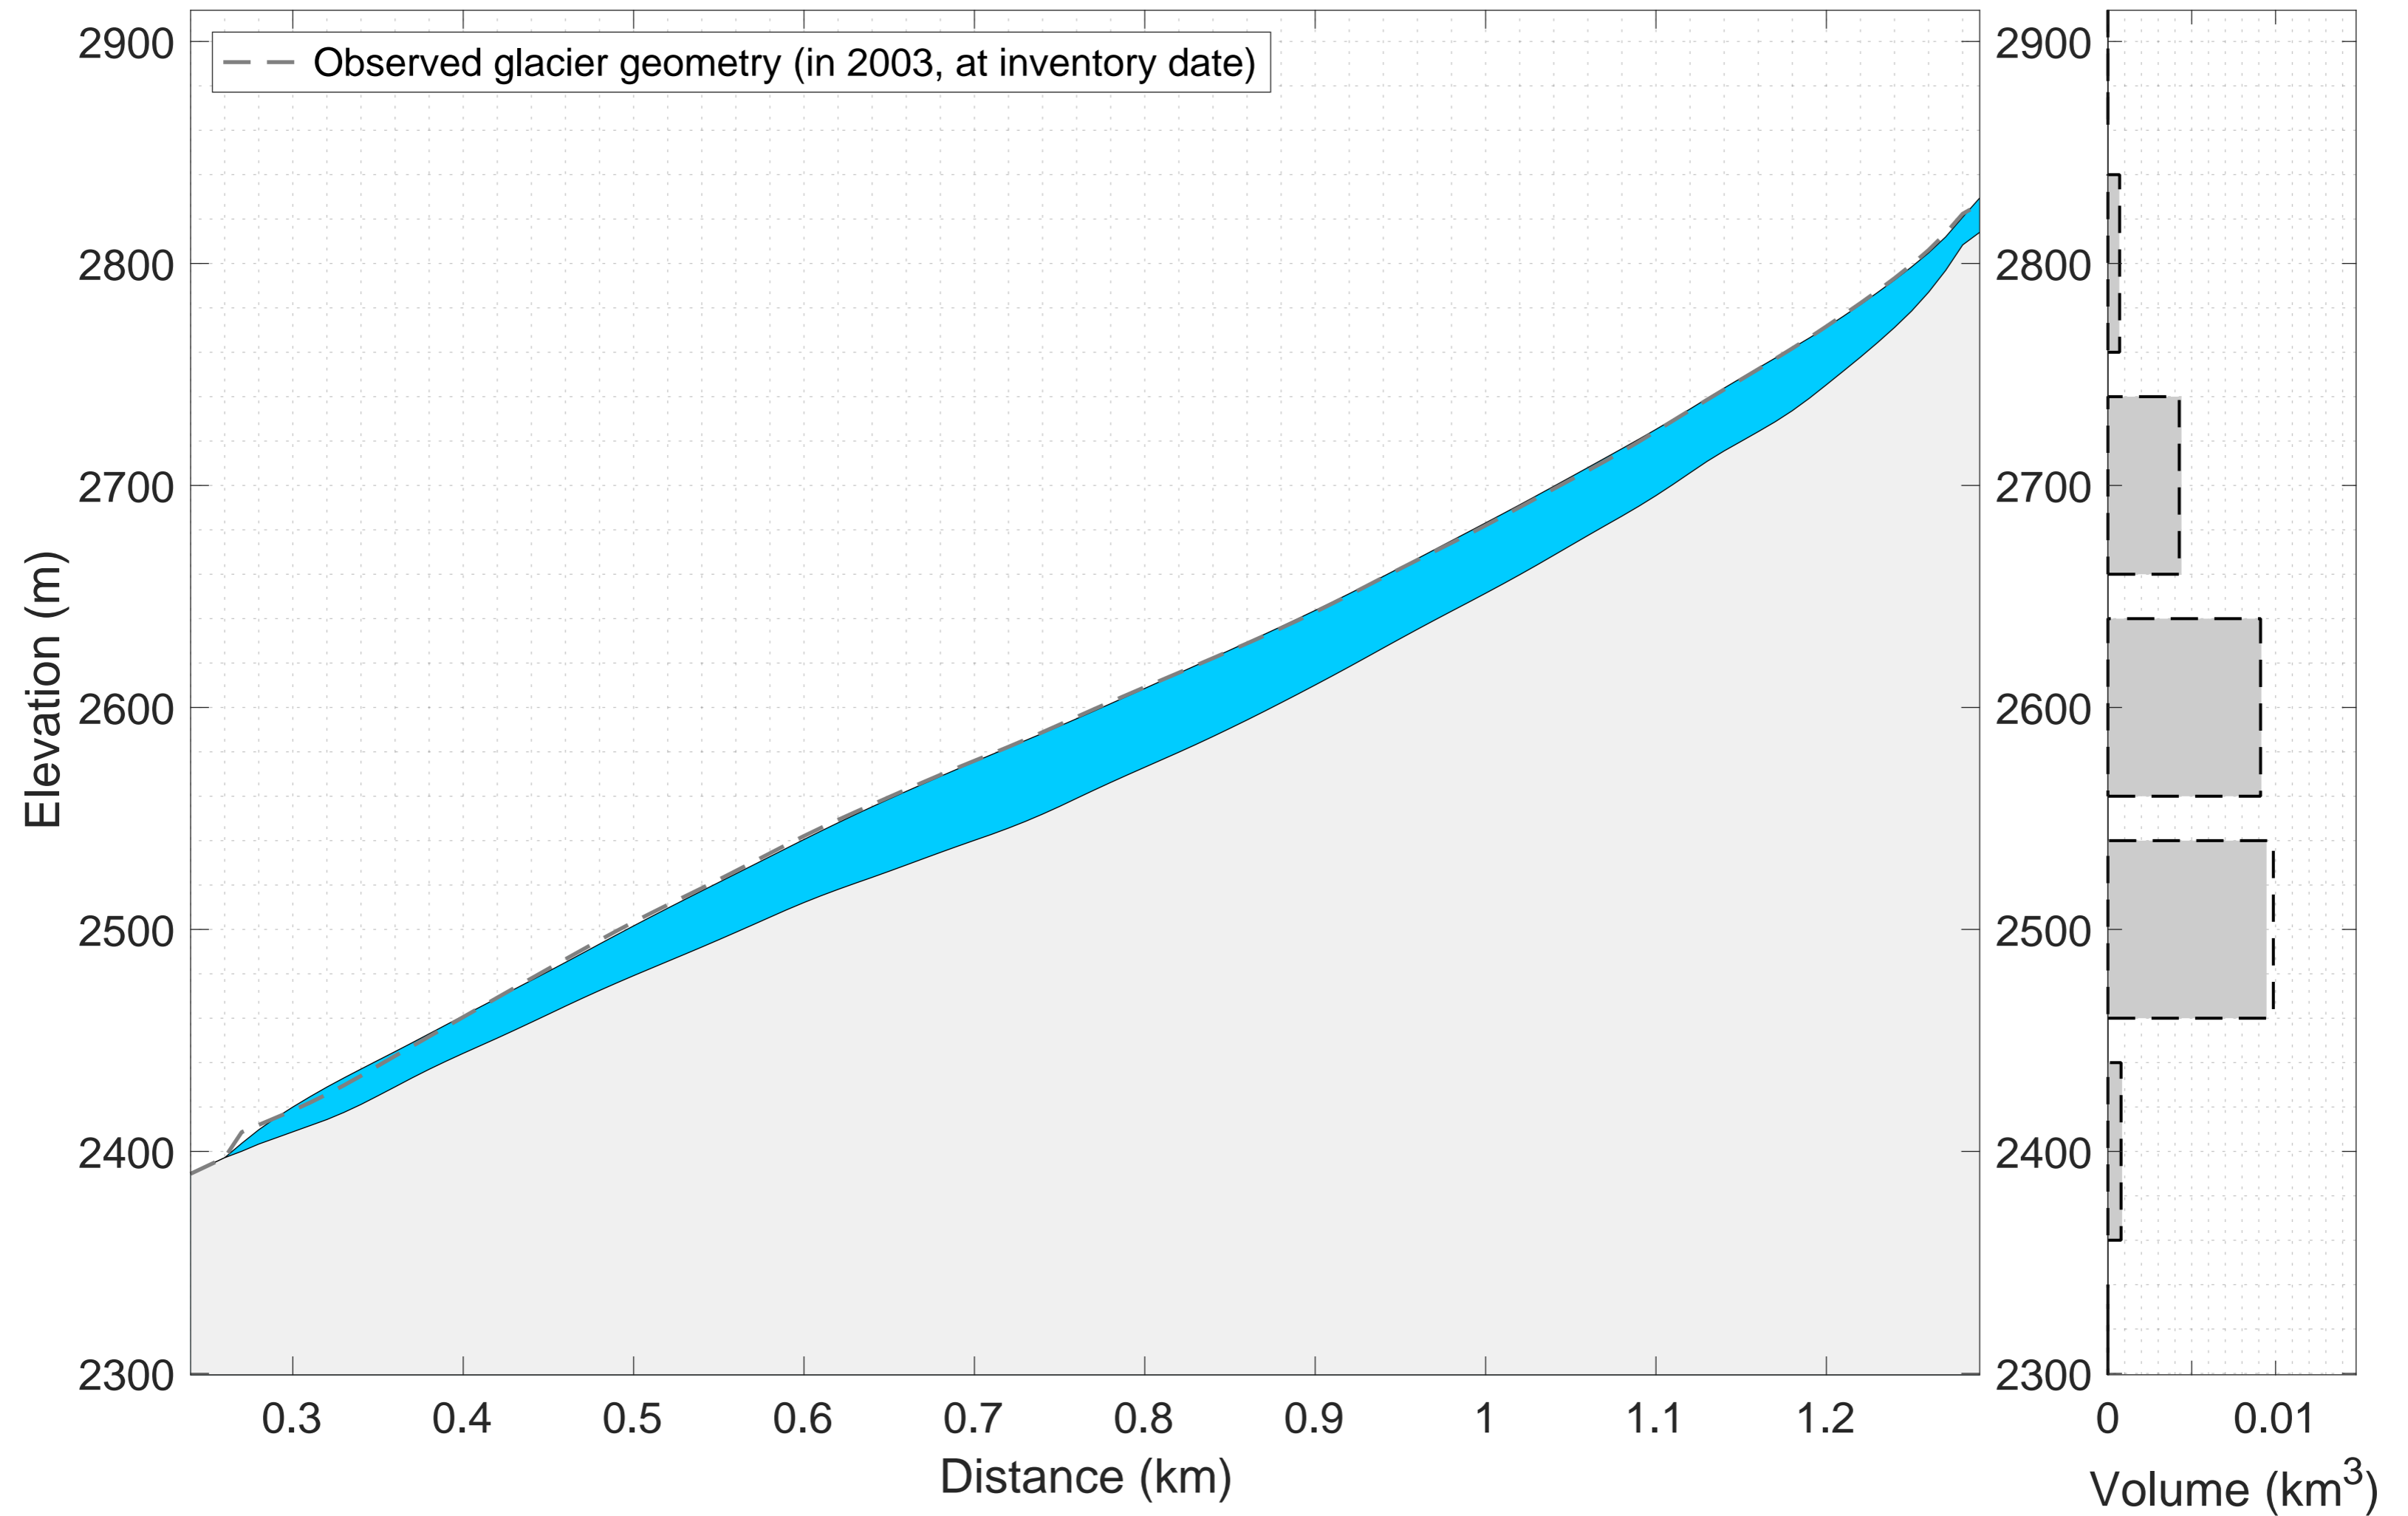

Supplement: Supplementary file 65 [file tc-13-1125-2019-supplement.zip]

**Modelled geometry (Glacier ID = 03146;  $A = 2.4887\text{e-}16 \text{ Pa}^{-3} \text{ a}^{-1}$ ;  $dx = 12 \text{ m}$ )**

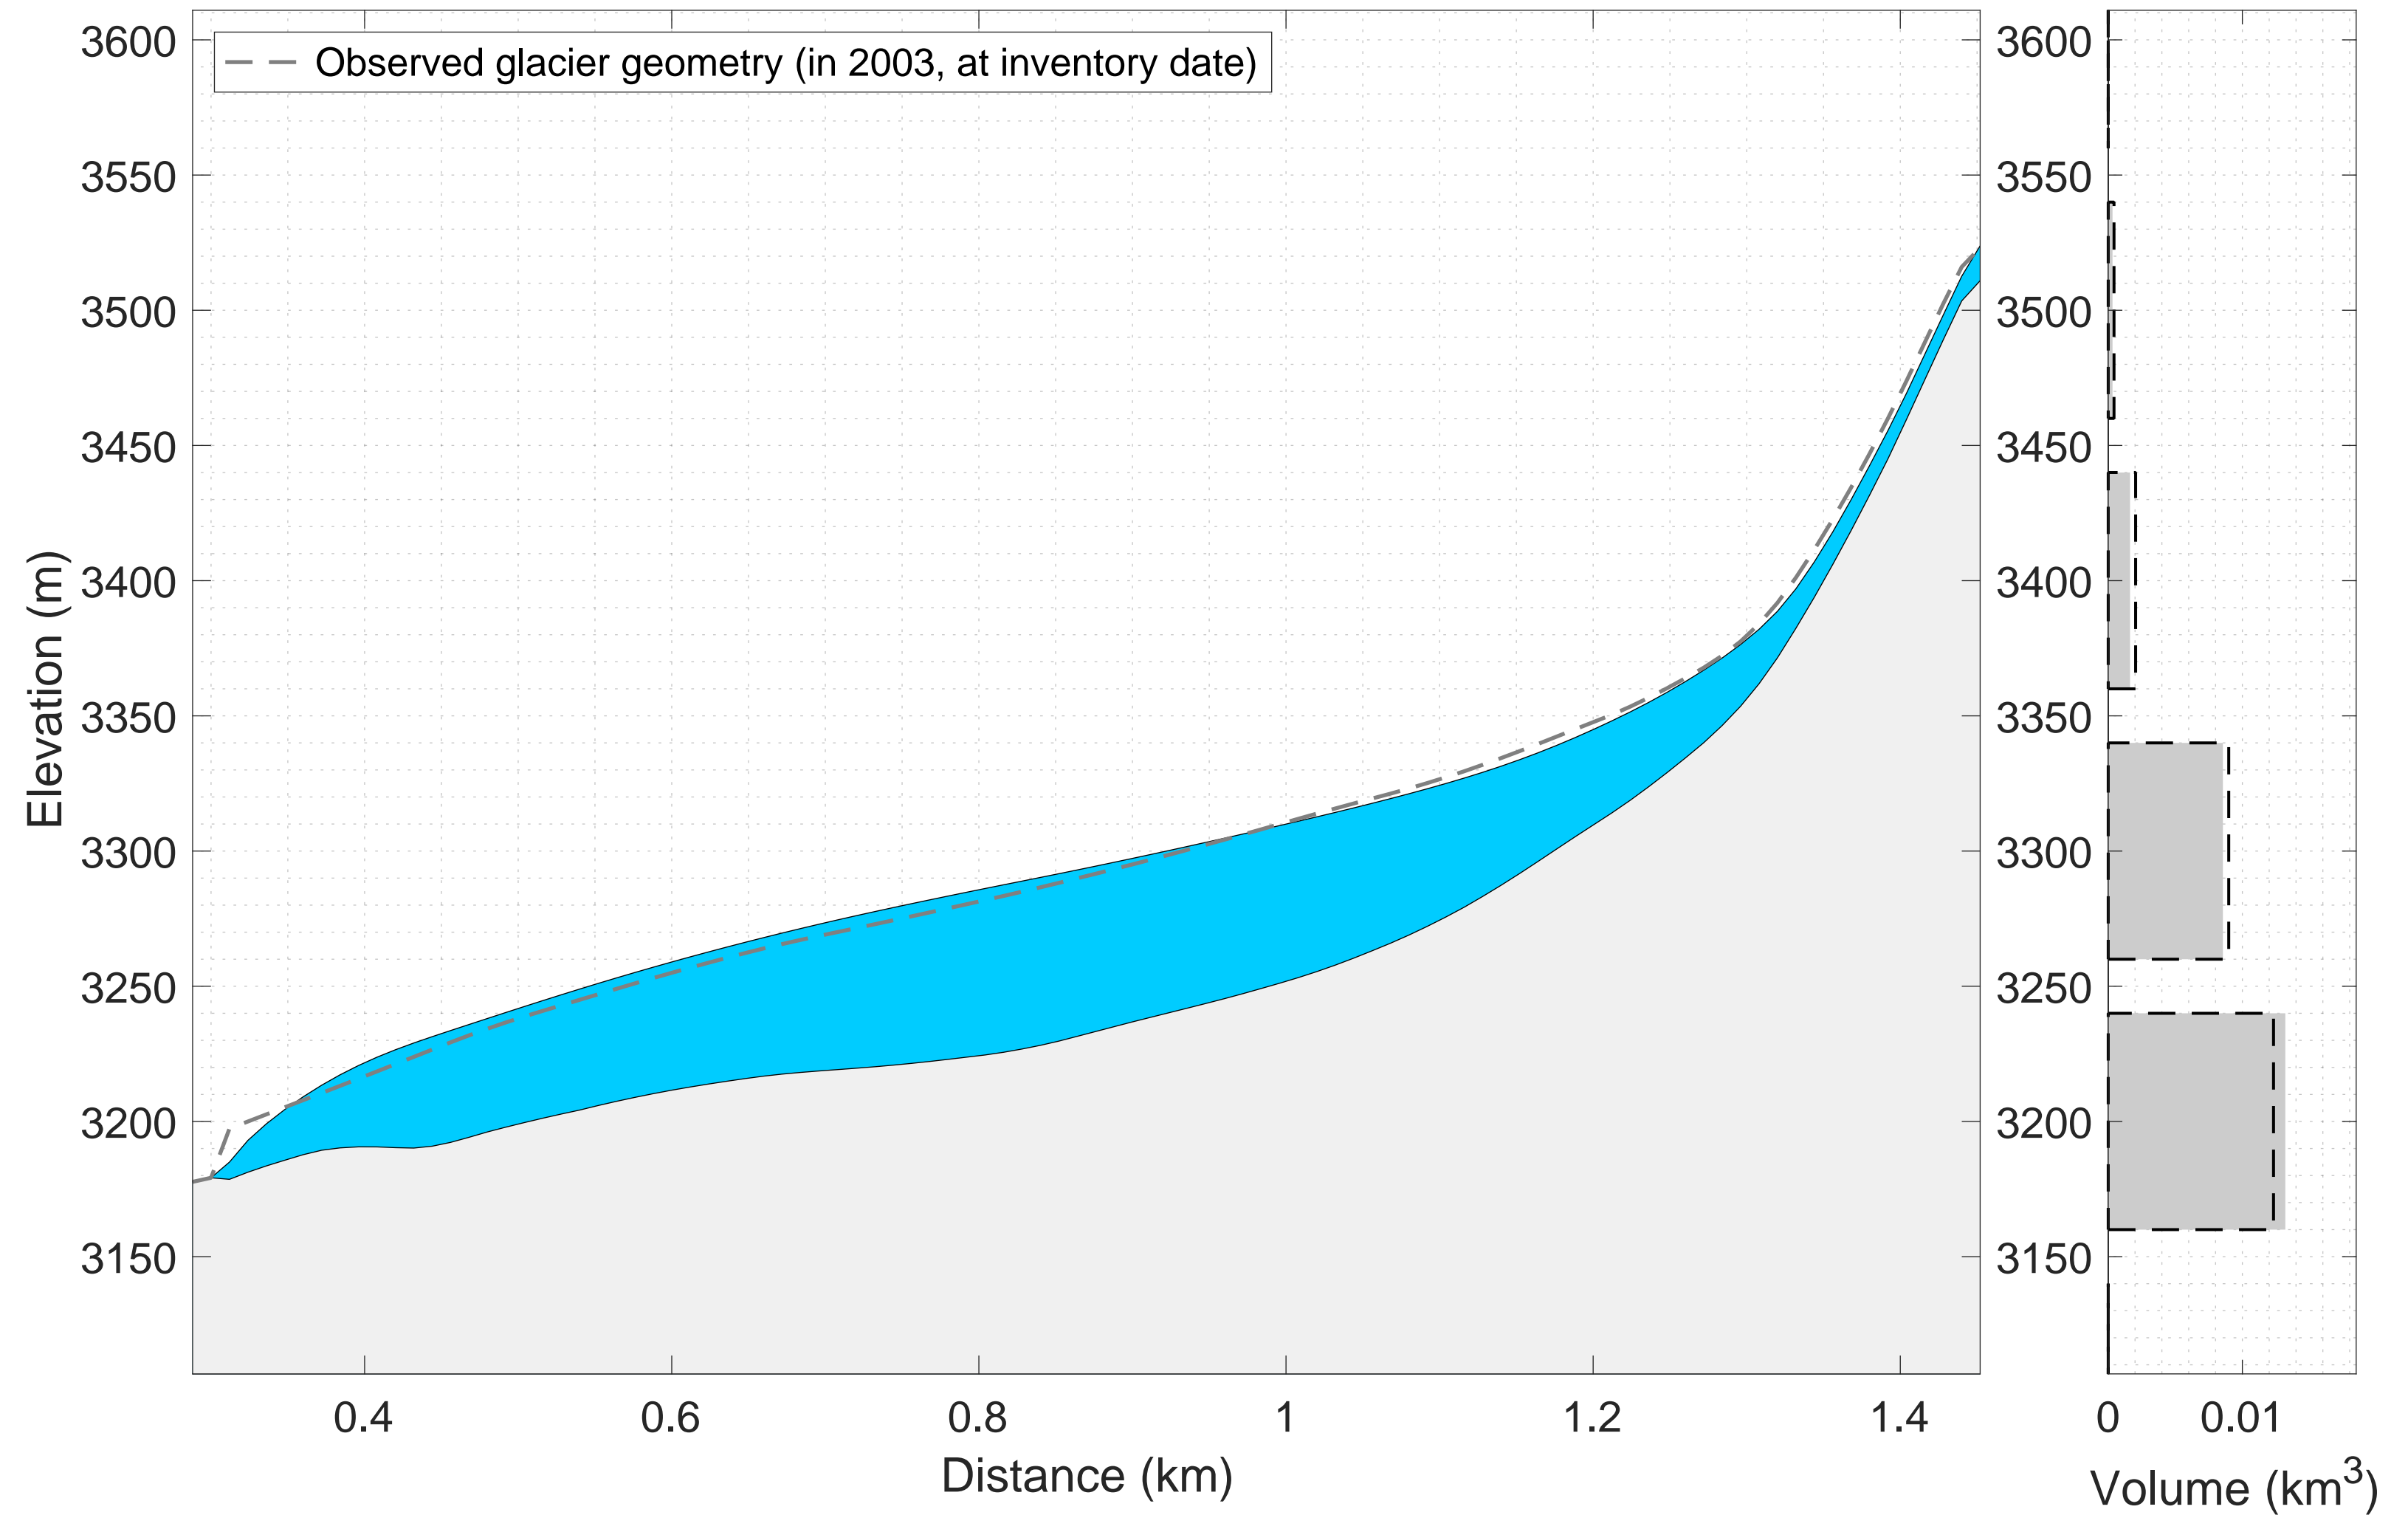

Supplement: Supplementary file 66 [file tc-13-1125-2019-supplement.zip]

**Modelled geometry (Glacier ID = 02867;  $A = 1.3391\text{e-}16 \text{ Pa}^{-3} \text{ a}^{-1}$ ;  $dx = 11 \text{ m}$ )**

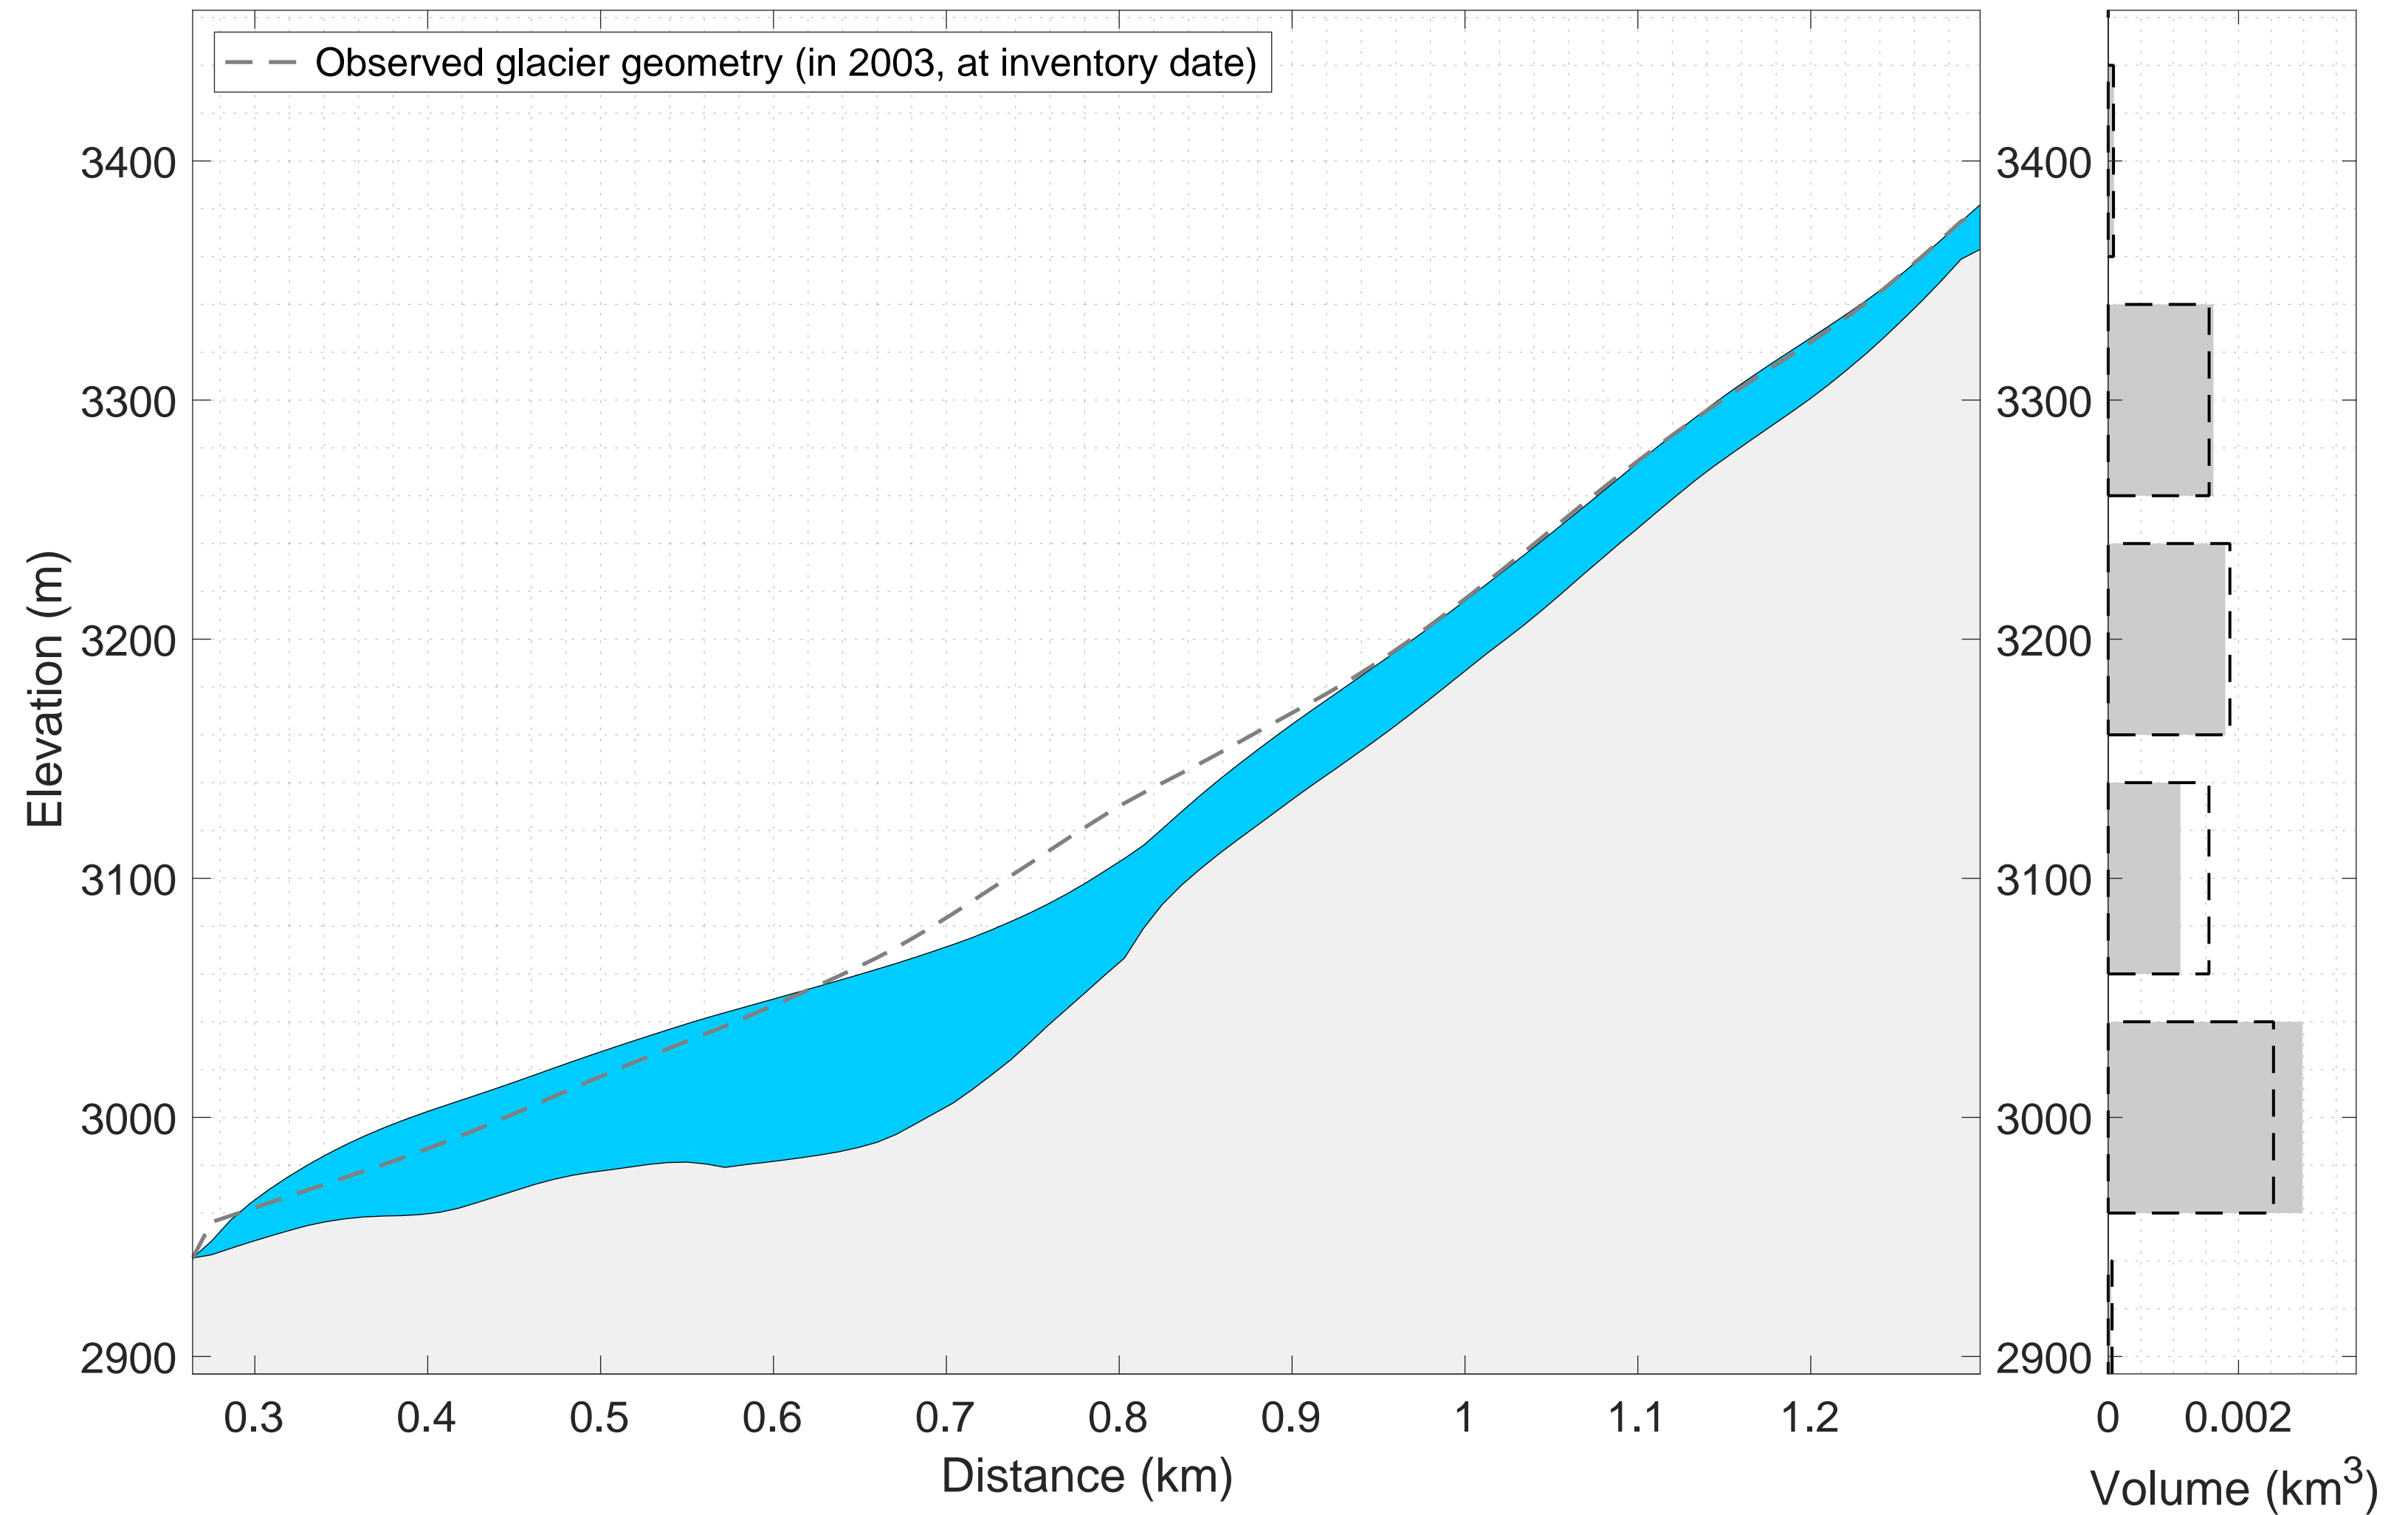

Supplement: Supplementary file 67 [file tc-13-1125-2019-supplement.zip]

**Modelled geometry (Glacier ID = 00919;  $A = 9.1659\text{e-}17 \text{ Pa}^{-3} \text{ a}^{-1}$ ;  $dx = 12 \text{ m}$ )**

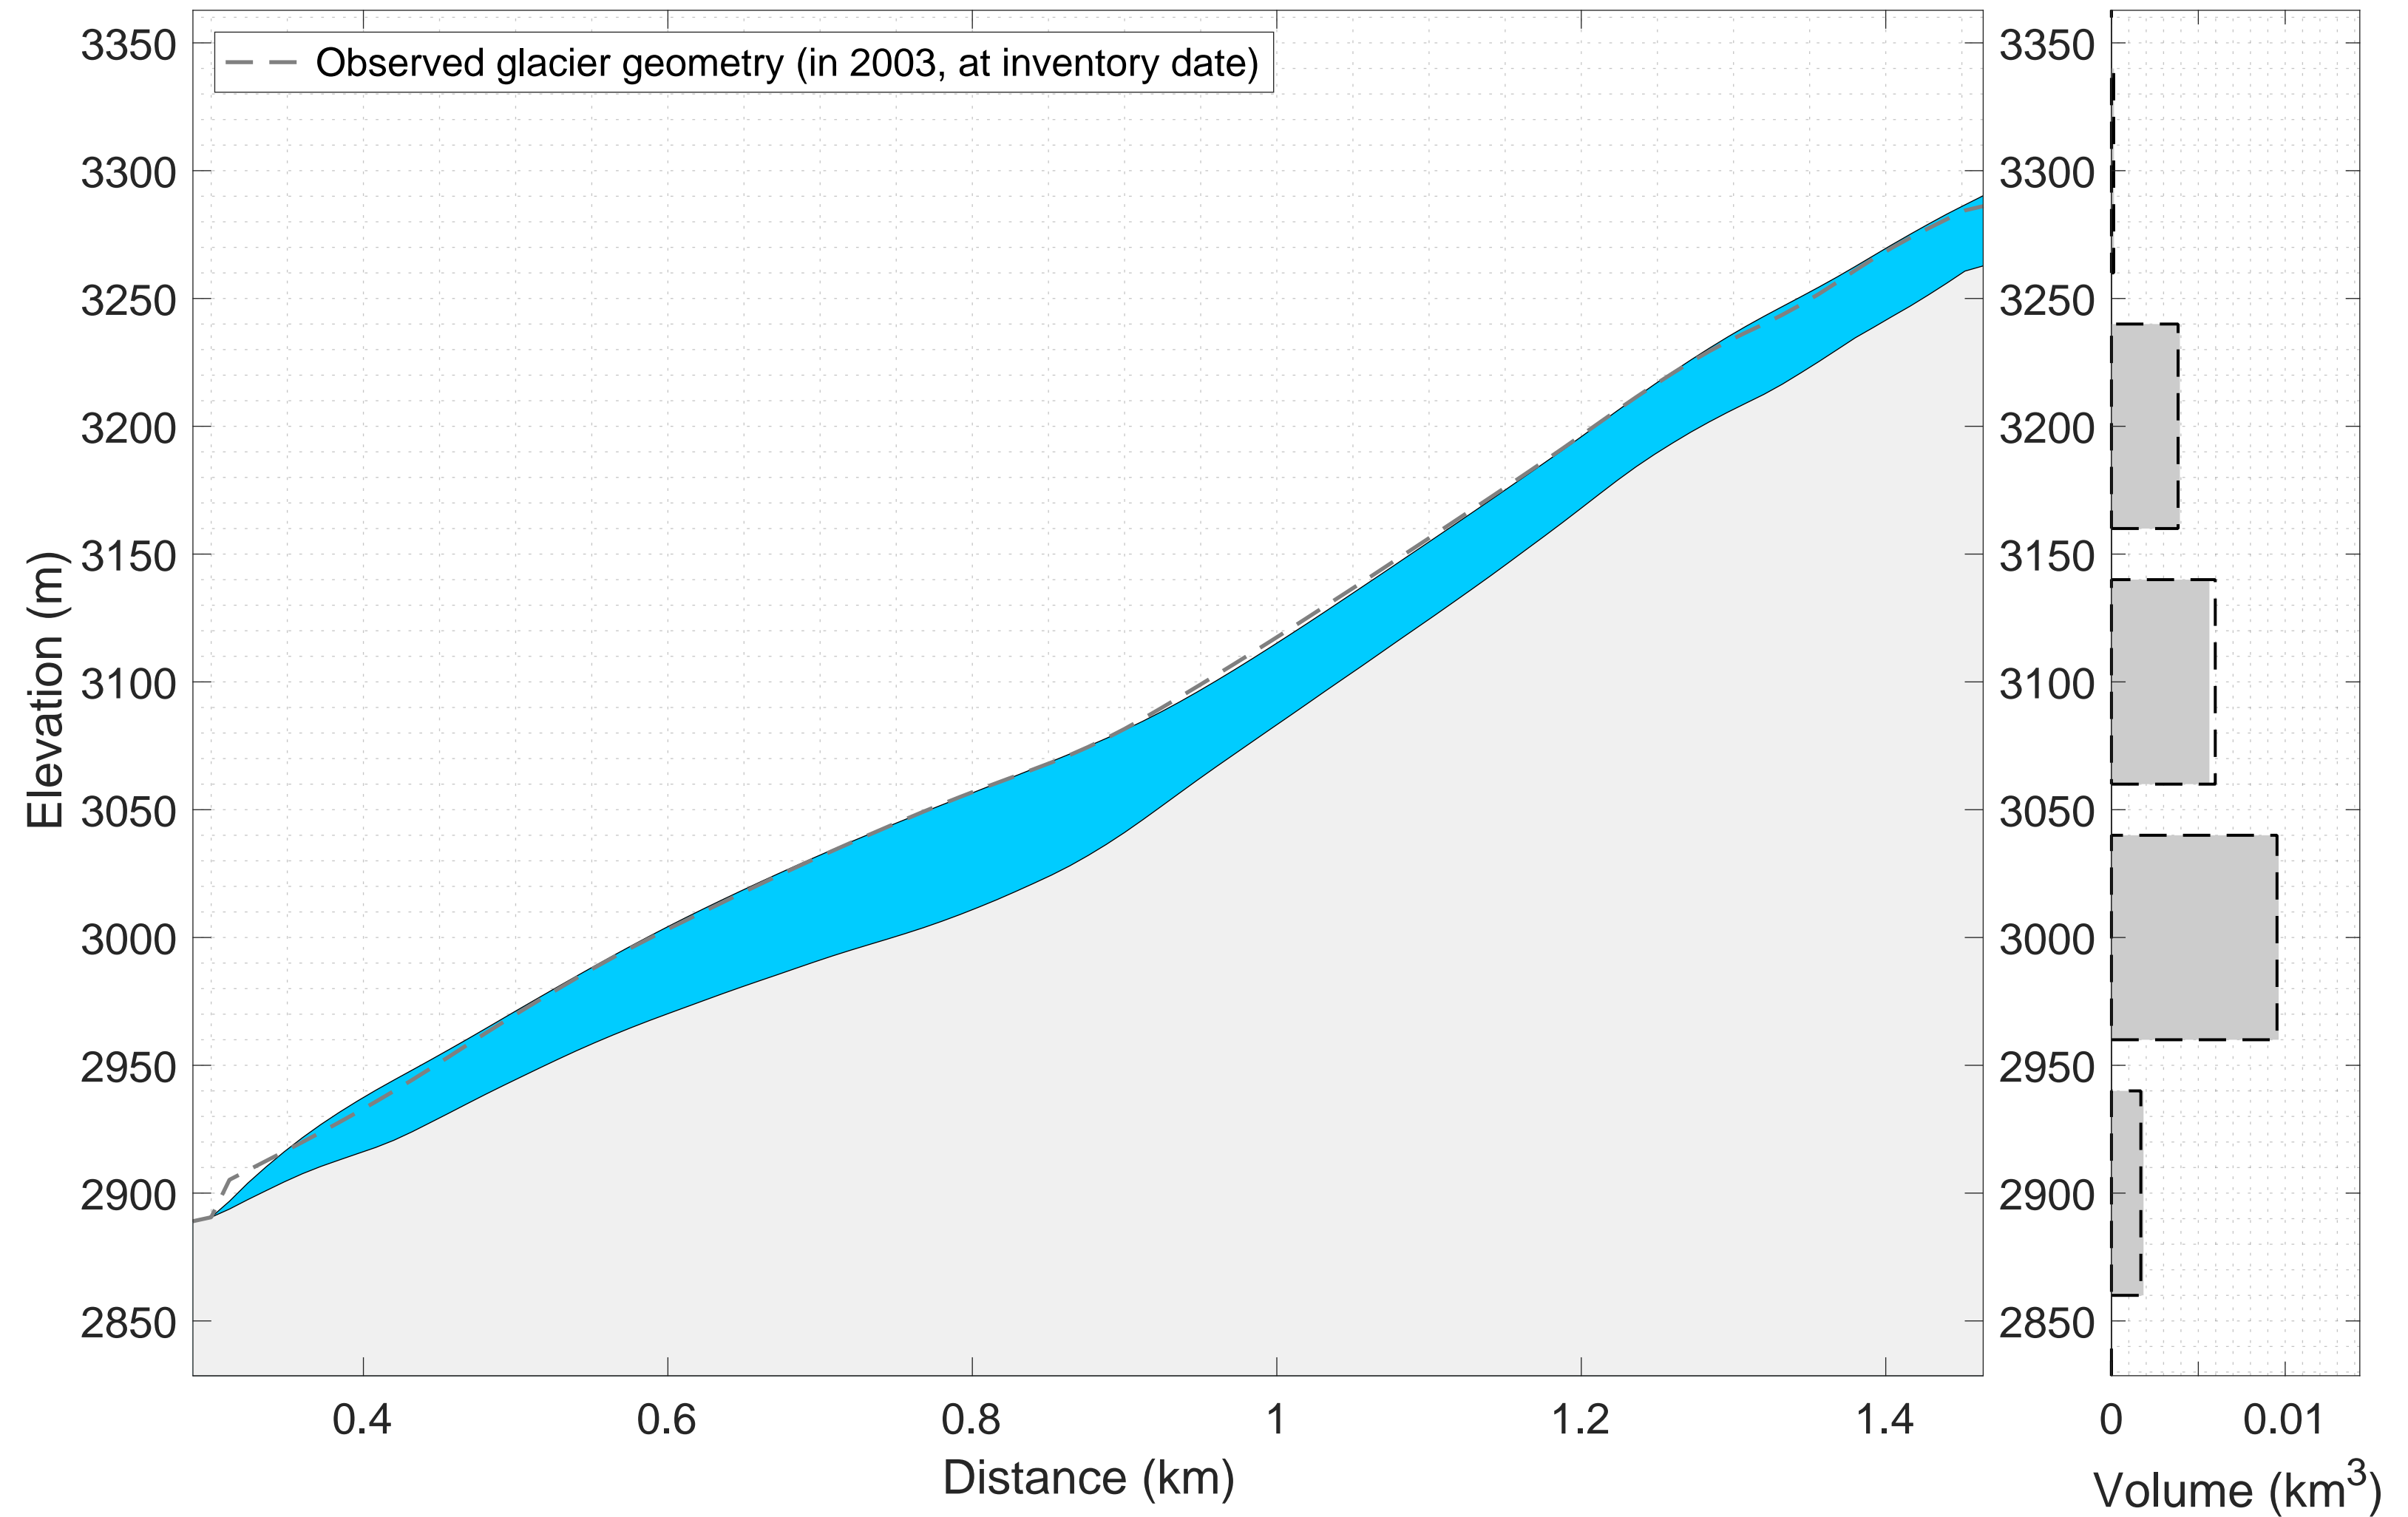

Supplement: Supplementary file 68 [file tc-13-1125-2019-supplement.zip]

**Modelled geometry (Glacier ID = 00899;  $A = 6.5688\text{e-}17 \text{ Pa}^{-3} \text{ a}^{-1}$ ;  $dx = 10 \text{ m}$ )**

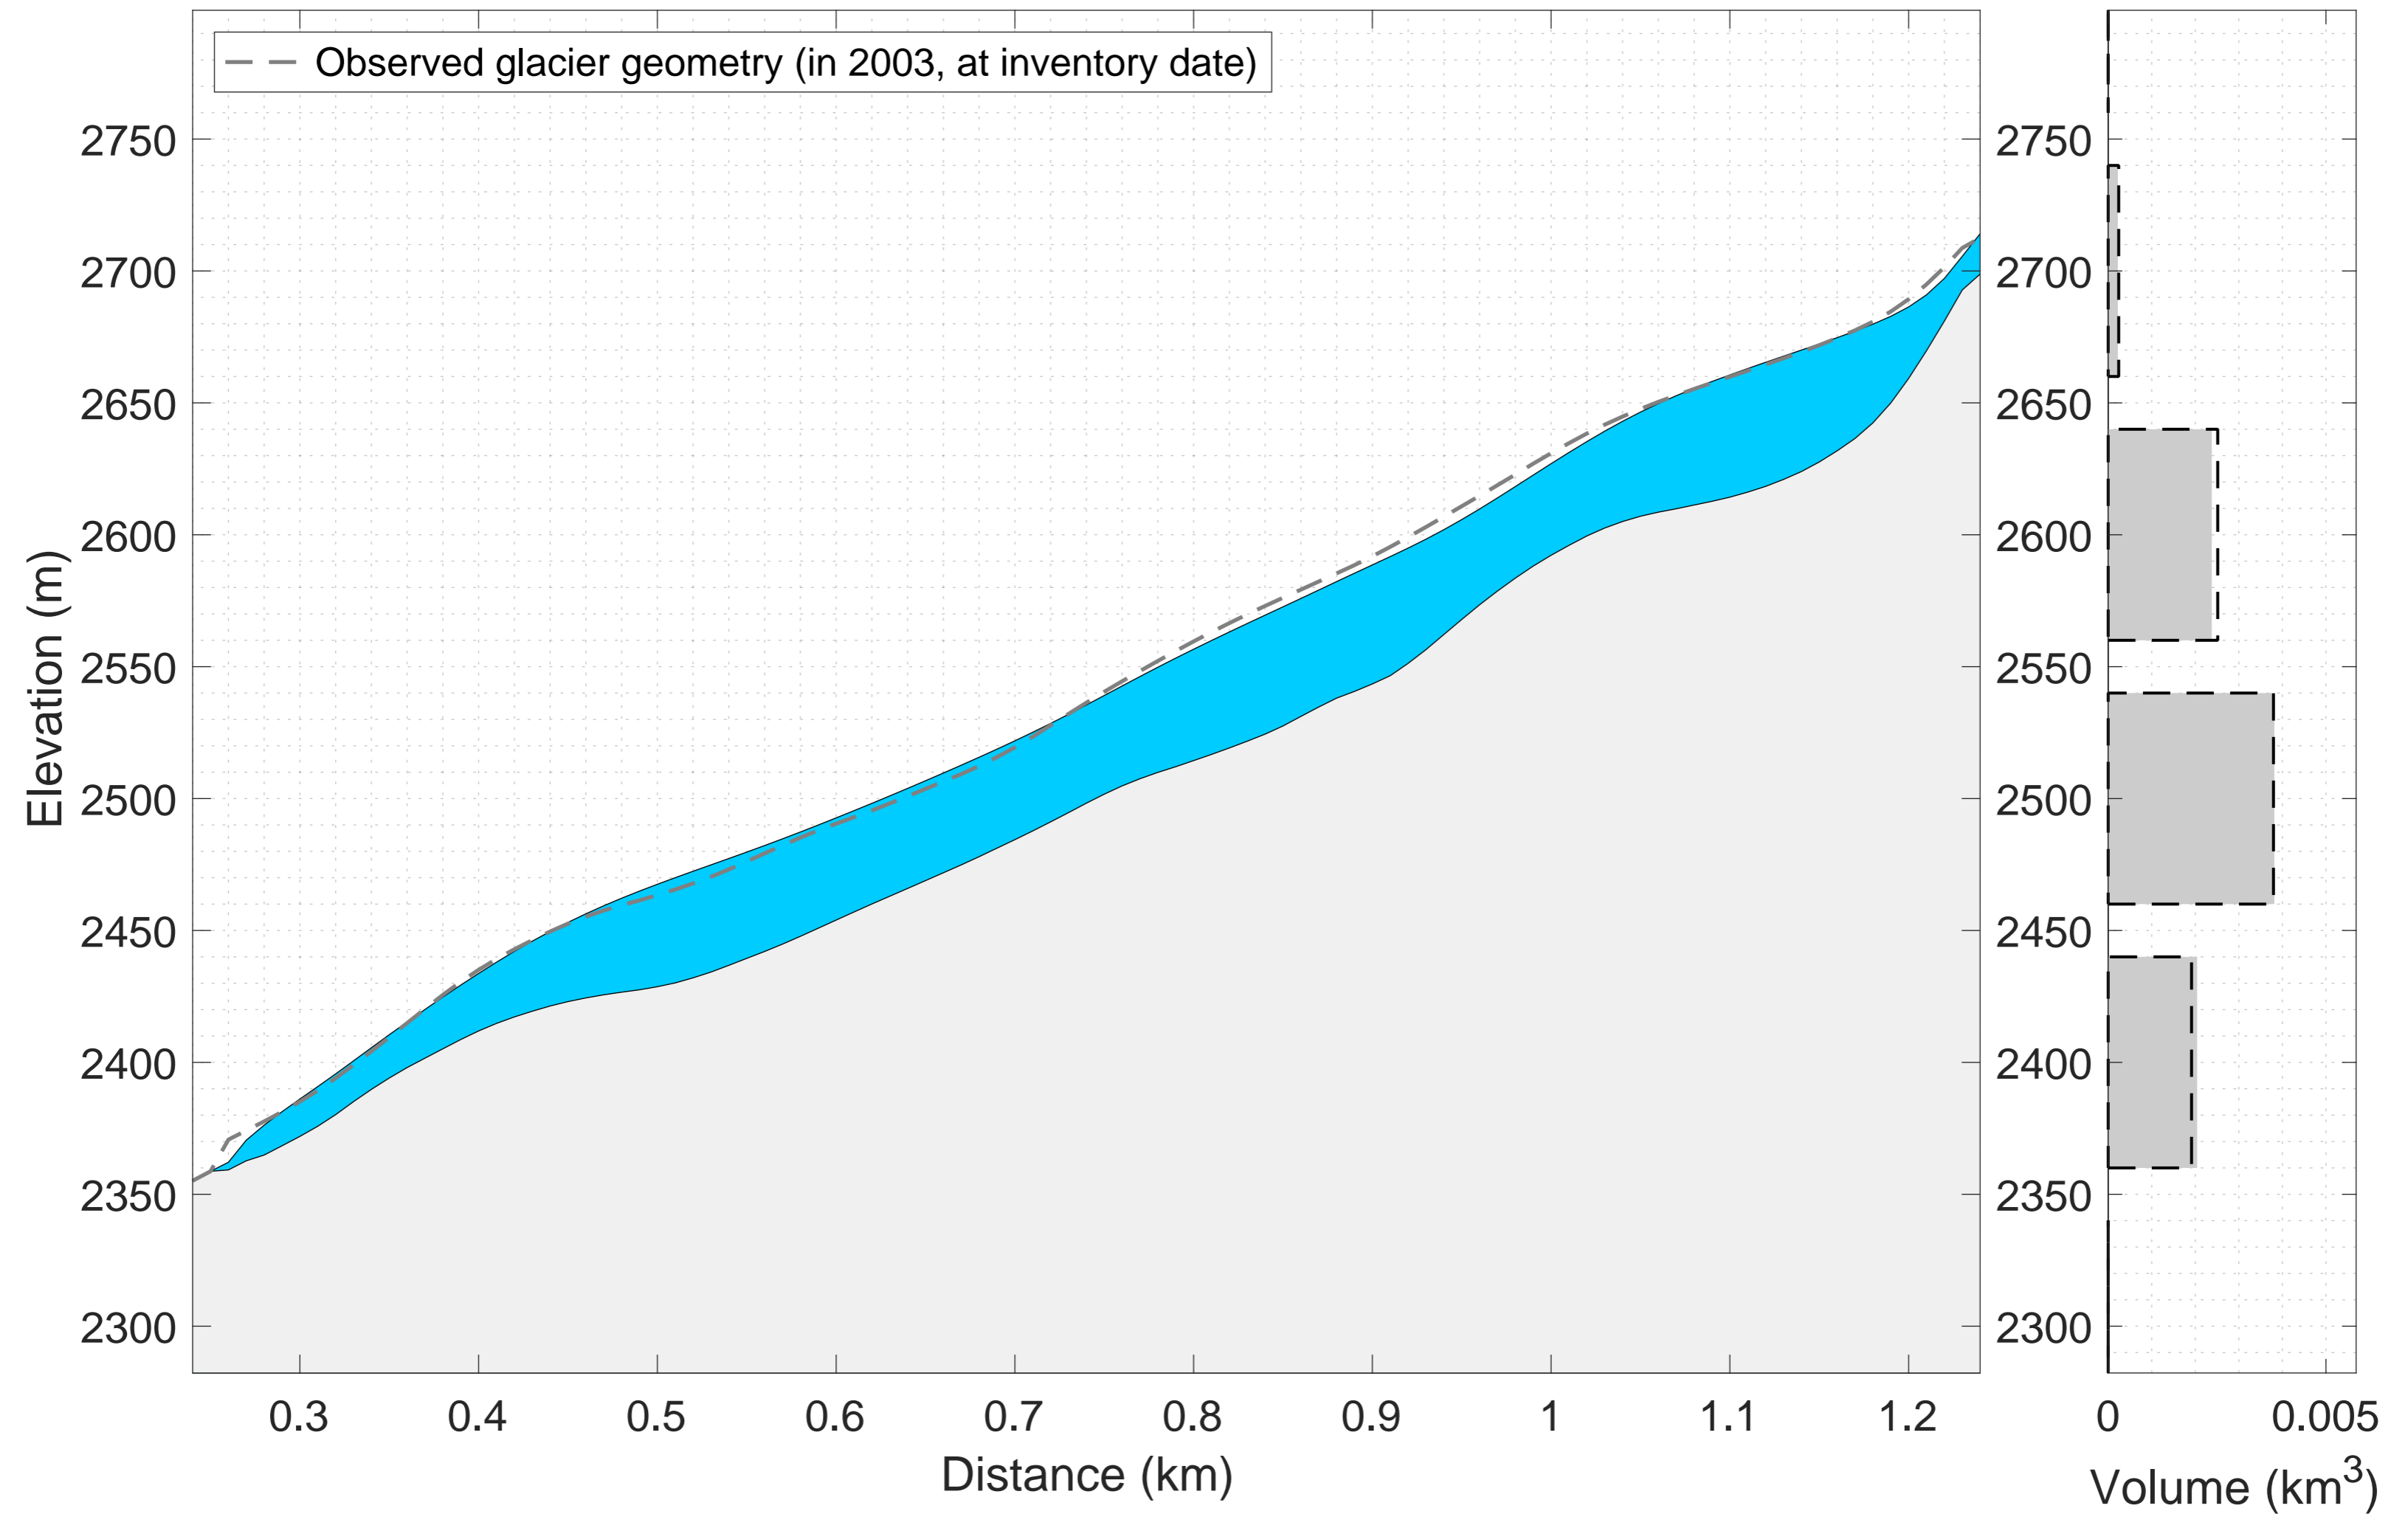

Supplement: Supplementary file 69 [file tc-13-1125-2019-supplement.zip]

**Modelled geometry (Glacier ID = 02910;  $A = 9.821\text{e-}17 \text{ Pa}^{-3} \text{ a}^{-1}$ ;  $dx = 19 \text{ m}$ )**

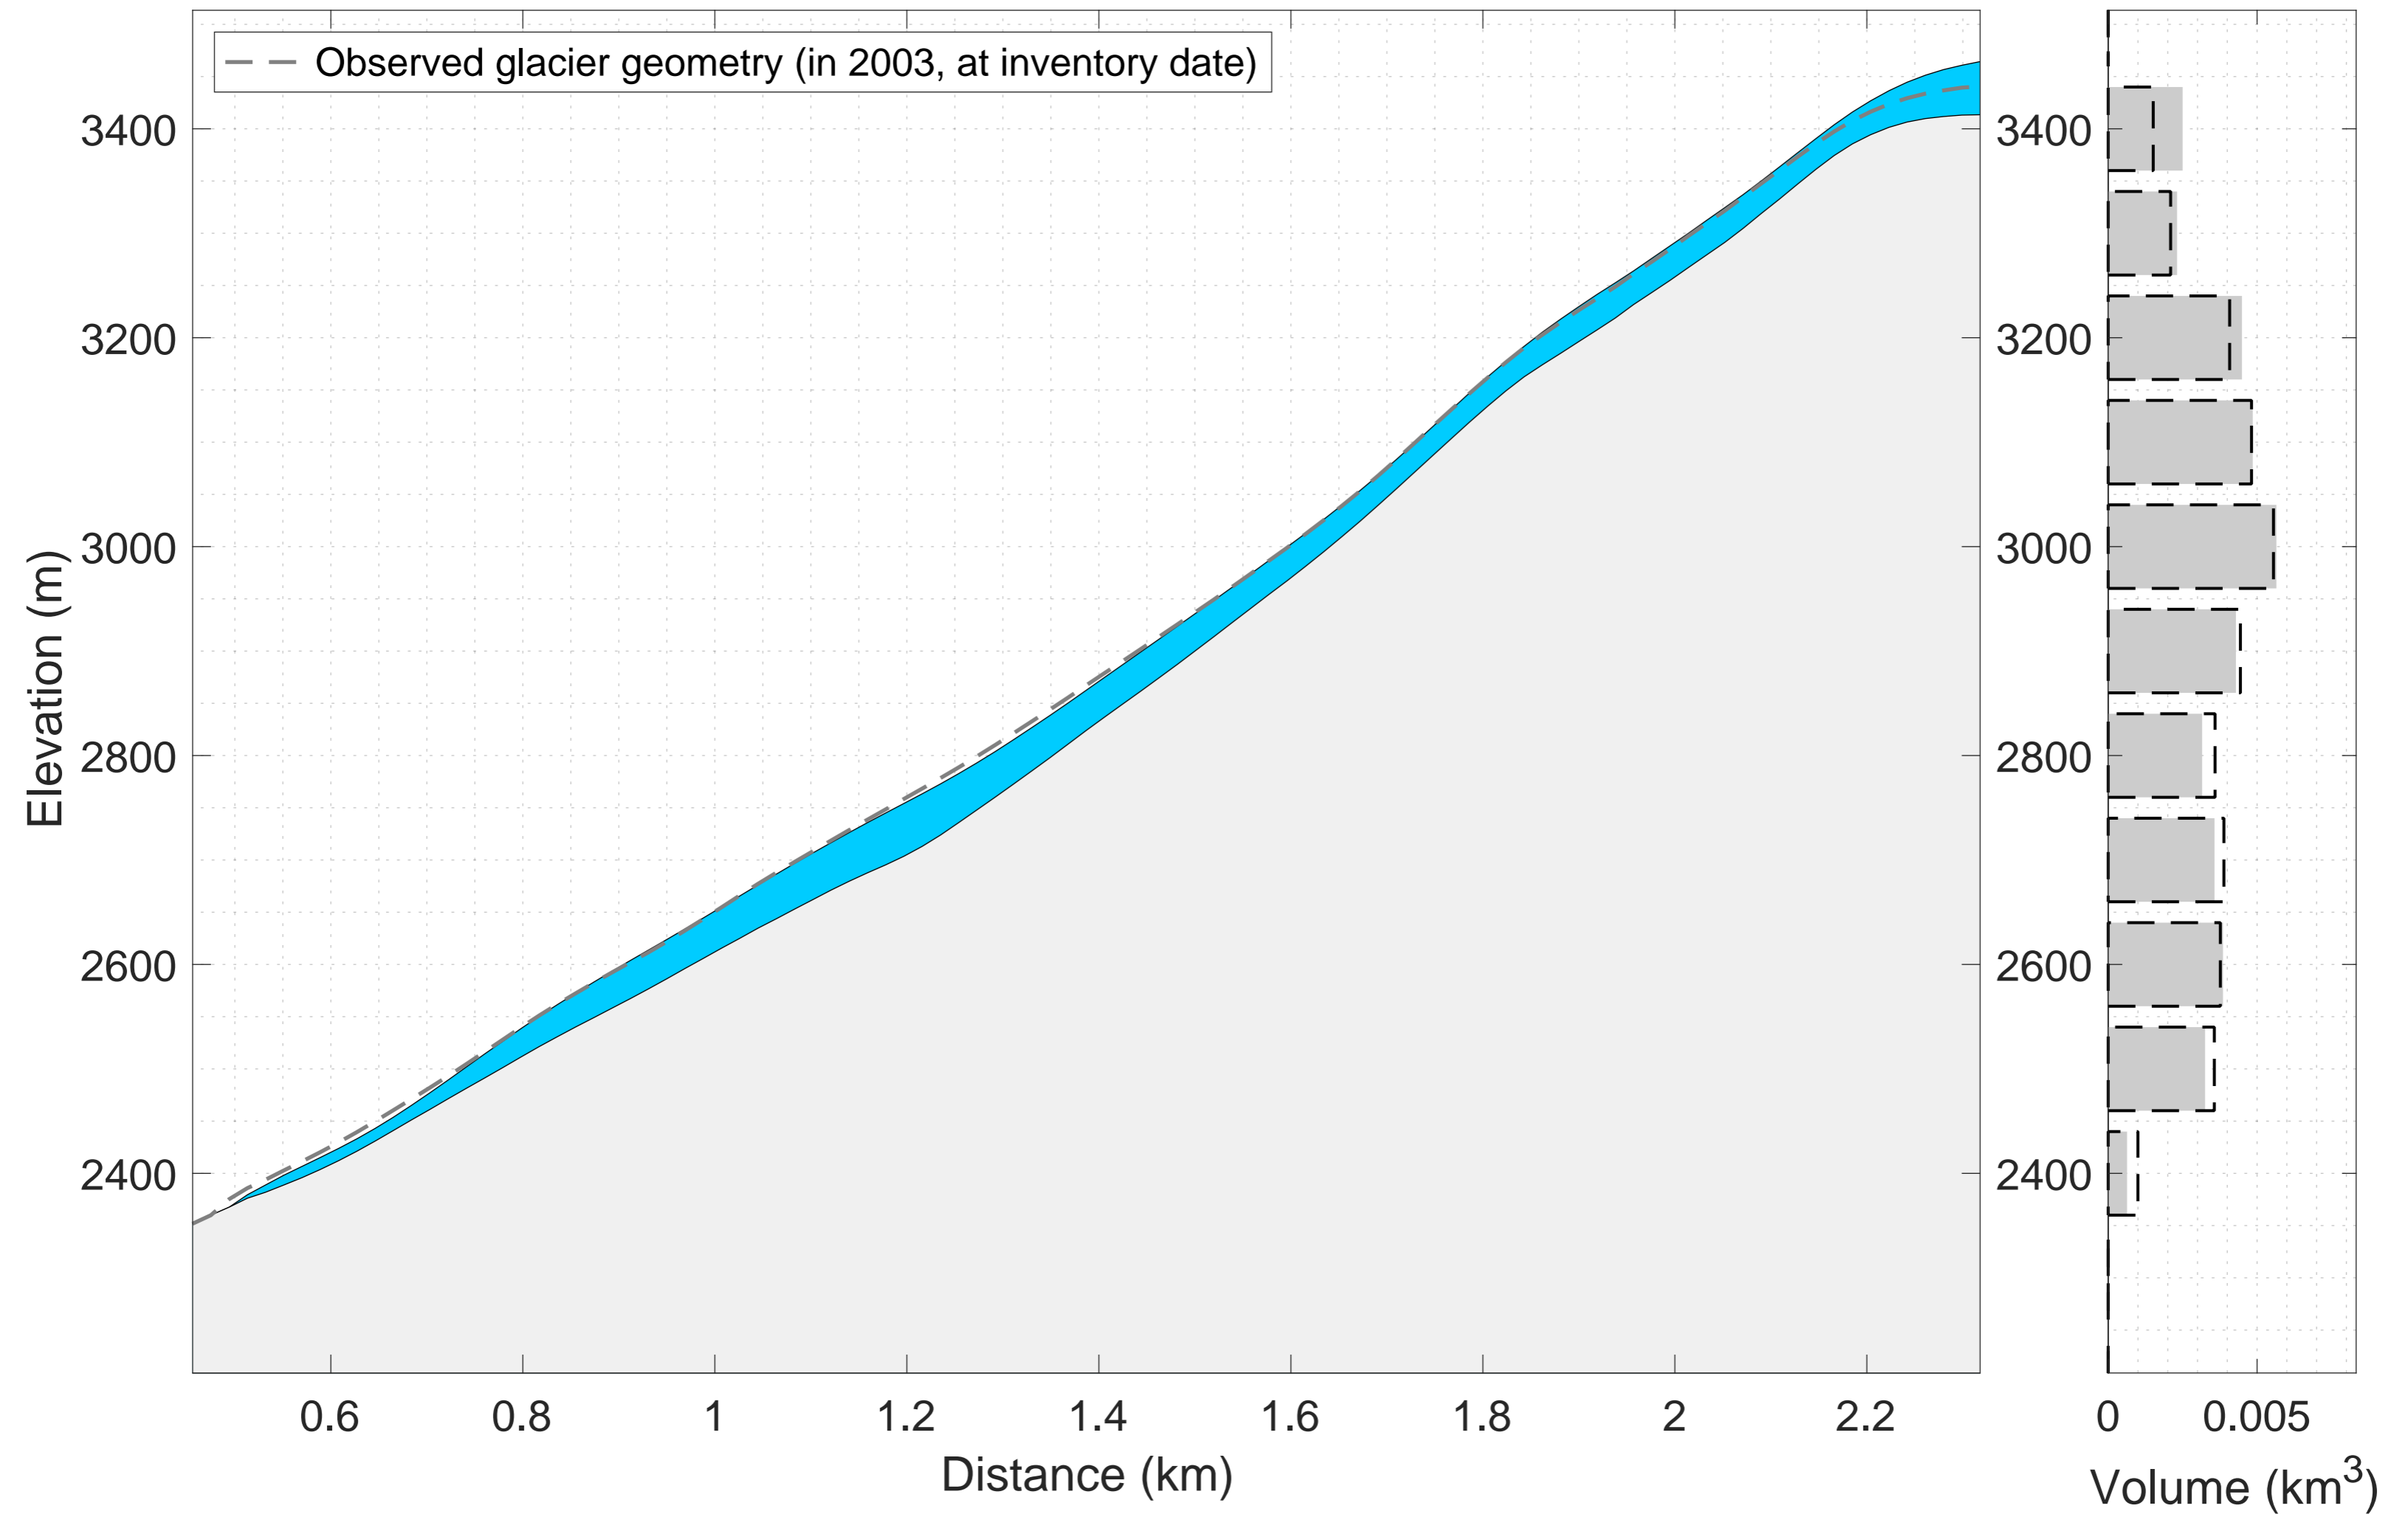

Supplement: Supplementary file 70 [file tc-13-1125-2019-supplement.zip]

# Modelled geometry (Glacier ID = 00159; $A = 1\text{e-}16 \text{ Pa}^{-3} \text{ a}^{-1}$ ; $dx = 16 \text{ m}$ )

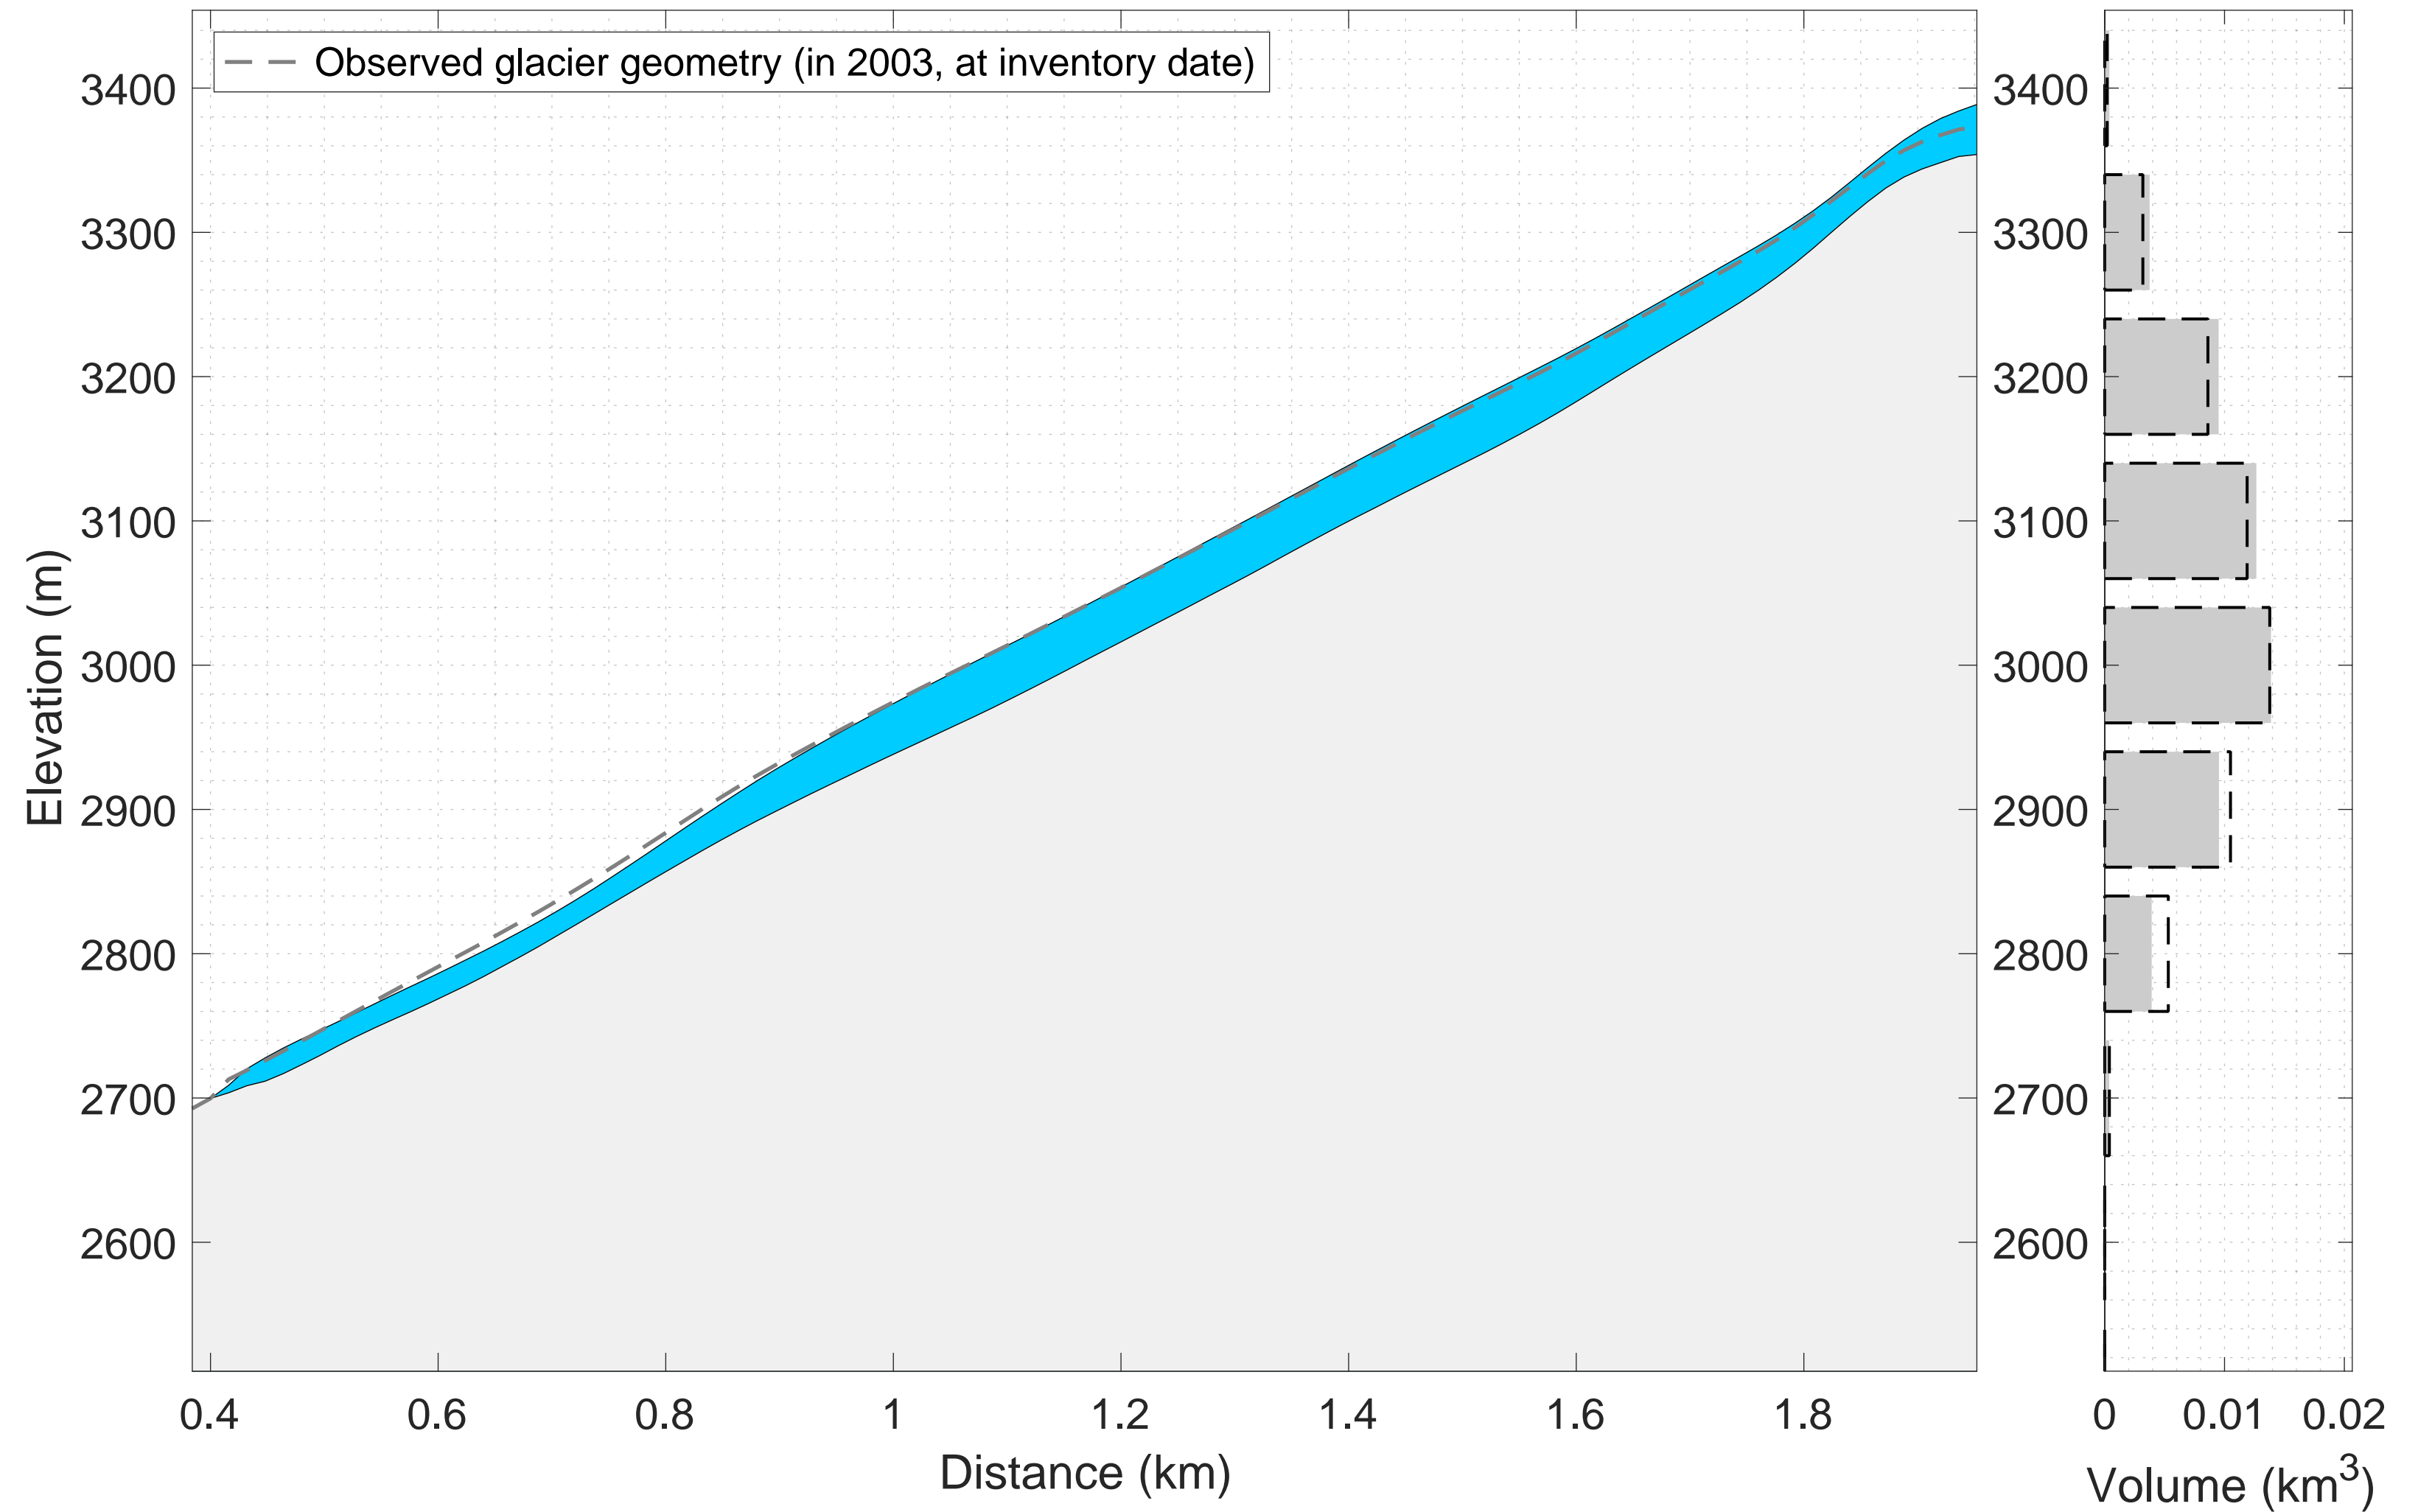

Supplement: Supplementary file 71 [file tc-13-1125-2019-supplement.zip]

**Modelled geometry (Glacier ID = 02813;  $A = 1.2751\text{e-}16 \text{ Pa}^{-3} \text{ a}^{-1}$ ;  $dx = 12 \text{ m}$ )**

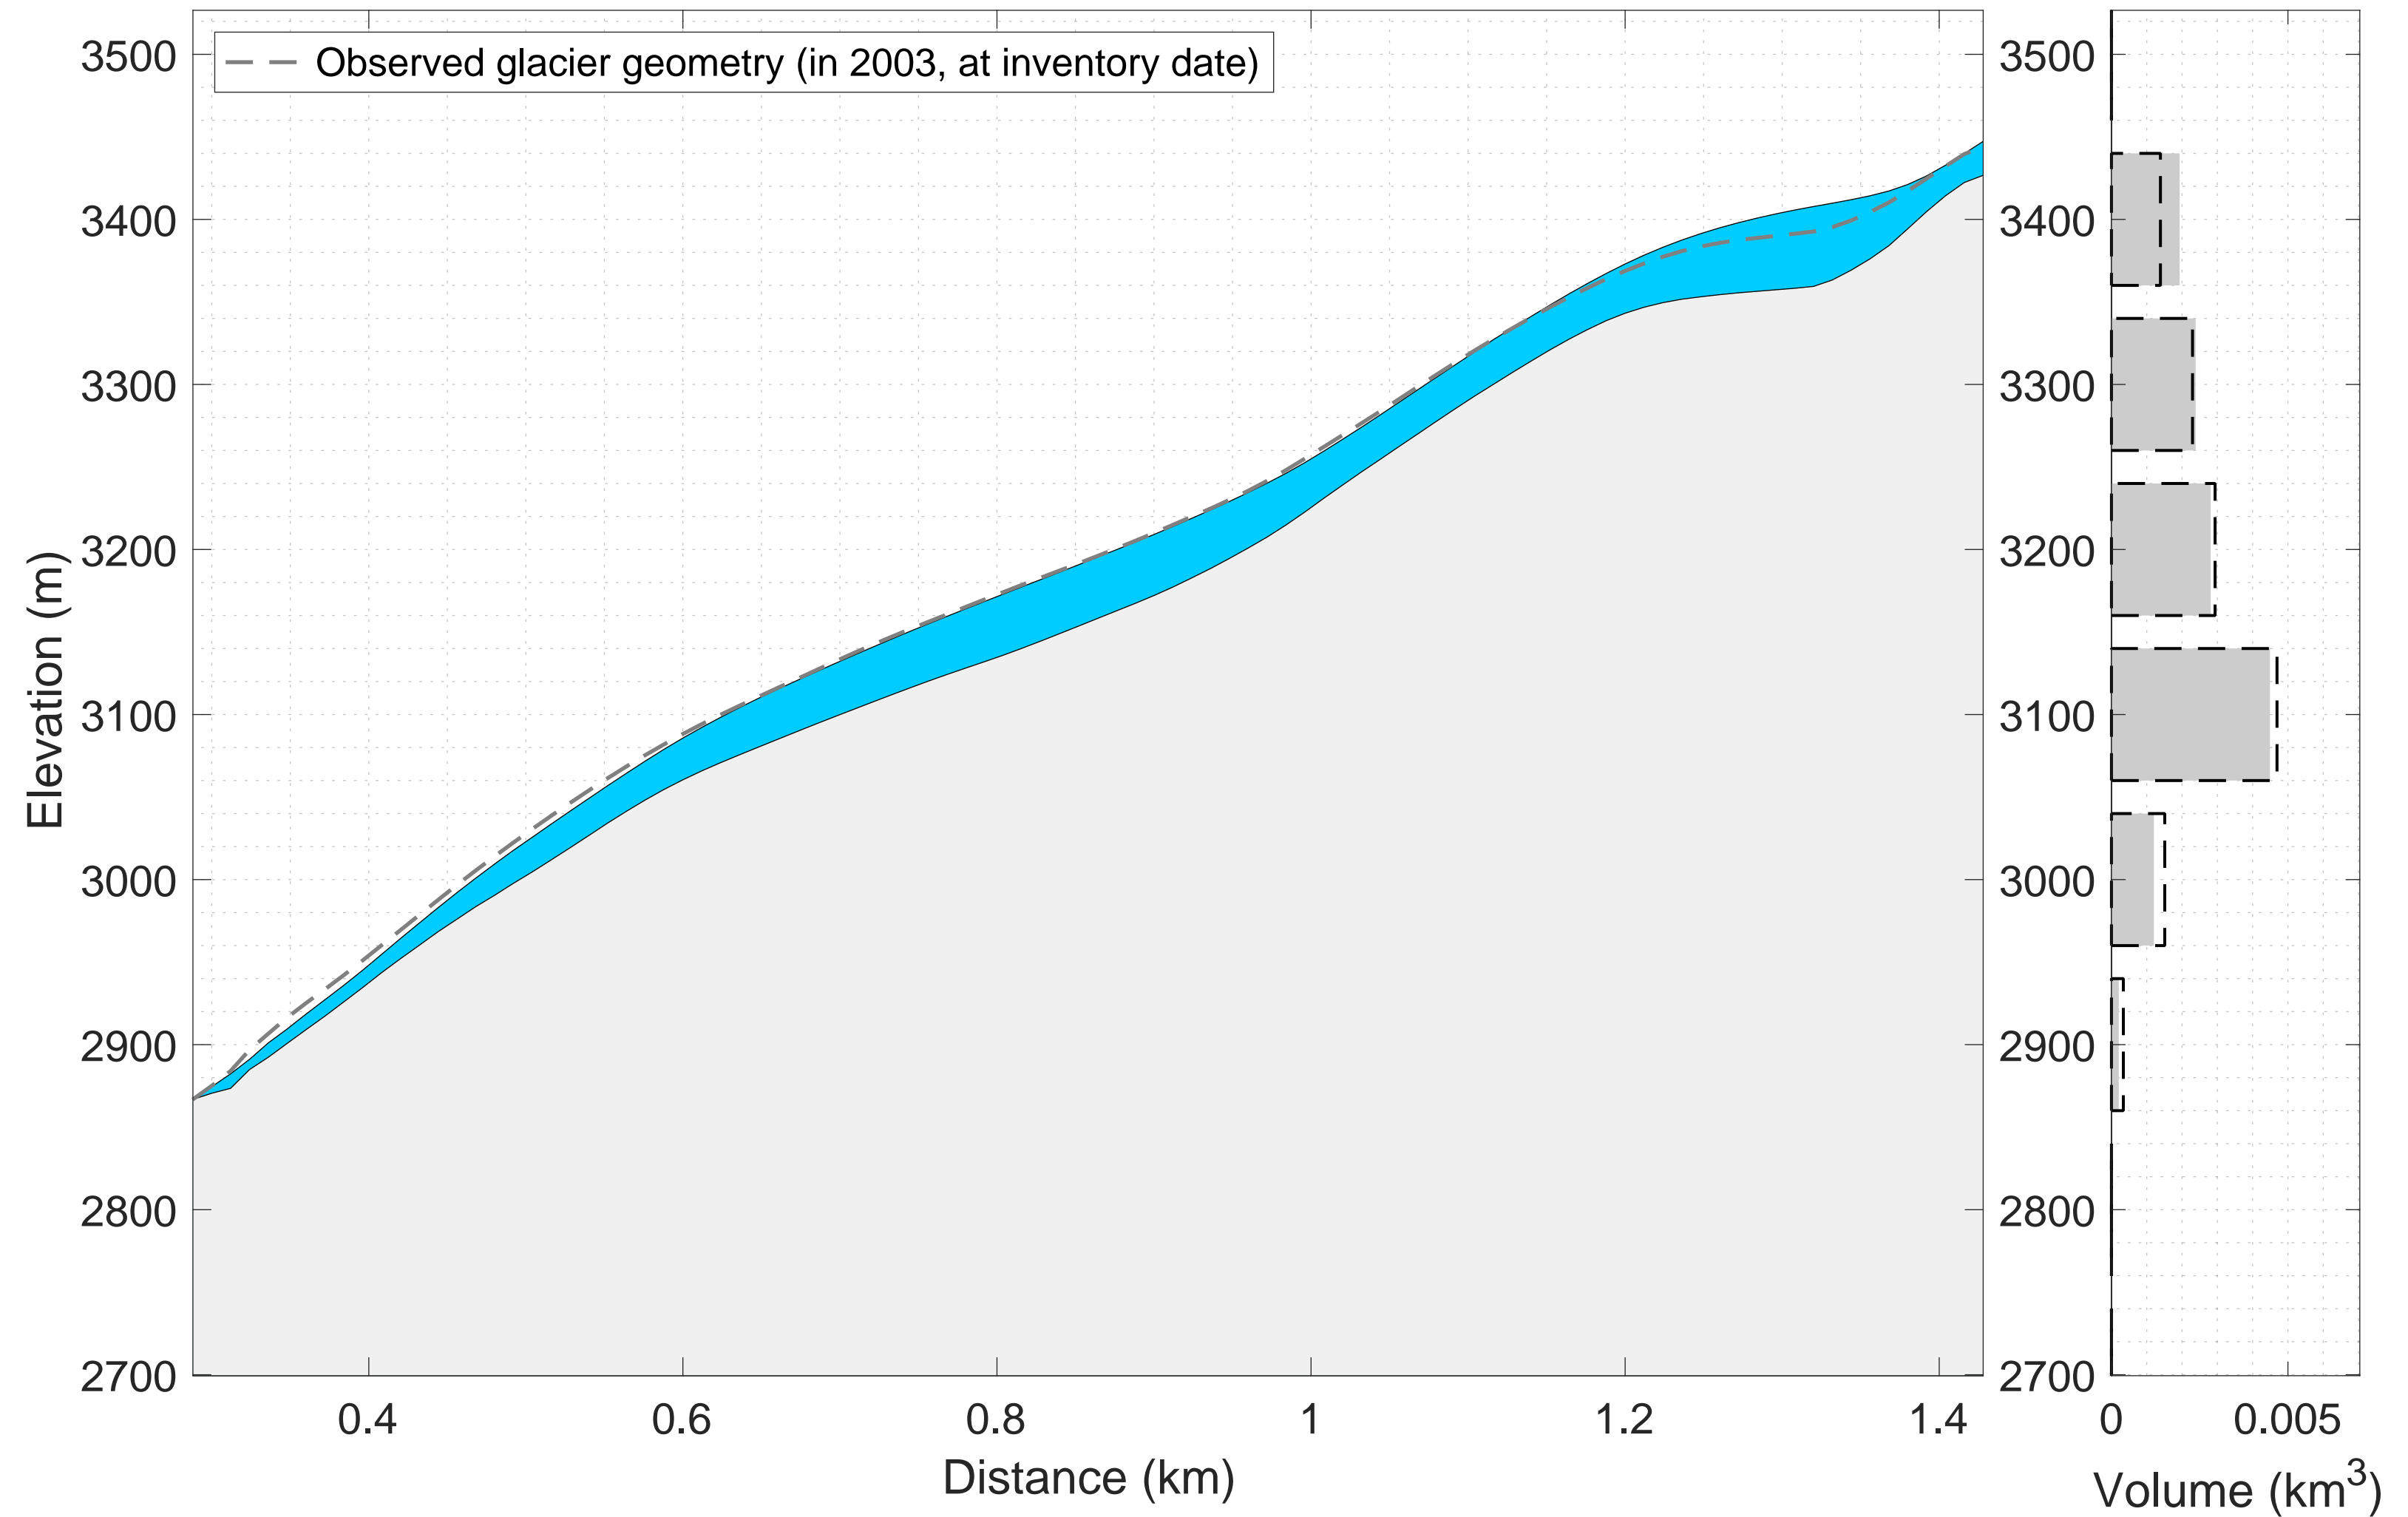

Supplement: Supplementary file 72 [file tc-13-1125-2019-supplement.zip]

**Modelled geometry (Glacier ID = 00291;  $A = 1.5355\text{e-}16 \text{ Pa}^{-3} \text{ a}^{-1}$ ;  $dx = 12 \text{ m}$ )**

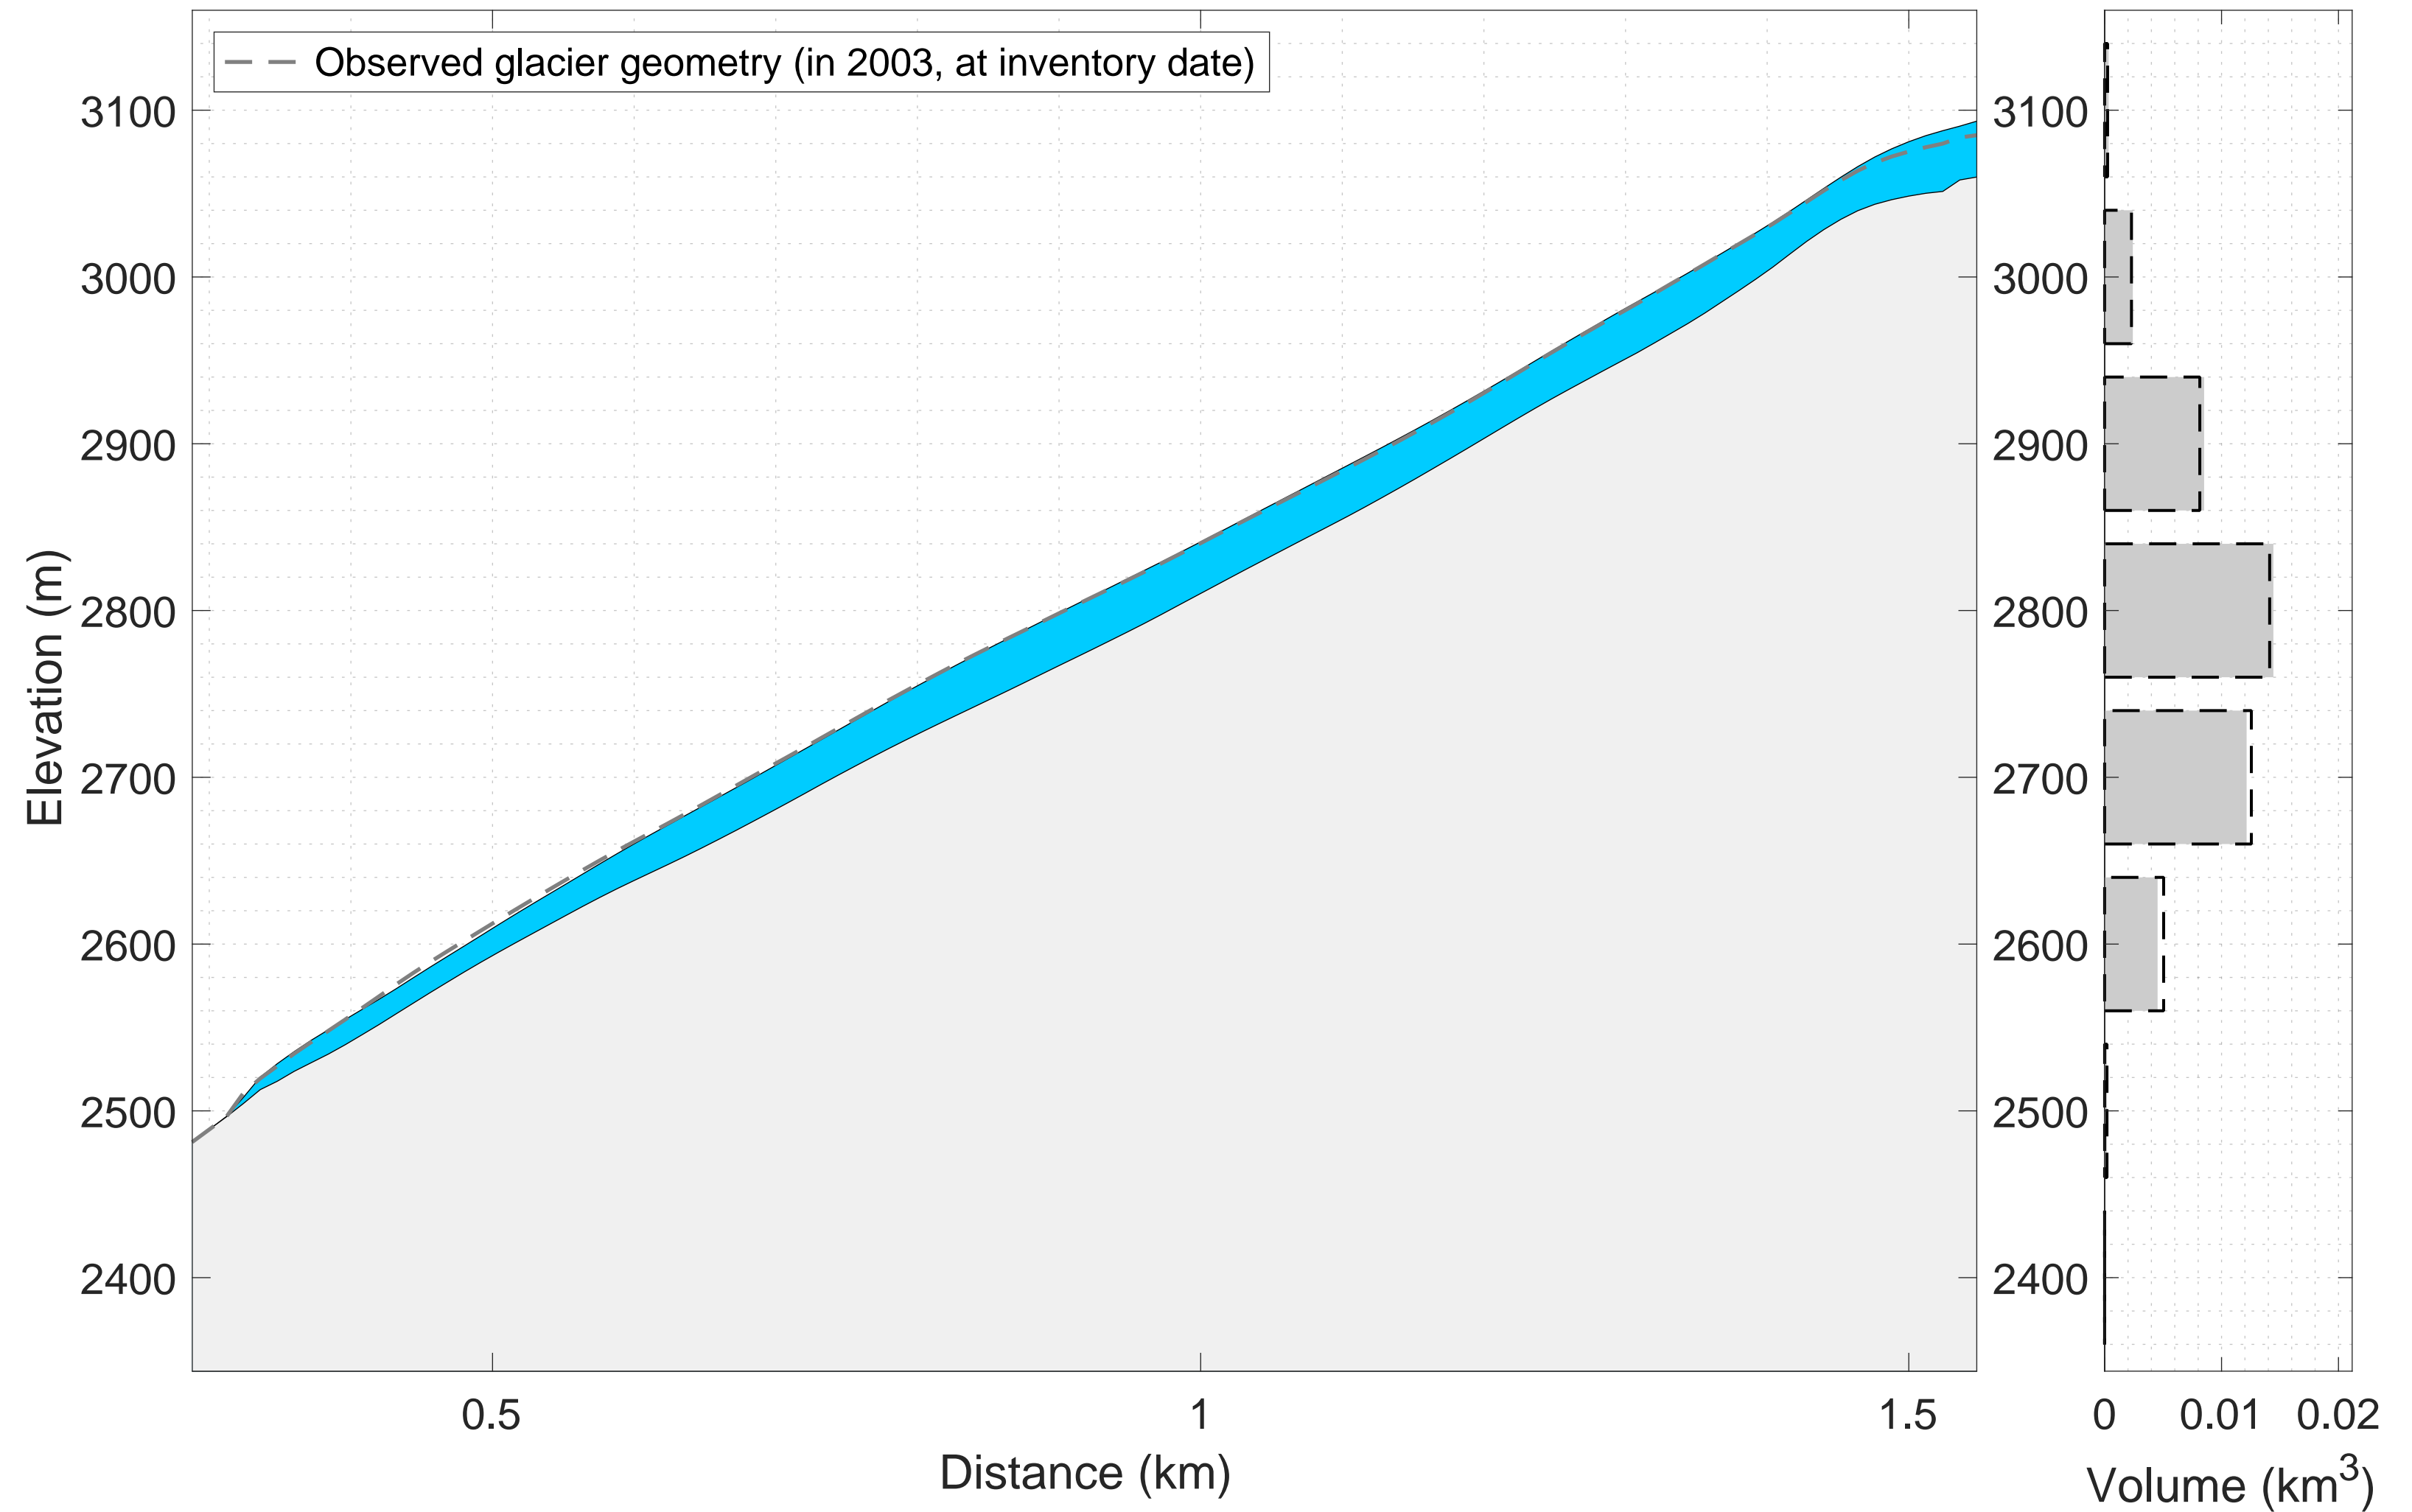

Supplement: Supplementary file 73 [file tc-13-1125-2019-supplement.zip]

**Modelled geometry (Glacier ID = 01177;  $A = 5.0957\text{e-}17 \text{ Pa}^{-3} \text{ a}^{-1}$ ;  $dx = 10 \text{ m}$ )**

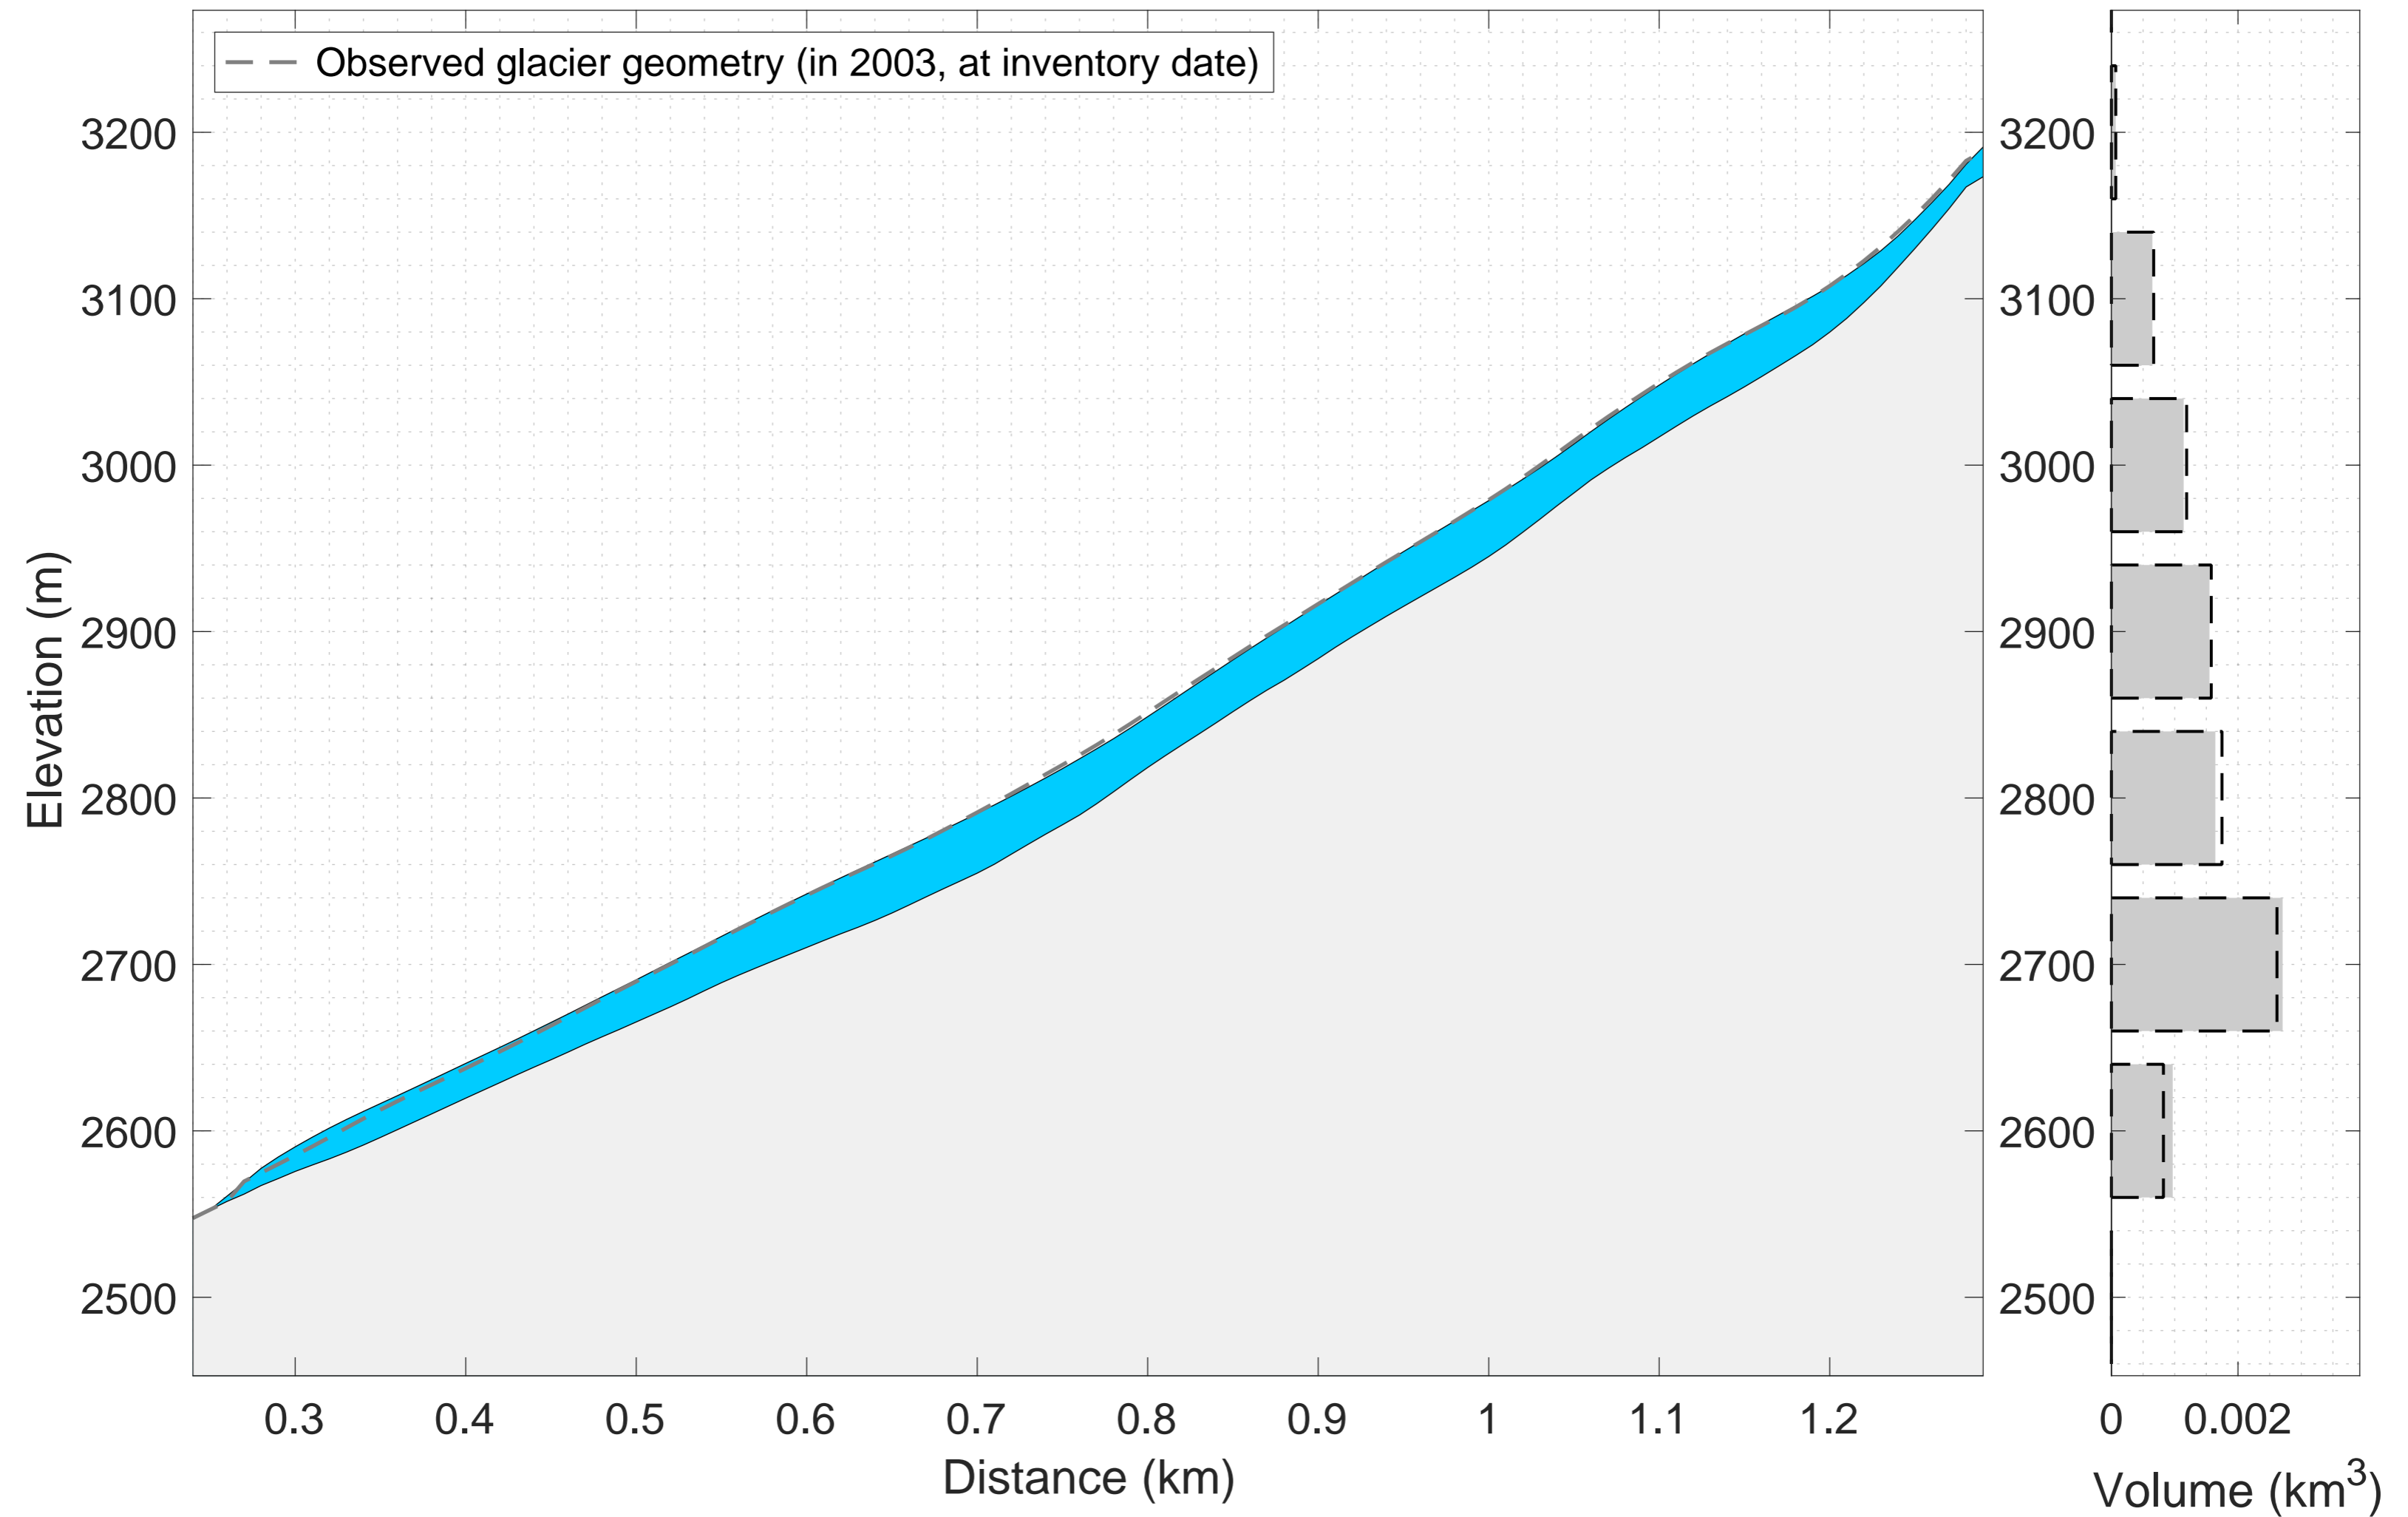

Supplement: Supplementary file 74 [file tc-13-1125-2019-supplement.zip]

**Modelled geometry (Glacier ID = 01716;  $A = 1.4768\text{e-}16 \text{ Pa}^{-3} \text{ a}^{-1}$ ;  $dx = 14 \text{ m}$ )**

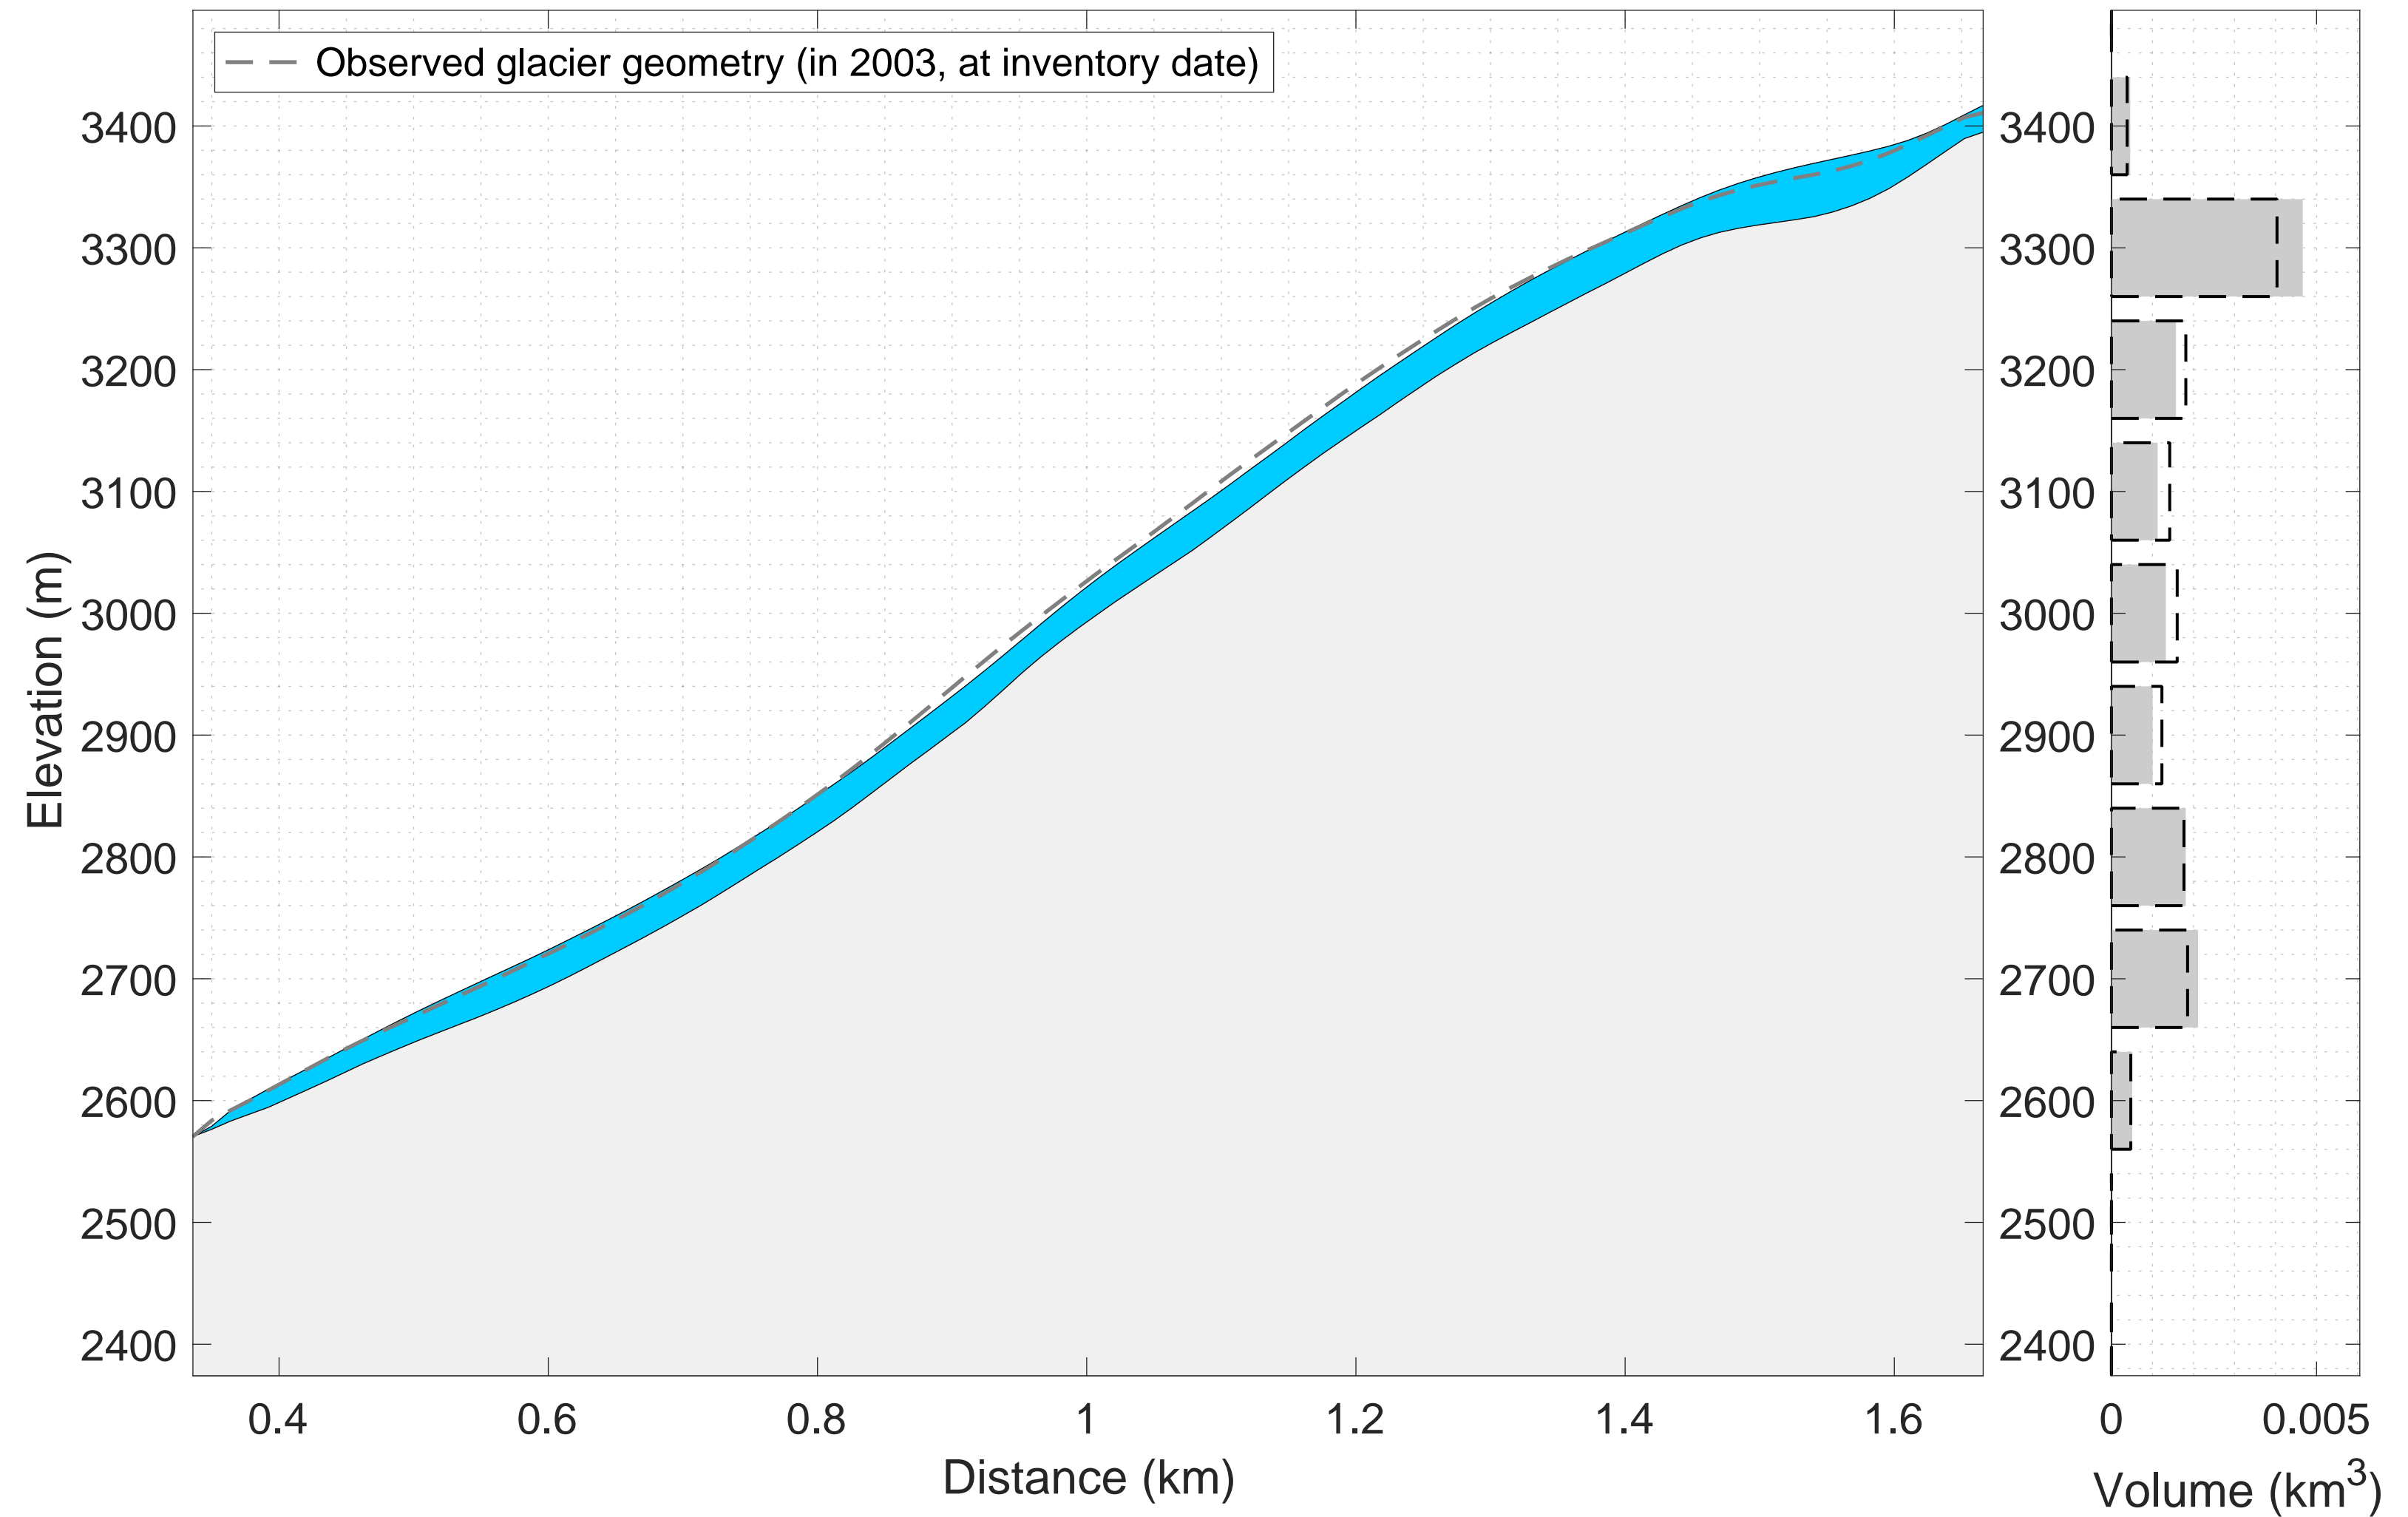

Supplement: Supplementary file 75 [file tc-13-1125-2019-supplement.zip]

**Modelled geometry (Glacier ID = 02711;  $A = 2.4418\text{e-}16 \text{ Pa}^{-3} \text{ a}^{-1}$ ;  $dx = 32 \text{ m}$ )**

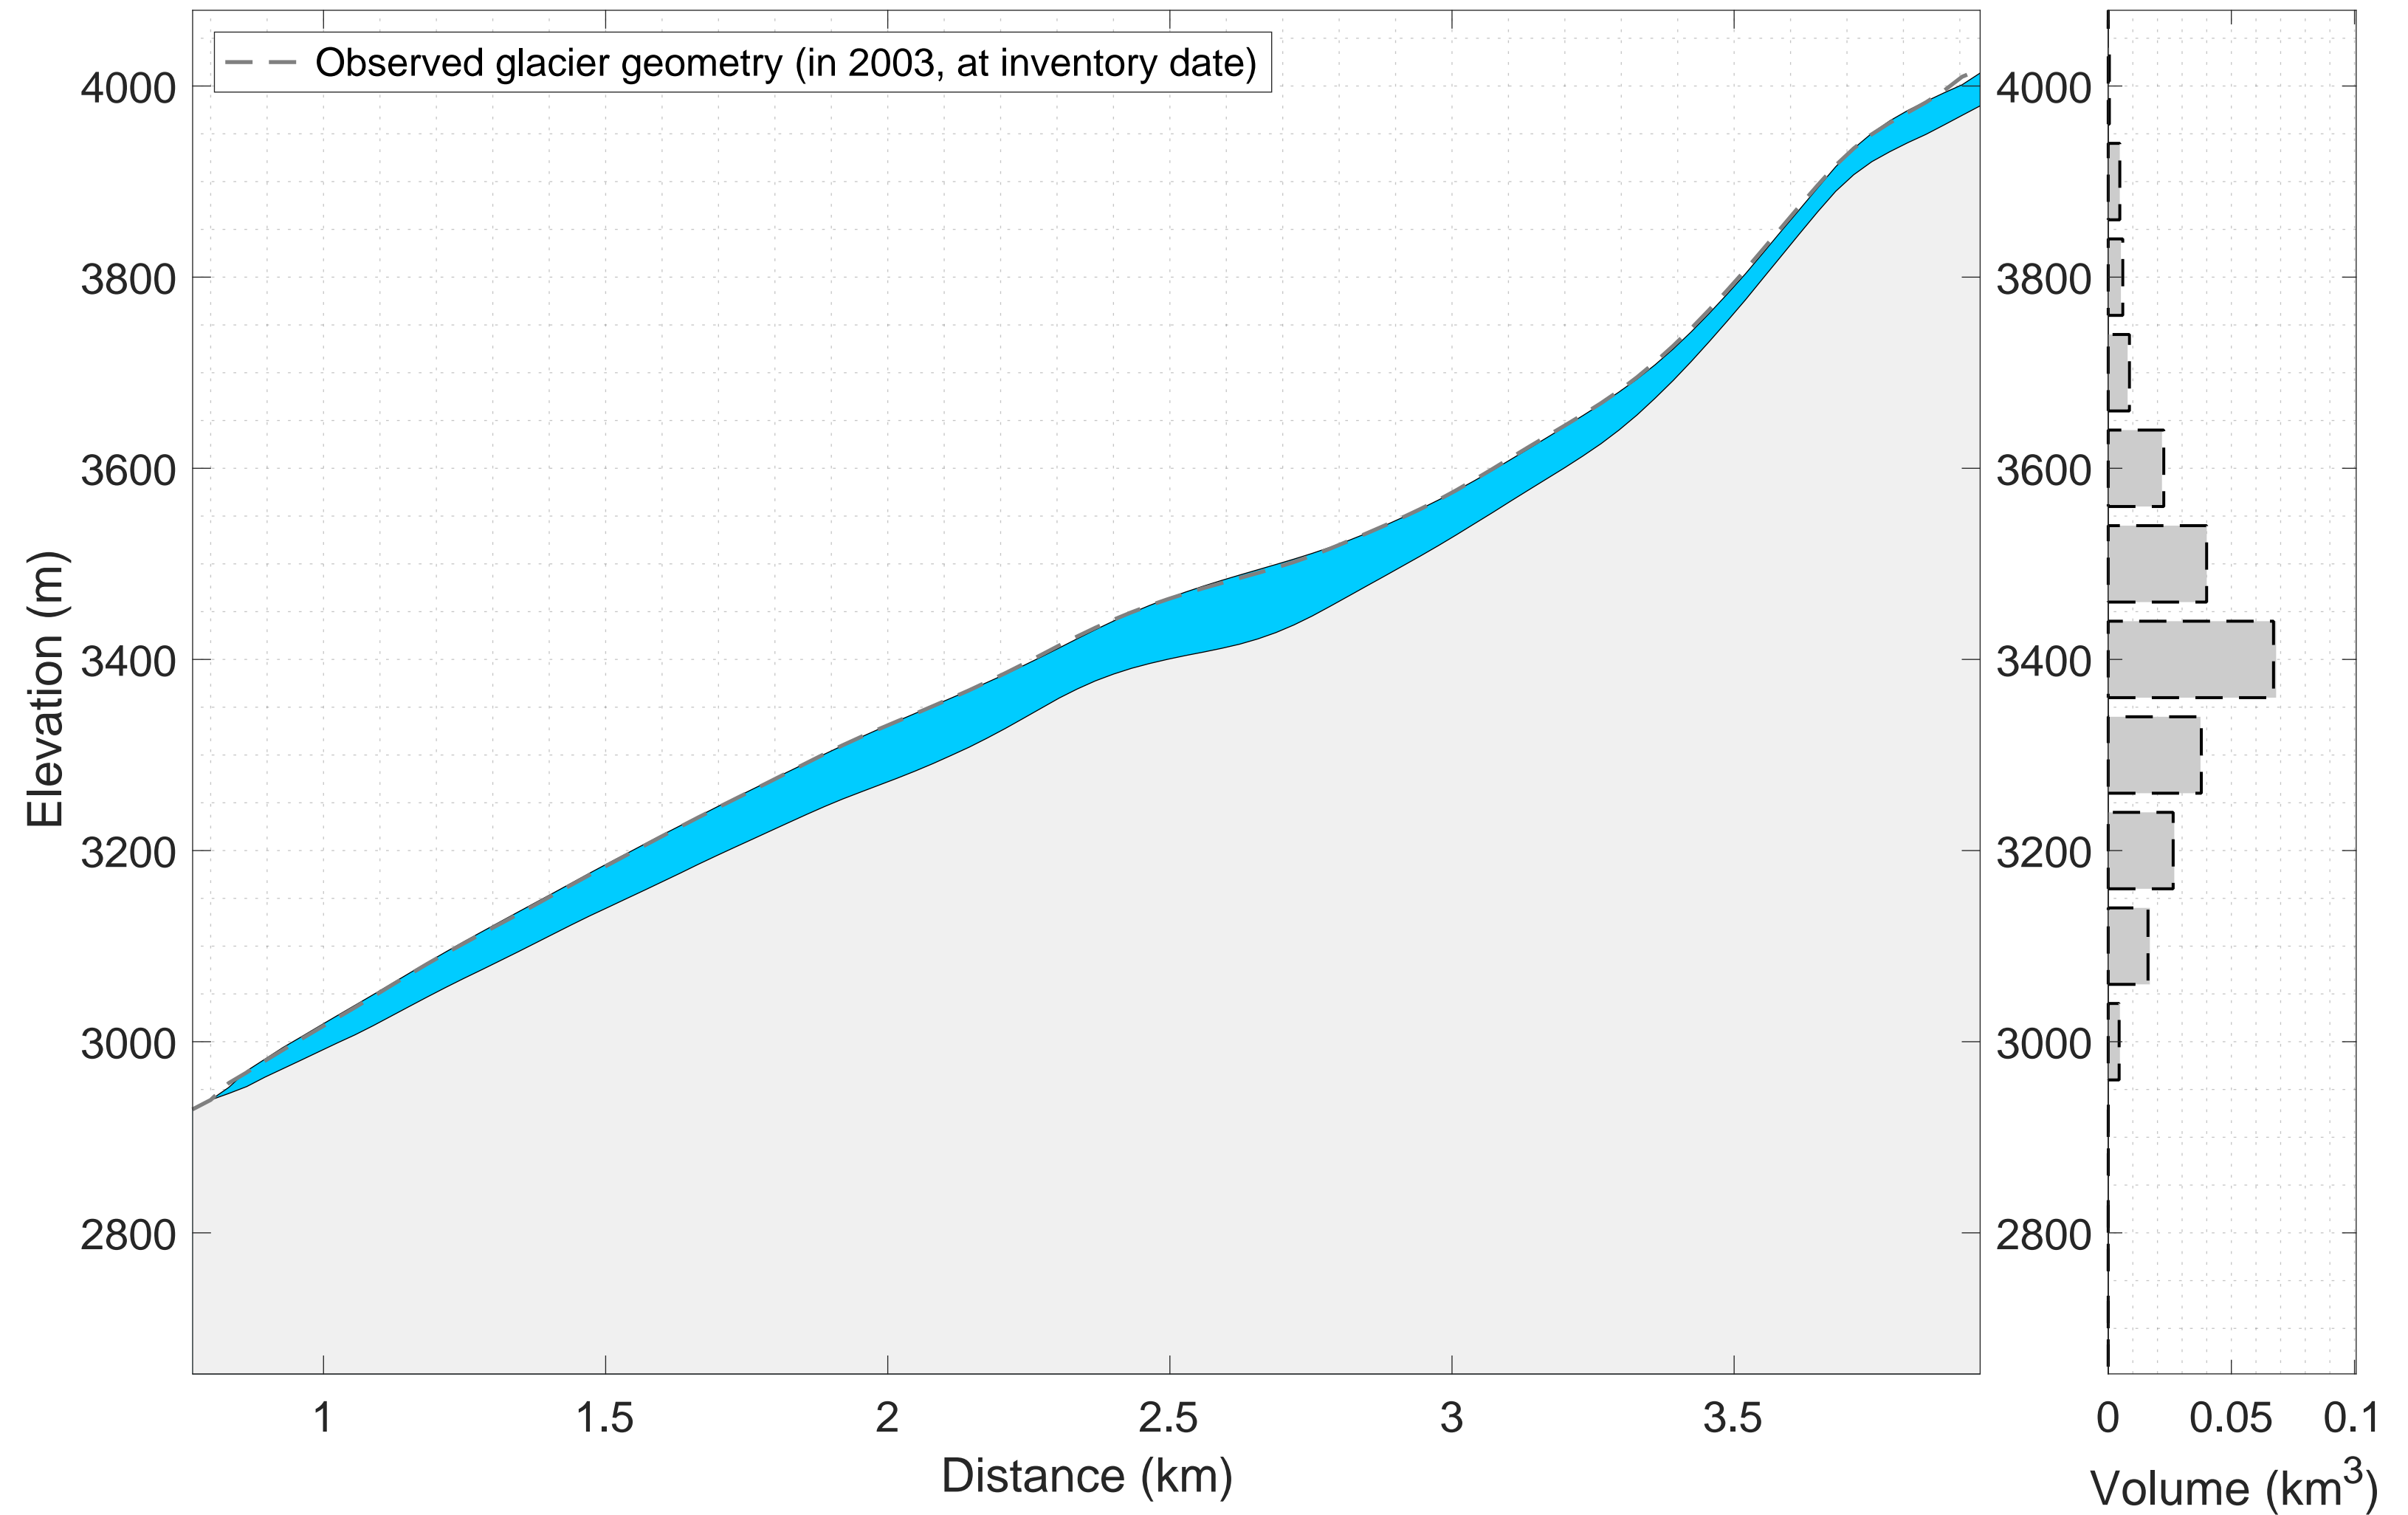

Supplement: Supplementary file 76 [file tc-13-1125-2019-supplement.zip]

**Modelled geometry (Glacier ID = 01800;  $A = 4.6836\text{e-}17 \text{ Pa}^{-3} \text{ a}^{-1}$ ;  $dx = 11 \text{ m}$ )**

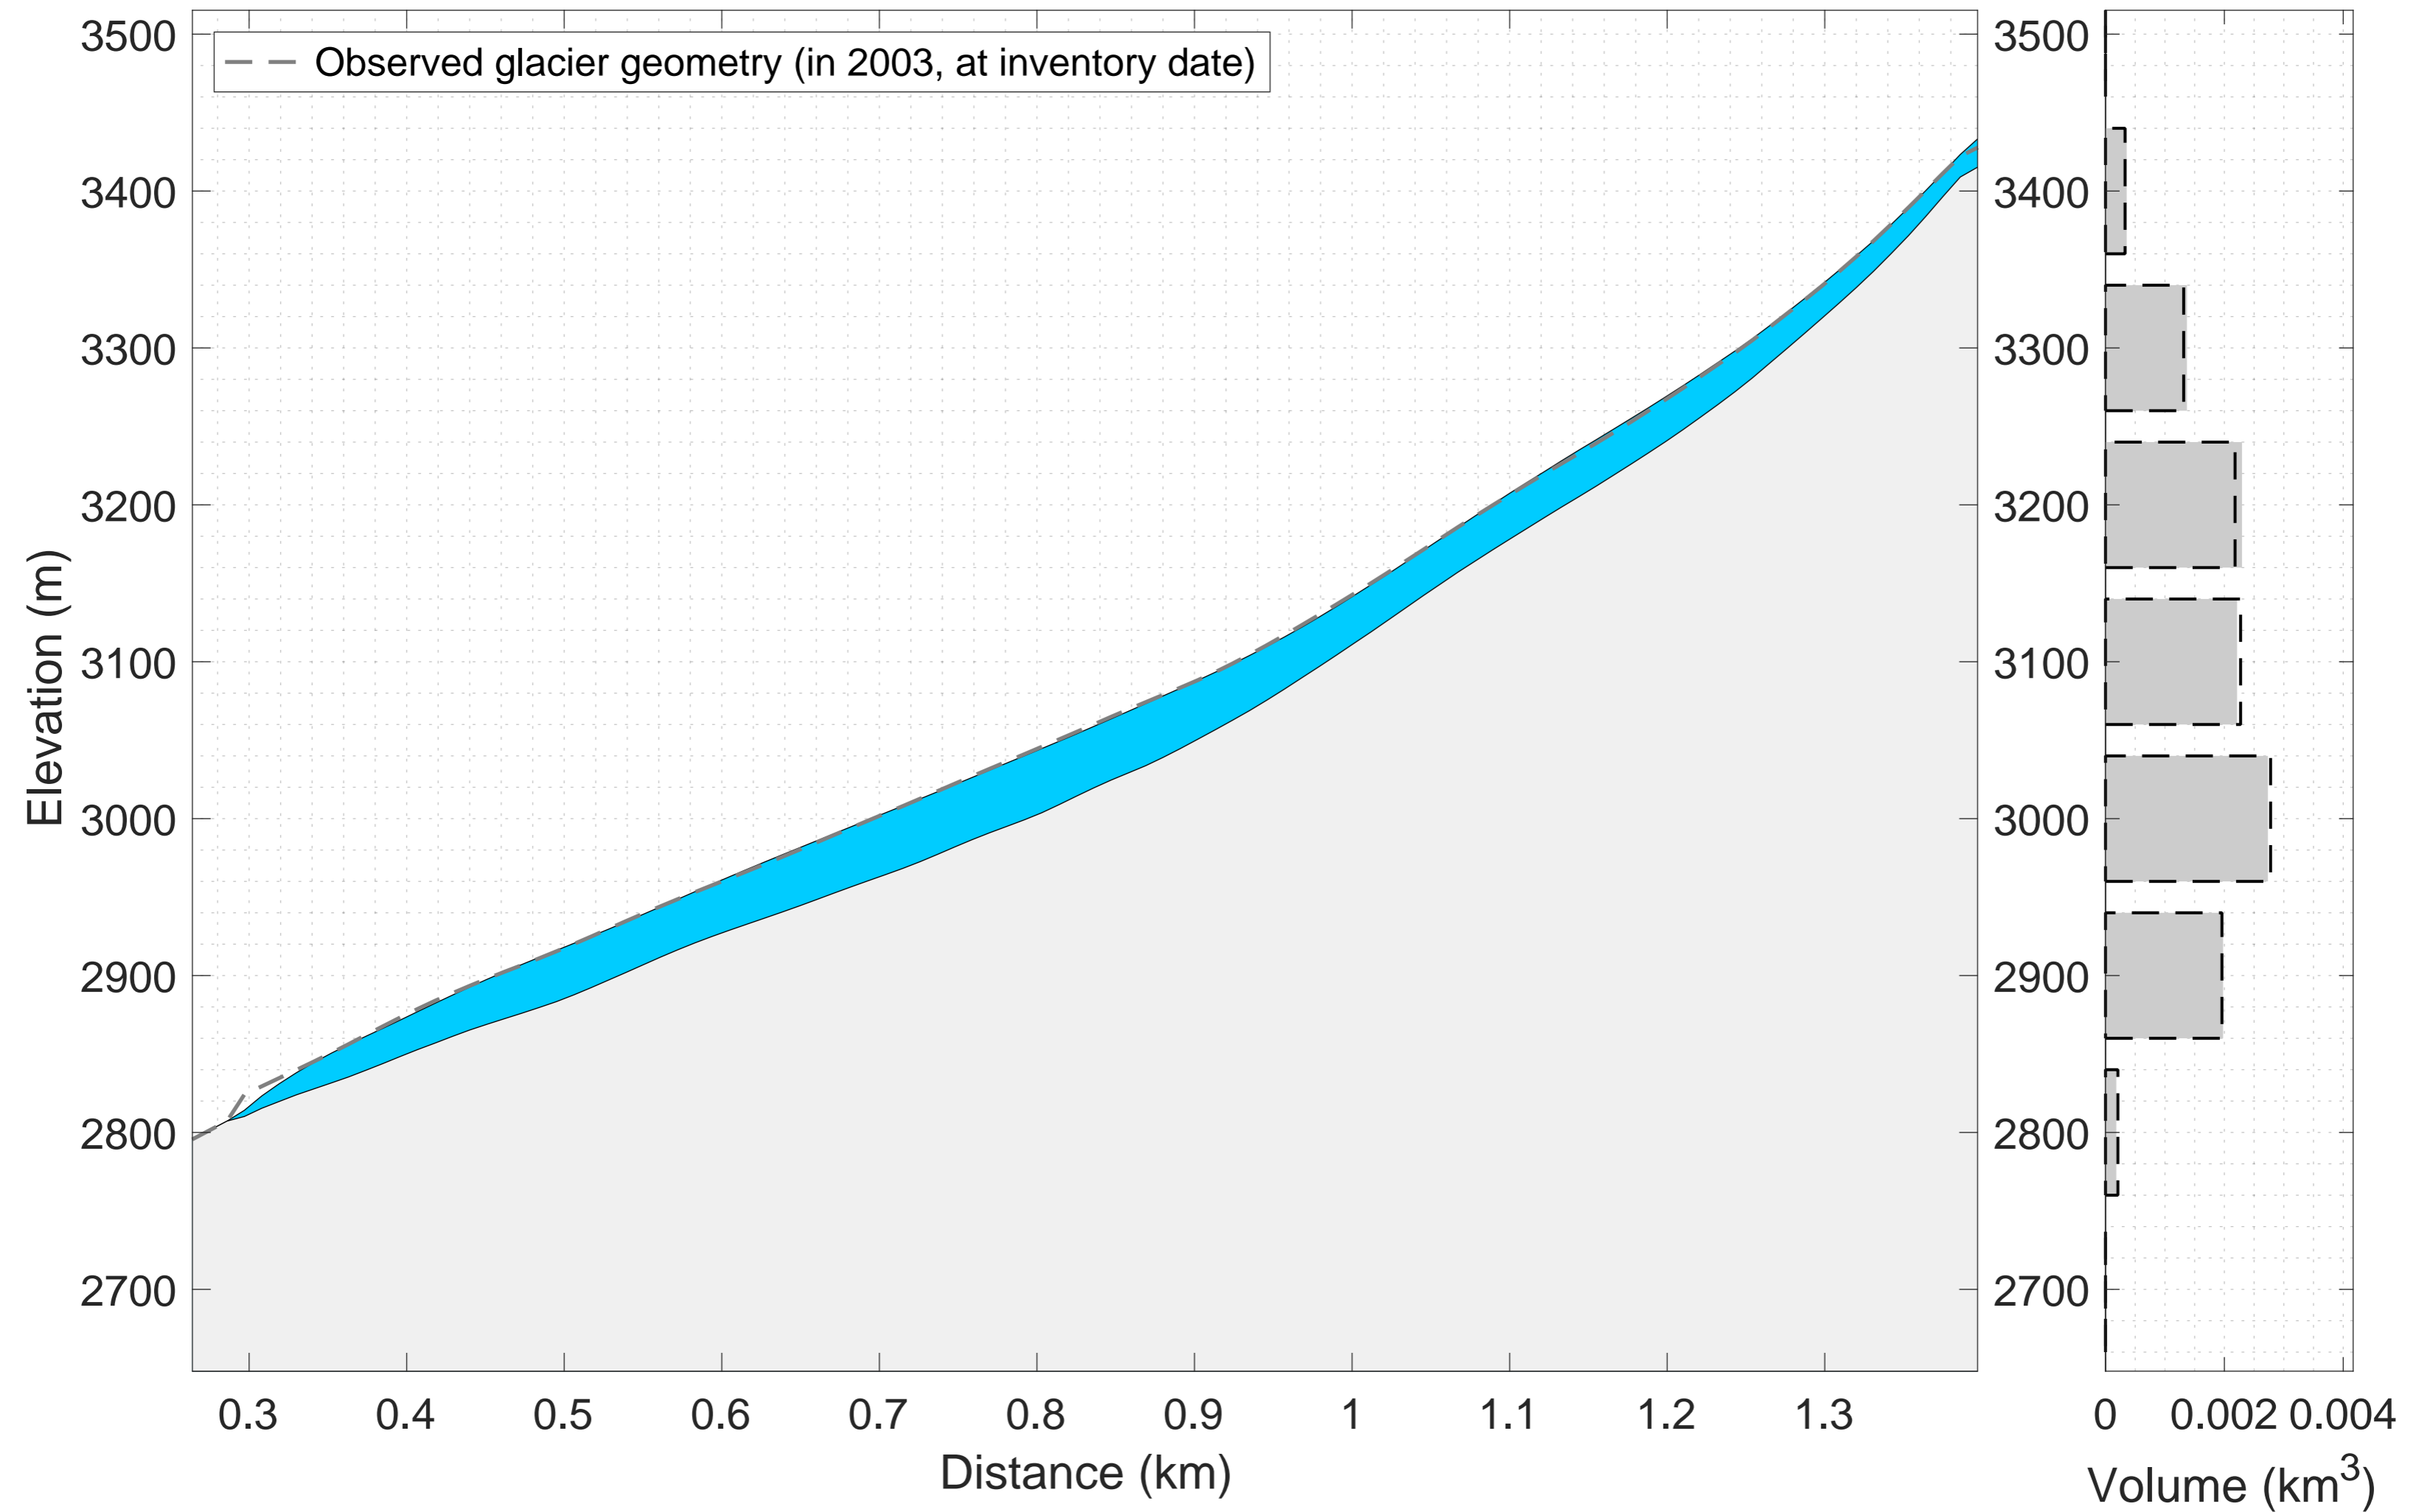

Supplement: Supplementary file 77 [file tc-13-1125-2019-supplement.zip]

**Modelled geometry (Glacier ID = 02069;  $A = 4.5407\text{e-}17 \text{ Pa}^{-3} \text{ a}^{-1}$ ;  $dx = 12 \text{ m}$ )**

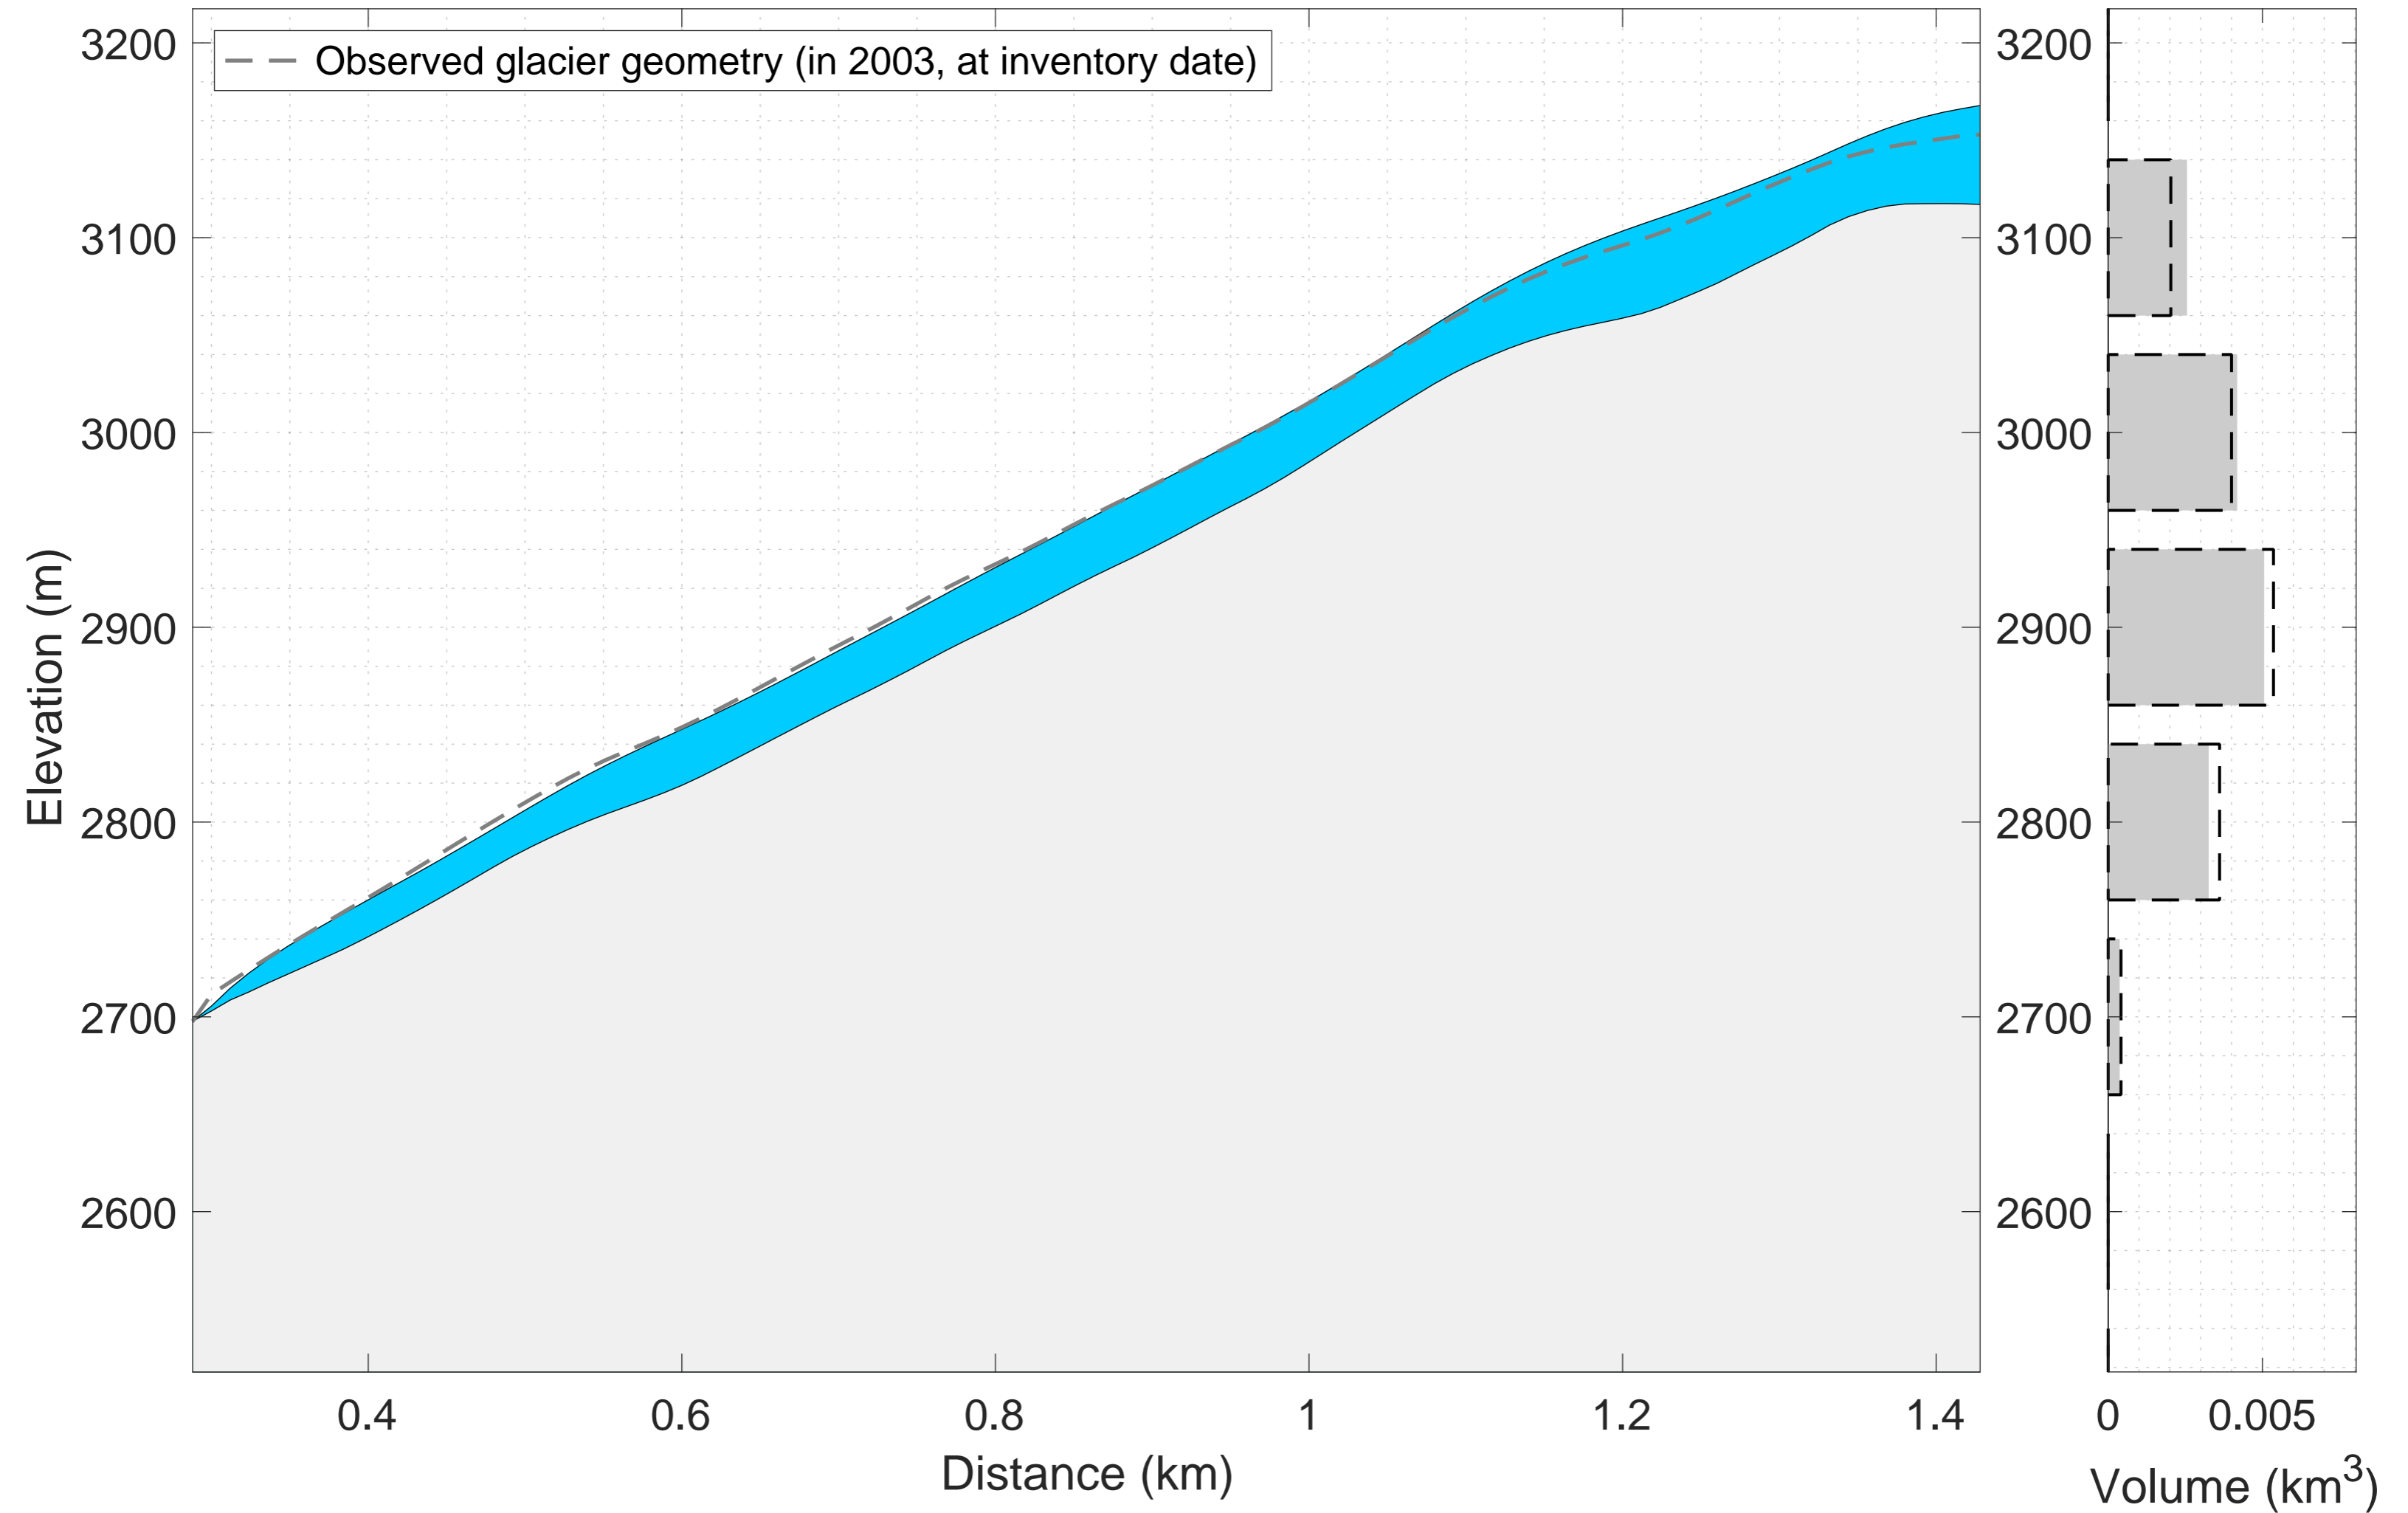

Supplement: Supplementary file 78 [file tc-13-1125-2019-supplement.zip]

**Modelled geometry (Glacier ID = 00975;  $A = 1.8019\text{e-}16 \text{ Pa}^{-3} \text{ a}^{-1}$ ;  $dx = 16 \text{ m}$ )**

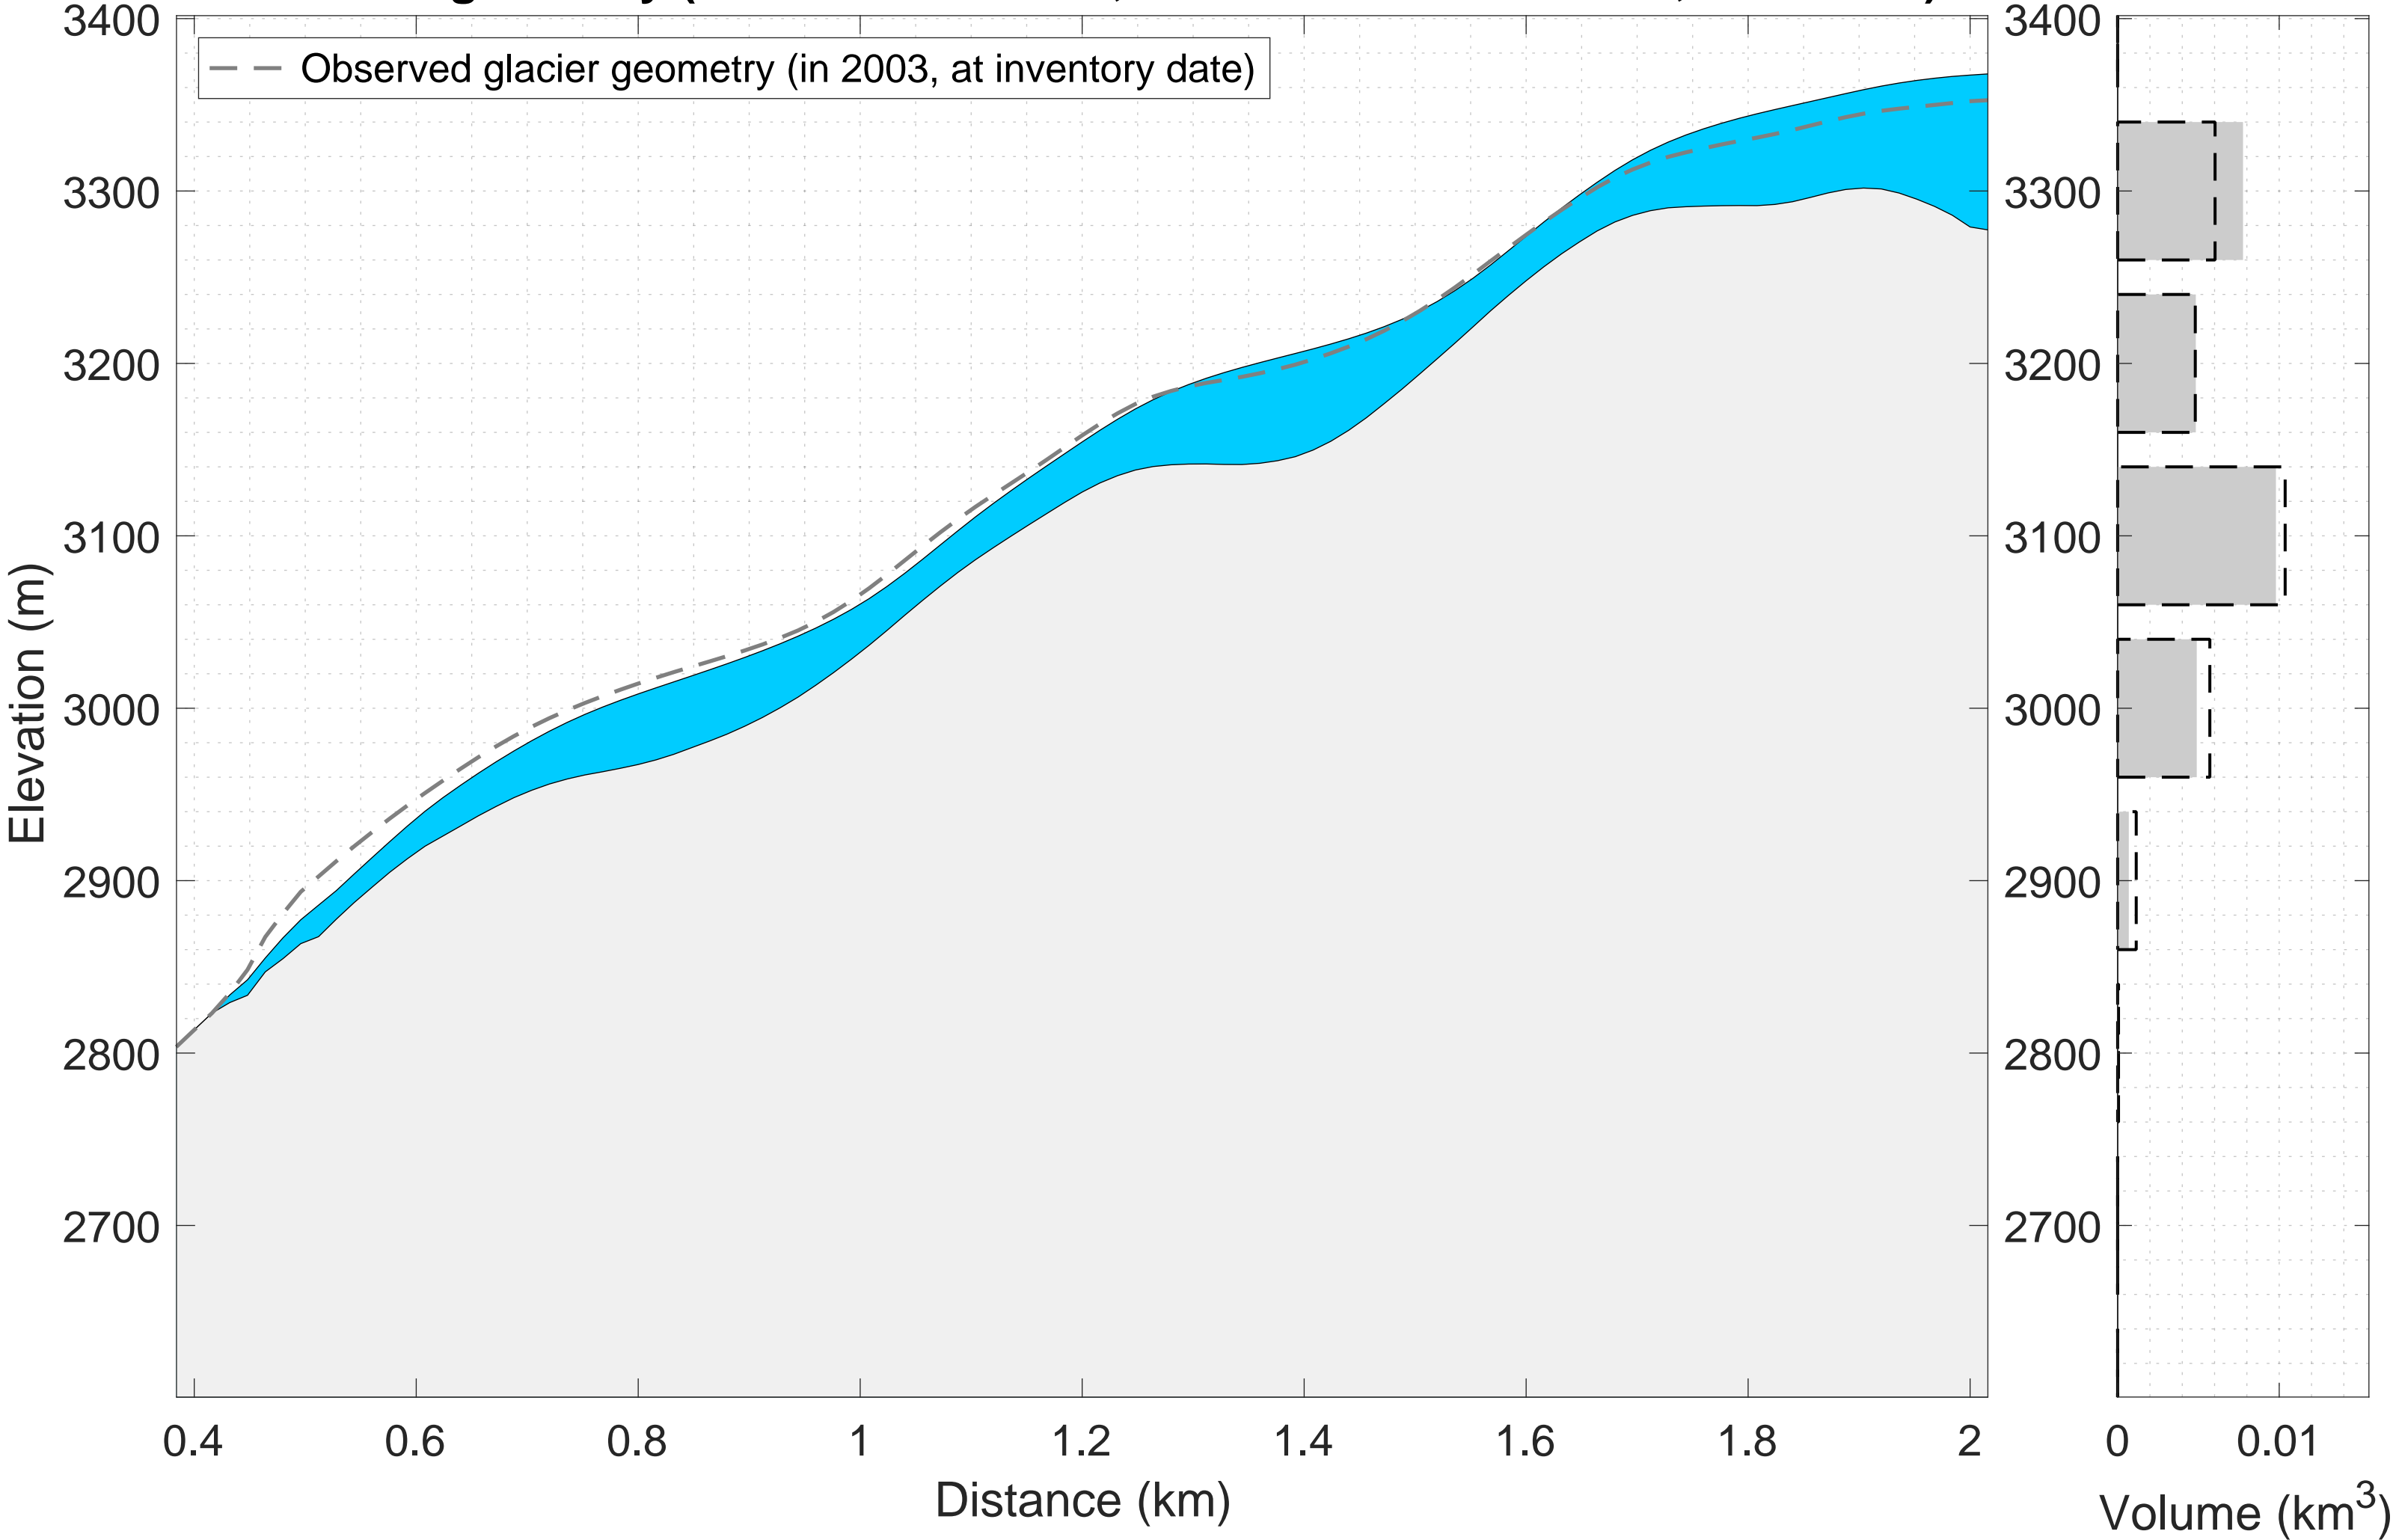

Supplement: Supplementary file 79 [file tc-13-1125-2019-supplement.zip]

**Modelled geometry (Glacier ID = 03262;  $A = 6.8057\text{e-}17 \text{ Pa}^{-3} \text{ a}^{-1}$ ;  $dx = 11 \text{ m}$ )**

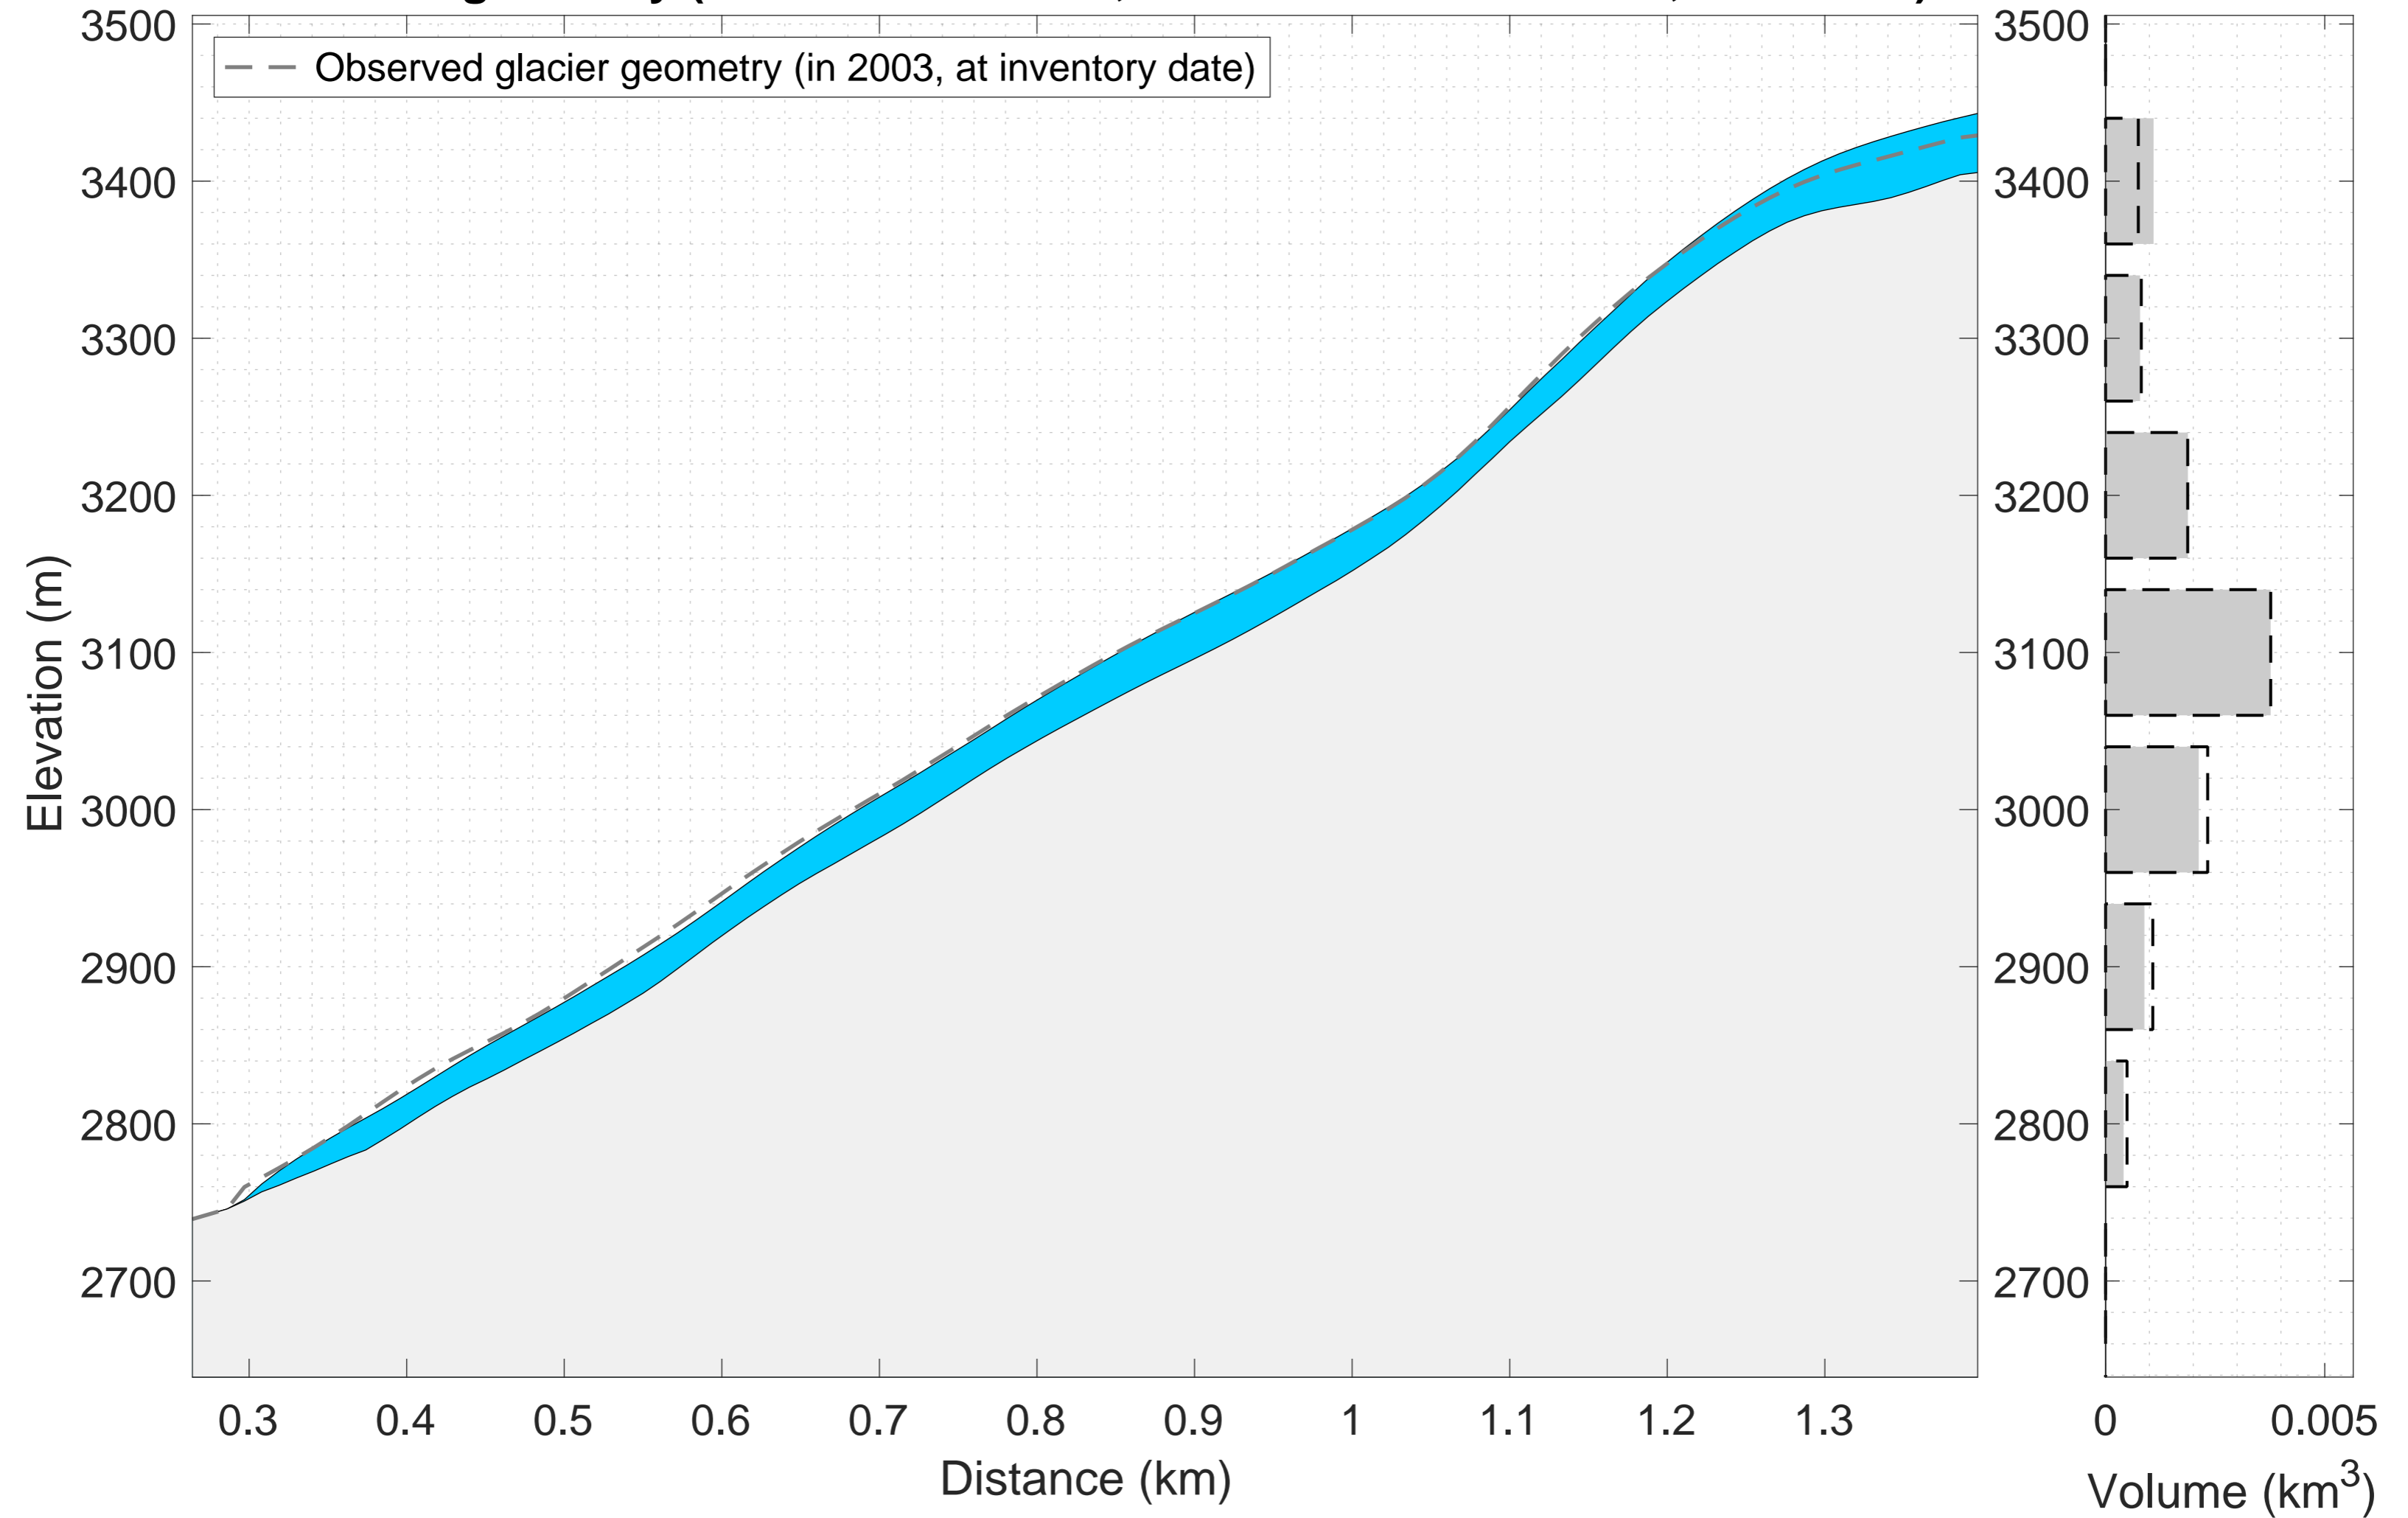

Supplement: Supplementary file 80 [file tc-13-1125-2019-supplement.zip]

**Modelled geometry (Glacier ID = 00189;  $A = 8.6754\text{e-}17 \text{ Pa}^{-3} \text{ a}^{-1}$ ;  $dx = 10 \text{ m}$ )**

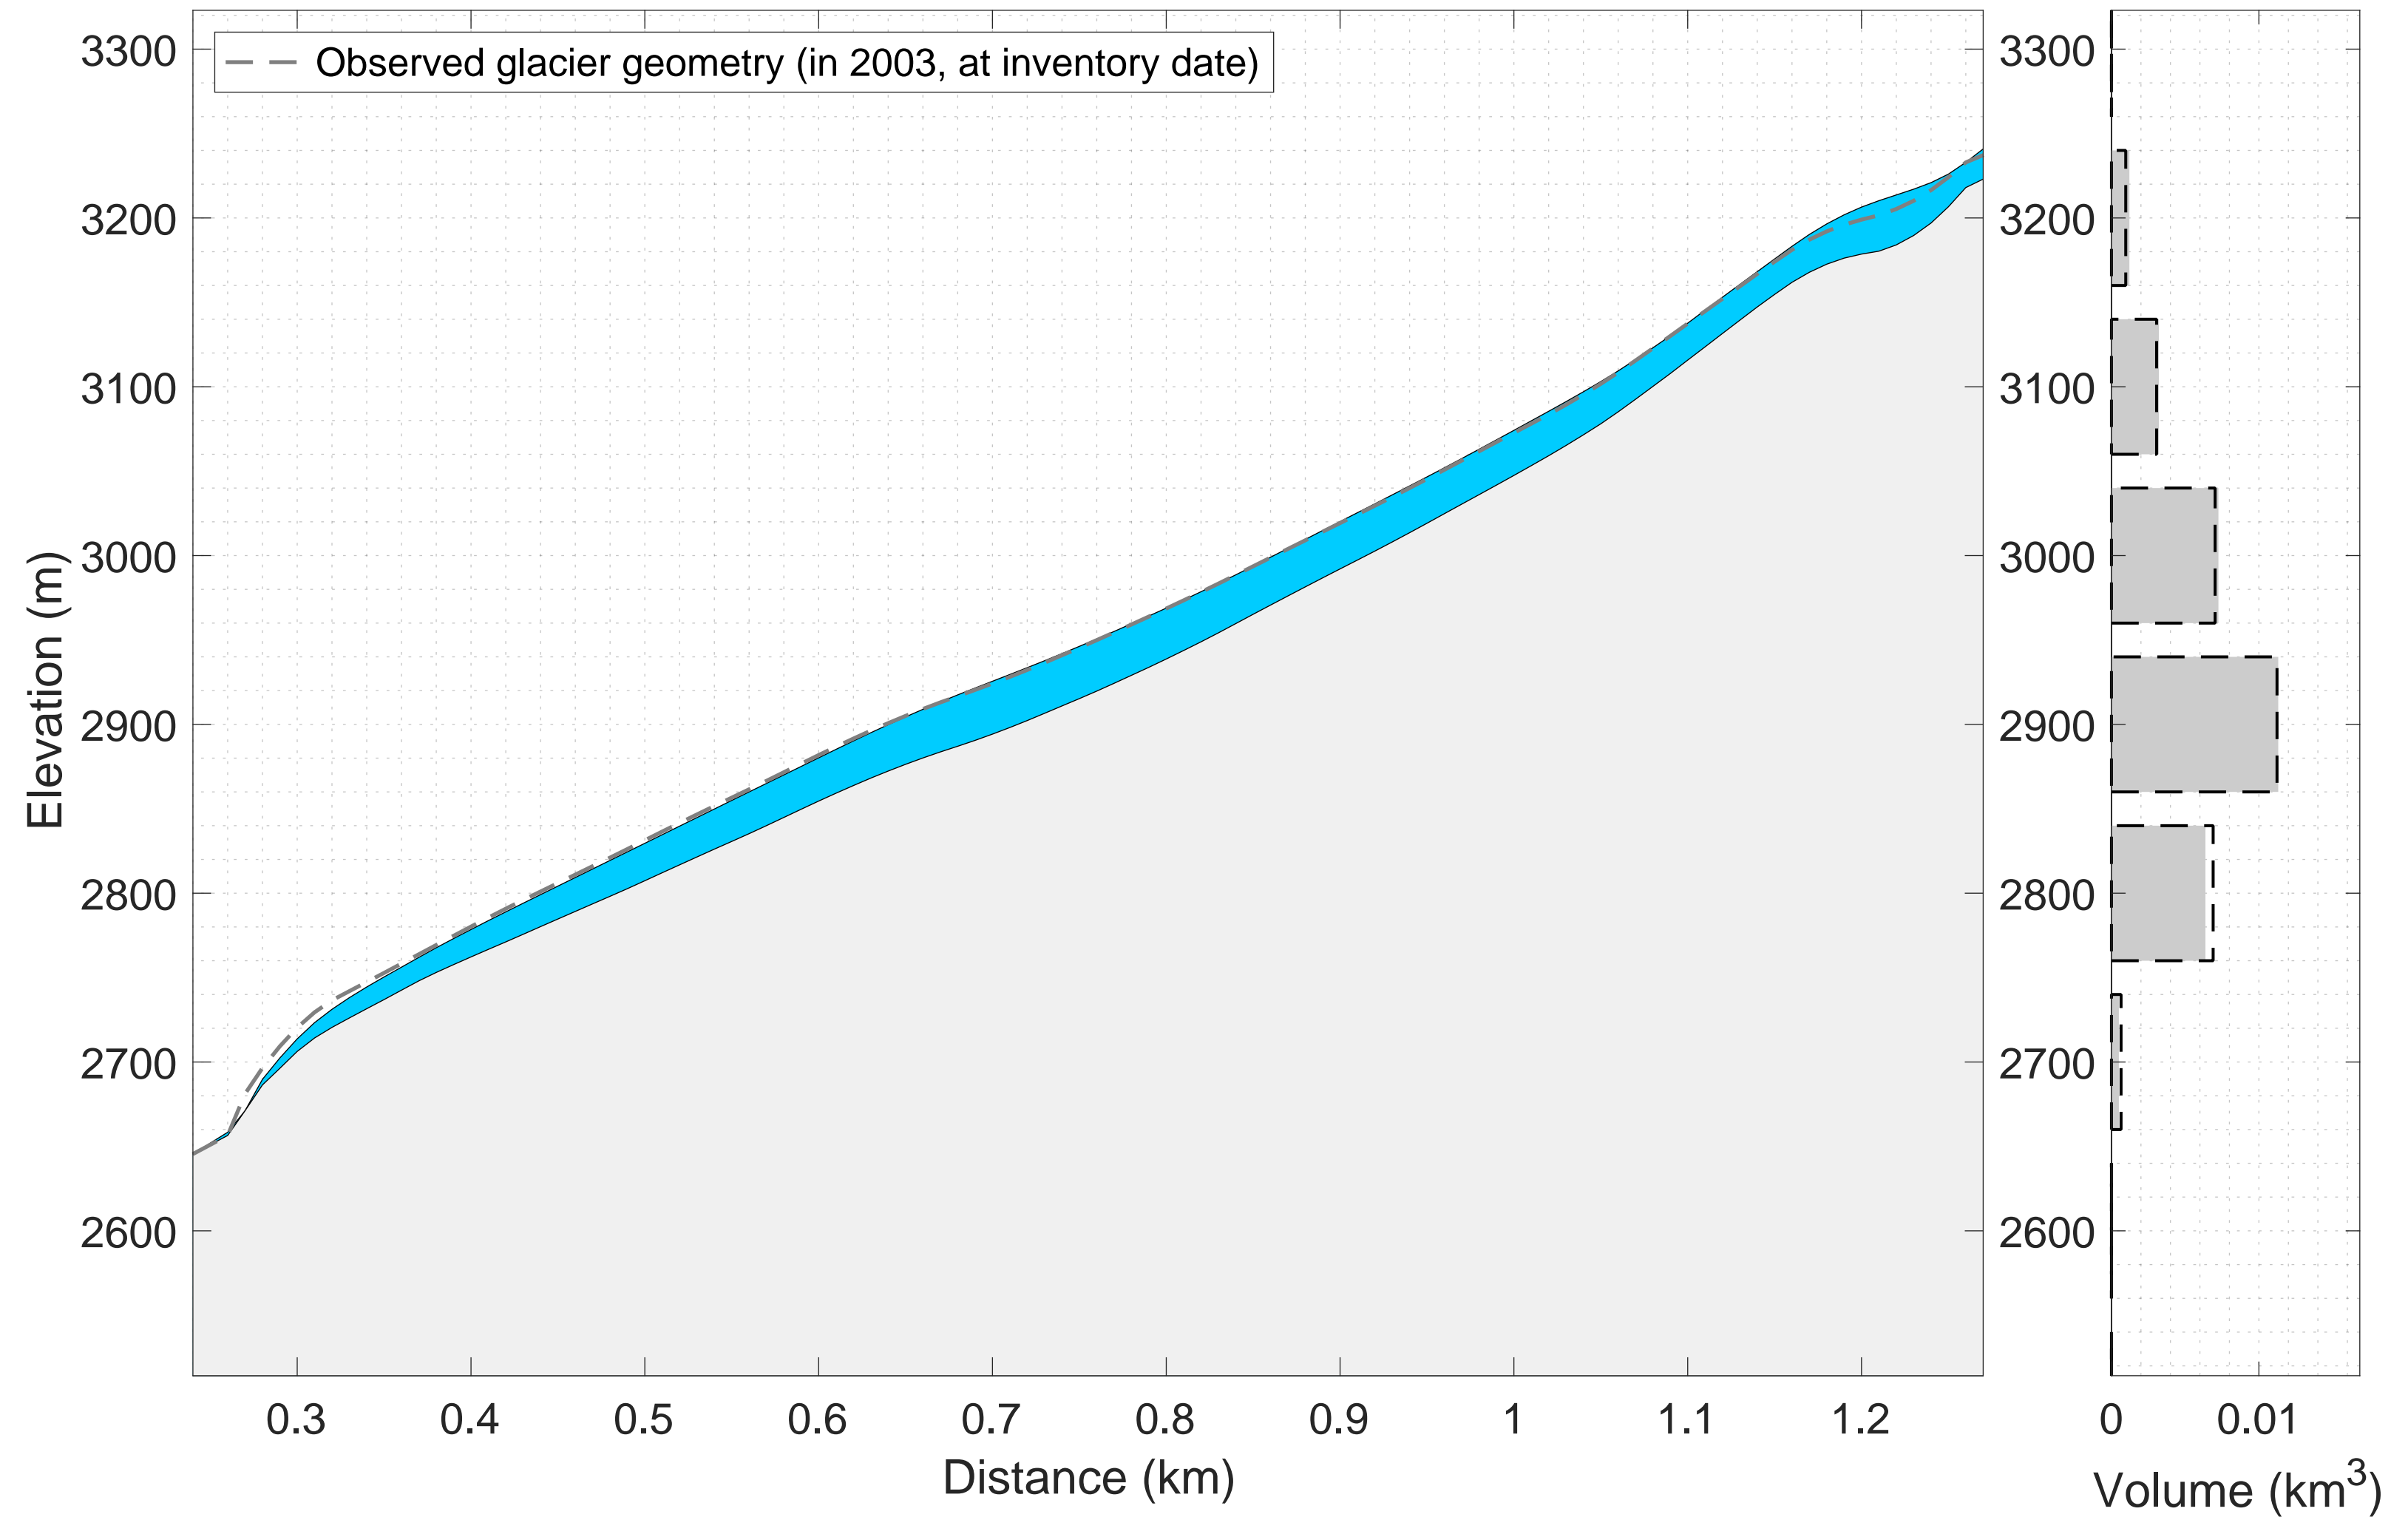

Supplement: Supplementary file 81 [file tc-13-1125-2019-supplement.zip]

**Modelled geometry (Glacier ID = 01575;  $A = 7.0687\text{e-}17 \text{ Pa}^{-3} \text{ a}^{-1}$ ;  $dx = 12 \text{ m}$ )**

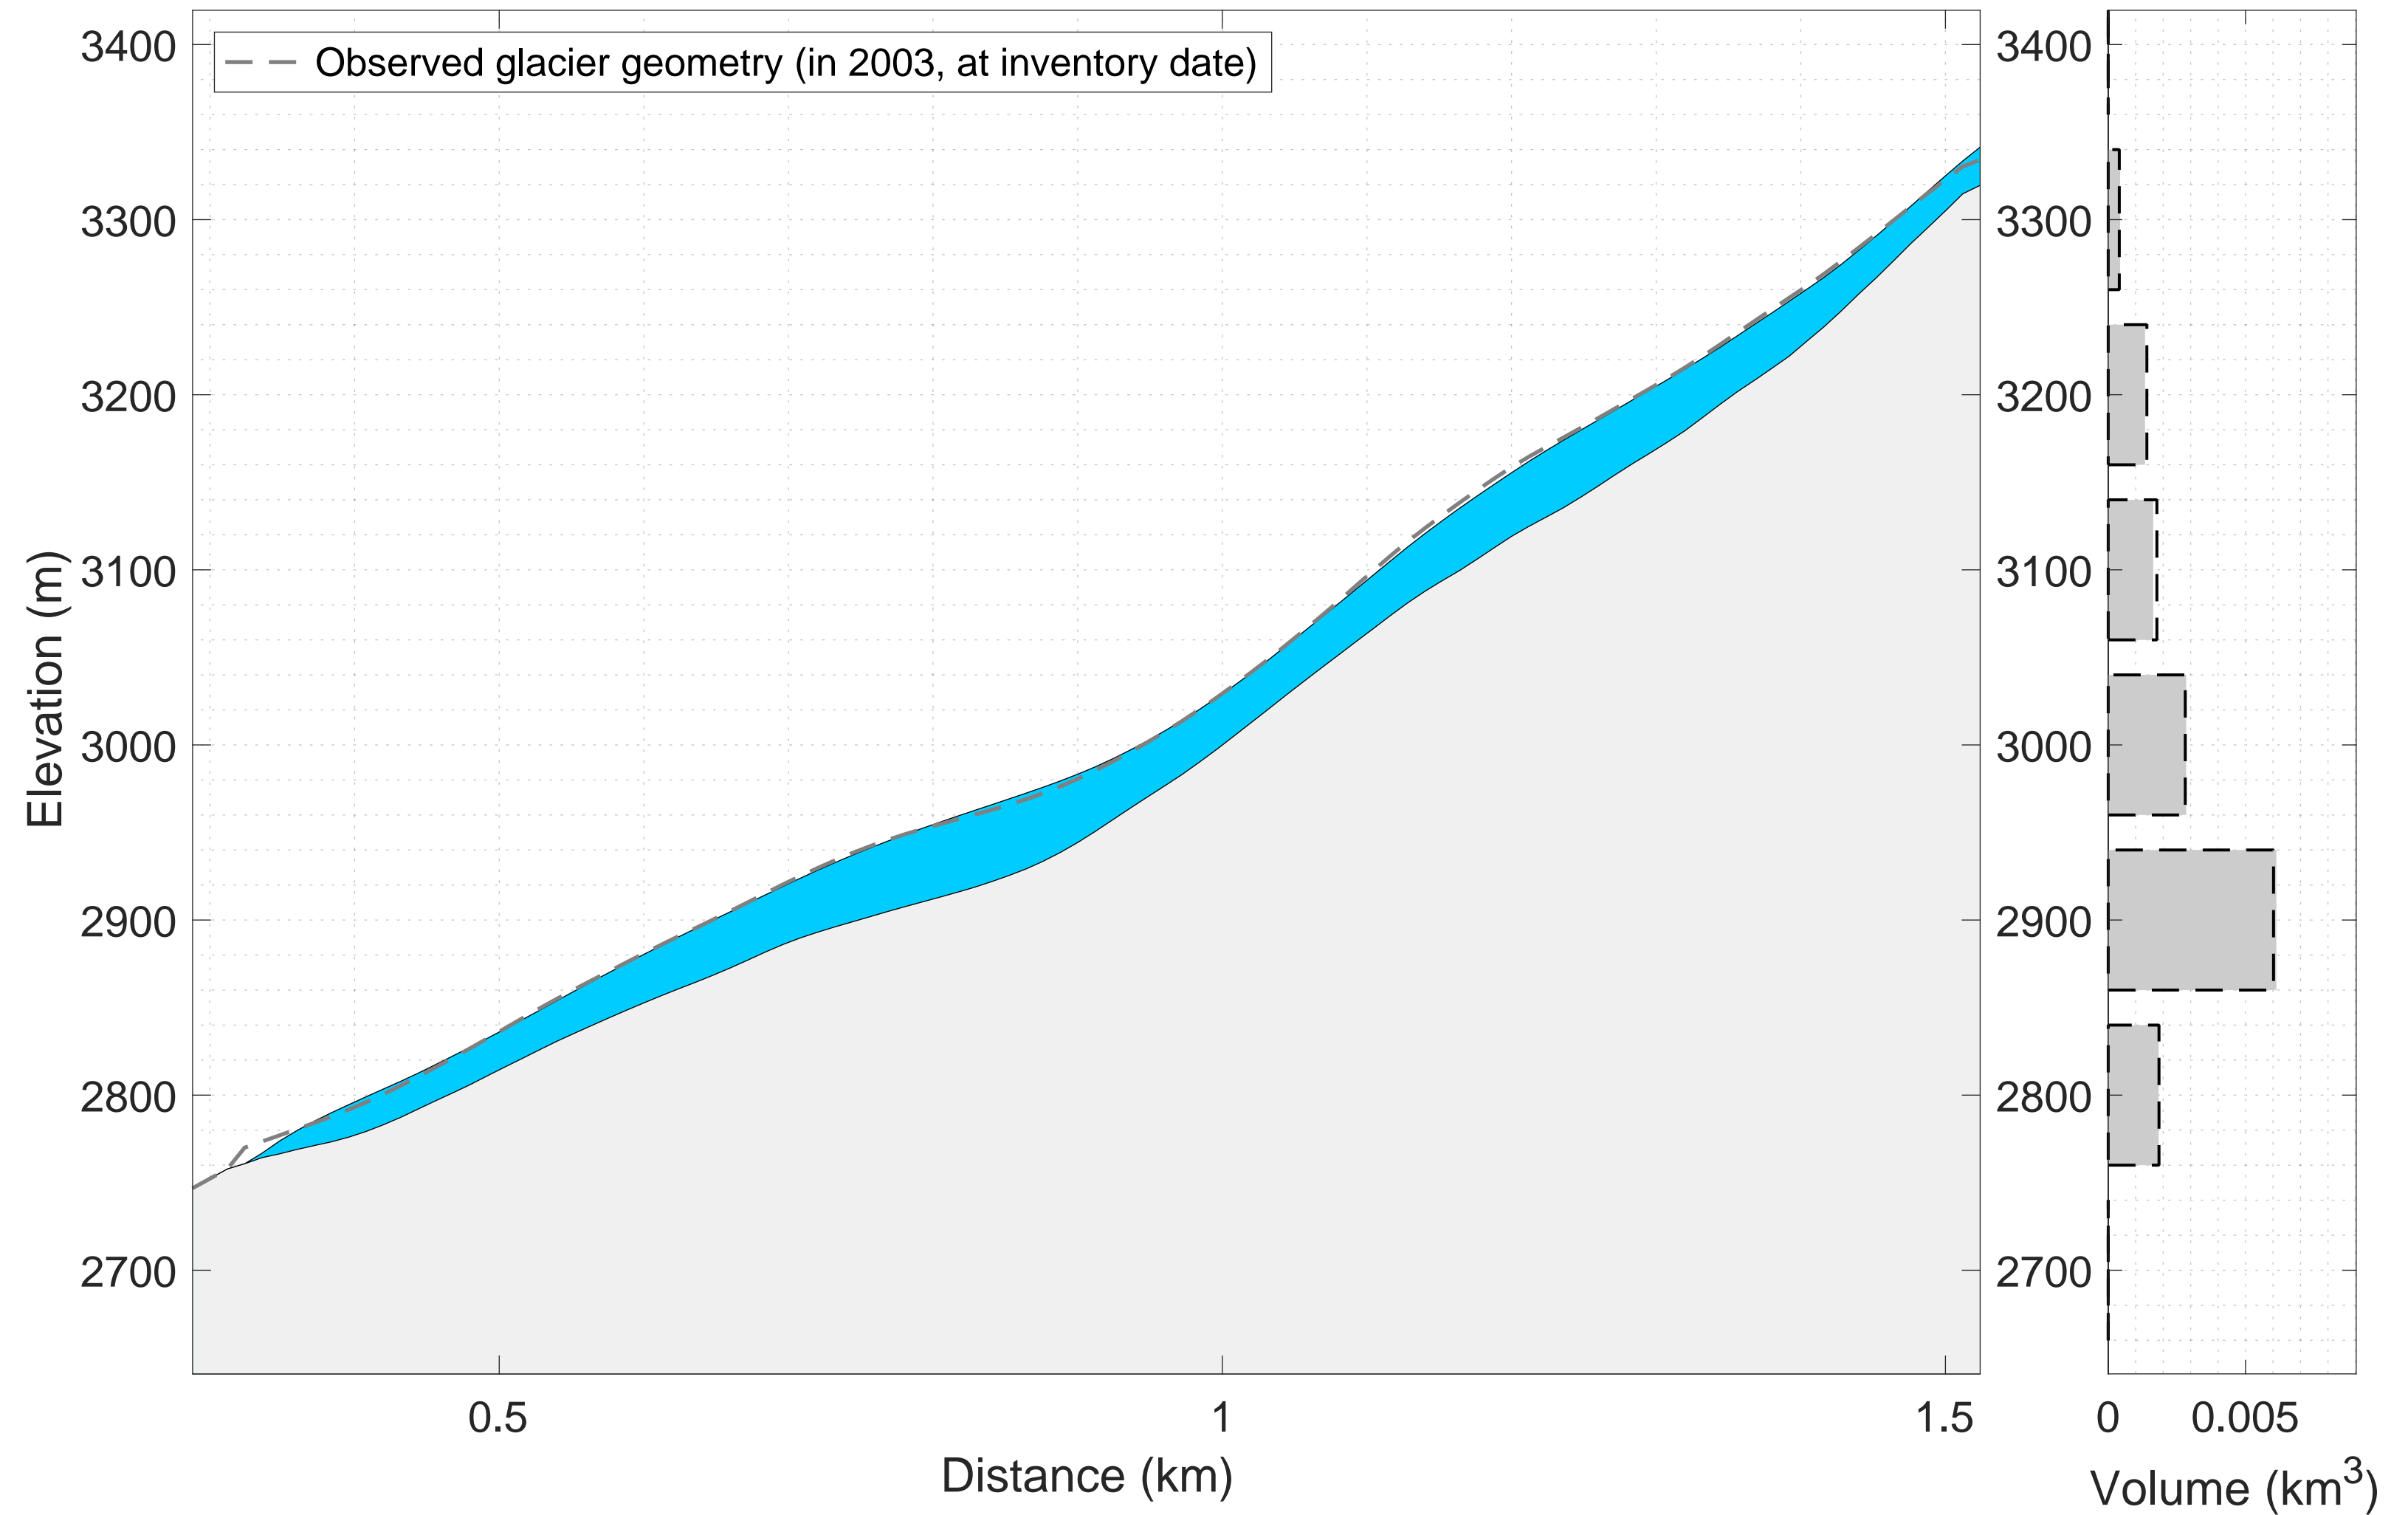

Supplement: Supplementary file 82 [file tc-13-1125-2019-supplement.zip]

**Modelled geometry (Glacier ID = 00781;  $A = 2.0942\text{e-}16 \text{ Pa}^{-3} \text{ a}^{-1}$ ;  $dx = 24 \text{ m}$ )**

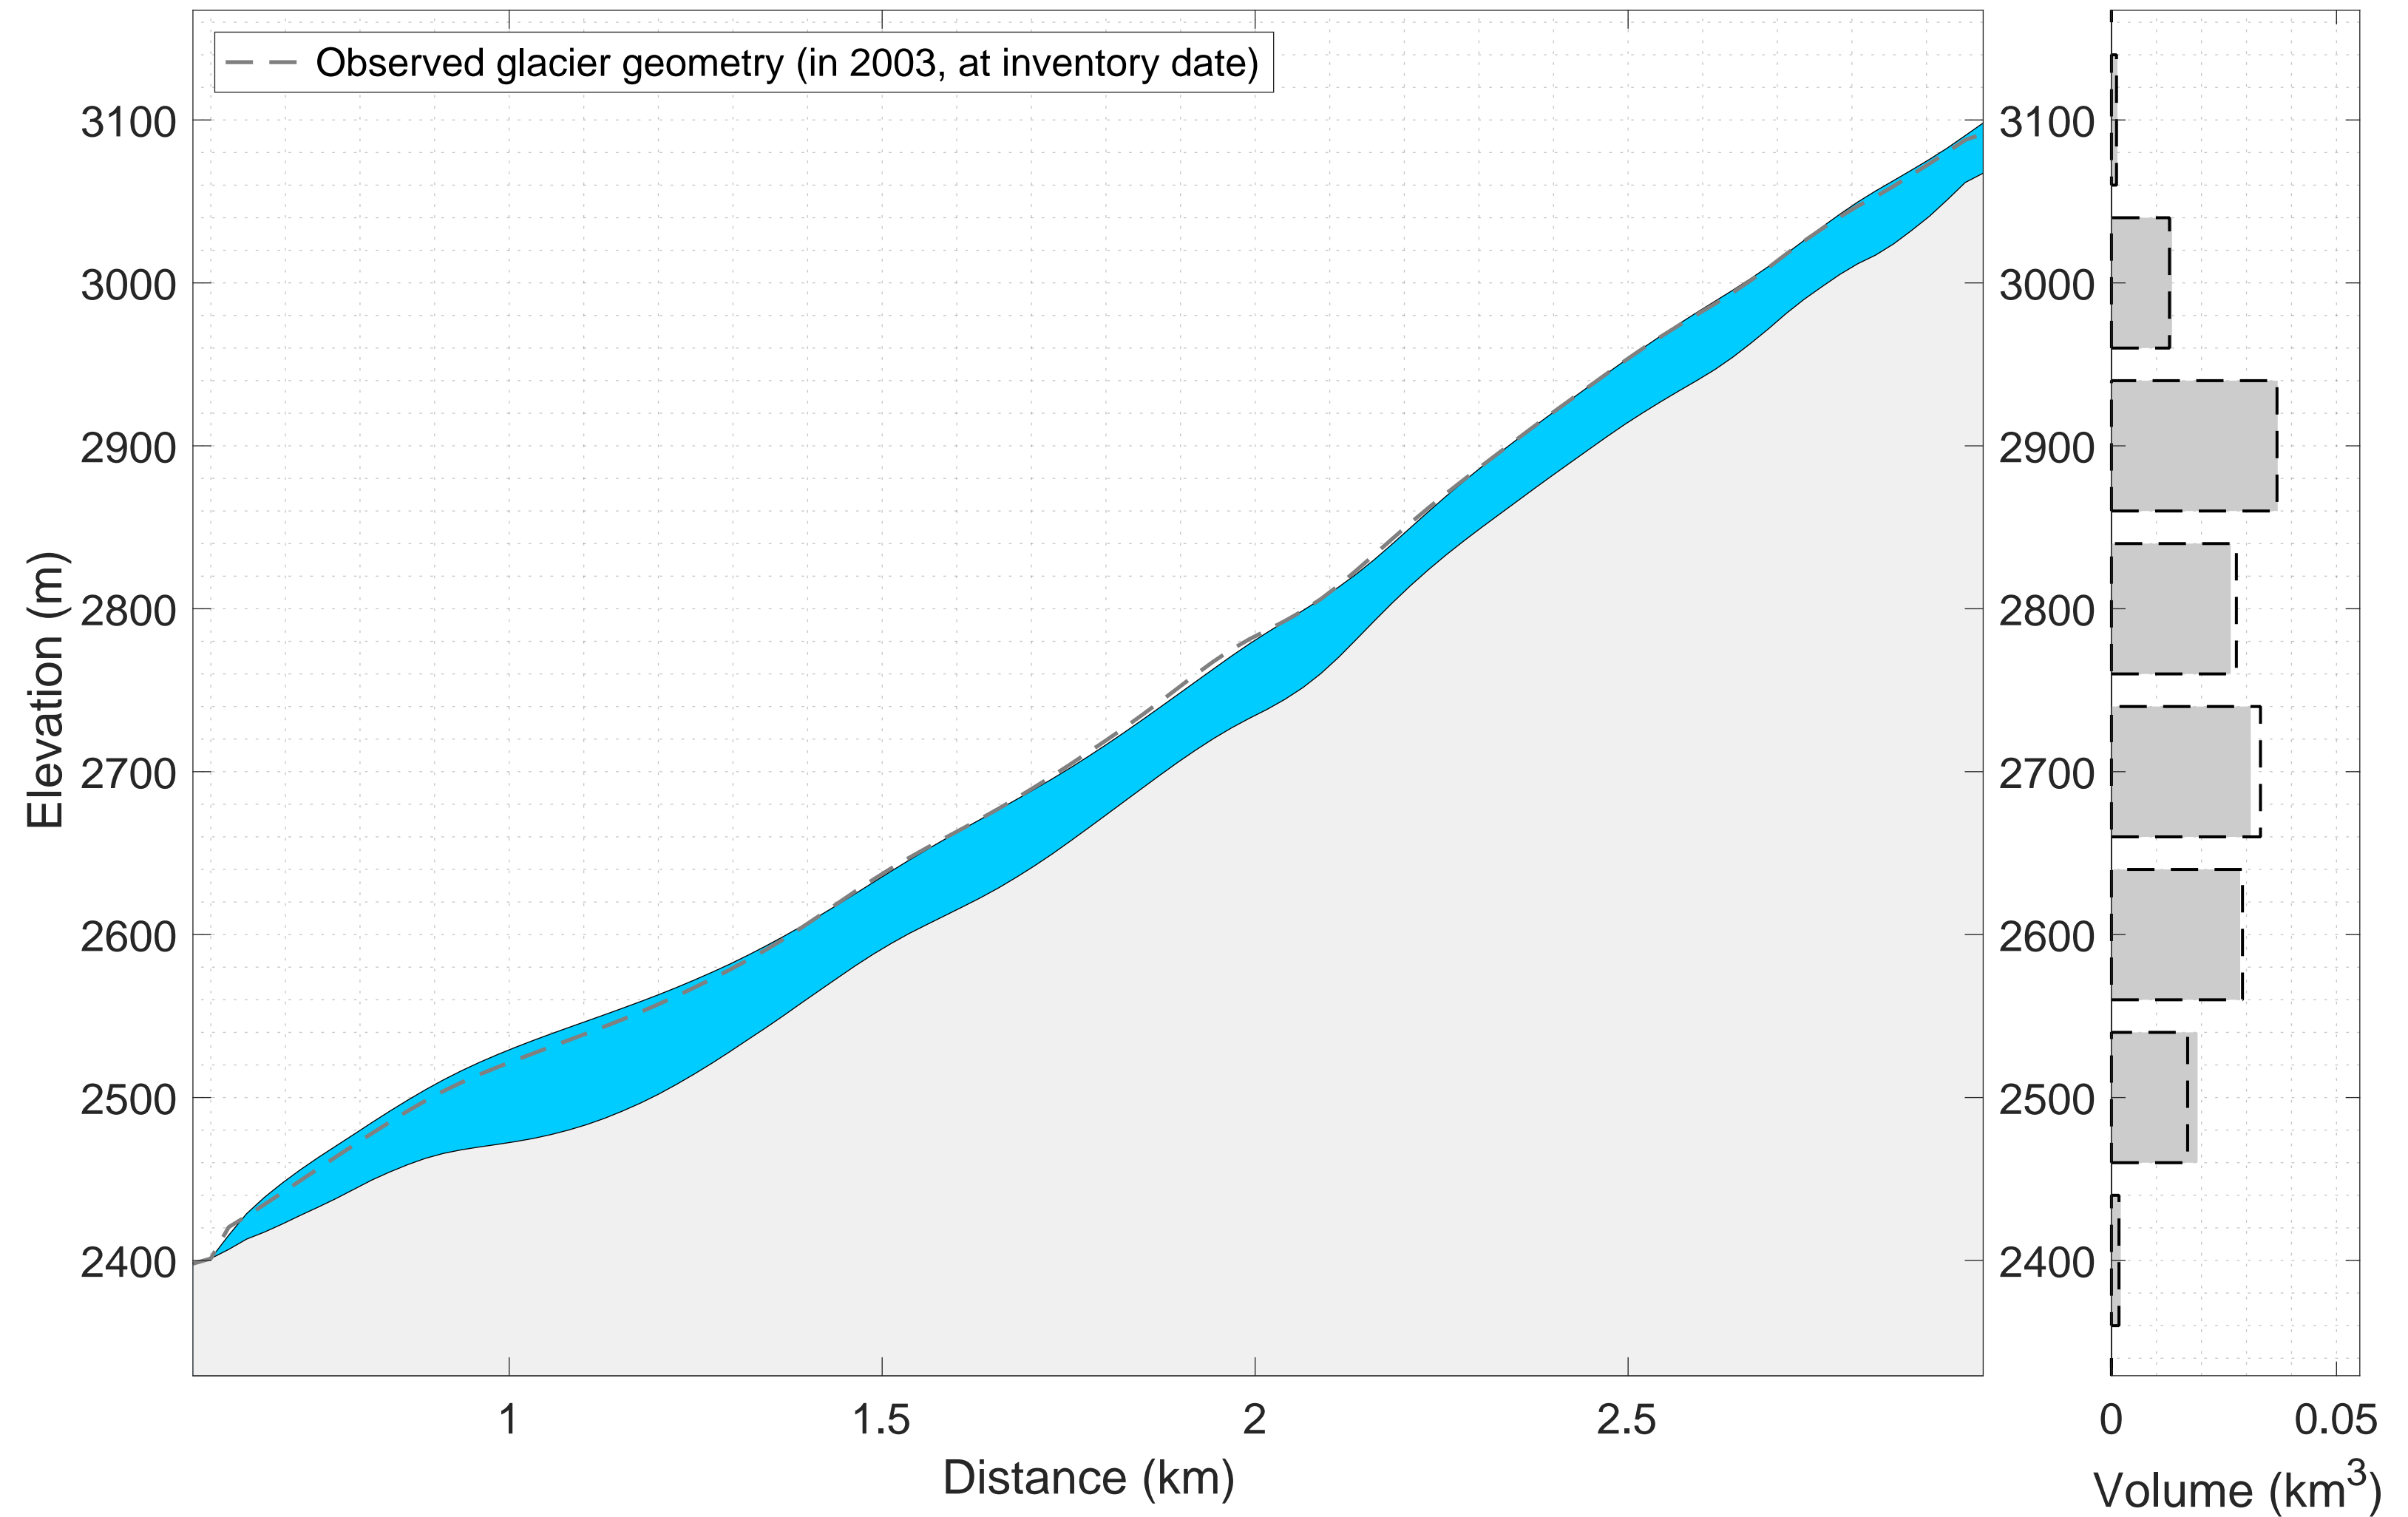

Supplement: Supplementary file 83 [file tc-13-1125-2019-supplement.zip]

**Modelled geometry (Glacier ID = 03645;  $A = 1.7271\text{e-}16 \text{ Pa}^{-3} \text{ a}^{-1}$ ;  $dx = 15 \text{ m}$ )**

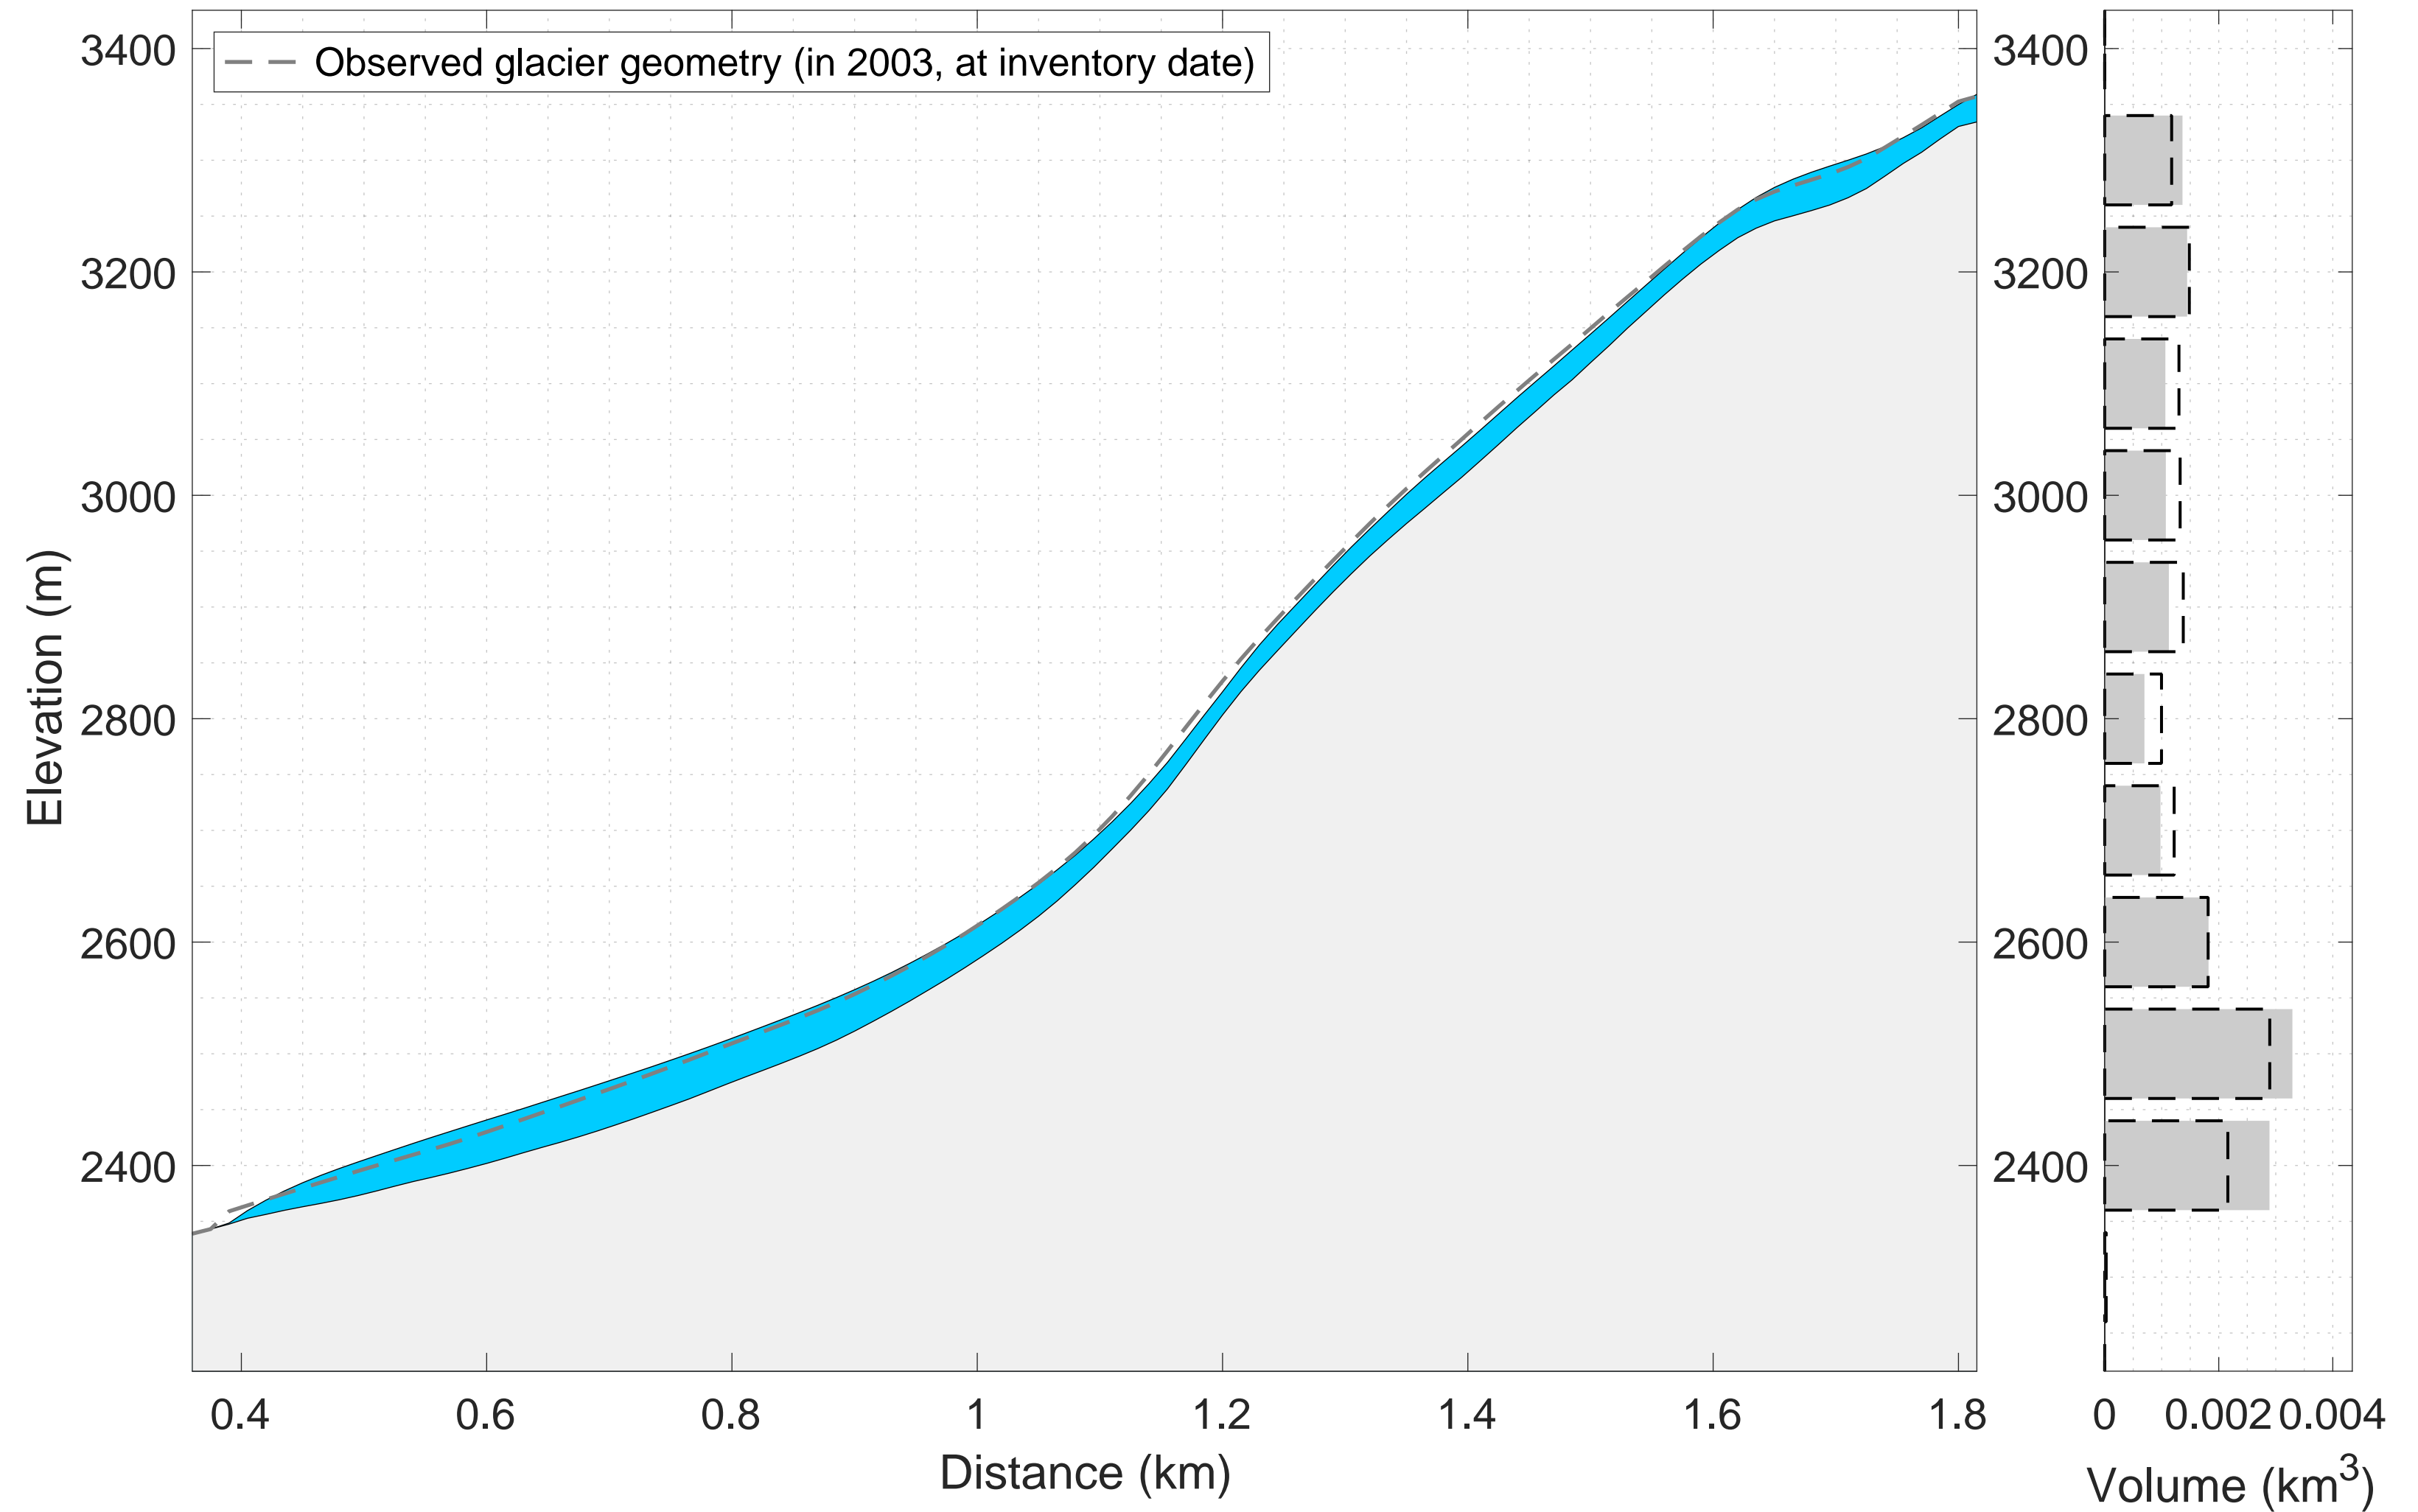

Supplement: Supplementary file 84 [file tc-13-1125-2019-supplement.zip]

**Modelled geometry (Glacier ID = 01738;  $A = 3.0365\text{e-}17 \text{ Pa}^{-3} \text{ a}^{-1}$ ;  $dx = 17 \text{ m}$ )**

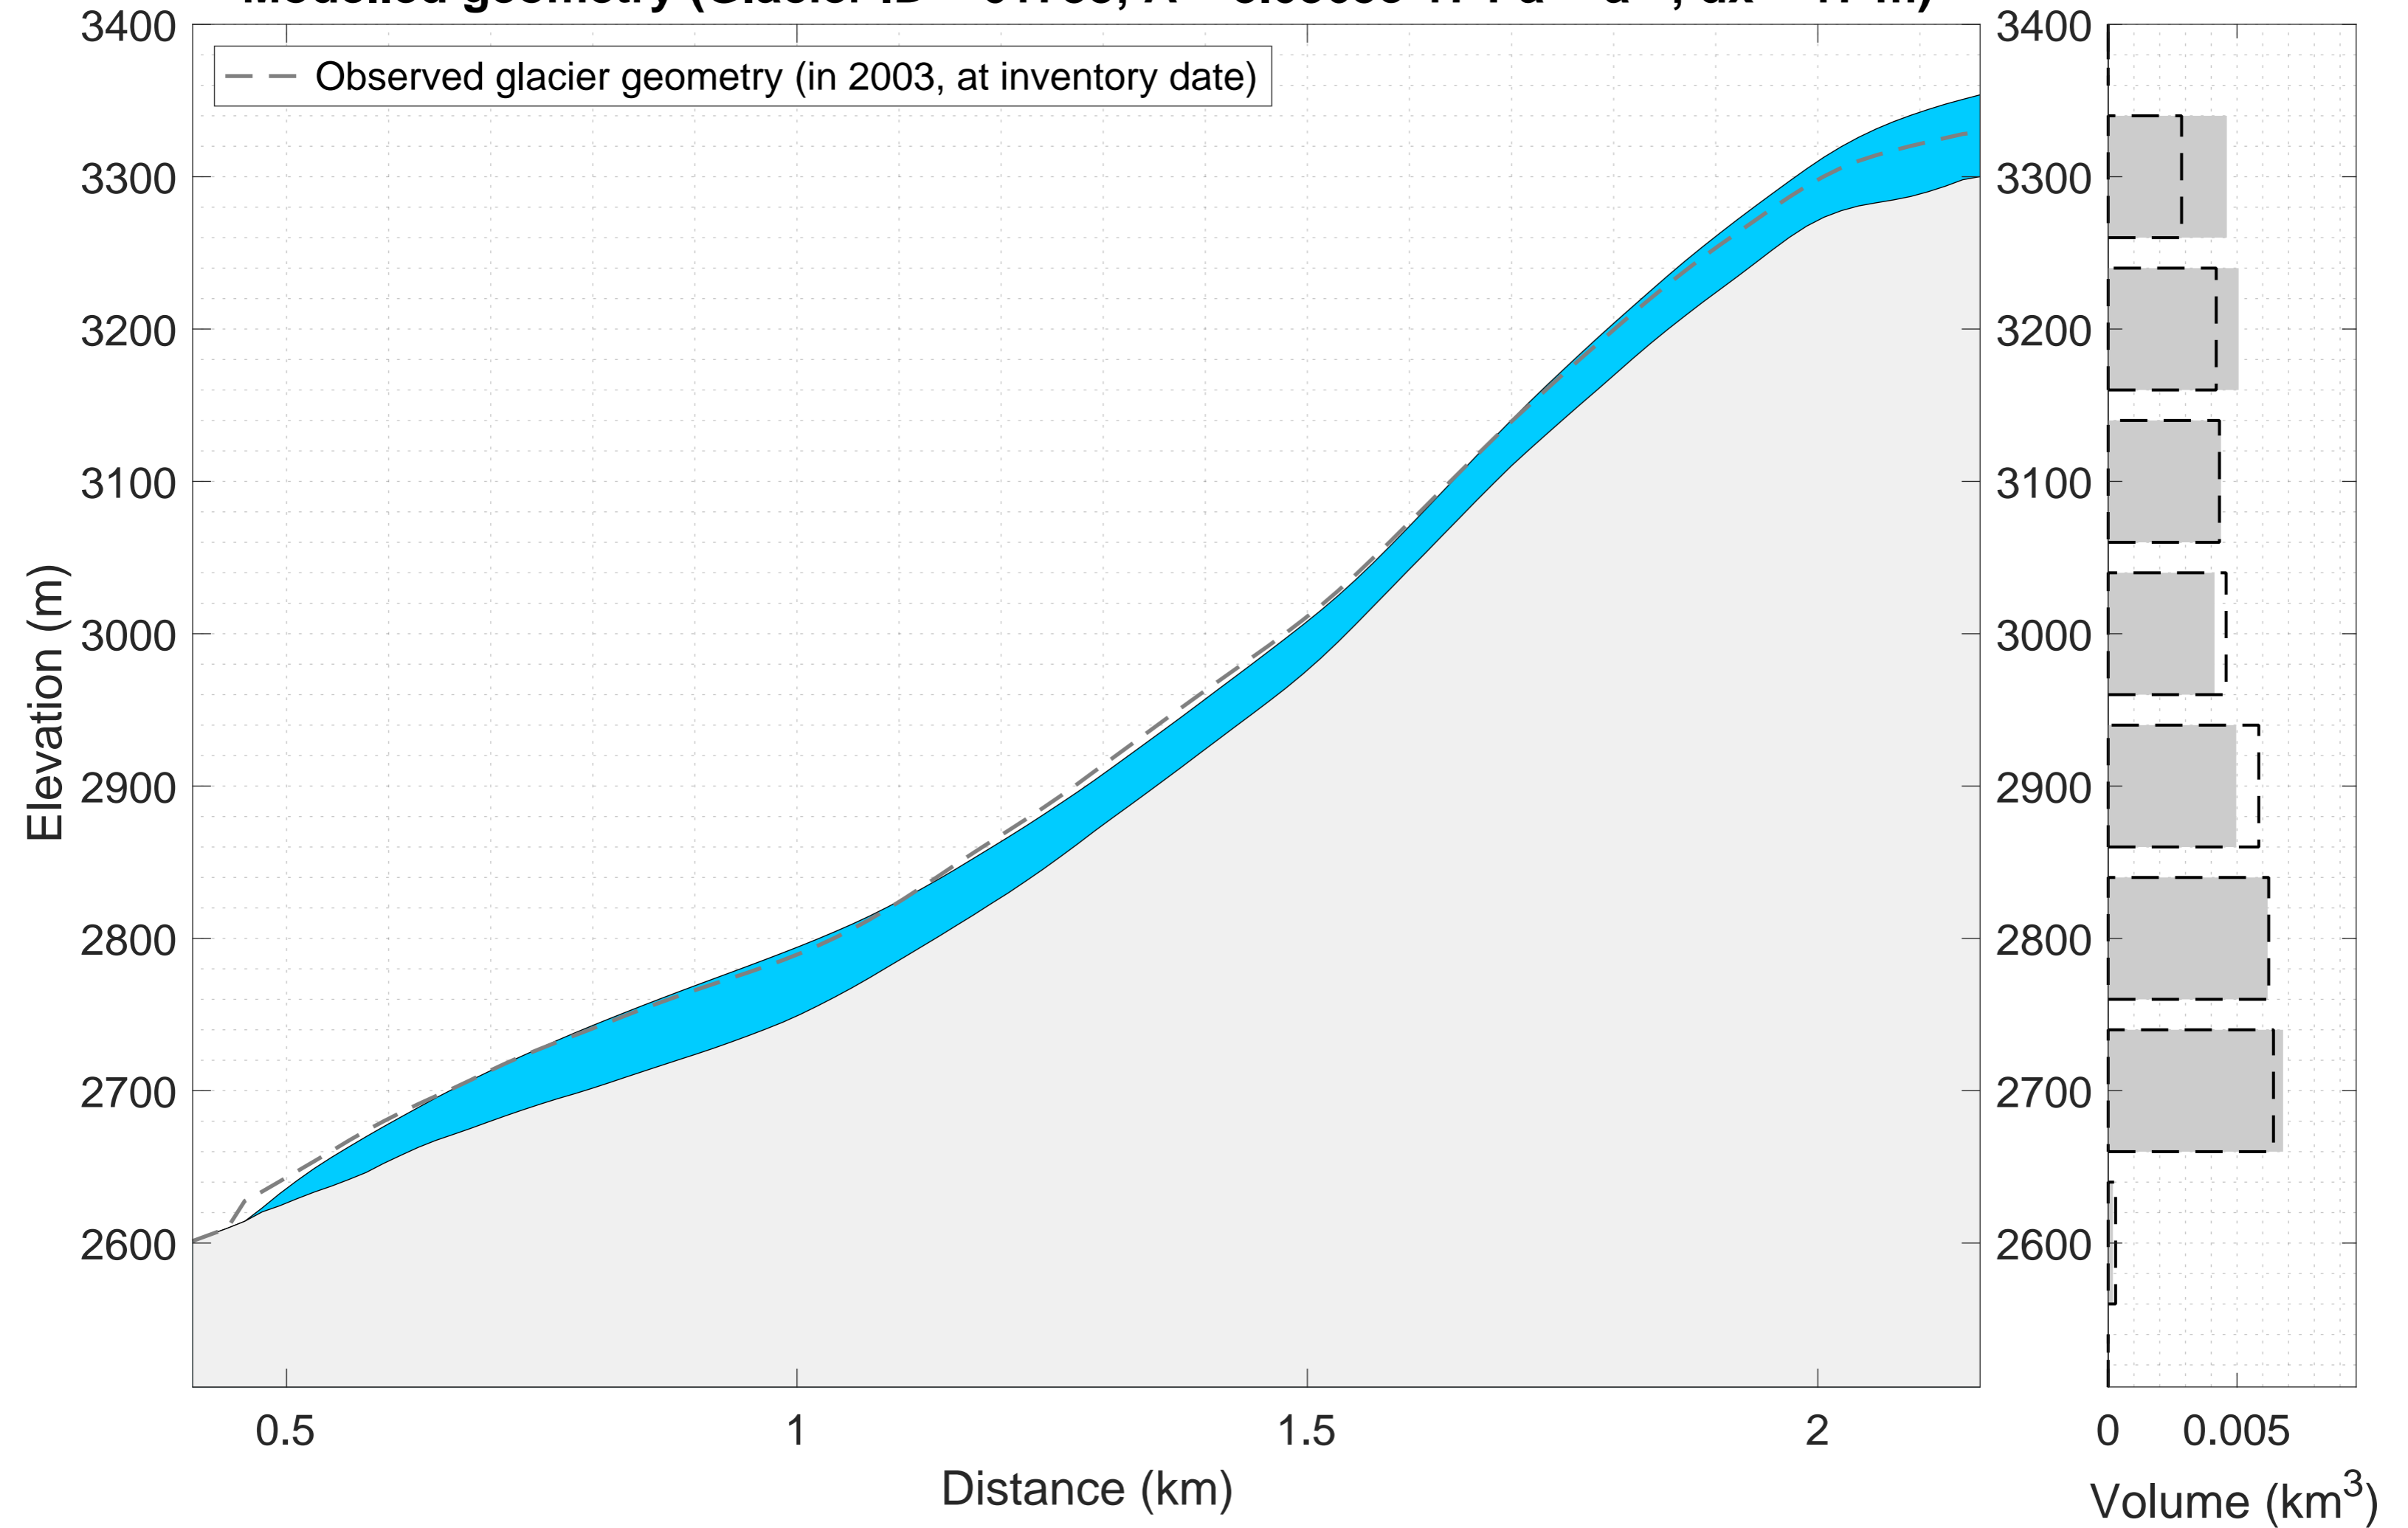

Supplement: Supplementary file 85 [file tc-13-1125-2019-supplement.zip]

**Modelled geometry (Glacier ID = 00028;  $A = 1.112\text{e-}16 \text{ Pa}^{-3} \text{ a}^{-1}$ ;  $dx = 12 \text{ m}$ )**

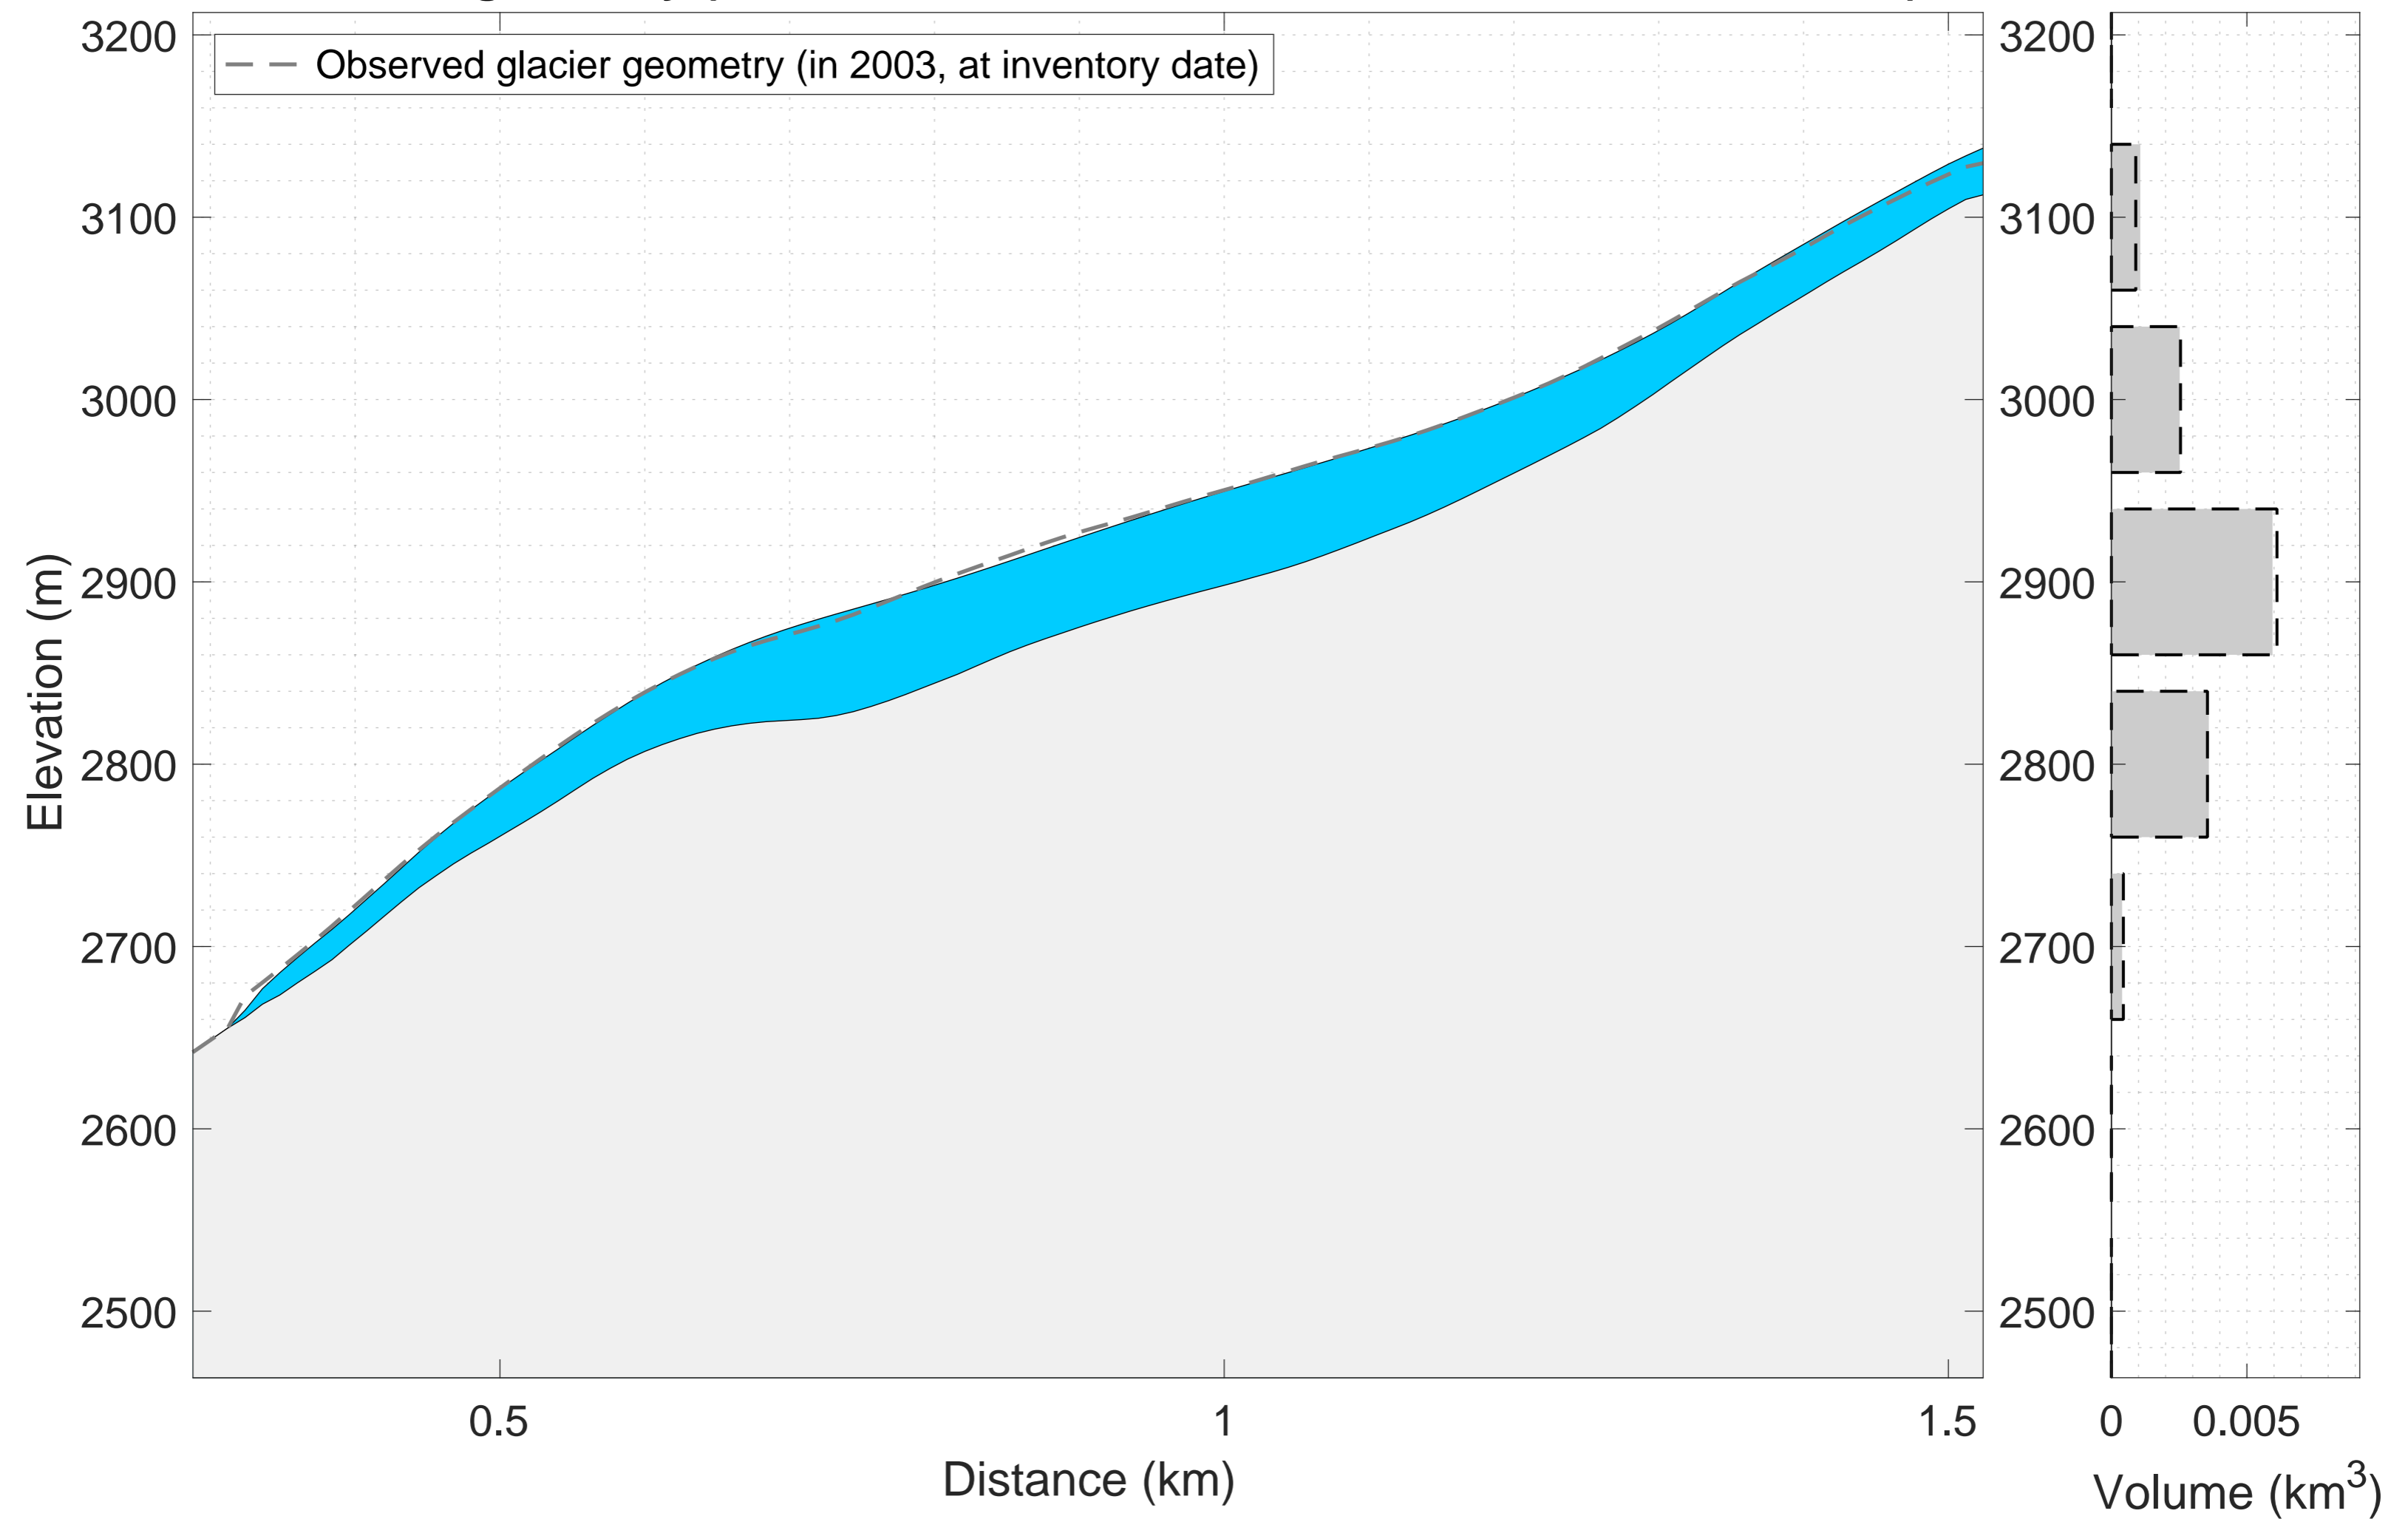

Supplement: Supplementary file 86 [file tc-13-1125-2019-supplement.zip]

**Modelled geometry (Glacier ID = 01019;  $A = 8.6571\text{e-}17 \text{ Pa}^{-3} \text{ a}^{-1}$ ;  $dx = 14 \text{ m}$ )**

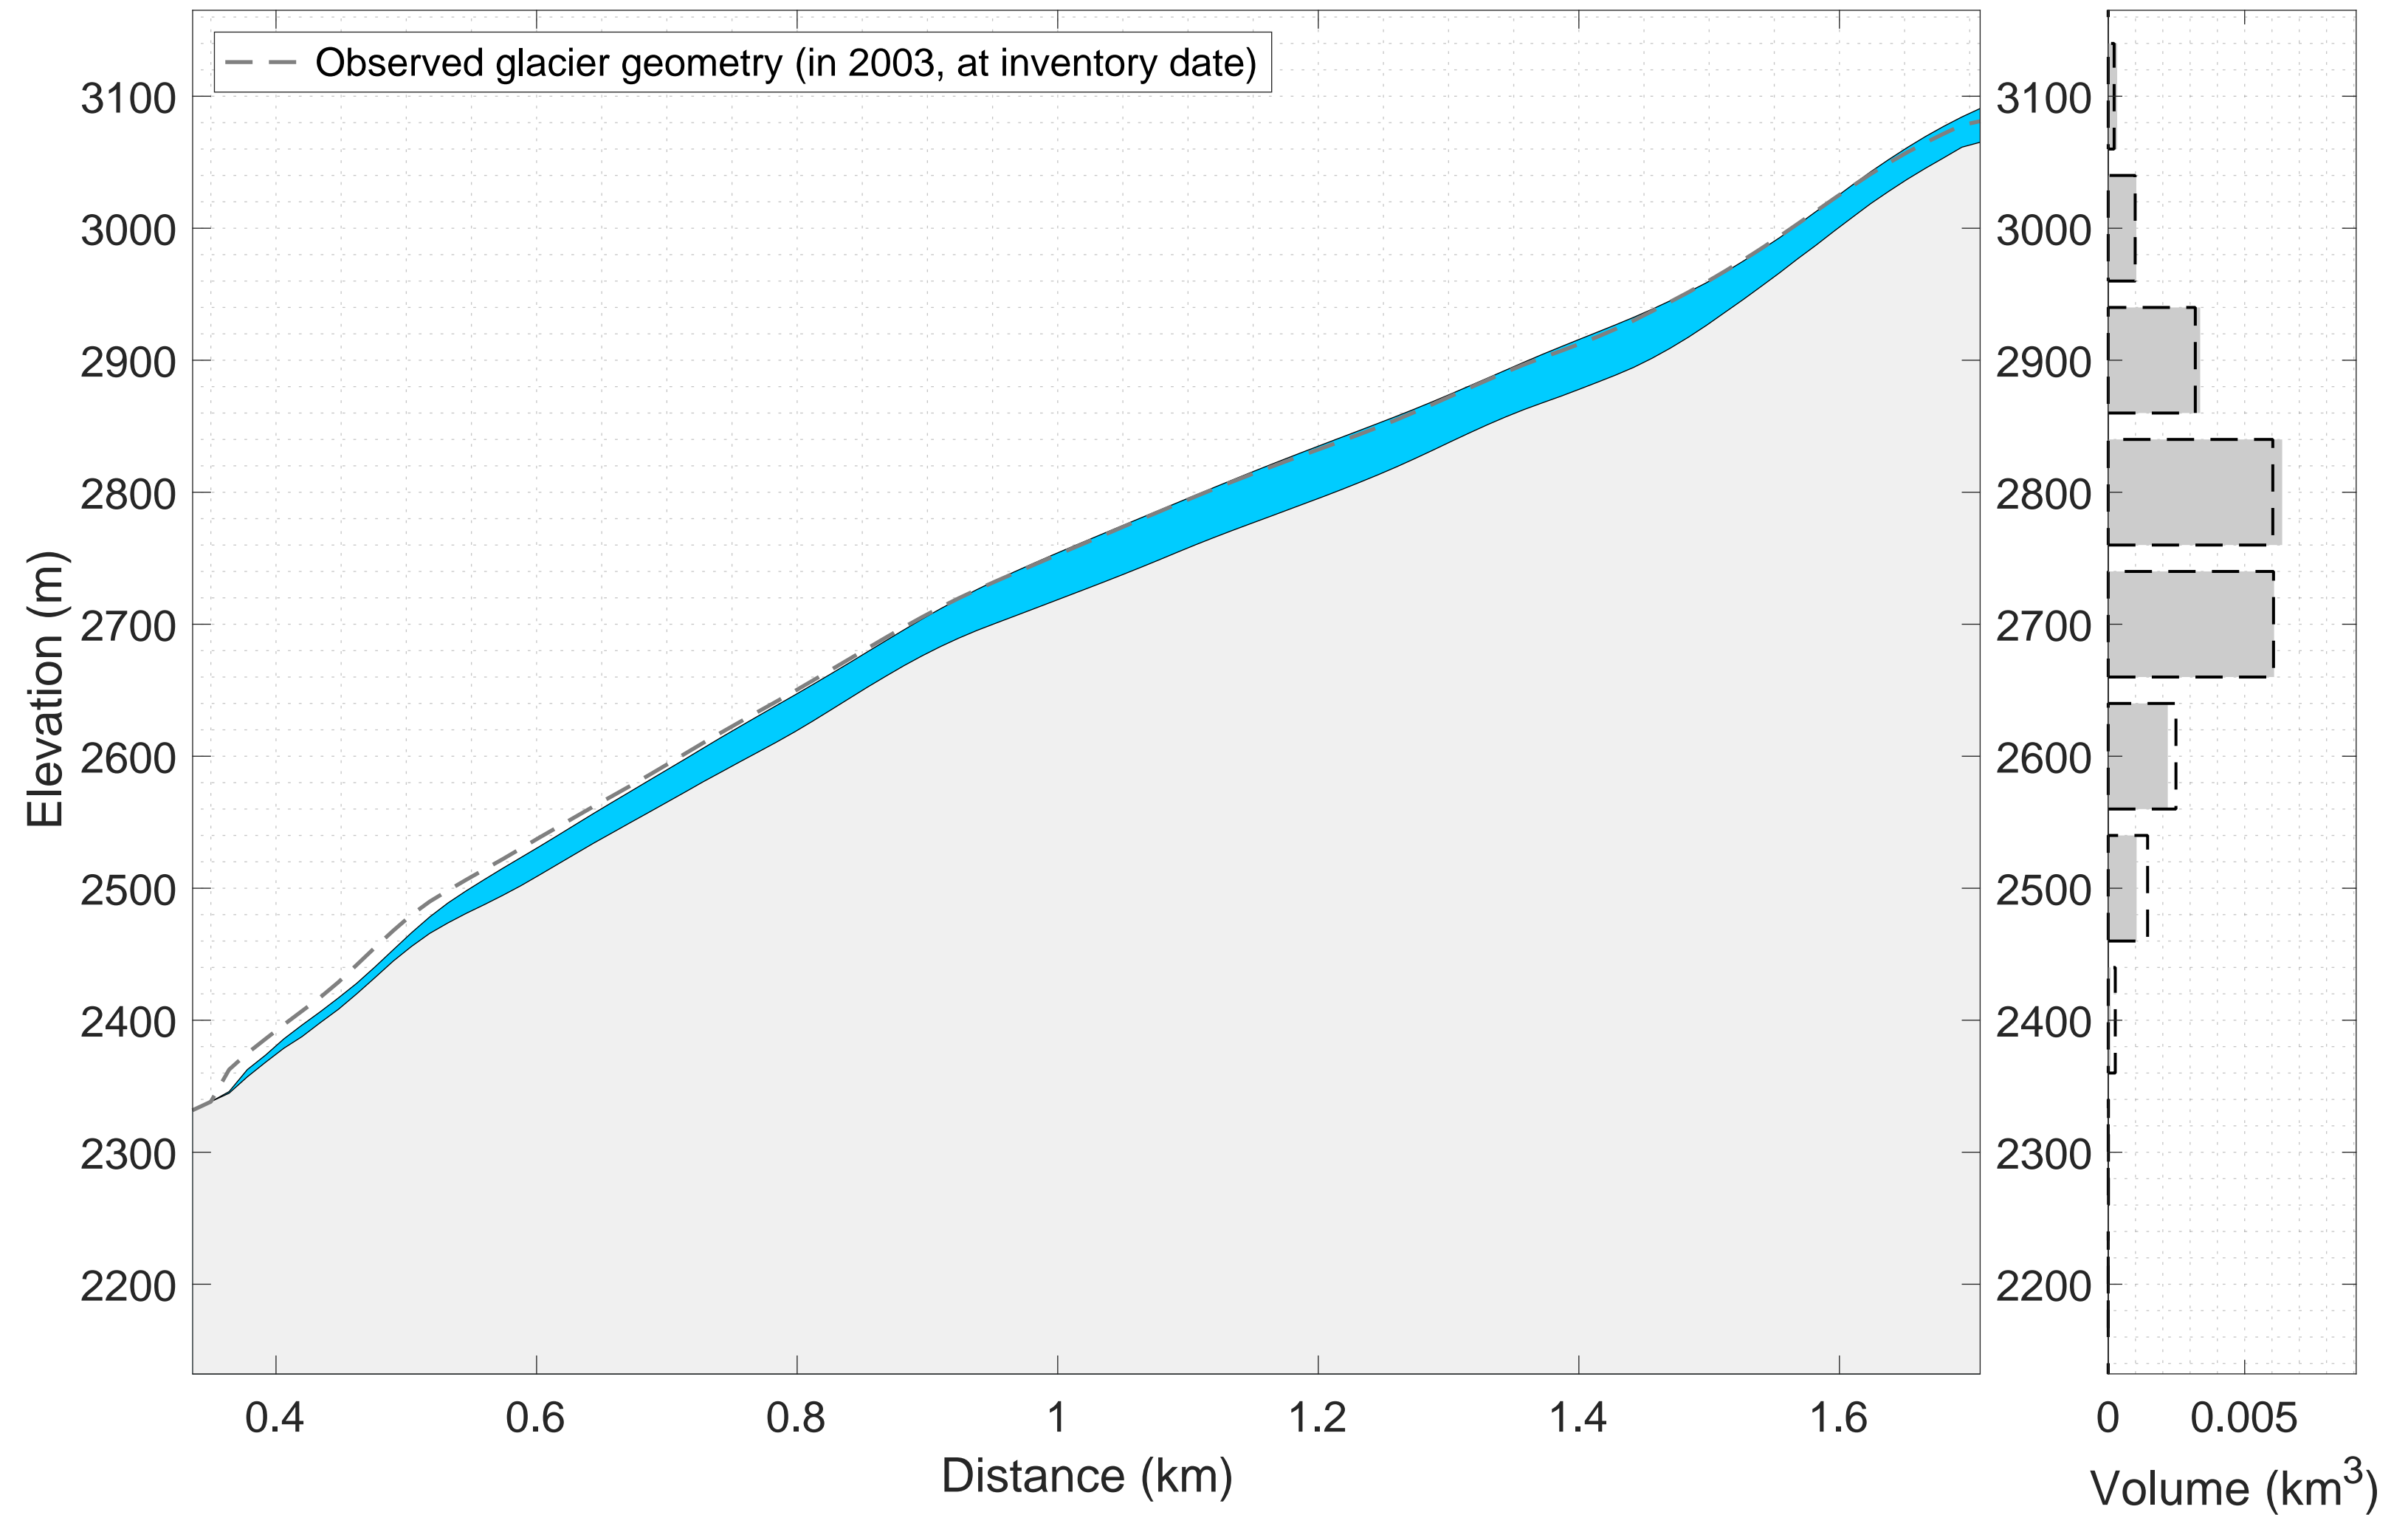

Supplement: Supplementary file 87 [file tc-13-1125-2019-supplement.zip]

**Modelled geometry (Glacier ID = 01165;  $A = 1.3682\text{e-}16 \text{ Pa}^{-3} \text{ a}^{-1}$ ;  $dx = 17 \text{ m}$ )**

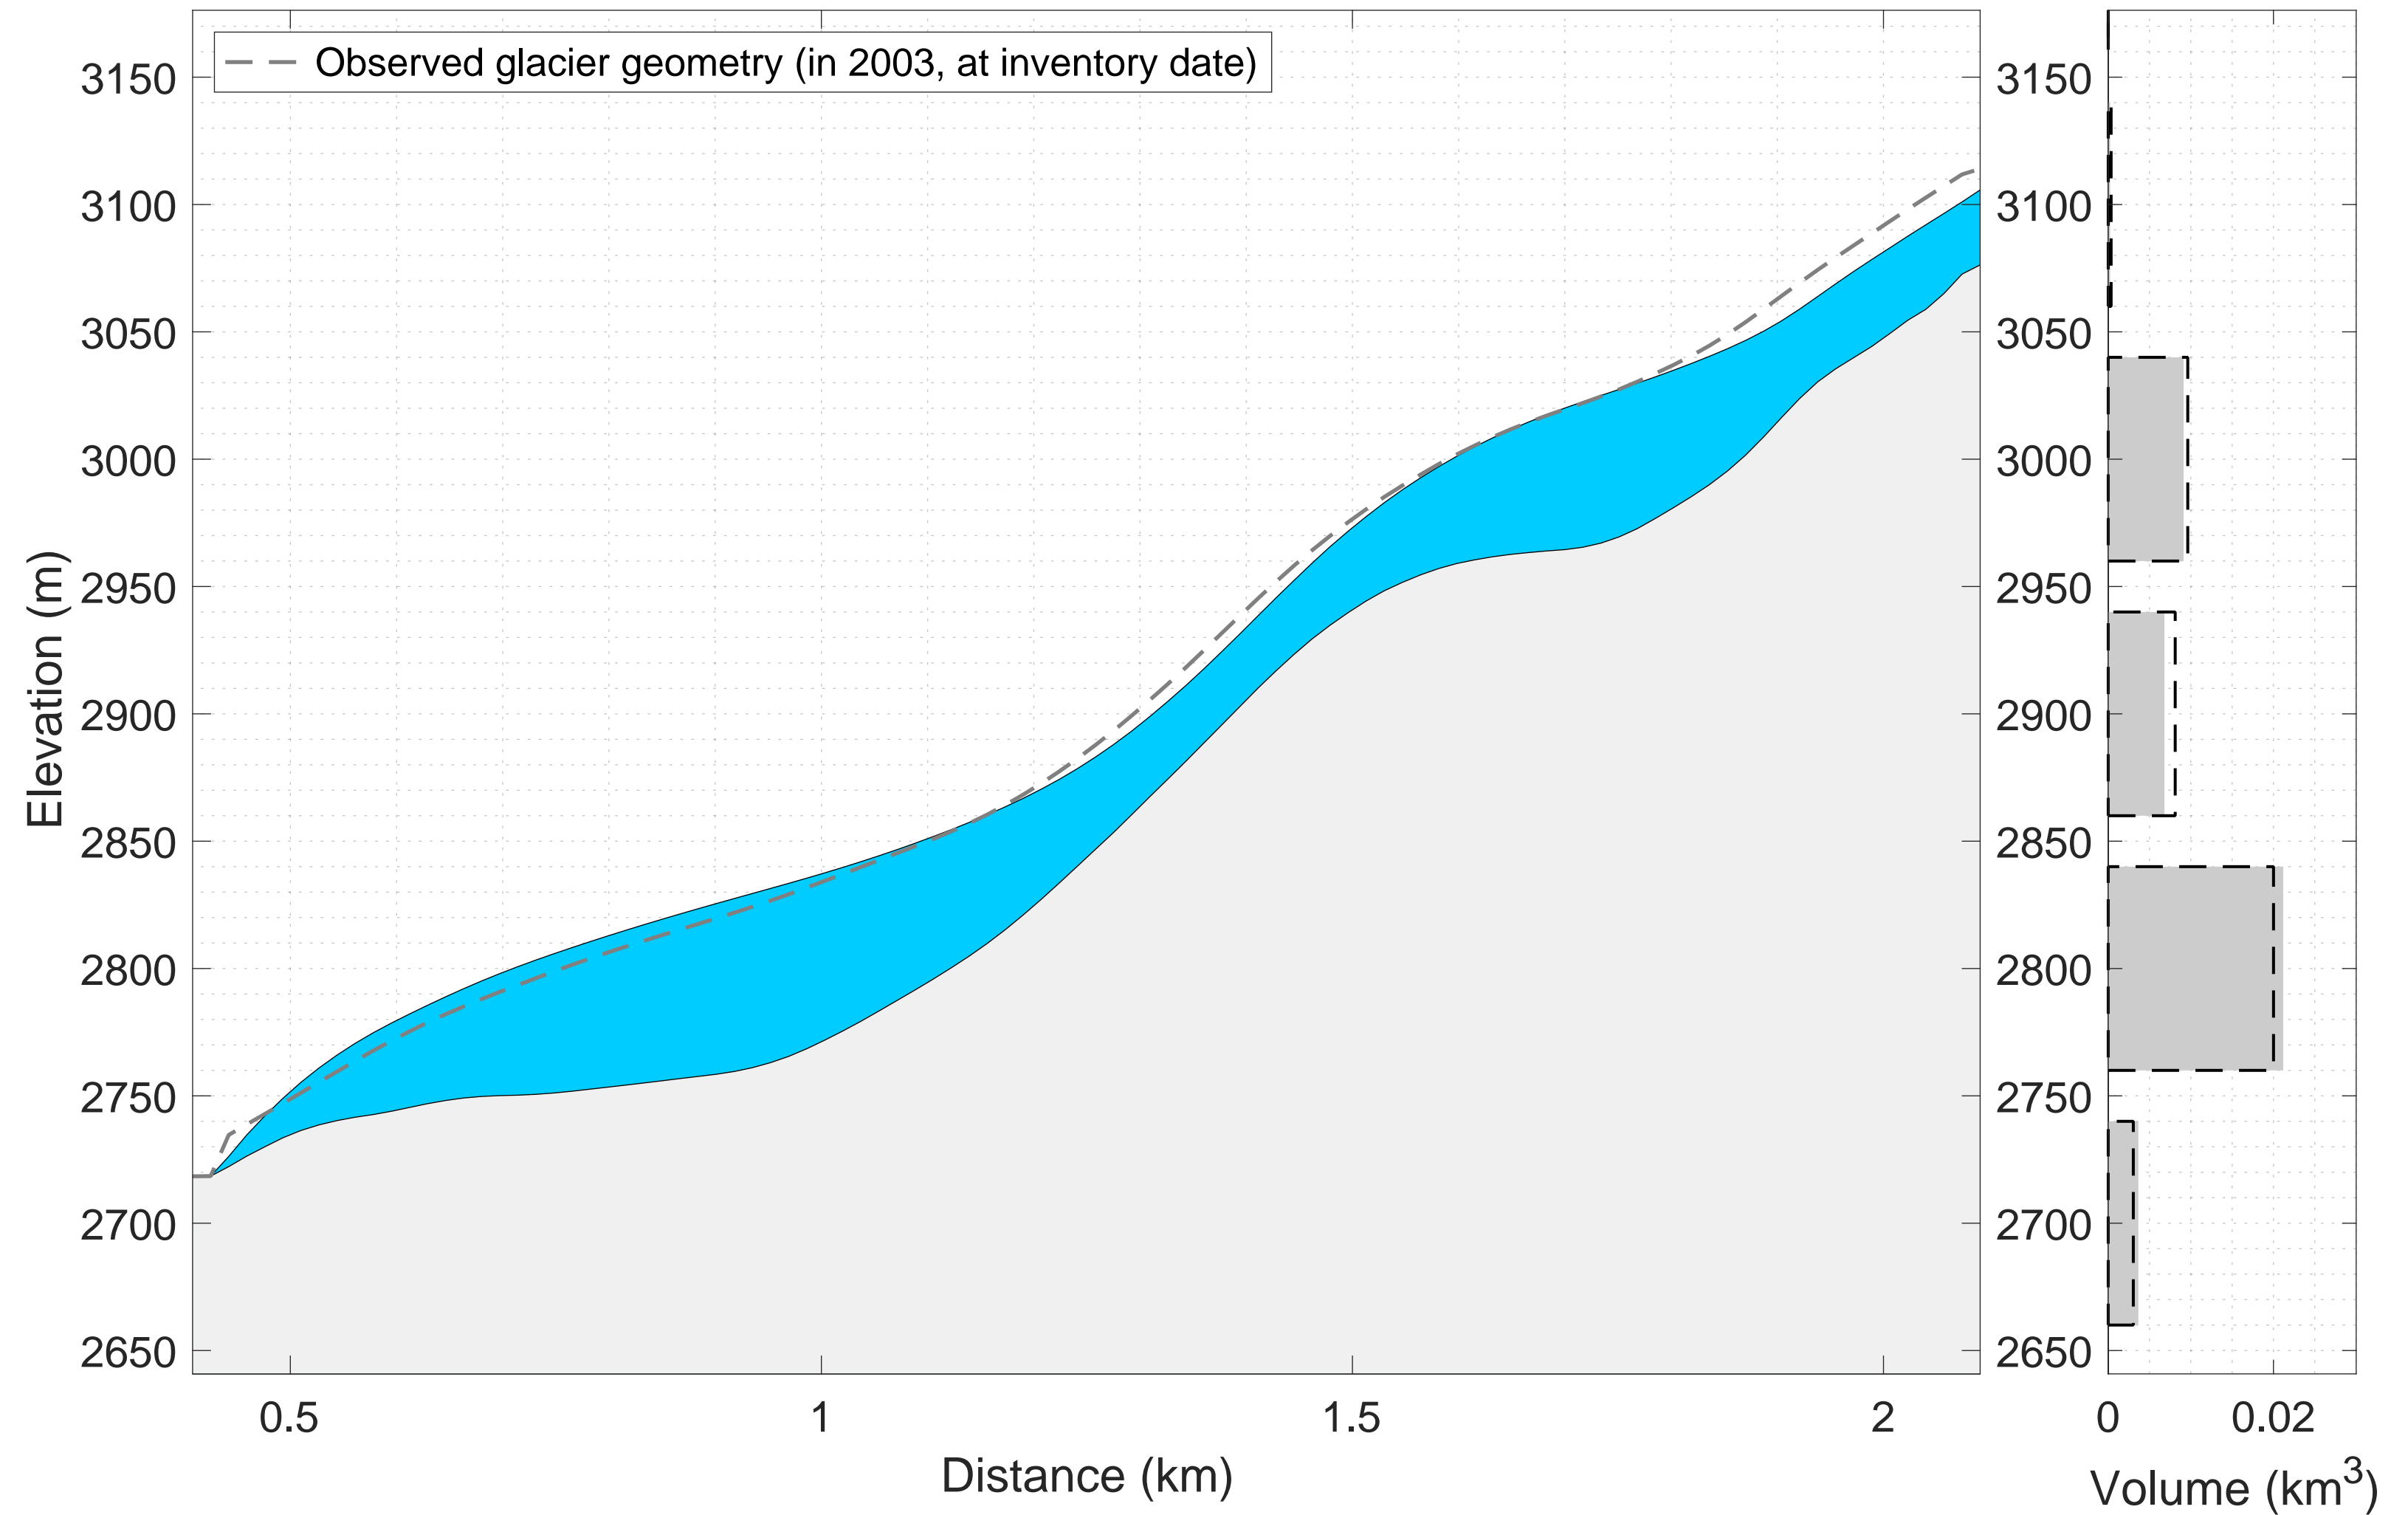

Supplement: Supplementary file 88 [file tc-13-1125-2019-supplement.zip]

**Modelled geometry (Glacier ID = 03427;  $A = 1.9703\text{e-}16 \text{ Pa}^{-3} \text{ a}^{-1}$ ;  $dx = 31 \text{ m}$ )**

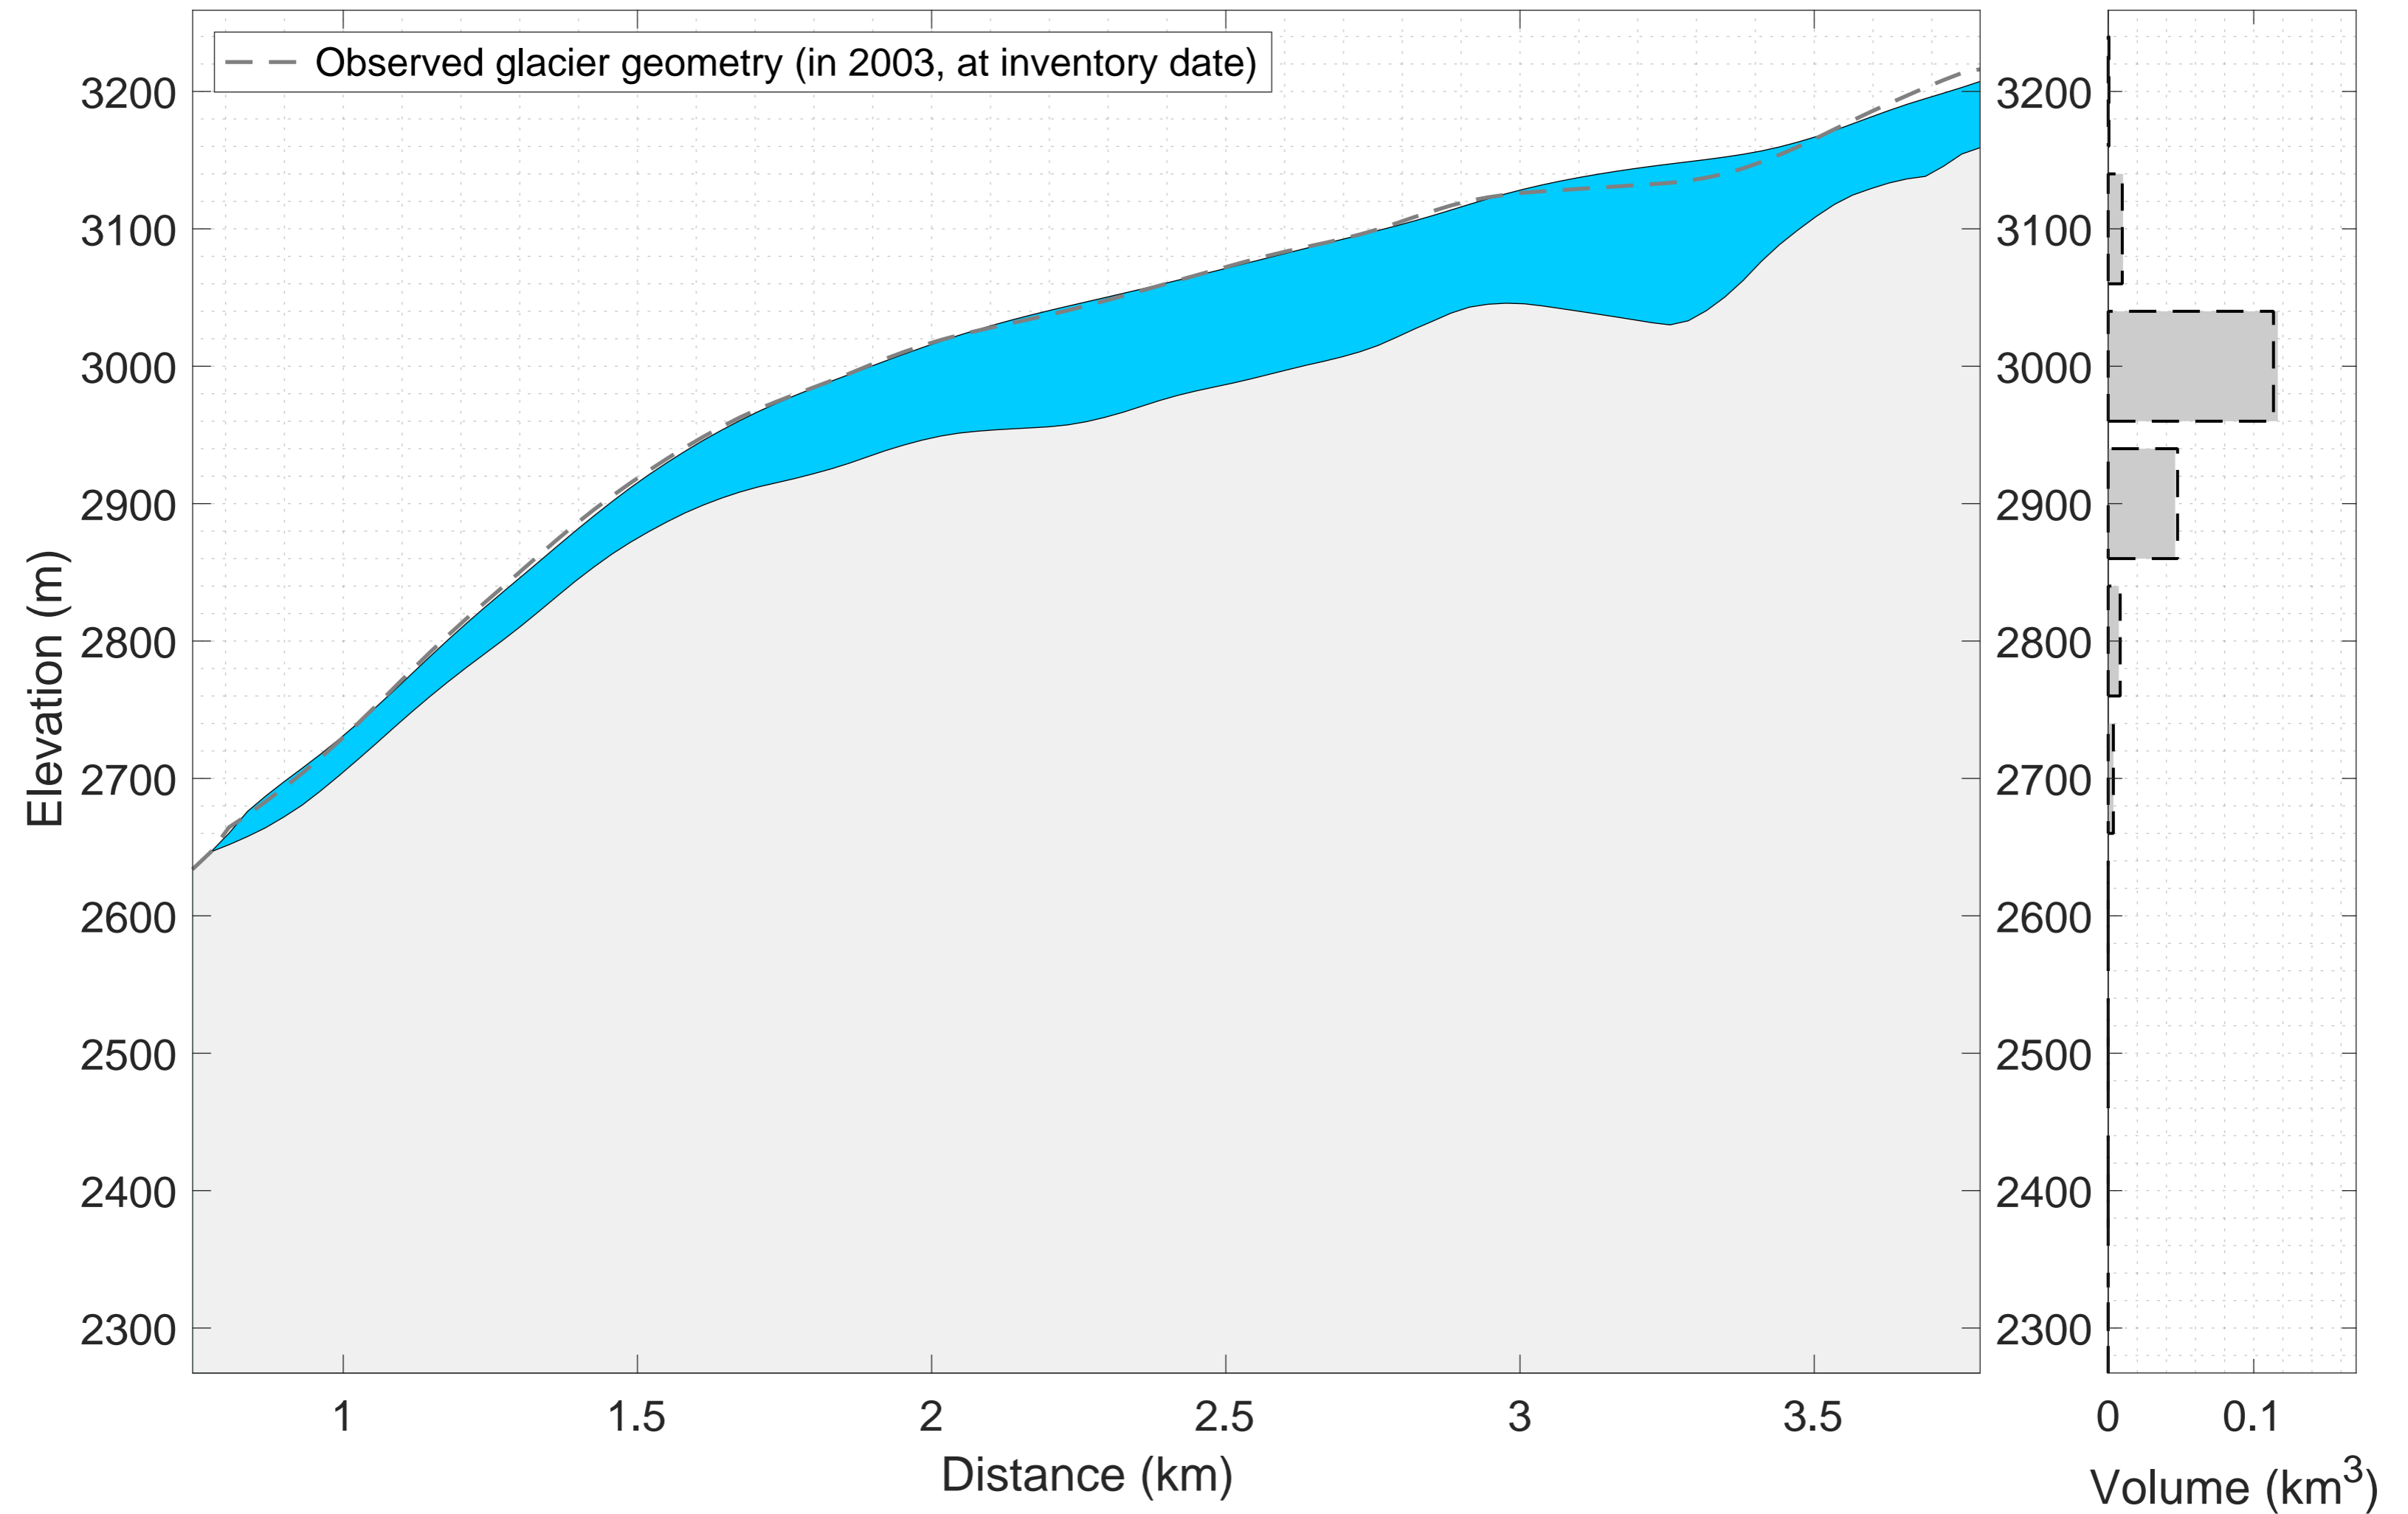

Supplement: Supplementary file 89 [file tc-13-1125-2019-supplement.zip]

**Modelled geometry (Glacier ID = 03493;  $A = 7.1226\text{e-}17 \text{ Pa}^{-3} \text{ a}^{-1}$ ;  $dx = 12 \text{ m}$ )**

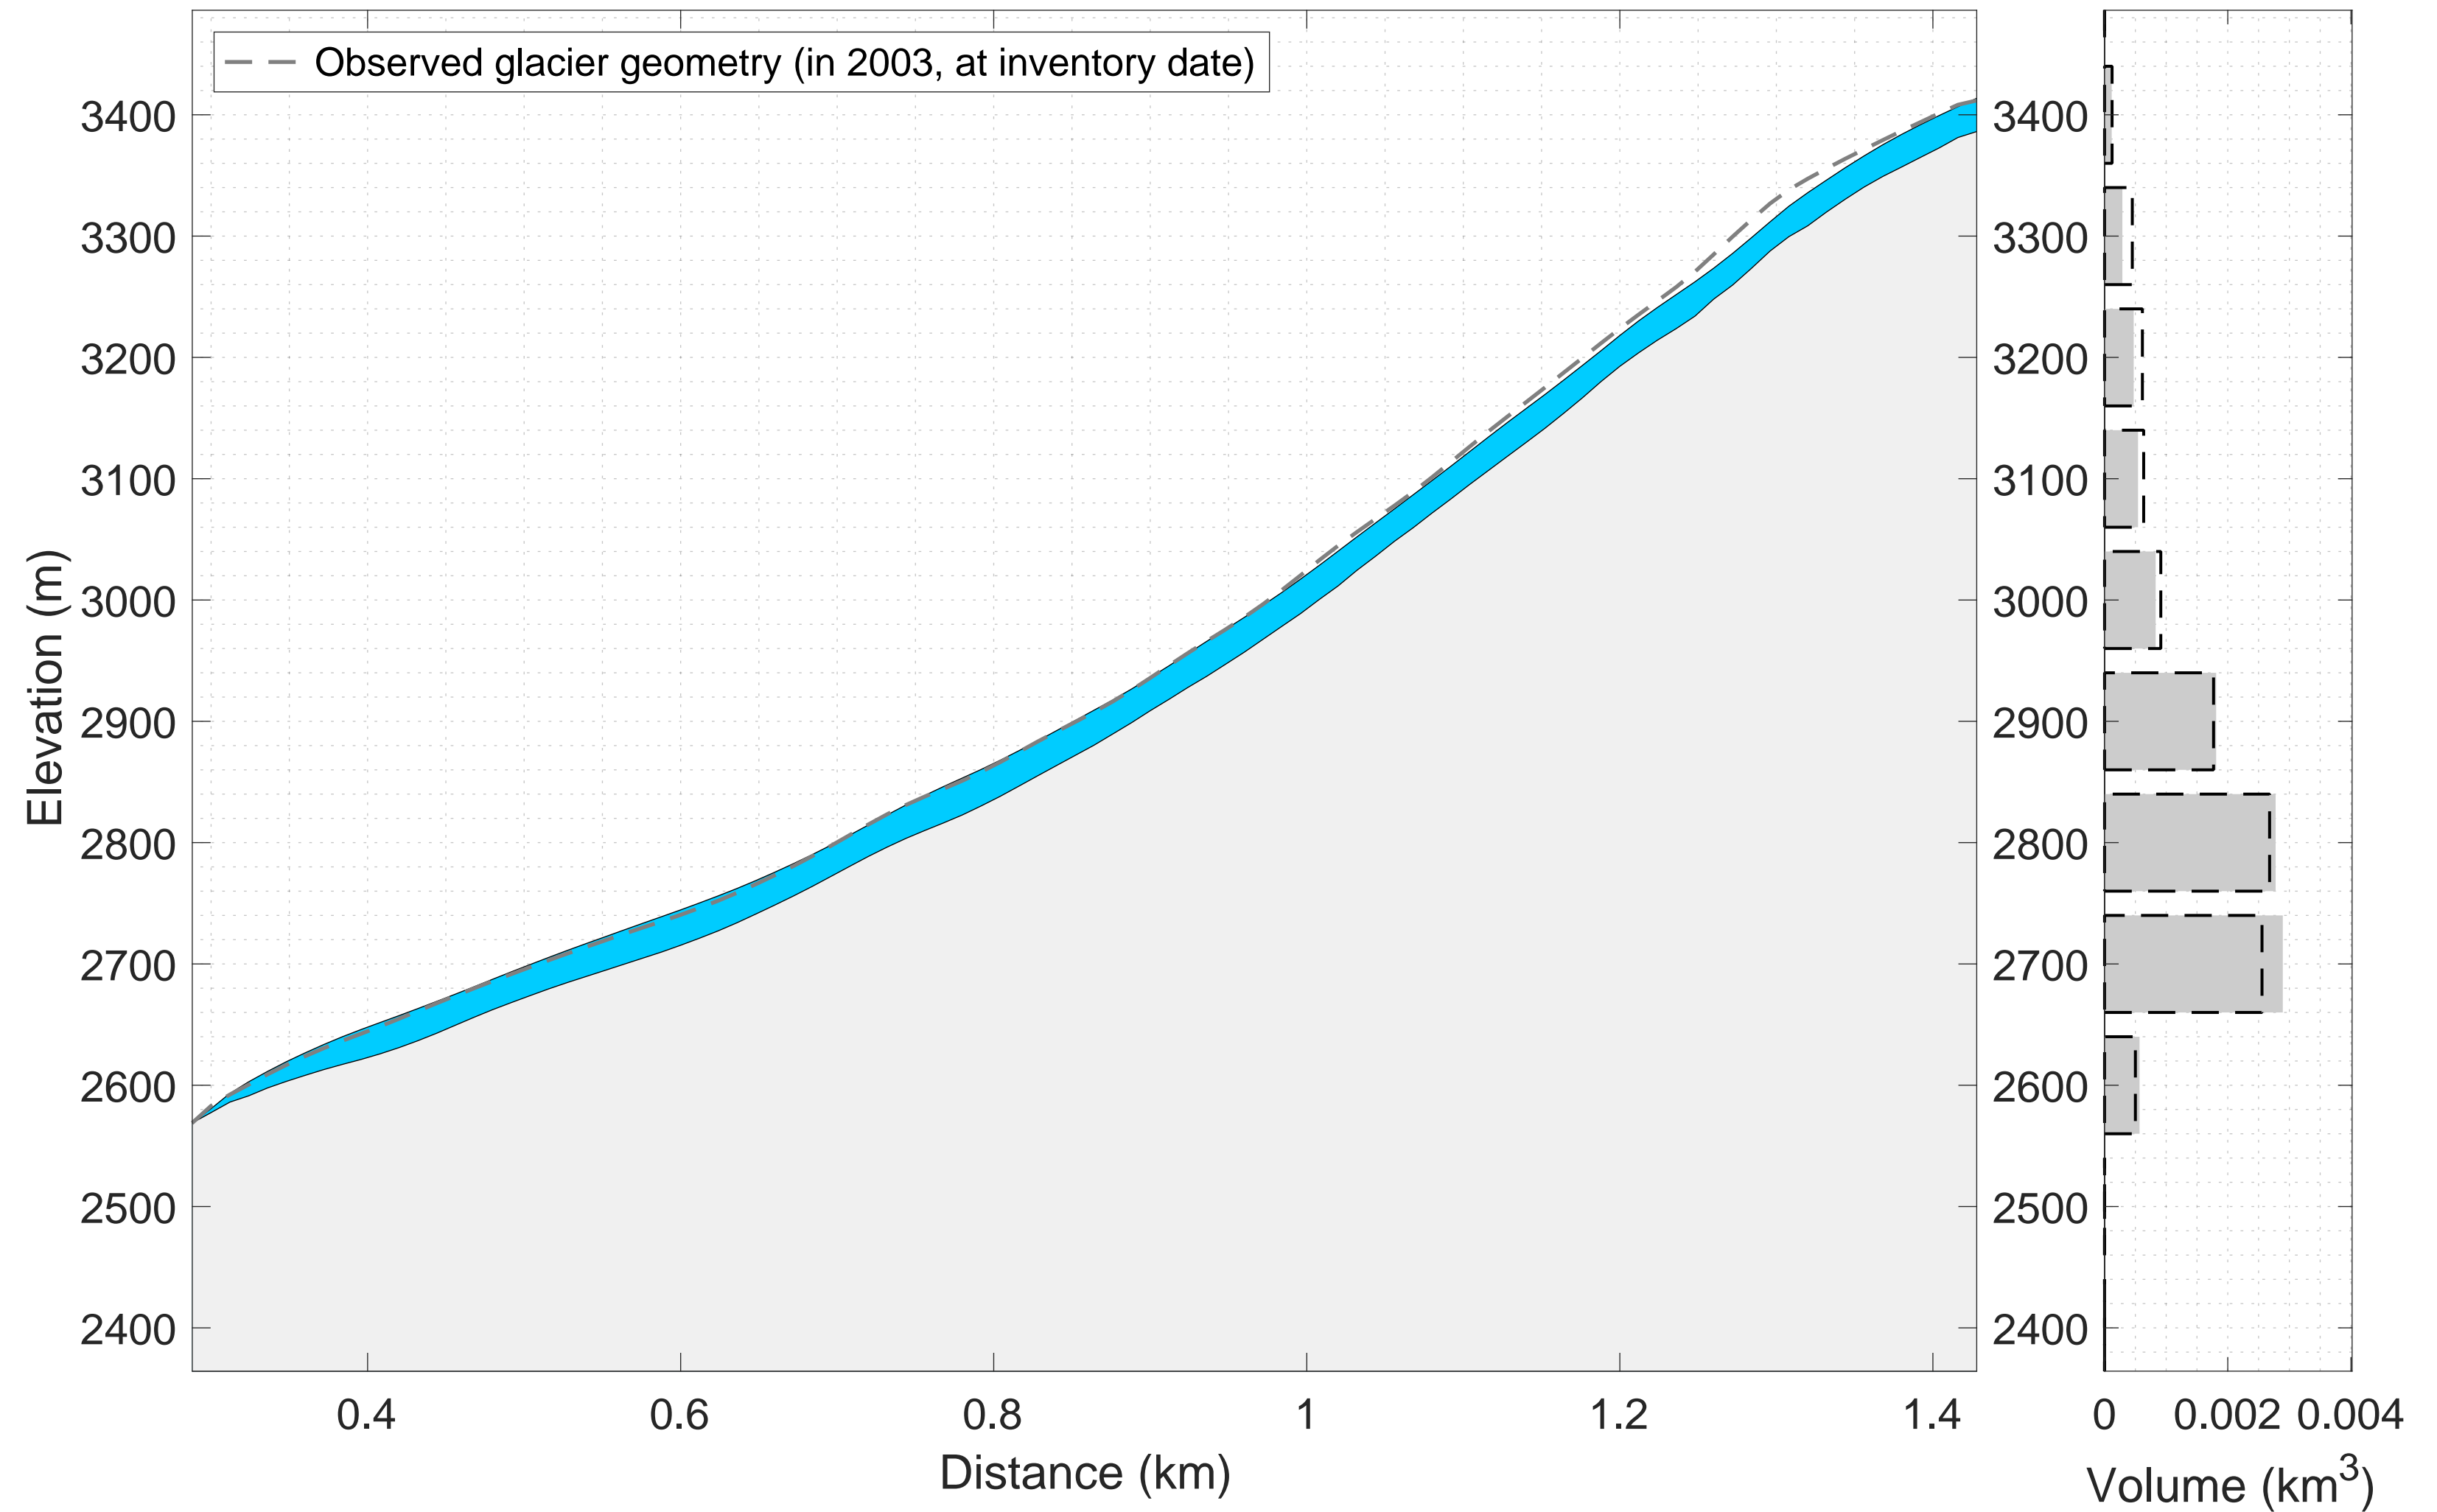

Supplement: Supplementary file 90 [file tc-13-1125-2019-supplement.zip]

**Modelled geometry (Glacier ID = 02879;  $A = 9.2668\text{e-}17 \text{ Pa}^{-3} \text{ a}^{-1}$ ;  $dx = 10 \text{ m}$ )**

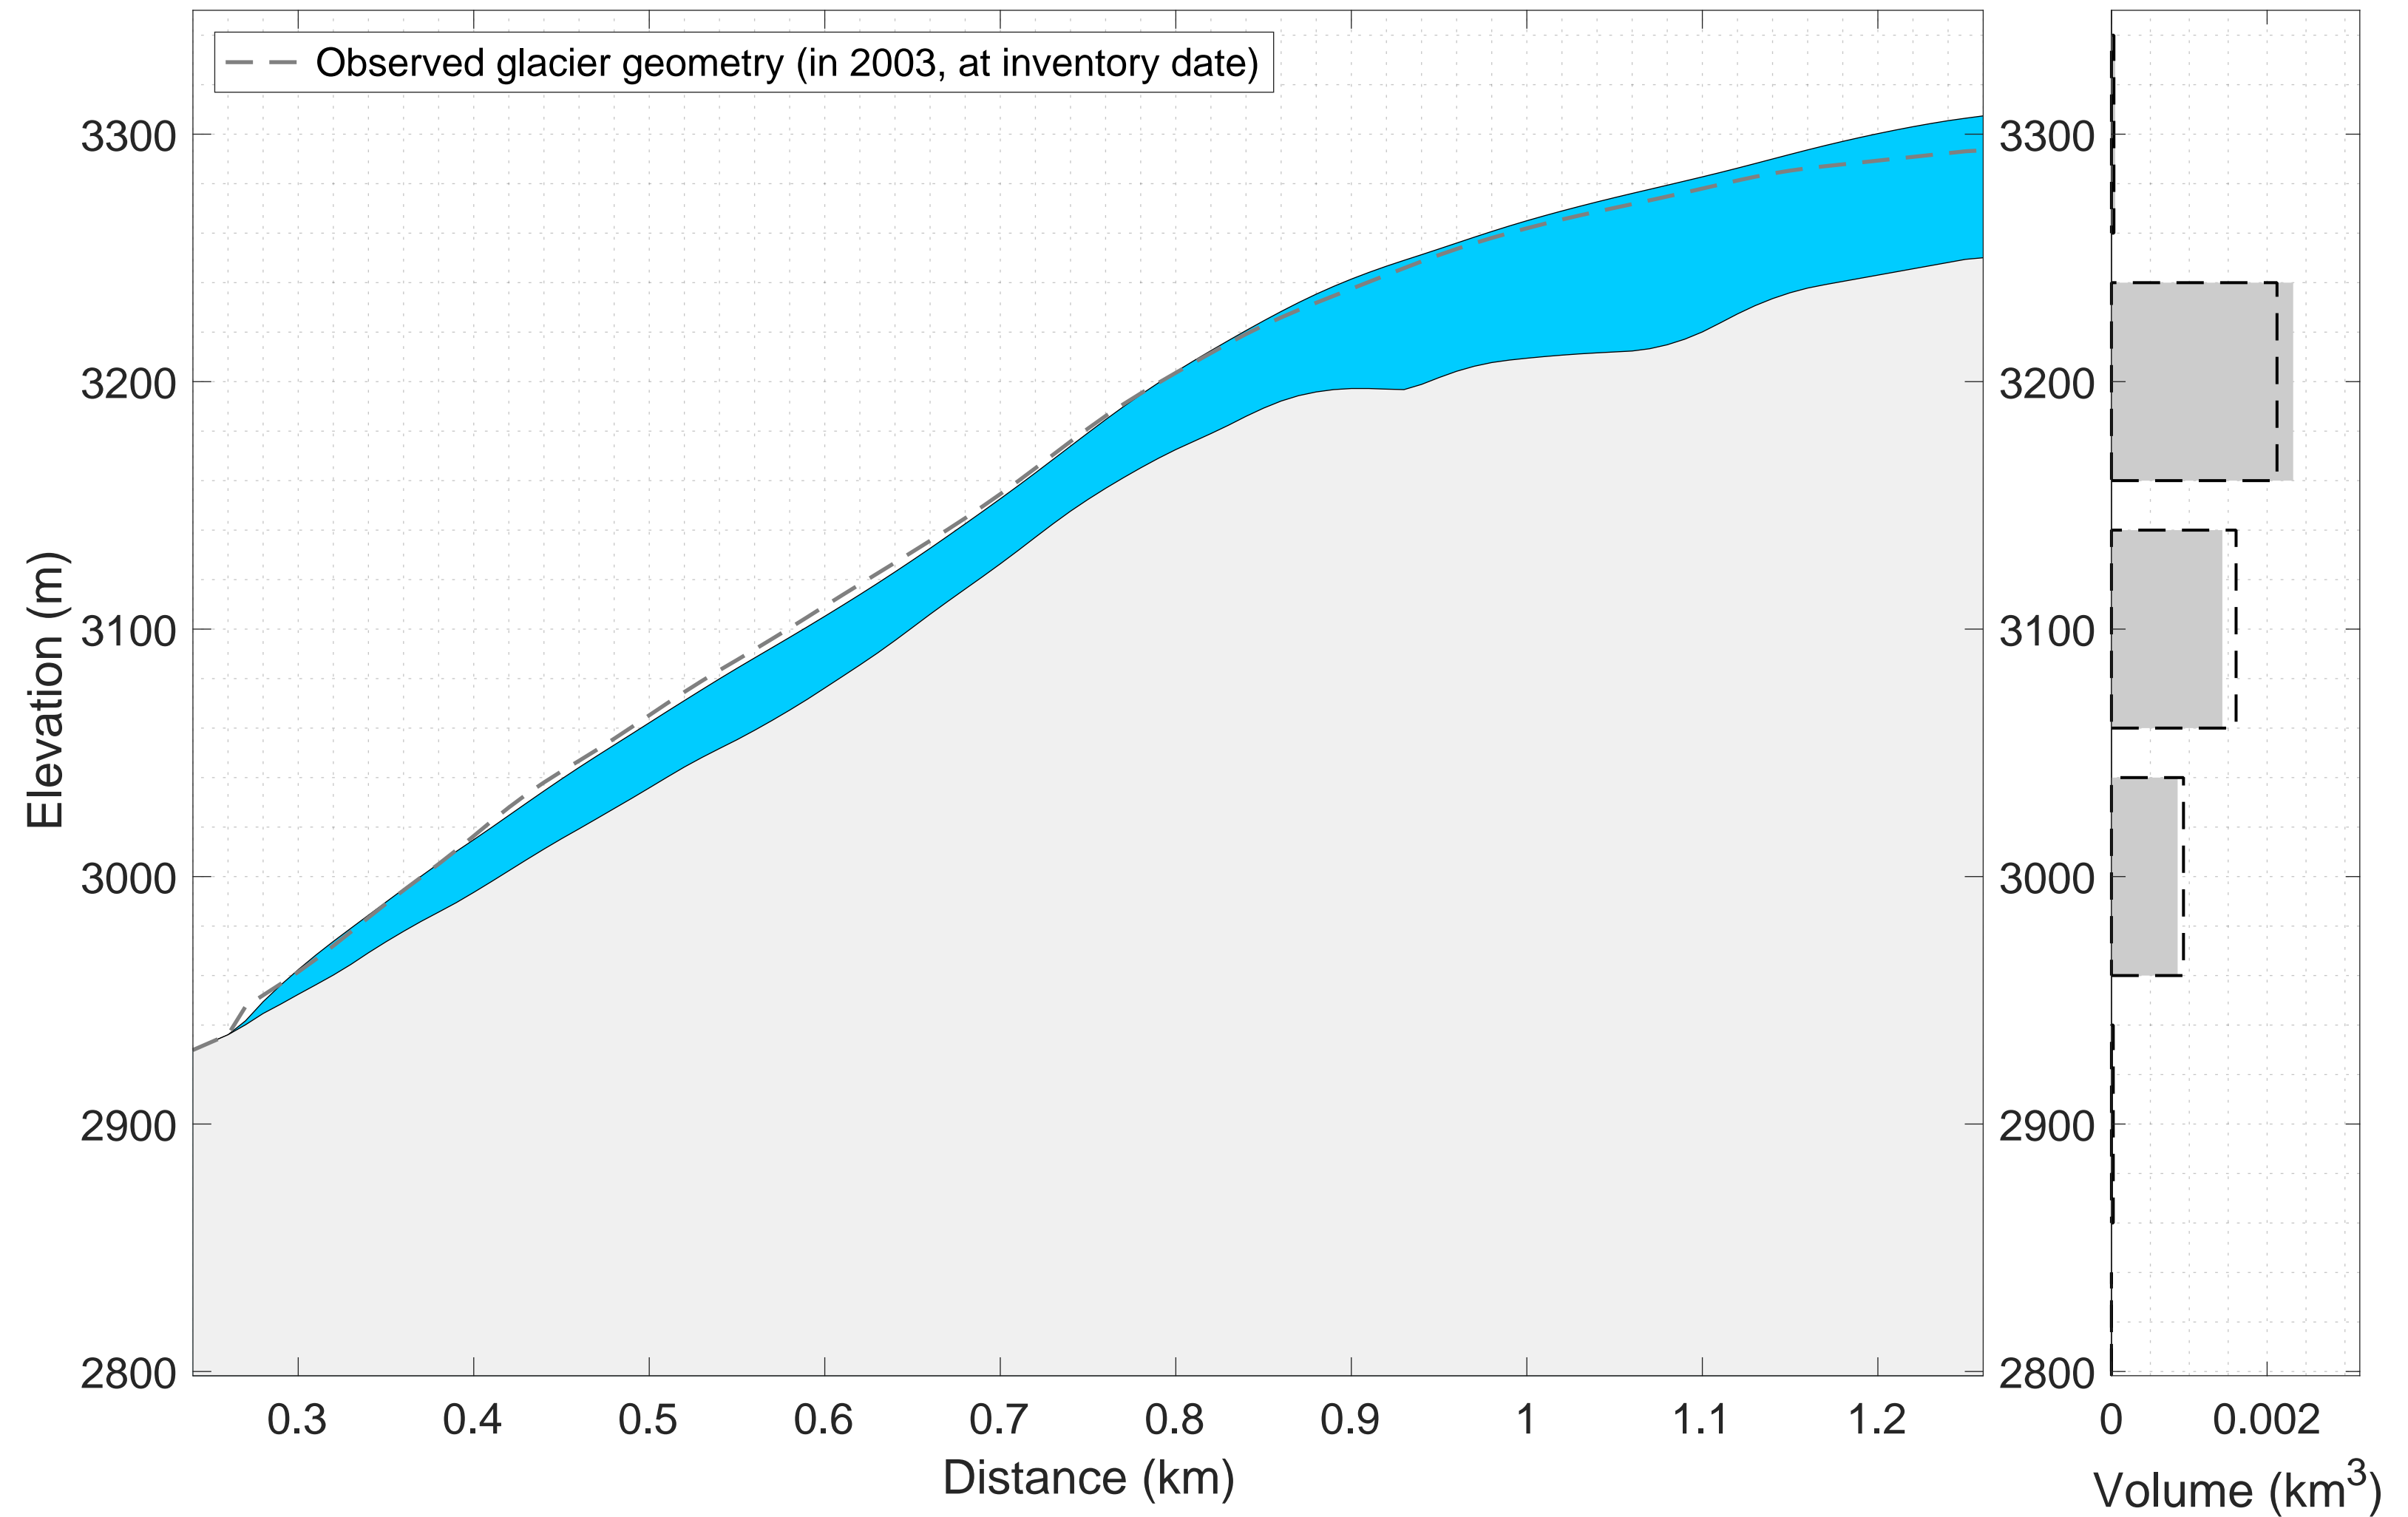

Supplement: Supplementary file 91 [file tc-13-1125-2019-supplement.zip]

**Modelled geometry (Glacier ID = 01283;  $A = 8.2309\text{e-}17 \text{ Pa}^{-3} \text{ a}^{-1}$ ;  $dx = 11 \text{ m}$ )**

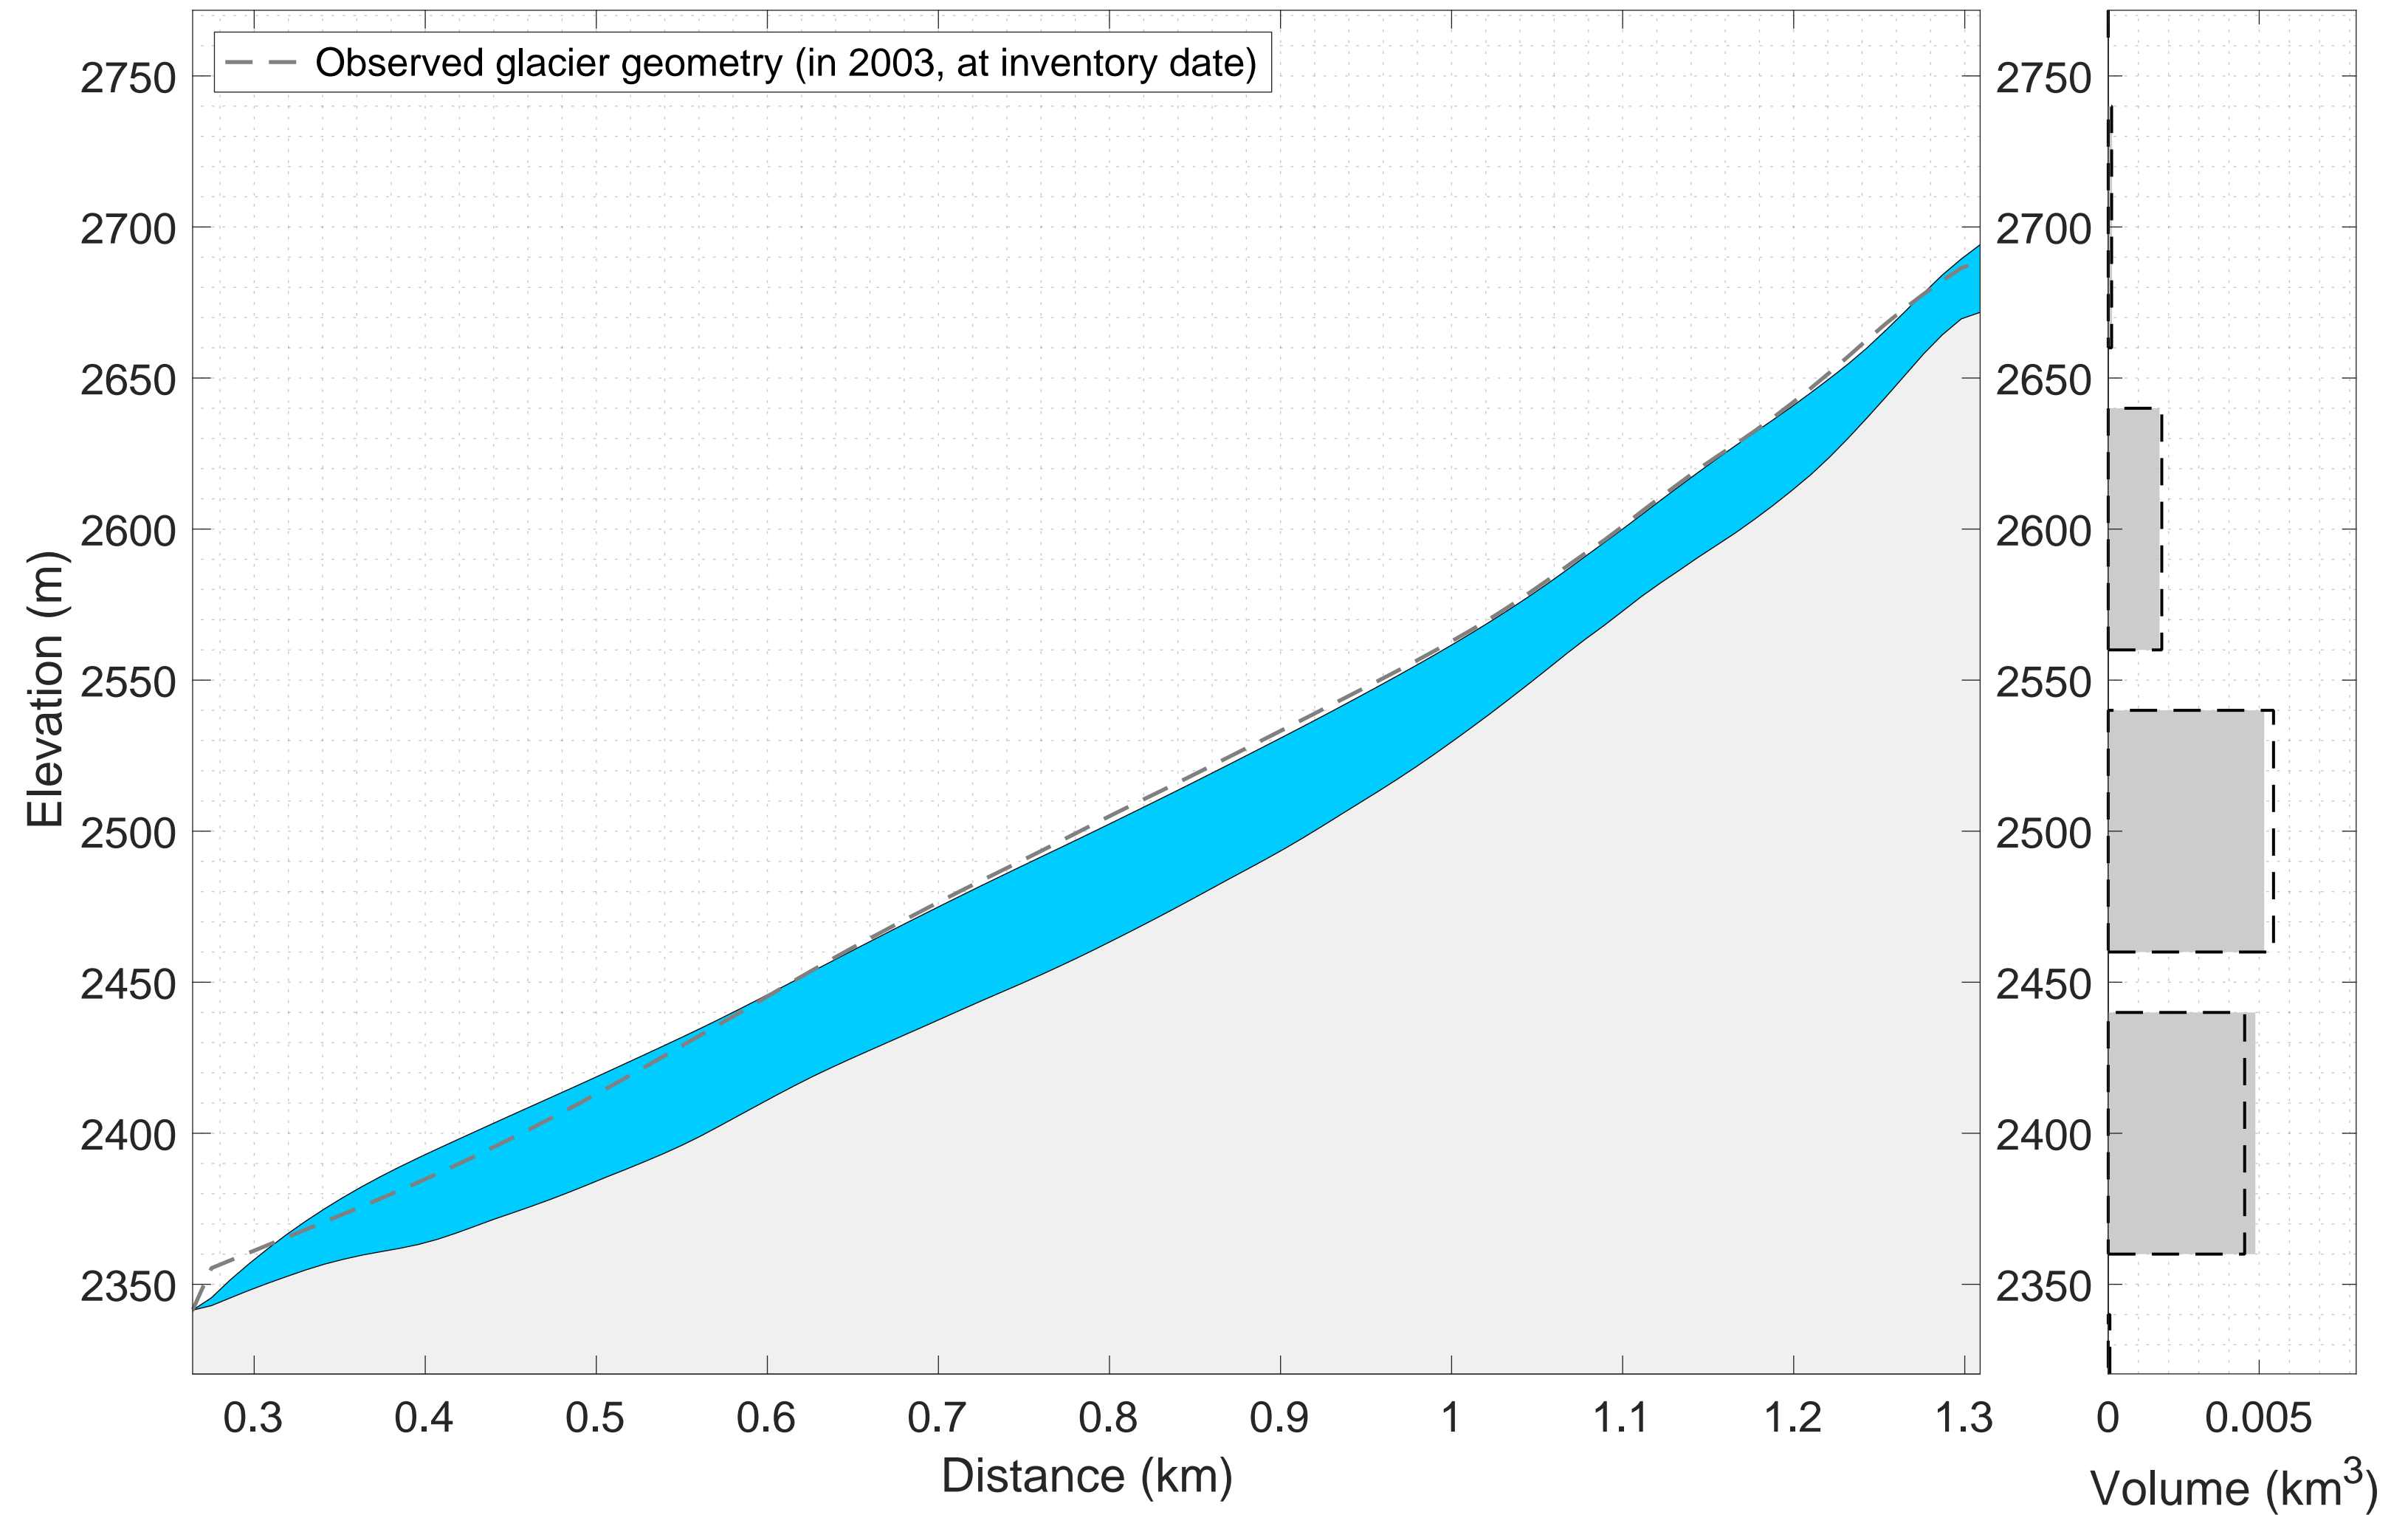

Supplement: Supplementary file 92 [file tc-13-1125-2019-supplement.zip]

**Modelled geometry (Glacier ID = 00954;  $A = 1.0966\text{e-}16 \text{ Pa}^{-3} \text{ a}^{-1}$ ;  $dx = 13 \text{ m}$ )**

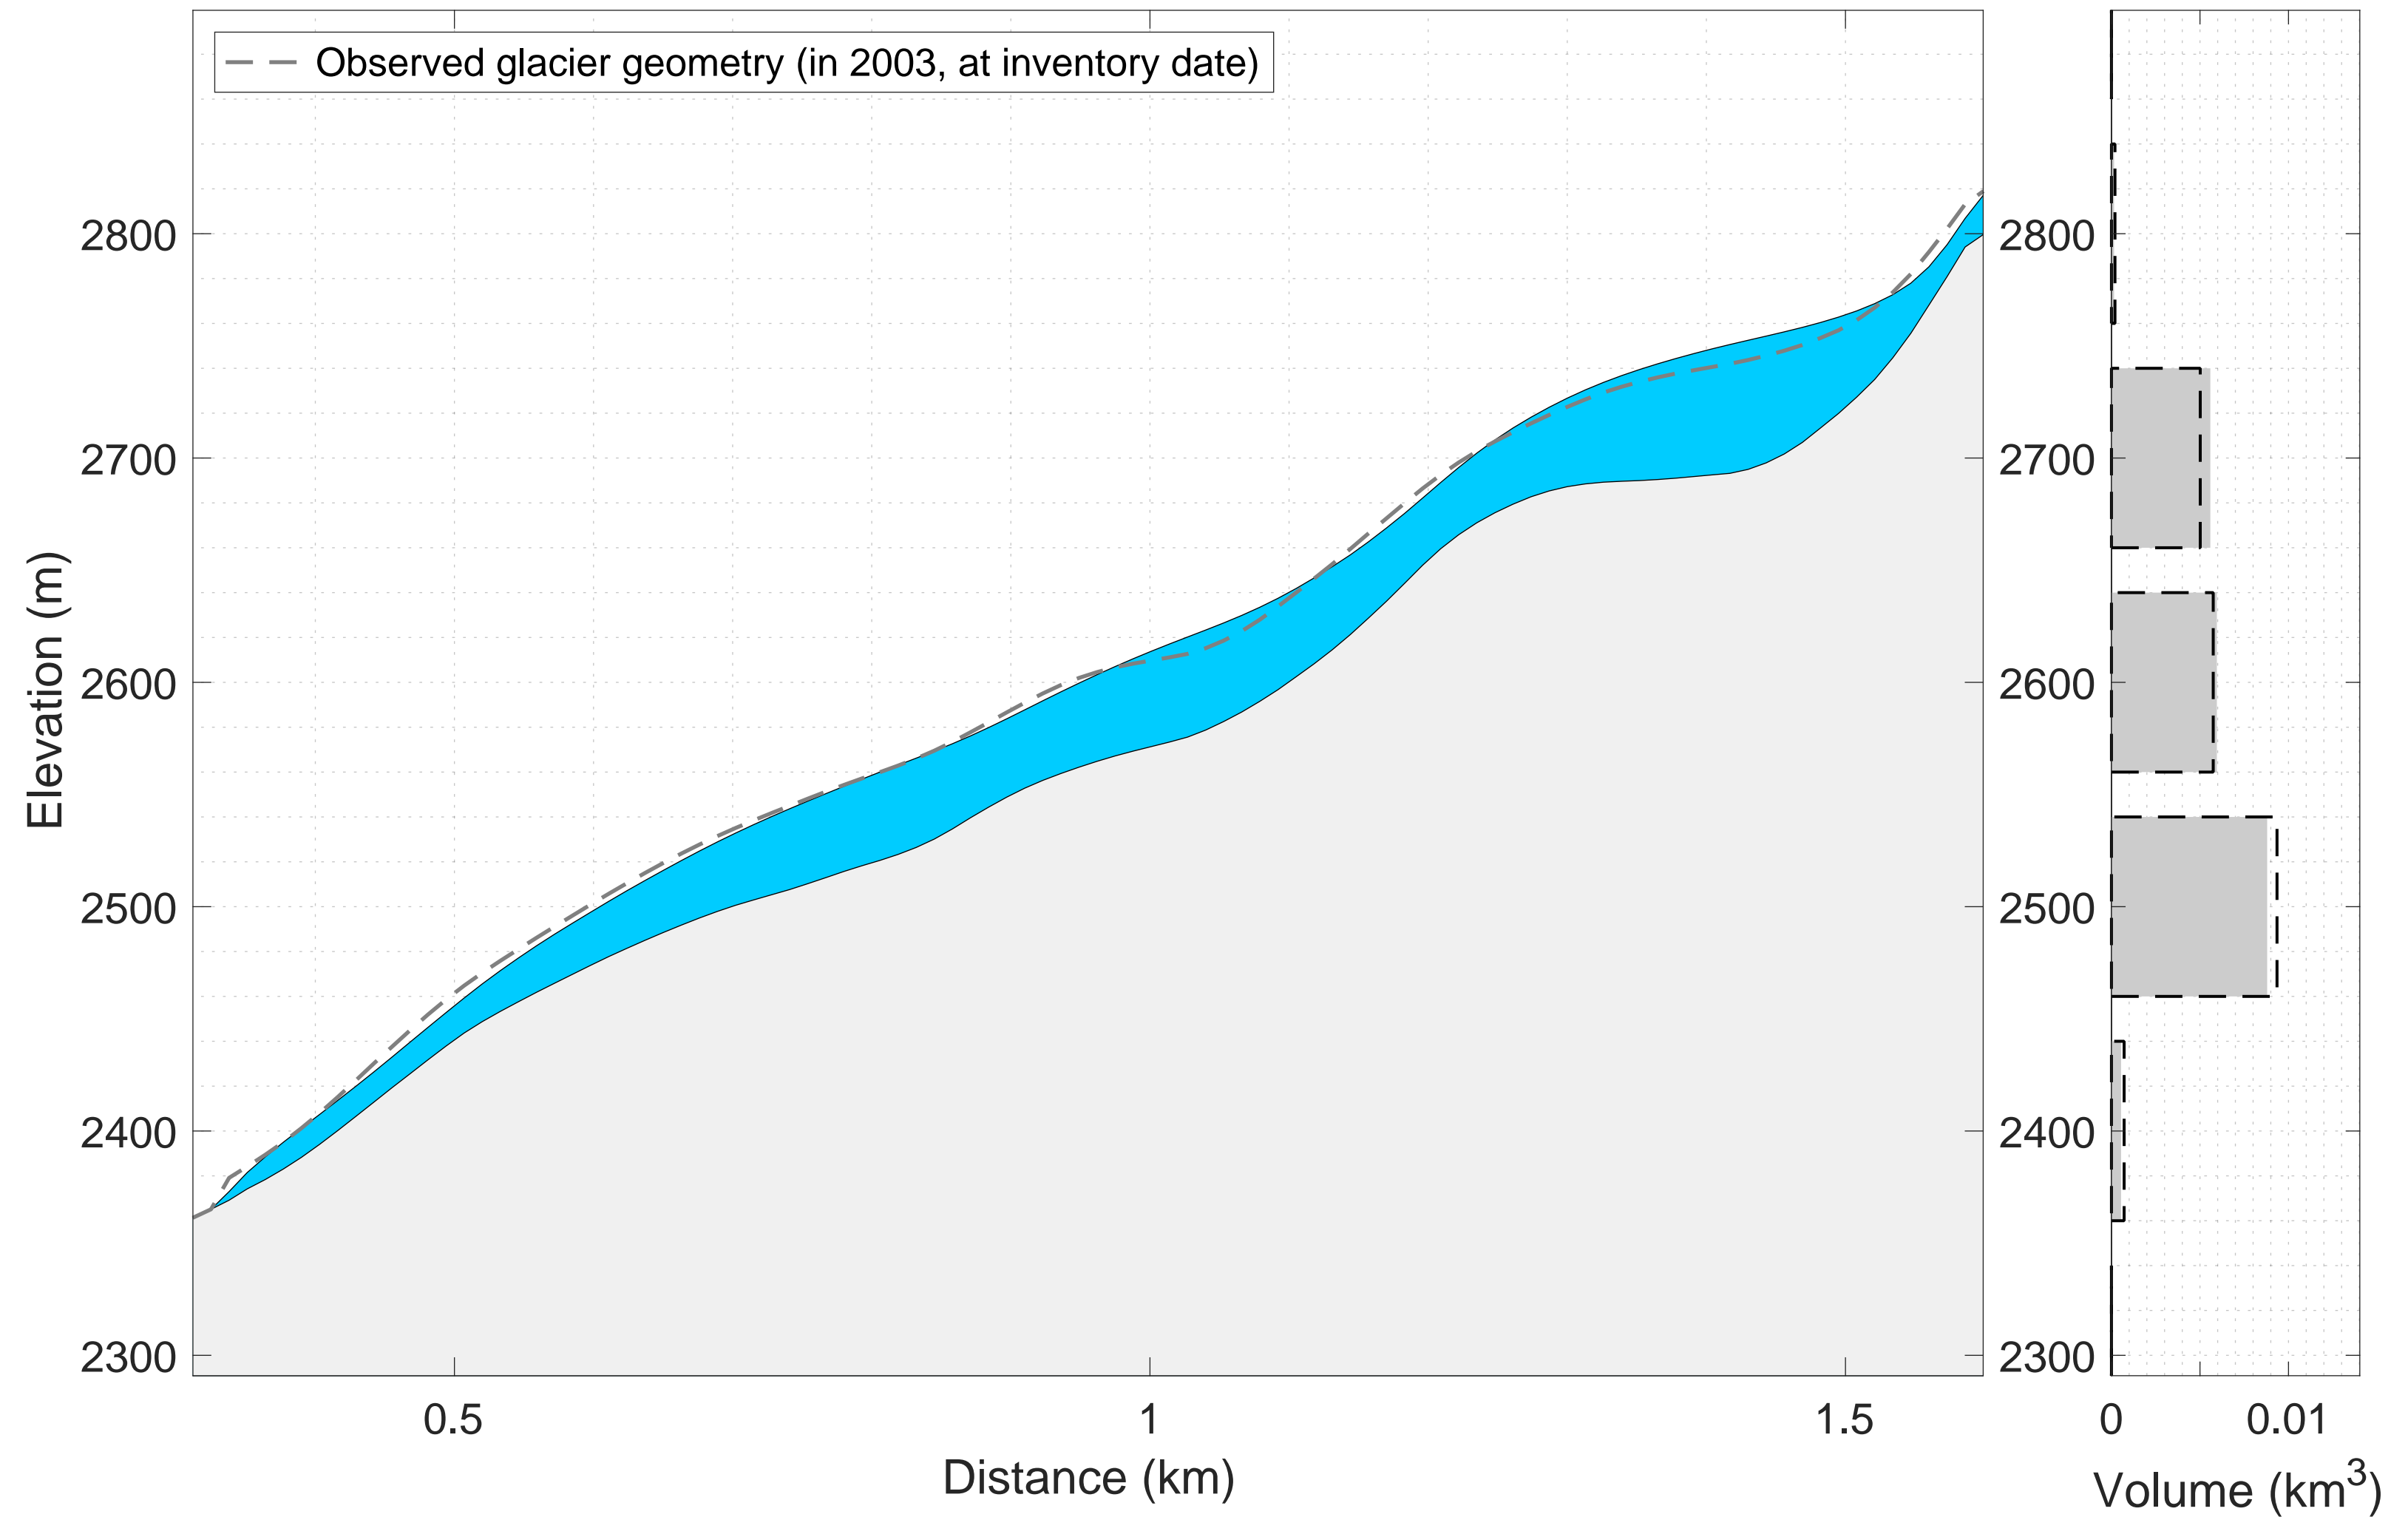

Supplement: Supplementary file 93 [file tc-13-1125-2019-supplement.zip]

**Modelled geometry (Glacier ID = 00326;  $A = 1.4241\text{e-}16 \text{ Pa}^{-3} \text{ a}^{-1}$ ;  $dx = 11 \text{ m}$ )**

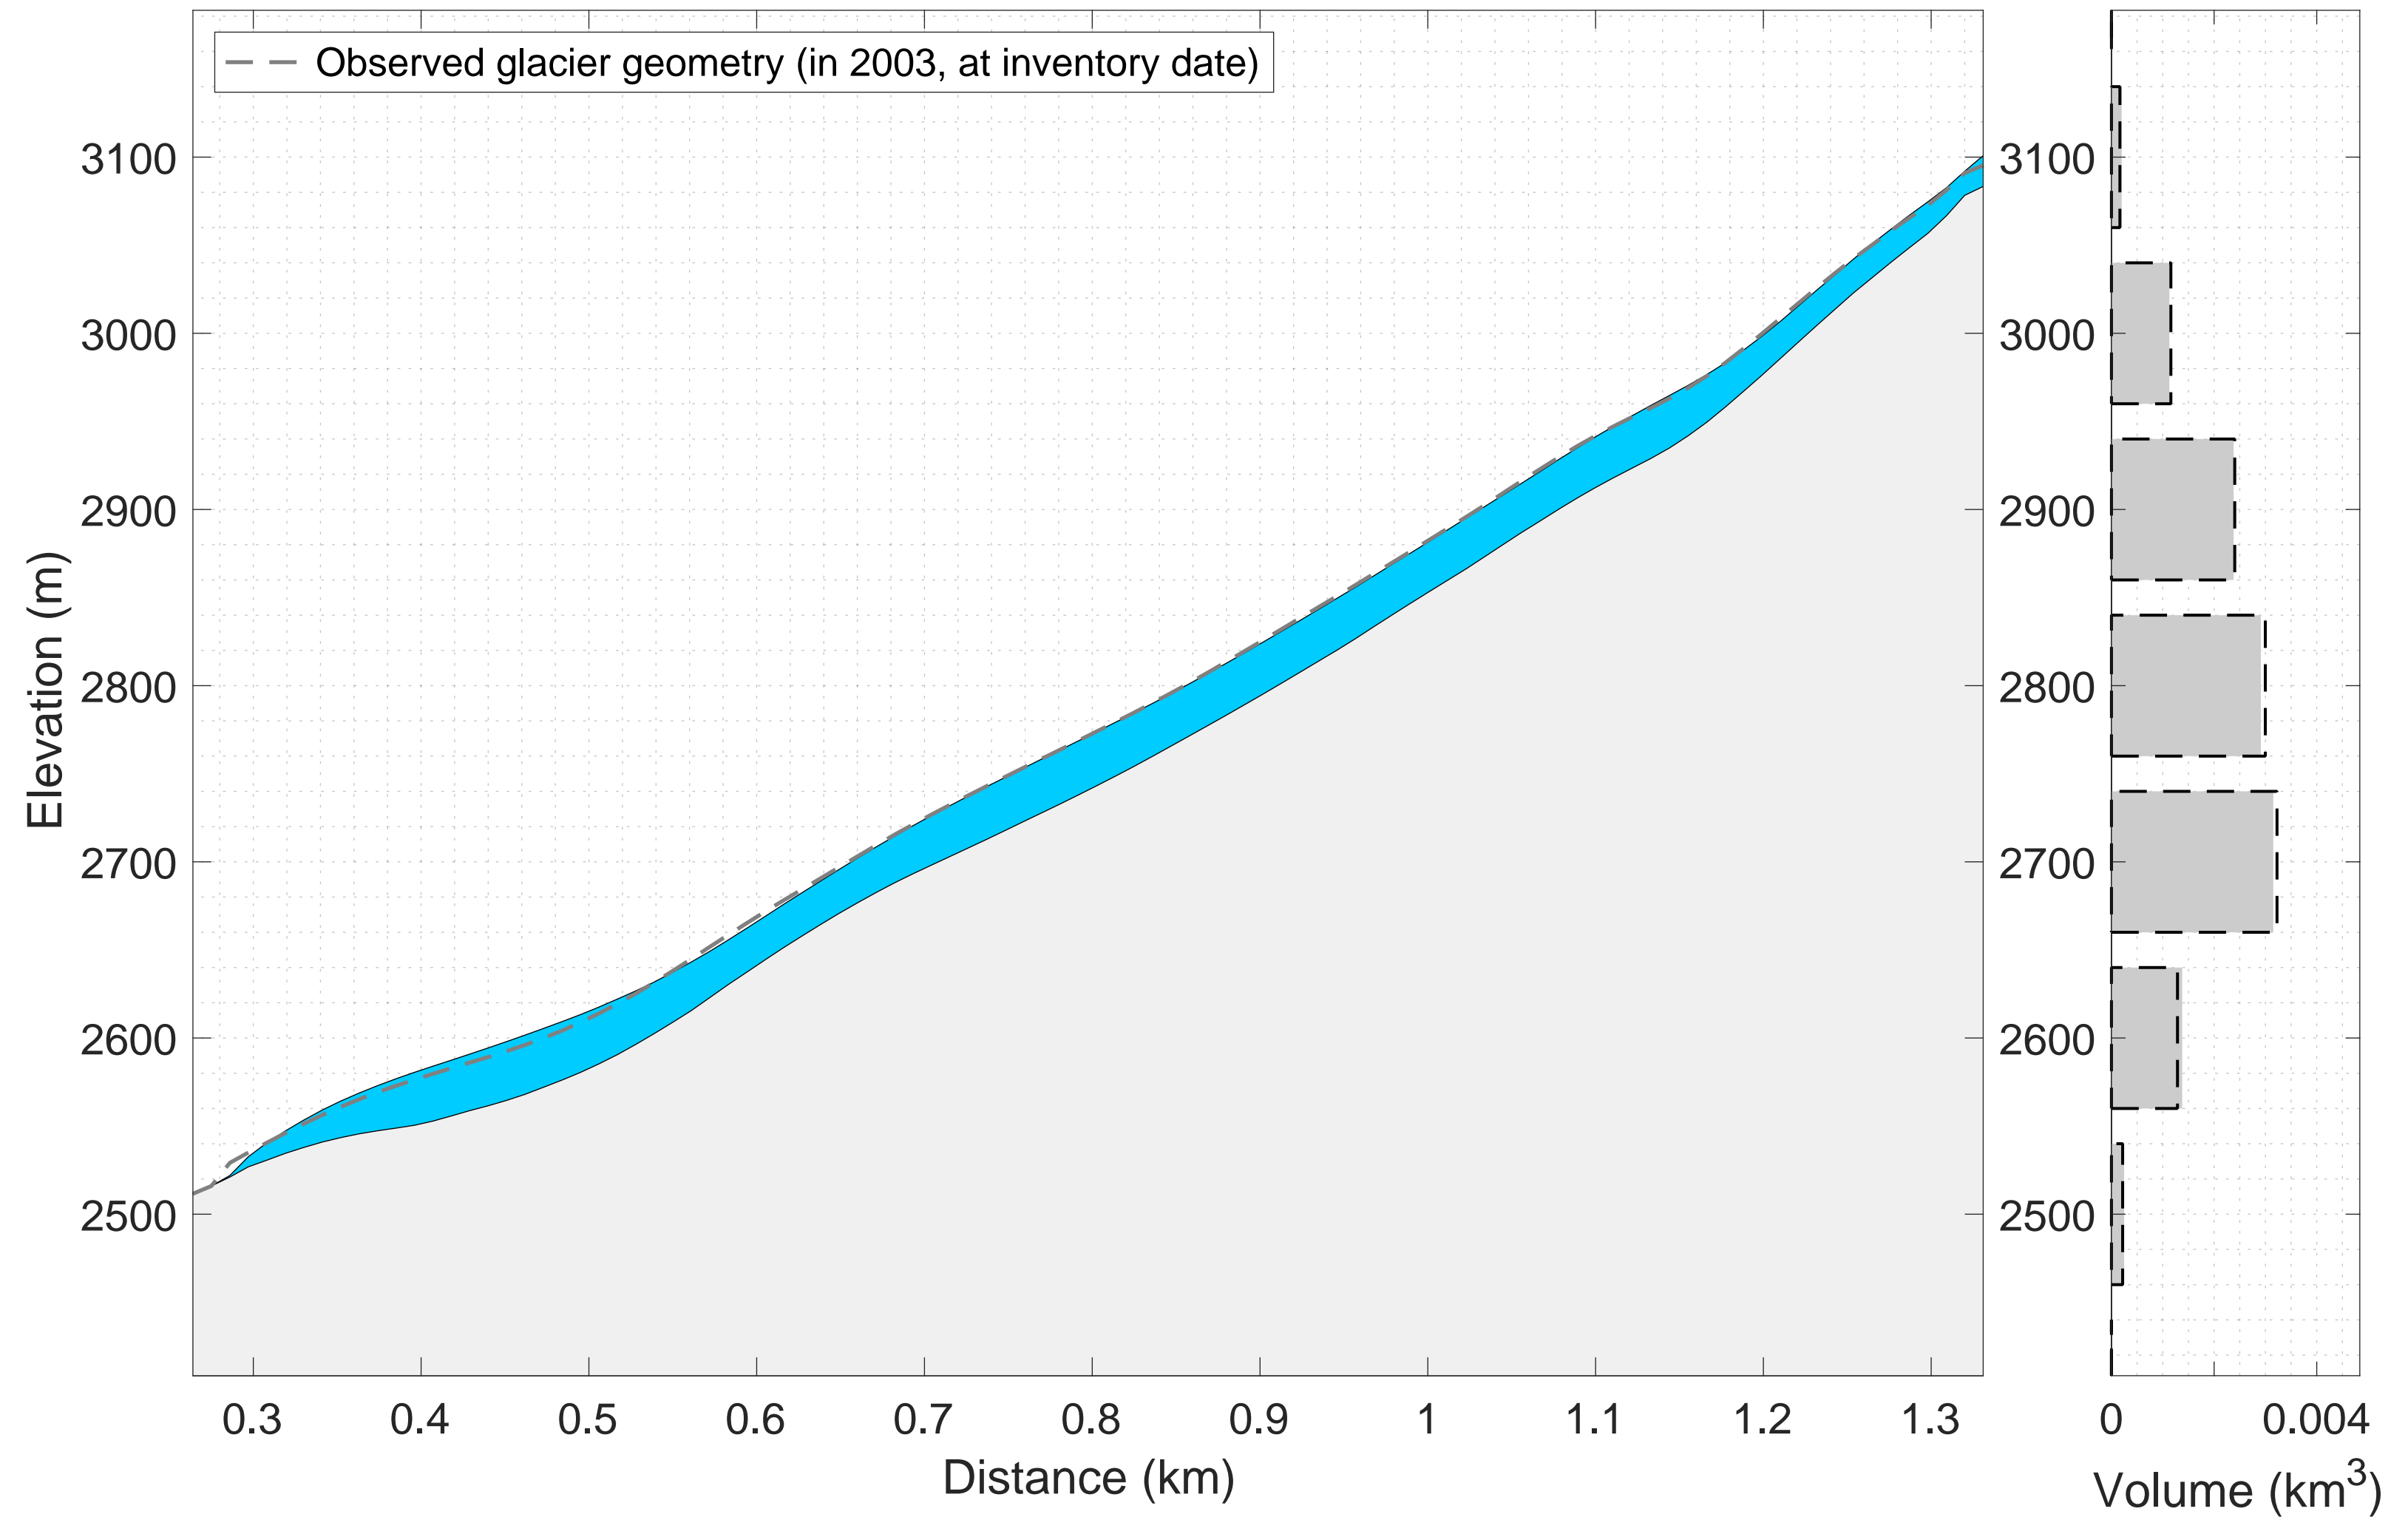

Supplement: Supplementary file 94 [file tc-13-1125-2019-supplement.zip]

**Modelled geometry (Glacier ID = 00264;  $A = 1.1238\text{e-}16 \text{ Pa}^{-3} \text{ a}^{-1}$ ;  $dx = 22 \text{ m}$ )**

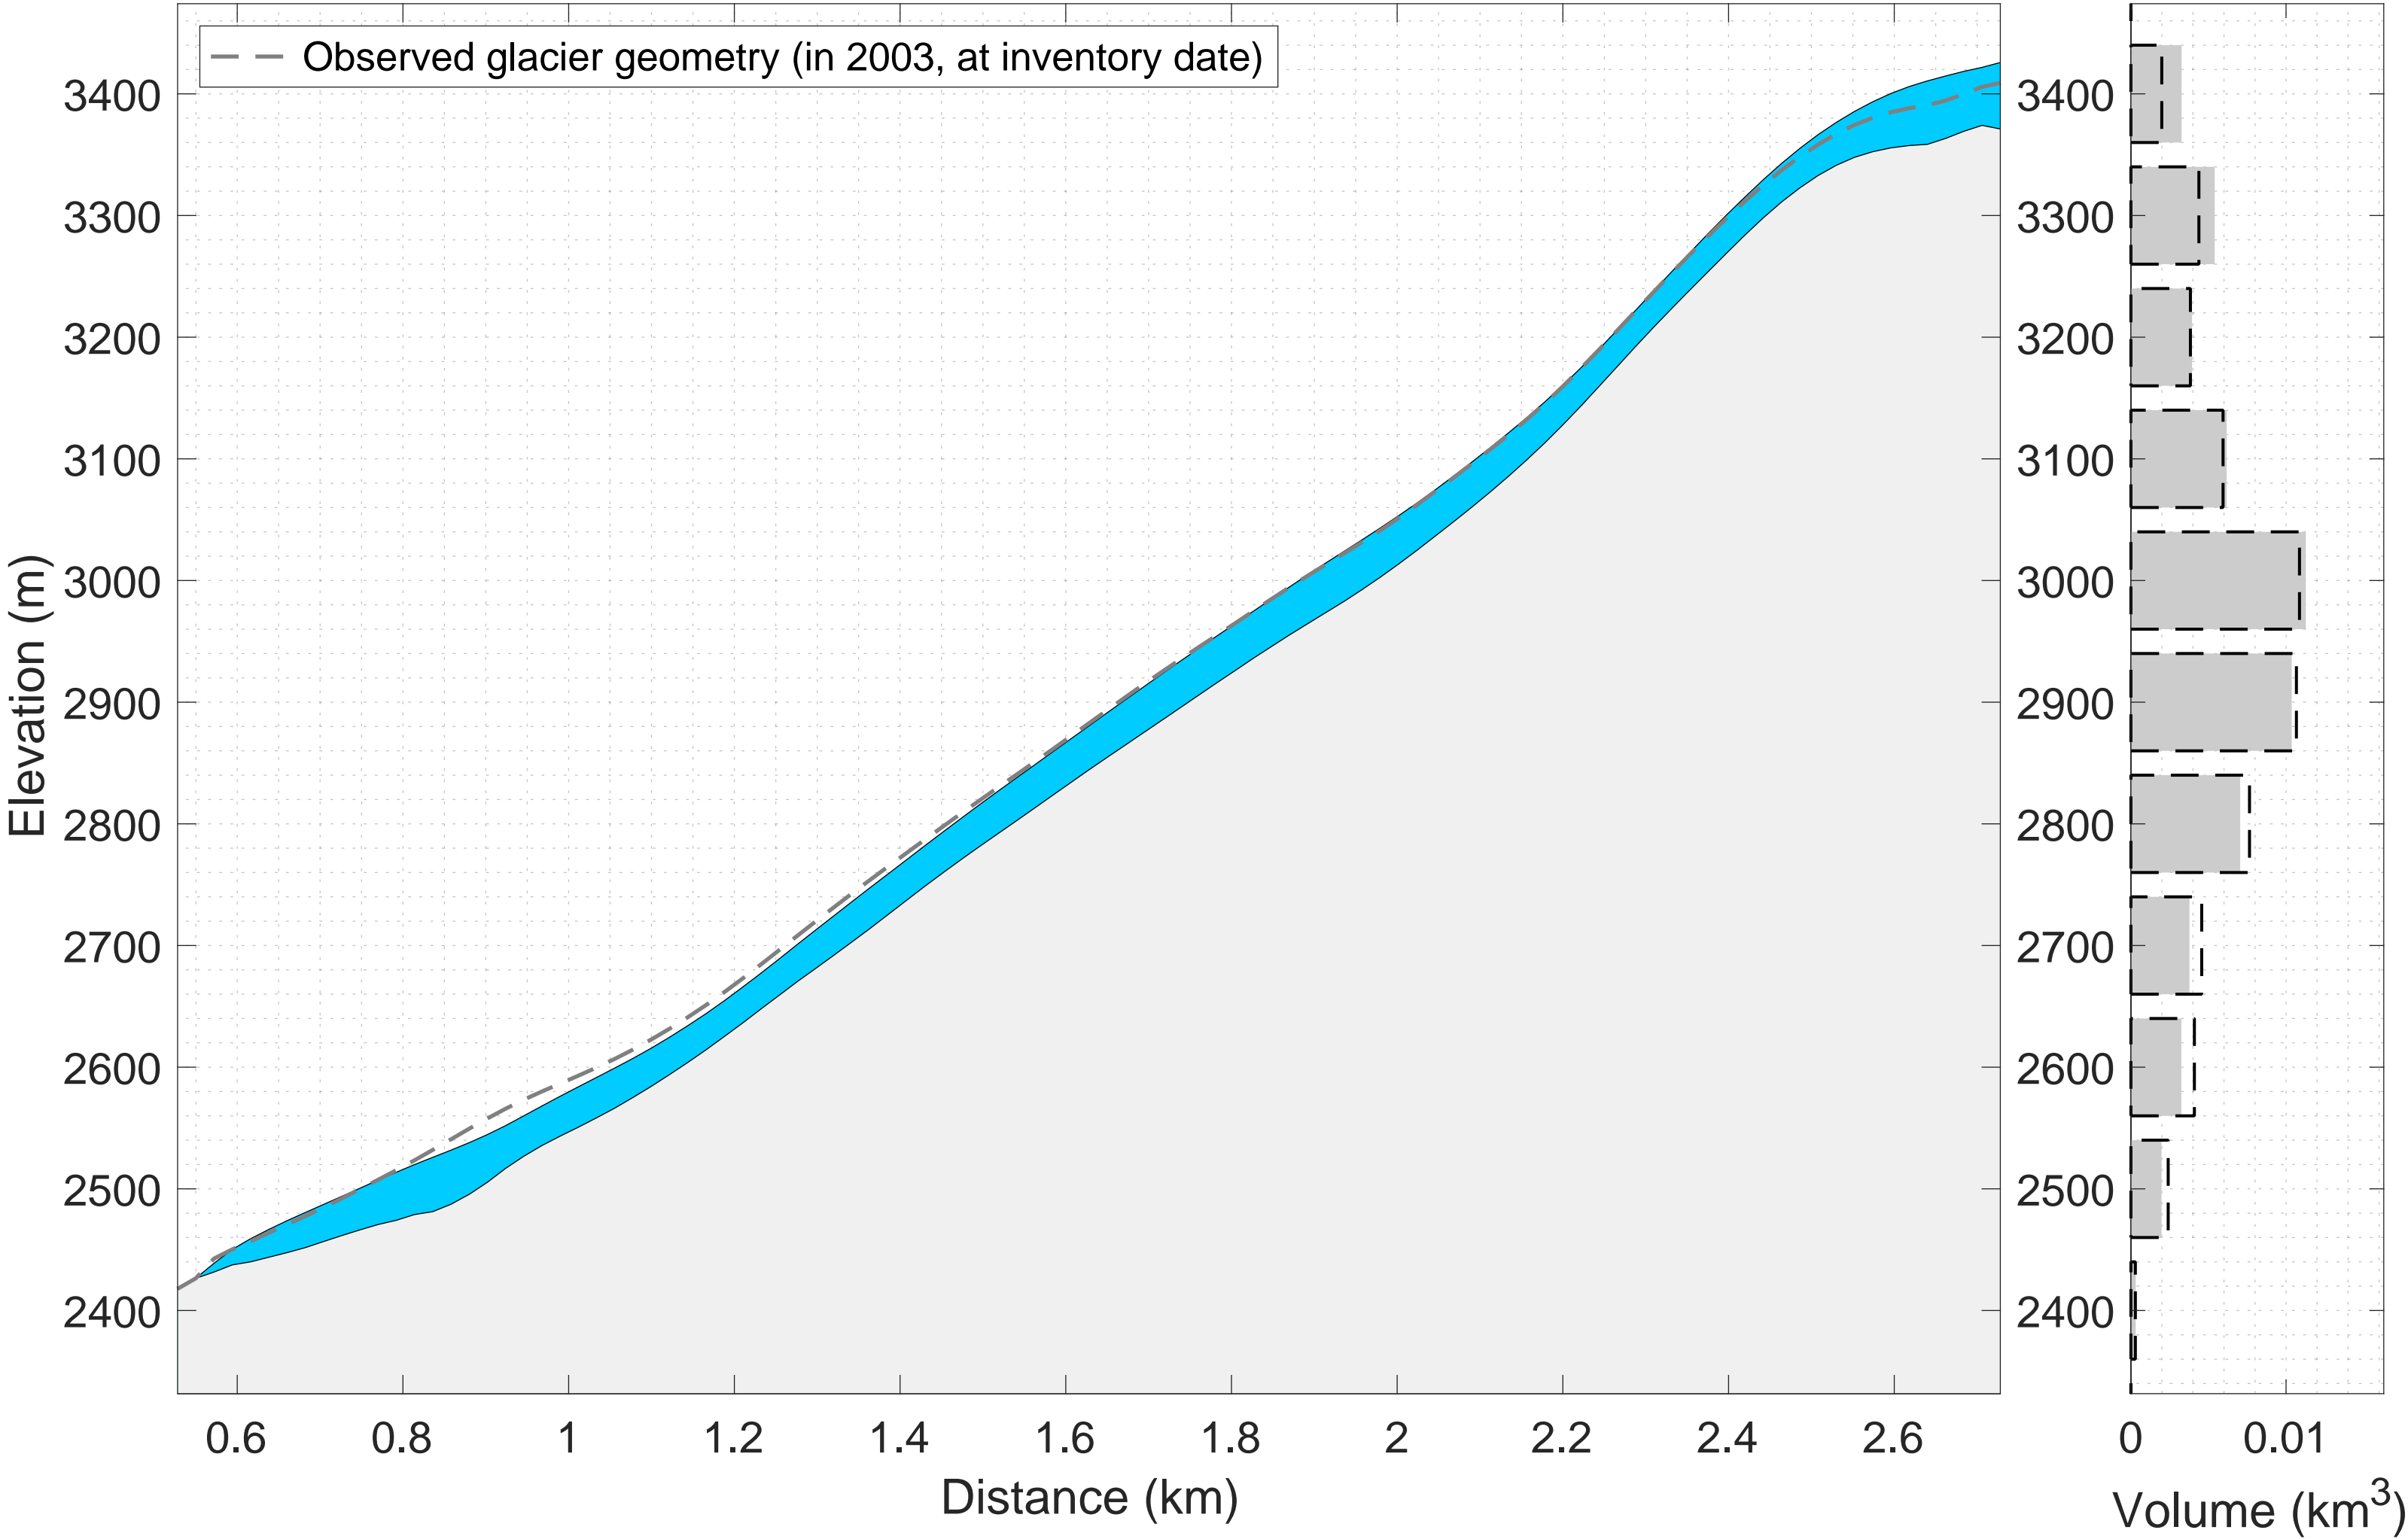

Supplement: Supplementary file 95 [file tc-13-1125-2019-supplement.zip]

**Modelled geometry (Glacier ID = 00945;  $A = 1.7657\text{e-}16 \text{ Pa}^{-3} \text{ a}^{-1}$ ;  $dx = 44 \text{ m}$ )**

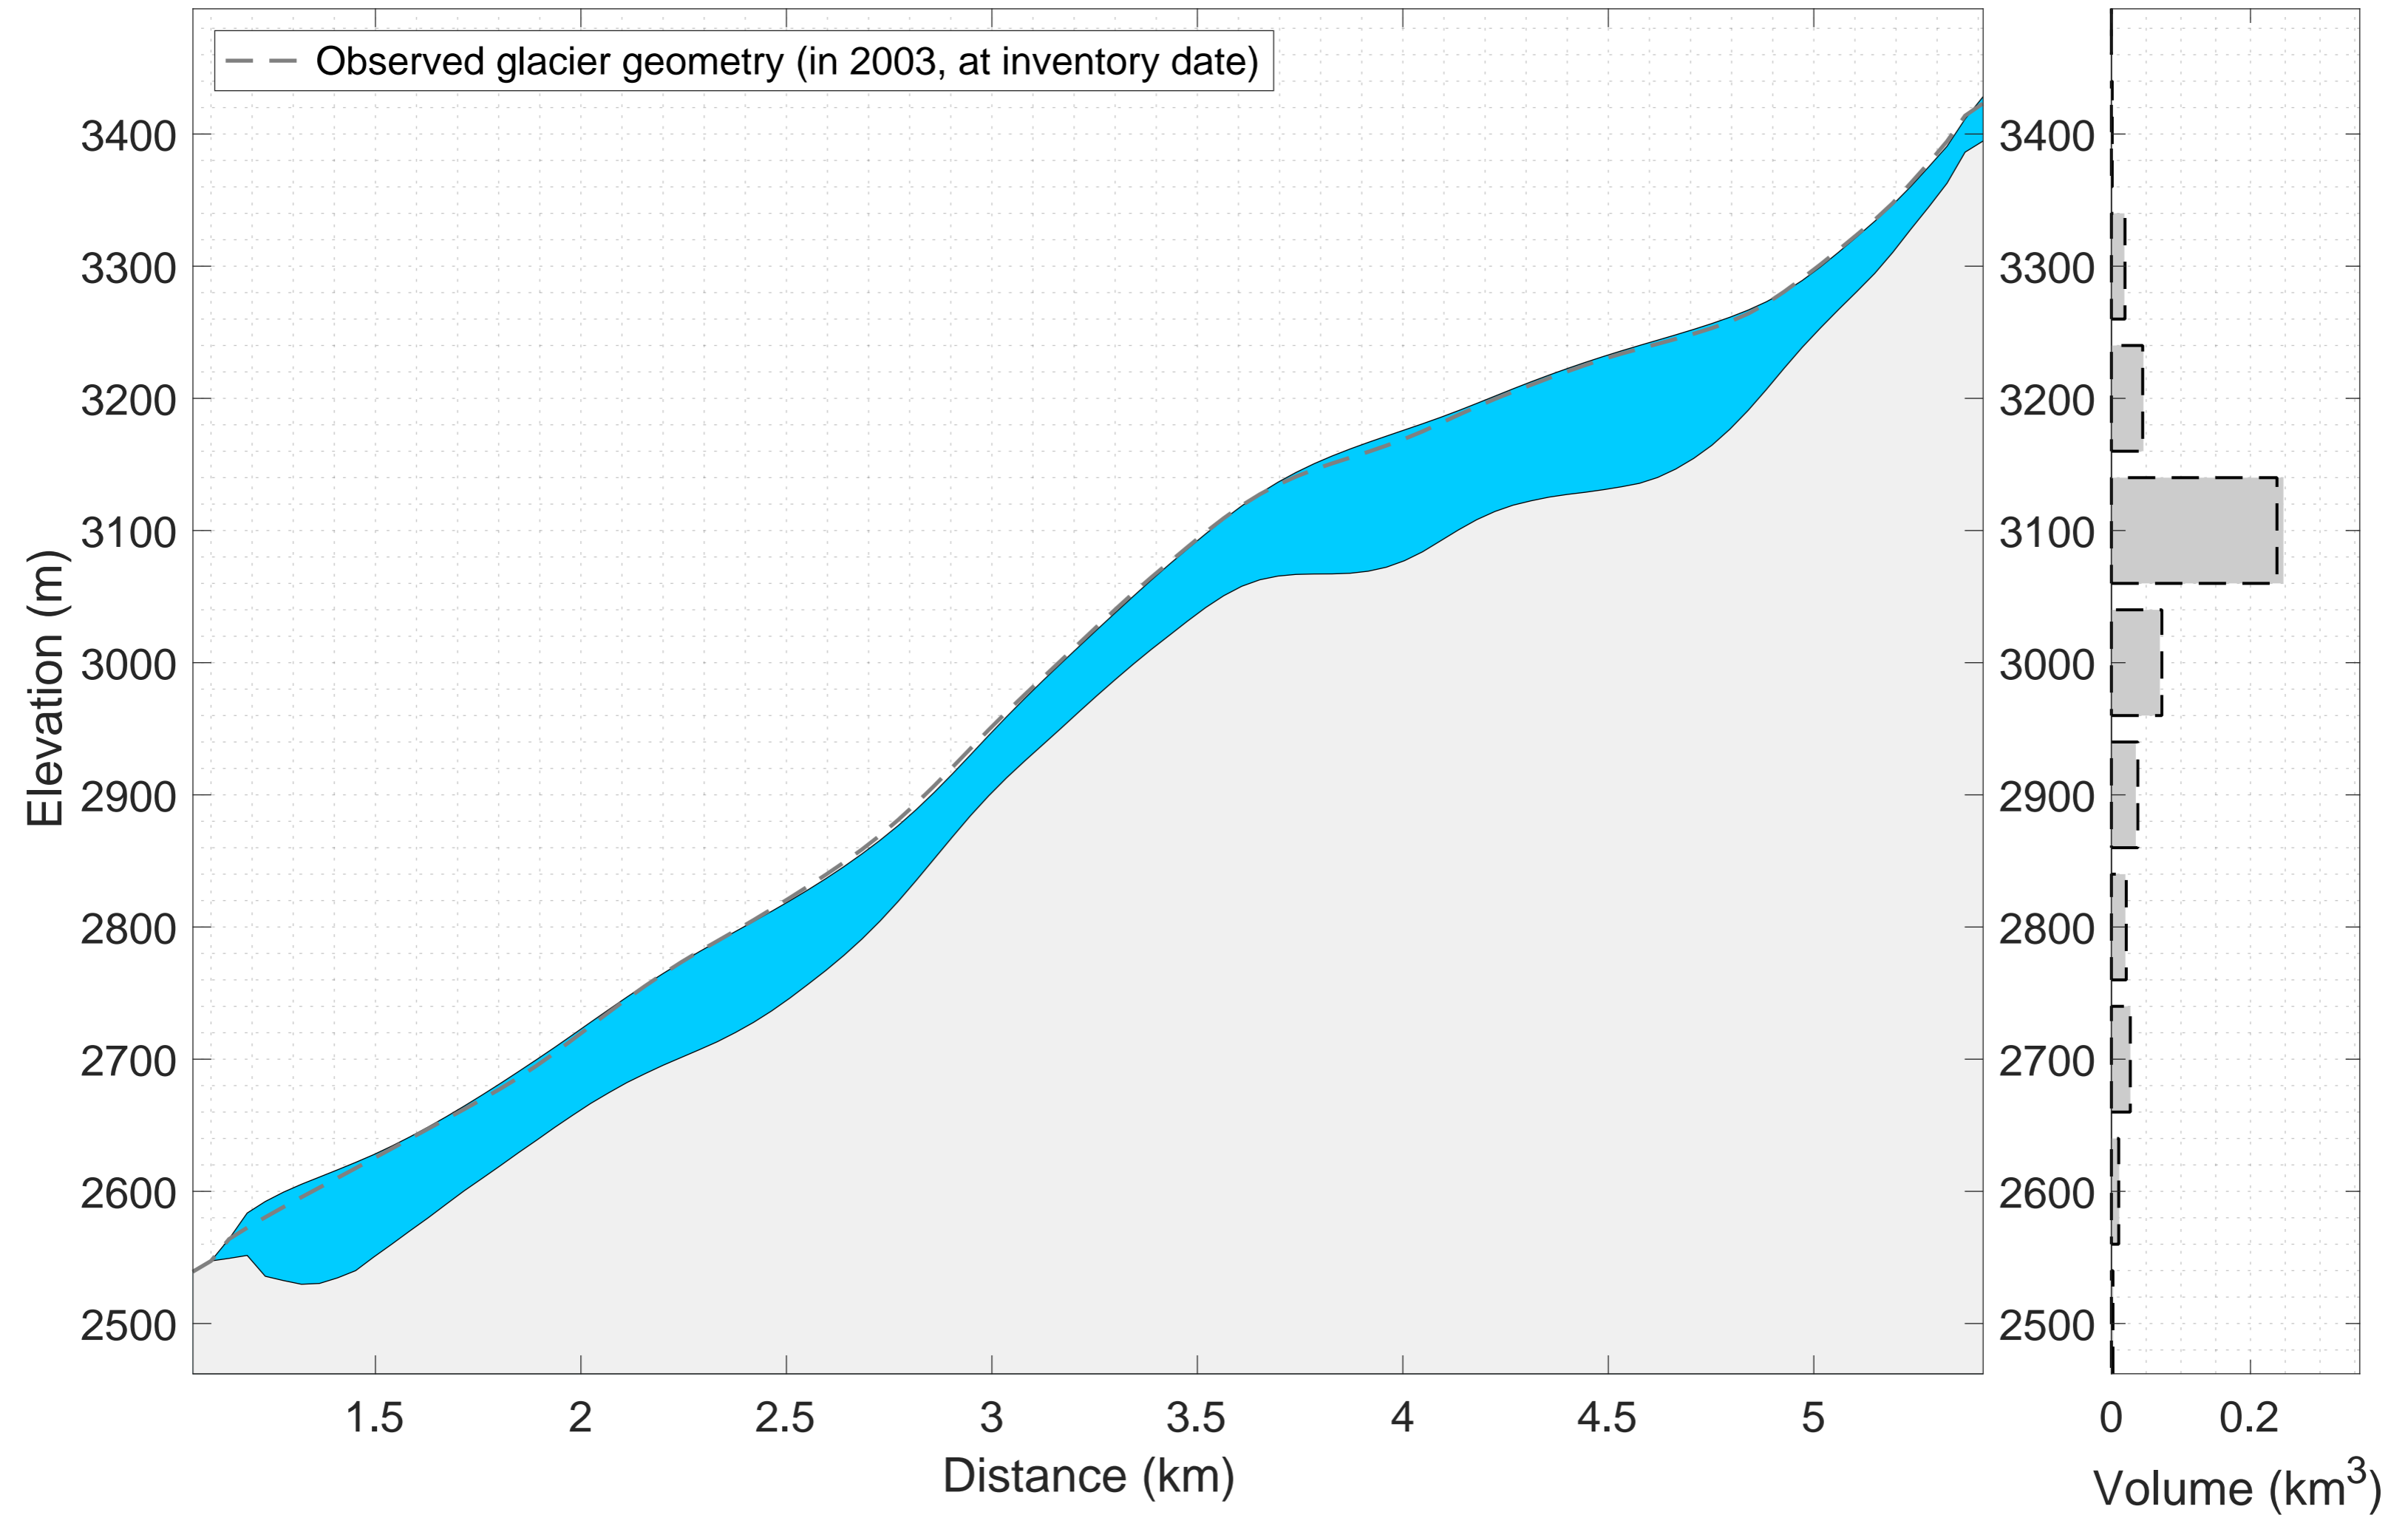

Supplement: Supplementary file 96 [file tc-13-1125-2019-supplement.zip]

**Modelled geometry (Glacier ID = 01146;  $A = 9.9461\text{e-}17 \text{ Pa}^{-3} \text{ a}^{-1}$ ;  $dx = 21 \text{ m}$ )**

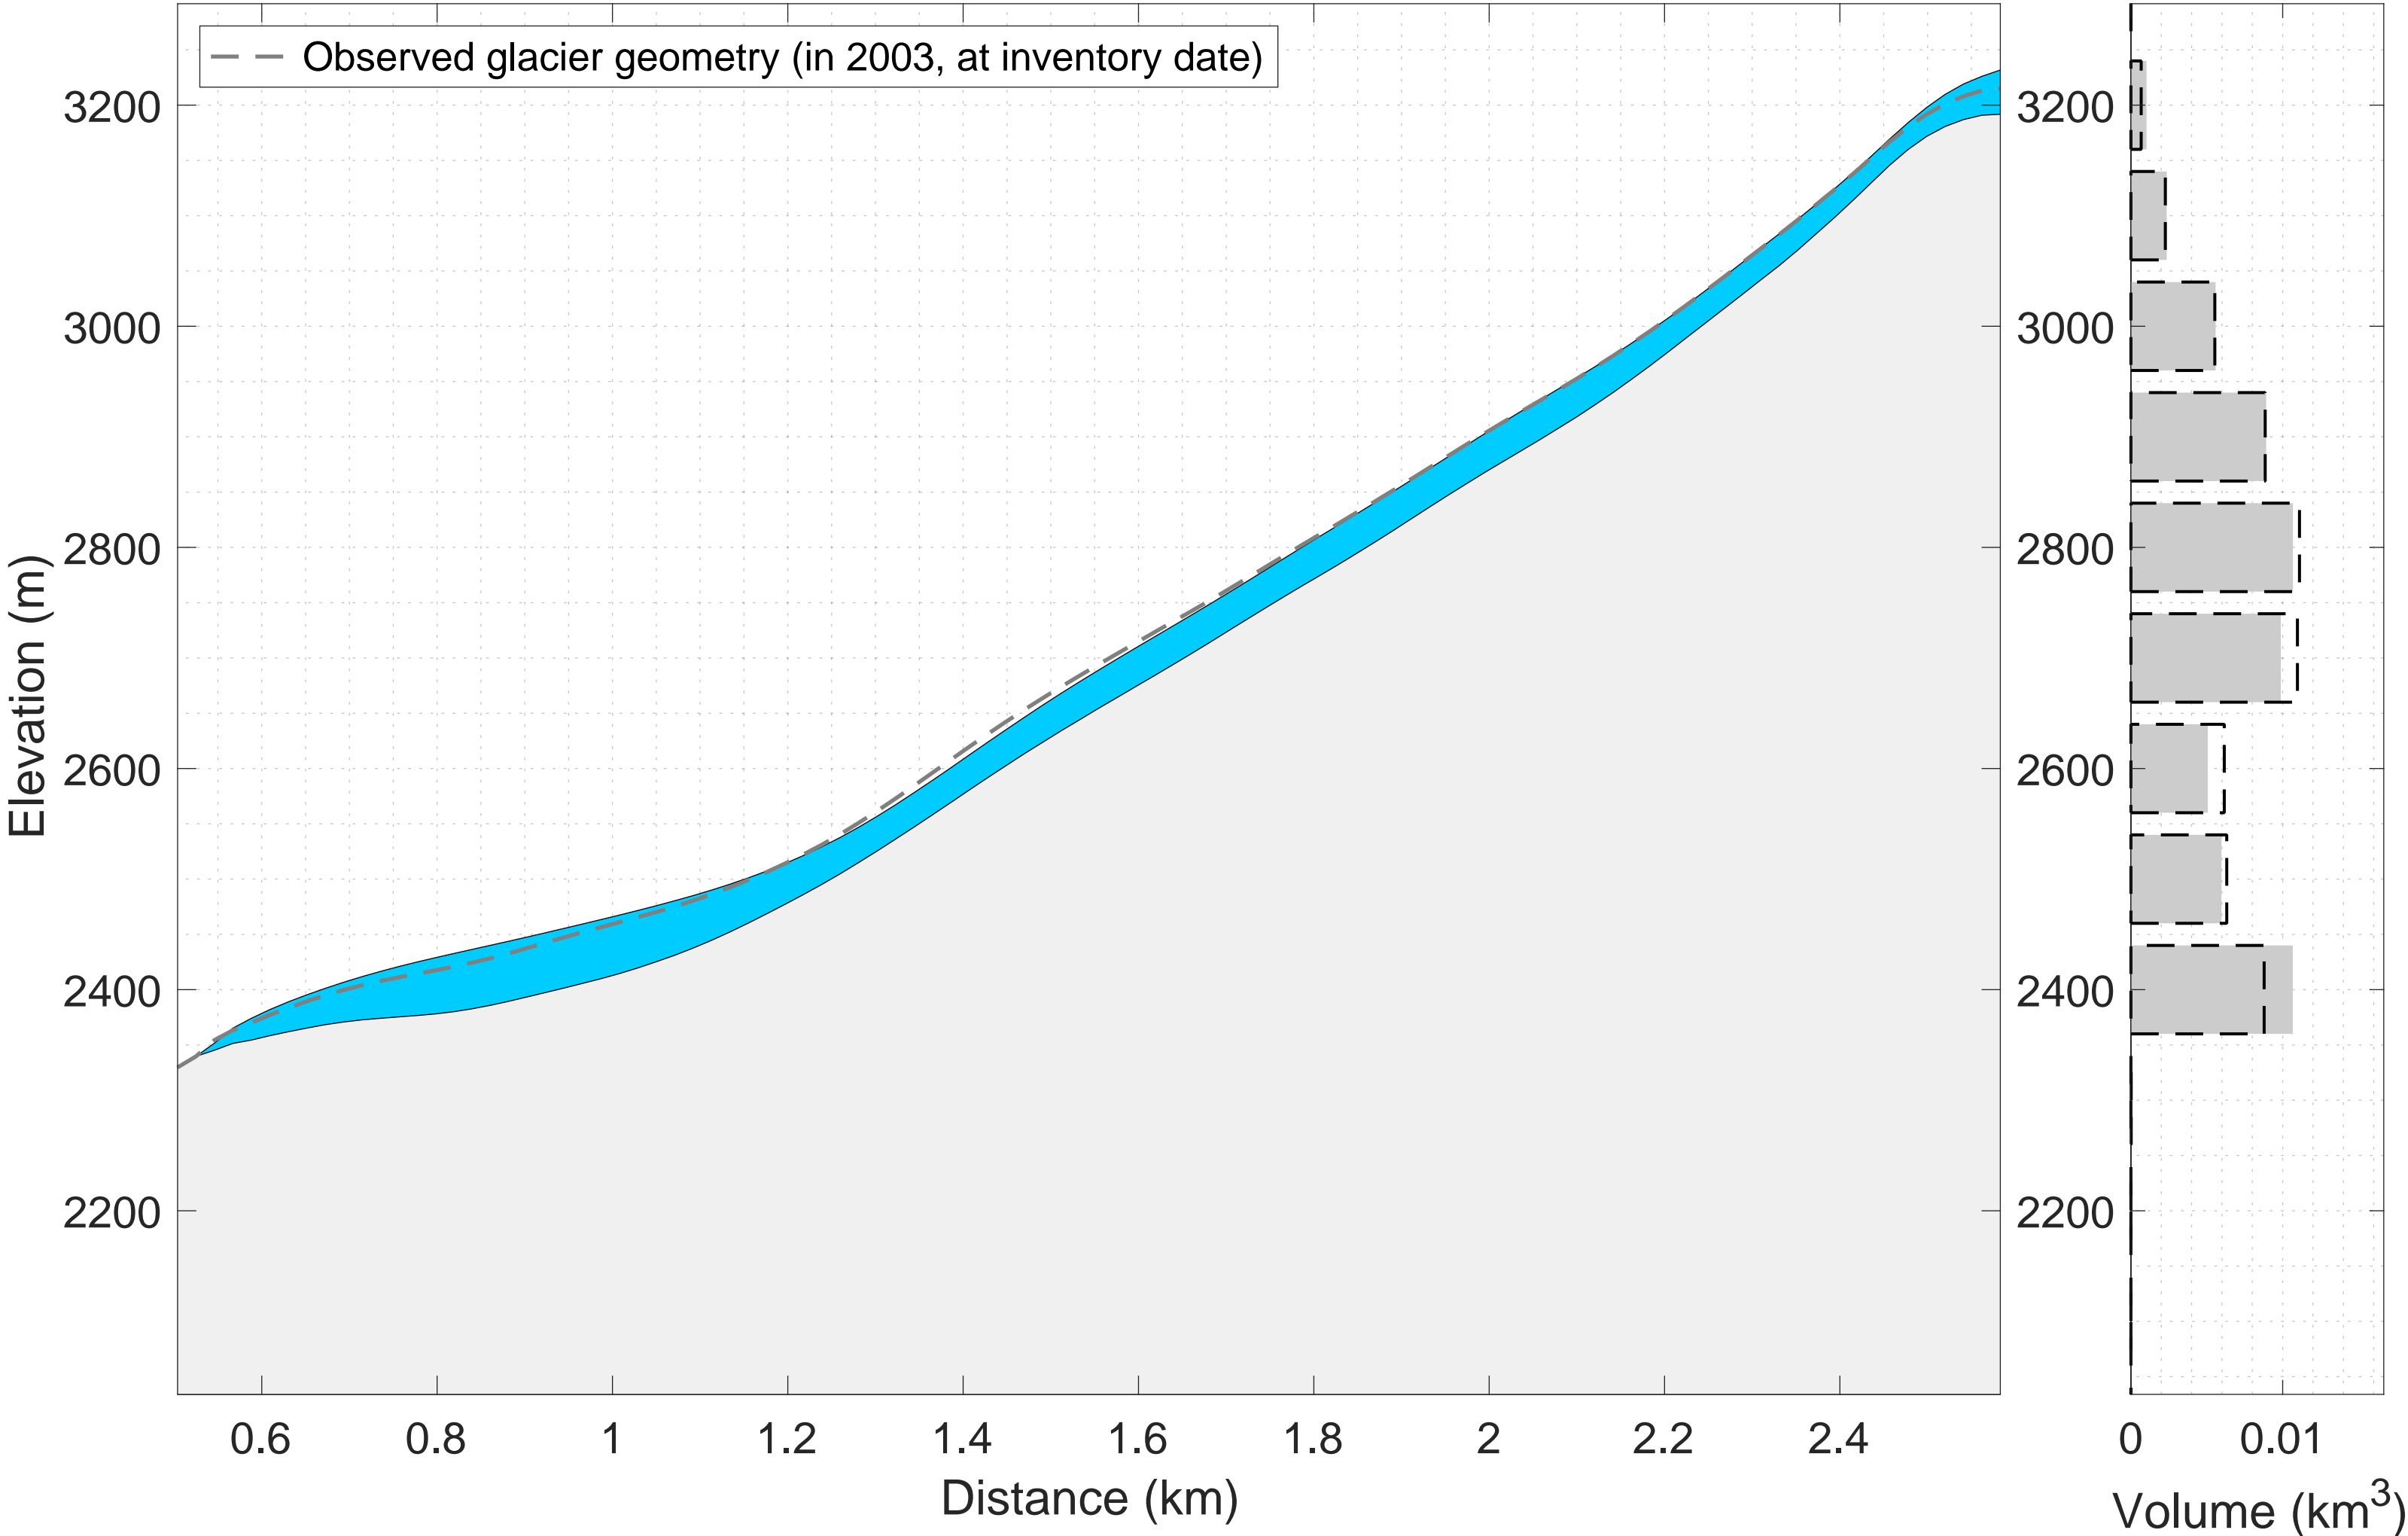

Supplement: Supplementary file 97 [file tc-13-1125-2019-supplement.zip]

**Modelled geometry (Glacier ID = 00755;  $A = 1.0553\text{e-}16 \text{ Pa}^{-3} \text{ a}^{-1}$ ;  $dx = 12 \text{ m}$ )**

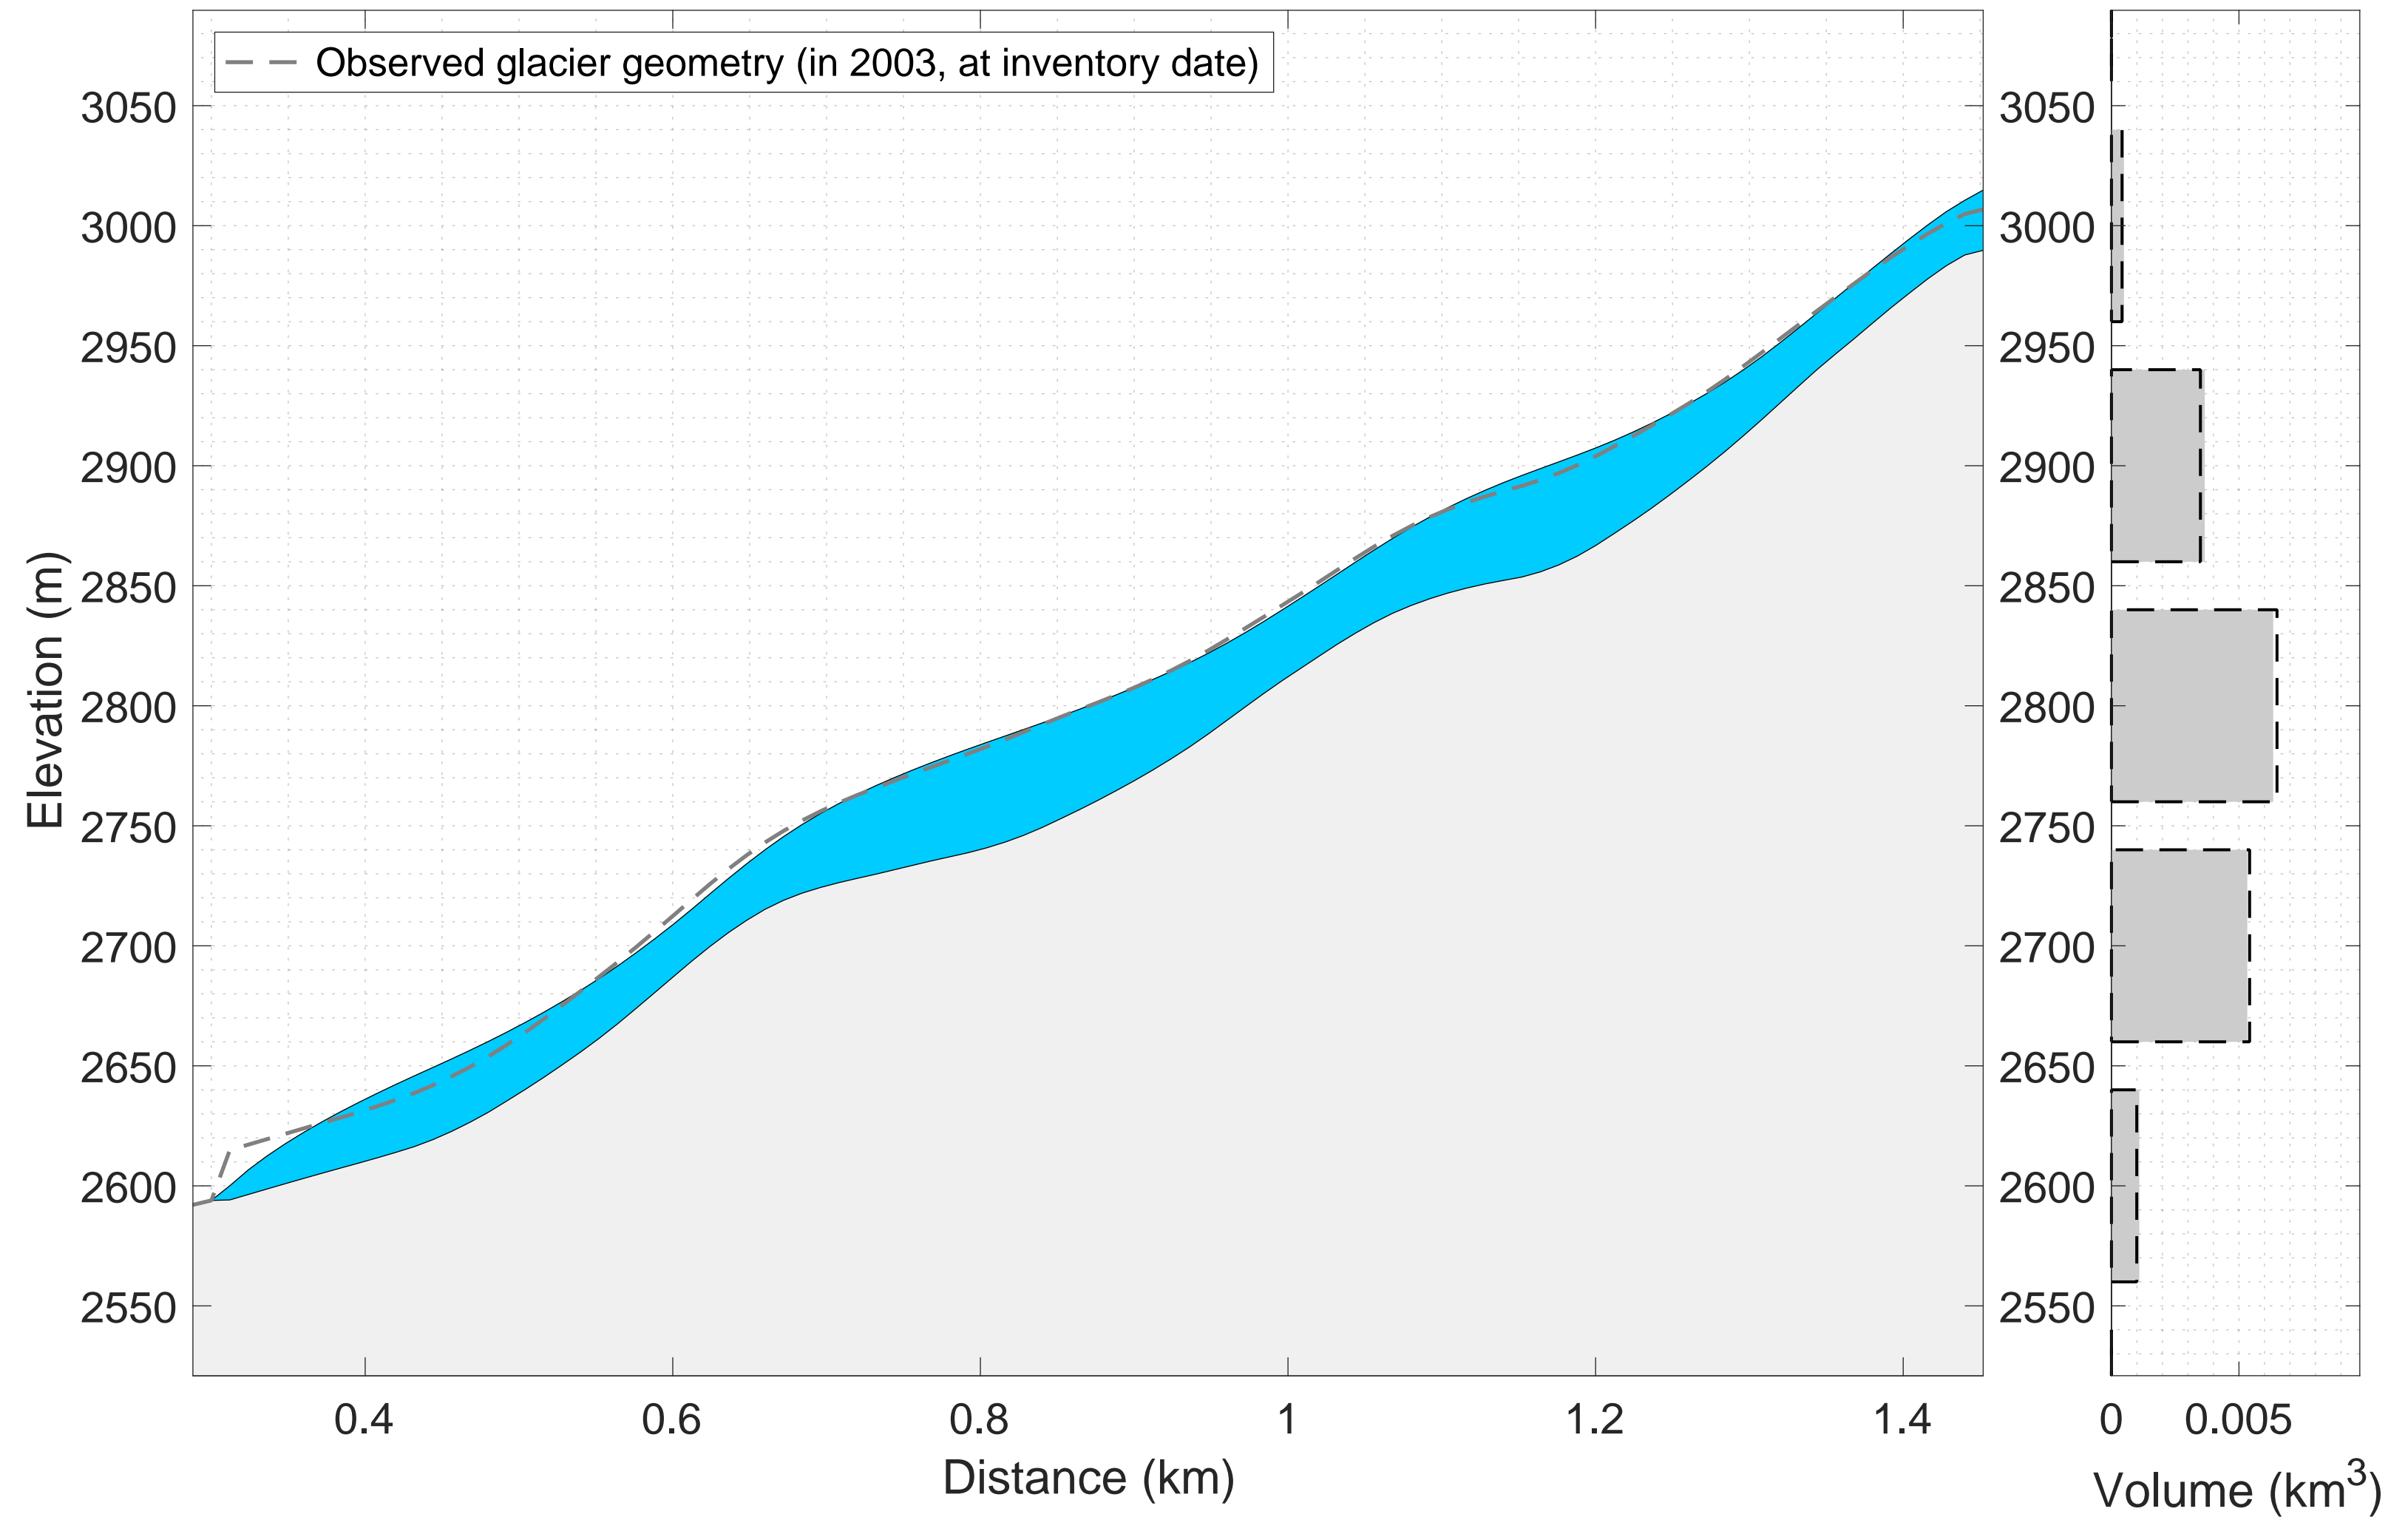

Supplement: Supplementary file 98 [file tc-13-1125-2019-supplement.zip]

**Modelled geometry (Glacier ID = 01958;  $A = 3.4179\text{e-}17 \text{ Pa}^{-3} \text{ a}^{-1}$ ;  $dx = 11 \text{ m}$ )**

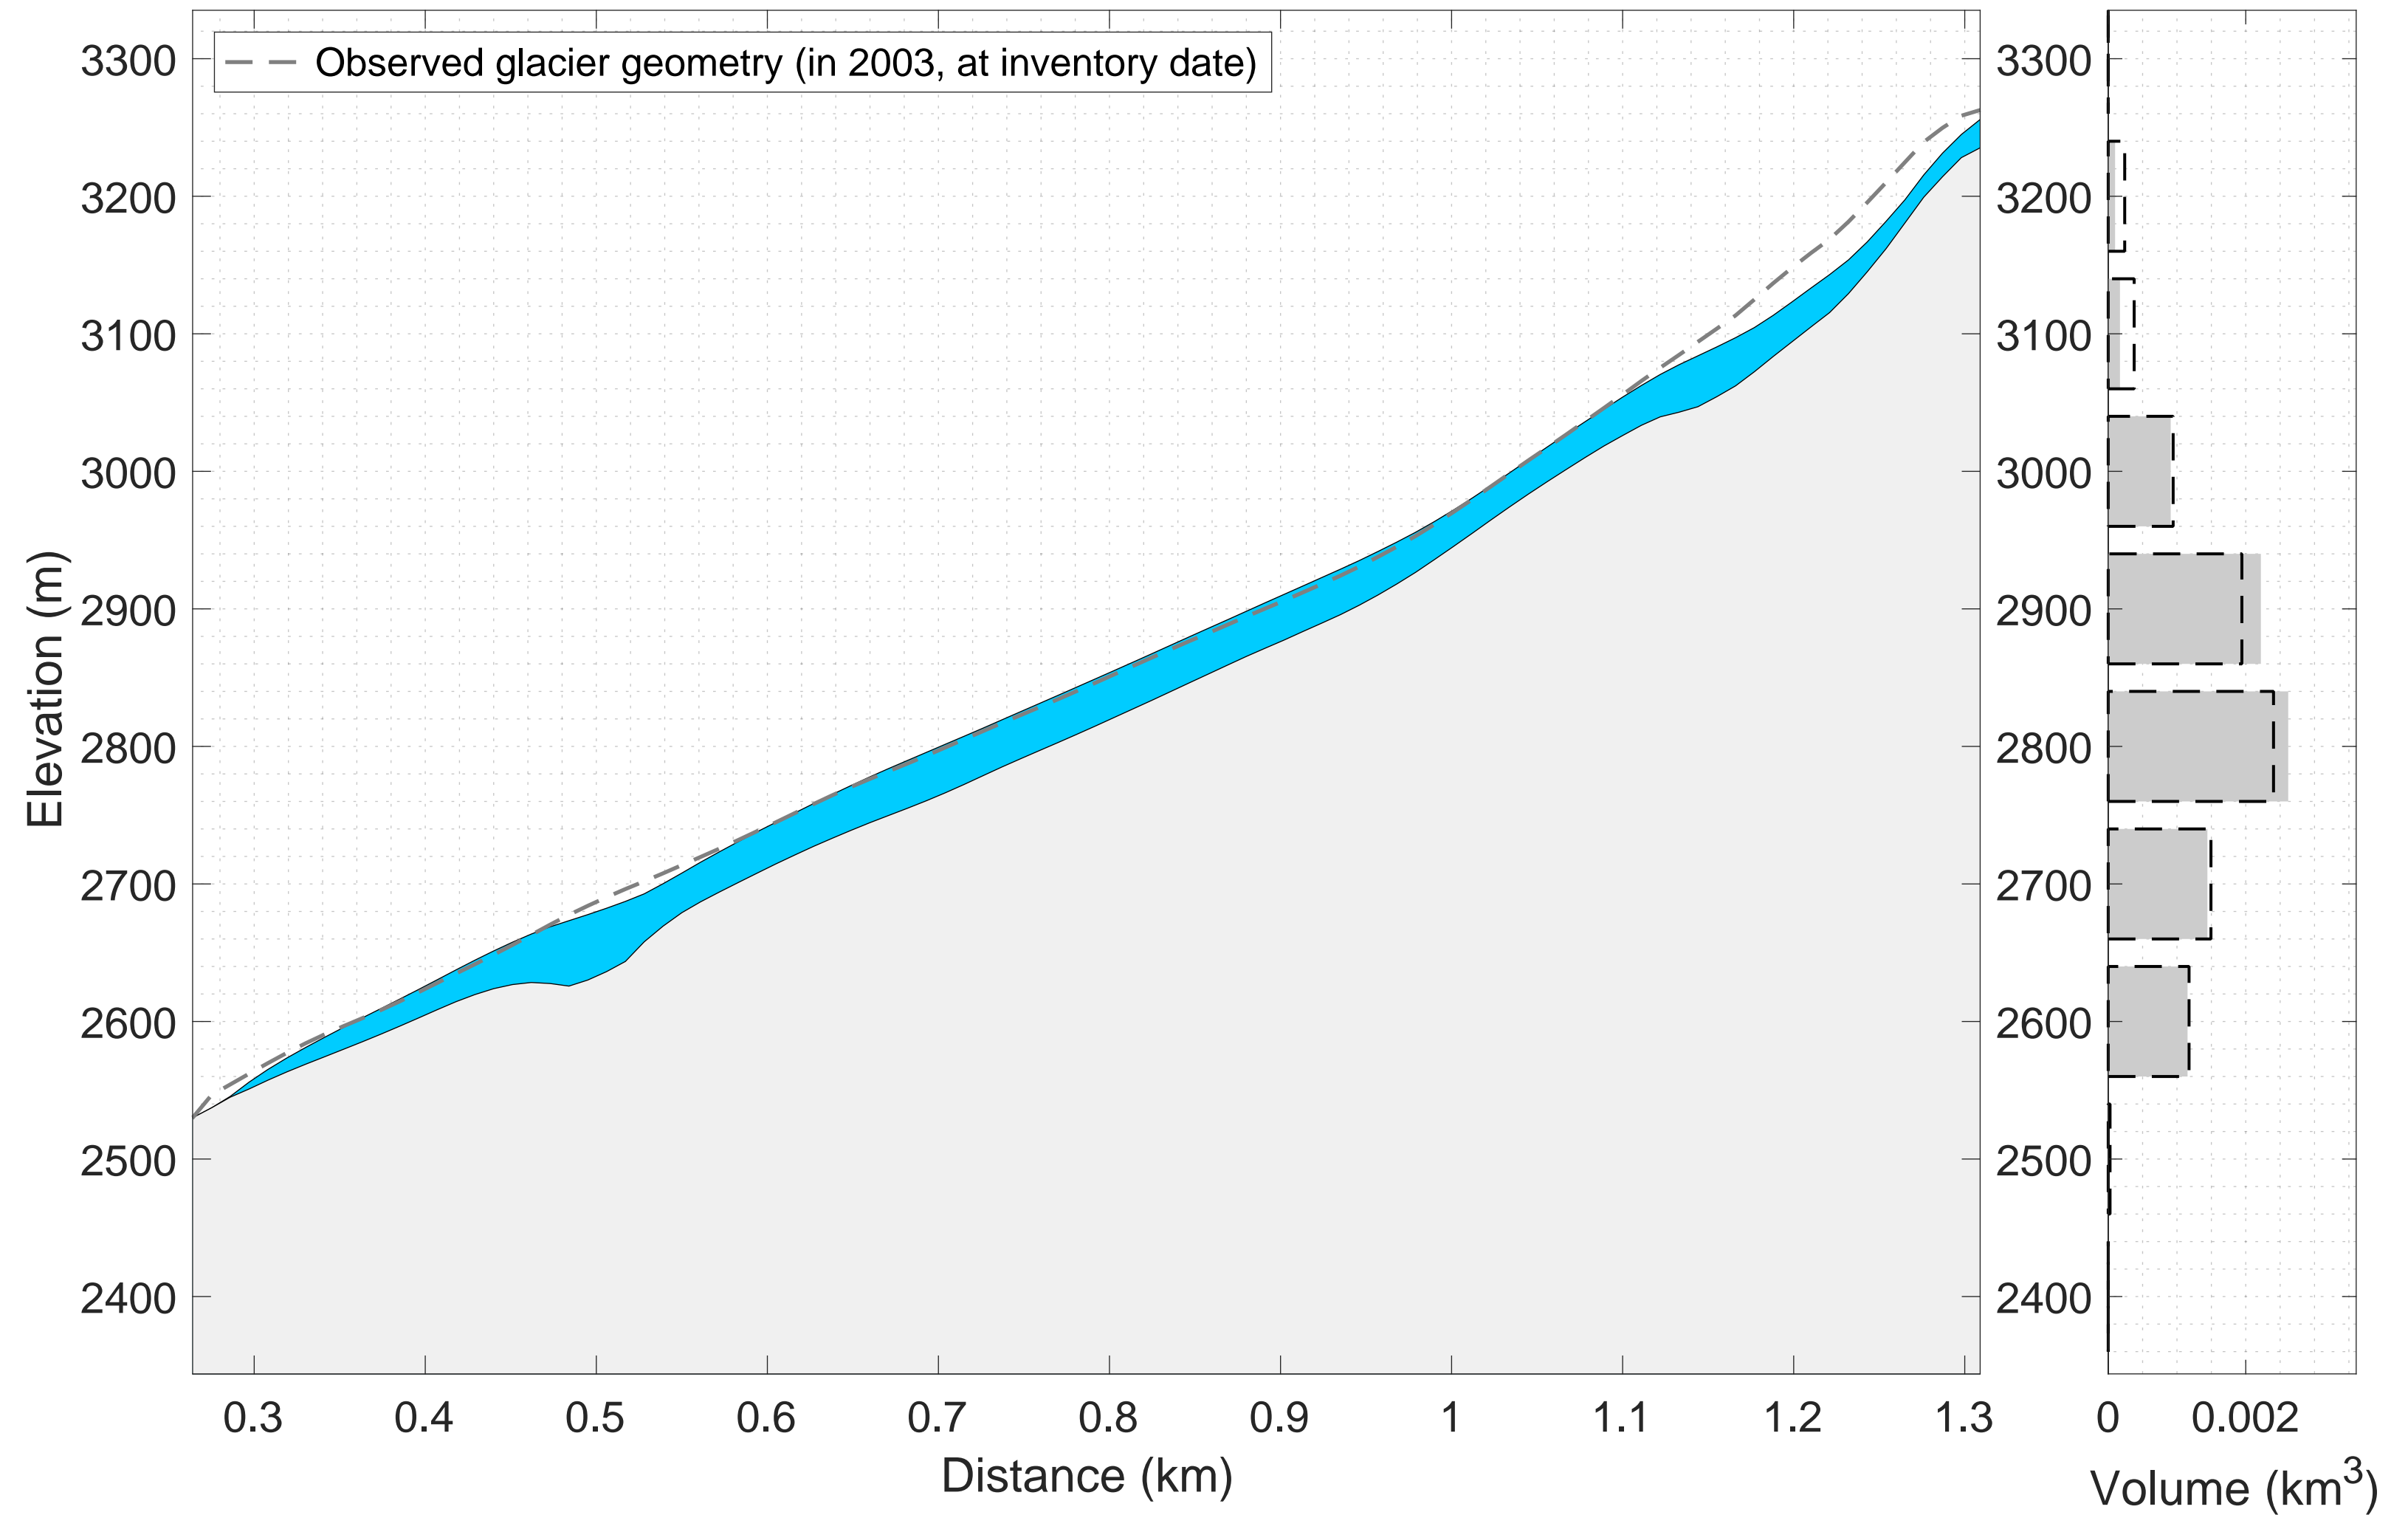

Supplement: Supplementary file 99 [file tc-13-1125-2019-supplement.zip]

**Modelled geometry (Glacier ID = 03688;  $A = 1.2\text{e-}16 \text{ Pa}^{-3} \text{ a}^{-1}$ ;  $dx = 10 \text{ m}$ )**

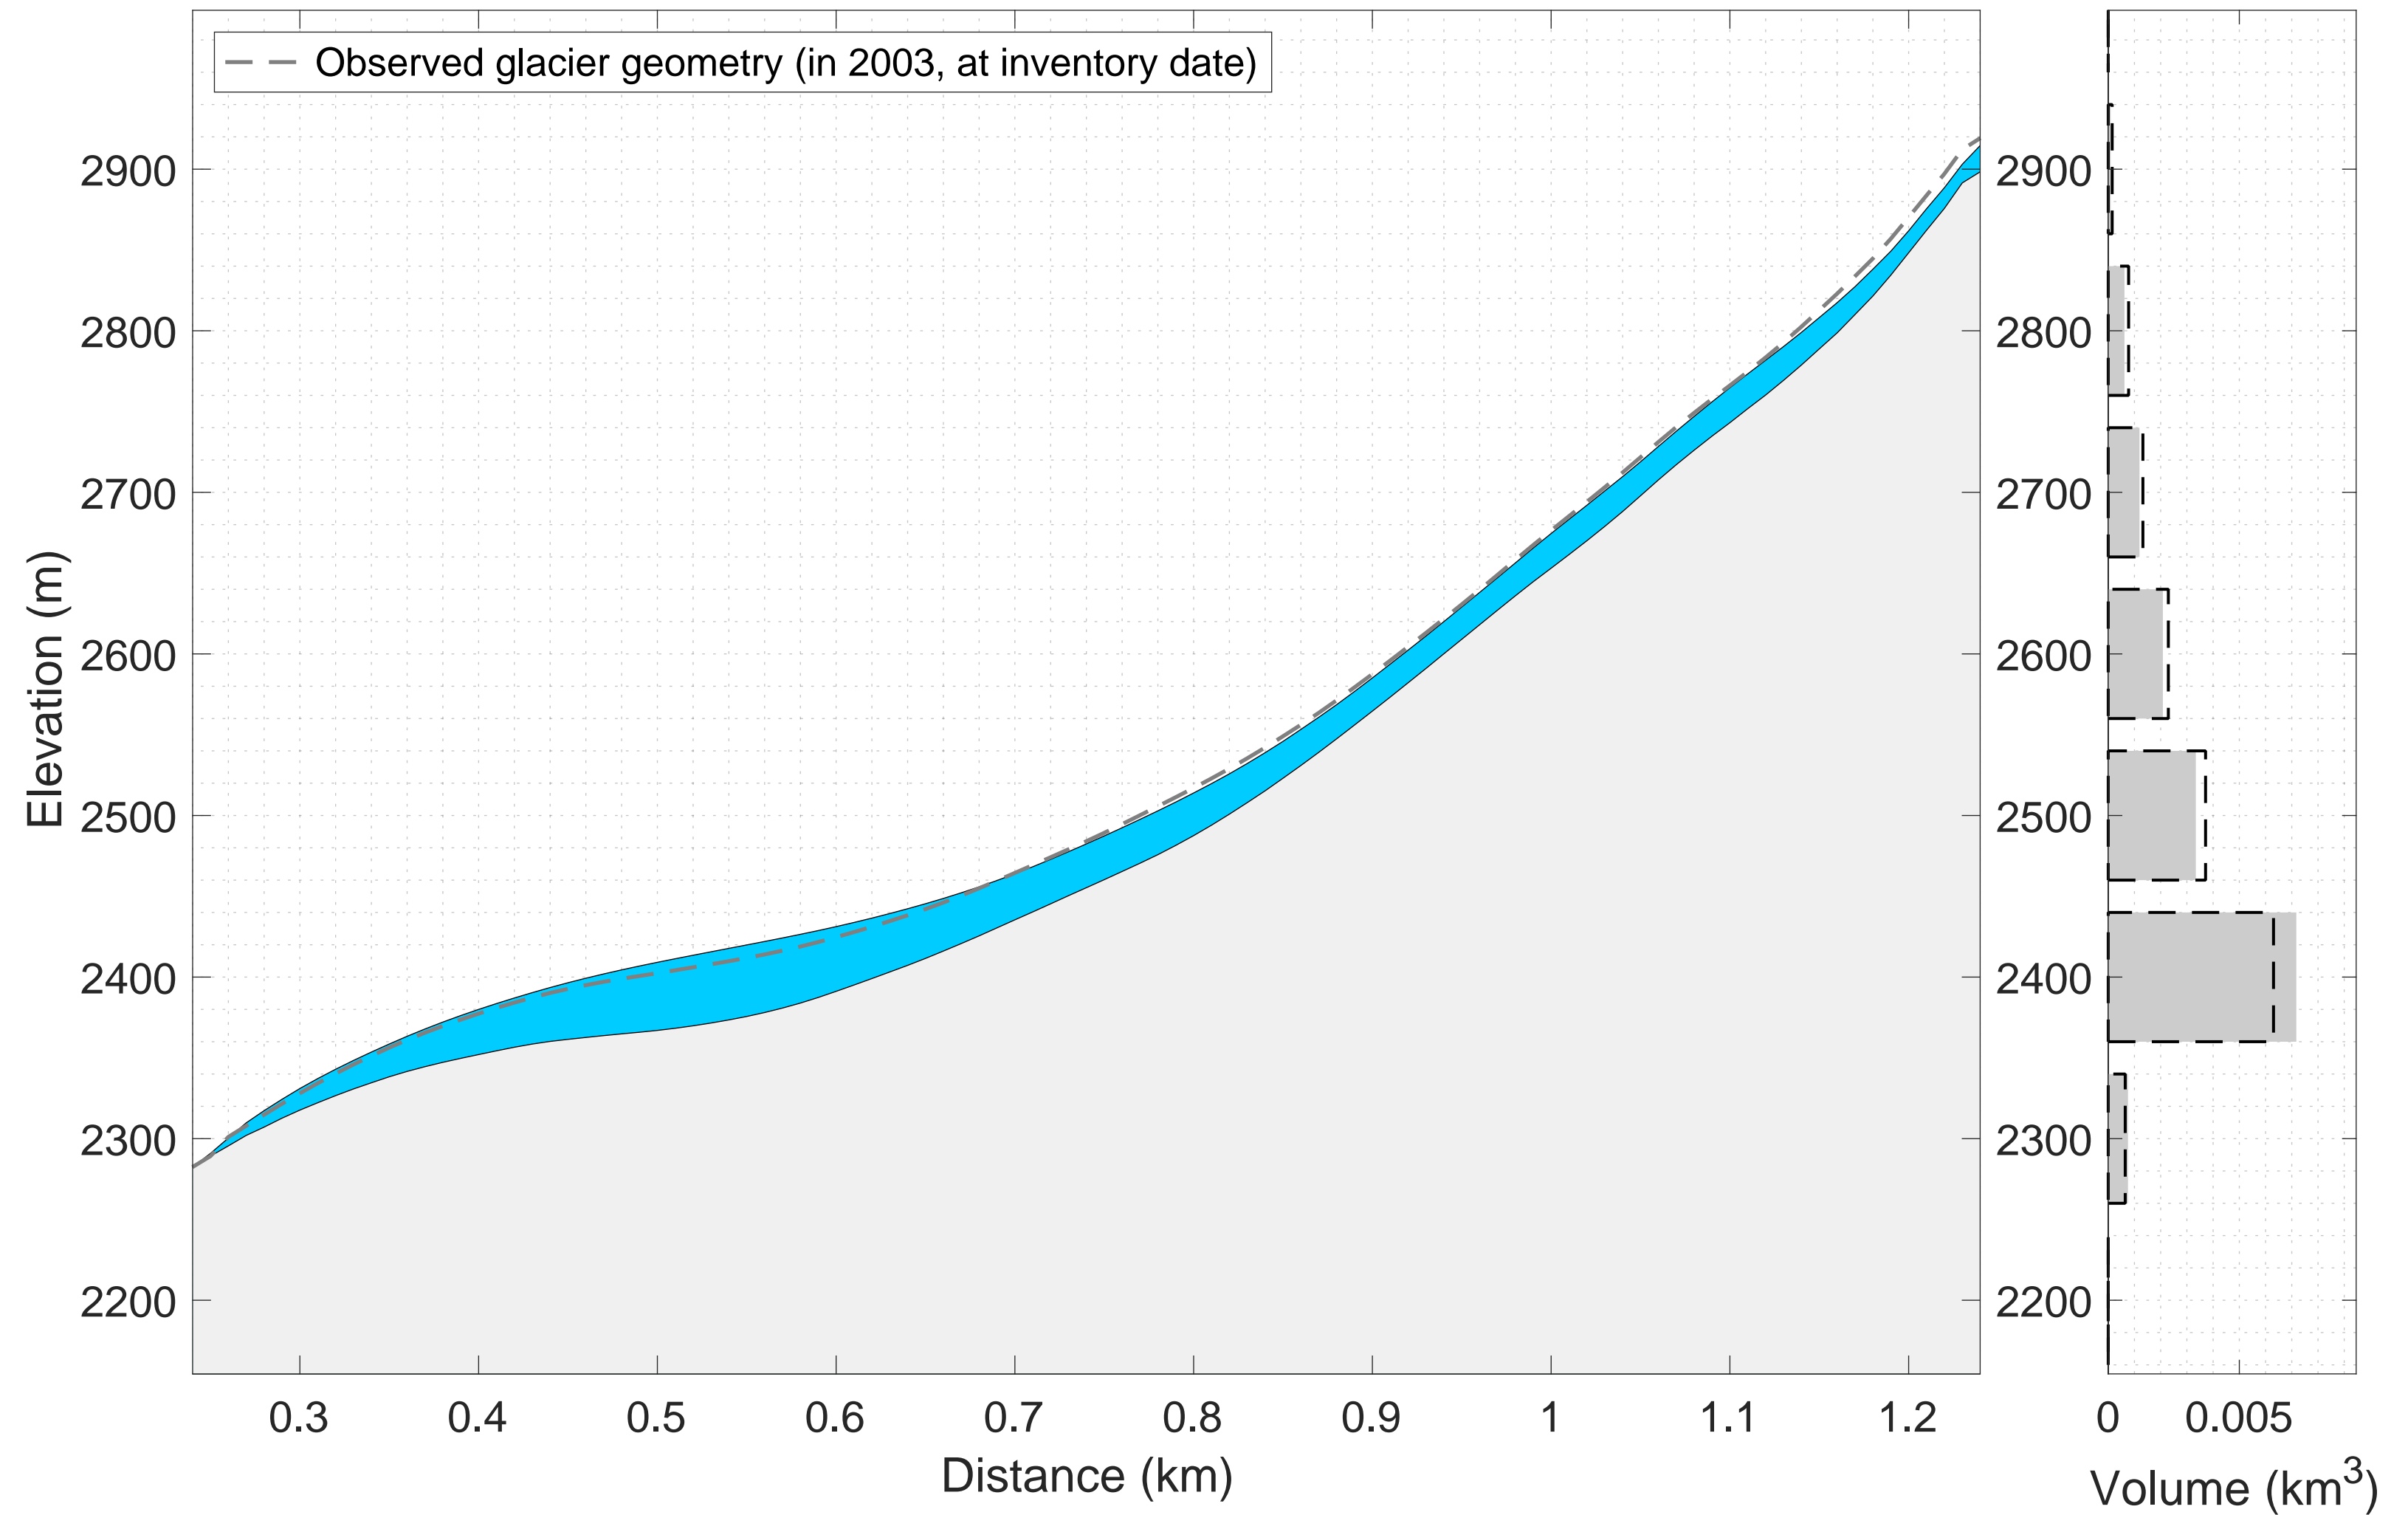

Supplement: Supplementary file 100 [file tc-13-1125-2019-supplement.zip]
