# Supplementary figures and images for: Modelling the future evolution of glaciers in the European Alps under the EURO-CORDEX RCM ensemble (part 2 of 8)
Source: Copernicus journal article supplement (doi:10.5194/tc-13-1125-2019), 2019-04-09

**Modelled geometry (Glacier ID = 00006;  $A = 4.9294\text{e-}16 \text{ Pa}^{-3} \text{ a}^{-1}$ ;  $dx = 10 \text{ m}$ )**

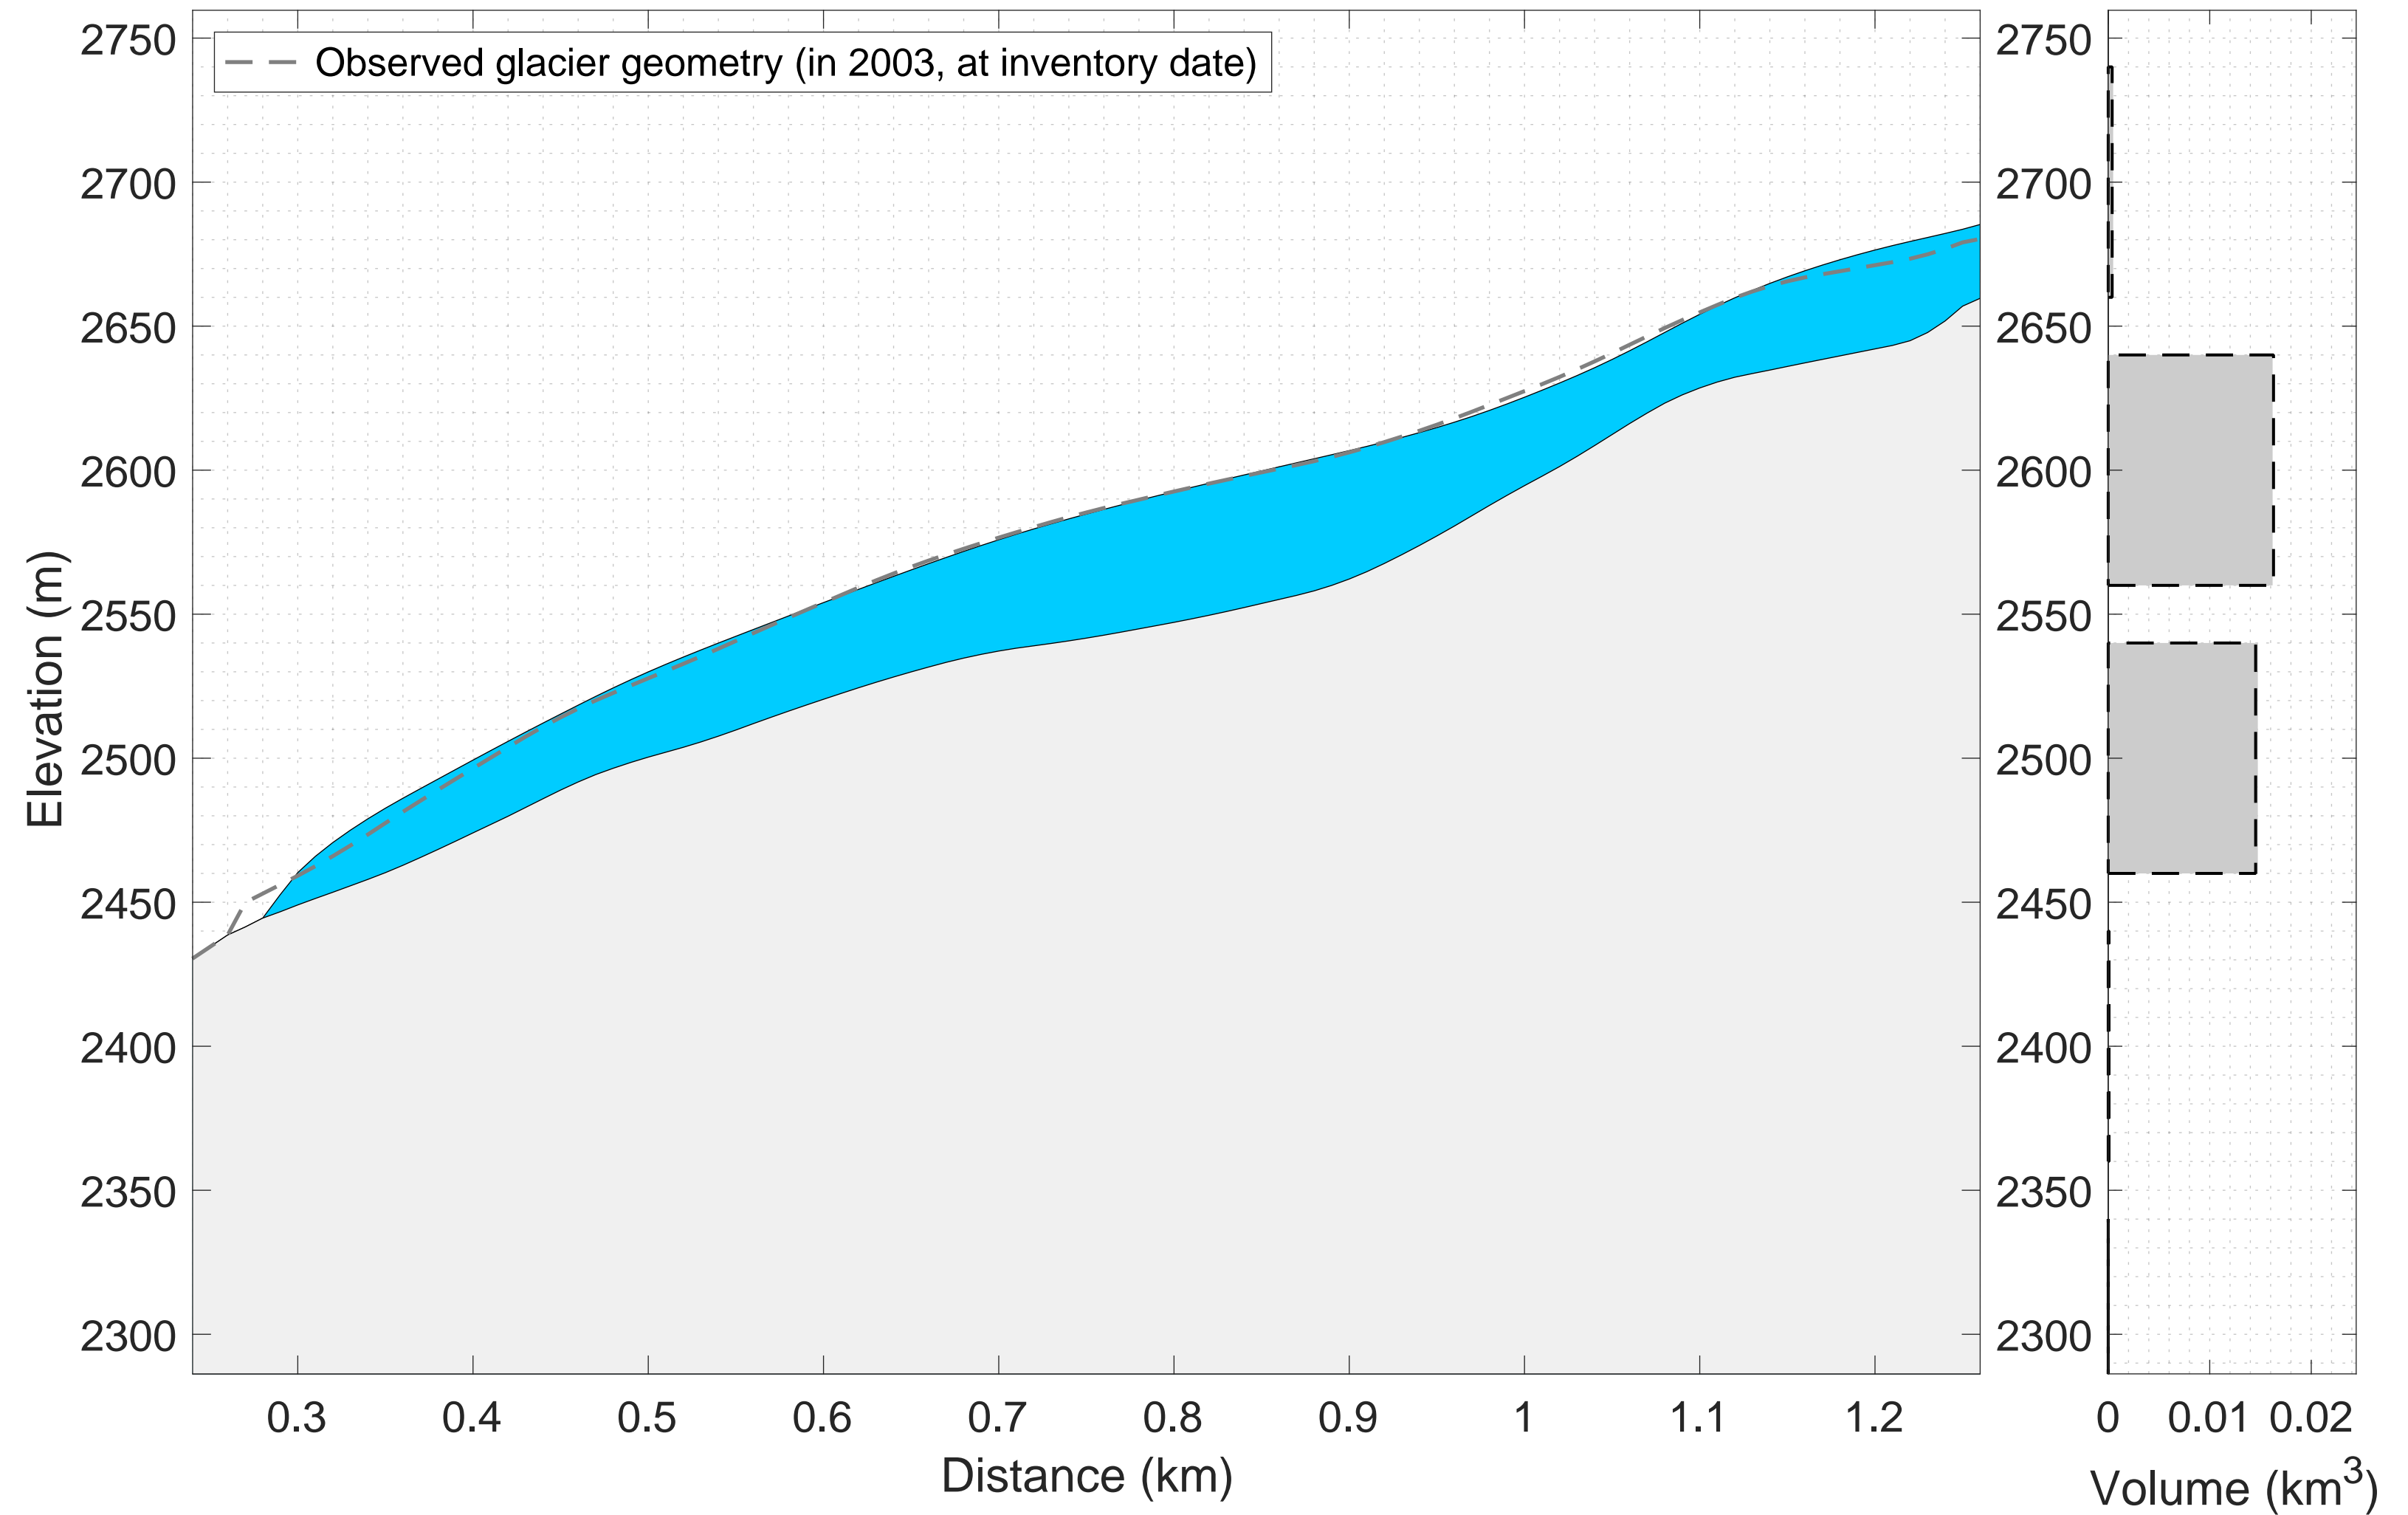

Supplement: Supplementary file 101 [file tc-13-1125-2019-supplement.zip]

**Modelled geometry (Glacier ID = 02863;  $A = 1.4371\text{e-}16 \text{ Pa}^{-3} \text{ a}^{-1}$ ;  $dx = 10 \text{ m}$ )**

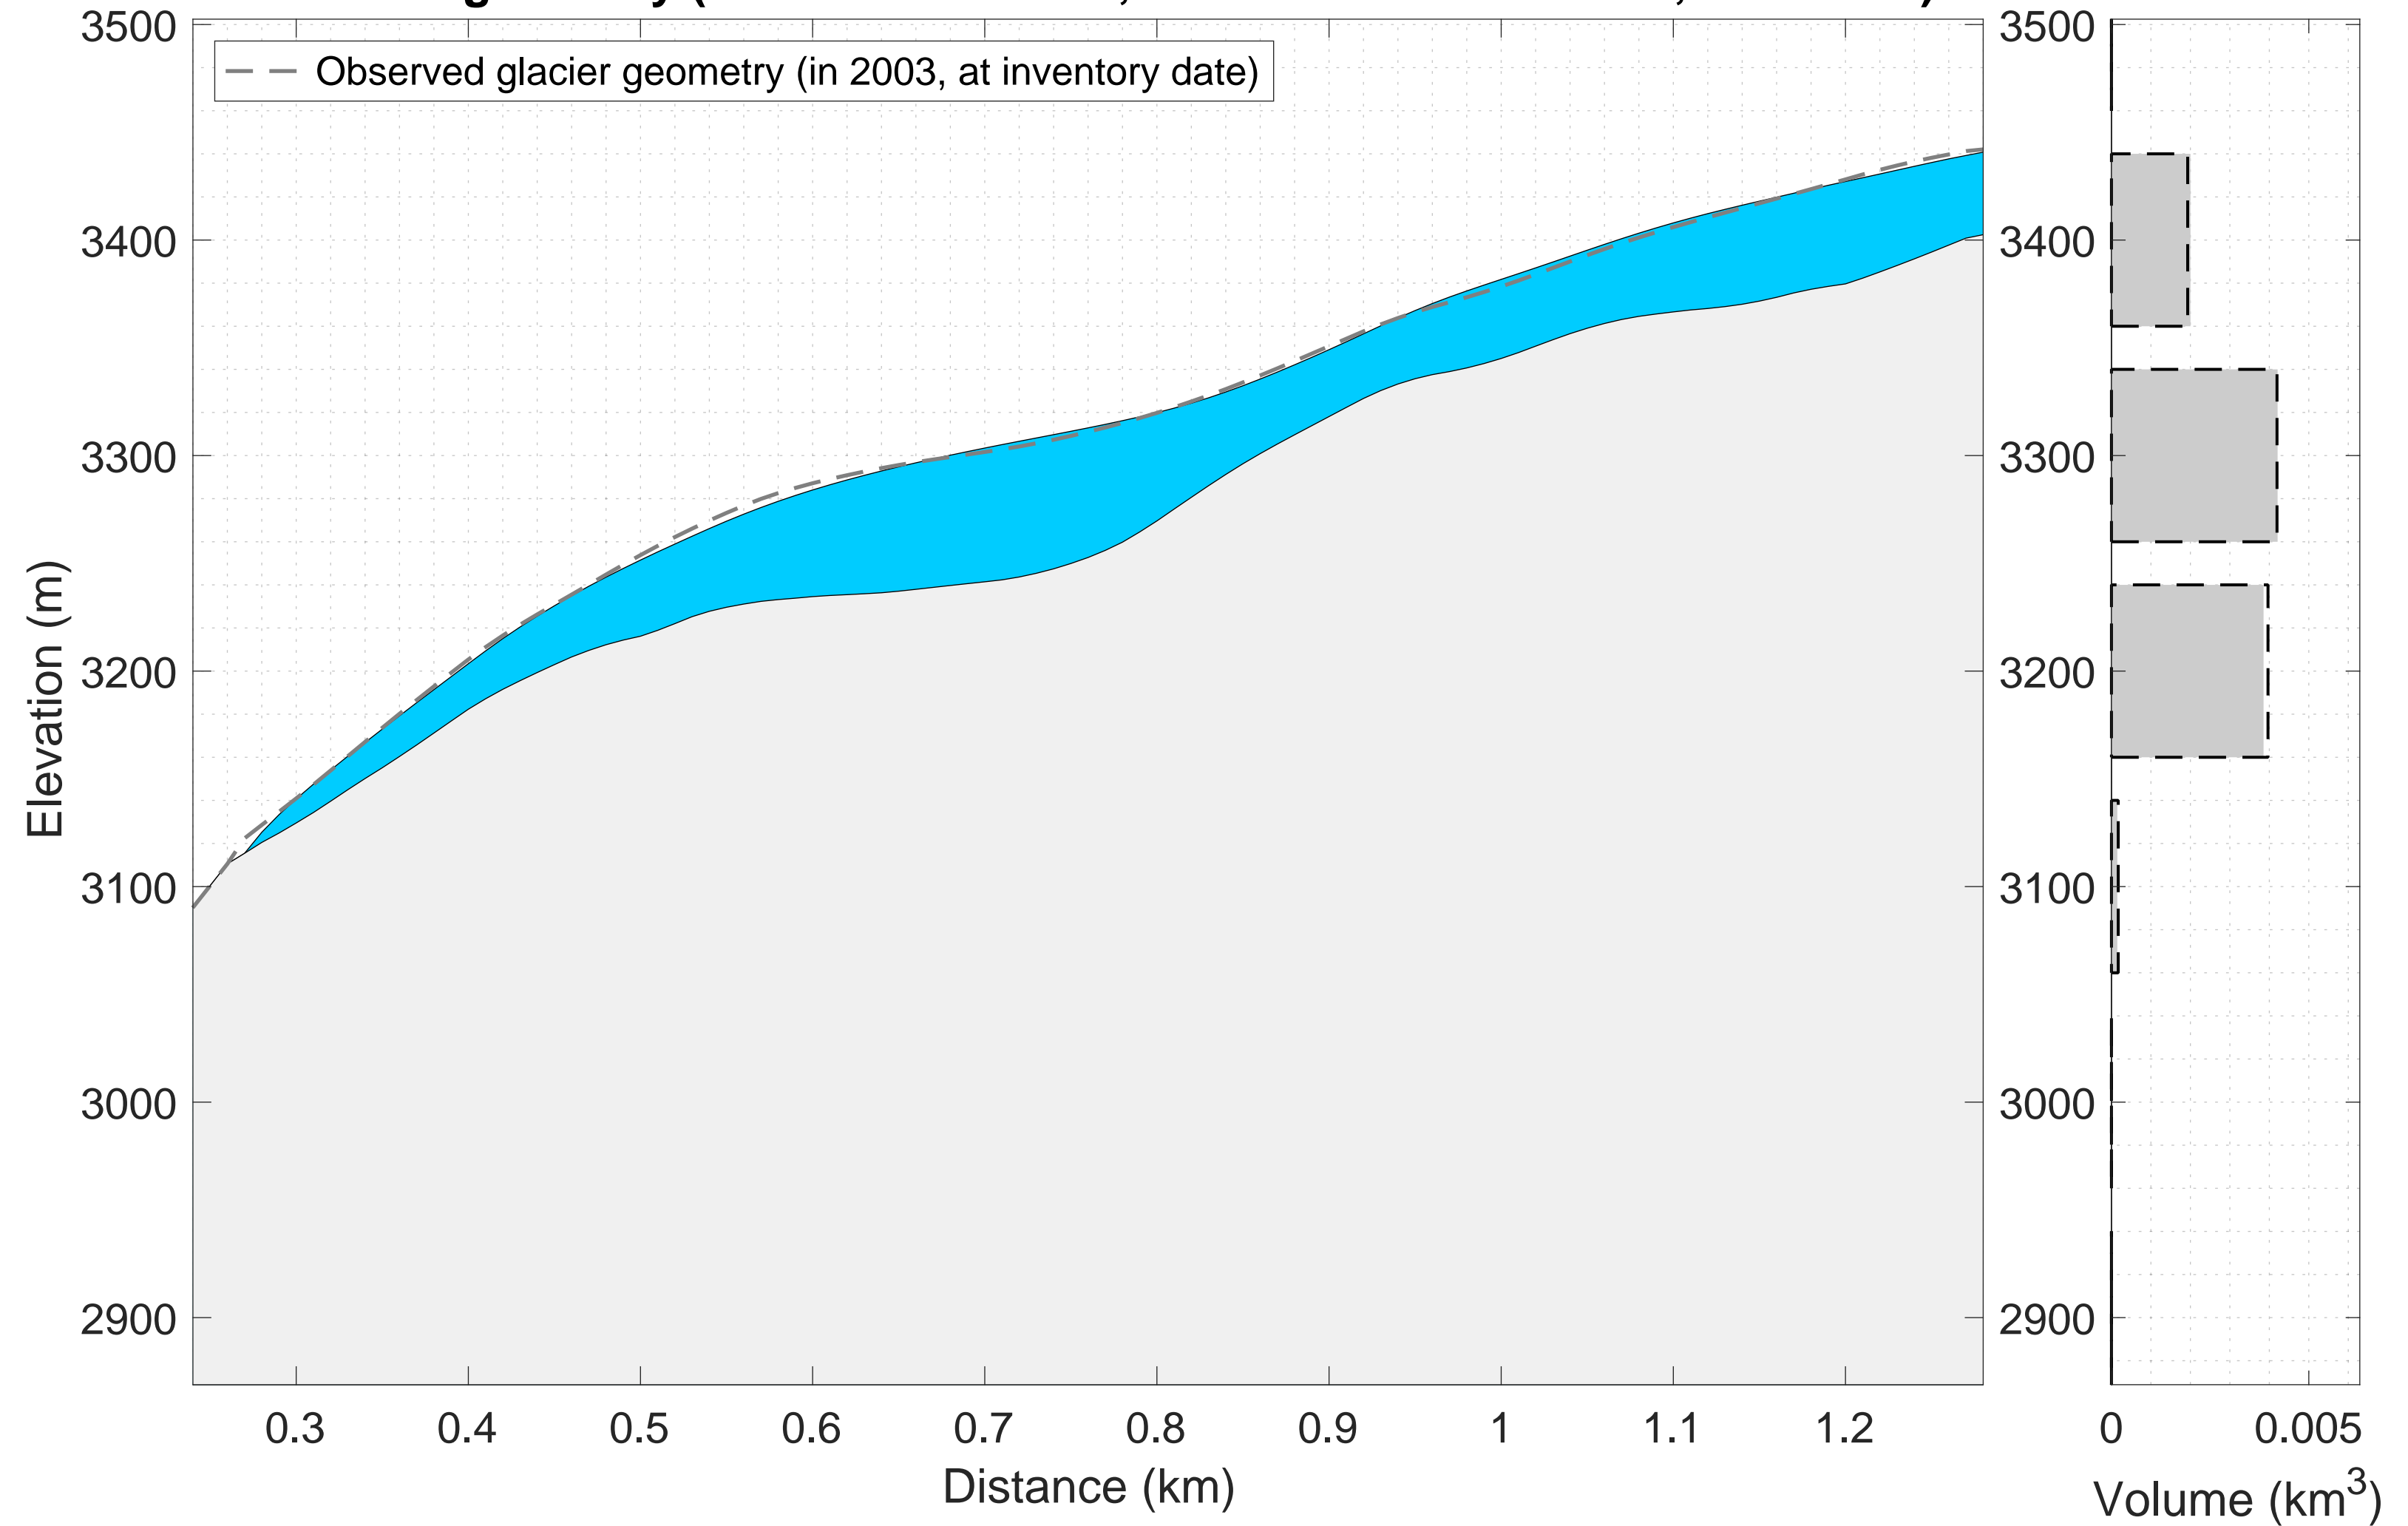

Supplement: Supplementary file 102 [file tc-13-1125-2019-supplement.zip]

**Modelled geometry (Glacier ID = 02370;  $A = 1.393\text{e-}16 \text{ Pa}^{-3} \text{ a}^{-1}$ ;  $dx = 15 \text{ m}$ )**

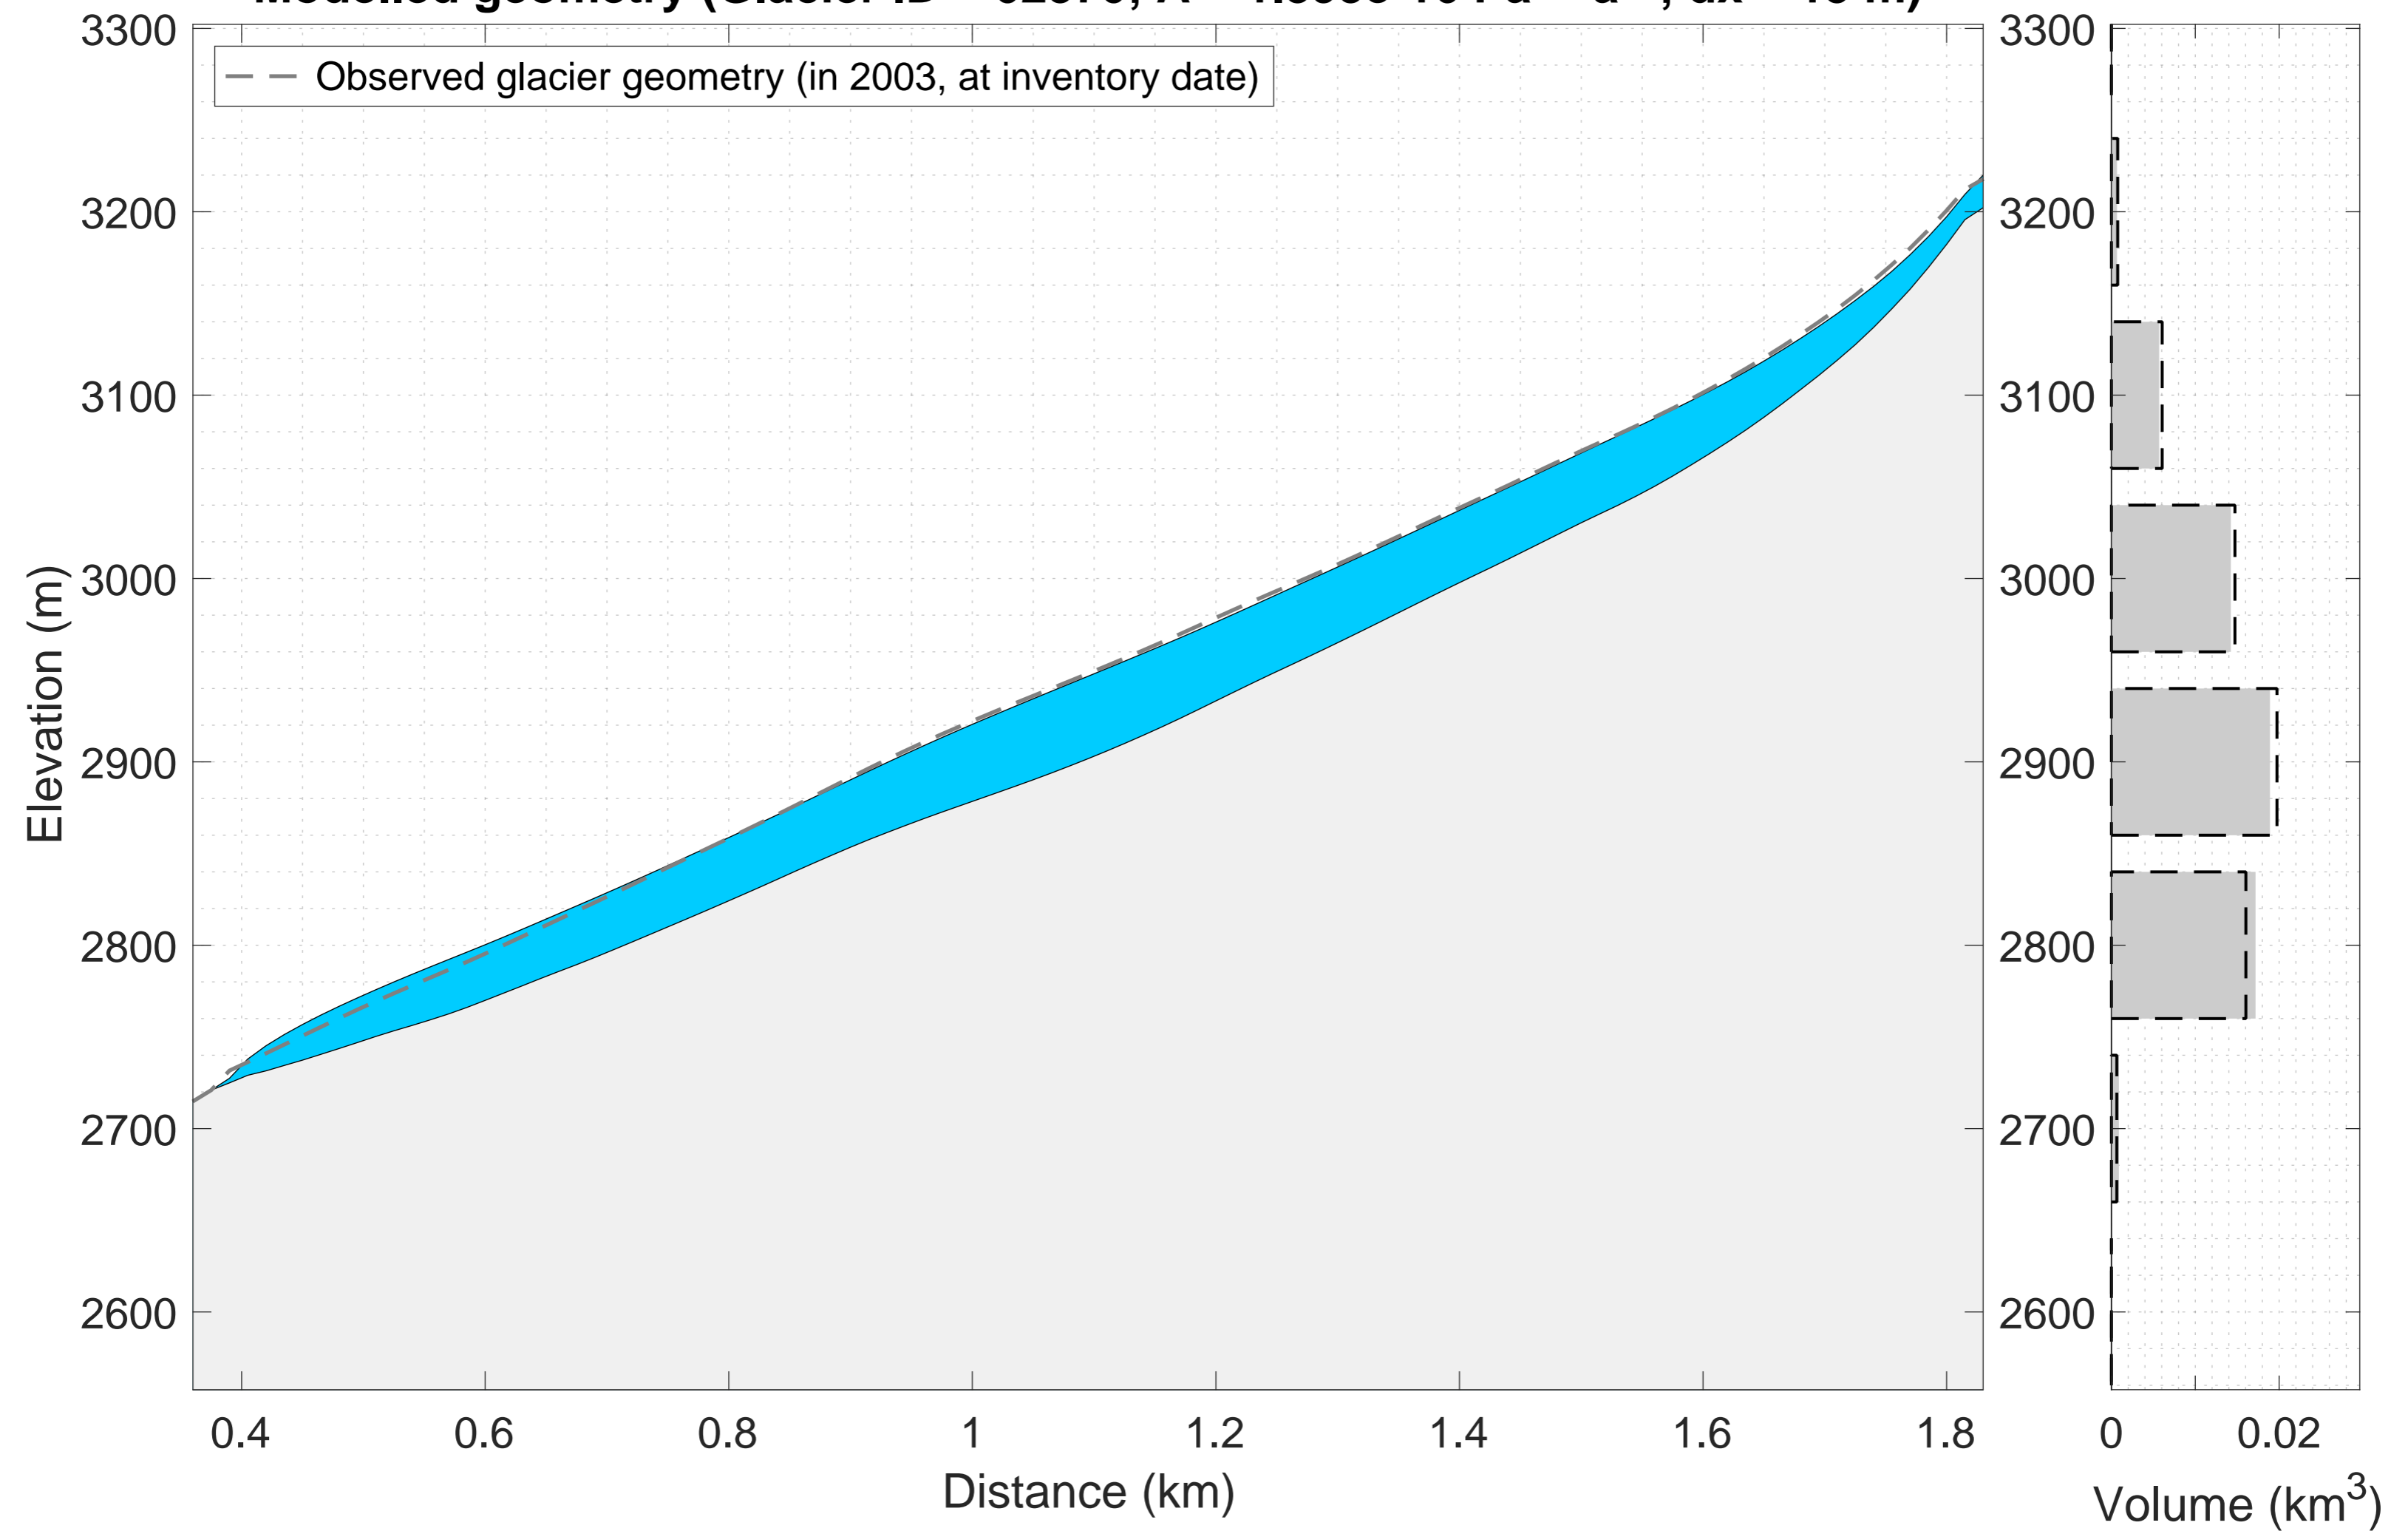

Supplement: Supplementary file 103 [file tc-13-1125-2019-supplement.zip]

**Modelled geometry (Glacier ID = 01296;  $A = 7.7207\text{e-}17 \text{ Pa}^{-3} \text{ a}^{-1}$ ;  $dx = 27 \text{ m}$ )**

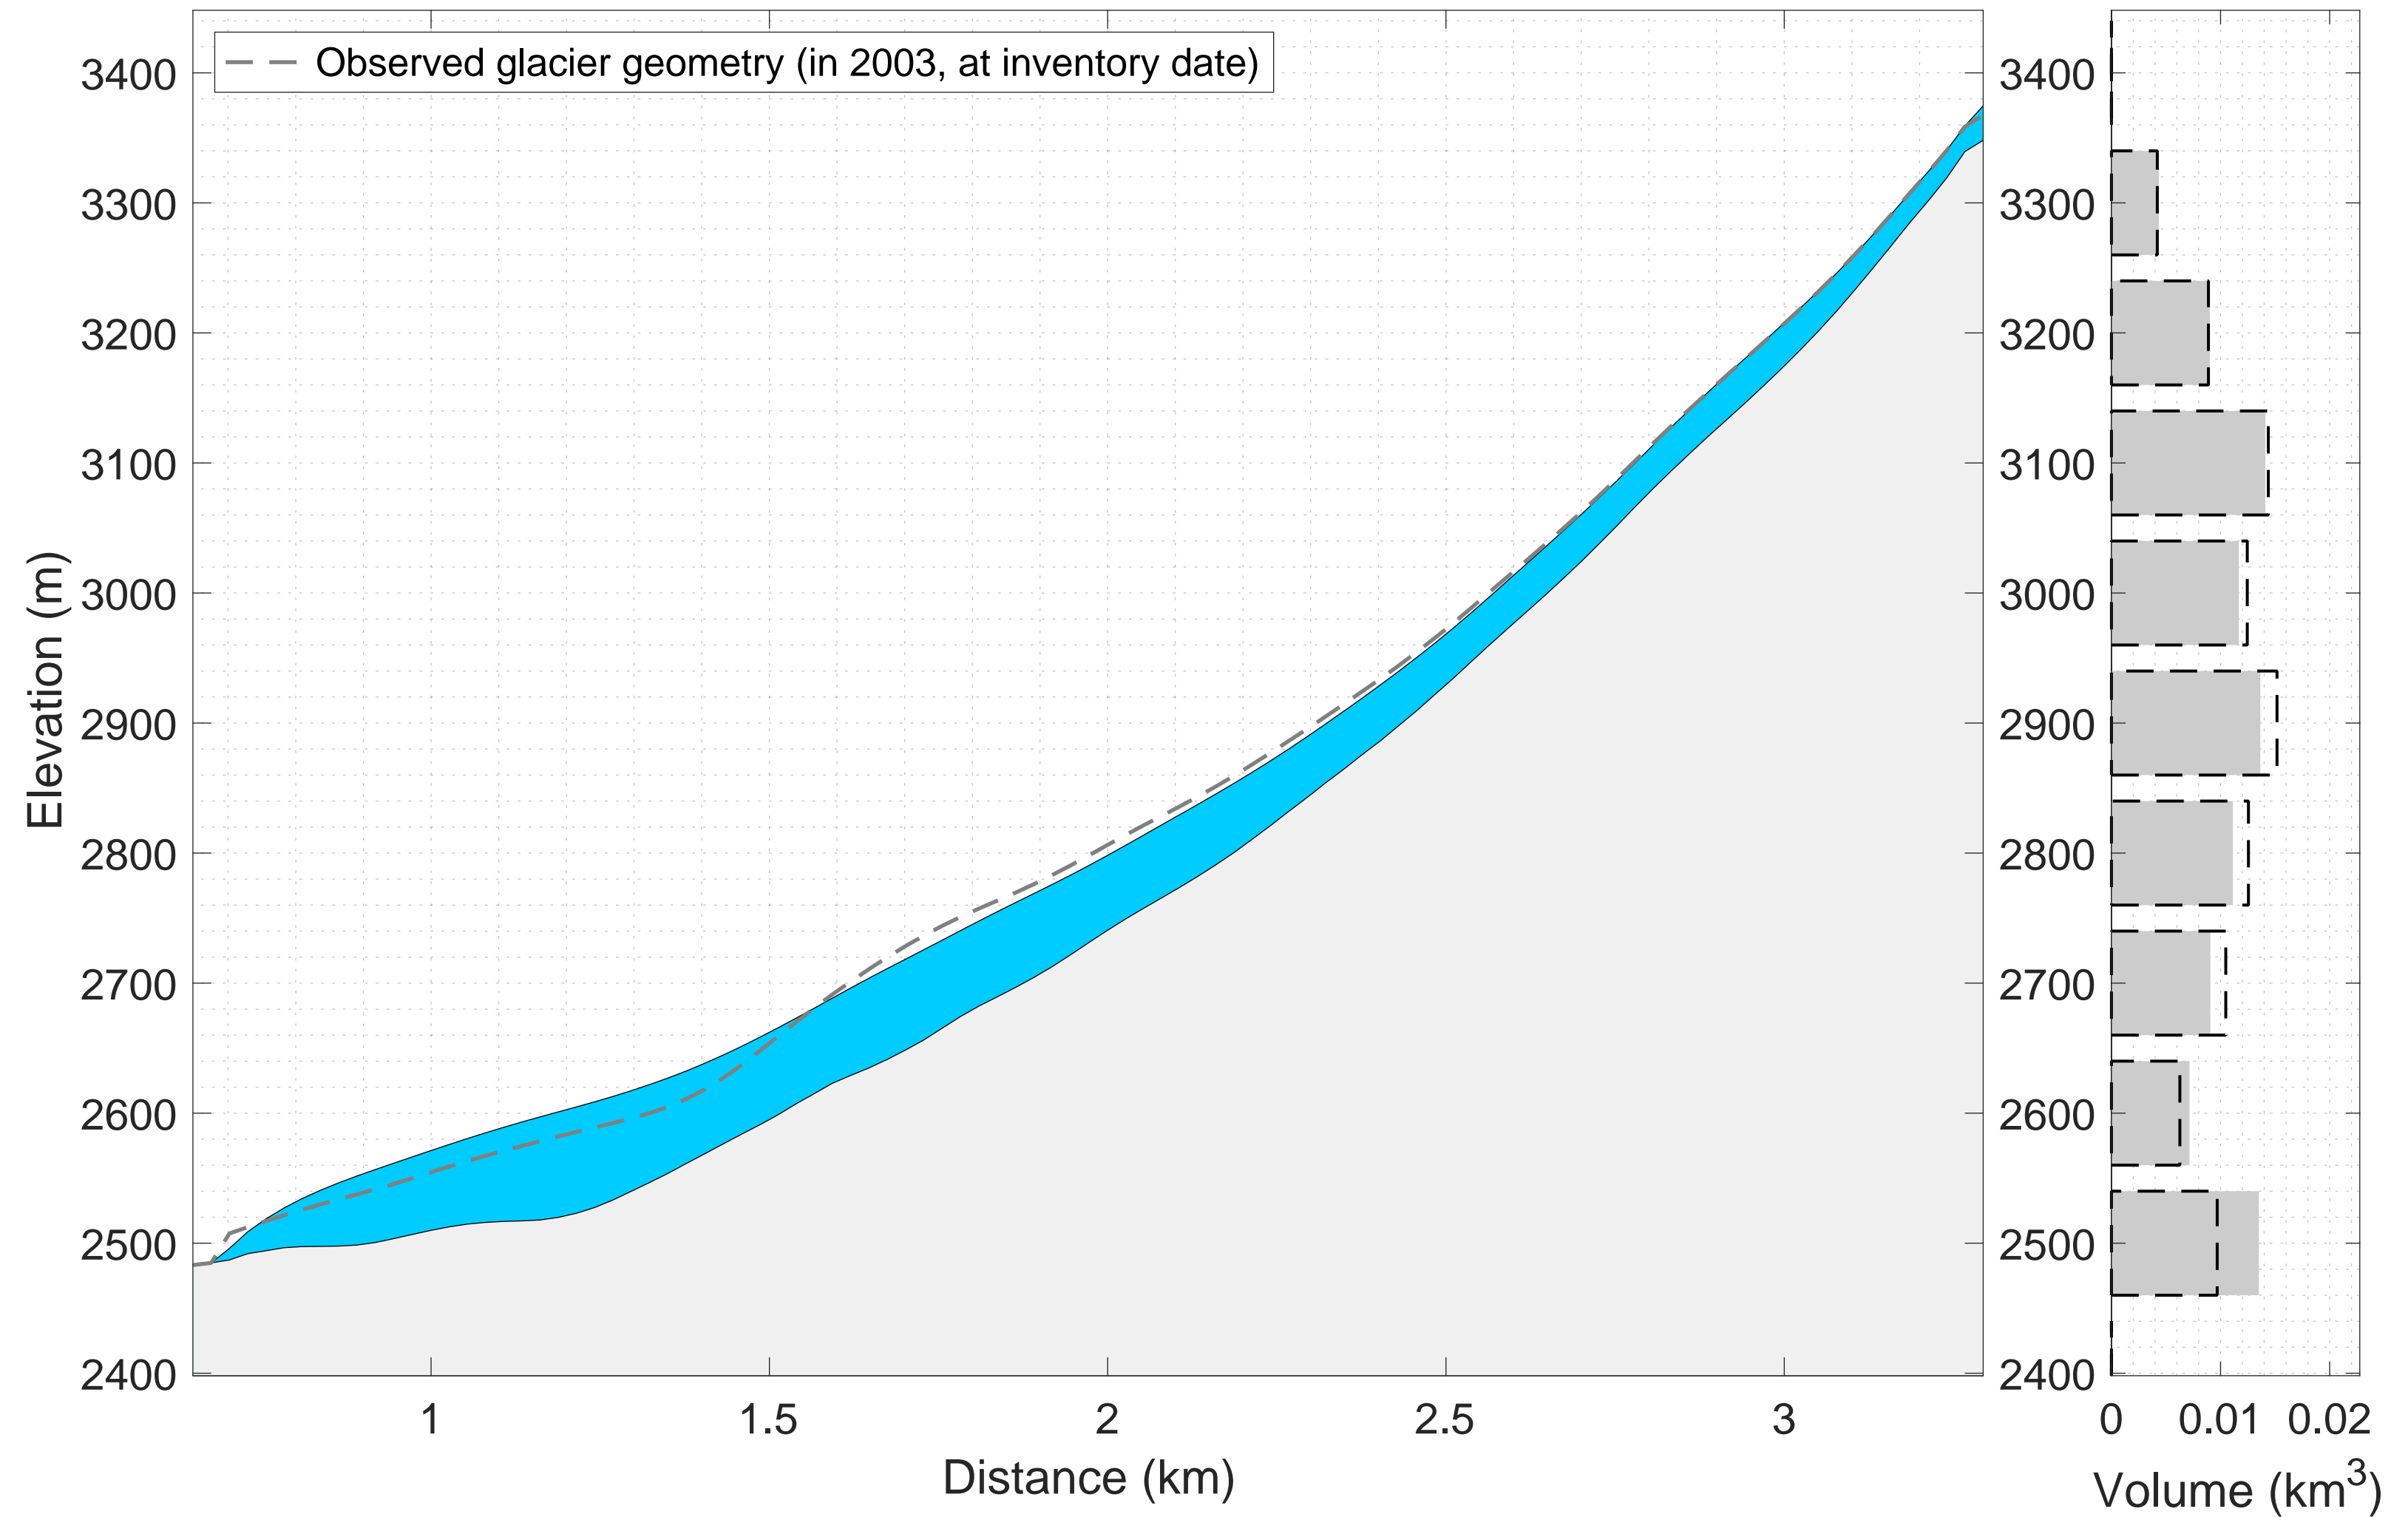

Supplement: Supplementary file 104 [file tc-13-1125-2019-supplement.zip]

**Modelled geometry (Glacier ID = 03732;  $A = 1.4247\text{e-}16 \text{ Pa}^{-3} \text{ a}^{-1}$ ;  $dx = 10 \text{ m}$ )**

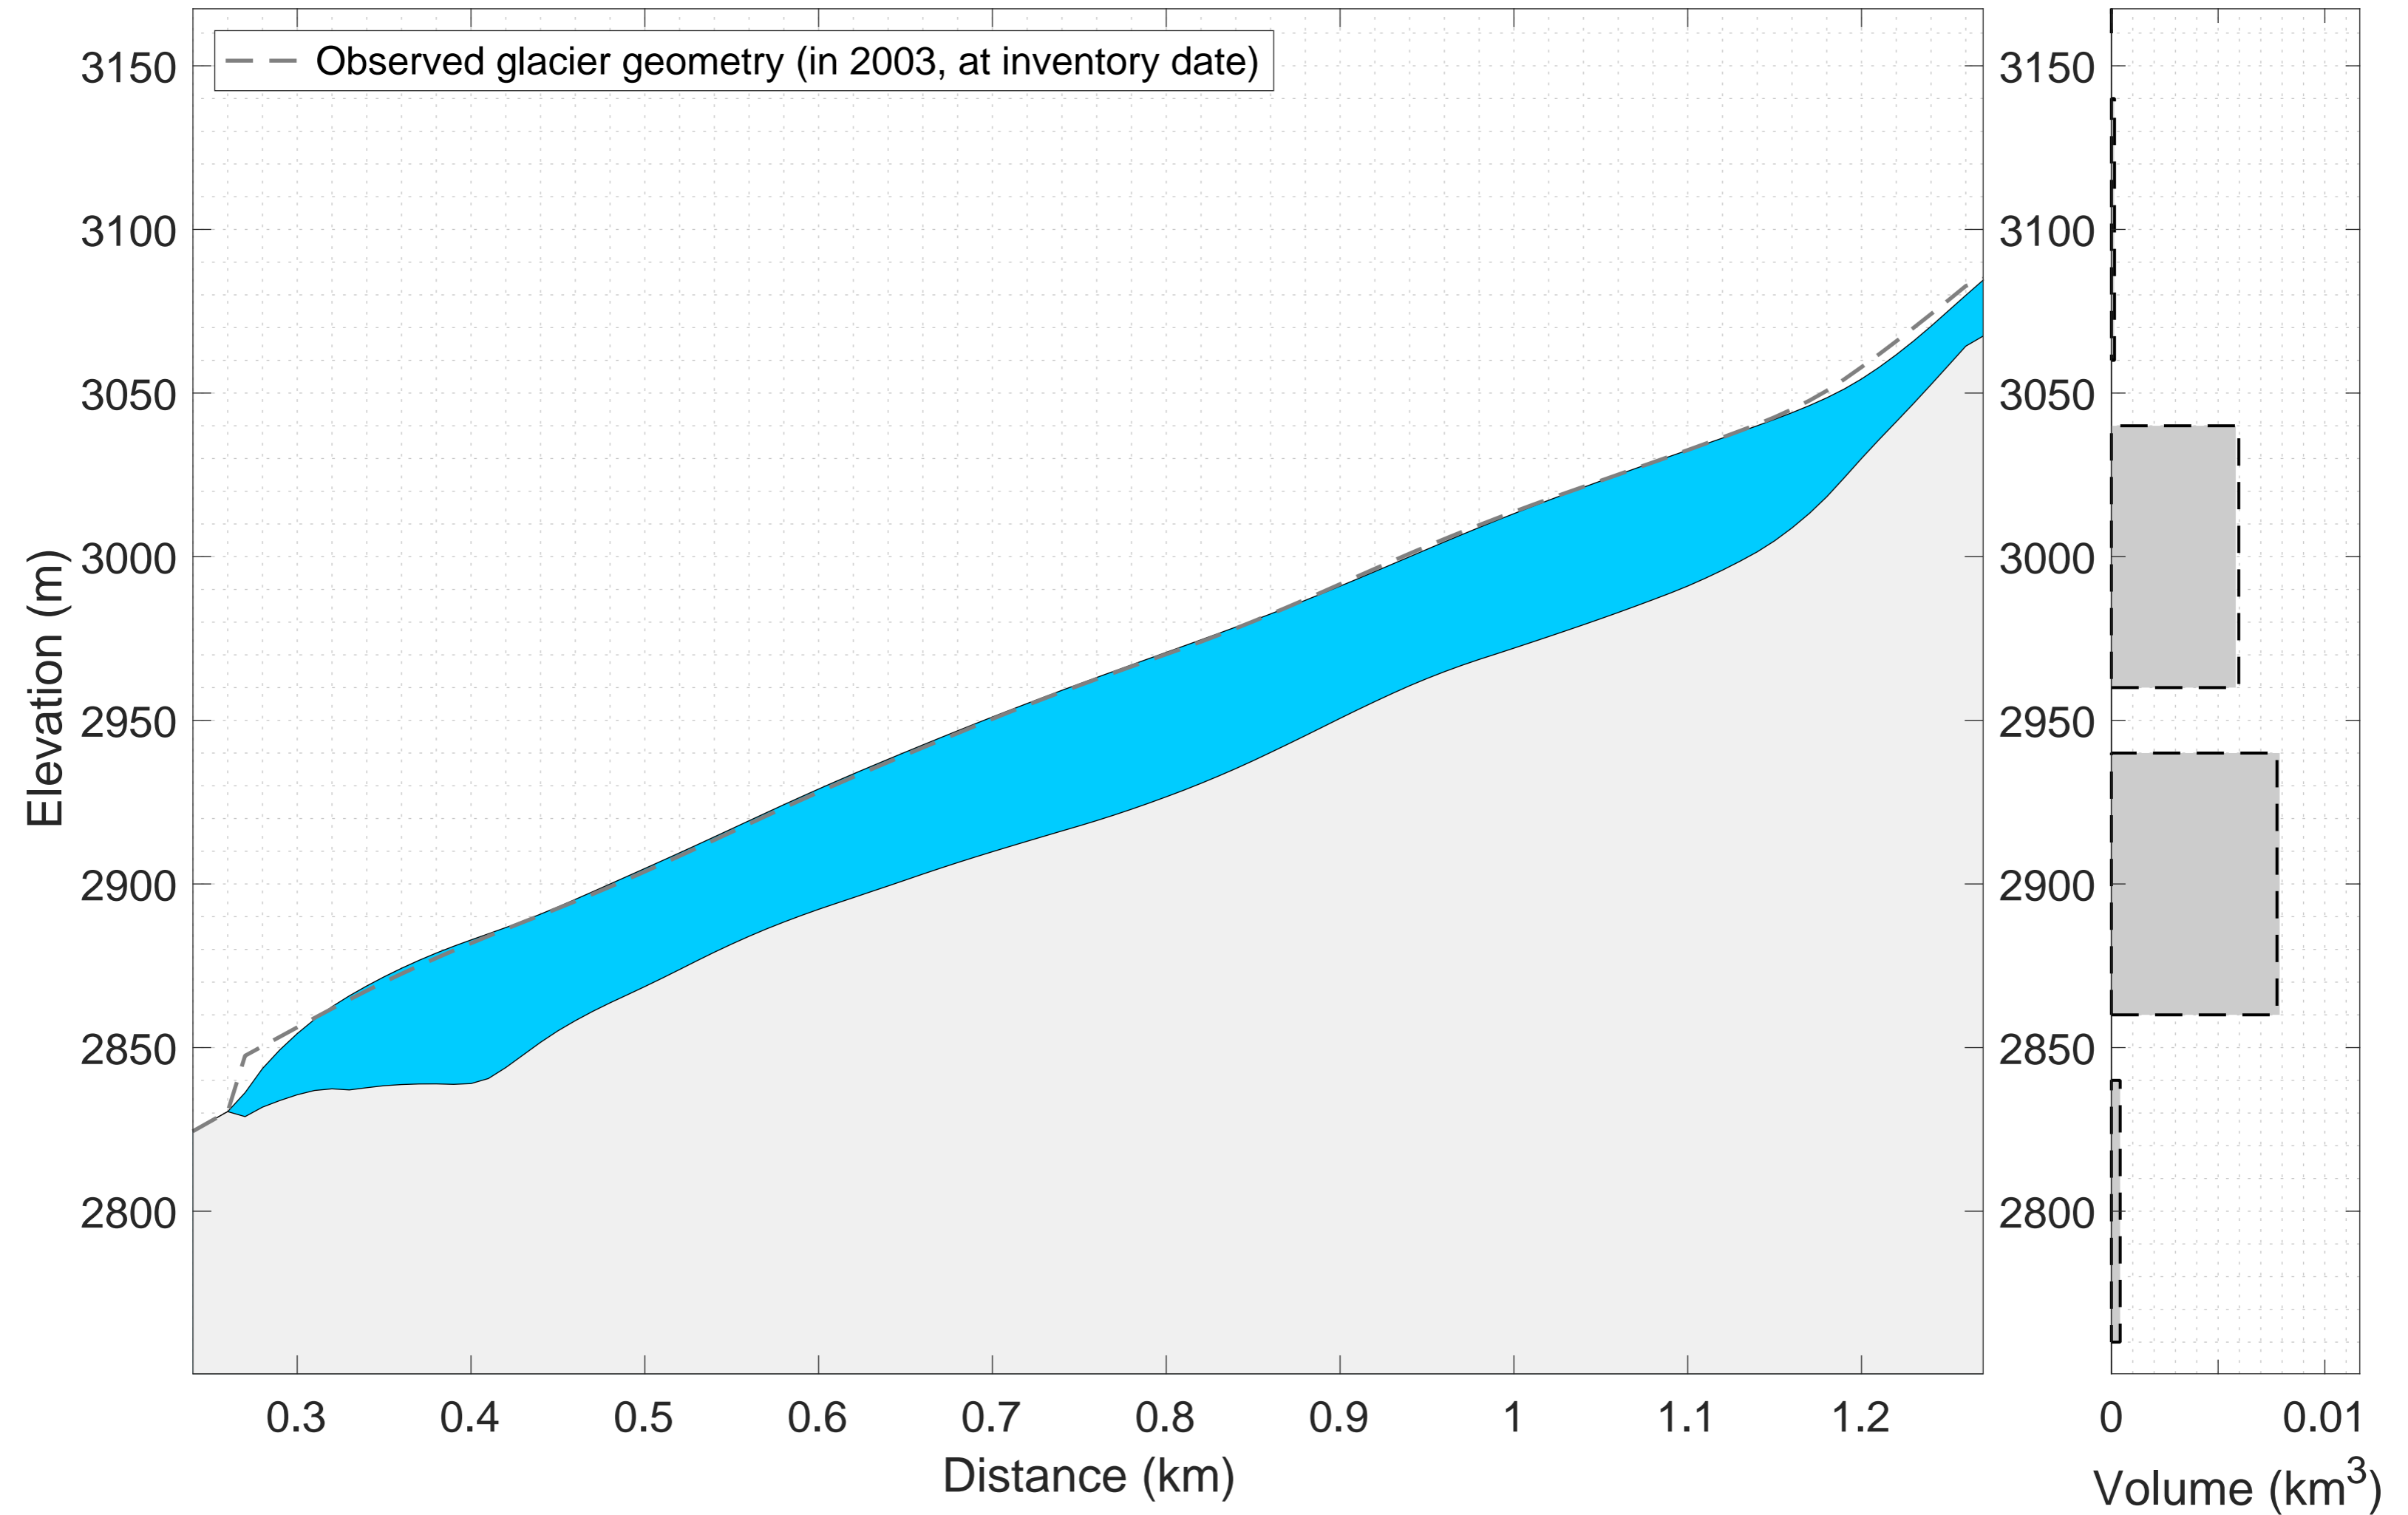

Supplement: Supplementary file 105 [file tc-13-1125-2019-supplement.zip]

Modelled geometry (Glacier ID = 03561;  $A = 7.0873\text{e-}17 \text{ Pa}^{-3} \text{ a}^{-1}$ ;  $dx = 11 \text{ m}$ )

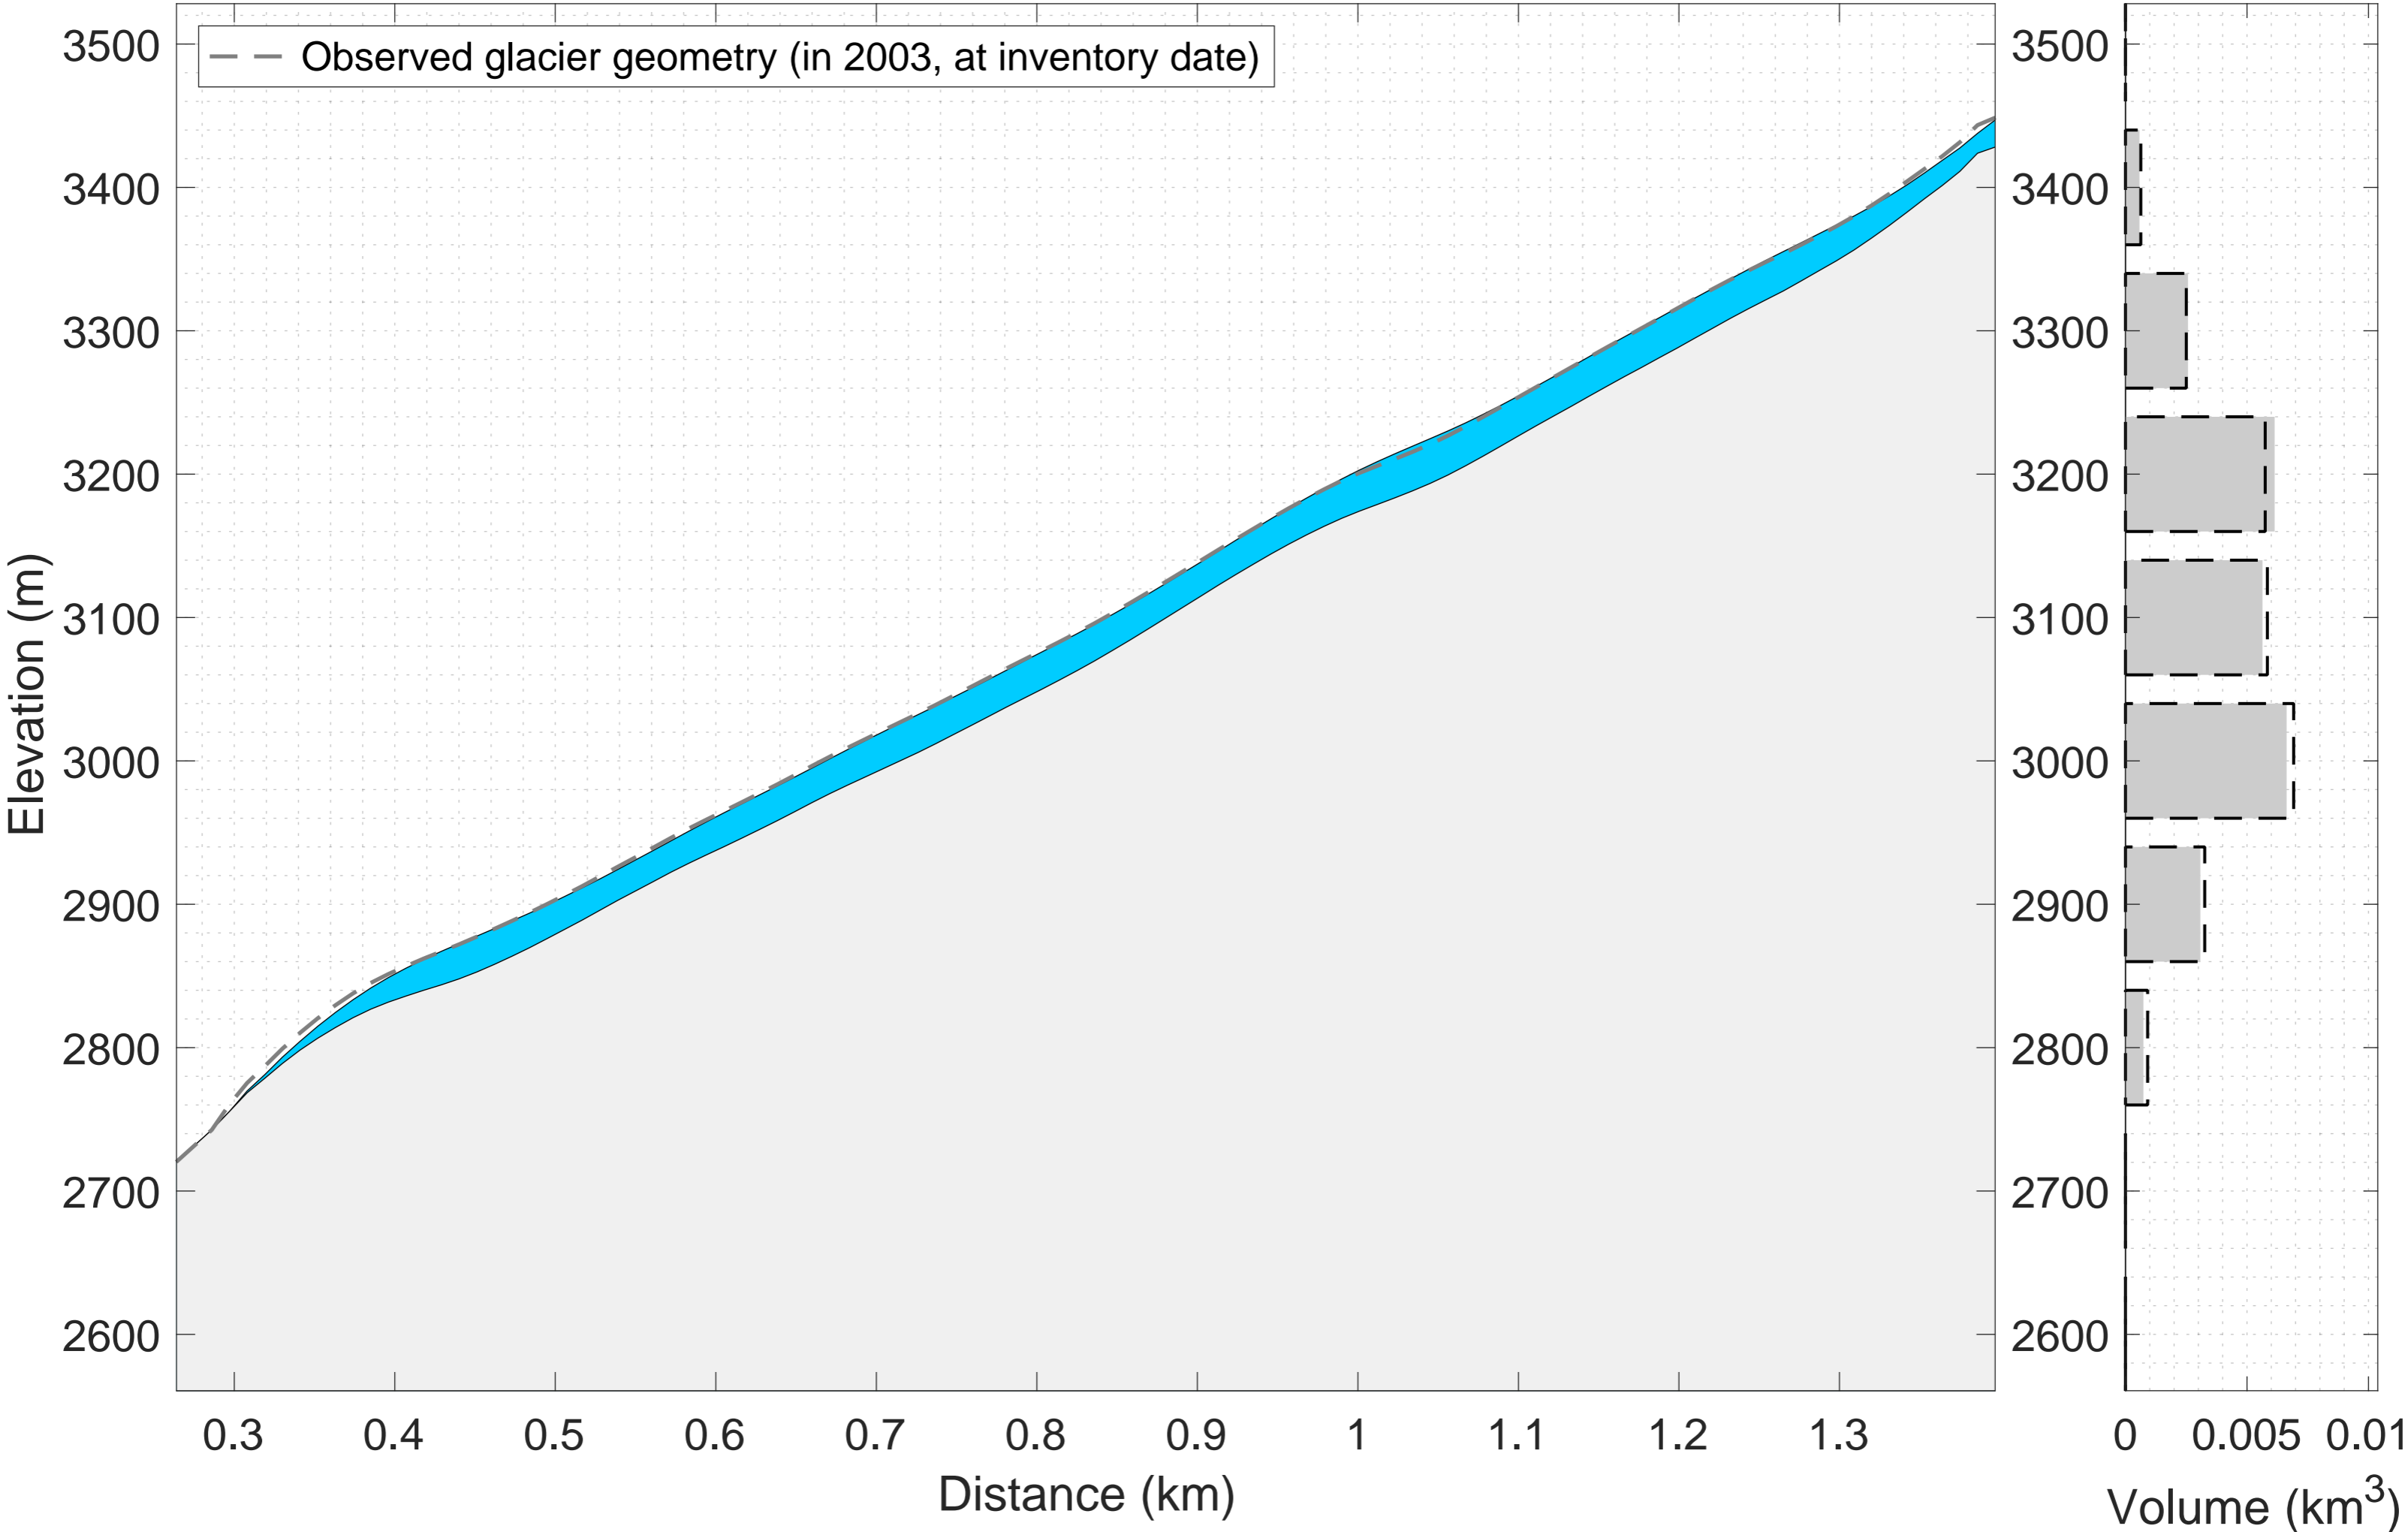

Supplement: Supplementary file 106 [file tc-13-1125-2019-supplement.zip]

**Modelled geometry (Glacier ID = 01642;  $A = 4.3078\text{e-}17 \text{ Pa}^{-3} \text{ a}^{-1}$ ;  $dx = 10 \text{ m}$ )**

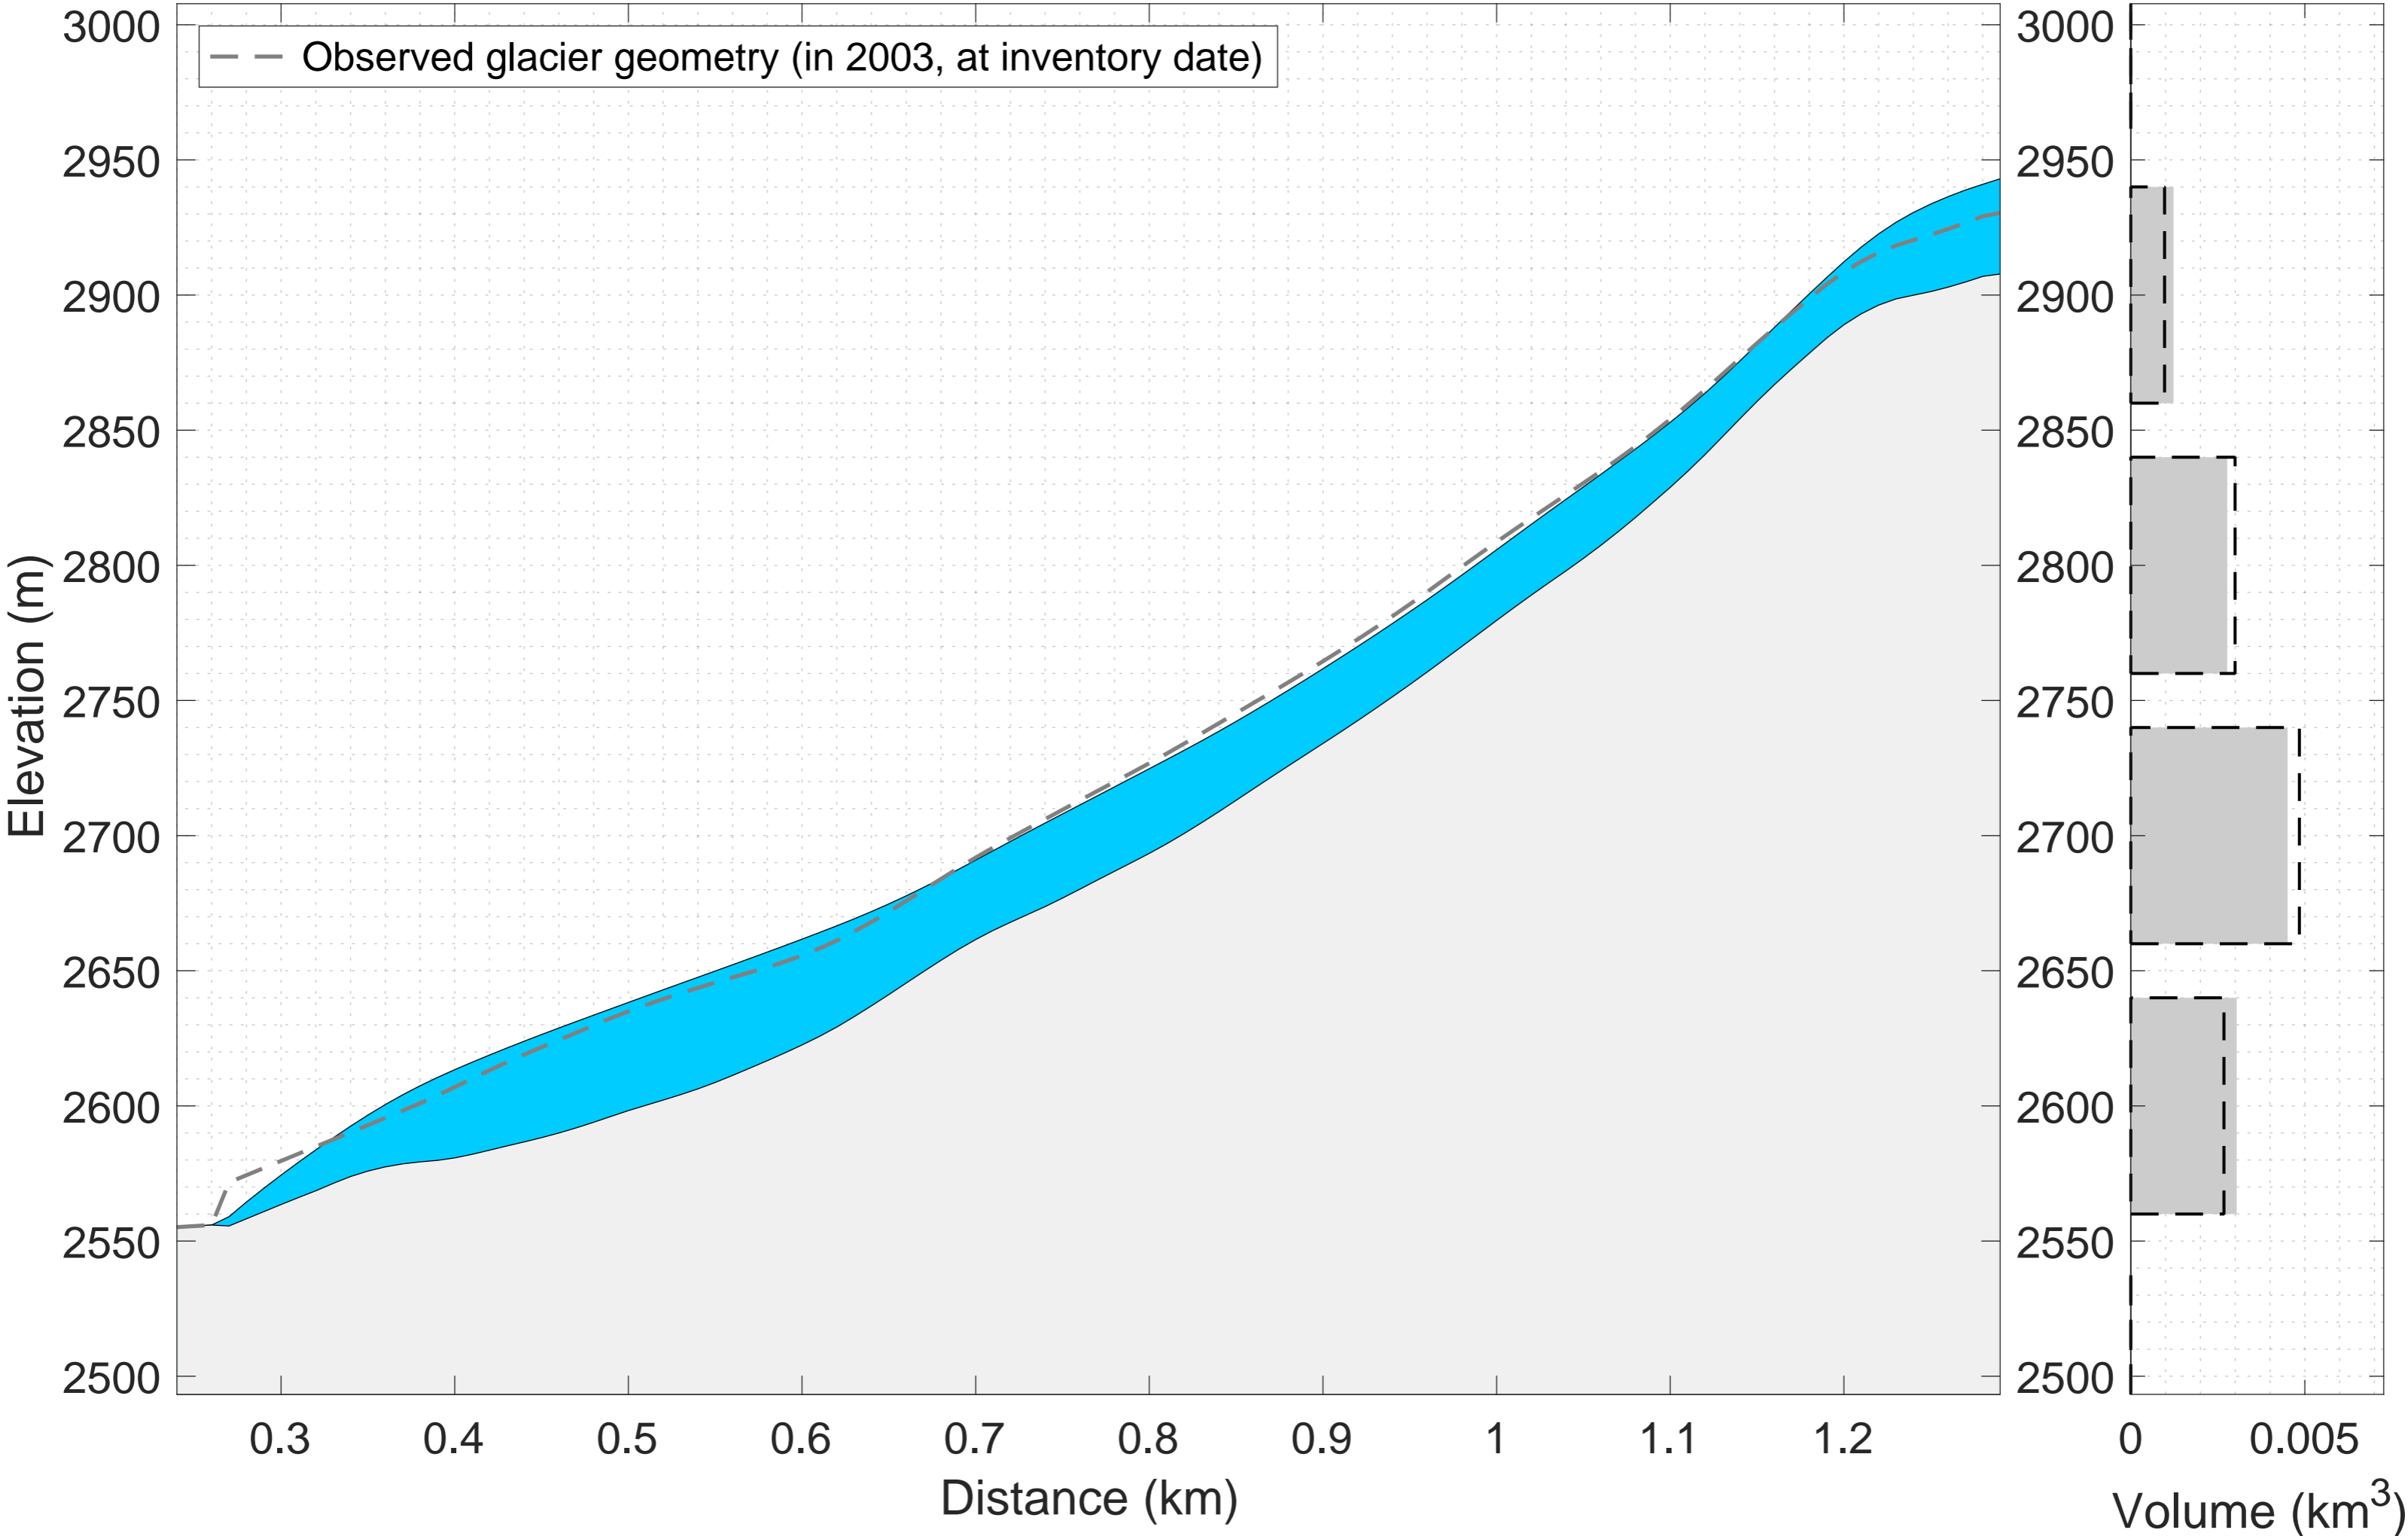

Supplement: Supplementary file 107 [file tc-13-1125-2019-supplement.zip]

**Modelled geometry (Glacier ID = 00434;  $A = 2.3034\text{e-}16 \text{ Pa}^{-3} \text{ a}^{-1}$ ;  $dx = 18 \text{ m}$ )**

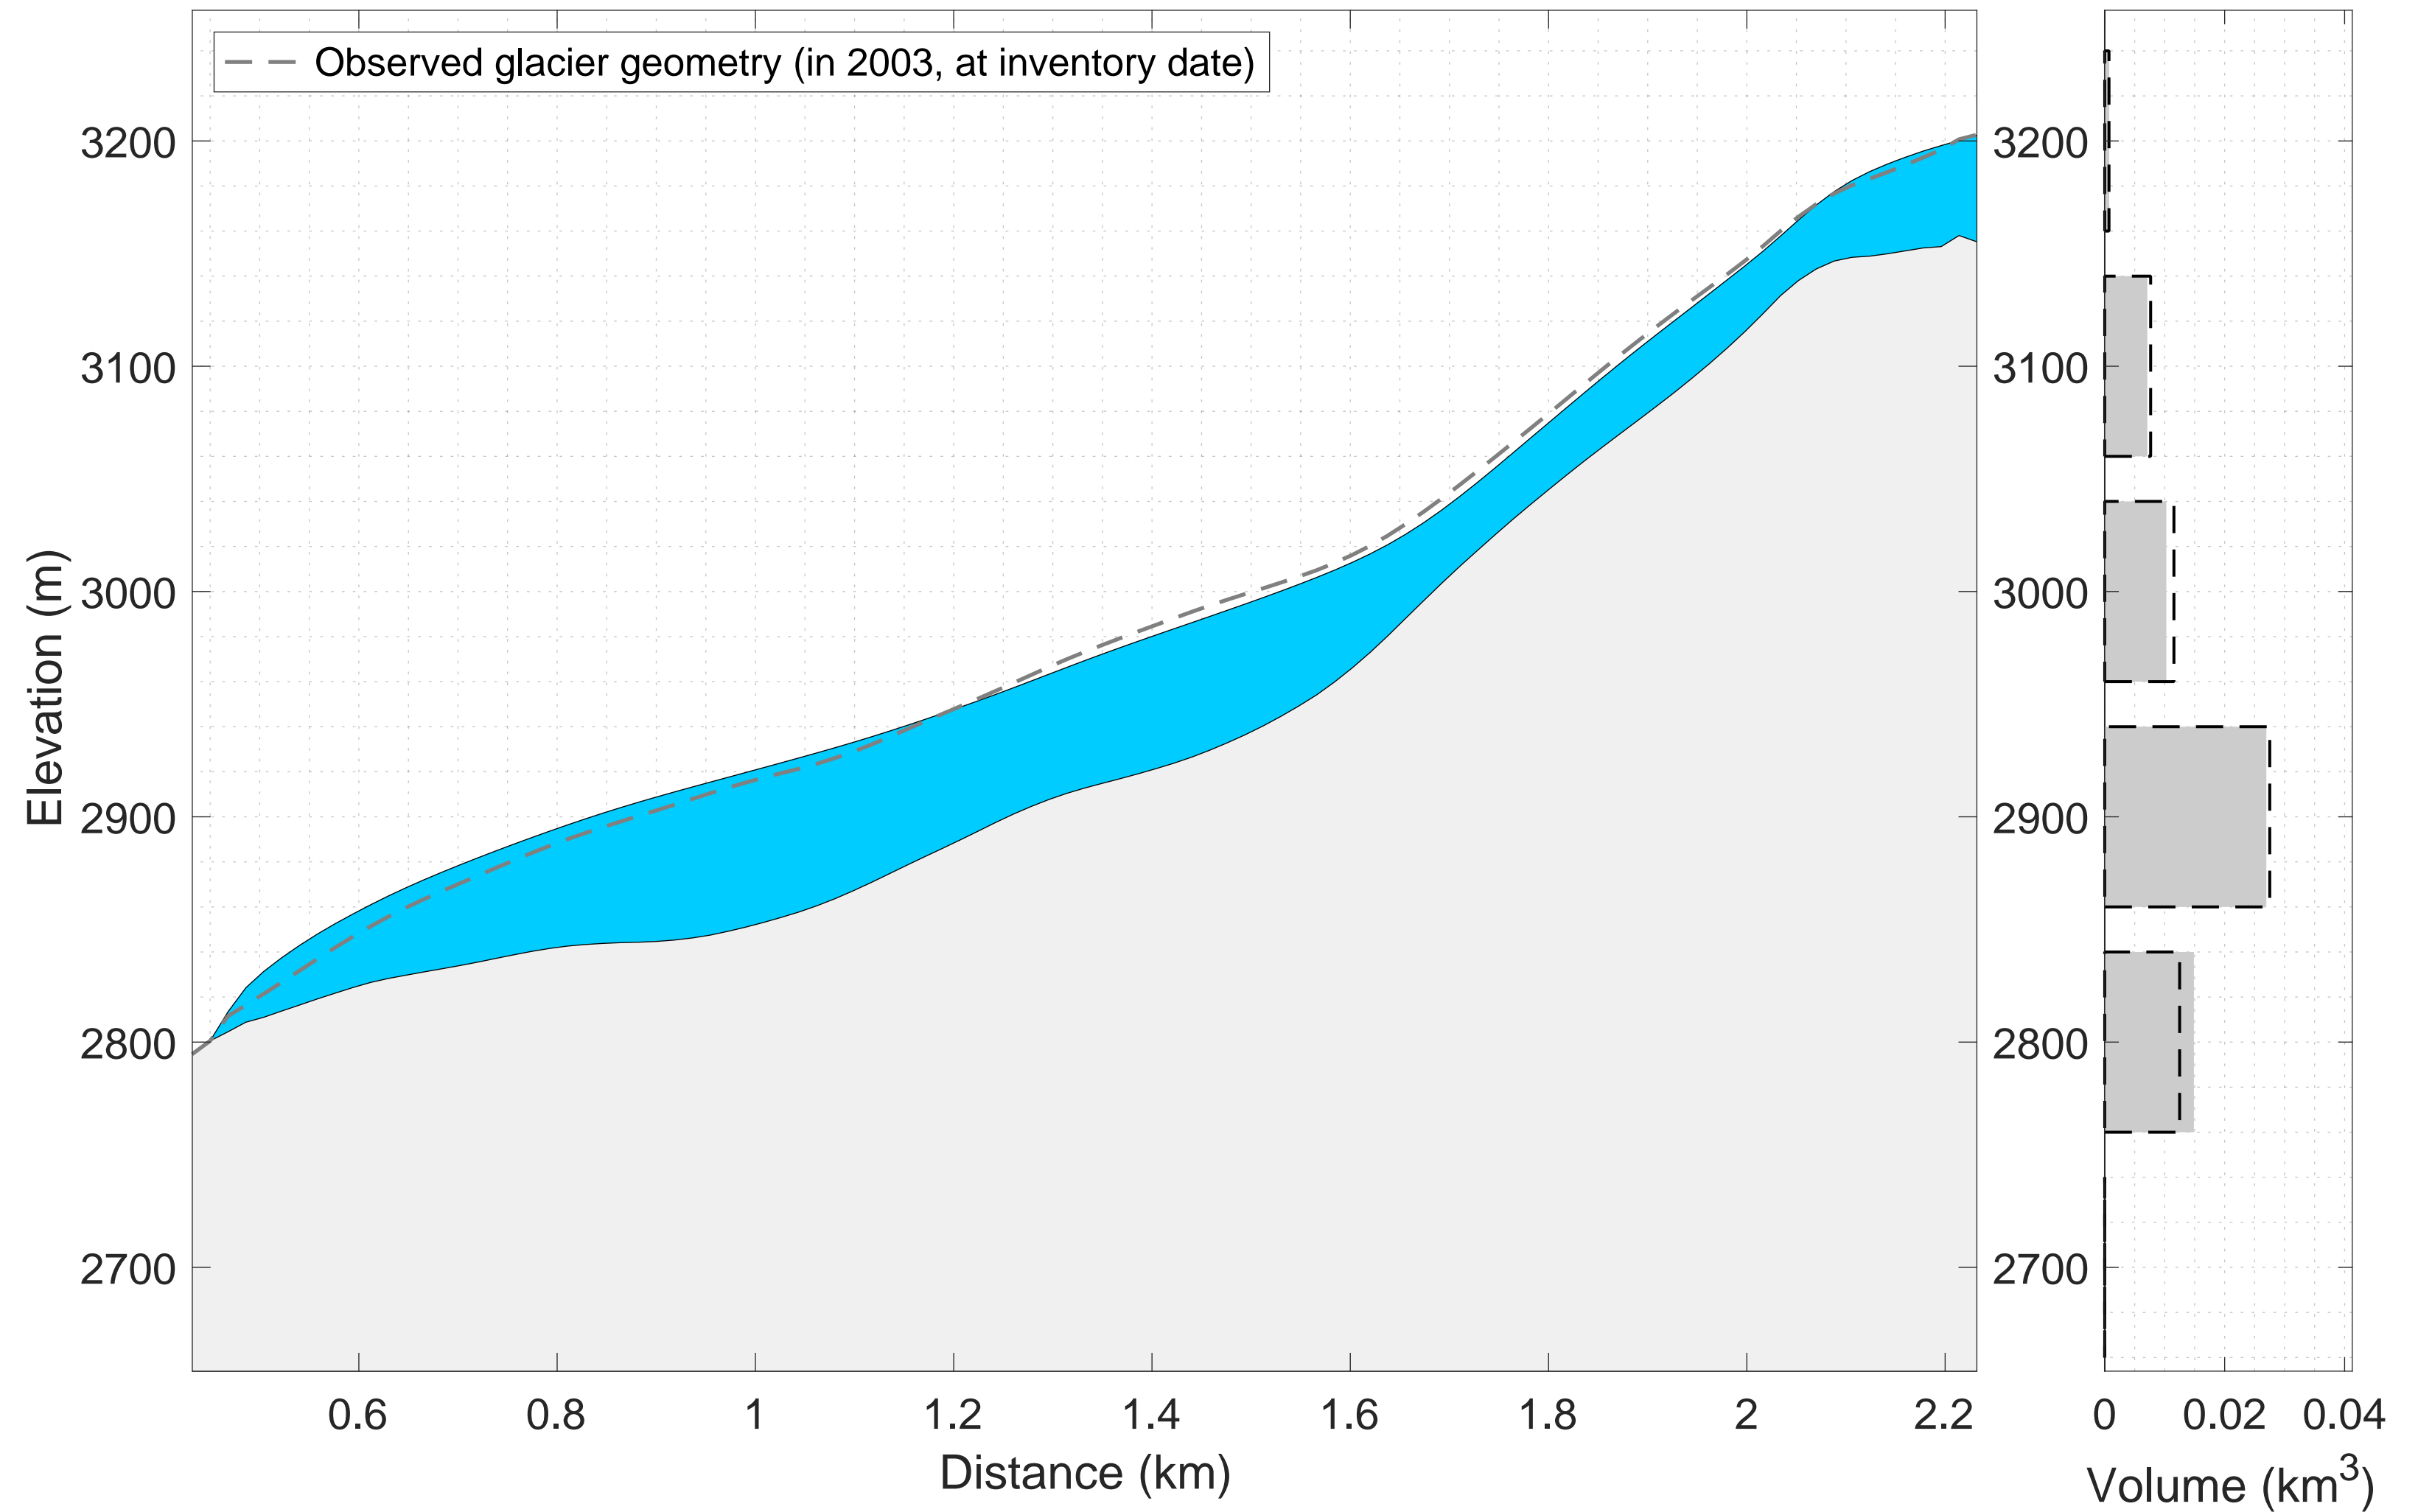

Supplement: Supplementary file 108 [file tc-13-1125-2019-supplement.zip]

**Modelled geometry (Glacier ID = 02866;  $A = 3.0587\text{e-}16 \text{ Pa}^{-3} \text{ a}^{-1}$ ;  $dx = 18 \text{ m}$ )**

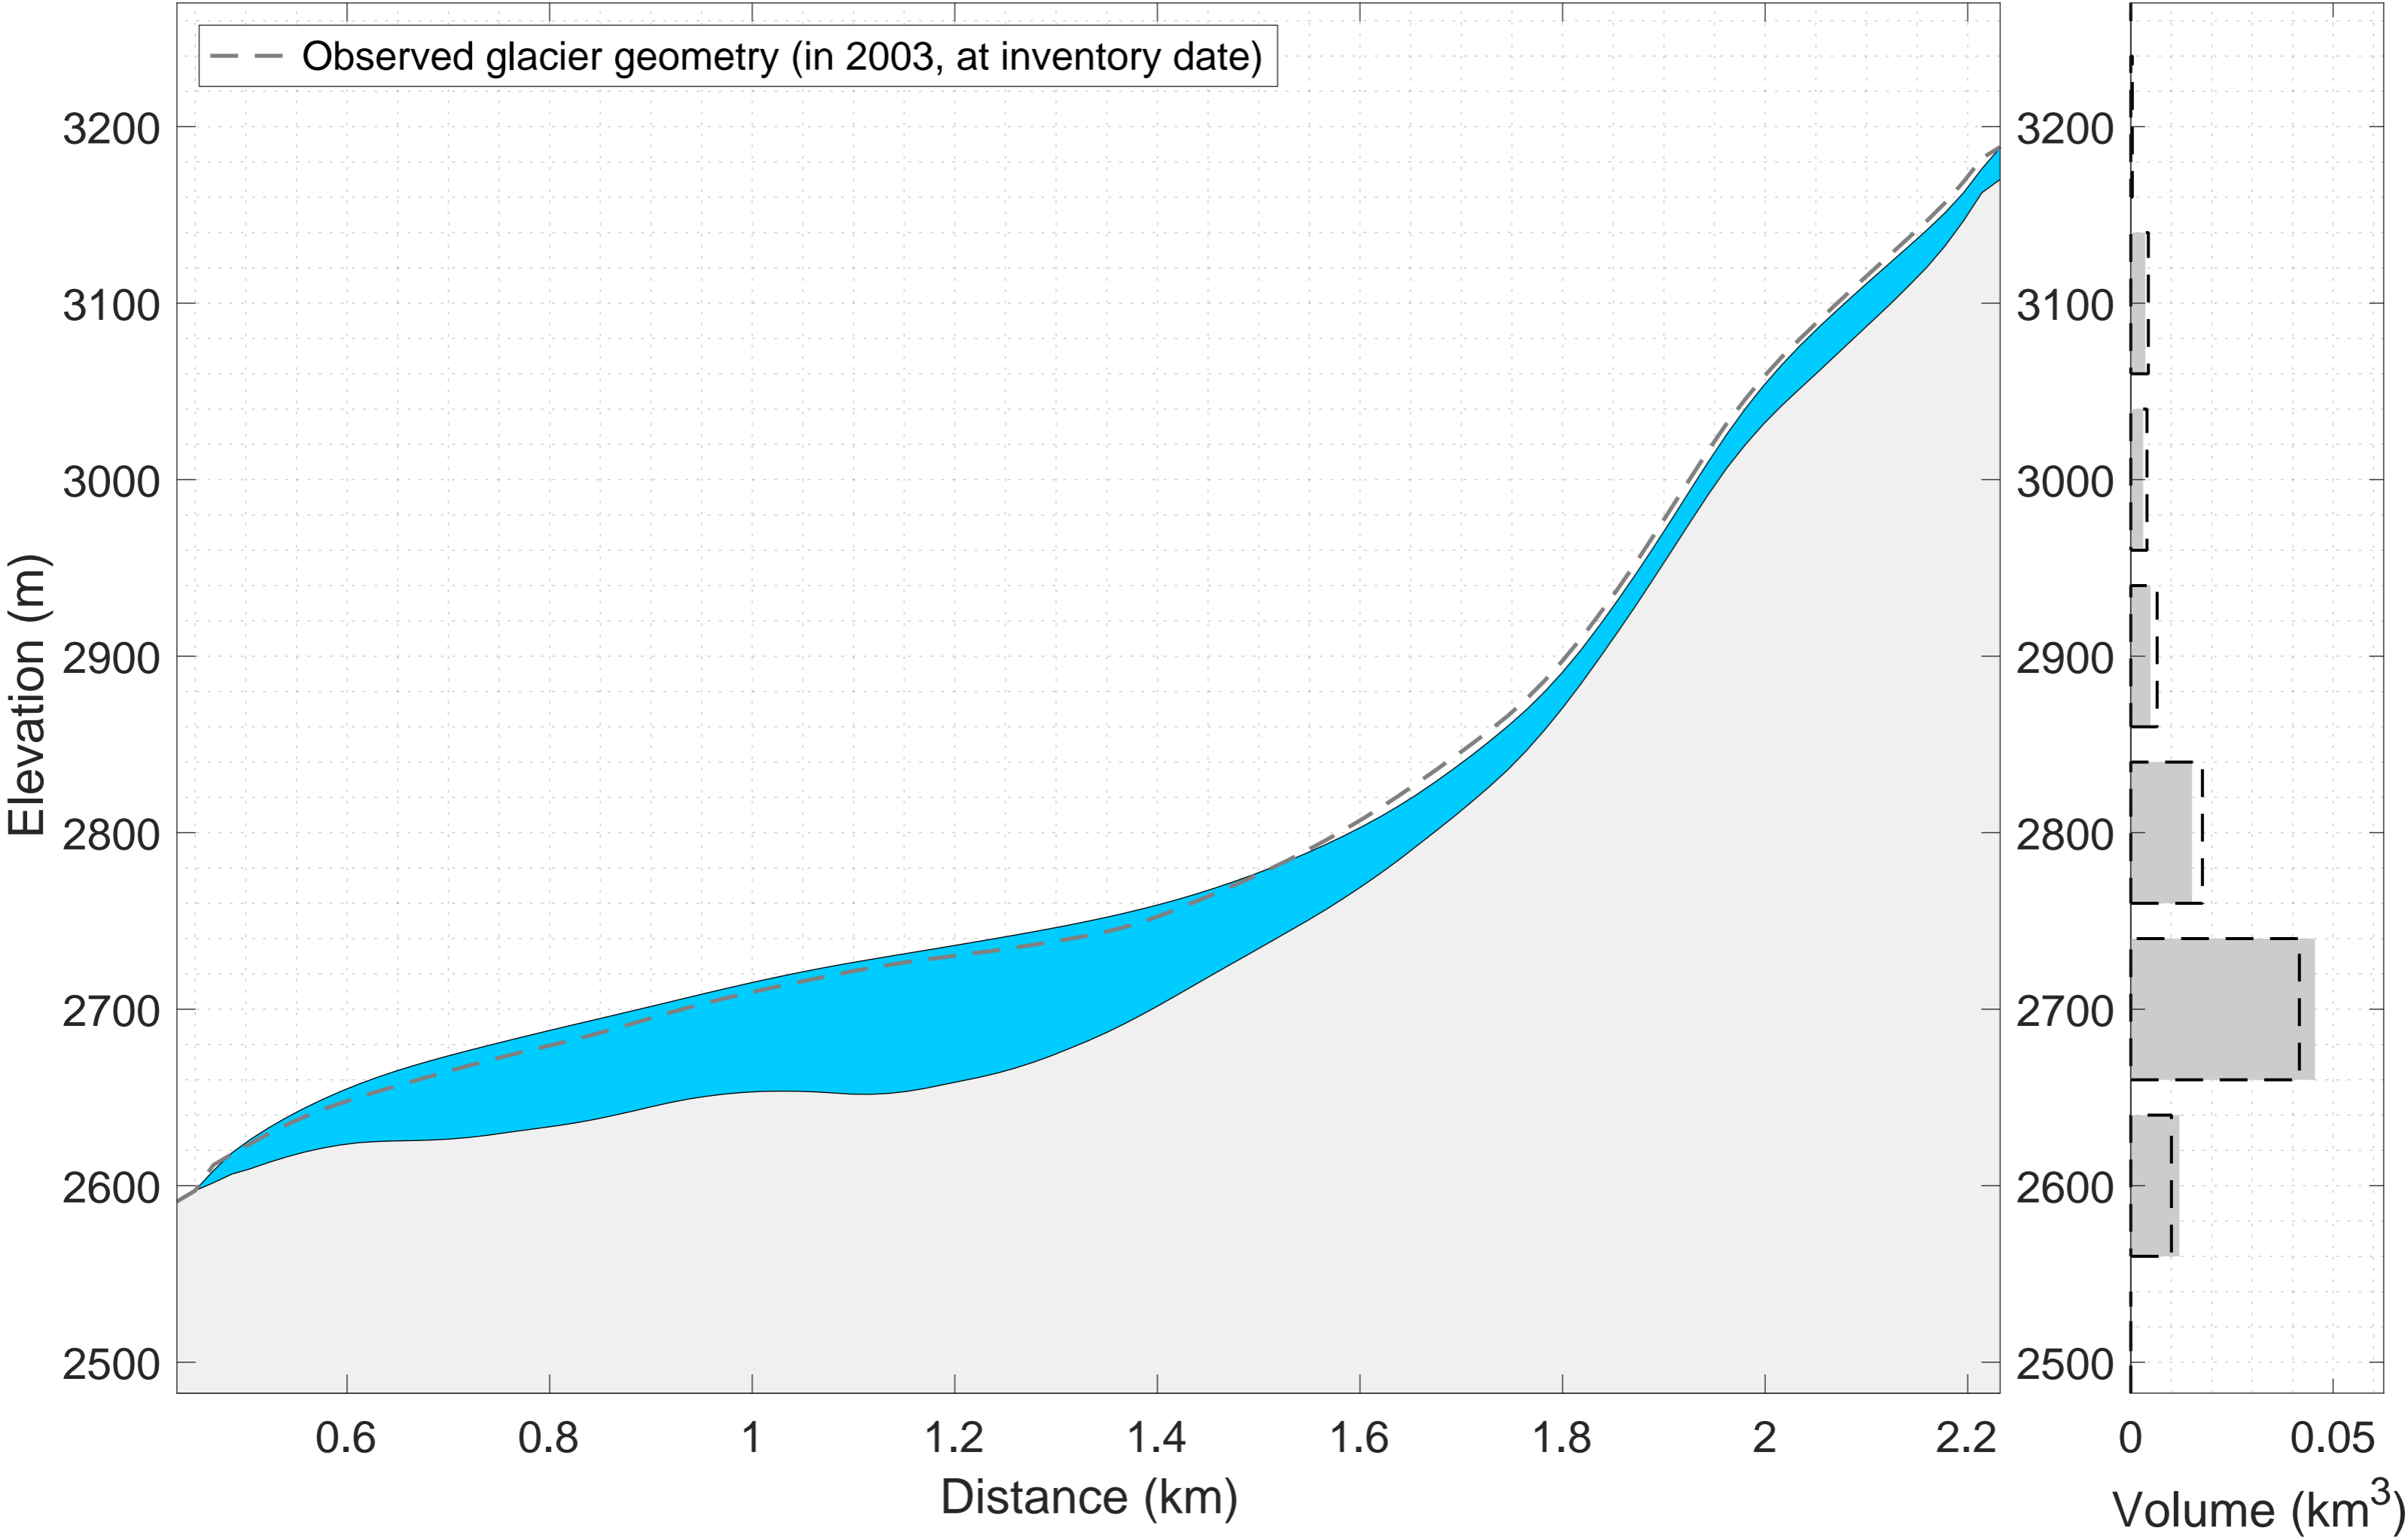

Supplement: Supplementary file 109 [file tc-13-1125-2019-supplement.zip]

**Modelled geometry (Glacier ID = 02930;  $A = 1.9157\text{e-}16 \text{ Pa}^{-3} \text{ a}^{-1}$ ;  $dx = 13 \text{ m}$ )**

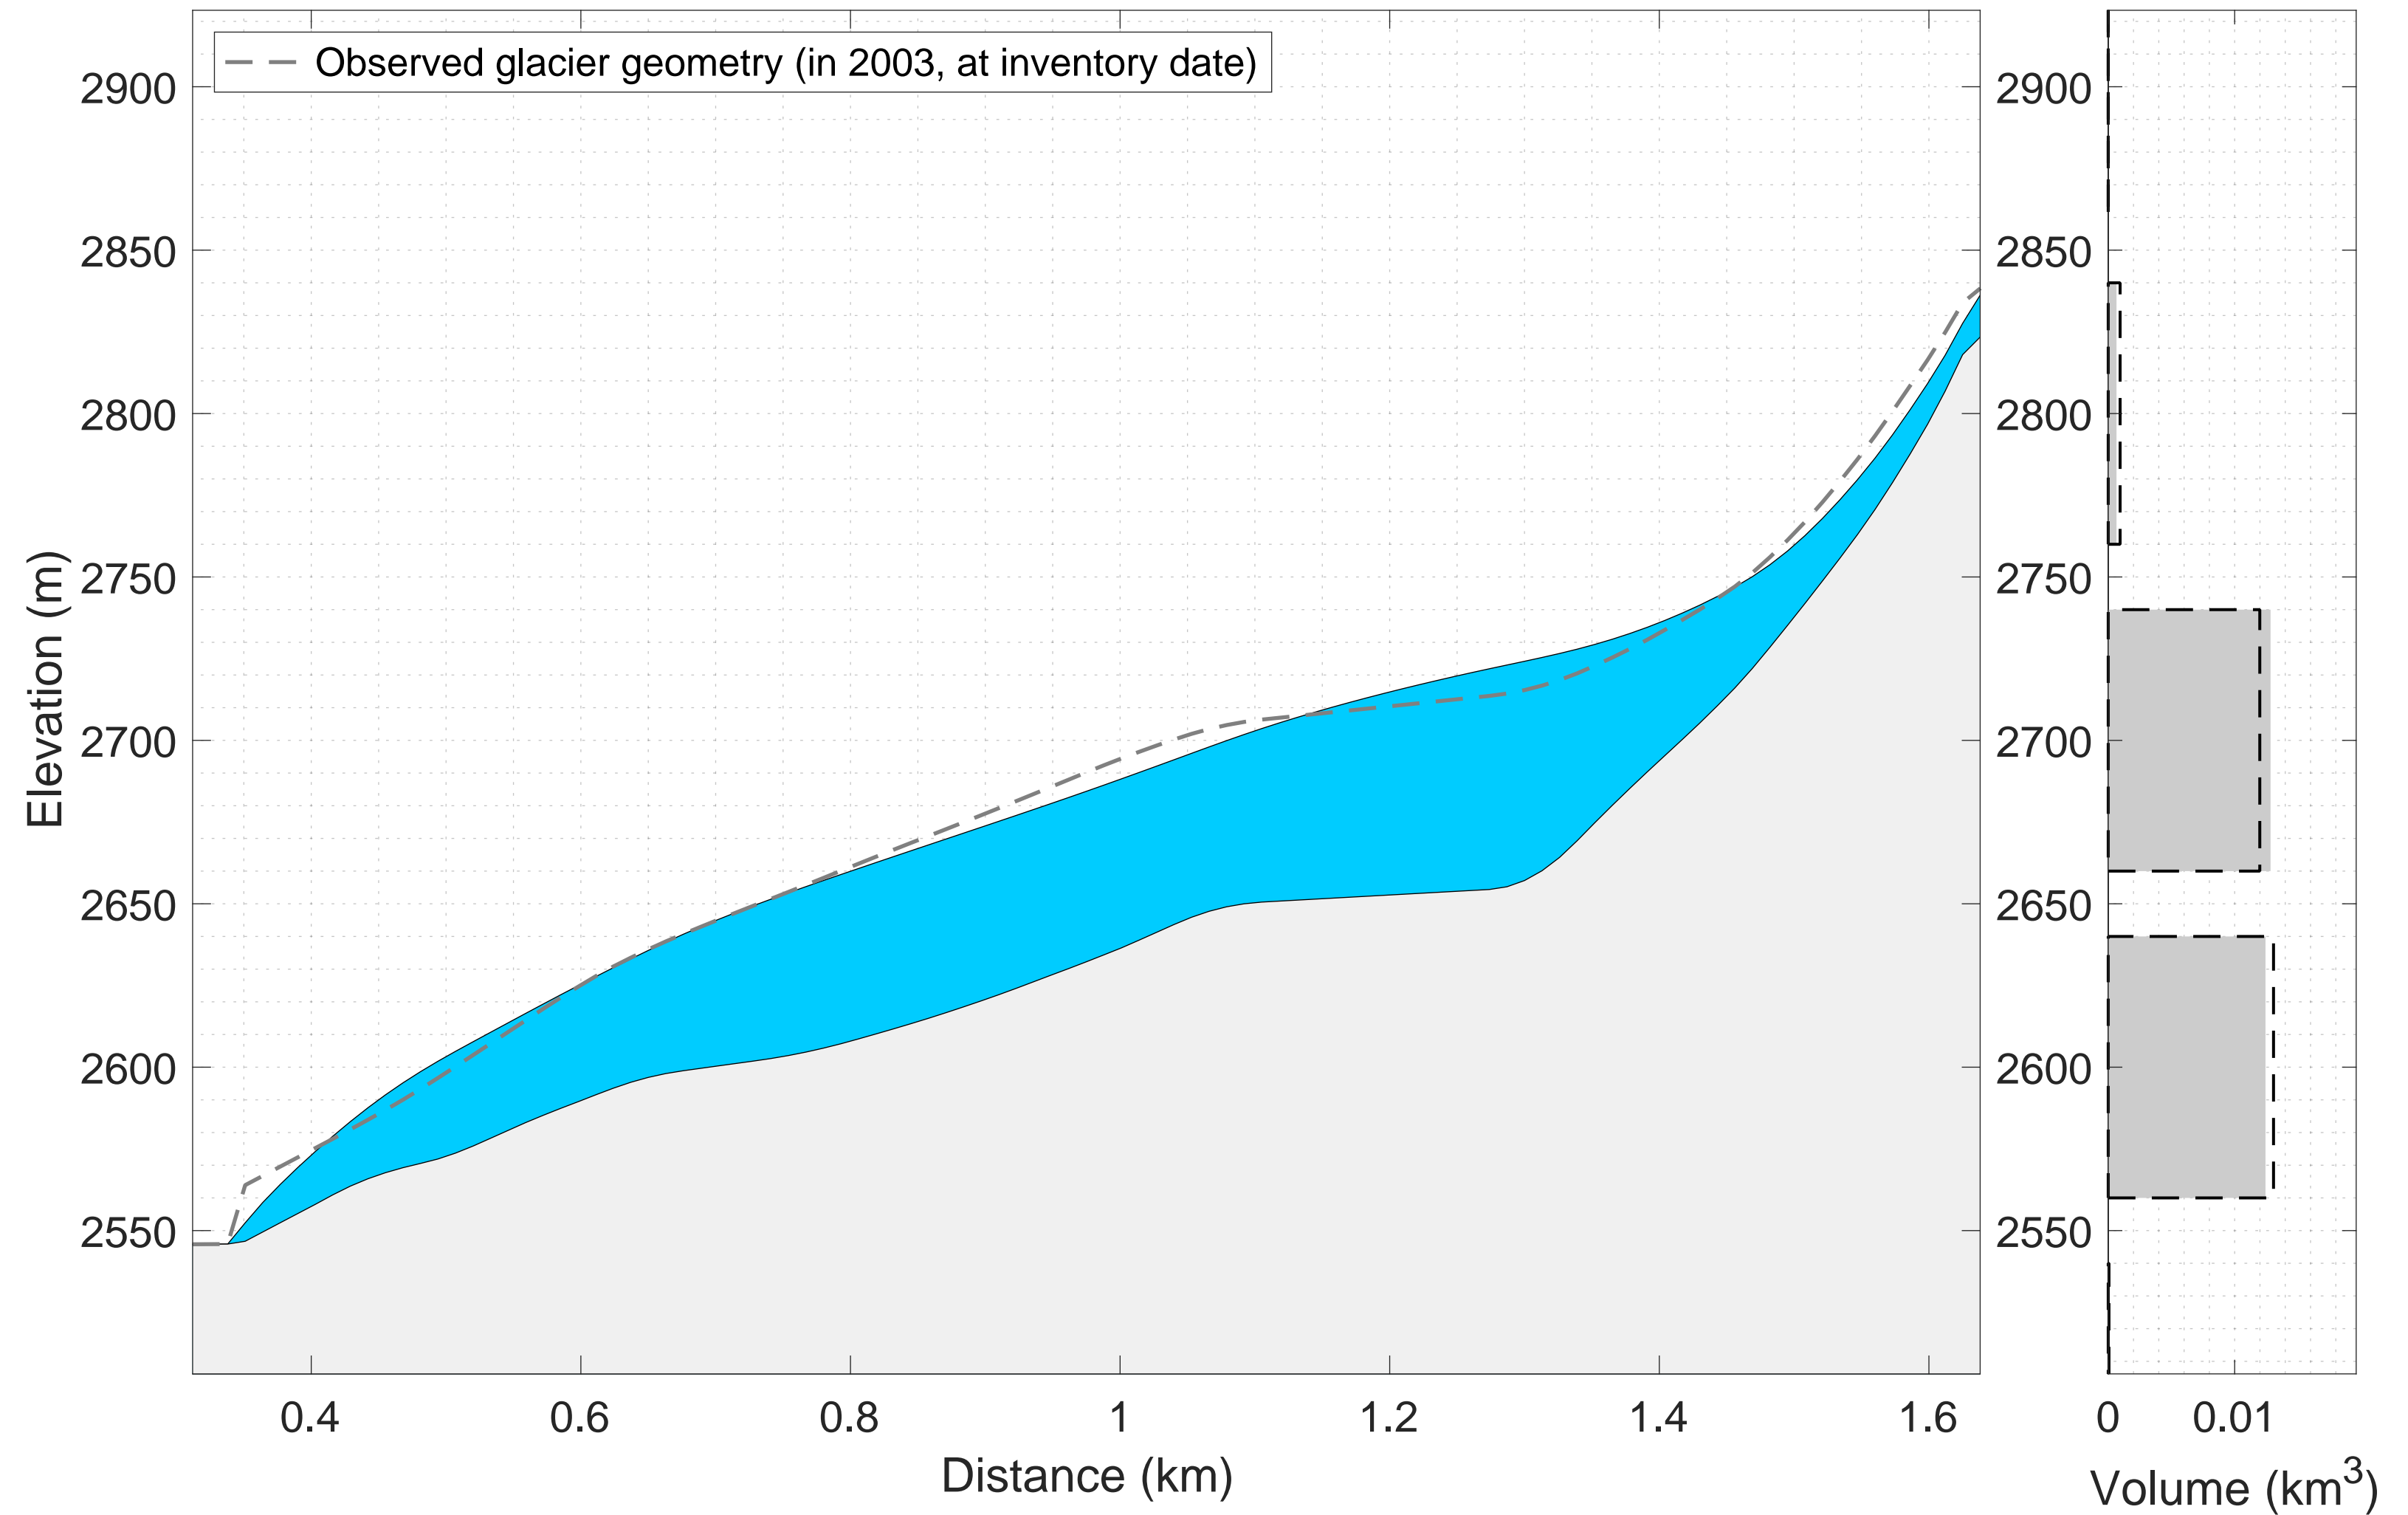

Supplement: Supplementary file 110 [file tc-13-1125-2019-supplement.zip]

**Modelled geometry (Glacier ID = 03588;  $A = 8.3113\text{e-}17 \text{ Pa}^{-3} \text{ a}^{-1}$ ;  $dx = 12 \text{ m}$ )**

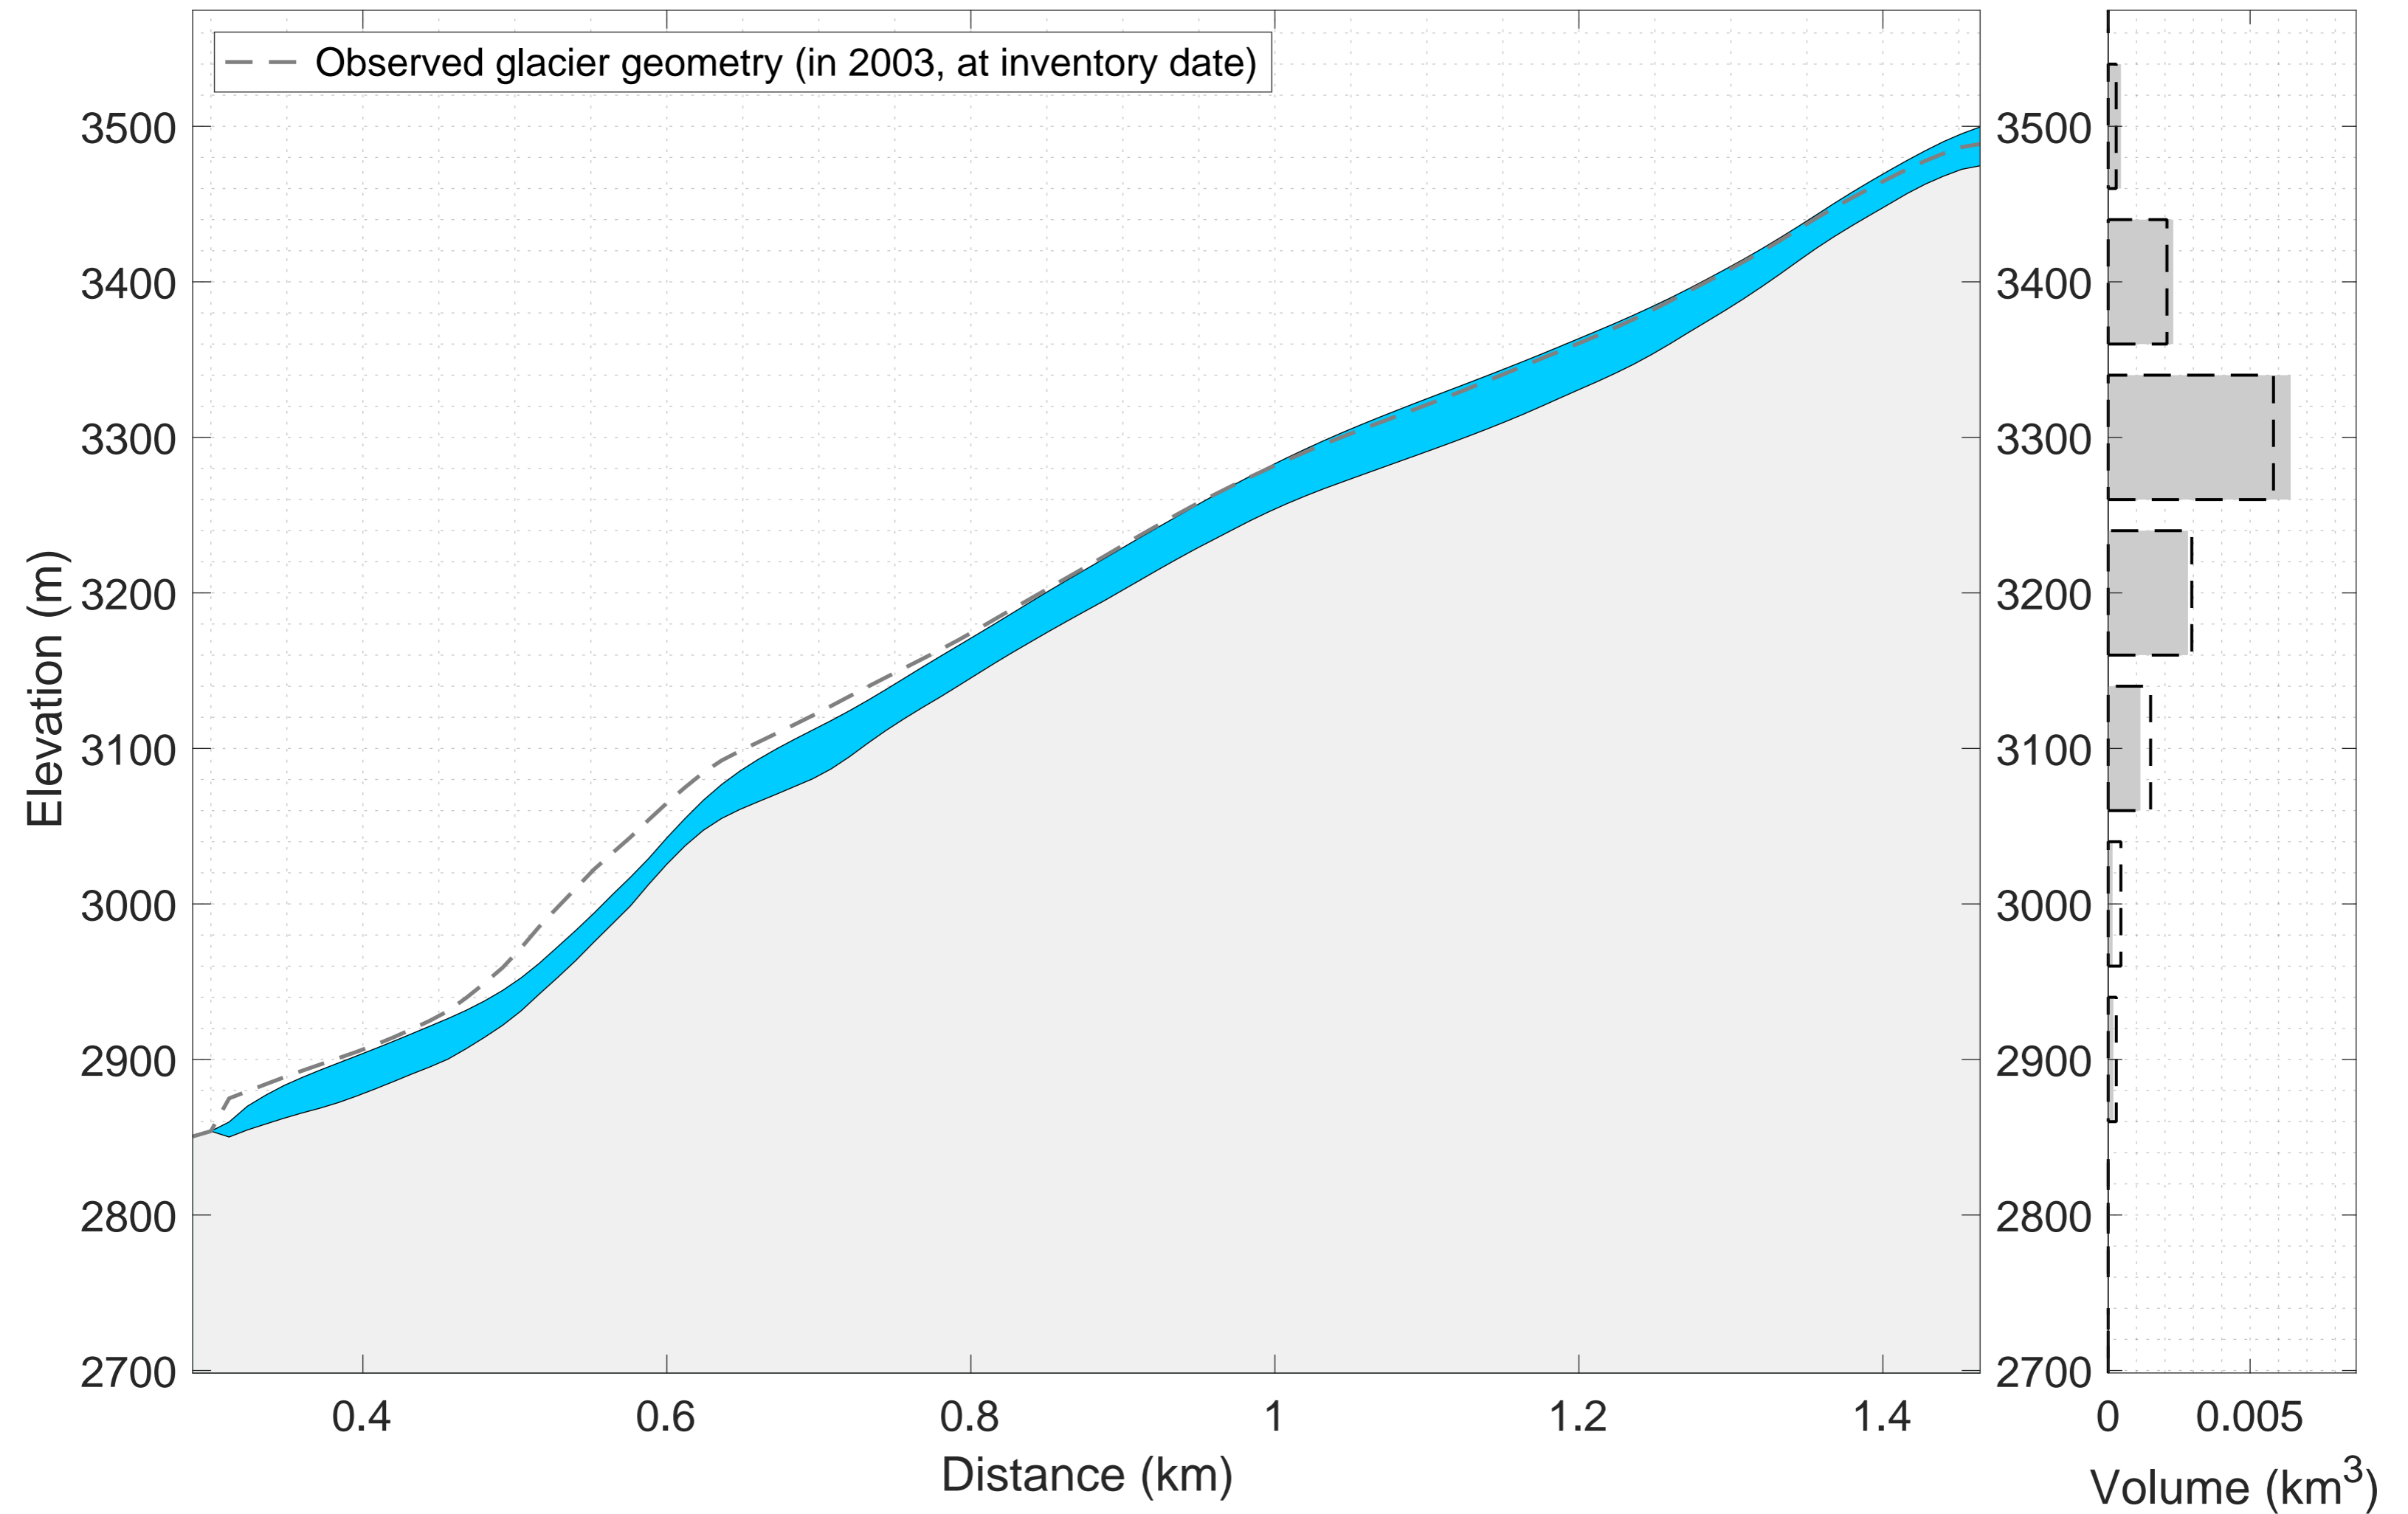

Supplement: Supplementary file 111 [file tc-13-1125-2019-supplement.zip]

**Modelled geometry (Glacier ID = 00897;  $A = 1.4809\text{e-}16 \text{ Pa}^{-3} \text{ a}^{-1}$ ;  $dx = 60 \text{ m}$ )**

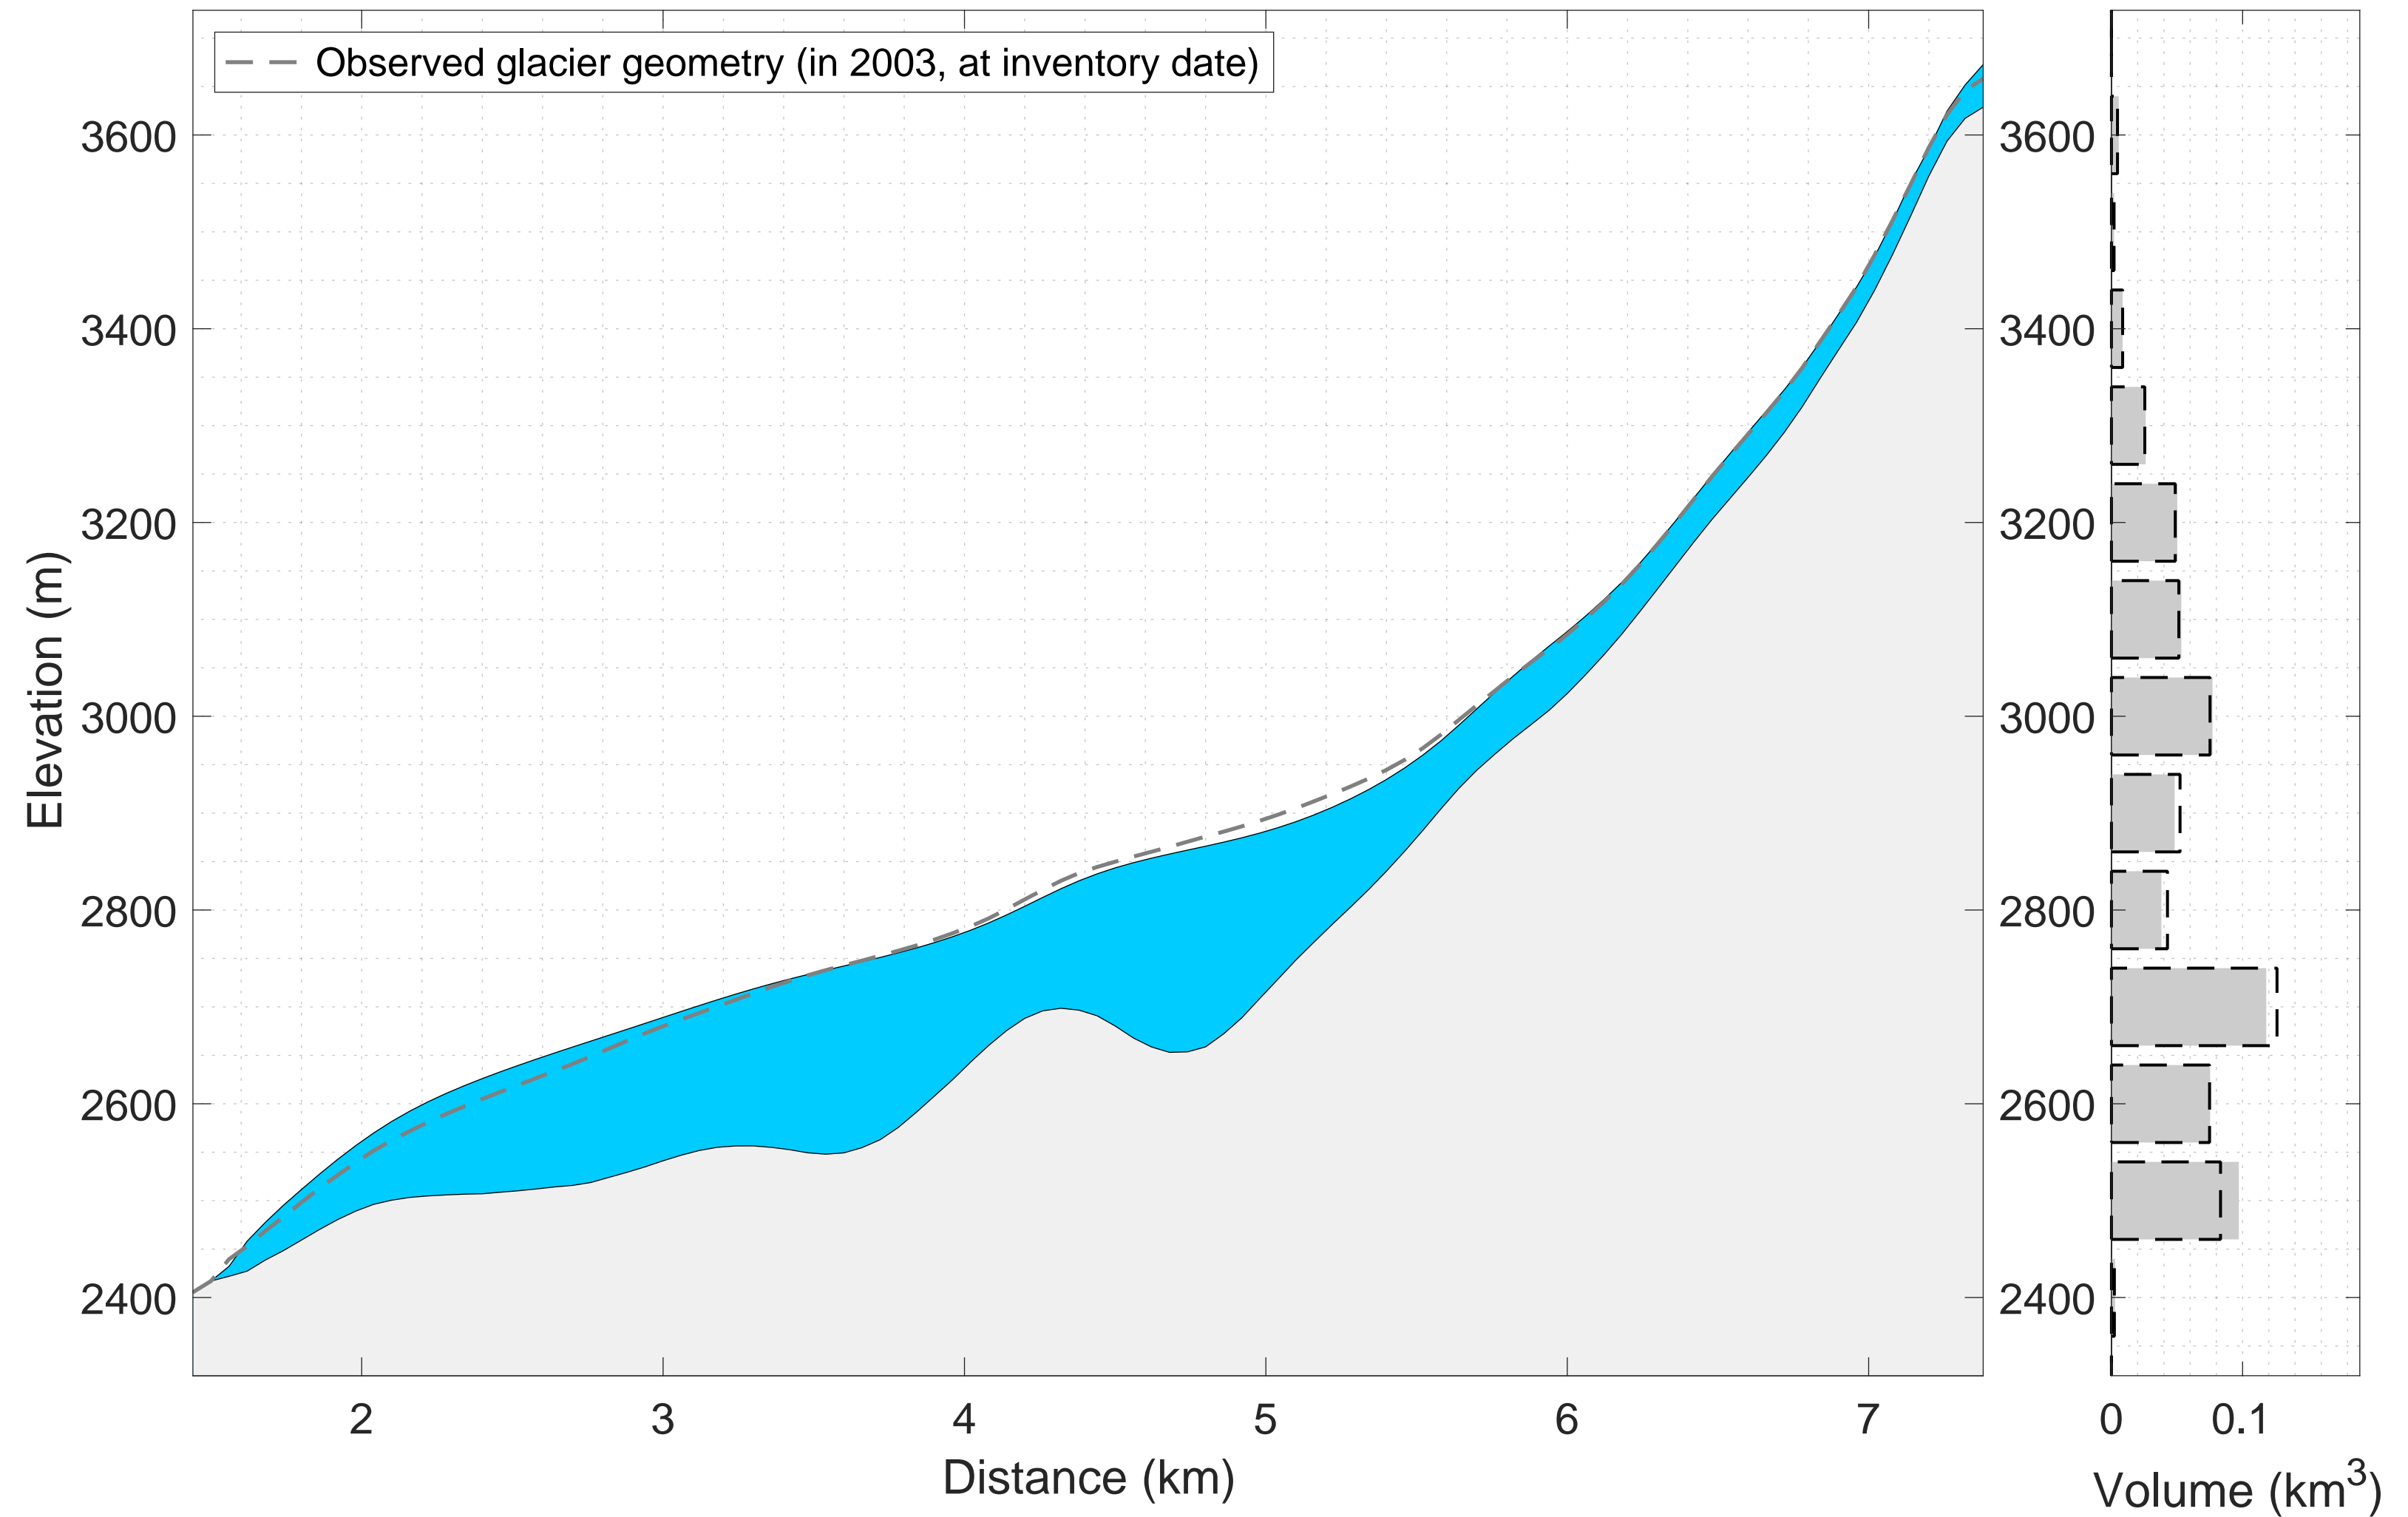

Supplement: Supplementary file 112 [file tc-13-1125-2019-supplement.zip]

**Modelled geometry (Glacier ID = 02665;  $A = 5.4053\text{e-}17 \text{ Pa}^{-3} \text{ a}^{-1}$ ;  $dx = 12 \text{ m}$ )**

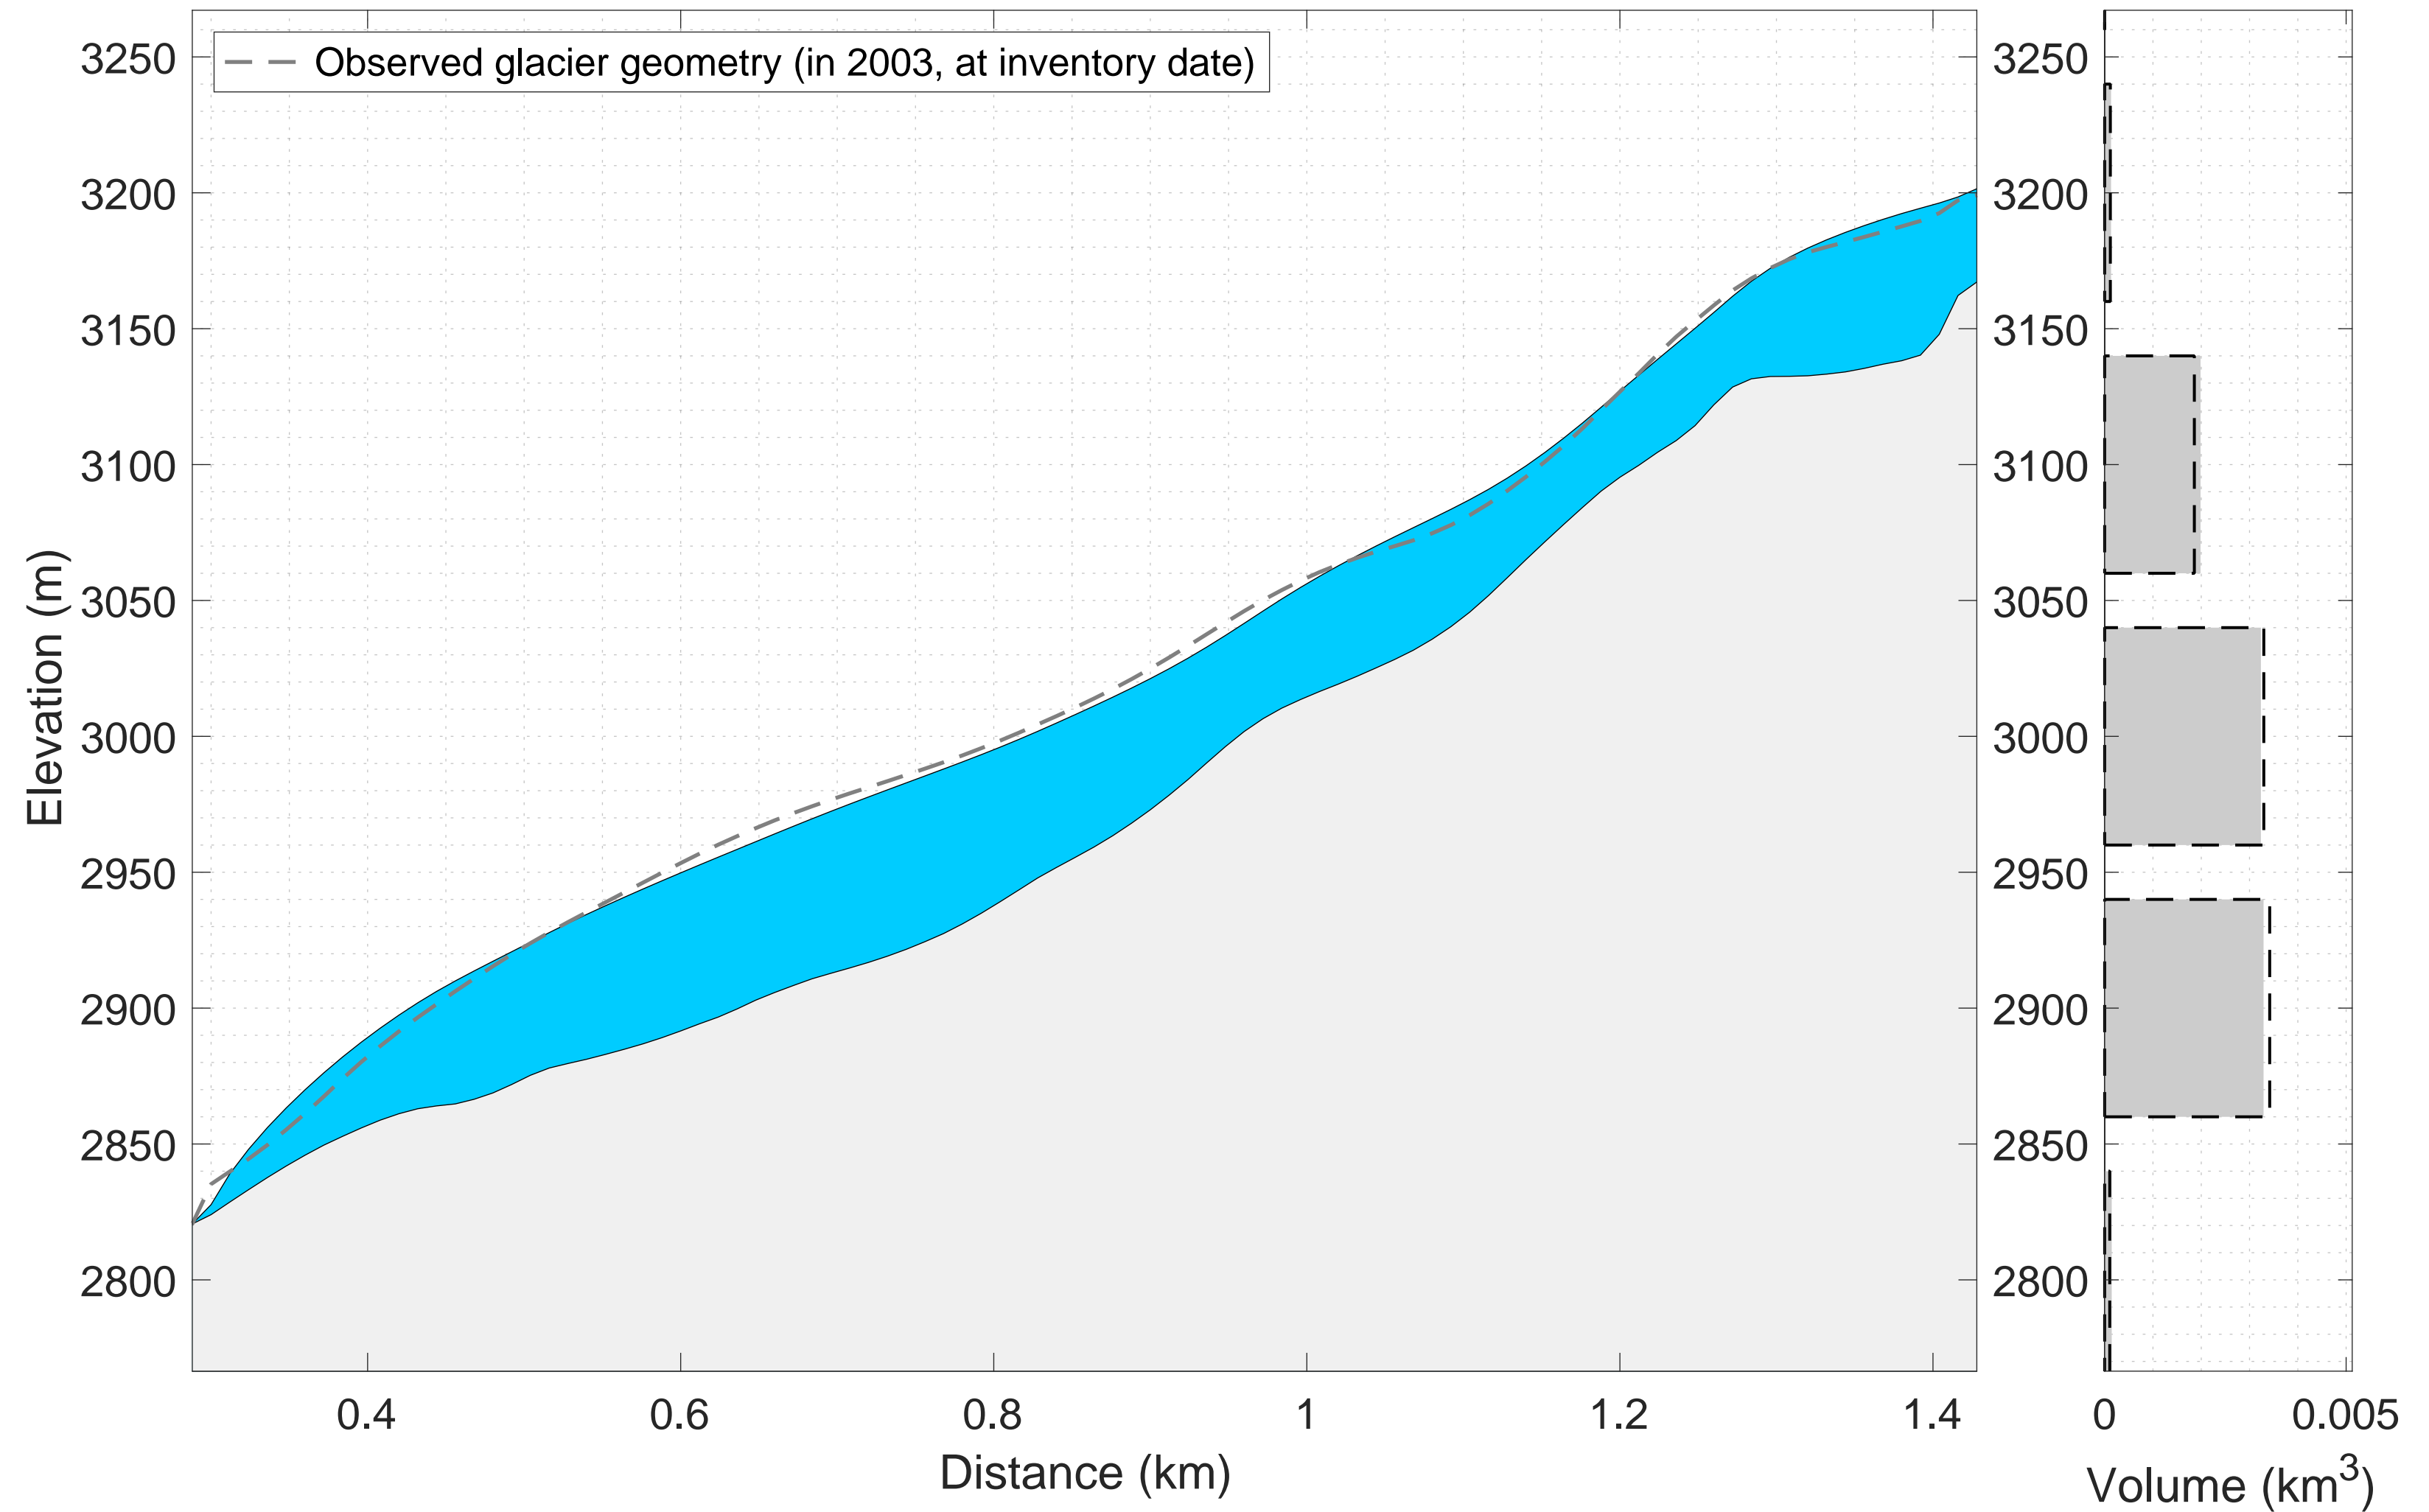

Supplement: Supplementary file 113 [file tc-13-1125-2019-supplement.zip]

**Modelled geometry (Glacier ID = 00190;  $A = 2.3806\text{e-}16 \text{ Pa}^{-3} \text{ a}^{-1}$ ;  $dx = 29 \text{ m}$ )**

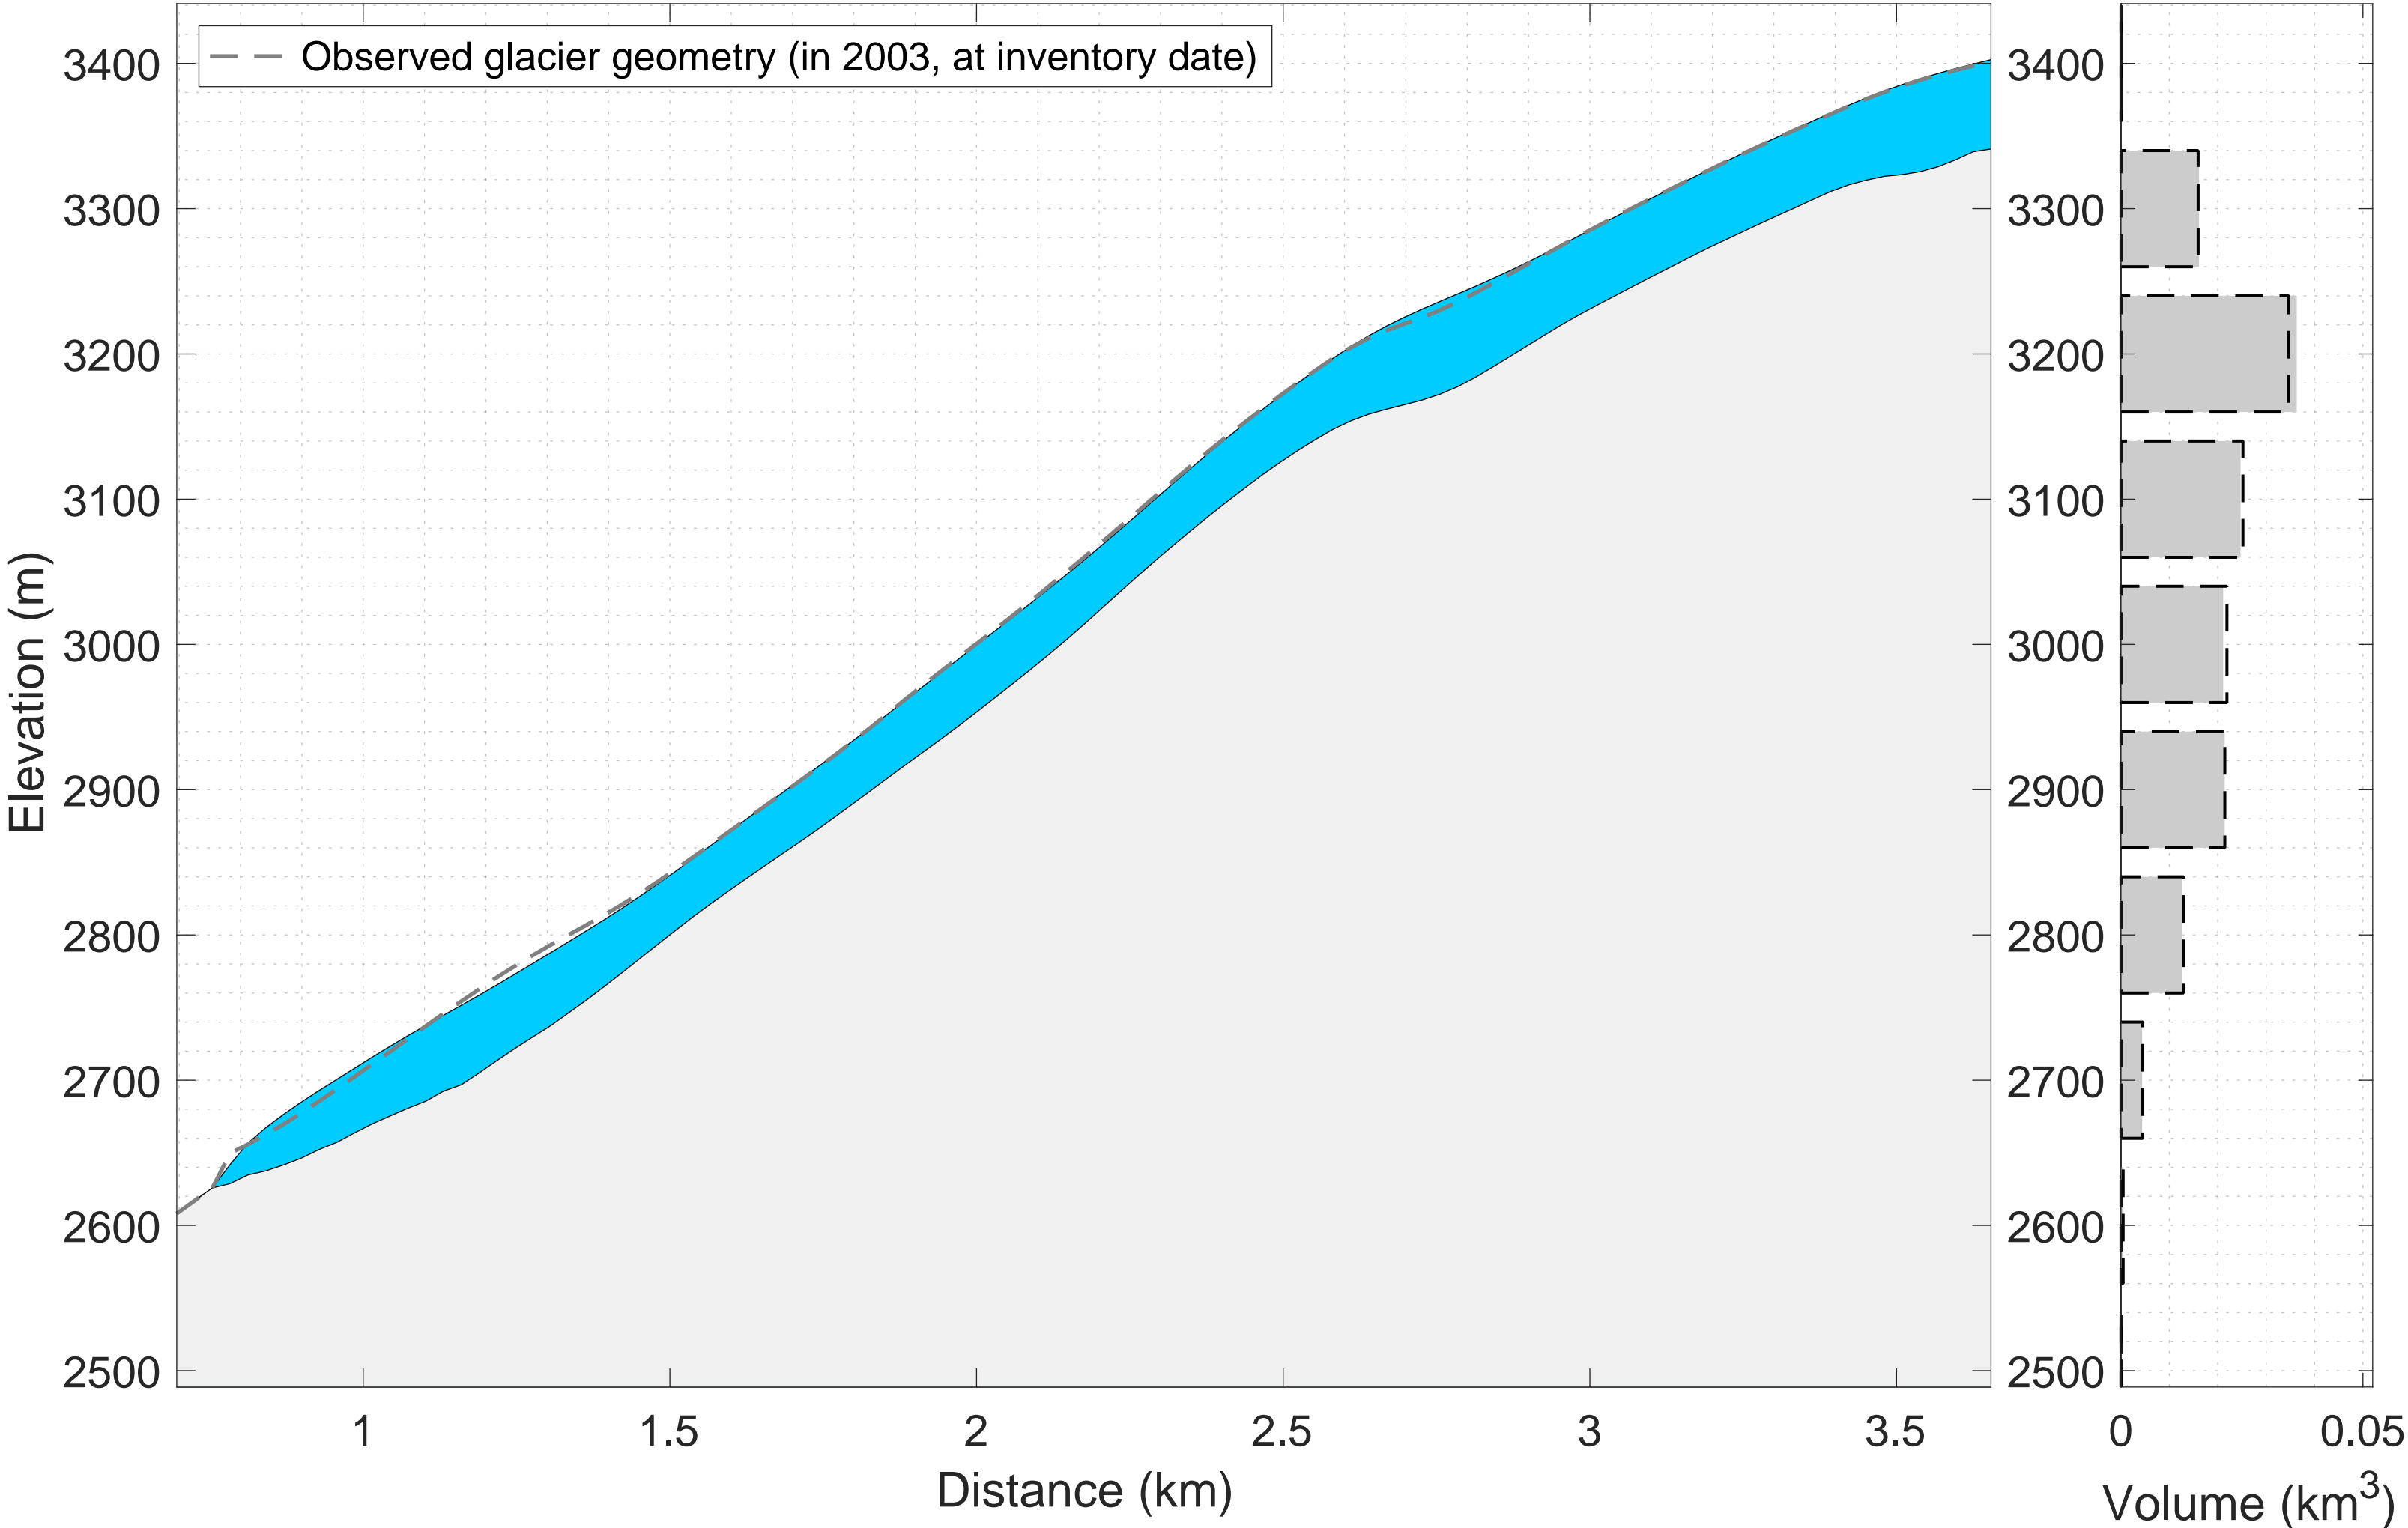

Supplement: Supplementary file 114 [file tc-13-1125-2019-supplement.zip]

**Modelled geometry (Glacier ID = 01478;  $A = 5.2522\text{e-}17 \text{ Pa}^{-3} \text{ a}^{-1}$ ;  $dx = 125 \text{ m}$ )**

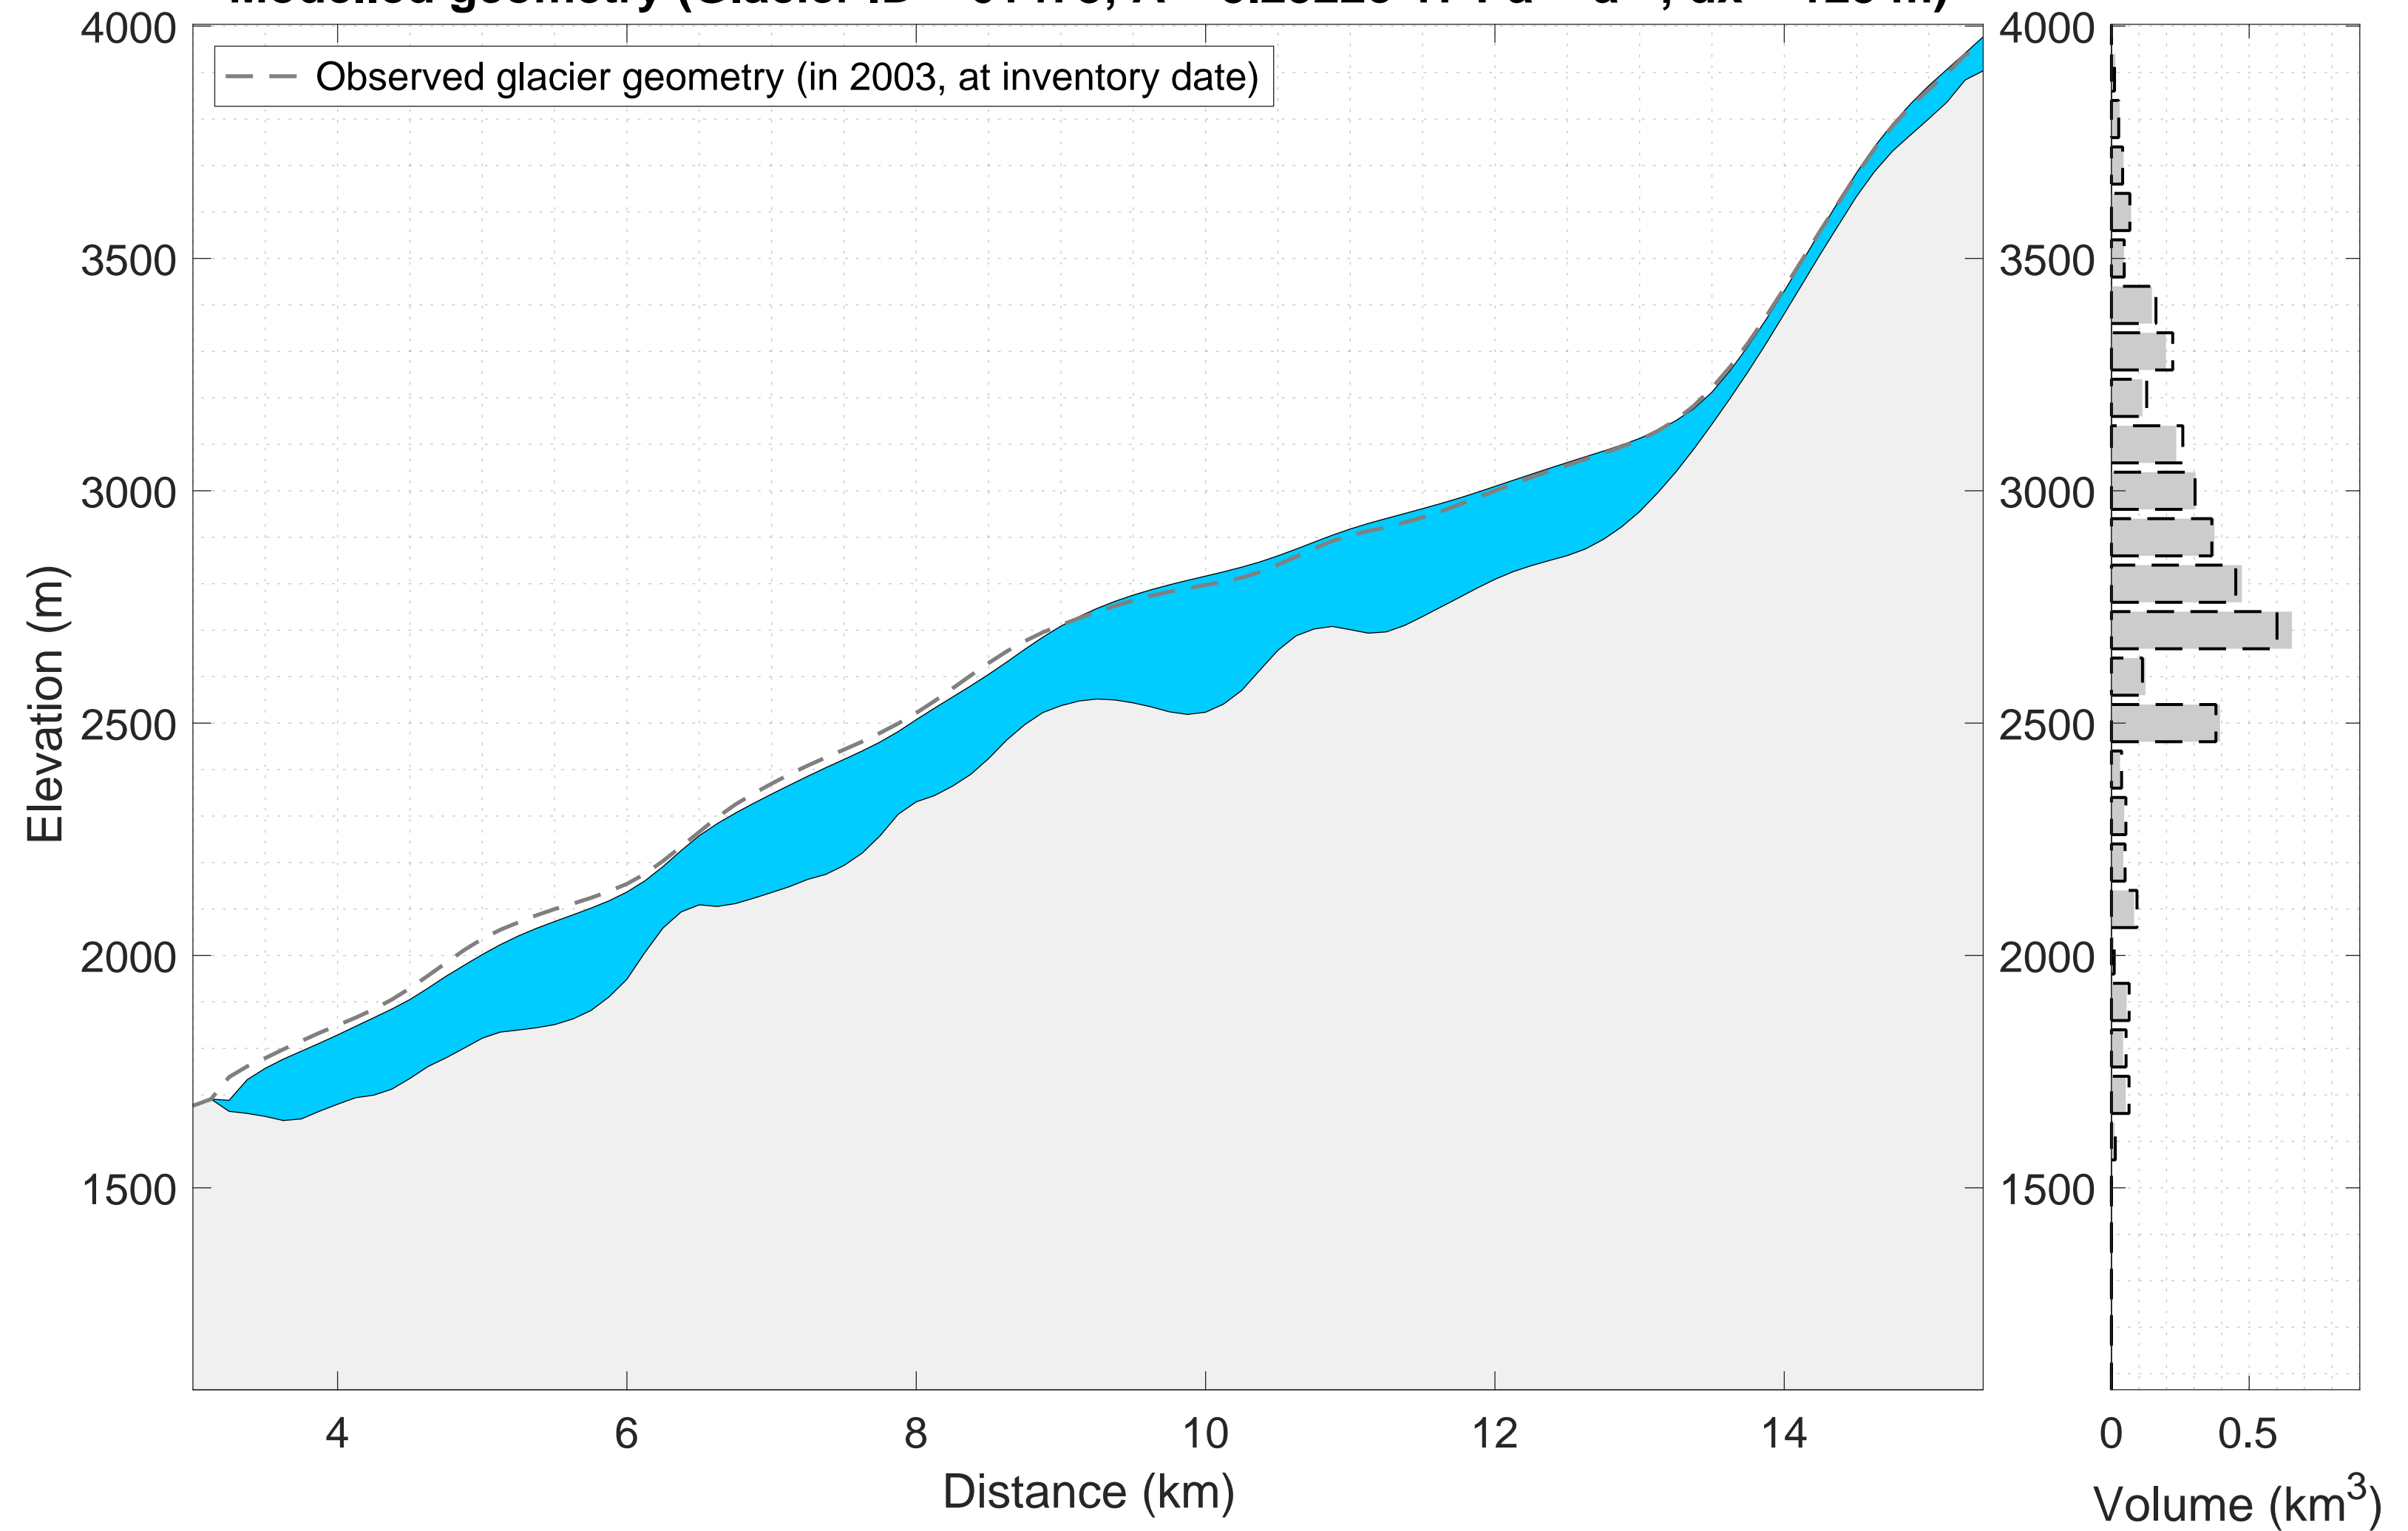

Supplement: Supplementary file 115 [file tc-13-1125-2019-supplement.zip]

**Modelled geometry (Glacier ID = 02883;  $A = 7.3253\text{e-}17 \text{ Pa}^{-3} \text{ a}^{-1}$ ;  $dx = 19 \text{ m}$ )**

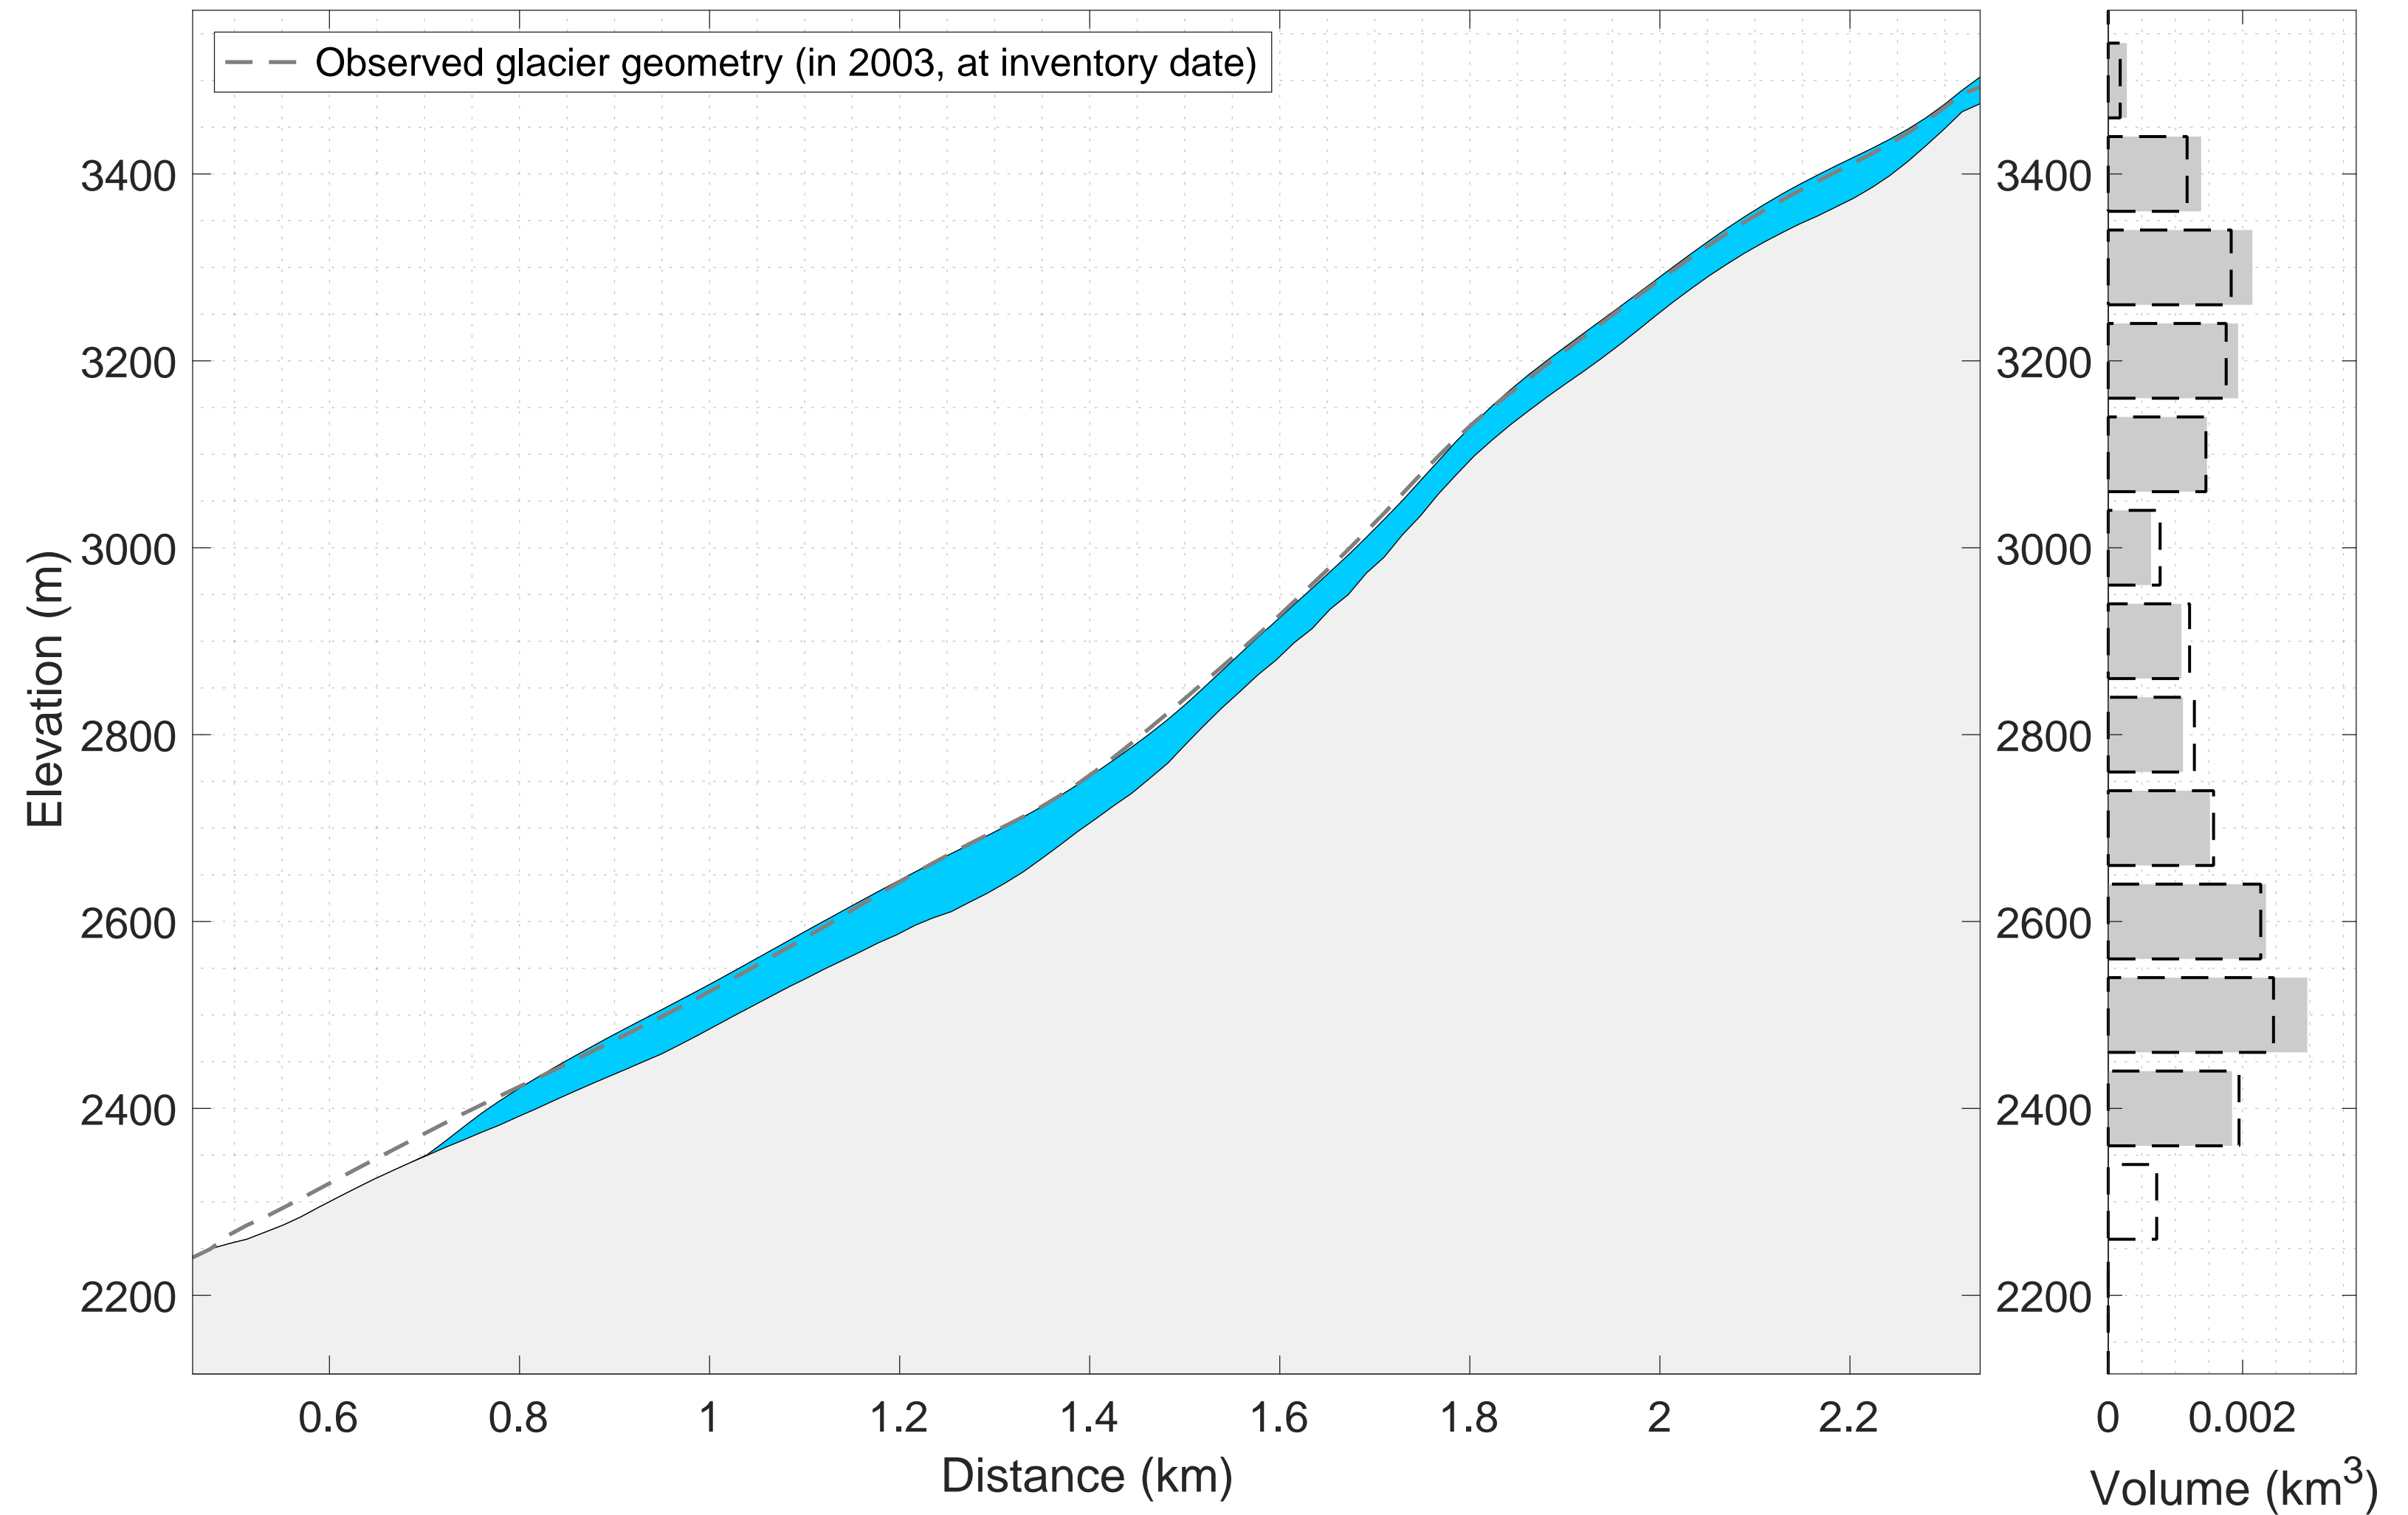

Supplement: Supplementary file 116 [file tc-13-1125-2019-supplement.zip]

**Modelled geometry (Glacier ID = 01453;  $A = 5.9394\text{e-}17 \text{ Pa}^{-3} \text{ a}^{-1}$ ;  $dx = 13 \text{ m}$ )**

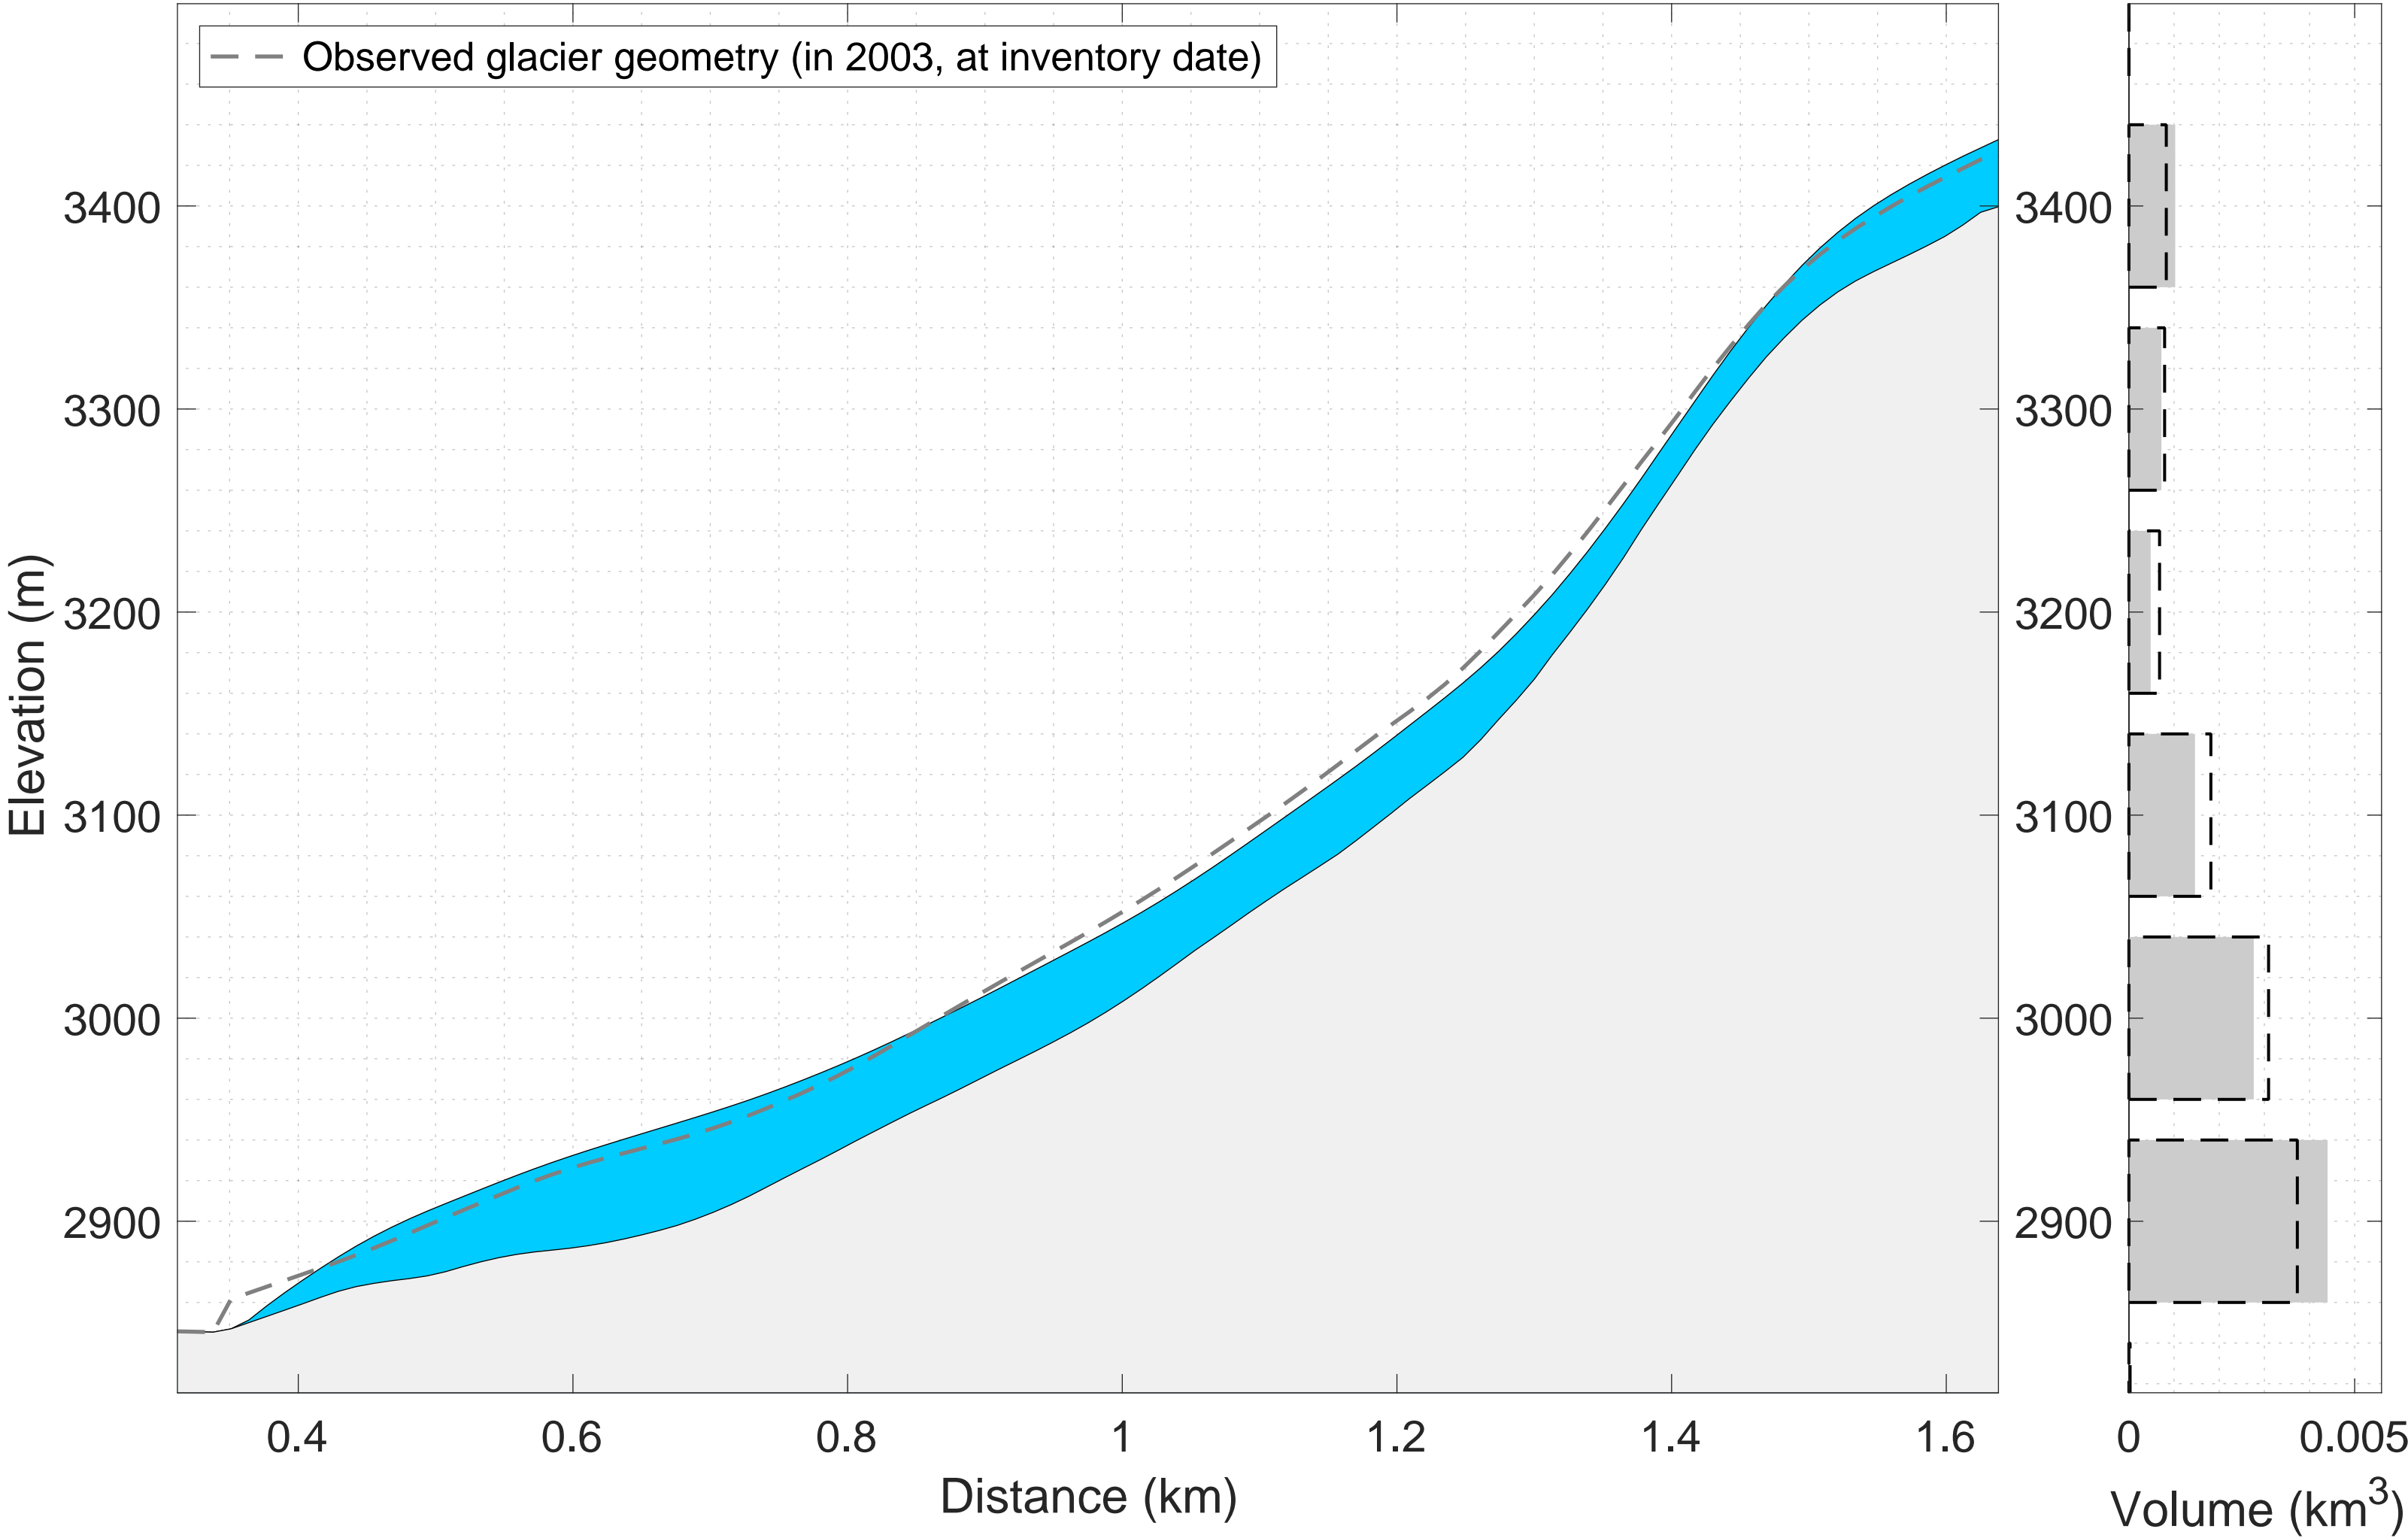

Supplement: Supplementary file 117 [file tc-13-1125-2019-supplement.zip]

**Modelled geometry (Glacier ID = 01920;  $A = 1.0284\text{e-}16 \text{ Pa}^{-3} \text{ a}^{-1}$ ;  $dx = 21 \text{ m}$ )**

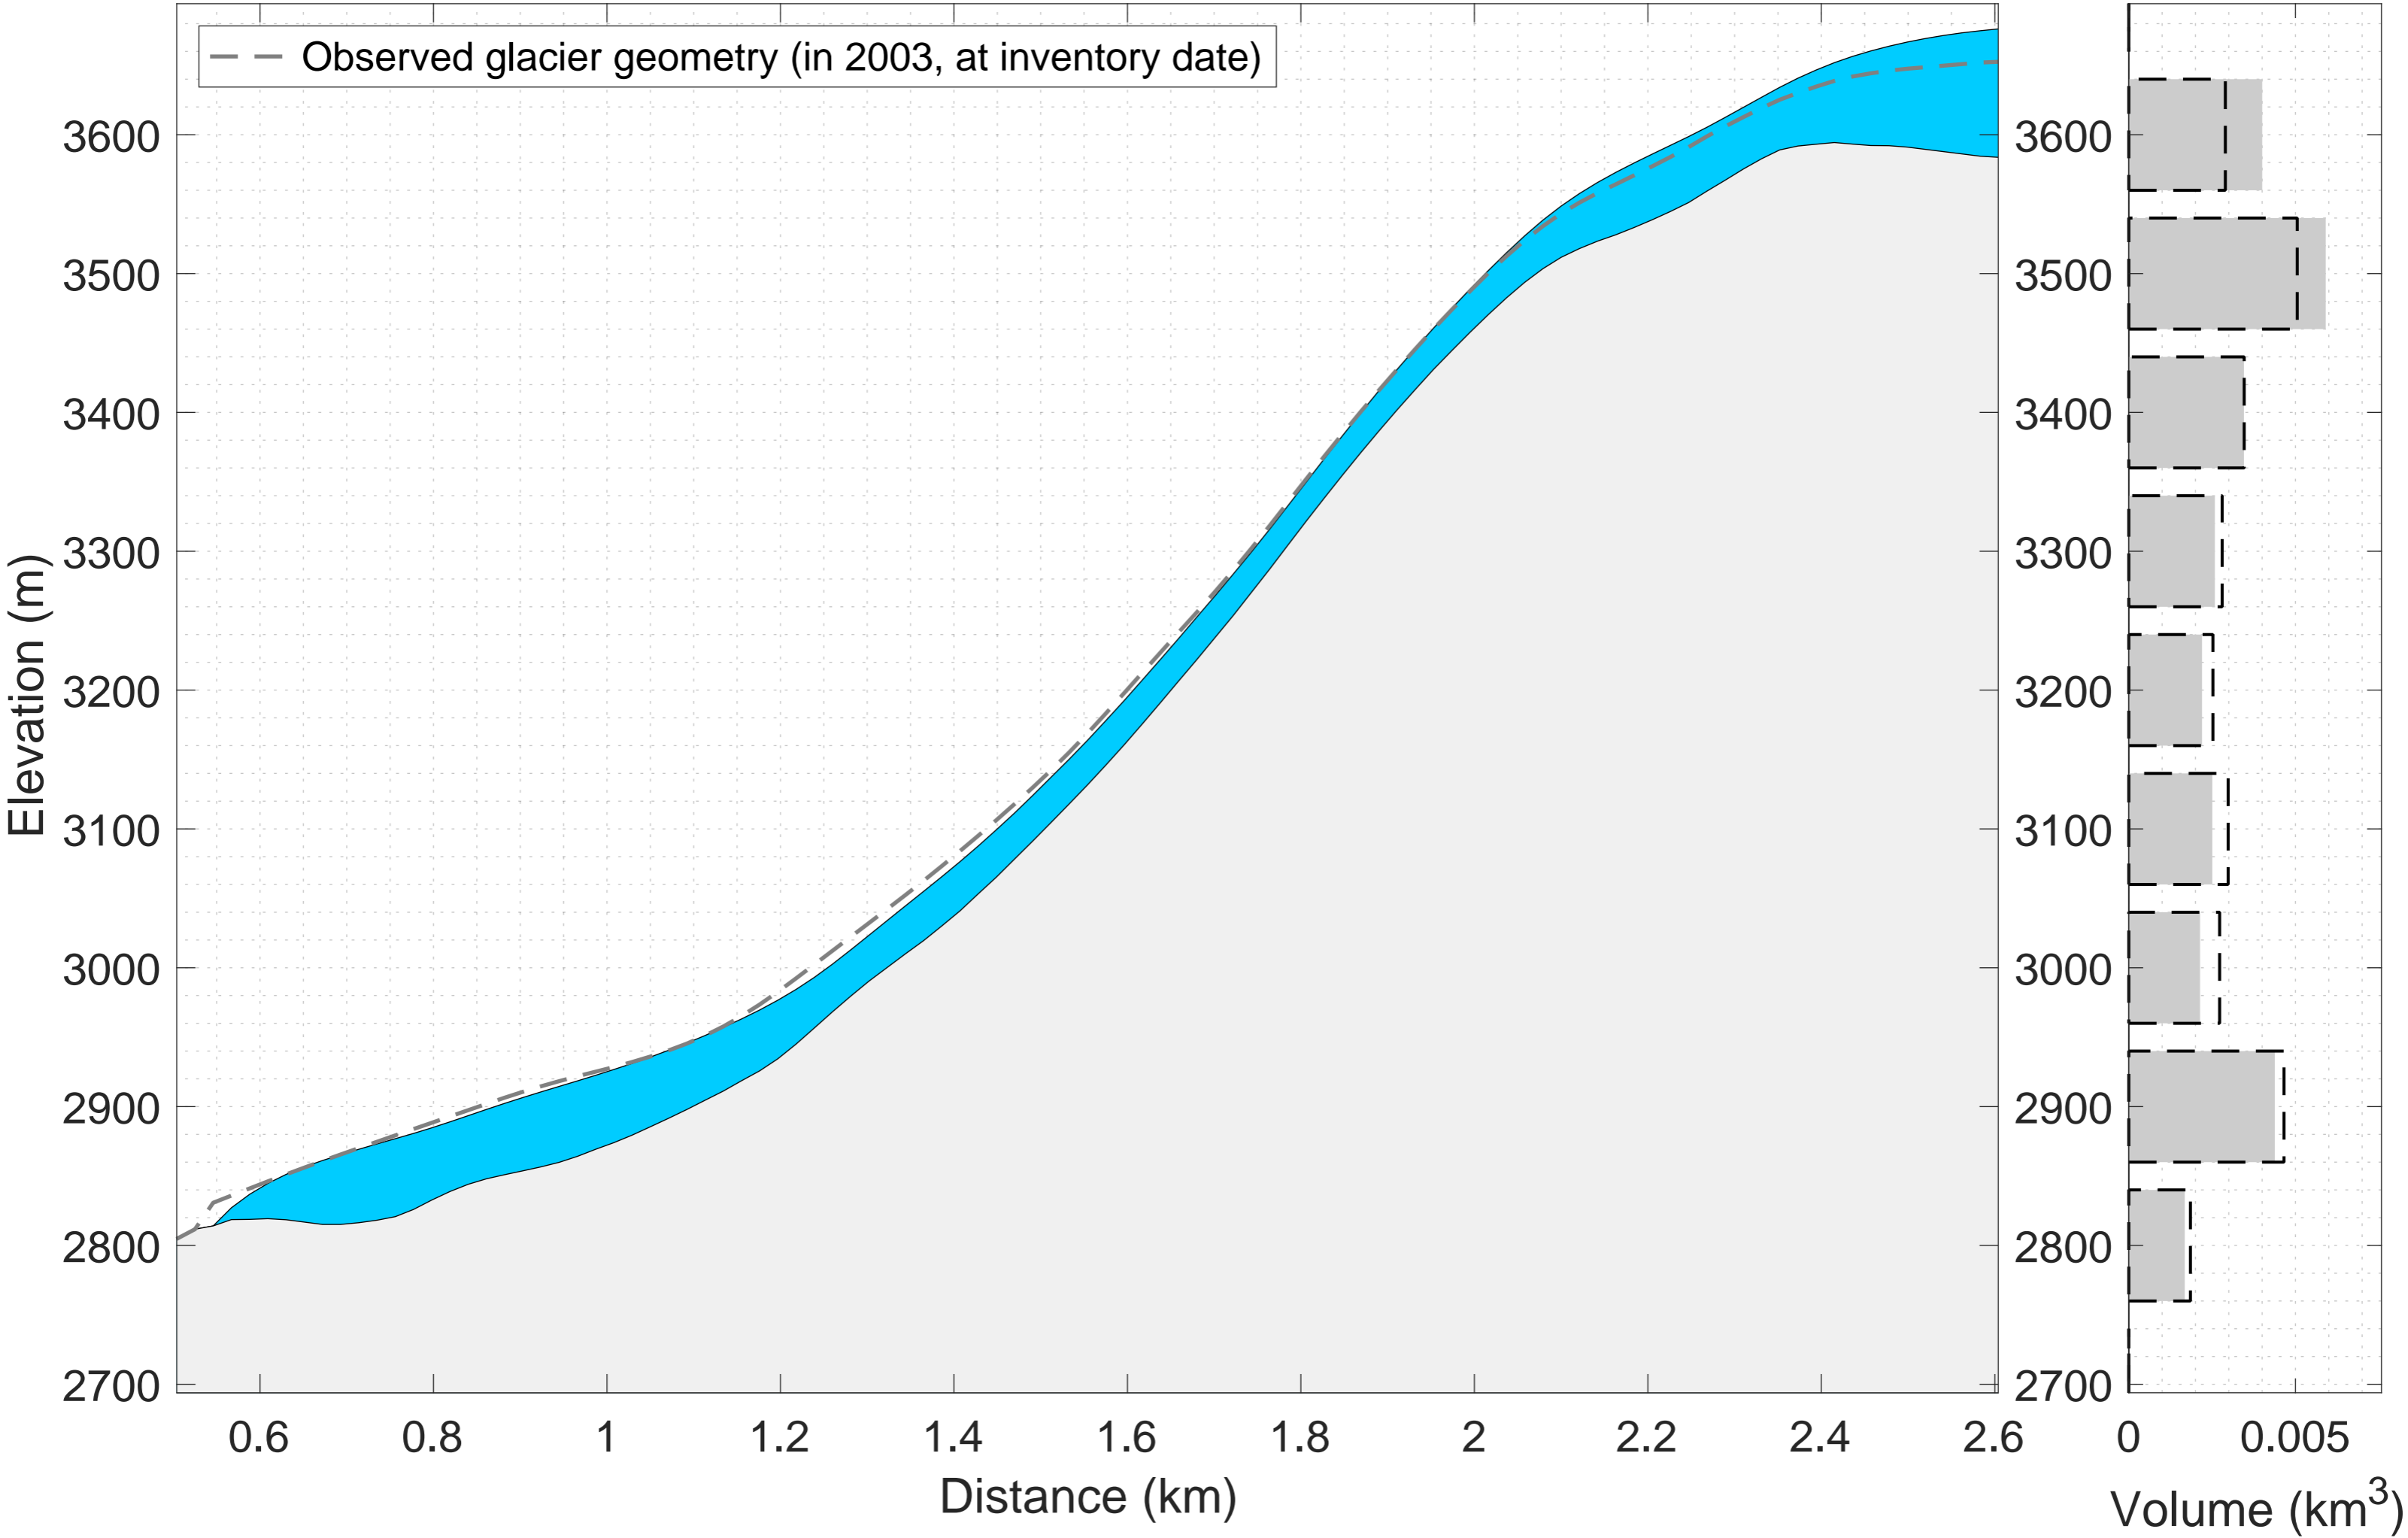

Supplement: Supplementary file 118 [file tc-13-1125-2019-supplement.zip]

**Modelled geometry (Glacier ID = 03164;  $A = 1.1168\text{e-}16 \text{ Pa}^{-3} \text{ a}^{-1}$ ;  $dx = 19 \text{ m}$ )**

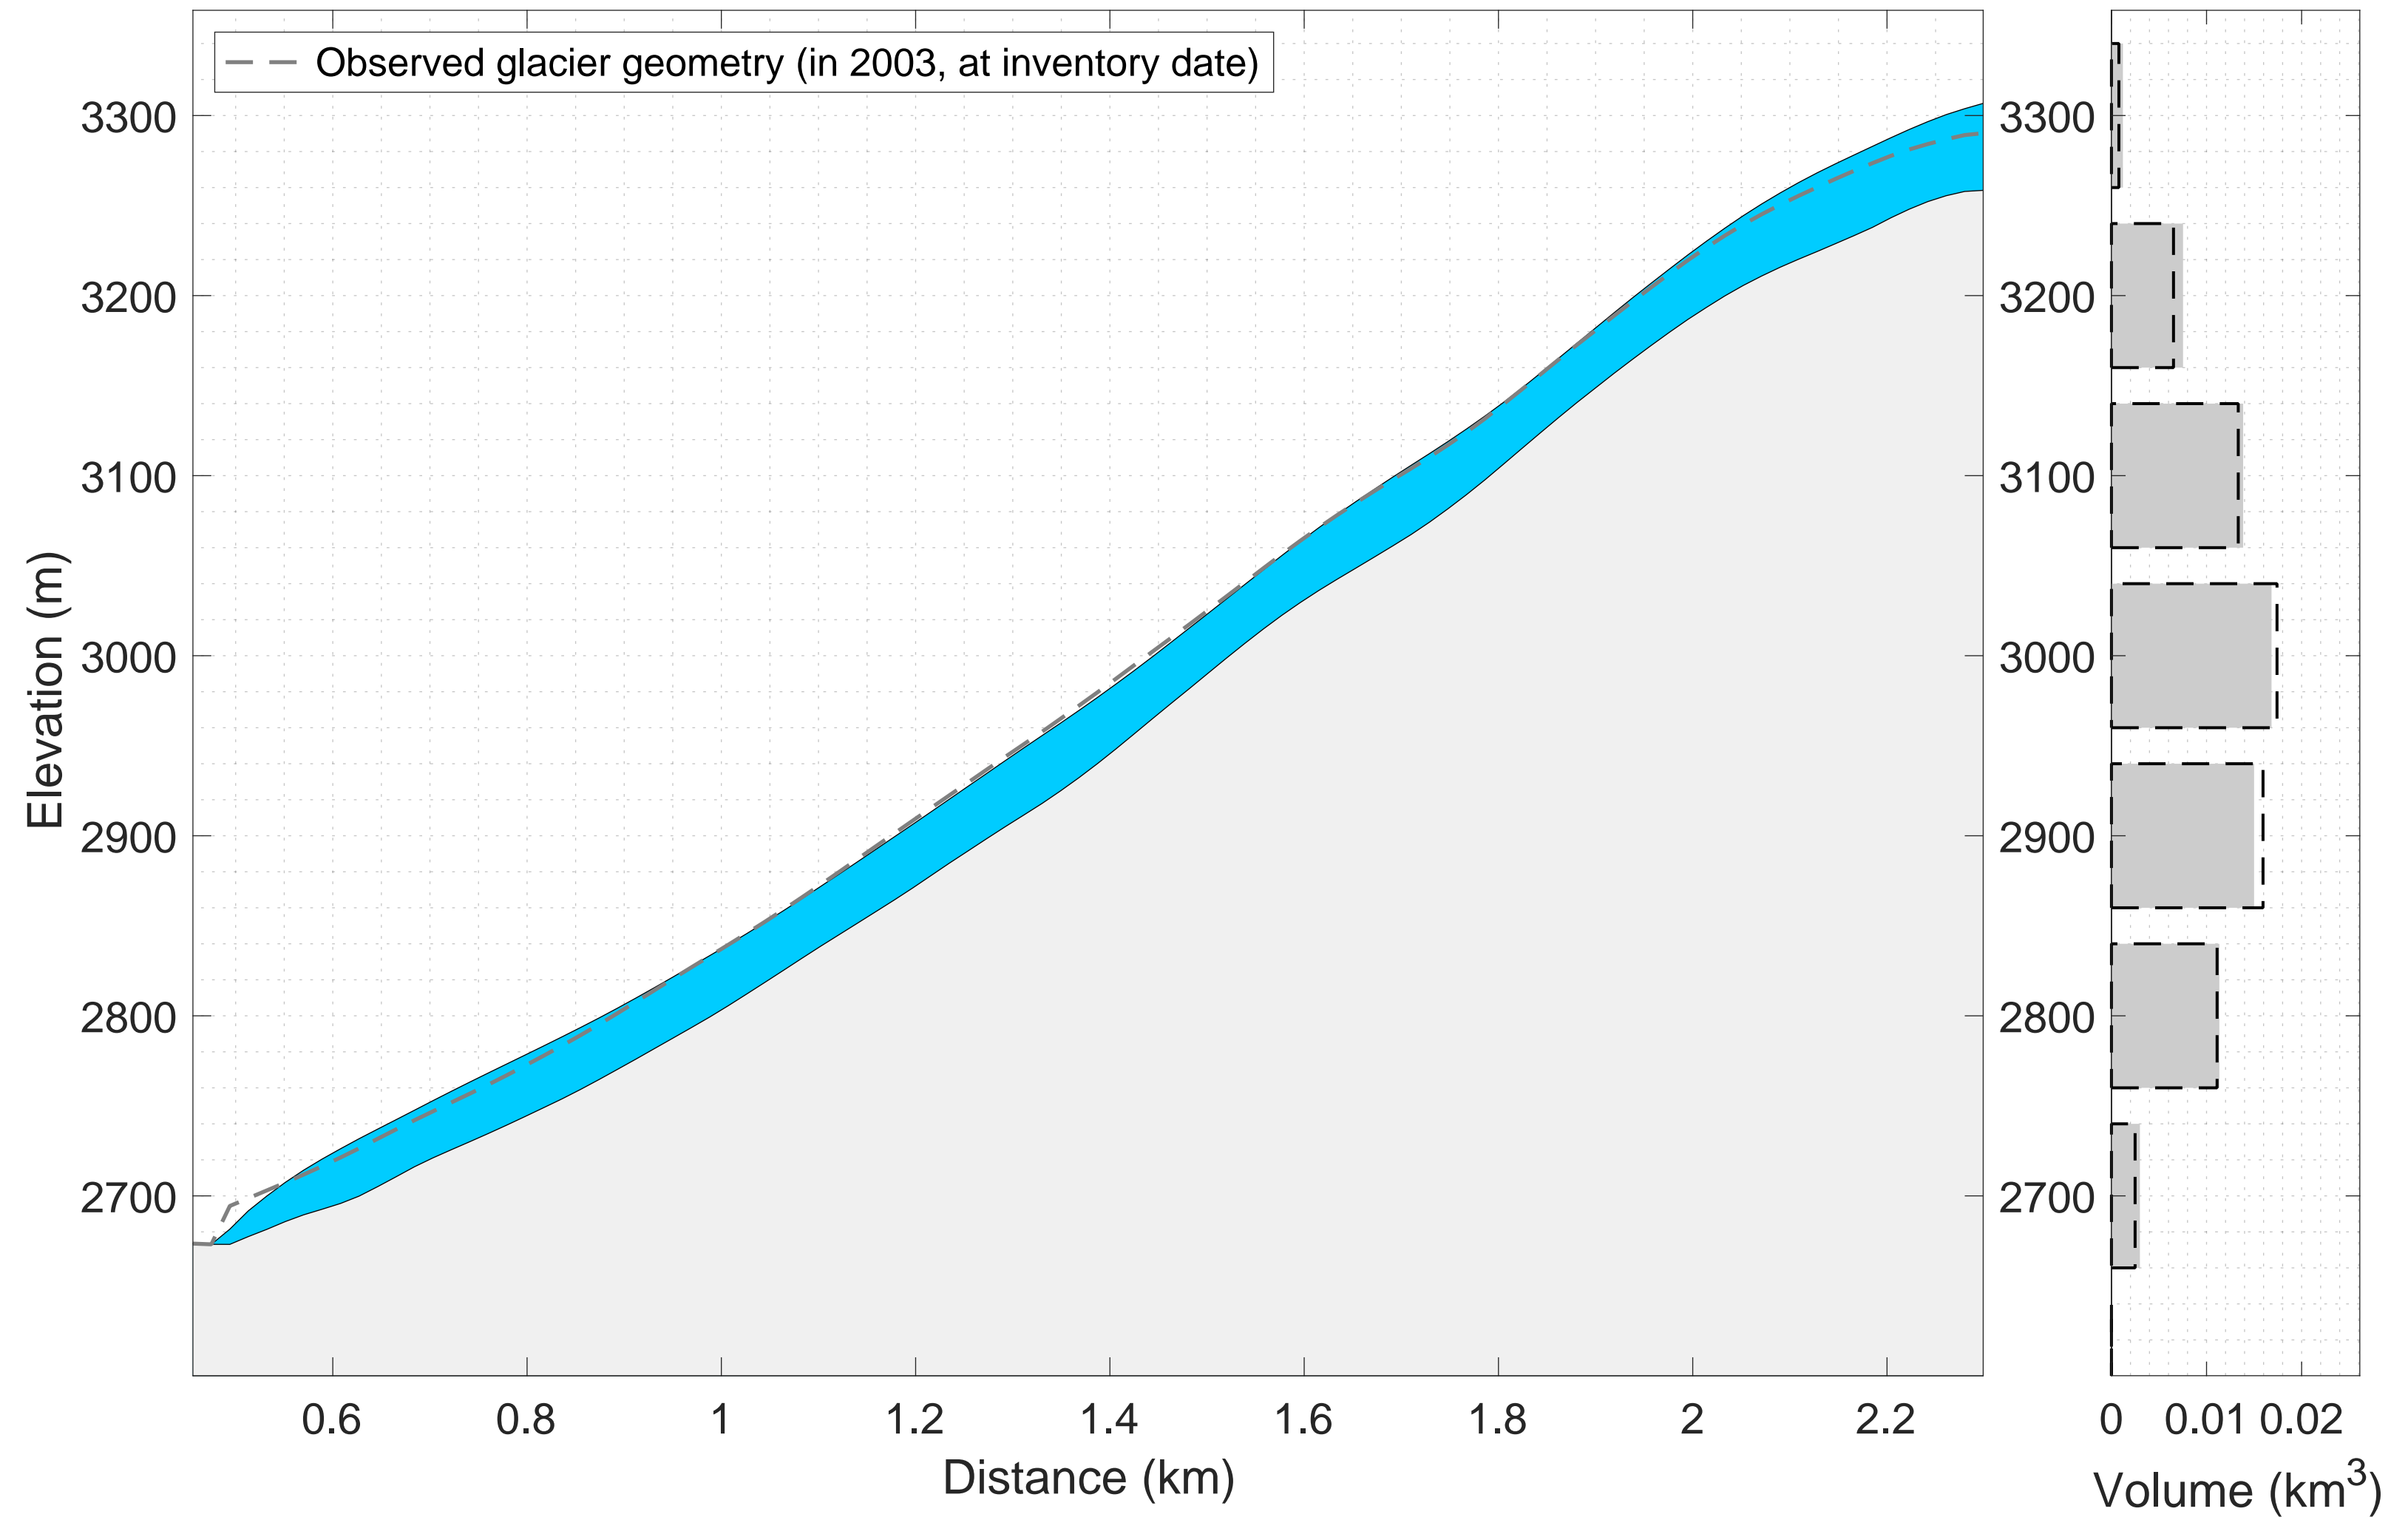

Supplement: Supplementary file 119 [file tc-13-1125-2019-supplement.zip]

**Modelled geometry (Glacier ID = 00991;  $A = 8.7122\text{e-}17 \text{ Pa}^{-3} \text{ a}^{-1}$ ;  $dx = 11 \text{ m}$ )**

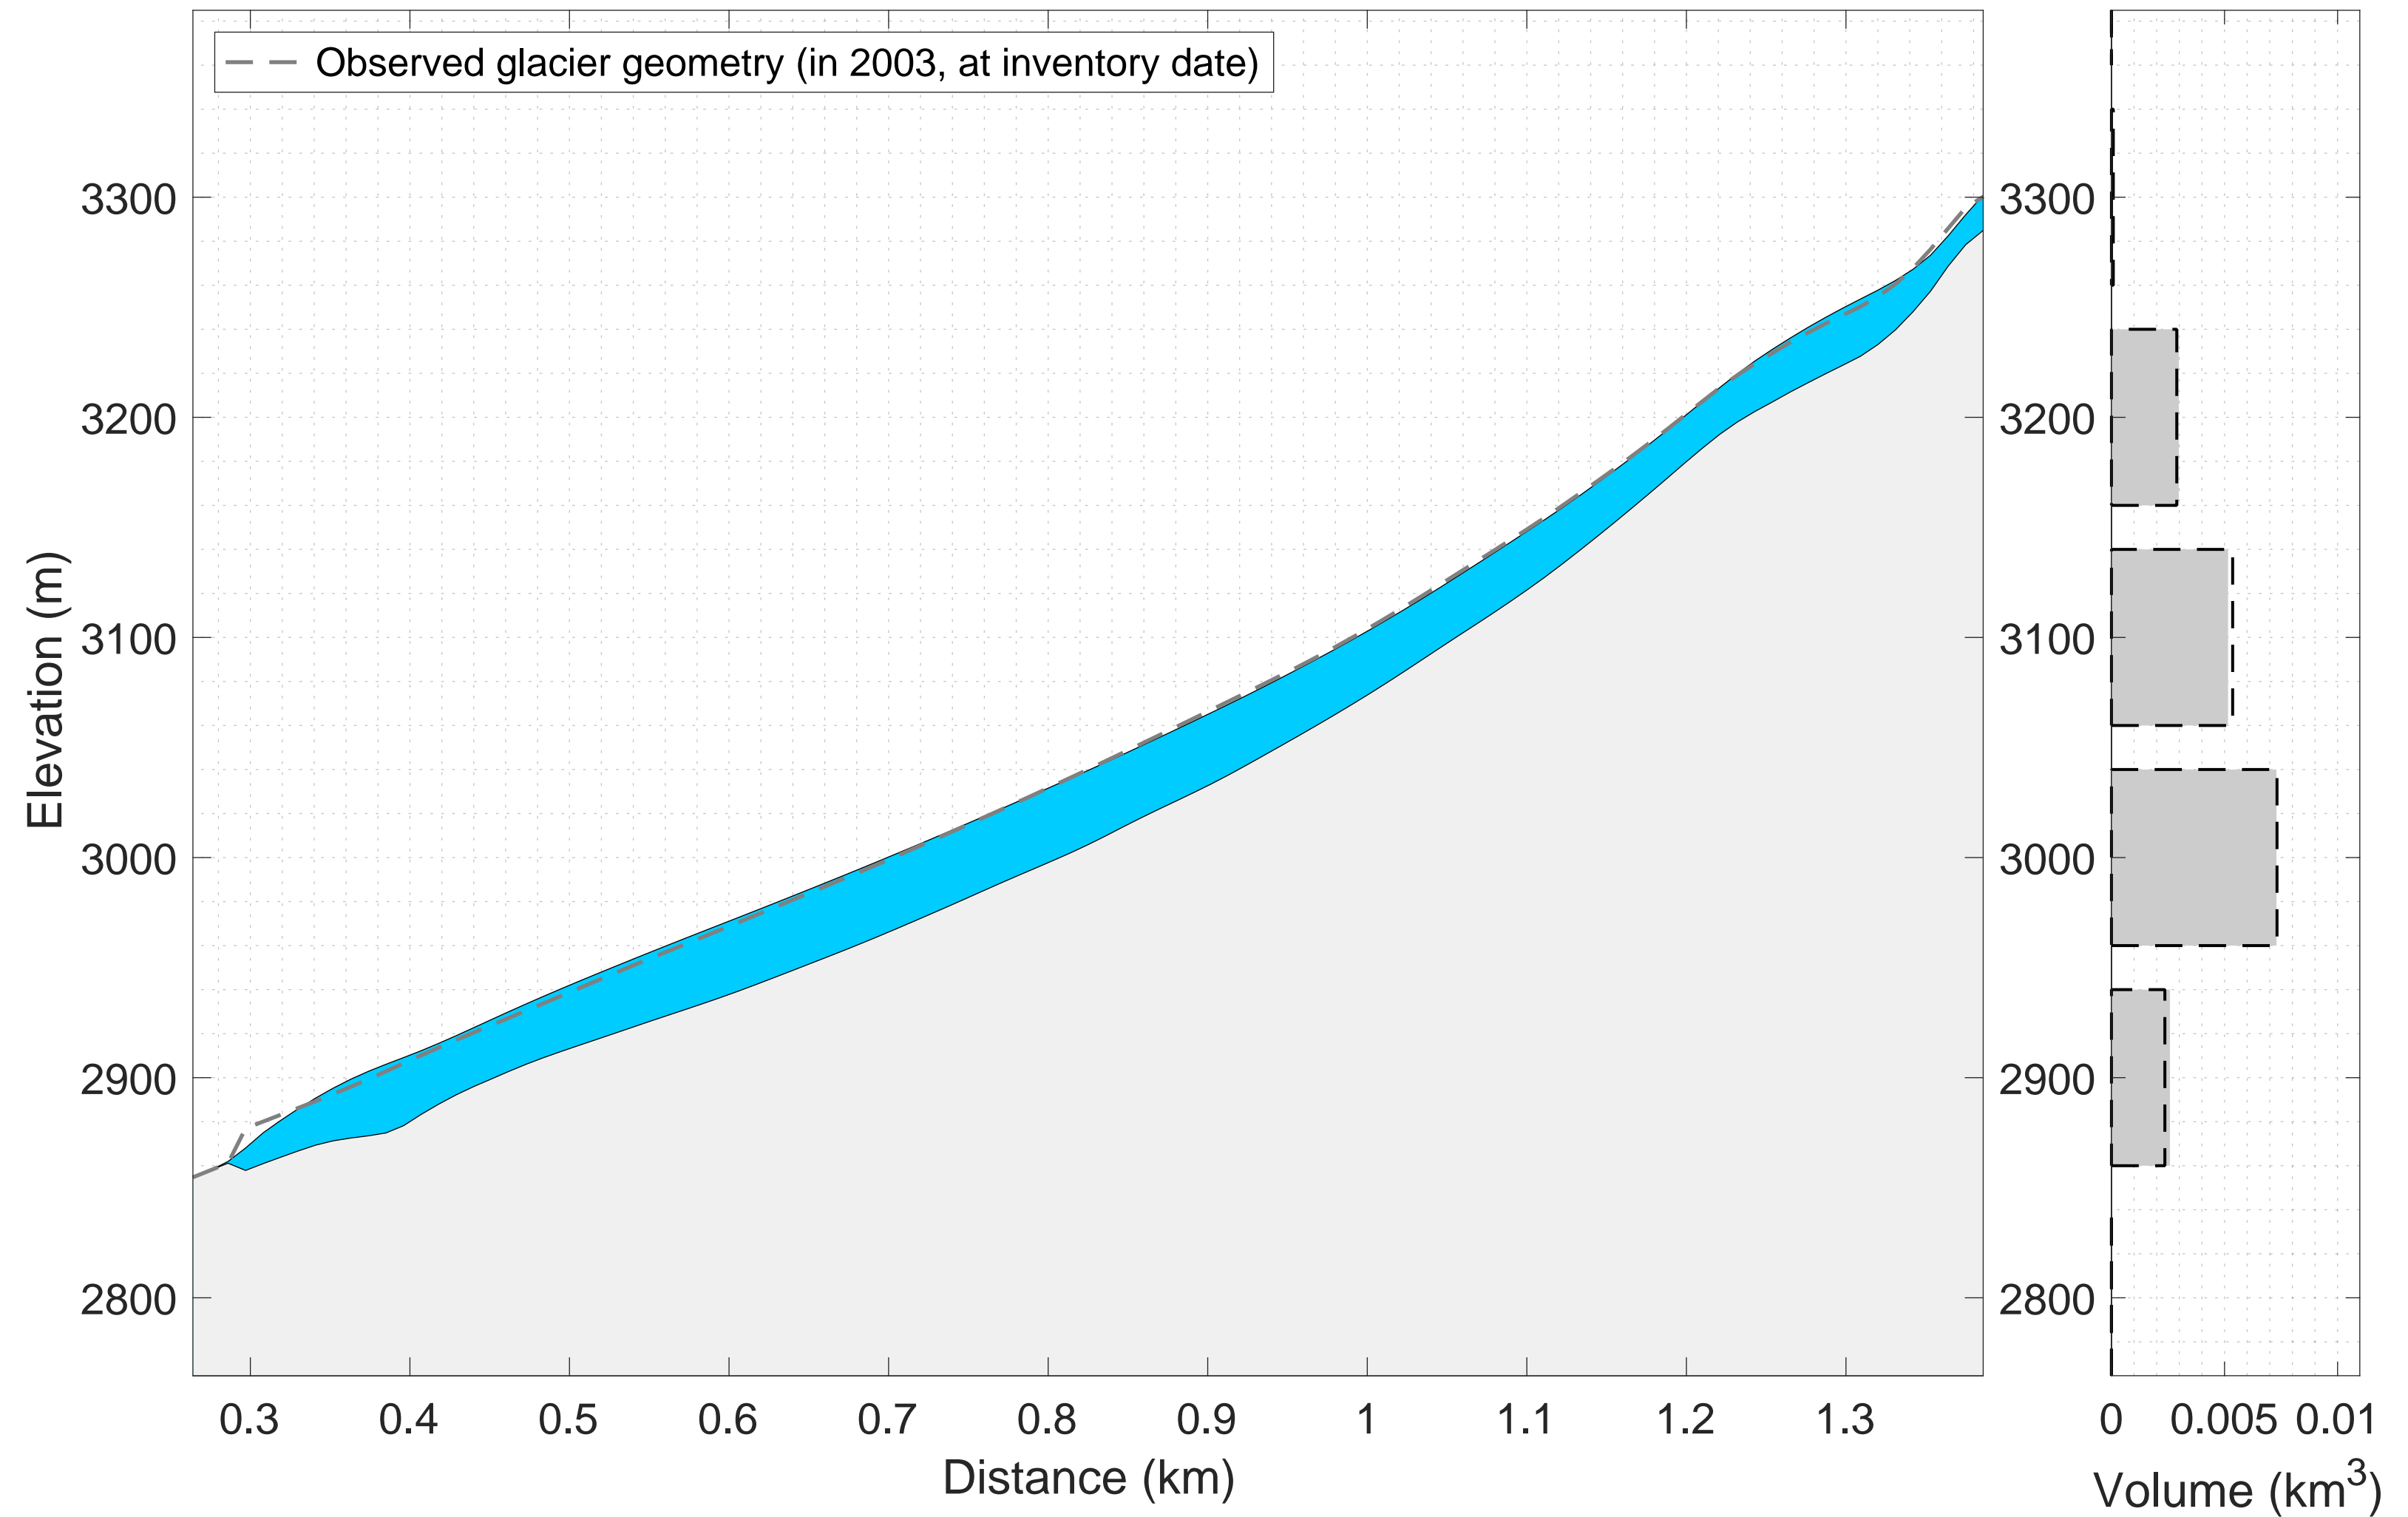

Supplement: Supplementary file 120 [file tc-13-1125-2019-supplement.zip]

**Modelled geometry (Glacier ID = 02695;  $A = 1.8472\text{e-}16 \text{ Pa}^{-3} \text{ a}^{-1}$ ;  $dx = 17 \text{ m}$ )**

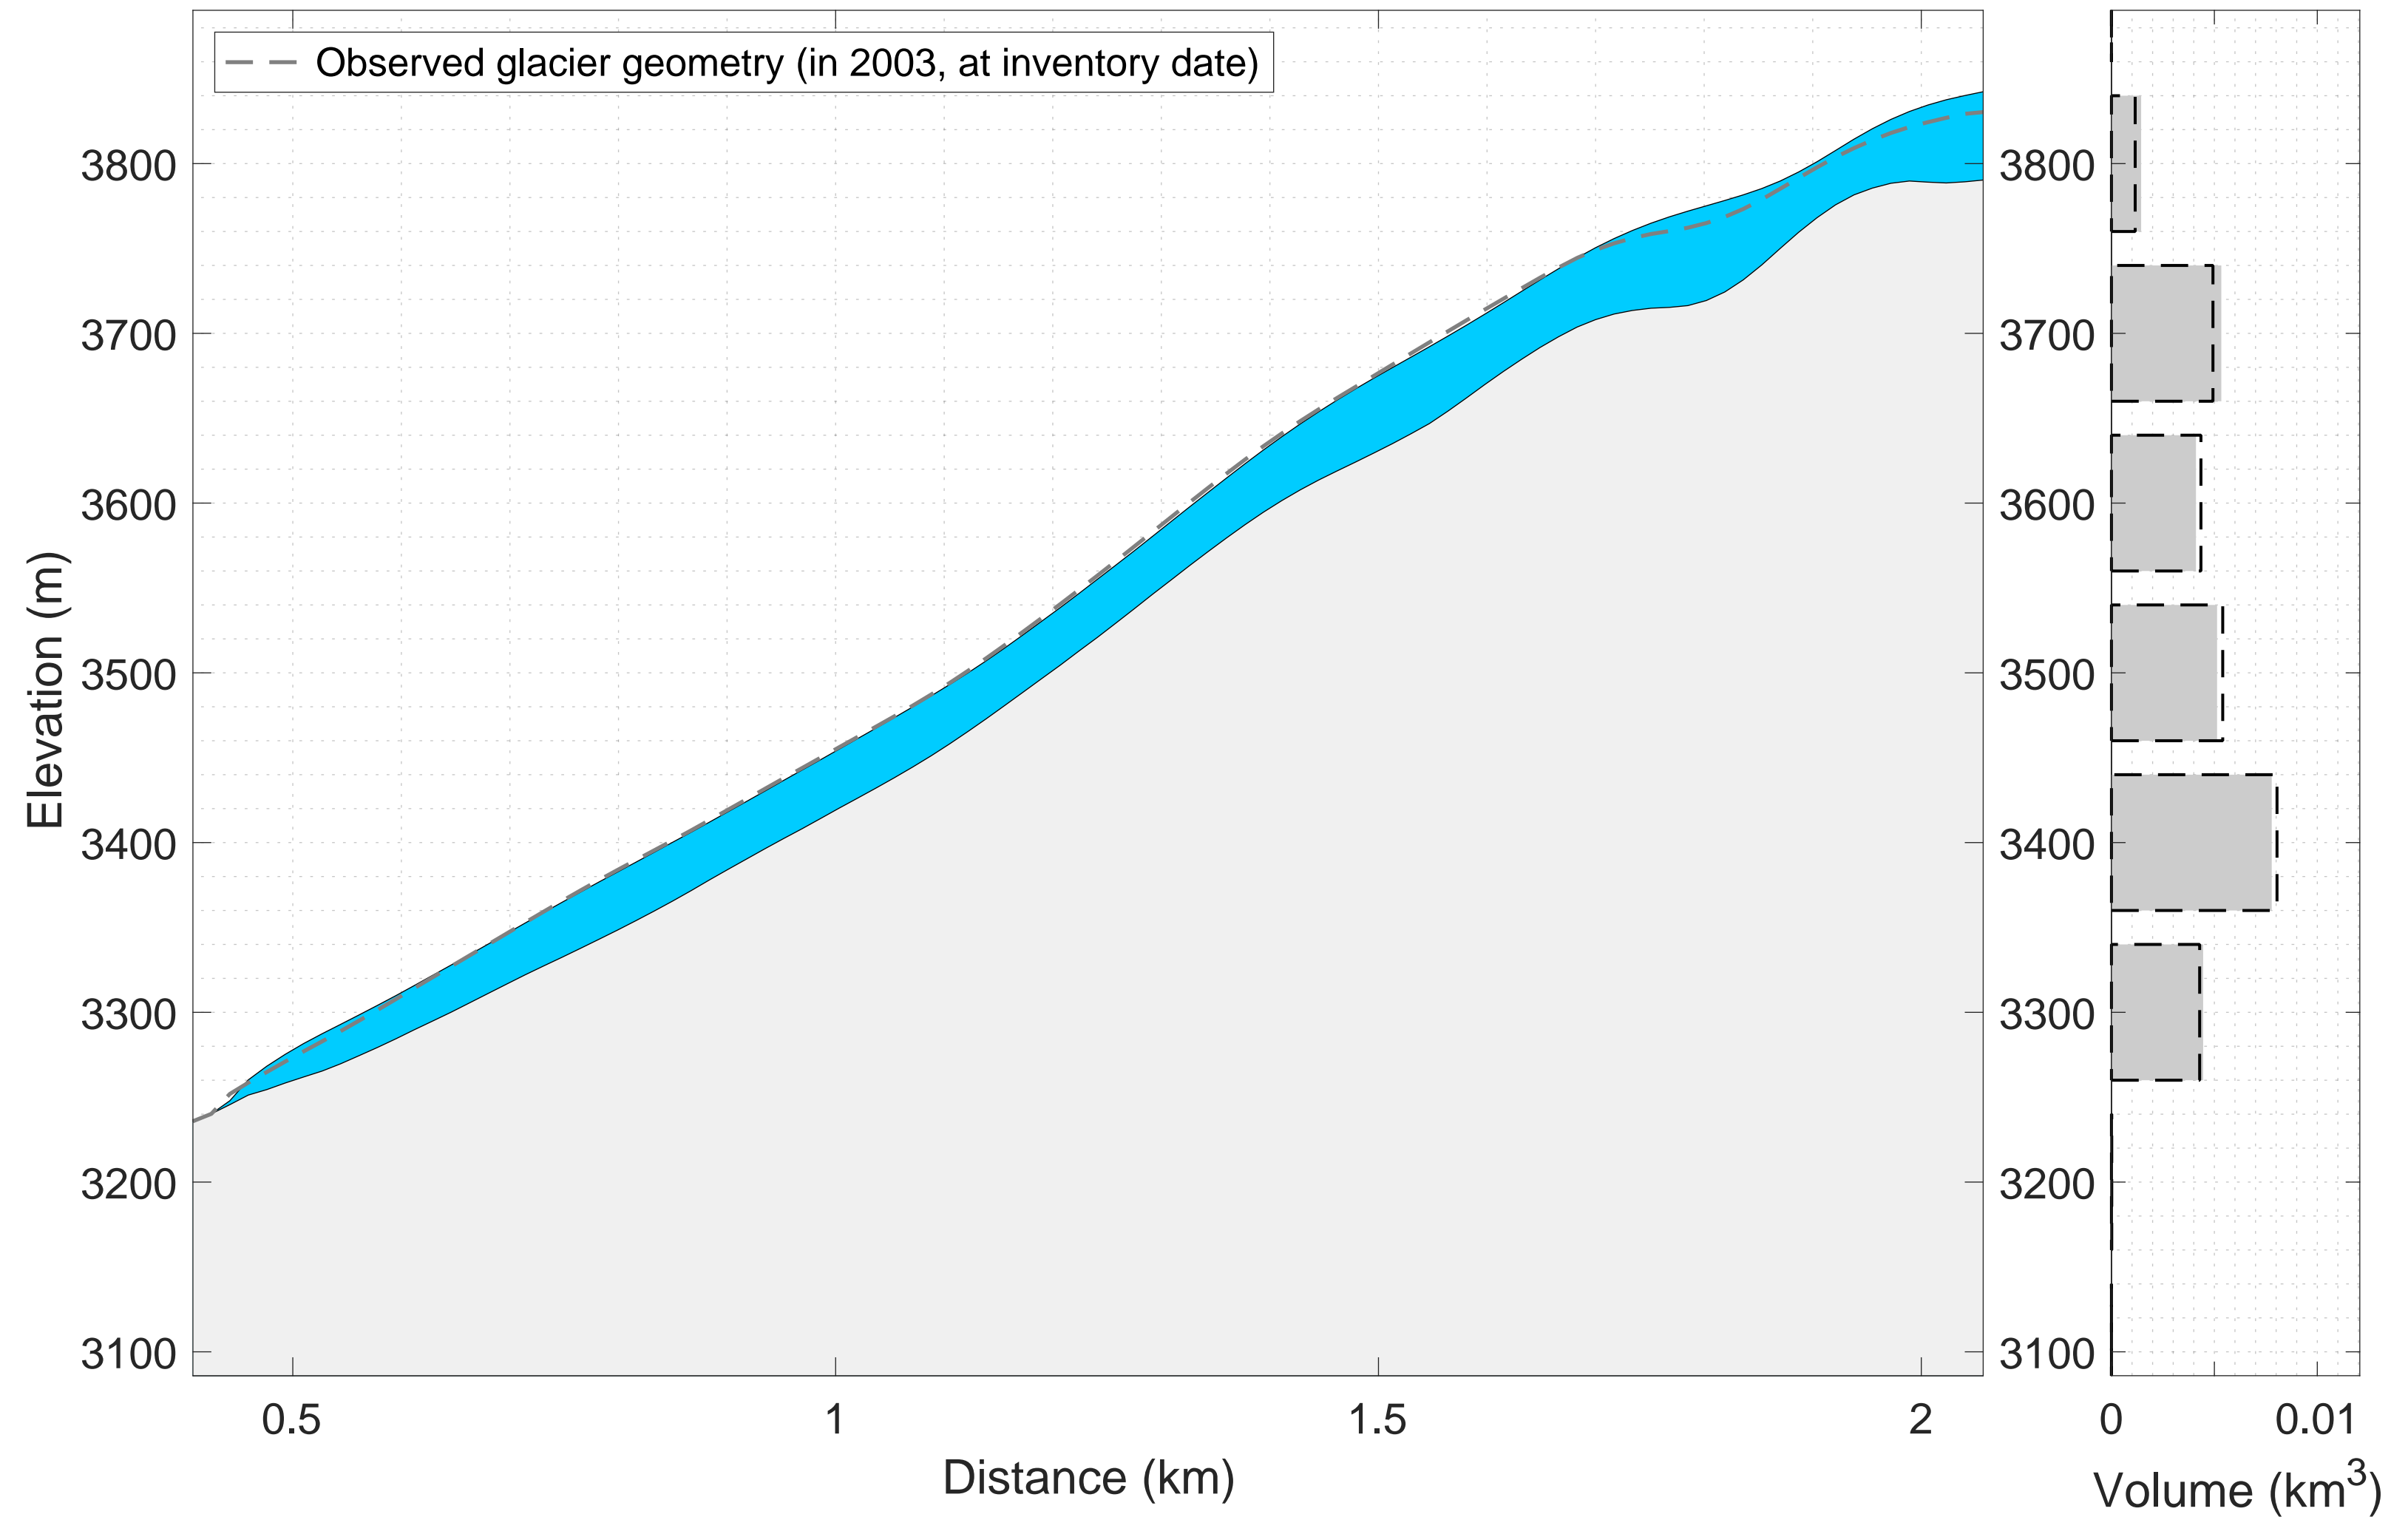

Supplement: Supplementary file 121 [file tc-13-1125-2019-supplement.zip]

**Modelled geometry (Glacier ID = 02939;  $A = 1.5539\text{e-}16 \text{ Pa}^{-3} \text{ a}^{-1}$ ;  $dx = 26 \text{ m}$ )**

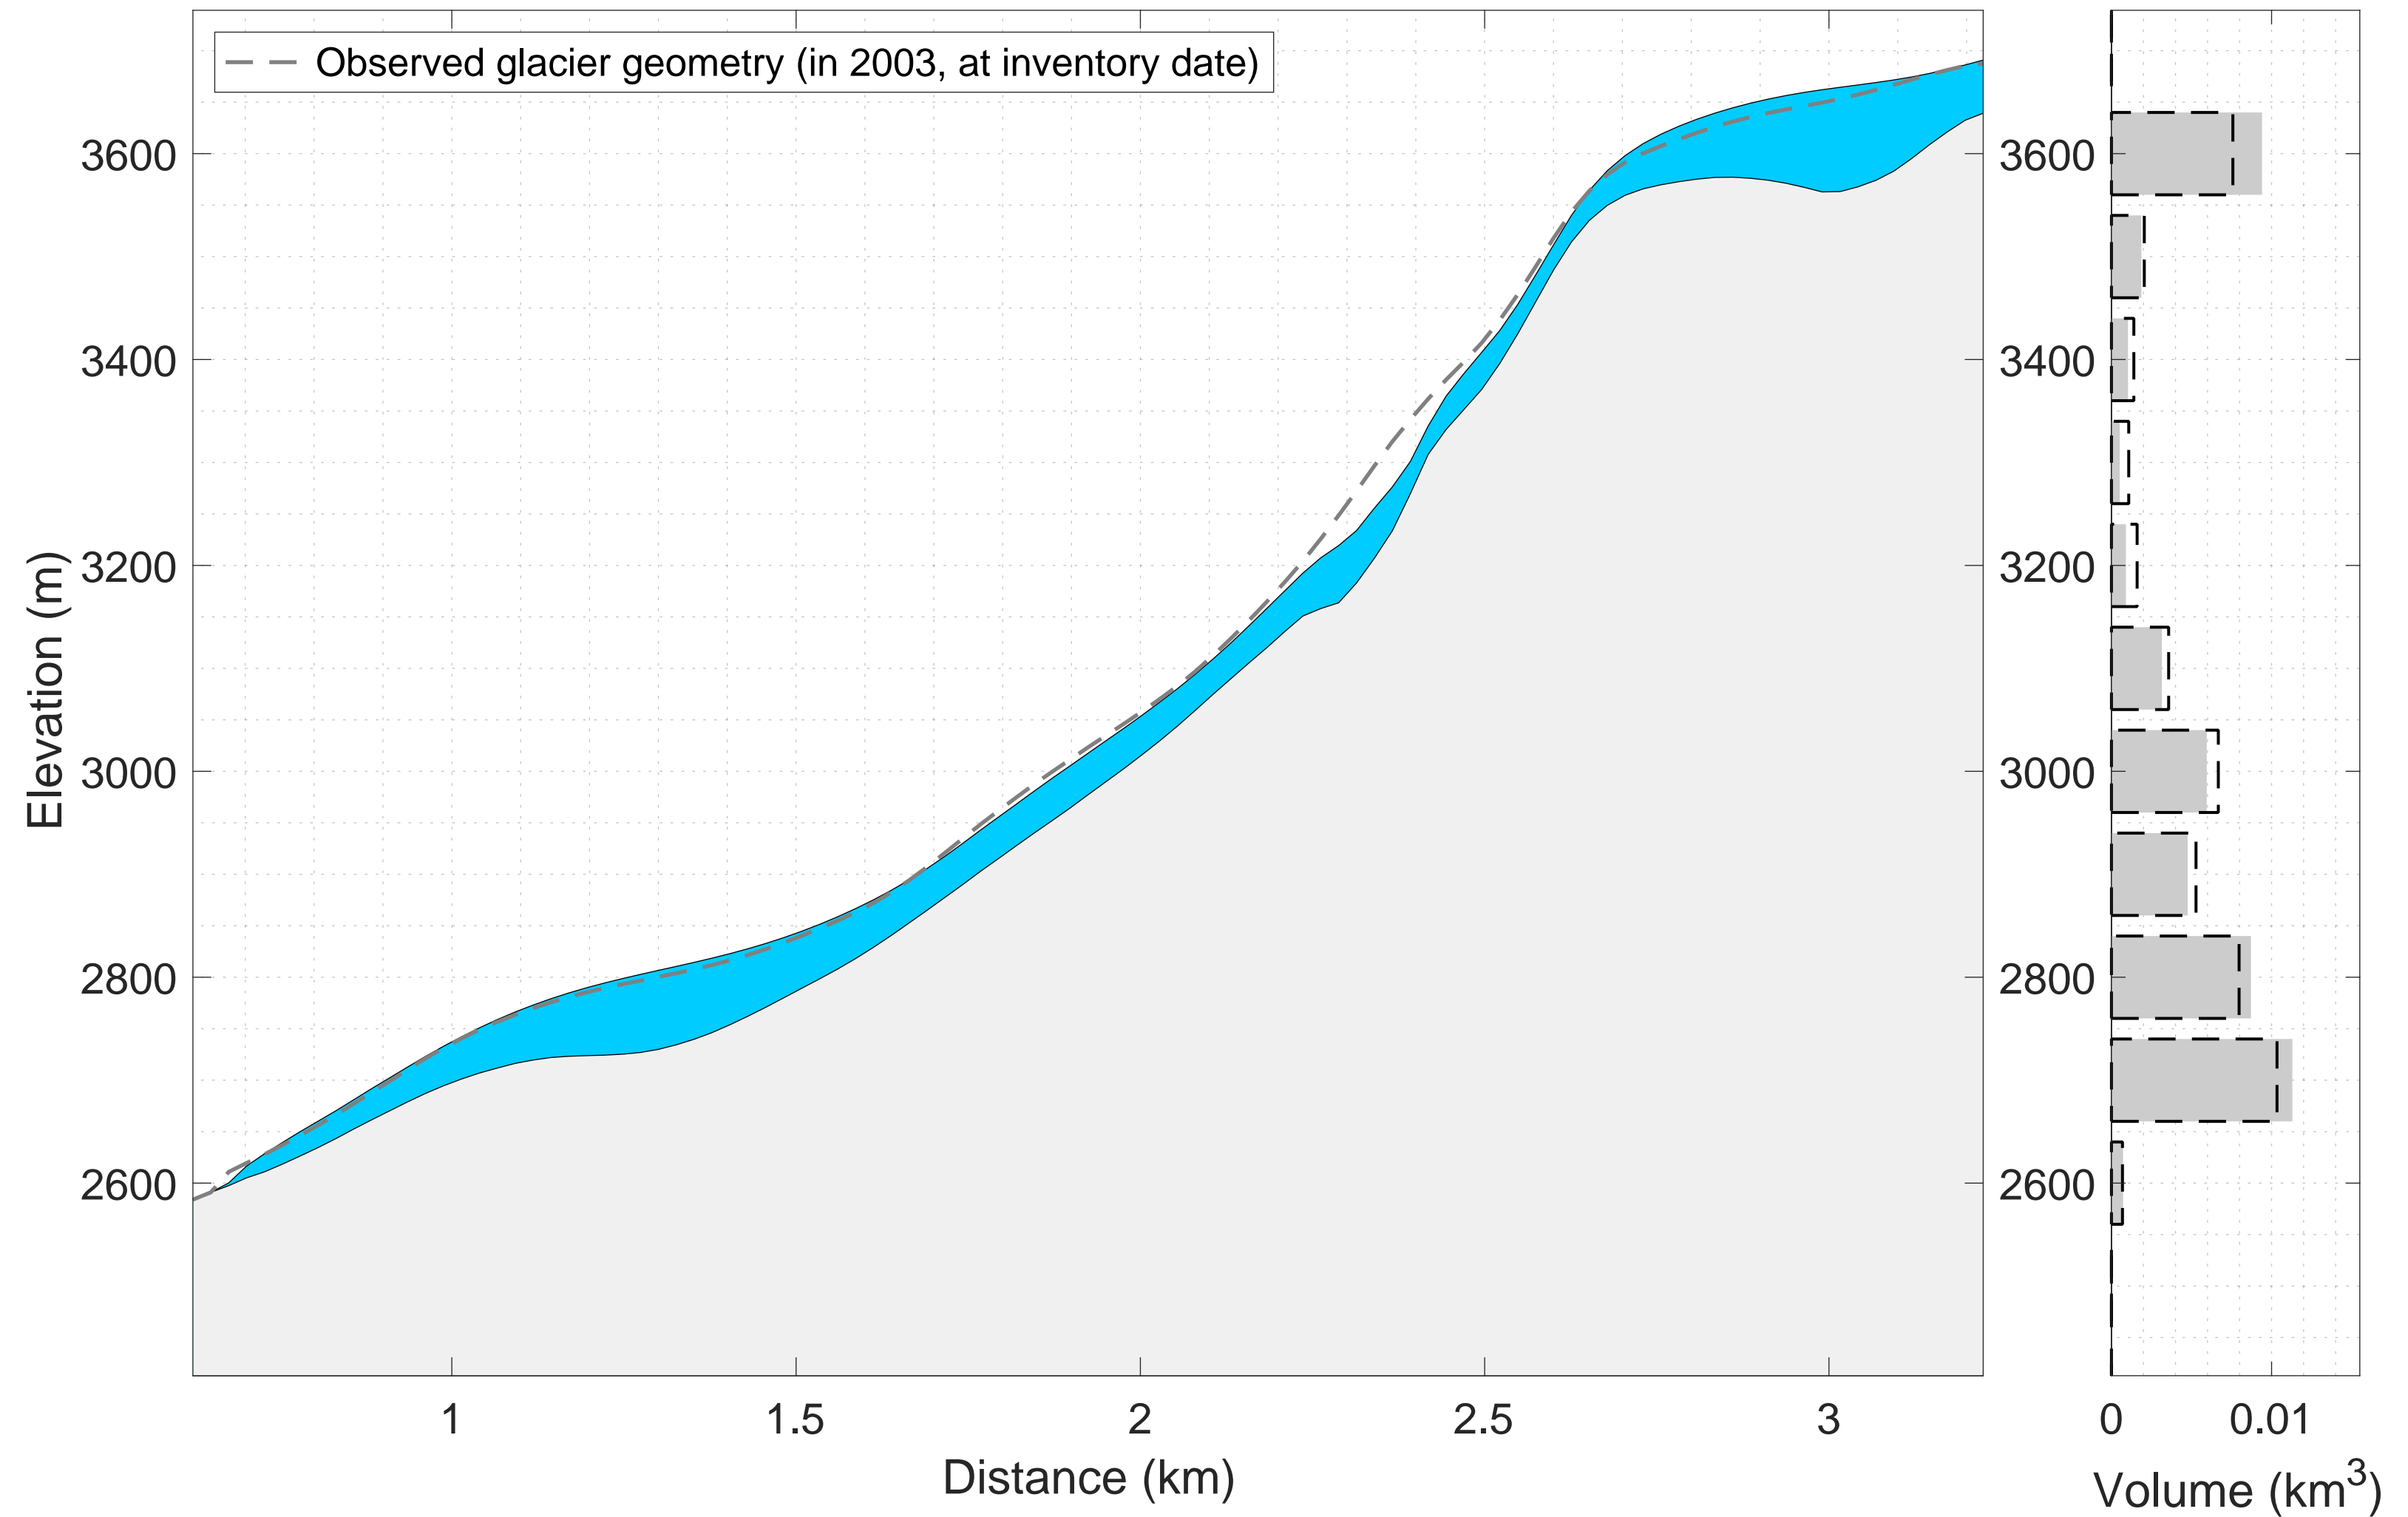

Supplement: Supplementary file 122 [file tc-13-1125-2019-supplement.zip]

**Modelled geometry (Glacier ID = 01549;  $A = 1.102\text{e-}16 \text{ Pa}^{-3} \text{ a}^{-1}$ ;  $dx = 15 \text{ m}$ )**

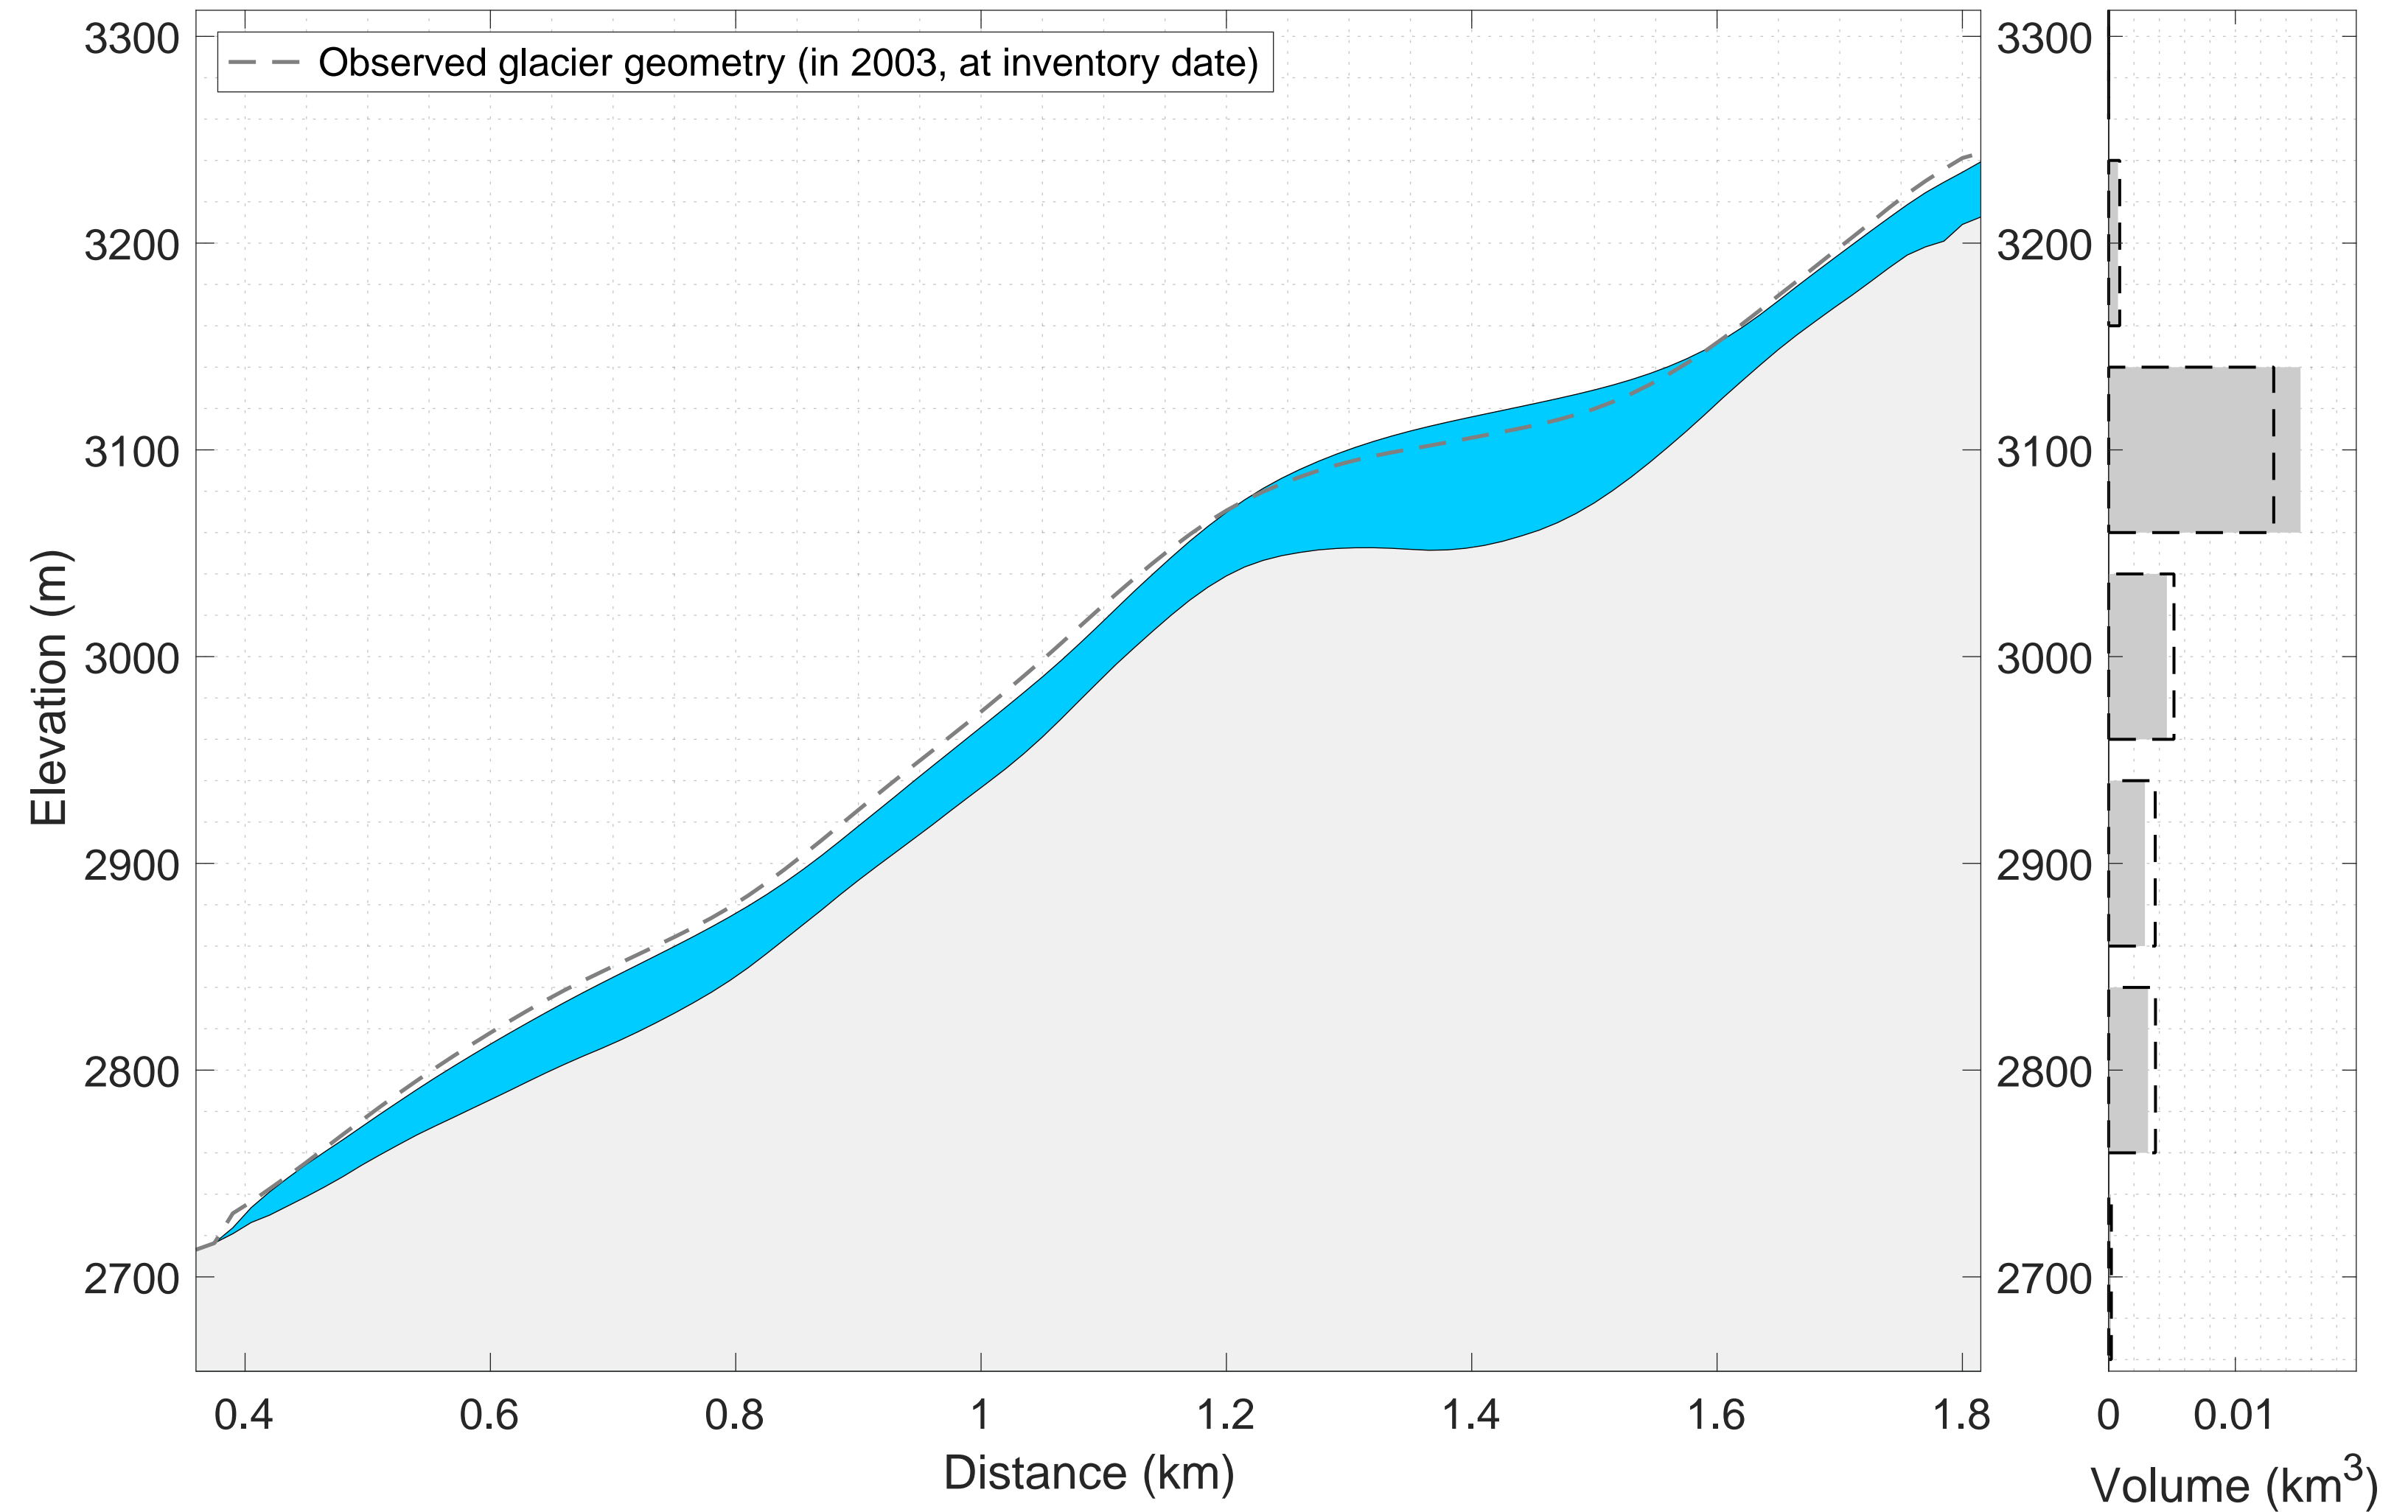

Supplement: Supplementary file 123 [file tc-13-1125-2019-supplement.zip]

**Modelled geometry (Glacier ID = 01824;  $A = 1.5734\text{e-}16 \text{ Pa}^{-3} \text{ a}^{-1}$ ;  $dx = 11 \text{ m}$ )**

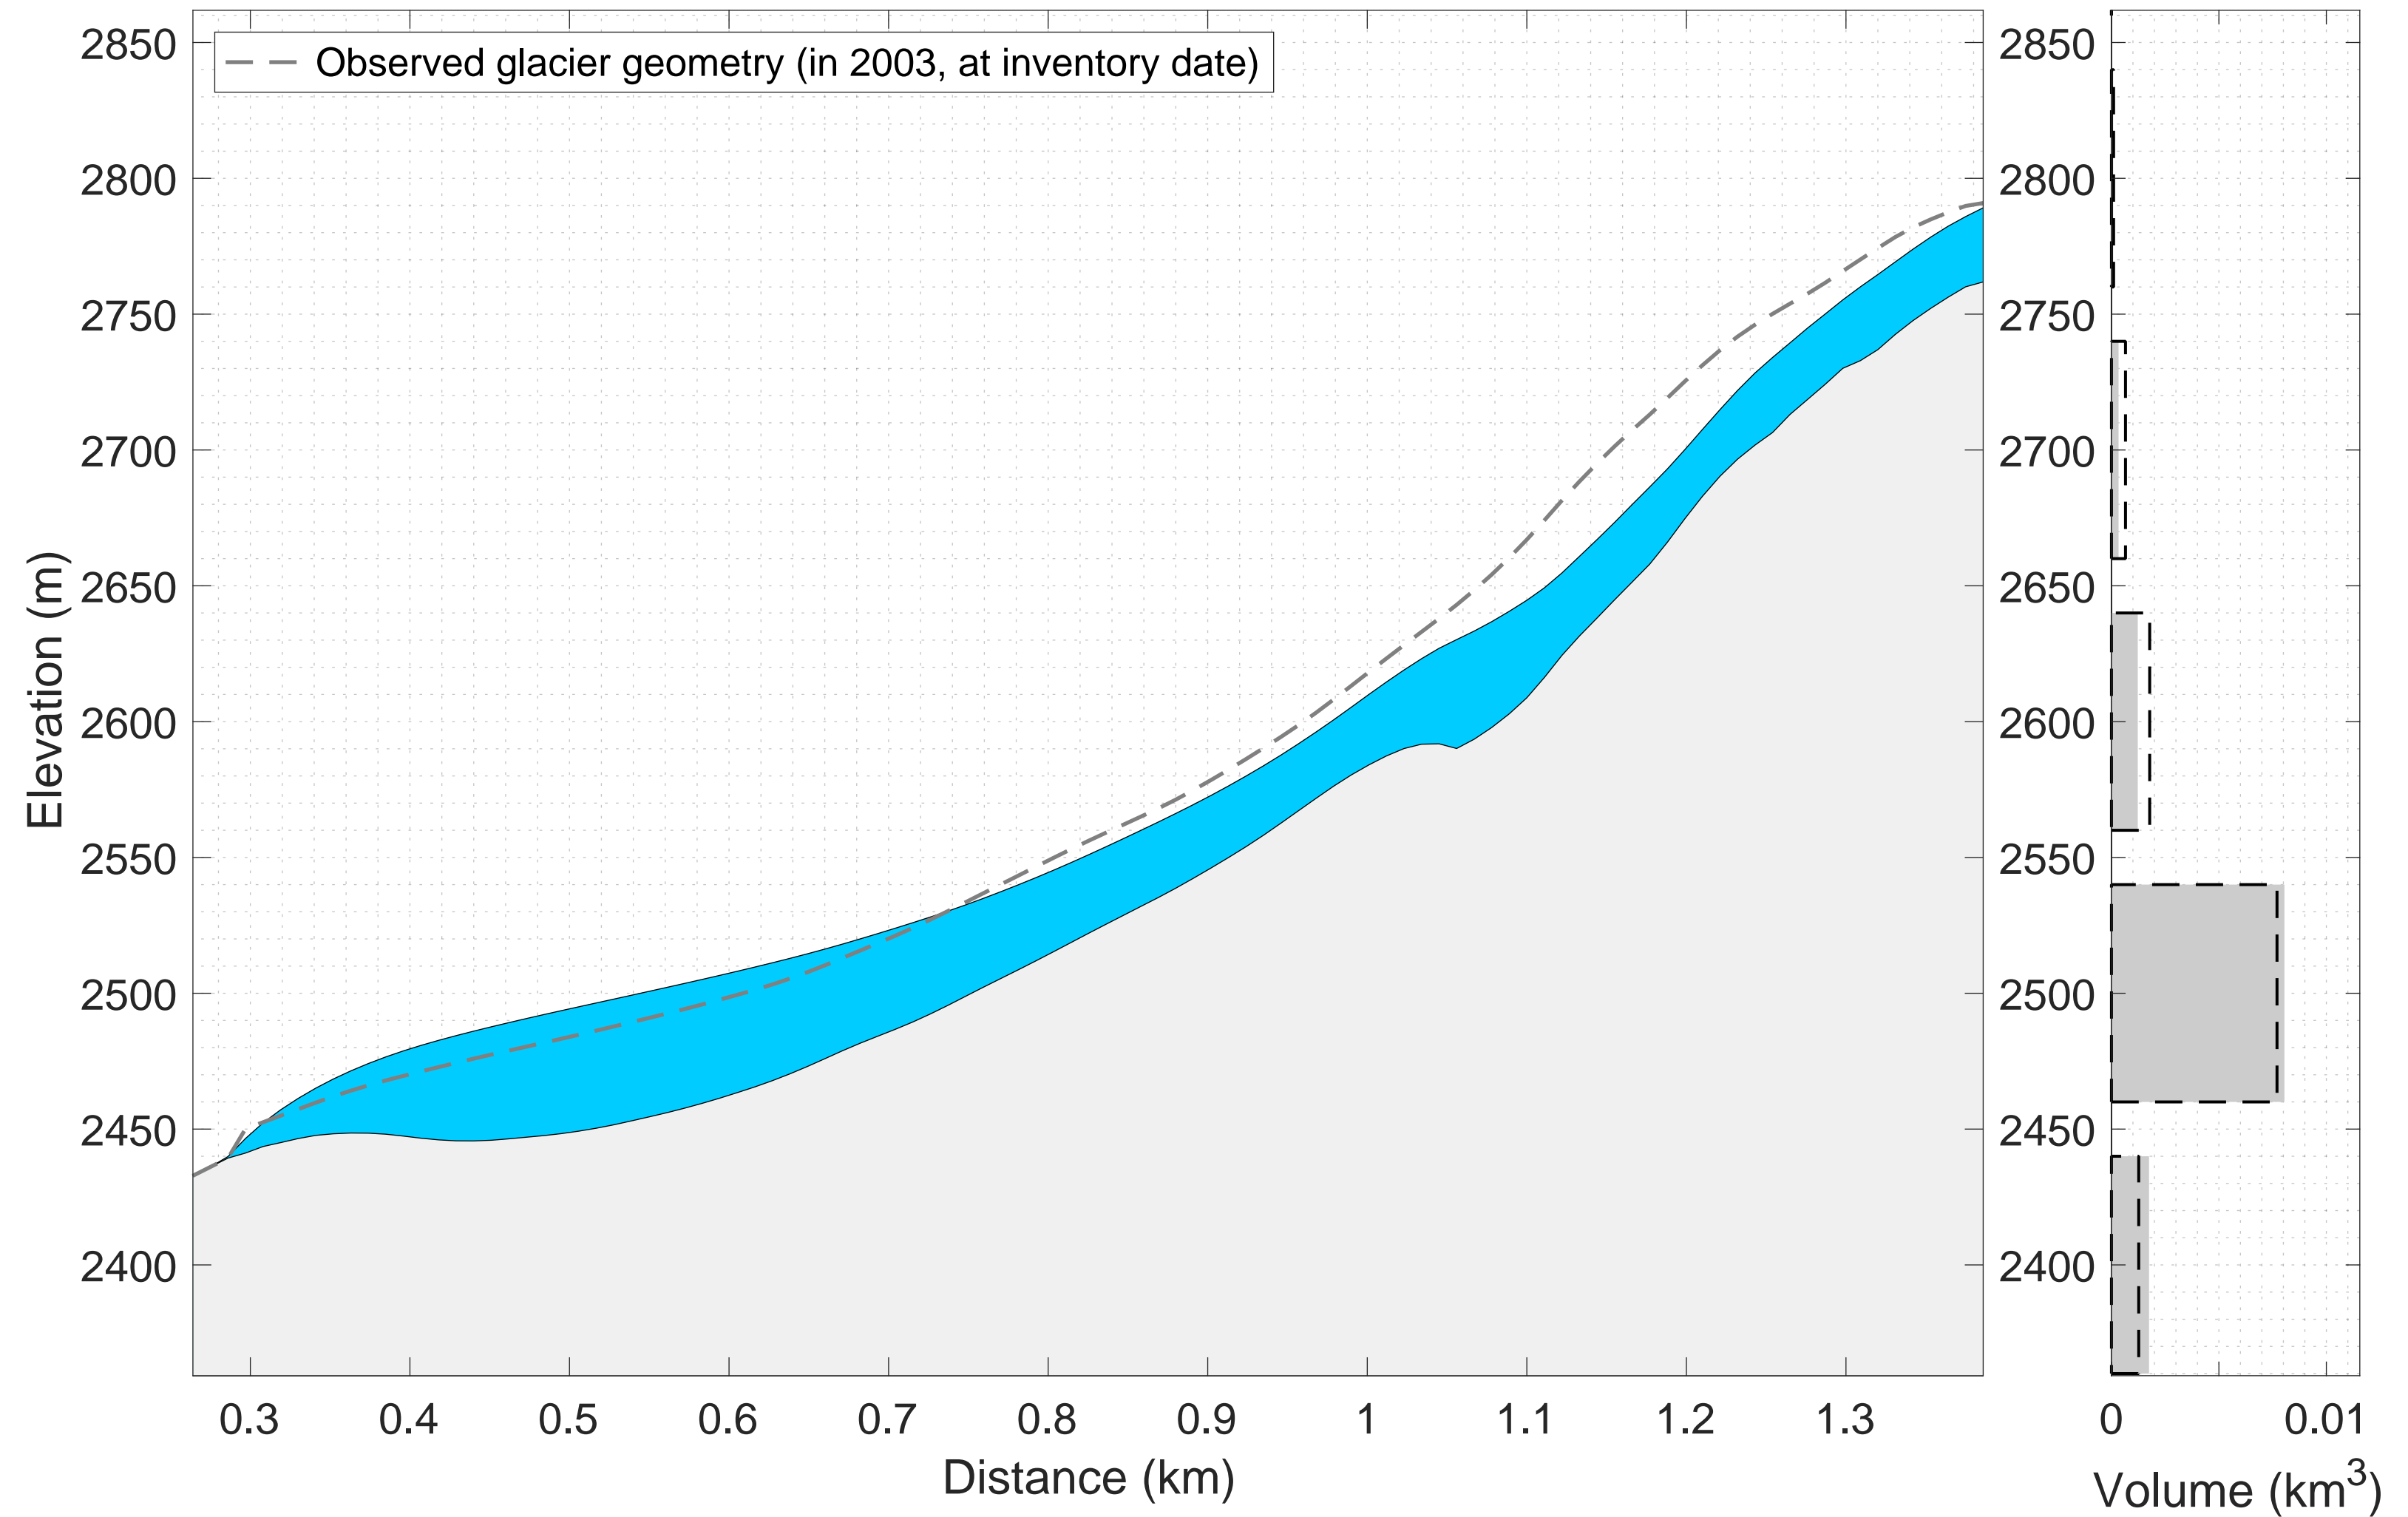

Supplement: Supplementary file 124 [file tc-13-1125-2019-supplement.zip]

**Modelled geometry (Glacier ID = 02869;  $A = 8.9671\text{e-}18 \text{ Pa}^{-3} \text{ a}^{-1}$ ;  $dx = 25 \text{ m}$ )**

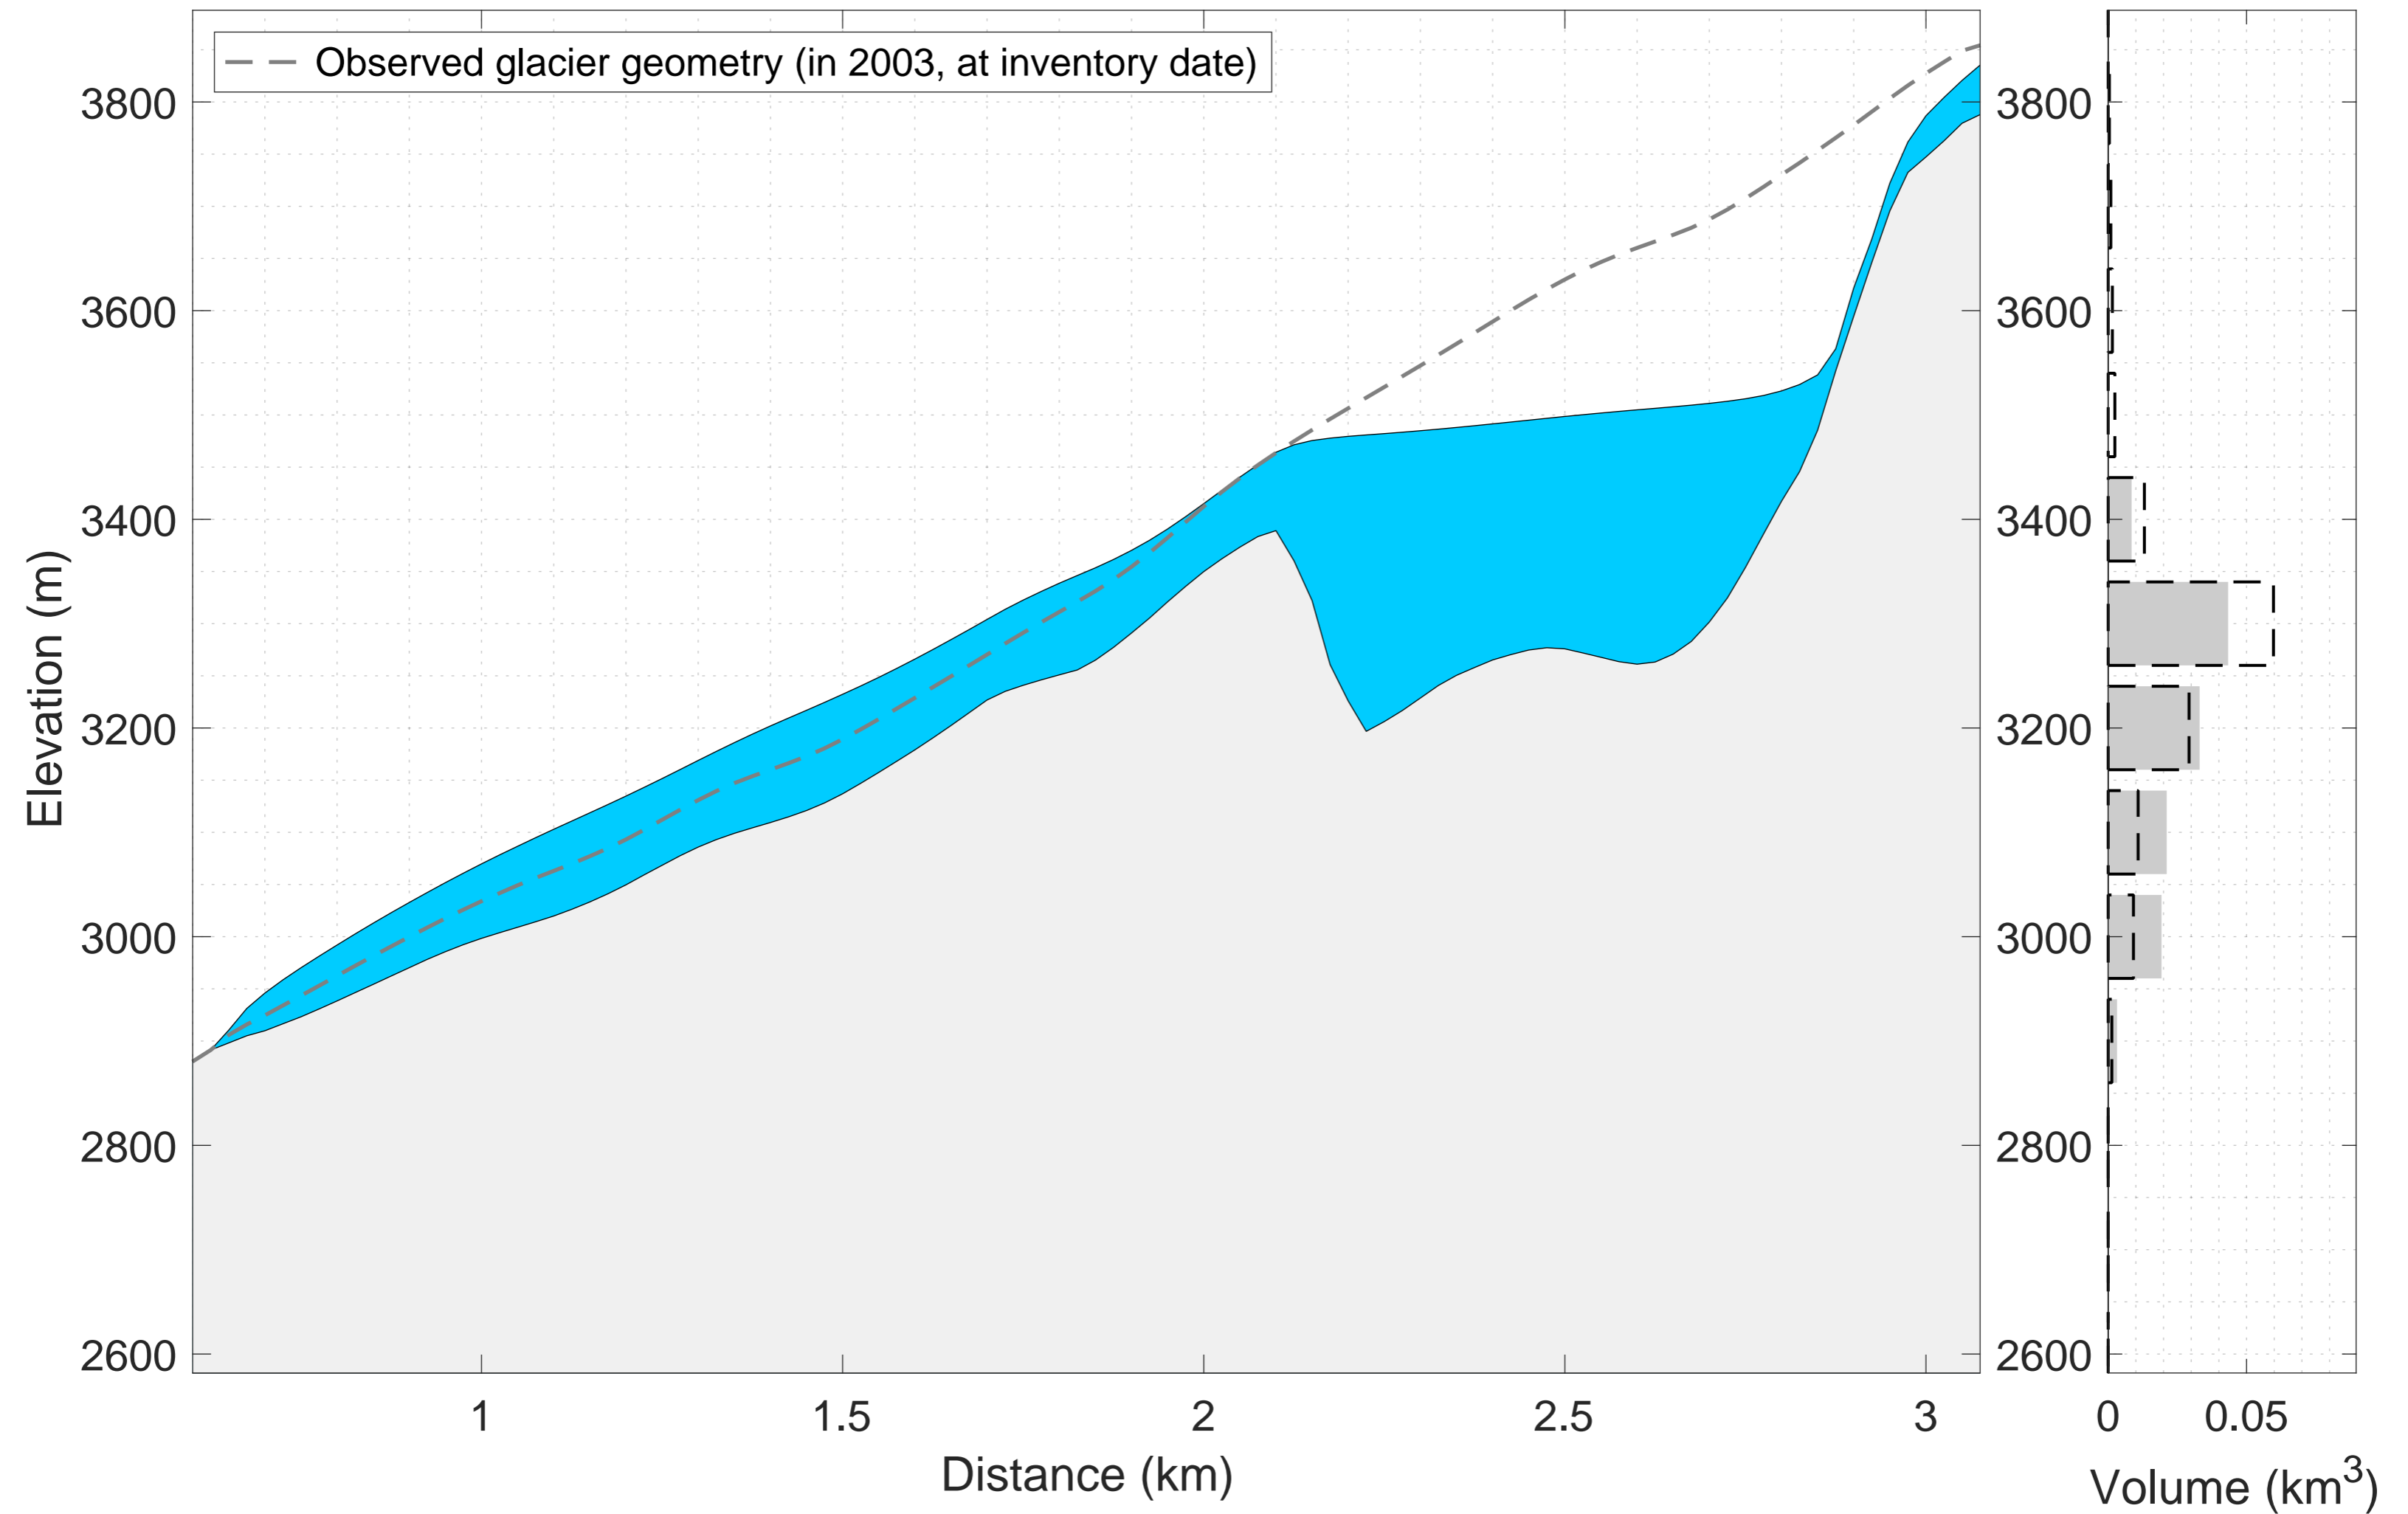

Supplement: Supplementary file 125 [file tc-13-1125-2019-supplement.zip]

**Modelled geometry (Glacier ID = 01952;  $A = 3.5975\text{e-}17 \text{ Pa}^{-3} \text{ a}^{-1}$ ;  $dx = 14 \text{ m}$ )**

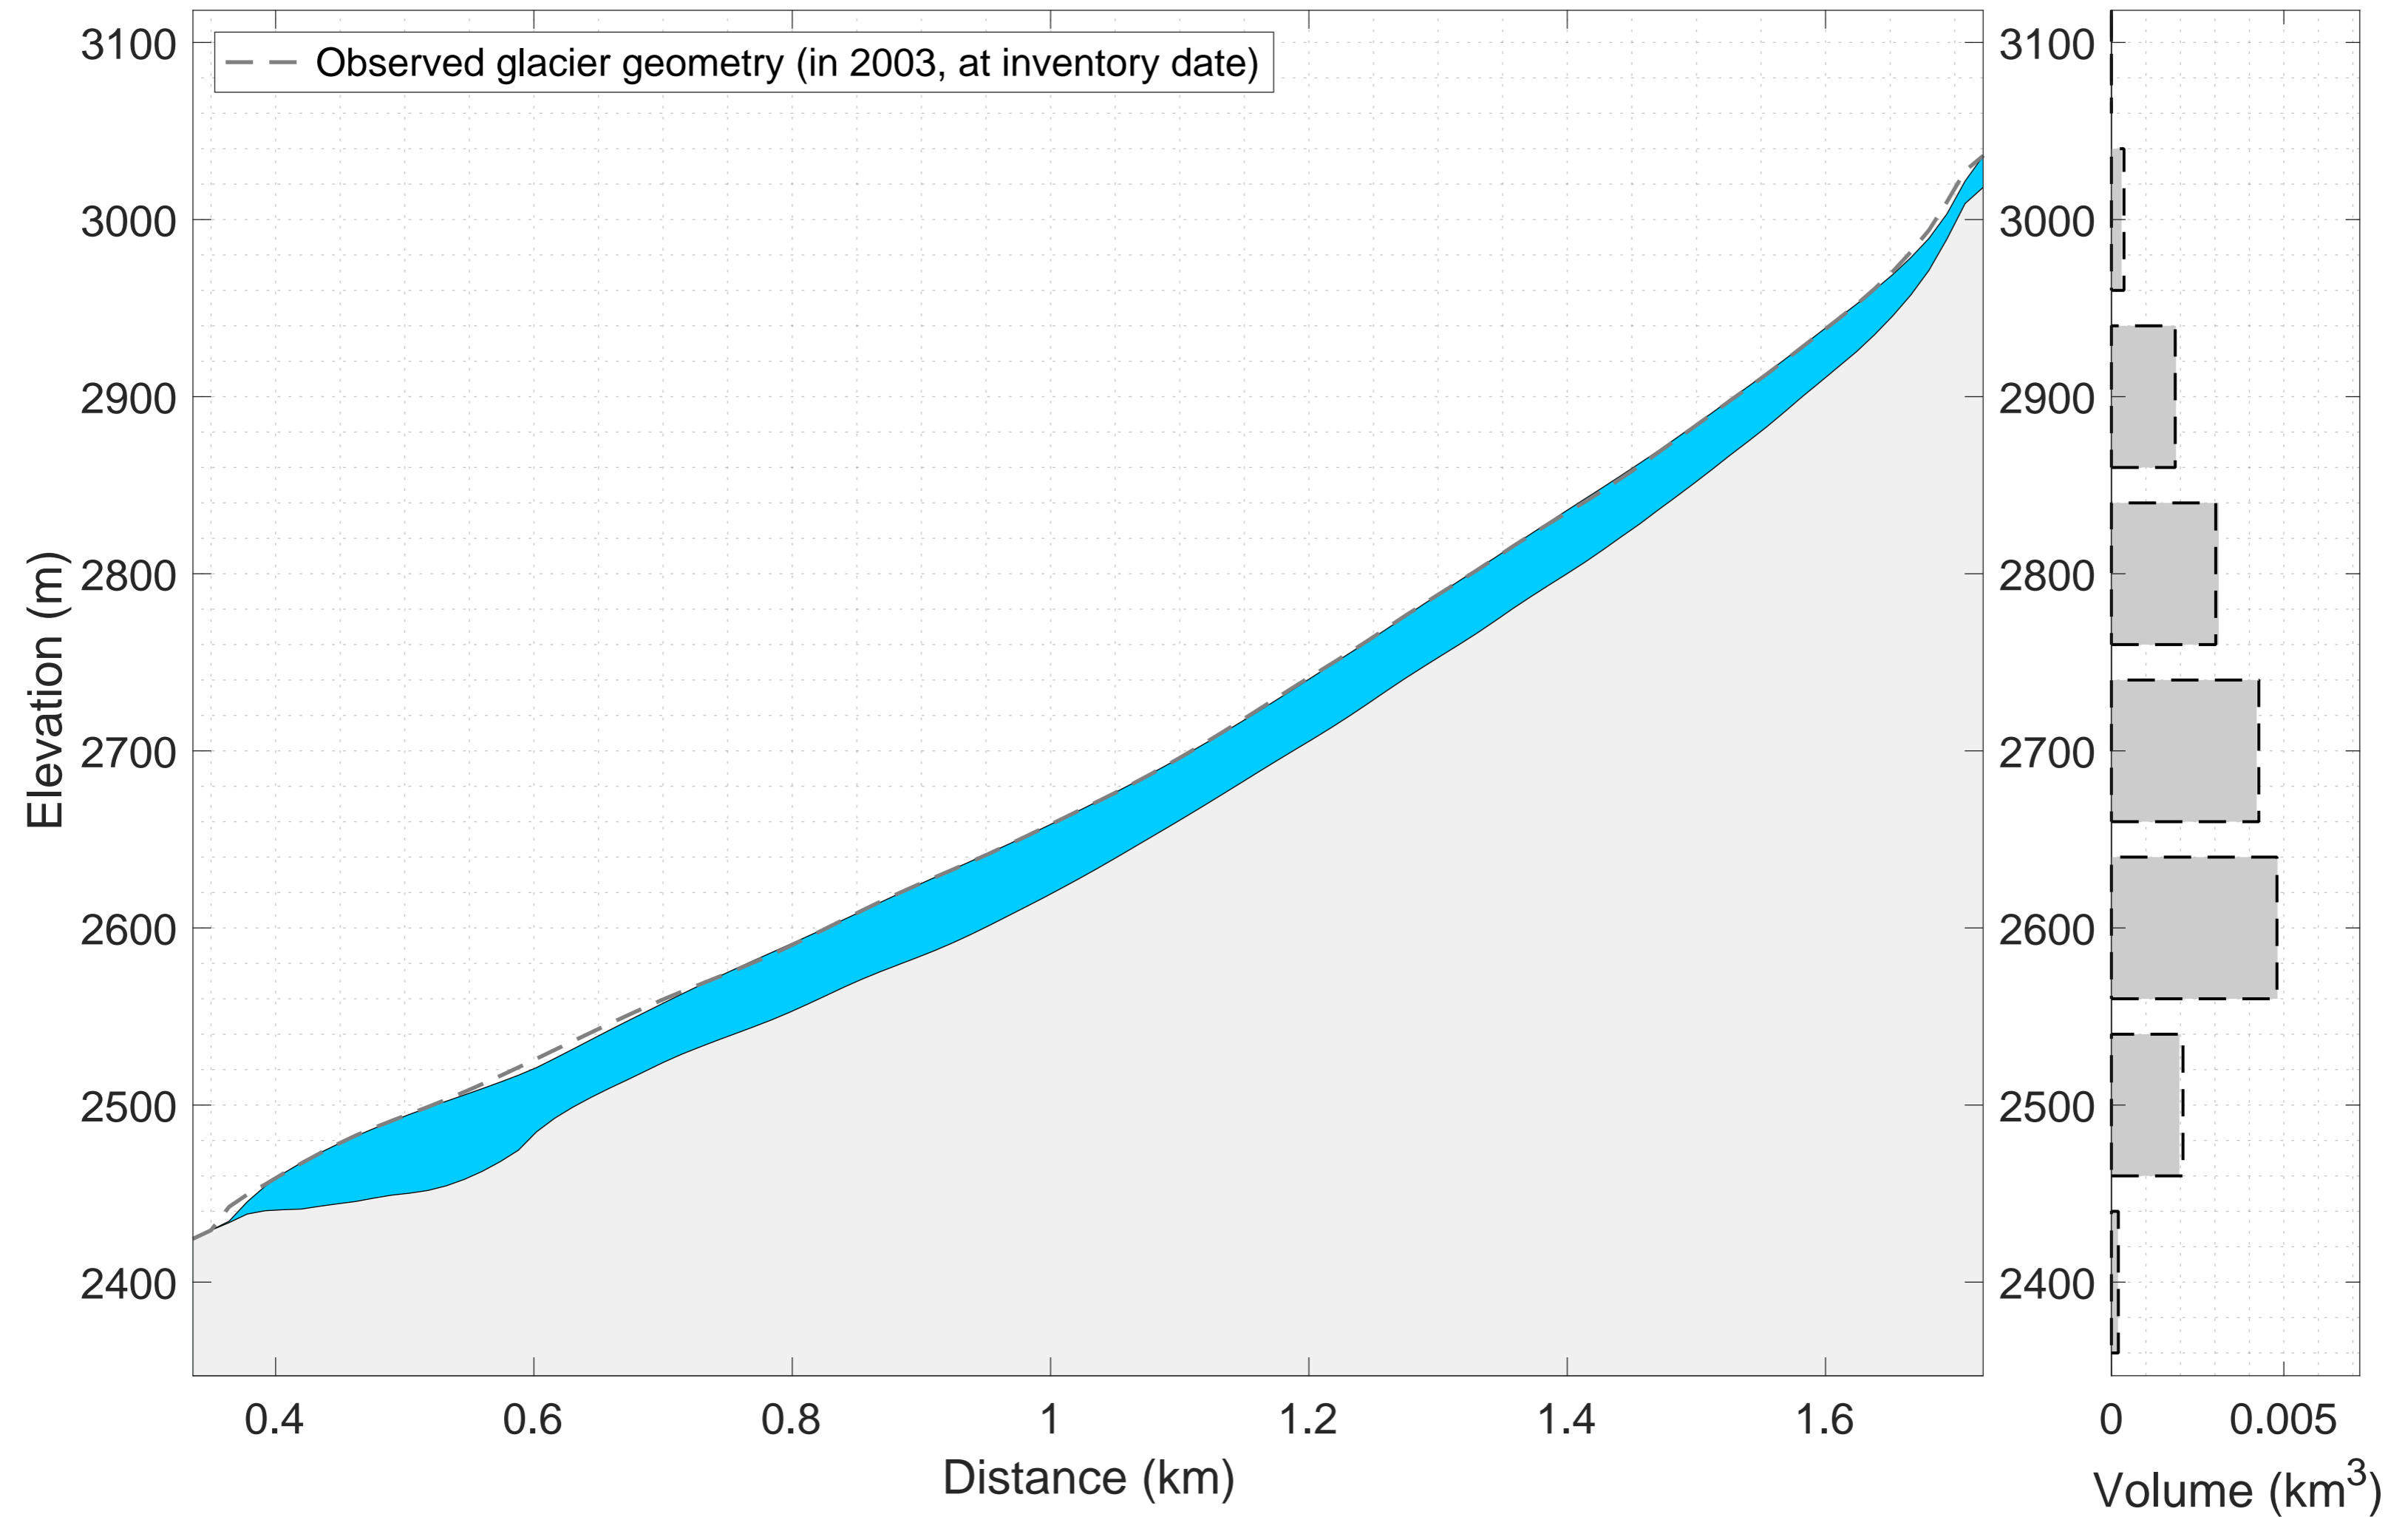

Supplement: Supplementary file 126 [file tc-13-1125-2019-supplement.zip]

**Modelled geometry (Glacier ID = 02544;  $A = 2.1271\text{e-}16 \text{ Pa}^{-3} \text{ a}^{-1}$ ;  $dx = 18 \text{ m}$ )**

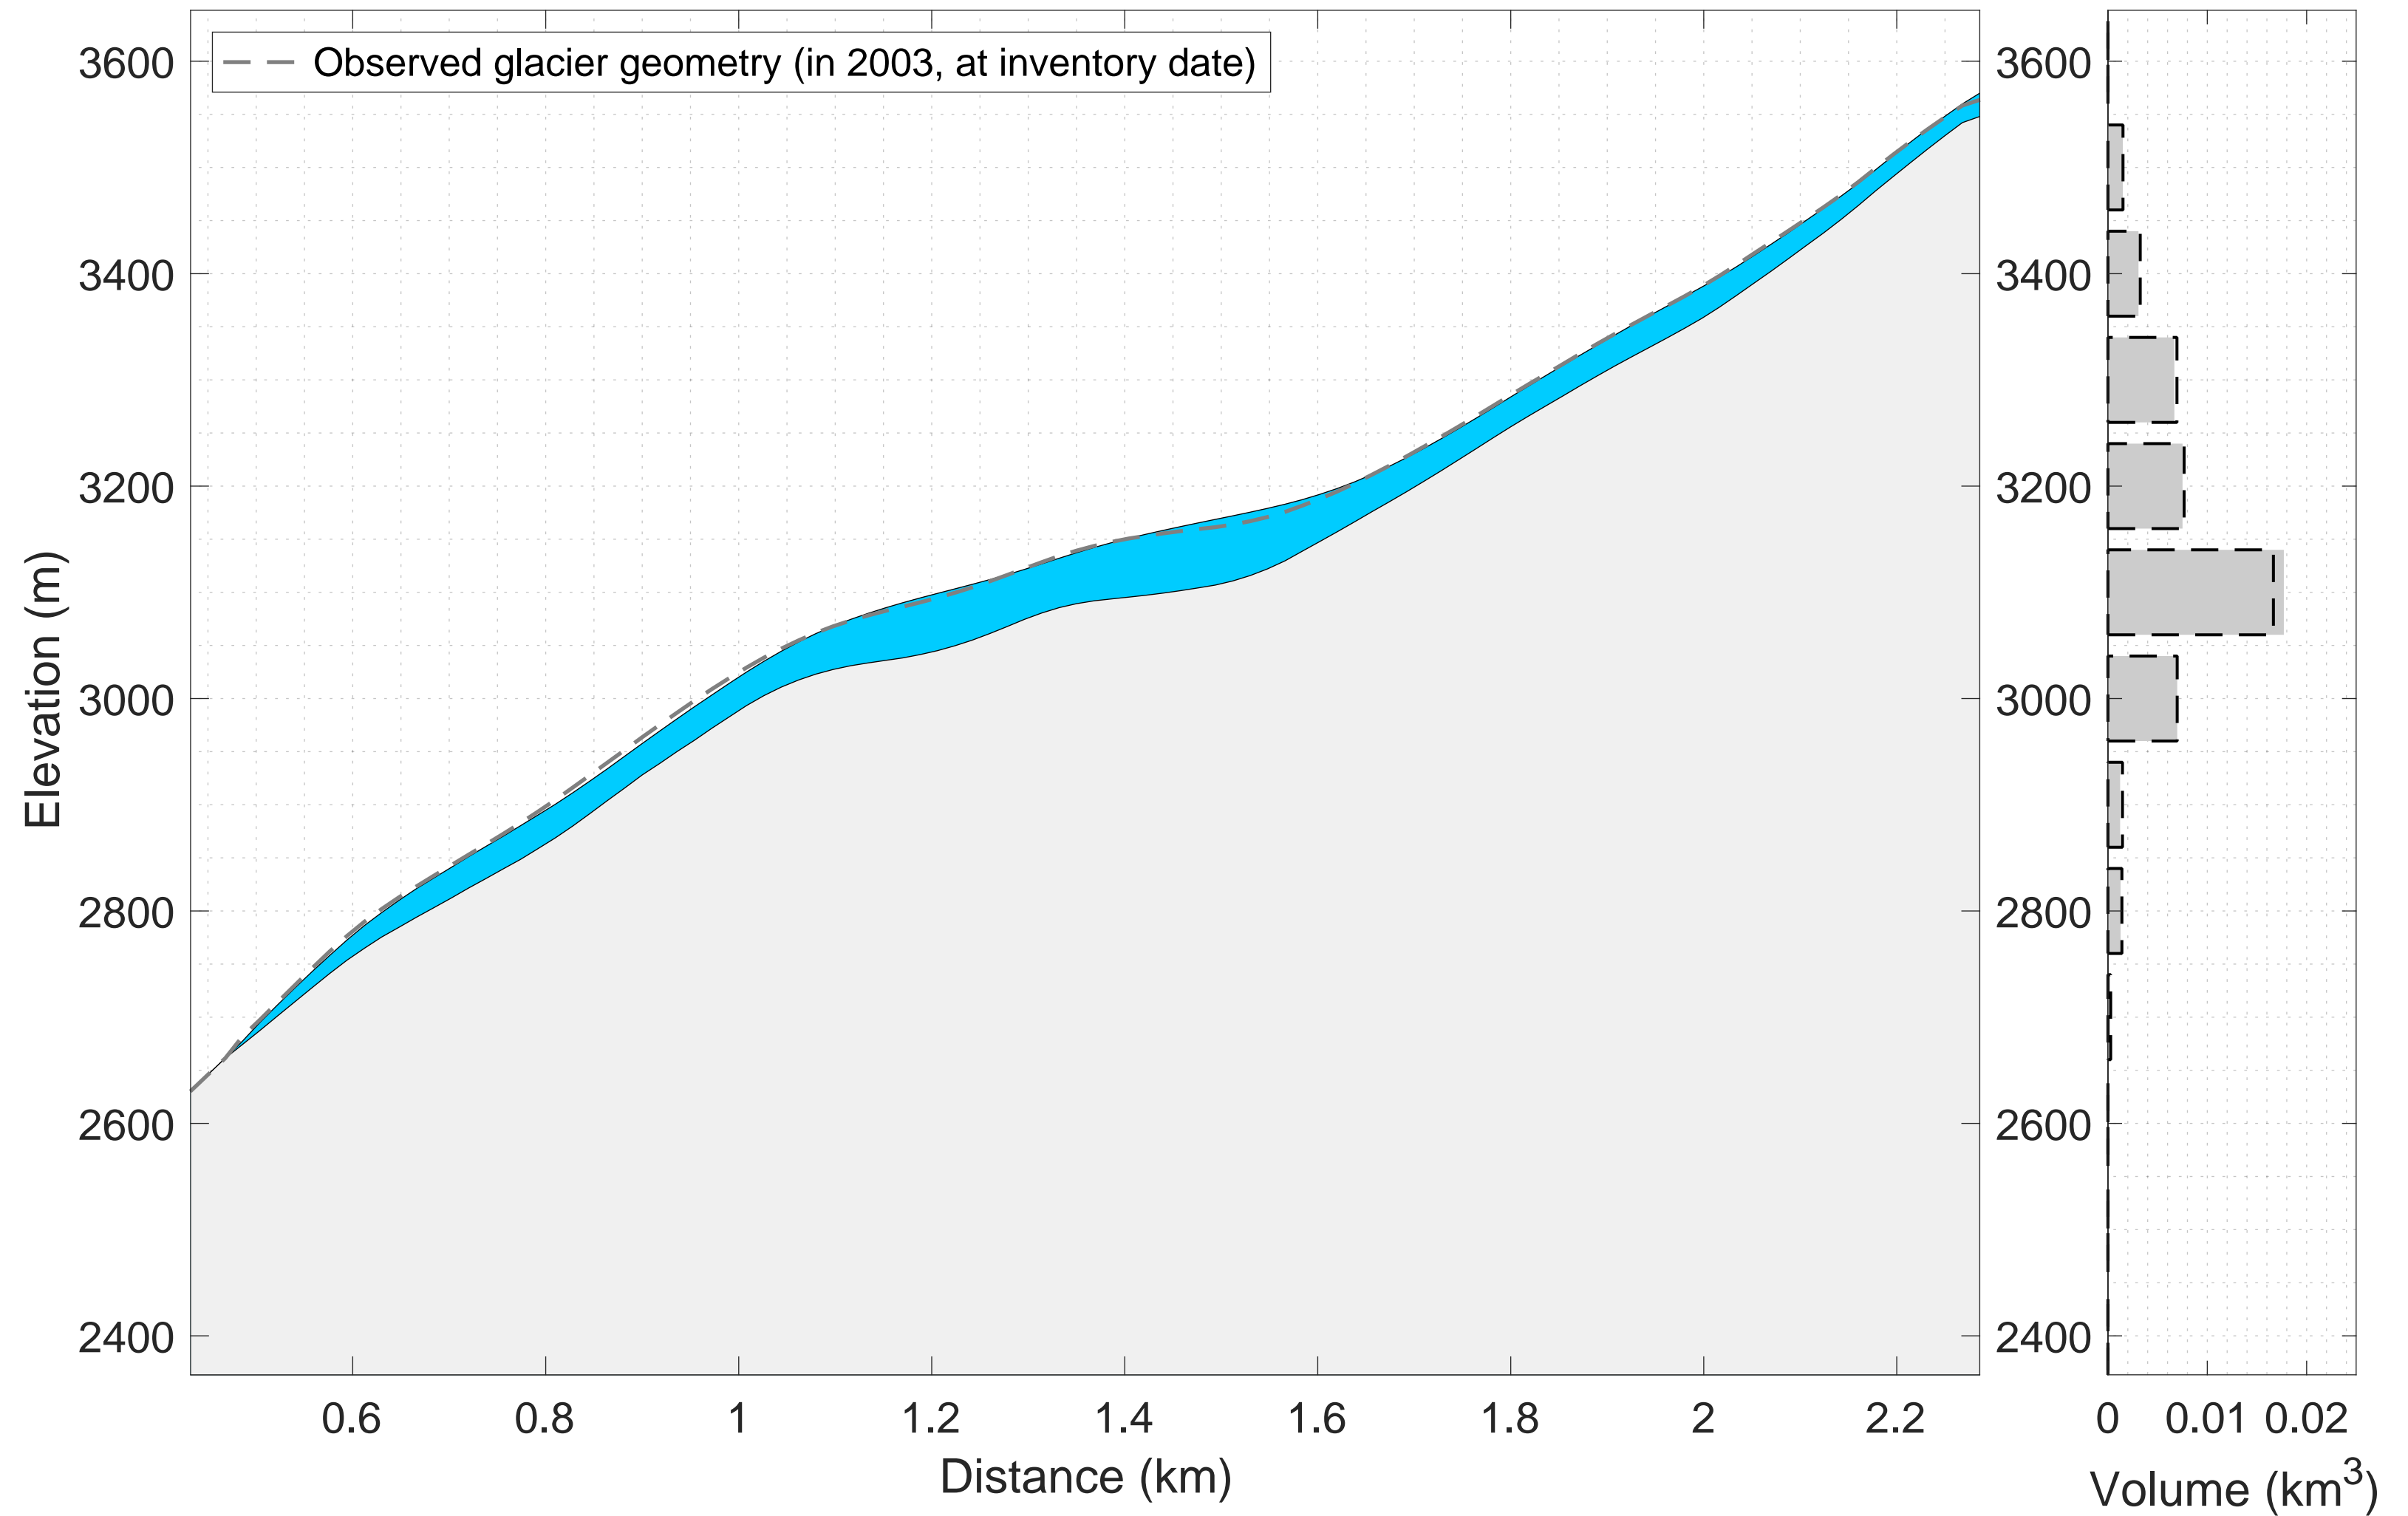

Supplement: Supplementary file 127 [file tc-13-1125-2019-supplement.zip]

**Modelled geometry (Glacier ID = 03400;  $A = 3.4423\text{e-}16 \text{ Pa}^{-3} \text{ a}^{-1}$ ;  $dx = 24 \text{ m}$ )**

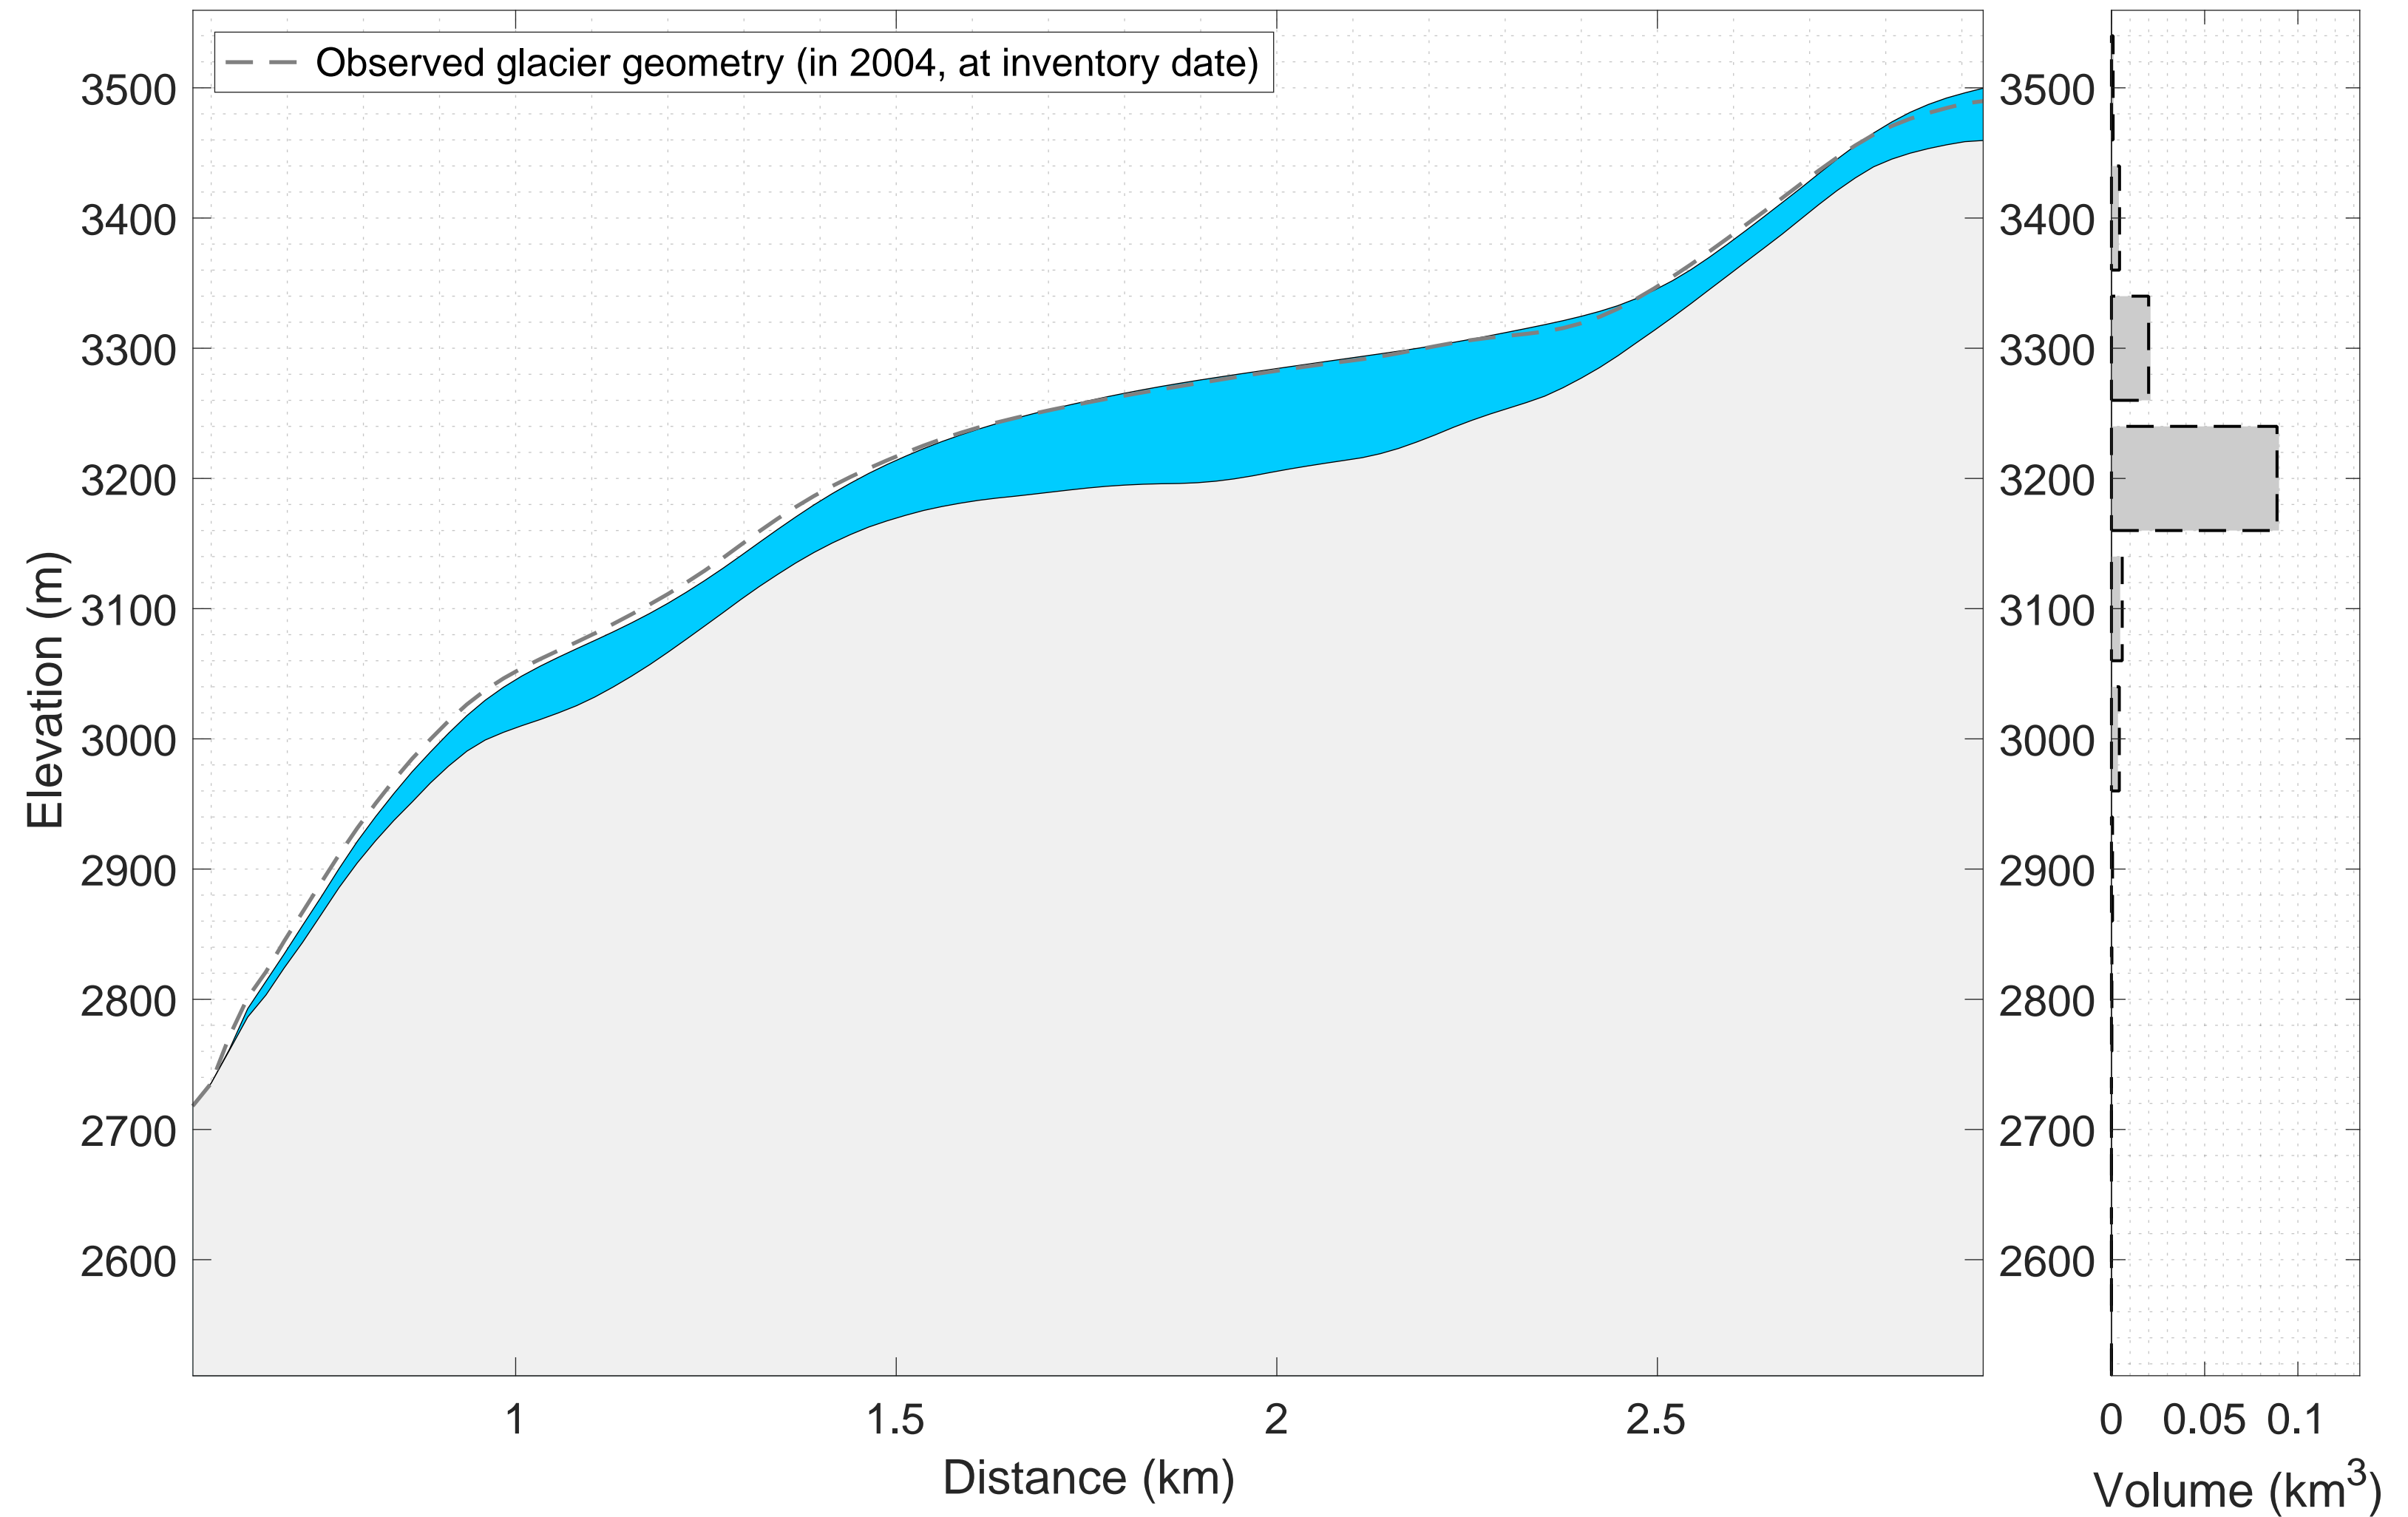

Supplement: Supplementary file 128 [file tc-13-1125-2019-supplement.zip]

**Modelled geometry (Glacier ID = 00041;  $A = 1.8242\text{e-}16 \text{ Pa}^{-3} \text{ a}^{-1}$ ;  $dx = 14 \text{ m}$ )**

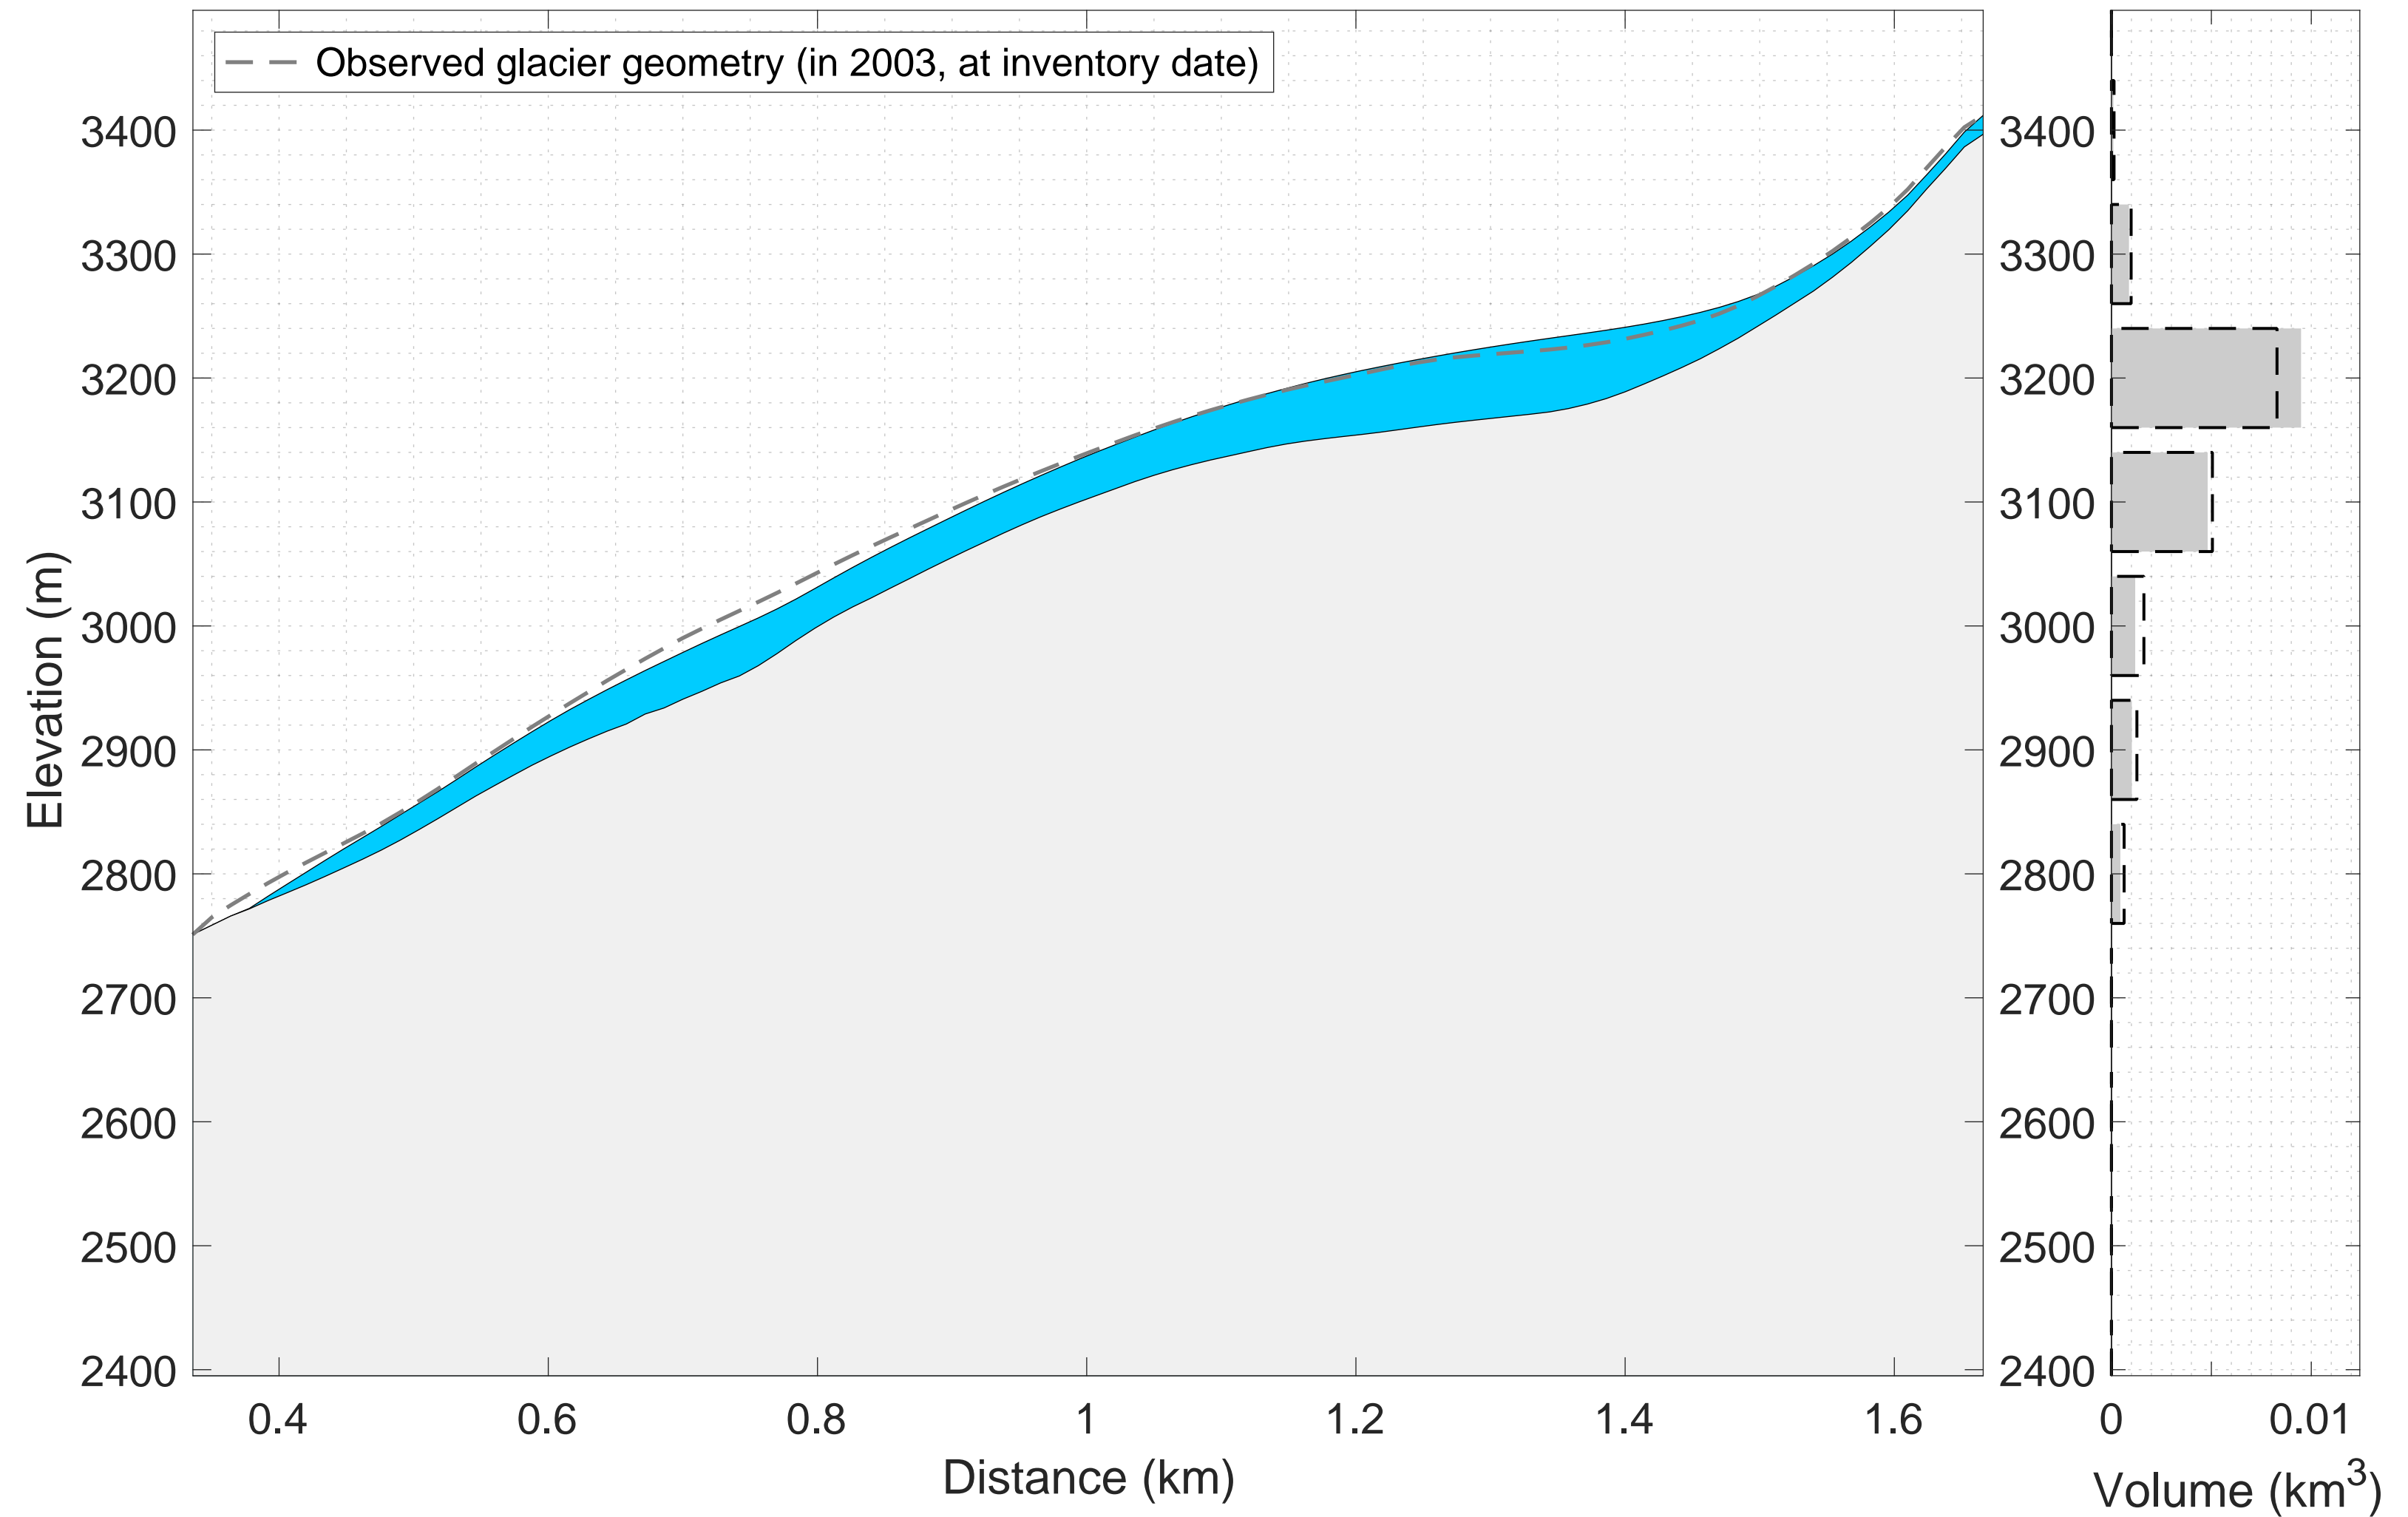

Supplement: Supplementary file 129 [file tc-13-1125-2019-supplement.zip]

**Modelled geometry (Glacier ID = 00892;  $A = 6.5046\text{e-}17 \text{ Pa}^{-3} \text{ a}^{-1}$ ;  $dx = 11 \text{ m}$ )**

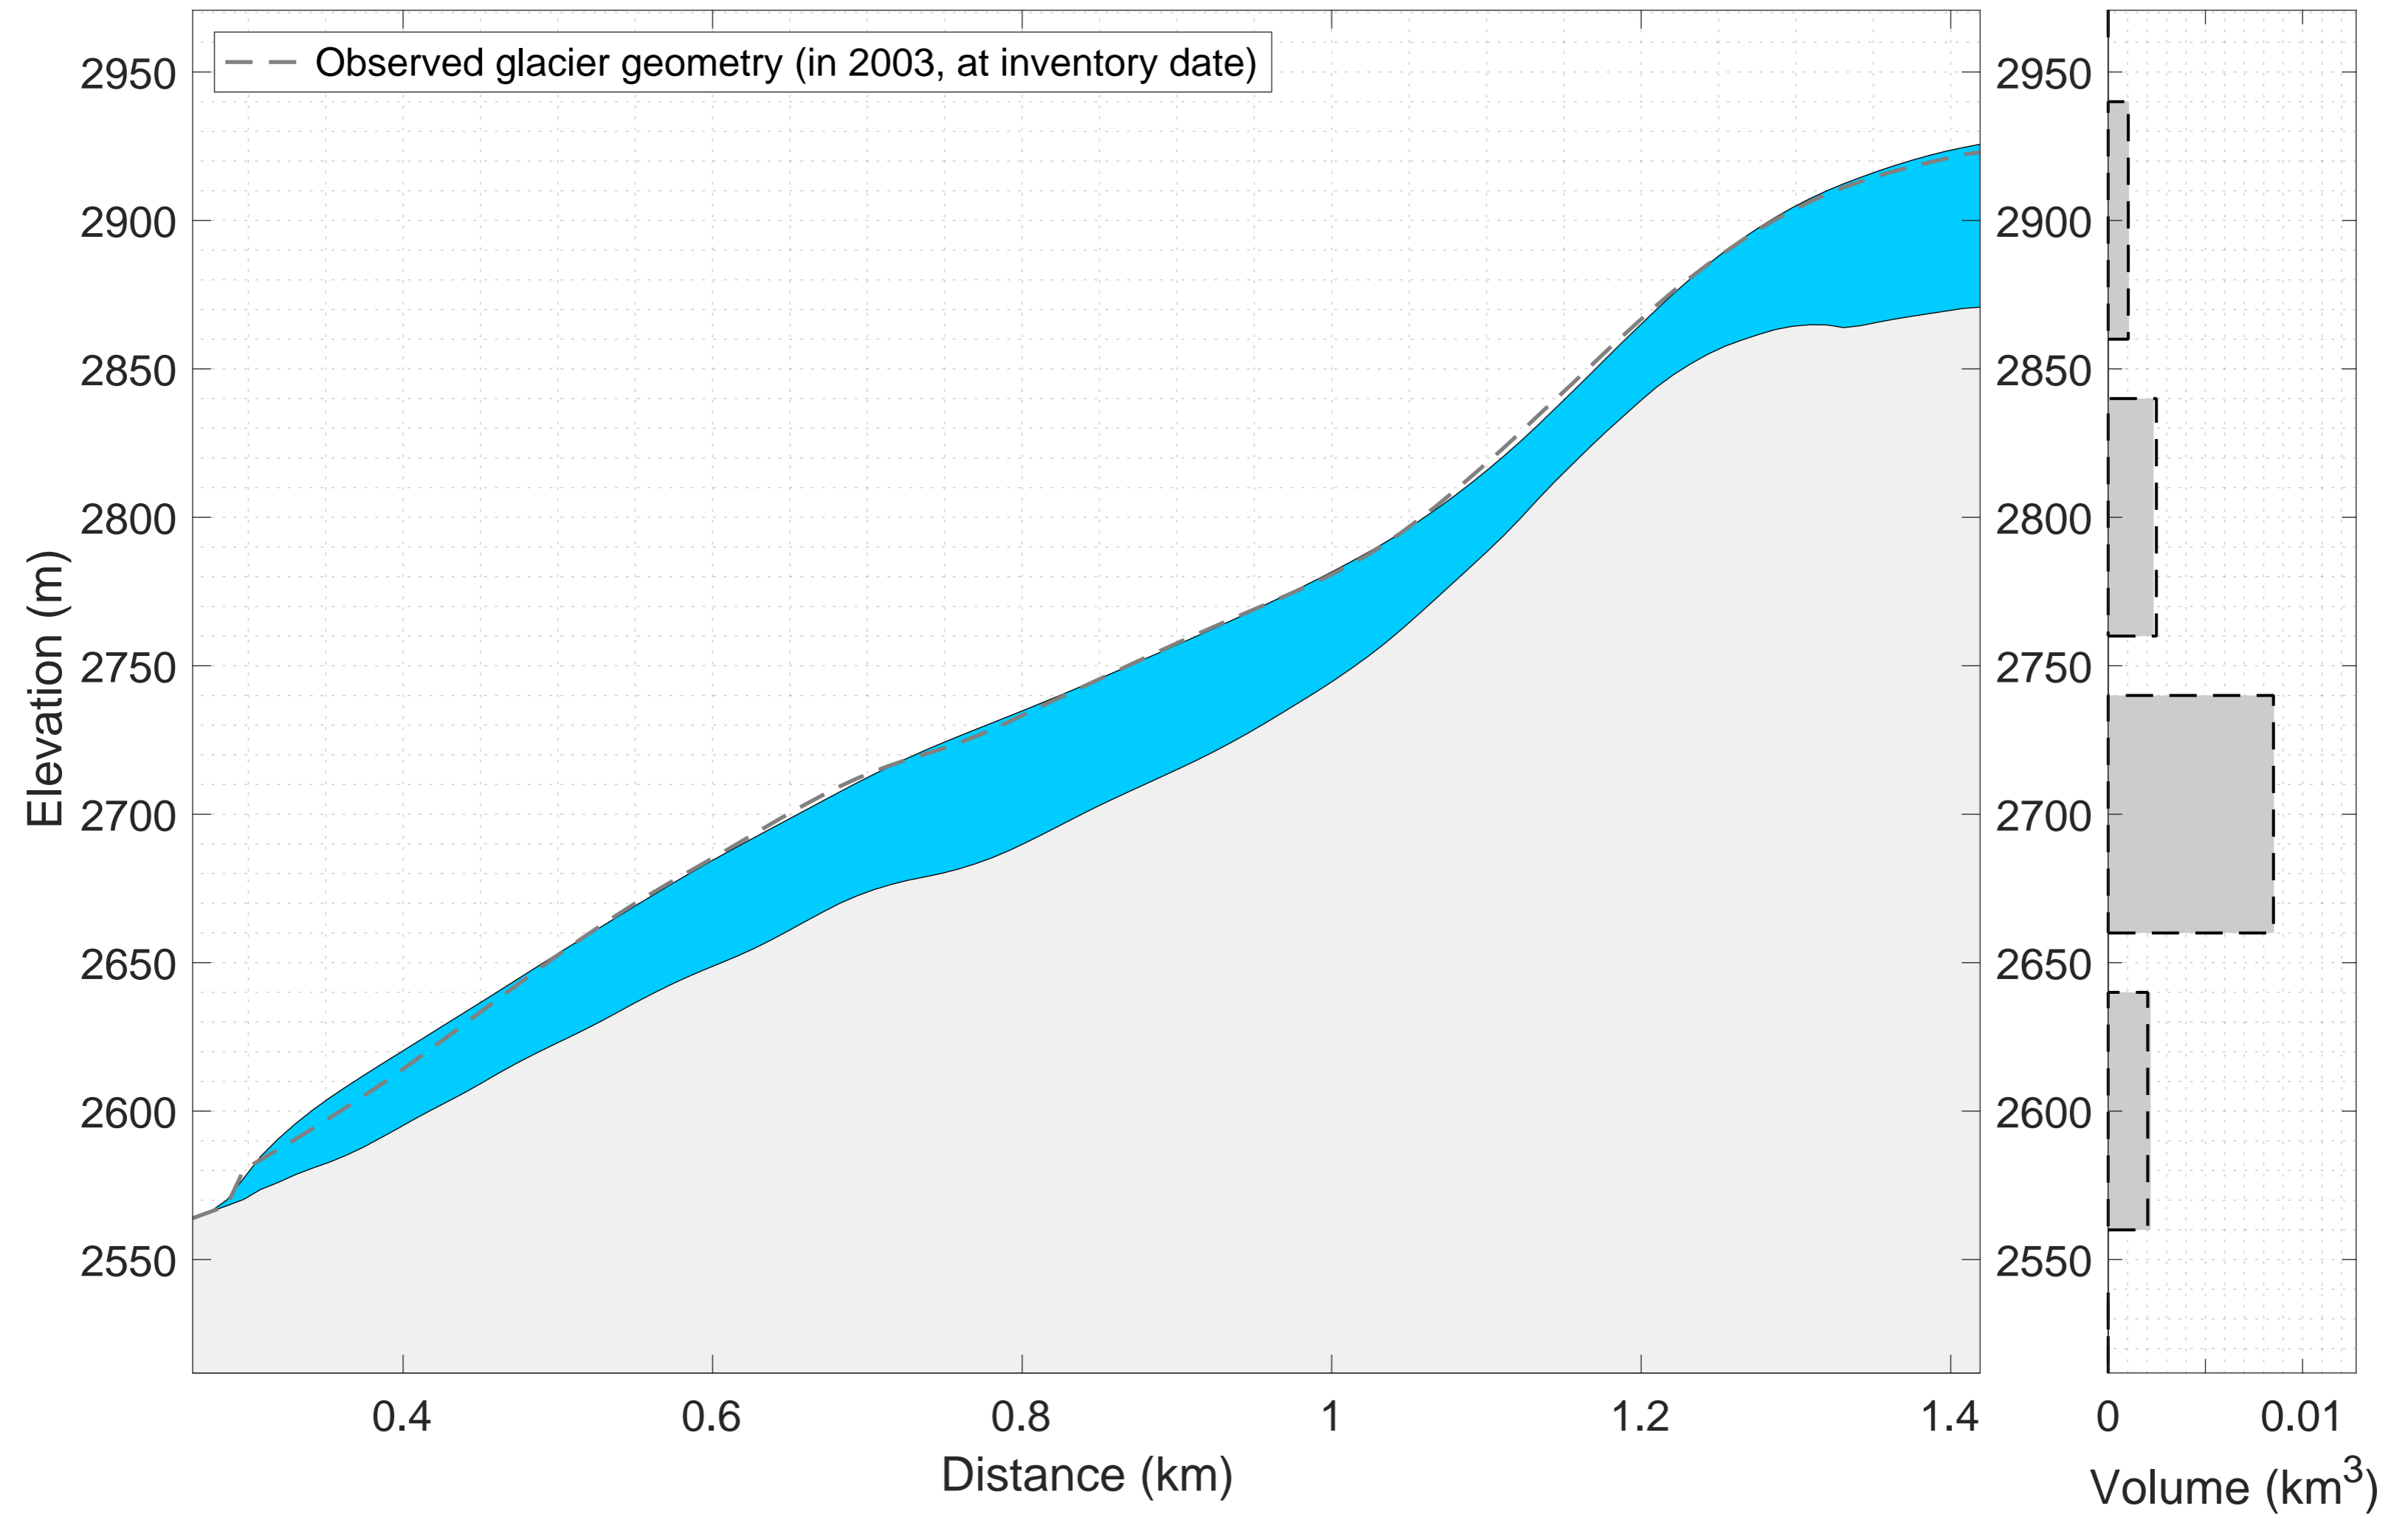

Supplement: Supplementary file 130 [file tc-13-1125-2019-supplement.zip]

**Modelled geometry (Glacier ID = 01068;  $A = 9.7046\text{e-}17 \text{ Pa}^{-3} \text{ a}^{-1}$ ;  $dx = 13 \text{ m}$ )**

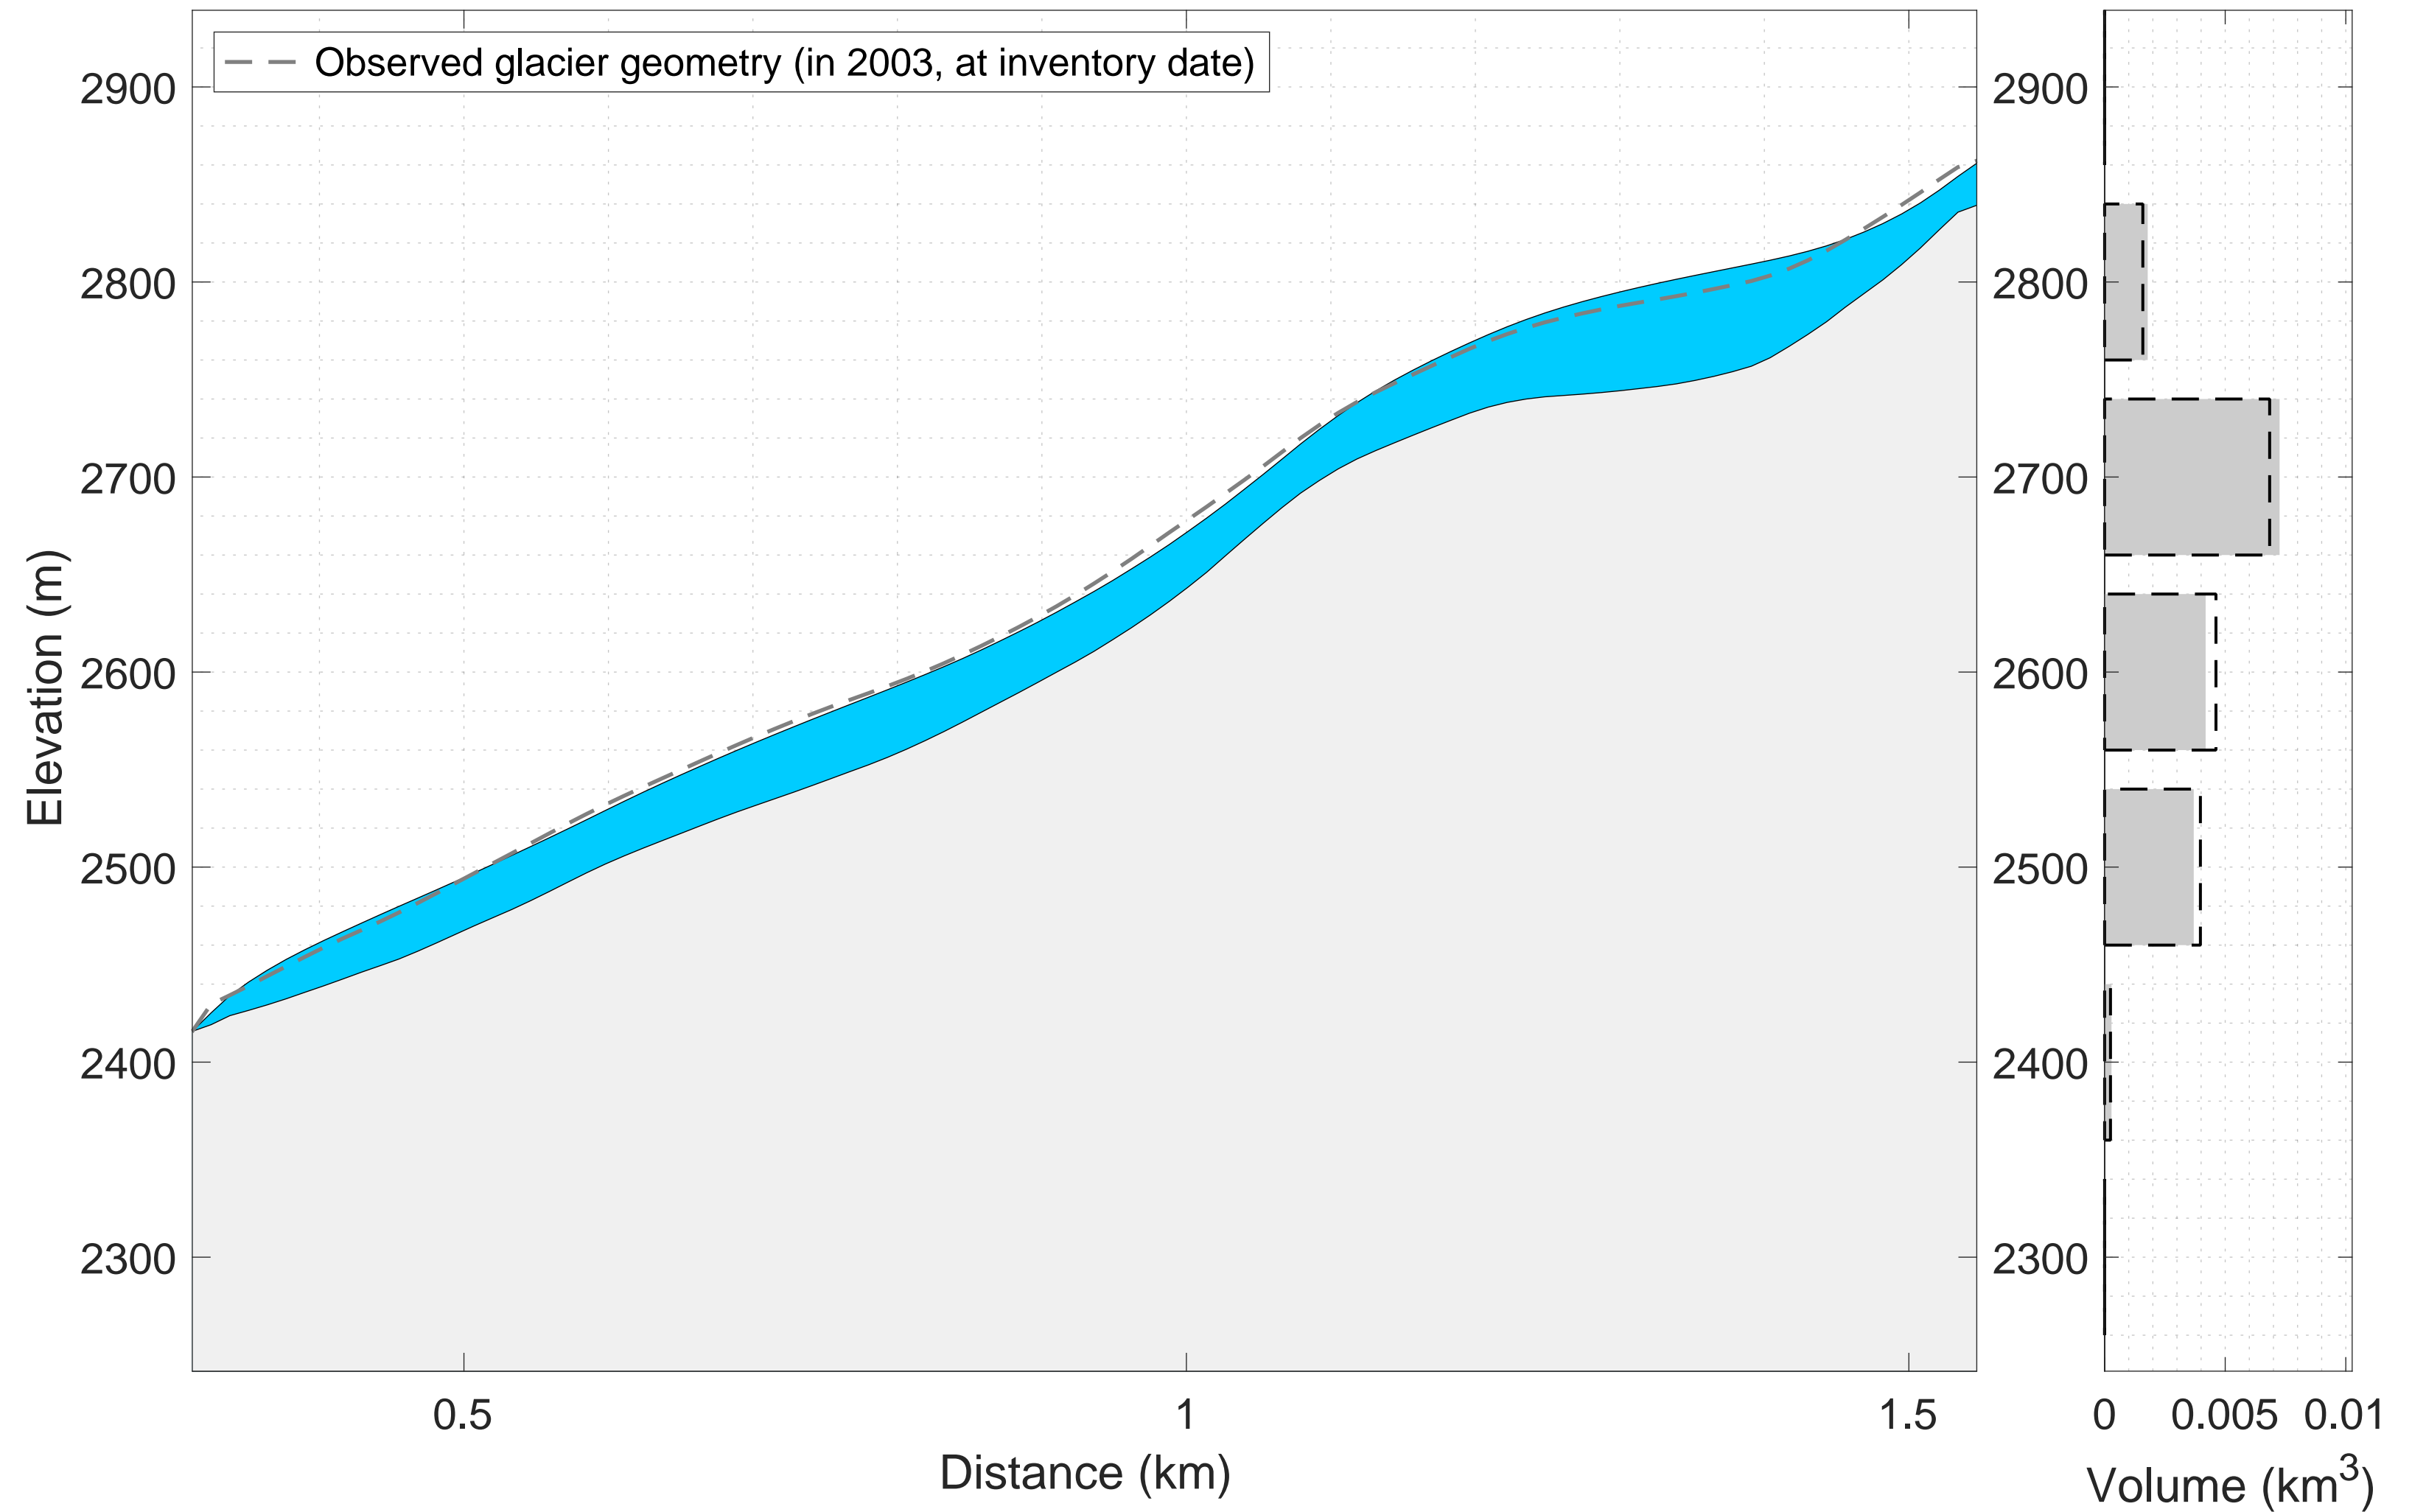

Supplement: Supplementary file 131 [file tc-13-1125-2019-supplement.zip]

**Modelled geometry (Glacier ID = 03640;  $A = 8.0372\text{e-}17 \text{ Pa}^{-3} \text{ a}^{-1}$ ;  $dx = 18 \text{ m}$ )**

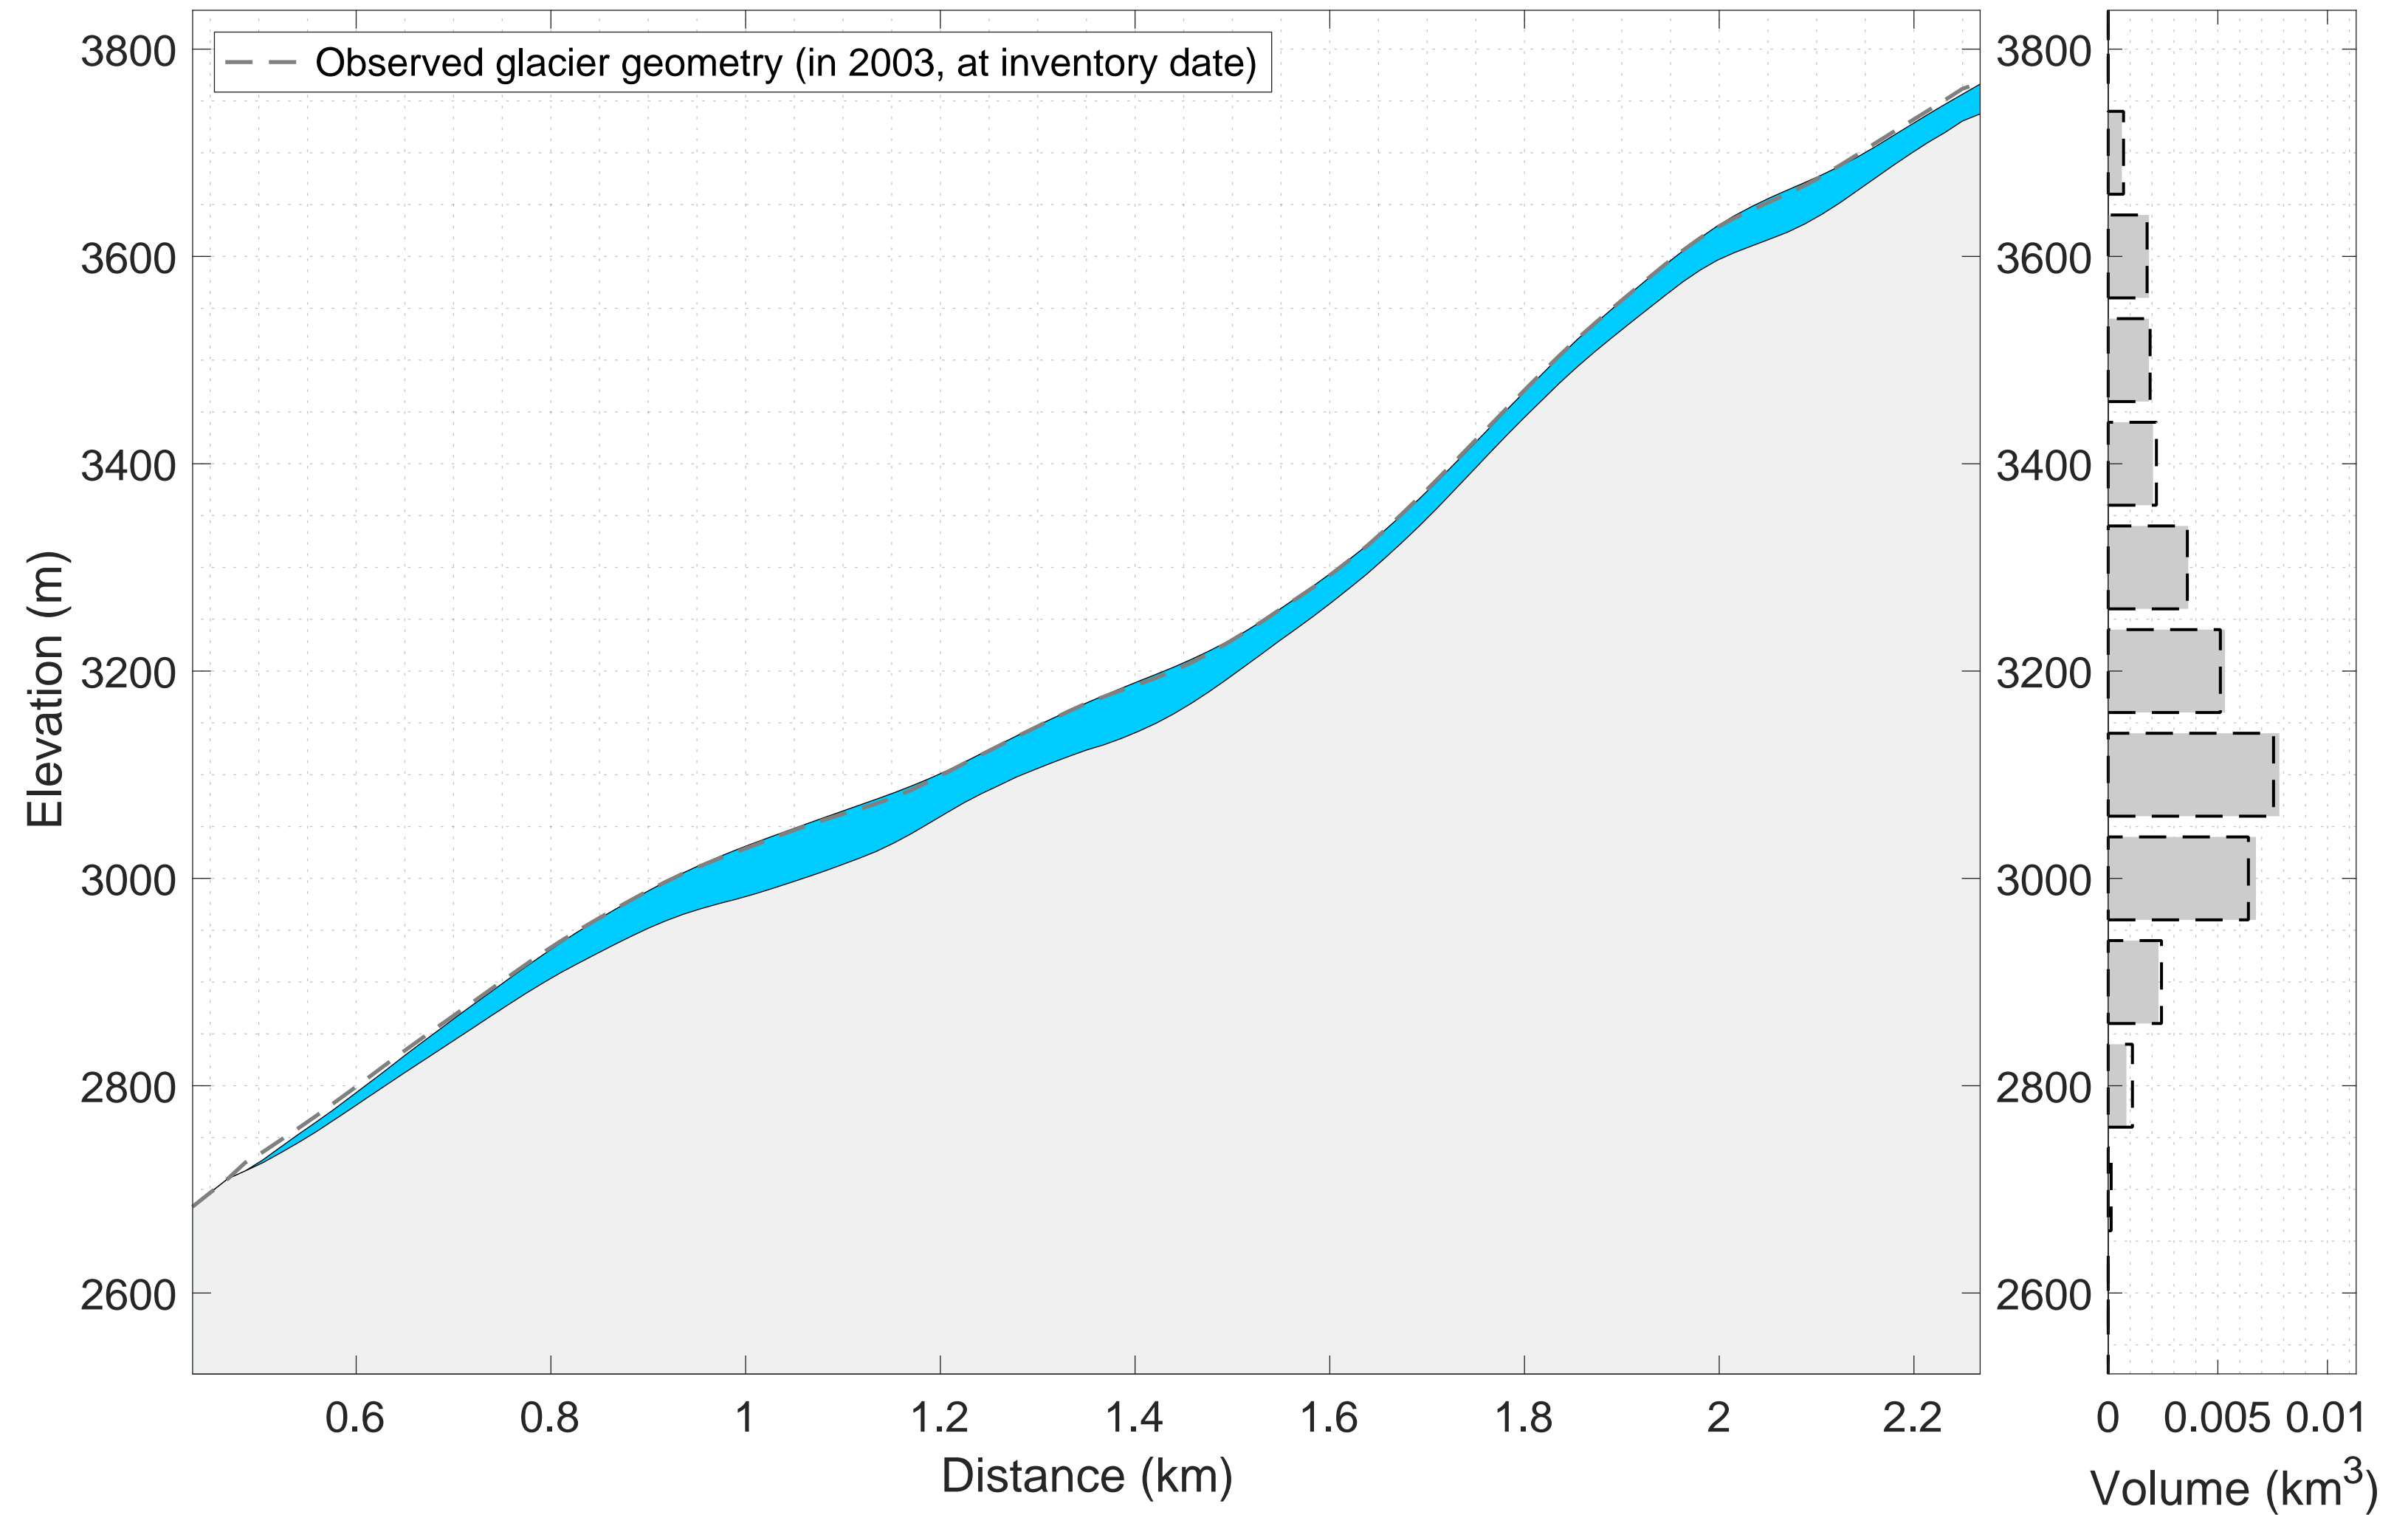

Supplement: Supplementary file 132 [file tc-13-1125-2019-supplement.zip]

**Modelled geometry (Glacier ID = 00047;  $A = 1.074\text{e-}16 \text{ Pa}^{-3} \text{ a}^{-1}$ ;  $dx = 24 \text{ m}$ )**

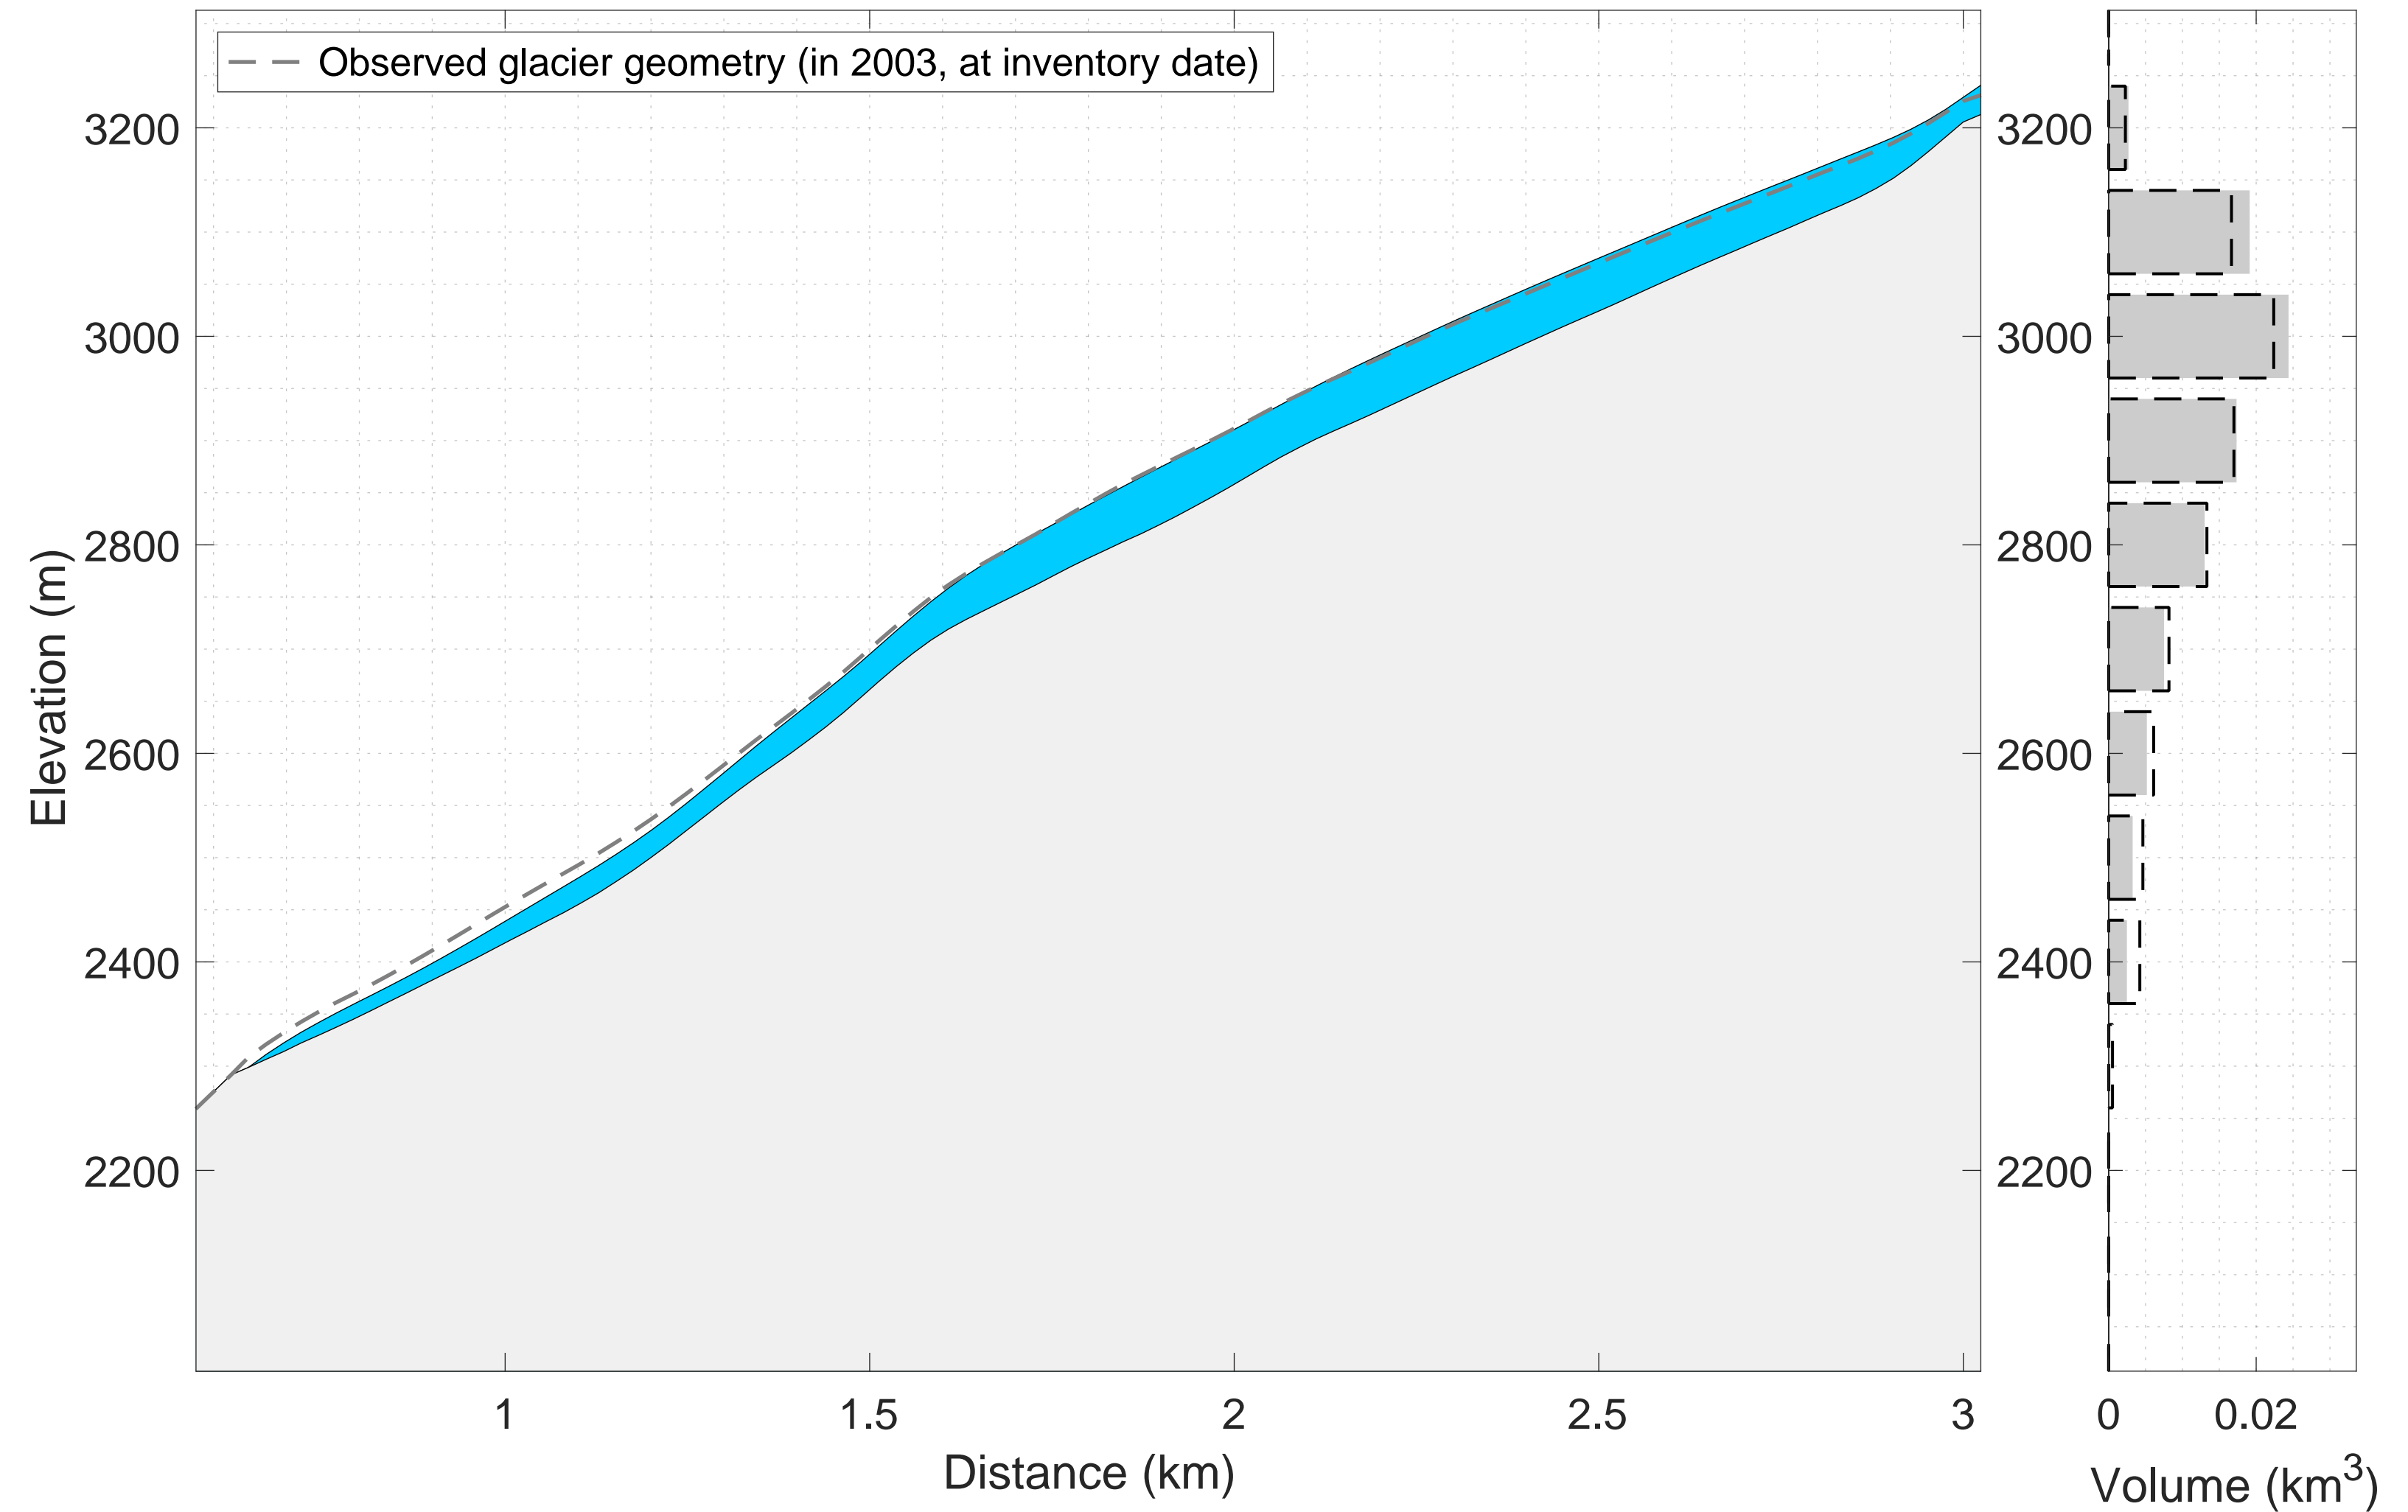

Supplement: Supplementary file 133 [file tc-13-1125-2019-supplement.zip]

**Modelled geometry (Glacier ID = 02483;  $A = 1.5284\text{e-}16 \text{ Pa}^{-3} \text{ a}^{-1}$ ;  $dx = 17 \text{ m}$ )**

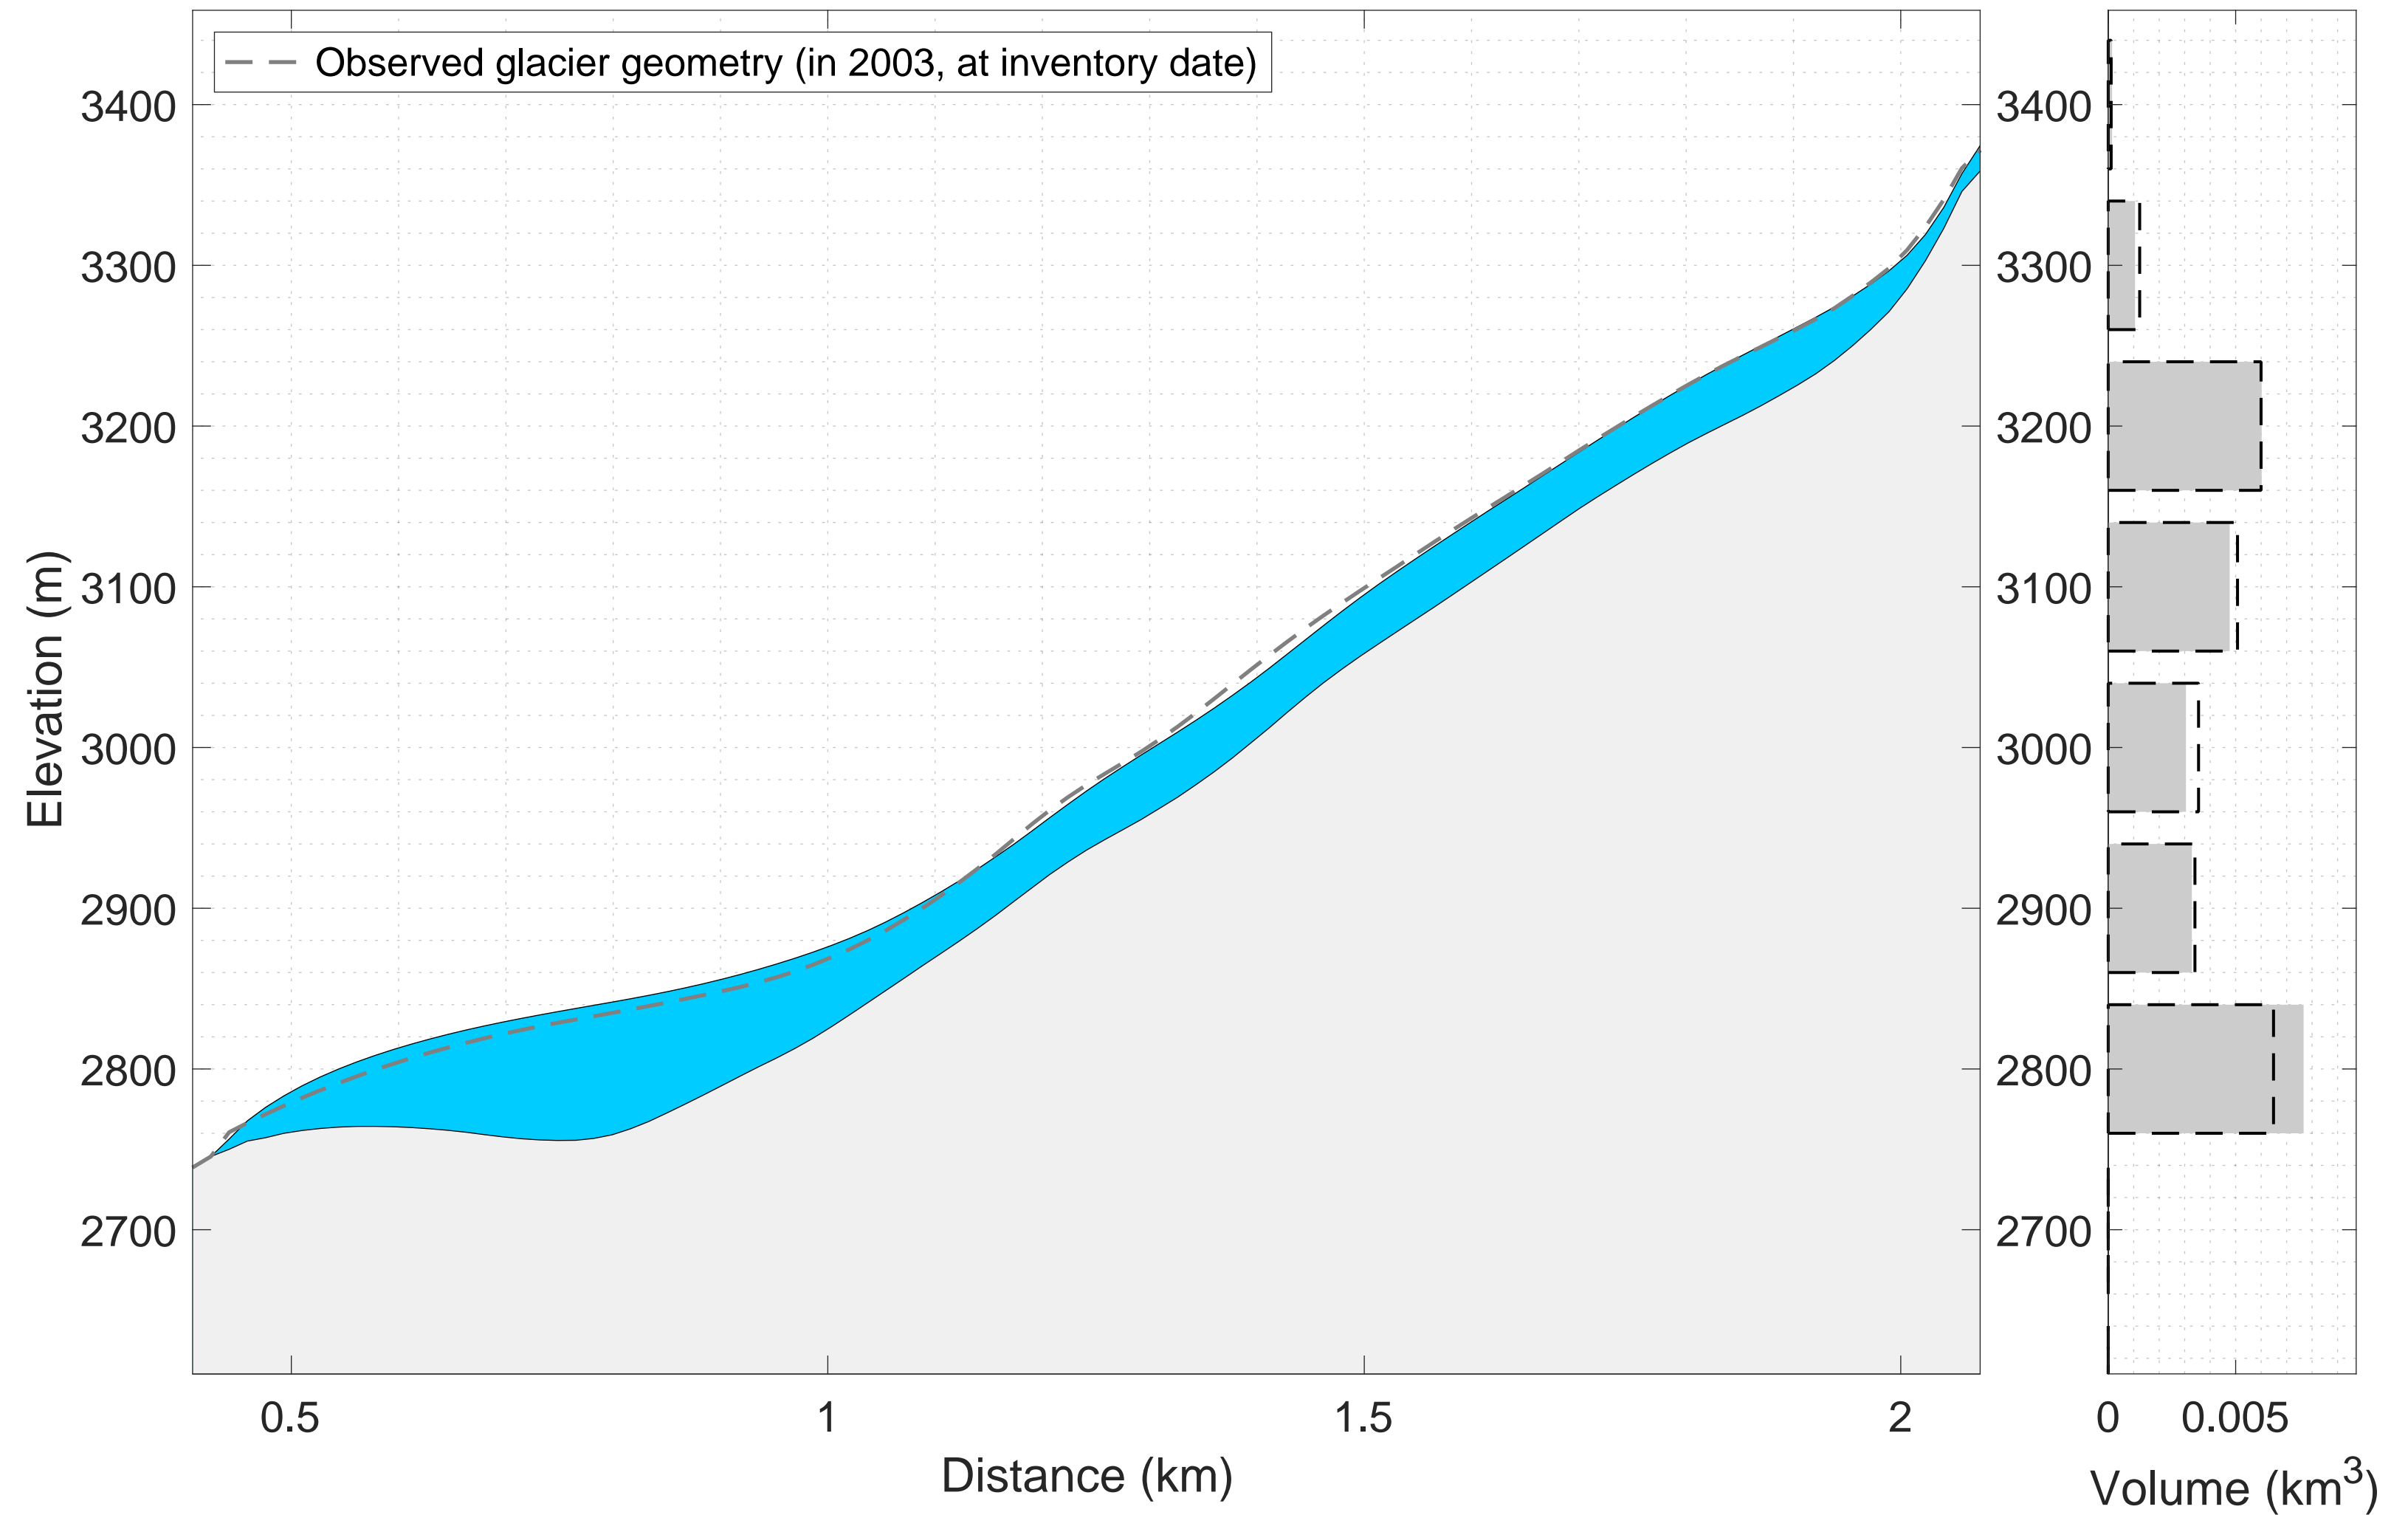

Supplement: Supplementary file 134 [file tc-13-1125-2019-supplement.zip]

**Modelled geometry (Glacier ID = 01942;  $A = 4.39\text{e-}17 \text{ Pa}^{-3} \text{ a}^{-1}$ ;  $dx = 21 \text{ m}$ )**

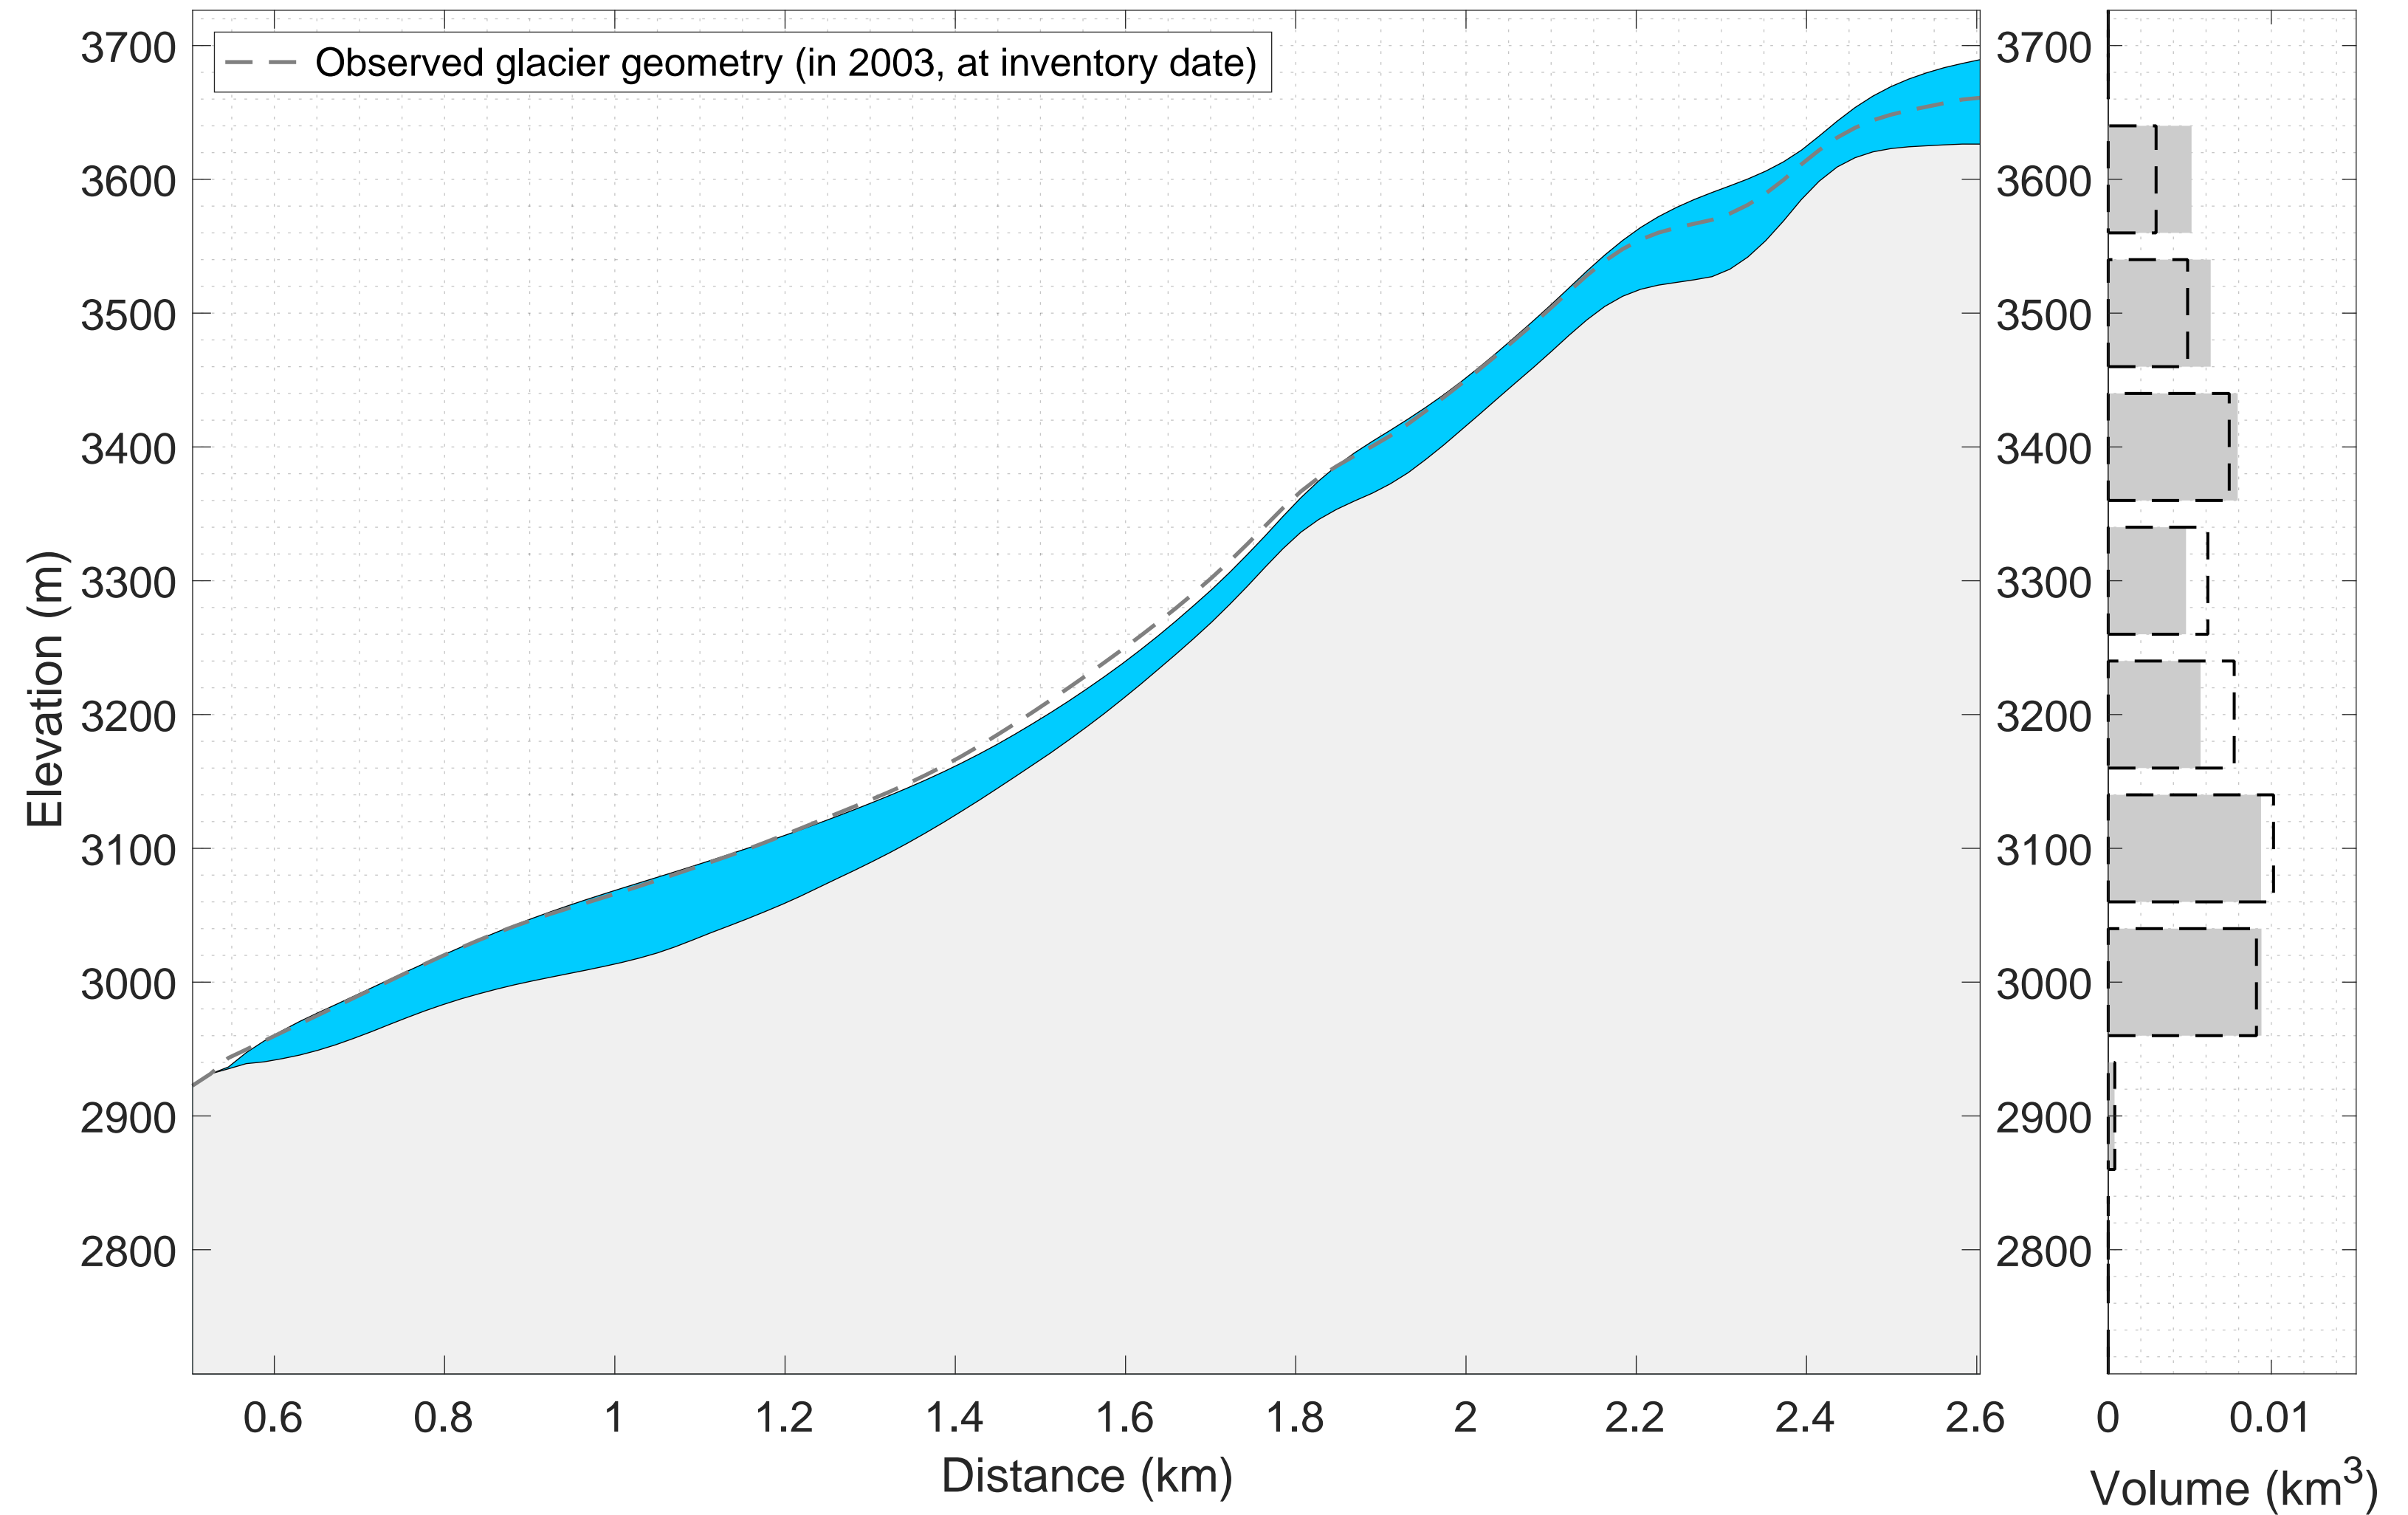

Supplement: Supplementary file 135 [file tc-13-1125-2019-supplement.zip]

**Modelled geometry (Glacier ID = 03147;  $A = 1.6244\text{e-}16 \text{ Pa}^{-3} \text{ a}^{-1}$ ;  $dx = 21 \text{ m}$ )**

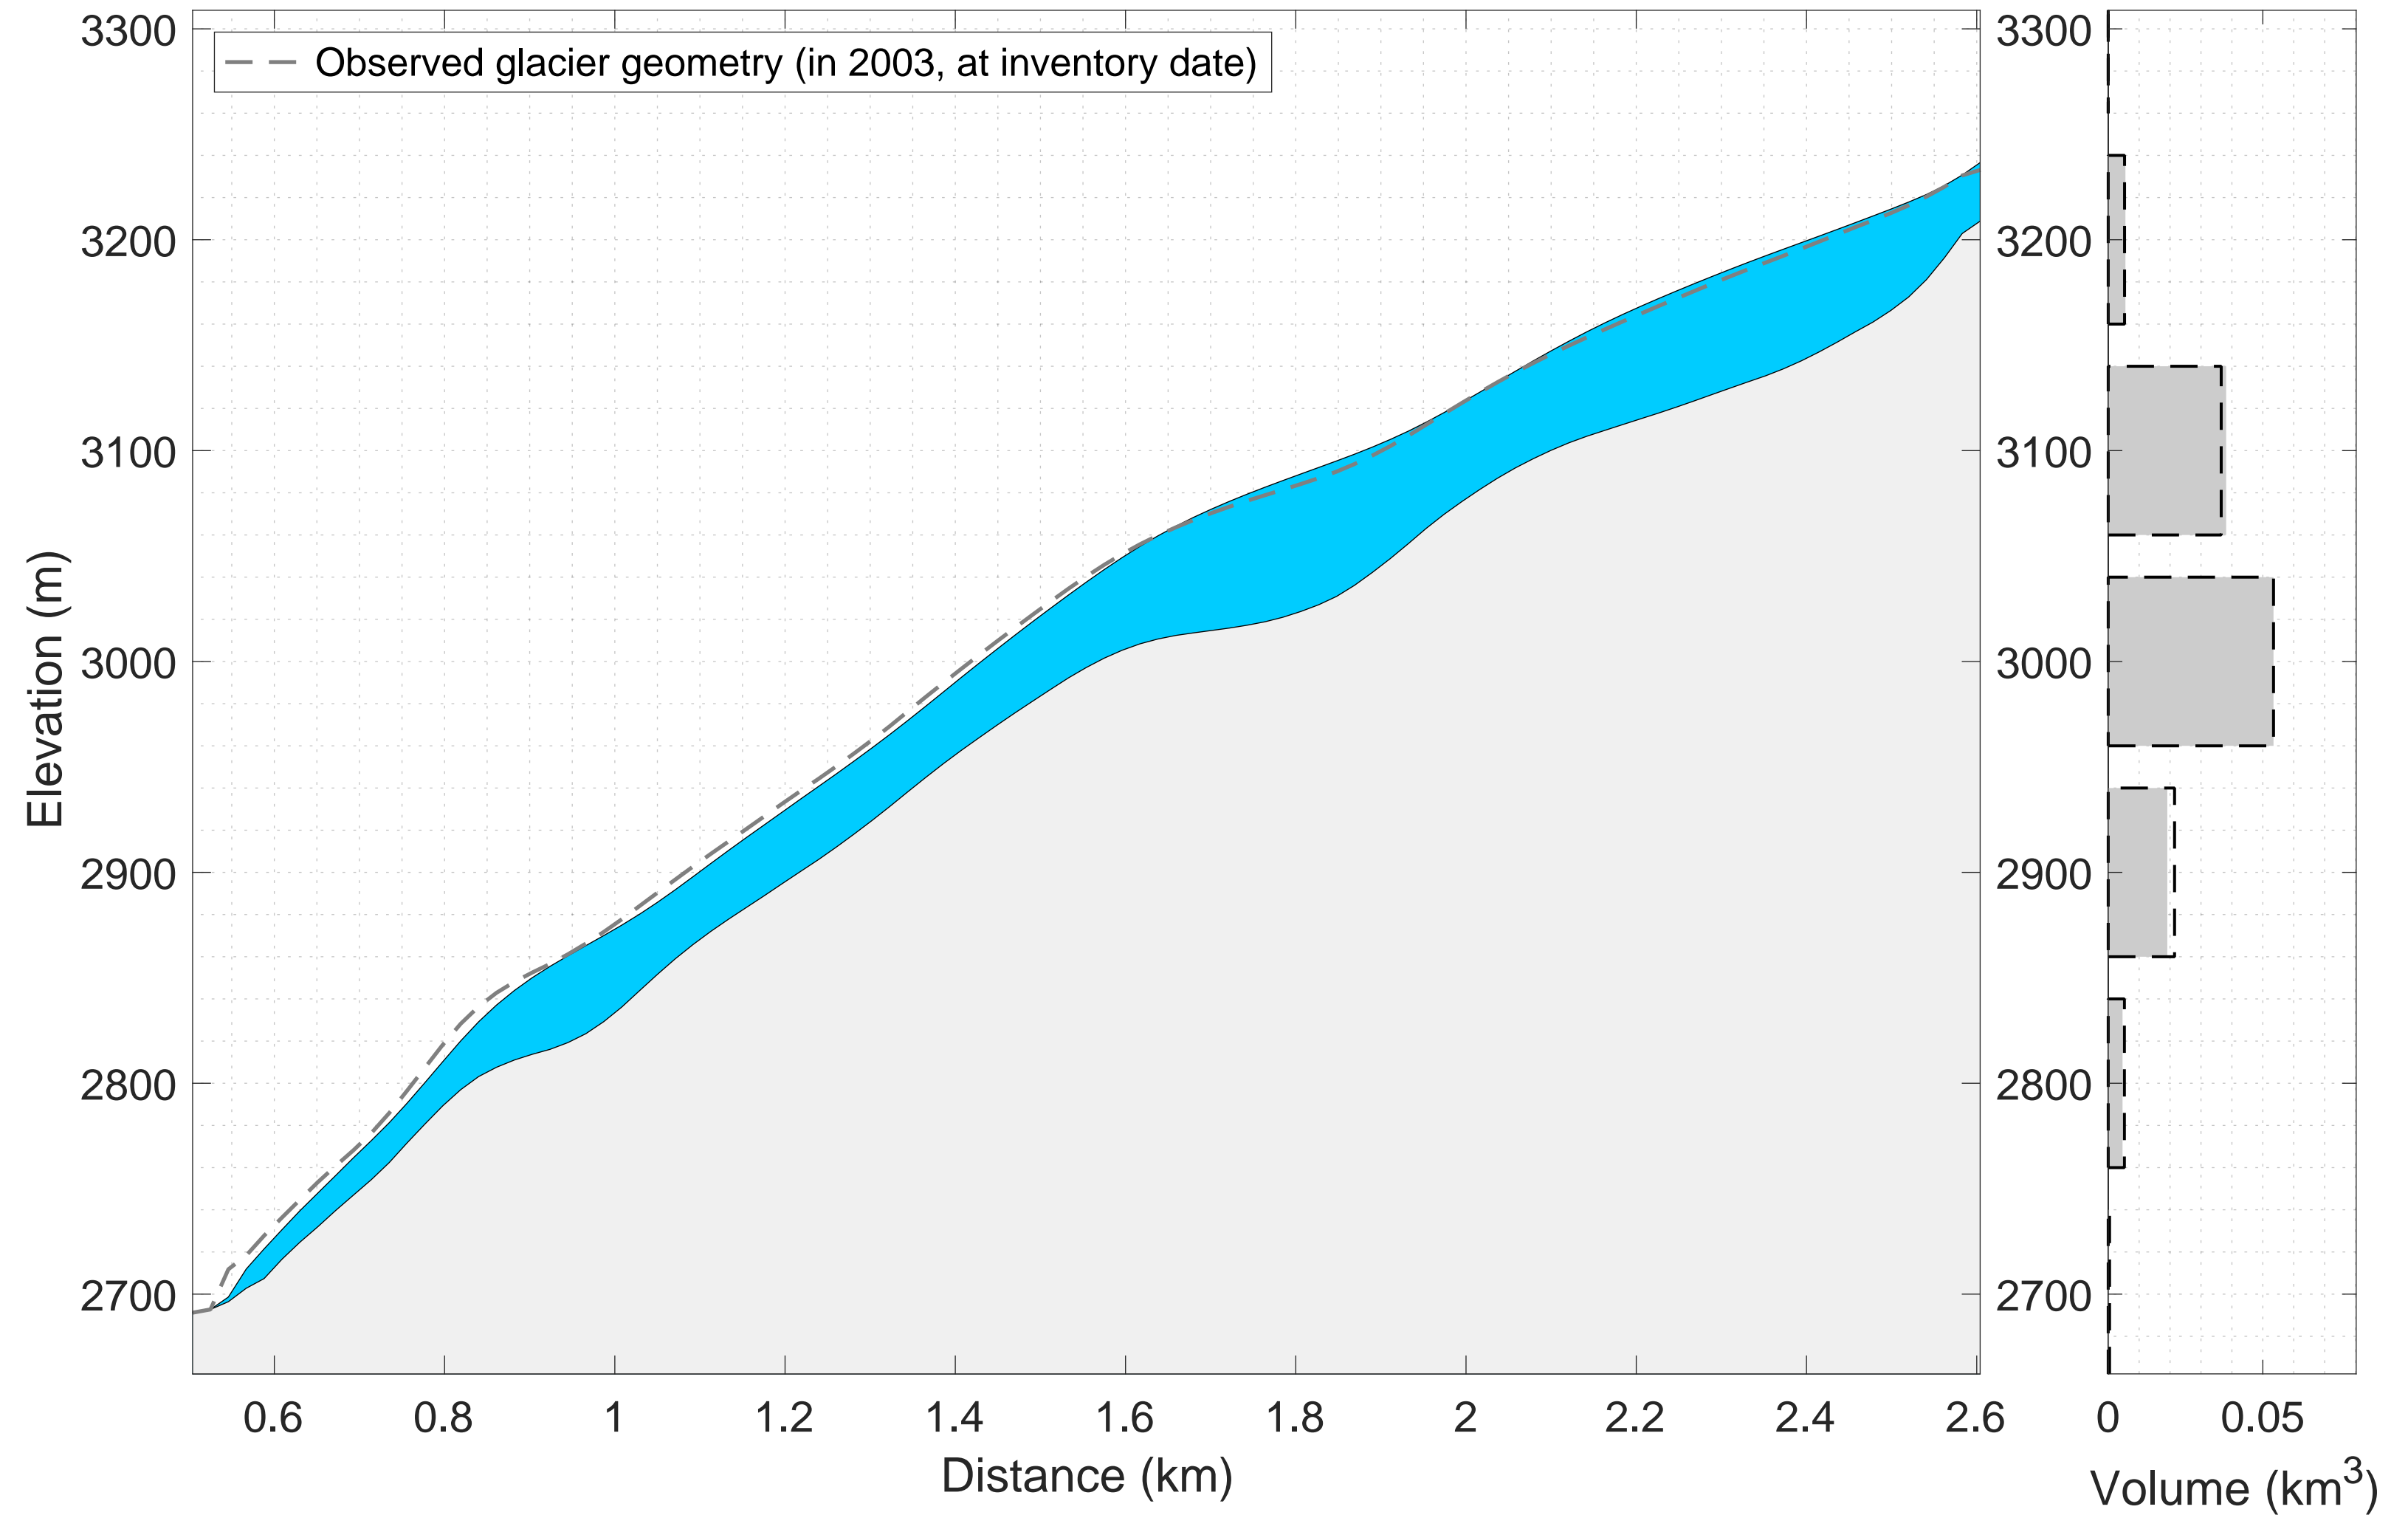

Supplement: Supplementary file 136 [file tc-13-1125-2019-supplement.zip]

**Modelled geometry (Glacier ID = 03650;  $A = 6.0272\text{e-}17 \text{ Pa}^{-3} \text{ a}^{-1}$ ;  $dx = 19 \text{ m}$ )**

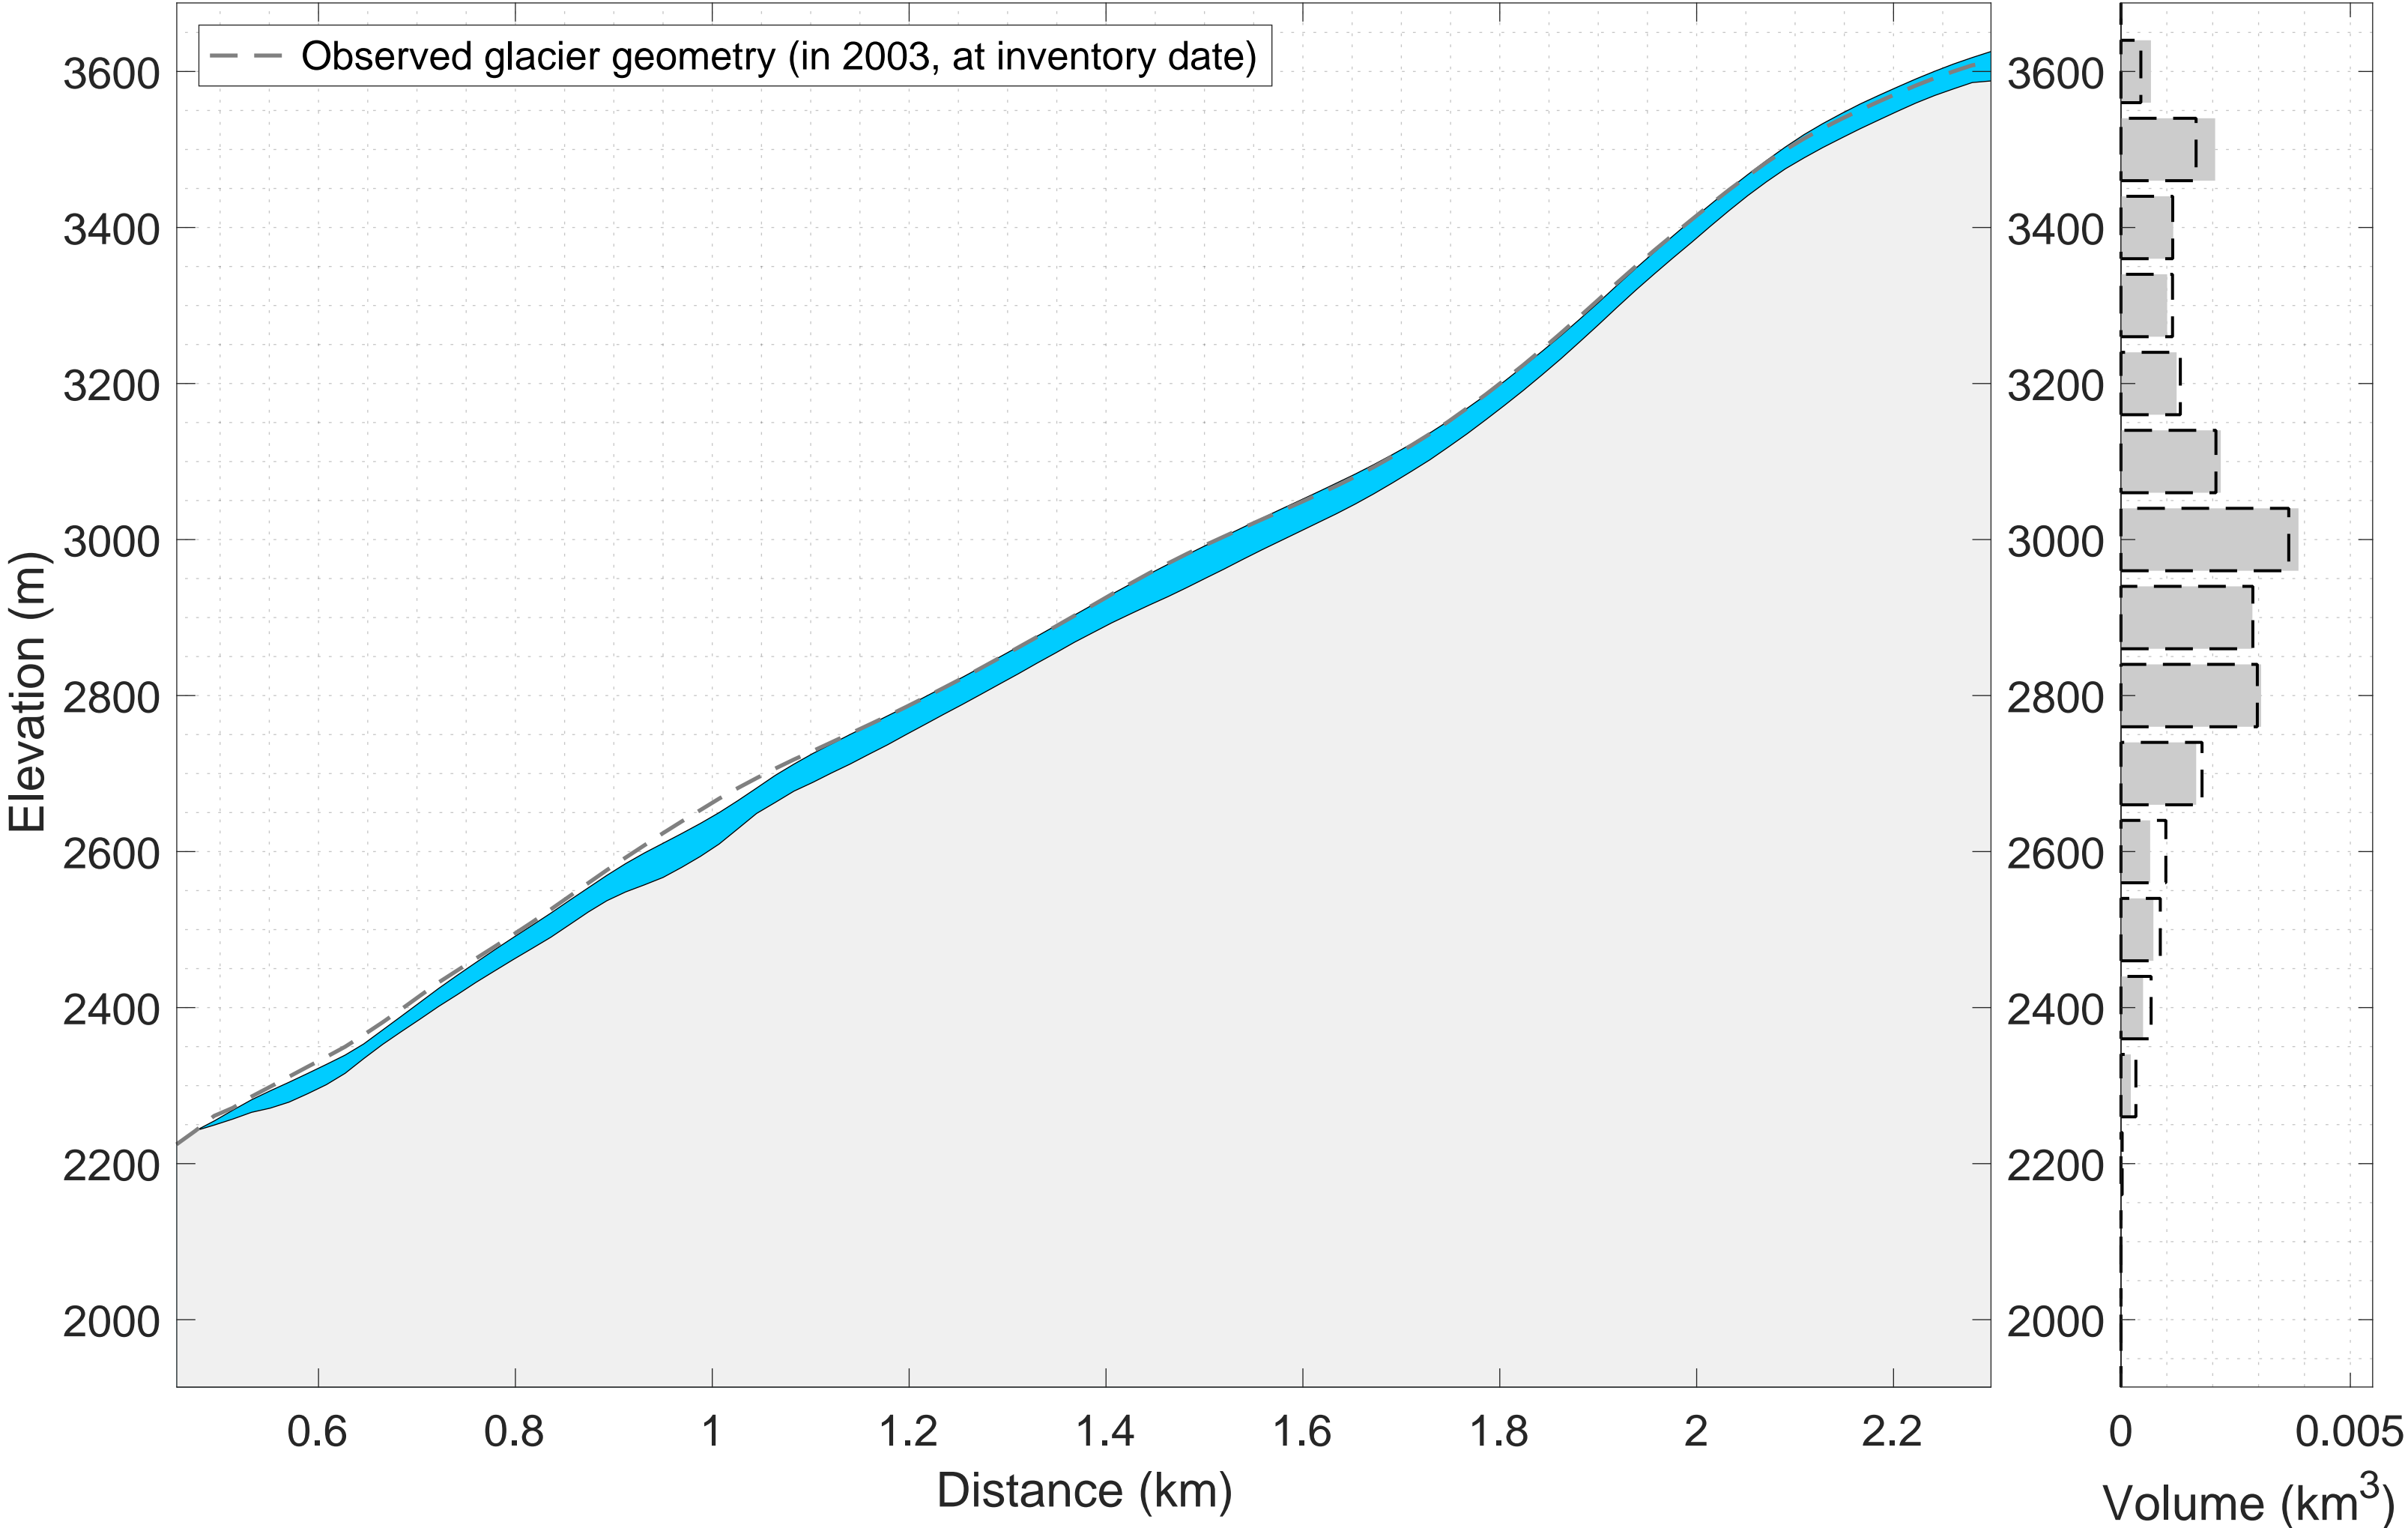

Supplement: Supplementary file 137 [file tc-13-1125-2019-supplement.zip]

**Modelled geometry (Glacier ID = 02474;  $A = 1.8933\text{e-}16 \text{ Pa}^{-3} \text{ a}^{-1}$ ;  $dx = 18 \text{ m}$ )**

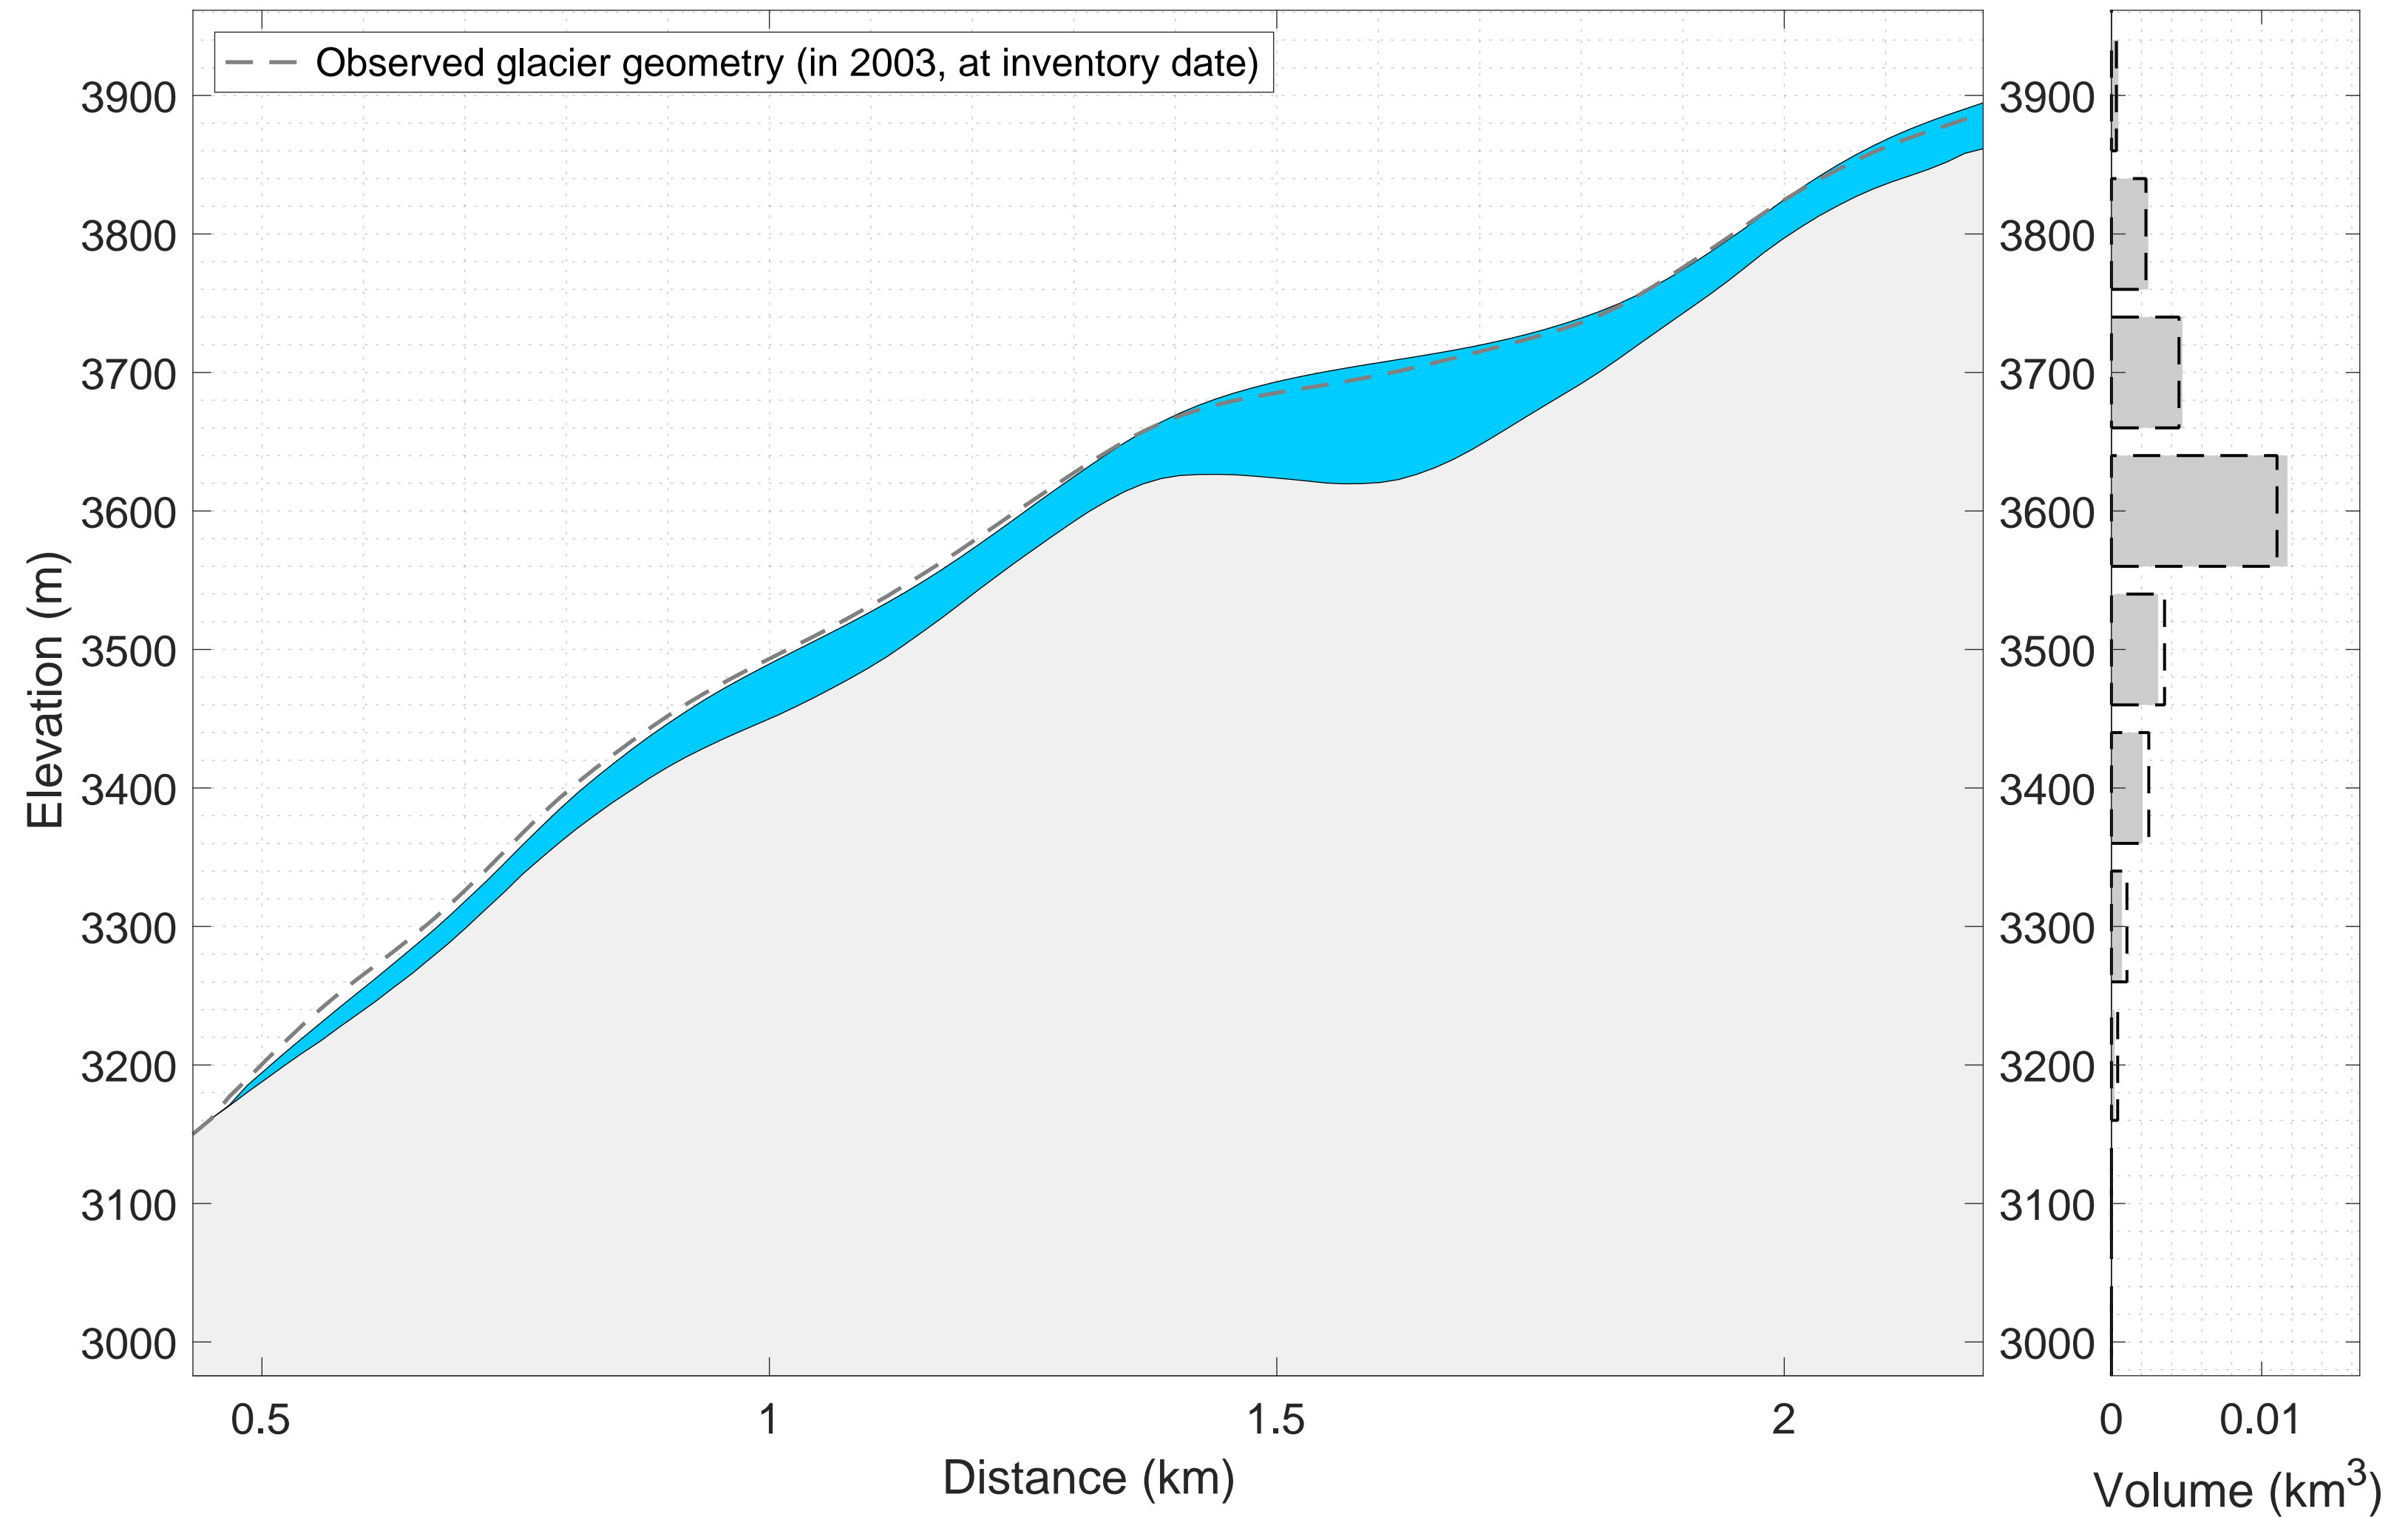

Supplement: Supplementary file 138 [file tc-13-1125-2019-supplement.zip]

**Modelled geometry (Glacier ID = 00067;  $A = 3.4857\text{e-}16 \text{ Pa}^{-3} \text{ a}^{-1}$ ;  $dx = 30 \text{ m}$ )**

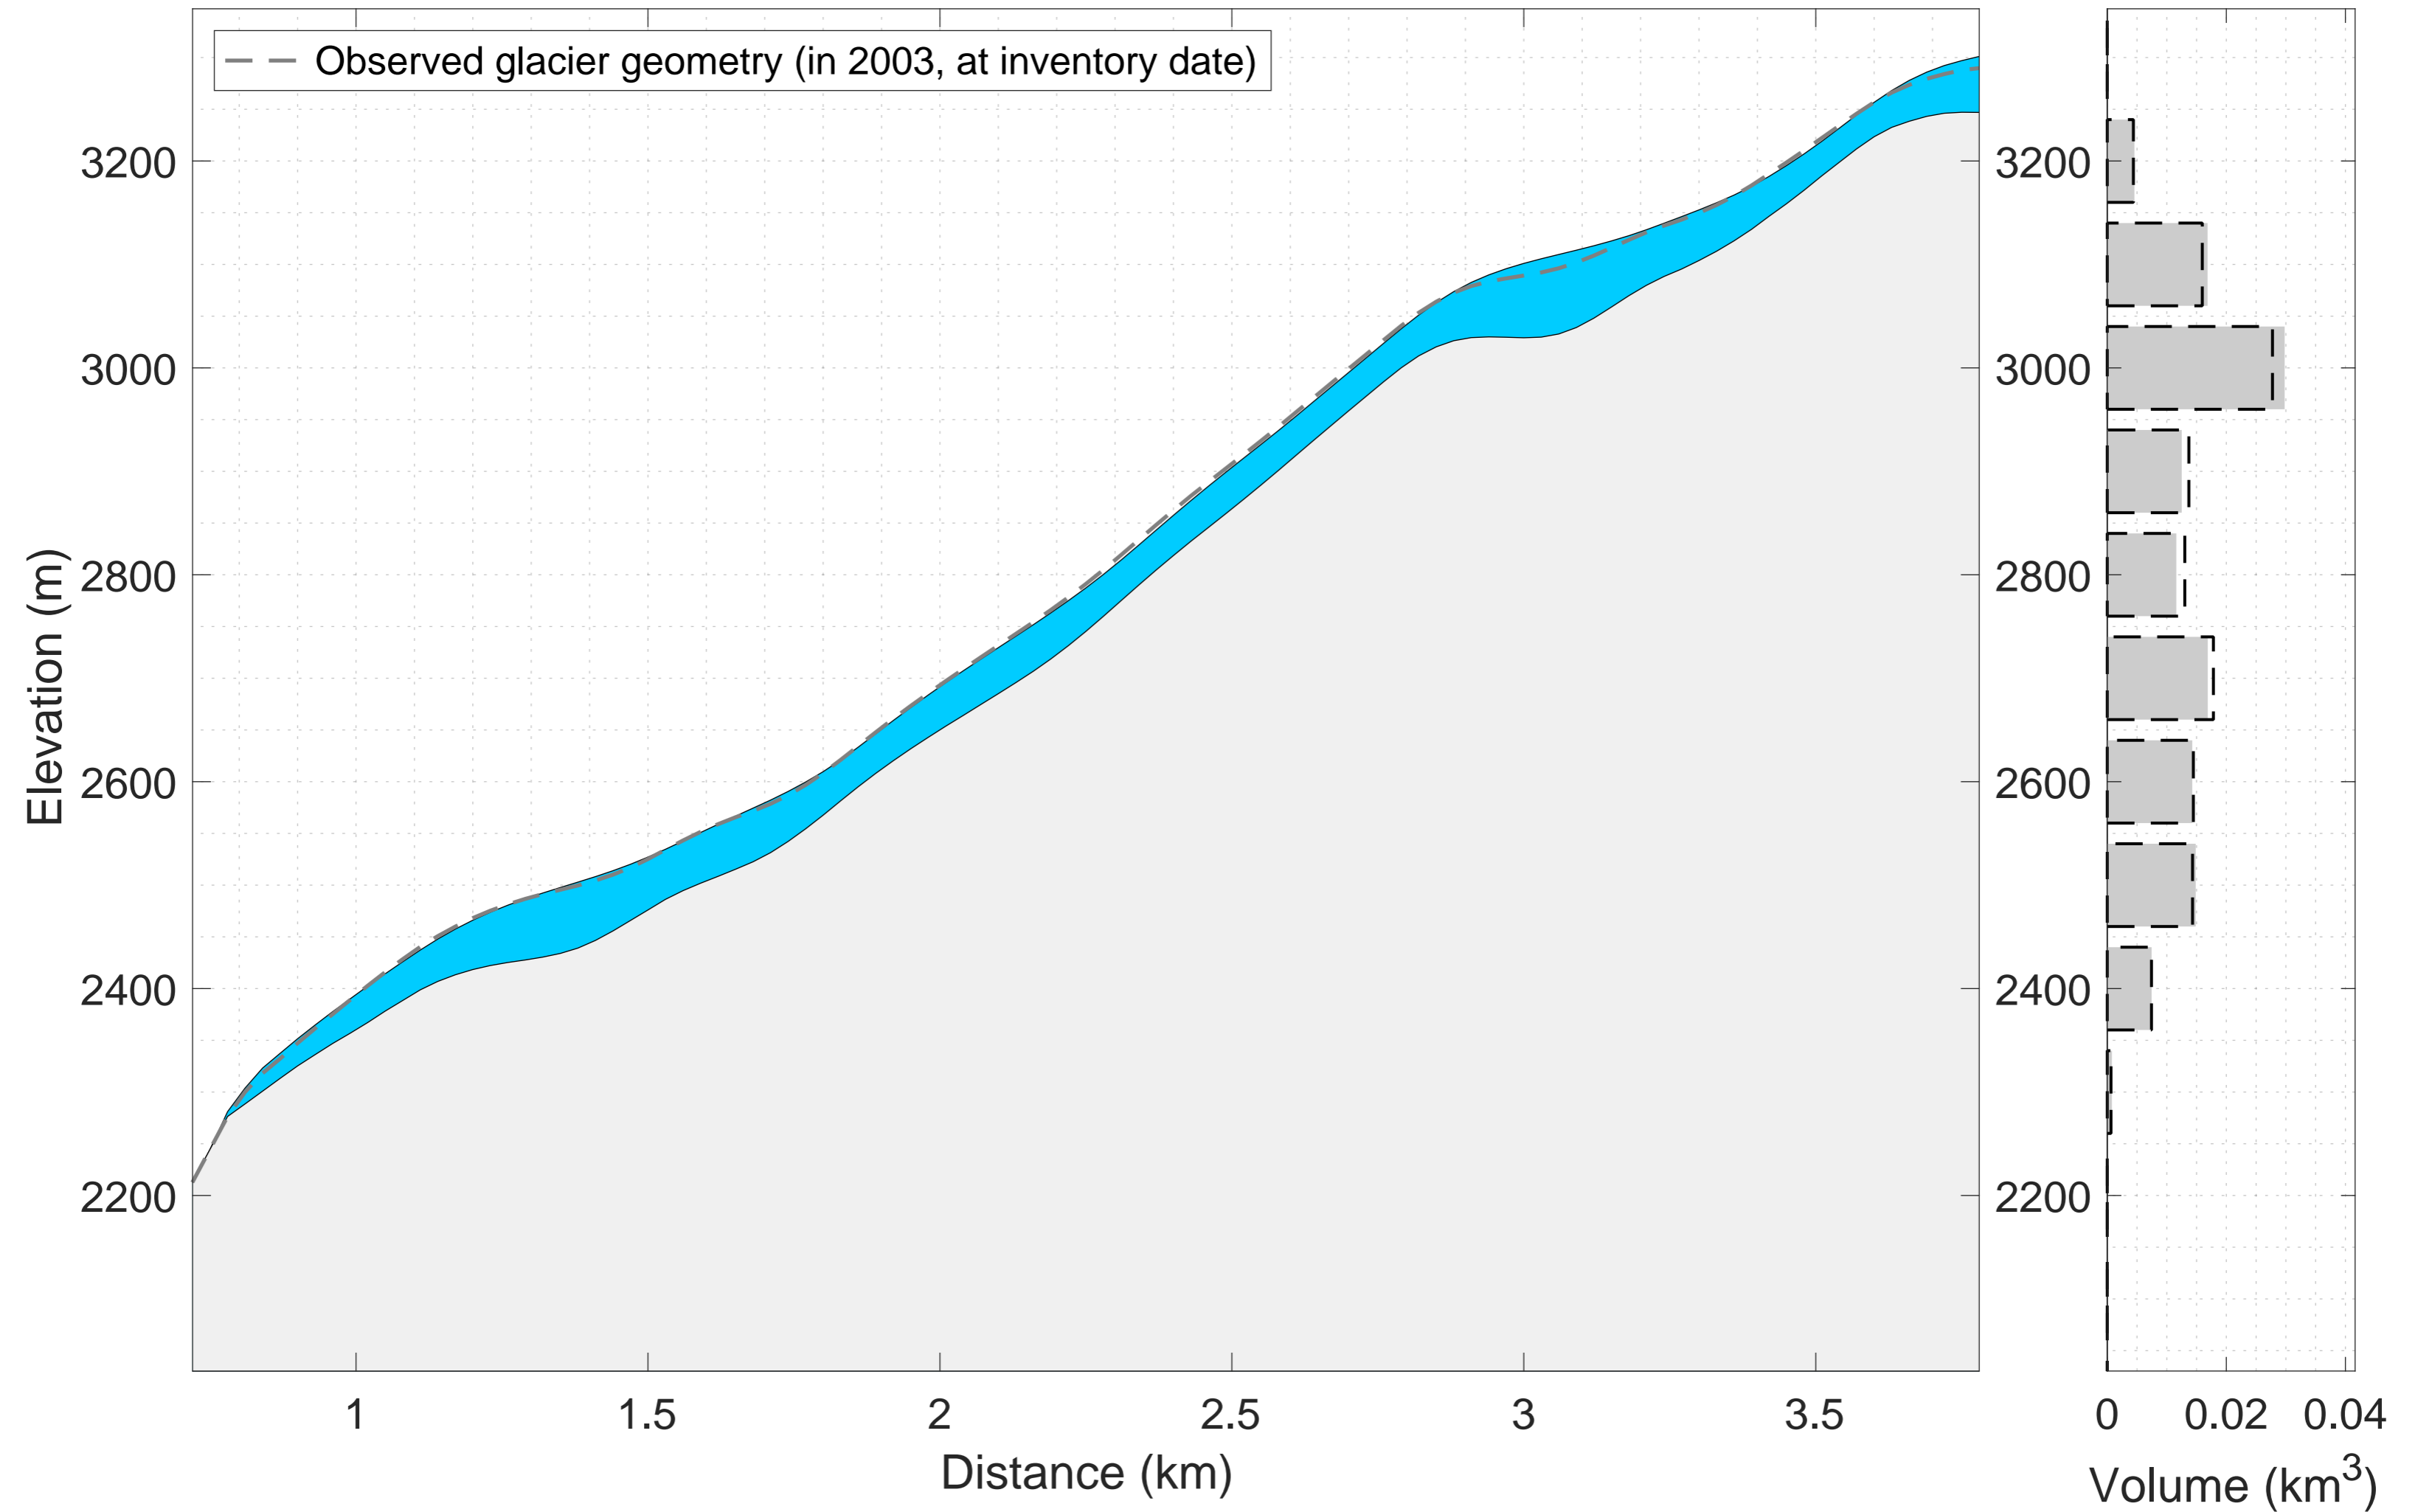

Supplement: Supplementary file 139 [file tc-13-1125-2019-supplement.zip]

**Modelled geometry (Glacier ID = 00213;  $A = 7.2226\text{e-}17 \text{ Pa}^{-3} \text{ a}^{-1}$ ;  $dx = 19 \text{ m}$ )**

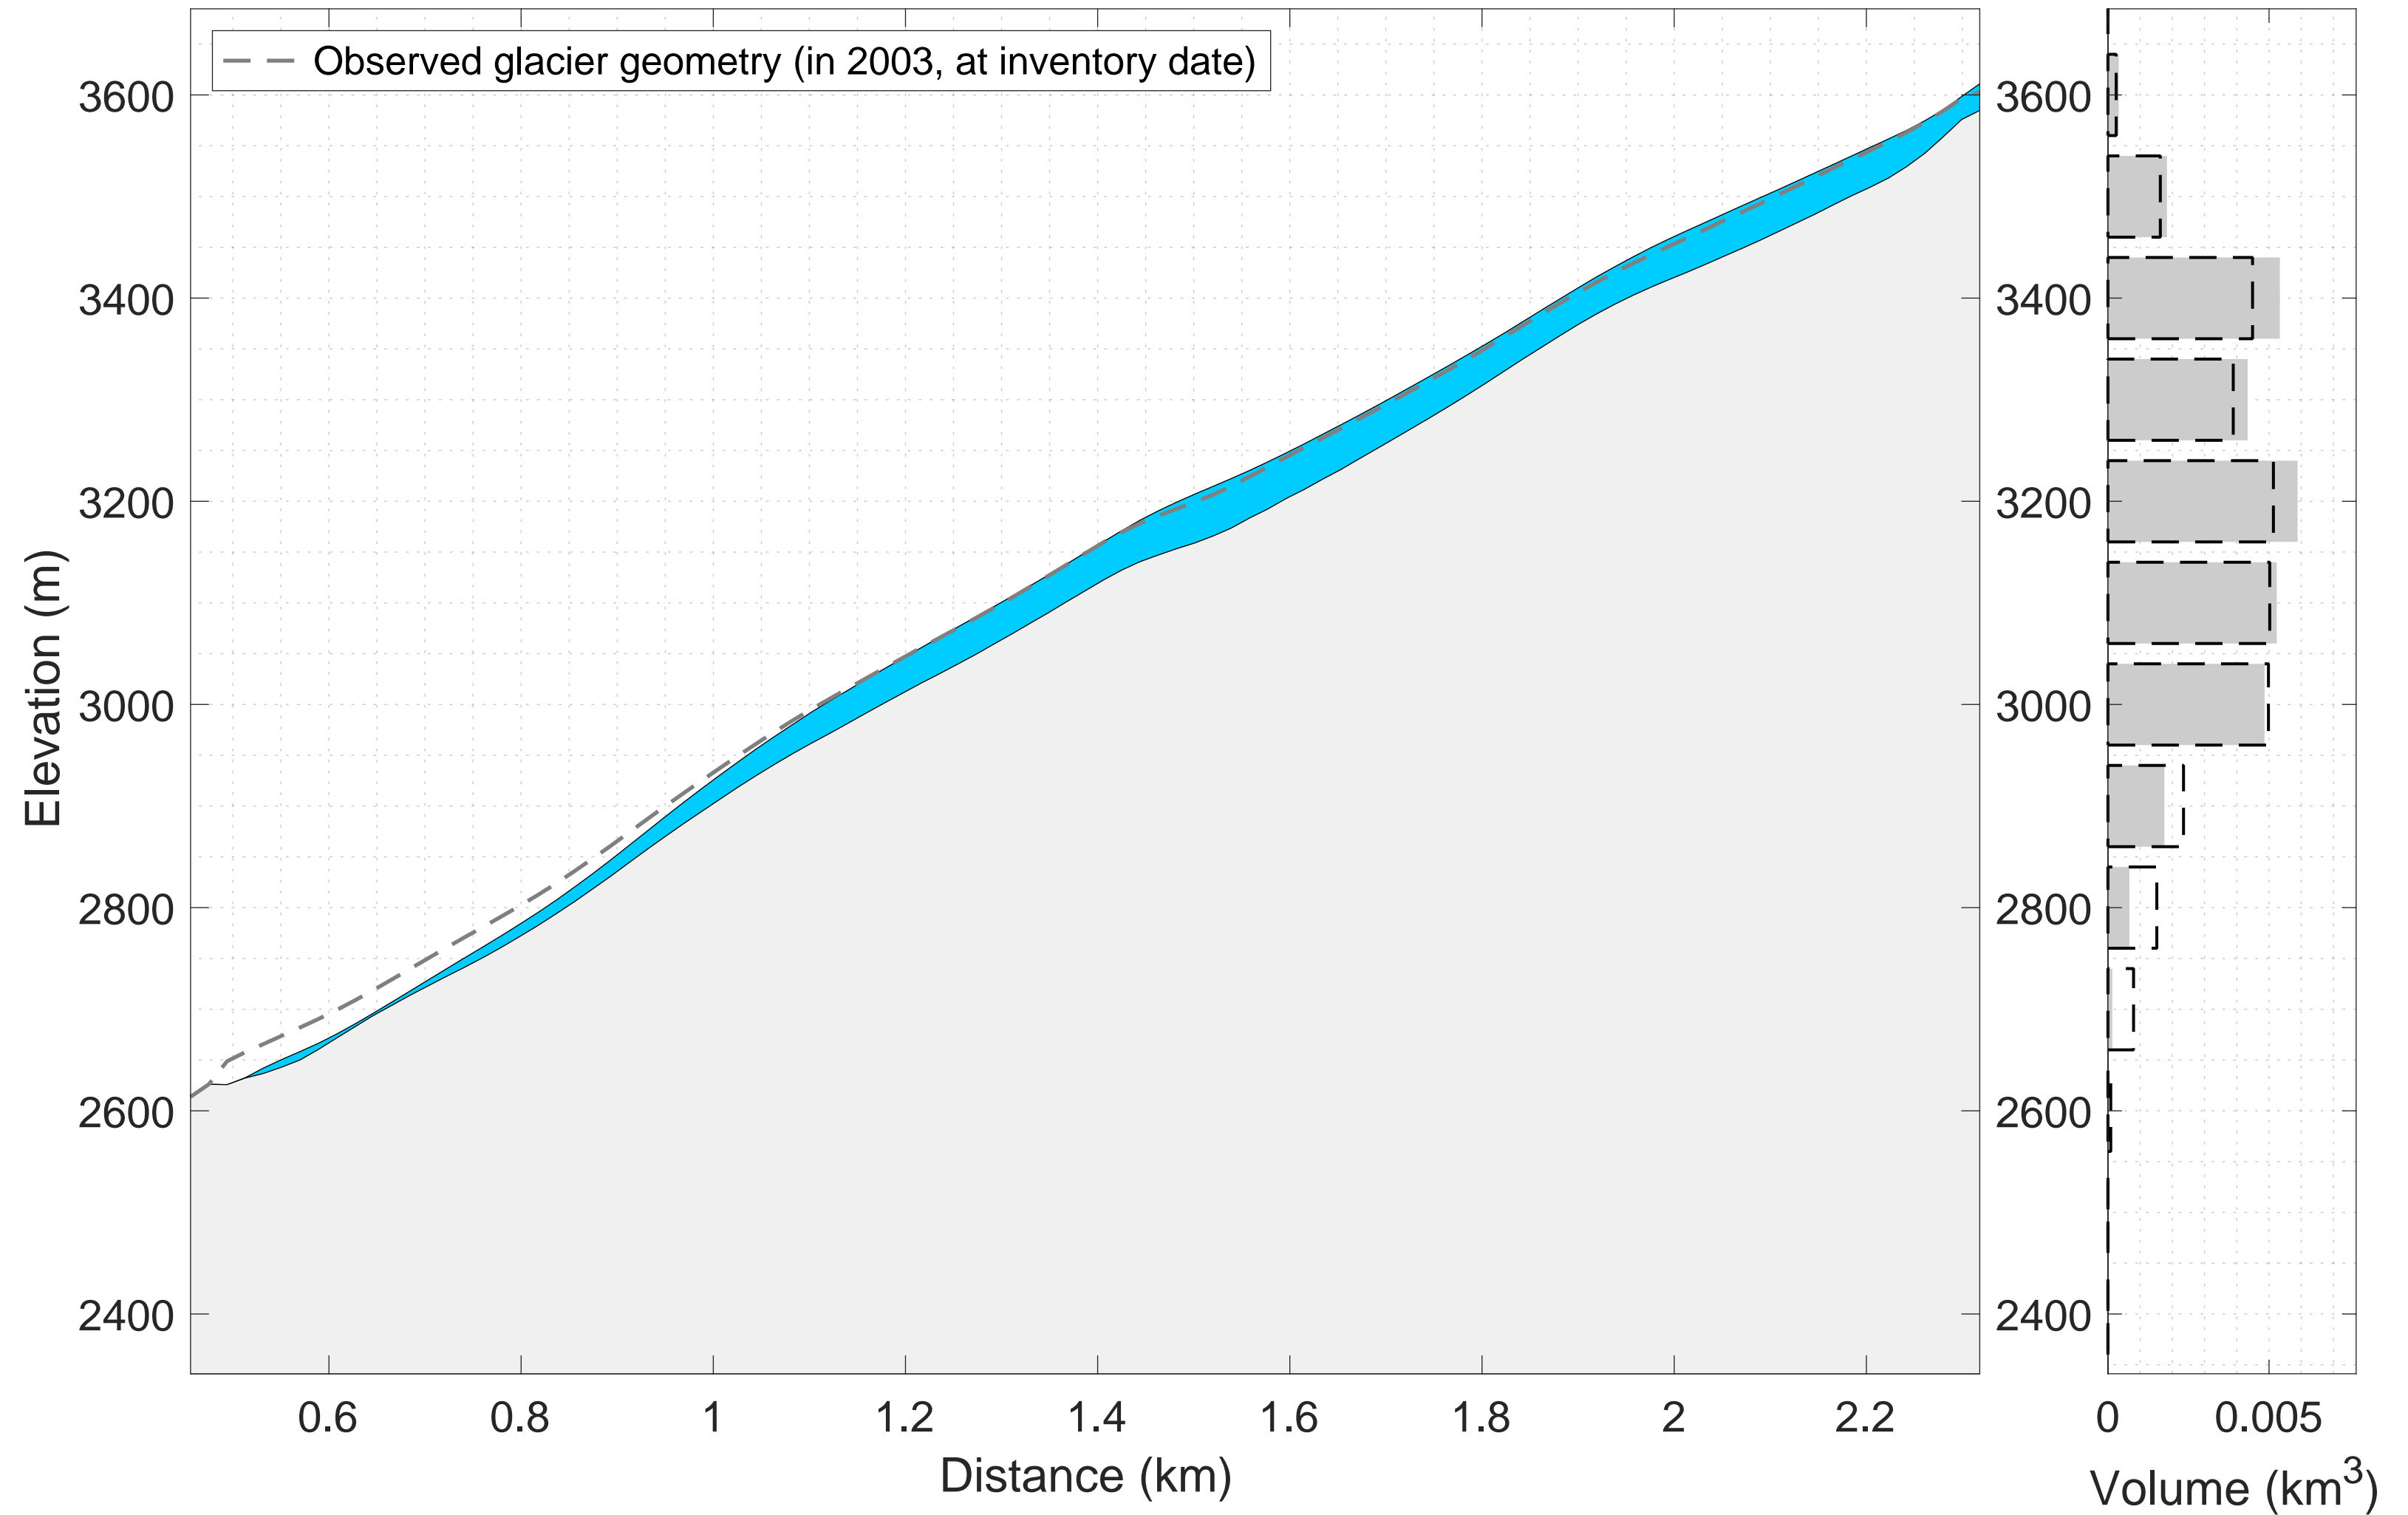

Supplement: Supplementary file 140 [file tc-13-1125-2019-supplement.zip]

**Modelled geometry (Glacier ID = 01328;  $A = 5.8424\text{e-}17 \text{ Pa}^{-3} \text{ a}^{-1}$ ;  $dx = 98 \text{ m}$ )**

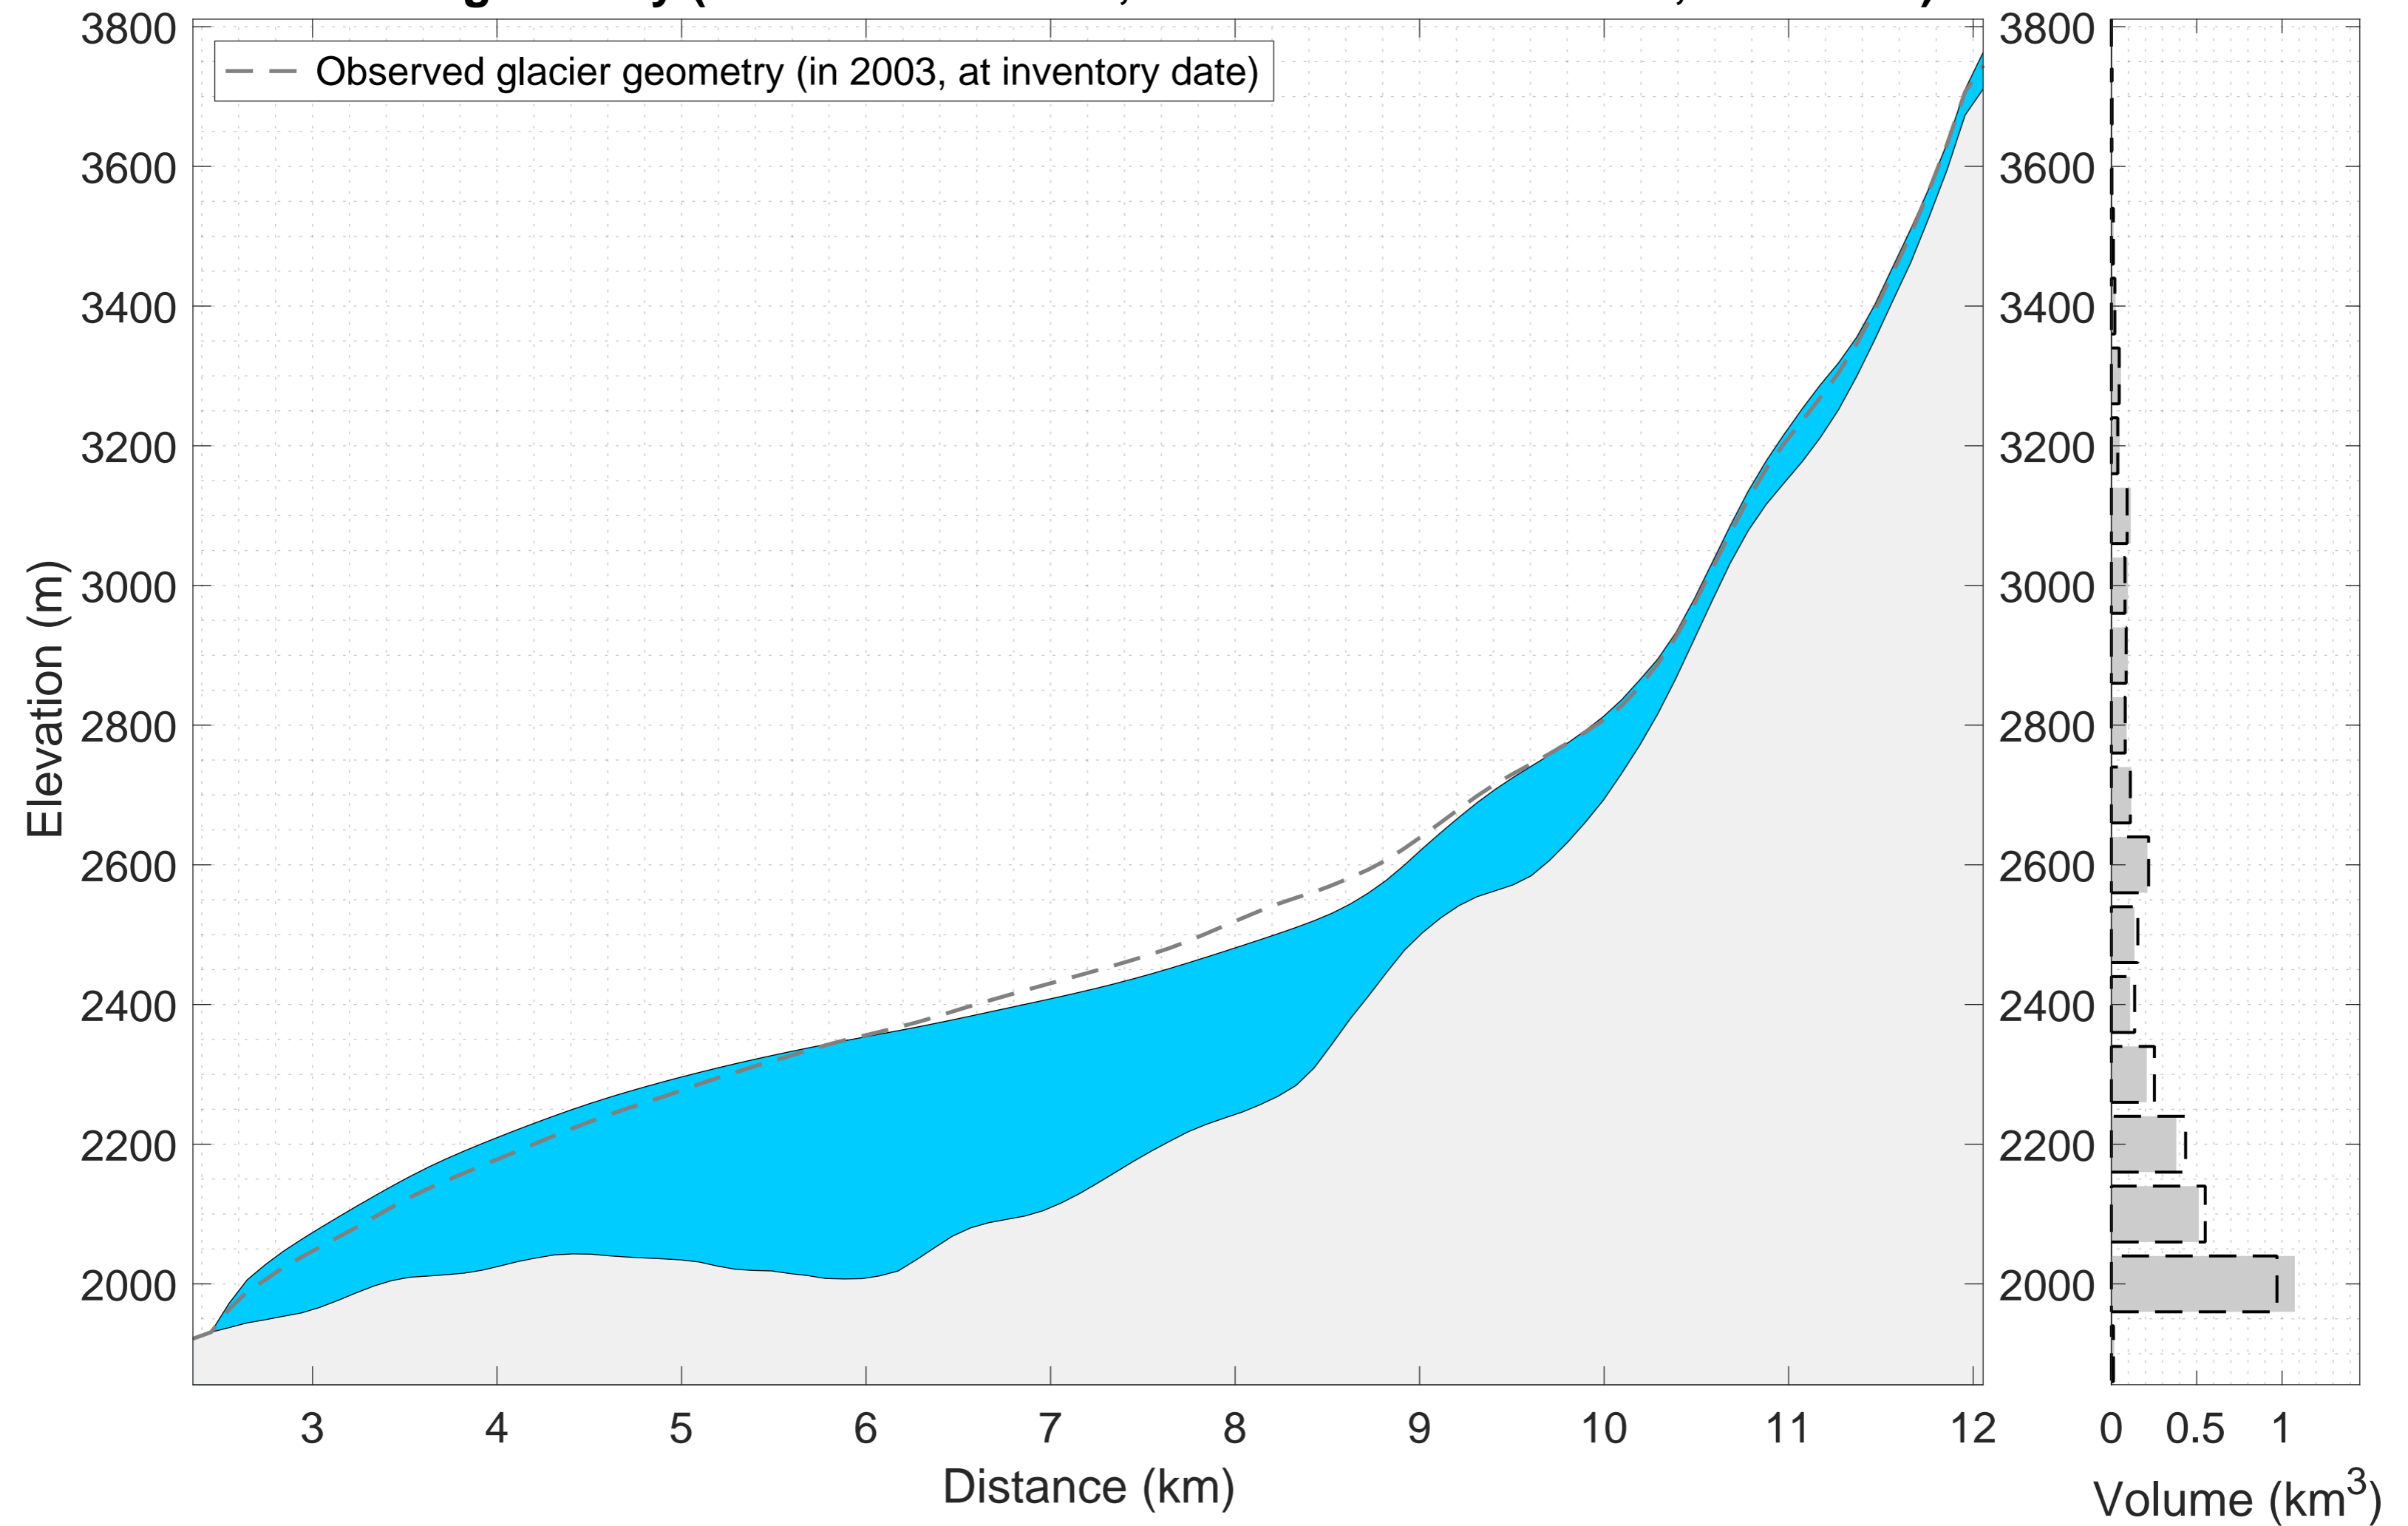

Supplement: Supplementary file 141 [file tc-13-1125-2019-supplement.zip]

**Modelled geometry (Glacier ID = 00659;  $A = 1.3019\text{e-}16 \text{ Pa}^{-3} \text{ a}^{-1}$ ;  $dx = 15 \text{ m}$ )**

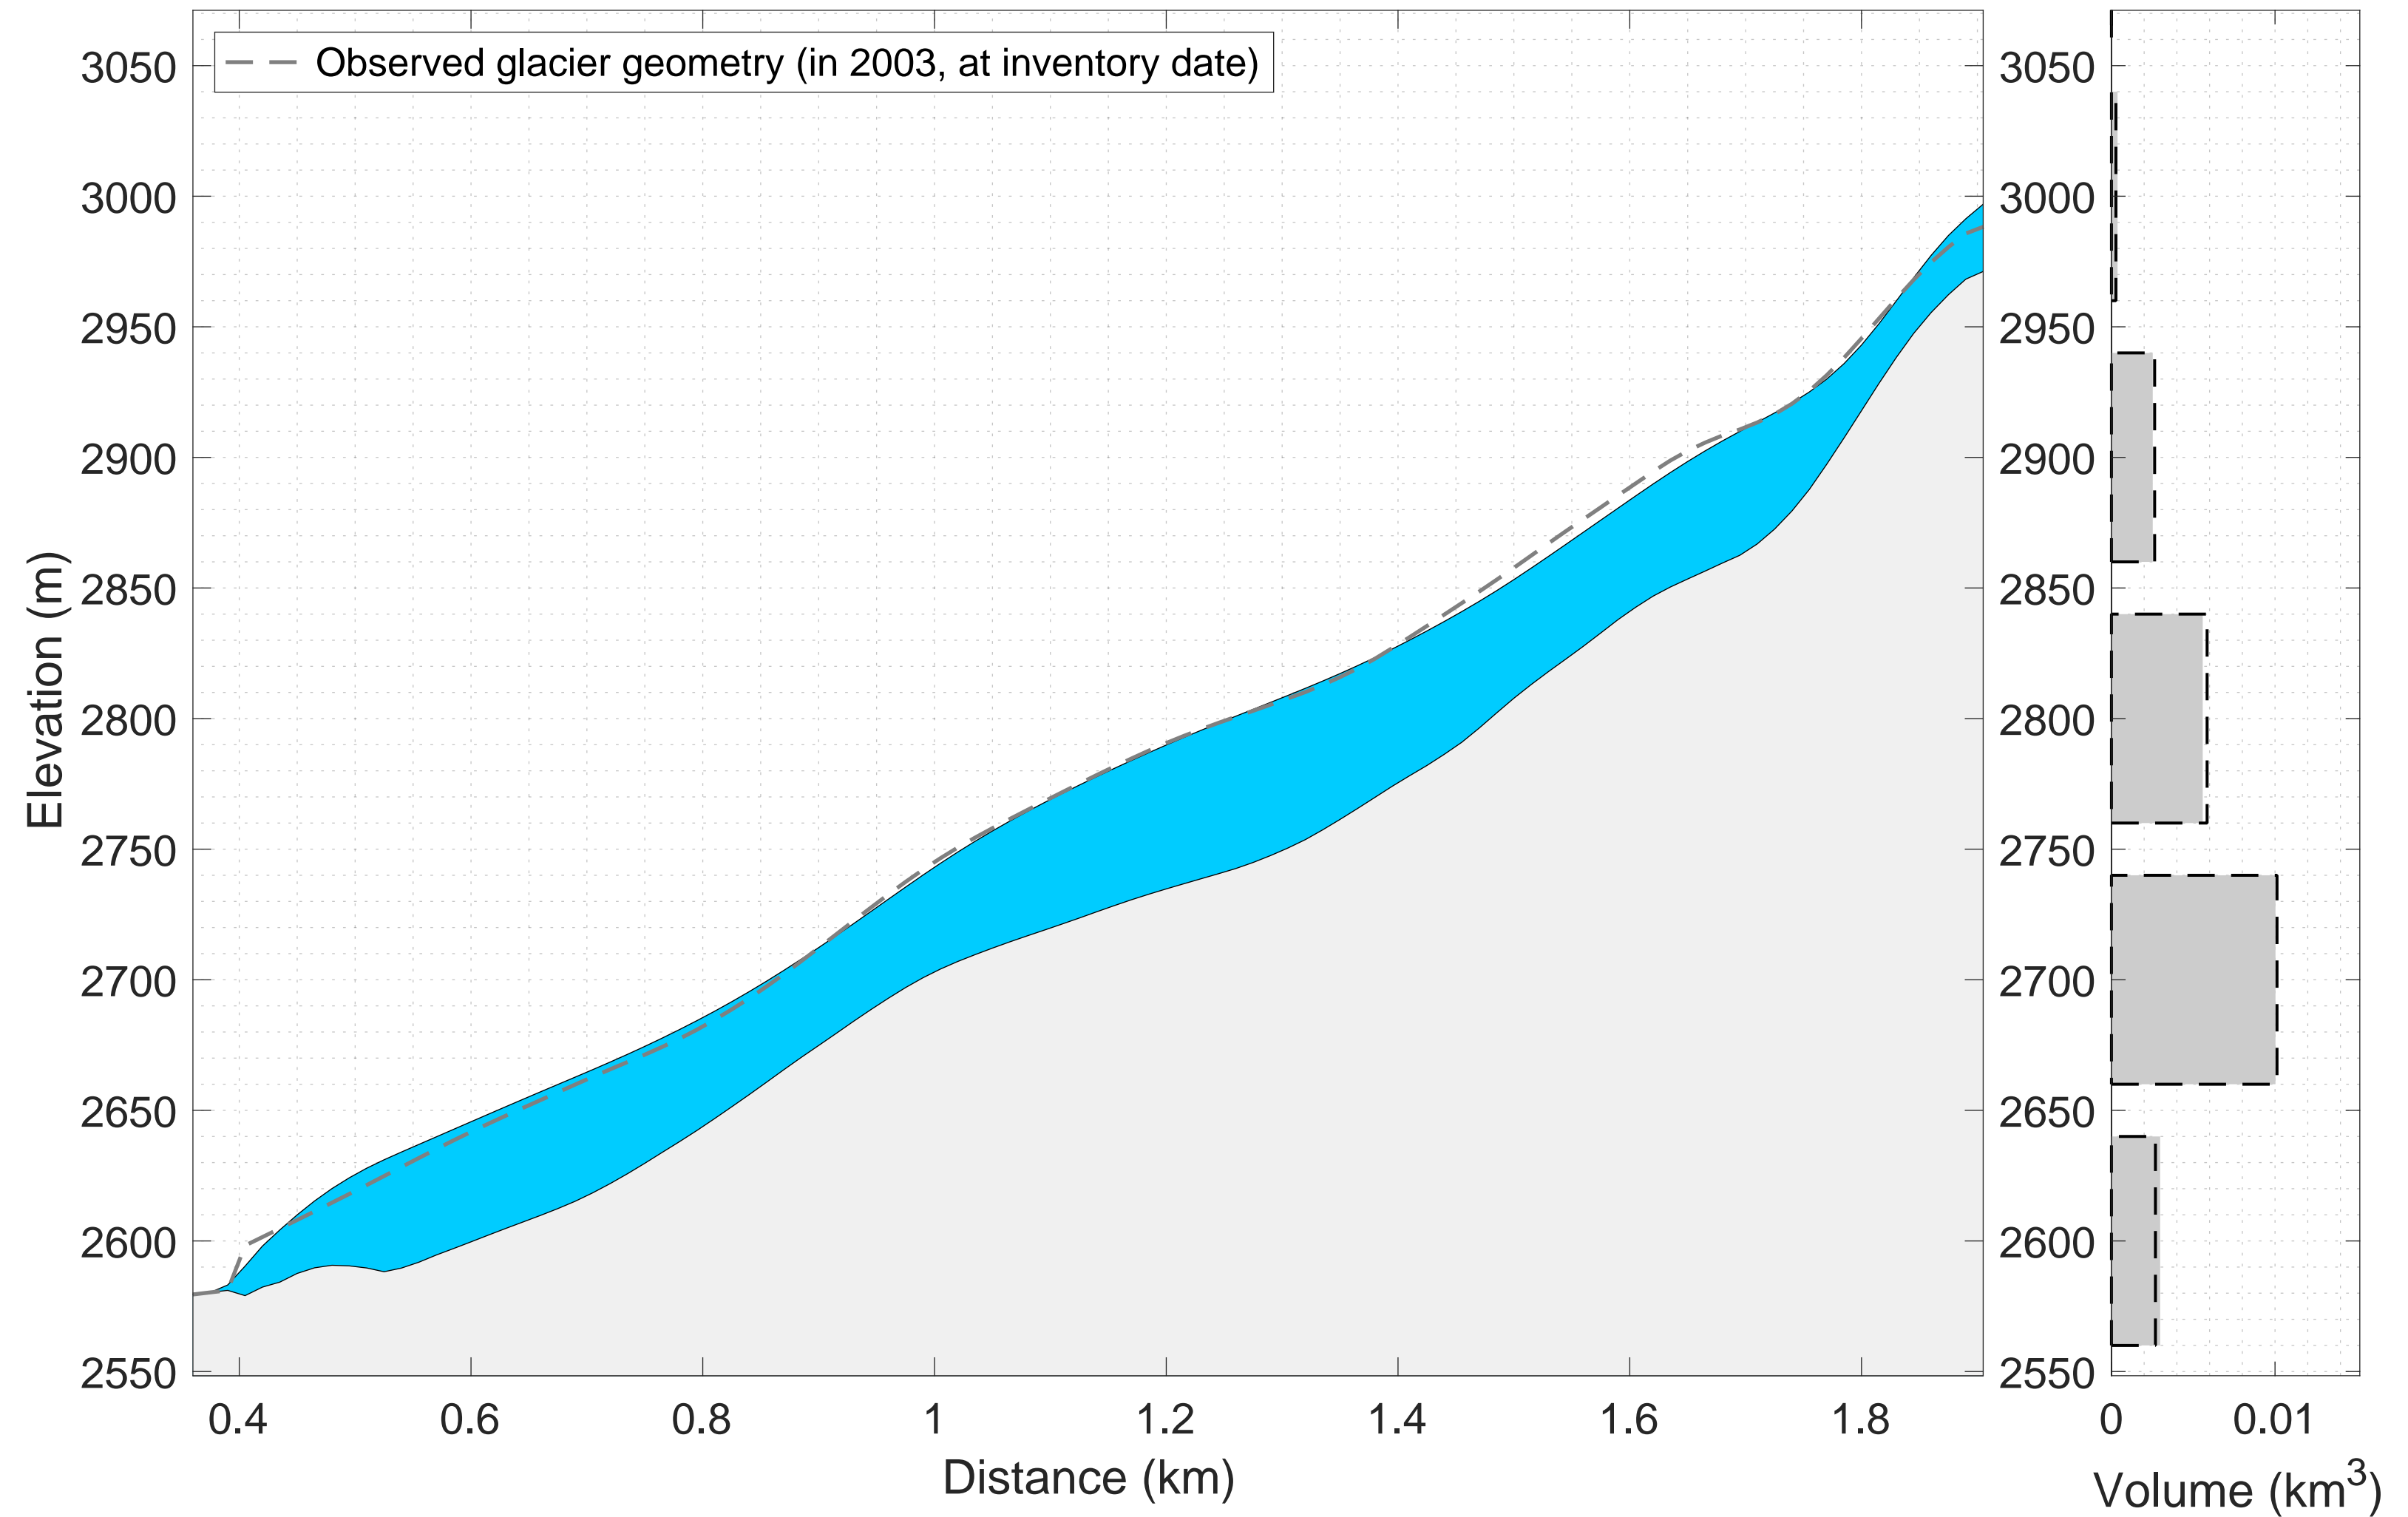

Supplement: Supplementary file 142 [file tc-13-1125-2019-supplement.zip]

**Modelled geometry (Glacier ID = 00221;  $A = 1.5058\text{e-}16 \text{ Pa}^{-3} \text{ a}^{-1}$ ;  $dx = 10 \text{ m}$ )**

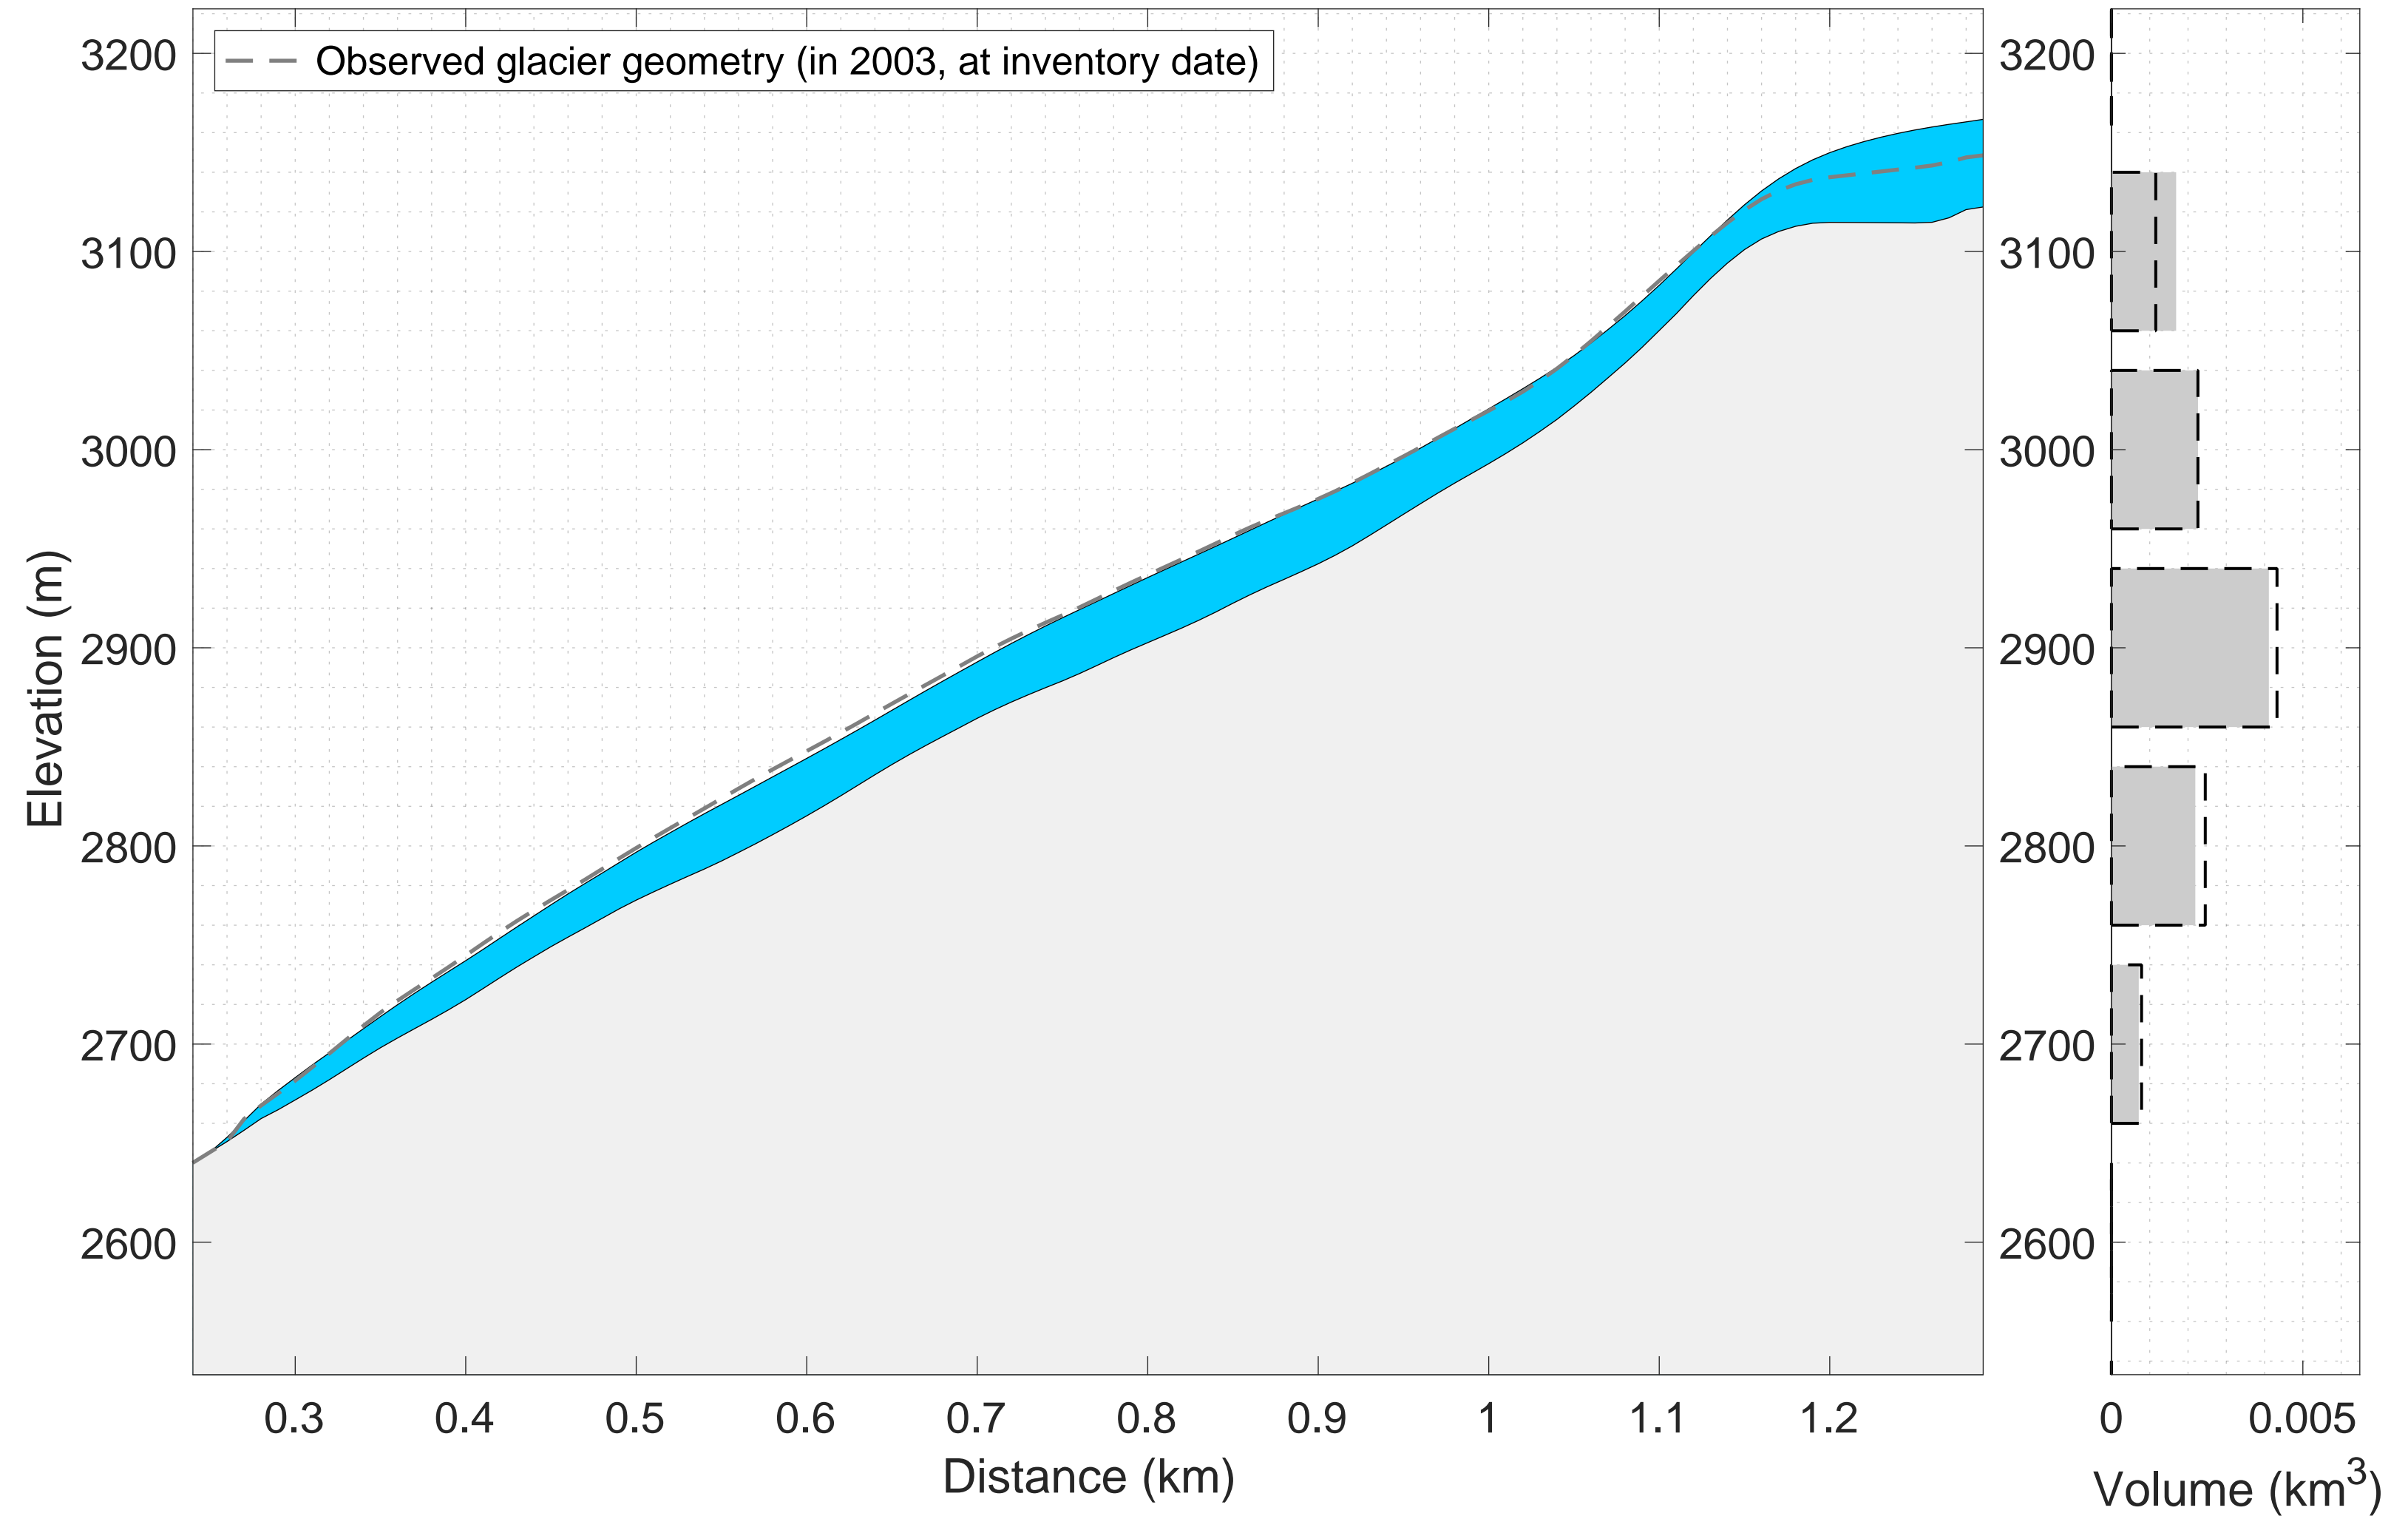

Supplement: Supplementary file 143 [file tc-13-1125-2019-supplement.zip]

**Modelled geometry (Glacier ID = 00787;  $A = 2.0652\text{e-}16 \text{ Pa}^{-3} \text{ a}^{-1}$ ;  $dx = 35 \text{ m}$ )**

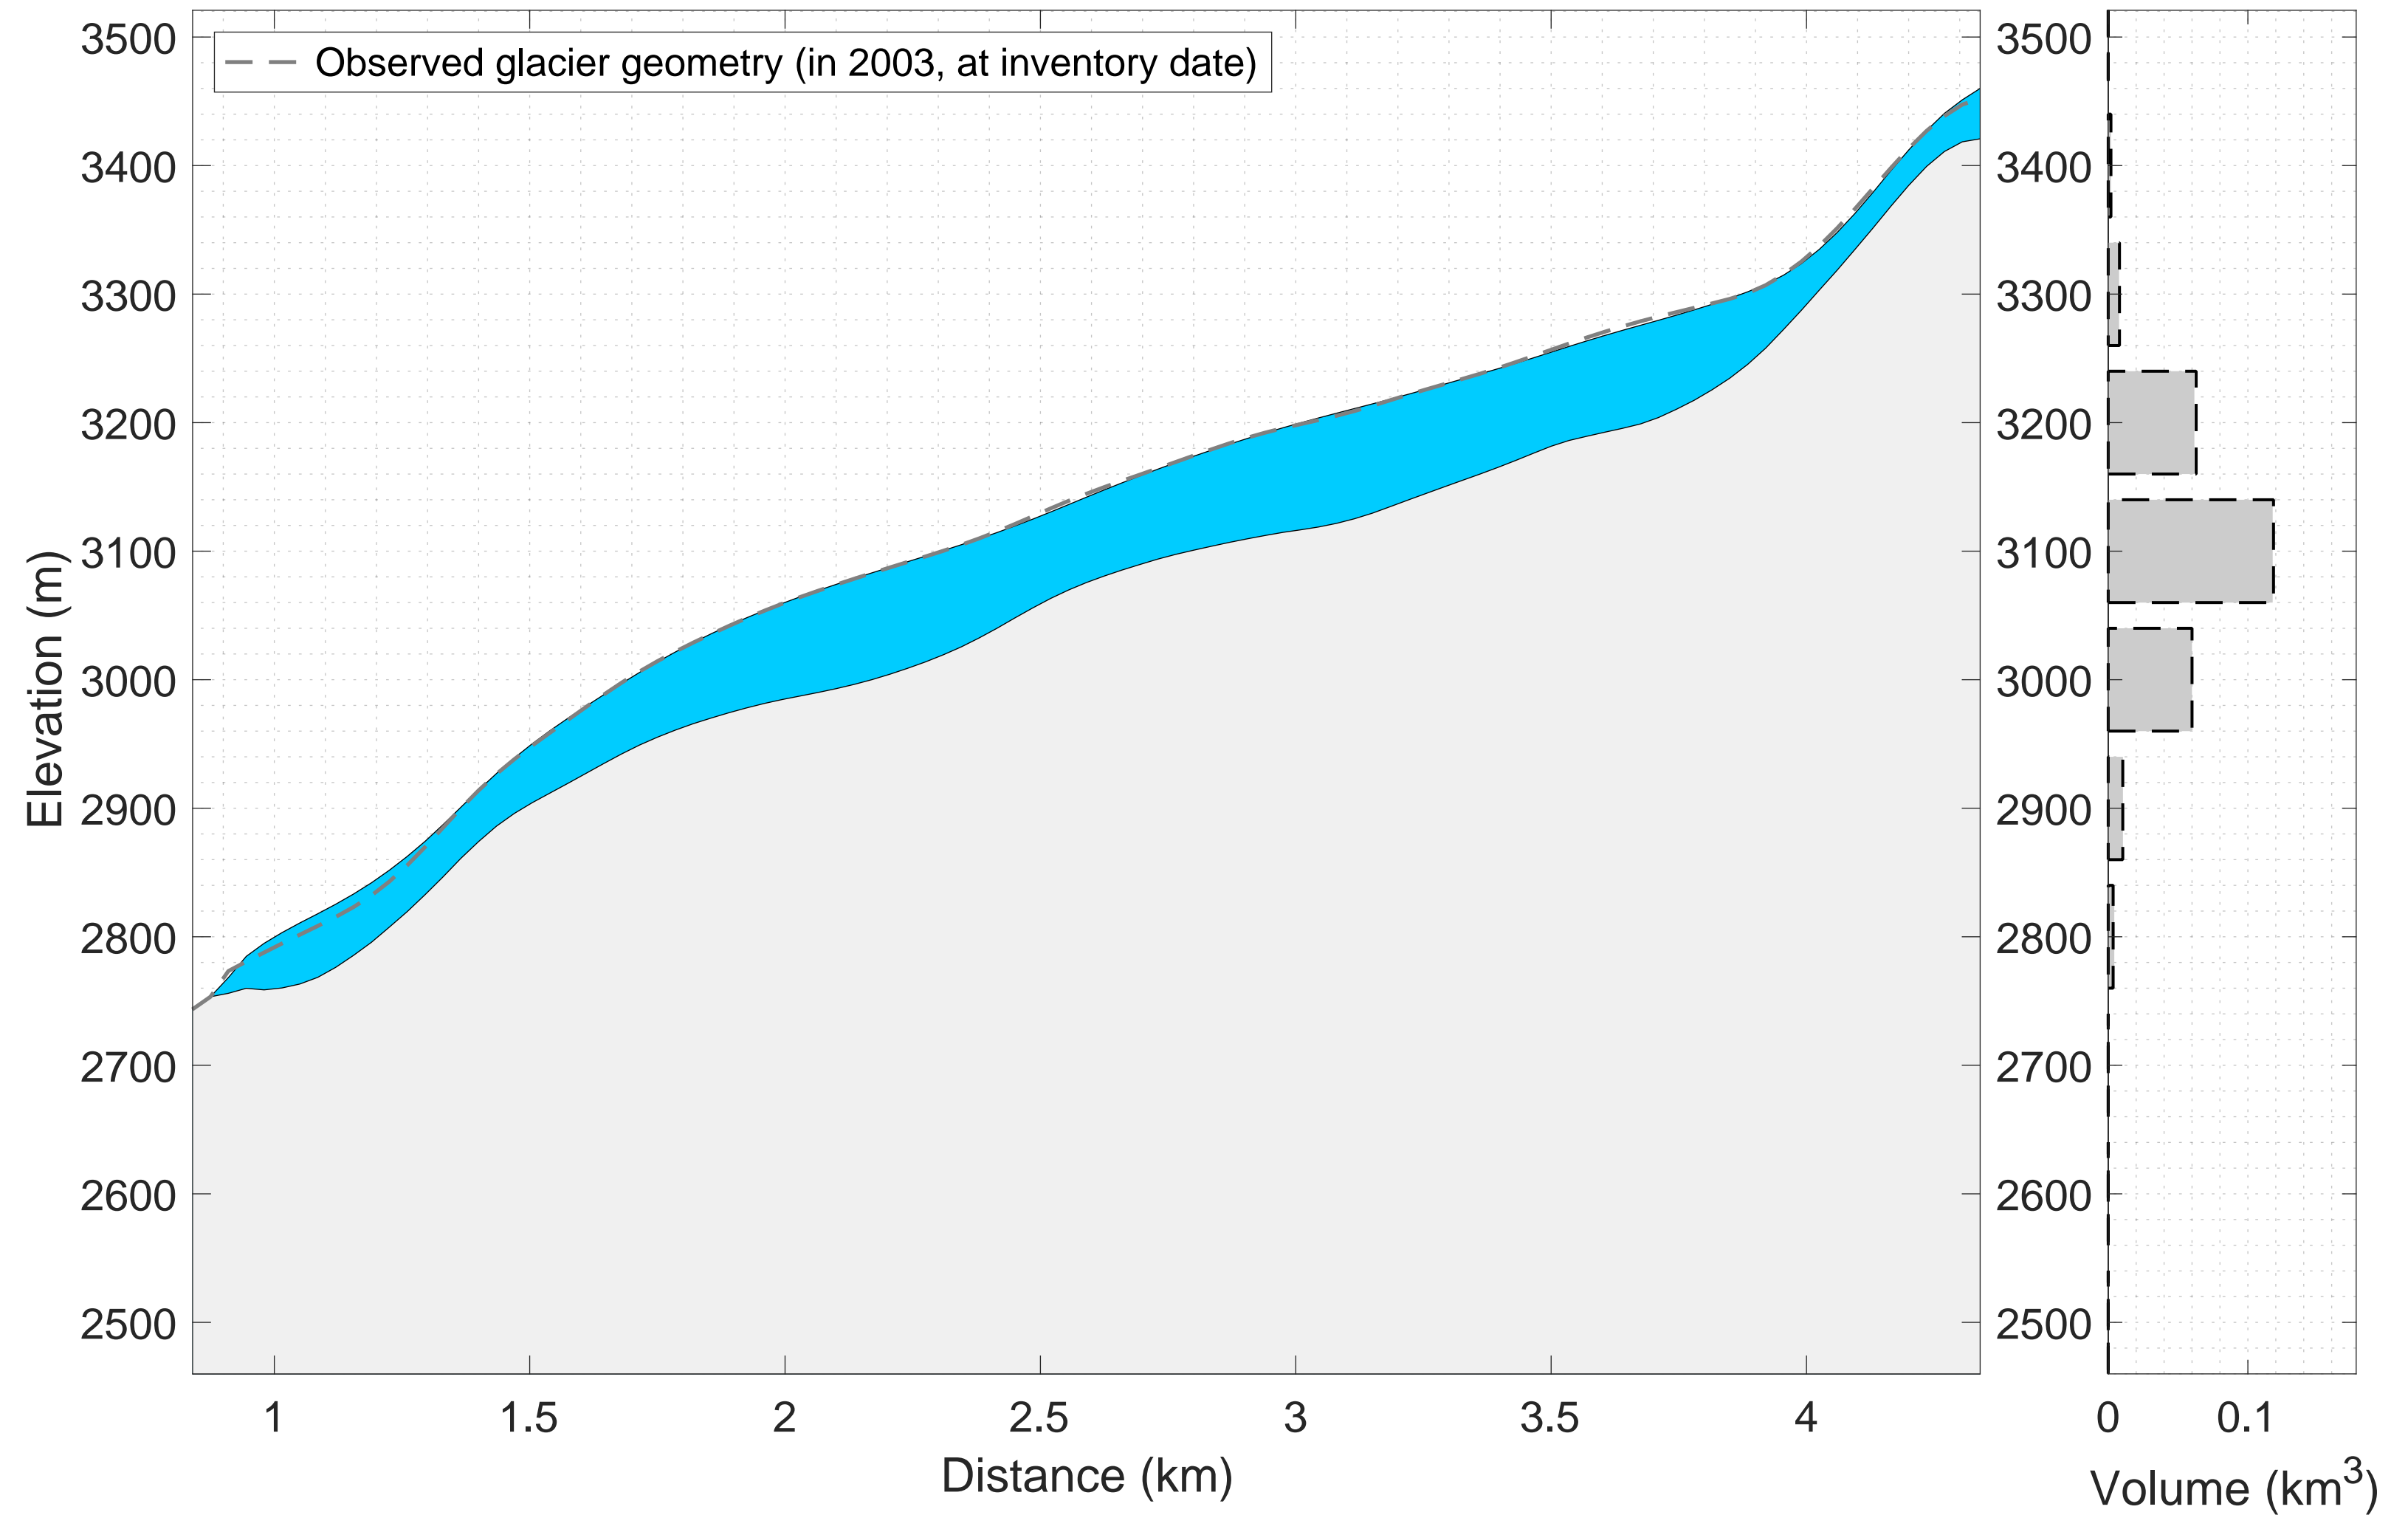

Supplement: Supplementary file 144 [file tc-13-1125-2019-supplement.zip]

**Modelled geometry (Glacier ID = 01445;  $A = 2.6516\text{e-}16 \text{ Pa}^{-3} \text{ a}^{-1}$ ;  $dx = 24 \text{ m}$ )**

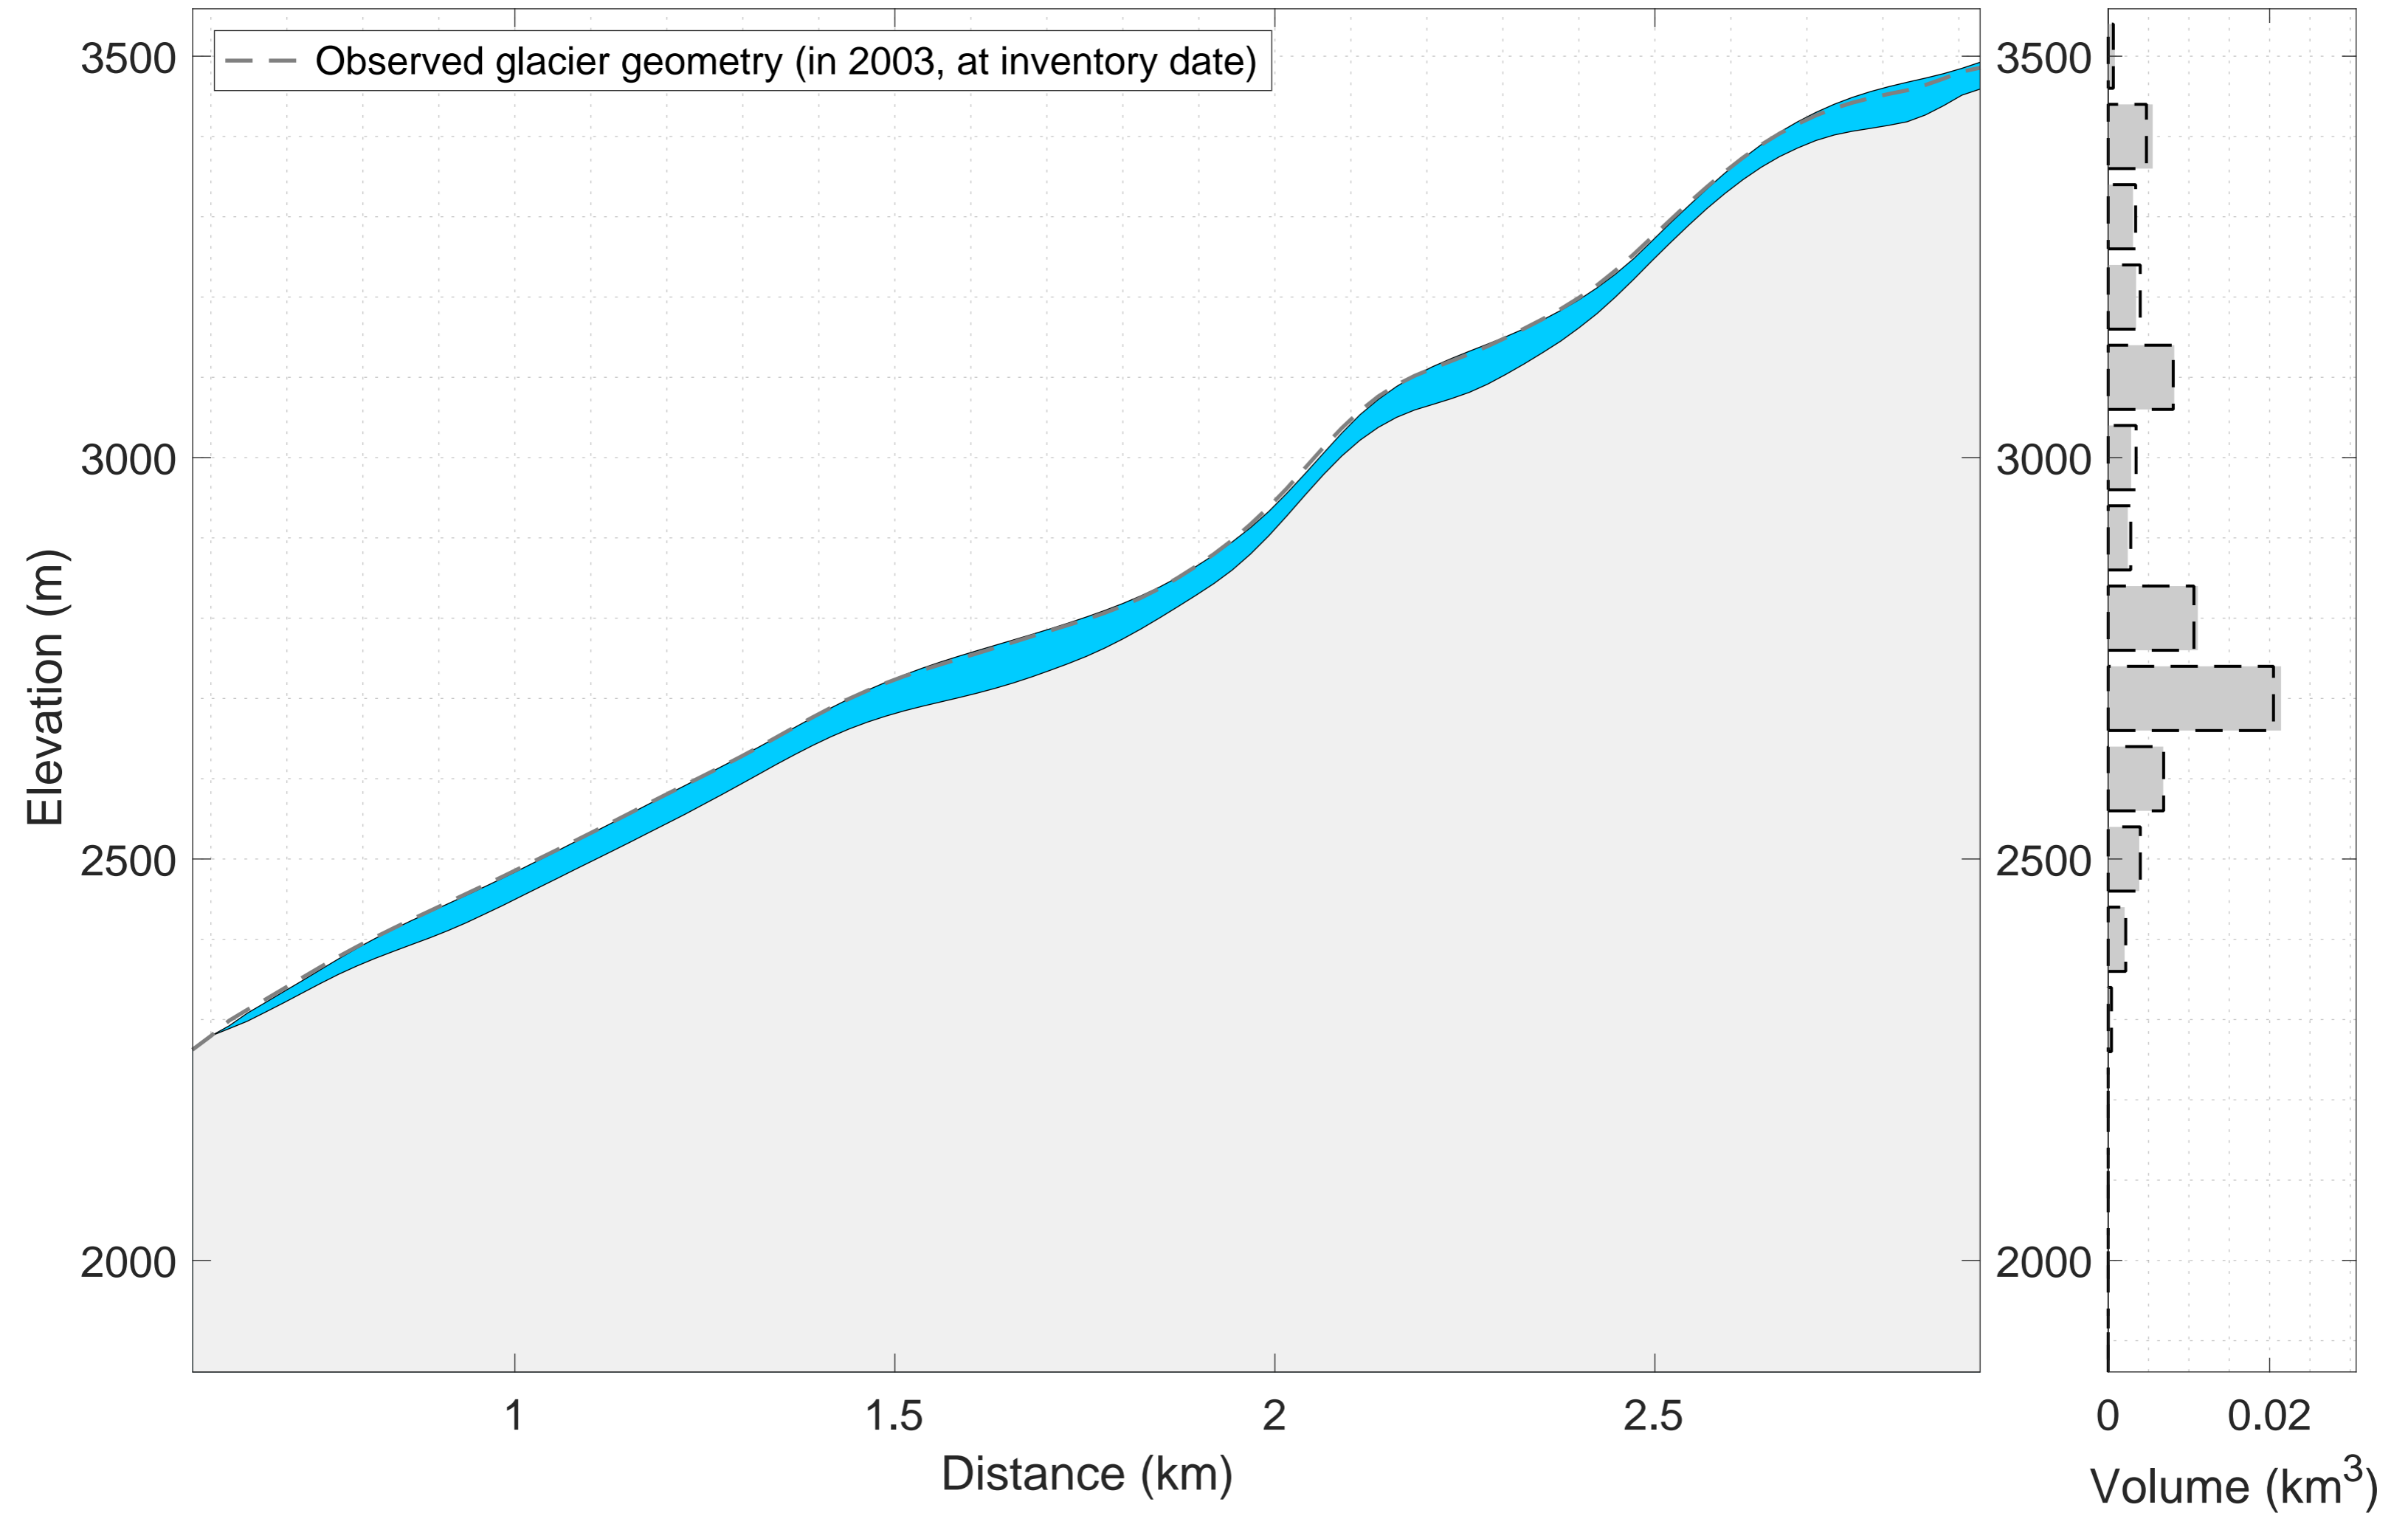

Supplement: Supplementary file 145 [file tc-13-1125-2019-supplement.zip]

**Modelled geometry (Glacier ID = 00535;  $A = 7.4737\text{e-}17 \text{ Pa}^{-3} \text{ a}^{-1}$ ;  $dx = 19 \text{ m}$ )**

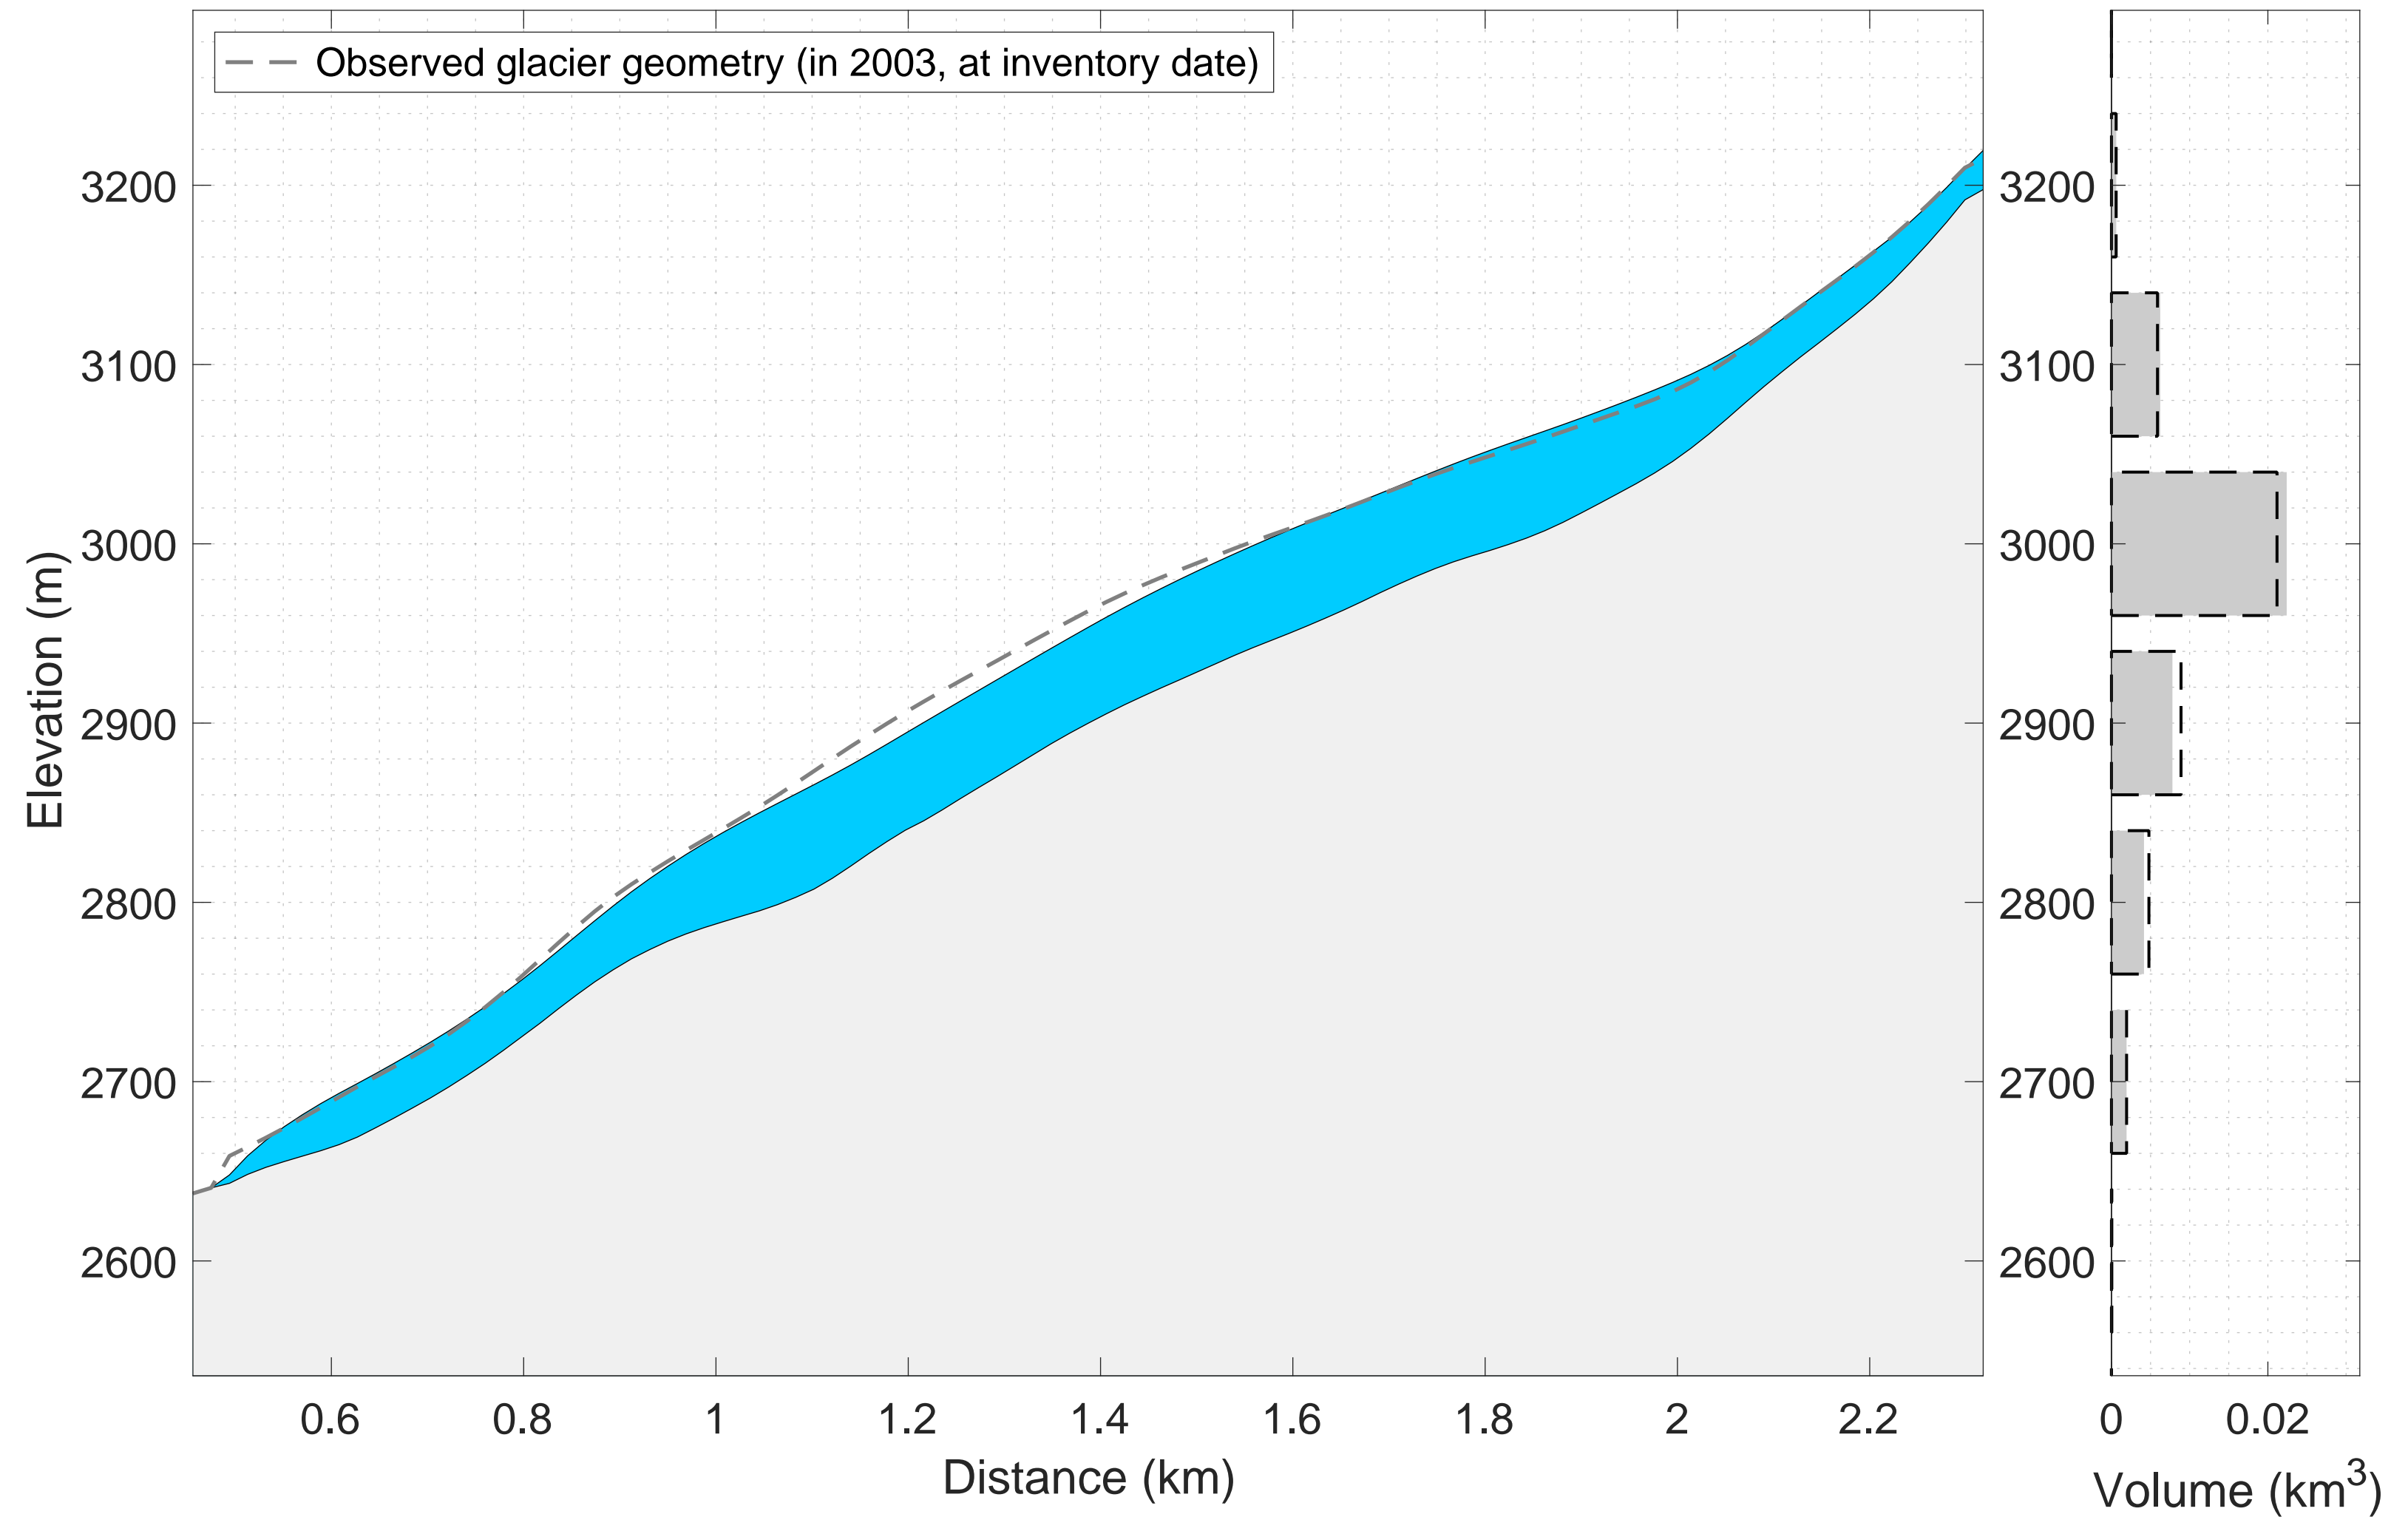

Supplement: Supplementary file 146 [file tc-13-1125-2019-supplement.zip]

**Modelled geometry (Glacier ID = 02950;  $A = 1.3613\text{e-}16 \text{ Pa}^{-3} \text{ a}^{-1}$ ;  $dx = 27 \text{ m}$ )**

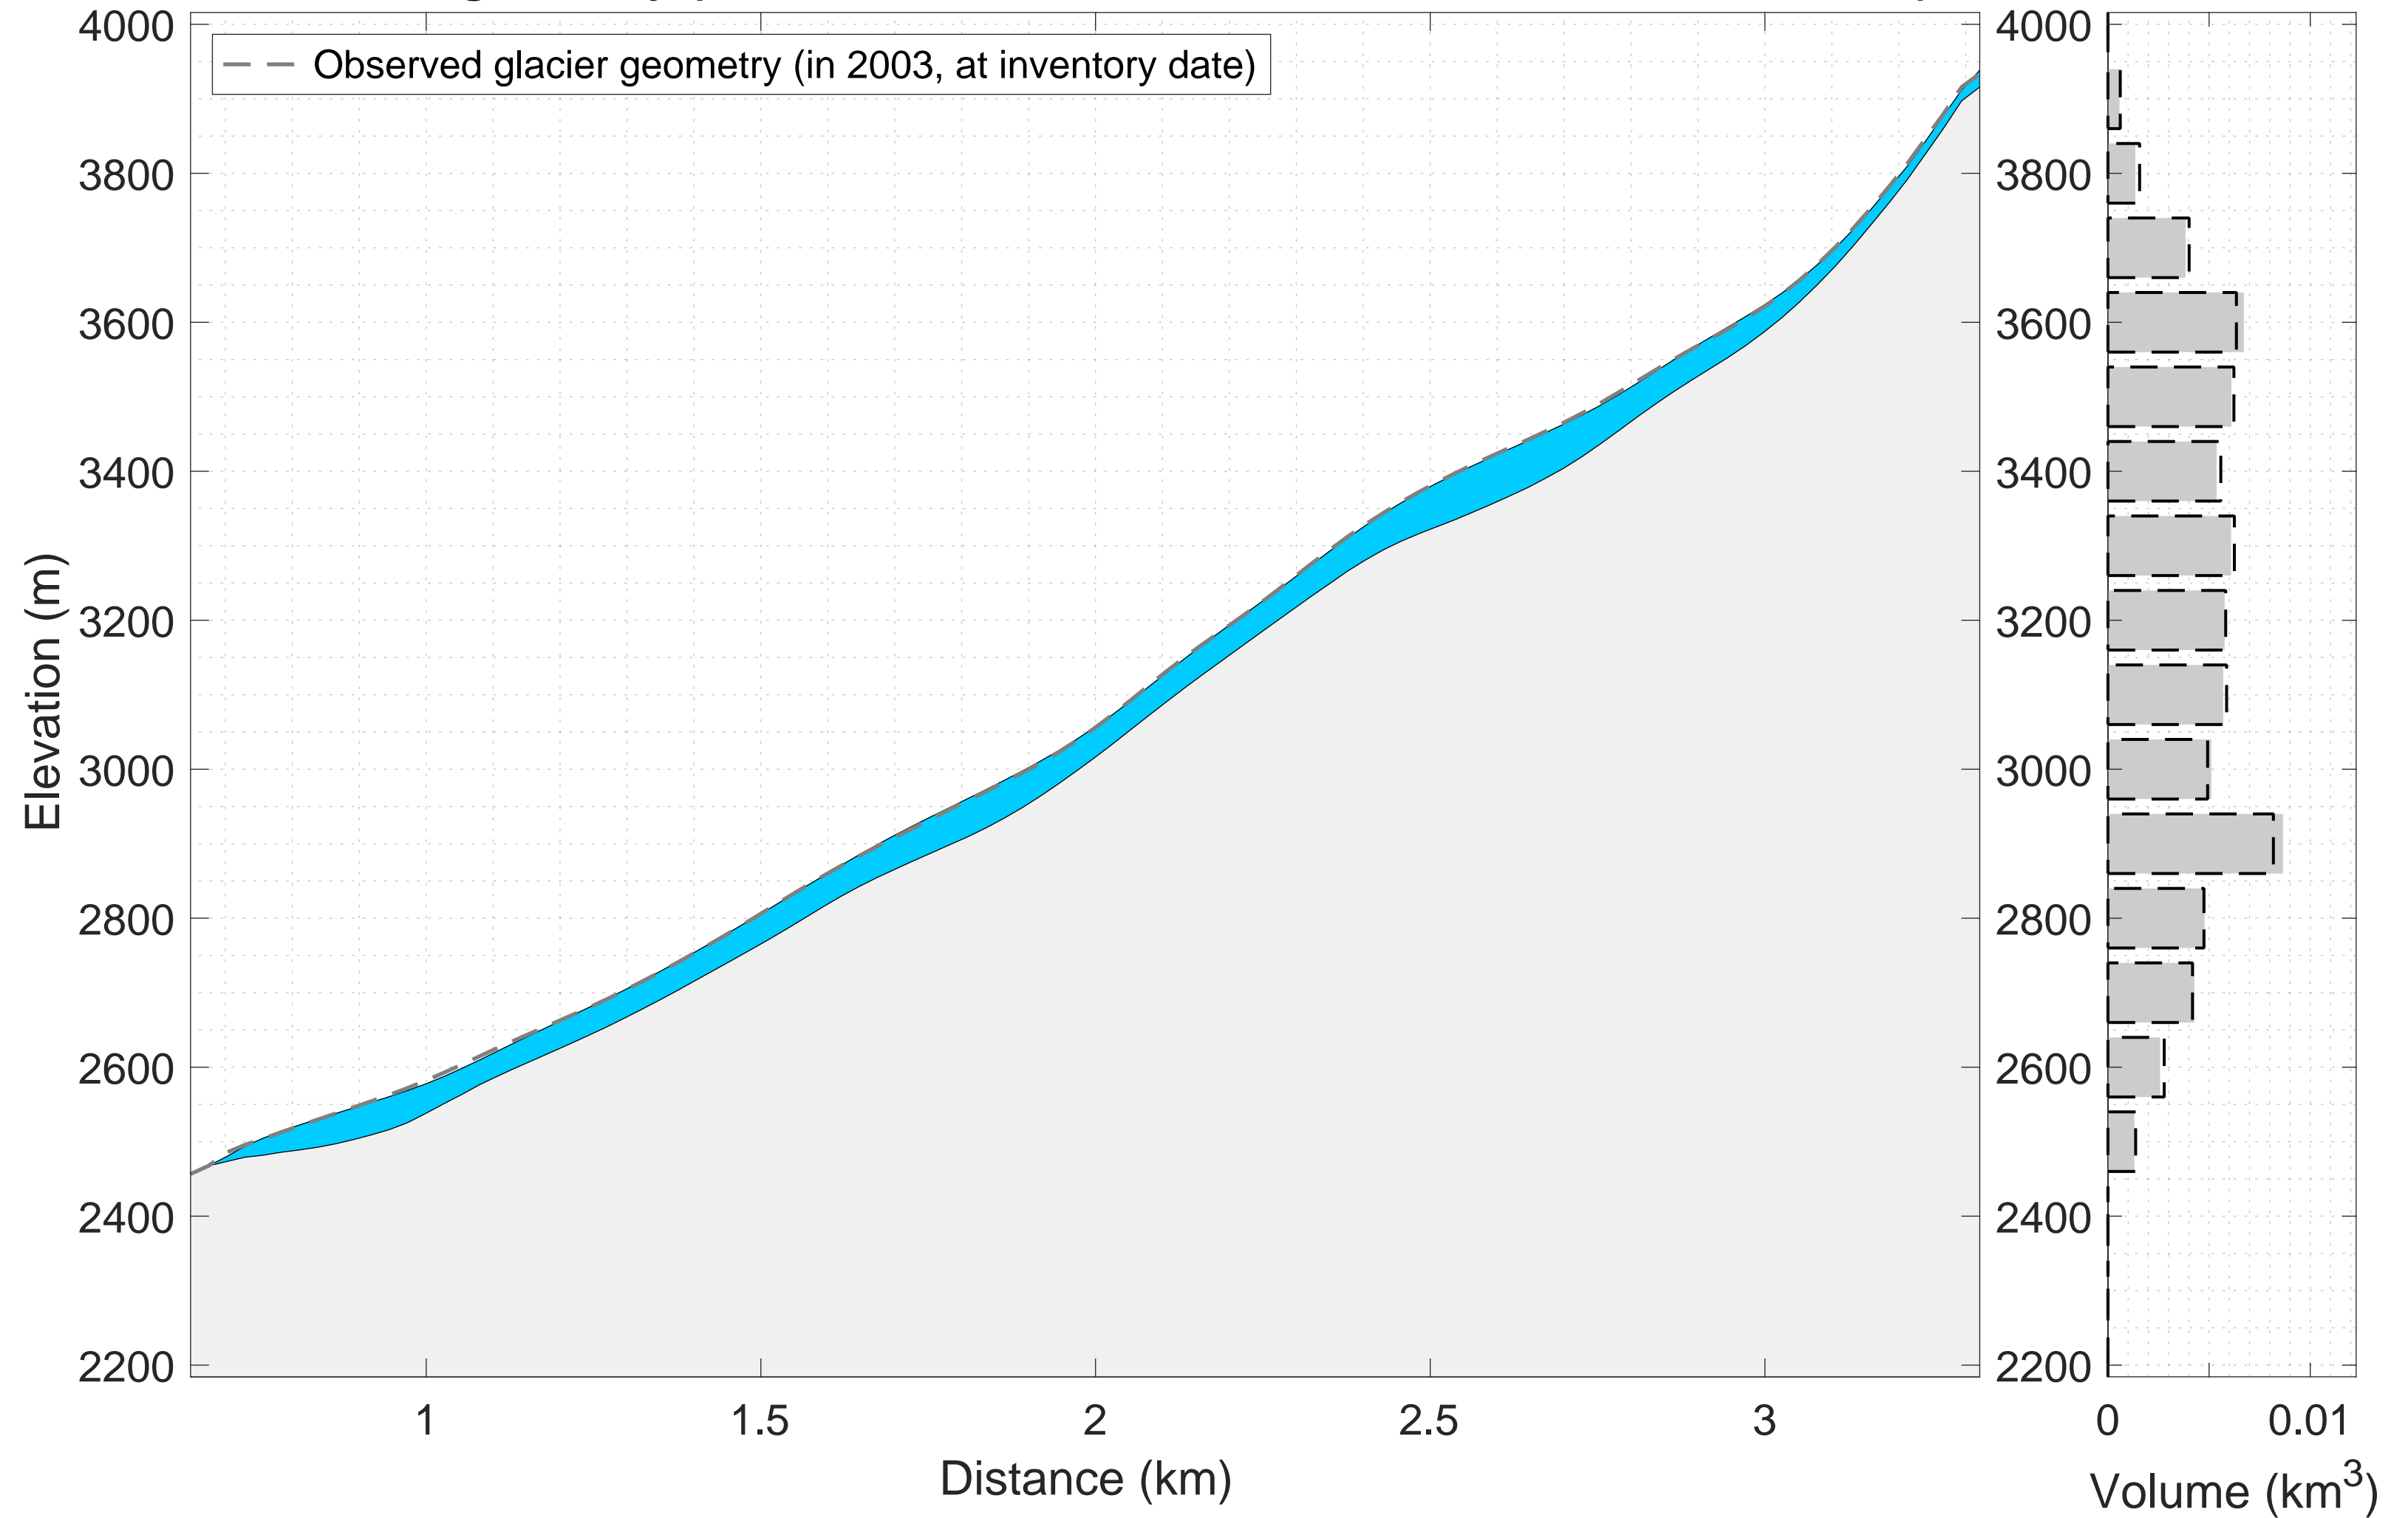

Supplement: Supplementary file 147 [file tc-13-1125-2019-supplement.zip]

**Modelled geometry (Glacier ID = 00541;  $A = 1.6234\text{e-}16 \text{ Pa}^{-3} \text{ a}^{-1}$ ;  $dx = 29 \text{ m}$ )**

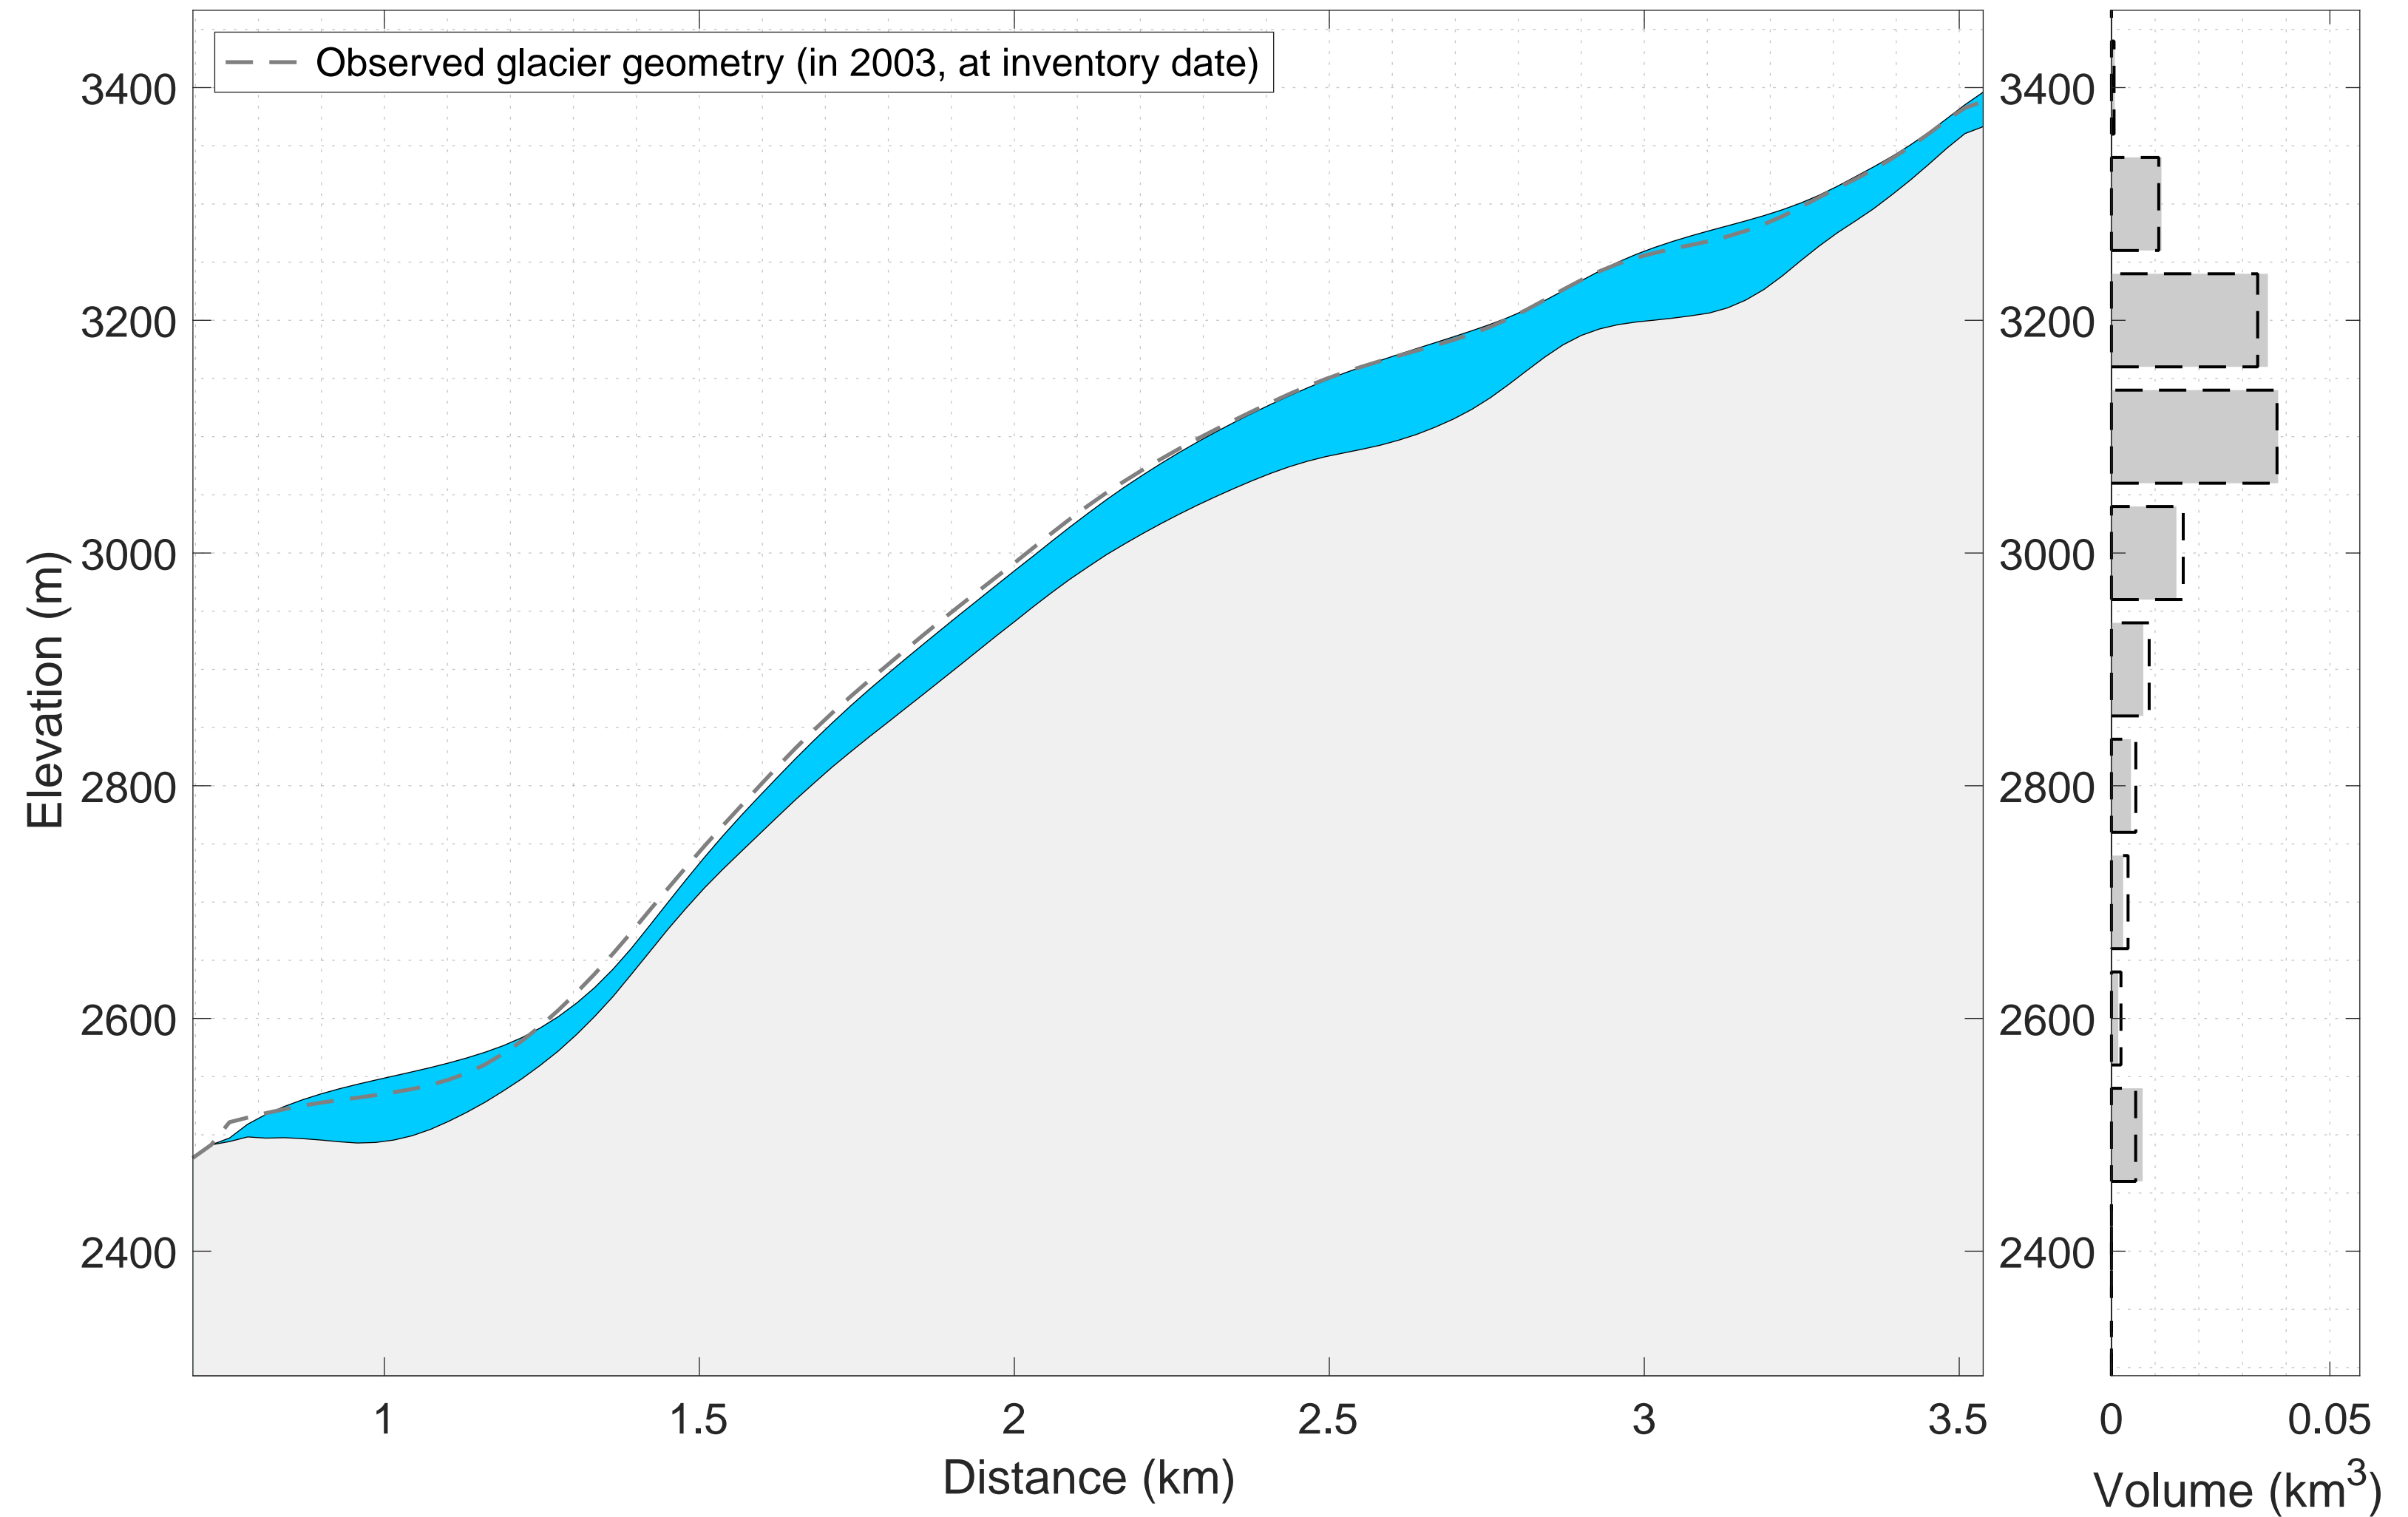

Supplement: Supplementary file 148 [file tc-13-1125-2019-supplement.zip]

**Modelled geometry (Glacier ID = 01293;  $A = 1\text{e-}16 \text{ Pa}^{-3} \text{ a}^{-1}$ ;  $dx = 21 \text{ m}$ )**

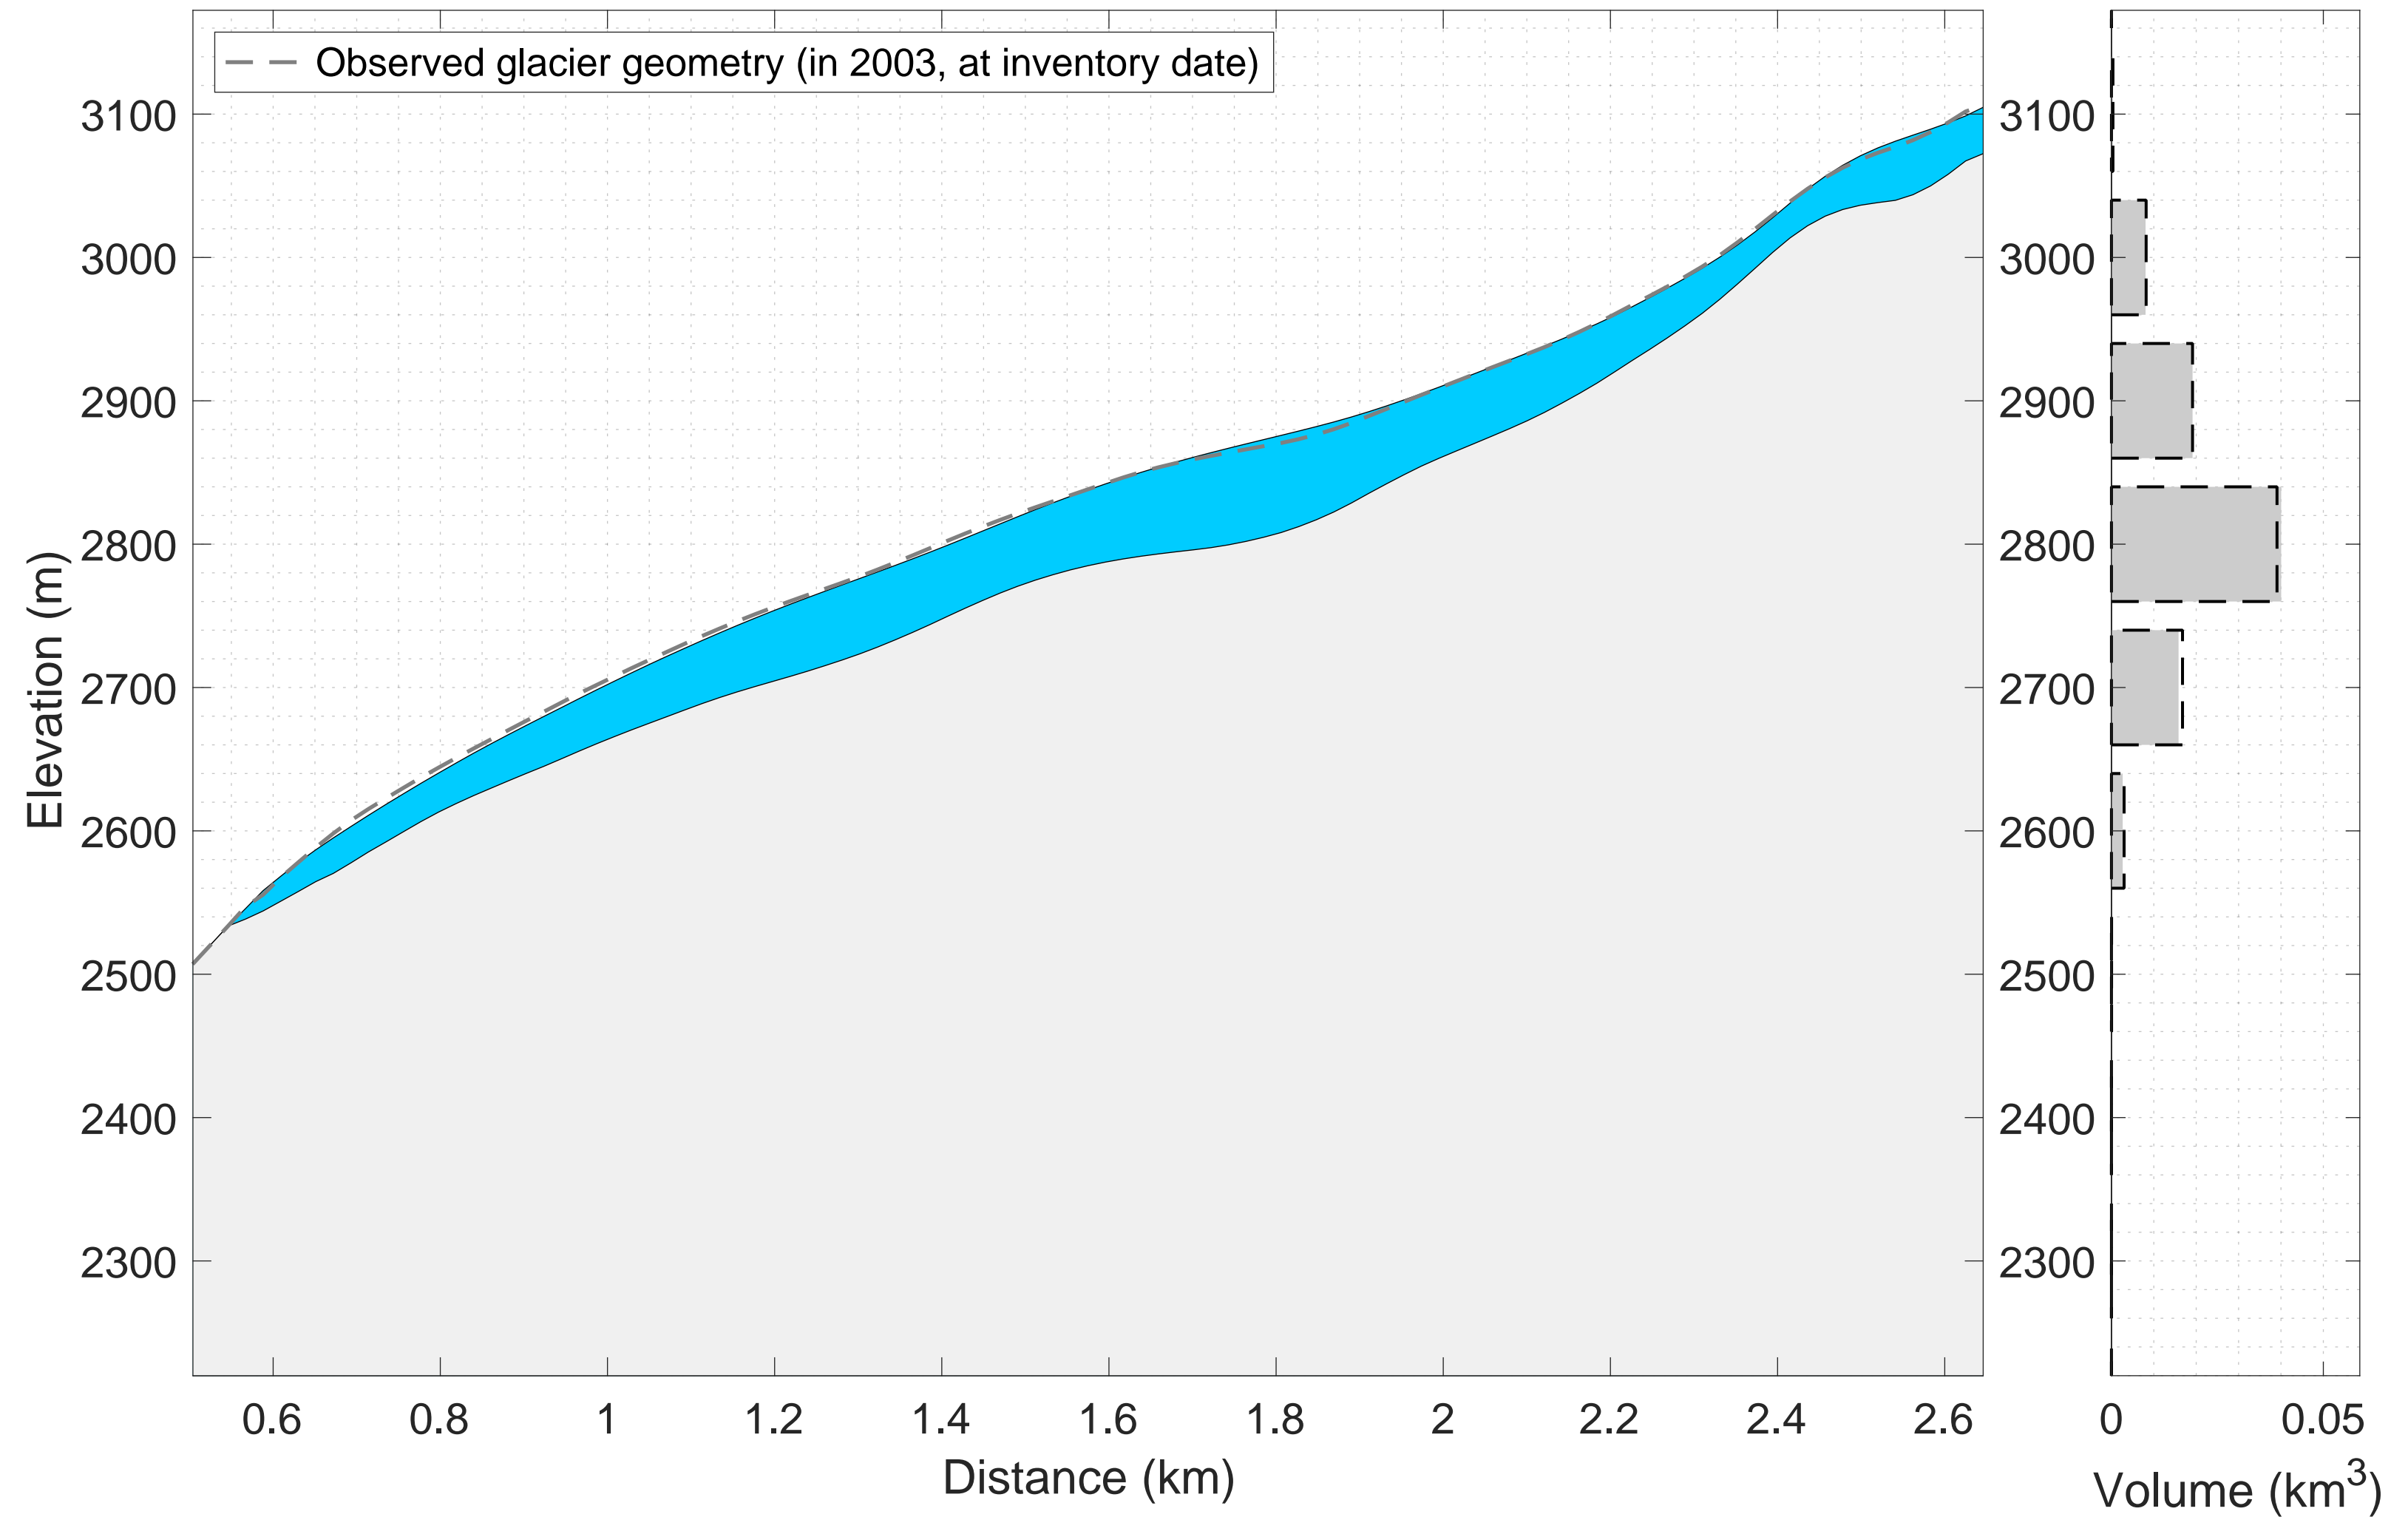

Supplement: Supplementary file 149 [file tc-13-1125-2019-supplement.zip]

**Modelled geometry (Glacier ID = 00520;  $A = 6.5259\text{e-}17 \text{ Pa}^{-3} \text{ a}^{-1}$ ;  $dx = 11 \text{ m}$ )**

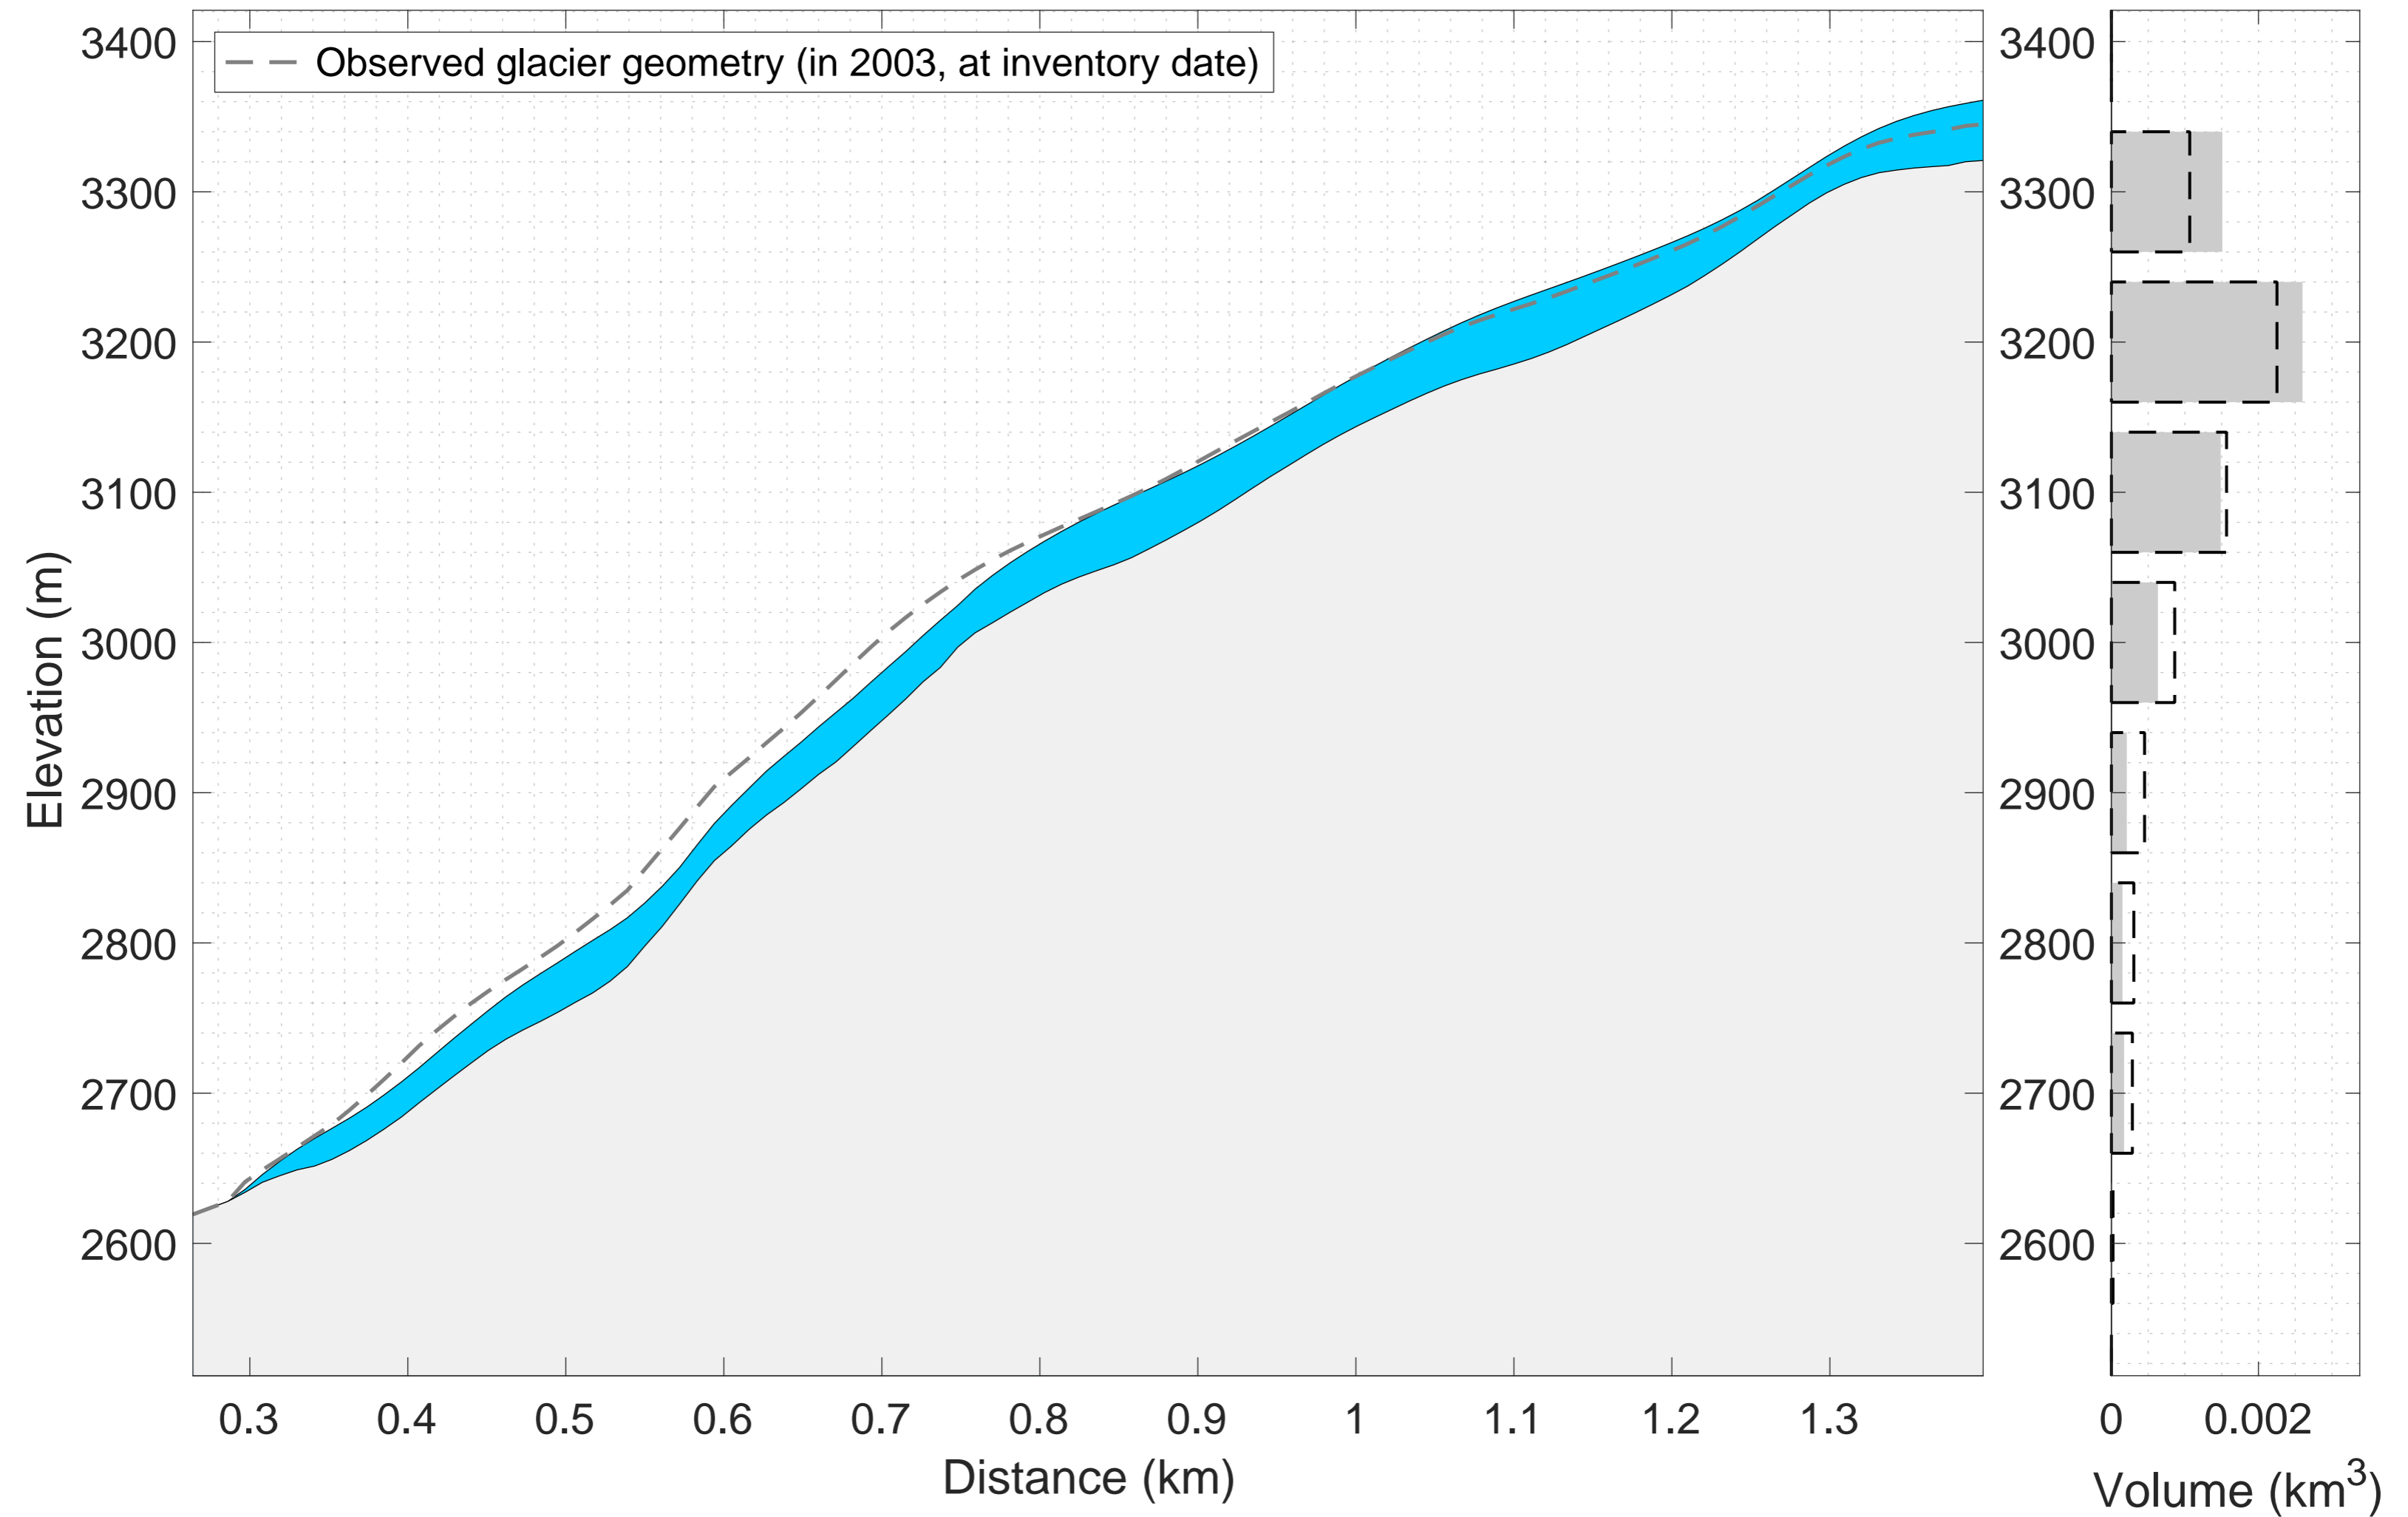

Supplement: Supplementary file 150 [file tc-13-1125-2019-supplement.zip]

Modelled geometry (Glacier ID = 03657;  $A = 2.0016\text{e-}16 \text{ Pa}^{-3} \text{ a}^{-1}$ ;  $dx = 12 \text{ m}$ )

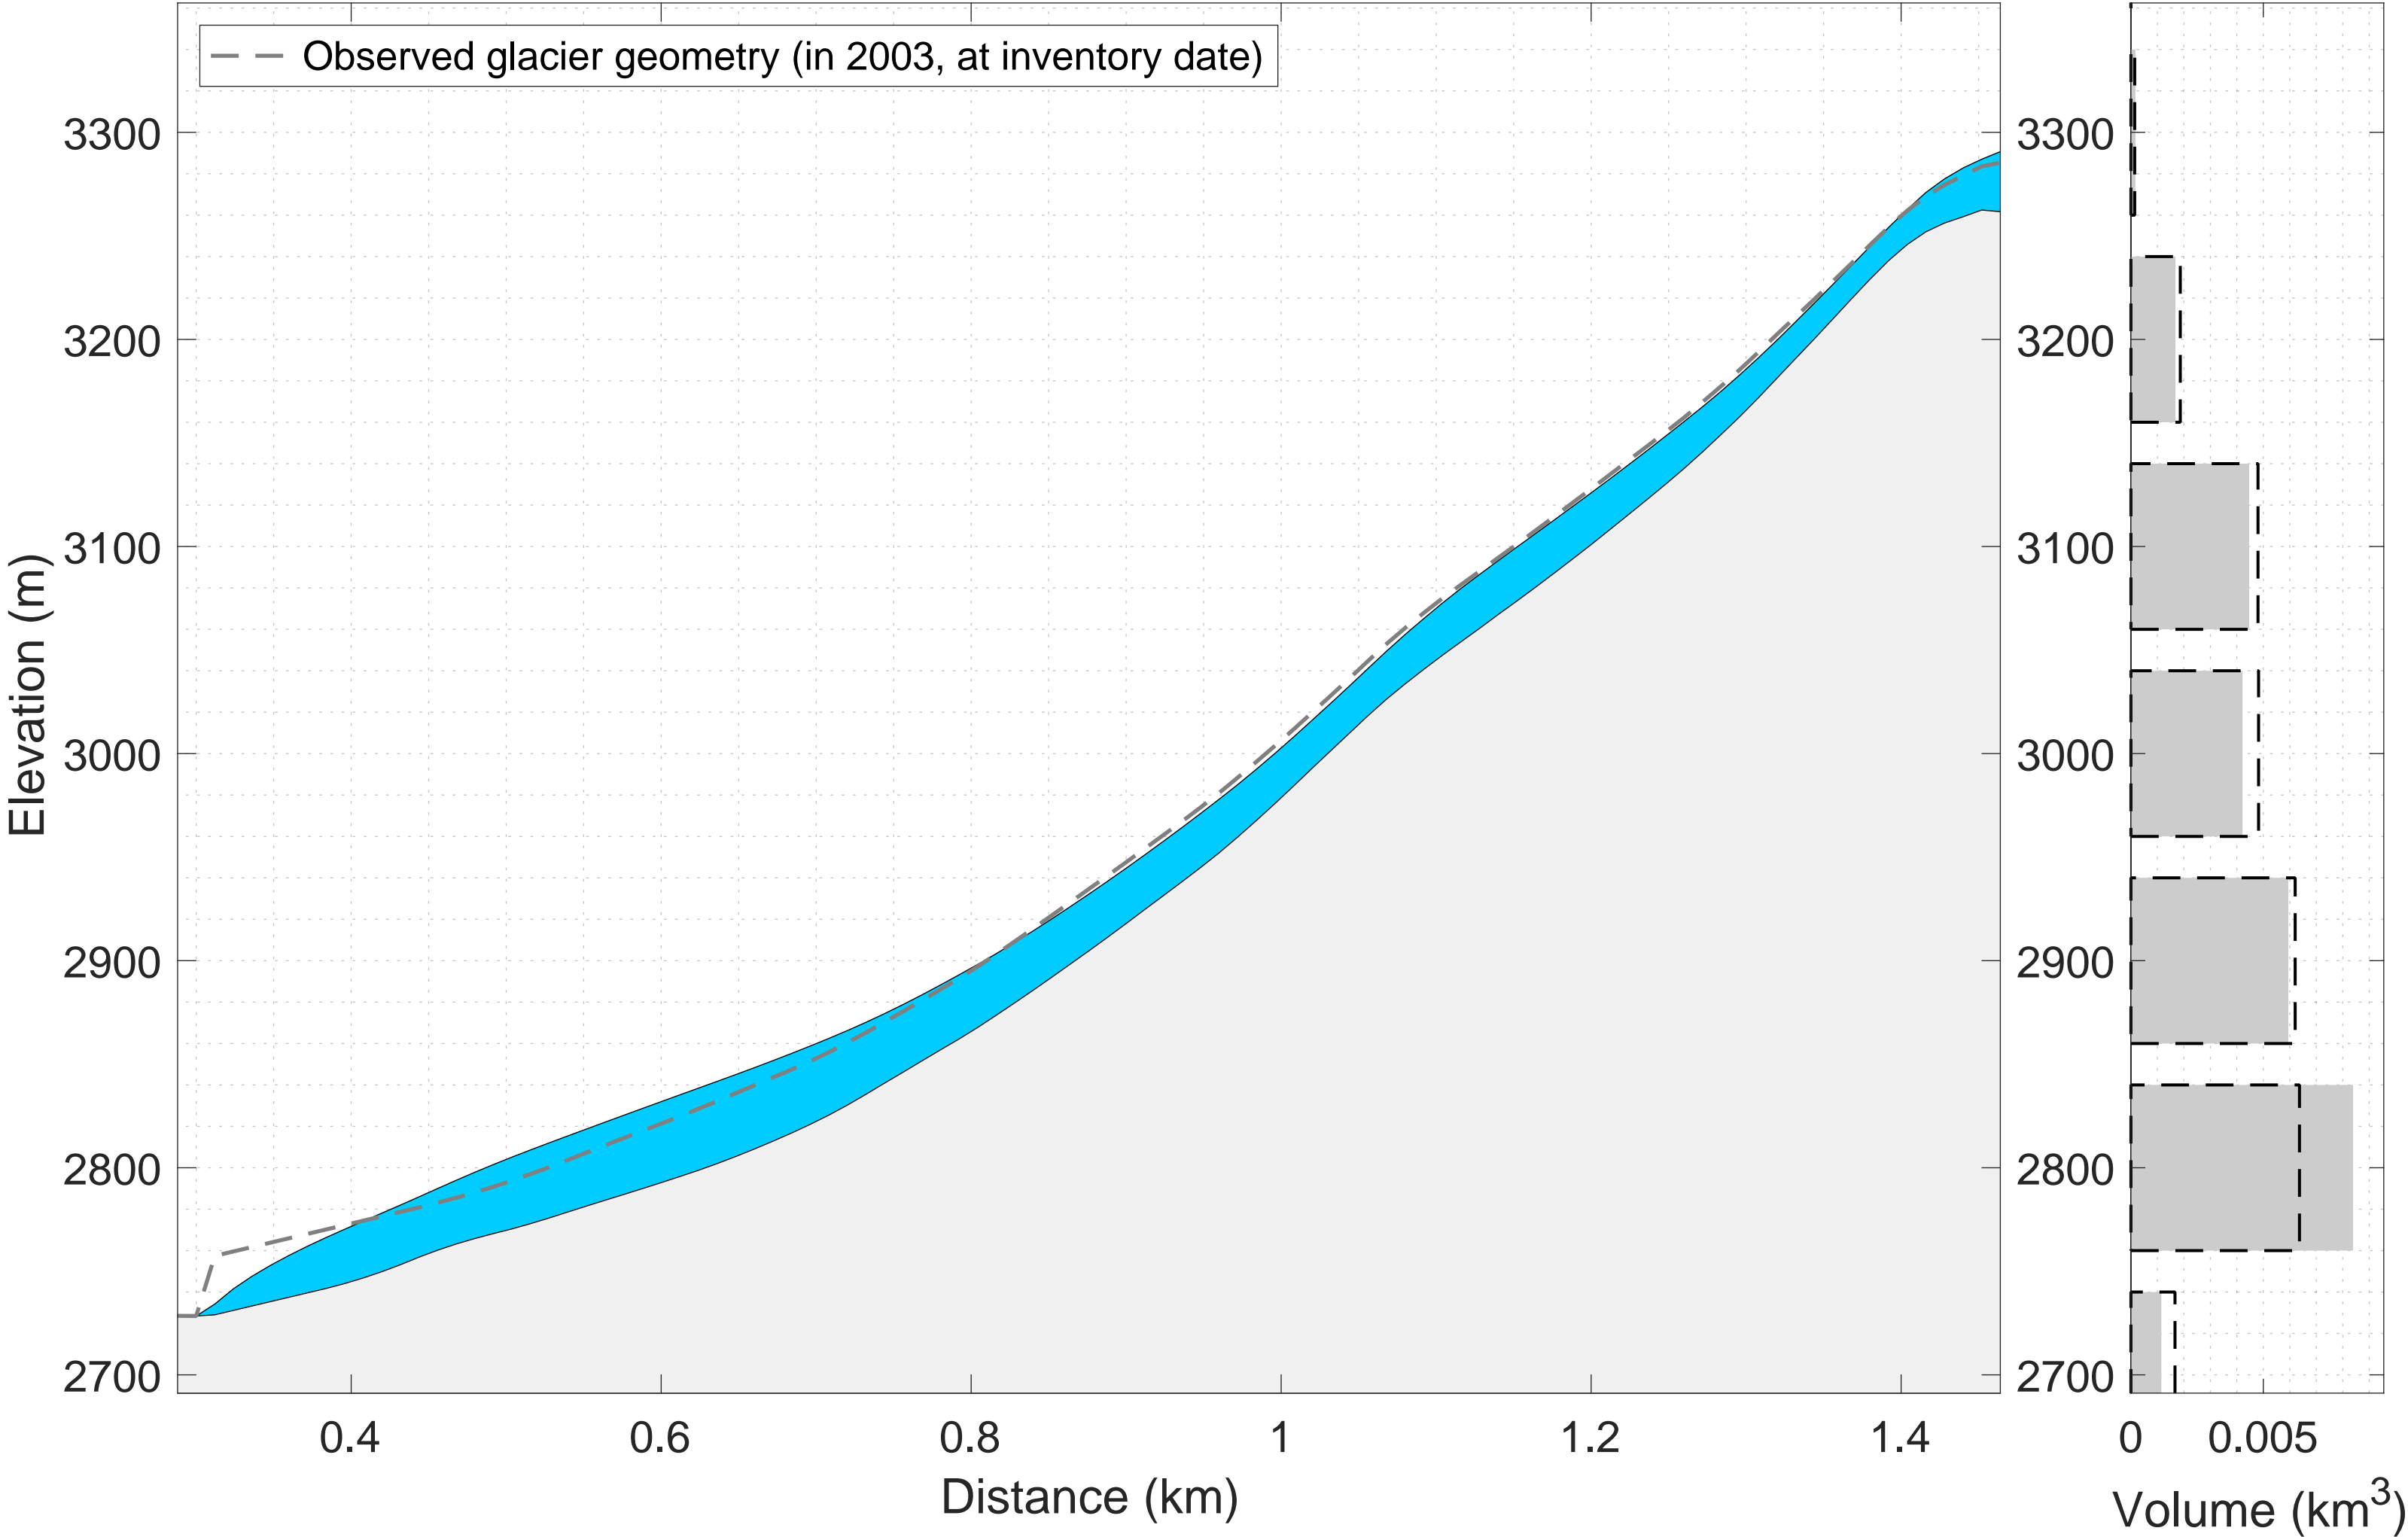

Supplement: Supplementary file 151 [file tc-13-1125-2019-supplement.zip]

**Modelled geometry (Glacier ID = 02282;  $A = 7.8262\text{e-}17 \text{ Pa}^{-3} \text{ a}^{-1}$ ;  $dx = 19 \text{ m}$ )**

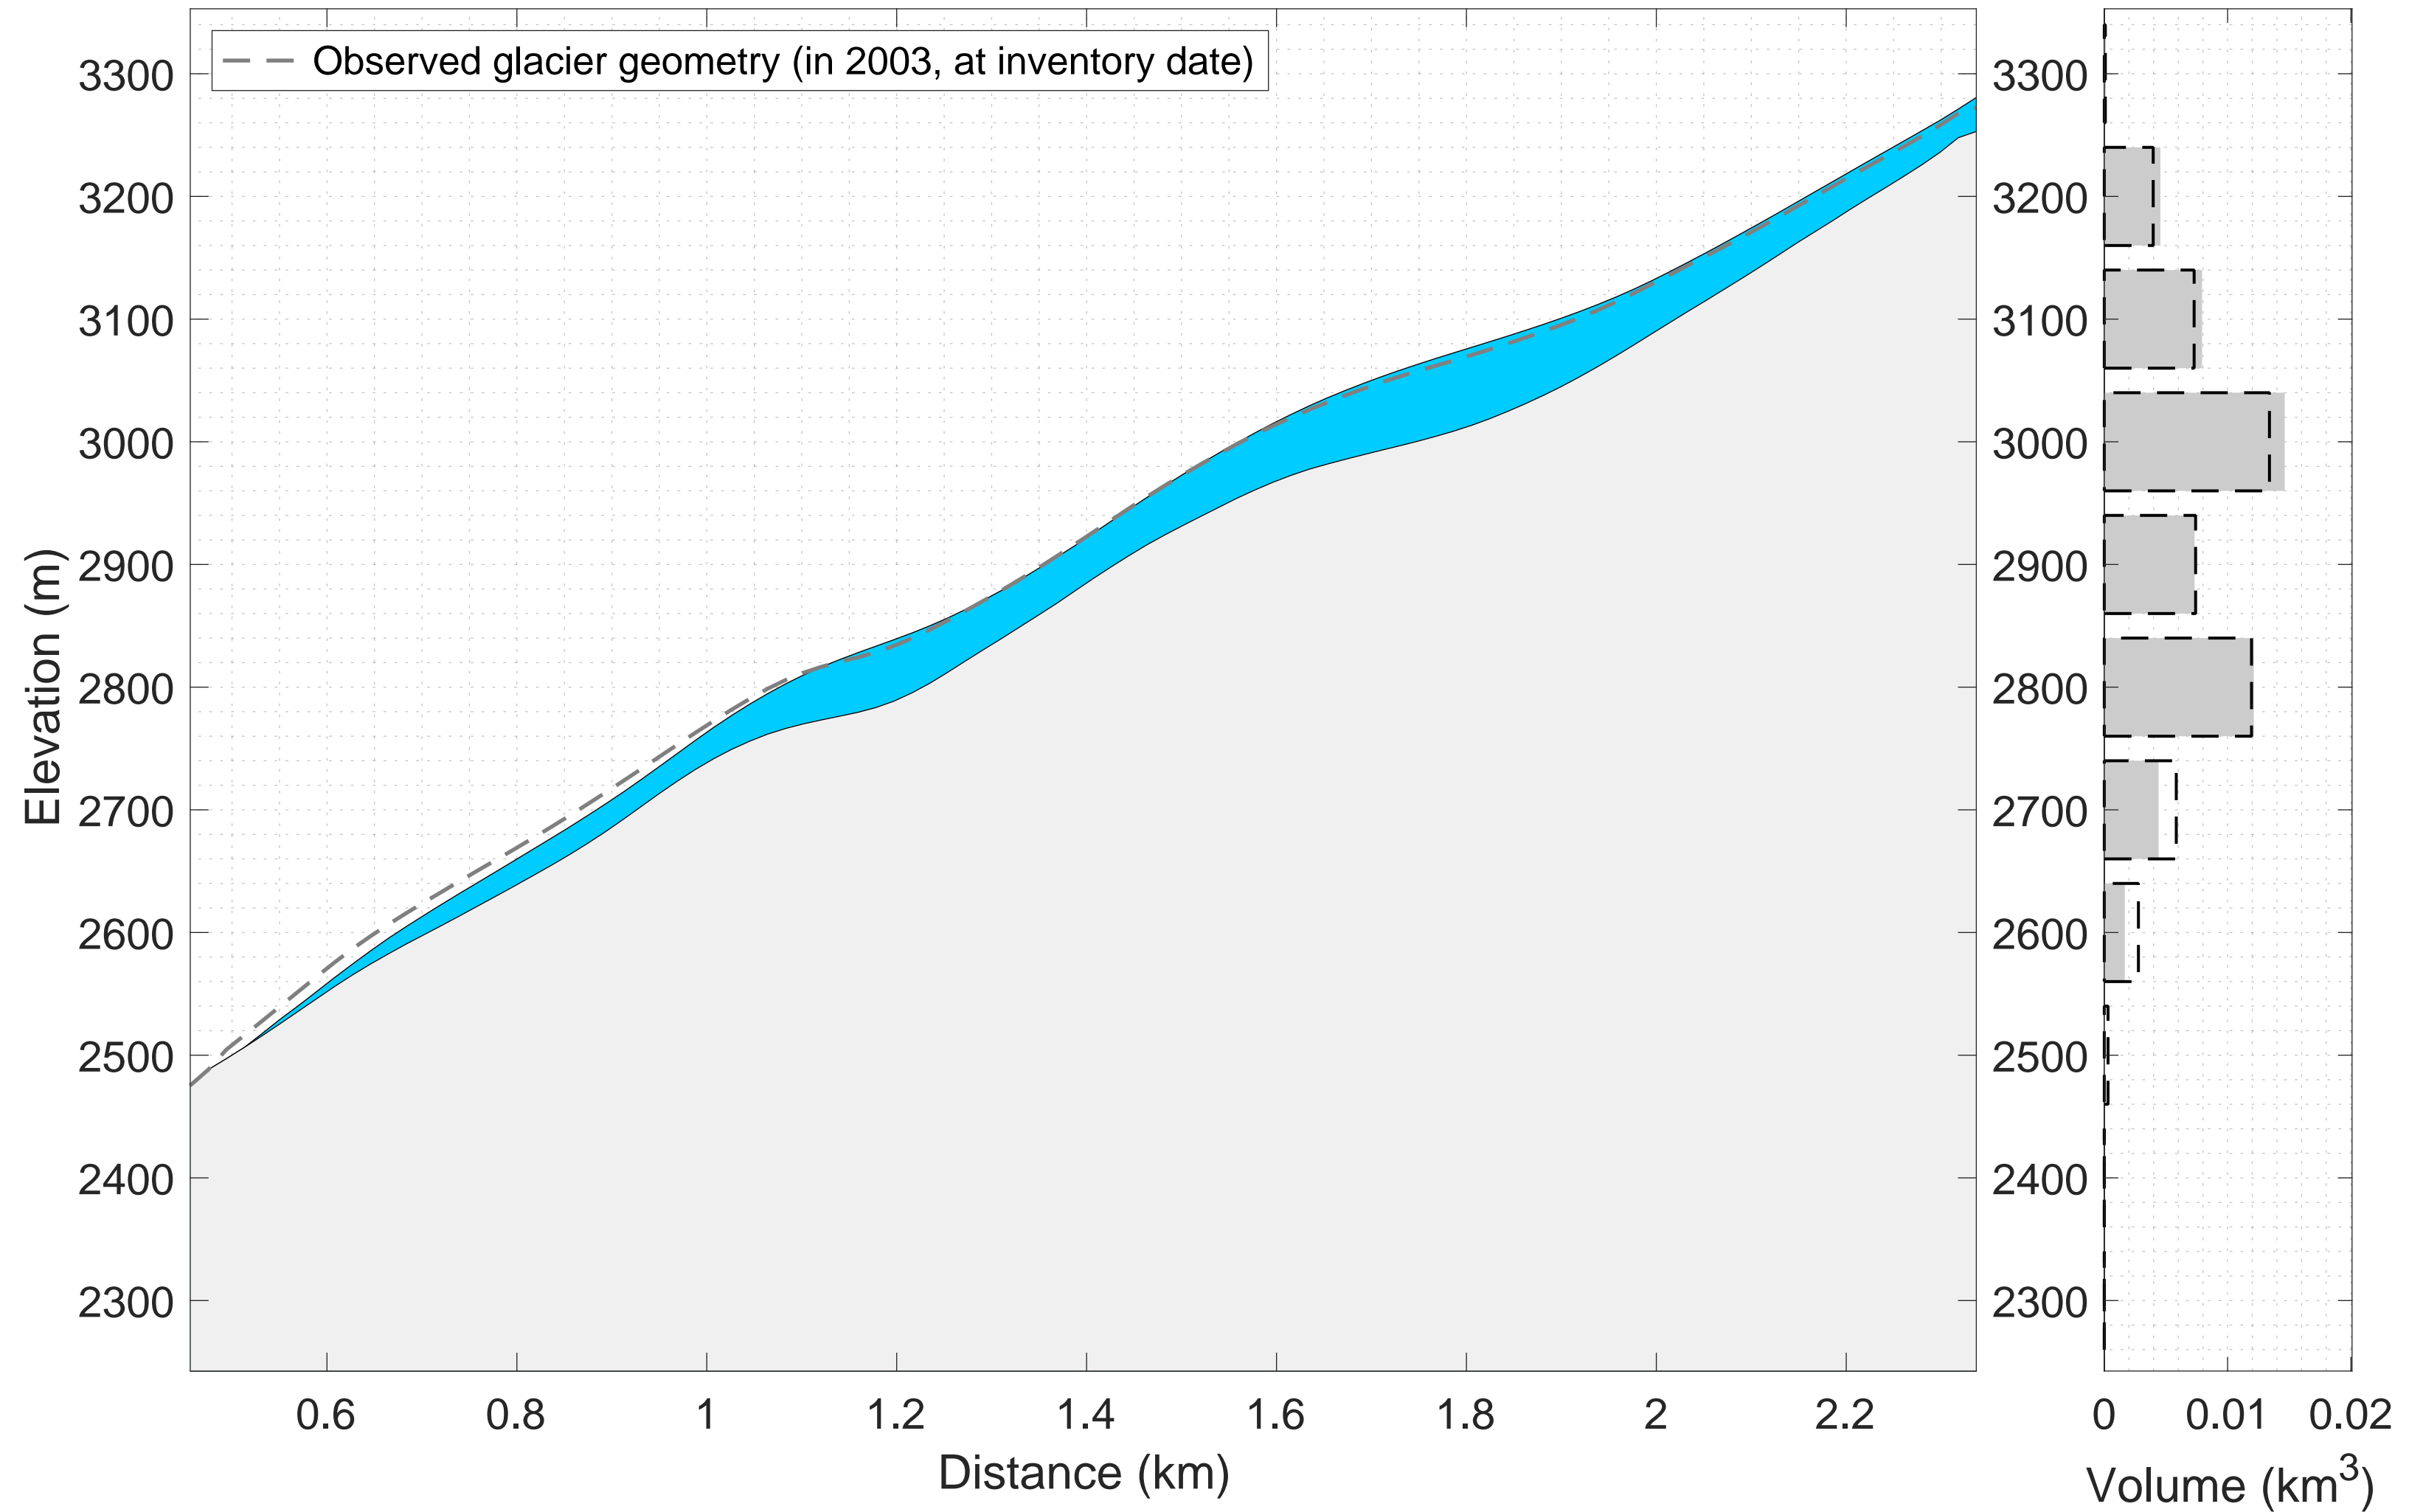

Supplement: Supplementary file 152 [file tc-13-1125-2019-supplement.zip]

**Modelled geometry (Glacier ID = 01876;  $A = 3.6043\text{e-}18 \text{ Pa}^{-3} \text{ a}^{-1}$ ;  $dx = 47 \text{ m}$ )**

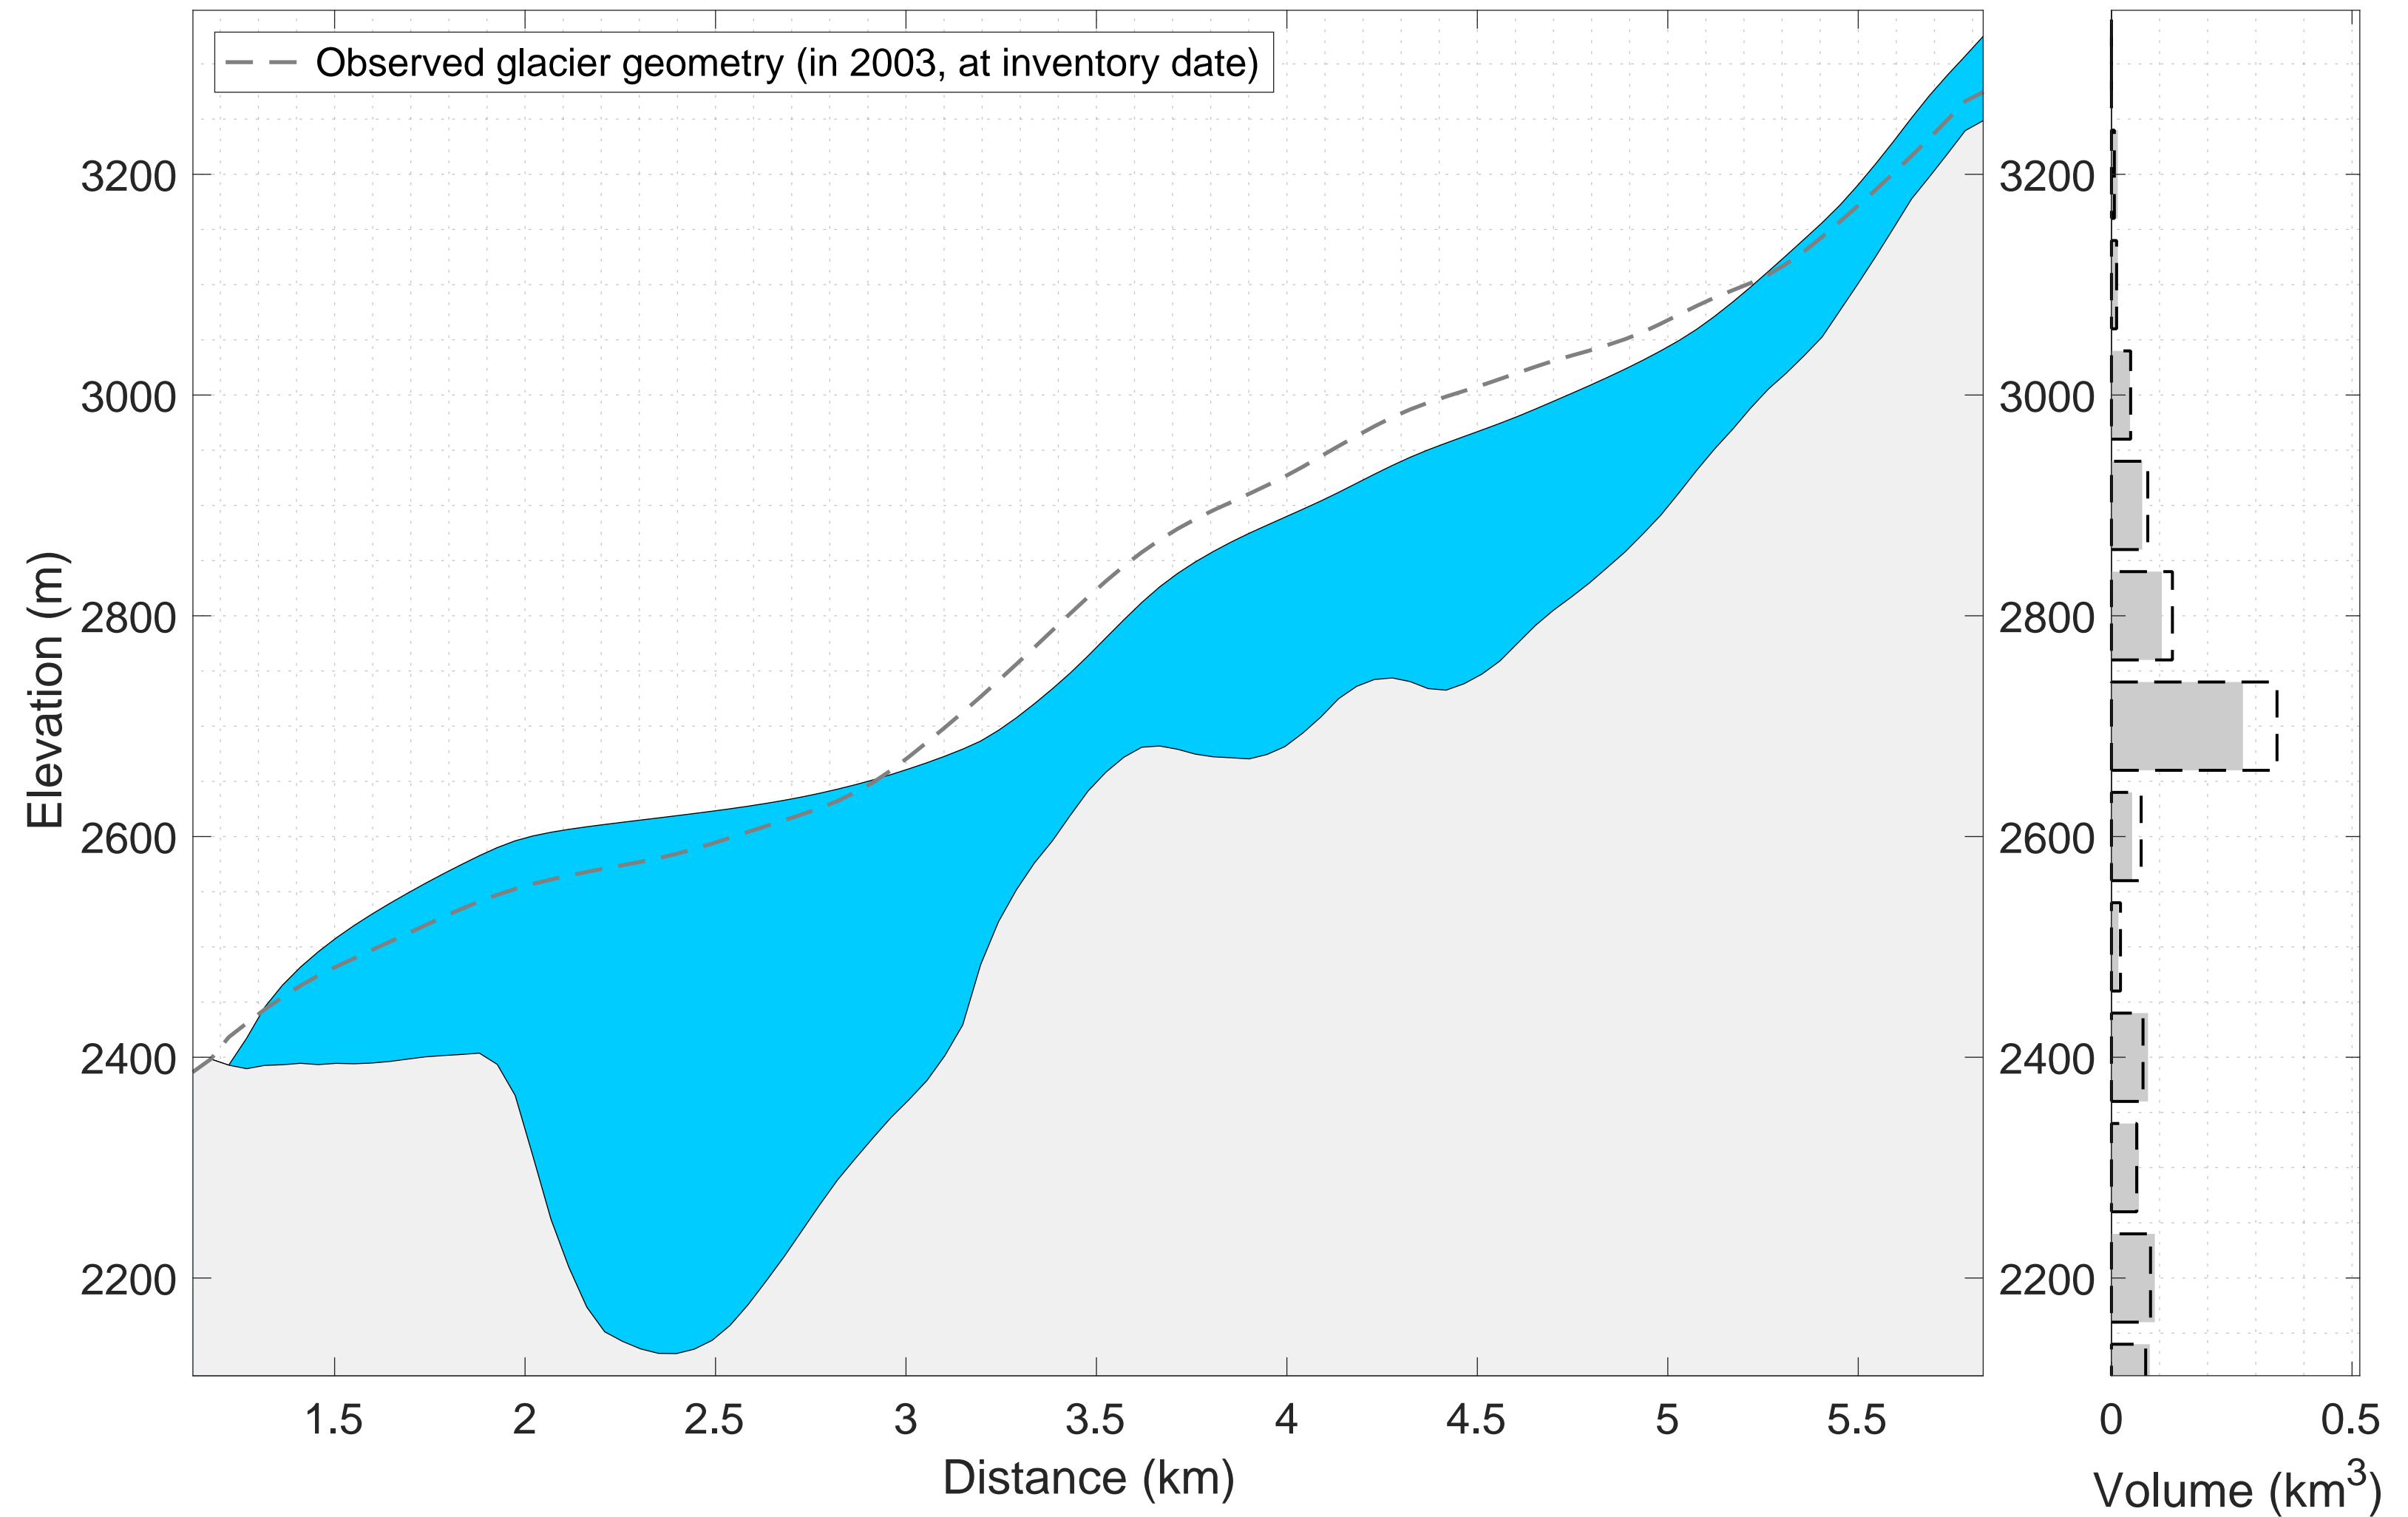

Supplement: Supplementary file 153 [file tc-13-1125-2019-supplement.zip]

**Modelled geometry (Glacier ID = 02570;  $A = 1.8222\text{e-}16 \text{ Pa}^{-3} \text{ a}^{-1}$ ;  $dx = 23 \text{ m}$ )**

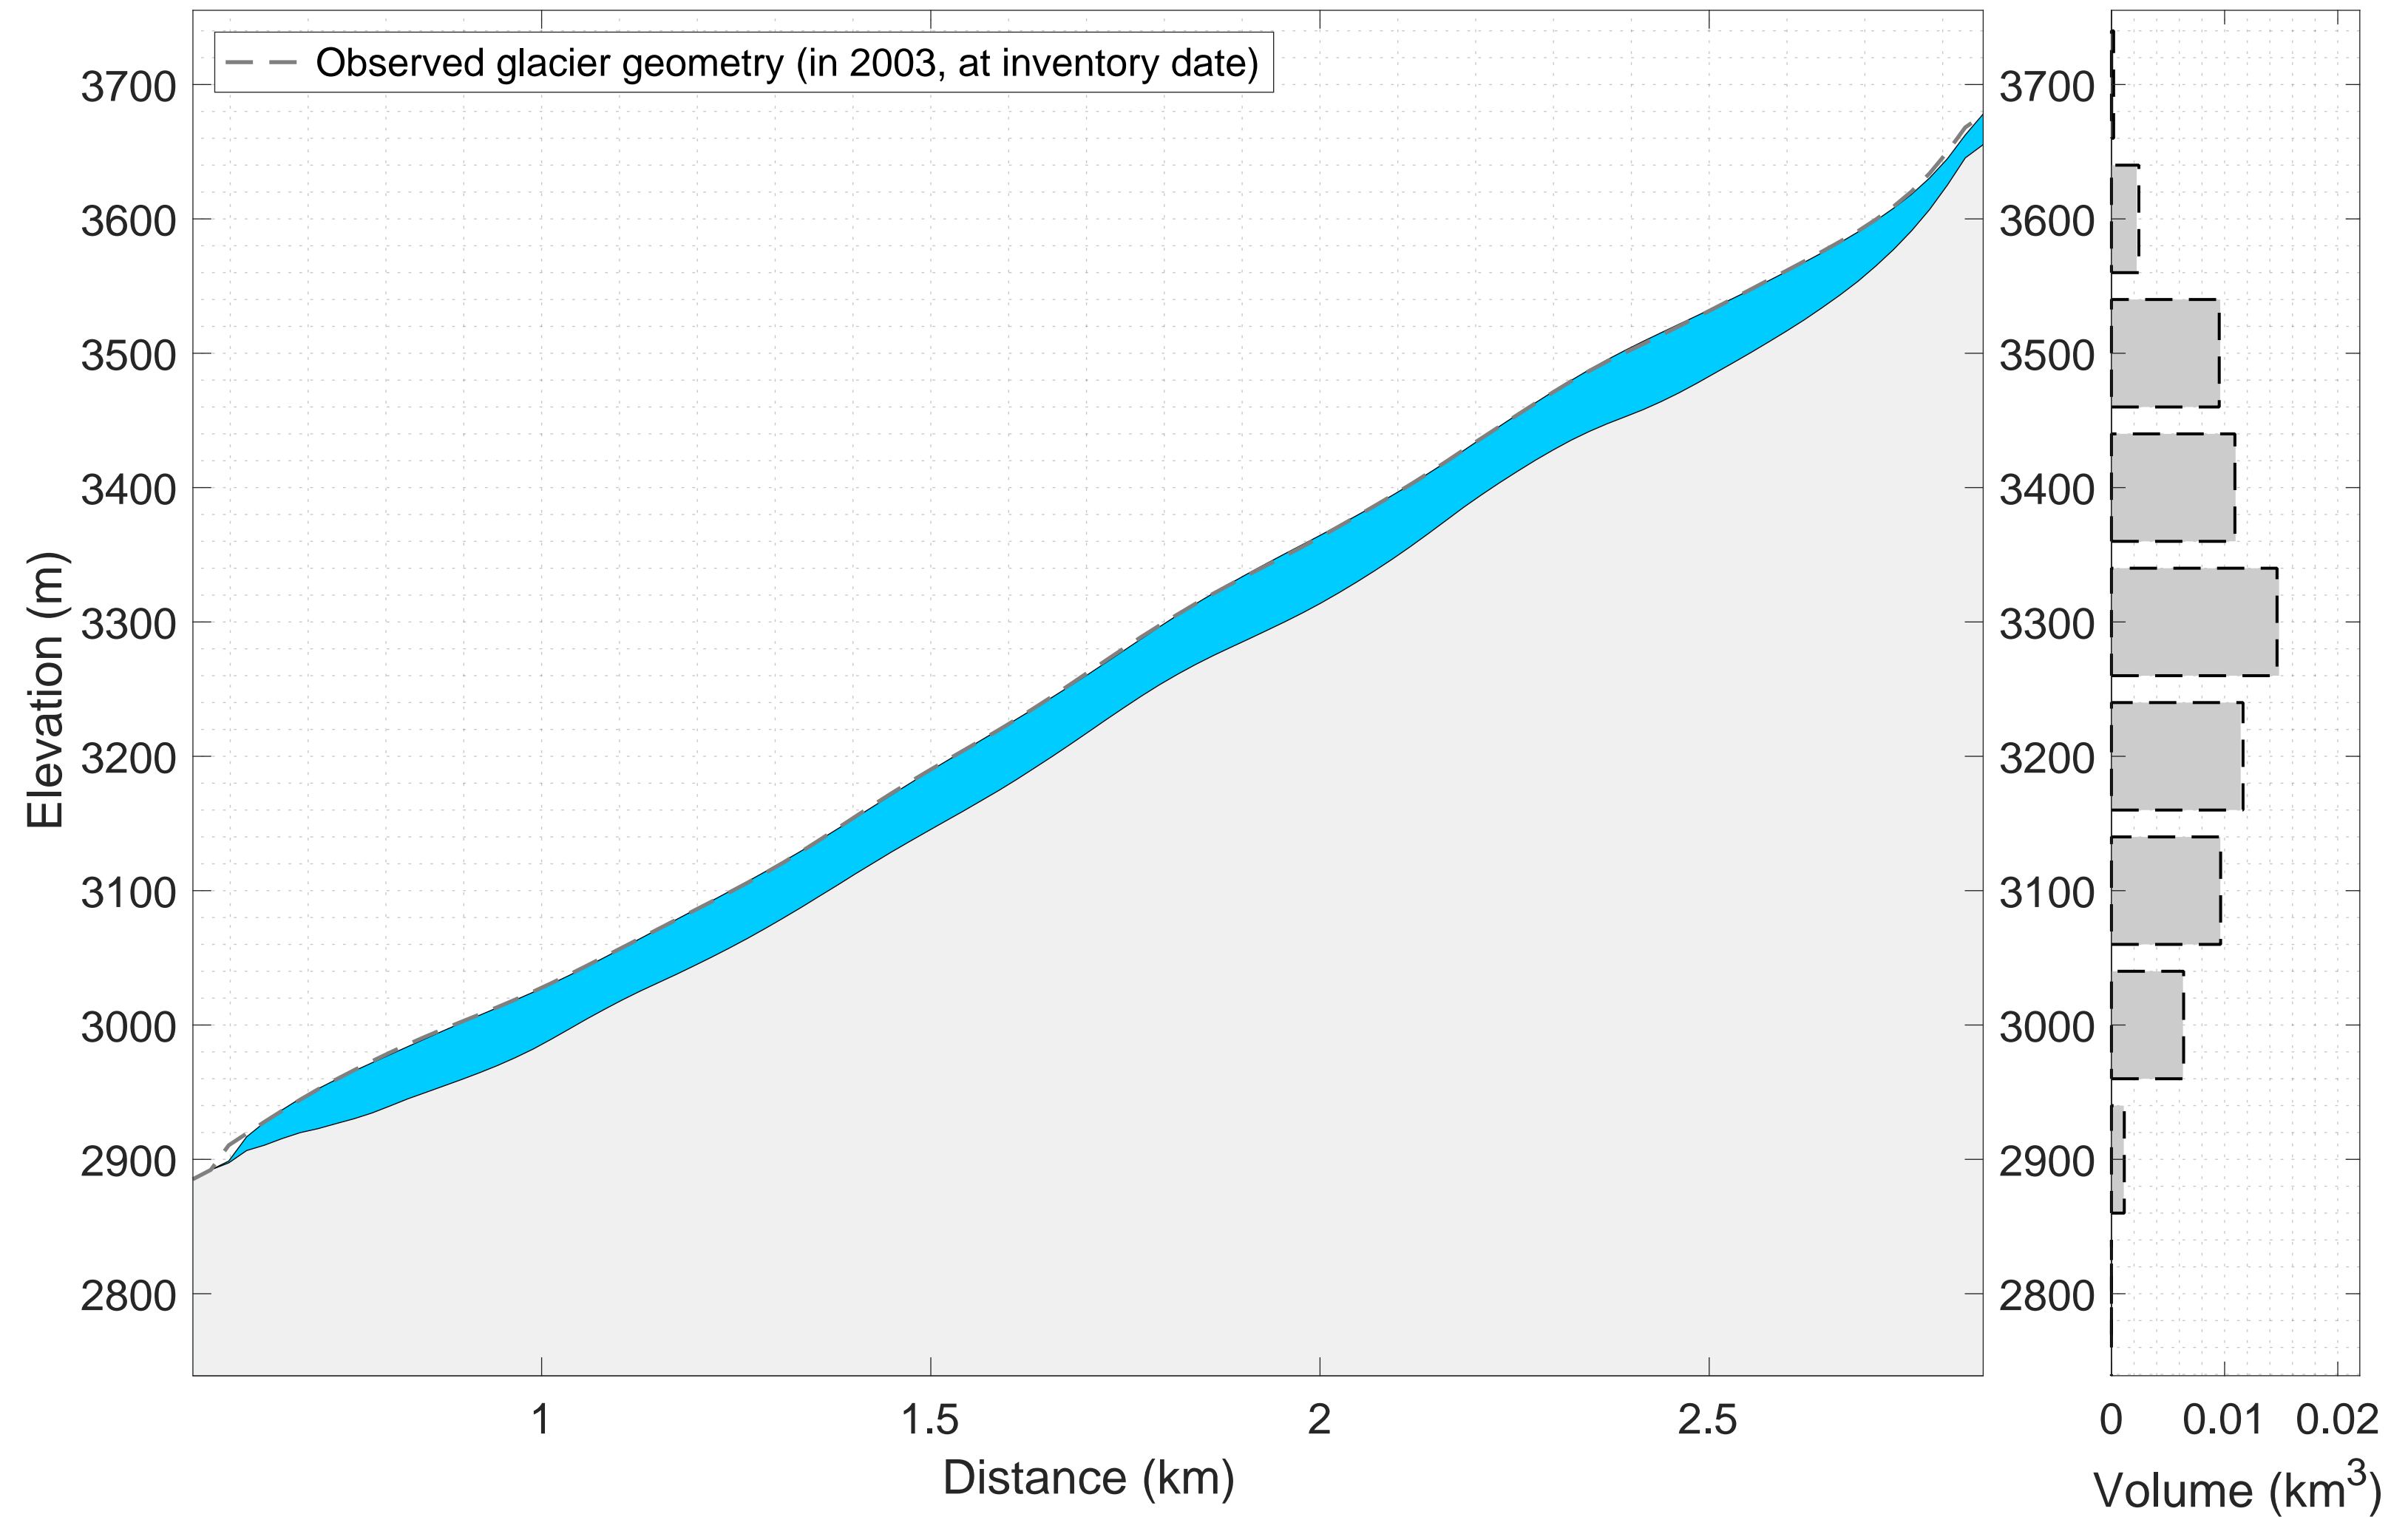

Supplement: Supplementary file 154 [file tc-13-1125-2019-supplement.zip]

**Modelled geometry (Glacier ID = 00025;  $A = 1.0875\text{e-}16 \text{ Pa}^{-3} \text{ a}^{-1}$ ;  $dx = 17 \text{ m}$ )**

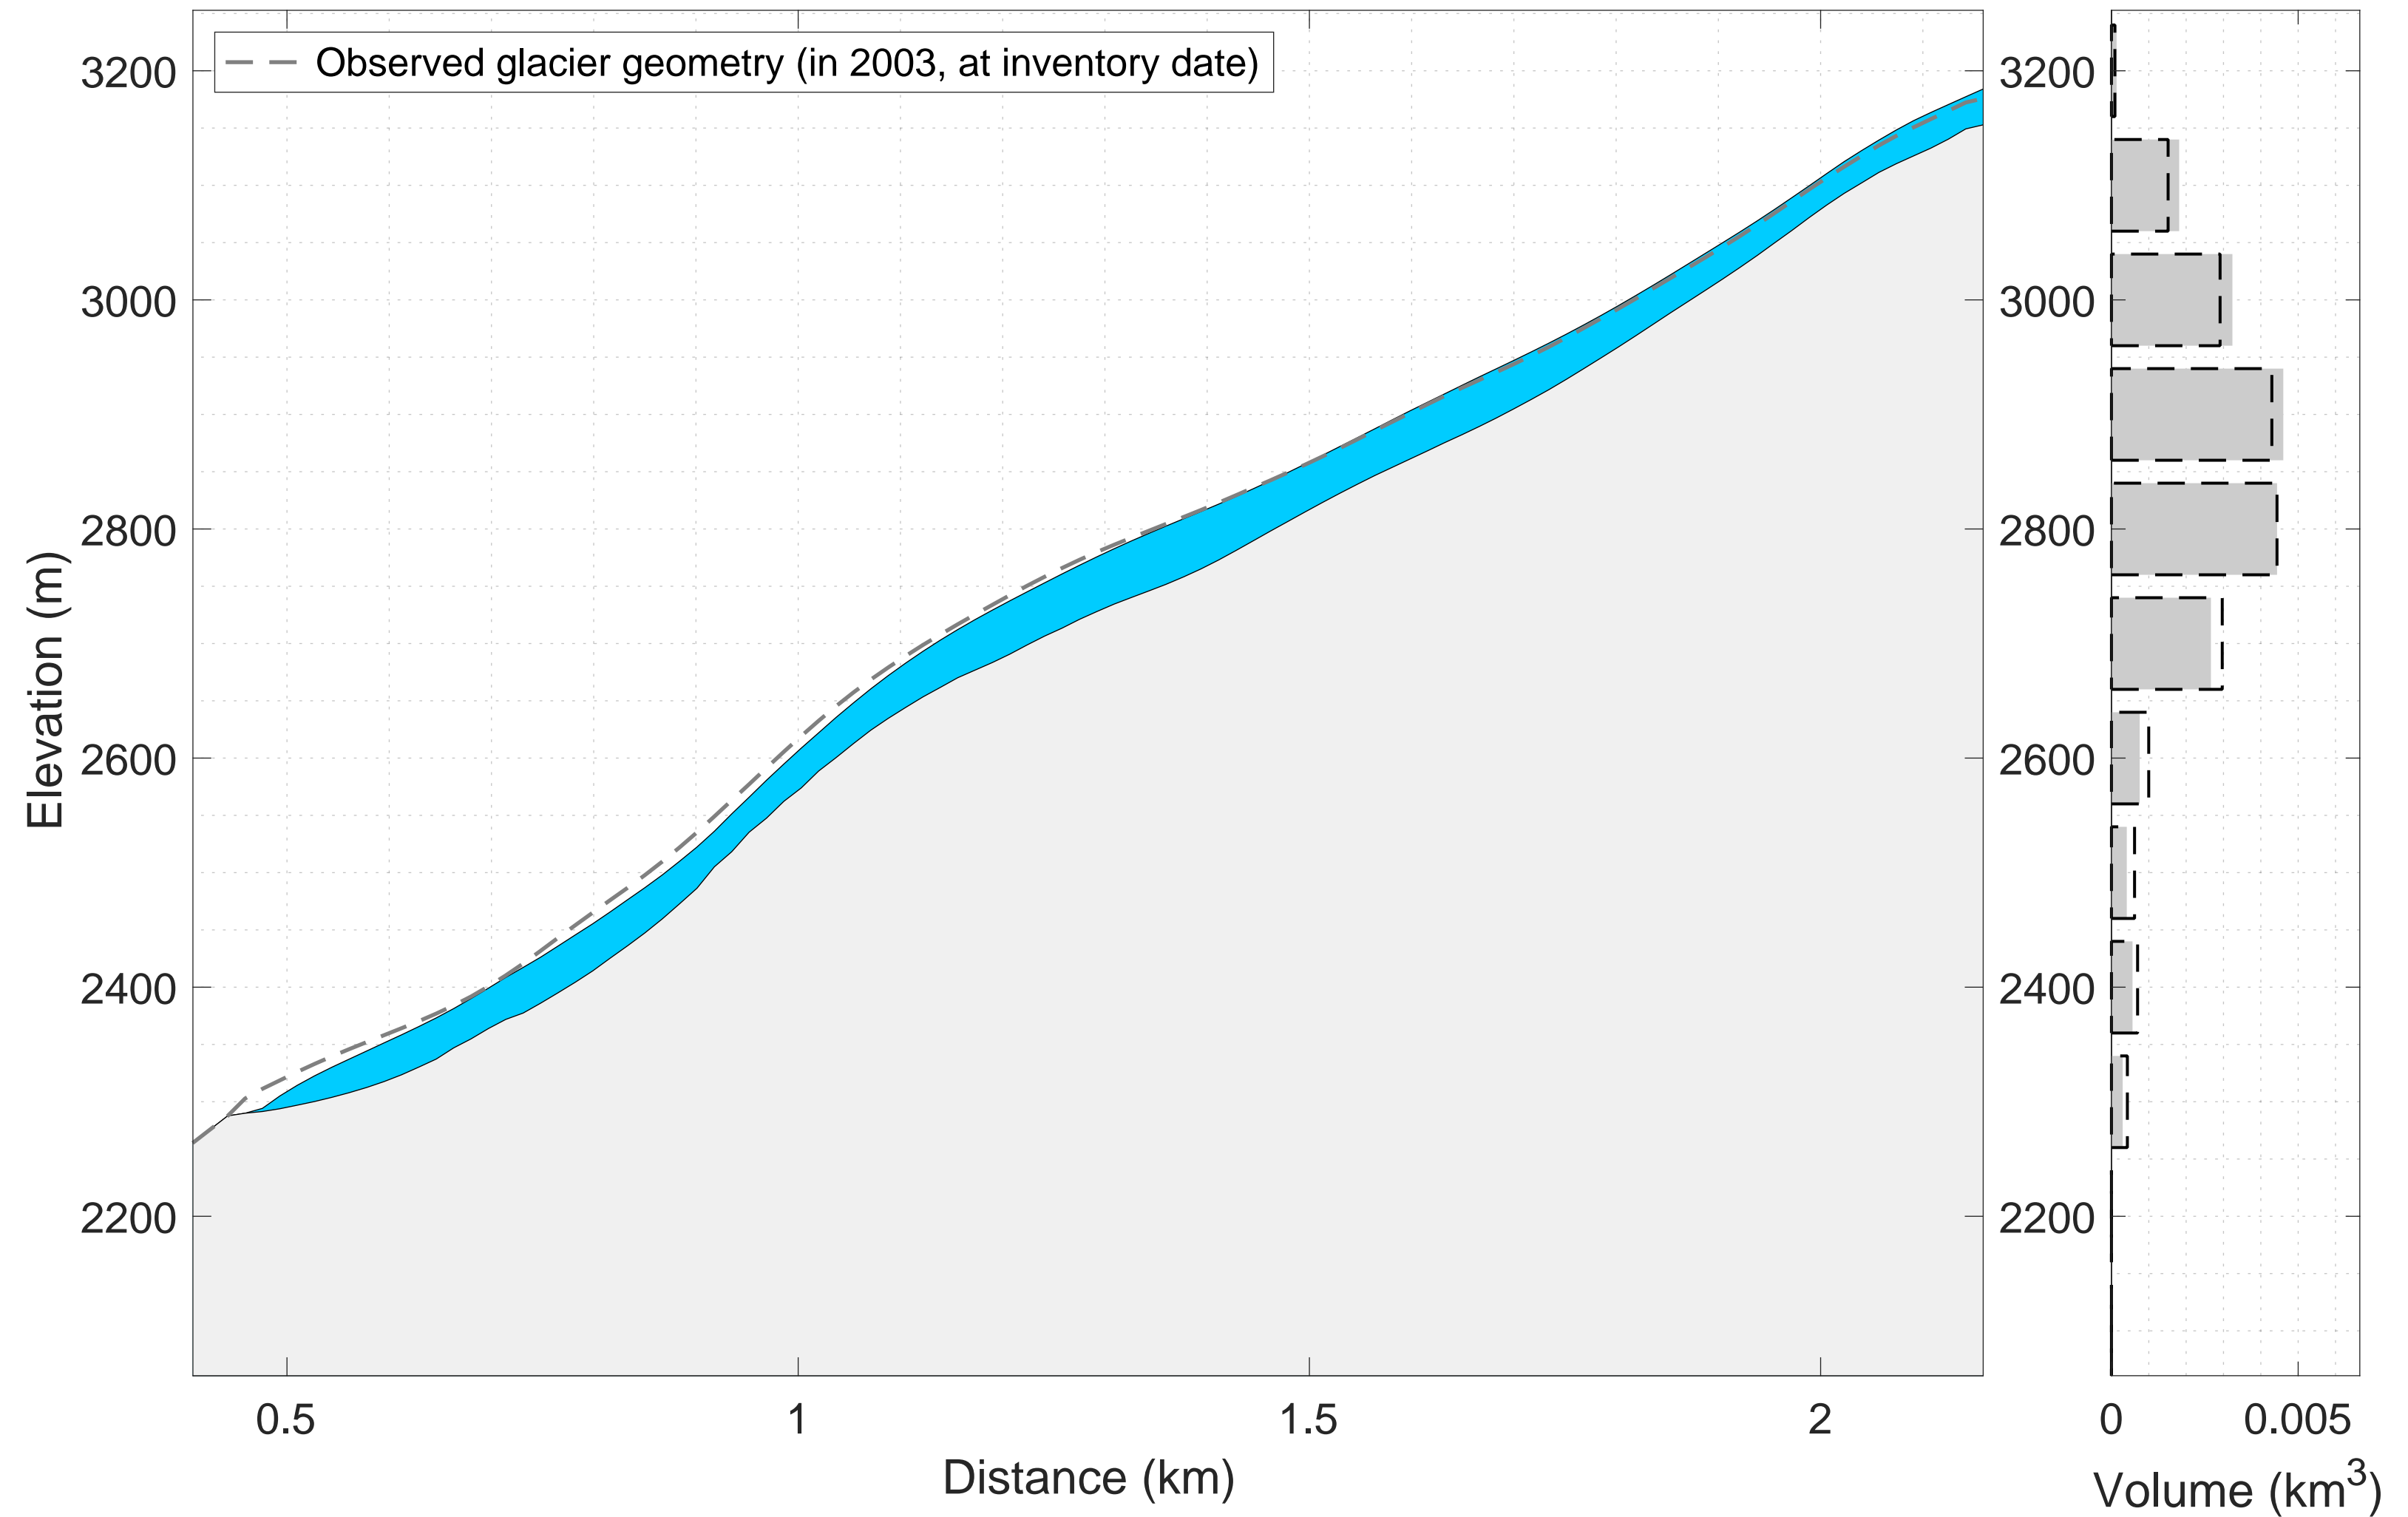

Supplement: Supplementary file 155 [file tc-13-1125-2019-supplement.zip]

**Modelled geometry (Glacier ID = 00628;  $A = 1.4672\text{e-}16 \text{ Pa}^{-3} \text{ a}^{-1}$ ;  $dx = 15 \text{ m}$ )**

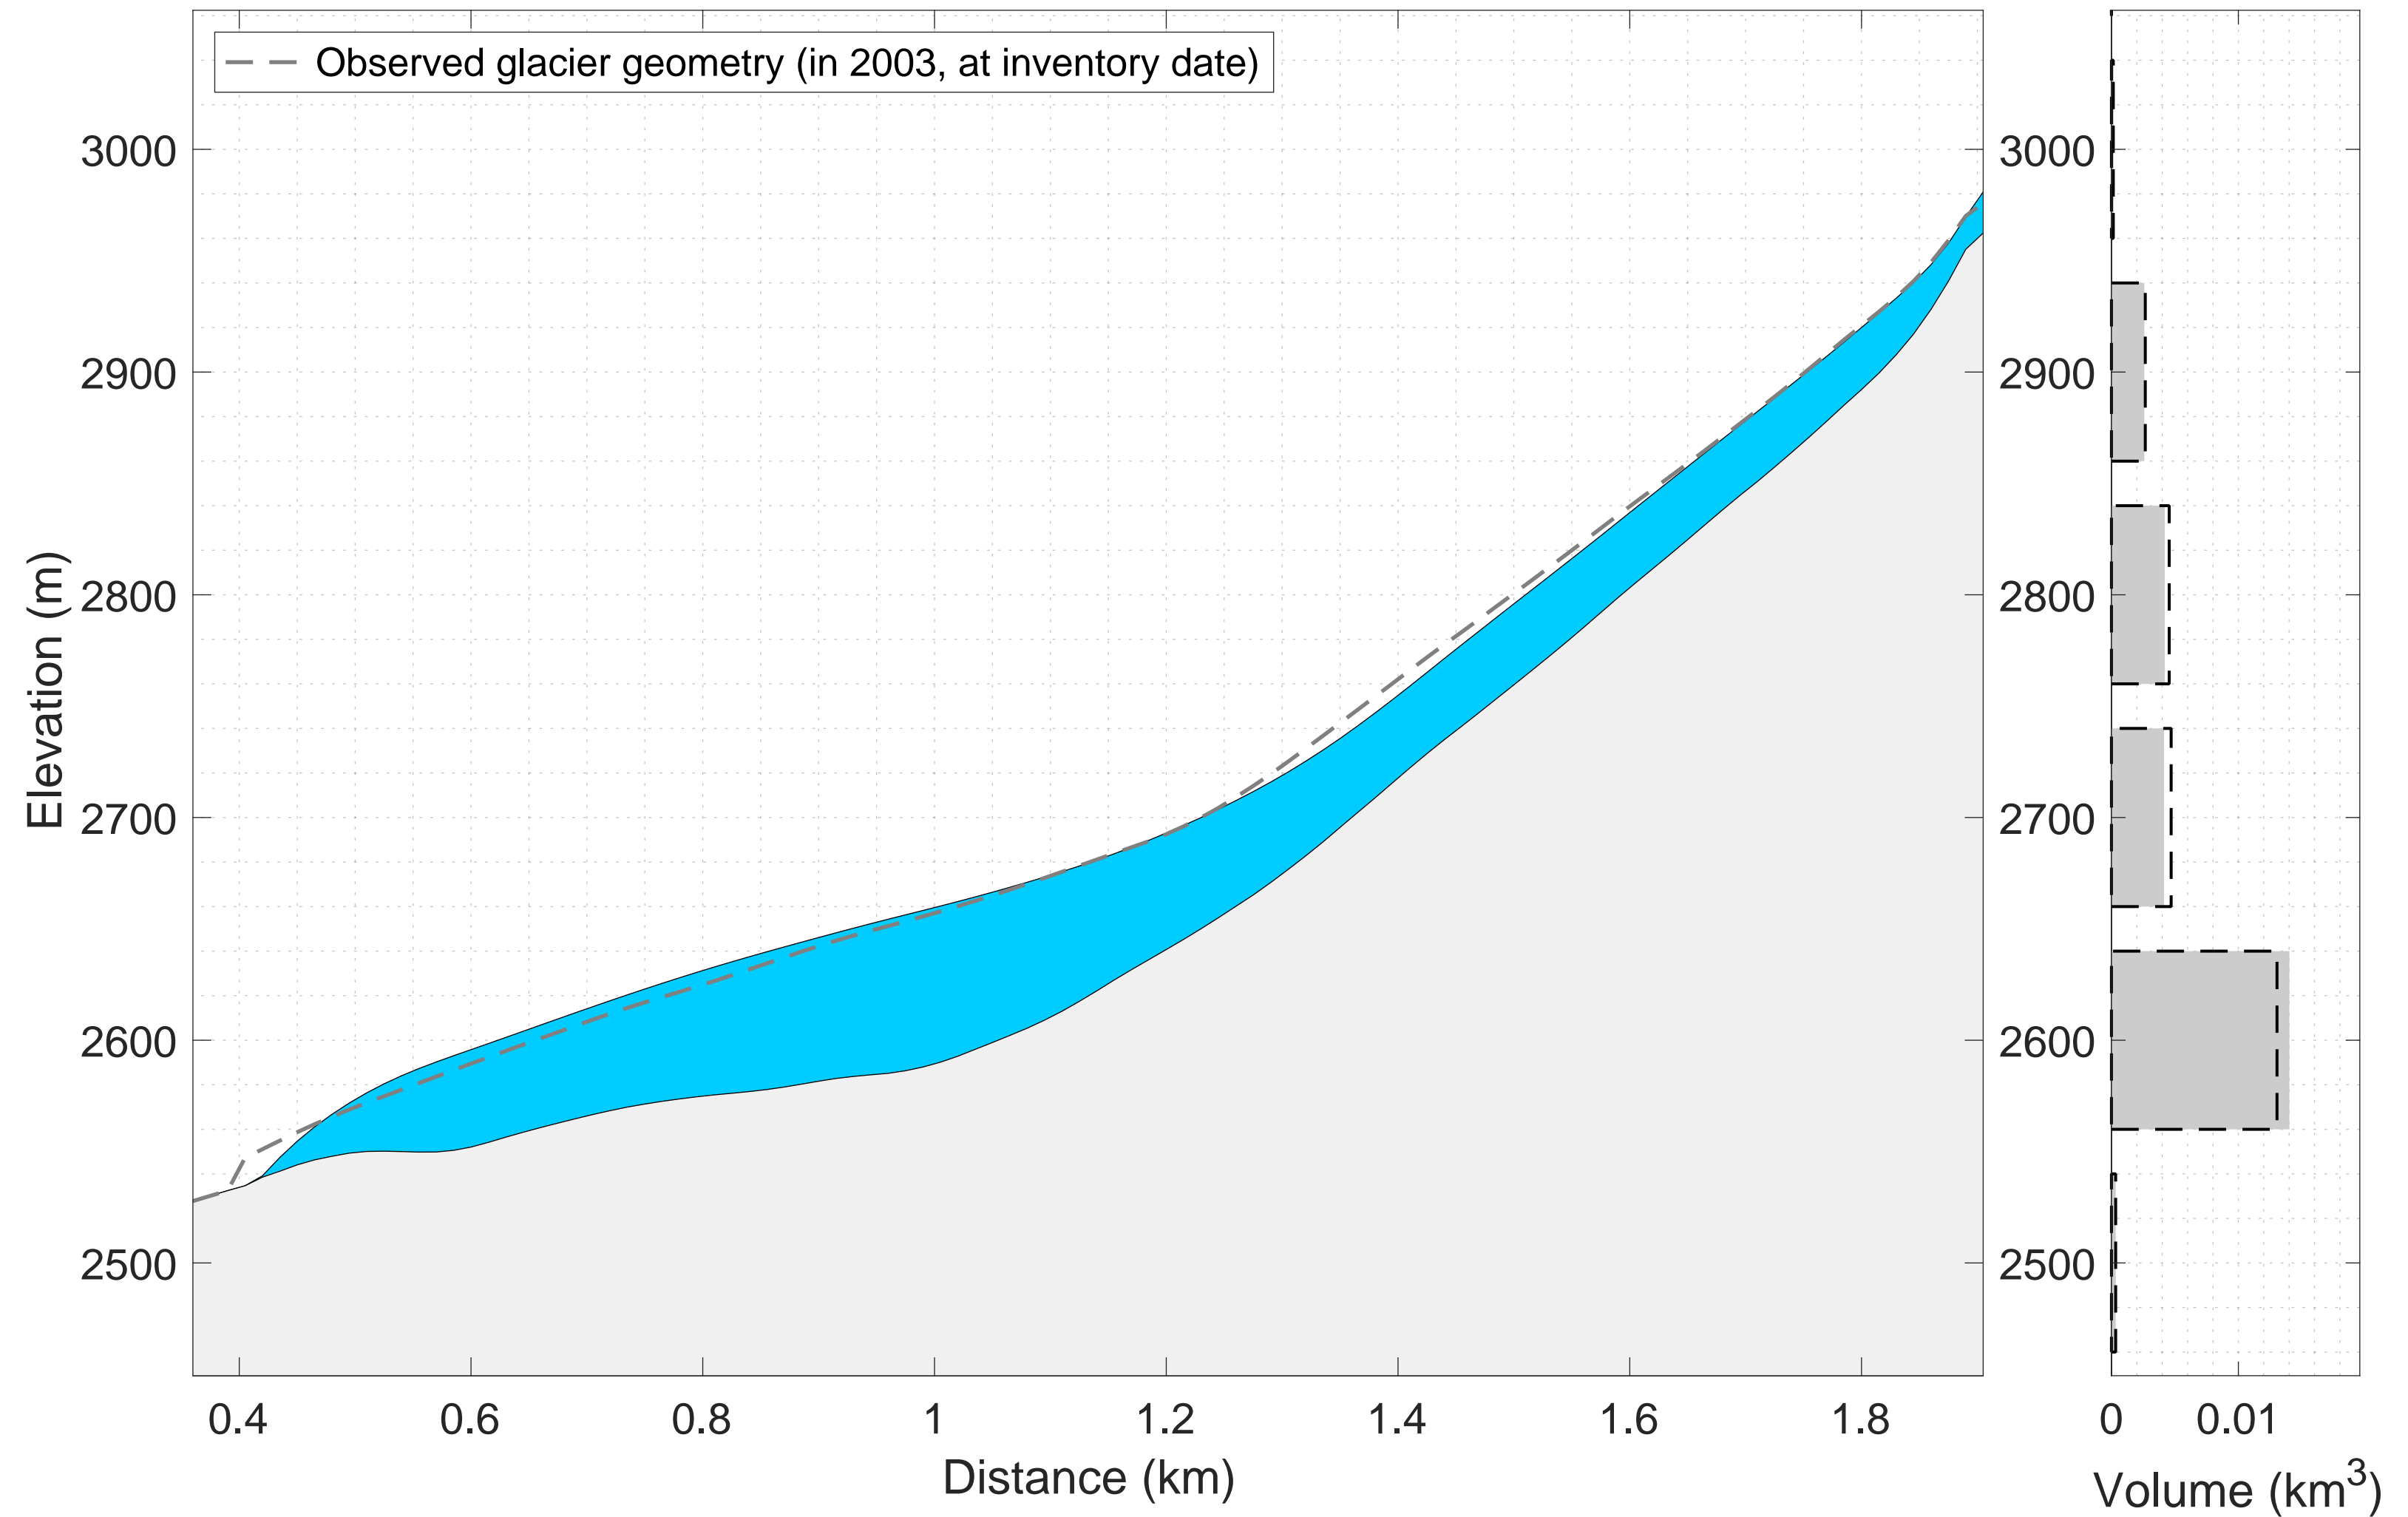

Supplement: Supplementary file 156 [file tc-13-1125-2019-supplement.zip]

**Modelled geometry (Glacier ID = 01619;  $A = 9.905\text{e-}17 \text{ Pa}^{-3} \text{ a}^{-1}$ ;  $dx = 11 \text{ m}$ )**

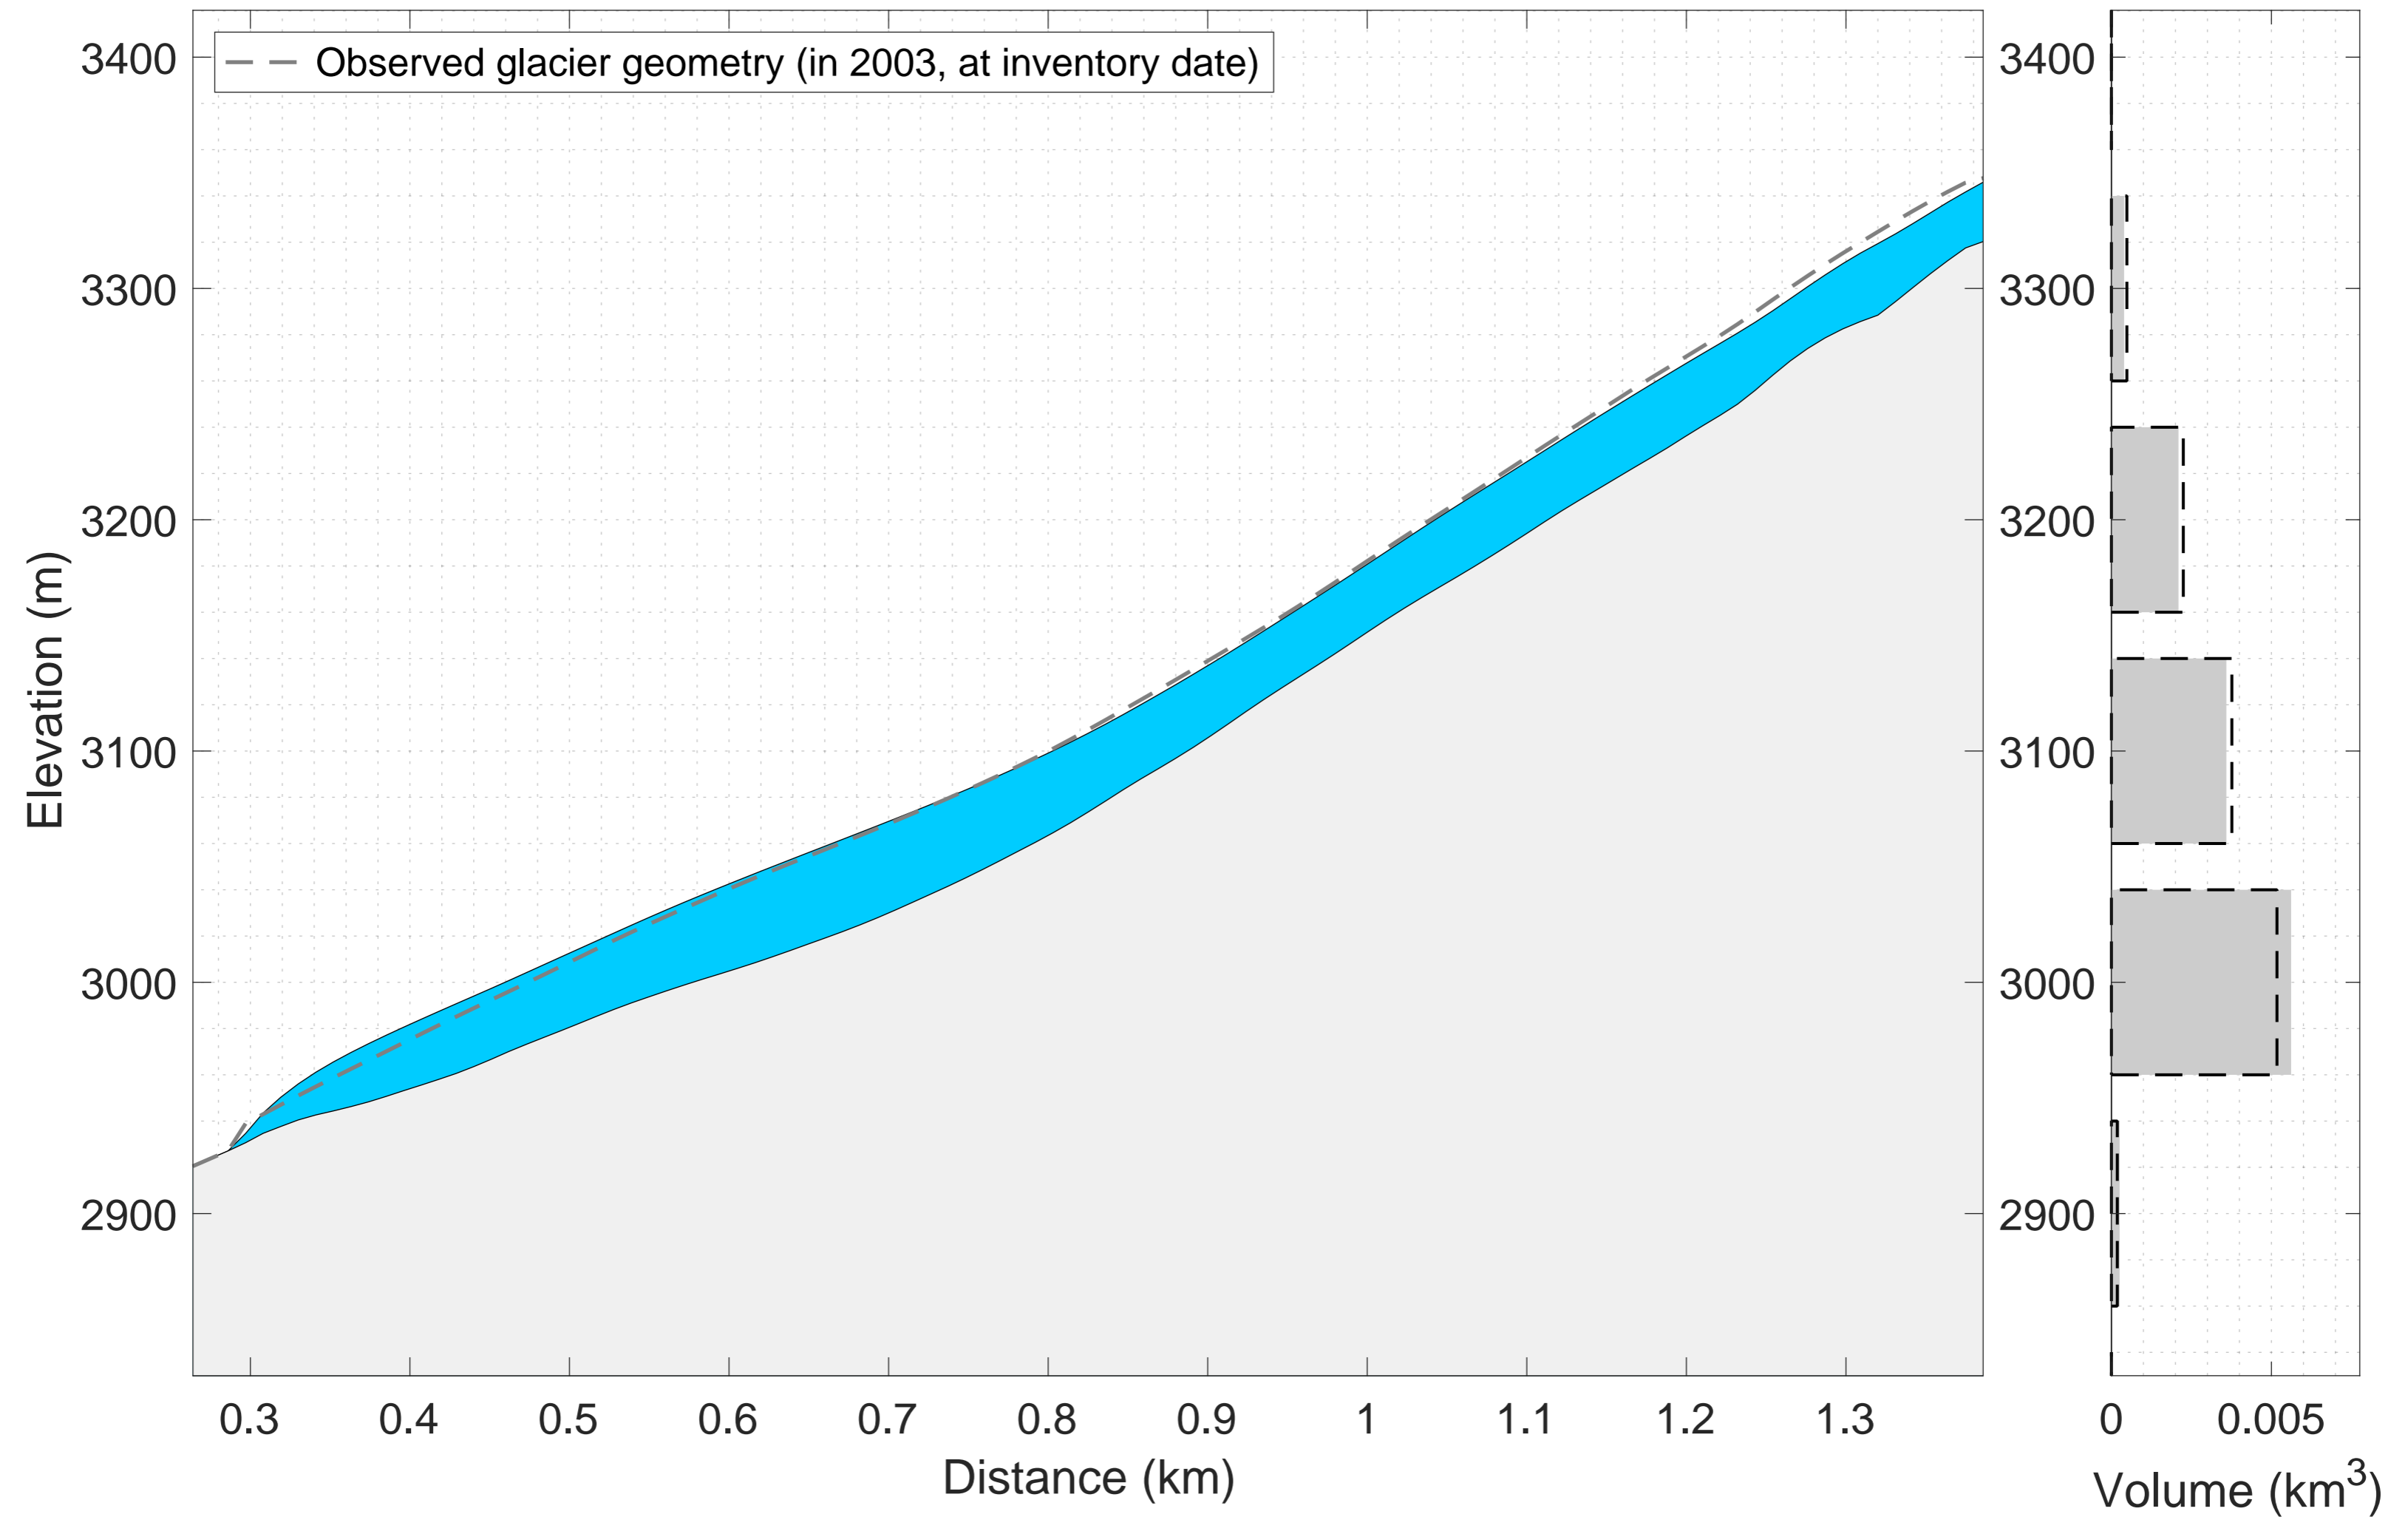

Supplement: Supplementary file 157 [file tc-13-1125-2019-supplement.zip]

**Modelled geometry (Glacier ID = 00168;  $A = 7.1727\text{e-}17 \text{ Pa}^{-3} \text{ a}^{-1}$ ;  $dx = 13 \text{ m}$ )**

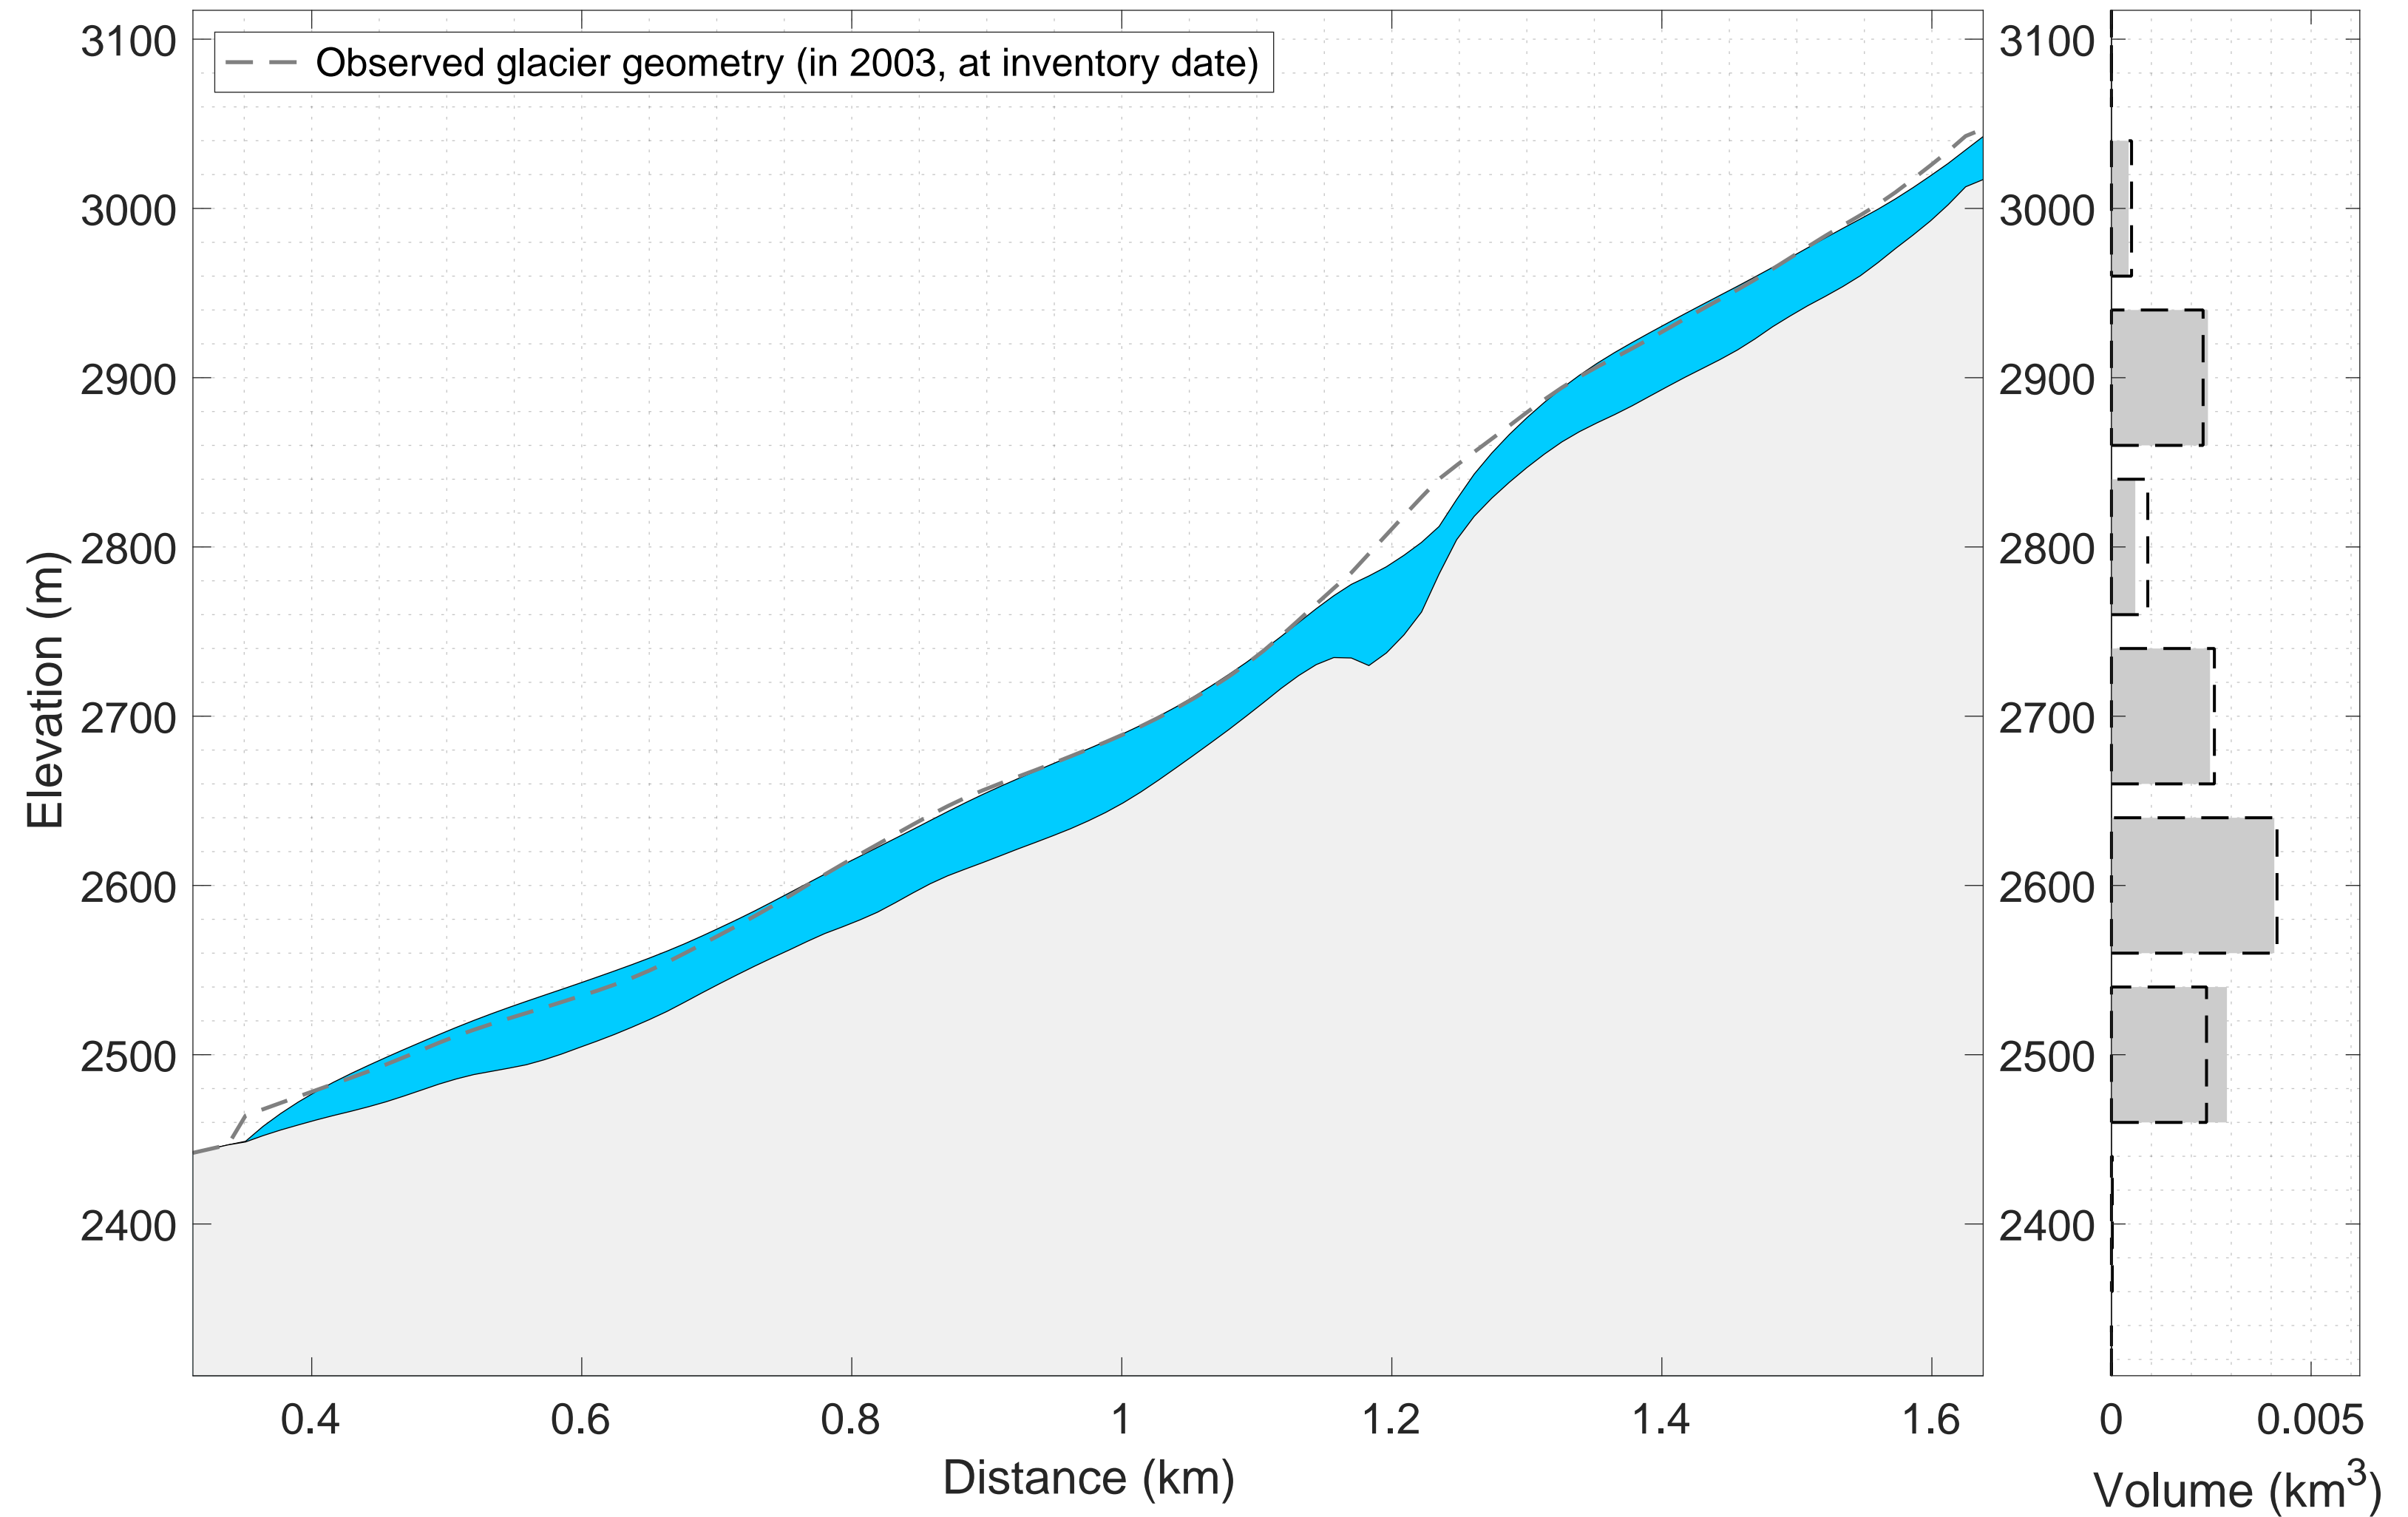

Supplement: Supplementary file 158 [file tc-13-1125-2019-supplement.zip]

**Modelled geometry (Glacier ID = 02909;  $A = 1.1268\text{e-}16 \text{ Pa}^{-3} \text{ a}^{-1}$ ;  $dx = 17 \text{ m}$ )**

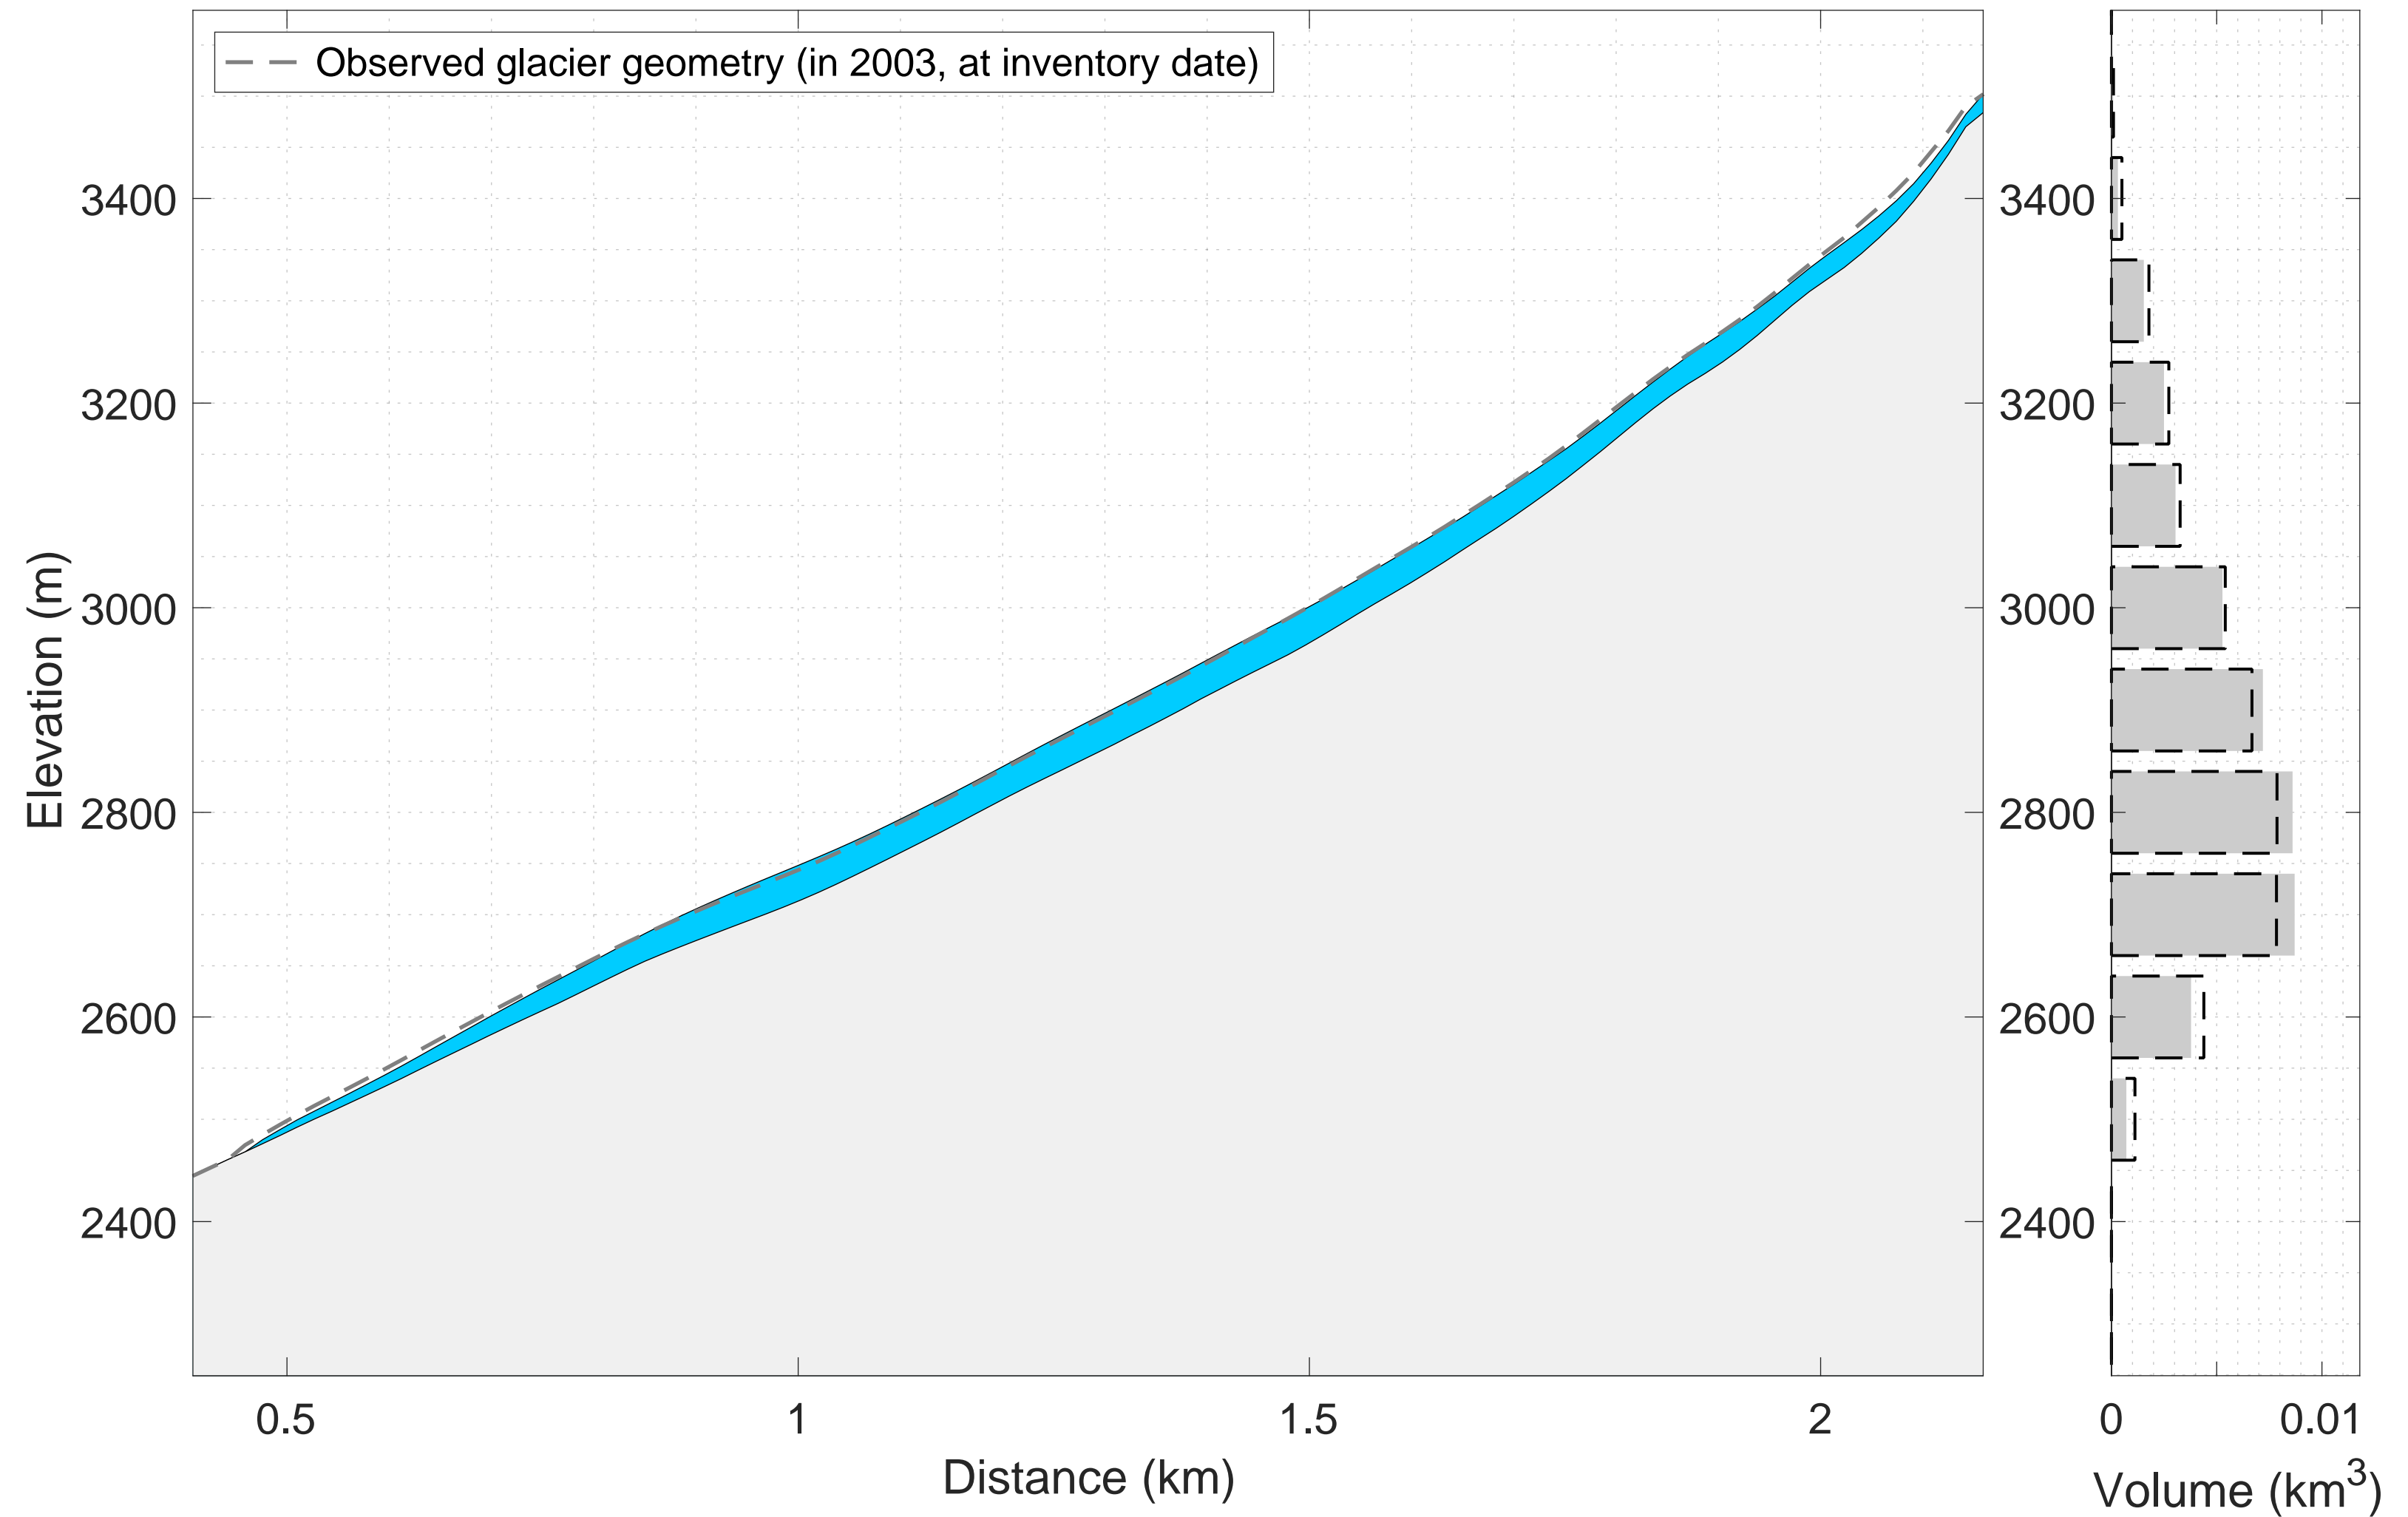

Supplement: Supplementary file 159 [file tc-13-1125-2019-supplement.zip]

**Modelled geometry (Glacier ID = 00233;  $A = 6.9113\text{e-}17 \text{ Pa}^{-3} \text{ a}^{-1}$ ;  $dx = 18 \text{ m}$ )**

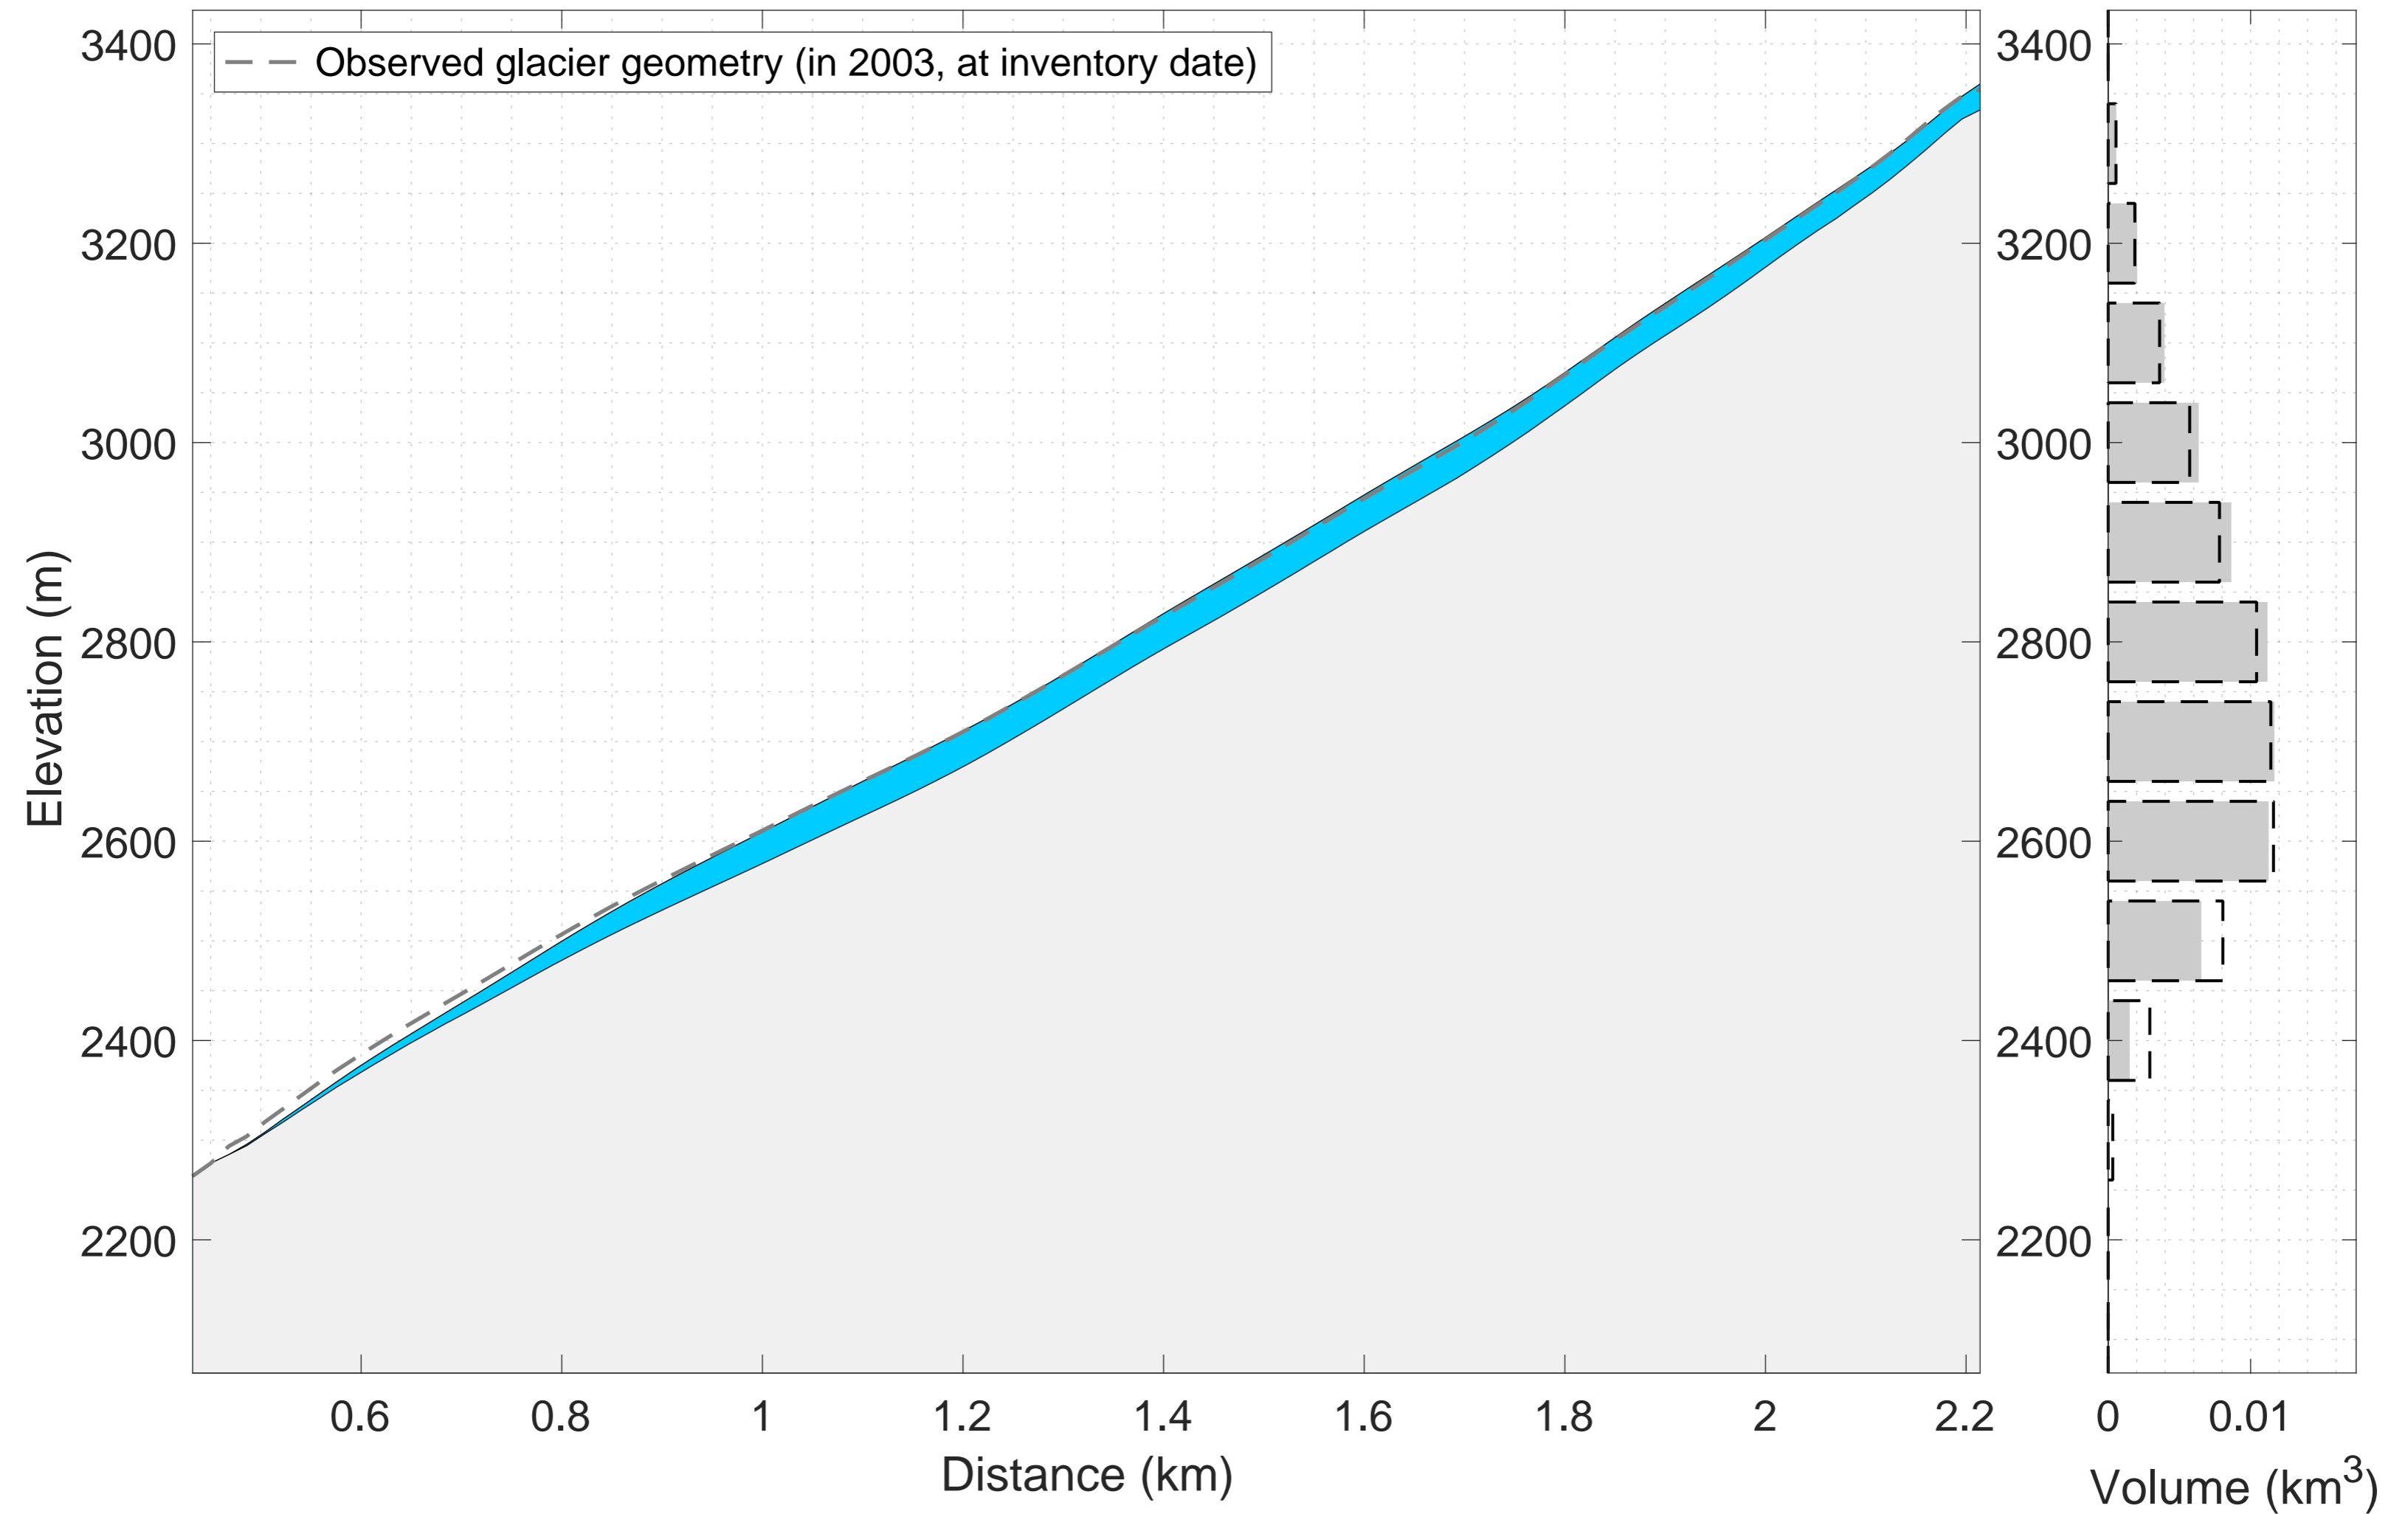

Supplement: Supplementary file 160 [file tc-13-1125-2019-supplement.zip]

**Modelled geometry (Glacier ID = 03539;  $A = 1.8688\text{e-}16 \text{ Pa}^{-3} \text{ a}^{-1}$ ;  $dx = 14 \text{ m}$ )**

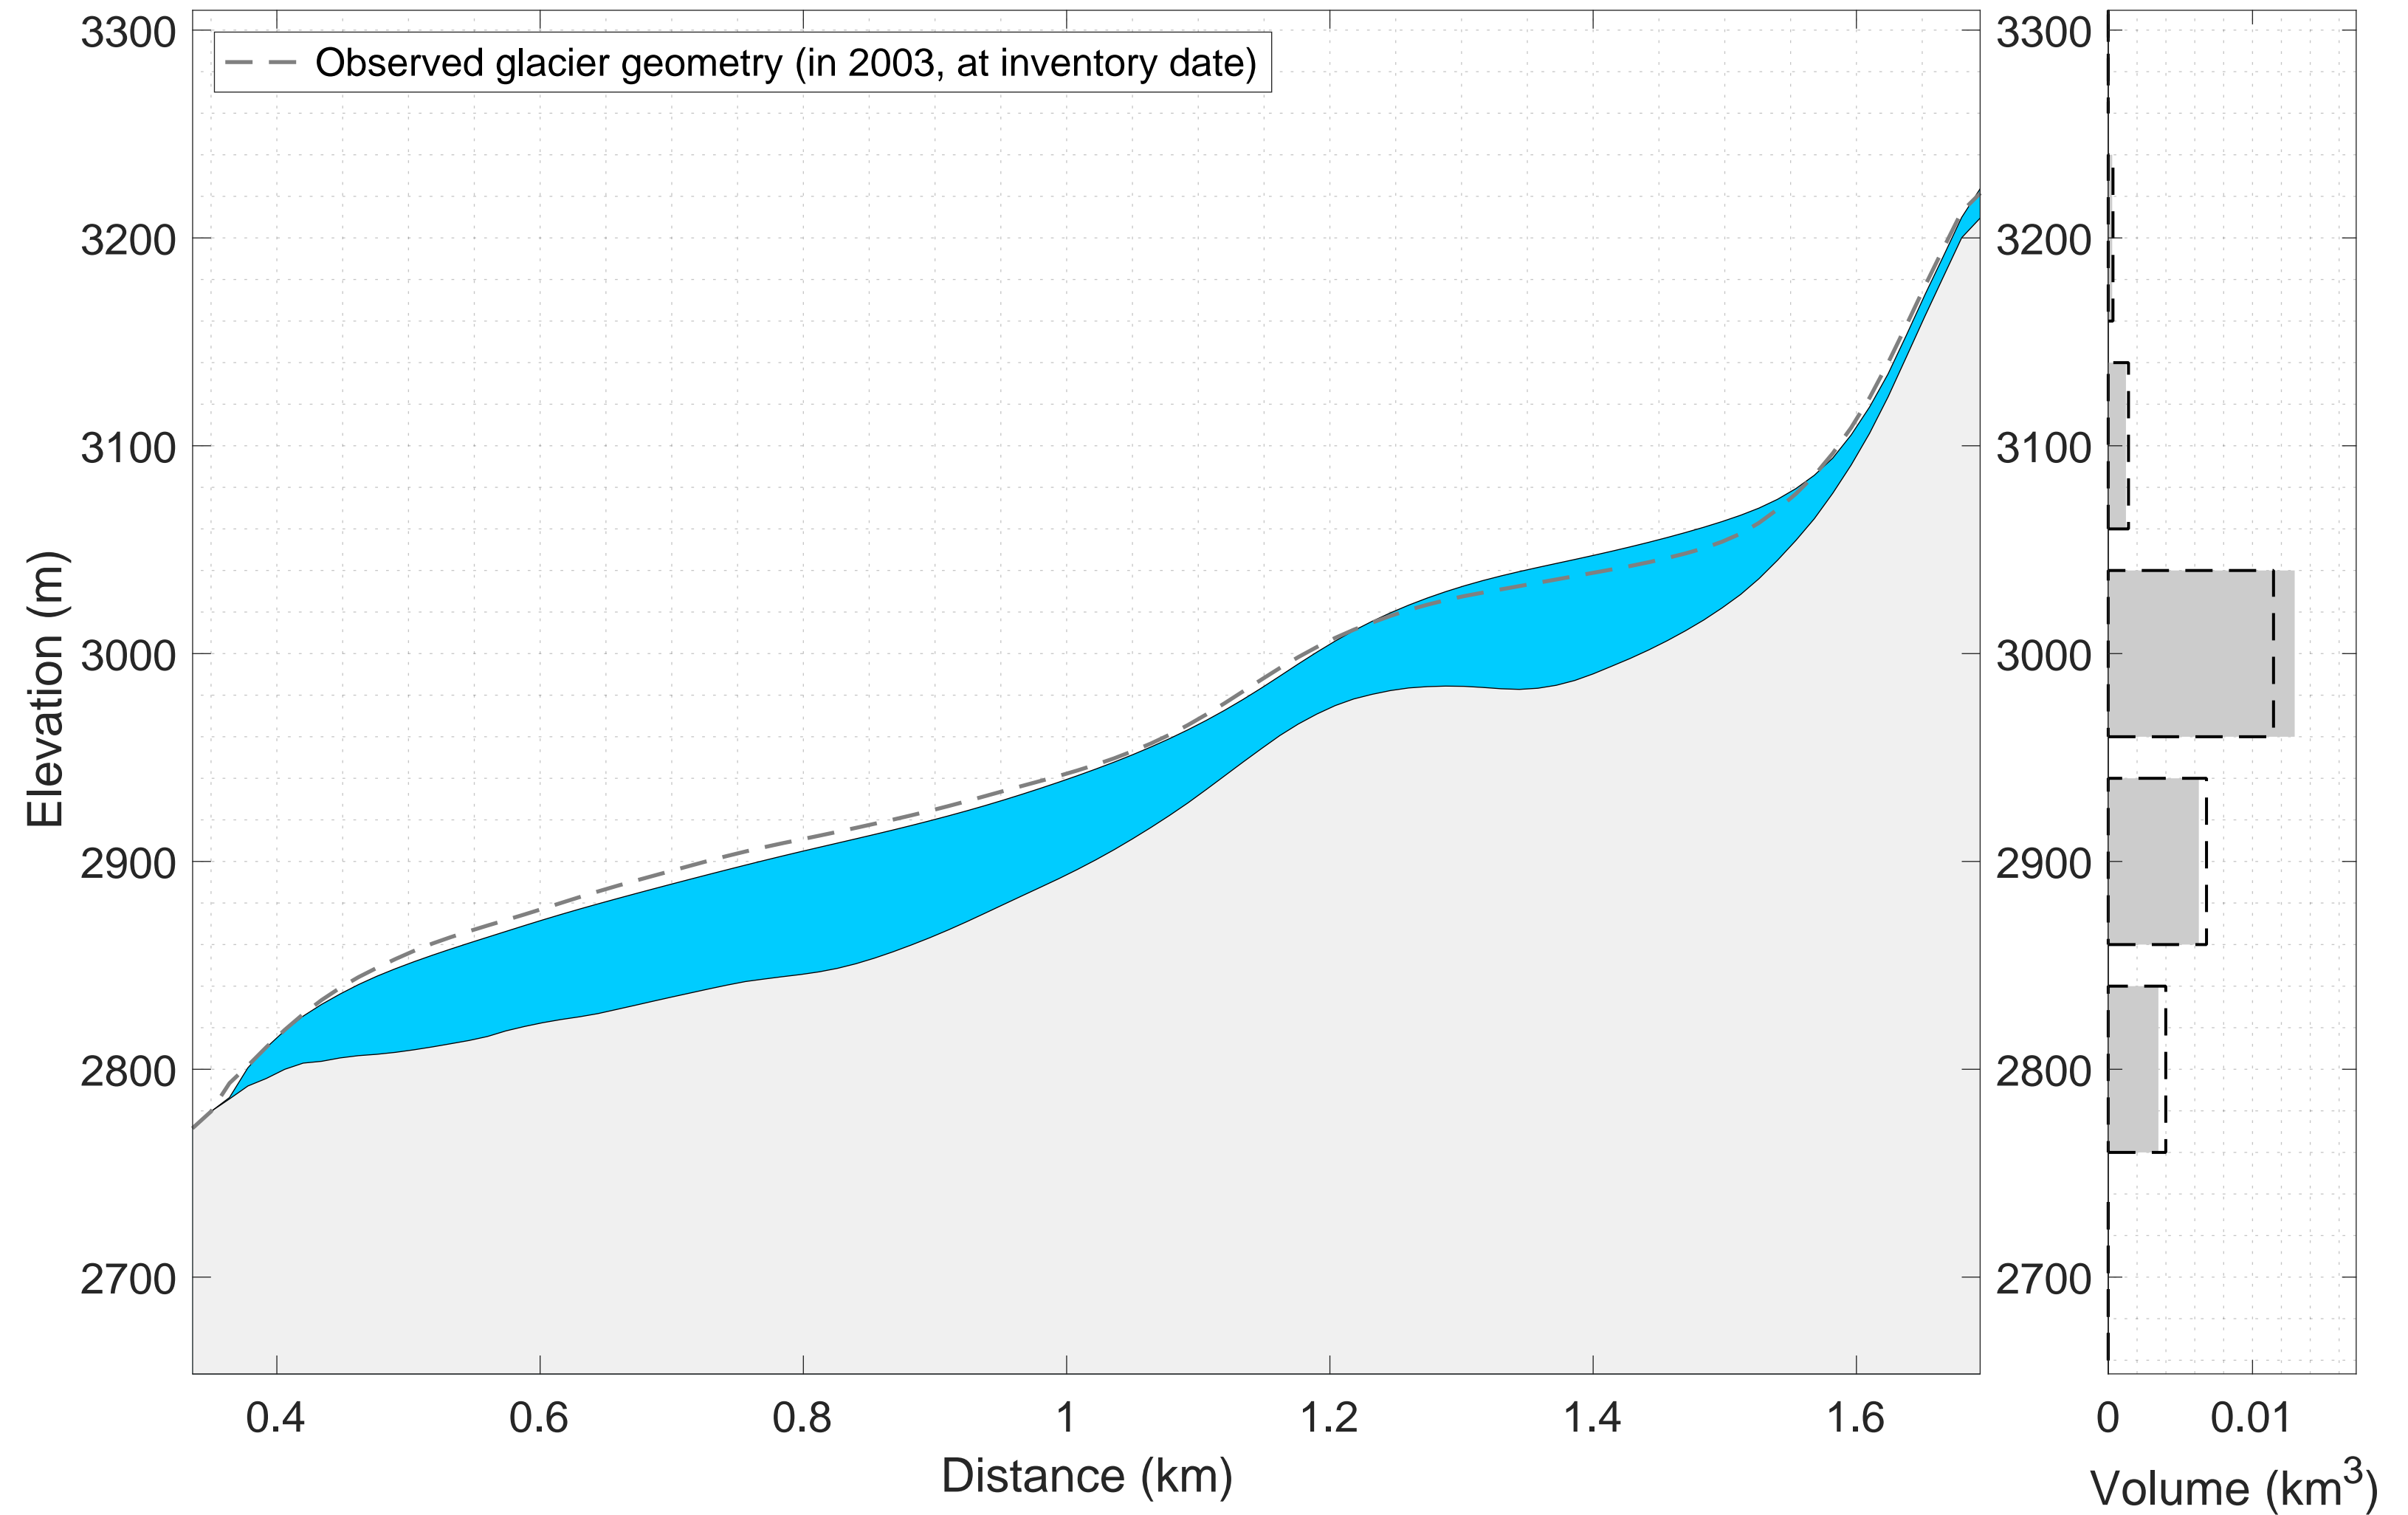

Supplement: Supplementary file 161 [file tc-13-1125-2019-supplement.zip]

**Modelled geometry (Glacier ID = 00658;  $A = 6.1567\text{e-}17 \text{ Pa}^{-3} \text{ a}^{-1}$ ;  $dx = 11 \text{ m}$ )**

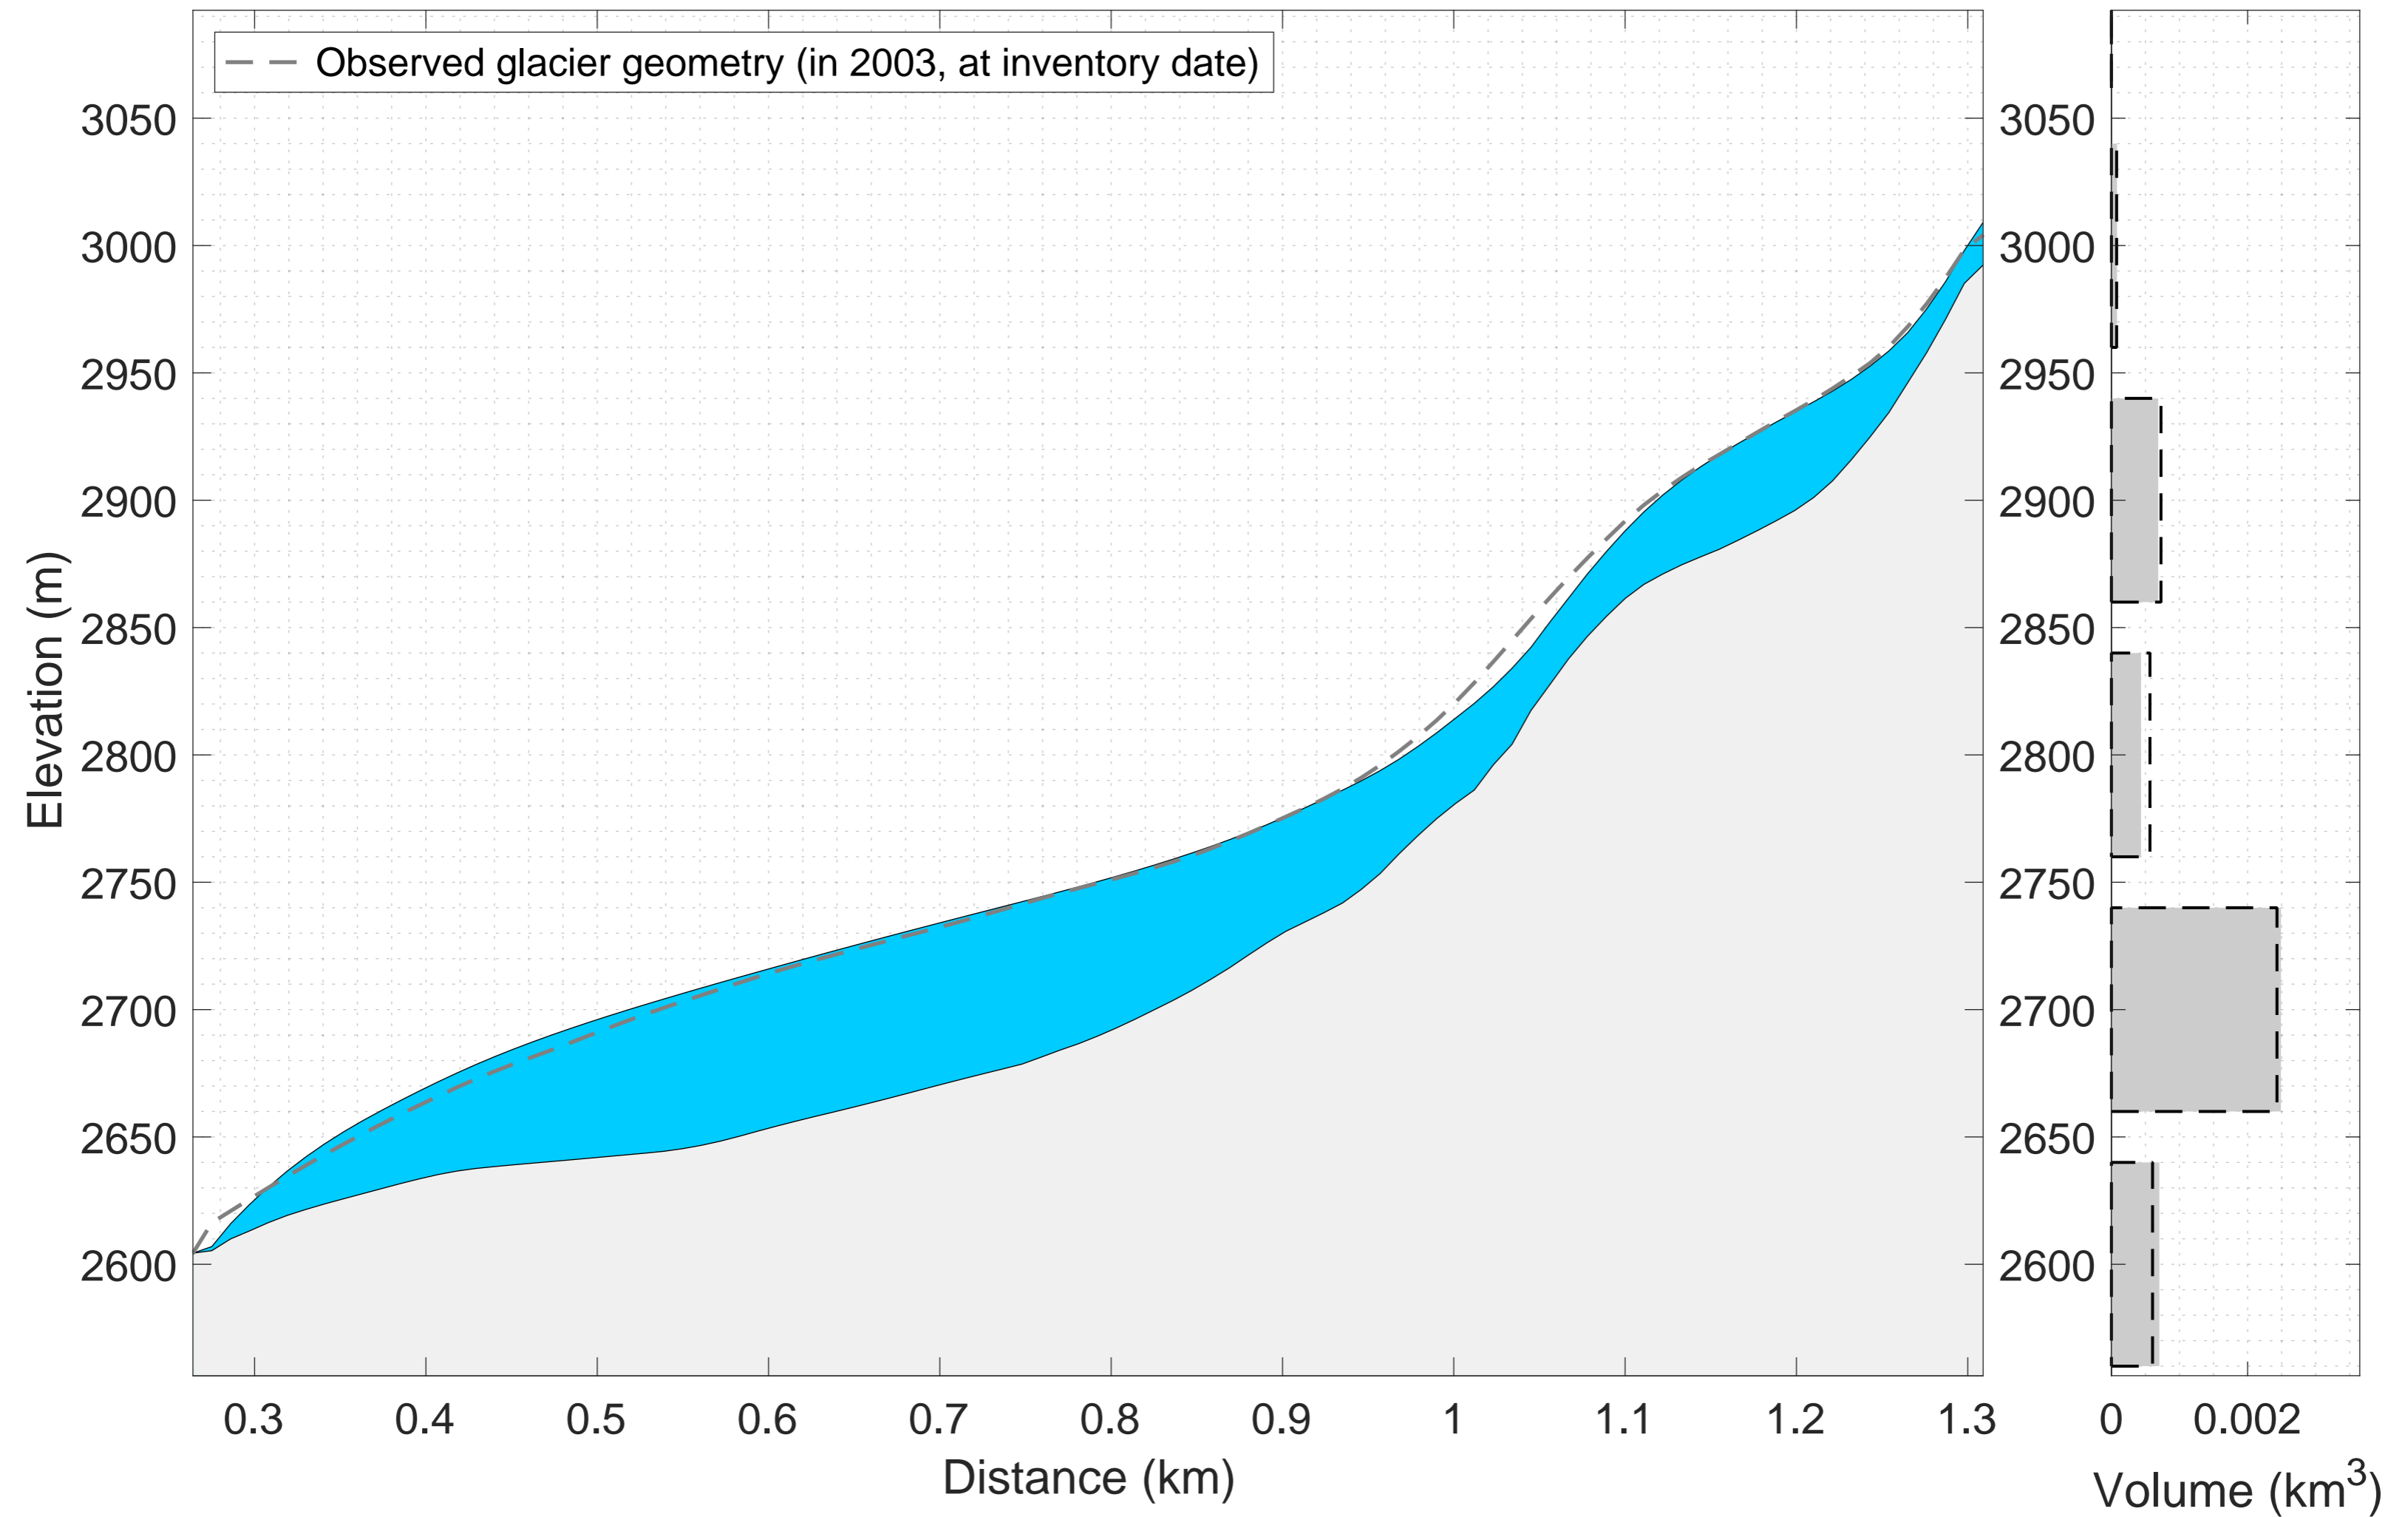

Supplement: Supplementary file 163 [file tc-13-1125-2019-supplement.zip]

**Modelled geometry (Glacier ID = 00634;  $A = 5.2795\text{e-}17 \text{ Pa}^{-3} \text{ a}^{-1}$ ;  $dx = 11 \text{ m}$ )**

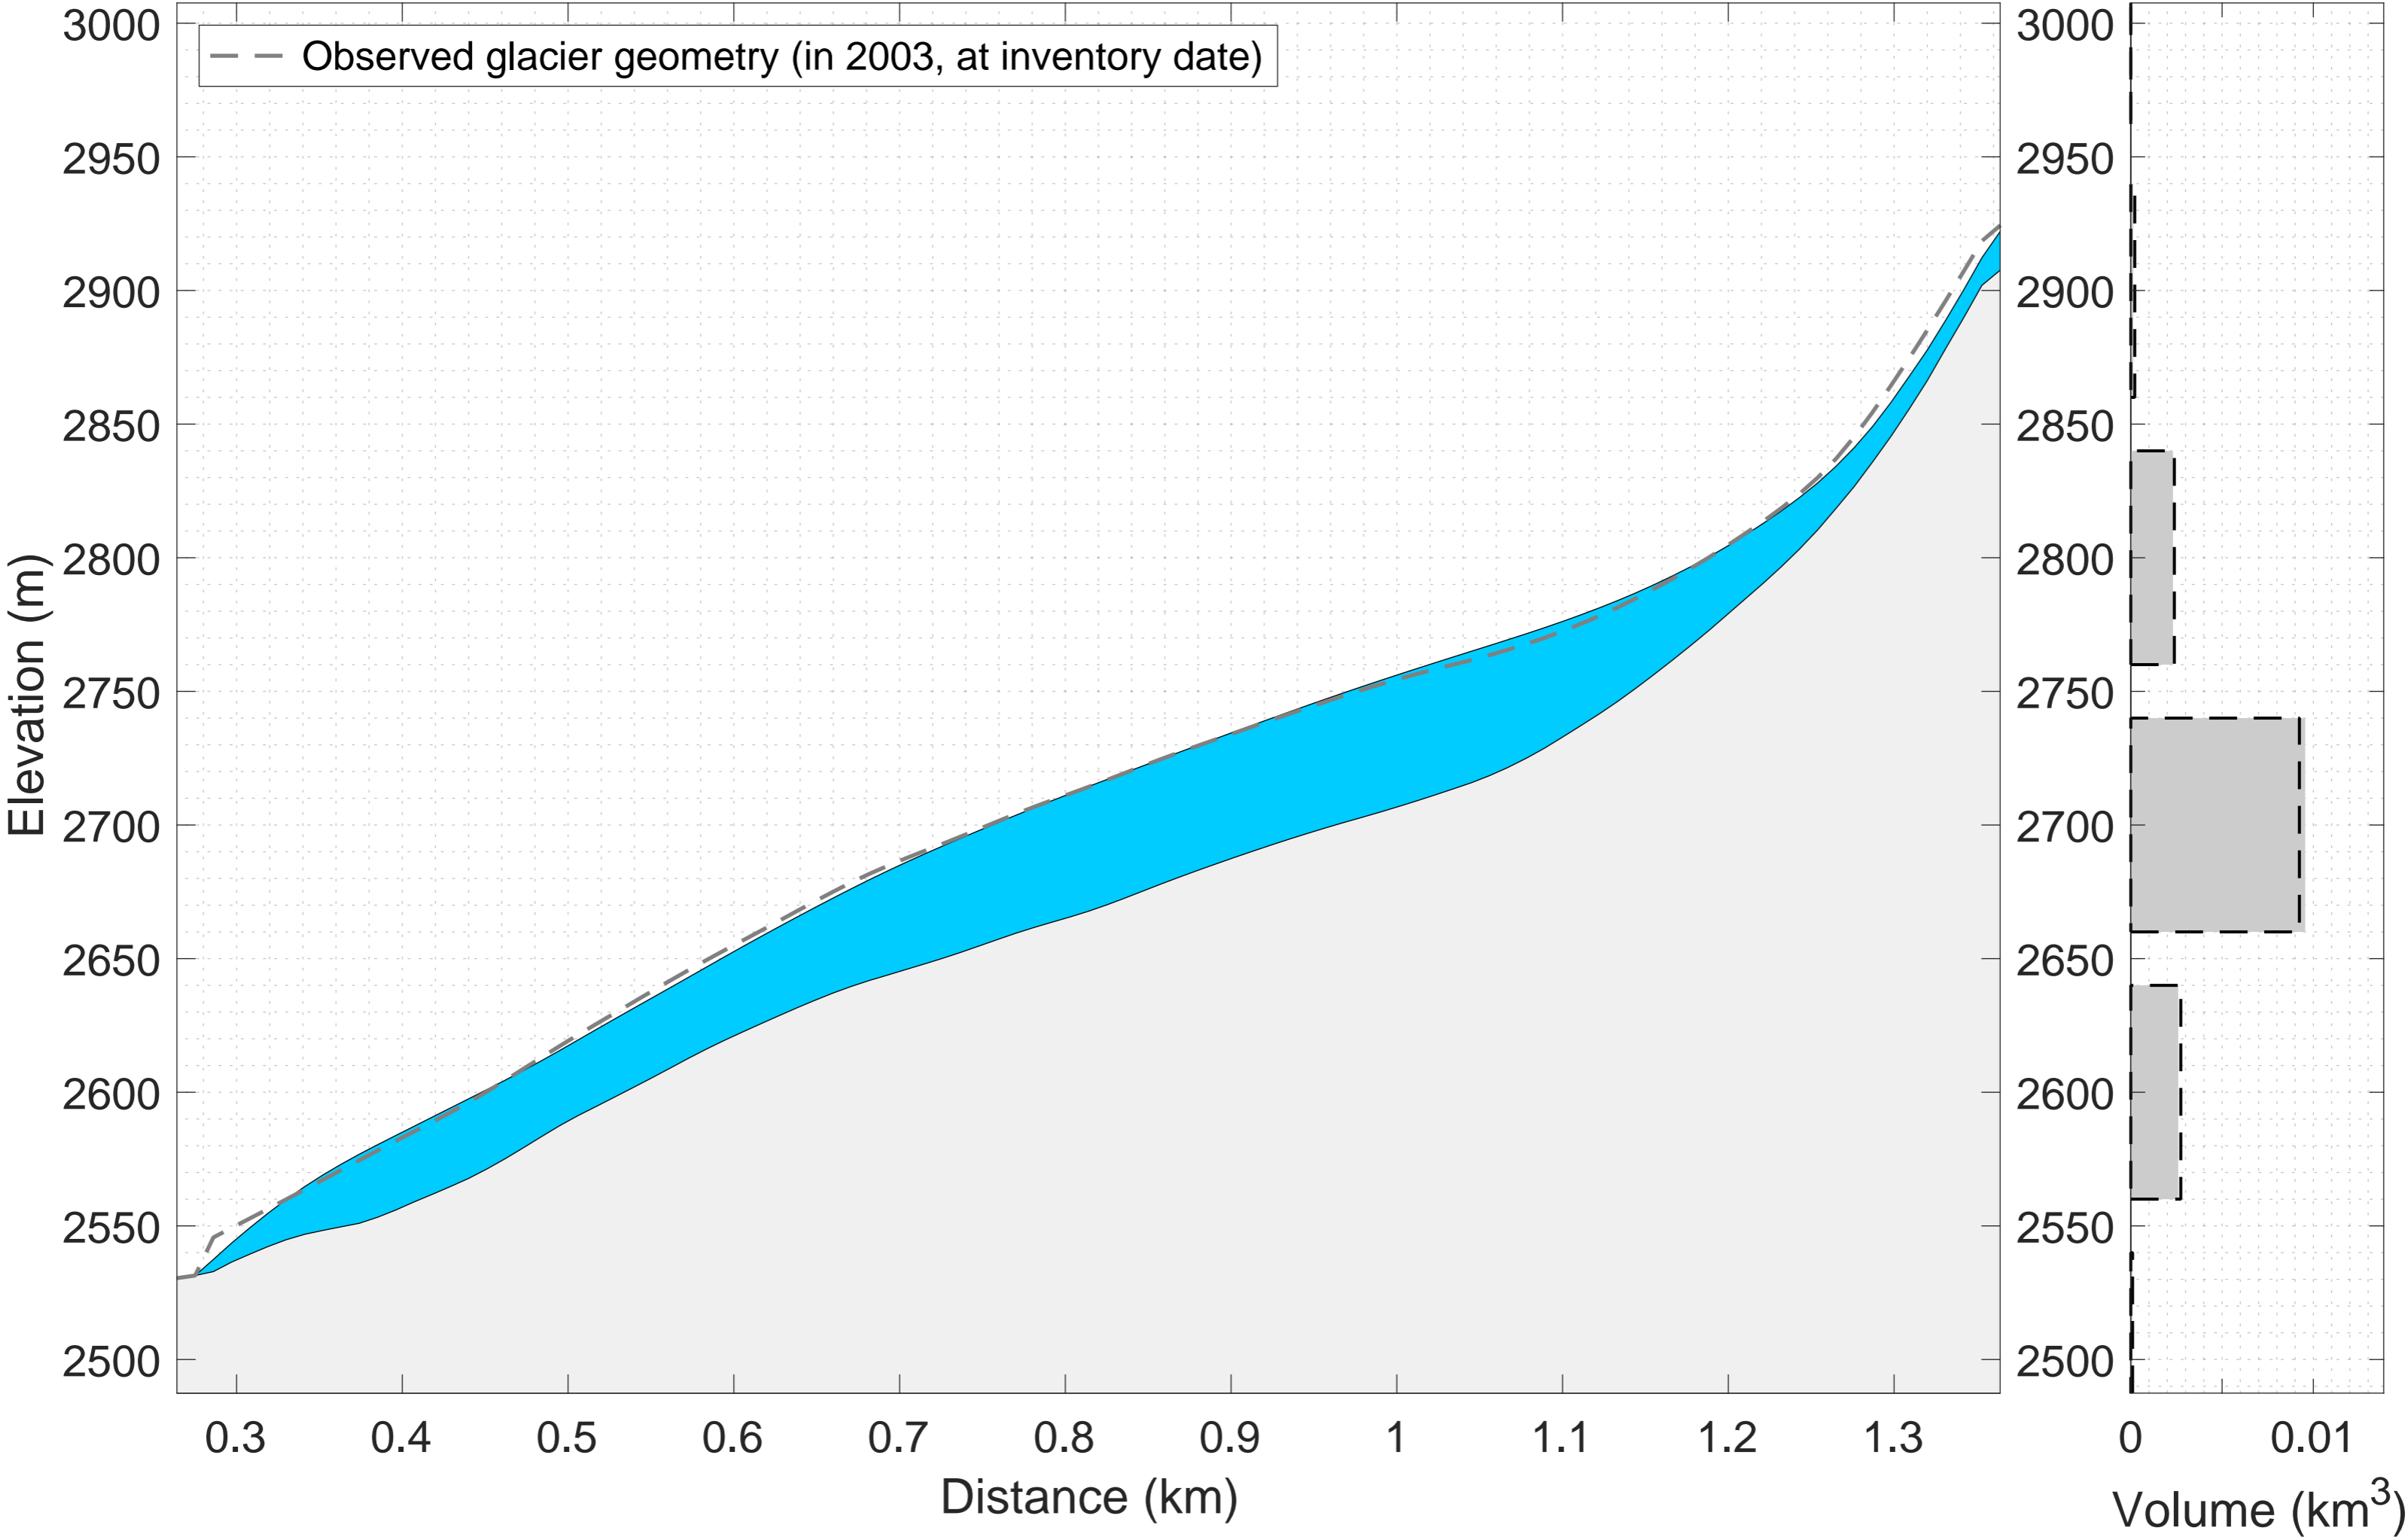

Supplement: Supplementary file 164 [file tc-13-1125-2019-supplement.zip]

**Modelled geometry (Glacier ID = 03028;  $A = 1.1191\text{e-}16 \text{ Pa}^{-3} \text{ a}^{-1}$ ;  $dx = 11 \text{ m}$ )**

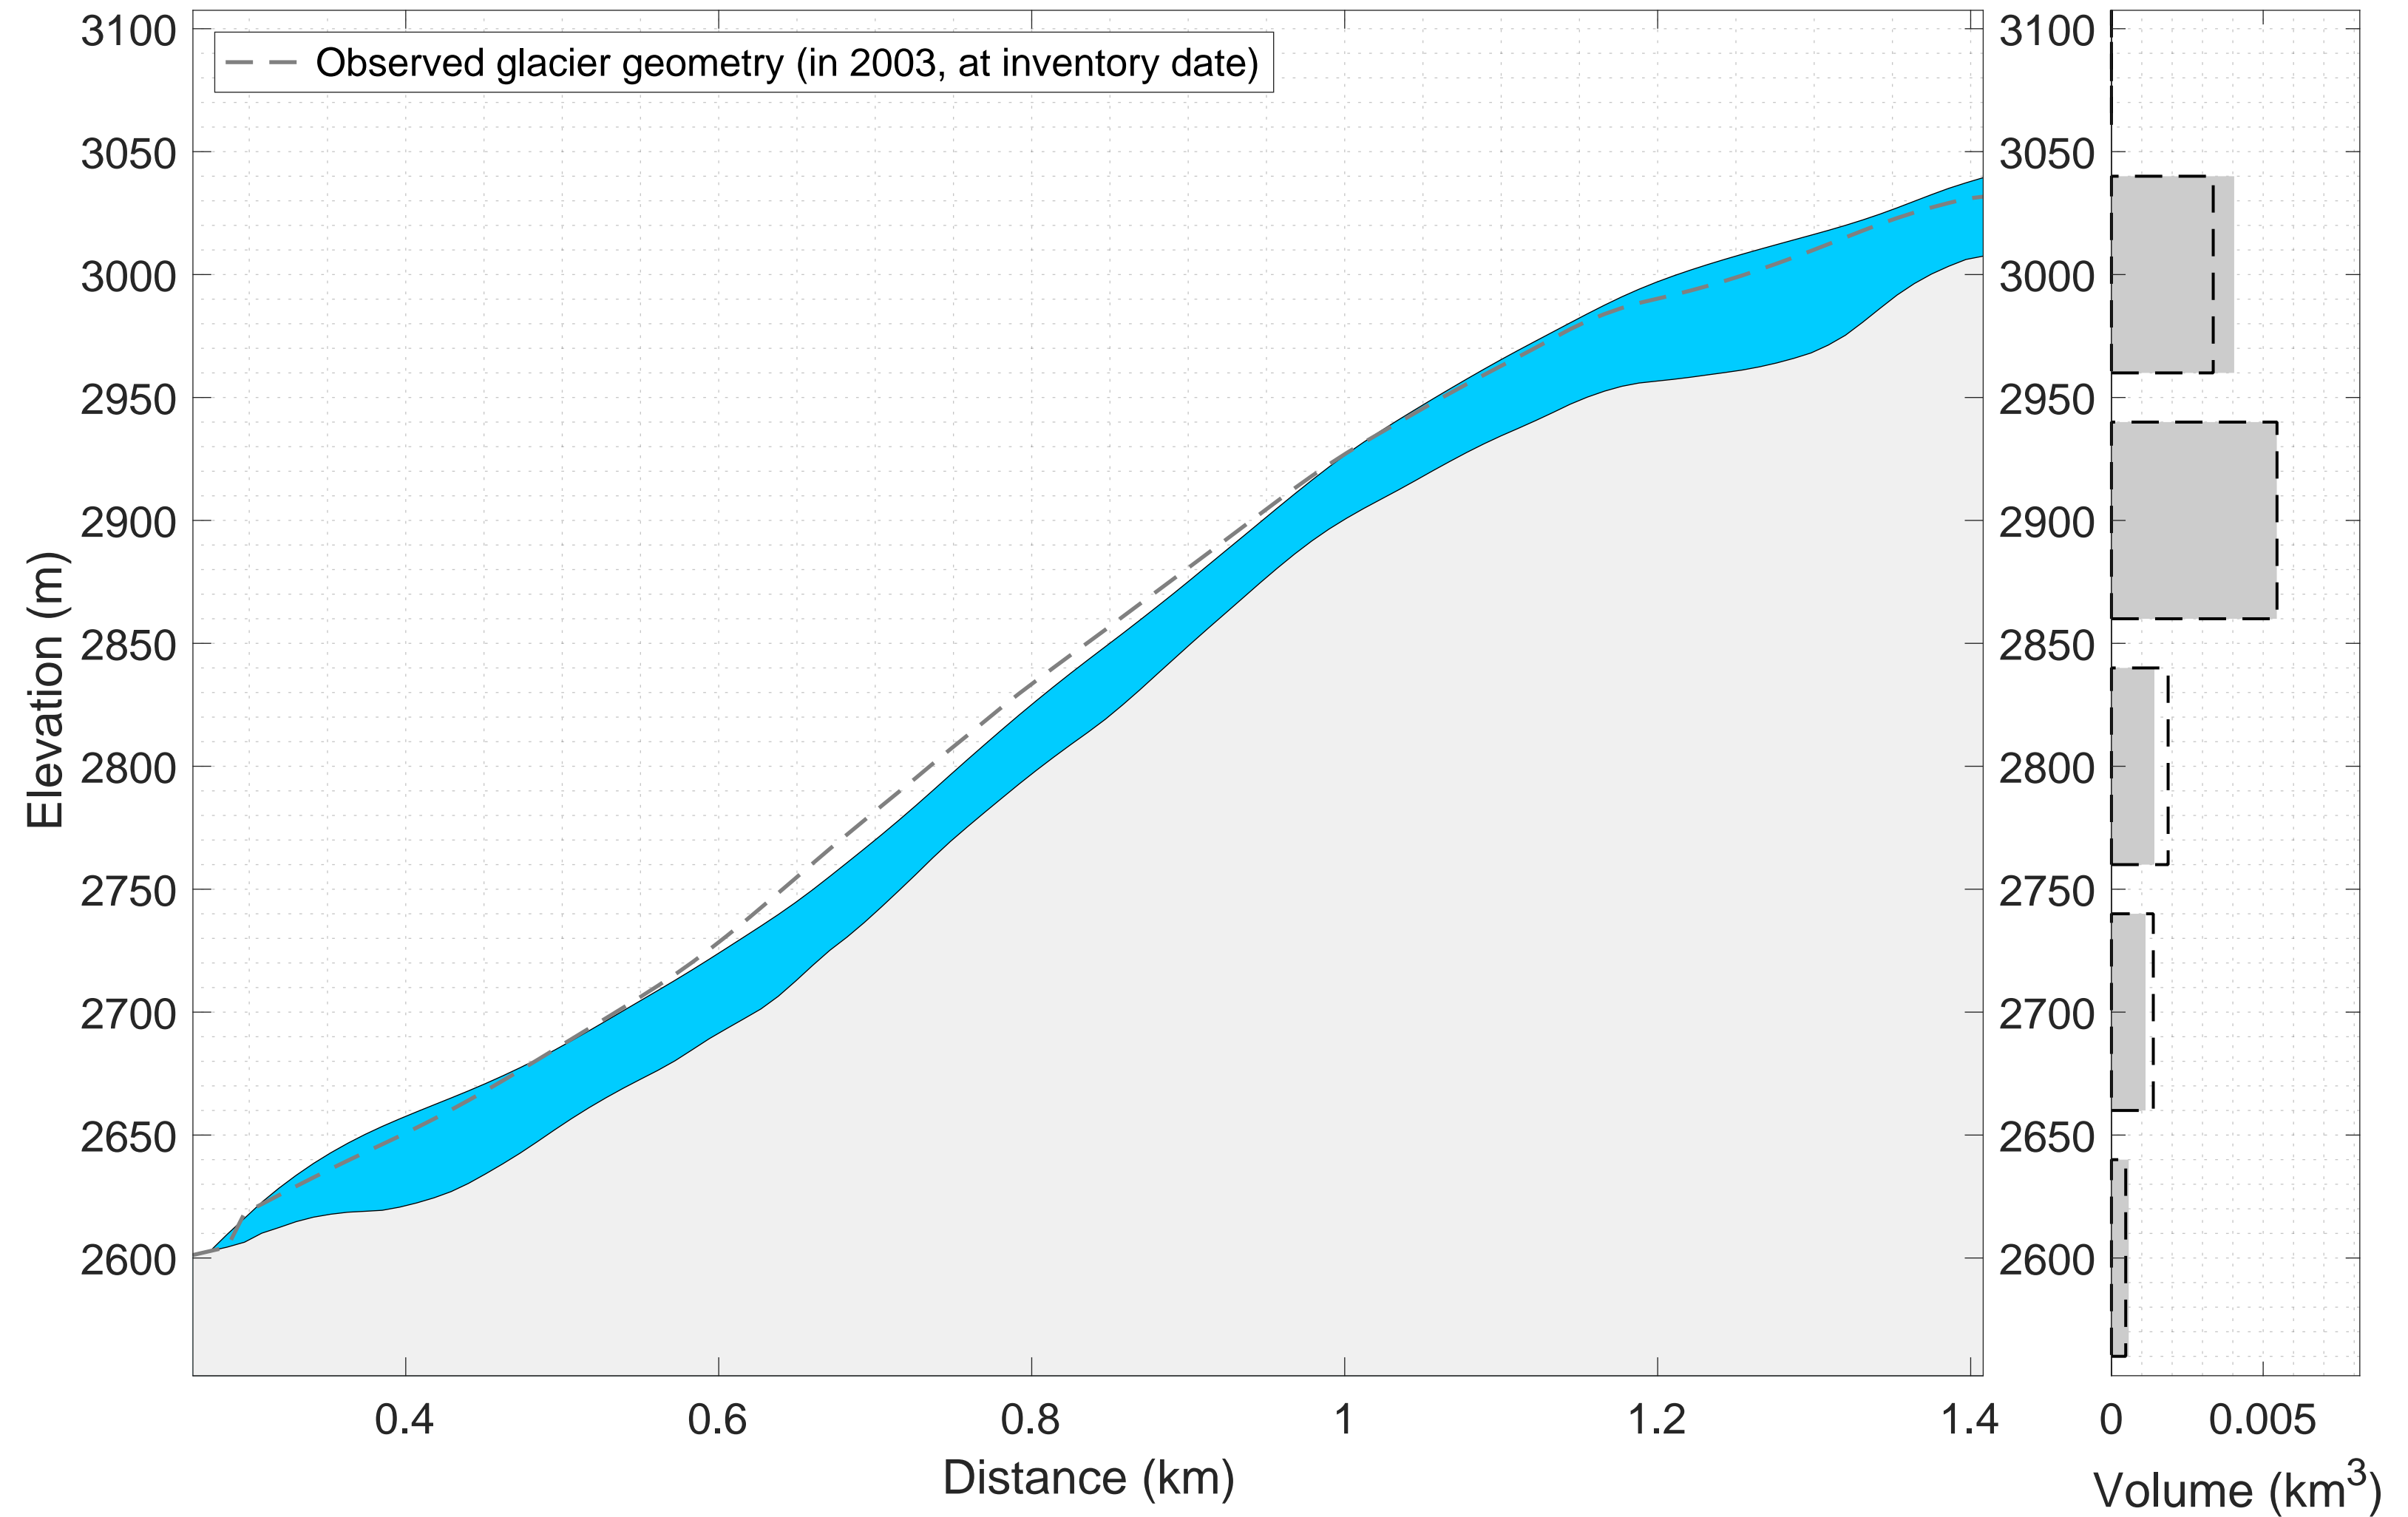

Supplement: Supplementary file 165 [file tc-13-1125-2019-supplement.zip]

**Modelled geometry (Glacier ID = 01648;  $A = 6.1796\text{e-}17 \text{ Pa}^{-3} \text{ a}^{-1}$ ;  $dx = 14 \text{ m}$ )**

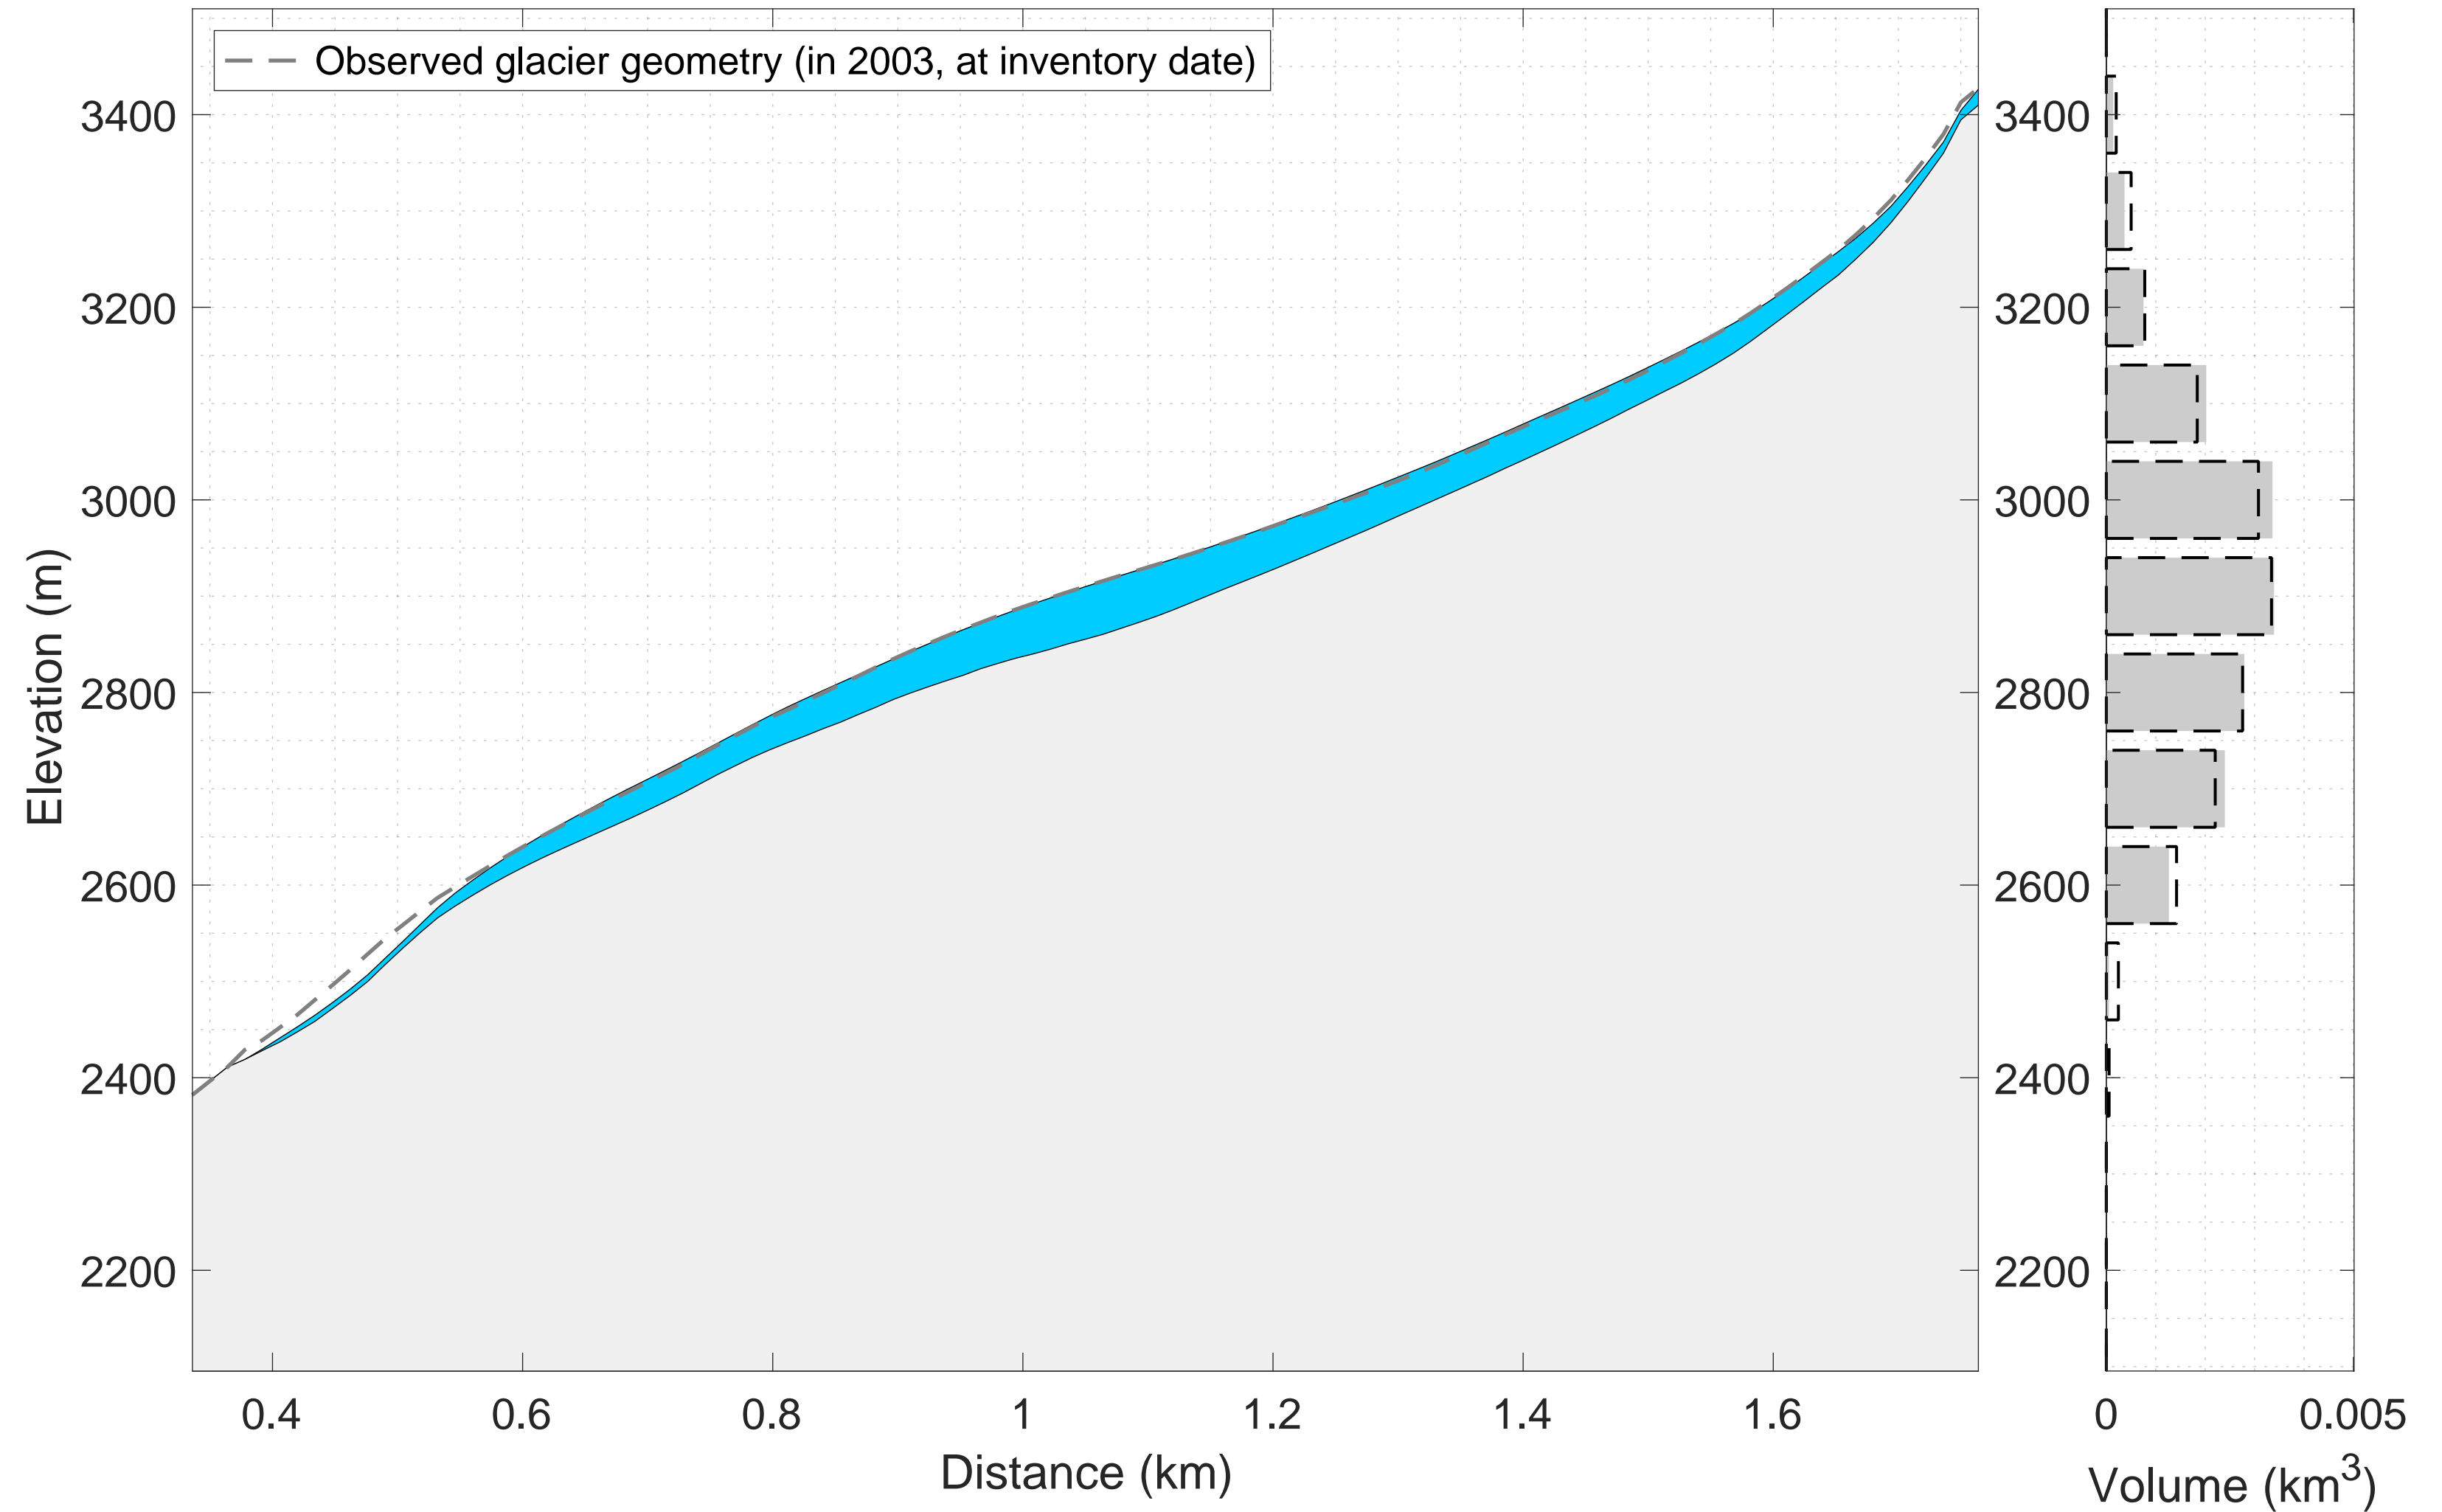

Supplement: Supplementary file 166 [file tc-13-1125-2019-supplement.zip]

**Modelled geometry (Glacier ID = 02781;  $A = 1.2478\text{e-}16 \text{ Pa}^{-3} \text{ a}^{-1}$ ;  $dx = 20 \text{ m}$ )**

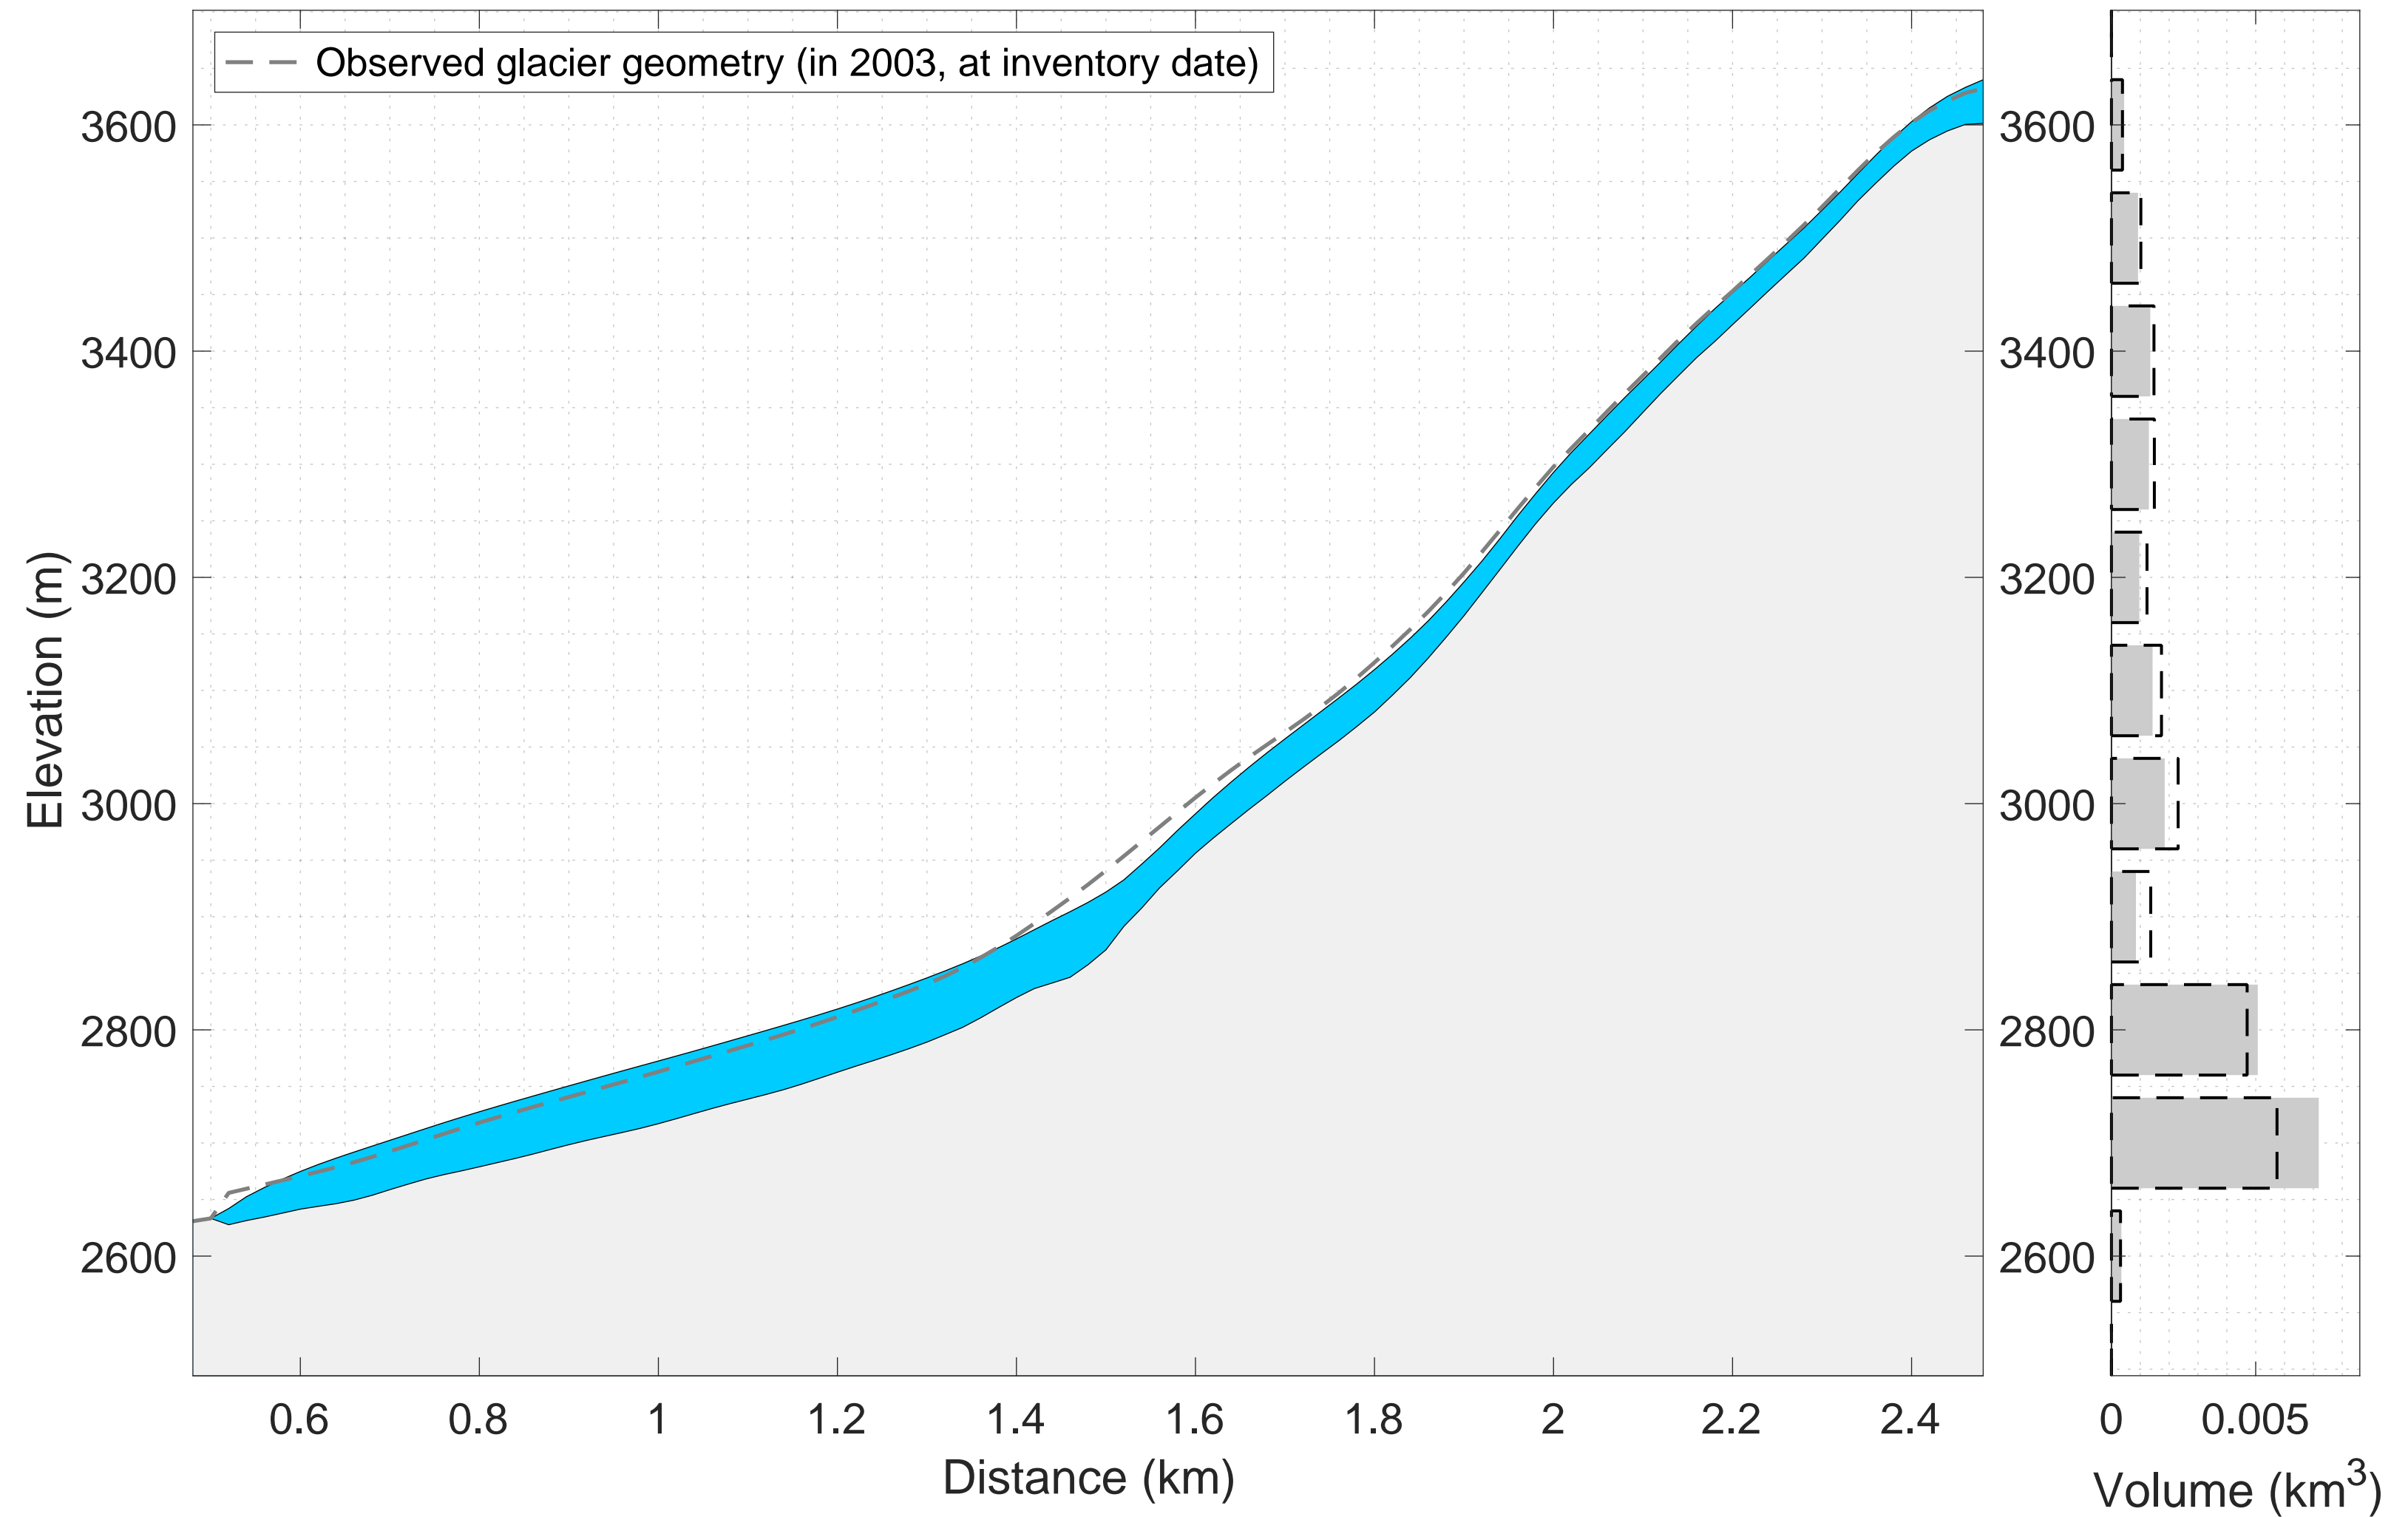

Supplement: Supplementary file 167 [file tc-13-1125-2019-supplement.zip]

**Modelled geometry (Glacier ID = 00088;  $A = 2.885\text{e-}16 \text{ Pa}^{-3} \text{ a}^{-1}$ ;  $dx = 23 \text{ m}$ )**

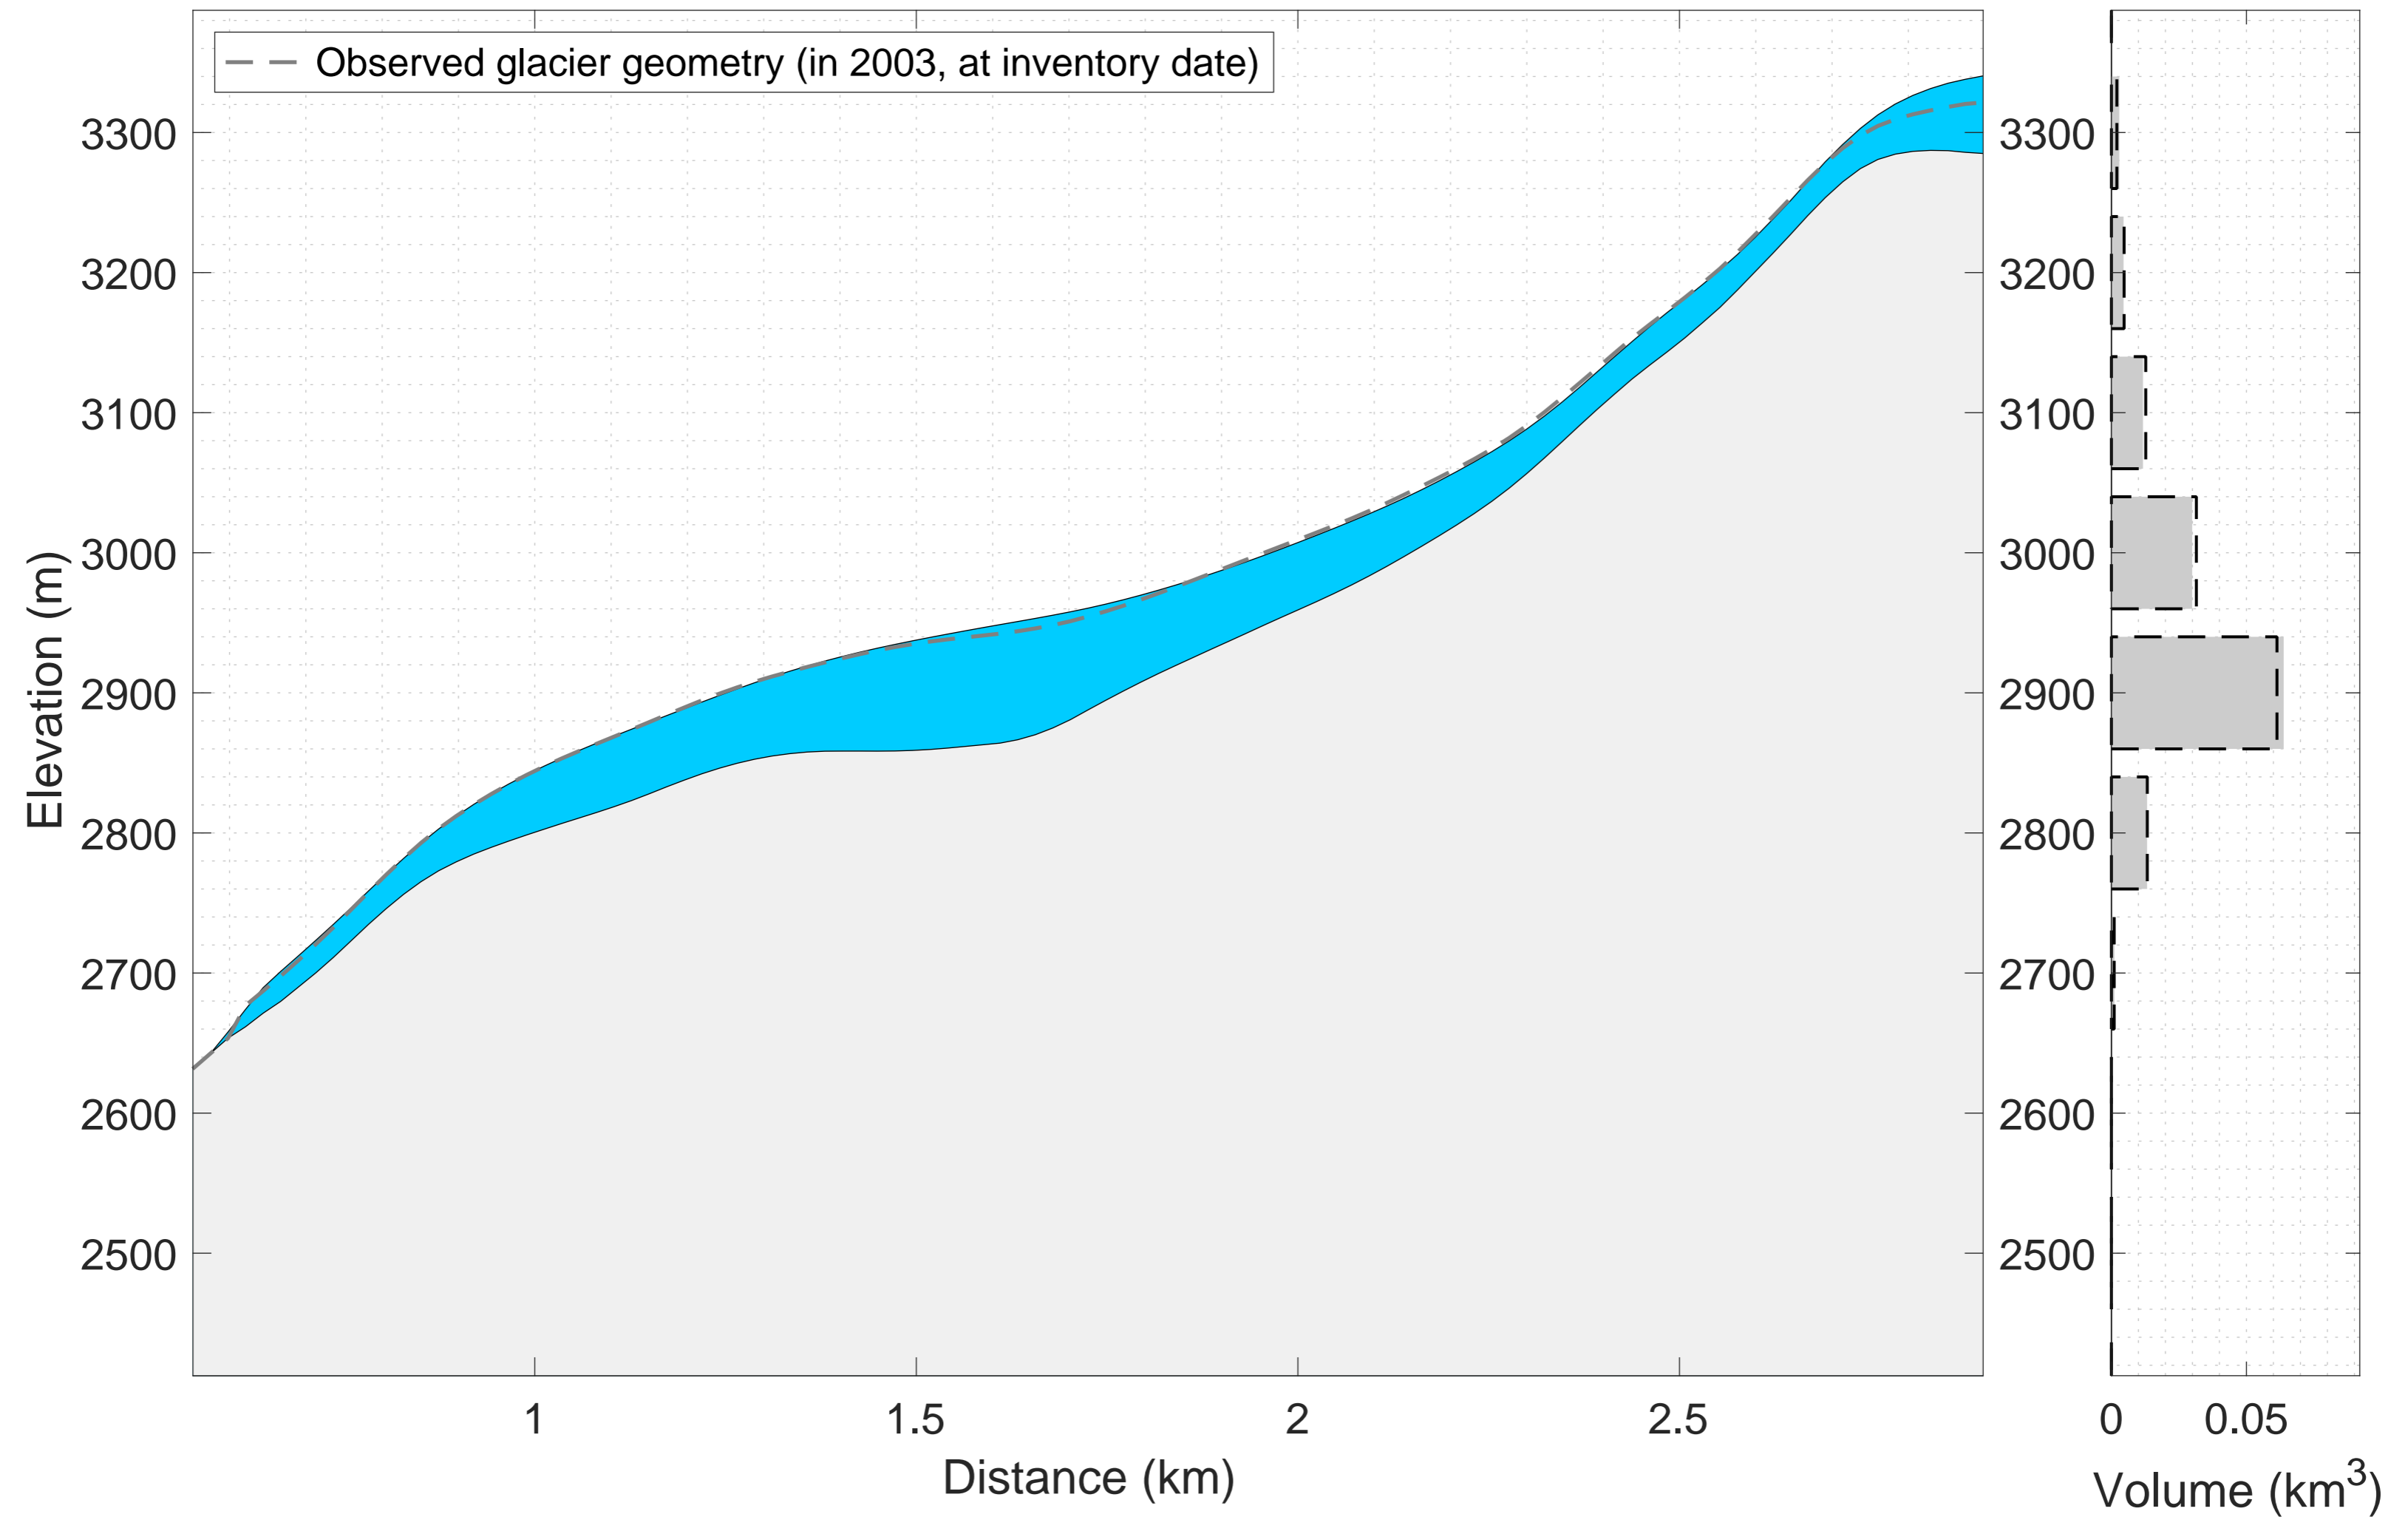

Supplement: Supplementary file 168 [file tc-13-1125-2019-supplement.zip]

**Modelled geometry (Glacier ID = 00944;  $A = 9.6089\text{e-}17 \text{ Pa}^{-3} \text{ a}^{-1}$ ;  $dx = 10 \text{ m}$ )**

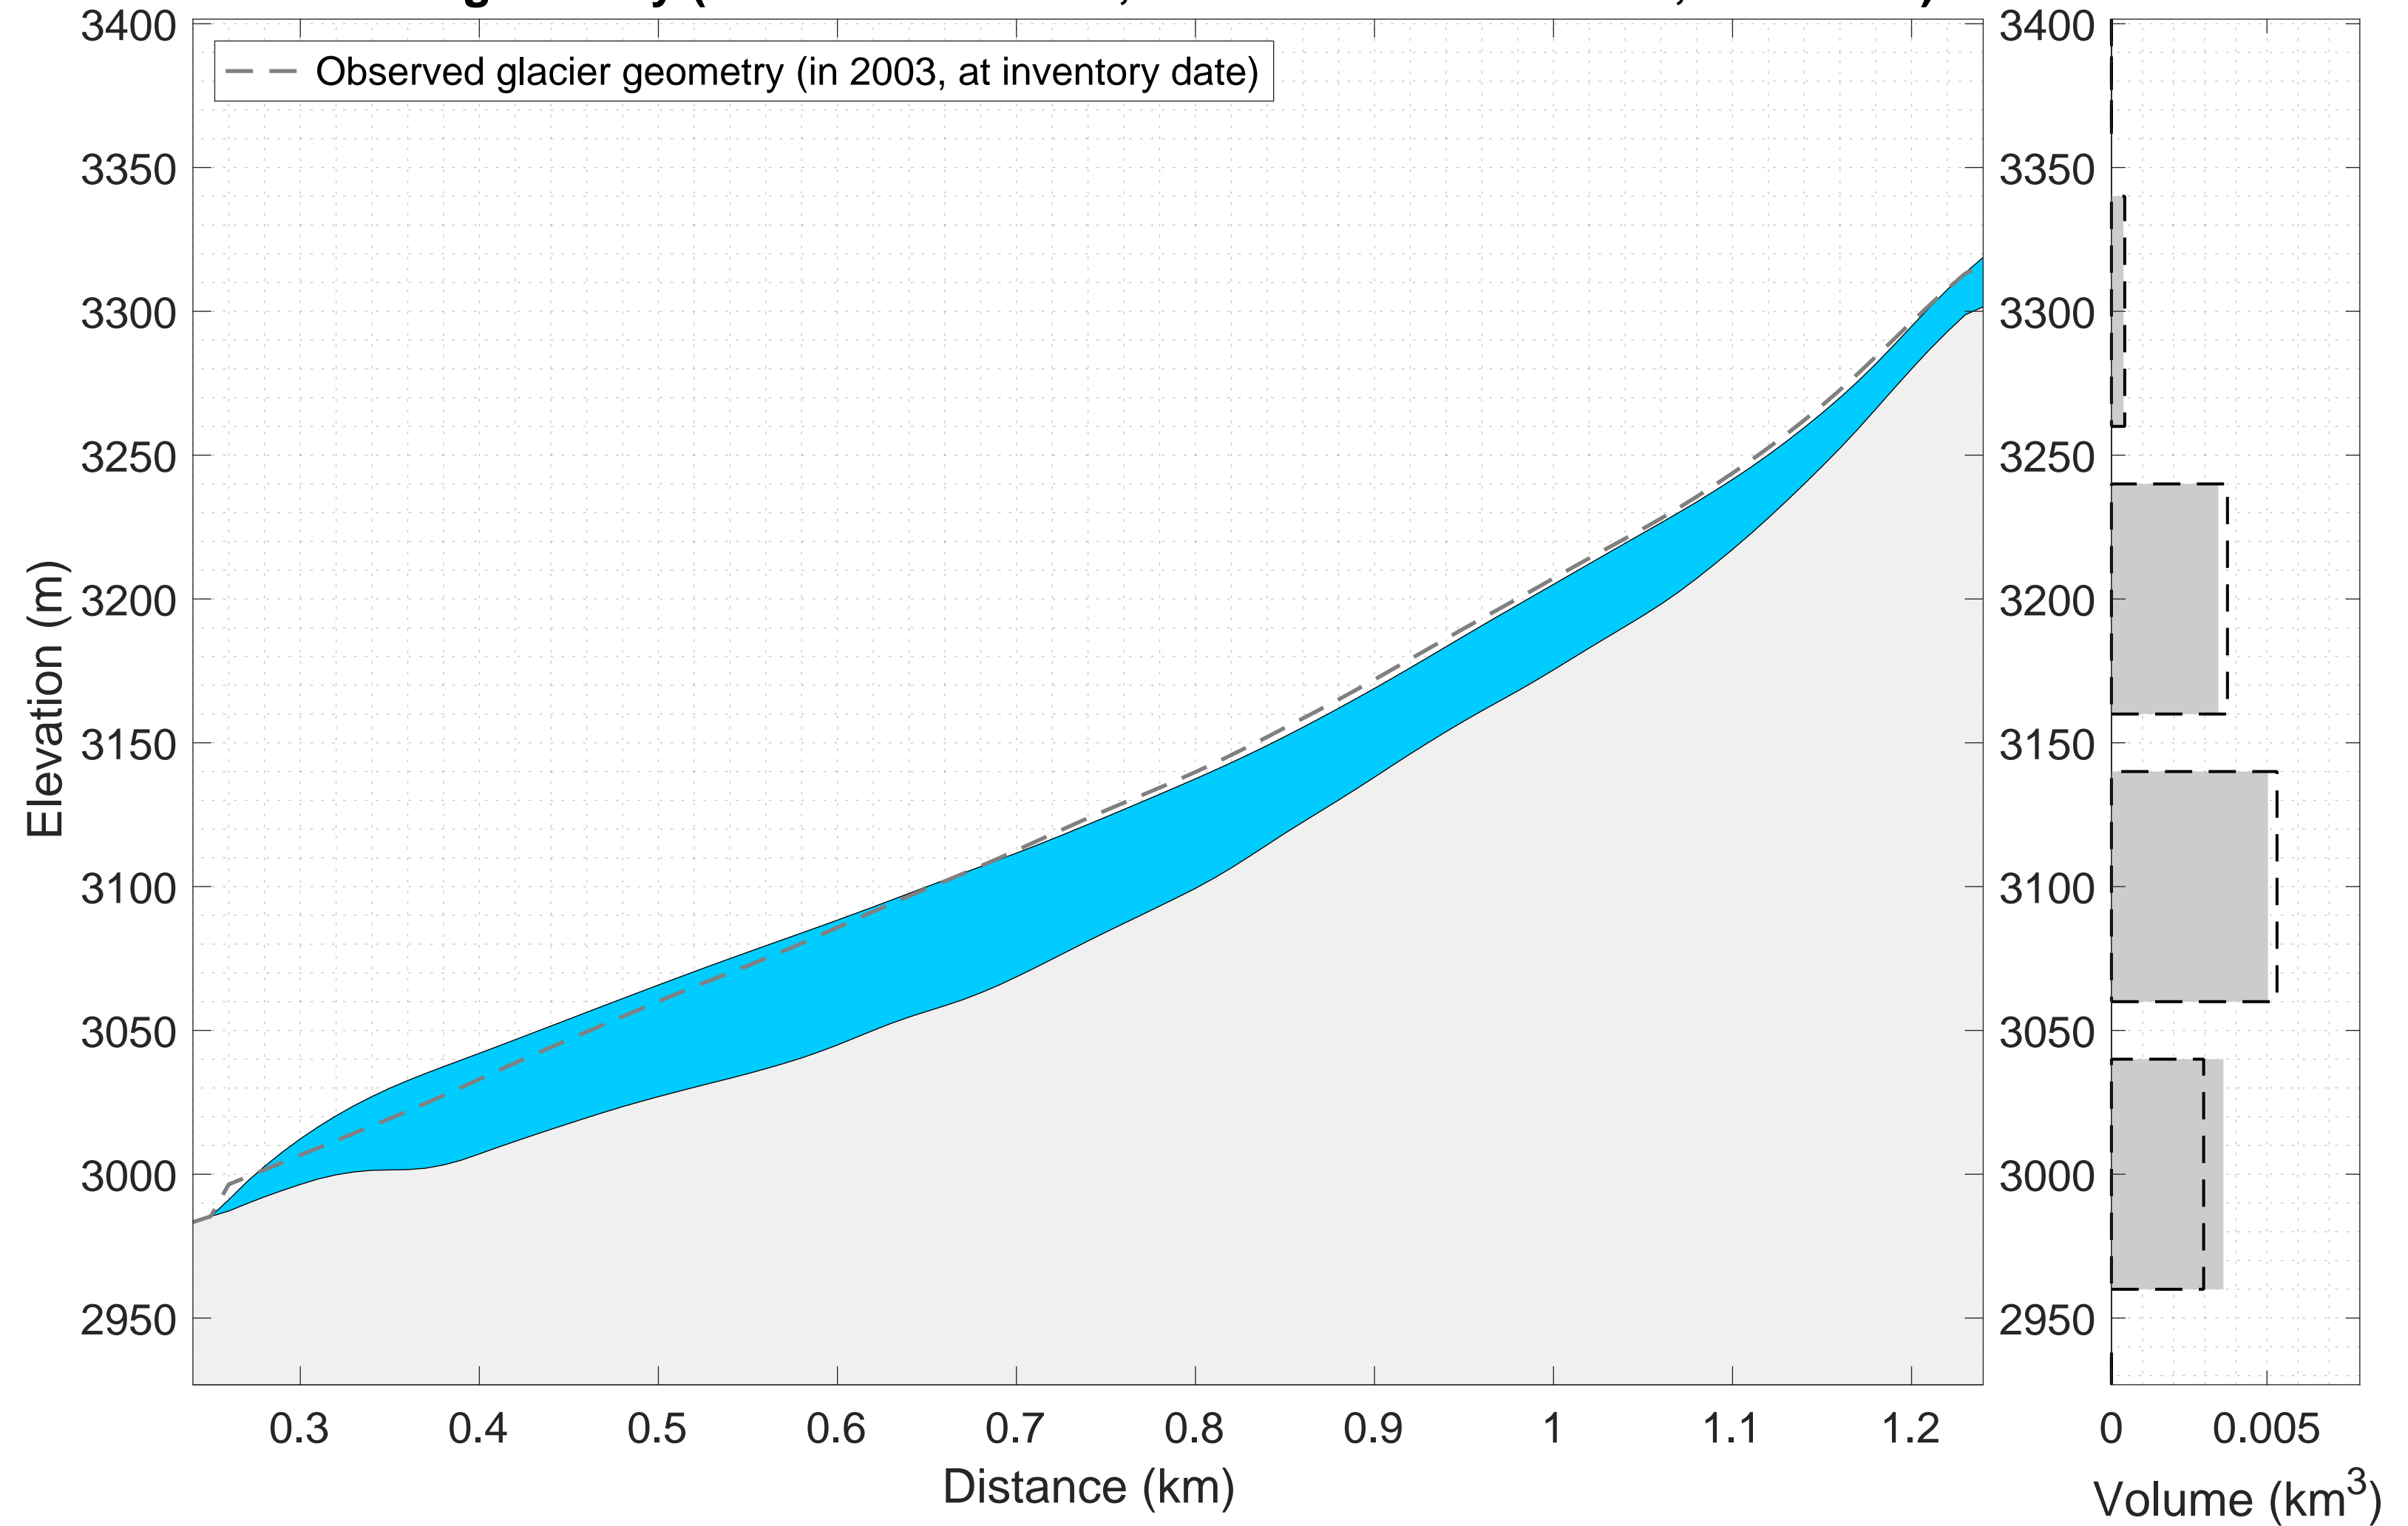

Supplement: Supplementary file 169 [file tc-13-1125-2019-supplement.zip]

**Modelled geometry (Glacier ID = 02796;  $A = 2.3412\text{e-}16 \text{ Pa}^{-3} \text{ a}^{-1}$ ;  $dx = 58 \text{ m}$ )**

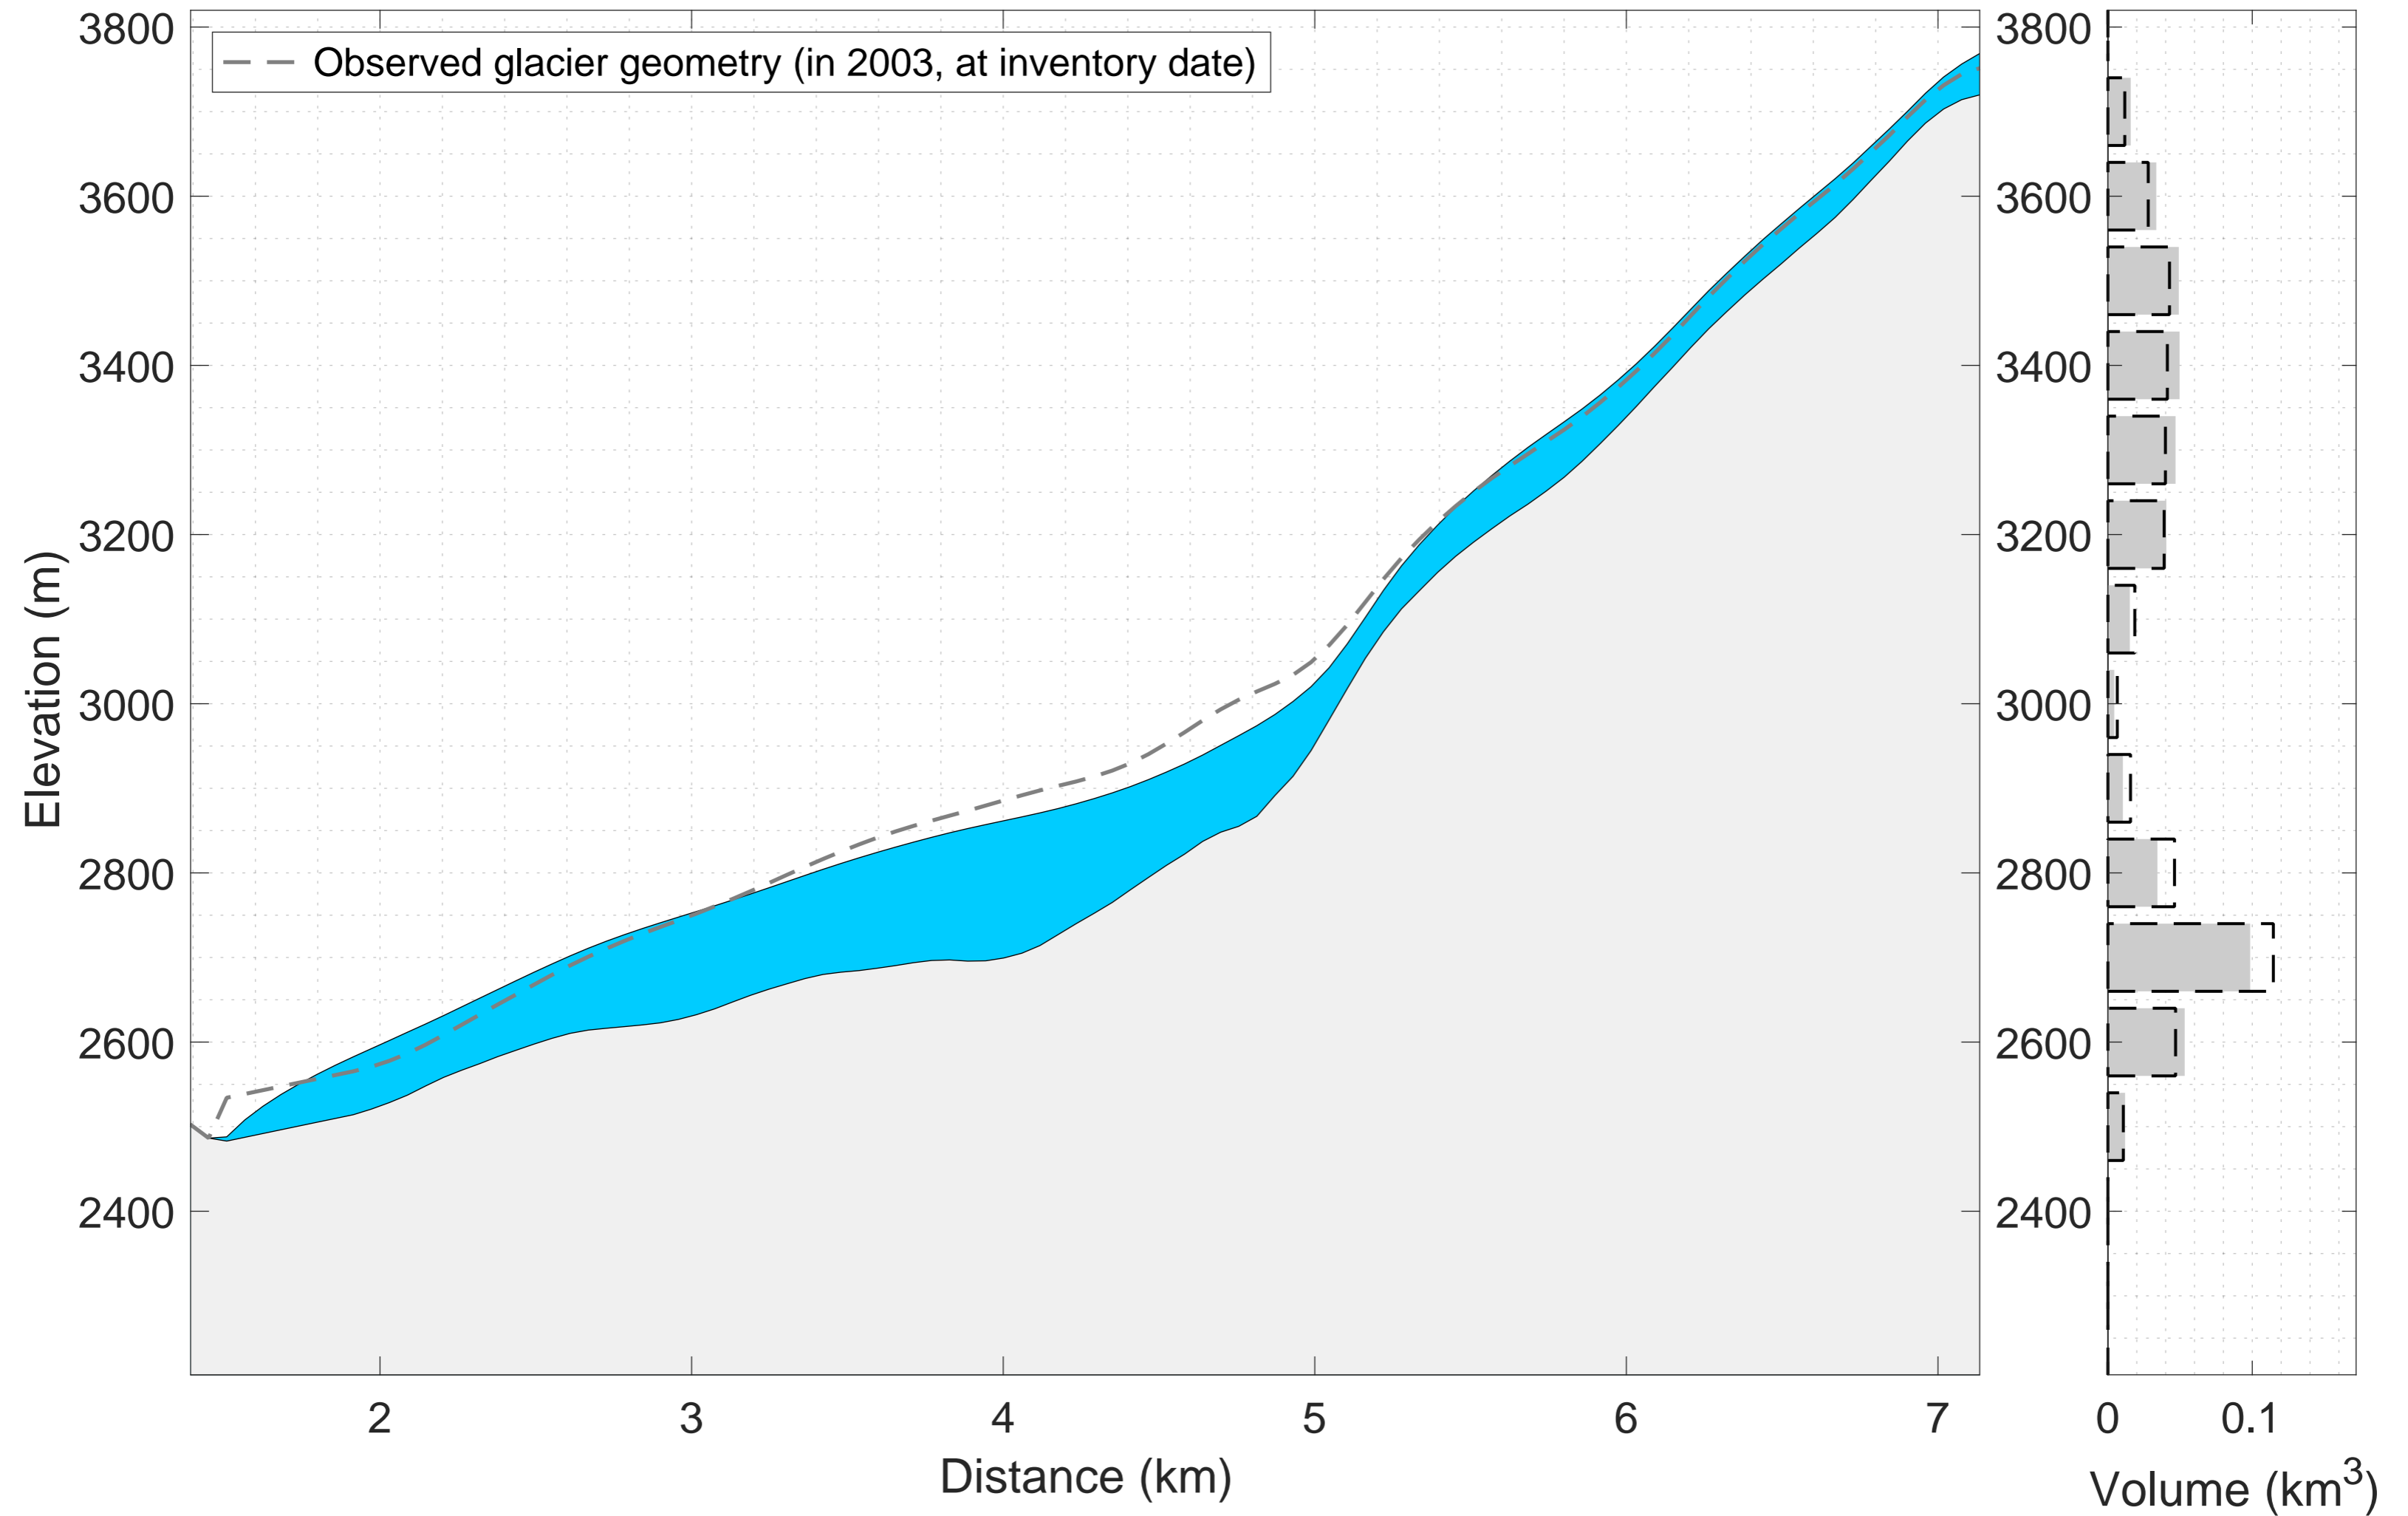

Supplement: Supplementary file 170 [file tc-13-1125-2019-supplement.zip]

**Modelled geometry (Glacier ID = 02460;  $A = 1.2511\text{e-16 Pa}^{-3} \text{ a}^{-1}$ ;  $dx = 37 \text{ m}$ )**

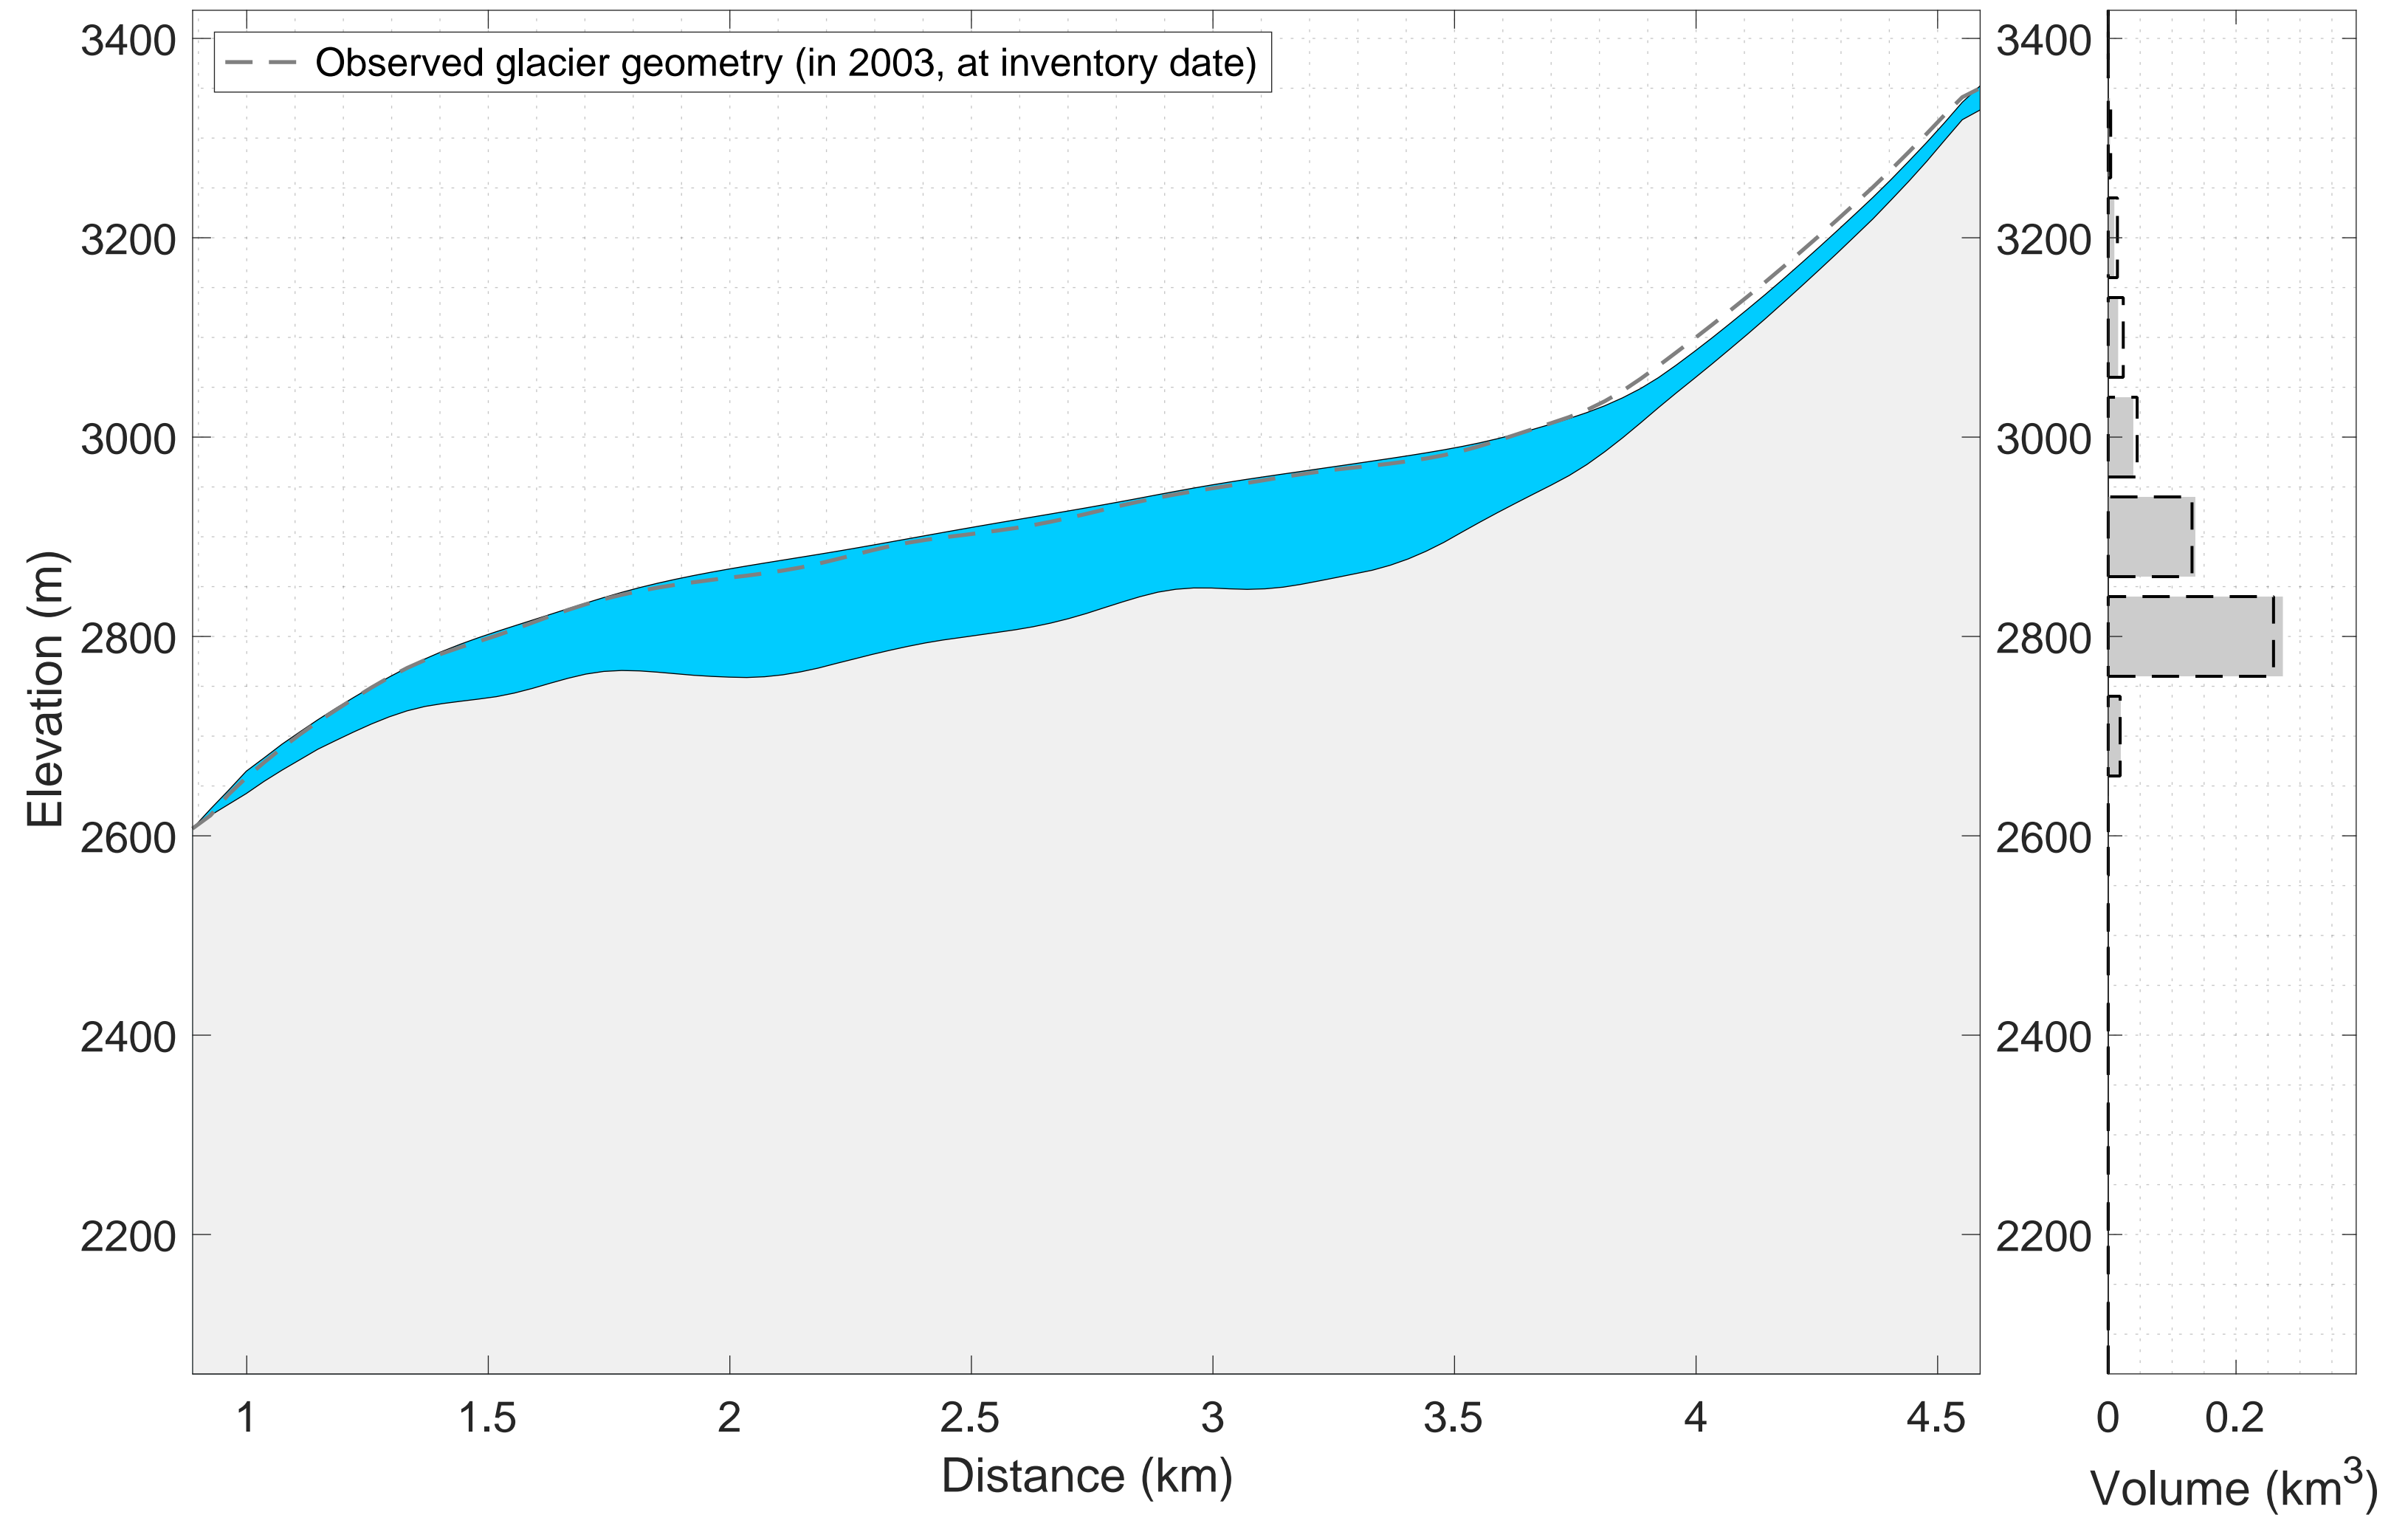

Supplement: Supplementary file 171 [file tc-13-1125-2019-supplement.zip]

**Modelled geometry (Glacier ID = 02525;  $A = 2.8951\text{e-}16 \text{ Pa}^{-3} \text{ a}^{-1}$ ;  $dx = 16 \text{ m}$ )**

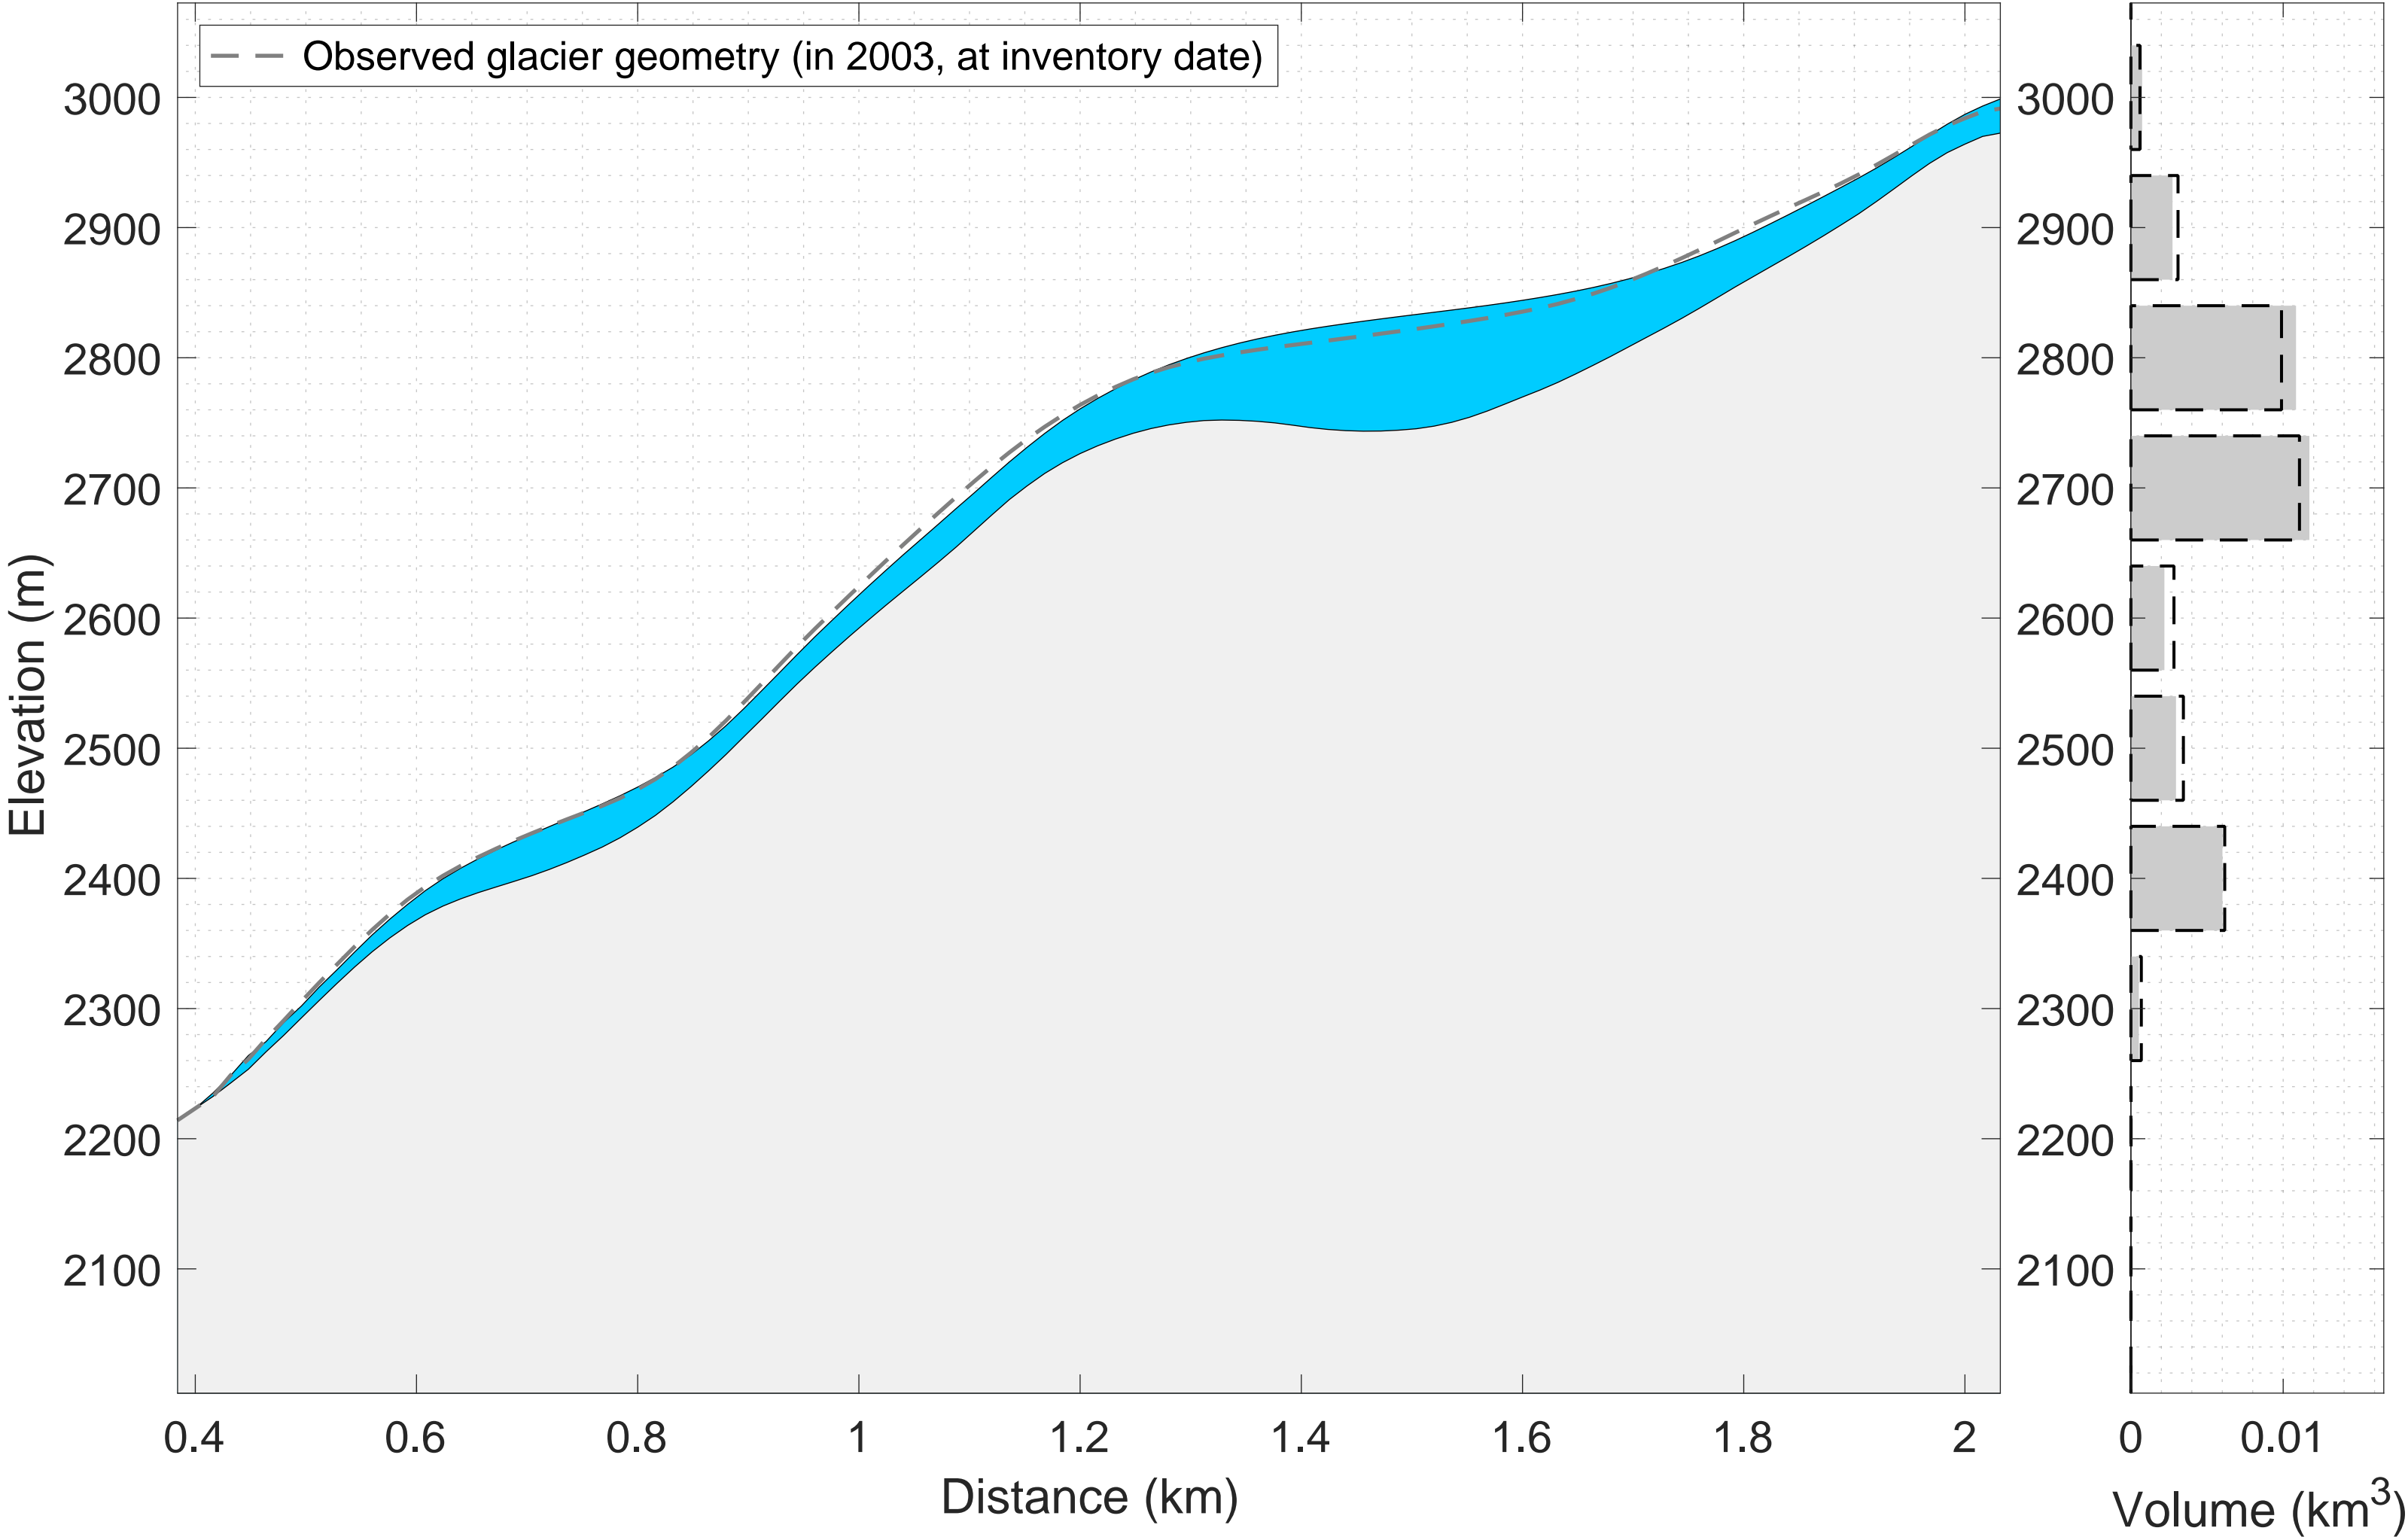

Supplement: Supplementary file 172 [file tc-13-1125-2019-supplement.zip]

**Modelled geometry (Glacier ID = 00619;  $A = 9.2084\text{e-}17 \text{ Pa}^{-3} \text{ a}^{-1}$ ;  $dx = 18 \text{ m}$ )**

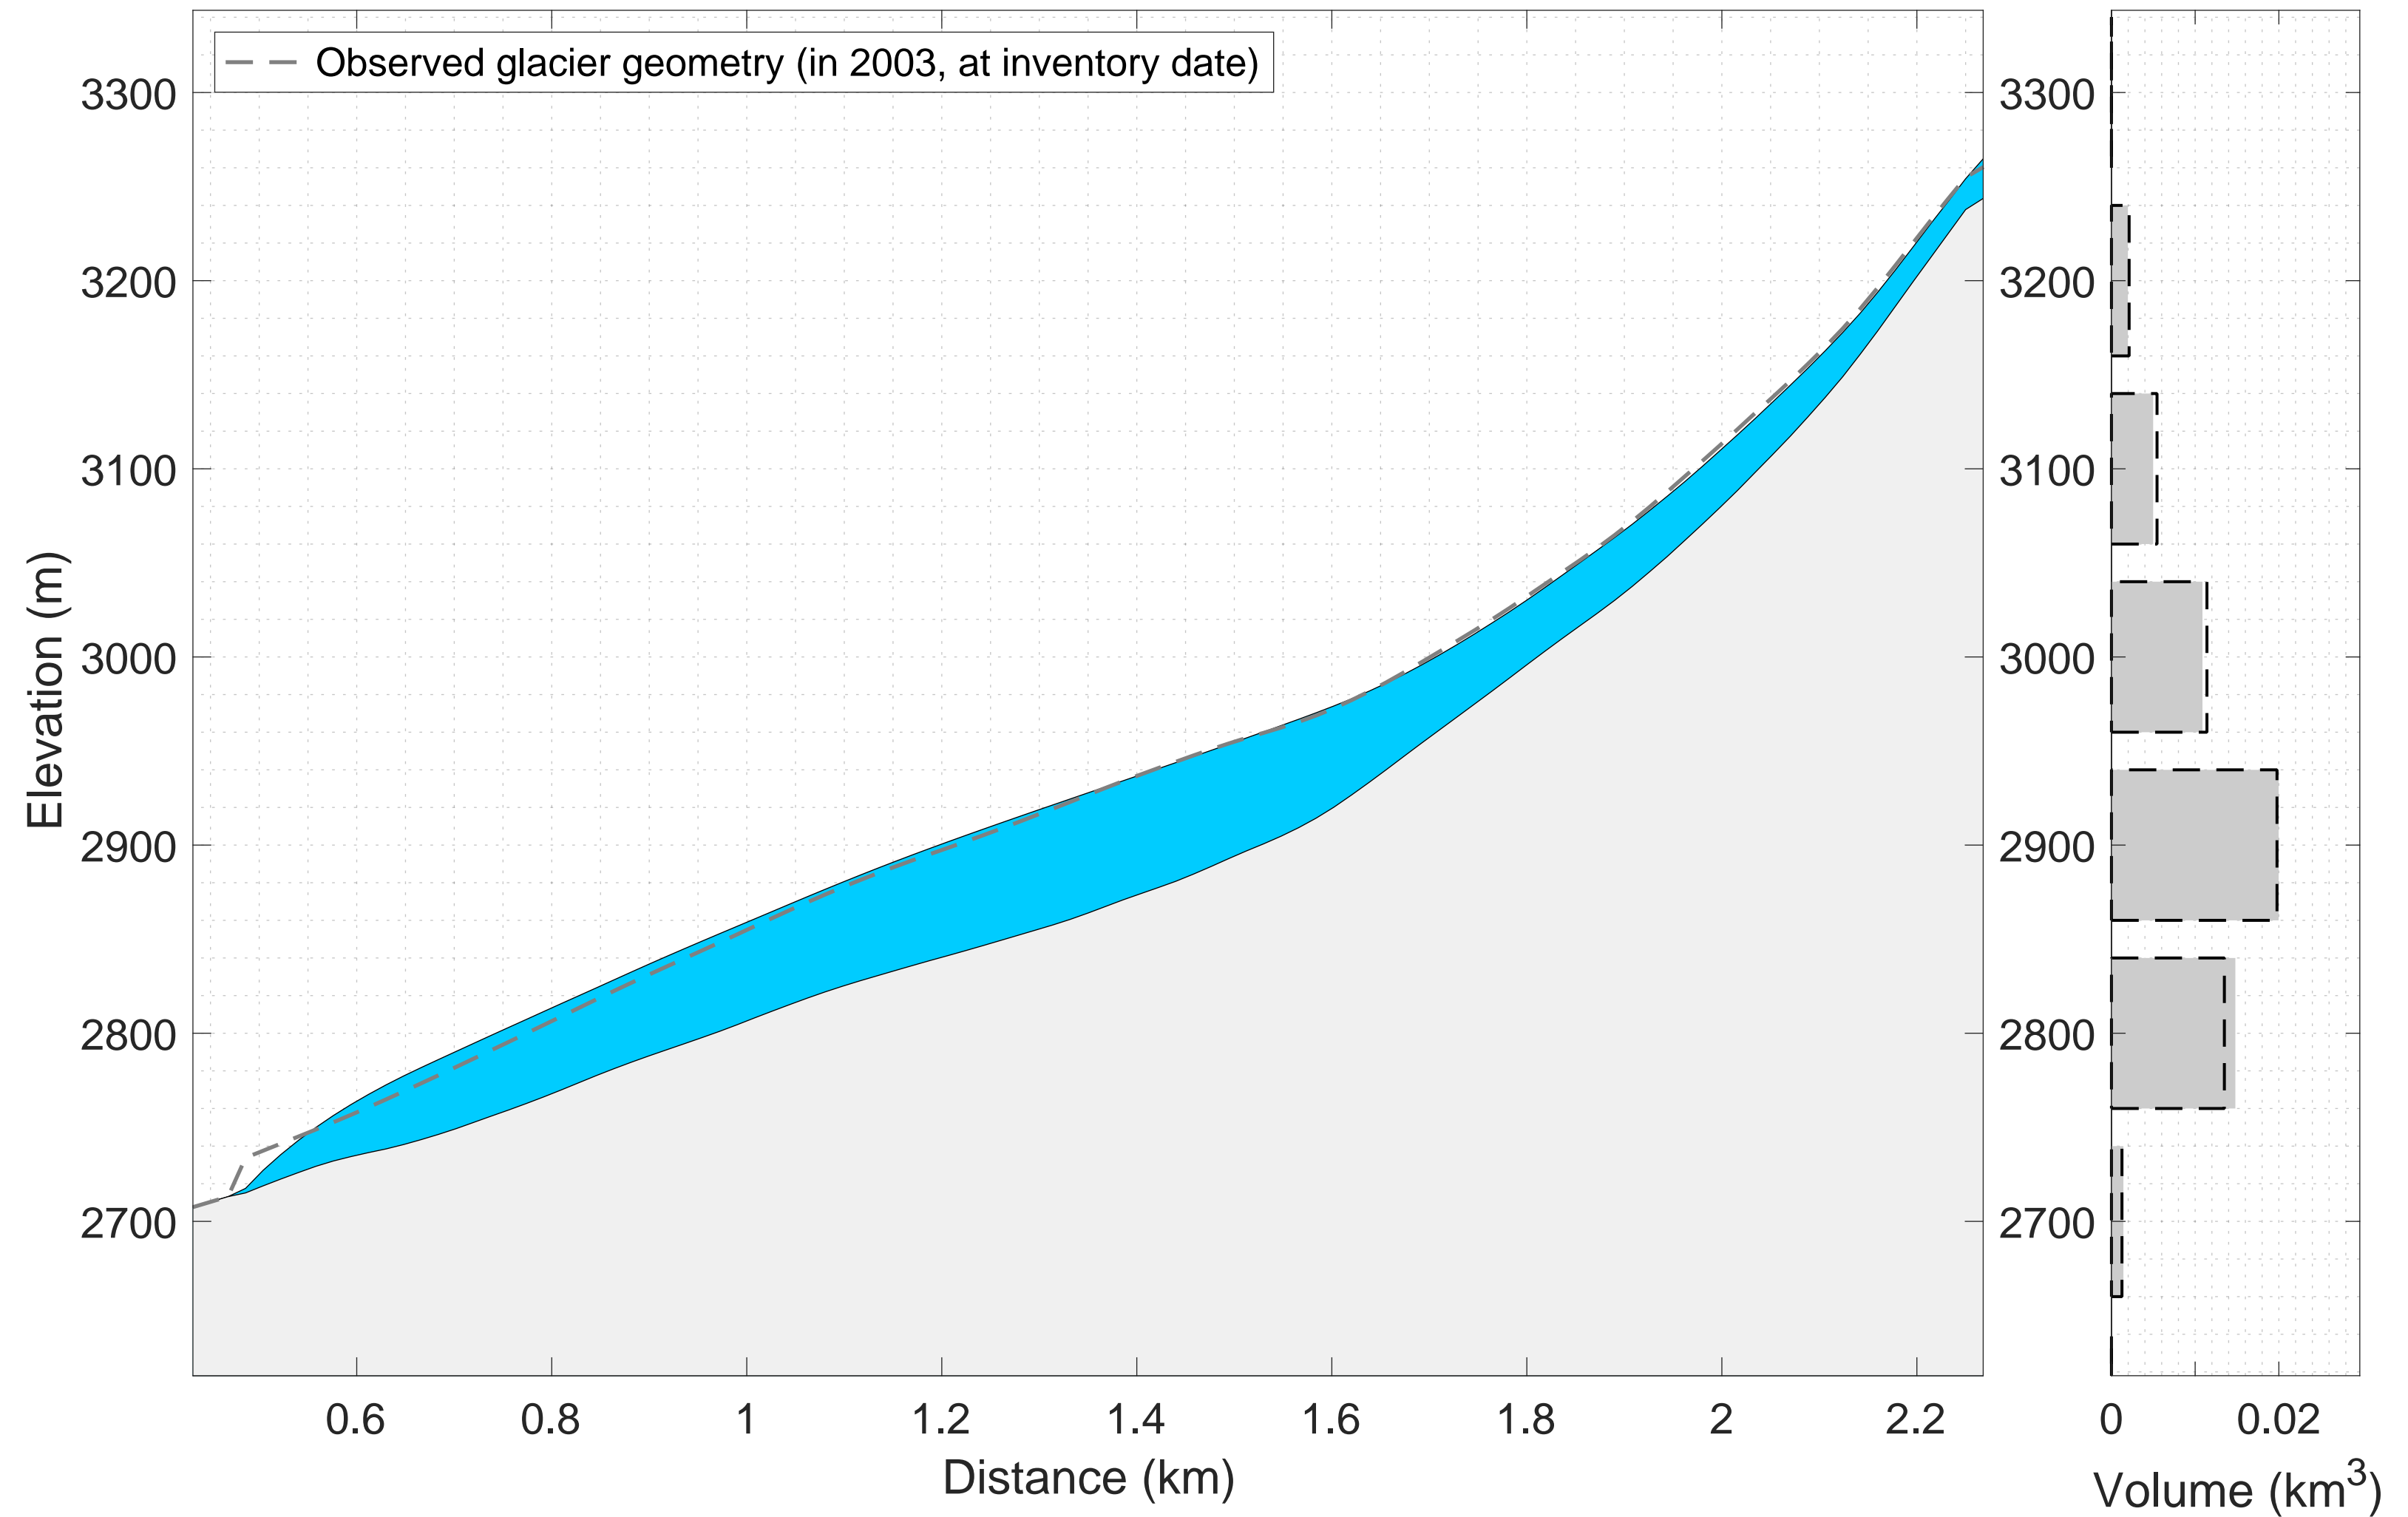

Supplement: Supplementary file 173 [file tc-13-1125-2019-supplement.zip]

**Modelled geometry (Glacier ID = 00836;  $A = 7.4107\text{e-}17 \text{ Pa}^{-3} \text{ a}^{-1}$ ;  $dx = 24 \text{ m}$ )**

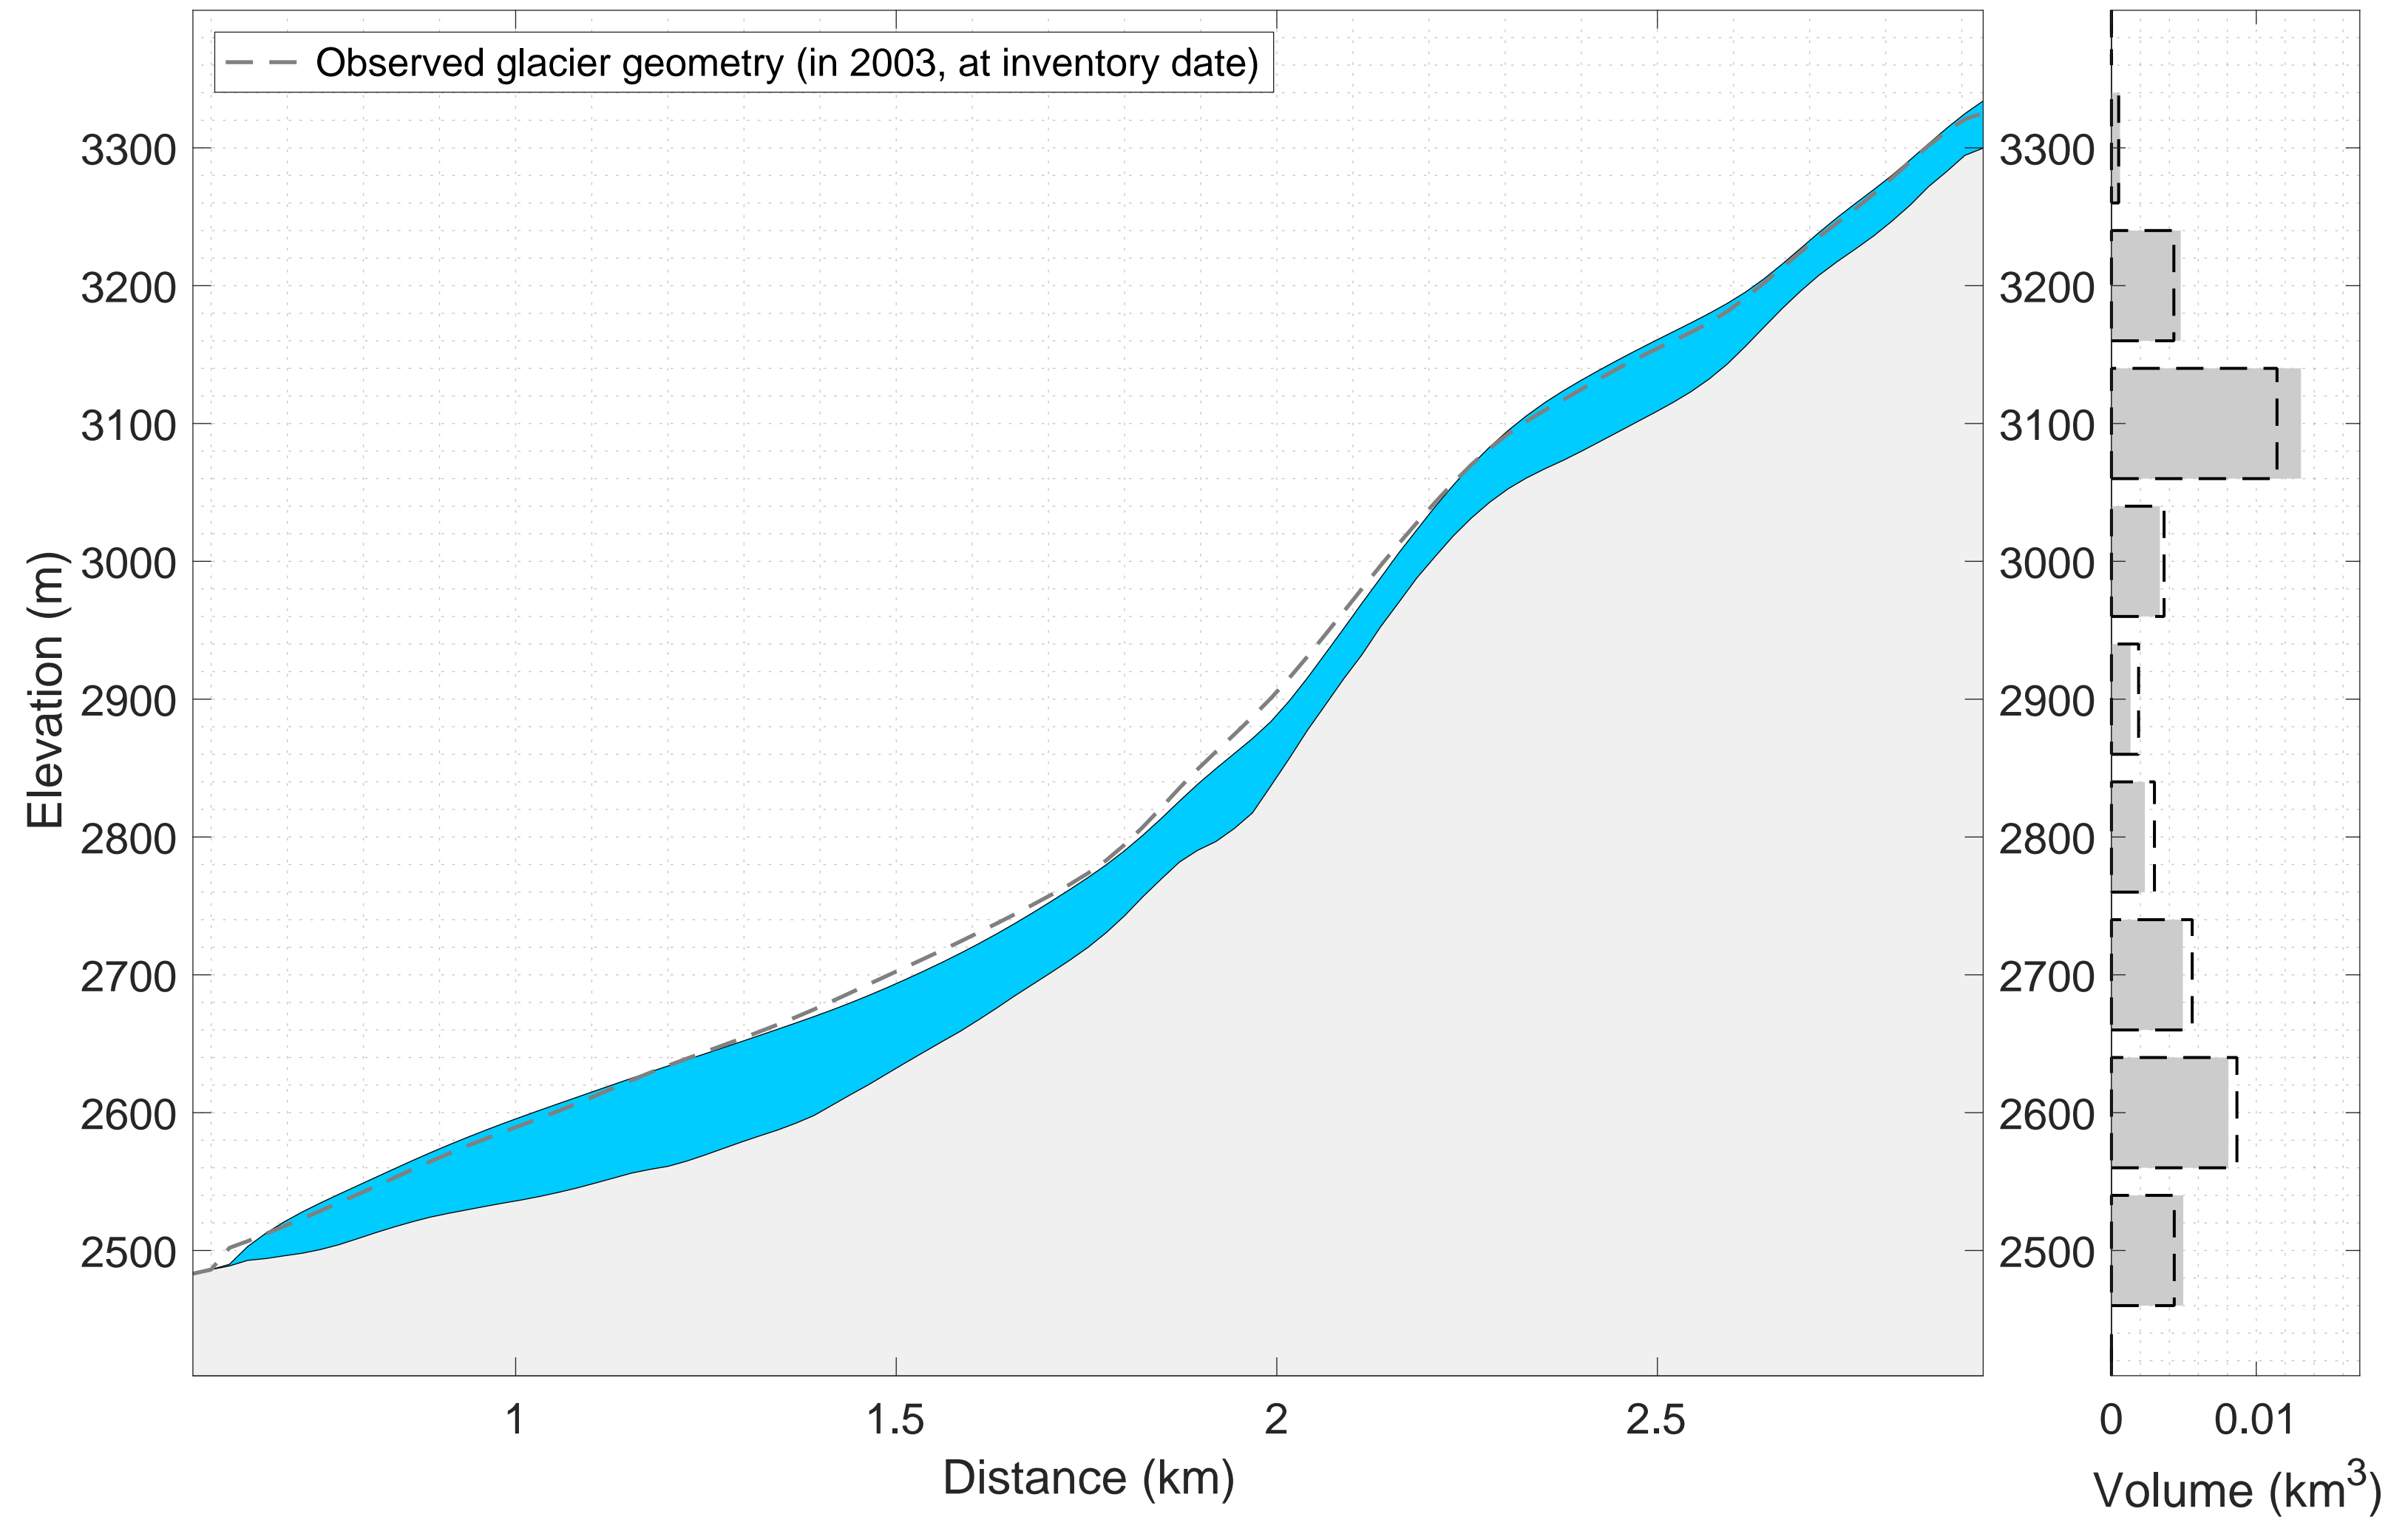

Supplement: Supplementary file 174 [file tc-13-1125-2019-supplement.zip]

**Modelled geometry (Glacier ID = 01604;  $A = 1.3088\text{e-}16 \text{ Pa}^{-3} \text{ a}^{-1}$ ;  $dx = 39 \text{ m}$ )**

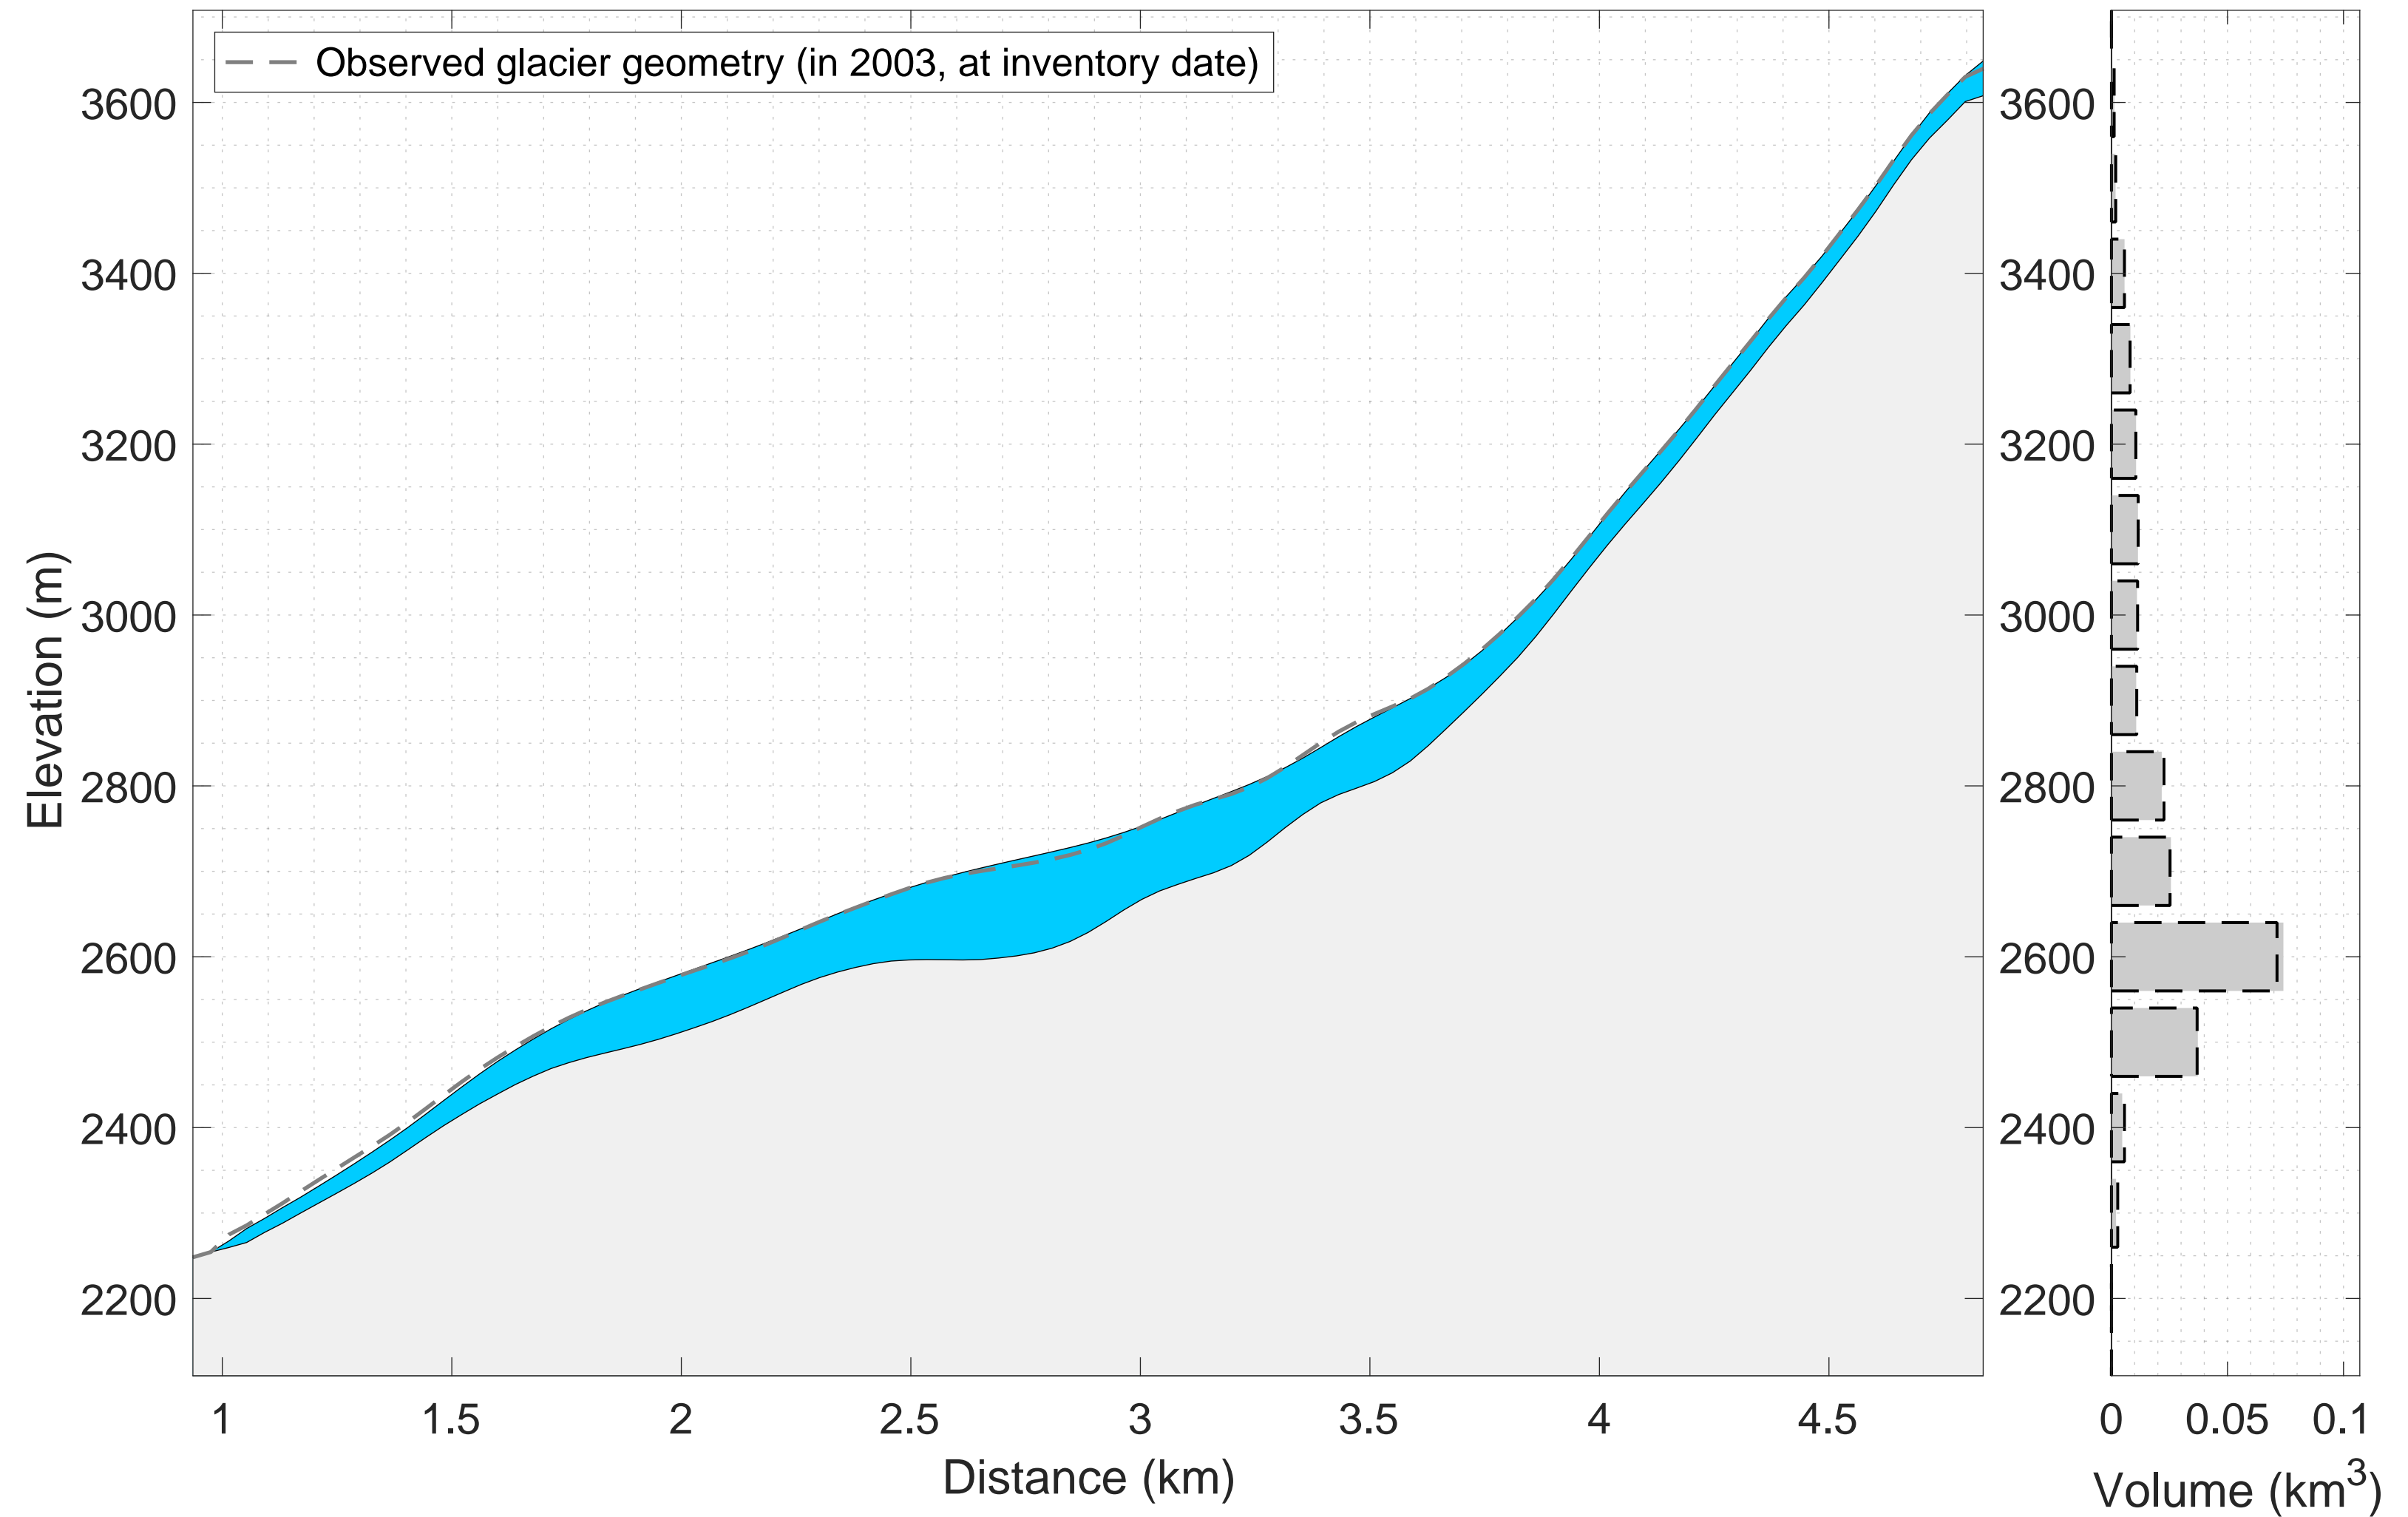

Supplement: Supplementary file 175 [file tc-13-1125-2019-supplement.zip]

**Modelled geometry (Glacier ID = 02119;  $A = 7.328\text{e-}17 \text{ Pa}^{-3} \text{ a}^{-1}$ ;  $dx = 39 \text{ m}$ )**

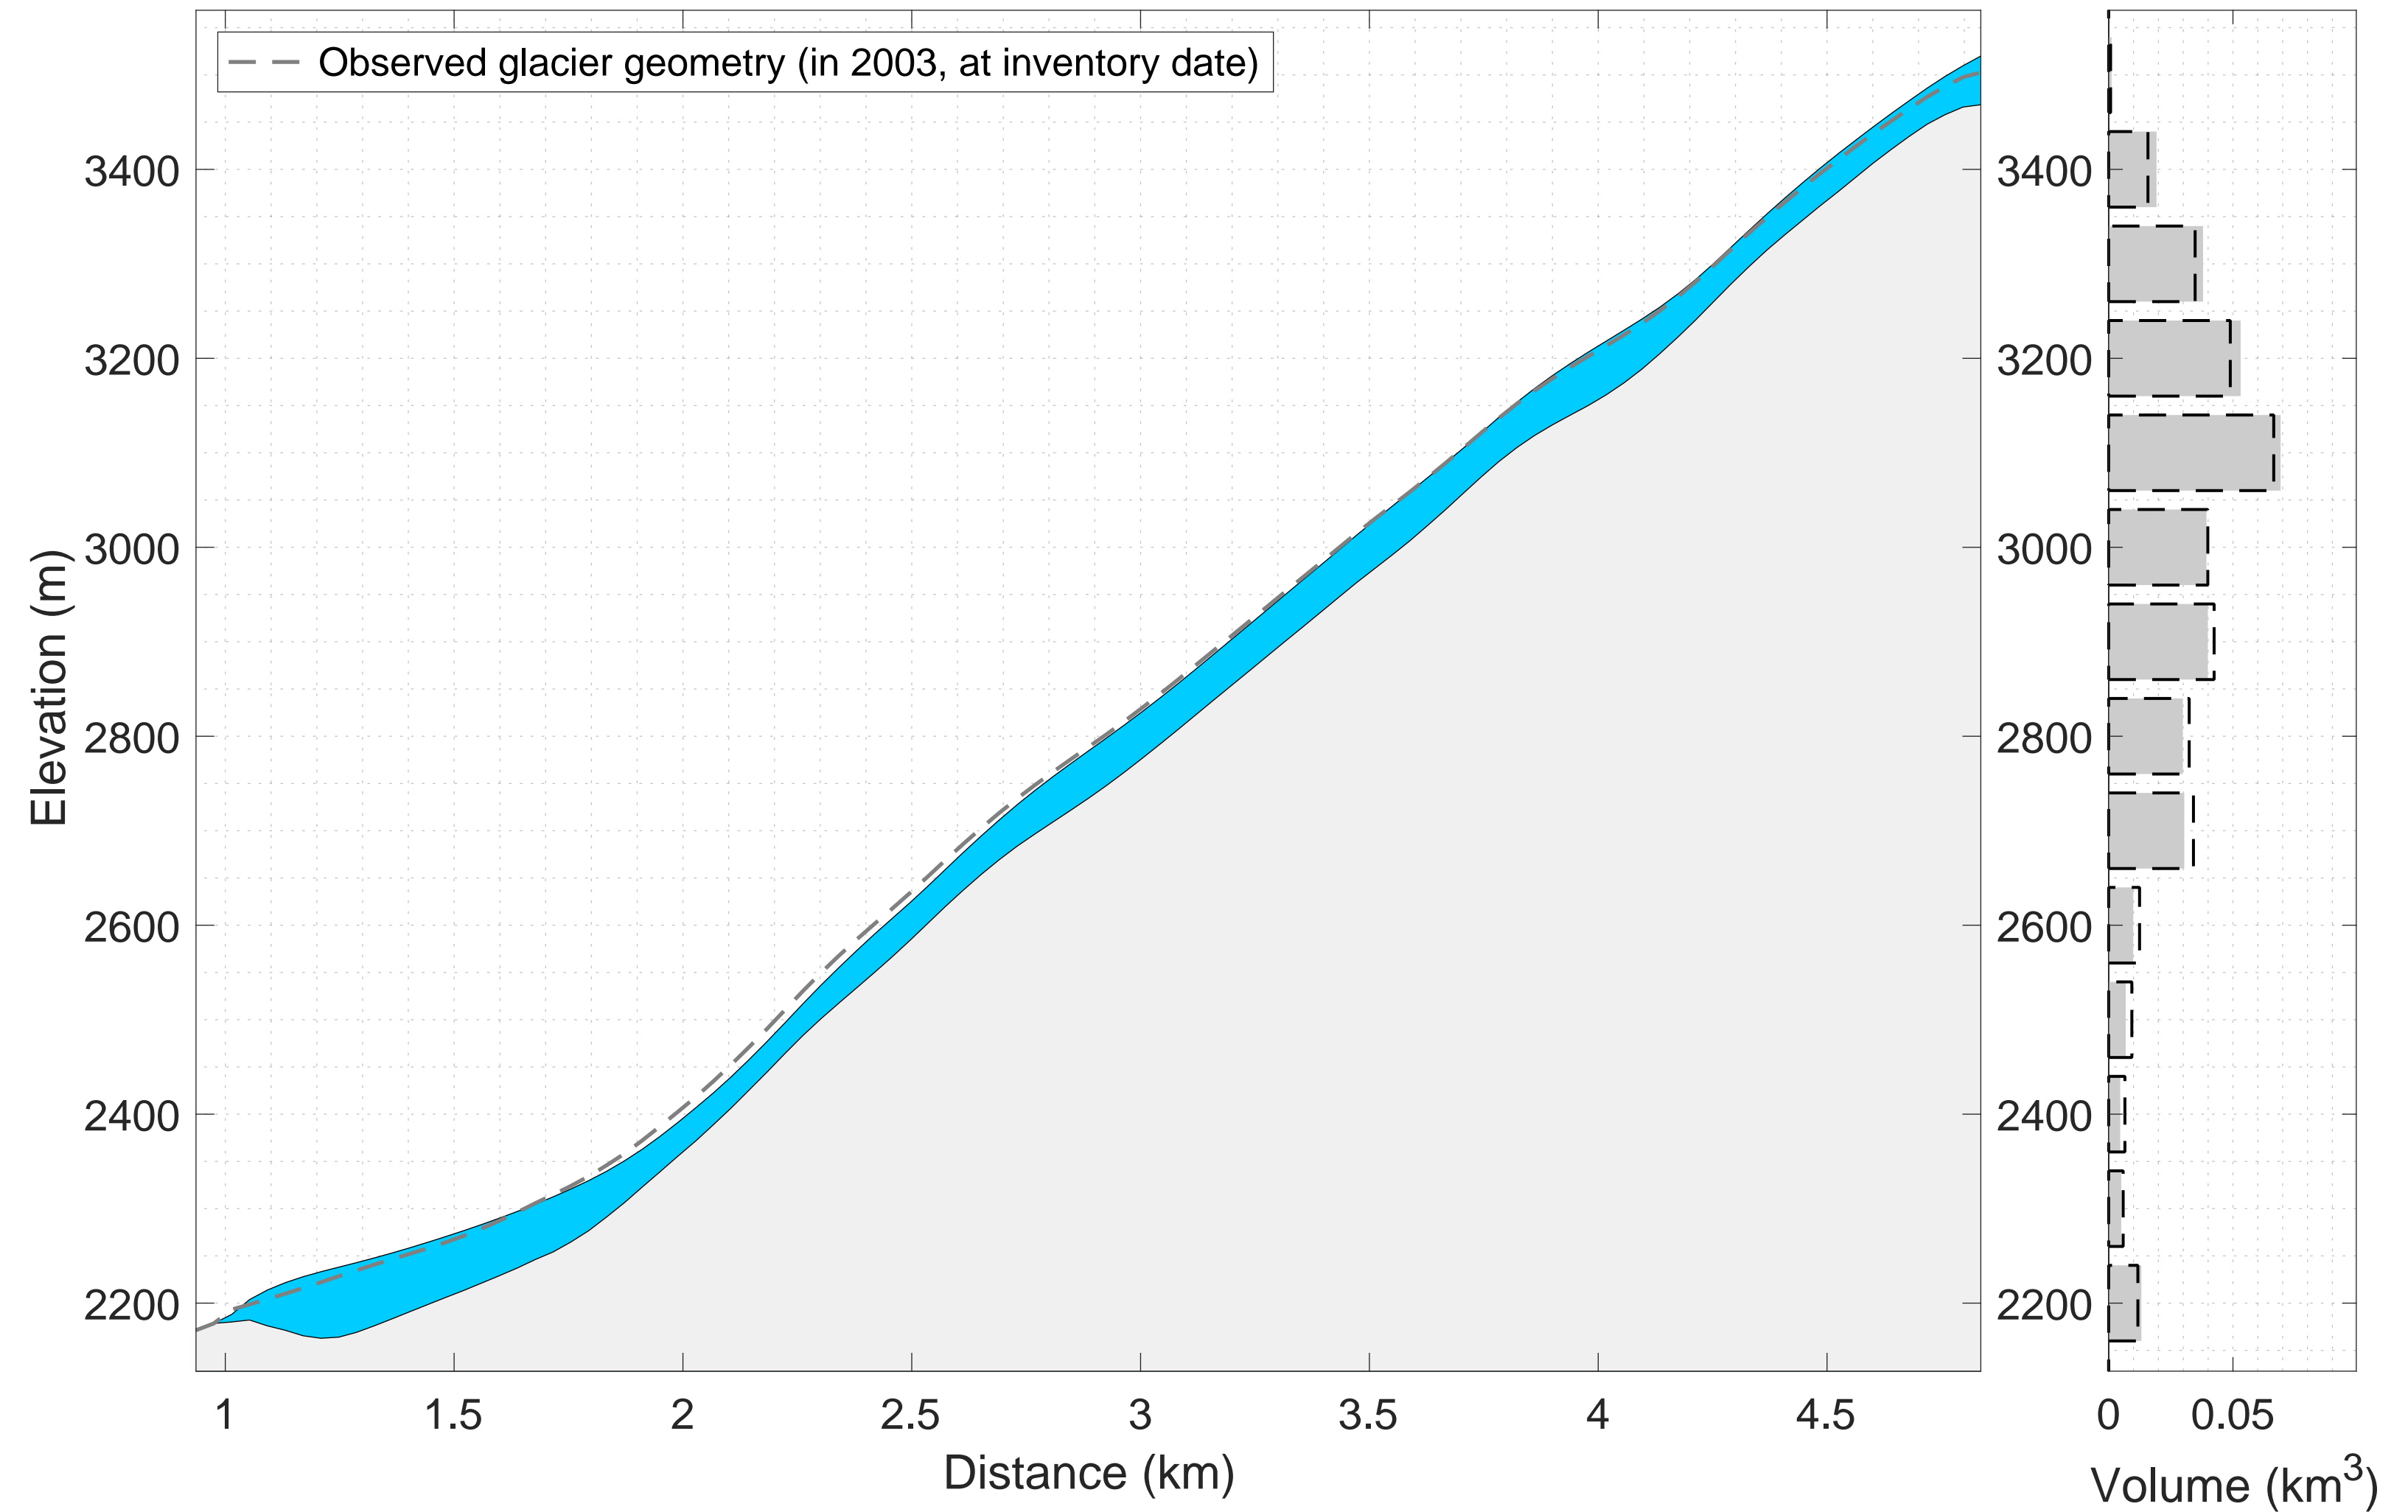

Supplement: Supplementary file 176 [file tc-13-1125-2019-supplement.zip]

**Modelled geometry (Glacier ID = 02740;  $A = 4.6363\text{e-}17 \text{ Pa}^{-3} \text{ a}^{-1}$ ;  $dx = 46 \text{ m}$ )**

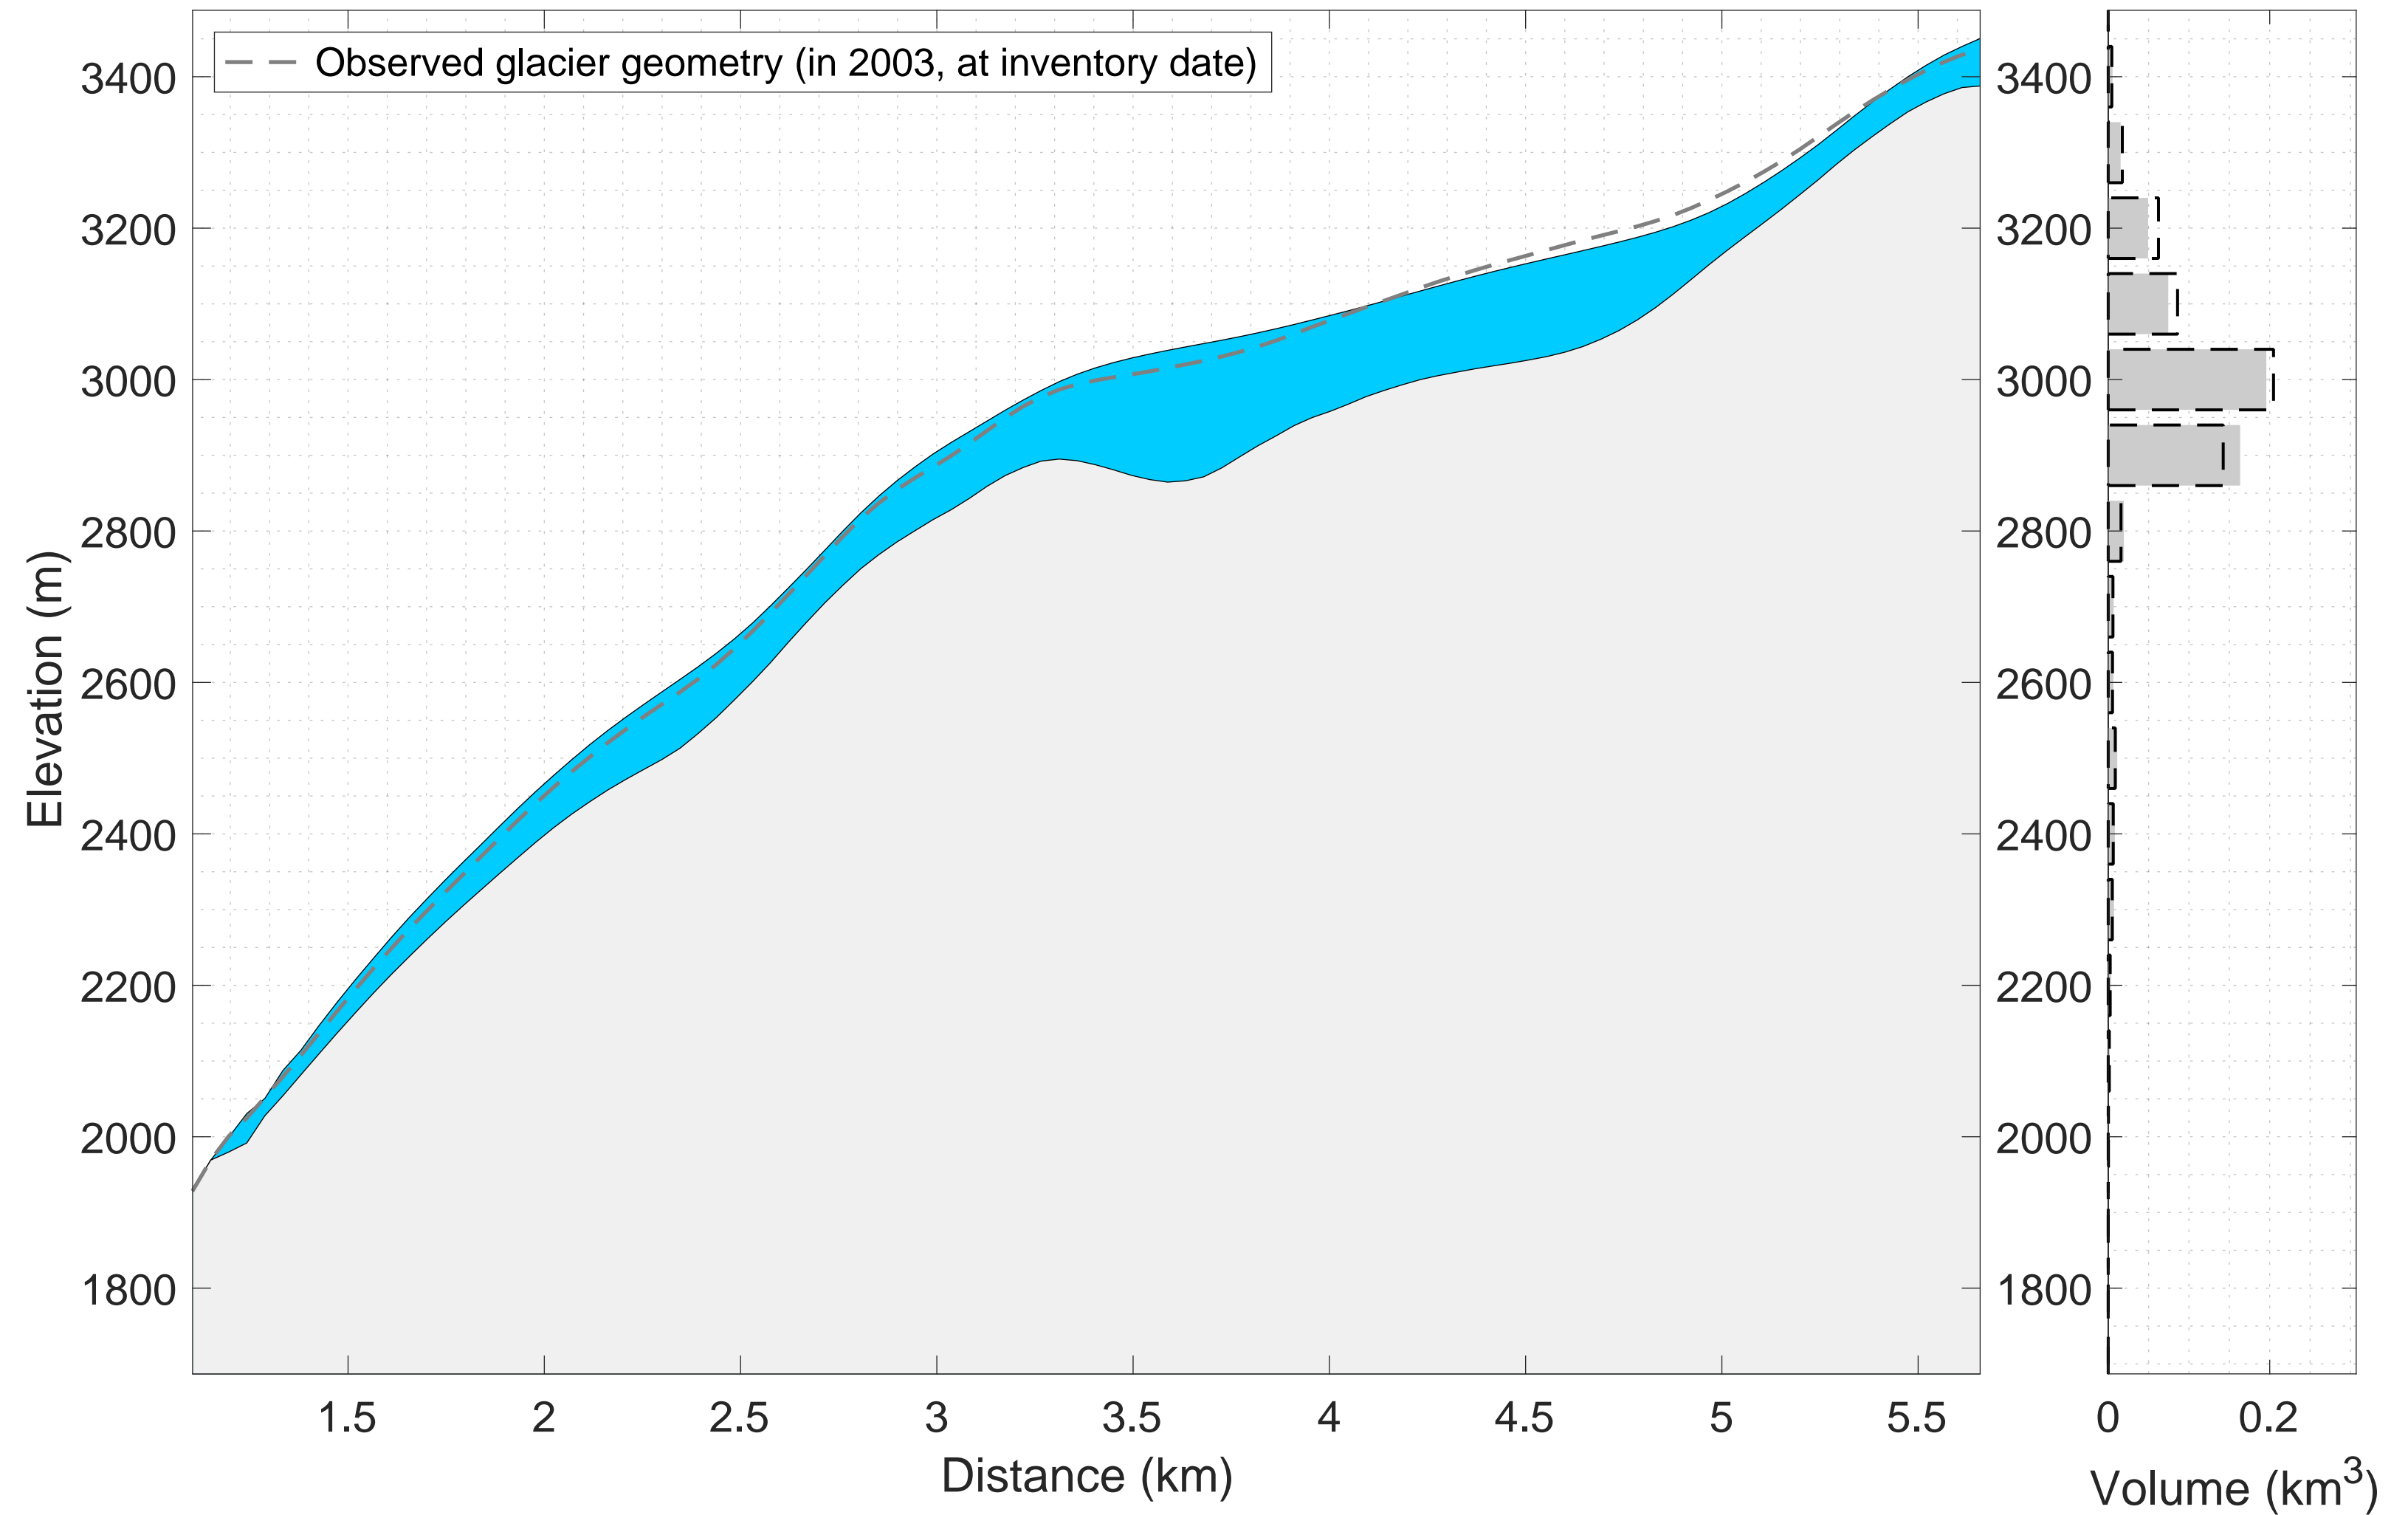

Supplement: Supplementary file 177 [file tc-13-1125-2019-supplement.zip]

**Modelled geometry (Glacier ID = 03045;  $A = 1.407\text{e-}16 \text{ Pa}^{-3} \text{ a}^{-1}$ ;  $dx = 11 \text{ m}$ )**

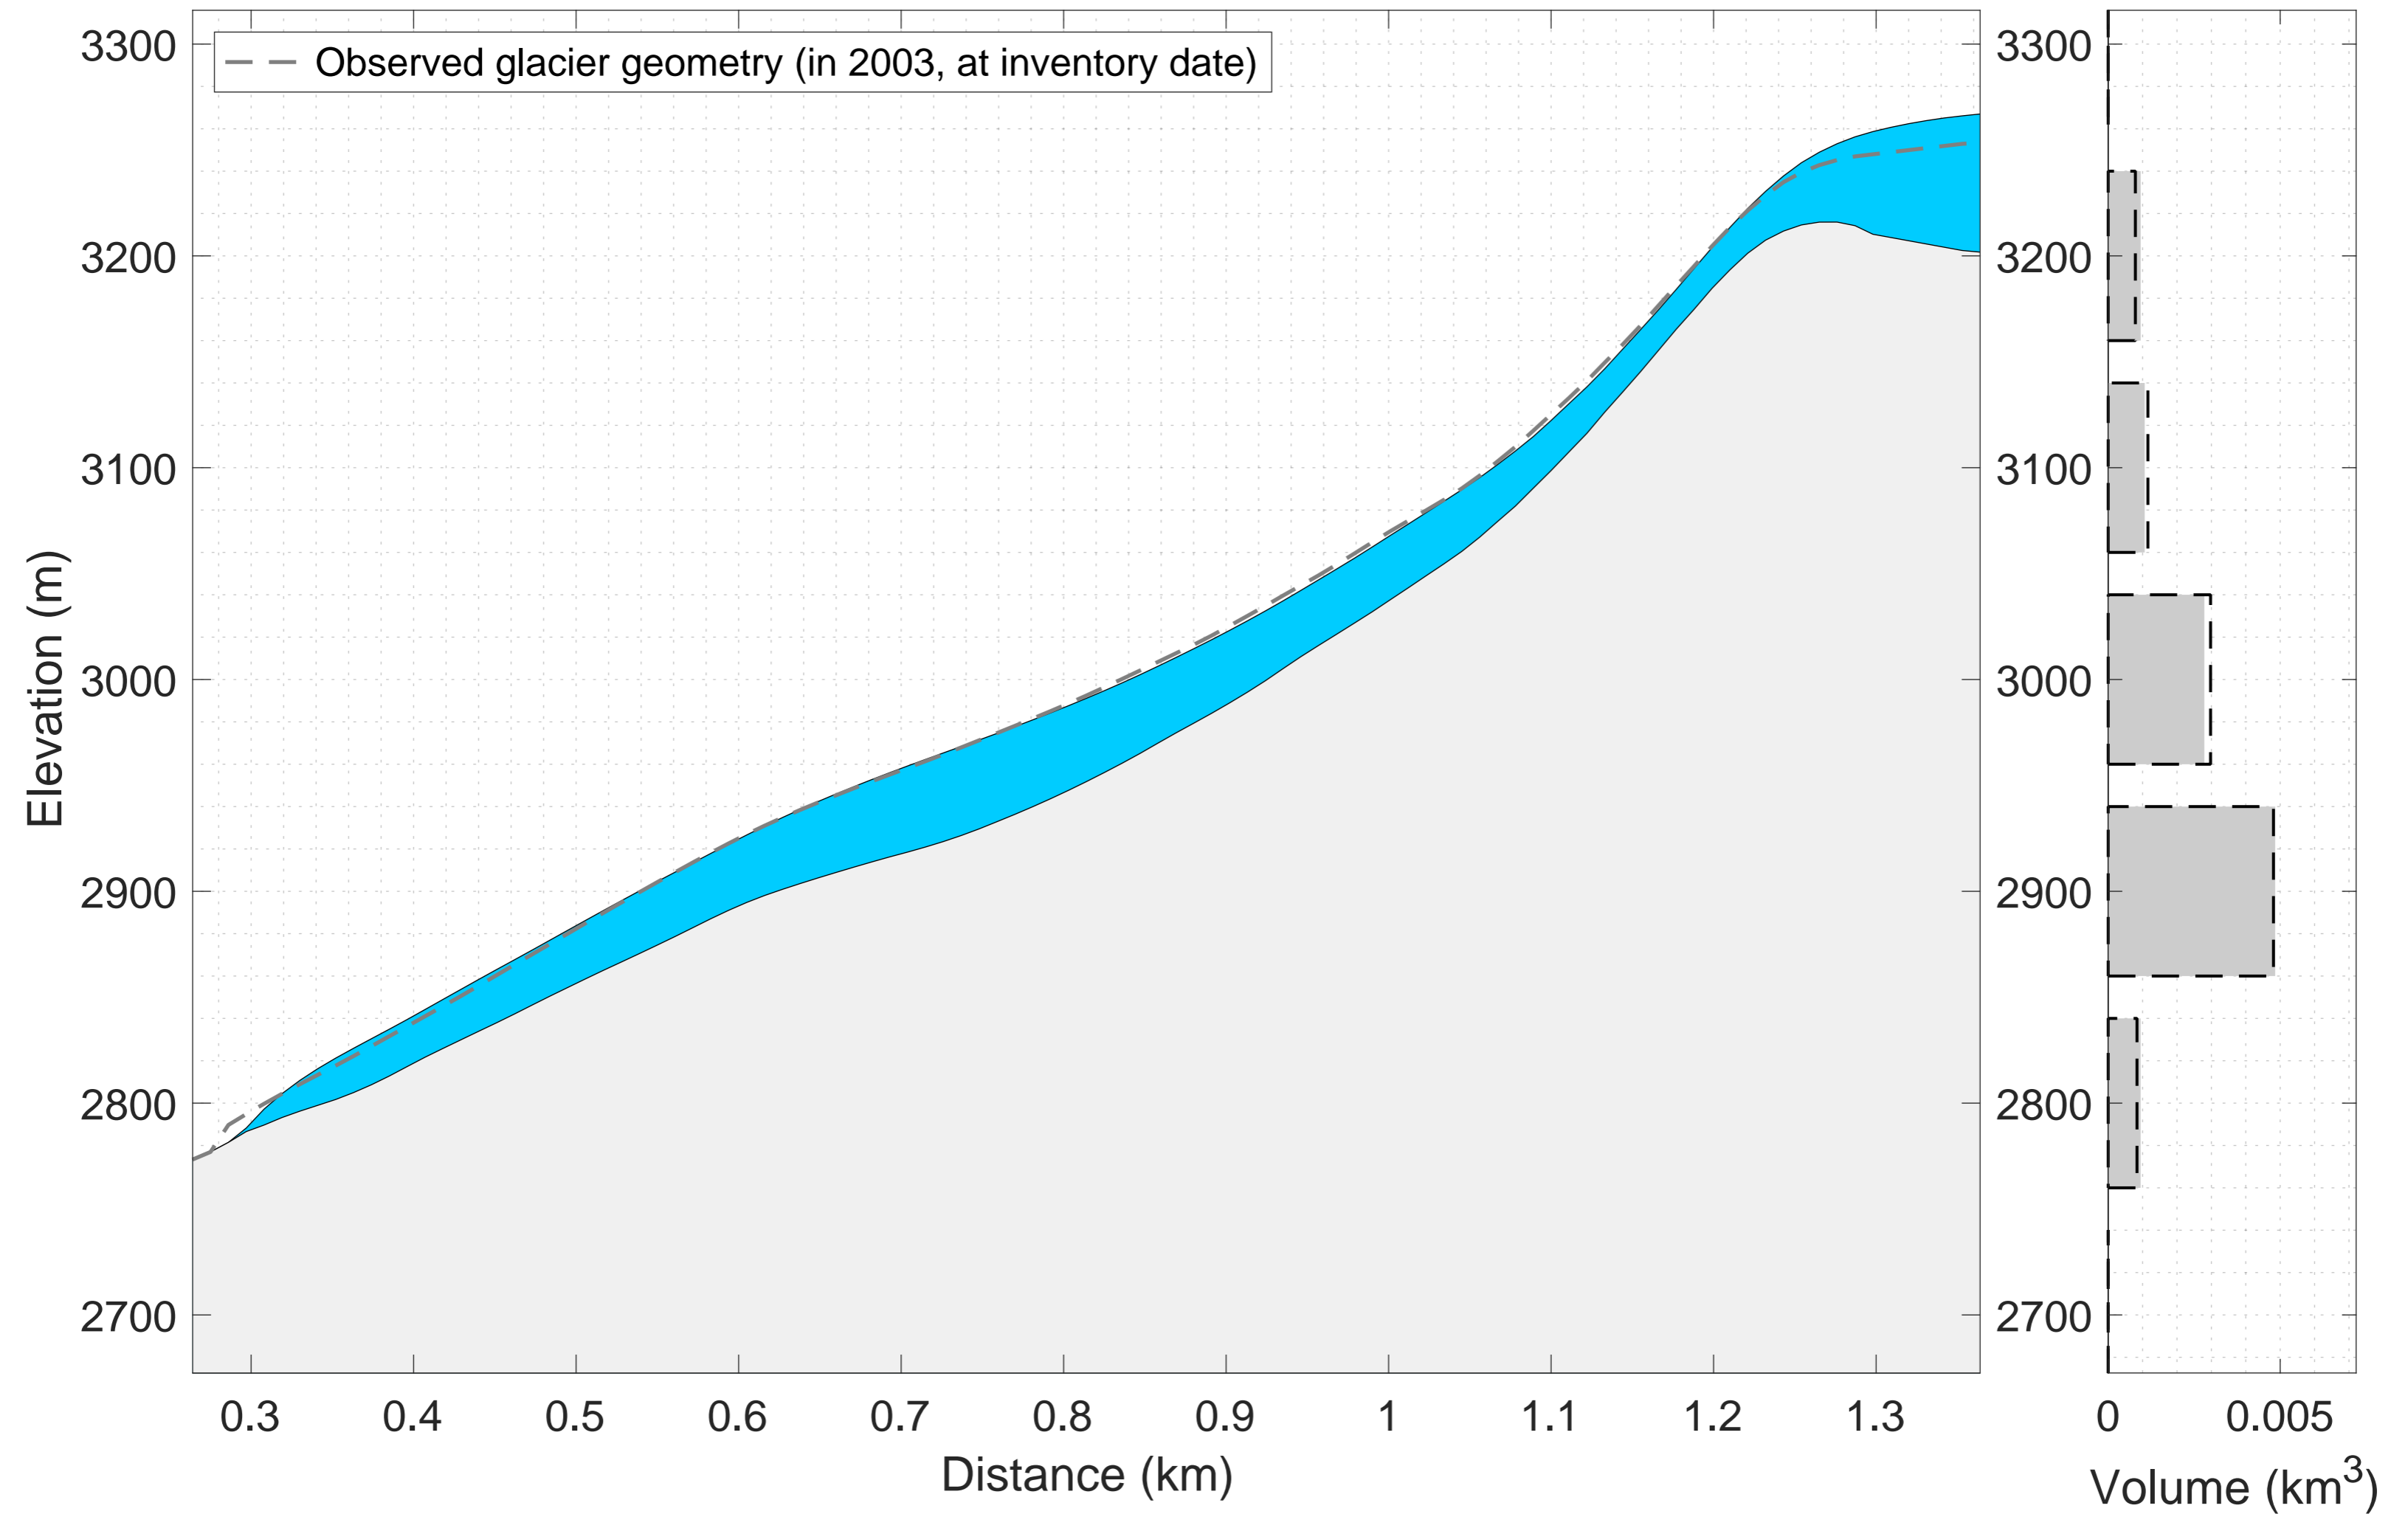

Supplement: Supplementary file 178 [file tc-13-1125-2019-supplement.zip]

**Modelled geometry (Glacier ID = 02630;  $A = 3.1191\text{e-}17 \text{ Pa}^{-3} \text{ a}^{-1}$ ;  $dx = 68 \text{ m}$ )**

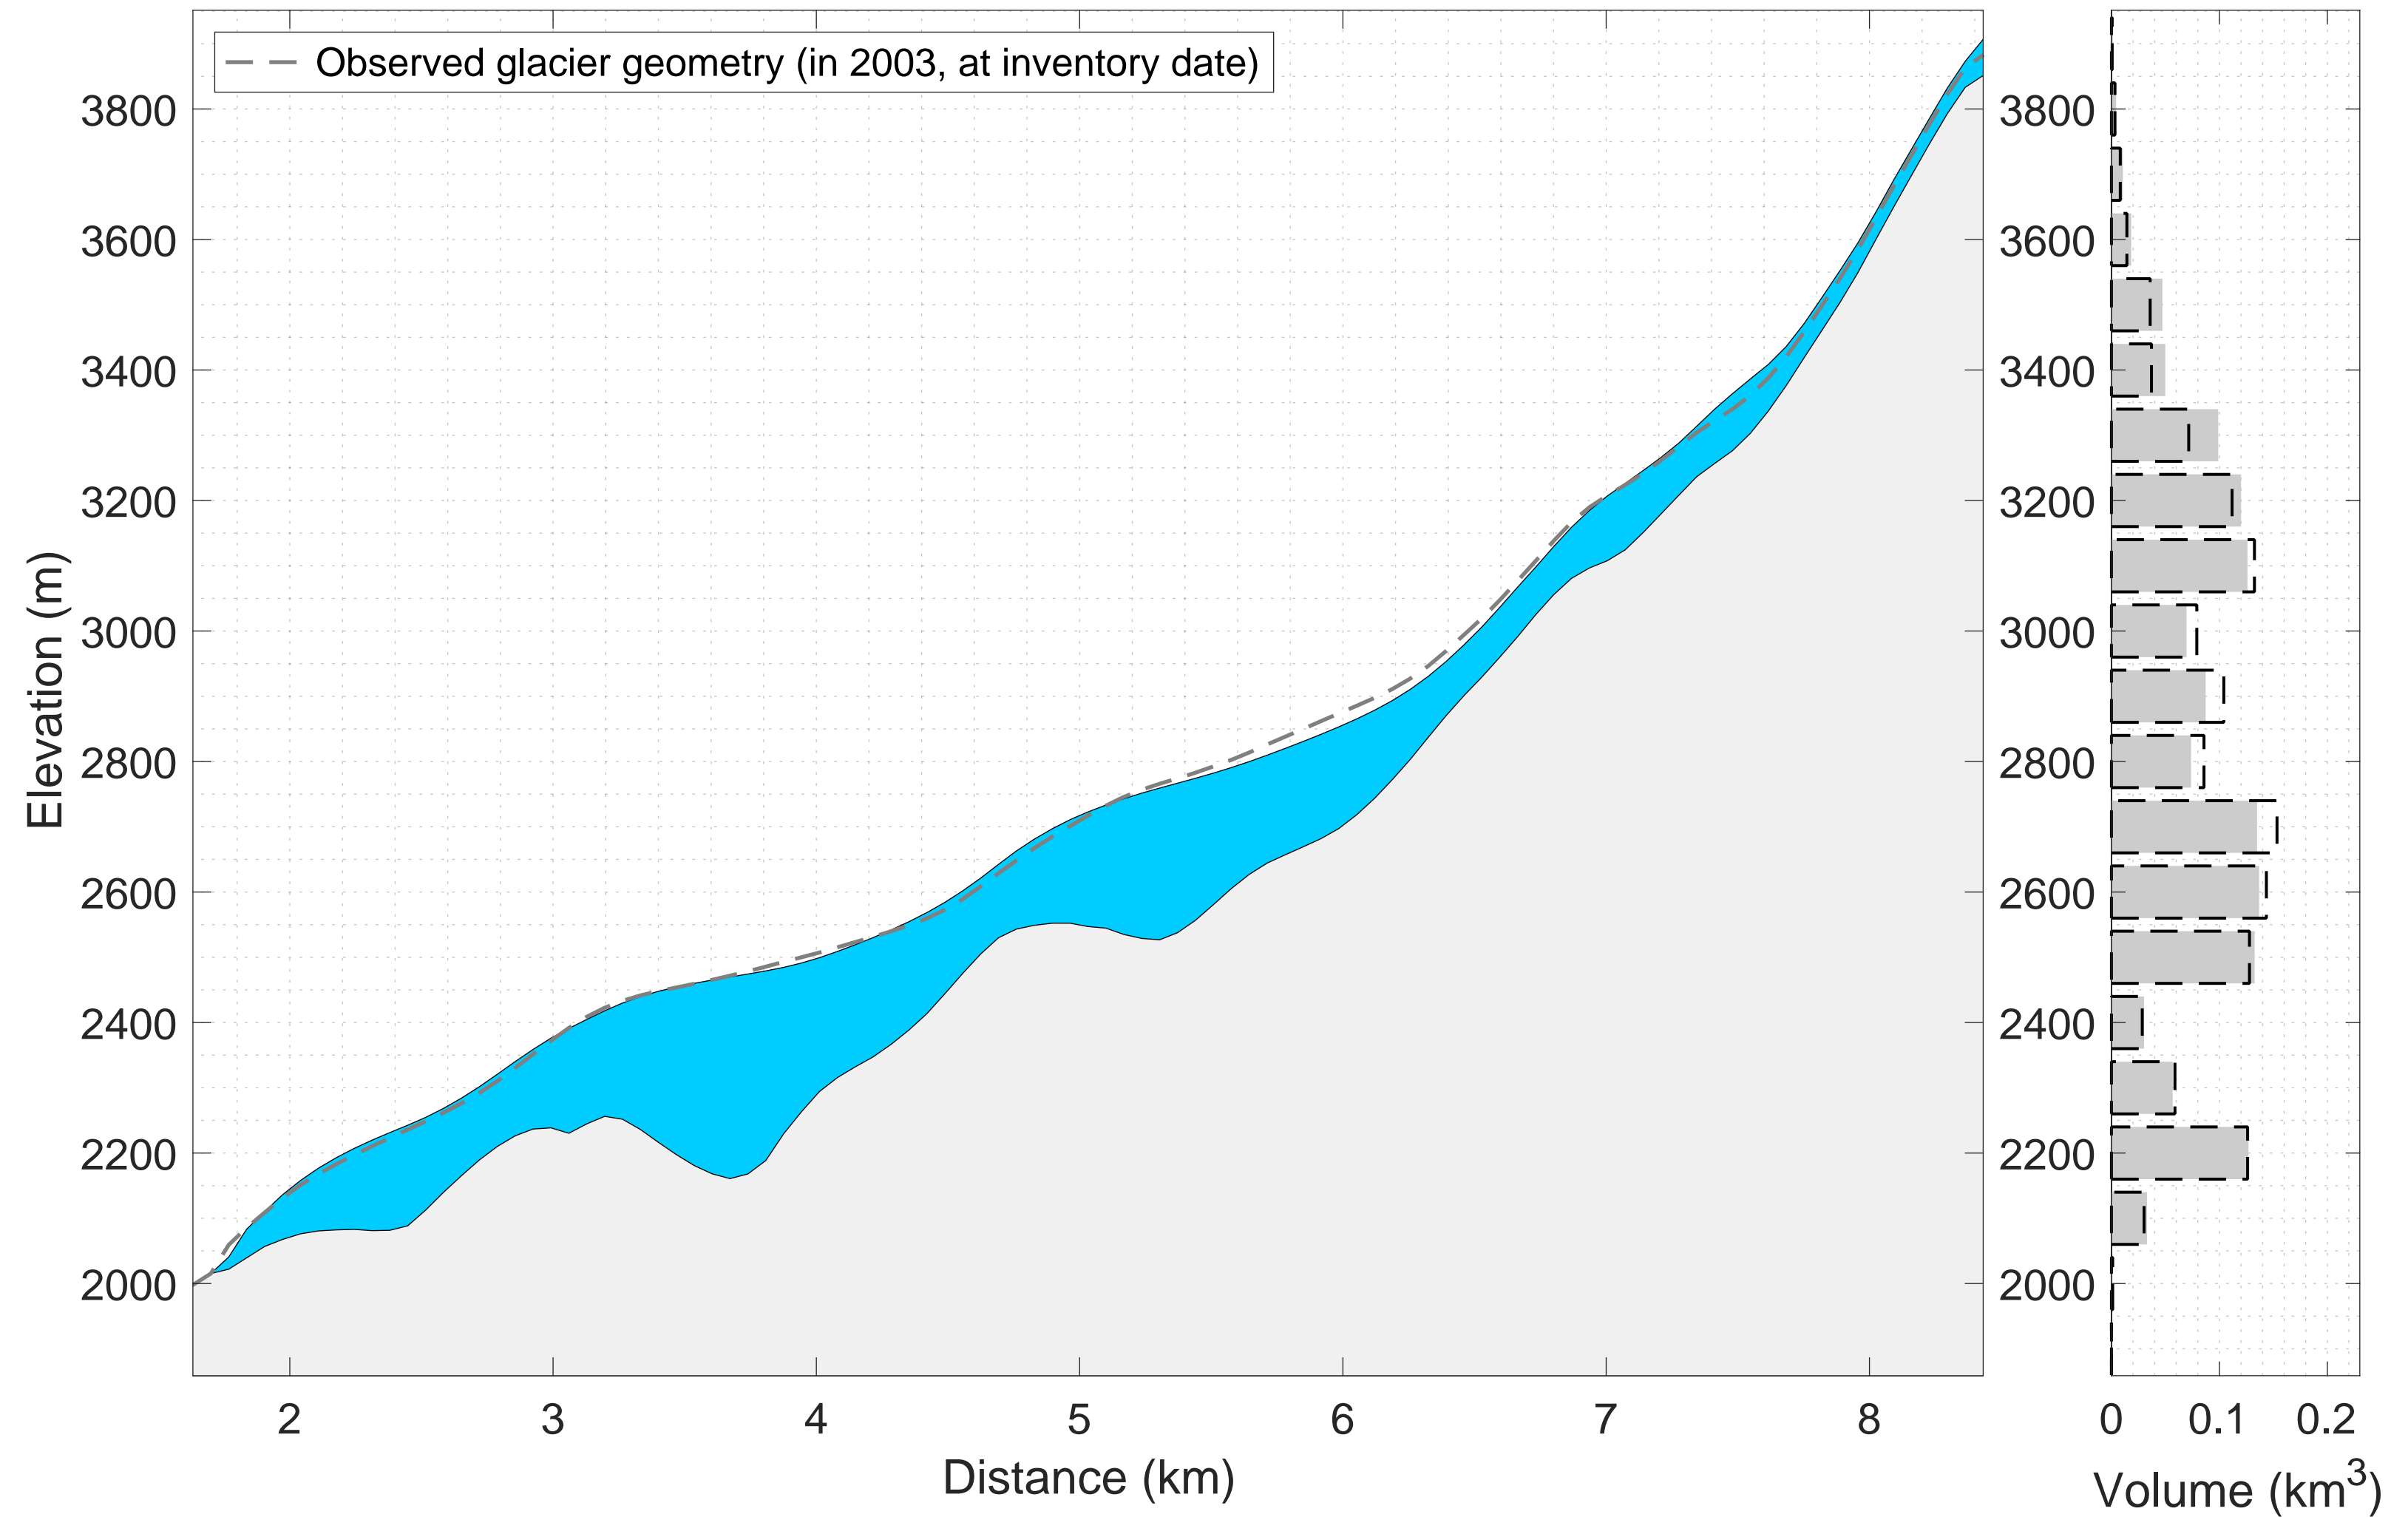

Supplement: Supplementary file 179 [file tc-13-1125-2019-supplement.zip]

**Modelled geometry (Glacier ID = 01623;  $A = 7.9079\text{e-}17 \text{ Pa}^{-3} \text{ a}^{-1}$ ;  $dx = 19 \text{ m}$ )**

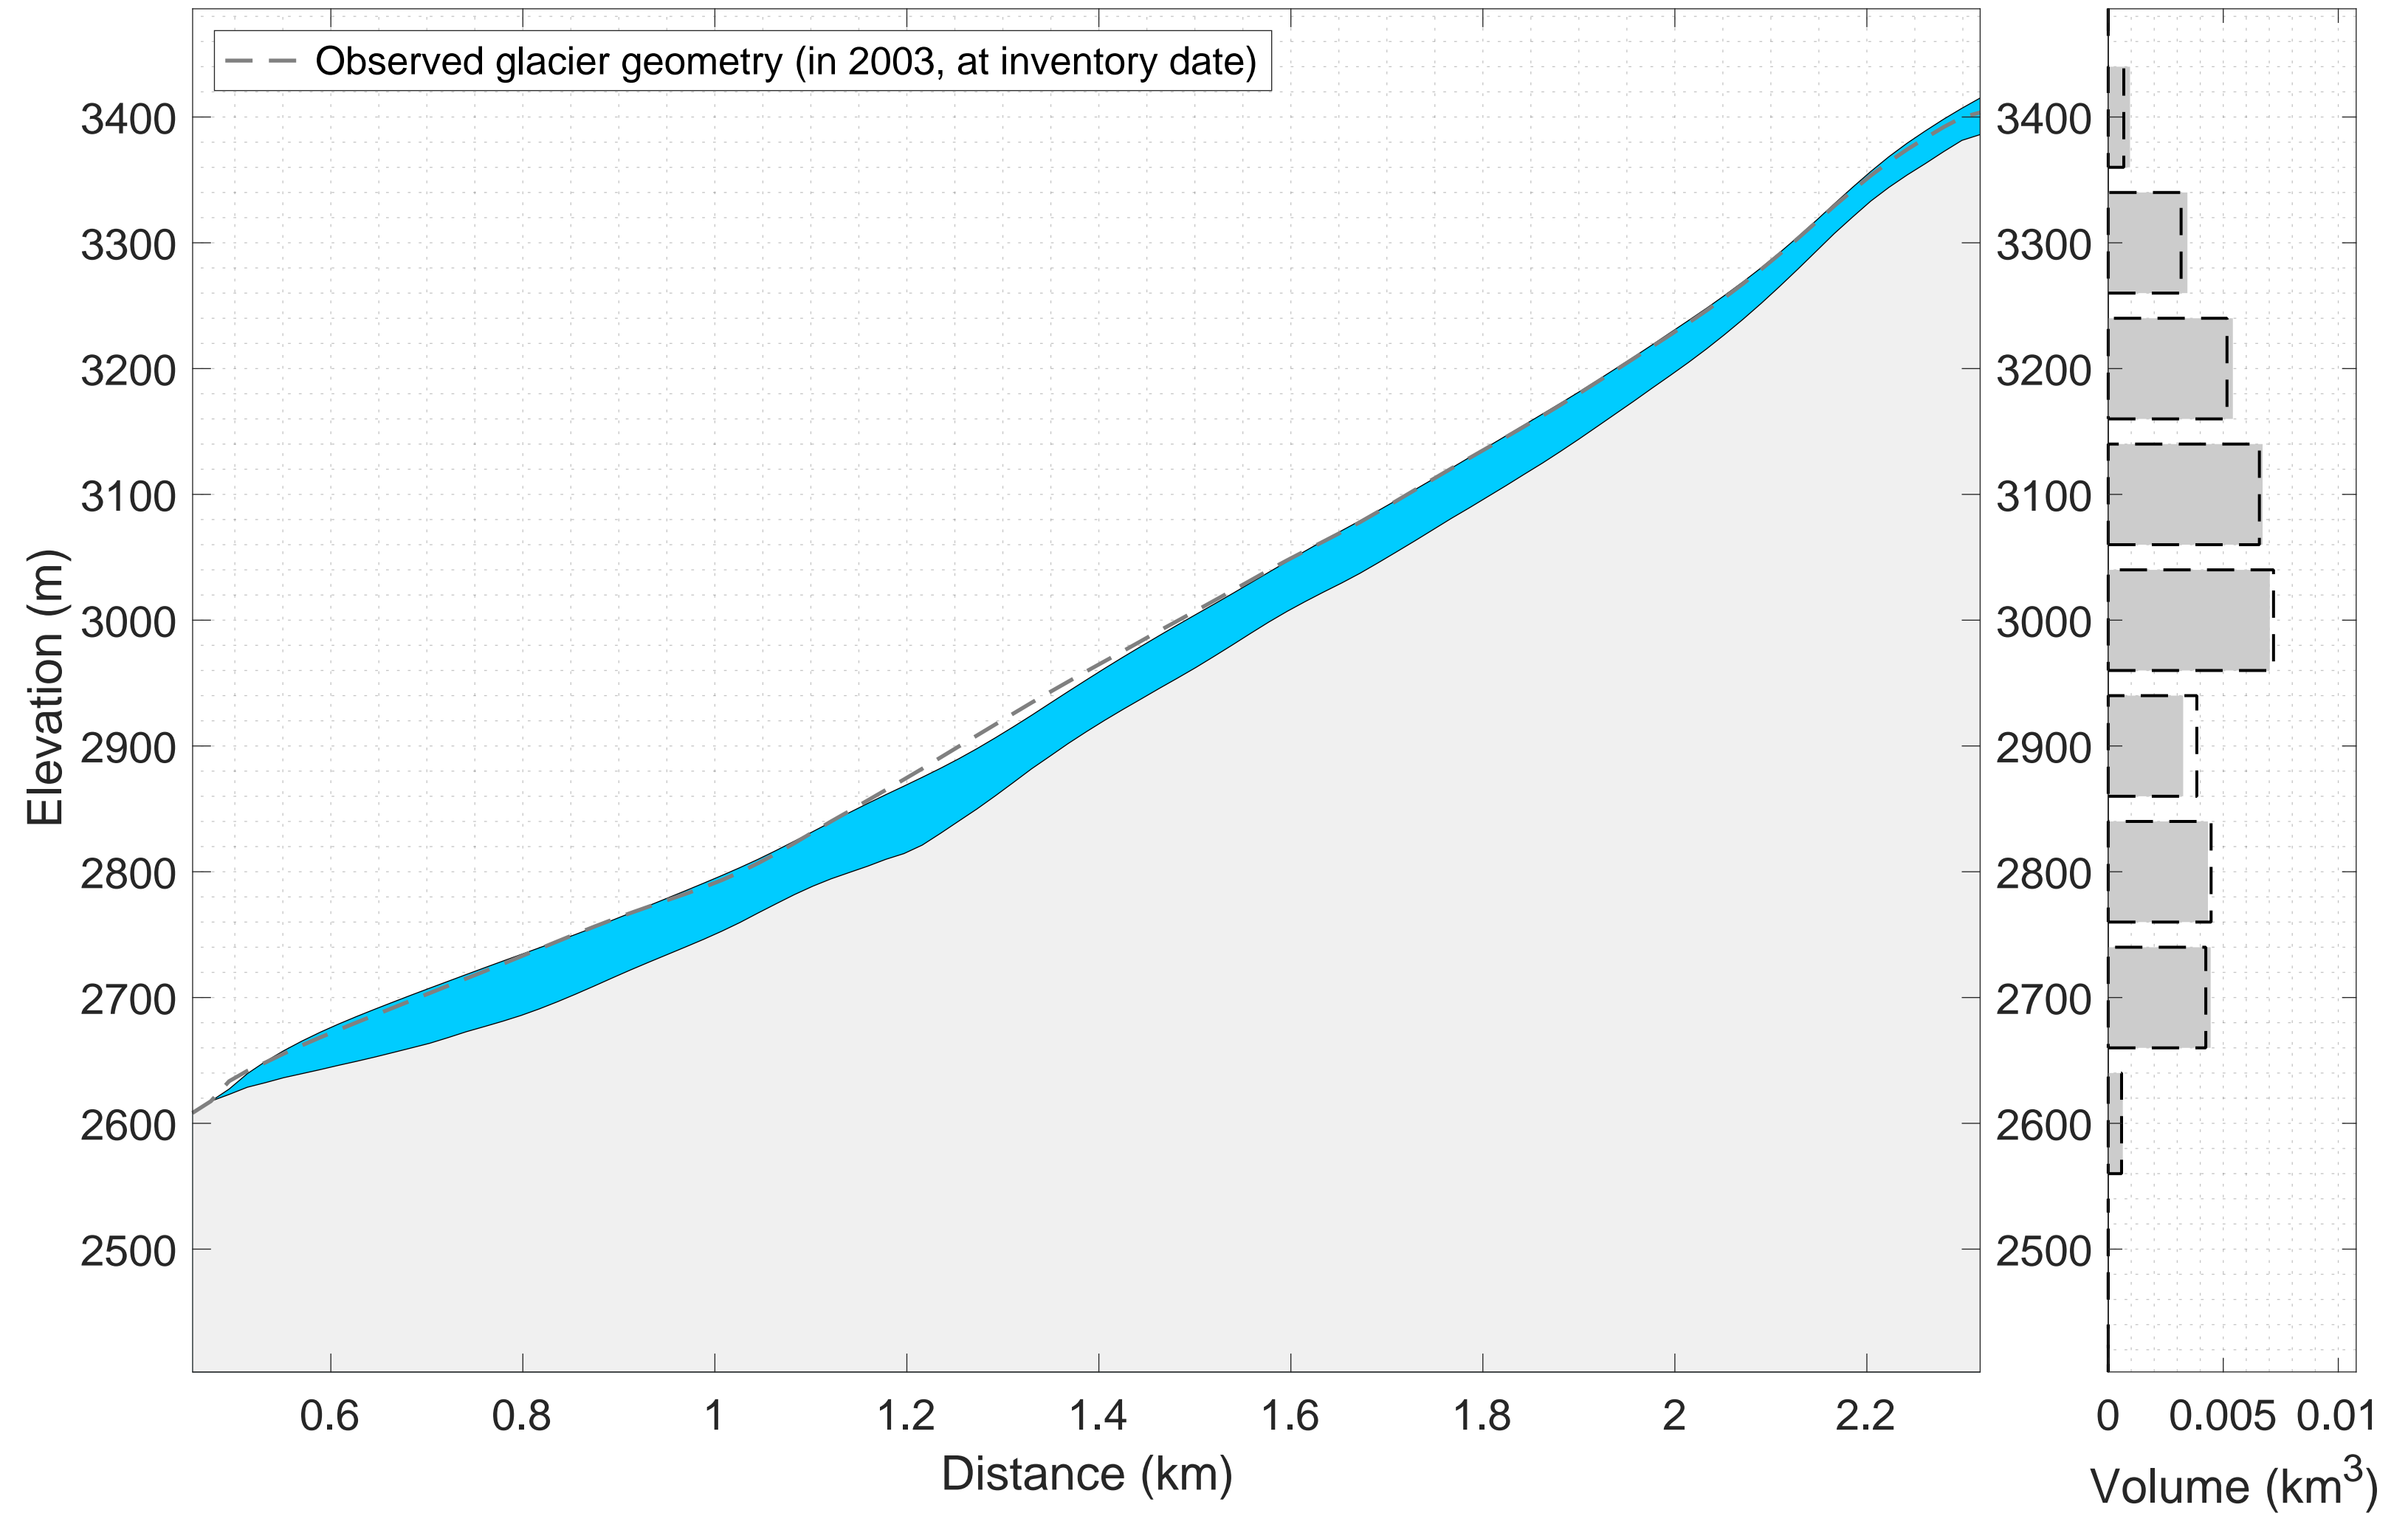

Supplement: Supplementary file 180 [file tc-13-1125-2019-supplement.zip]

**Modelled geometry (Glacier ID = 02136;  $A = 5.9197\text{e-}17 \text{ Pa}^{-3} \text{ a}^{-1}$ ;  $dx = 13 \text{ m}$ )**

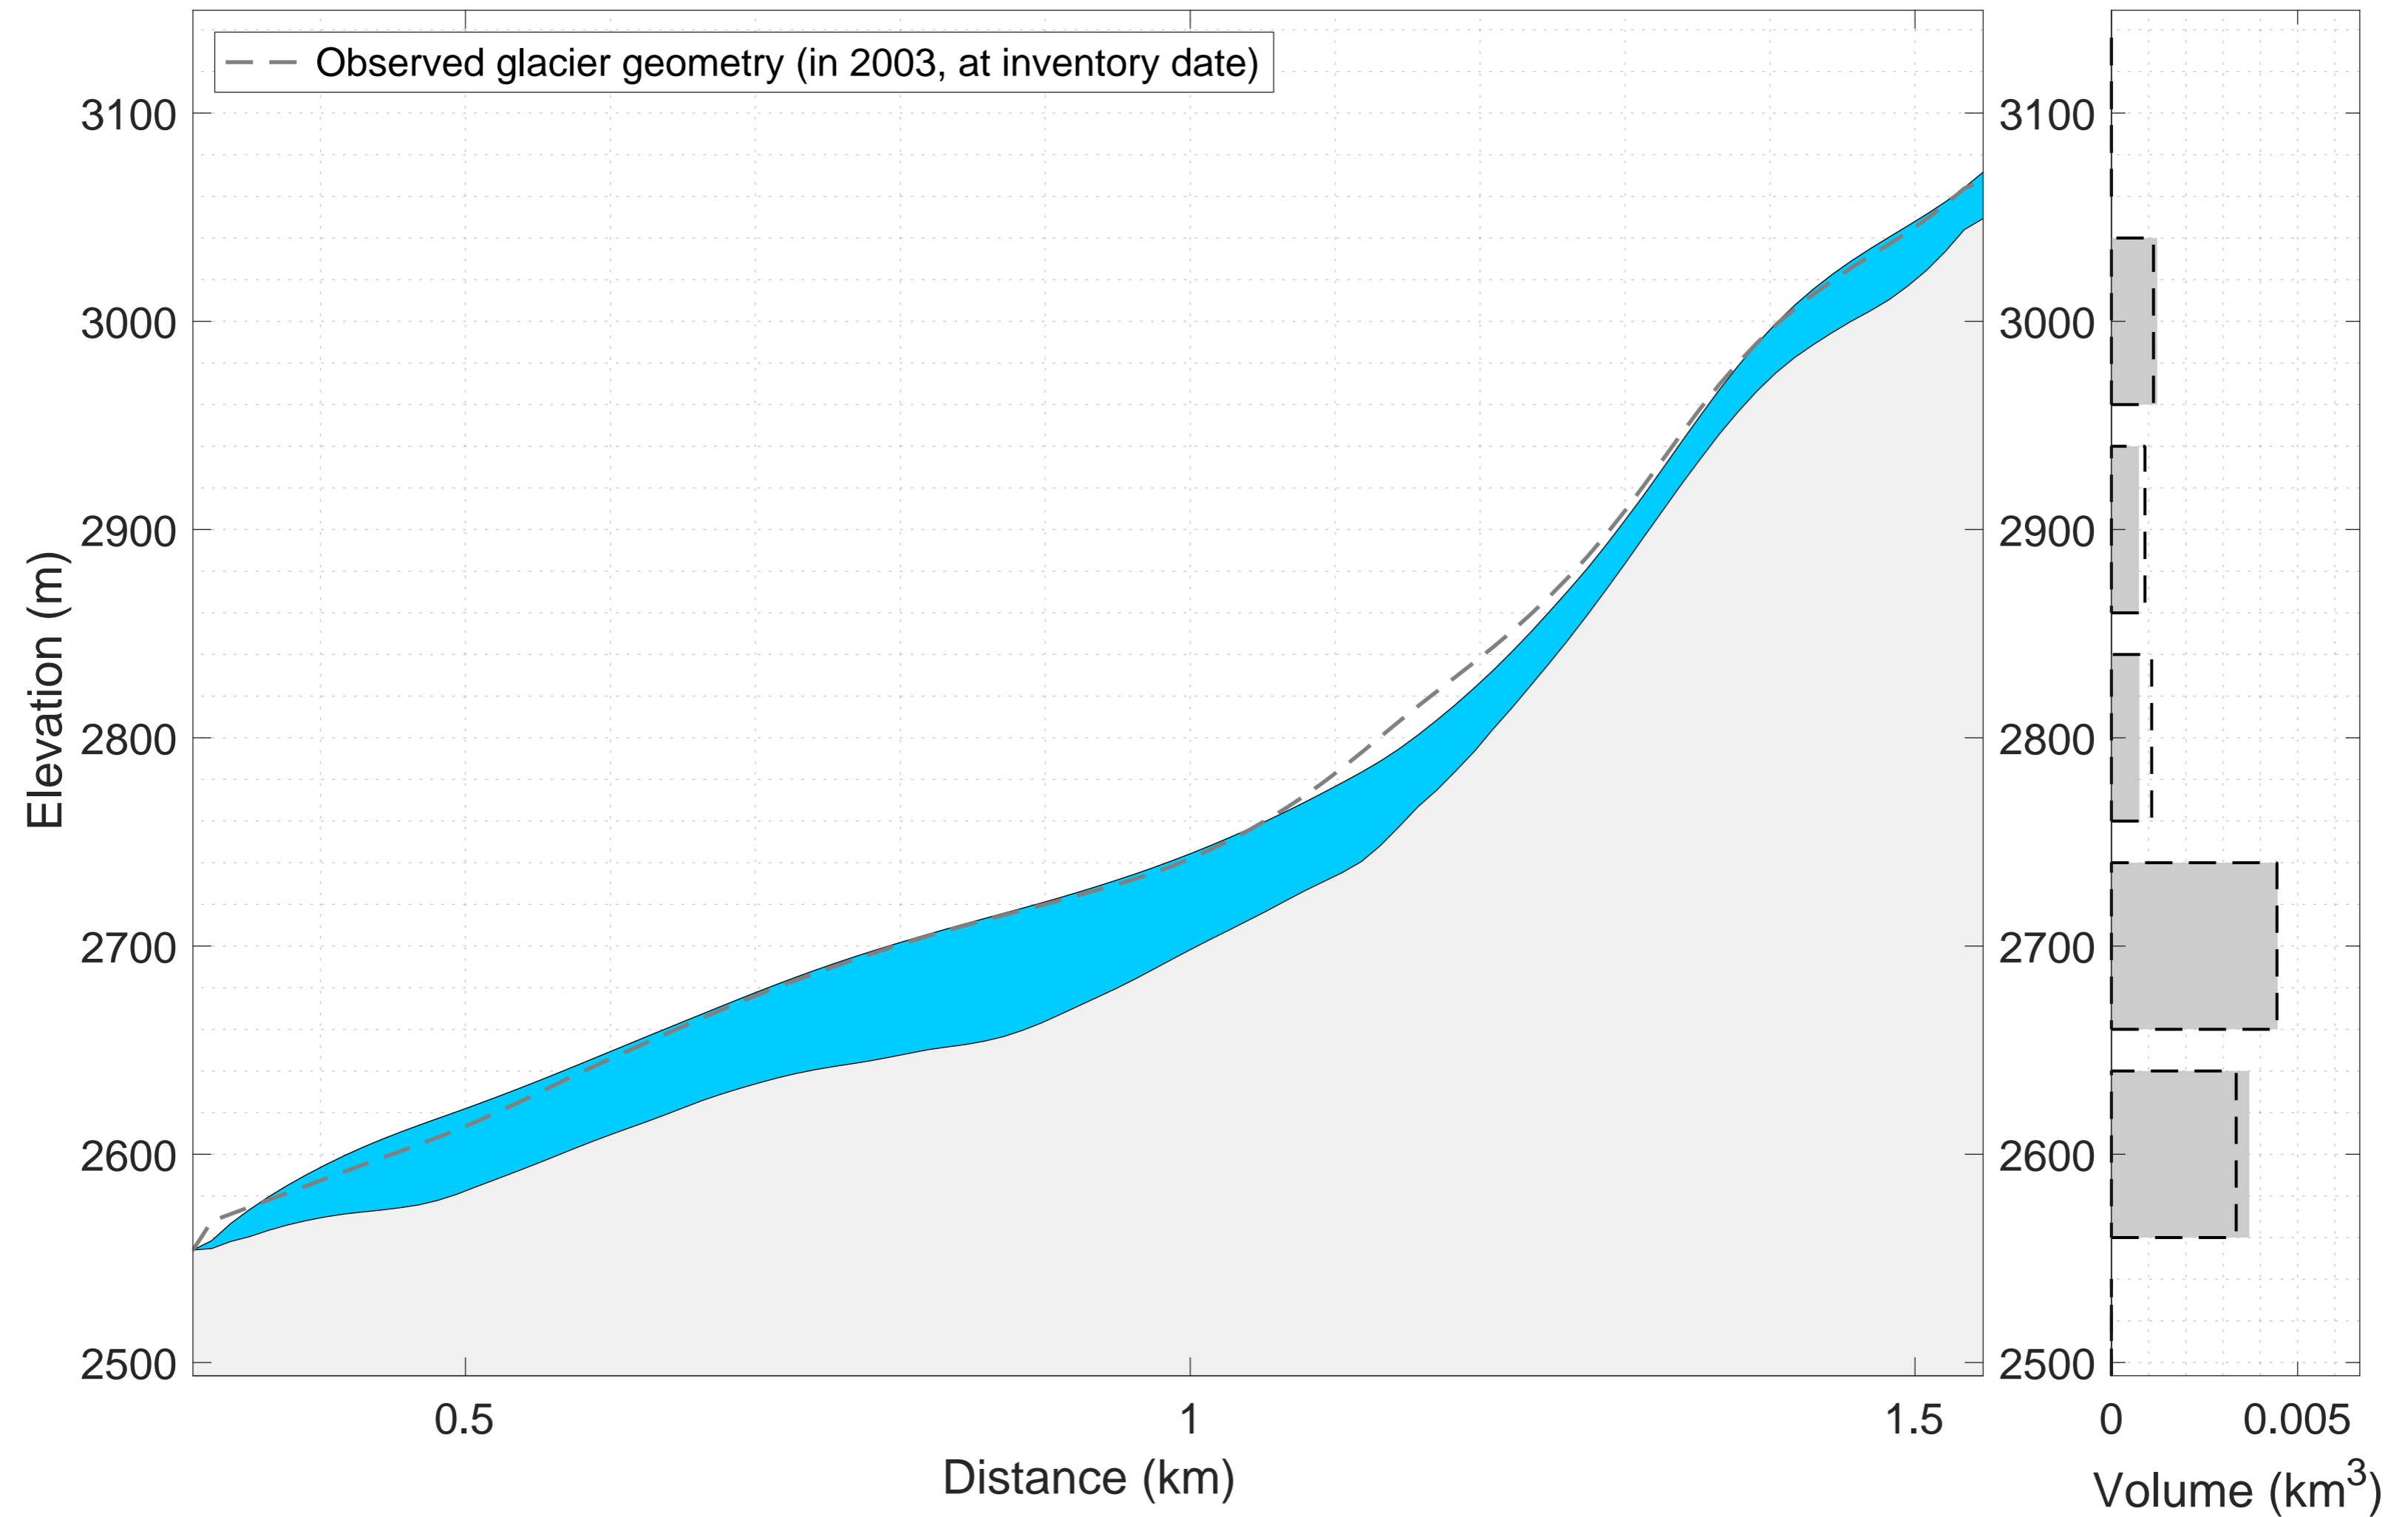

Supplement: Supplementary file 181 [file tc-13-1125-2019-supplement.zip]

**Modelled geometry (Glacier ID = 03484;  $A = 1.9341\text{e-}16 \text{ Pa}^{-3} \text{ a}^{-1}$ ;  $dx = 13 \text{ m}$ )**

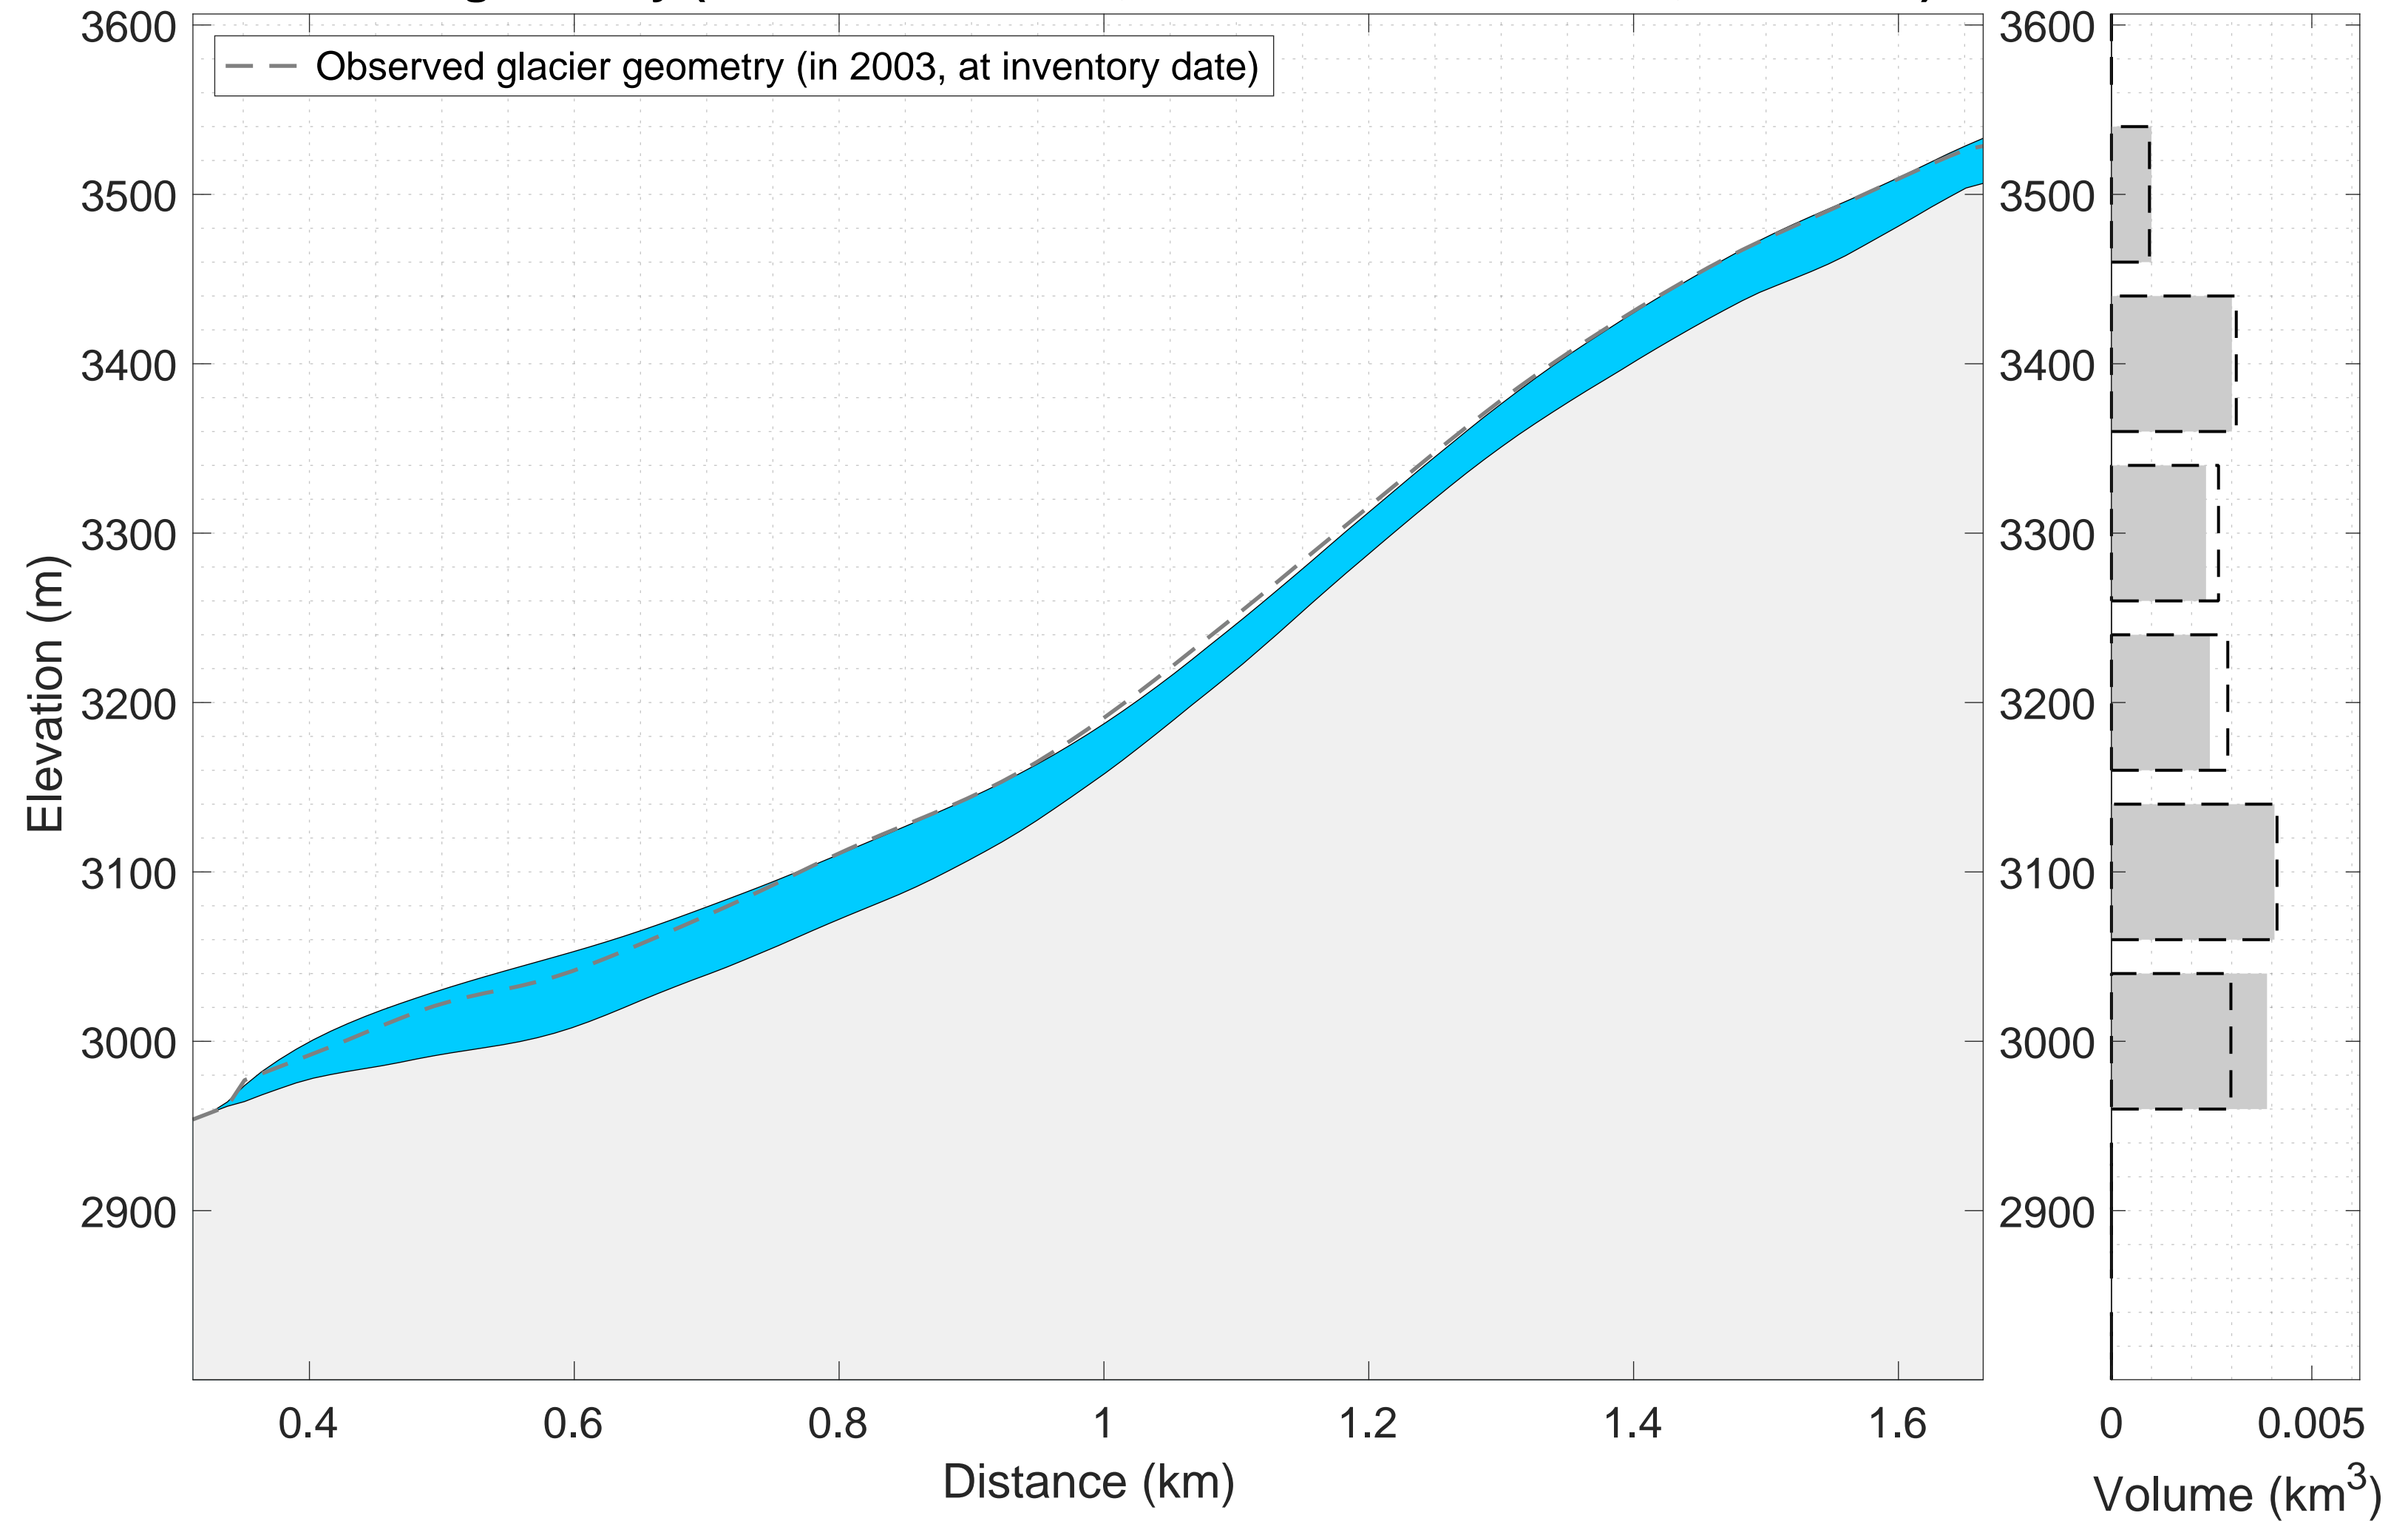

Supplement: Supplementary file 182 [file tc-13-1125-2019-supplement.zip]

**Modelled geometry (Glacier ID = 02860;  $A = 1.2792\text{e-}16 \text{ Pa}^{-3} \text{ a}^{-1}$ ;  $dx = 10 \text{ m}$ )**

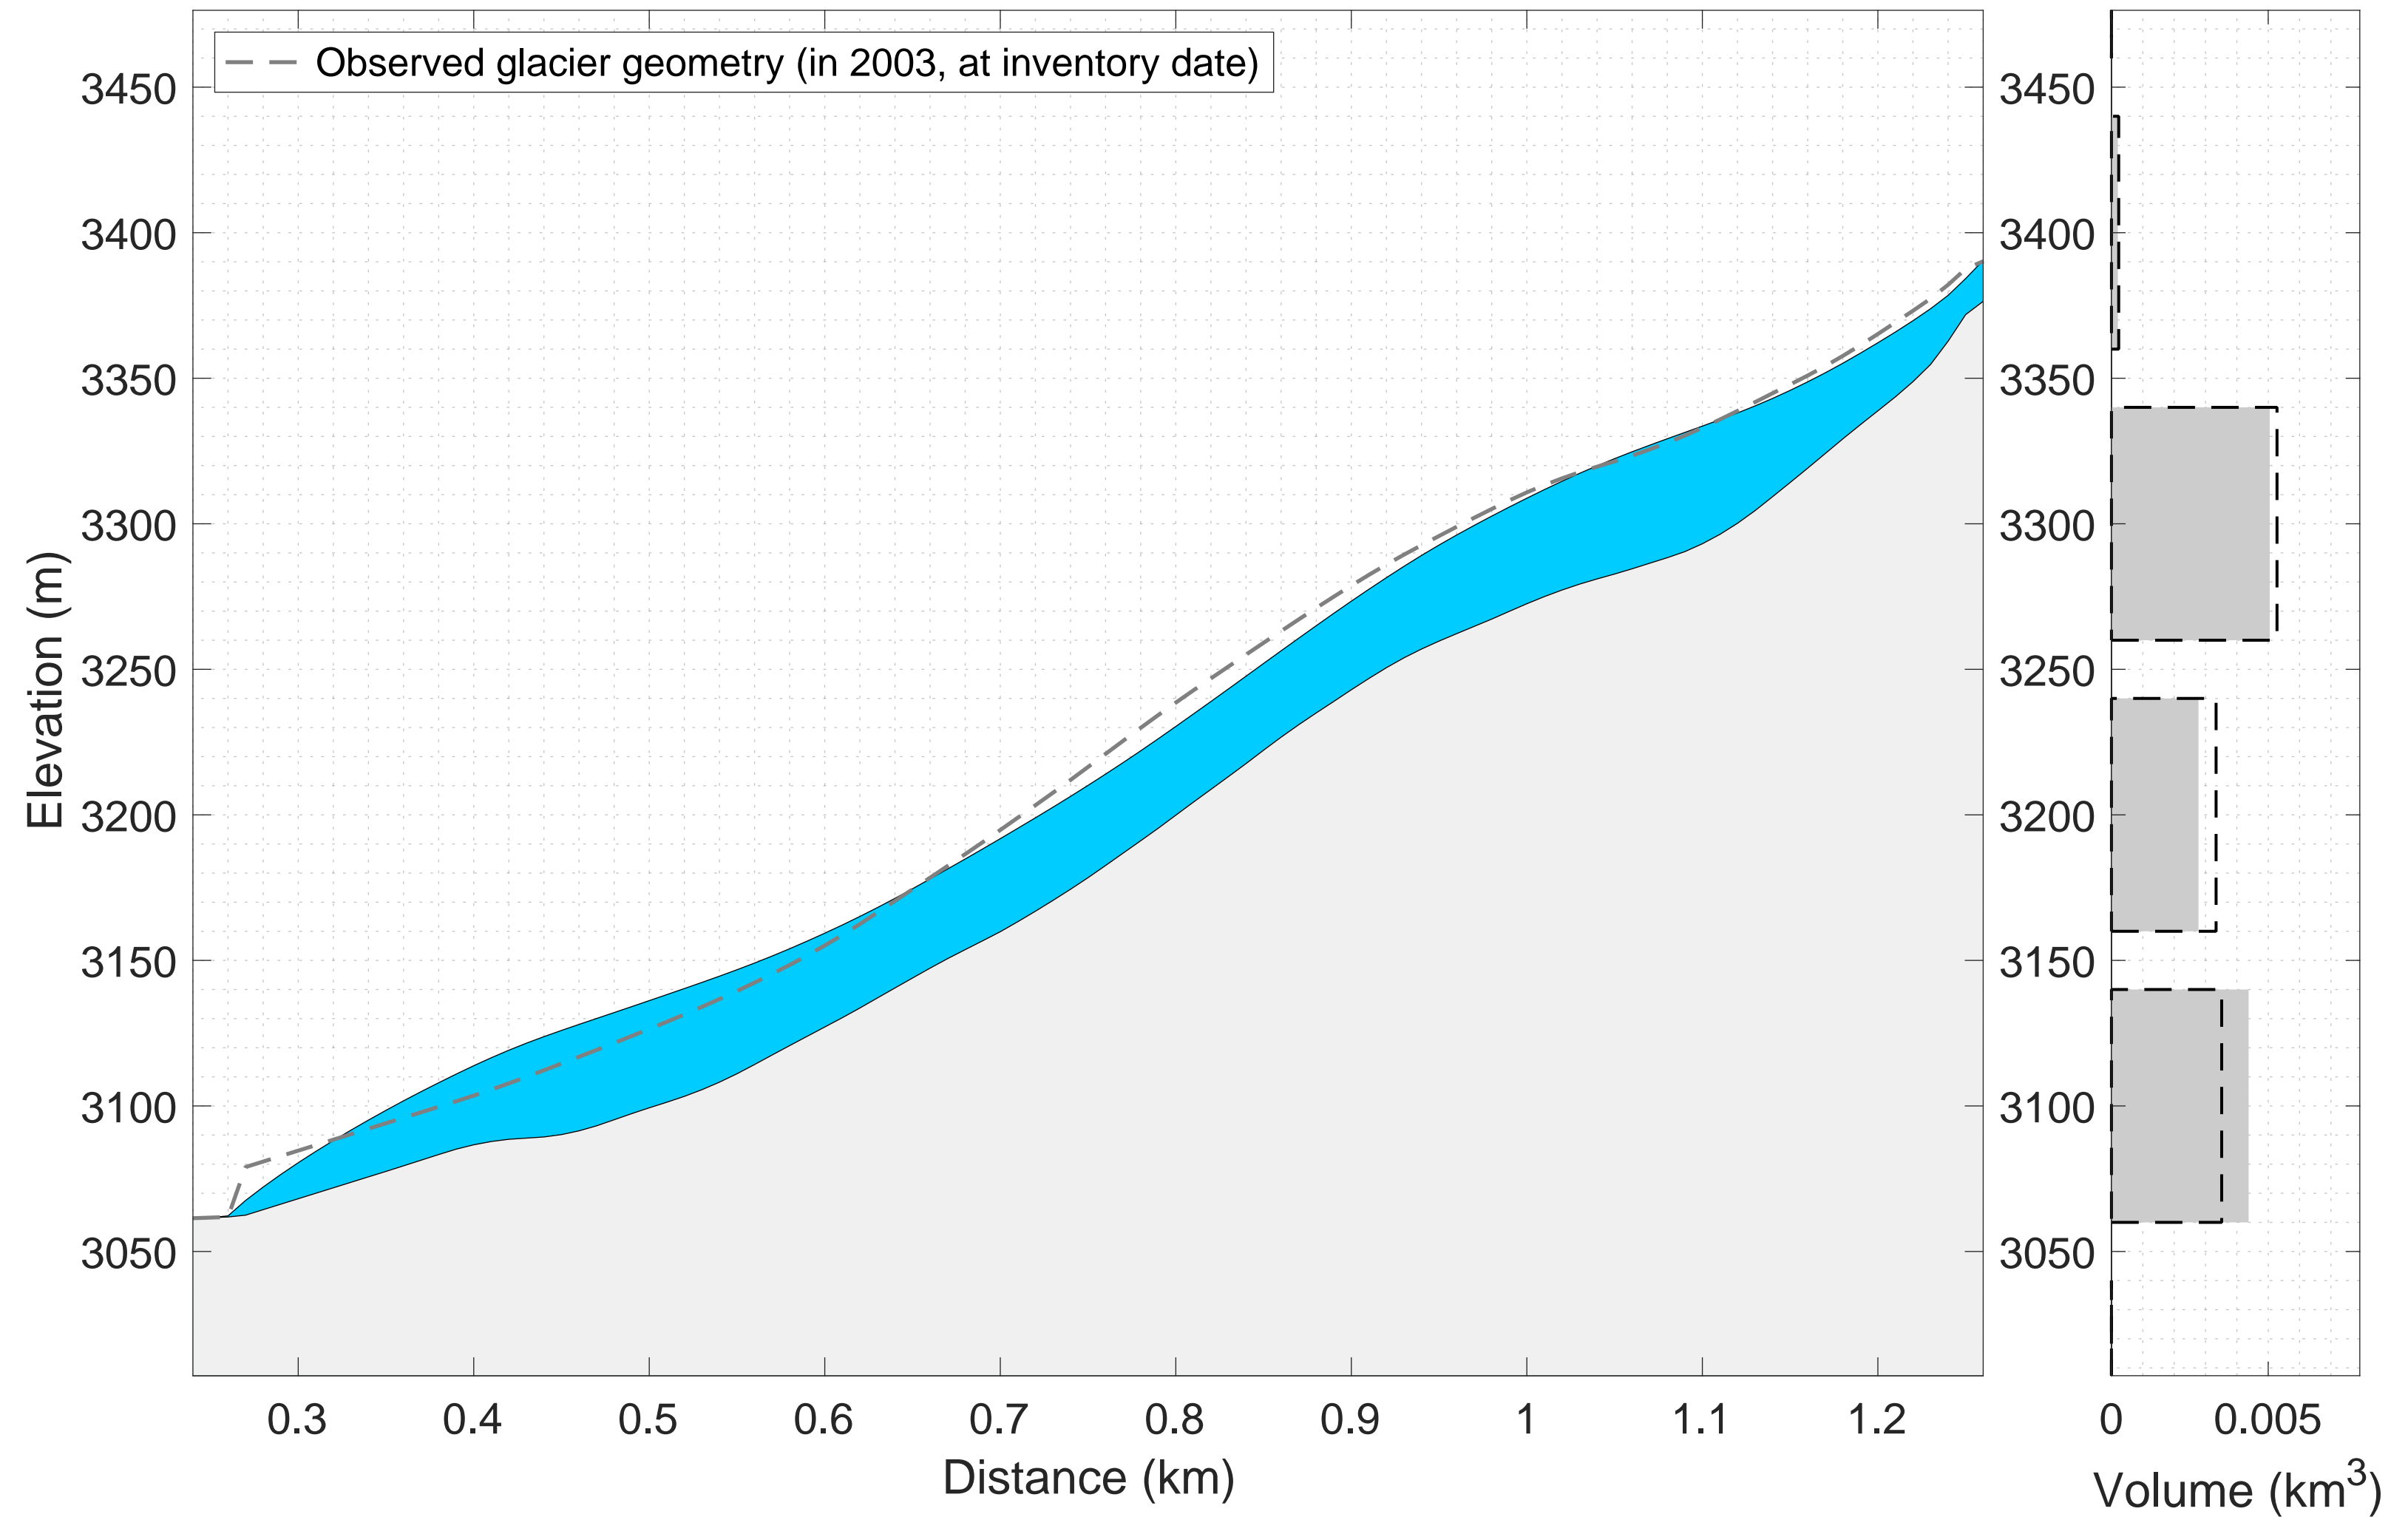

Supplement: Supplementary file 183 [file tc-13-1125-2019-supplement.zip]

**Modelled geometry (Glacier ID = 03646;  $A = 1.4107\text{e-}16 \text{ Pa}^{-3} \text{ a}^{-1}$ ;  $dx = 71 \text{ m}$ )**

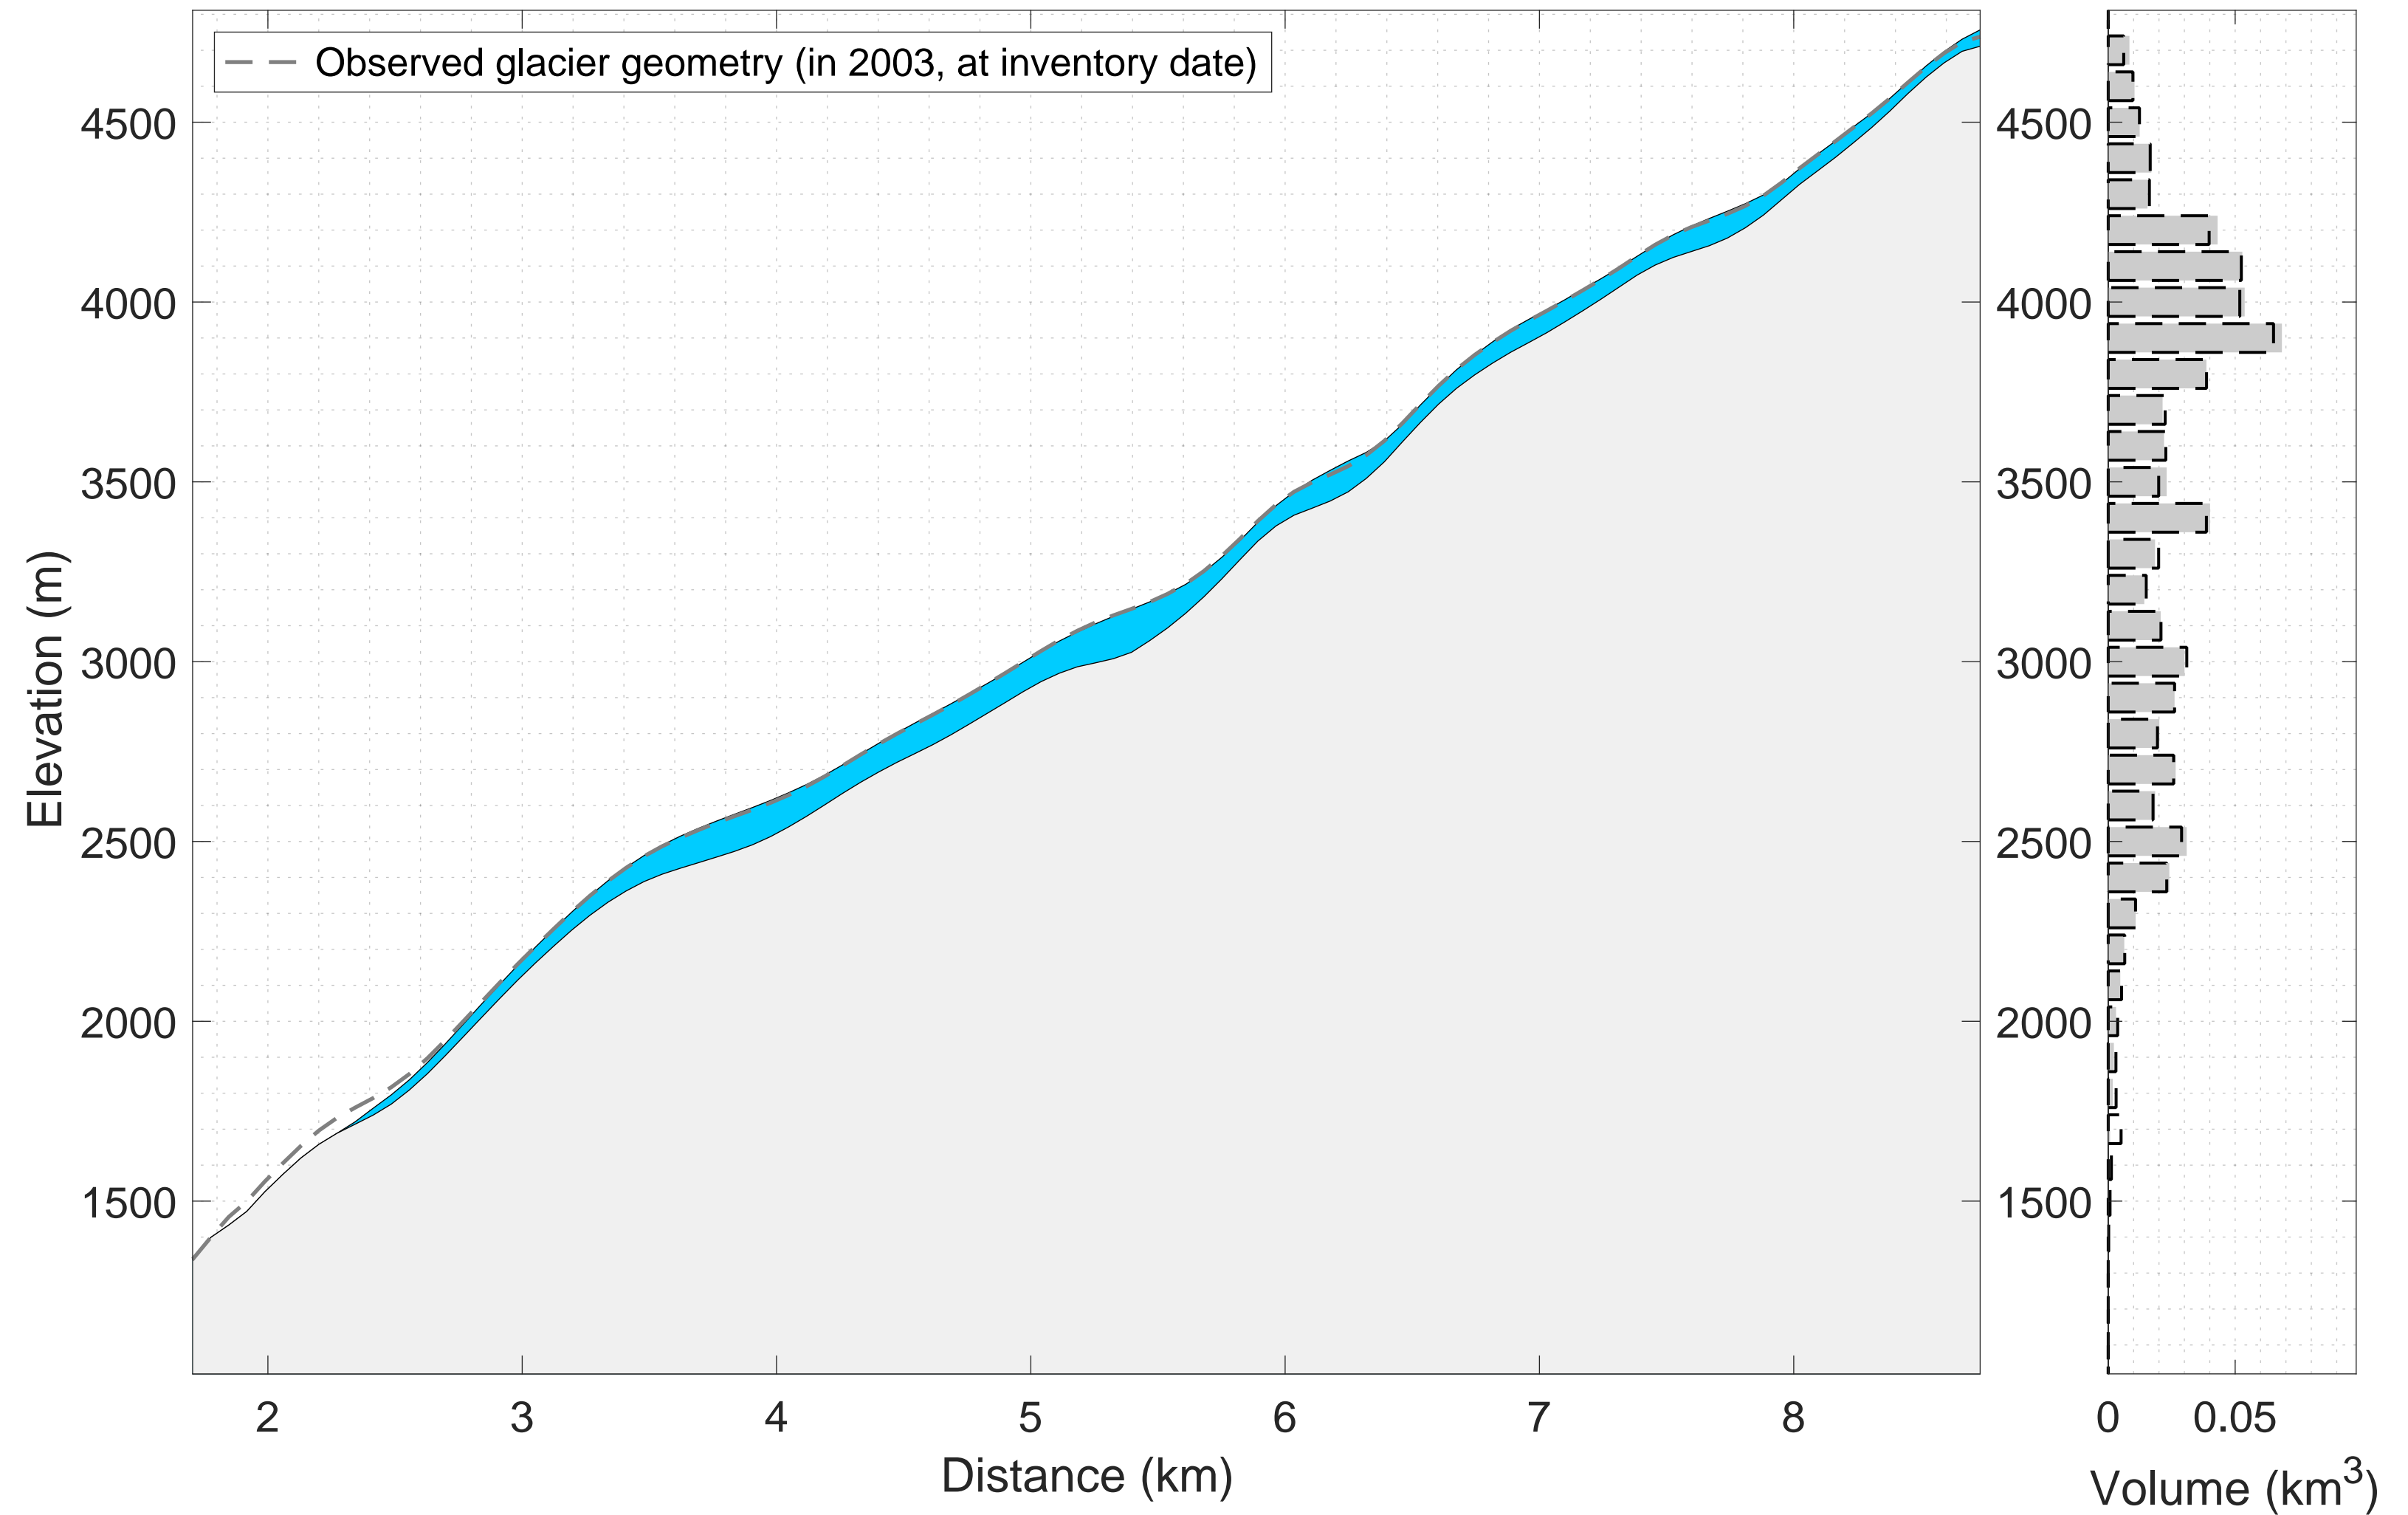

Supplement: Supplementary file 184 [file tc-13-1125-2019-supplement.zip]

**Modelled geometry (Glacier ID = 00666;  $A = 1.3047\text{e-}16 \text{ Pa}^{-3} \text{ a}^{-1}$ ;  $dx = 55 \text{ m}$ )**

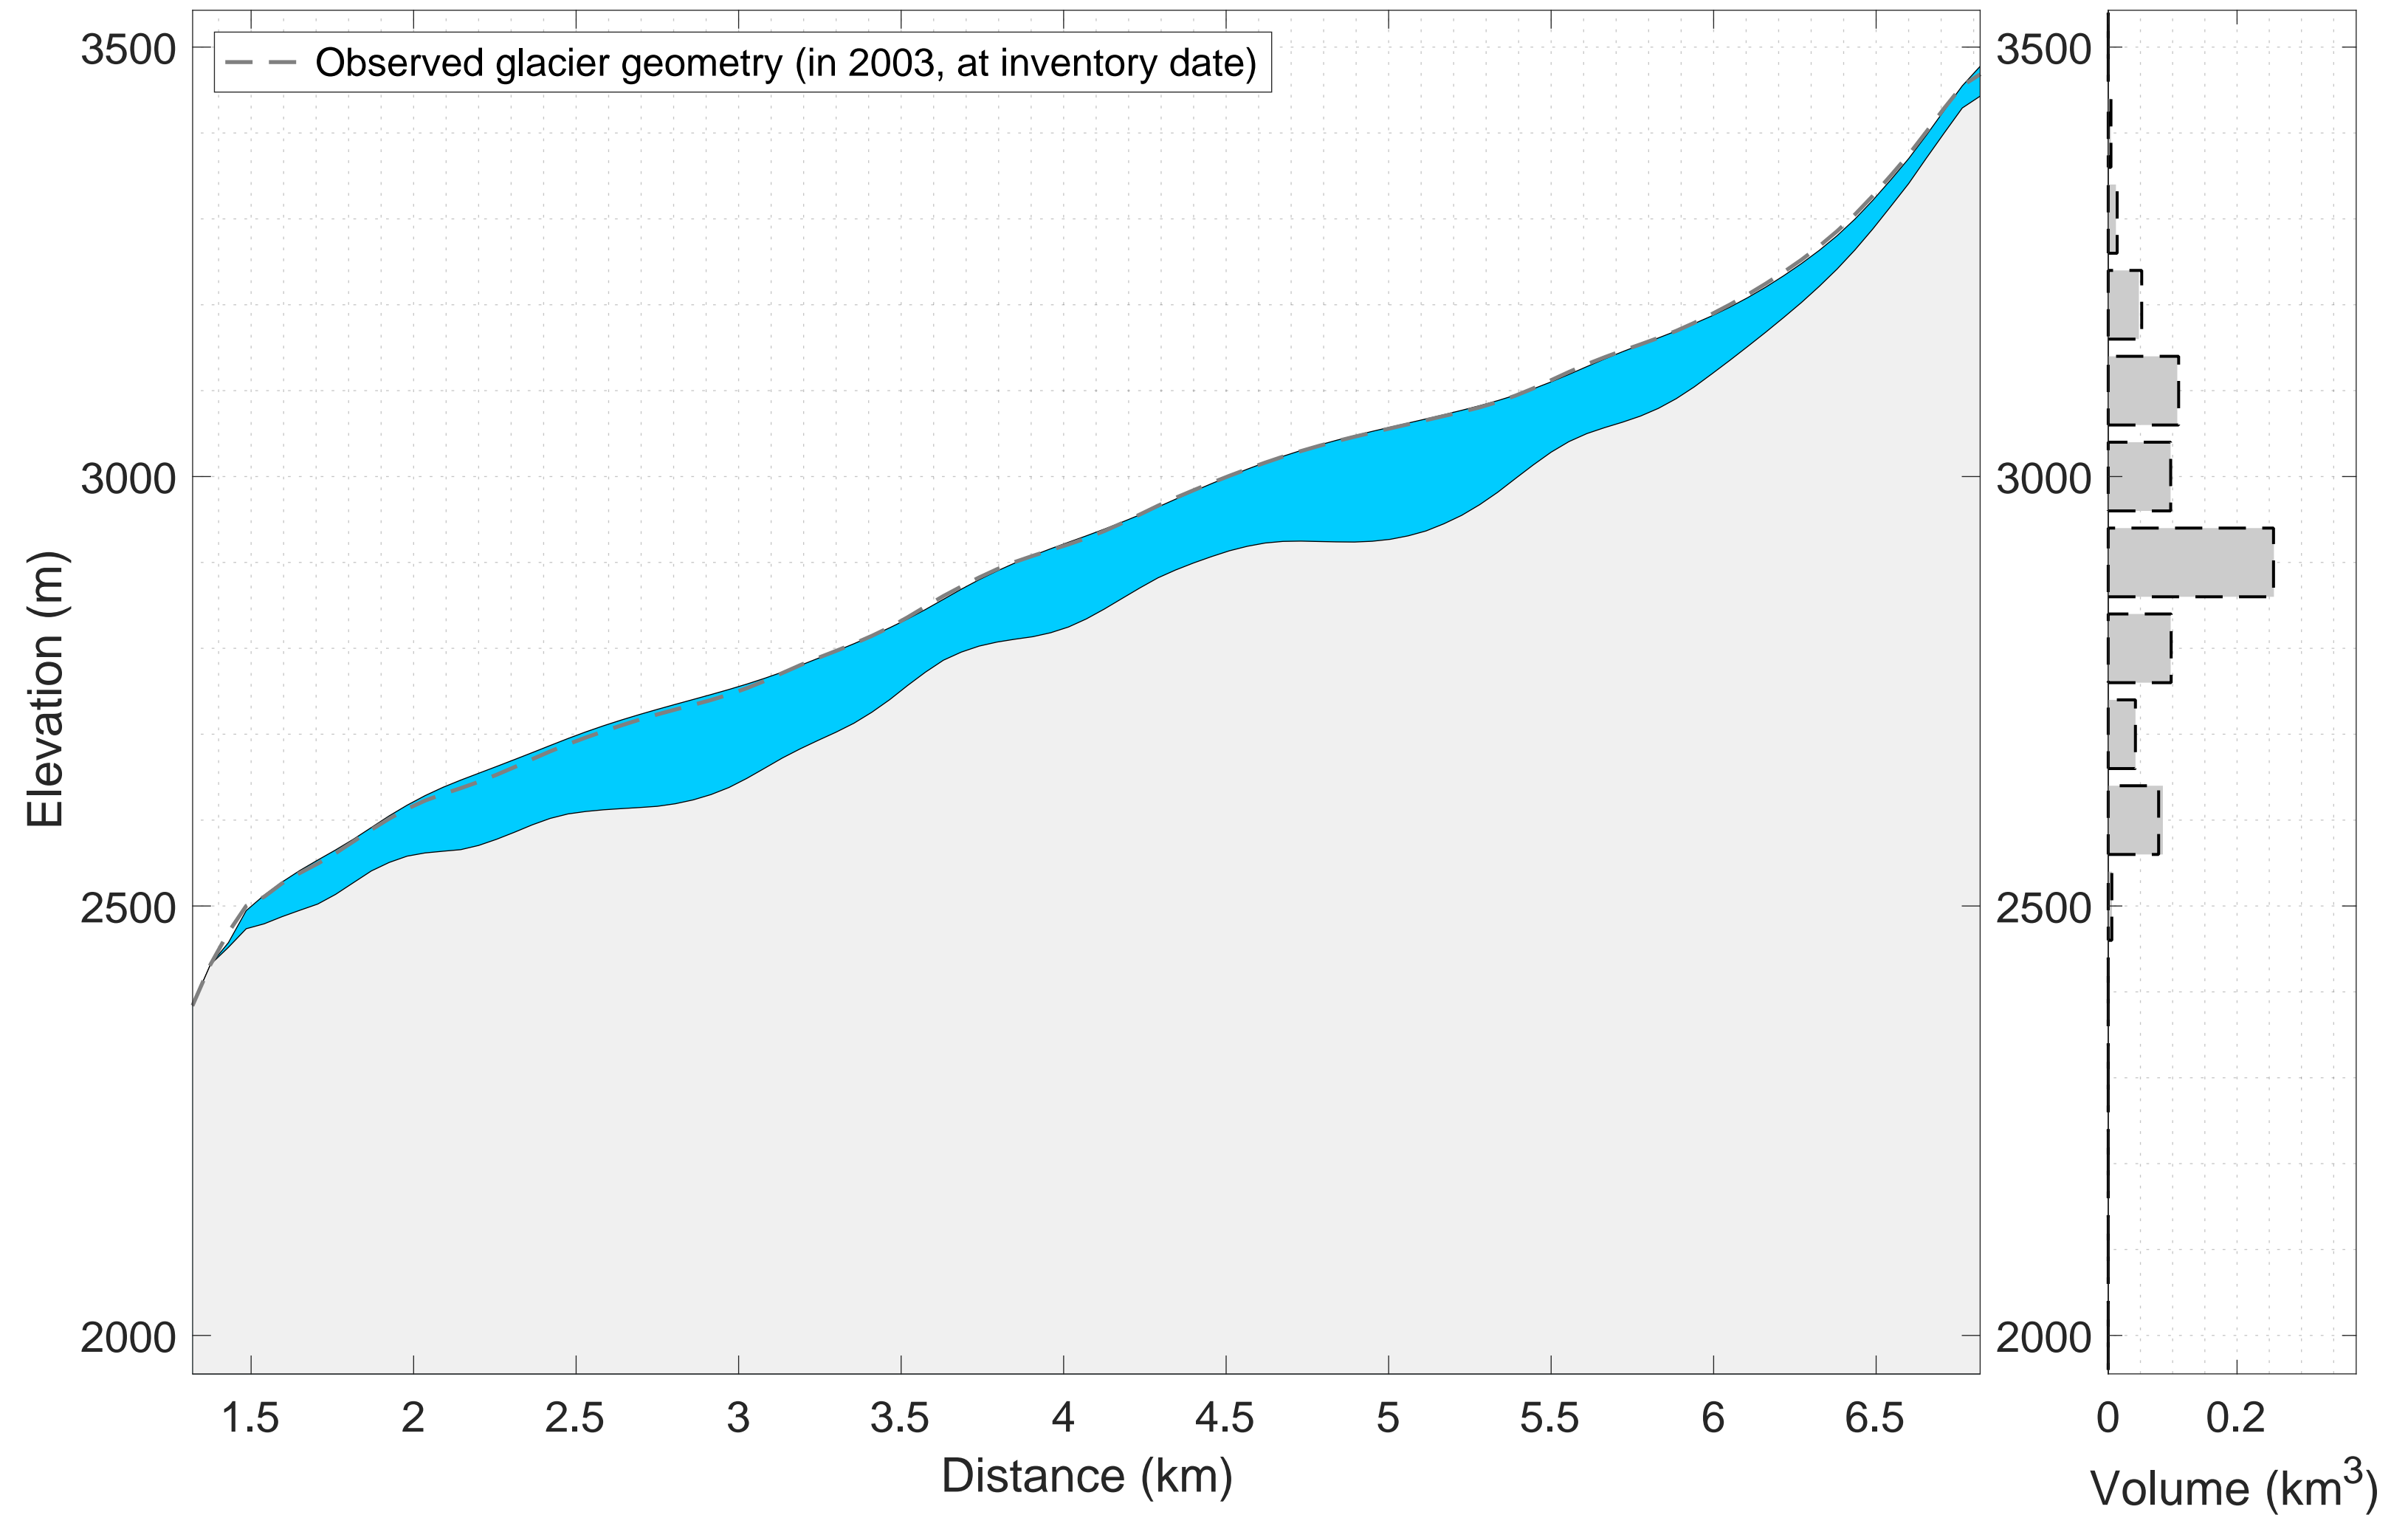

Supplement: Supplementary file 185 [file tc-13-1125-2019-supplement.zip]

**Modelled geometry (Glacier ID = 03103;  $A = 1.6367\text{e-}16 \text{ Pa}^{-3} \text{ a}^{-1}$ ;  $dx = 14 \text{ m}$ )**

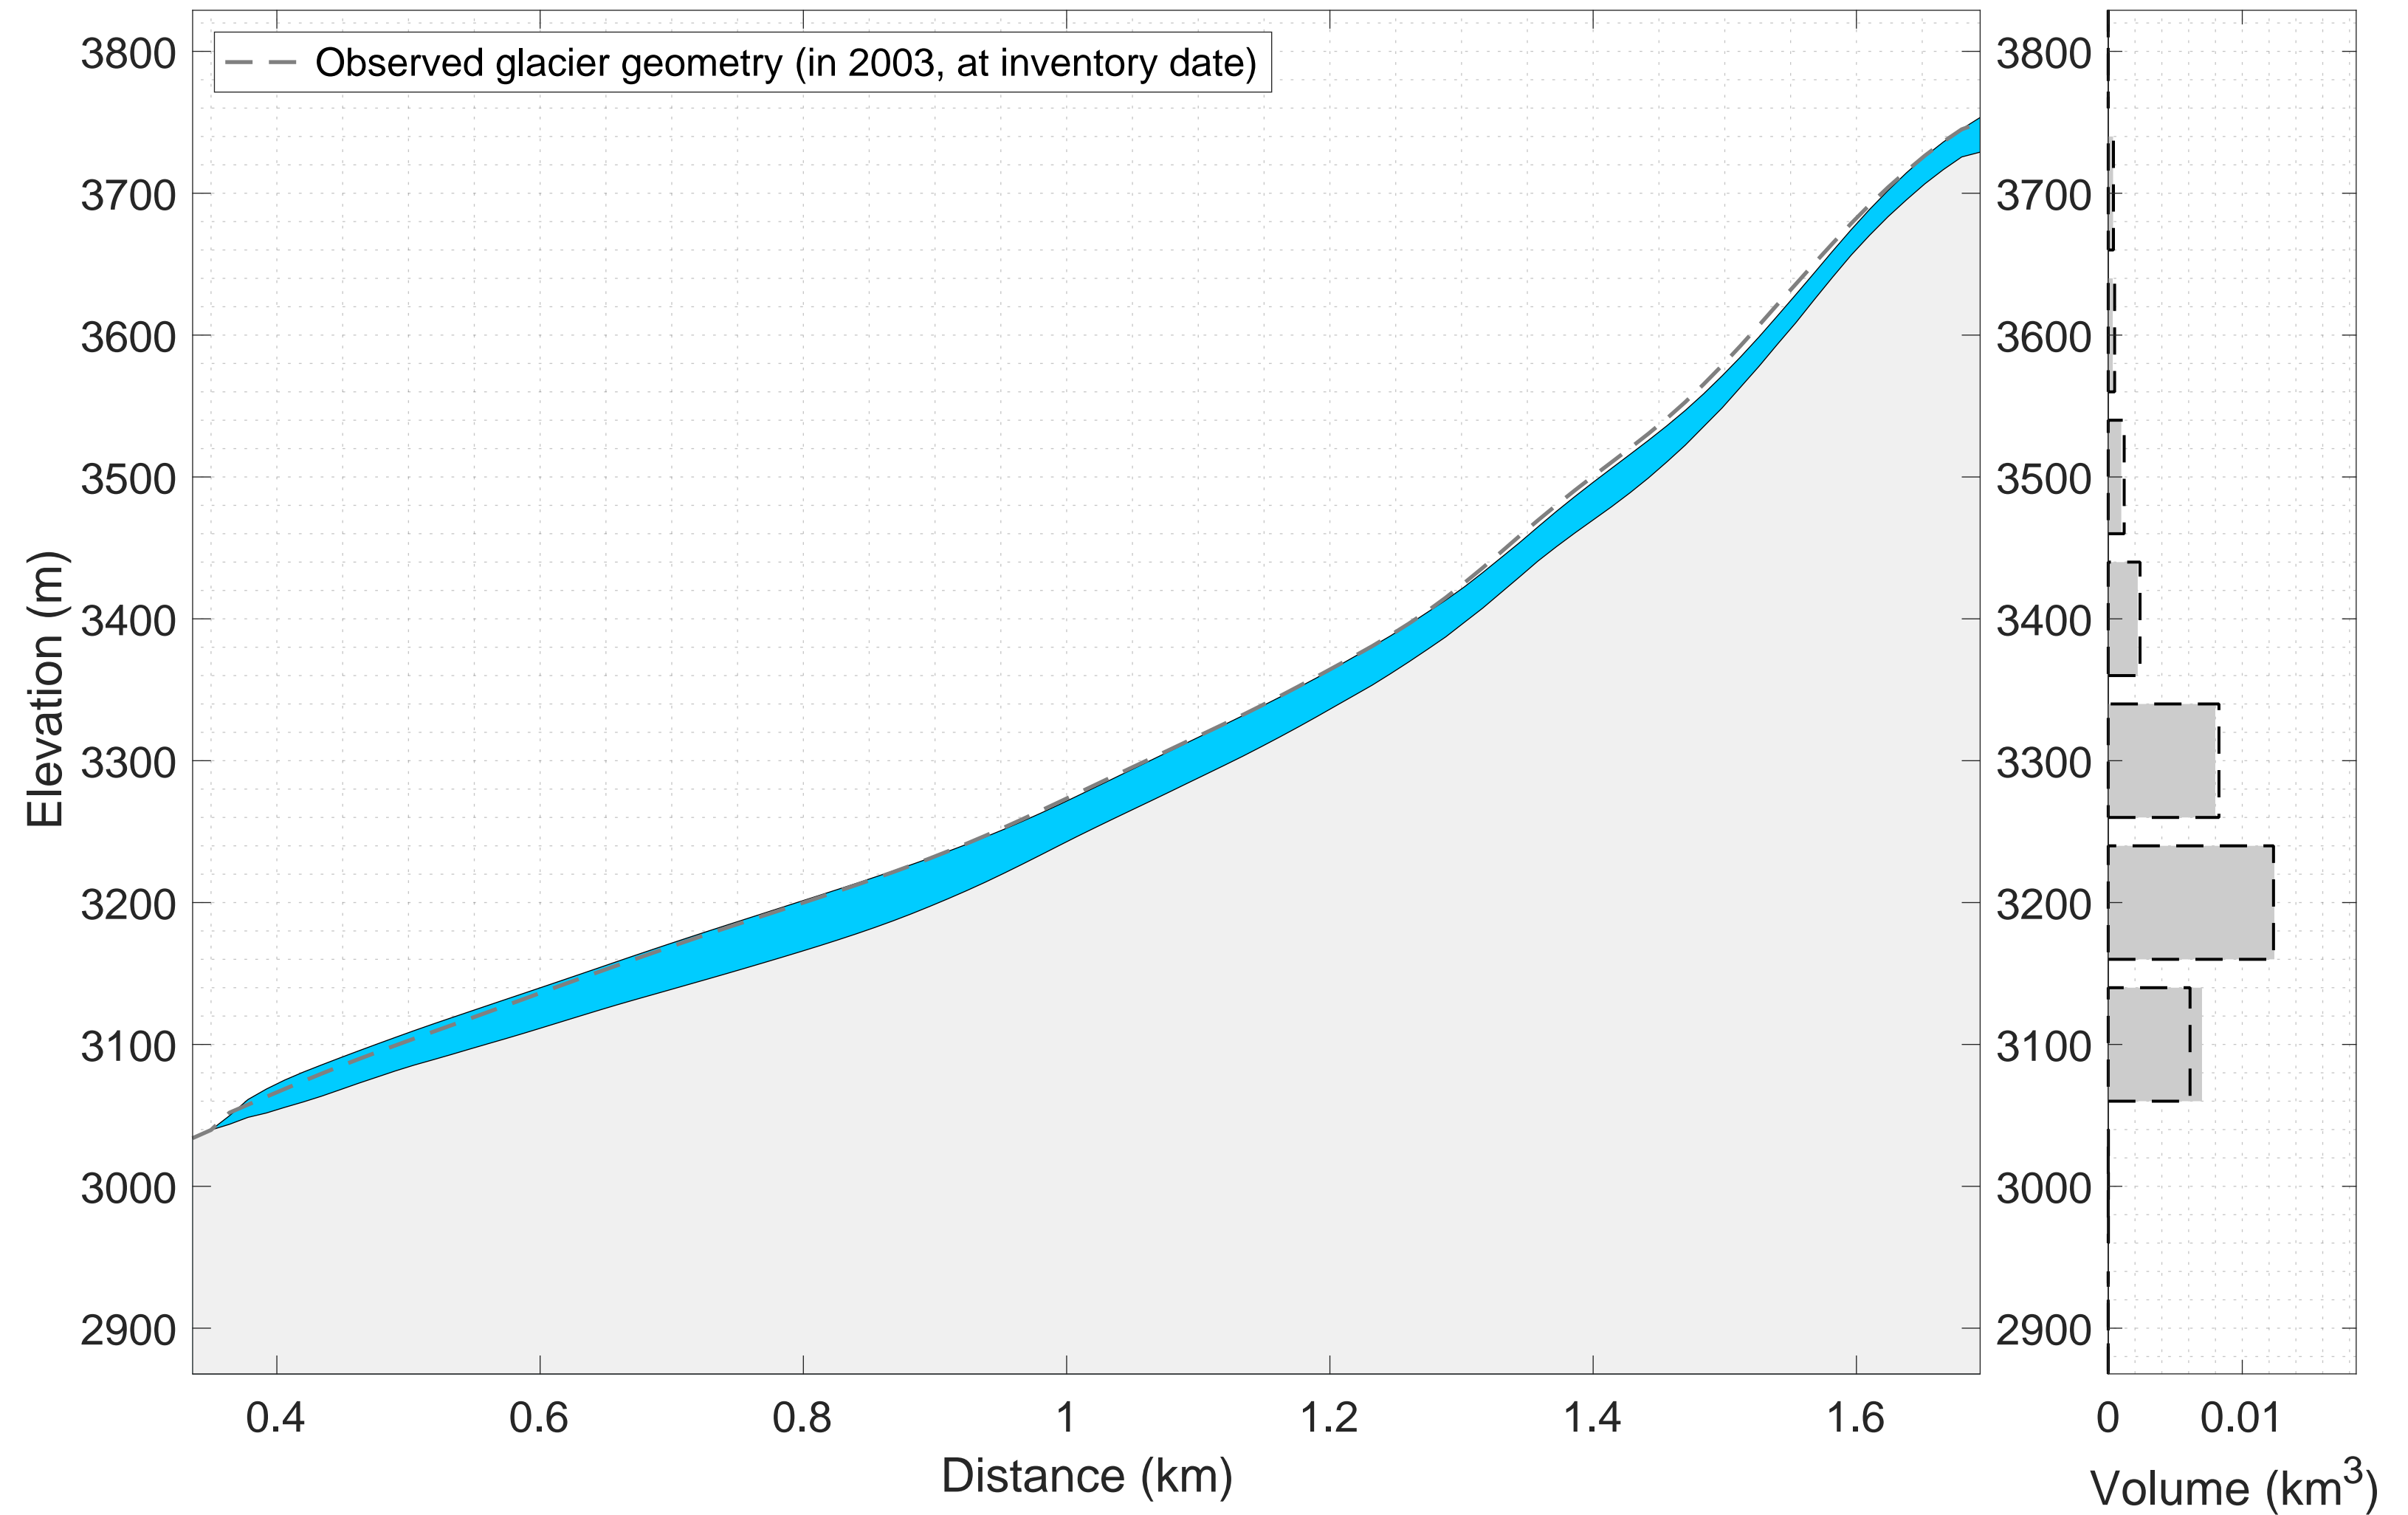

Supplement: Supplementary file 186 [file tc-13-1125-2019-supplement.zip]

**Modelled geometry (Glacier ID = 03111;  $A = 2.0208\text{e-}16 \text{ Pa}^{-3} \text{ a}^{-1}$ ;  $dx = 22 \text{ m}$ )**

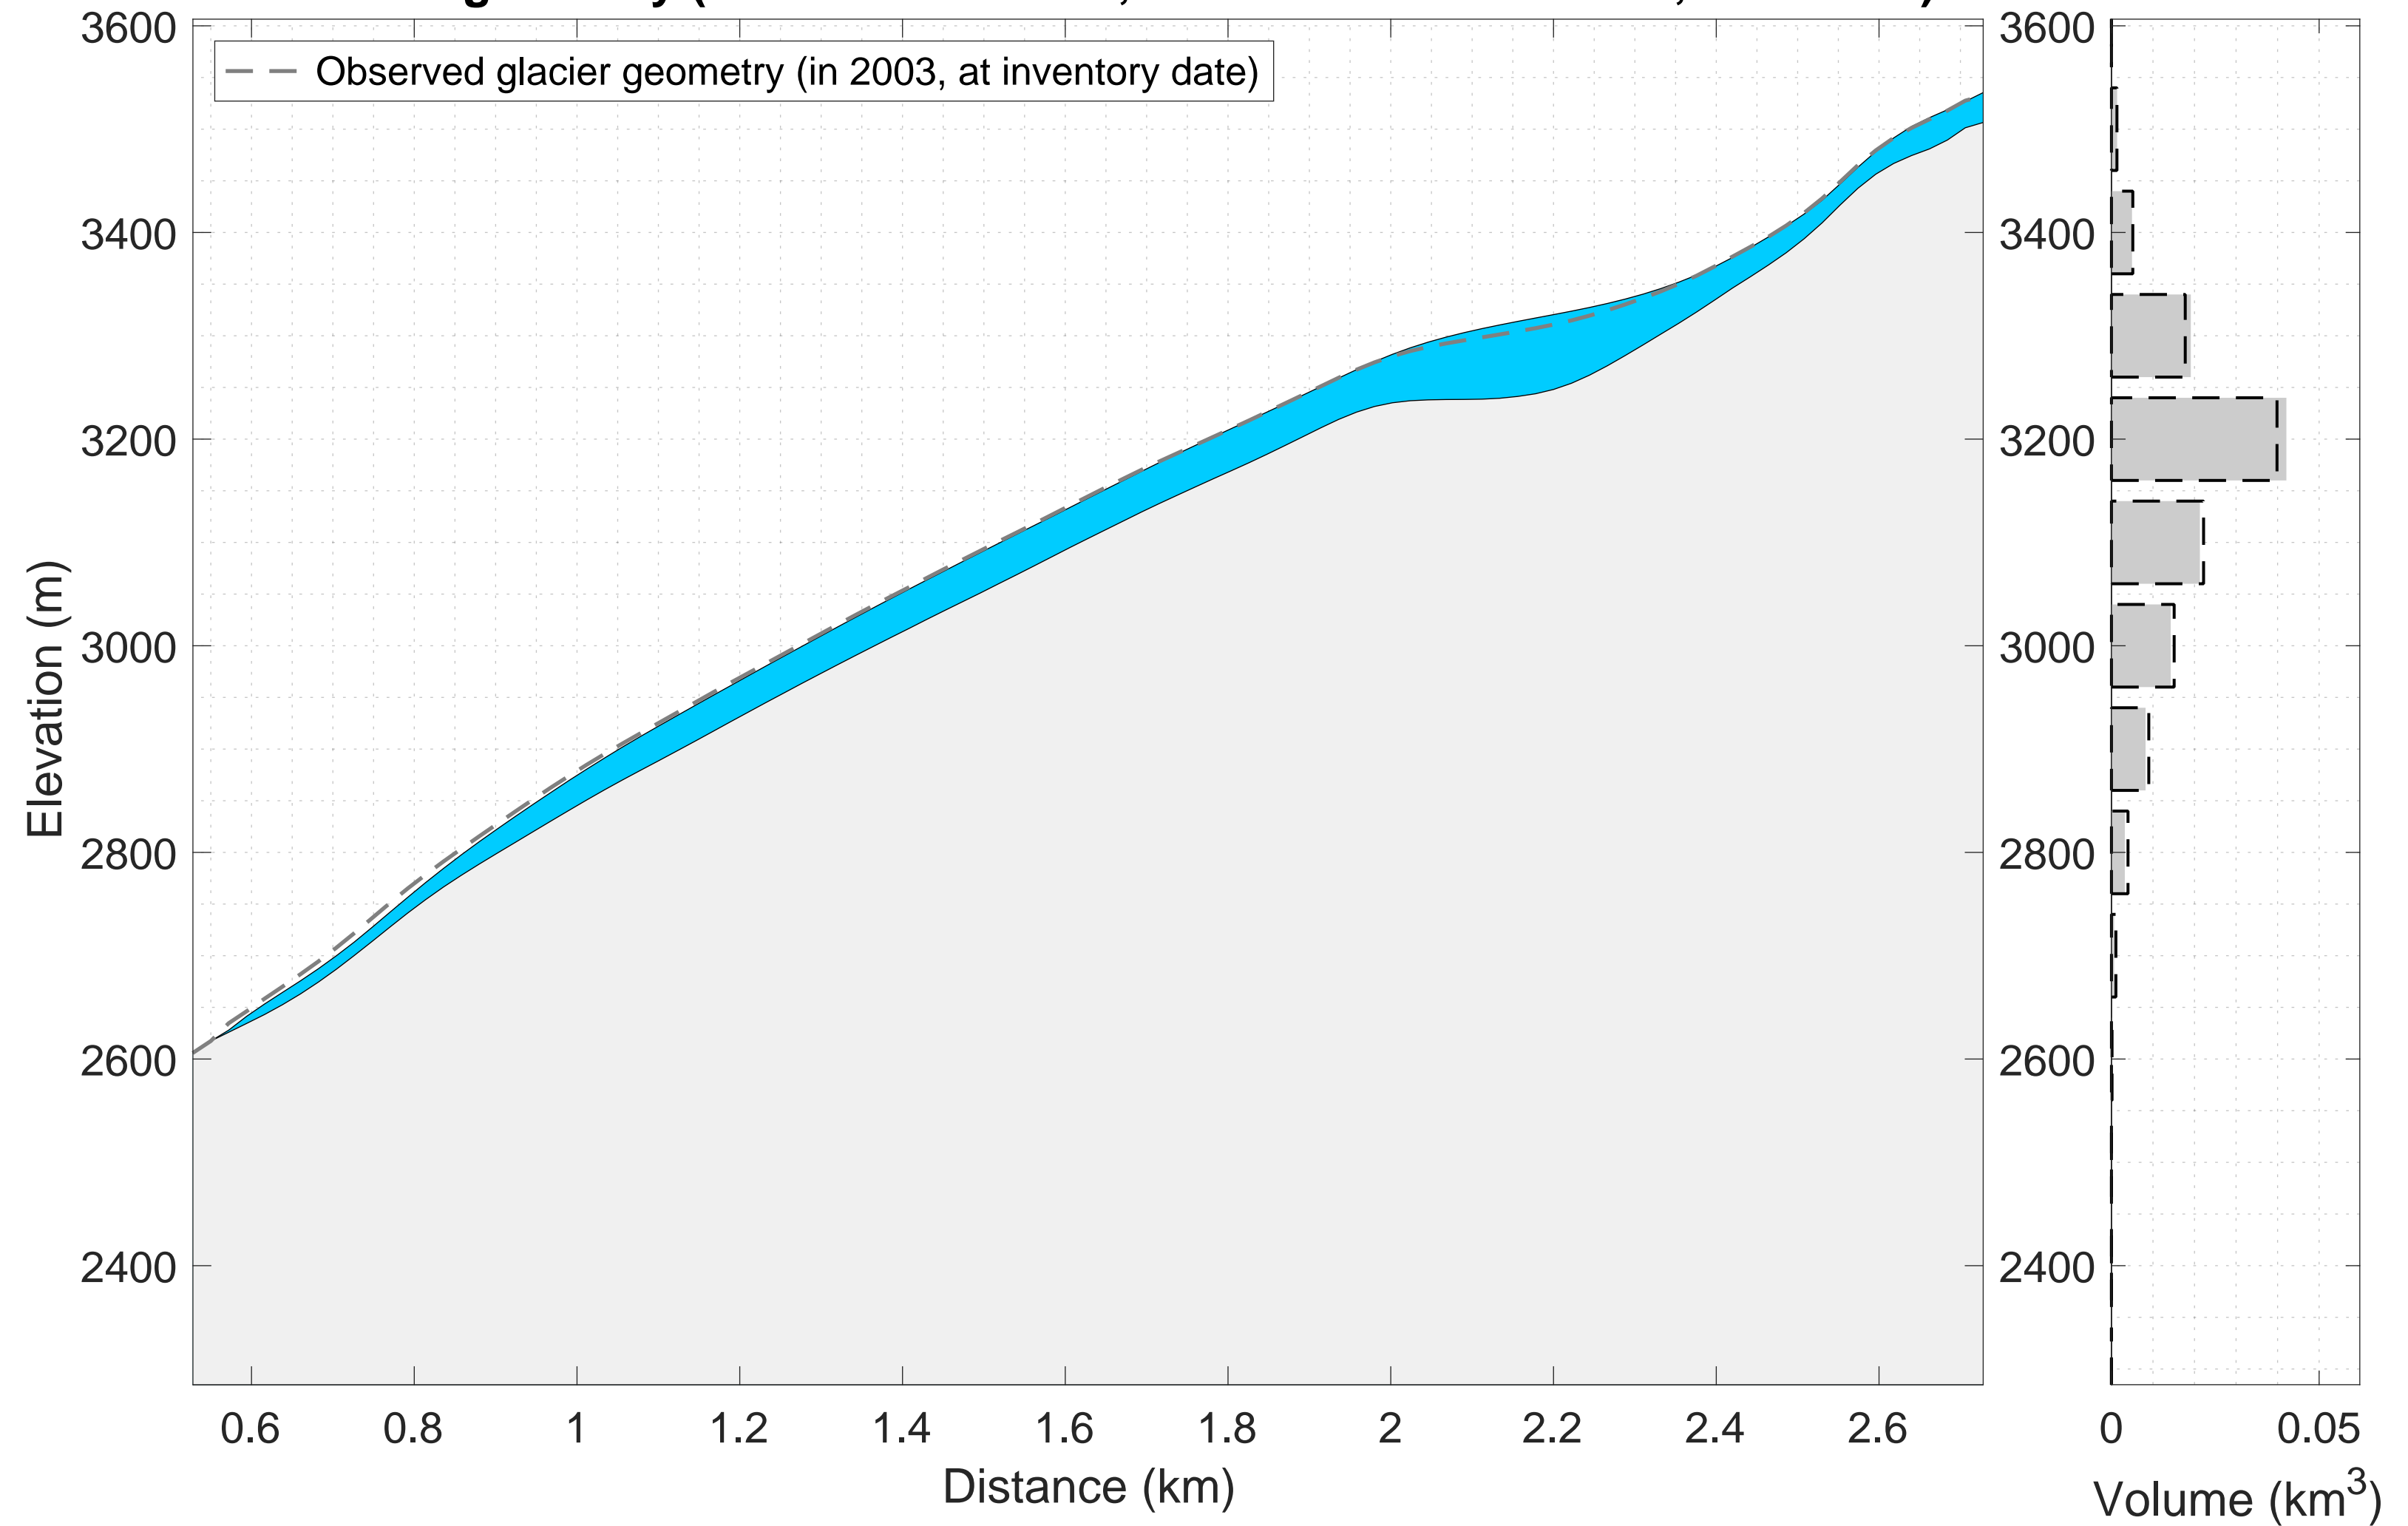

Supplement: Supplementary file 187 [file tc-13-1125-2019-supplement.zip]

**Modelled geometry (Glacier ID = 02769;  $A = 9.3849\text{e-}17 \text{ Pa}^{-3} \text{ a}^{-1}$ ;  $dx = 10 \text{ m}$ )**

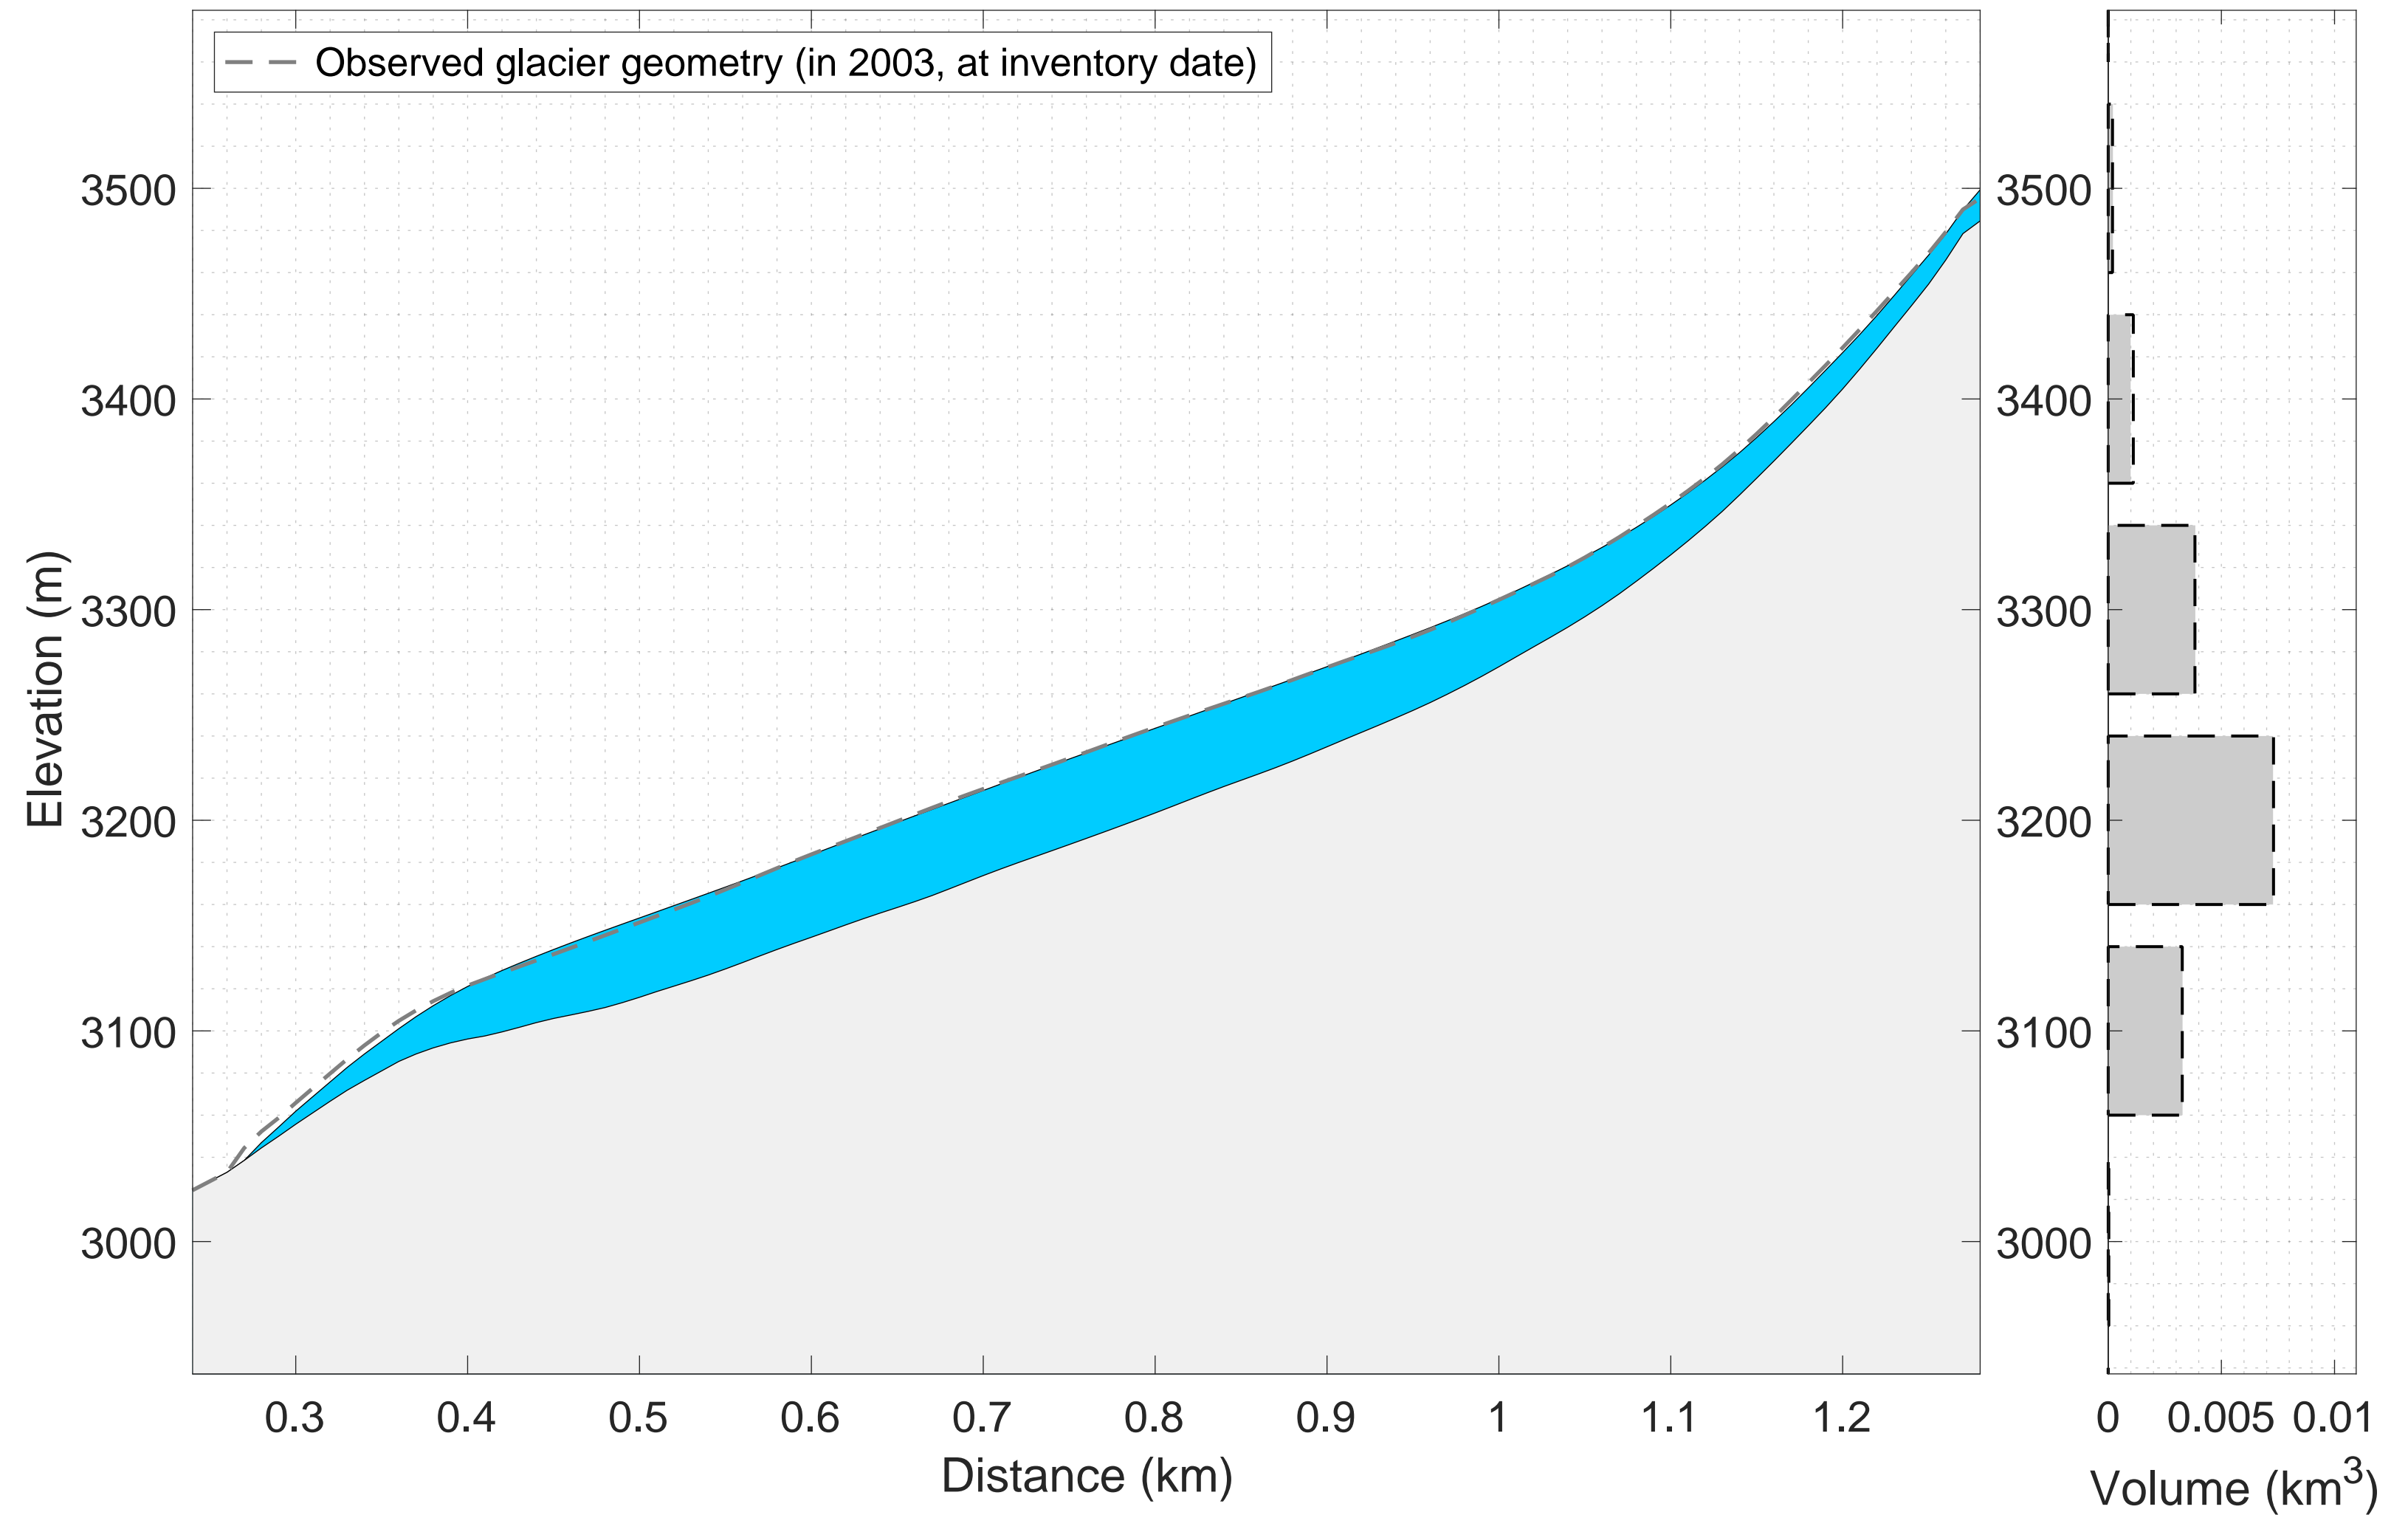

Supplement: Supplementary file 188 [file tc-13-1125-2019-supplement.zip]

**Modelled geometry (Glacier ID = 01745;  $A = 1.1685\text{e-}16 \text{ Pa}^{-3} \text{ a}^{-1}$ ;  $dx = 10 \text{ m}$ )**

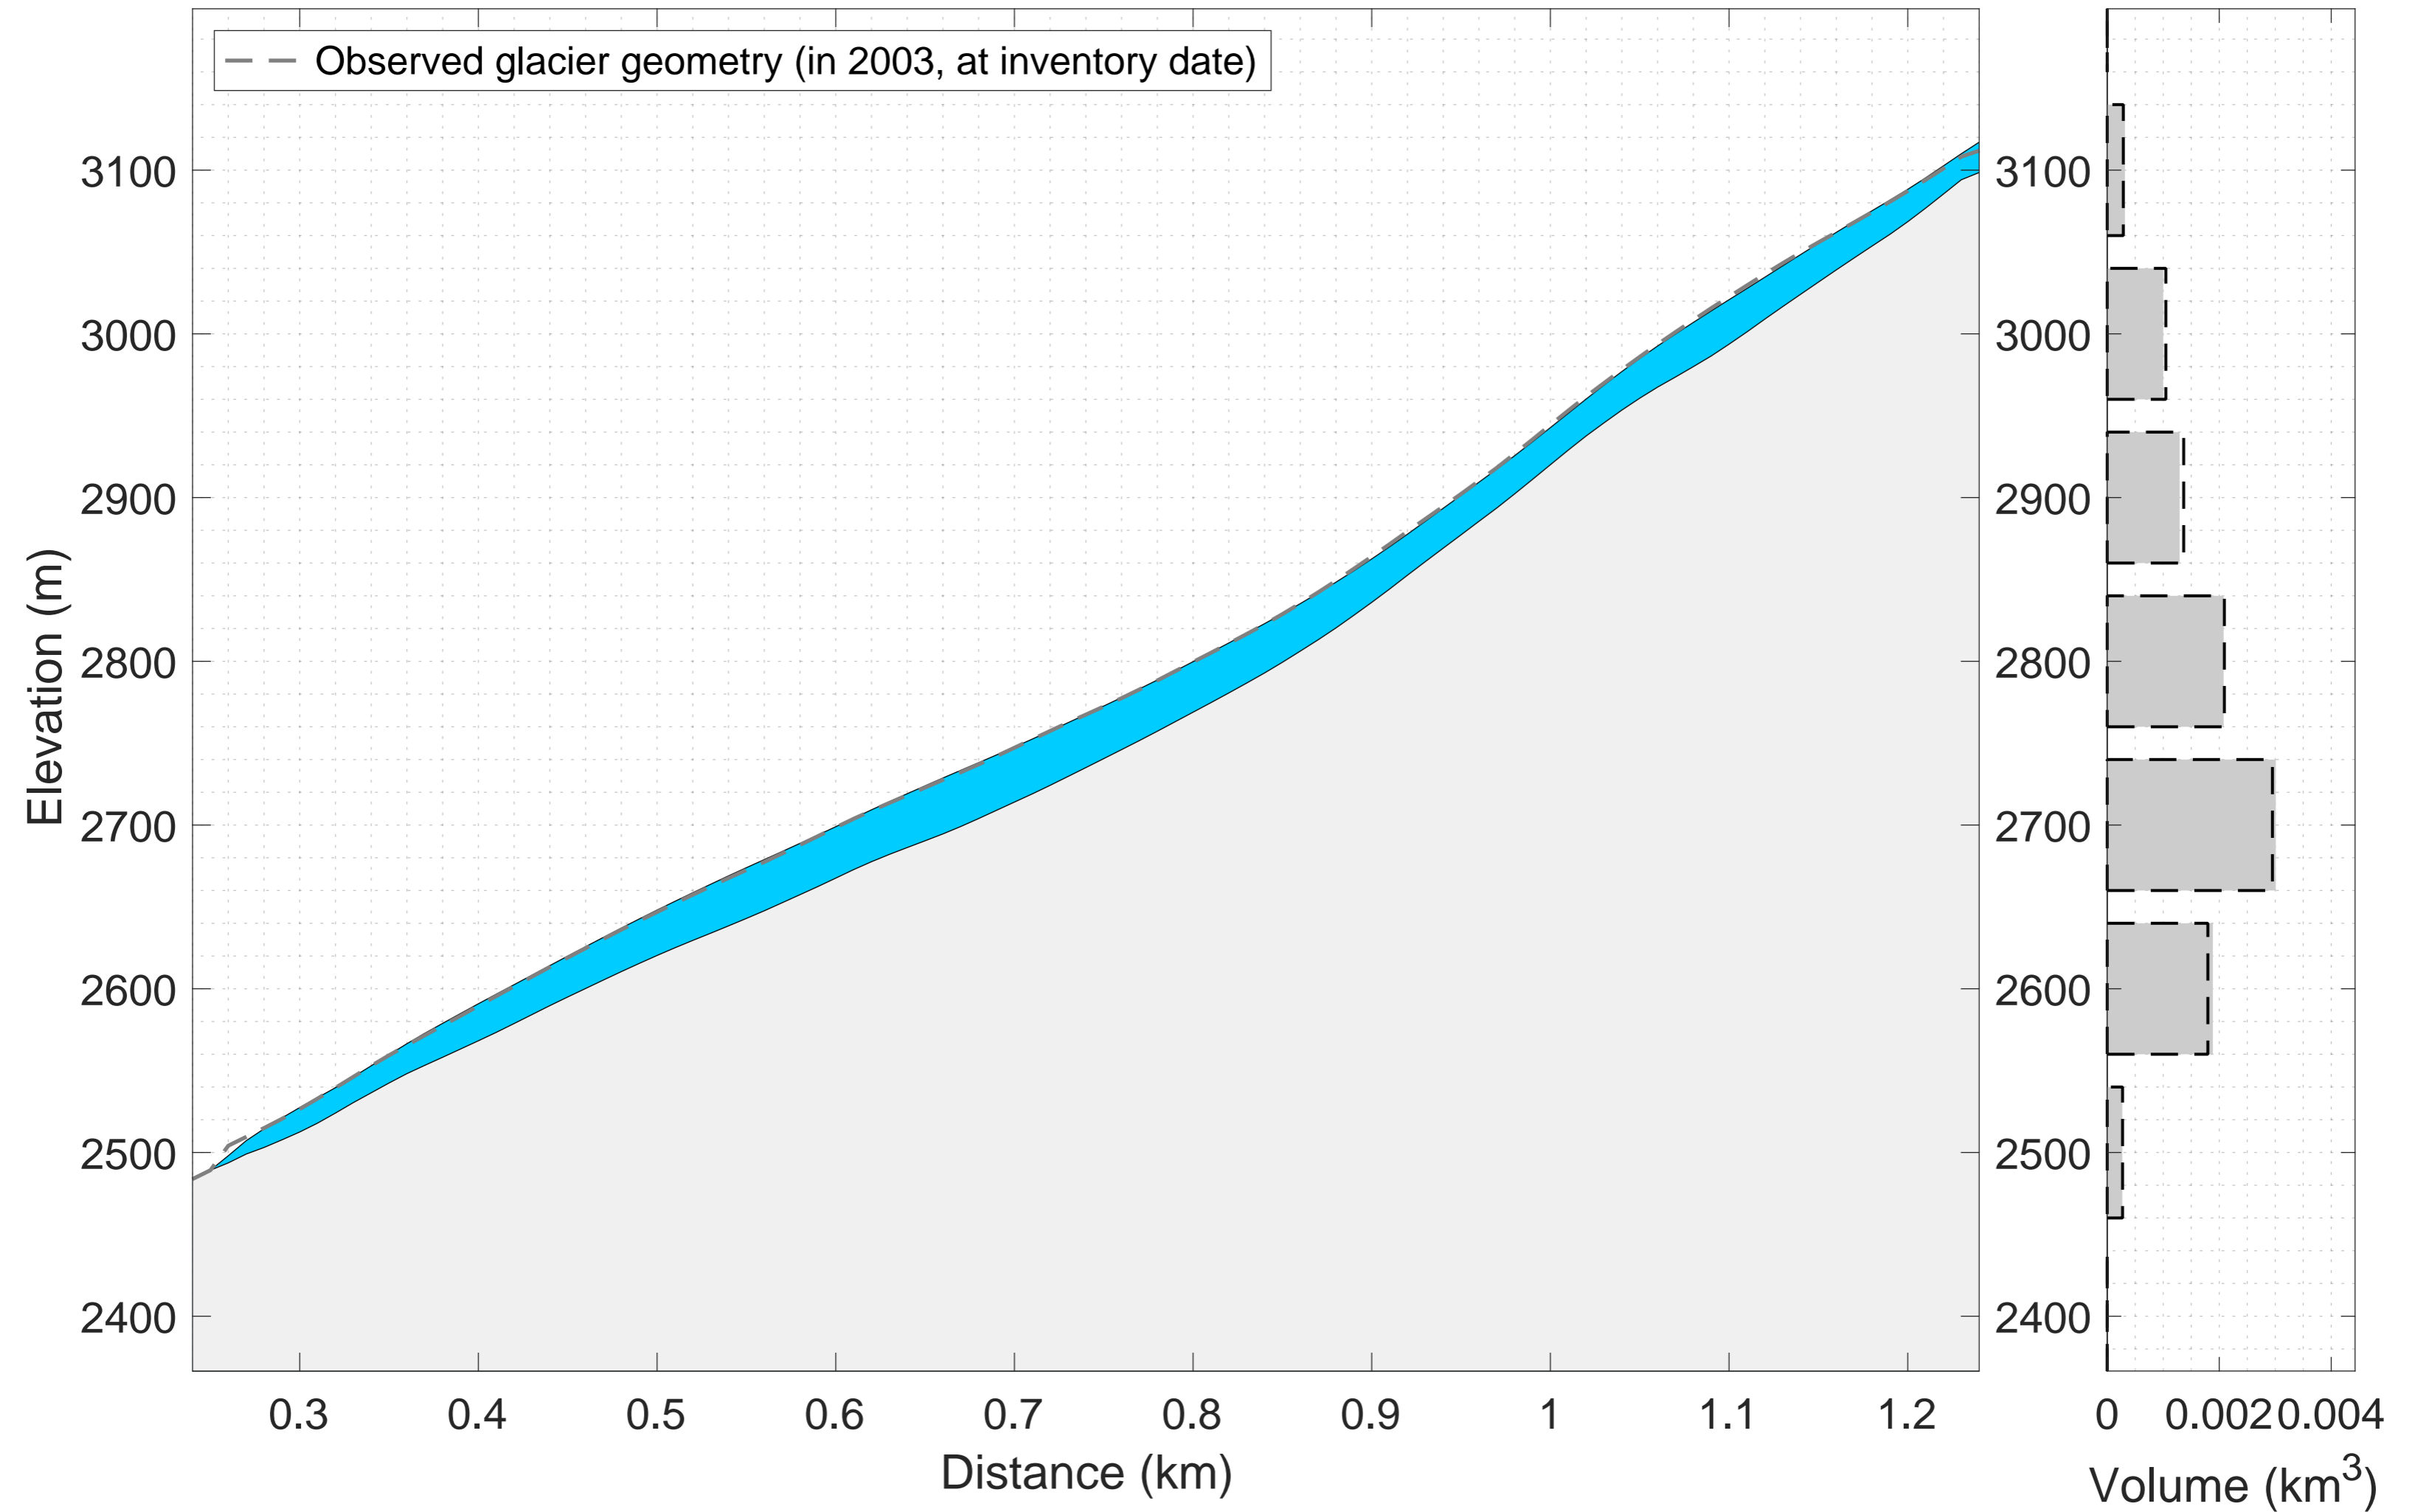

Supplement: Supplementary file 189 [file tc-13-1125-2019-supplement.zip]

**Modelled geometry (Glacier ID = 02488;  $A = 5.1397\text{e-}17 \text{ Pa}^{-3} \text{ a}^{-1}$ ;  $dx = 17 \text{ m}$ )**

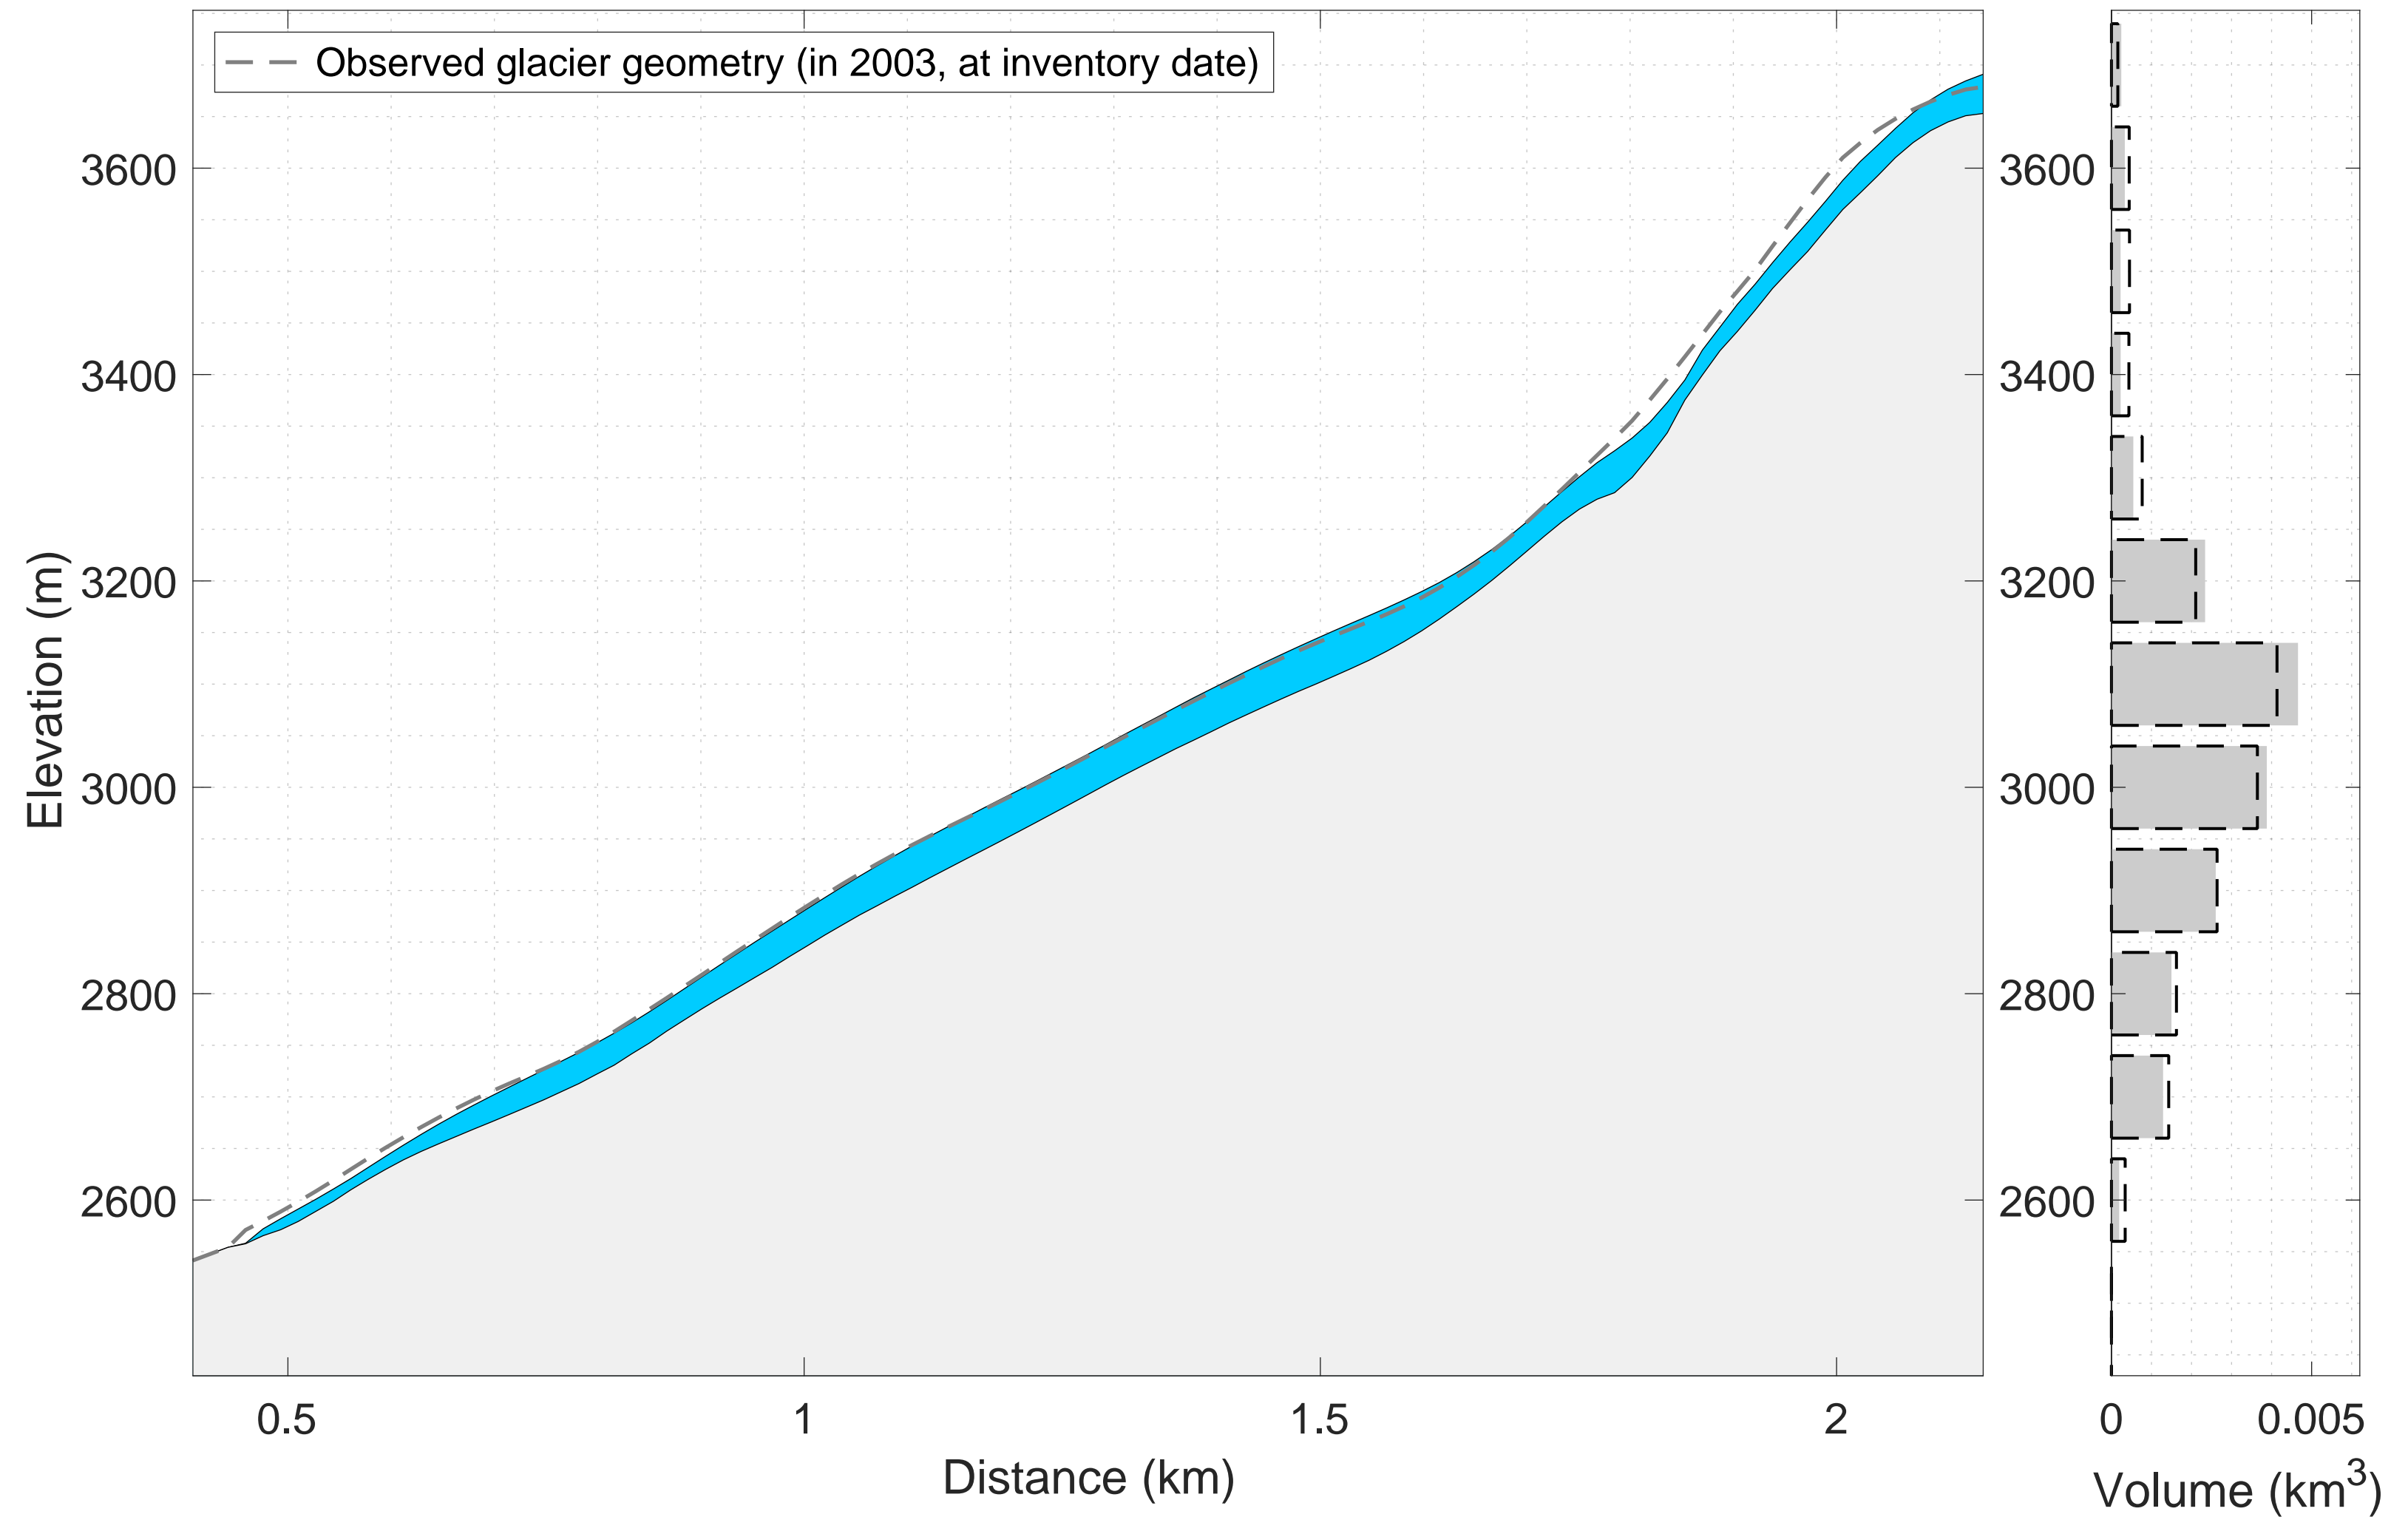

Supplement: Supplementary file 190 [file tc-13-1125-2019-supplement.zip]

**Modelled geometry (Glacier ID = 03000;  $A = 1.1762\text{e-}16 \text{ Pa}^{-3} \text{ a}^{-1}$ ;  $dx = 11 \text{ m}$ )**

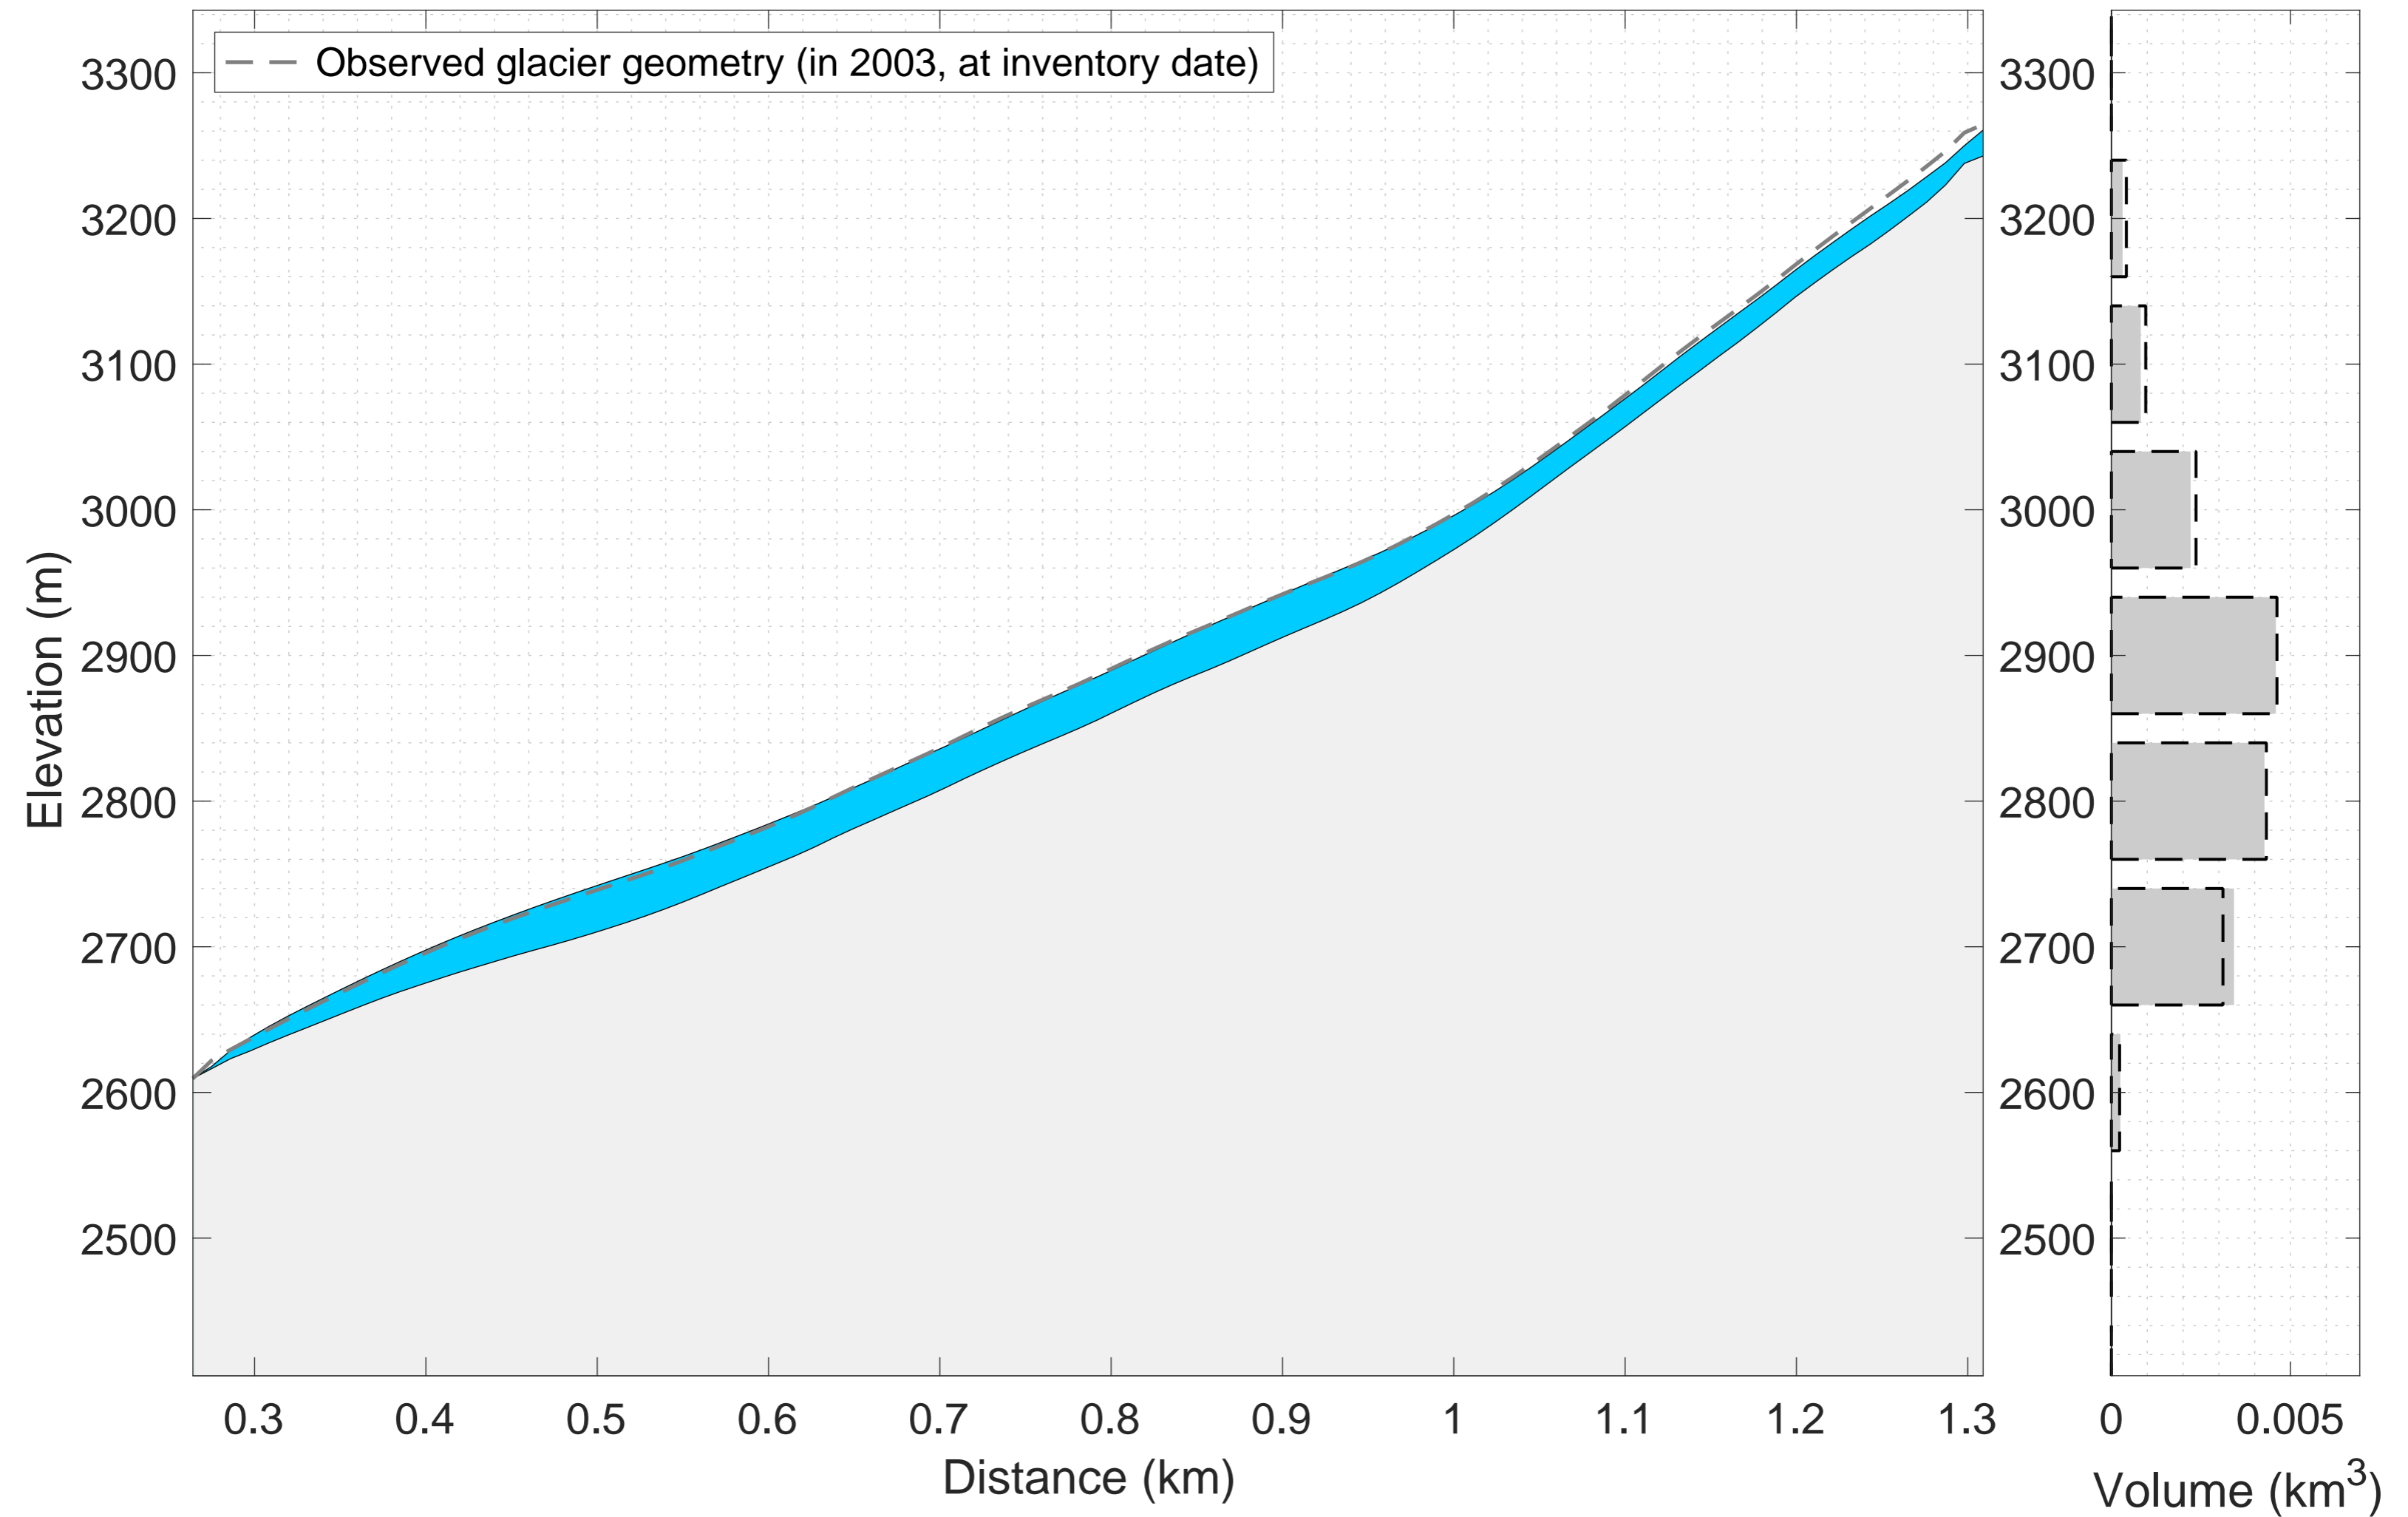

Supplement: Supplementary file 191 [file tc-13-1125-2019-supplement.zip]

**Modelled geometry (Glacier ID = 00546;  $A = 9.8331\text{e-}17 \text{ Pa}^{-3} \text{ a}^{-1}$ ;  $dx = 23 \text{ m}$ )**

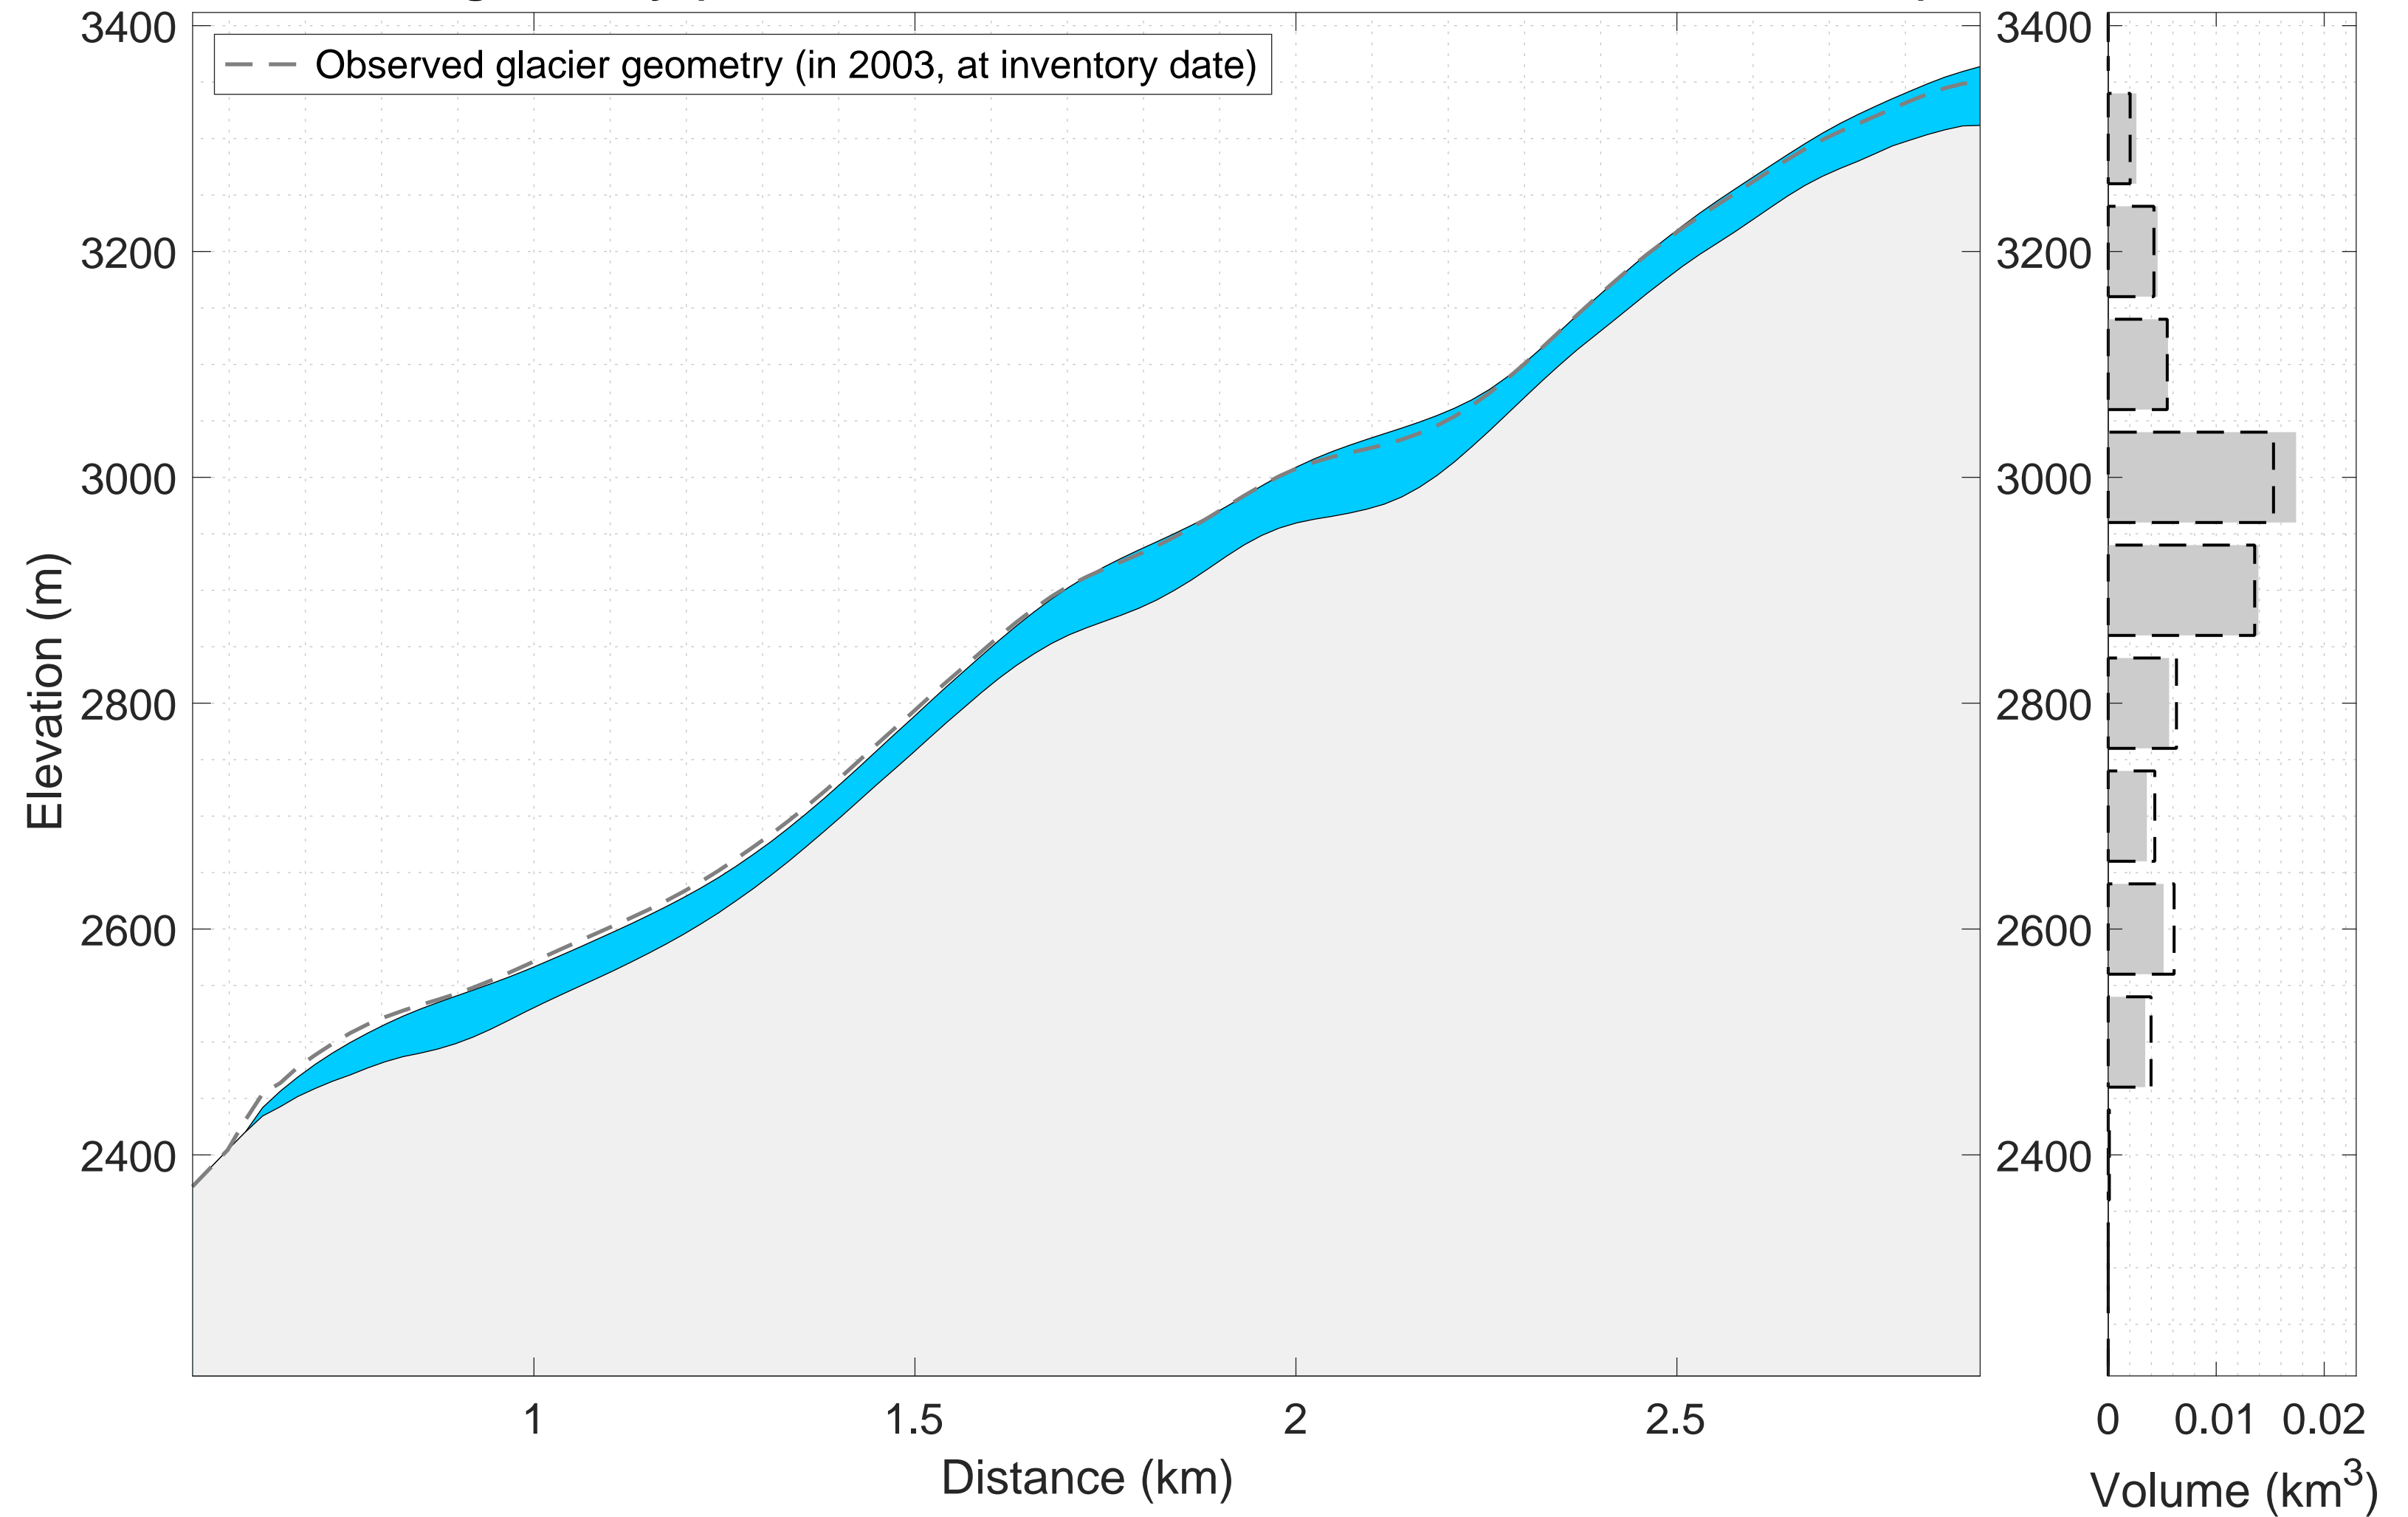

Supplement: Supplementary file 192 [file tc-13-1125-2019-supplement.zip]

**Modelled geometry (Glacier ID = 01635;  $A = 7.321\text{e-}17 \text{ Pa}^{-3} \text{ a}^{-1}$ ;  $dx = 21 \text{ m}$ )**

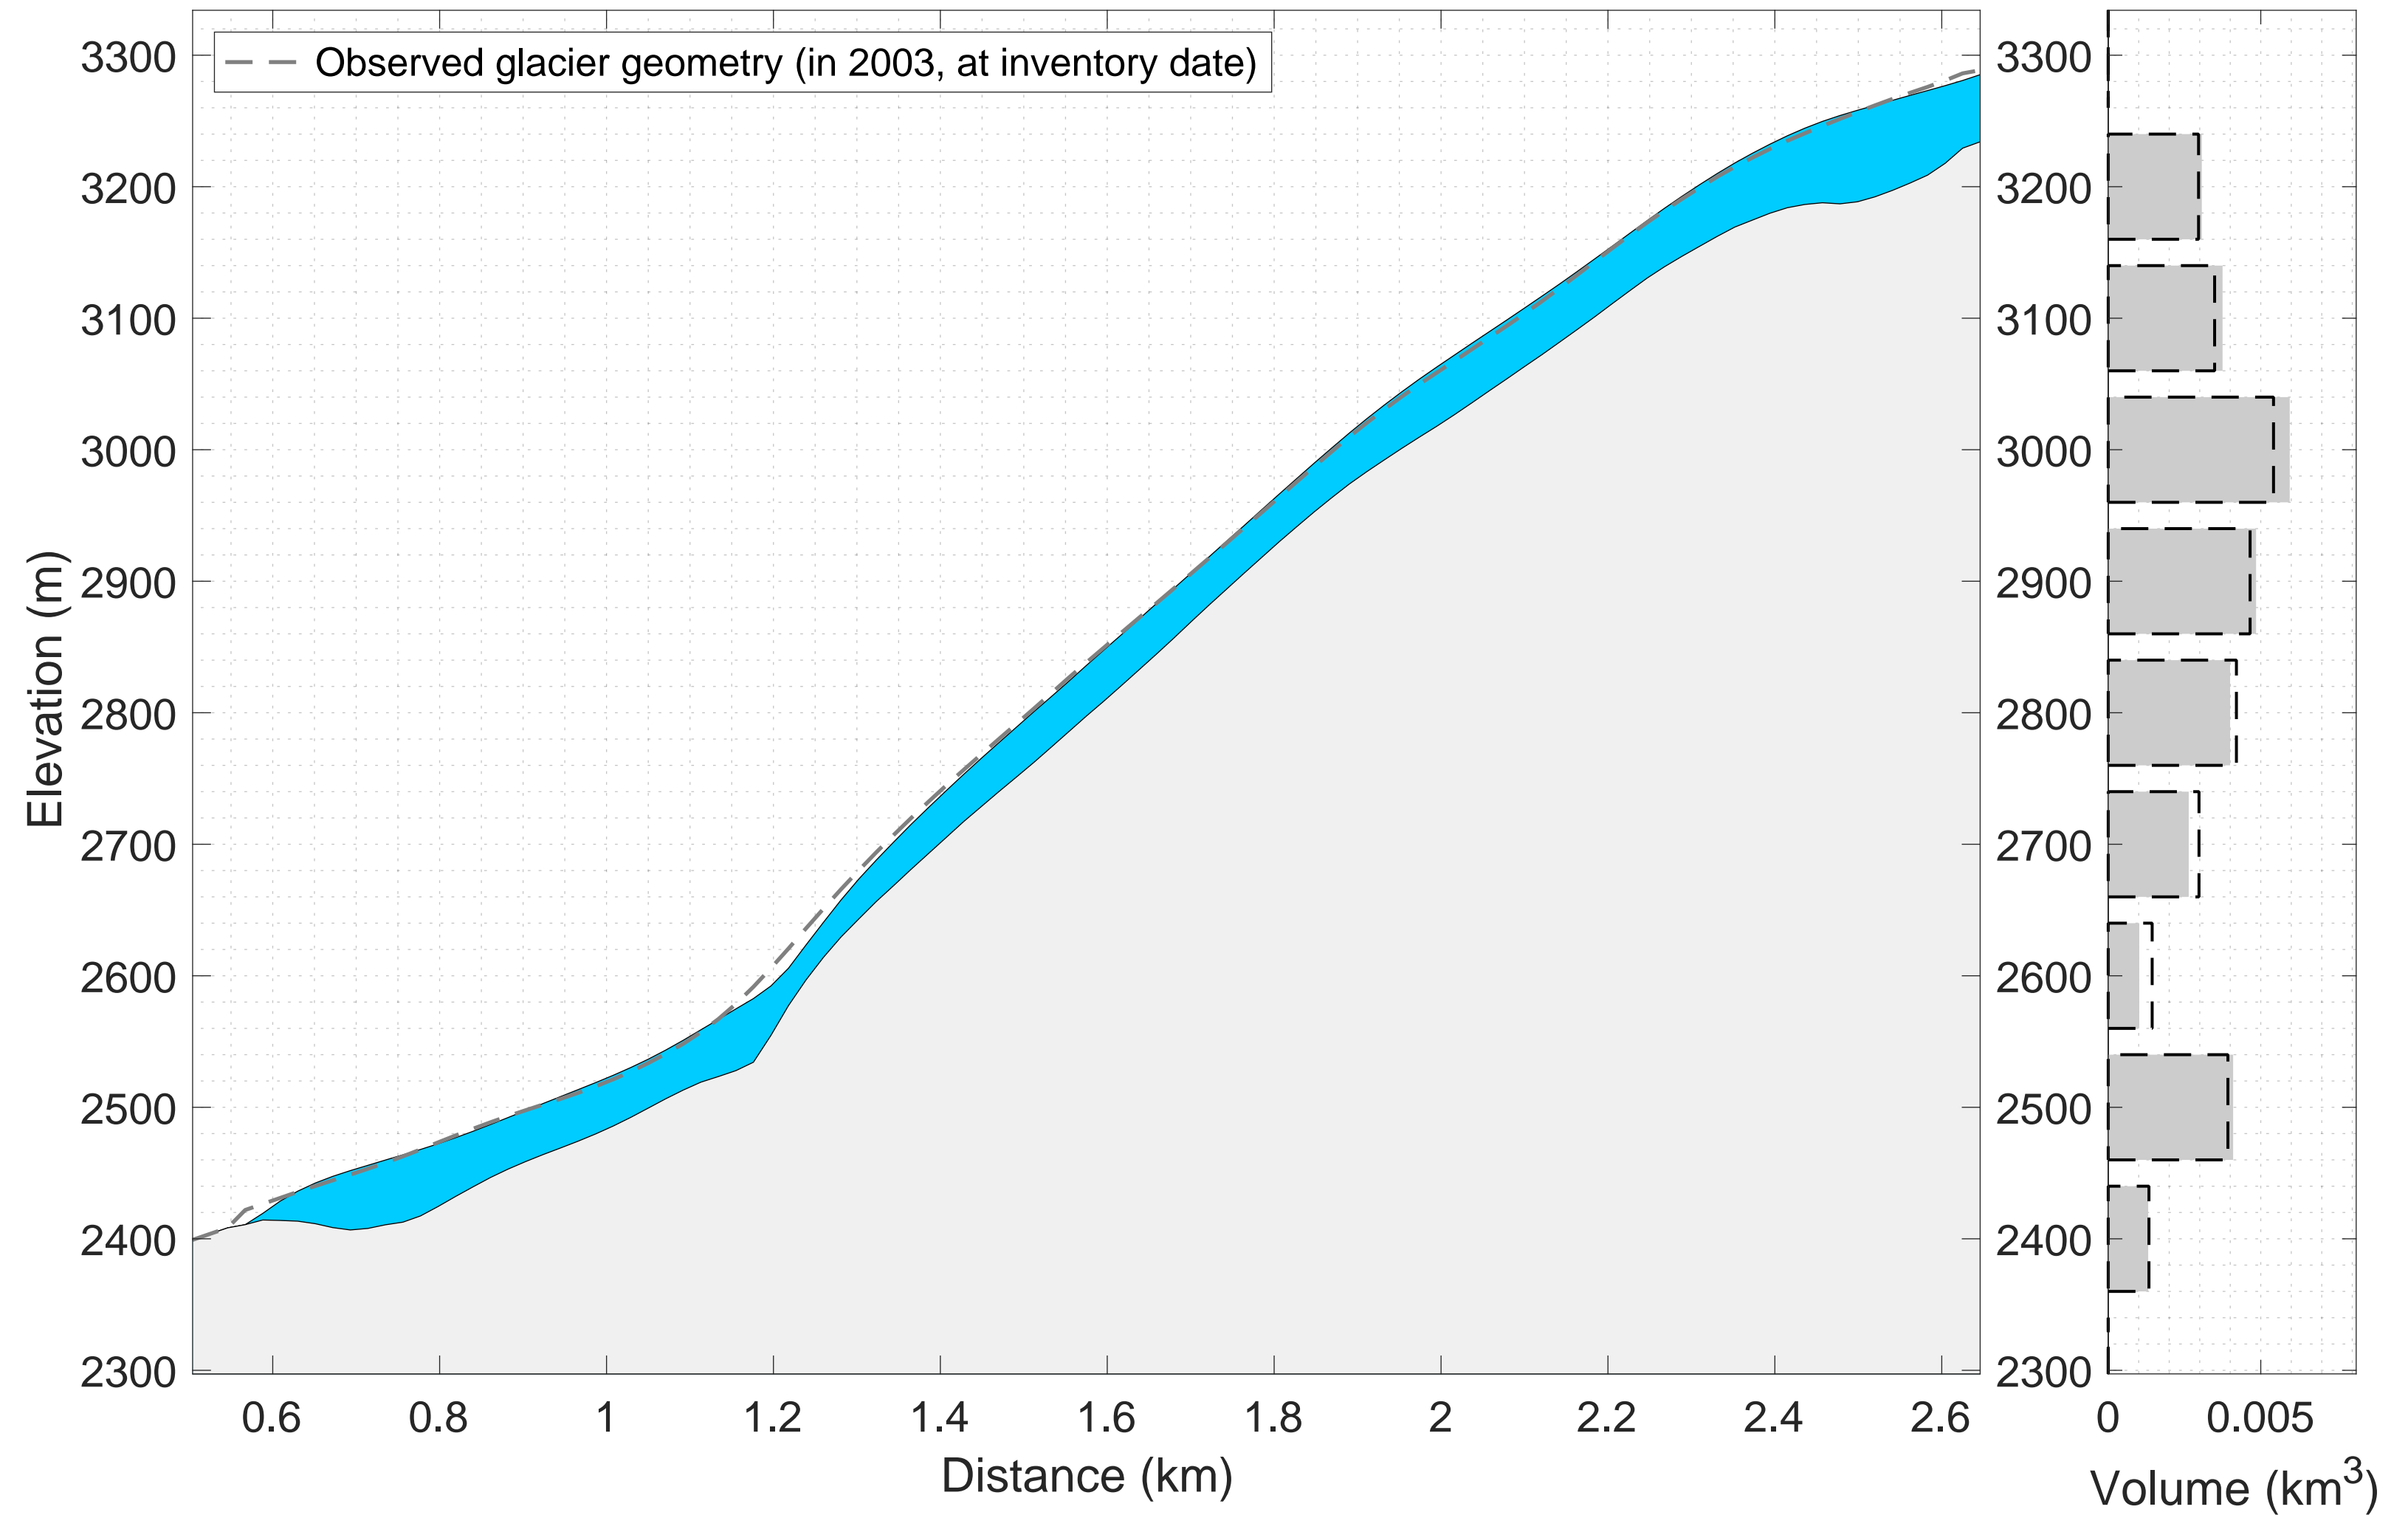

Supplement: Supplementary file 193 [file tc-13-1125-2019-supplement.zip]

**Modelled geometry (Glacier ID = 00181;  $A = 1.1458\text{e-}16 \text{ Pa}^{-3} \text{ a}^{-1}$ ;  $dx = 17 \text{ m}$ )**

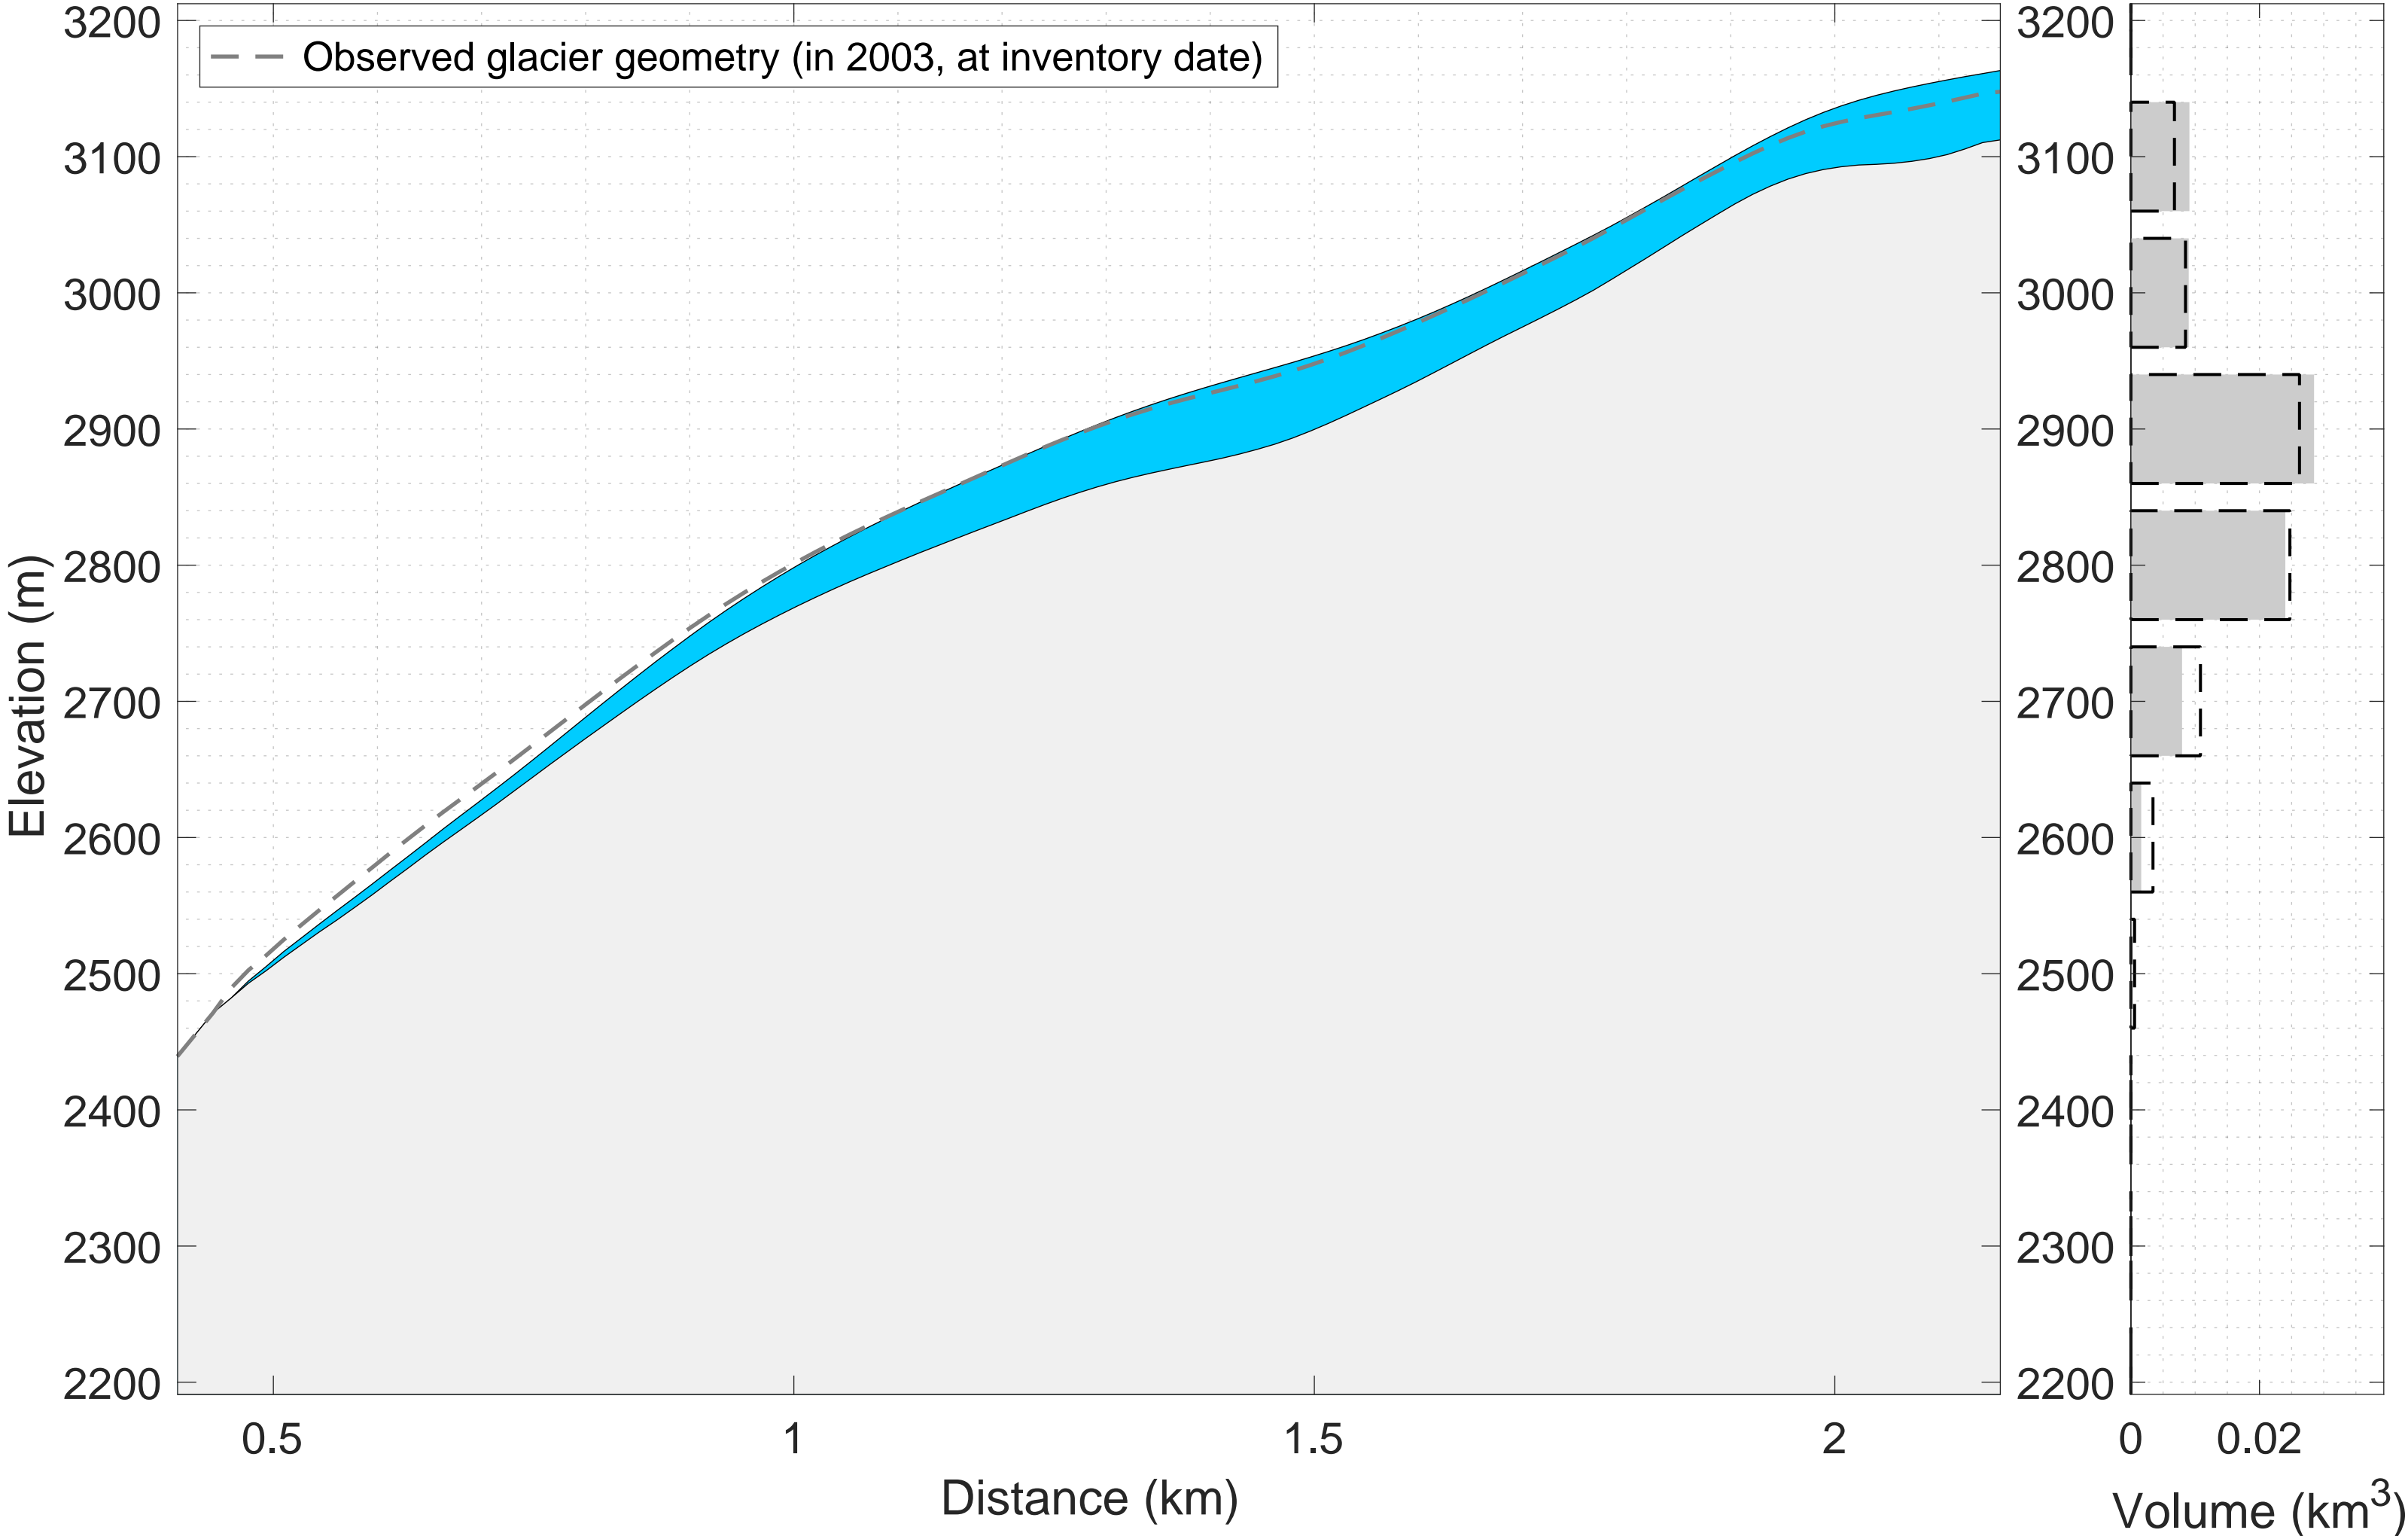

Supplement: Supplementary file 194 [file tc-13-1125-2019-supplement.zip]

**Modelled geometry (Glacier ID = 00698;  $A = 1.133\text{e-}16 \text{ Pa}^{-3} \text{ a}^{-1}$ ;  $dx = 24 \text{ m}$ )**

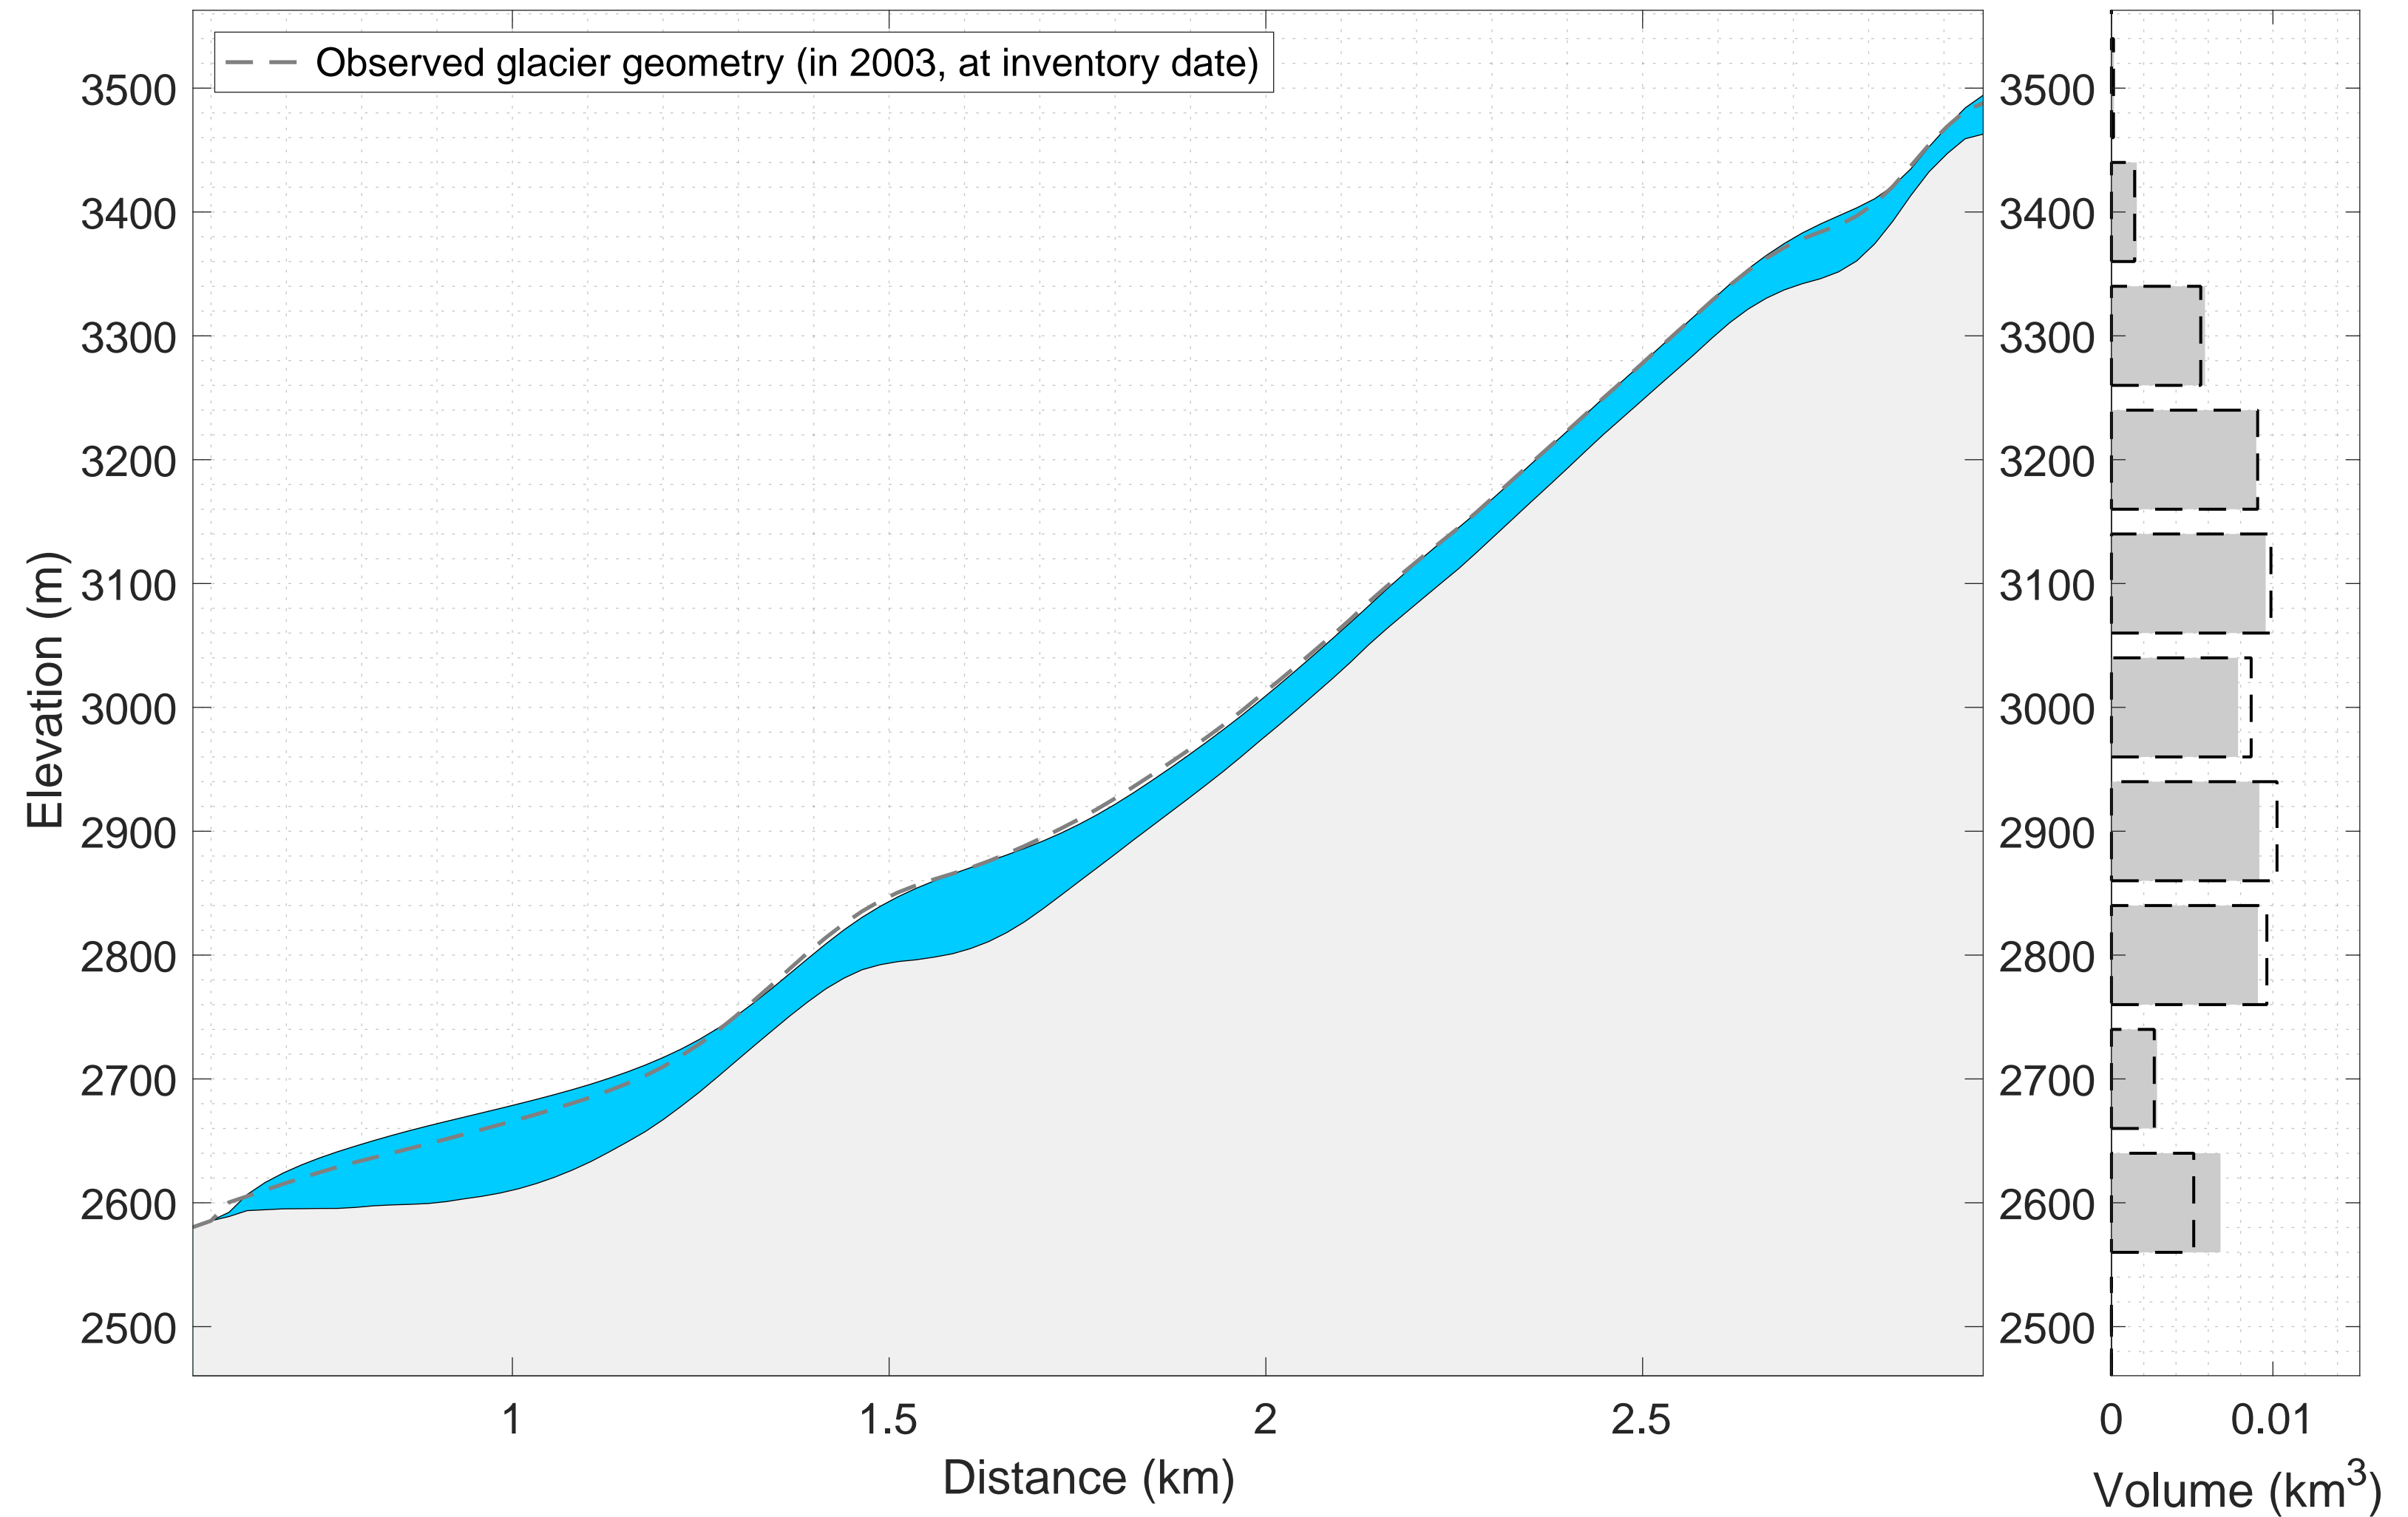

Supplement: Supplementary file 195 [file tc-13-1125-2019-supplement.zip]

**Modelled geometry (Glacier ID = 01762;  $A = 5.8297\text{e-}17 \text{ Pa}^{-3} \text{ a}^{-1}$ ;  $dx = 17 \text{ m}$ )**

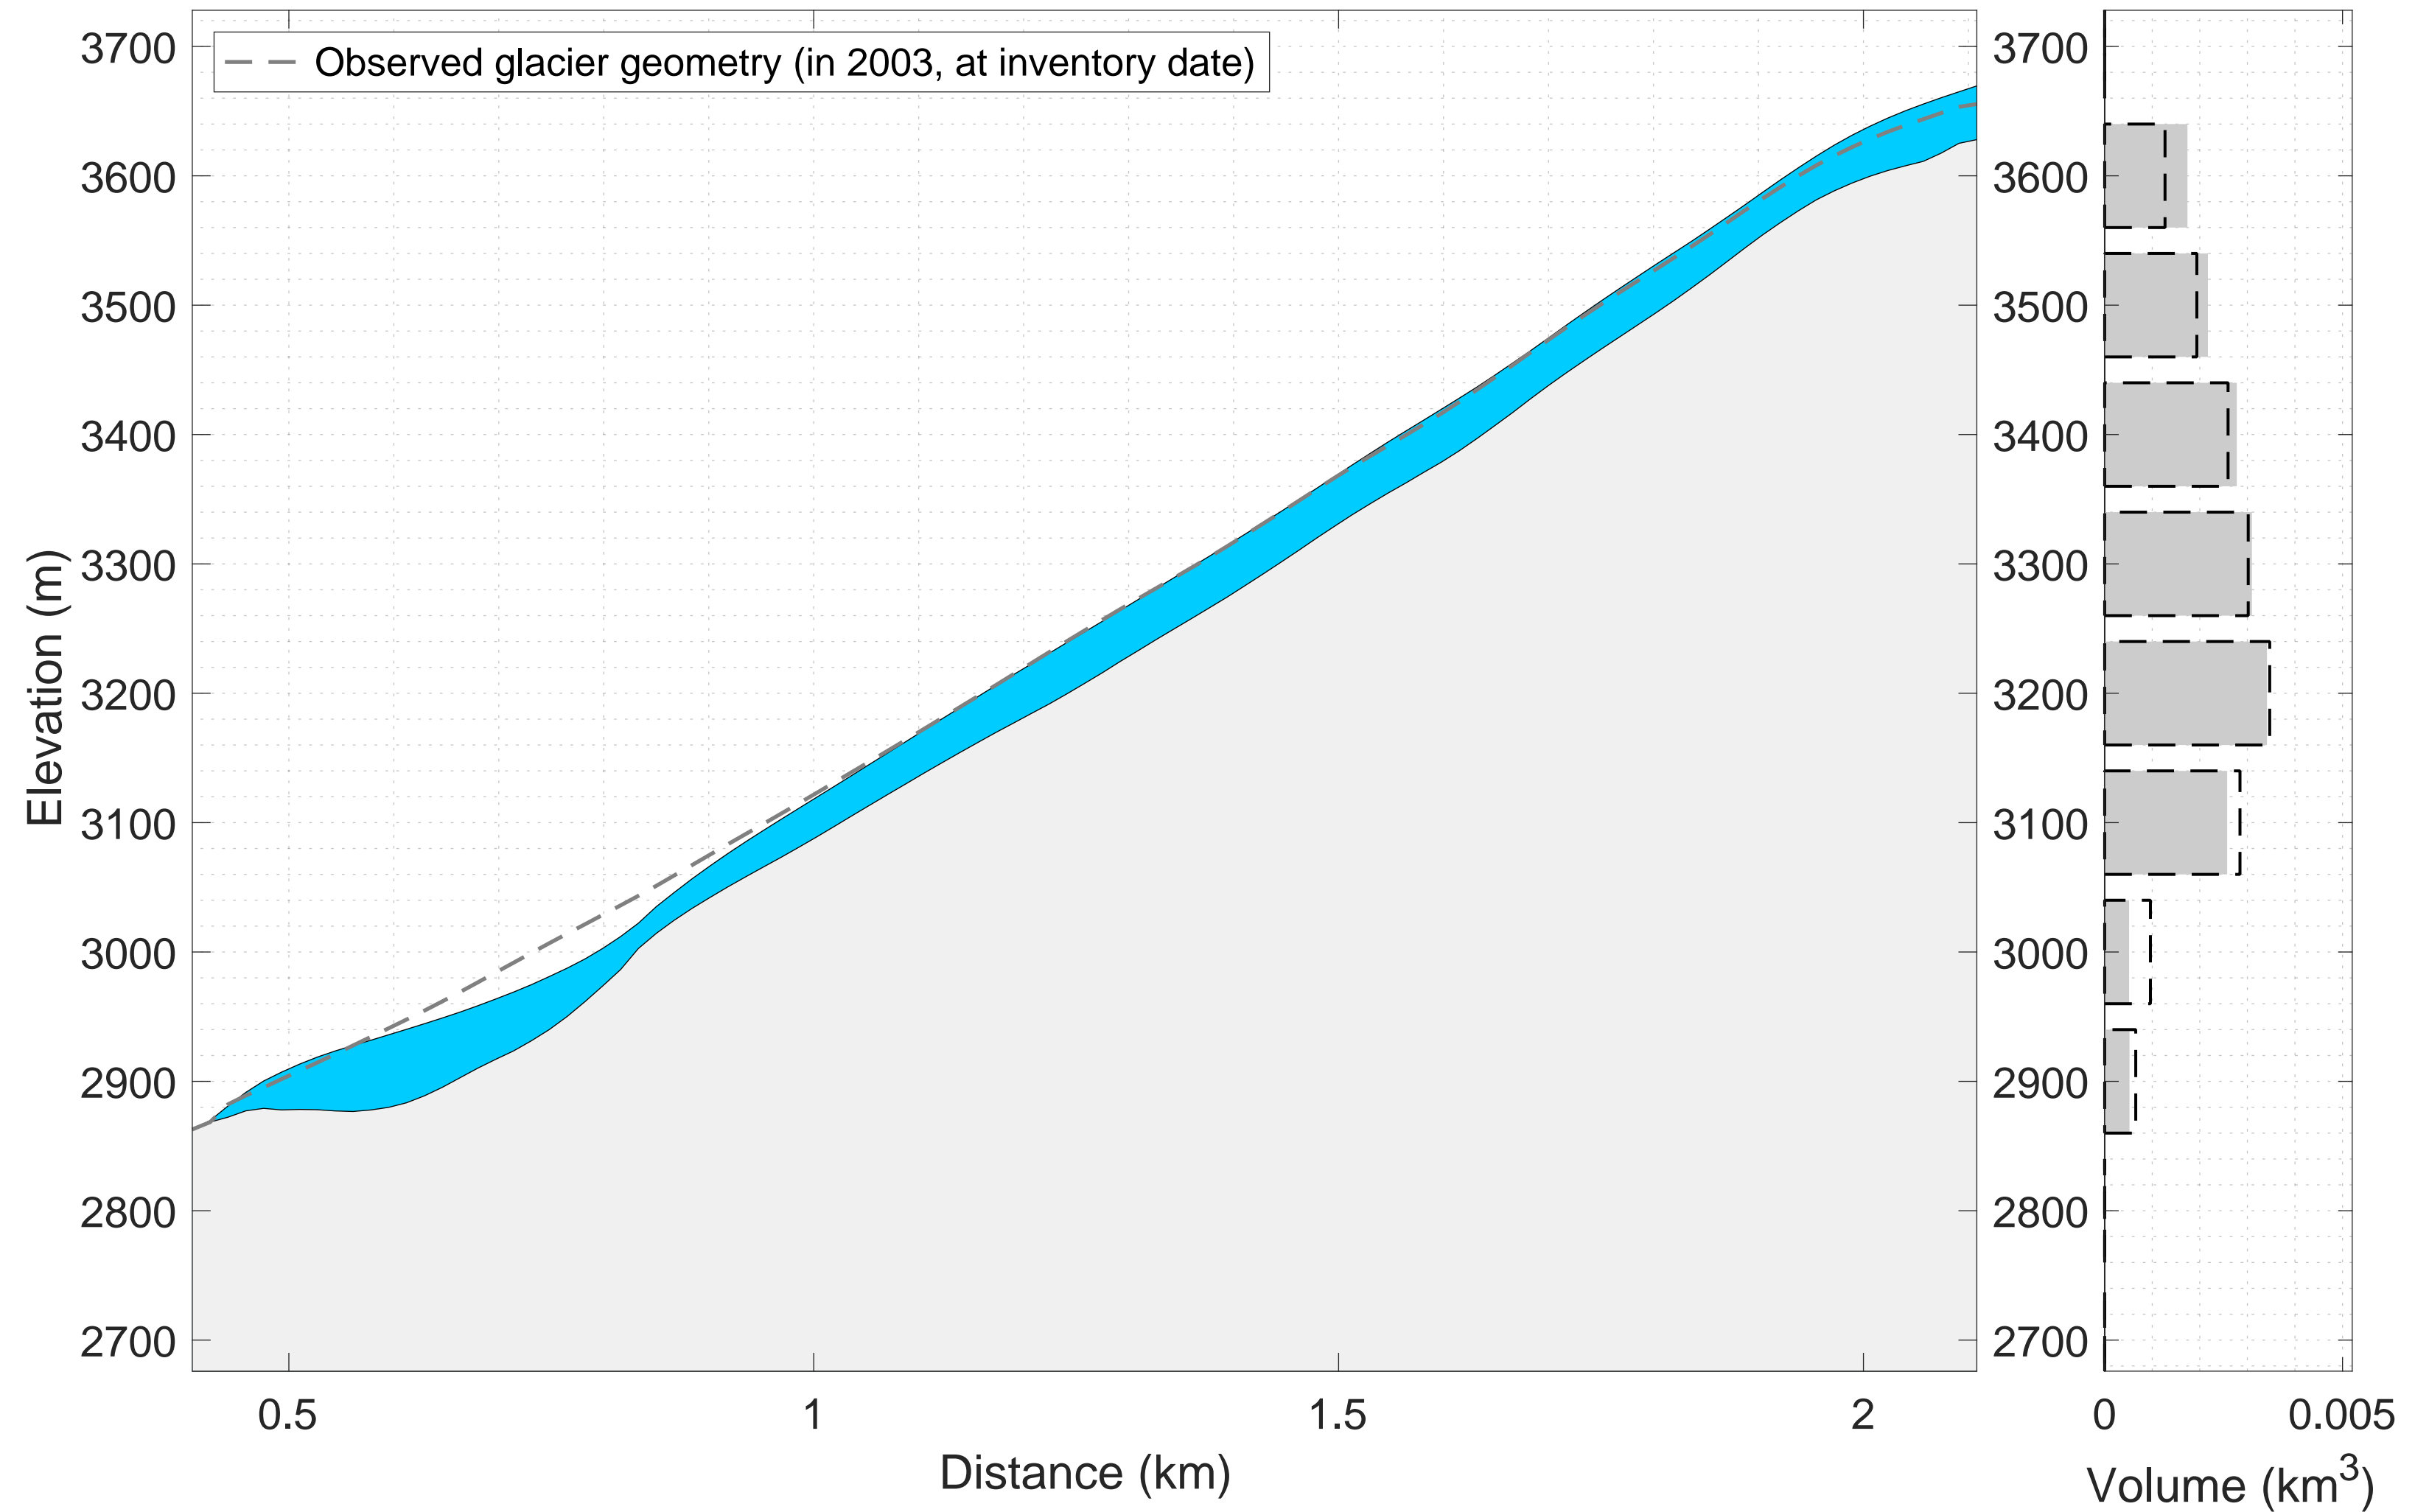

Supplement: Supplementary file 196 [file tc-13-1125-2019-supplement.zip]

**Modelled geometry (Glacier ID = 01776;  $A = 8.1885\text{e-}17 \text{ Pa}^{-3} \text{ a}^{-1}$ ;  $dx = 28 \text{ m}$ )**

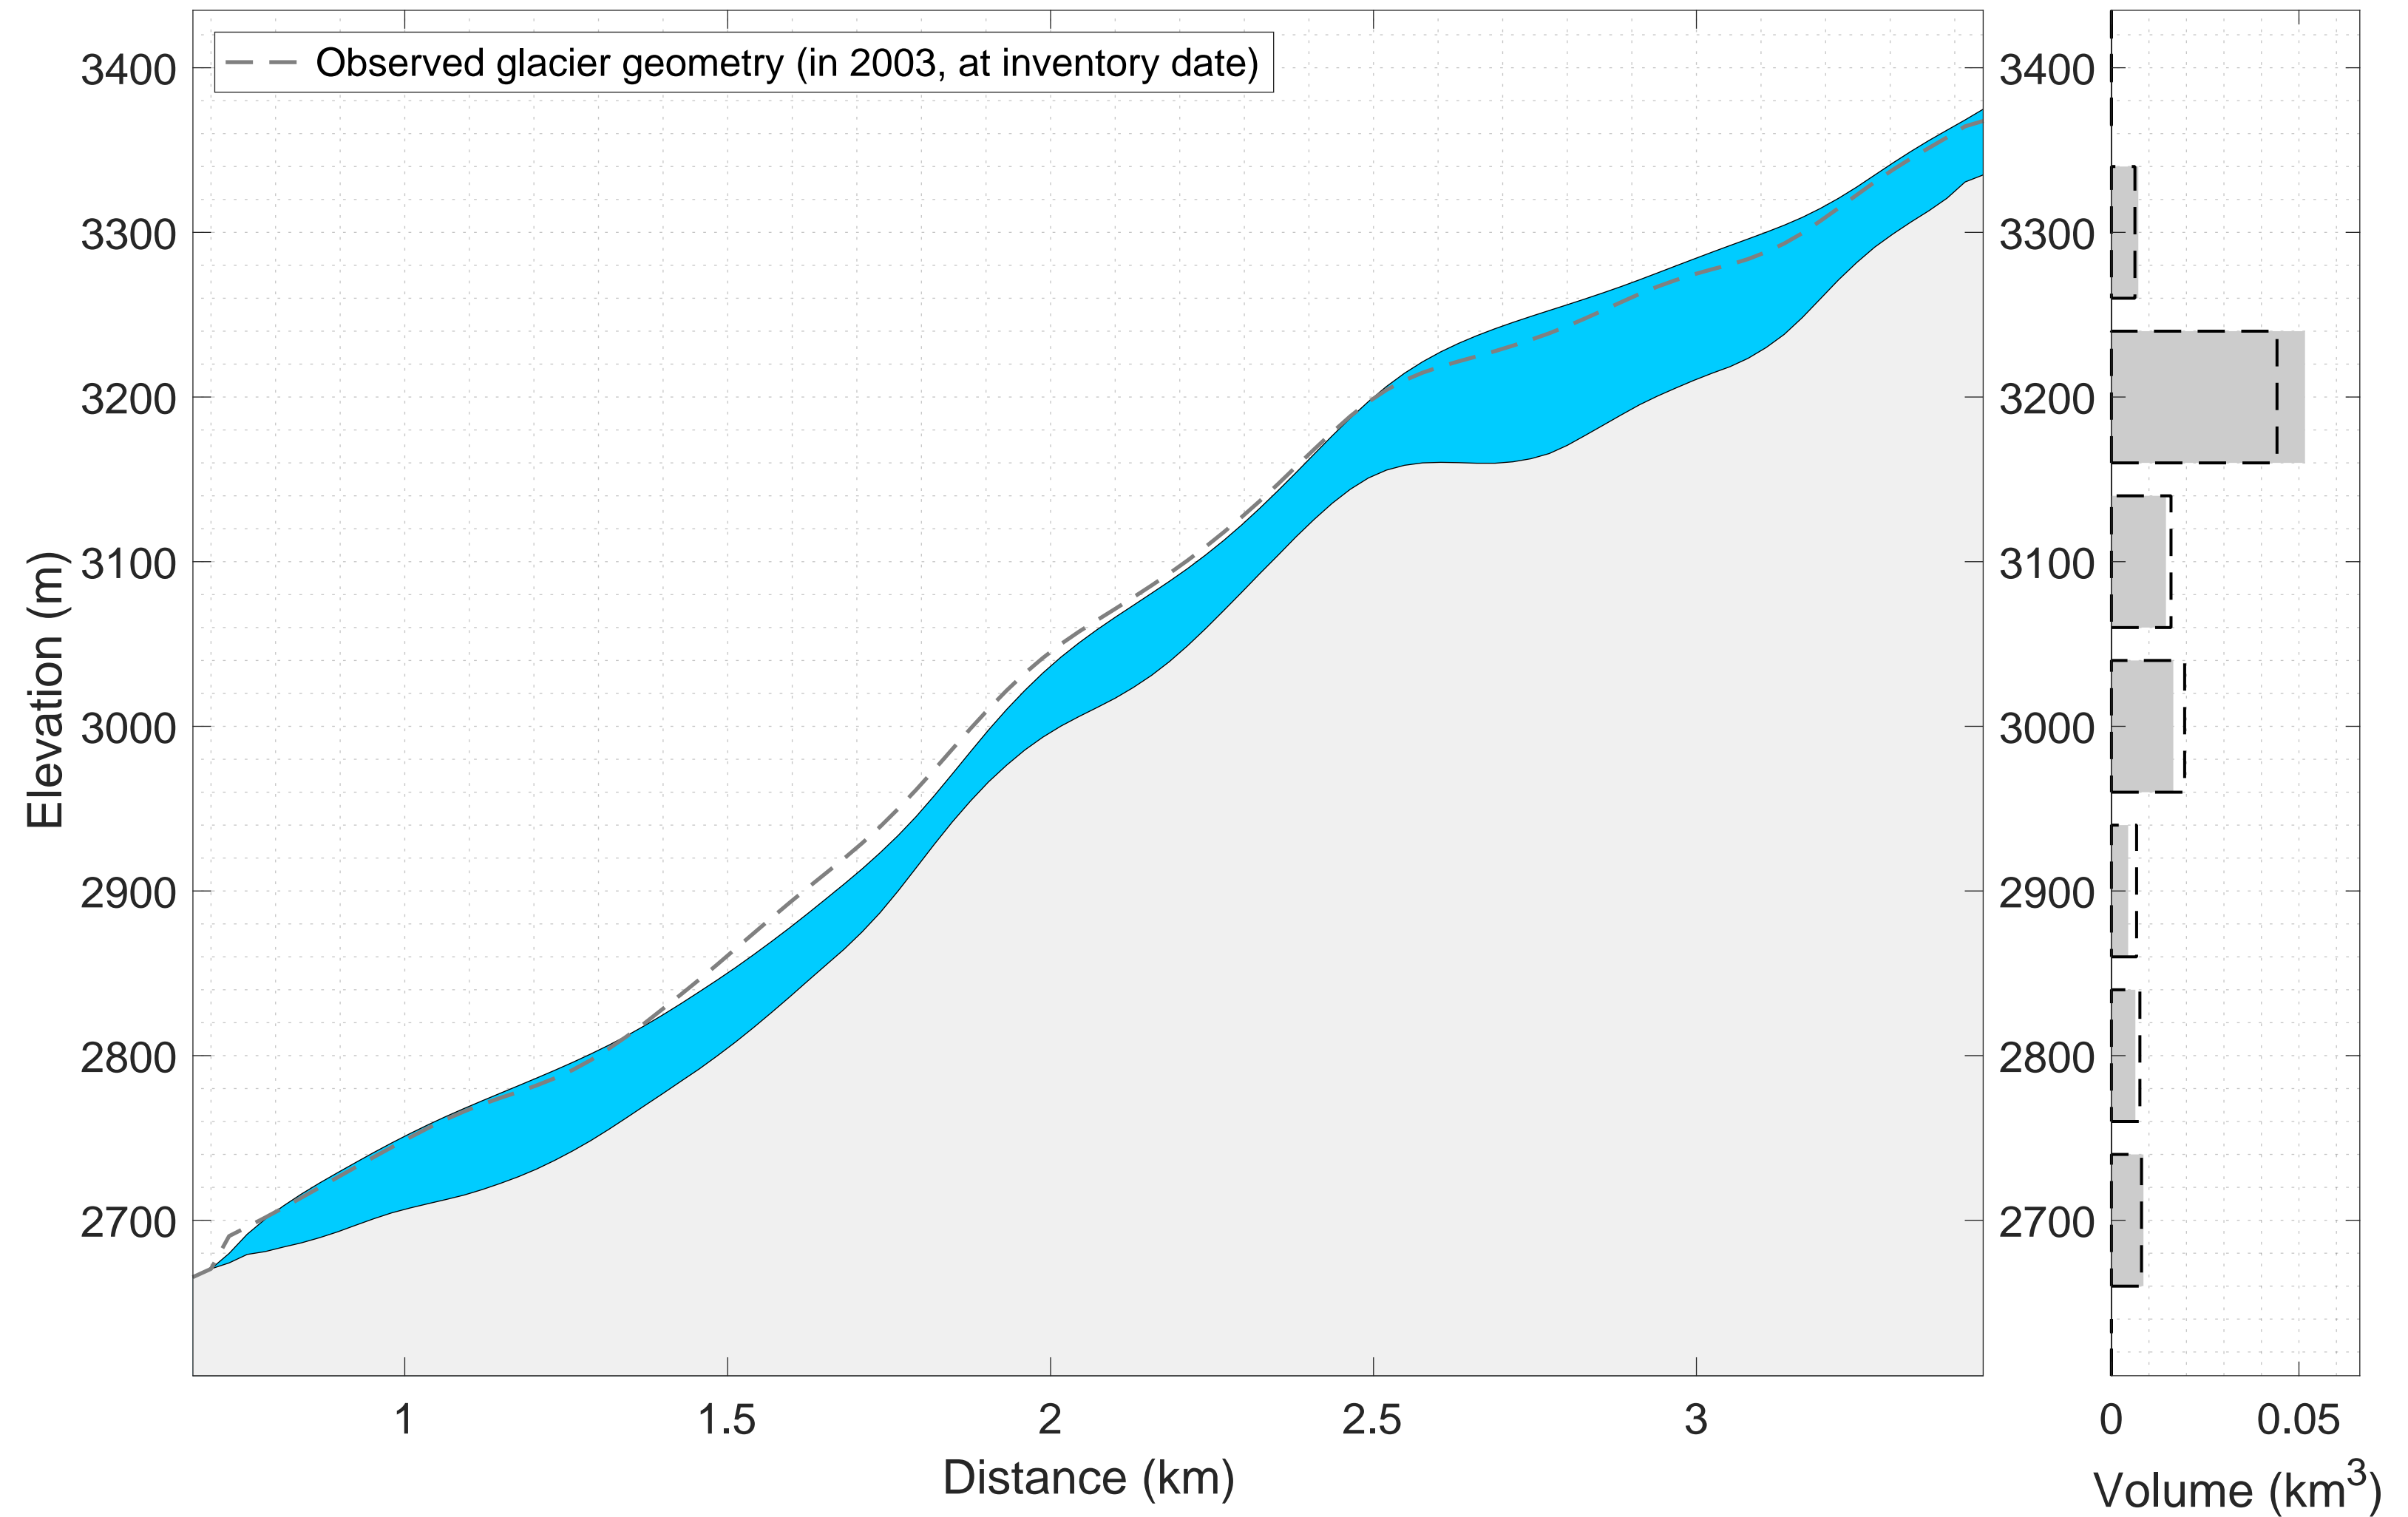

Supplement: Supplementary file 197 [file tc-13-1125-2019-supplement.zip]

**Modelled geometry (Glacier ID = 01203;  $A = 6.3674\text{e-}17 \text{ Pa}^{-3} \text{ a}^{-1}$ ;  $dx = 13 \text{ m}$ )**

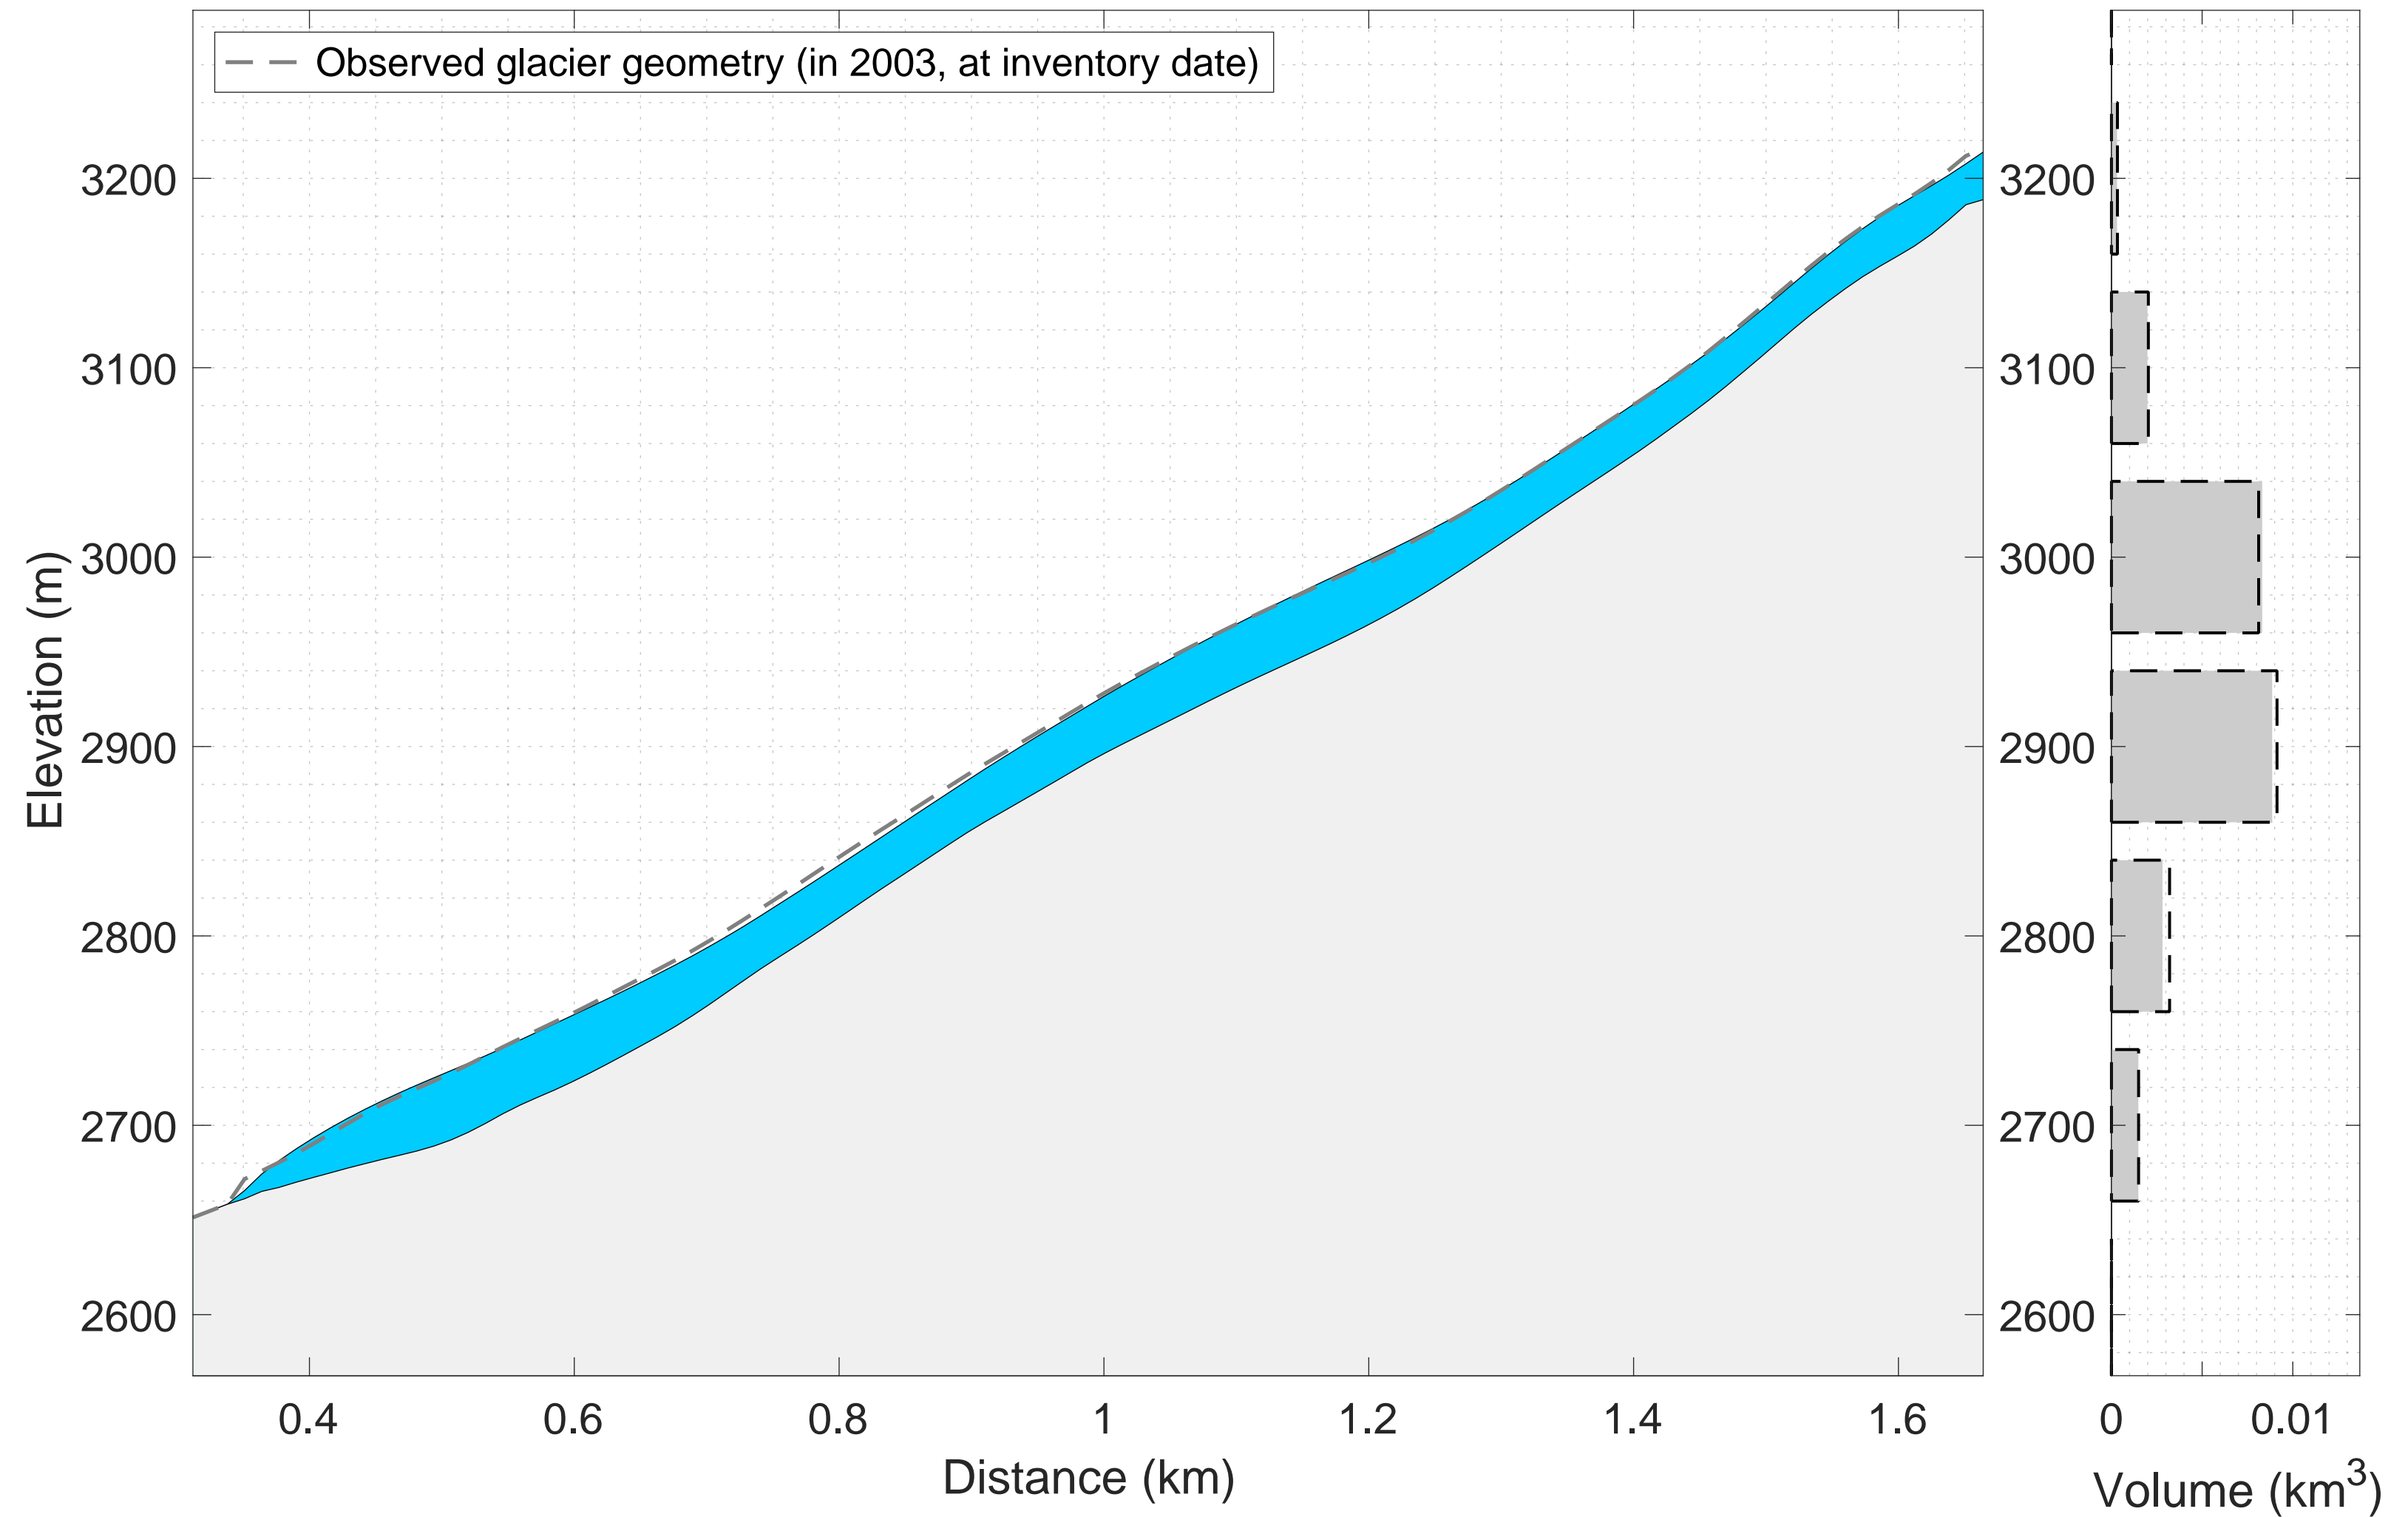

Supplement: Supplementary file 198 [file tc-13-1125-2019-supplement.zip]

**Modelled geometry (Glacier ID = 00697;  $A = 1.3694\text{e-}16 \text{ Pa}^{-3} \text{ a}^{-1}$ ;  $dx = 23 \text{ m}$ )**

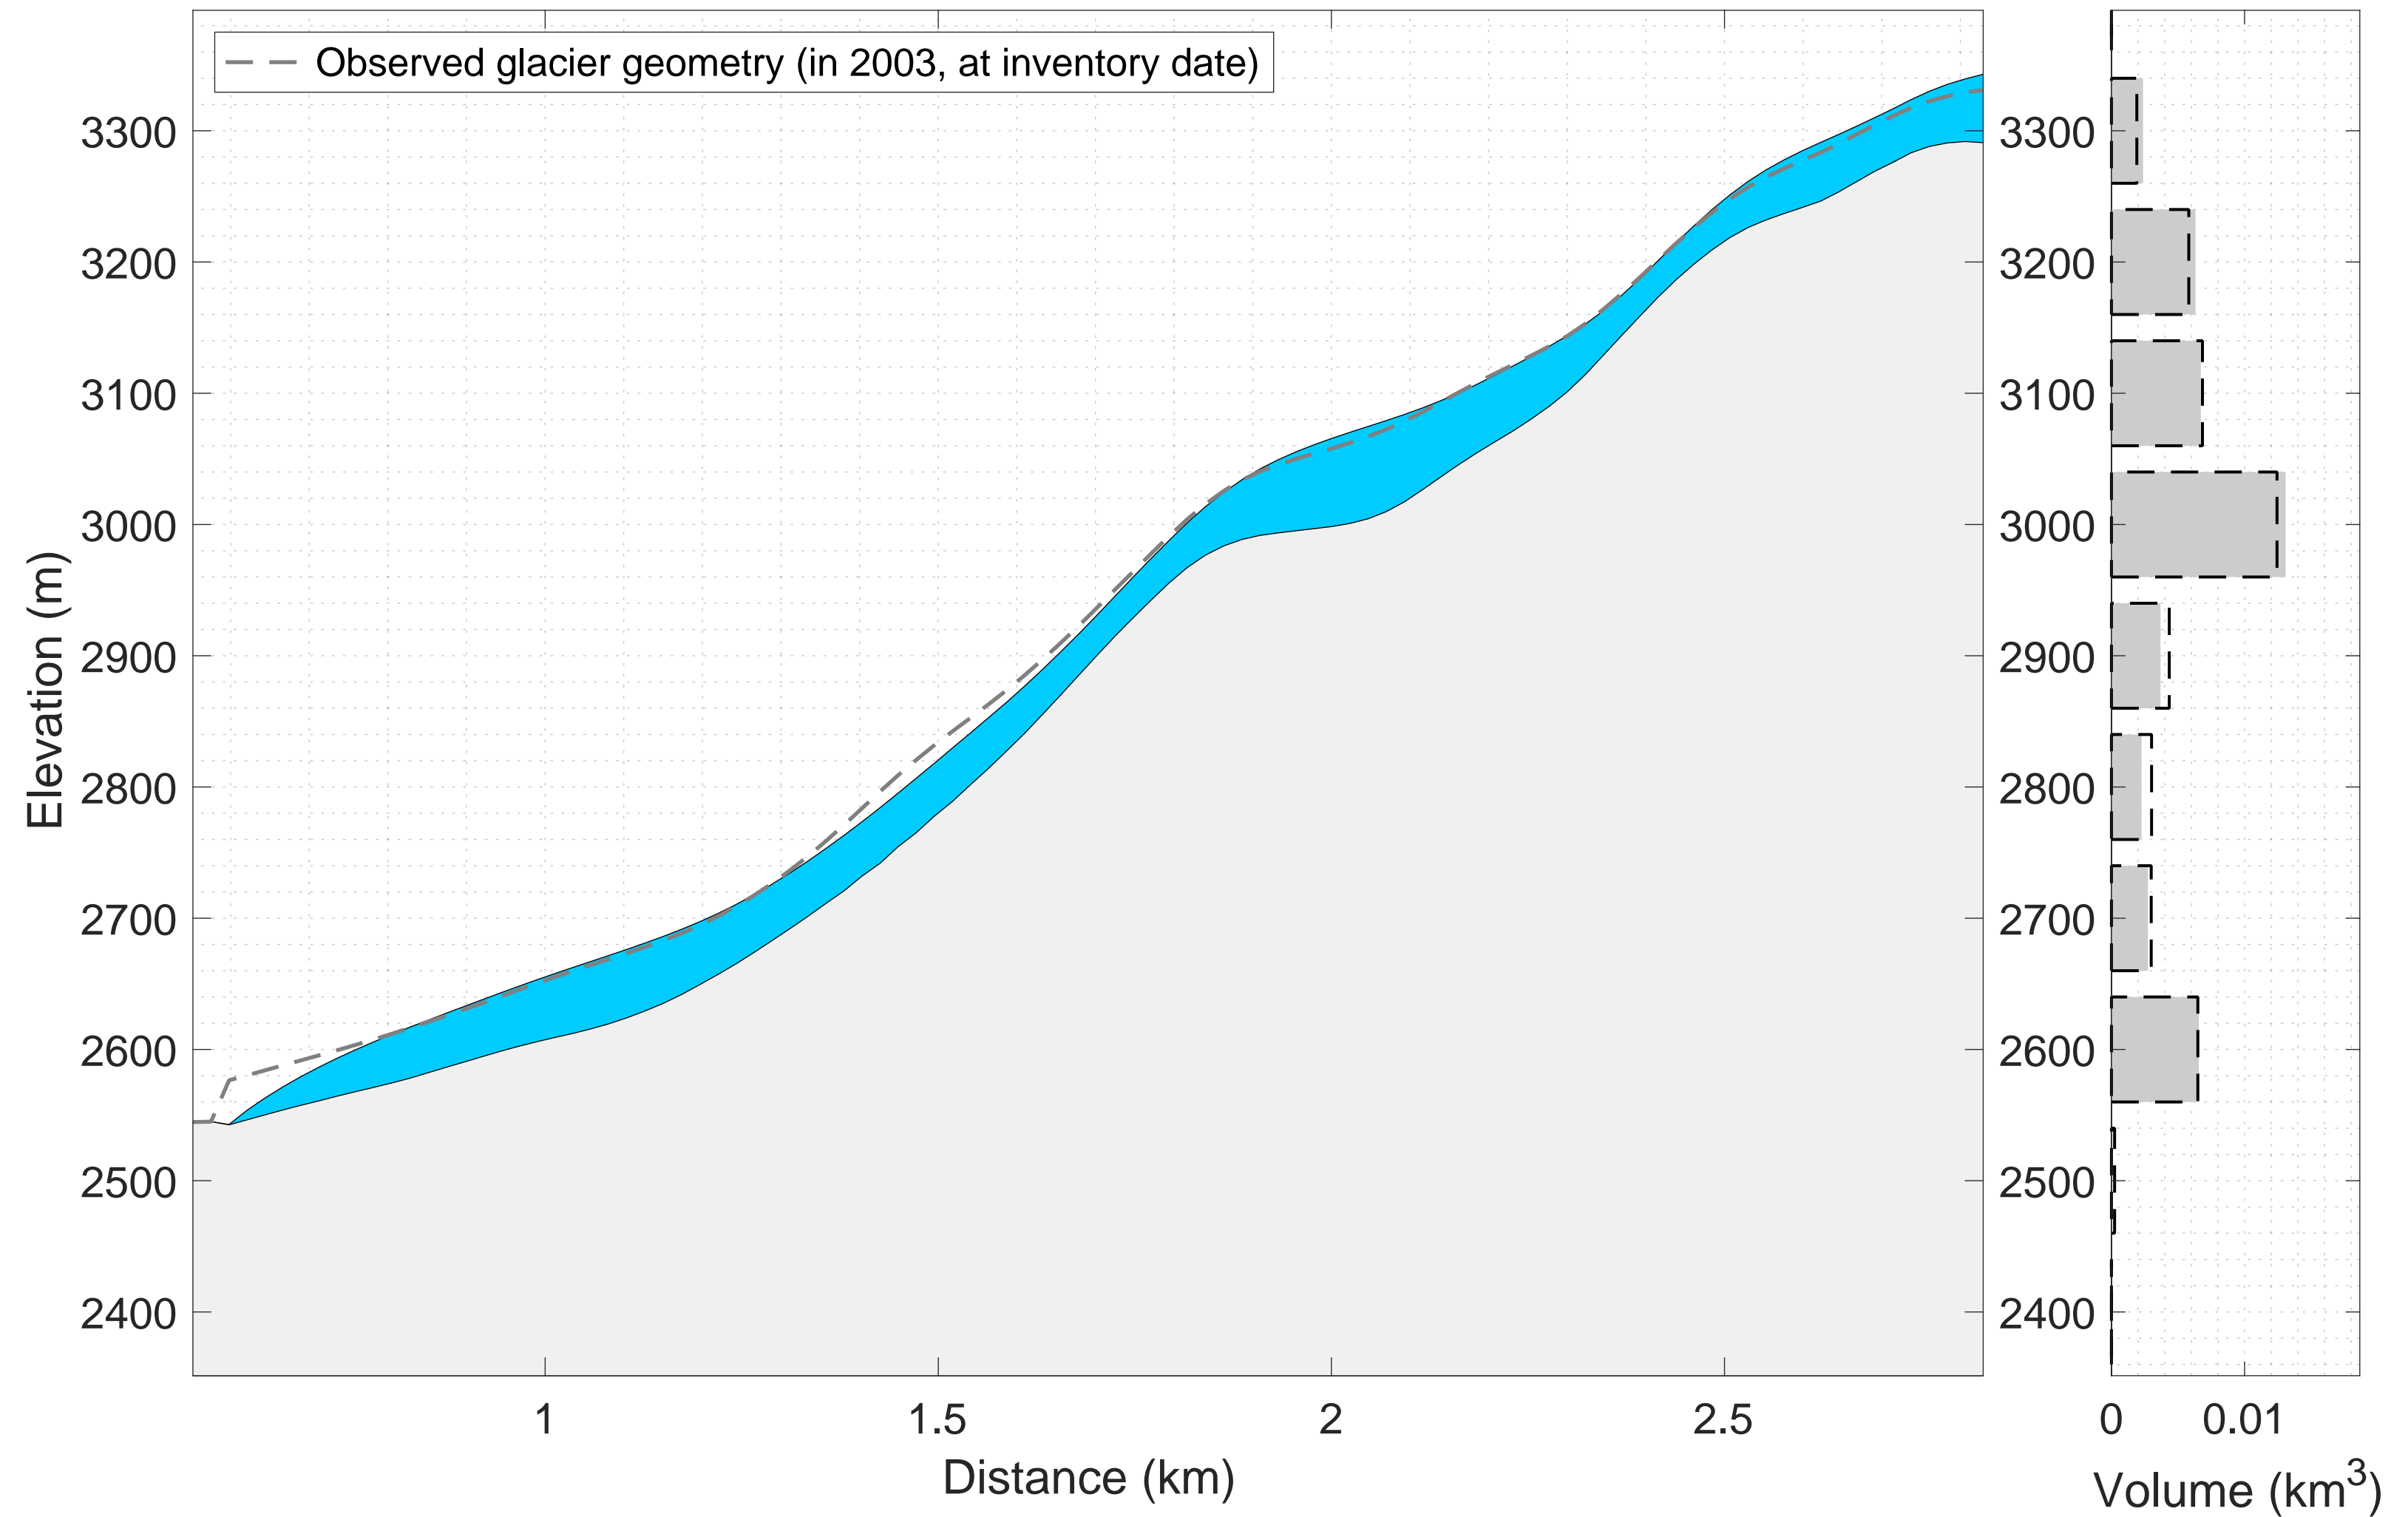

Supplement: Supplementary file 199 [file tc-13-1125-2019-supplement.zip]

**Modelled geometry (Glacier ID = 02536;  $A = 1.3792\text{e-}16 \text{ Pa}^{-3} \text{ a}^{-1}$ ;  $dx = 13 \text{ m}$ )**

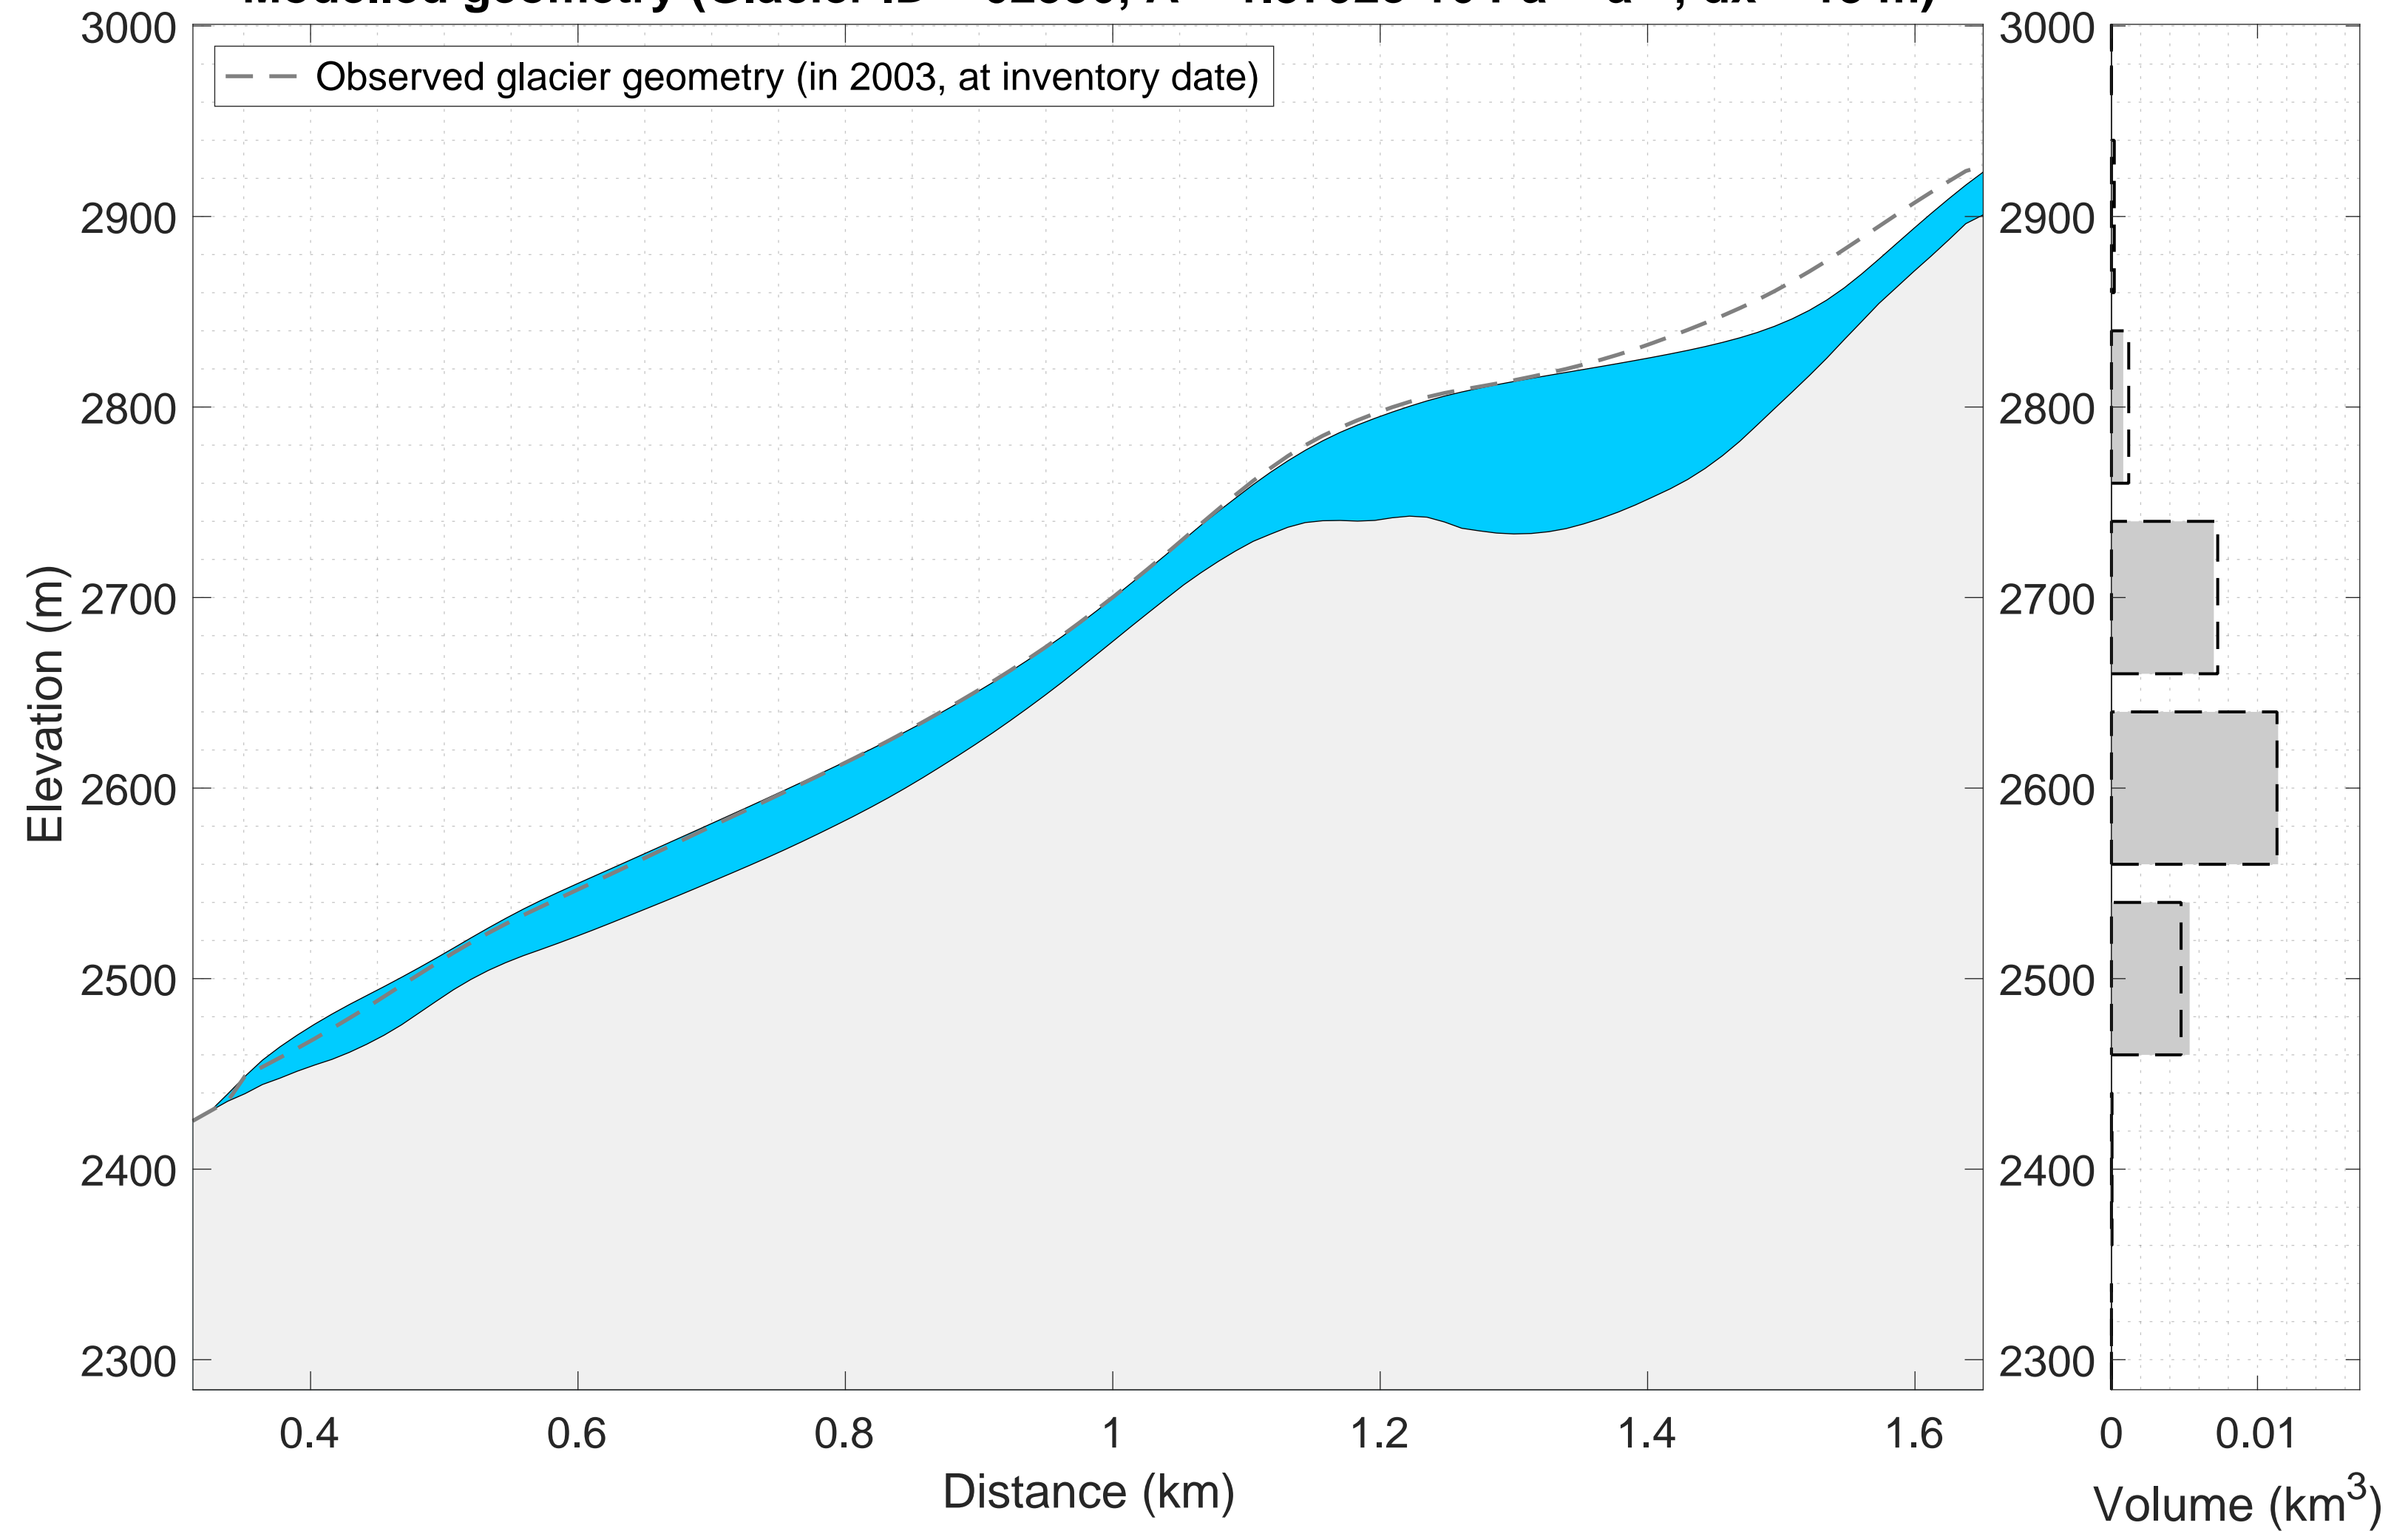

Supplement: Supplementary file 200 [file tc-13-1125-2019-supplement.zip]

**Modelled geometry (Glacier ID = 02400;  $A = 4.2778\text{e-}17 \text{ Pa}^{-3} \text{ a}^{-1}$ ;  $dx = 22 \text{ m}$ )**

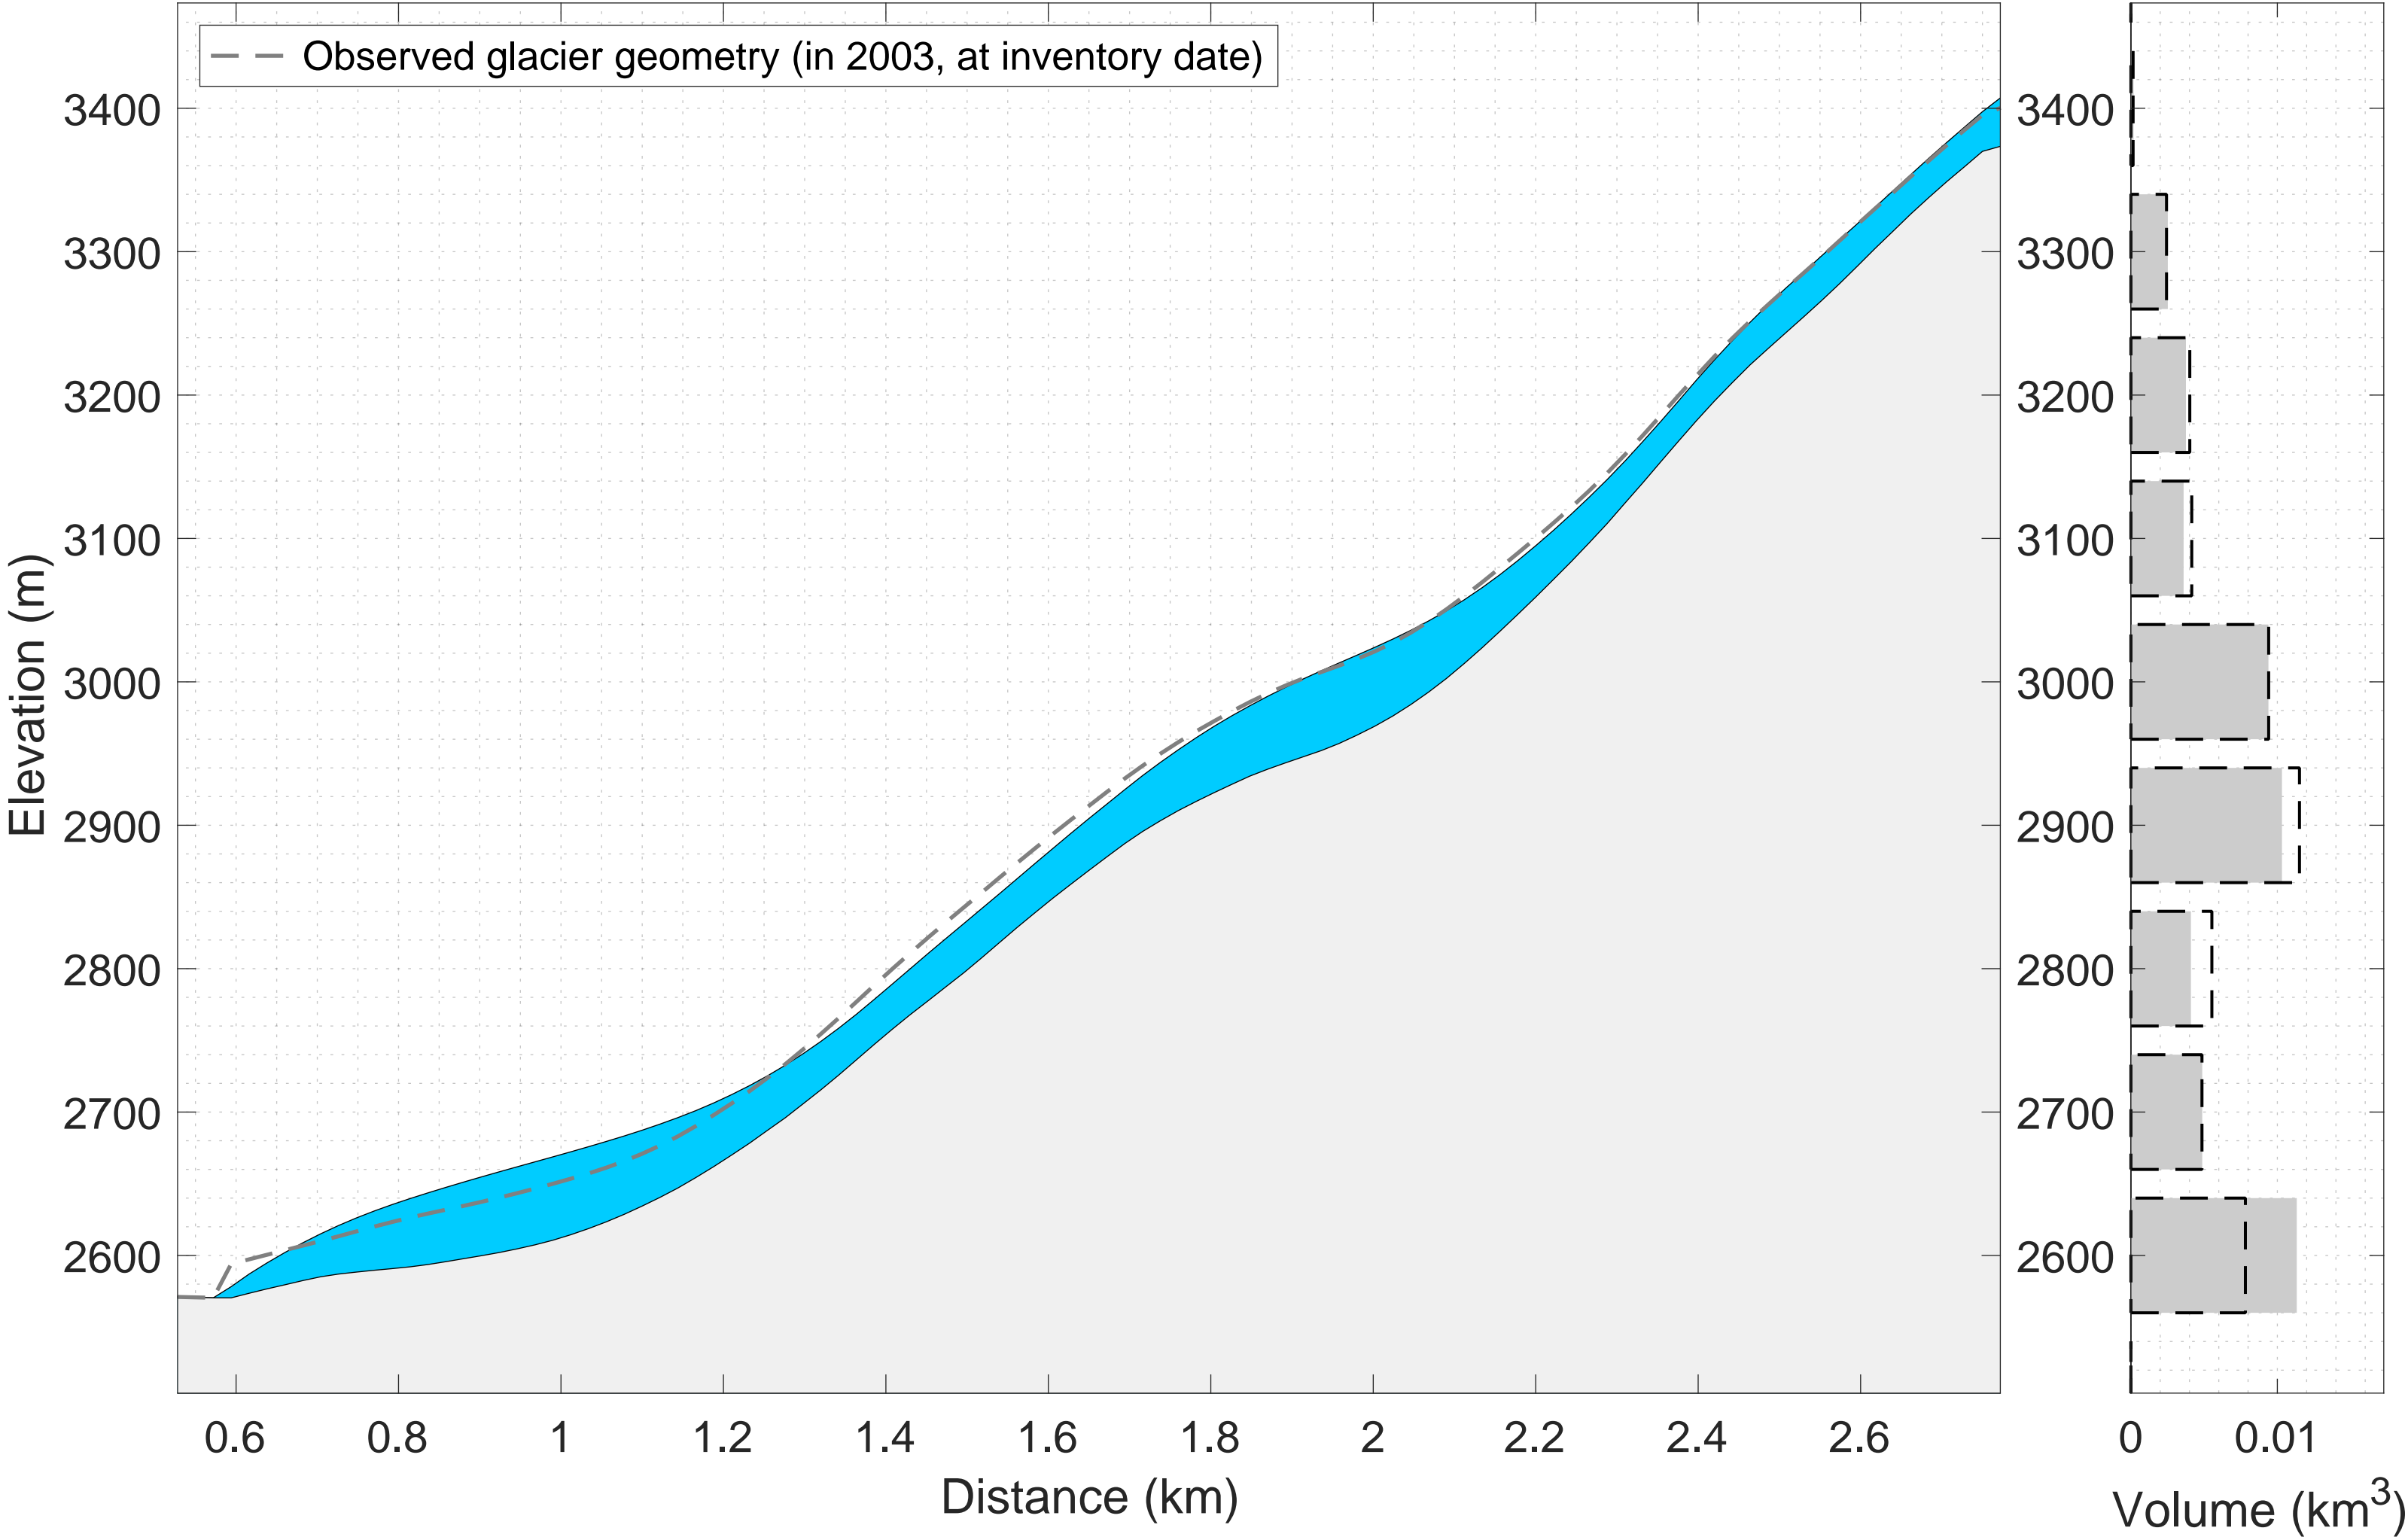

Supplement: Supplementary file 201 [file tc-13-1125-2019-supplement.zip]
