# Supplementary figures and images for: Modelling the future evolution of glaciers in the European Alps under the EURO-CORDEX RCM ensemble (part 3 of 8)
Source: Copernicus journal article supplement (doi:10.5194/tc-13-1125-2019), 2019-04-09

**Modelled geometry (Glacier ID = 01099;  $A = 4.6897\text{e-}17 \text{ Pa}^{-3} \text{ a}^{-1}$ ;  $dx = 11 \text{ m}$ )**

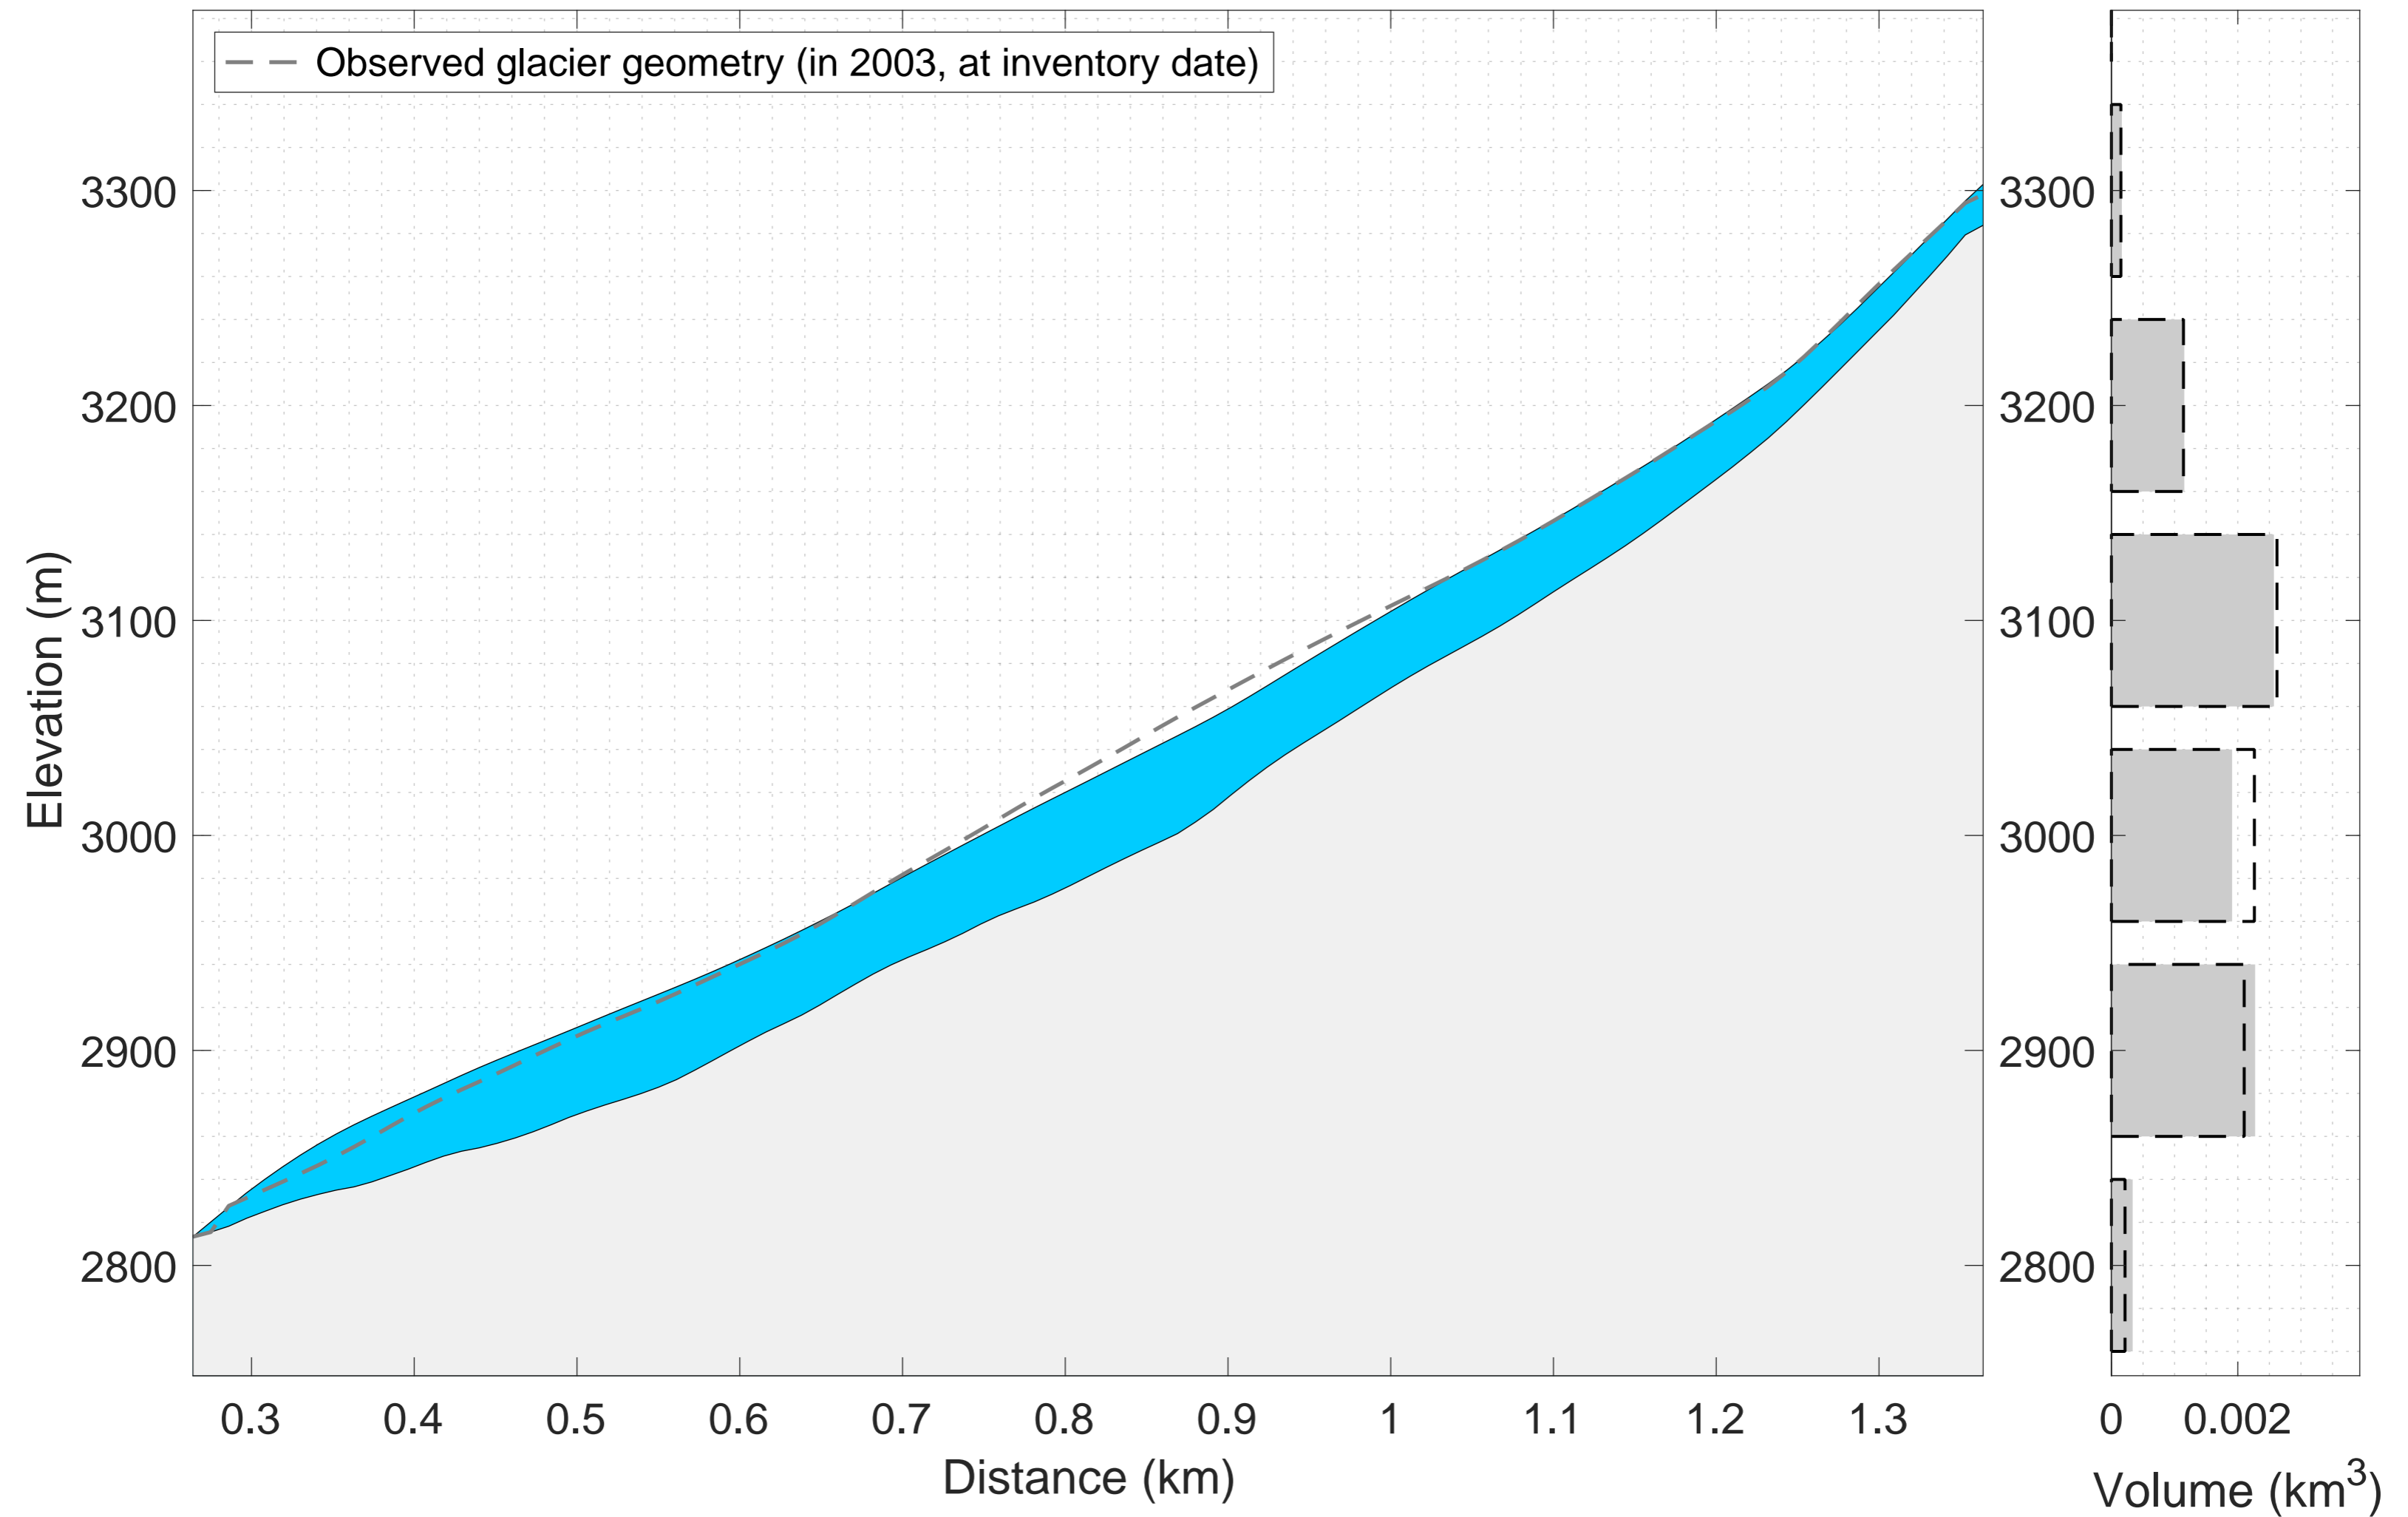

Supplement: Supplementary file 202 [file tc-13-1125-2019-supplement.zip]

**Modelled geometry (Glacier ID = 01500;  $A = 7.2511\text{e-}17 \text{ Pa}^{-3} \text{ a}^{-1}$ ;  $dx = 11 \text{ m}$ )**

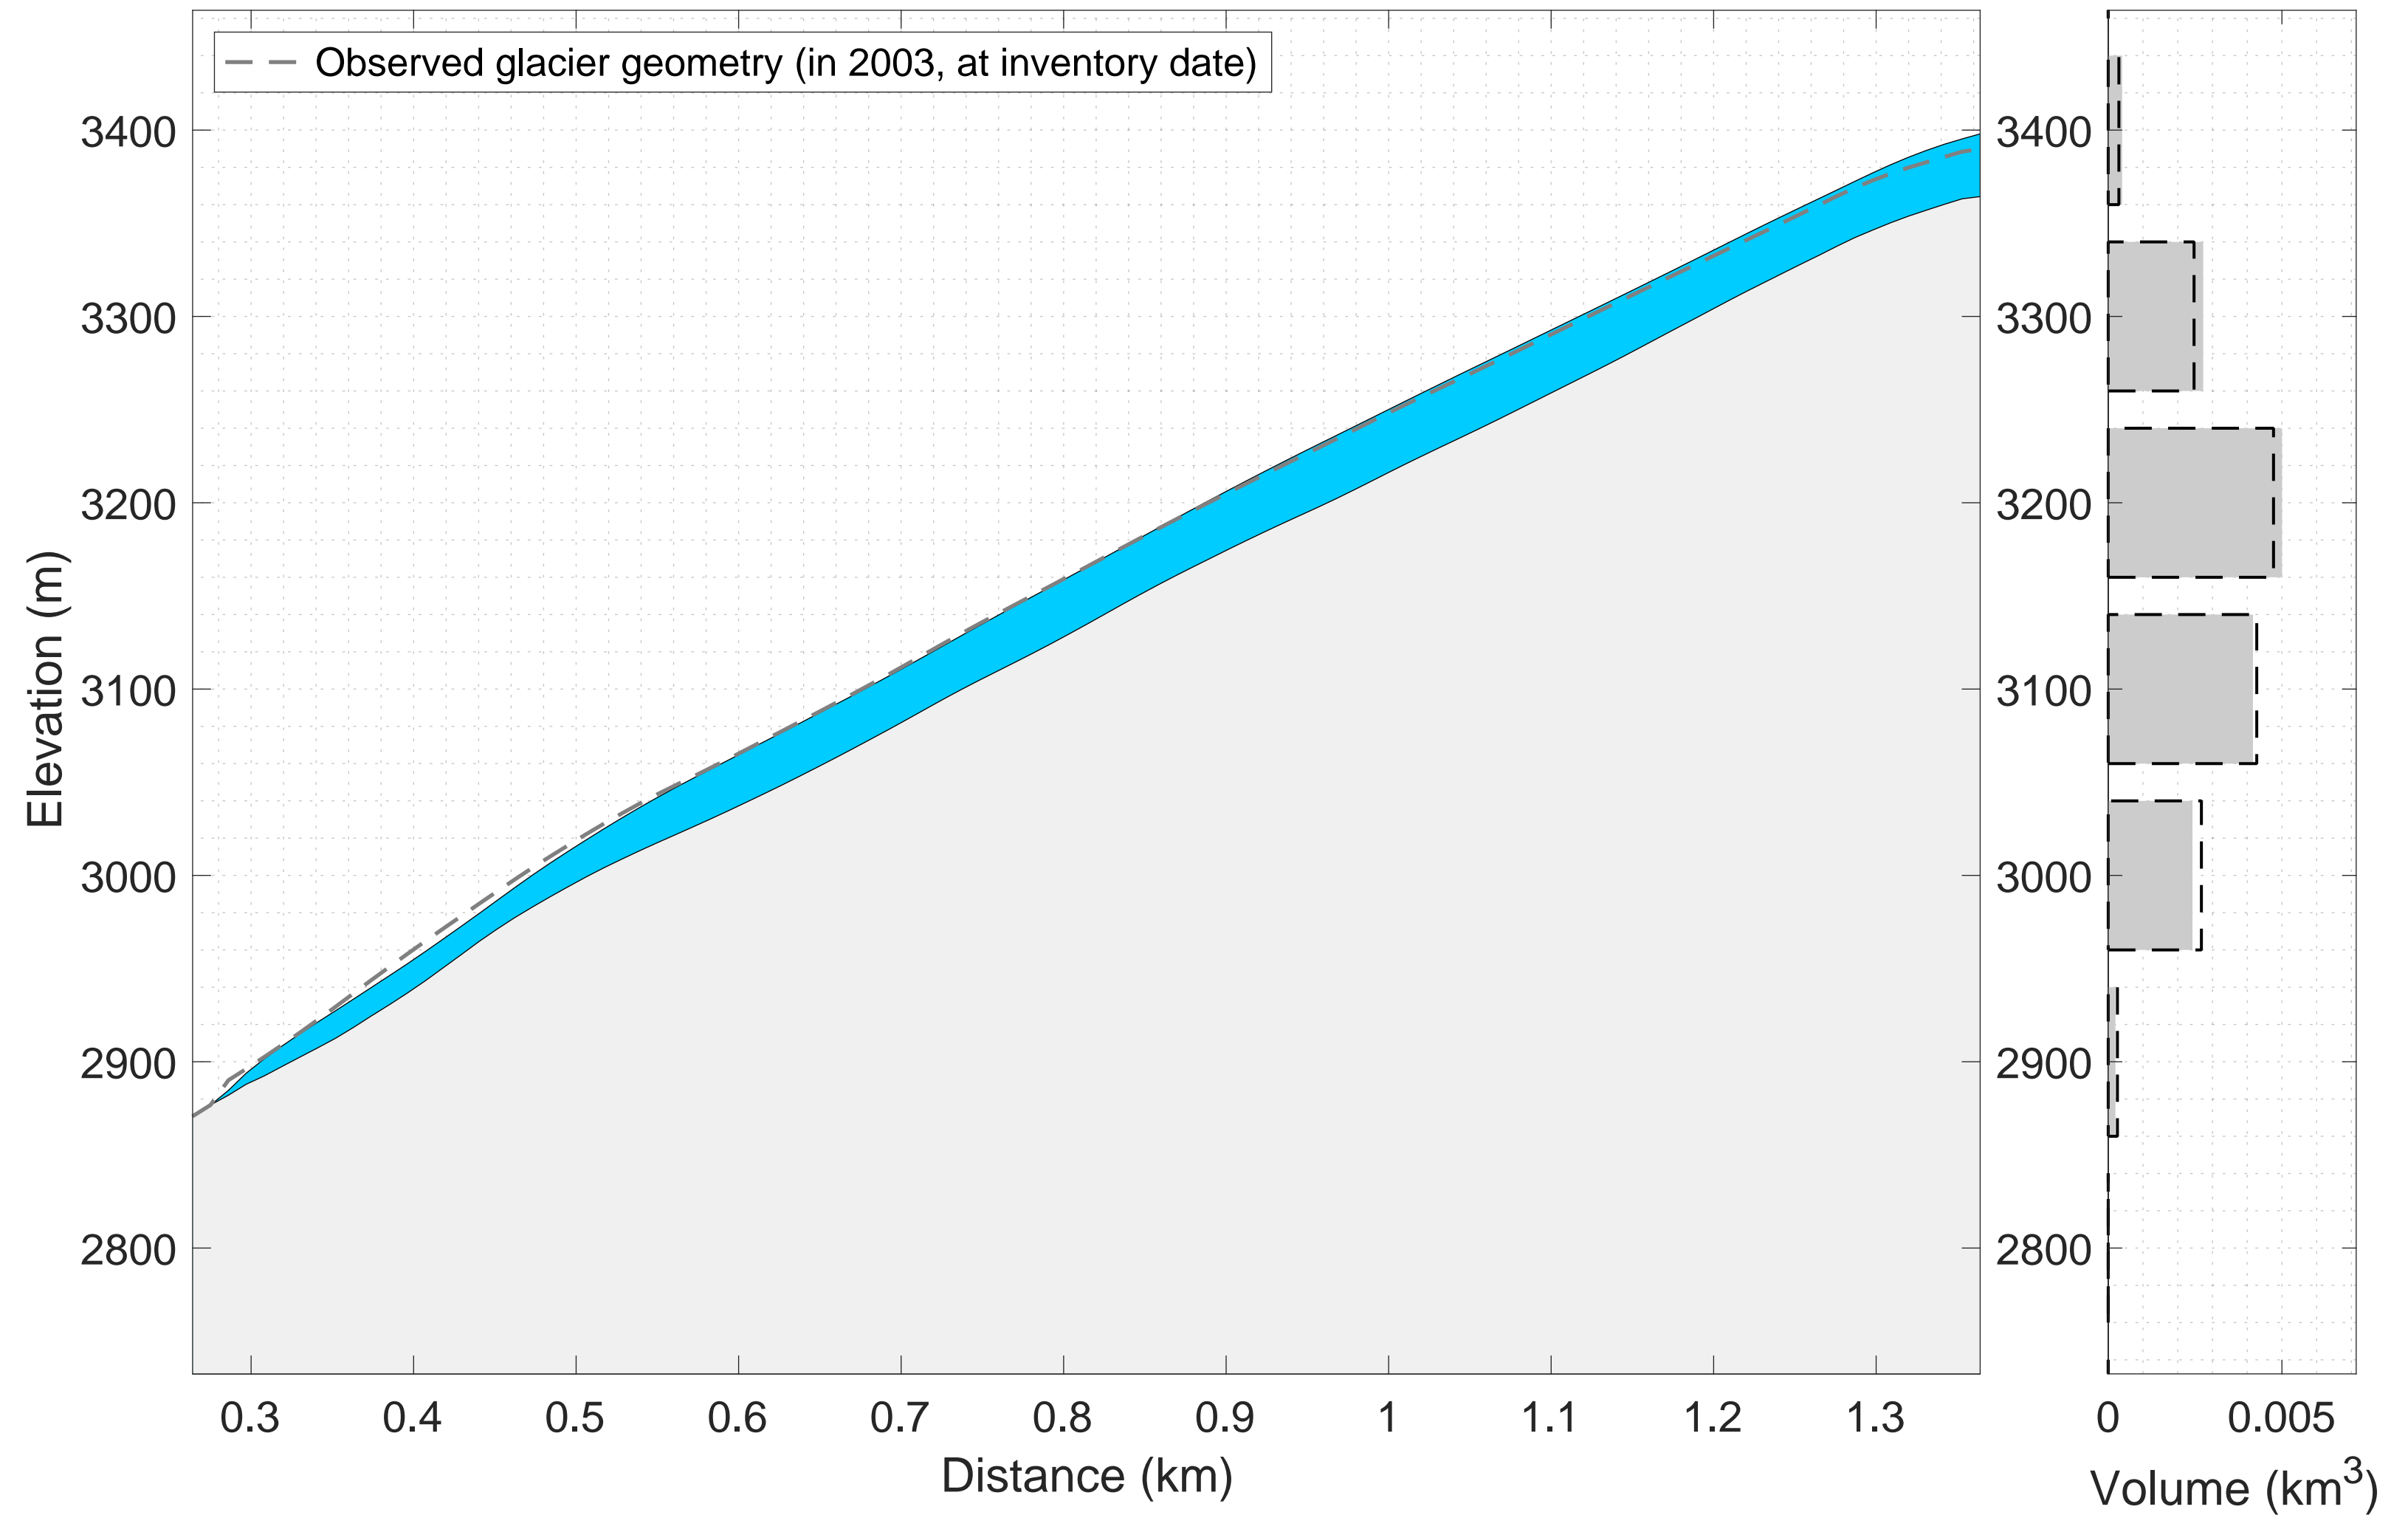

Supplement: Supplementary file 203 [file tc-13-1125-2019-supplement.zip]

**Modelled geometry (Glacier ID = 00469;  $A = 1.0973\text{e-}16 \text{ Pa}^{-3} \text{ a}^{-1}$ ;  $dx = 21 \text{ m}$ )**

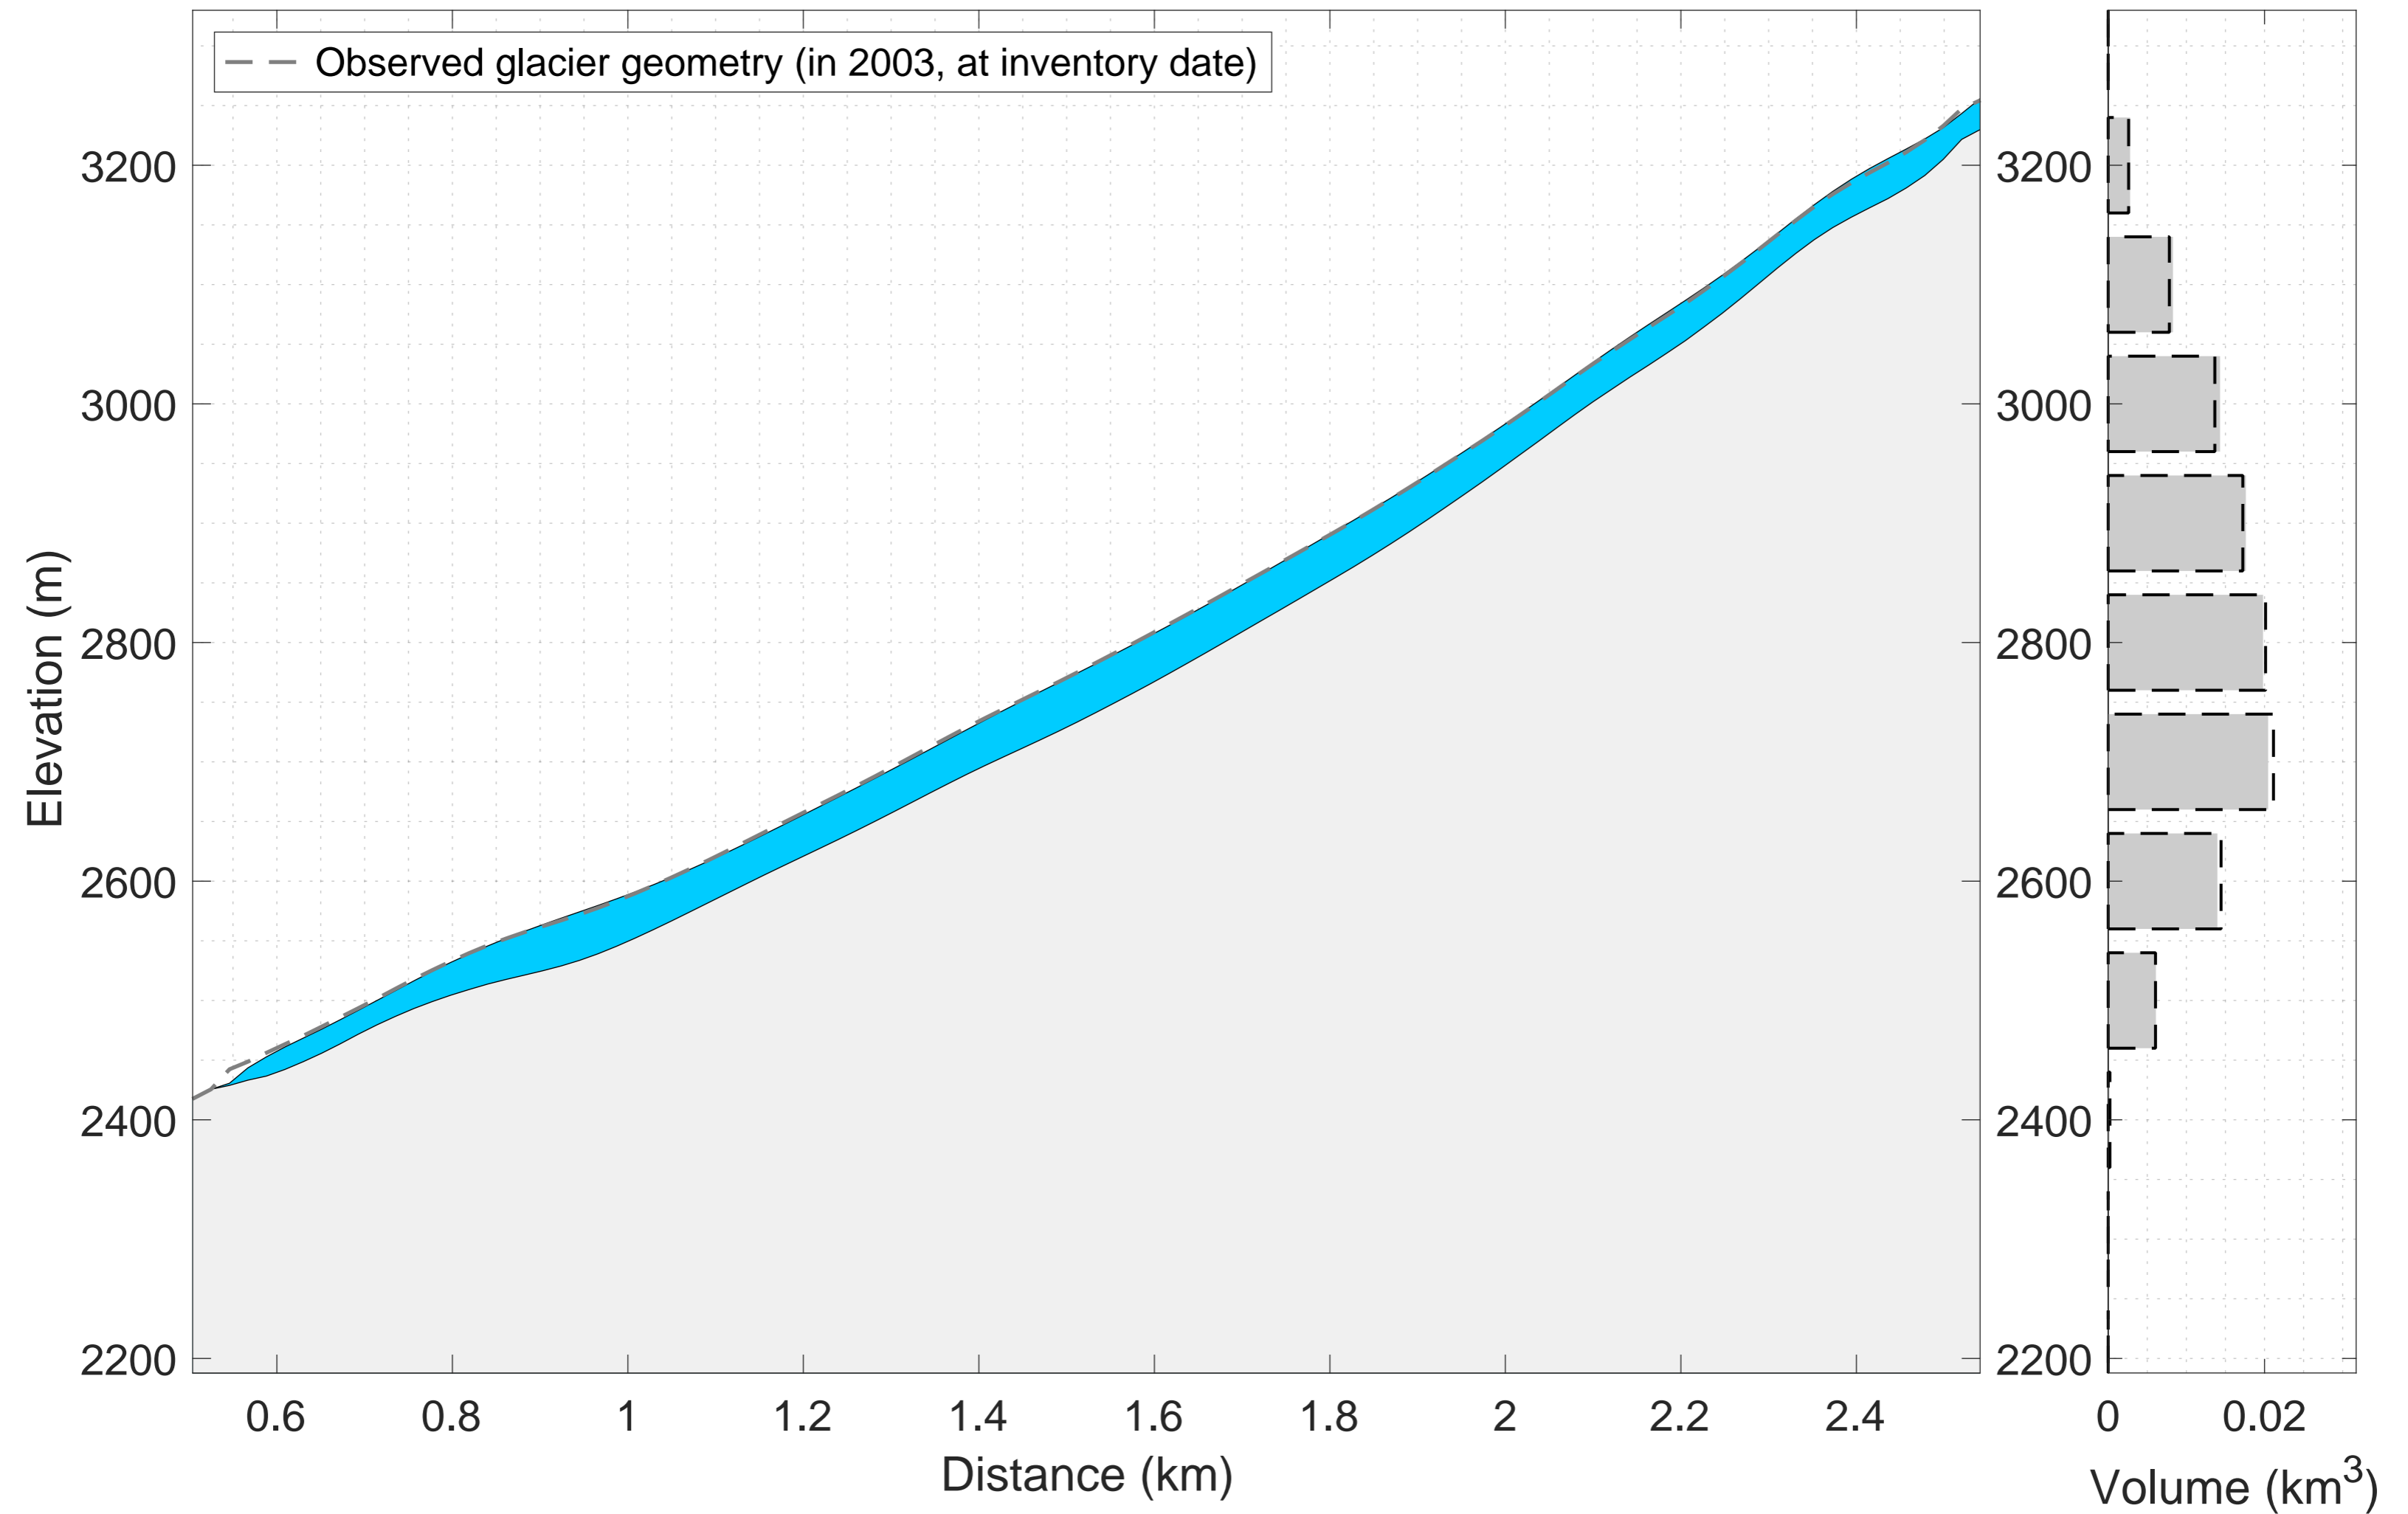

Supplement: Supplementary file 204 [file tc-13-1125-2019-supplement.zip]

**Modelled geometry (Glacier ID = 00880;  $A = 6.2243\text{e-}17 \text{ Pa}^{-3} \text{ a}^{-1}$ ;  $dx = 11 \text{ m}$ )**

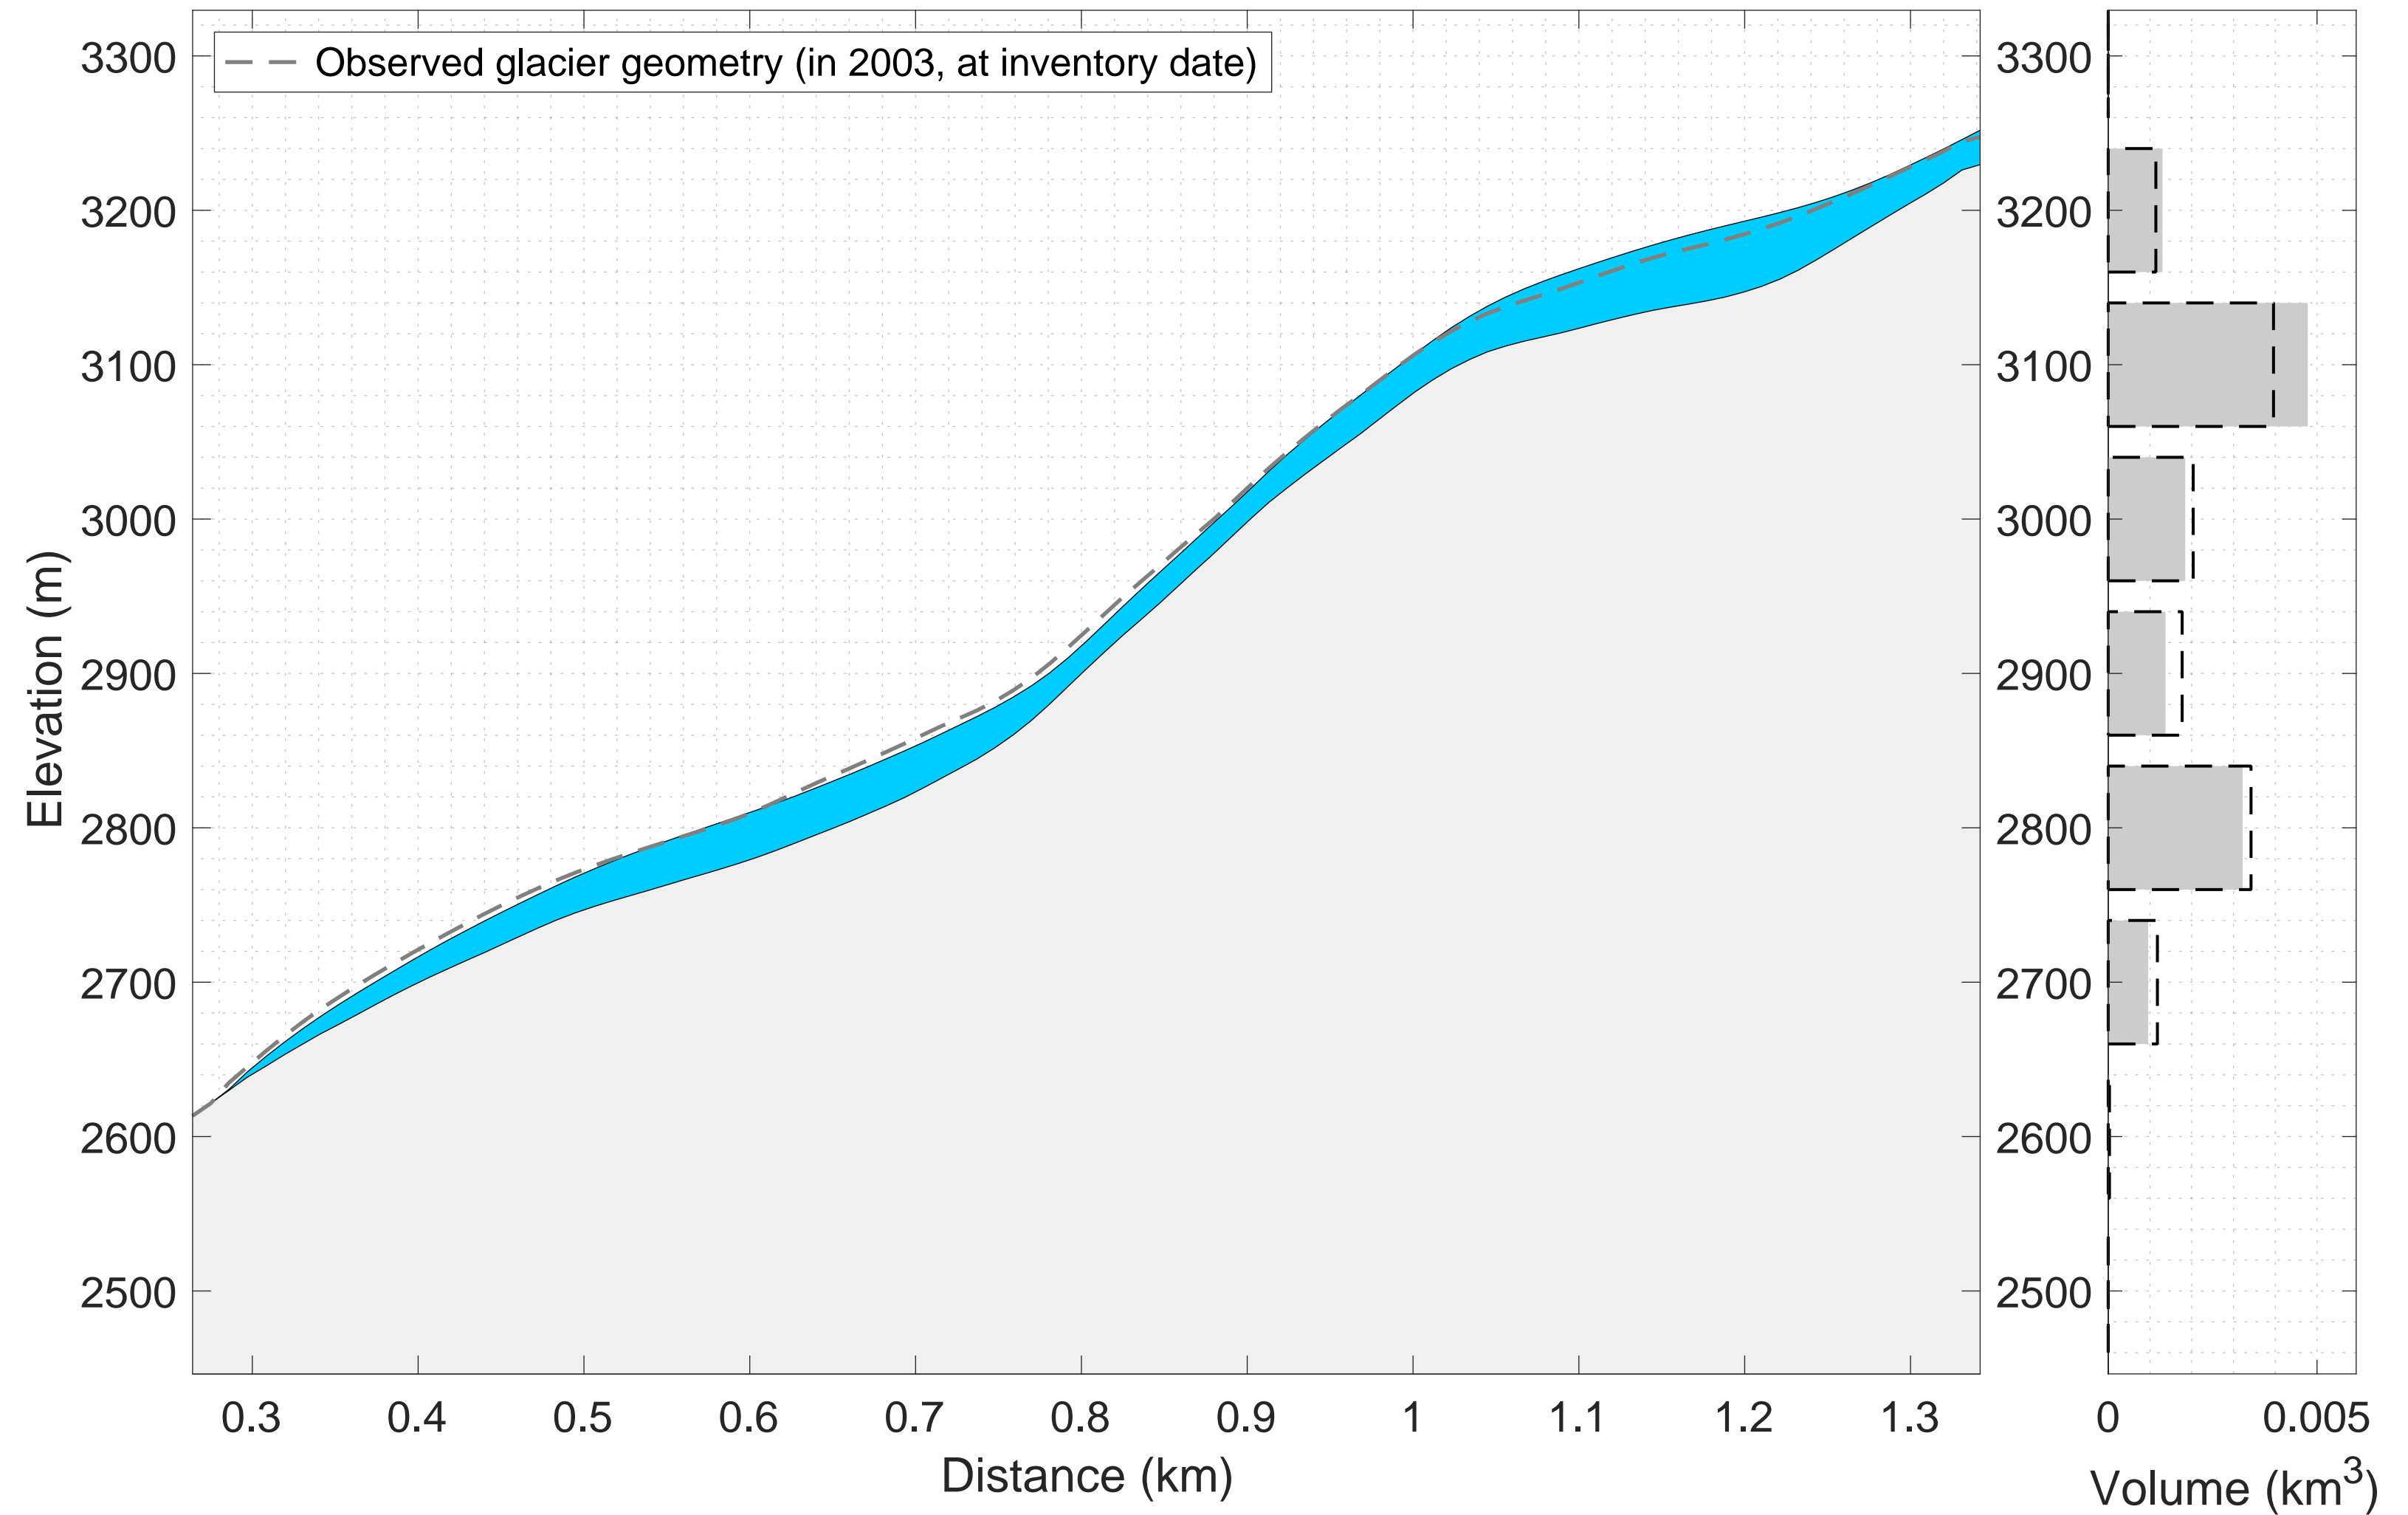

Supplement: Supplementary file 205 [file tc-13-1125-2019-supplement.zip]

**Modelled geometry (Glacier ID = 02540;  $A = 1.3298\text{e-}16 \text{ Pa}^{-3} \text{ a}^{-1}$ ;  $dx = 27 \text{ m}$ )**

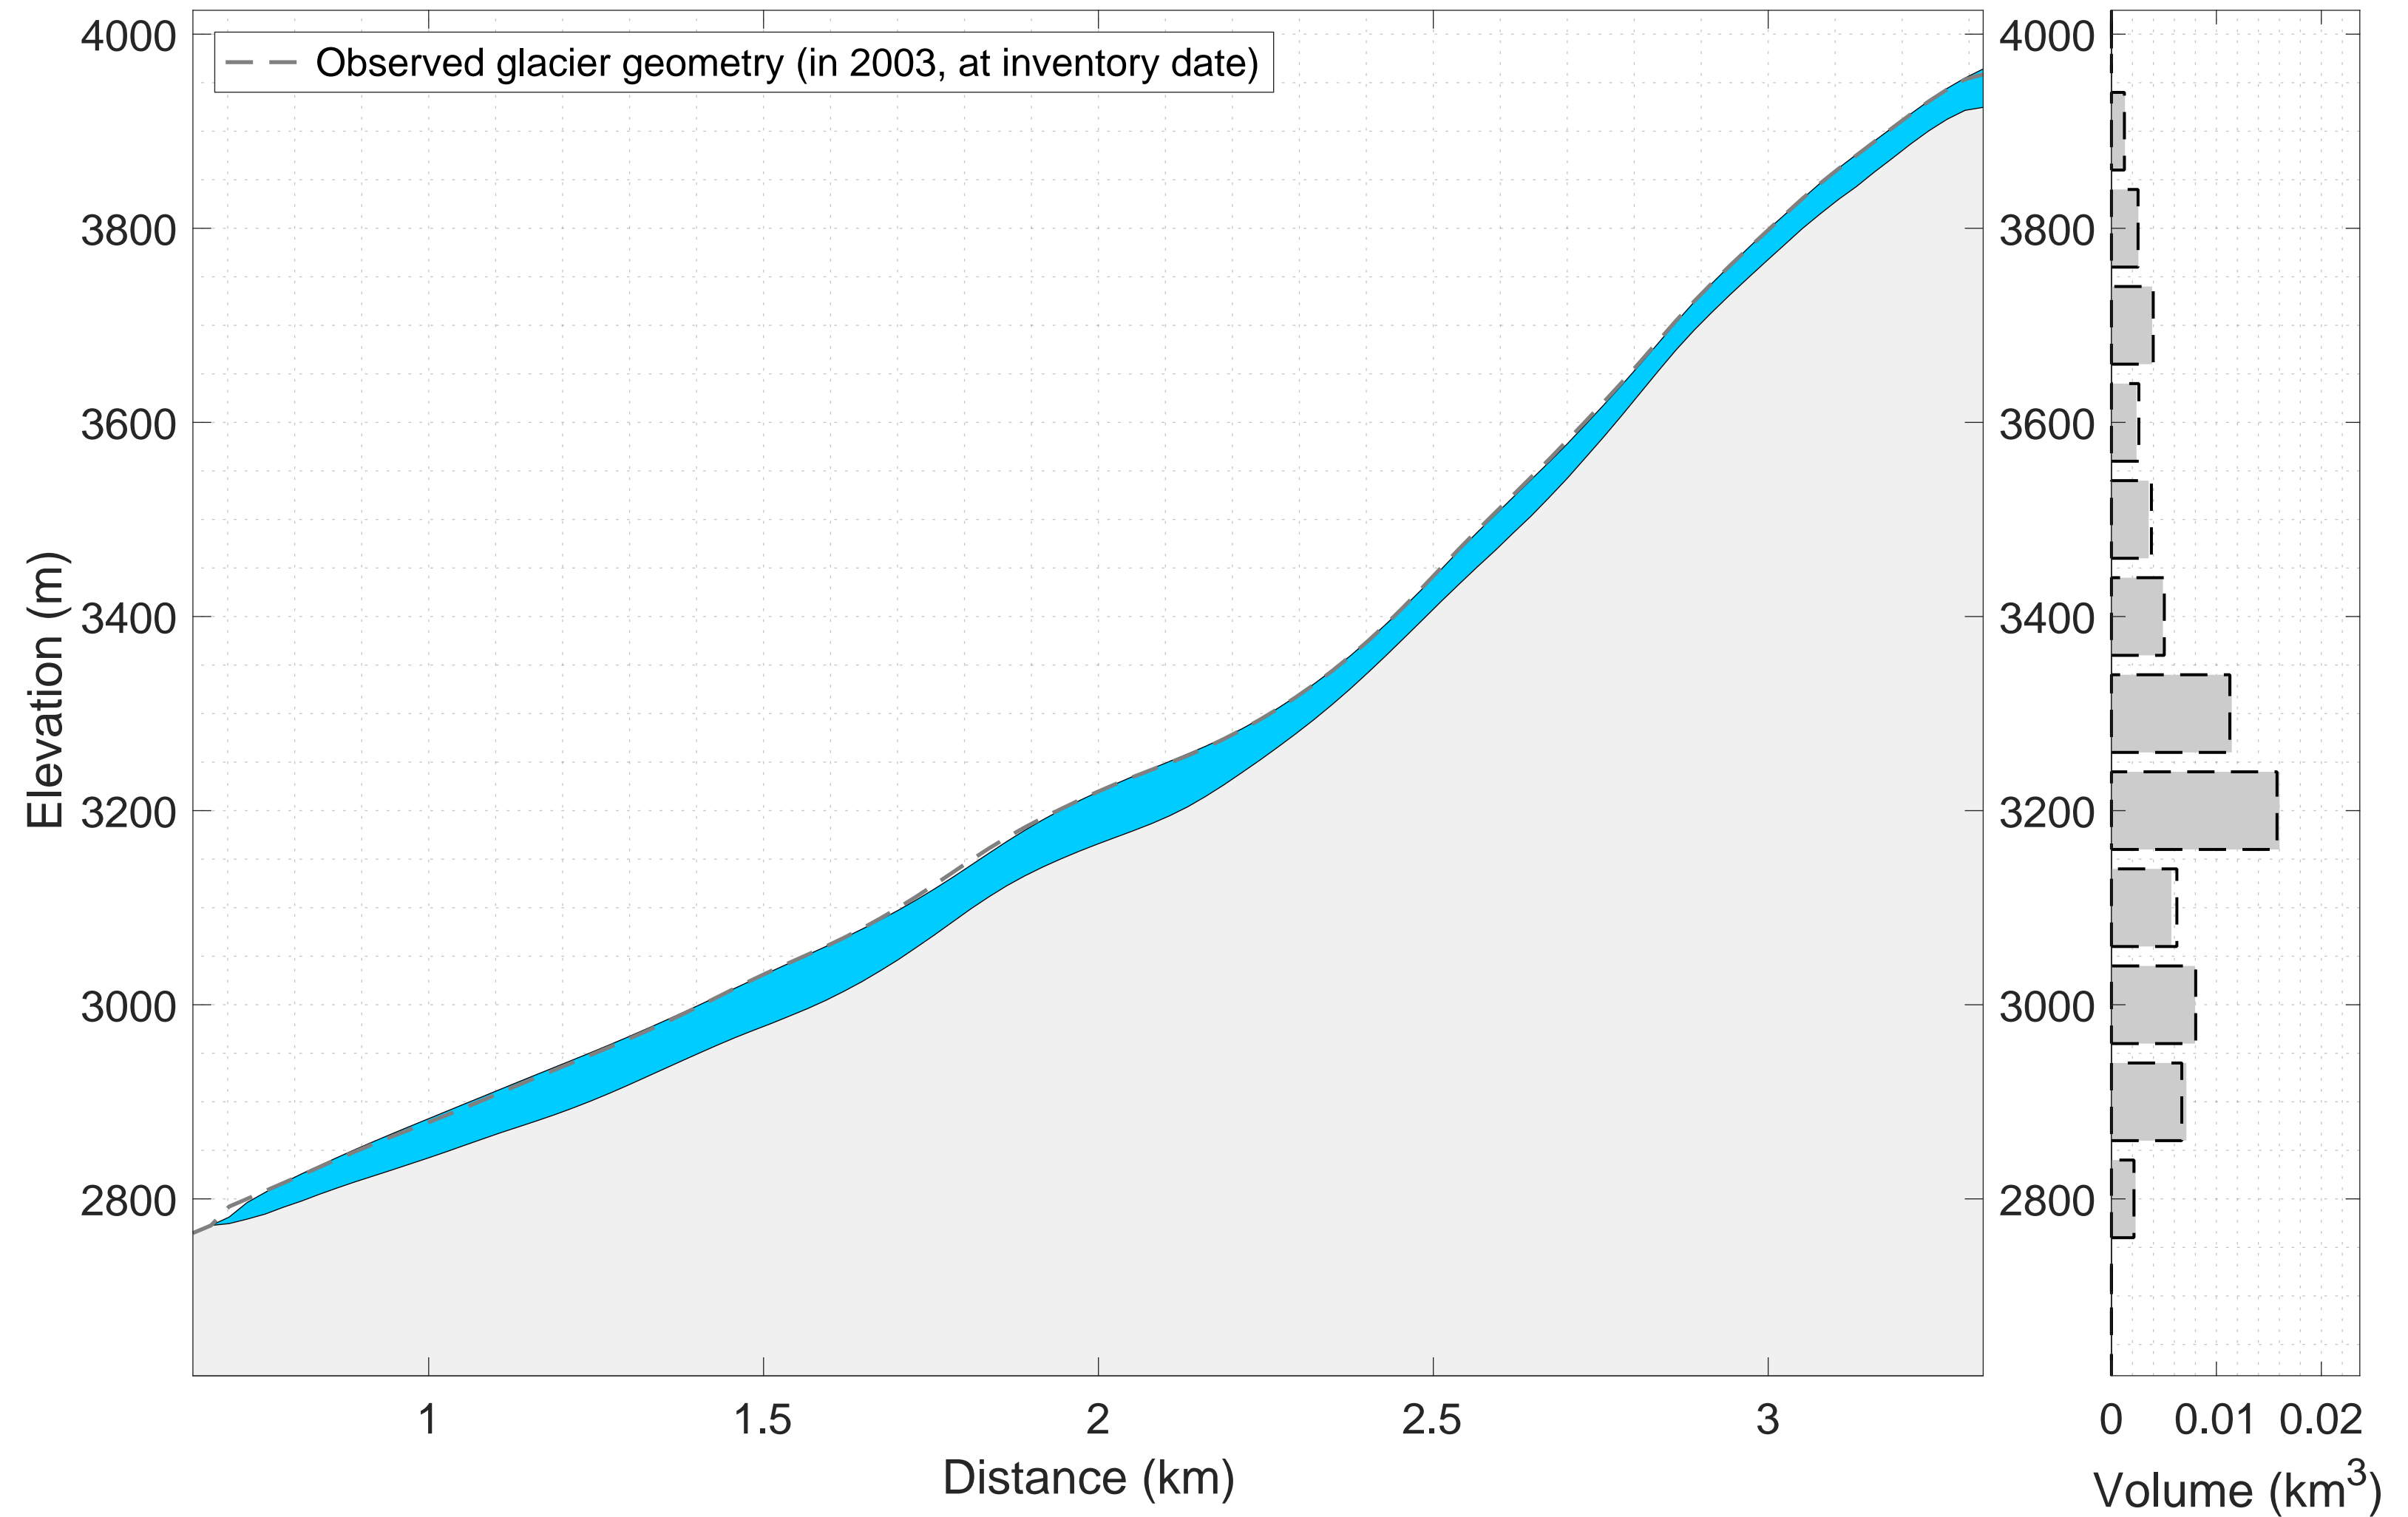

Supplement: Supplementary file 206 [file tc-13-1125-2019-supplement.zip]

**Modelled geometry (Glacier ID = 01290;  $A = 9.3998\text{e-}17 \text{ Pa}^{-3} \text{ a}^{-1}$ ;  $dx = 12 \text{ m}$ )**

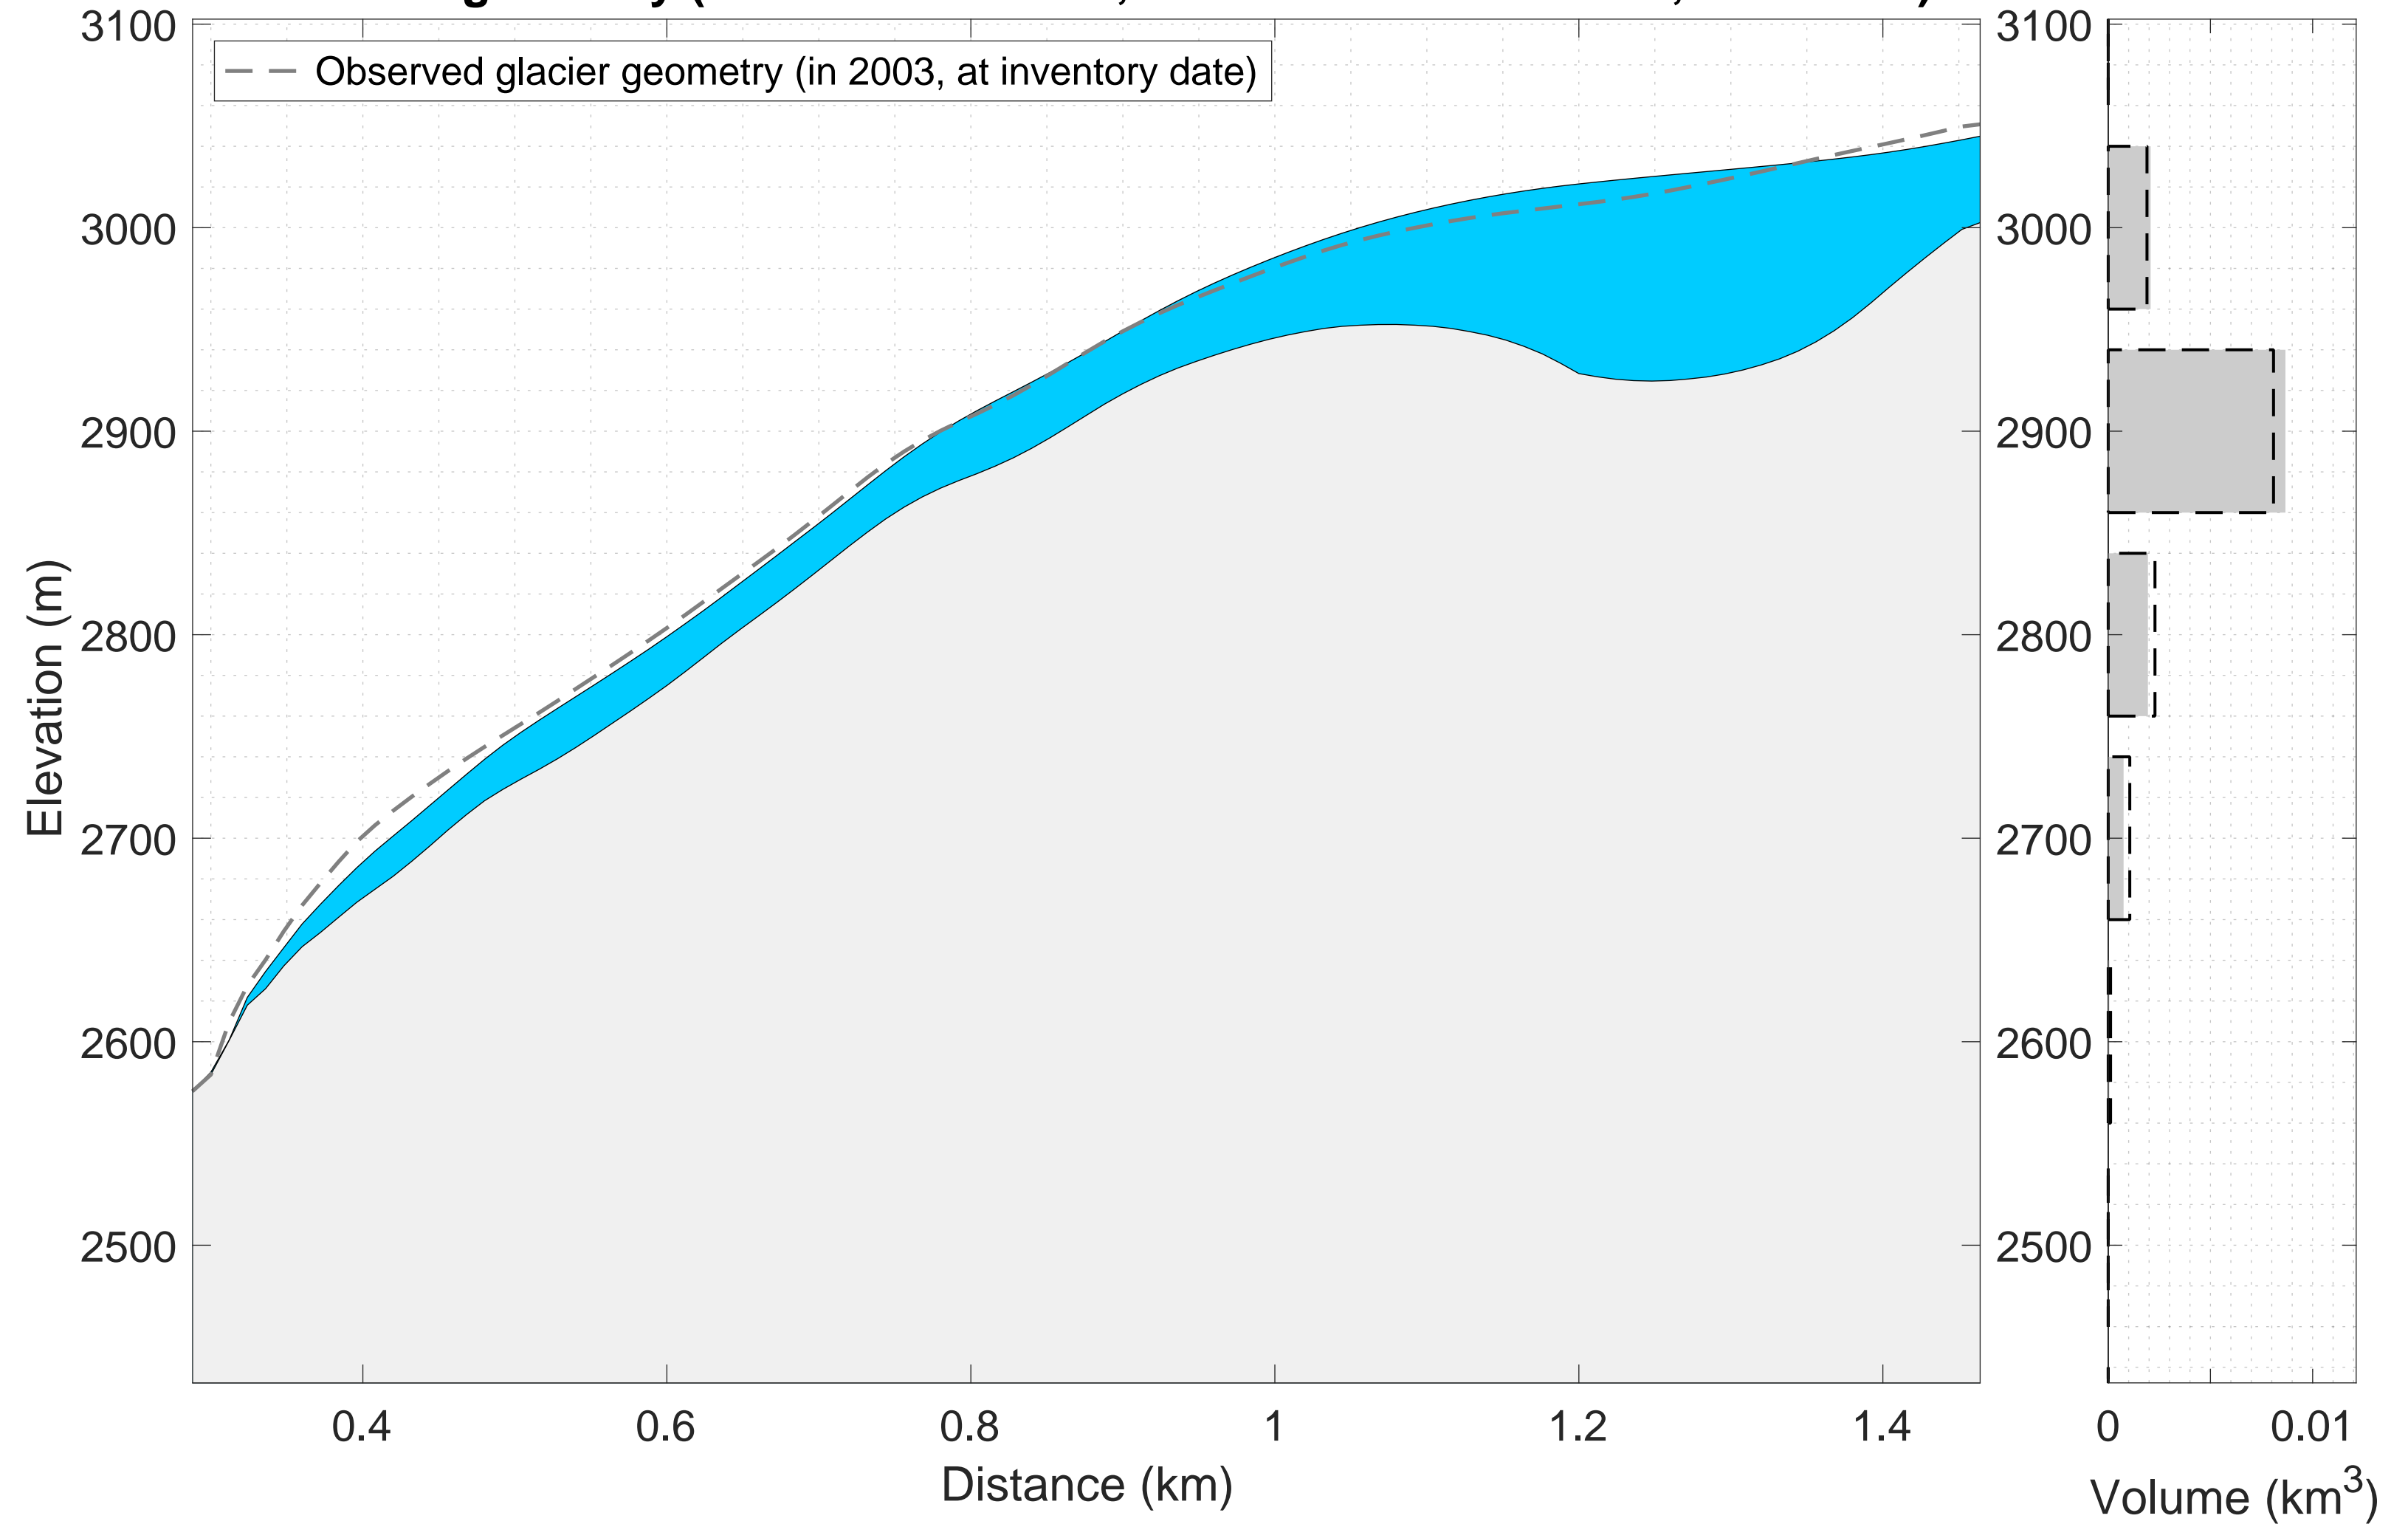

Supplement: Supplementary file 207 [file tc-13-1125-2019-supplement.zip]

**Modelled geometry (Glacier ID = 01224;  $A = 4.1191\text{e-}17 \text{ Pa}^{-3} \text{ a}^{-1}$ ;  $dx = 19 \text{ m}$ )**

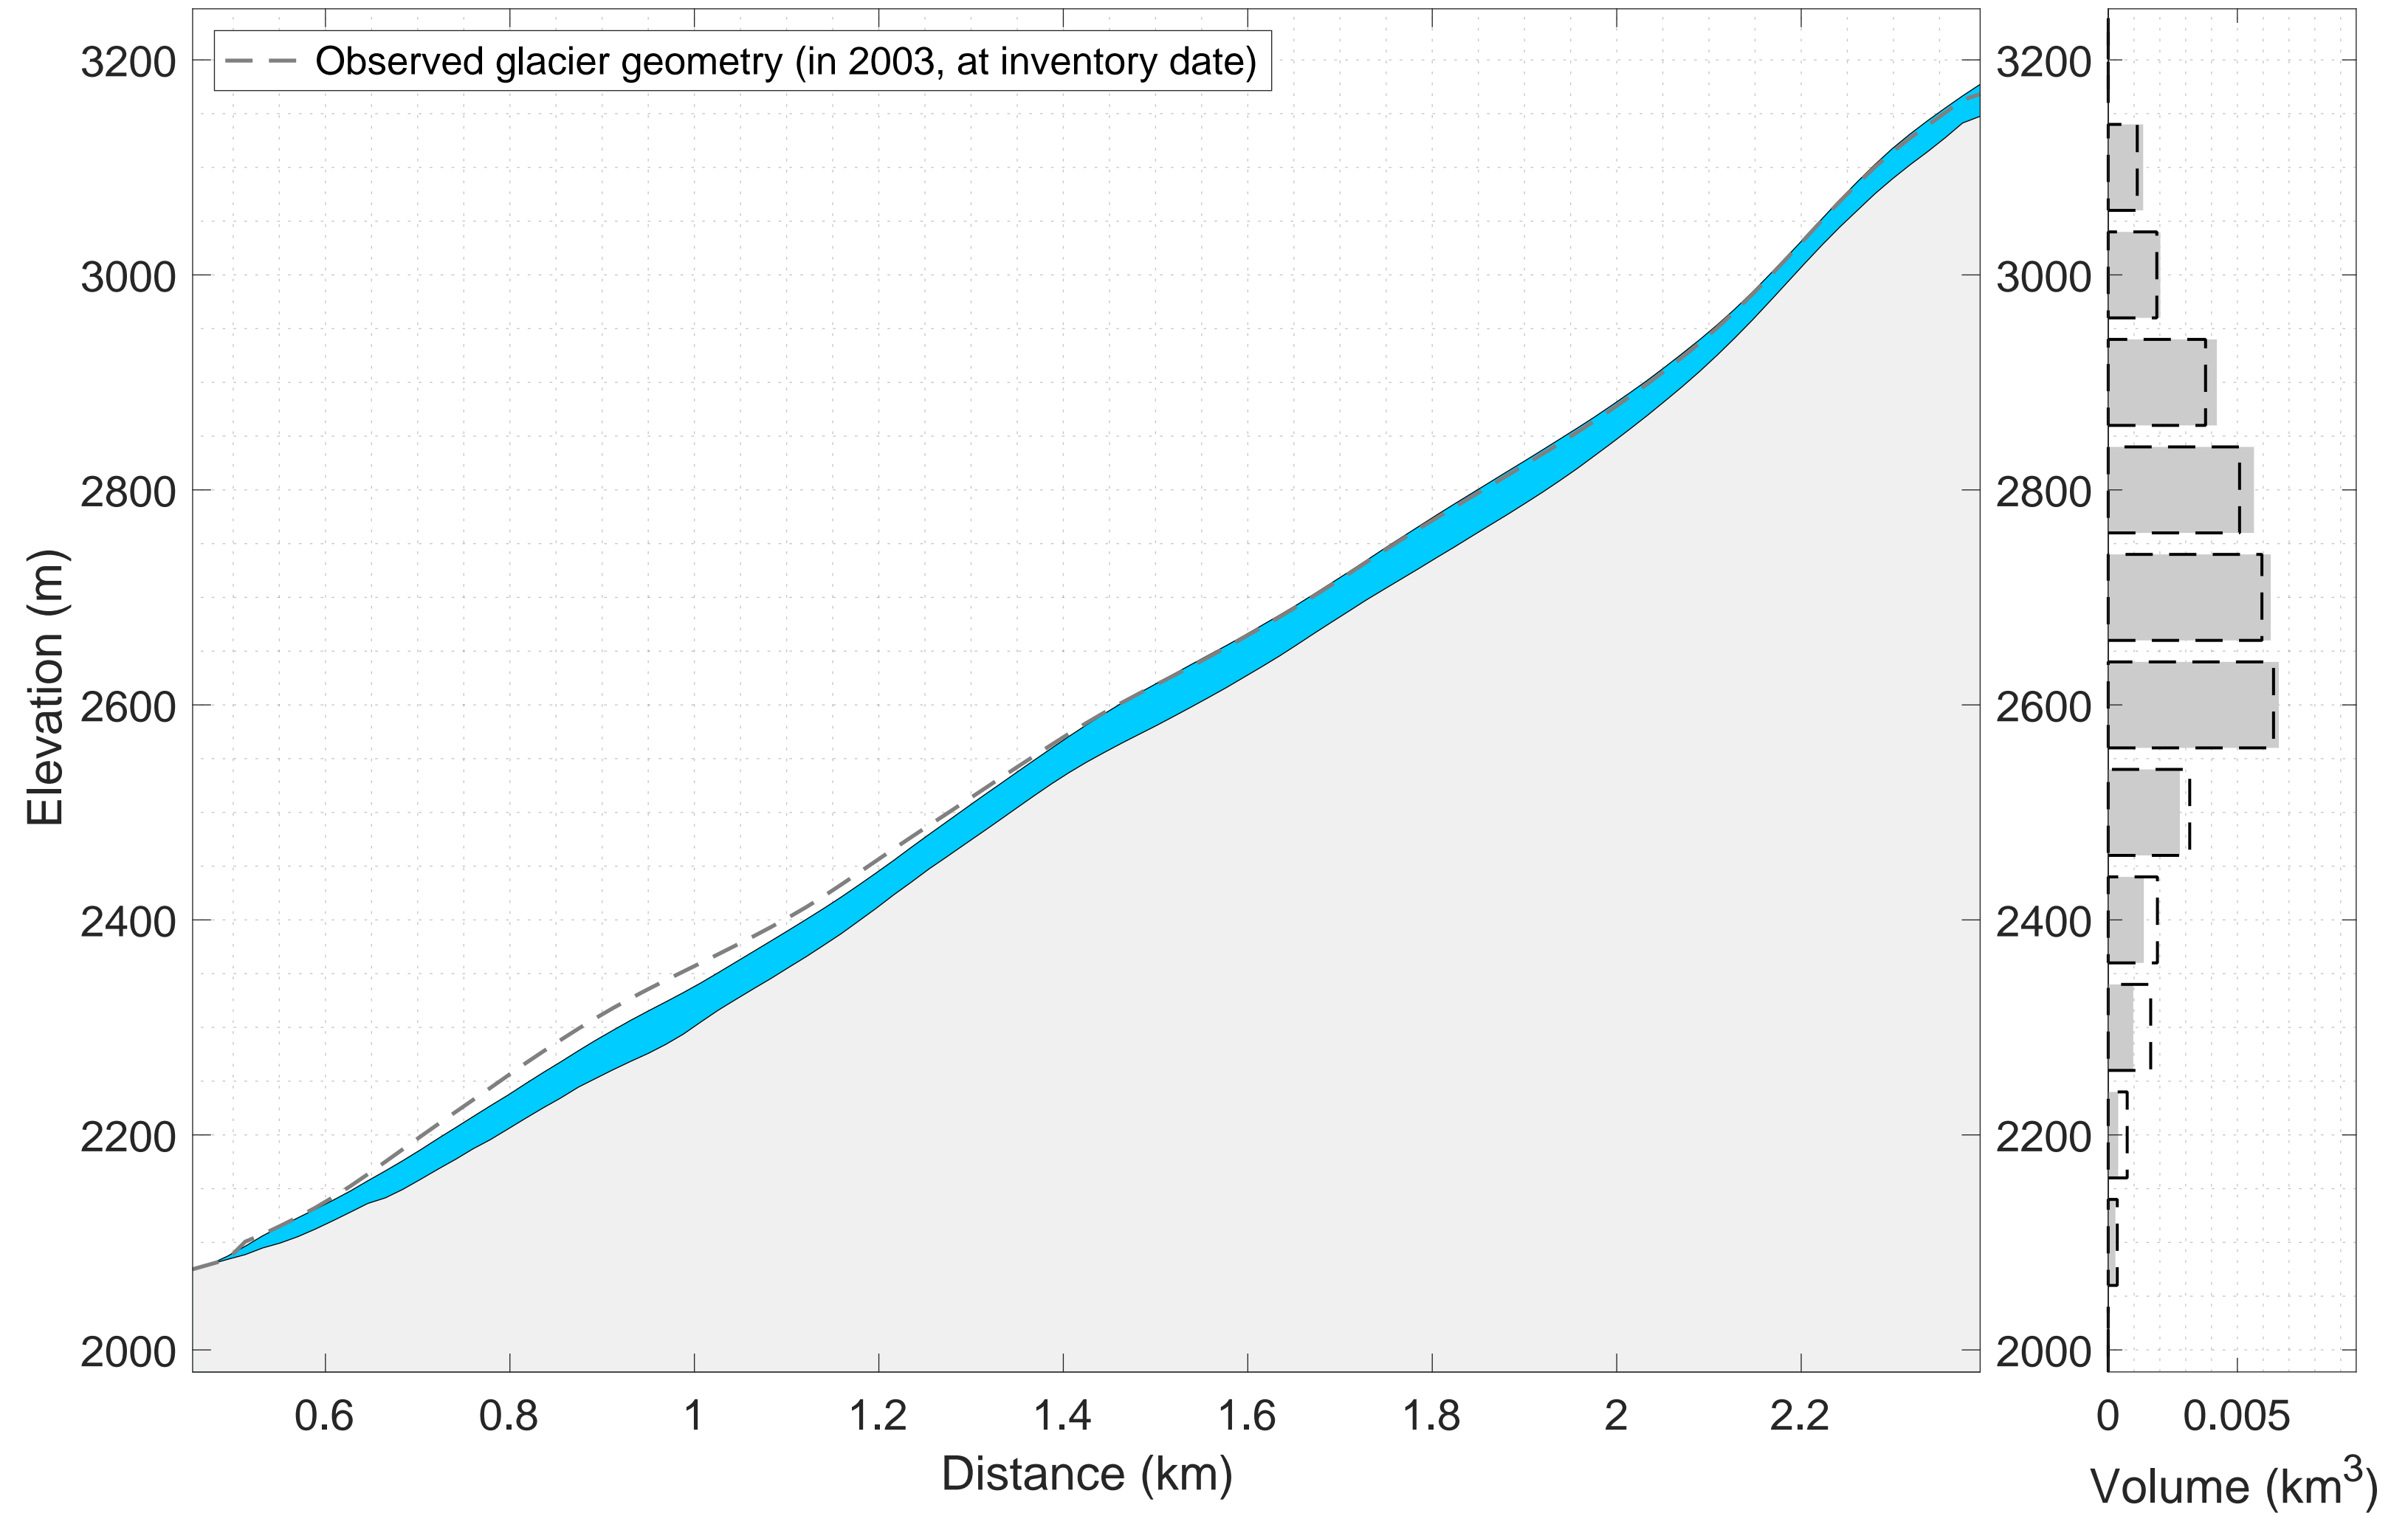

Supplement: Supplementary file 208 [file tc-13-1125-2019-supplement.zip]

**Modelled geometry (Glacier ID = 03816;  $A = 2.0125\text{e-}16 \text{ Pa}^{-3} \text{ a}^{-1}$ ;  $dx = 21 \text{ m}$ )**

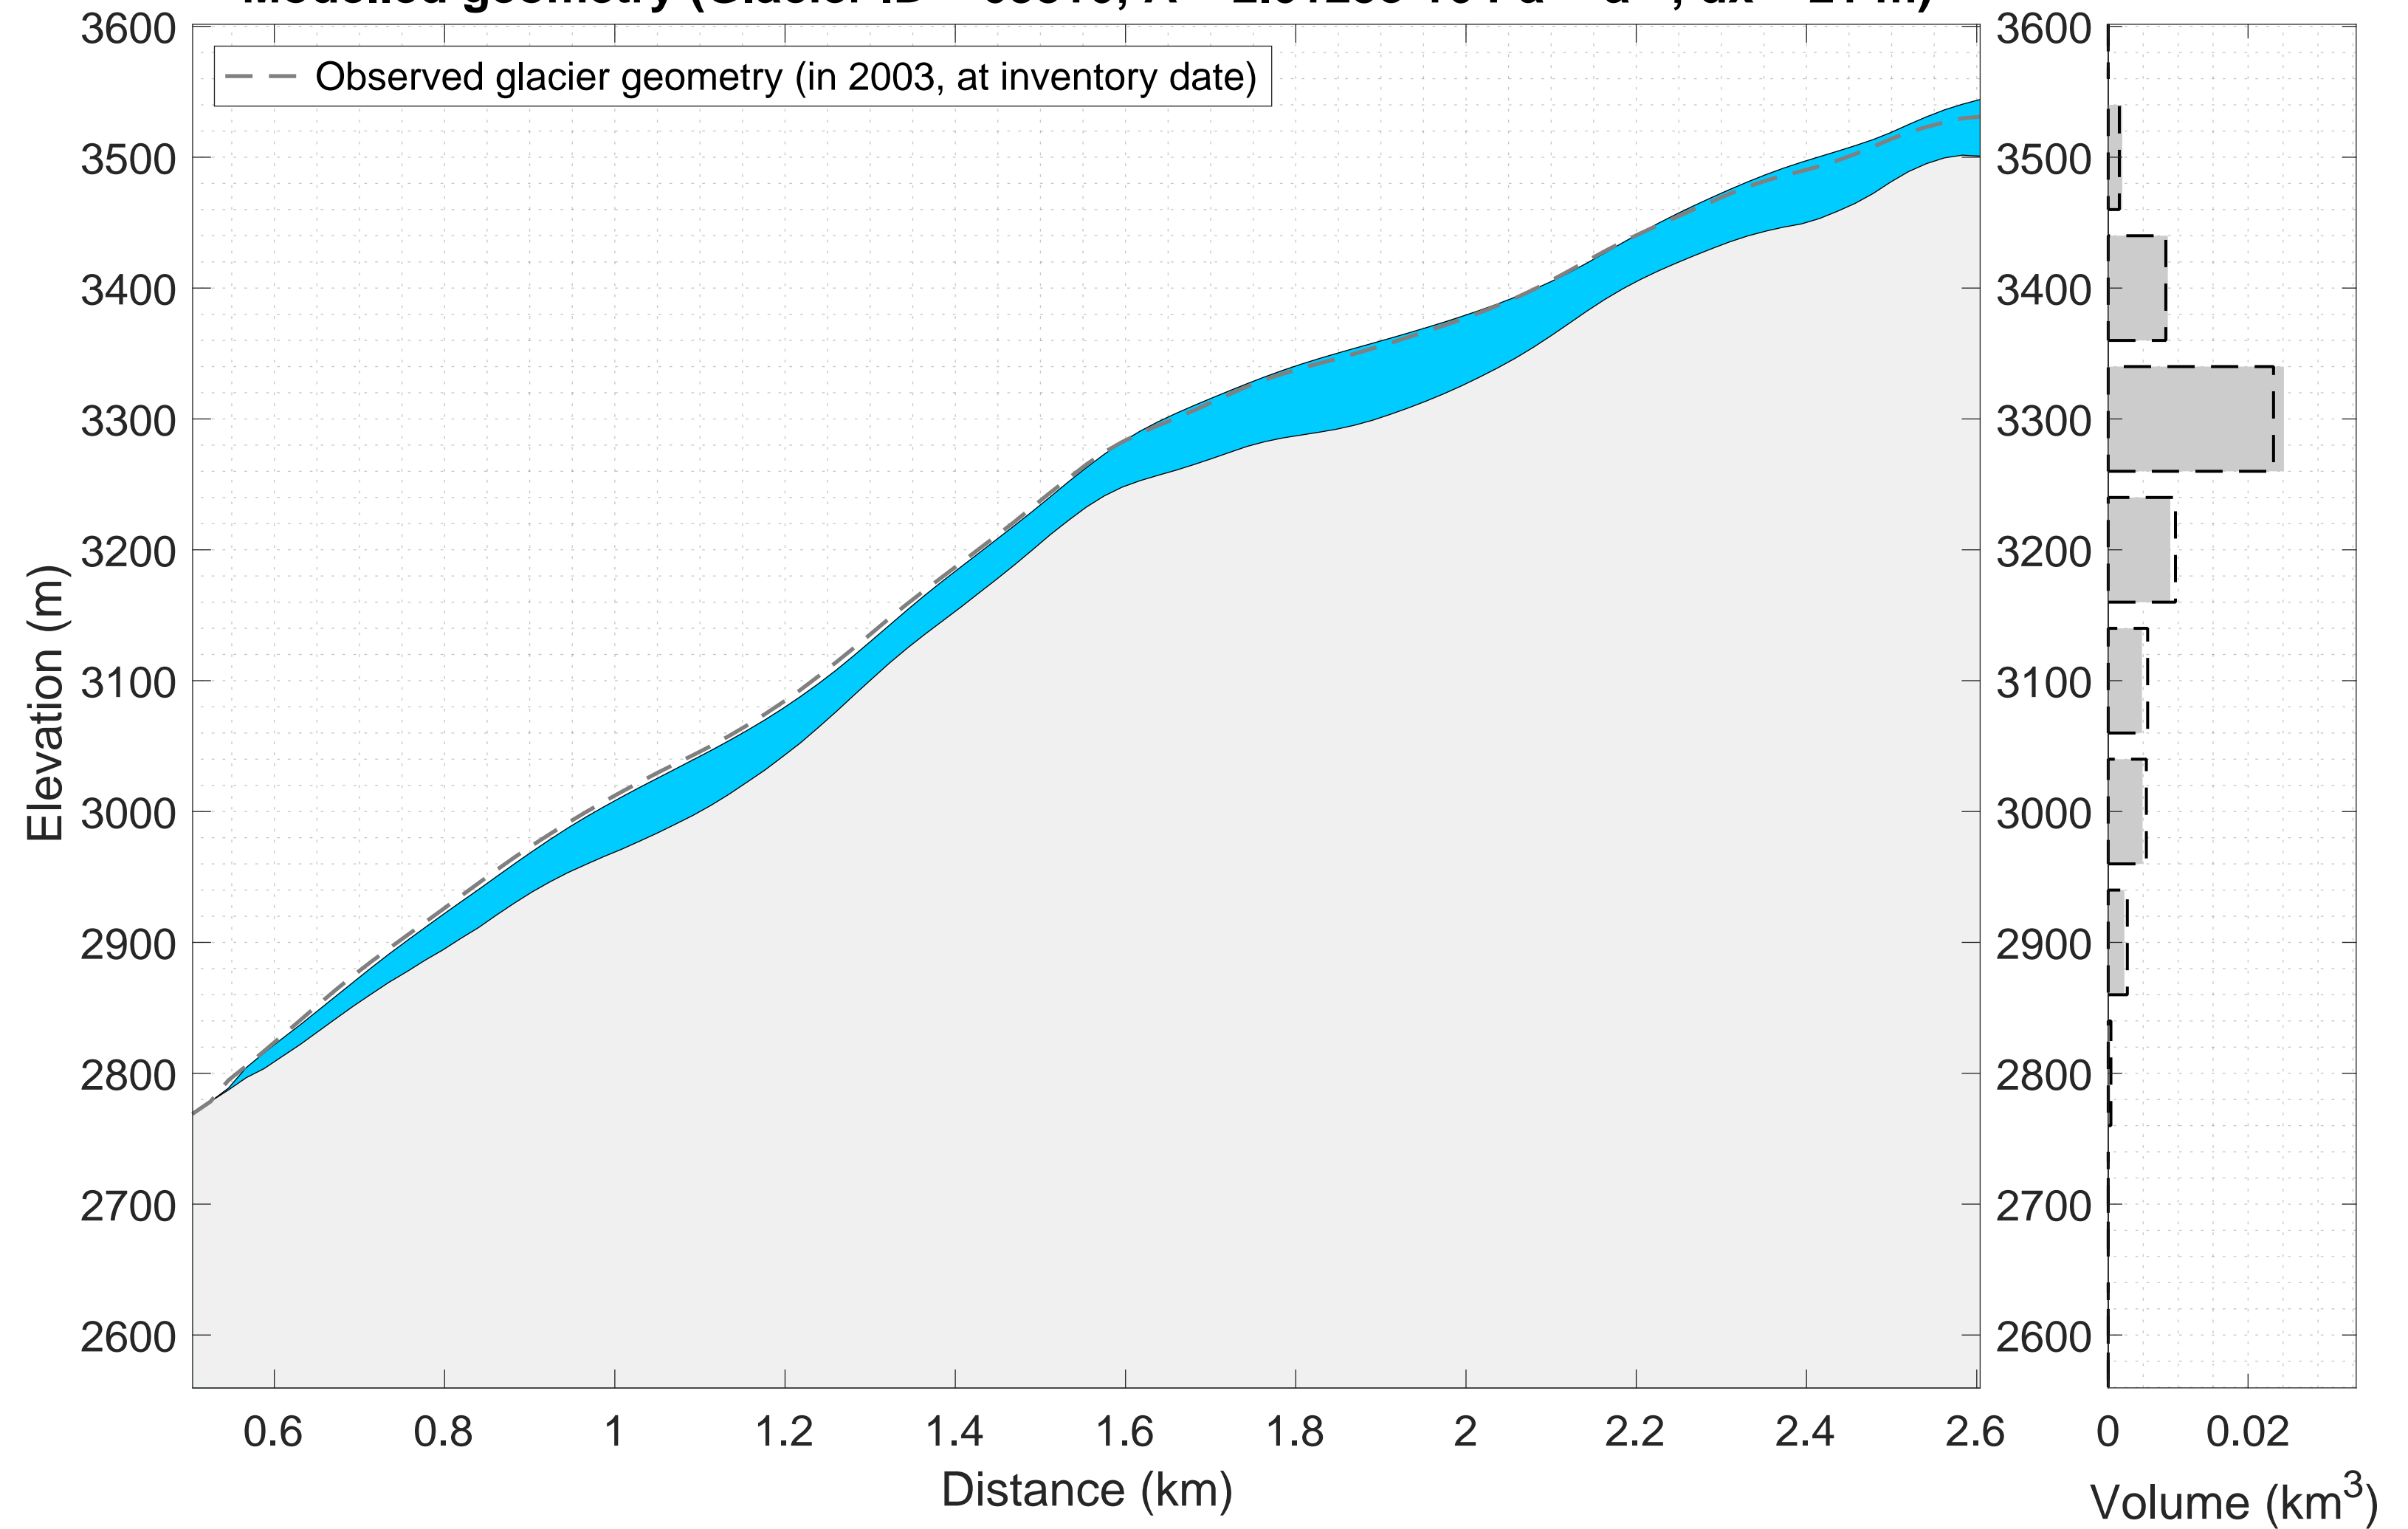

Supplement: Supplementary file 209 [file tc-13-1125-2019-supplement.zip]

**Modelled geometry (Glacier ID = 03689;  $A = 9.8669\text{e-}17 \text{ Pa}^{-3} \text{ a}^{-1}$ ;  $dx = 13 \text{ m}$ )**

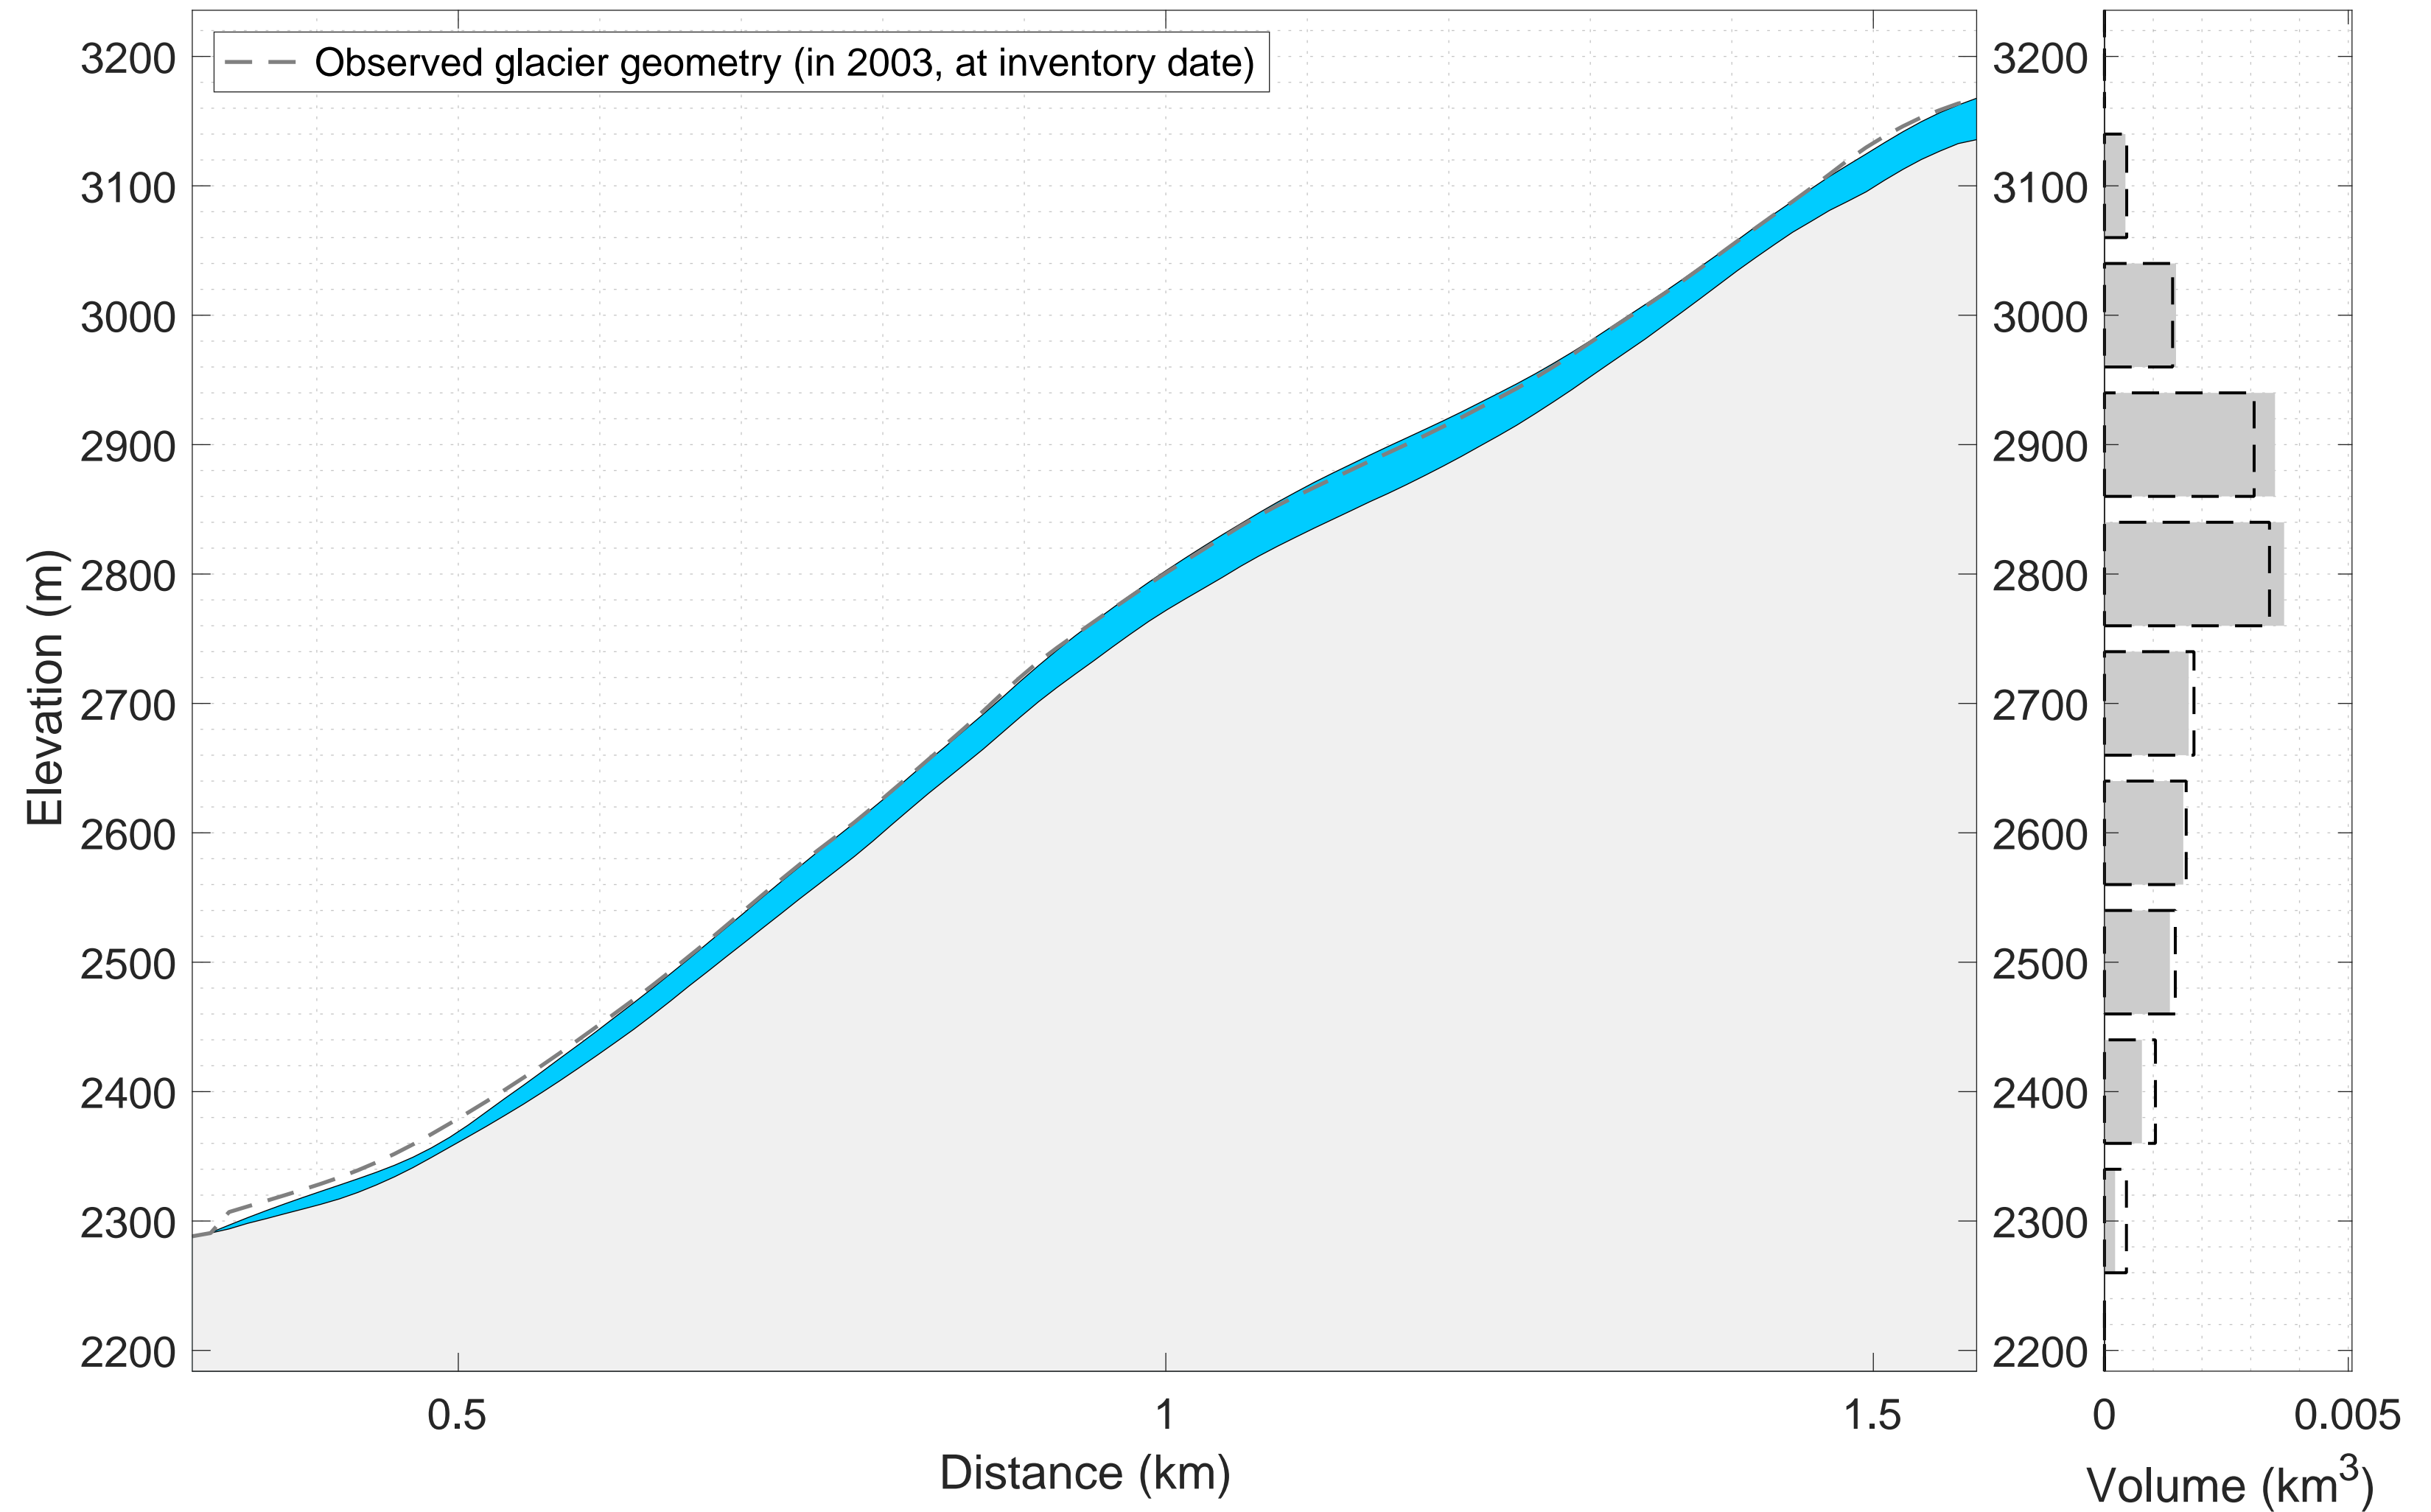

Supplement: Supplementary file 210 [file tc-13-1125-2019-supplement.zip]

**Modelled geometry (Glacier ID = 02714;  $A = 5.4833\text{e-}17 \text{ Pa}^{-3} \text{ a}^{-1}$ ;  $dx = 10 \text{ m}$ )**

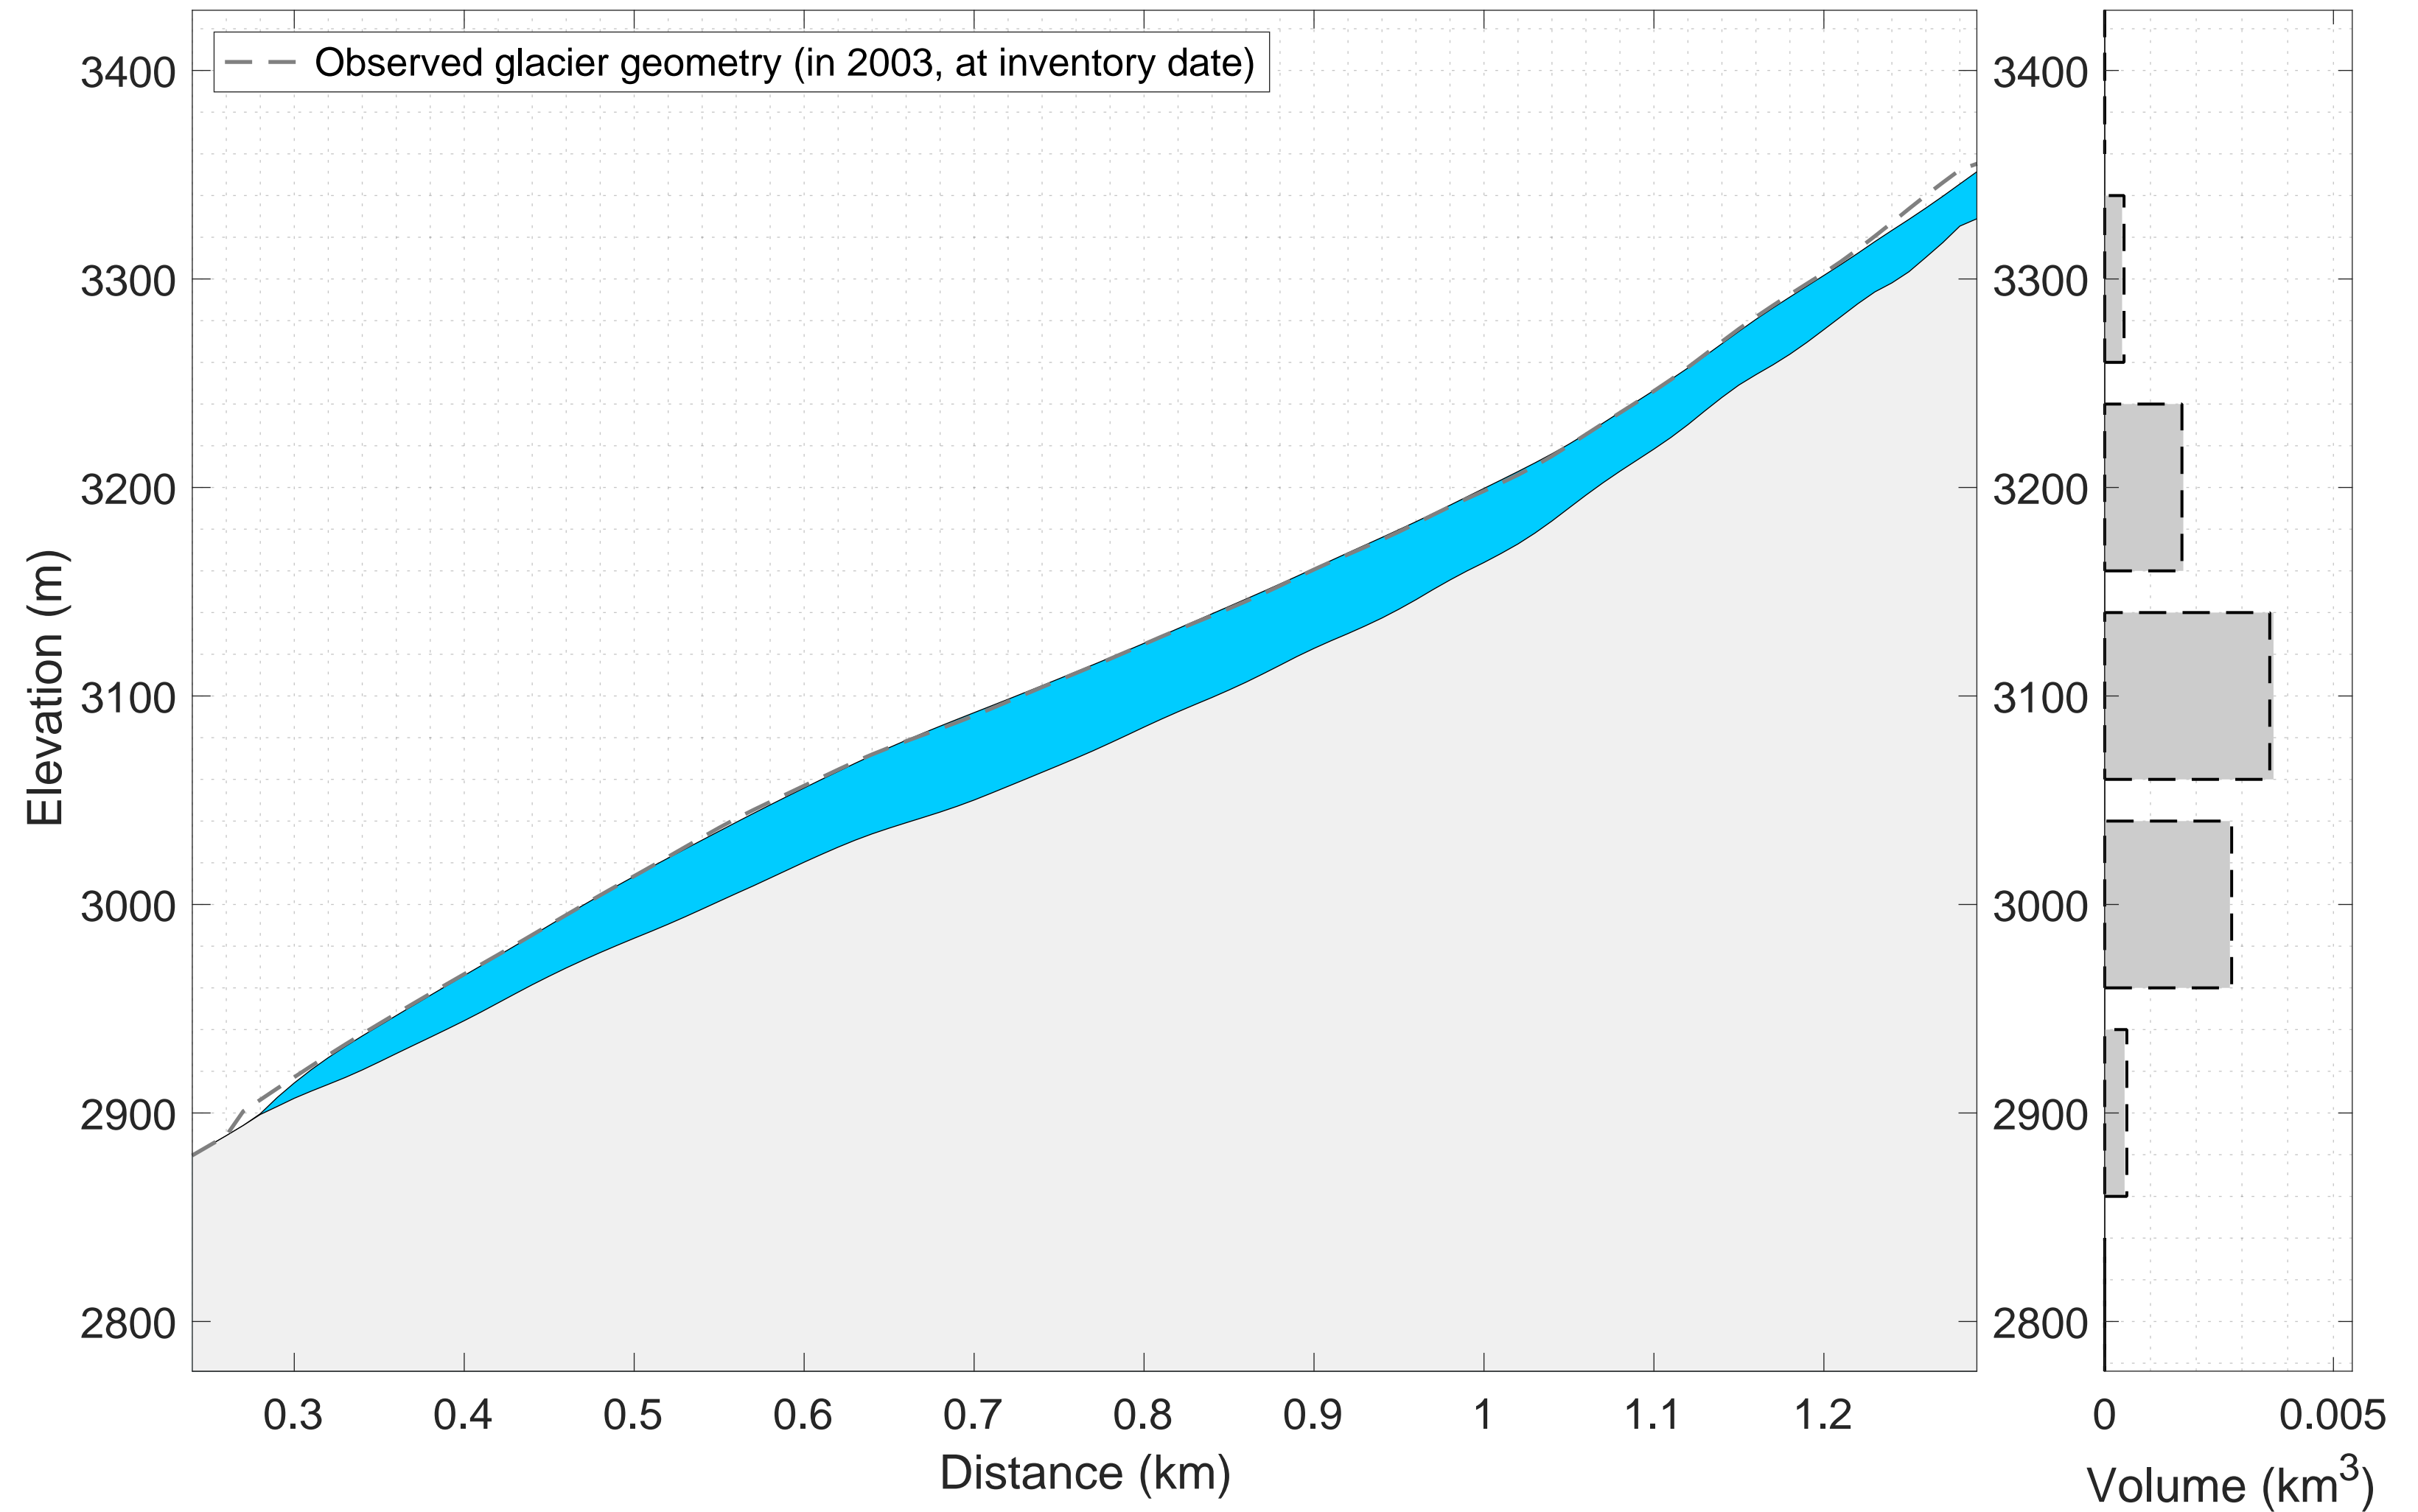

Supplement: Supplementary file 211 [file tc-13-1125-2019-supplement.zip]

**Modelled geometry (Glacier ID = 02890;  $A = 7.8626\text{e-}17 \text{ Pa}^{-3} \text{ a}^{-1}$ ;  $dx = 55 \text{ m}$ )**

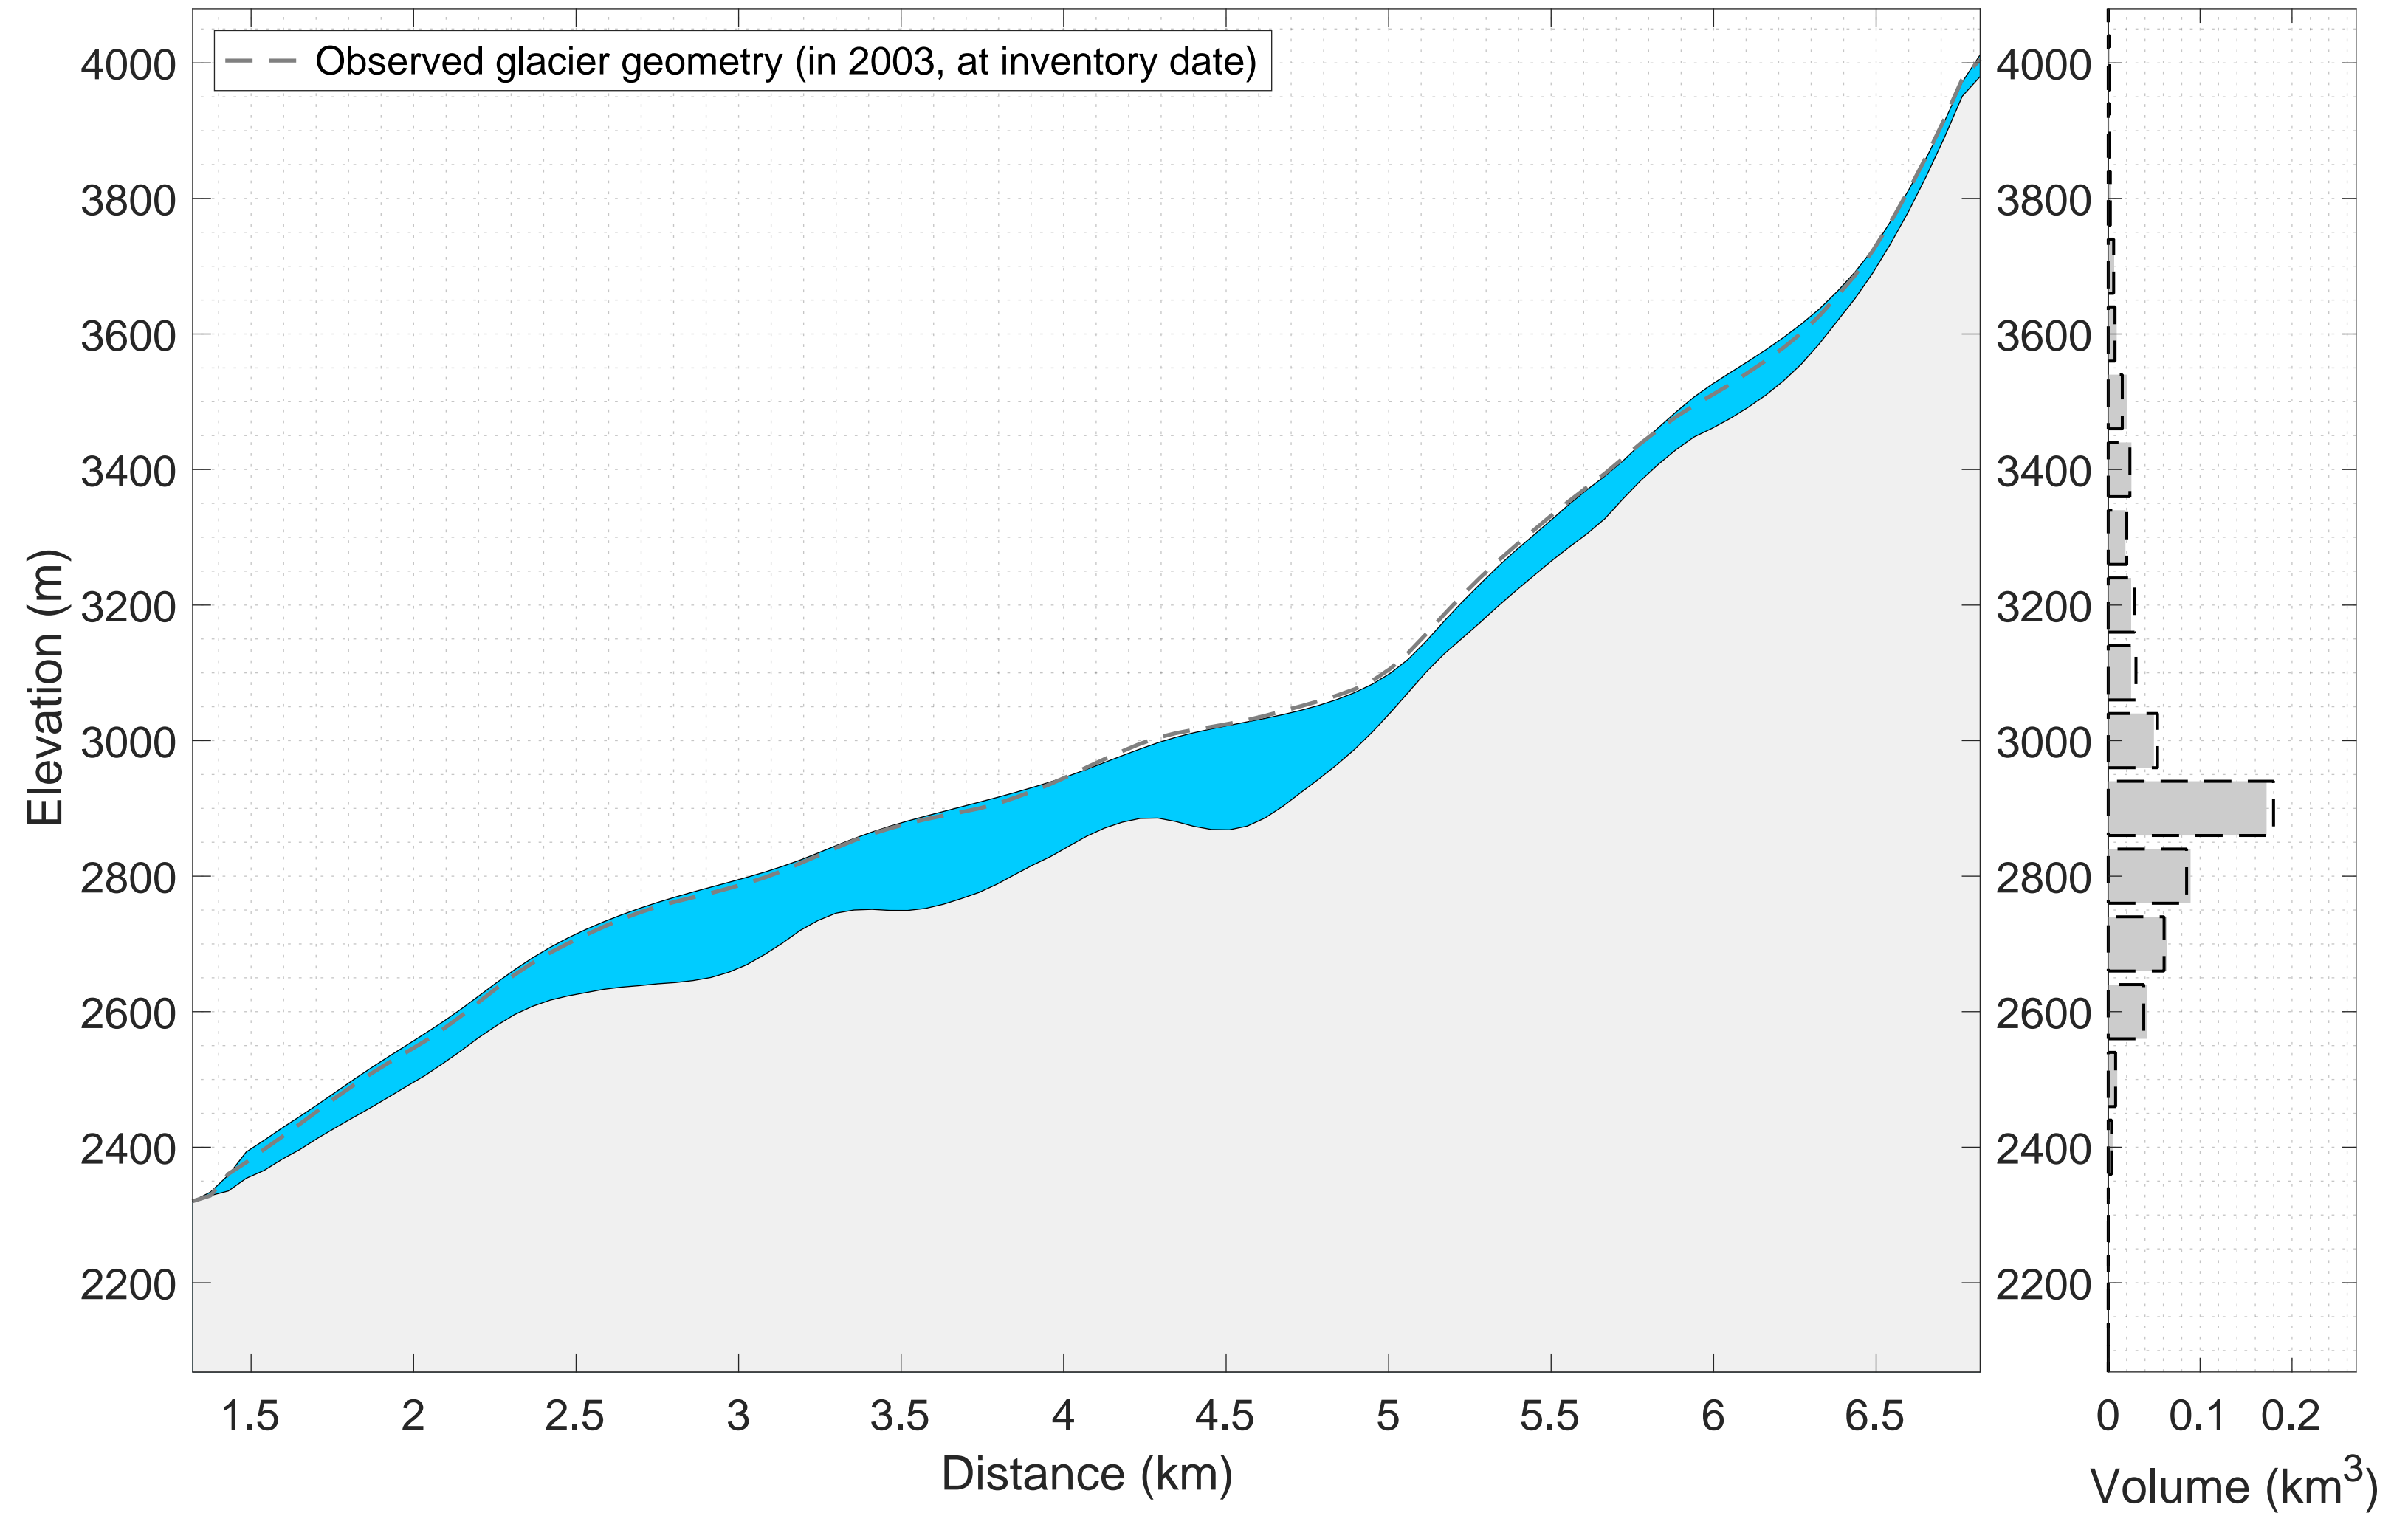

Supplement: Supplementary file 212 [file tc-13-1125-2019-supplement.zip]

**Modelled geometry (Glacier ID = 00673;  $A = 8.4832\text{e-}17 \text{ Pa}^{-3} \text{ a}^{-1}$ ;  $dx = 12 \text{ m}$ )**

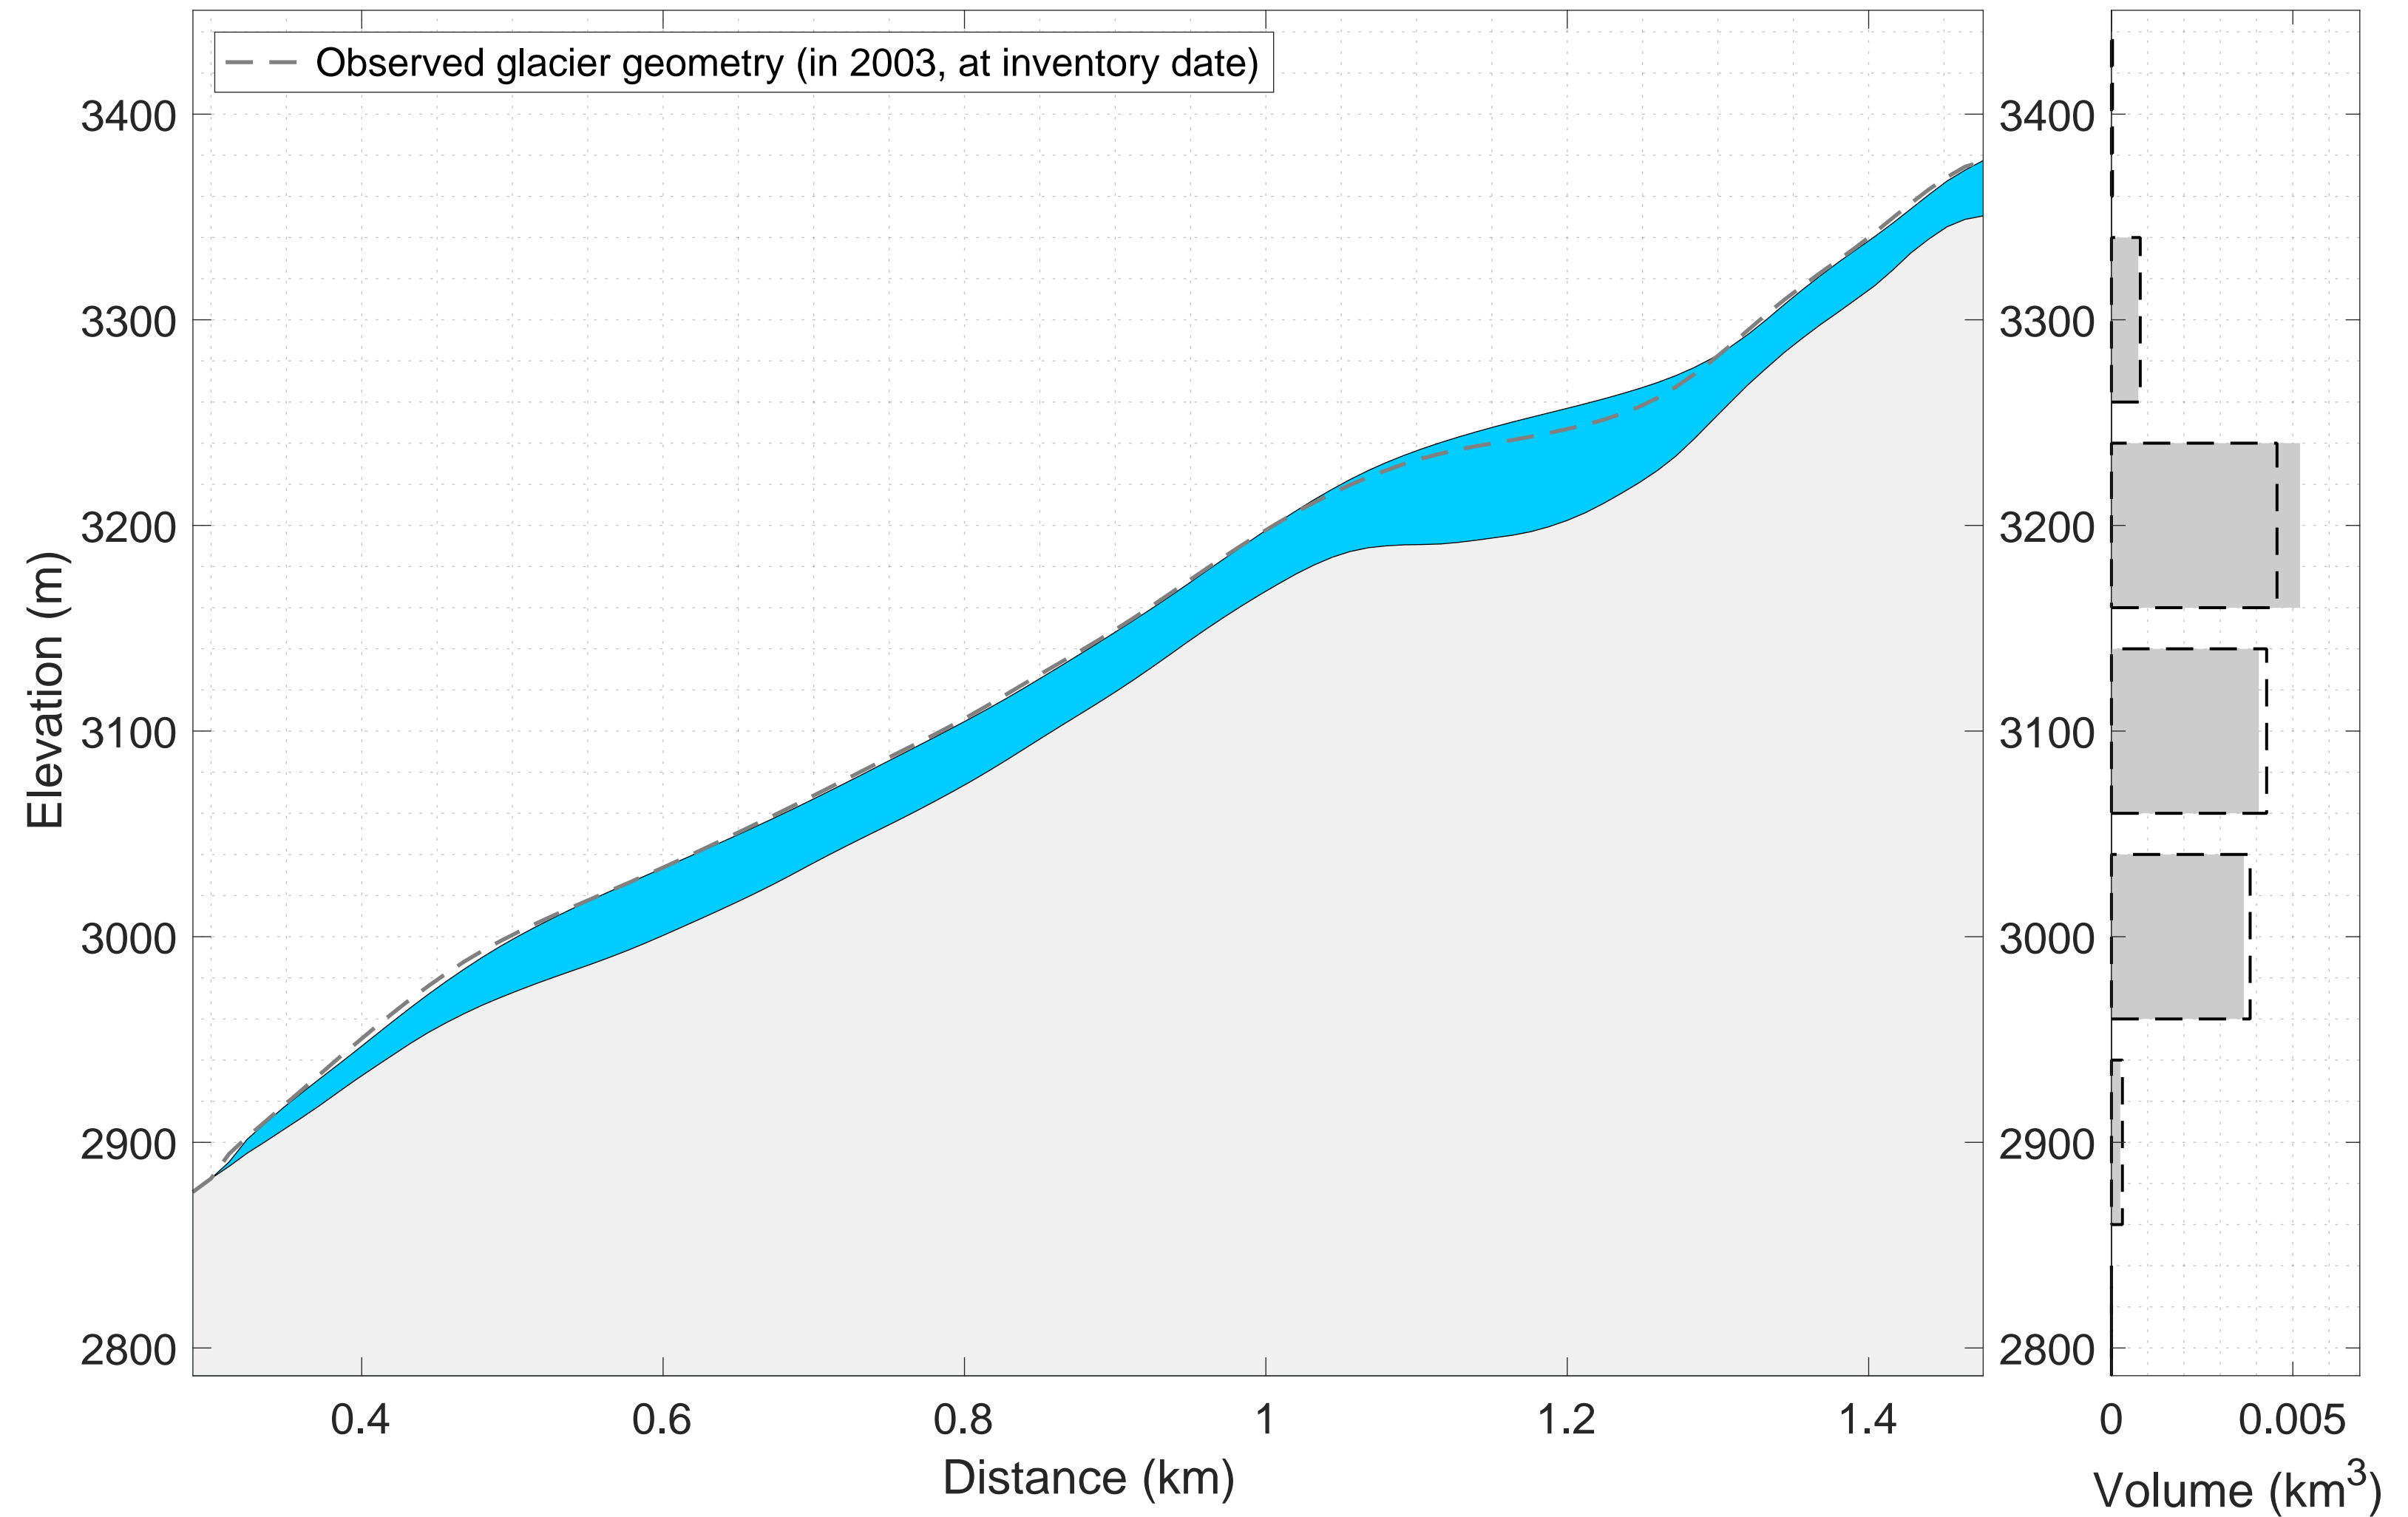

Supplement: Supplementary file 213 [file tc-13-1125-2019-supplement.zip]

**Modelled geometry (Glacier ID = 00590;  $A = 1.0573\text{e-}16 \text{ Pa}^{-3} \text{ a}^{-1}$ ;  $dx = 17 \text{ m}$ )**

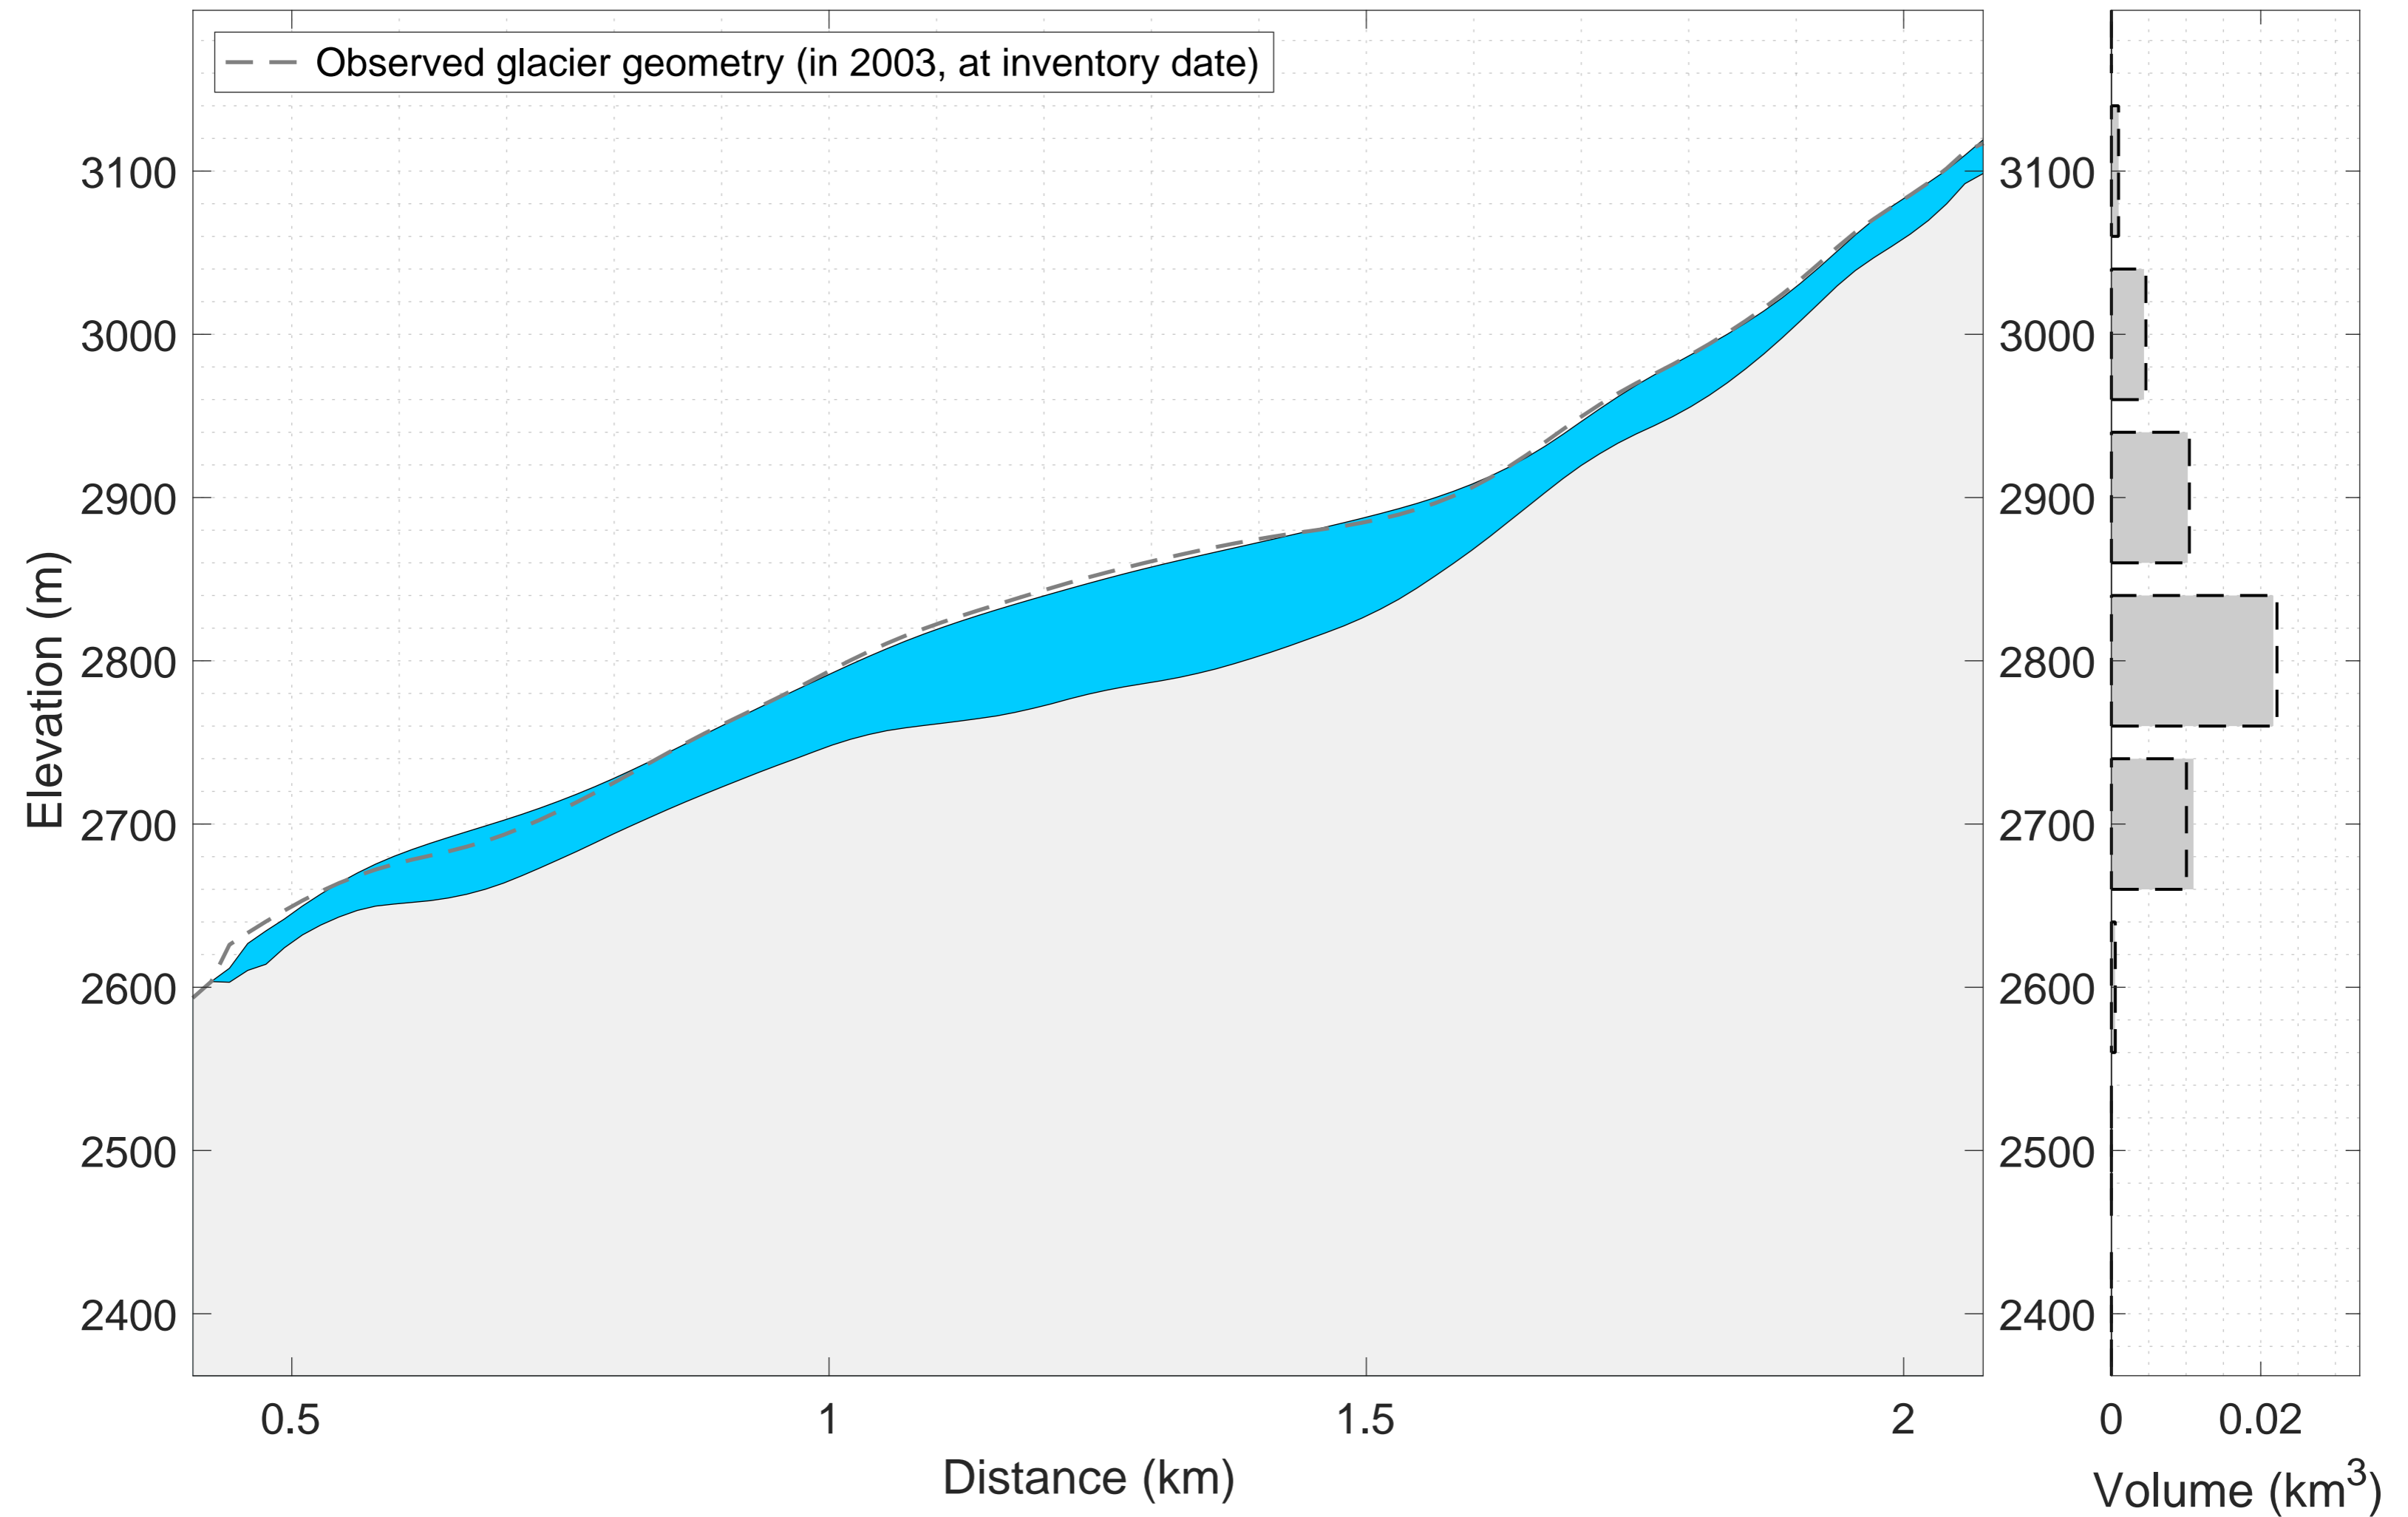

Supplement: Supplementary file 214 [file tc-13-1125-2019-supplement.zip]

**Modelled geometry (Glacier ID = 02968;  $A = 9.9388\text{e-}17 \text{ Pa}^{-3} \text{ a}^{-1}$ ;  $dx = 22 \text{ m}$ )**

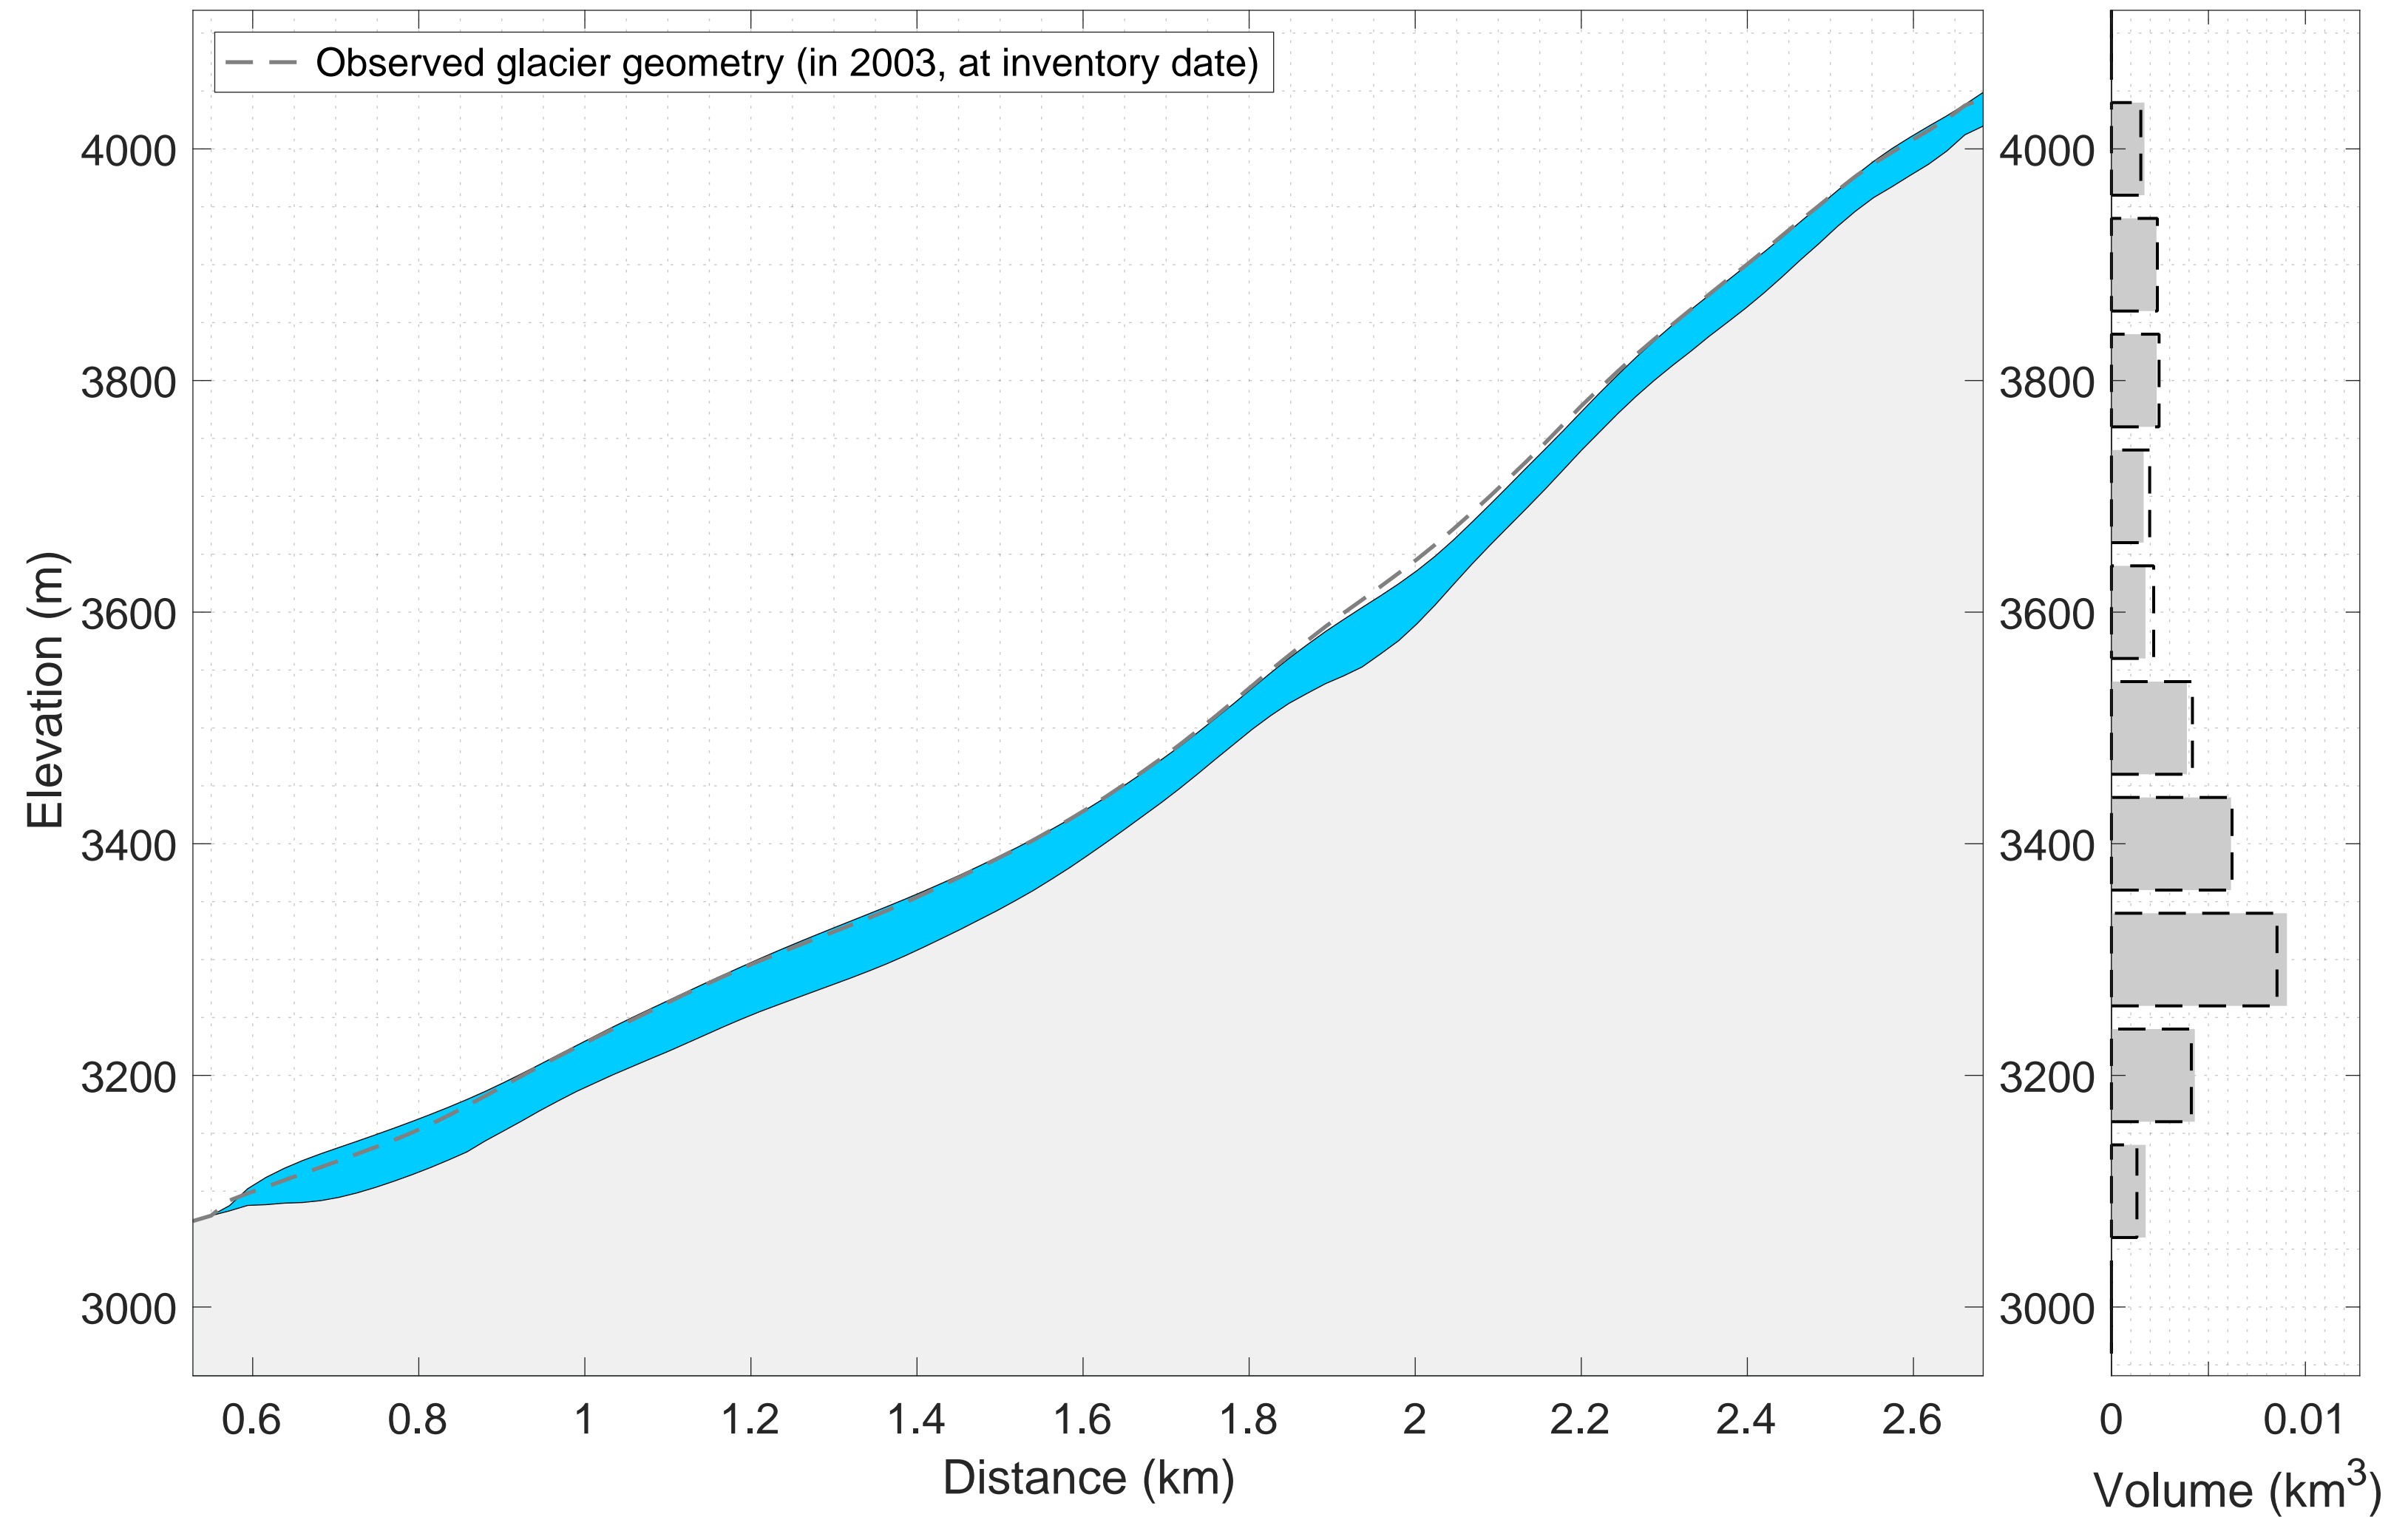

Supplement: Supplementary file 215 [file tc-13-1125-2019-supplement.zip]

Modelled geometry (Glacier ID = 02578;  $A = 1.2959\text{e-}16 \text{ Pa}^{-3} \text{ a}^{-1}$ ;  $dx = 11 \text{ m}$ )

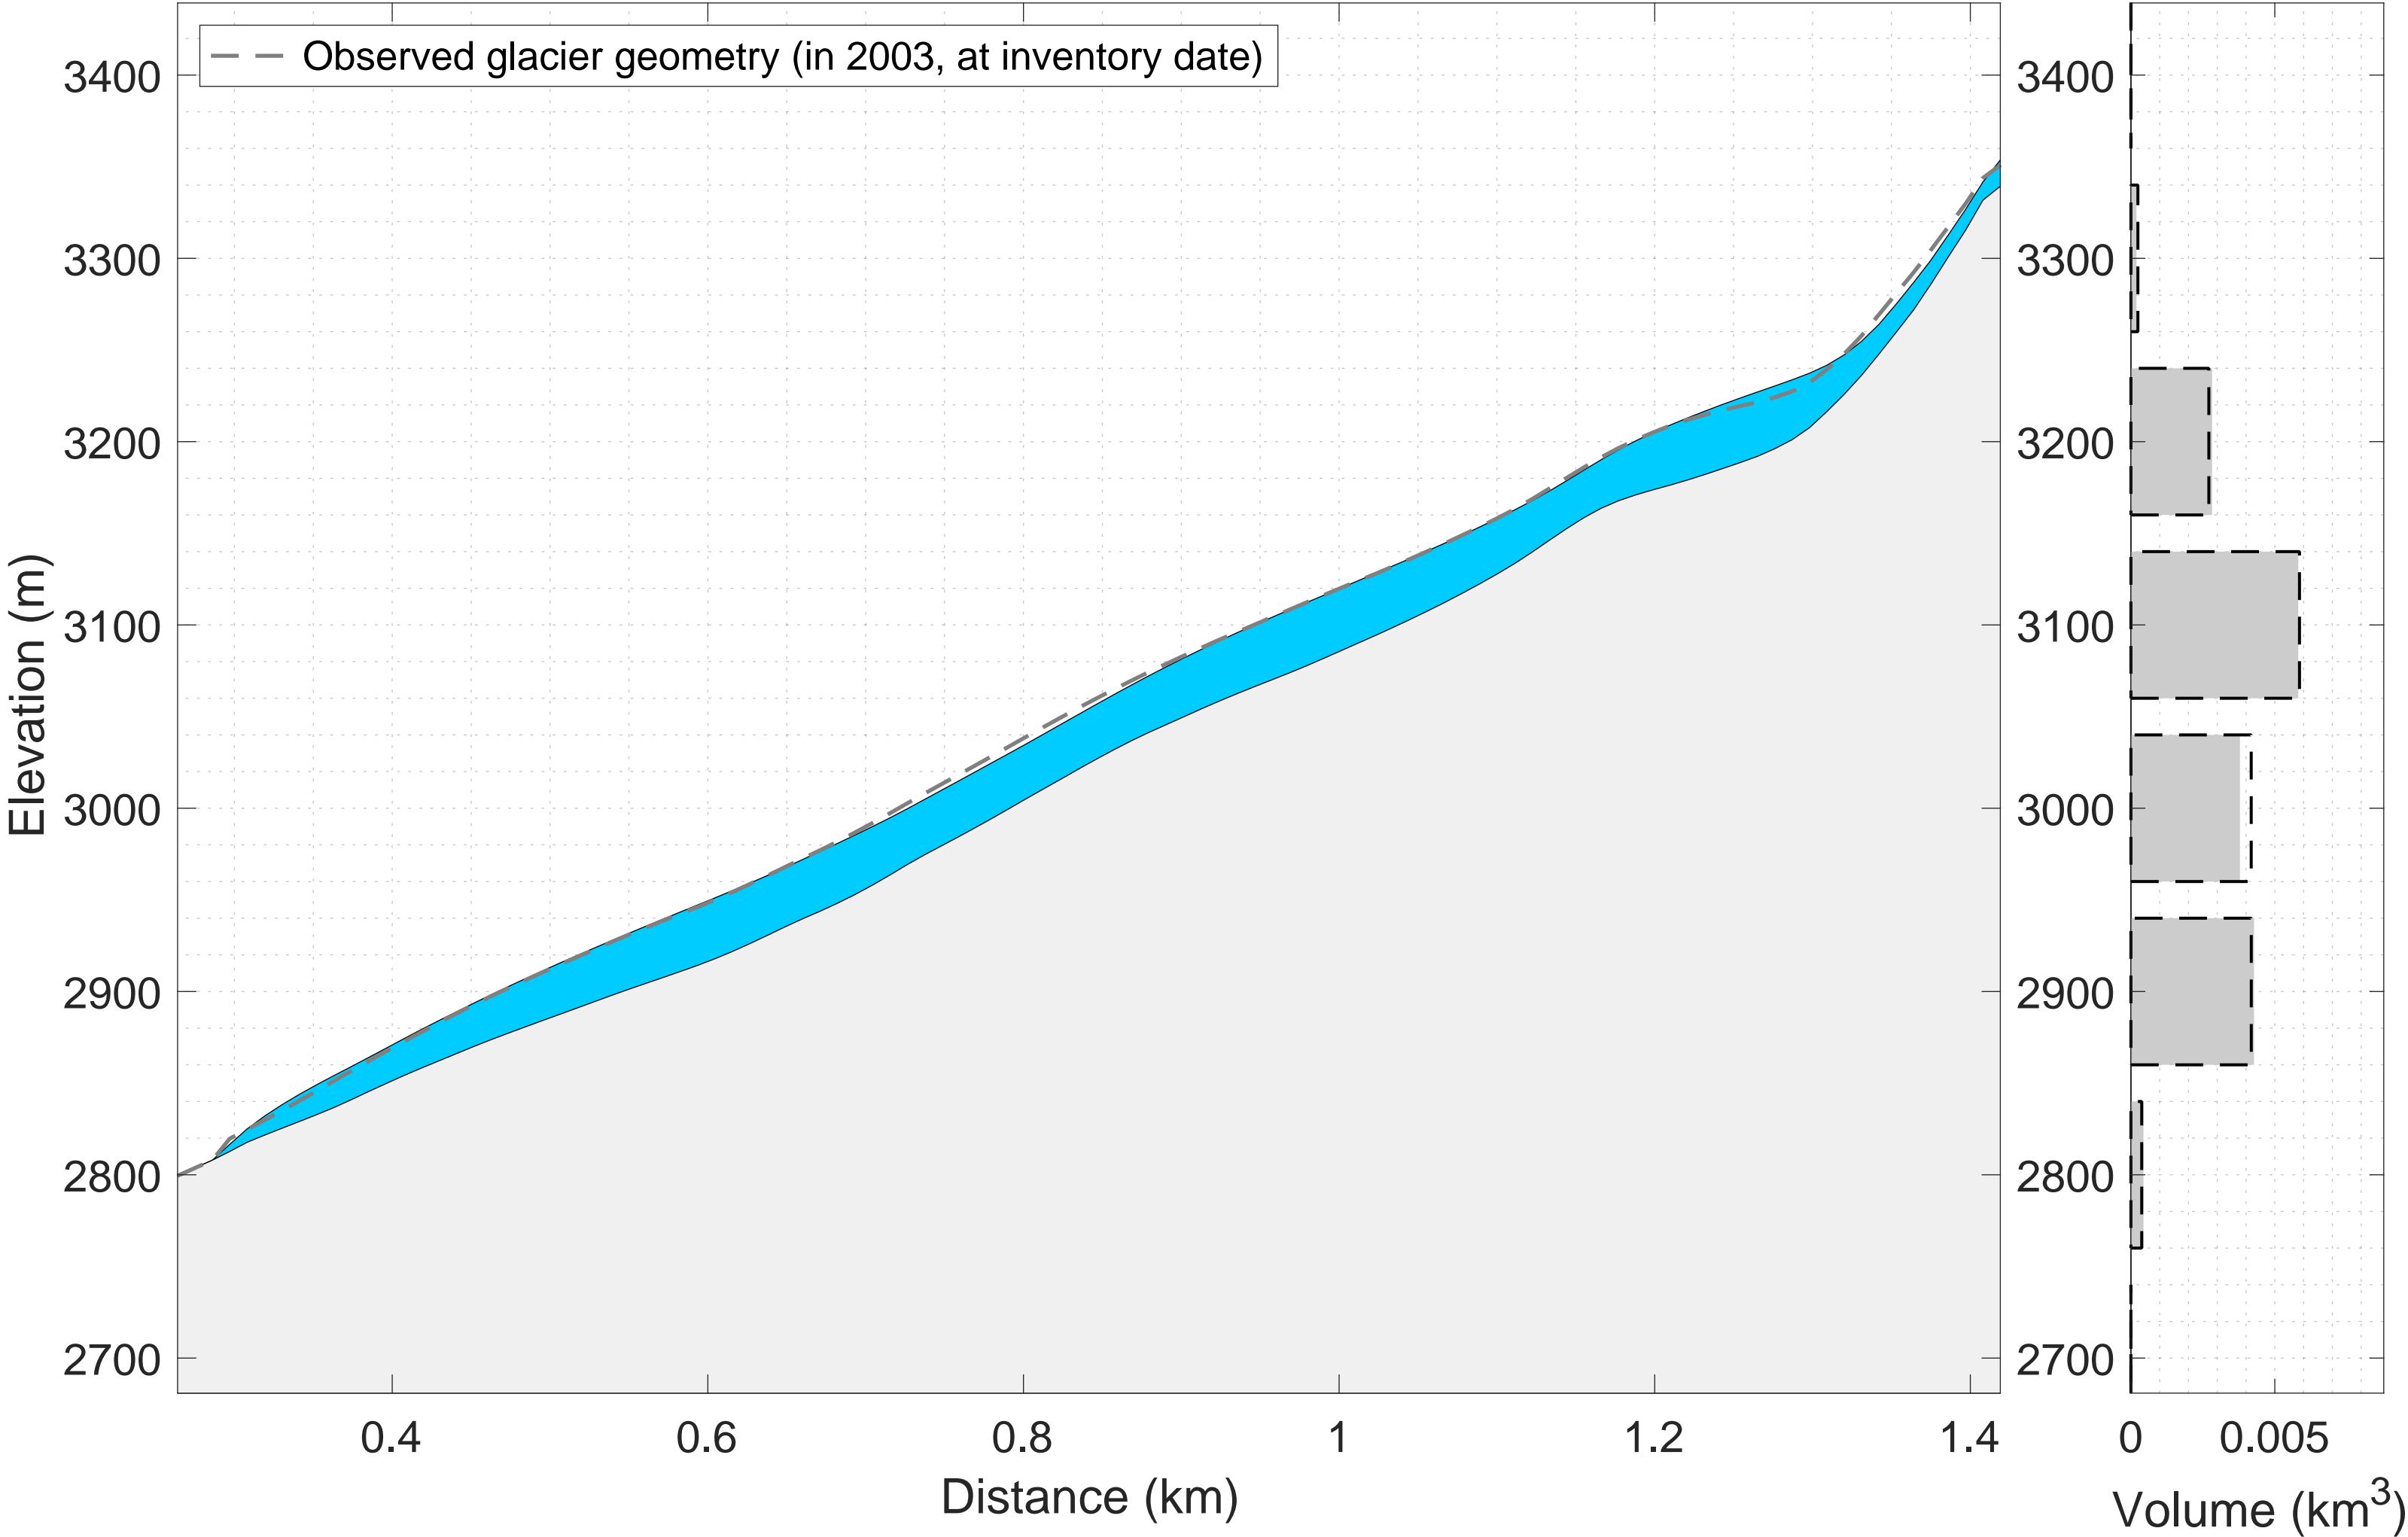

Supplement: Supplementary file 216 [file tc-13-1125-2019-supplement.zip]

**Modelled geometry (Glacier ID = 00116;  $A = 2.7182\text{e-}16 \text{ Pa}^{-3} \text{ a}^{-1}$ ;  $dx = 42 \text{ m}$ )**

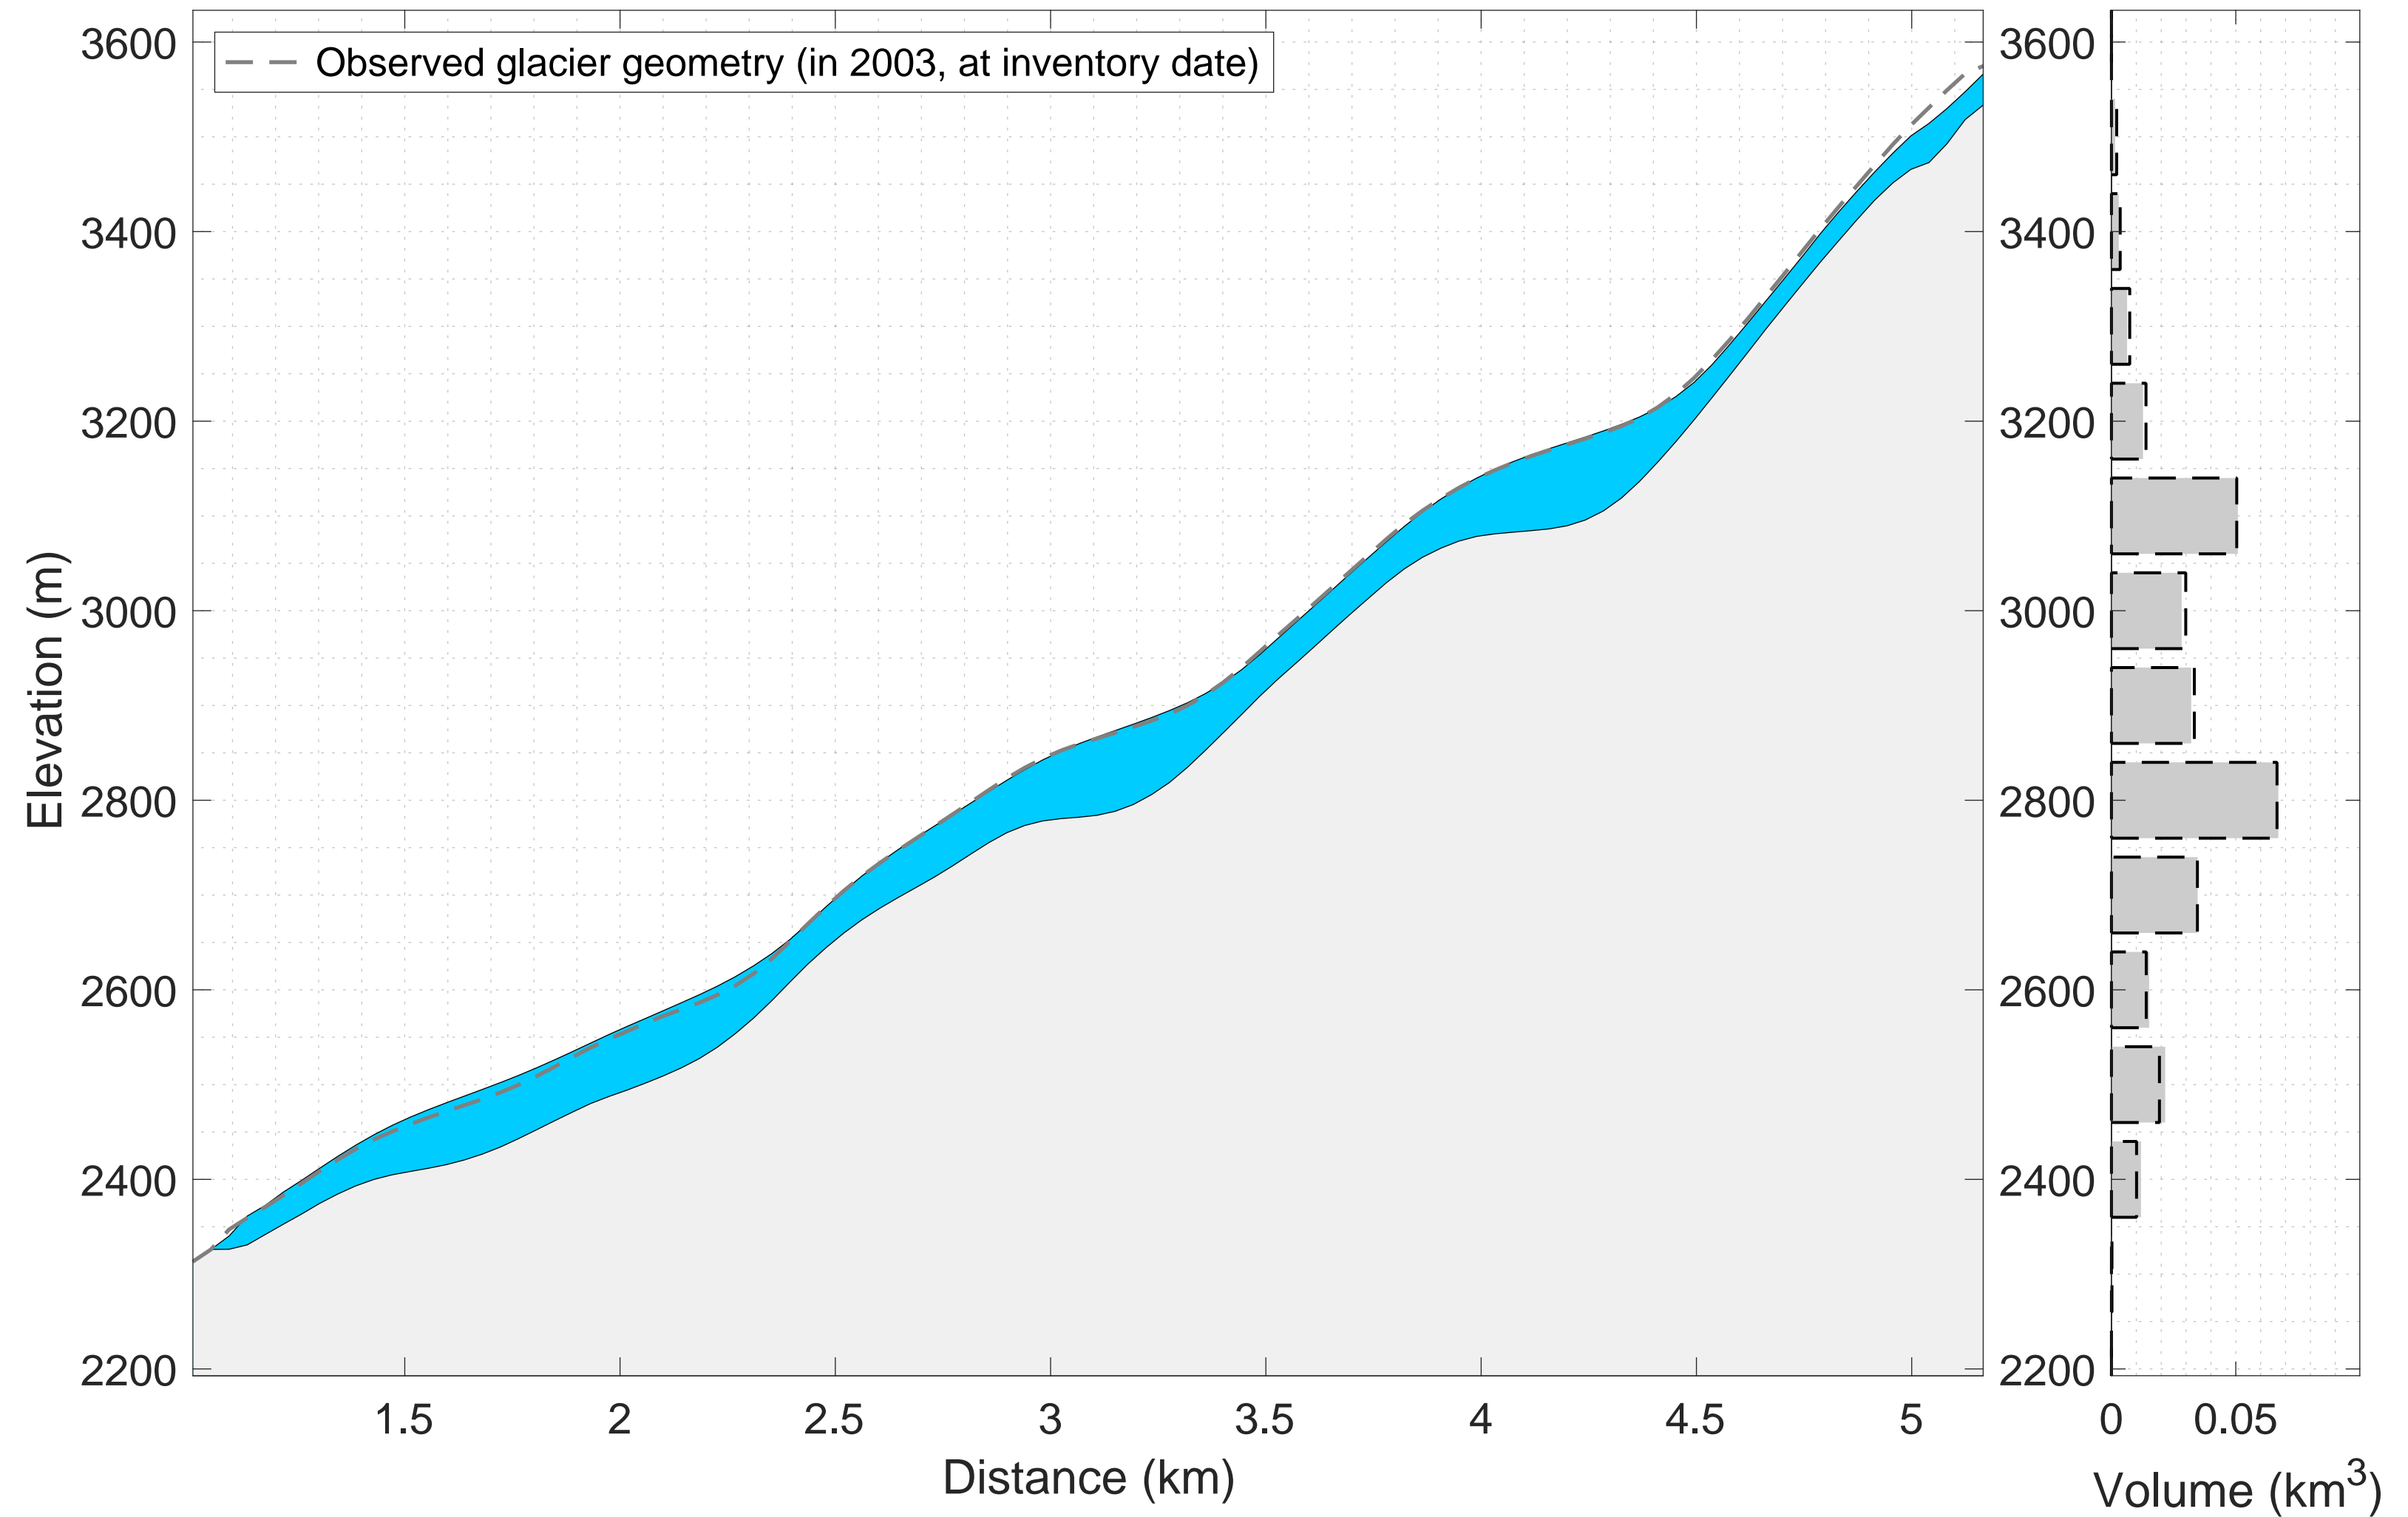

Supplement: Supplementary file 217 [file tc-13-1125-2019-supplement.zip]

**Modelled geometry (Glacier ID = 02590;  $A = 1.8923\text{e-}16 \text{ Pa}^{-3} \text{ a}^{-1}$ ;  $dx = 17 \text{ m}$ )**

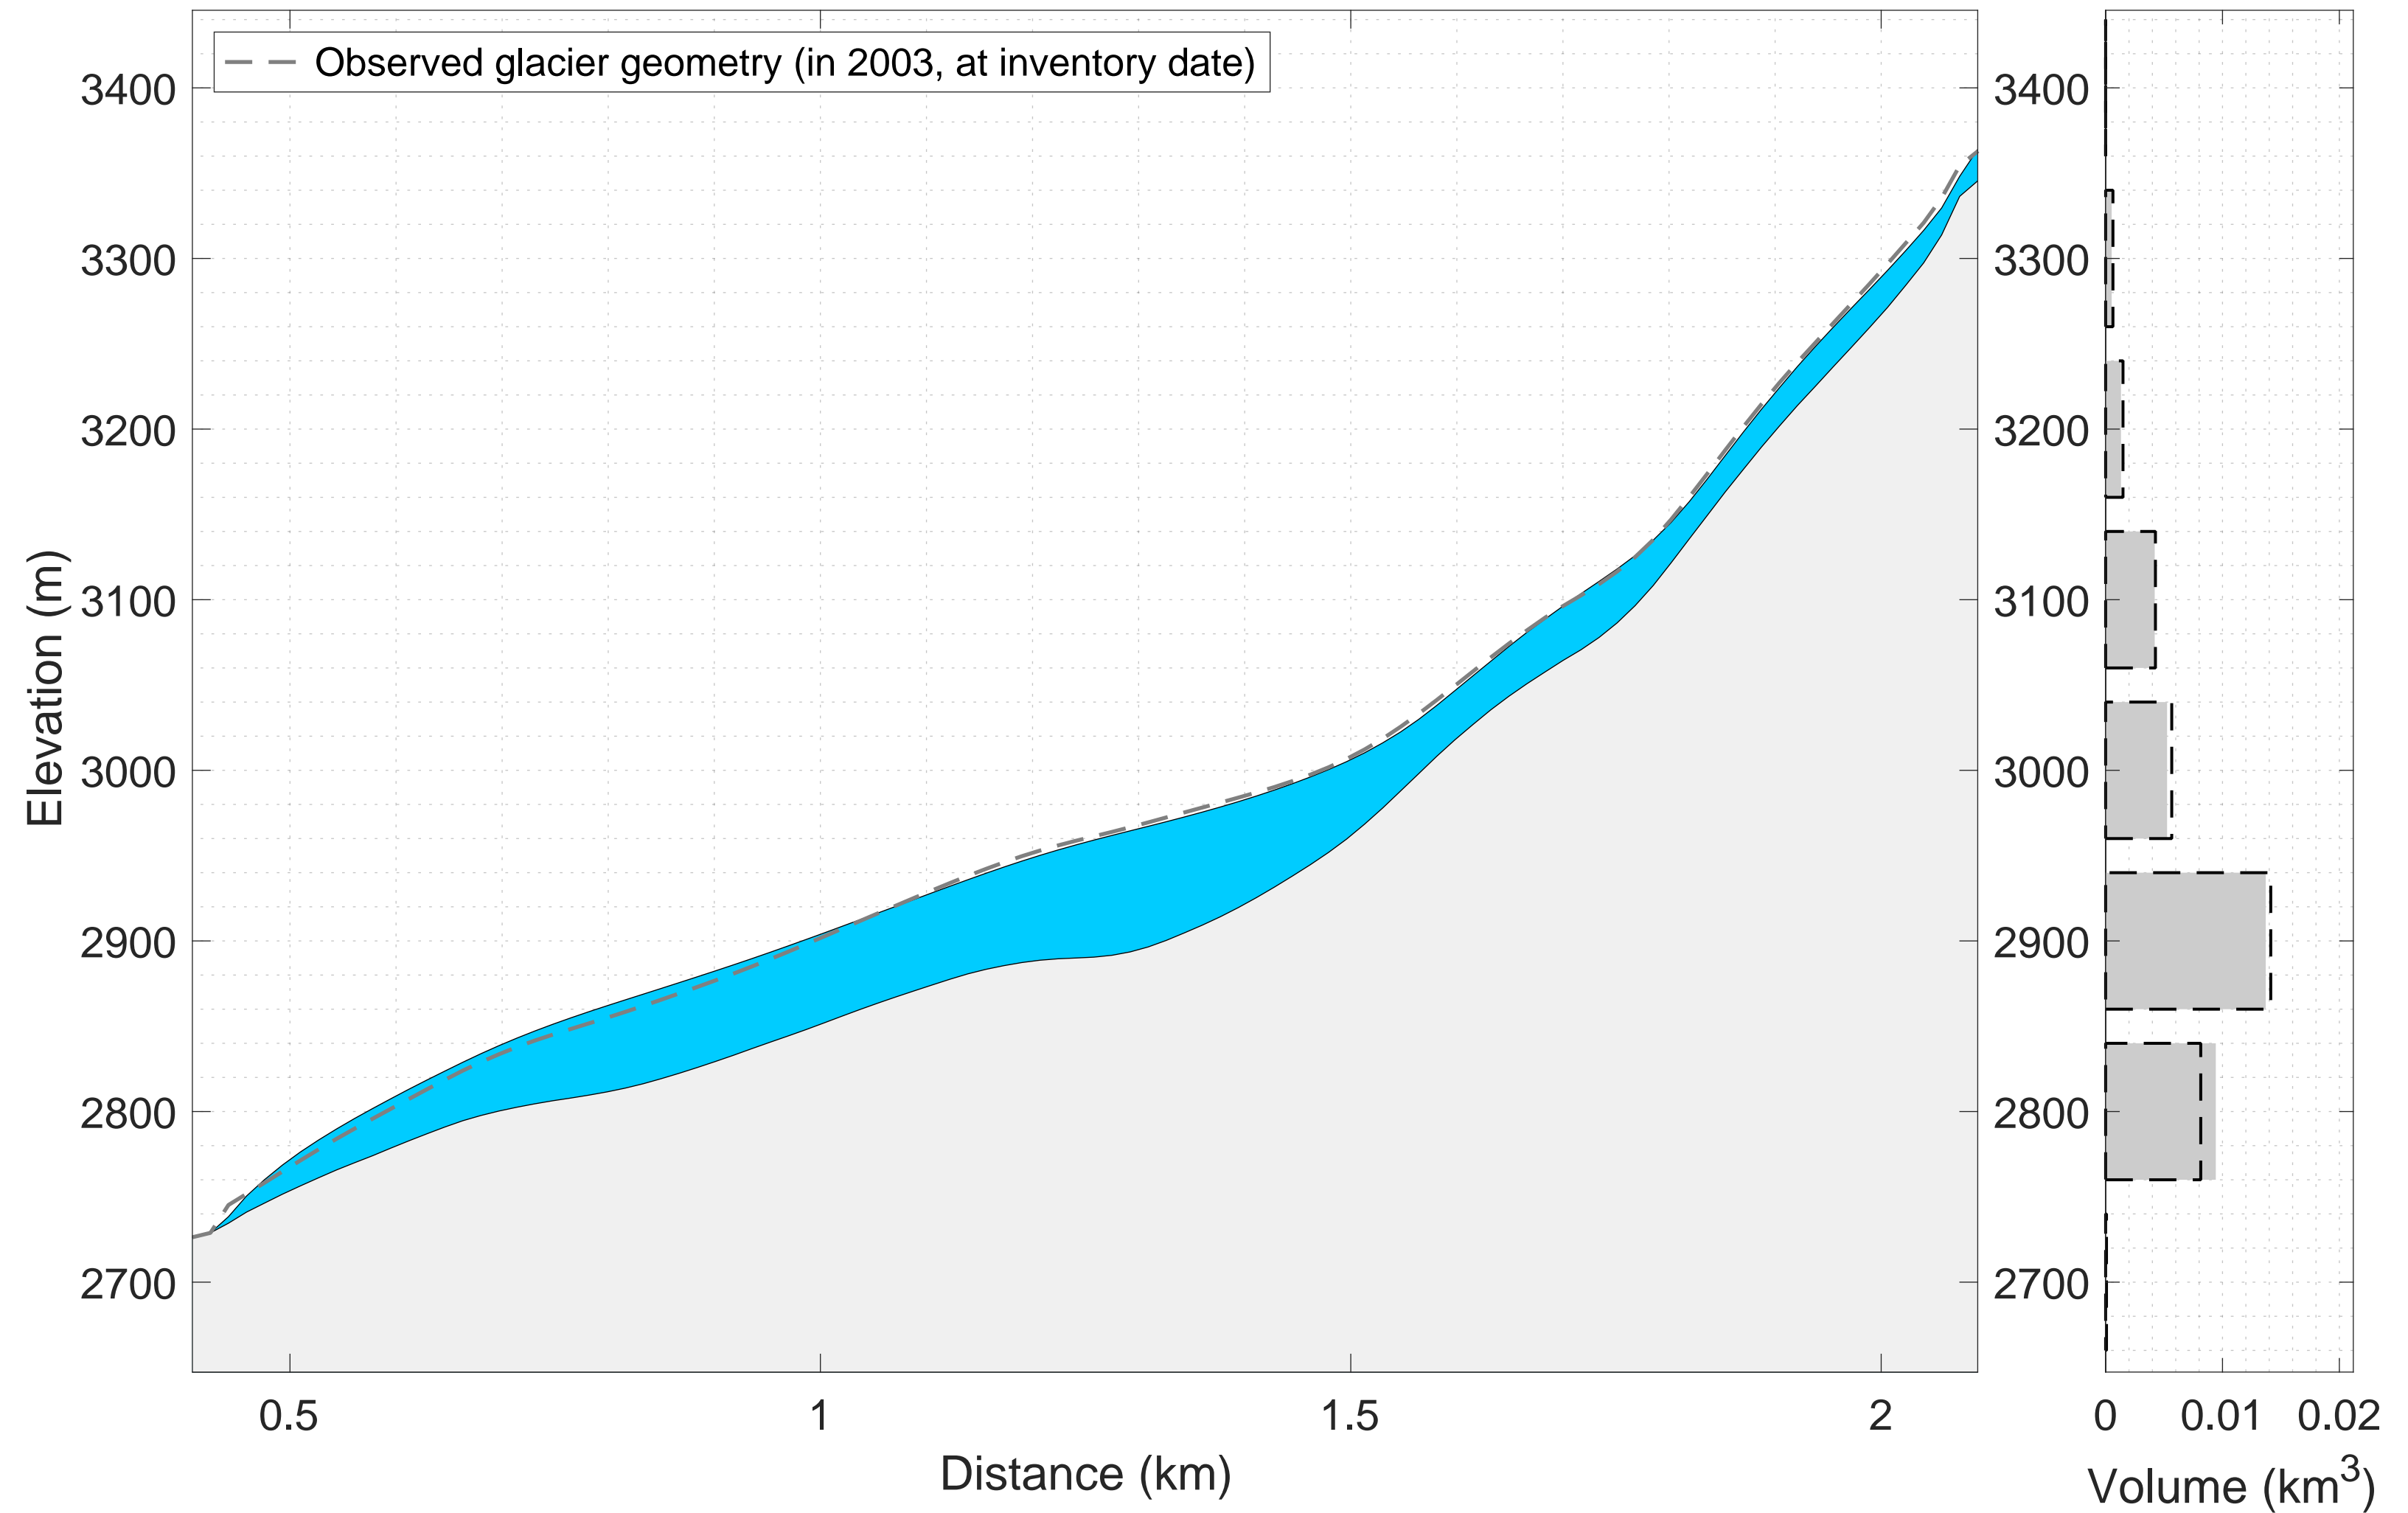

Supplement: Supplementary file 218 [file tc-13-1125-2019-supplement.zip]

**Modelled geometry (Glacier ID = 00141;  $A = 1.7235\text{e-}16 \text{ Pa}^{-3} \text{ a}^{-1}$ ;  $dx = 39 \text{ m}$ )**

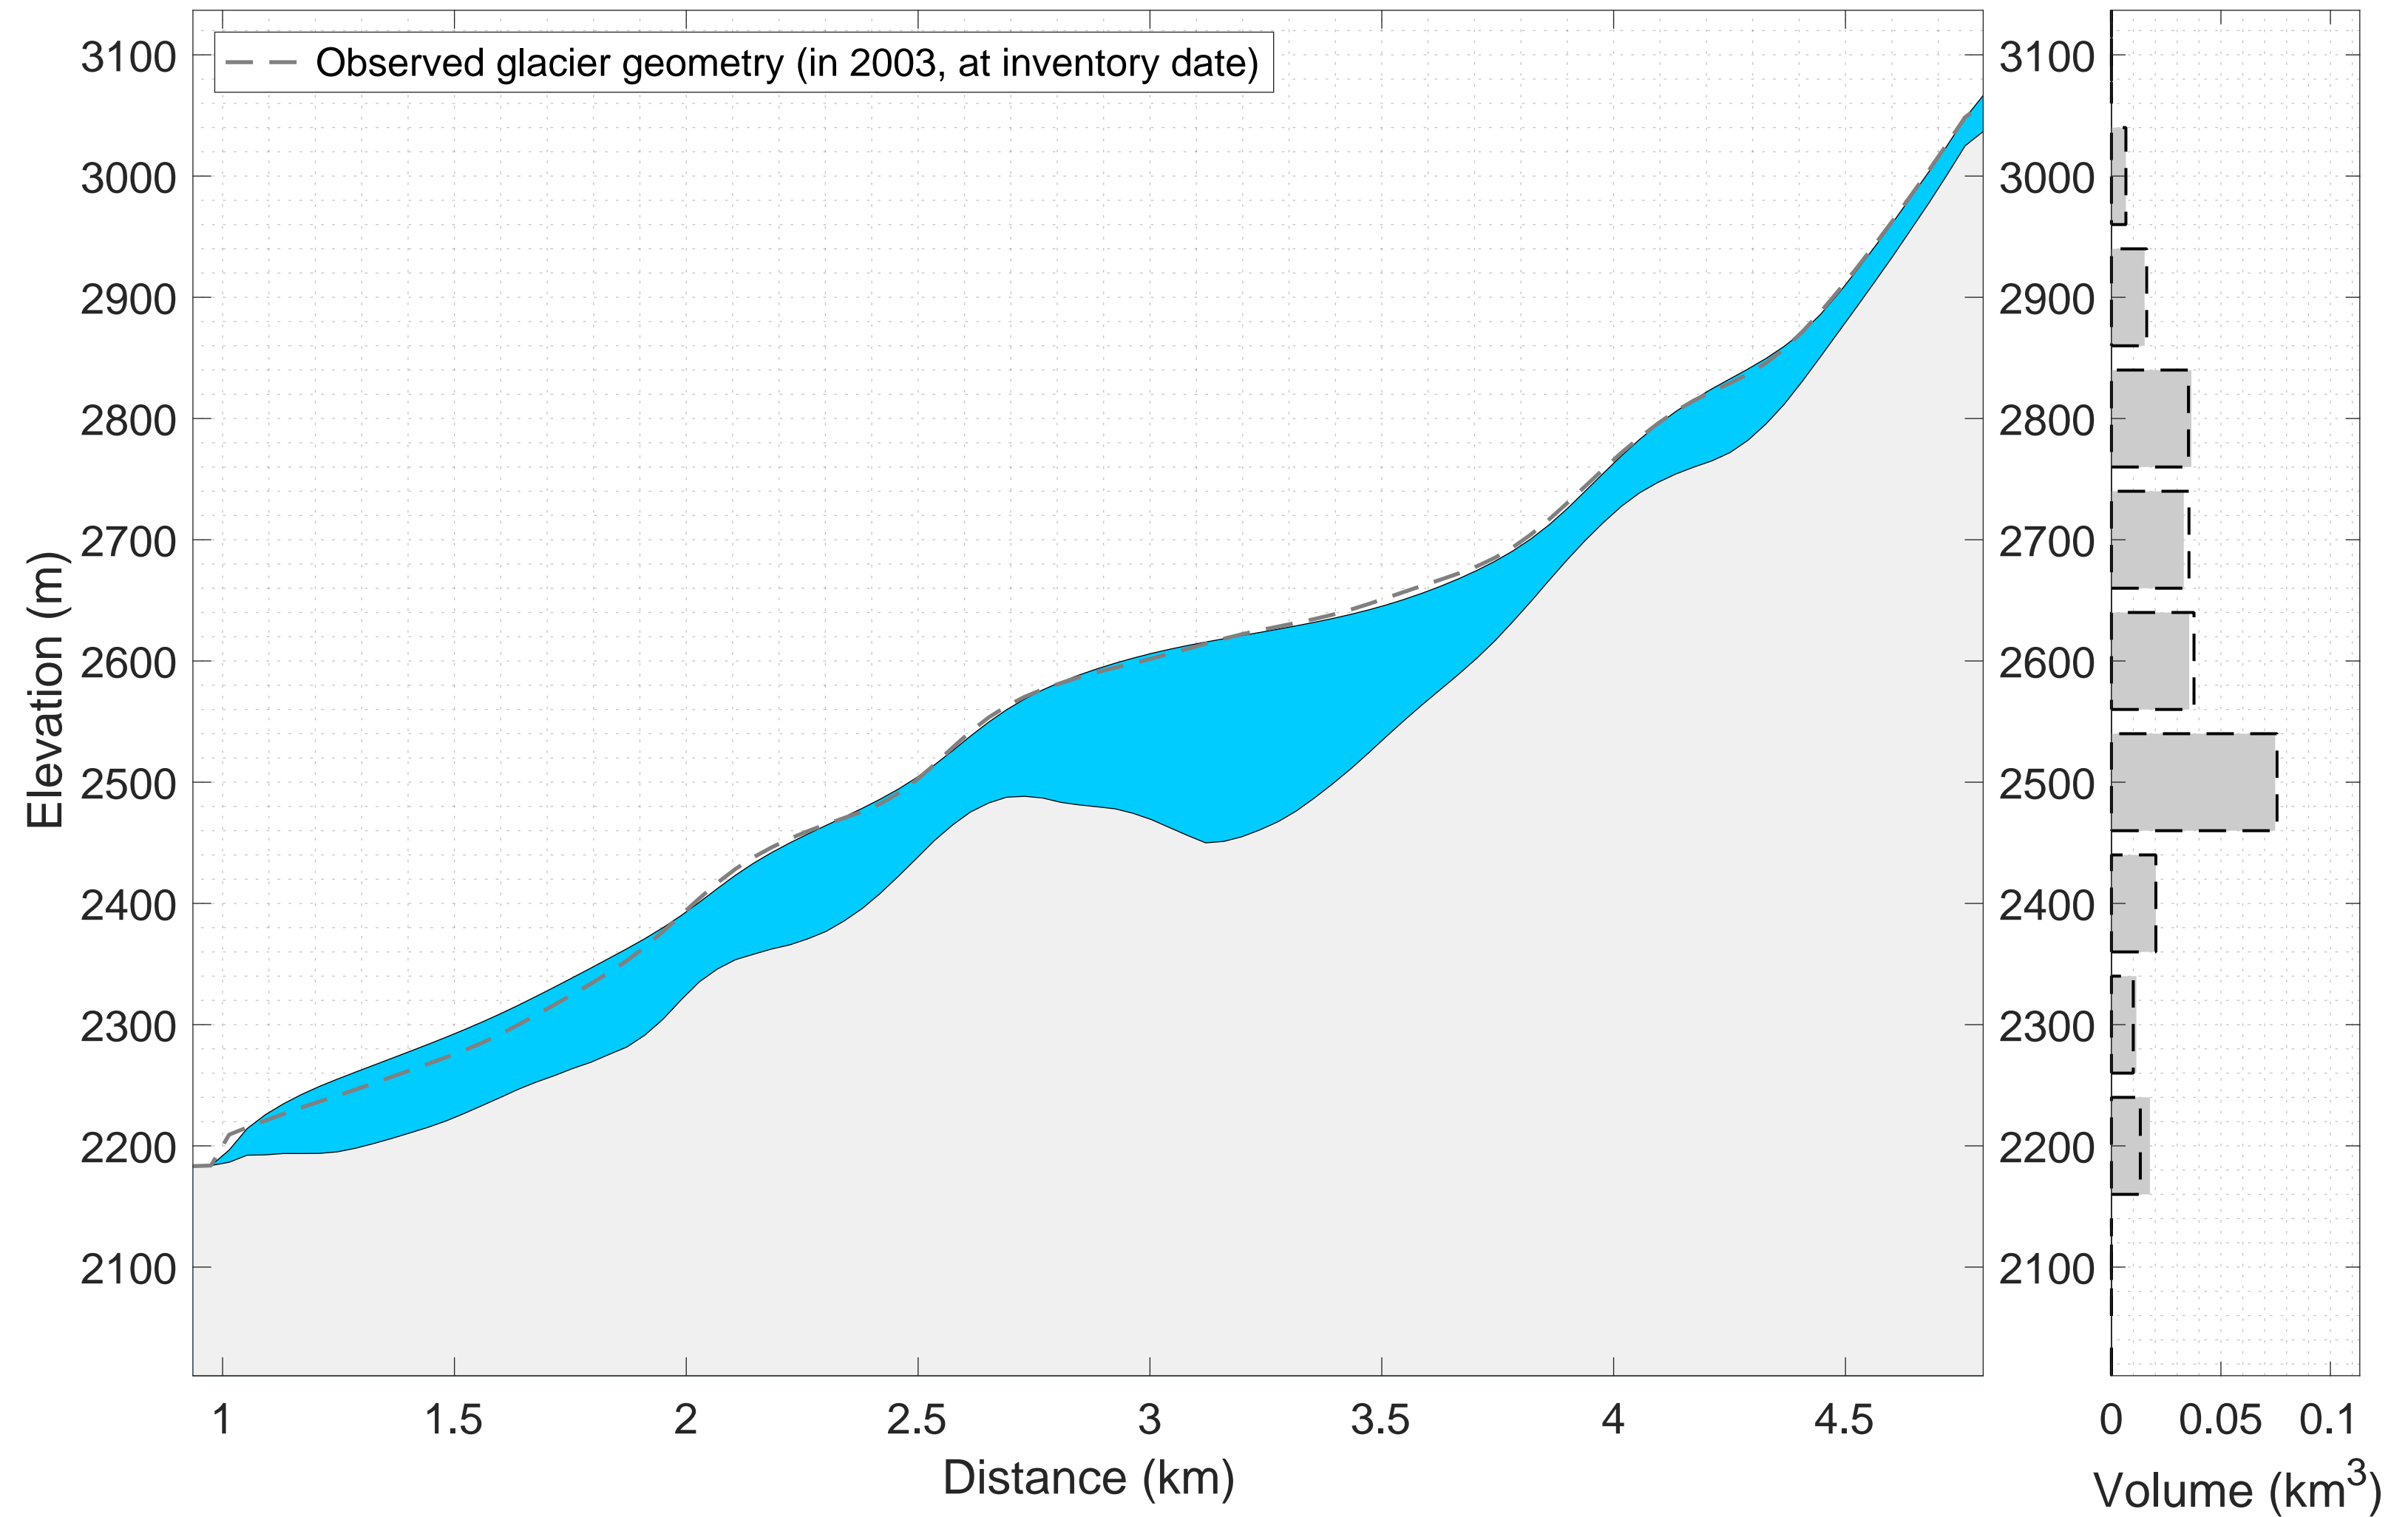

Supplement: Supplementary file 219 [file tc-13-1125-2019-supplement.zip]

**Modelled geometry (Glacier ID = 02801;  $A = 8.1724\text{e-}17 \text{ Pa}^{-3} \text{ a}^{-1}$ ;  $dx = 78 \text{ m}$ )**

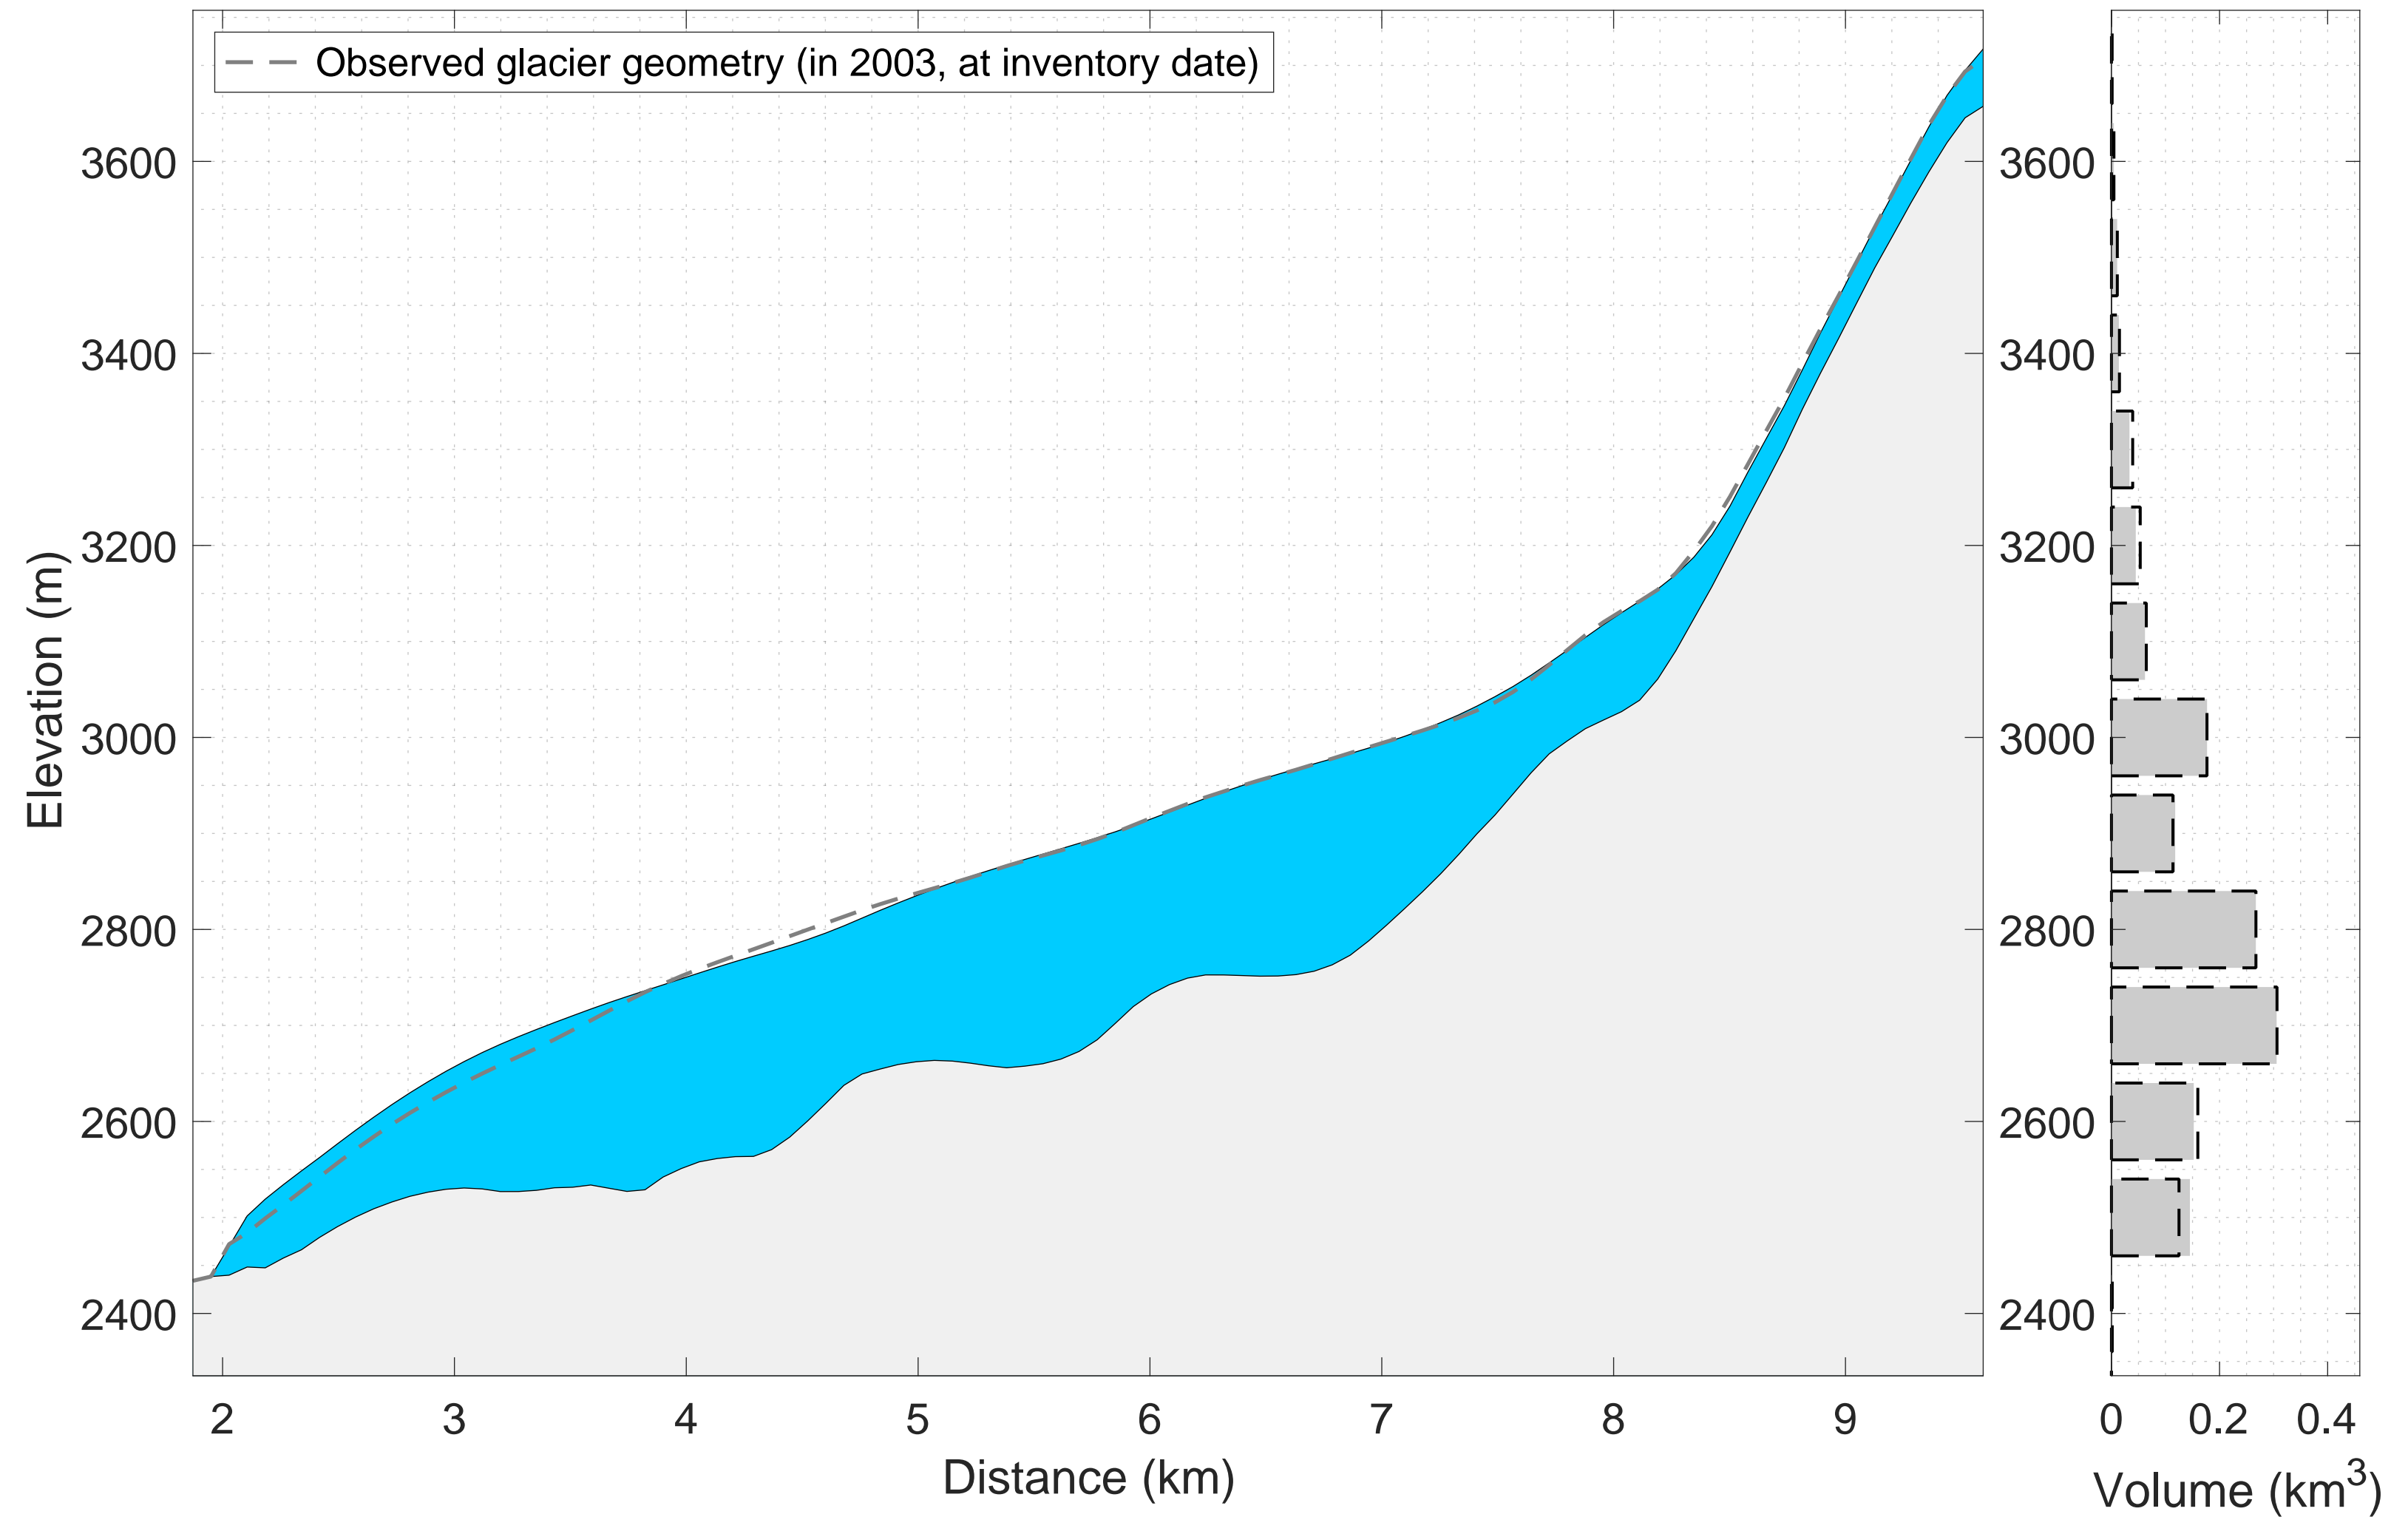

Supplement: Supplementary file 220 [file tc-13-1125-2019-supplement.zip]

**Modelled geometry (Glacier ID = 01576;  $A = 2.3849\text{e-}16 \text{ Pa}^{-3} \text{ a}^{-1}$ ;  $dx = 28 \text{ m}$ )**

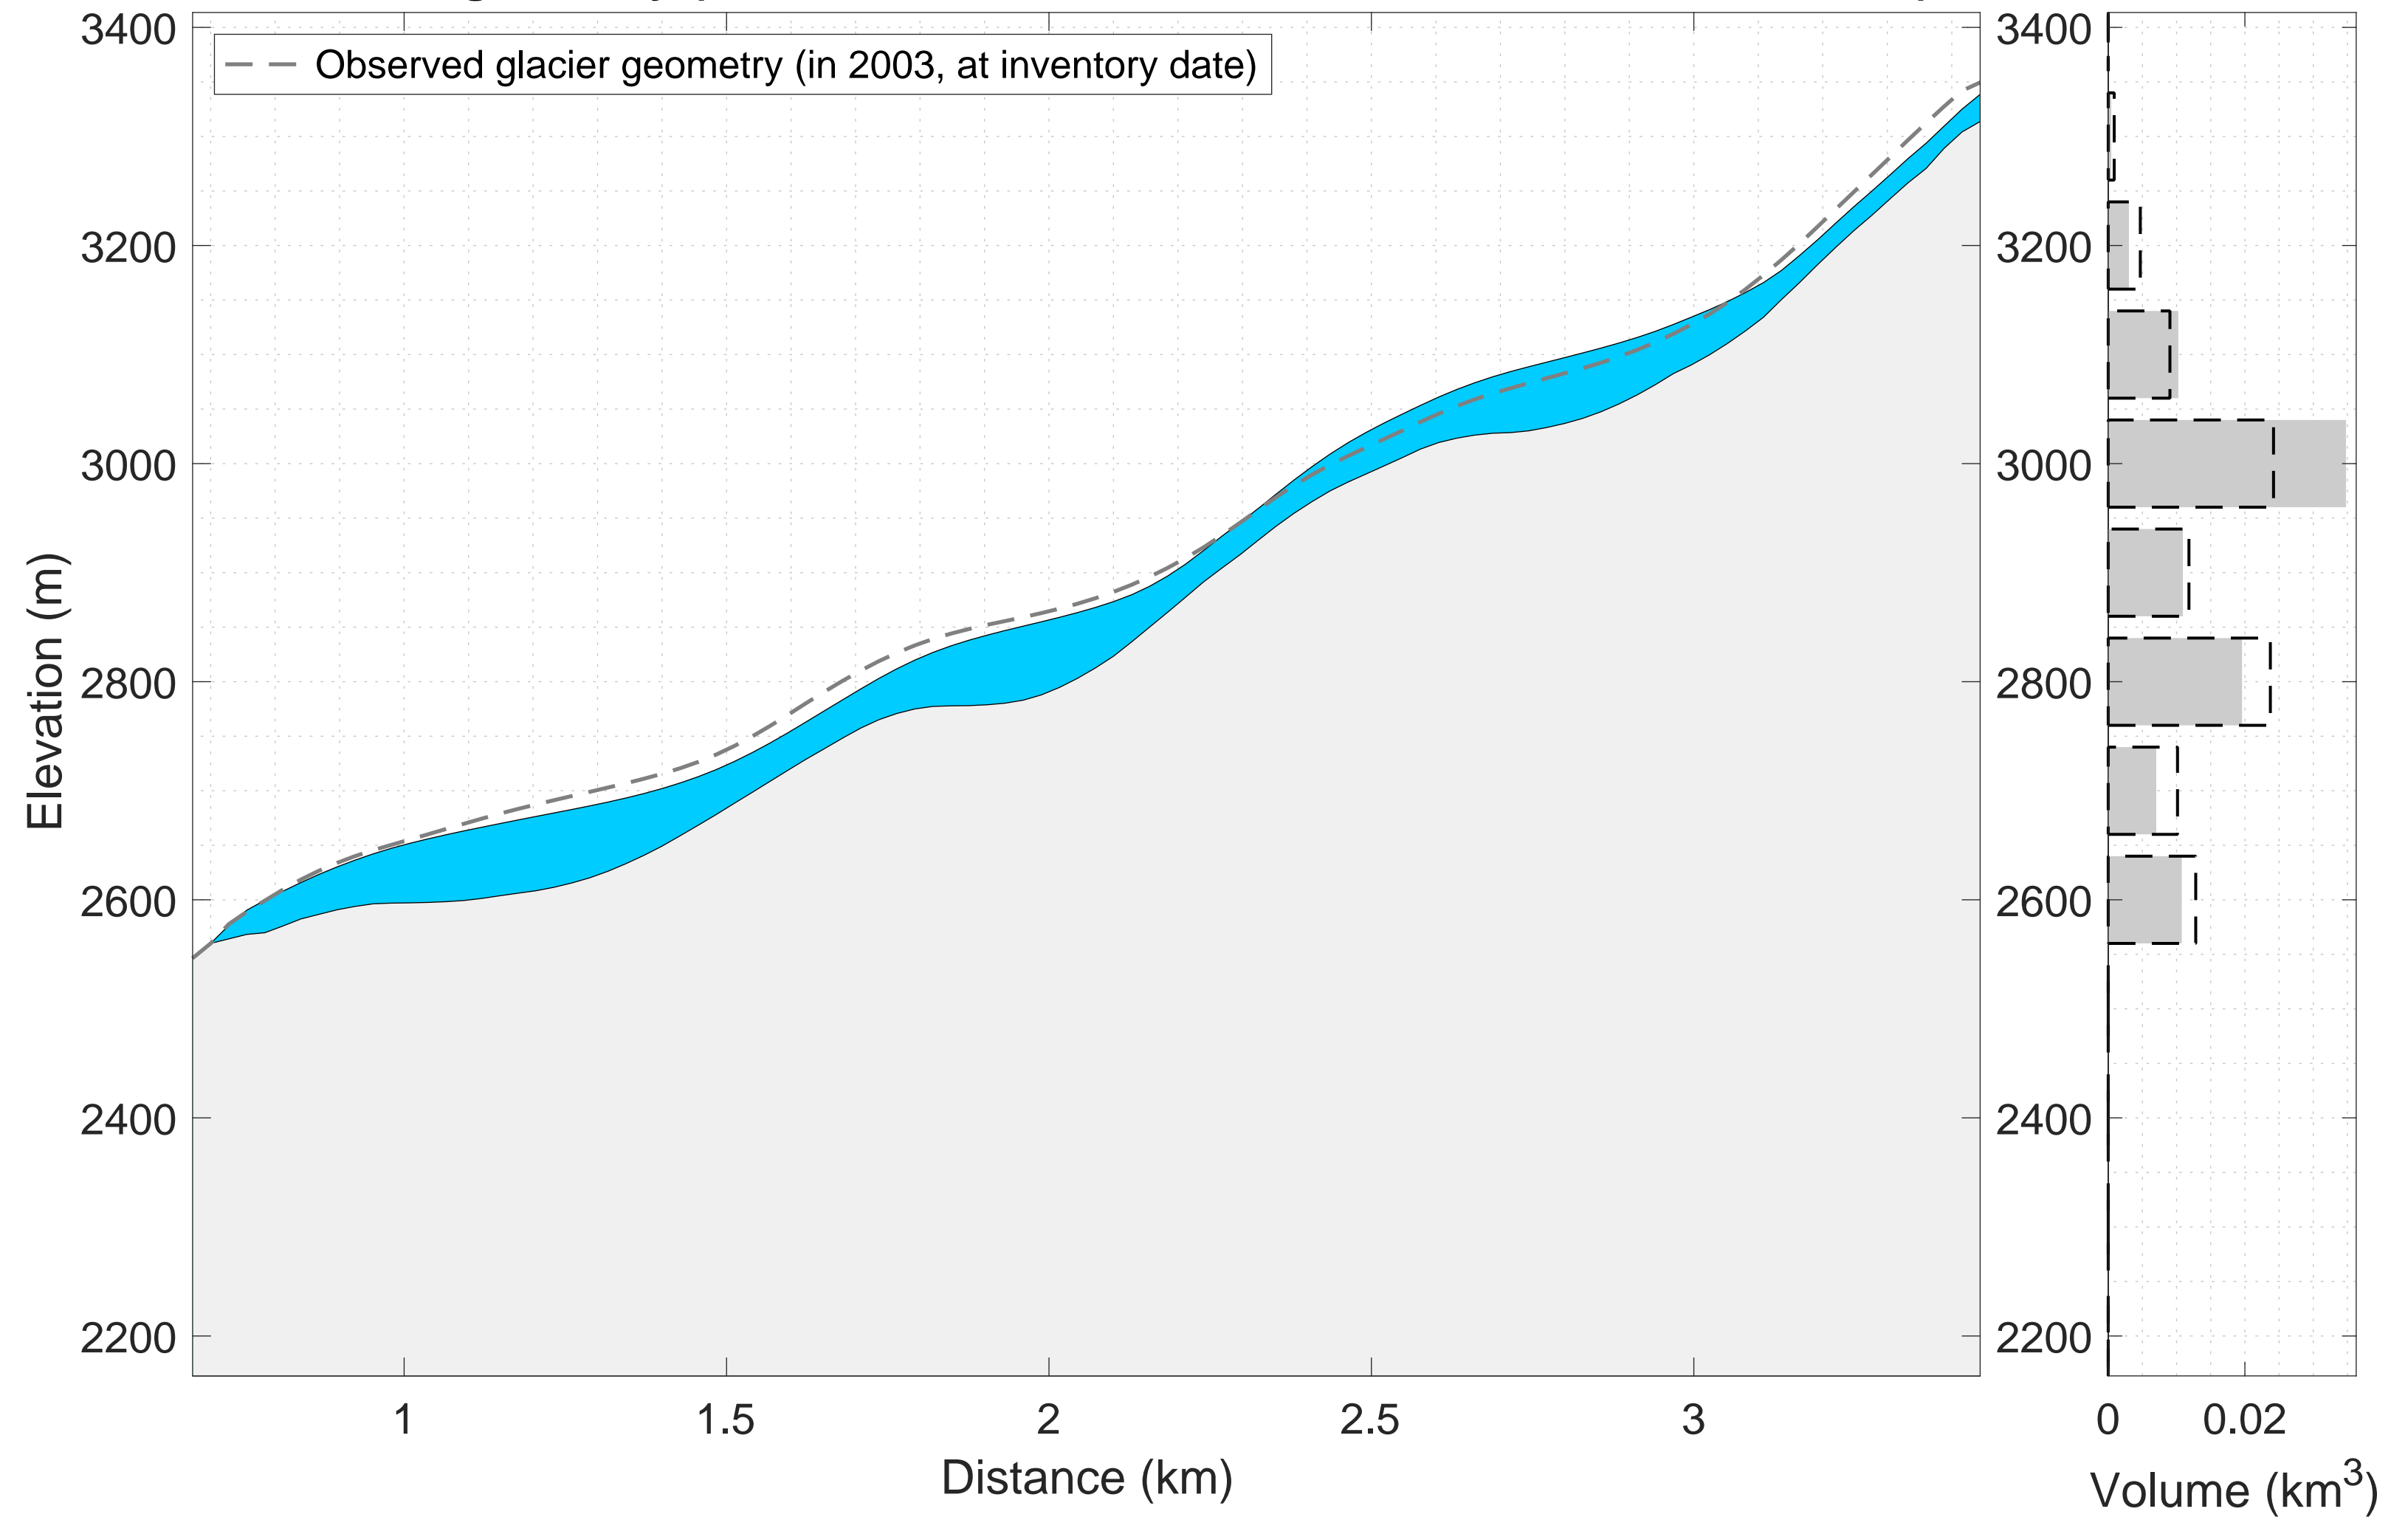

Supplement: Supplementary file 221 [file tc-13-1125-2019-supplement.zip]

**Modelled geometry (Glacier ID = 00962;  $A = 5.7314\text{e-}17 \text{ Pa}^{-3} \text{ a}^{-1}$ ;  $dx = 14 \text{ m}$ )**

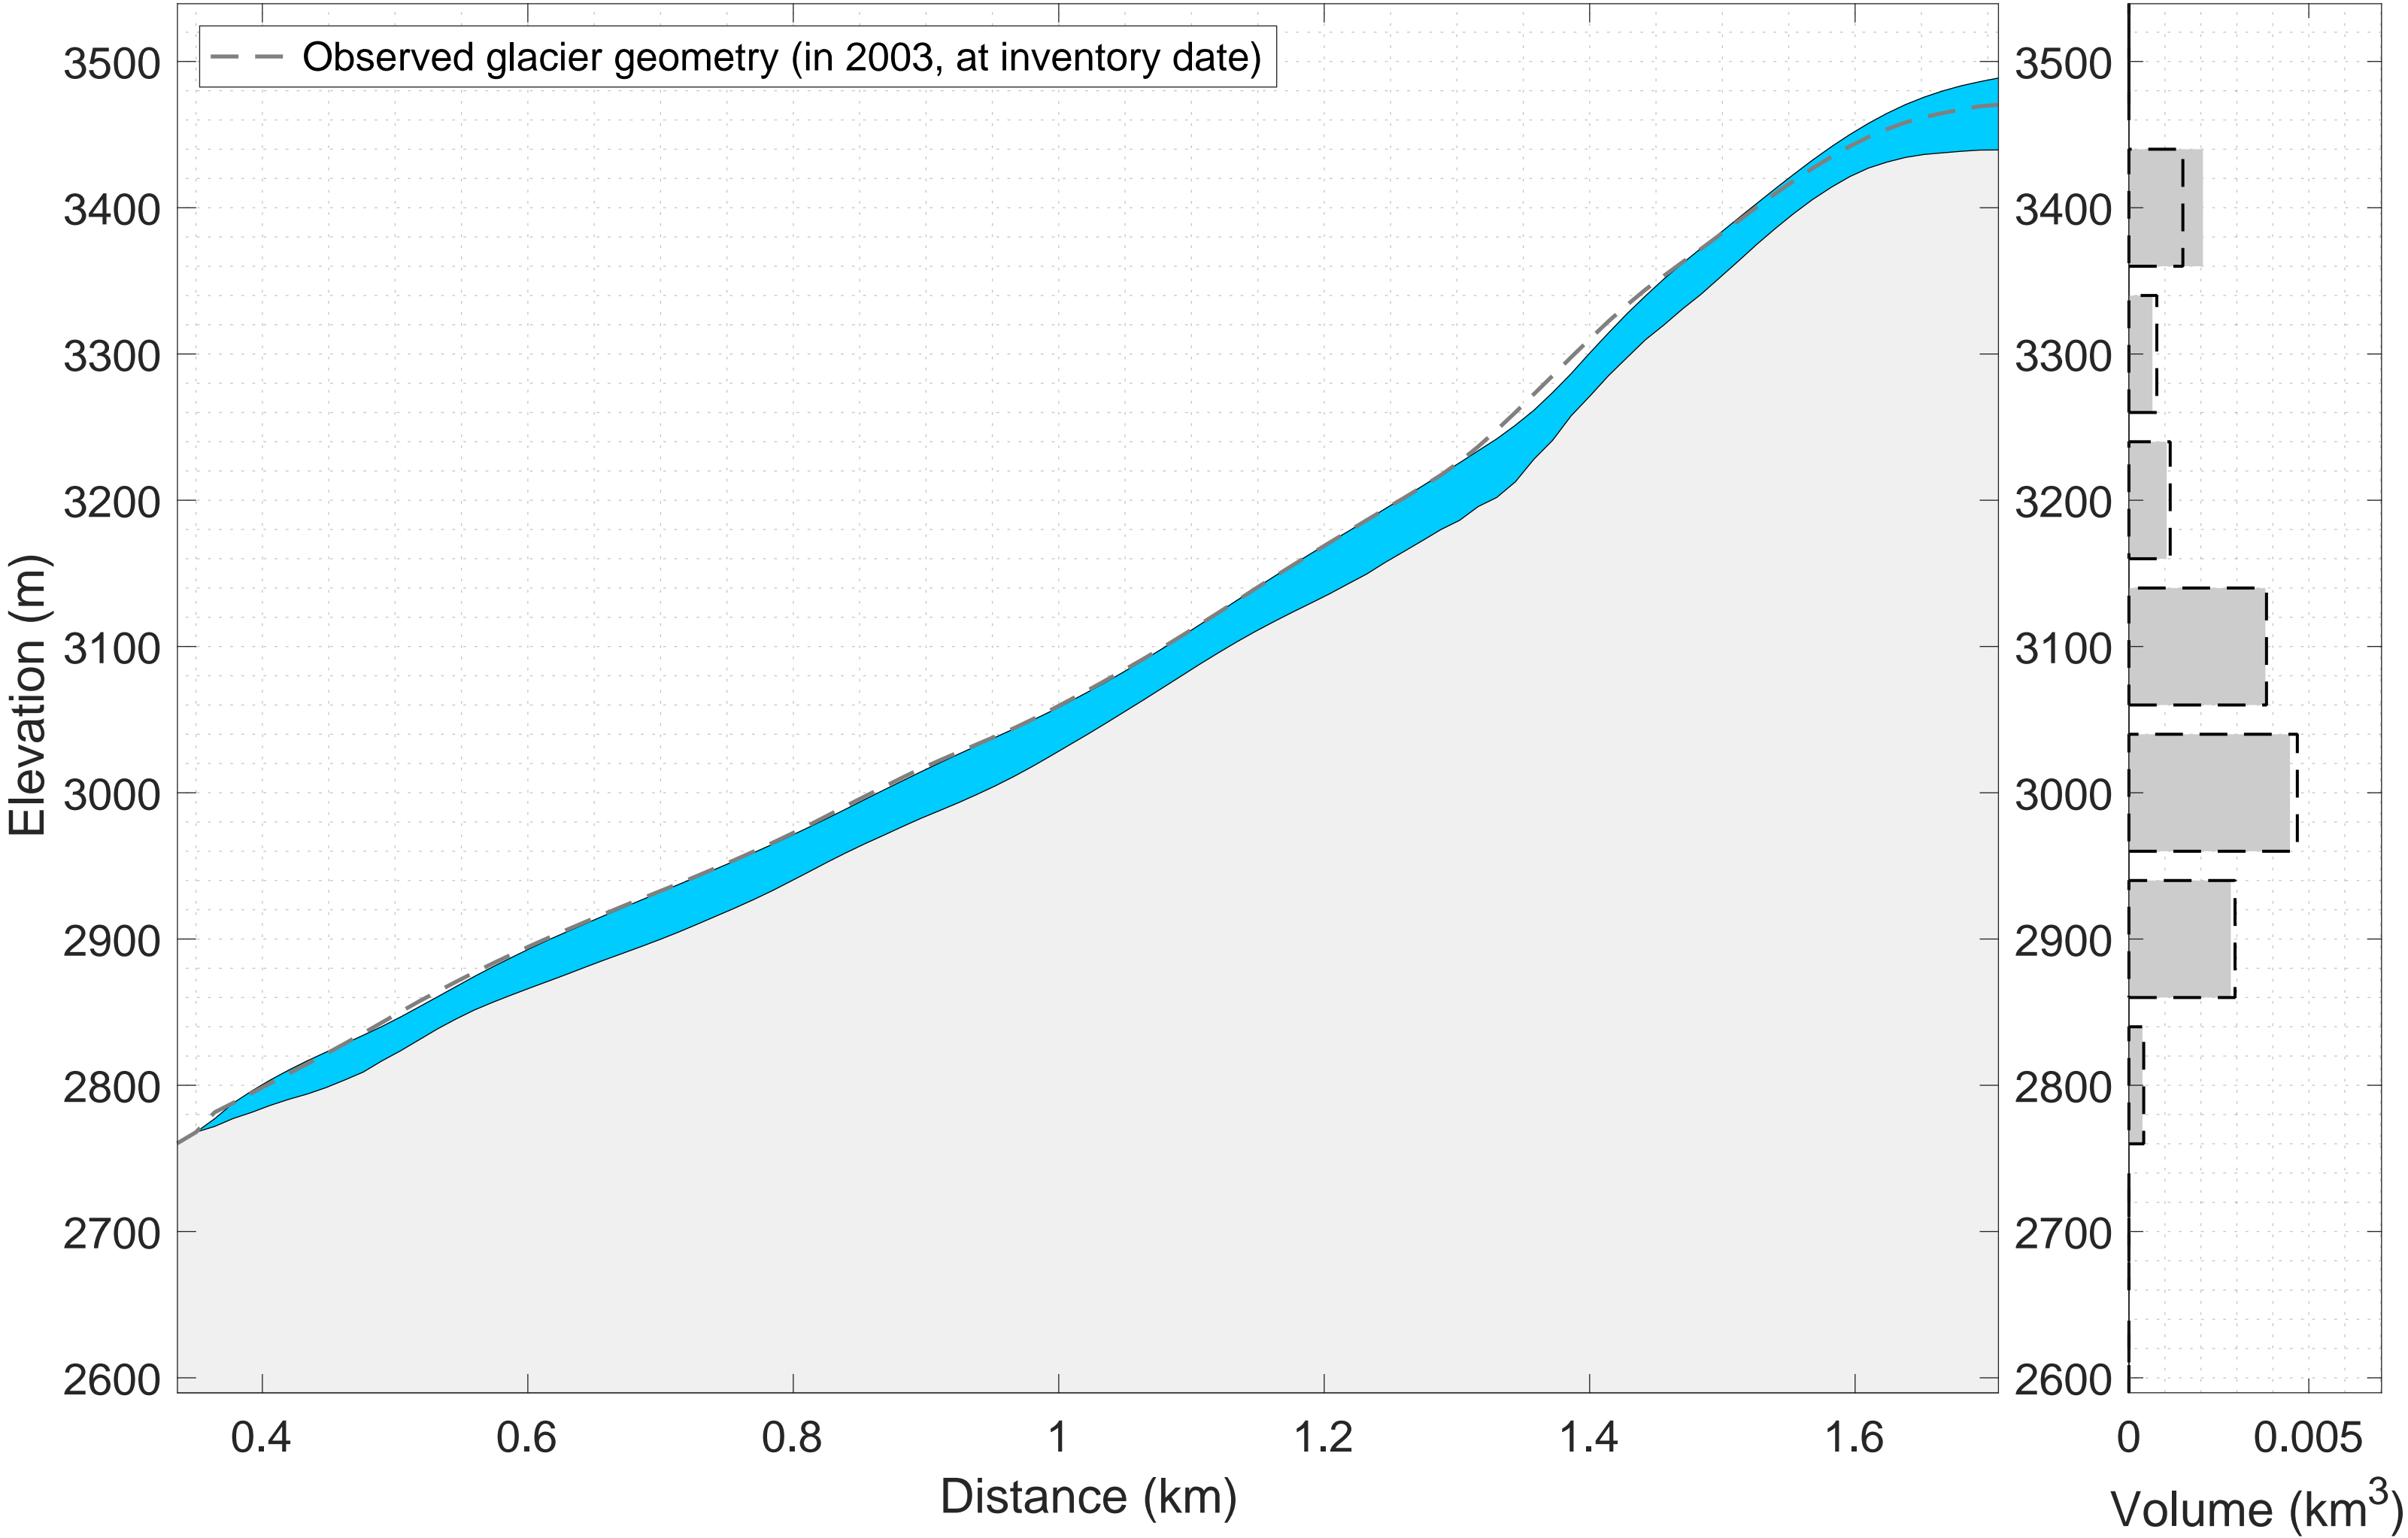

Supplement: Supplementary file 222 [file tc-13-1125-2019-supplement.zip]

**Modelled geometry (Glacier ID = 03699;  $A = 1.5398\text{e-}16 \text{ Pa}^{-3} \text{ a}^{-1}$ ;  $dx = 14 \text{ m}$ )**

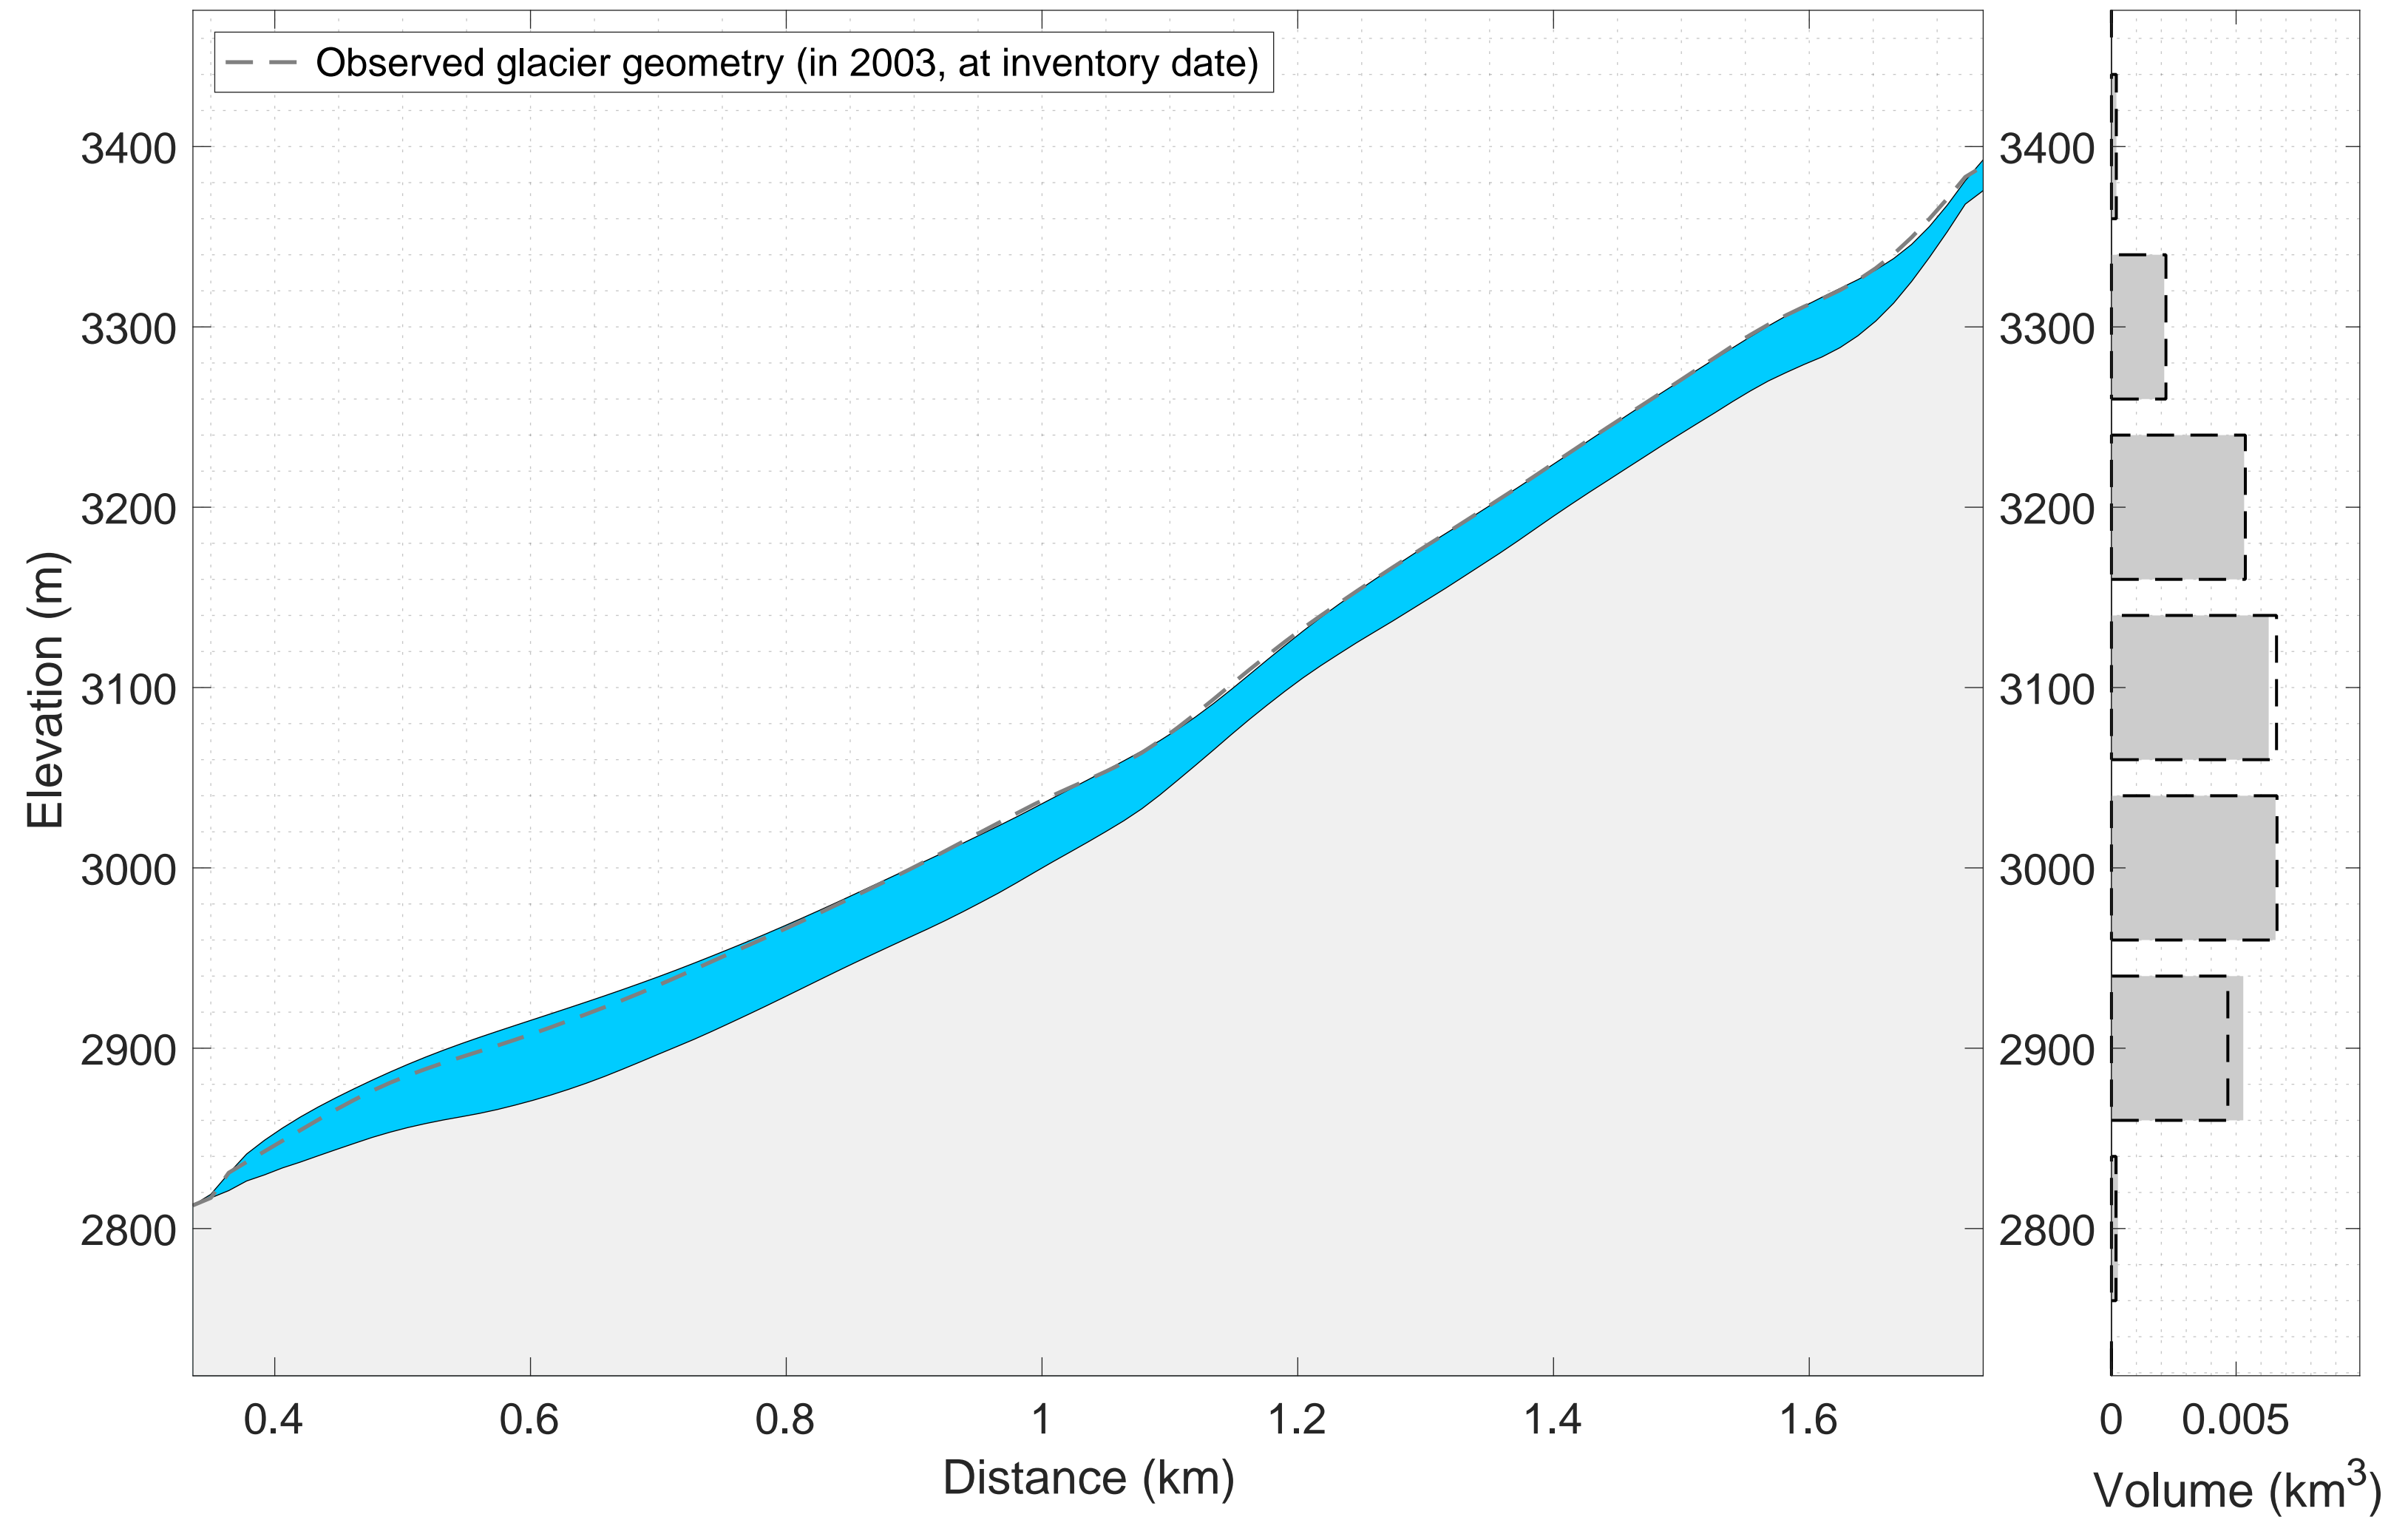

Supplement: Supplementary file 223 [file tc-13-1125-2019-supplement.zip]

**Modelled geometry (Glacier ID = 02803;  $A = 1.6012\text{e-}16 \text{ Pa}^{-3} \text{ a}^{-1}$ ;  $dx = 13 \text{ m}$ )**

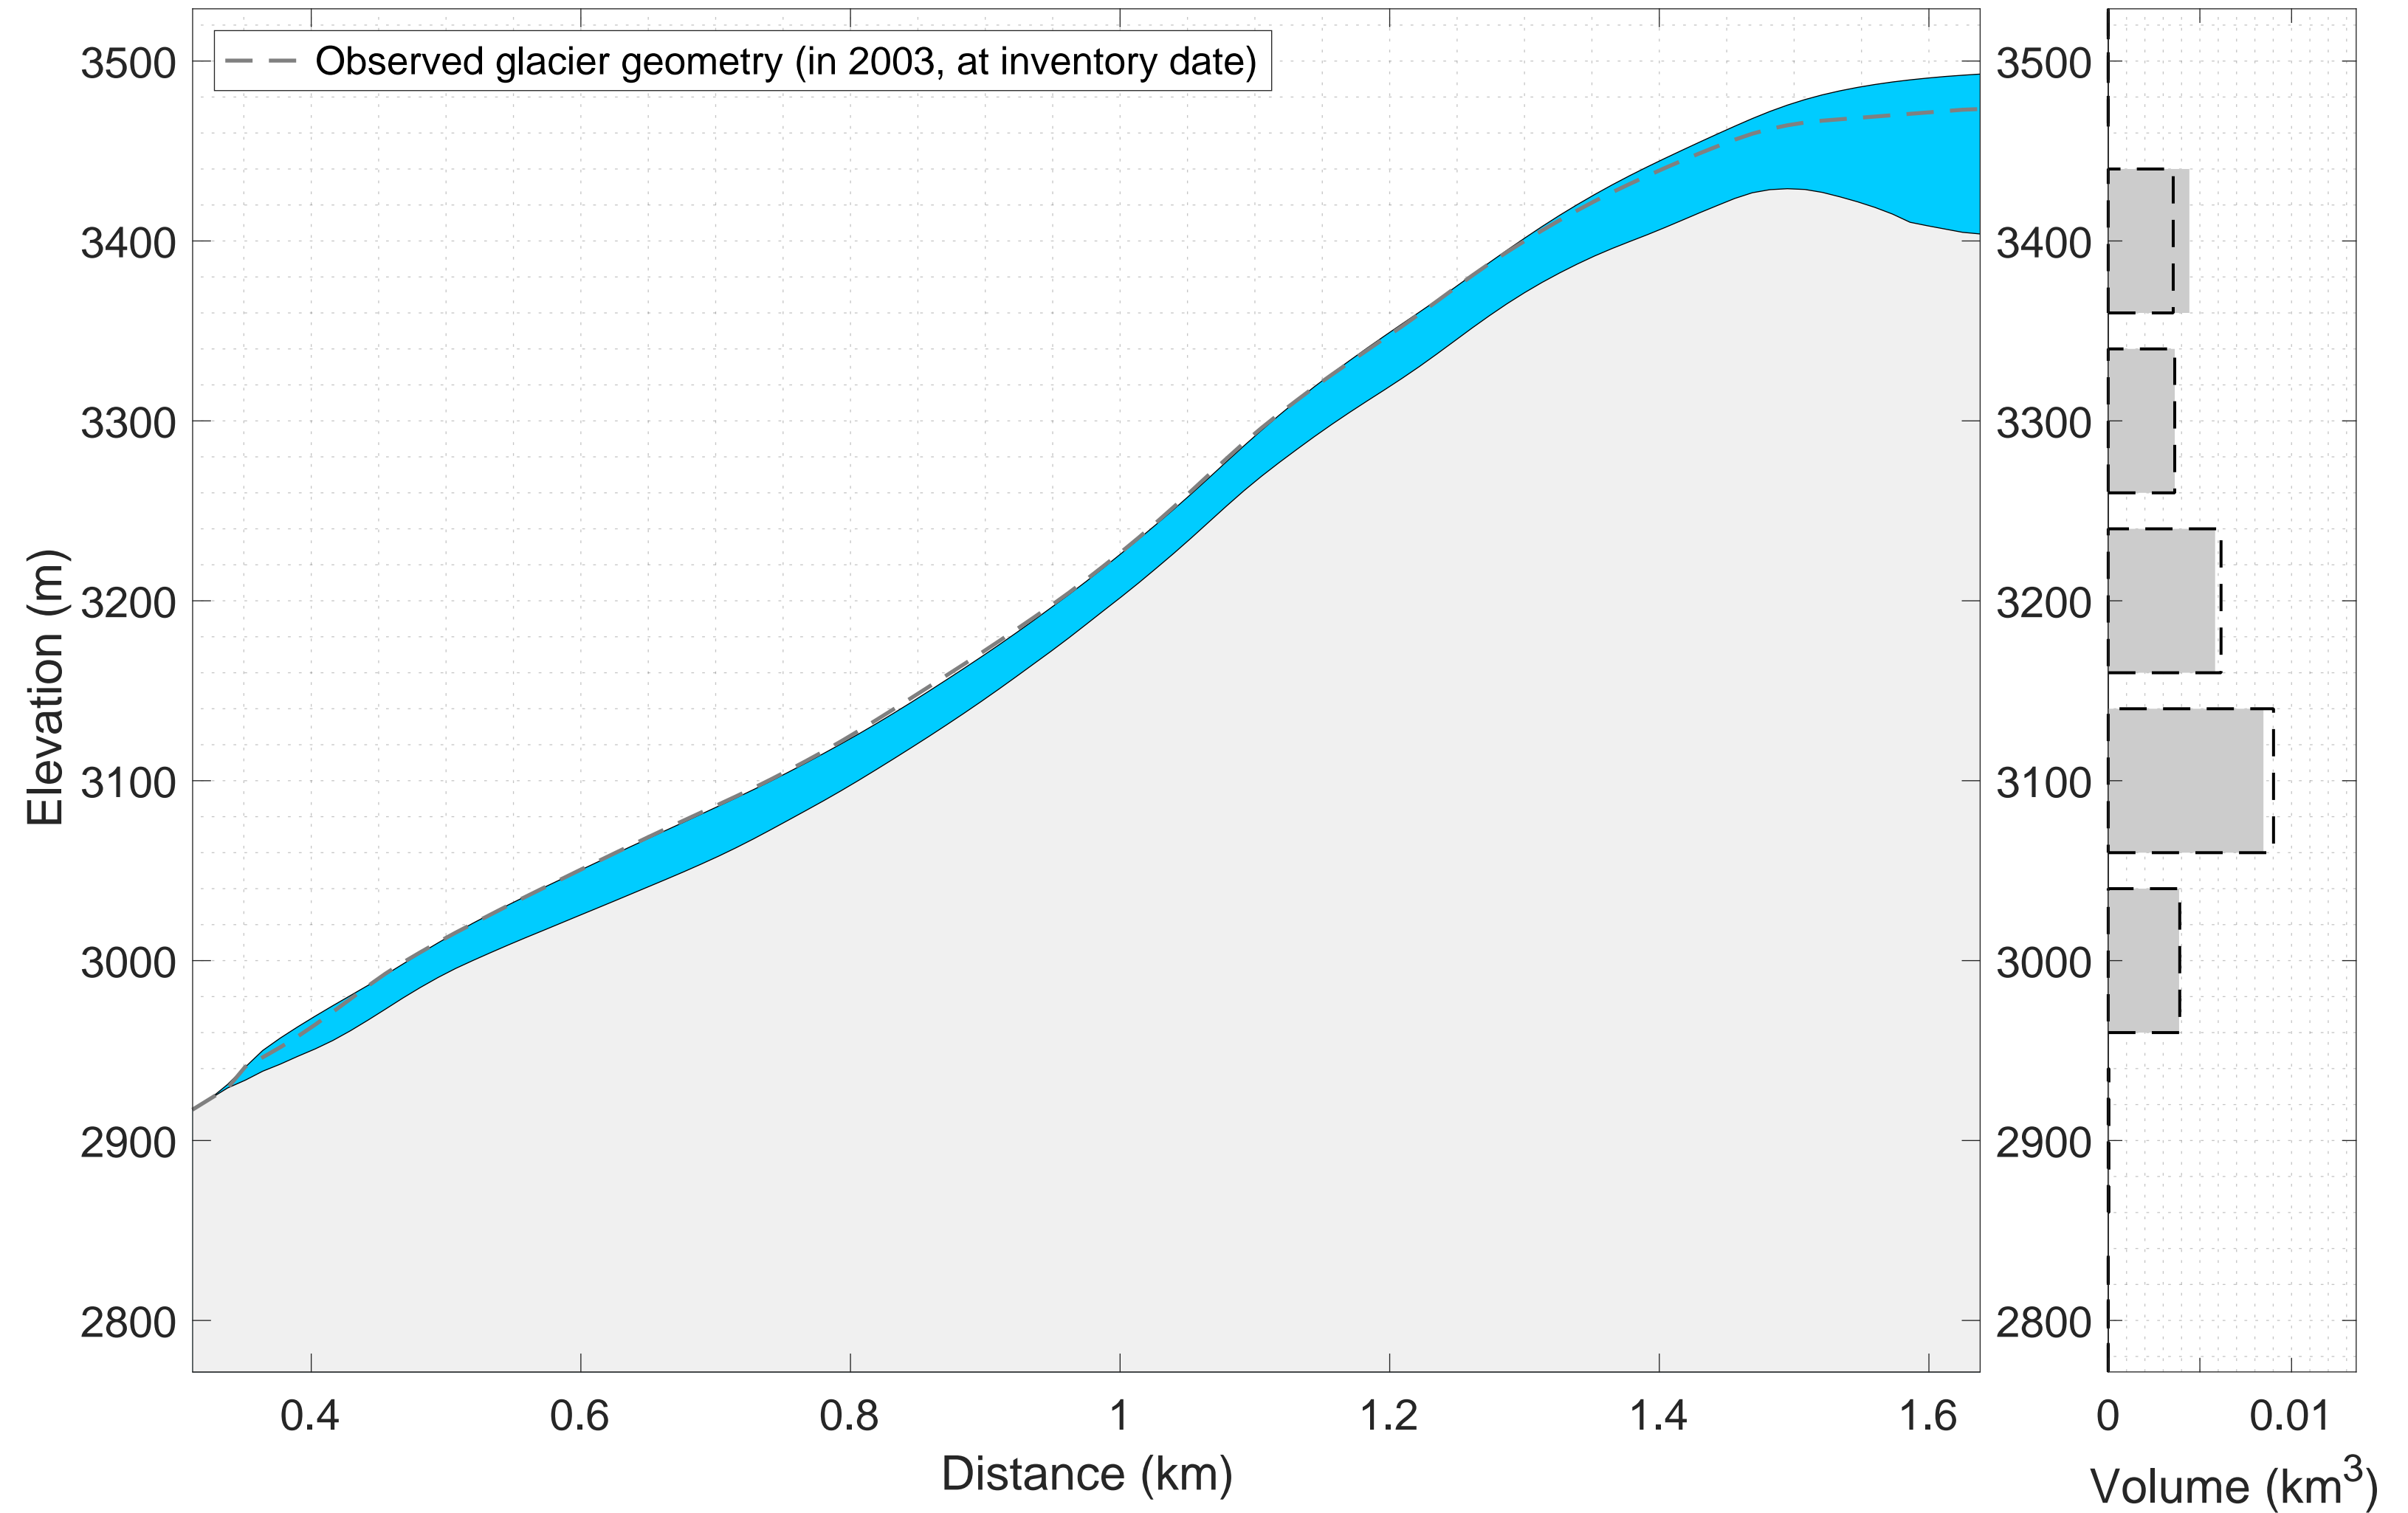

Supplement: Supplementary file 224 [file tc-13-1125-2019-supplement.zip]

**Modelled geometry (Glacier ID = 03261;  $A = 6.8248\text{e-}17 \text{ Pa}^{-3} \text{ a}^{-1}$ ;  $dx = 17 \text{ m}$ )**

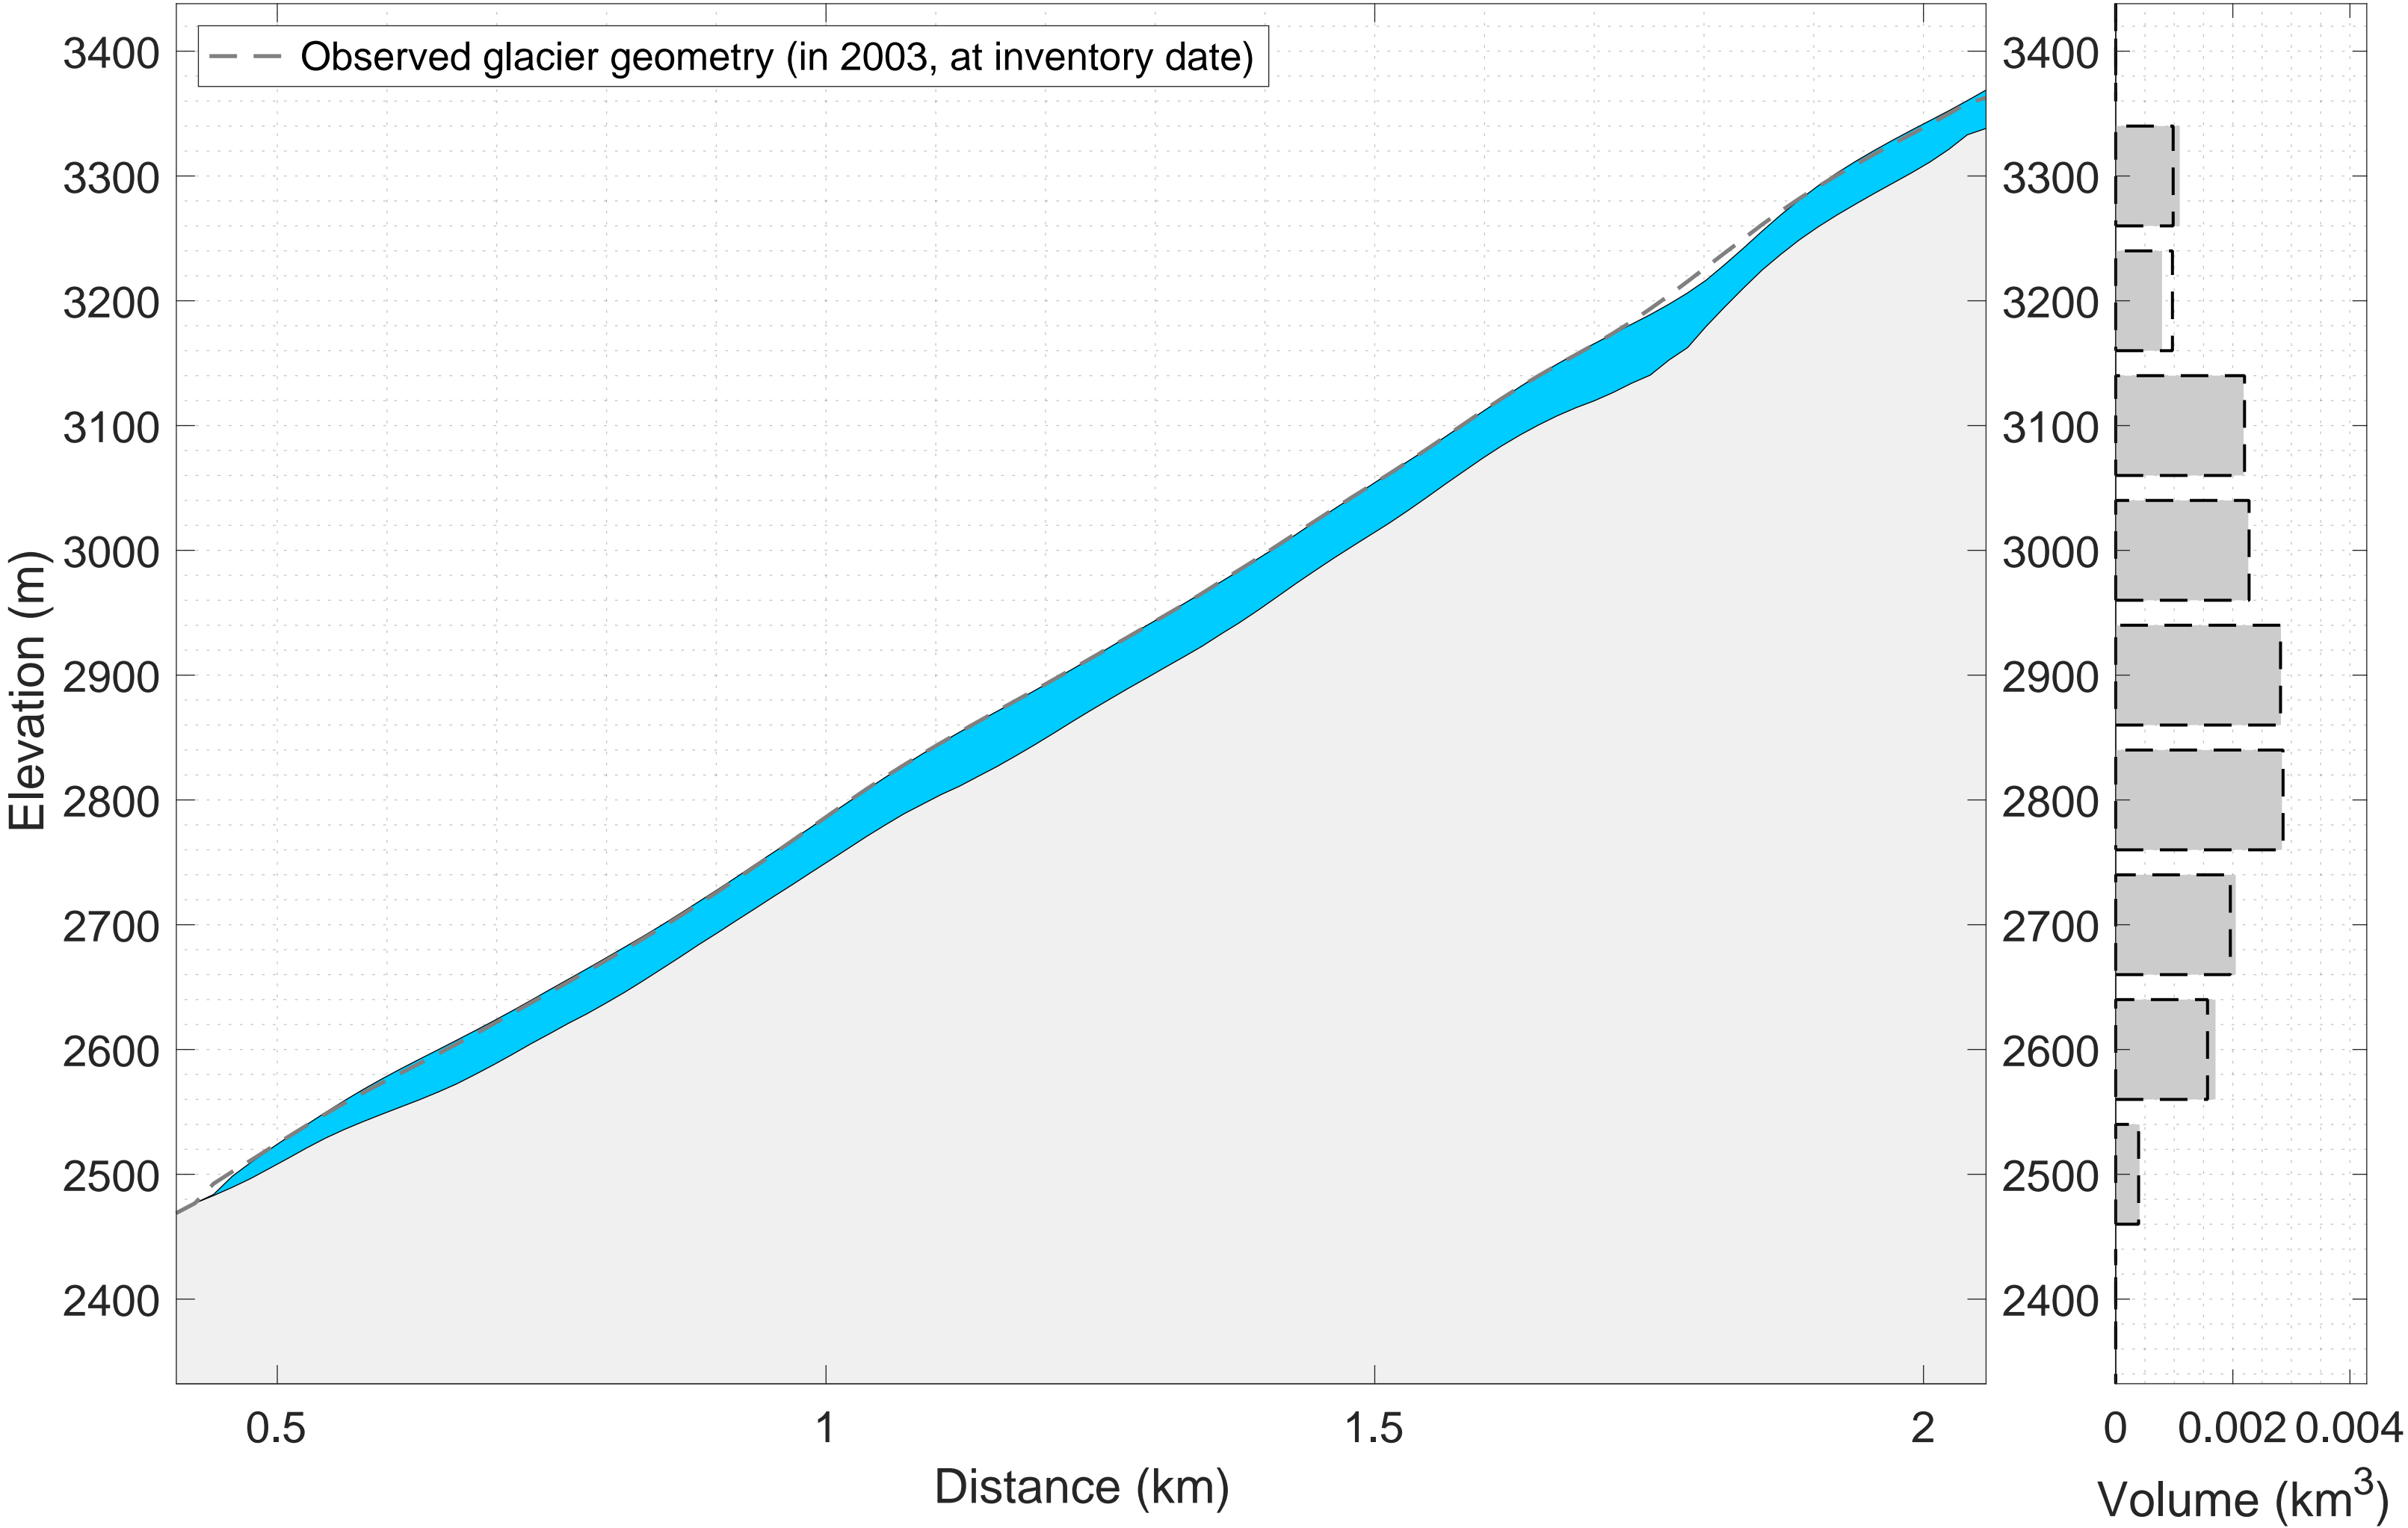

Supplement: Supplementary file 225 [file tc-13-1125-2019-supplement.zip]

**Modelled geometry (Glacier ID = 00289;  $A = 3.4739\text{e-}16 \text{ Pa}^{-3} \text{ a}^{-1}$ ;  $dx = 13 \text{ m}$ )**

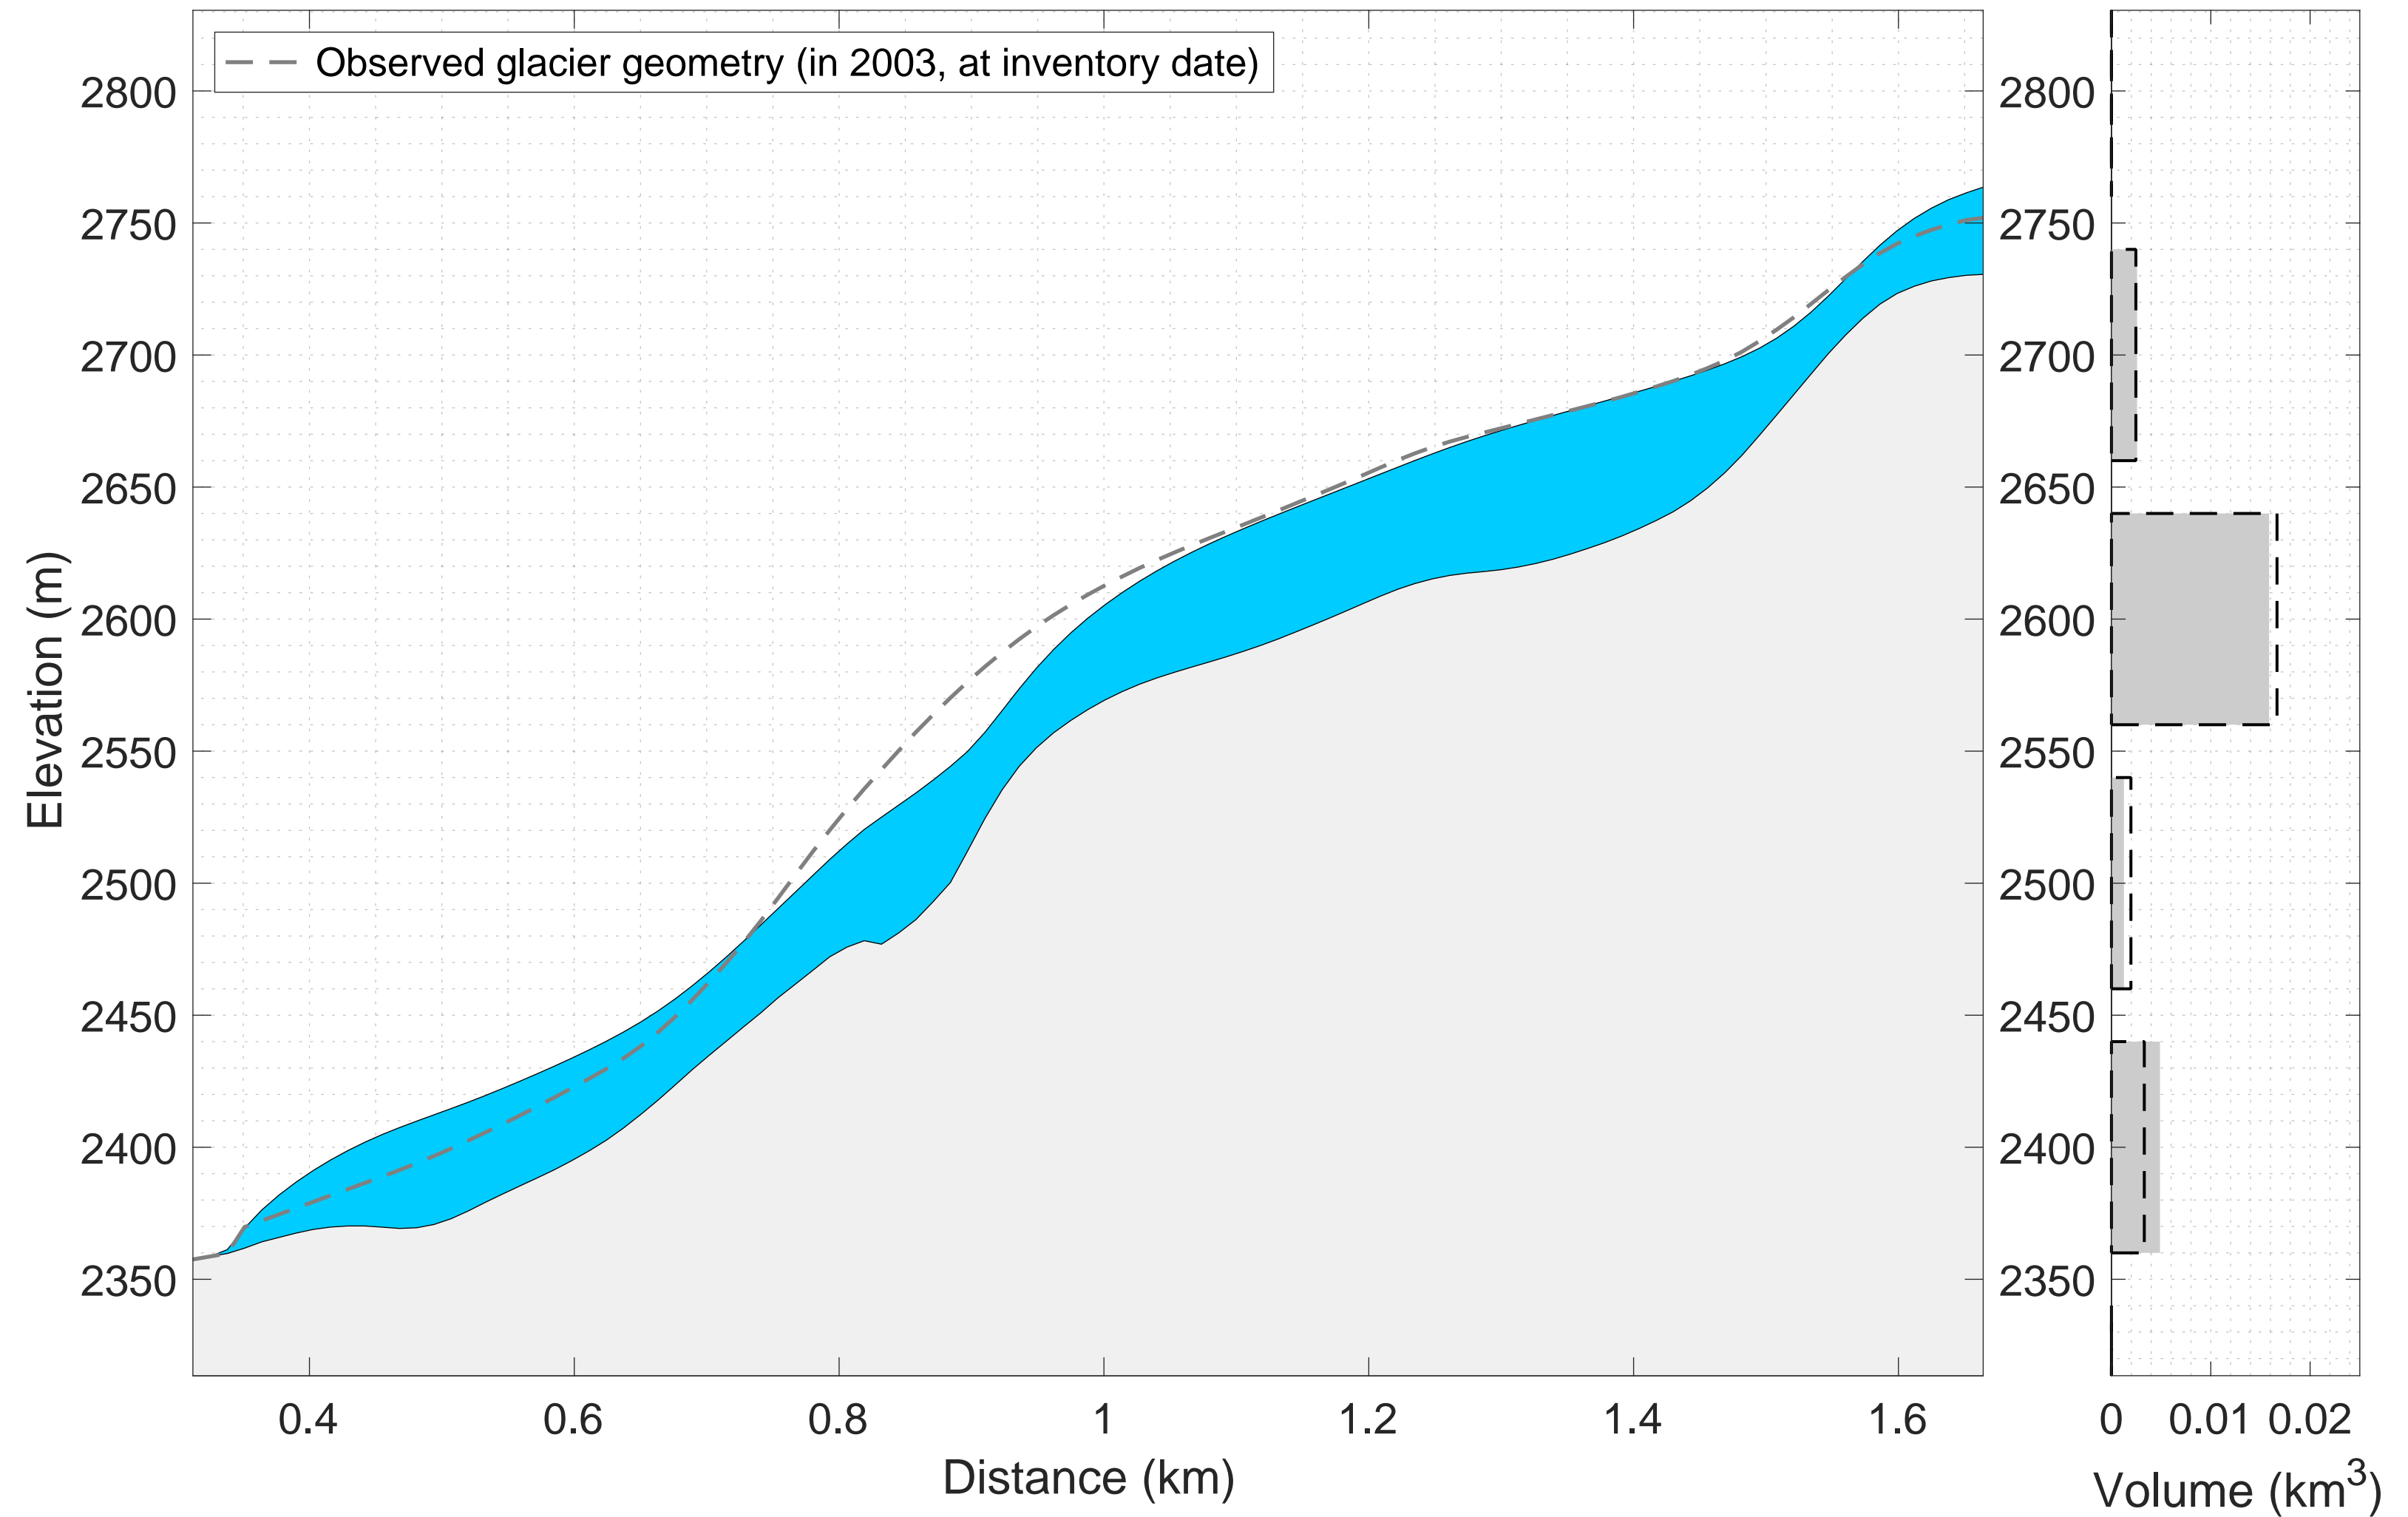

Supplement: Supplementary file 226 [file tc-13-1125-2019-supplement.zip]

**Modelled geometry (Glacier ID = 00674;  $A = 9.3371\text{e-}17 \text{ Pa}^{-3} \text{ a}^{-1}$ ;  $dx = 15 \text{ m}$ )**

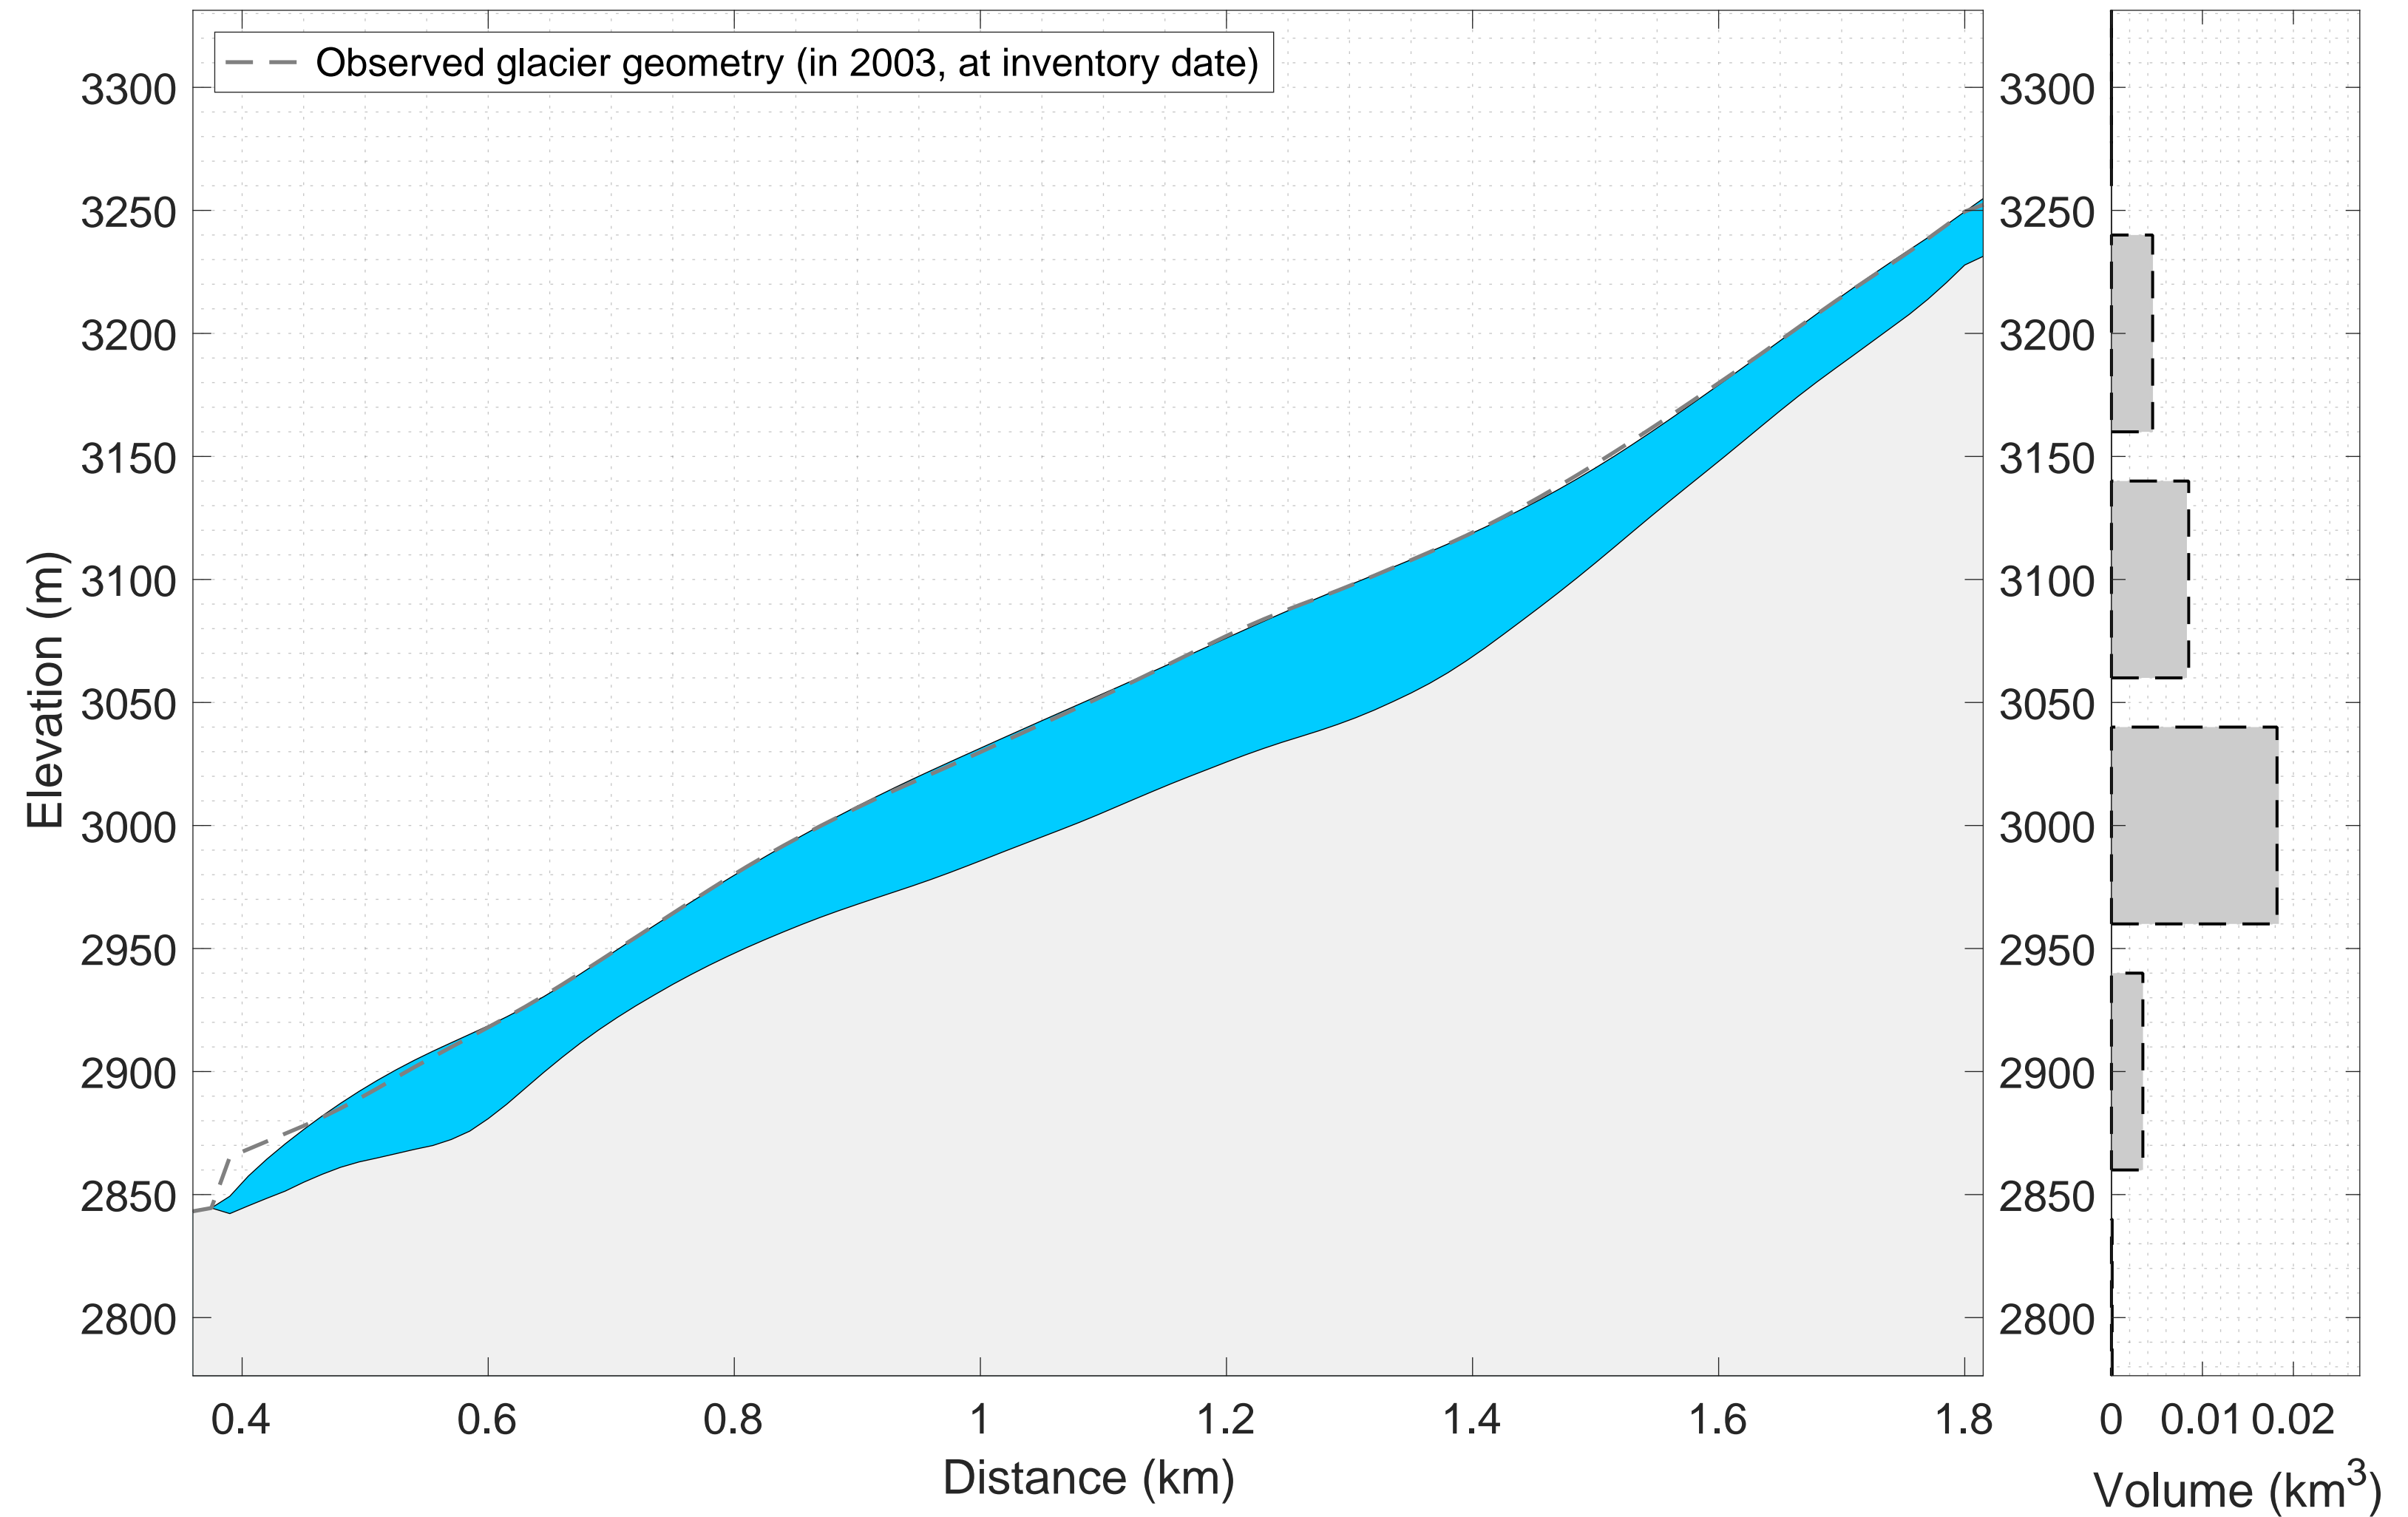

Supplement: Supplementary file 227 [file tc-13-1125-2019-supplement.zip]

**Modelled geometry (Glacier ID = 01934;  $A = 6.7105\text{e-}17 \text{ Pa}^{-3} \text{ a}^{-1}$ ;  $dx = 30 \text{ m}$ )**

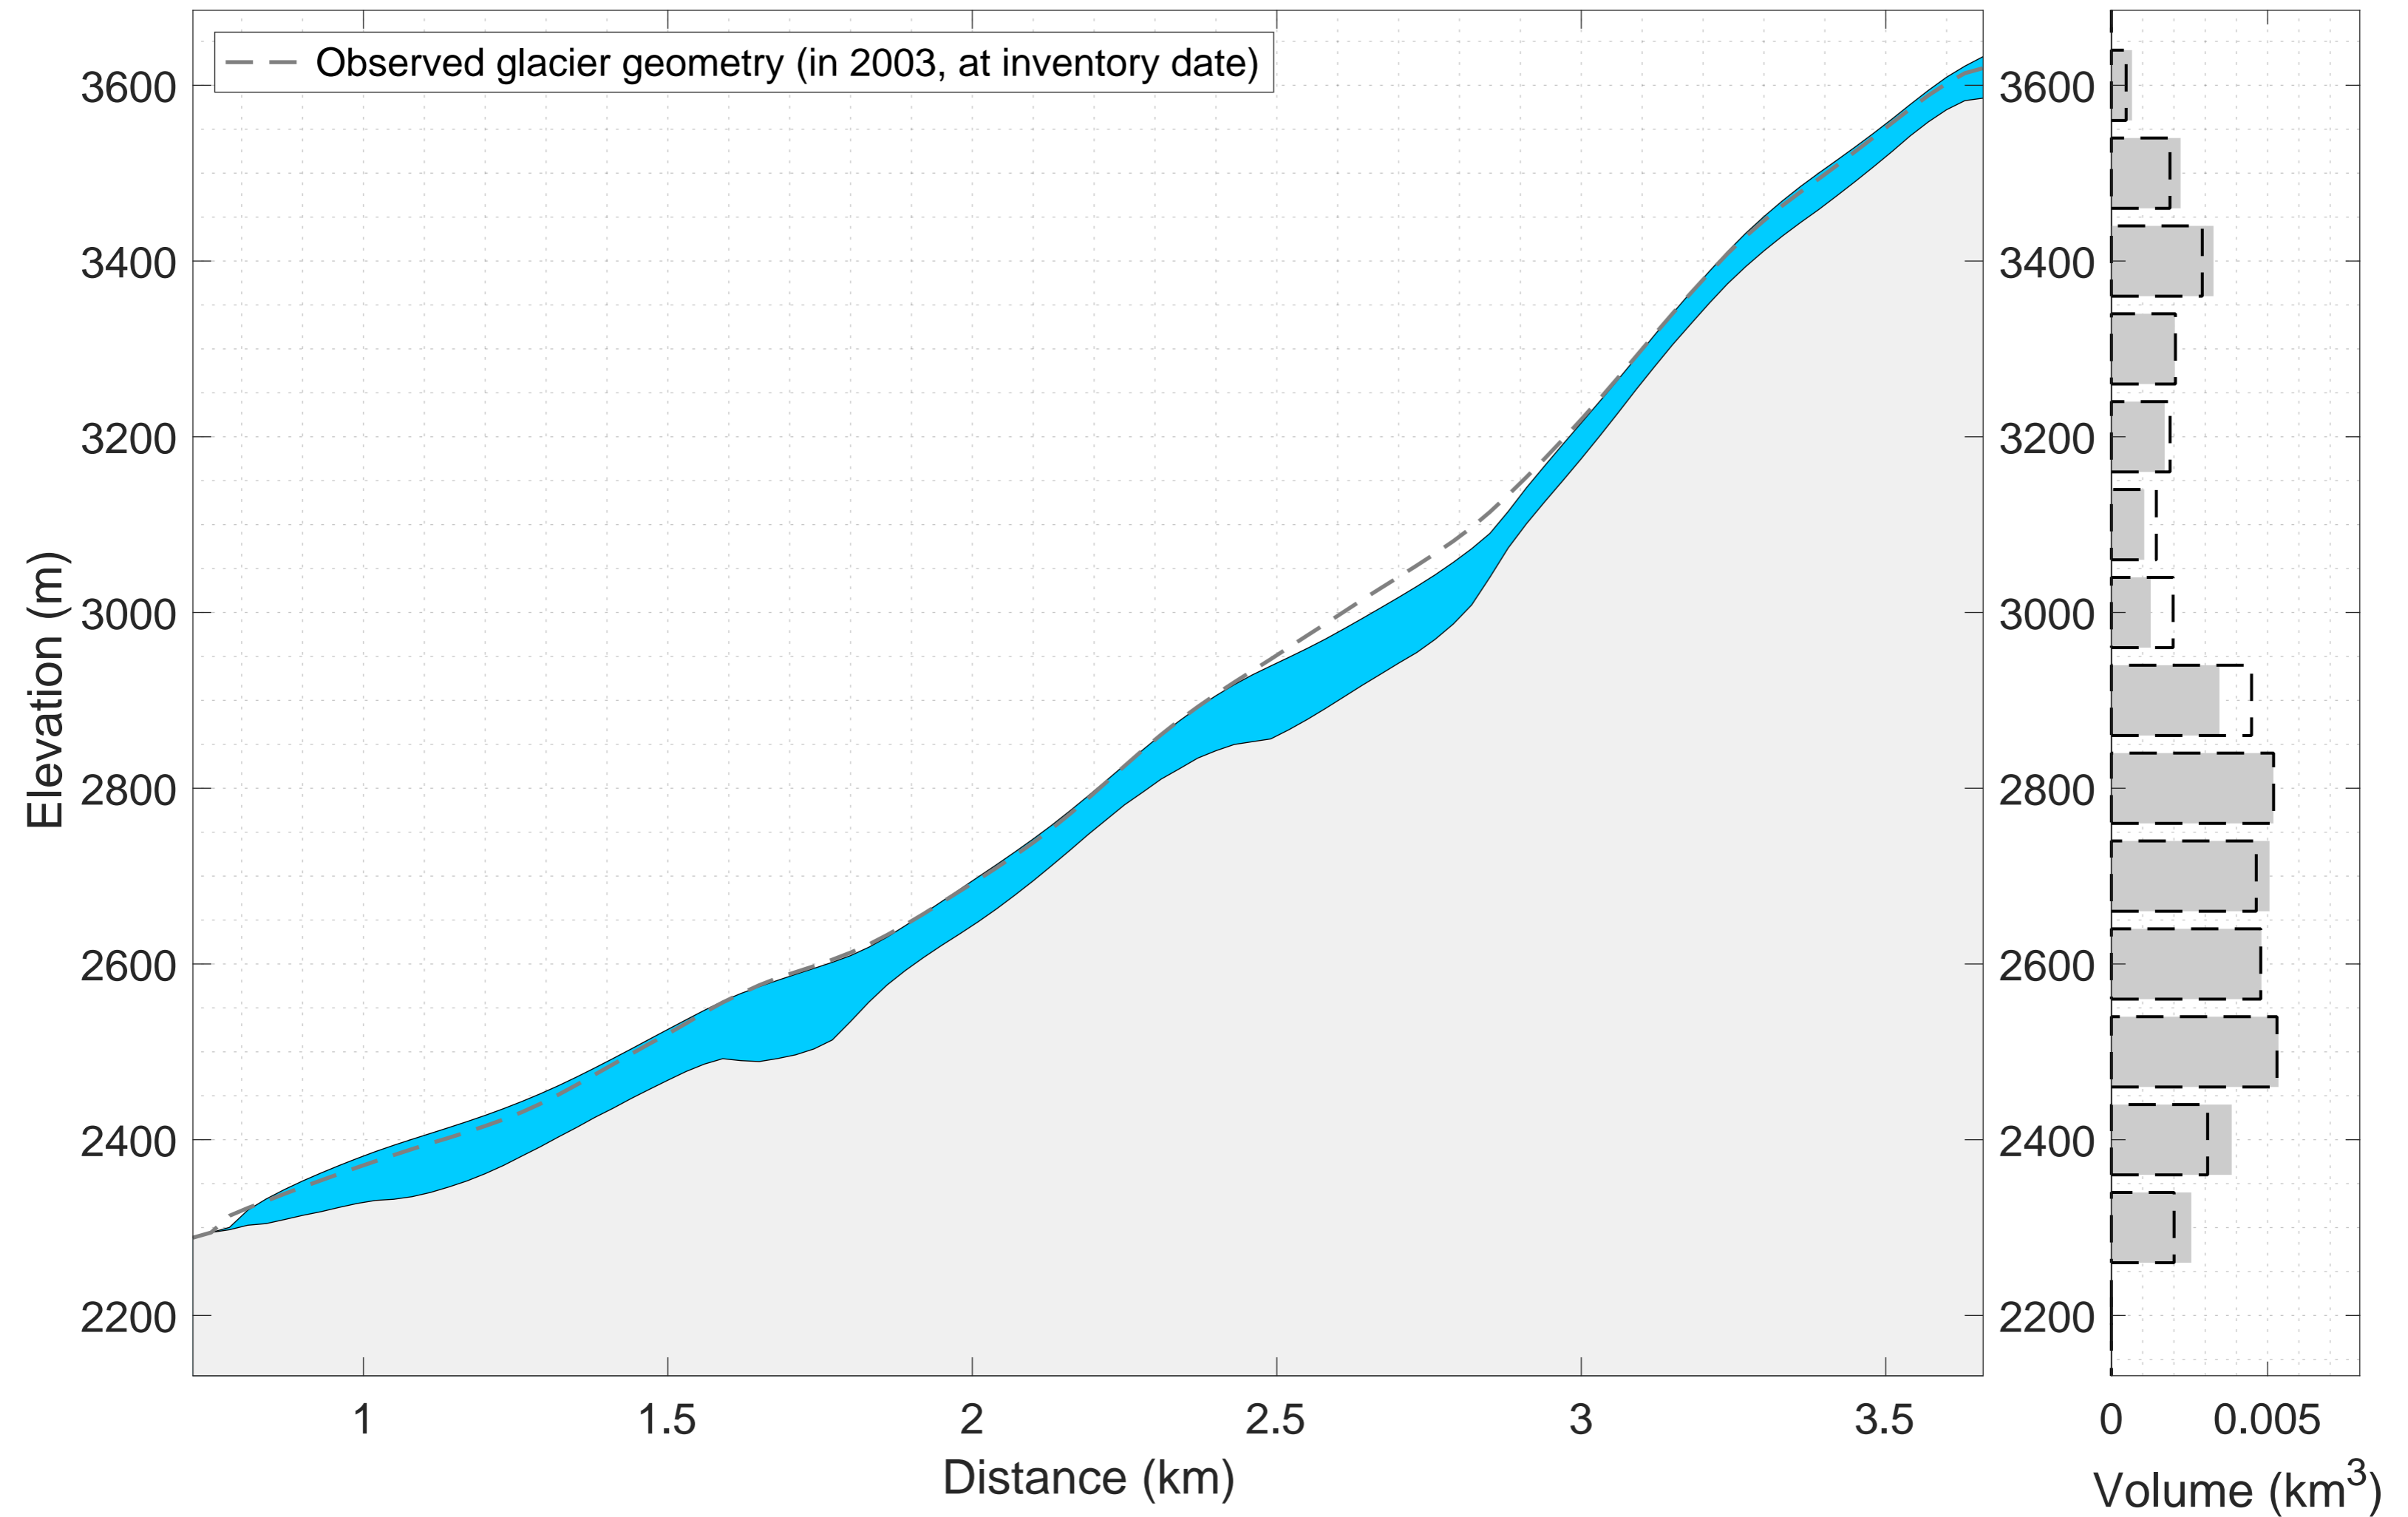

Supplement: Supplementary file 228 [file tc-13-1125-2019-supplement.zip]

**Modelled geometry (Glacier ID = 00348;  $A = 7.6266\text{e-}17 \text{ Pa}^{-3} \text{ a}^{-1}$ ;  $dx = 14 \text{ m}$ )**

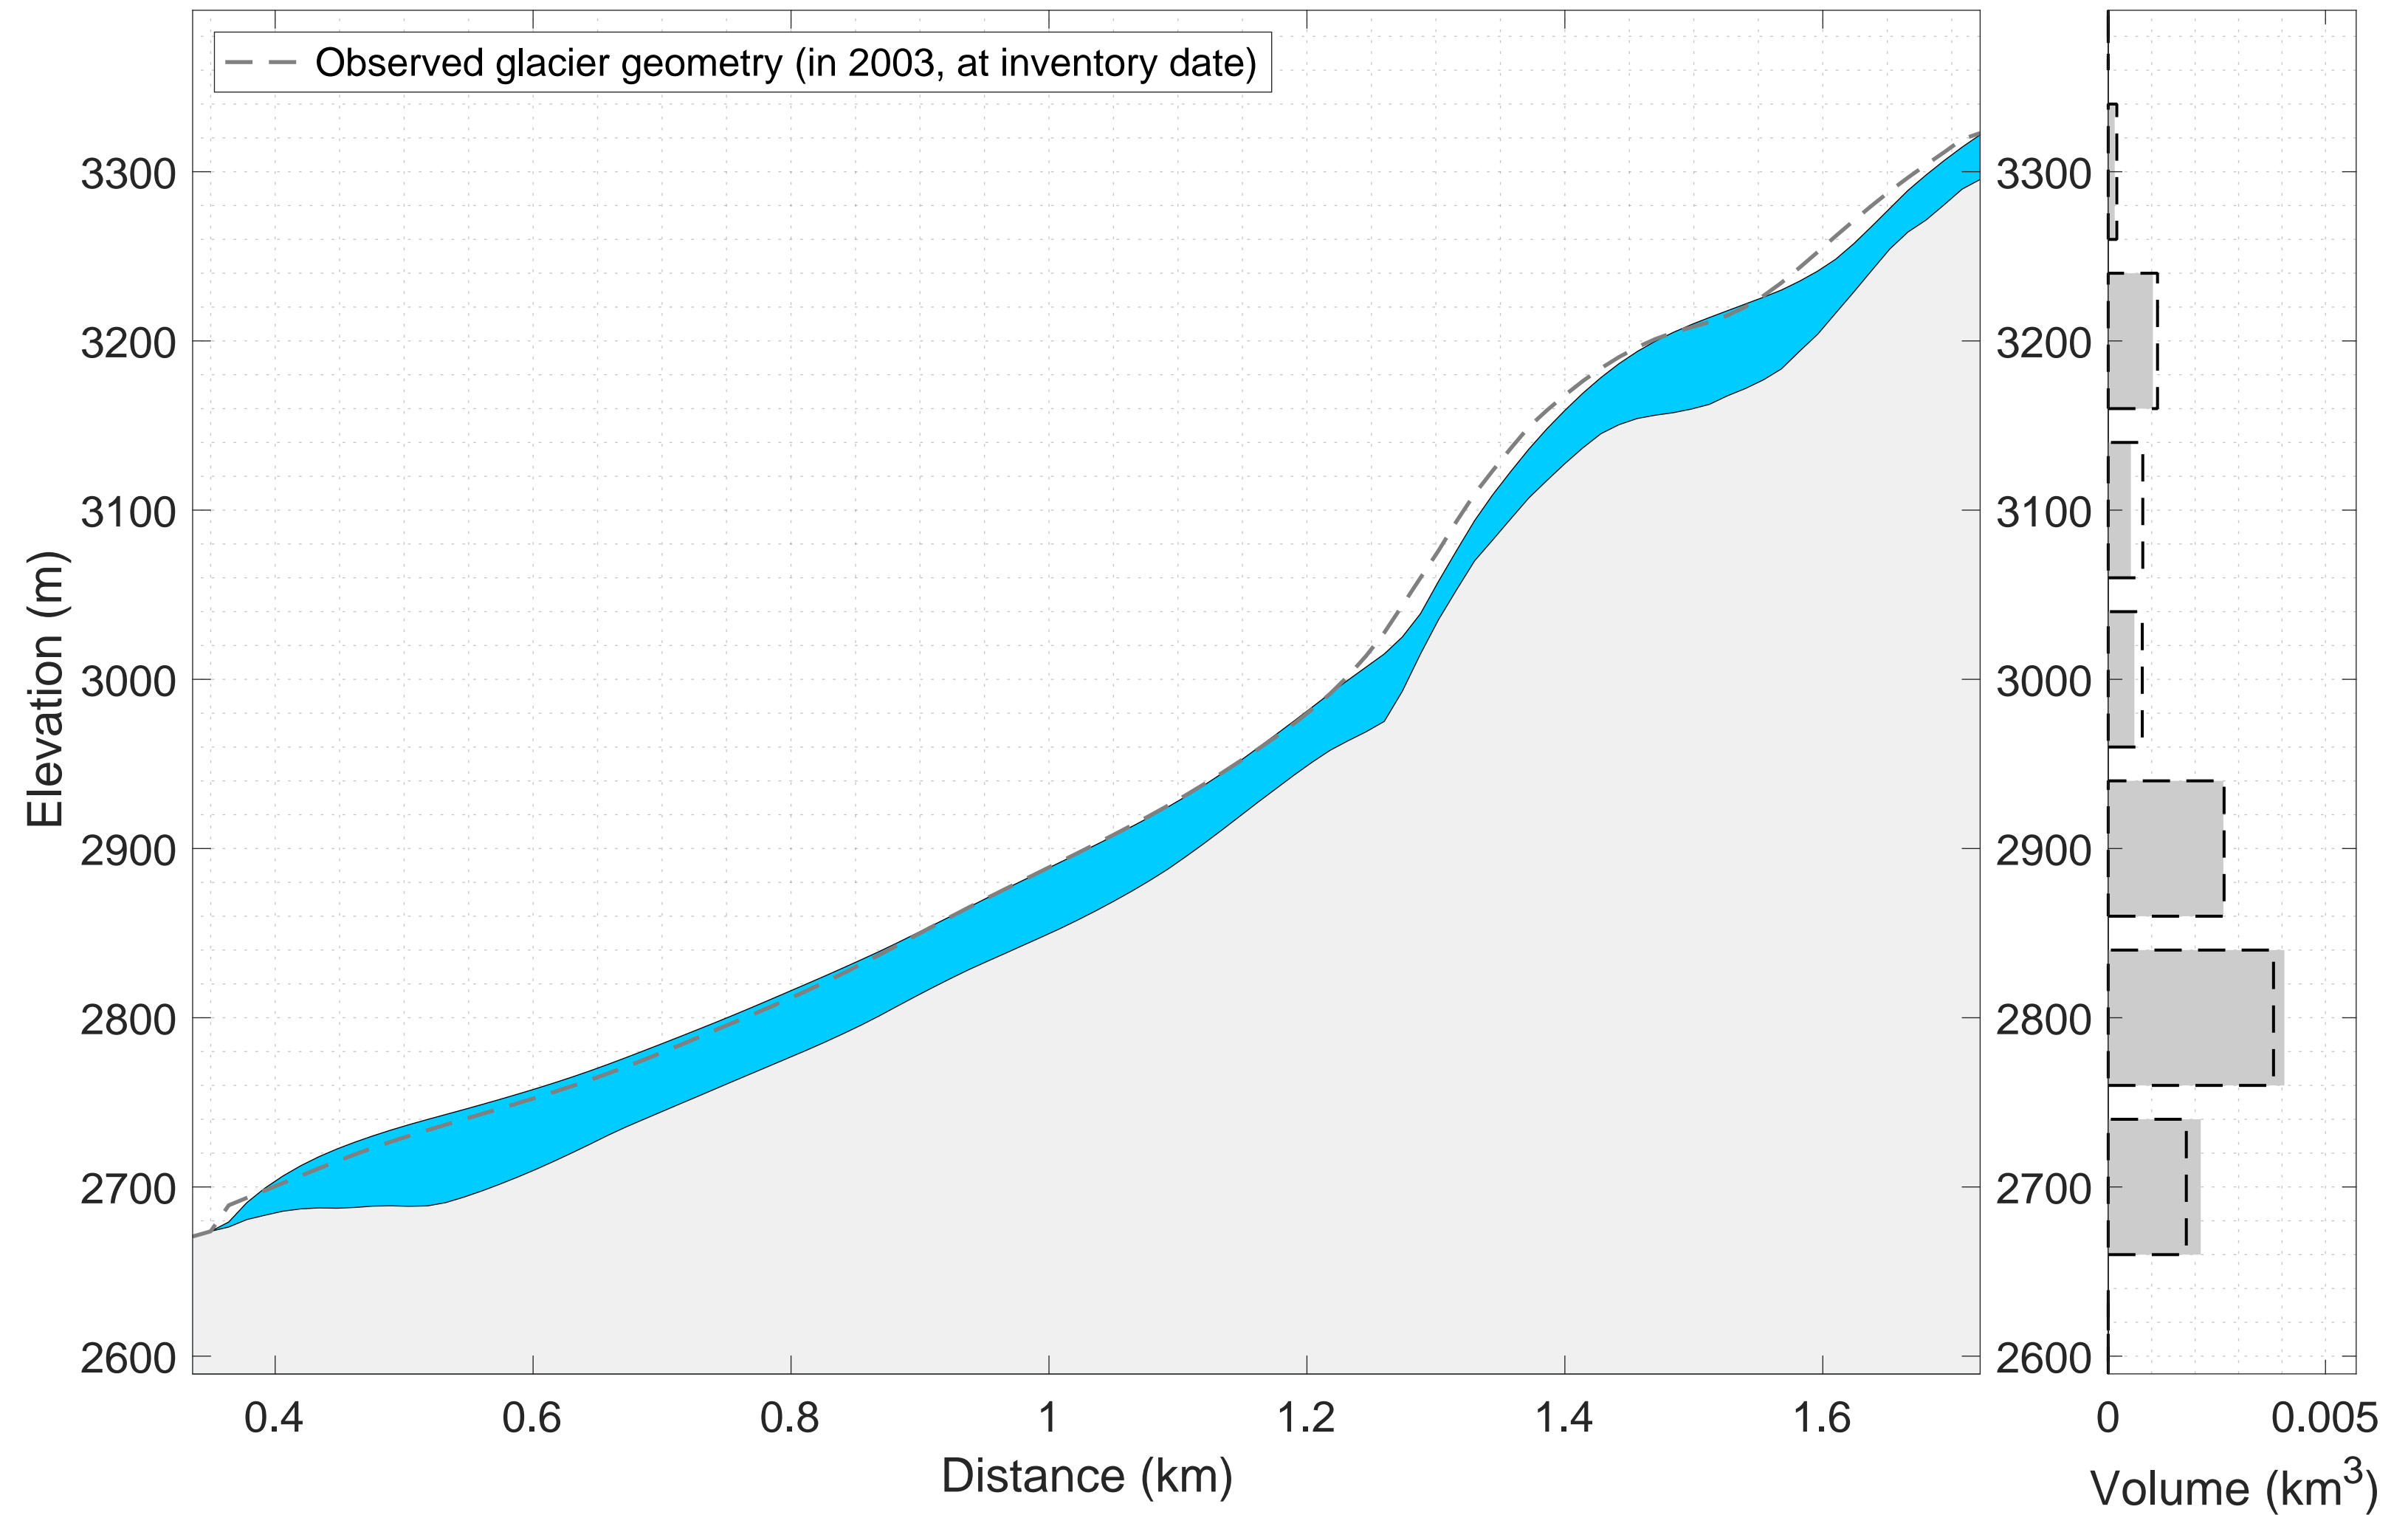

Supplement: Supplementary file 229 [file tc-13-1125-2019-supplement.zip]

**Modelled geometry (Glacier ID = 03813;  $A = 2.0274\text{e-}16 \text{ Pa}^{-3} \text{ a}^{-1}$ ;  $dx = 18 \text{ m}$ )**

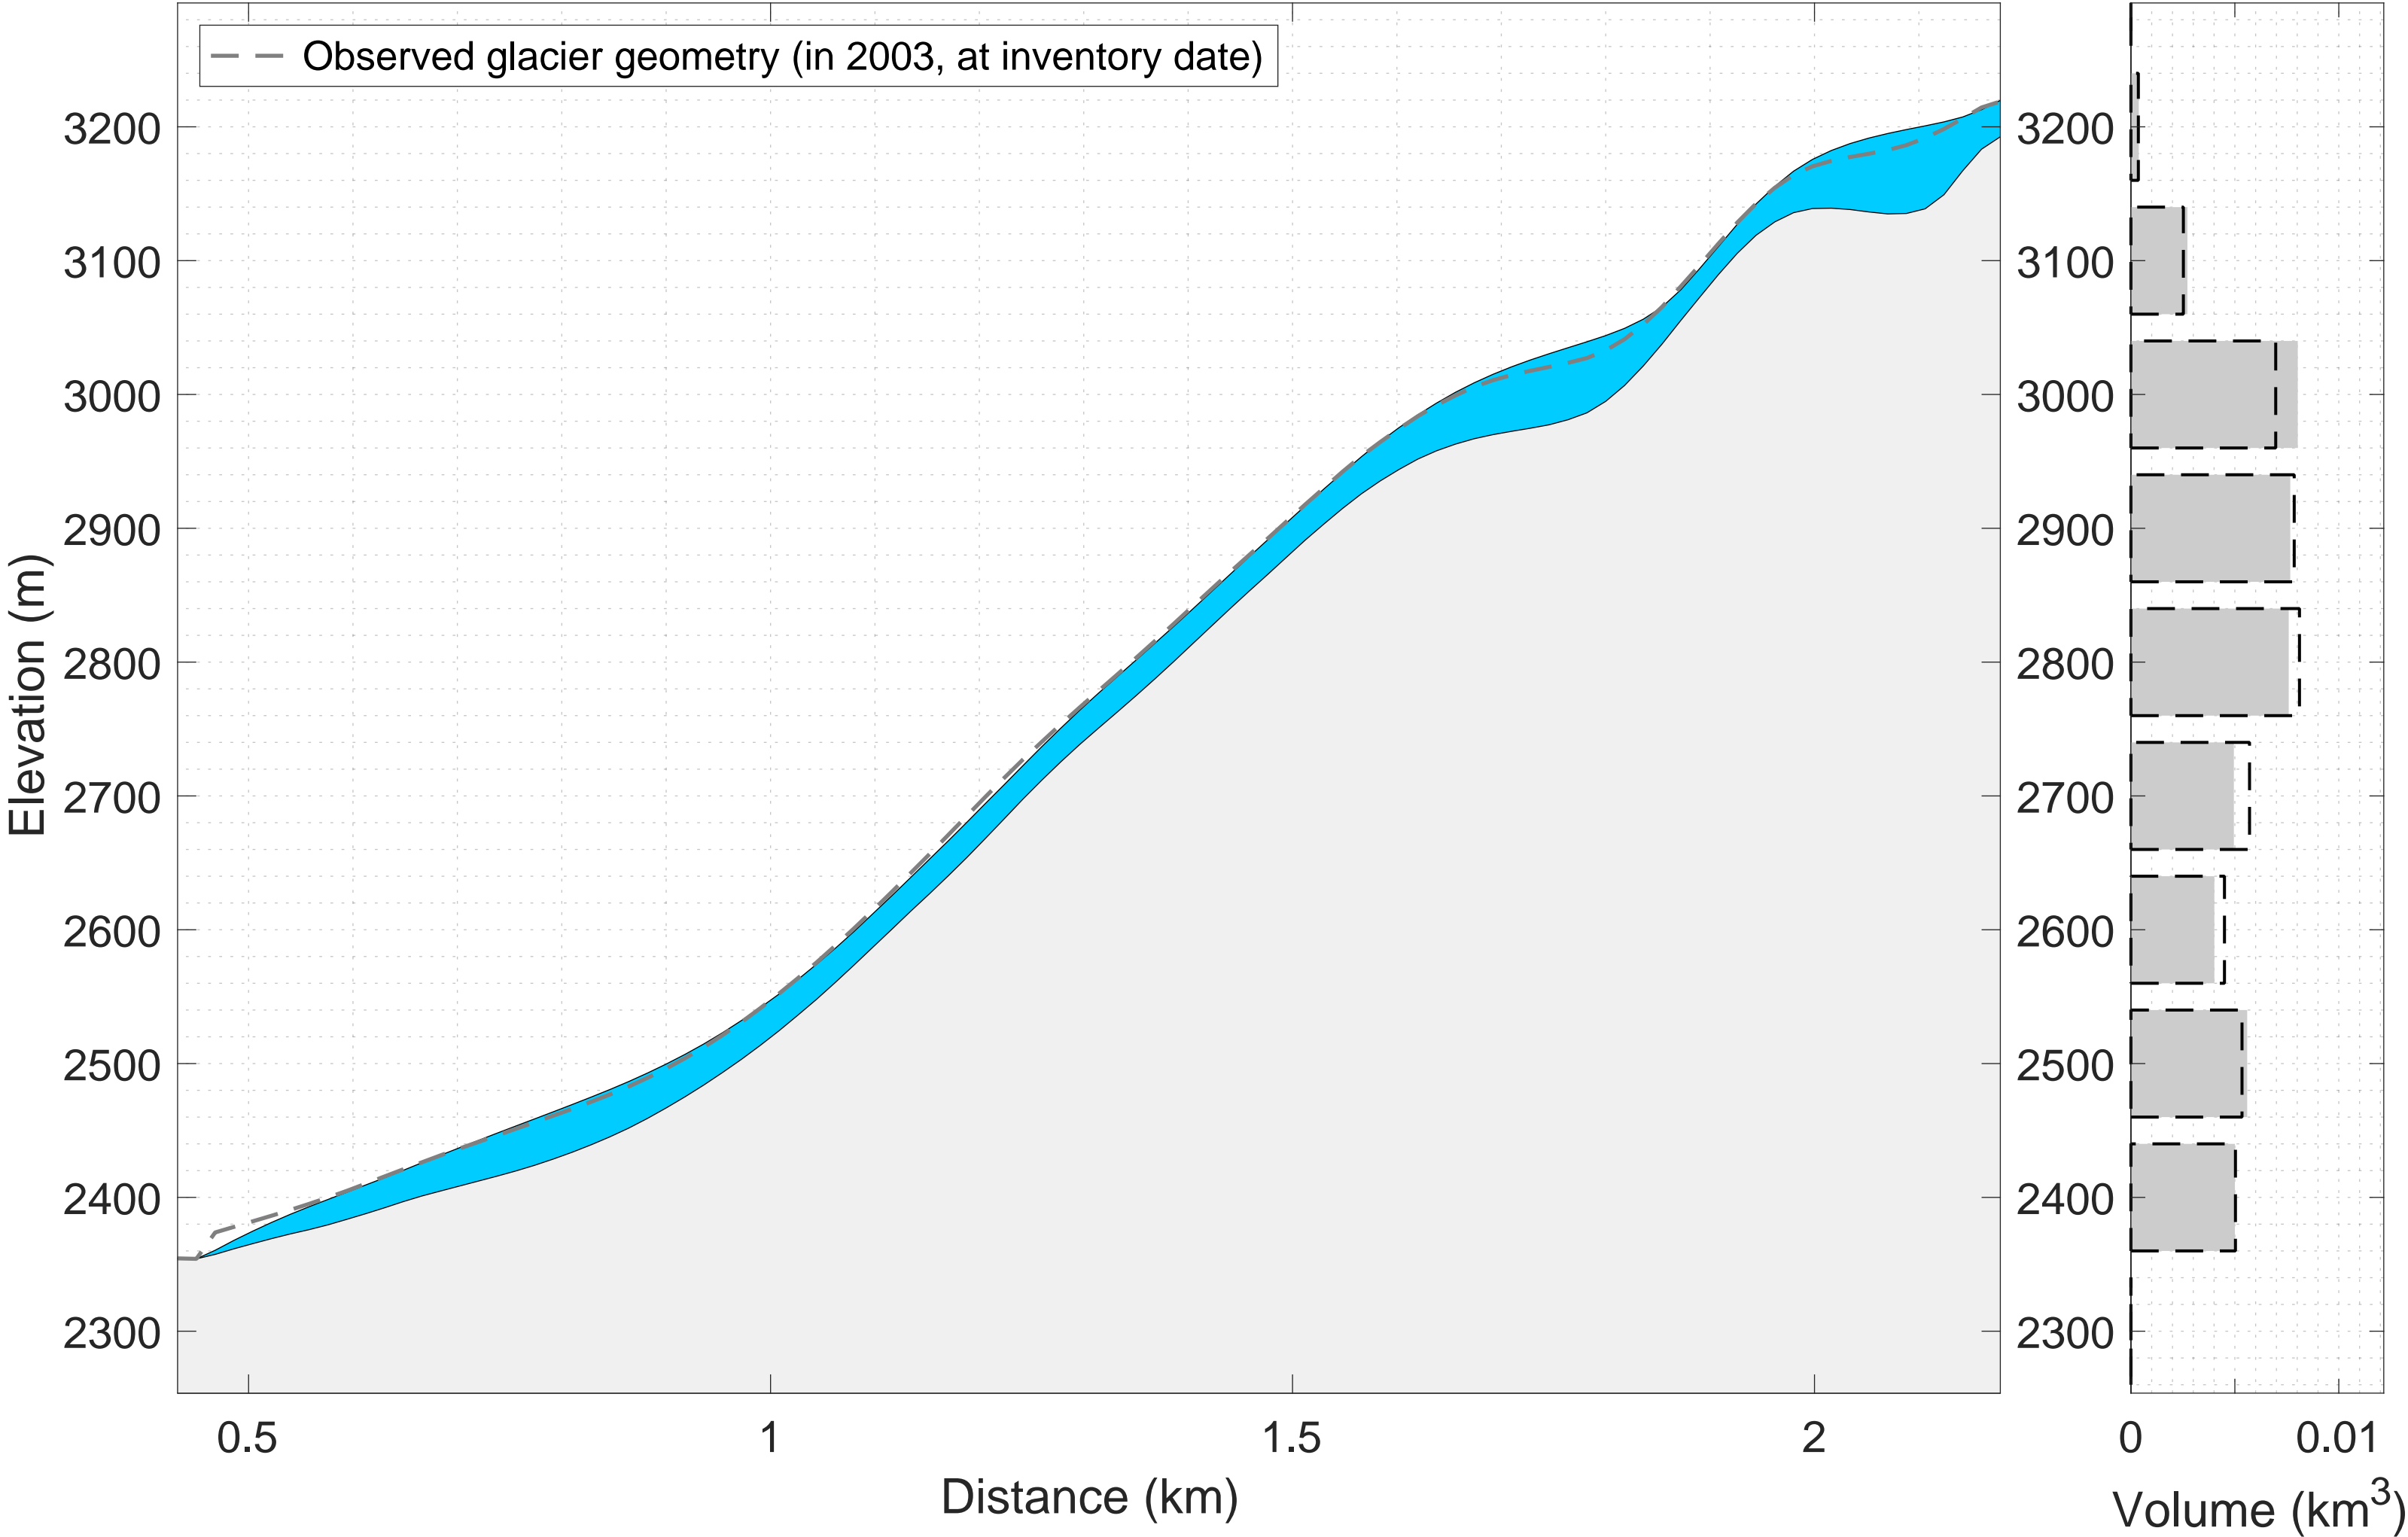

Supplement: Supplementary file 230 [file tc-13-1125-2019-supplement.zip]

**Modelled geometry (Glacier ID = 01237;  $A = 1.4132\text{e-}16 \text{ Pa}^{-3} \text{ a}^{-1}$ ;  $dx = 24 \text{ m}$ )**

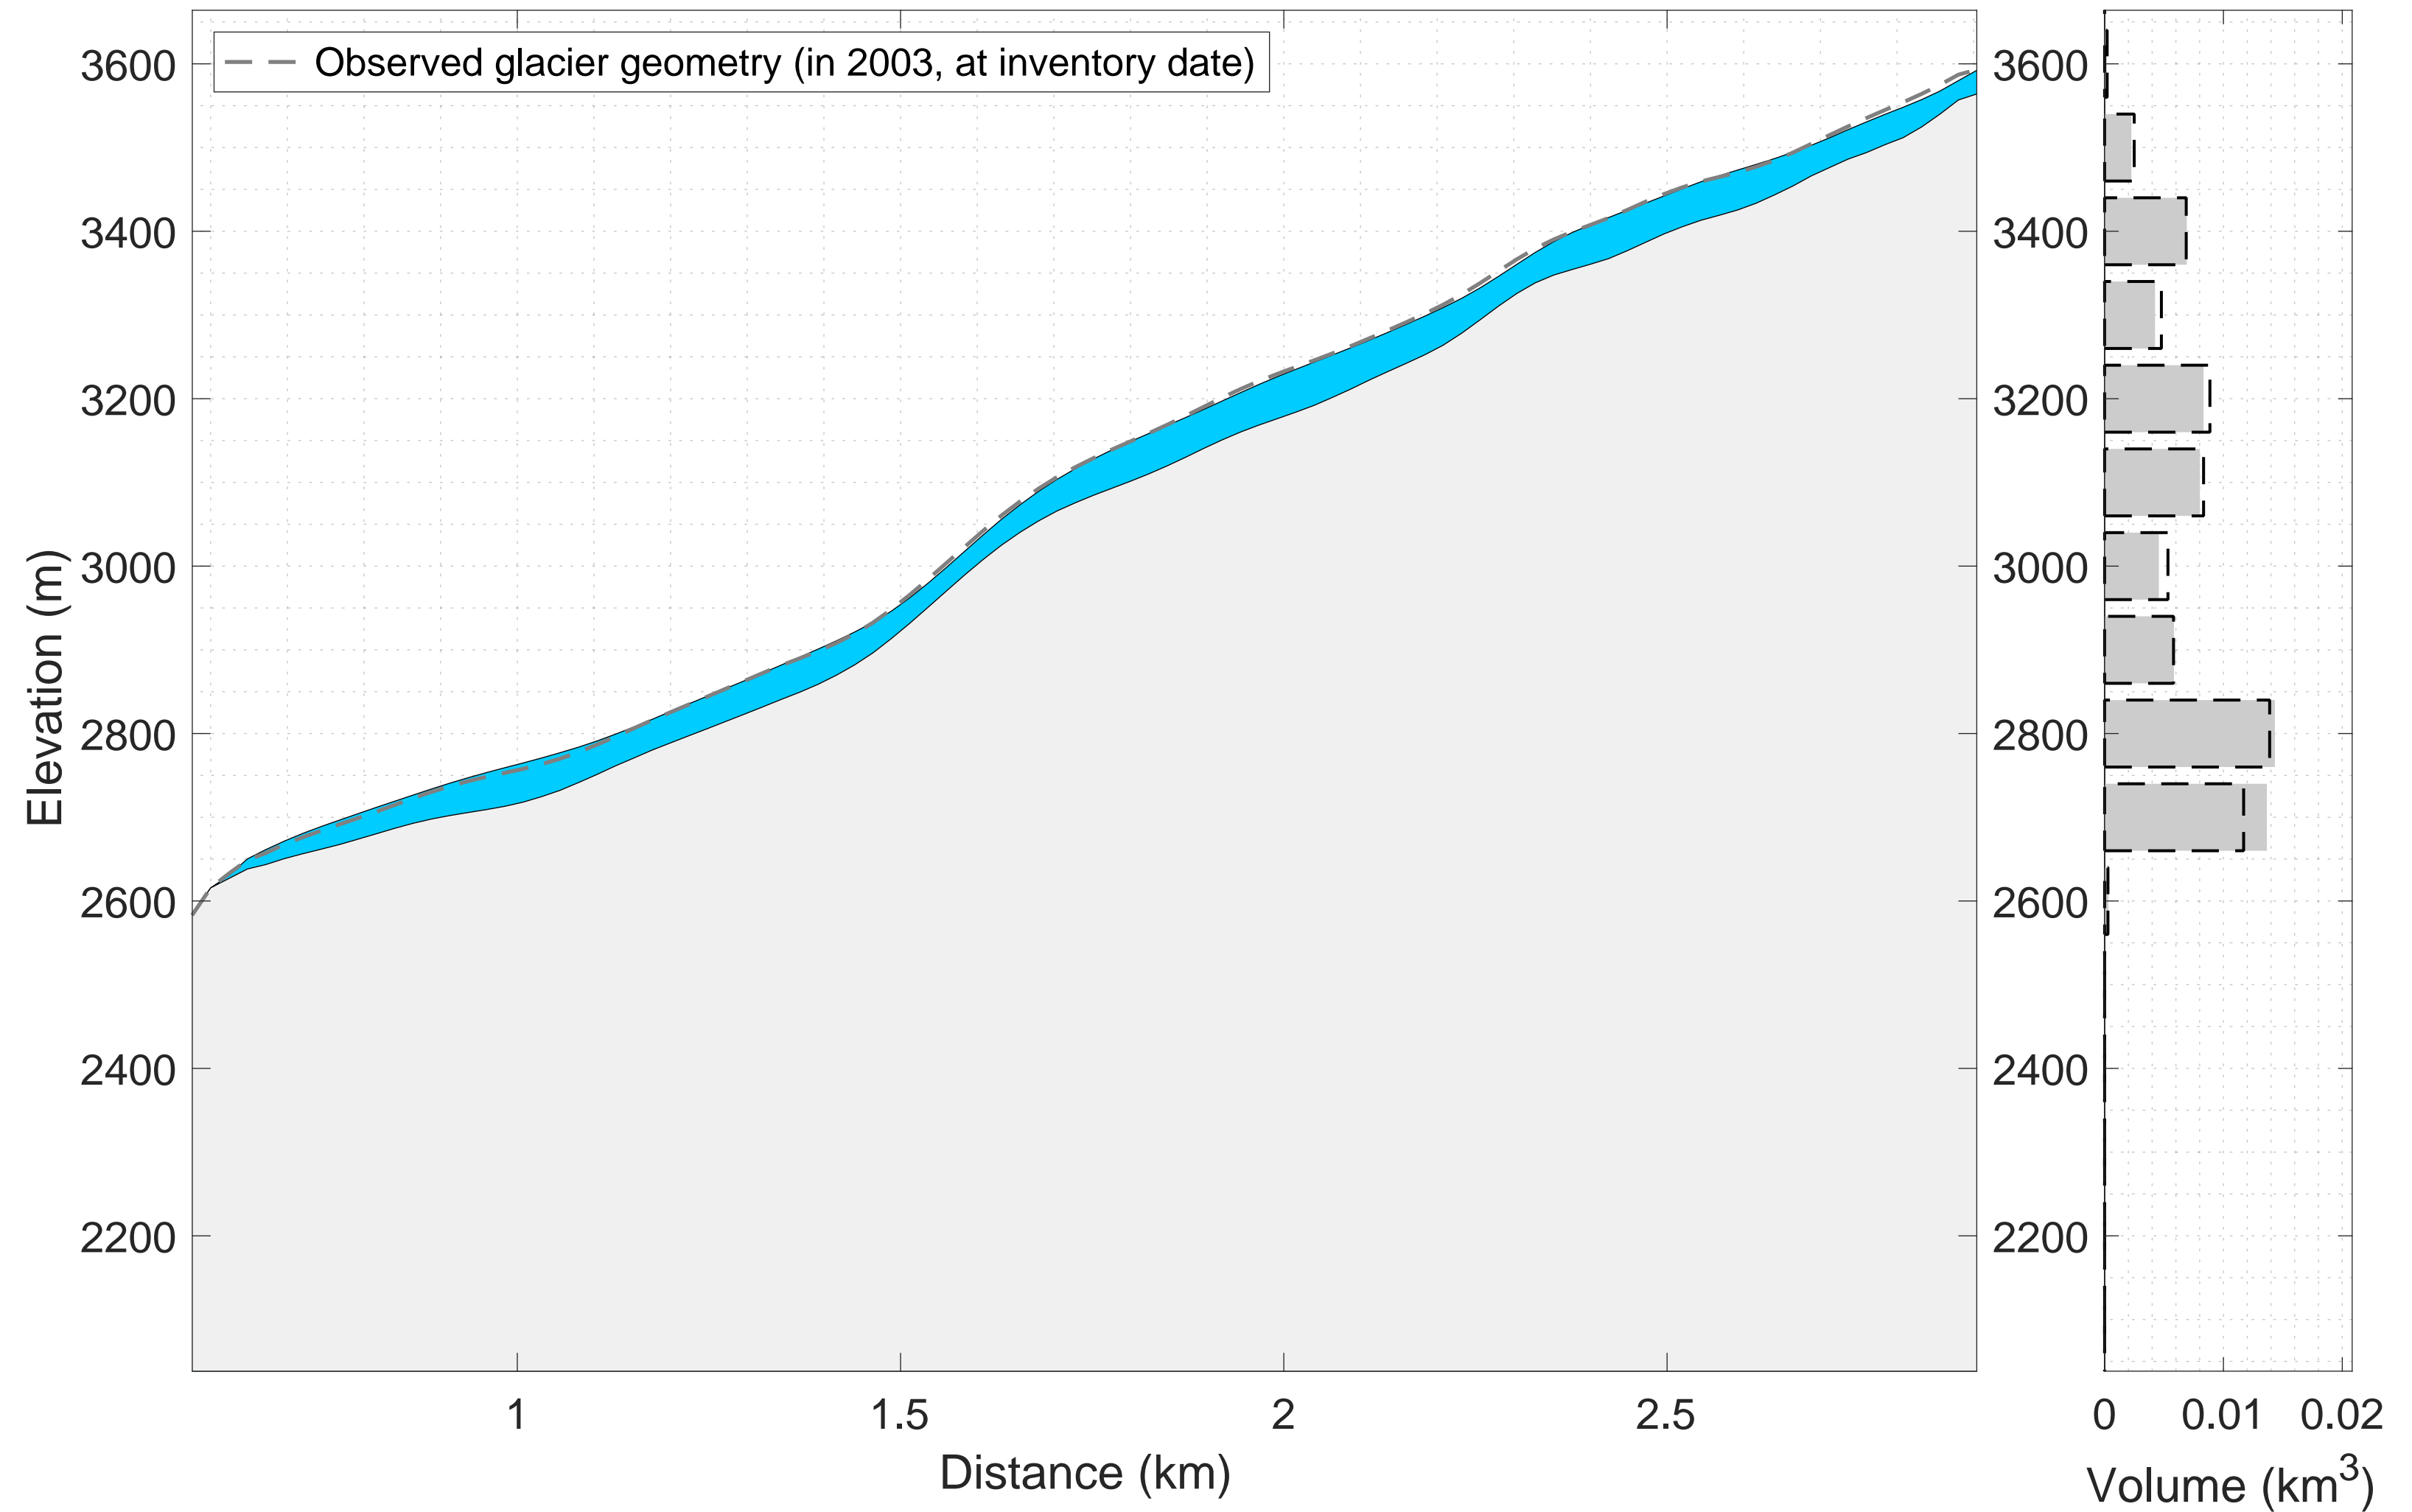

Supplement: Supplementary file 231 [file tc-13-1125-2019-supplement.zip]

**Modelled geometry (Glacier ID = 01834;  $A = 1.8028\text{e-}16 \text{ Pa}^{-3} \text{ a}^{-1}$ ;  $dx = 26 \text{ m}$ )**

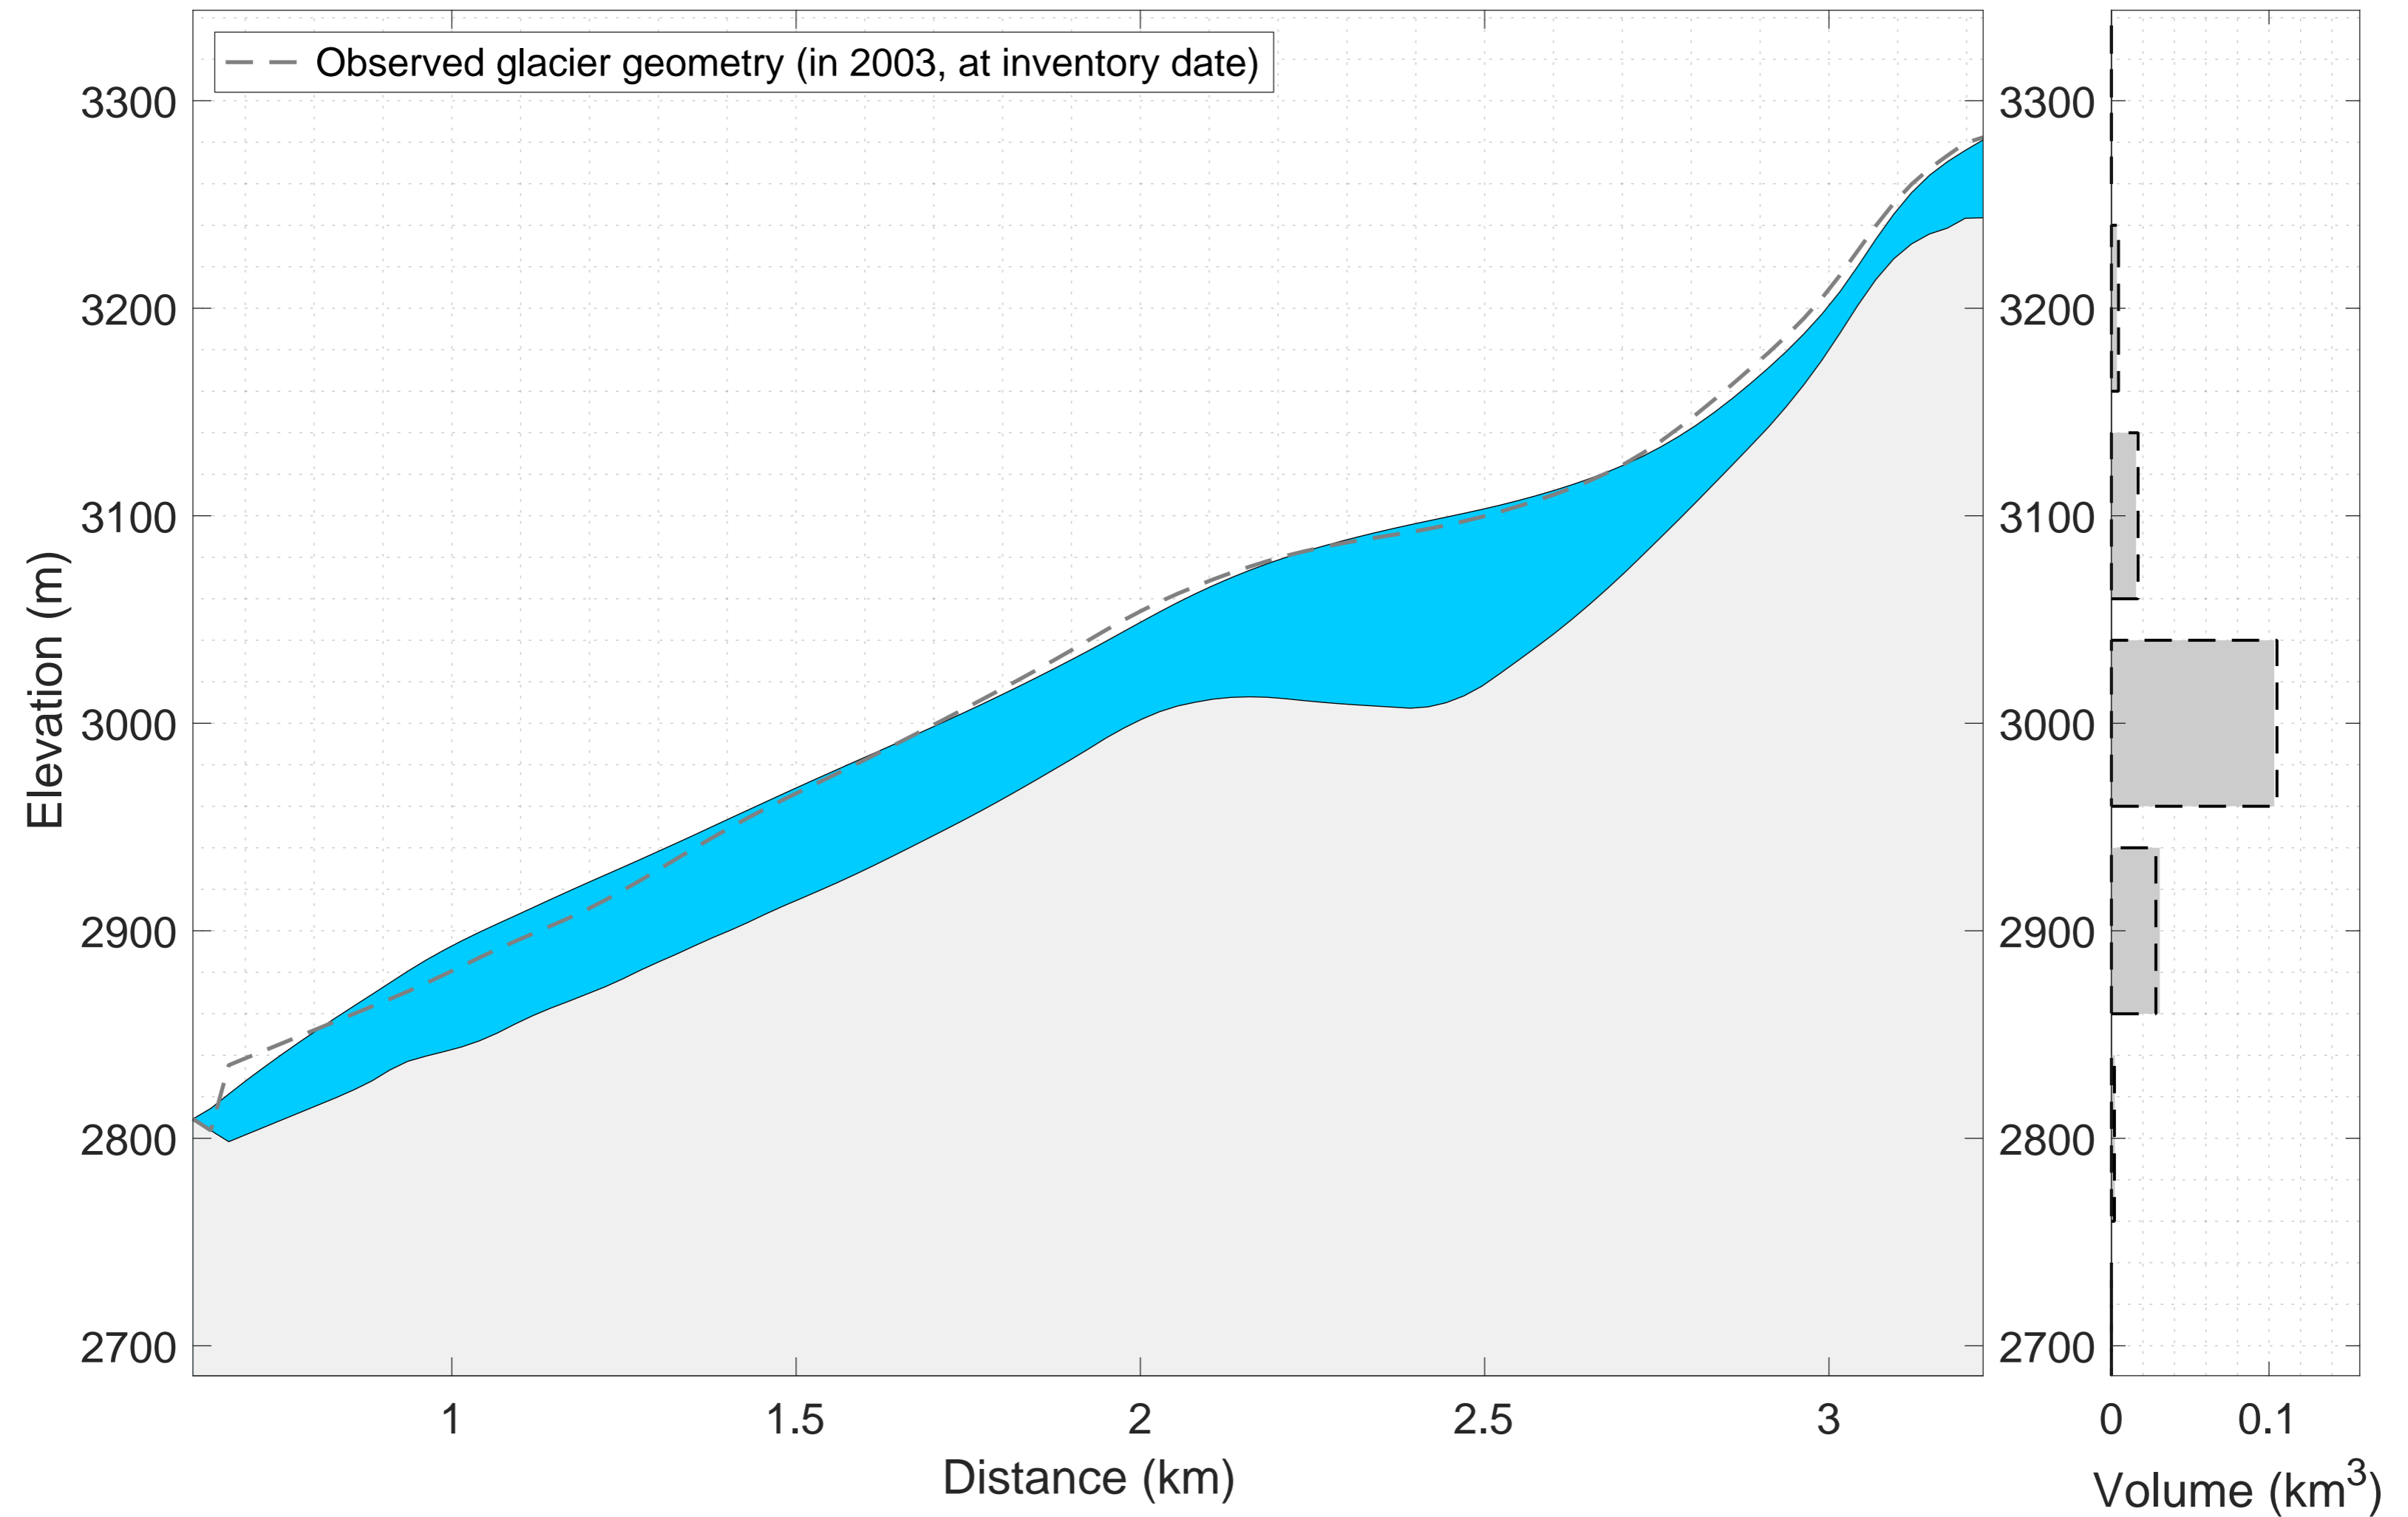

Supplement: Supplementary file 232 [file tc-13-1125-2019-supplement.zip]

**Modelled geometry (Glacier ID = 02293;  $A = 8.9641\text{e-}17 \text{ Pa}^{-3} \text{ a}^{-1}$ ;  $dx = 21 \text{ m}$ )**

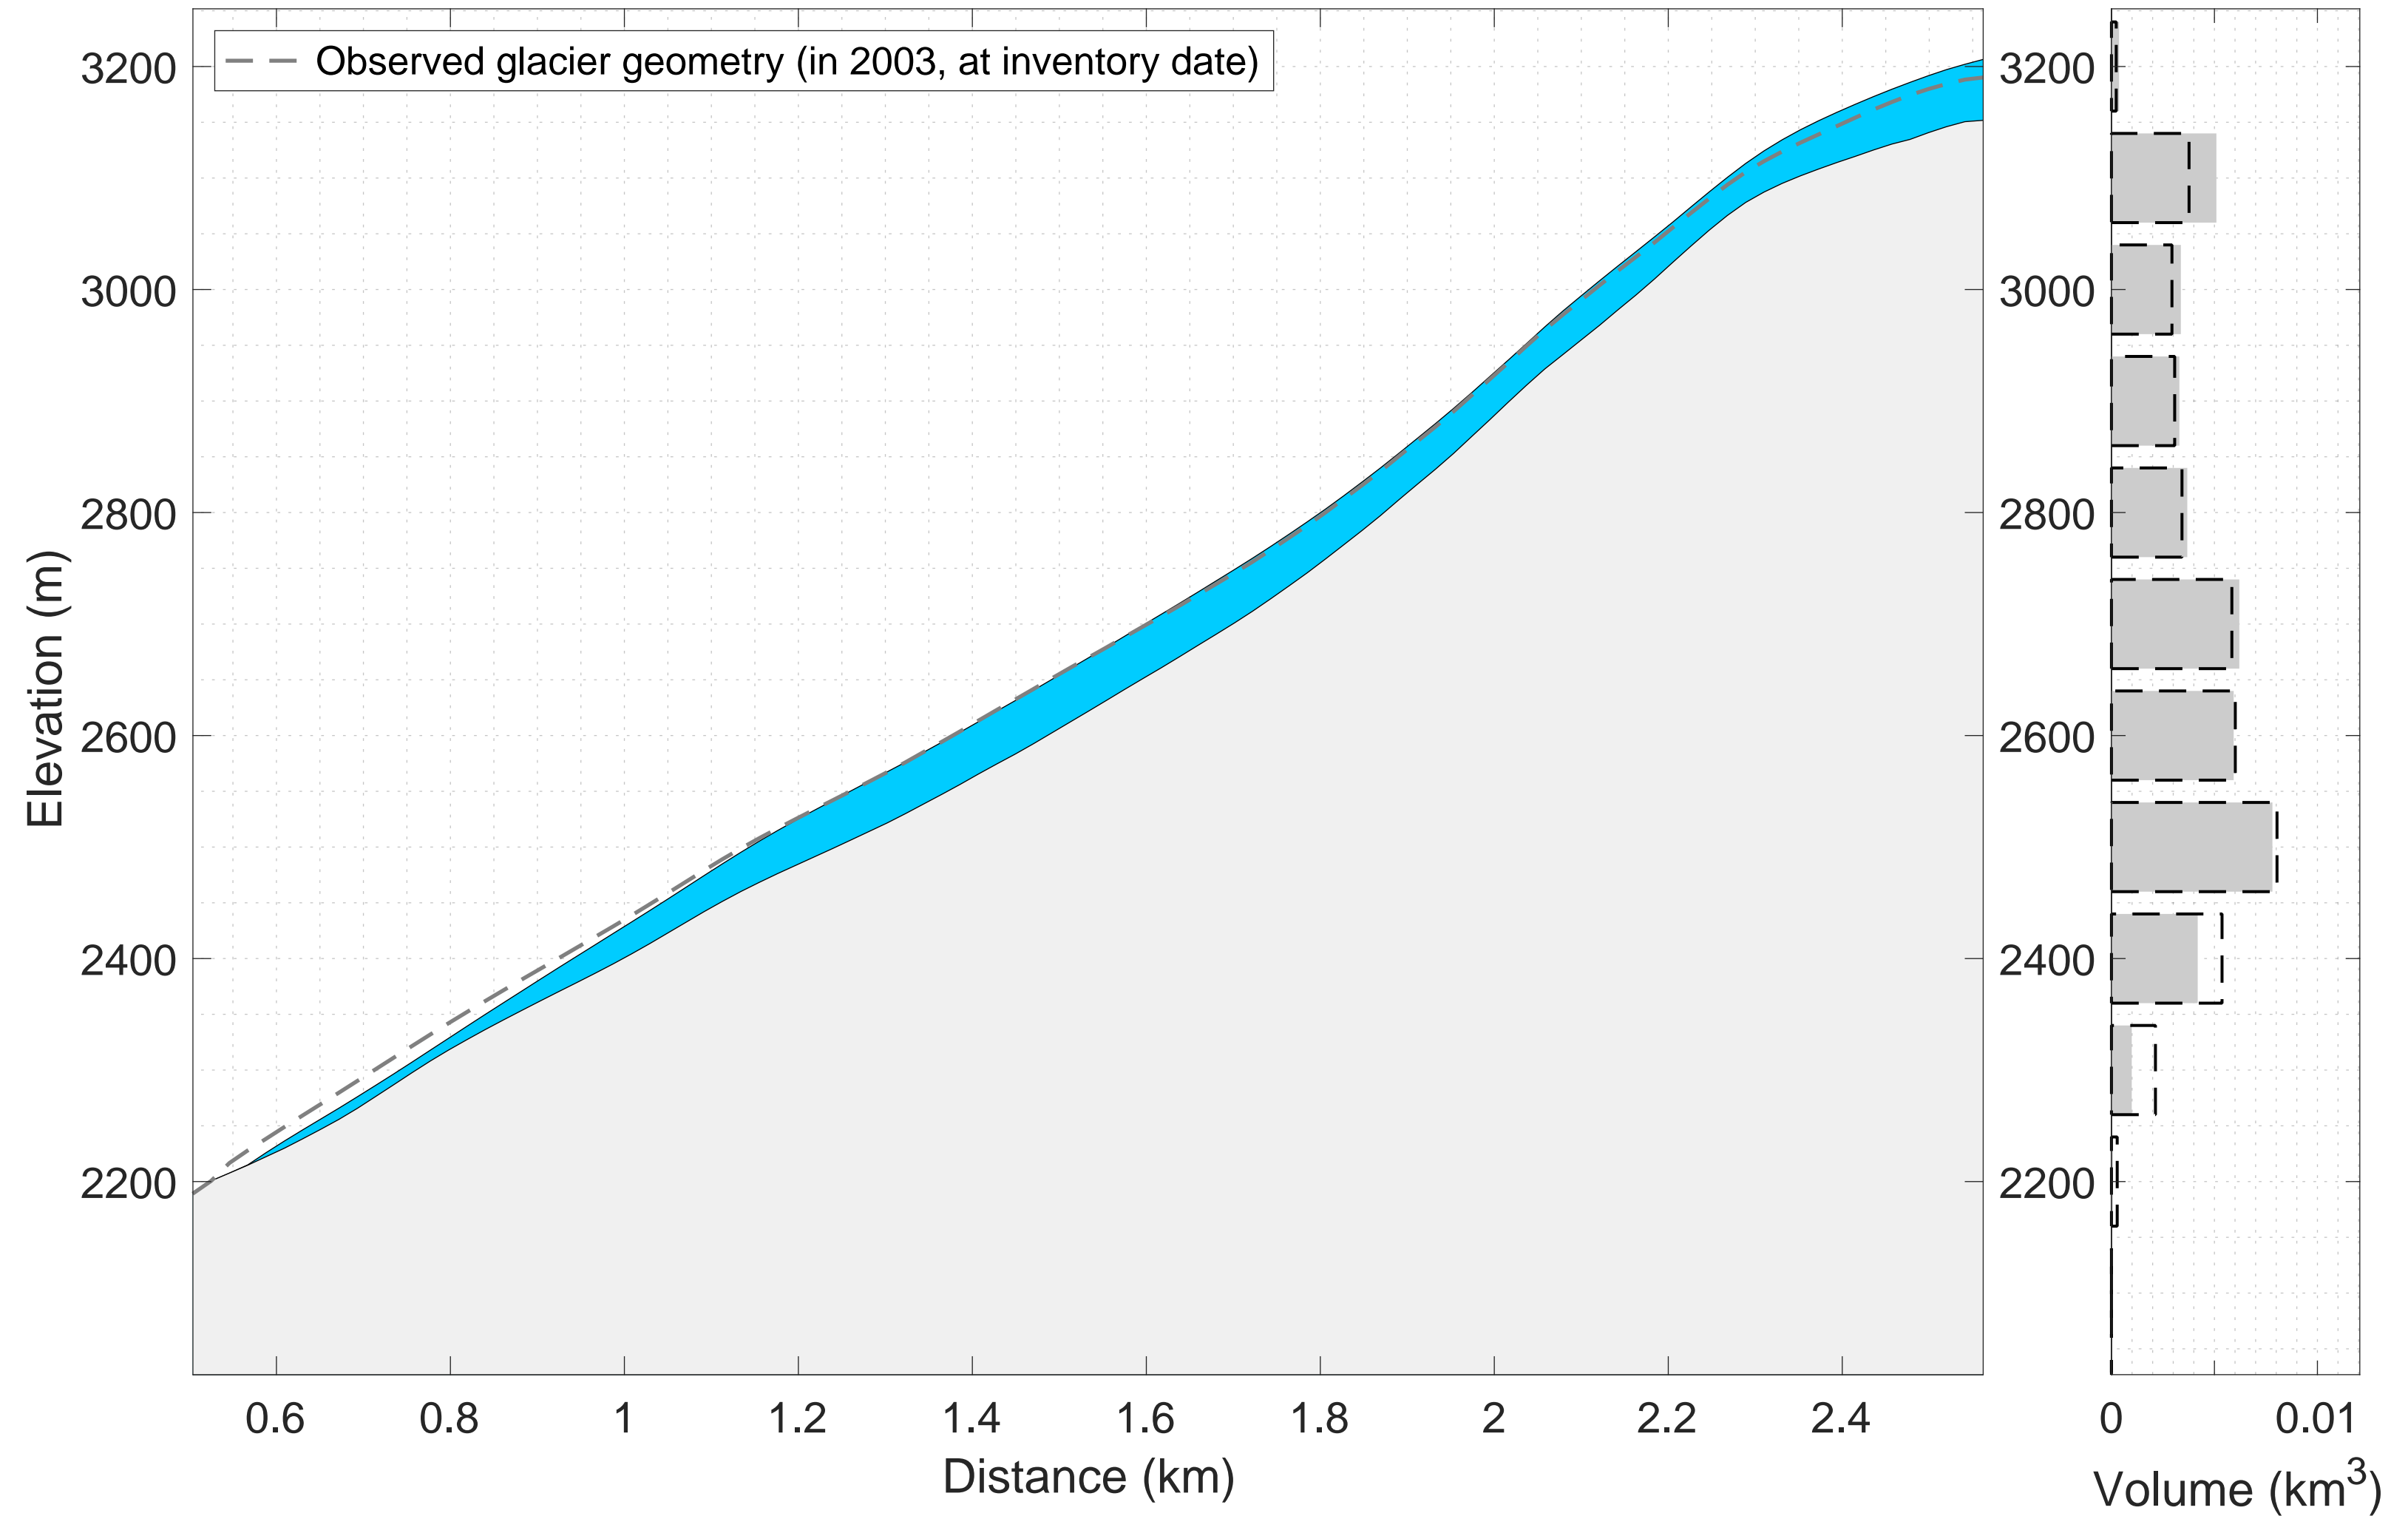

Supplement: Supplementary file 233 [file tc-13-1125-2019-supplement.zip]

**Modelled geometry (Glacier ID = 02810;  $A = 1.5961\text{e-}16 \text{ Pa}^{-3} \text{ a}^{-1}$ ;  $dx = 42 \text{ m}$ )**

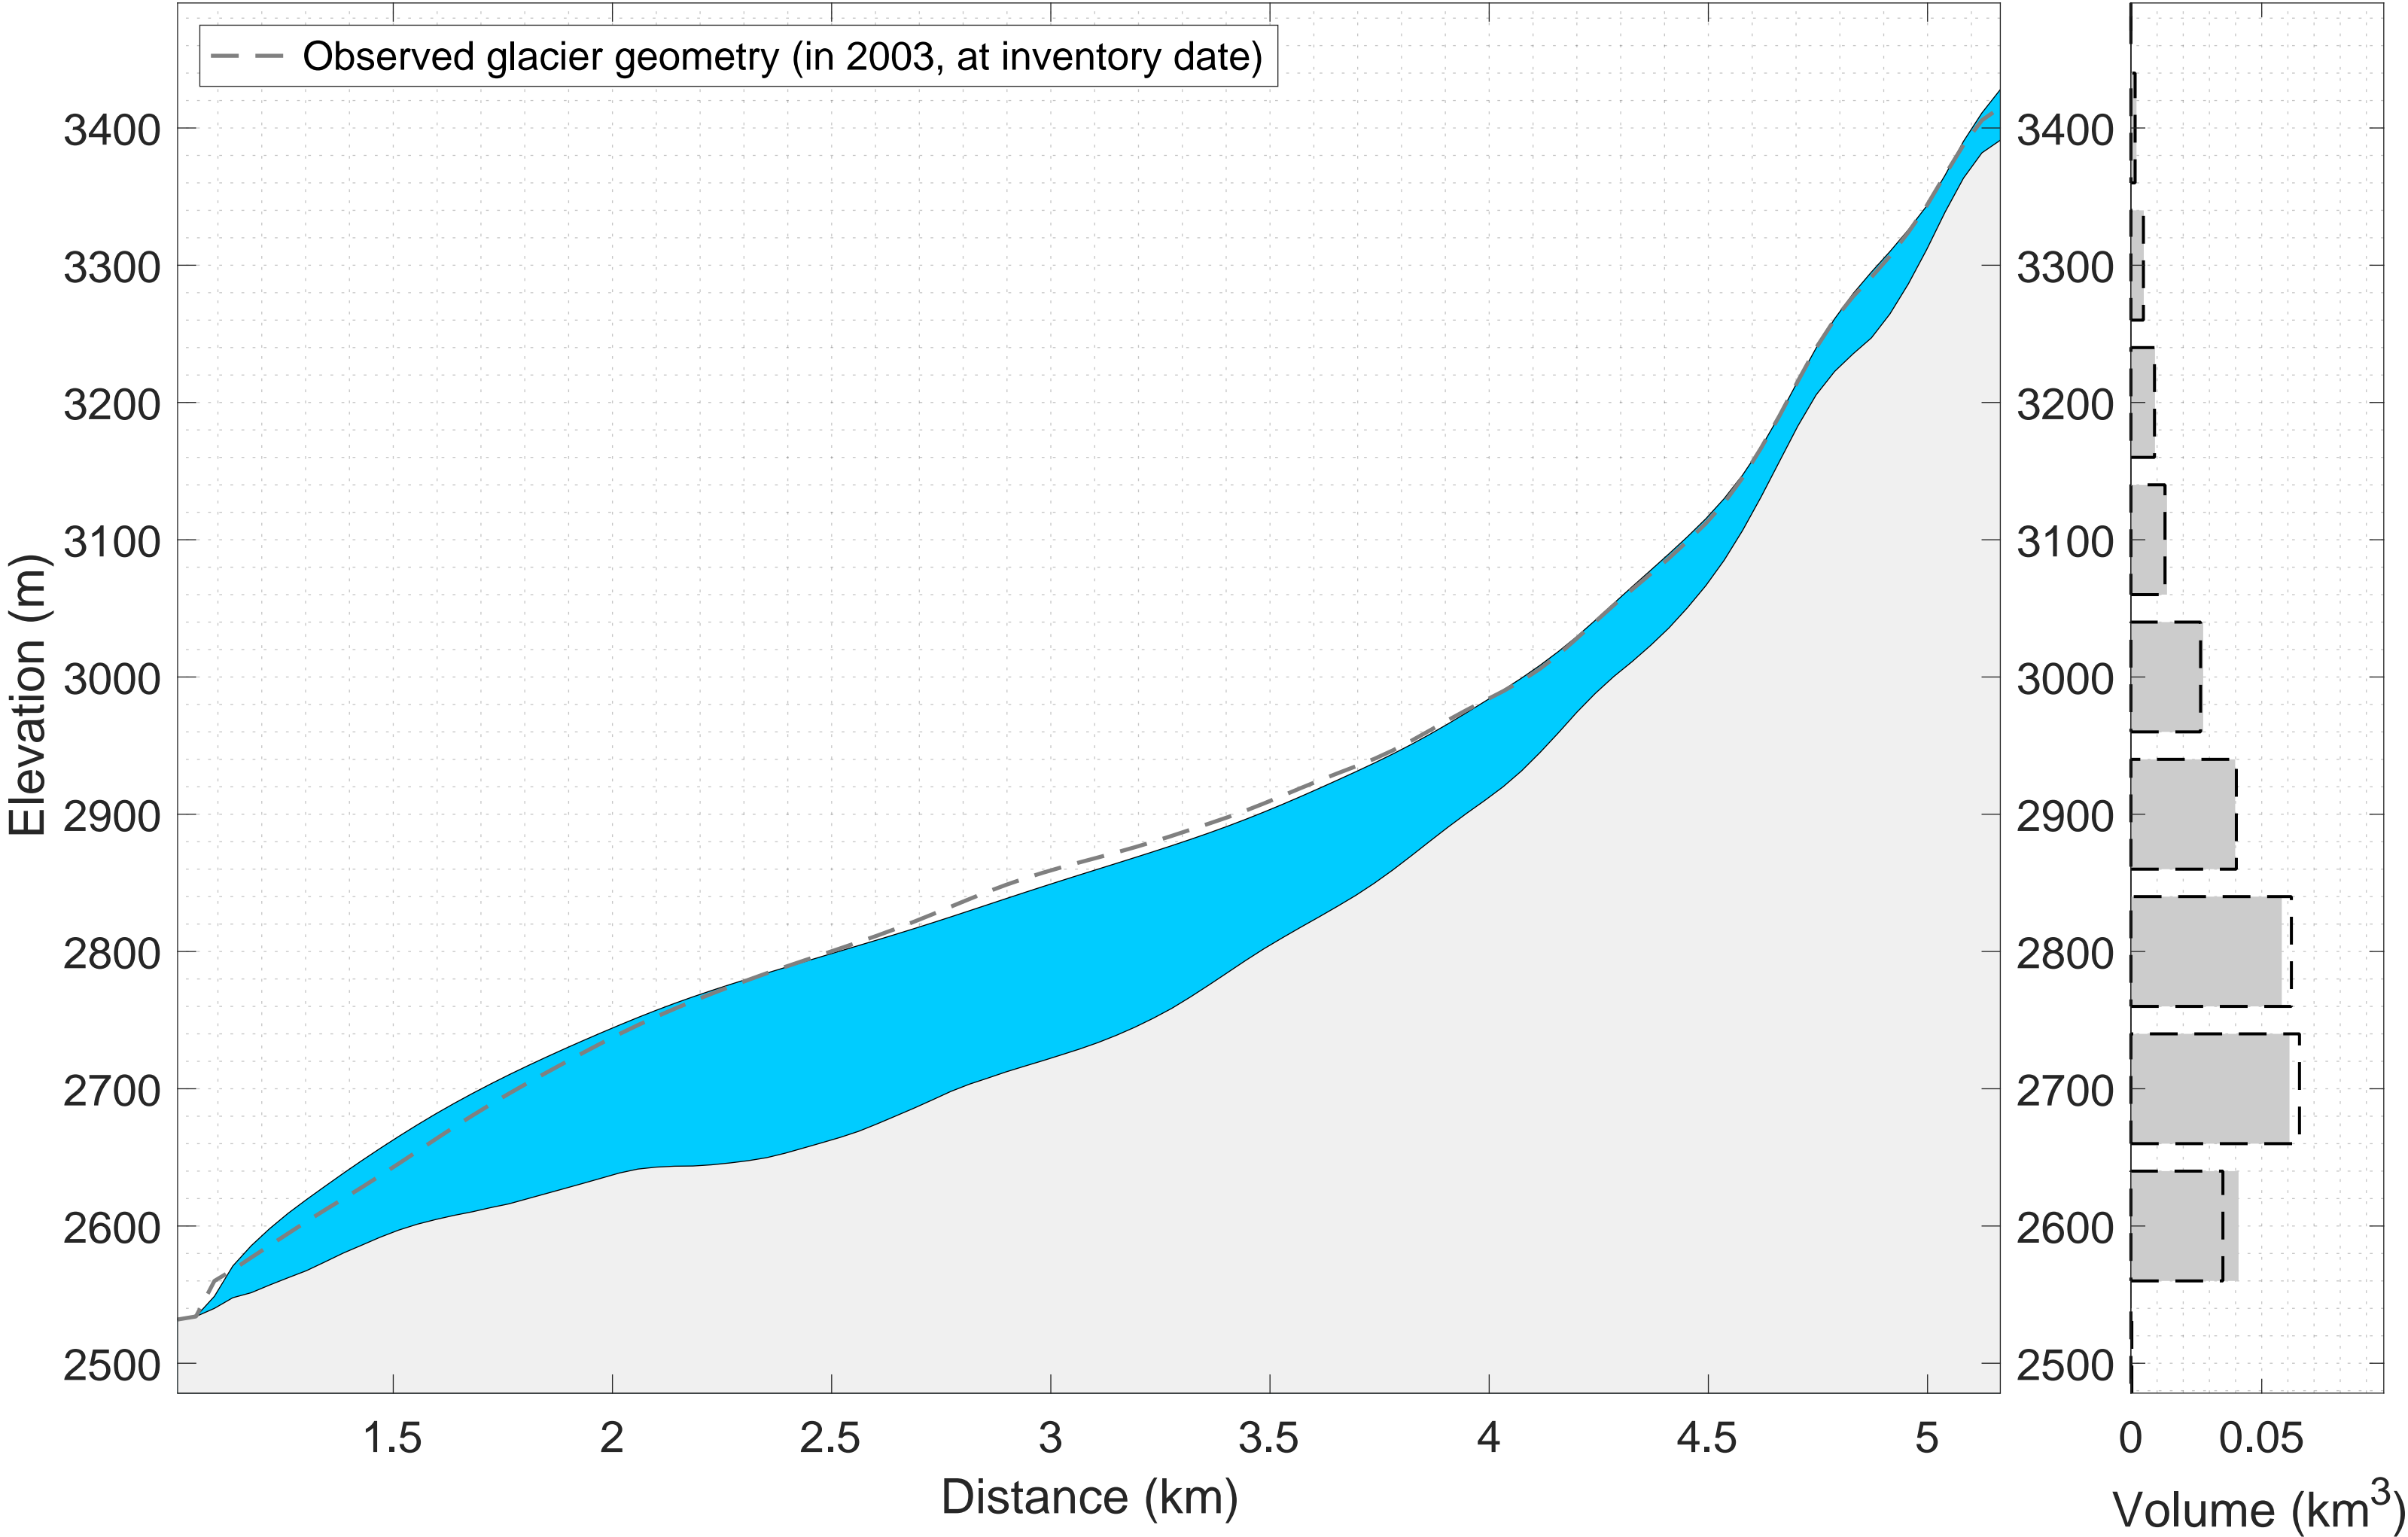

Supplement: Supplementary file 234 [file tc-13-1125-2019-supplement.zip]

**Modelled geometry (Glacier ID = 01791;  $A = 5.14\text{e-}17 \text{ Pa}^{-3} \text{ a}^{-1}$ ;  $dx = 21 \text{ m}$ )**

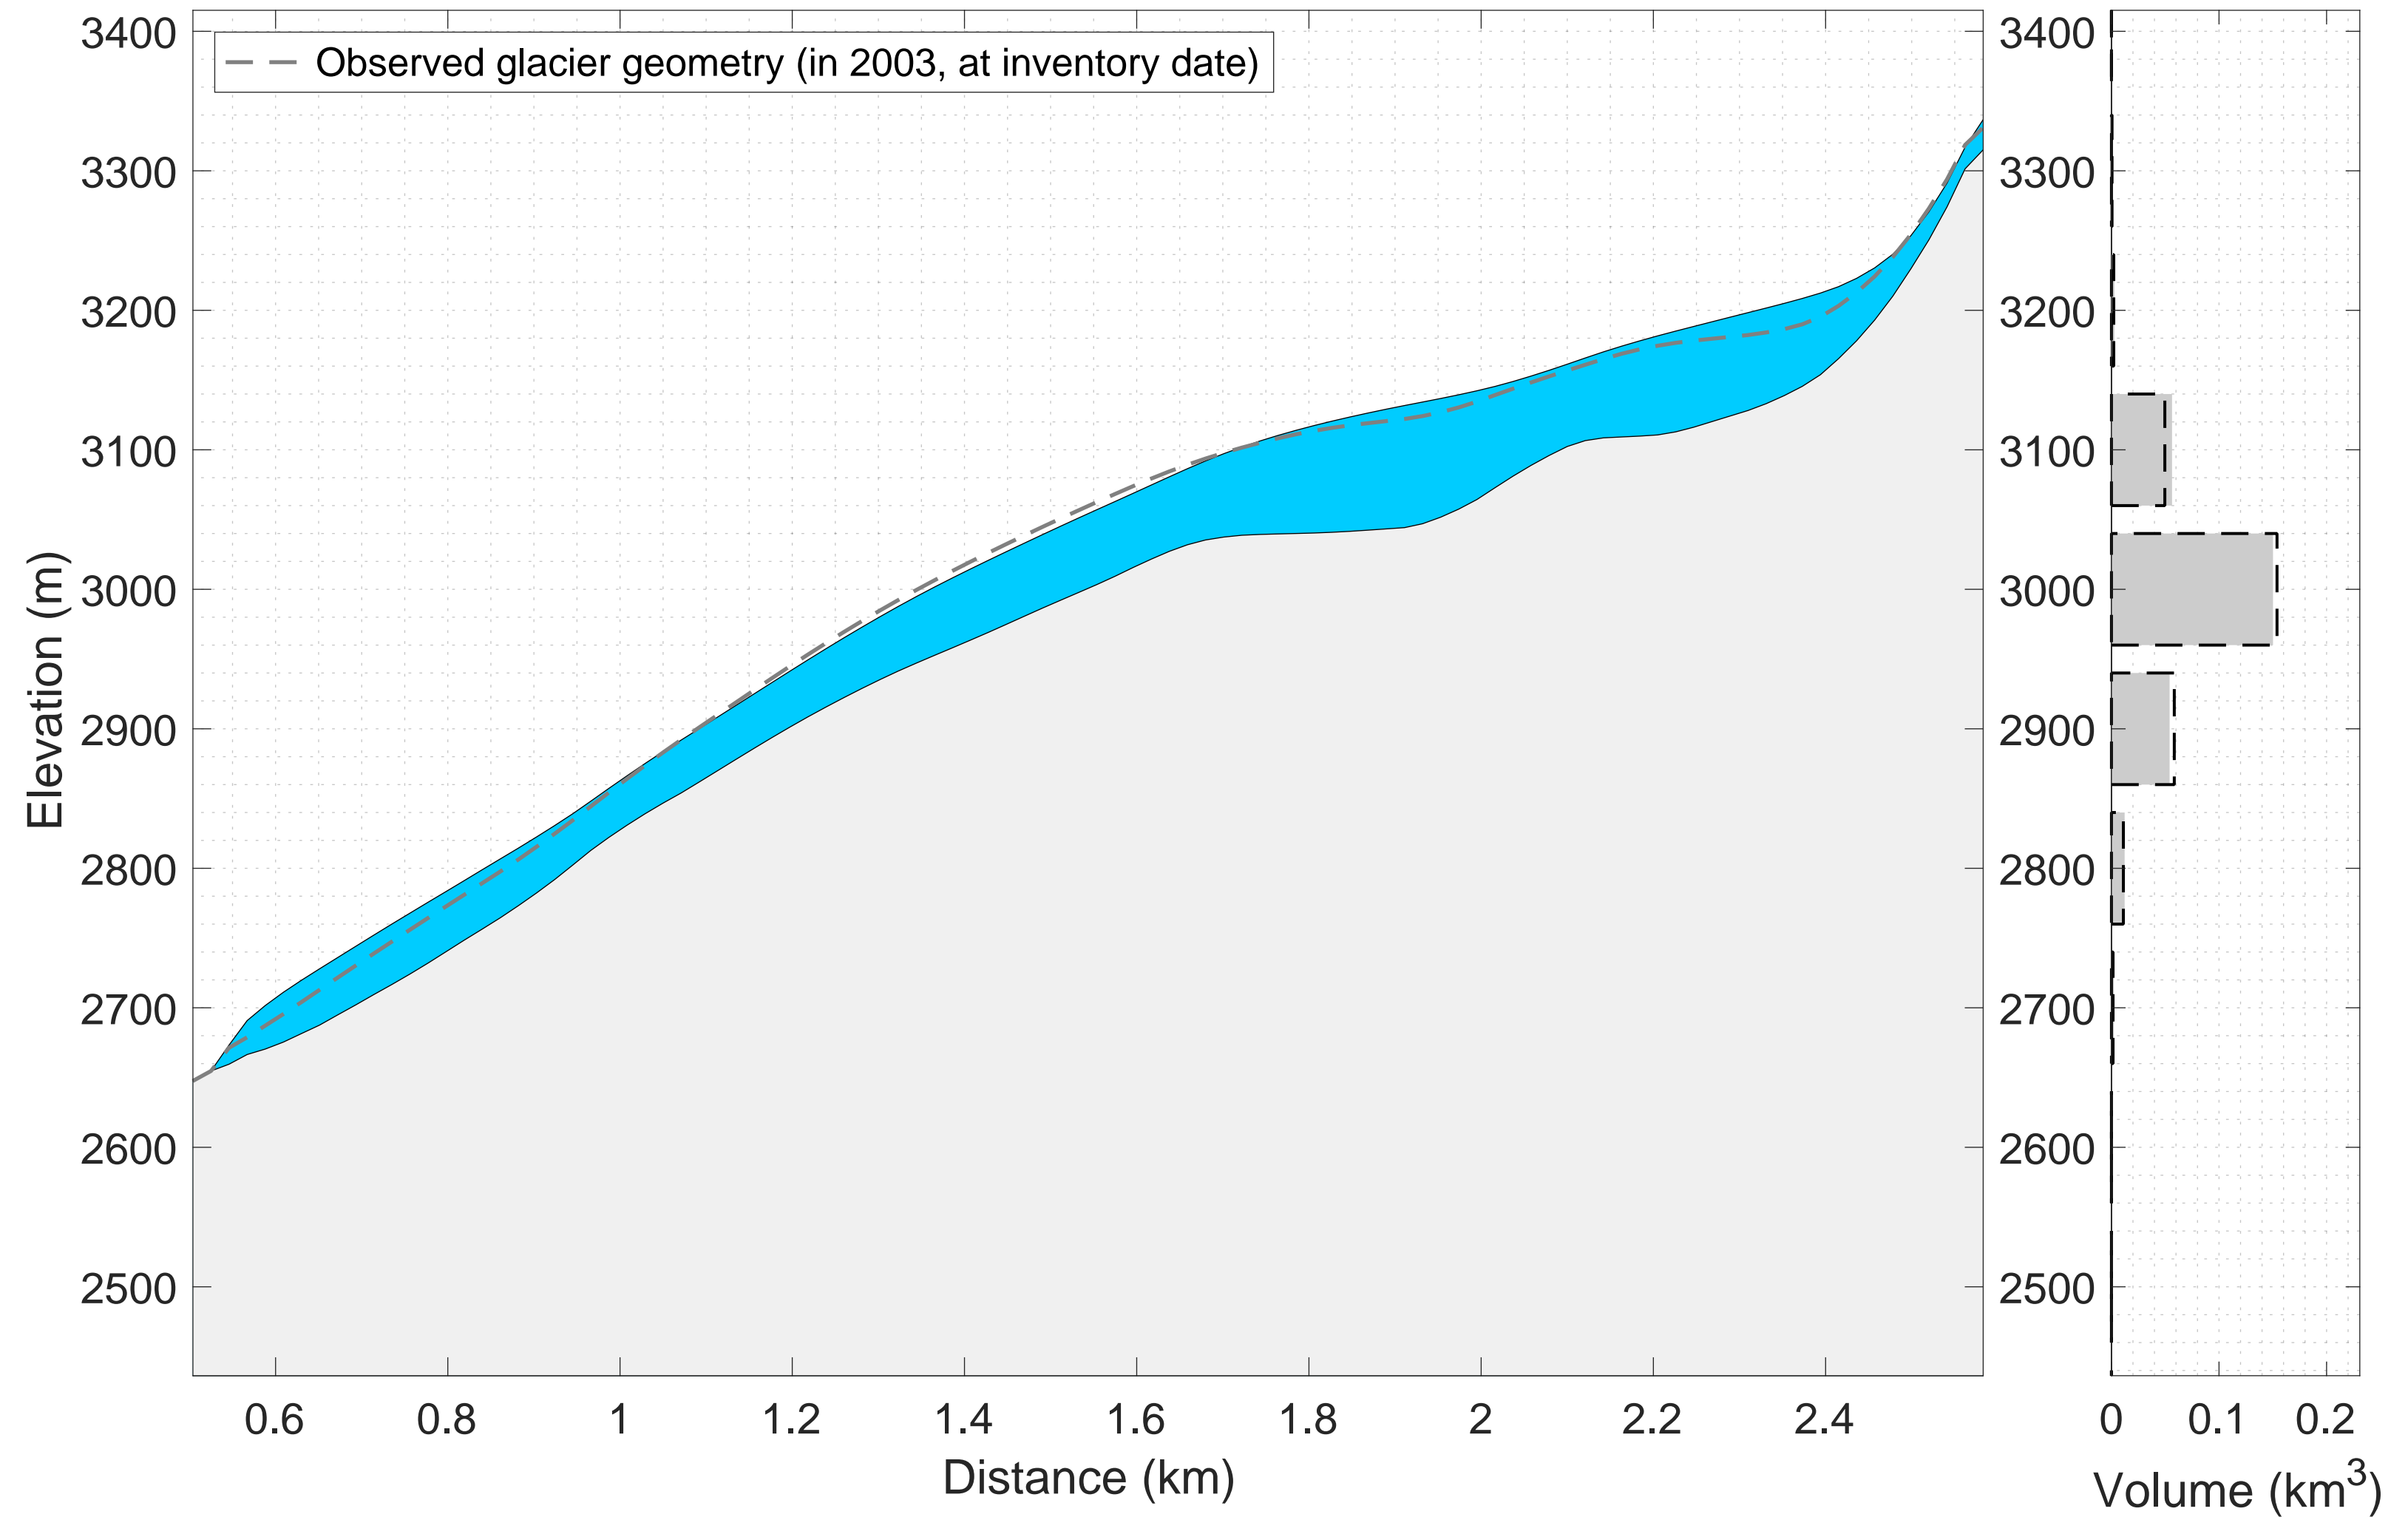

Supplement: Supplementary file 235 [file tc-13-1125-2019-supplement.zip]

**Modelled geometry (Glacier ID = 02802;  $A = 2.2085\text{e-}17 \text{ Pa}^{-3} \text{ a}^{-1}$ ;  $dx = 17 \text{ m}$ )**

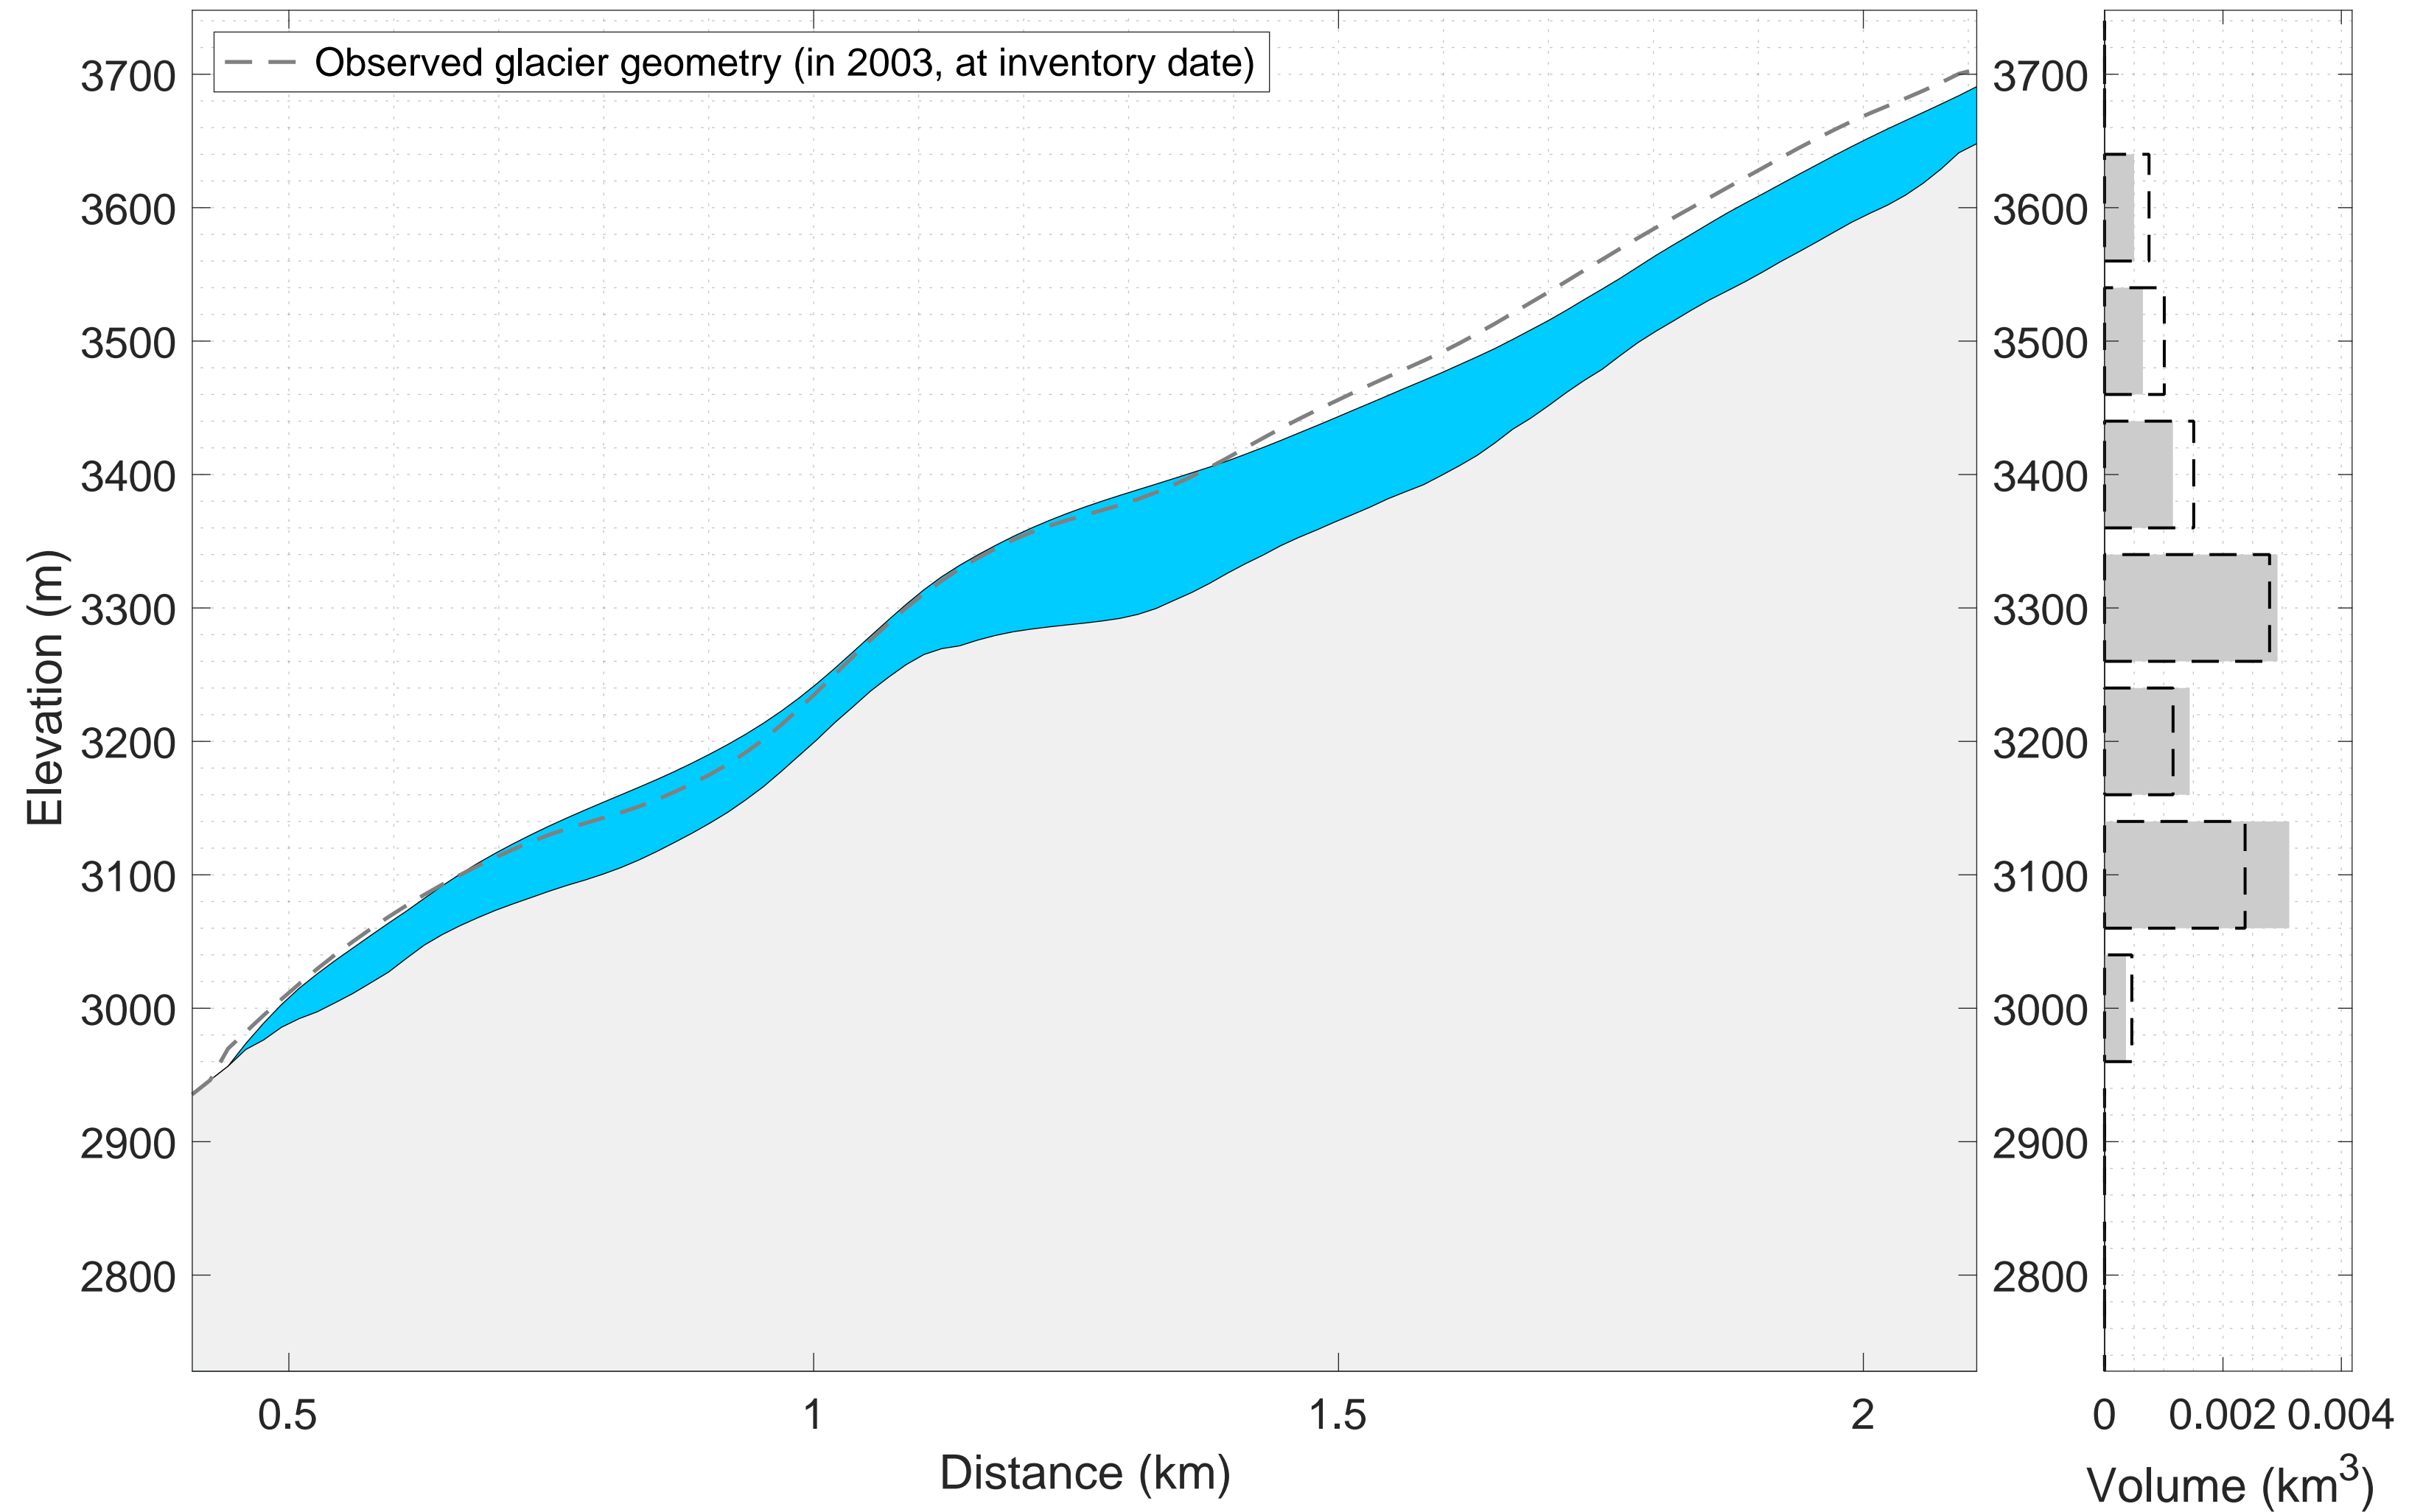

Supplement: Supplementary file 236 [file tc-13-1125-2019-supplement.zip]

**Modelled geometry (Glacier ID = 00894;  $A = 1.0908\text{e-}16 \text{ Pa}^{-3} \text{ a}^{-1}$ ;  $dx = 11 \text{ m}$ )**

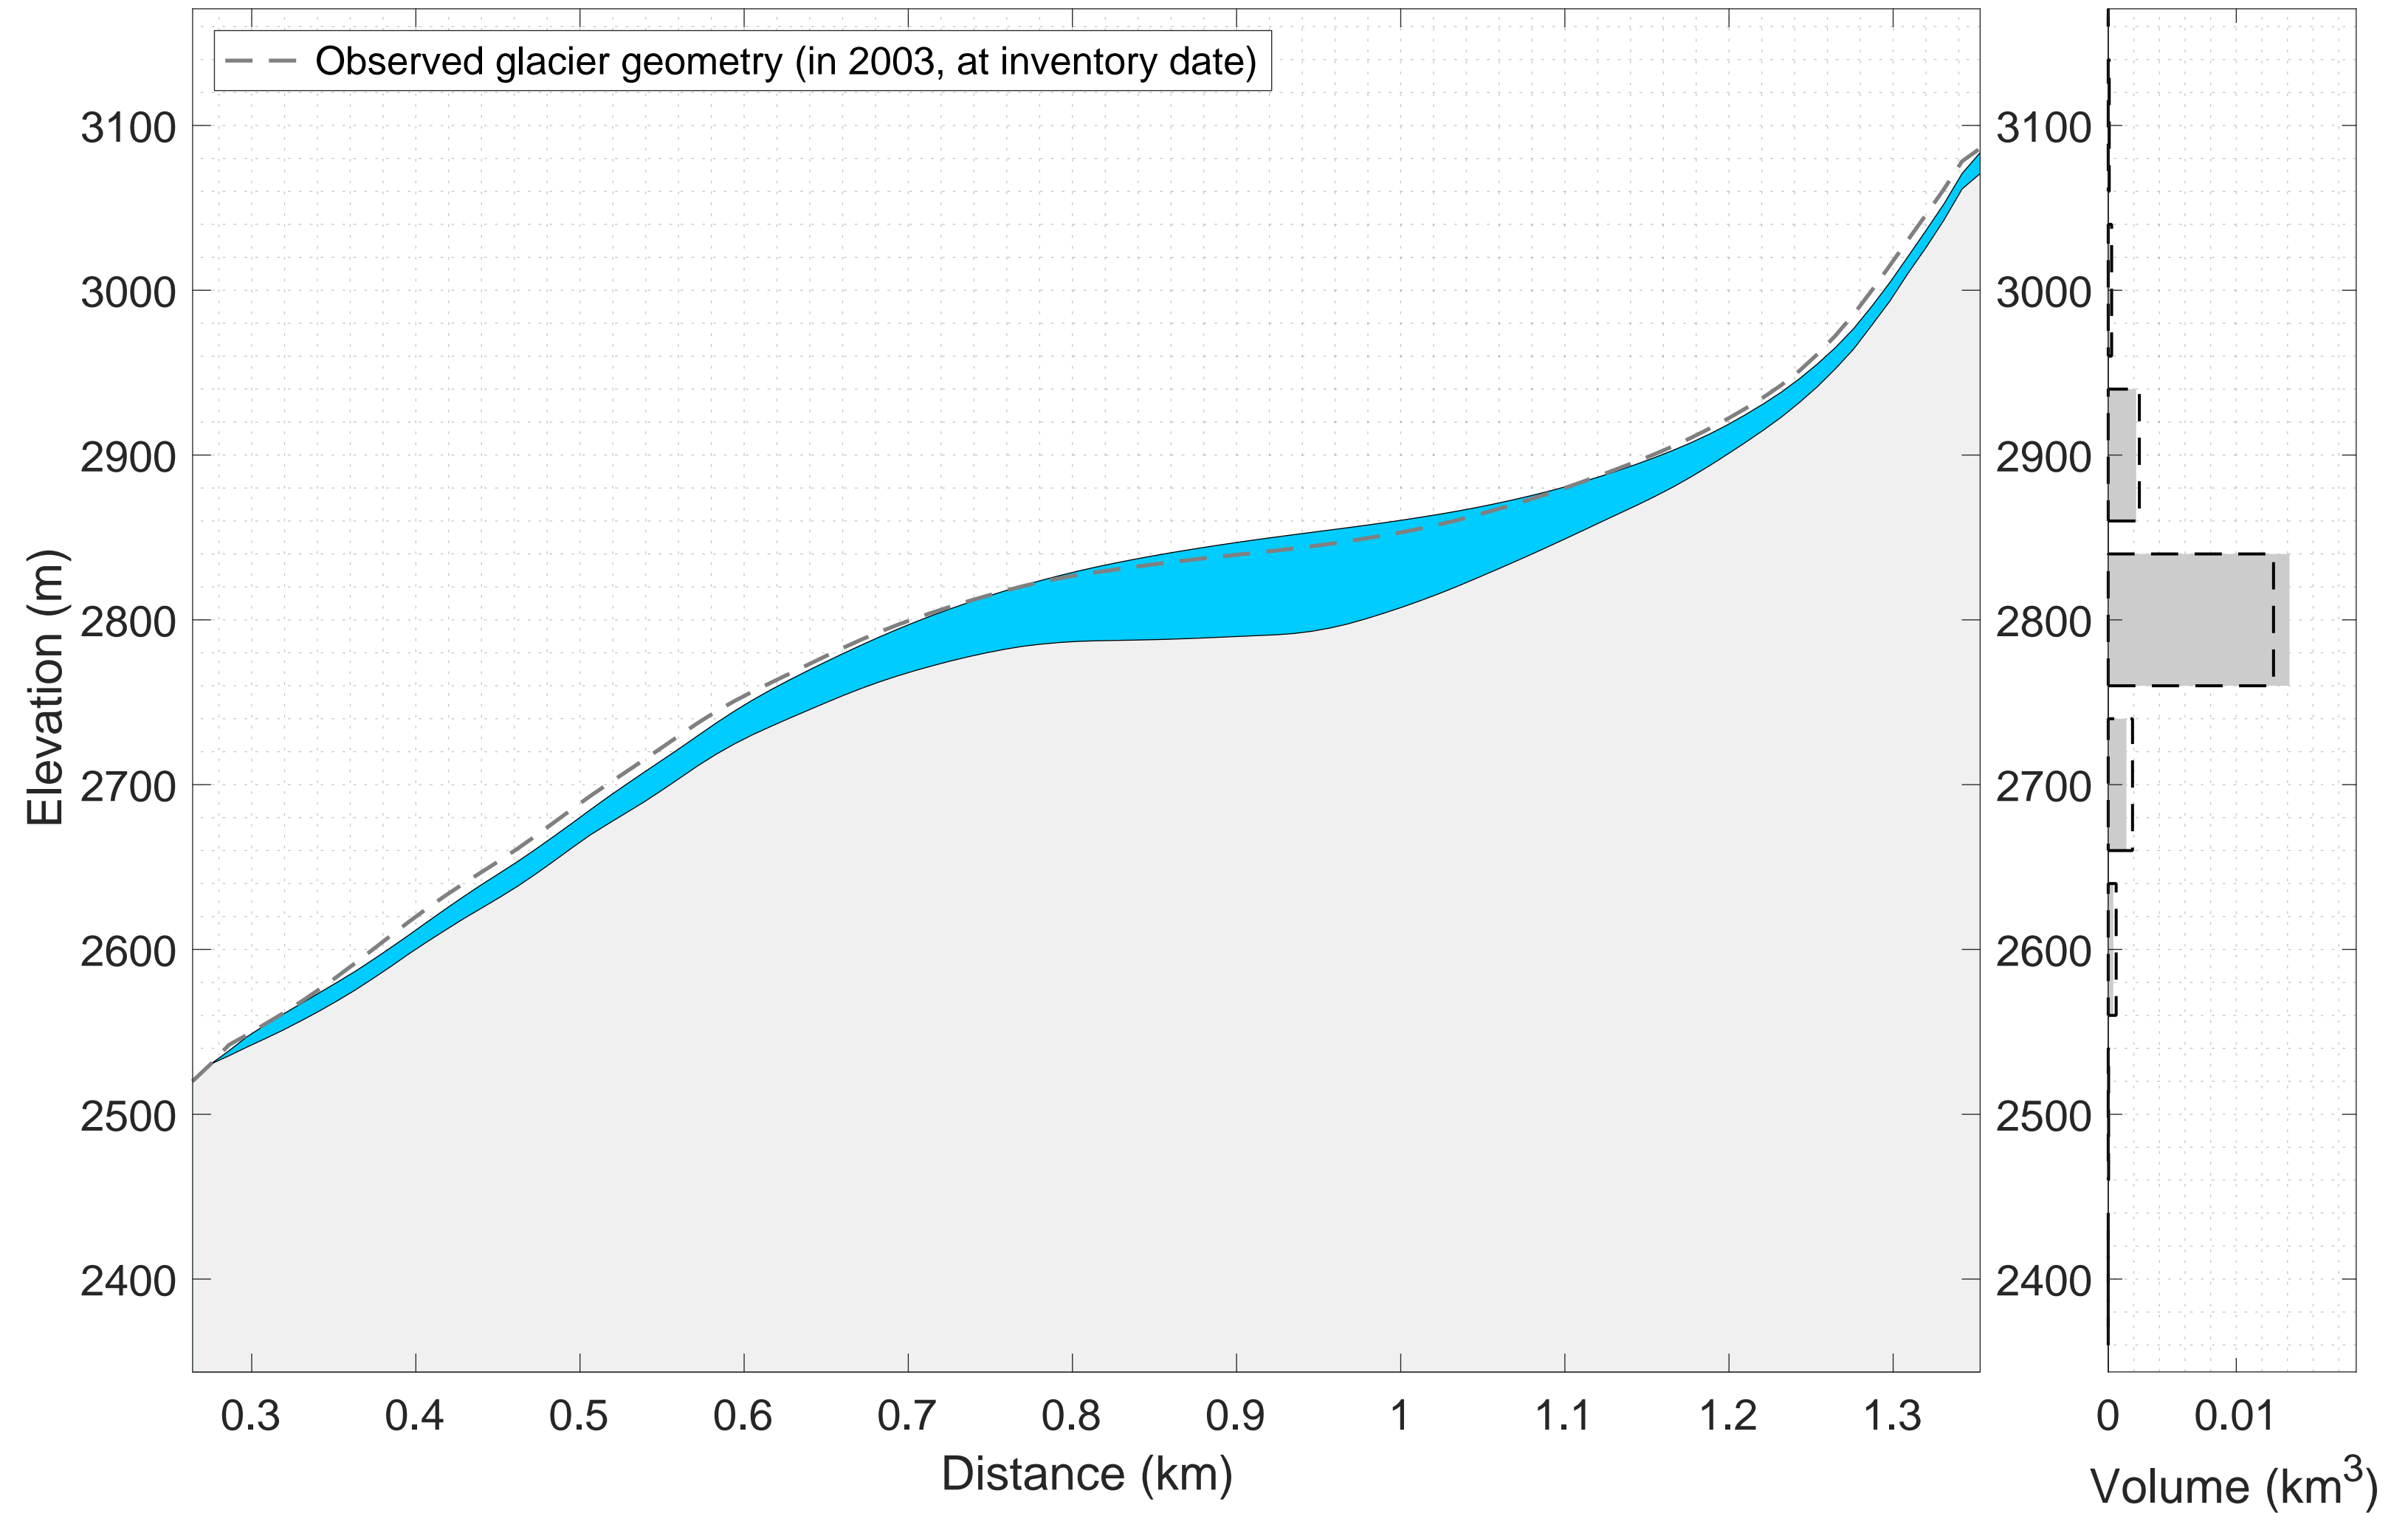

Supplement: Supplementary file 237 [file tc-13-1125-2019-supplement.zip]

**Modelled geometry (Glacier ID = 03527;  $A = 2.0405\text{e-}16 \text{ Pa}^{-3} \text{ a}^{-1}$ ;  $dx = 10 \text{ m}$ )**

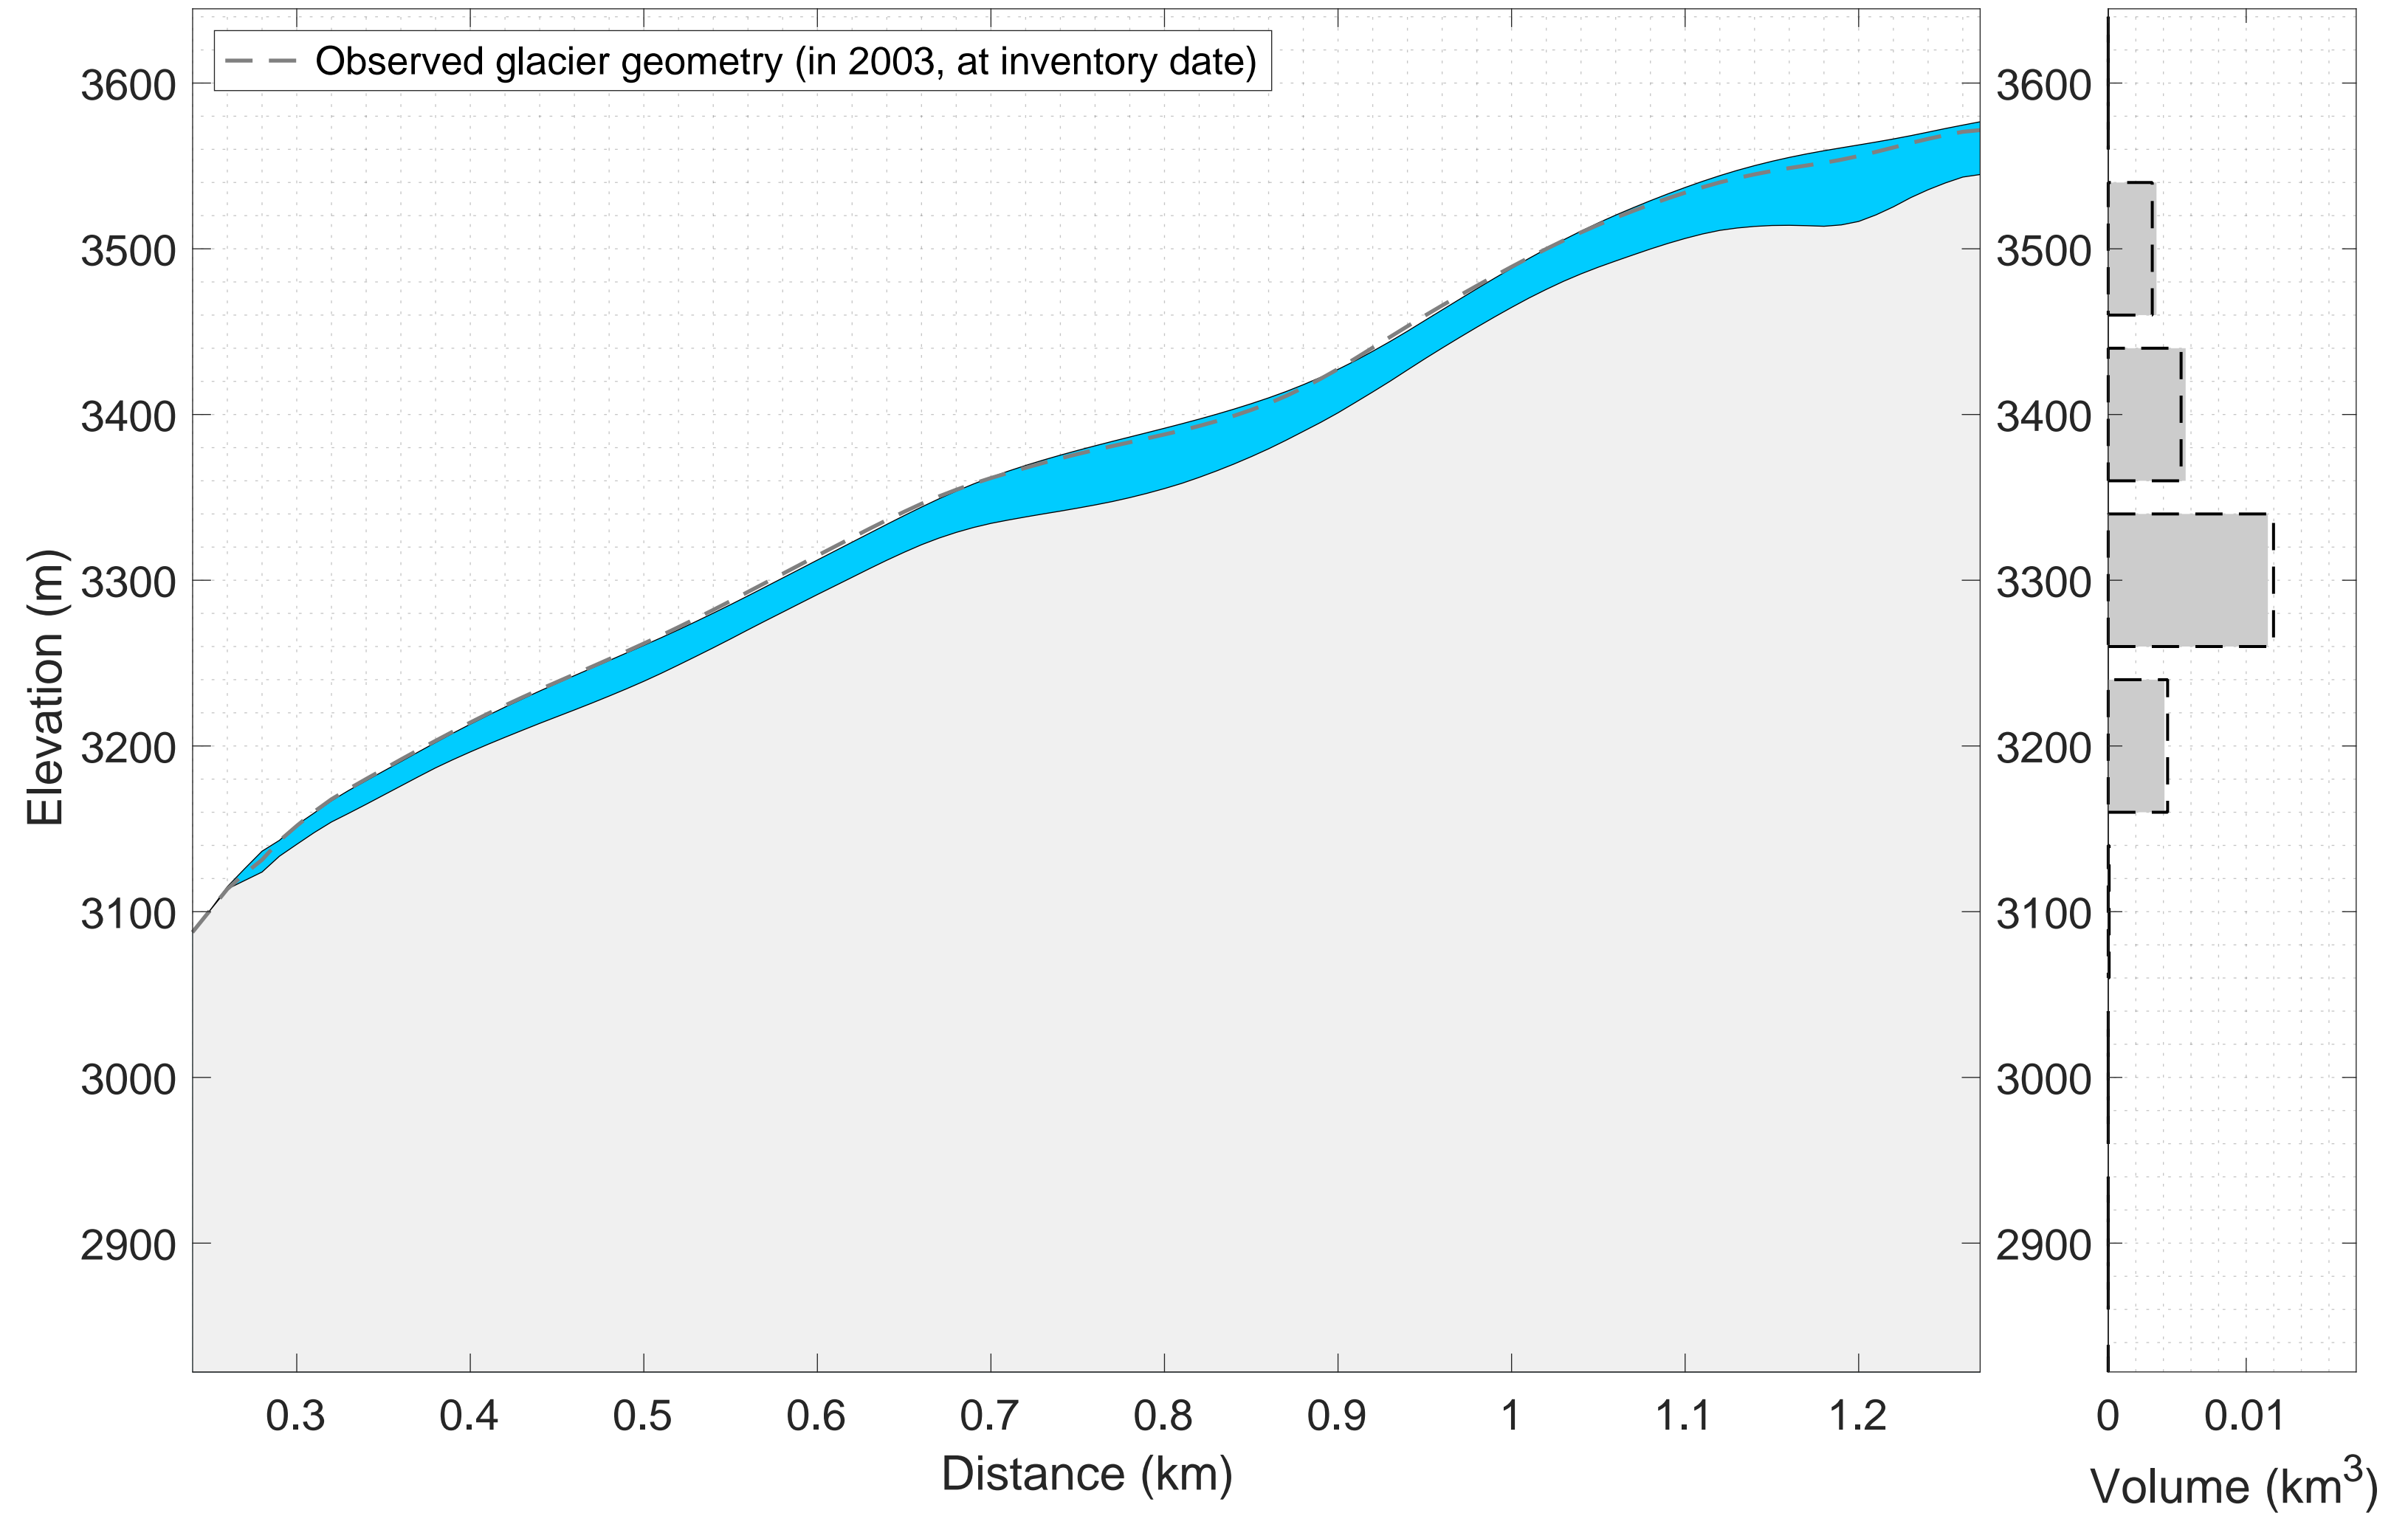

Supplement: Supplementary file 238 [file tc-13-1125-2019-supplement.zip]

**Modelled geometry (Glacier ID = 03451;  $A = 1.2224\text{e-}16 \text{ Pa}^{-3} \text{ a}^{-1}$ ;  $dx = 12 \text{ m}$ )**

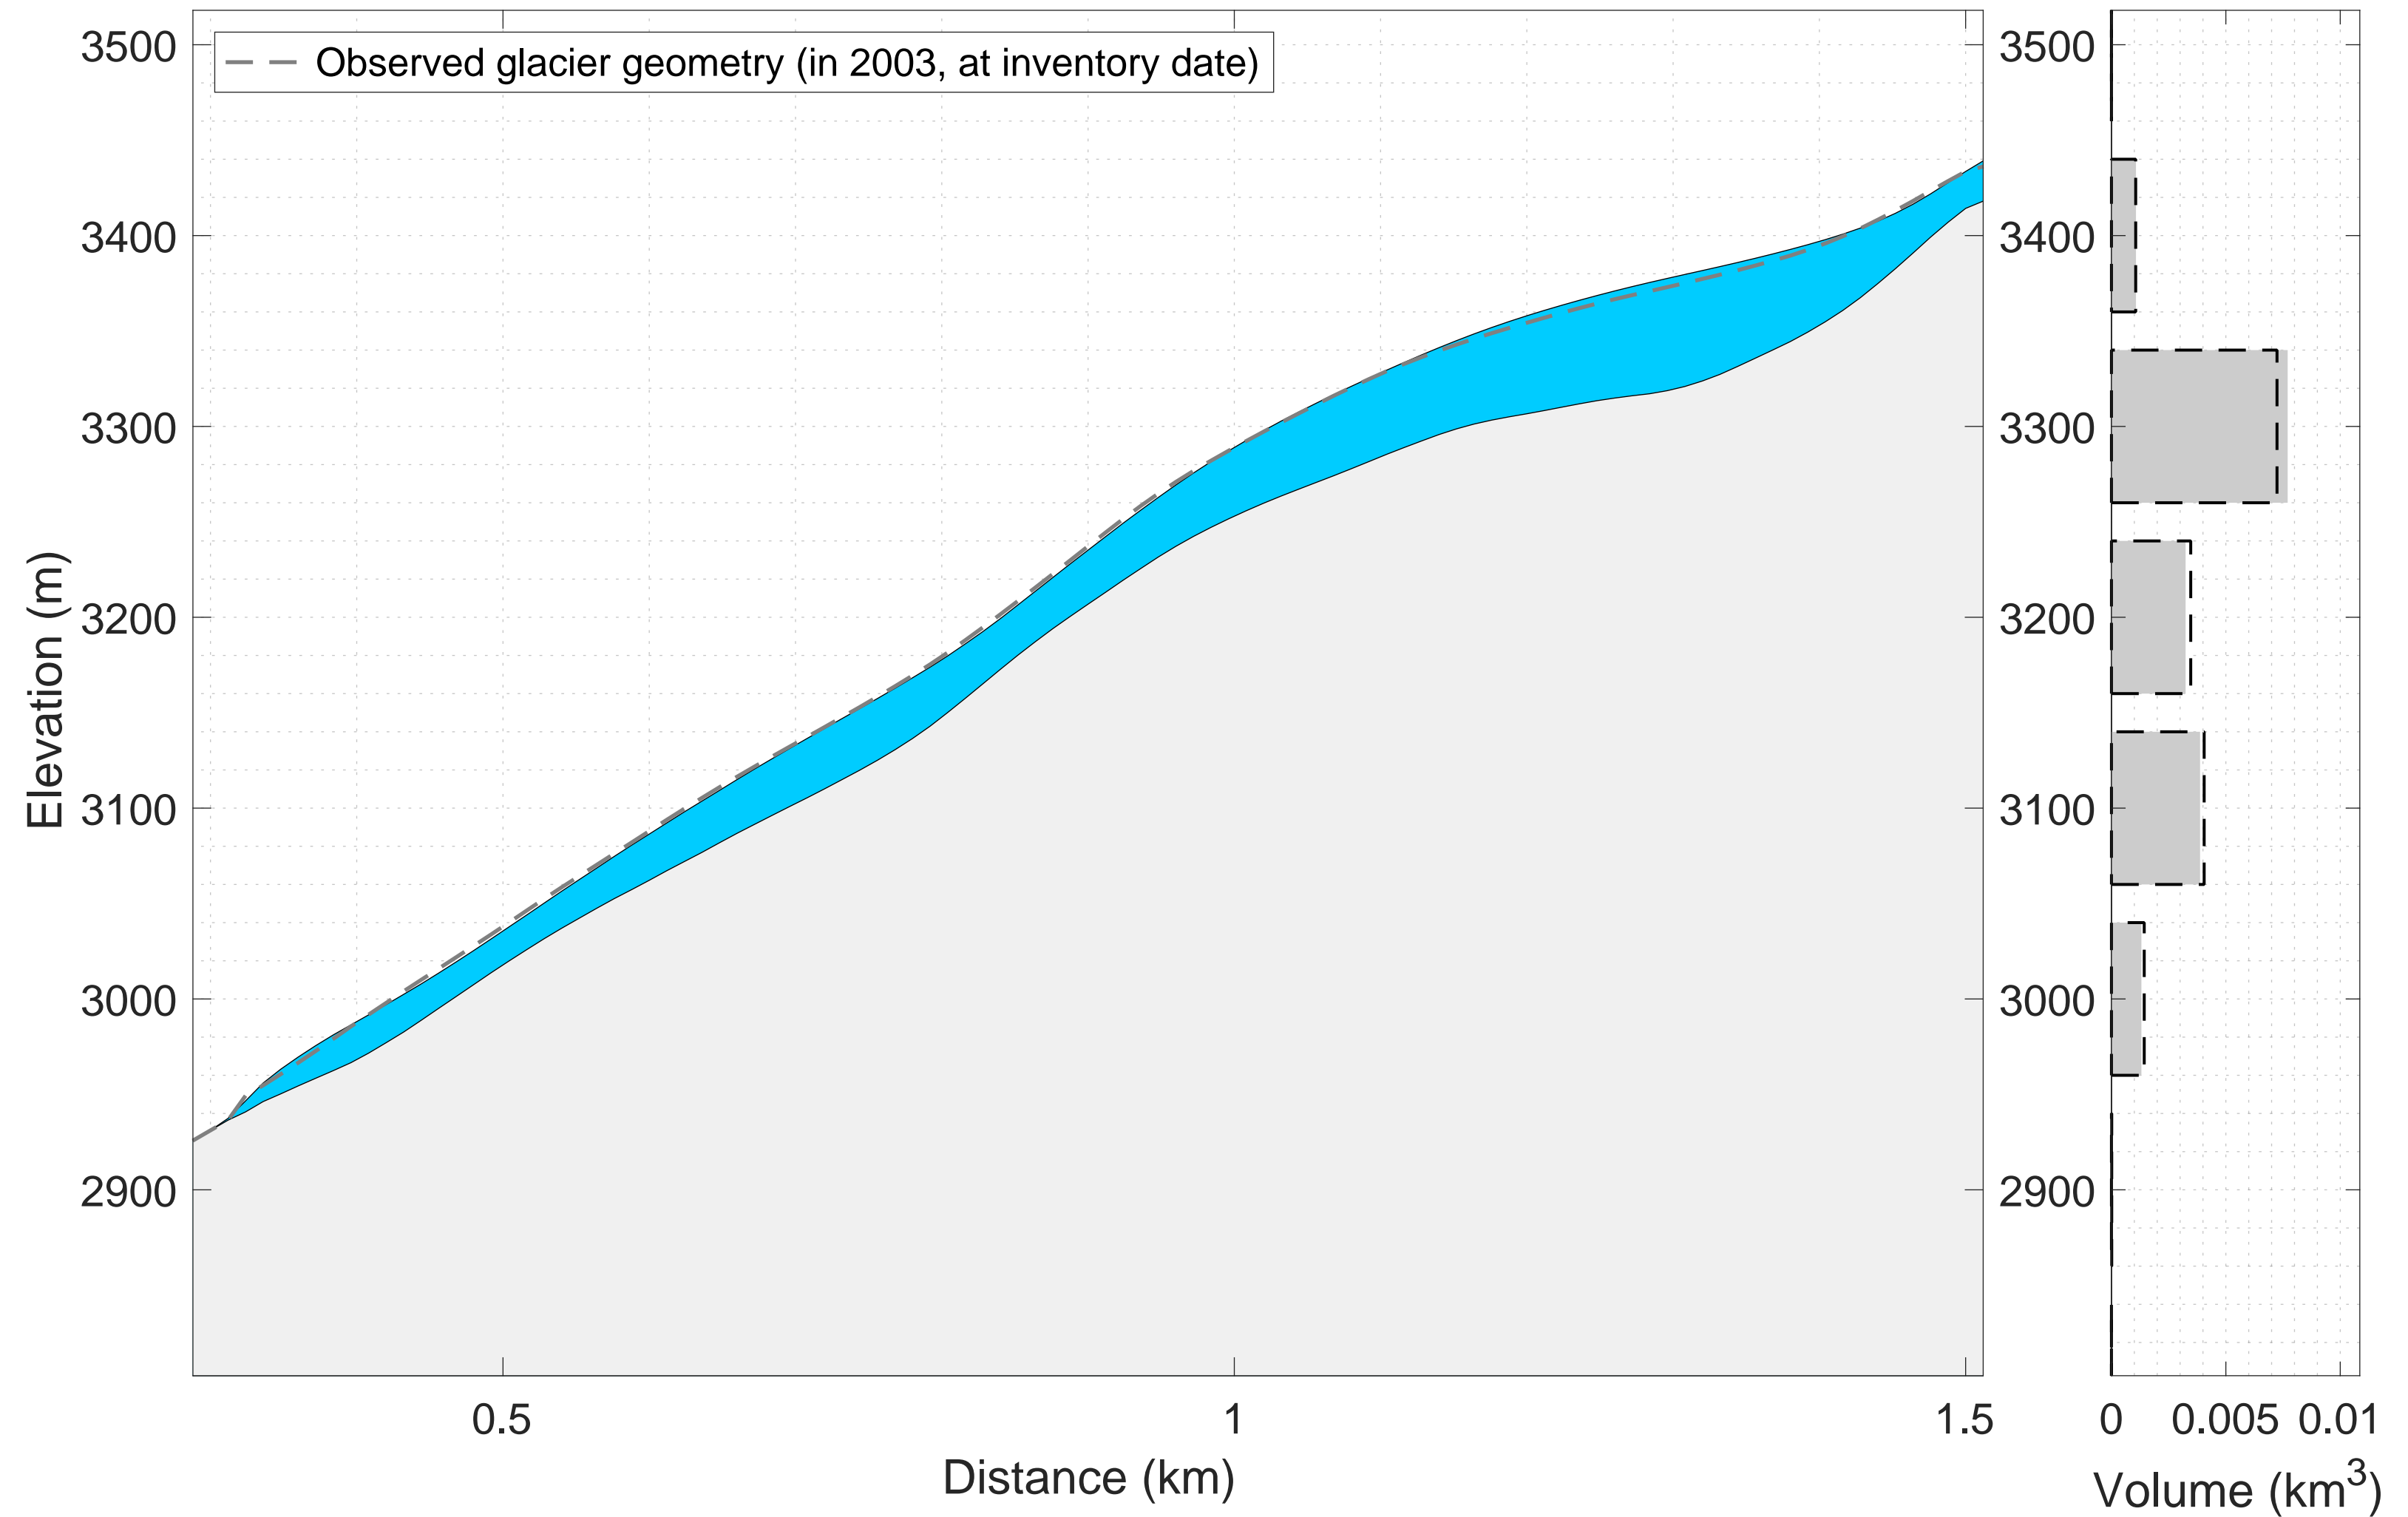

Supplement: Supplementary file 239 [file tc-13-1125-2019-supplement.zip]

**Modelled geometry (Glacier ID = 01509;  $A = 1.937\text{e-}16 \text{ Pa}^{-3} \text{ a}^{-1}$ ;  $dx = 41 \text{ m}$ )**

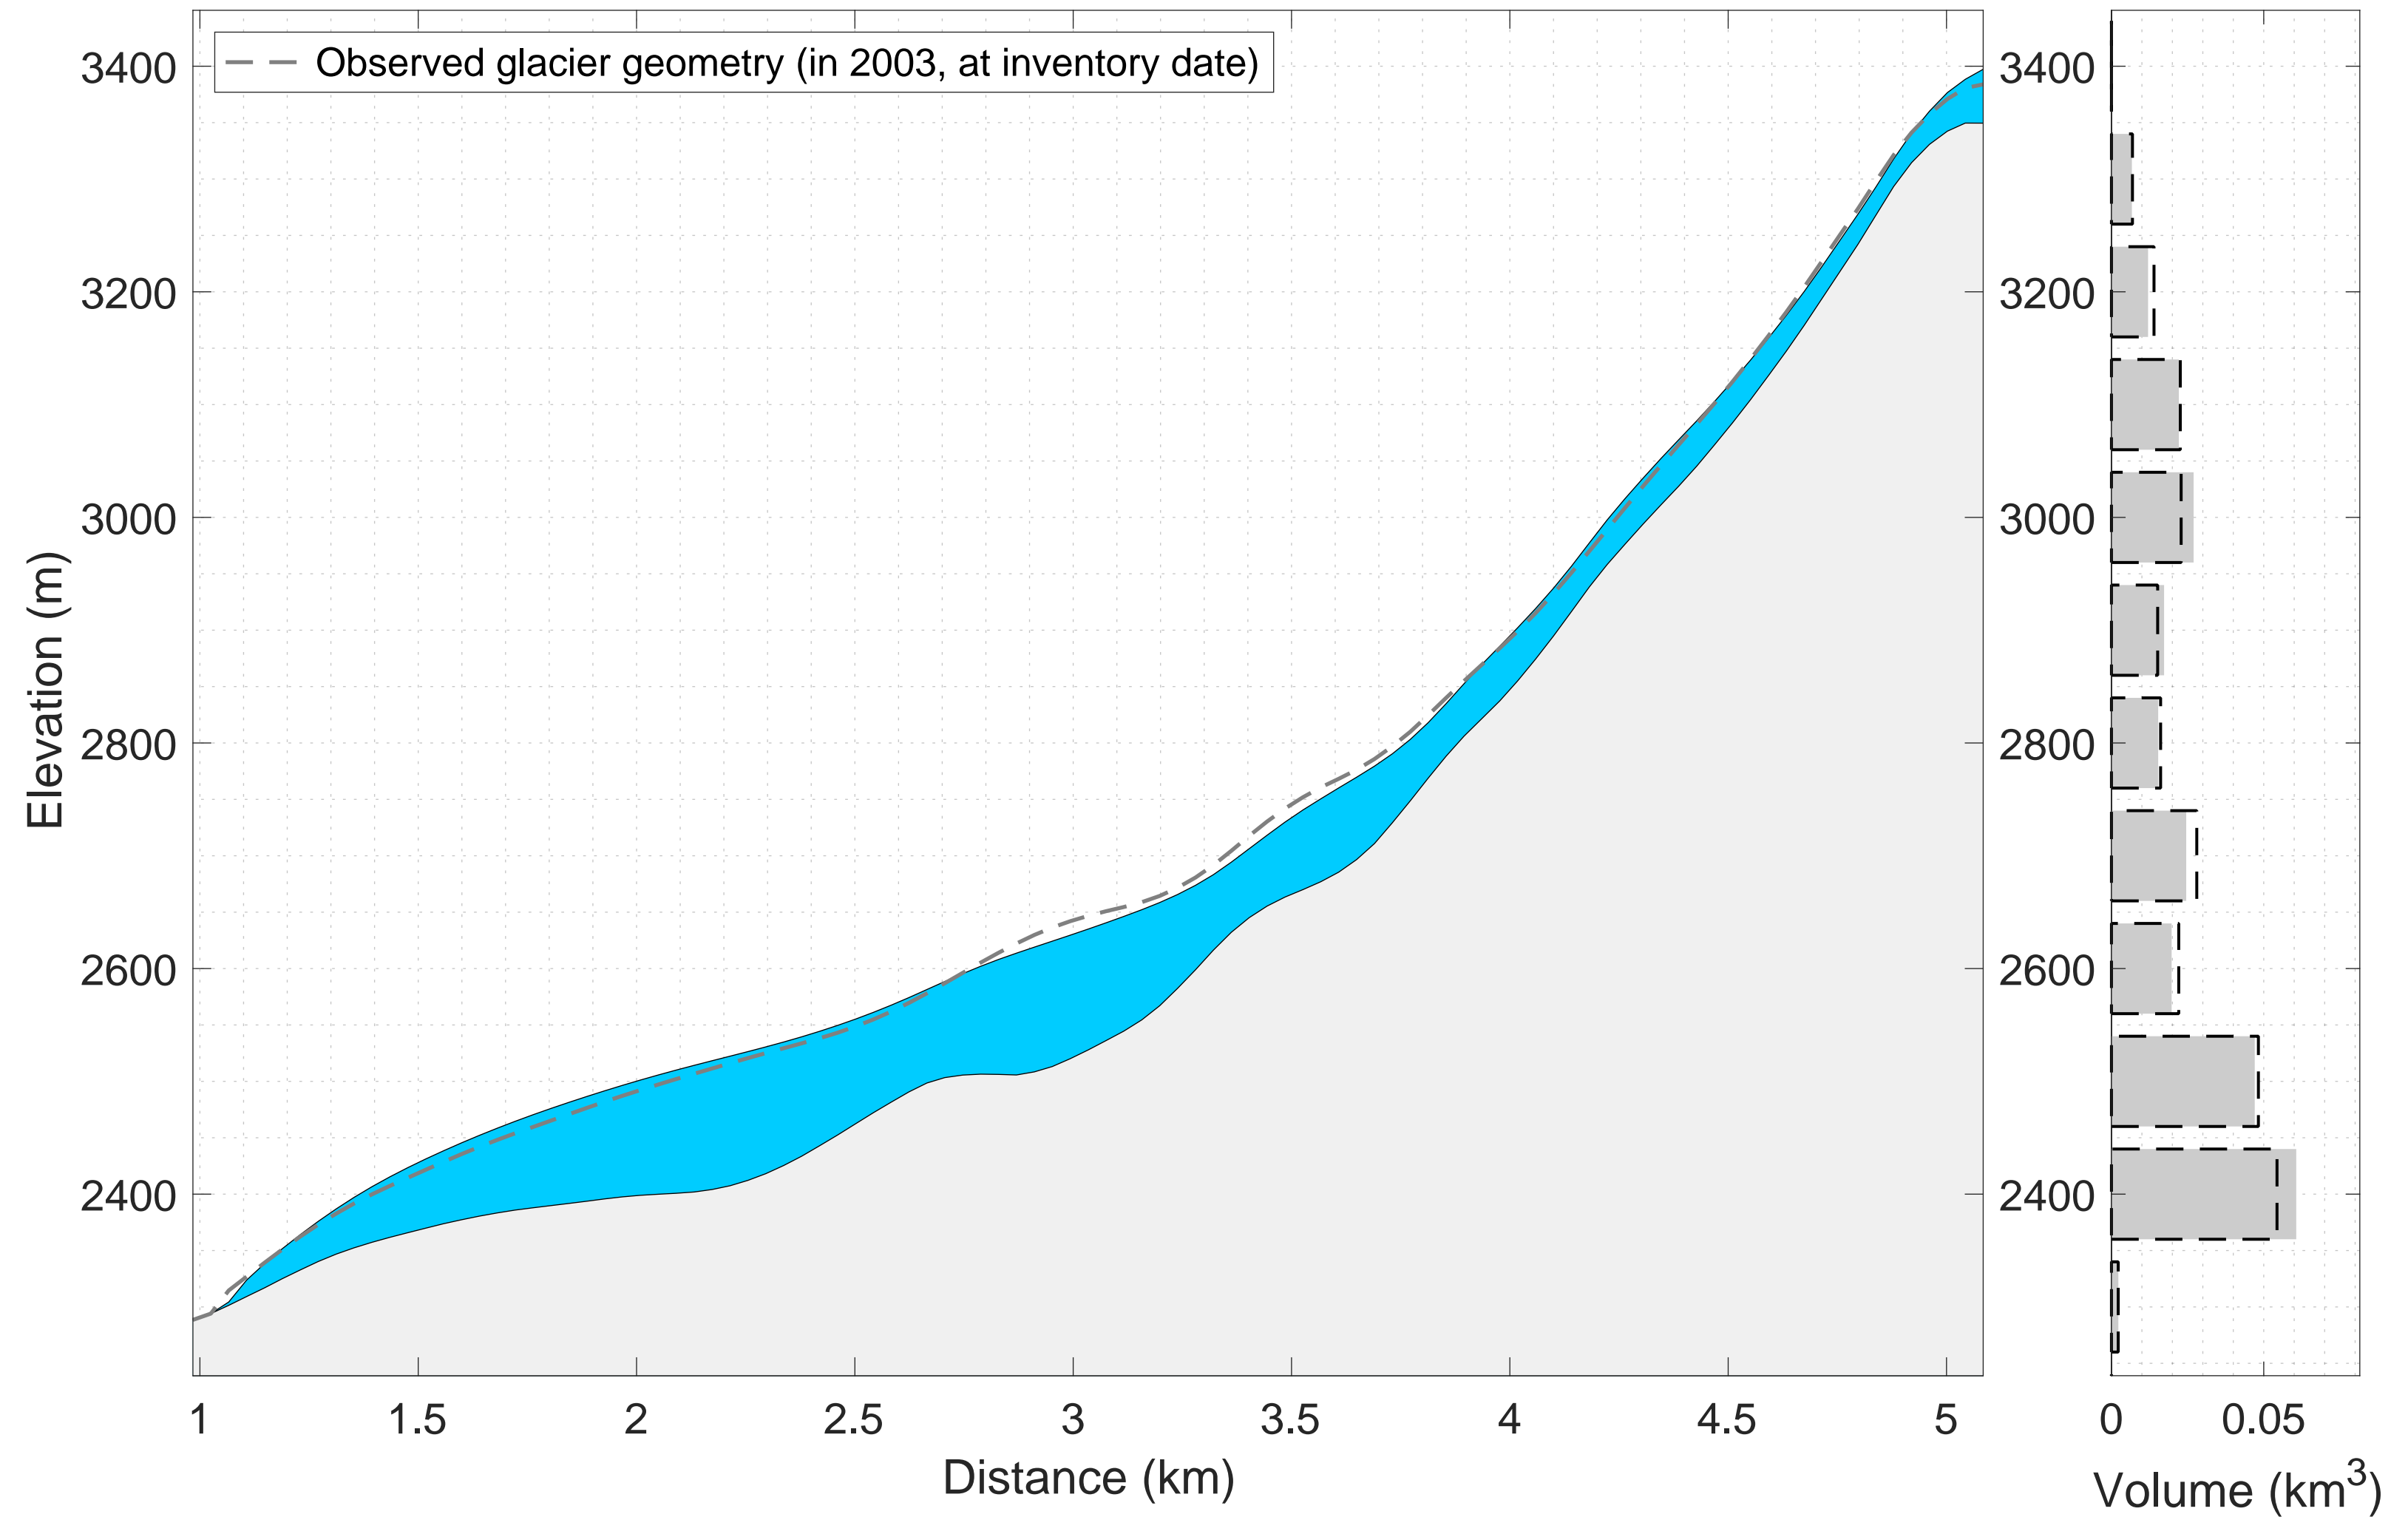

Supplement: Supplementary file 240 [file tc-13-1125-2019-supplement.zip]

**Modelled geometry (Glacier ID = 03683;  $A = 1.8344\text{e-}16 \text{ Pa}^{-3} \text{ a}^{-1}$ ;  $dx = 28 \text{ m}$ )**

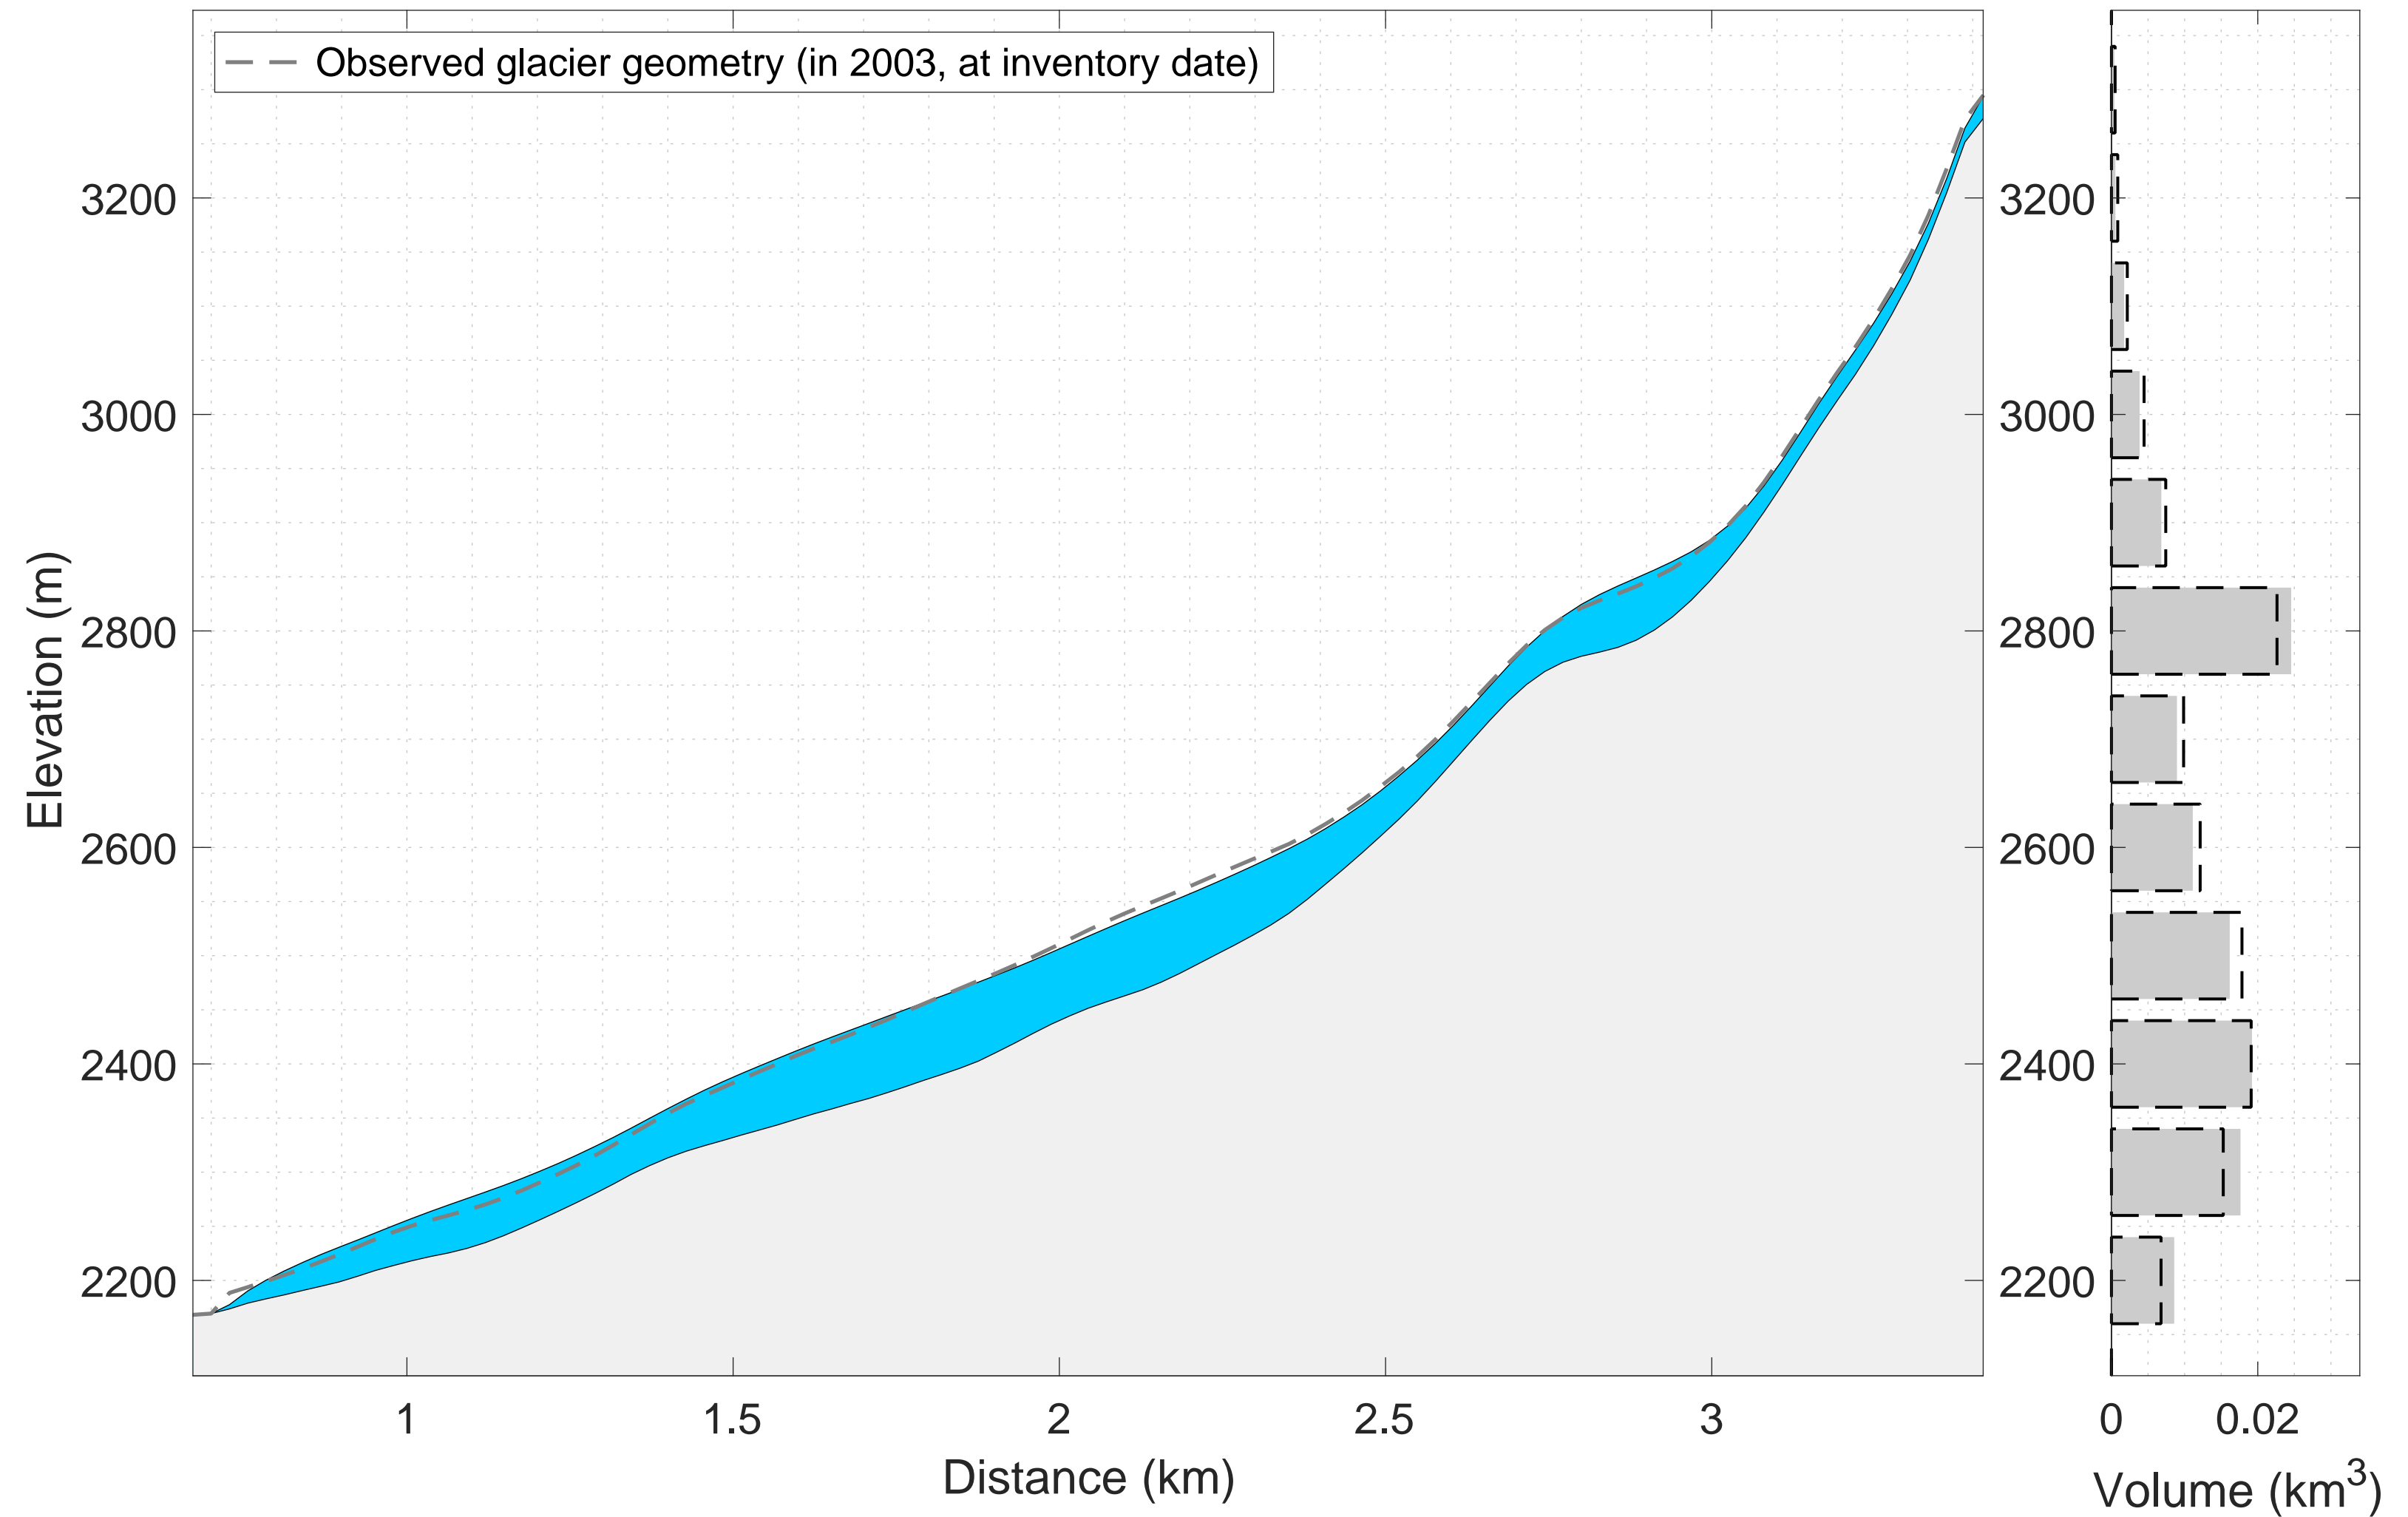

Supplement: Supplementary file 241 [file tc-13-1125-2019-supplement.zip]

**Modelled geometry (Glacier ID = 01550;  $A = 2.1059\text{e-}16 \text{ Pa}^{-3} \text{ a}^{-1}$ ;  $dx = 35 \text{ m}$ )**

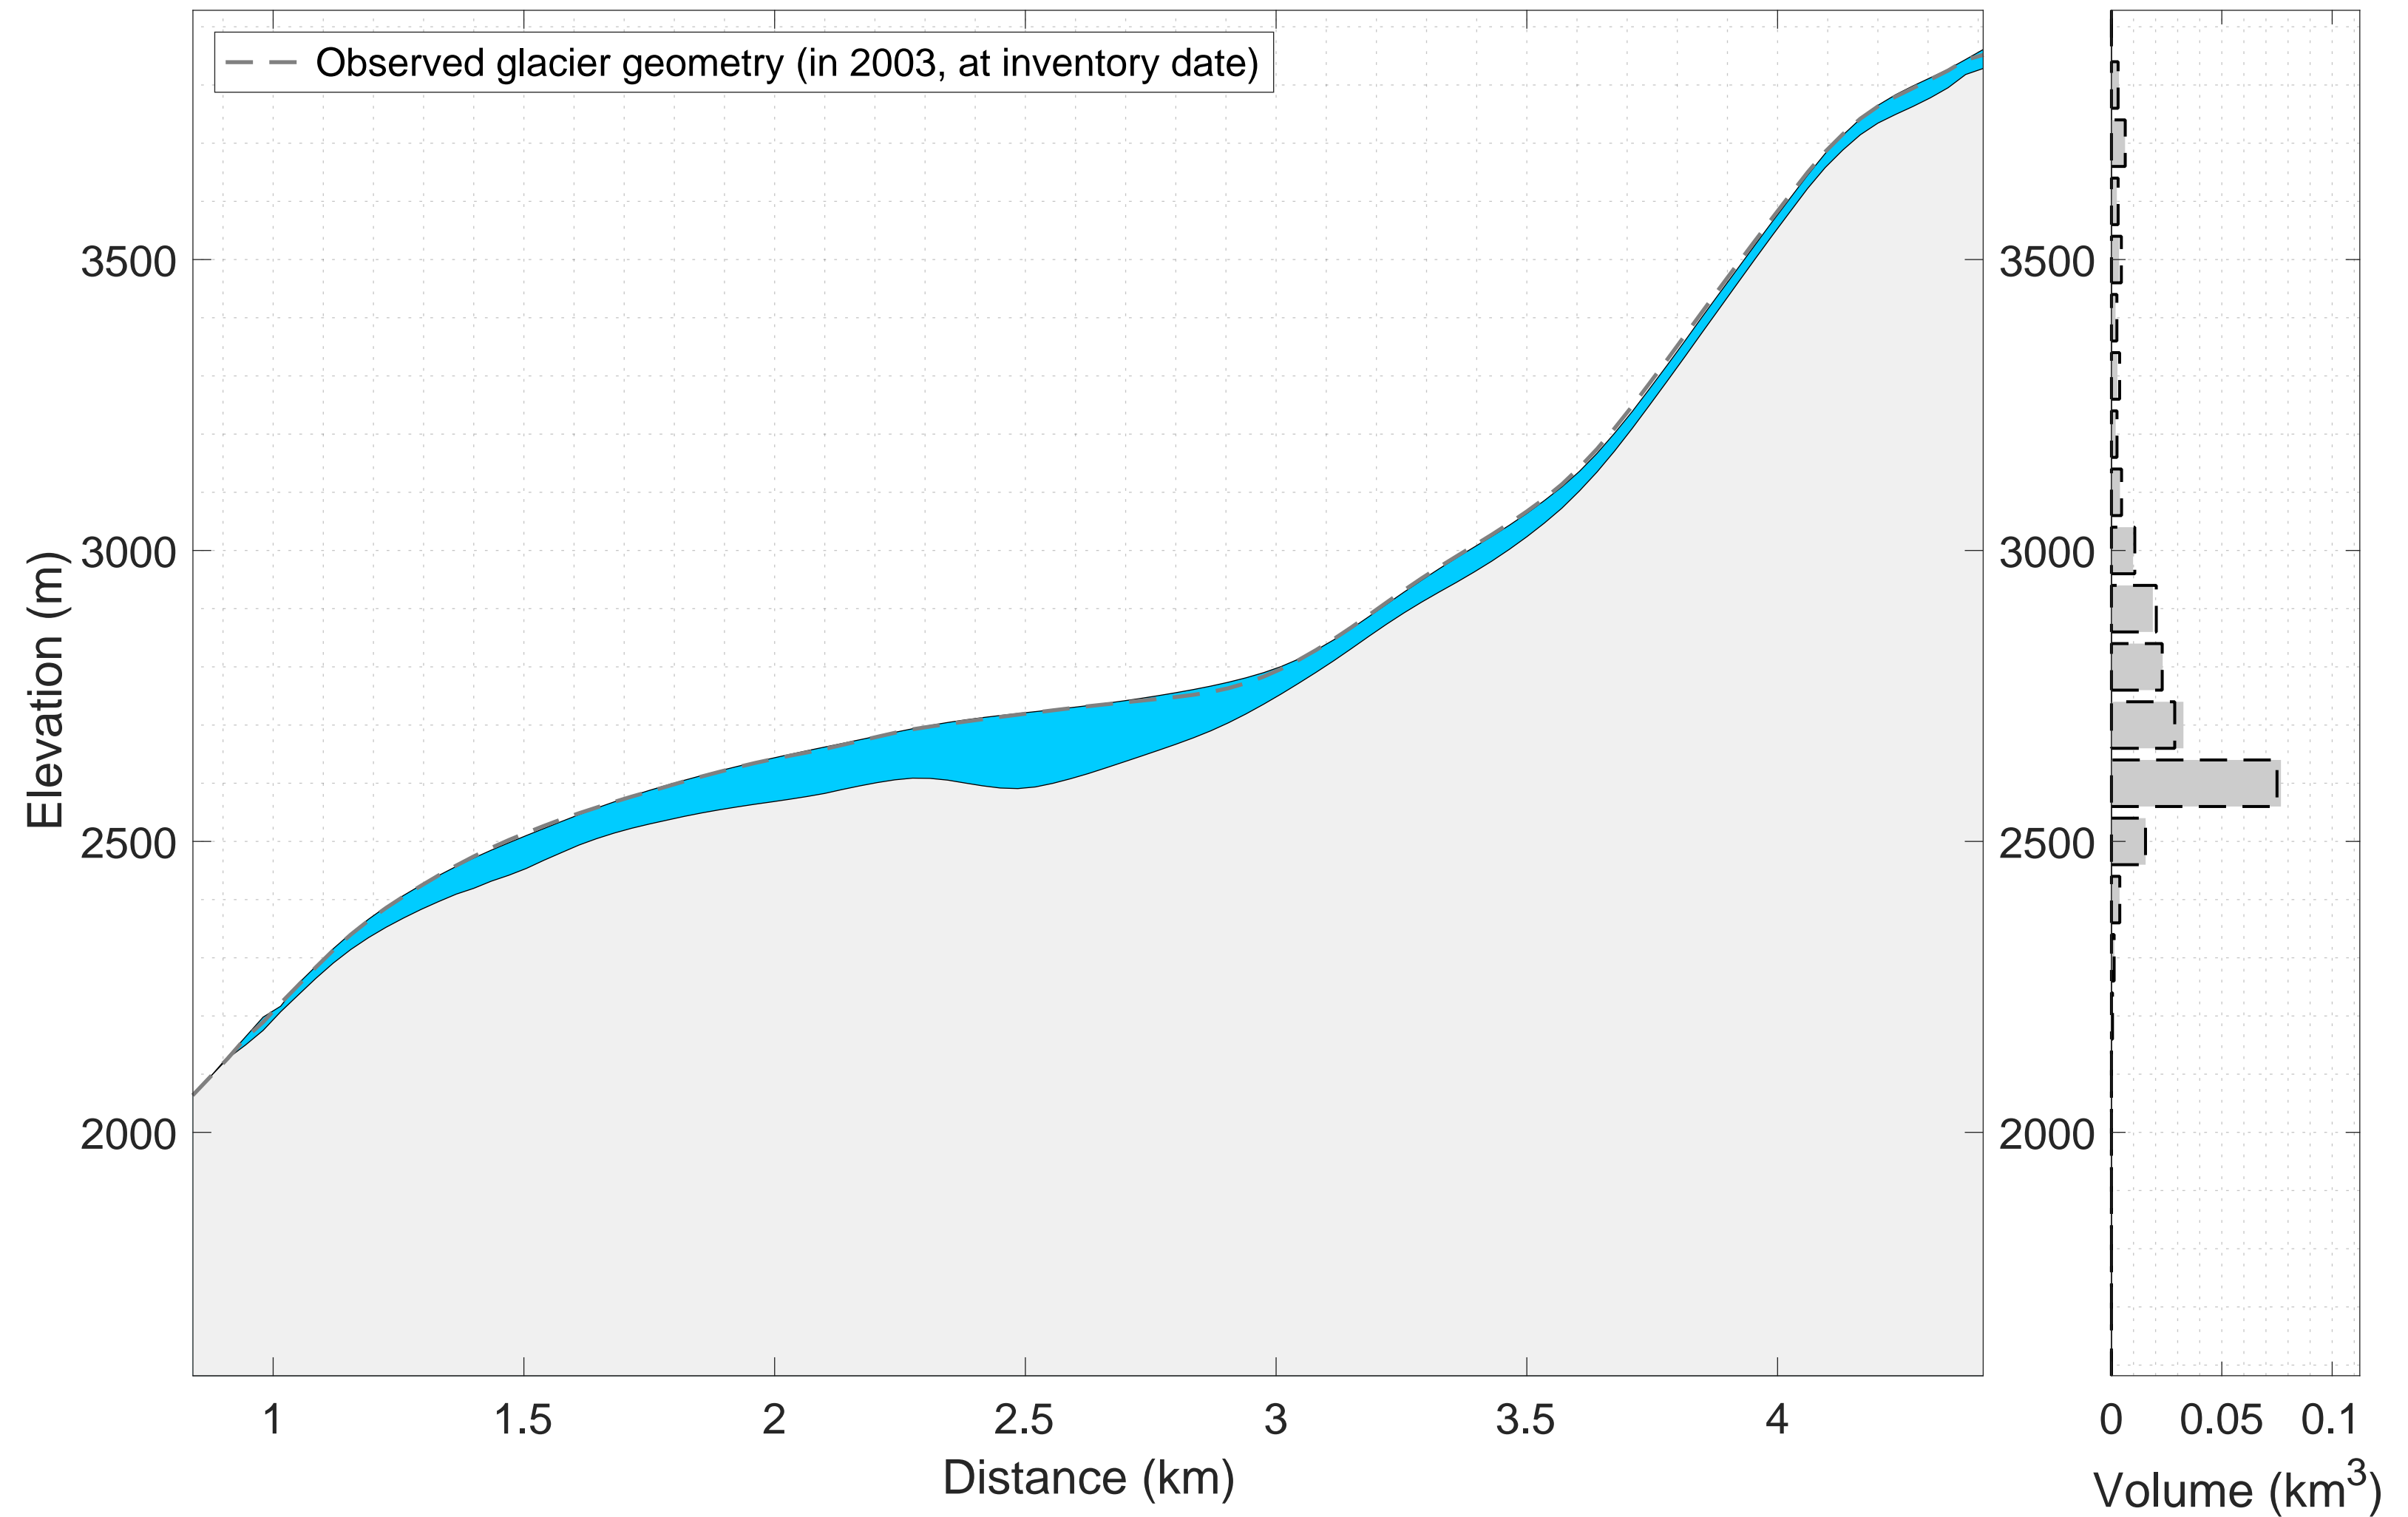

Supplement: Supplementary file 242 [file tc-13-1125-2019-supplement.zip]

**Modelled geometry (Glacier ID = 00862;  $A = 8.2487\text{e-}17 \text{ Pa}^{-3} \text{ a}^{-1}$ ;  $dx = 10 \text{ m}$ )**

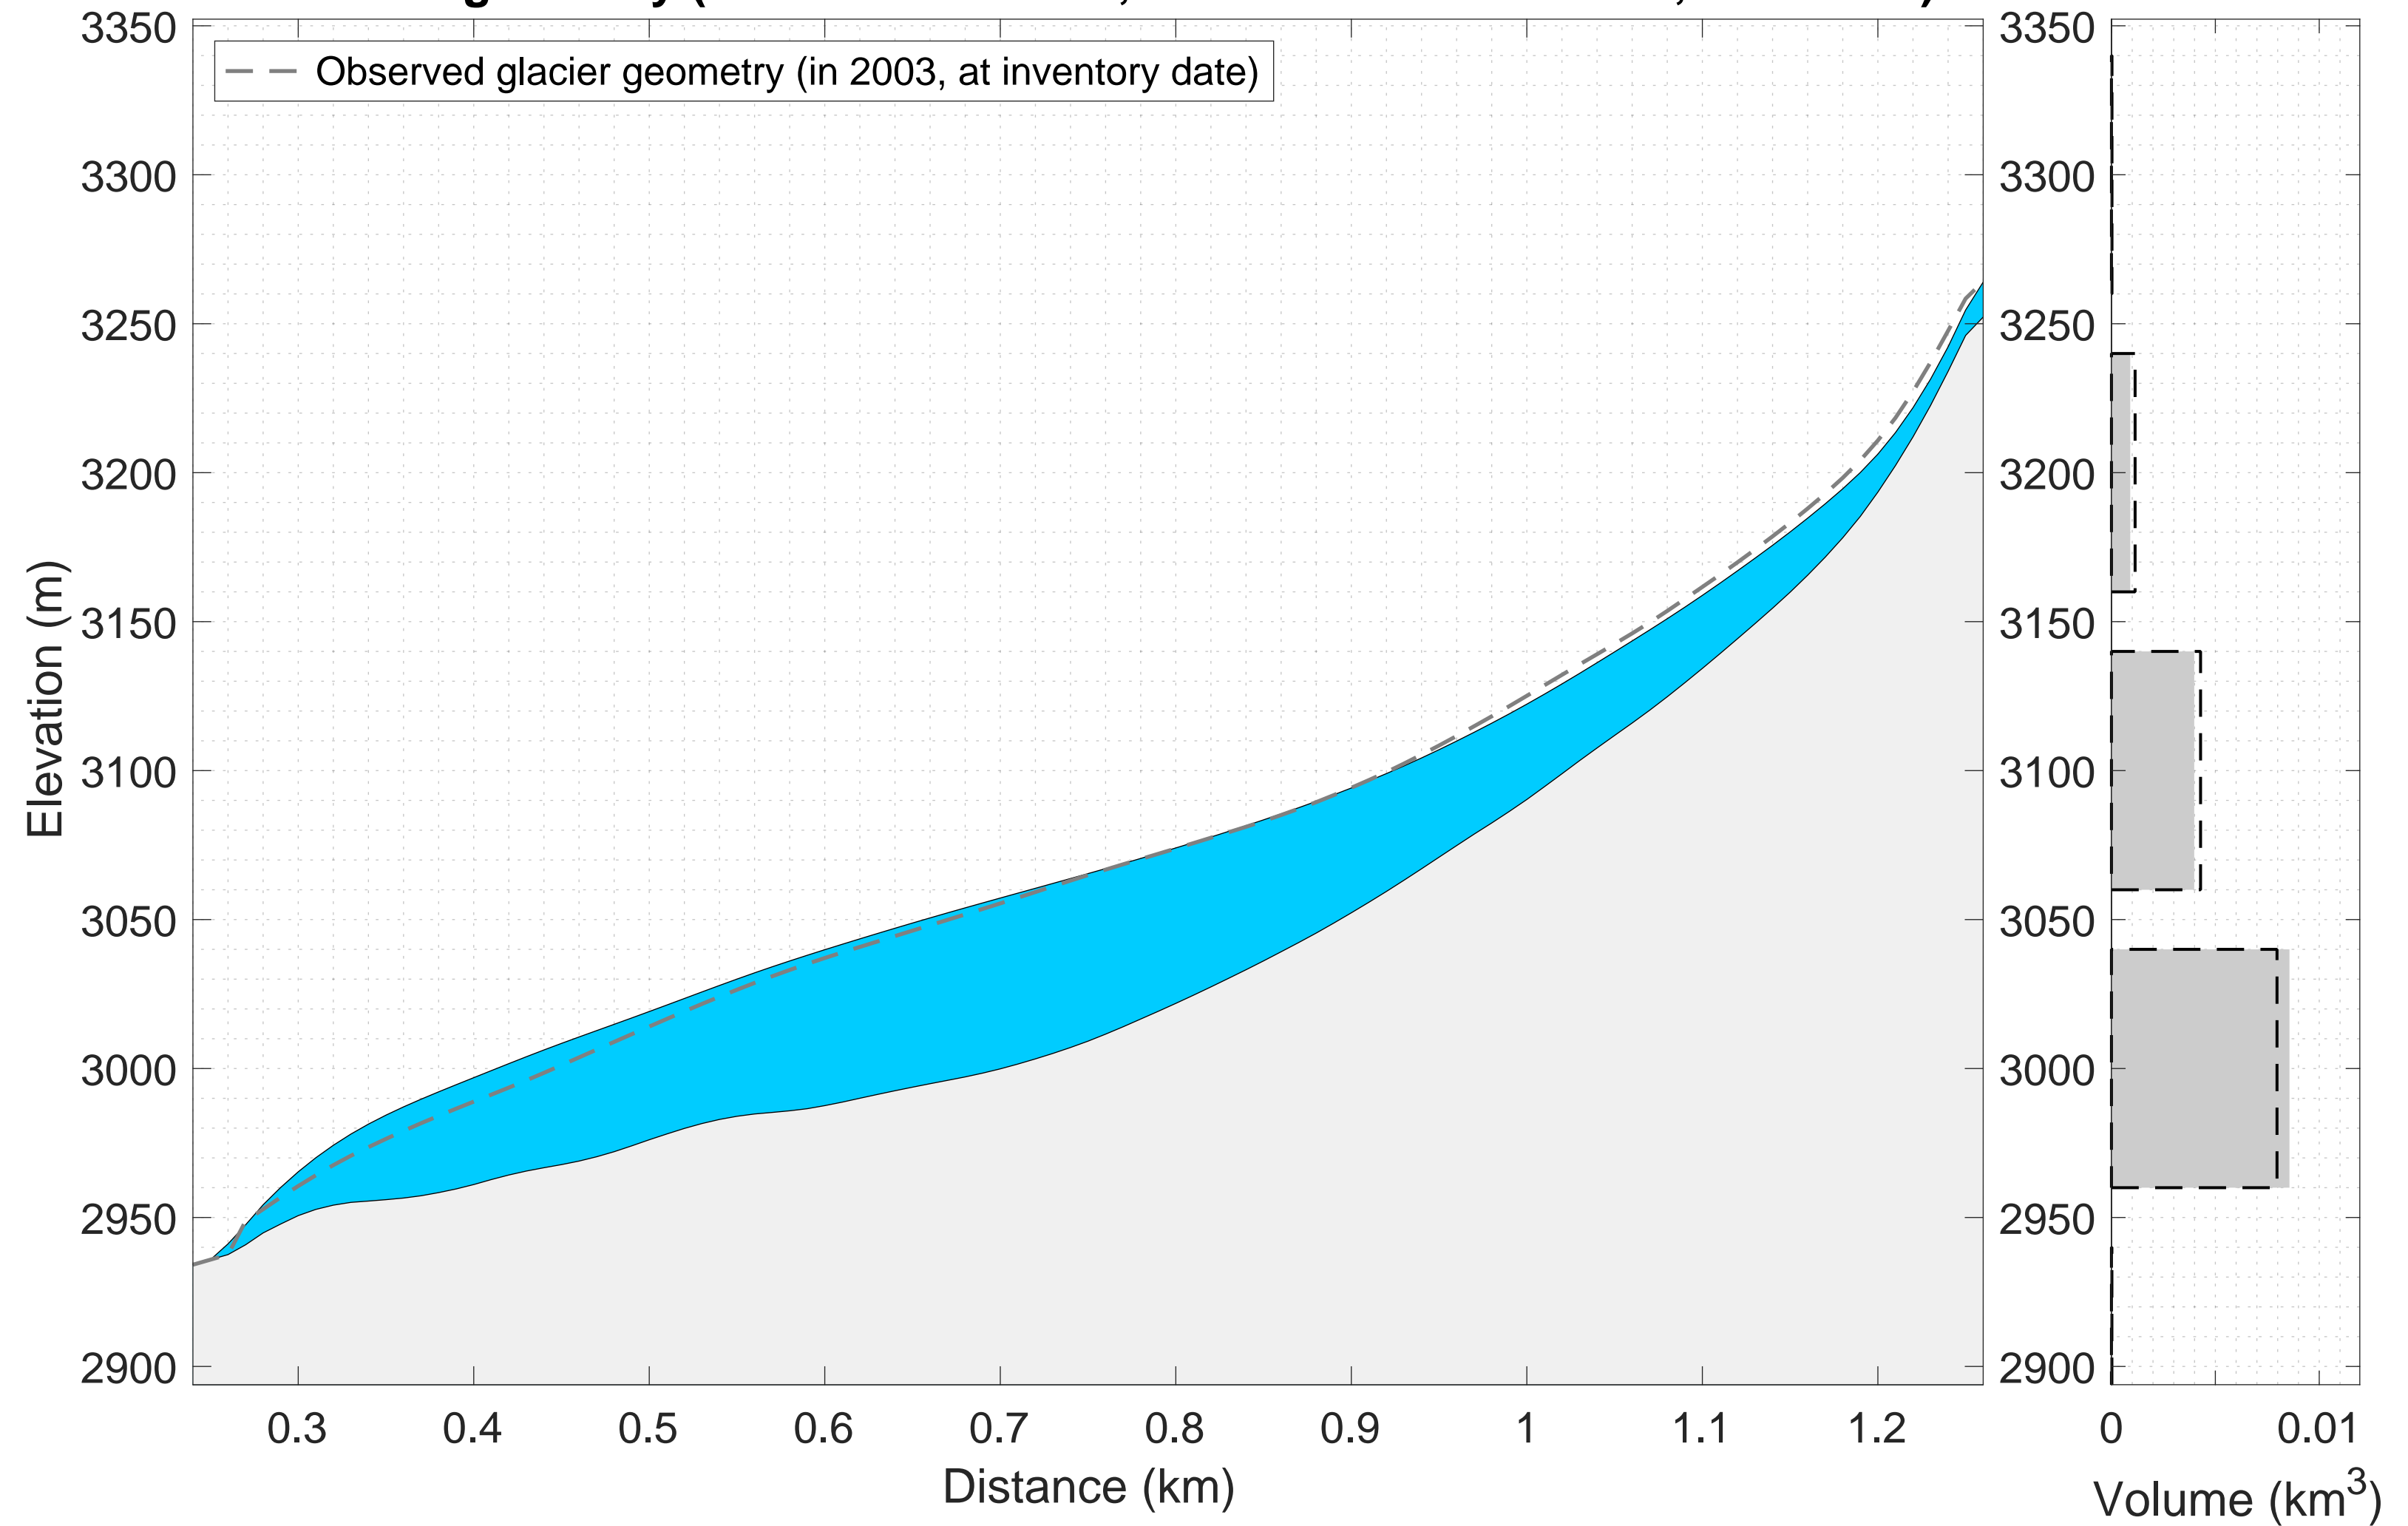

Supplement: Supplementary file 243 [file tc-13-1125-2019-supplement.zip]

**Modelled geometry (Glacier ID = 03680;  $A = 1.3529\text{e-}16 \text{ Pa}^{-3} \text{ a}^{-1}$ ;  $dx = 23 \text{ m}$ )**

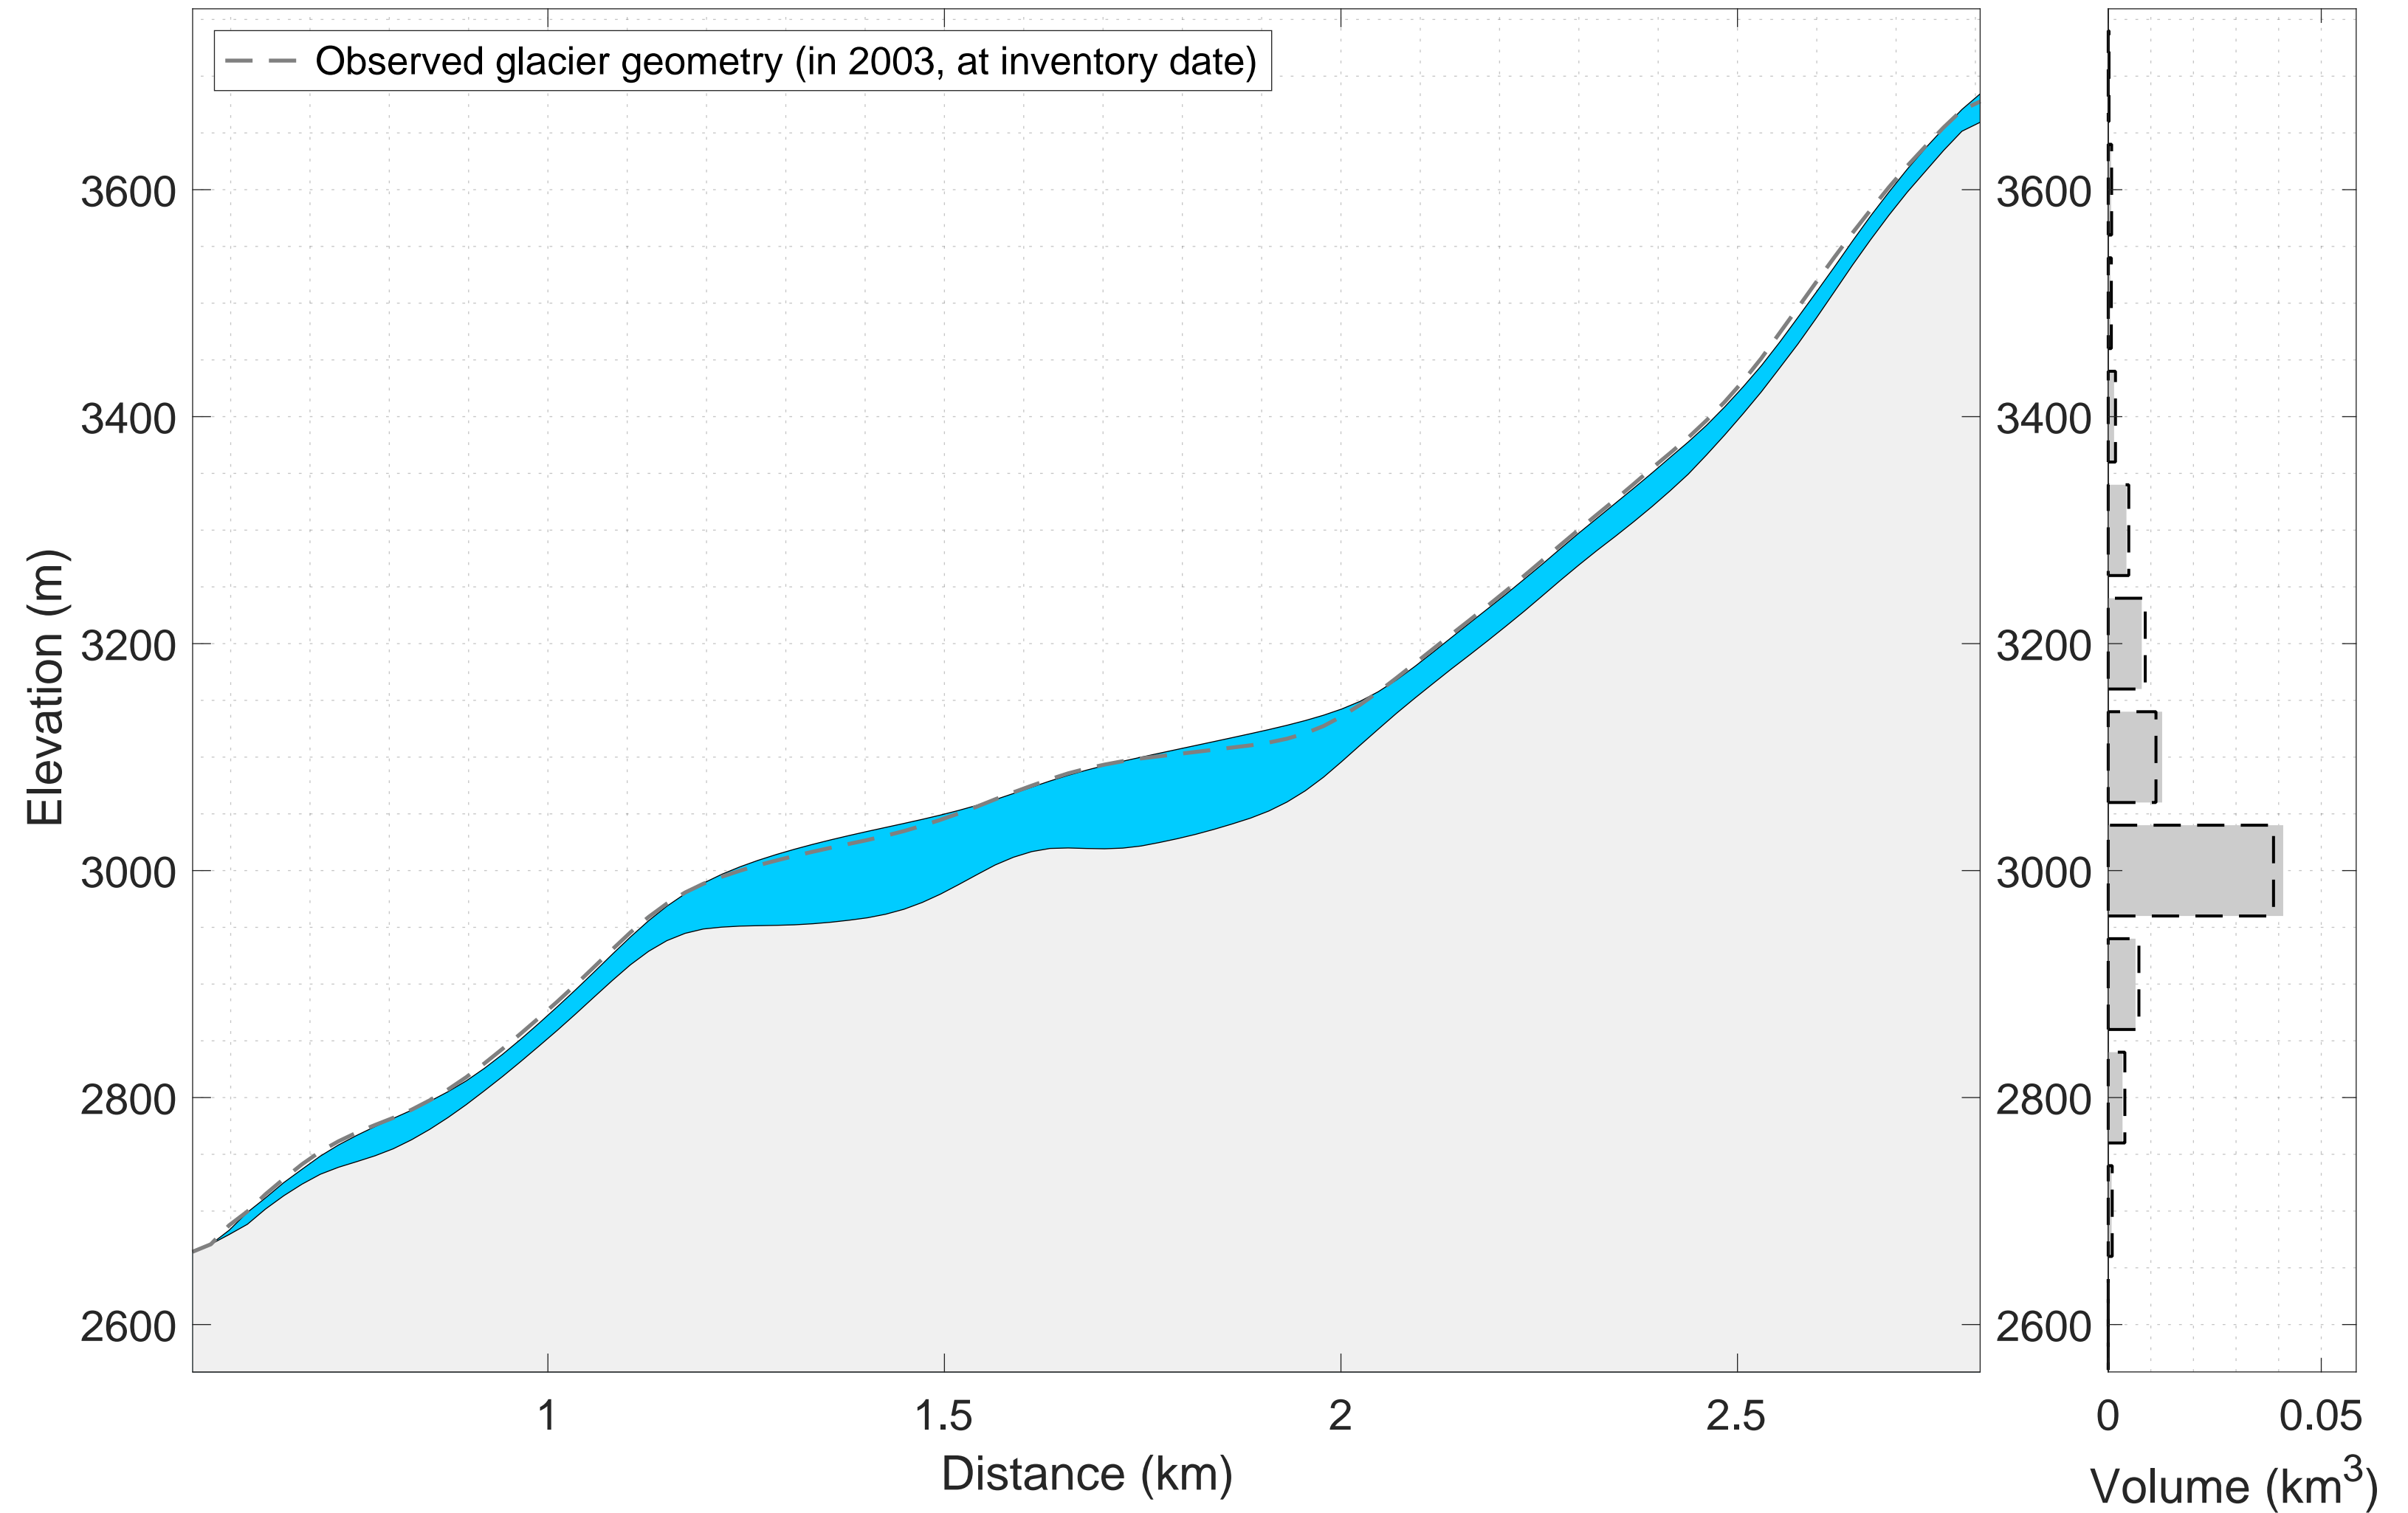

Supplement: Supplementary file 244 [file tc-13-1125-2019-supplement.zip]

**Modelled geometry (Glacier ID = 02504;  $A = 1.064\text{e-}16 \text{ Pa}^{-3} \text{ a}^{-1}$ ;  $dx = 13 \text{ m}$ )**

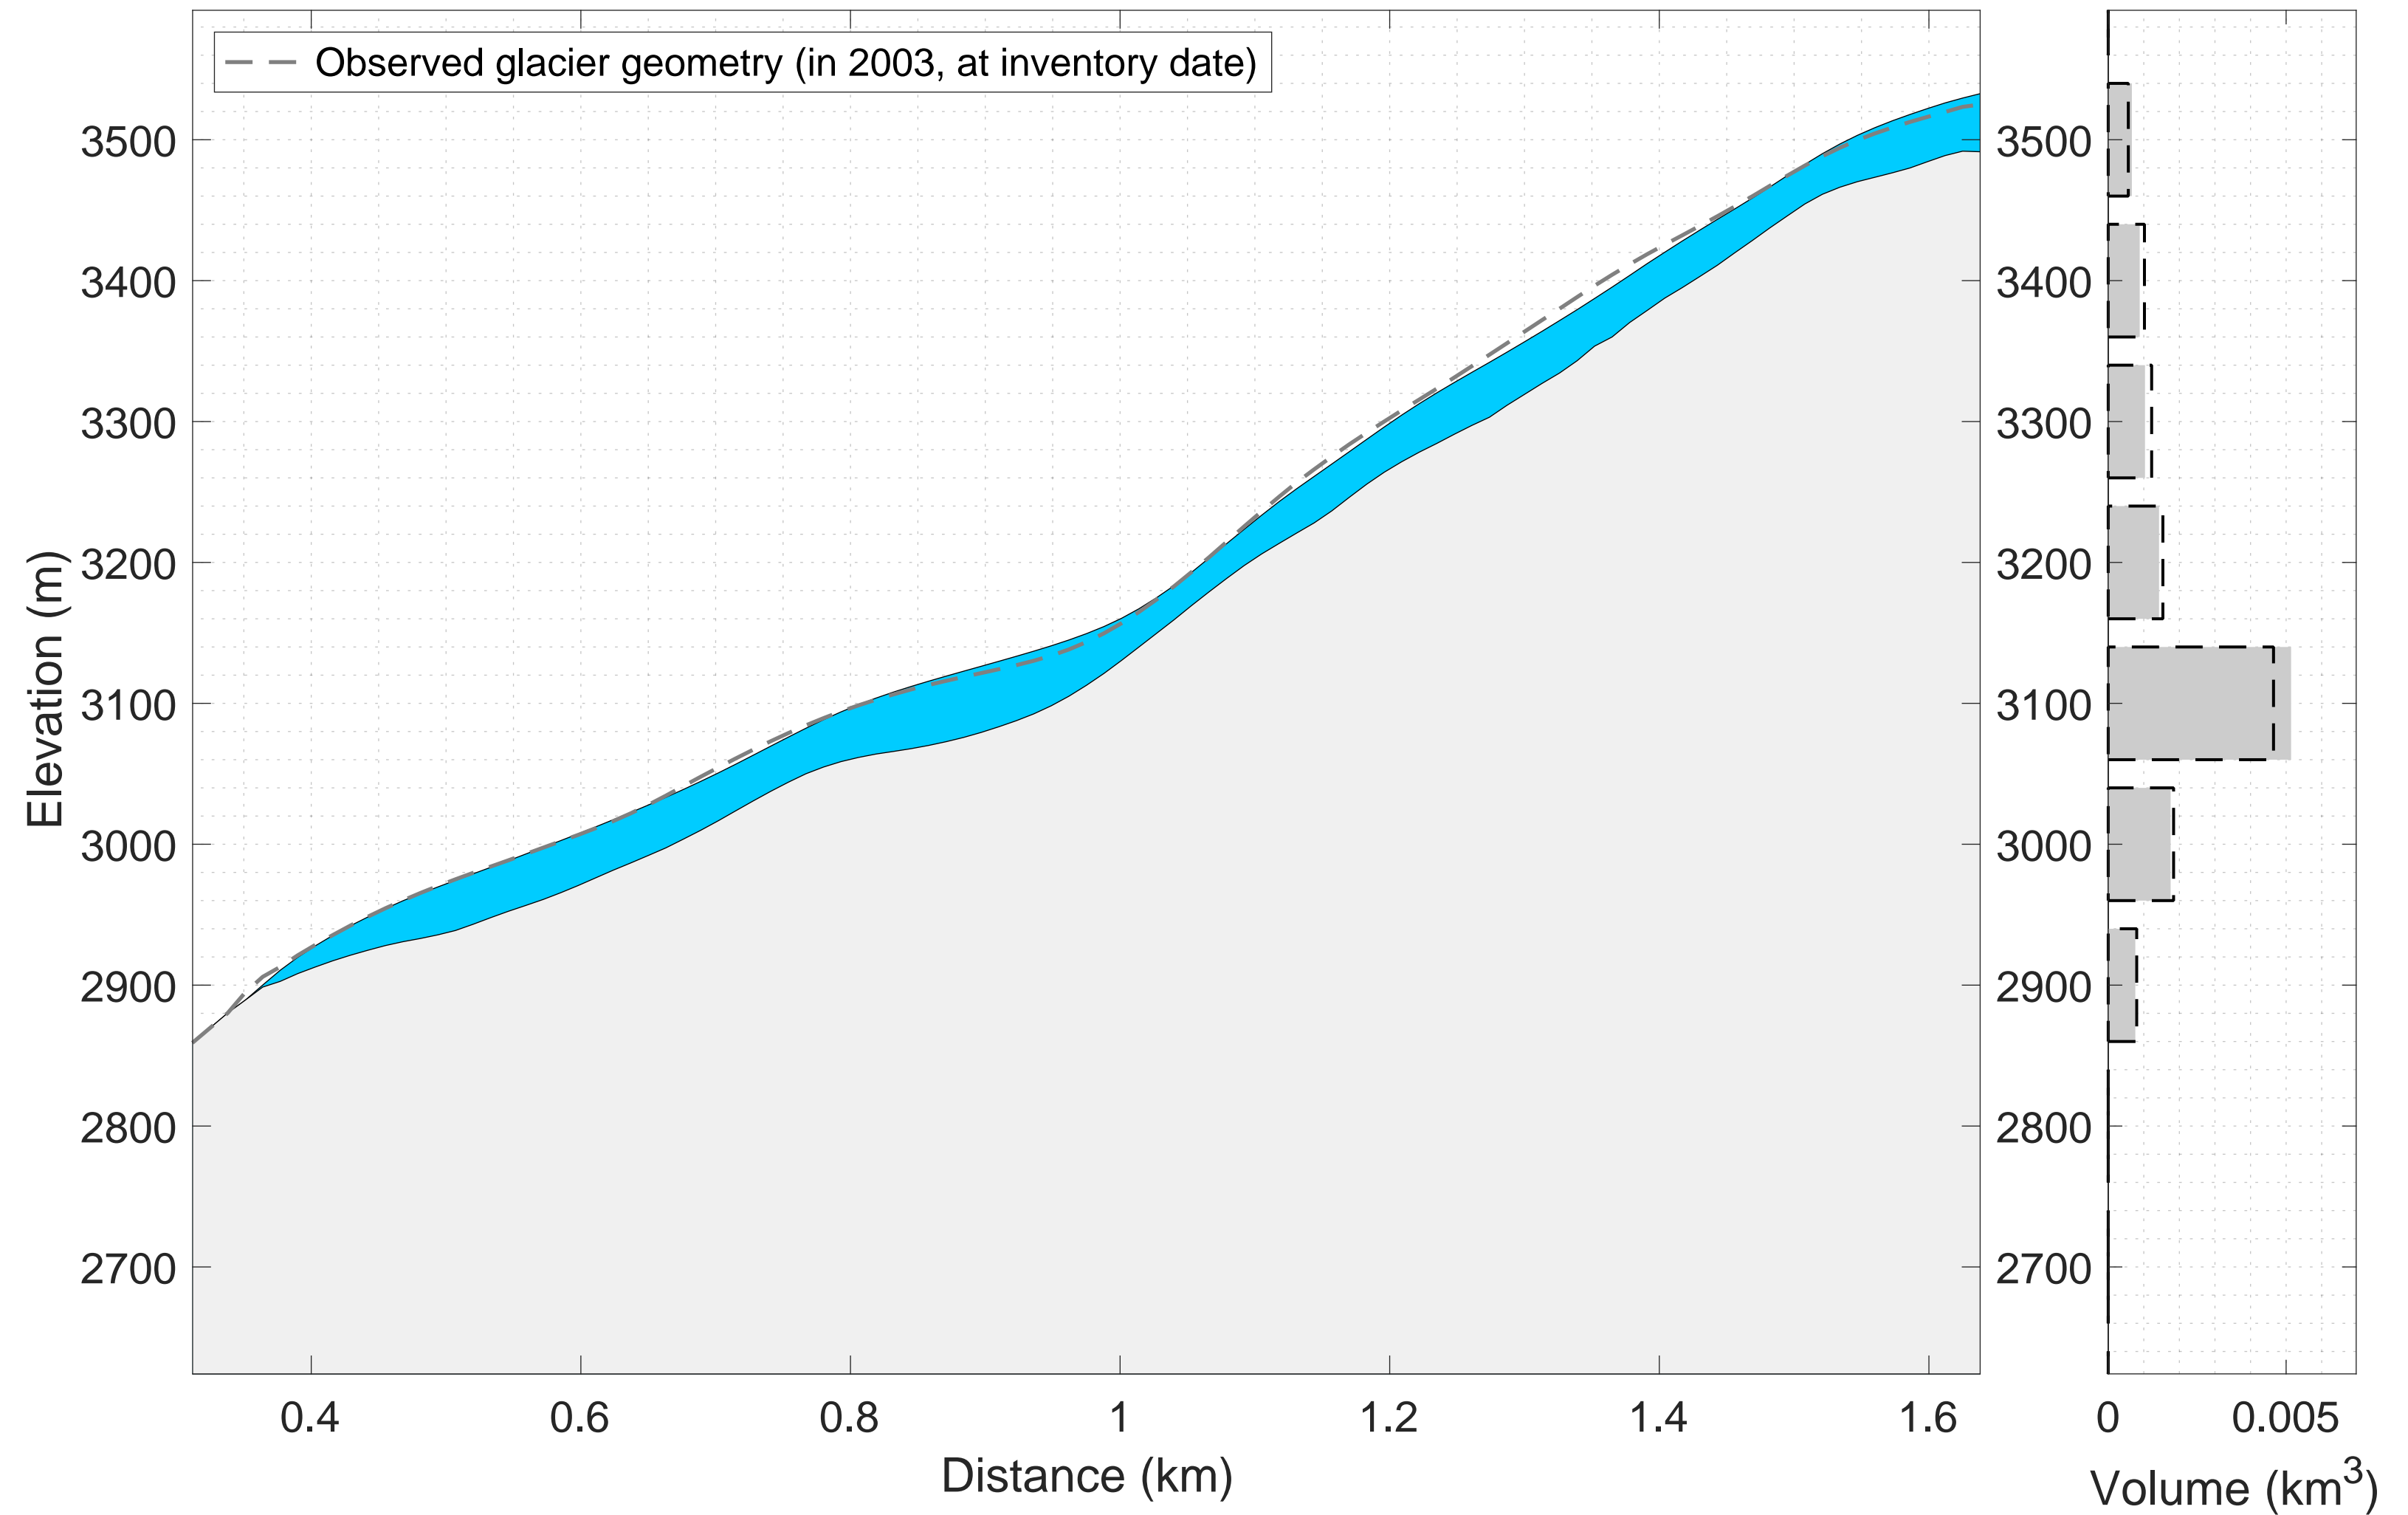

Supplement: Supplementary file 245 [file tc-13-1125-2019-supplement.zip]

**Modelled geometry (Glacier ID = 00164;  $A = 8.8703\text{e-}17 \text{ Pa}^{-3} \text{ a}^{-1}$ ;  $dx = 13 \text{ m}$ )**

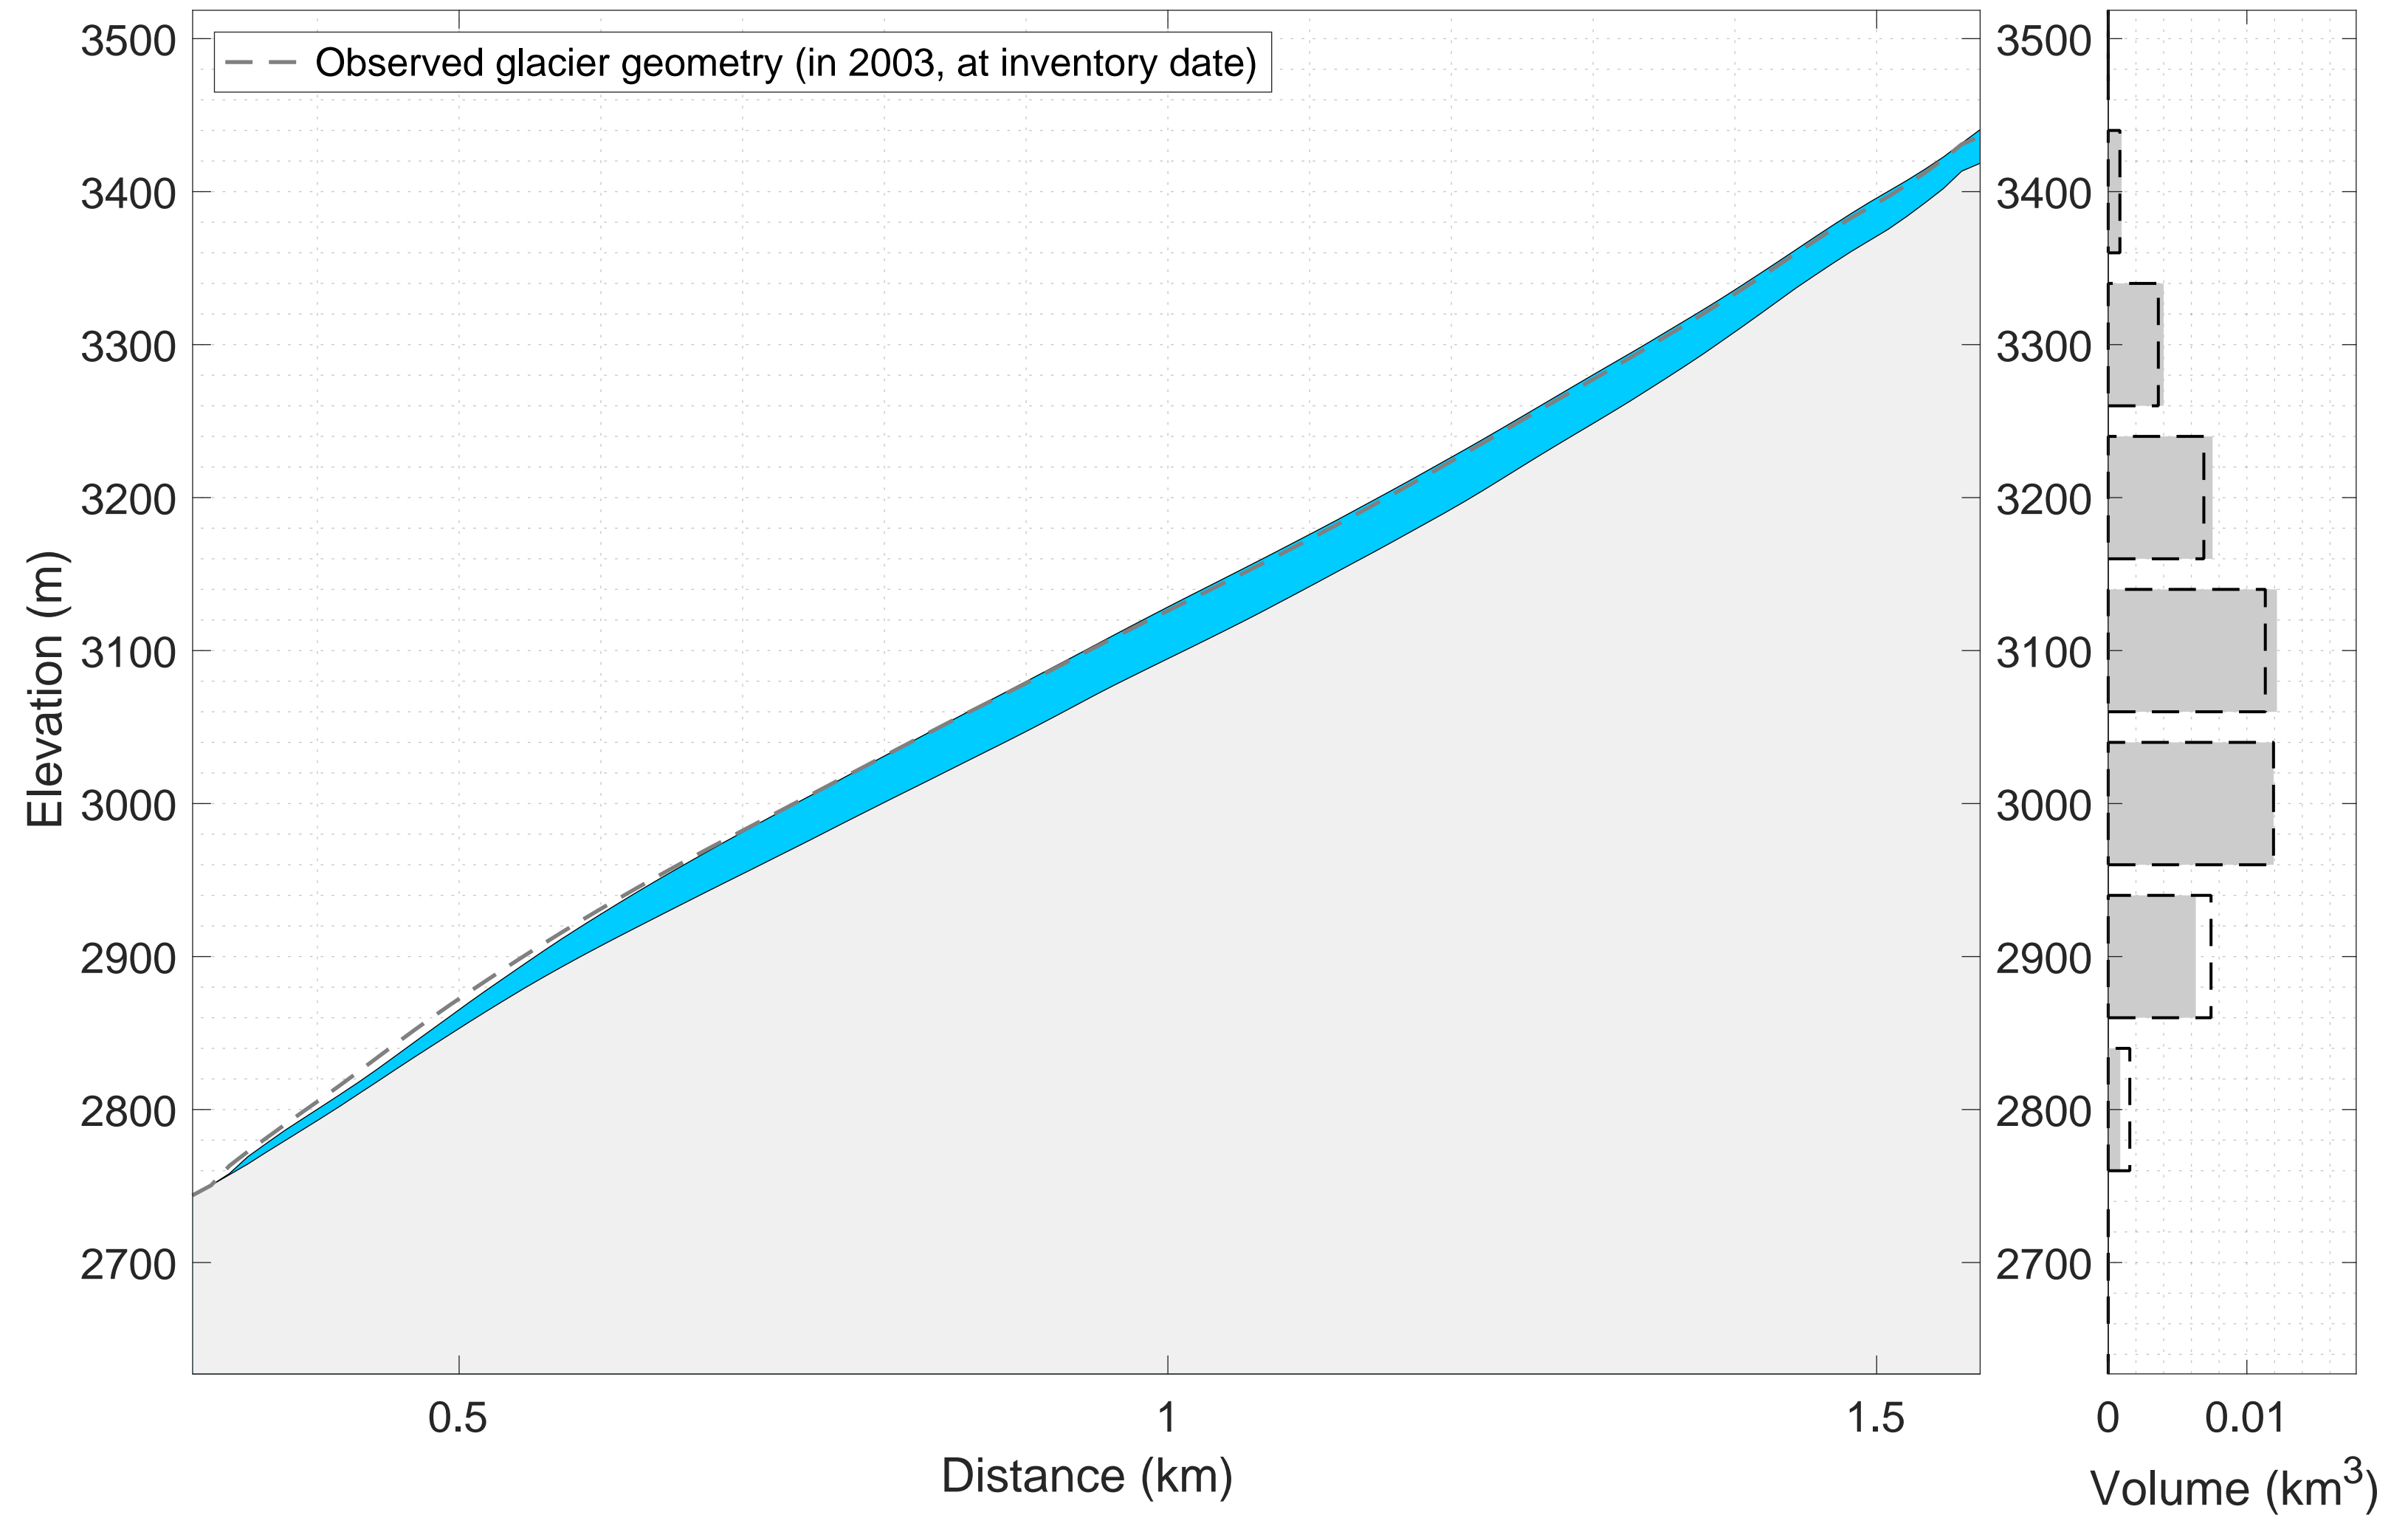

Supplement: Supplementary file 246 [file tc-13-1125-2019-supplement.zip]

**Modelled geometry (Glacier ID = 02388;  $A = 2.2442\text{e-}17 \text{ Pa}^{-3} \text{ a}^{-1}$ ;  $dx = 19 \text{ m}$ )**

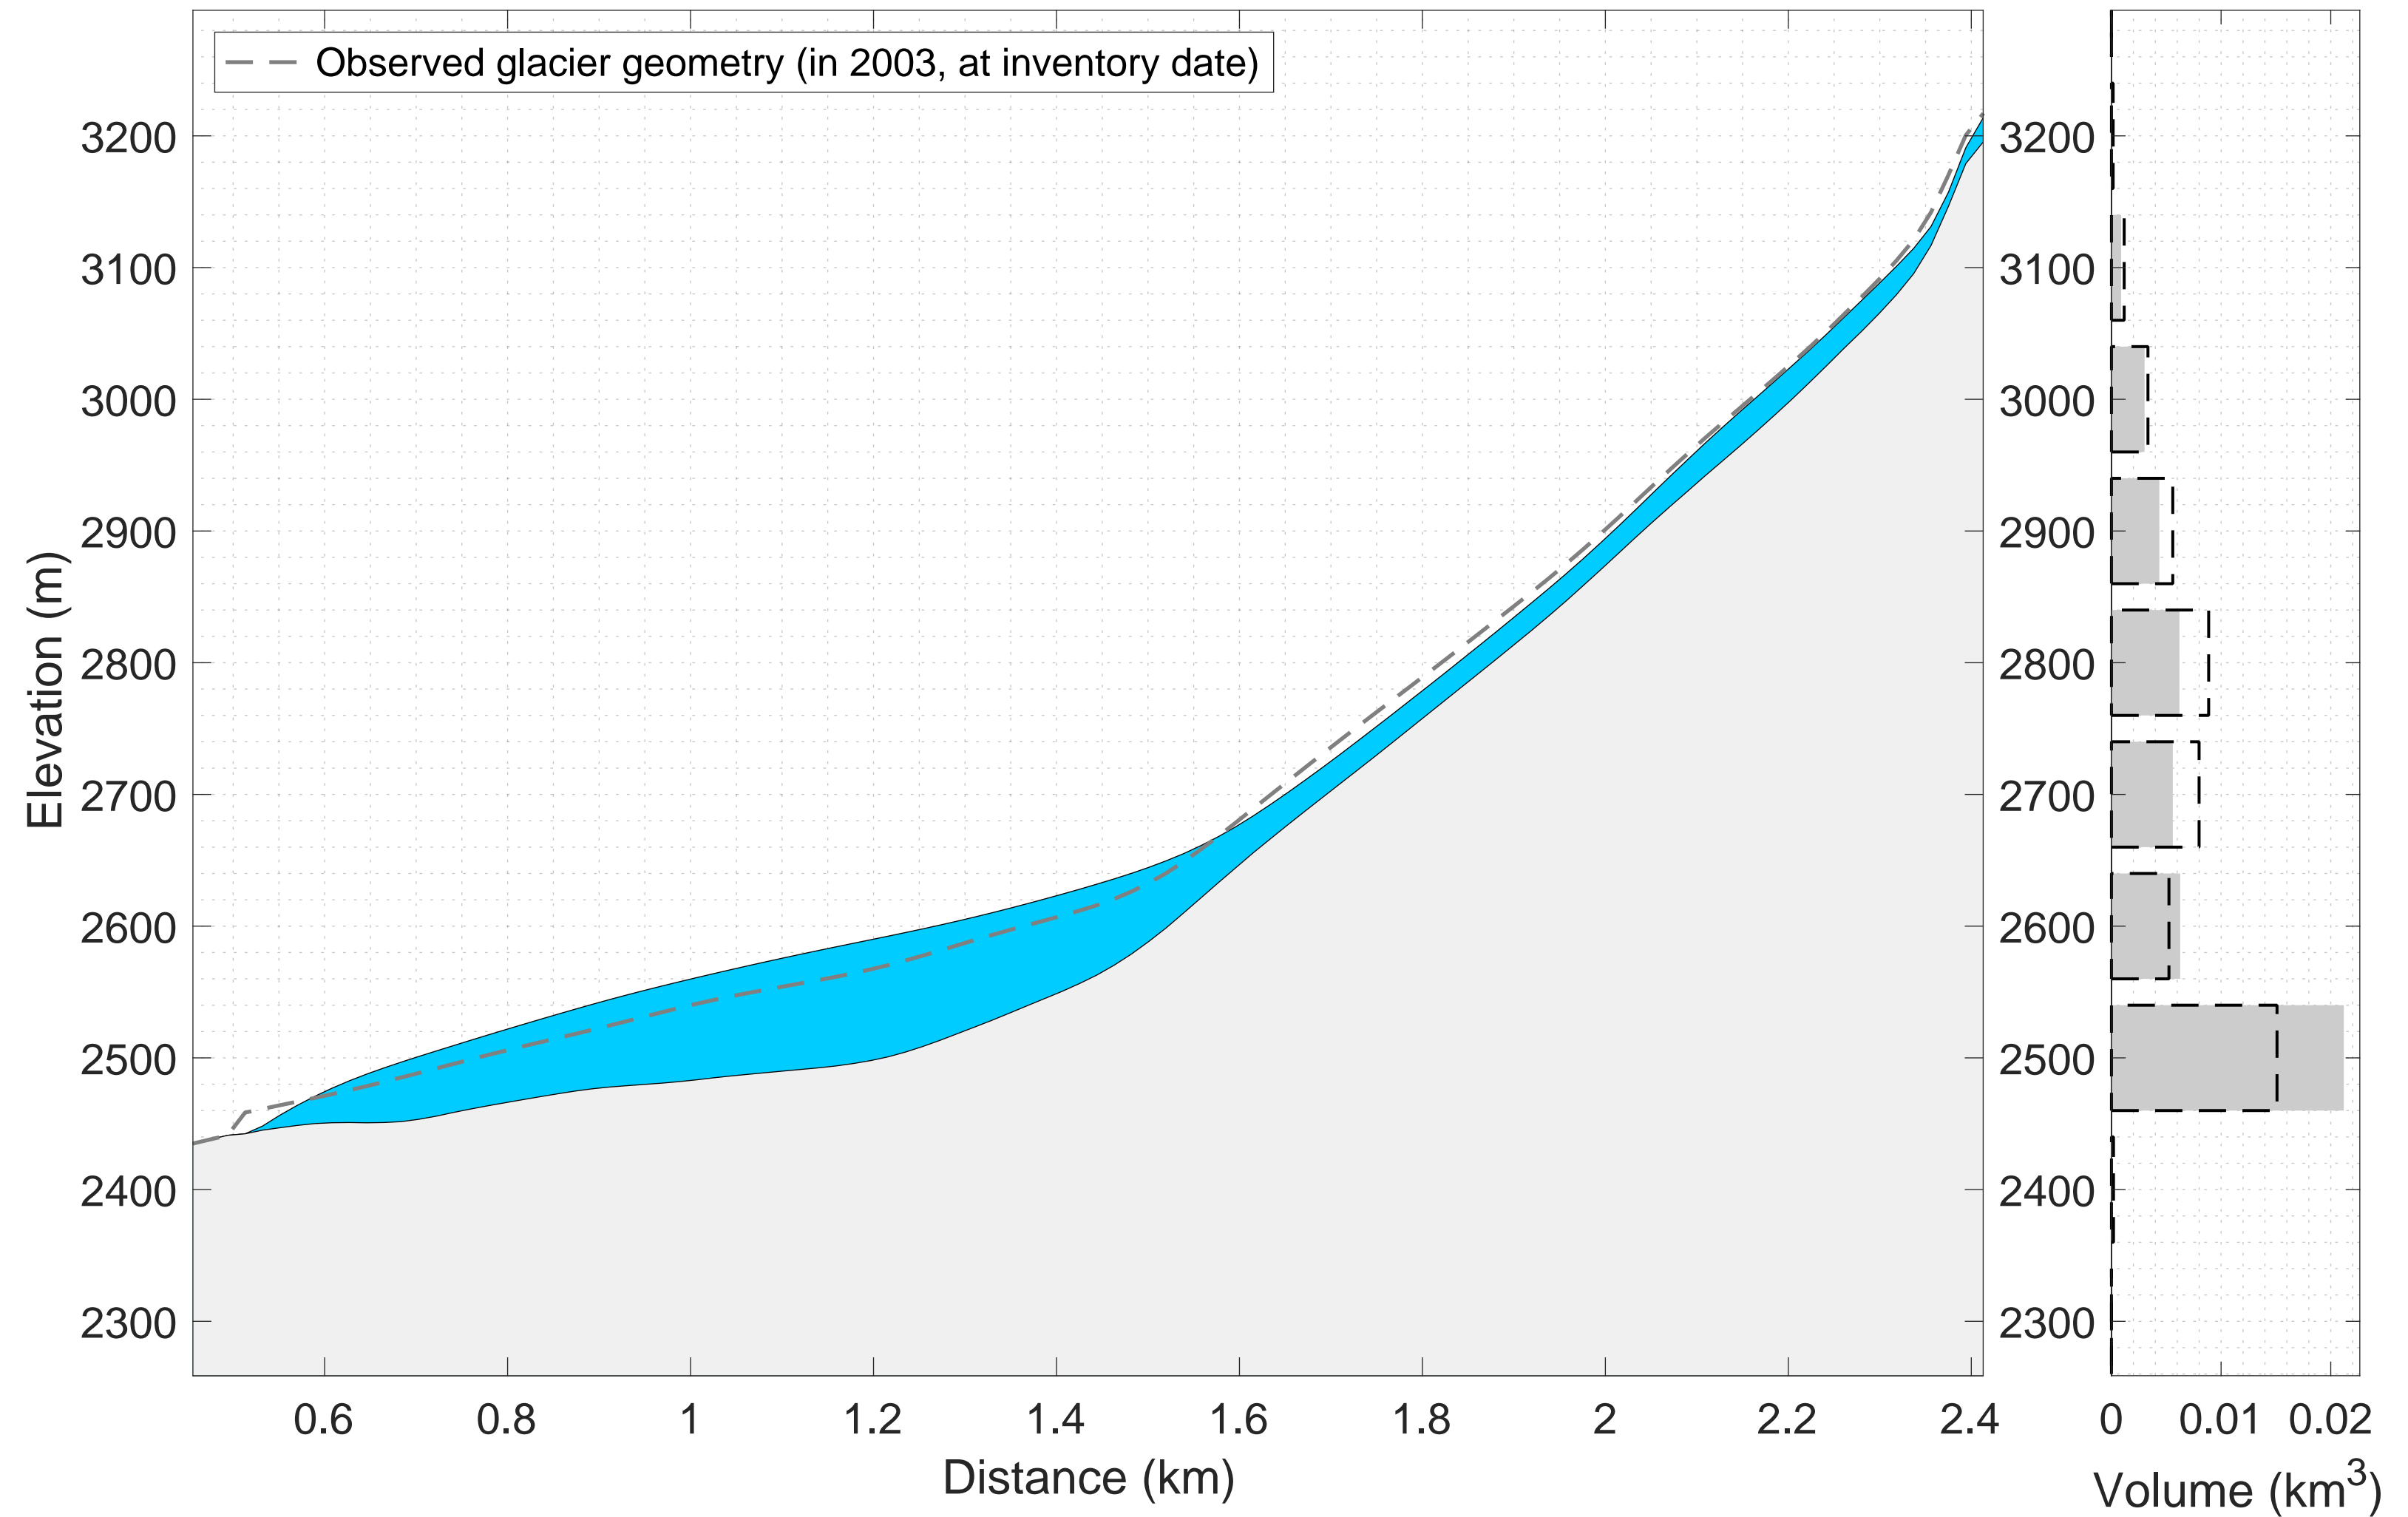

Supplement: Supplementary file 247 [file tc-13-1125-2019-supplement.zip]

**Modelled geometry (Glacier ID = 00907;  $A = 5.7551\text{e-}17 \text{ Pa}^{-3} \text{ a}^{-1}$ ;  $dx = 12 \text{ m}$ )**

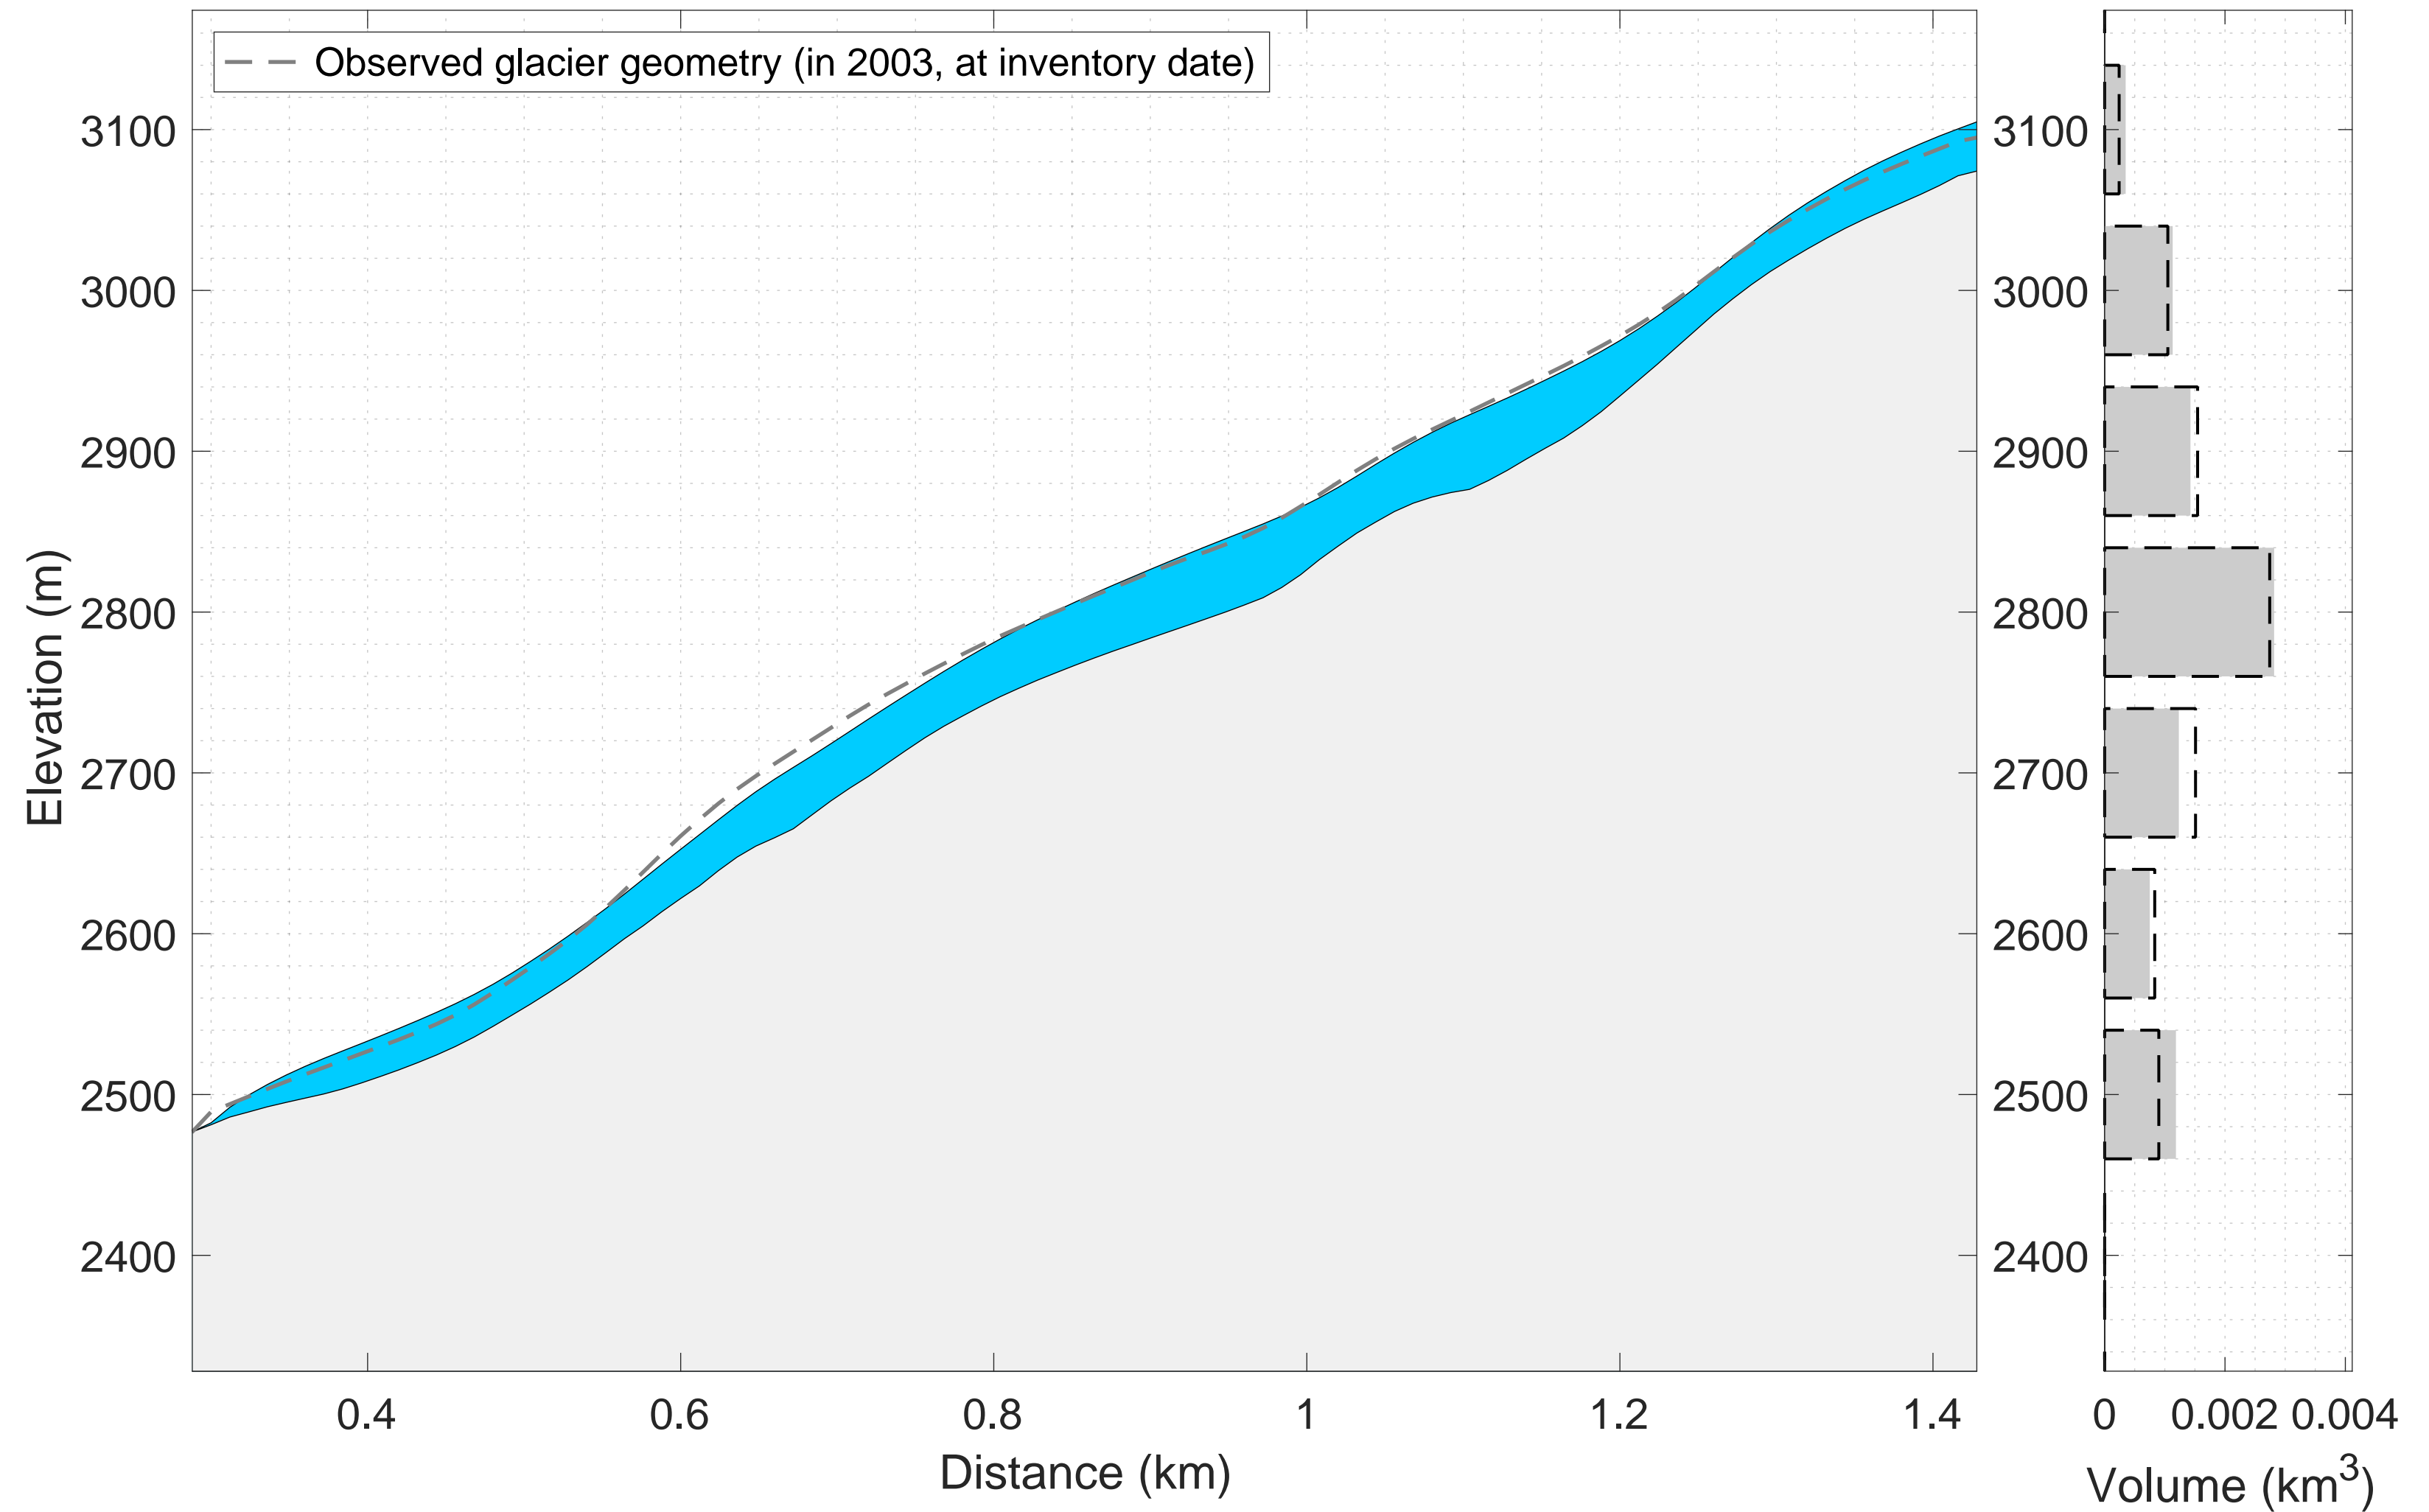

Supplement: Supplementary file 248 [file tc-13-1125-2019-supplement.zip]

**Modelled geometry (Glacier ID = 01863;  $A = 8.8713\text{e-}17 \text{ Pa}^{-3} \text{ a}^{-1}$ ;  $dx = 33 \text{ m}$ )**

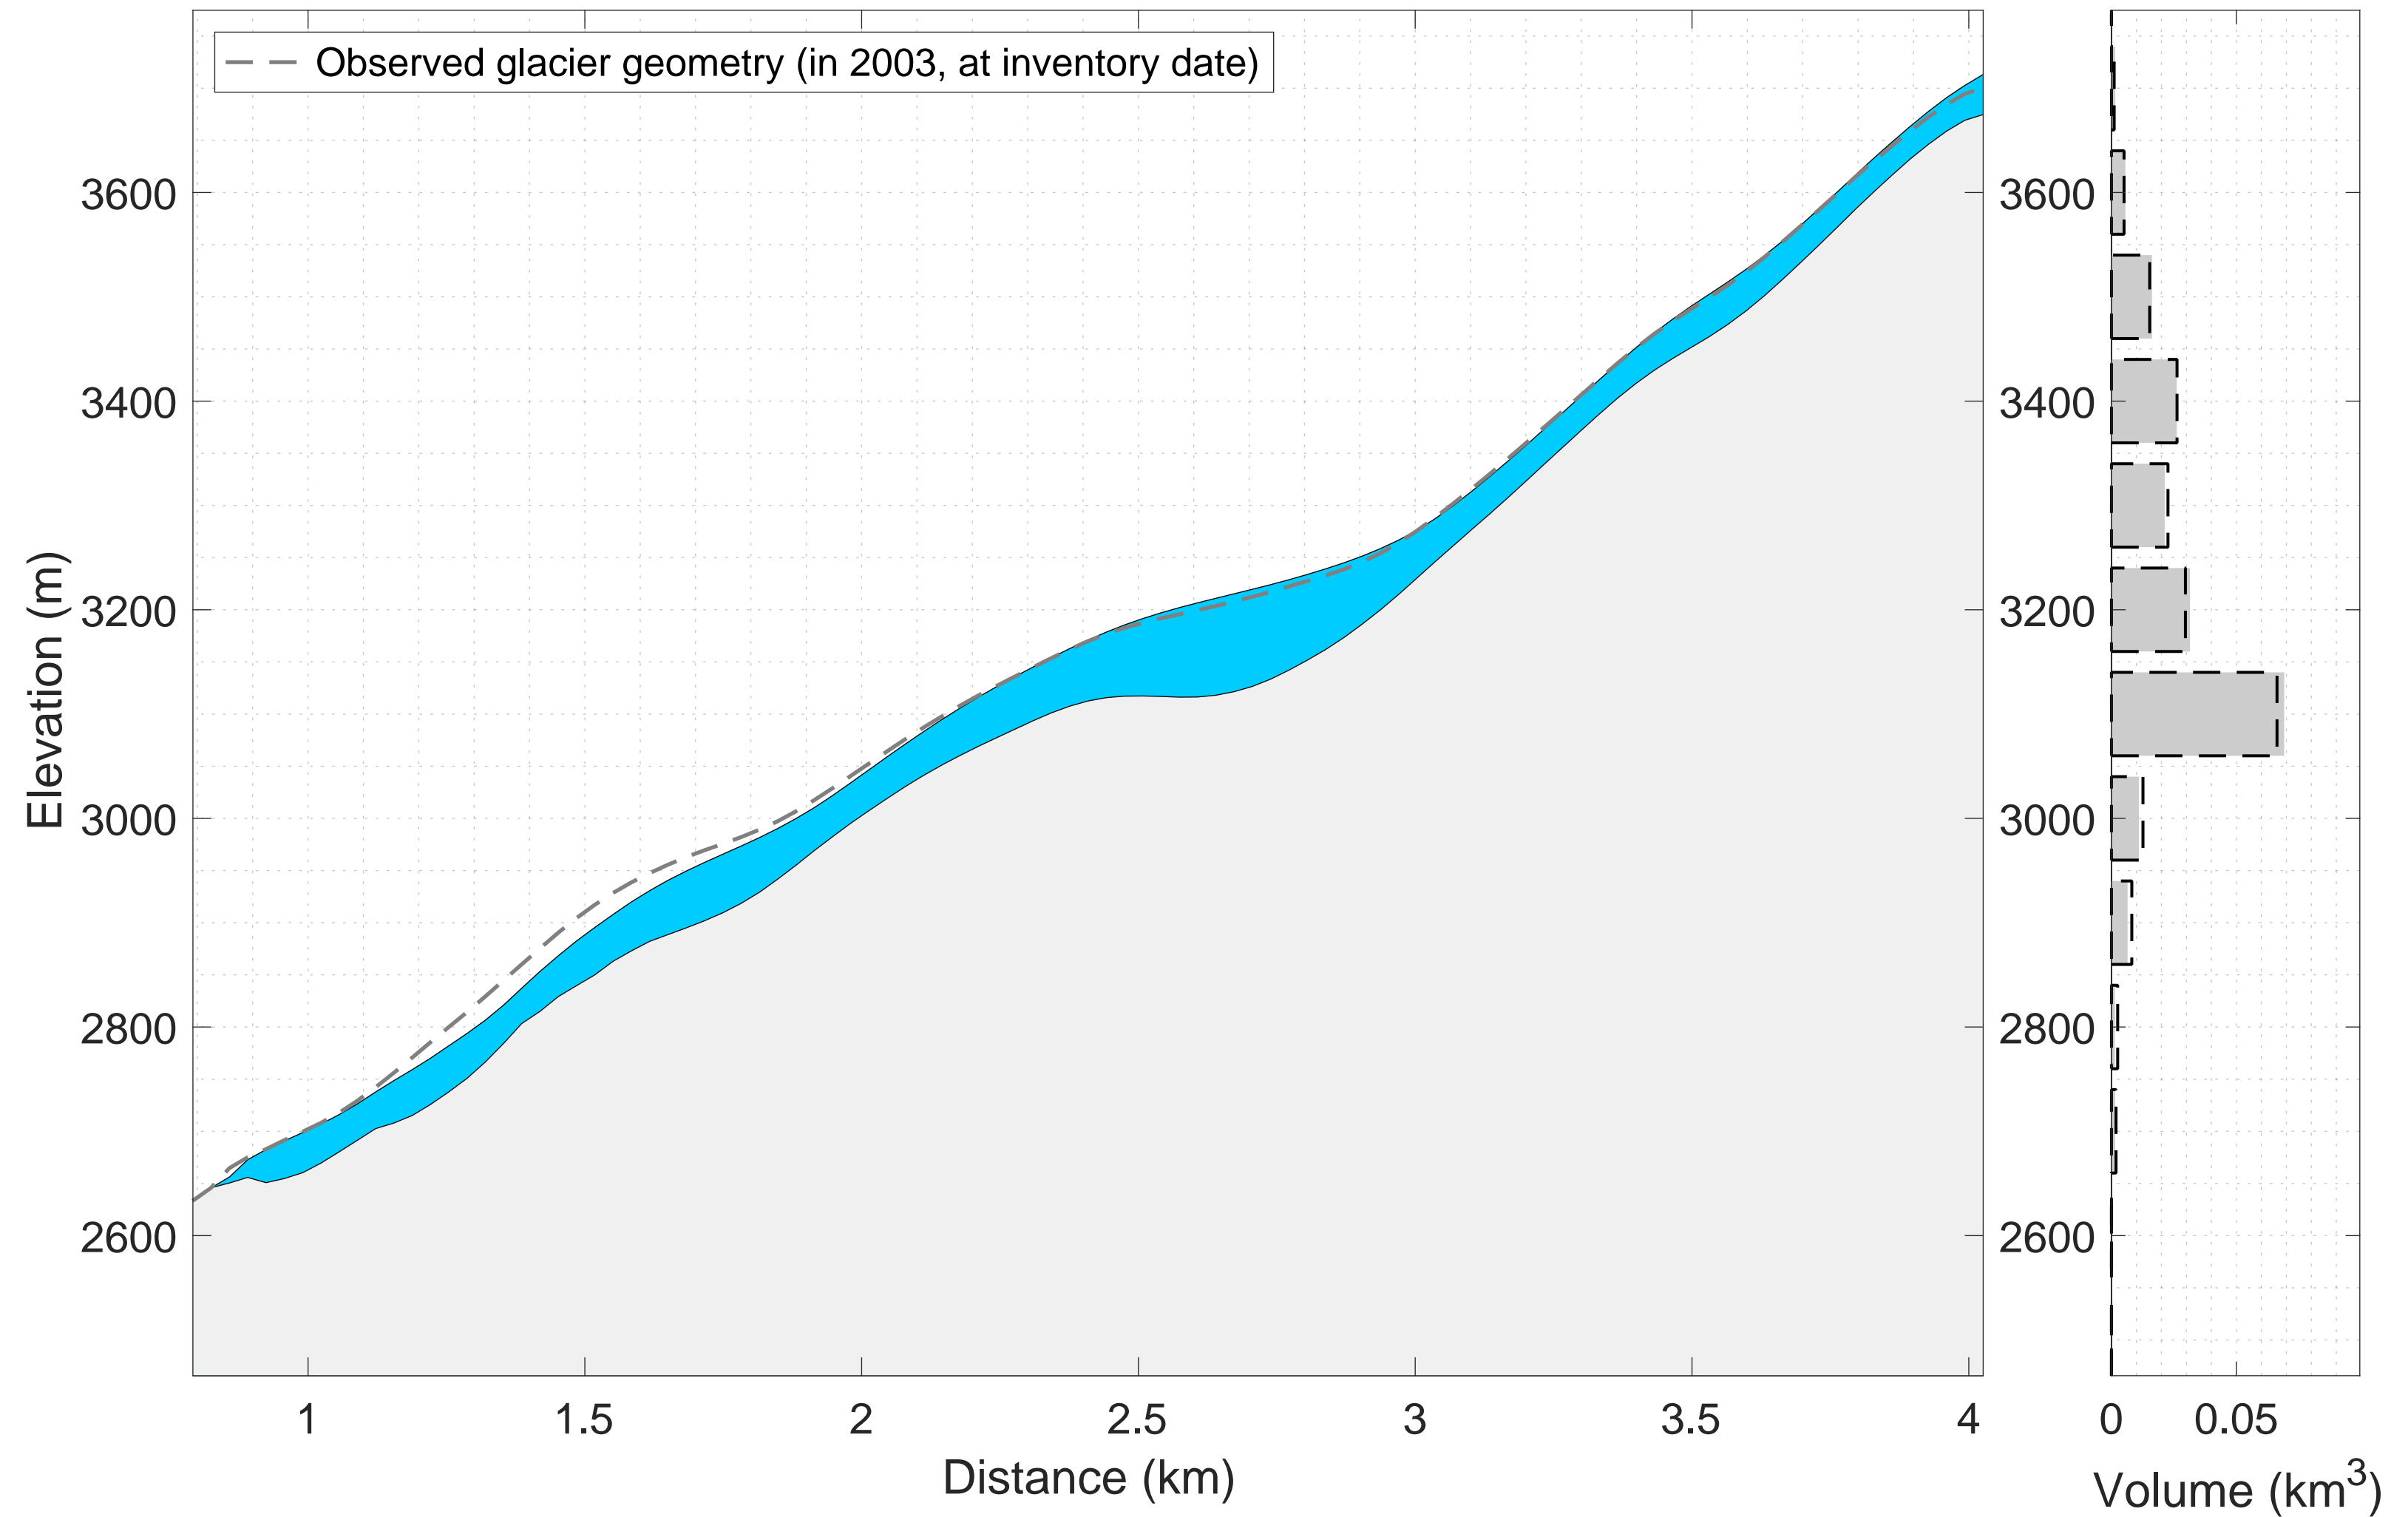

Supplement: Supplementary file 249 [file tc-13-1125-2019-supplement.zip]

**Modelled geometry (Glacier ID = 00003;  $A = 3.1446\text{e-}16 \text{ Pa}^{-3} \text{ a}^{-1}$ ;  $dx = 15 \text{ m}$ )**

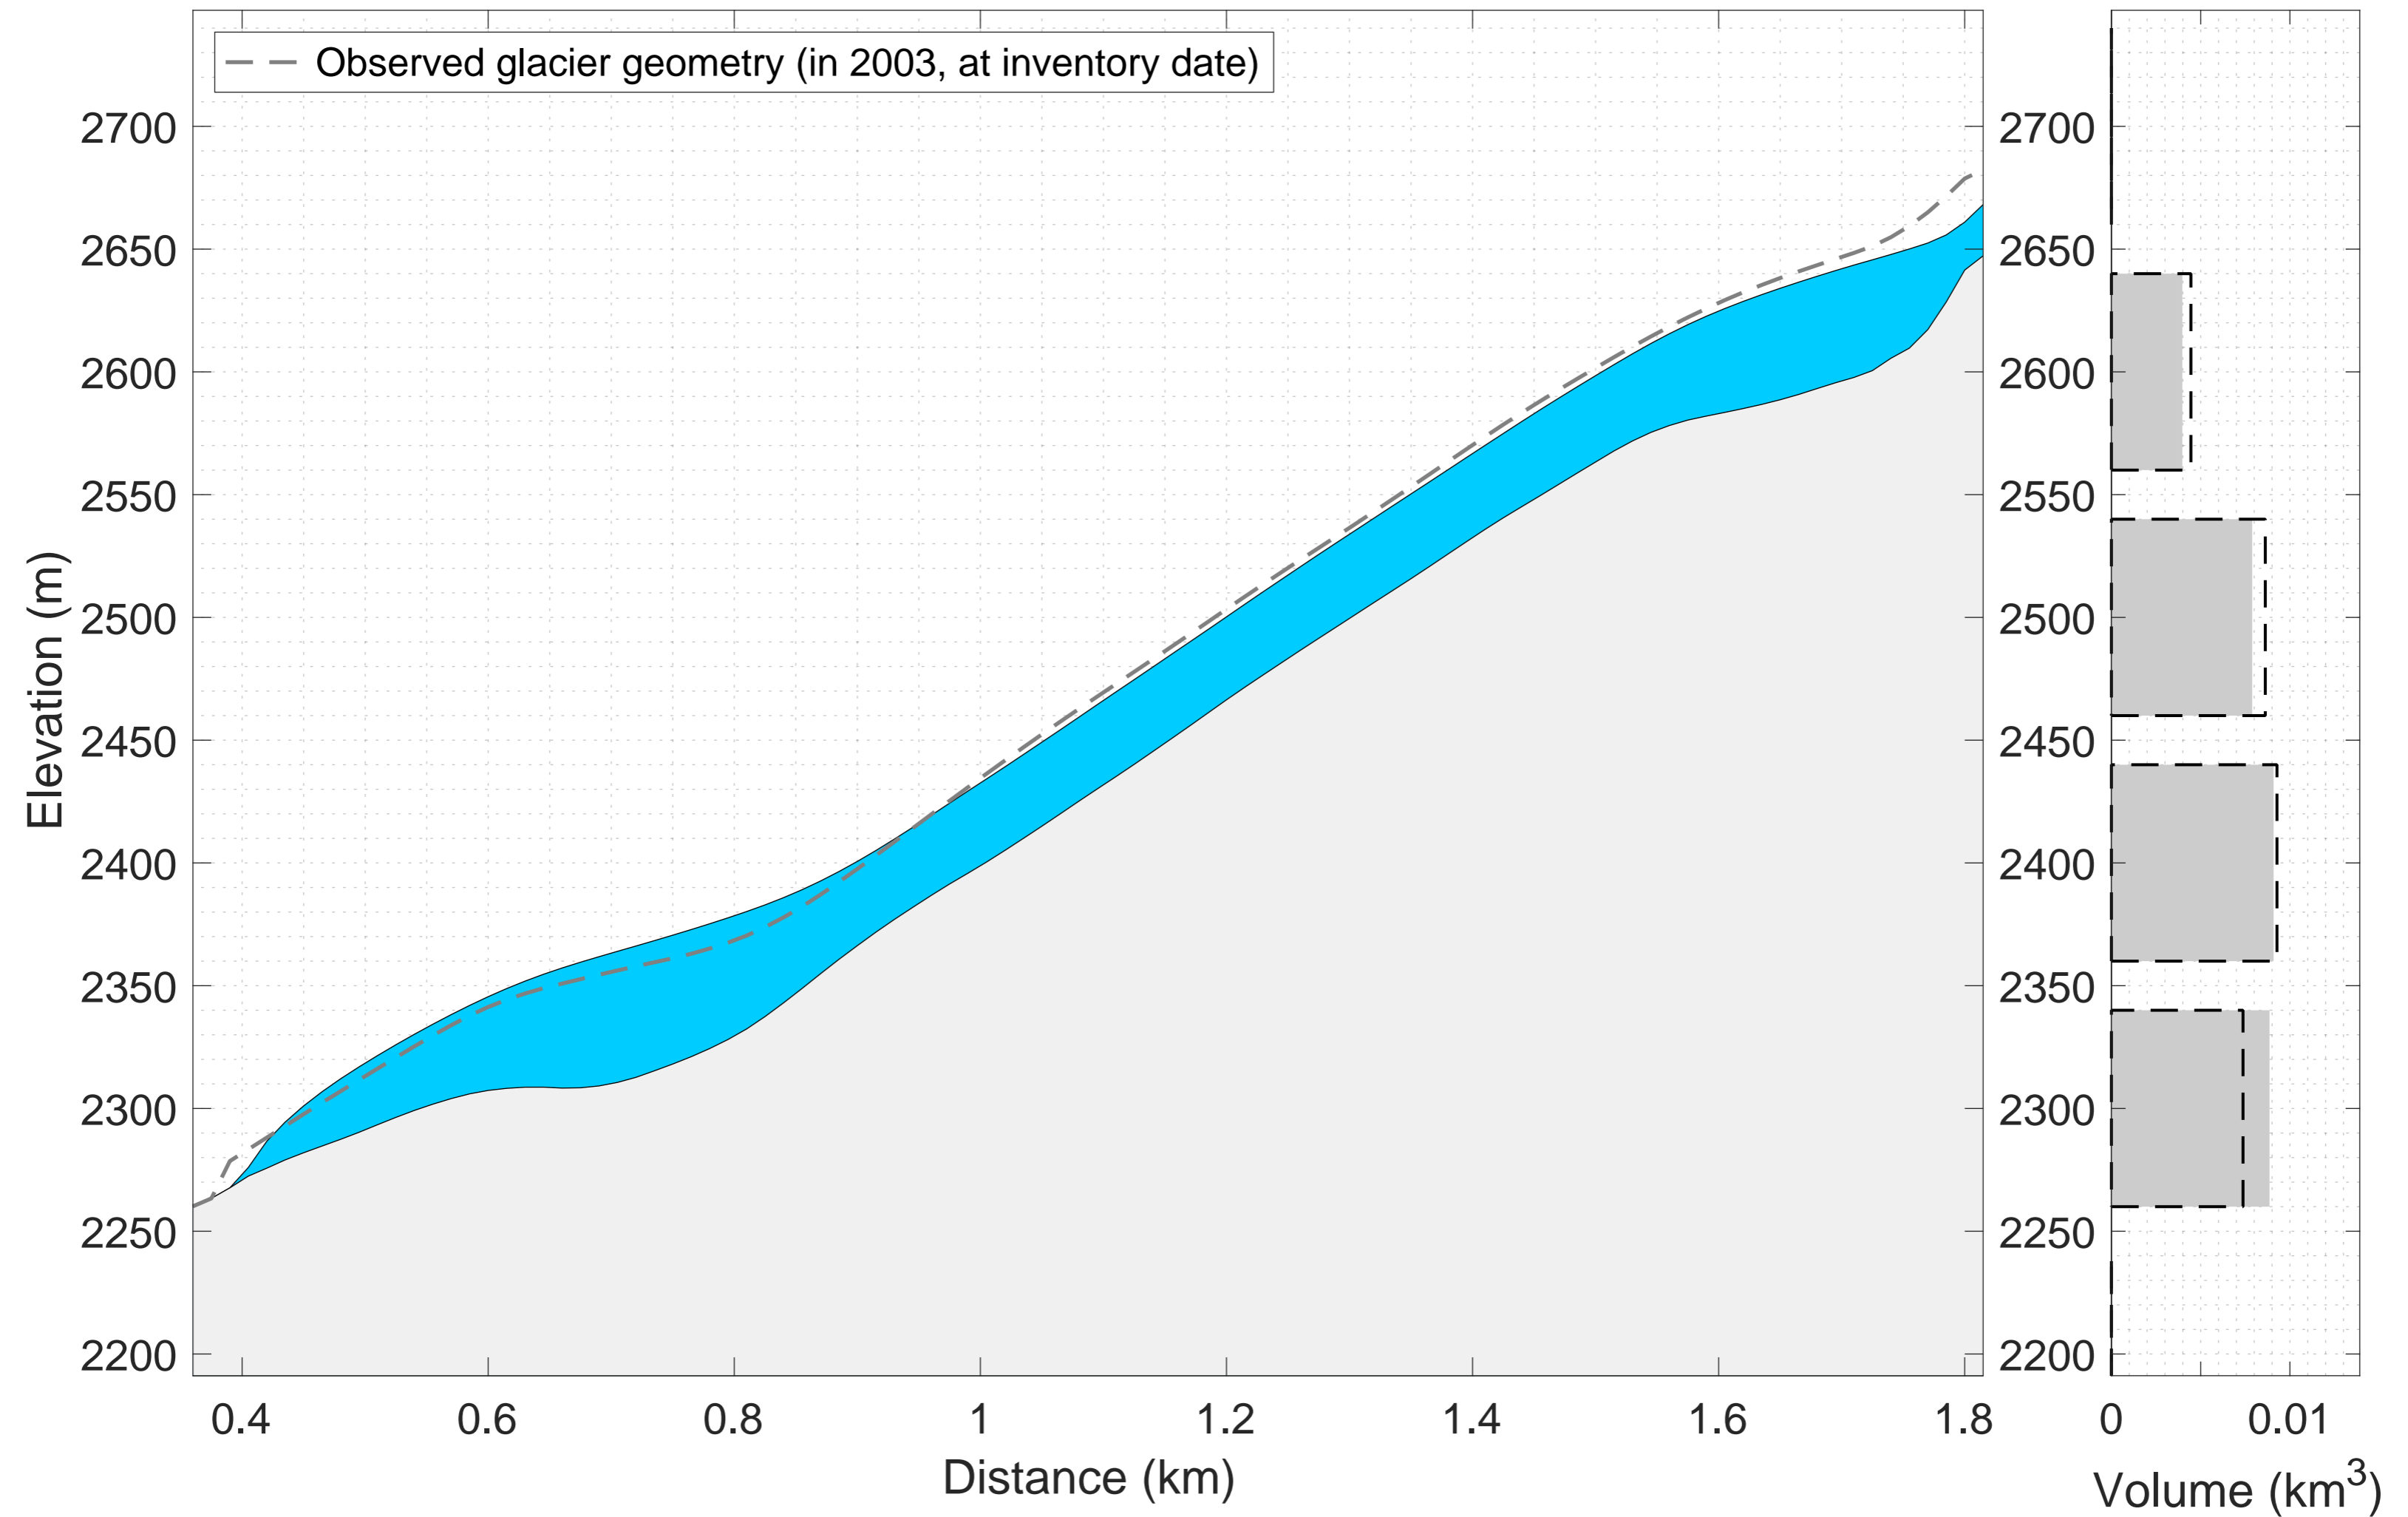

Supplement: Supplementary file 250 [file tc-13-1125-2019-supplement.zip]

Modelled geometry (Glacier ID = 00886;  $A = 1.1273\text{e-}16 \text{ Pa}^{-3} \text{ a}^{-1}$ ;  $dx = 27 \text{ m}$ )

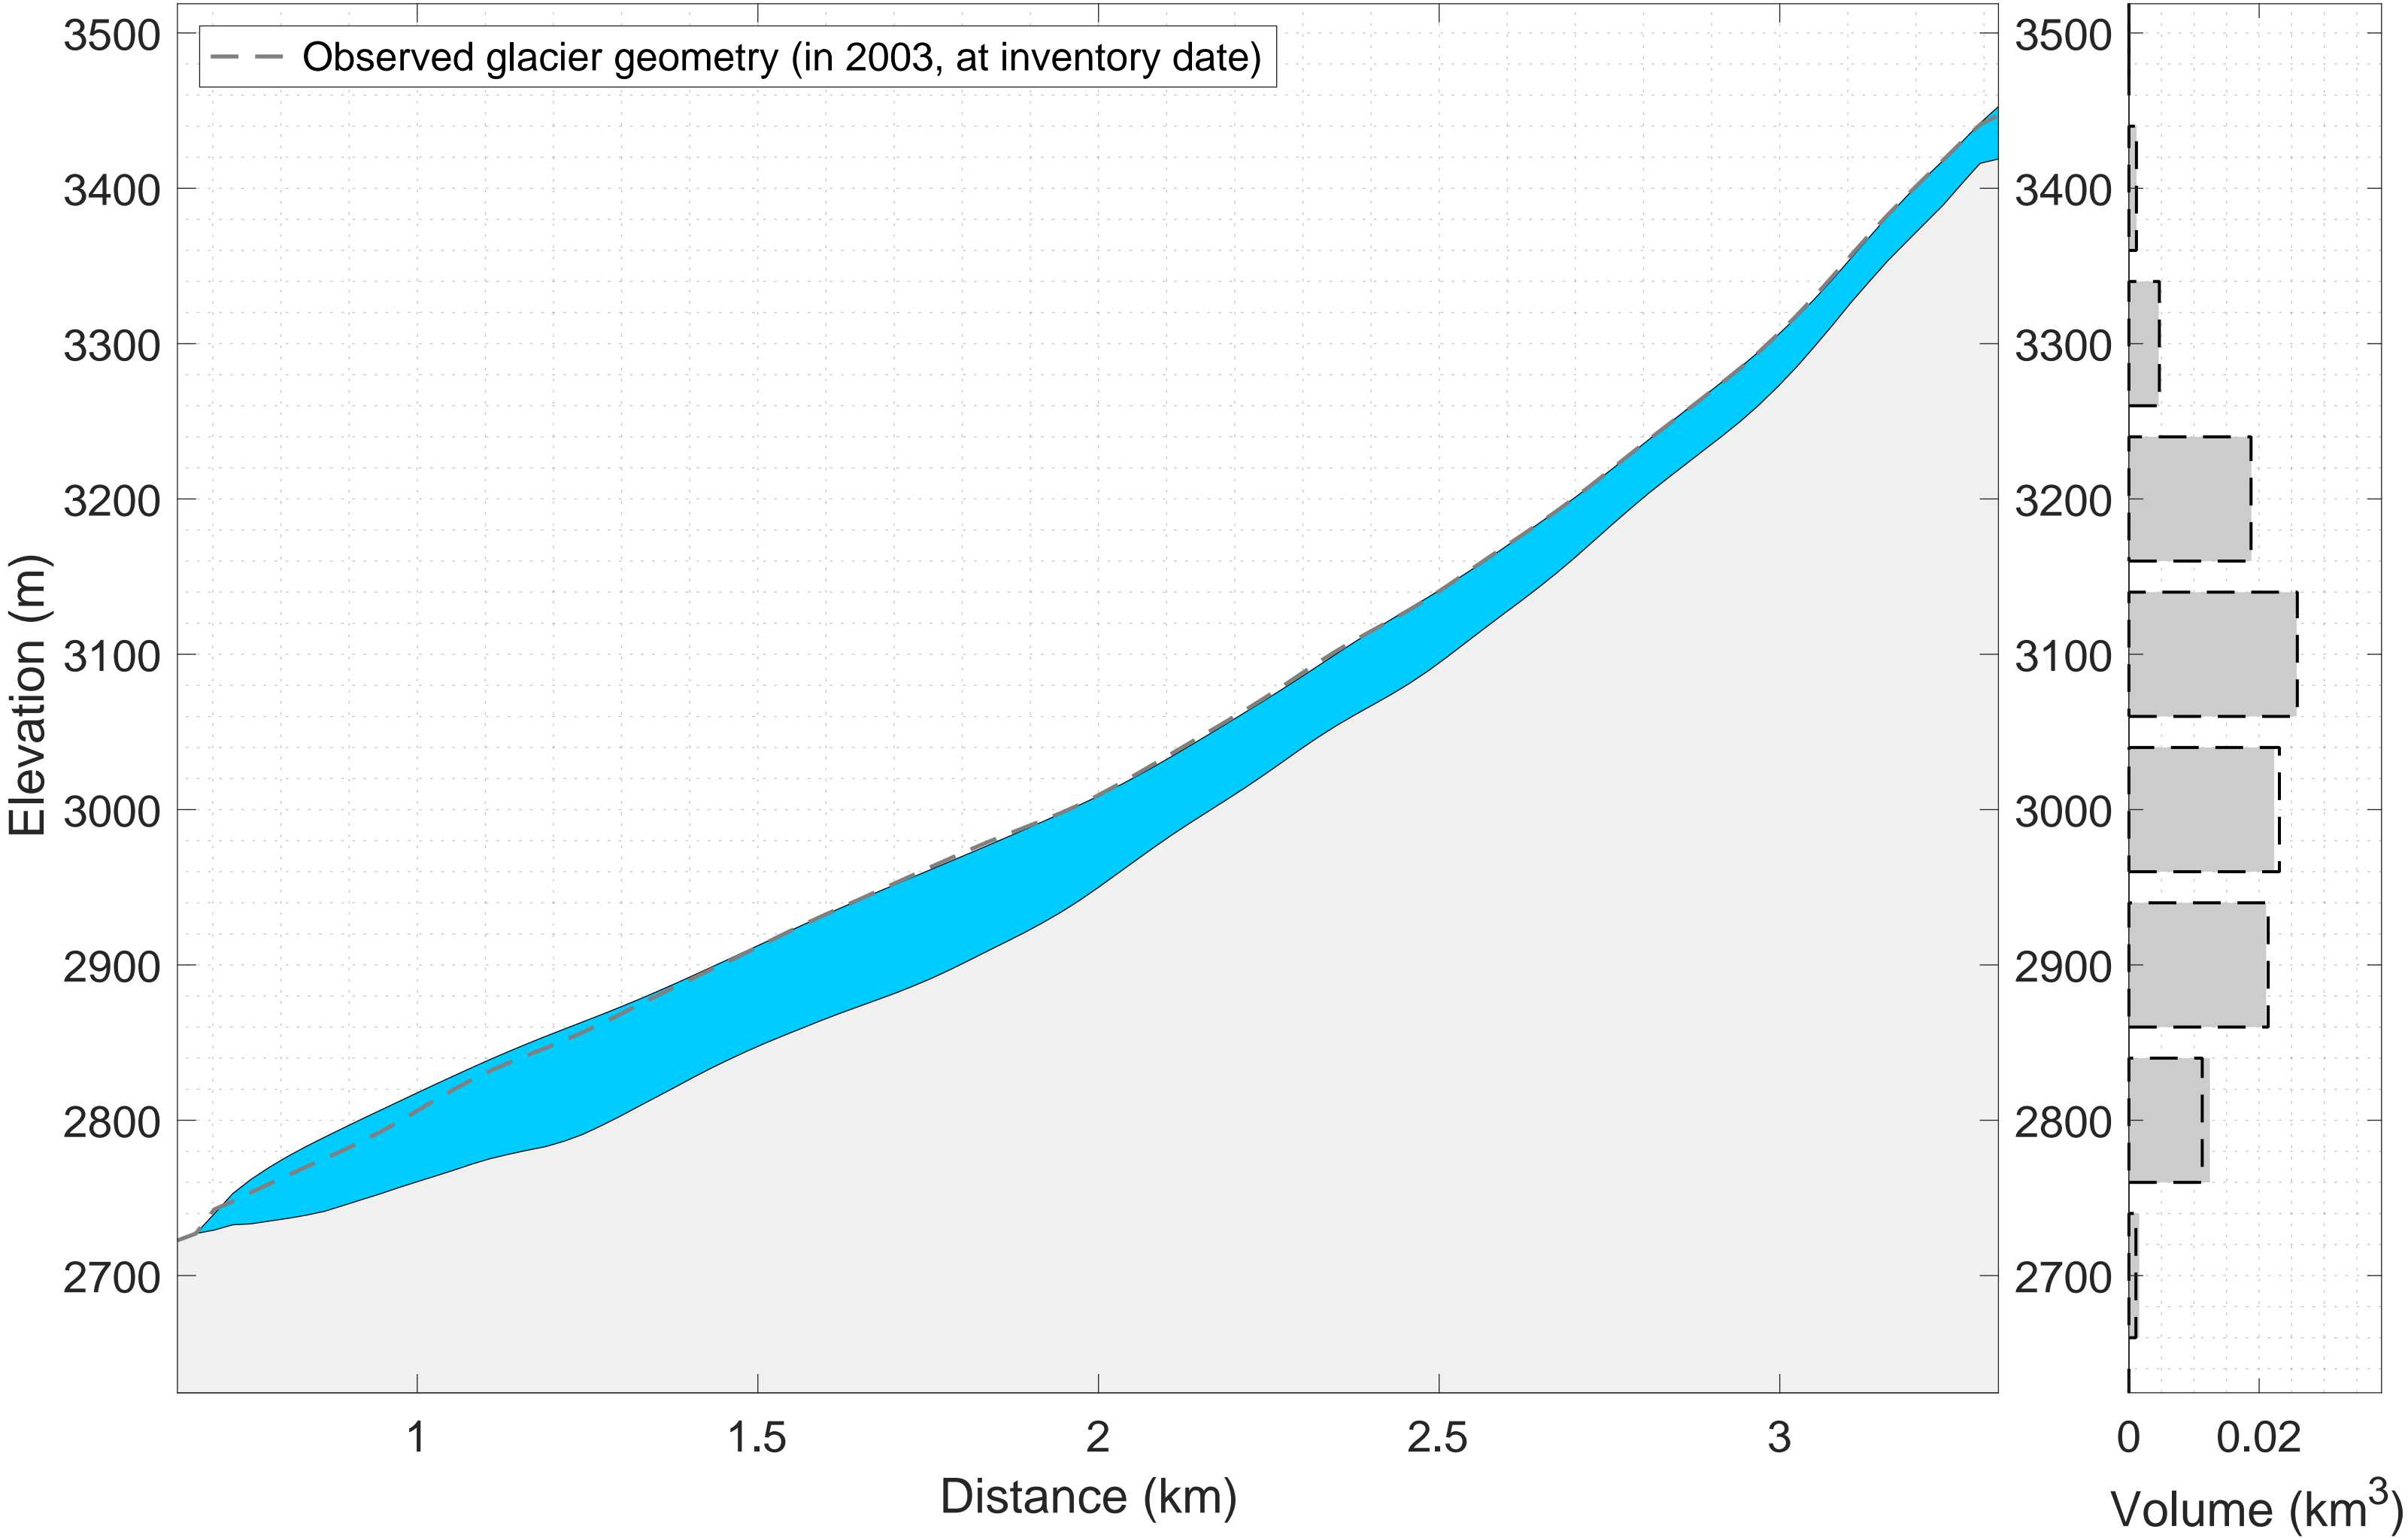

Supplement: Supplementary file 251 [file tc-13-1125-2019-supplement.zip]

Modelled geometry (Glacier ID = 02064;  $A = 1.5378\text{e-}16 \text{ Pa}^{-3} \text{ a}^{-1}$ ;  $dx = 28 \text{ m}$ )

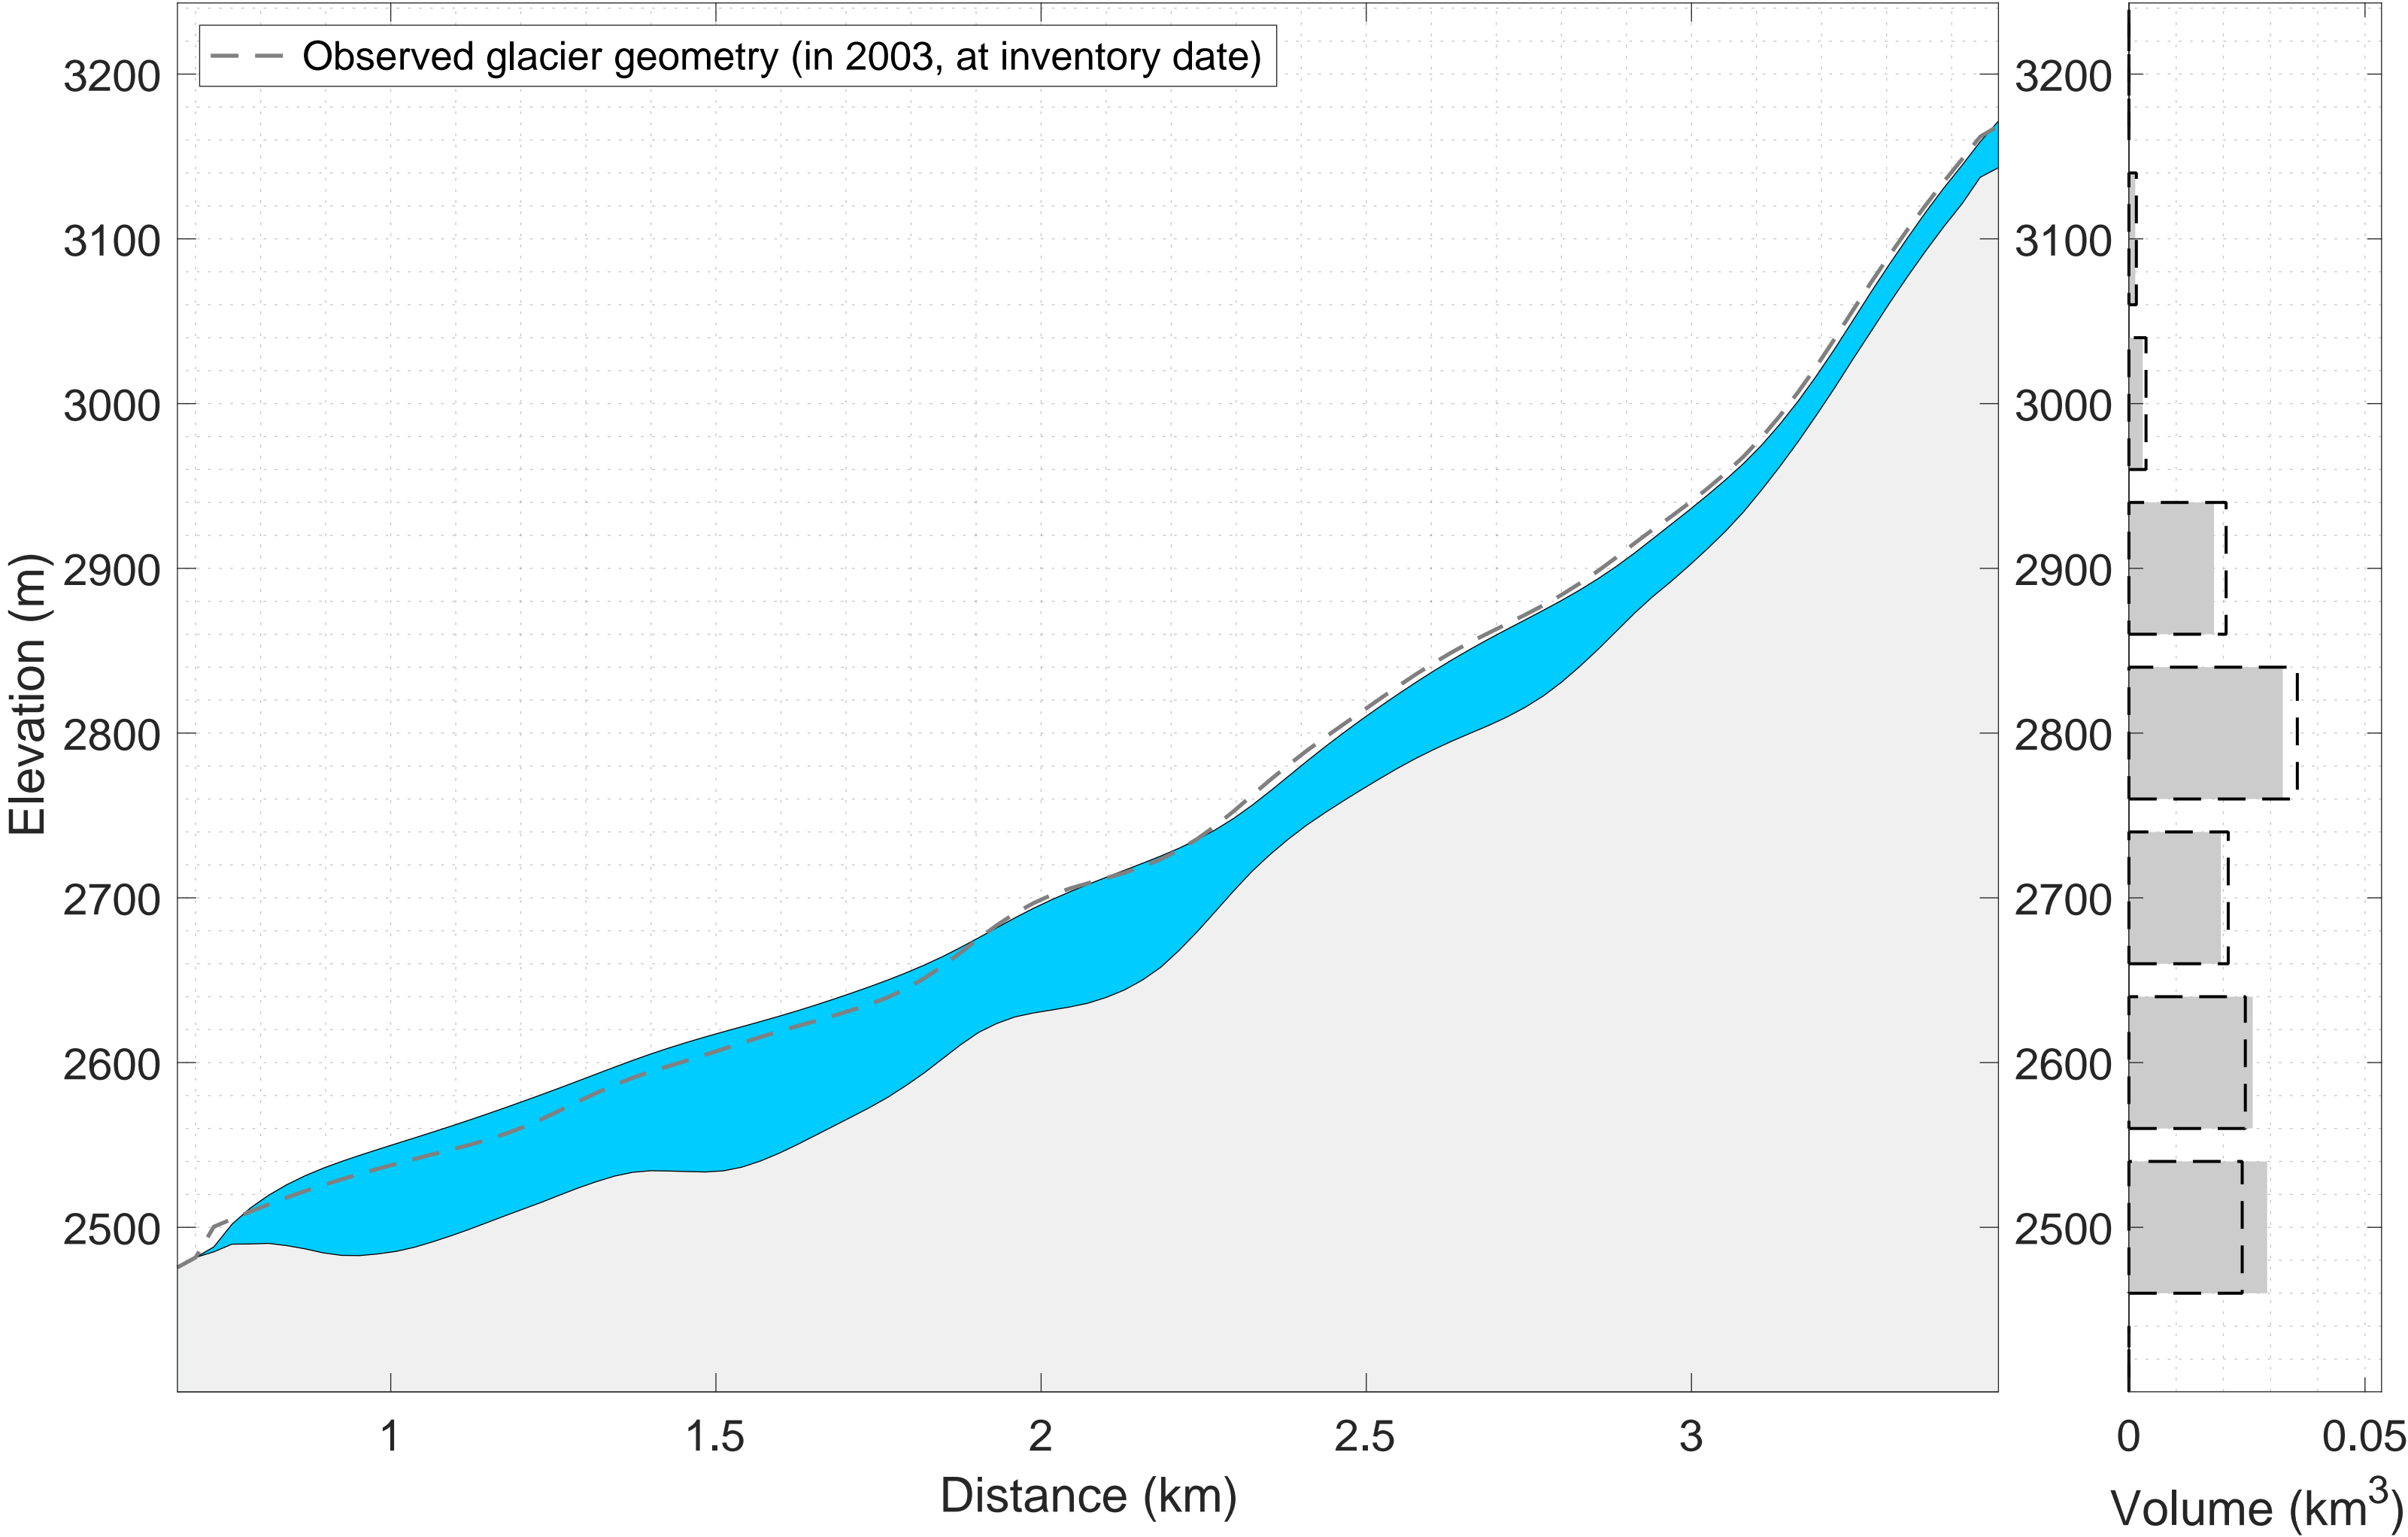

Supplement: Supplementary file 252 [file tc-13-1125-2019-supplement.zip]

**Modelled geometry (Glacier ID = 02916;  $A = 1.552\text{e-}16 \text{ Pa}^{-3} \text{ a}^{-1}$ ;  $dx = 39 \text{ m}$ )**

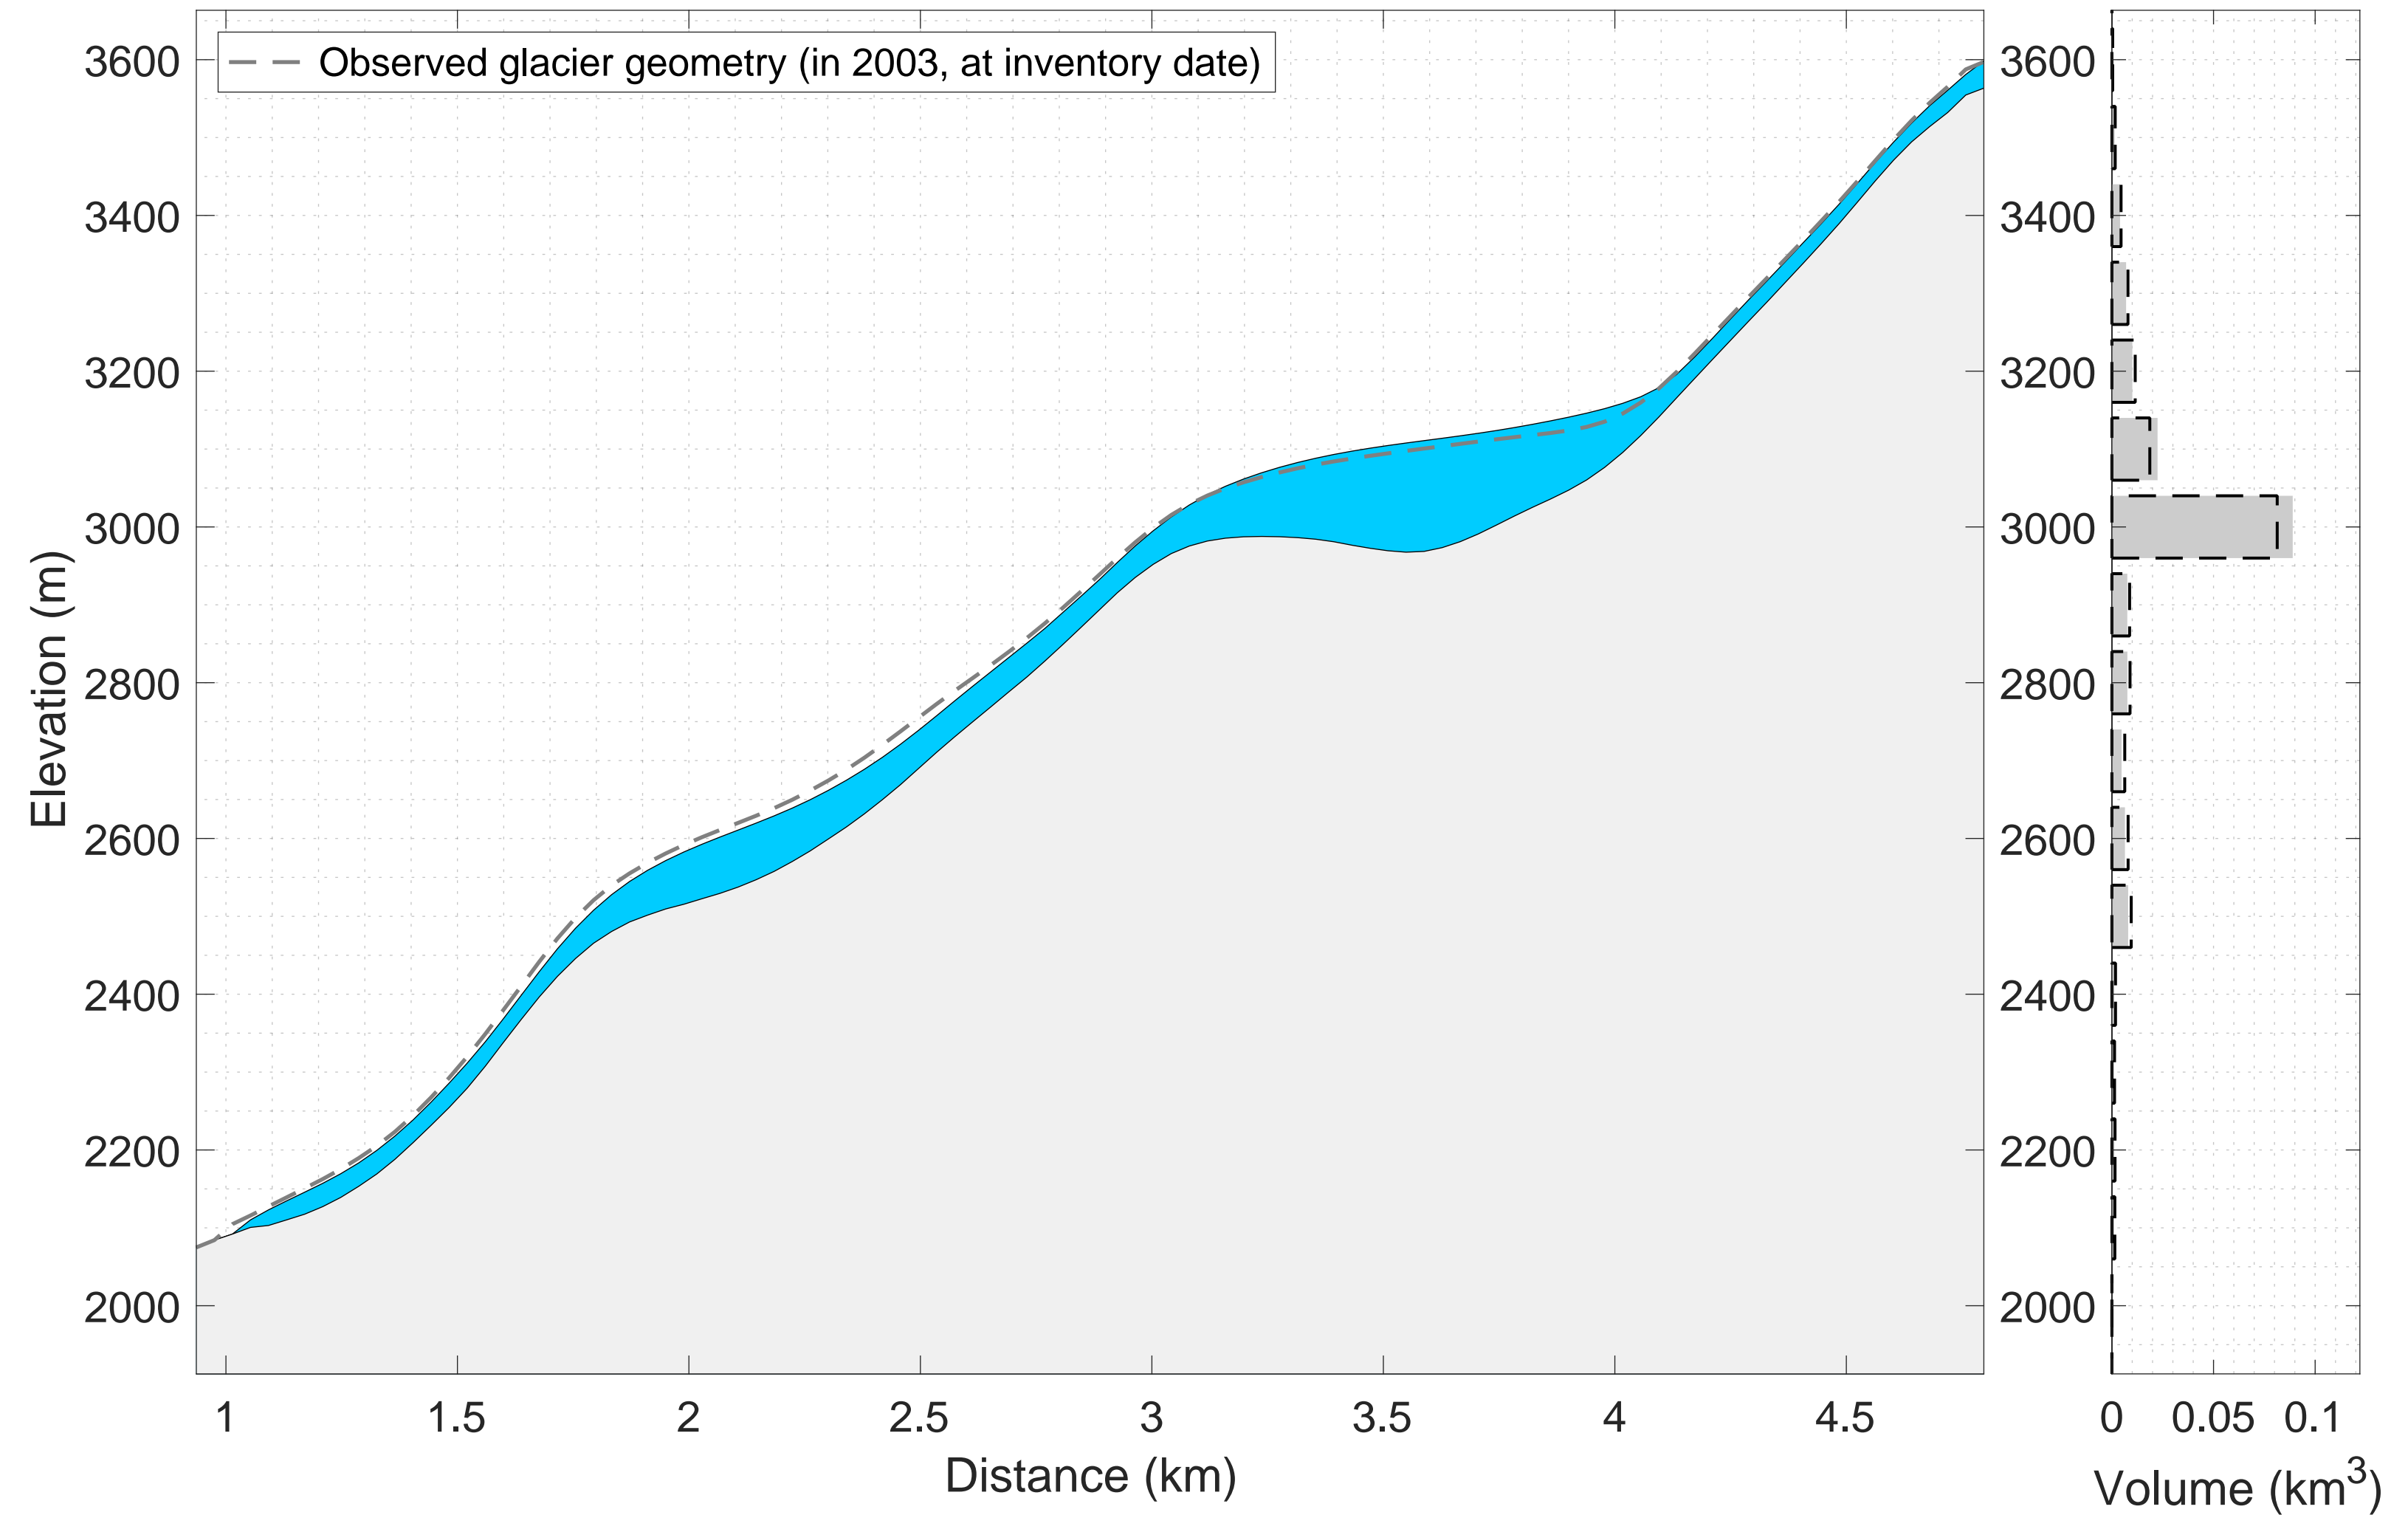

Supplement: Supplementary file 253 [file tc-13-1125-2019-supplement.zip]

**Modelled geometry (Glacier ID = 01760;  $A = 9.5601\text{e-}17 \text{ Pa}^{-3} \text{ a}^{-1}$ ;  $dx = 17 \text{ m}$ )**

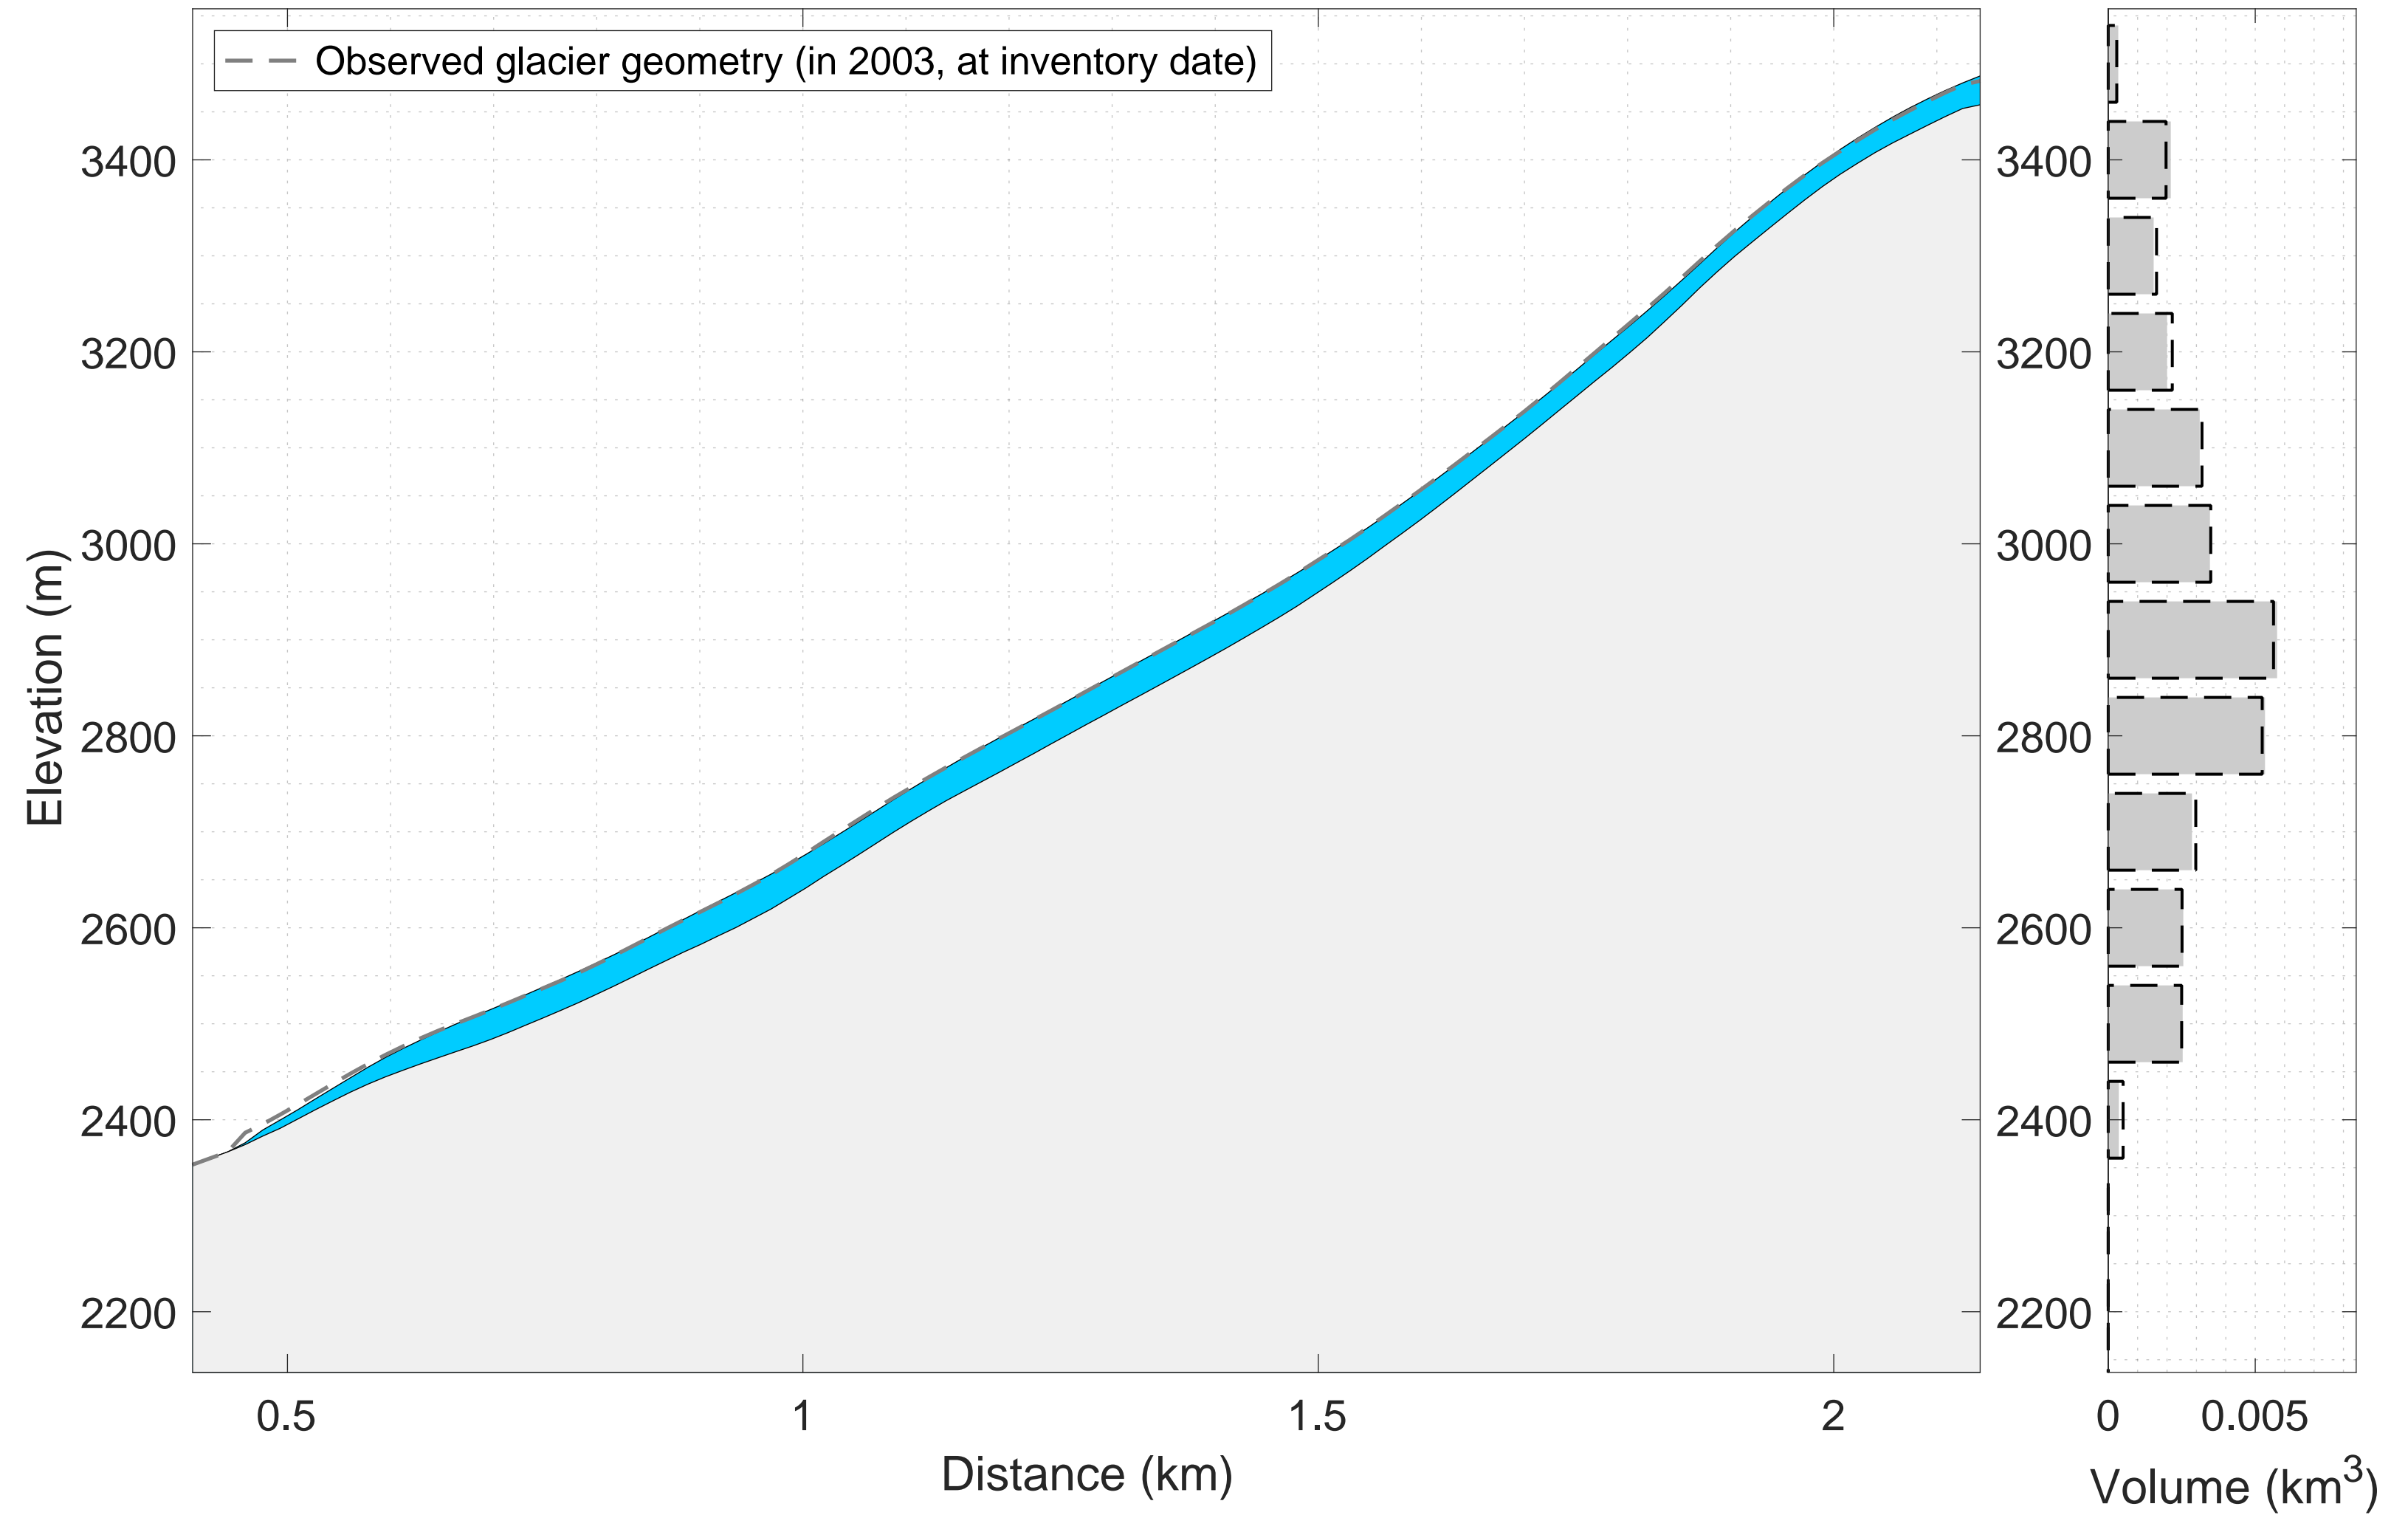

Supplement: Supplementary file 254 [file tc-13-1125-2019-supplement.zip]

**Modelled geometry (Glacier ID = 02419;  $A = 6.7224\text{e-}17 \text{ Pa}^{-3} \text{ a}^{-1}$ ;  $dx = 16 \text{ m}$ )**

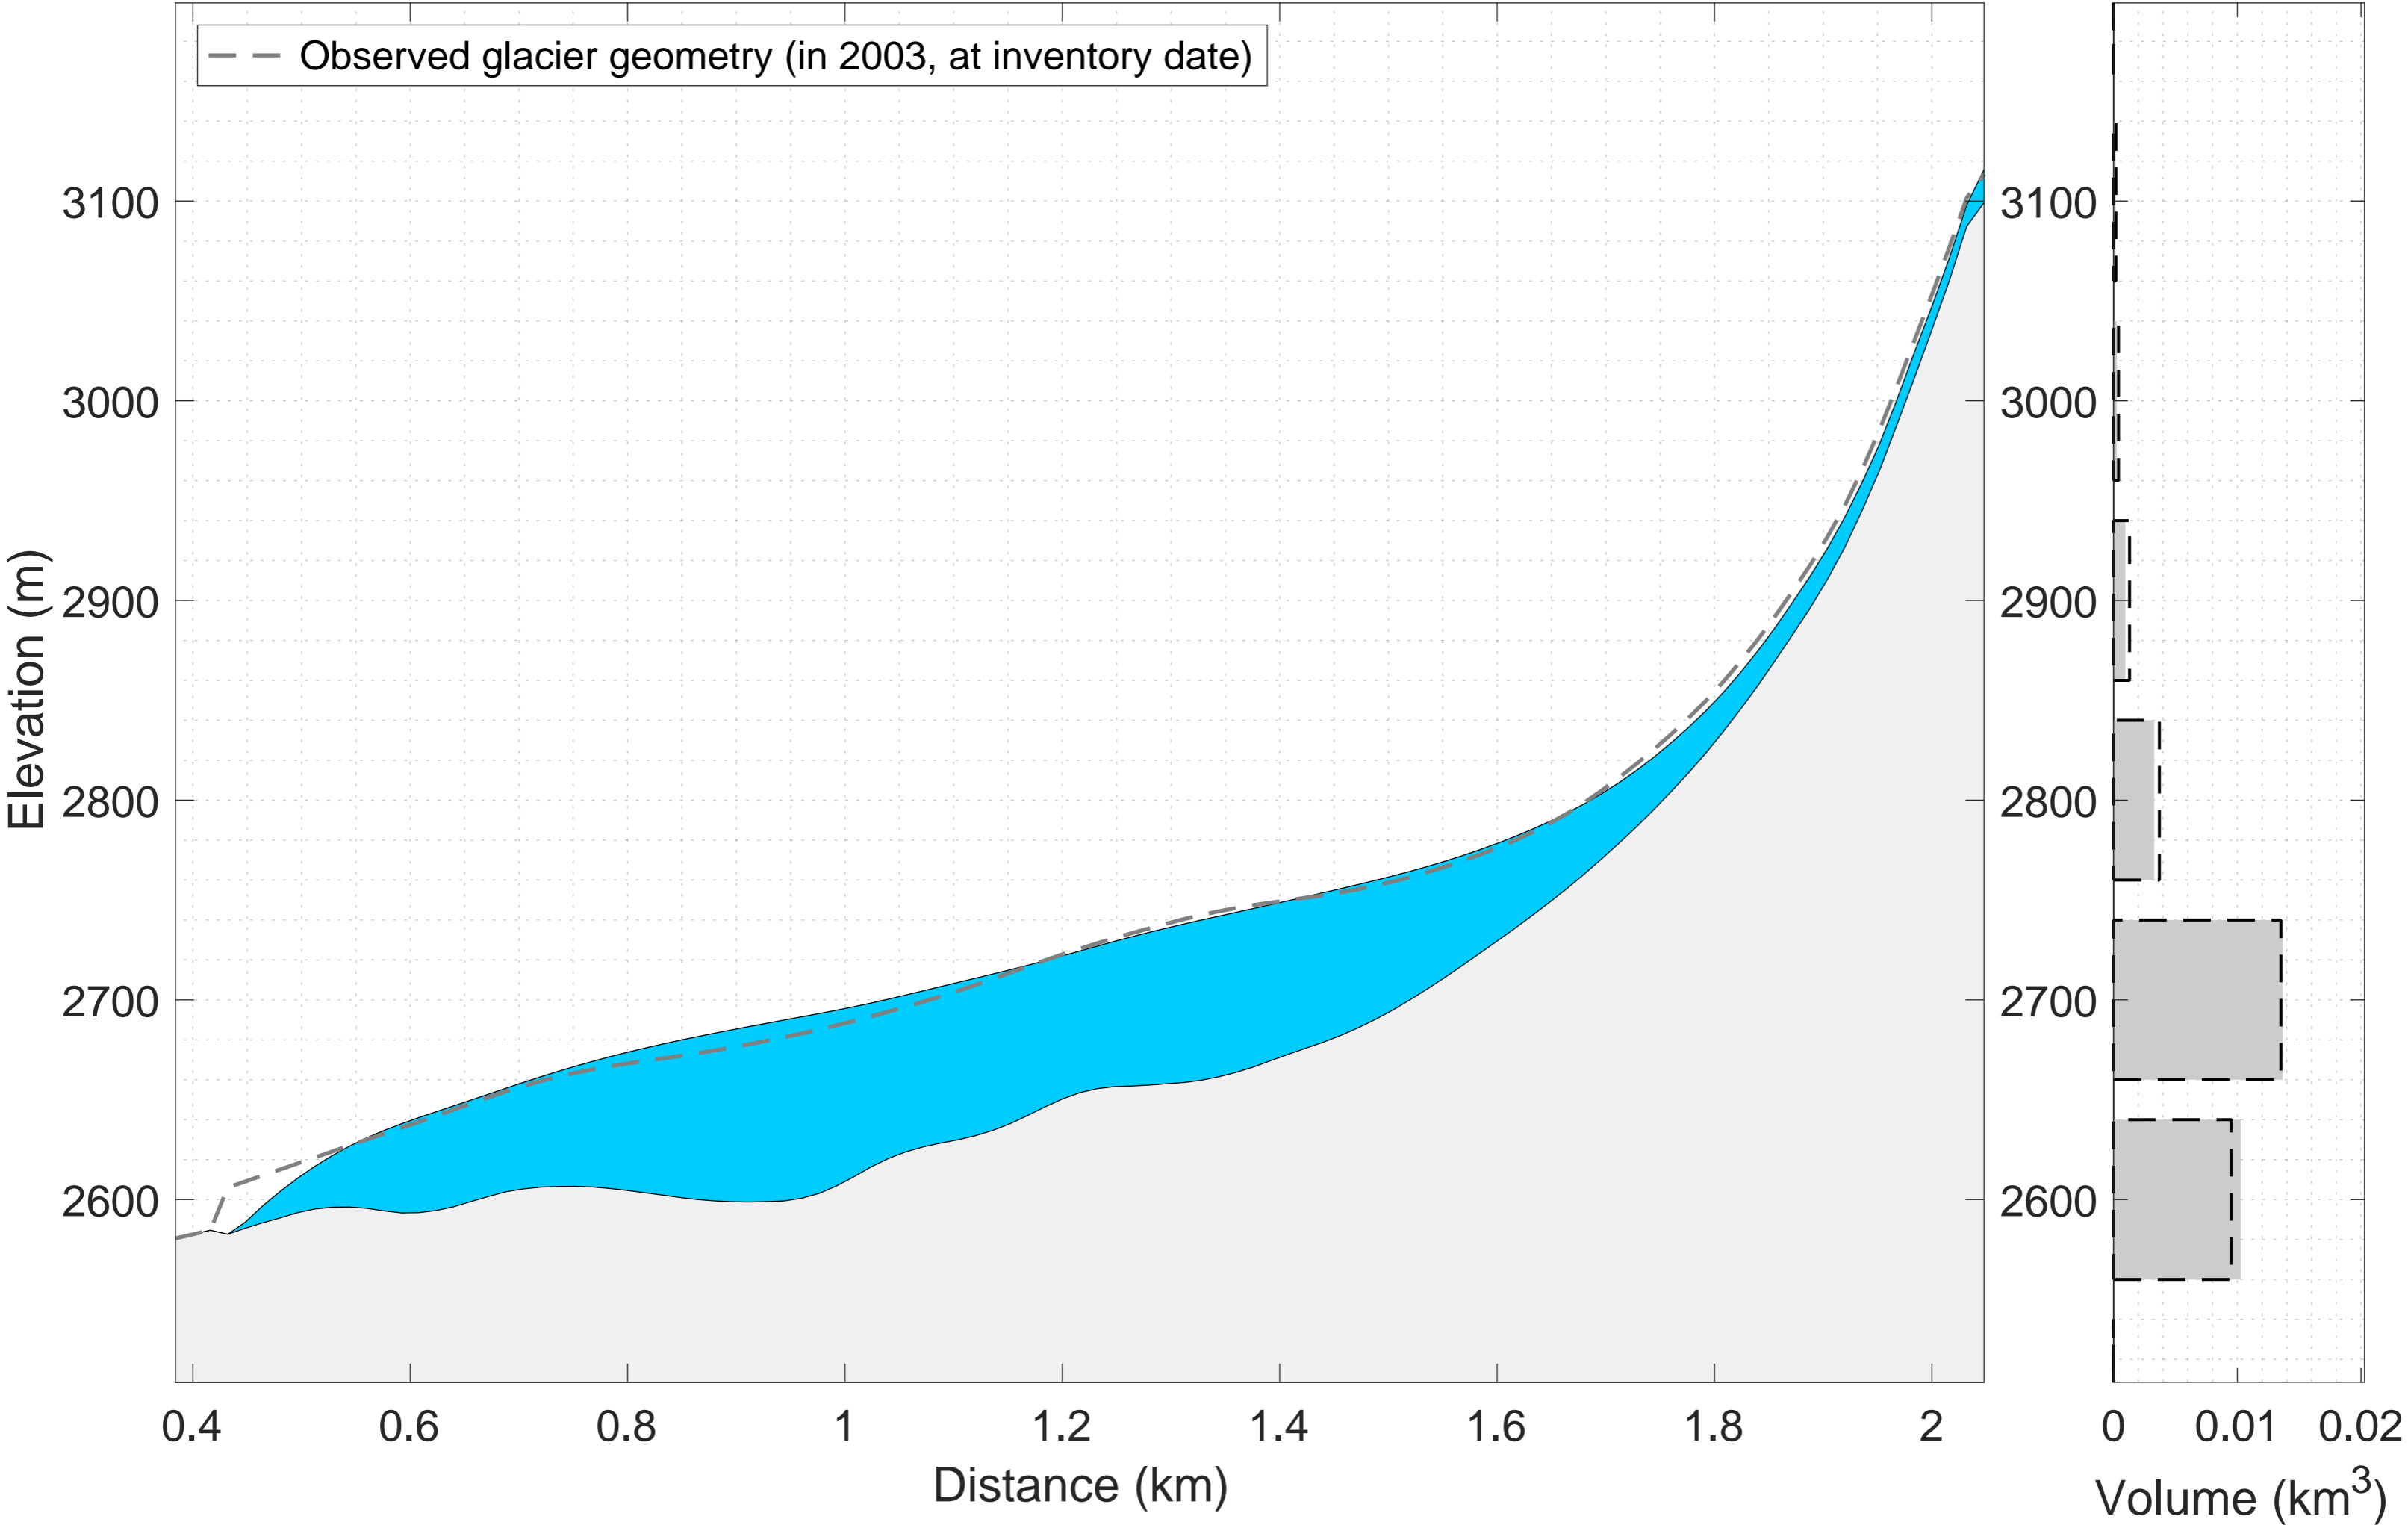

Supplement: Supplementary file 255 [file tc-13-1125-2019-supplement.zip]

**Modelled geometry (Glacier ID = 00114;  $A = 5.9426\text{e-}17 \text{ Pa}^{-3} \text{ a}^{-1}$ ;  $dx = 10 \text{ m}$ )**

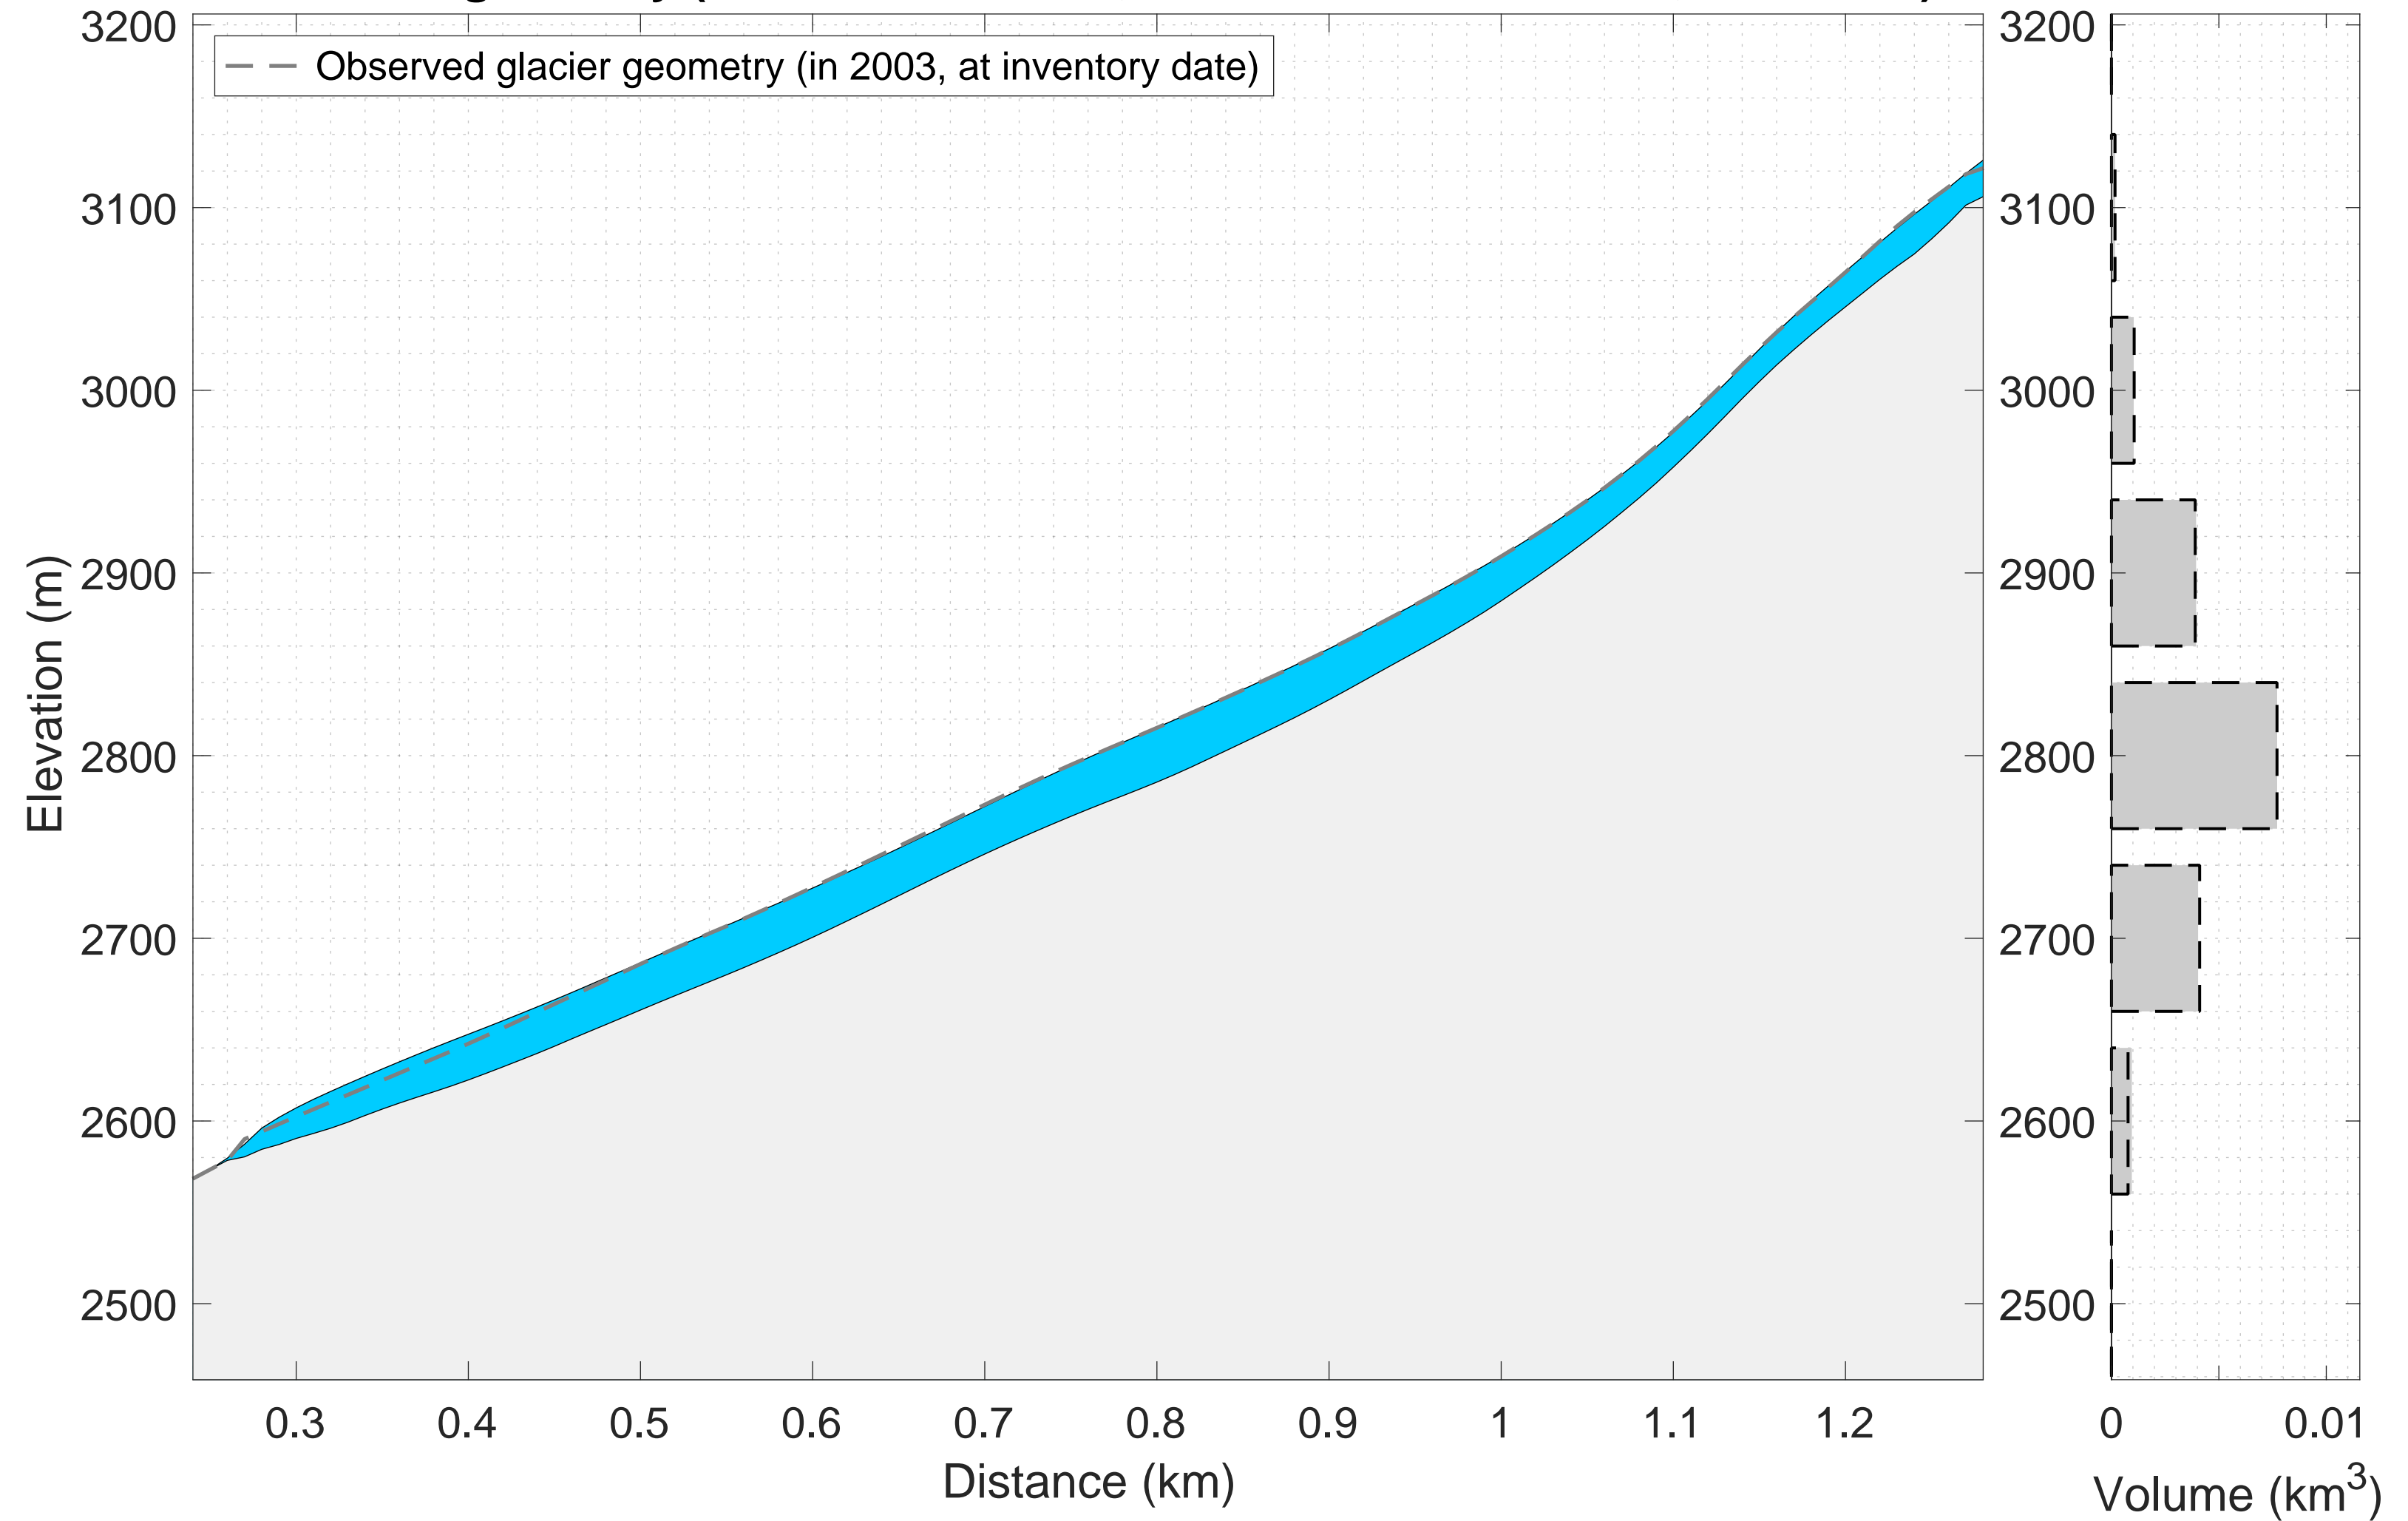

Supplement: Supplementary file 256 [file tc-13-1125-2019-supplement.zip]

**Modelled geometry (Glacier ID = 02884;  $A = 1.0955\text{e-}16 \text{ Pa}^{-3} \text{ a}^{-1}$ ;  $dx = 29 \text{ m}$ )**

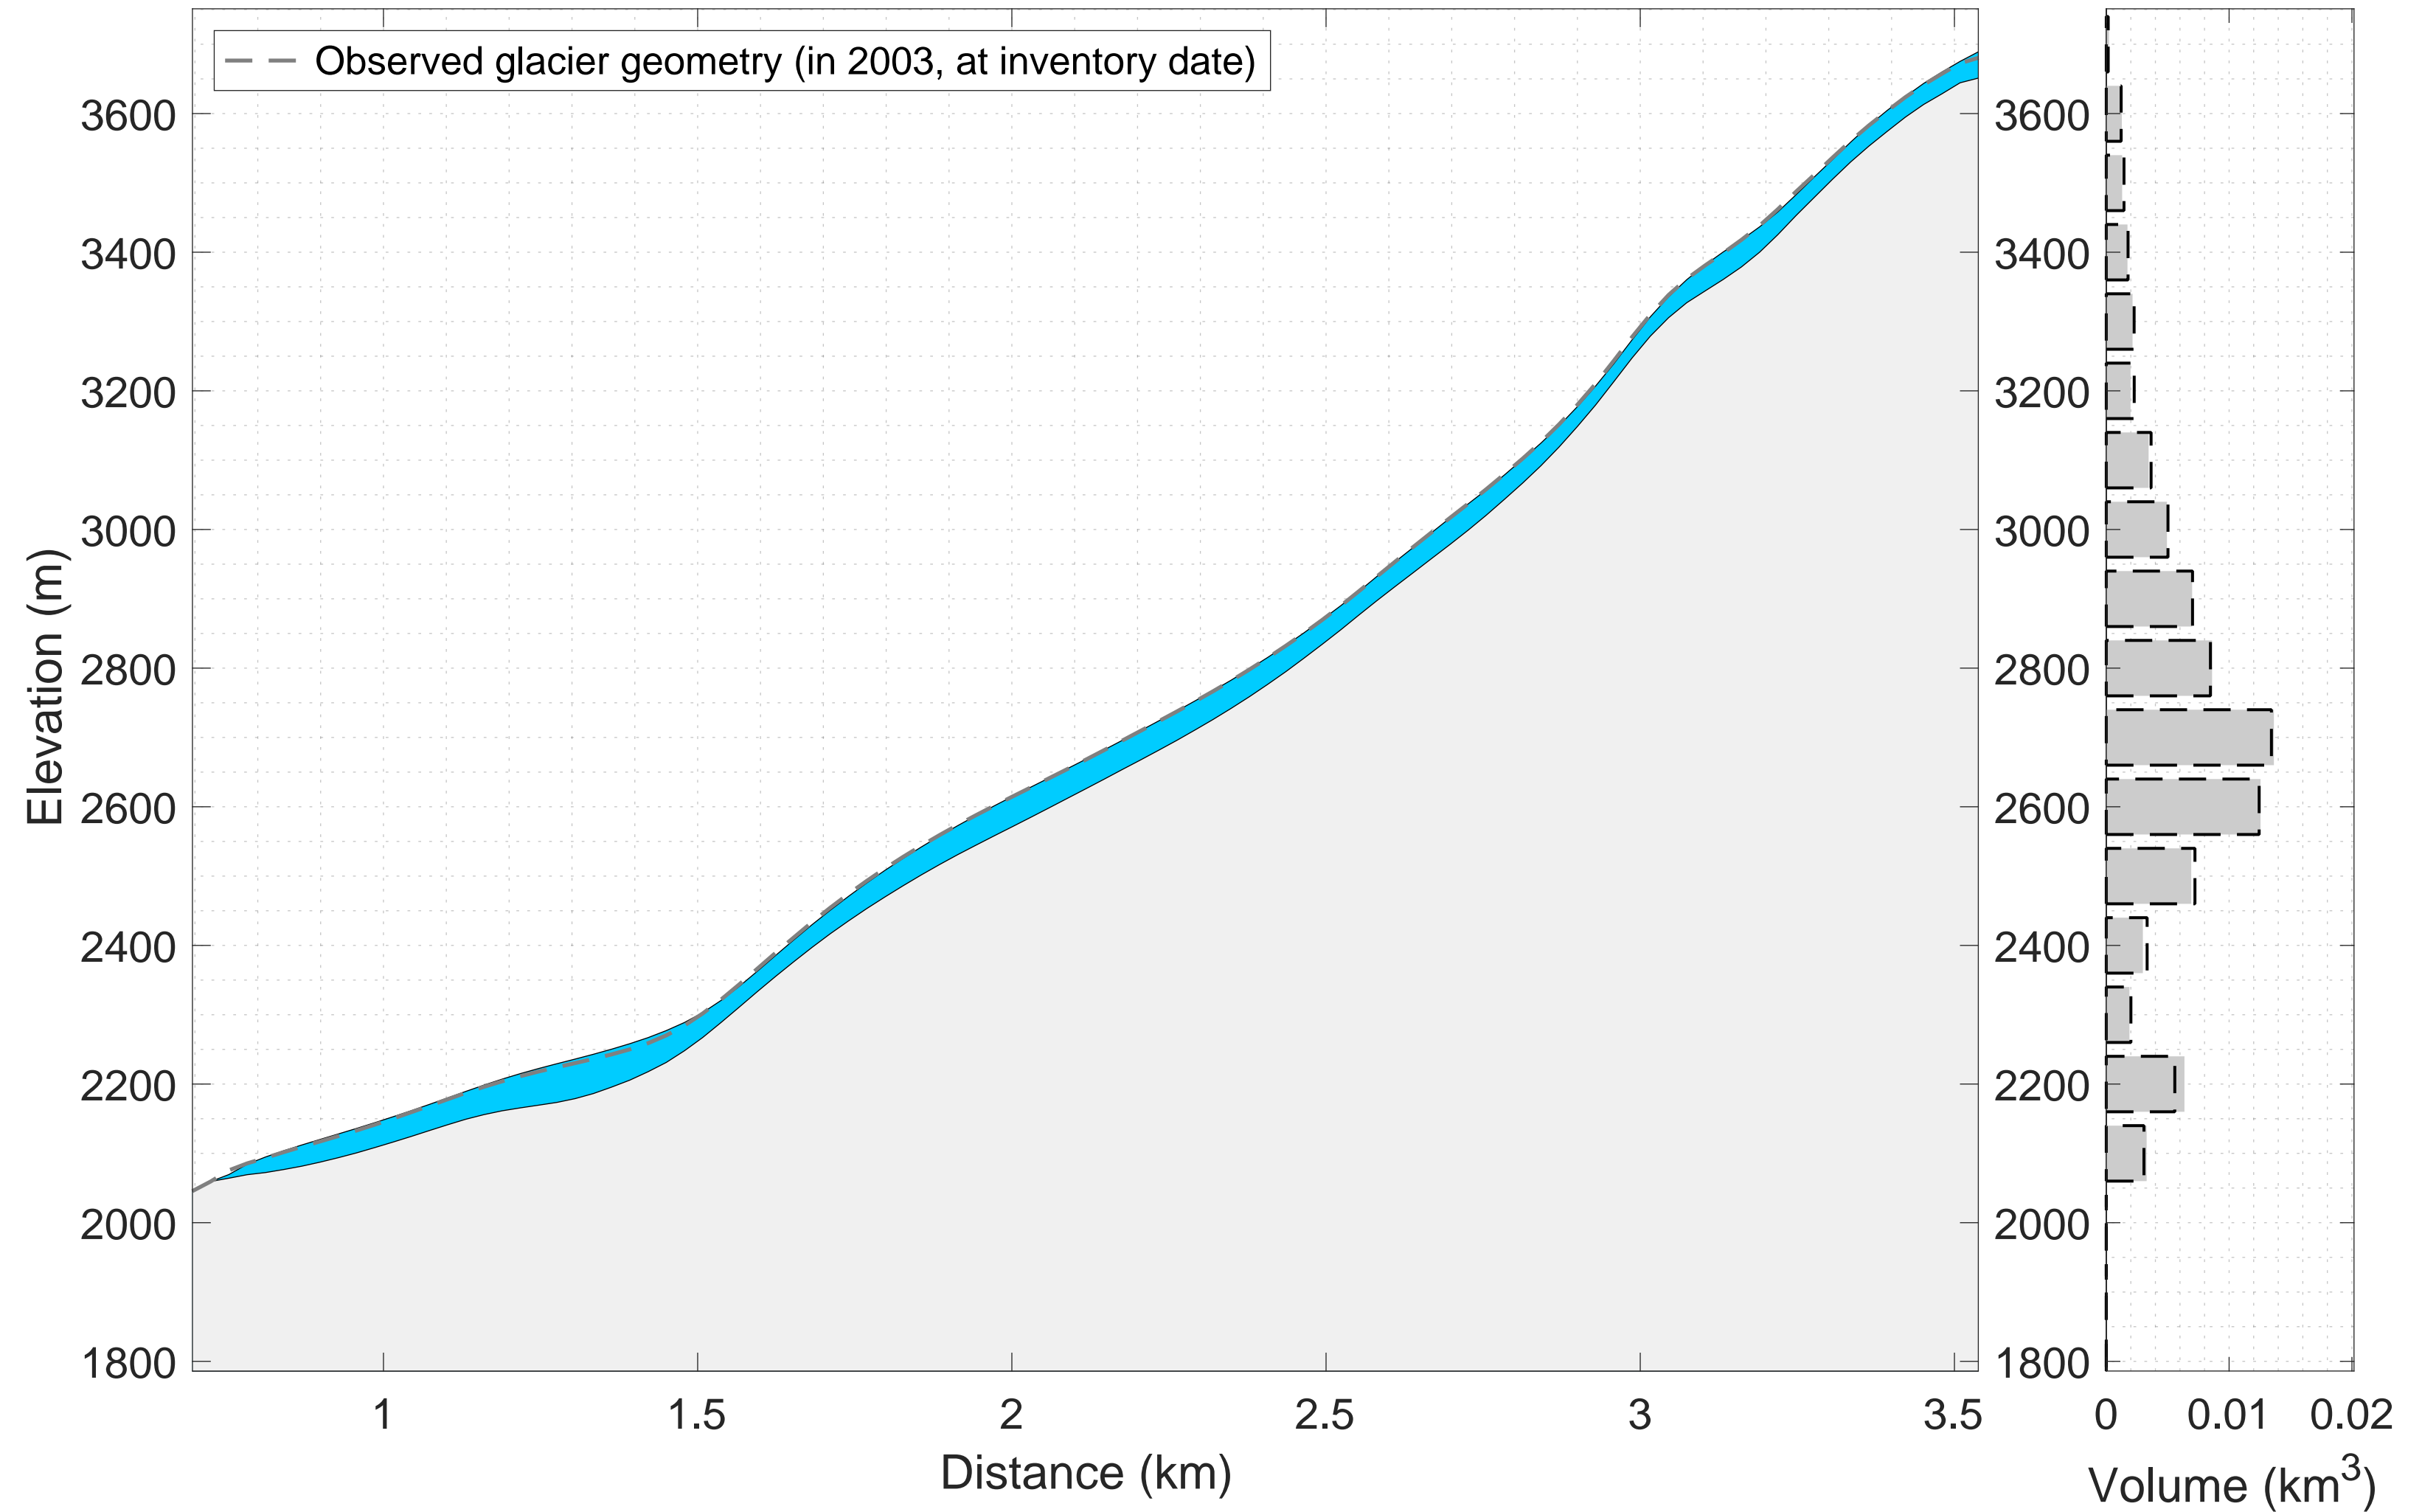

Supplement: Supplementary file 257 [file tc-13-1125-2019-supplement.zip]

**Modelled geometry (Glacier ID = 01120;  $A = 2.4565\text{e-}16 \text{ Pa}^{-3} \text{ a}^{-1}$ ;  $dx = 28 \text{ m}$ )**

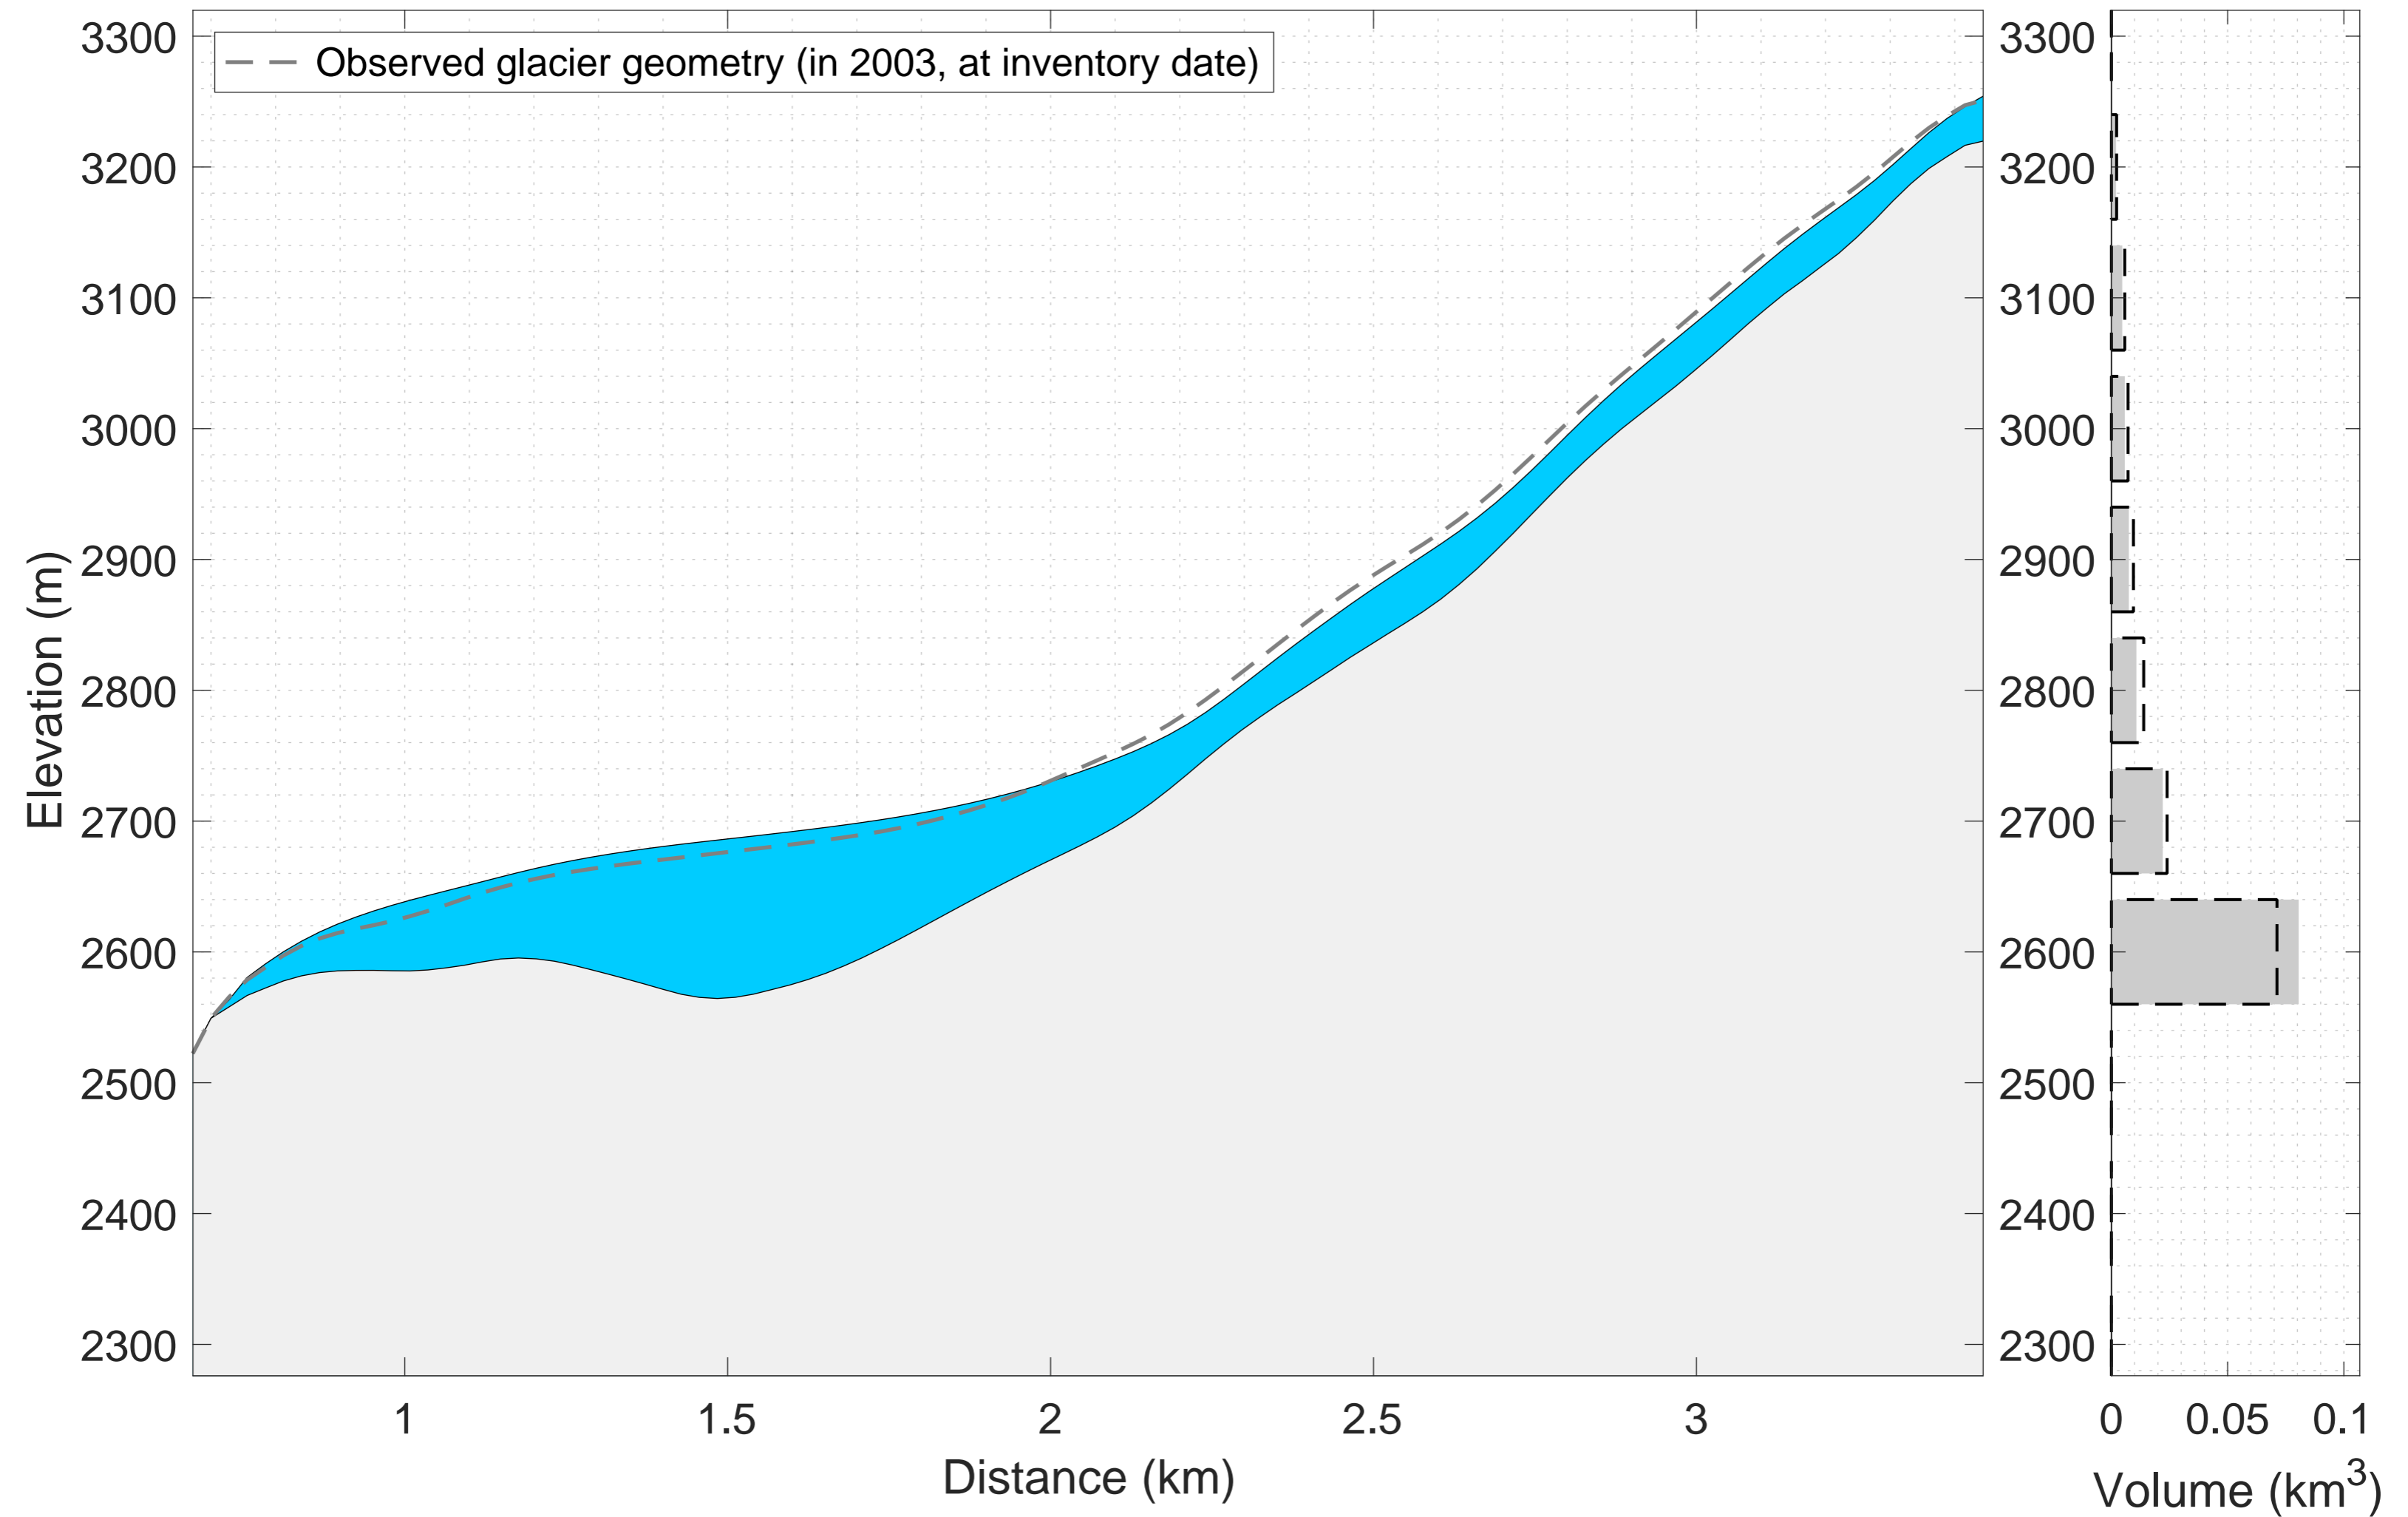

Supplement: Supplementary file 258 [file tc-13-1125-2019-supplement.zip]

**Modelled geometry (Glacier ID = 01556;  $A = 4.6347\text{e-}17 \text{ Pa}^{-3} \text{ a}^{-1}$ ;  $dx = 17 \text{ m}$ )**

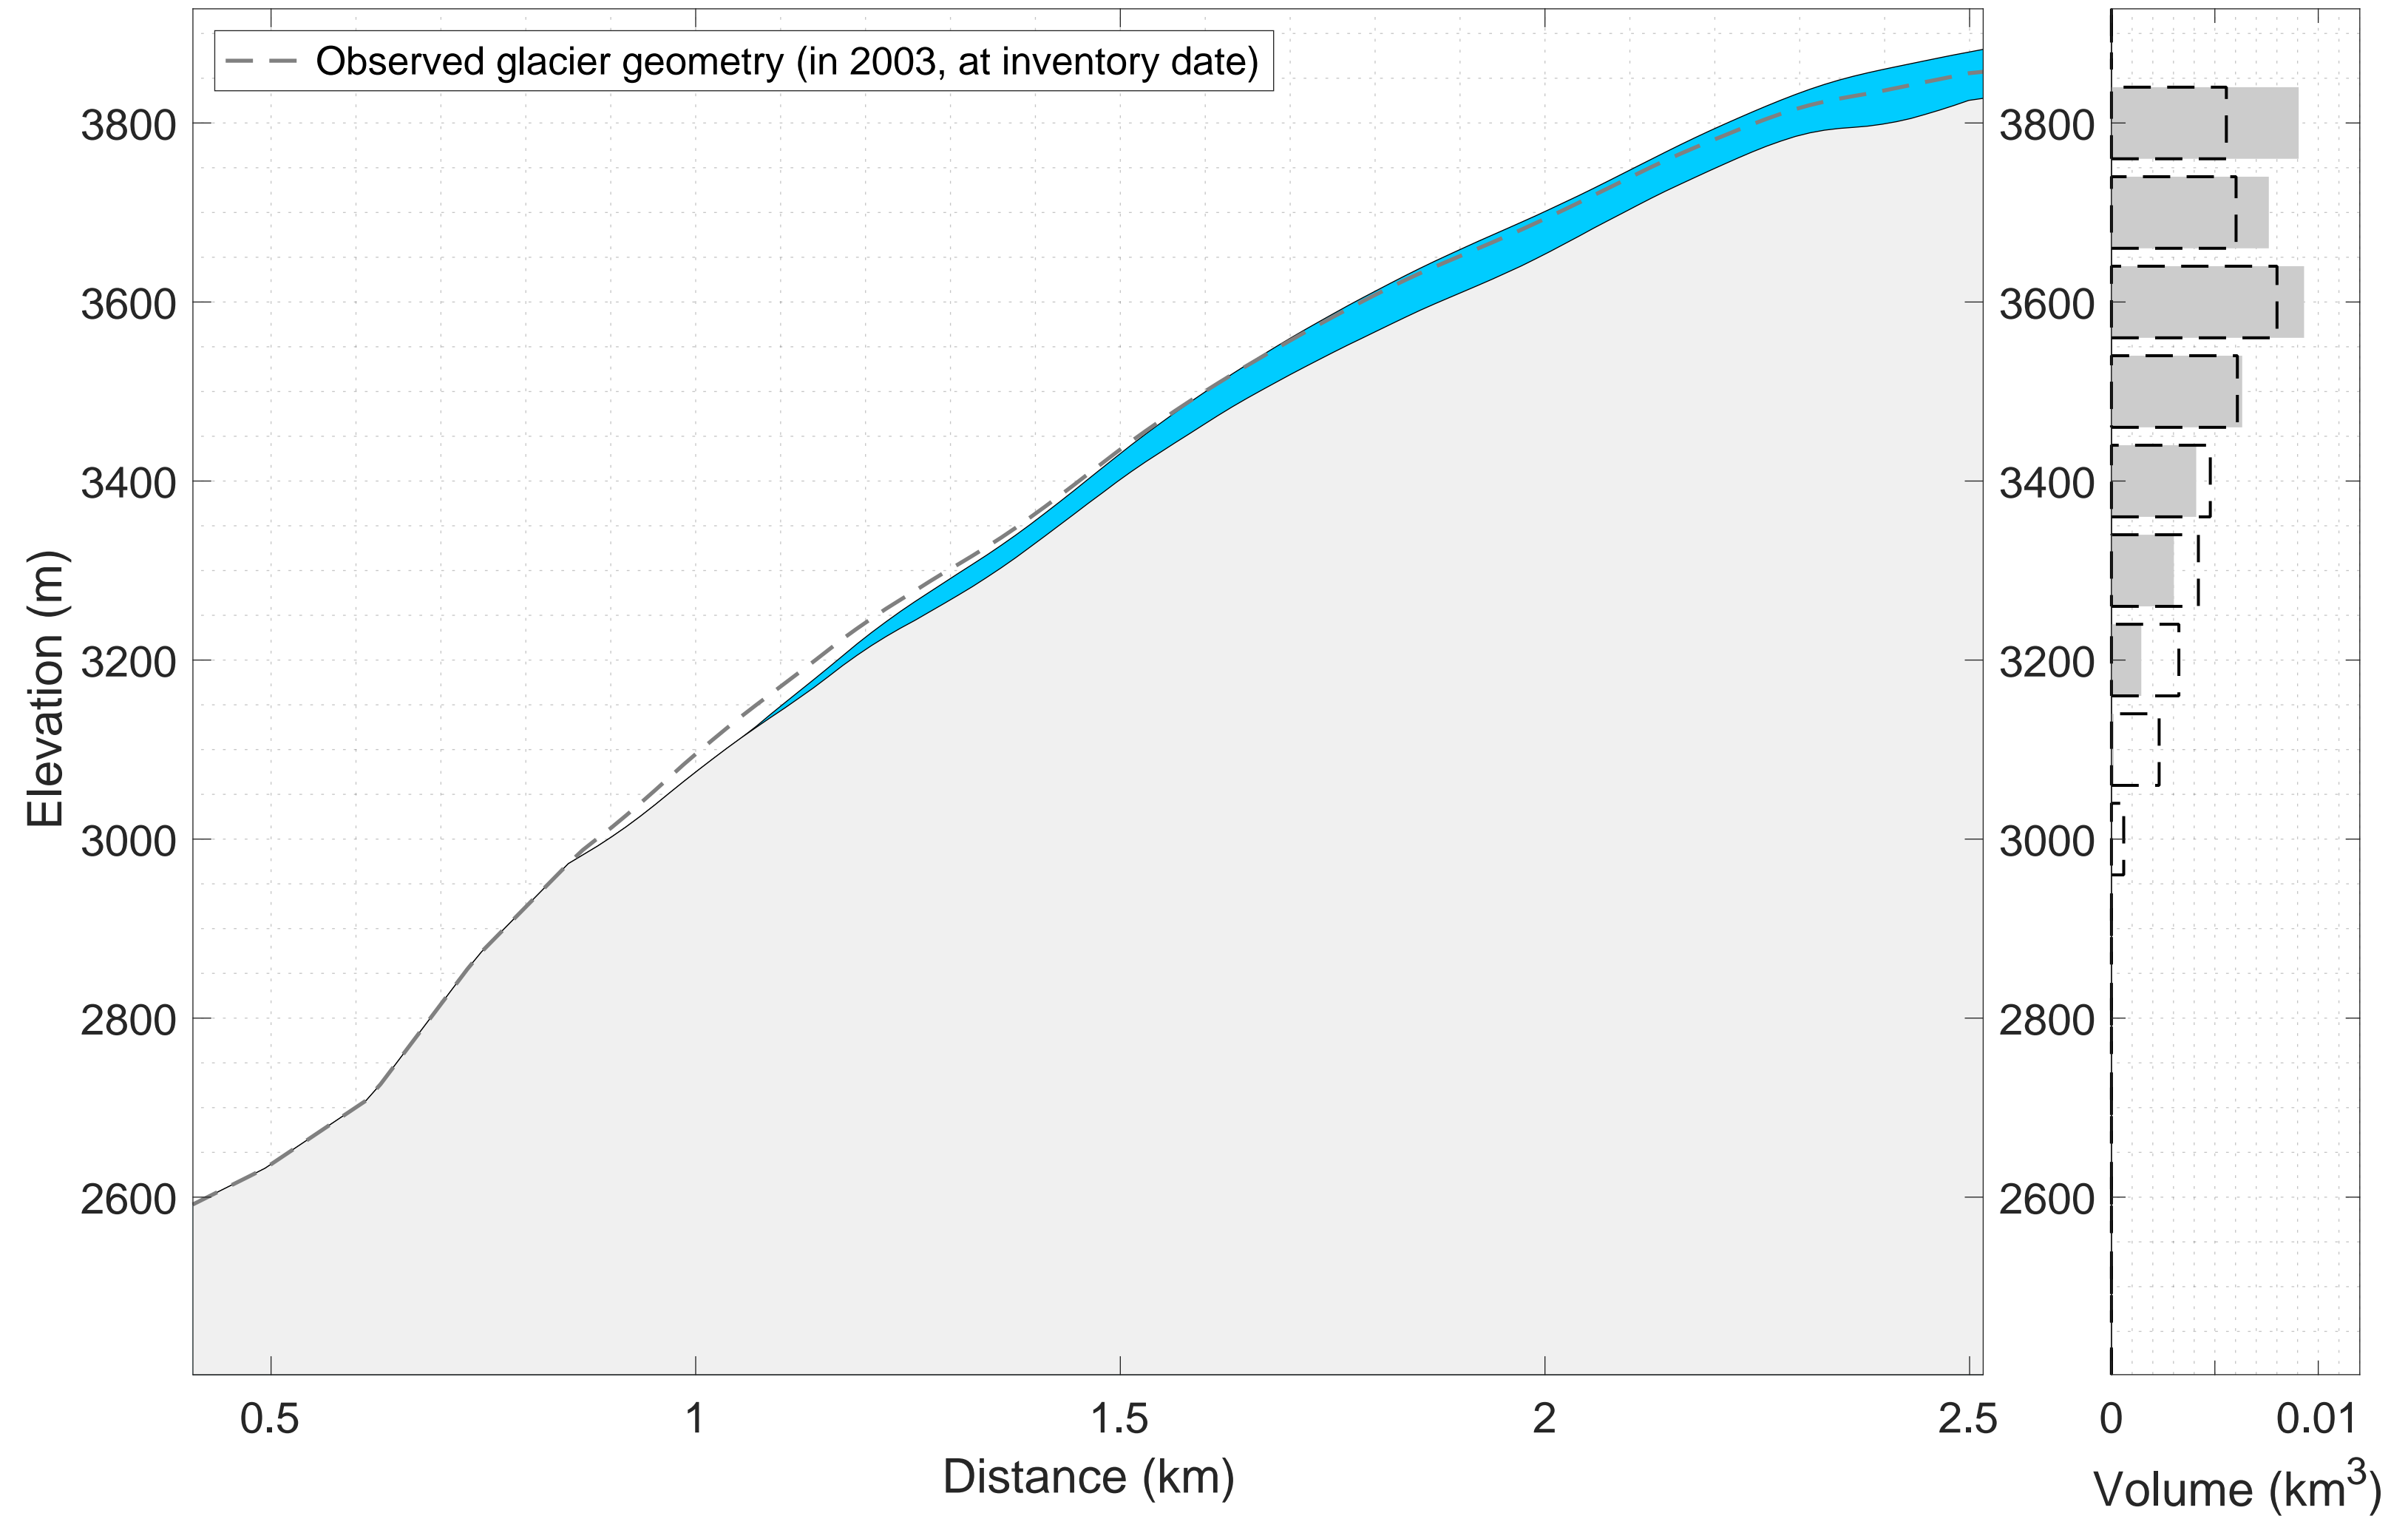

Supplement: Supplementary file 259 [file tc-13-1125-2019-supplement.zip]

Modelled geometry (Glacier ID = 03843;  $A = 7.7279\text{e-}17 \text{ Pa}^{-3} \text{ a}^{-1}$ ;  $dx = 11 \text{ m}$ )

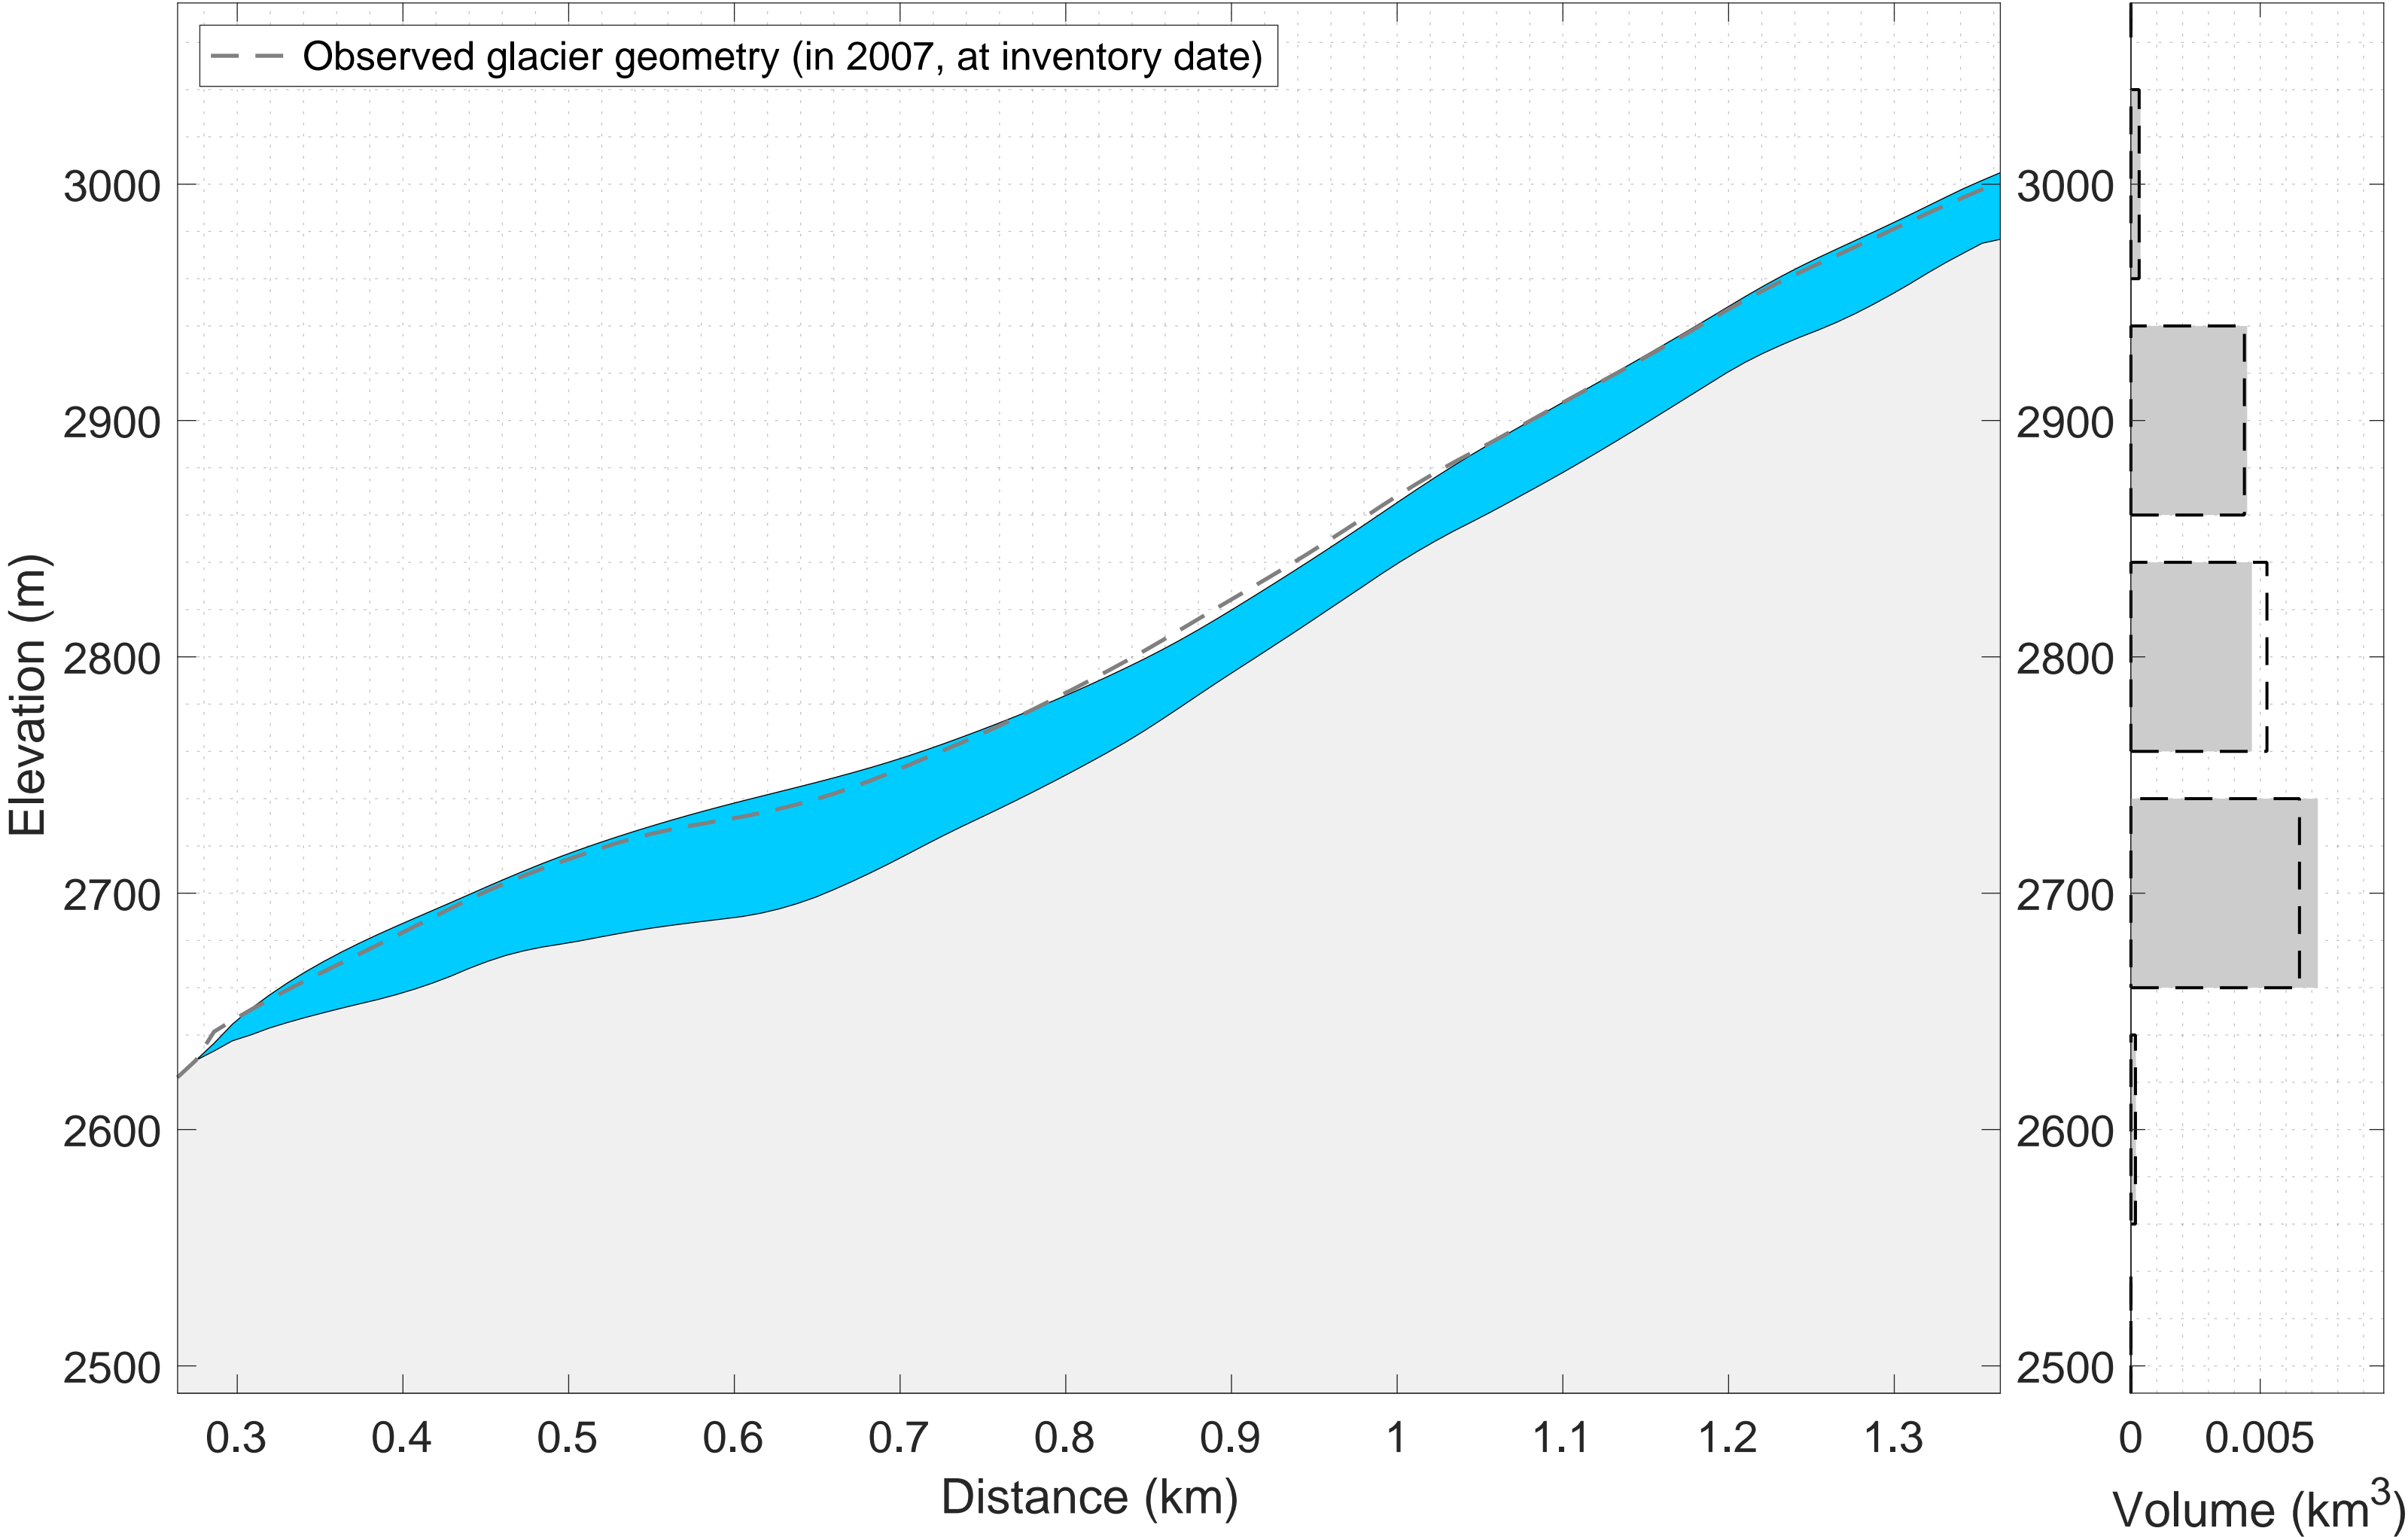

Supplement: Supplementary file 260 [file tc-13-1125-2019-supplement.zip]

**Modelled geometry (Glacier ID = 01335;  $A = 1.9127\text{e-}16 \text{ Pa}^{-3} \text{ a}^{-1}$ ;  $dx = 18 \text{ m}$ )**

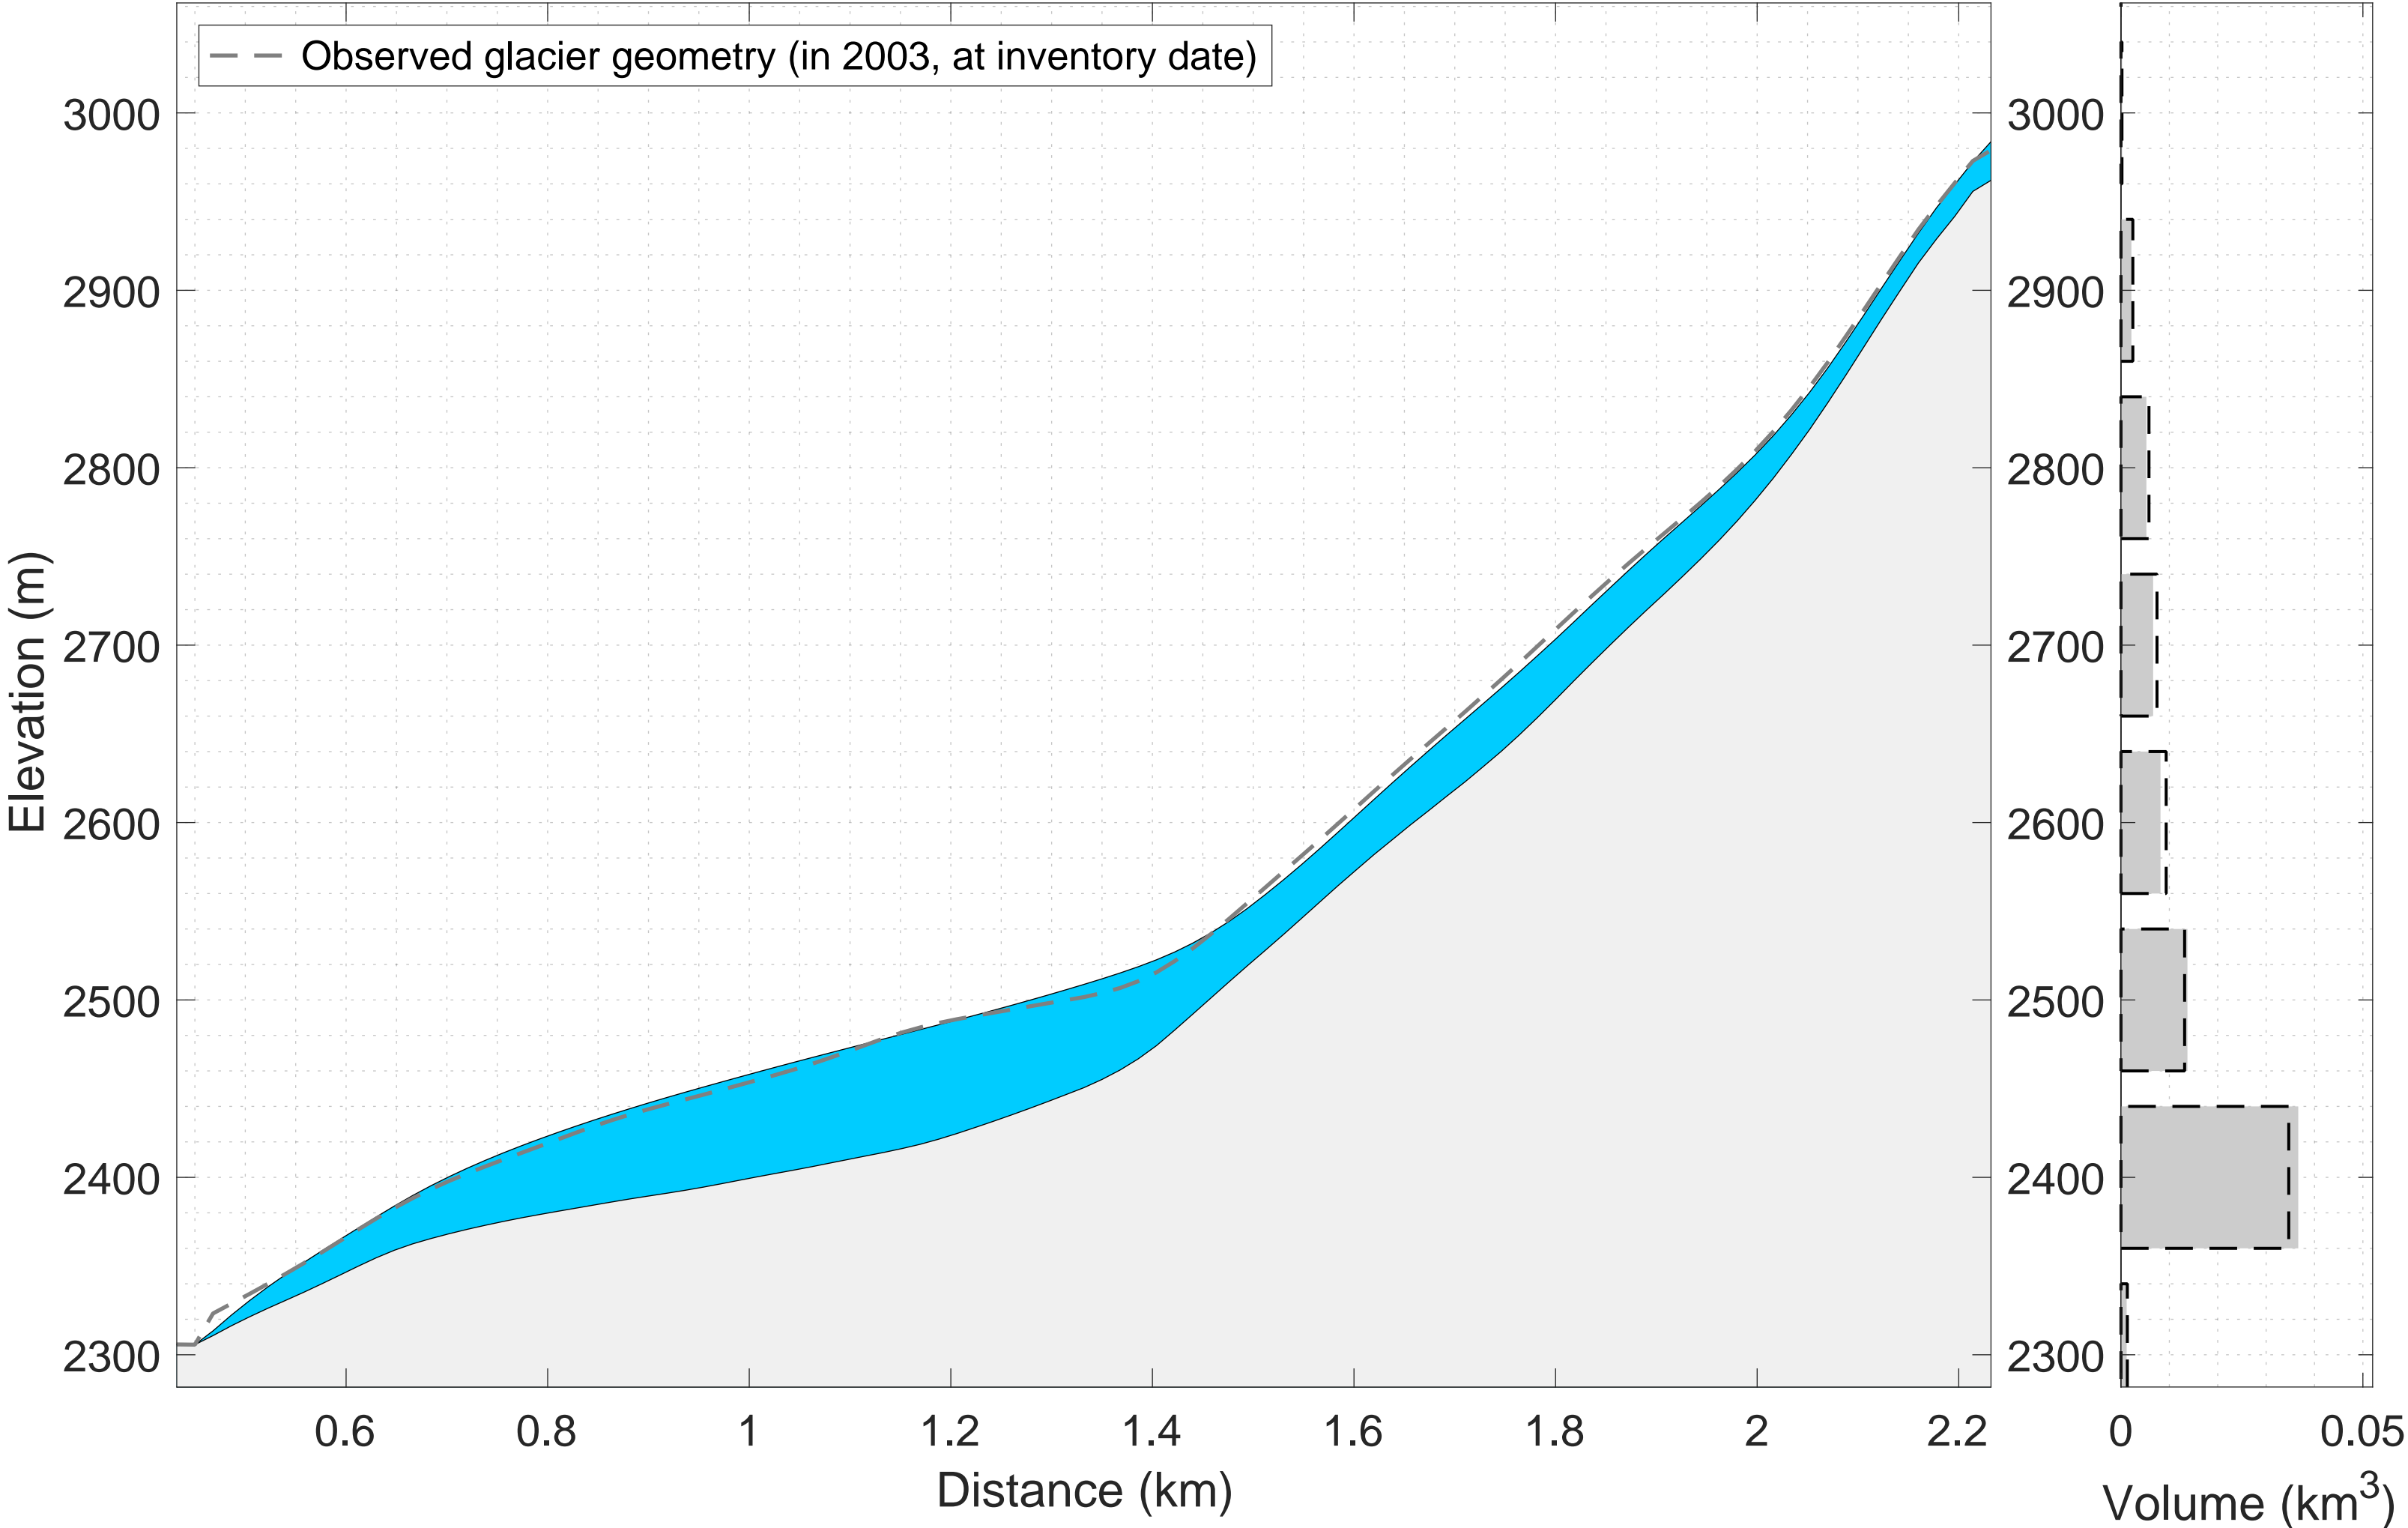

Supplement: Supplementary file 261 [file tc-13-1125-2019-supplement.zip]

**Modelled geometry (Glacier ID = 03654;  $A = 1.6994\text{e-}16 \text{ Pa}^{-3} \text{ a}^{-1}$ ;  $dx = 18 \text{ m}$ )**

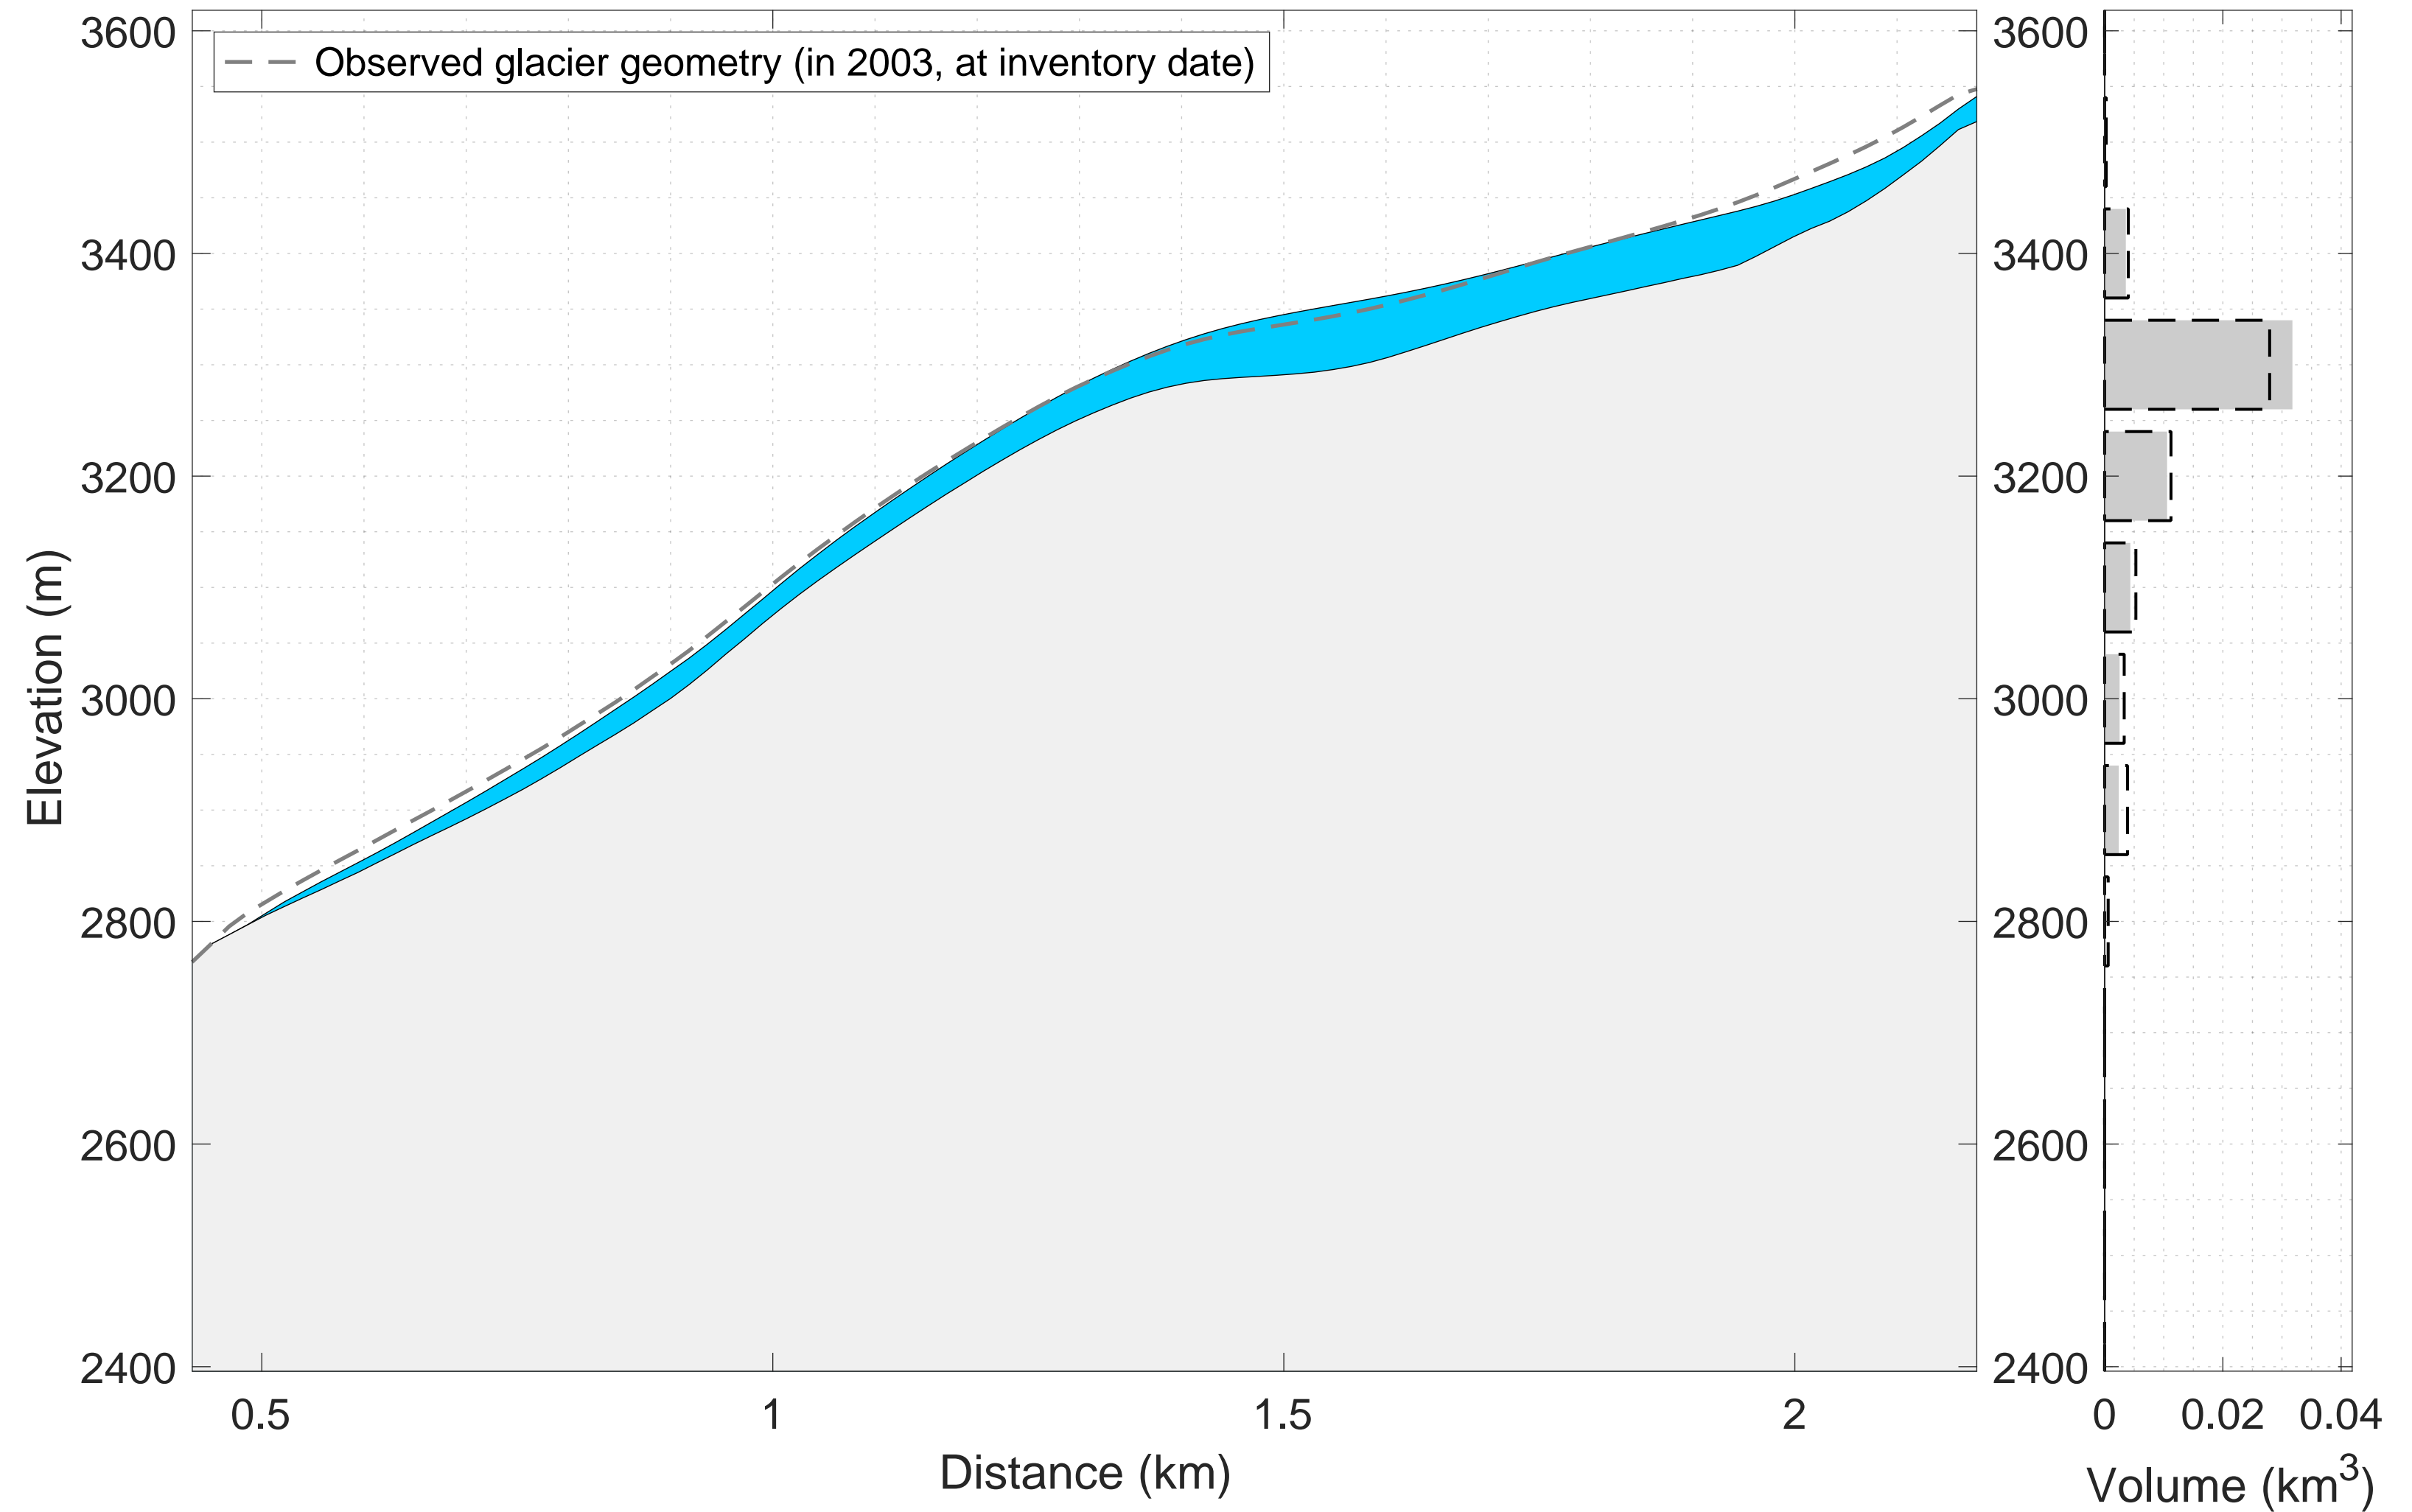

Supplement: Supplementary file 262 [file tc-13-1125-2019-supplement.zip]

**Modelled geometry (Glacier ID = 01902;  $A = 1.5134\text{e-}16 \text{ Pa}^{-3} \text{ a}^{-1}$ ;  $dx = 16 \text{ m}$ )**

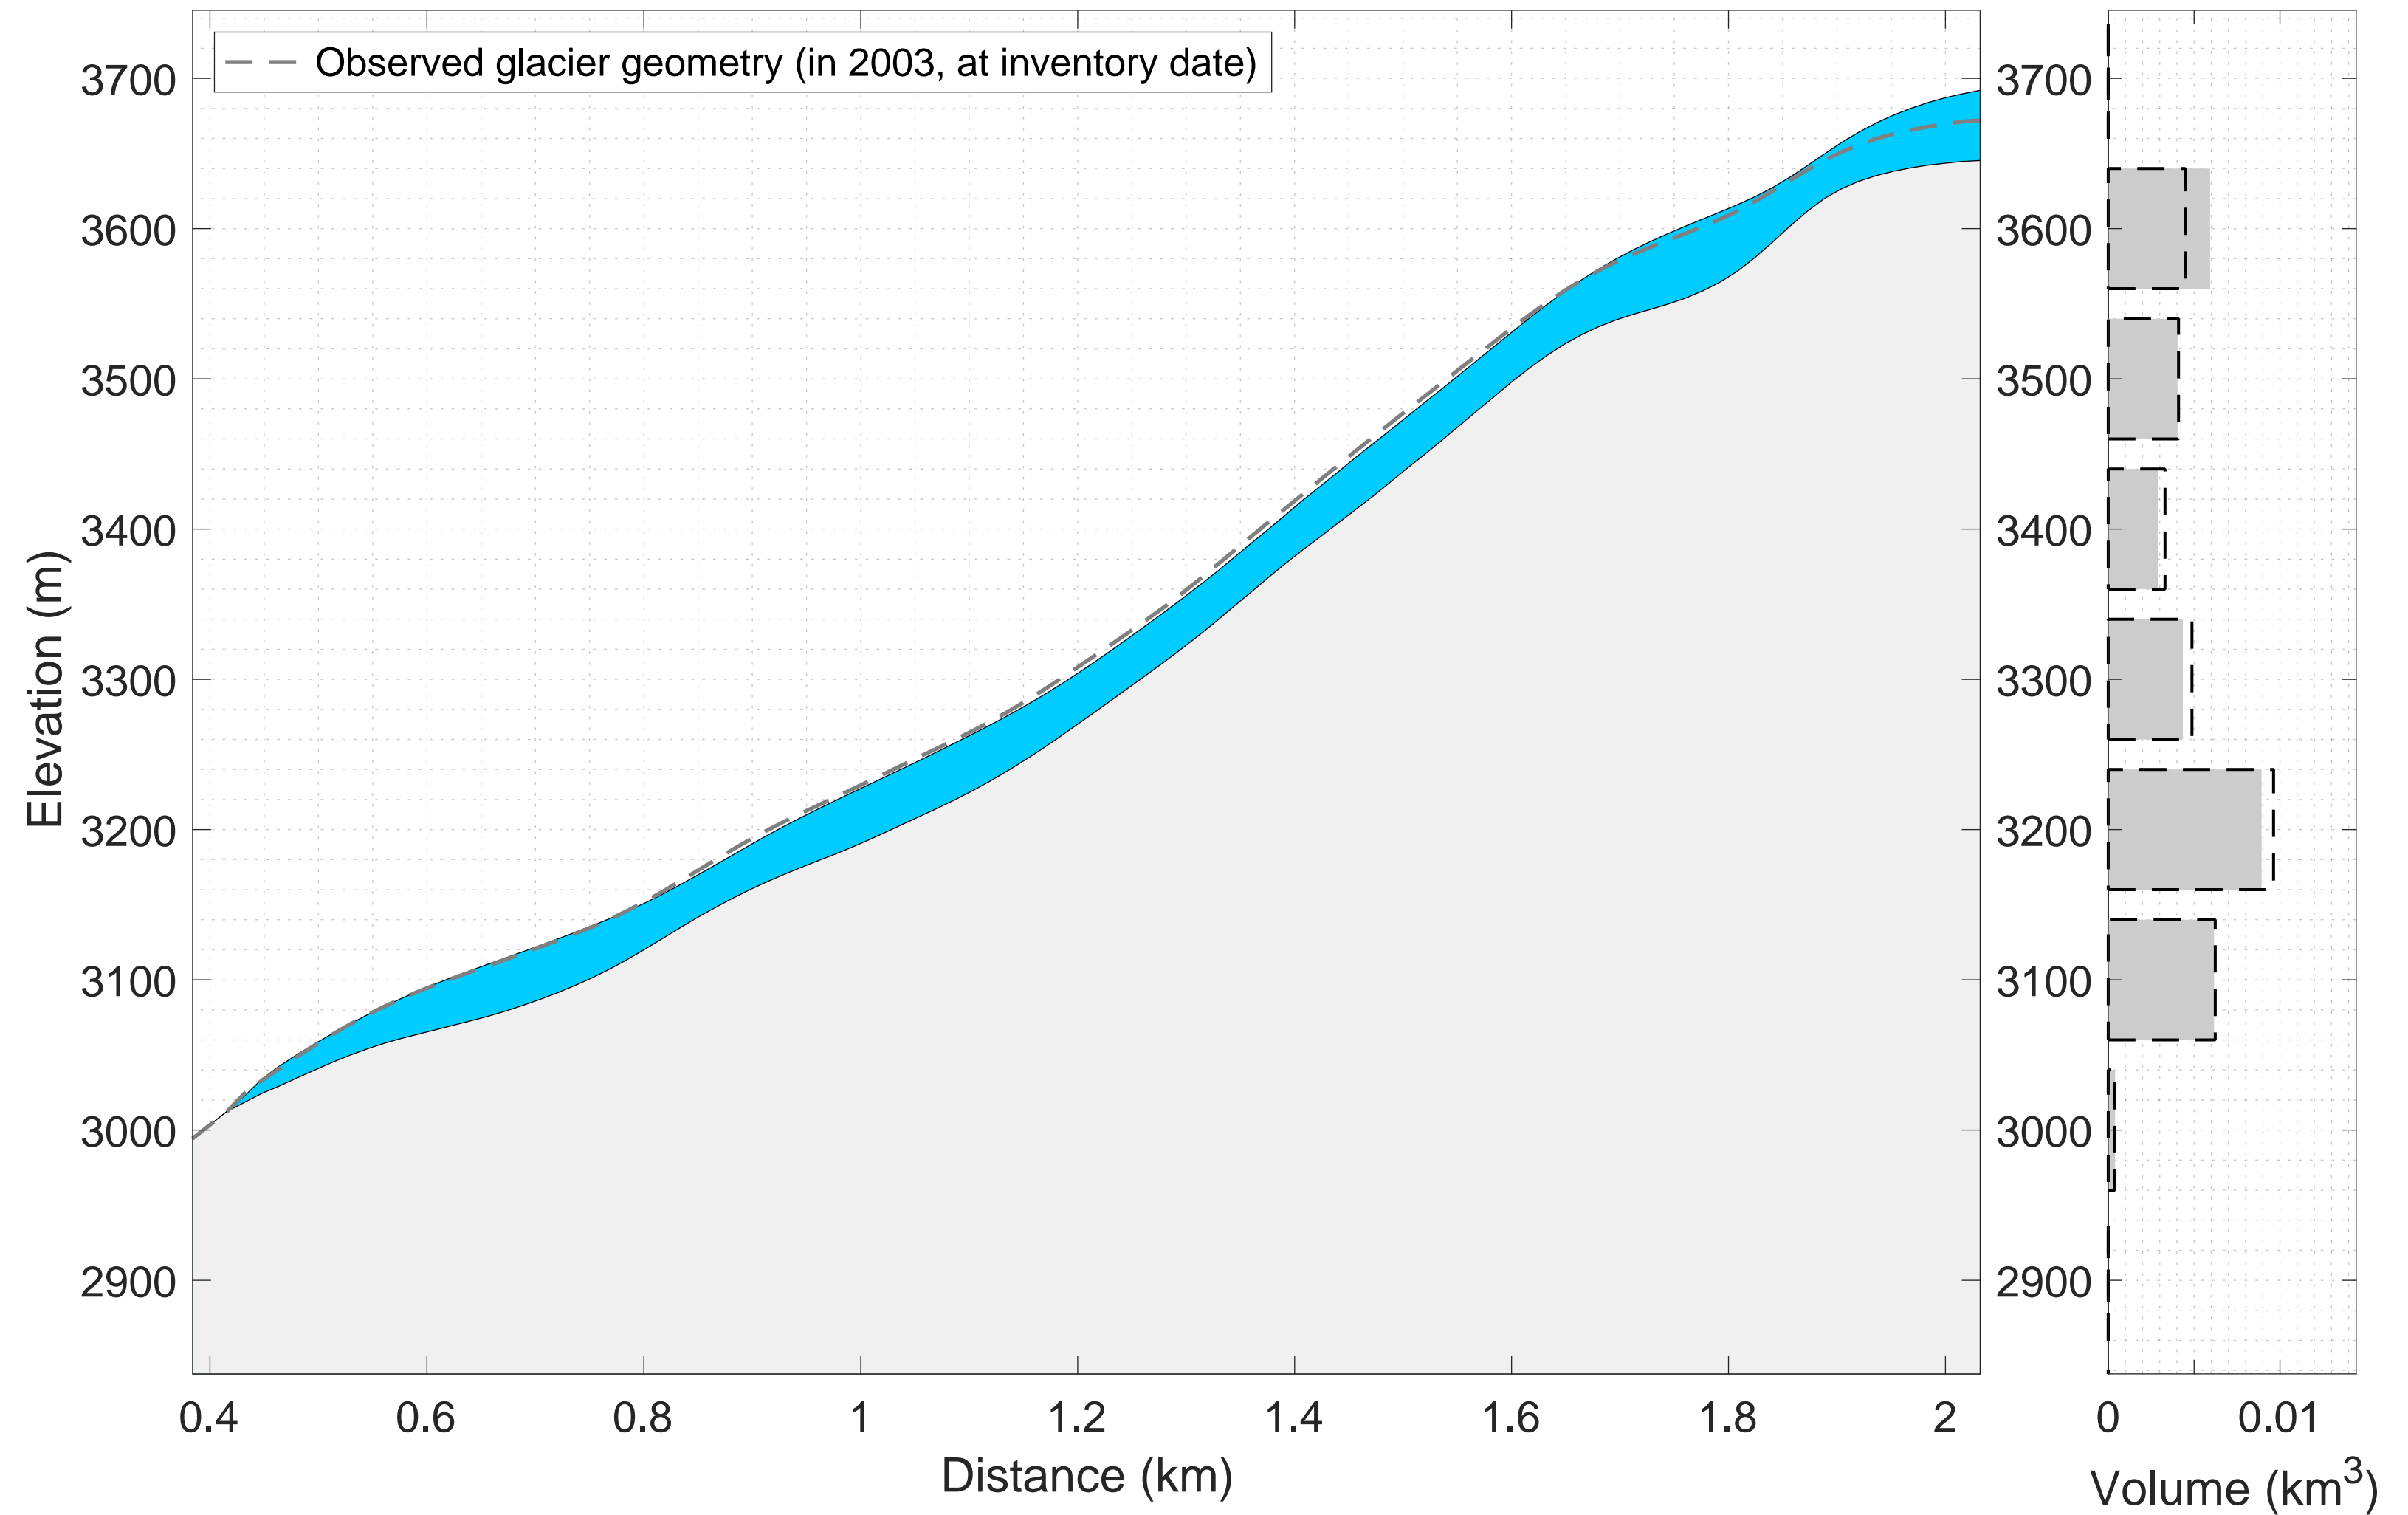

Supplement: Supplementary file 263 [file tc-13-1125-2019-supplement.zip]

**Modelled geometry (Glacier ID = 03809;  $A = 8.962\text{e-}17 \text{ Pa}^{-3} \text{ a}^{-1}$ ;  $dx = 15 \text{ m}$ )**

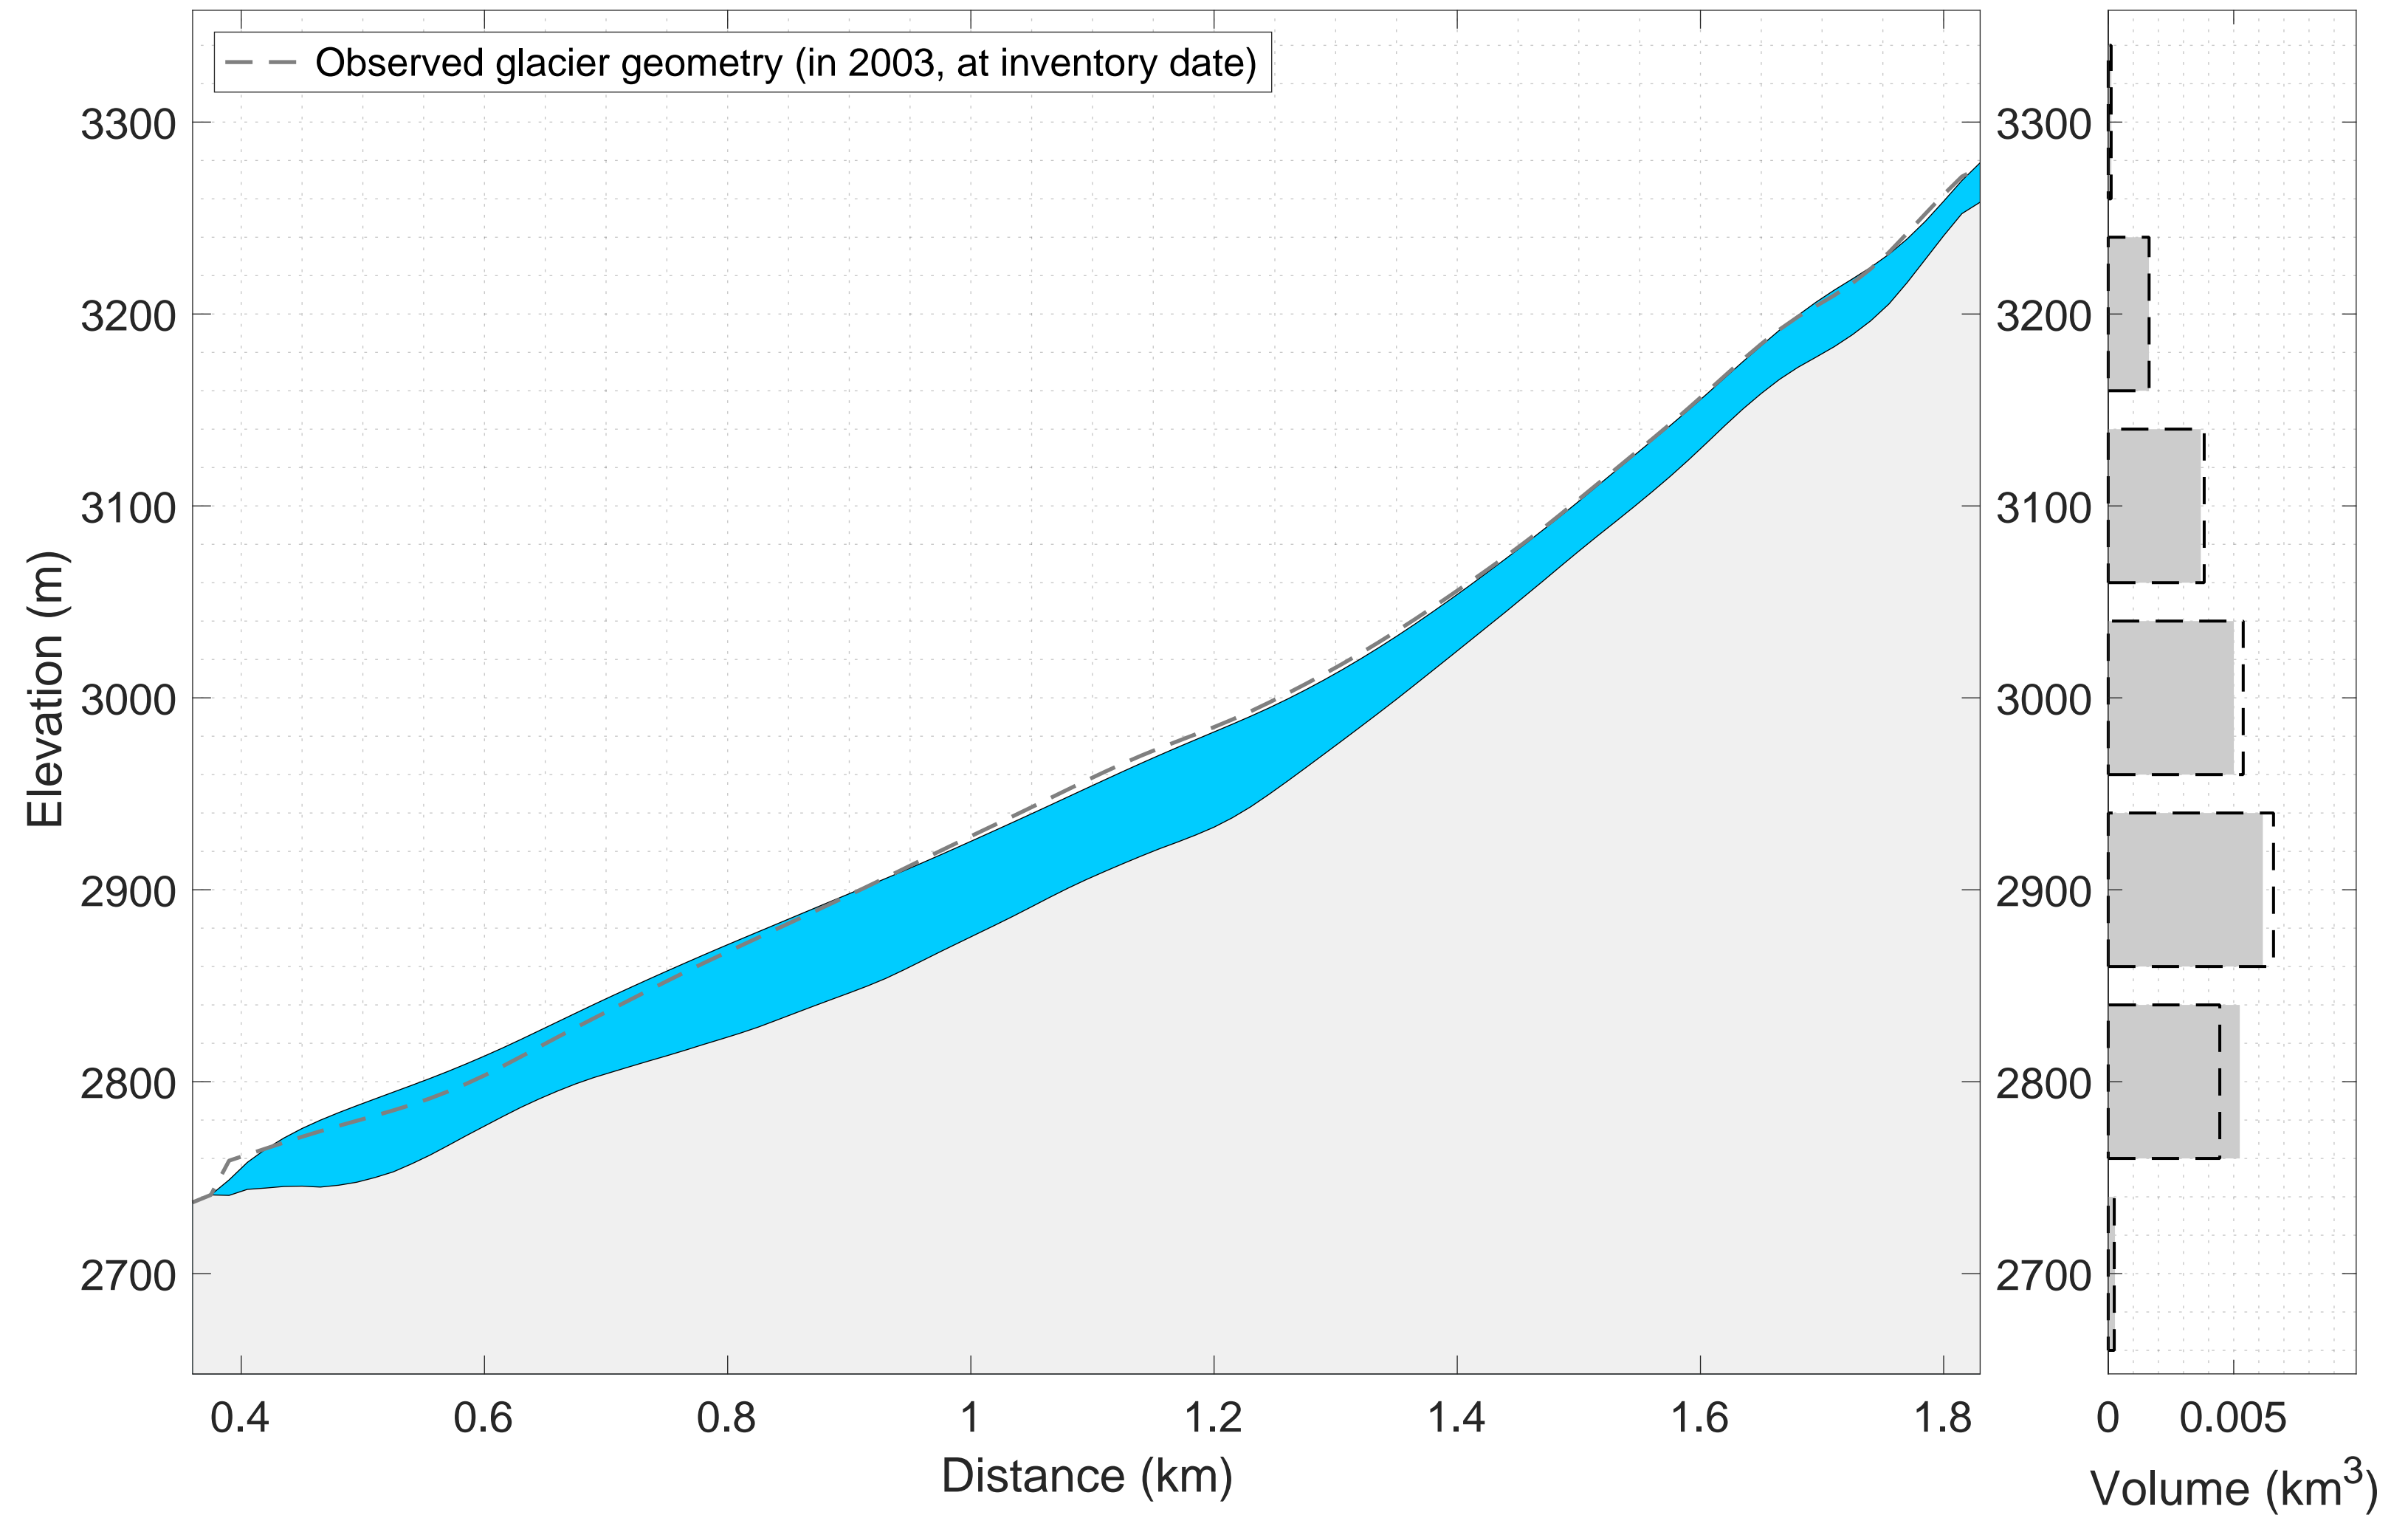

Supplement: Supplementary file 264 [file tc-13-1125-2019-supplement.zip]

**Modelled geometry (Glacier ID = 01840;  $A = 8.2134\text{e-}17 \text{ Pa}^{-3} \text{ a}^{-1}$ ;  $dx = 32 \text{ m}$ )**

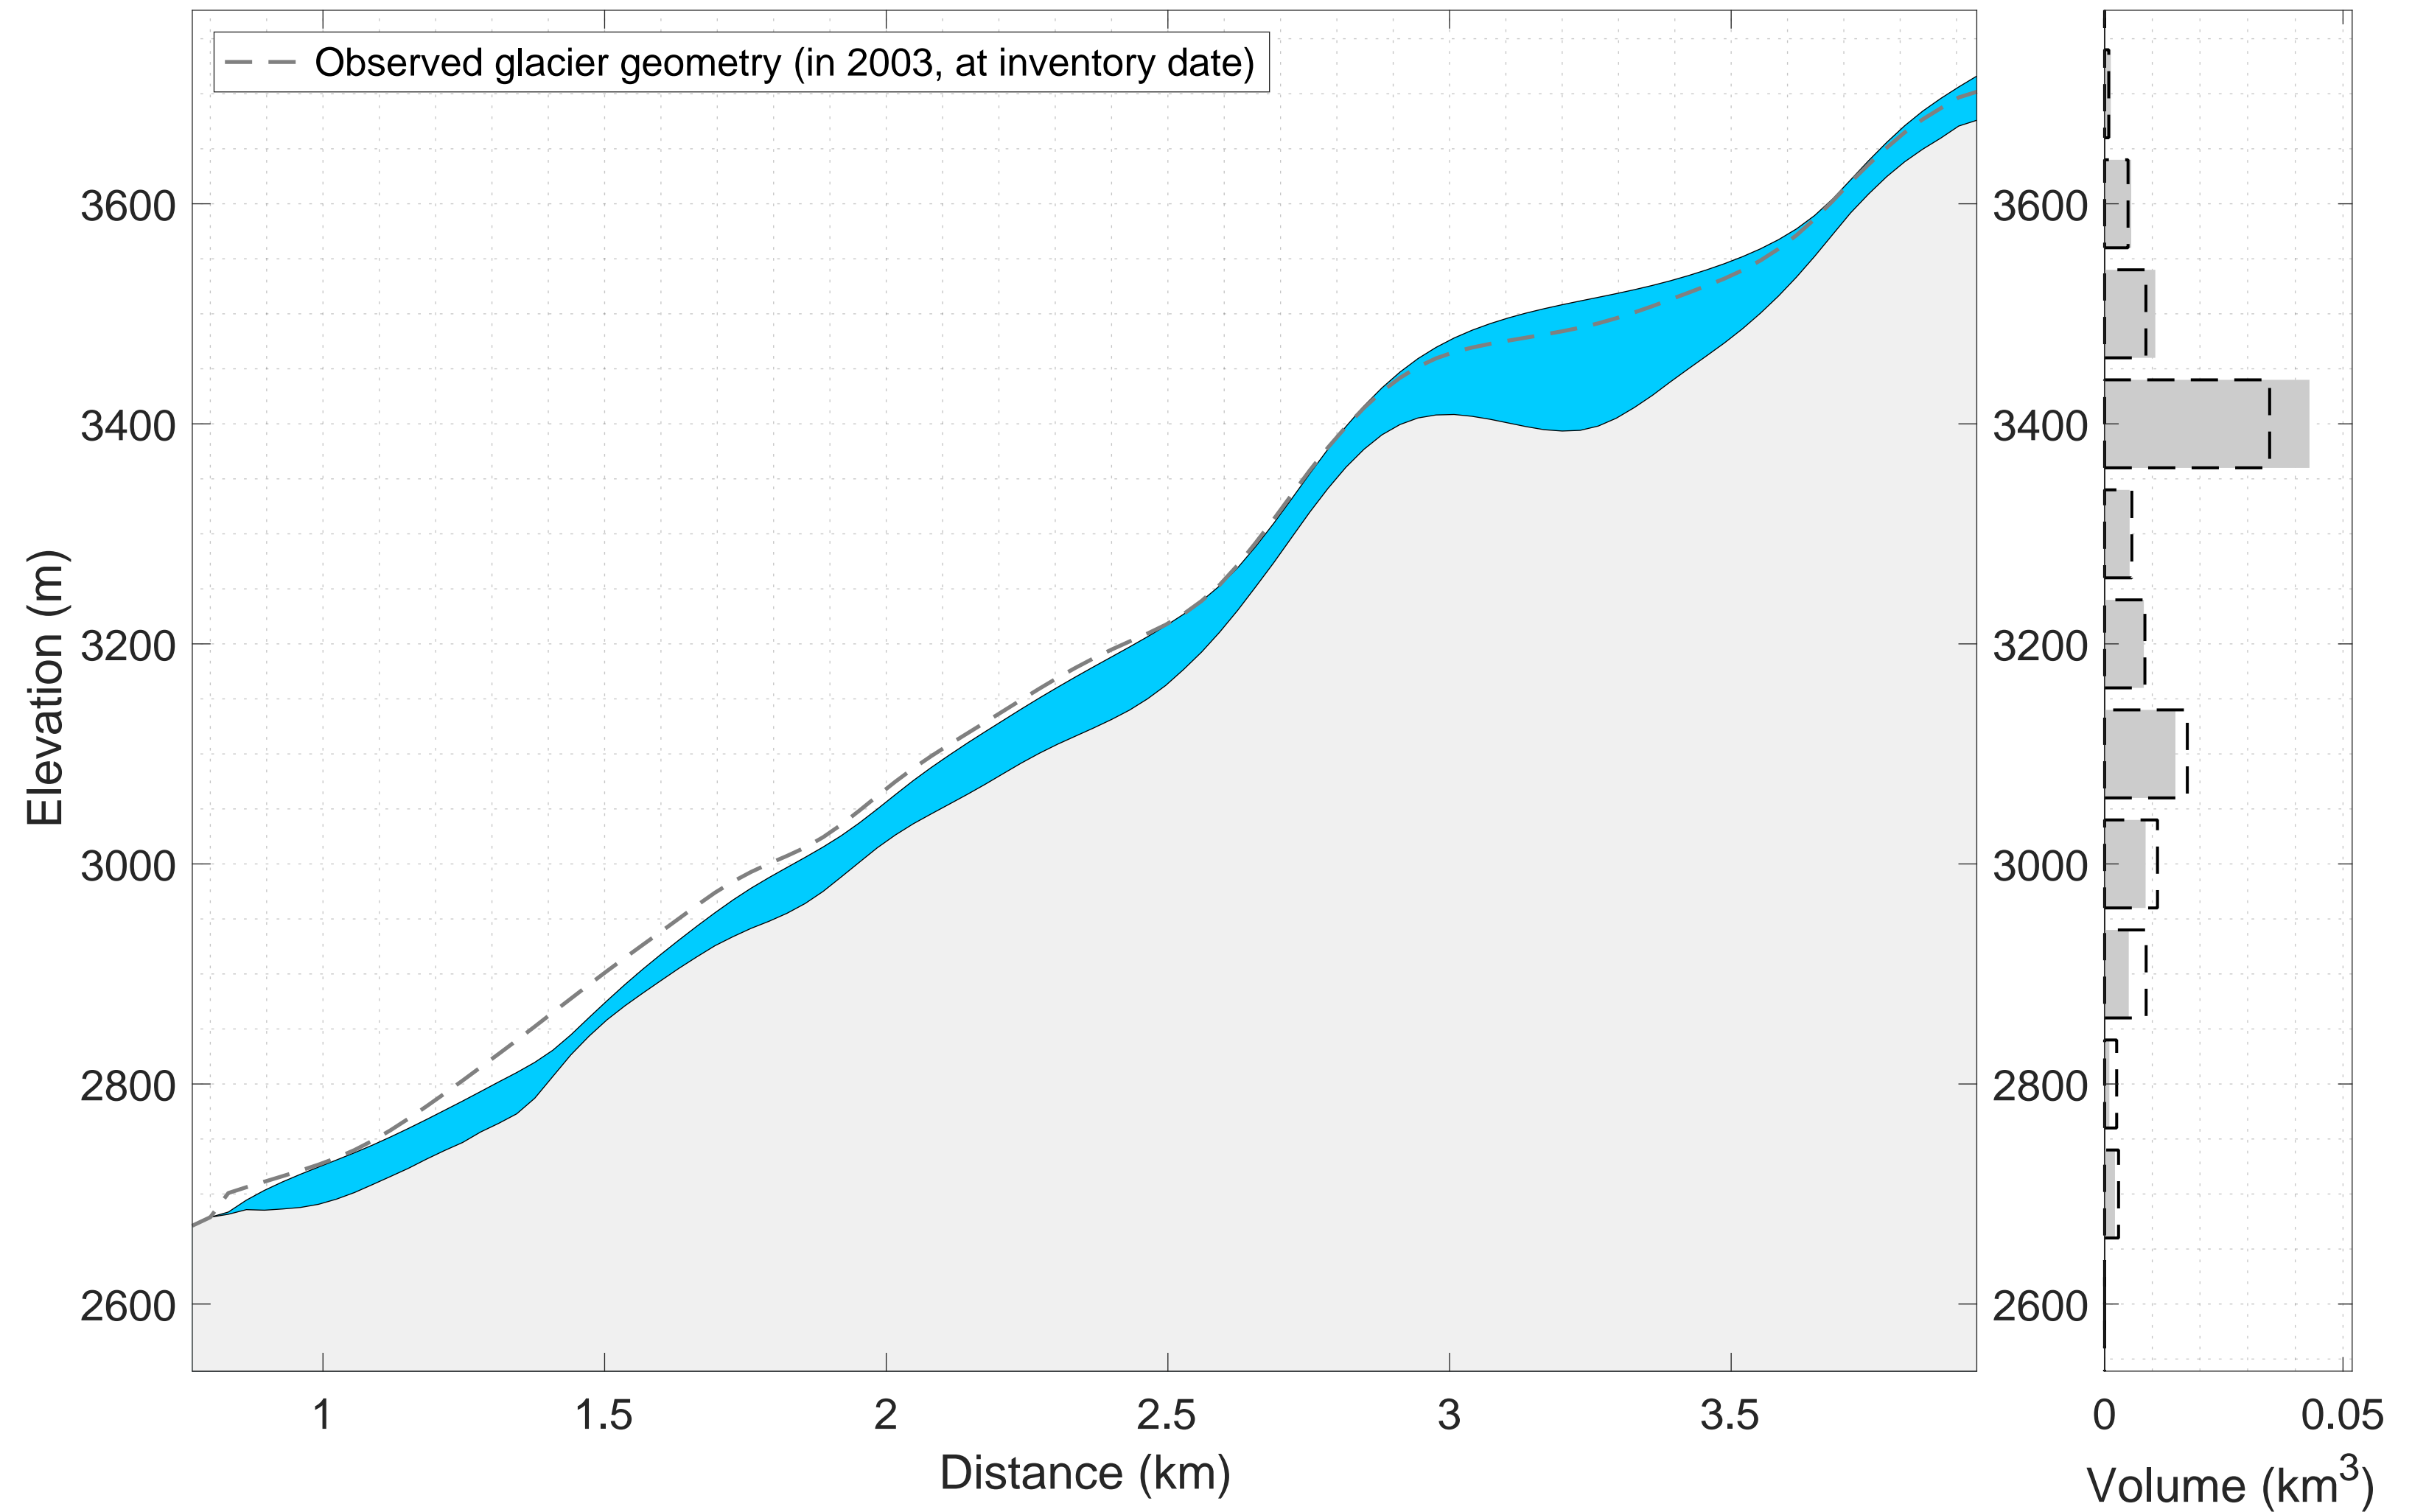

Supplement: Supplementary file 265 [file tc-13-1125-2019-supplement.zip]

**Modelled geometry (Glacier ID = 03232;  $A = 5.1233\text{e-}17 \text{ Pa}^{-3} \text{ a}^{-1}$ ;  $dx = 13 \text{ m}$ )**

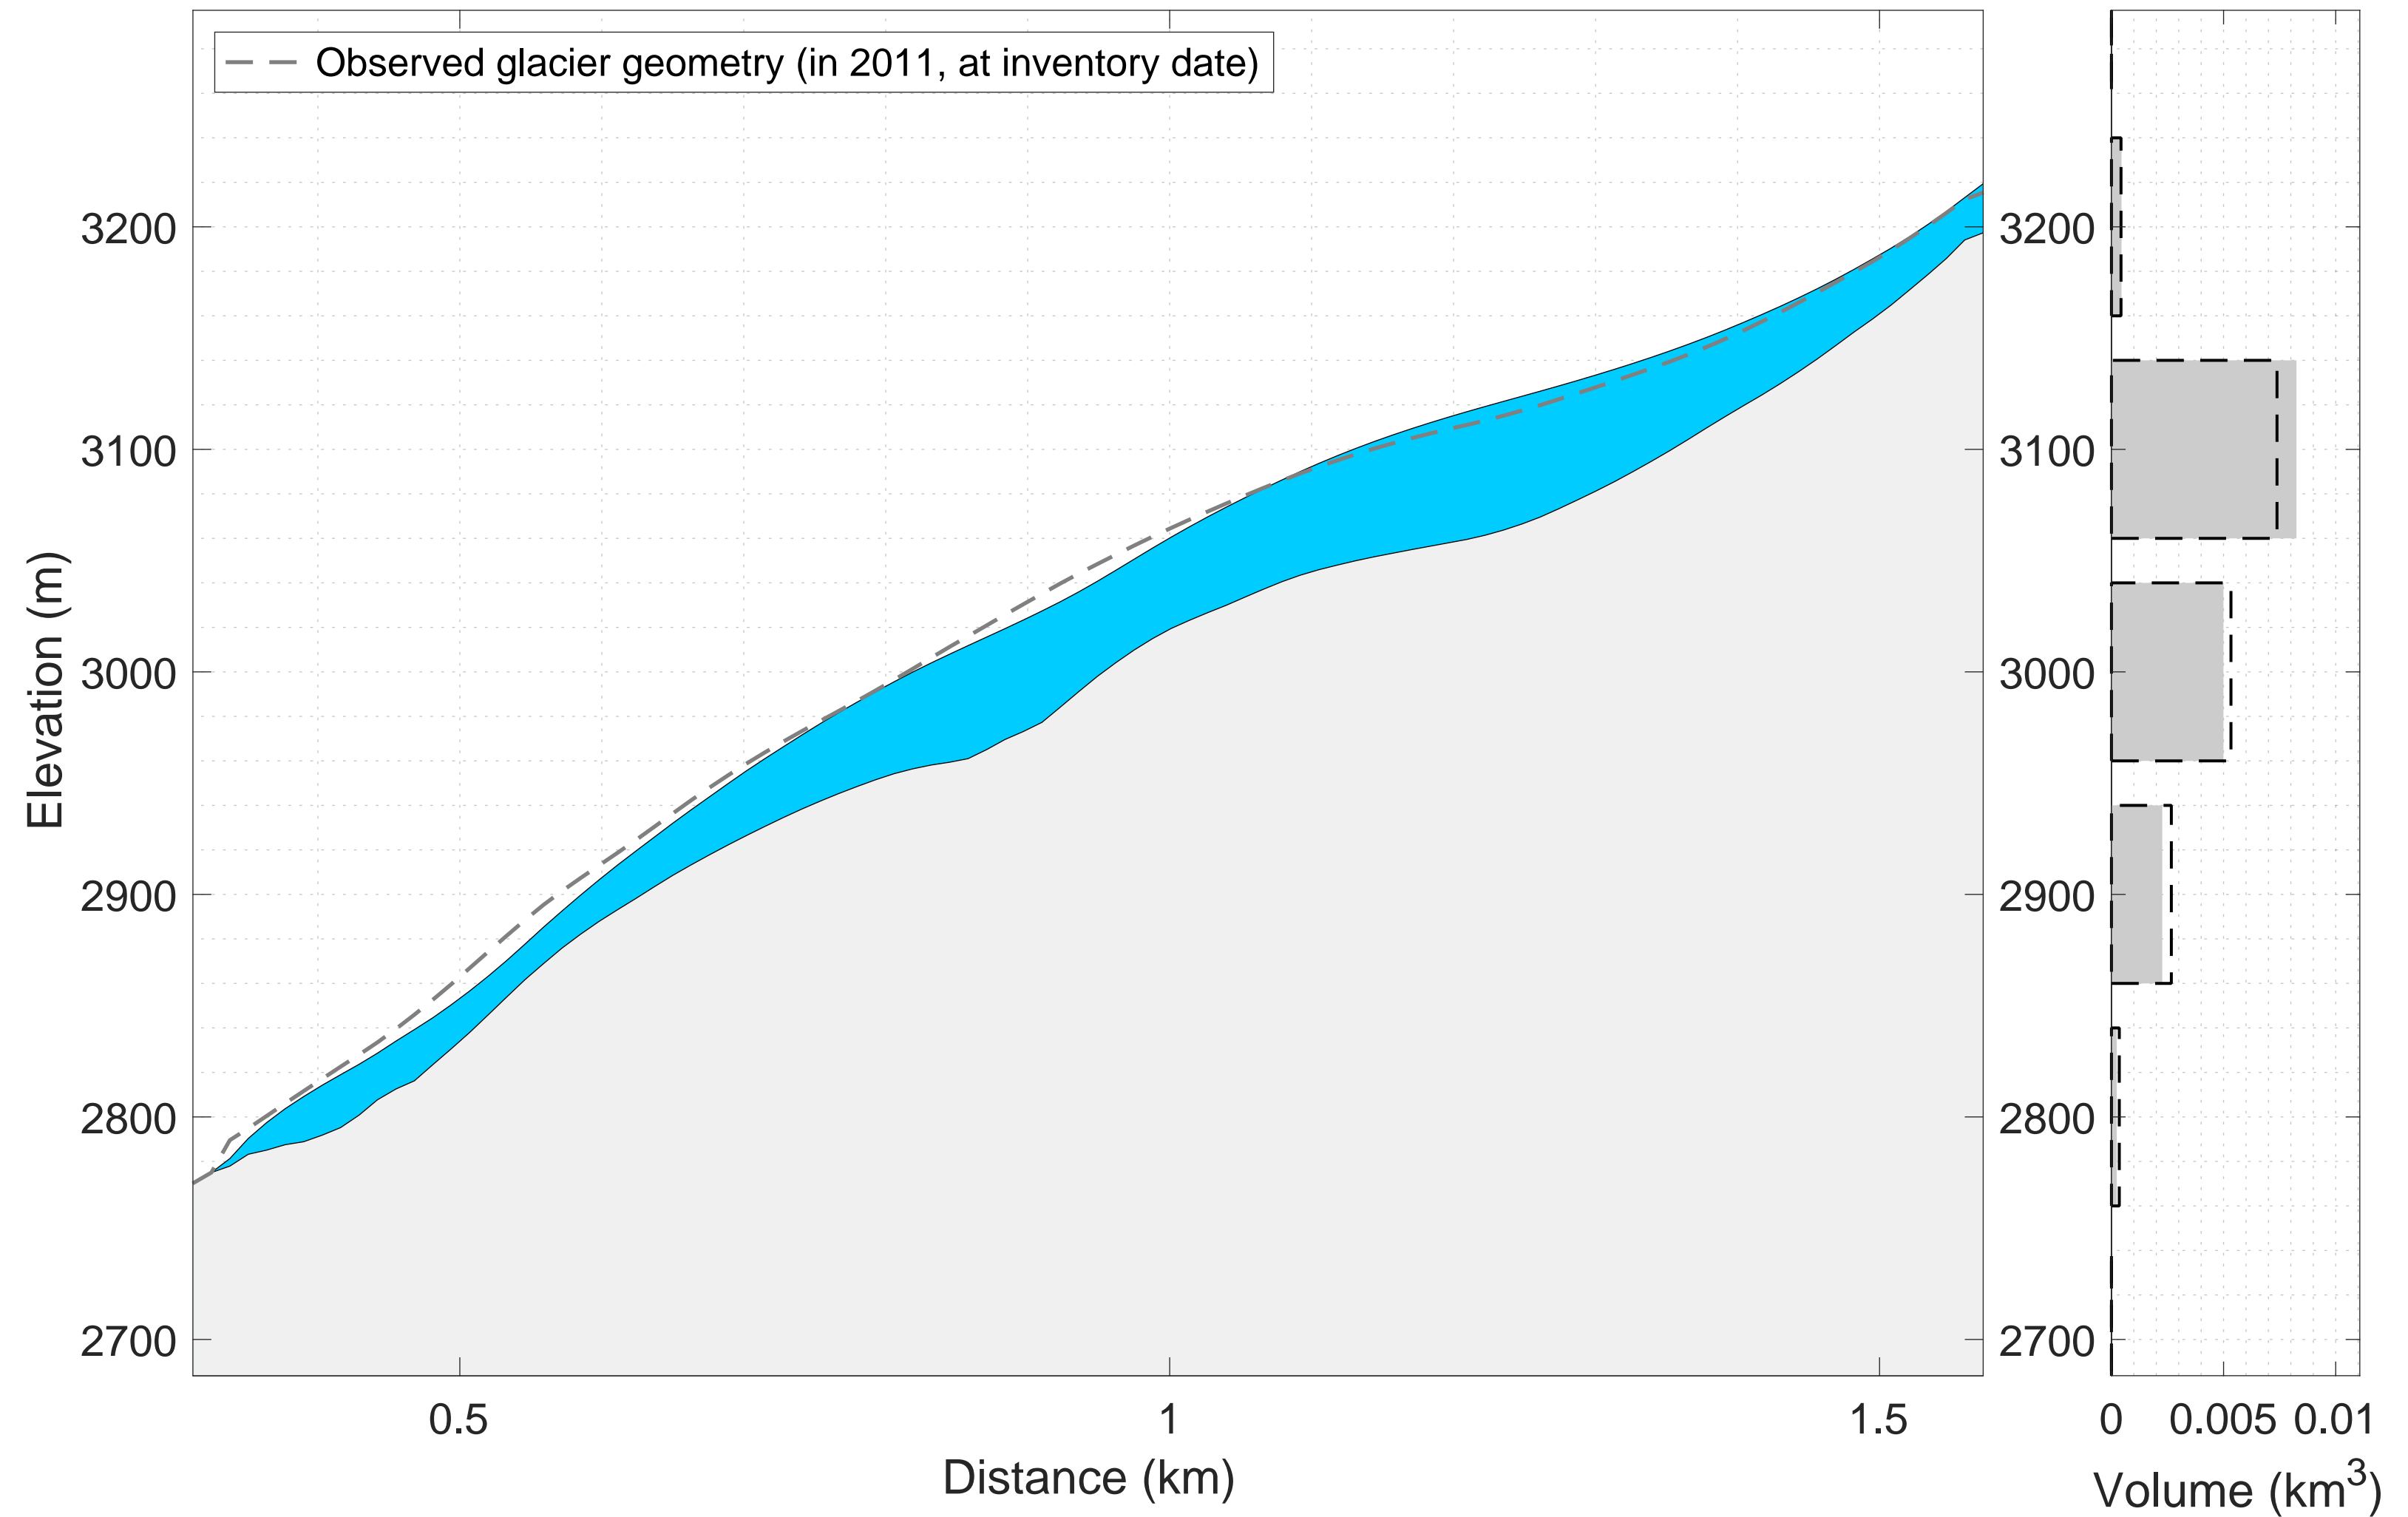

Supplement: Supplementary file 266 [file tc-13-1125-2019-supplement.zip]

**Modelled geometry (Glacier ID = 00603;  $A = 1.2036\text{e-}16 \text{ Pa}^{-3} \text{ a}^{-1}$ ;  $dx = 13 \text{ m}$ )**

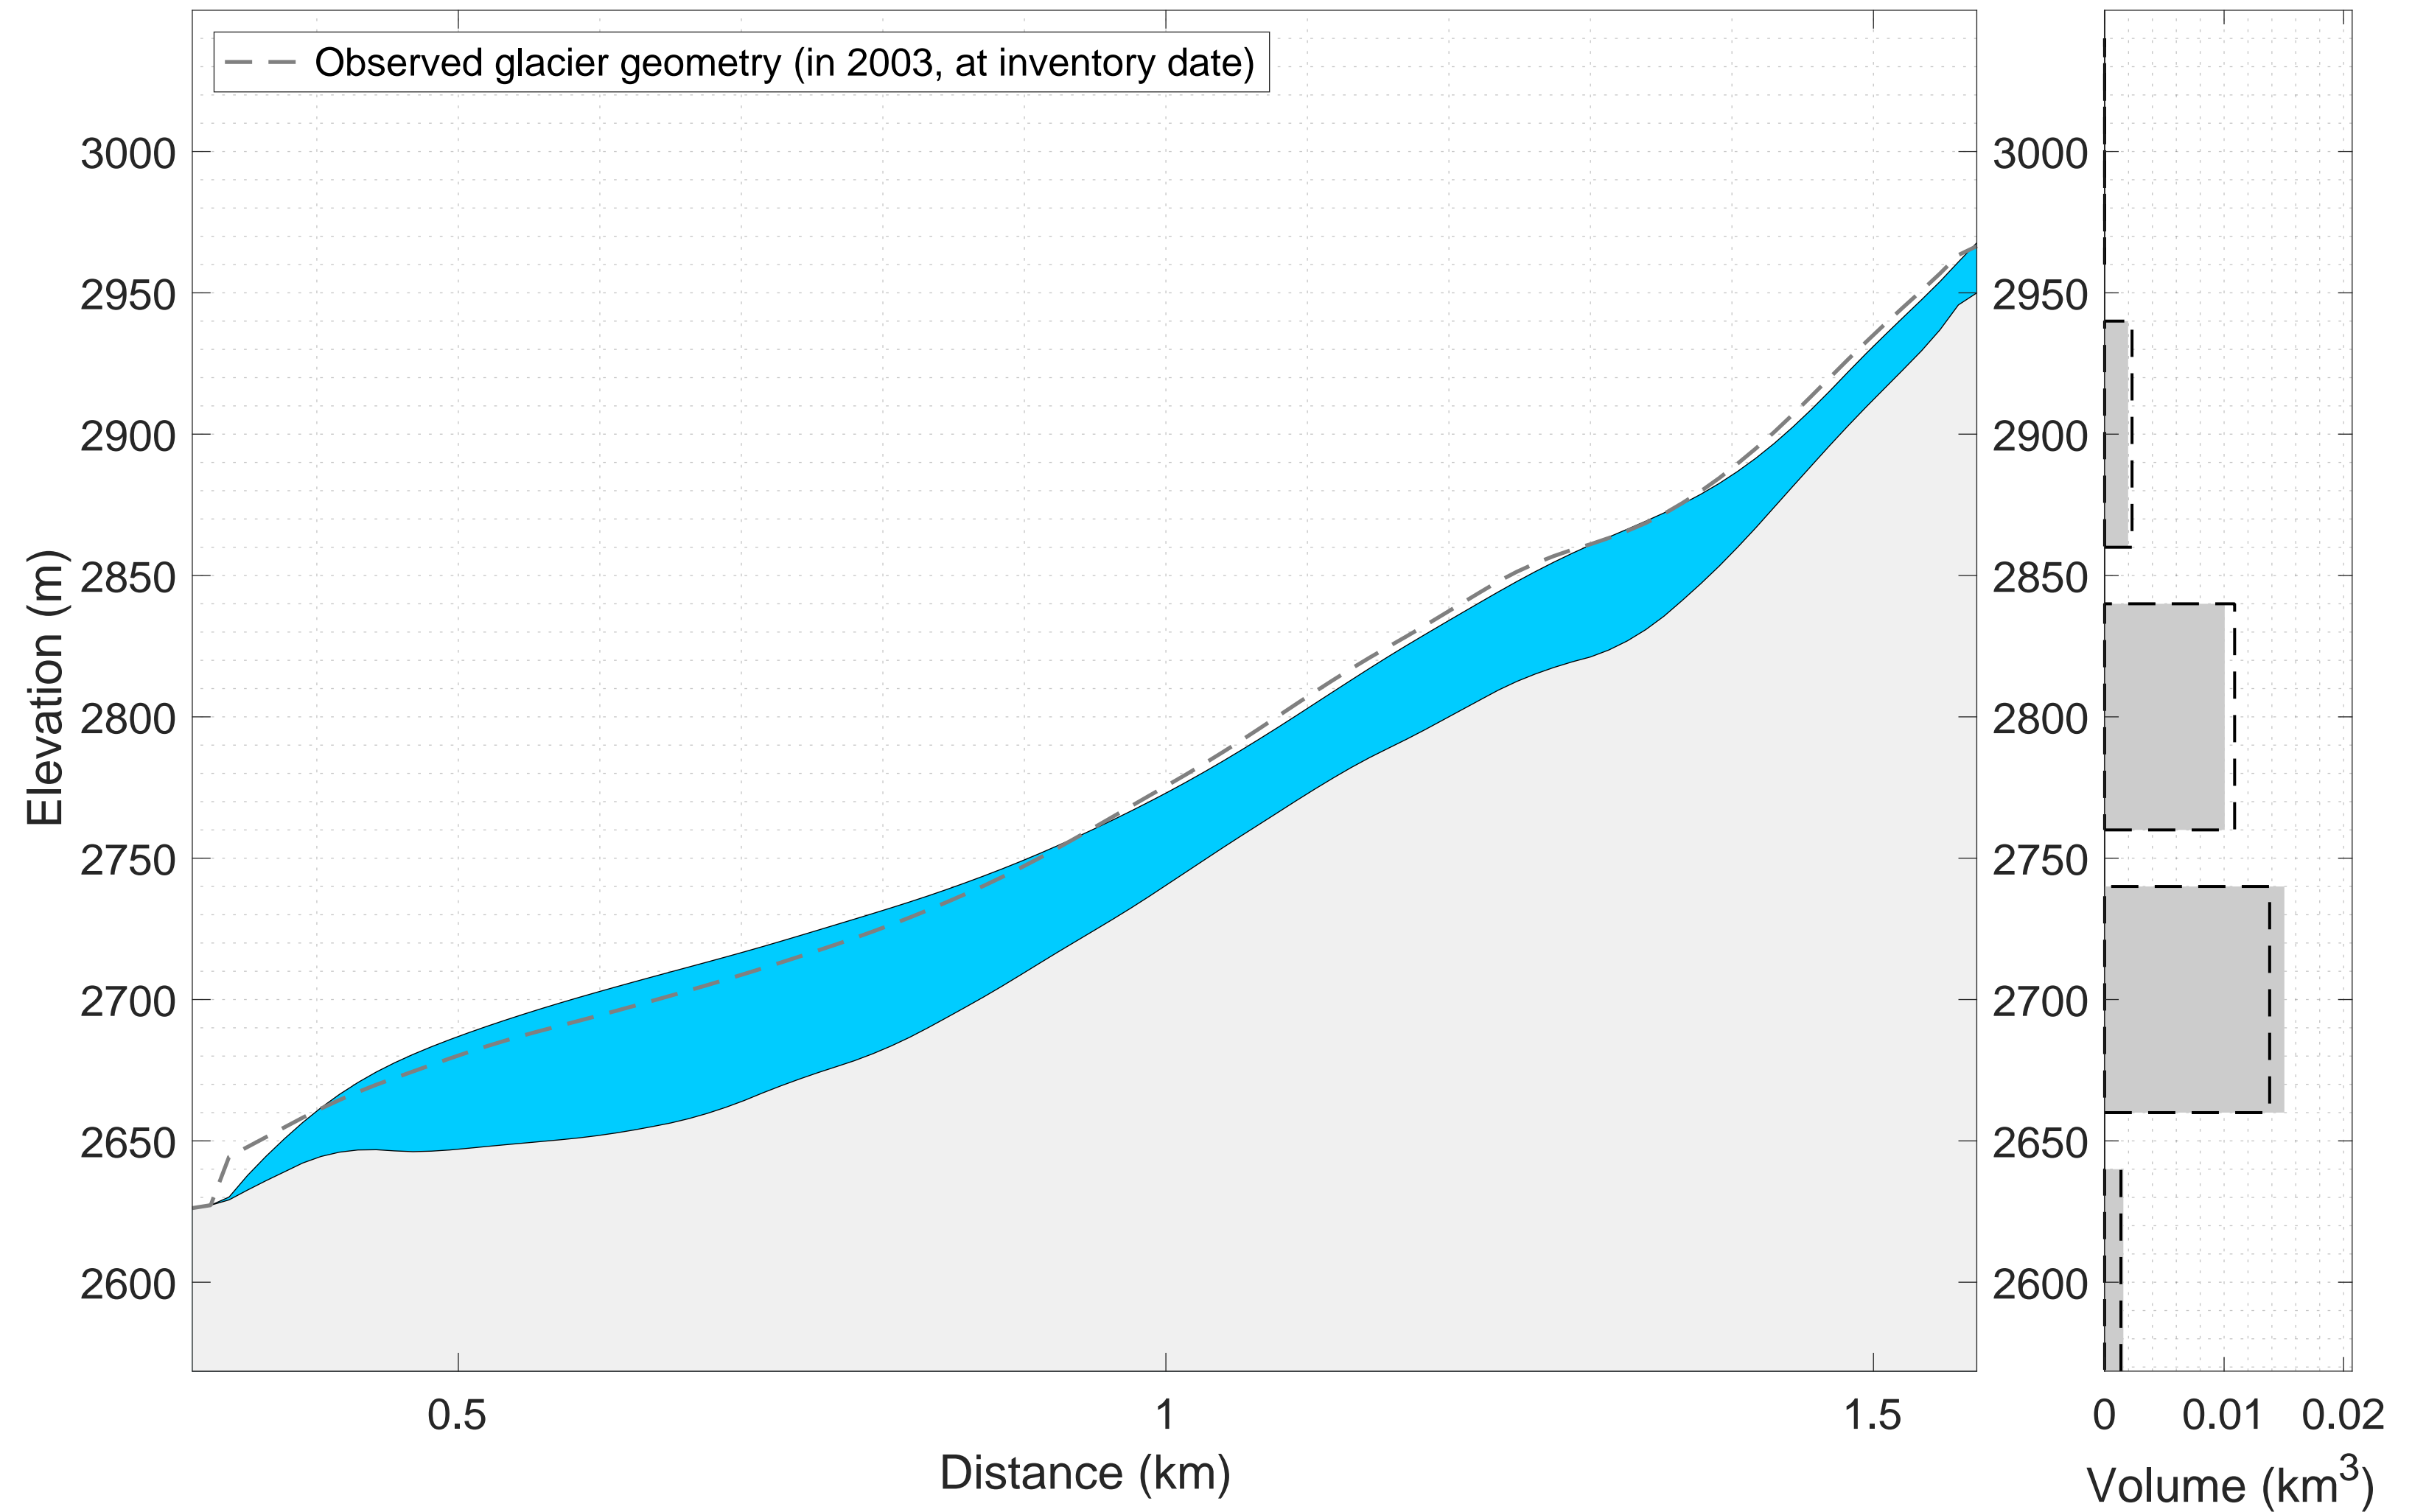

Supplement: Supplementary file 267 [file tc-13-1125-2019-supplement.zip]

**Modelled geometry (Glacier ID = 03475;  $A = 4.1578\text{e-}17 \text{ Pa}^{-3} \text{ a}^{-1}$ ;  $dx = 11 \text{ m}$ )**

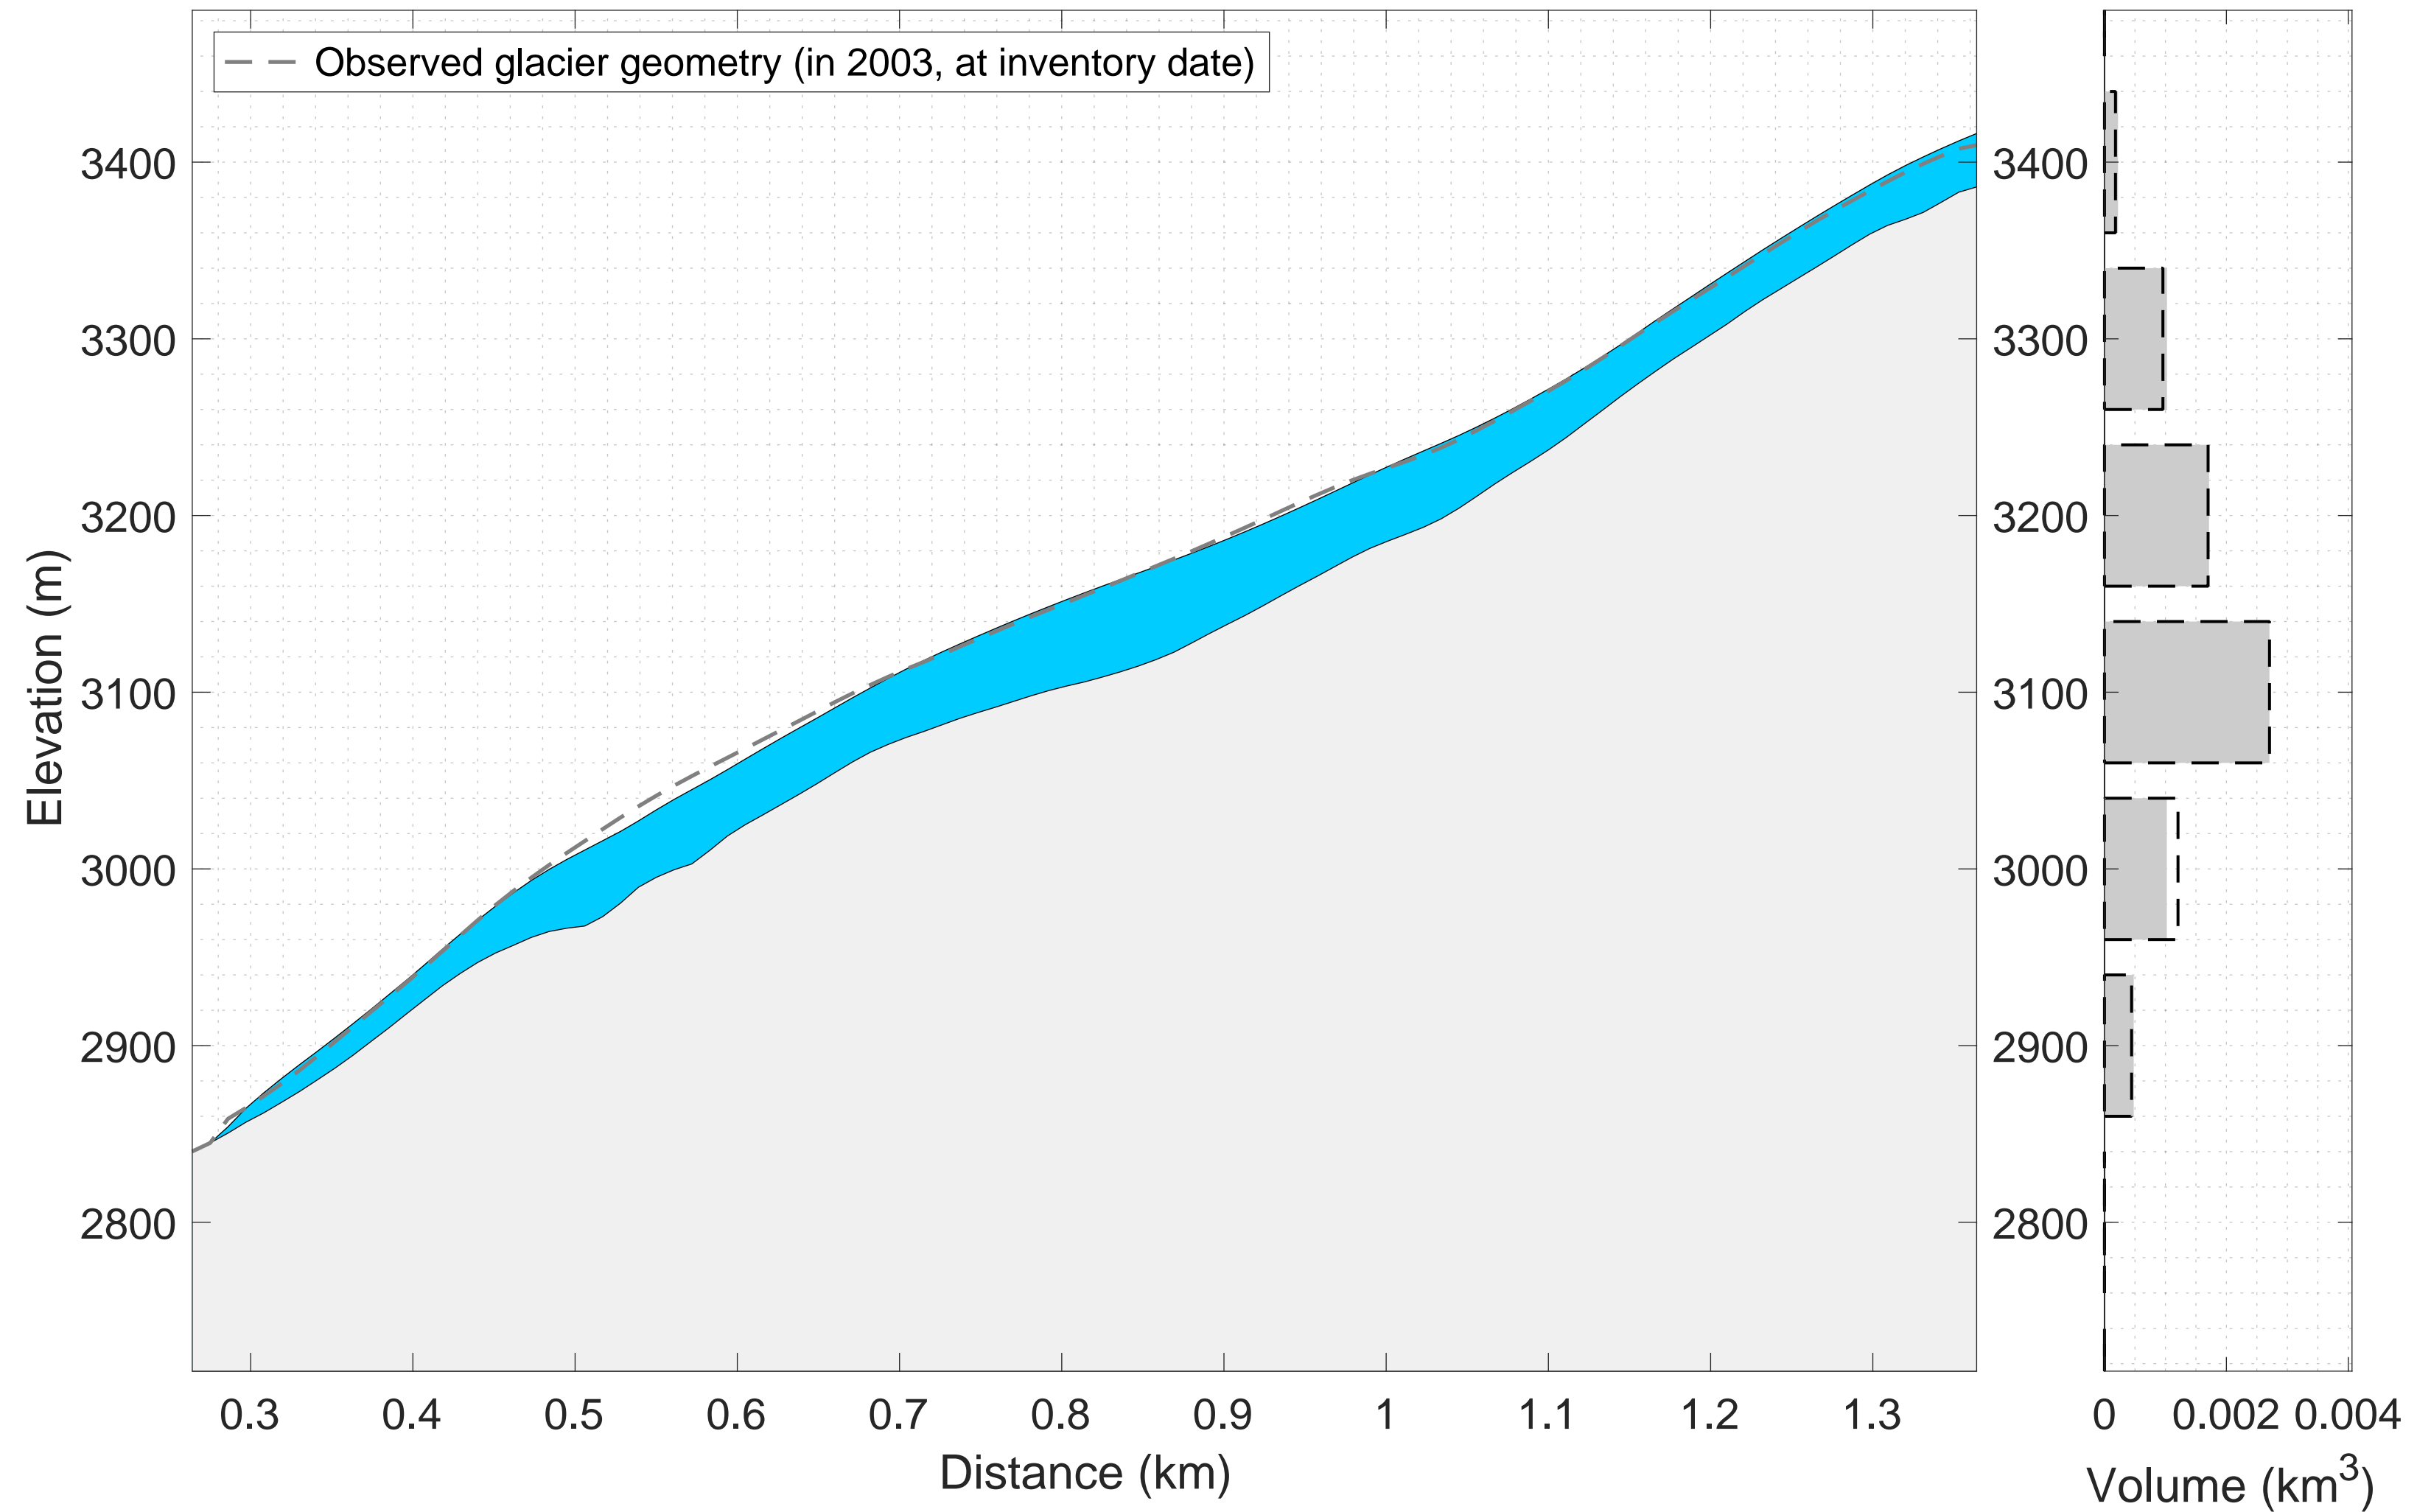

Supplement: Supplementary file 268 [file tc-13-1125-2019-supplement.zip]

**Modelled geometry (Glacier ID = 02754;  $A = 1.2496\text{e-}16 \text{ Pa}^{-3} \text{ a}^{-1}$ ;  $dx = 15 \text{ m}$ )**

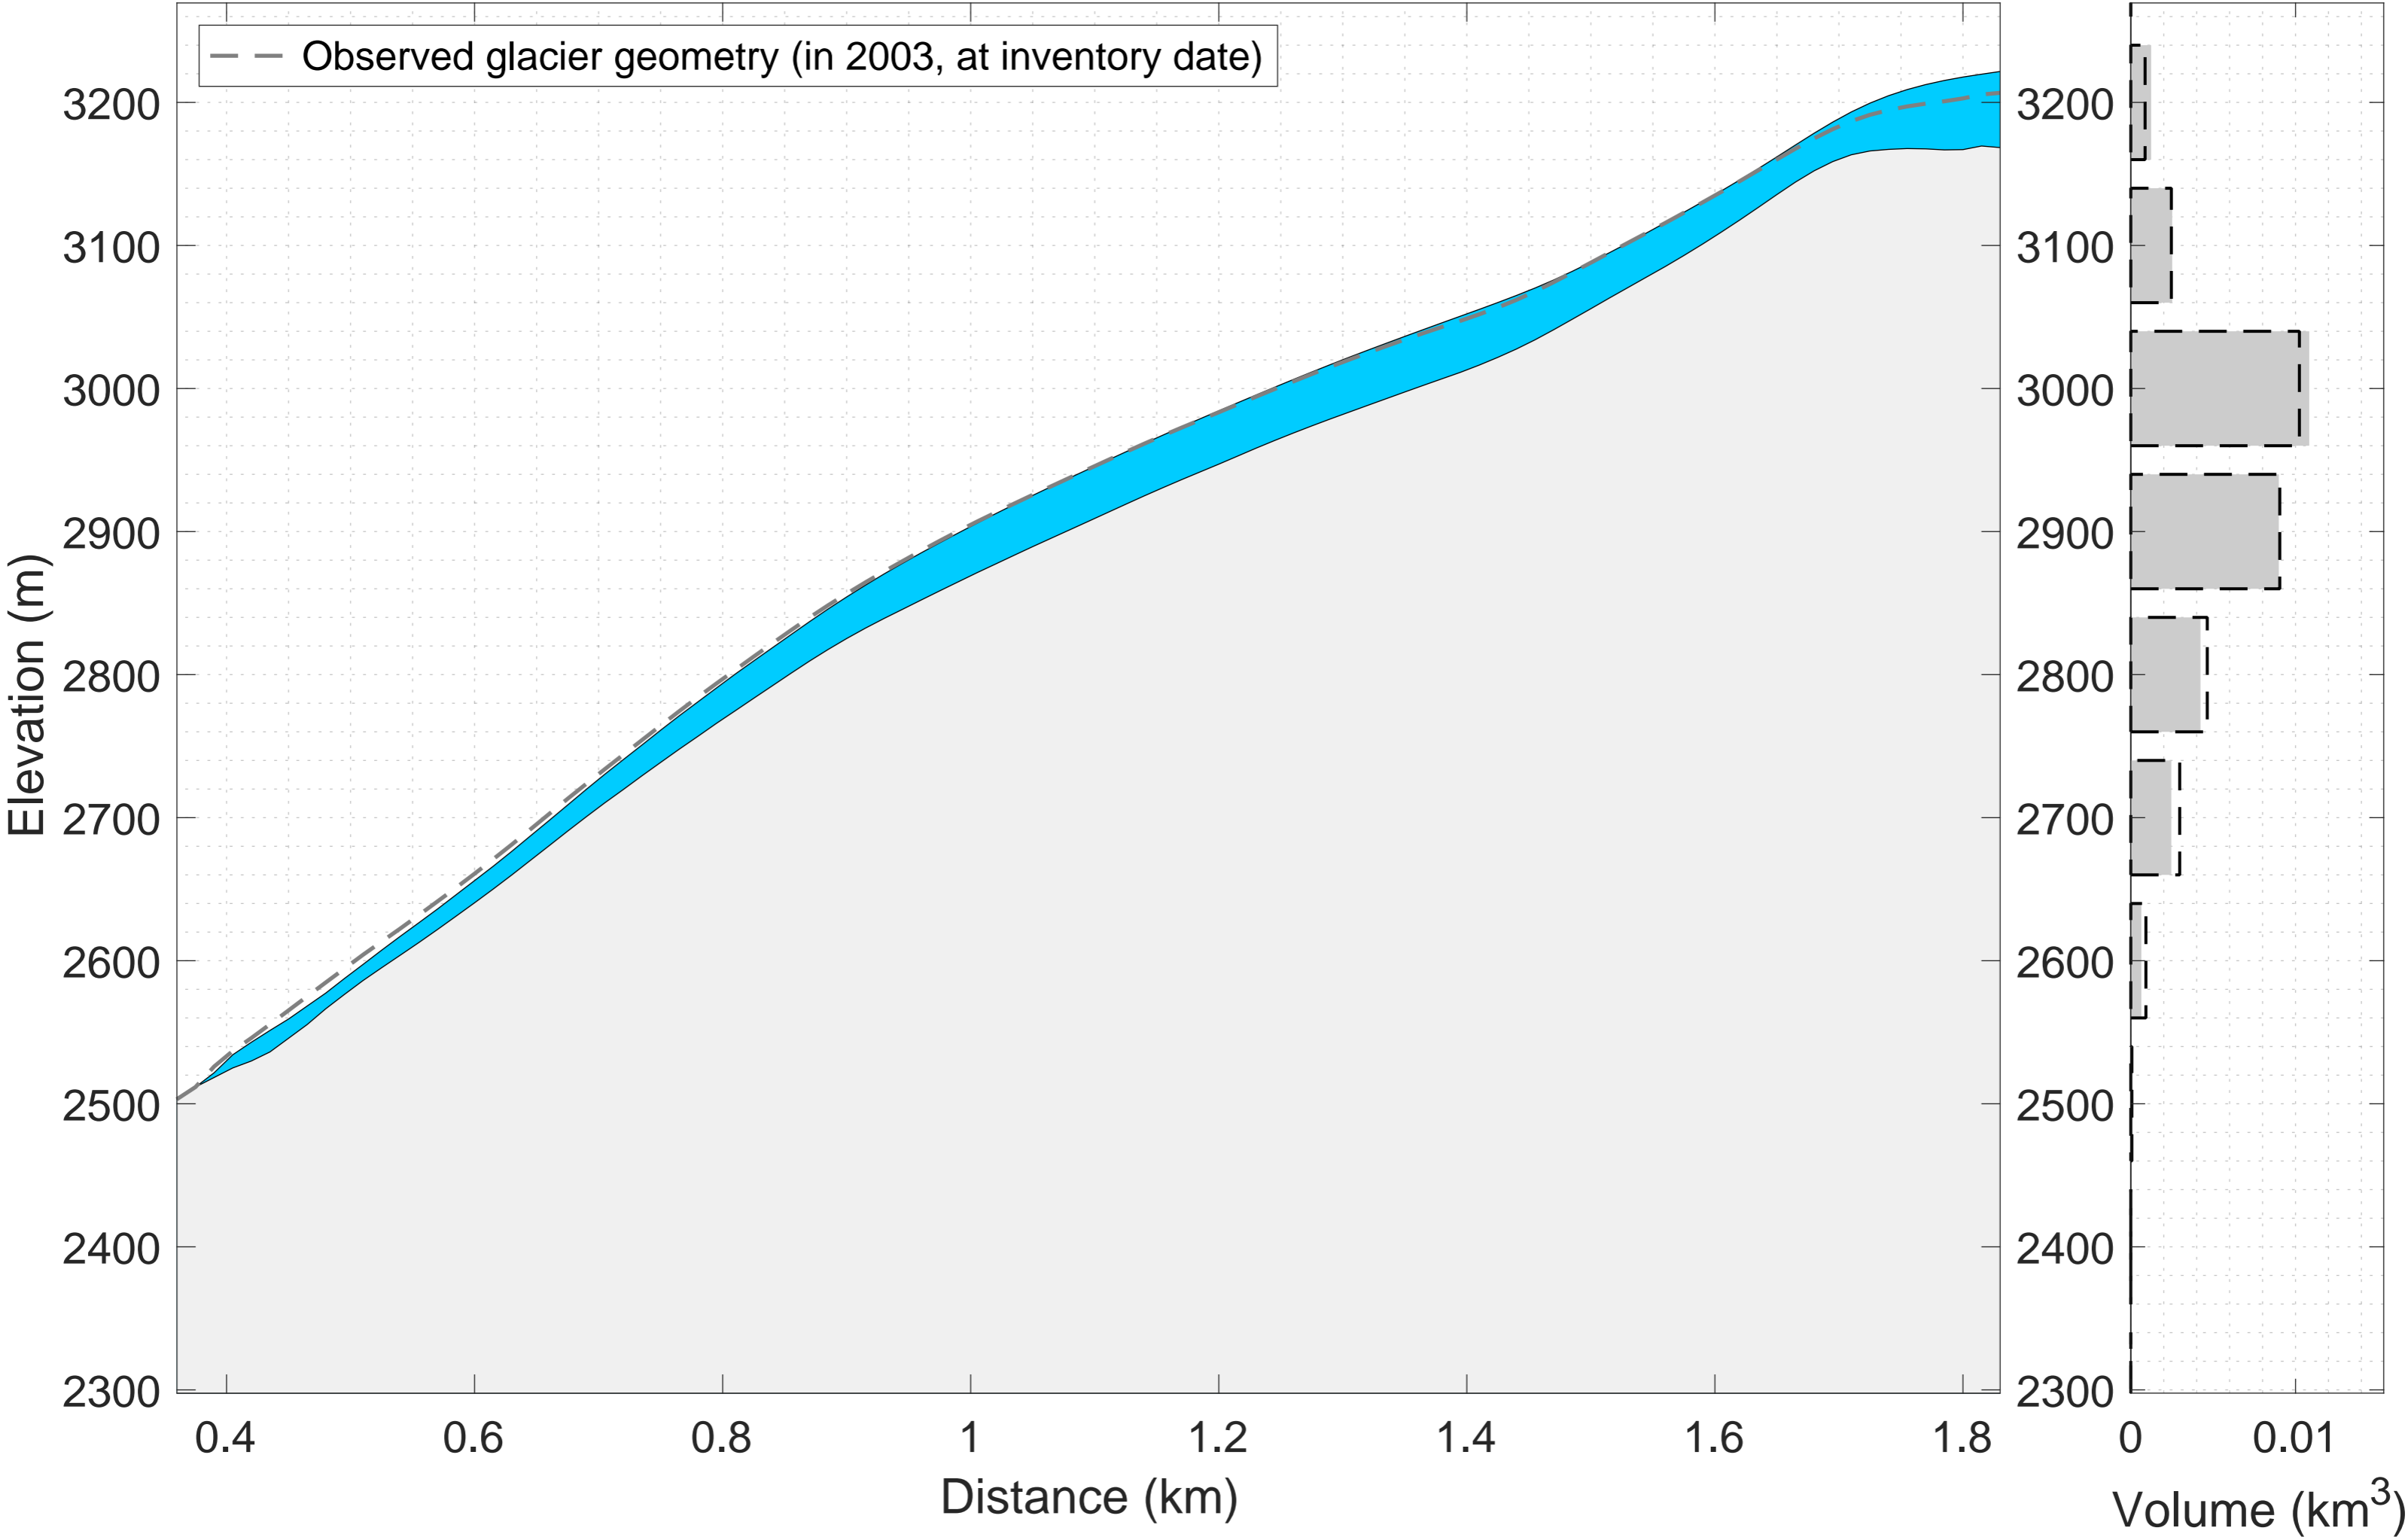

Supplement: Supplementary file 269 [file tc-13-1125-2019-supplement.zip]

**Modelled geometry (Glacier ID = 02337;  $A = 7.3962\text{e-}17 \text{ Pa}^{-3} \text{ a}^{-1}$ ;  $dx = 19 \text{ m}$ )**

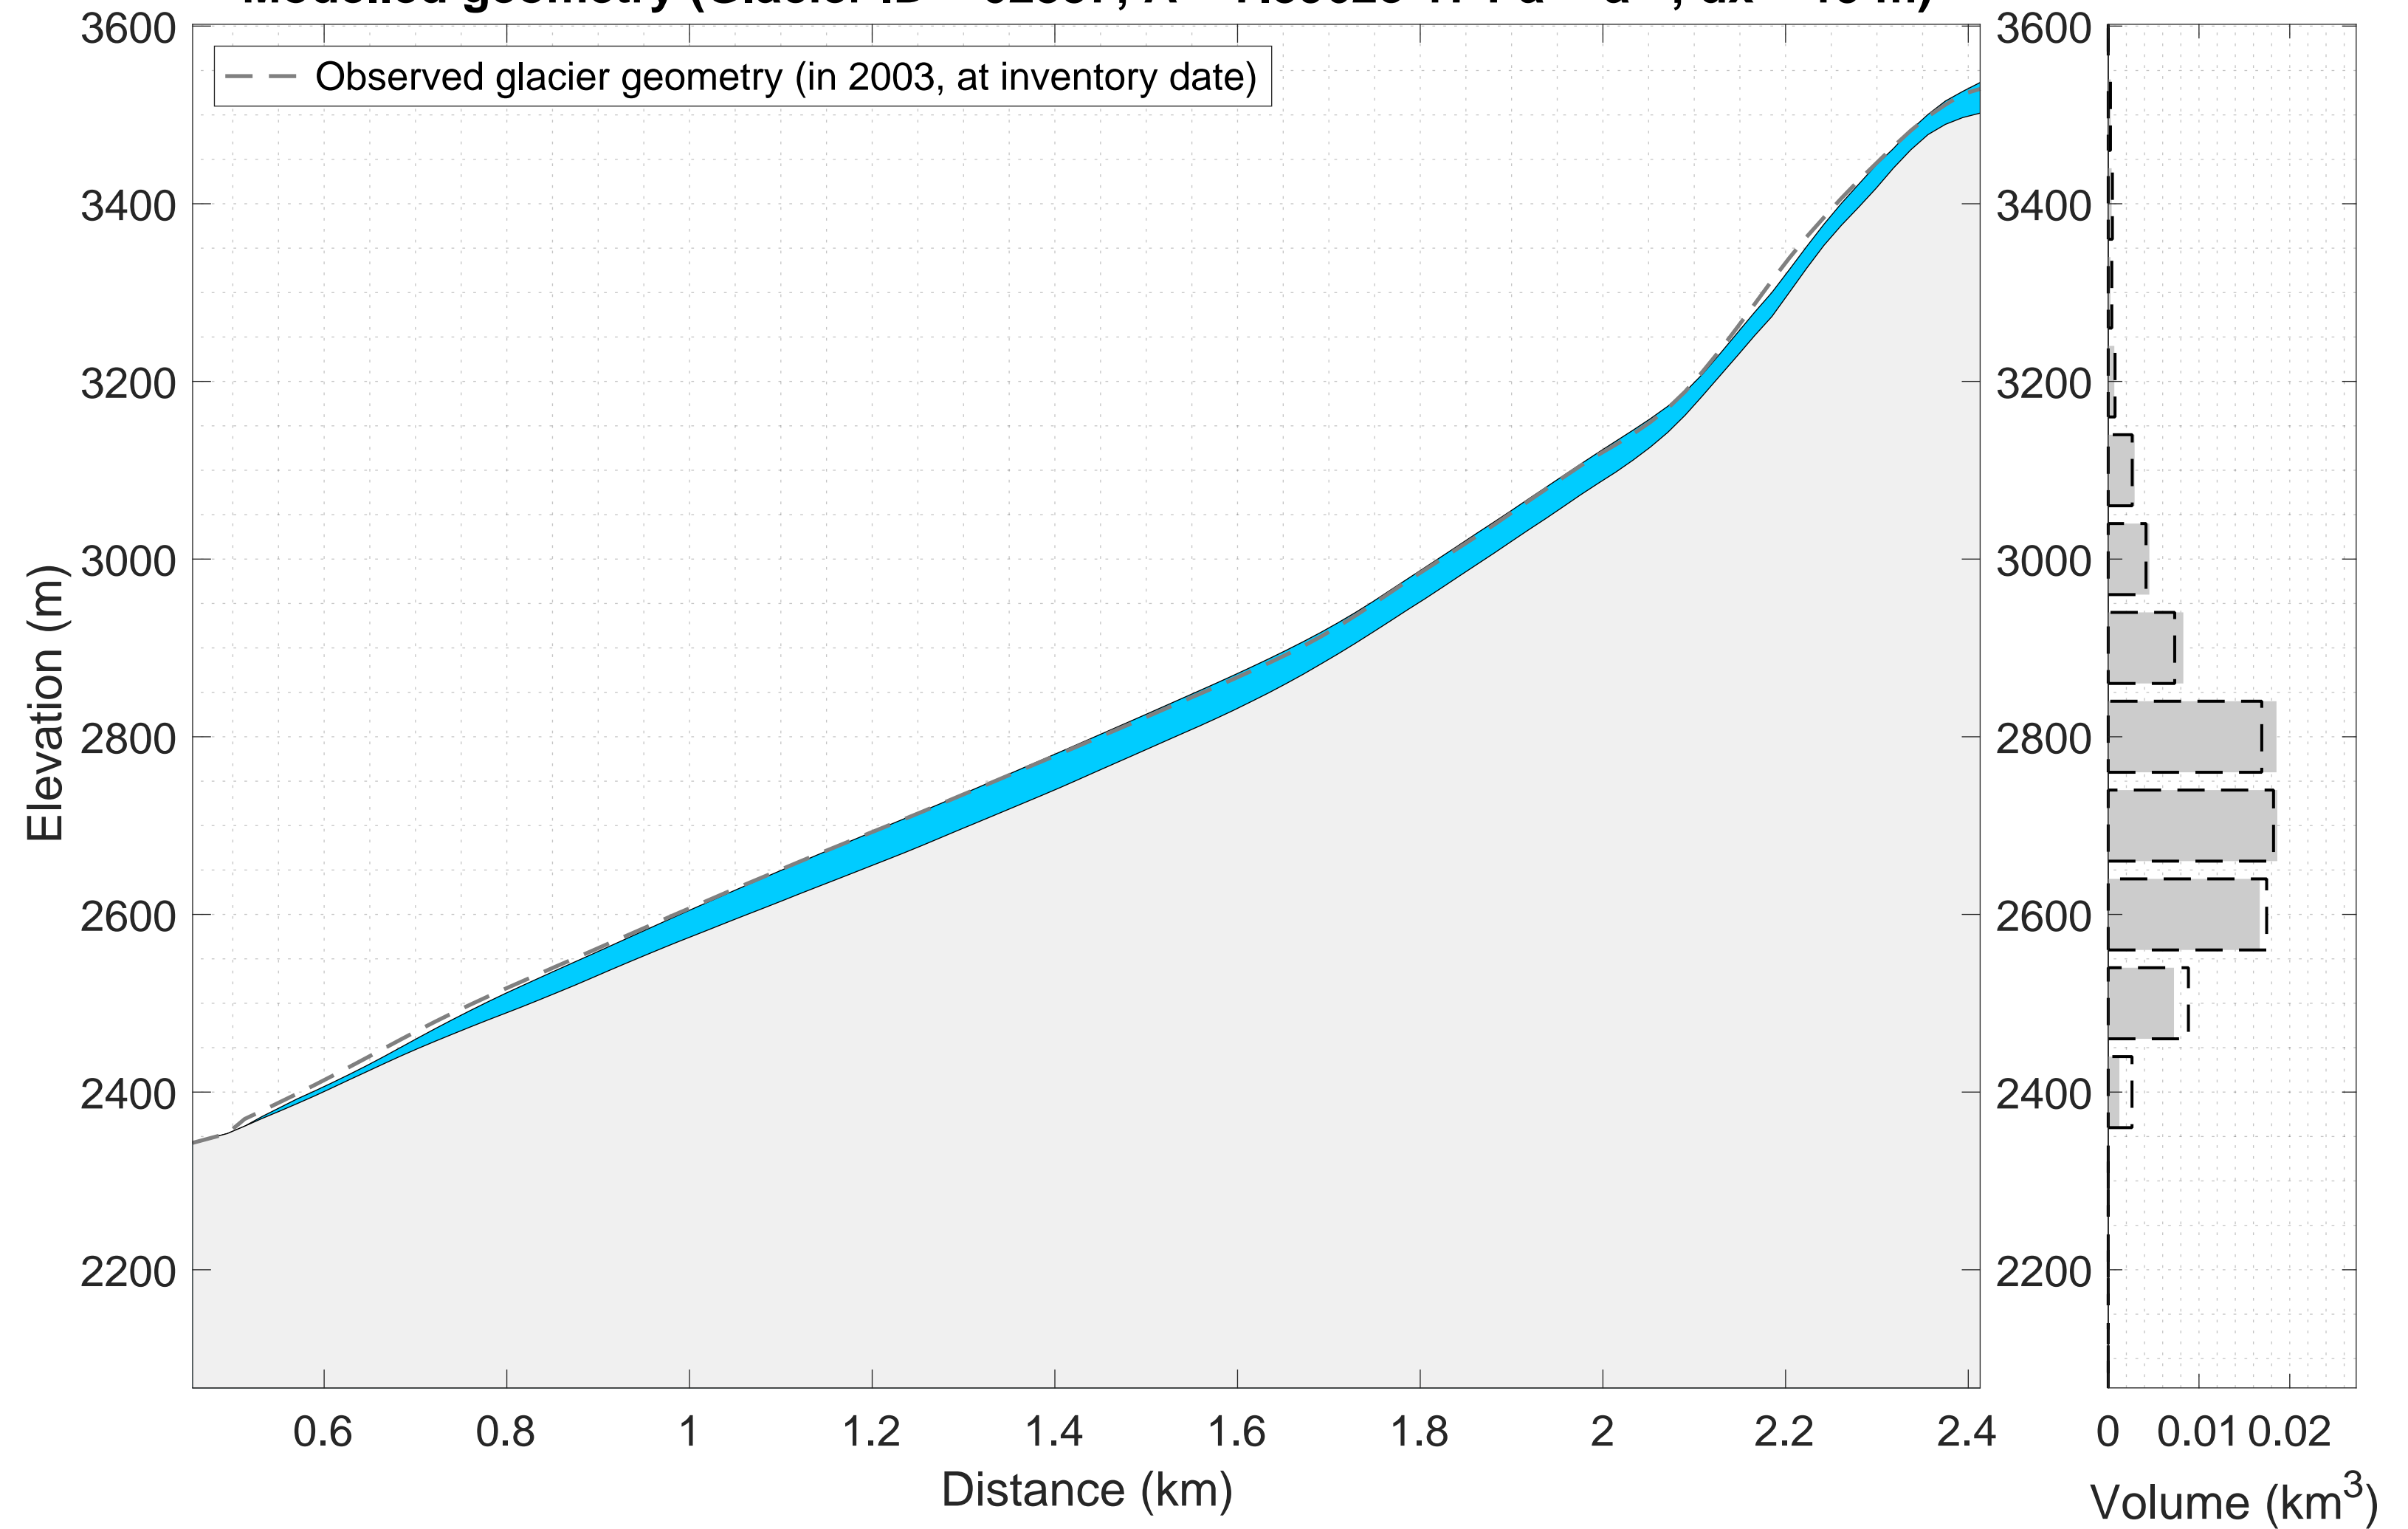

Supplement: Supplementary file 270 [file tc-13-1125-2019-supplement.zip]

**Modelled geometry (Glacier ID = 00648;  $A = 1.4853\text{e-}16 \text{ Pa}^{-3} \text{ a}^{-1}$ ;  $dx = 21 \text{ m}$ )**

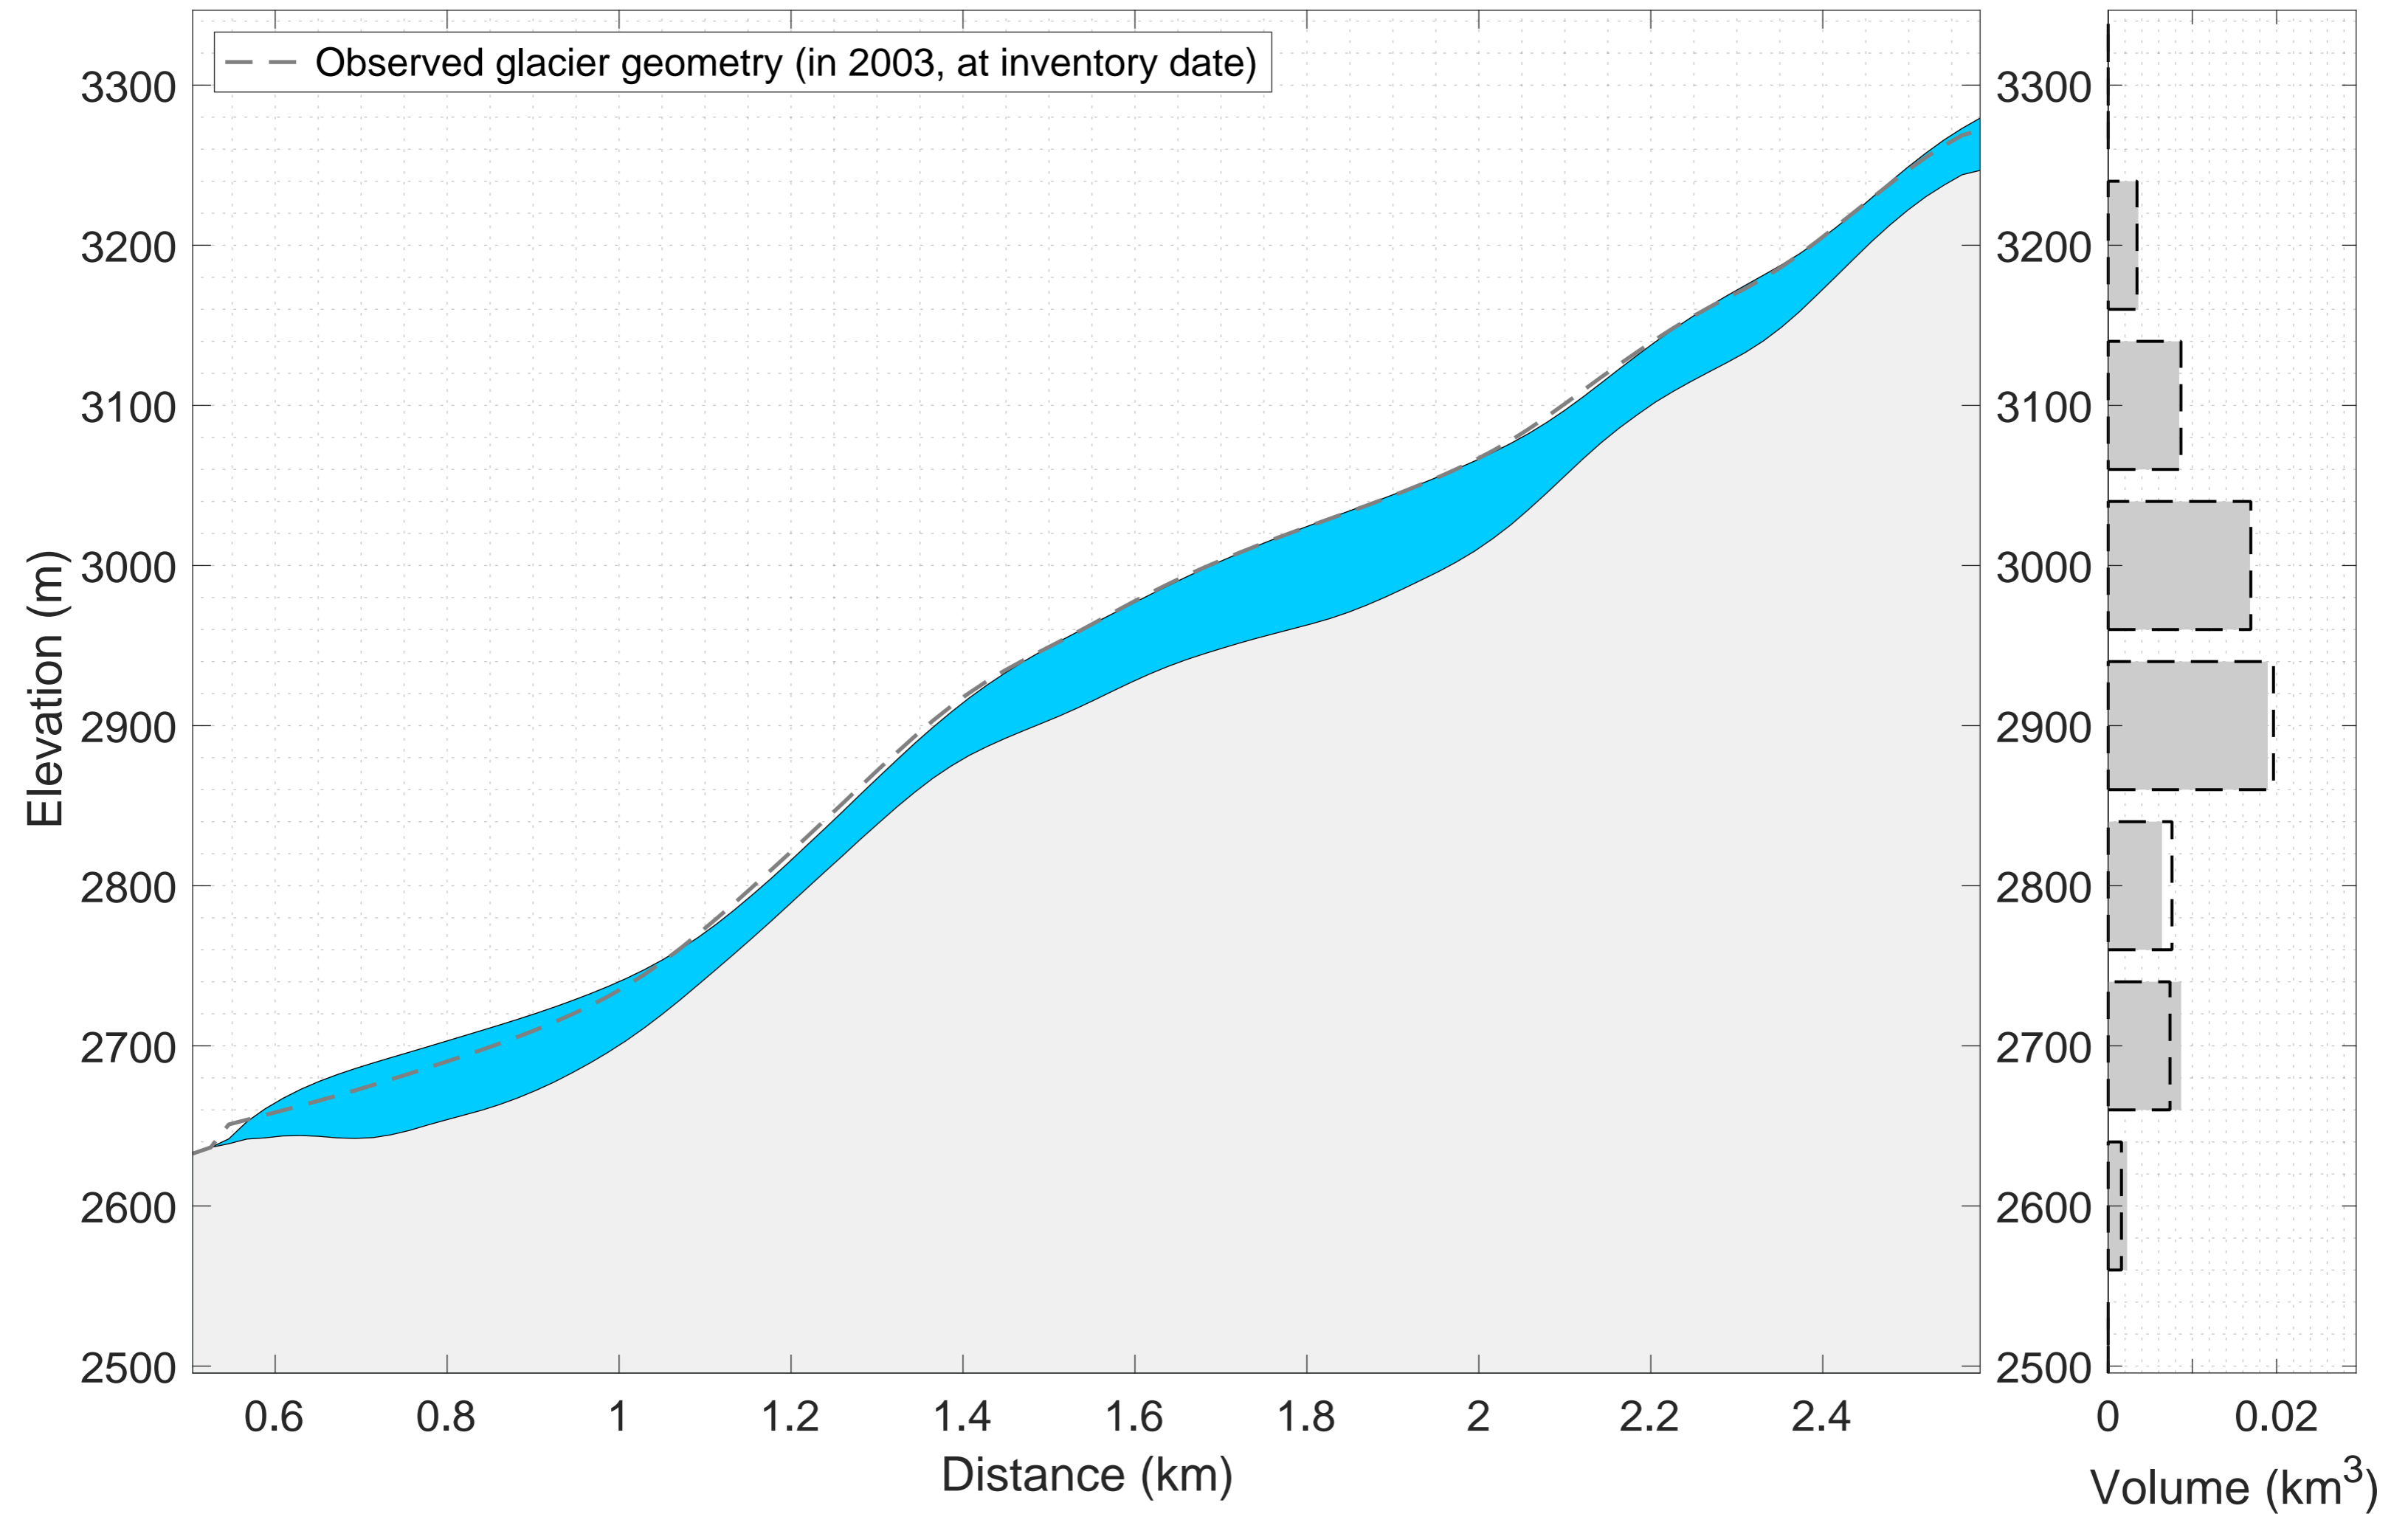

Supplement: Supplementary file 271 [file tc-13-1125-2019-supplement.zip]

**Modelled geometry (Glacier ID = 03488;  $A = 9.573\text{e-}17 \text{ Pa}^{-3} \text{ a}^{-1}$ ;  $dx = 11 \text{ m}$ )**

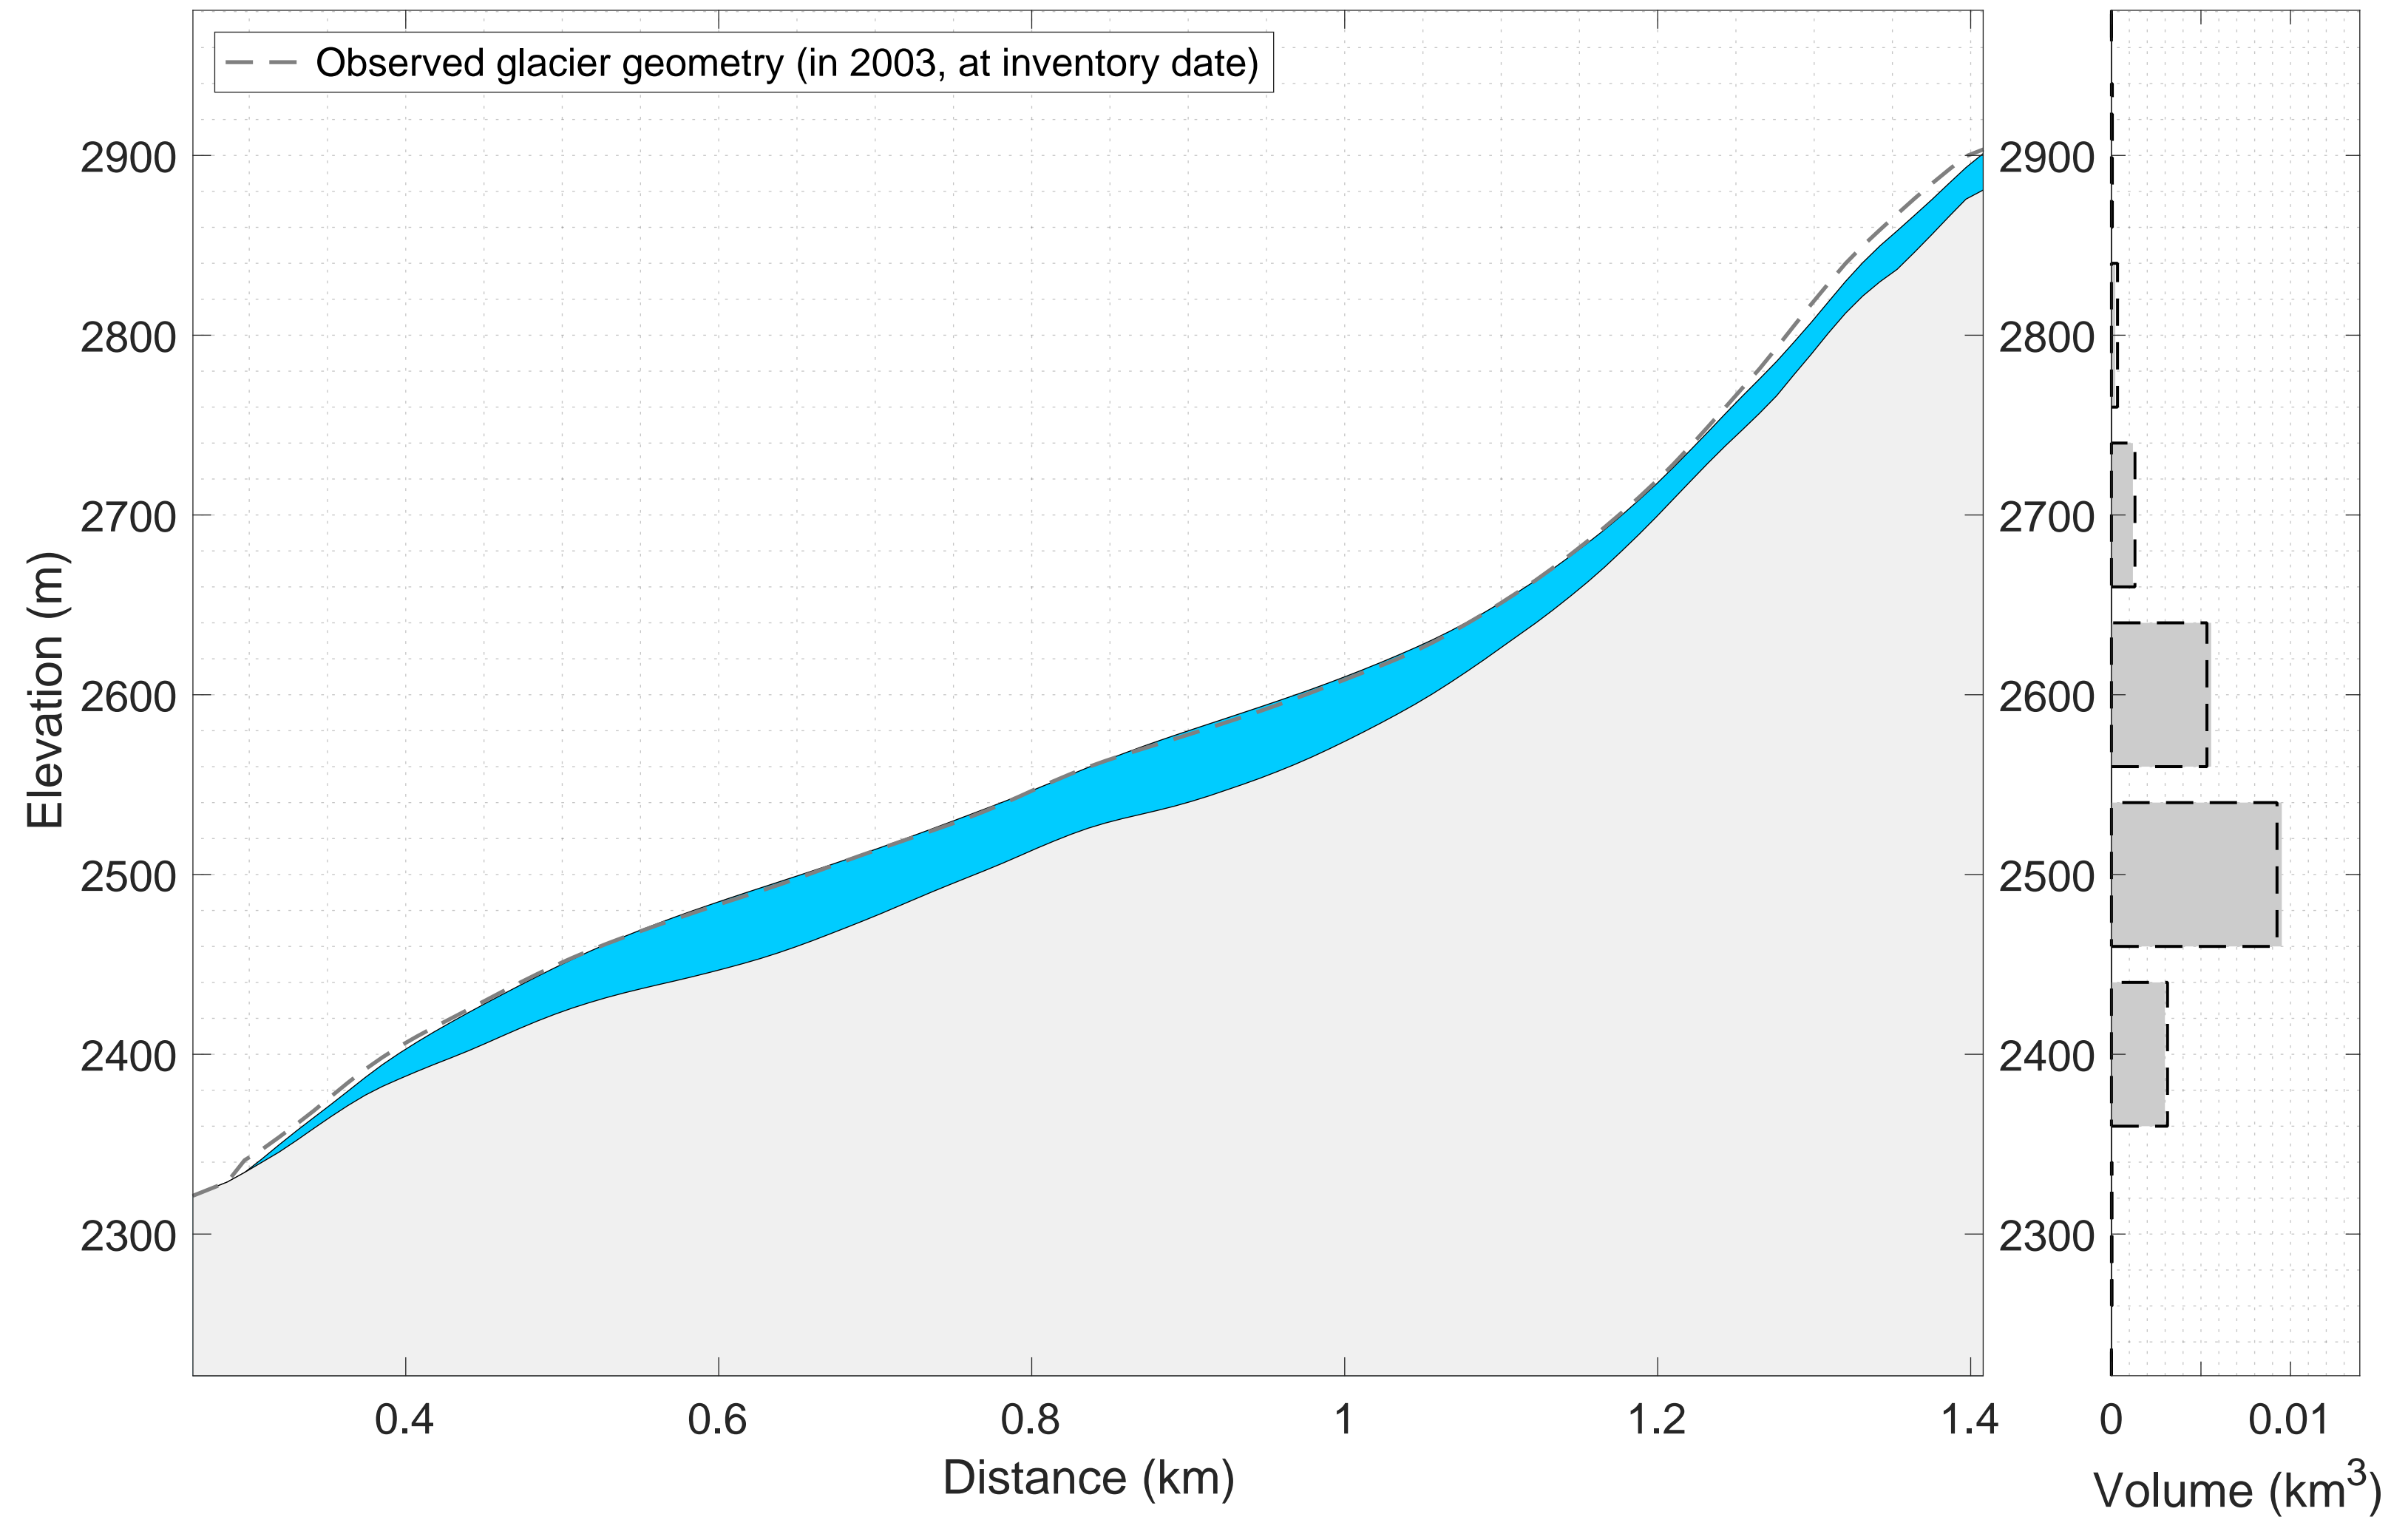

Supplement: Supplementary file 272 [file tc-13-1125-2019-supplement.zip]

**Modelled geometry (Glacier ID = 02165;  $A = 1.2114\text{e-}16 \text{ Pa}^{-3} \text{ a}^{-1}$ ;  $dx = 15 \text{ m}$ )**

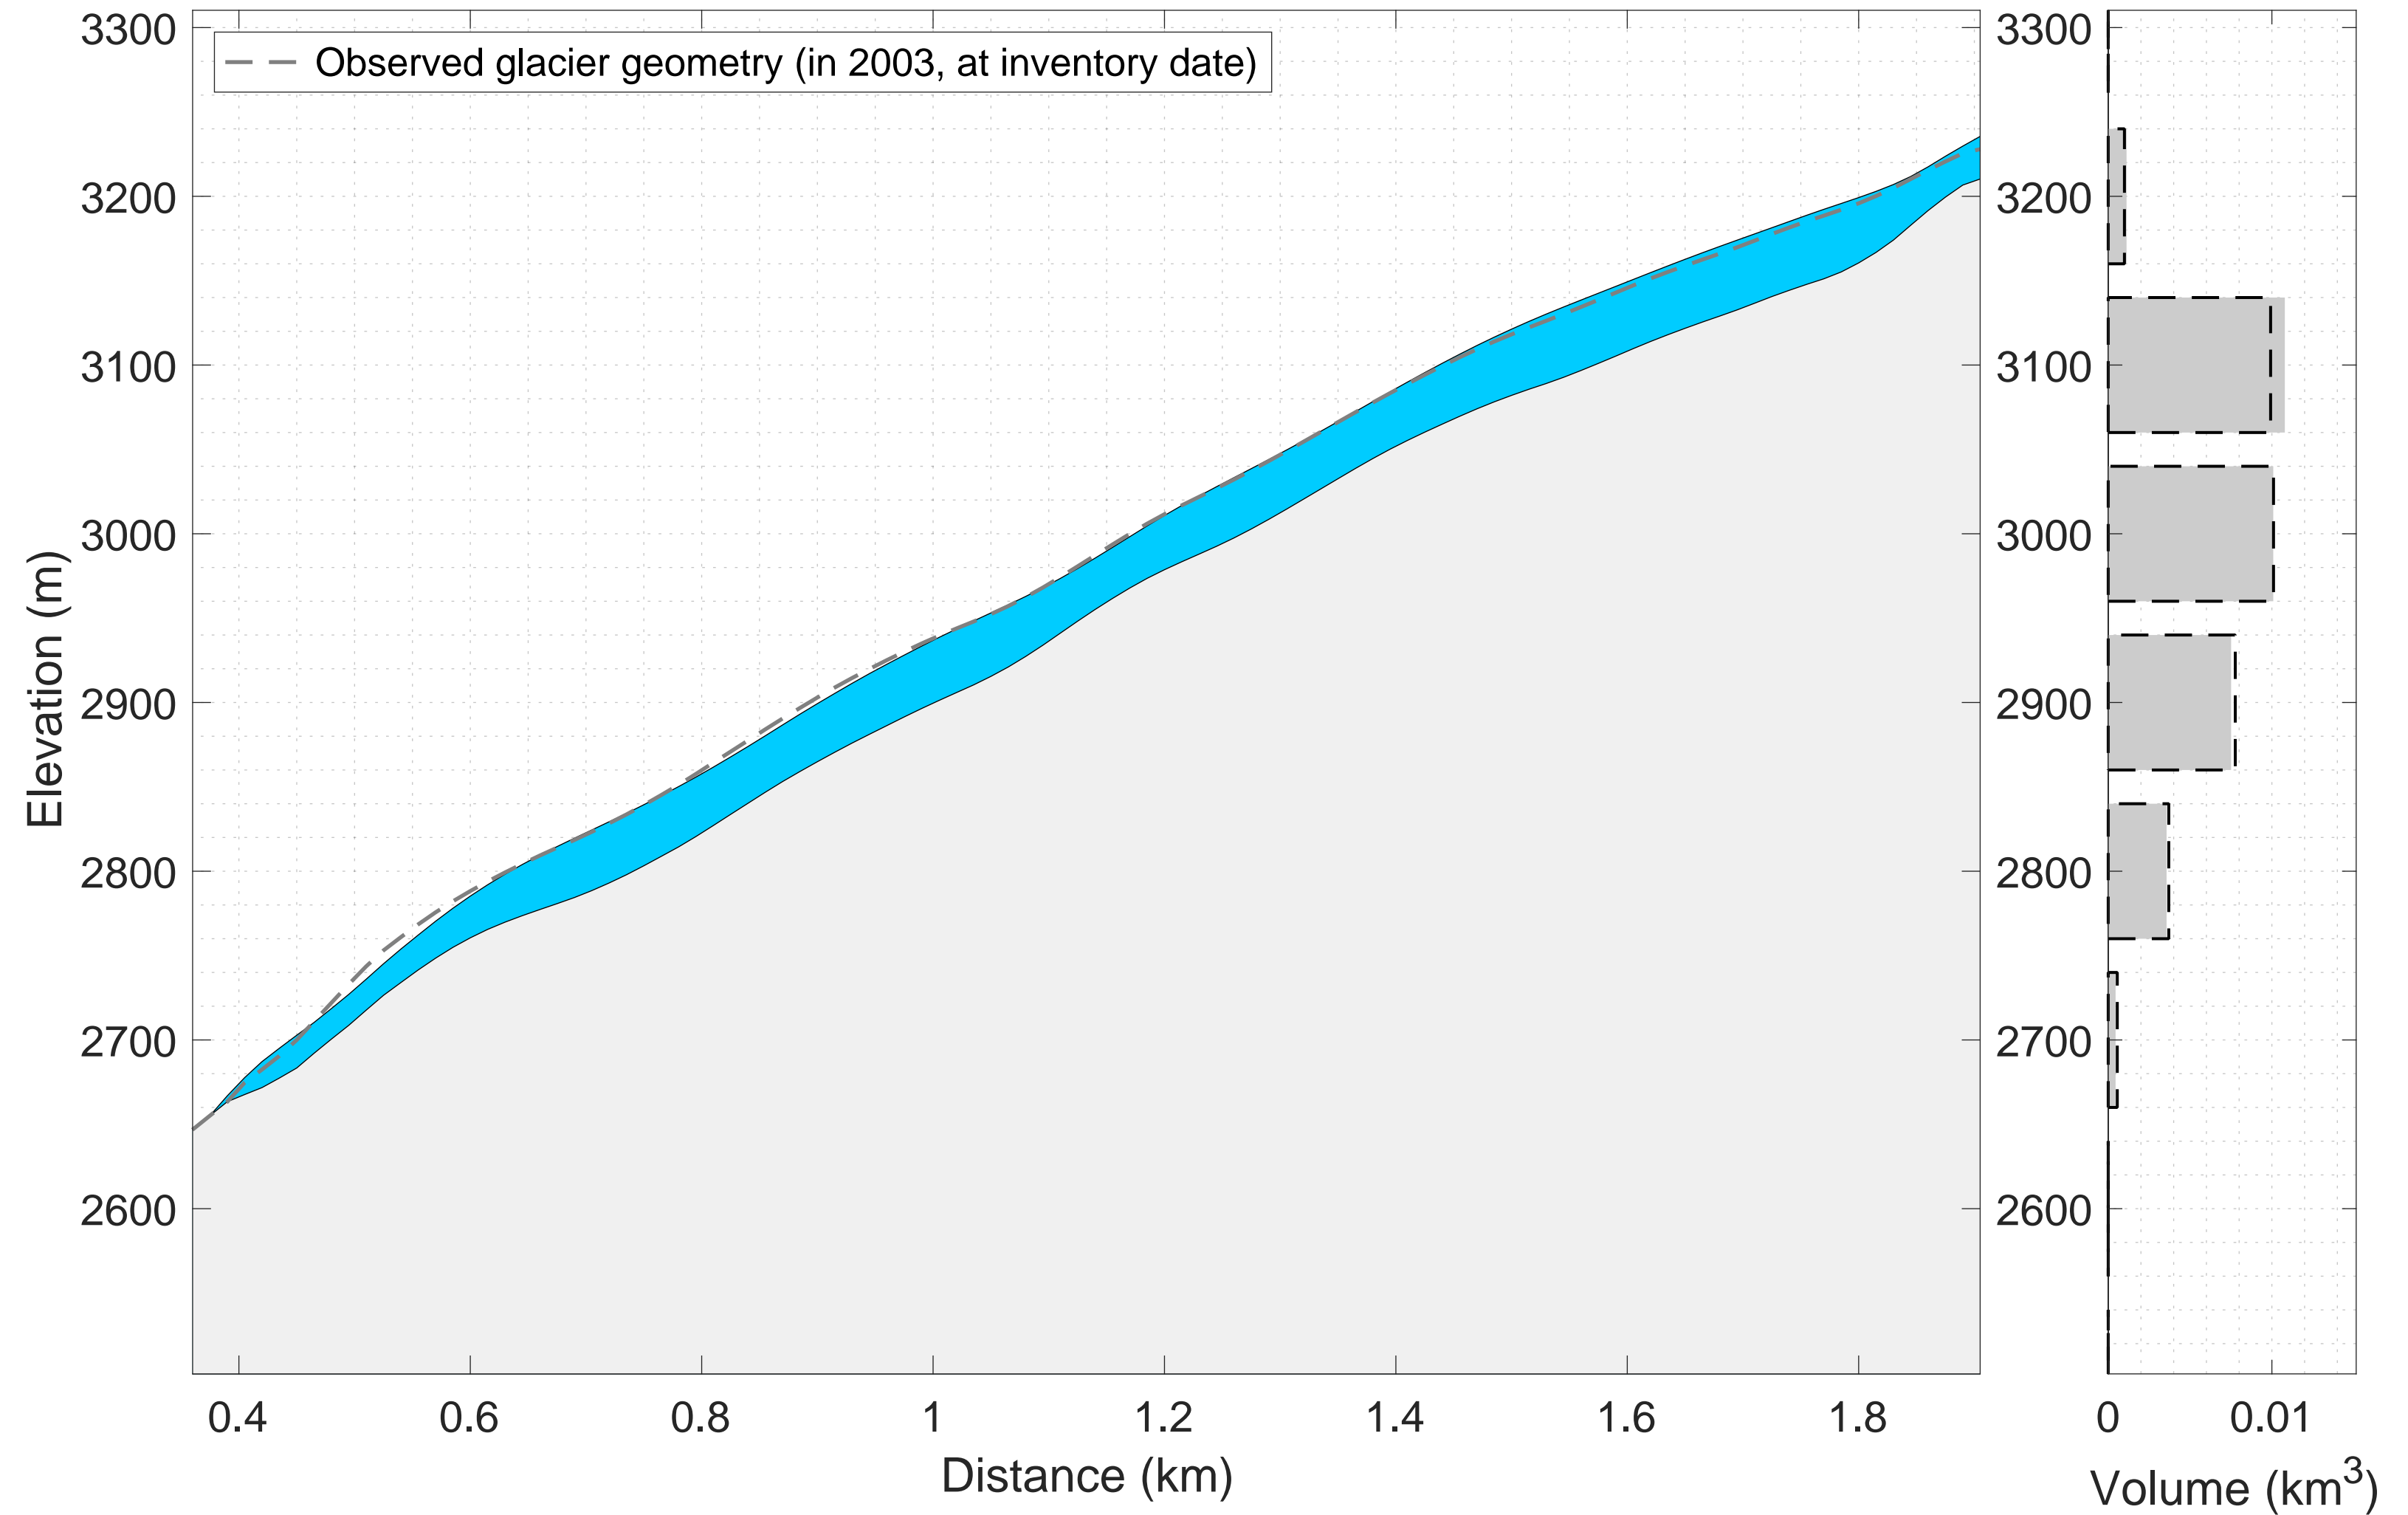

Supplement: Supplementary file 273 [file tc-13-1125-2019-supplement.zip]

**Modelled geometry (Glacier ID = 02569;  $A = 1.8145\text{e-}16 \text{ Pa}^{-3} \text{ a}^{-1}$ ;  $dx = 43 \text{ m}$ )**

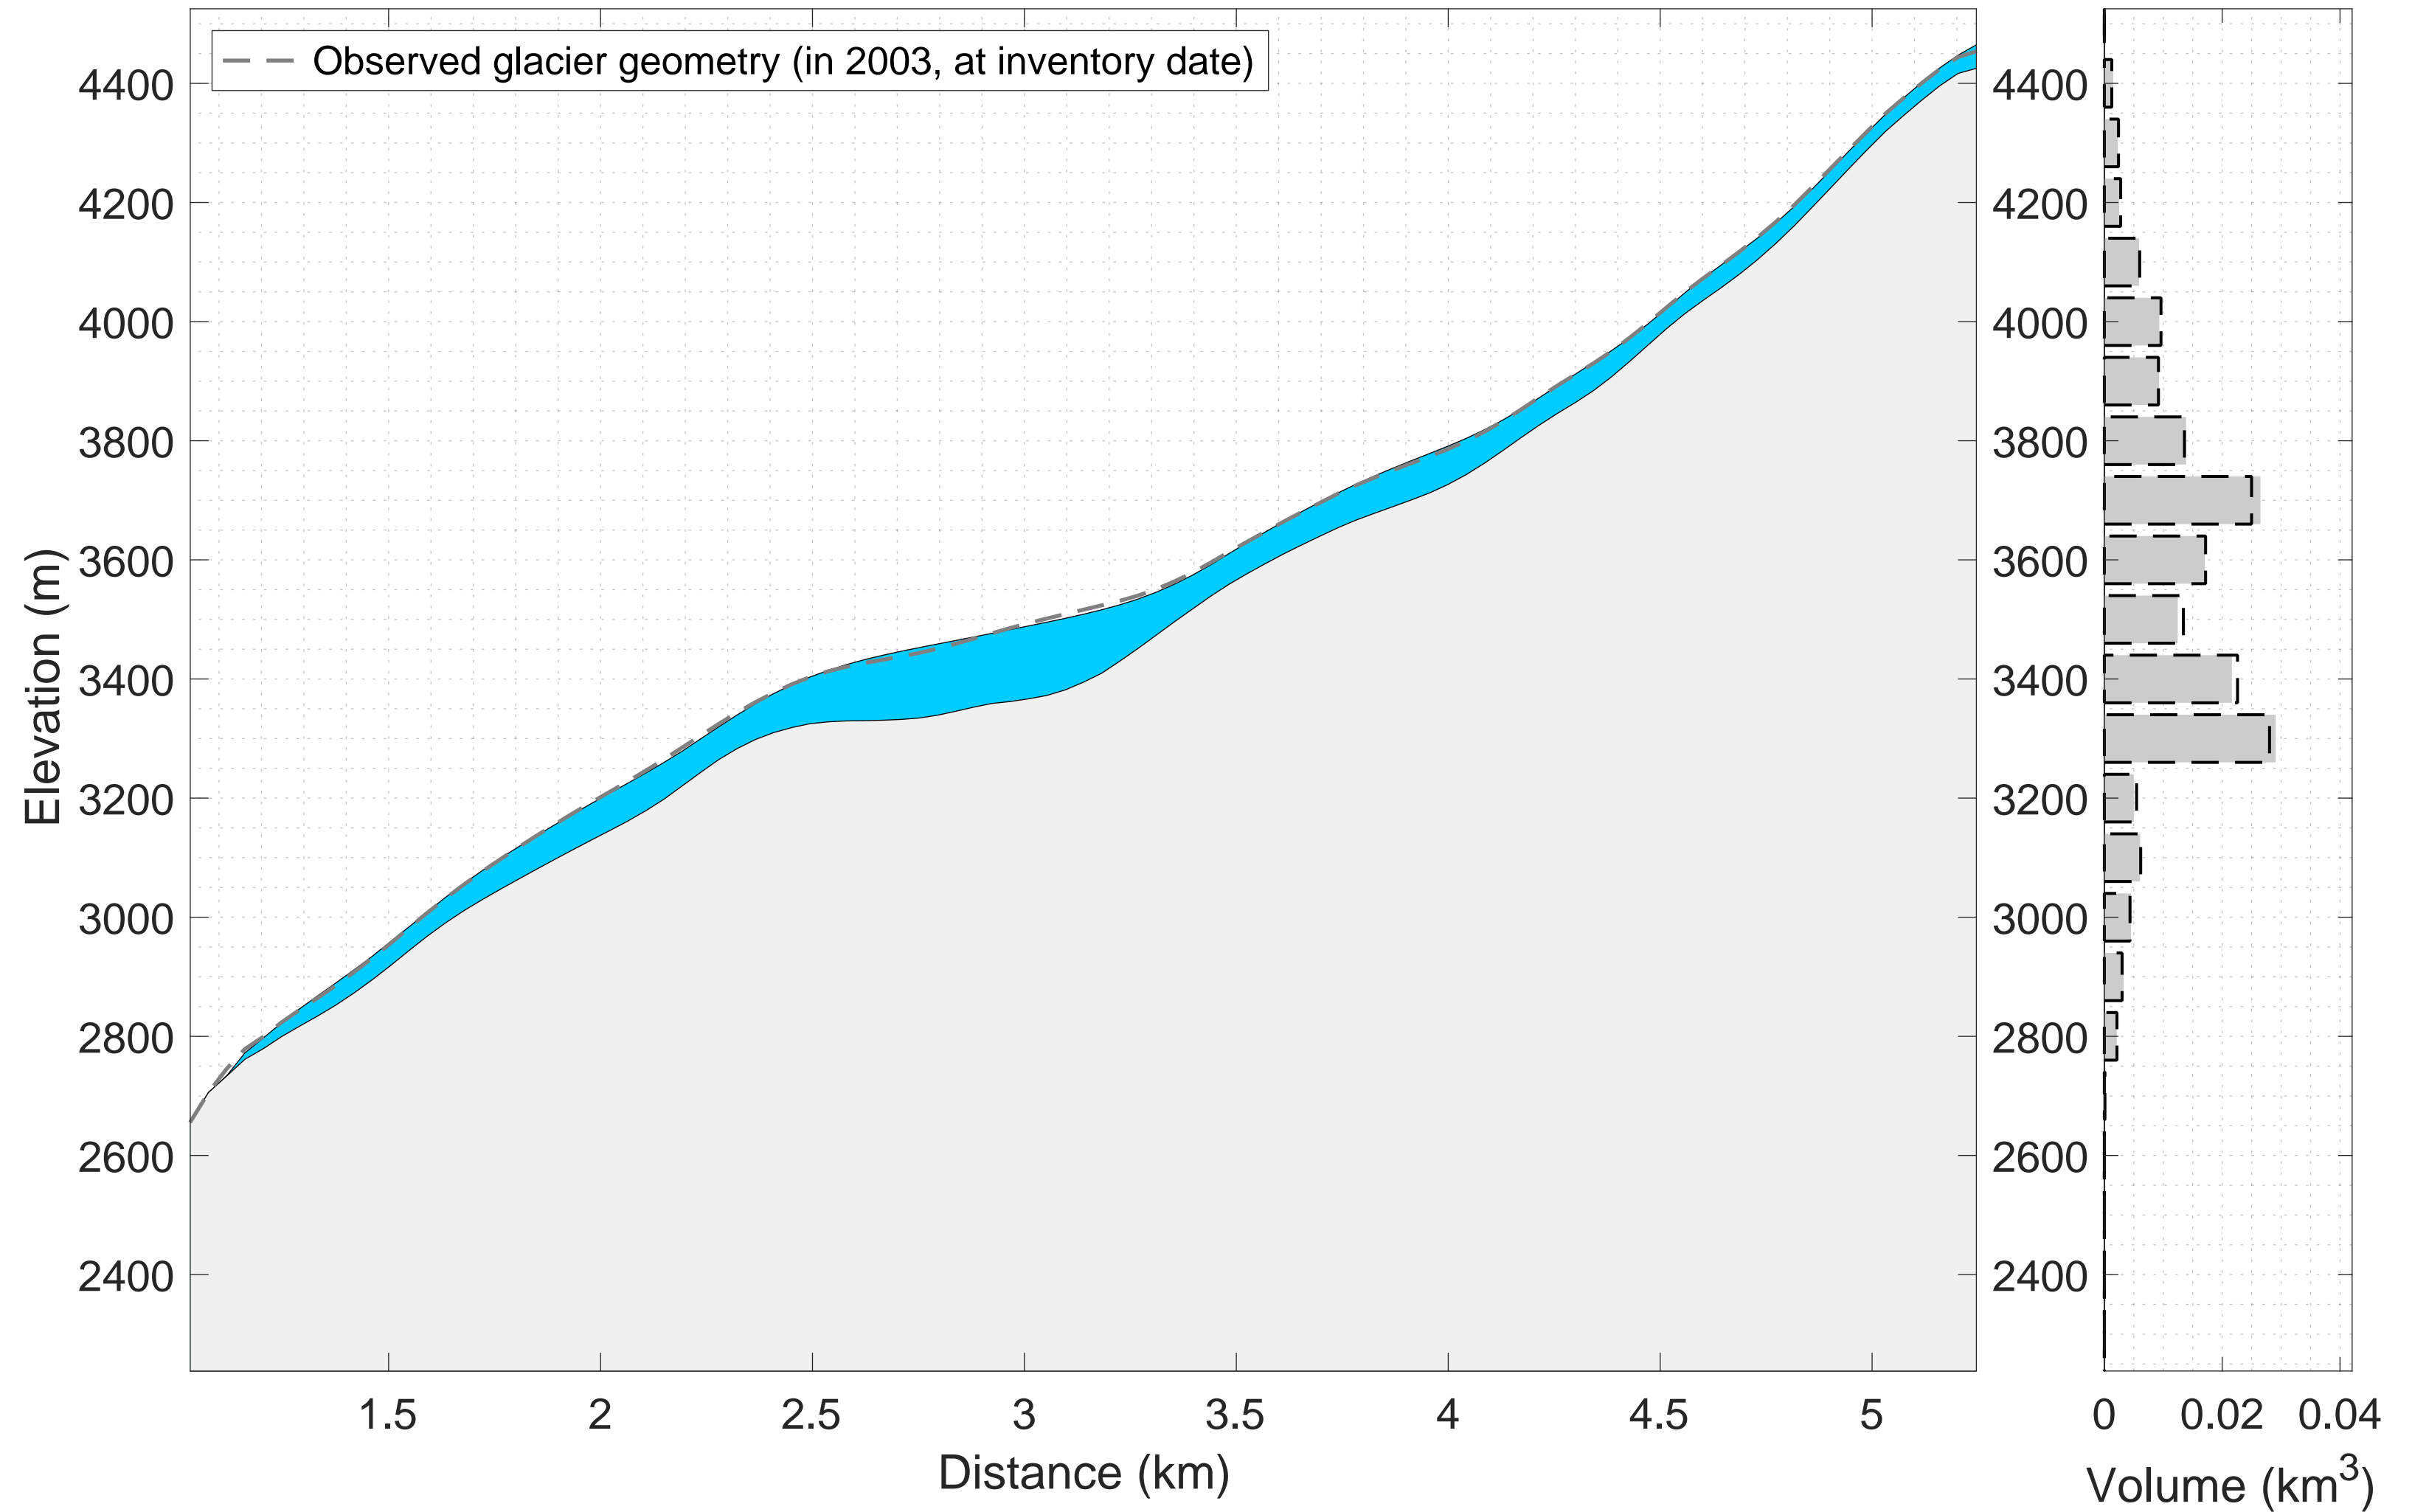

Supplement: Supplementary file 274 [file tc-13-1125-2019-supplement.zip]

**Modelled geometry (Glacier ID = 01208;  $A = 6.8828\text{e-}17 \text{ Pa}^{-3} \text{ a}^{-1}$ ;  $dx = 16 \text{ m}$ )**

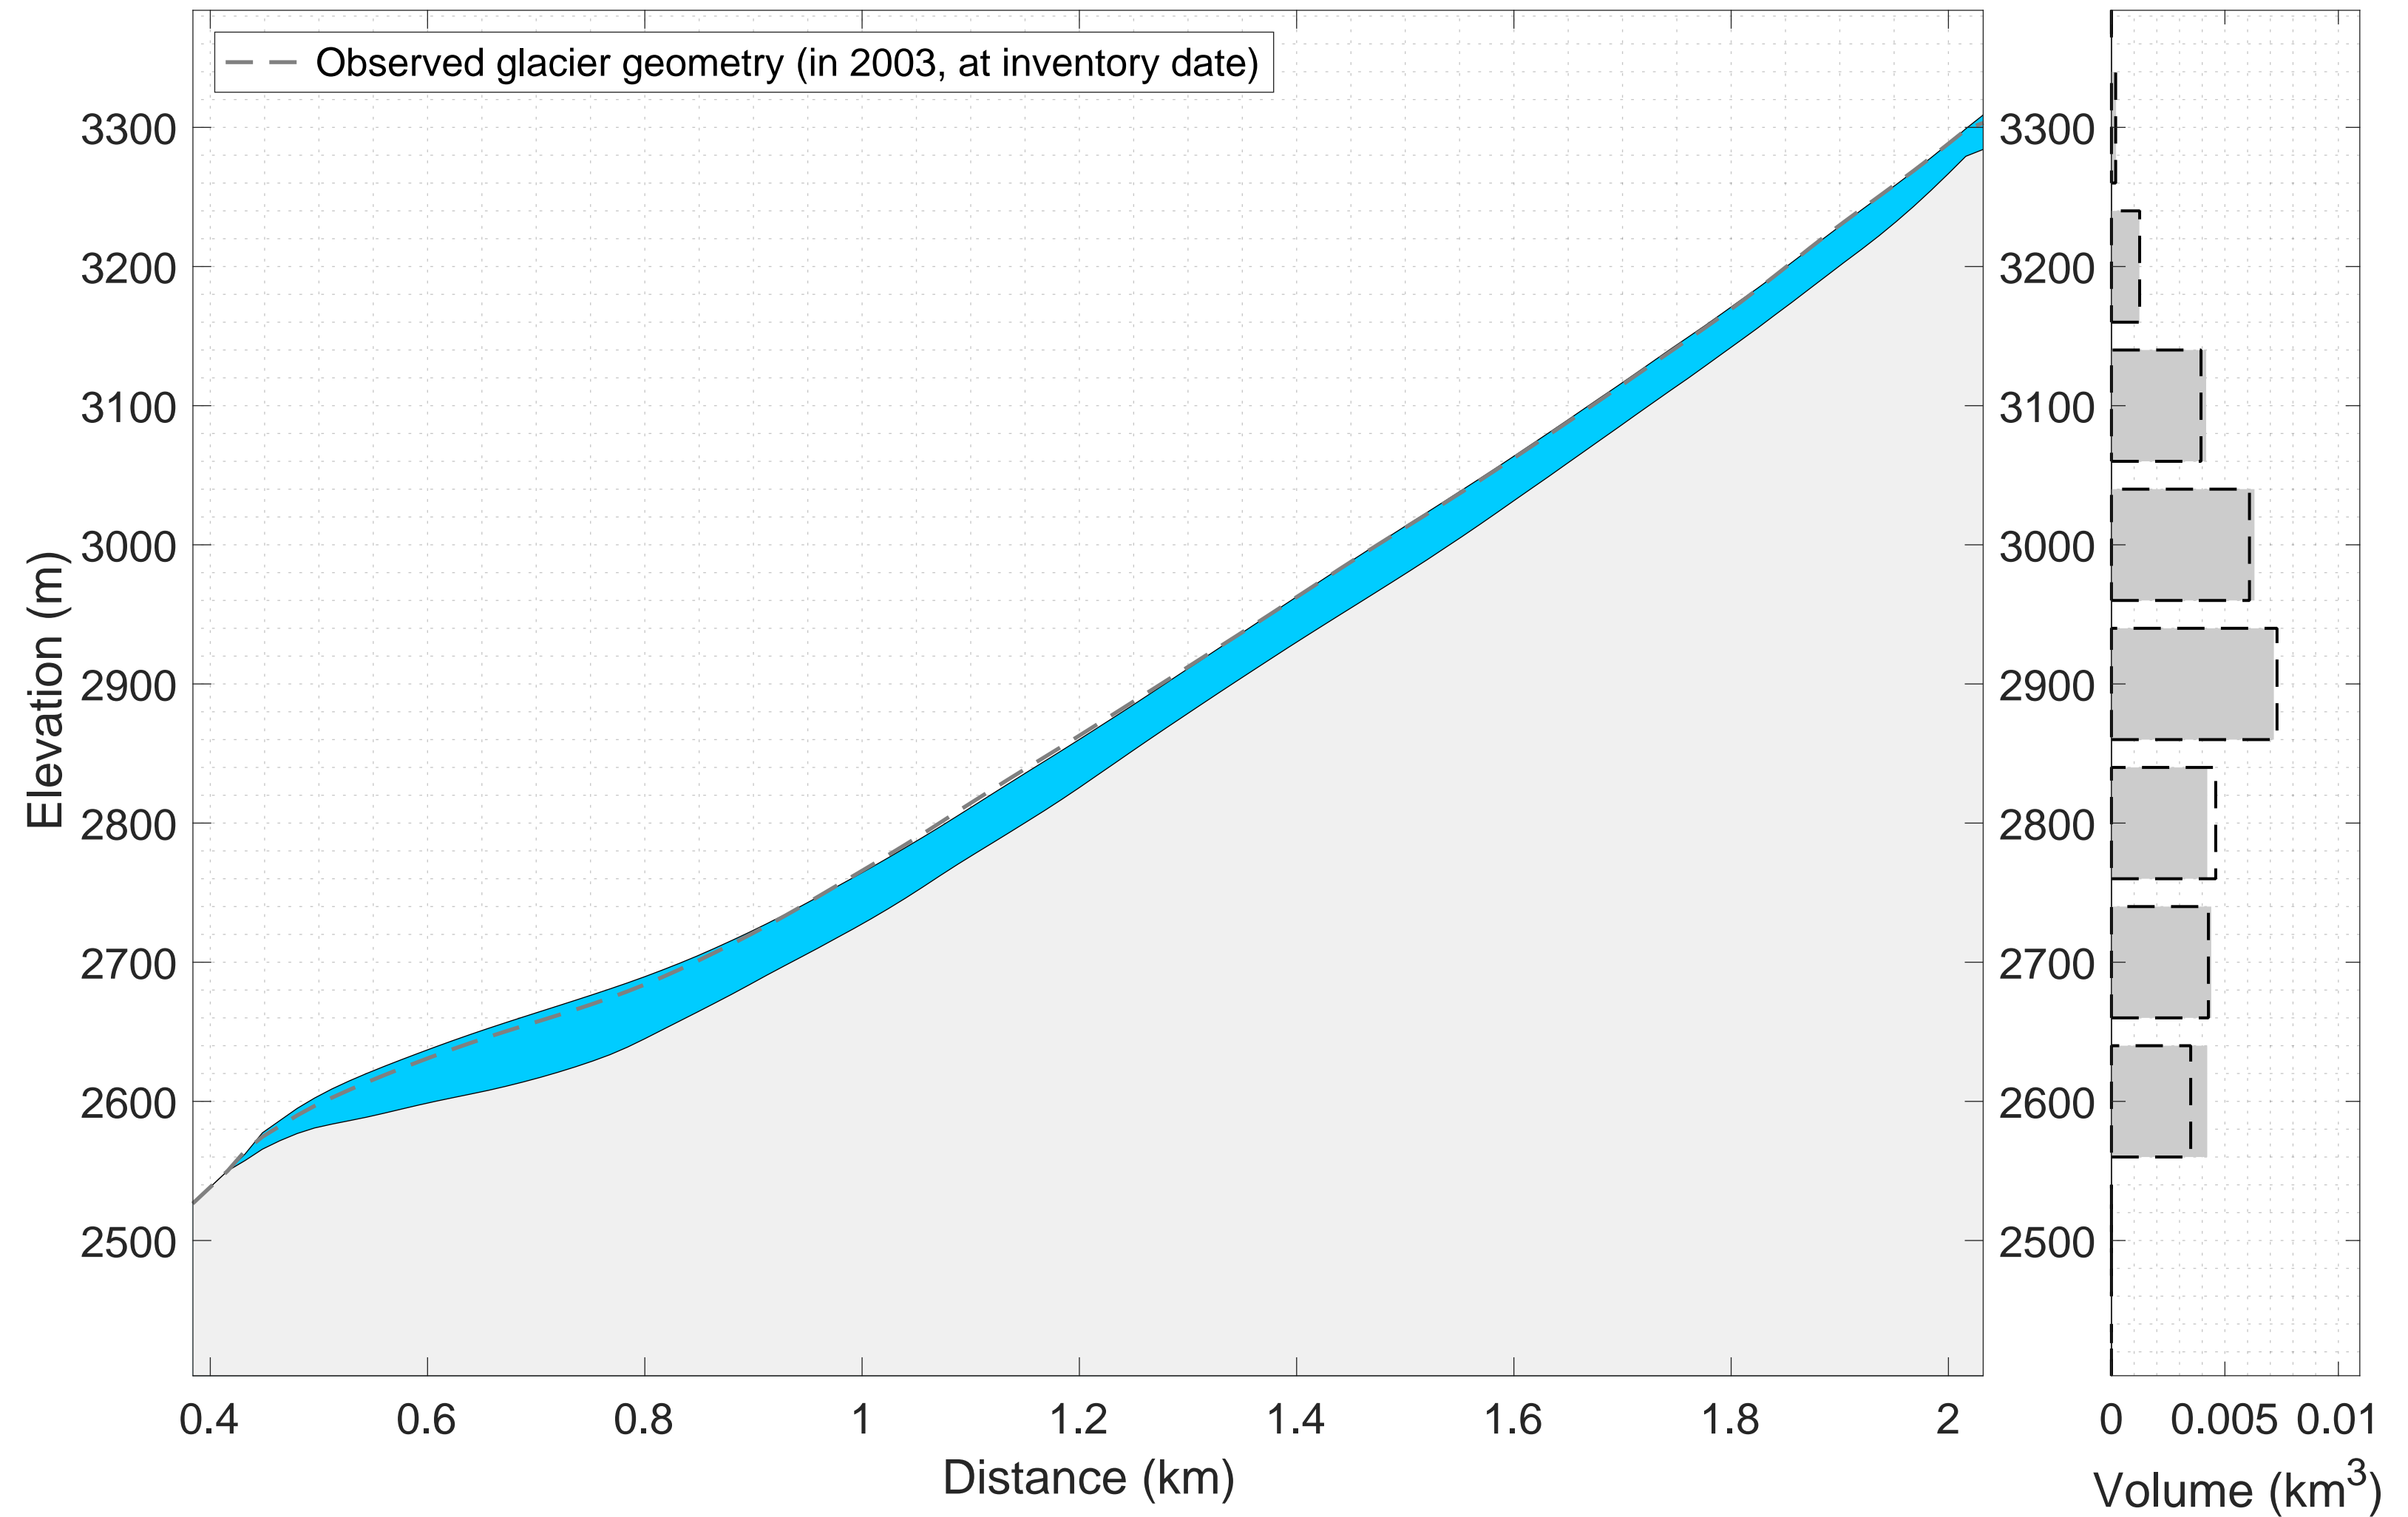

Supplement: Supplementary file 275 [file tc-13-1125-2019-supplement.zip]

**Modelled geometry (Glacier ID = 03672;  $A = 1.8035\text{e-}16 \text{ Pa}^{-3} \text{ a}^{-1}$ ;  $dx = 25 \text{ m}$ )**

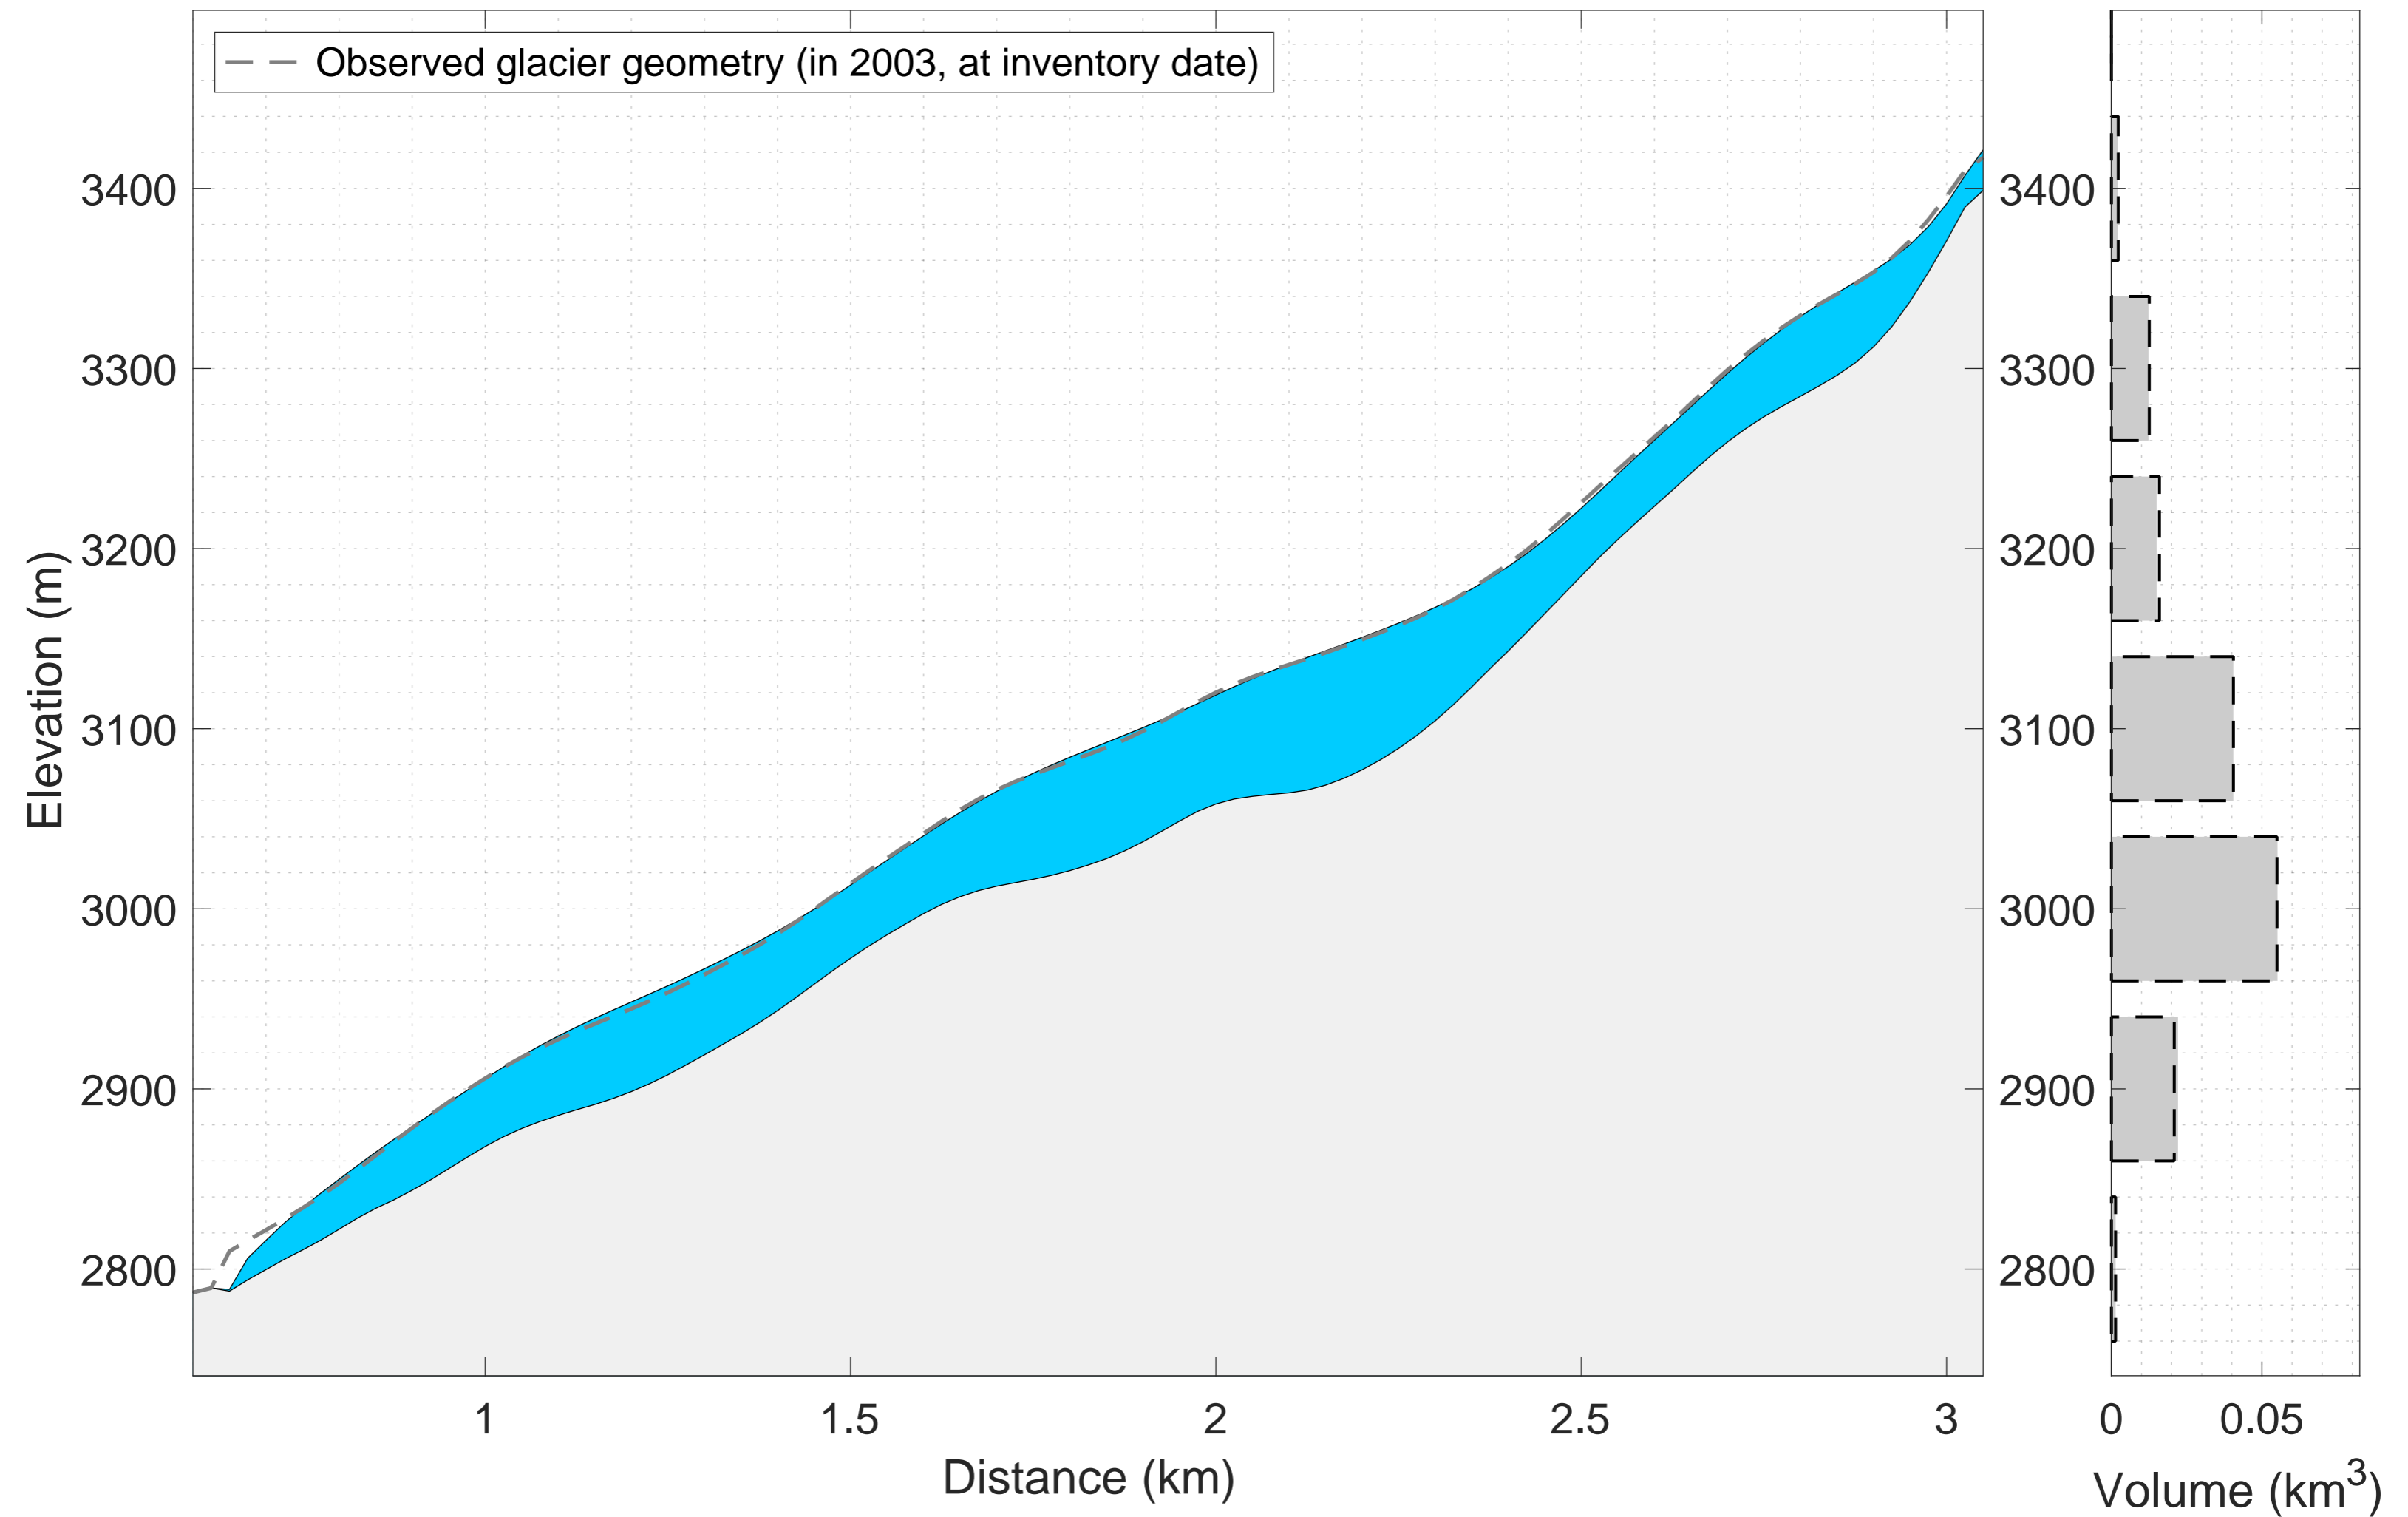

Supplement: Supplementary file 276 [file tc-13-1125-2019-supplement.zip]

**Modelled geometry (Glacier ID = 00752;  $A = 1.9996\text{e-}16 \text{ Pa}^{-3} \text{ a}^{-1}$ ;  $dx = 18 \text{ m}$ )**

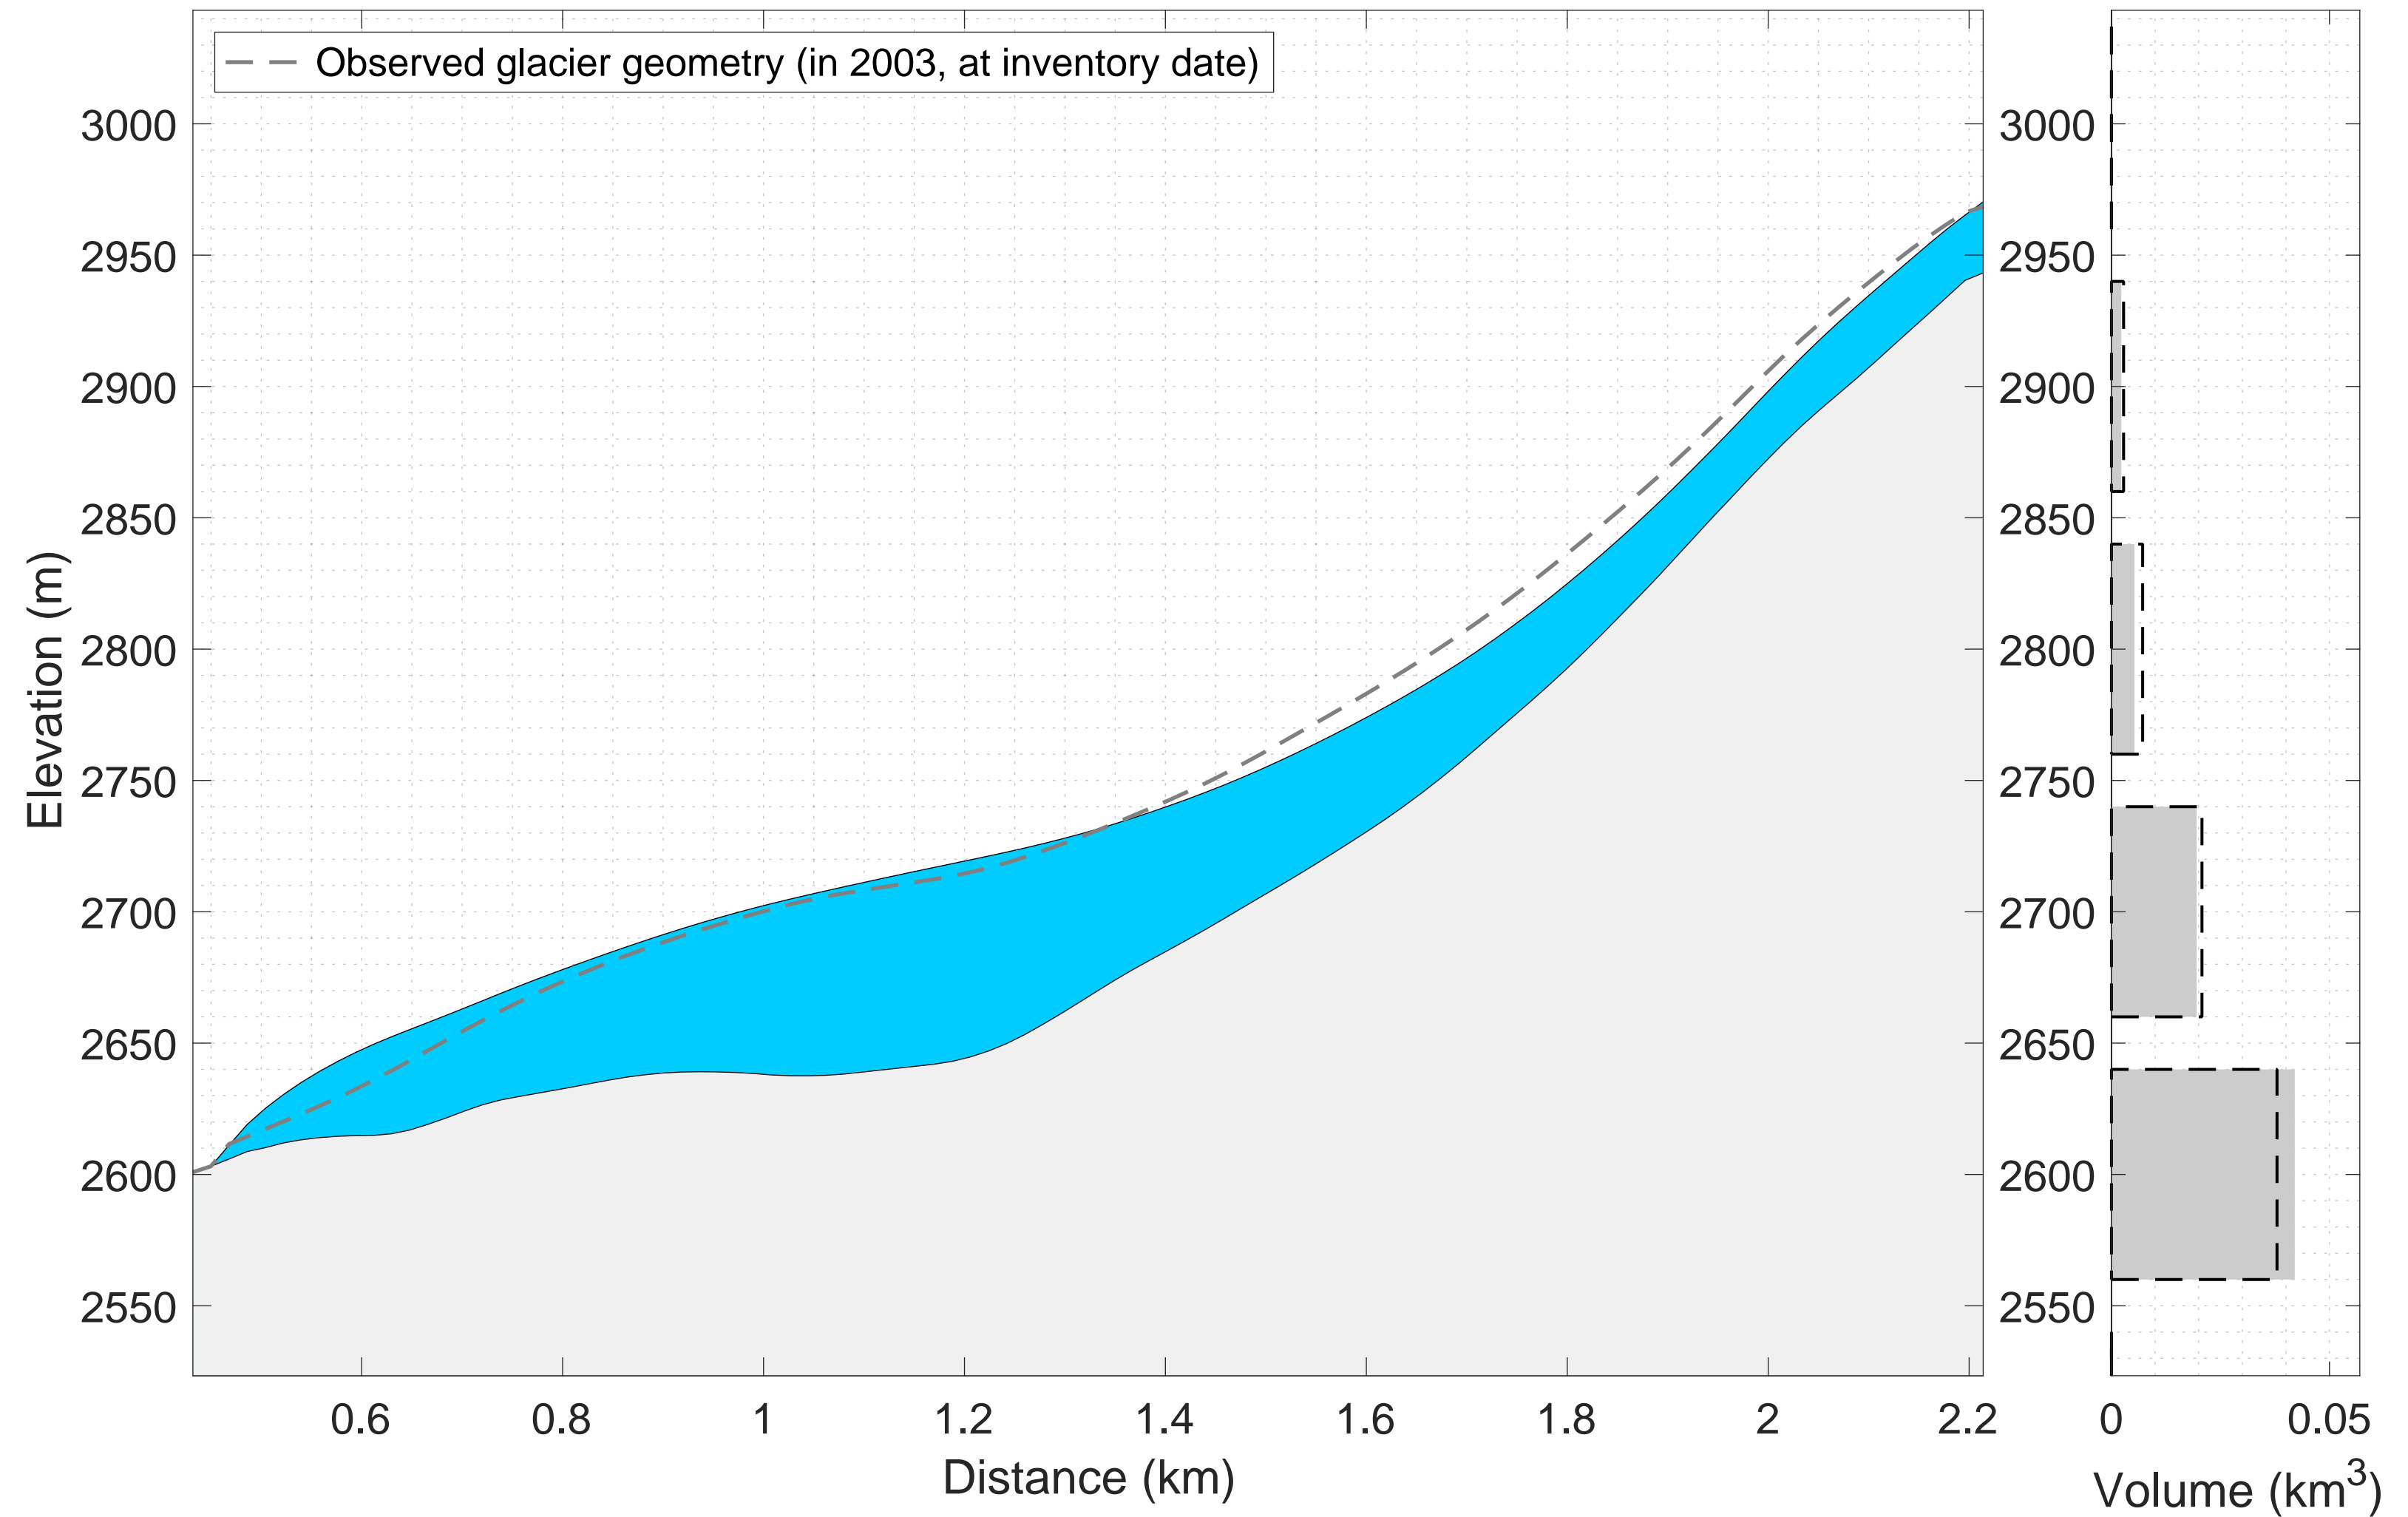

Supplement: Supplementary file 277 [file tc-13-1125-2019-supplement.zip]

**Modelled geometry (Glacier ID = 03347;  $A = 1.4233\text{e-}16 \text{ Pa}^{-3} \text{ a}^{-1}$ ;  $dx = 14 \text{ m}$ )**

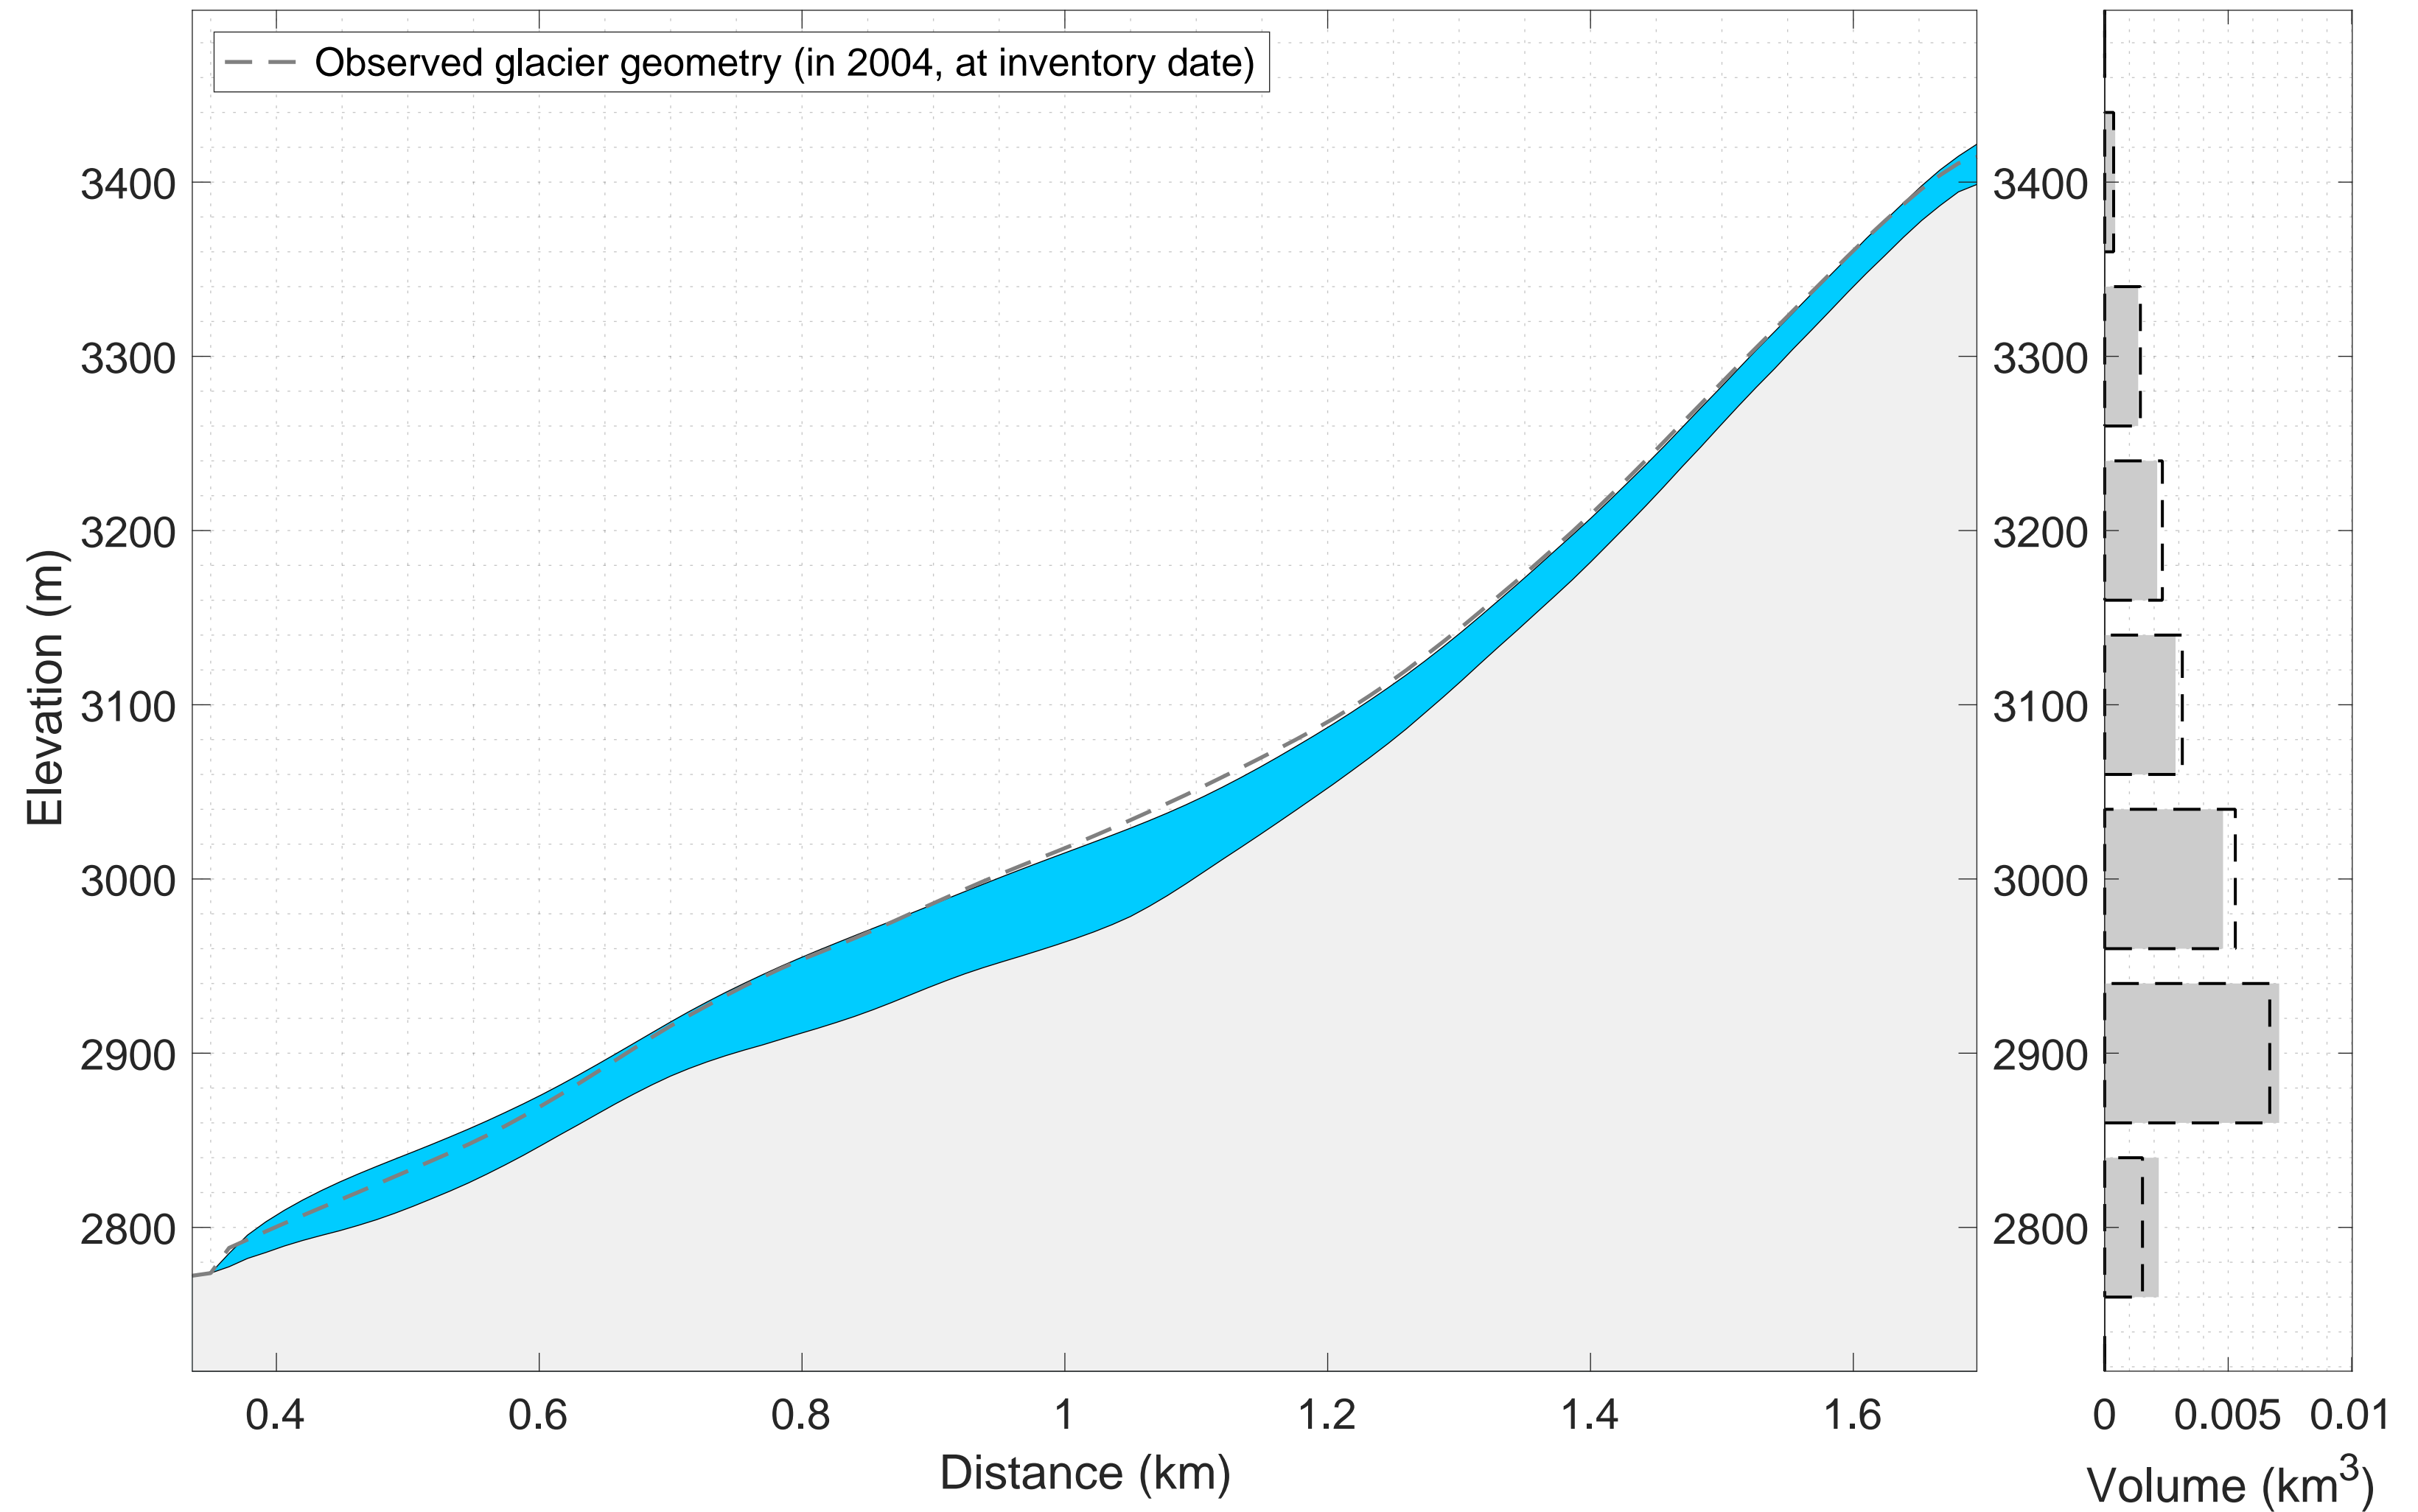

Supplement: Supplementary file 278 [file tc-13-1125-2019-supplement.zip]

**Modelled geometry (Glacier ID = 00345;  $A = 1.1543\text{e-}16 \text{ Pa}^{-3} \text{ a}^{-1}$ ;  $dx = 18 \text{ m}$ )**

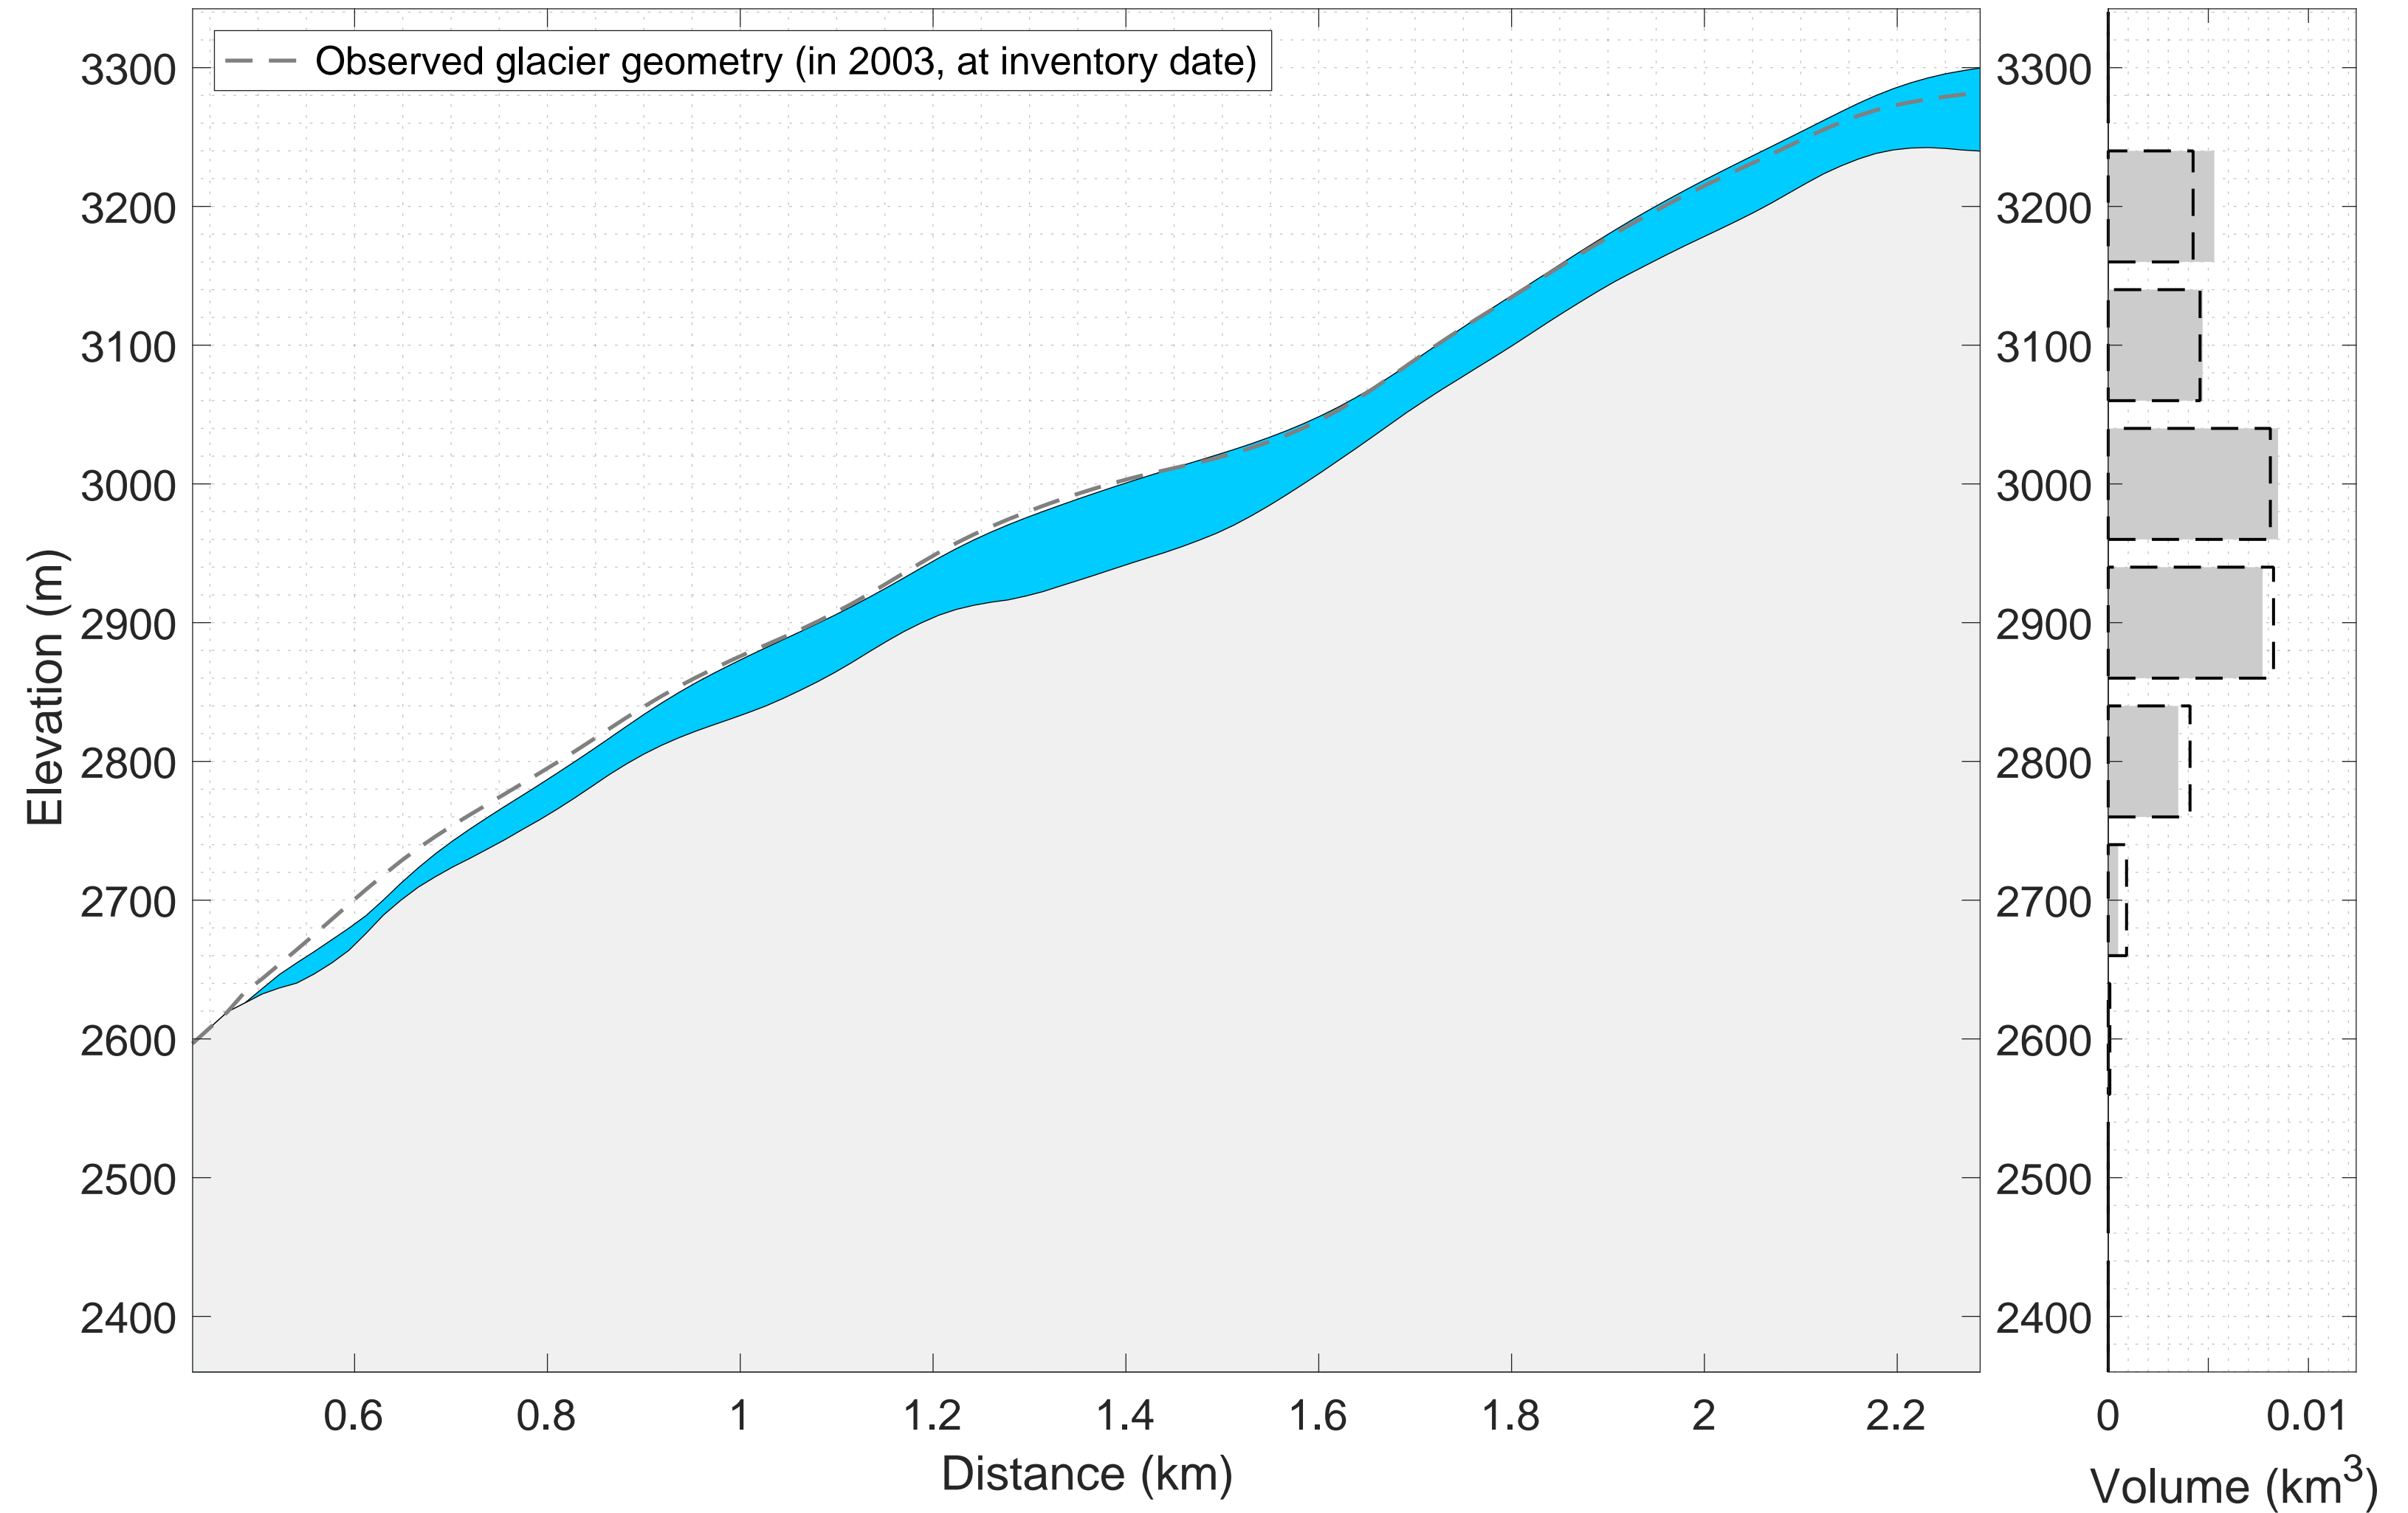

Supplement: Supplementary file 279 [file tc-13-1125-2019-supplement.zip]

**Modelled geometry (Glacier ID = 02593;  $A = 2.3581\text{e-}16 \text{ Pa}^{-3} \text{ a}^{-1}$ ;  $dx = 44 \text{ m}$ )**

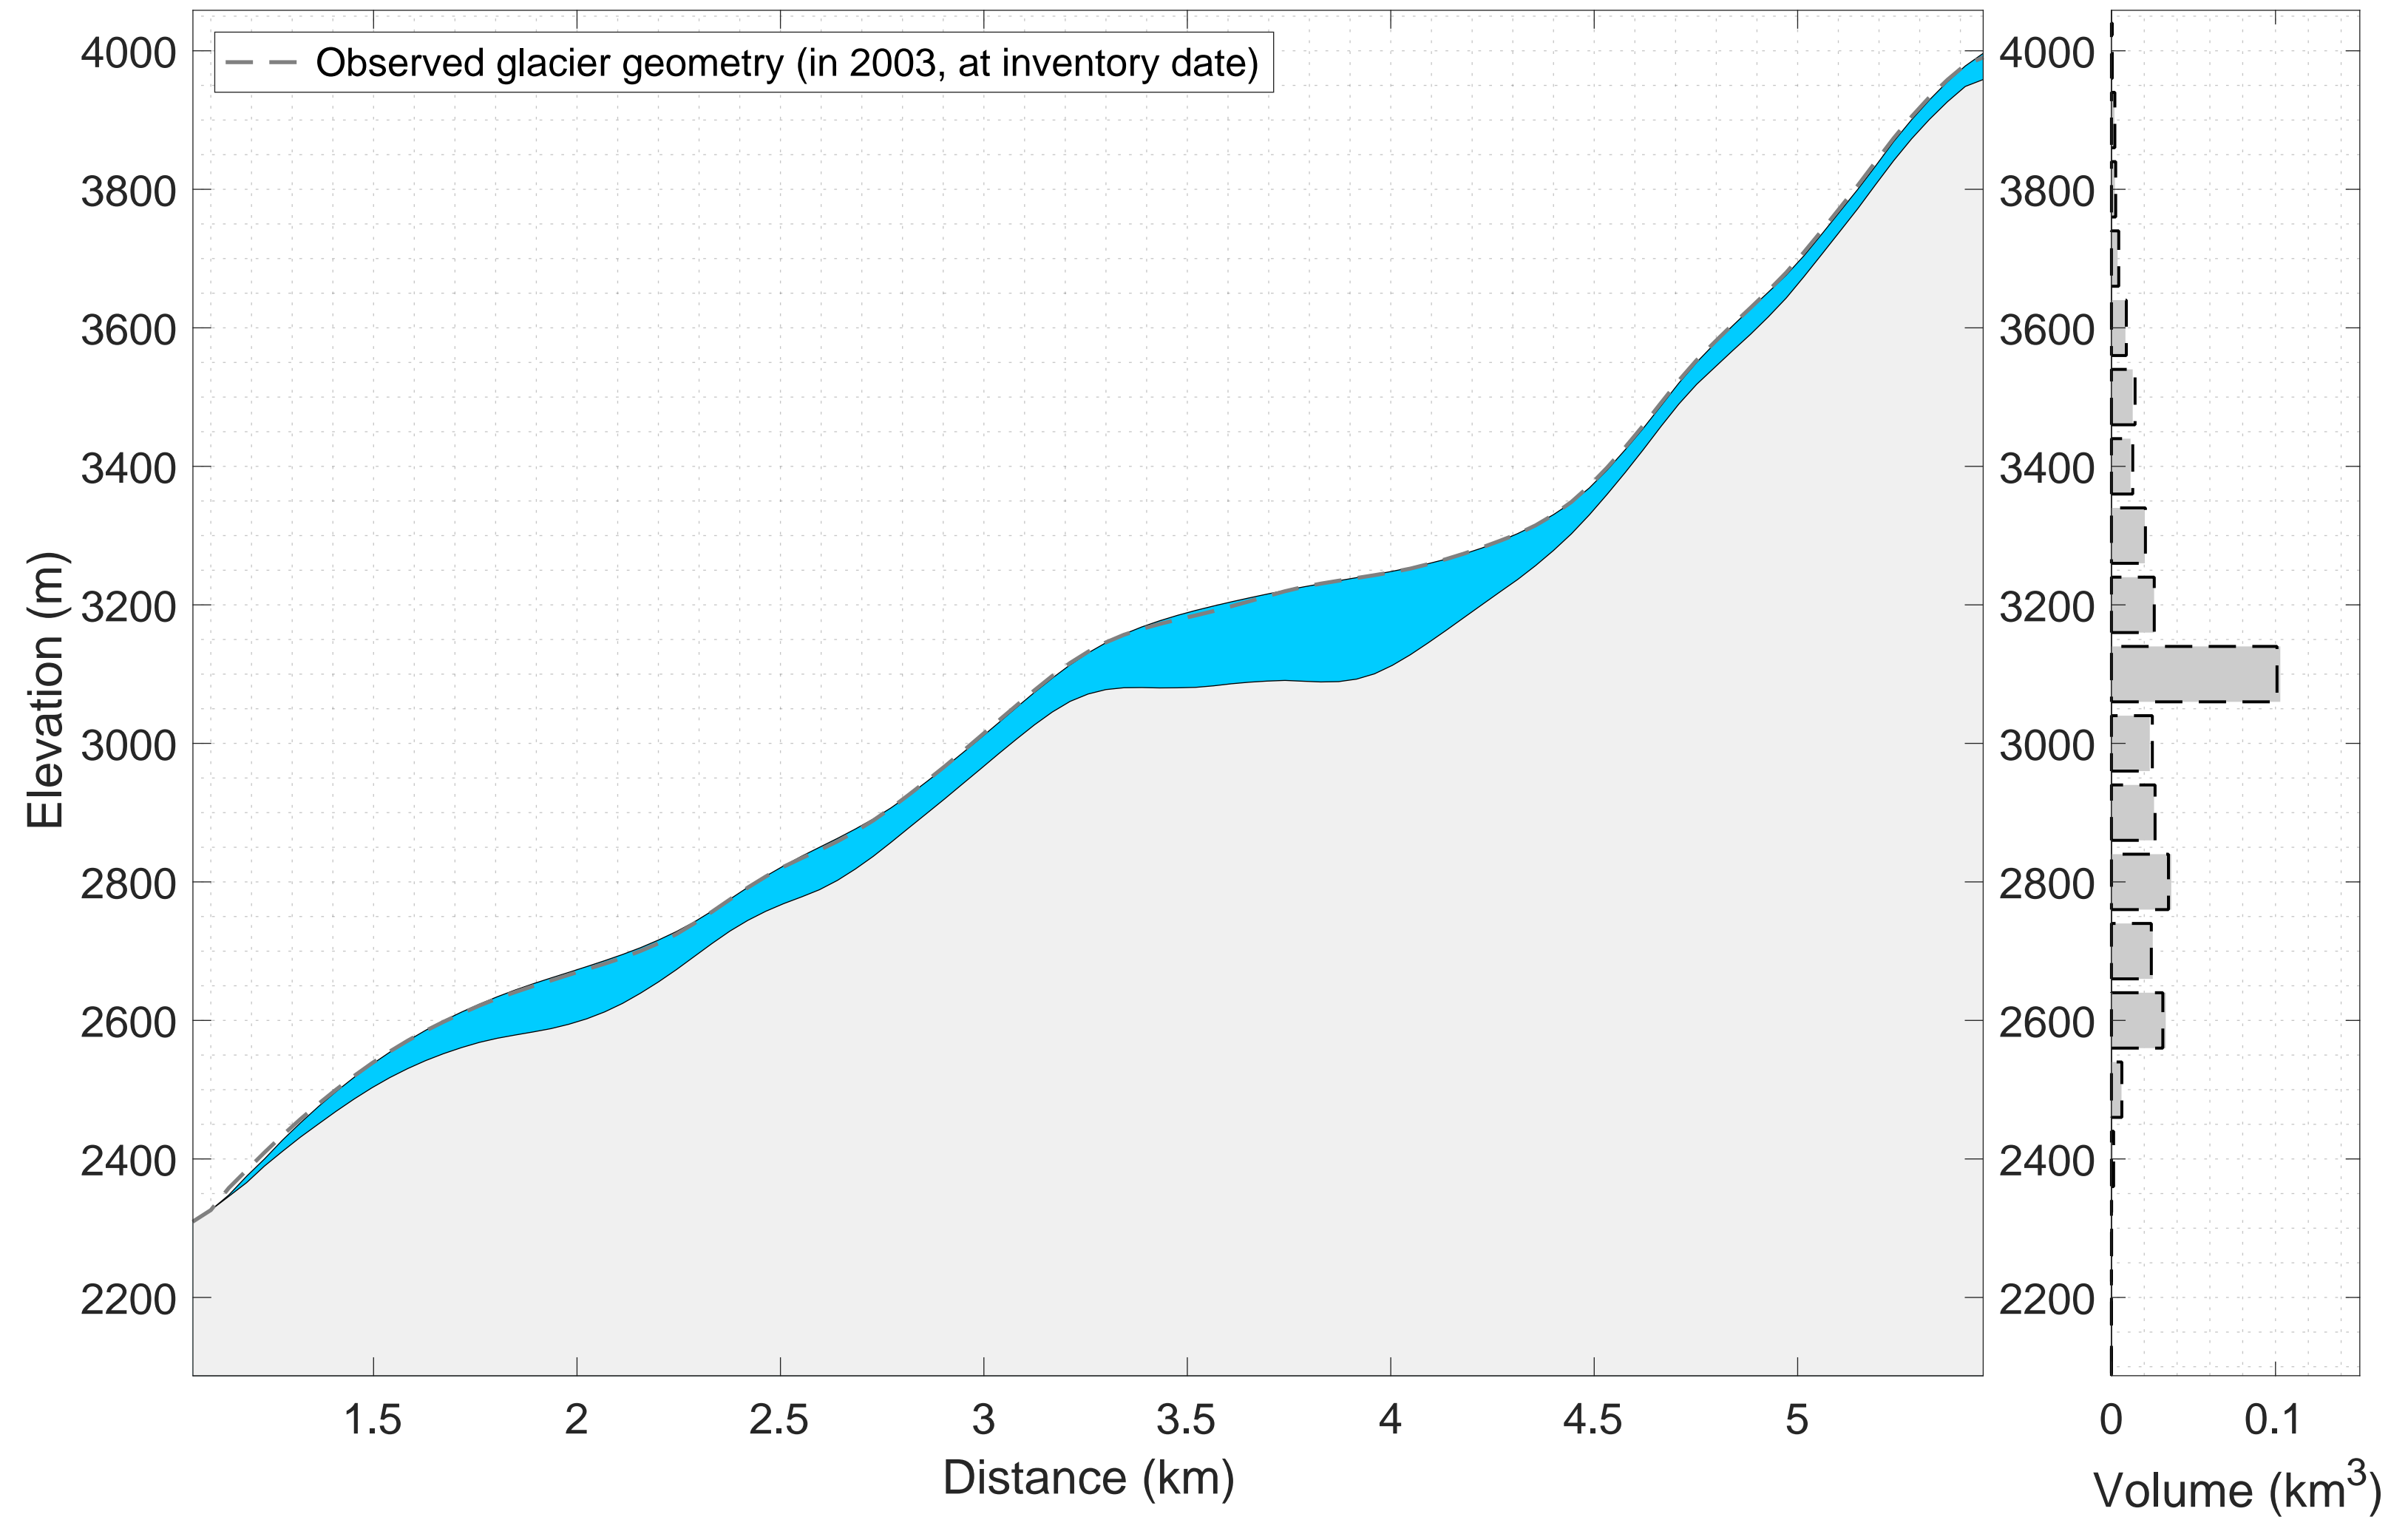

Supplement: Supplementary file 280 [file tc-13-1125-2019-supplement.zip]

**Modelled geometry (Glacier ID = 01912;  $A = 1.4708\text{e-}16 \text{ Pa}^{-3} \text{ a}^{-1}$ ;  $dx = 19 \text{ m}$ )**

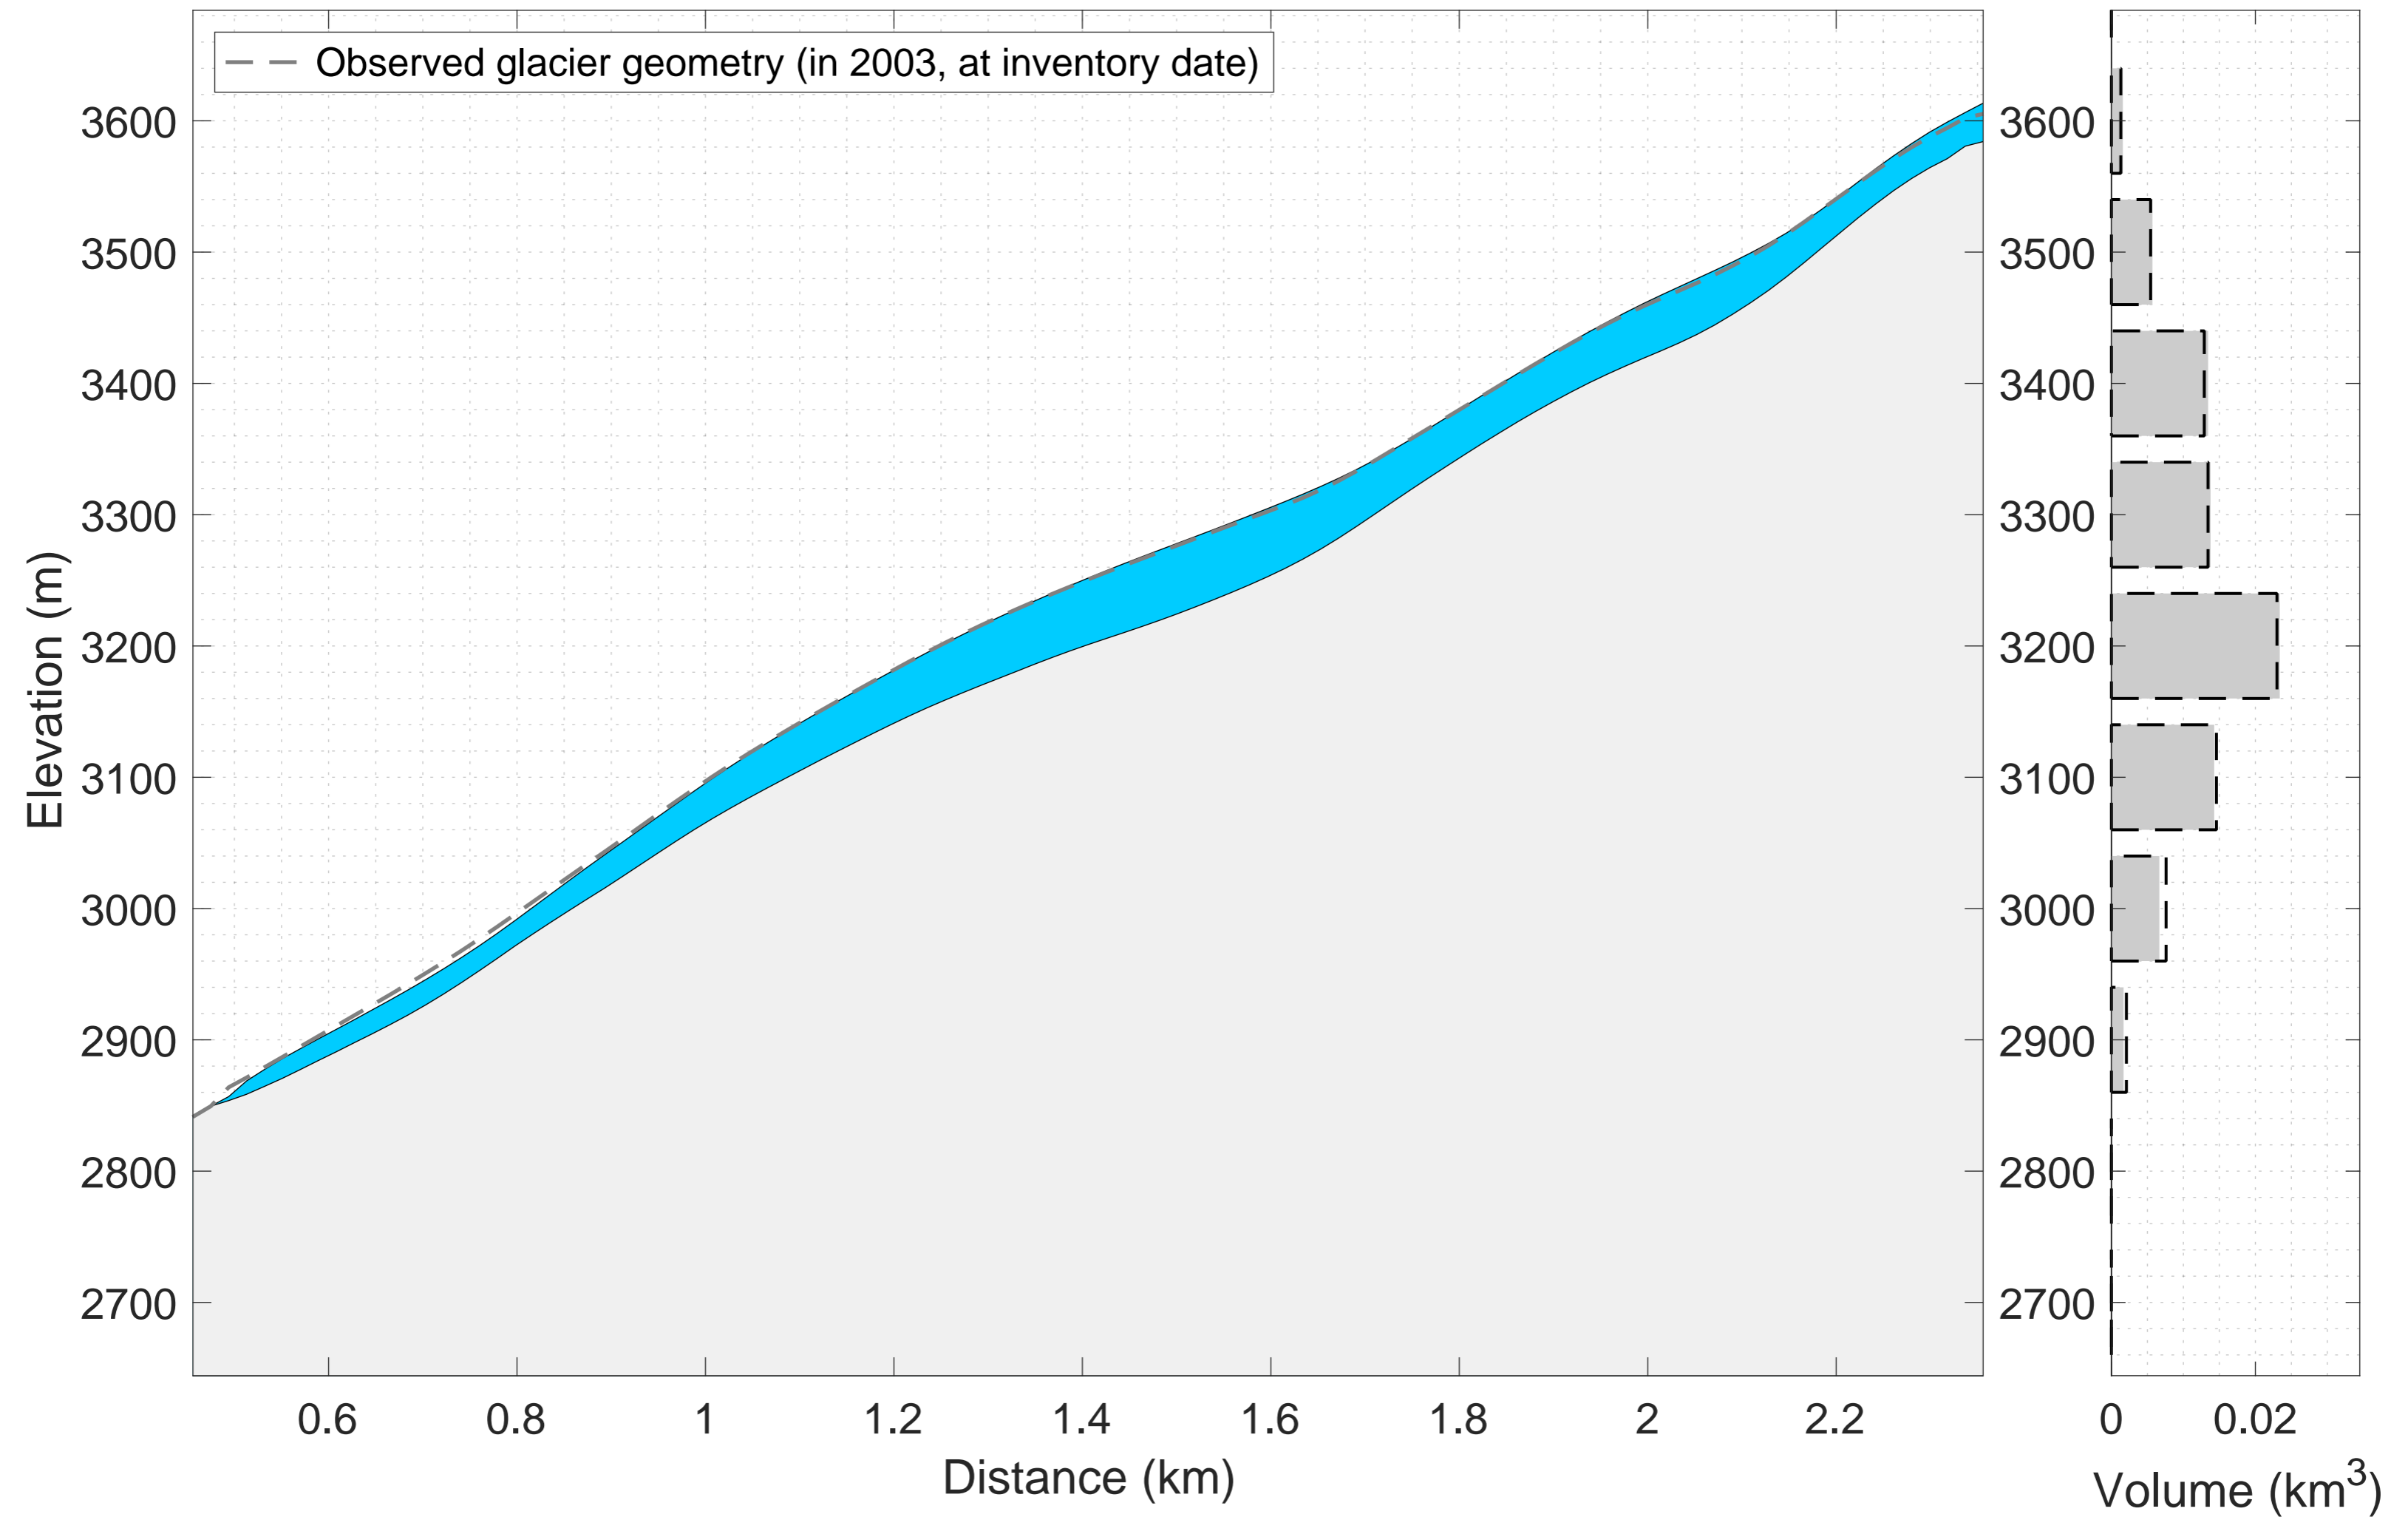

Supplement: Supplementary file 281 [file tc-13-1125-2019-supplement.zip]

**Modelled geometry (Glacier ID = 01267;  $A = 8.0202\text{e-}17 \text{ Pa}^{-3} \text{ a}^{-1}$ ;  $dx = 22 \text{ m}$ )**

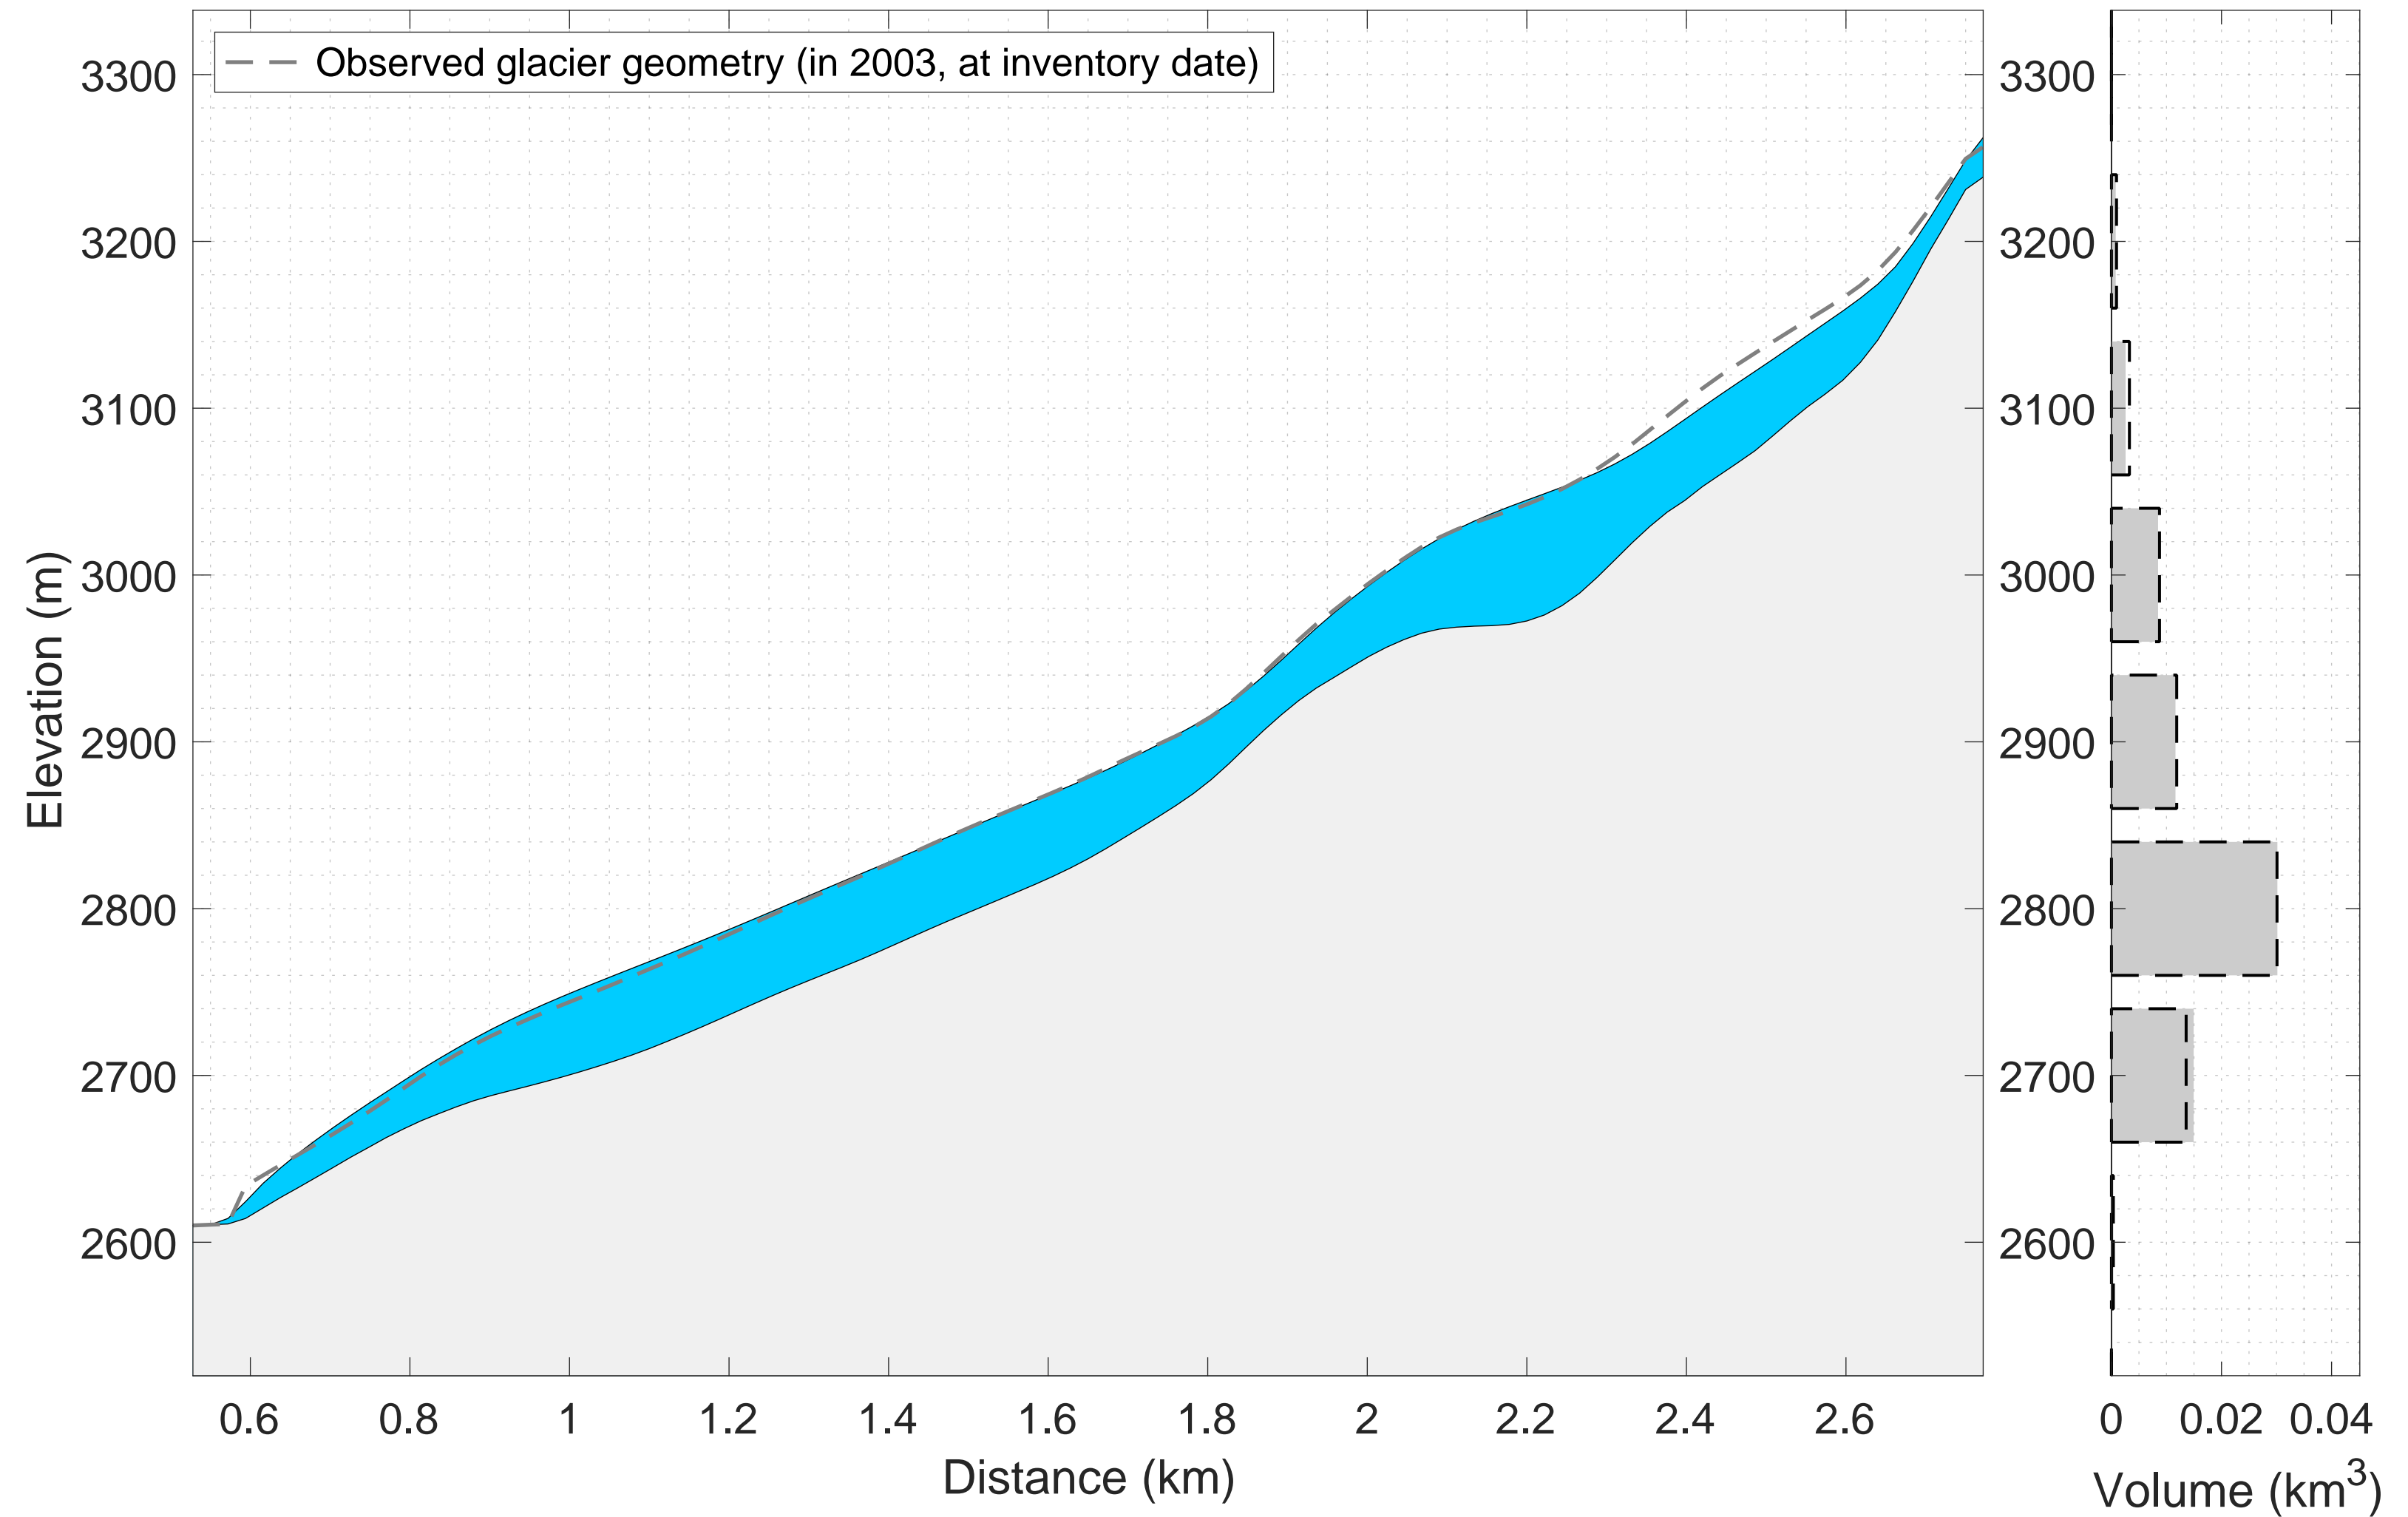

Supplement: Supplementary file 282 [file tc-13-1125-2019-supplement.zip]

**Modelled geometry (Glacier ID = 01813;  $A = 3.4303\text{e-}17 \text{ Pa}^{-3} \text{ a}^{-1}$ ;  $dx = 18 \text{ m}$ )**

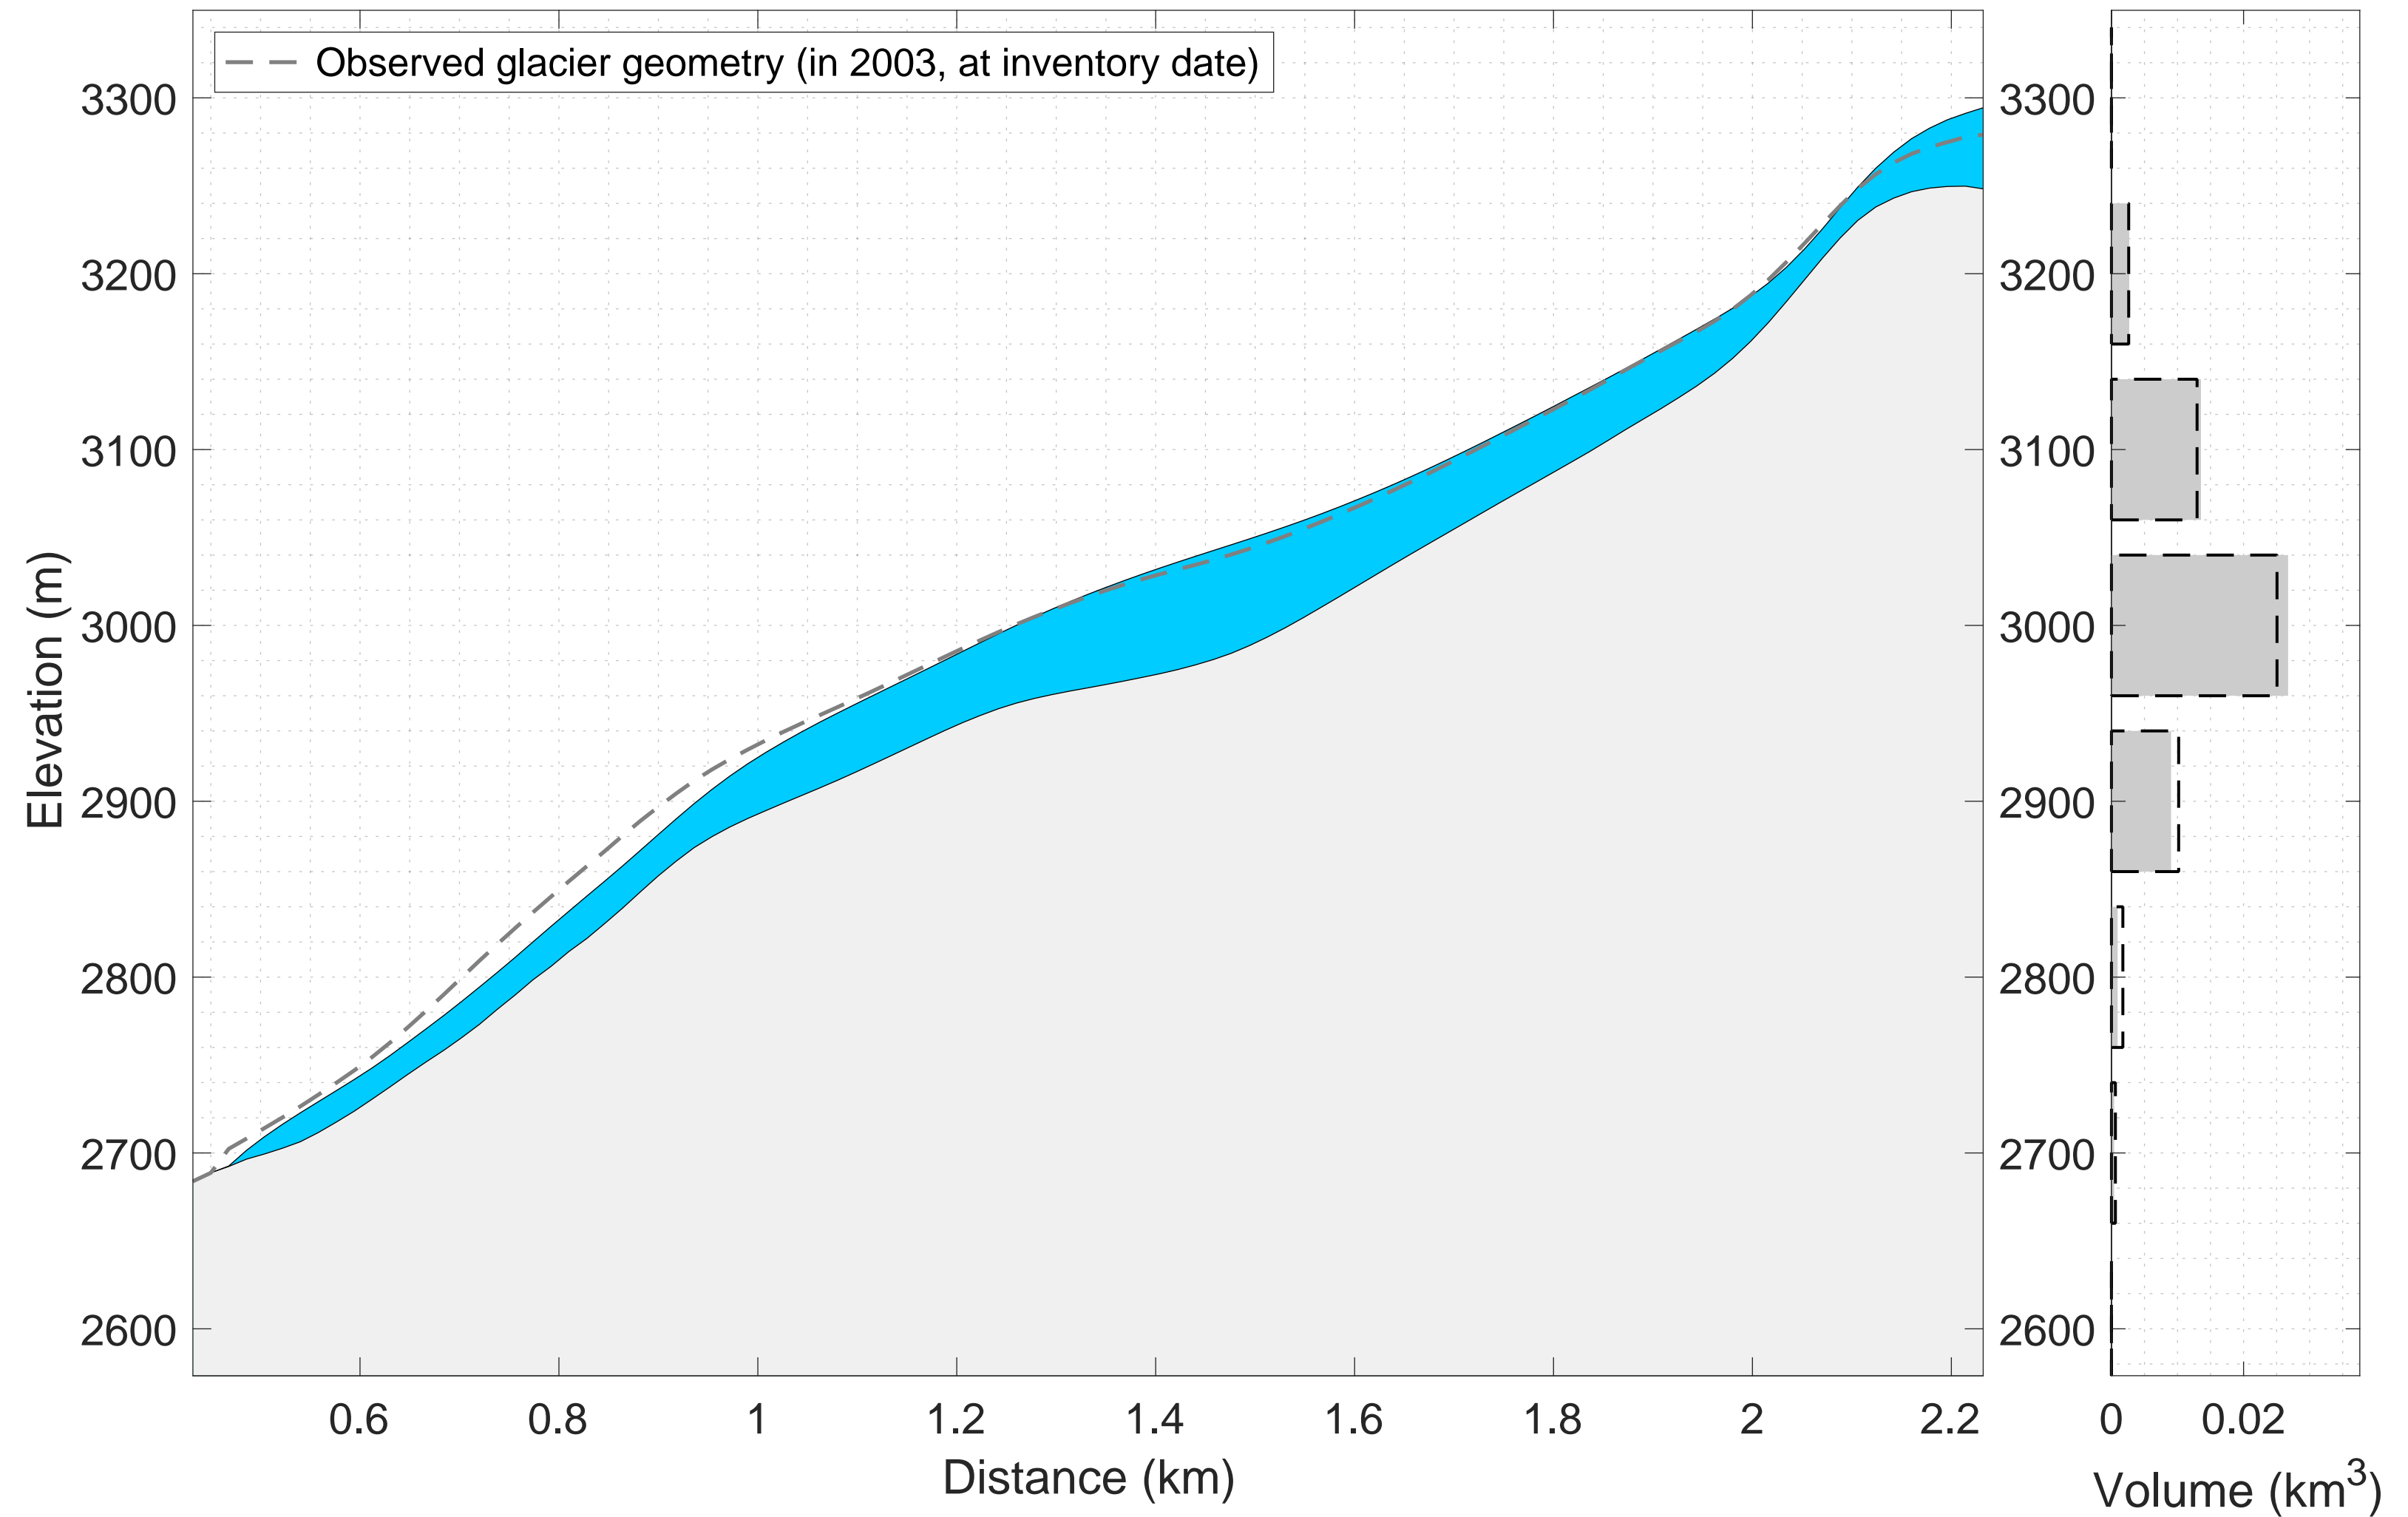

Supplement: Supplementary file 283 [file tc-13-1125-2019-supplement.zip]

**Modelled geometry (Glacier ID = 03740;  $A = 1.7532\text{e-}16 \text{ Pa}^{-3} \text{ a}^{-1}$ ;  $dx = 26 \text{ m}$ )**

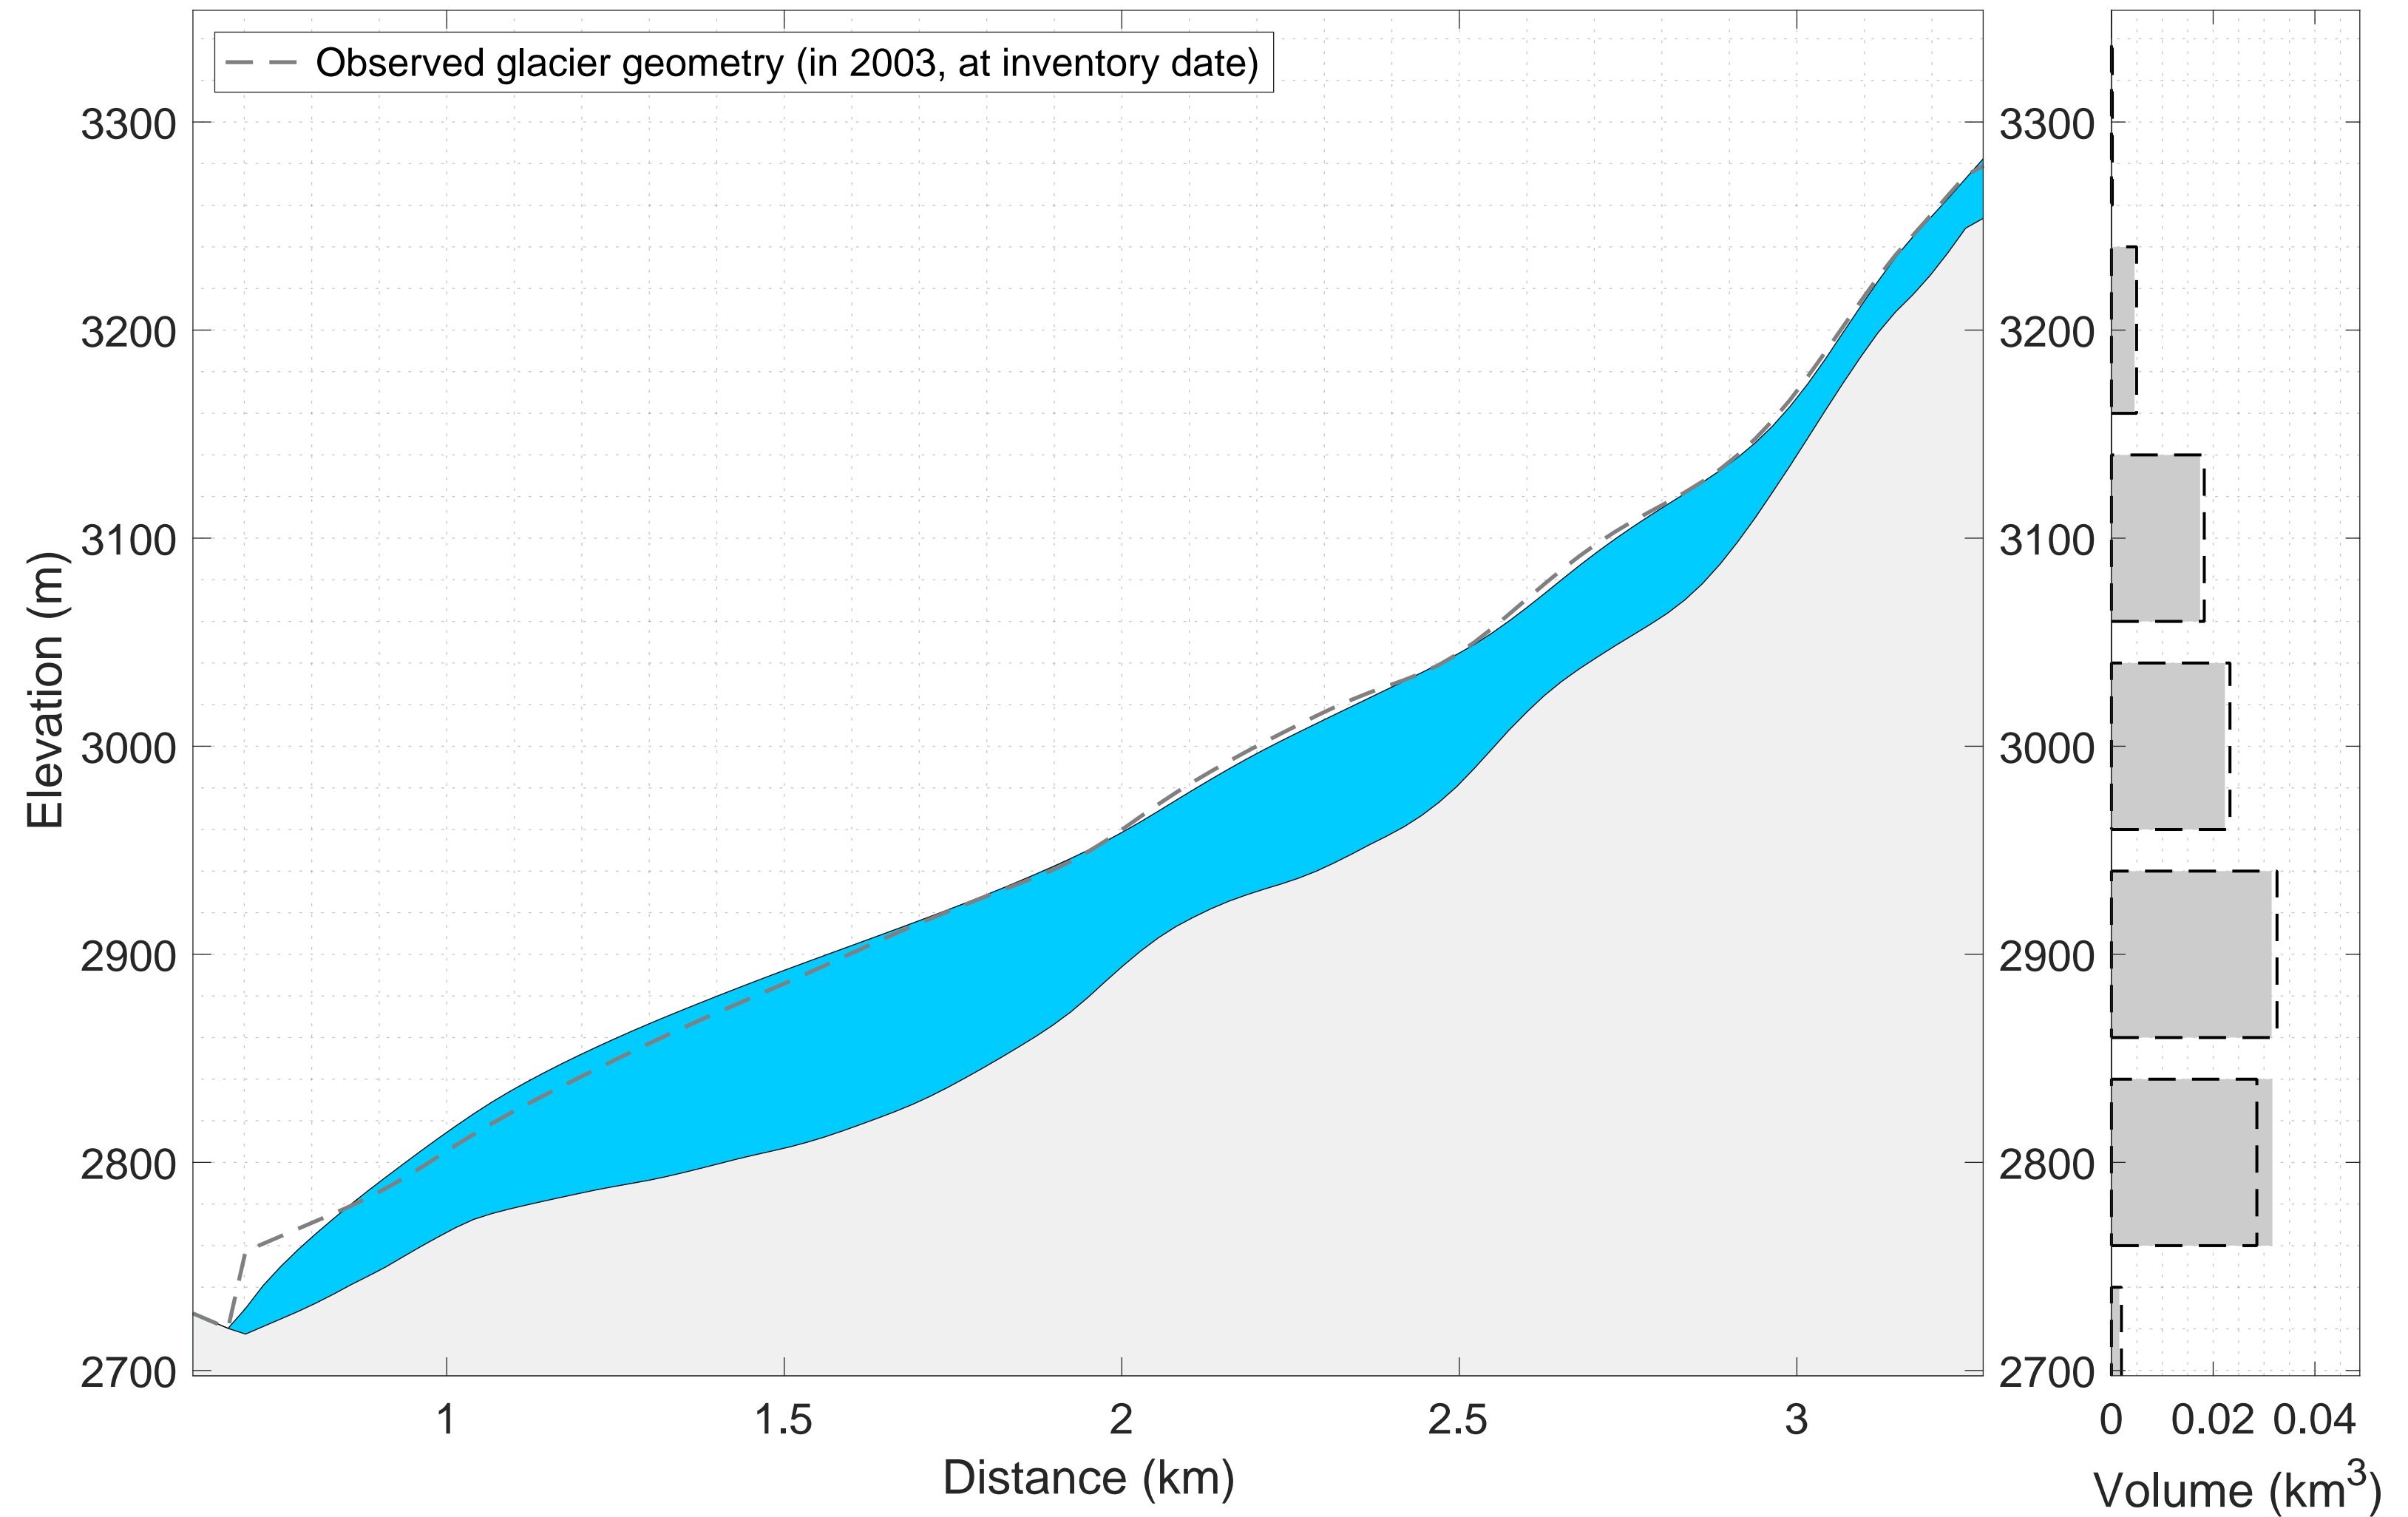

Supplement: Supplementary file 284 [file tc-13-1125-2019-supplement.zip]

**Modelled geometry (Glacier ID = 01067;  $A = 6.1471\text{e-}17 \text{ Pa}^{-3} \text{ a}^{-1}$ ;  $dx = 23 \text{ m}$ )**

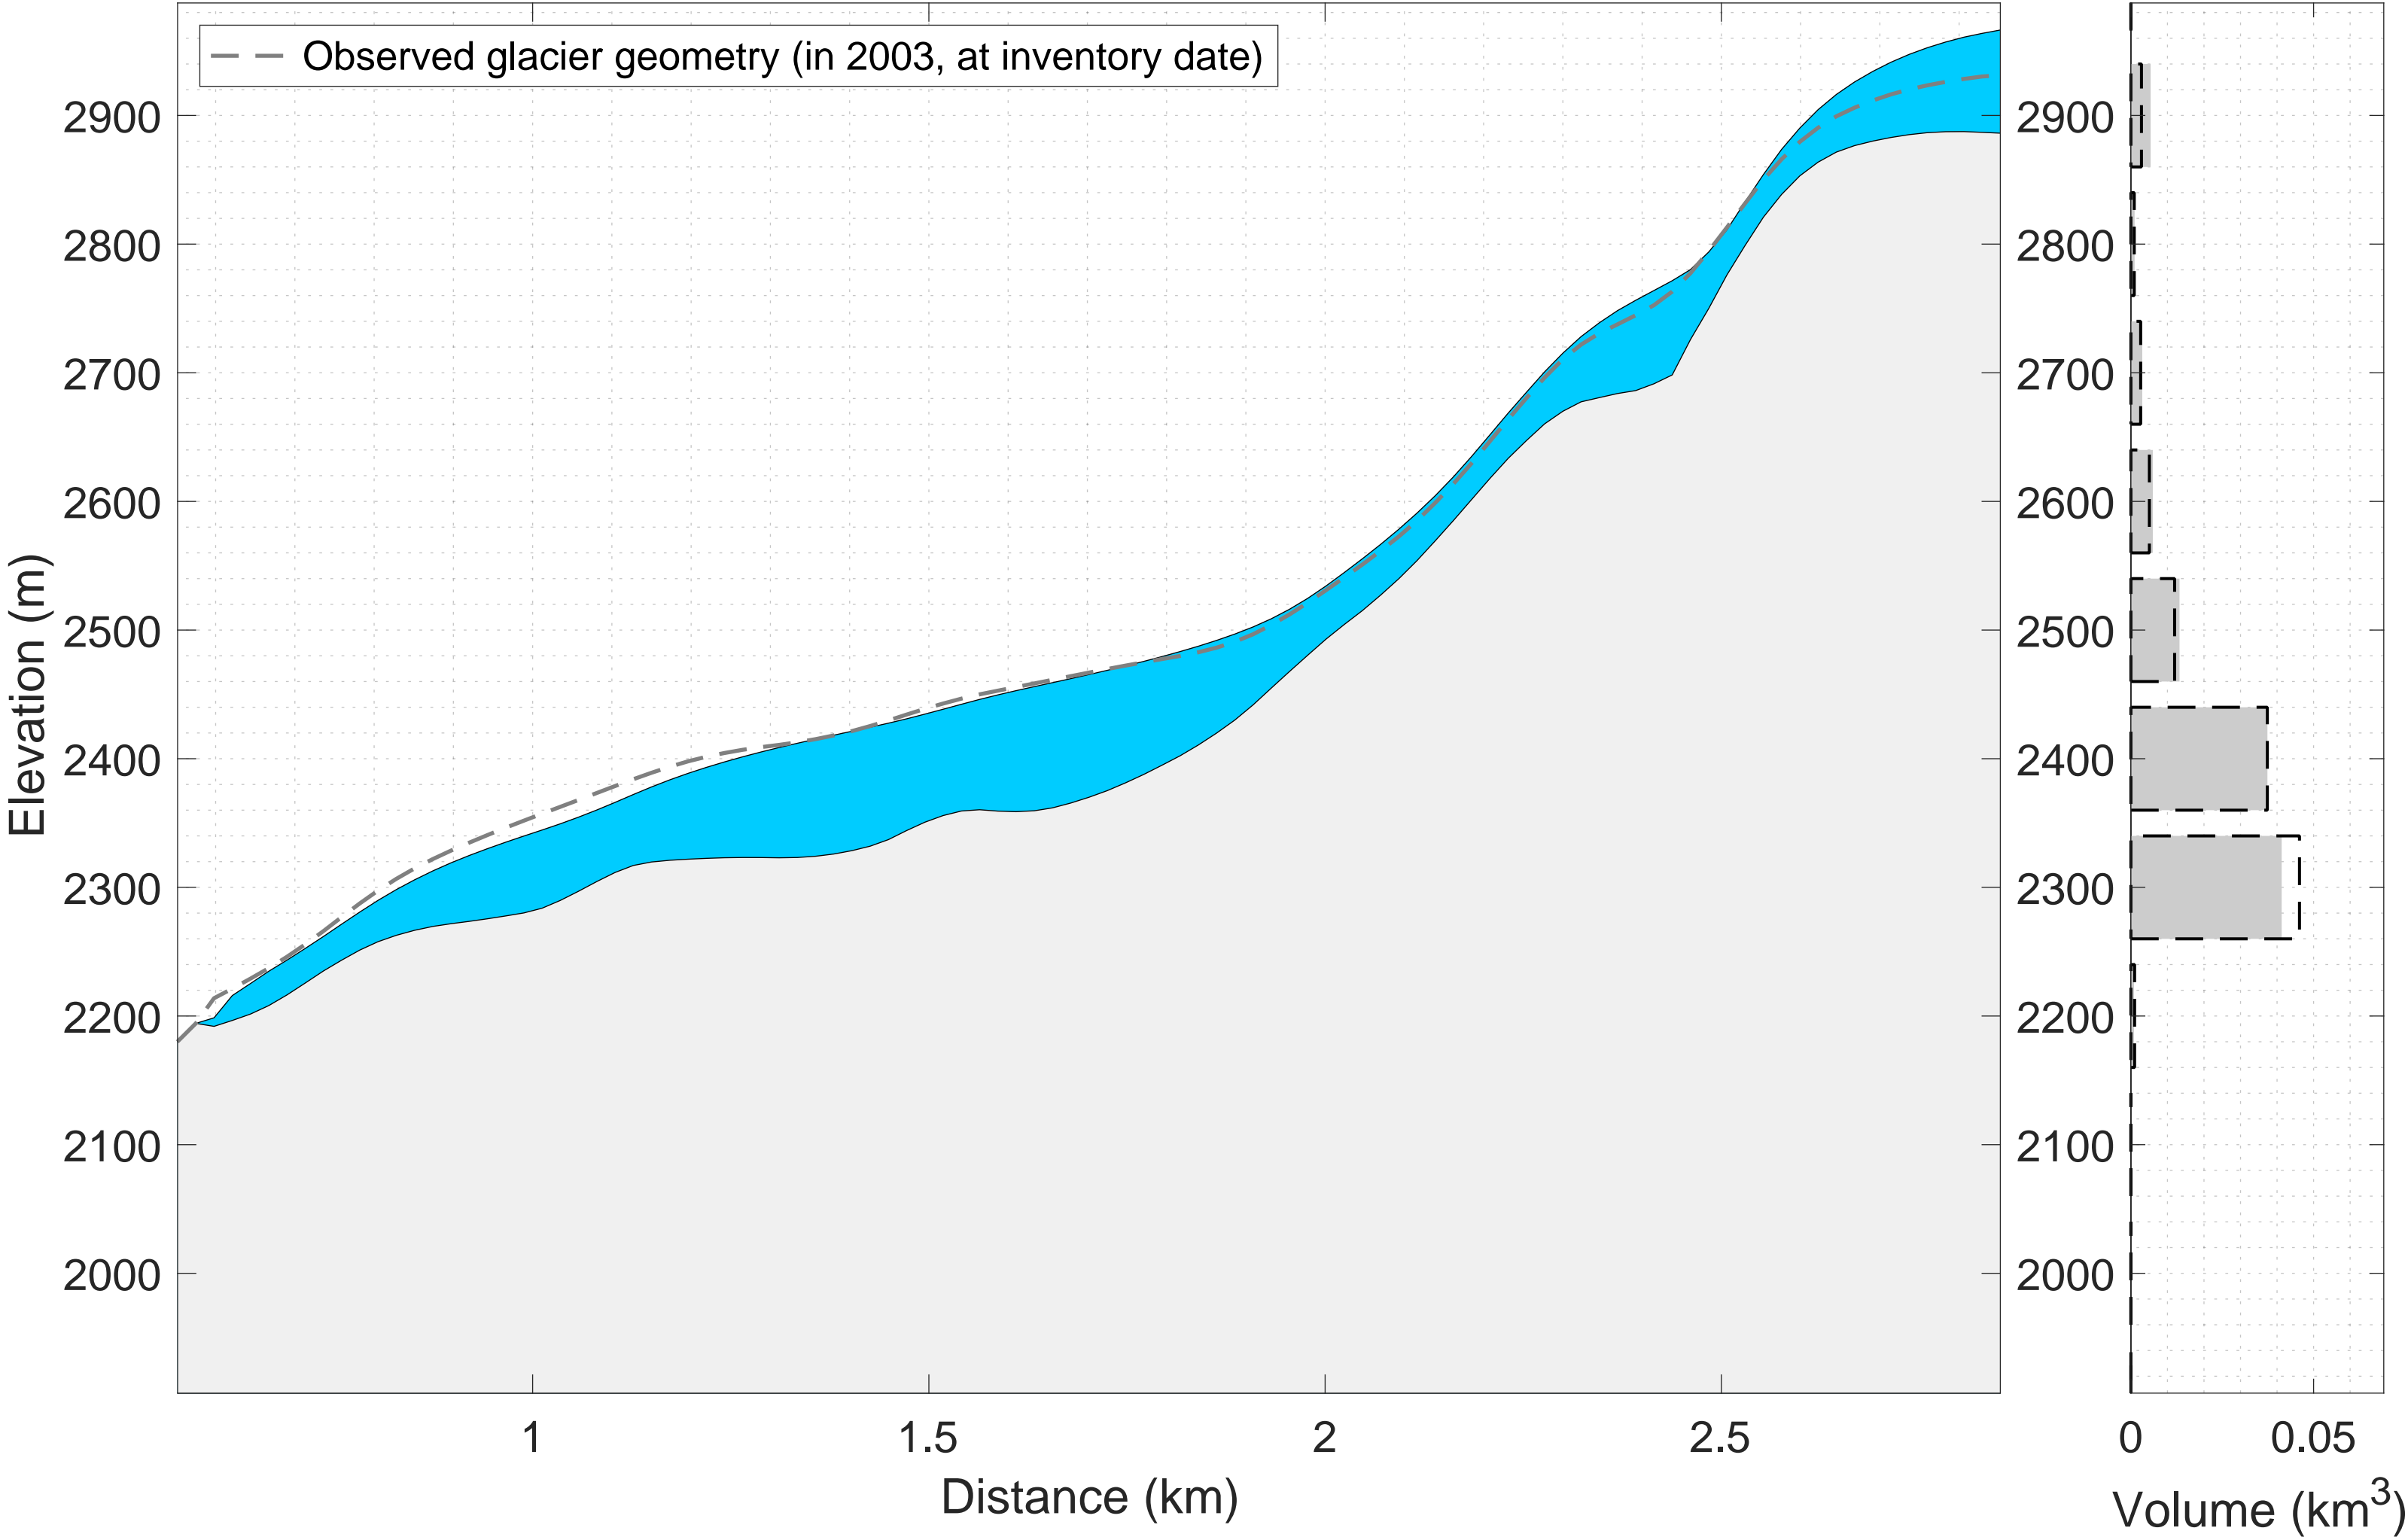

Supplement: Supplementary file 285 [file tc-13-1125-2019-supplement.zip]

**Modelled geometry (Glacier ID = 03312;  $A = 1.6487\text{e-}16 \text{ Pa}^{-3} \text{ a}^{-1}$ ;  $dx = 13 \text{ m}$ )**

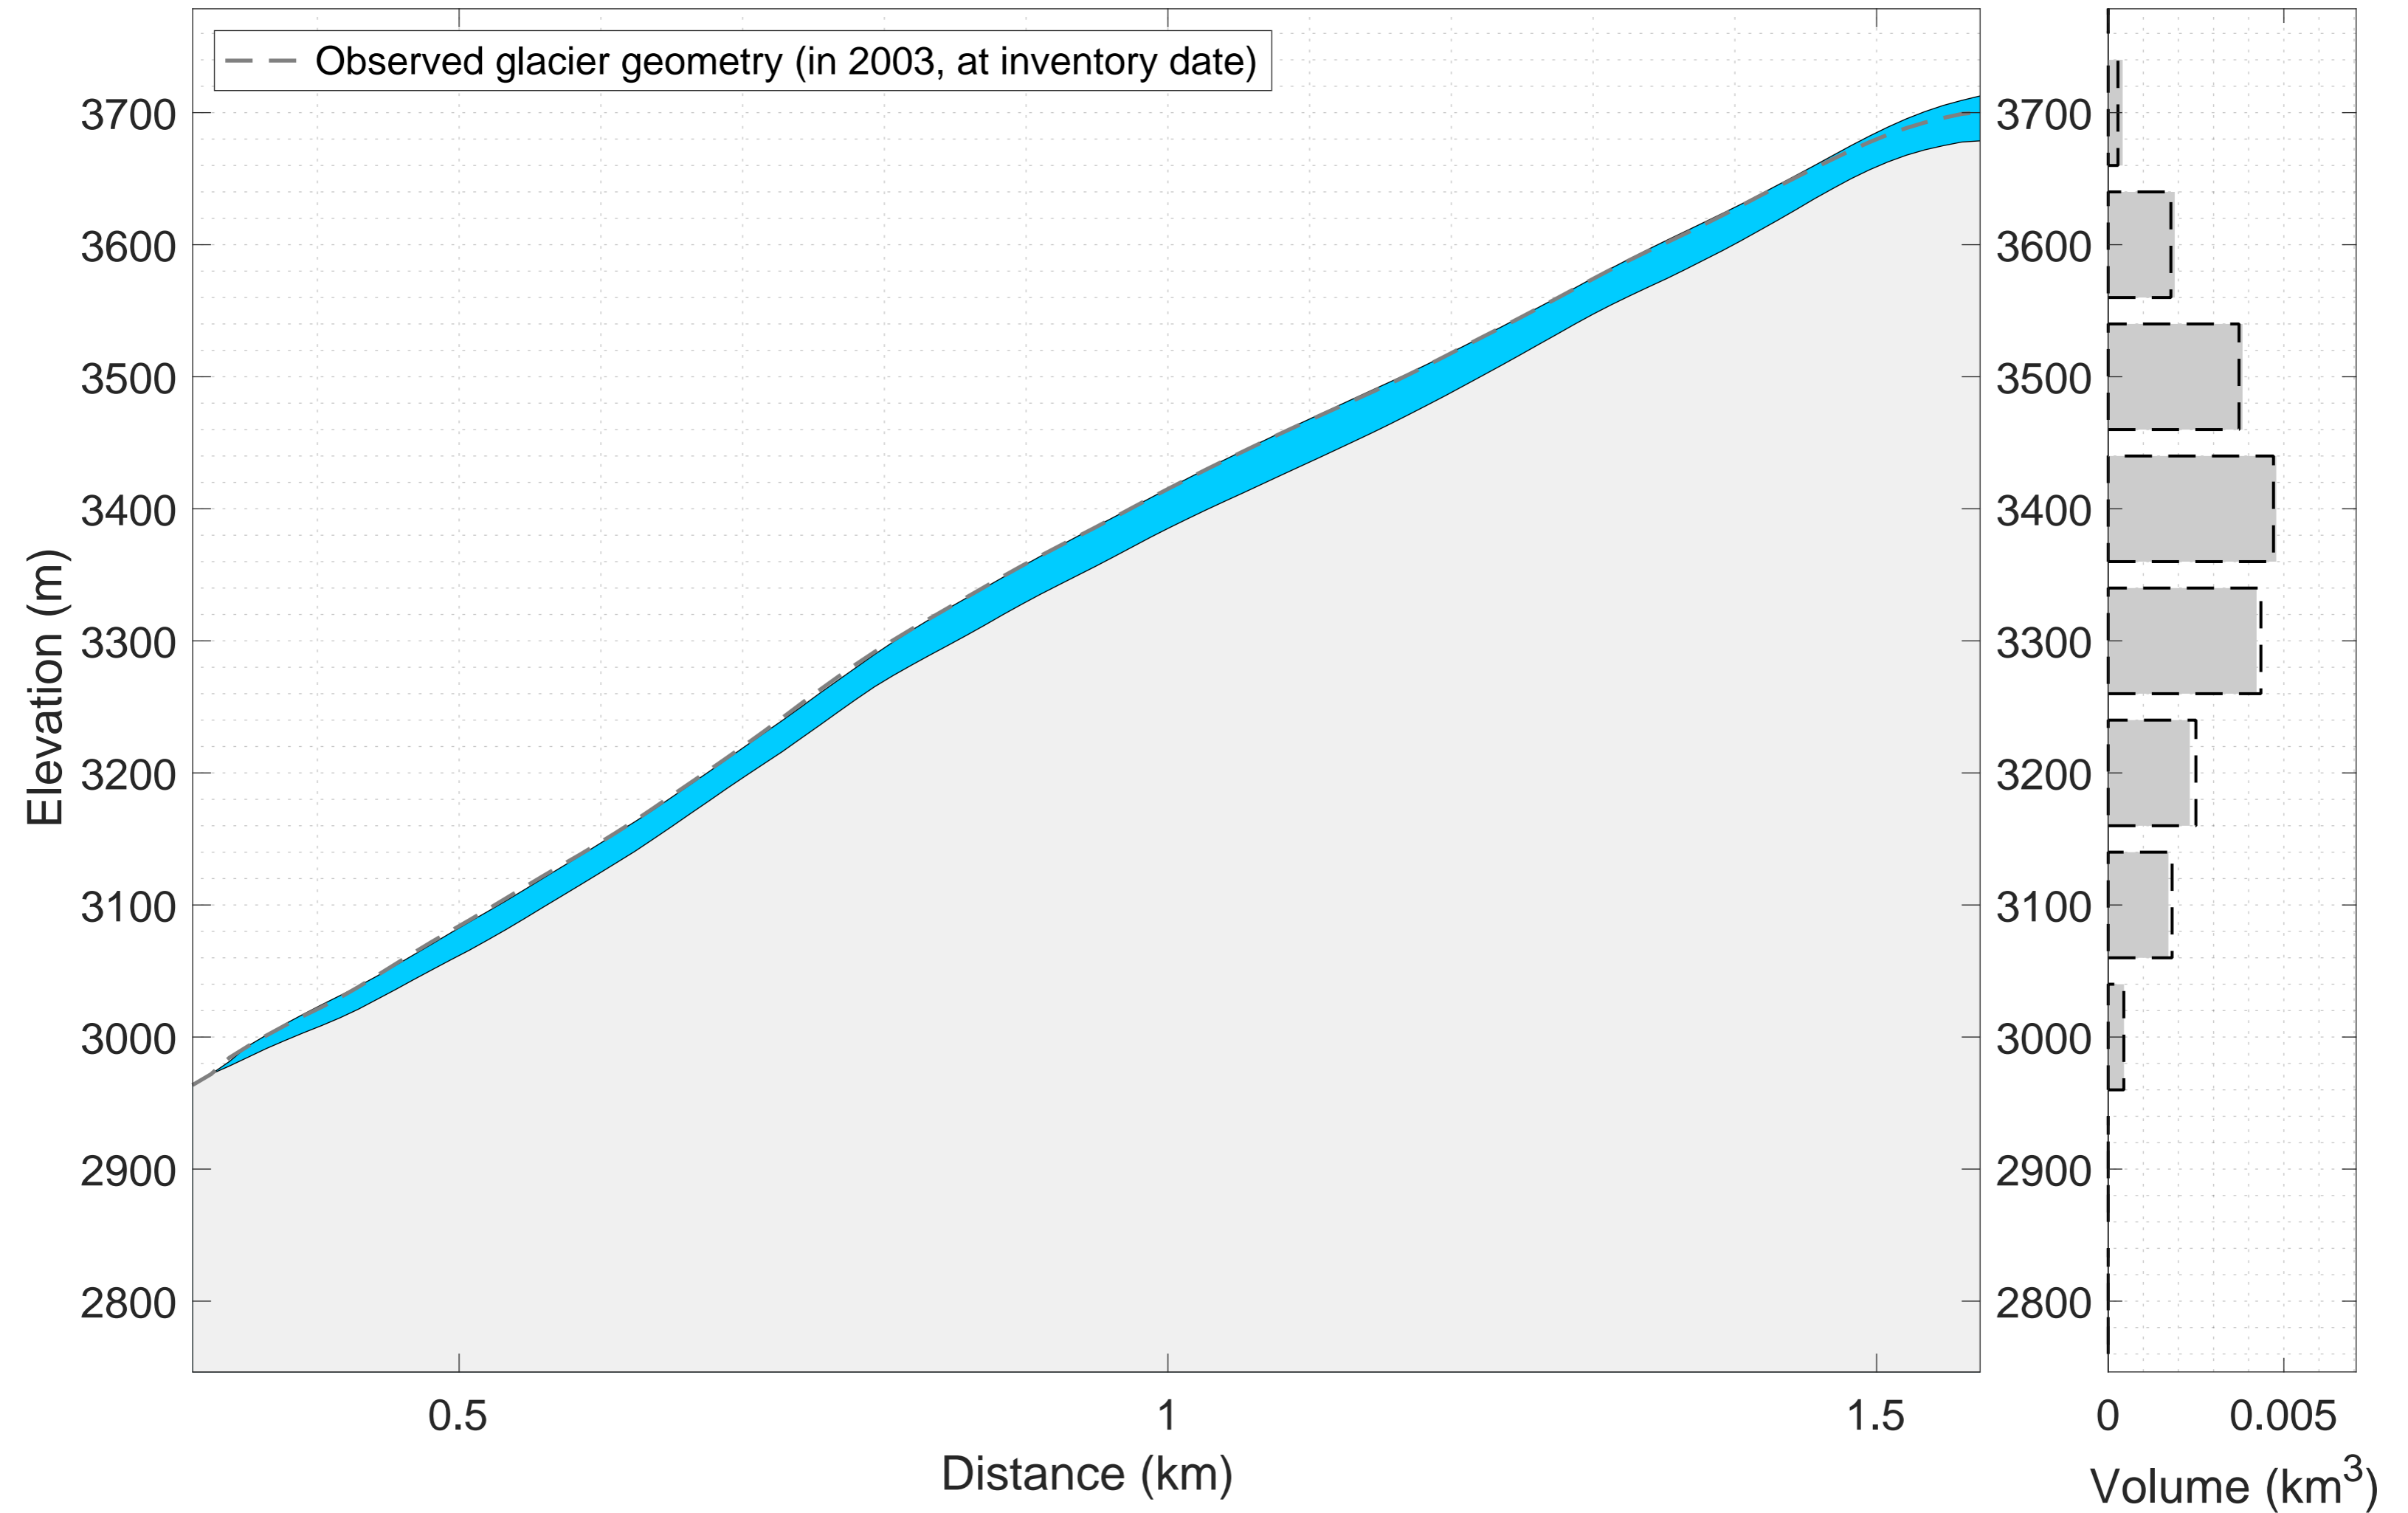

Supplement: Supplementary file 286 [file tc-13-1125-2019-supplement.zip]

**Modelled geometry (Glacier ID = 00872;  $A = 1.2037\text{e-}16 \text{ Pa}^{-3} \text{ a}^{-1}$ ;  $dx = 70 \text{ m}$ )**

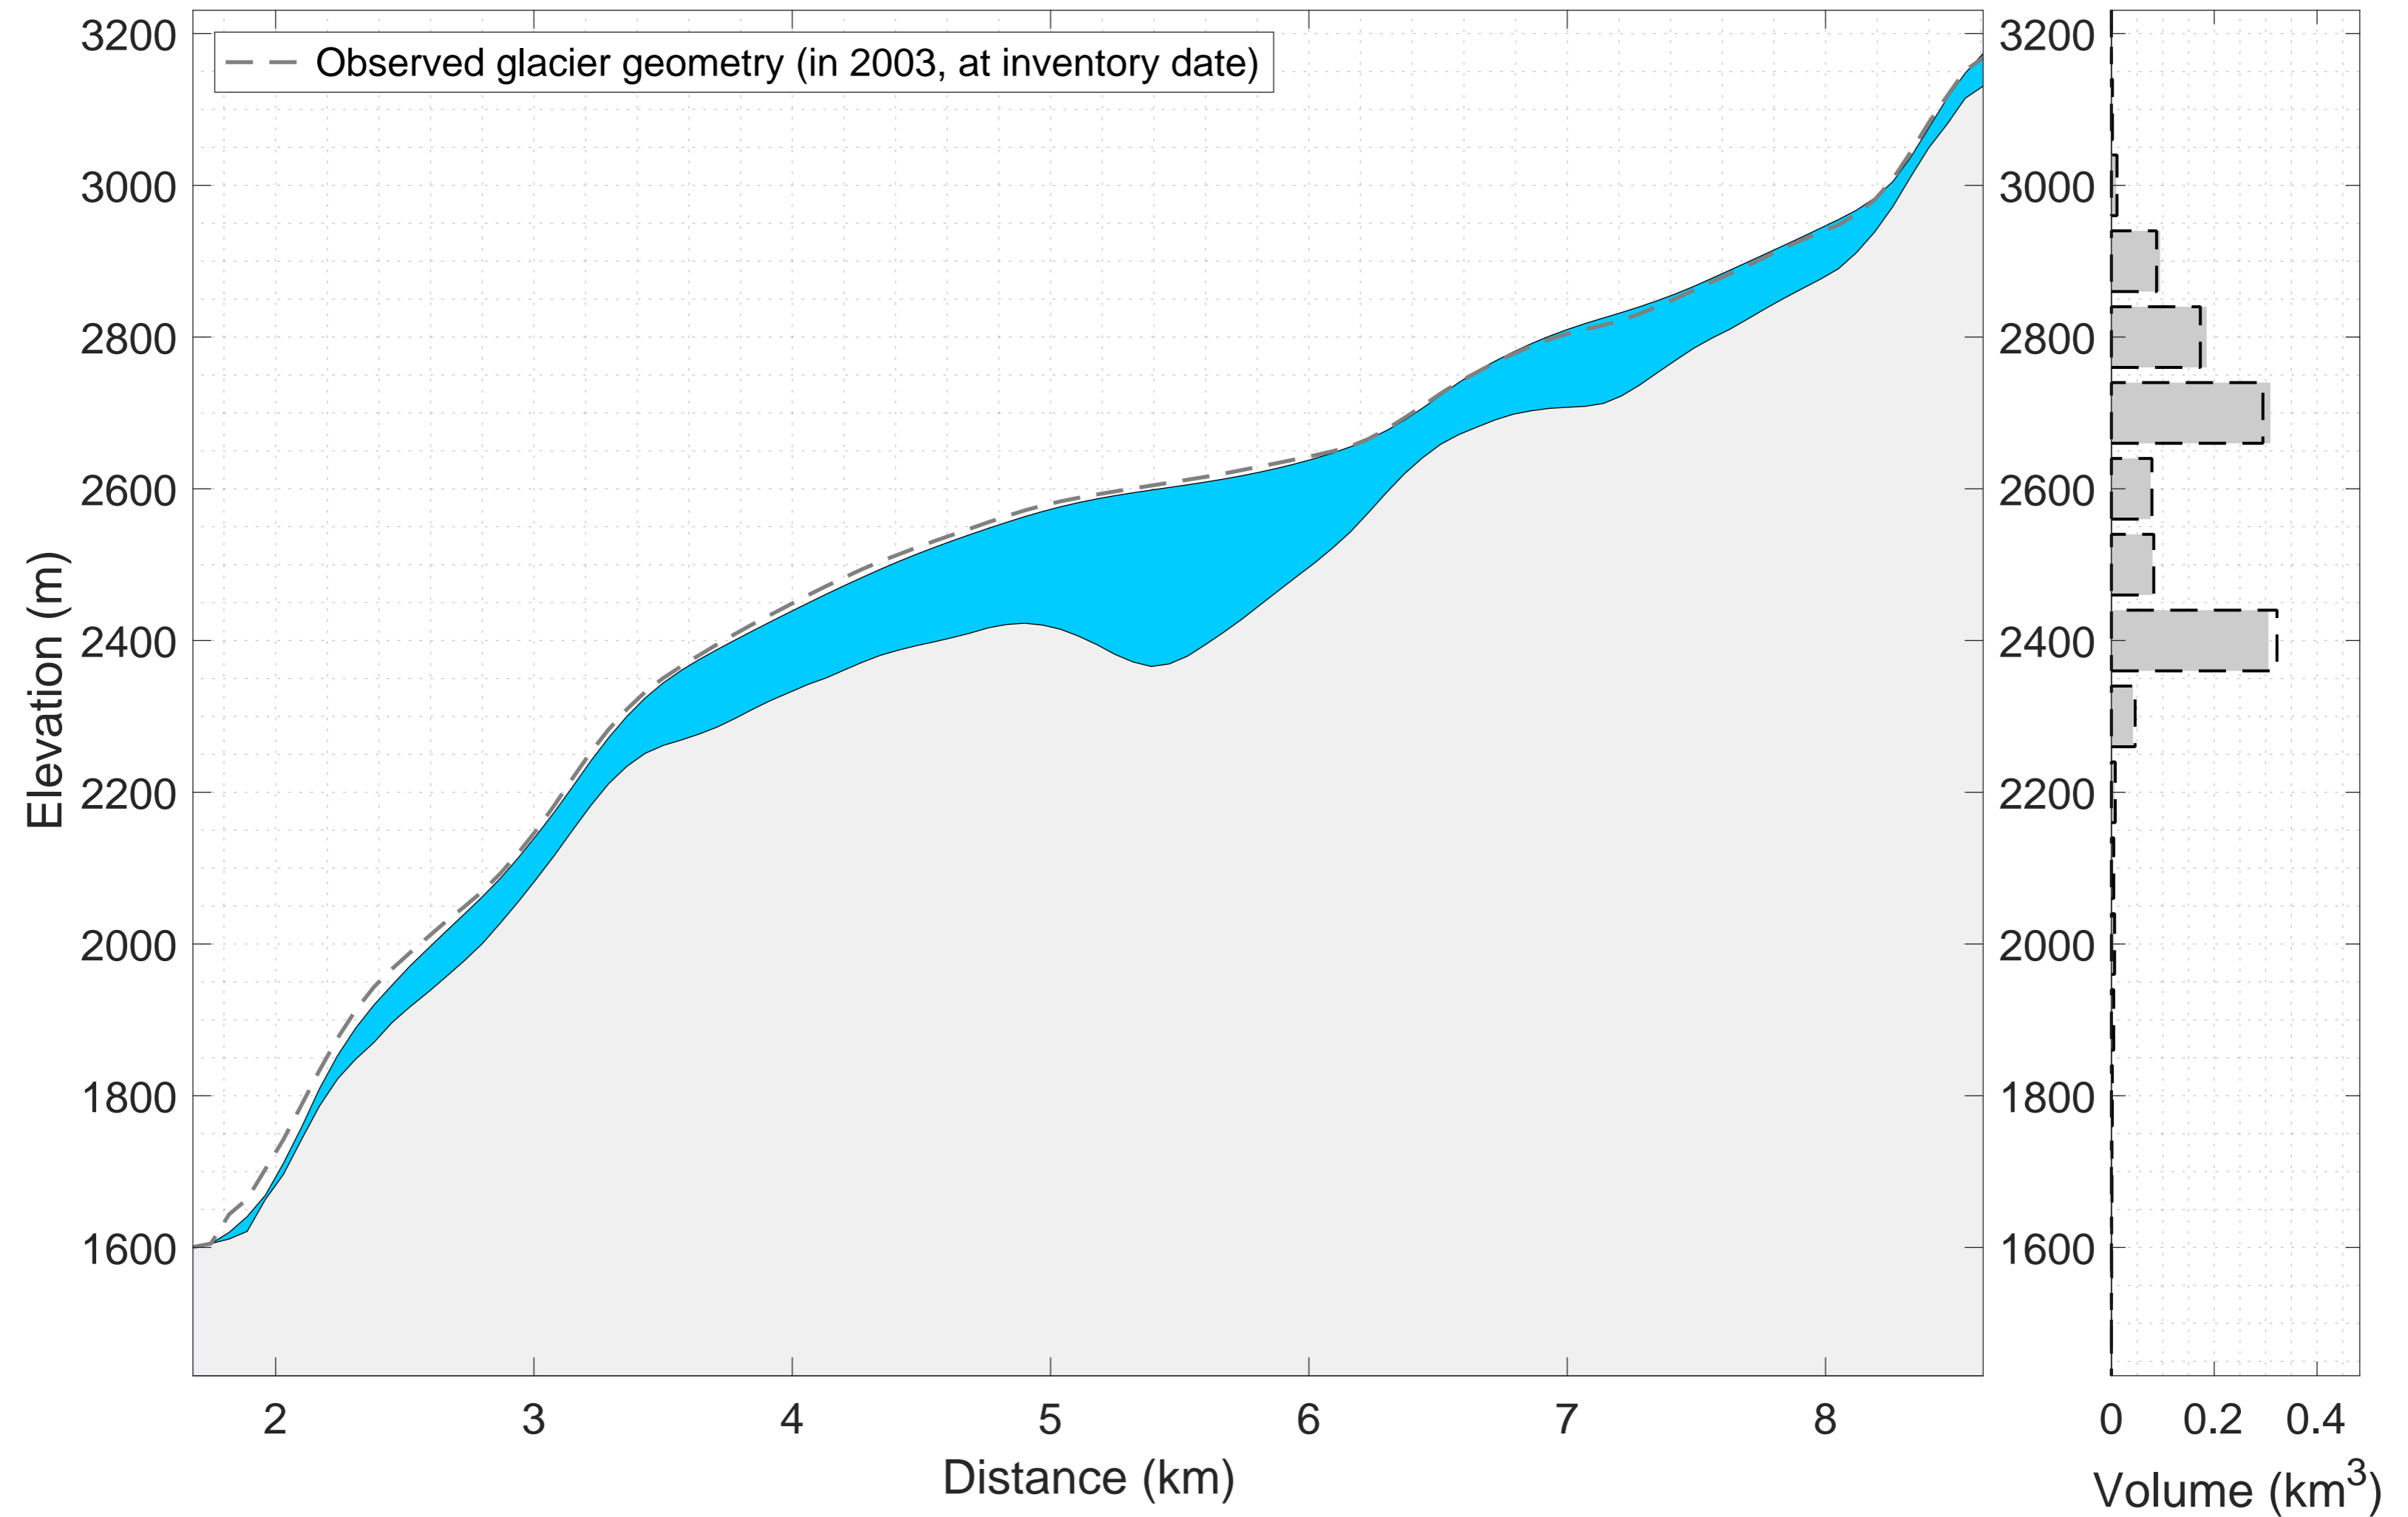

Supplement: Supplementary file 287 [file tc-13-1125-2019-supplement.zip]

**Modelled geometry (Glacier ID = 02385;  $A = 1.641\text{e-}16 \text{ Pa}^{-3} \text{ a}^{-1}$ ;  $dx = 18 \text{ m}$ )**

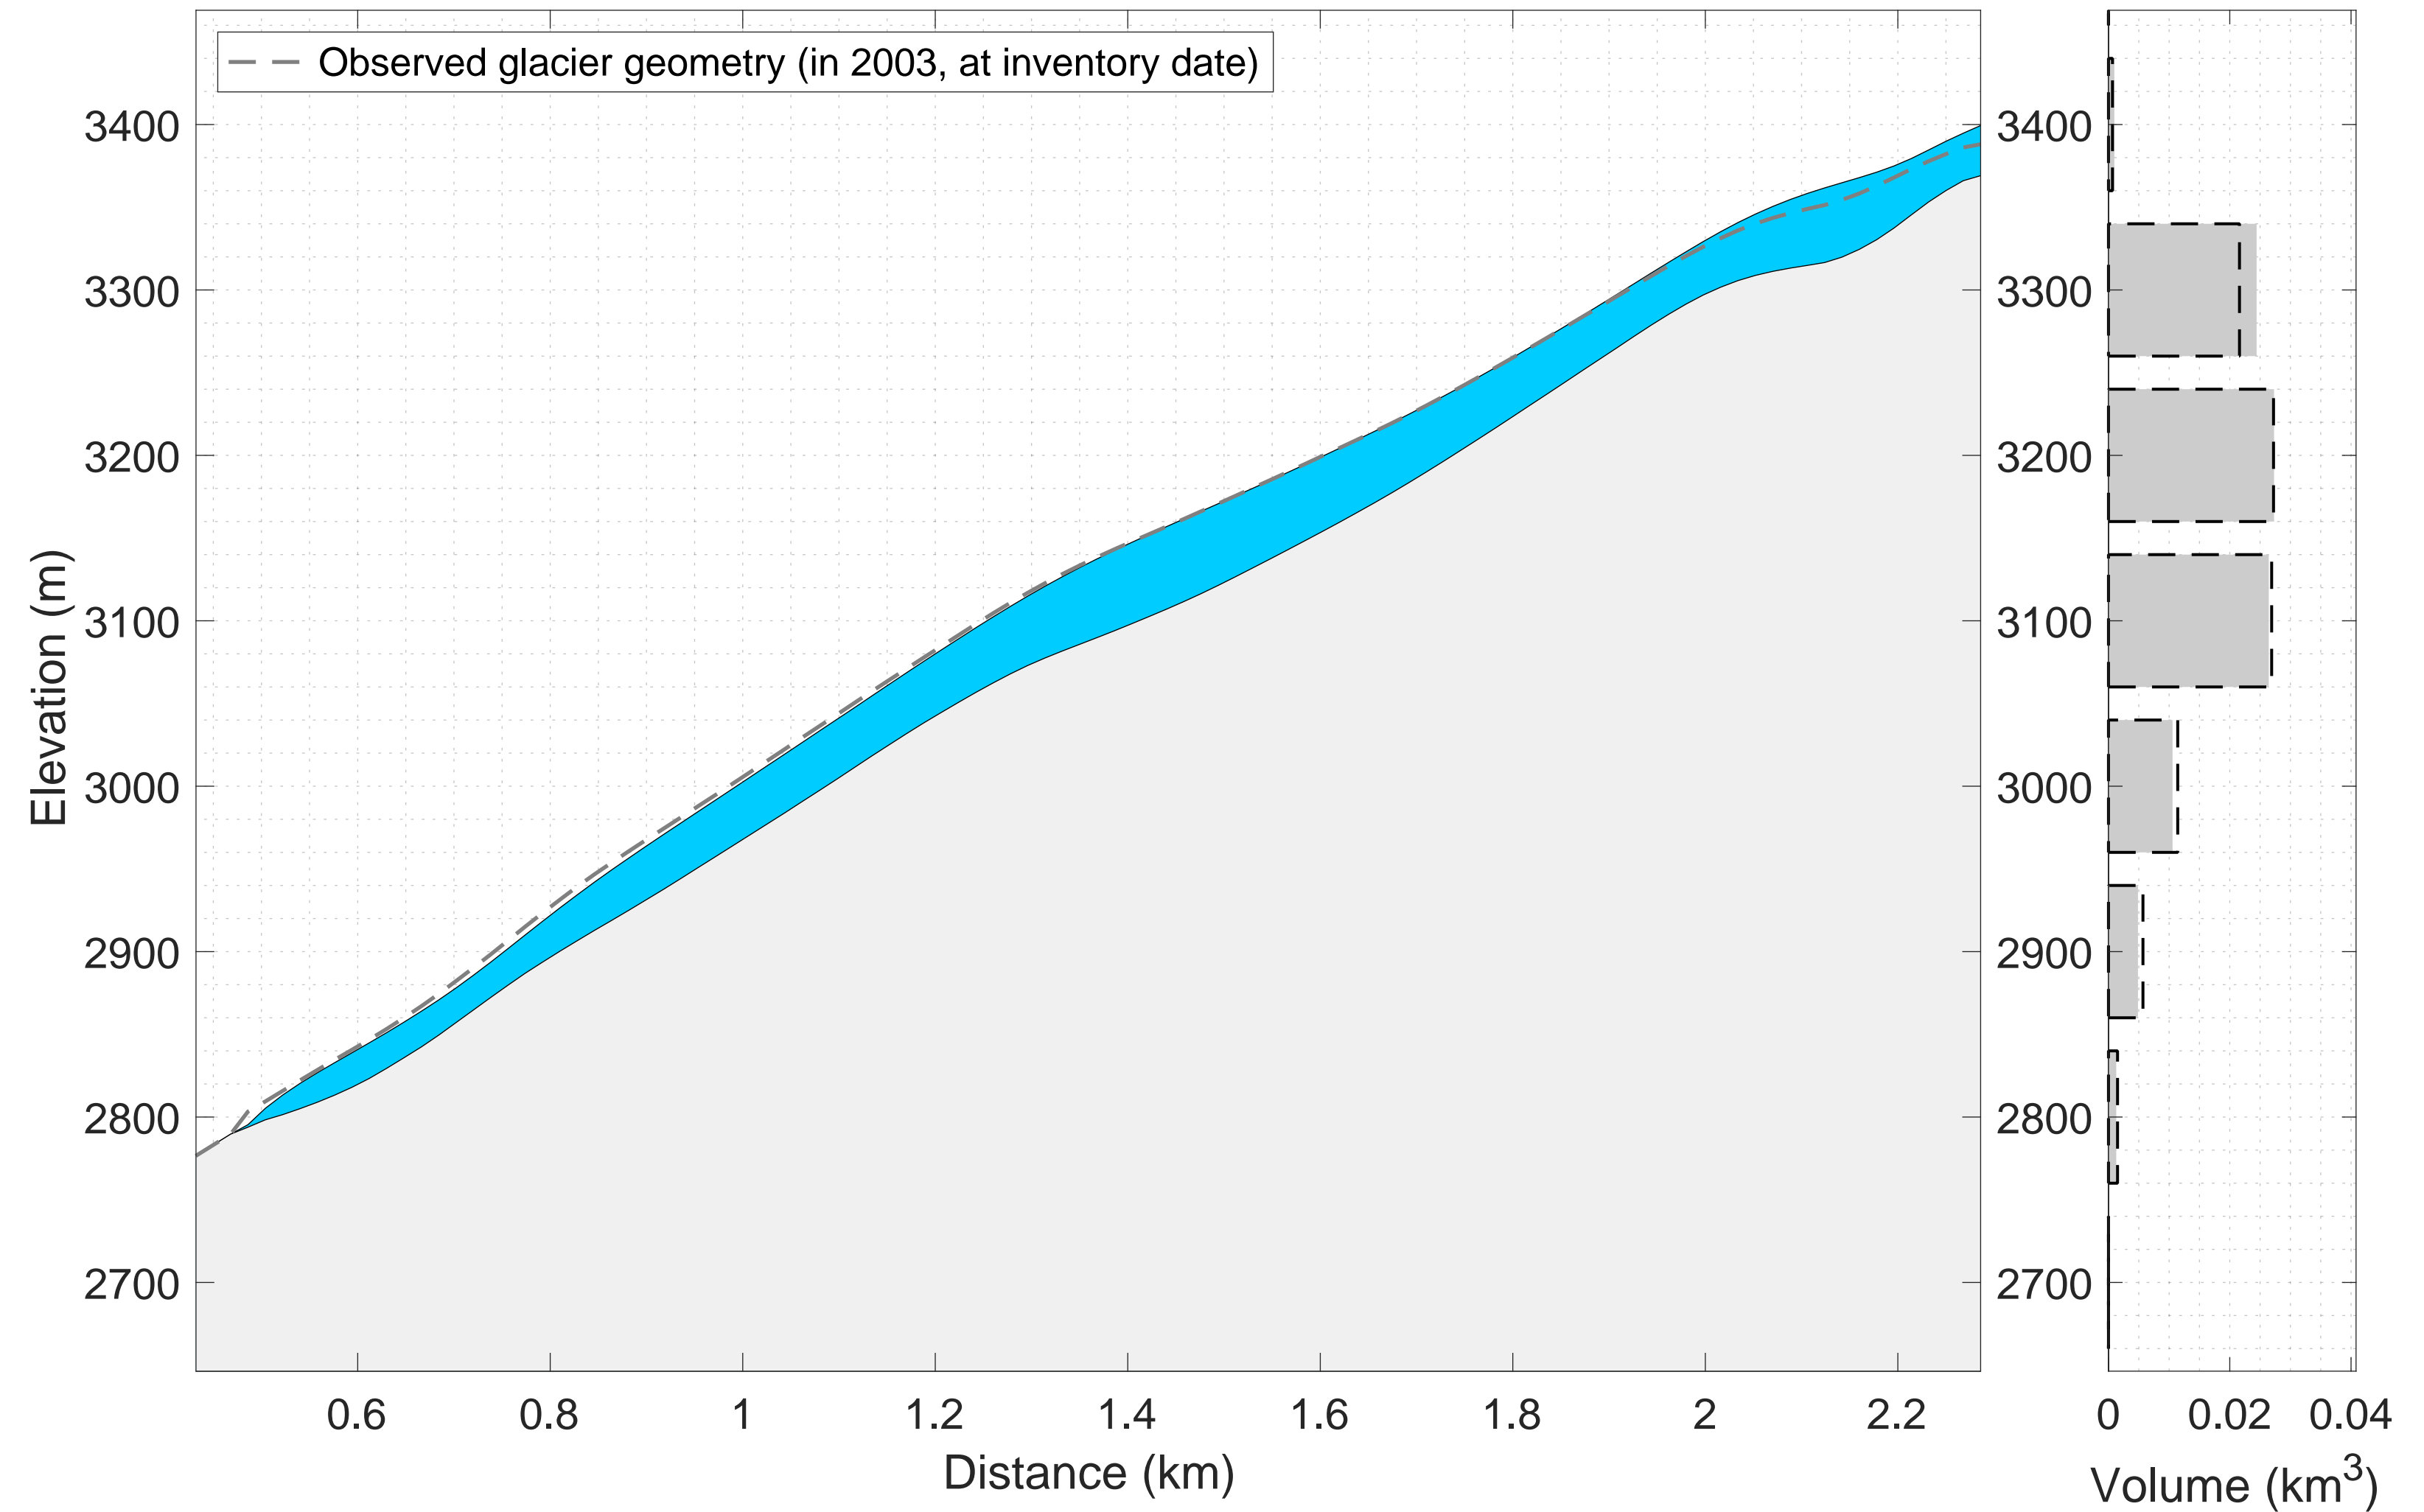

Supplement: Supplementary file 288 [file tc-13-1125-2019-supplement.zip]

**Modelled geometry (Glacier ID = 00940;  $A = 6.7329\text{e-}17 \text{ Pa}^{-3} \text{ a}^{-1}$ ;  $dx = 14 \text{ m}$ )**

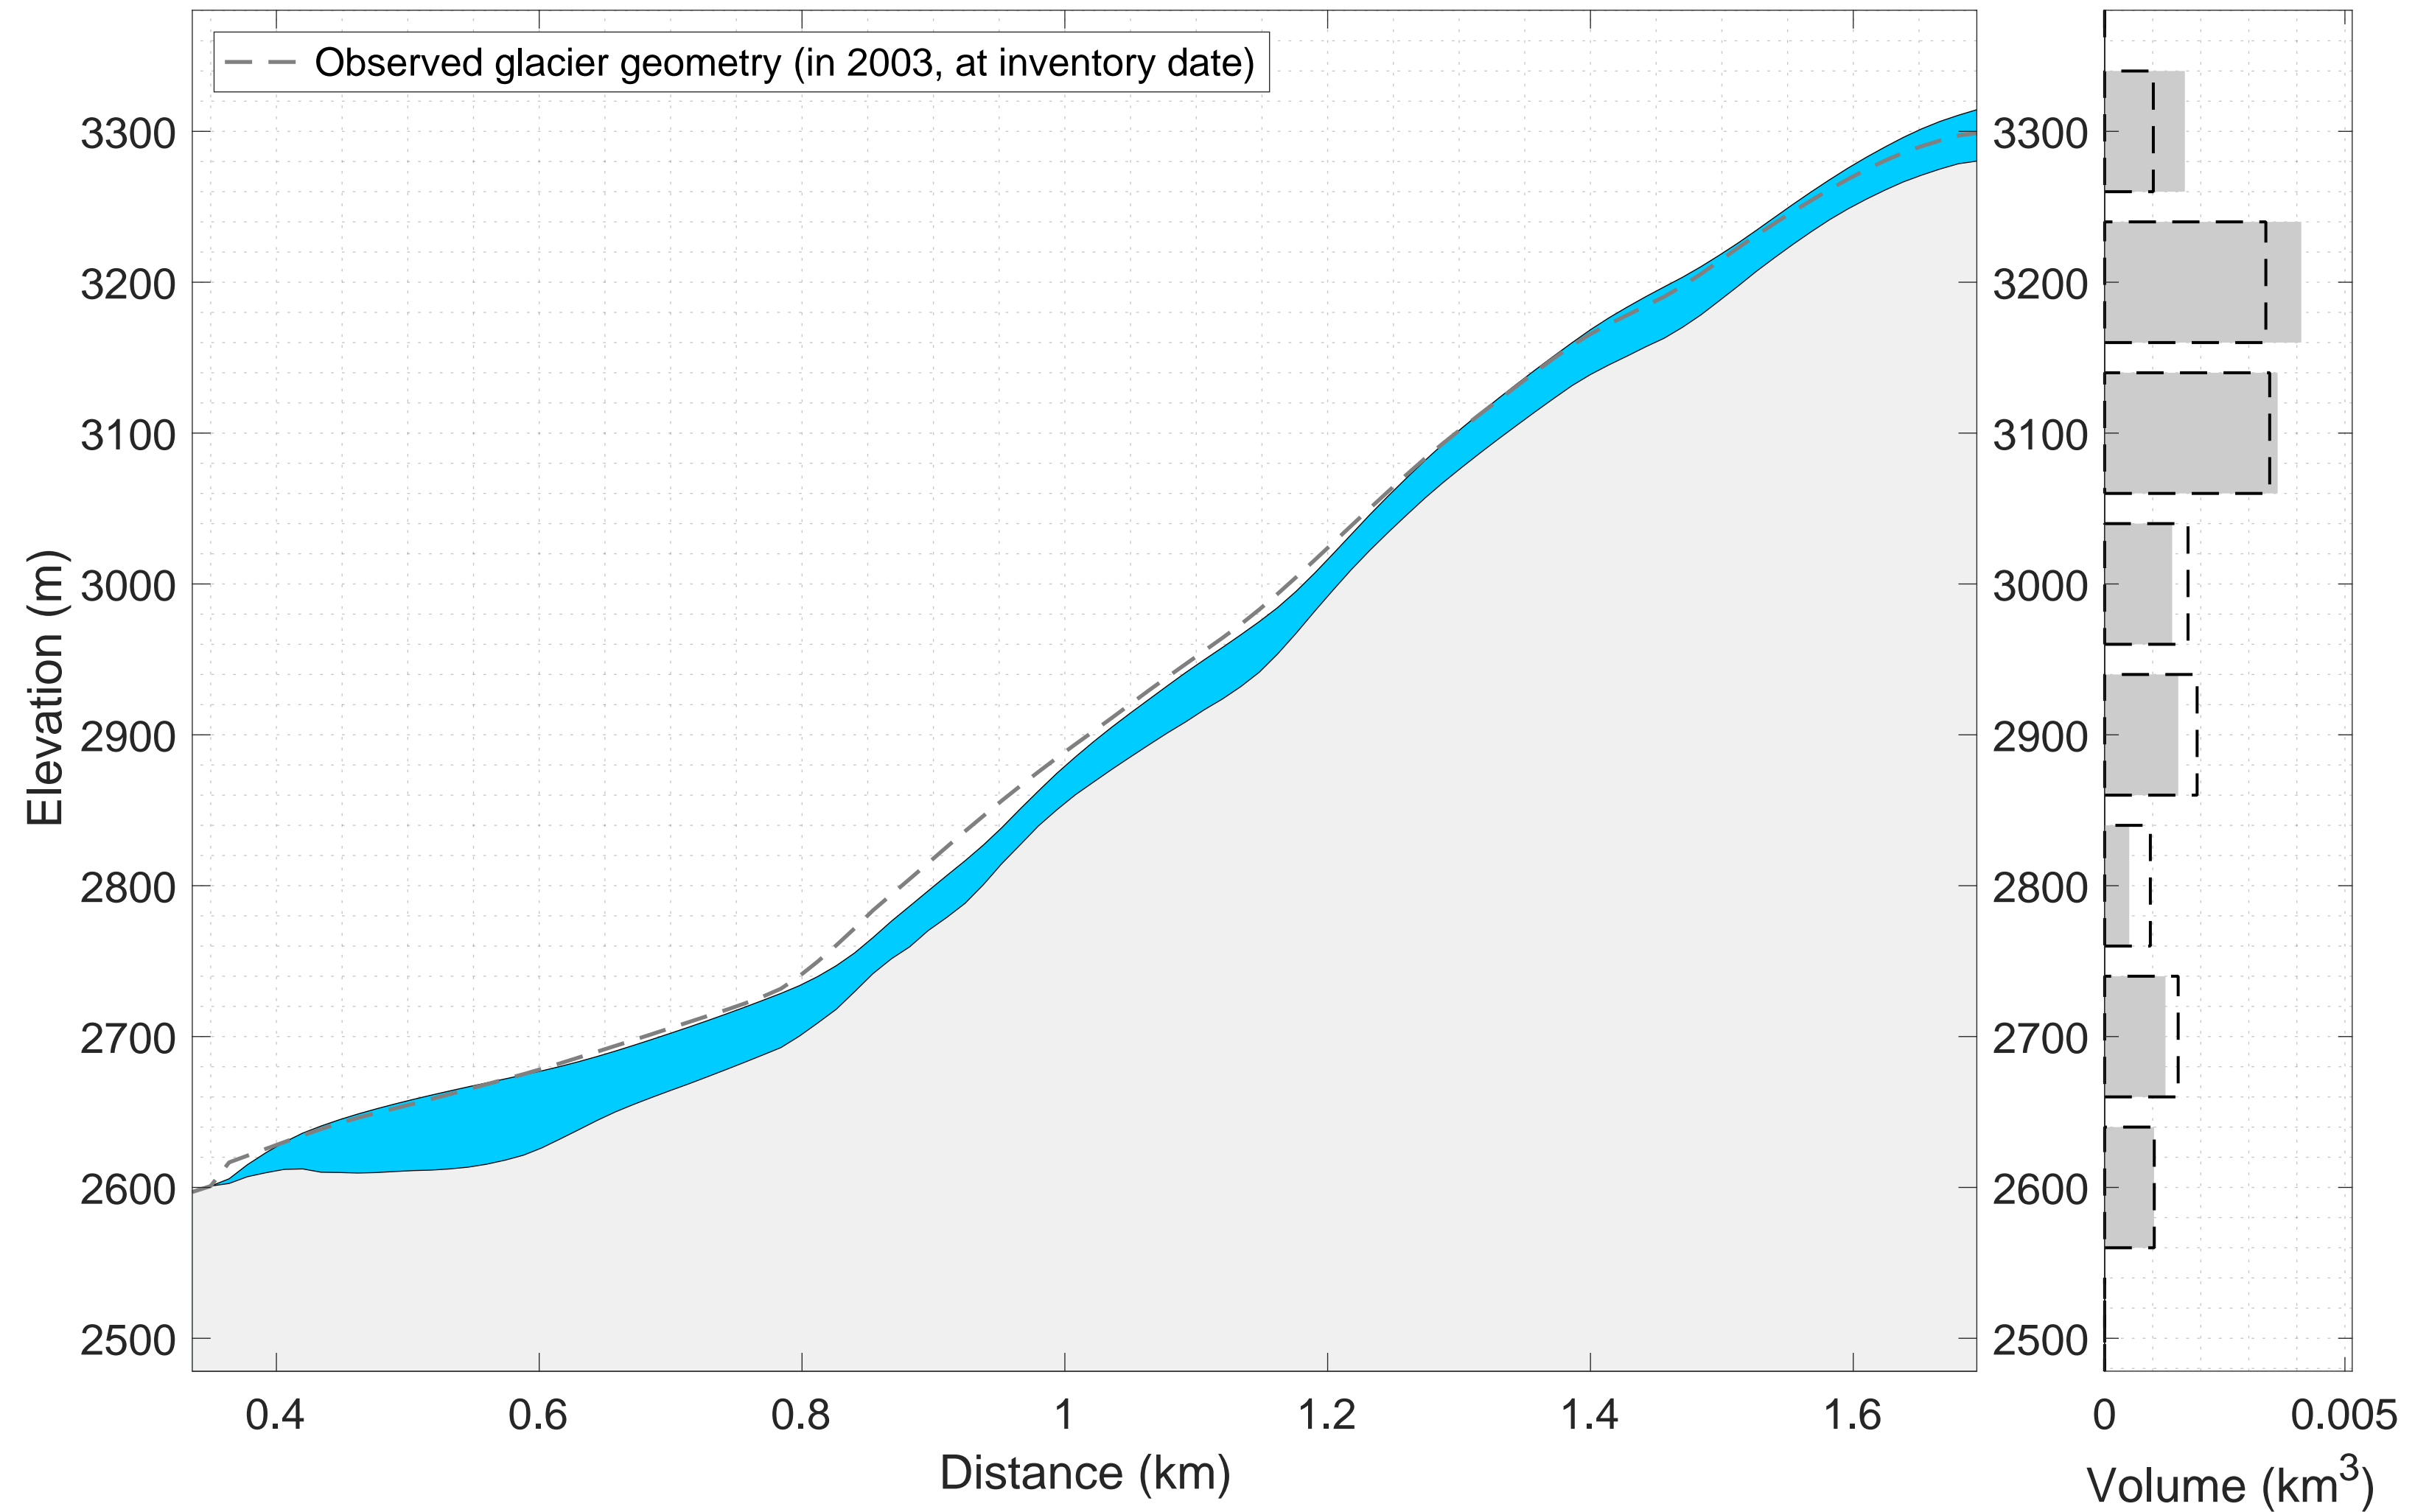

Supplement: Supplementary file 289 [file tc-13-1125-2019-supplement.zip]

**Modelled geometry (Glacier ID = 01631;  $A = 5.3785\text{e-}17 \text{ Pa}^{-3} \text{ a}^{-1}$ ;  $dx = 24 \text{ m}$ )**

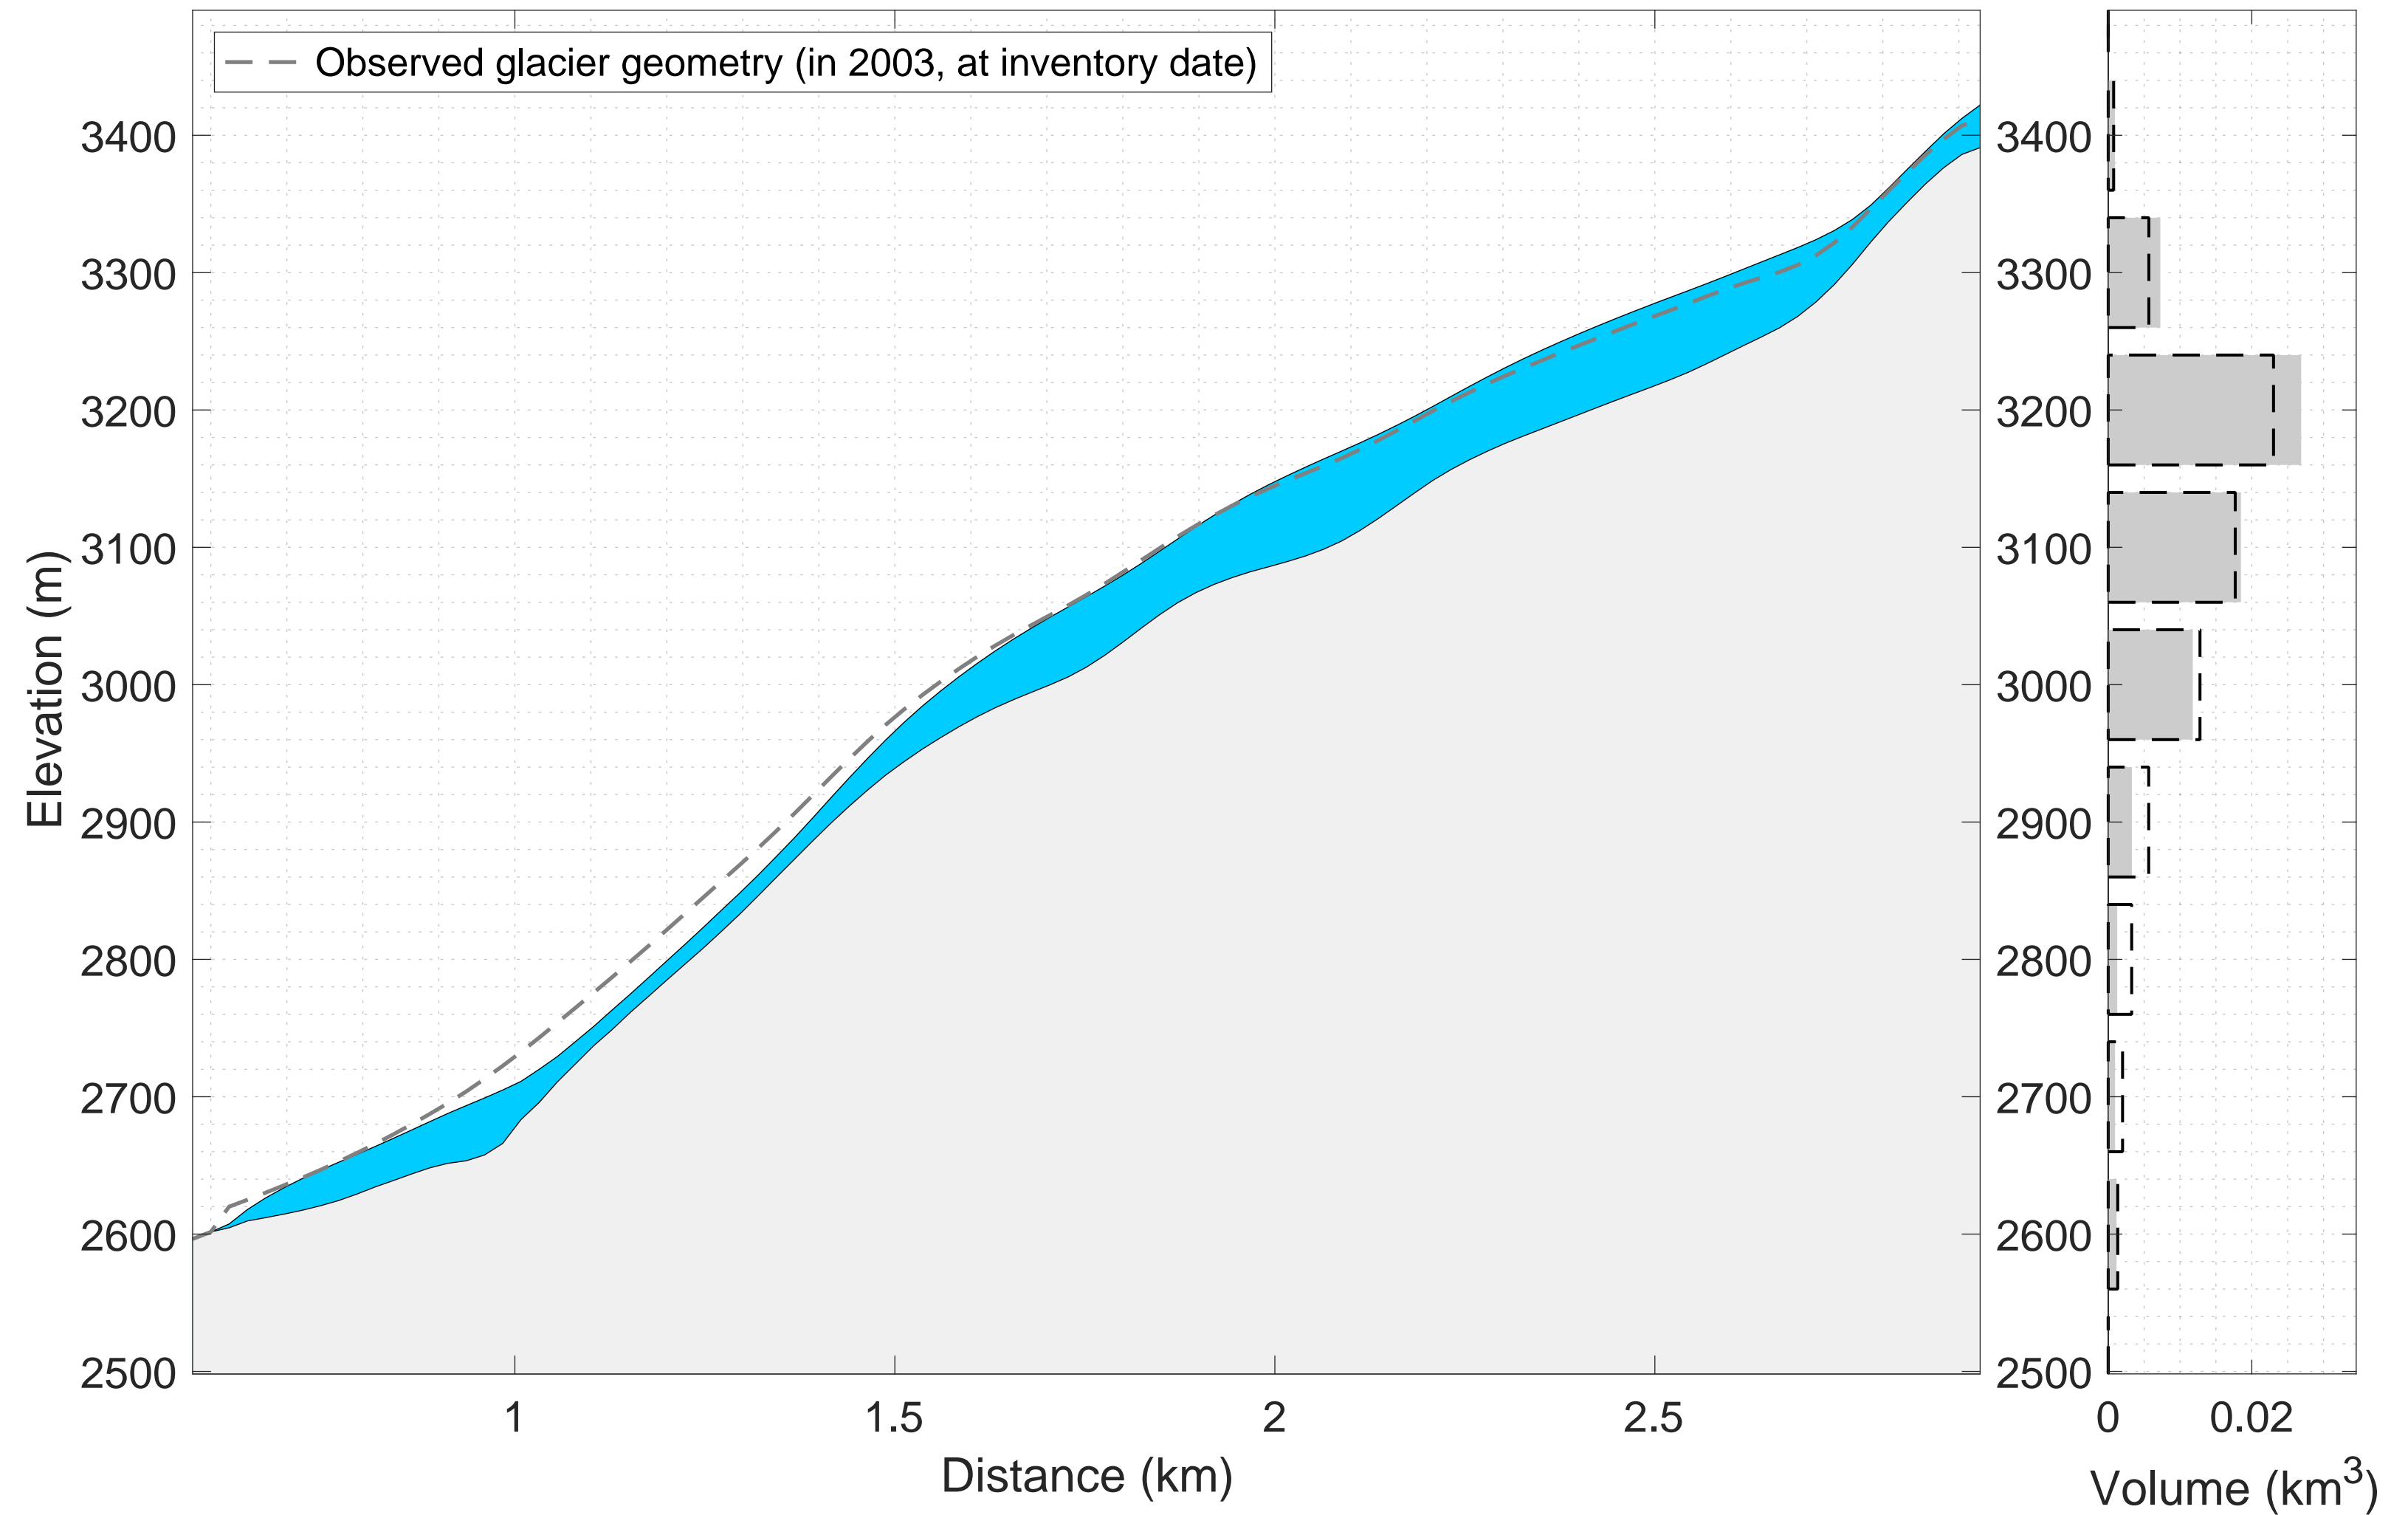

Supplement: Supplementary file 290 [file tc-13-1125-2019-supplement.zip]

**Modelled geometry (Glacier ID = 02855;  $A = 1.4322\text{e-}16 \text{ Pa}^{-3} \text{ a}^{-1}$ ;  $dx = 12 \text{ m}$ )**

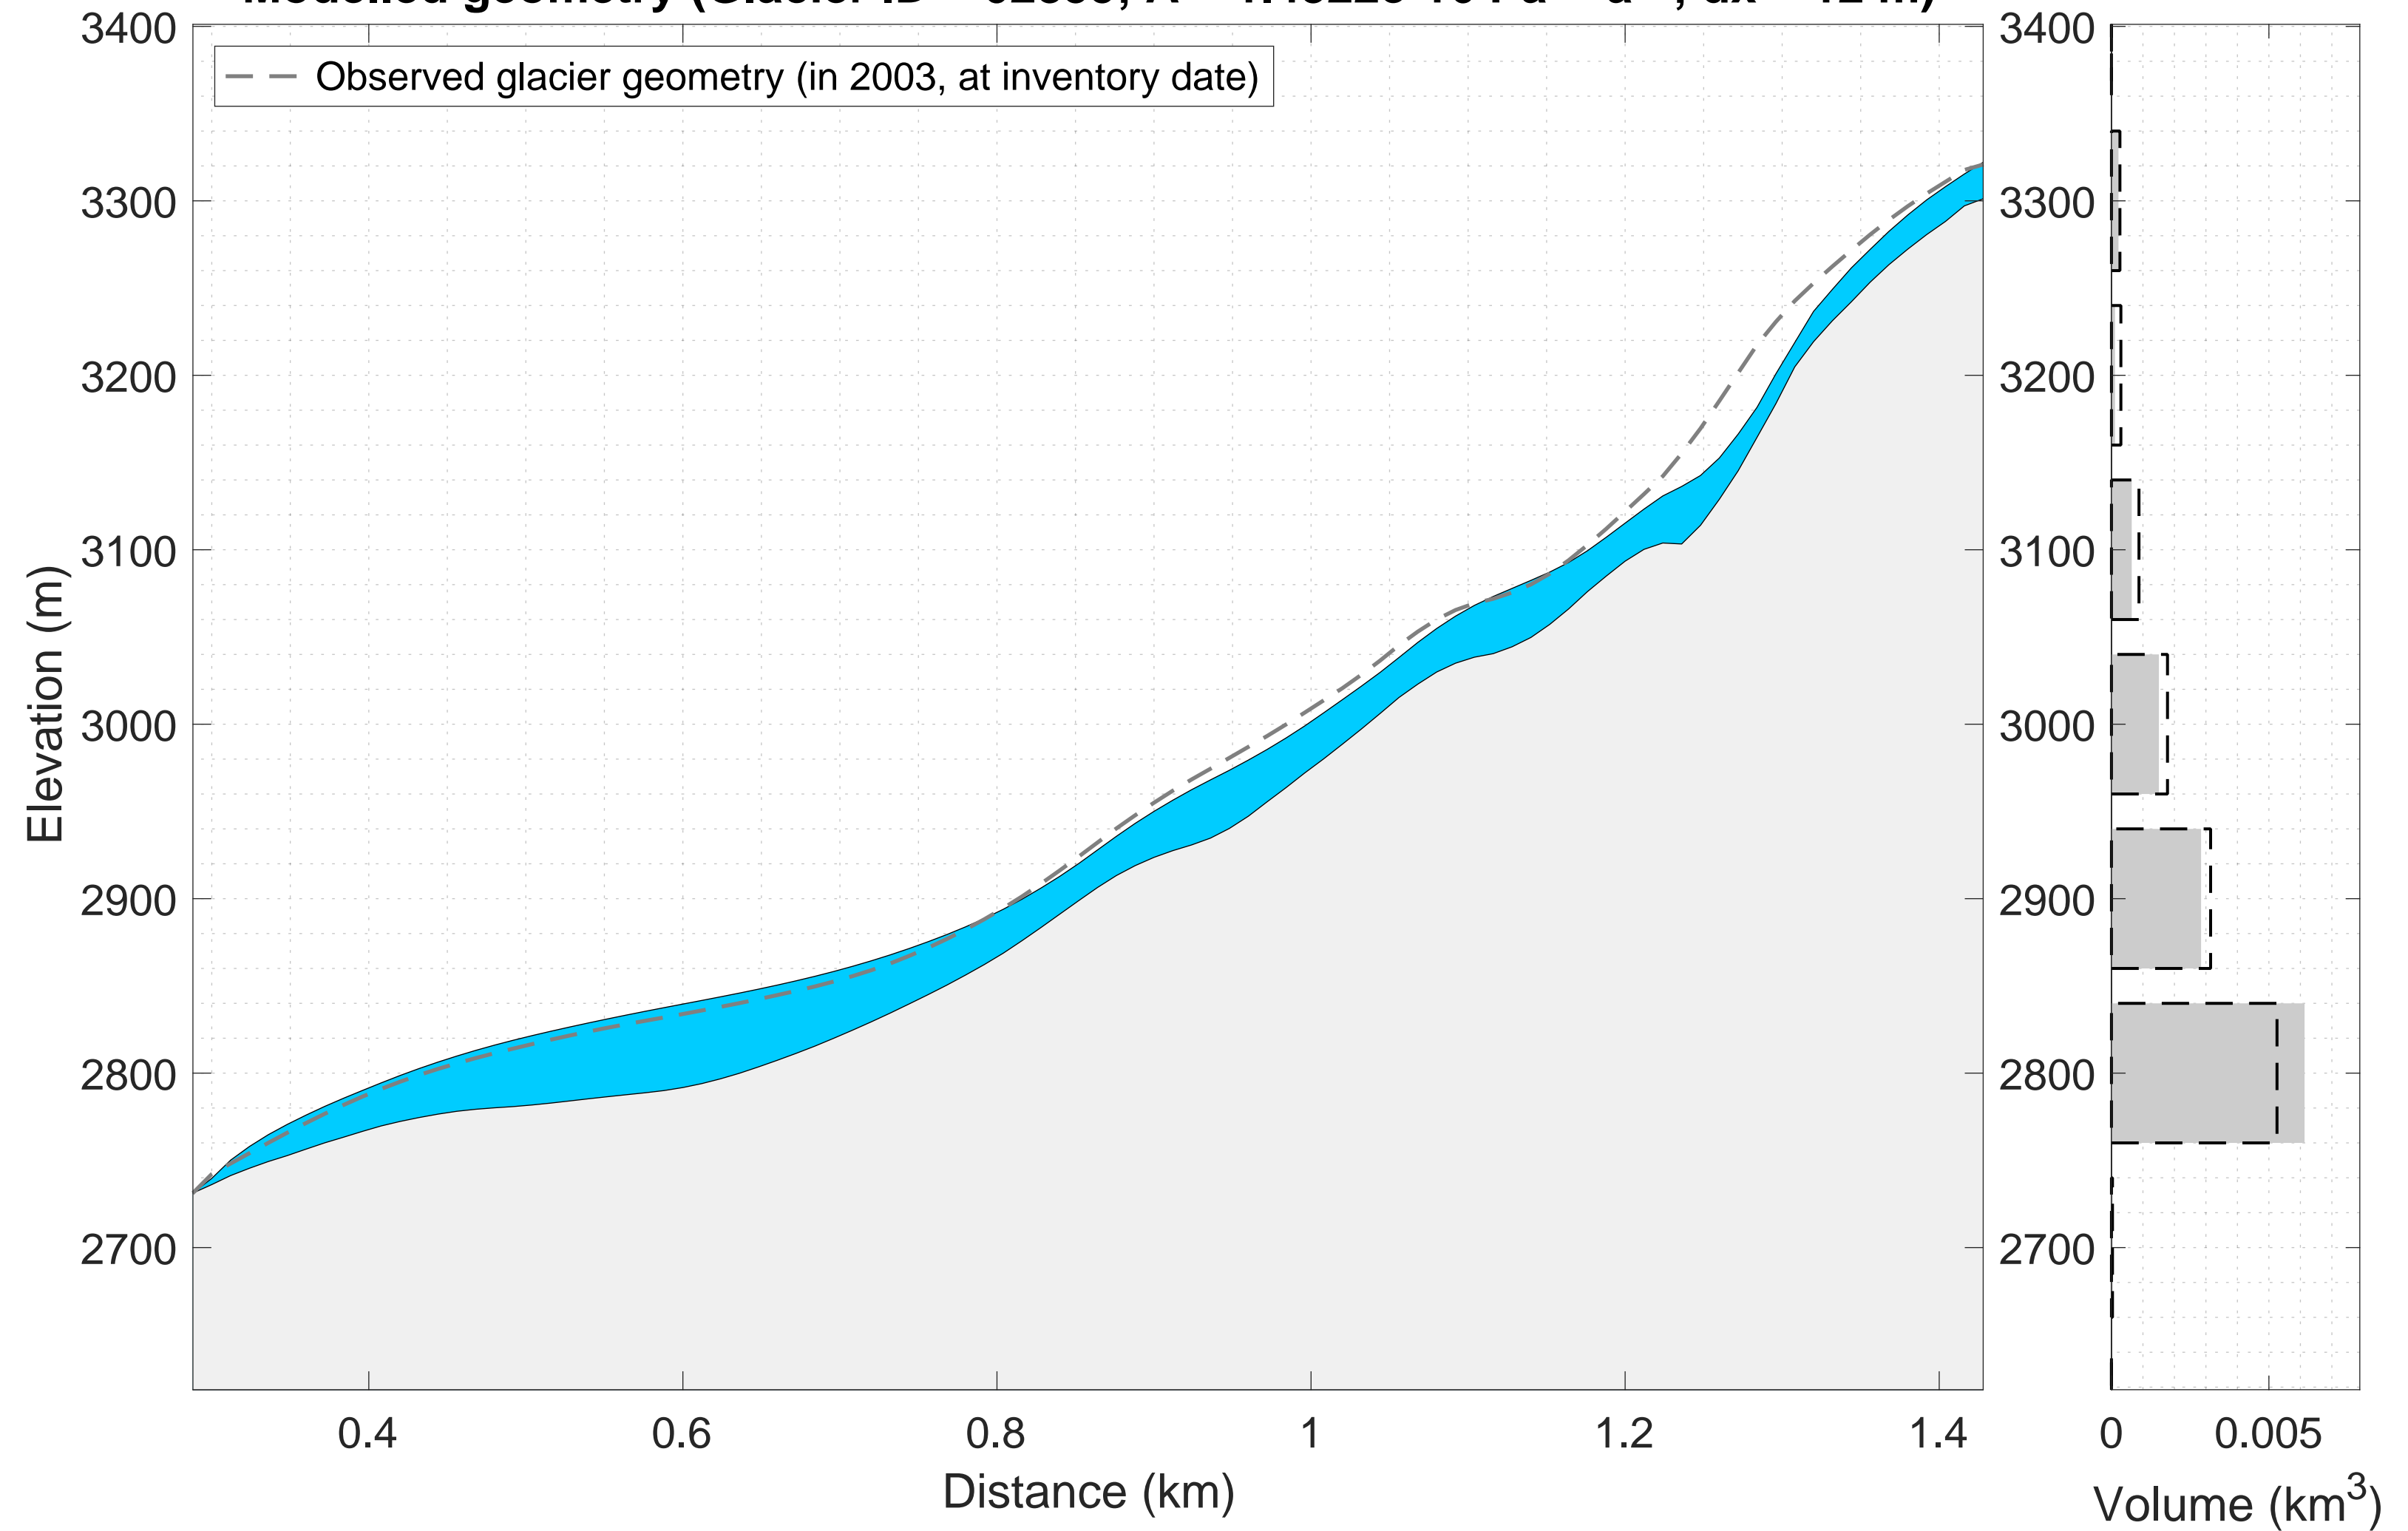

Supplement: Supplementary file 291 [file tc-13-1125-2019-supplement.zip]

**Modelled geometry (Glacier ID = 02102;  $A = 5.8356\text{e-}17 \text{ Pa}^{-3} \text{ a}^{-1}$ ;  $dx = 11 \text{ m}$ )**

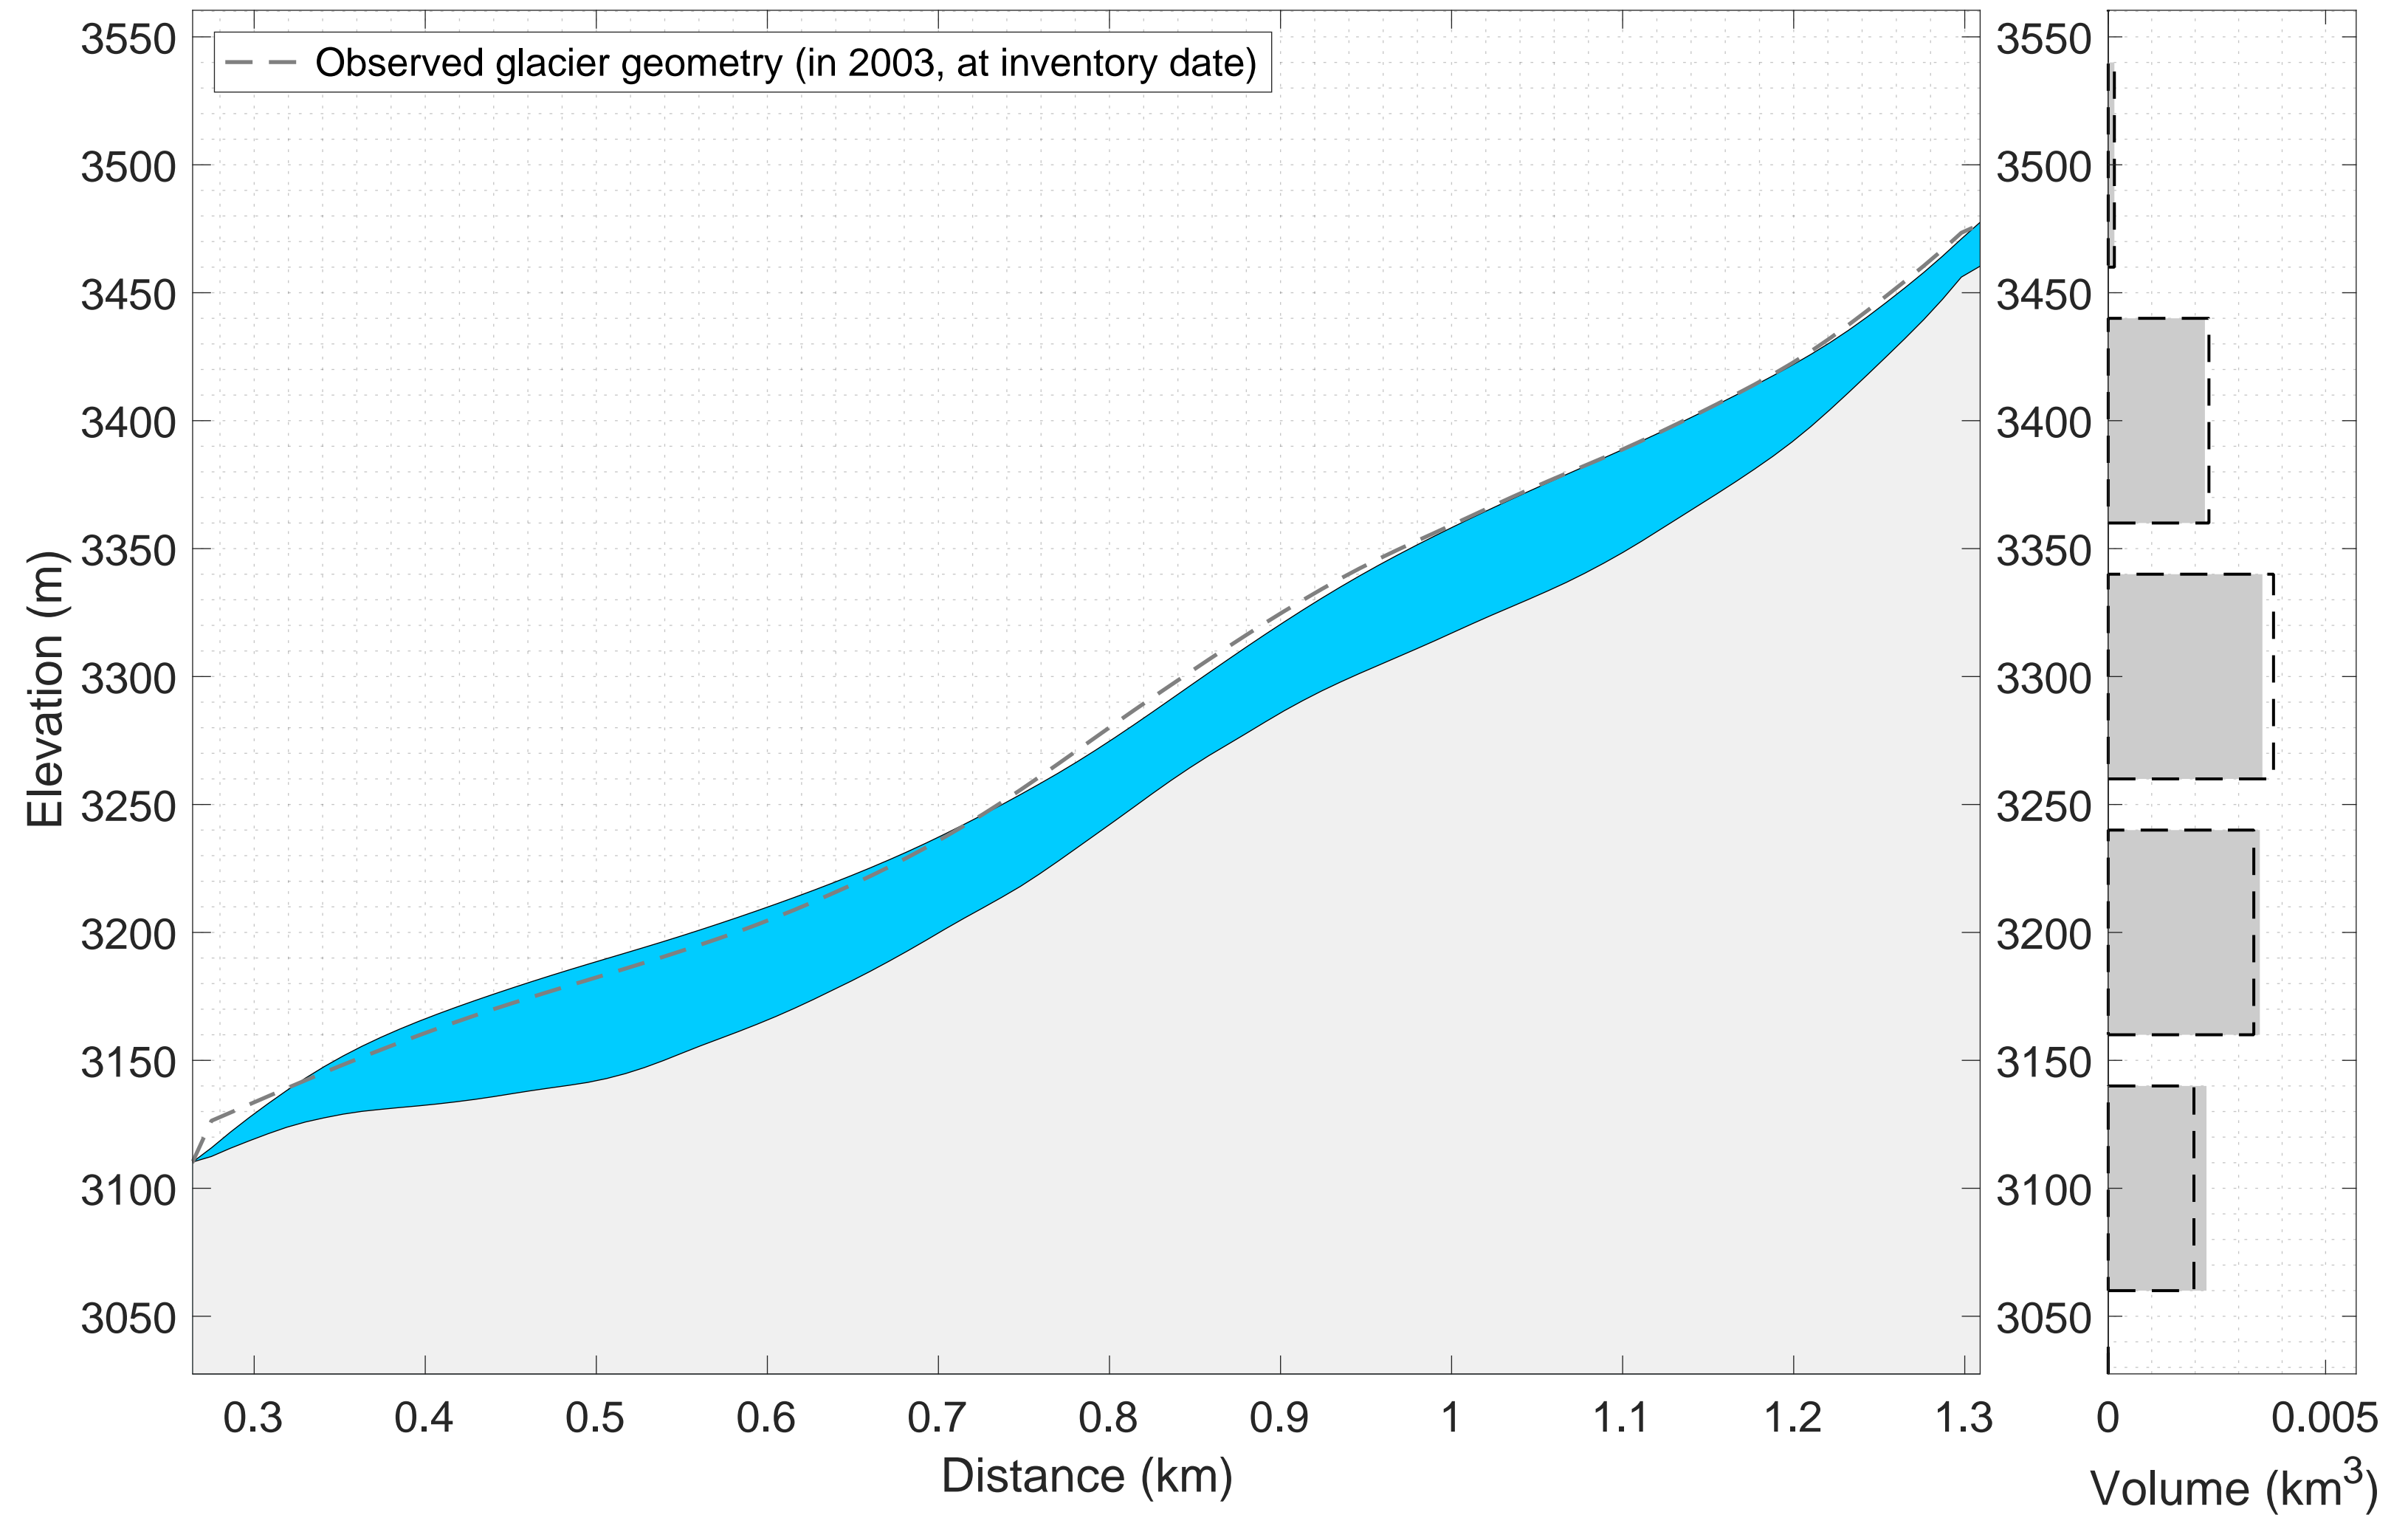

Supplement: Supplementary file 292 [file tc-13-1125-2019-supplement.zip]

**Modelled geometry (Glacier ID = 01587;  $A = 3.2822\text{e-}17 \text{ Pa}^{-3} \text{ a}^{-1}$ ;  $dx = 19 \text{ m}$ )**

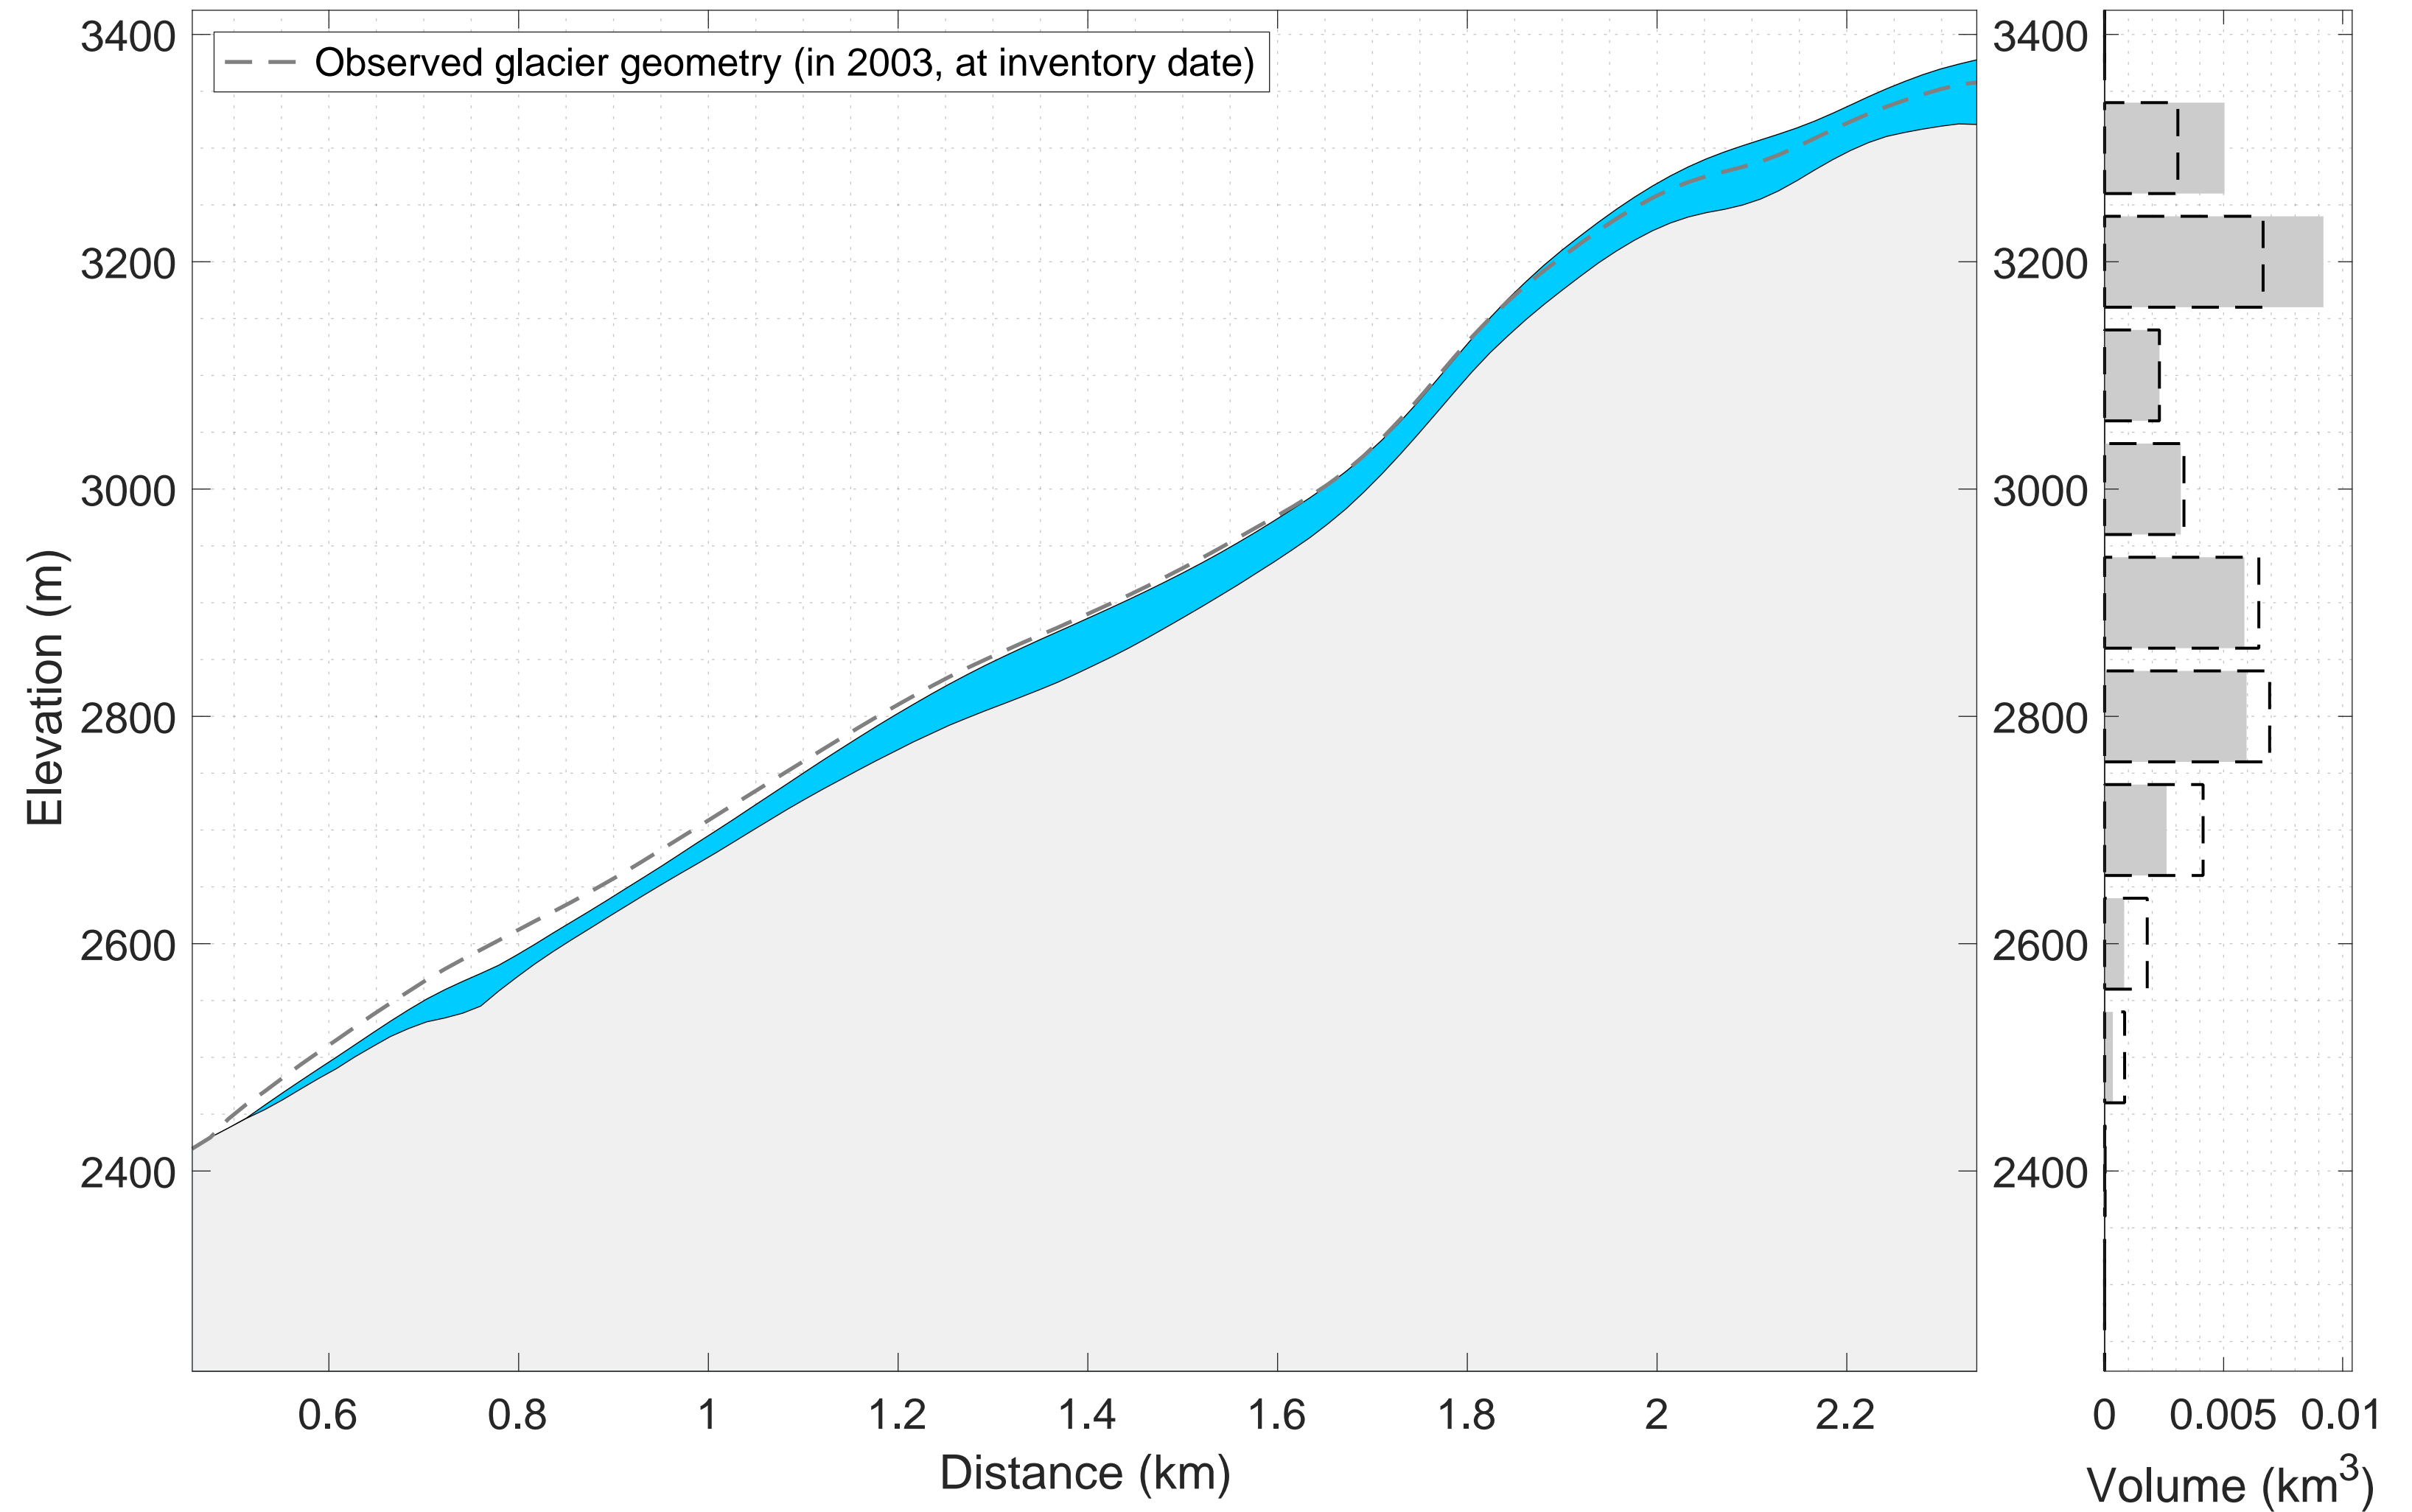

Supplement: Supplementary file 293 [file tc-13-1125-2019-supplement.zip]

**Modelled geometry (Glacier ID = 00817;  $A = 1.6195\text{e-}16 \text{ Pa}^{-3} \text{ a}^{-1}$ ;  $dx = 12 \text{ m}$ )**

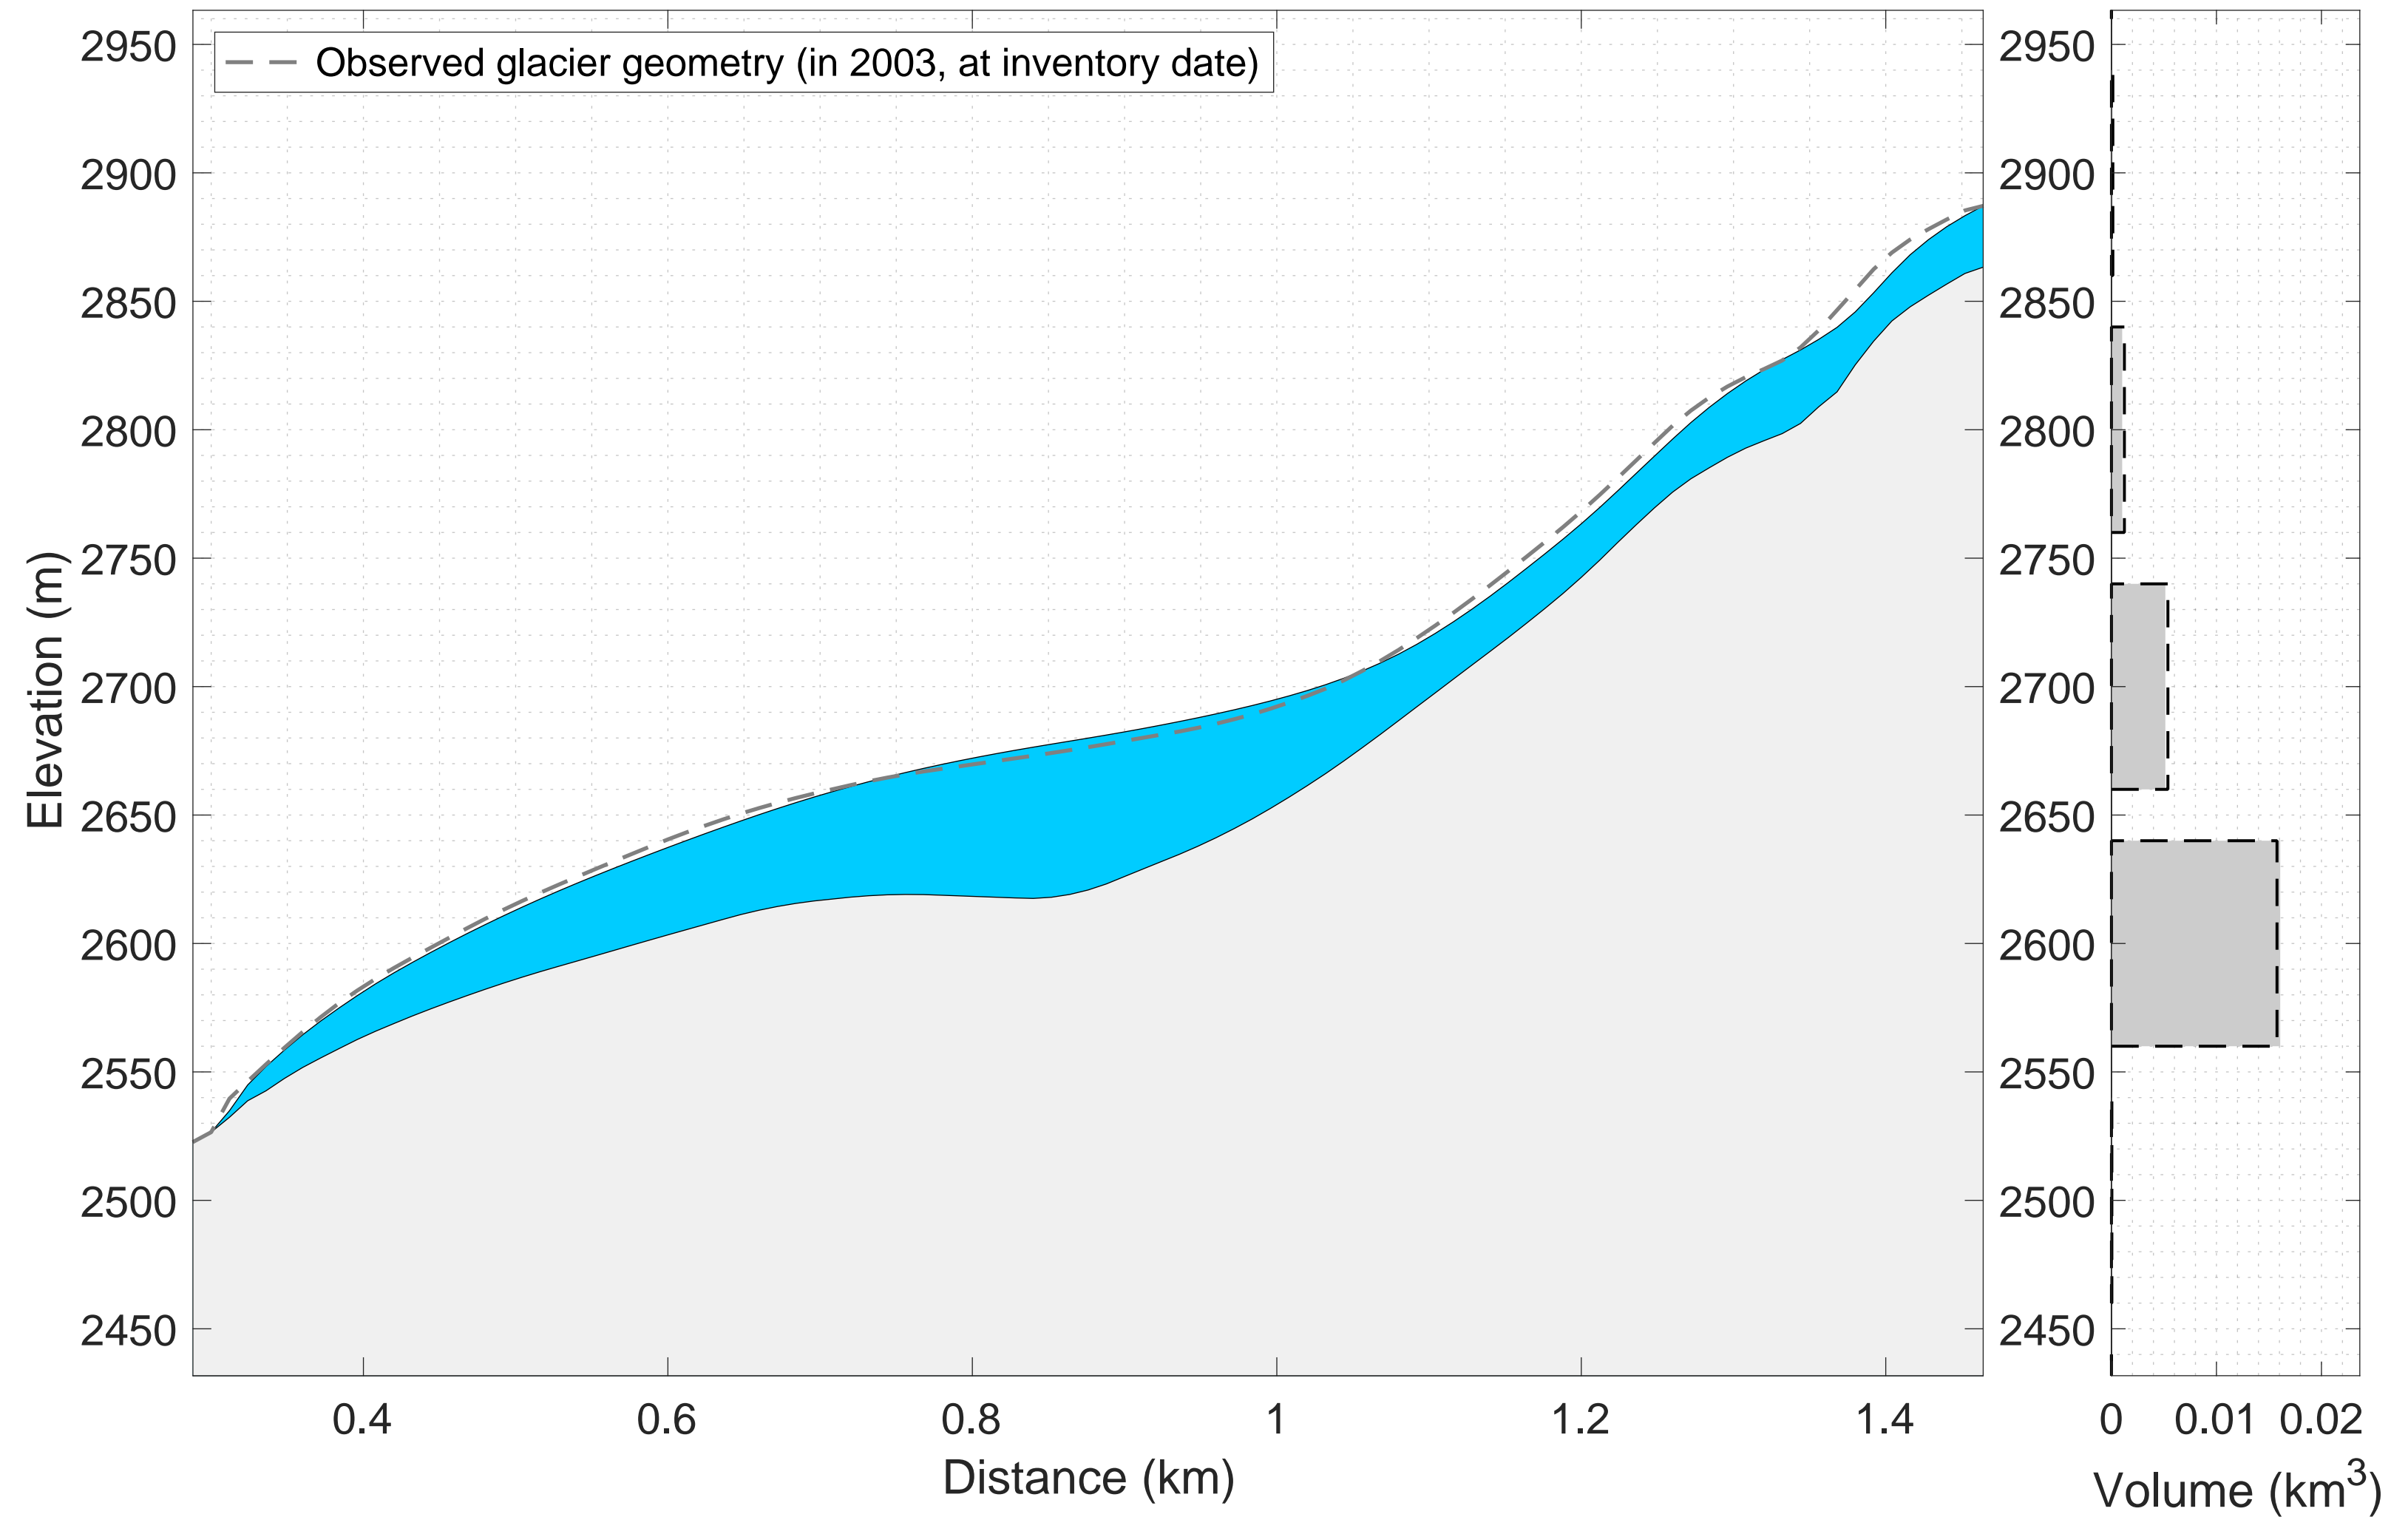

Supplement: Supplementary file 294 [file tc-13-1125-2019-supplement.zip]

**Modelled geometry (Glacier ID = 01755;  $A = 9.9923\text{e-}17 \text{ Pa}^{-3} \text{ a}^{-1}$ ;  $dx = 12 \text{ m}$ )**

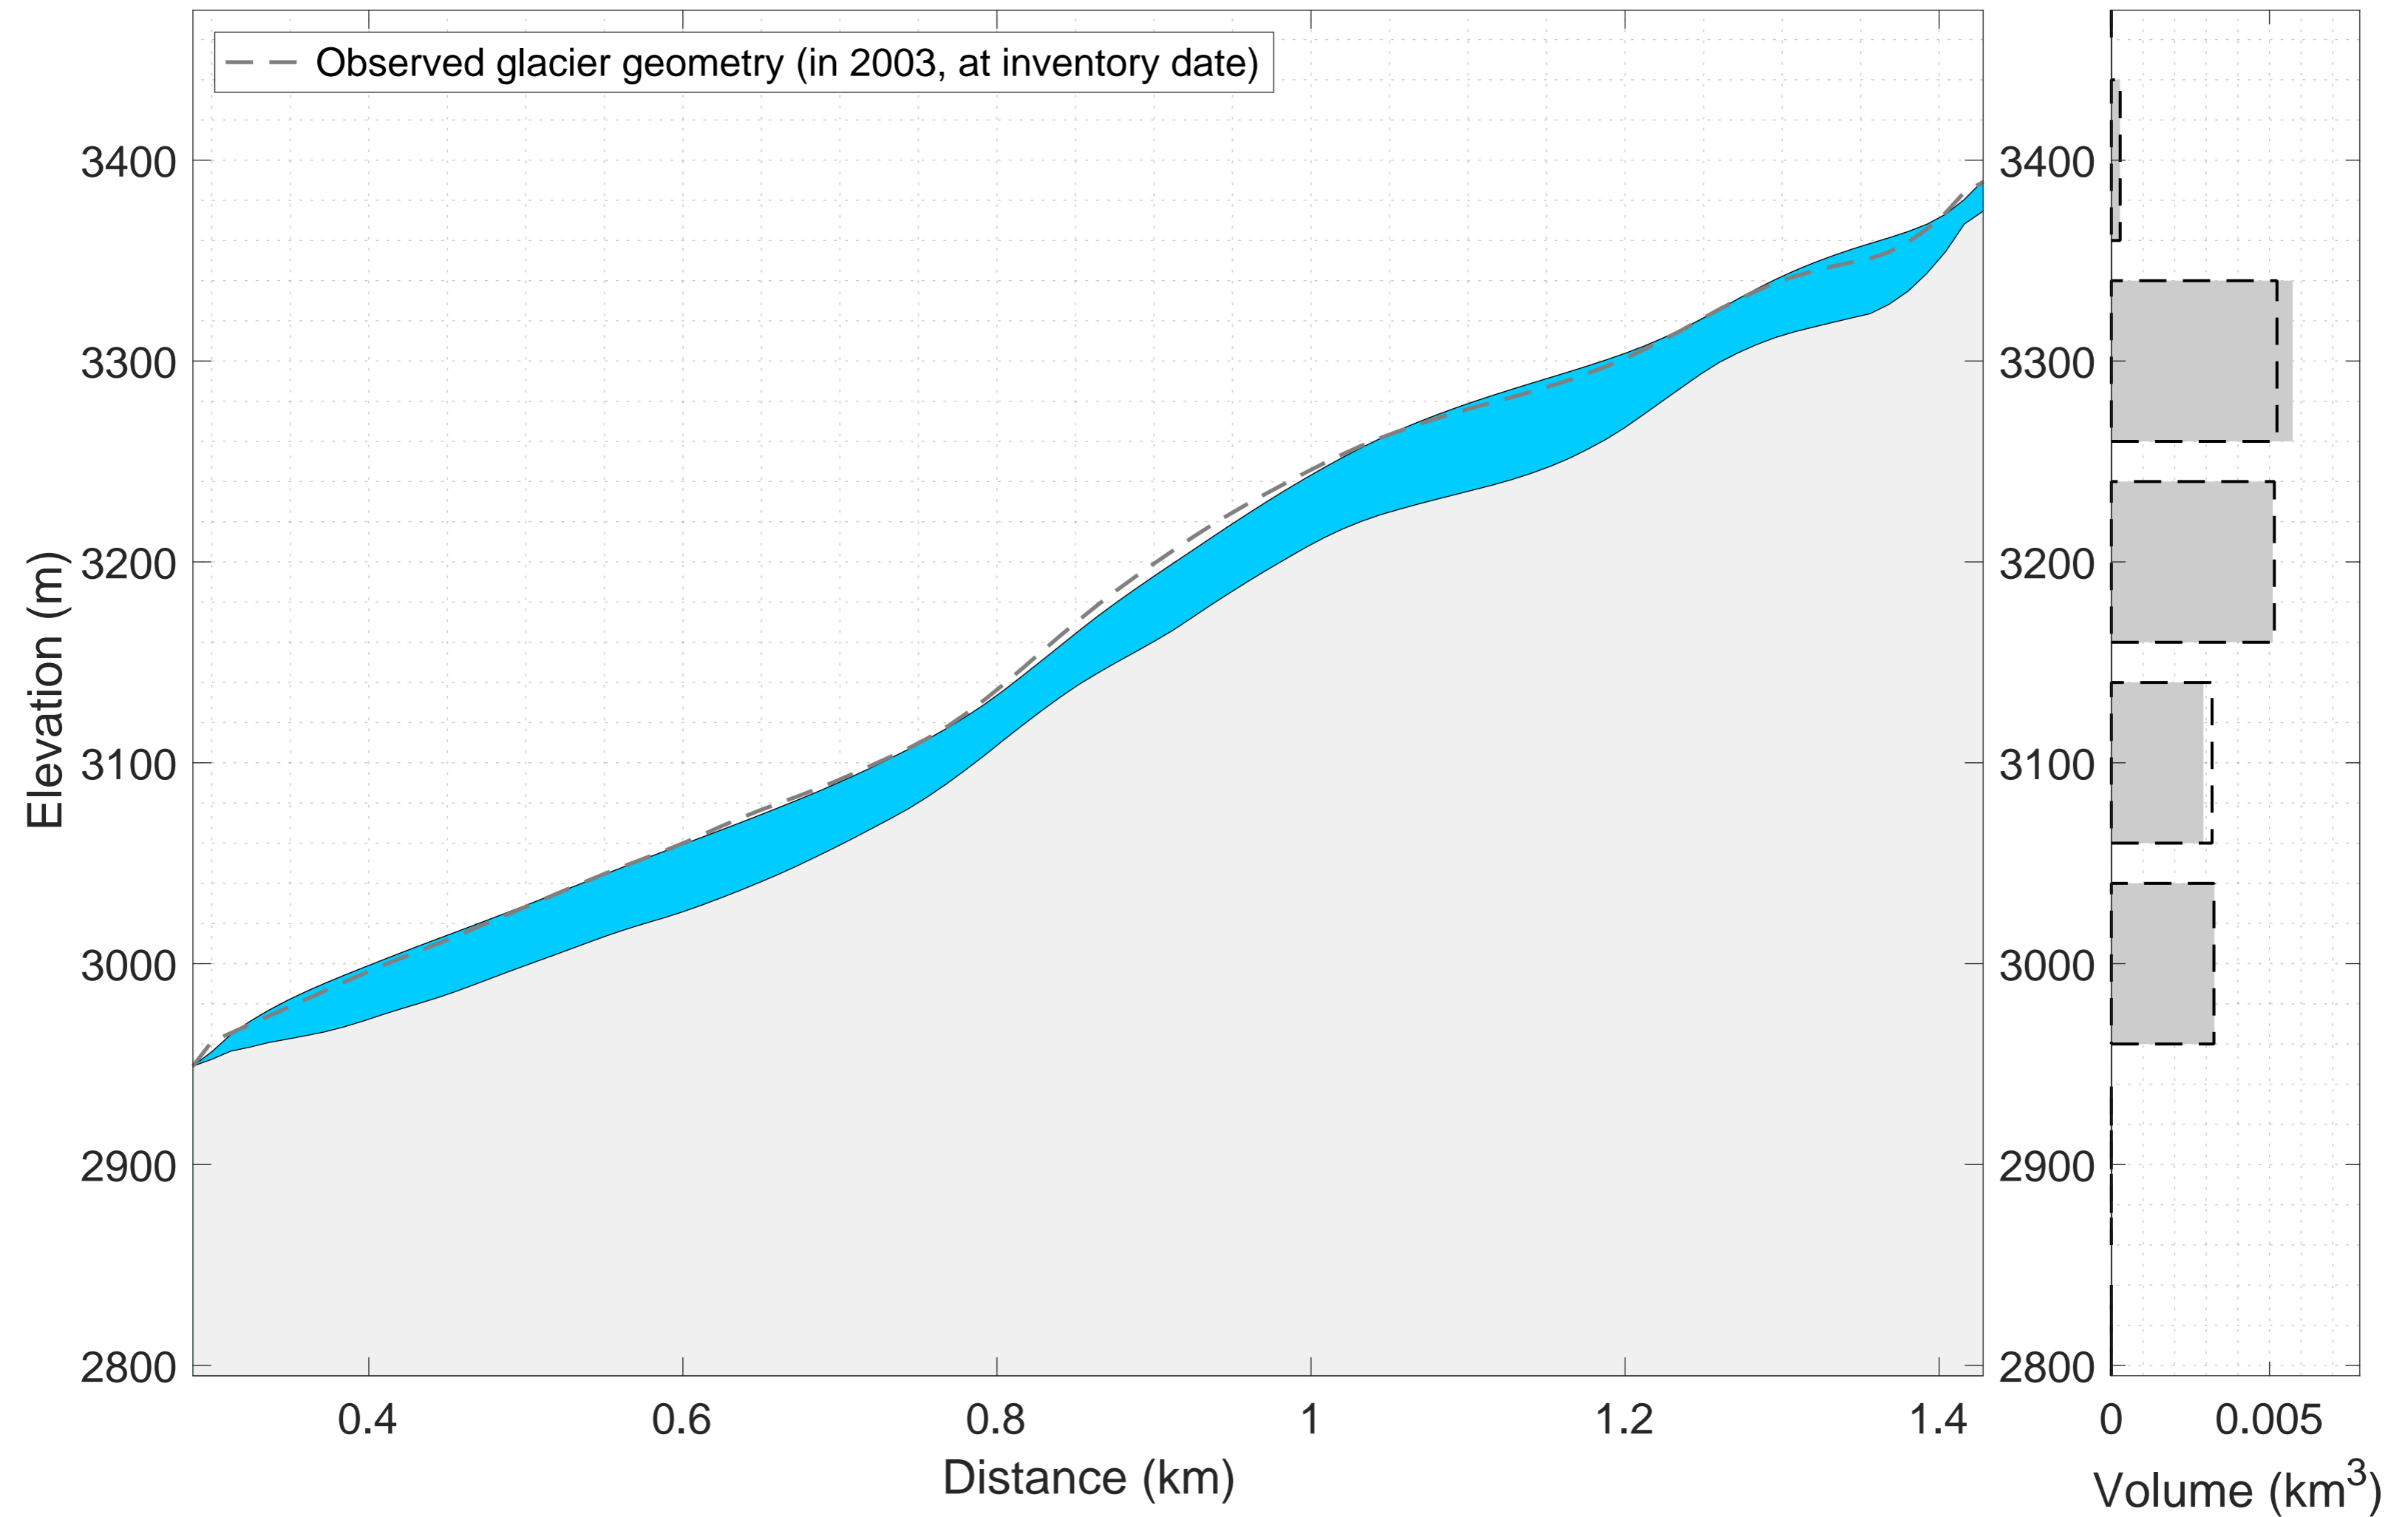

Supplement: Supplementary file 295 [file tc-13-1125-2019-supplement.zip]

**Modelled geometry (Glacier ID = 03810;  $A = 1.569\text{e-}16 \text{ Pa}^{-3} \text{ a}^{-1}$ ;  $dx = 28 \text{ m}$ )**

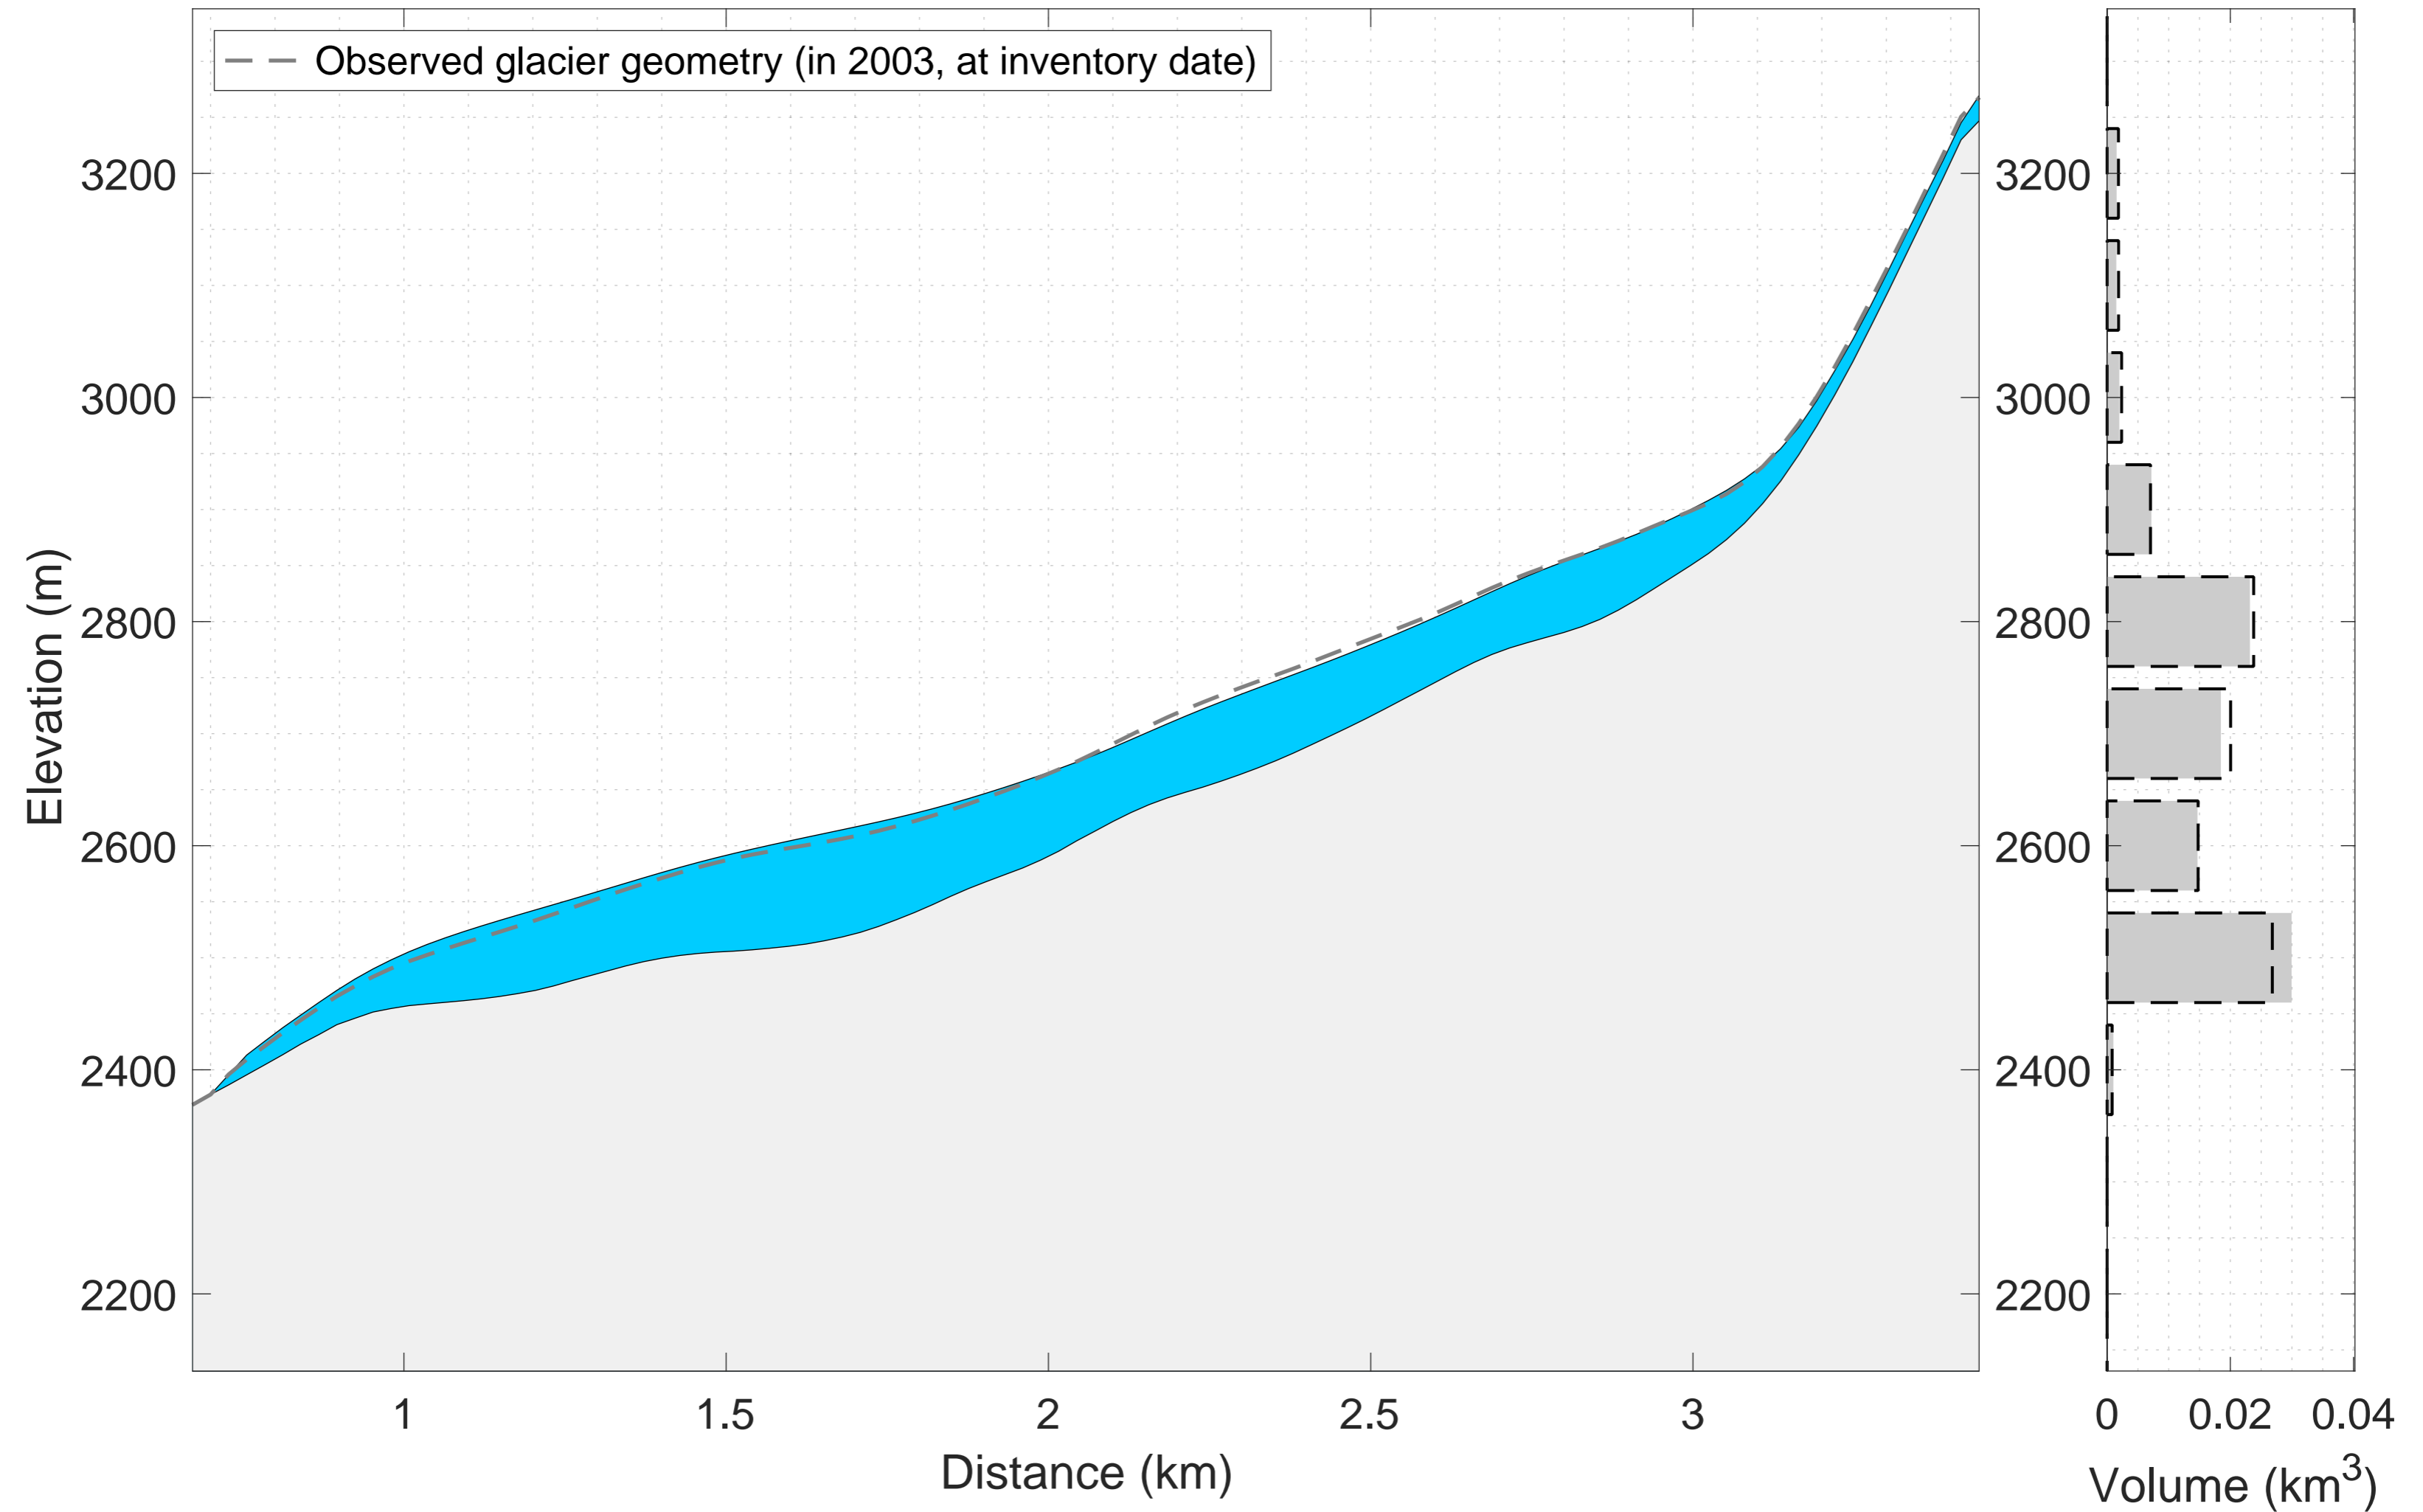

Supplement: Supplementary file 296 [file tc-13-1125-2019-supplement.zip]

**Modelled geometry (Glacier ID = 02746;  $A = 3.2786\text{e-}17 \text{ Pa}^{-3} \text{ a}^{-1}$ ;  $dx = 39 \text{ m}$ )**

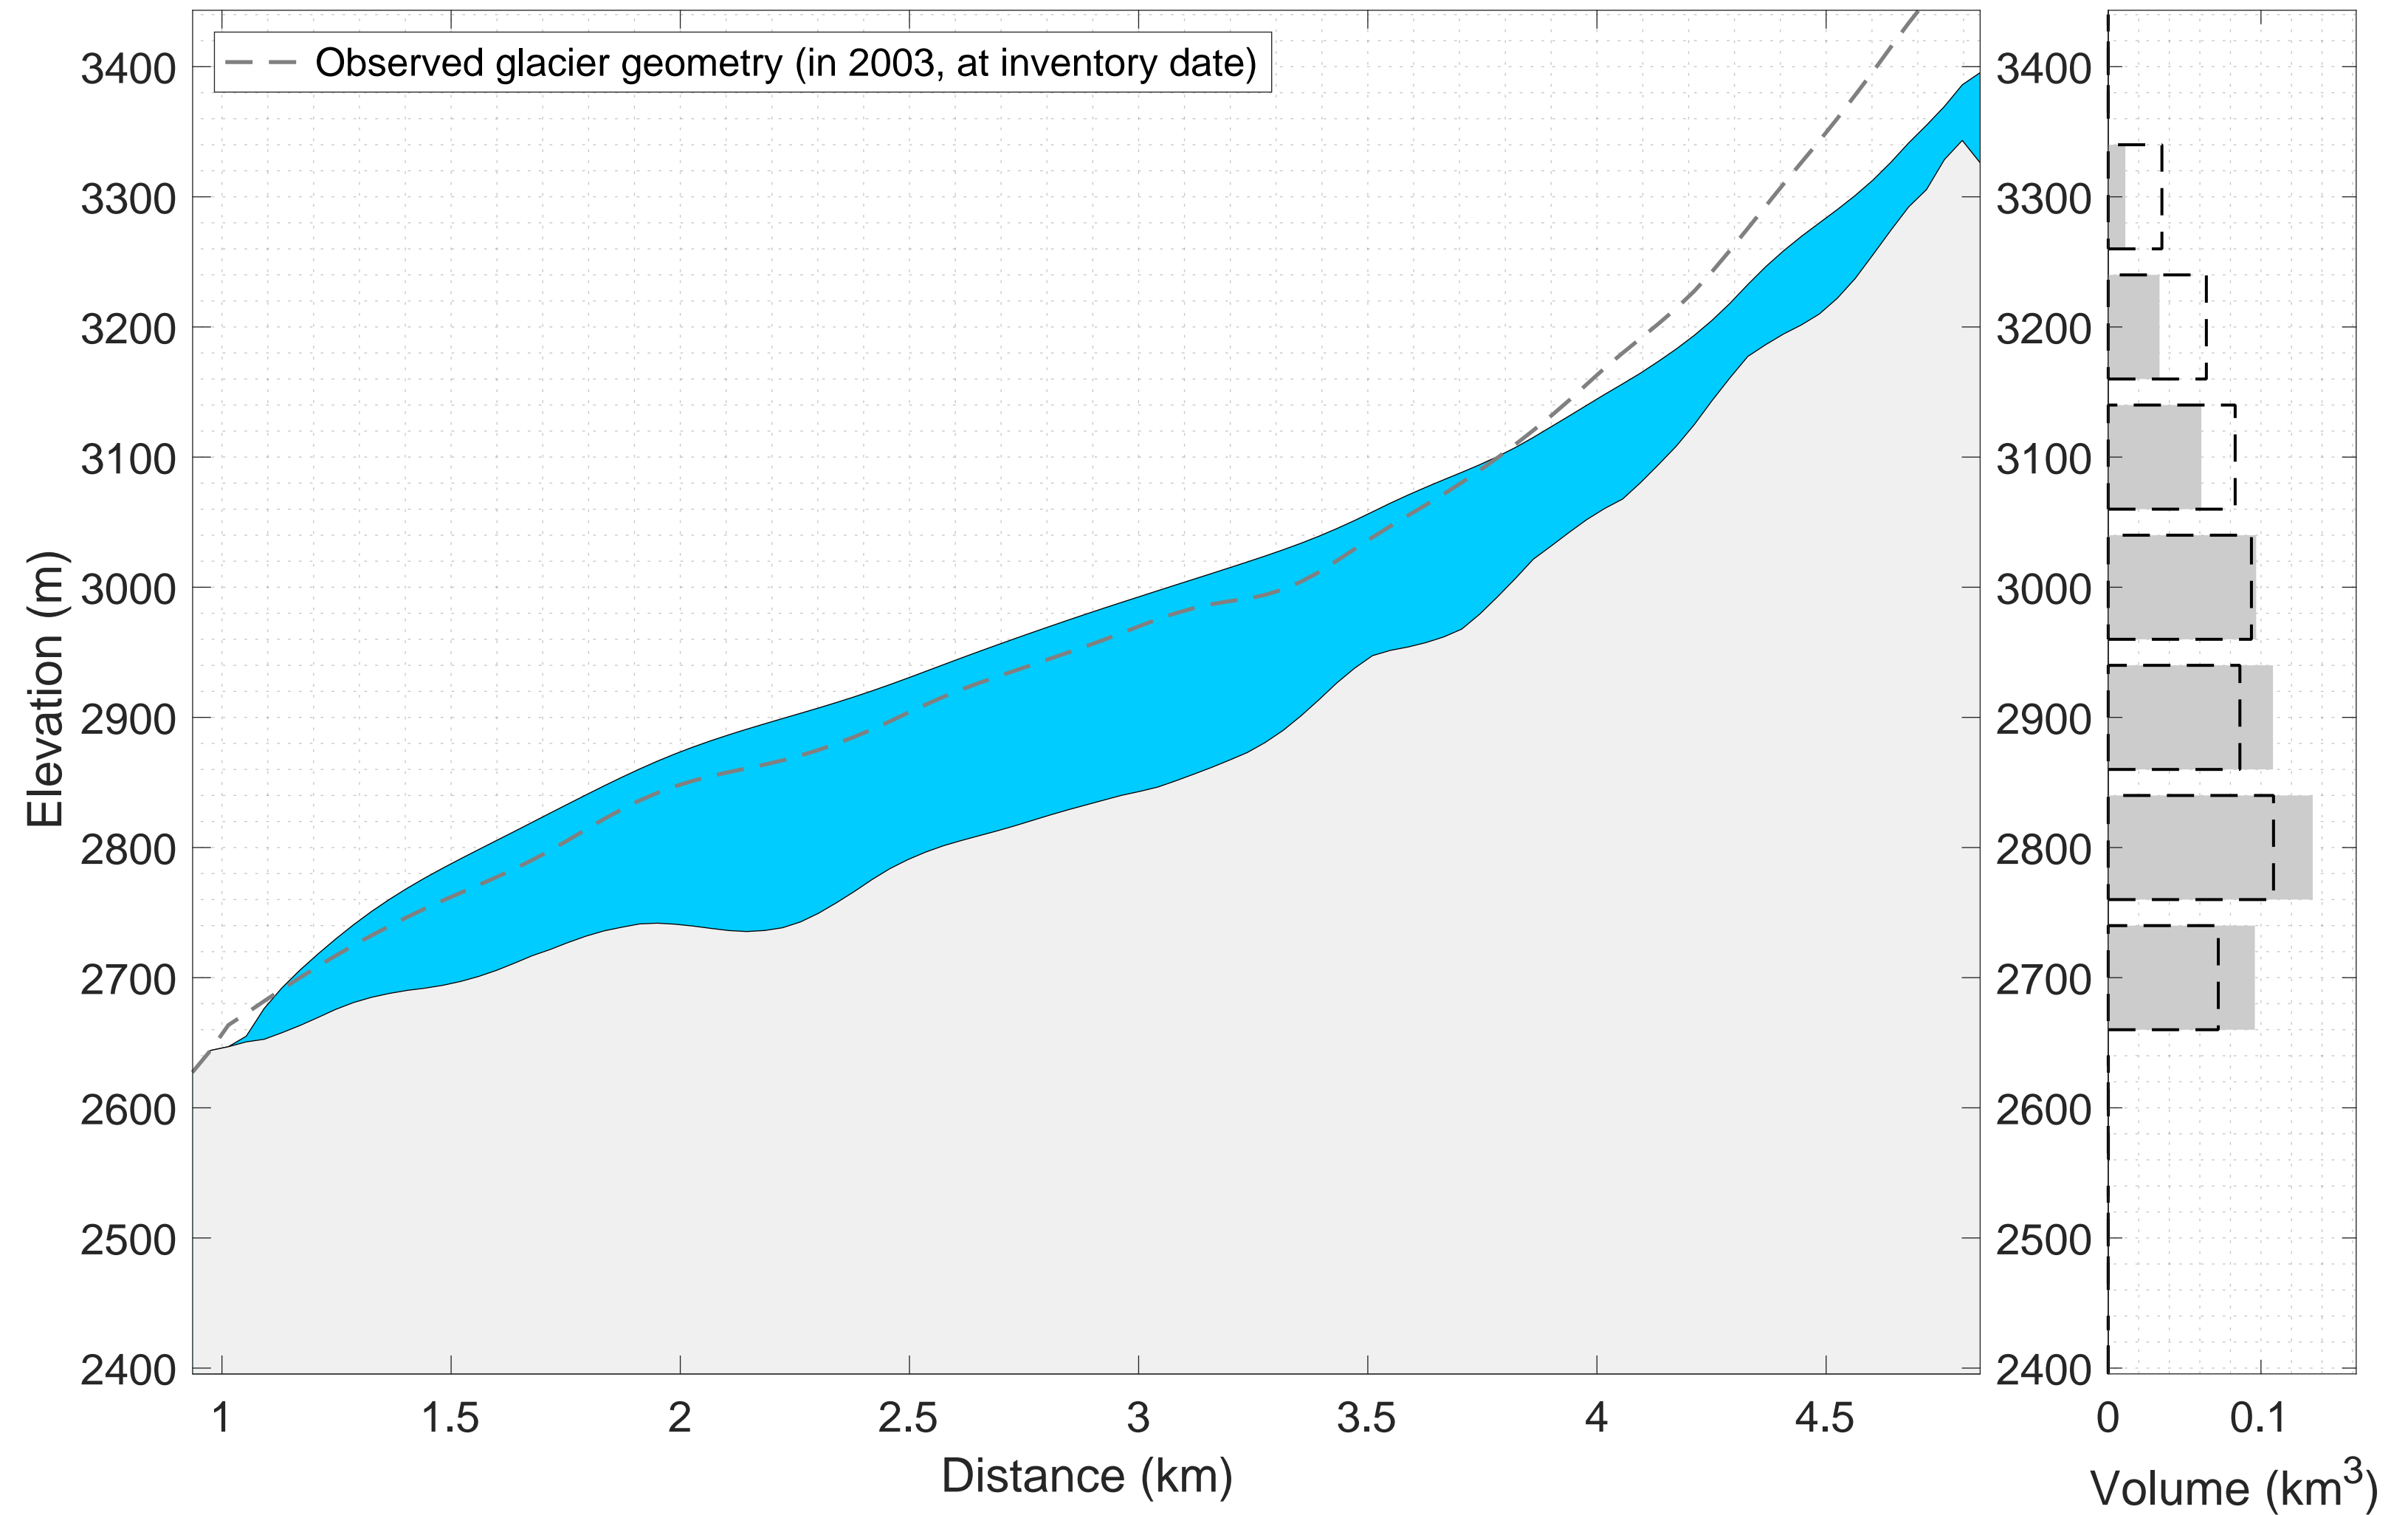

Supplement: Supplementary file 297 [file tc-13-1125-2019-supplement.zip]

**Modelled geometry (Glacier ID = 01943;  $A = 3.1124\text{e-}16 \text{ Pa}^{-3} \text{ a}^{-1}$ ;  $dx = 23 \text{ m}$ )**

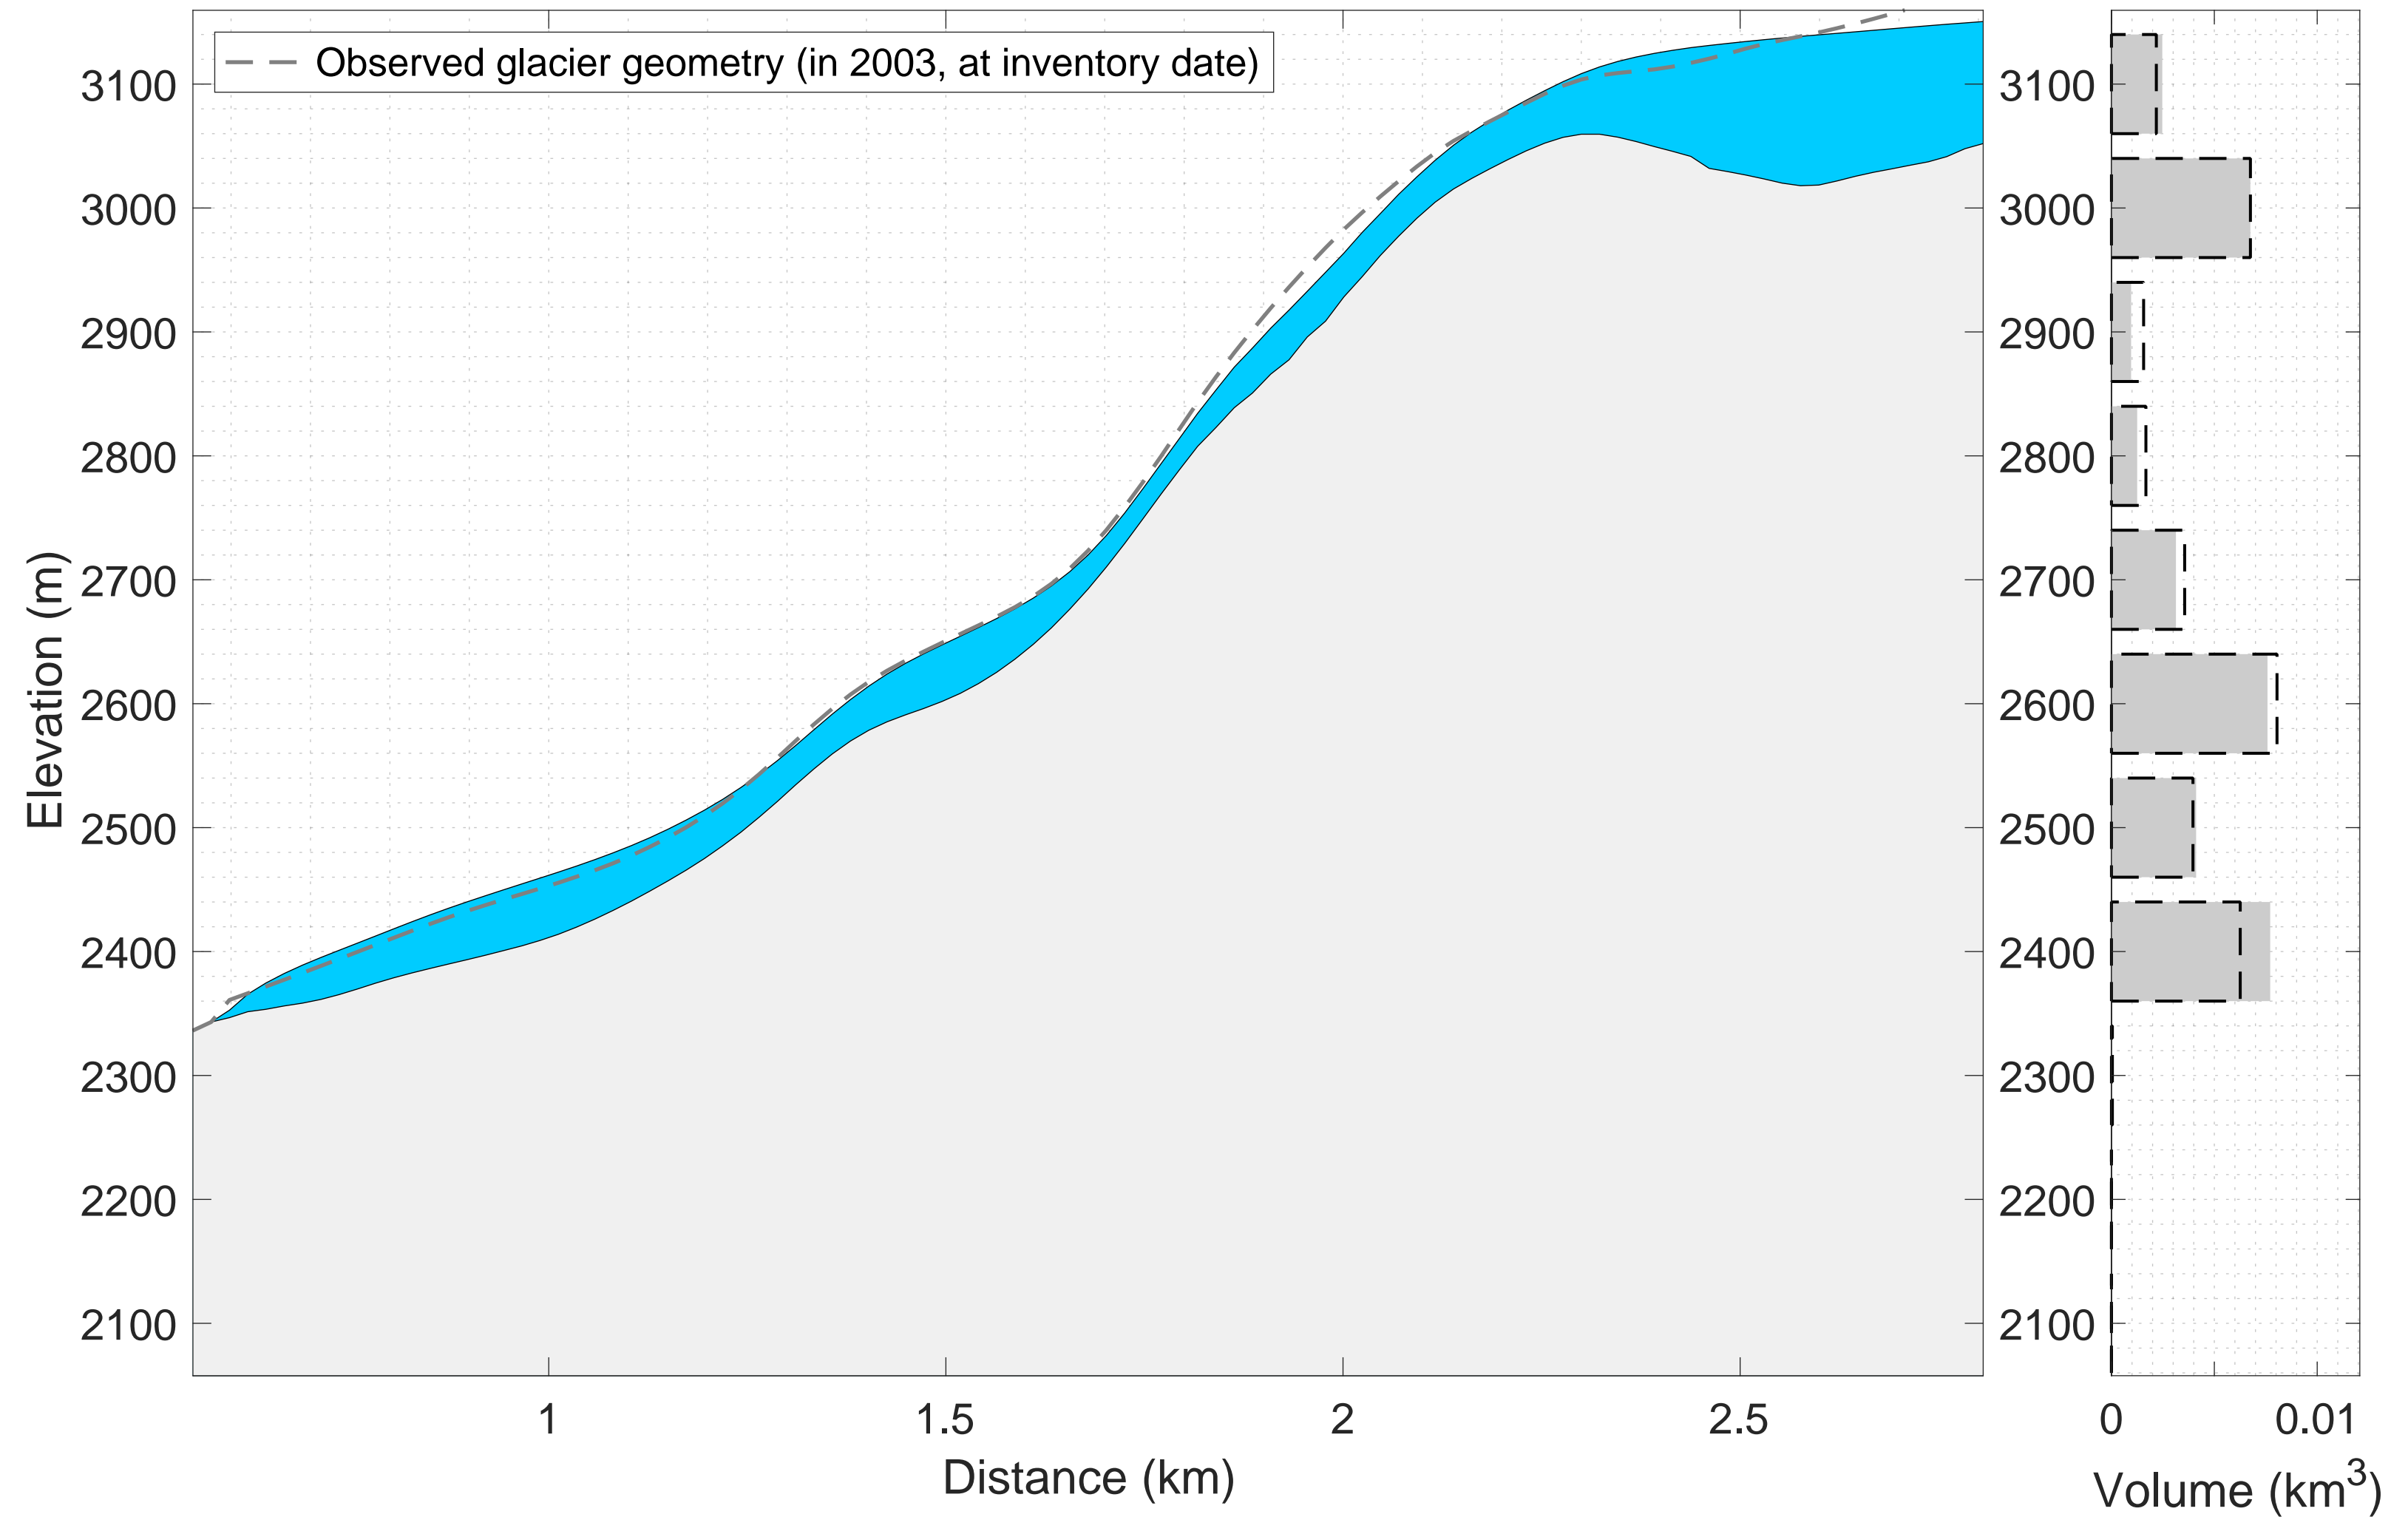

Supplement: Supplementary file 298 [file tc-13-1125-2019-supplement.zip]

**Modelled geometry (Glacier ID = 03685;  $A = 1.1809\text{e-}16 \text{ Pa}^{-3} \text{ a}^{-1}$ ;  $dx = 12 \text{ m}$ )**

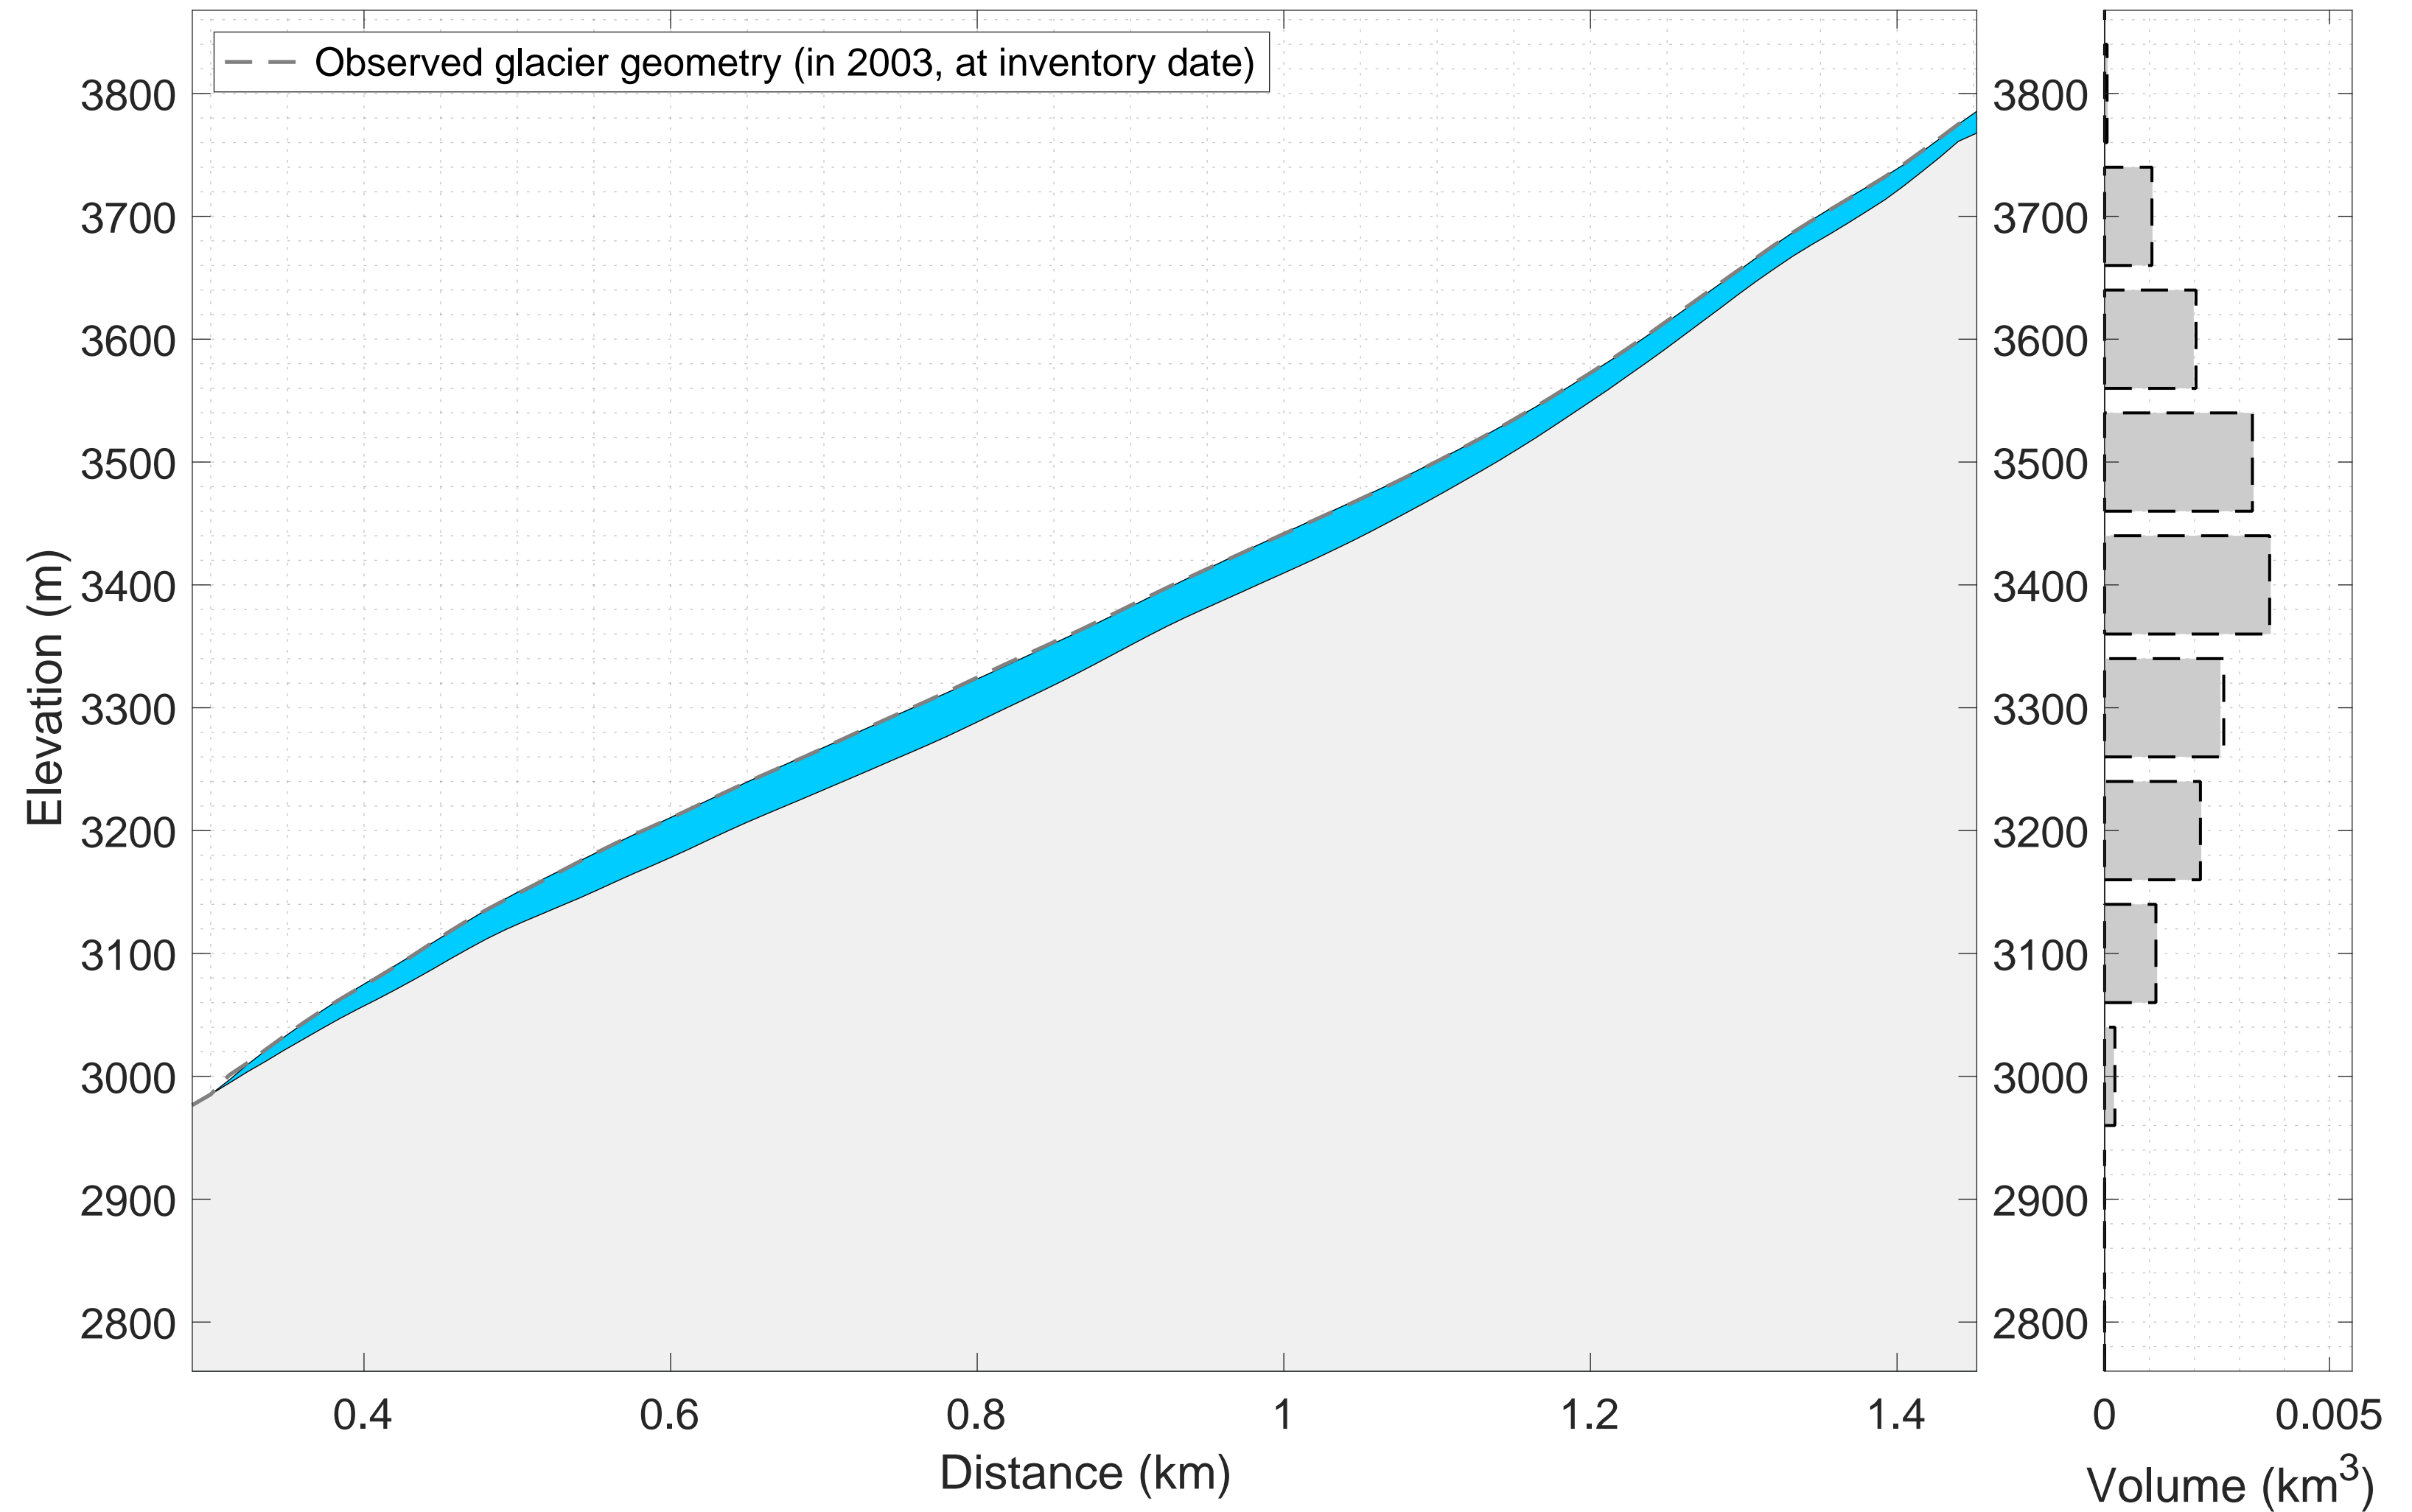

Supplement: Supplementary file 299 [file tc-13-1125-2019-supplement.zip]

**Modelled geometry (Glacier ID = 02594;  $A = 1.6554\text{e-}16 \text{ Pa}^{-3} \text{ a}^{-1}$ ;  $dx = 18 \text{ m}$ )**

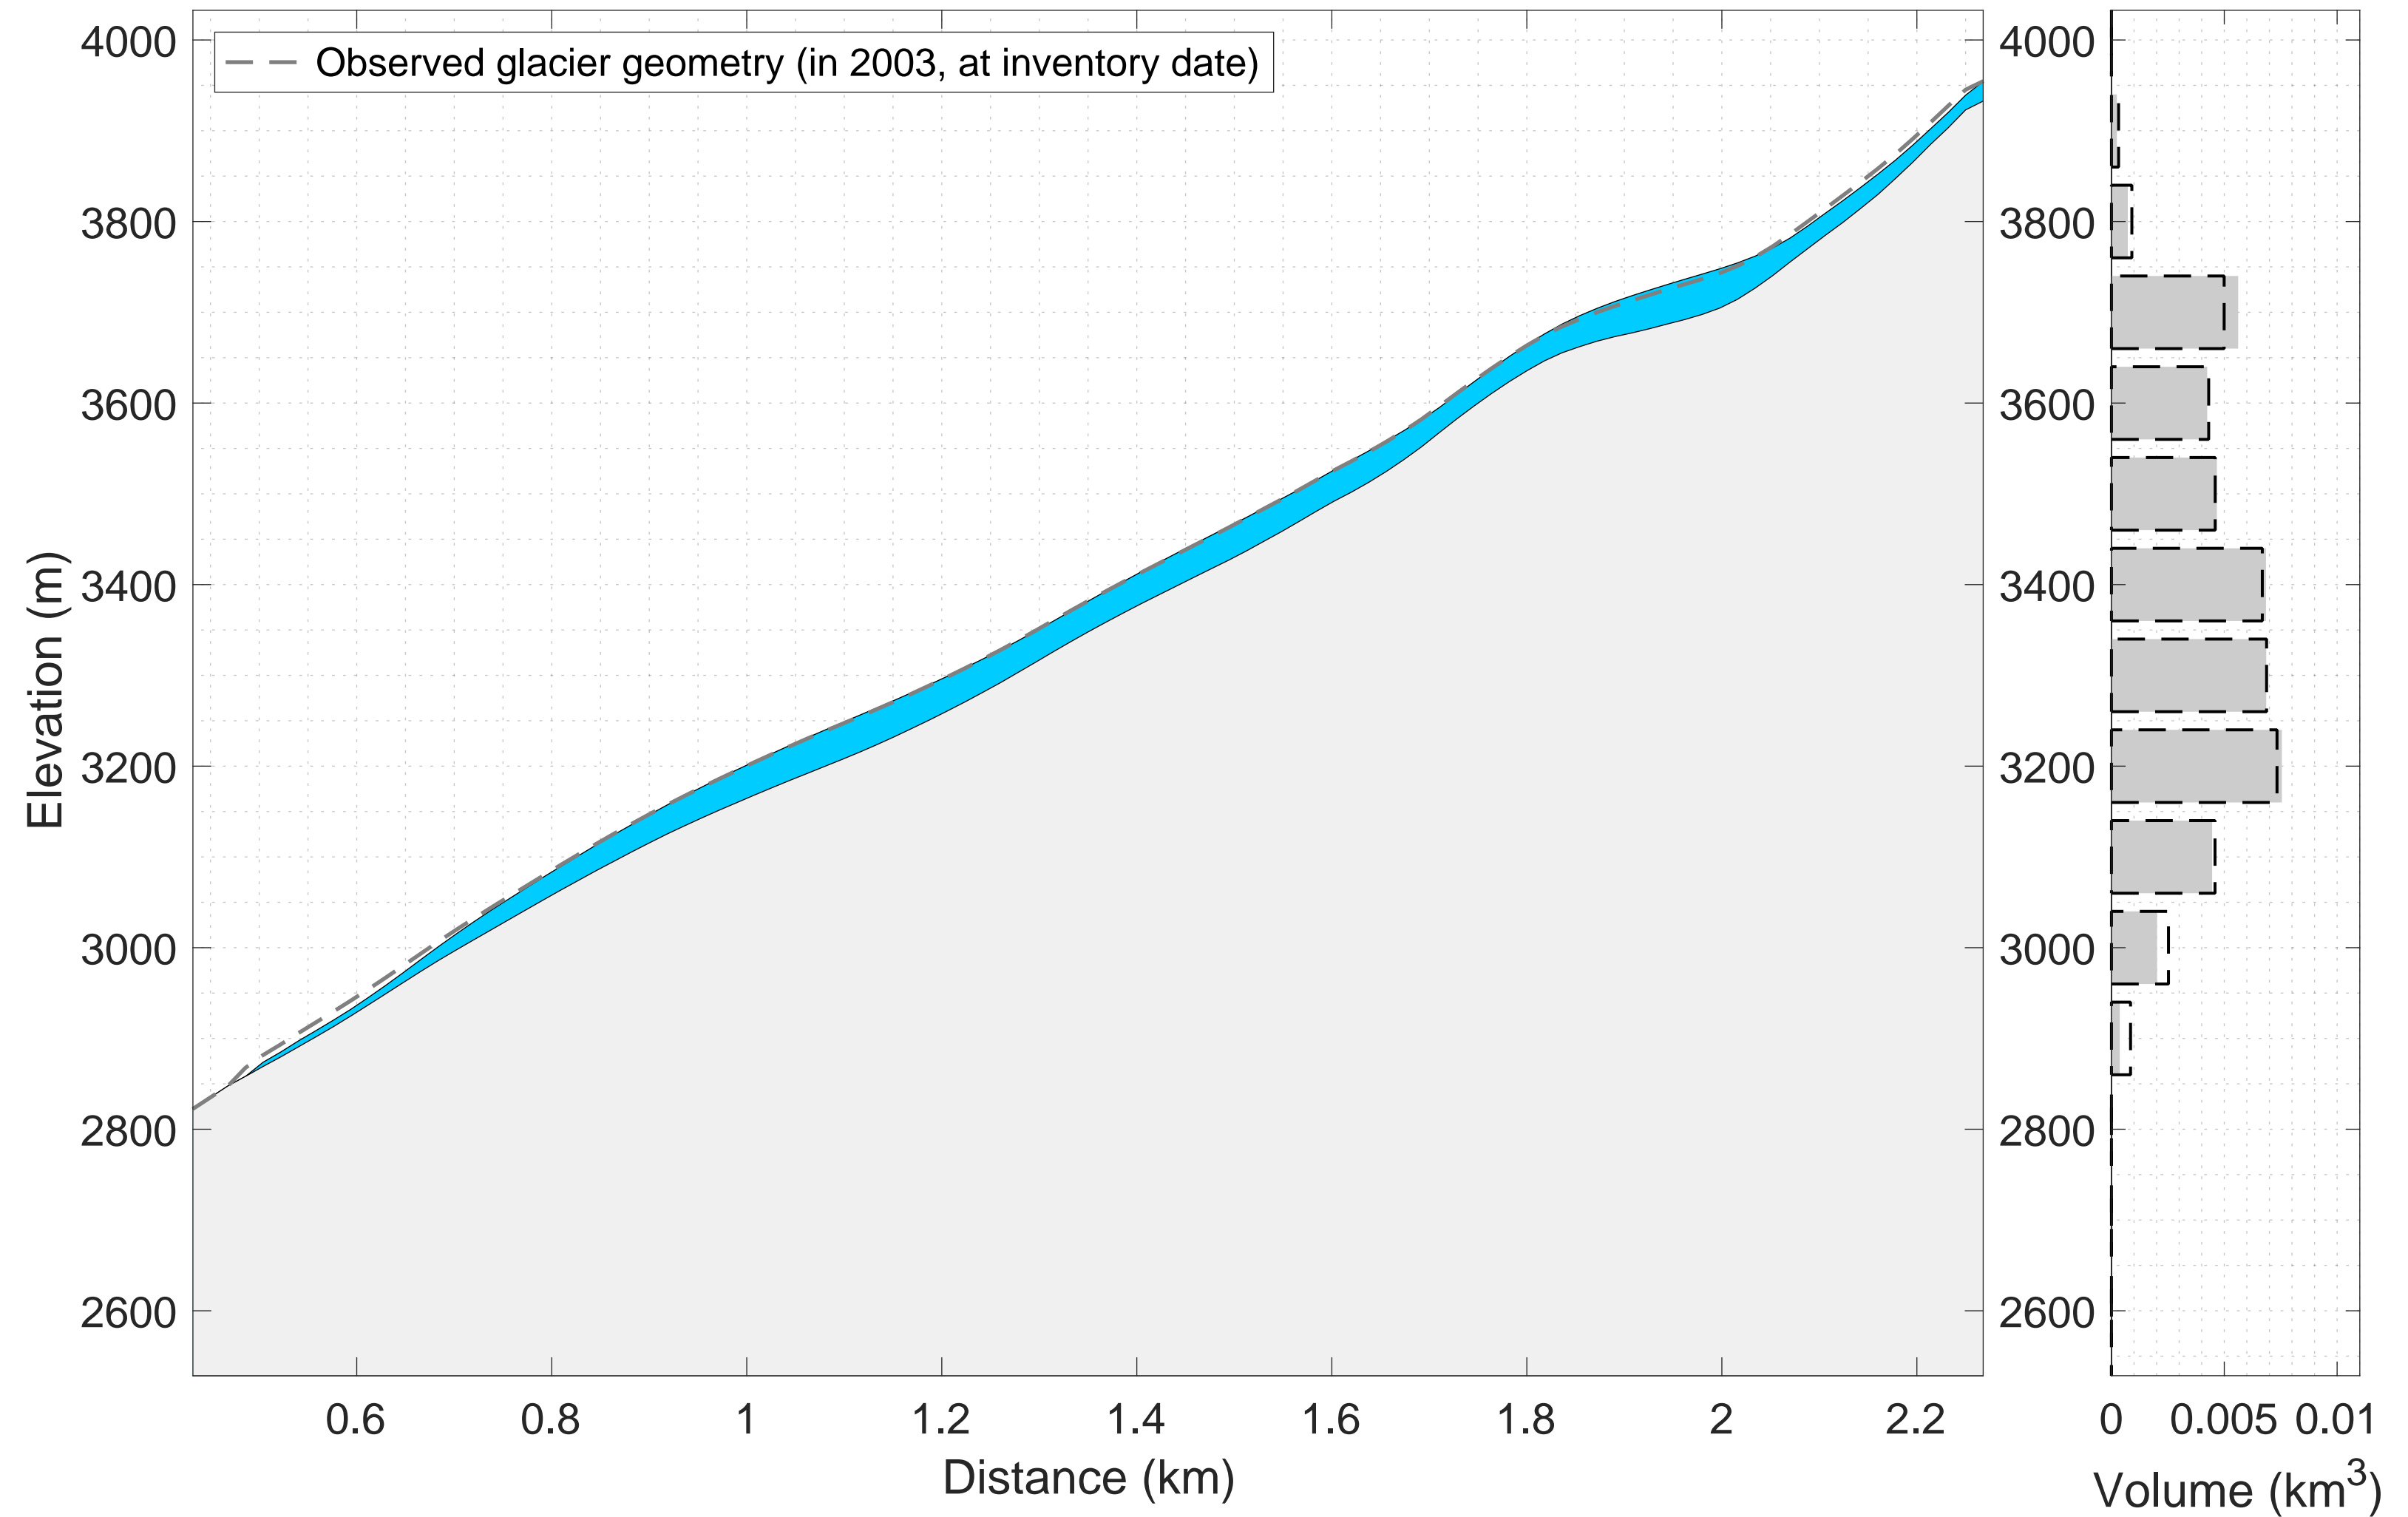

Supplement: Supplementary file 300 [file tc-13-1125-2019-supplement.zip]

**Modelled geometry (Glacier ID = 02628;  $A = 8.4666\text{e-}17 \text{ Pa}^{-3} \text{ a}^{-1}$ ;  $dx = 17 \text{ m}$ )**

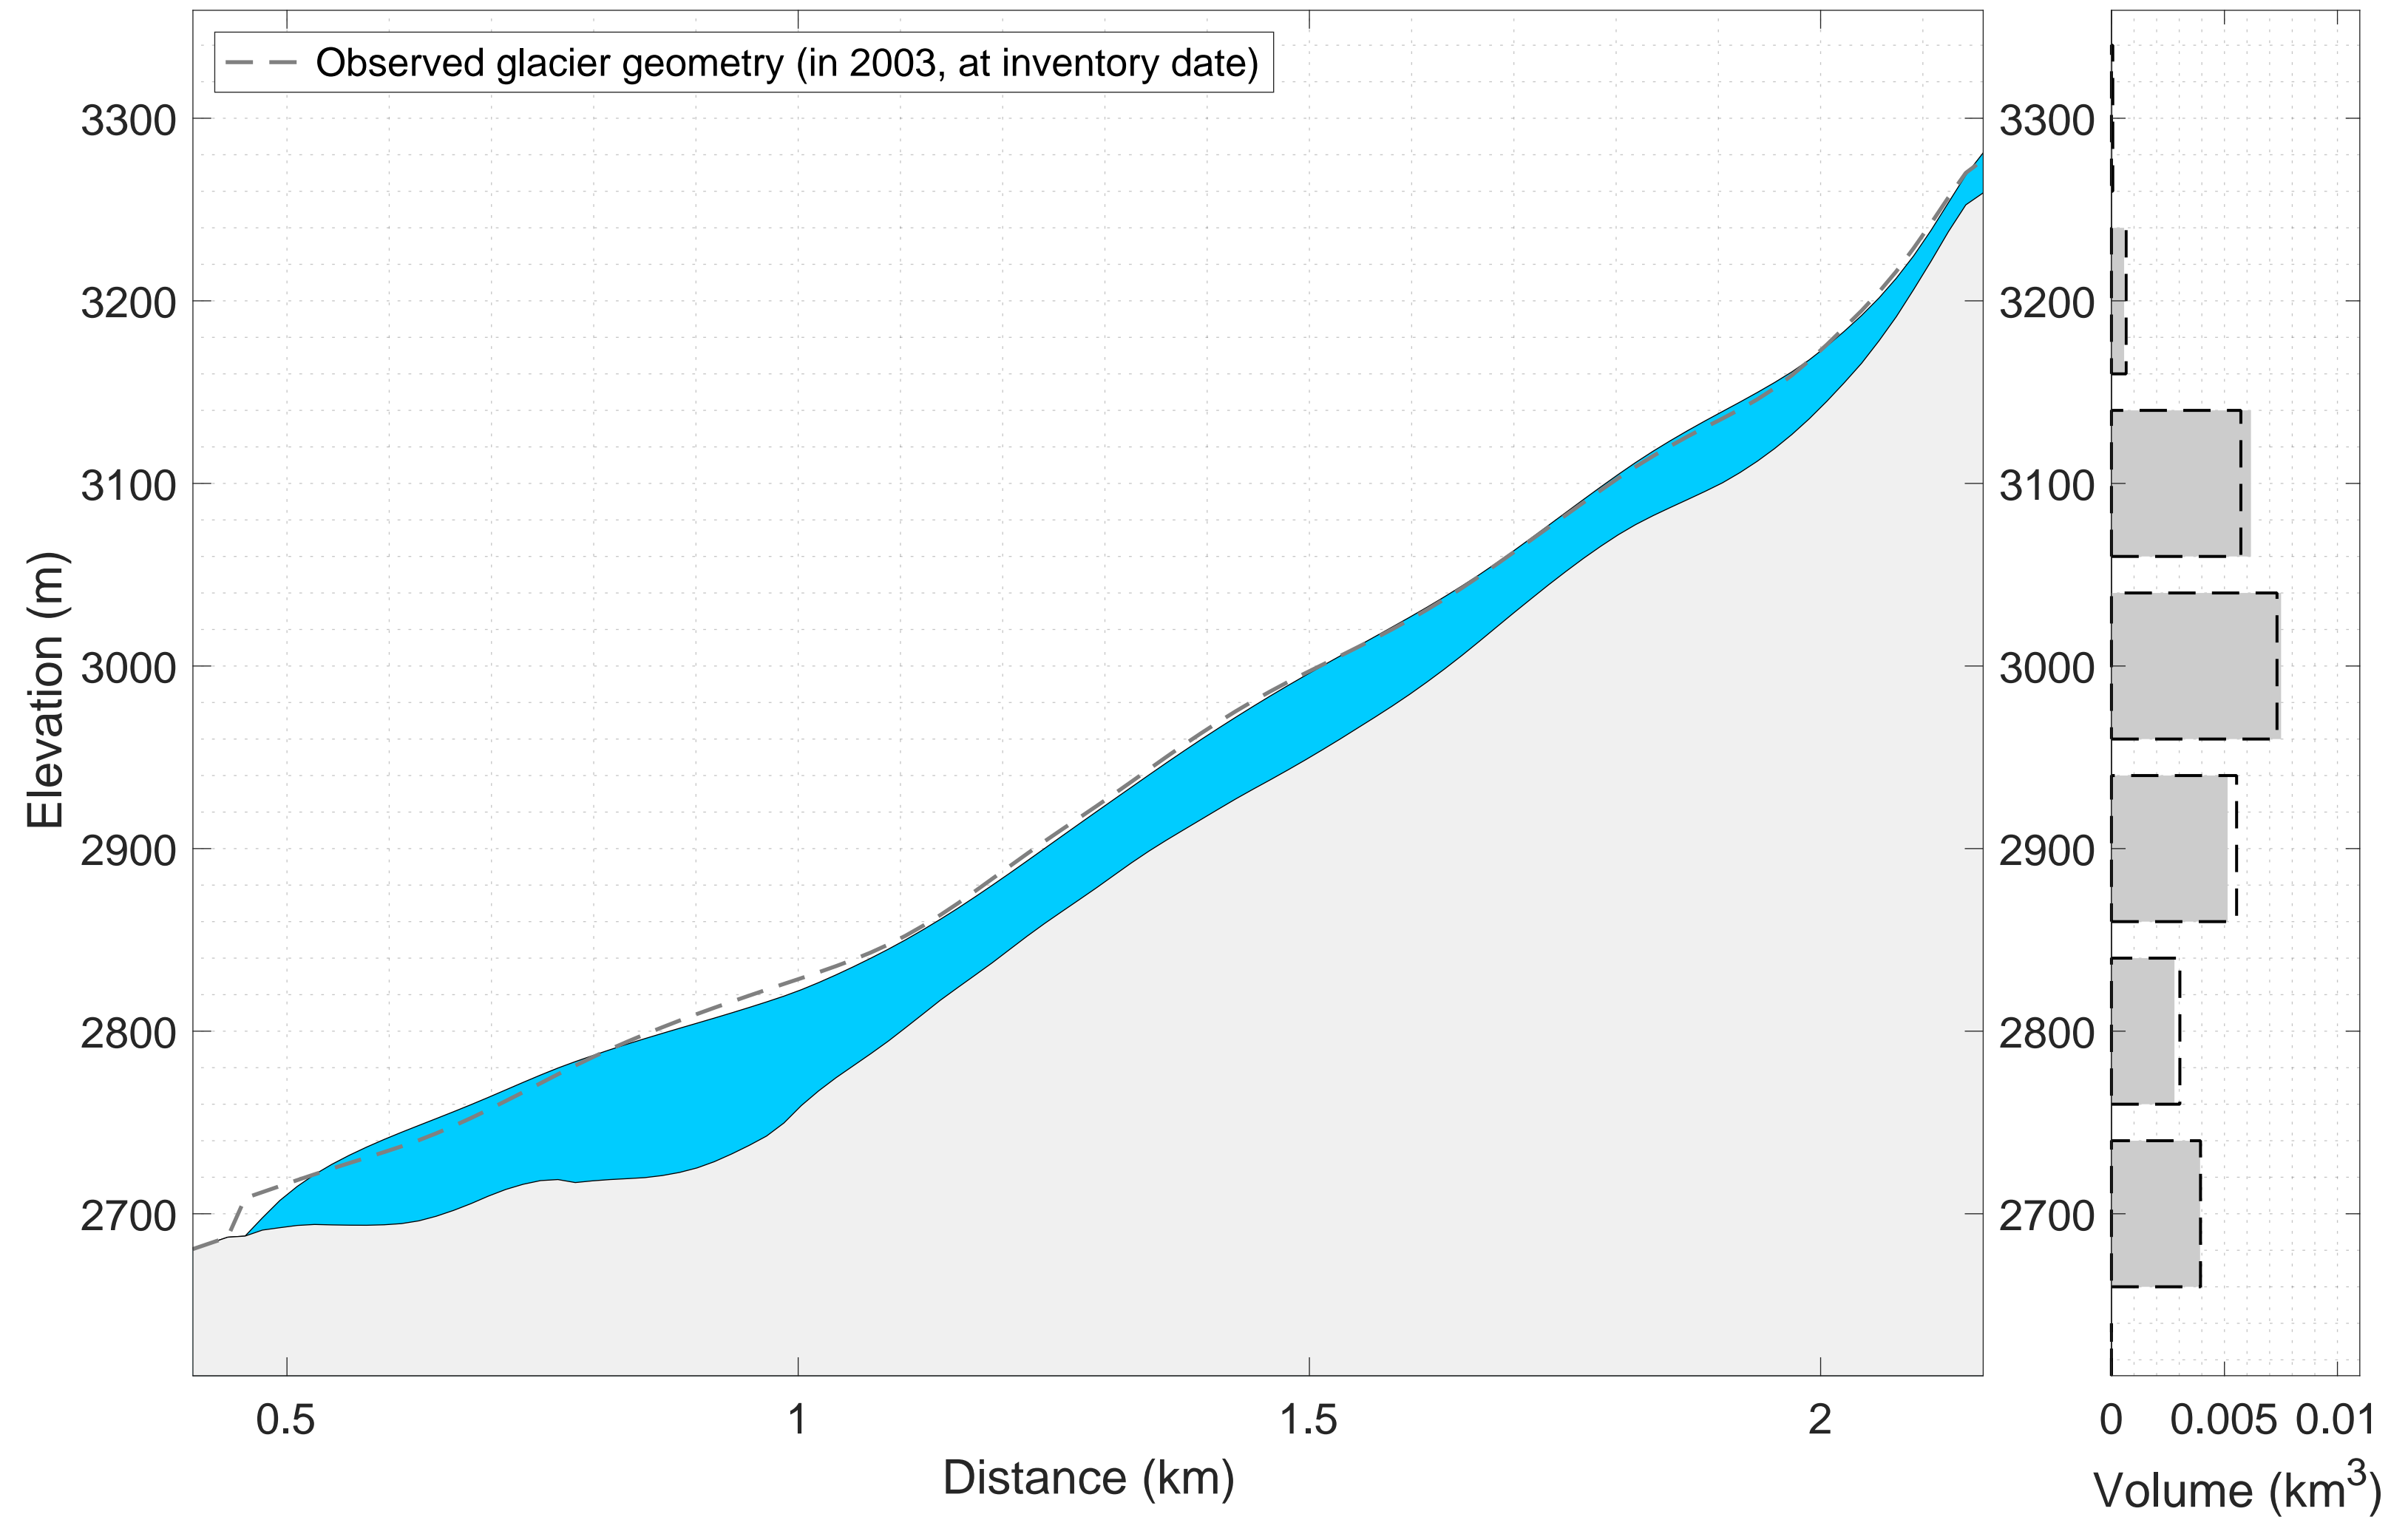

Supplement: Supplementary file 301 [file tc-13-1125-2019-supplement.zip]
