# Supplementary figures and images for: Modelling the future evolution of glaciers in the European Alps under the EURO-CORDEX RCM ensemble (part 4 of 8)
Source: Copernicus journal article supplement (doi:10.5194/tc-13-1125-2019), 2019-04-09

**Modelled geometry (Glacier ID = 03536;  $A = 1.2668\text{e-}16 \text{ Pa}^{-3} \text{ a}^{-1}$ ;  $dx = 11 \text{ m}$ )**

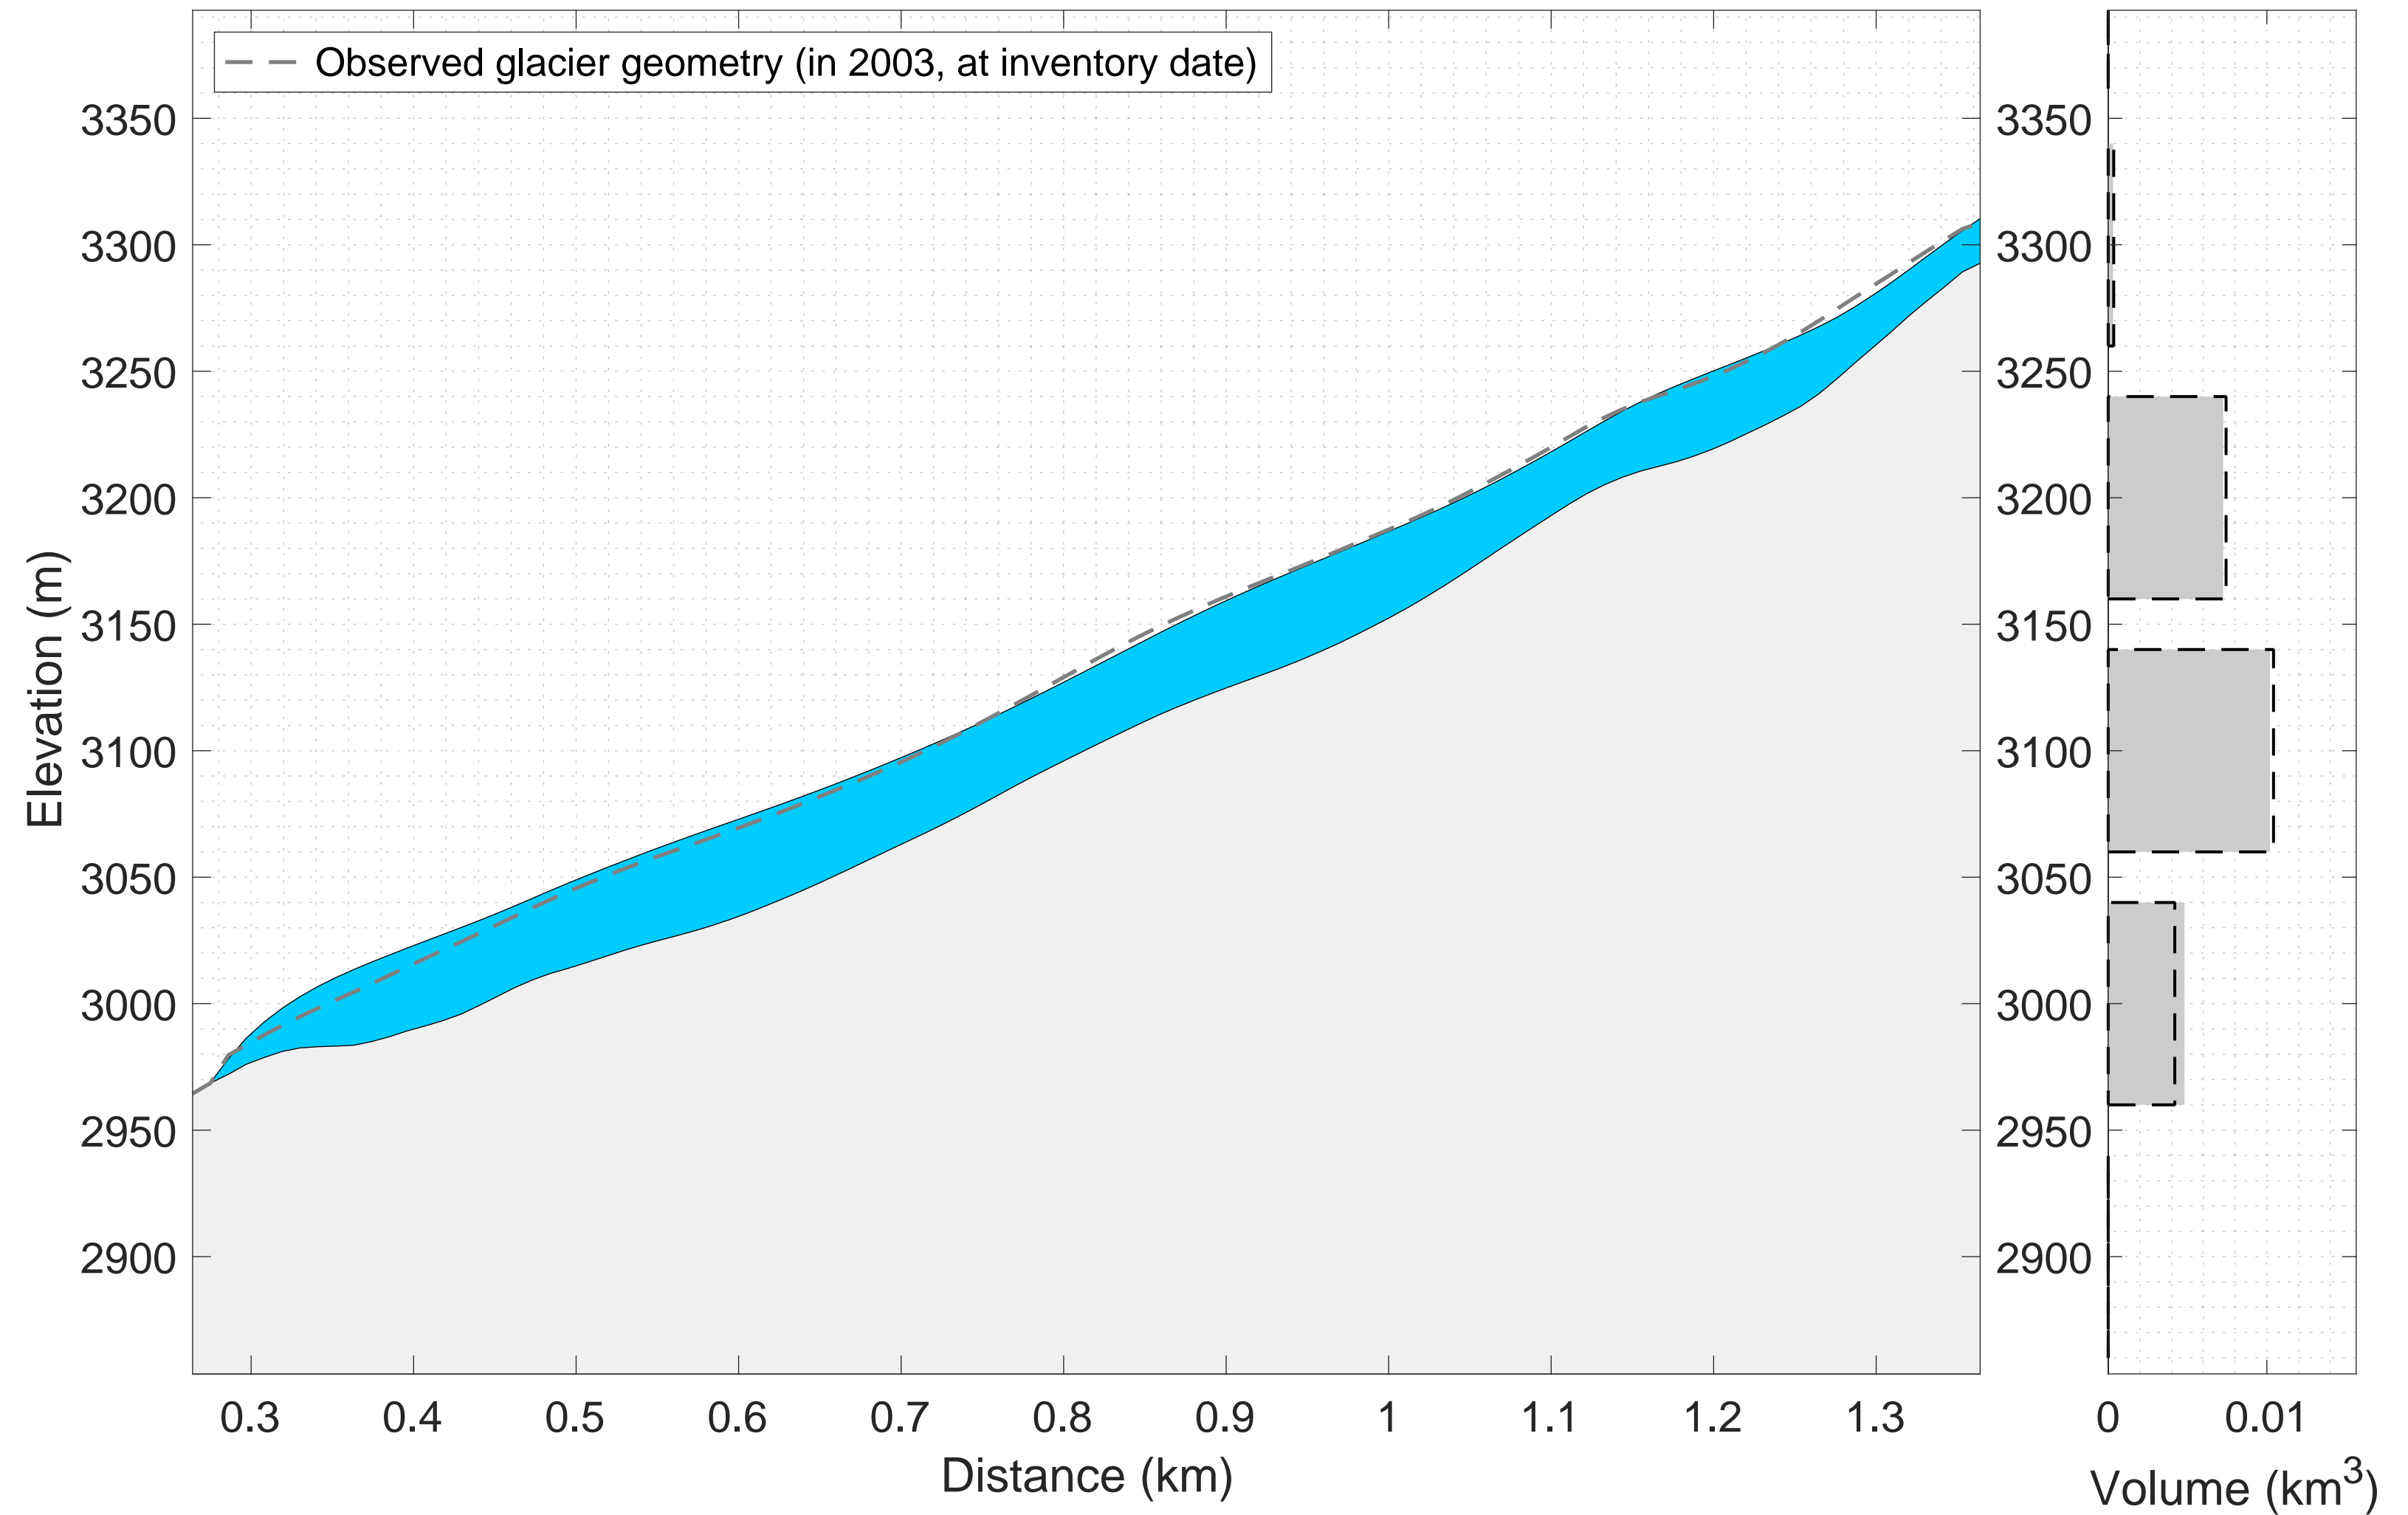

Supplement: Supplementary file 302 [file tc-13-1125-2019-supplement.zip]

**Modelled geometry (Glacier ID = 02529;  $A = 1.7775\text{e-}16 \text{ Pa}^{-3} \text{ a}^{-1}$ ;  $dx = 24 \text{ m}$ )**

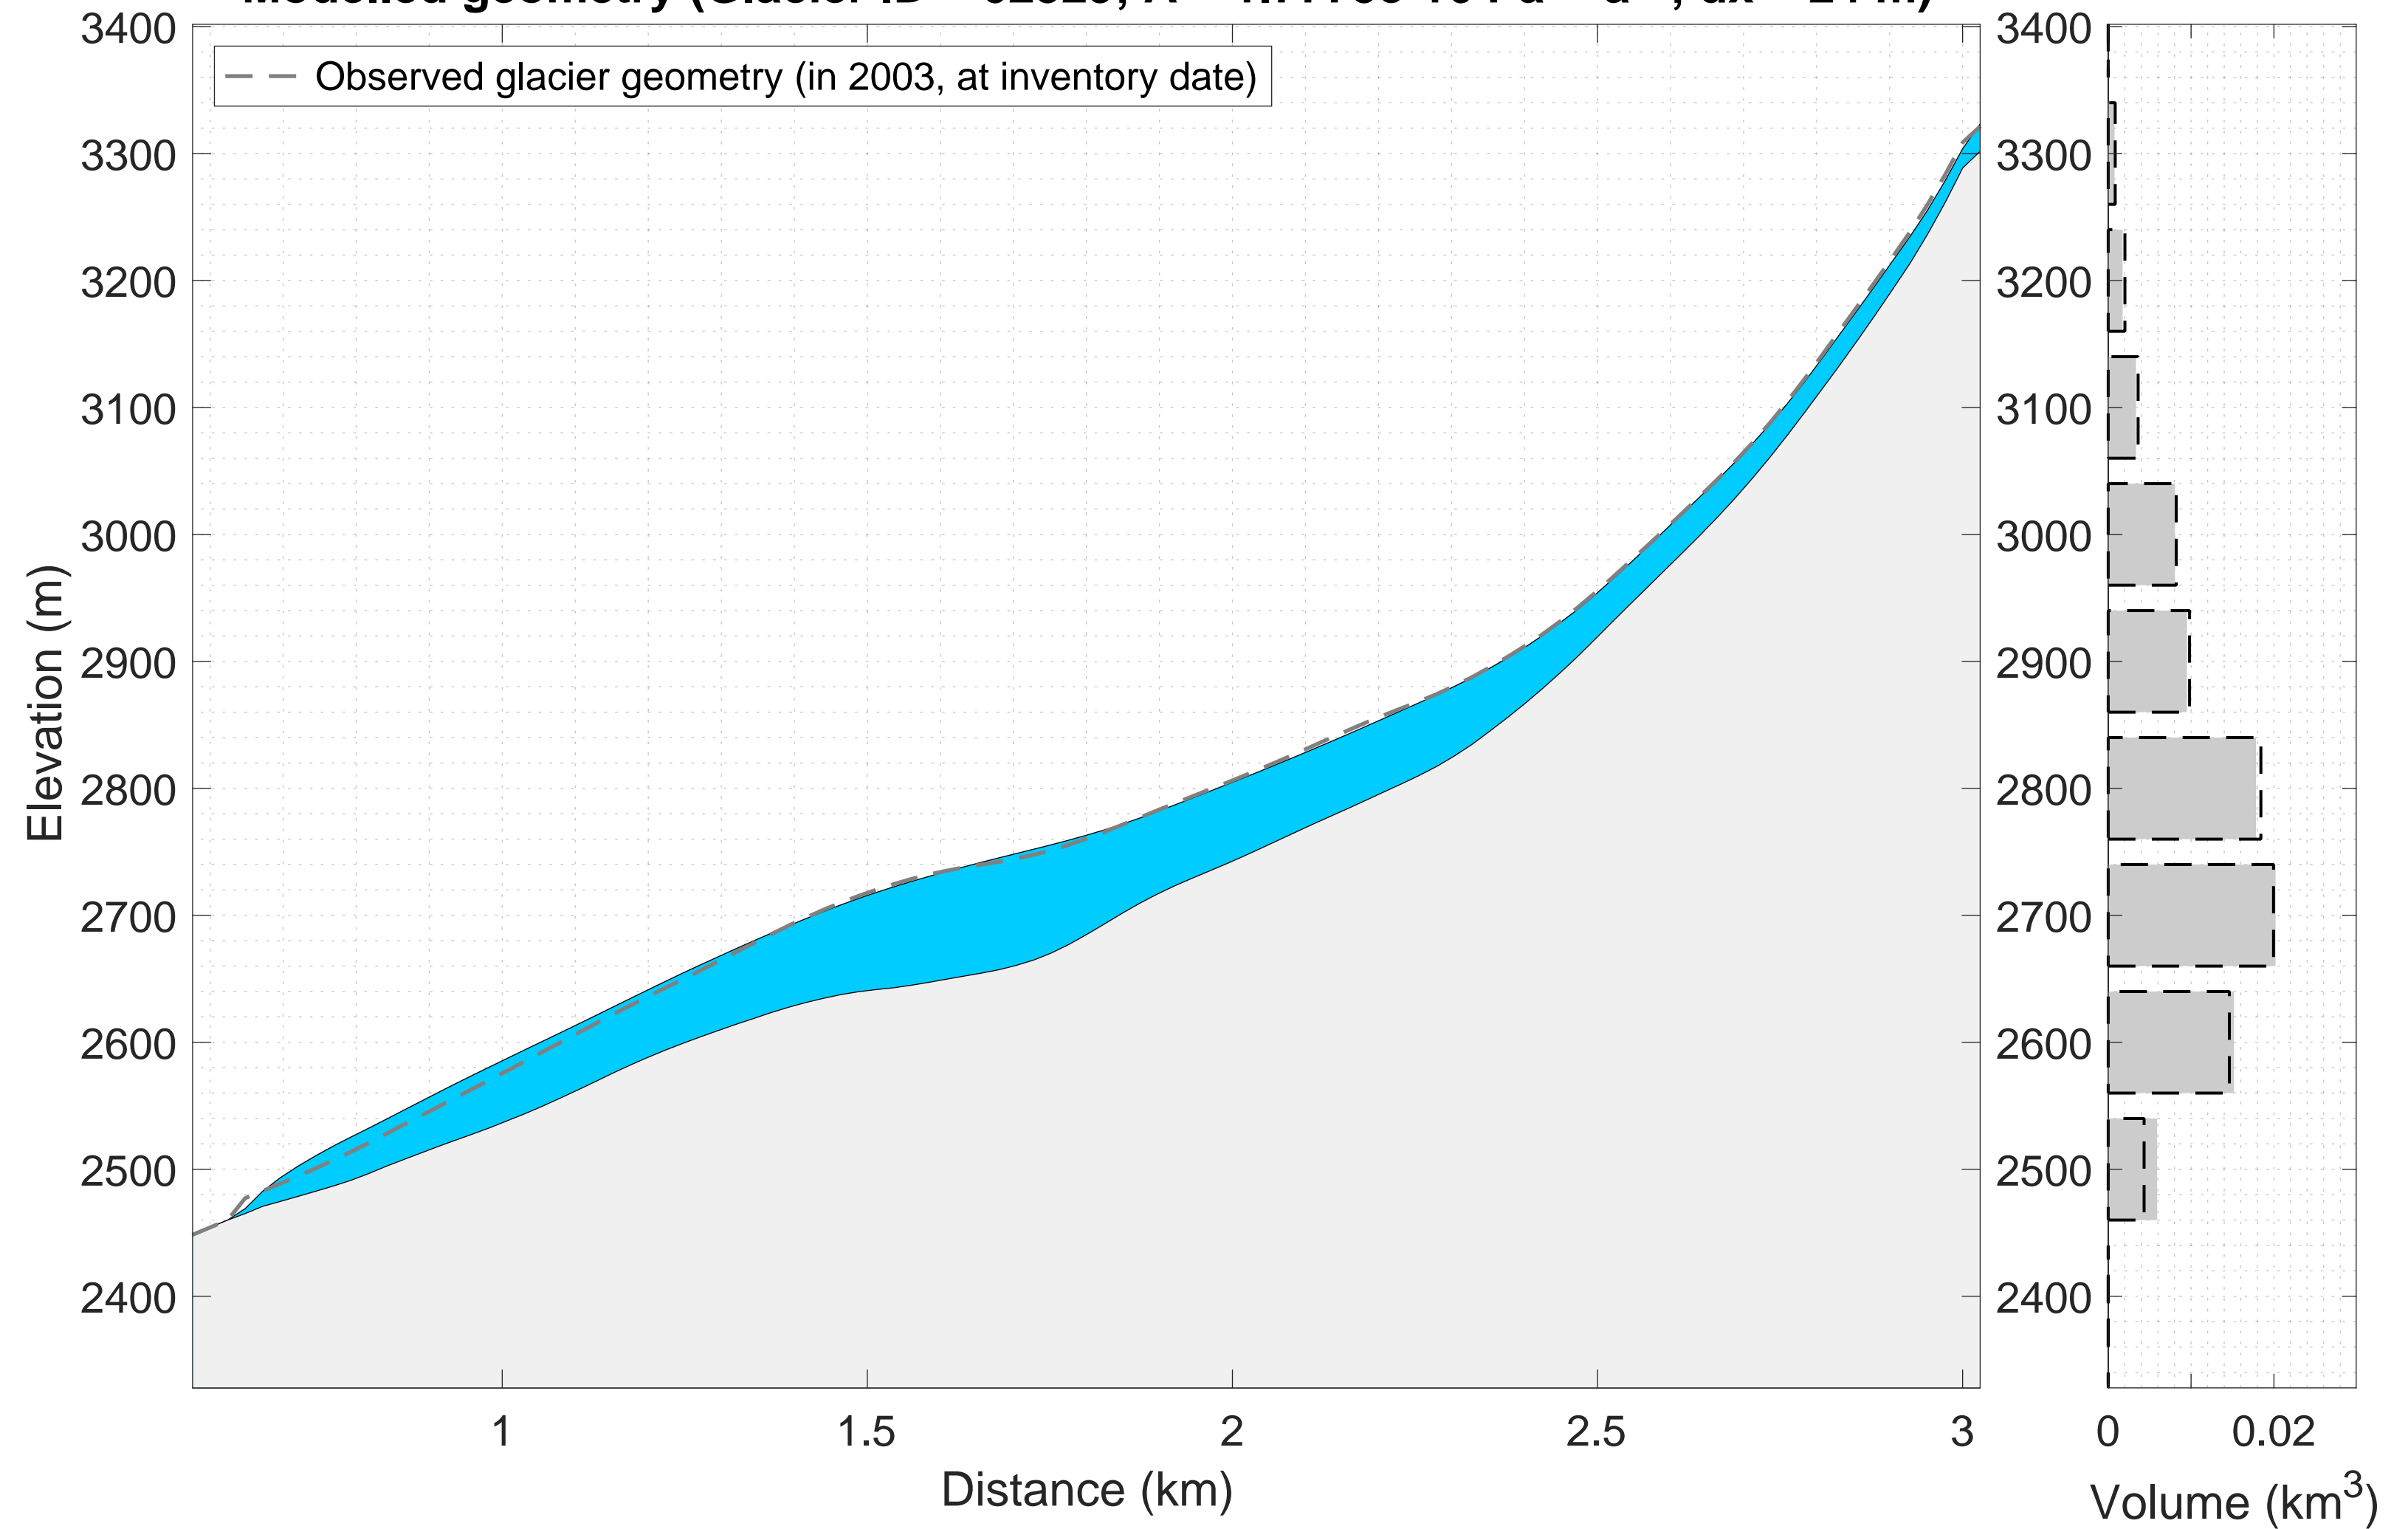

Supplement: Supplementary file 303 [file tc-13-1125-2019-supplement.zip]

**Modelled geometry (Glacier ID = 01161;  $A = 5.6986\text{e-}17 \text{ Pa}^{-3} \text{ a}^{-1}$ ;  $dx = 16 \text{ m}$ )**

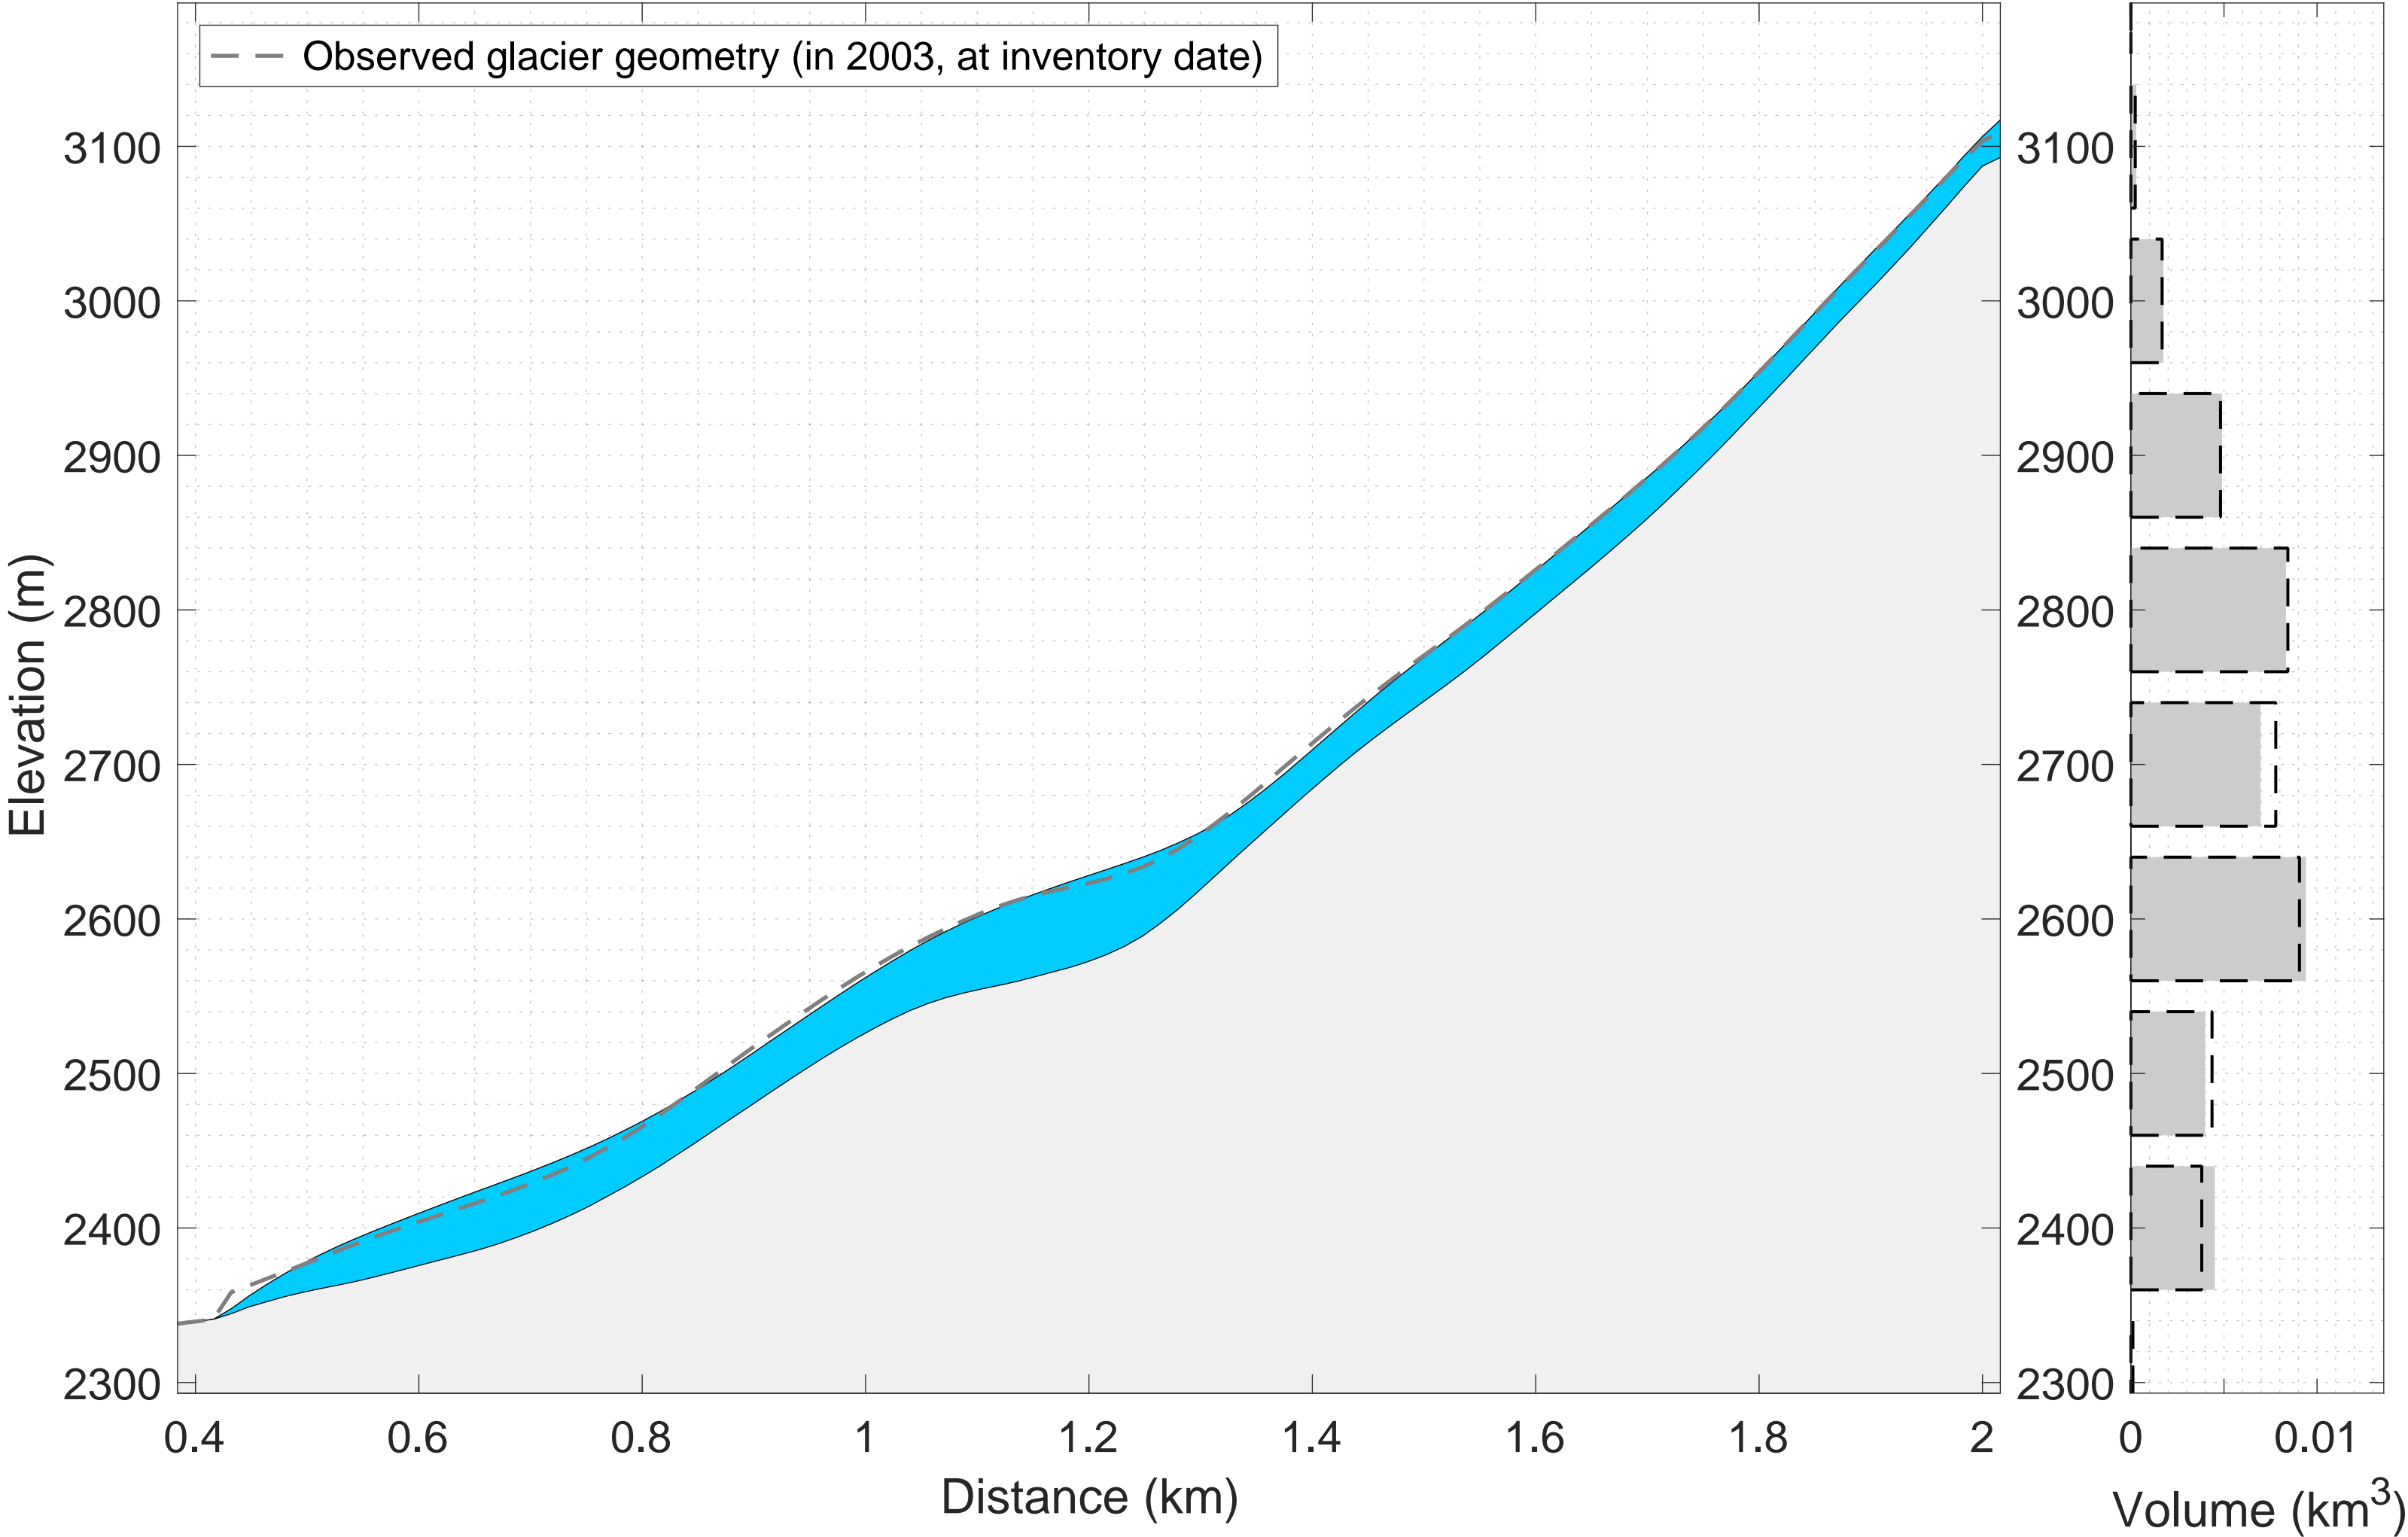

Supplement: Supplementary file 304 [file tc-13-1125-2019-supplement.zip]

**Modelled geometry (Glacier ID = 00062;  $A = 6.0313\text{e-}17 \text{ Pa}^{-3} \text{ a}^{-1}$ ;  $dx = 13 \text{ m}$ )**

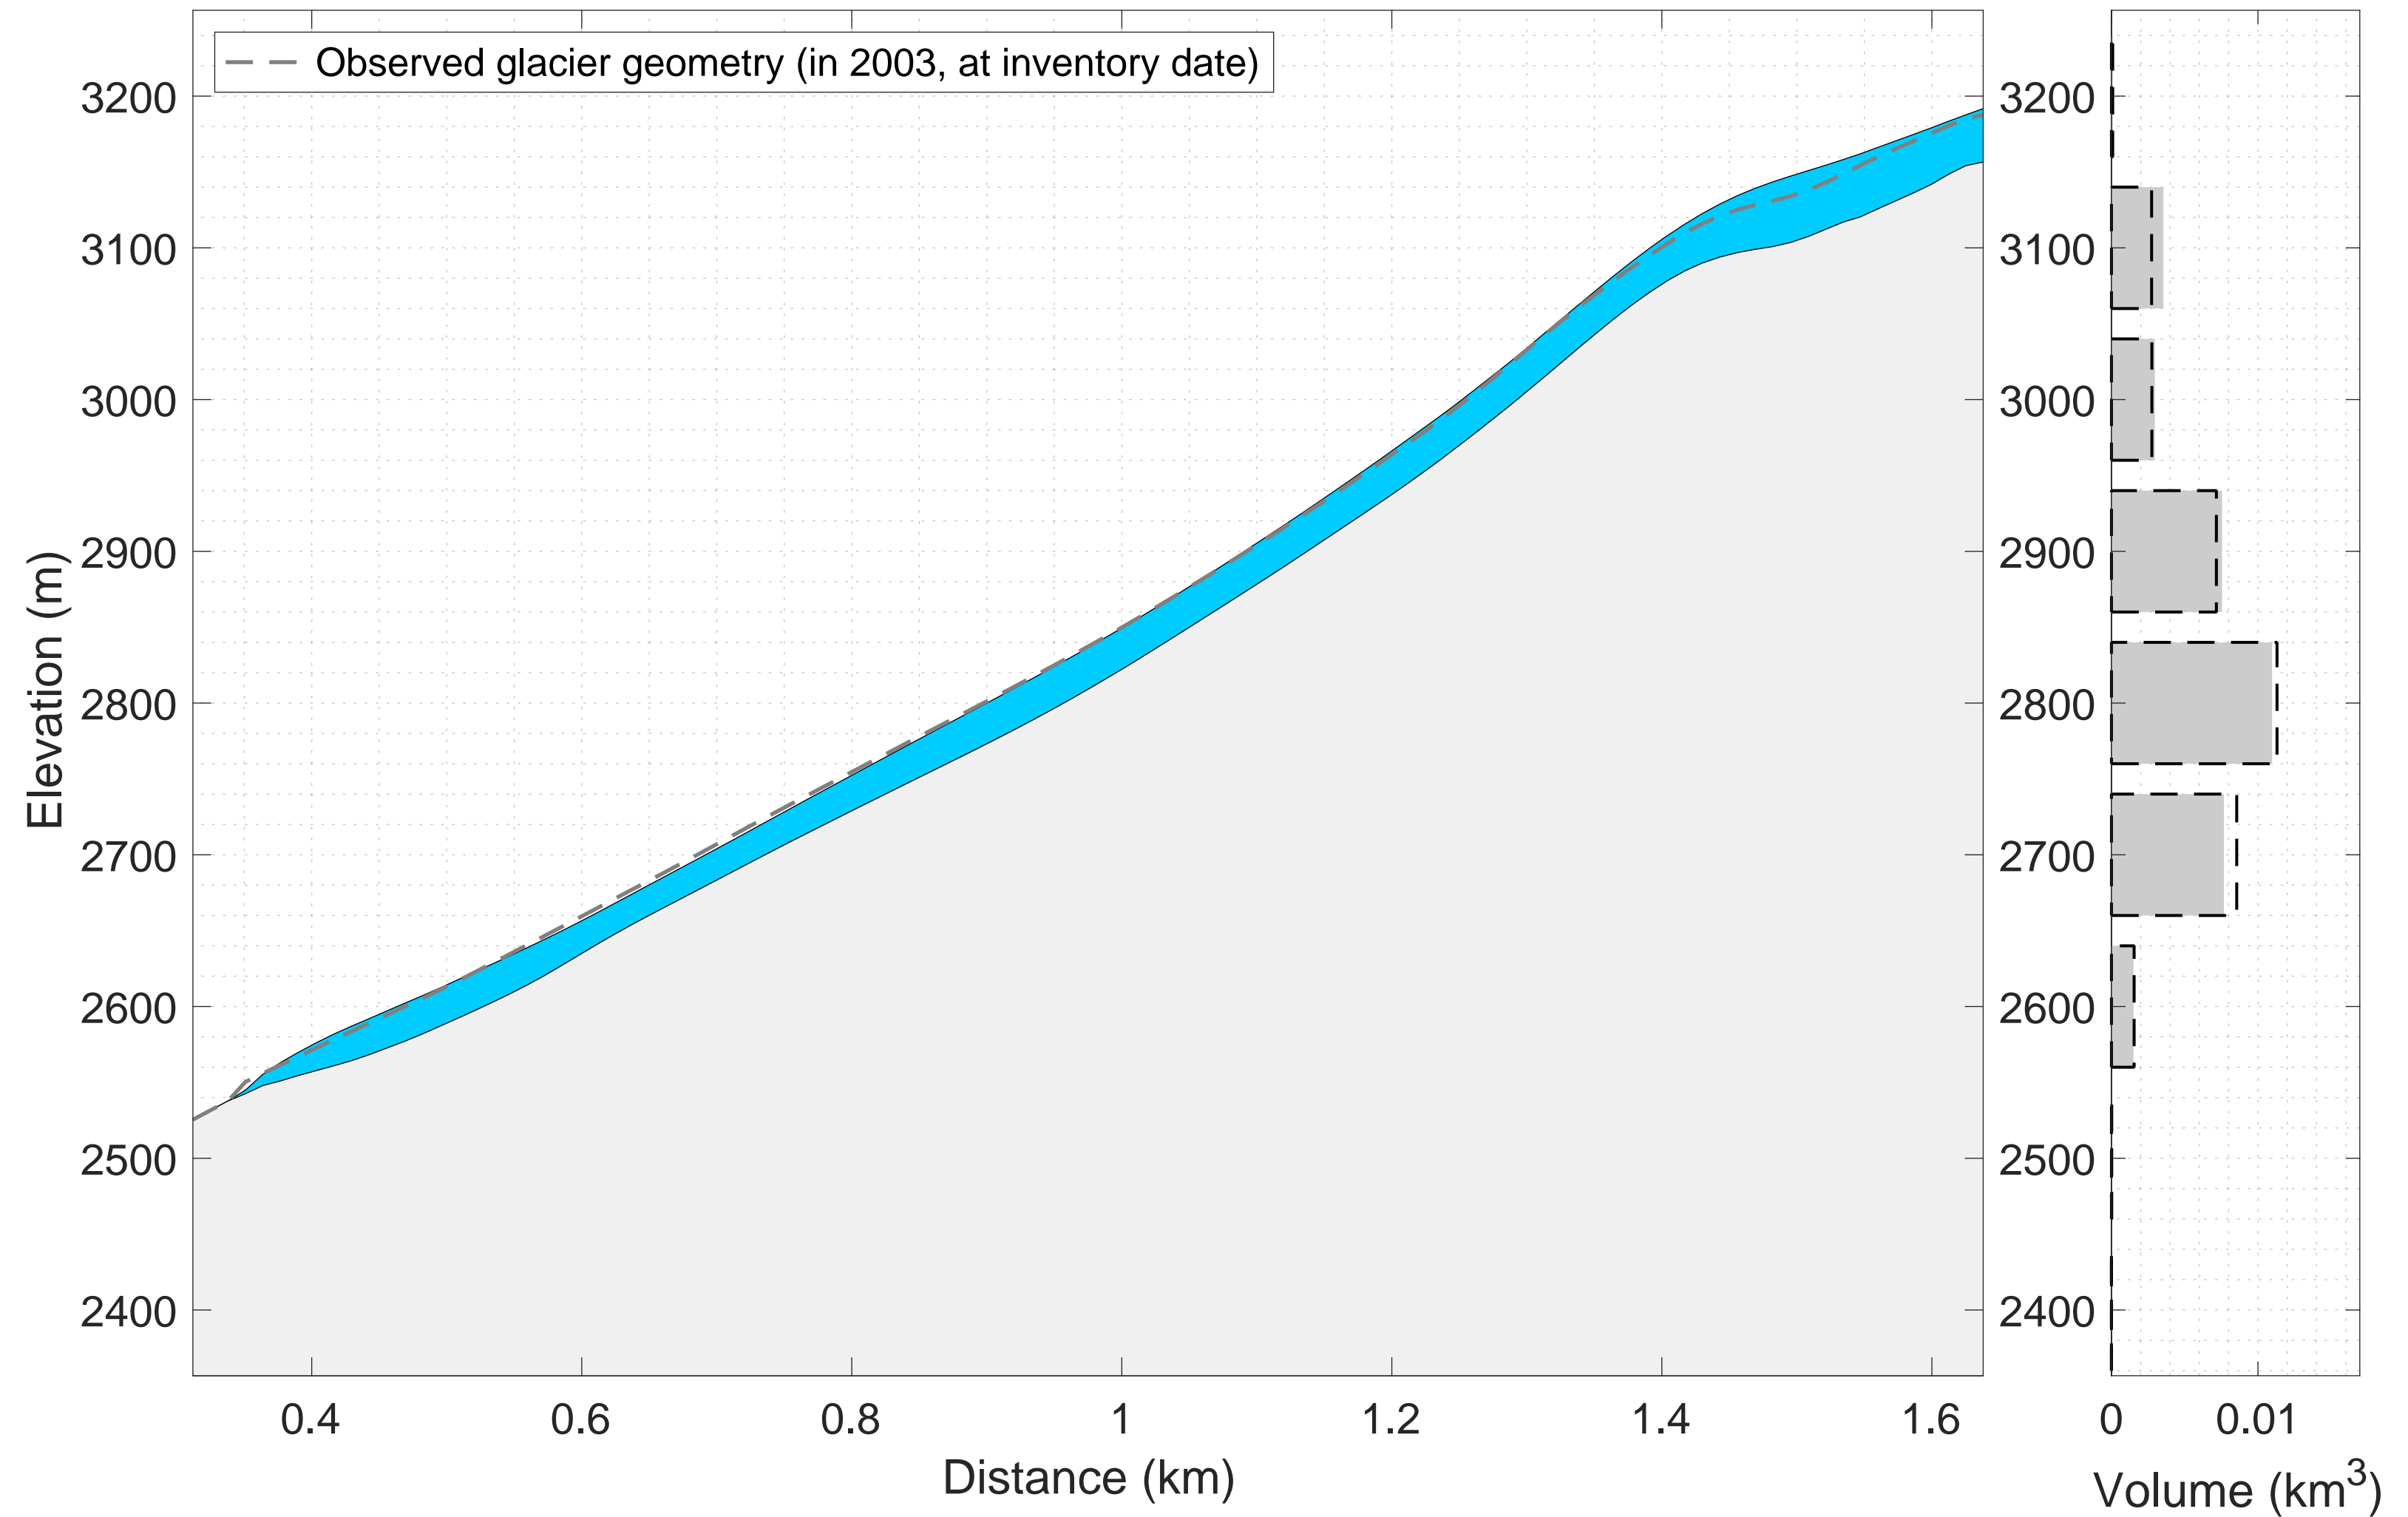

Supplement: Supplementary file 305 [file tc-13-1125-2019-supplement.zip]

**Modelled geometry (Glacier ID = 01868;  $A = 9.22\text{e-}17 \text{ Pa}^{-3} \text{ a}^{-1}$ ;  $dx = 14 \text{ m}$ )**

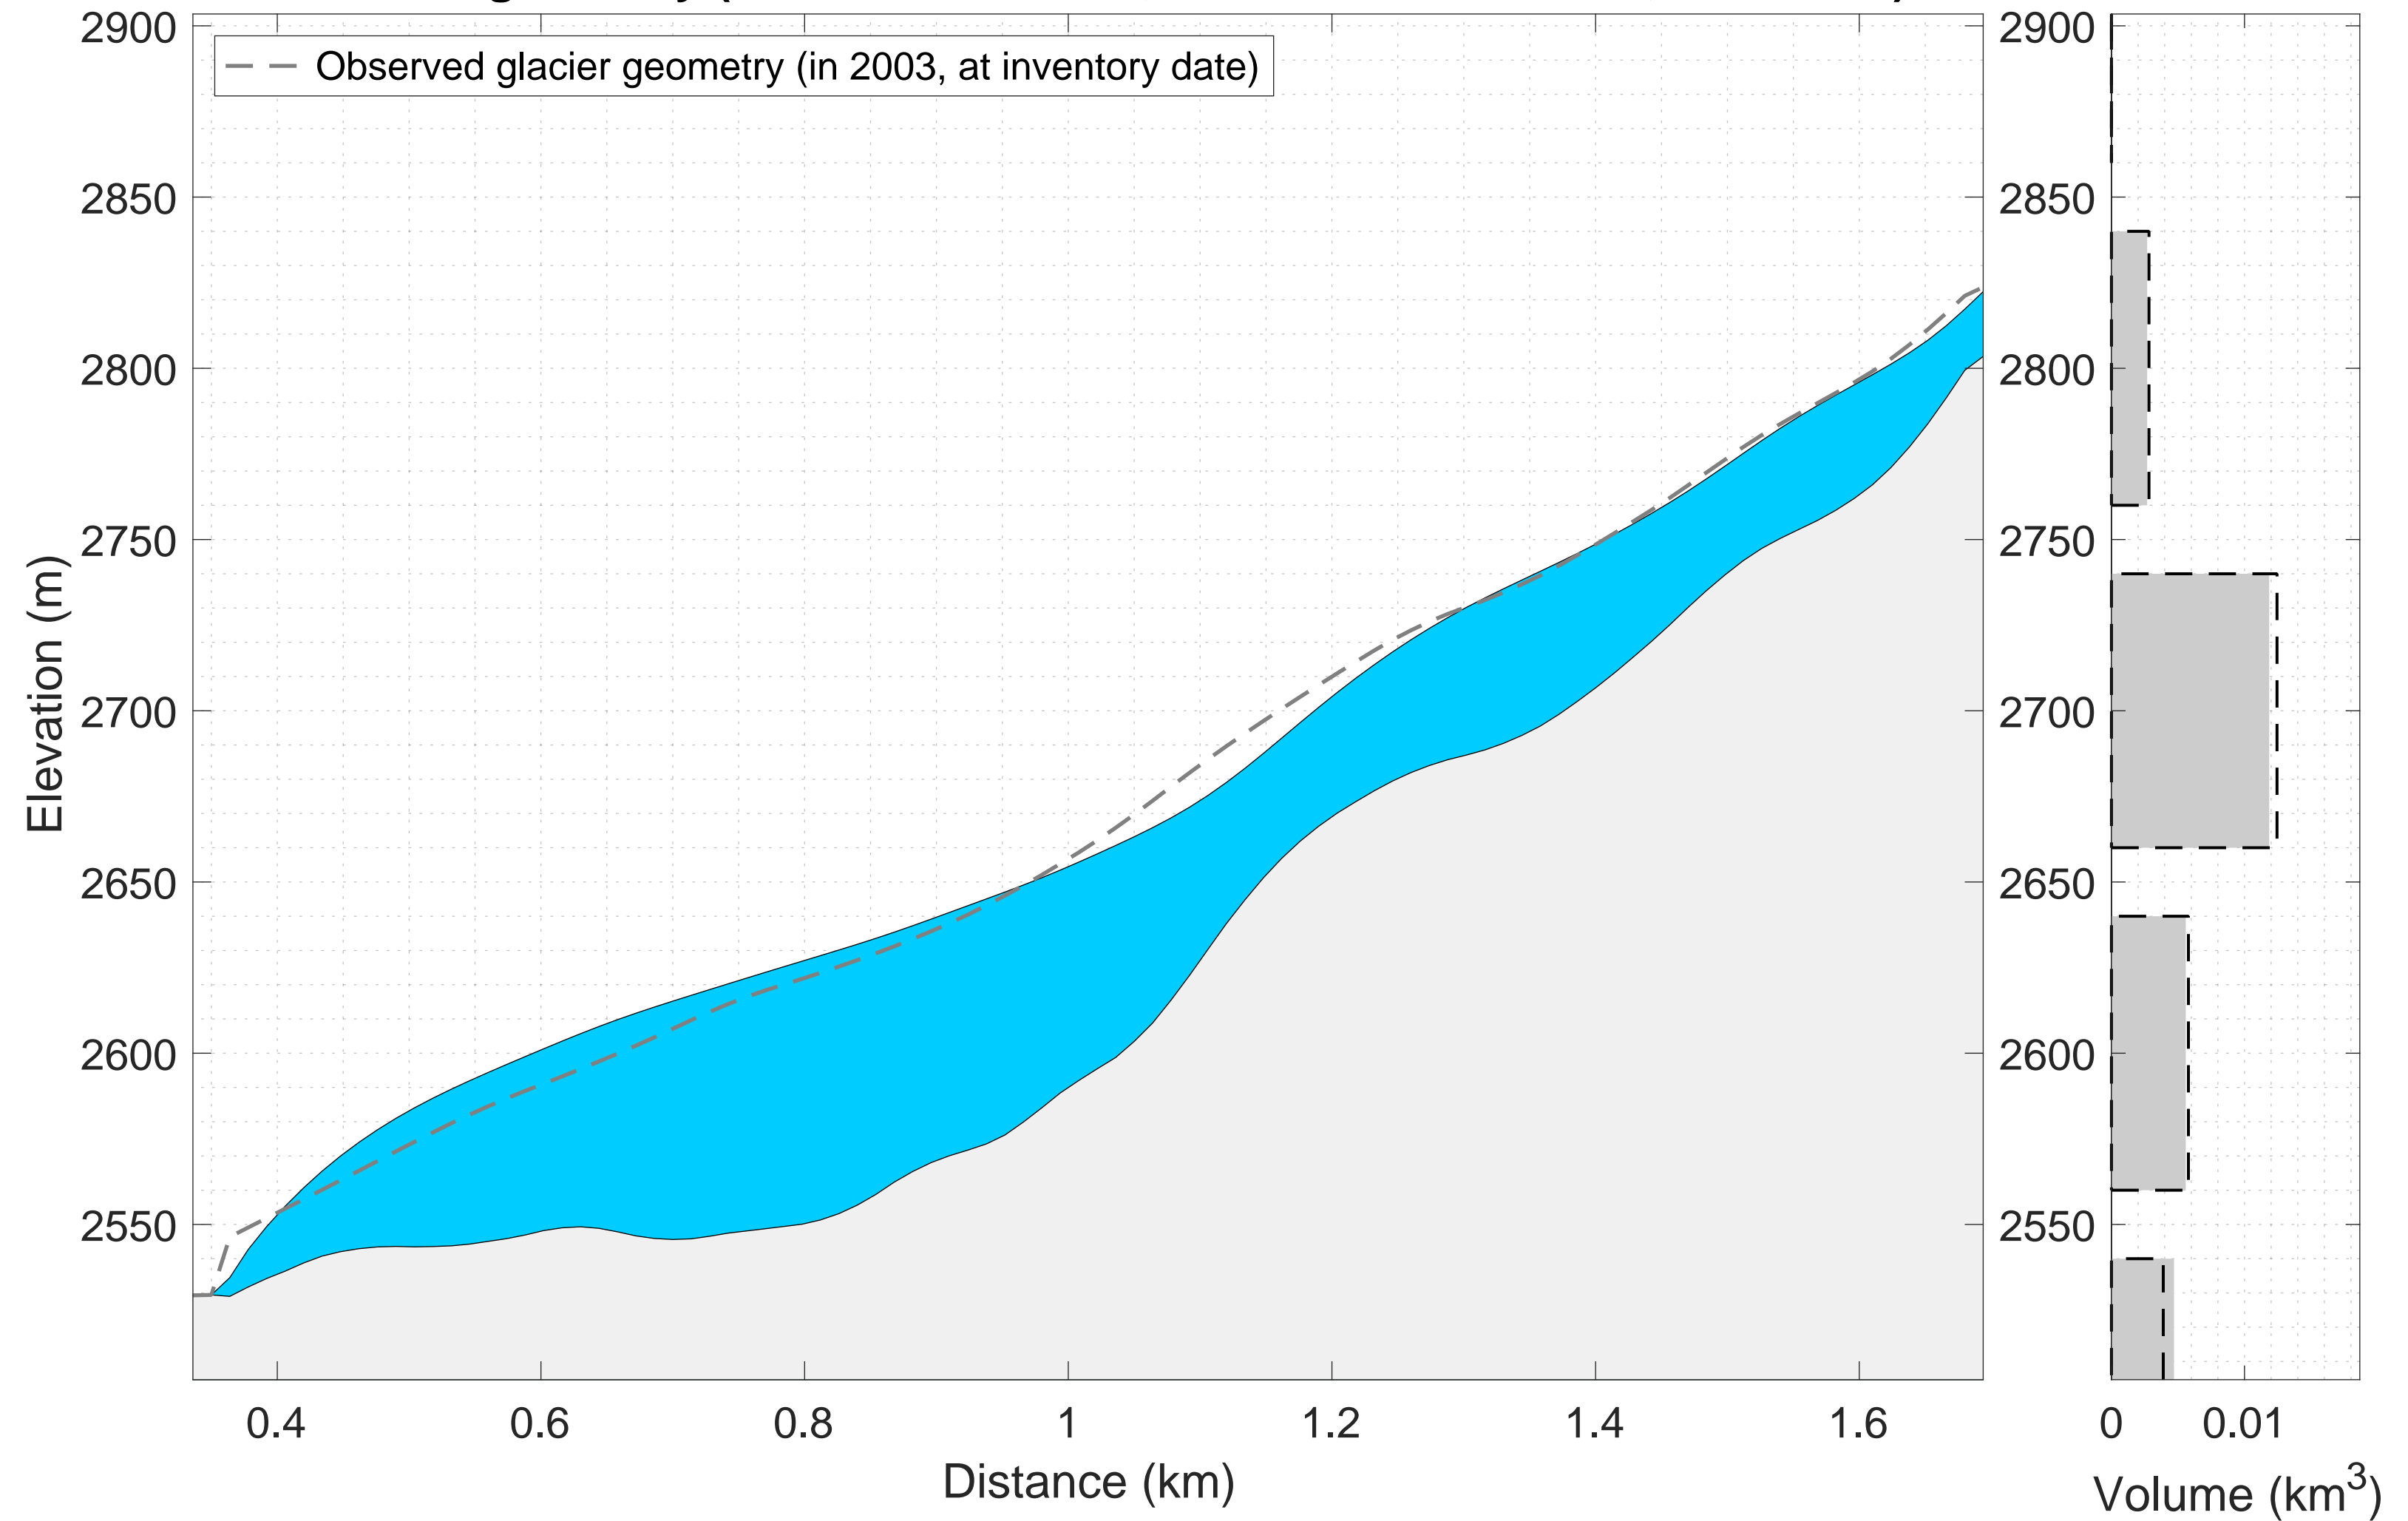

Supplement: Supplementary file 306 [file tc-13-1125-2019-supplement.zip]

**Modelled geometry (Glacier ID = 03290;  $A = 3.5398\text{e-}17 \text{ Pa}^{-3} \text{ a}^{-1}$ ;  $dx = 14 \text{ m}$ )**

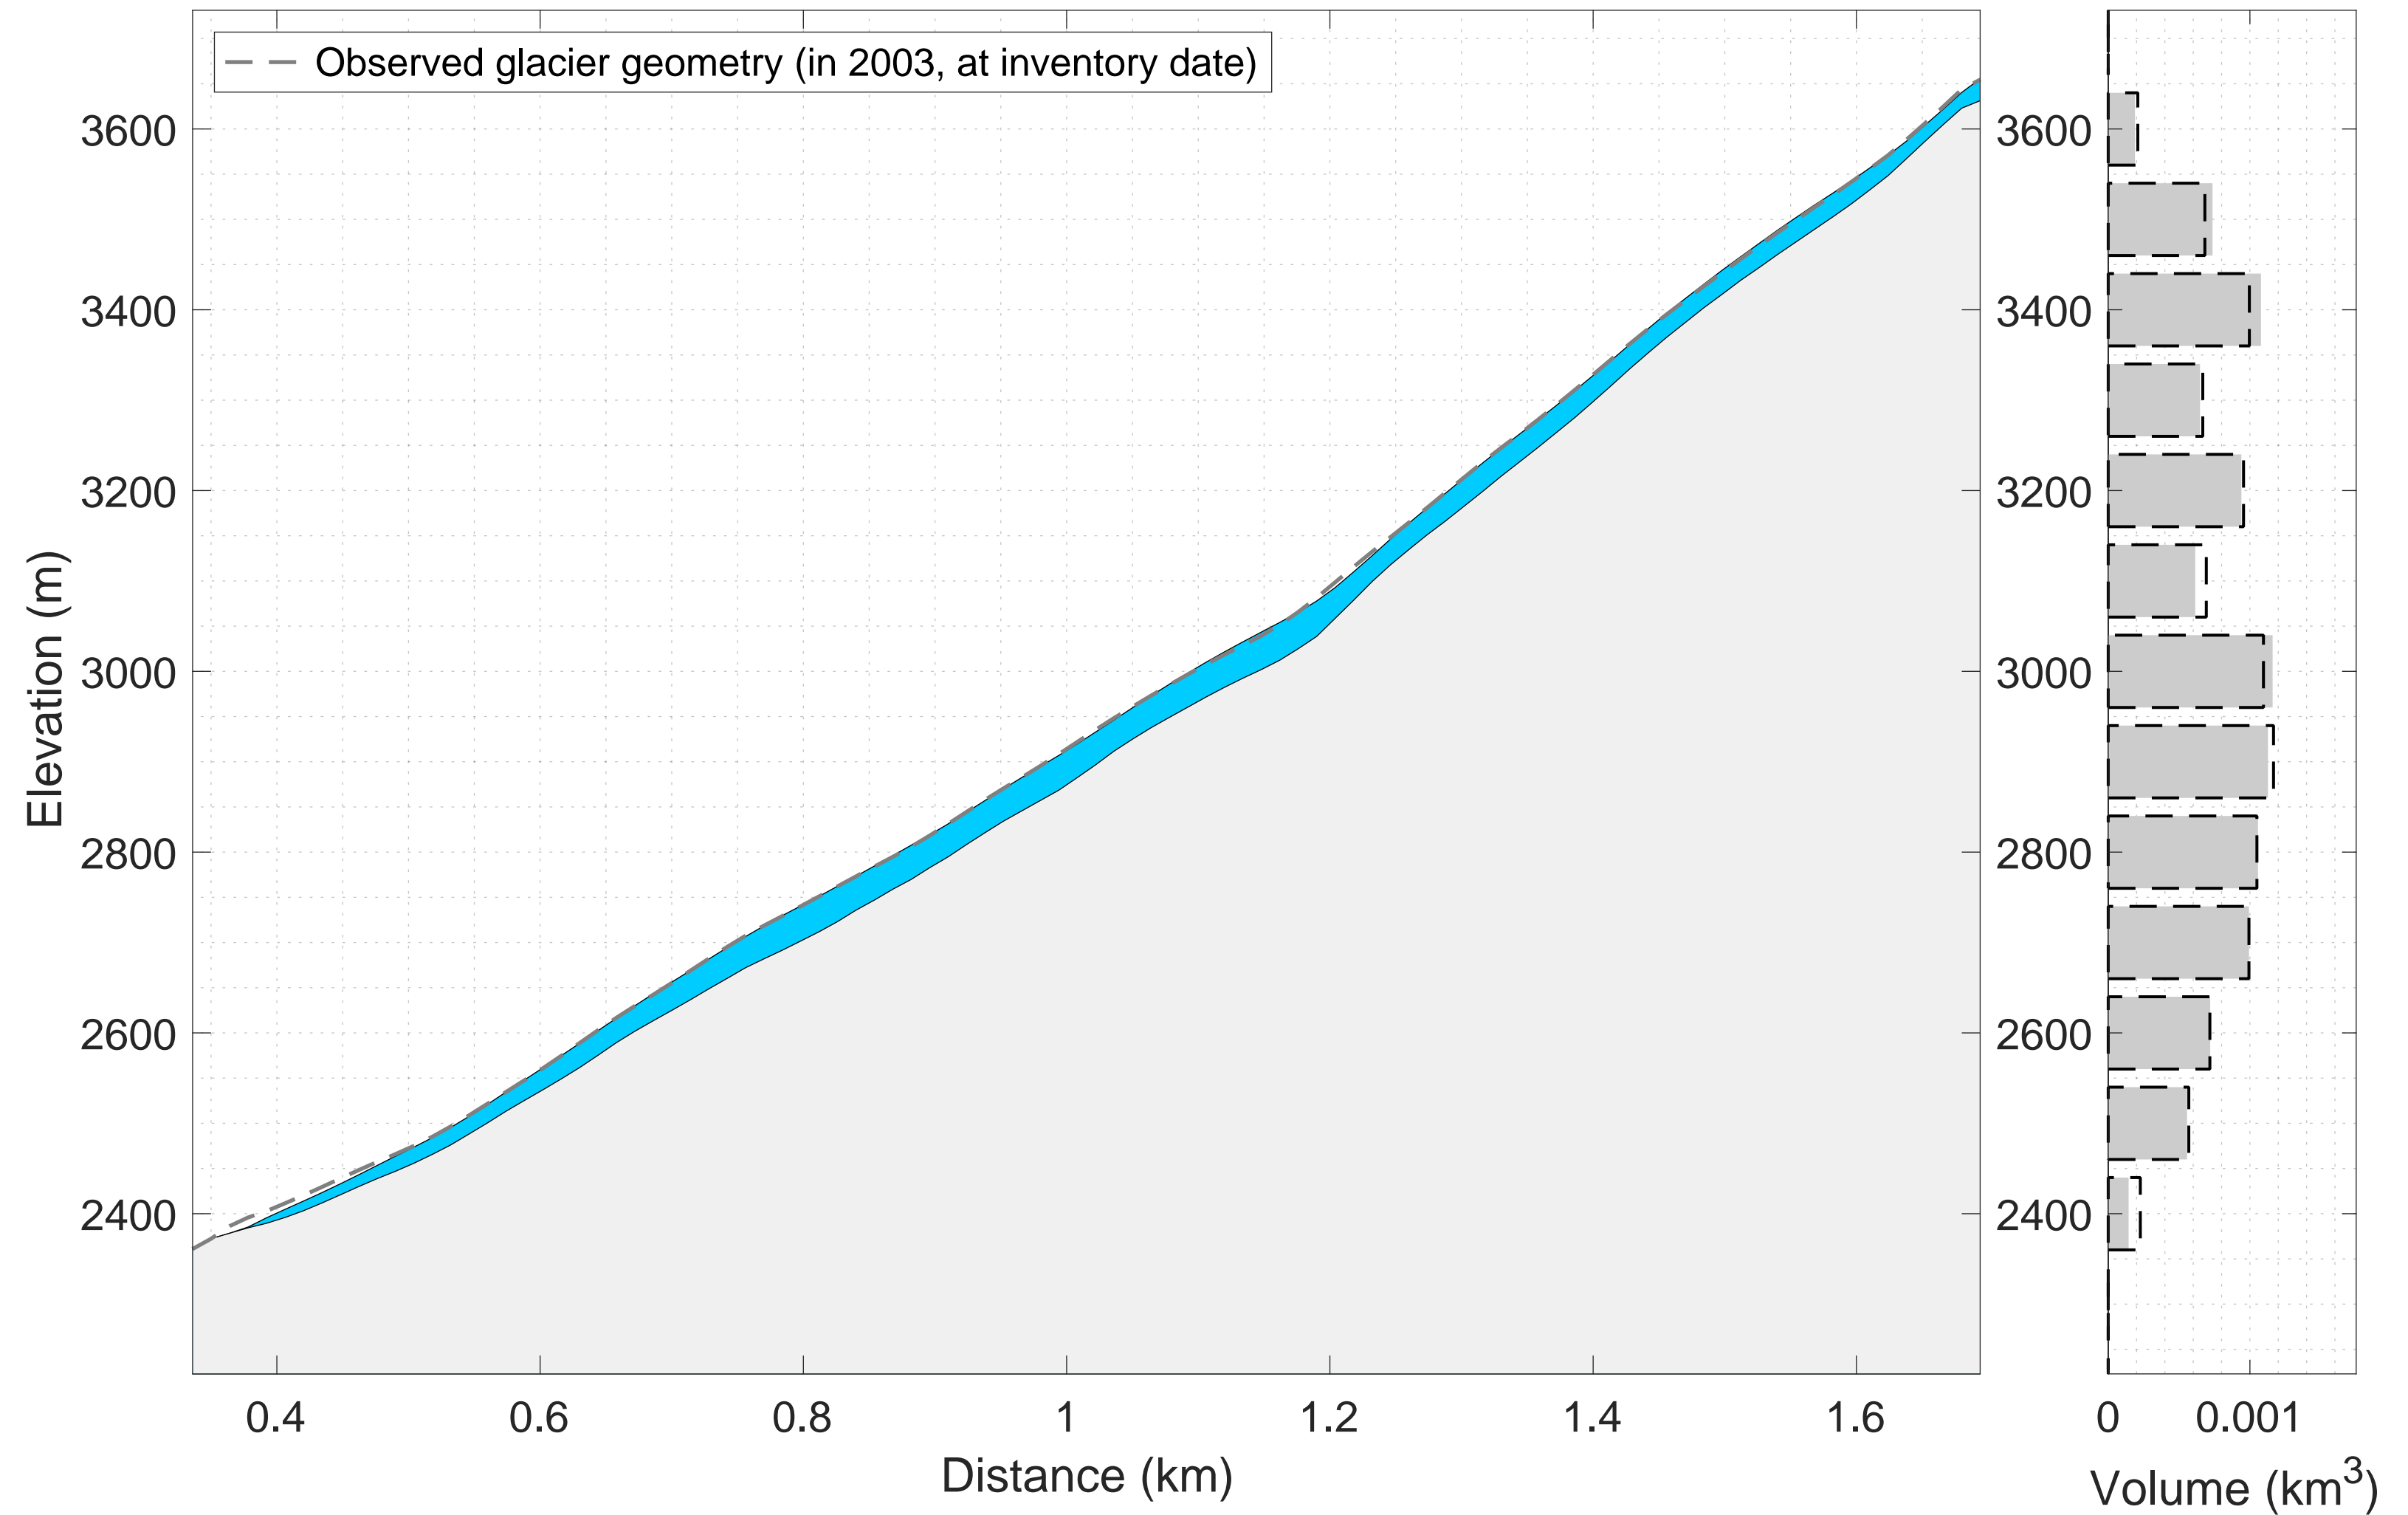

Supplement: Supplementary file 307 [file tc-13-1125-2019-supplement.zip]

**Modelled geometry (Glacier ID = 02922;  $A = 1.4704\text{e-}16 \text{ Pa}^{-3} \text{ a}^{-1}$ ;  $dx = 54 \text{ m}$ )**

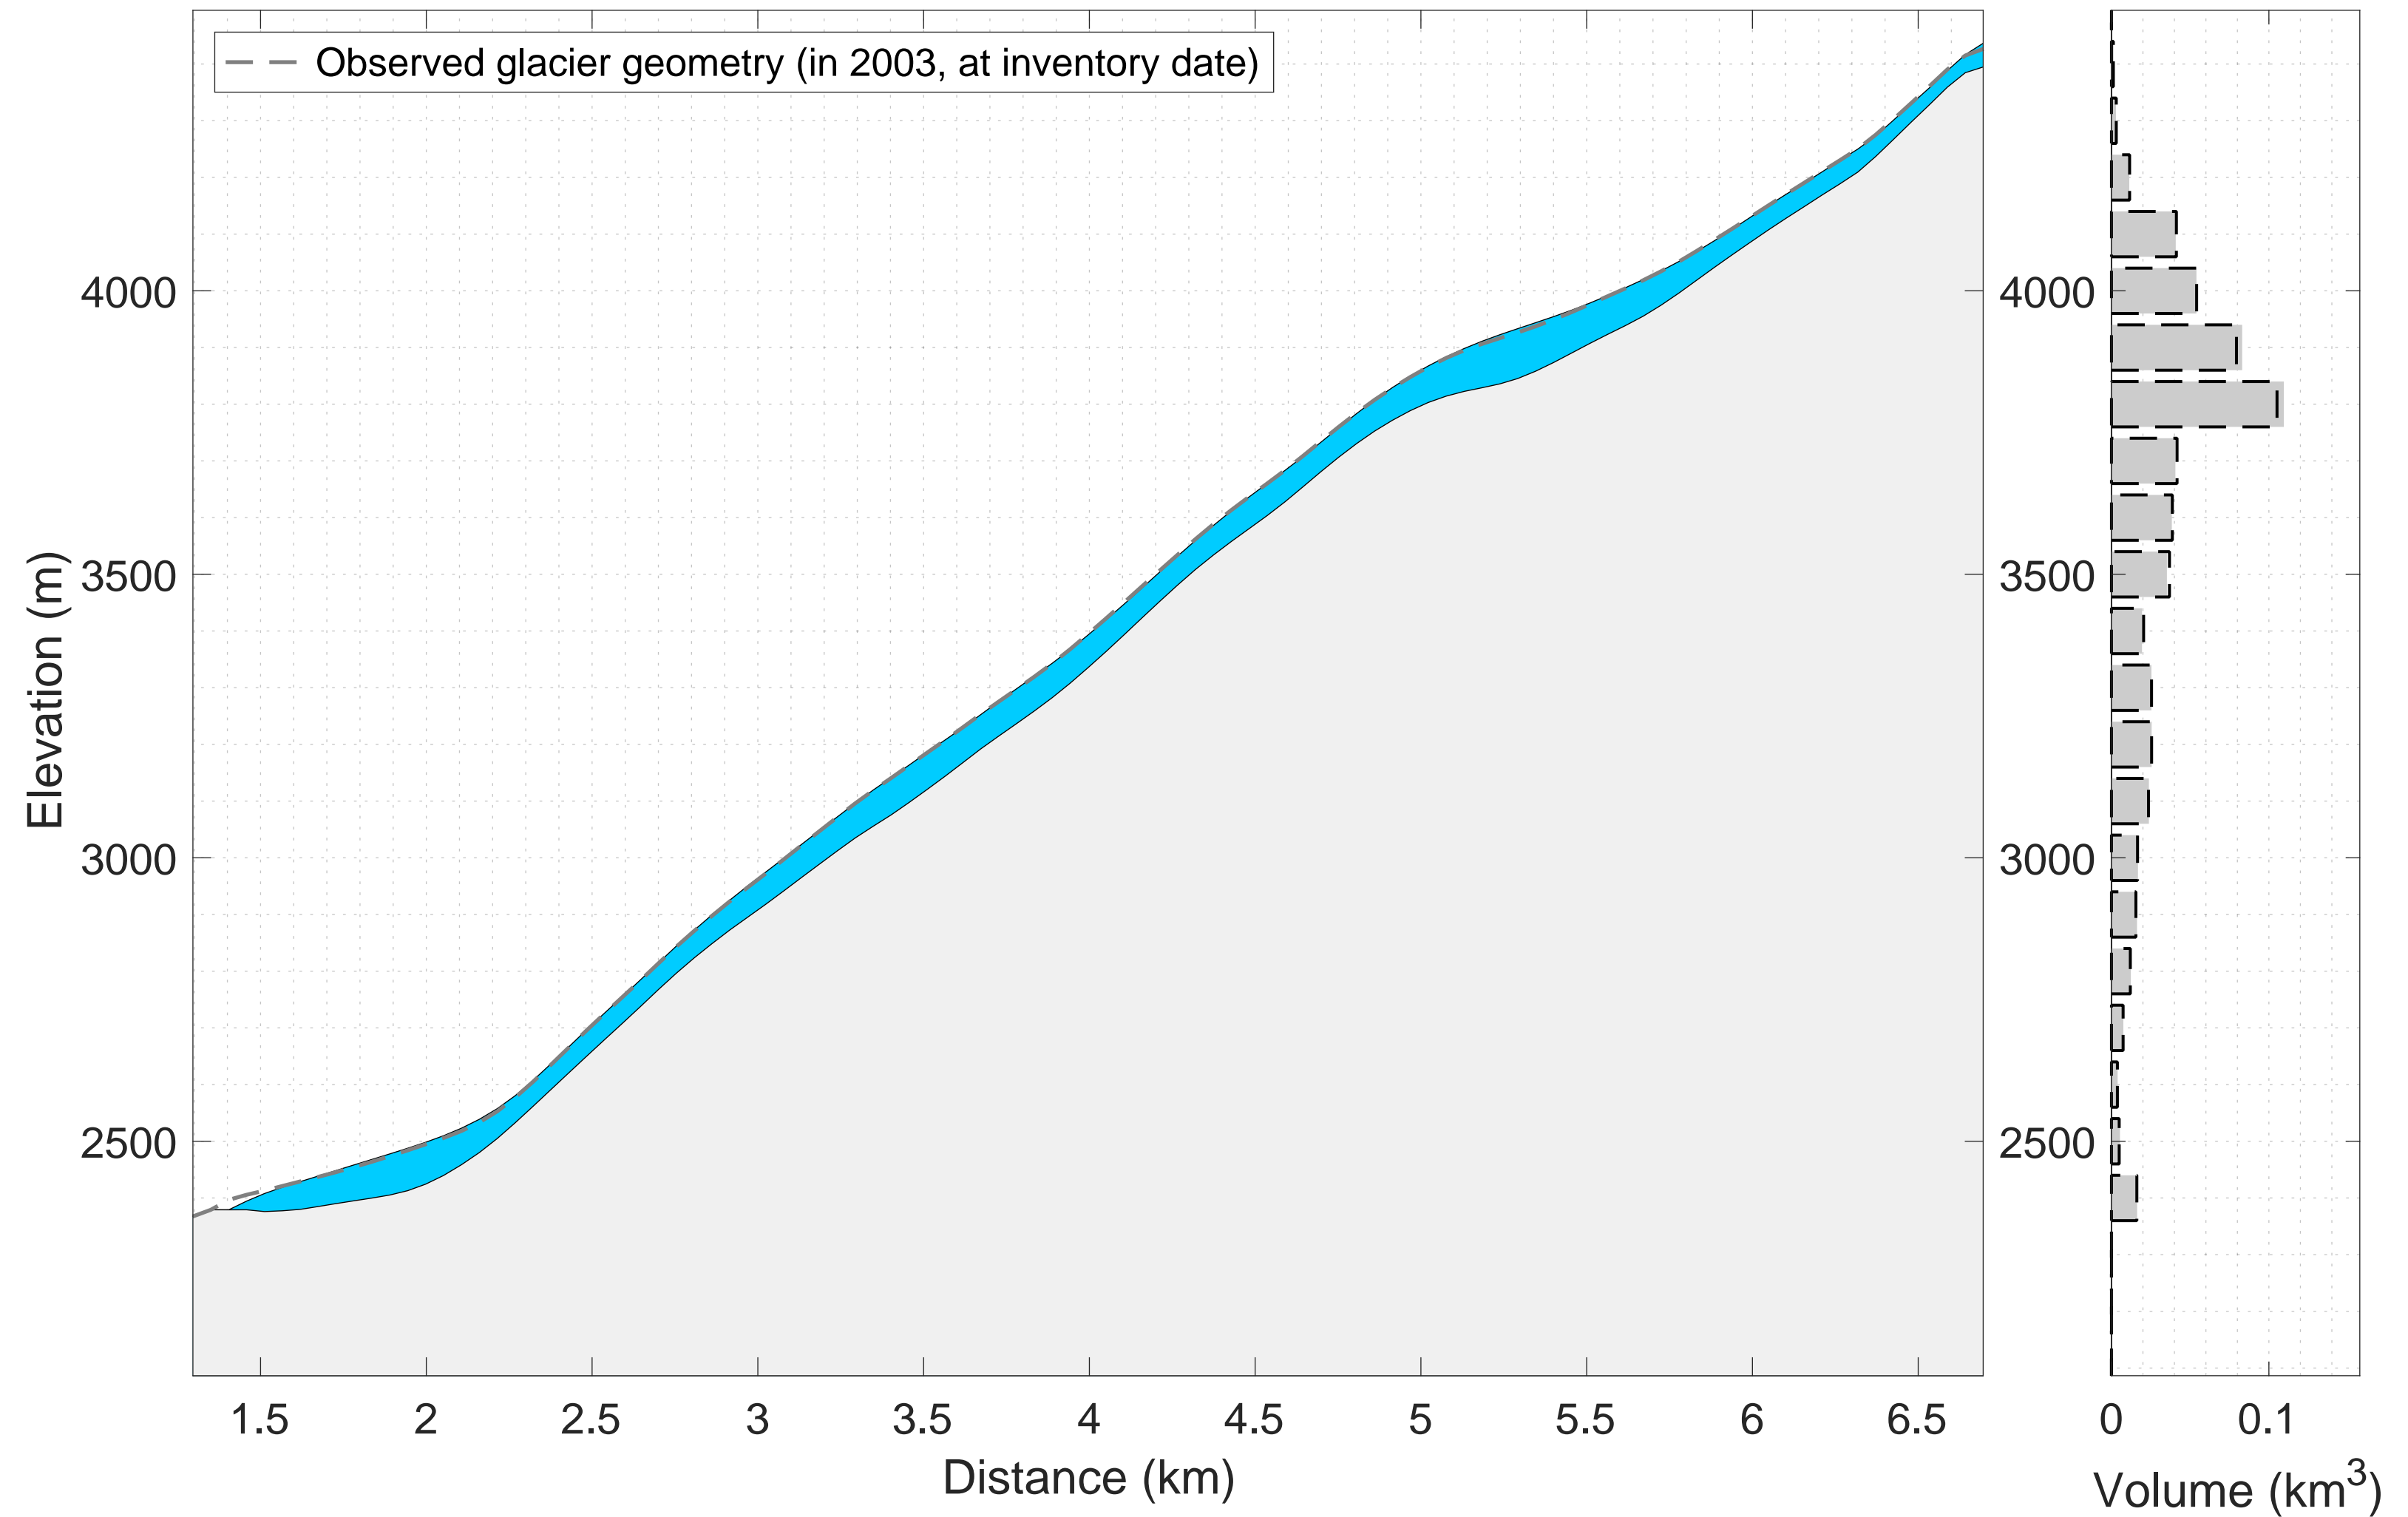

Supplement: Supplementary file 308 [file tc-13-1125-2019-supplement.zip]

**Modelled geometry (Glacier ID = 01757;  $A = 1.4687\text{e-}16 \text{ Pa}^{-3} \text{ a}^{-1}$ ;  $dx = 12 \text{ m}$ )**

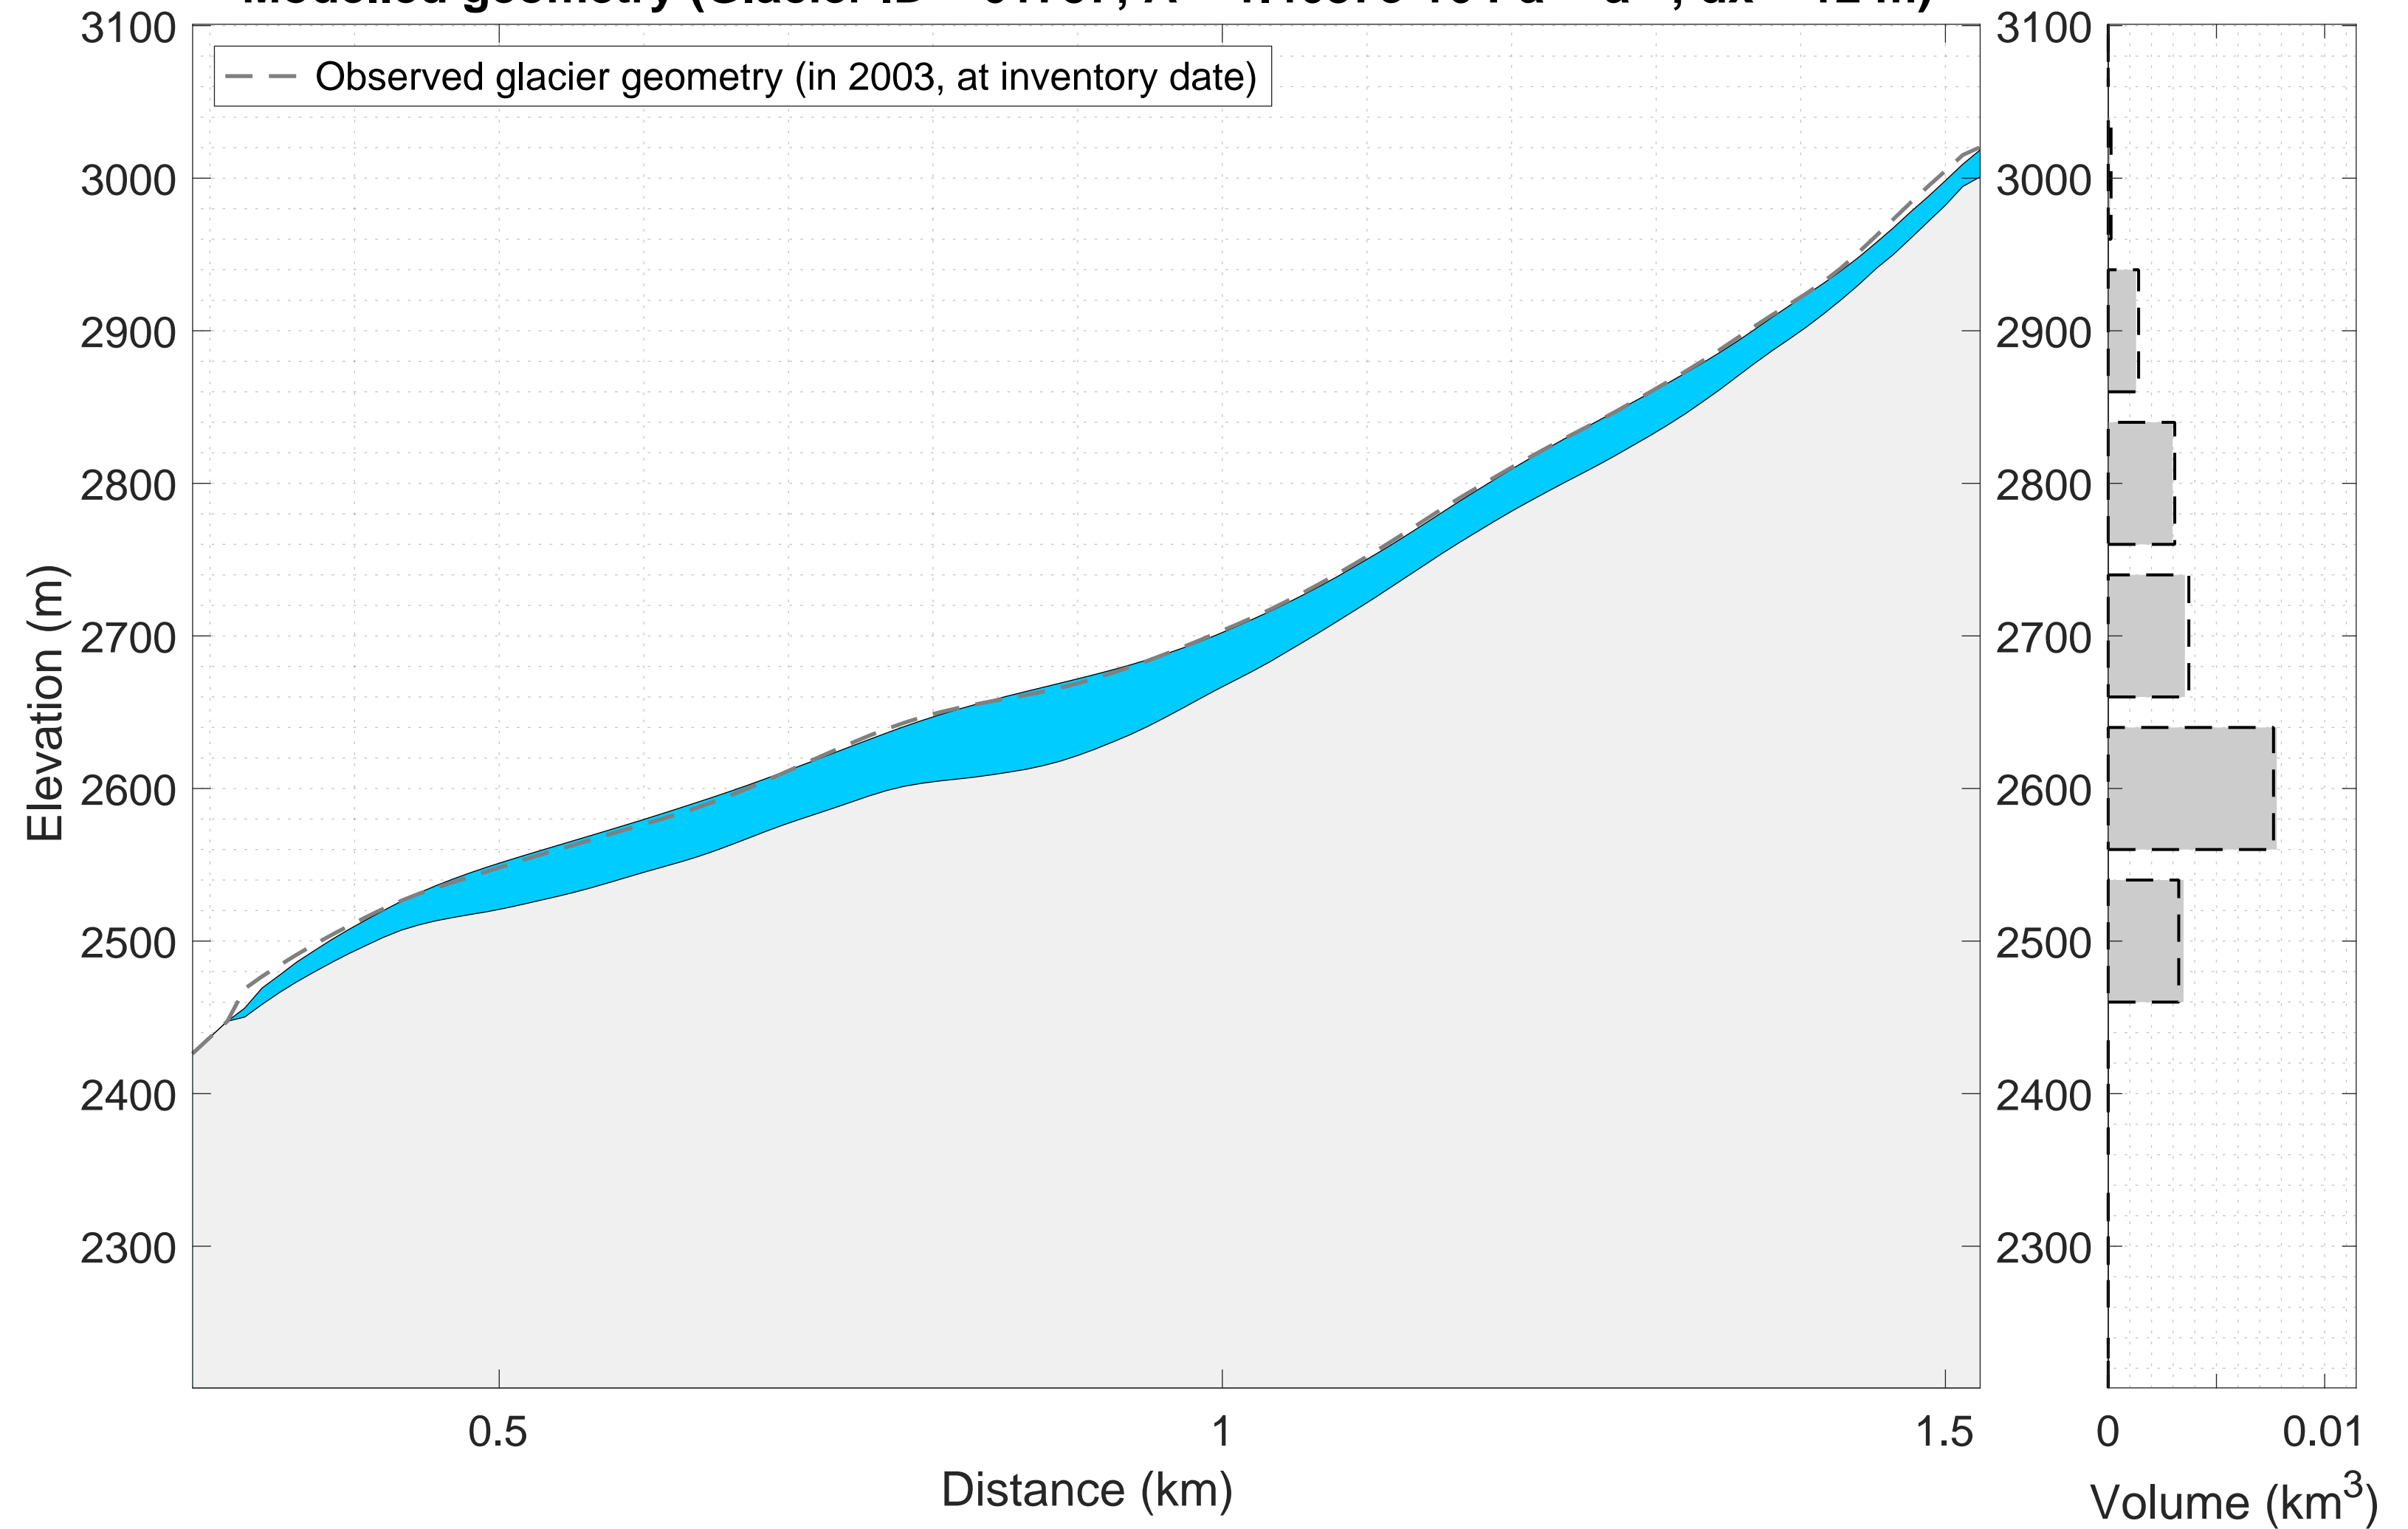

Supplement: Supplementary file 309 [file tc-13-1125-2019-supplement.zip]

**Modelled geometry (Glacier ID = 00392;  $A = 9.1575\text{e-}17 \text{ Pa}^{-3} \text{ a}^{-1}$ ;  $dx = 23 \text{ m}$ )**

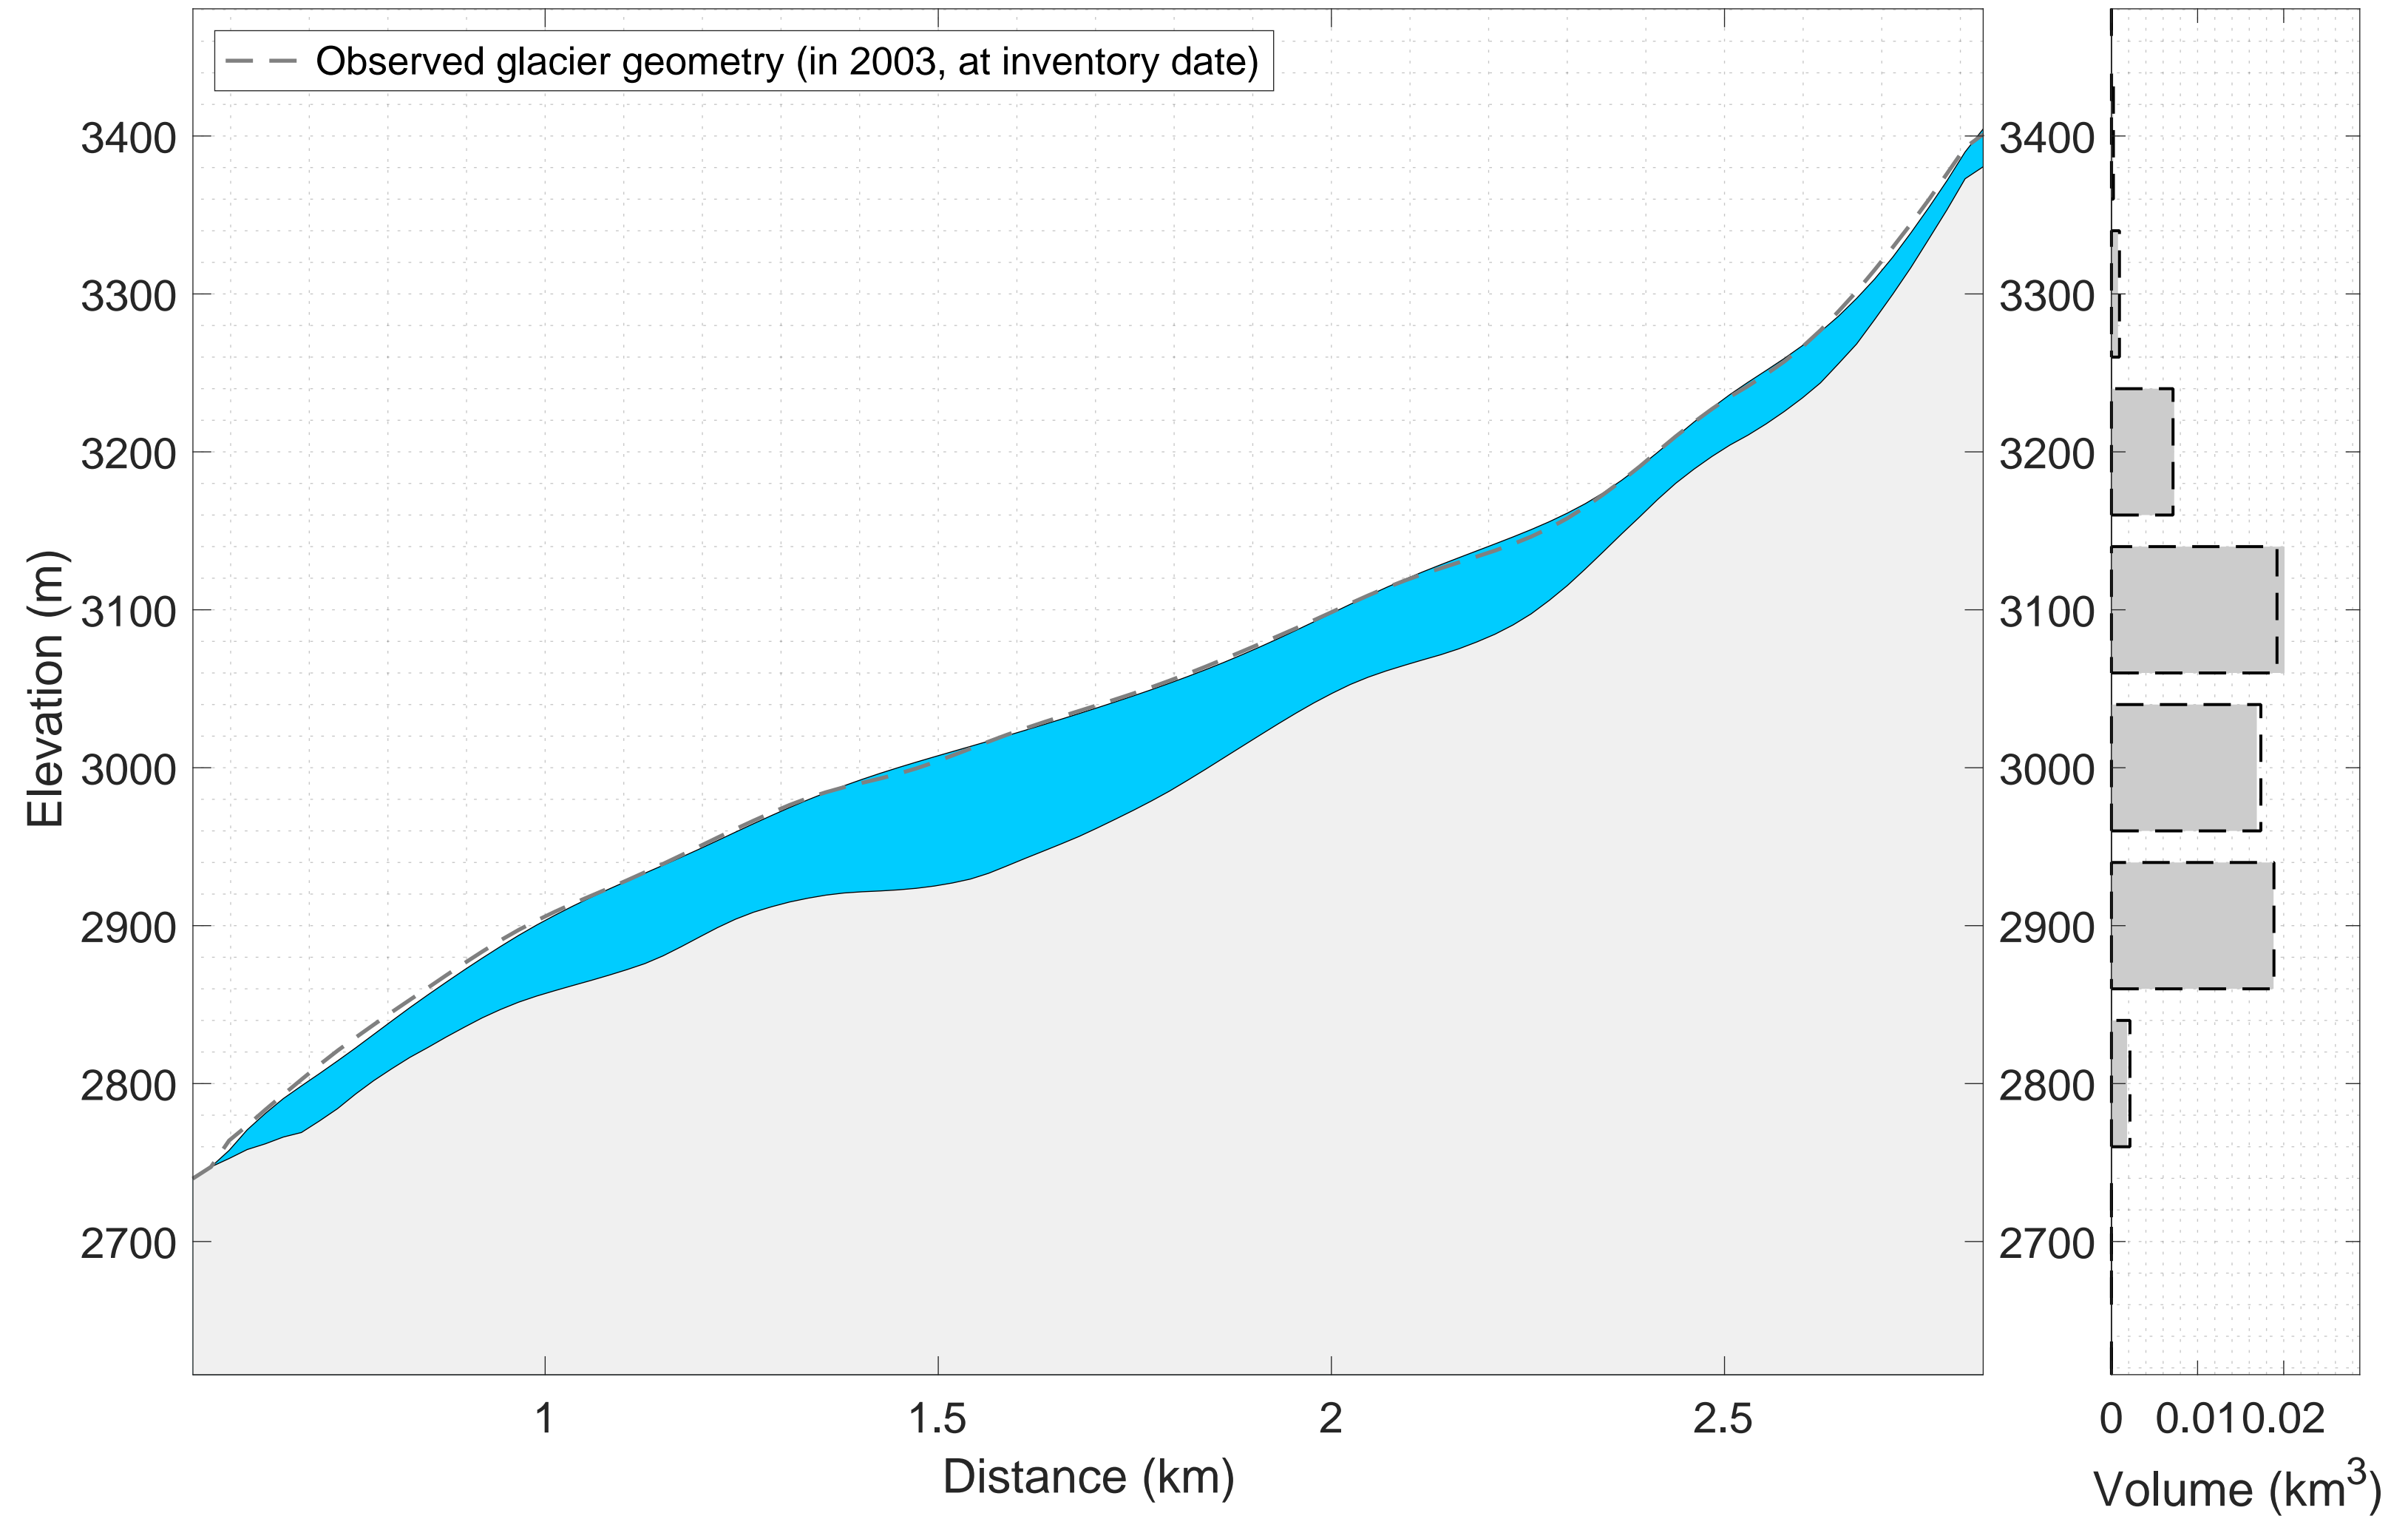

Supplement: Supplementary file 310 [file tc-13-1125-2019-supplement.zip]

**Modelled geometry (Glacier ID = 01833;  $A = 5.9796\text{e-}17 \text{ Pa}^{-3} \text{ a}^{-1}$ ;  $dx = 11 \text{ m}$ )**

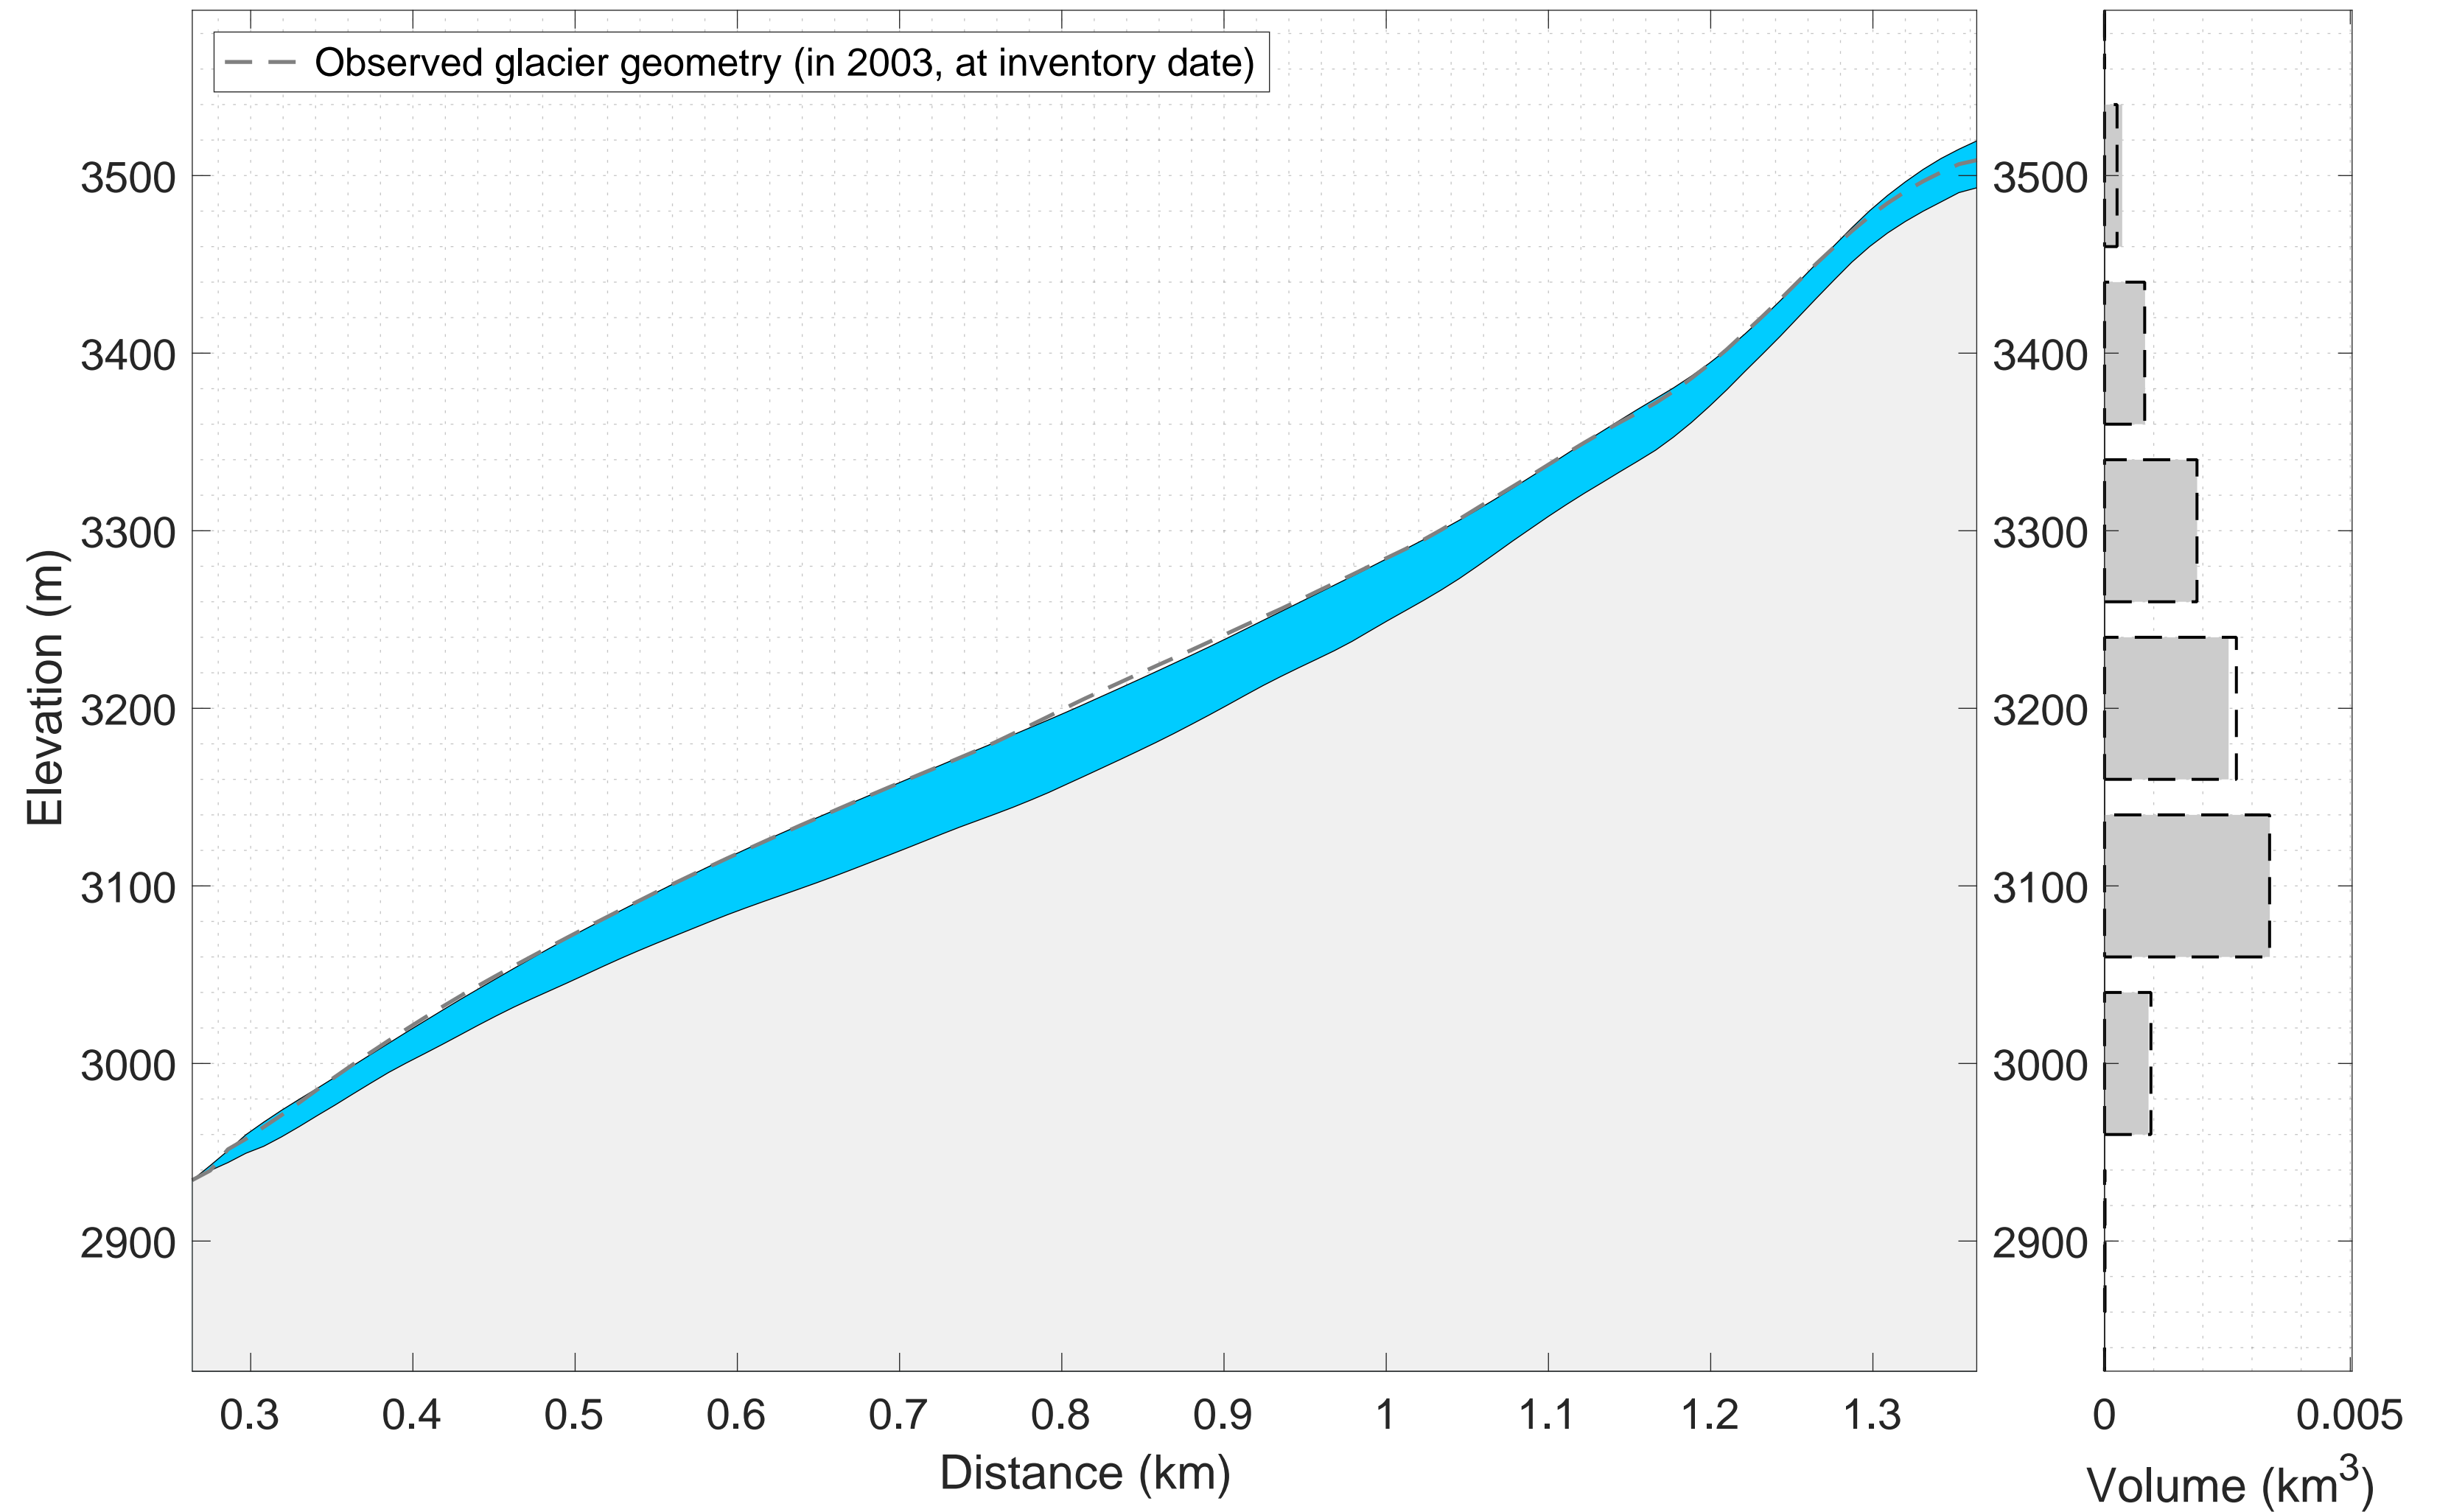

Supplement: Supplementary file 311 [file tc-13-1125-2019-supplement.zip]

**Modelled geometry (Glacier ID = 02242;  $A = 7.6279\text{e-}17 \text{ Pa}^{-3} \text{ a}^{-1}$ ;  $dx = 10 \text{ m}$ )**

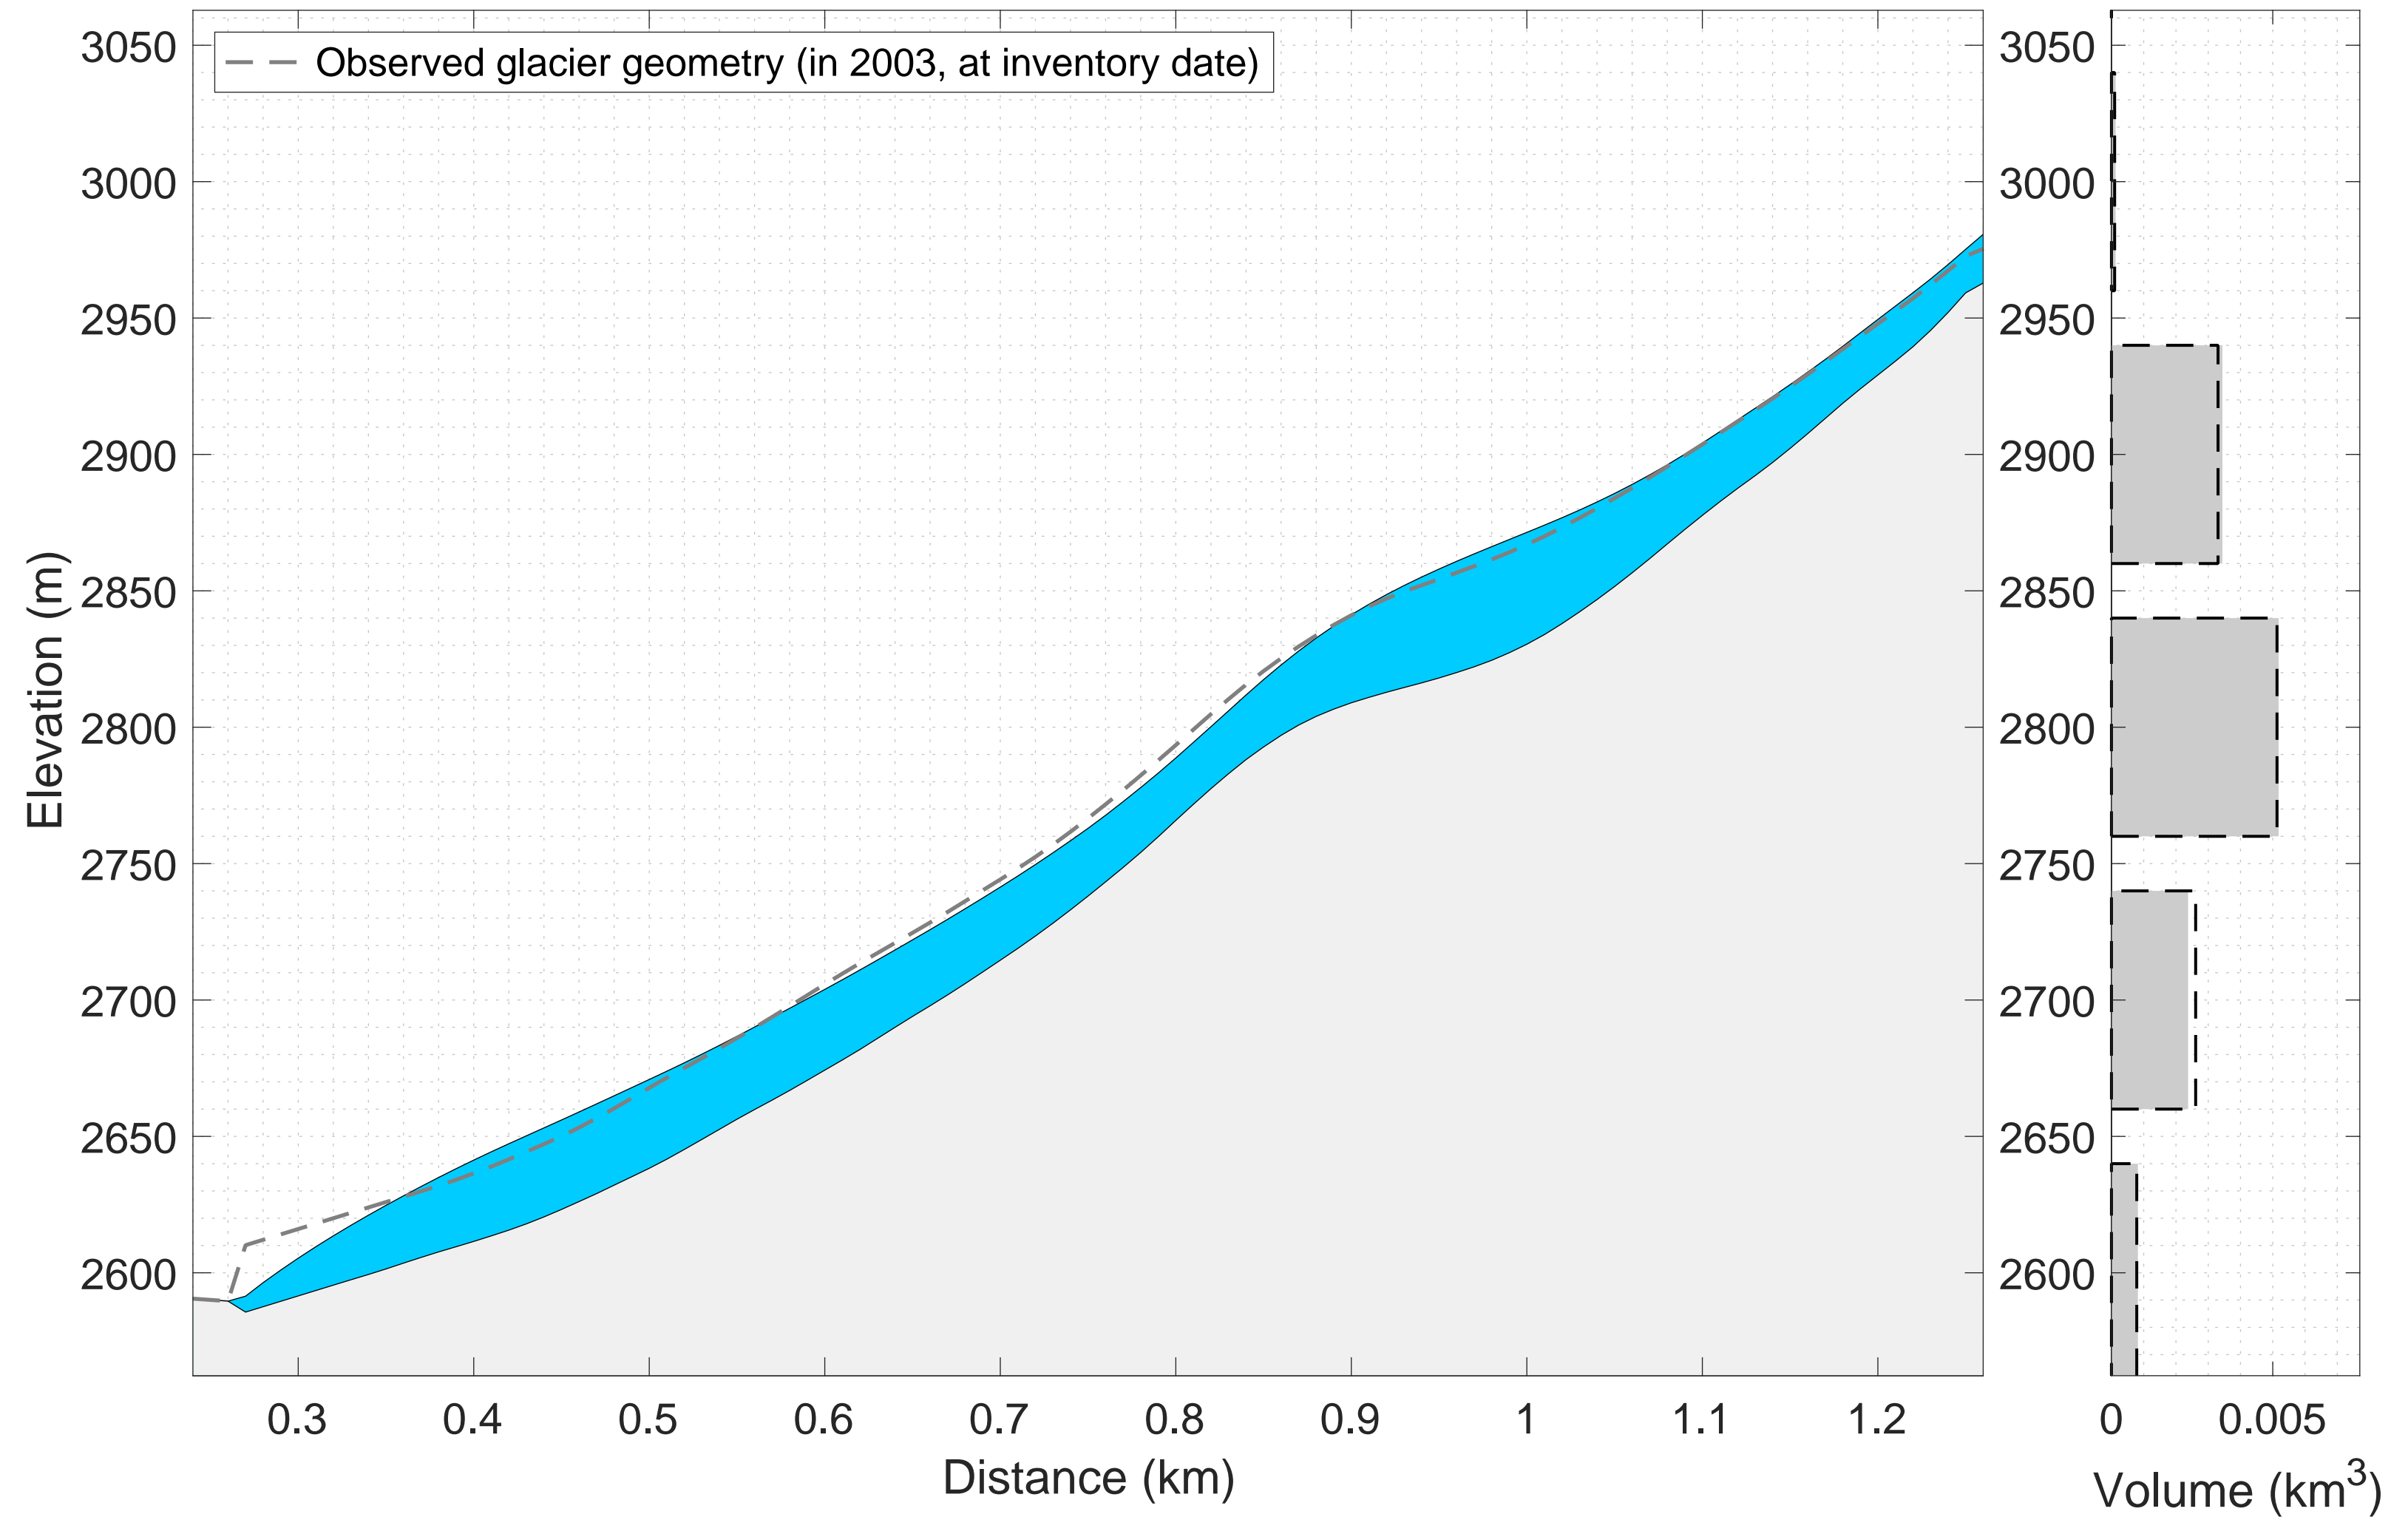

Supplement: Supplementary file 312 [file tc-13-1125-2019-supplement.zip]

**Modelled geometry (Glacier ID = 02818;  $A = 1.0455\text{e-}16 \text{ Pa}^{-3} \text{ a}^{-1}$ ;  $dx = 10 \text{ m}$ )**

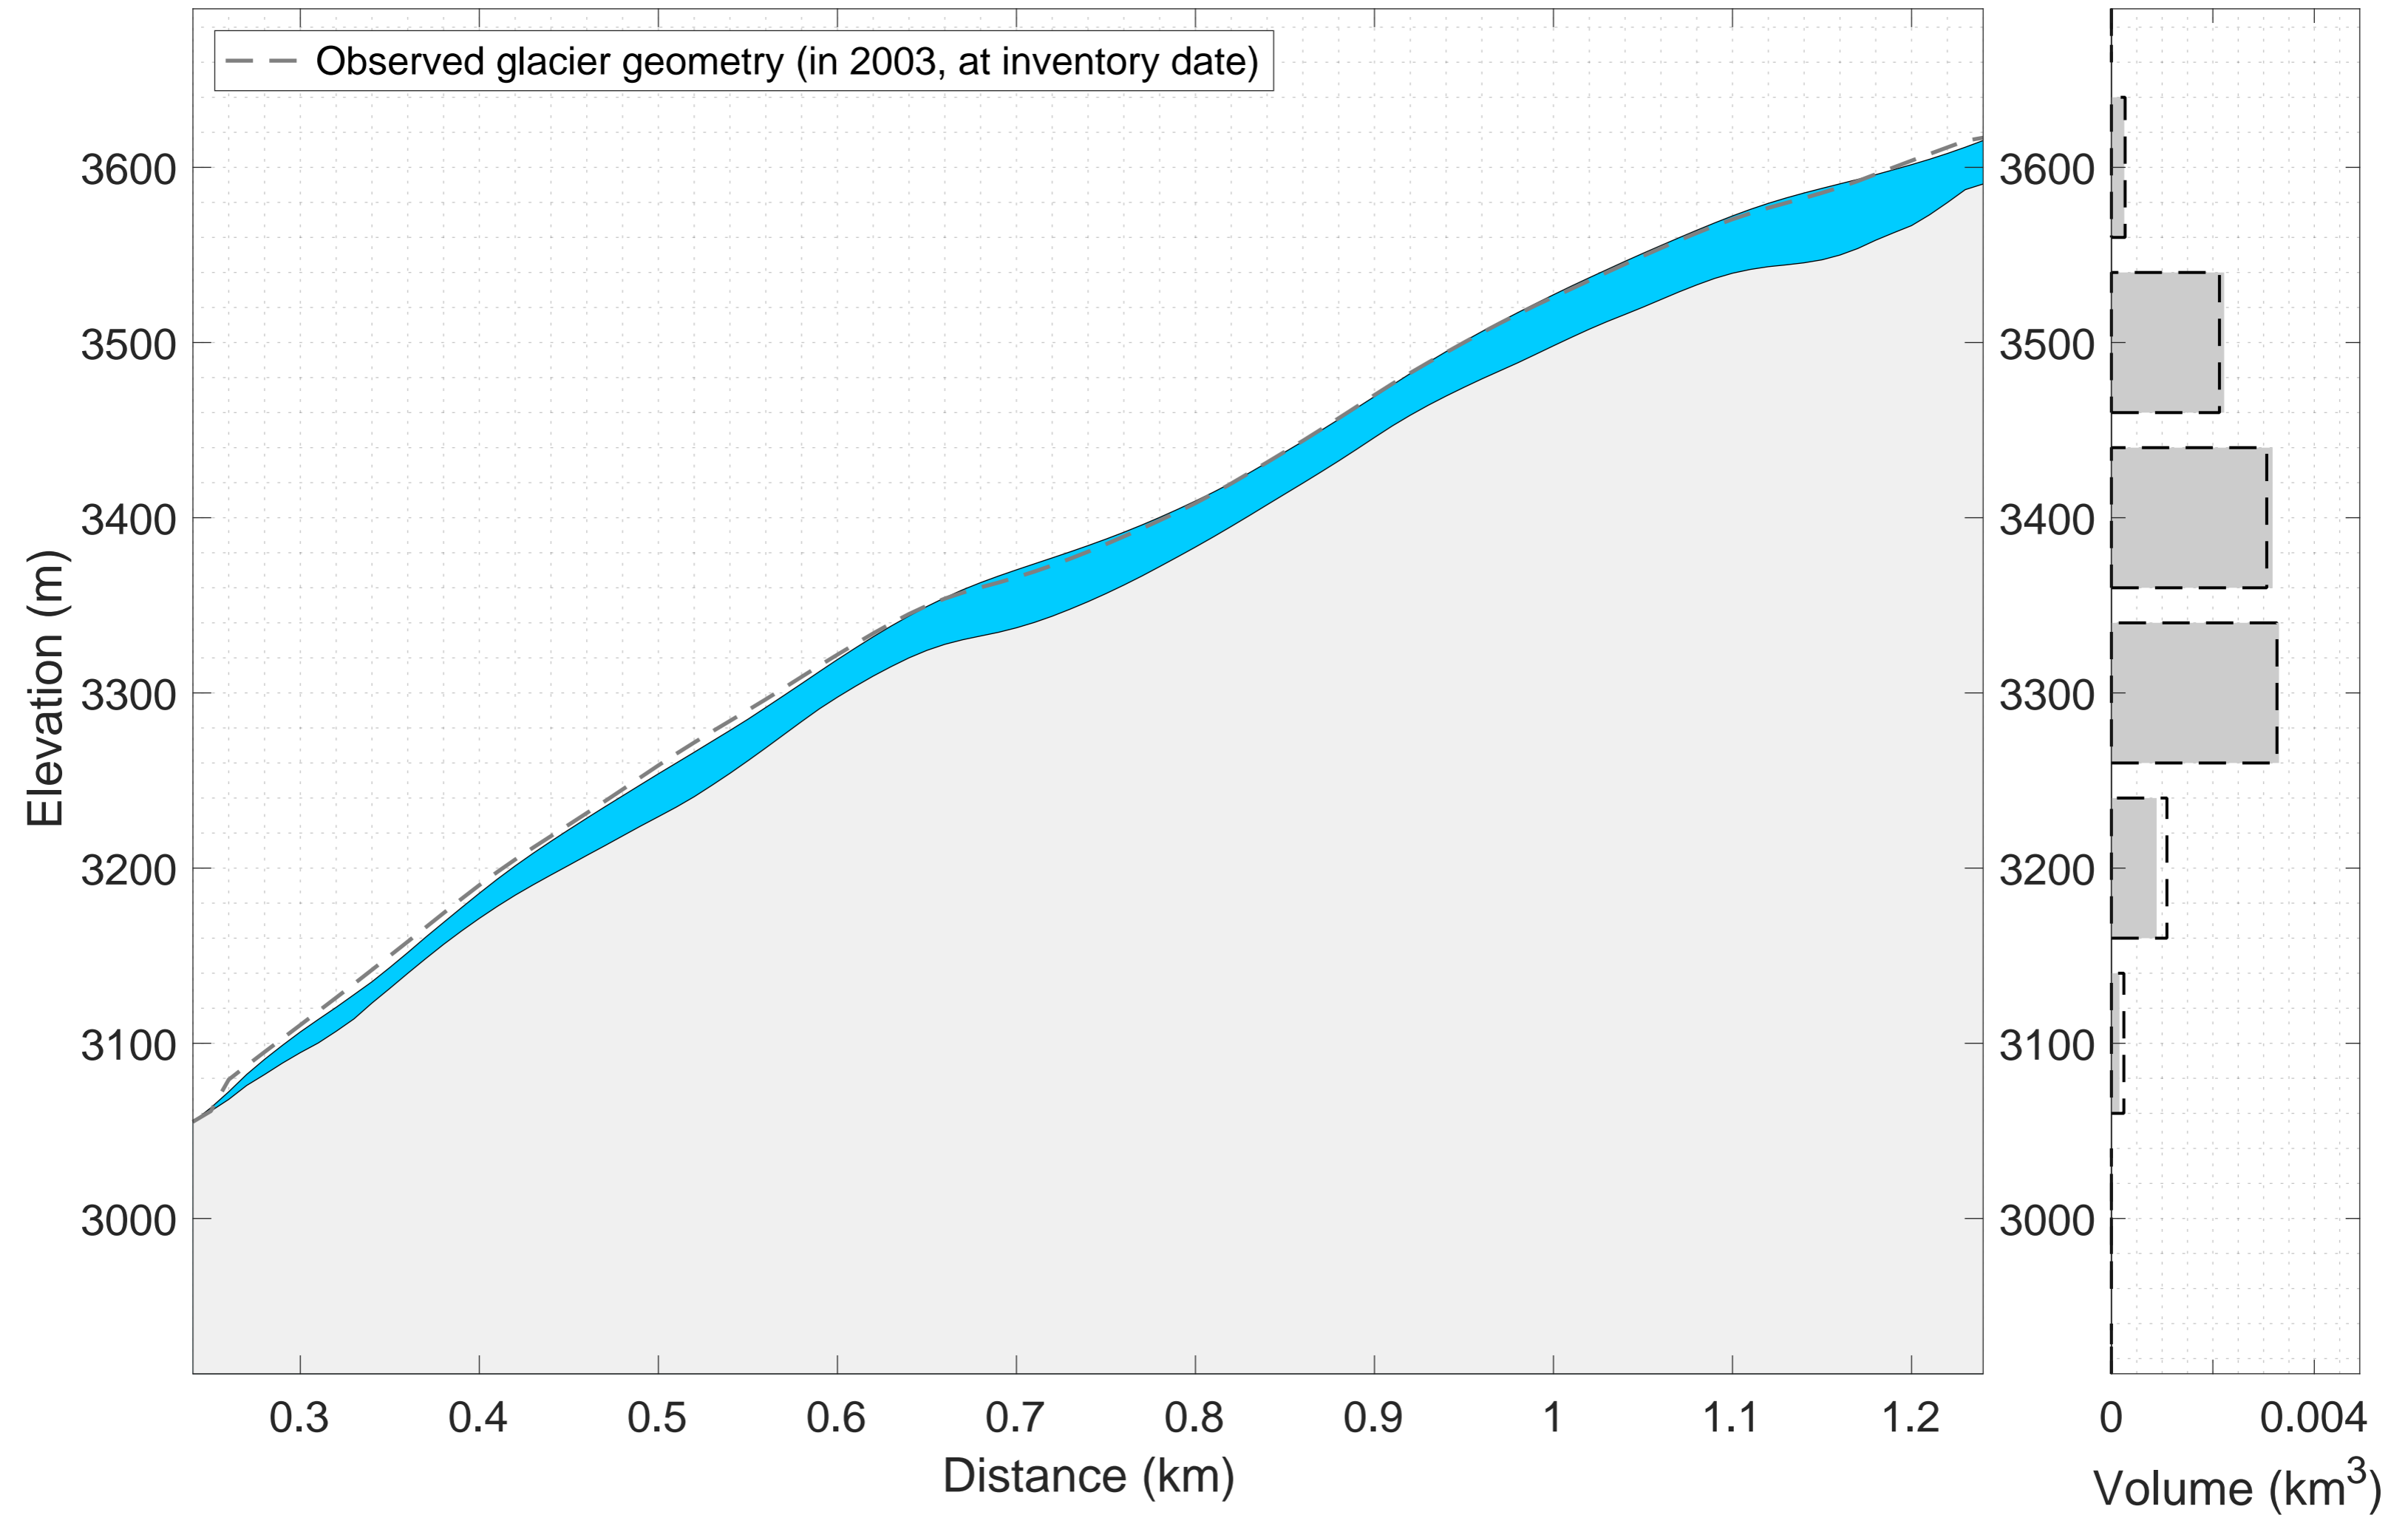

Supplement: Supplementary file 313 [file tc-13-1125-2019-supplement.zip]

**Modelled geometry (Glacier ID = 00784;  $A = 8.6142\text{e-}17 \text{ Pa}^{-3} \text{ a}^{-1}$ ;  $dx = 11 \text{ m}$ )**

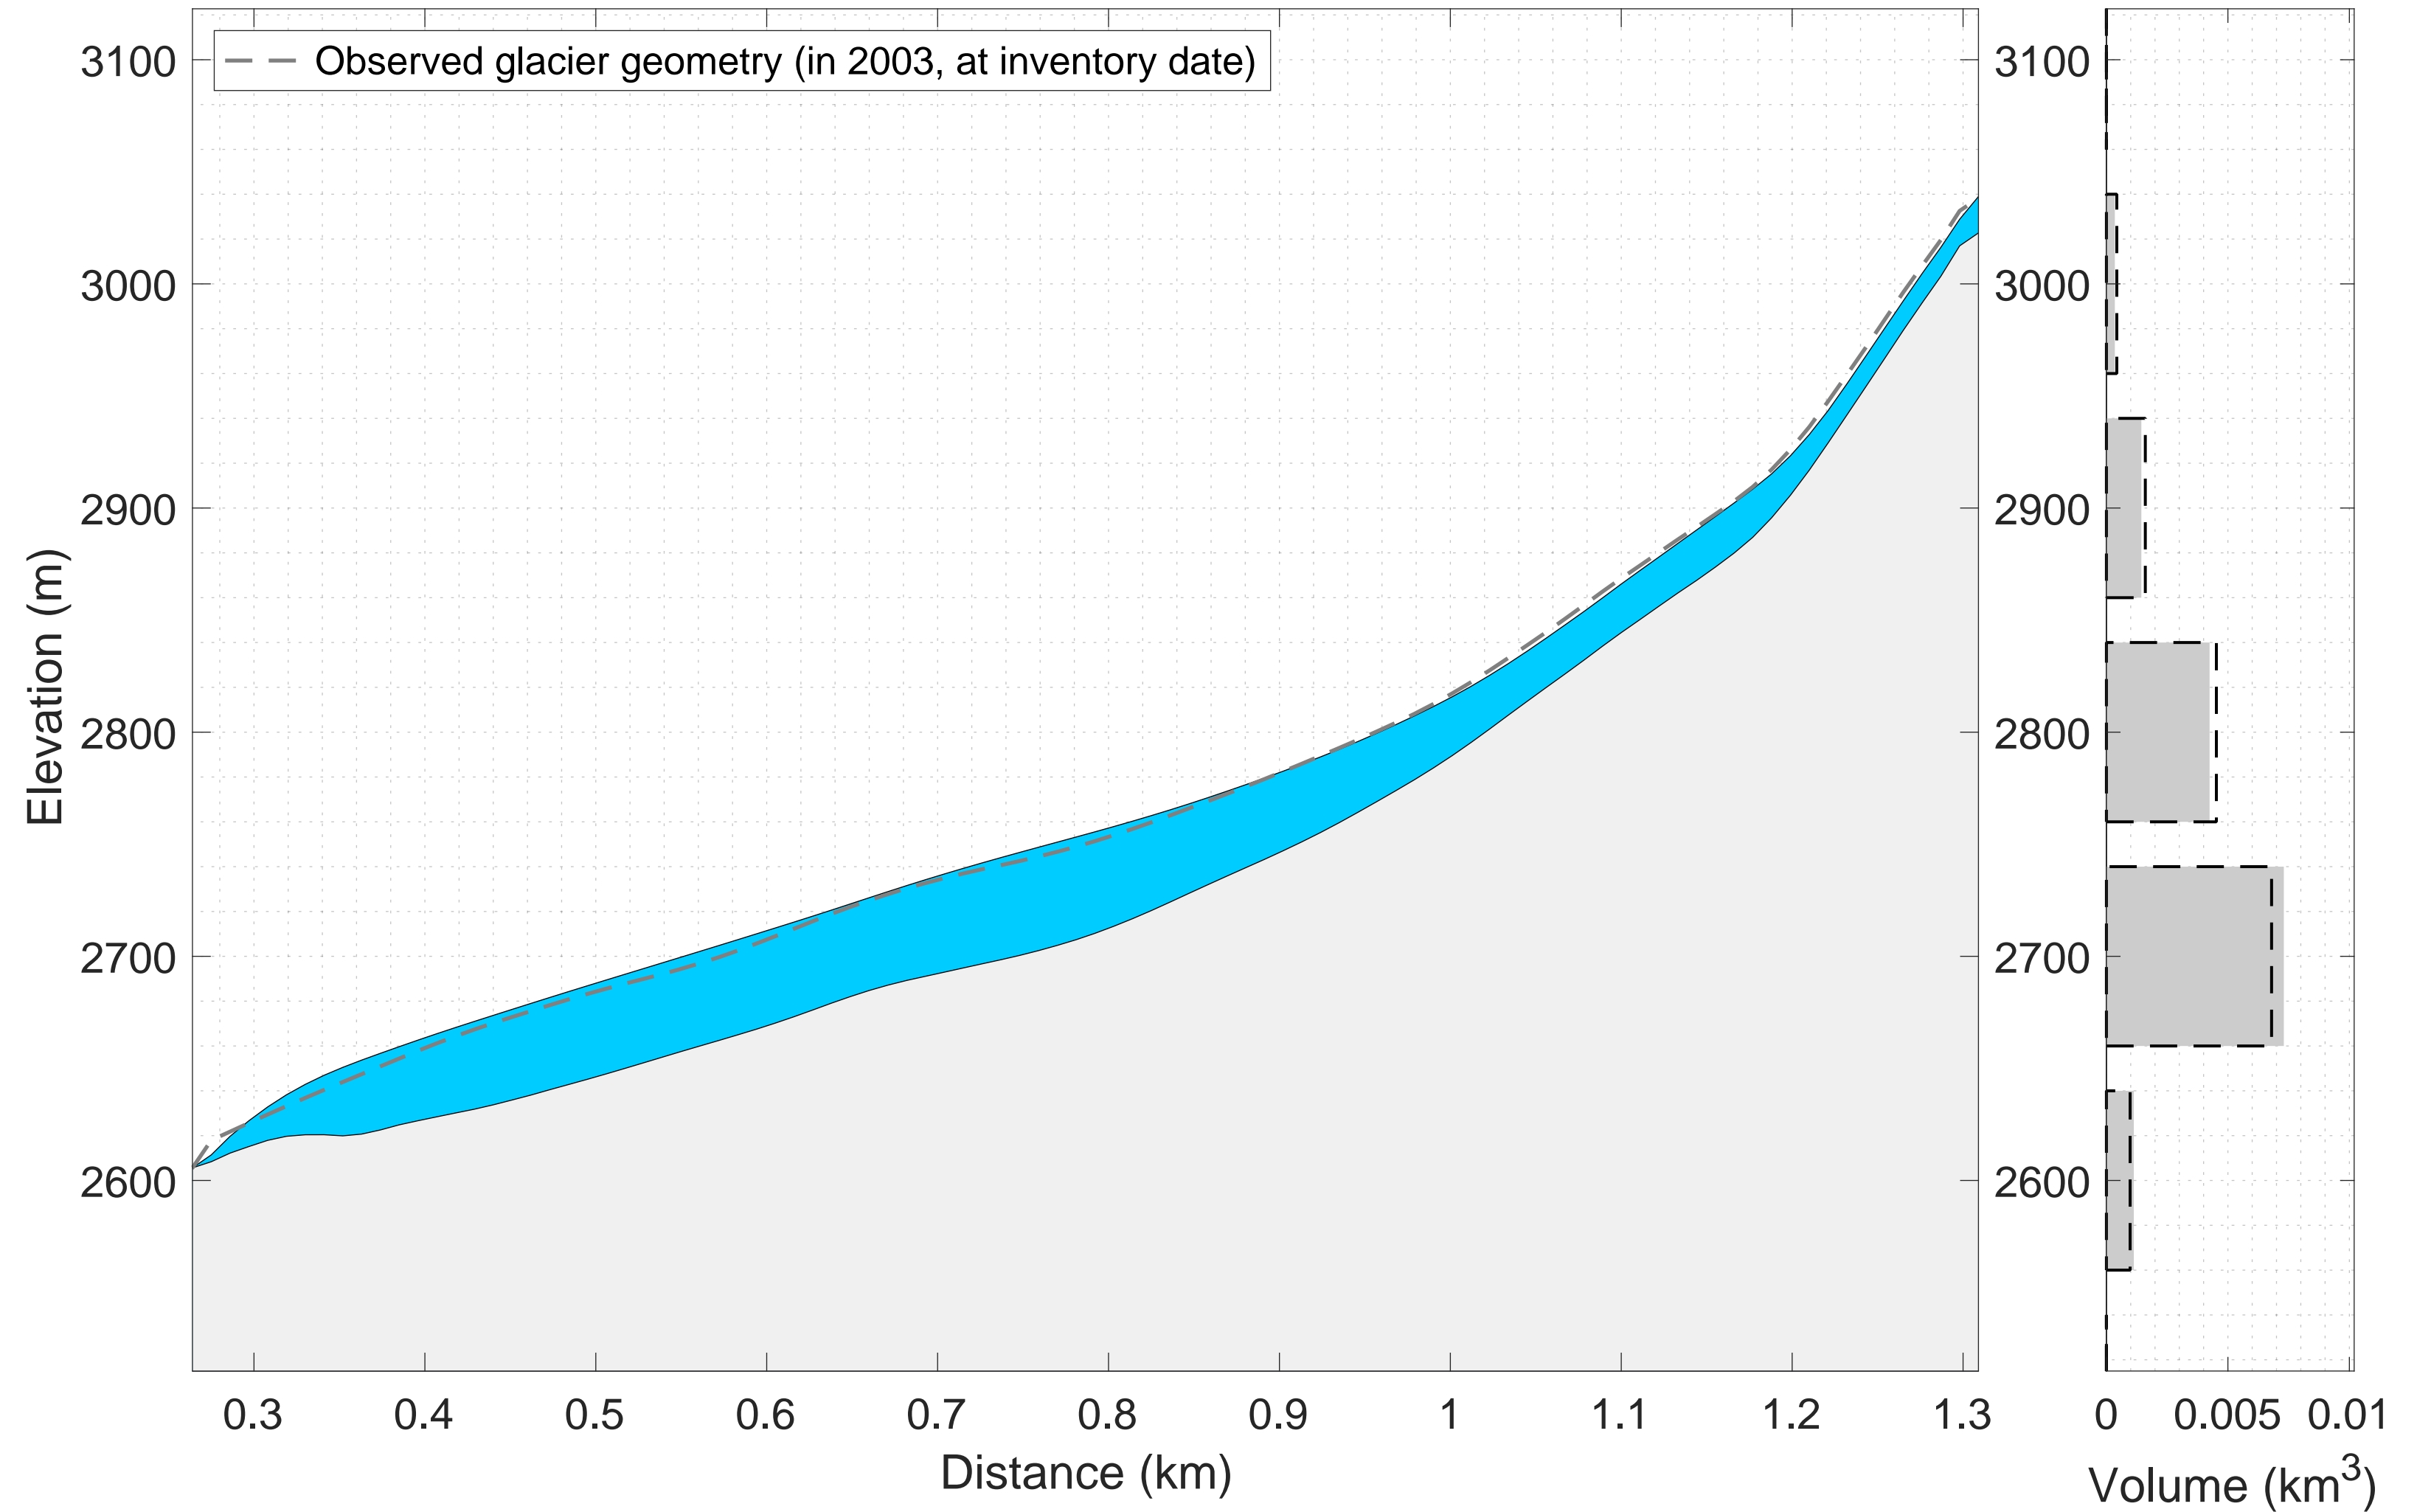

Supplement: Supplementary file 314 [file tc-13-1125-2019-supplement.zip]

**Modelled geometry (Glacier ID = 02652;  $A = 1.358\text{e-}16 \text{ Pa}^{-3} \text{ a}^{-1}$ ;  $dx = 24 \text{ m}$ )**

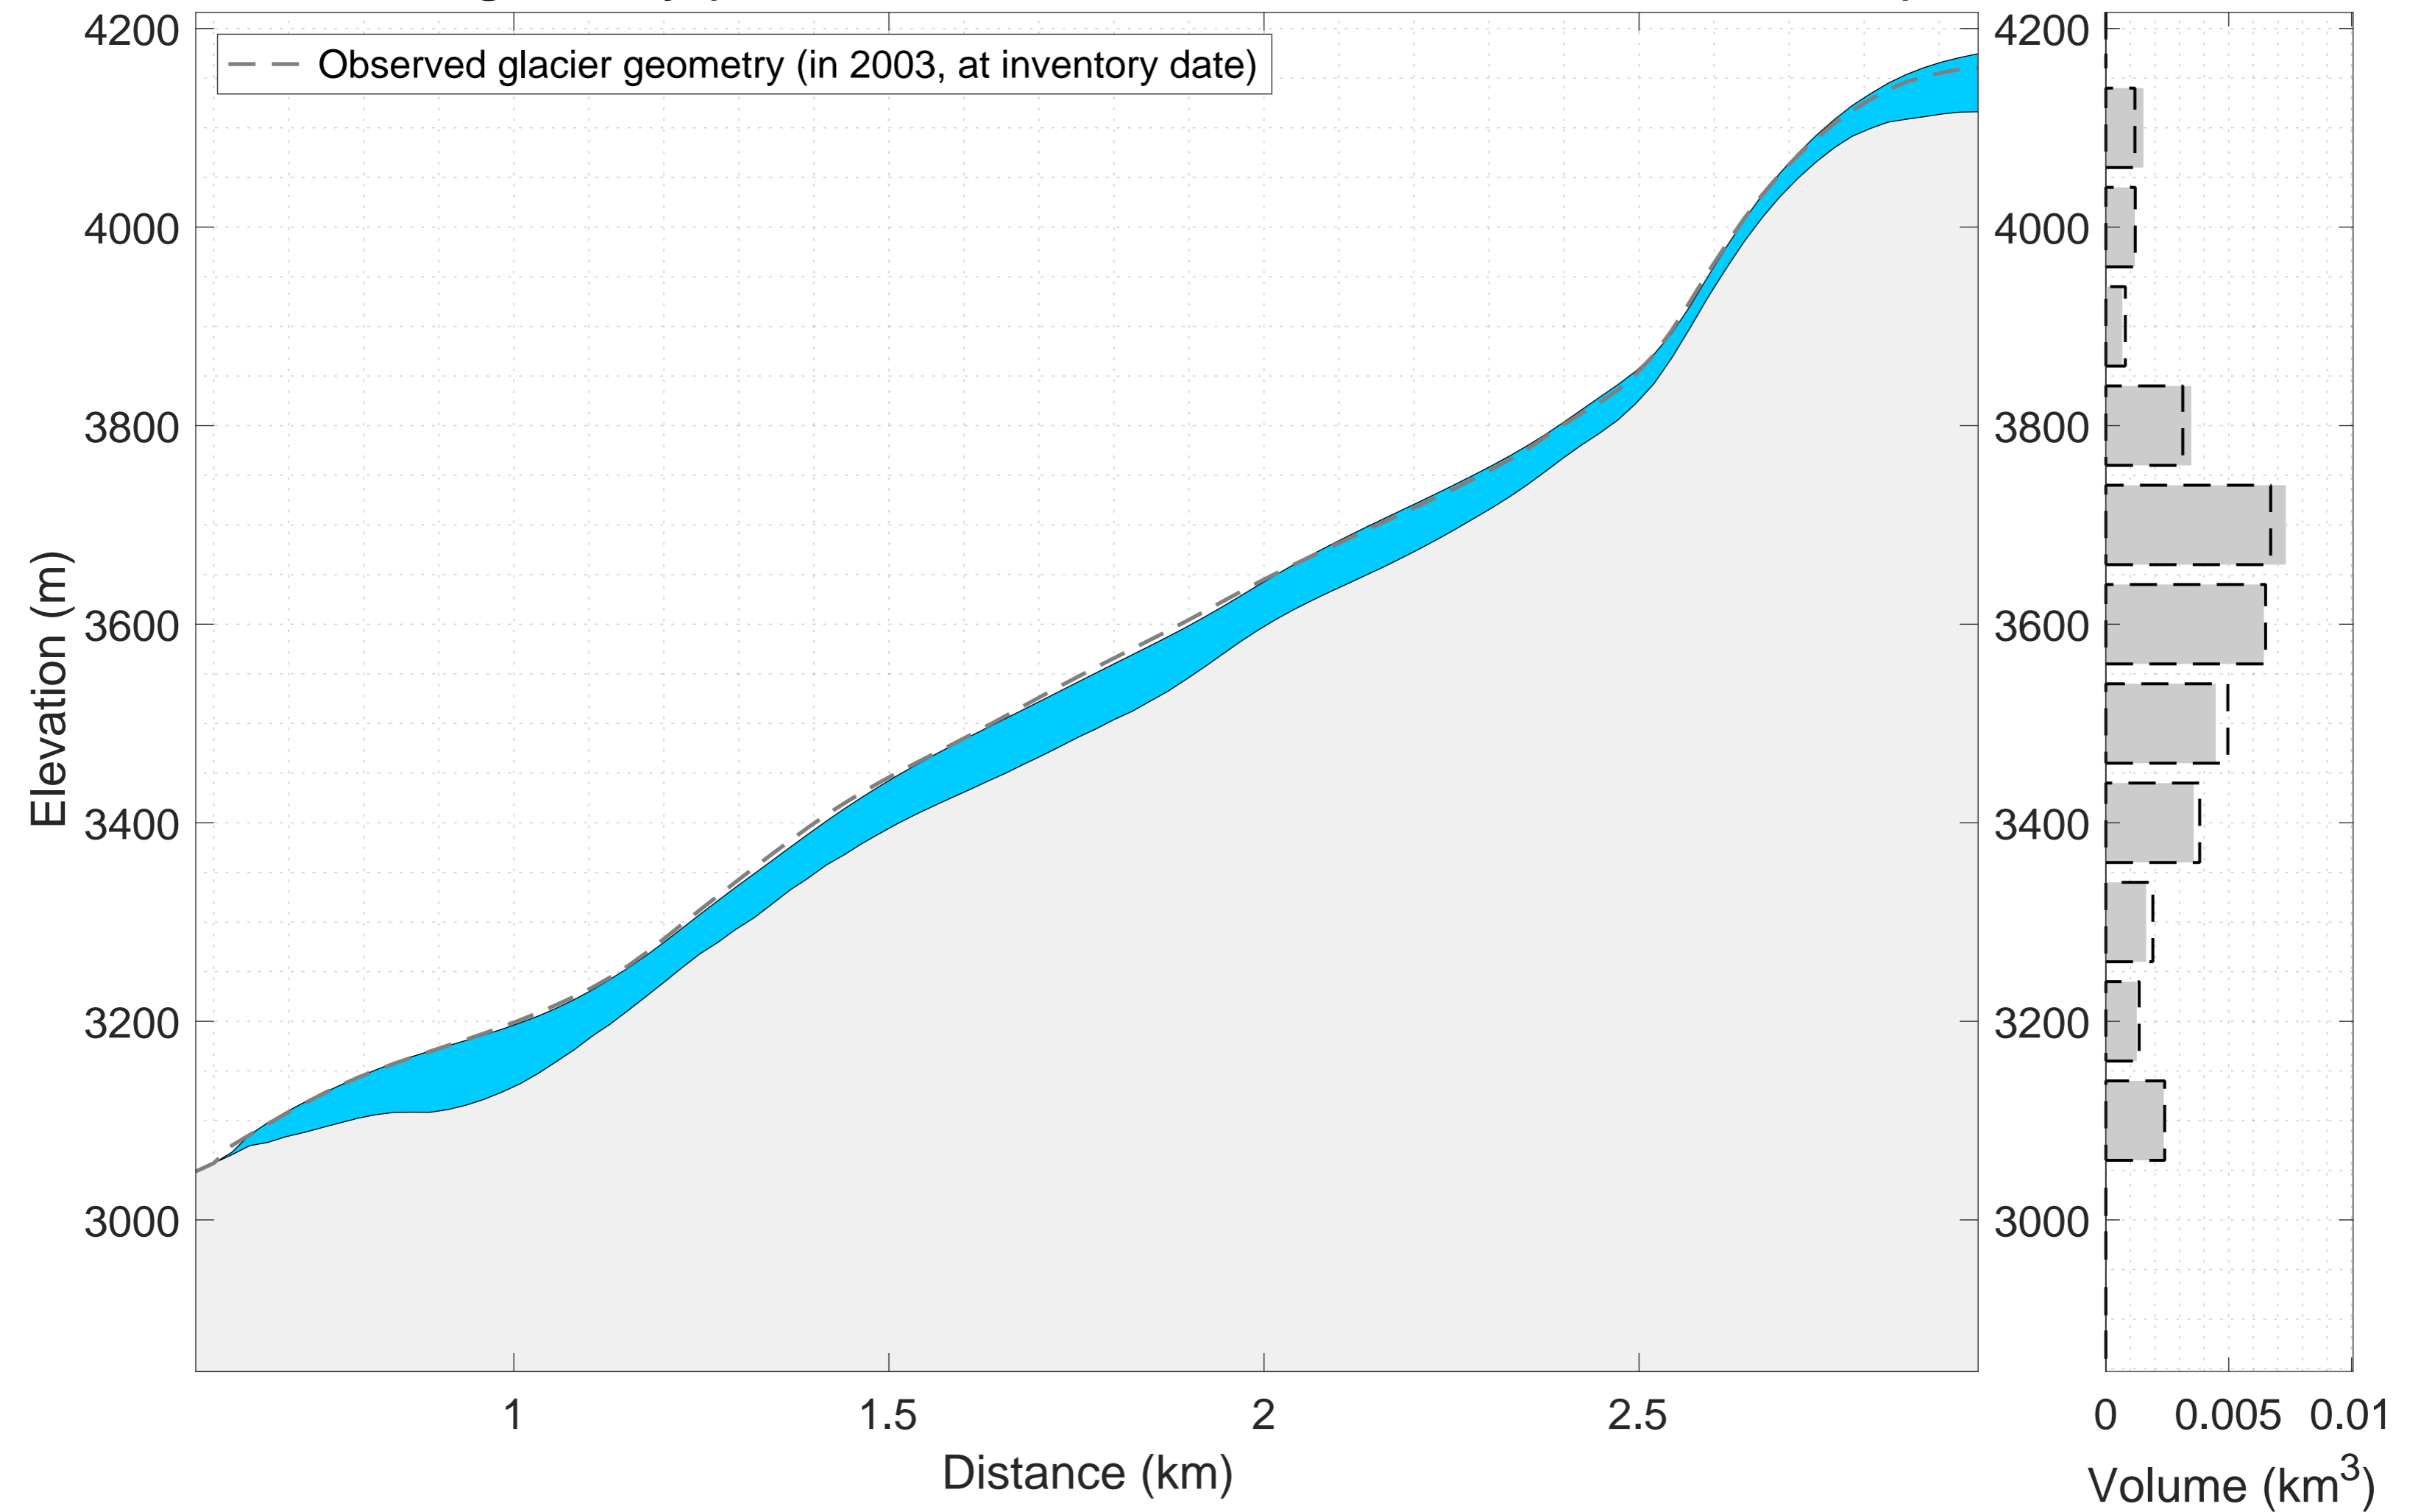

Supplement: Supplementary file 315 [file tc-13-1125-2019-supplement.zip]

**Modelled geometry (Glacier ID = 00127;  $A = 9.128\text{e-}17 \text{ Pa}^{-3} \text{ a}^{-1}$ ;  $dx = 16 \text{ m}$ )**

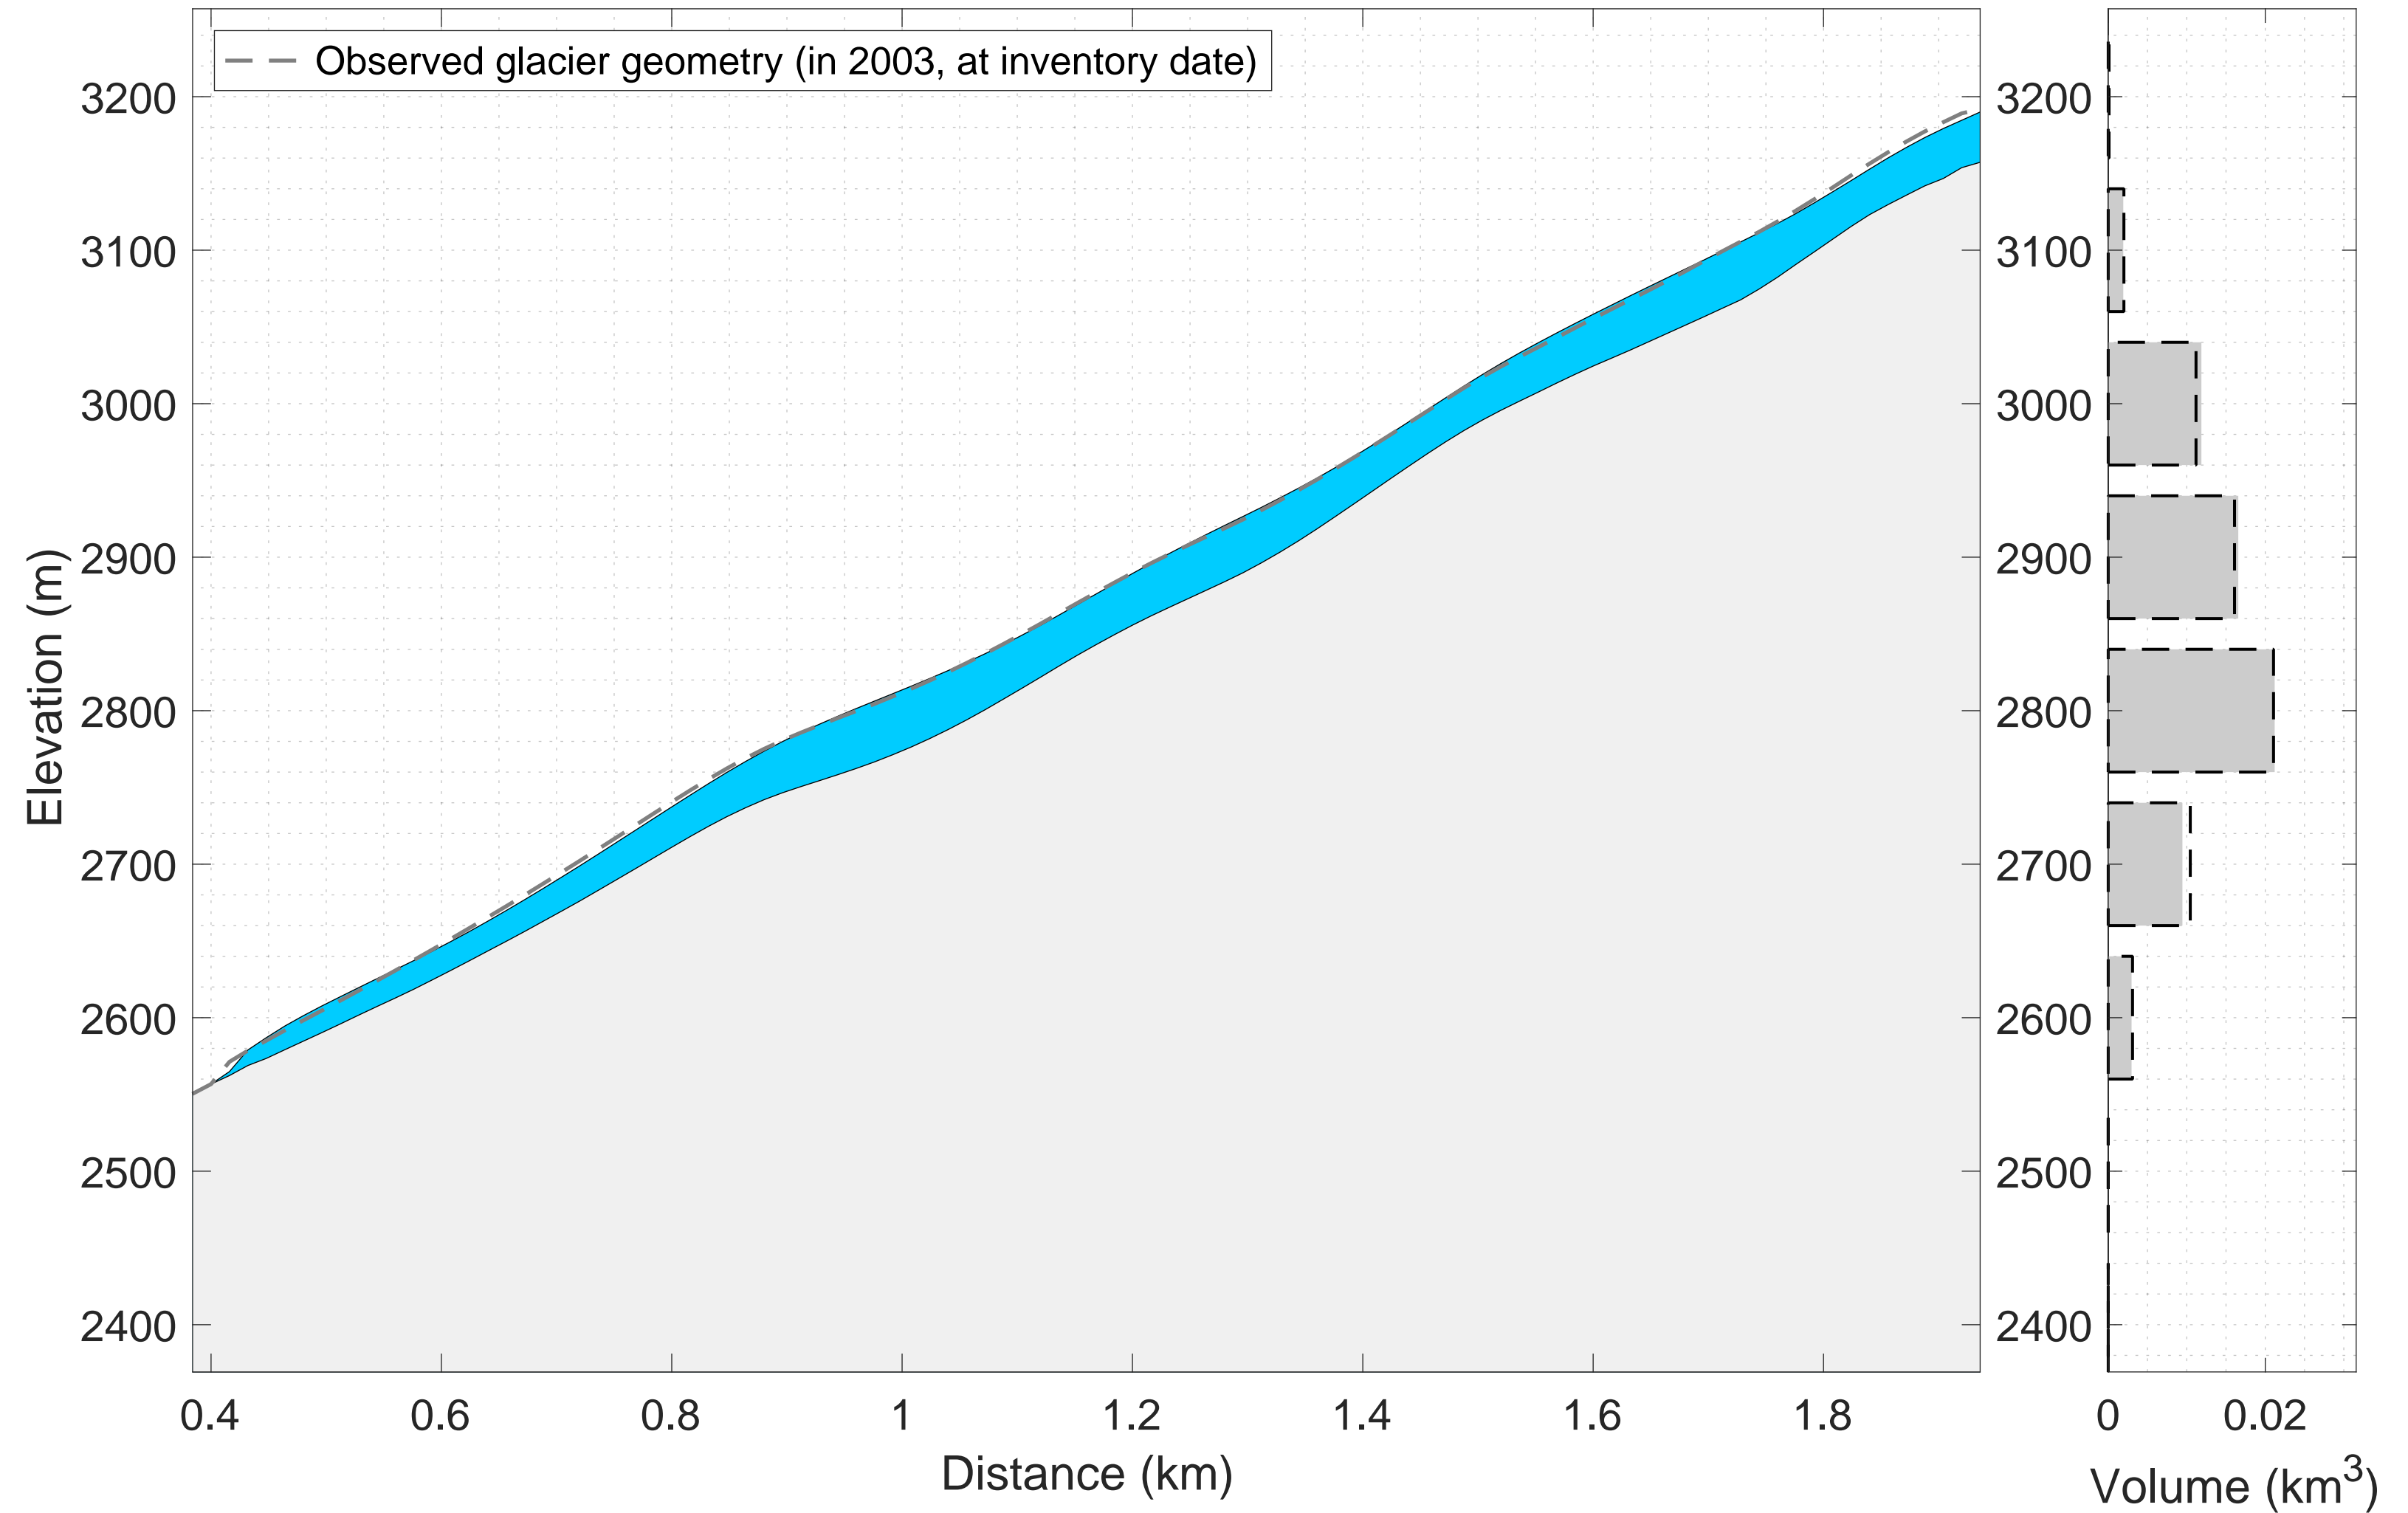

Supplement: Supplementary file 316 [file tc-13-1125-2019-supplement.zip]

**Modelled geometry (Glacier ID = 00068;  $A = 2.7073\text{e-}16 \text{ Pa}^{-3} \text{ a}^{-1}$ ;  $dx = 53 \text{ m}$ )**

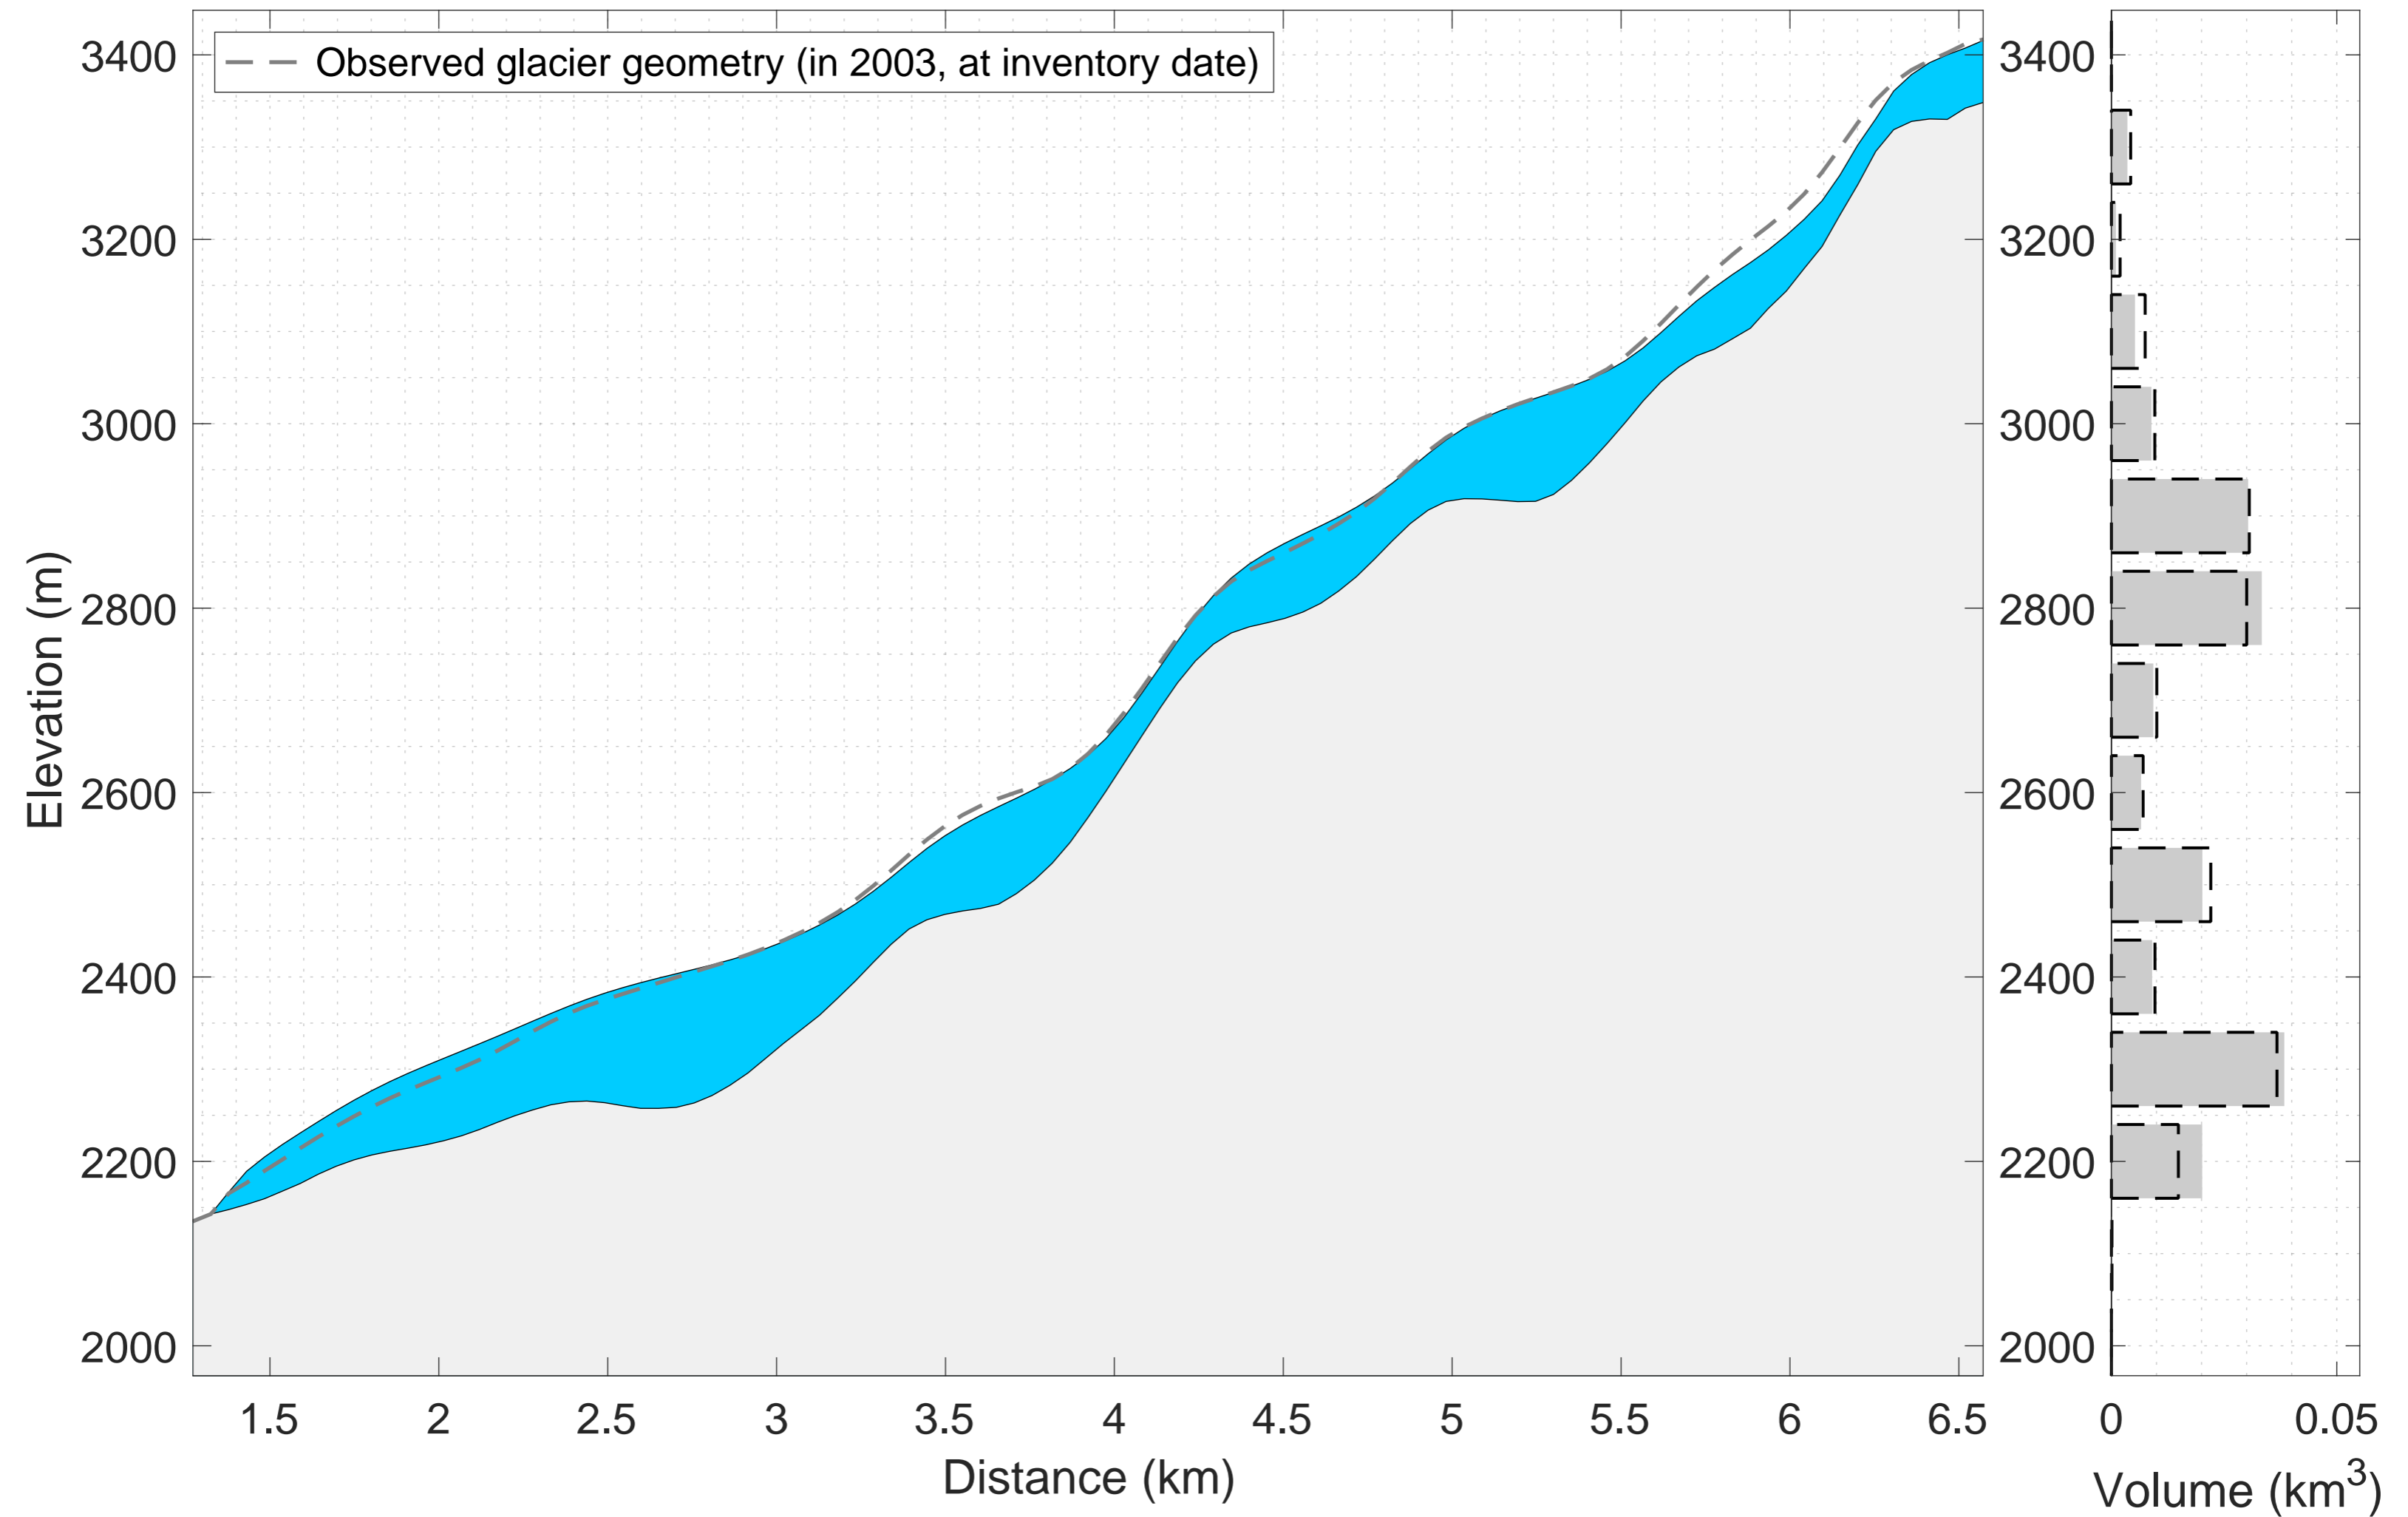

Supplement: Supplementary file 317 [file tc-13-1125-2019-supplement.zip]

Modelled geometry (Glacier ID = 00220;  $A = 1.0204\text{e-}16 \text{ Pa}^{-3} \text{ a}^{-1}$ ;  $dx = 15 \text{ m}$ )

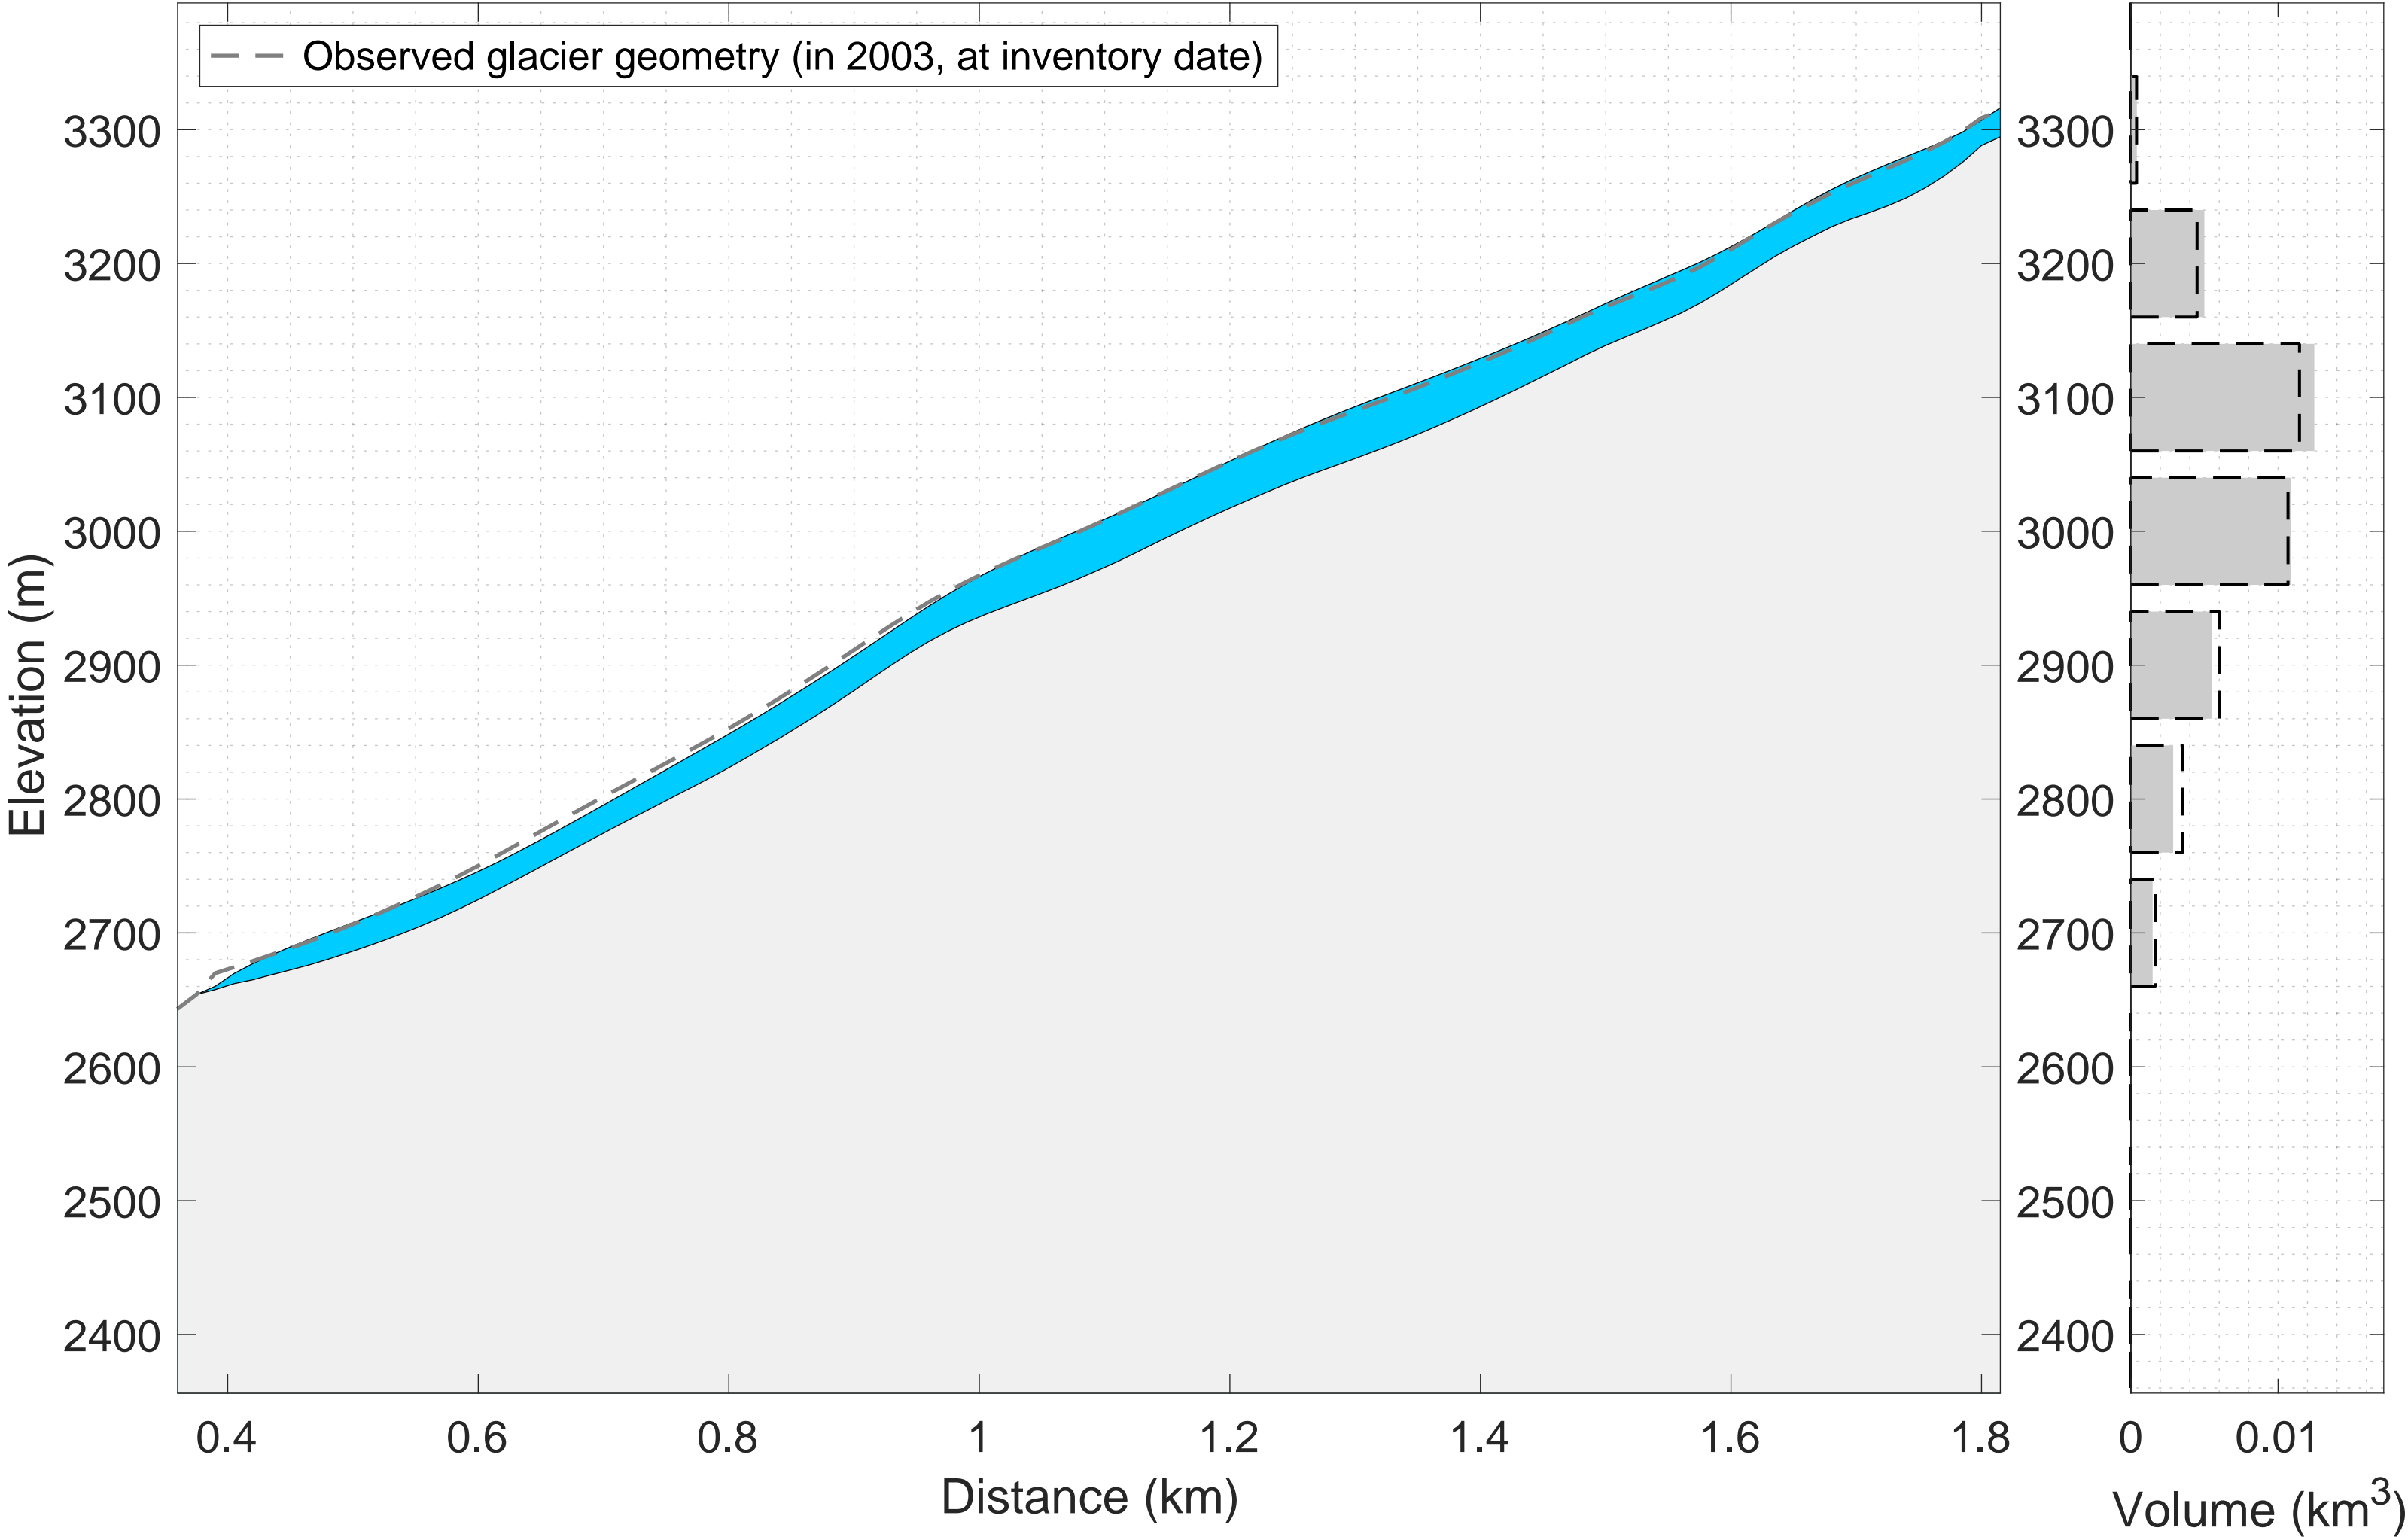

Supplement: Supplementary file 318 [file tc-13-1125-2019-supplement.zip]

**Modelled geometry (Glacier ID = 03684;  $A = 1.4838\text{e-}16 \text{ Pa}^{-3} \text{ a}^{-1}$ ;  $dx = 53 \text{ m}$ )**

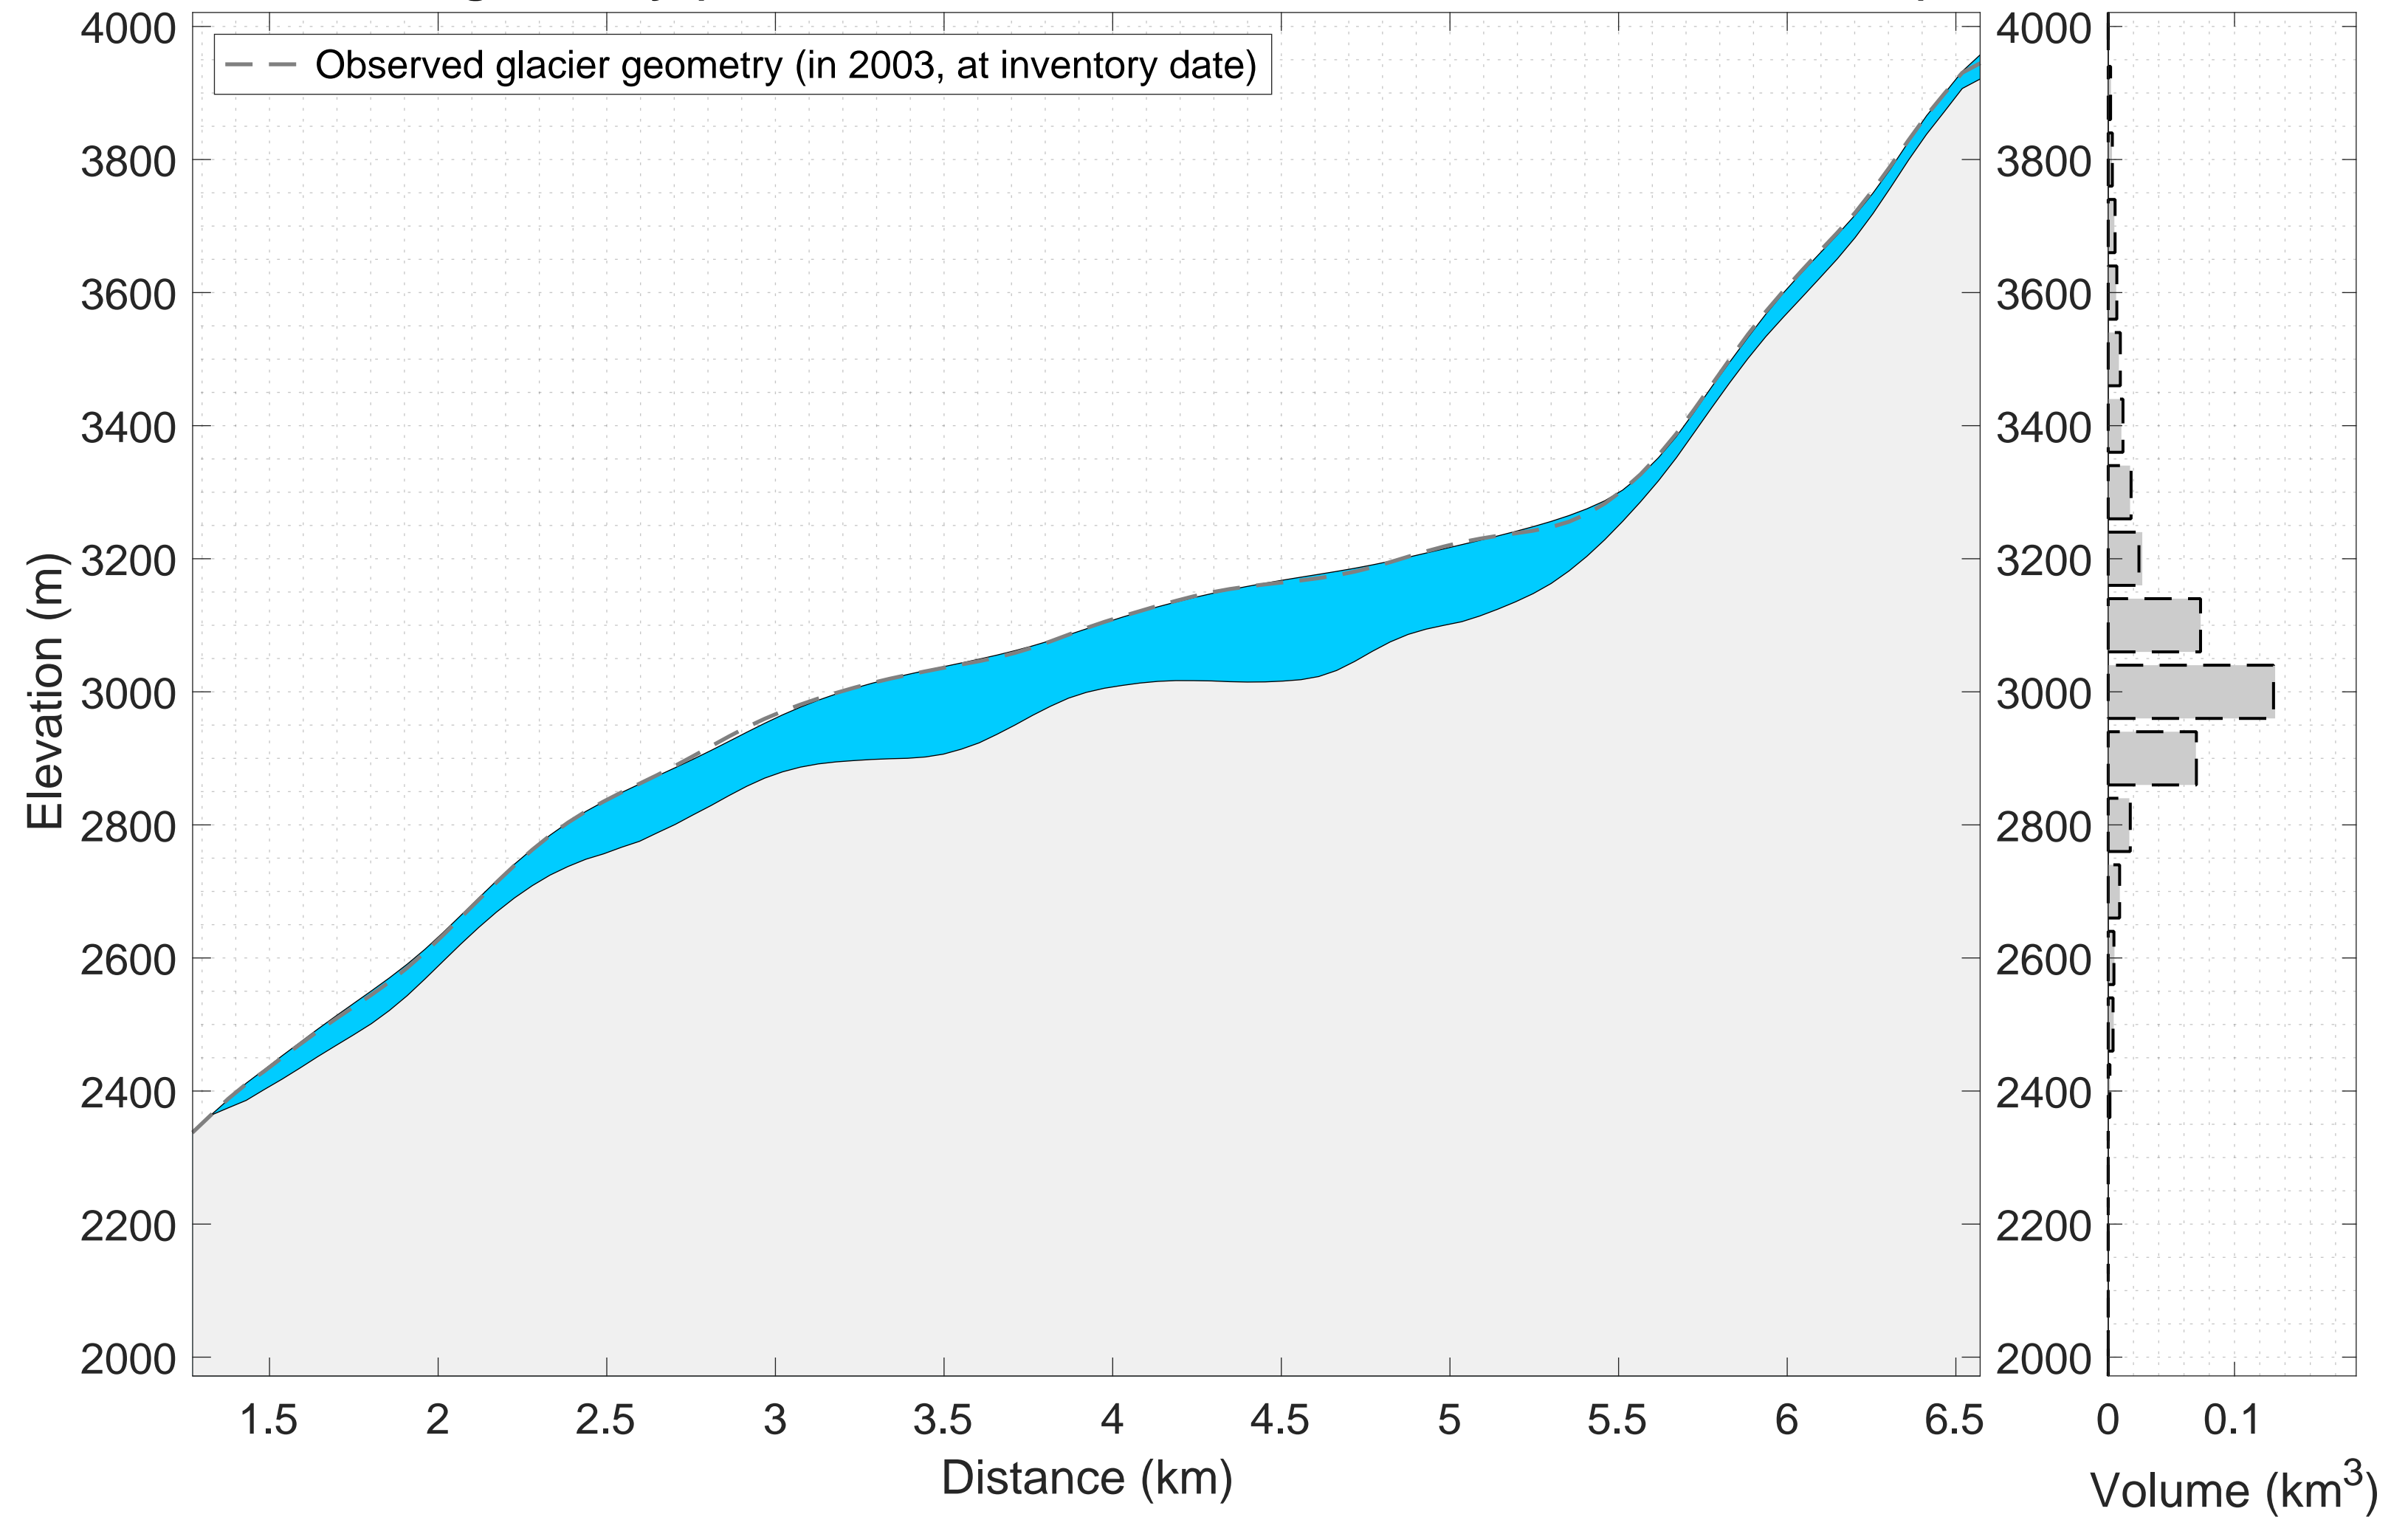

Supplement: Supplementary file 319 [file tc-13-1125-2019-supplement.zip]

**Modelled geometry (Glacier ID = 02861;  $A = 8.5113\text{e-}17 \text{ Pa}^{-3} \text{ a}^{-1}$ ;  $dx = 14 \text{ m}$ )**

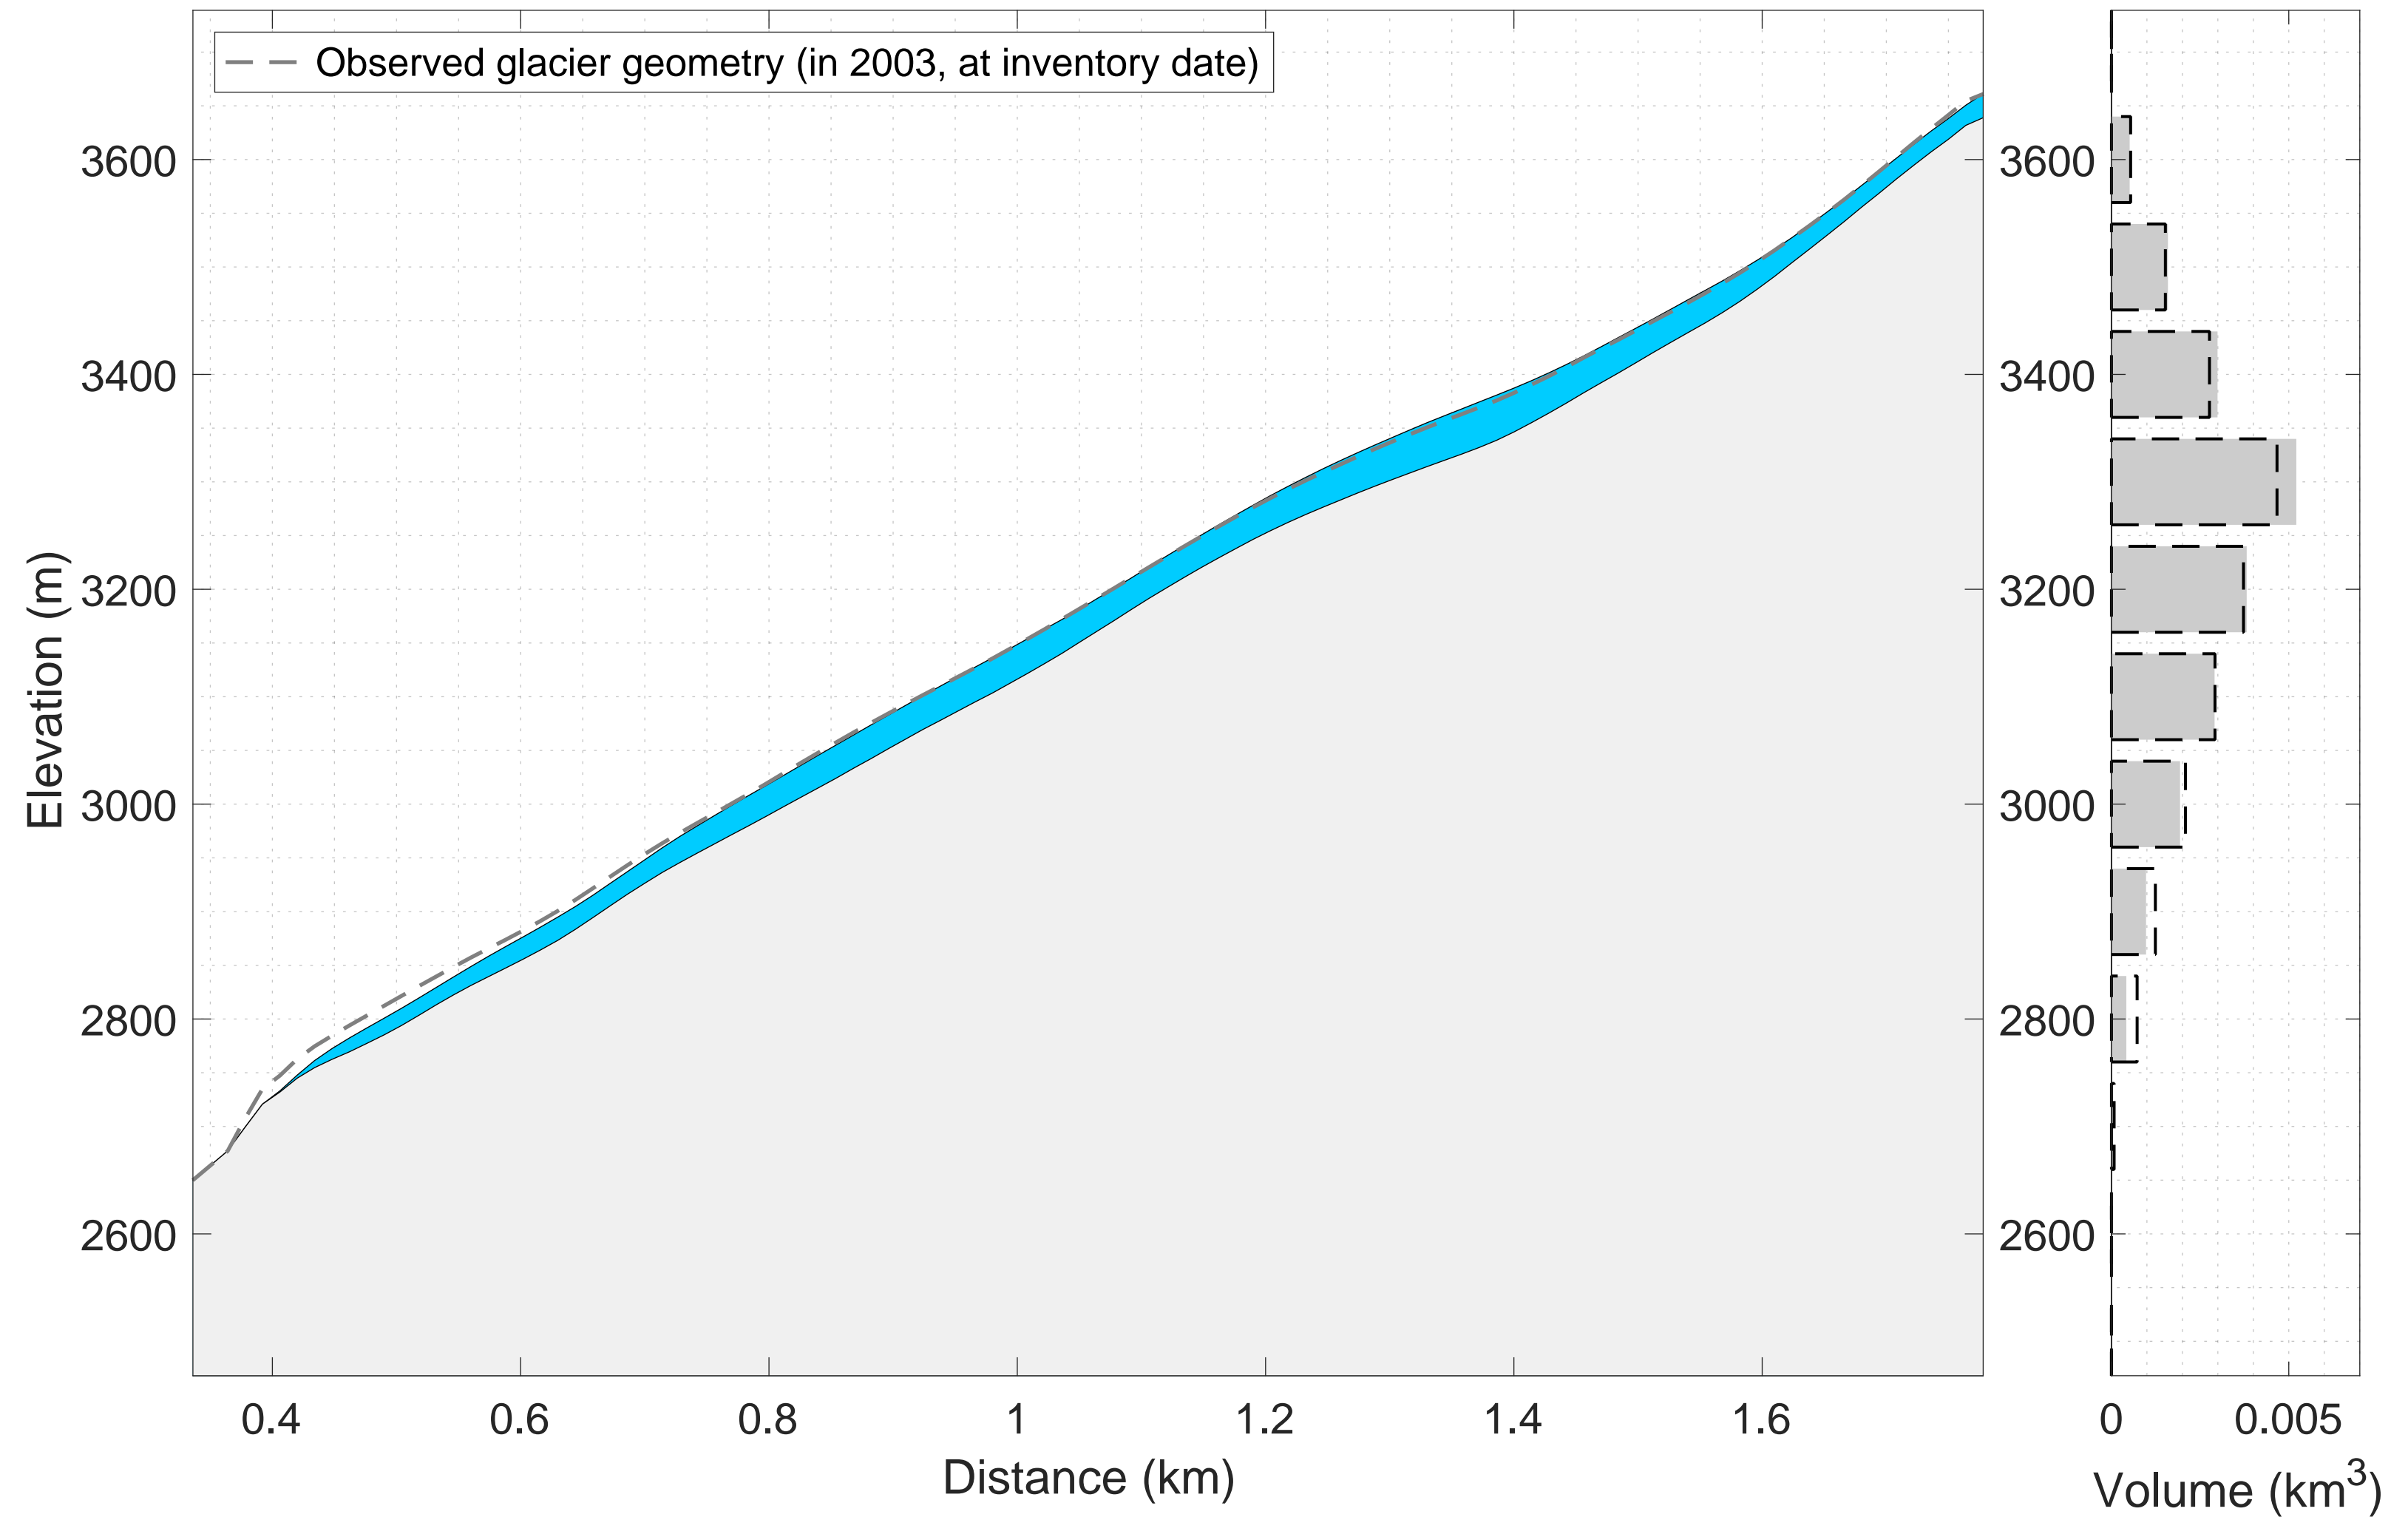

Supplement: Supplementary file 320 [file tc-13-1125-2019-supplement.zip]

**Modelled geometry (Glacier ID = 02750;  $A = 1.2588\text{e-}16 \text{ Pa}^{-3} \text{ a}^{-1}$ ;  $dx = 15 \text{ m}$ )**

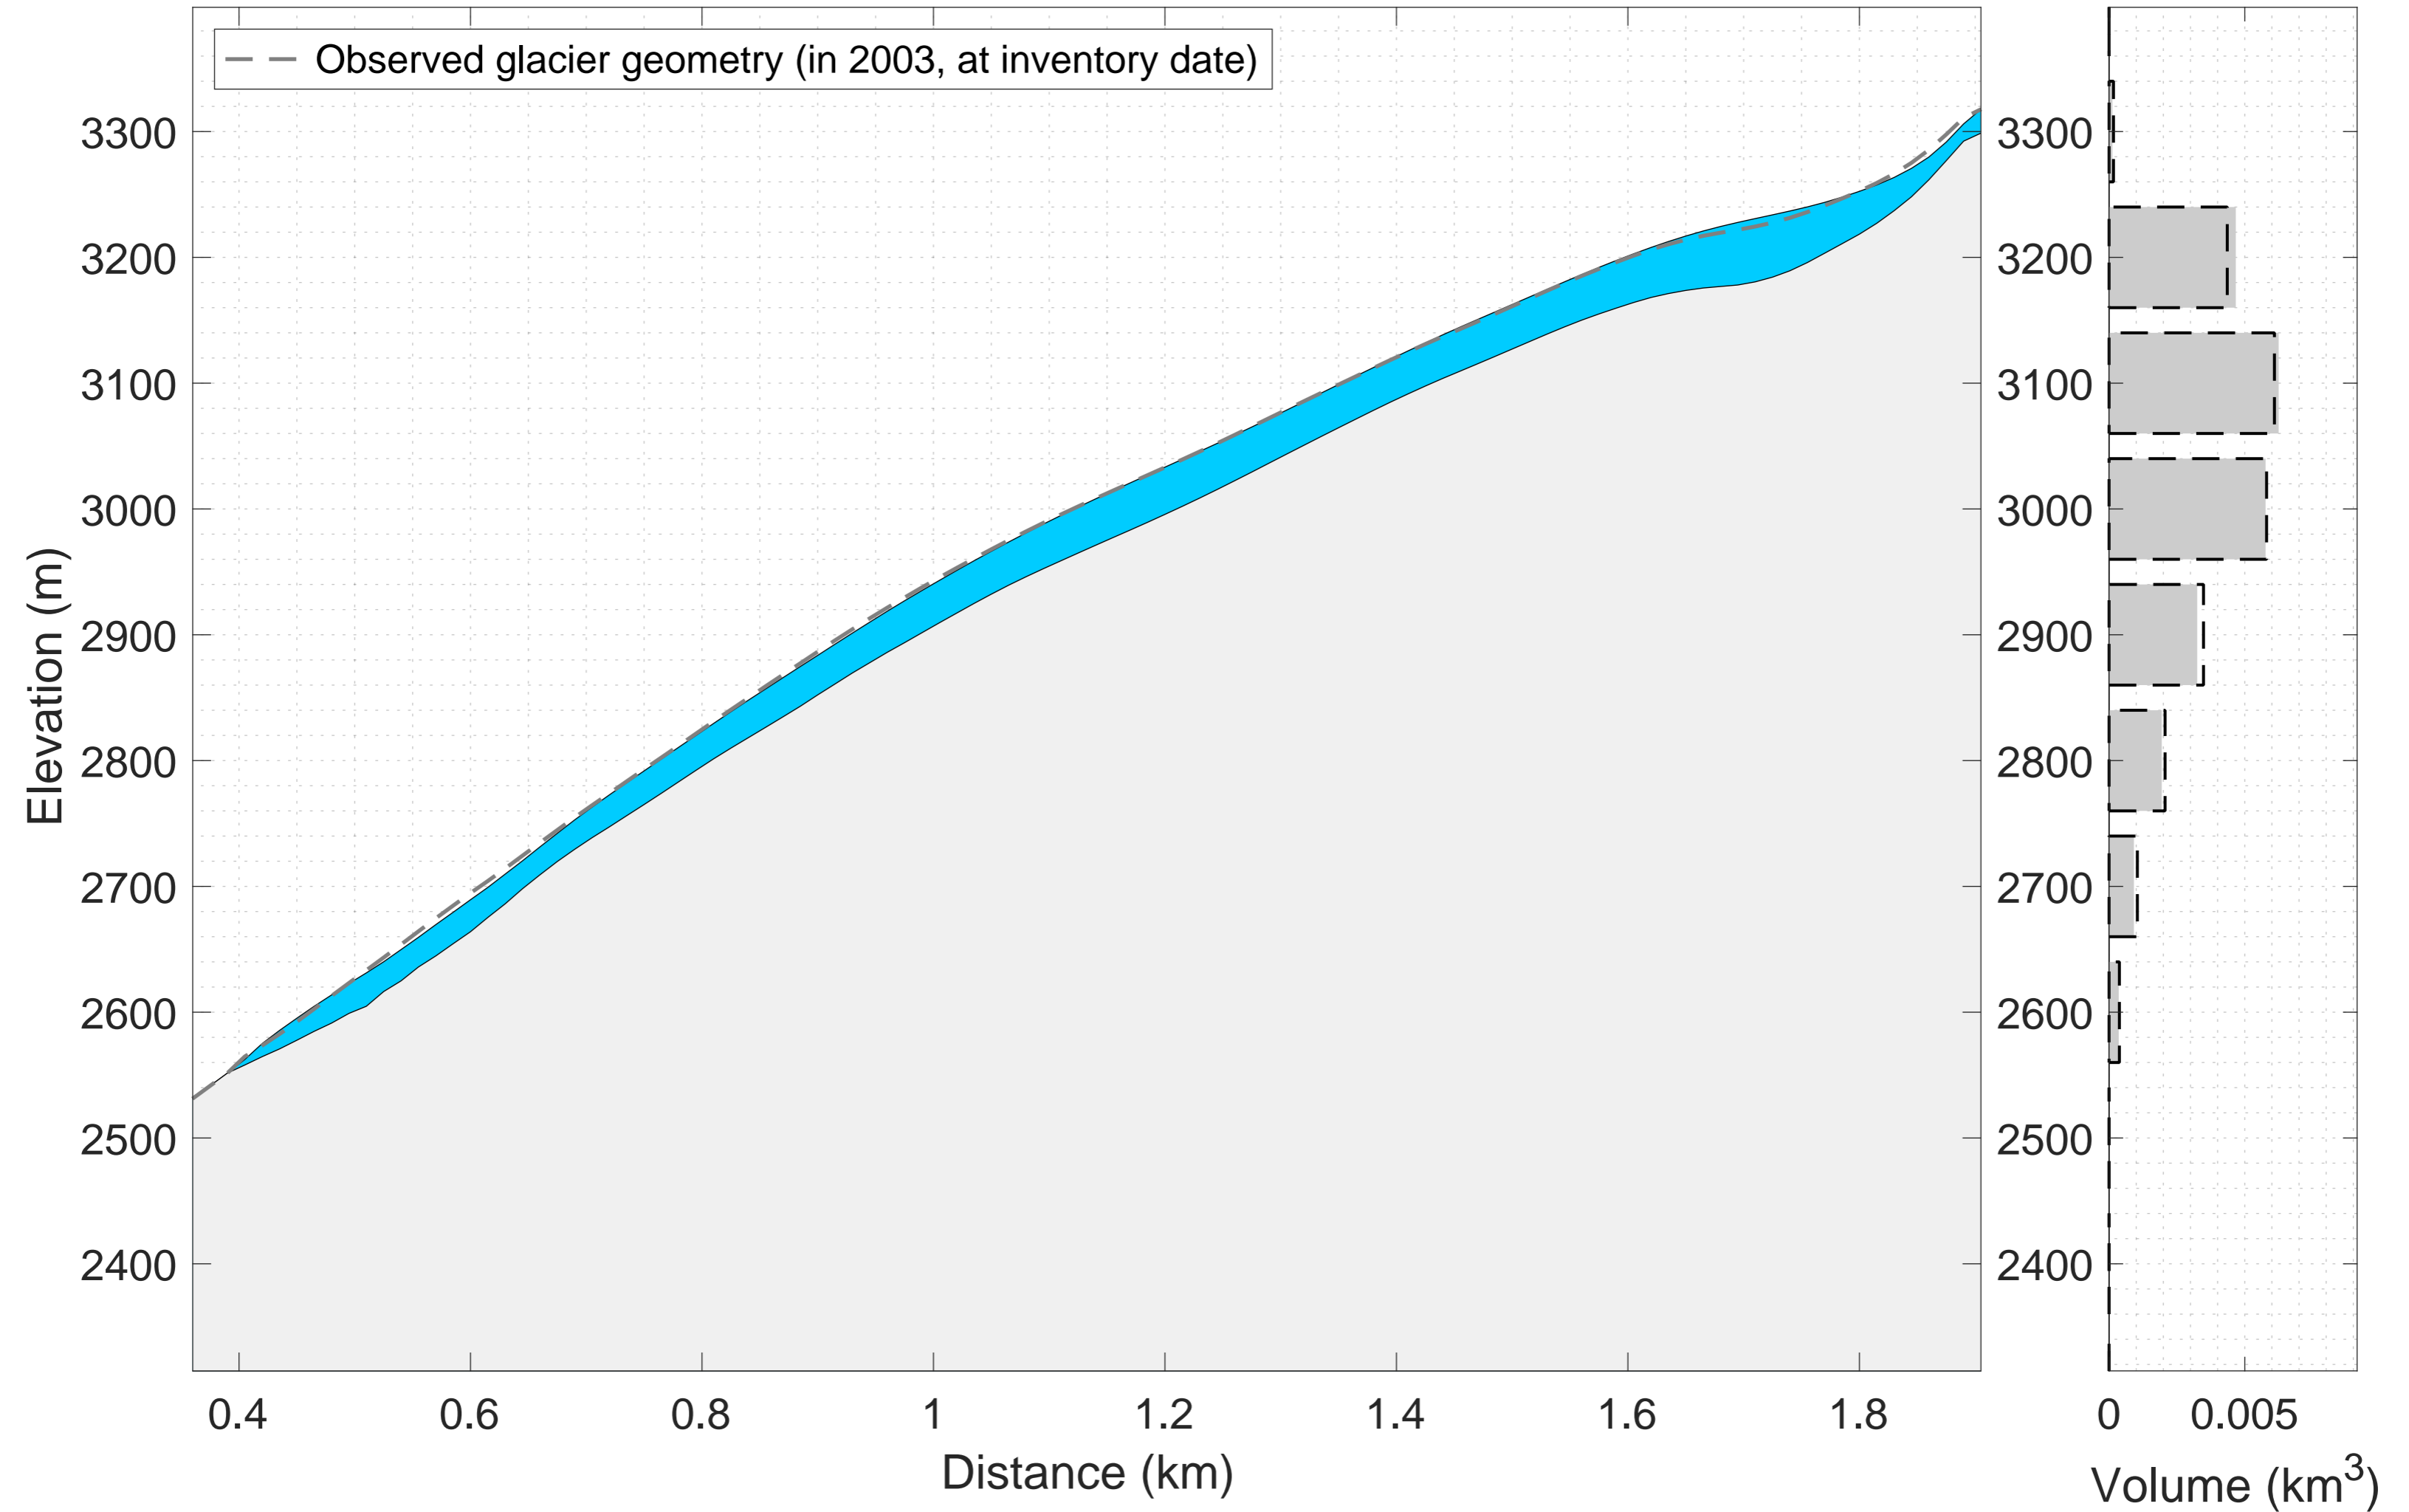

Supplement: Supplementary file 321 [file tc-13-1125-2019-supplement.zip]

**Modelled geometry (Glacier ID = 03656;  $A = 3.2806\text{e-}16 \text{ Pa}^{-3} \text{ a}^{-1}$ ;  $dx = 16 \text{ m}$ )**

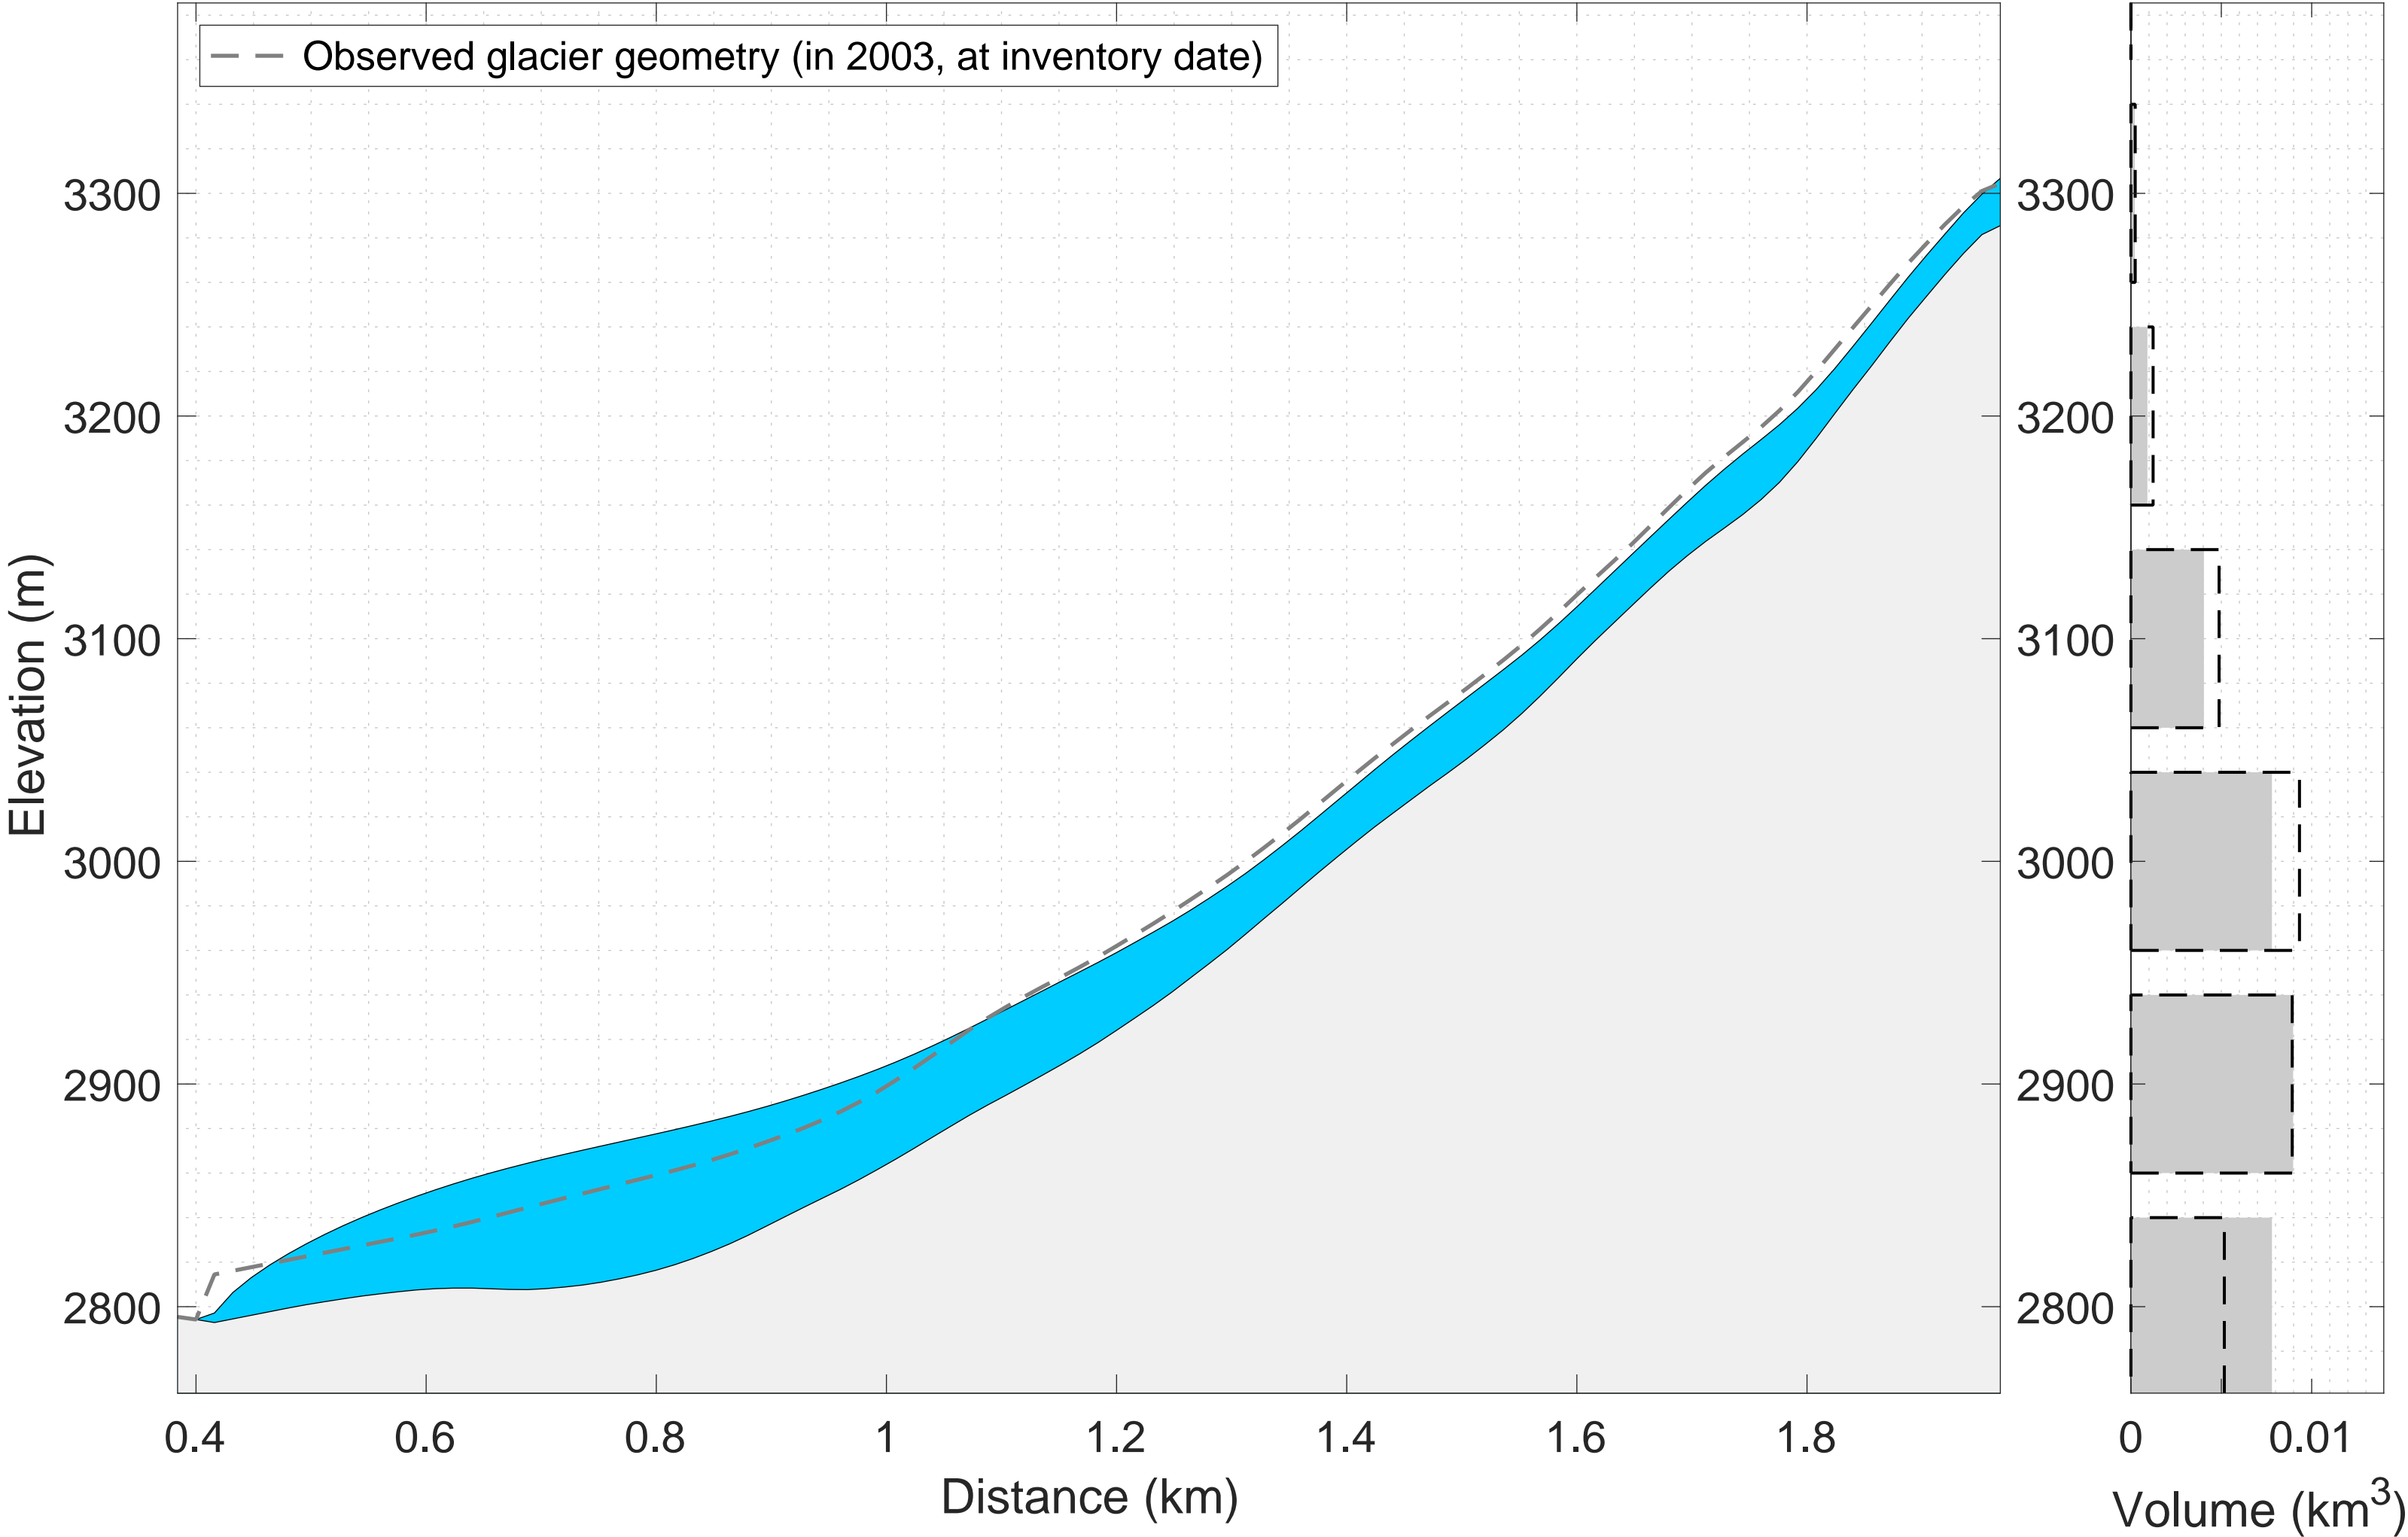

Supplement: Supplementary file 322 [file tc-13-1125-2019-supplement.zip]

**Modelled geometry (Glacier ID = 03601;  $A = 7.9716\text{e-}17 \text{ Pa}^{-3} \text{ a}^{-1}$ ;  $dx = 18 \text{ m}$ )**

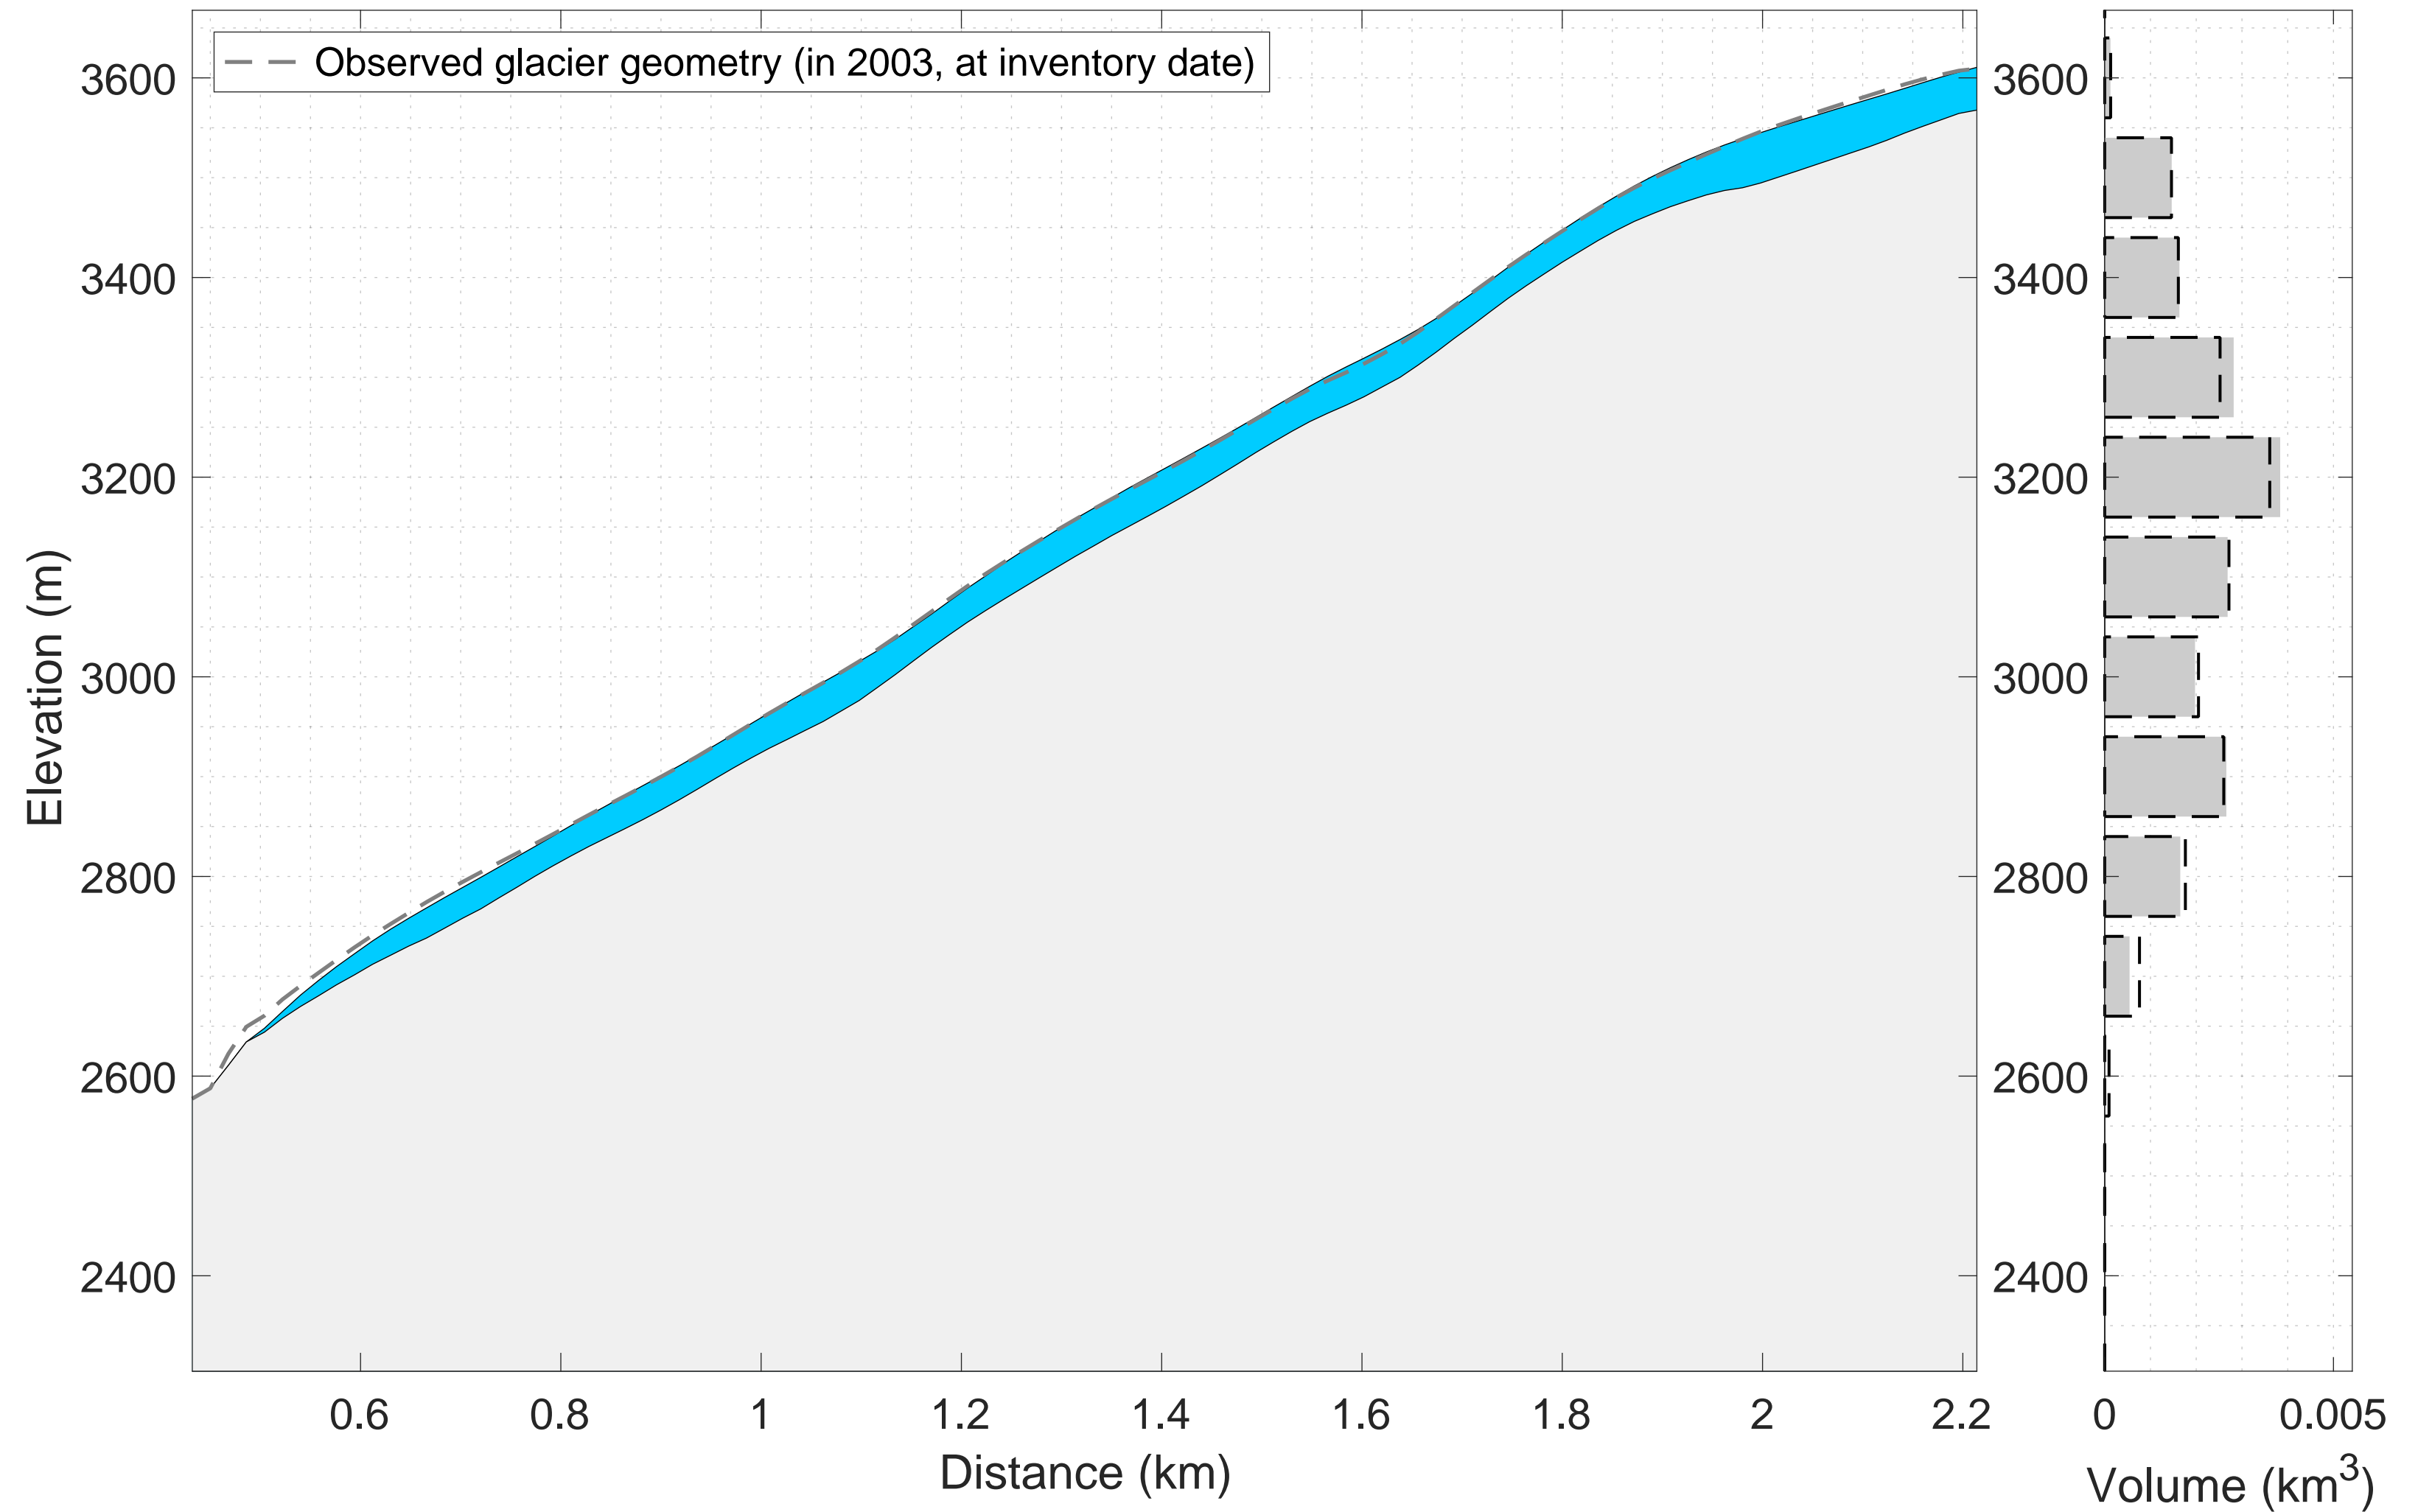

Supplement: Supplementary file 323 [file tc-13-1125-2019-supplement.zip]

**Modelled geometry (Glacier ID = 01379;  $A = 1\text{e-}16 \text{ Pa}^{-3} \text{ a}^{-1}$ ;  $dx = 14 \text{ m}$ )**

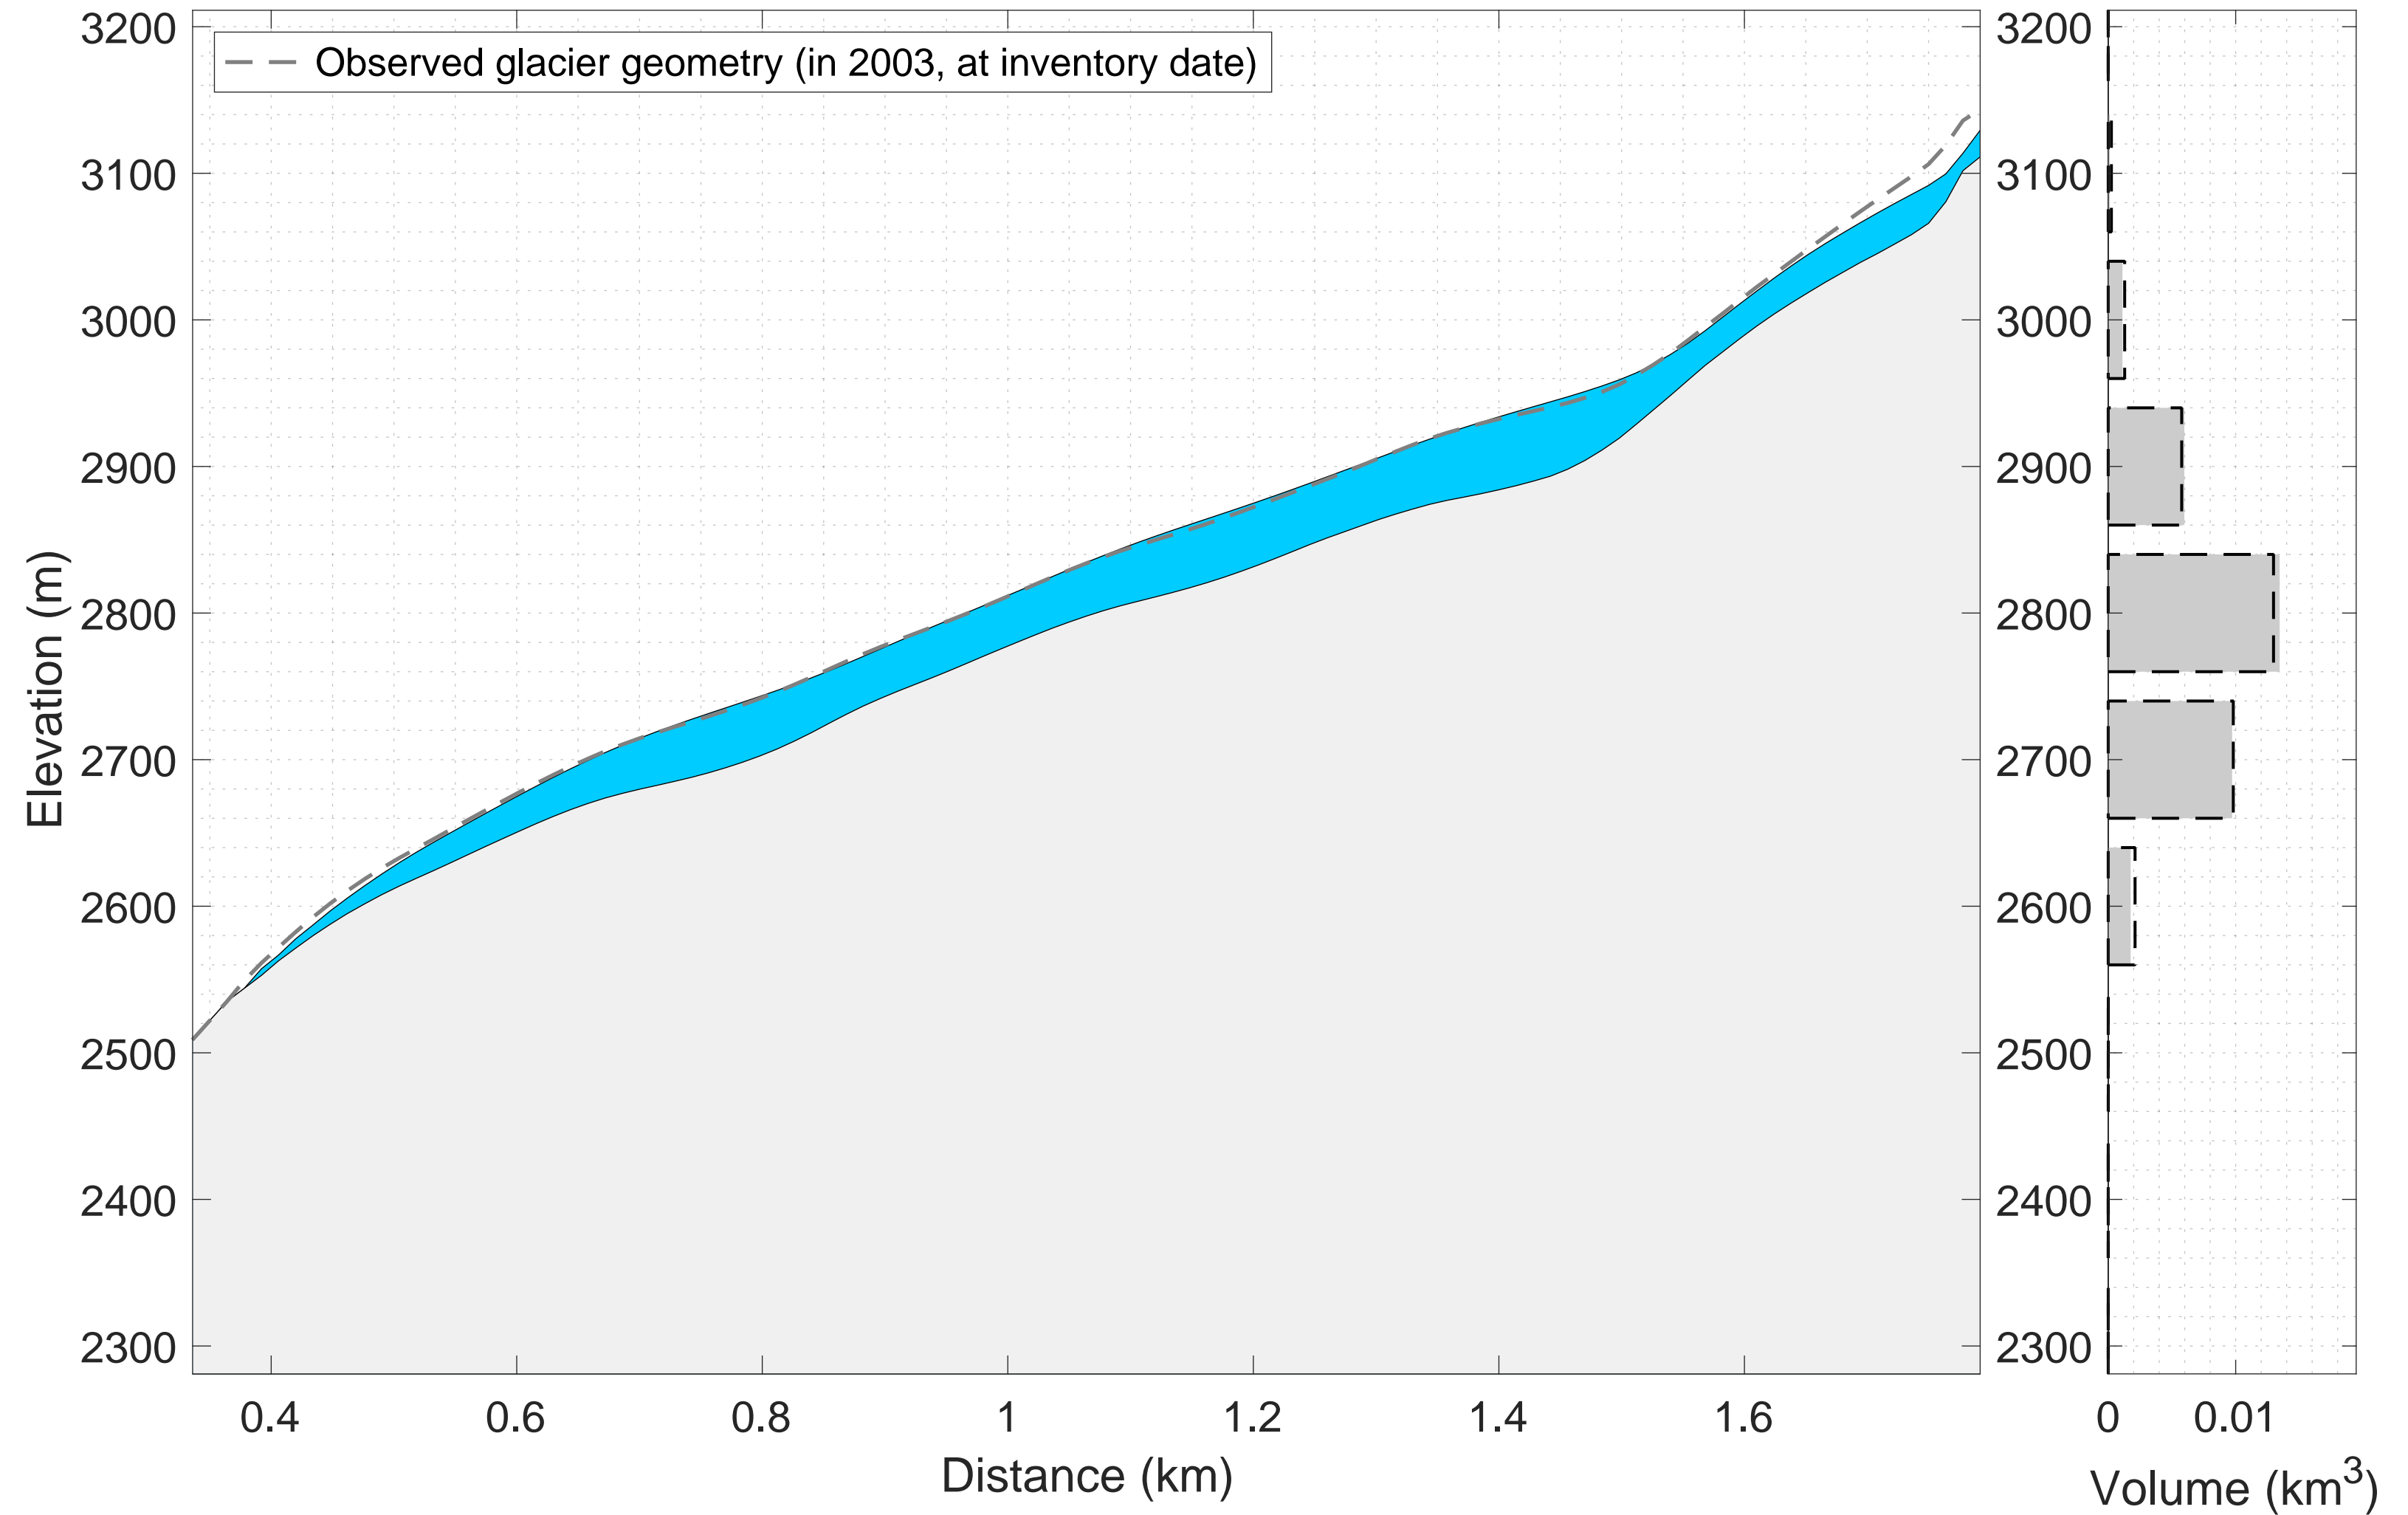

Supplement: Supplementary file 324 [file tc-13-1125-2019-supplement.zip]

**Modelled geometry (Glacier ID = 00303;  $A = 1.4505\text{e-}16 \text{ Pa}^{-3} \text{ a}^{-1}$ ;  $dx = 24 \text{ m}$ )**

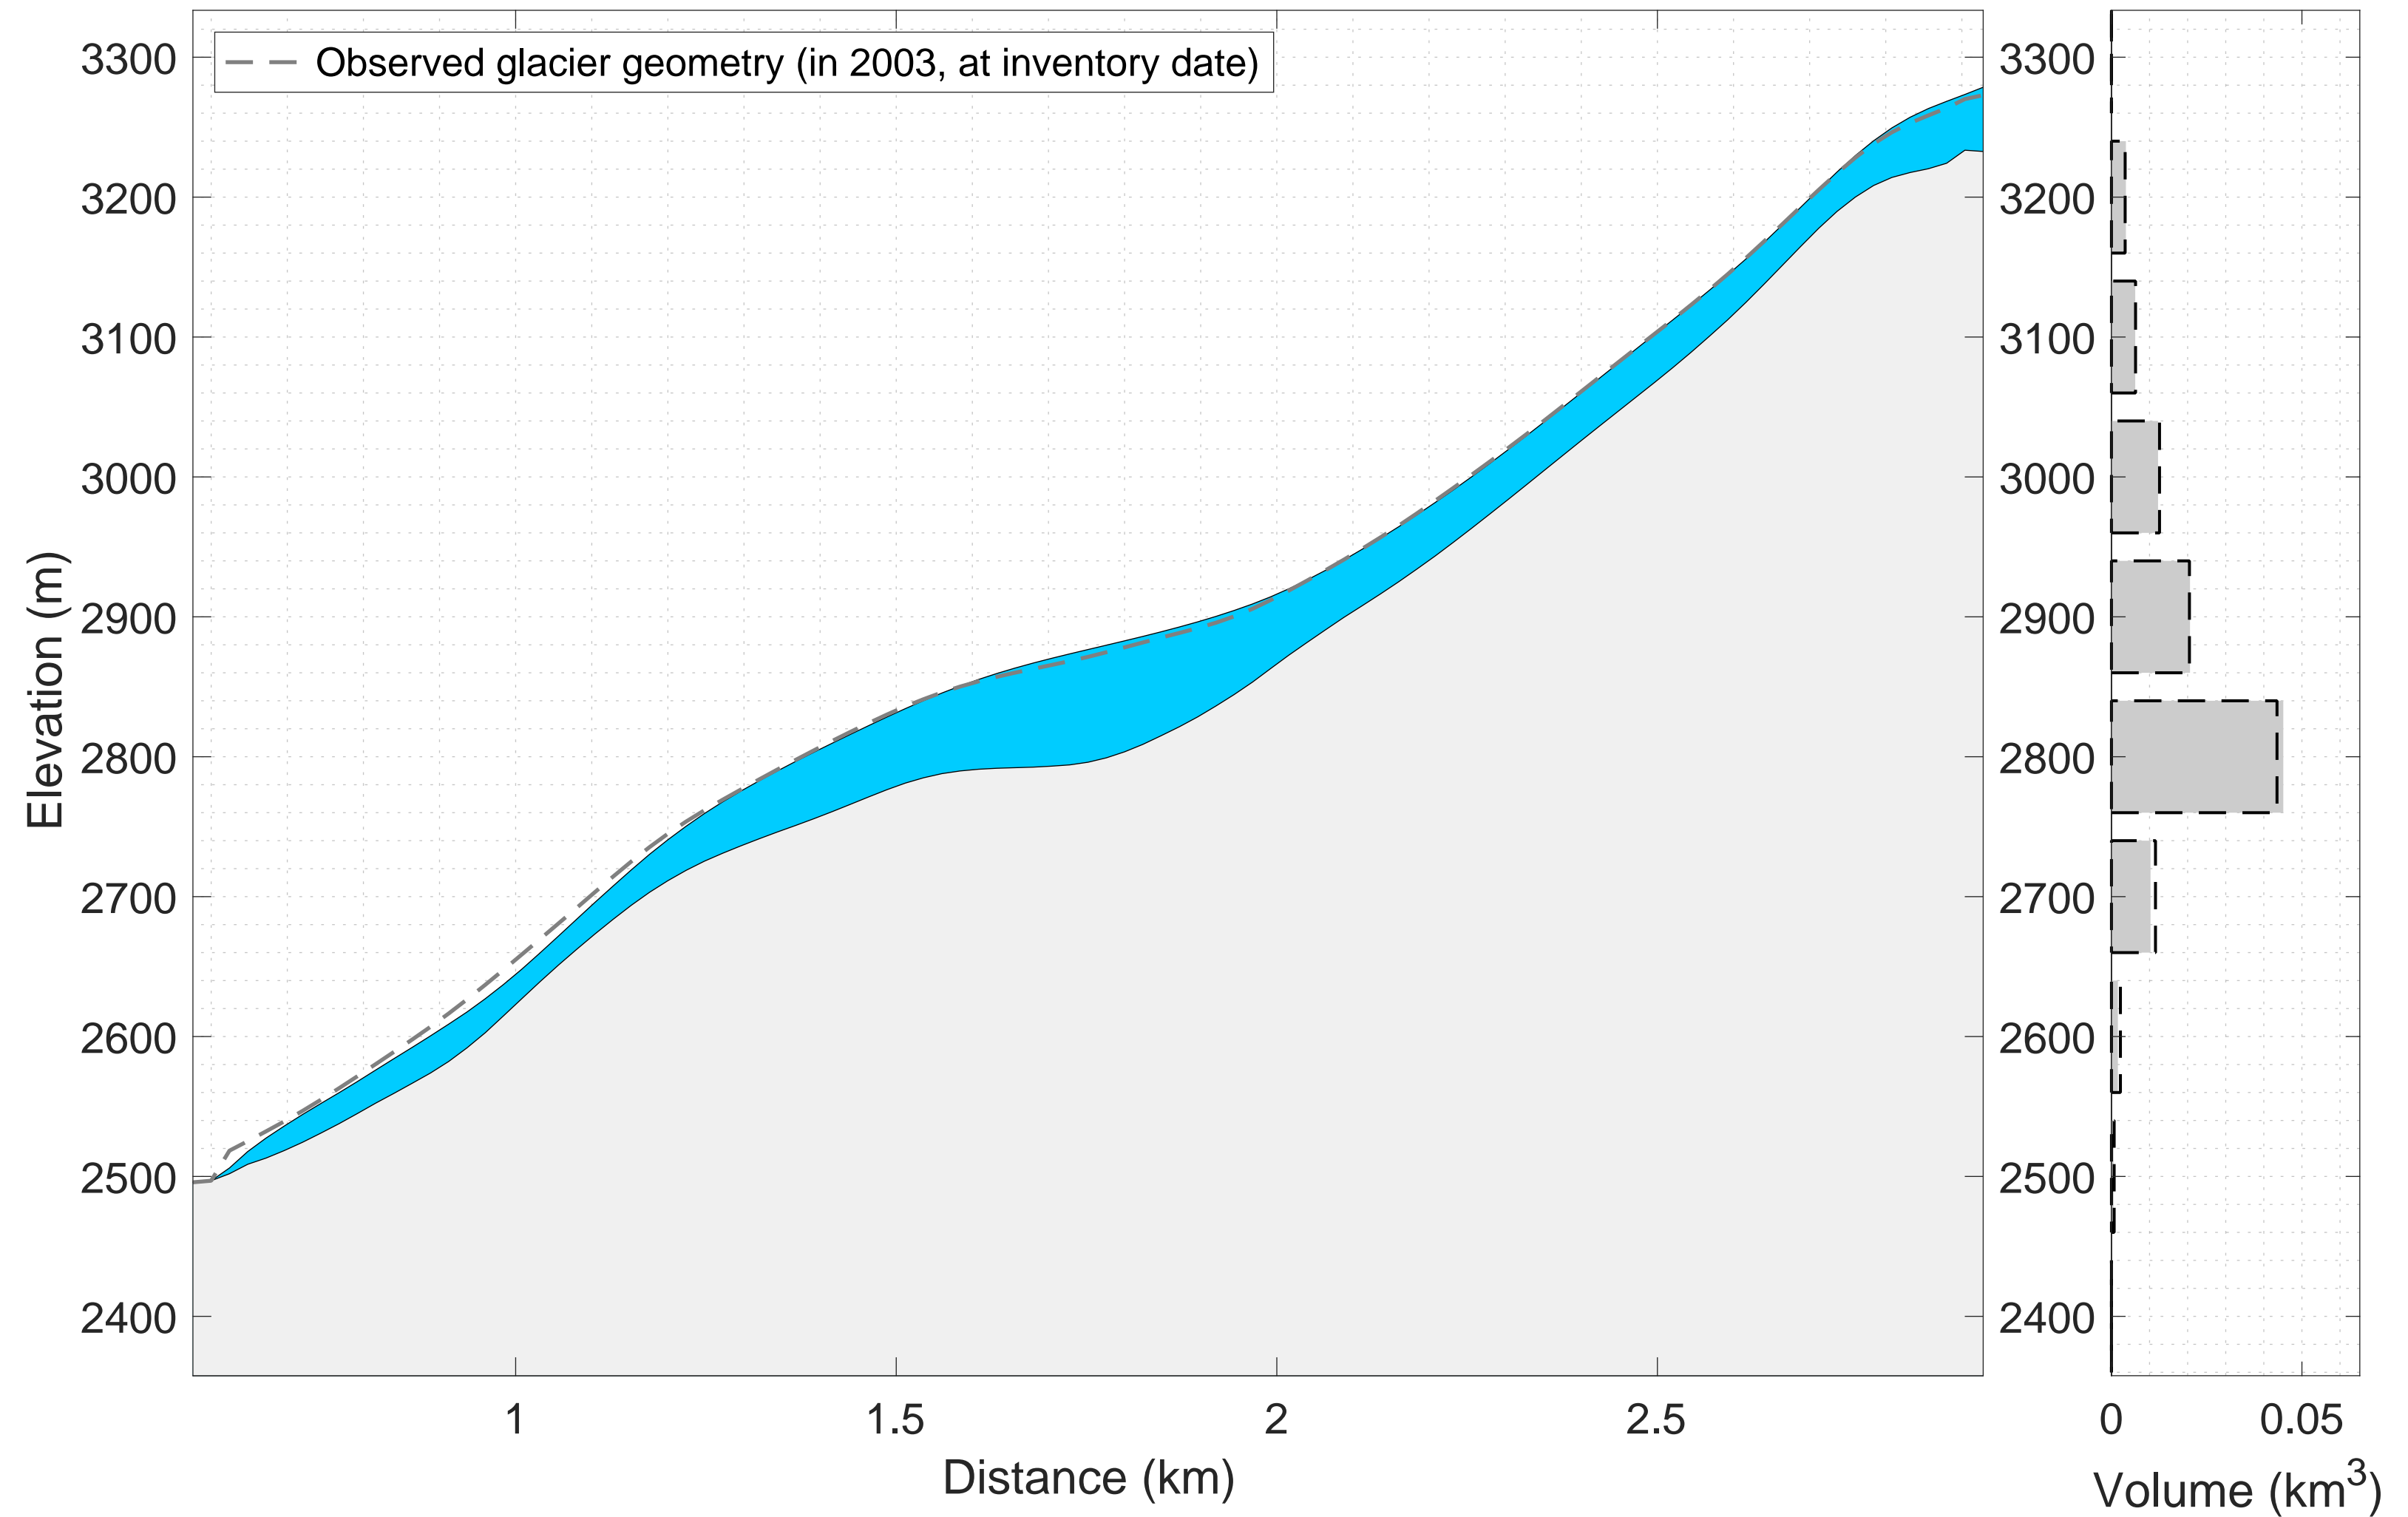

Supplement: Supplementary file 325 [file tc-13-1125-2019-supplement.zip]

**Modelled geometry (Glacier ID = 03377;  $A = 1.6249\text{e-}16 \text{ Pa}^{-3} \text{ a}^{-1}$ ;  $dx = 16 \text{ m}$ )**

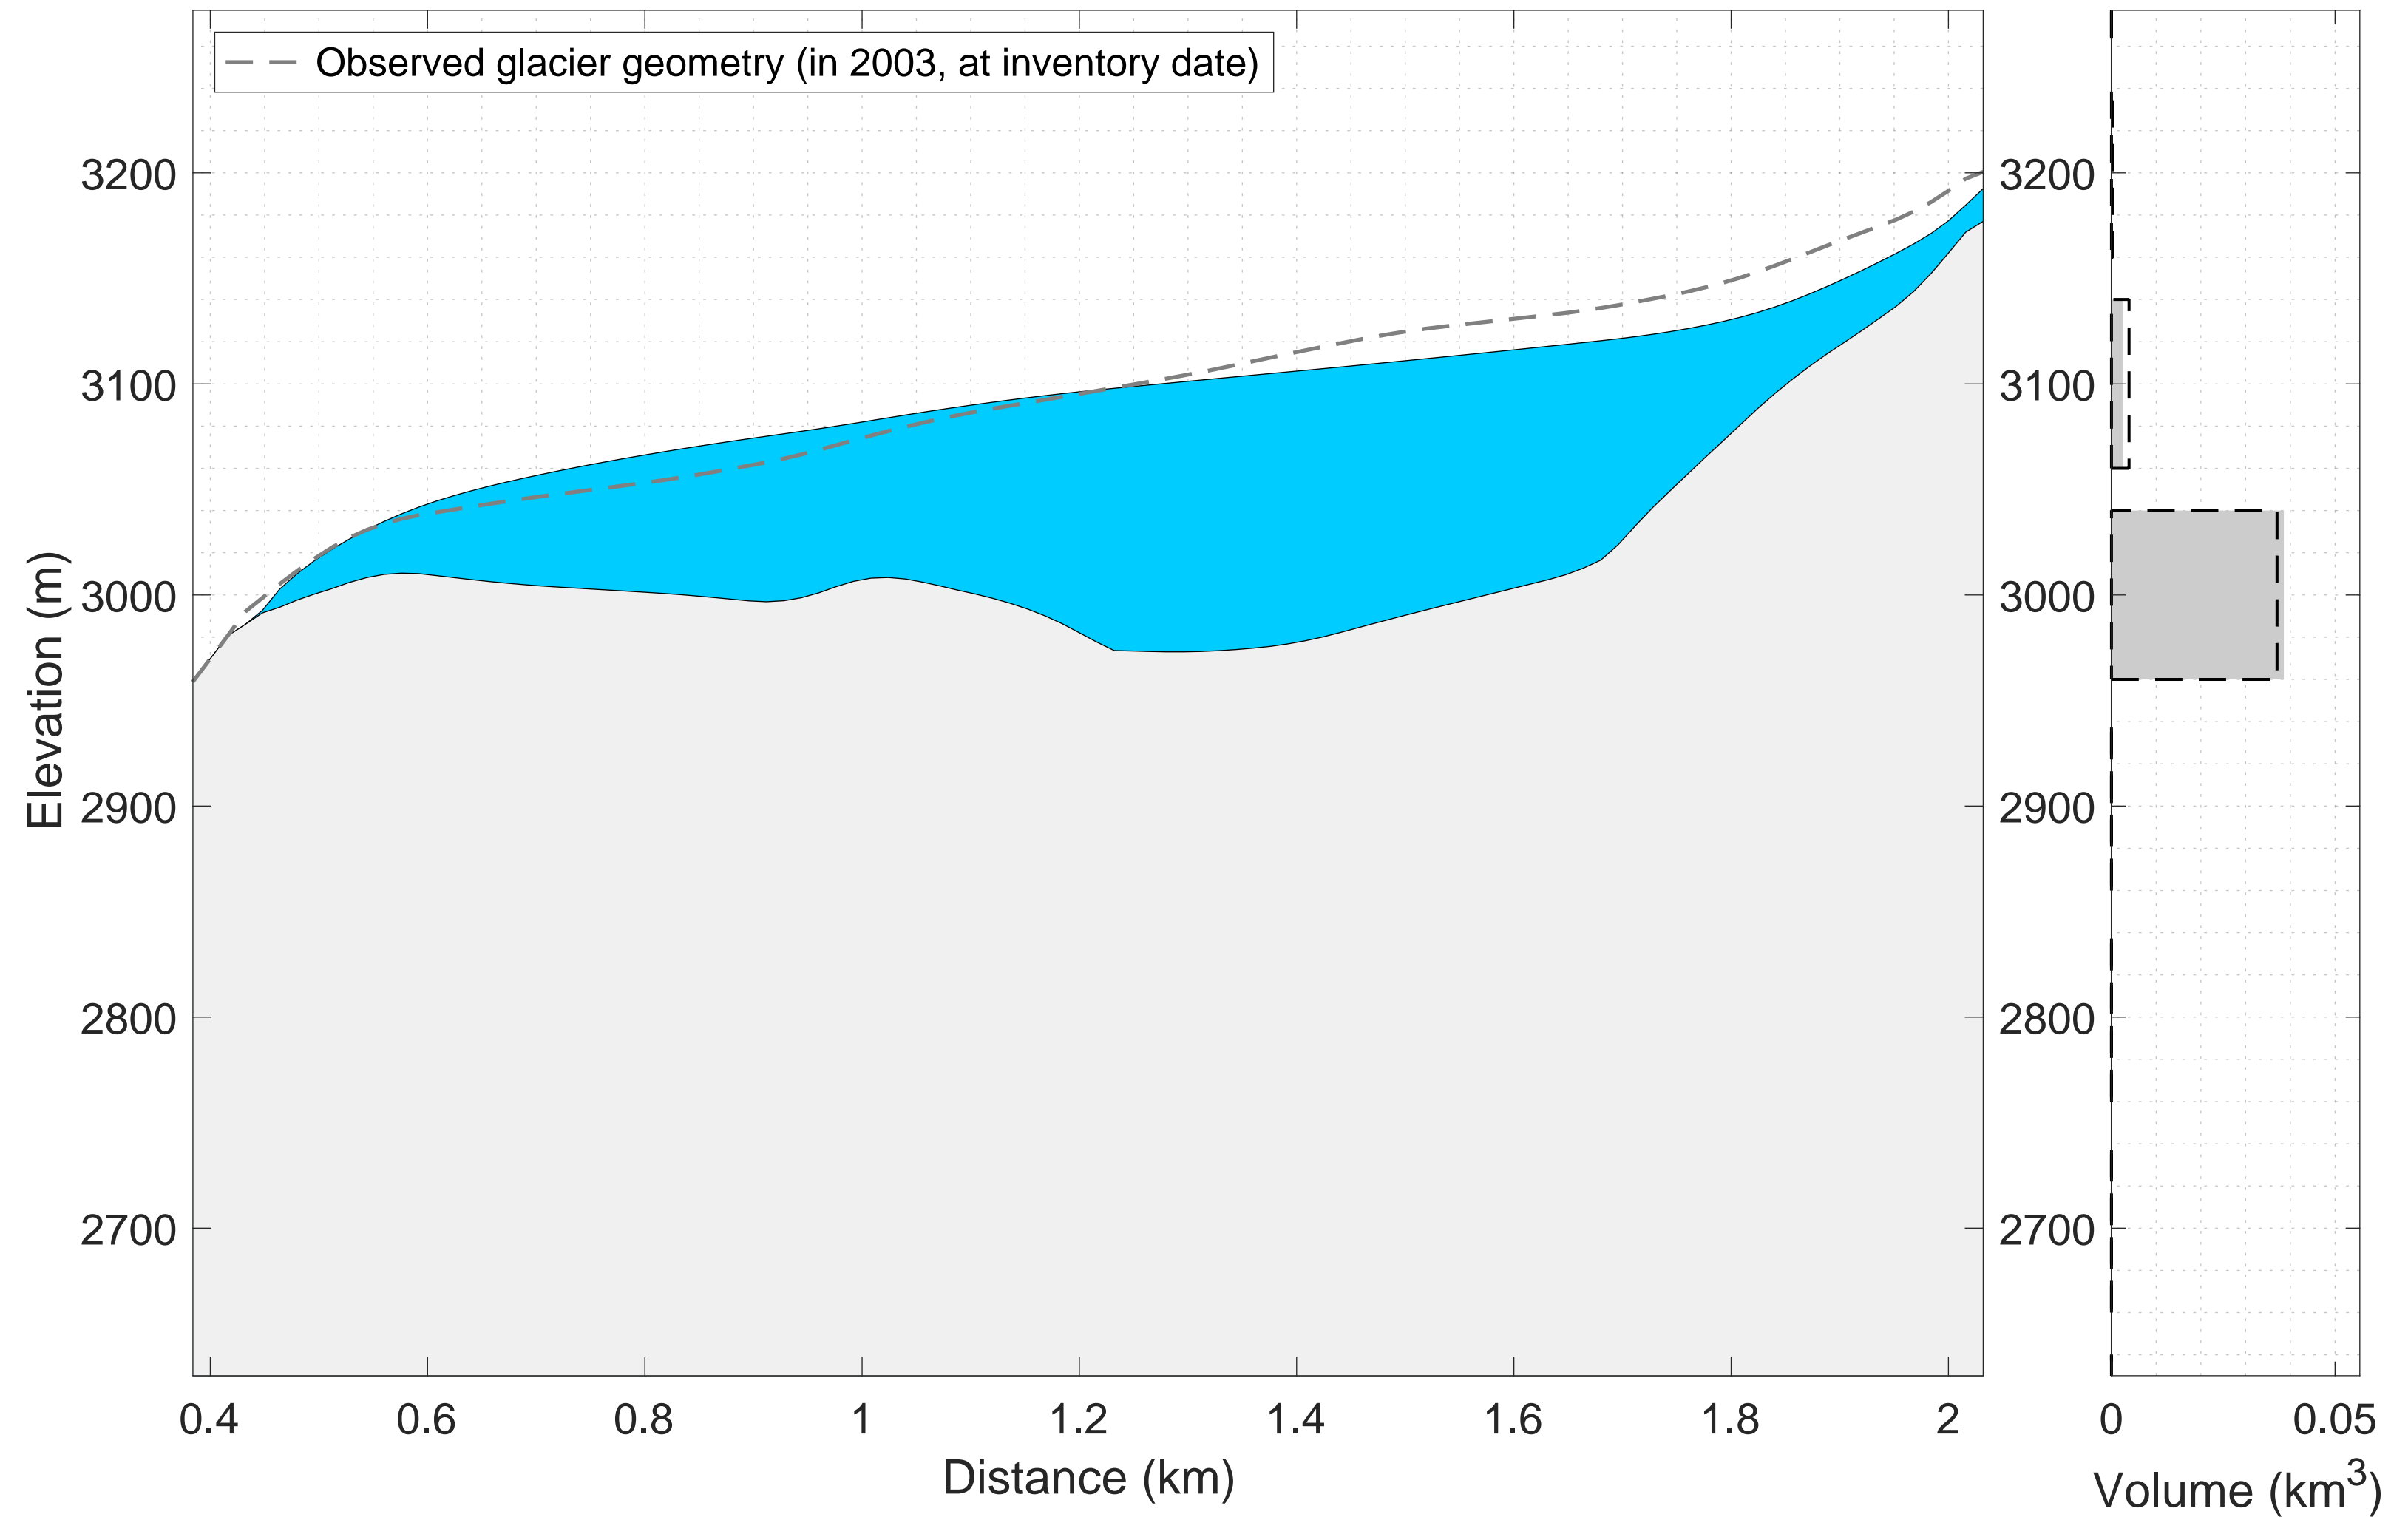

Supplement: Supplementary file 326 [file tc-13-1125-2019-supplement.zip]

**Modelled geometry (Glacier ID = 00691;  $A = 1.7235\text{e-}16 \text{ Pa}^{-3} \text{ a}^{-1}$ ;  $dx = 18 \text{ m}$ )**

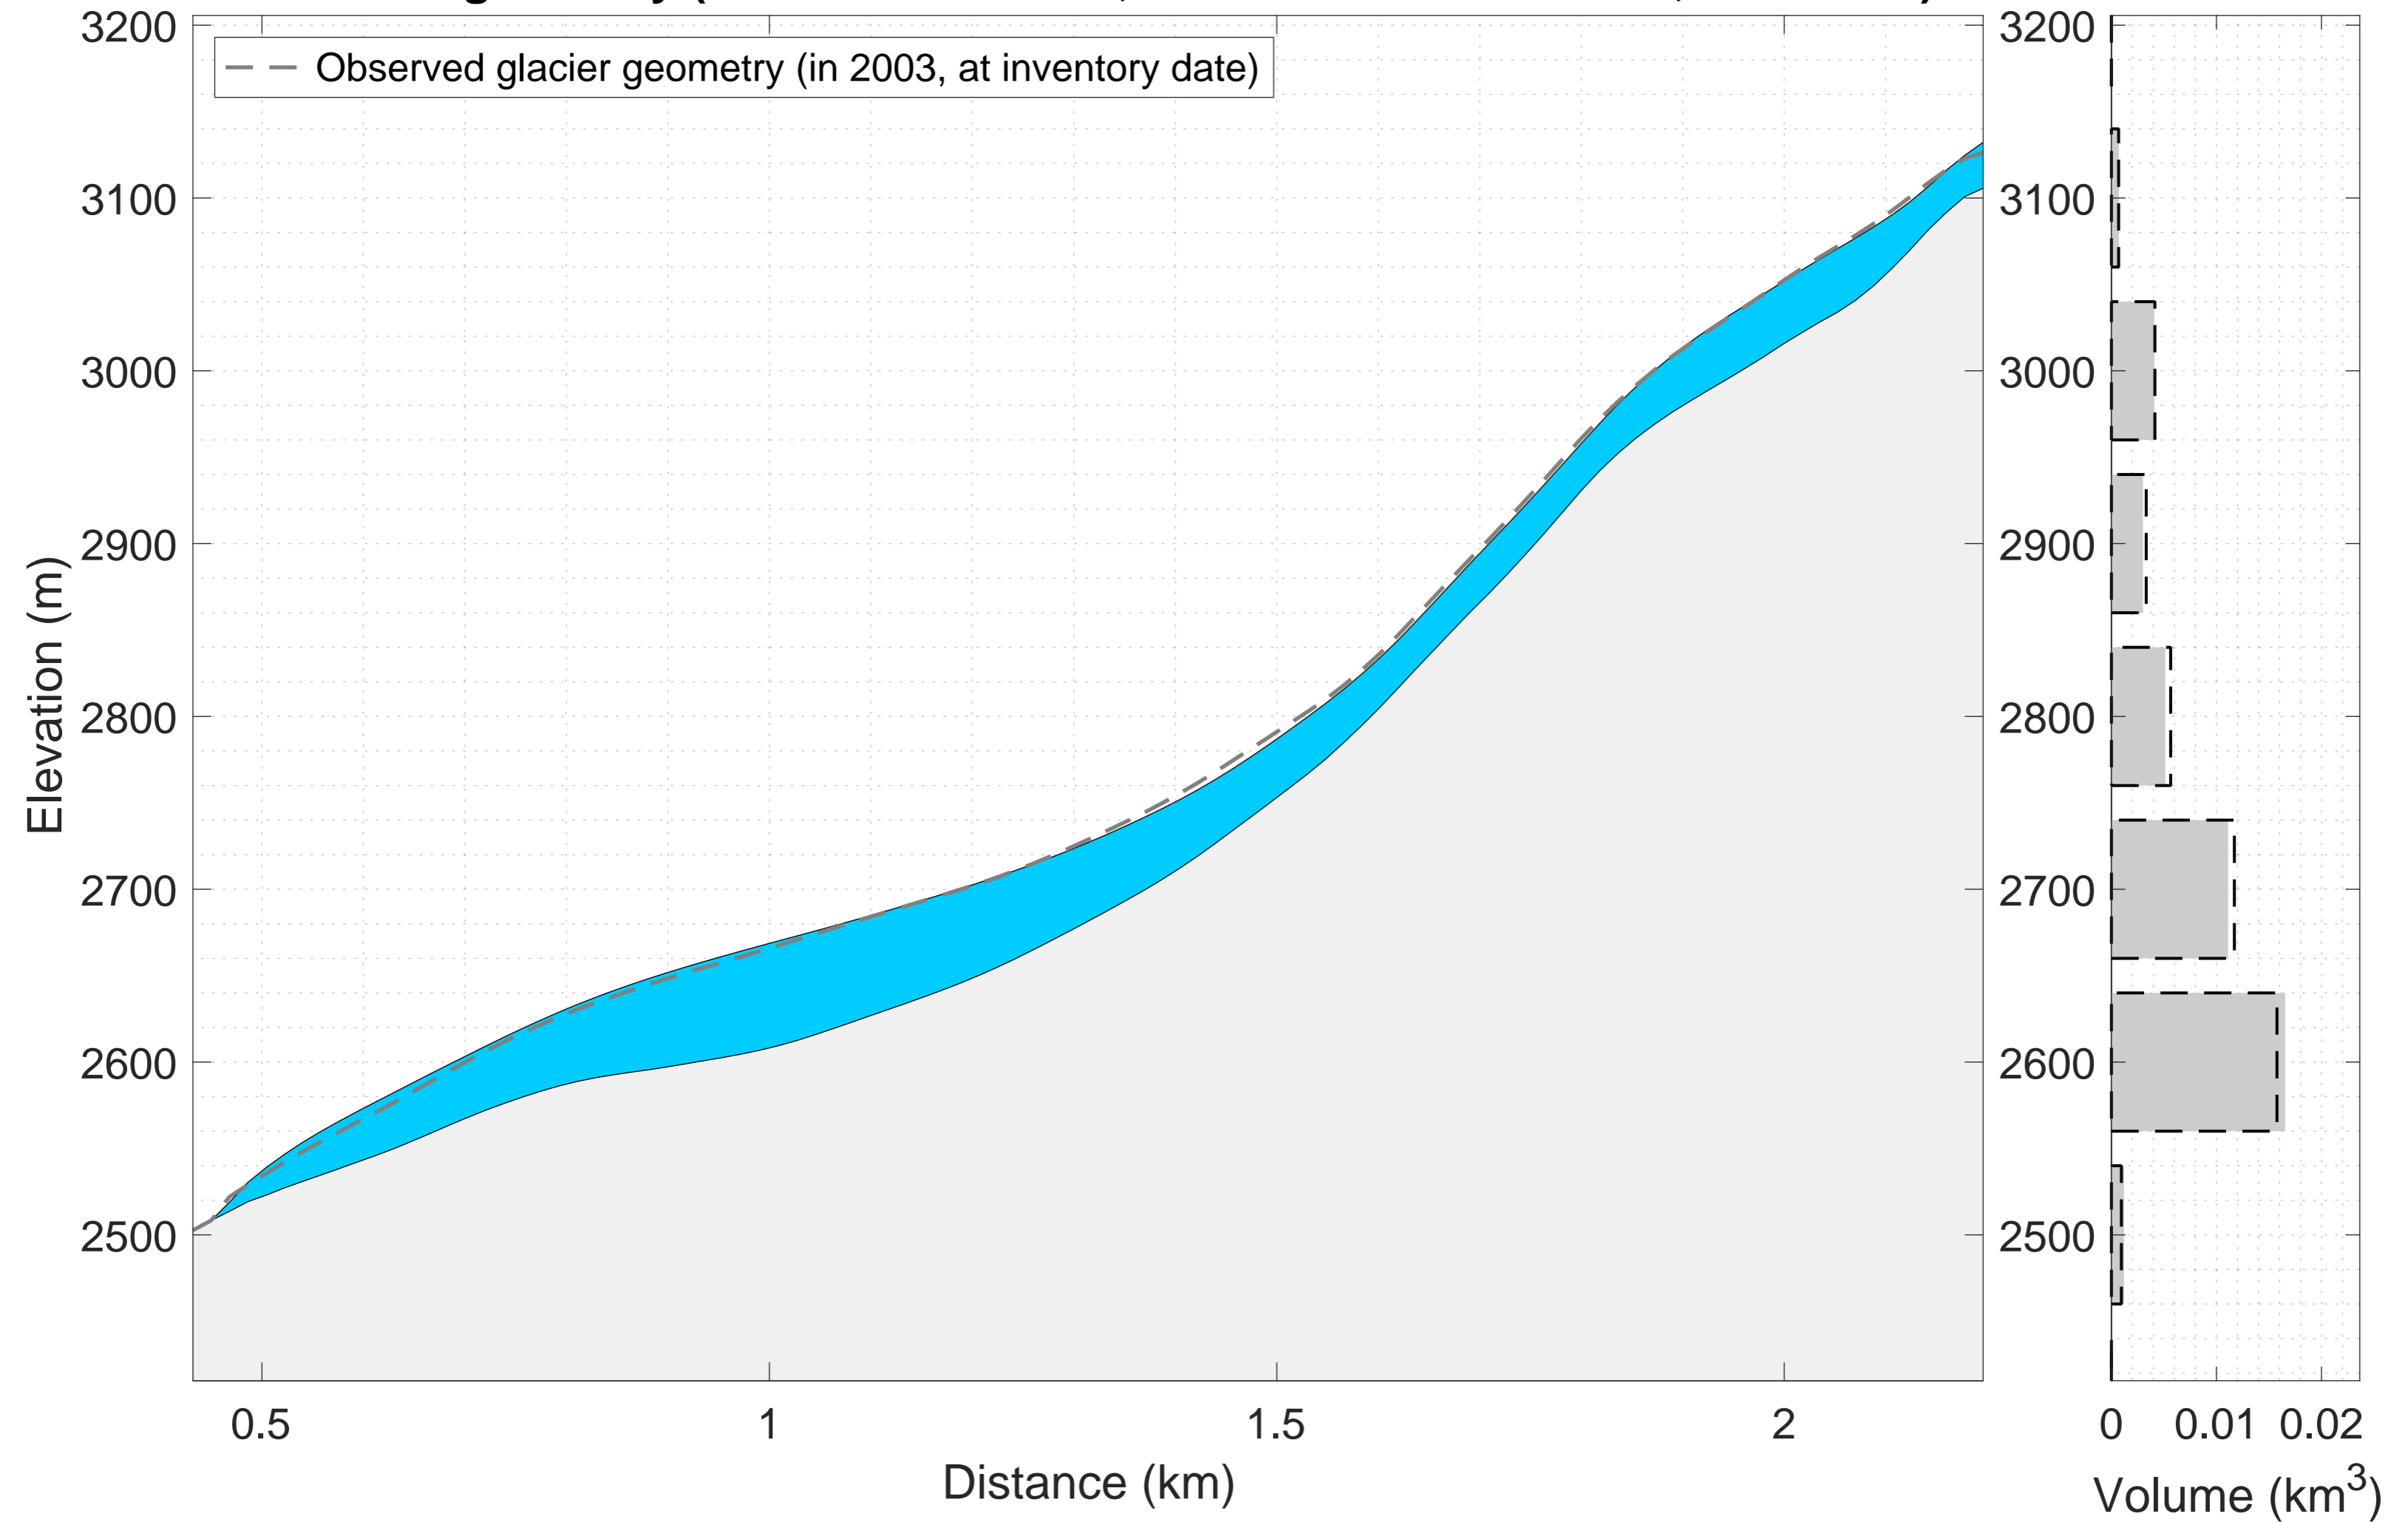

Supplement: Supplementary file 327 [file tc-13-1125-2019-supplement.zip]

**Modelled geometry (Glacier ID = 02715;  $A = 3.3411\text{e-}16 \text{ Pa}^{-3} \text{ a}^{-1}$ ;  $dx = 59 \text{ m}$ )**

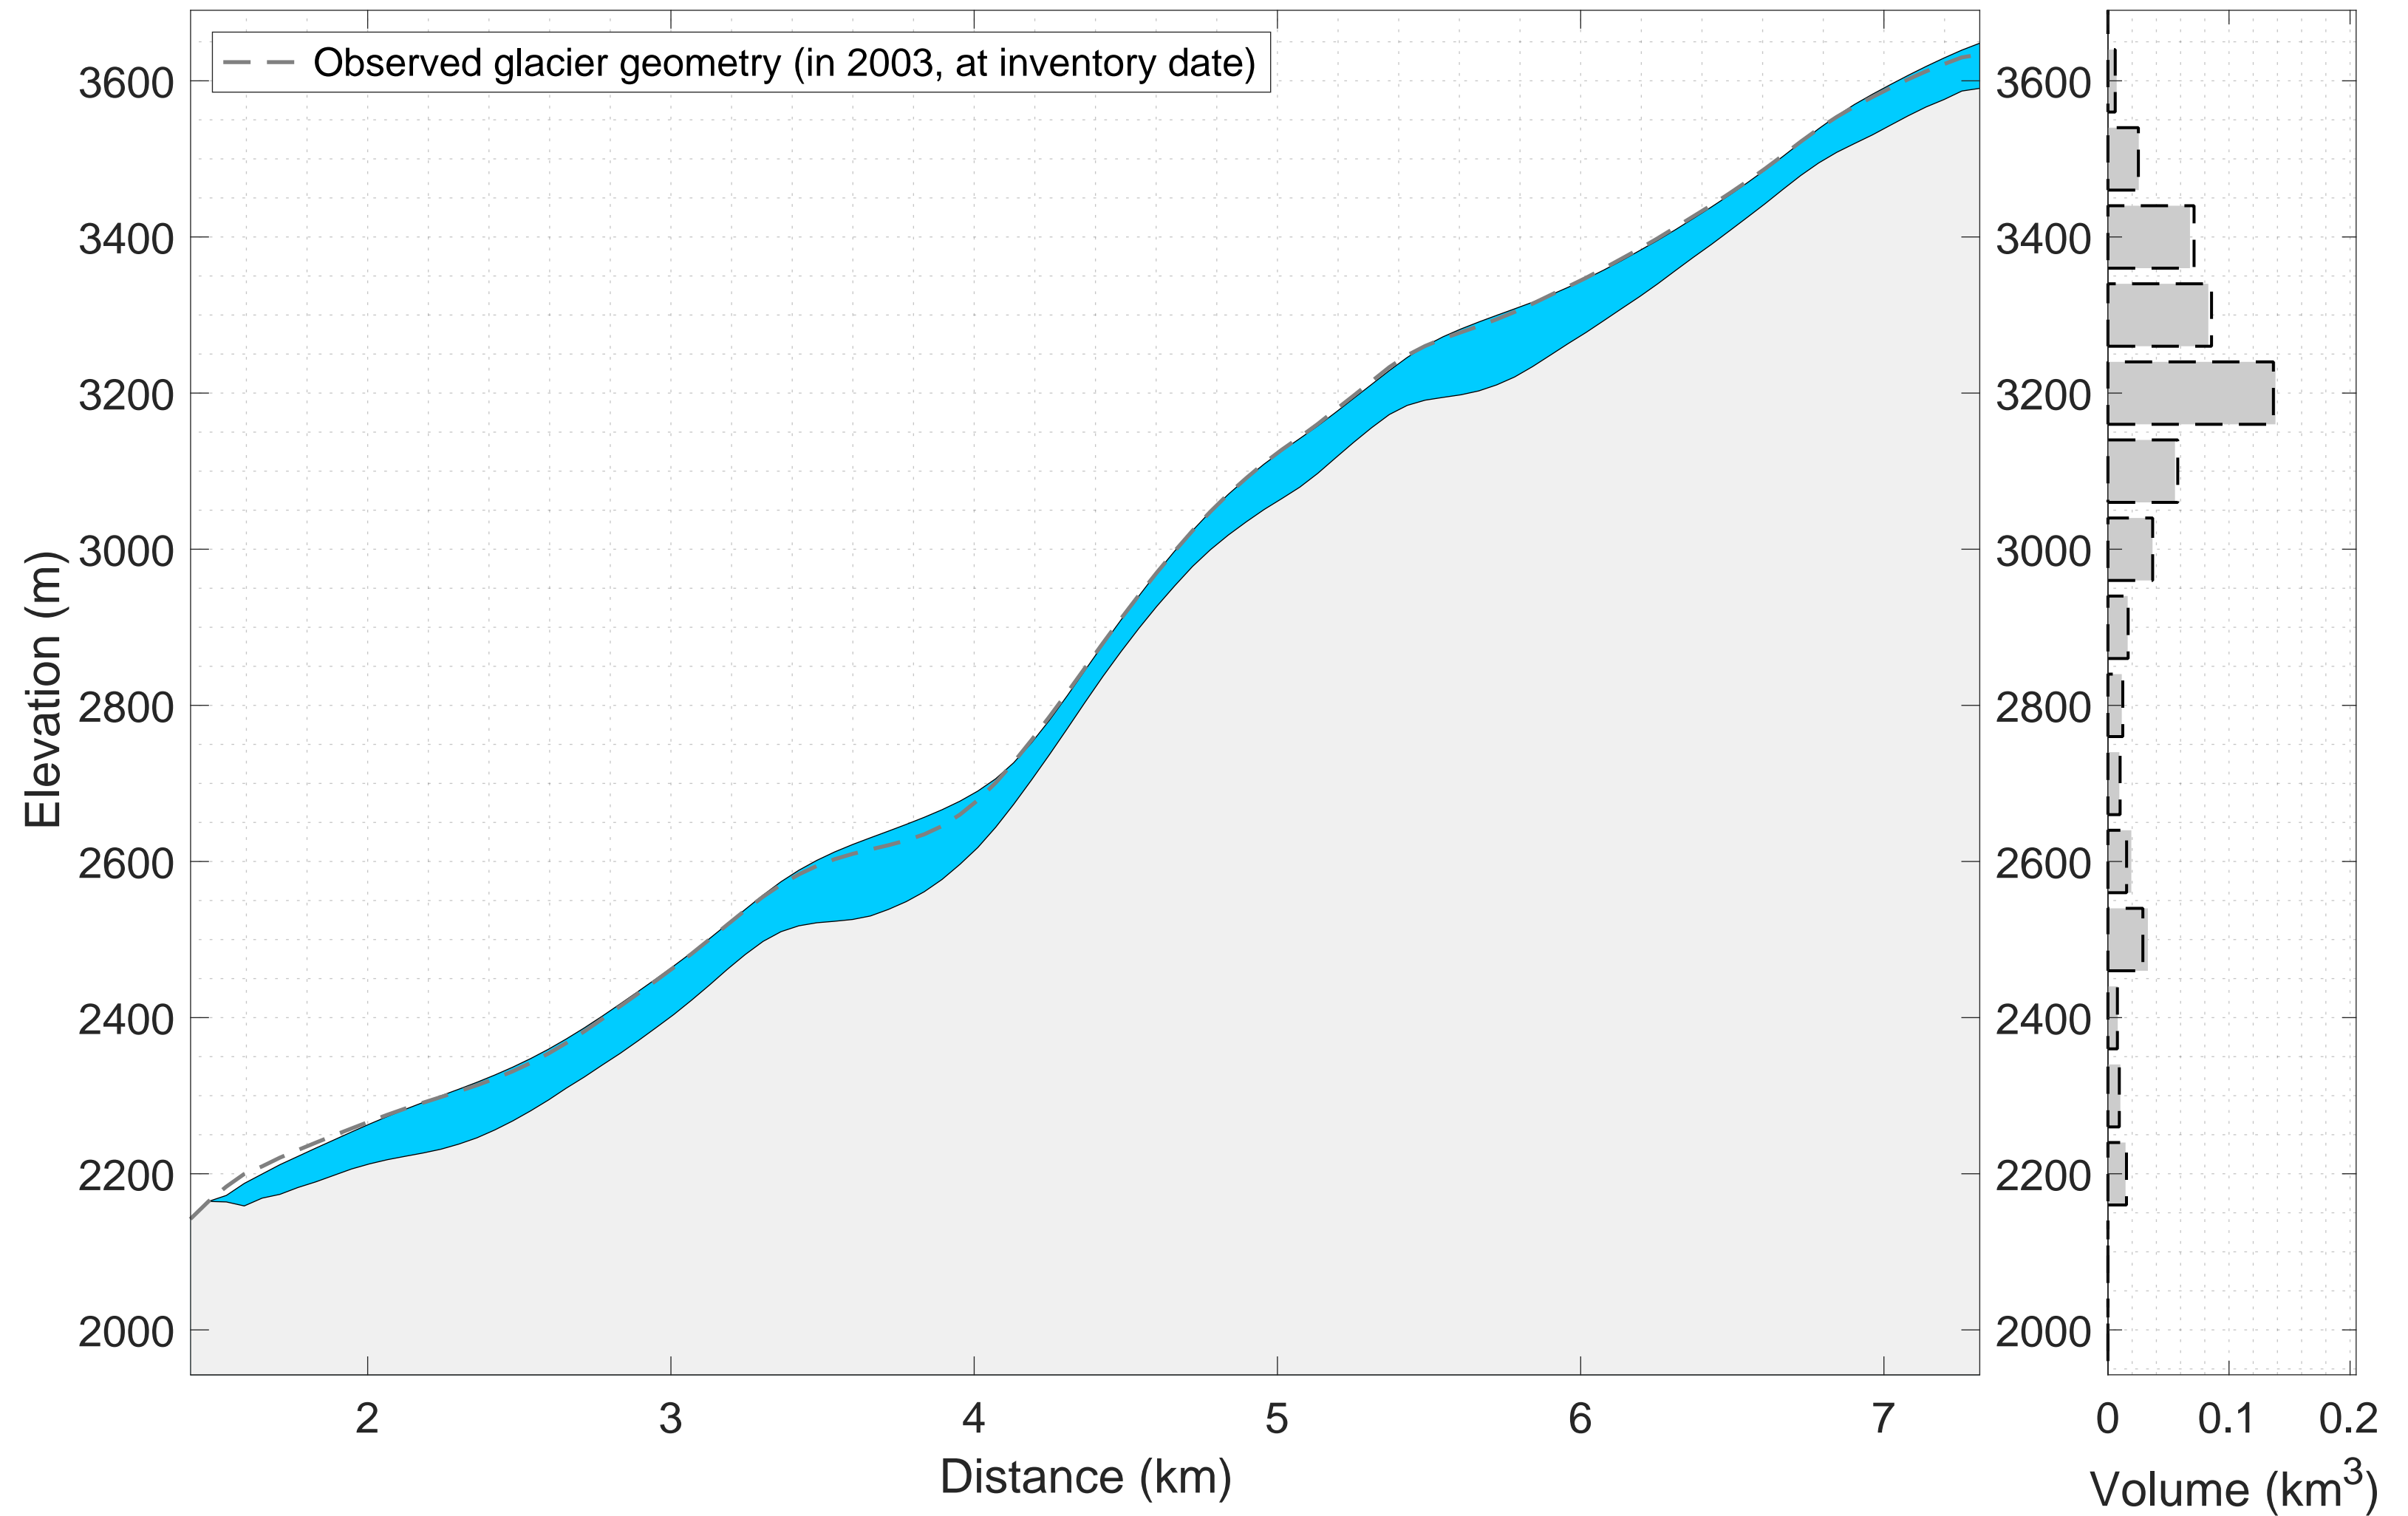

Supplement: Supplementary file 328 [file tc-13-1125-2019-supplement.zip]

Modelled geometry (Glacier ID = 03524;  $A = 1.1219\text{e-}16 \text{ Pa}^{-3} \text{ a}^{-1}$ ;  $dx = 11 \text{ m}$ )

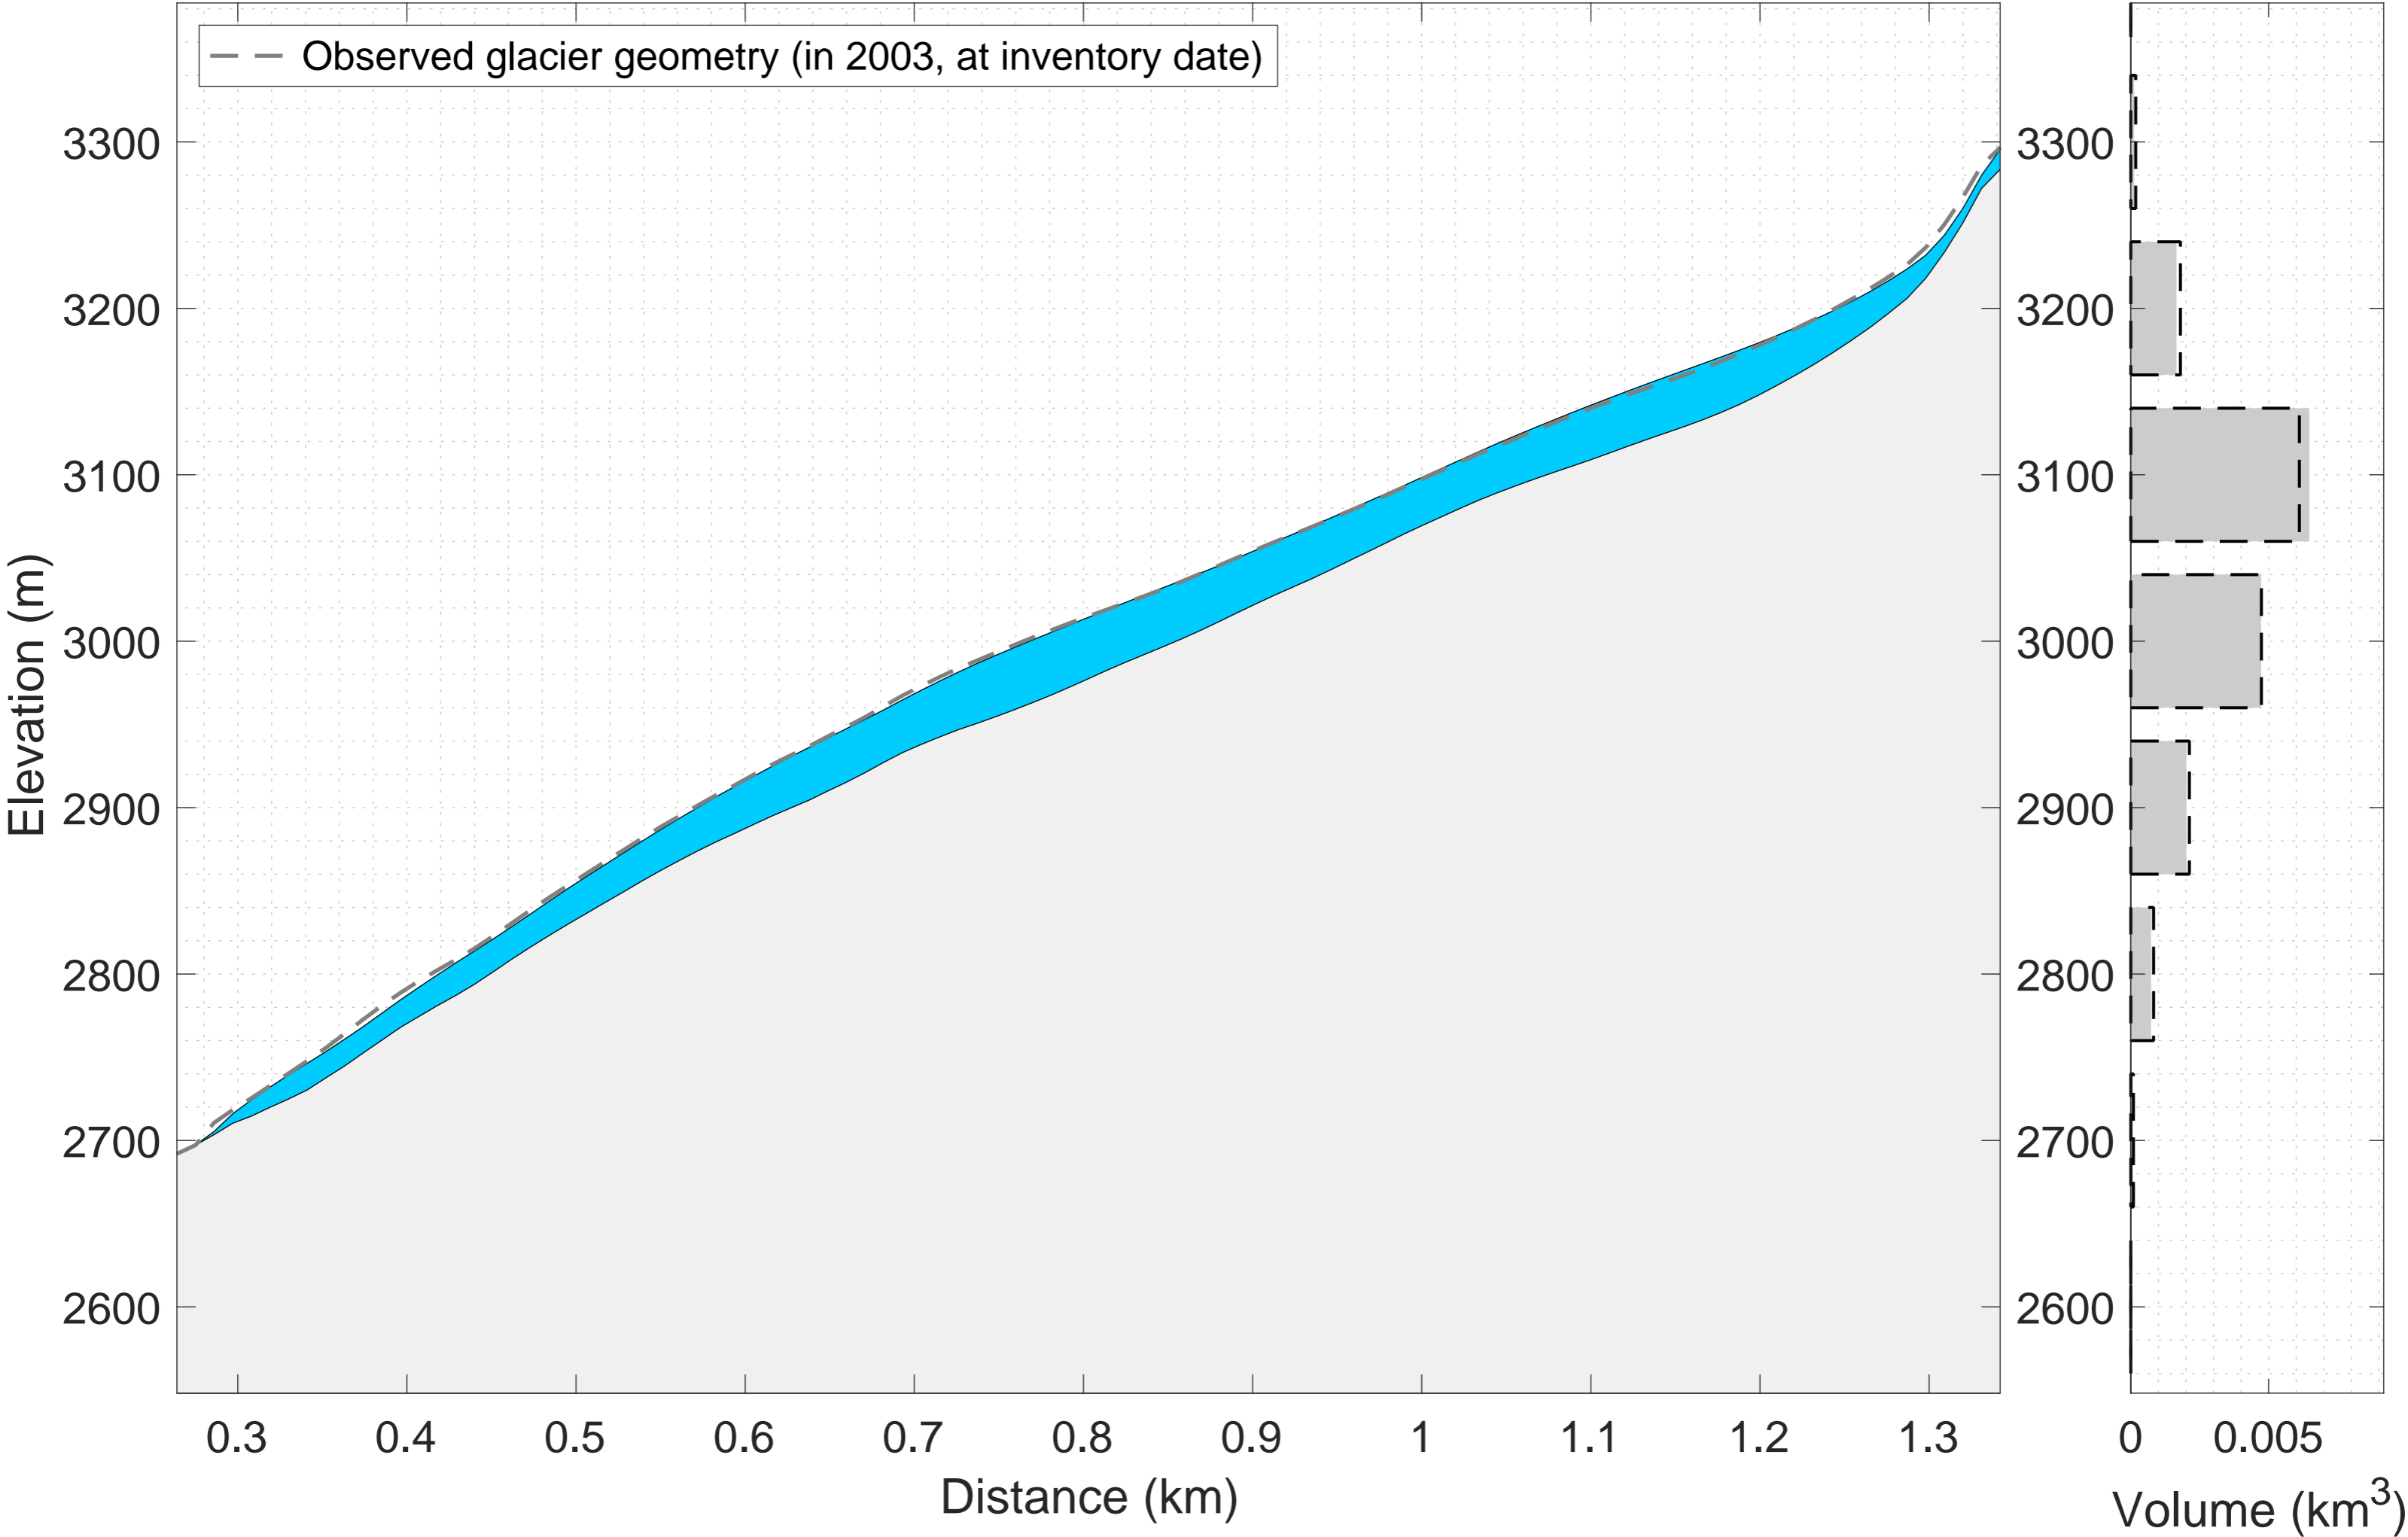

Supplement: Supplementary file 329 [file tc-13-1125-2019-supplement.zip]

**Modelled geometry (Glacier ID = 03101;  $A = 2.0565\text{e-}16 \text{ Pa}^{-3} \text{ a}^{-1}$ ;  $dx = 21 \text{ m}$ )**

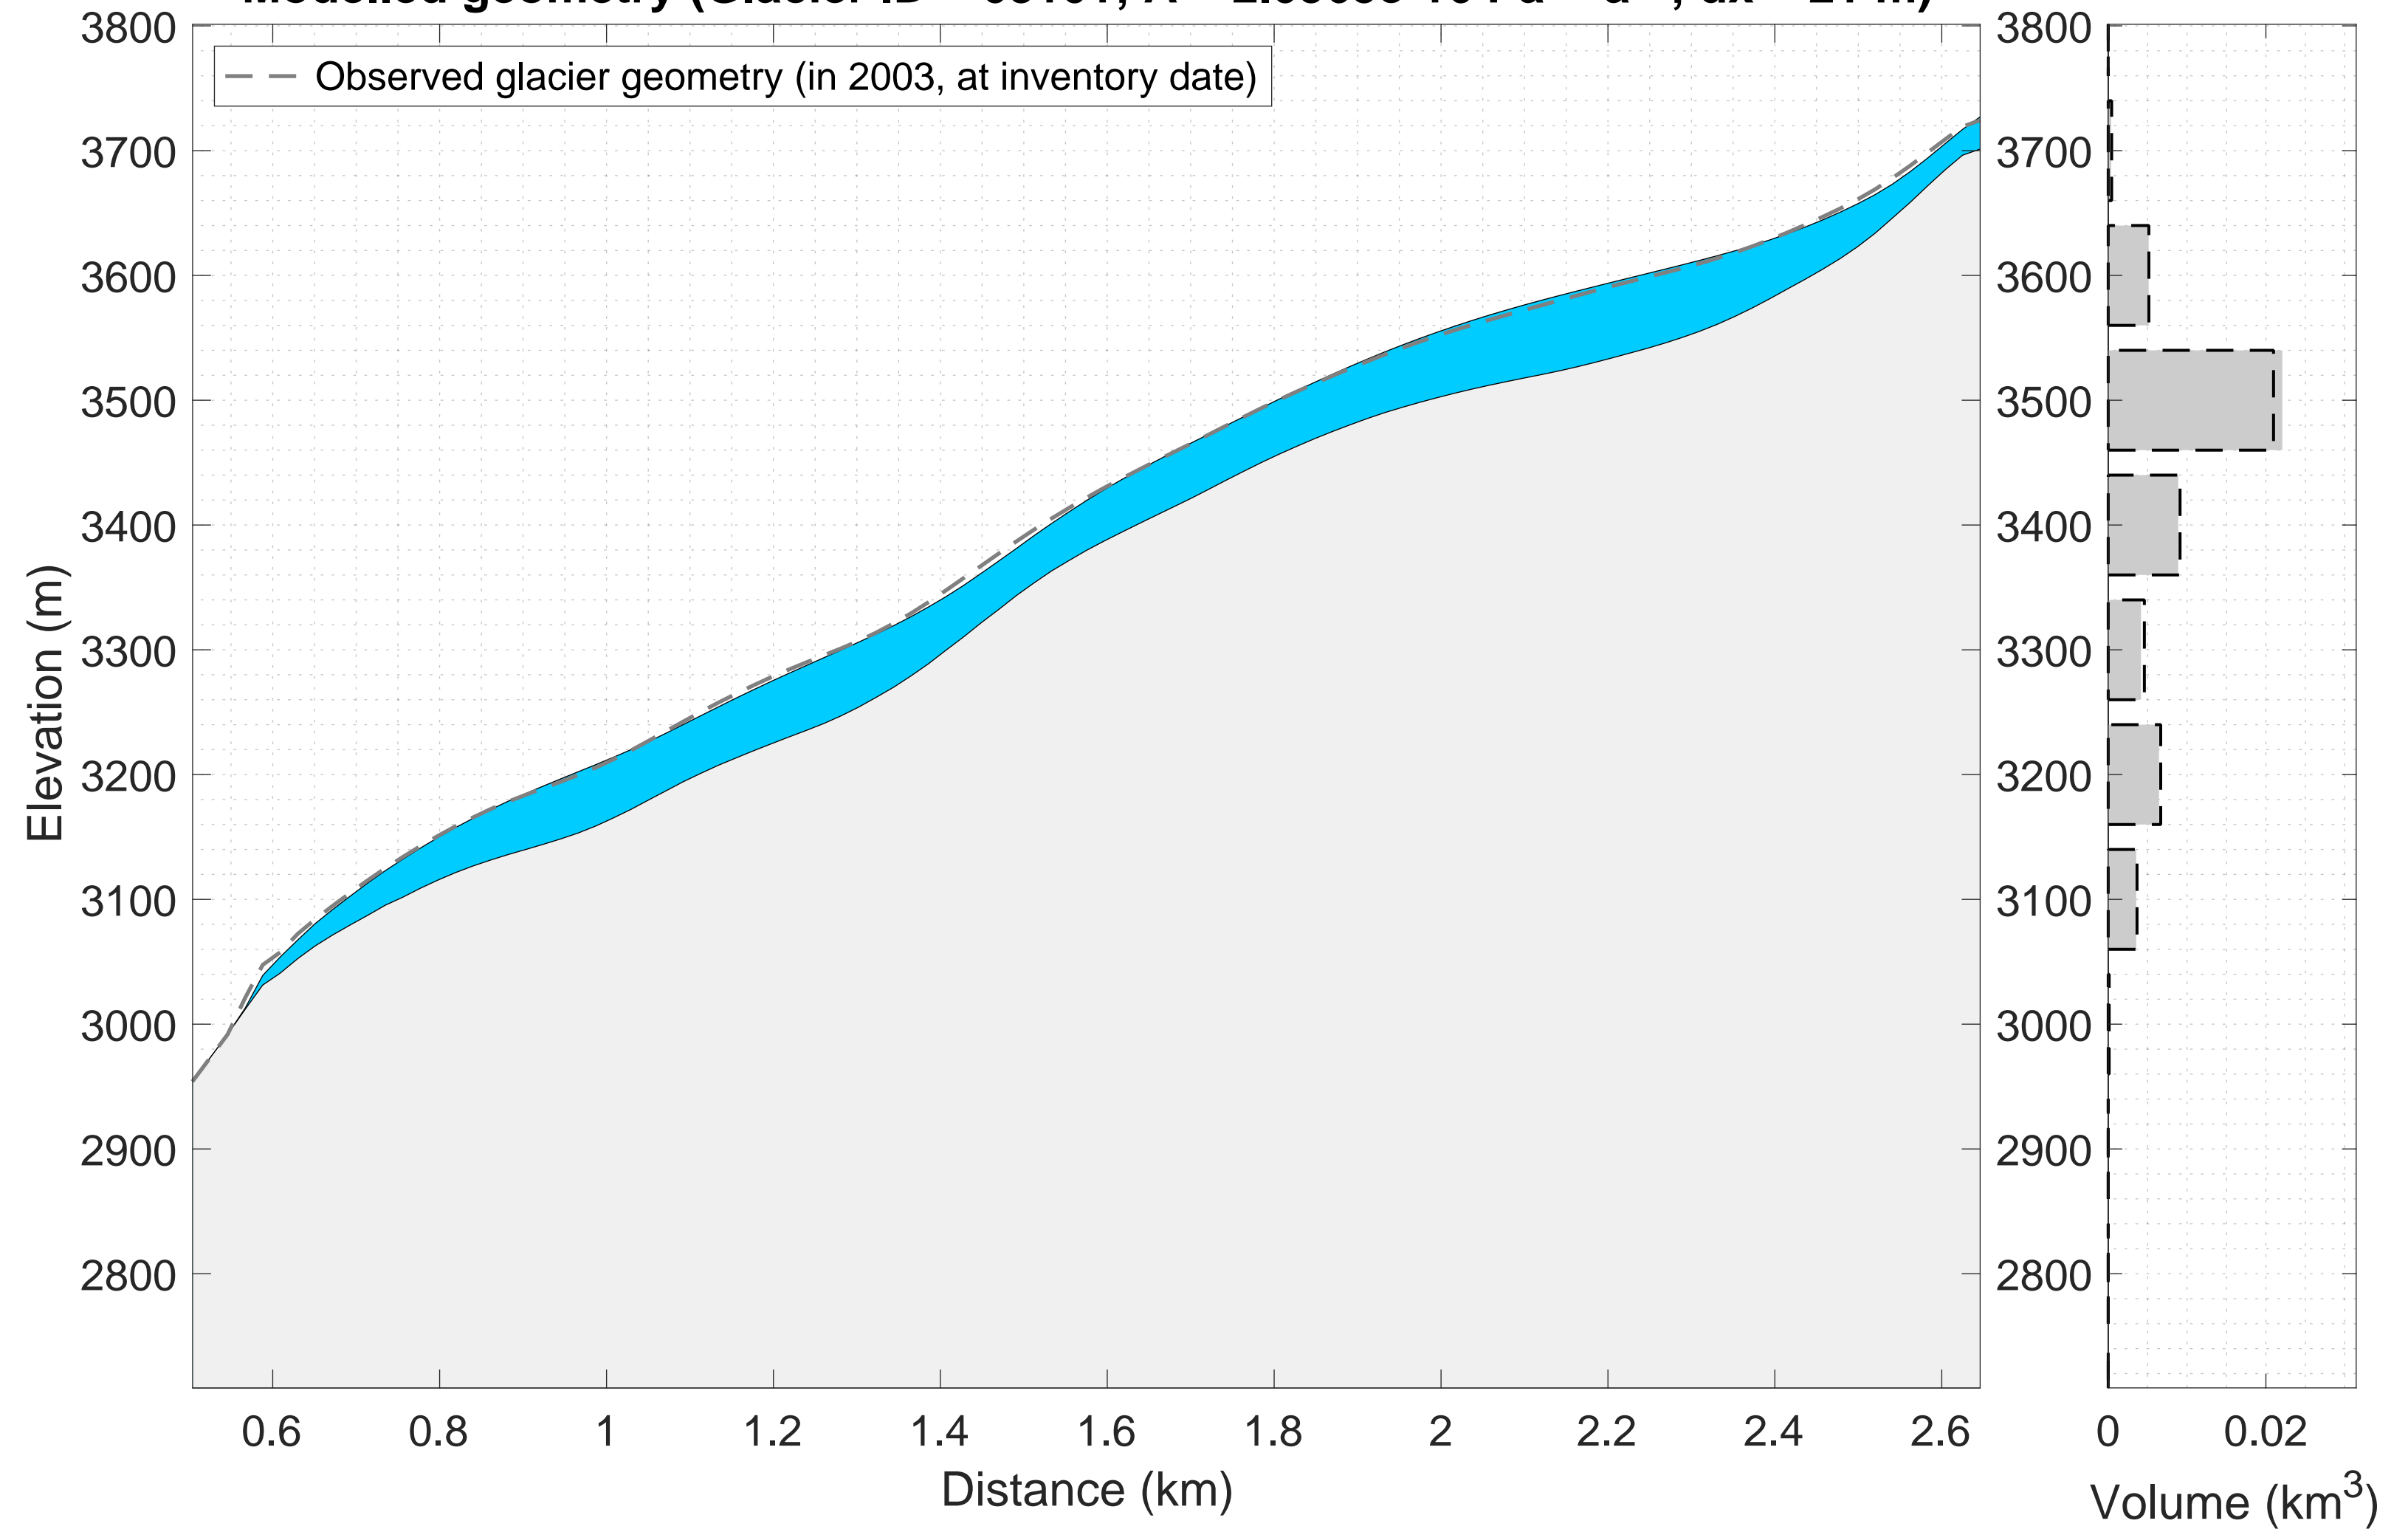

Supplement: Supplementary file 330 [file tc-13-1125-2019-supplement.zip]

**Modelled geometry (Glacier ID = 00124;  $A = 1.773\text{e-}16 \text{ Pa}^{-3} \text{ a}^{-1}$ ;  $dx = 22 \text{ m}$ )**

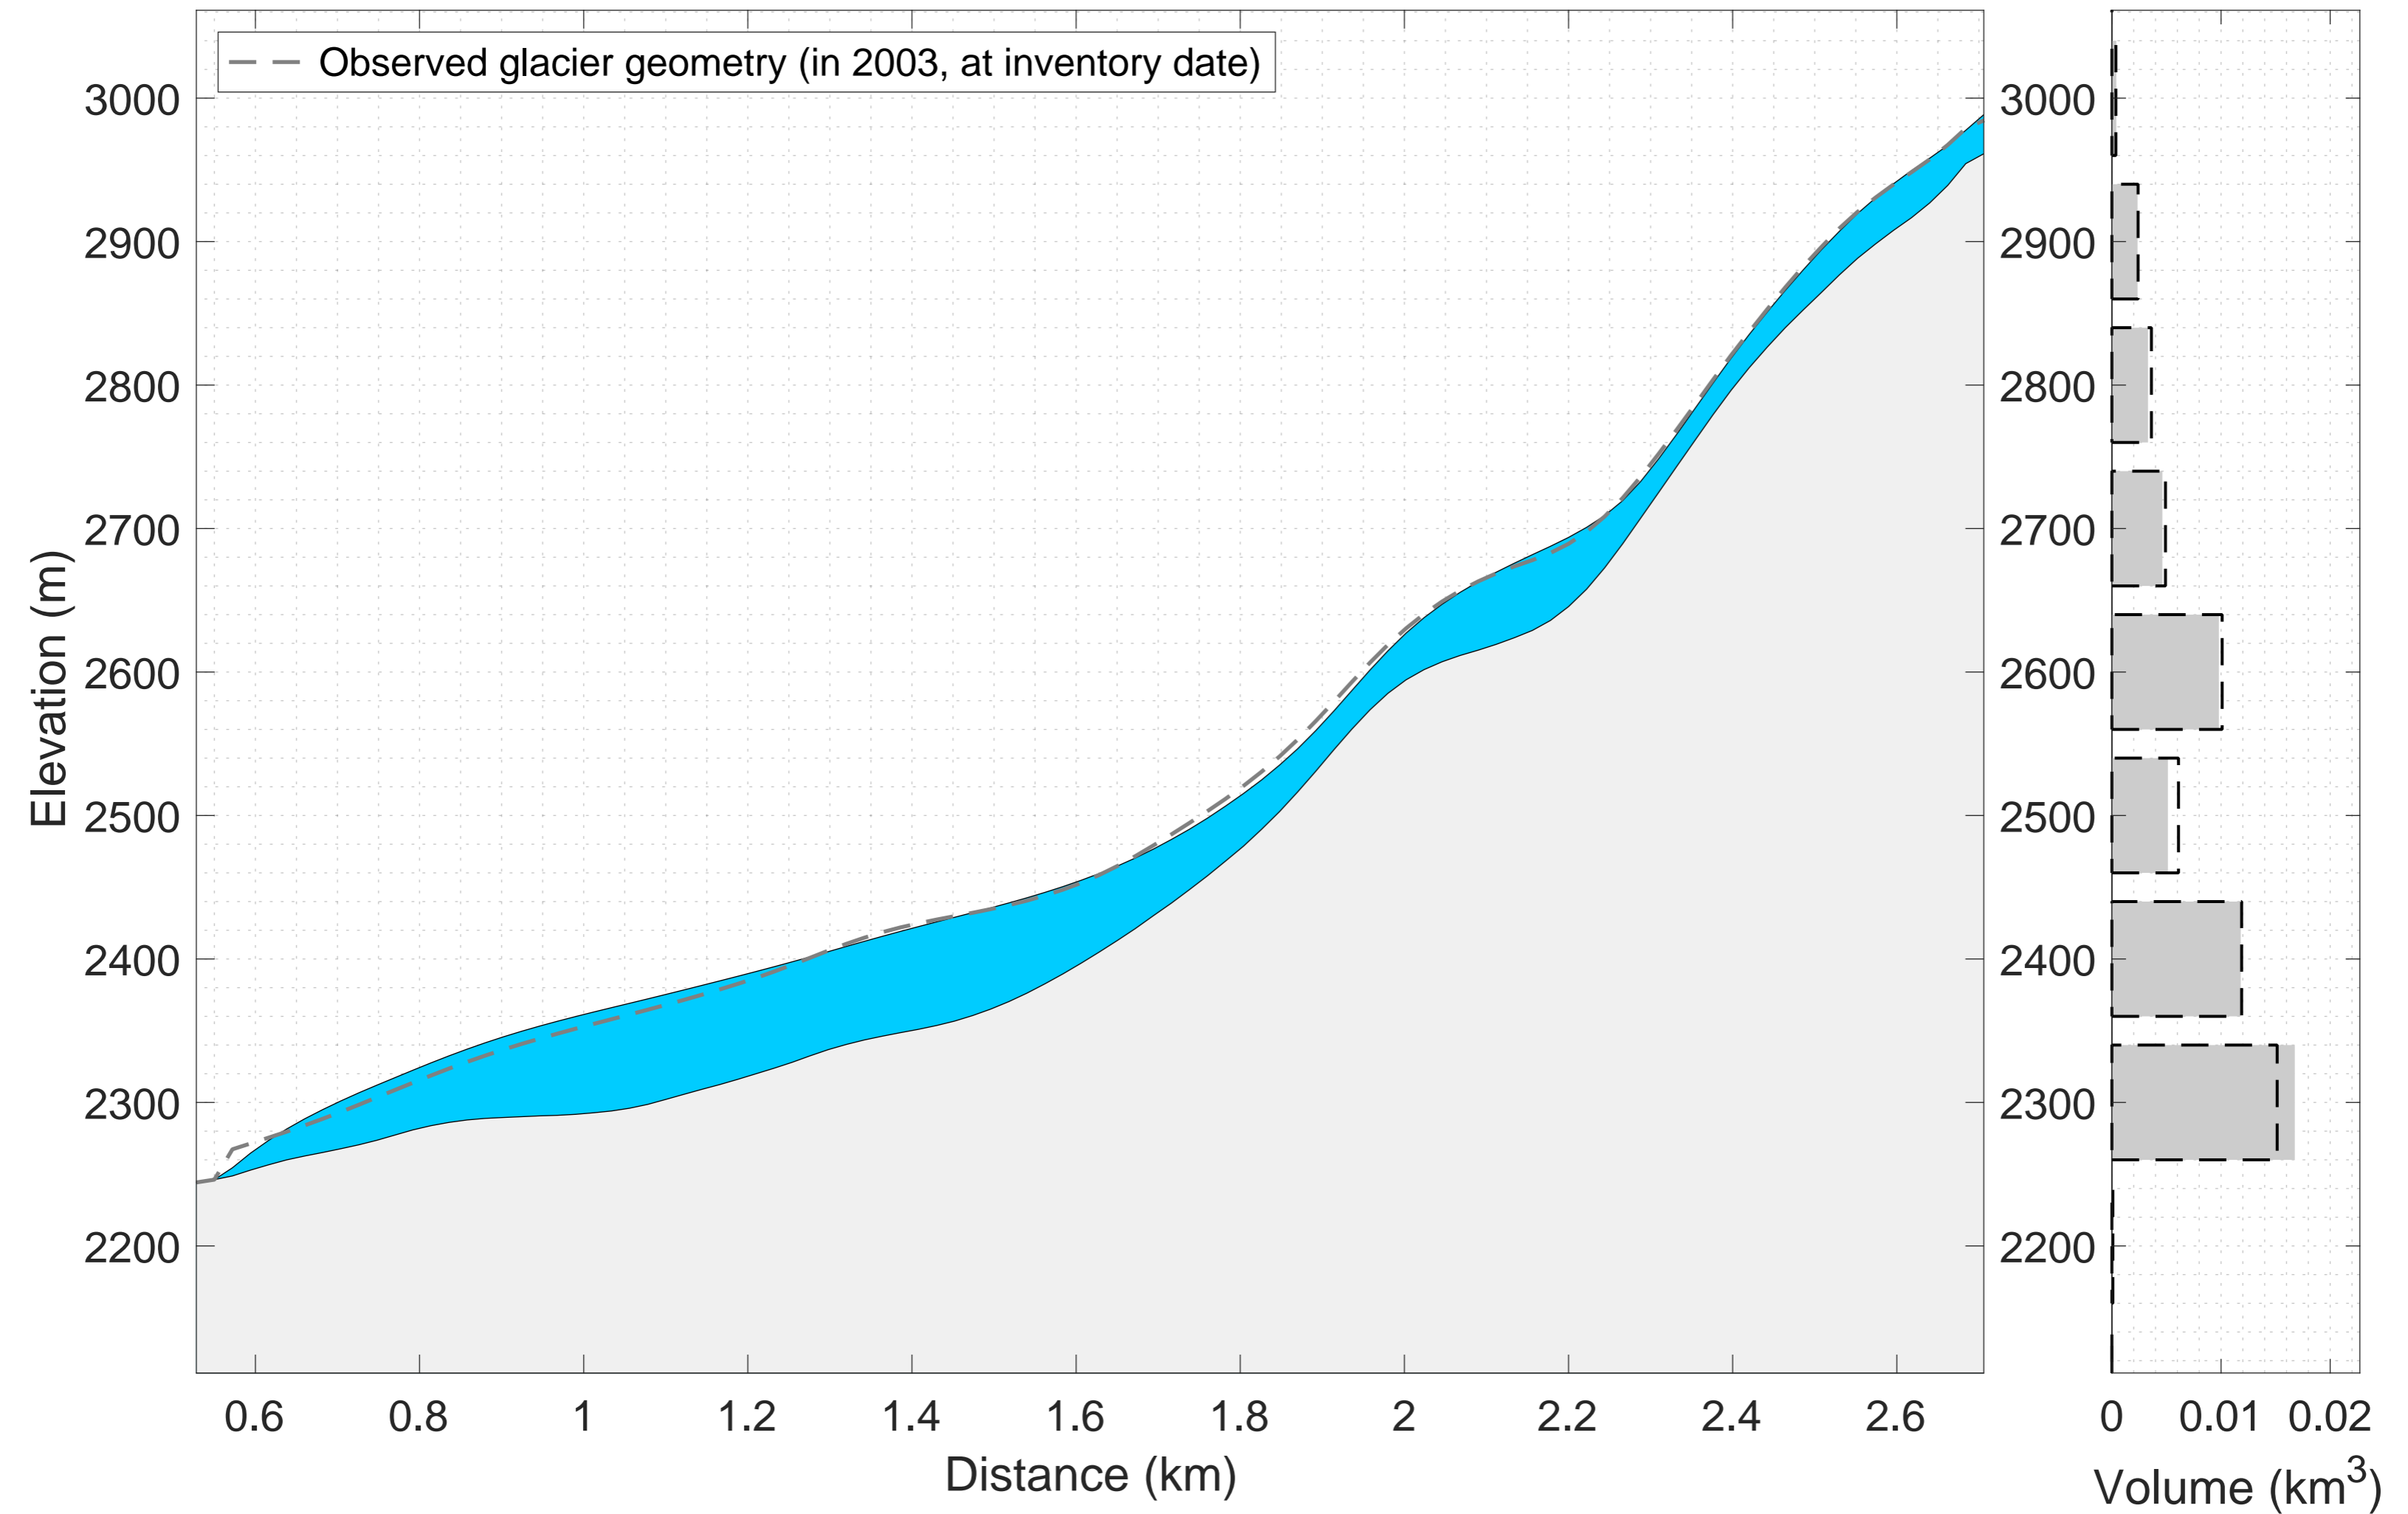

Supplement: Supplementary file 331 [file tc-13-1125-2019-supplement.zip]

**Modelled geometry (Glacier ID = 03466;  $A = 1.3727\text{e-}16 \text{ Pa}^{-3} \text{ a}^{-1}$ ;  $dx = 41 \text{ m}$ )**

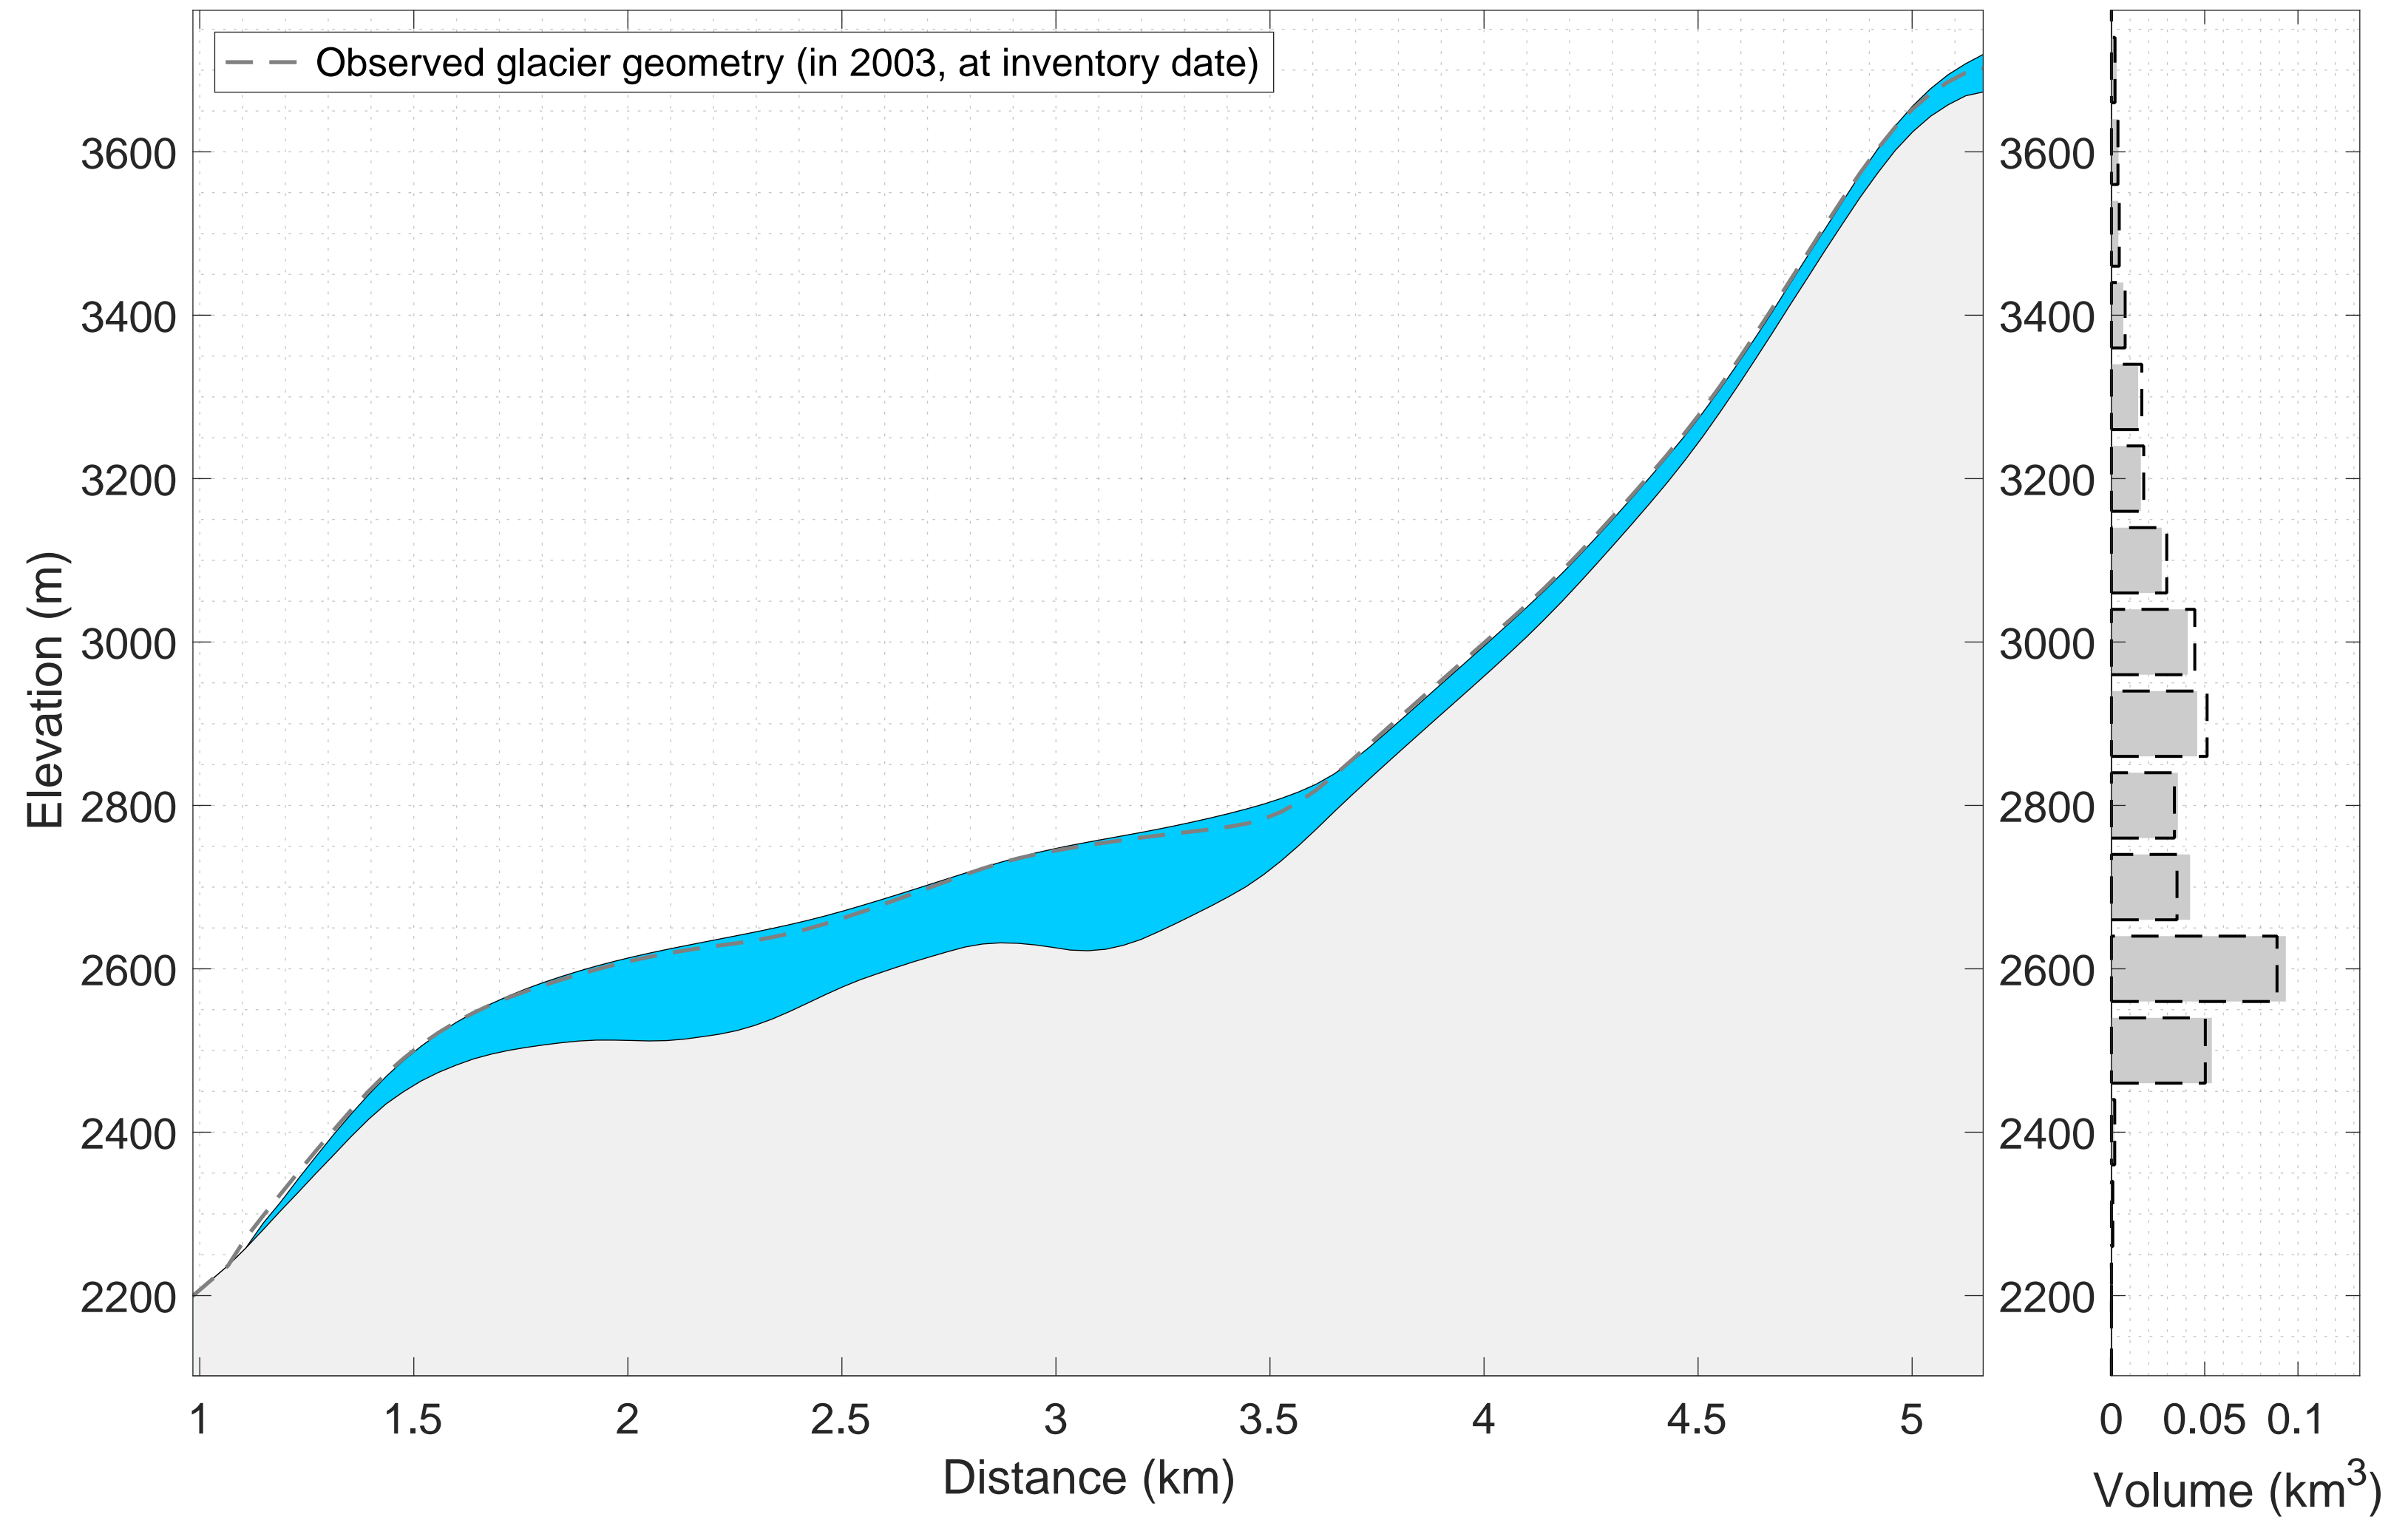

Supplement: Supplementary file 332 [file tc-13-1125-2019-supplement.zip]

**Modelled geometry (Glacier ID = 00518;  $A = 9.0412\text{e-}17 \text{ Pa}^{-3} \text{ a}^{-1}$ ;  $dx = 19 \text{ m}$ )**

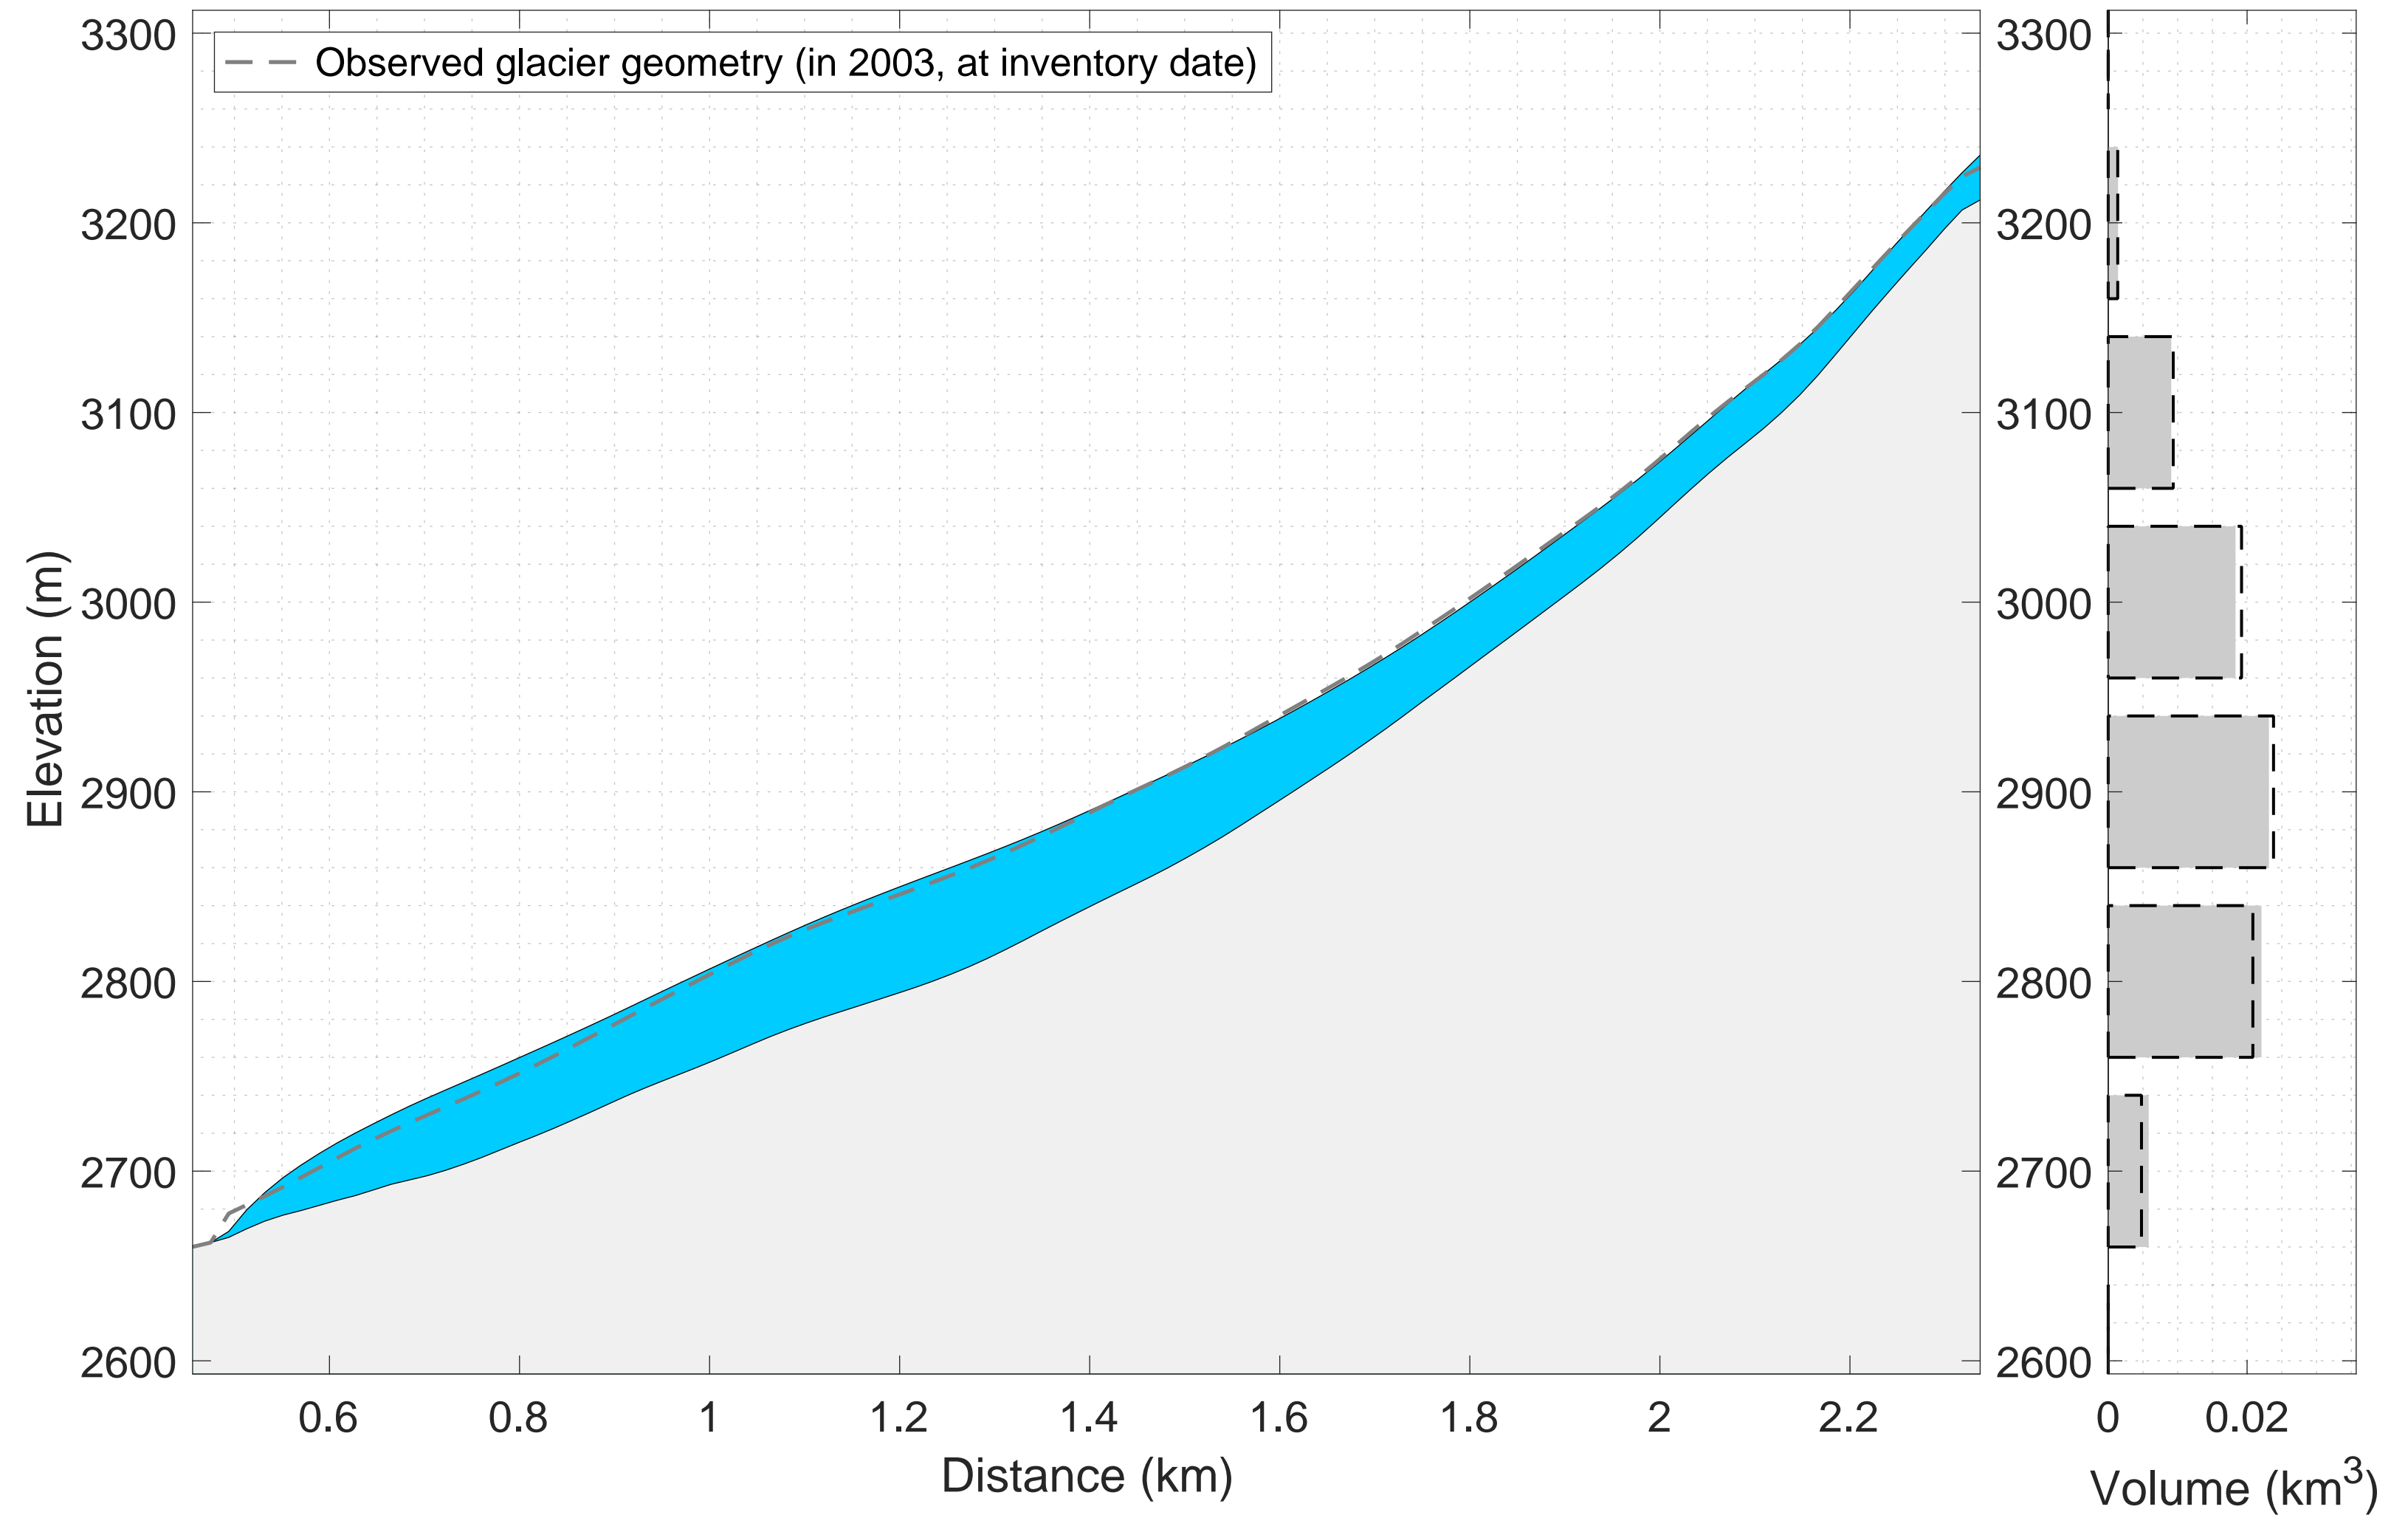

Supplement: Supplementary file 333 [file tc-13-1125-2019-supplement.zip]

**Modelled geometry (Glacier ID = 03796;  $A = 1.2273\text{e-}16 \text{ Pa}^{-3} \text{ a}^{-1}$ ;  $dx = 13 \text{ m}$ )**

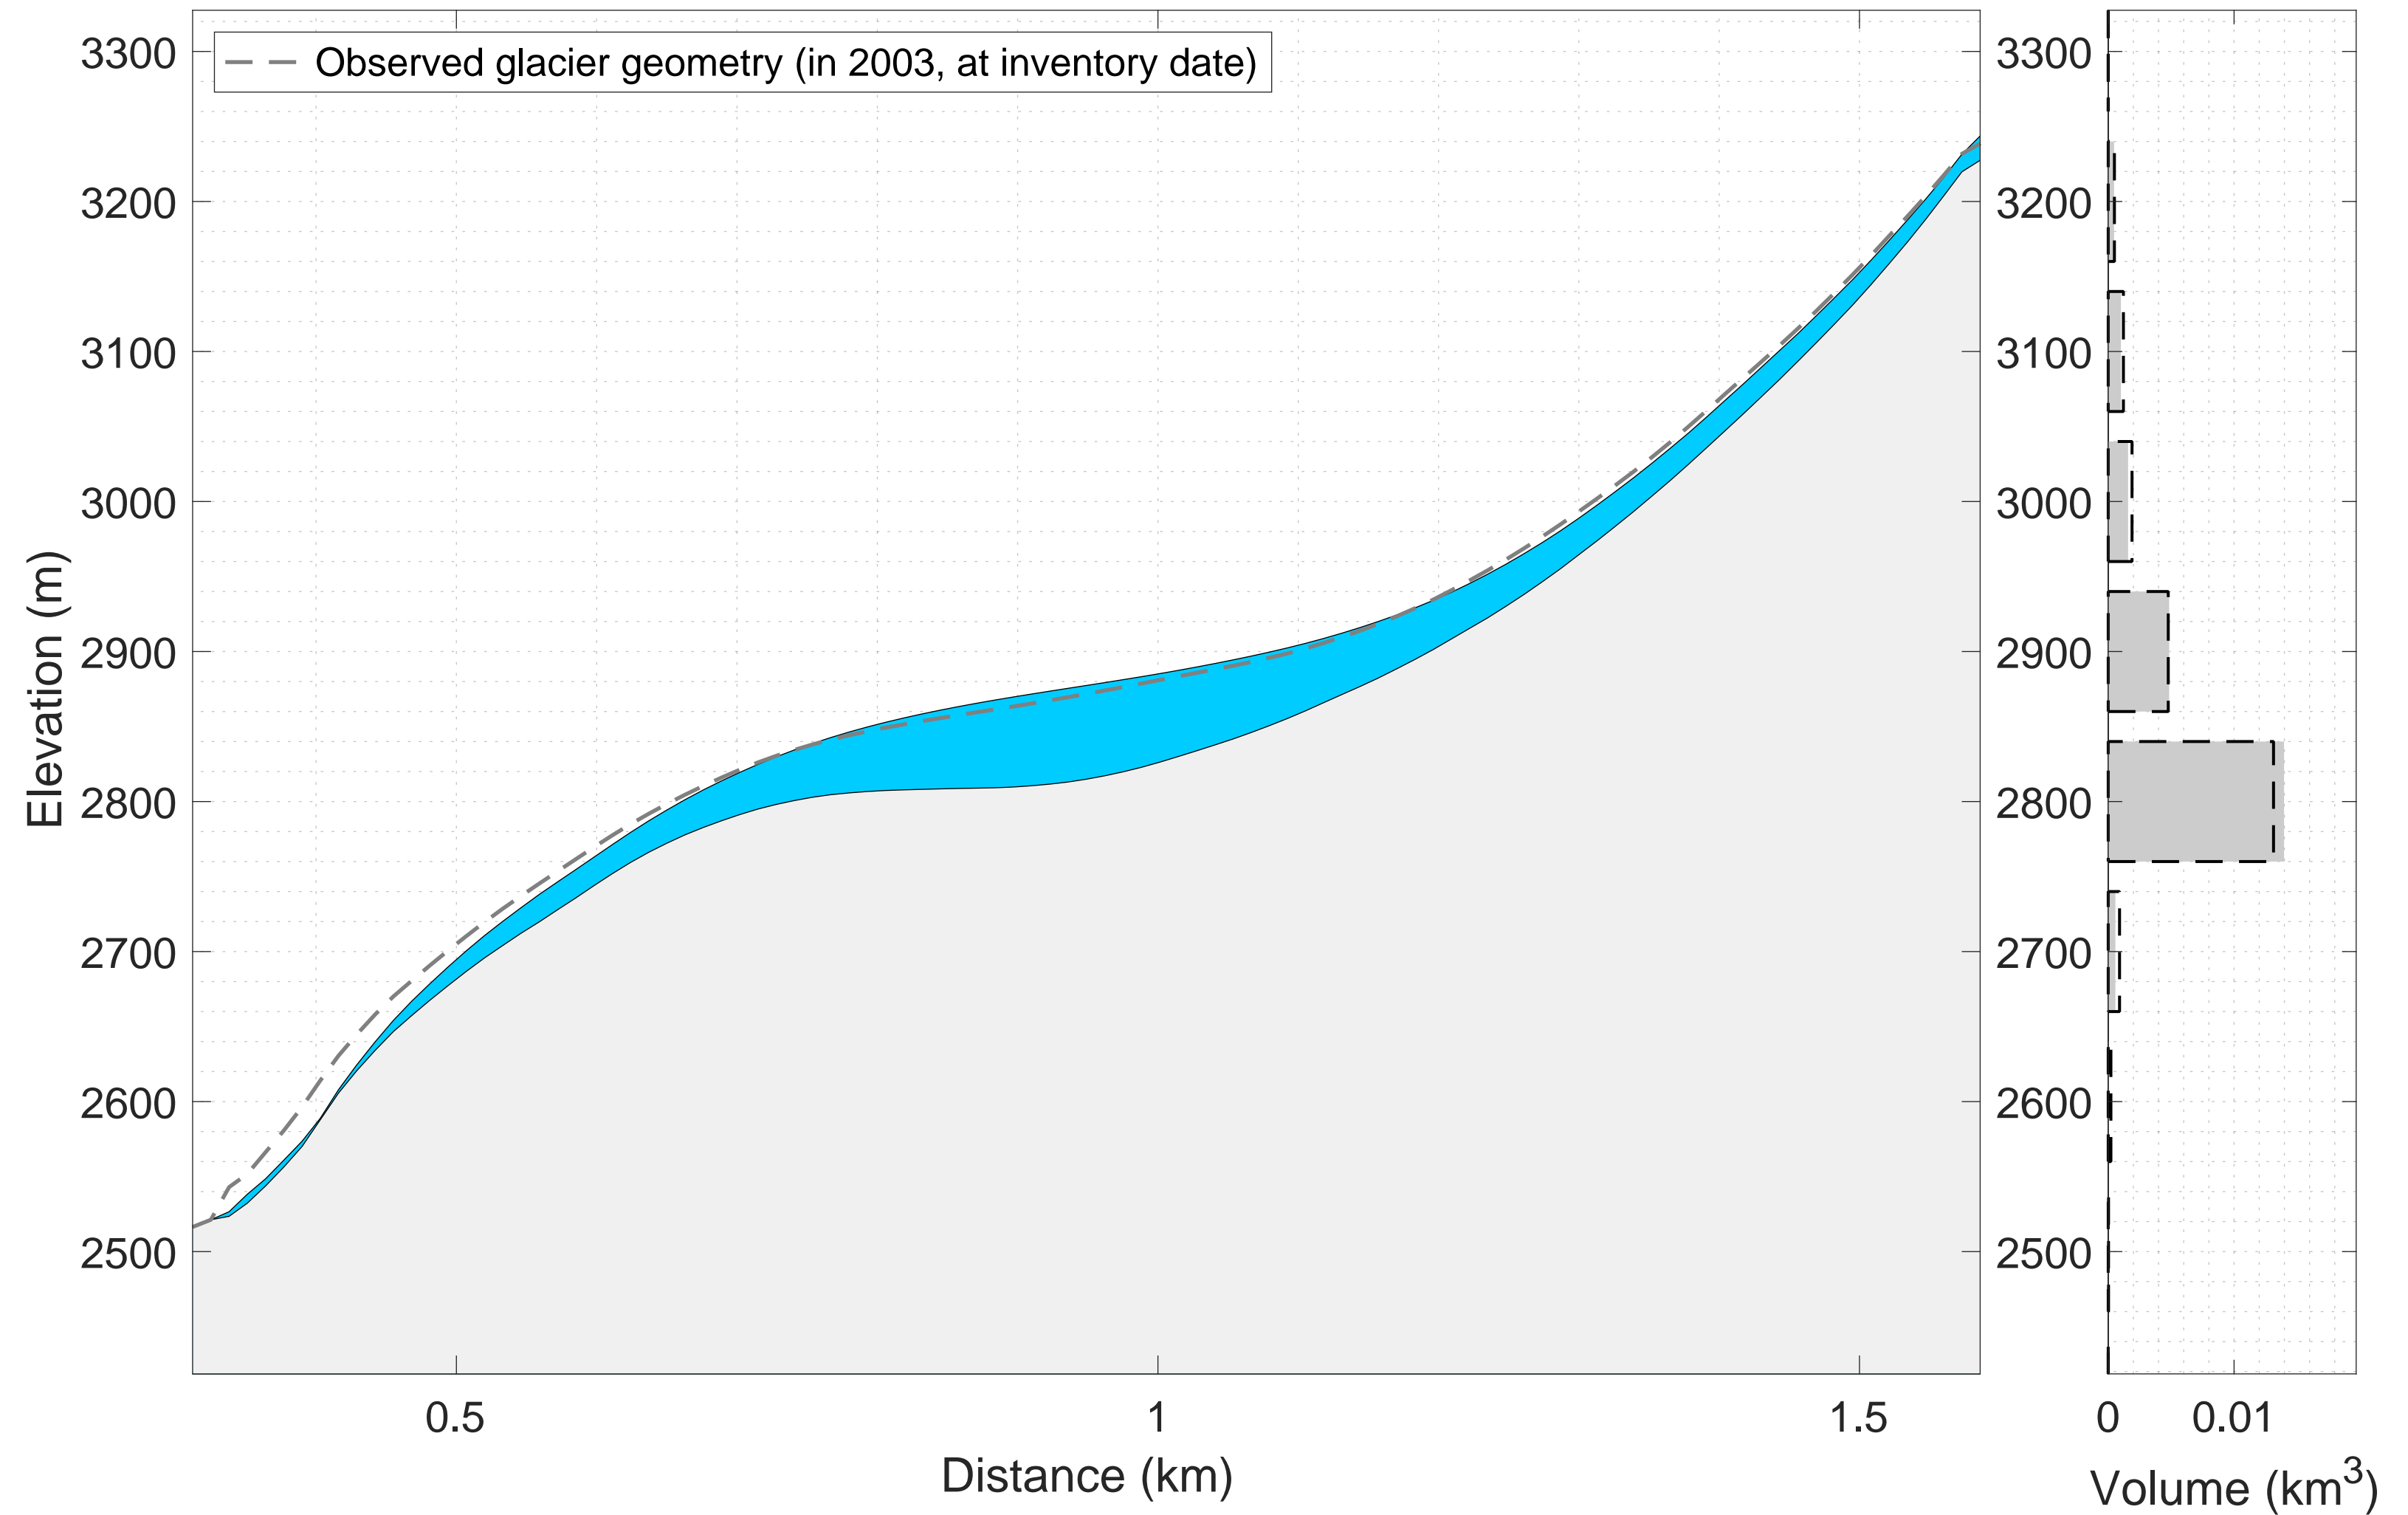

Supplement: Supplementary file 334 [file tc-13-1125-2019-supplement.zip]

**Modelled geometry (Glacier ID = 00524;  $A = 9.8459\text{e-}17 \text{ Pa}^{-3} \text{ a}^{-1}$ ;  $dx = 14 \text{ m}$ )**

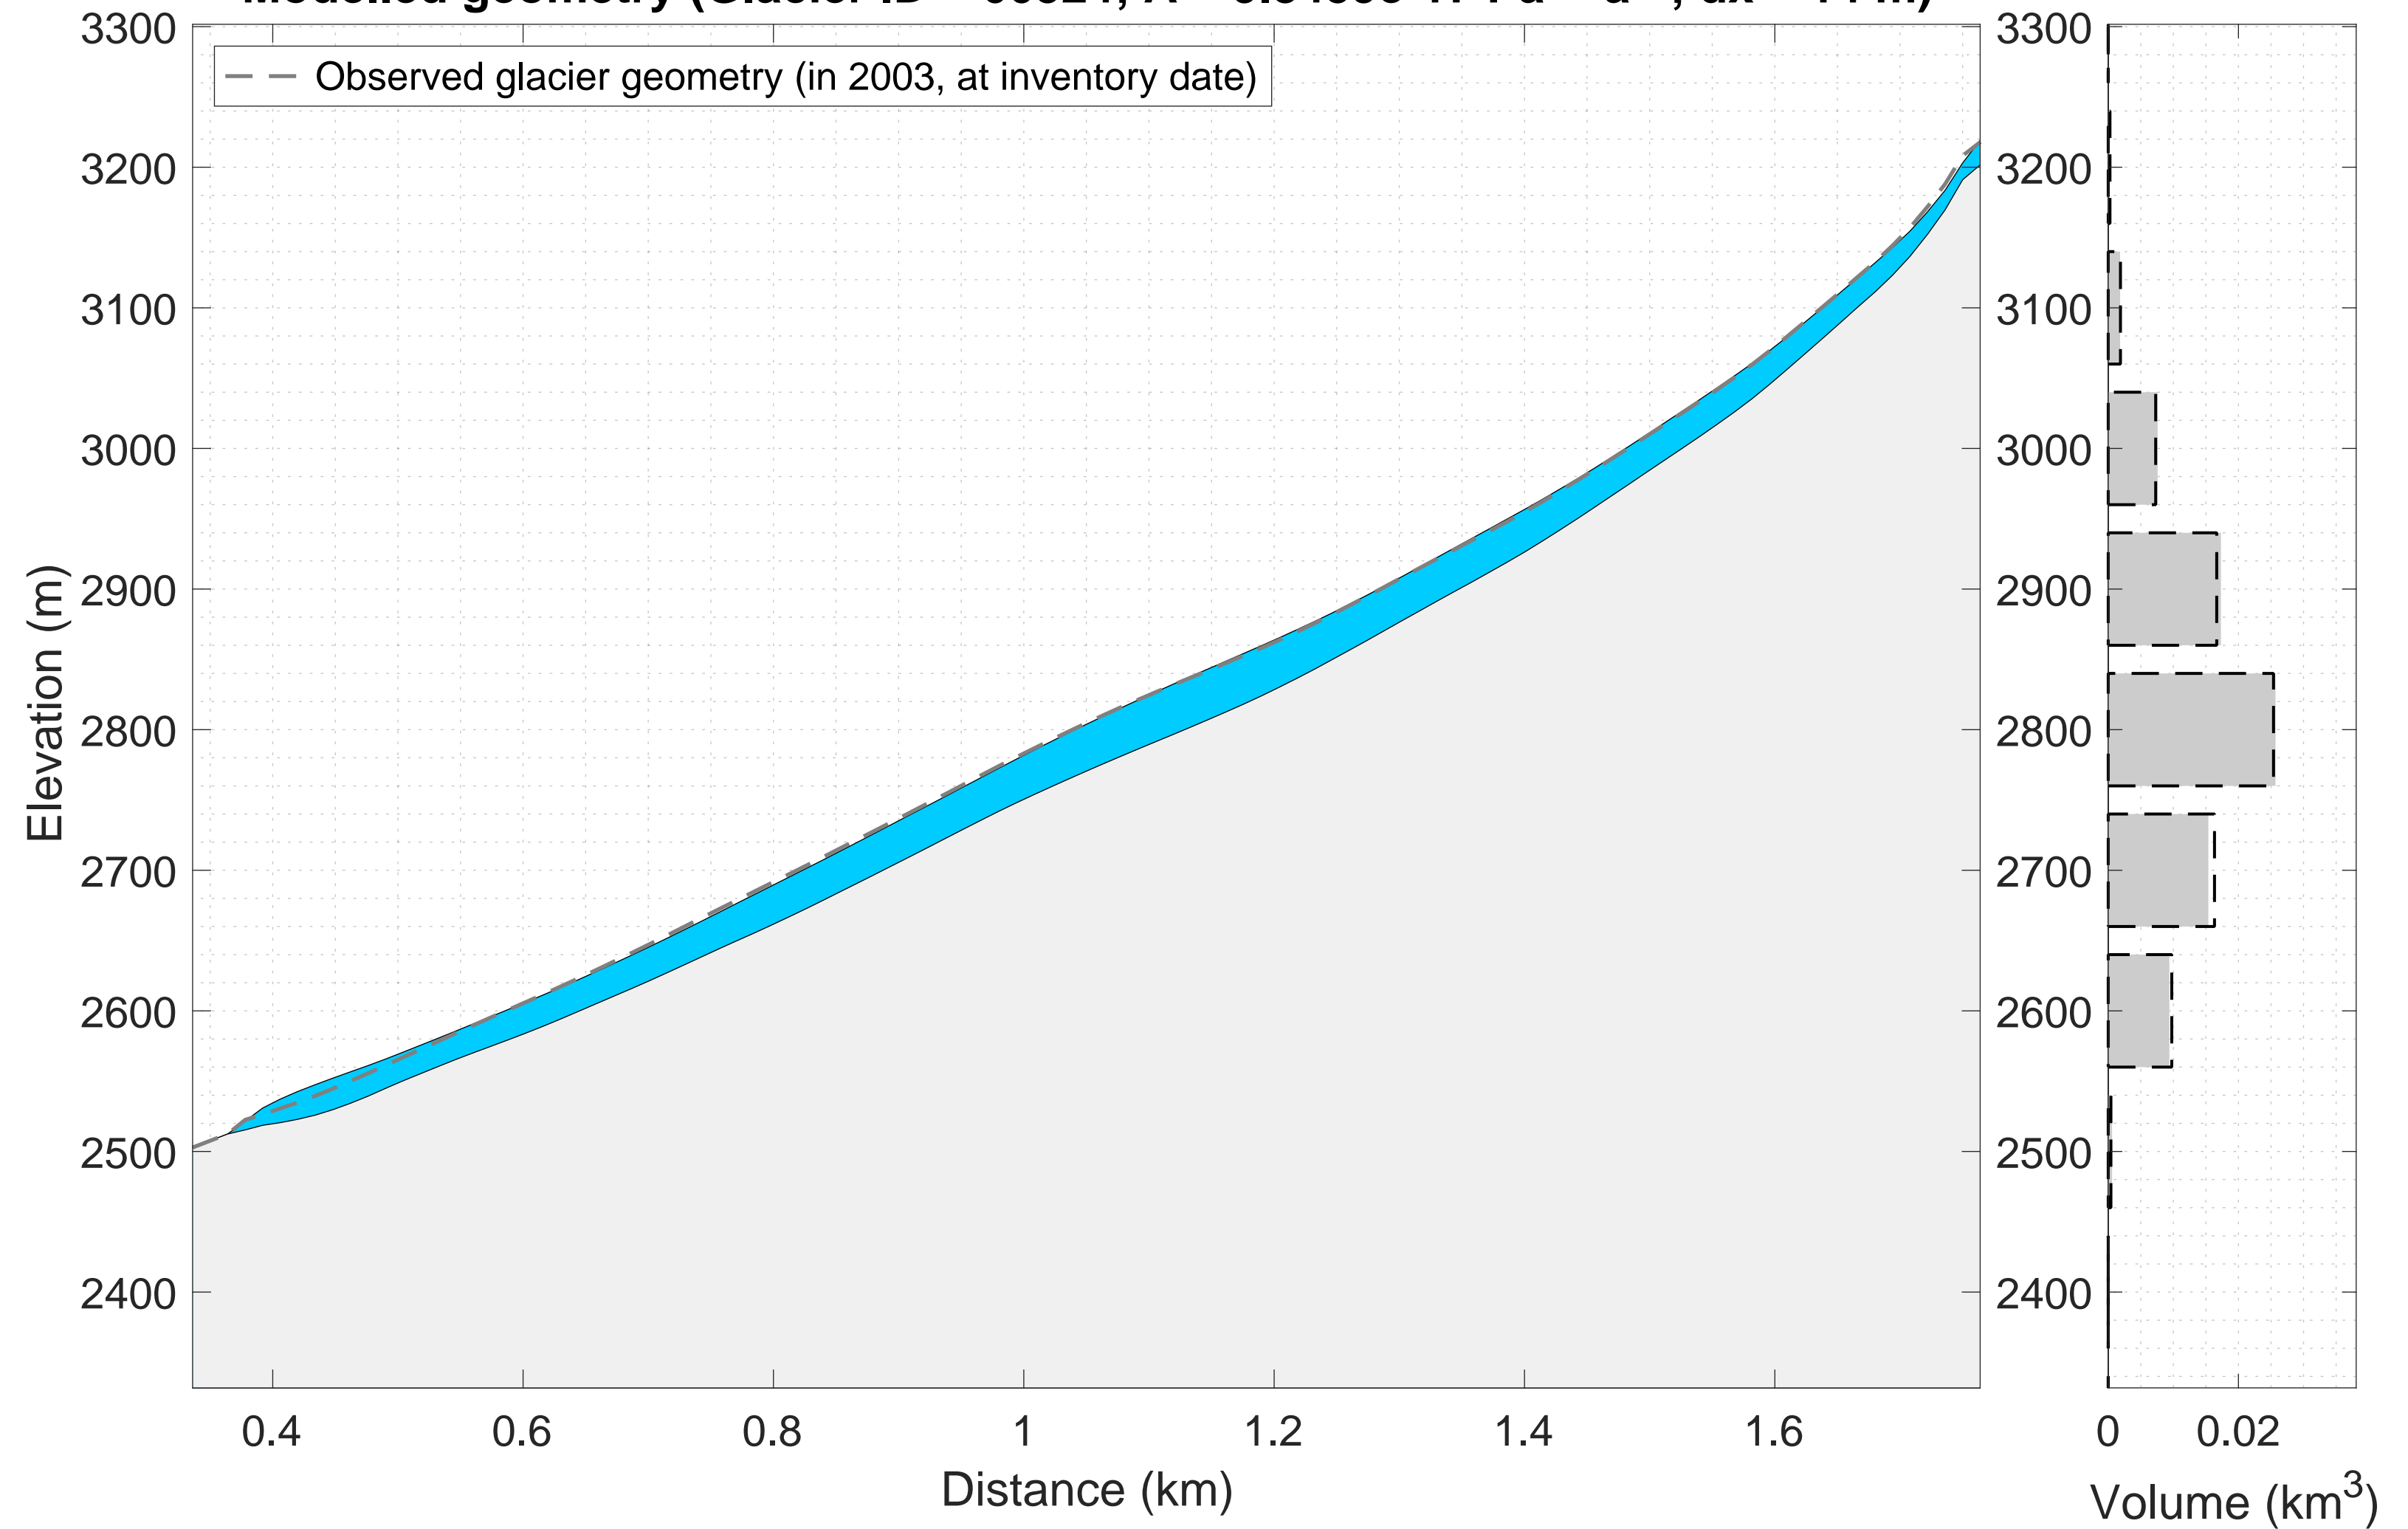

Supplement: Supplementary file 335 [file tc-13-1125-2019-supplement.zip]

**Modelled geometry (Glacier ID = 03694;  $A = 1.0382\text{e-}16 \text{ Pa}^{-3} \text{ a}^{-1}$ ;  $dx = 17 \text{ m}$ )**

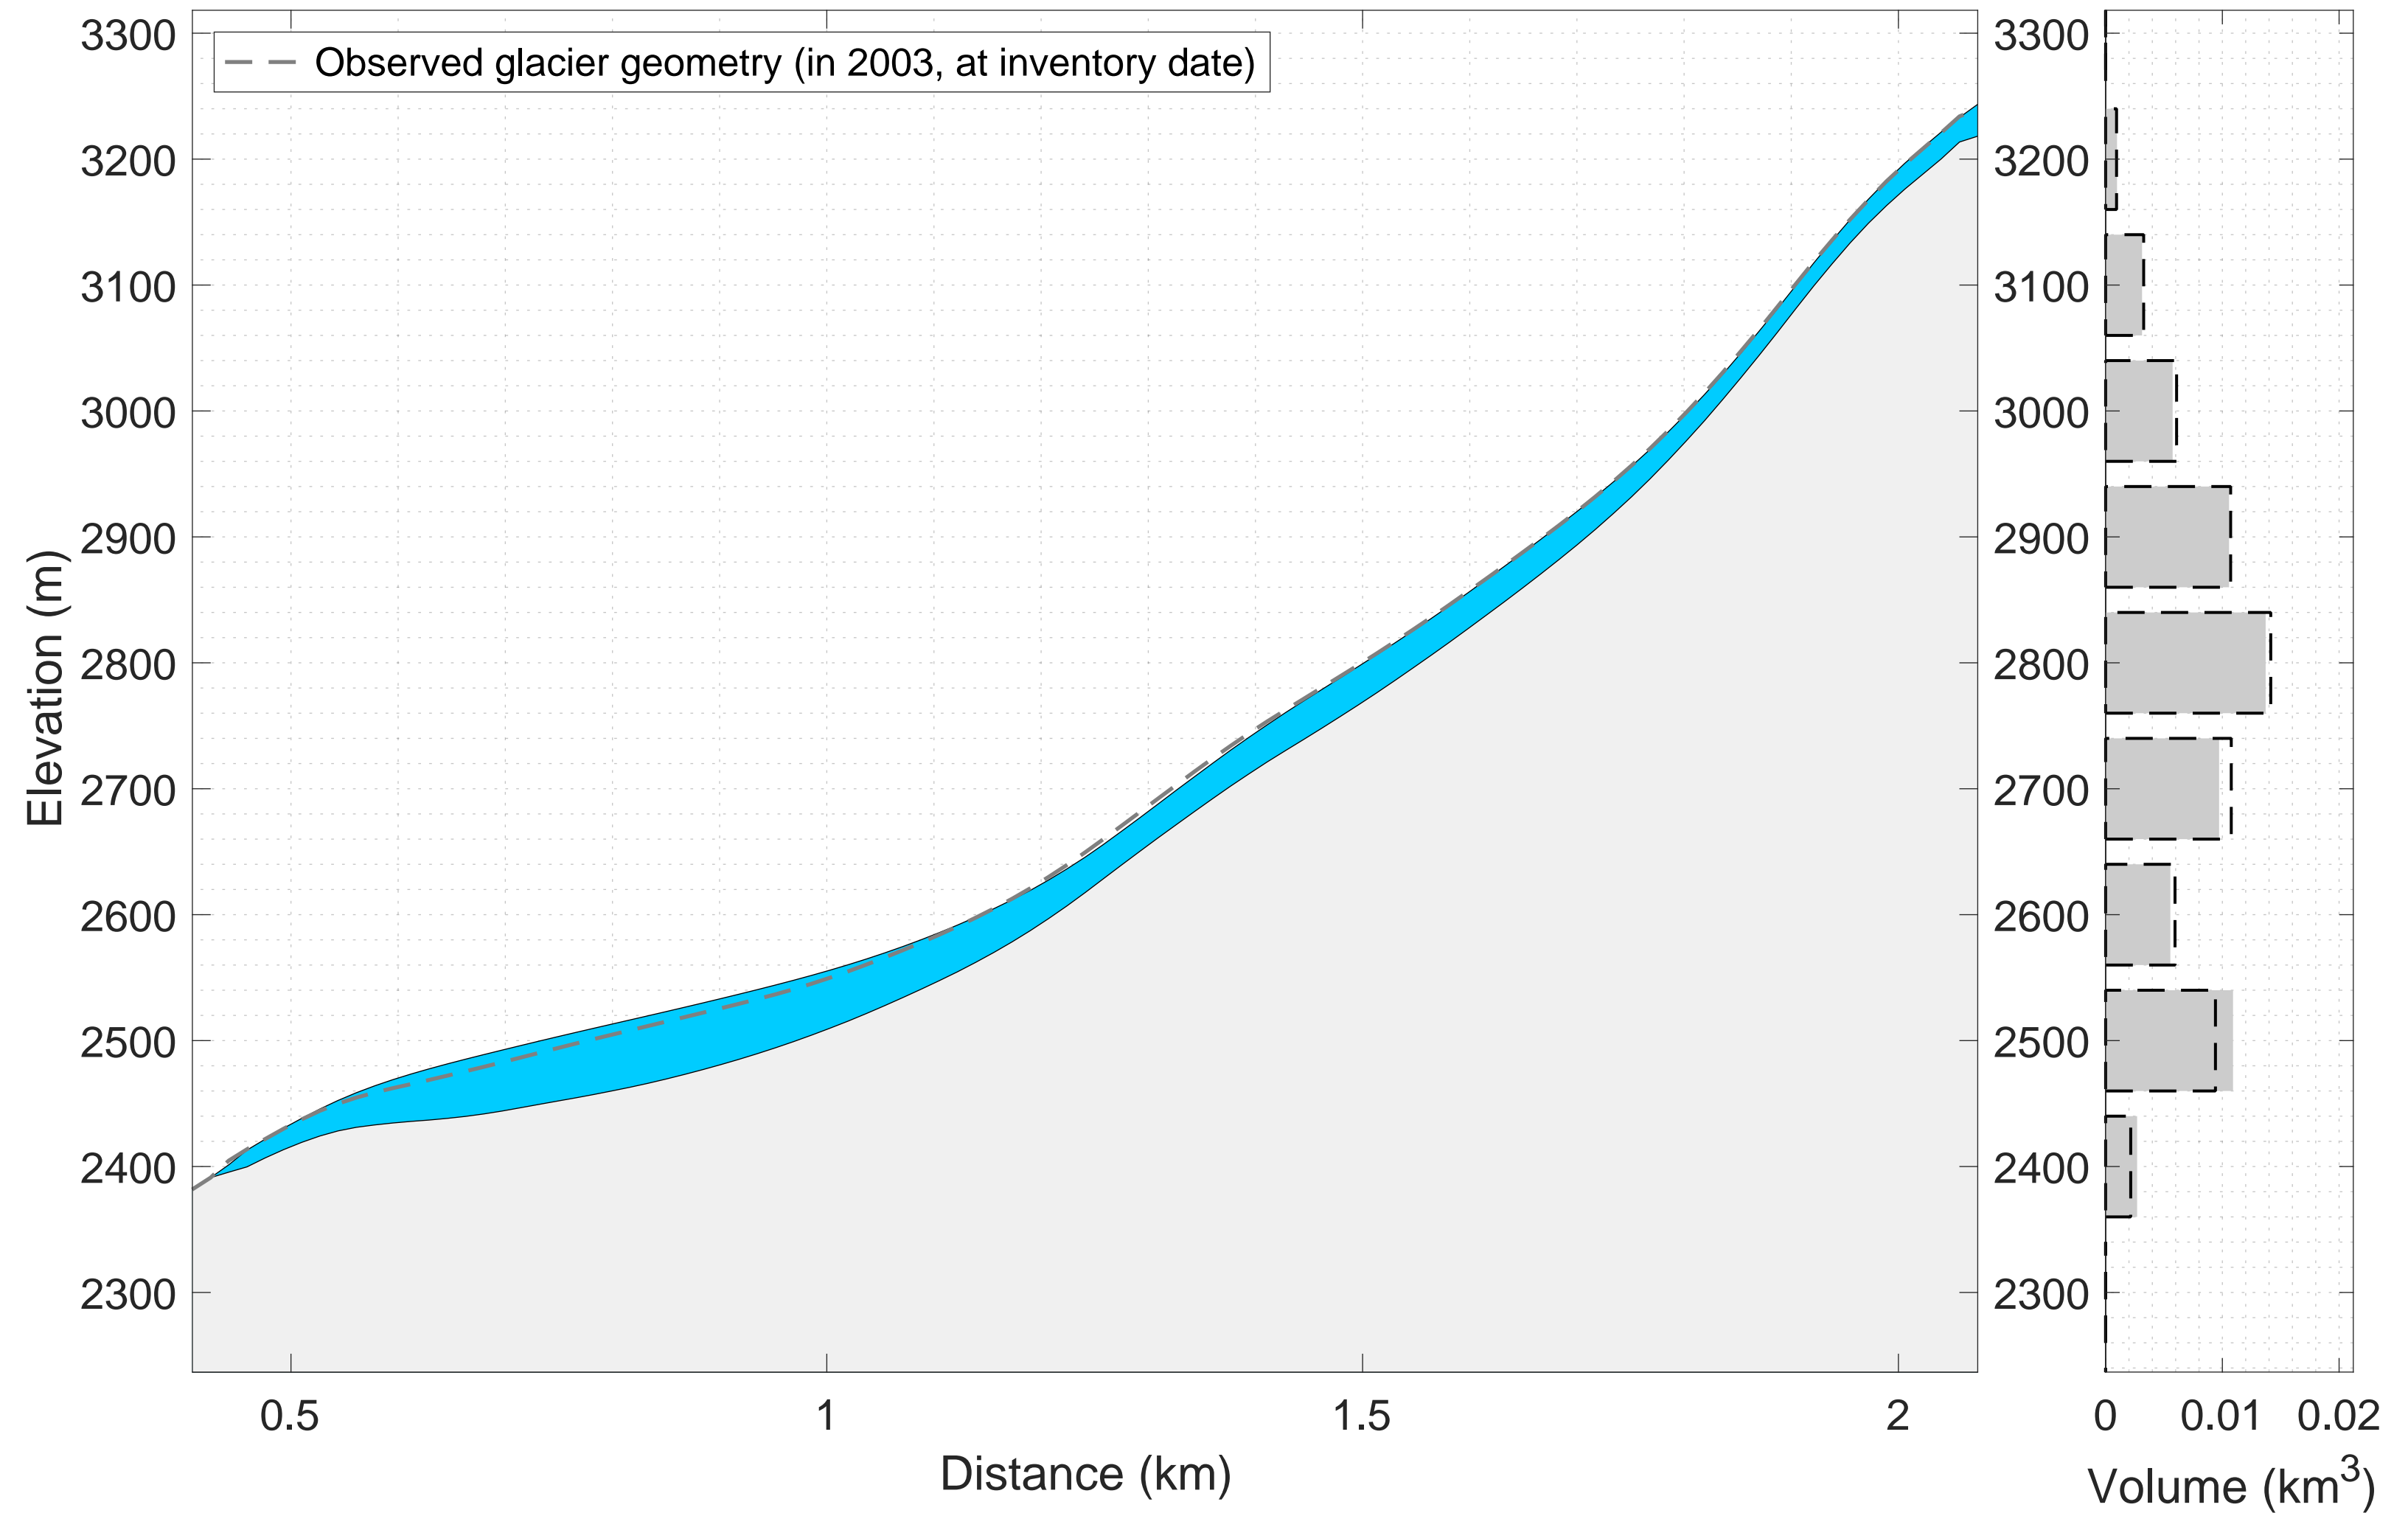

Supplement: Supplementary file 336 [file tc-13-1125-2019-supplement.zip]

**Modelled geometry (Glacier ID = 00778;  $A = 6.7612\text{e-}17 \text{ Pa}^{-3} \text{ a}^{-1}$ ;  $dx = 12 \text{ m}$ )**

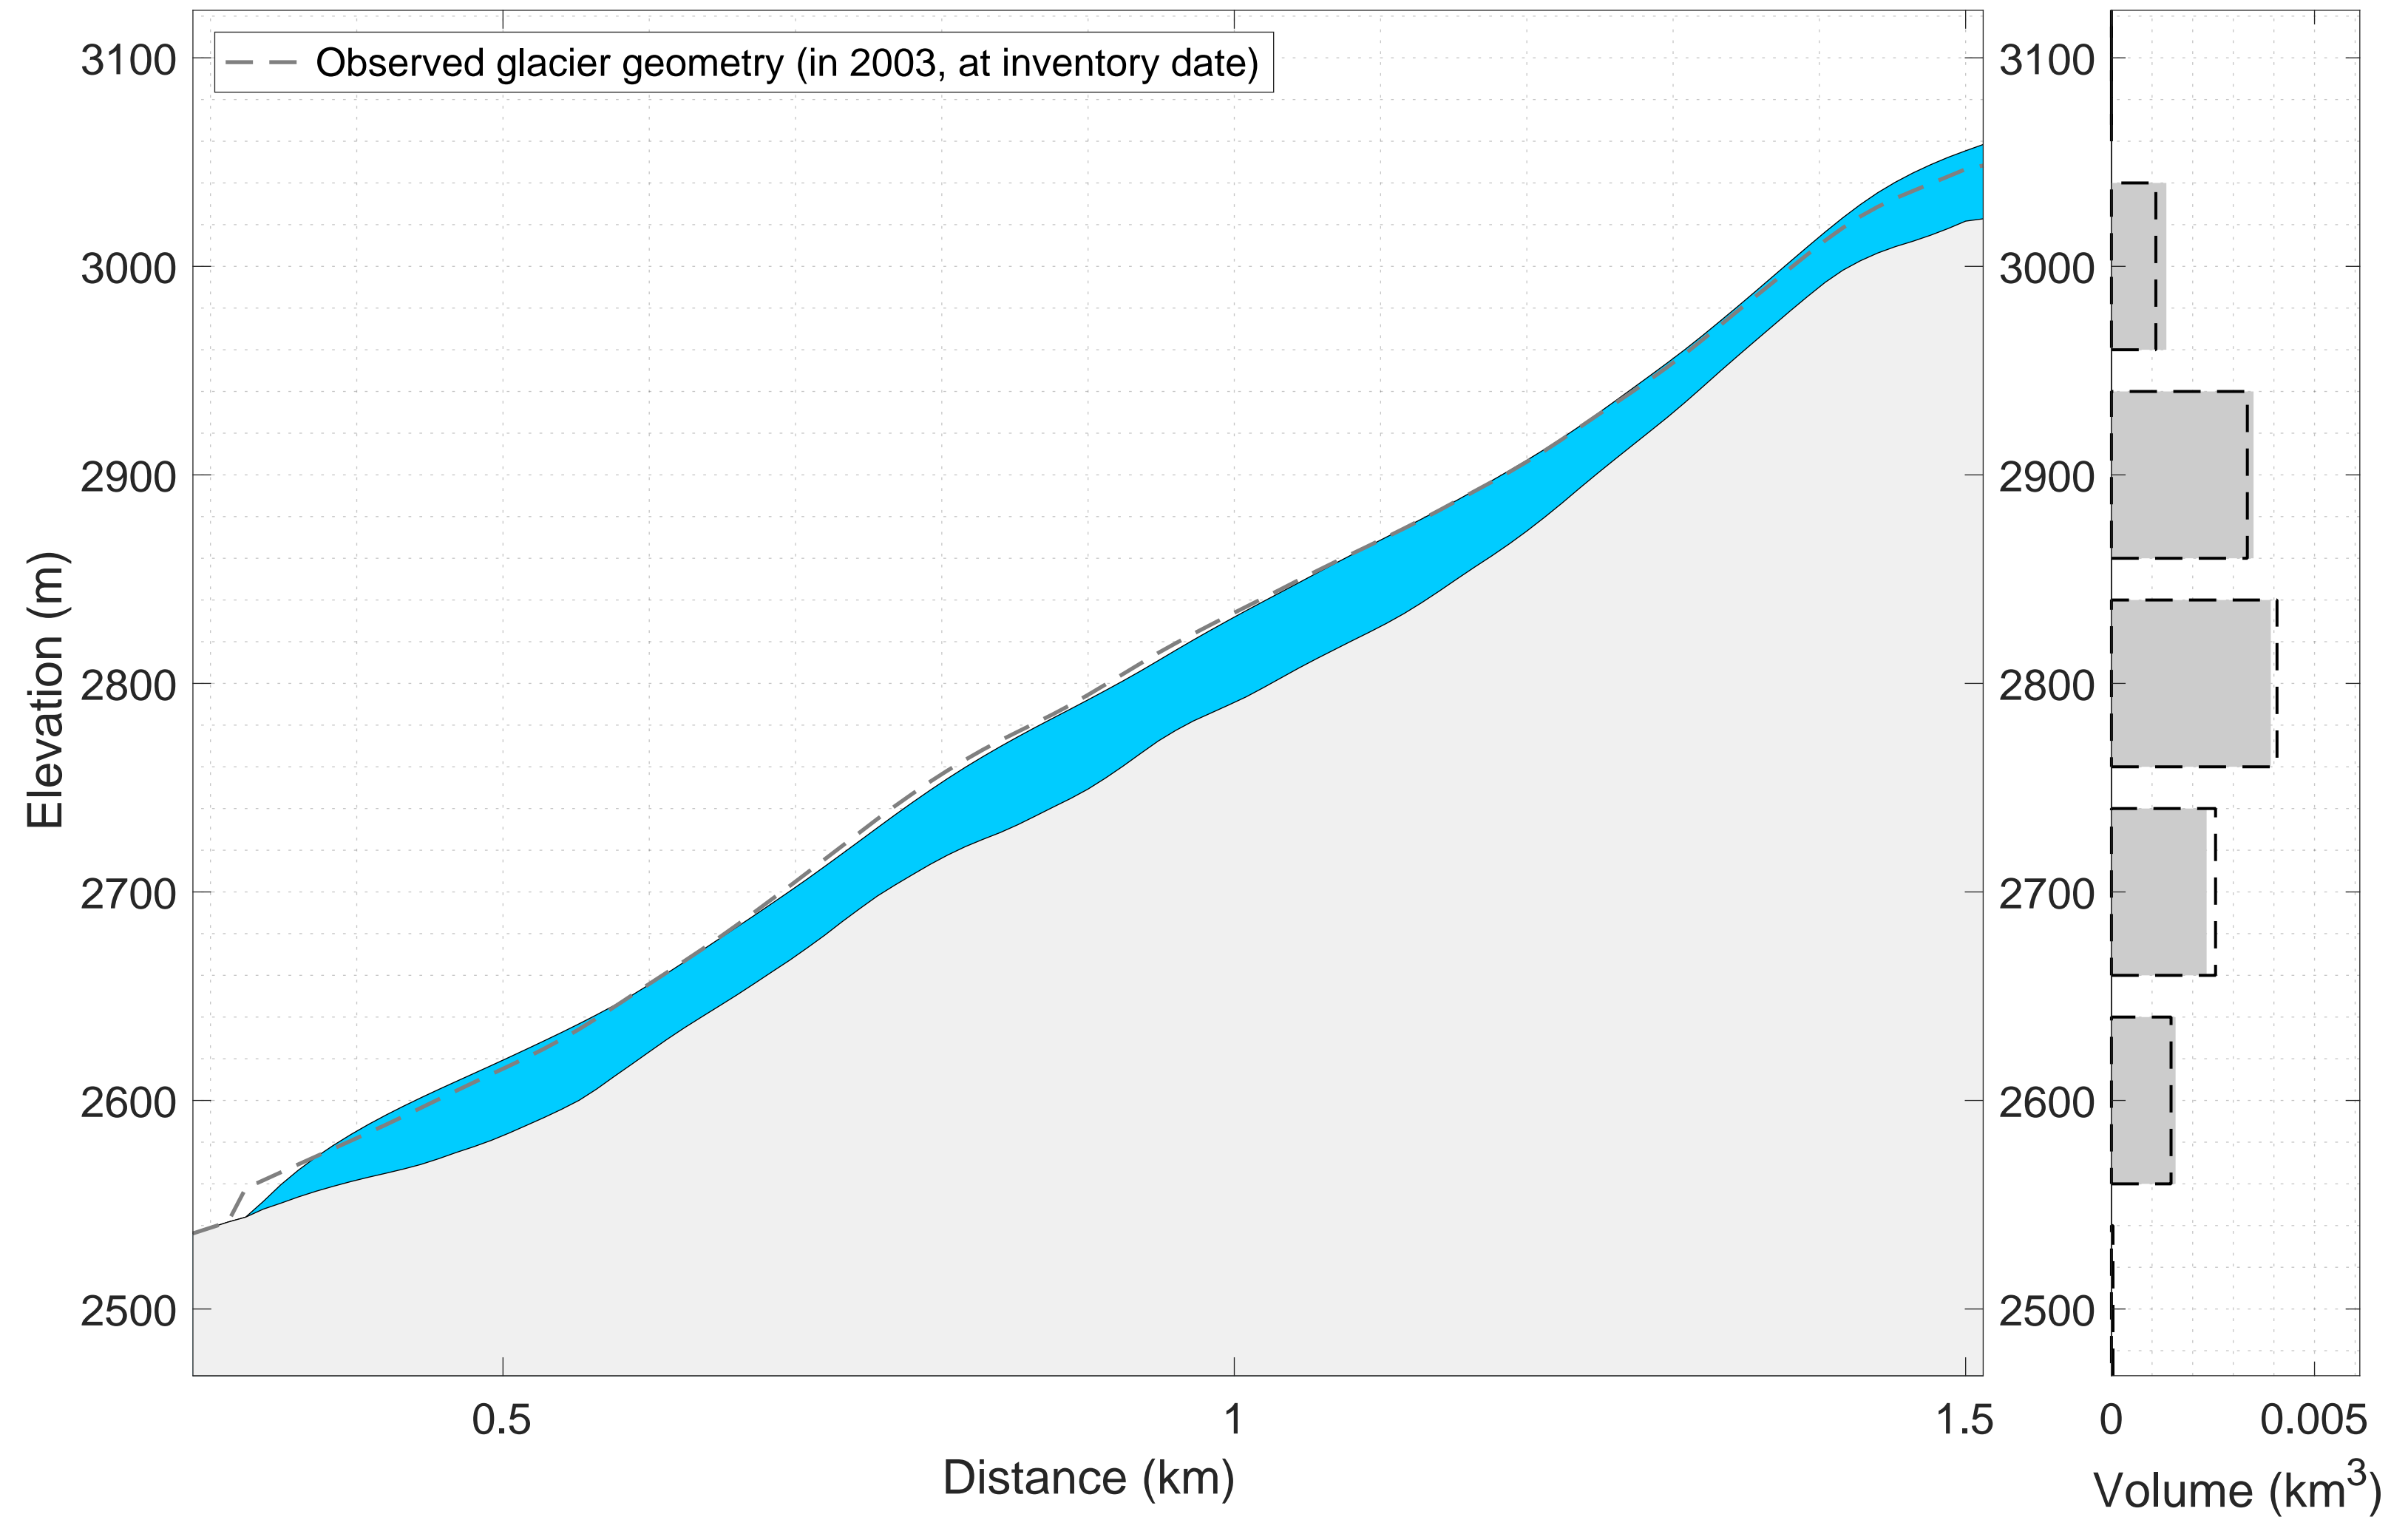

Supplement: Supplementary file 337 [file tc-13-1125-2019-supplement.zip]

**Modelled geometry (Glacier ID = 03553;  $A = 1.5438\text{e-}16 \text{ Pa}^{-3} \text{ a}^{-1}$ ;  $dx = 15 \text{ m}$ )**

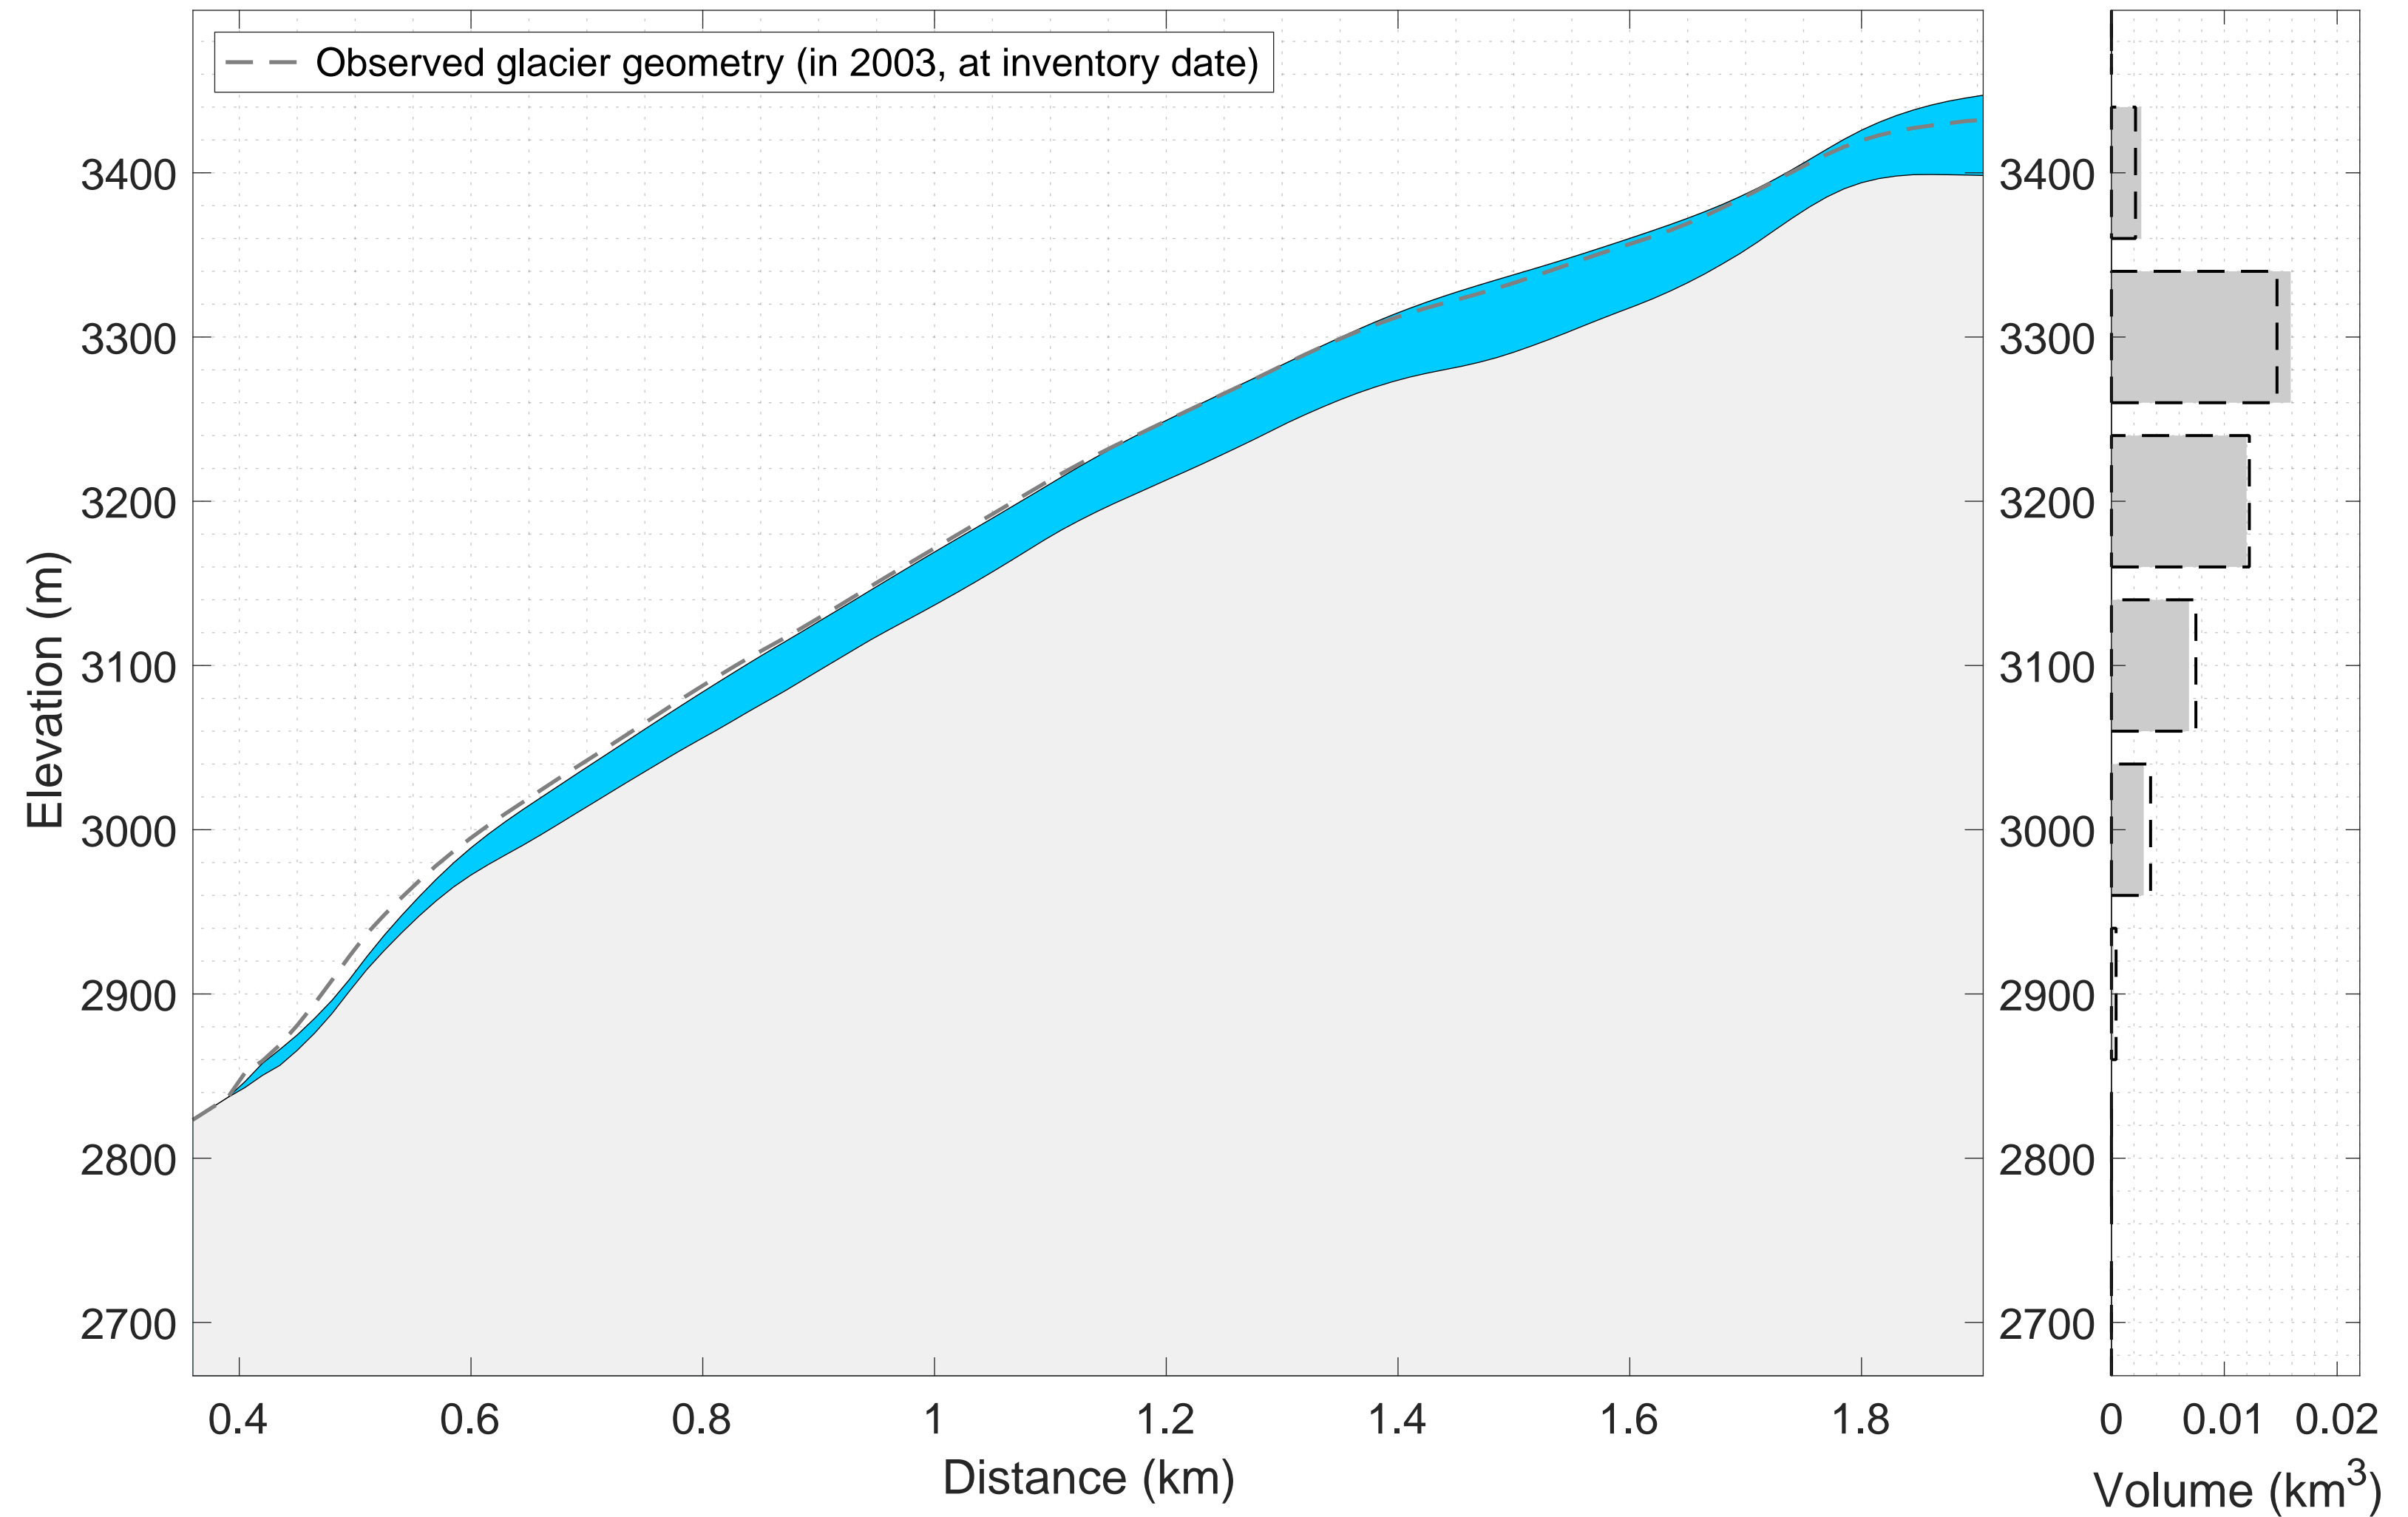

Supplement: Supplementary file 338 [file tc-13-1125-2019-supplement.zip]

**Modelled geometry (Glacier ID = 03376;  $A = 1.1385\text{e-}16 \text{ Pa}^{-3} \text{ a}^{-1}$ ;  $dx = 11 \text{ m}$ )**

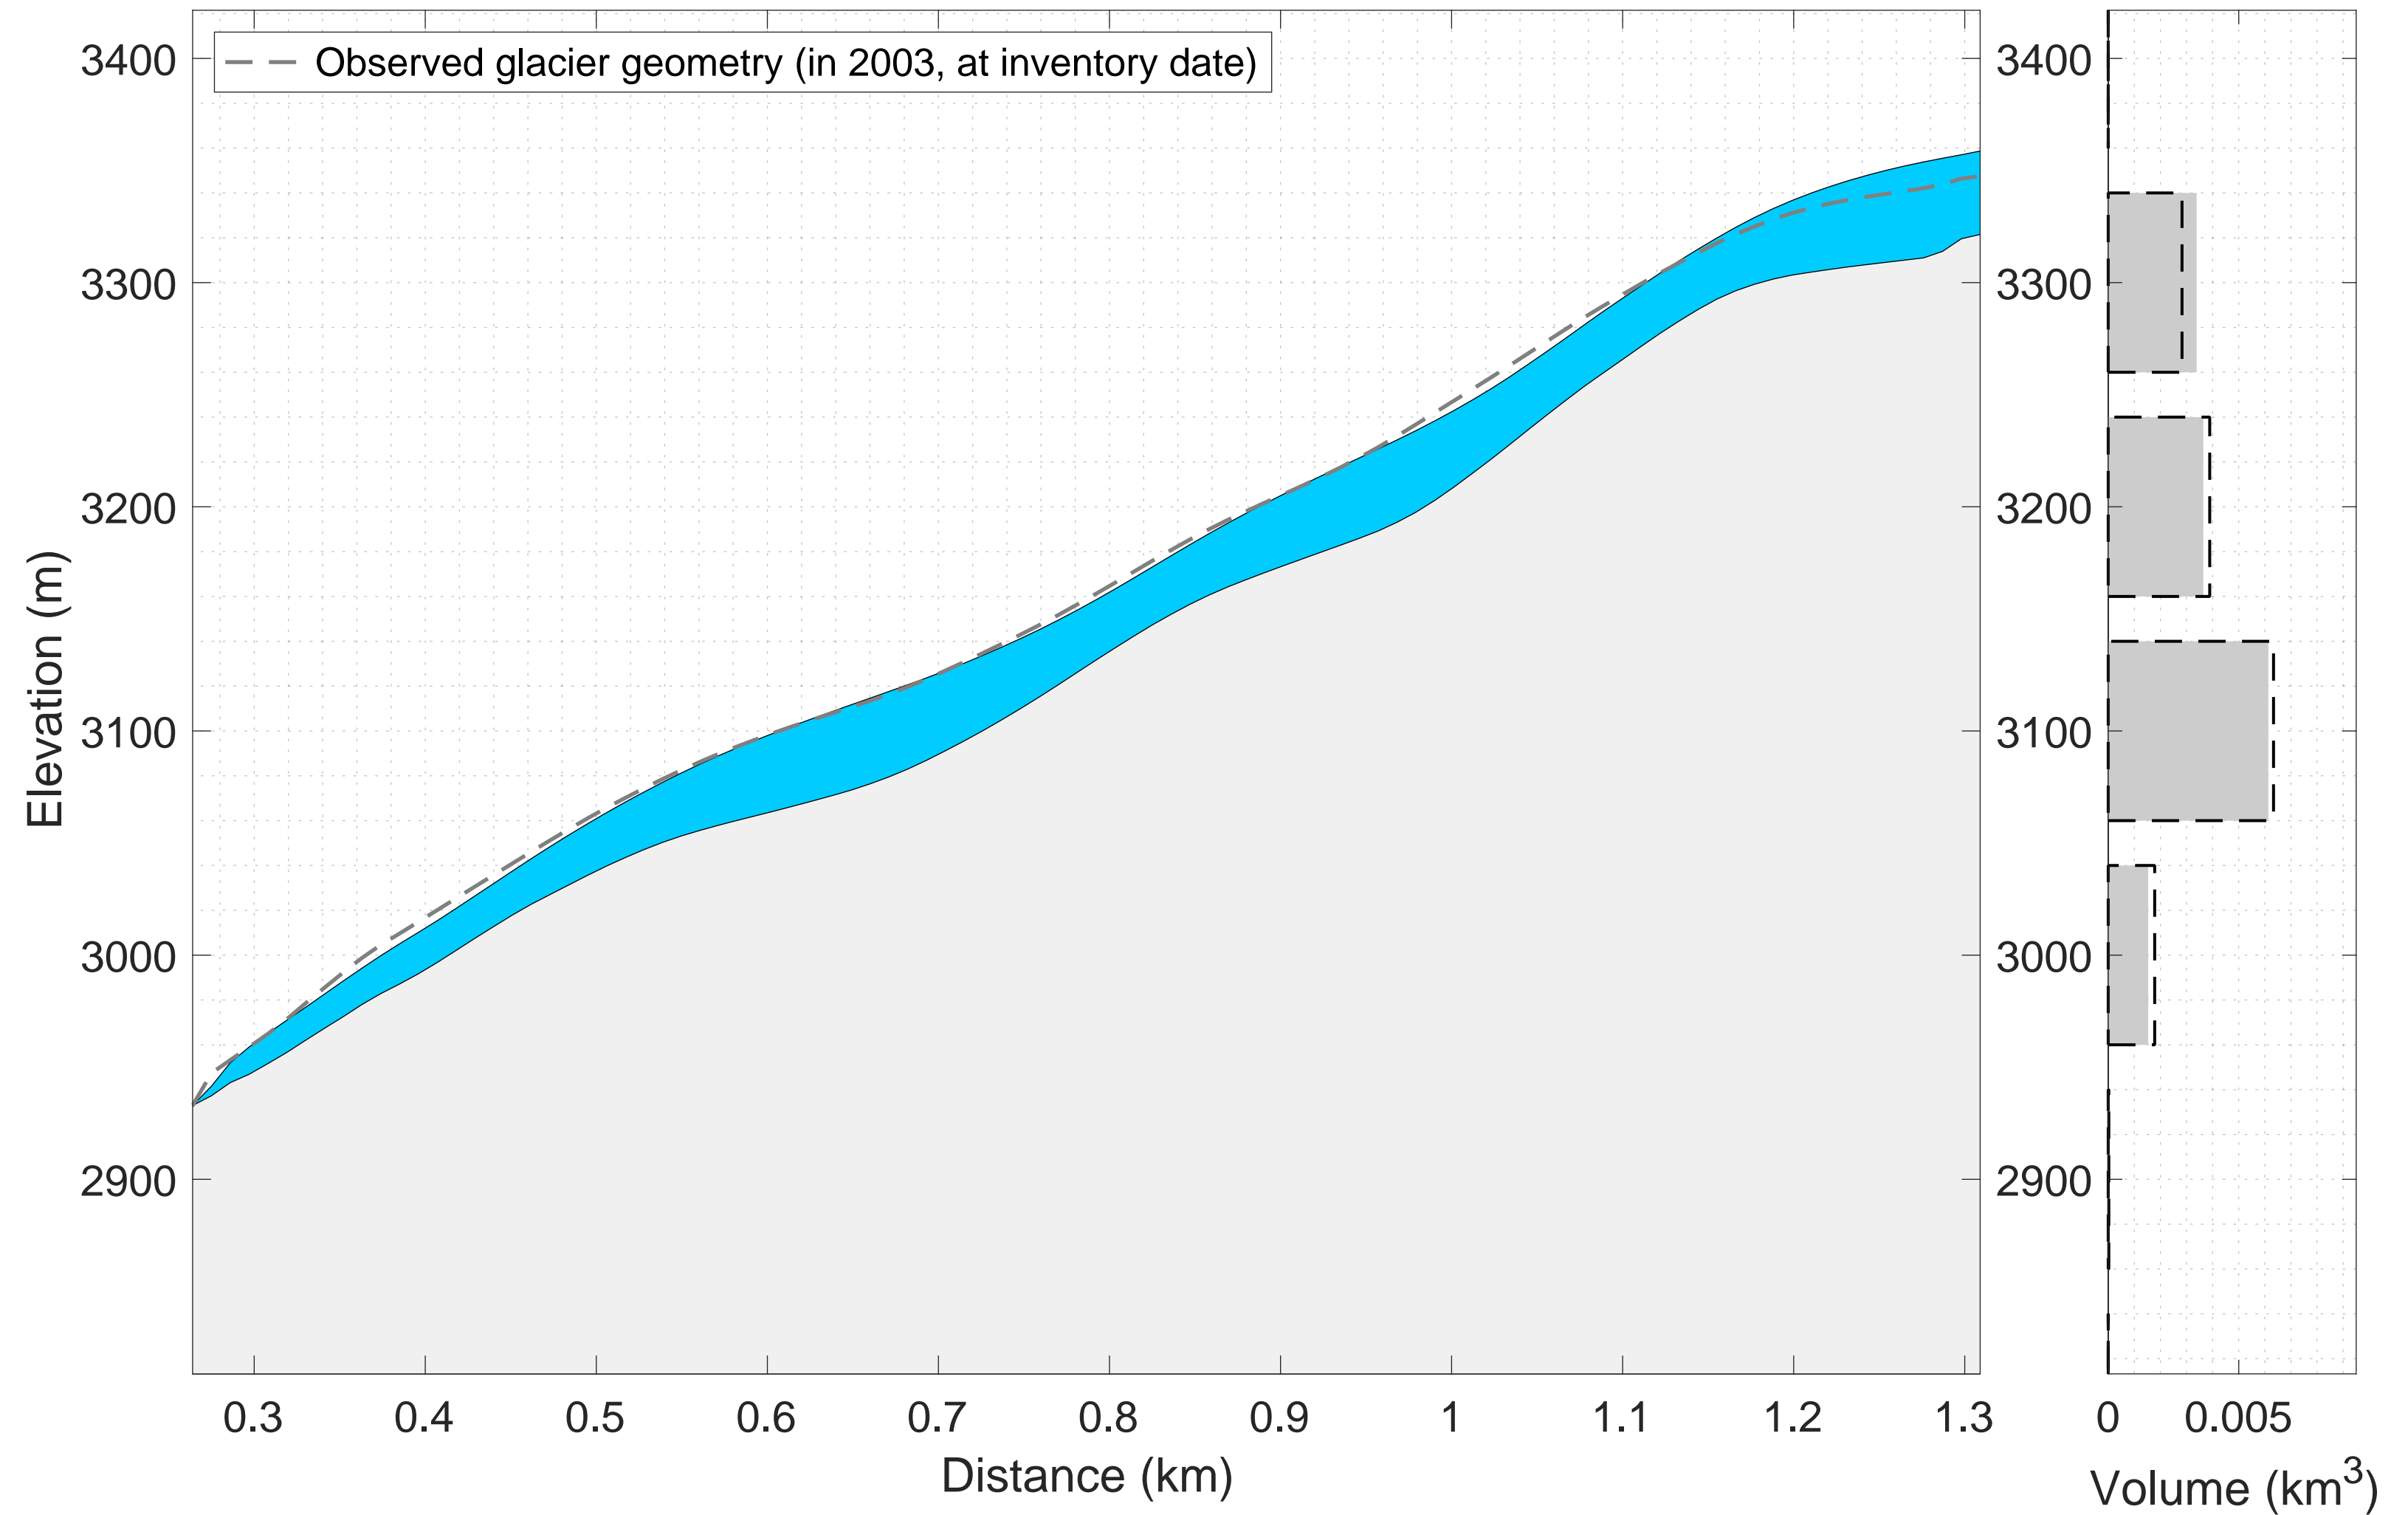

Supplement: Supplementary file 339 [file tc-13-1125-2019-supplement.zip]

**Modelled geometry (Glacier ID = 02389;  $A = 1.2175\text{e-}16 \text{ Pa}^{-3} \text{ a}^{-1}$ ;  $dx = 11 \text{ m}$ )**

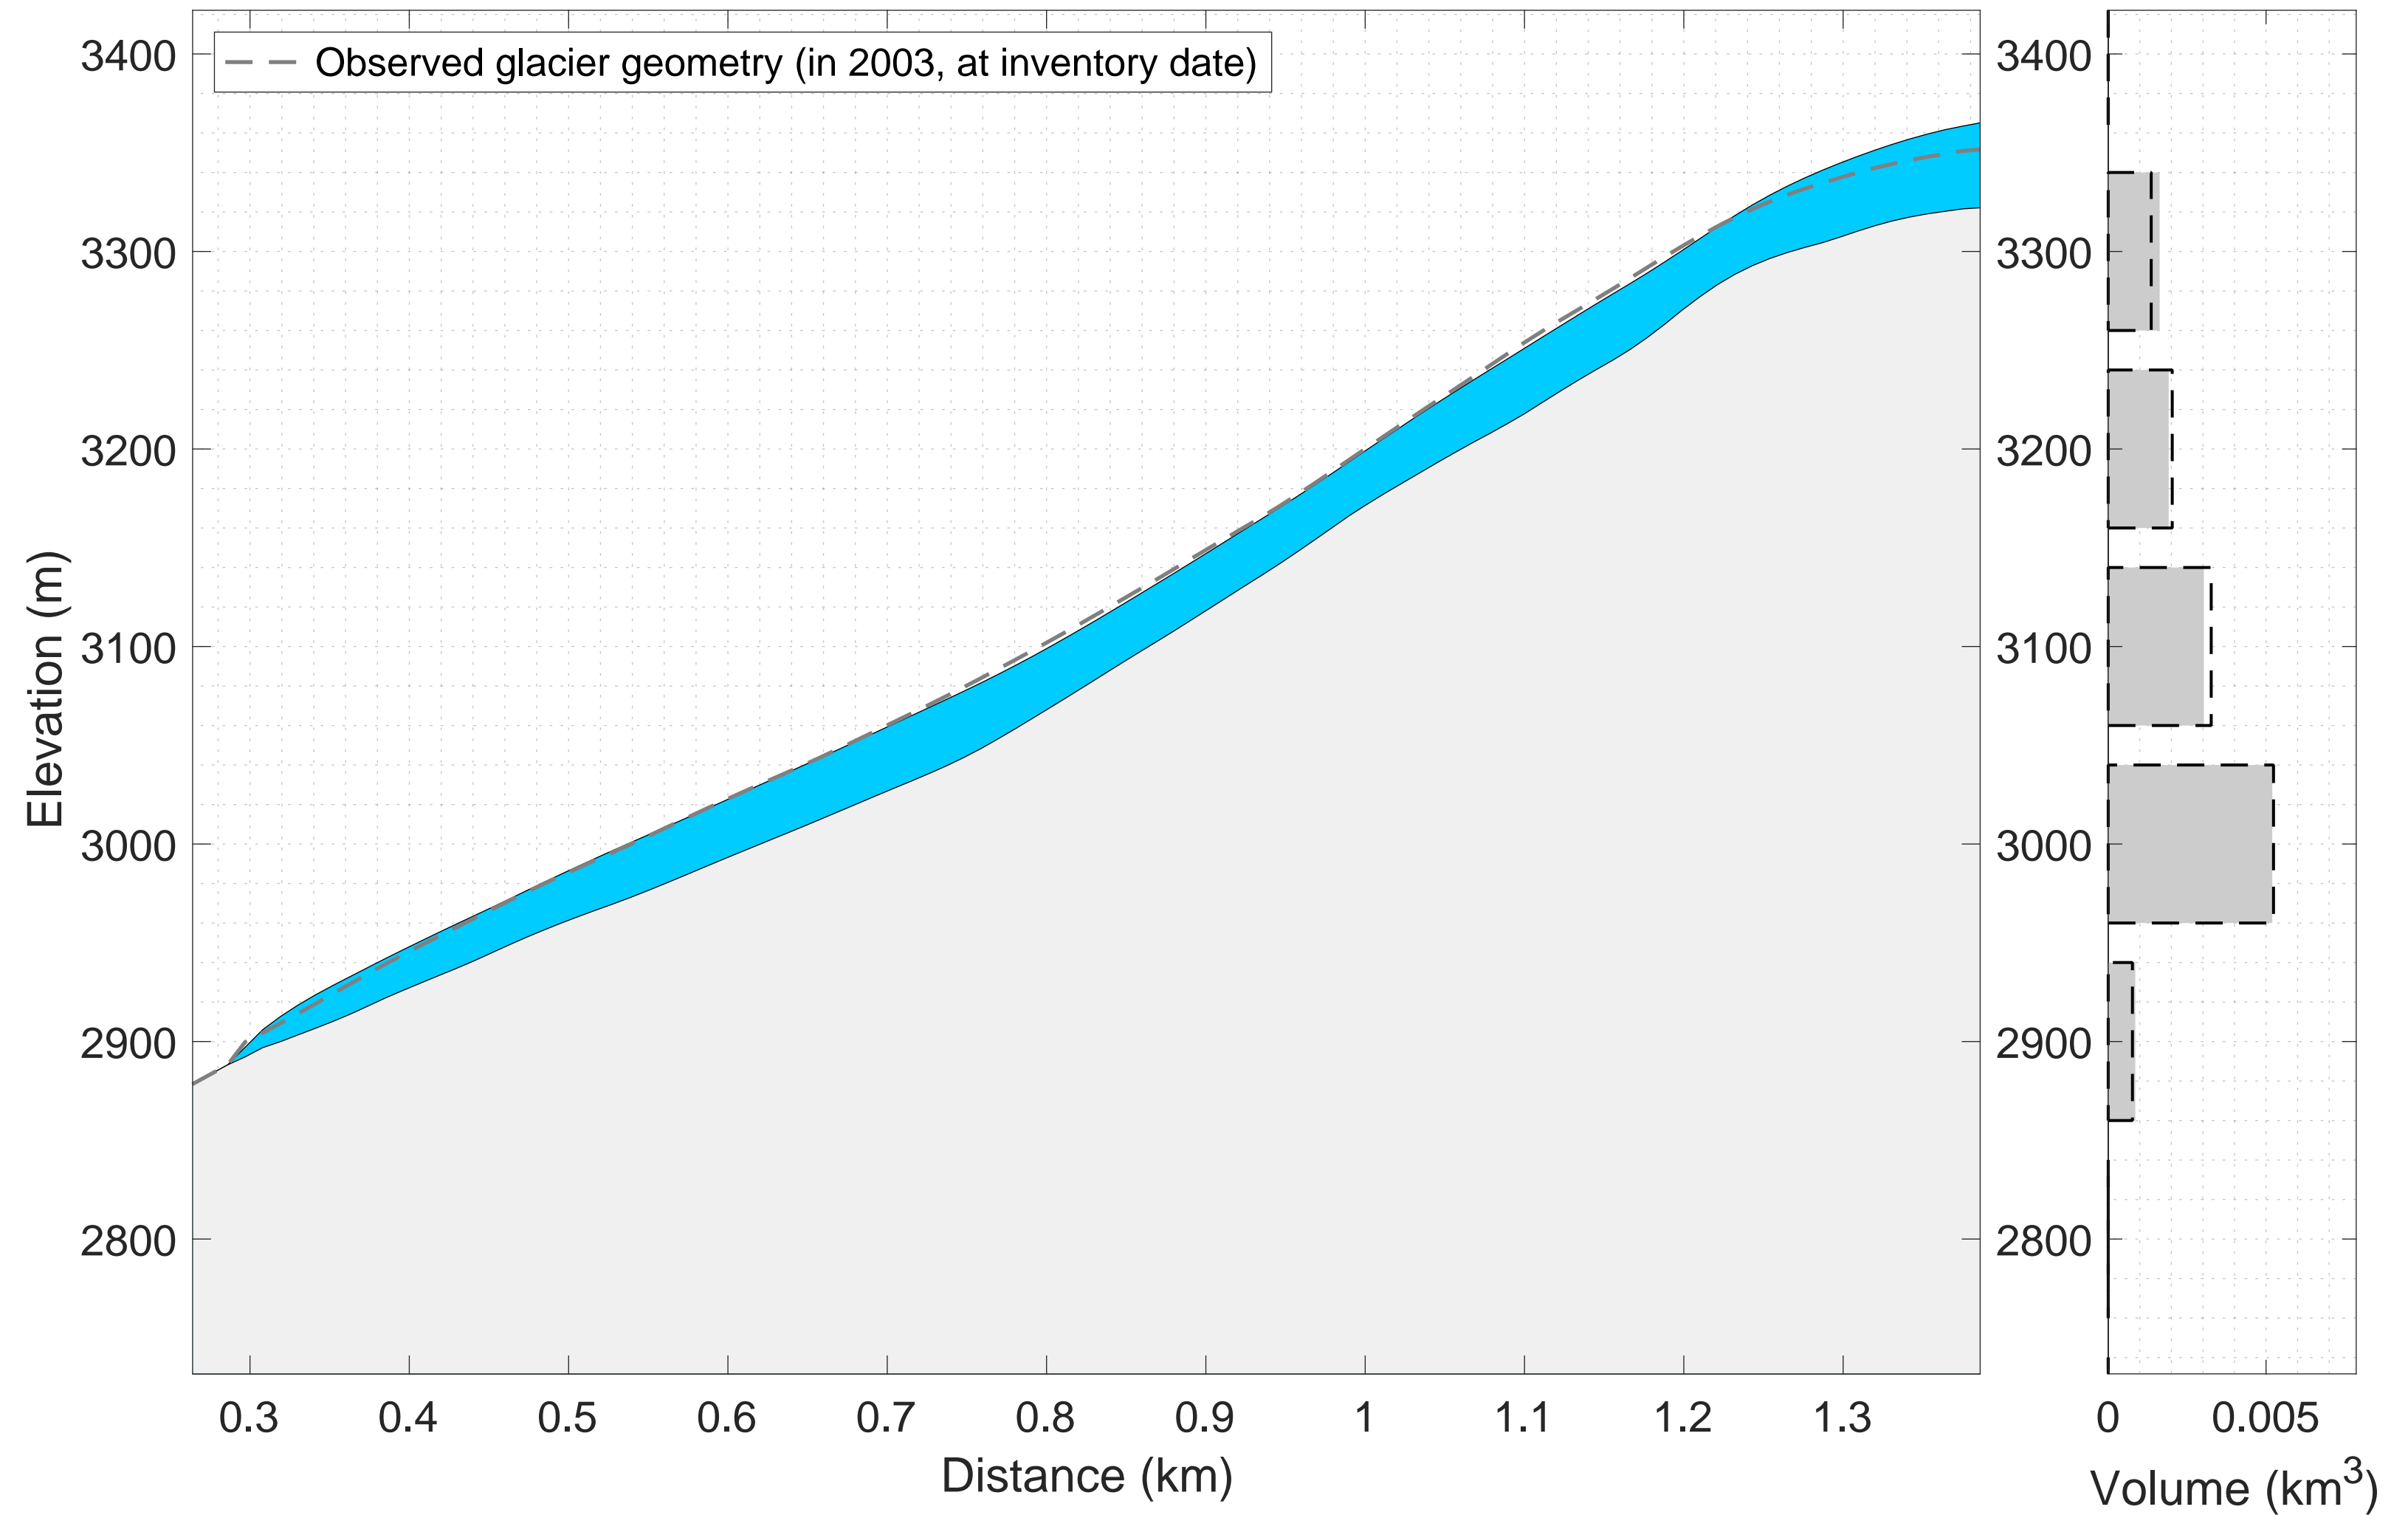

Supplement: Supplementary file 340 [file tc-13-1125-2019-supplement.zip]

**Modelled geometry (Glacier ID = 02925;  $A = 1.715\text{e-}16 \text{ Pa}^{-3} \text{ a}^{-1}$ ;  $dx = 12 \text{ m}$ )**

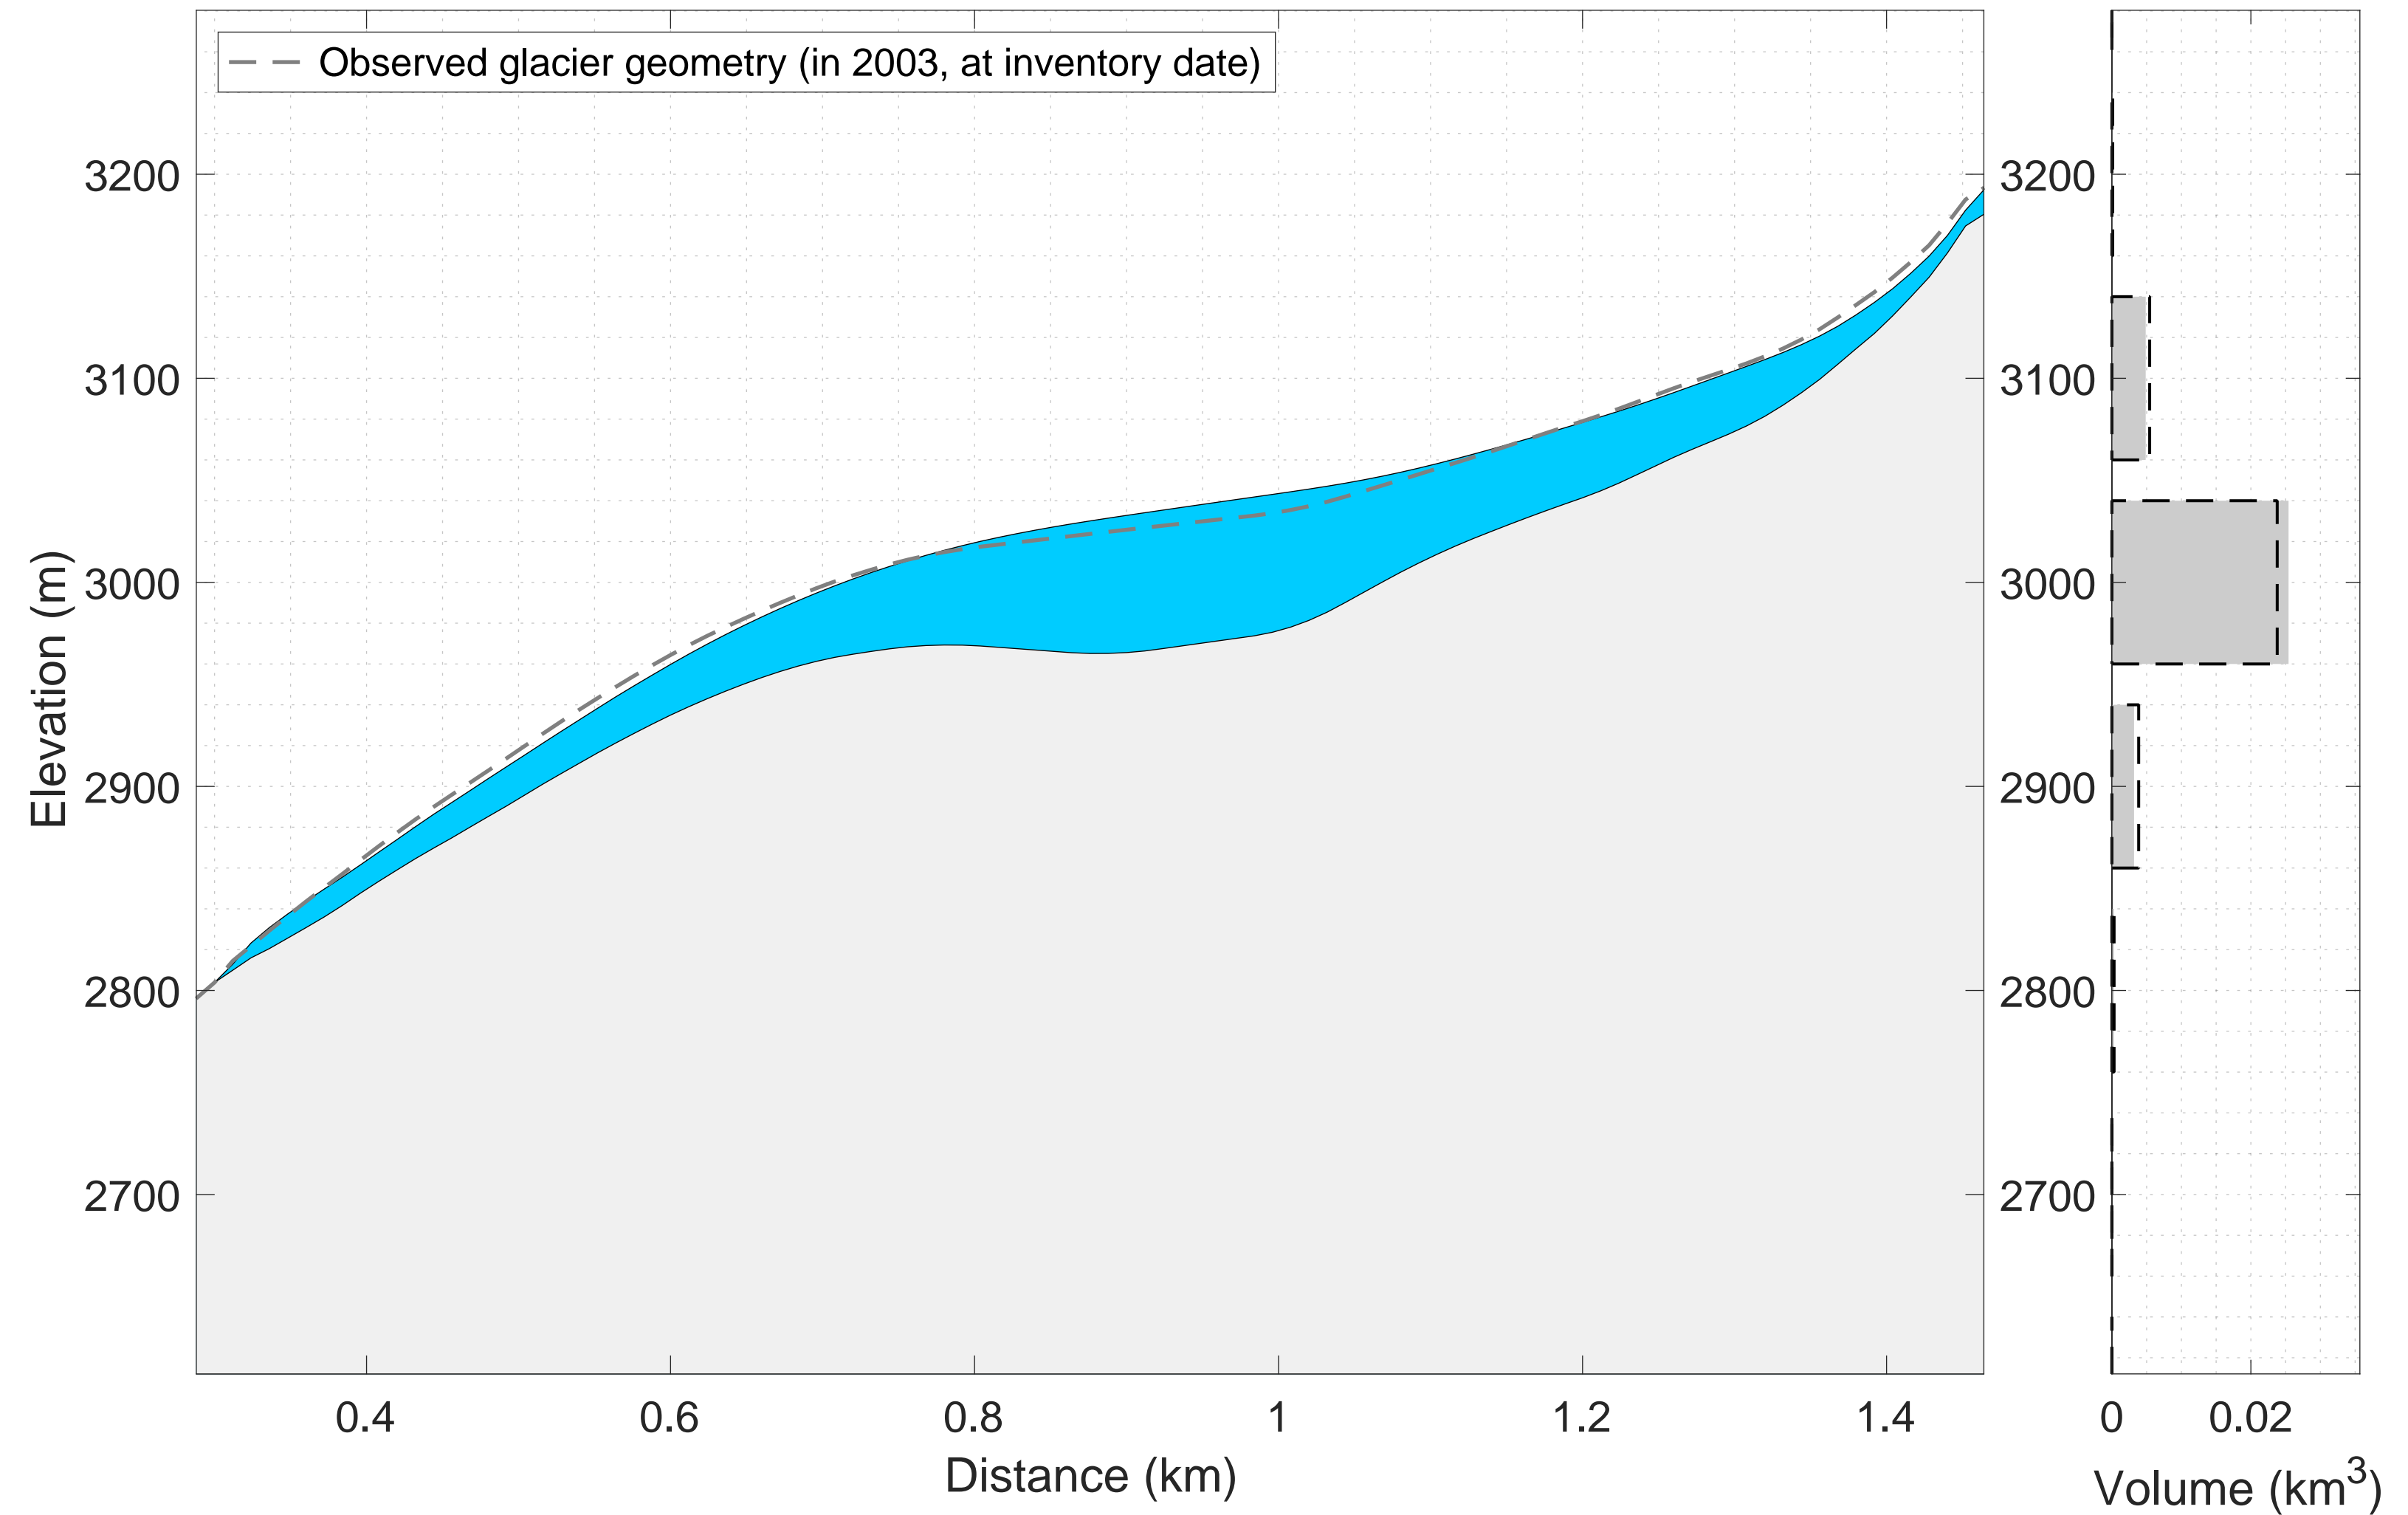

Supplement: Supplementary file 341 [file tc-13-1125-2019-supplement.zip]

**Modelled geometry (Glacier ID = 03110;  $A = 3.8848\text{e-}16 \text{ Pa}^{-3} \text{ a}^{-1}$ ;  $dx = 35 \text{ m}$ )**

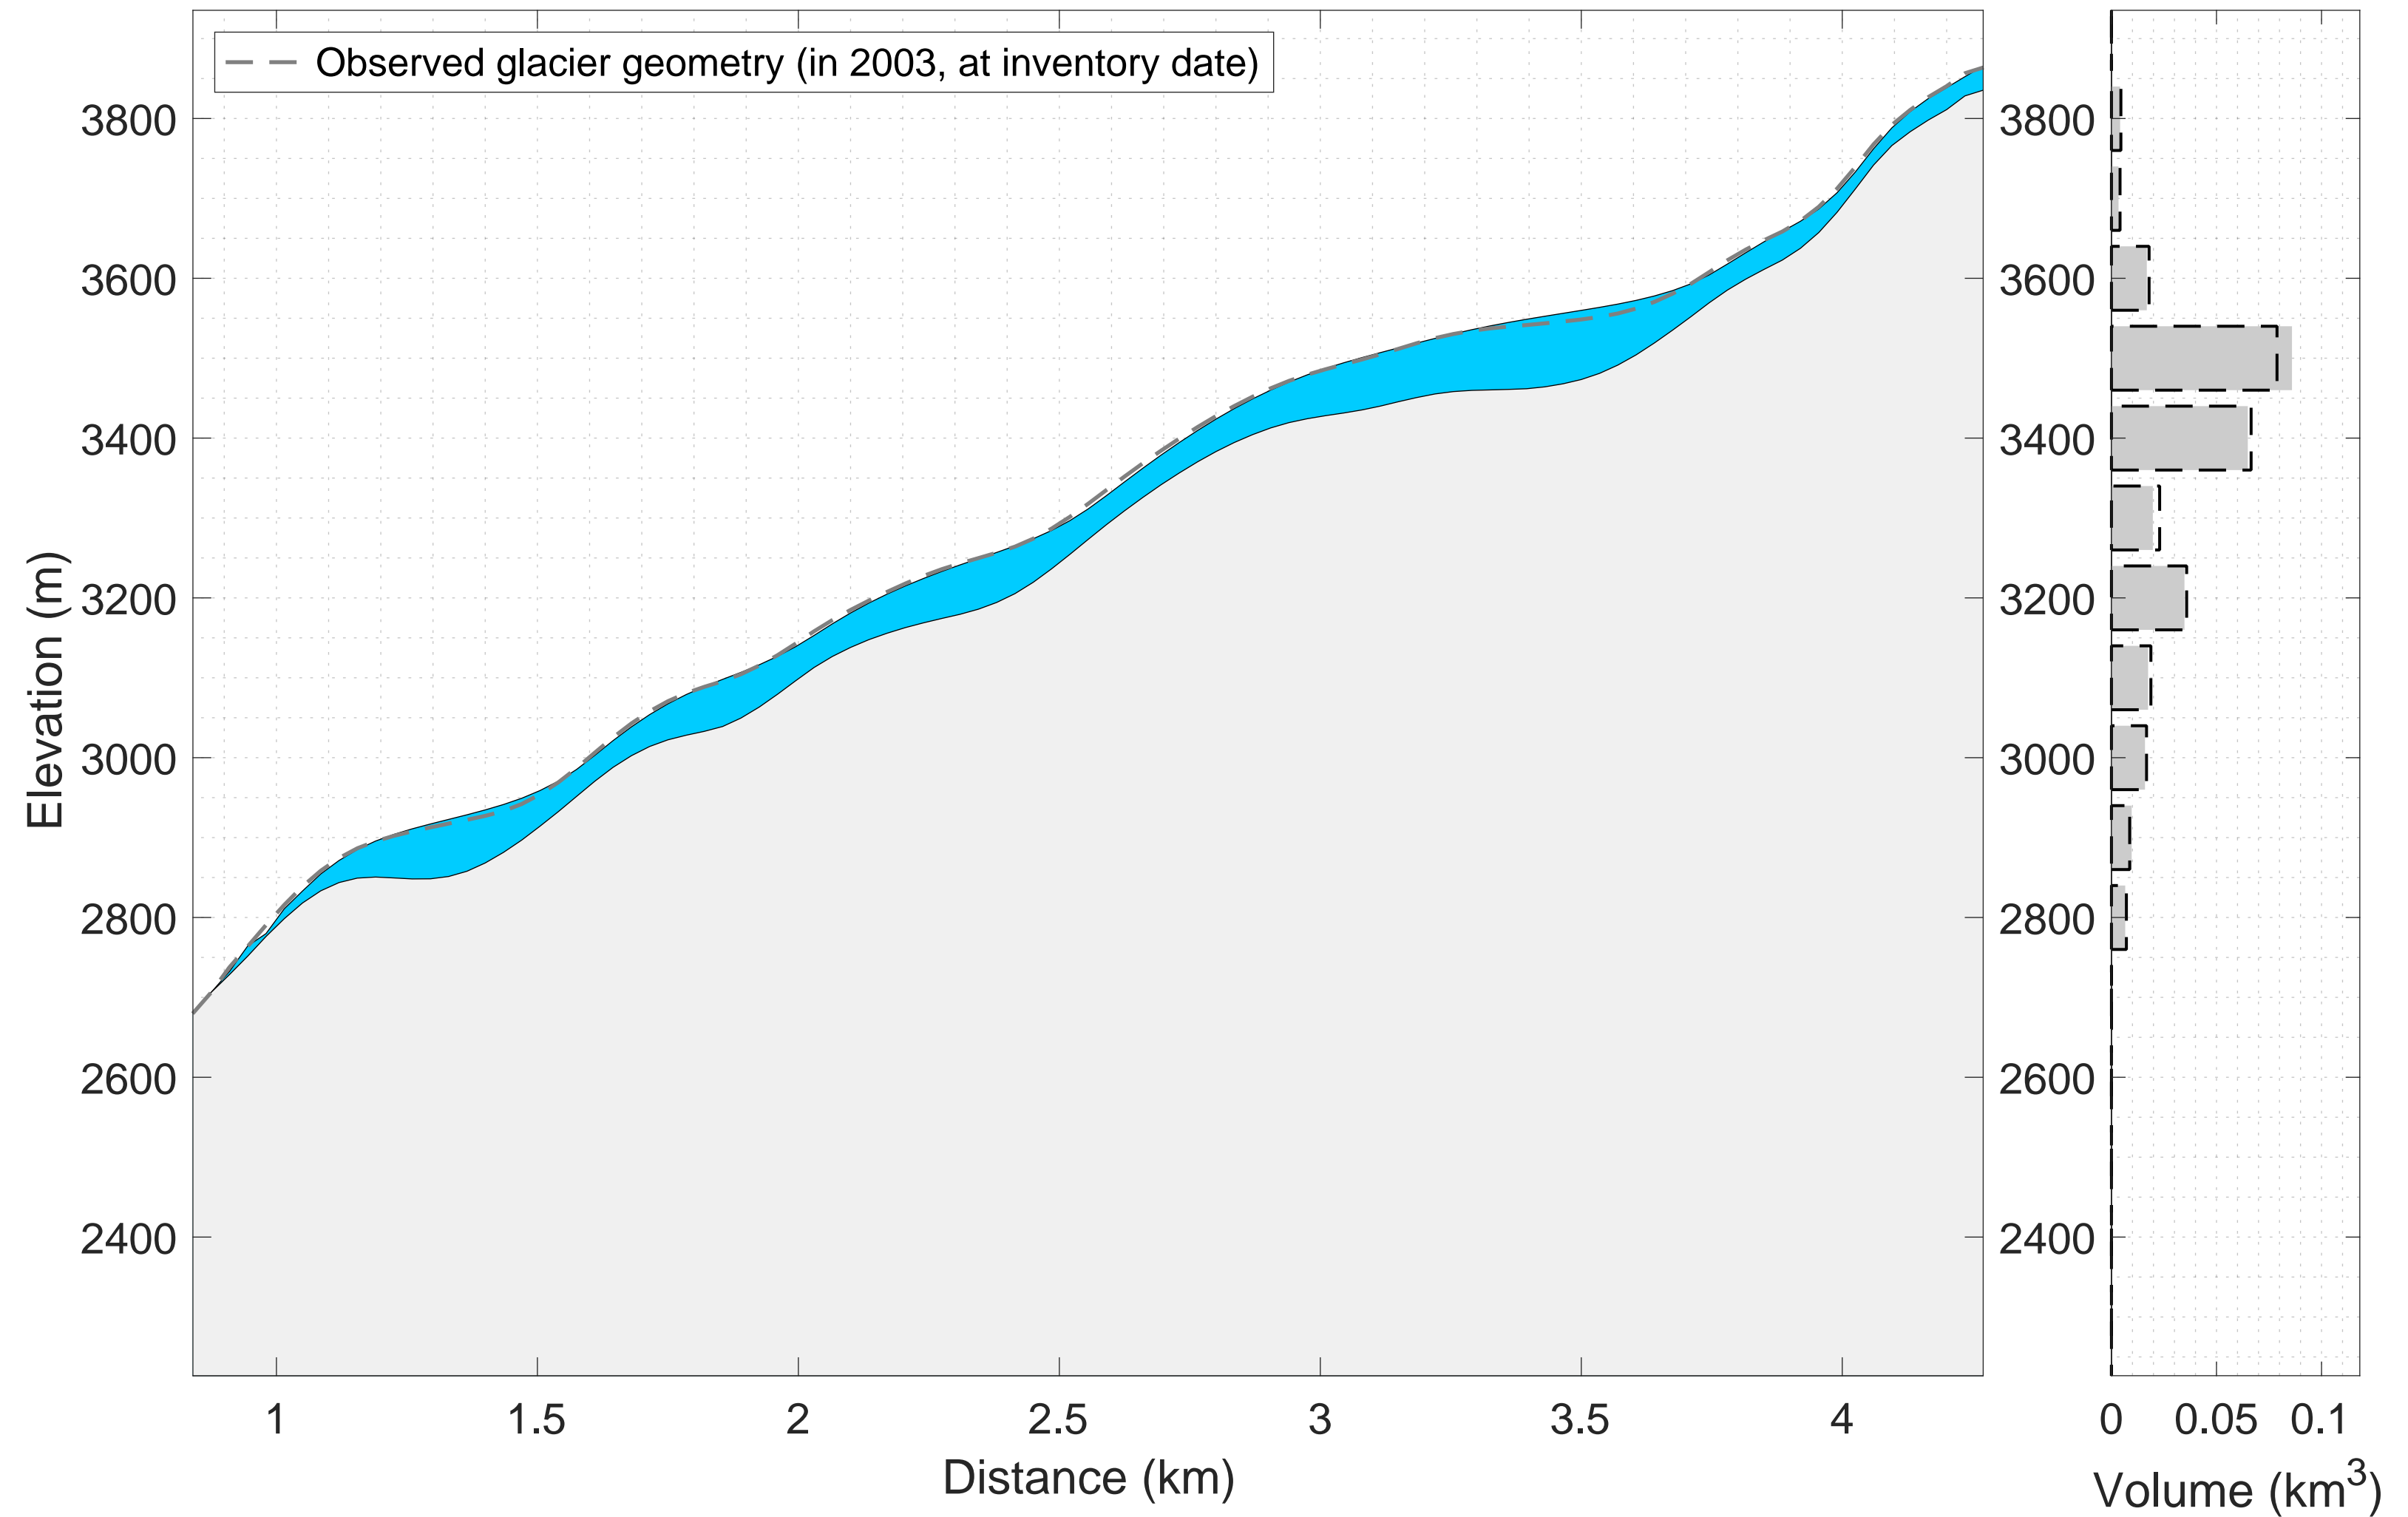

Supplement: Supplementary file 342 [file tc-13-1125-2019-supplement.zip]

**Modelled geometry (Glacier ID = 03614;  $A = 2.7975\text{e-}16 \text{ Pa}^{-3} \text{ a}^{-1}$ ;  $dx = 18 \text{ m}$ )**

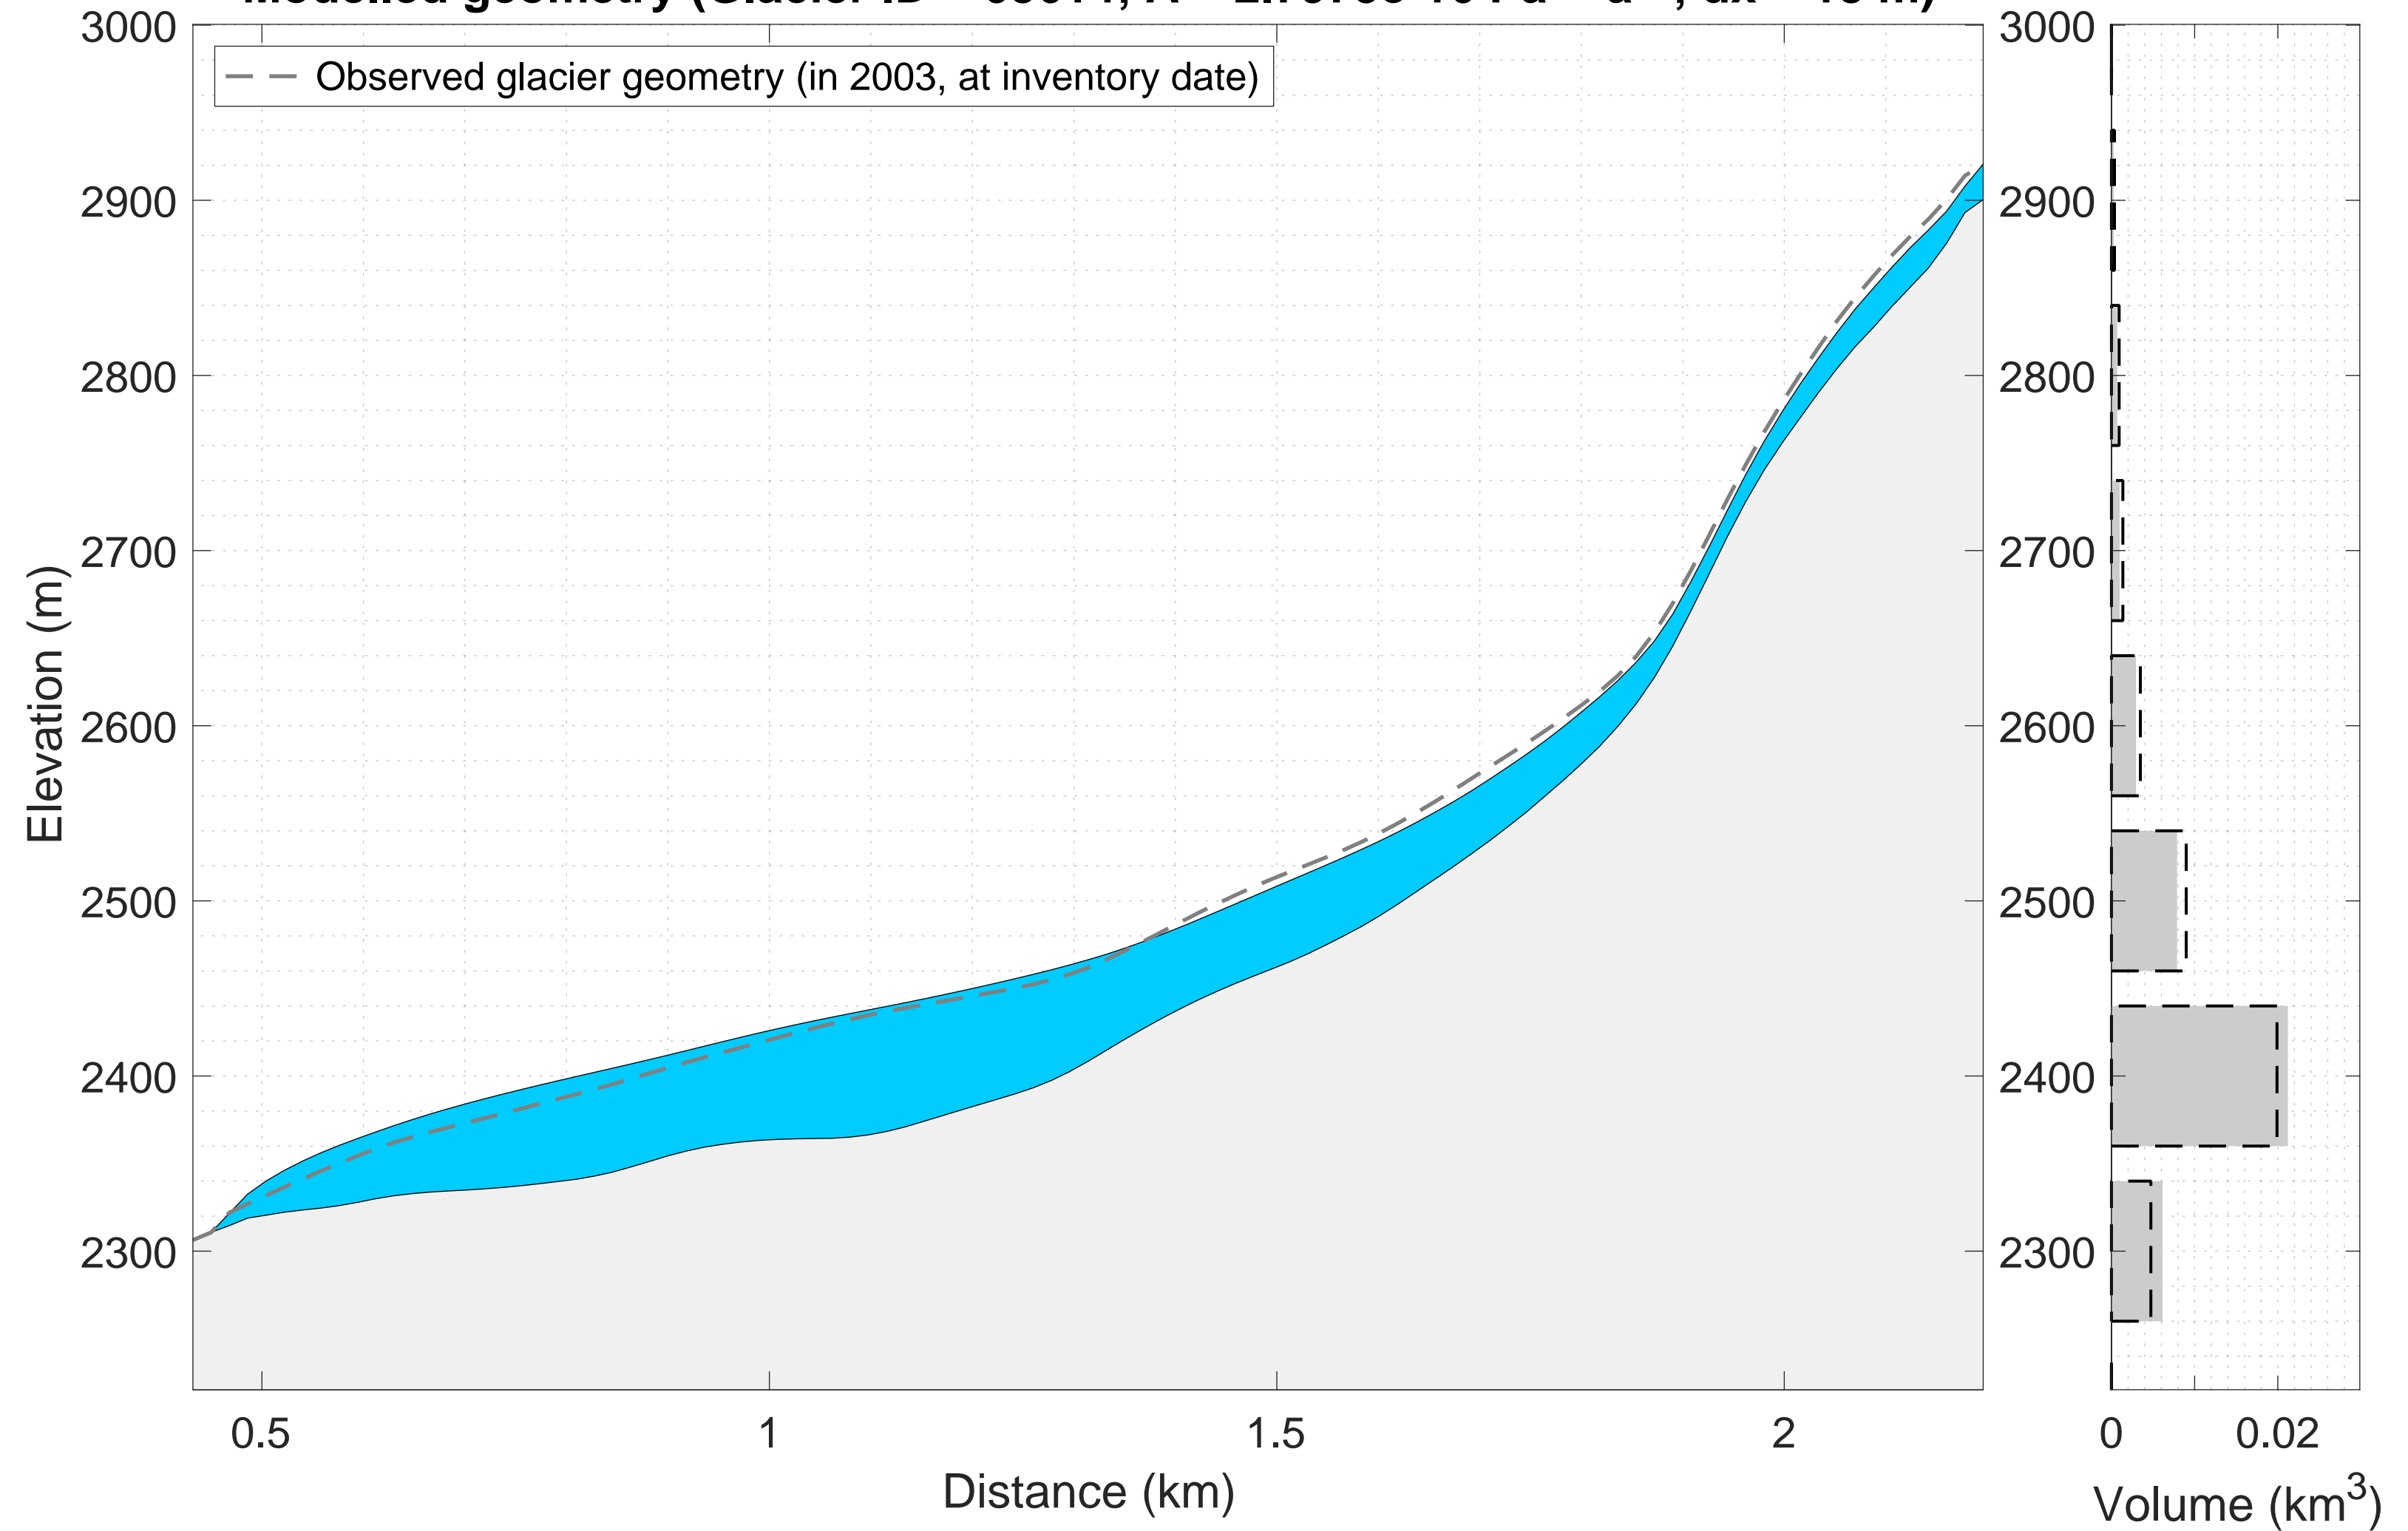

Supplement: Supplementary file 343 [file tc-13-1125-2019-supplement.zip]

**Modelled geometry (Glacier ID = 02598;  $A = 7.0259\text{e-}17 \text{ Pa}^{-3} \text{ a}^{-1}$ ;  $dx = 12 \text{ m}$ )**

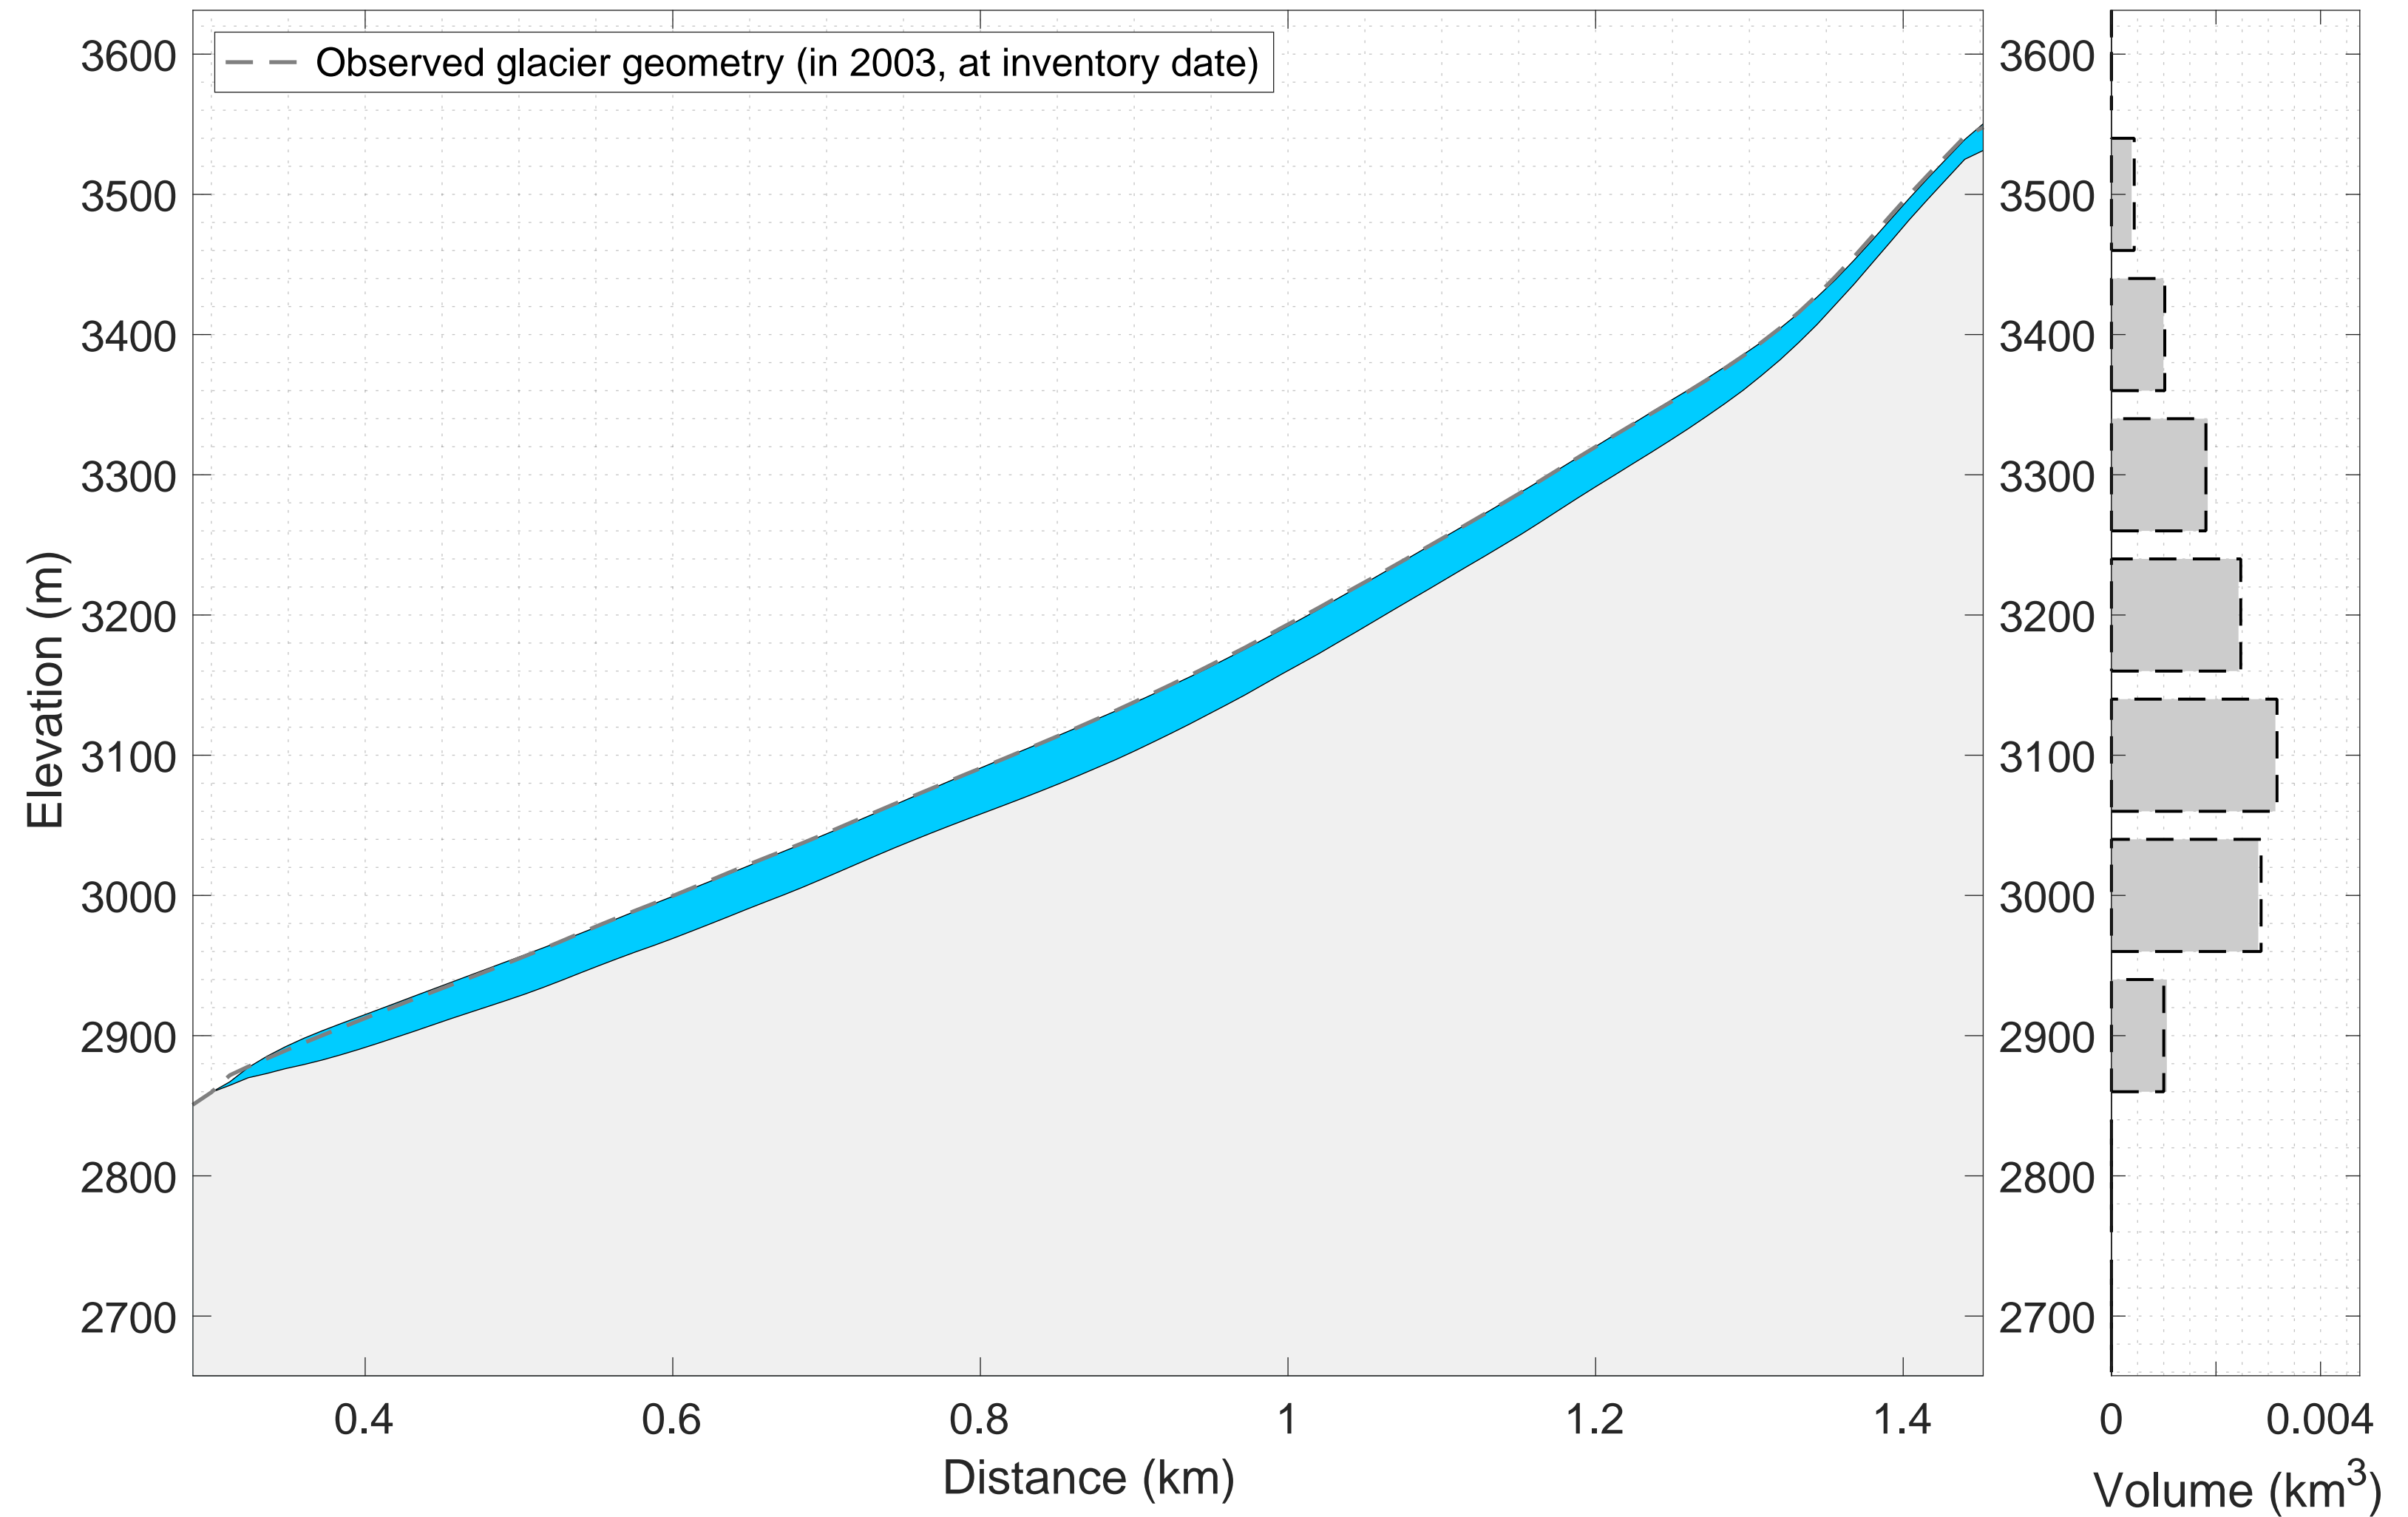

Supplement: Supplementary file 344 [file tc-13-1125-2019-supplement.zip]

**Modelled geometry (Glacier ID = 00458;  $A = 1.1429\text{e-}16 \text{ Pa}^{-3} \text{ a}^{-1}$ ;  $dx = 10 \text{ m}$ )**

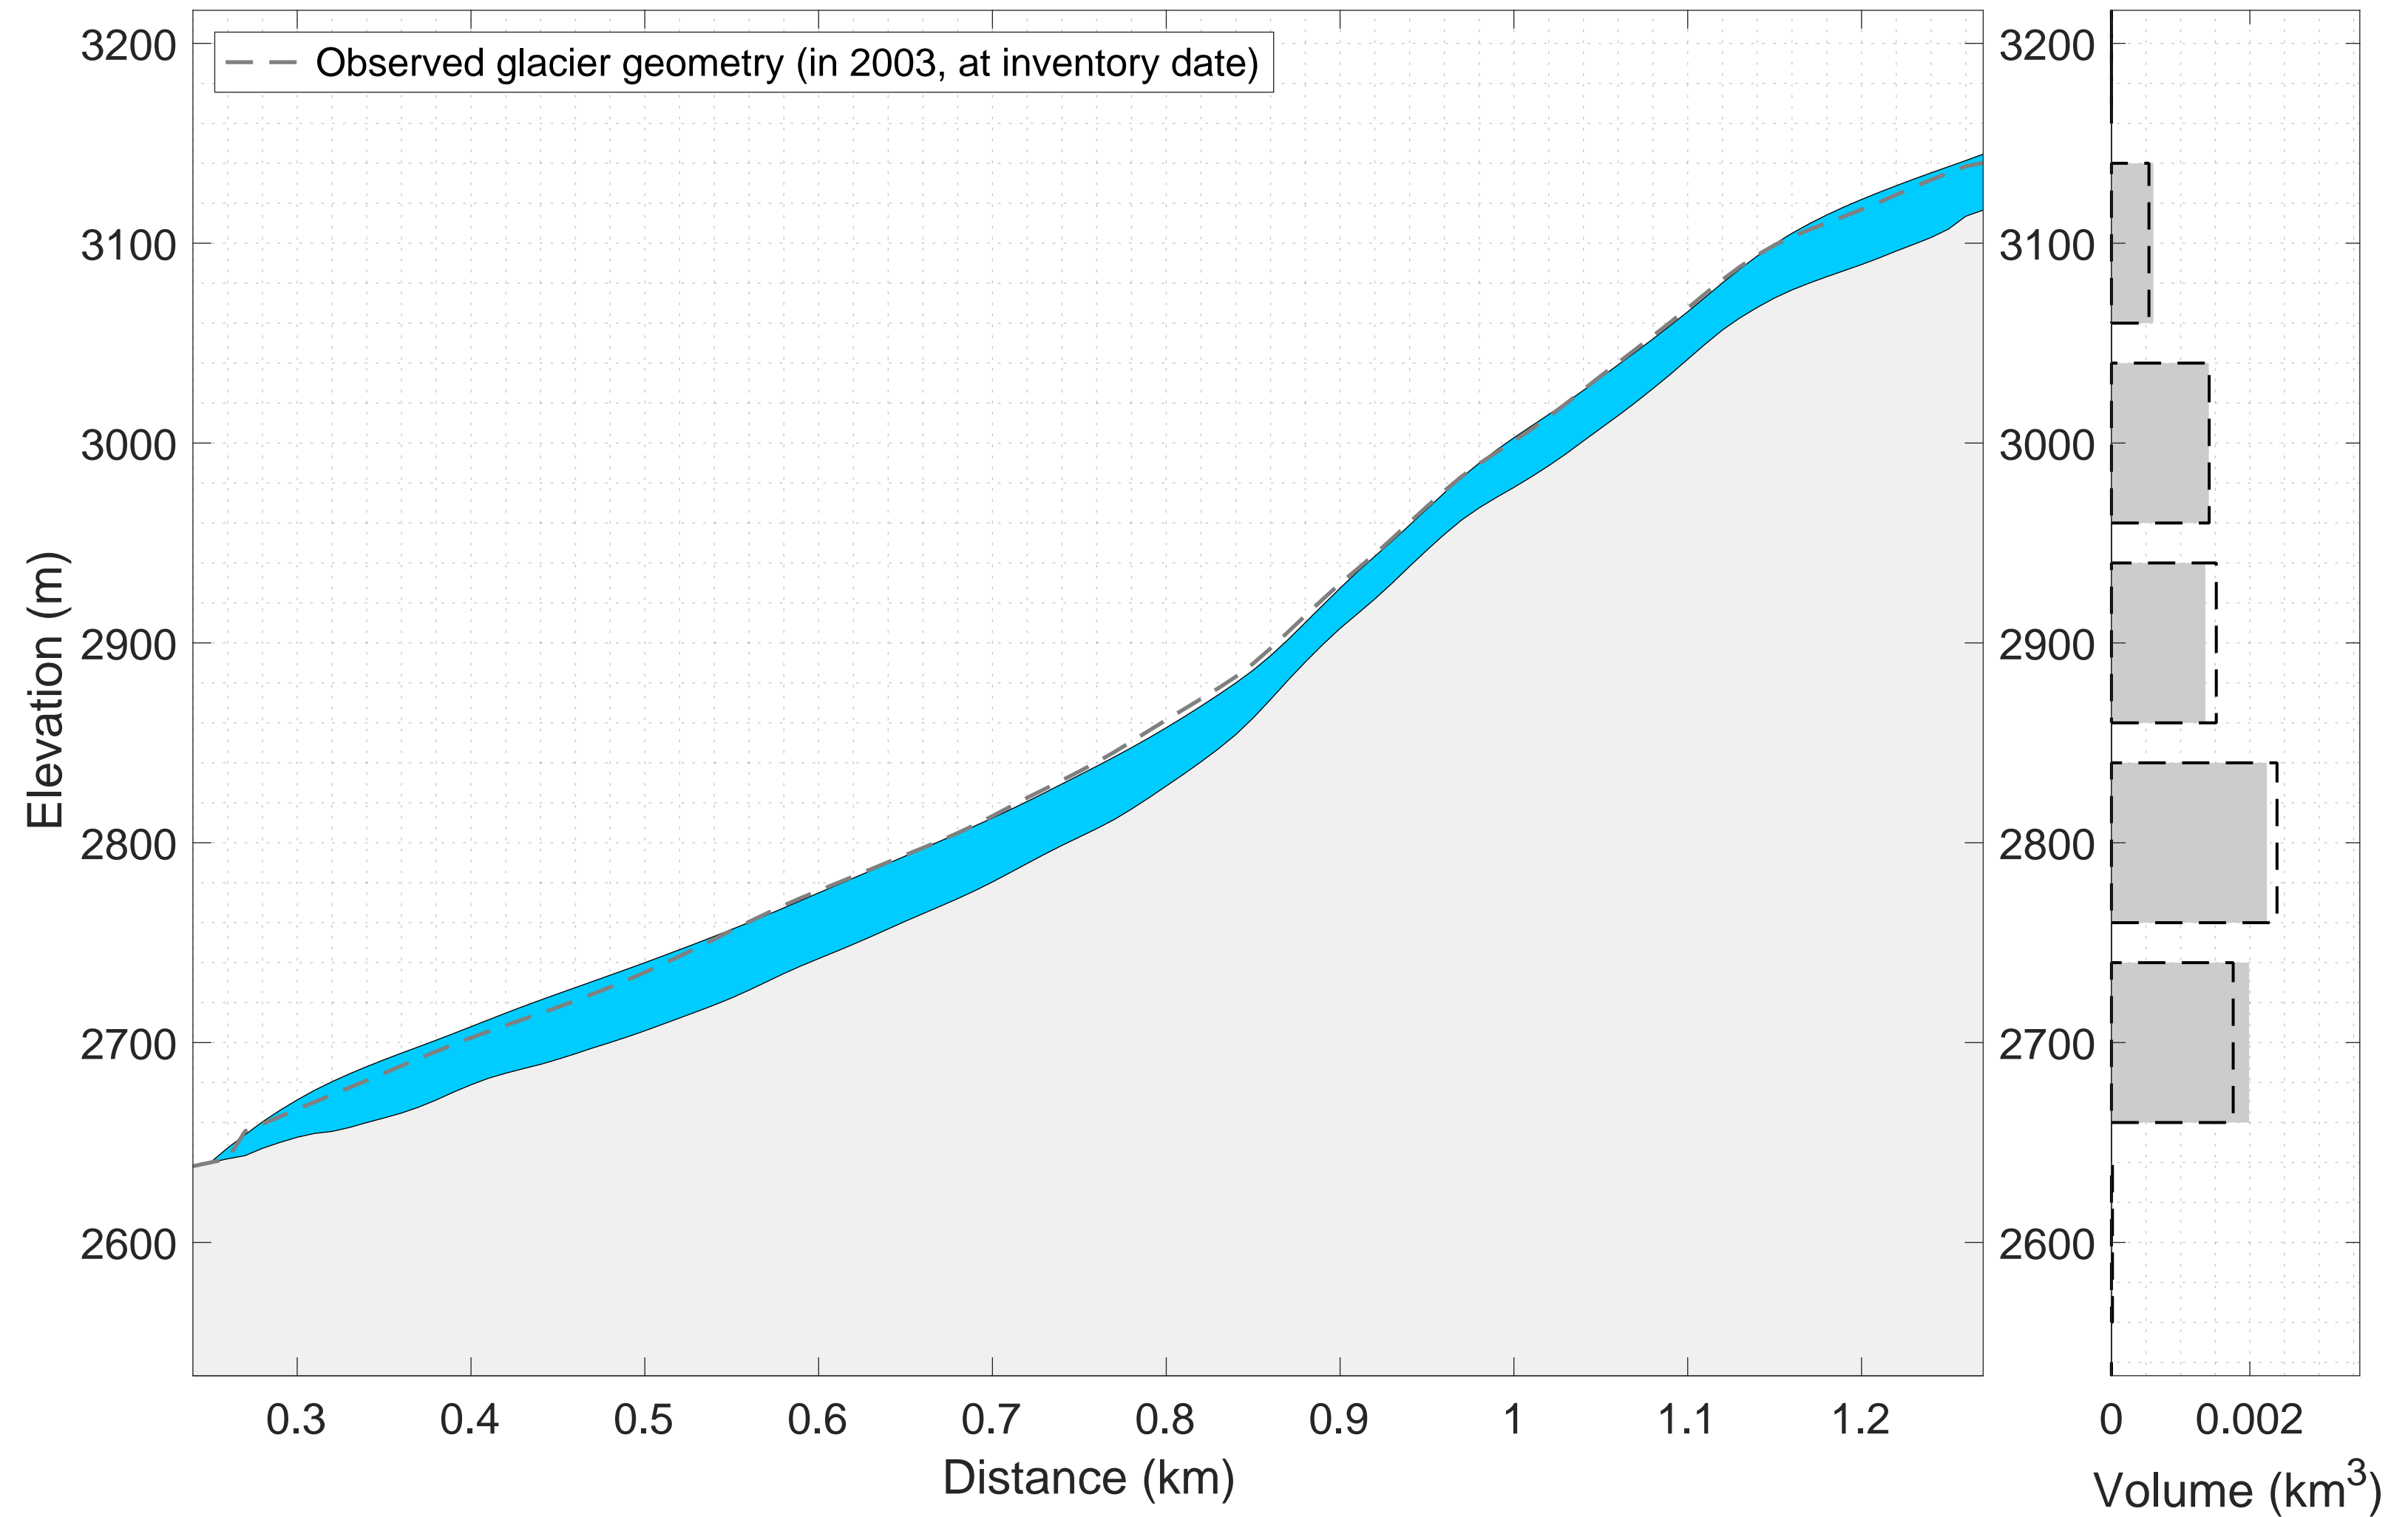

Supplement: Supplementary file 345 [file tc-13-1125-2019-supplement.zip]

**Modelled geometry (Glacier ID = 03522;  $A = 9.1096\text{e-}17 \text{ Pa}^{-3} \text{ a}^{-1}$ ;  $dx = 17 \text{ m}$ )**

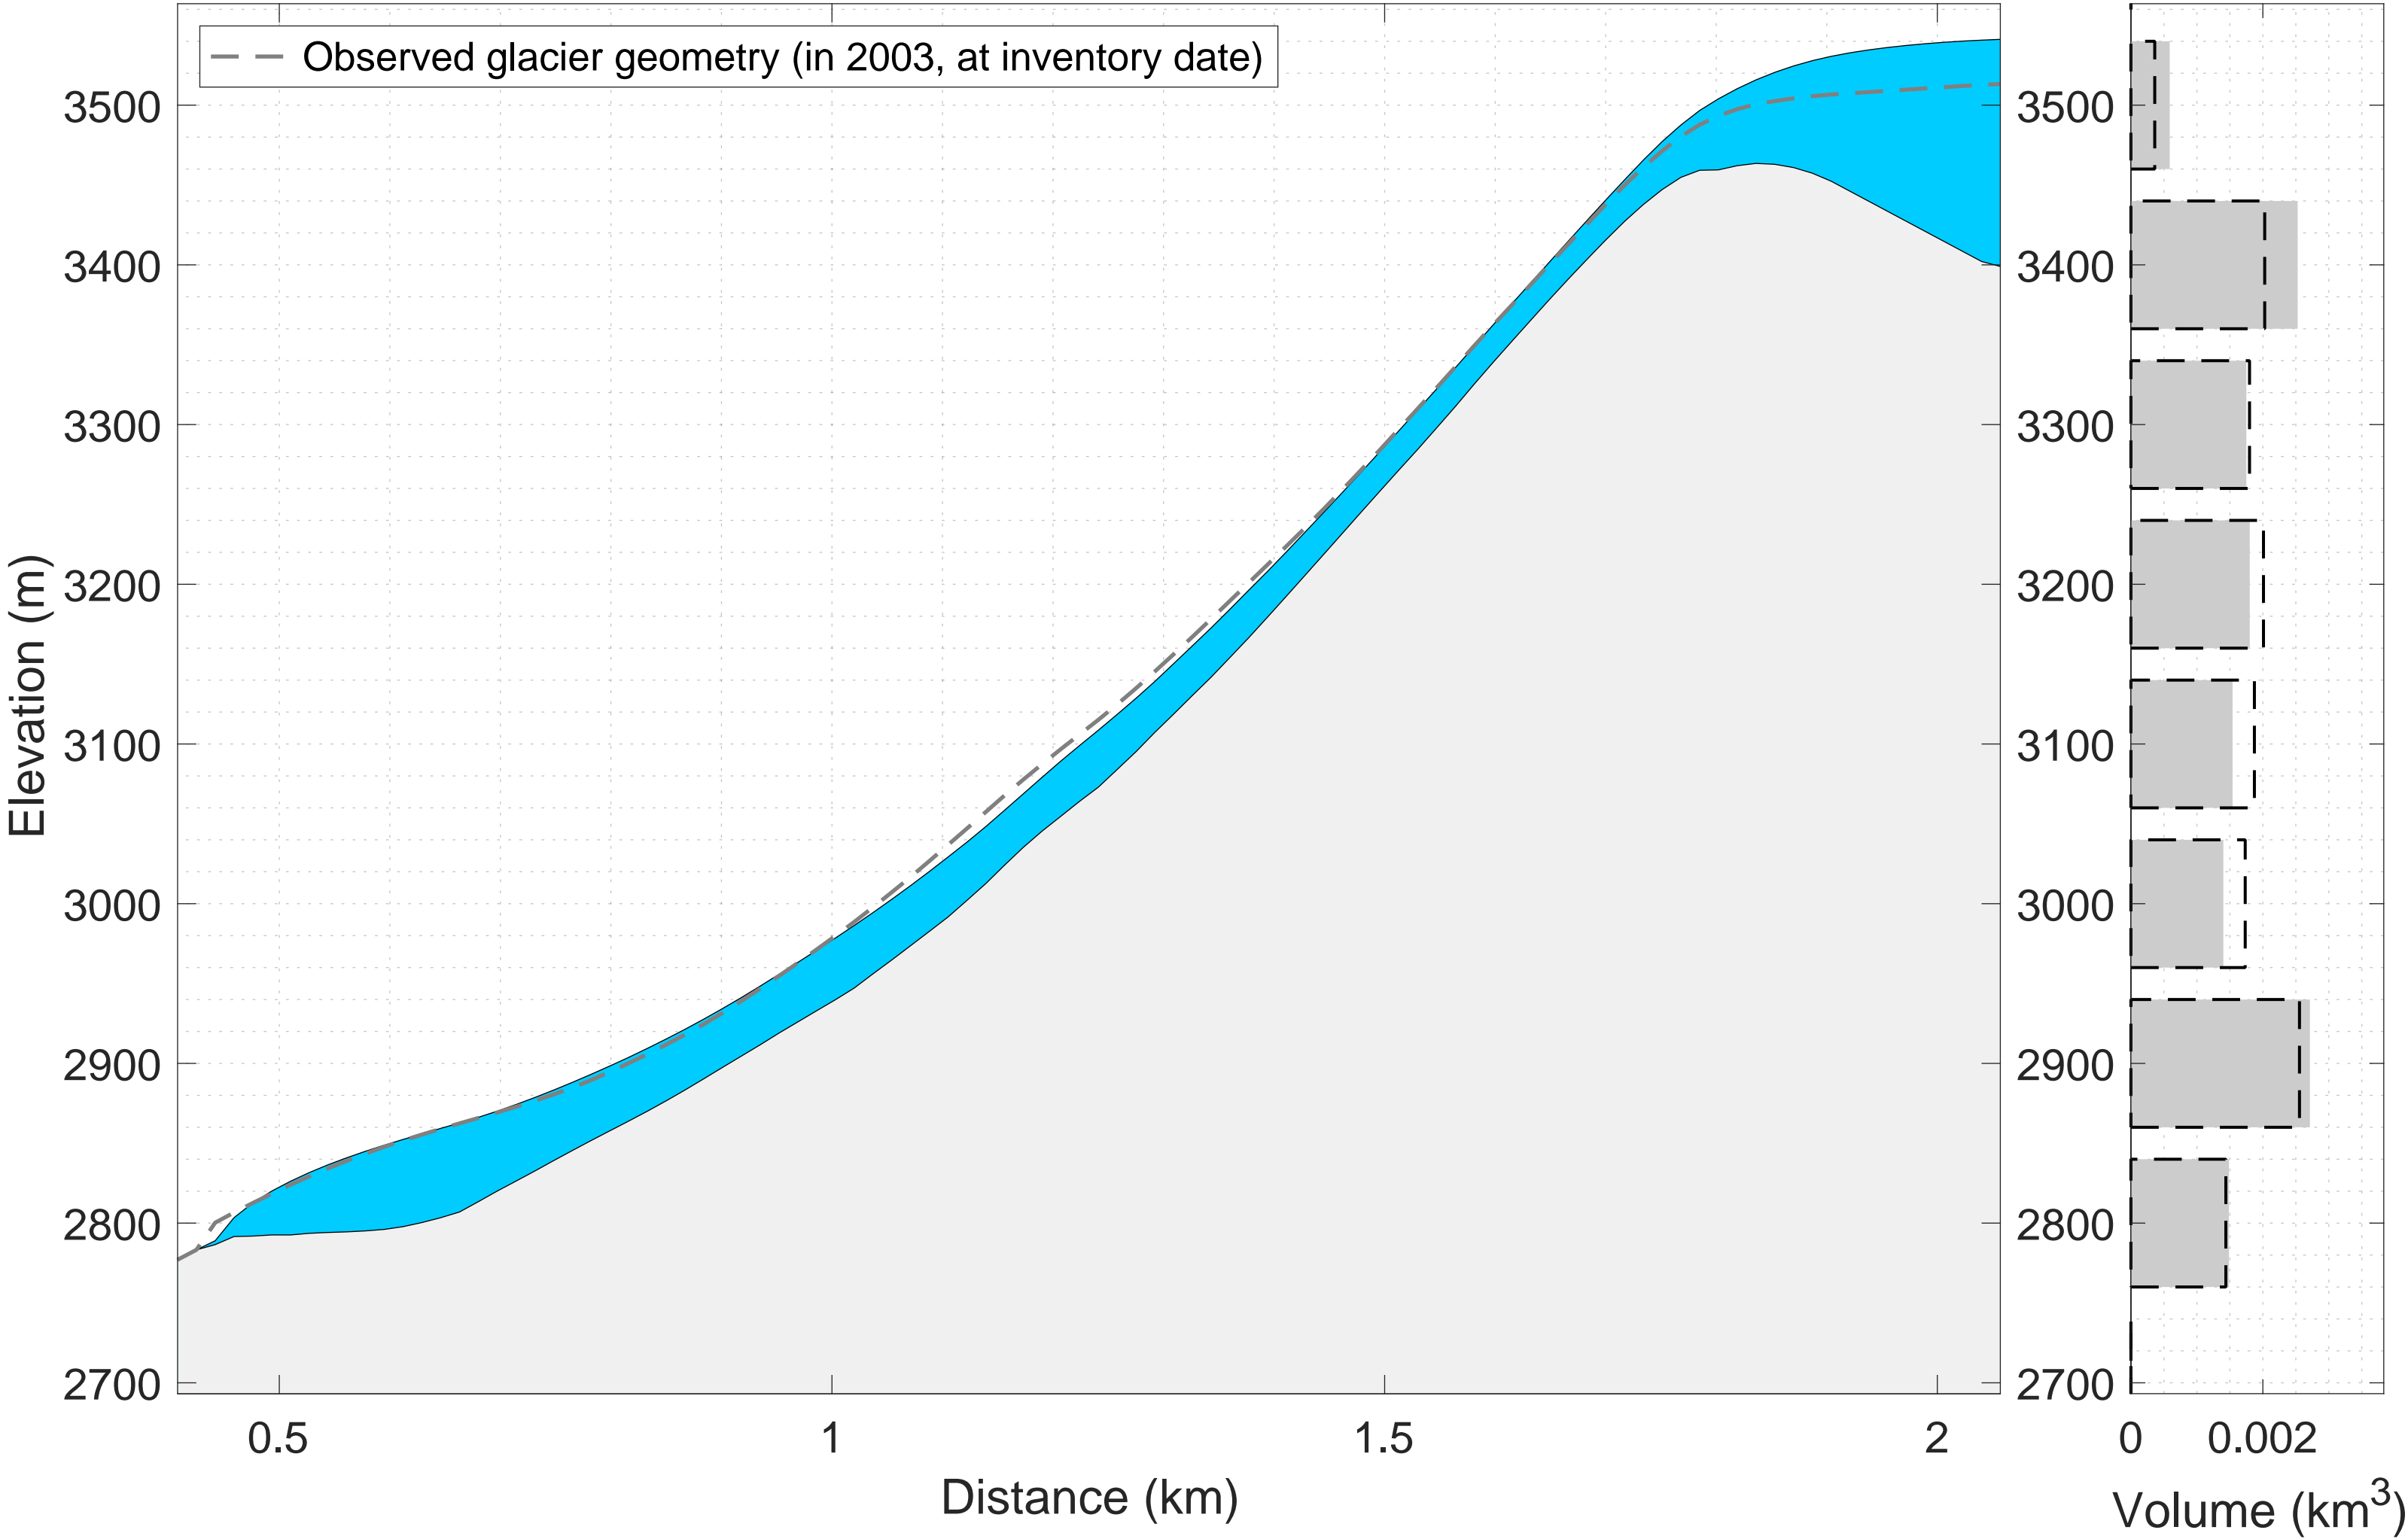

Supplement: Supplementary file 346 [file tc-13-1125-2019-supplement.zip]

**Modelled geometry (Glacier ID = 02249;  $A = 1.4233\text{e-}16 \text{ Pa}^{-3} \text{ a}^{-1}$ ;  $dx = 29 \text{ m}$ )**

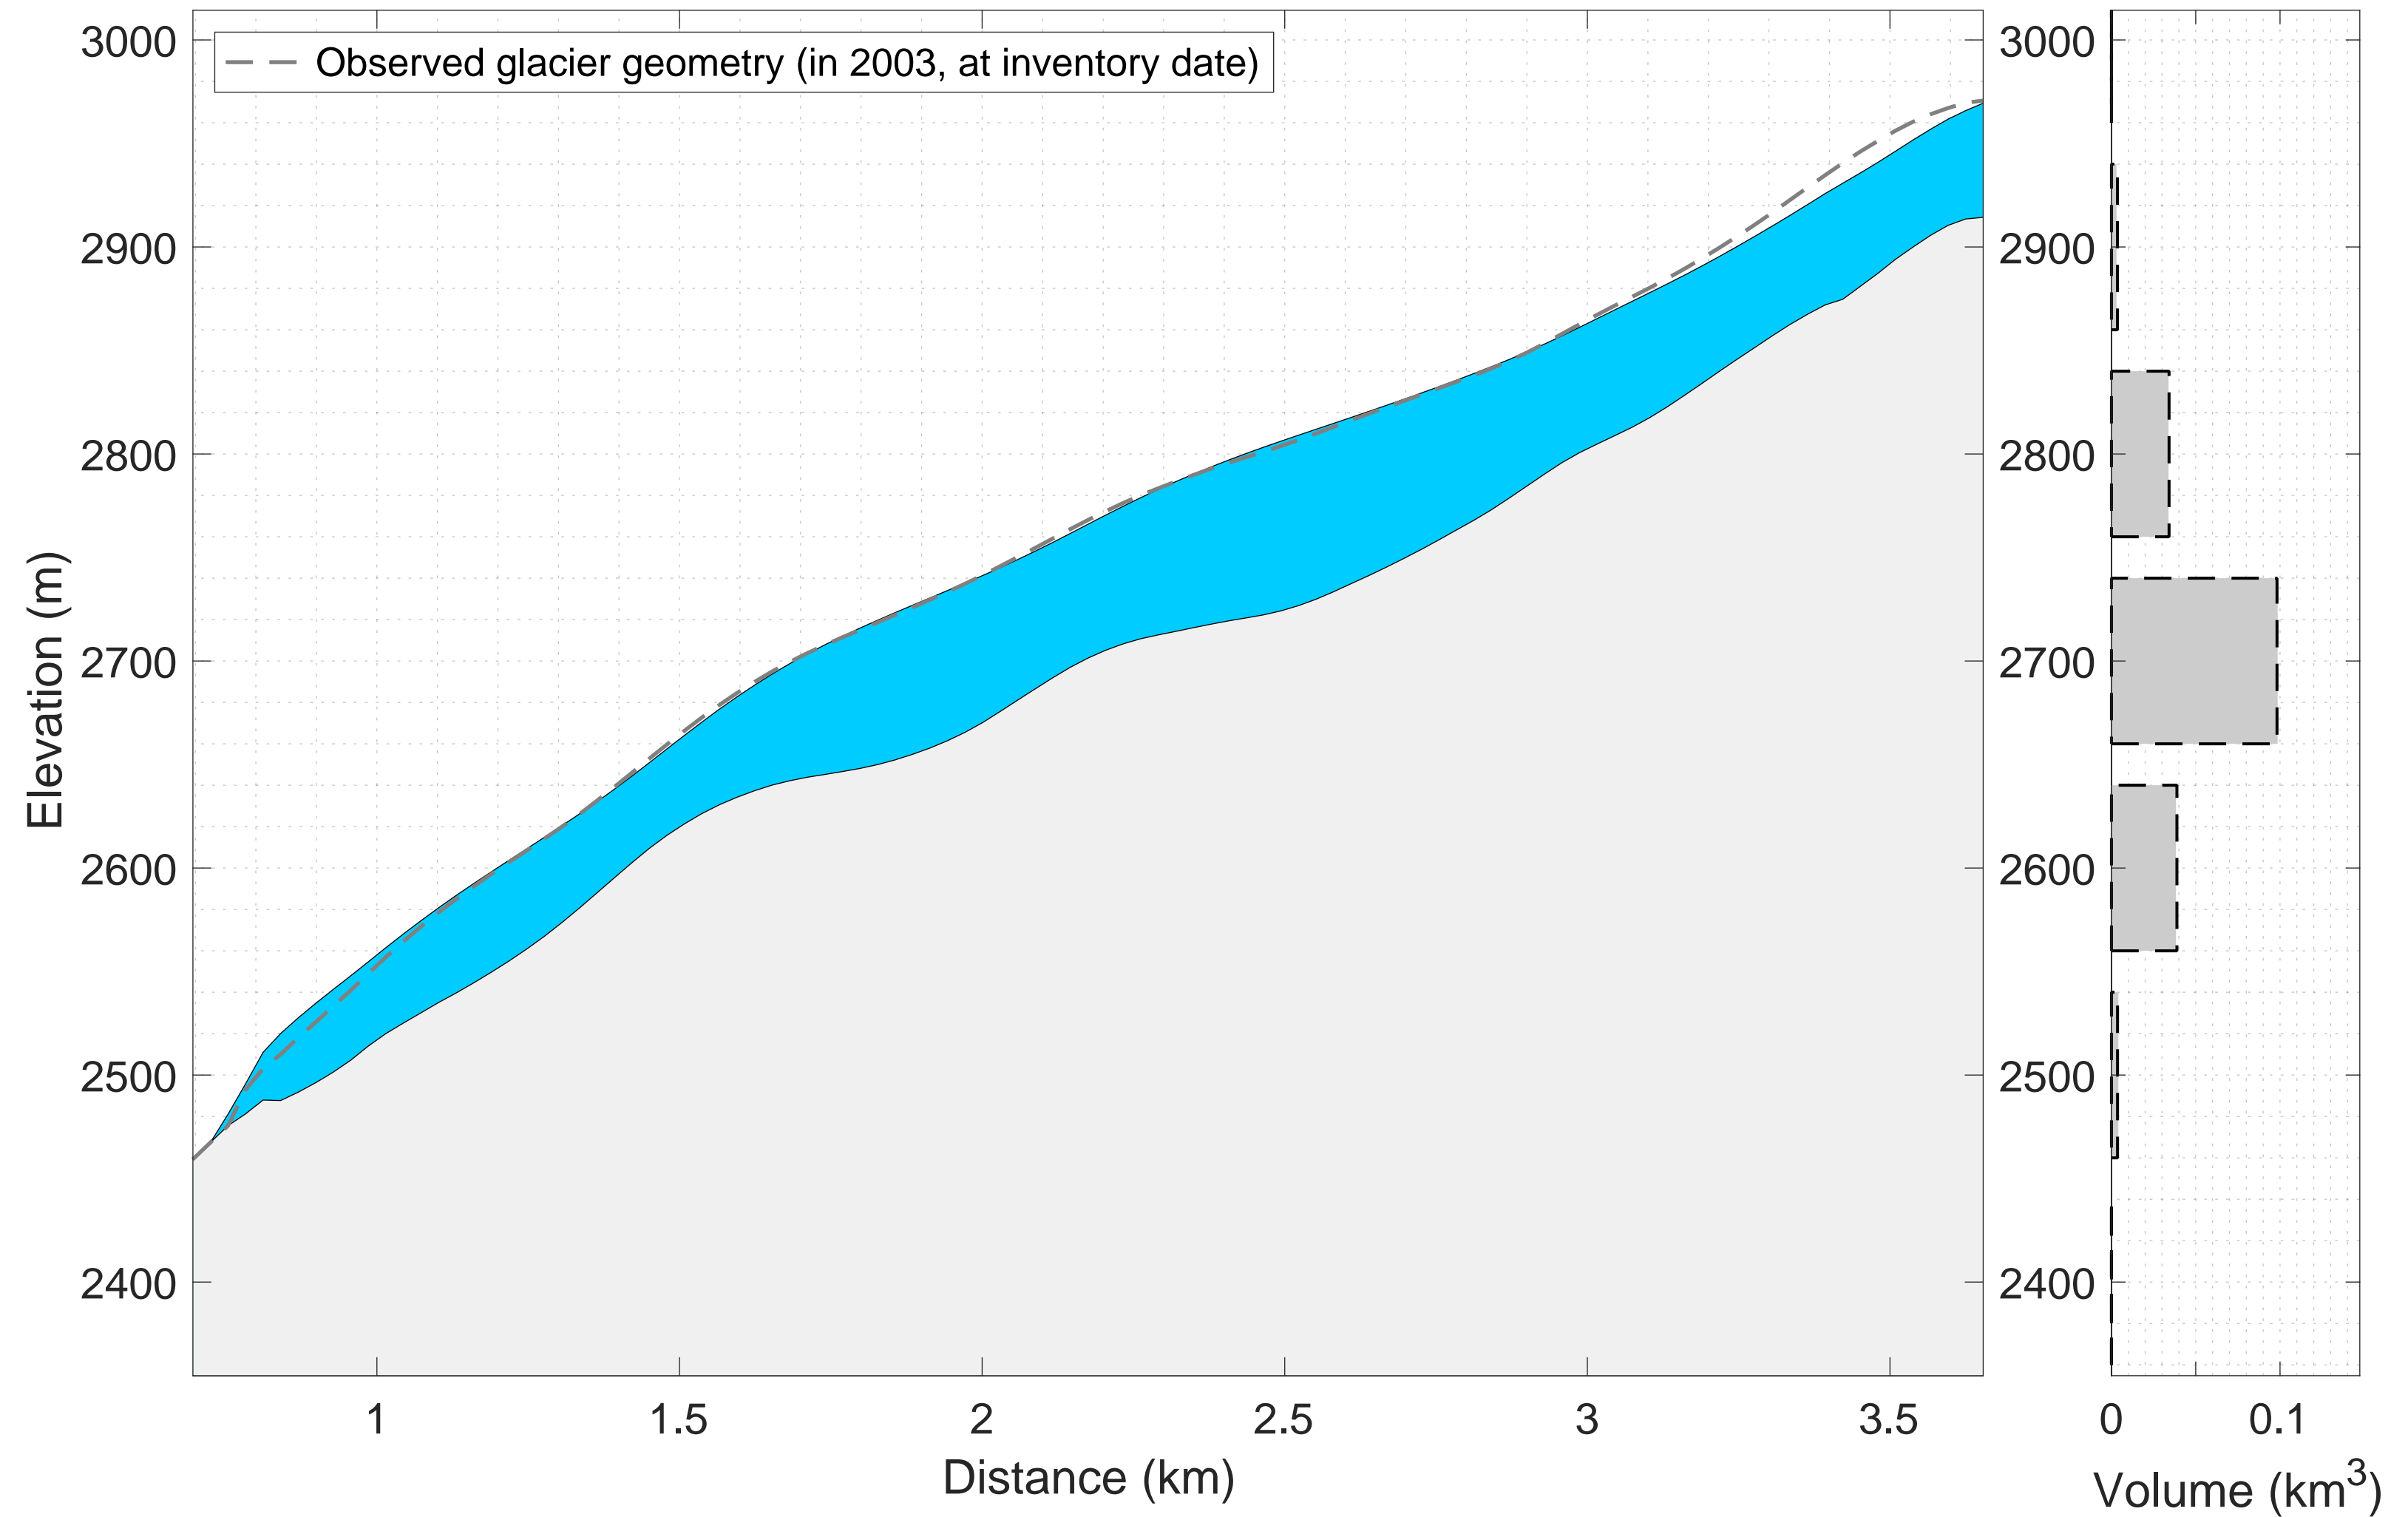

Supplement: Supplementary file 347 [file tc-13-1125-2019-supplement.zip]

**Modelled geometry (Glacier ID = 02929;  $A = 1.3325\text{e-}16 \text{ Pa}^{-3} \text{ a}^{-1}$ ;  $dx = 14 \text{ m}$ )**

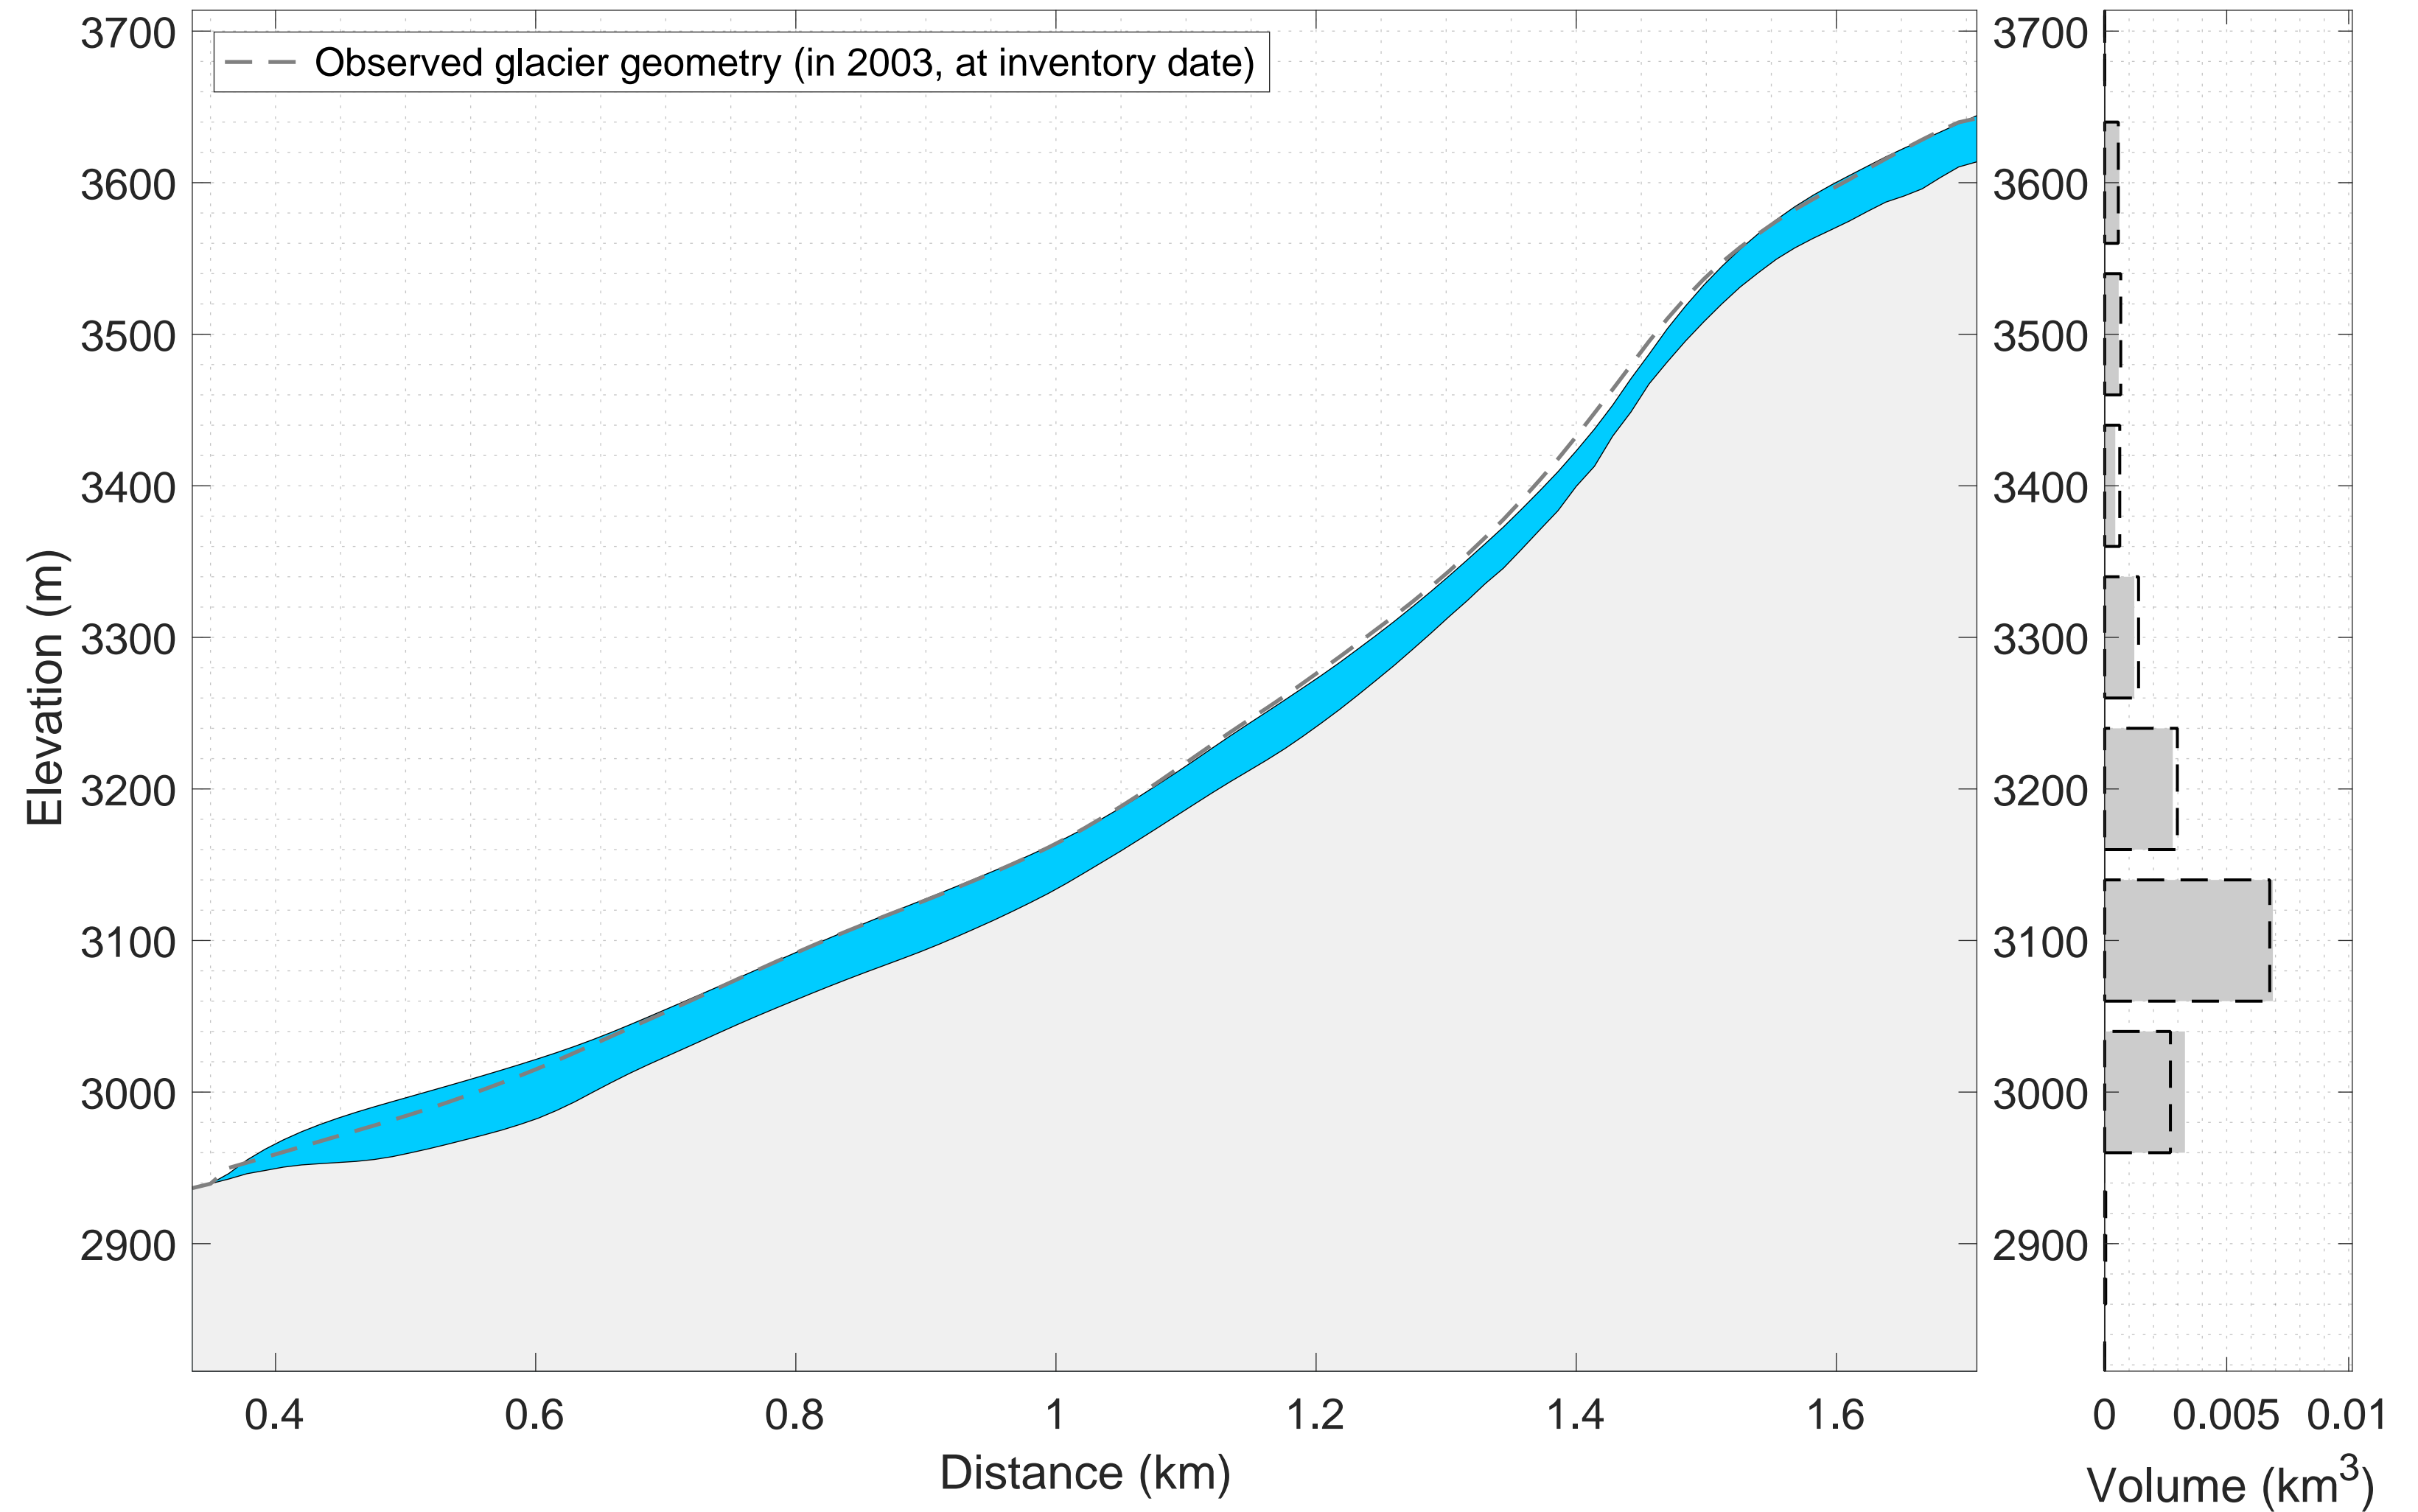

Supplement: Supplementary file 348 [file tc-13-1125-2019-supplement.zip]

**Modelled geometry (Glacier ID = 02586;  $A = 1.703\text{e-}16 \text{ Pa}^{-3} \text{ a}^{-1}$ ;  $dx = 29 \text{ m}$ )**

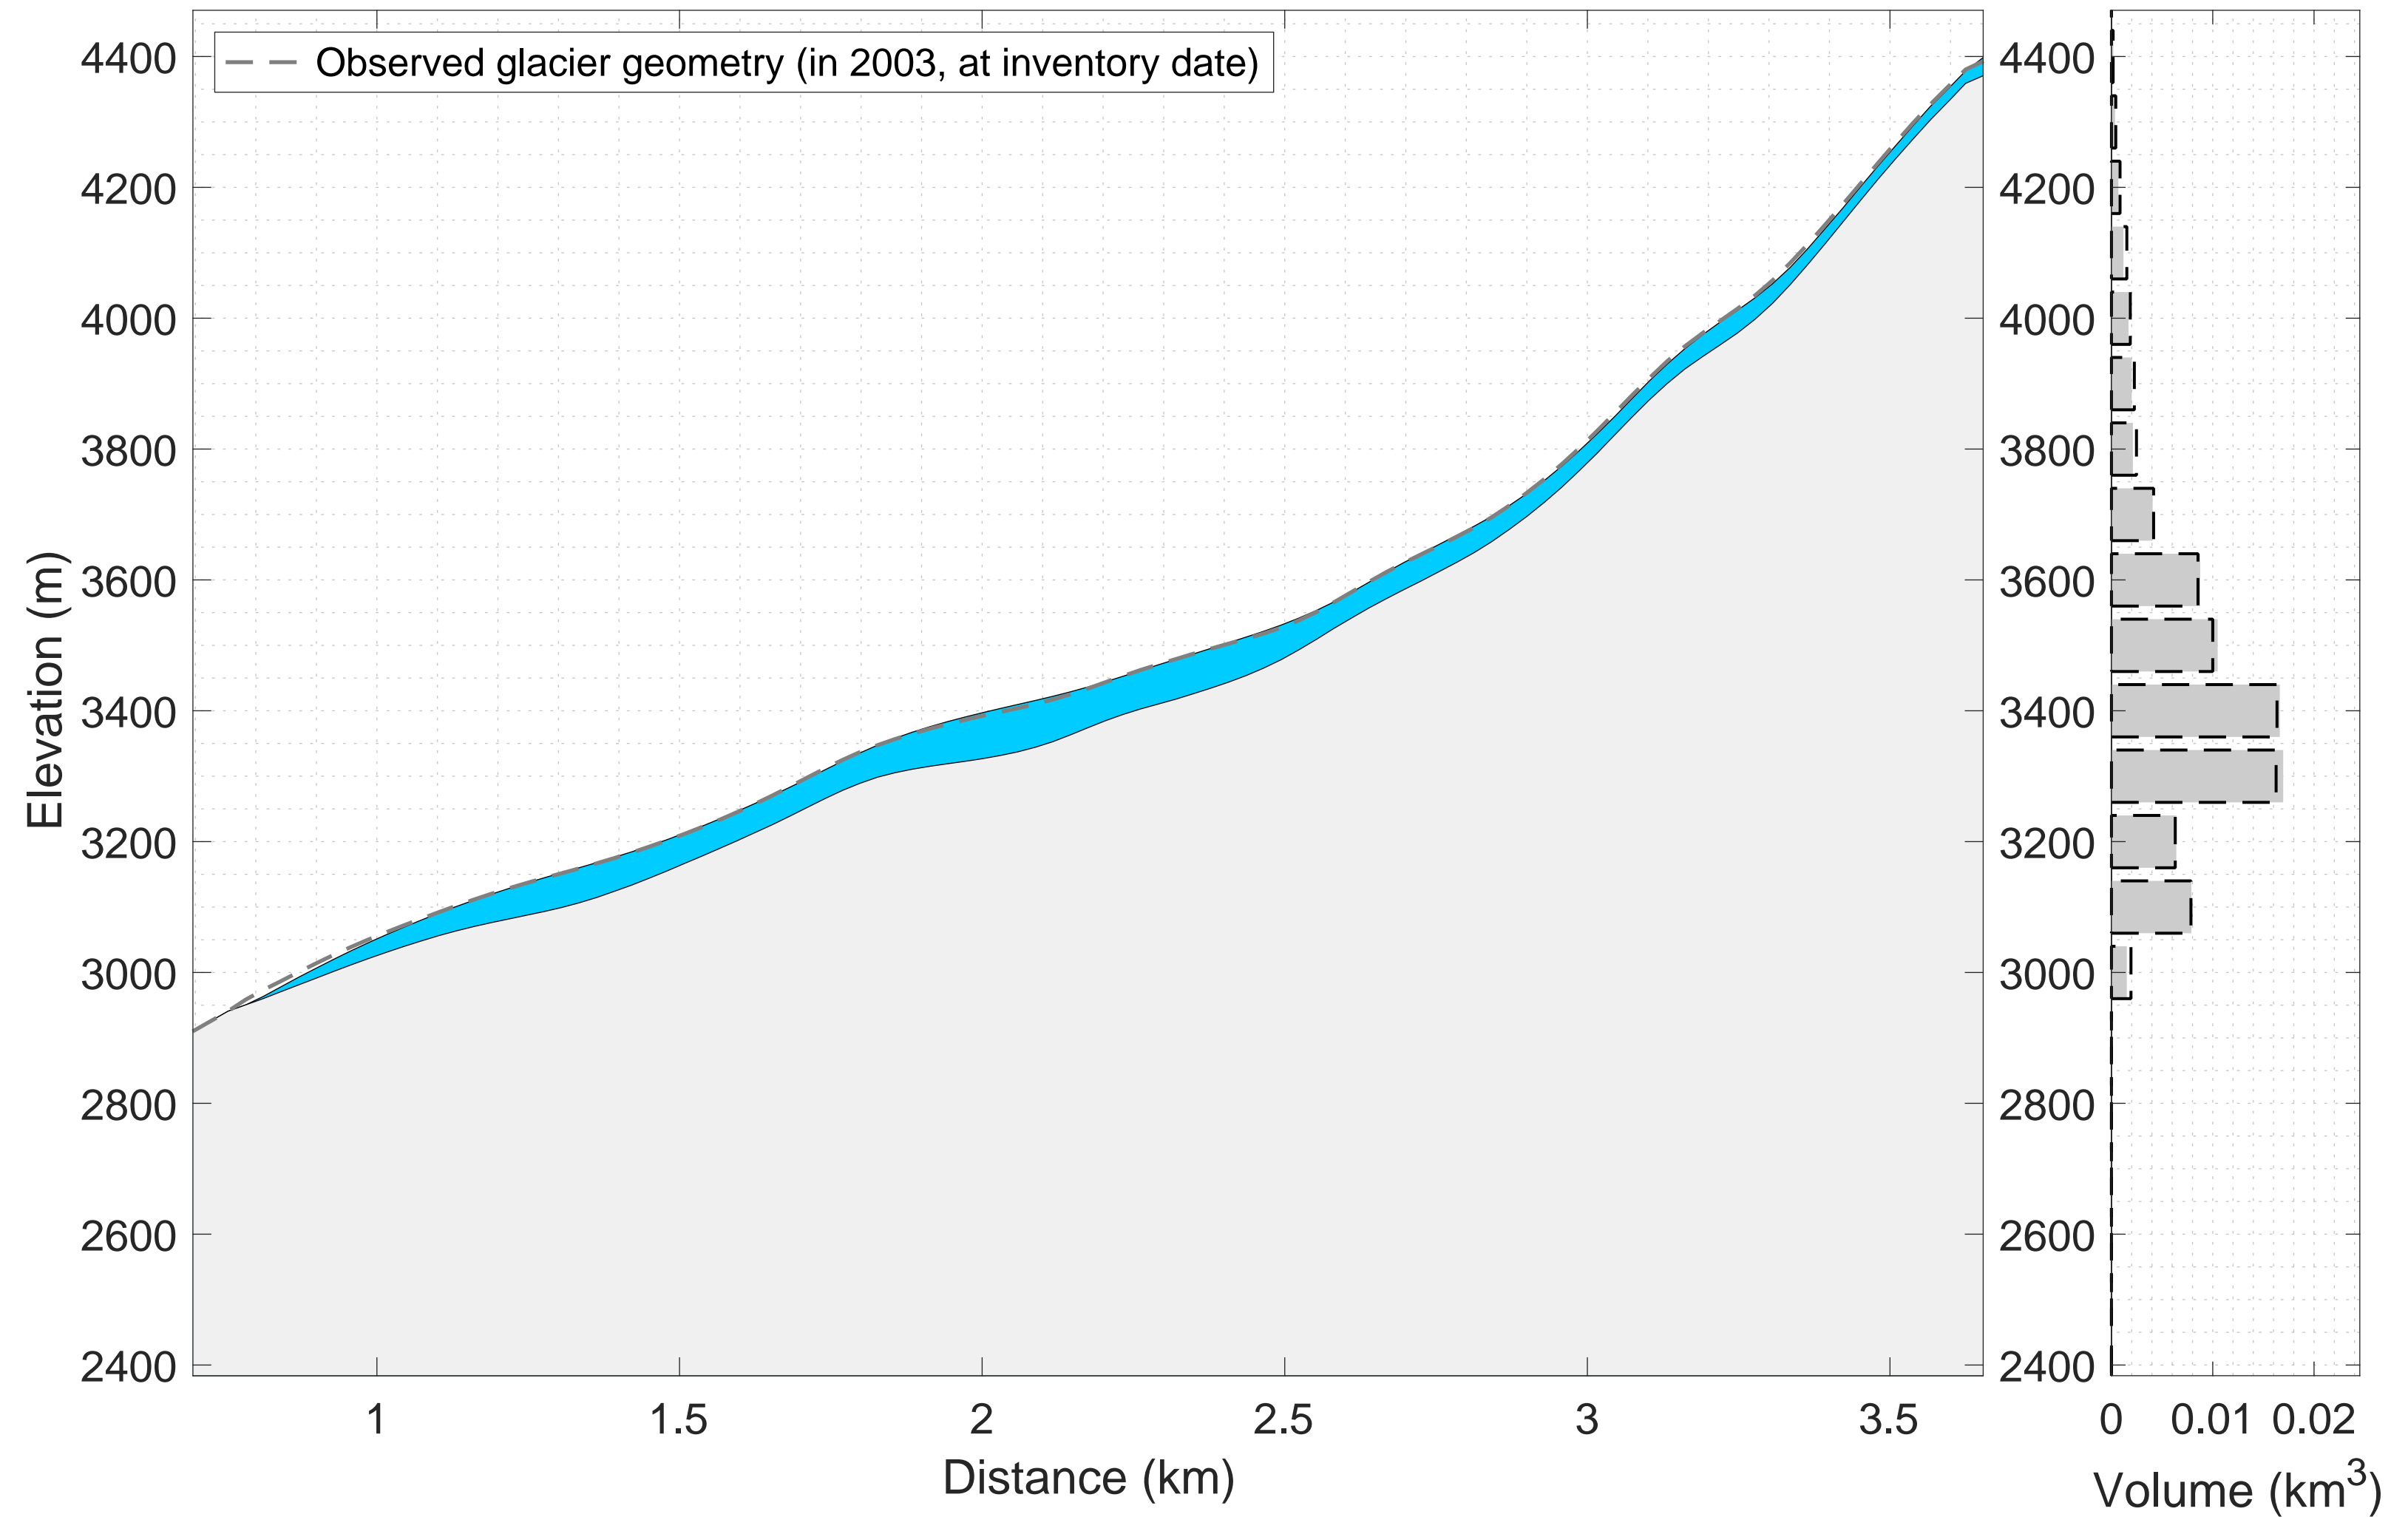

Supplement: Supplementary file 349 [file tc-13-1125-2019-supplement.zip]

**Modelled geometry (Glacier ID = 00021;  $A = 2.1554\text{e-}16 \text{ Pa}^{-3} \text{ a}^{-1}$ ;  $dx = 11 \text{ m}$ )**

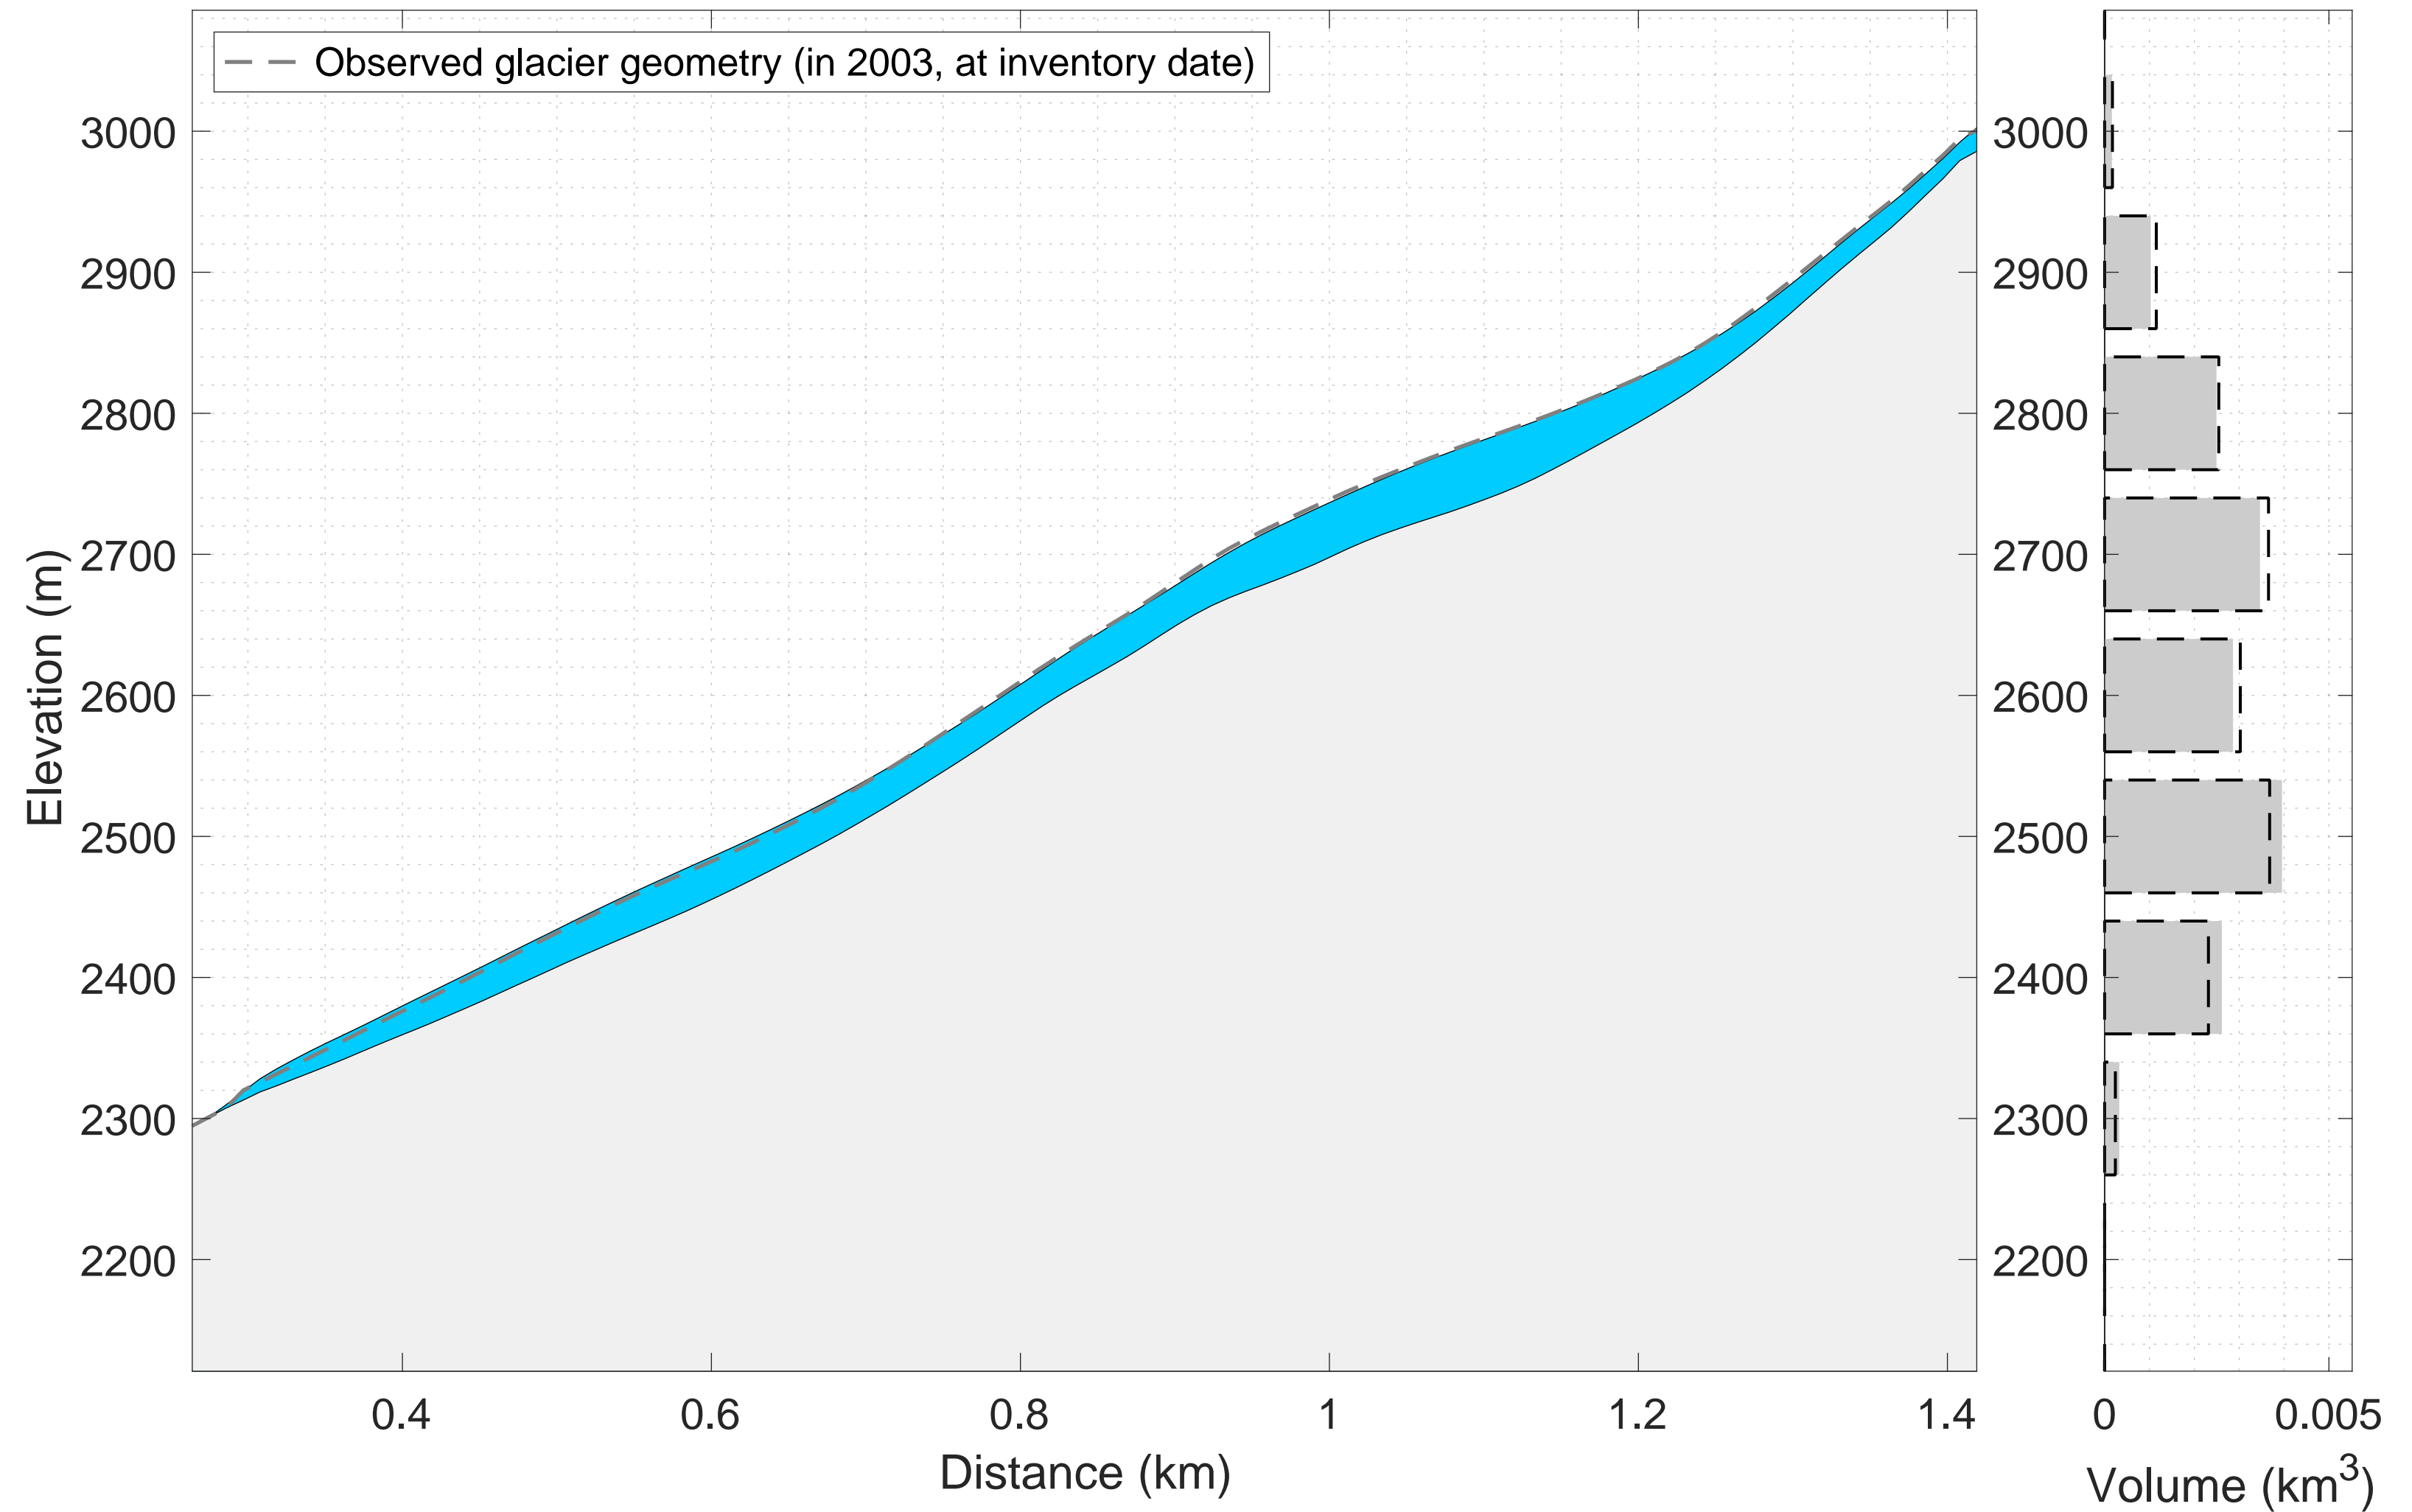

Supplement: Supplementary file 350 [file tc-13-1125-2019-supplement.zip]

**Modelled geometry (Glacier ID = 03693;  $A = 1.3748\text{e-}16 \text{ Pa}^{-3} \text{ a}^{-1}$ ;  $dx = 12 \text{ m}$ )**

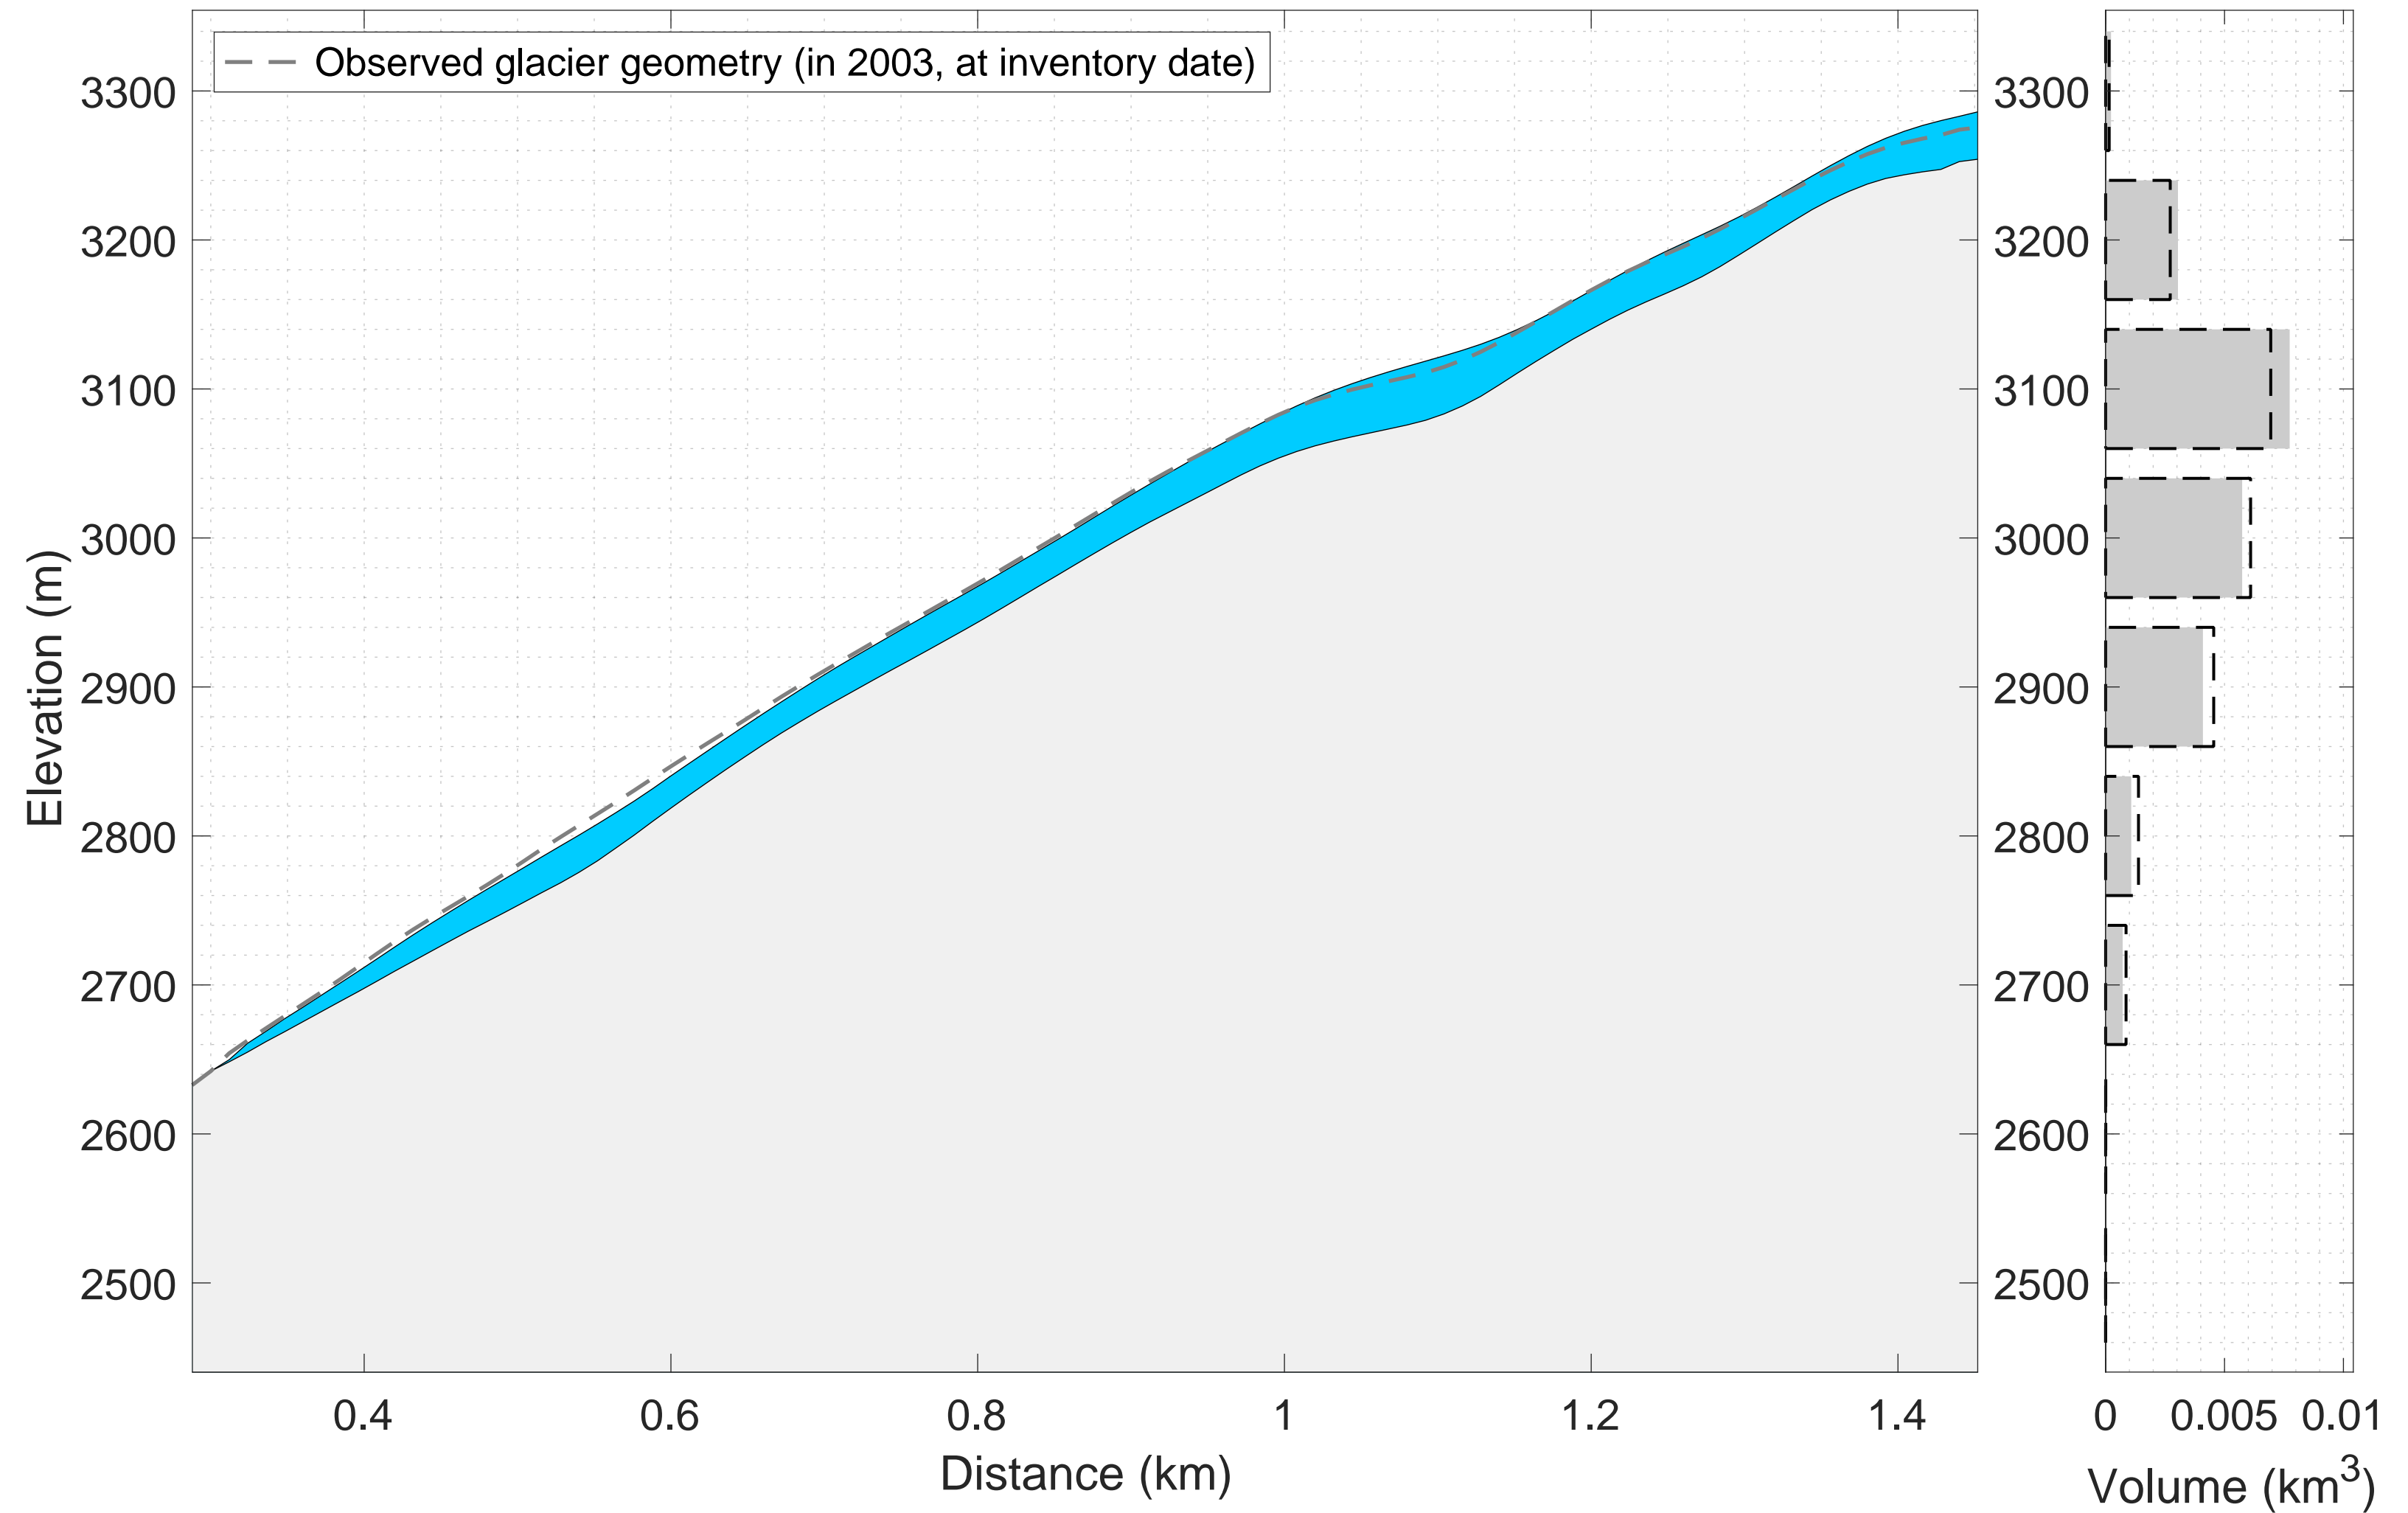

Supplement: Supplementary file 351 [file tc-13-1125-2019-supplement.zip]

**Modelled geometry (Glacier ID = 03297;  $A = 1.648\text{e-}16 \text{ Pa}^{-3} \text{ a}^{-1}$ ;  $dx = 22 \text{ m}$ )**

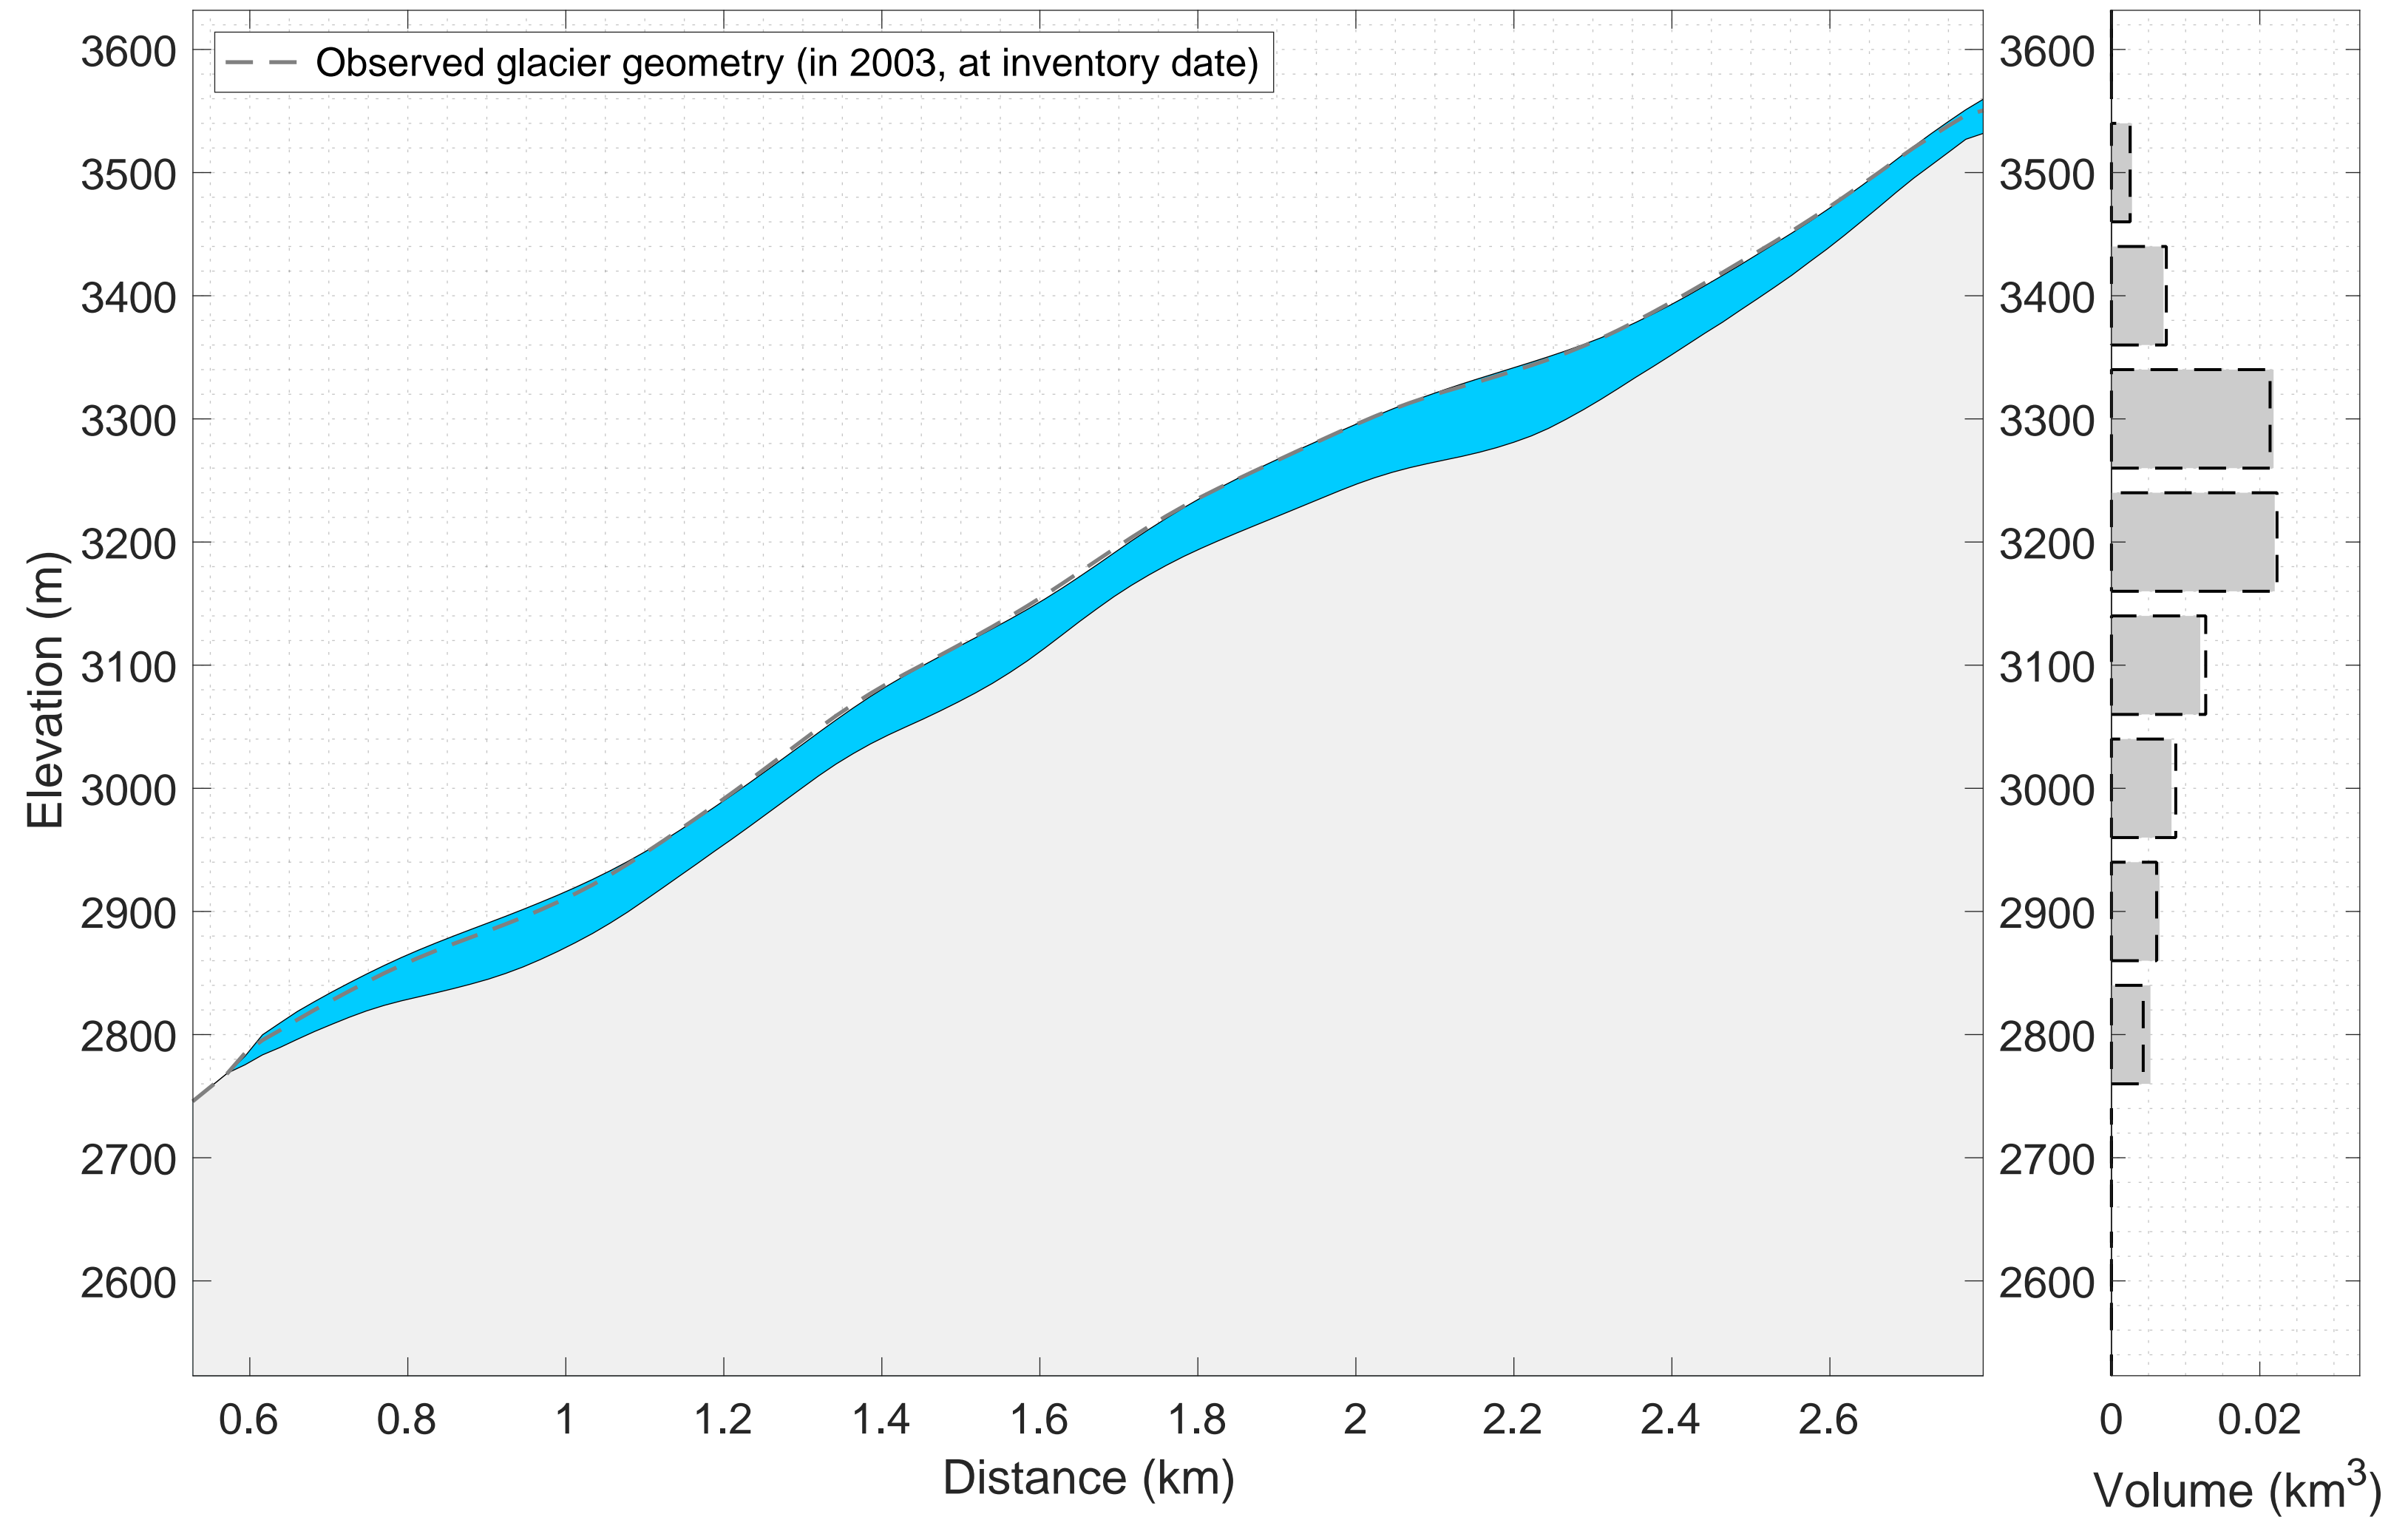

Supplement: Supplementary file 352 [file tc-13-1125-2019-supplement.zip]

**Modelled geometry (Glacier ID = 00476;  $A = 1.1292\text{e-}16 \text{ Pa}^{-3} \text{ a}^{-1}$ ;  $dx = 16 \text{ m}$ )**

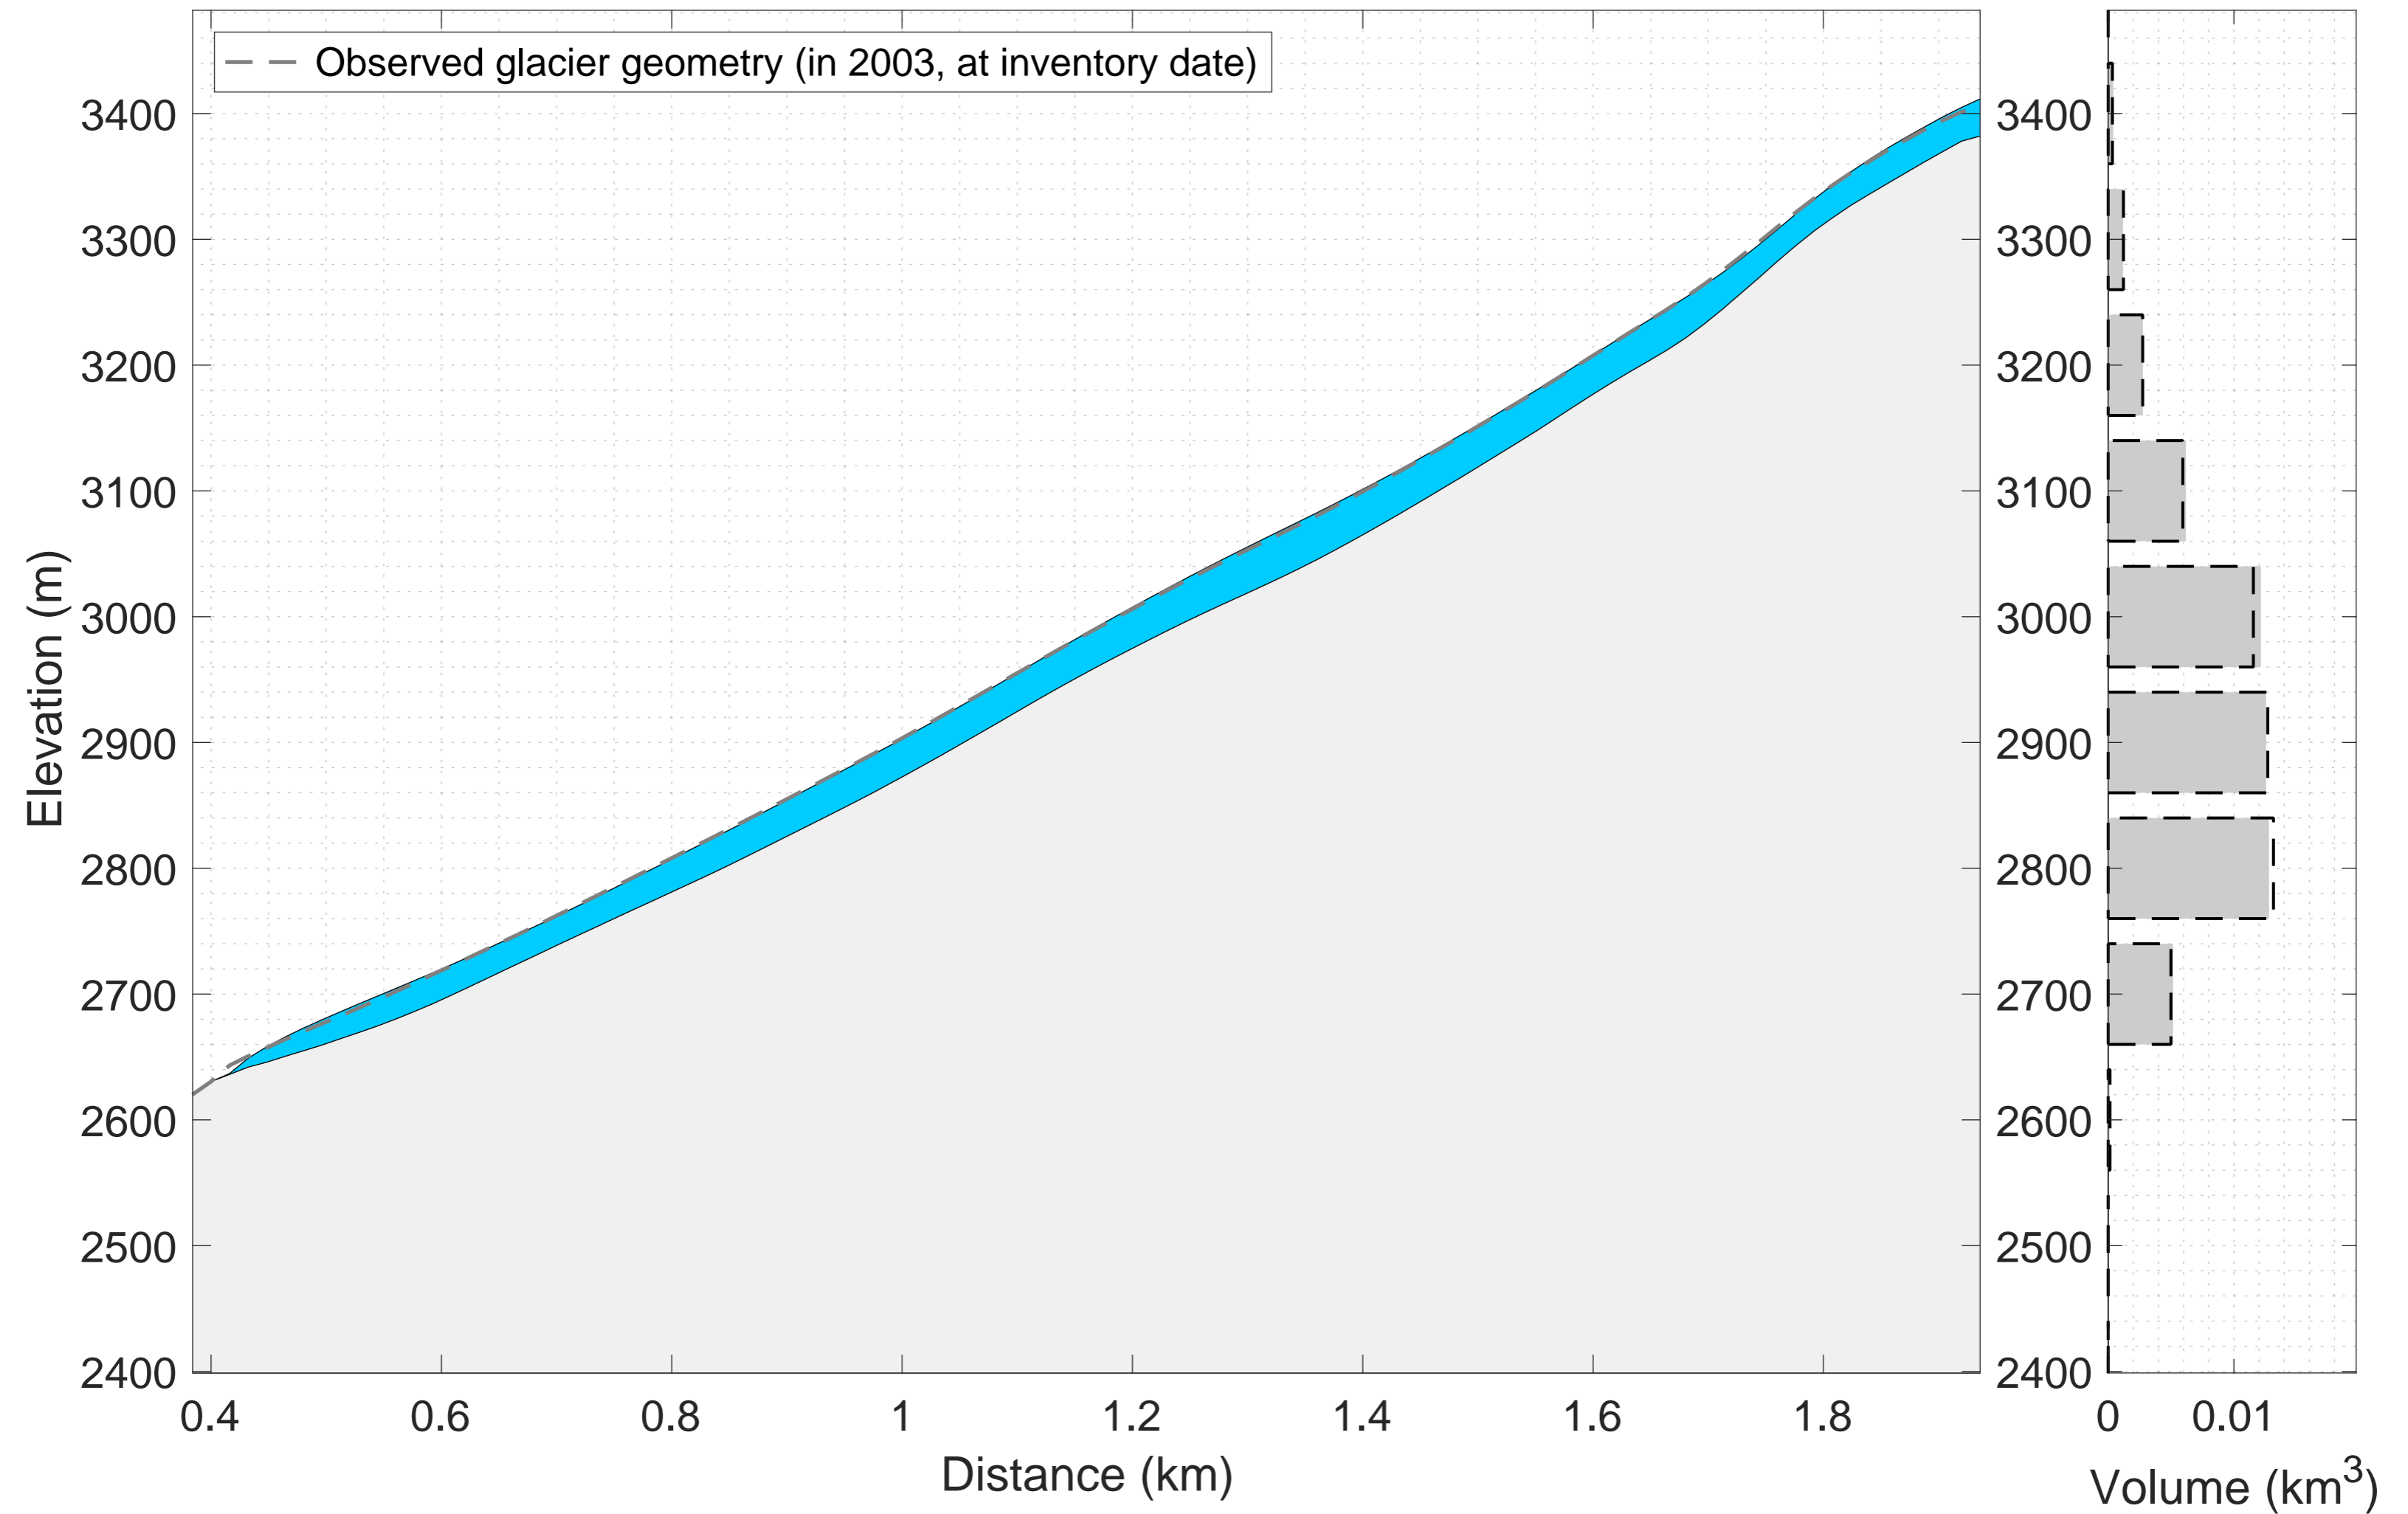

Supplement: Supplementary file 353 [file tc-13-1125-2019-supplement.zip]

**Modelled geometry (Glacier ID = 03452;  $A = 1.0197\text{e-}16 \text{ Pa}^{-3} \text{ a}^{-1}$ ;  $dx = 20 \text{ m}$ )**

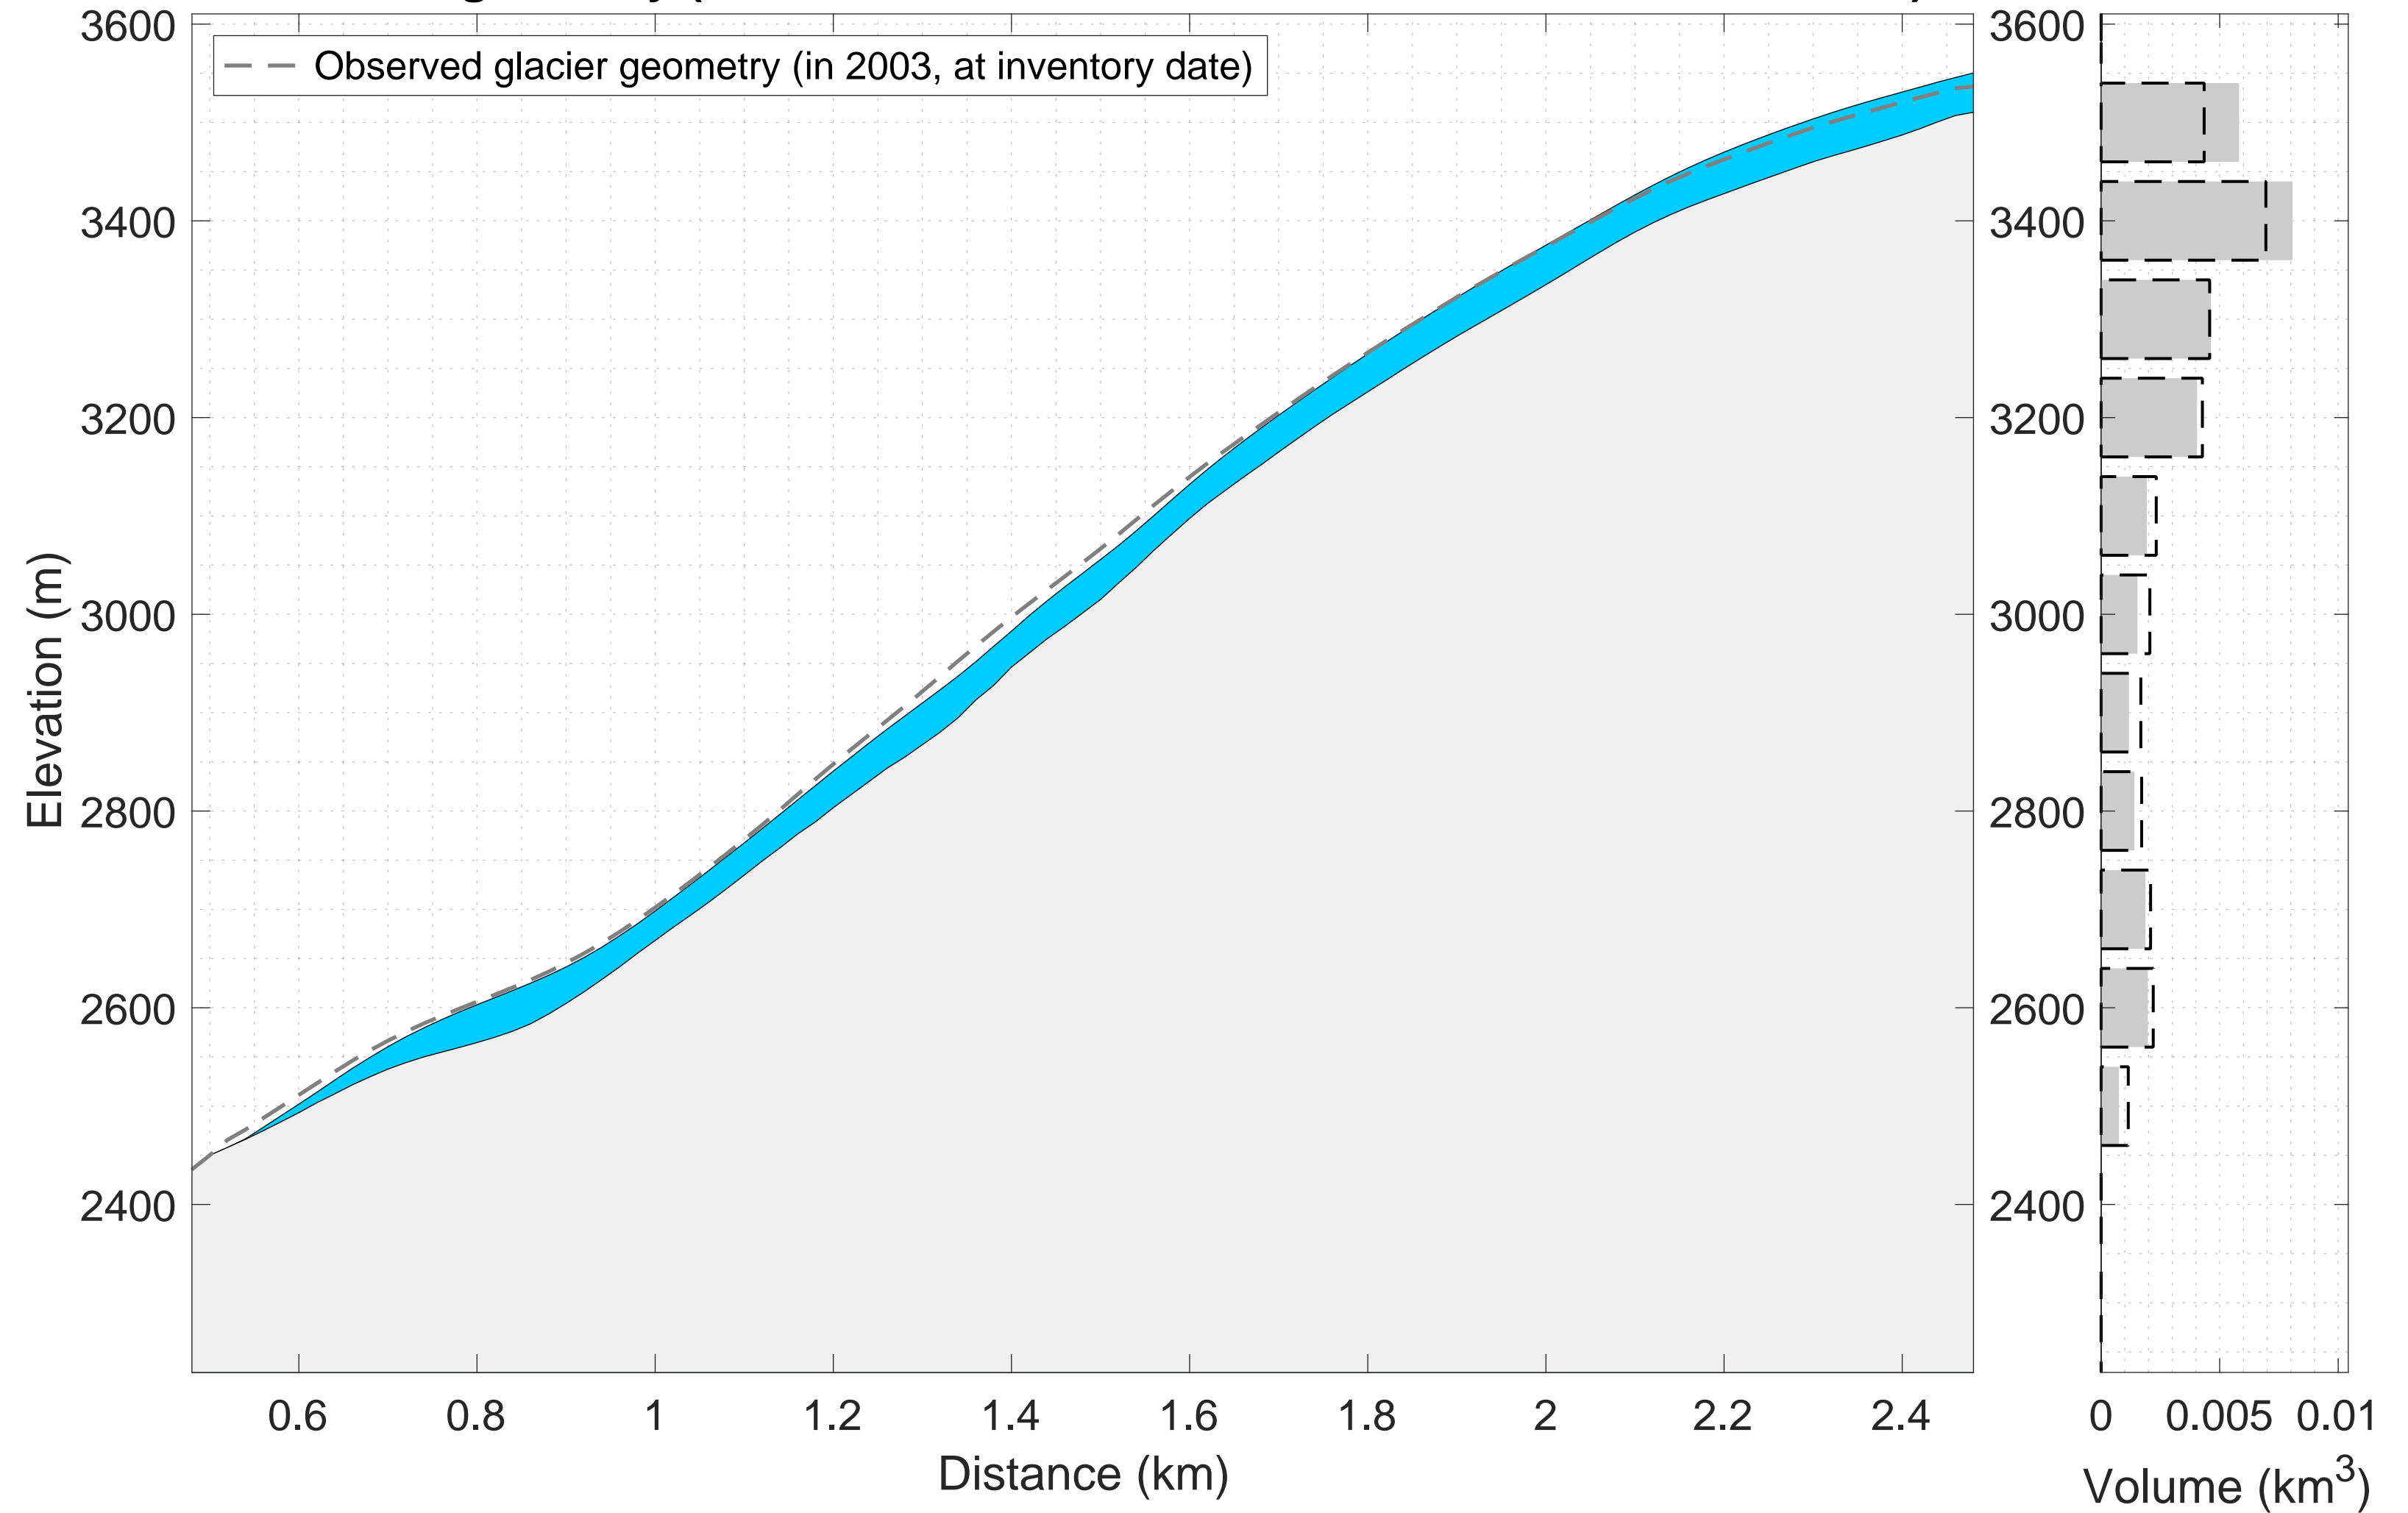

Supplement: Supplementary file 354 [file tc-13-1125-2019-supplement.zip]

**Modelled geometry (Glacier ID = 00054;  $A = 7.4525\text{e-}17 \text{ Pa}^{-3} \text{ a}^{-1}$ ;  $dx = 18 \text{ m}$ )**

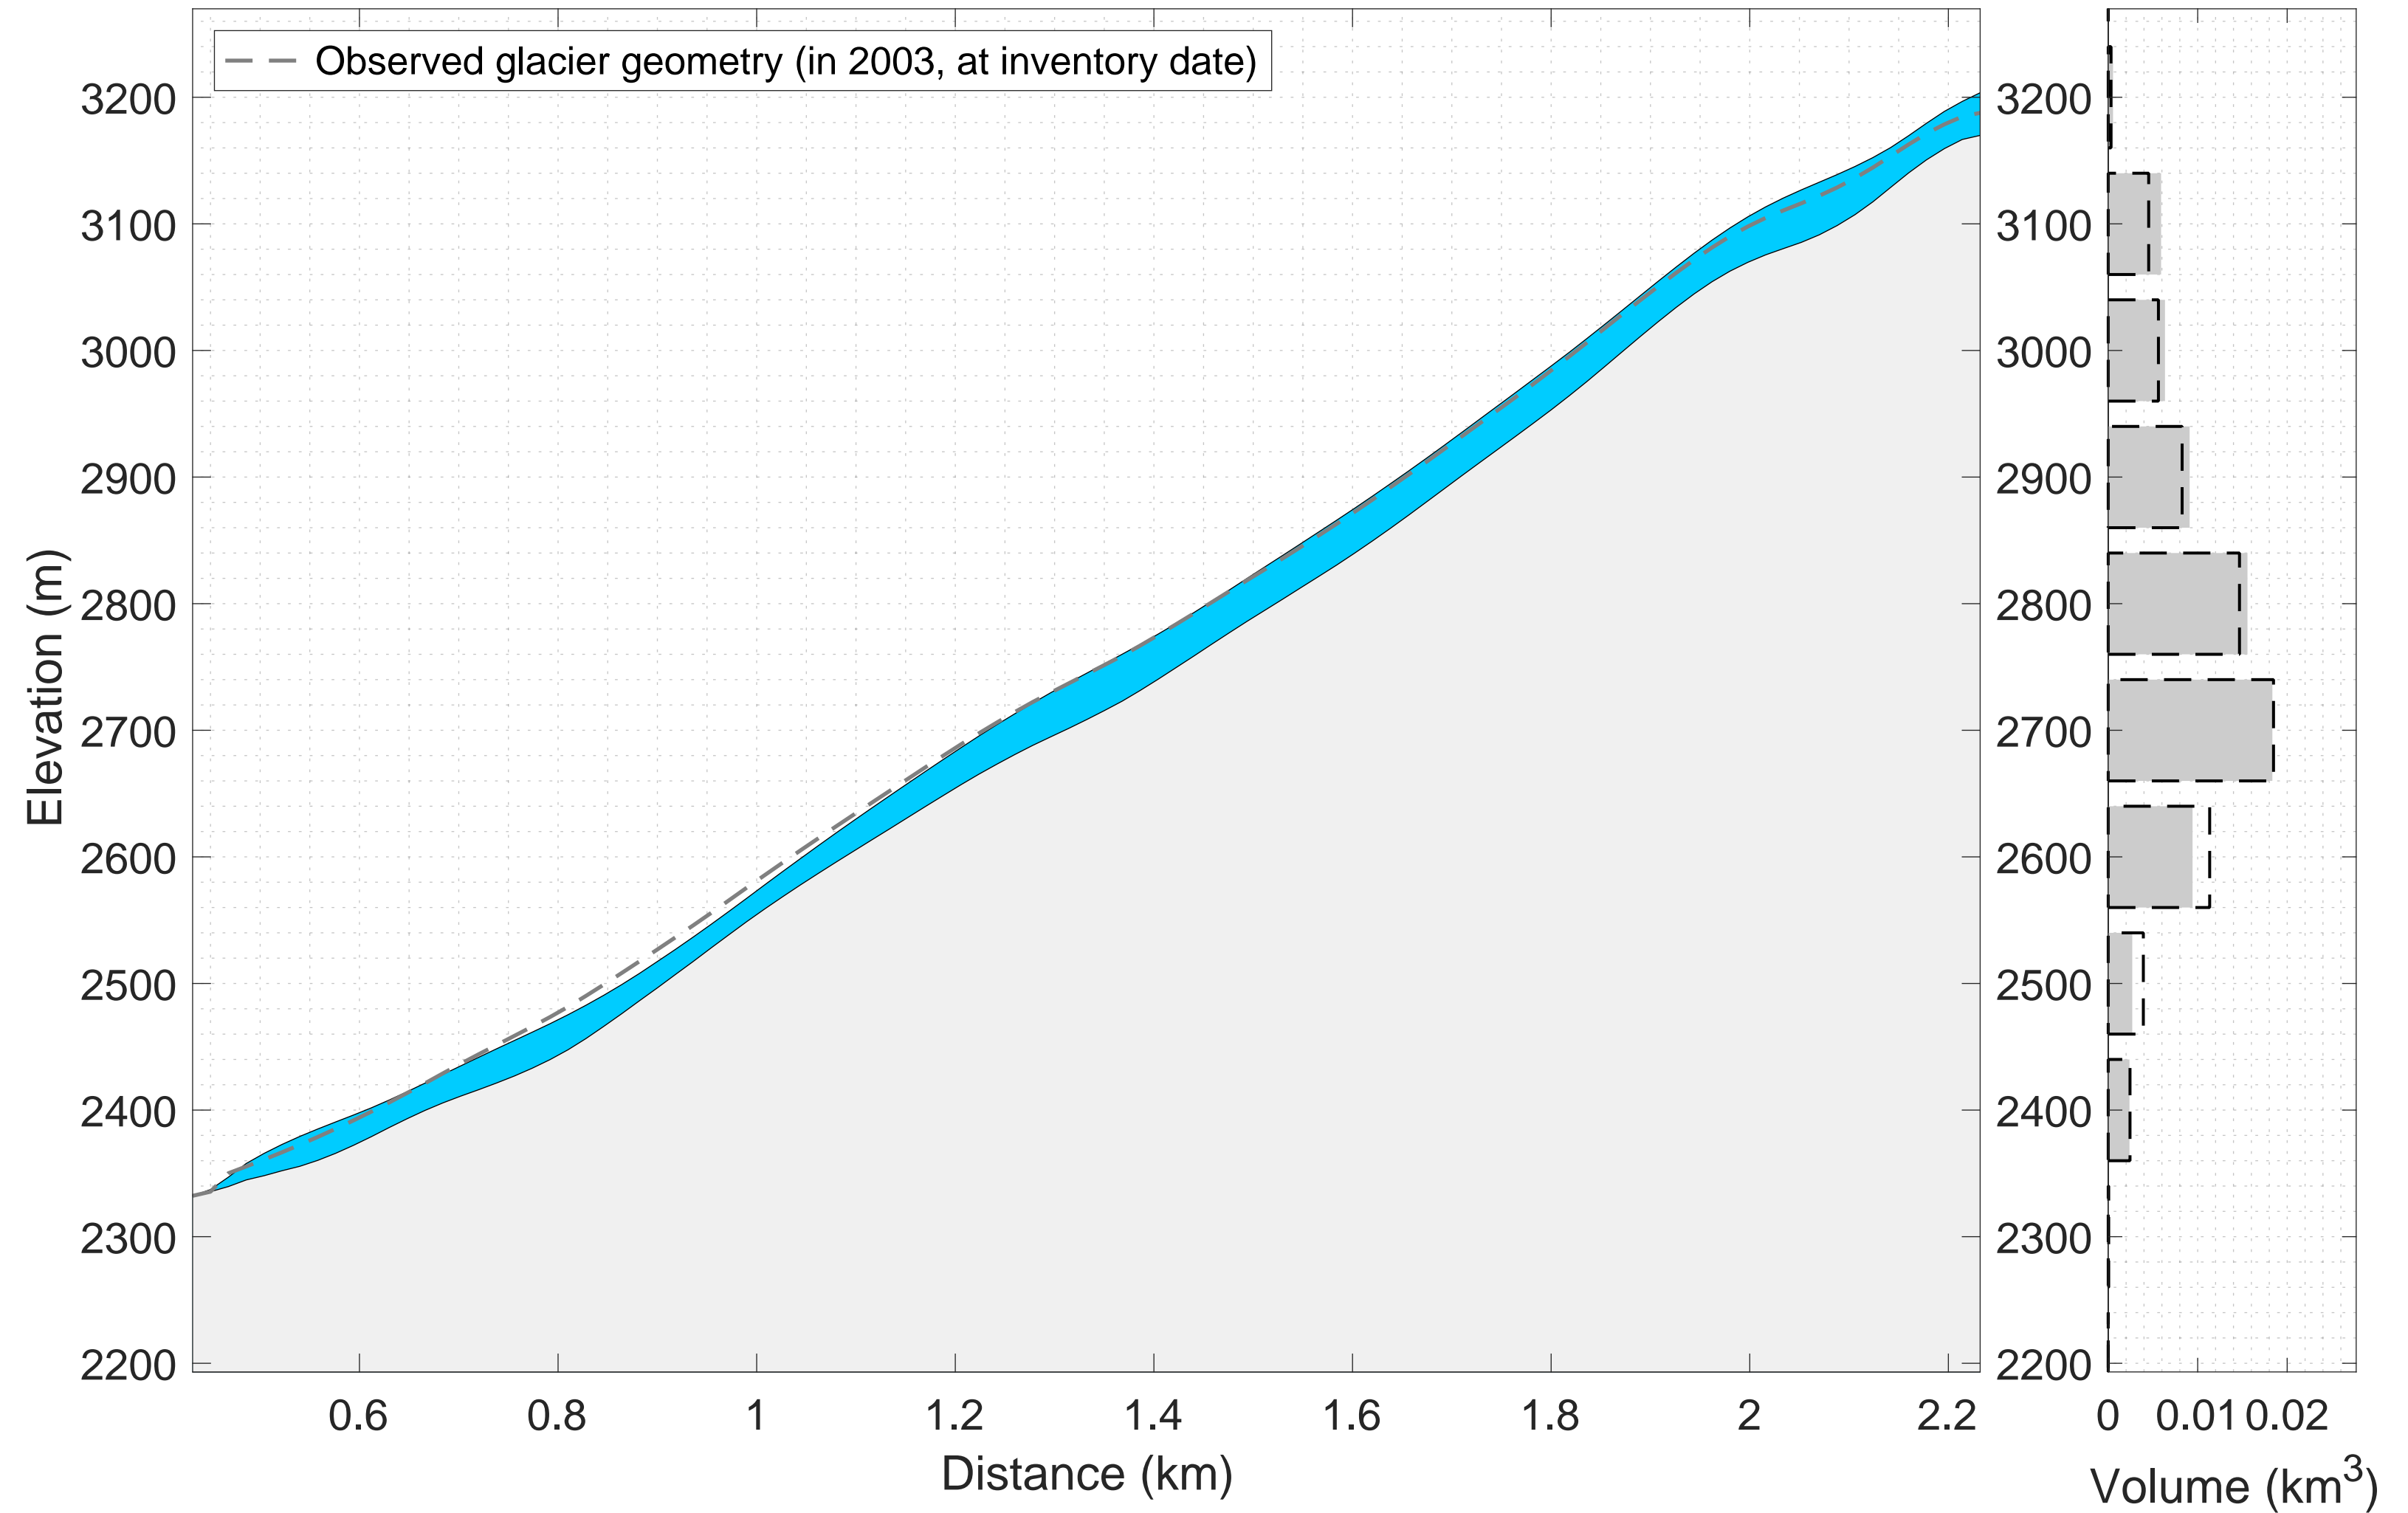

Supplement: Supplementary file 355 [file tc-13-1125-2019-supplement.zip]

**Modelled geometry (Glacier ID = 01473;  $A = 1.2684\text{e-}16 \text{ Pa}^{-3} \text{ a}^{-1}$ ;  $dx = 28 \text{ m}$ )**

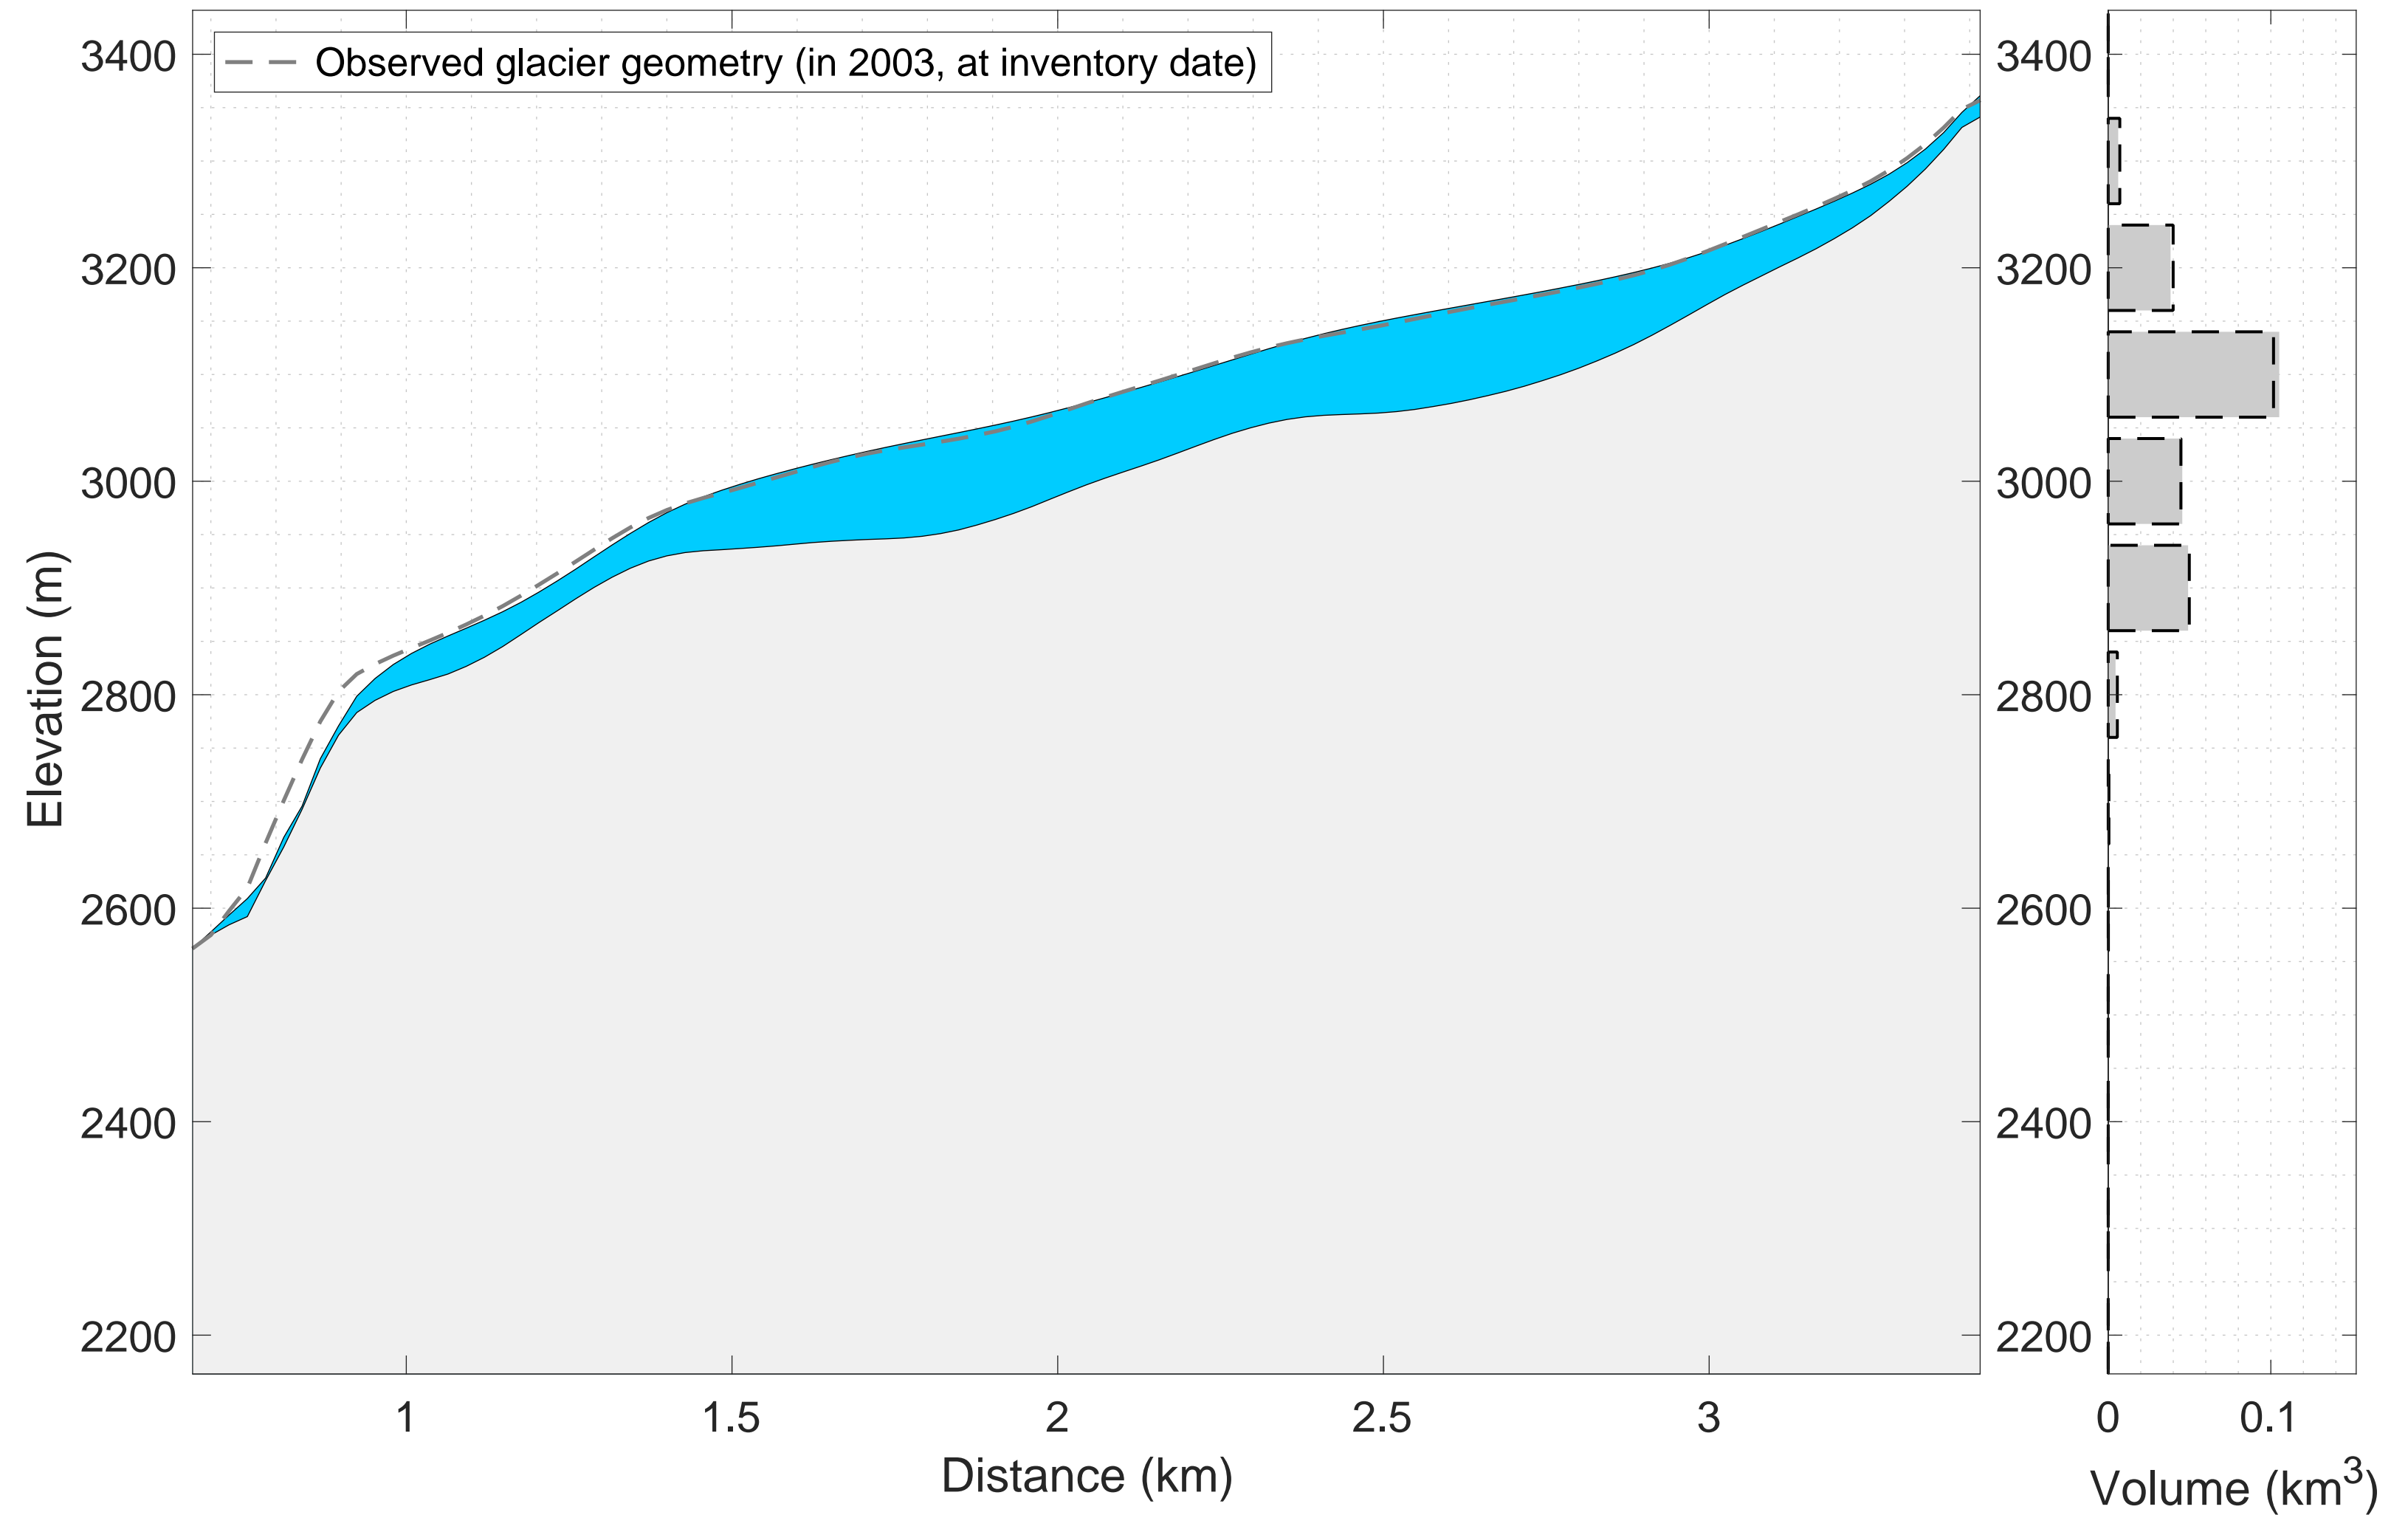

Supplement: Supplementary file 356 [file tc-13-1125-2019-supplement.zip]

**Modelled geometry (Glacier ID = 02073;  $A = 5.6642\text{e-}17 \text{ Pa}^{-3} \text{ a}^{-1}$ ;  $dx = 17 \text{ m}$ )**

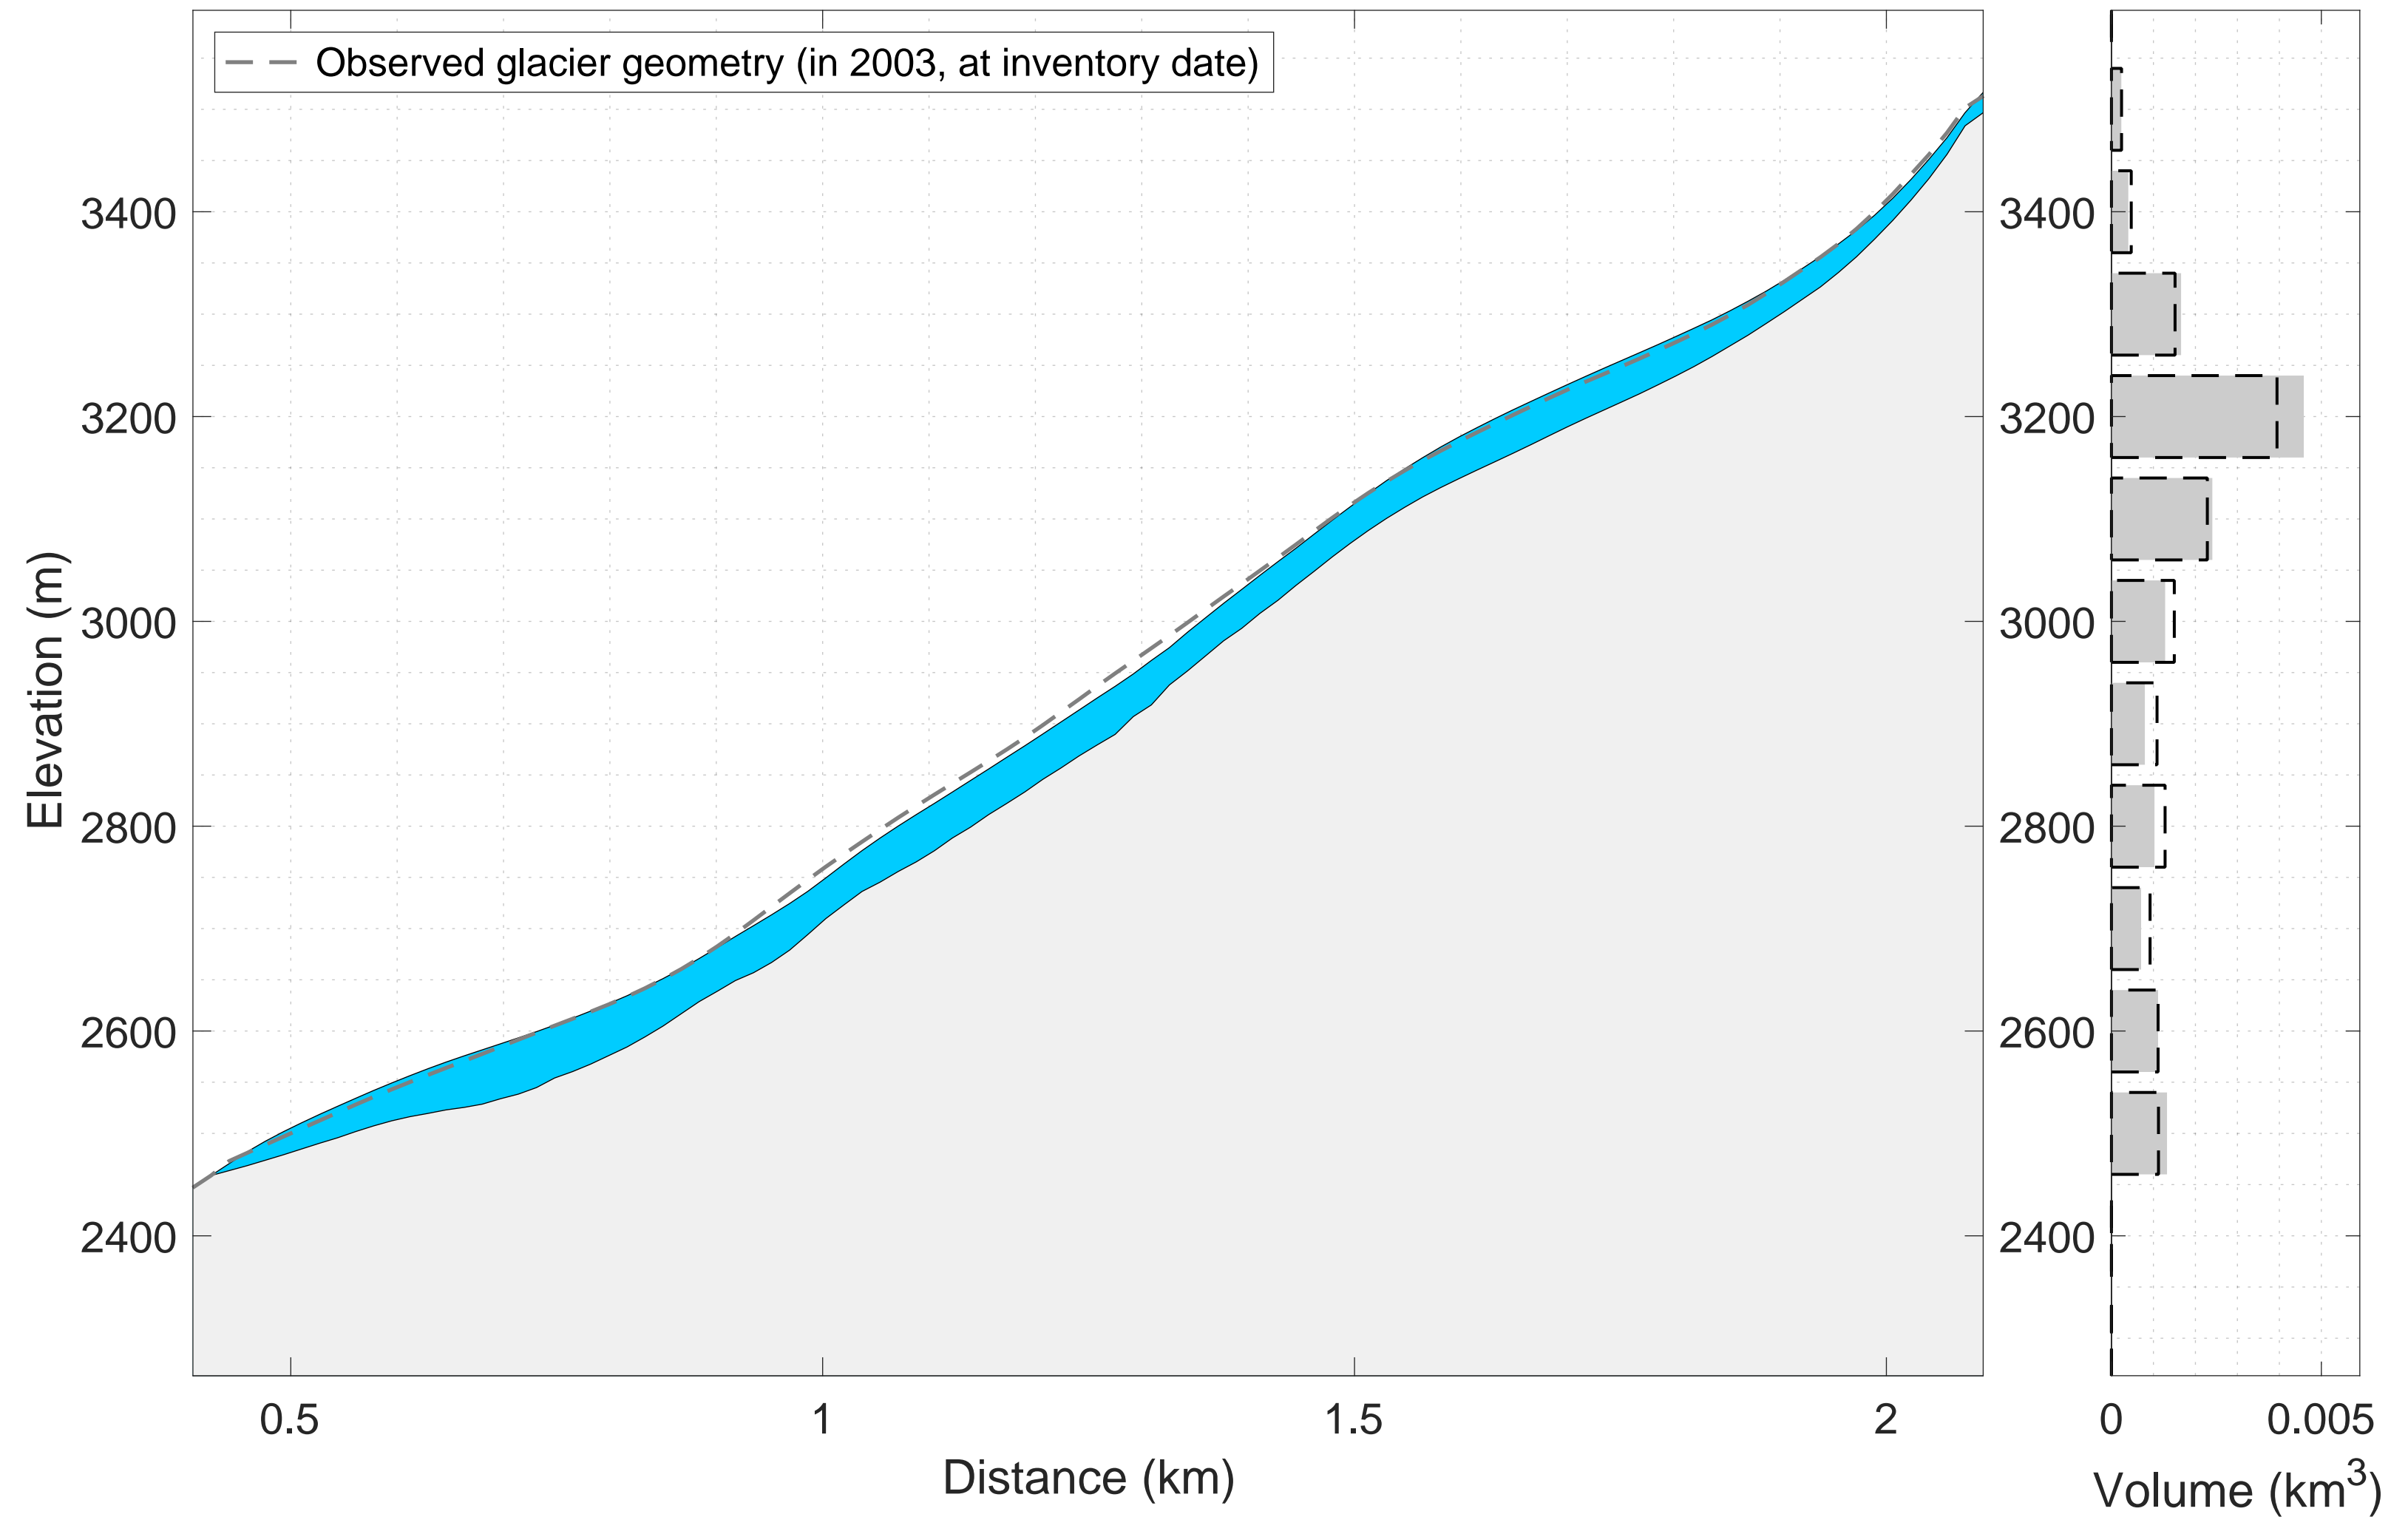

Supplement: Supplementary file 357 [file tc-13-1125-2019-supplement.zip]

**Modelled geometry (Glacier ID = 01489;  $A = 4.5834\text{e-}17 \text{ Pa}^{-3} \text{ a}^{-1}$ ;  $dx = 11 \text{ m}$ )**

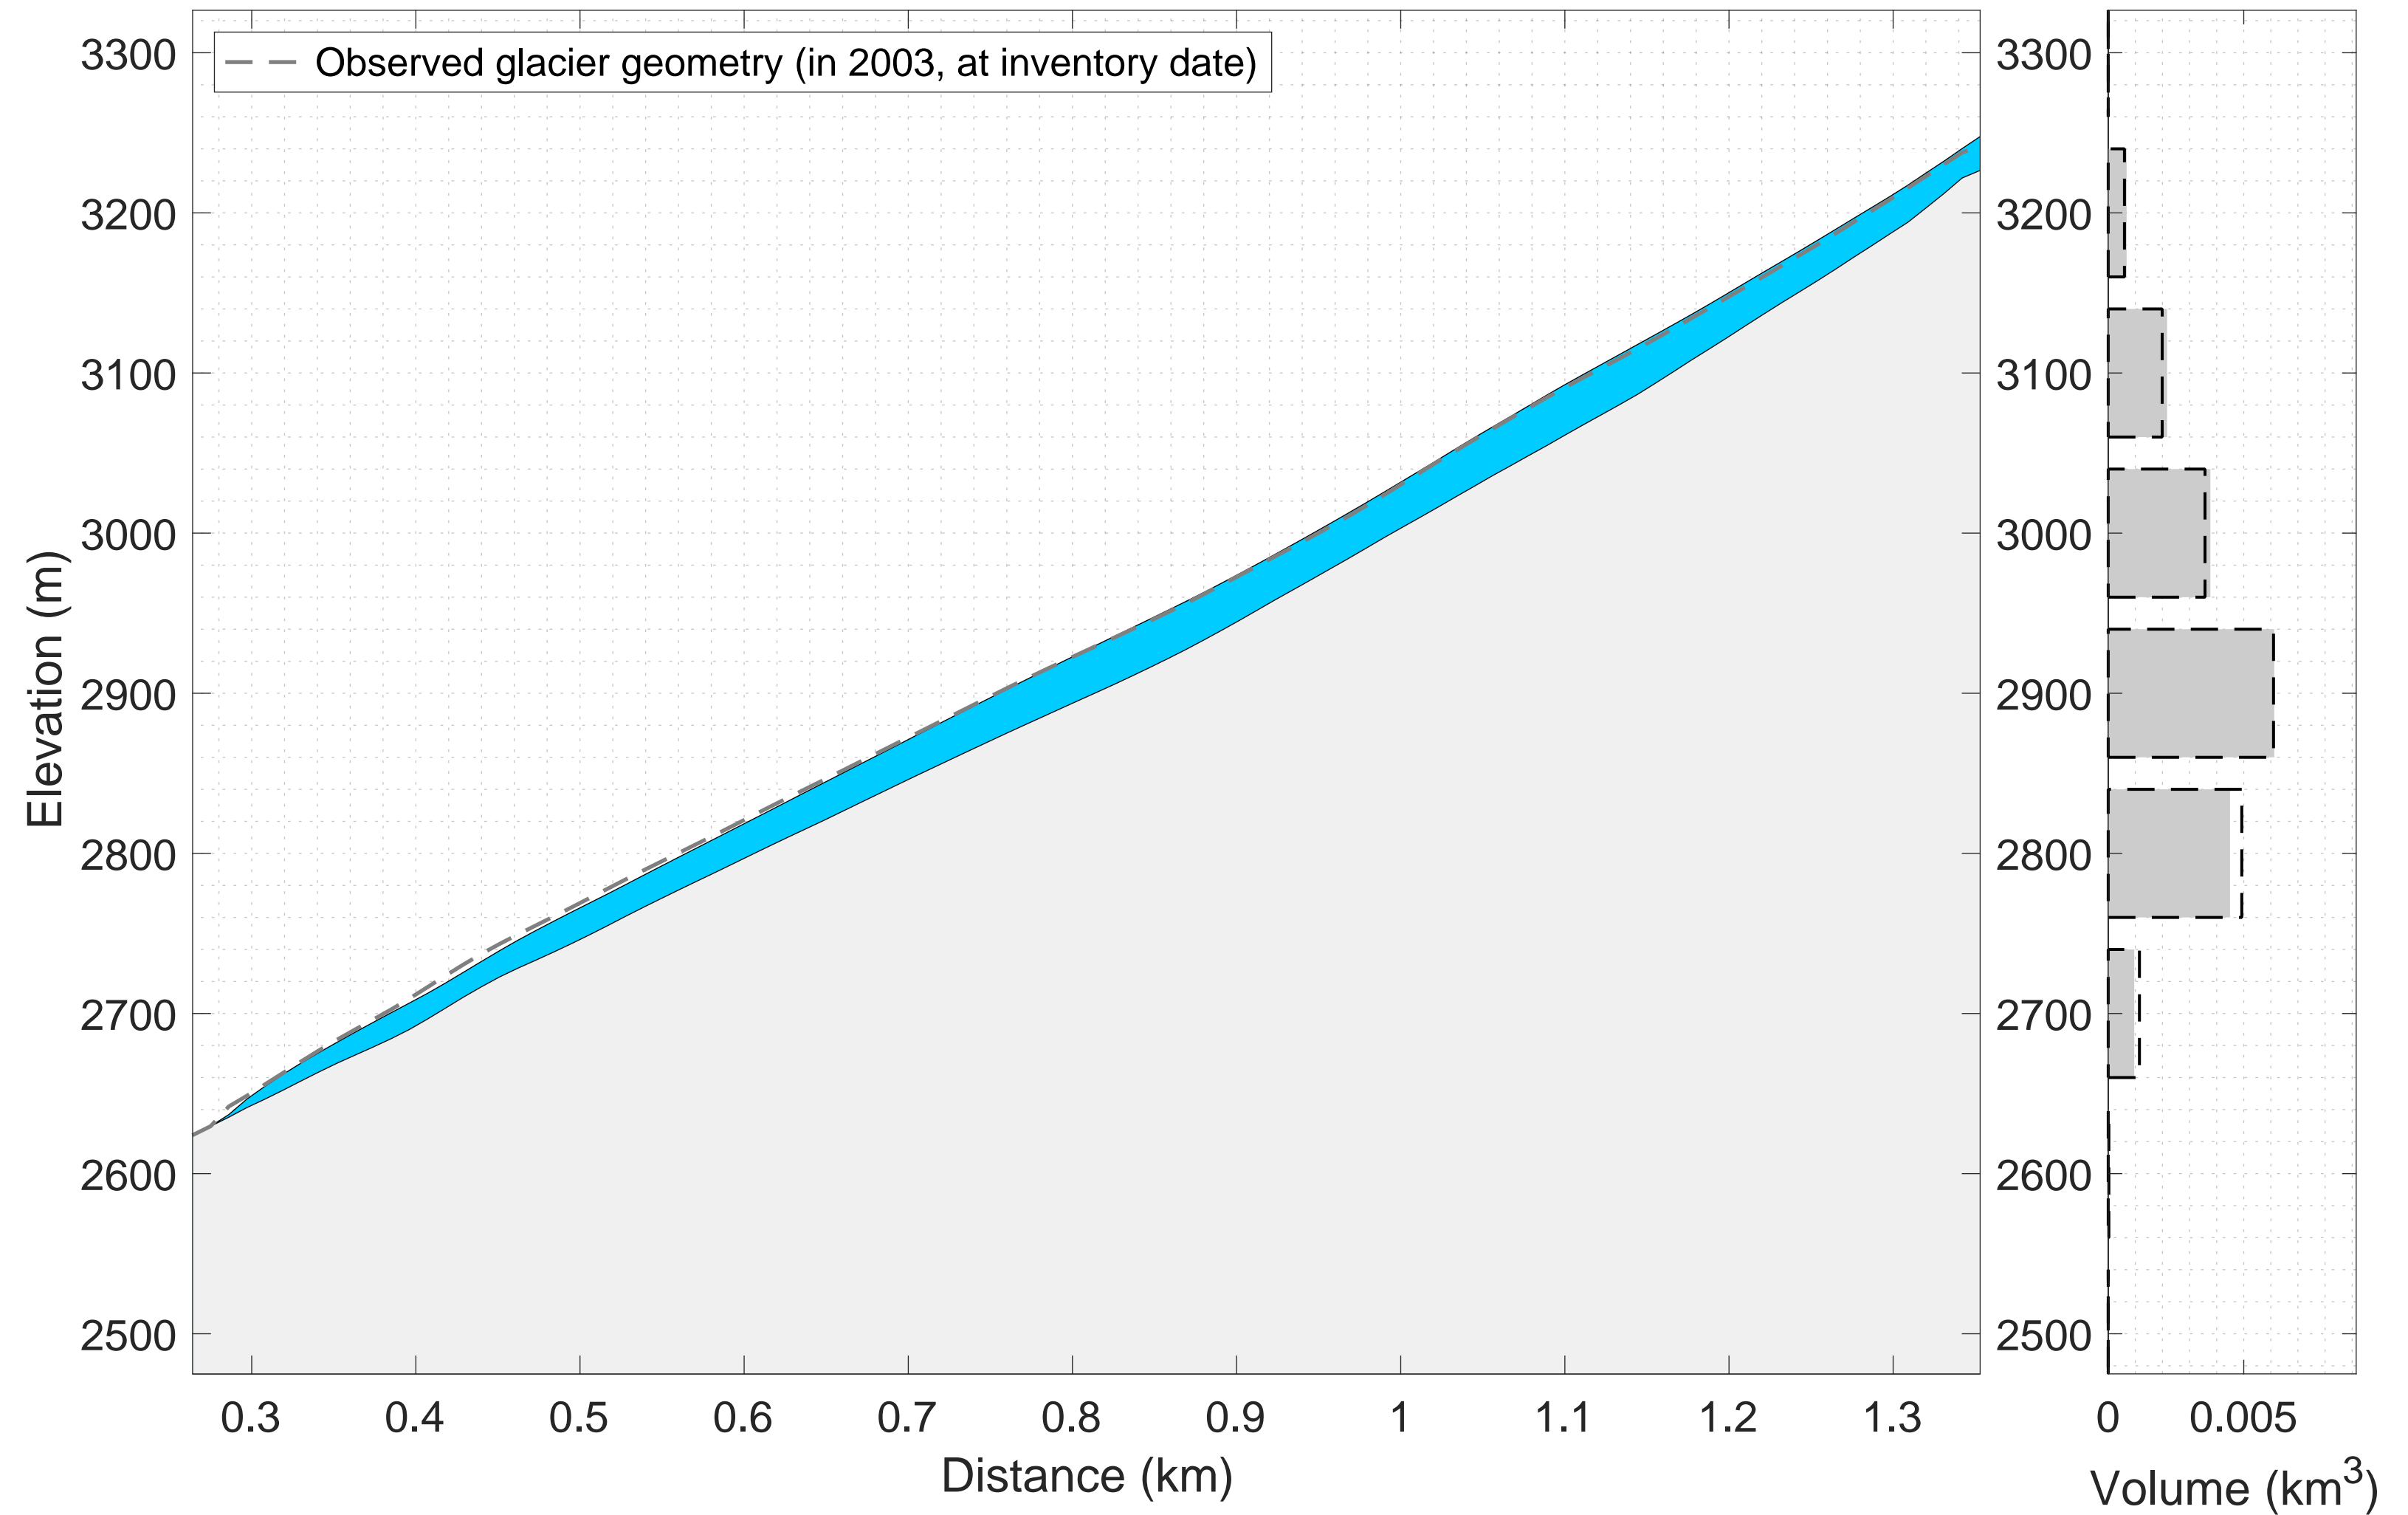

Supplement: Supplementary file 358 [file tc-13-1125-2019-supplement.zip]

**Modelled geometry (Glacier ID = 03791;  $A = 2.4194\text{e-}16 \text{ Pa}^{-3} \text{ a}^{-1}$ ;  $dx = 15 \text{ m}$ )**

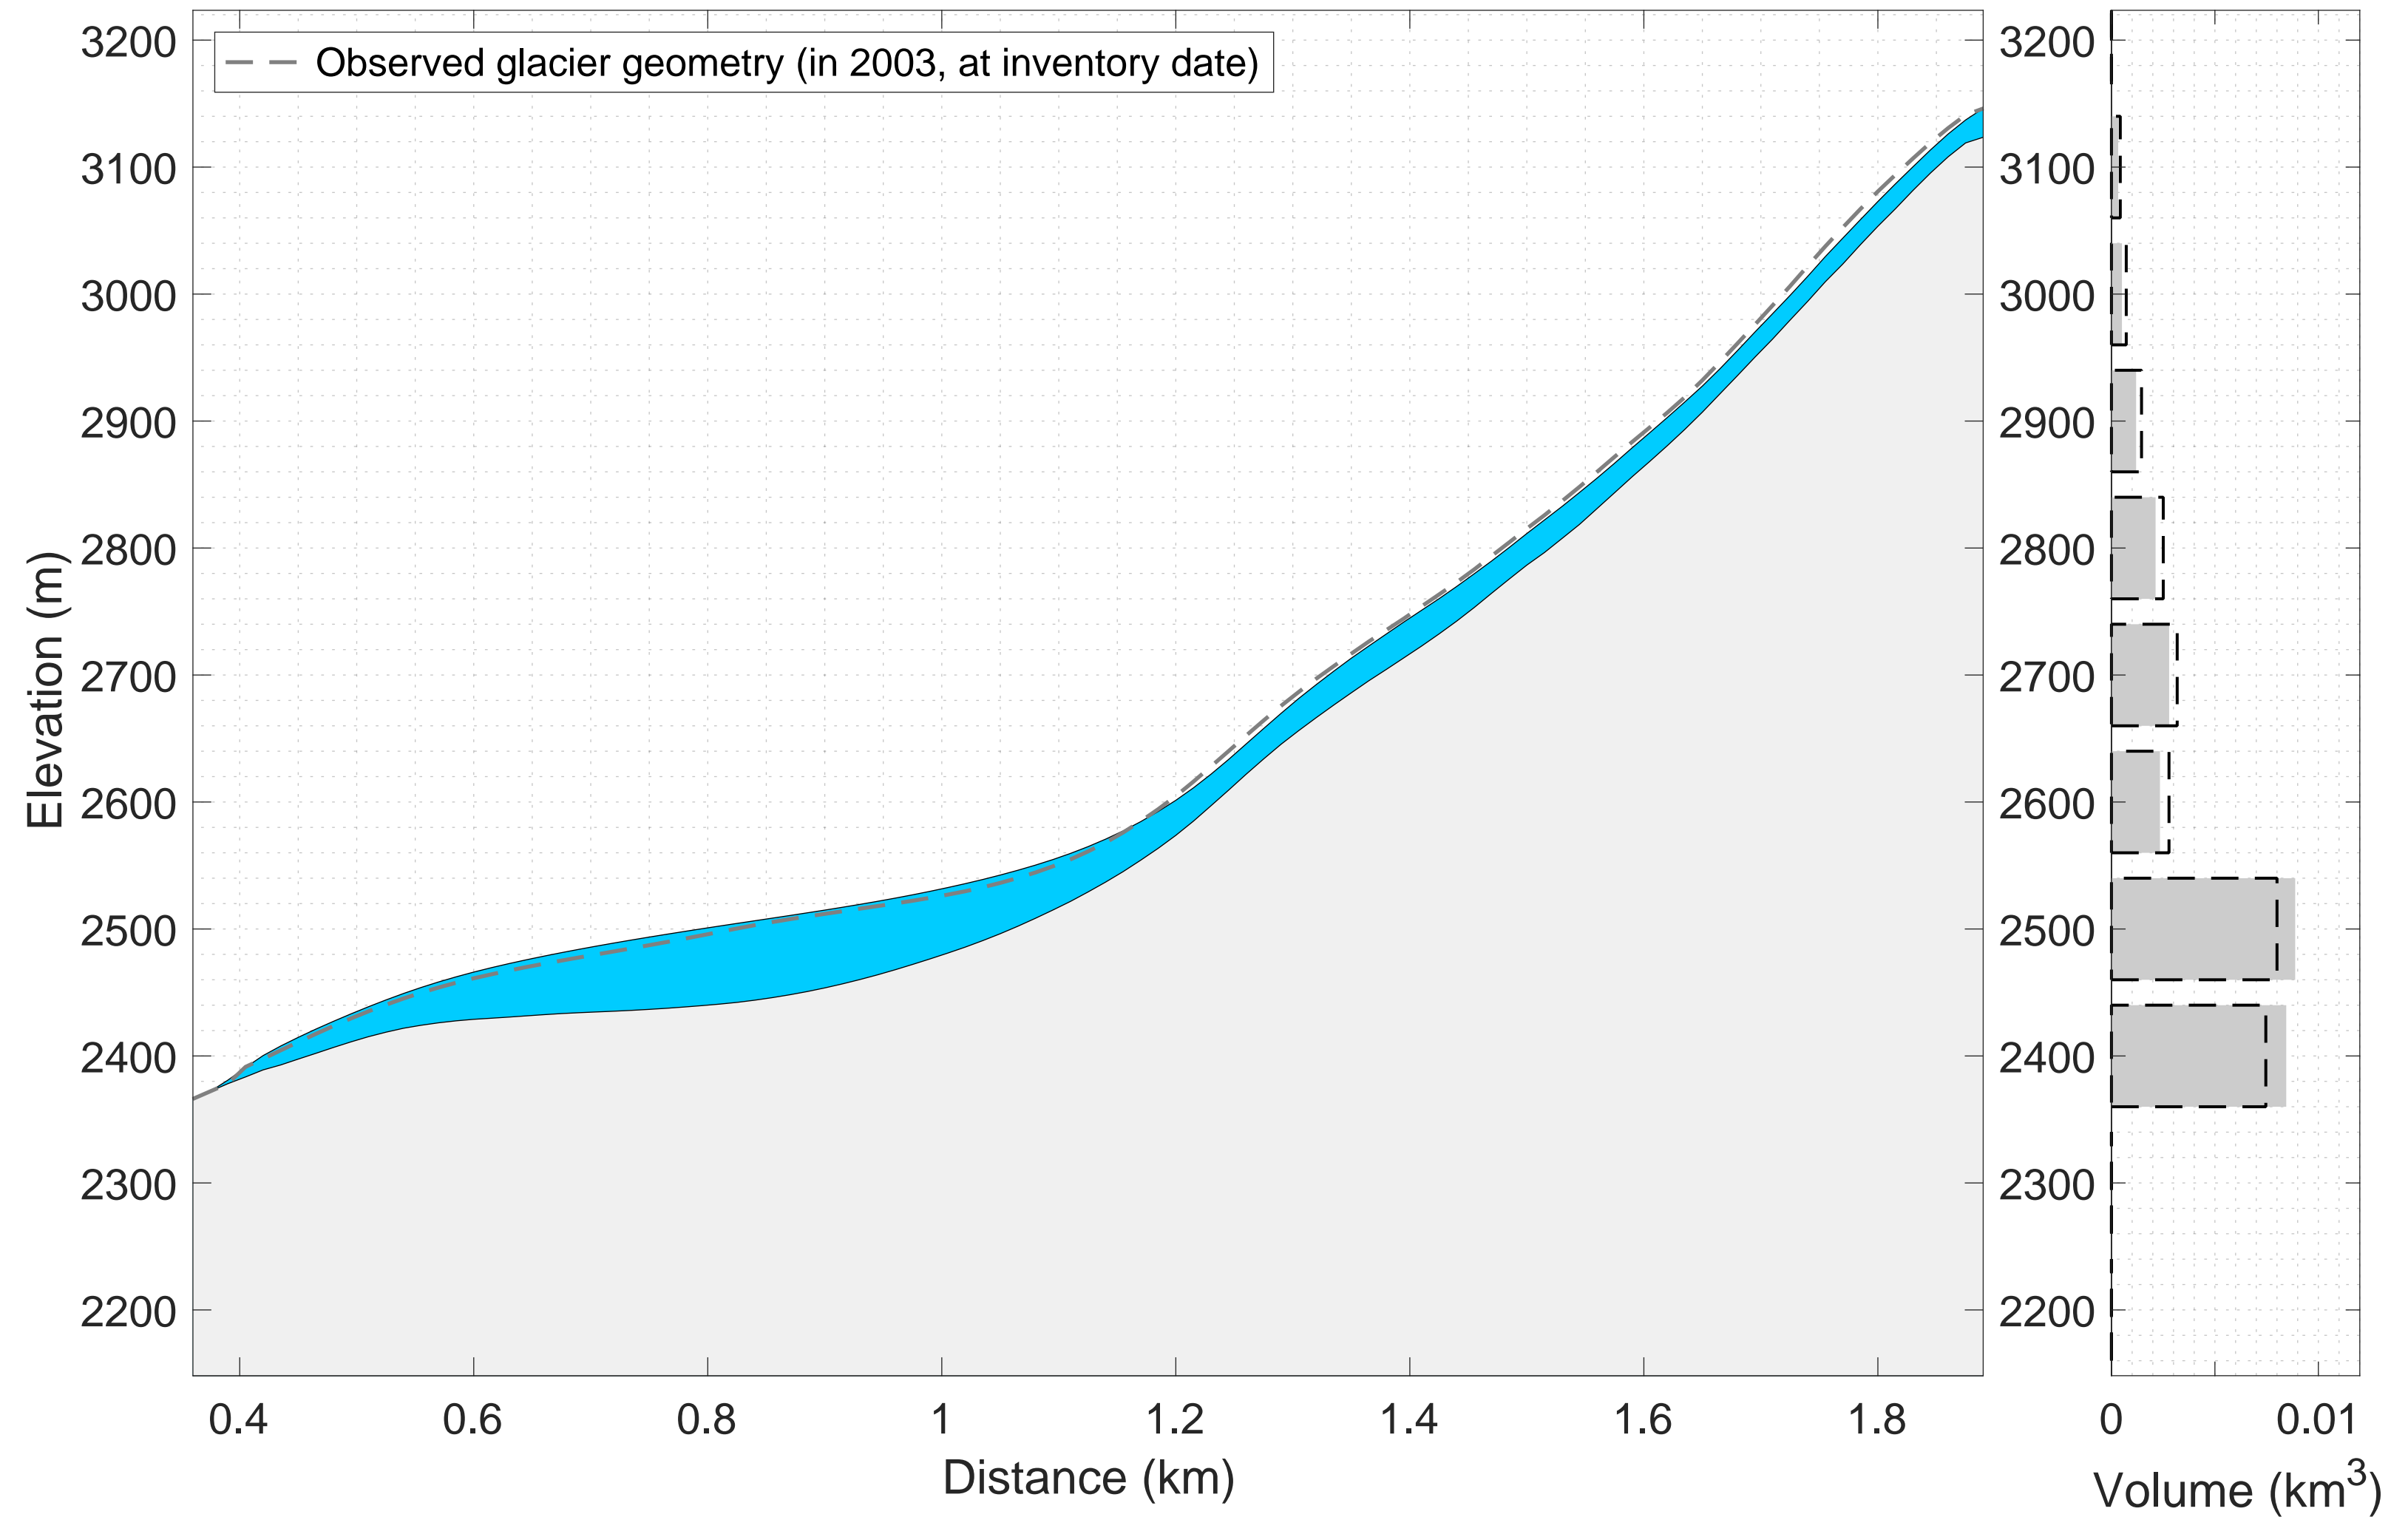

Supplement: Supplementary file 359 [file tc-13-1125-2019-supplement.zip]

Modelled geometry (Glacier ID = 03102;  $A = 1.1265\text{e-}16 \text{ Pa}^{-3} \text{ a}^{-1}$ ;  $dx = 12 \text{ m}$ )

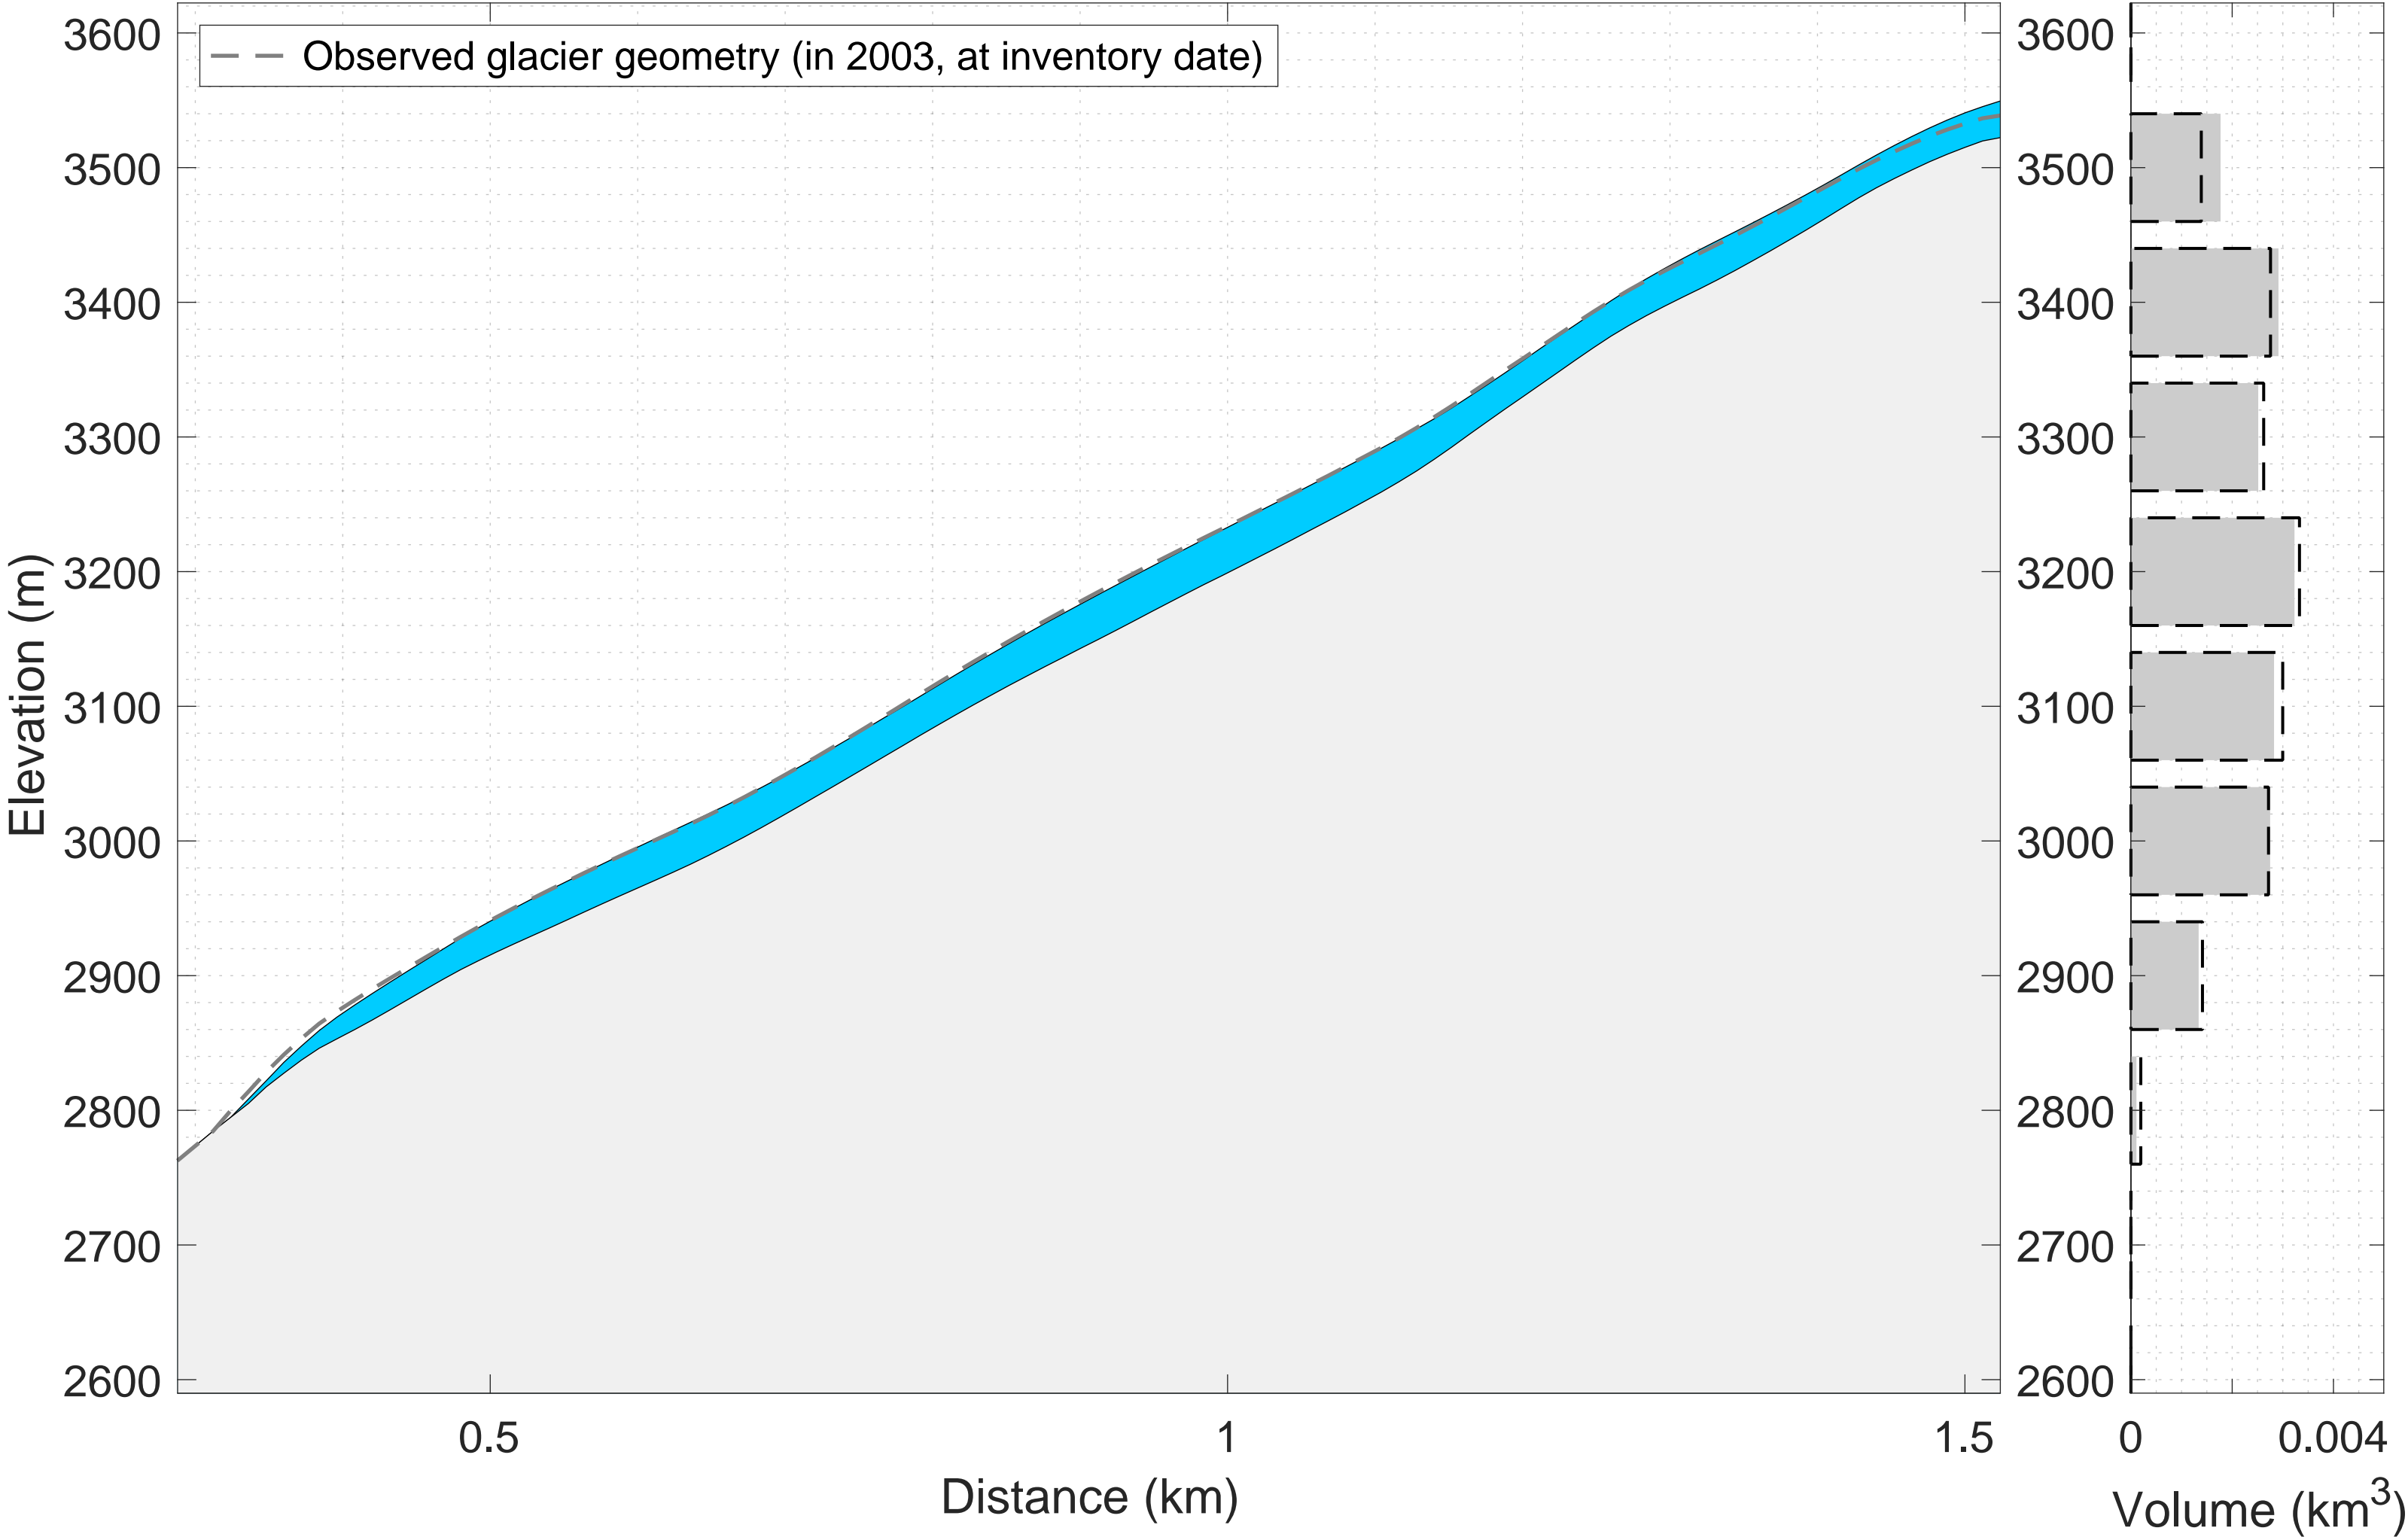

Supplement: Supplementary file 360 [file tc-13-1125-2019-supplement.zip]

**Modelled geometry (Glacier ID = 01743;  $A = 9.5719\text{e-}17 \text{ Pa}^{-3} \text{ a}^{-1}$ ;  $dx = 13 \text{ m}$ )**

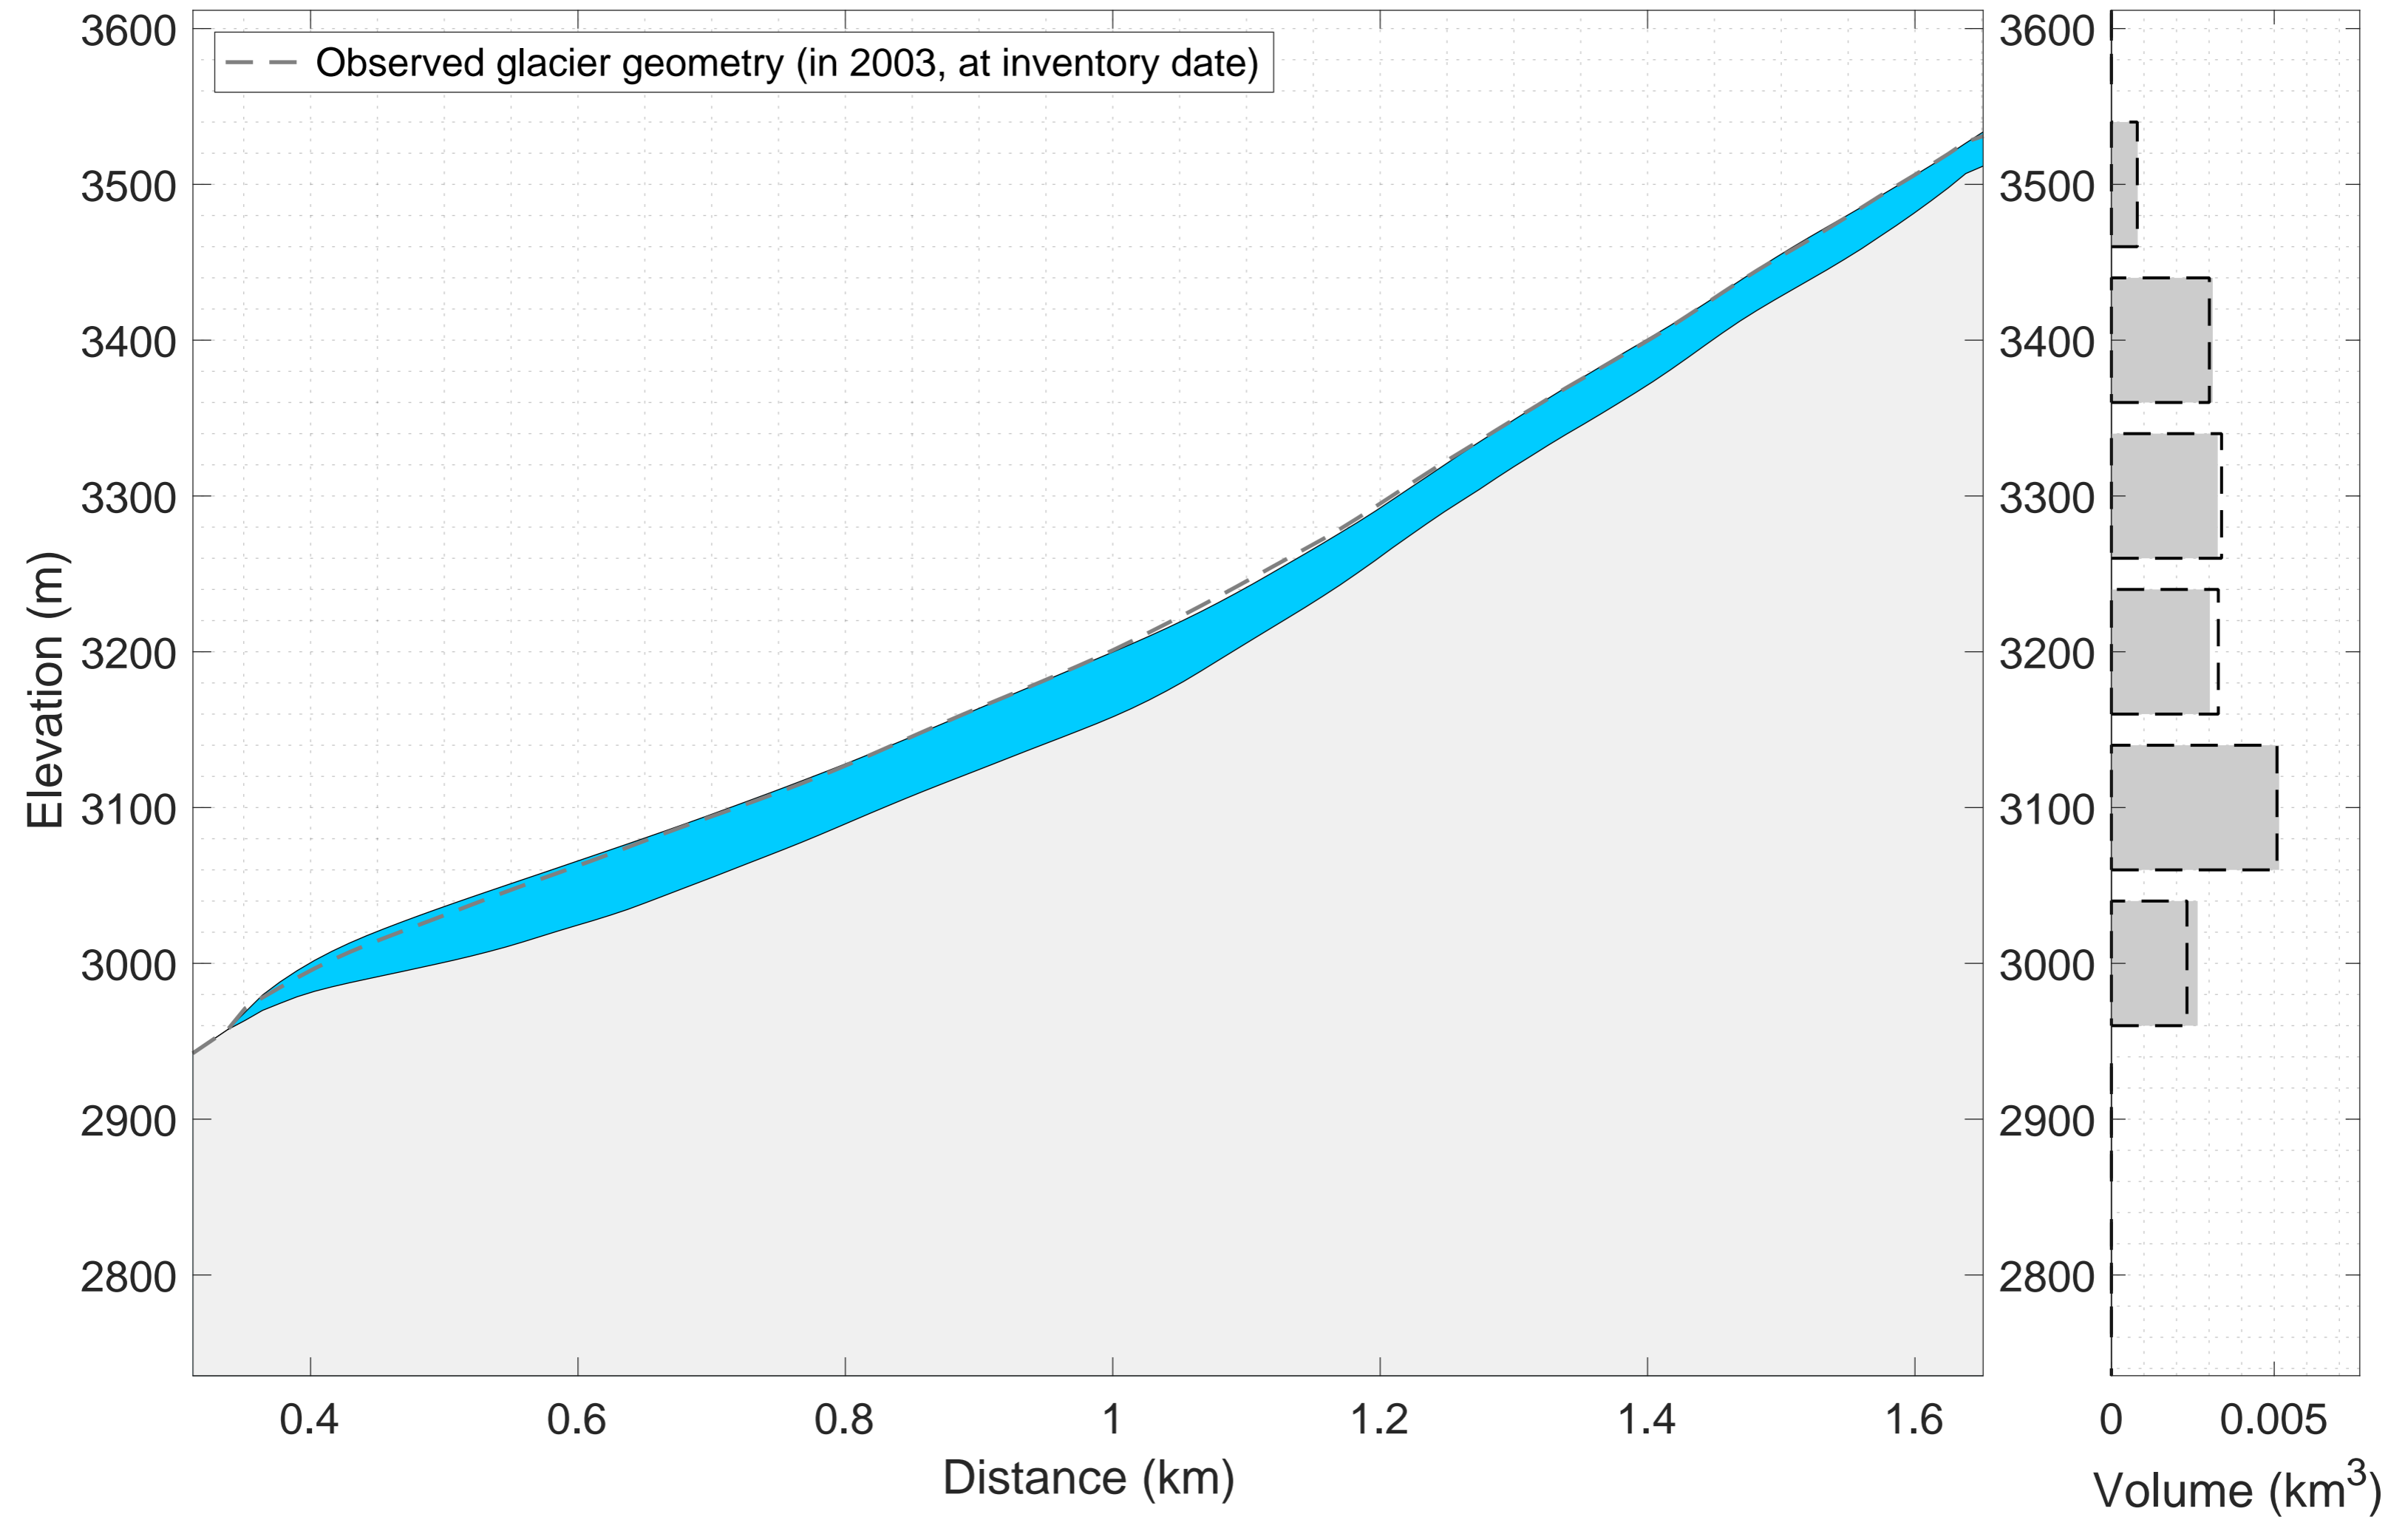

Supplement: Supplementary file 361 [file tc-13-1125-2019-supplement.zip]

**Modelled geometry (Glacier ID = 01766;  $A = 8.1035\text{e-}17 \text{ Pa}^{-3} \text{ a}^{-1}$ ;  $dx = 12 \text{ m}$ )**

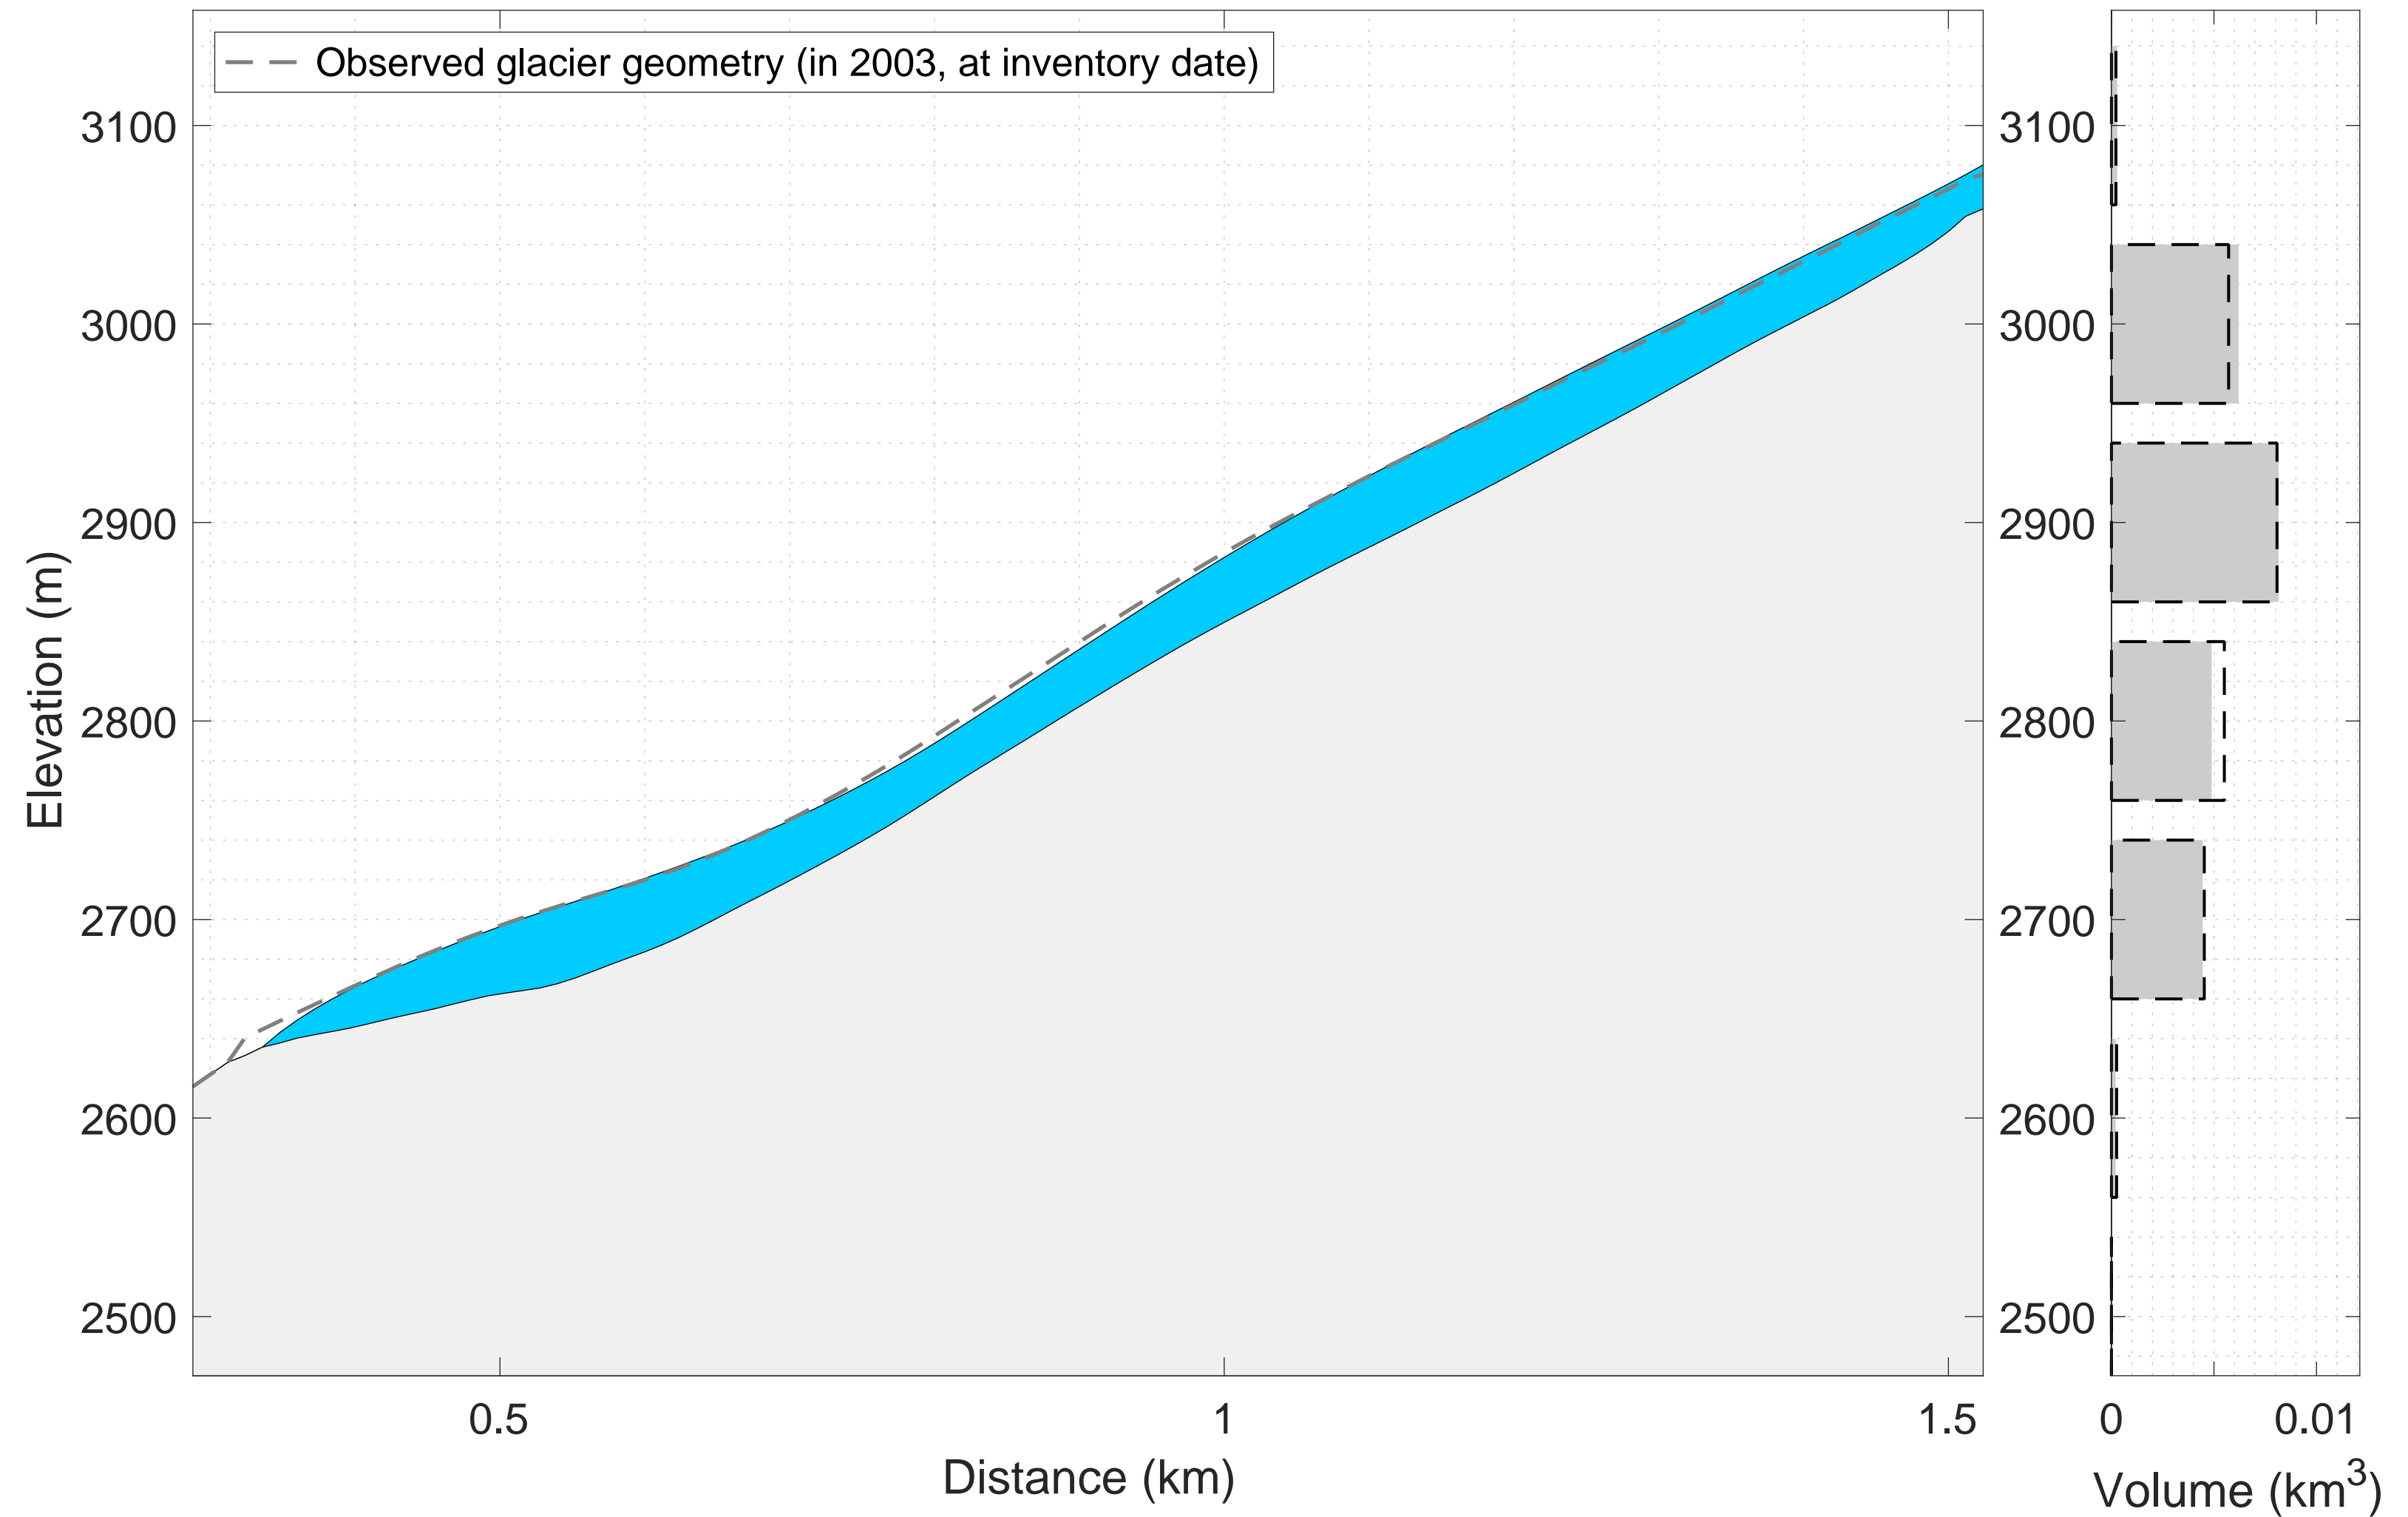

Supplement: Supplementary file 362 [file tc-13-1125-2019-supplement.zip]

**Modelled geometry (Glacier ID = 03263;  $A = 6.5072\text{e-}17 \text{ Pa}^{-3} \text{ a}^{-1}$ ;  $dx = 16 \text{ m}$ )**

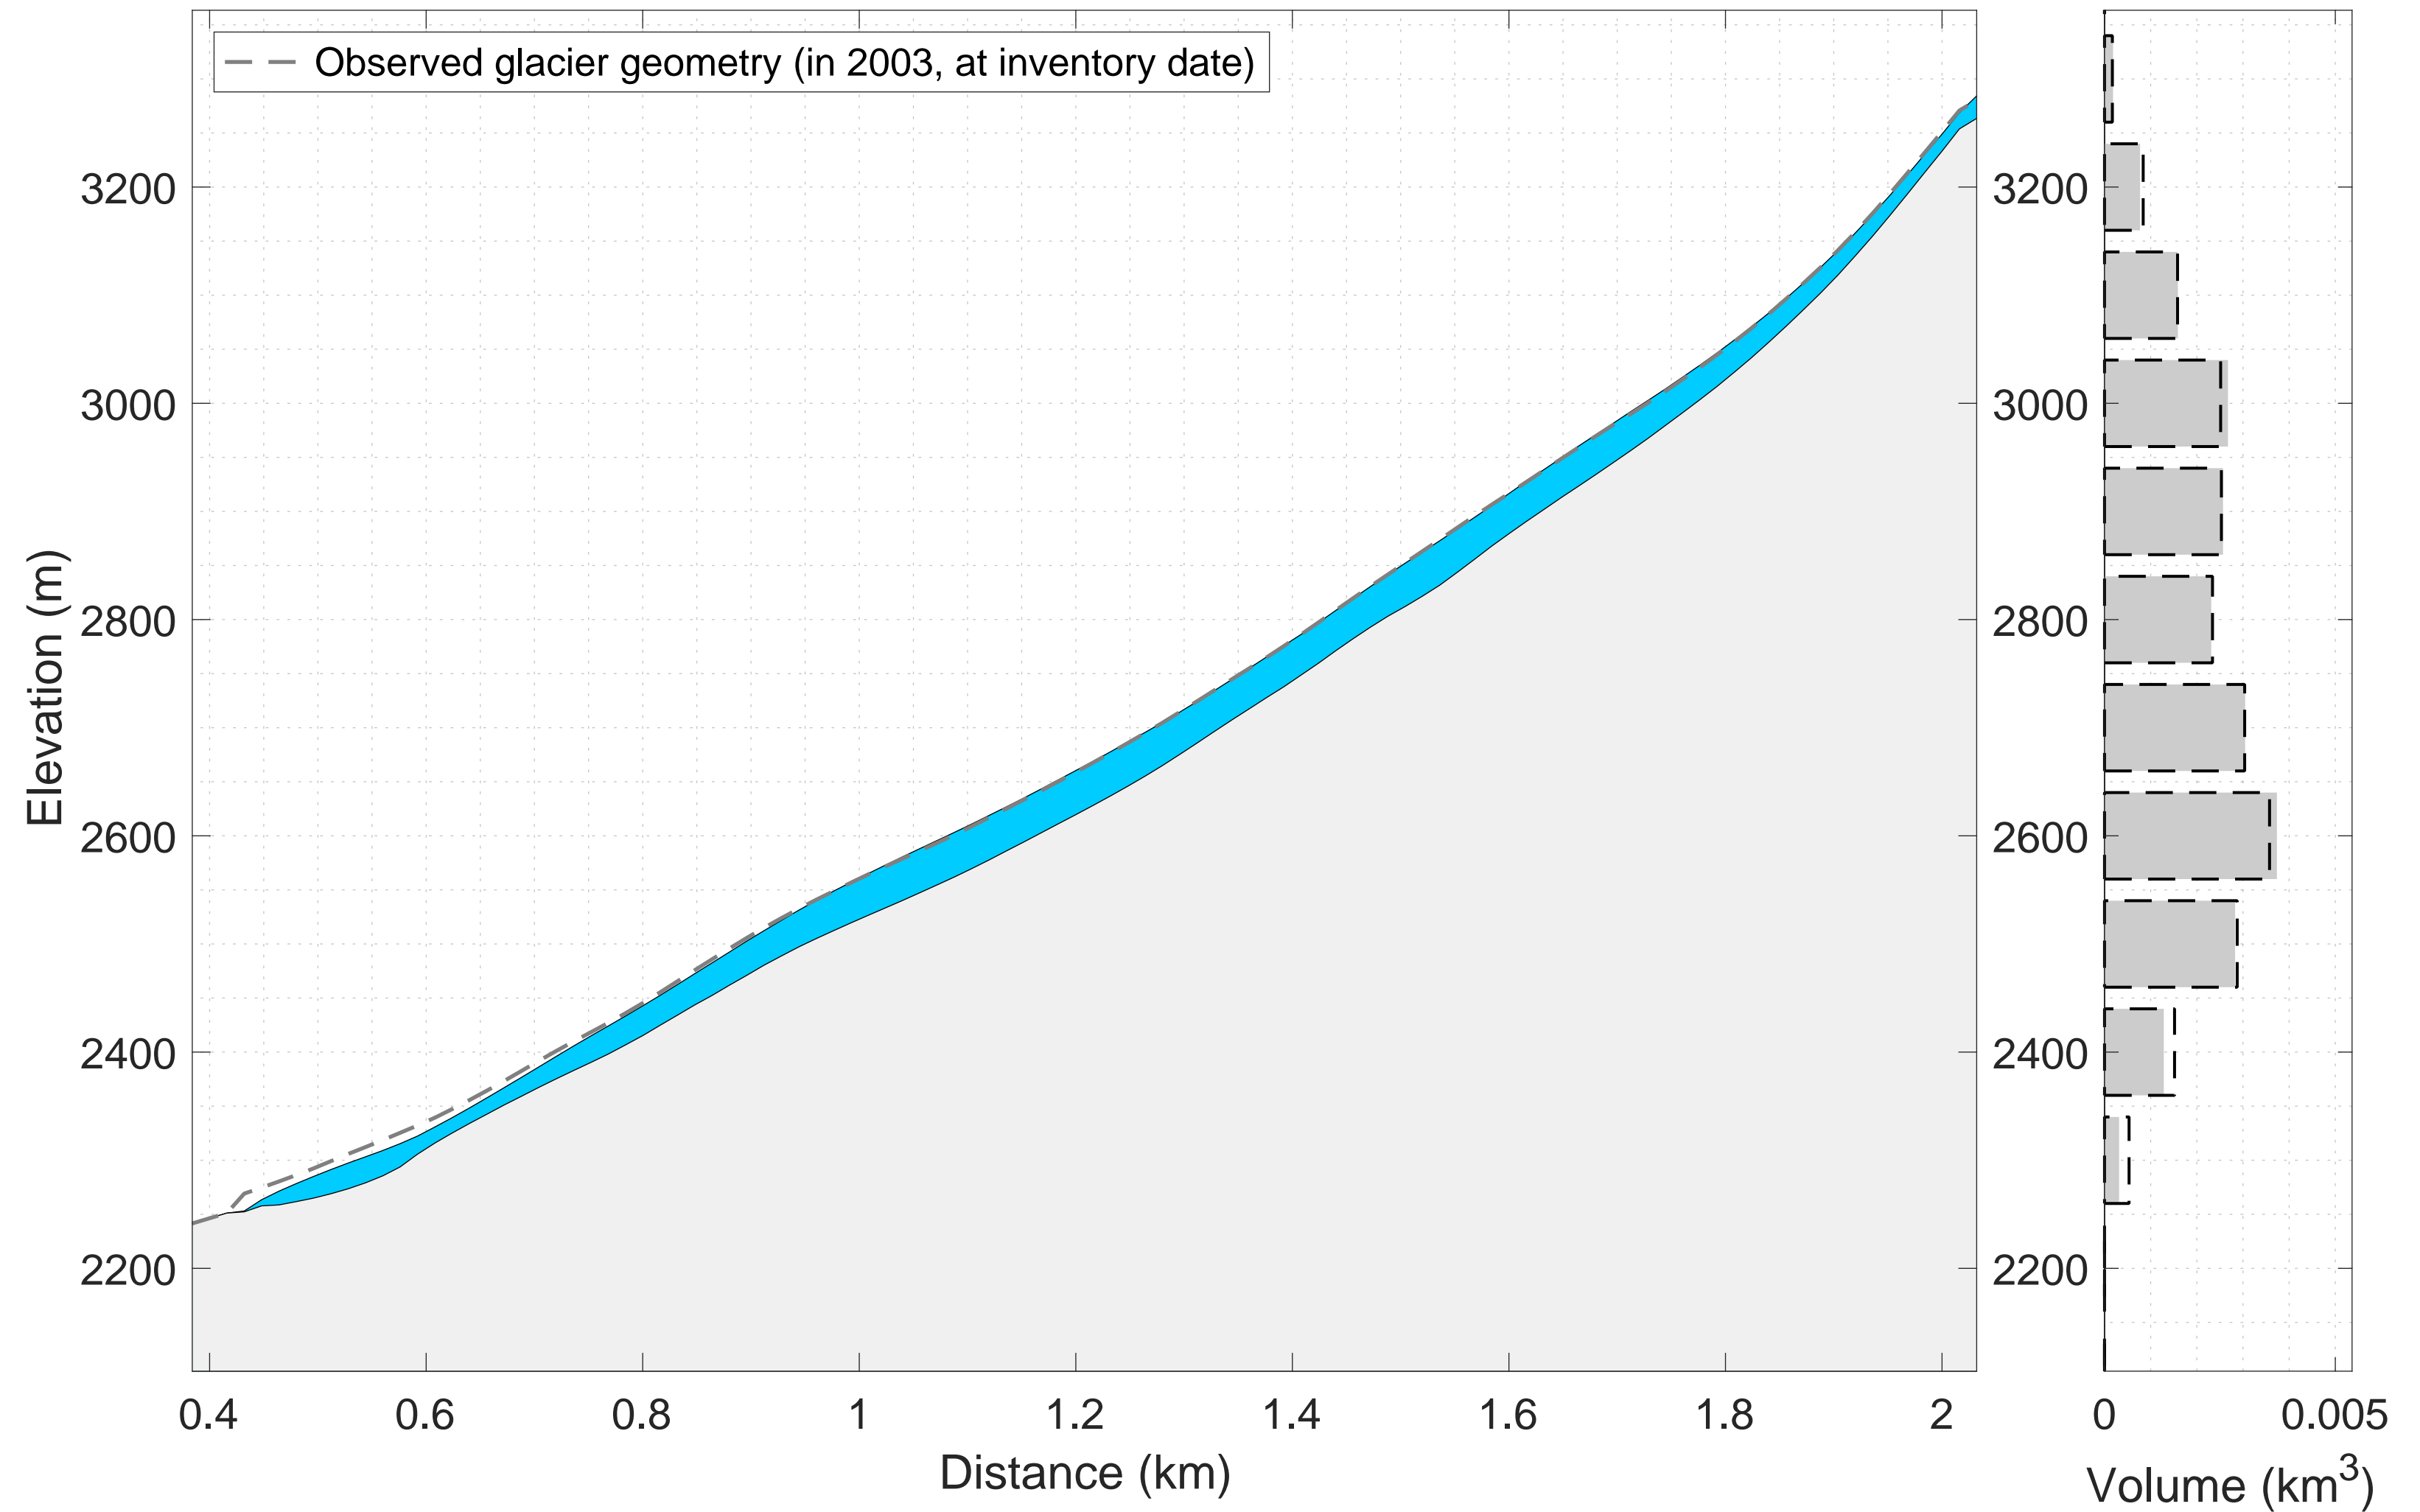

Supplement: Supplementary file 363 [file tc-13-1125-2019-supplement.zip]

**Modelled geometry (Glacier ID = 00199;  $A = 1.9503\text{e-}16 \text{ Pa}^{-3} \text{ a}^{-1}$ ;  $dx = 22 \text{ m}$ )**

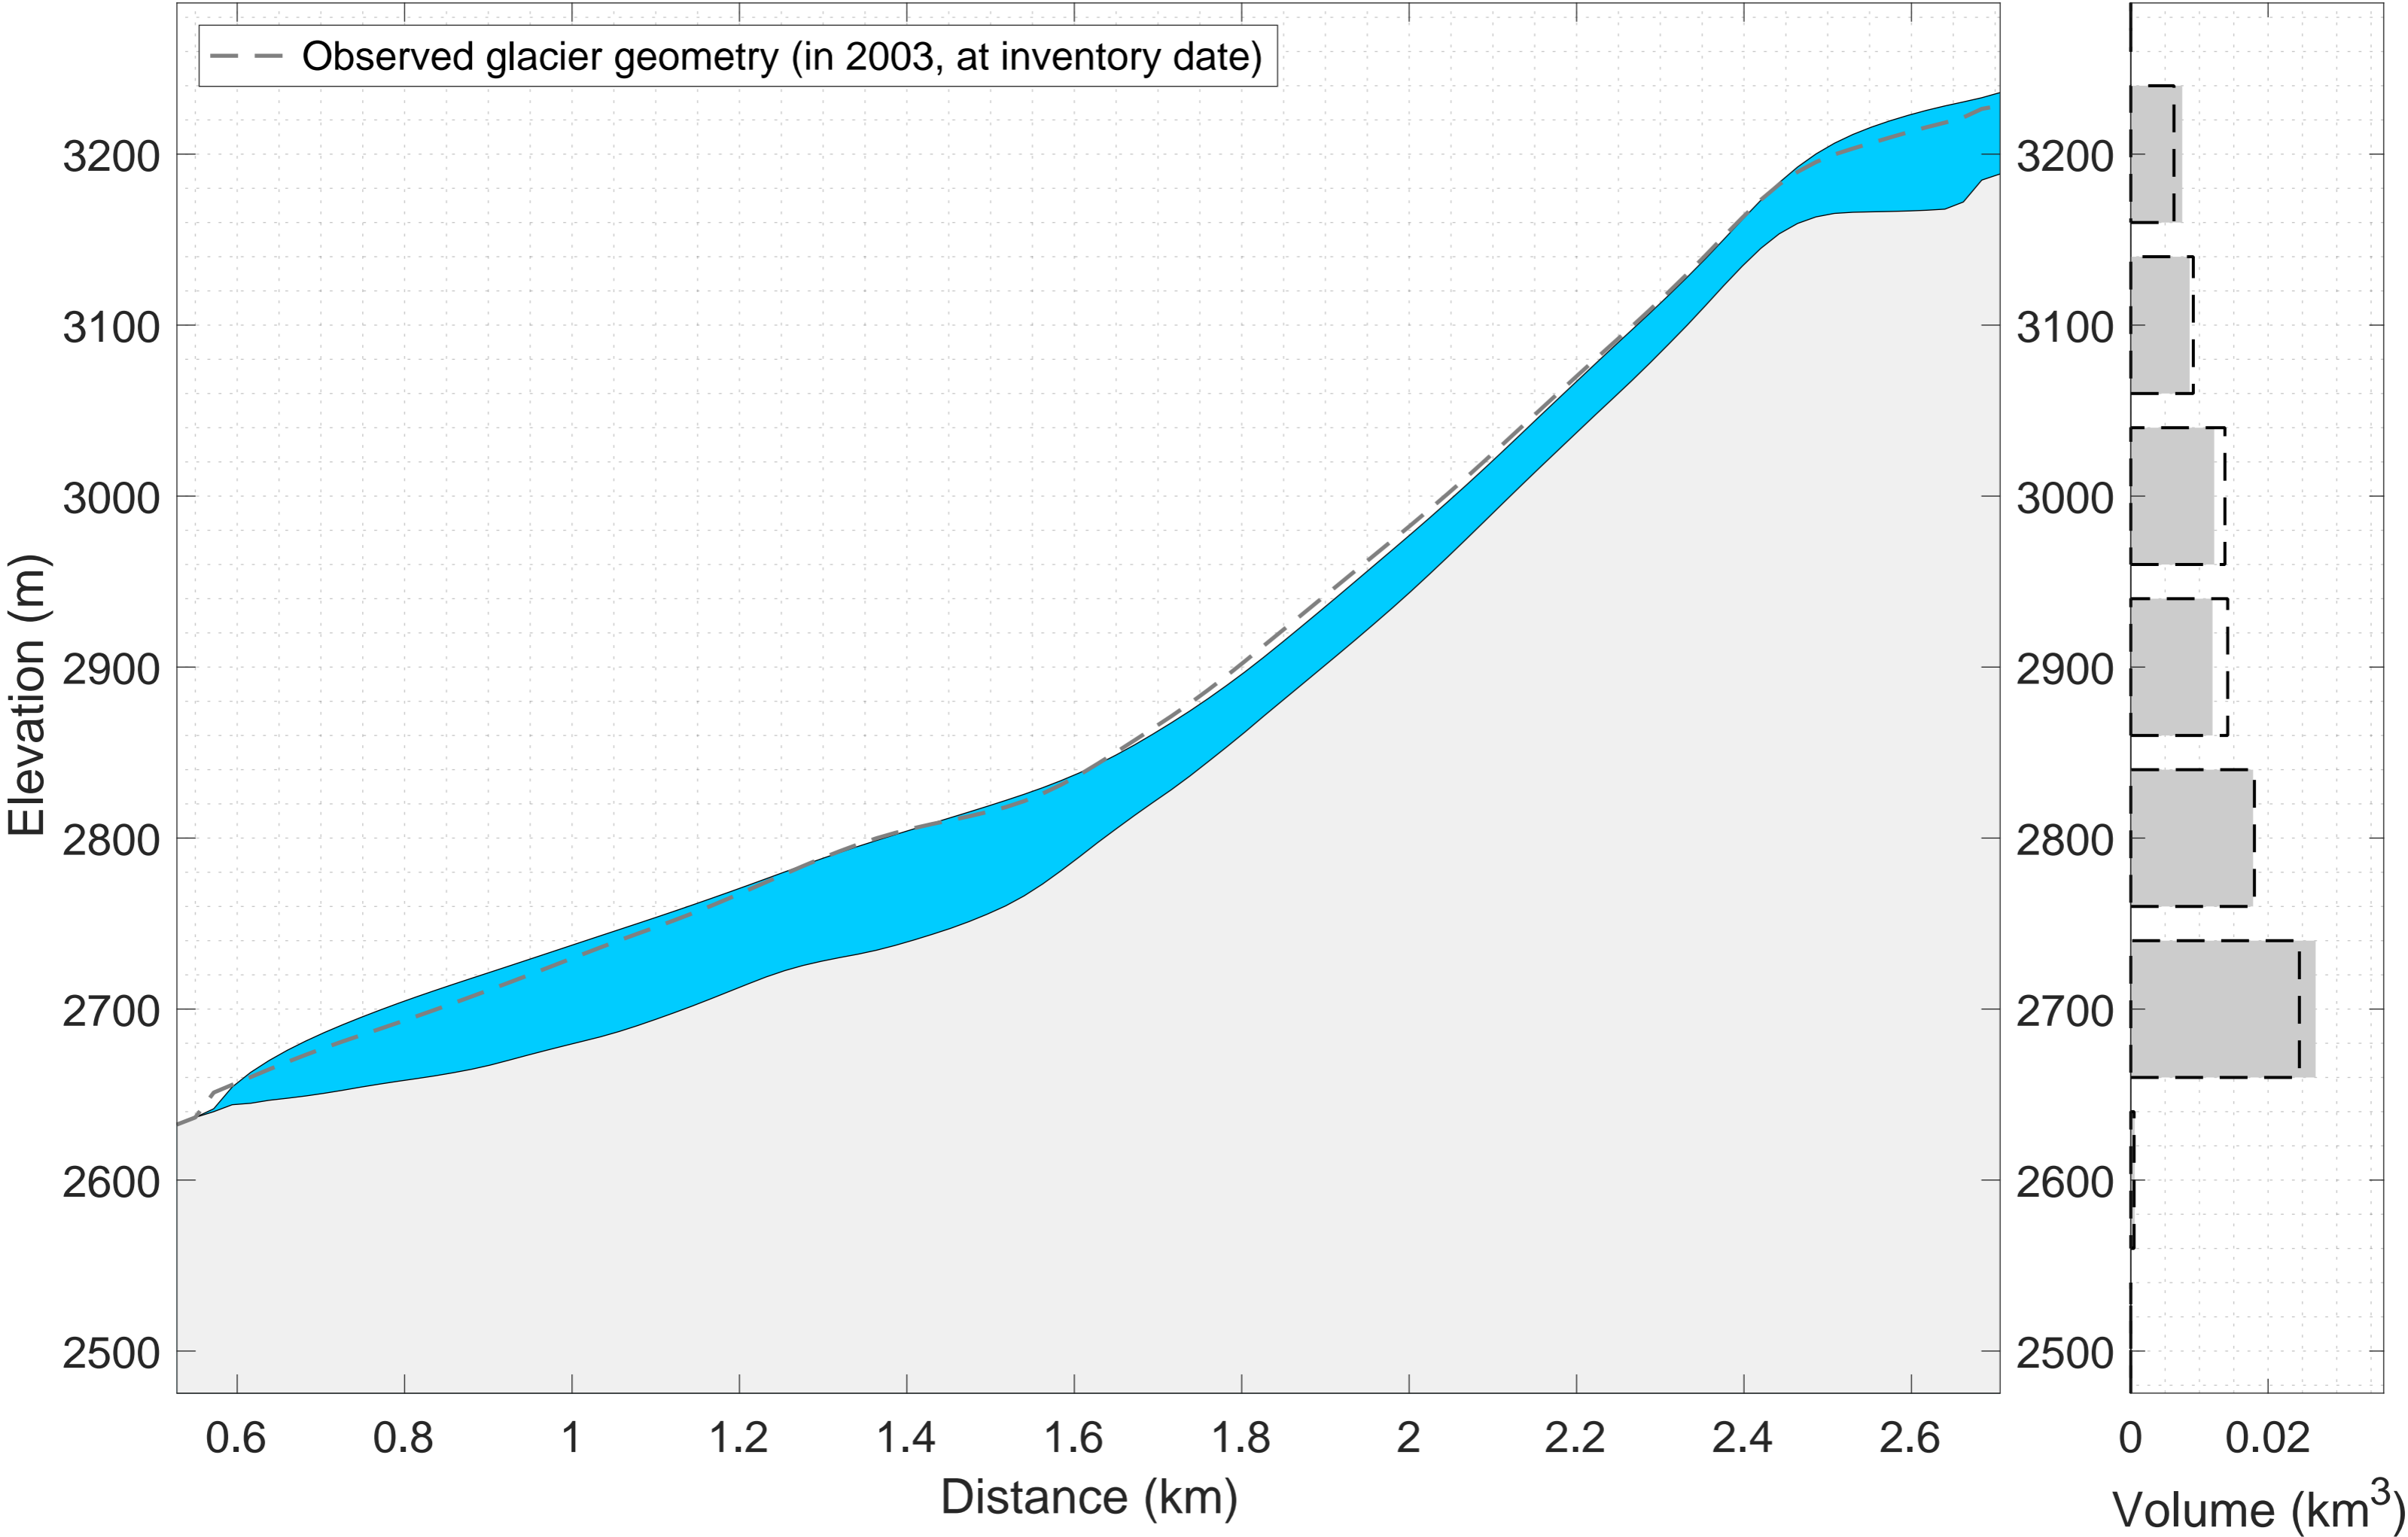

Supplement: Supplementary file 364 [file tc-13-1125-2019-supplement.zip]

**Modelled geometry (Glacier ID = 03686;  $A = 8.4429\text{e-}17 \text{ Pa}^{-3} \text{ a}^{-1}$ ;  $dx = 14 \text{ m}$ )**

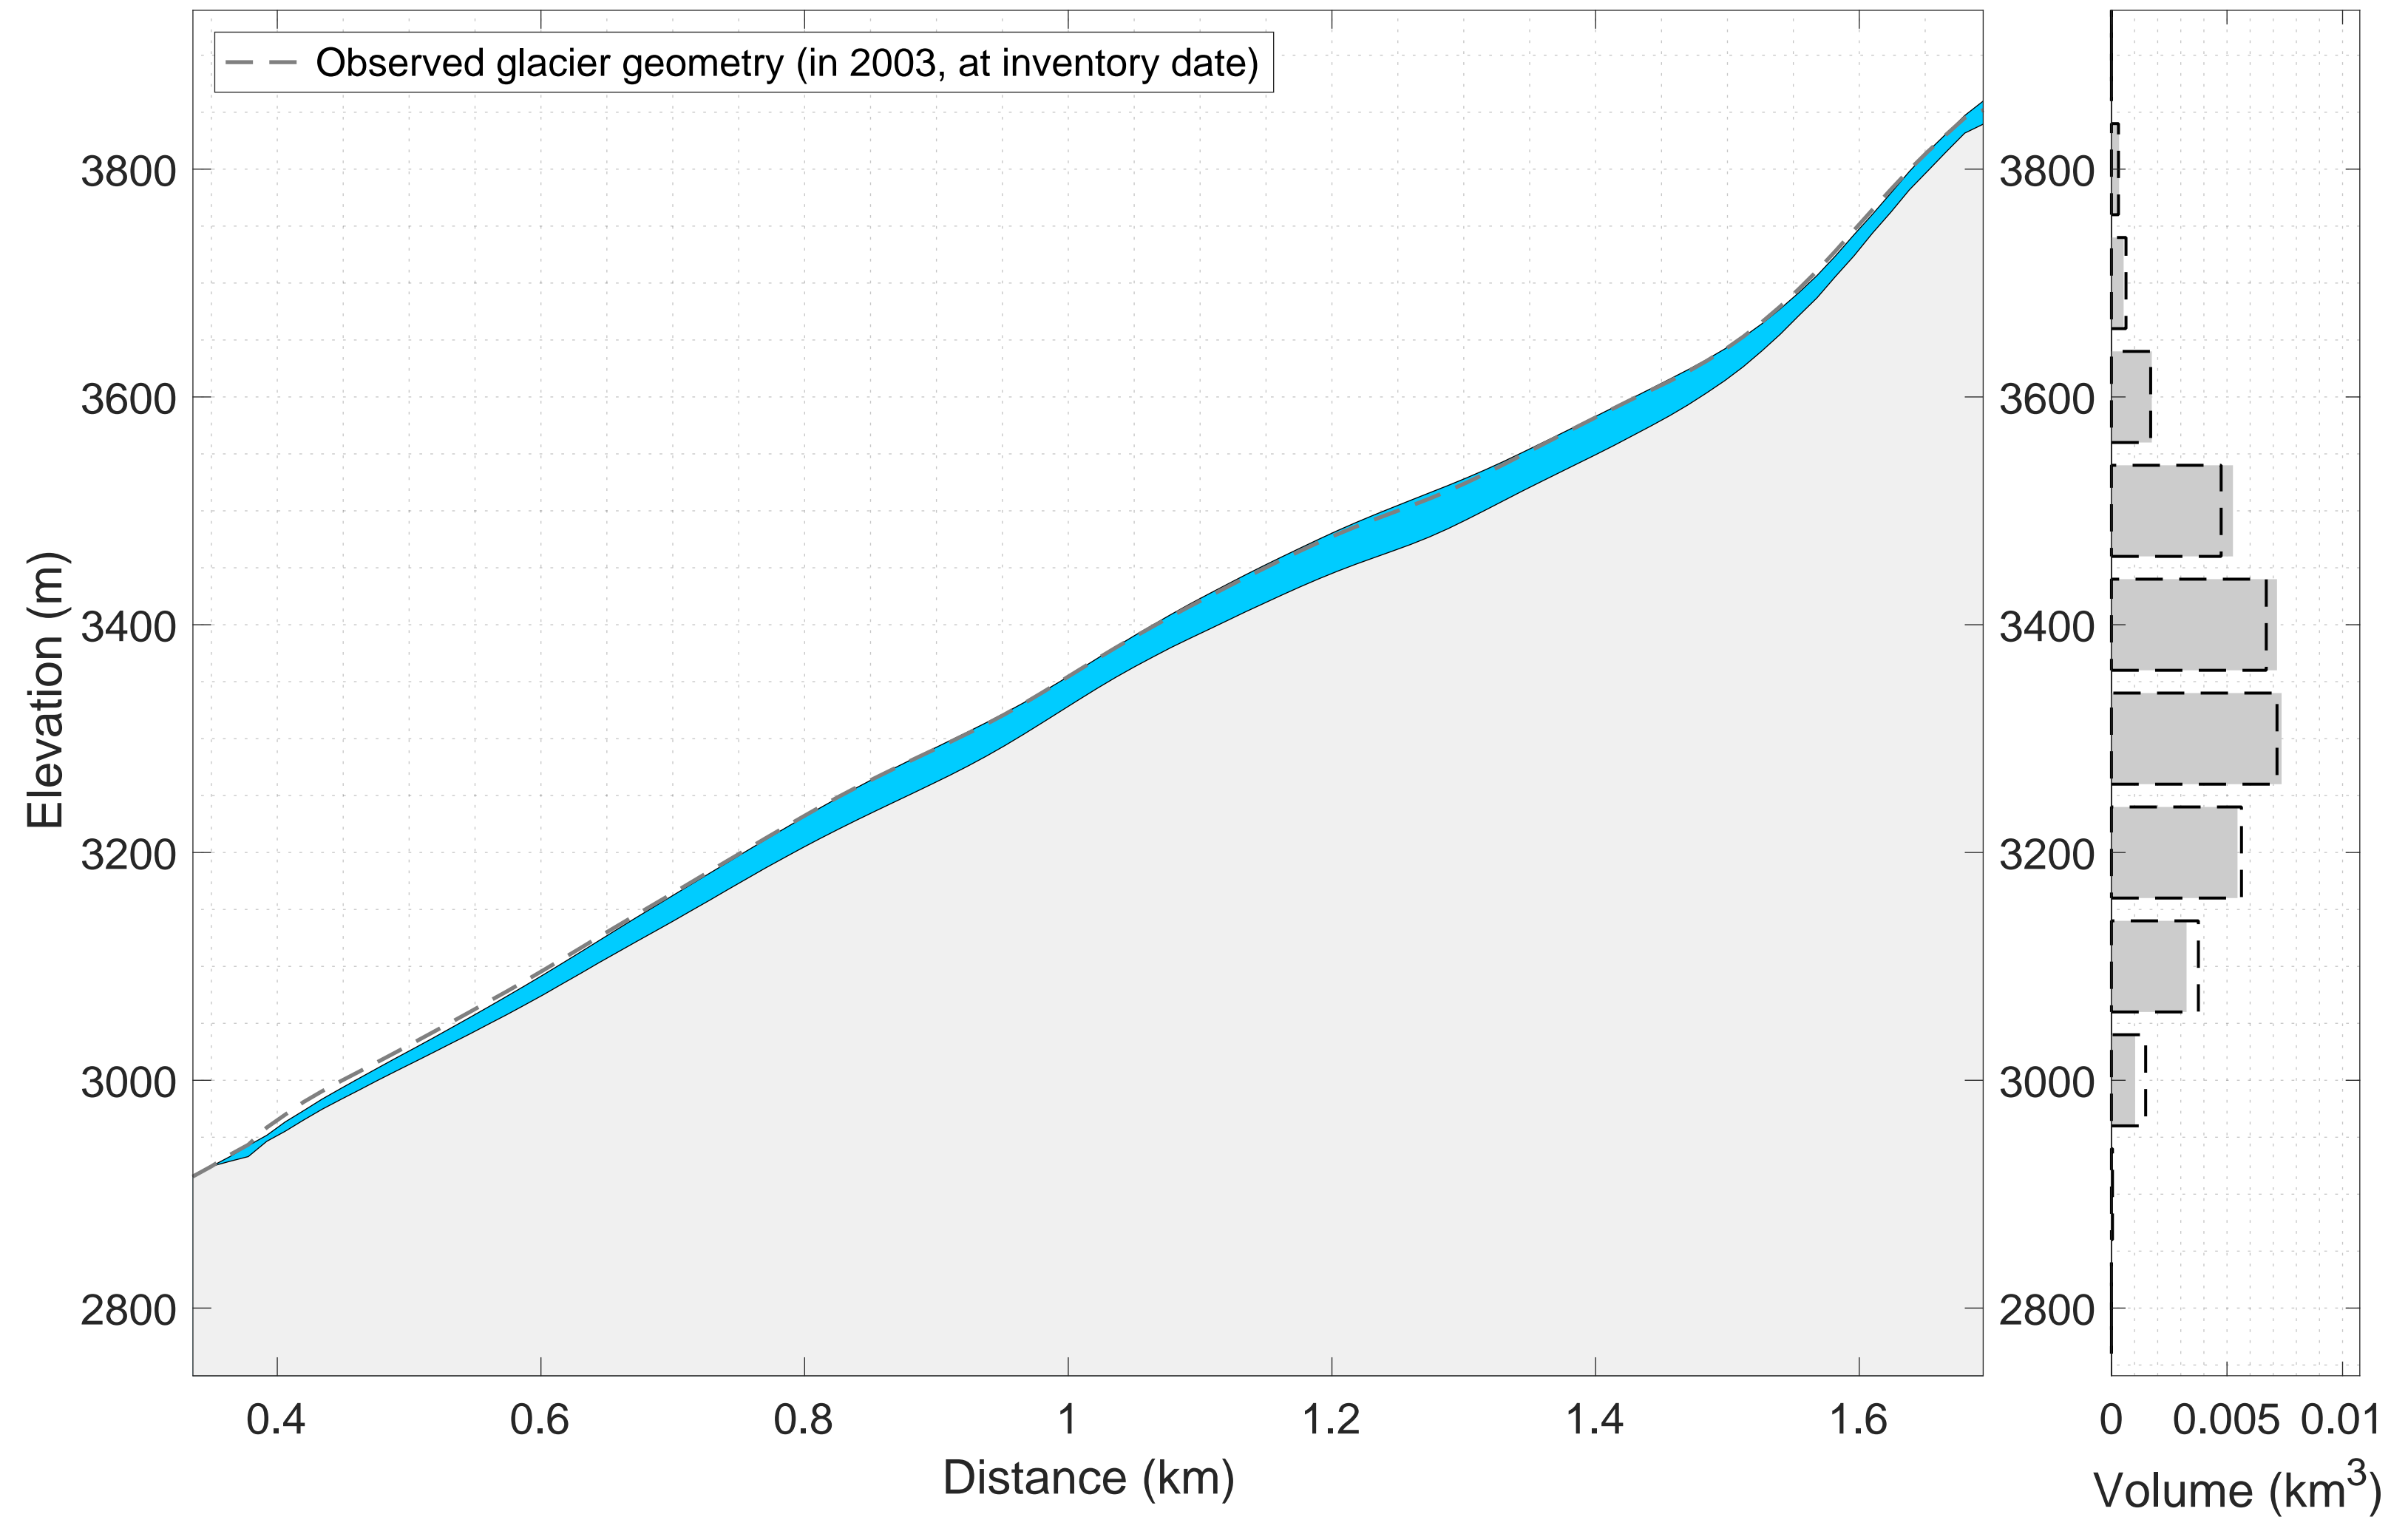

Supplement: Supplementary file 365 [file tc-13-1125-2019-supplement.zip]

**Modelled geometry (Glacier ID = 03259;  $A = 2.2733\text{e-}16 \text{ Pa}^{-3} \text{ a}^{-1}$ ;  $dx = 19 \text{ m}$ )**

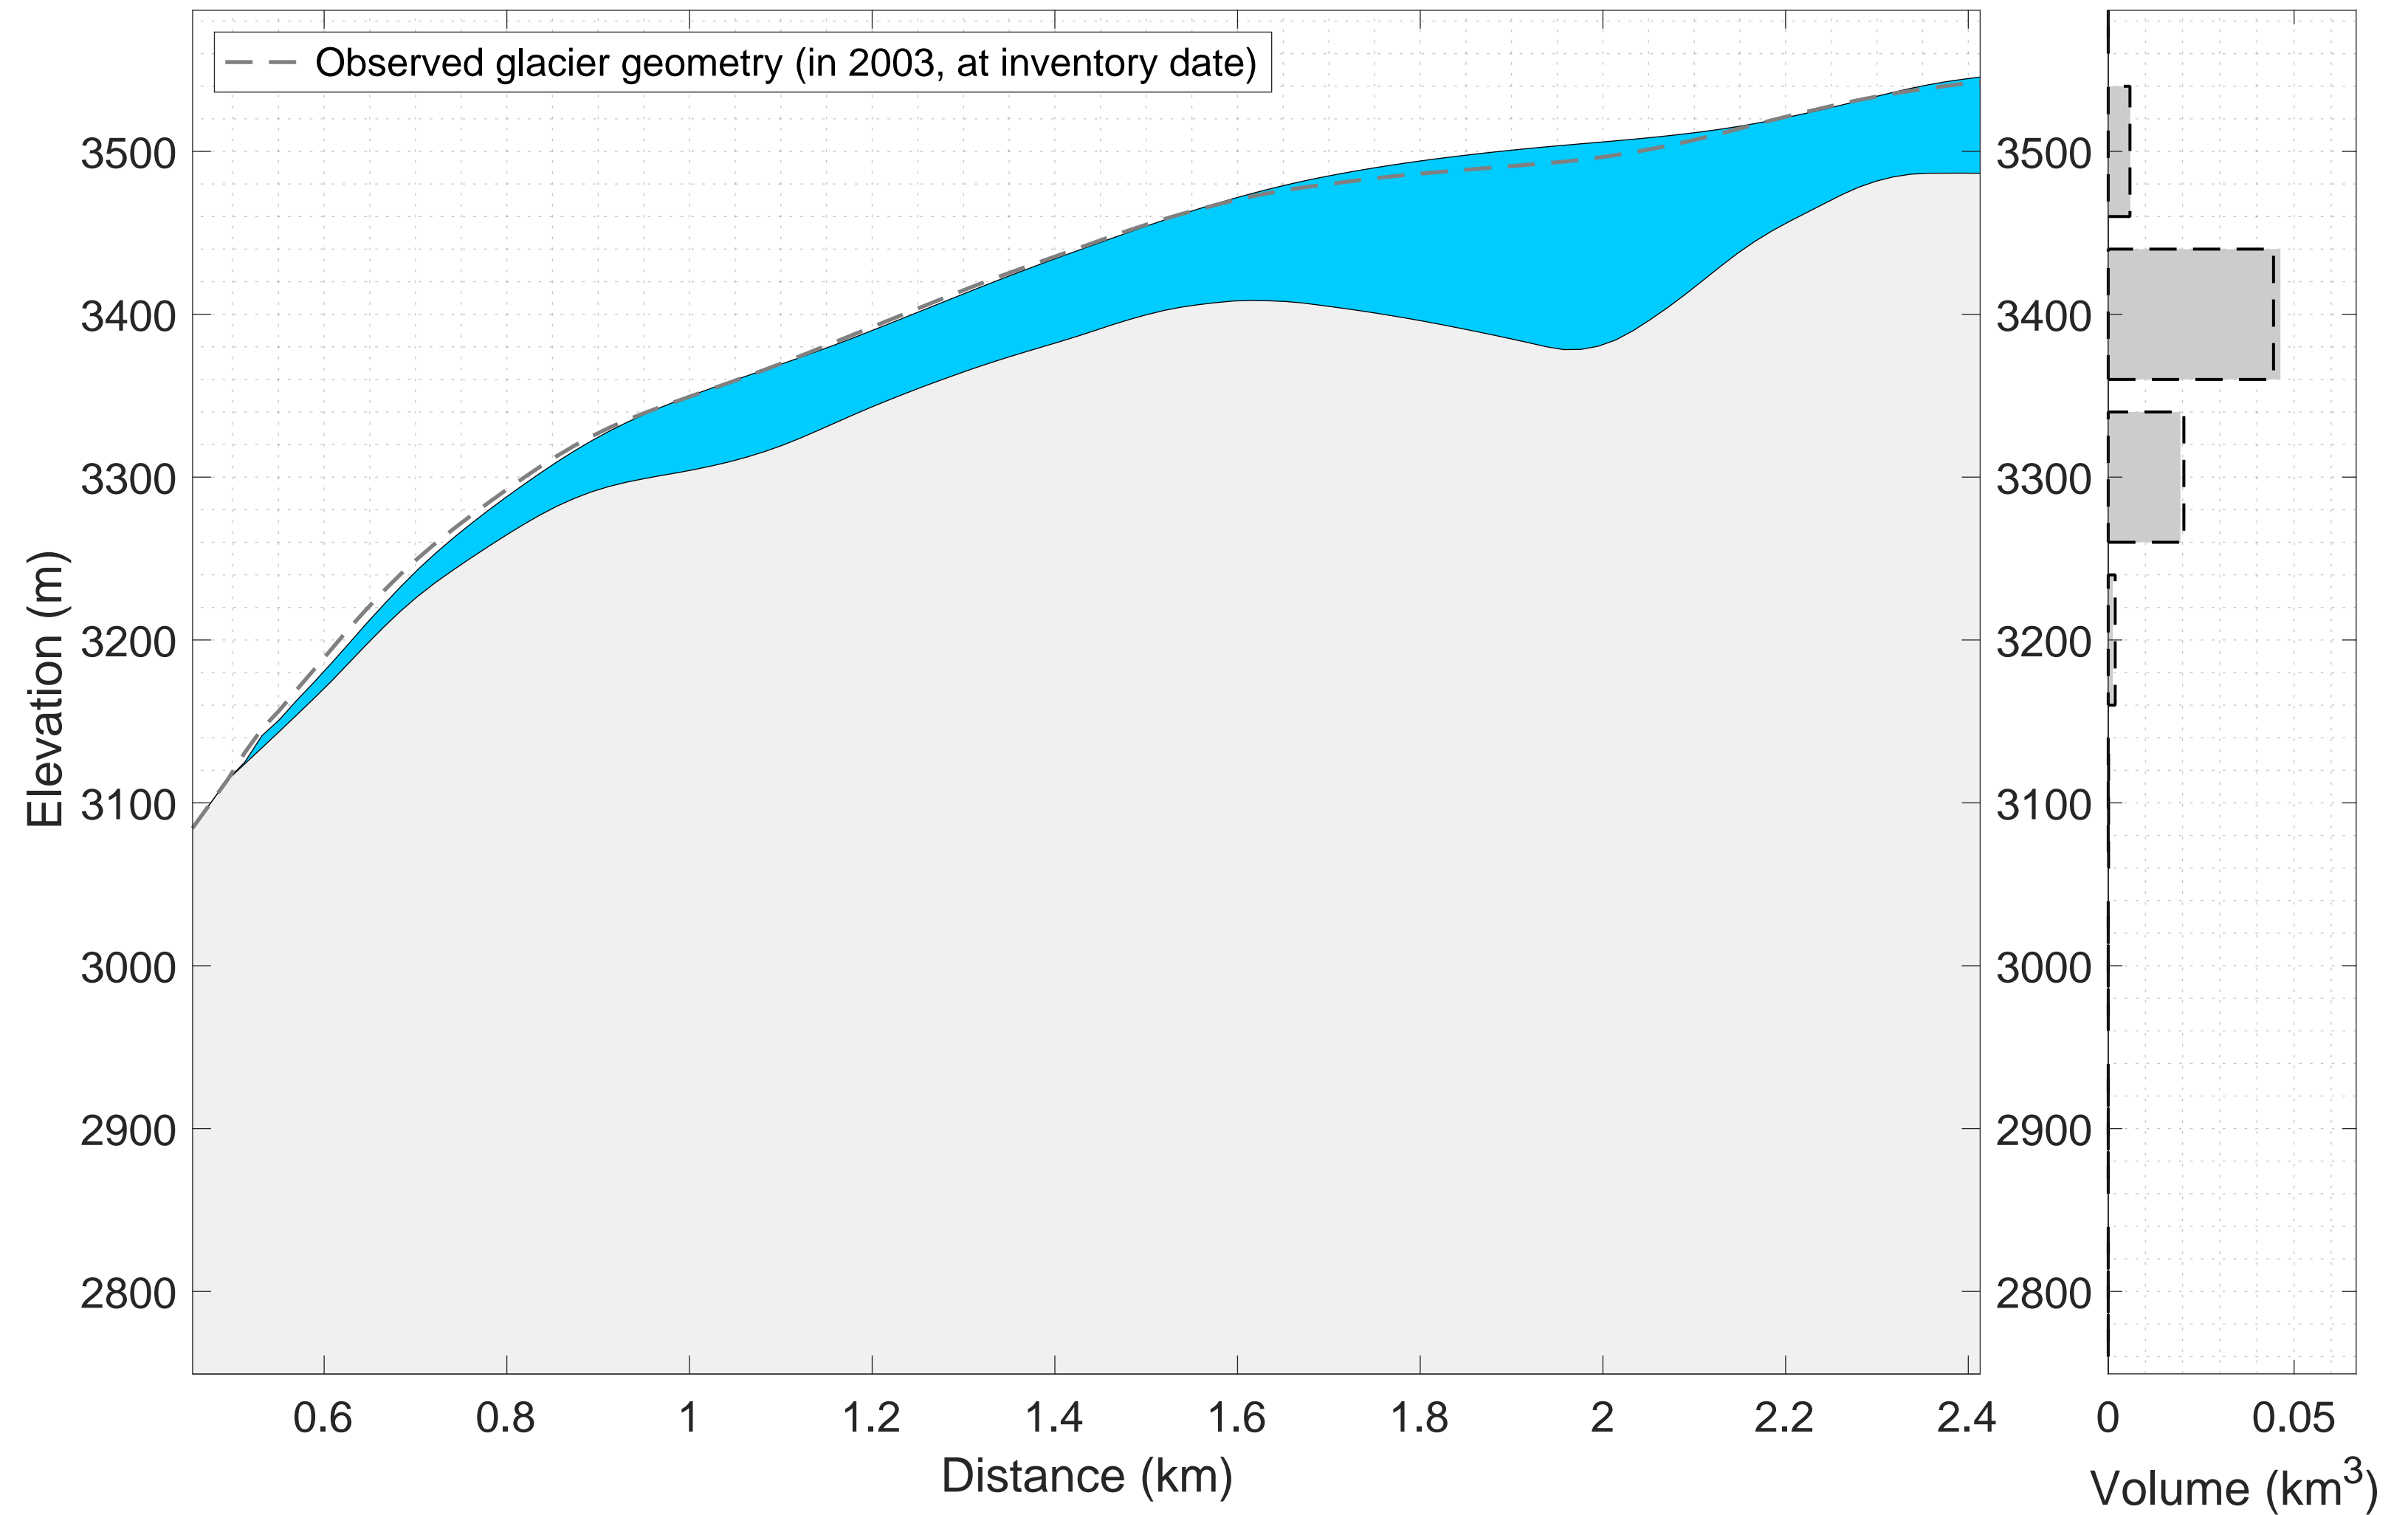

Supplement: Supplementary file 366 [file tc-13-1125-2019-supplement.zip]

**Modelled geometry (Glacier ID = 00312;  $A = 1.0097\text{e-}16 \text{ Pa}^{-3} \text{ a}^{-1}$ ;  $dx = 10 \text{ m}$ )**

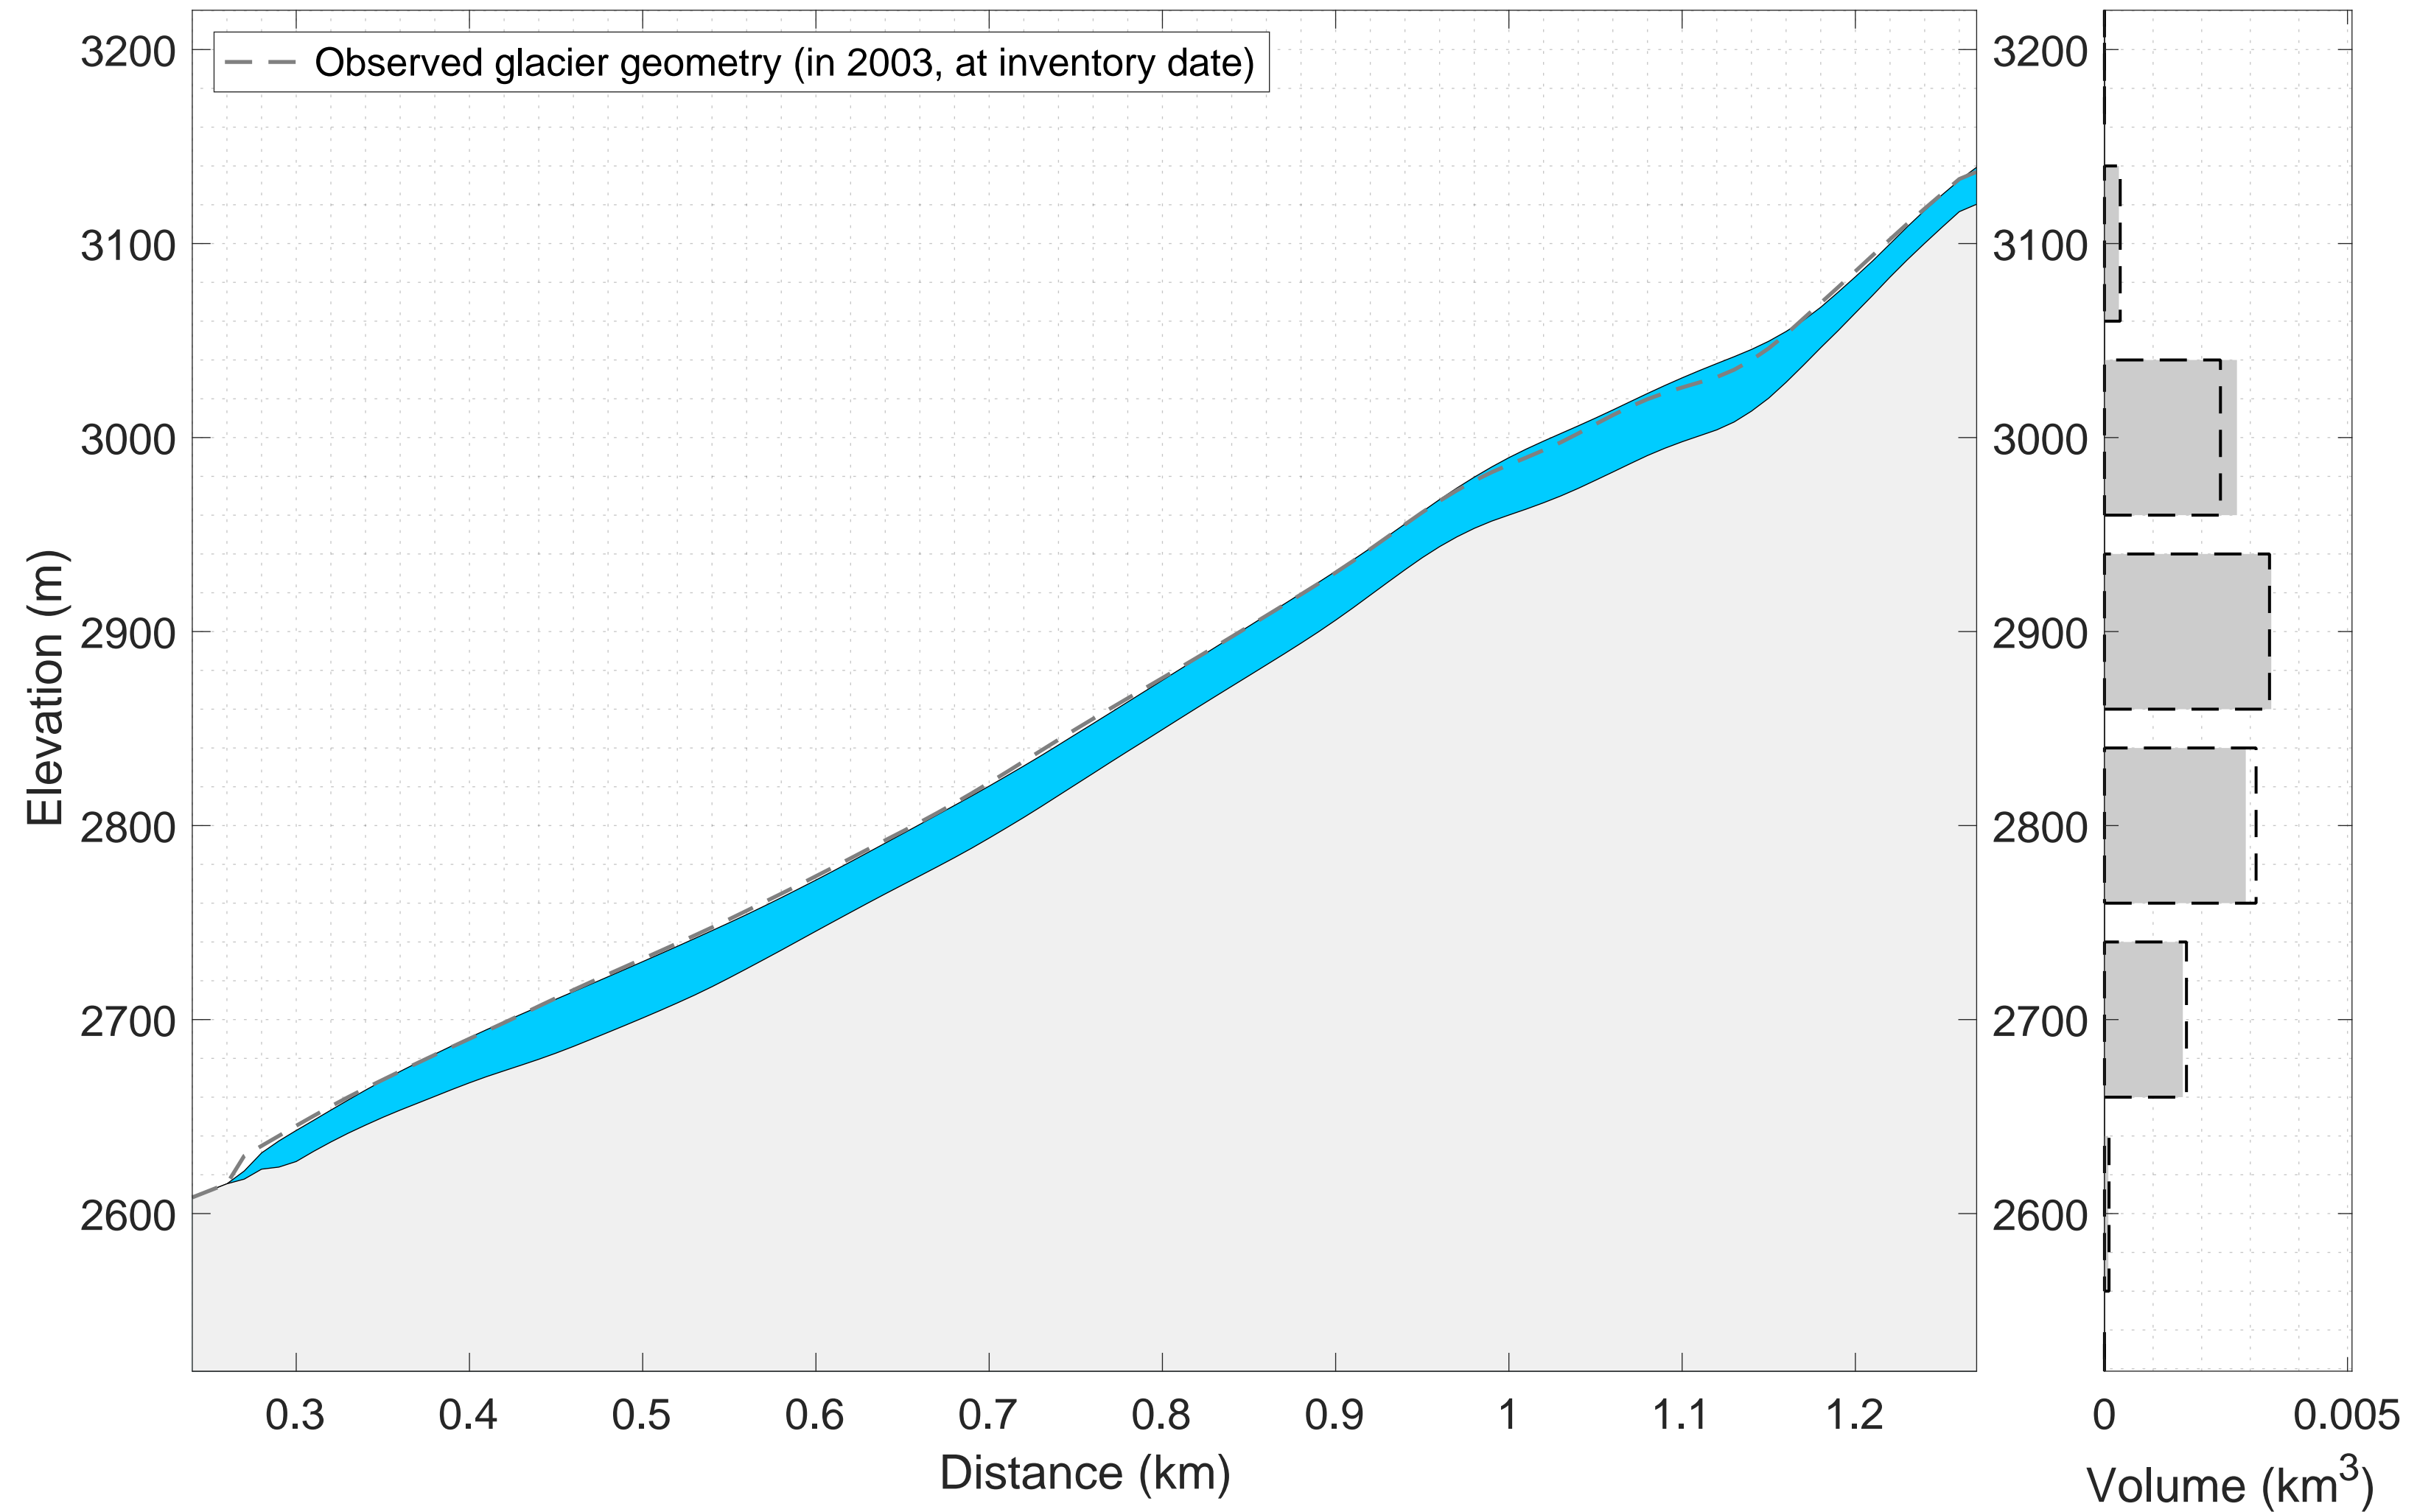

Supplement: Supplementary file 367 [file tc-13-1125-2019-supplement.zip]

**Modelled geometry (Glacier ID = 00593;  $A = 1.2136\text{e-}16 \text{ Pa}^{-3} \text{ a}^{-1}$ ;  $dx = 17 \text{ m}$ )**

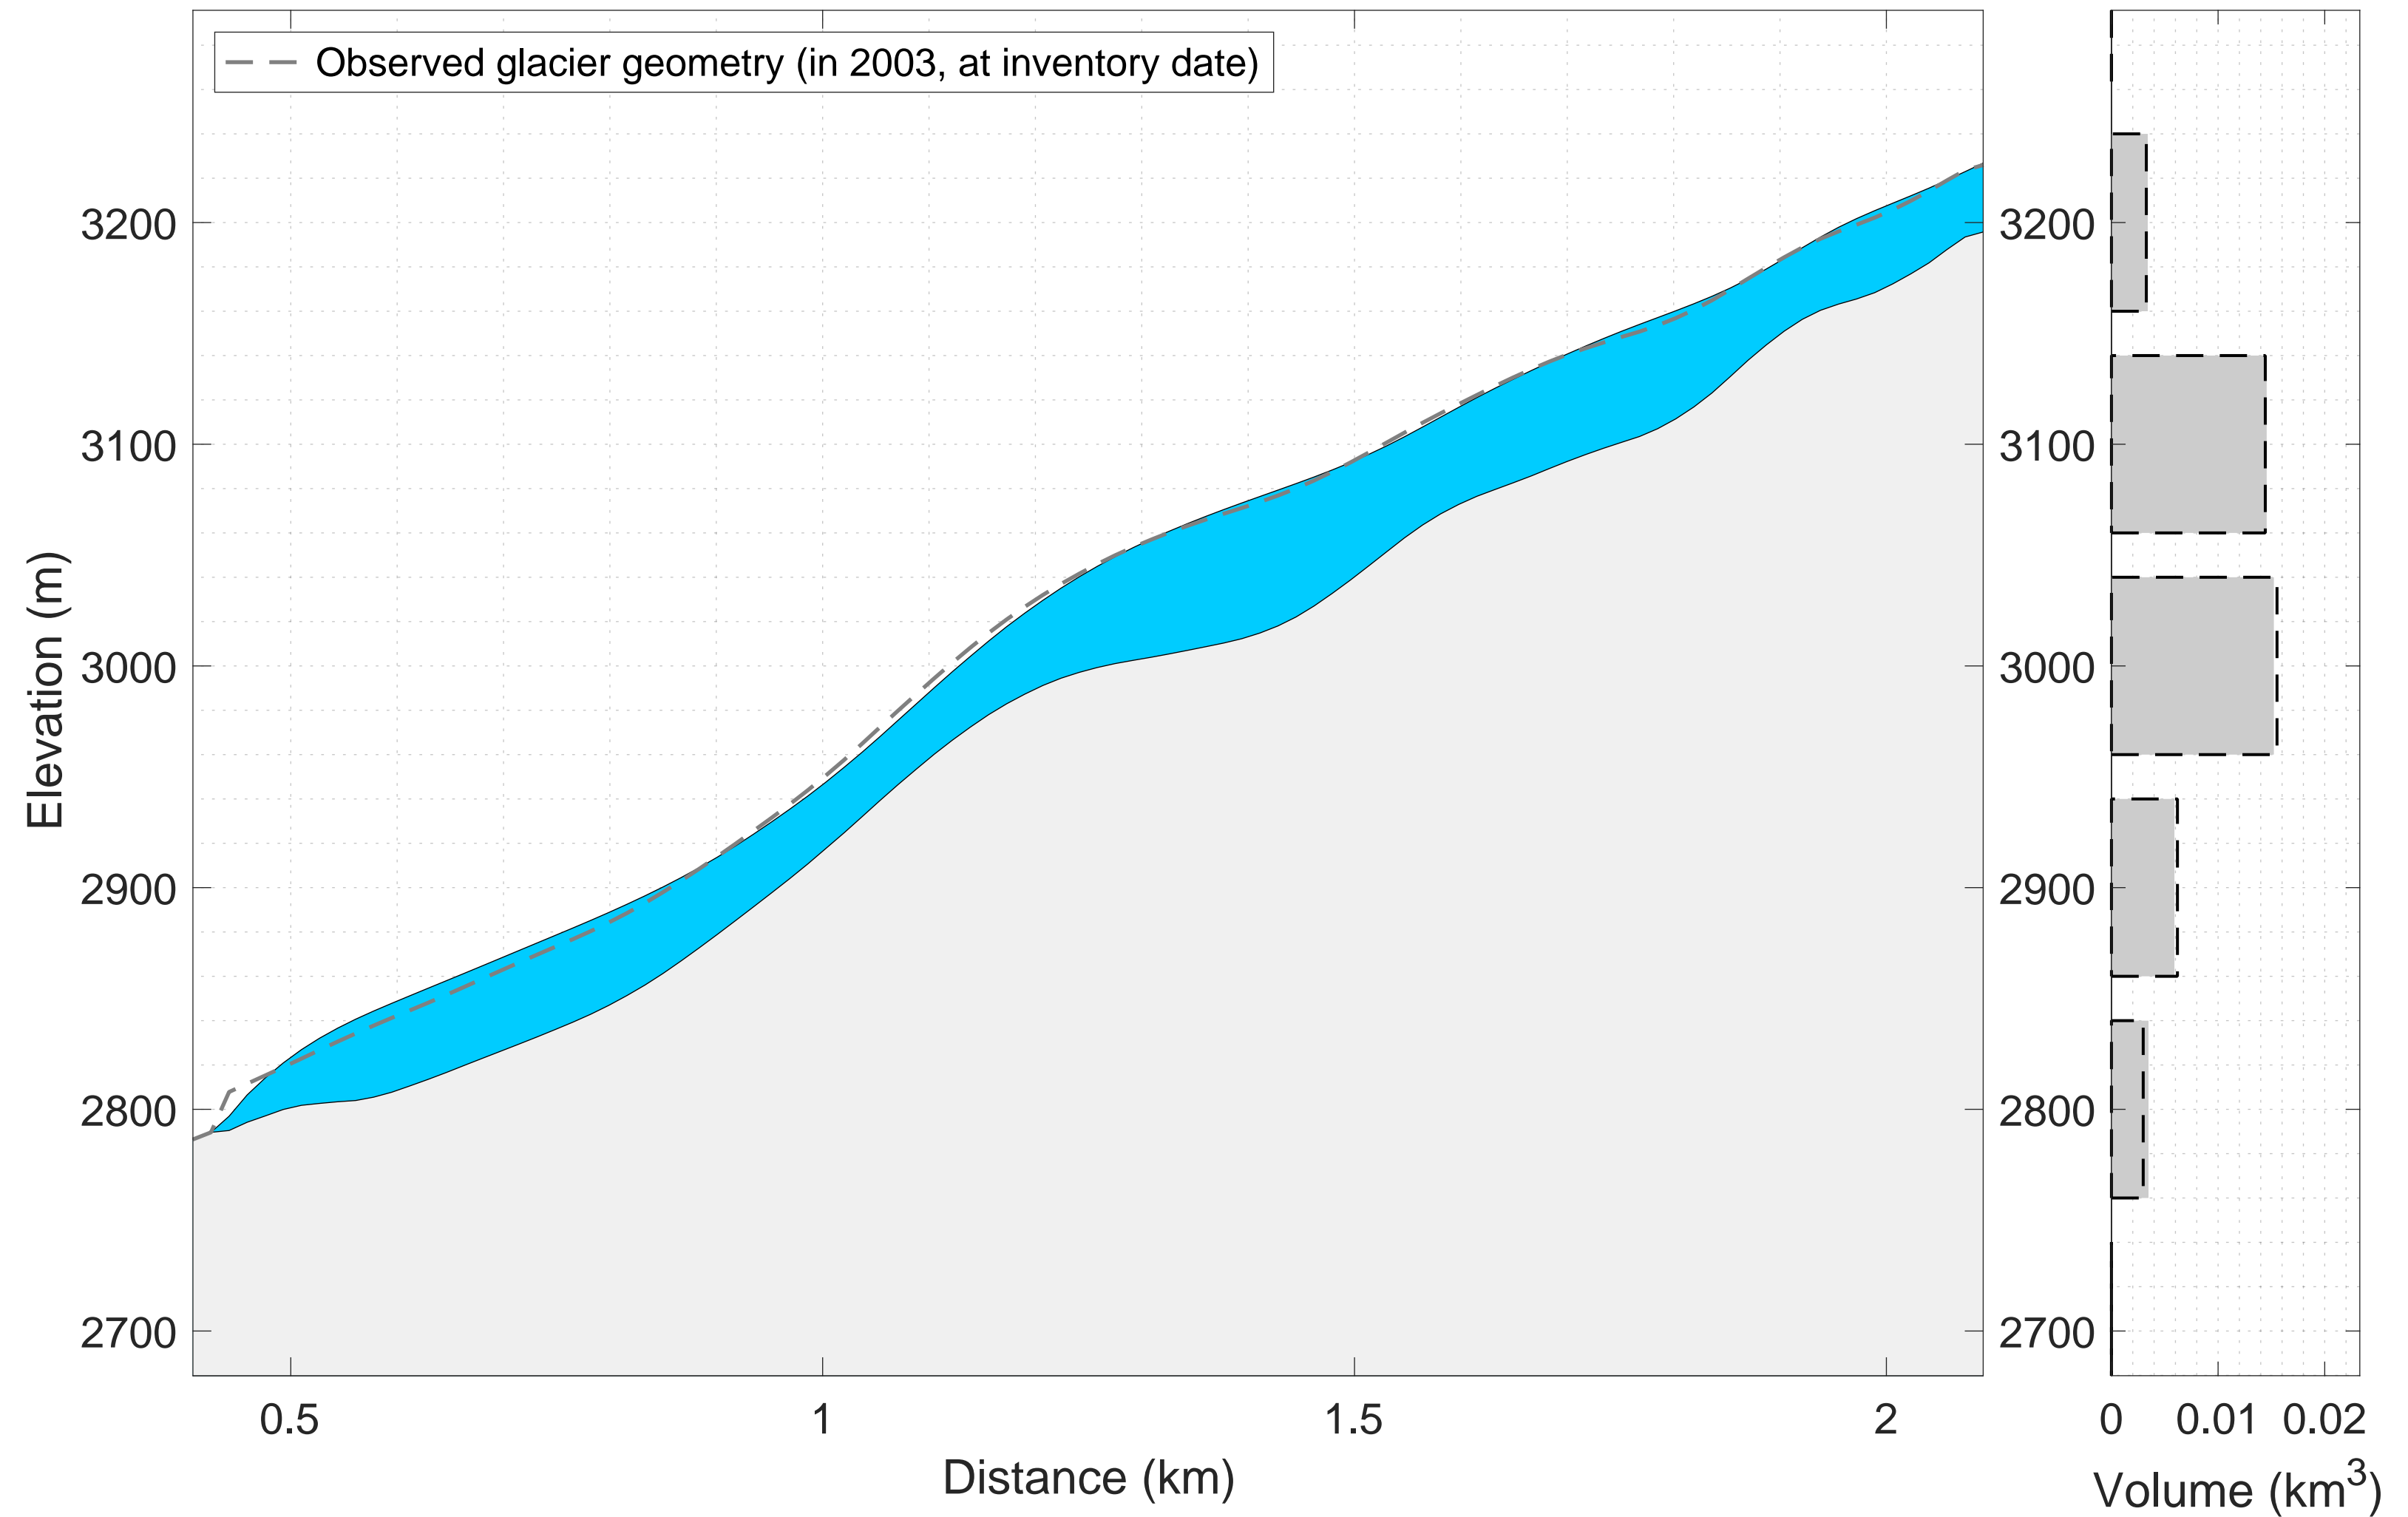

Supplement: Supplementary file 368 [file tc-13-1125-2019-supplement.zip]

**Modelled geometry (Glacier ID = 00826;  $A = 1.6189\text{e-}16 \text{ Pa}^{-3} \text{ a}^{-1}$ ;  $dx = 16 \text{ m}$ )**

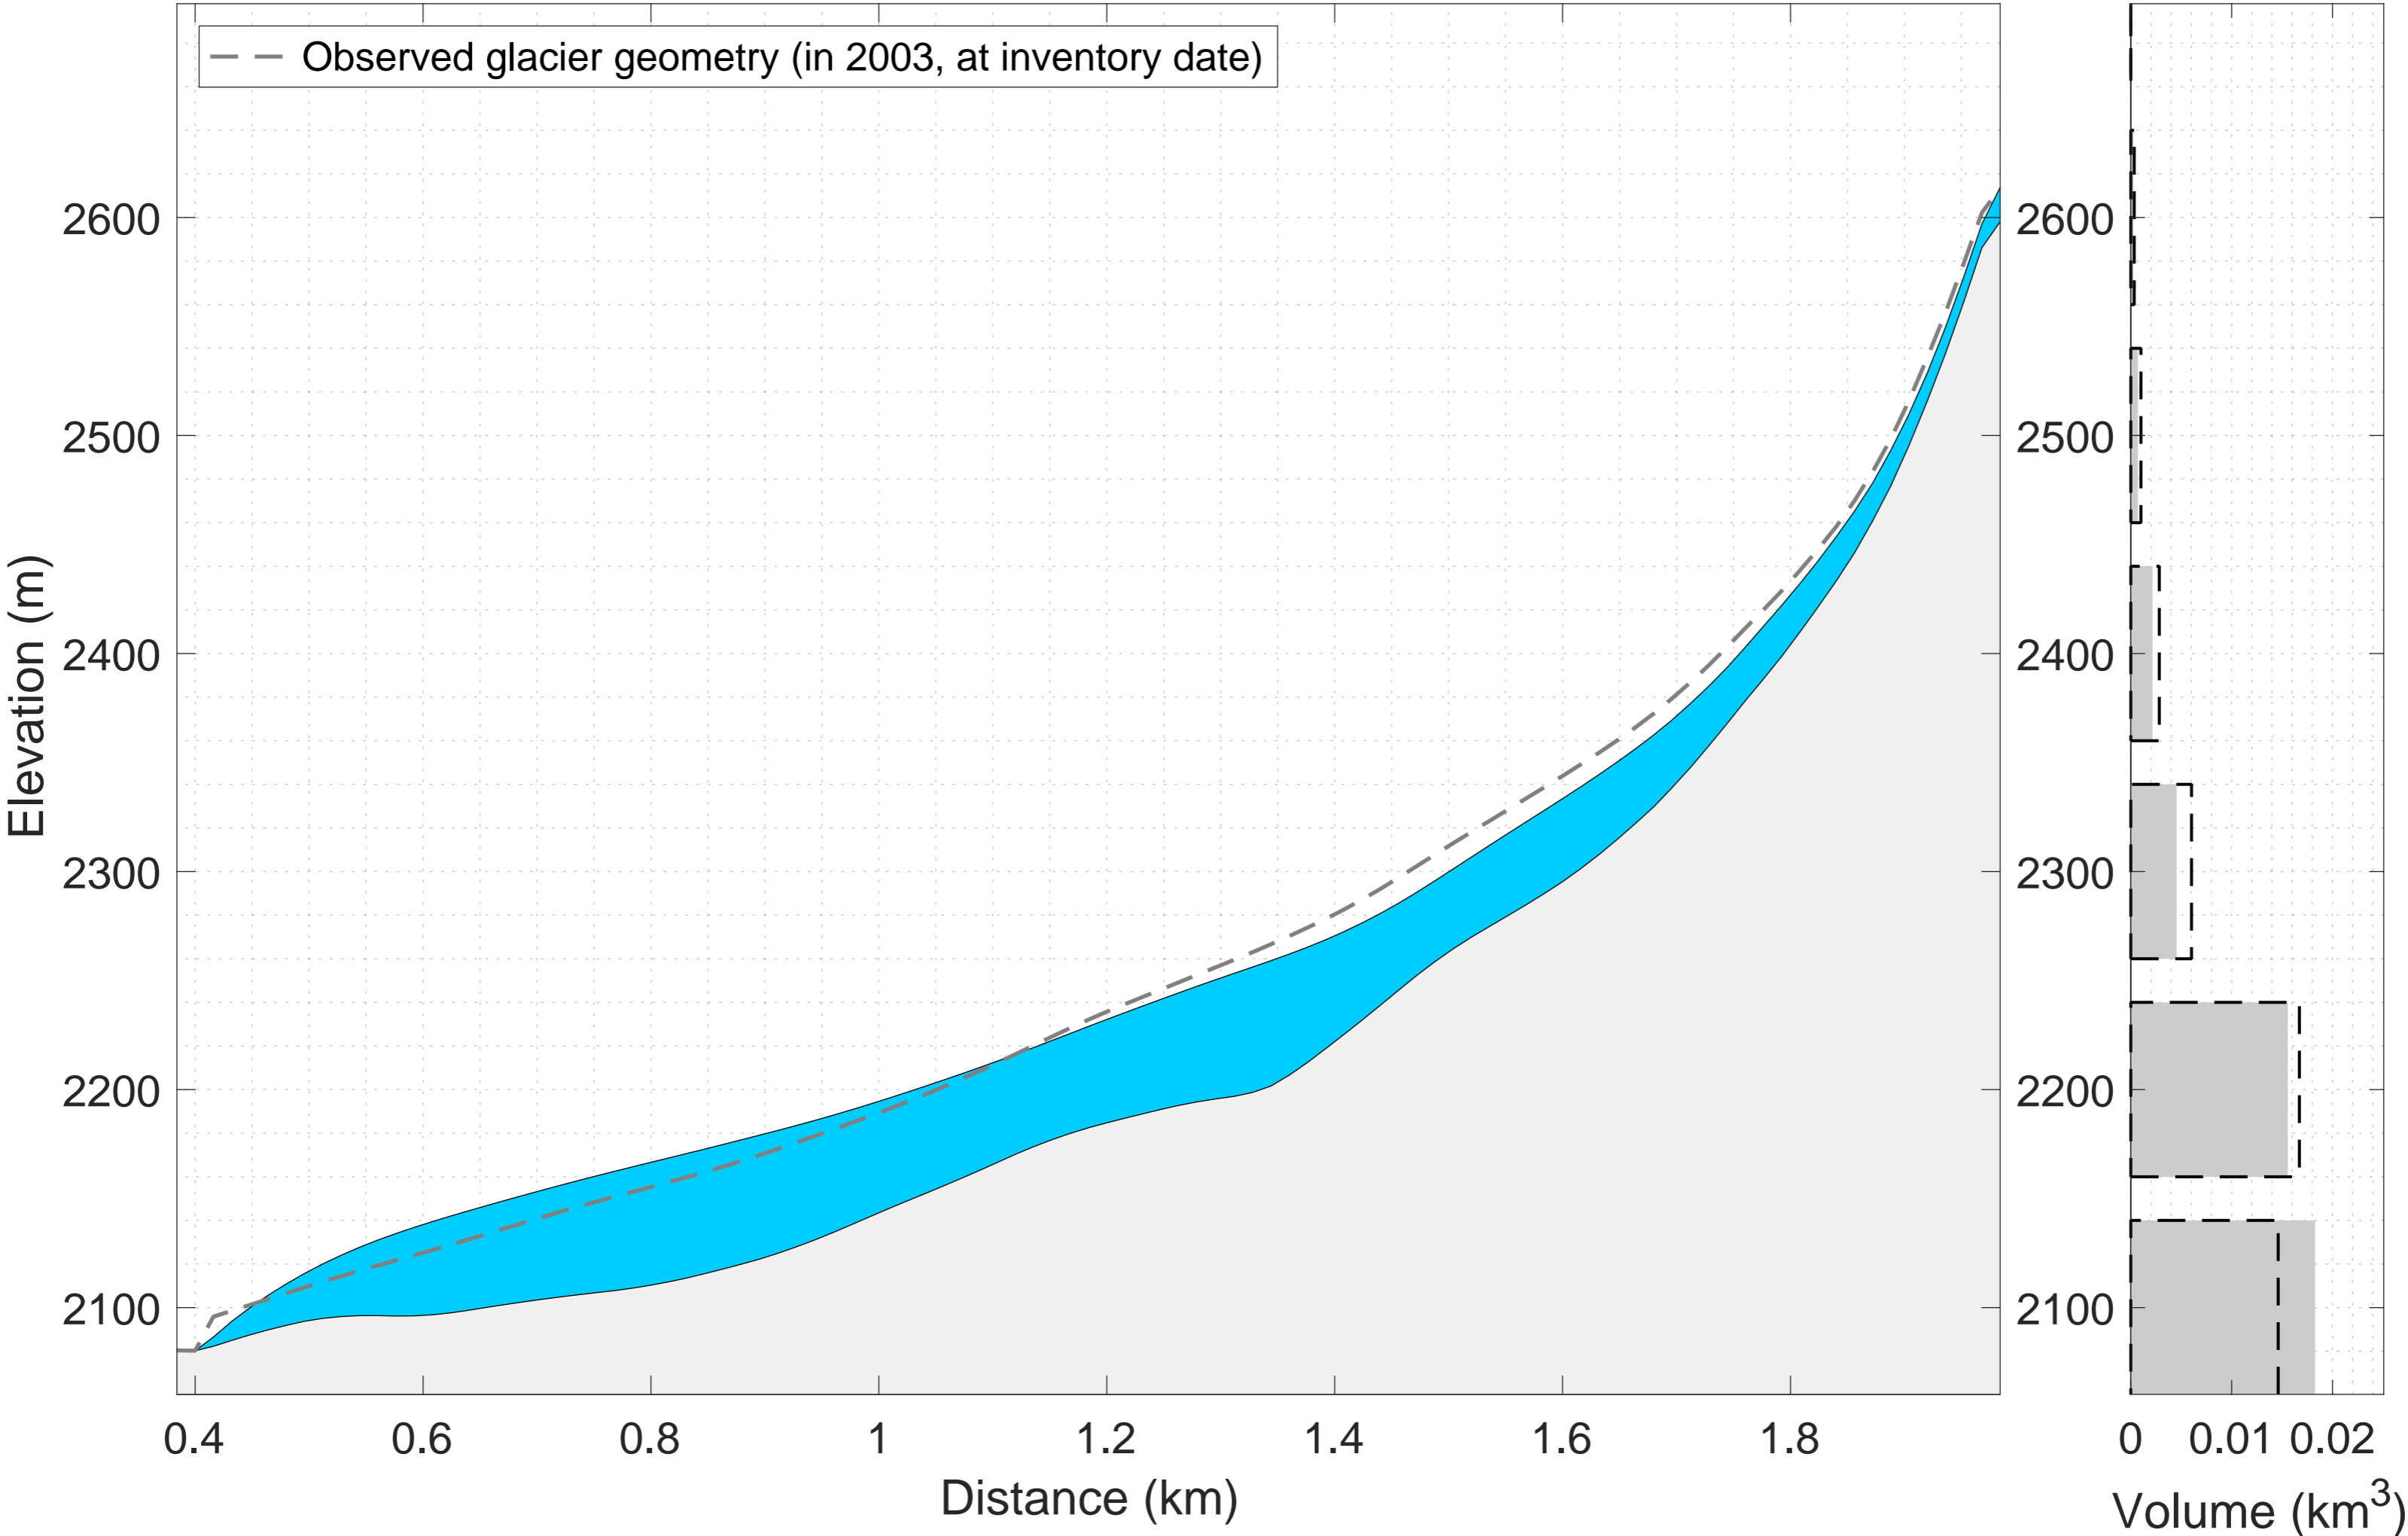

Supplement: Supplementary file 369 [file tc-13-1125-2019-supplement.zip]

**Modelled geometry (Glacier ID = 03482;  $A = 1.0527\text{e-}16 \text{ Pa}^{-3} \text{ a}^{-1}$ ;  $dx = 10 \text{ m}$ )**

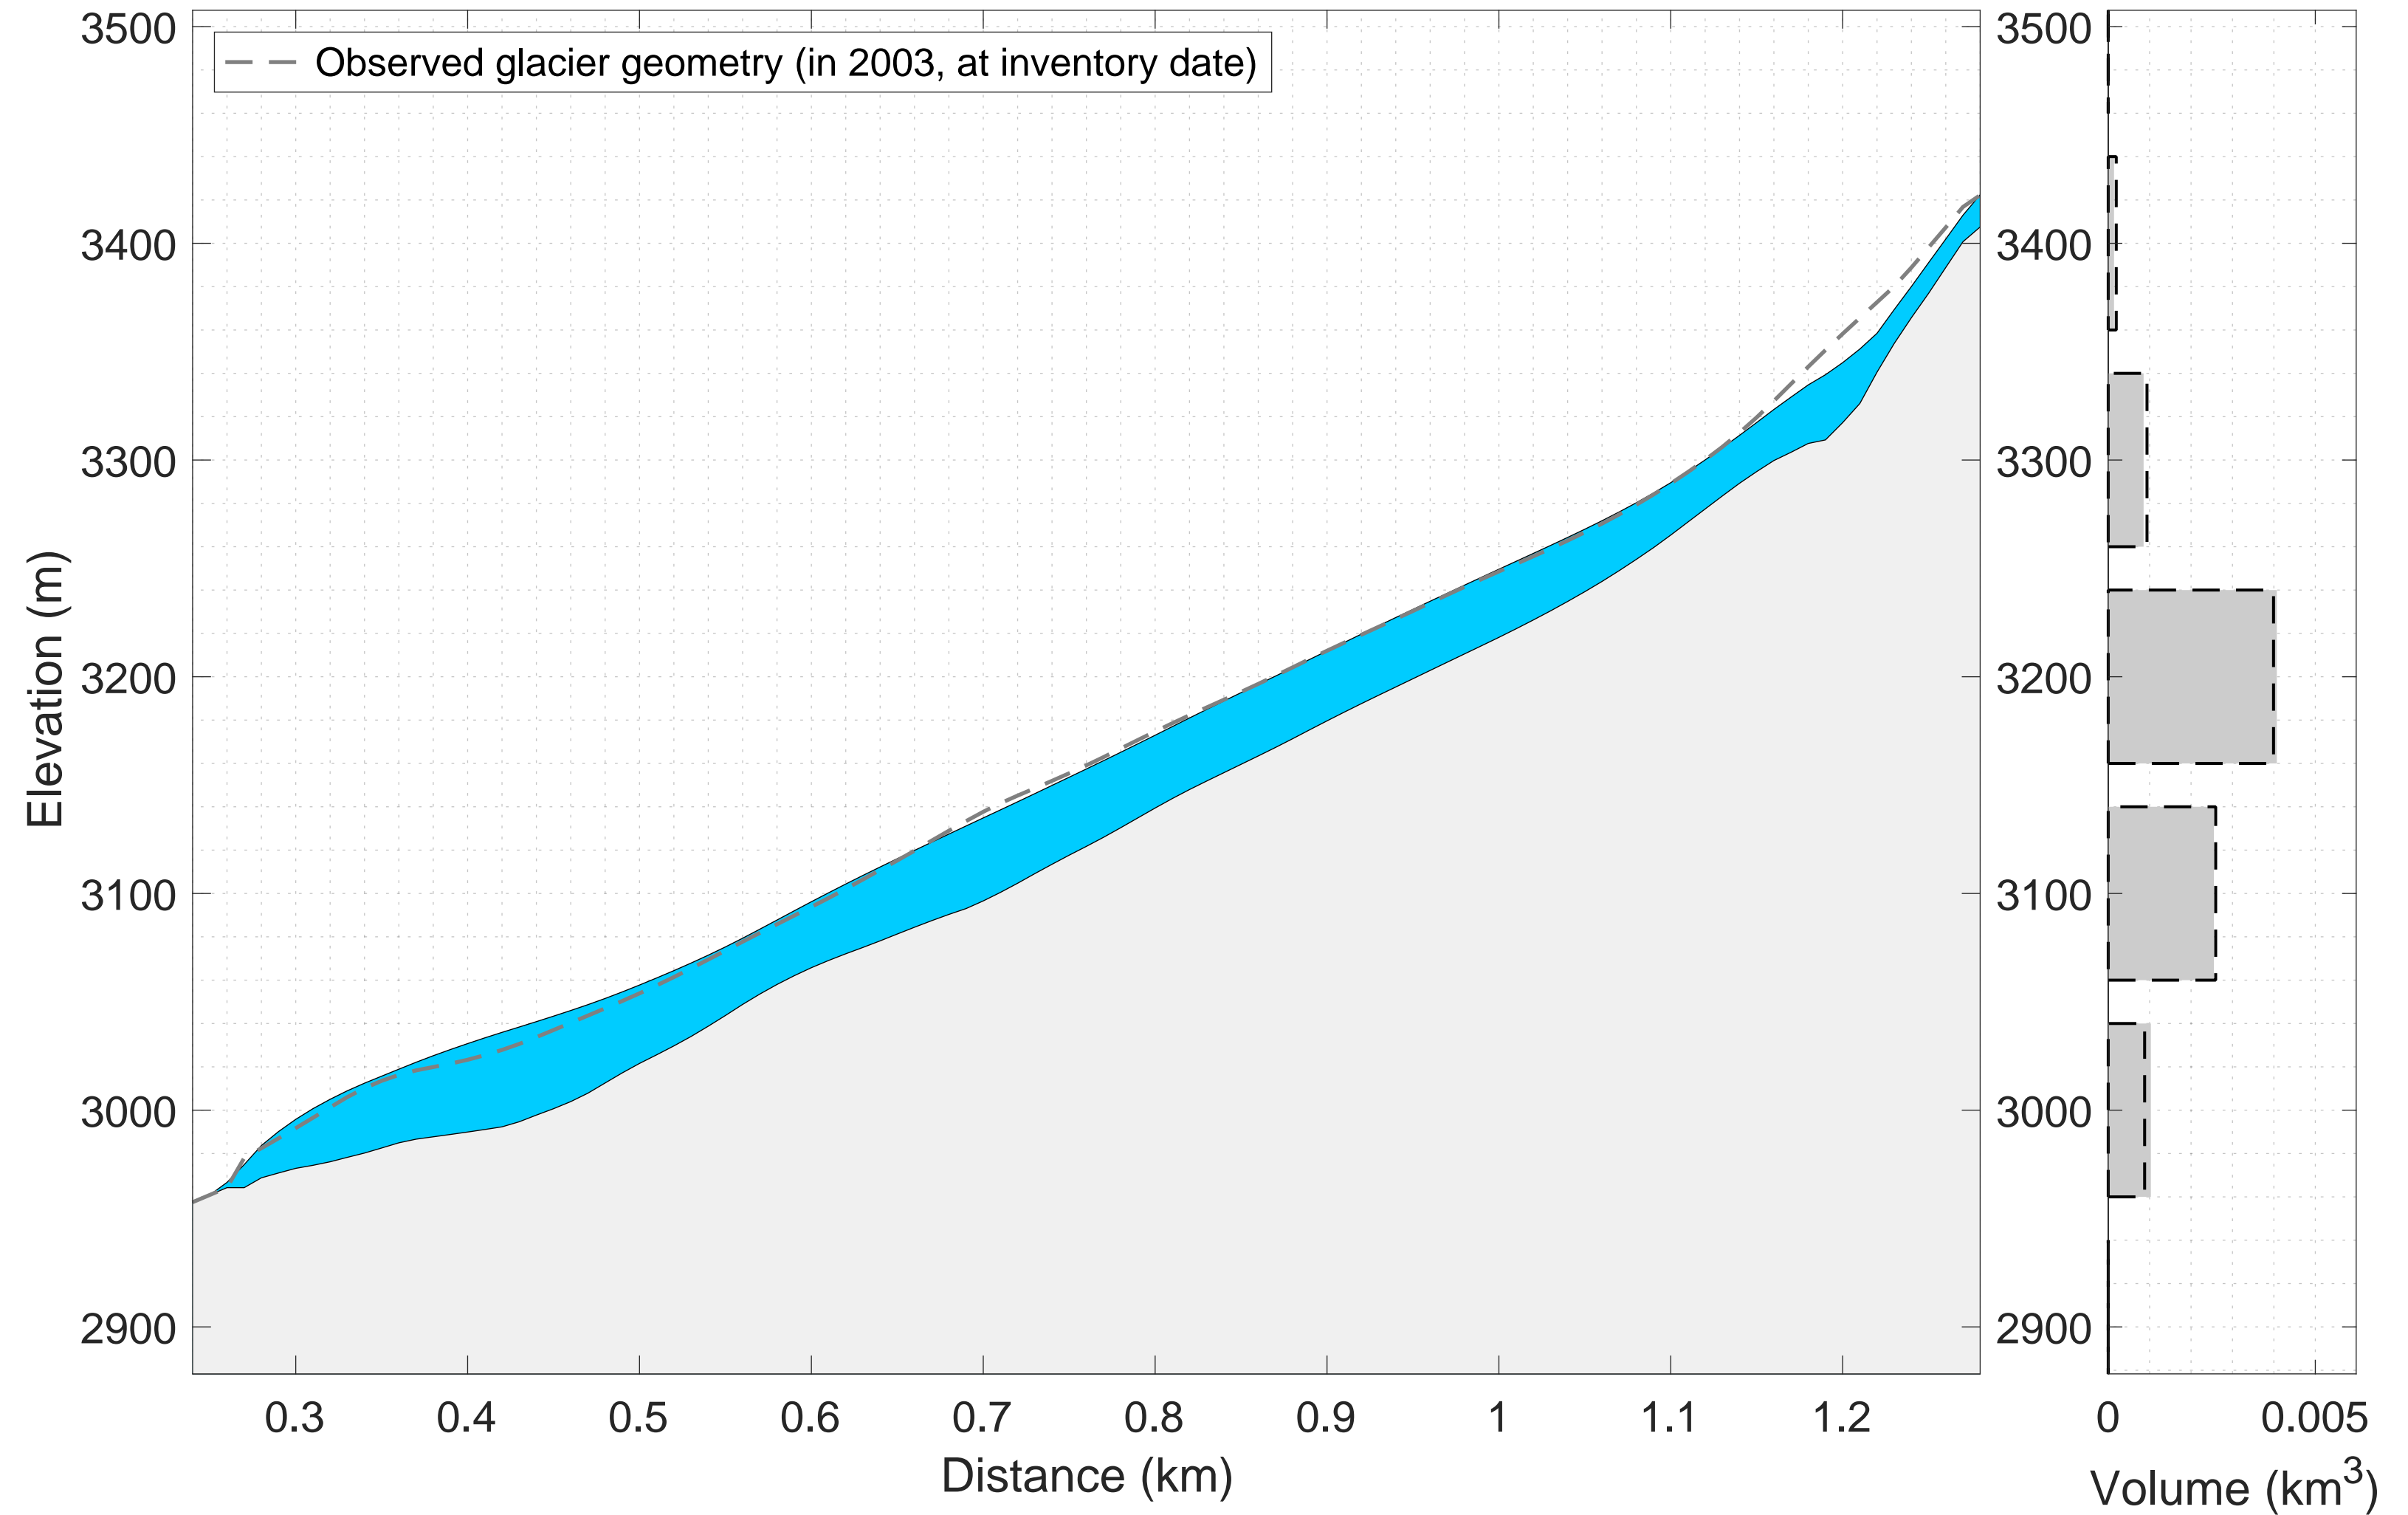

Supplement: Supplementary file 370 [file tc-13-1125-2019-supplement.zip]

**Modelled geometry (Glacier ID = 02775;  $A = 5.7787\text{e-}18 \text{ Pa}^{-3} \text{ a}^{-1}$ ;  $dx = 28 \text{ m}$ )**

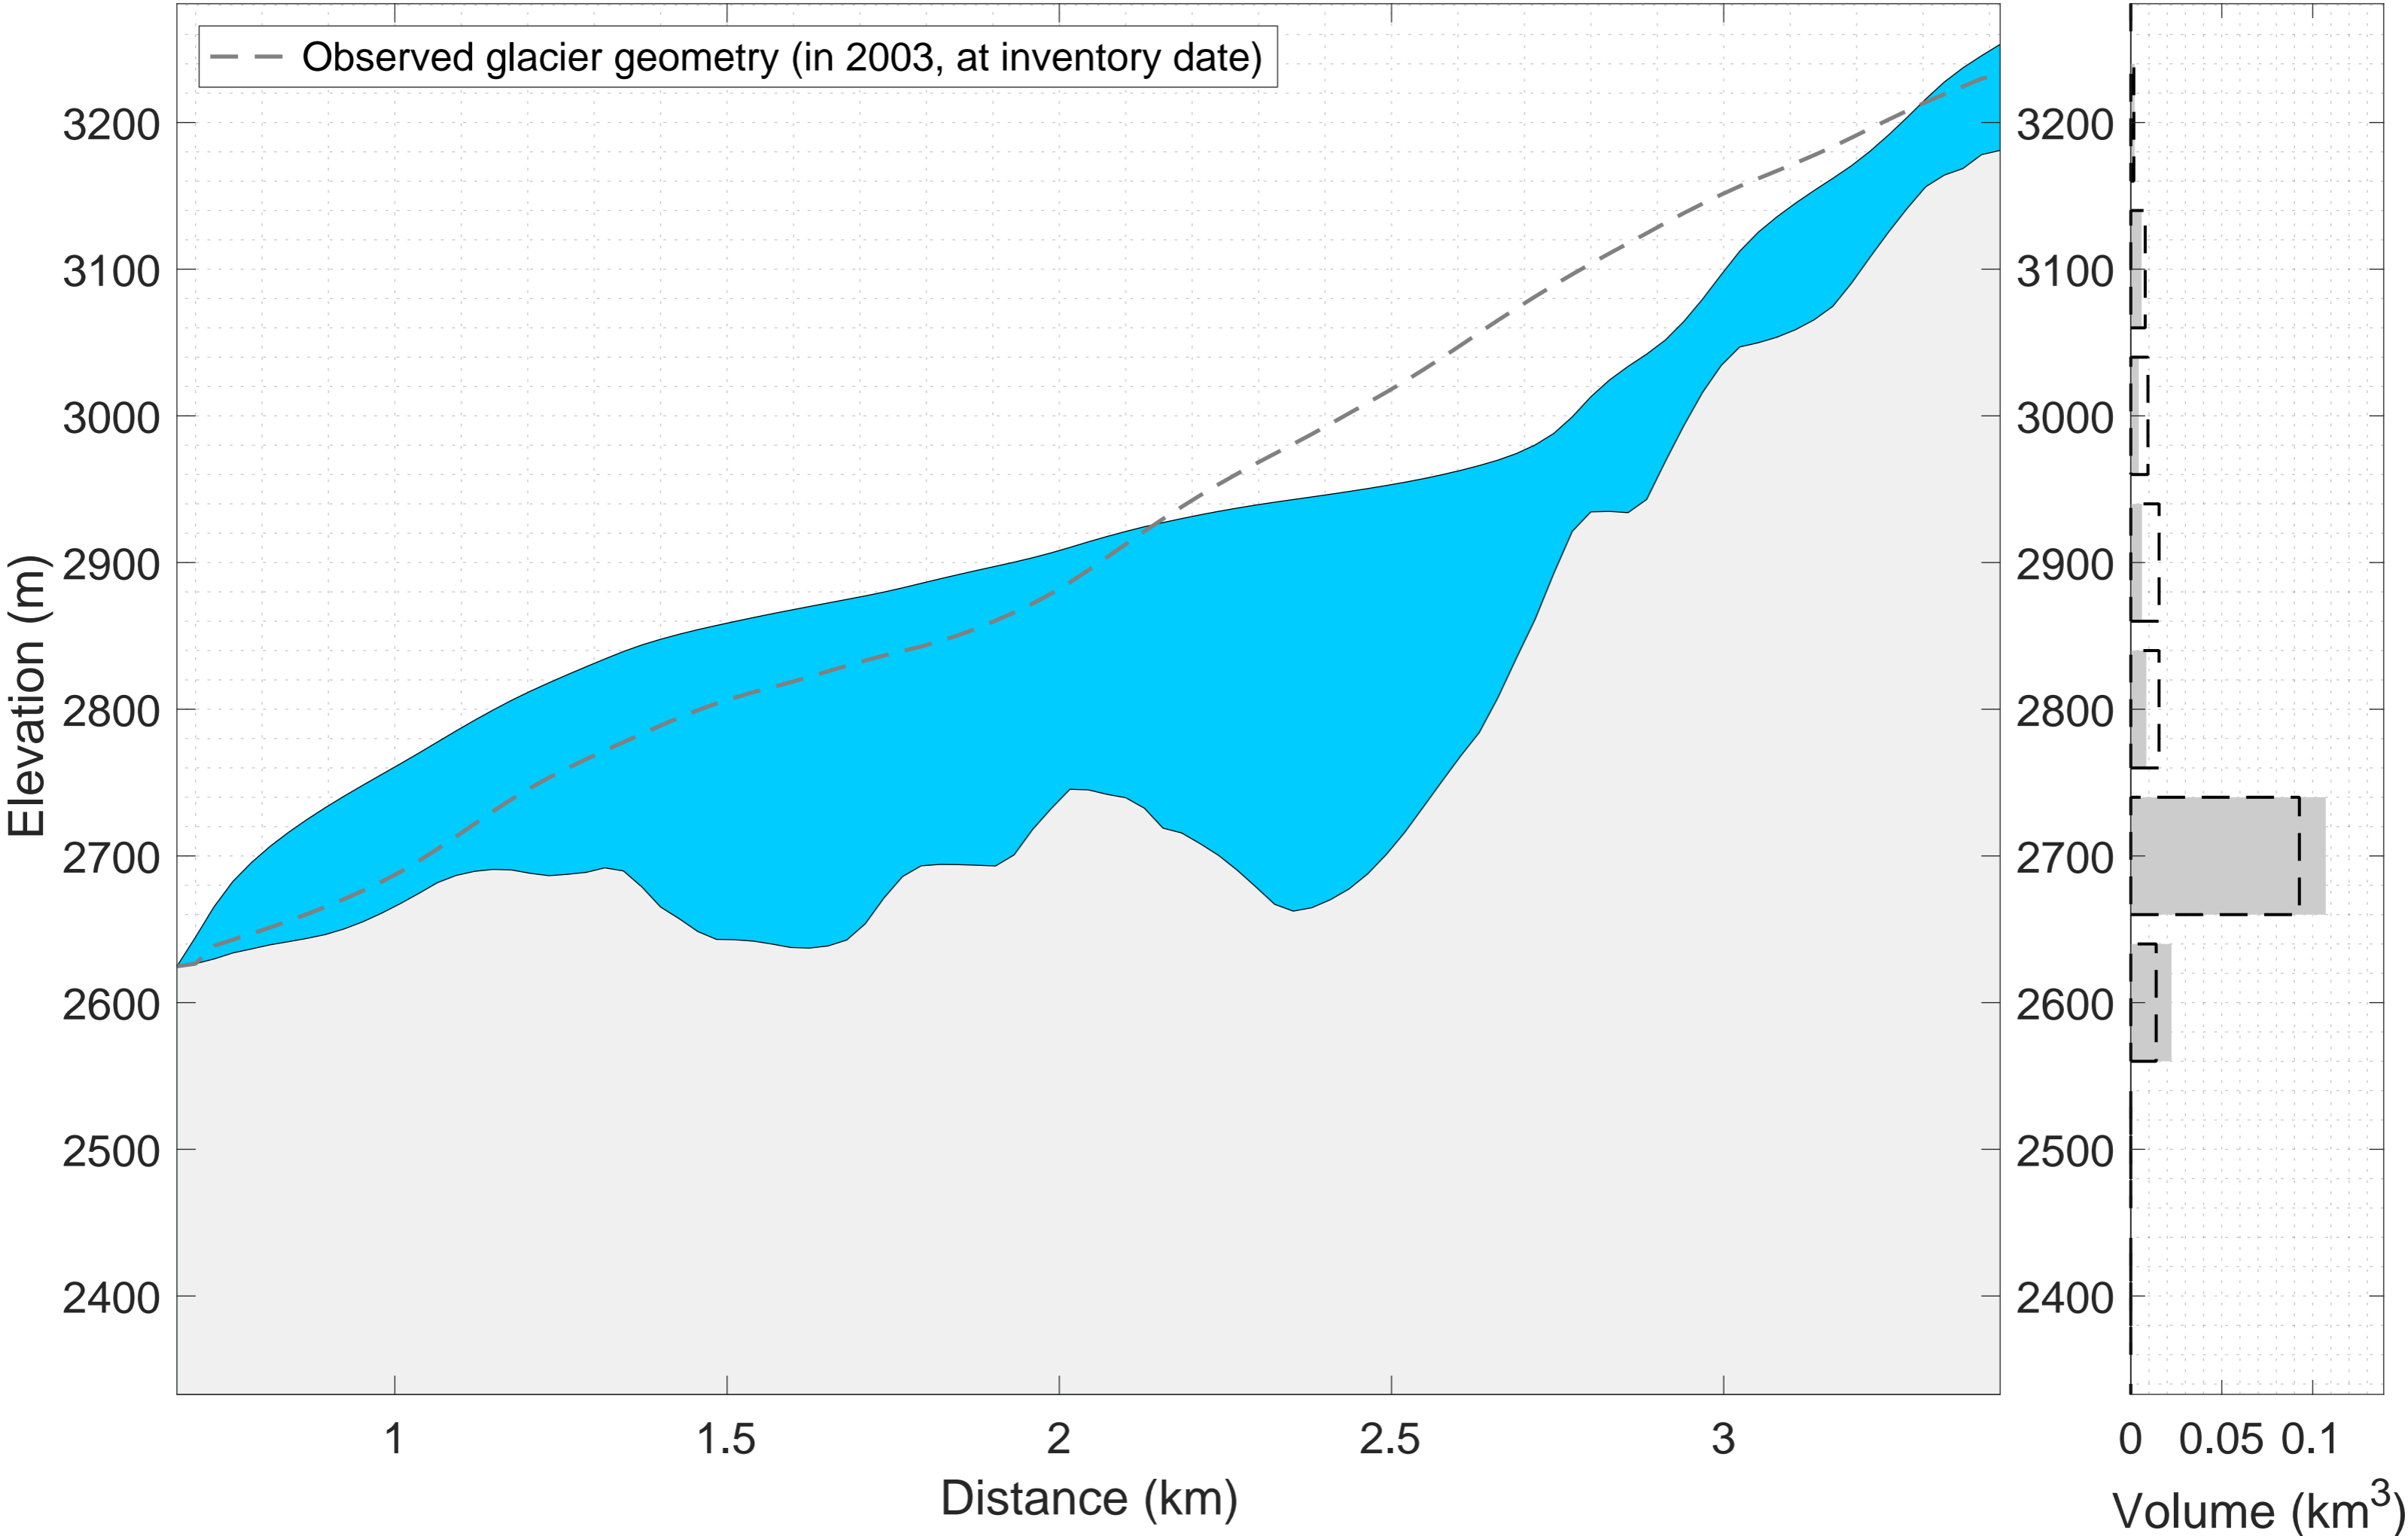

Supplement: Supplementary file 371 [file tc-13-1125-2019-supplement.zip]

**Modelled geometry (Glacier ID = 01987;  $A = 6.5268\text{e-}18 \text{ Pa}^{-3} \text{ a}^{-1}$ ;  $dx = 18 \text{ m}$ )**

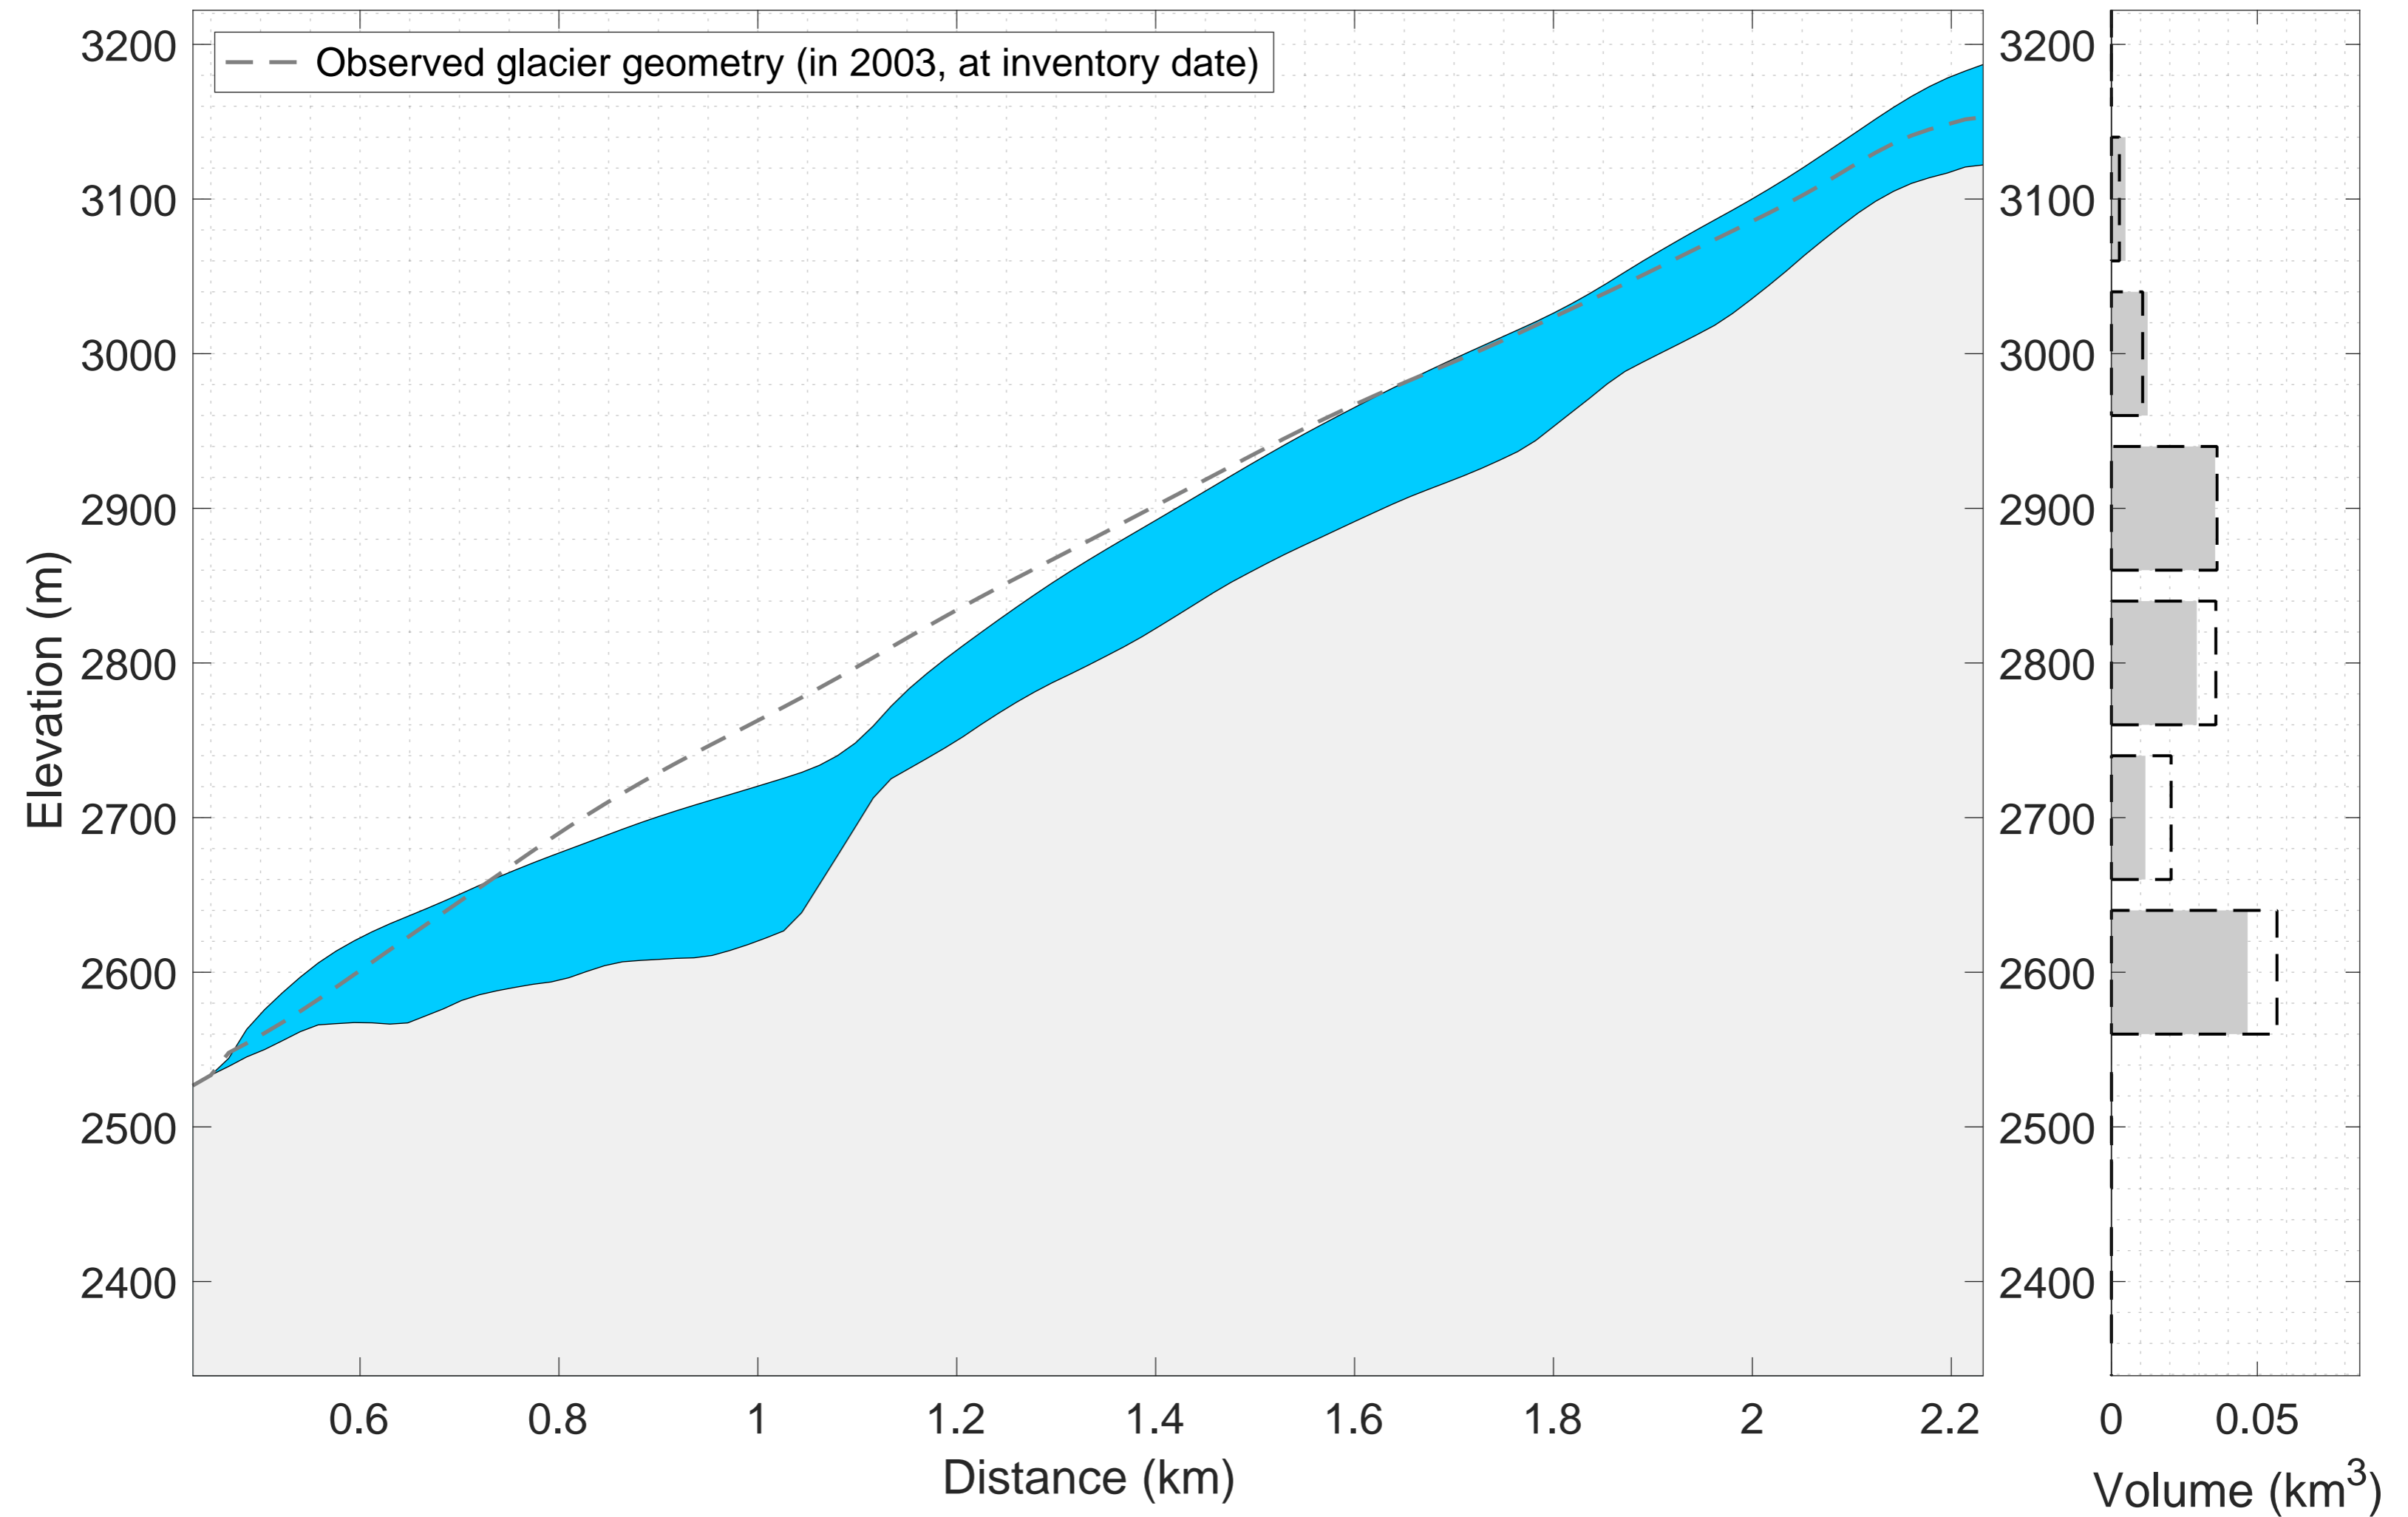

Supplement: Supplementary file 372 [file tc-13-1125-2019-supplement.zip]

**Modelled geometry (Glacier ID = 02051;  $A = 1.1155\text{e-}16 \text{ Pa}^{-3} \text{ a}^{-1}$ ;  $dx = 47 \text{ m}$ )**

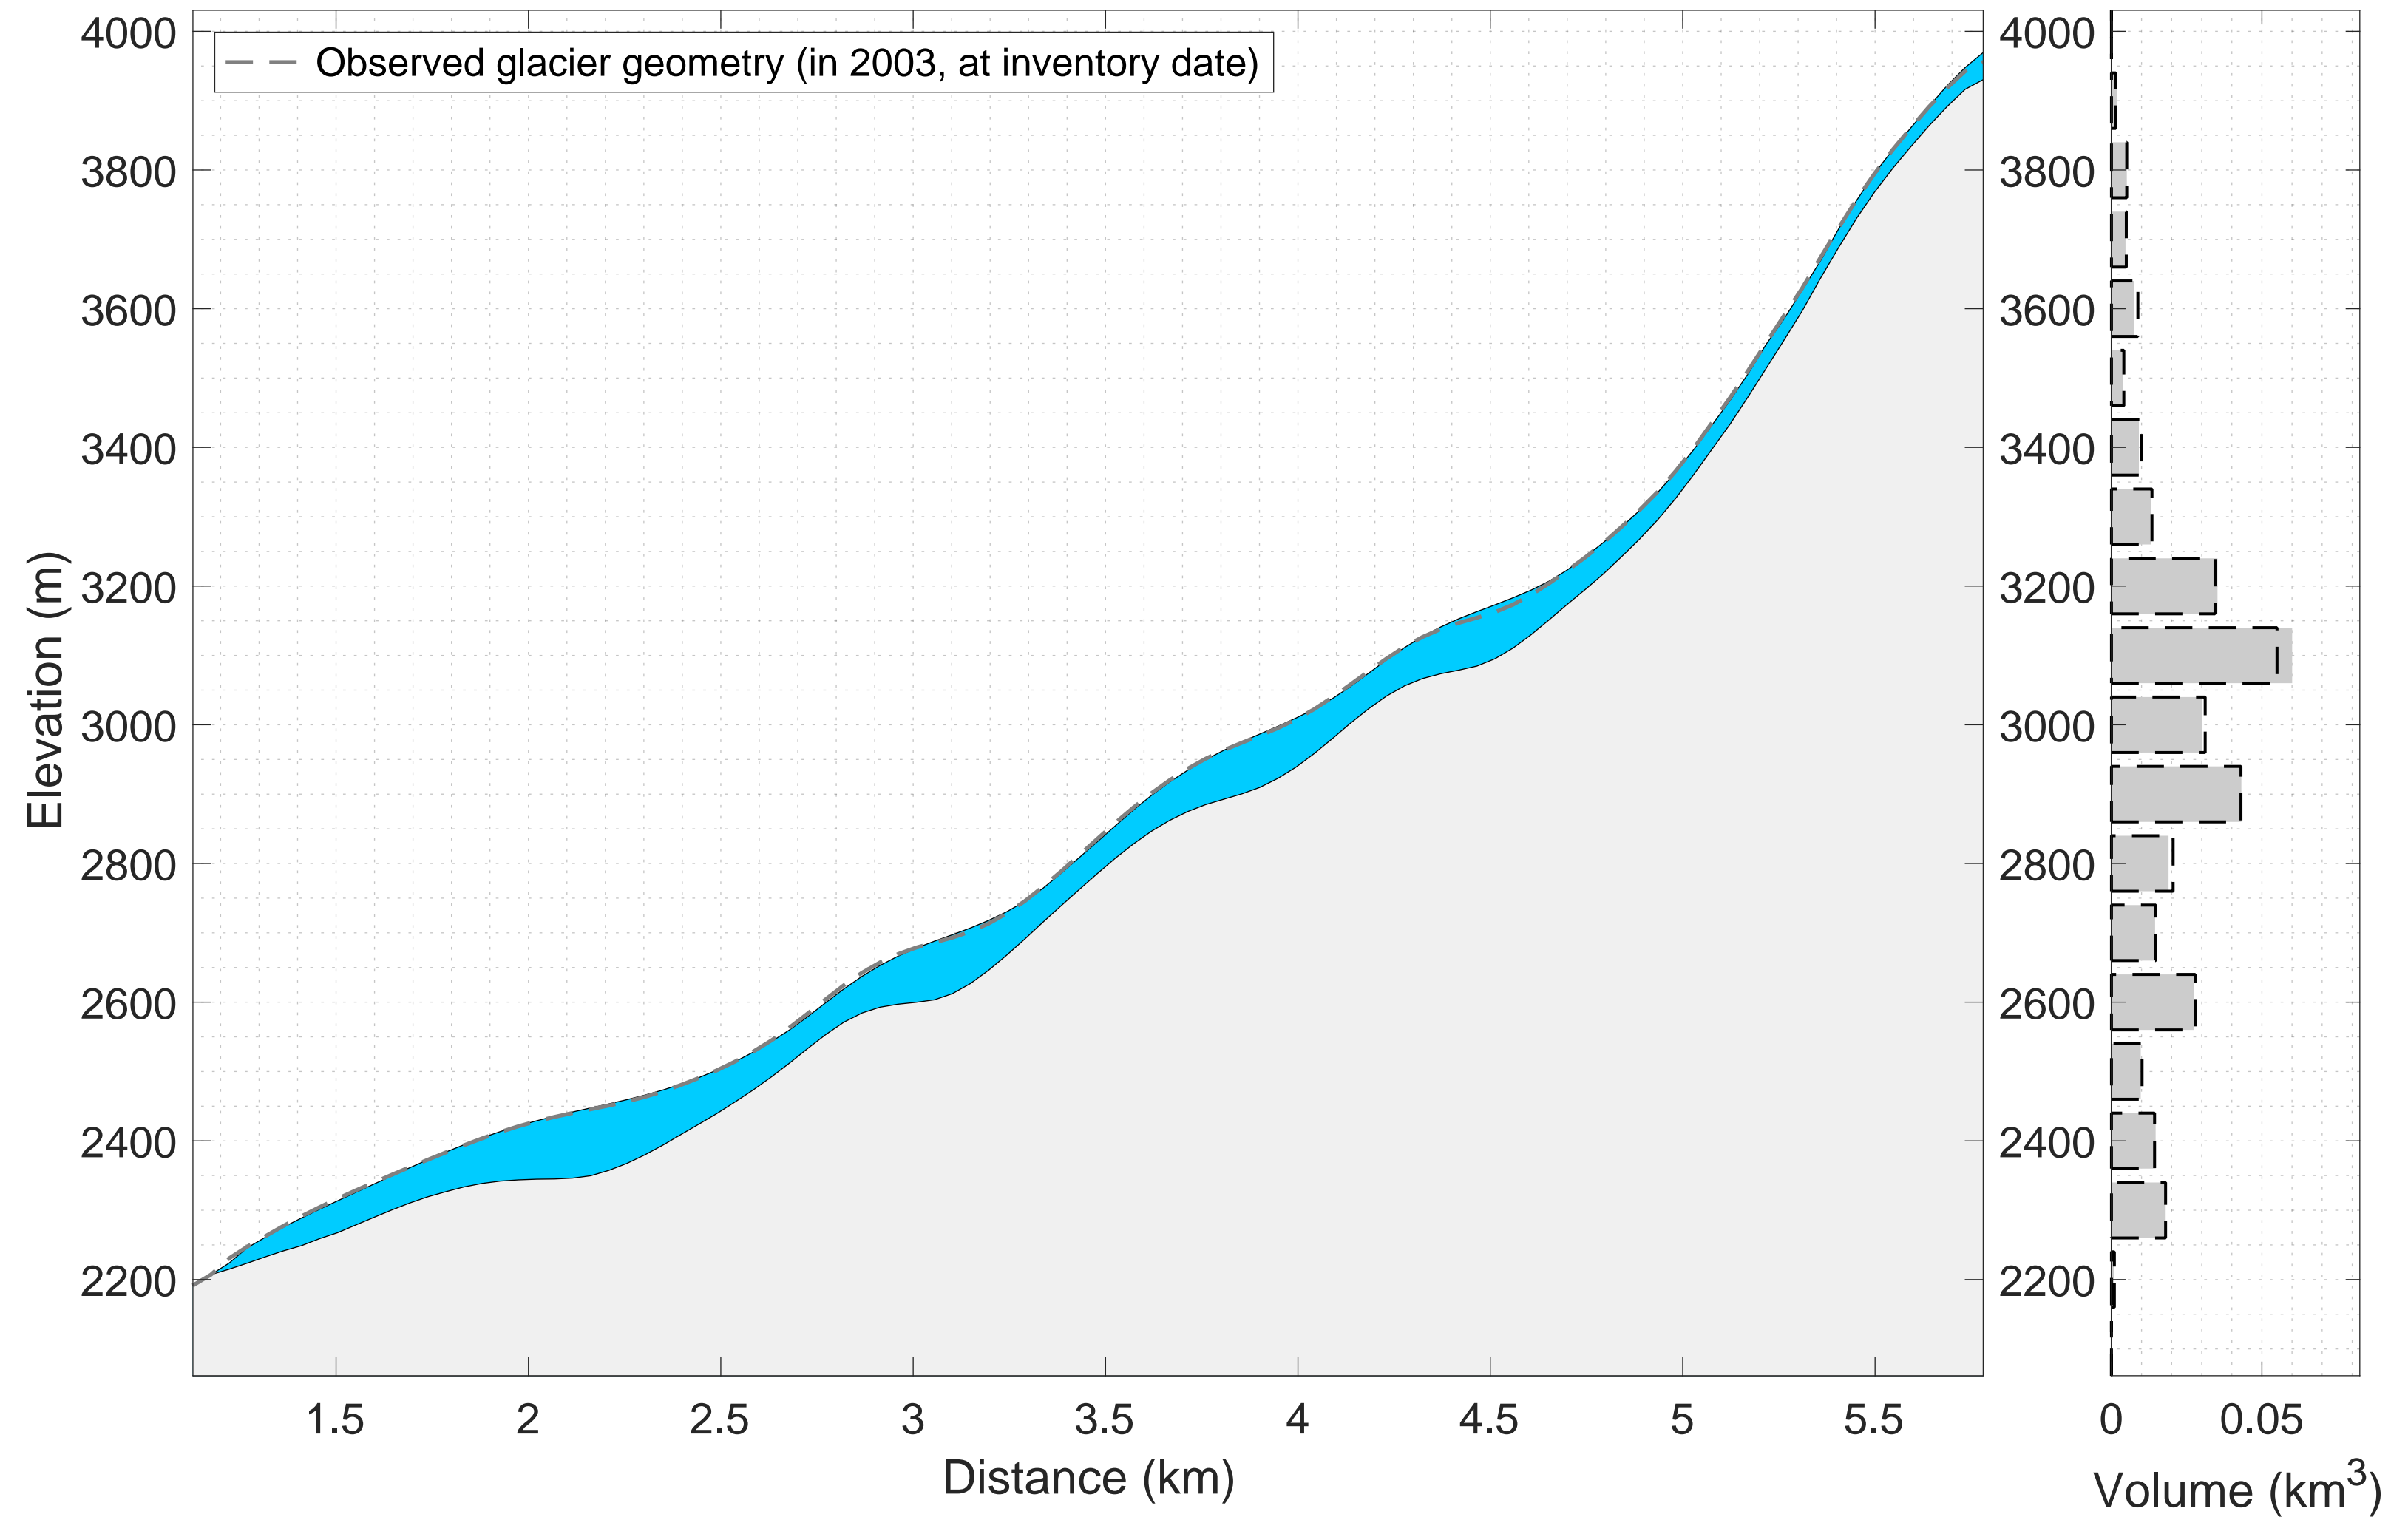

Supplement: Supplementary file 373 [file tc-13-1125-2019-supplement.zip]

**Modelled geometry (Glacier ID = 01737;  $A = 7.2018\text{e-}17 \text{ Pa}^{-3} \text{ a}^{-1}$ ;  $dx = 11 \text{ m}$ )**

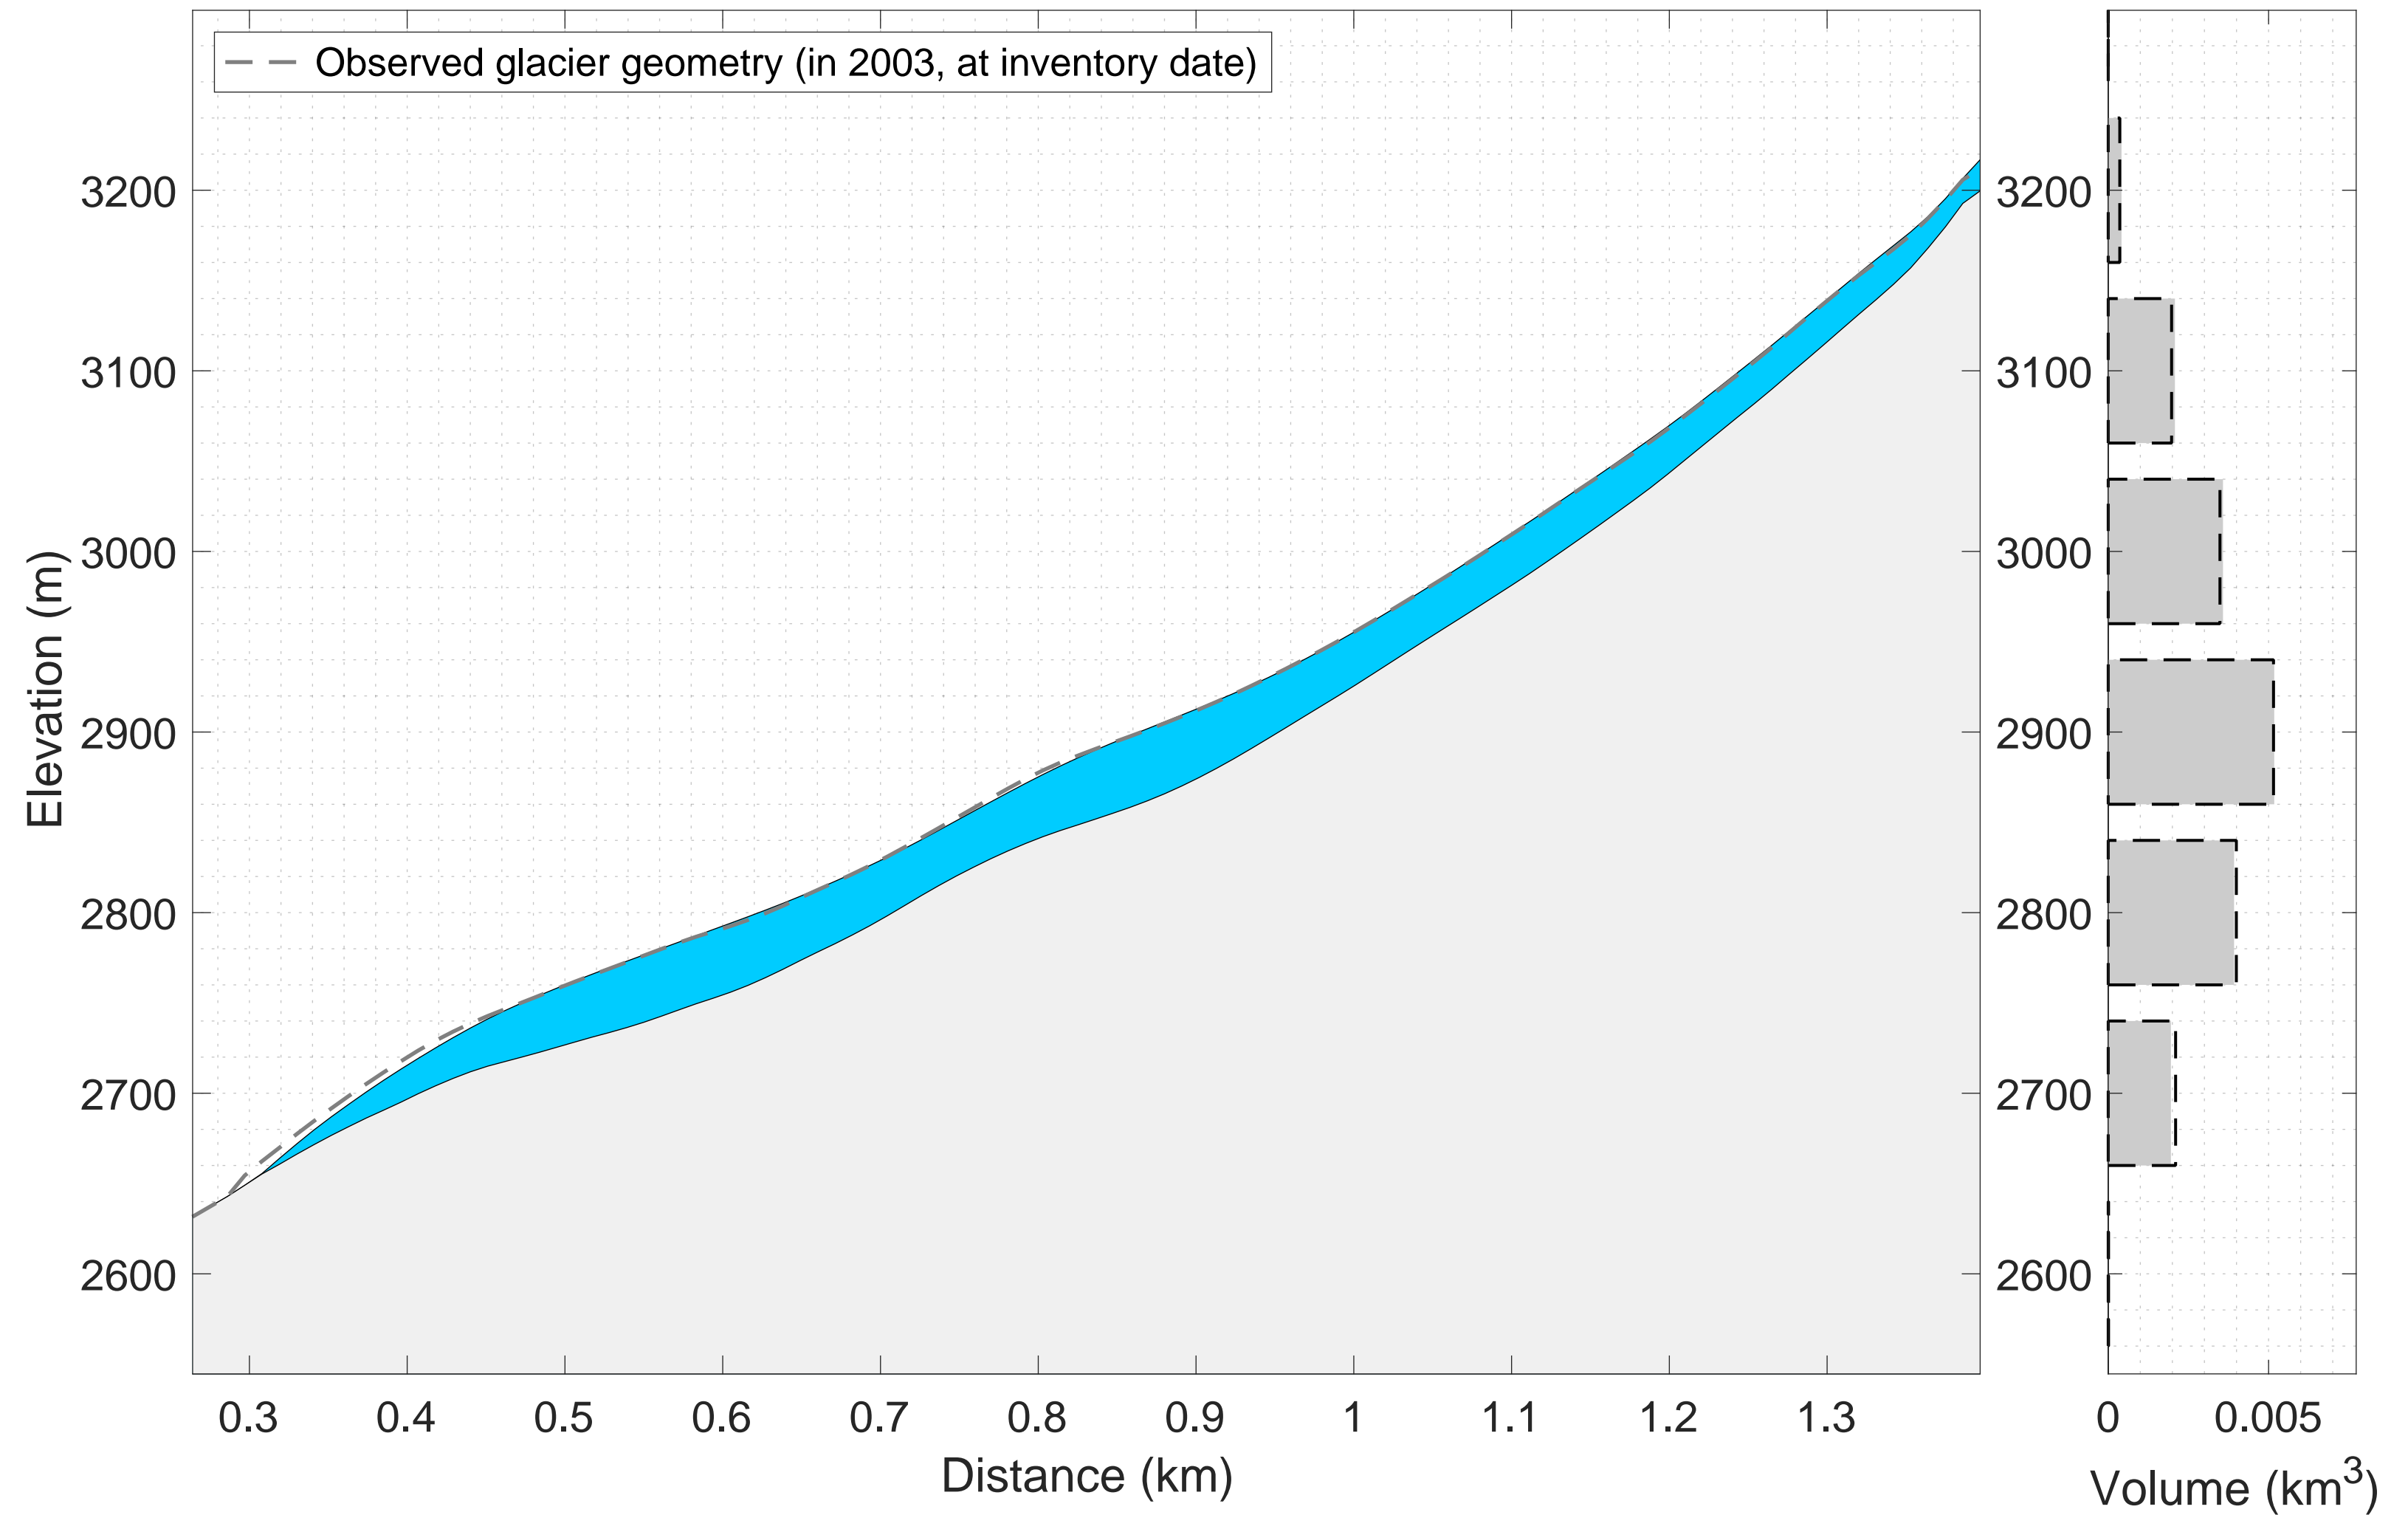

Supplement: Supplementary file 374 [file tc-13-1125-2019-supplement.zip]

**Modelled geometry (Glacier ID = 00950;  $A = 1\text{e-}16 \text{ Pa}^{-3} \text{ a}^{-1}$ ;  $dx = 25 \text{ m}$ )**

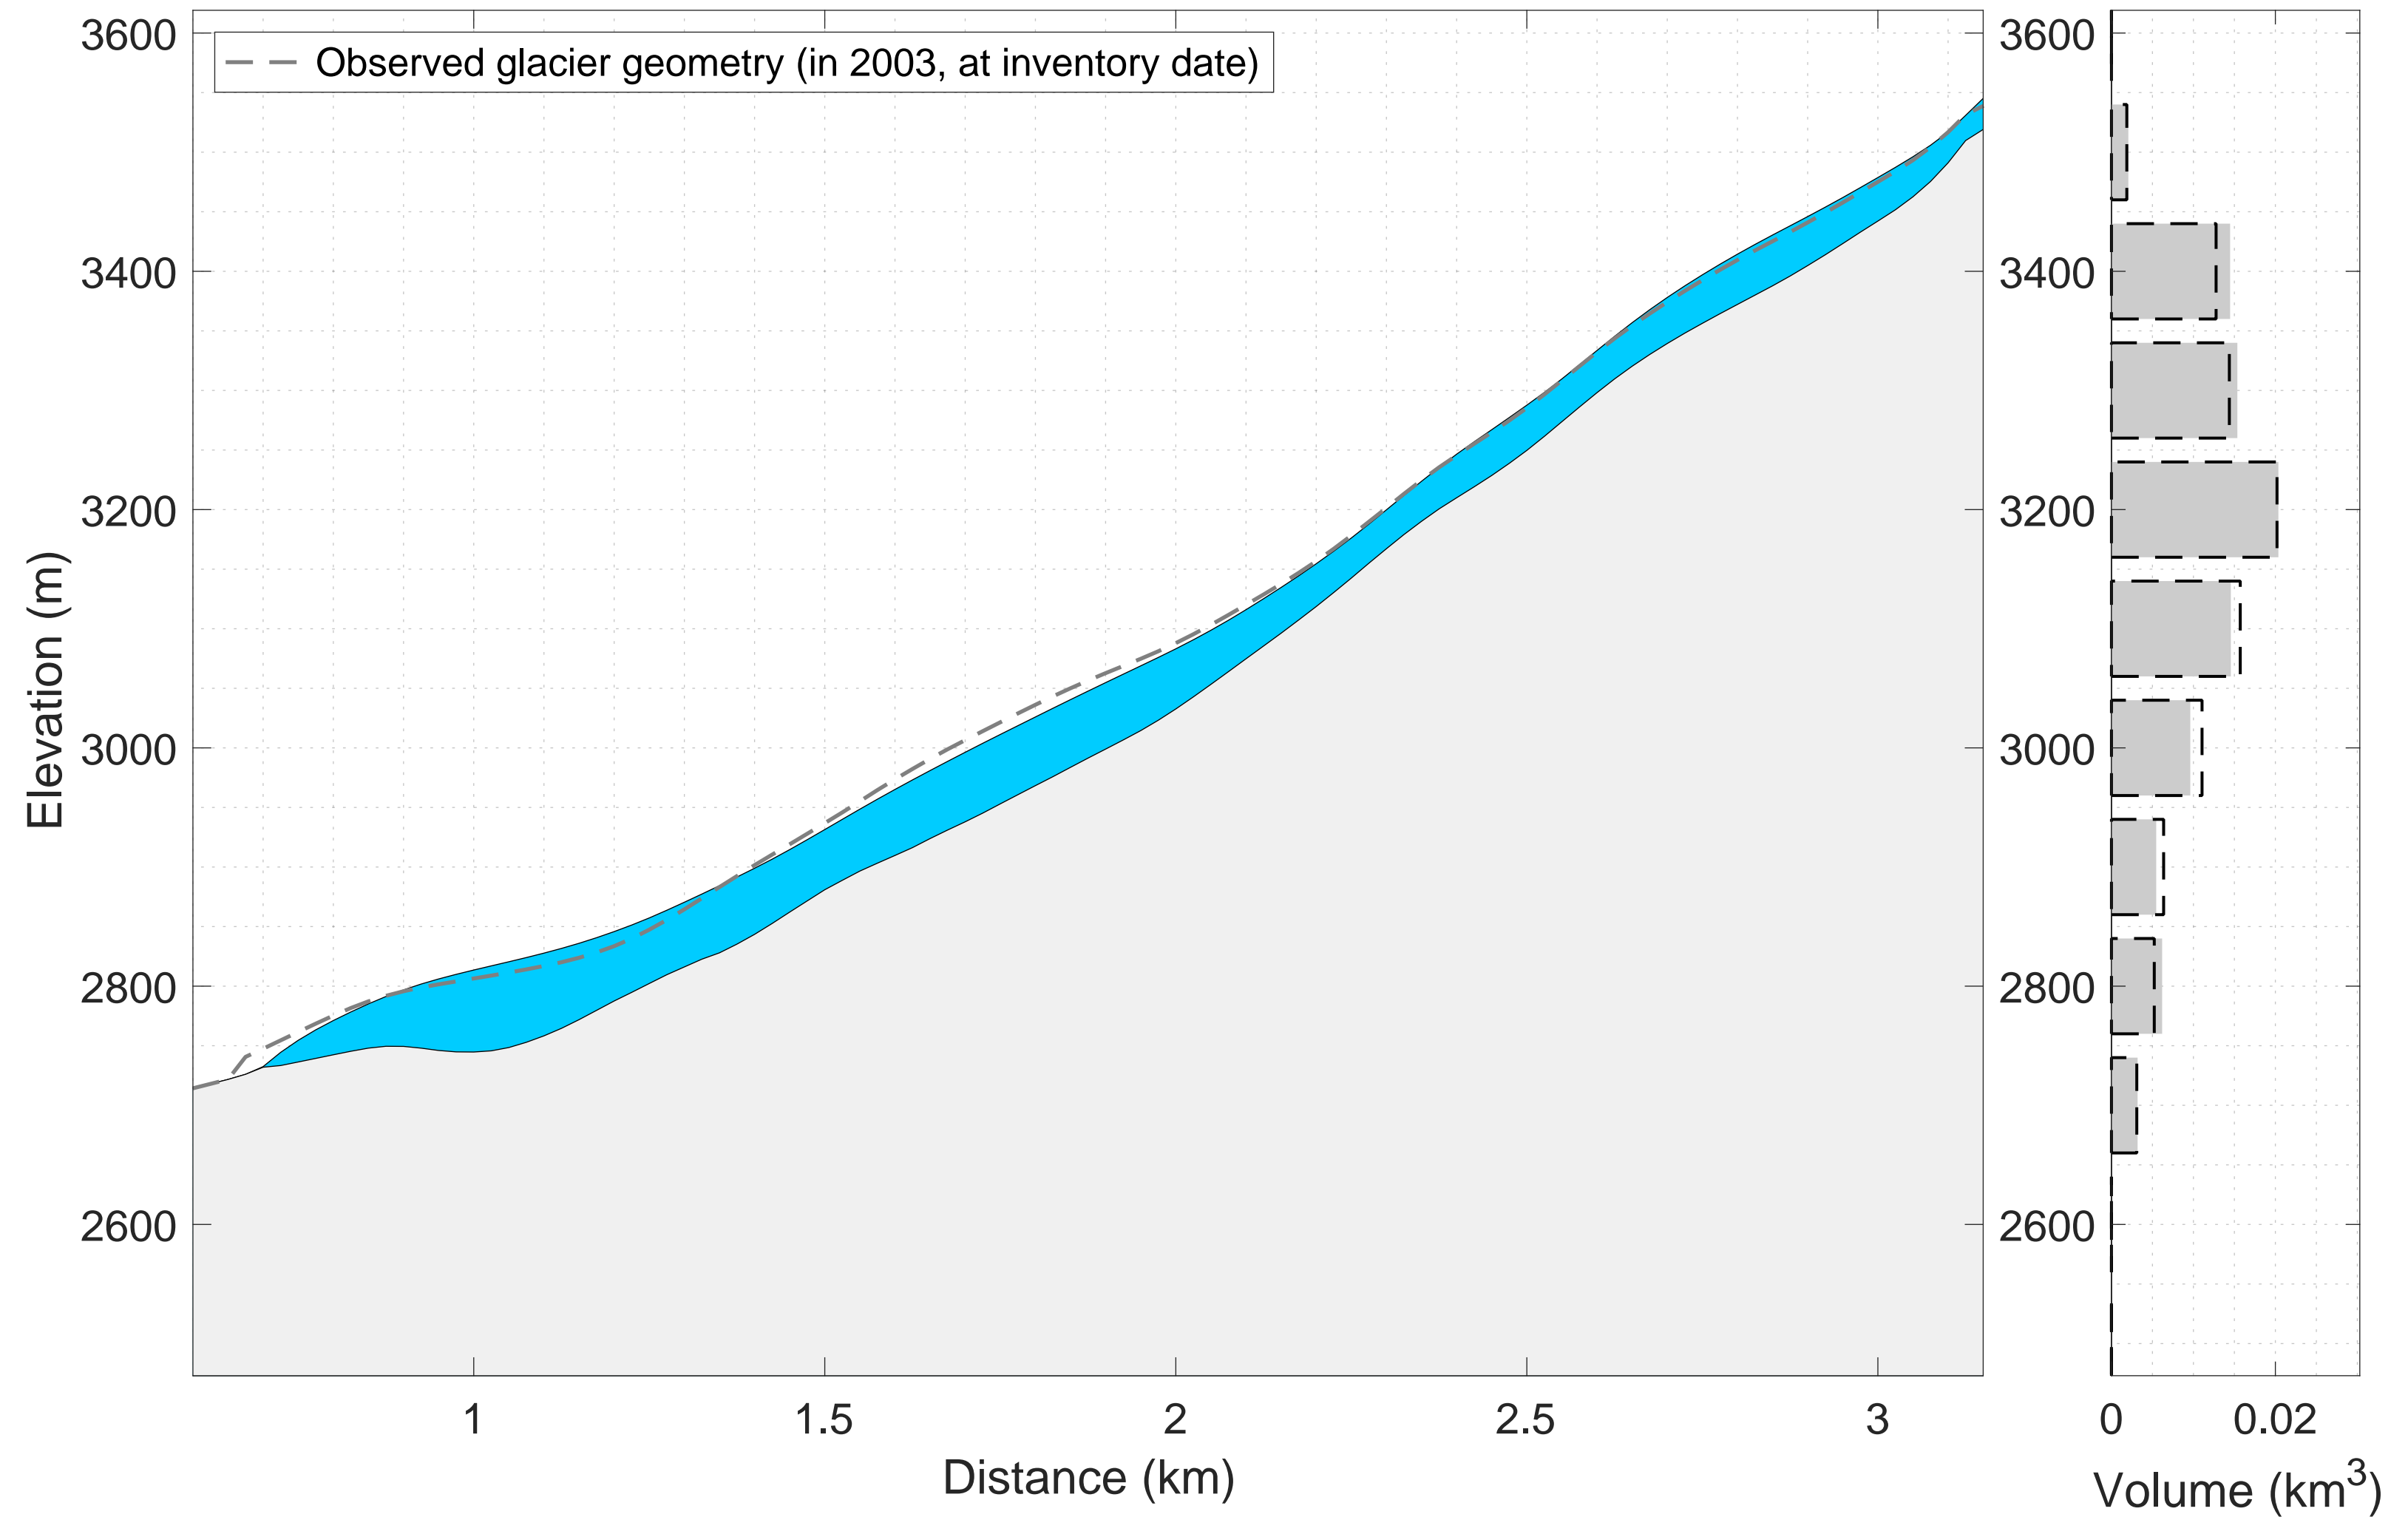

Supplement: Supplementary file 375 [file tc-13-1125-2019-supplement.zip]

**Modelled geometry (Glacier ID = 00746;  $A = 1.5553\text{e-}16 \text{ Pa}^{-3} \text{ a}^{-1}$ ;  $dx = 83 \text{ m}$ )**

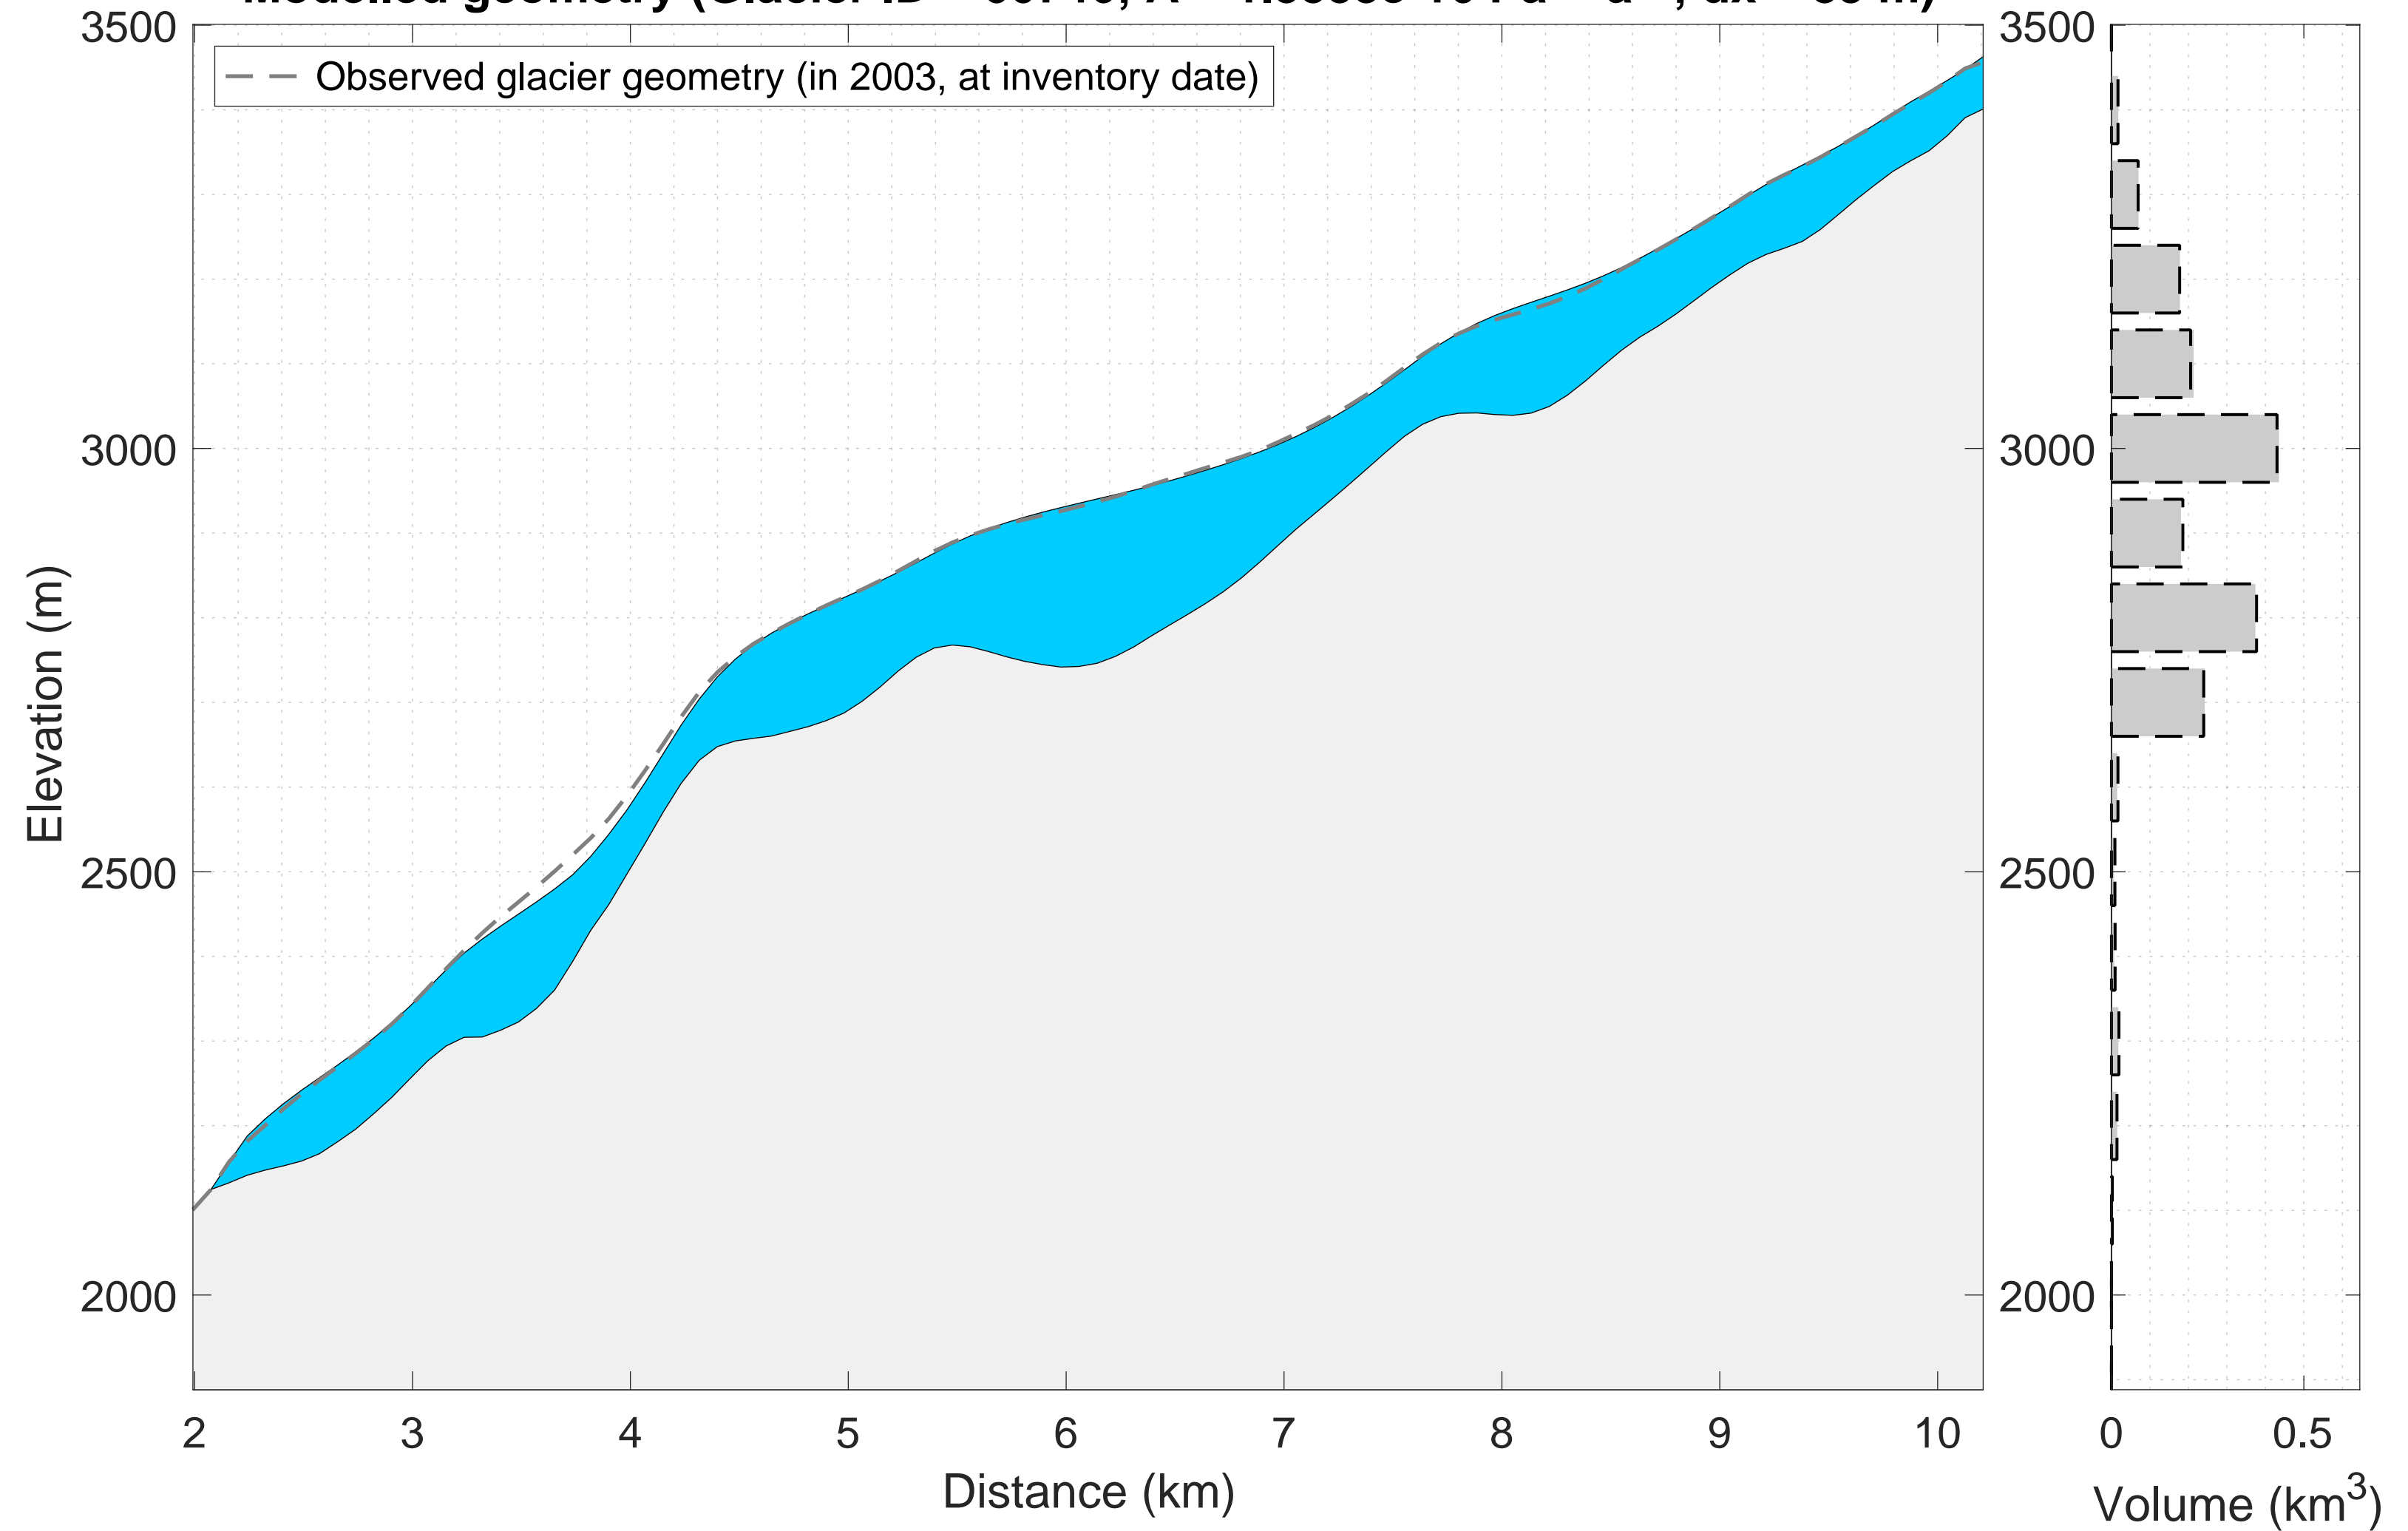

Supplement: Supplementary file 376 [file tc-13-1125-2019-supplement.zip]

**Modelled geometry (Glacier ID = 03677;  $A = 7.2541\text{e-}17 \text{ Pa}^{-3} \text{ a}^{-1}$ ;  $dx = 20 \text{ m}$ )**

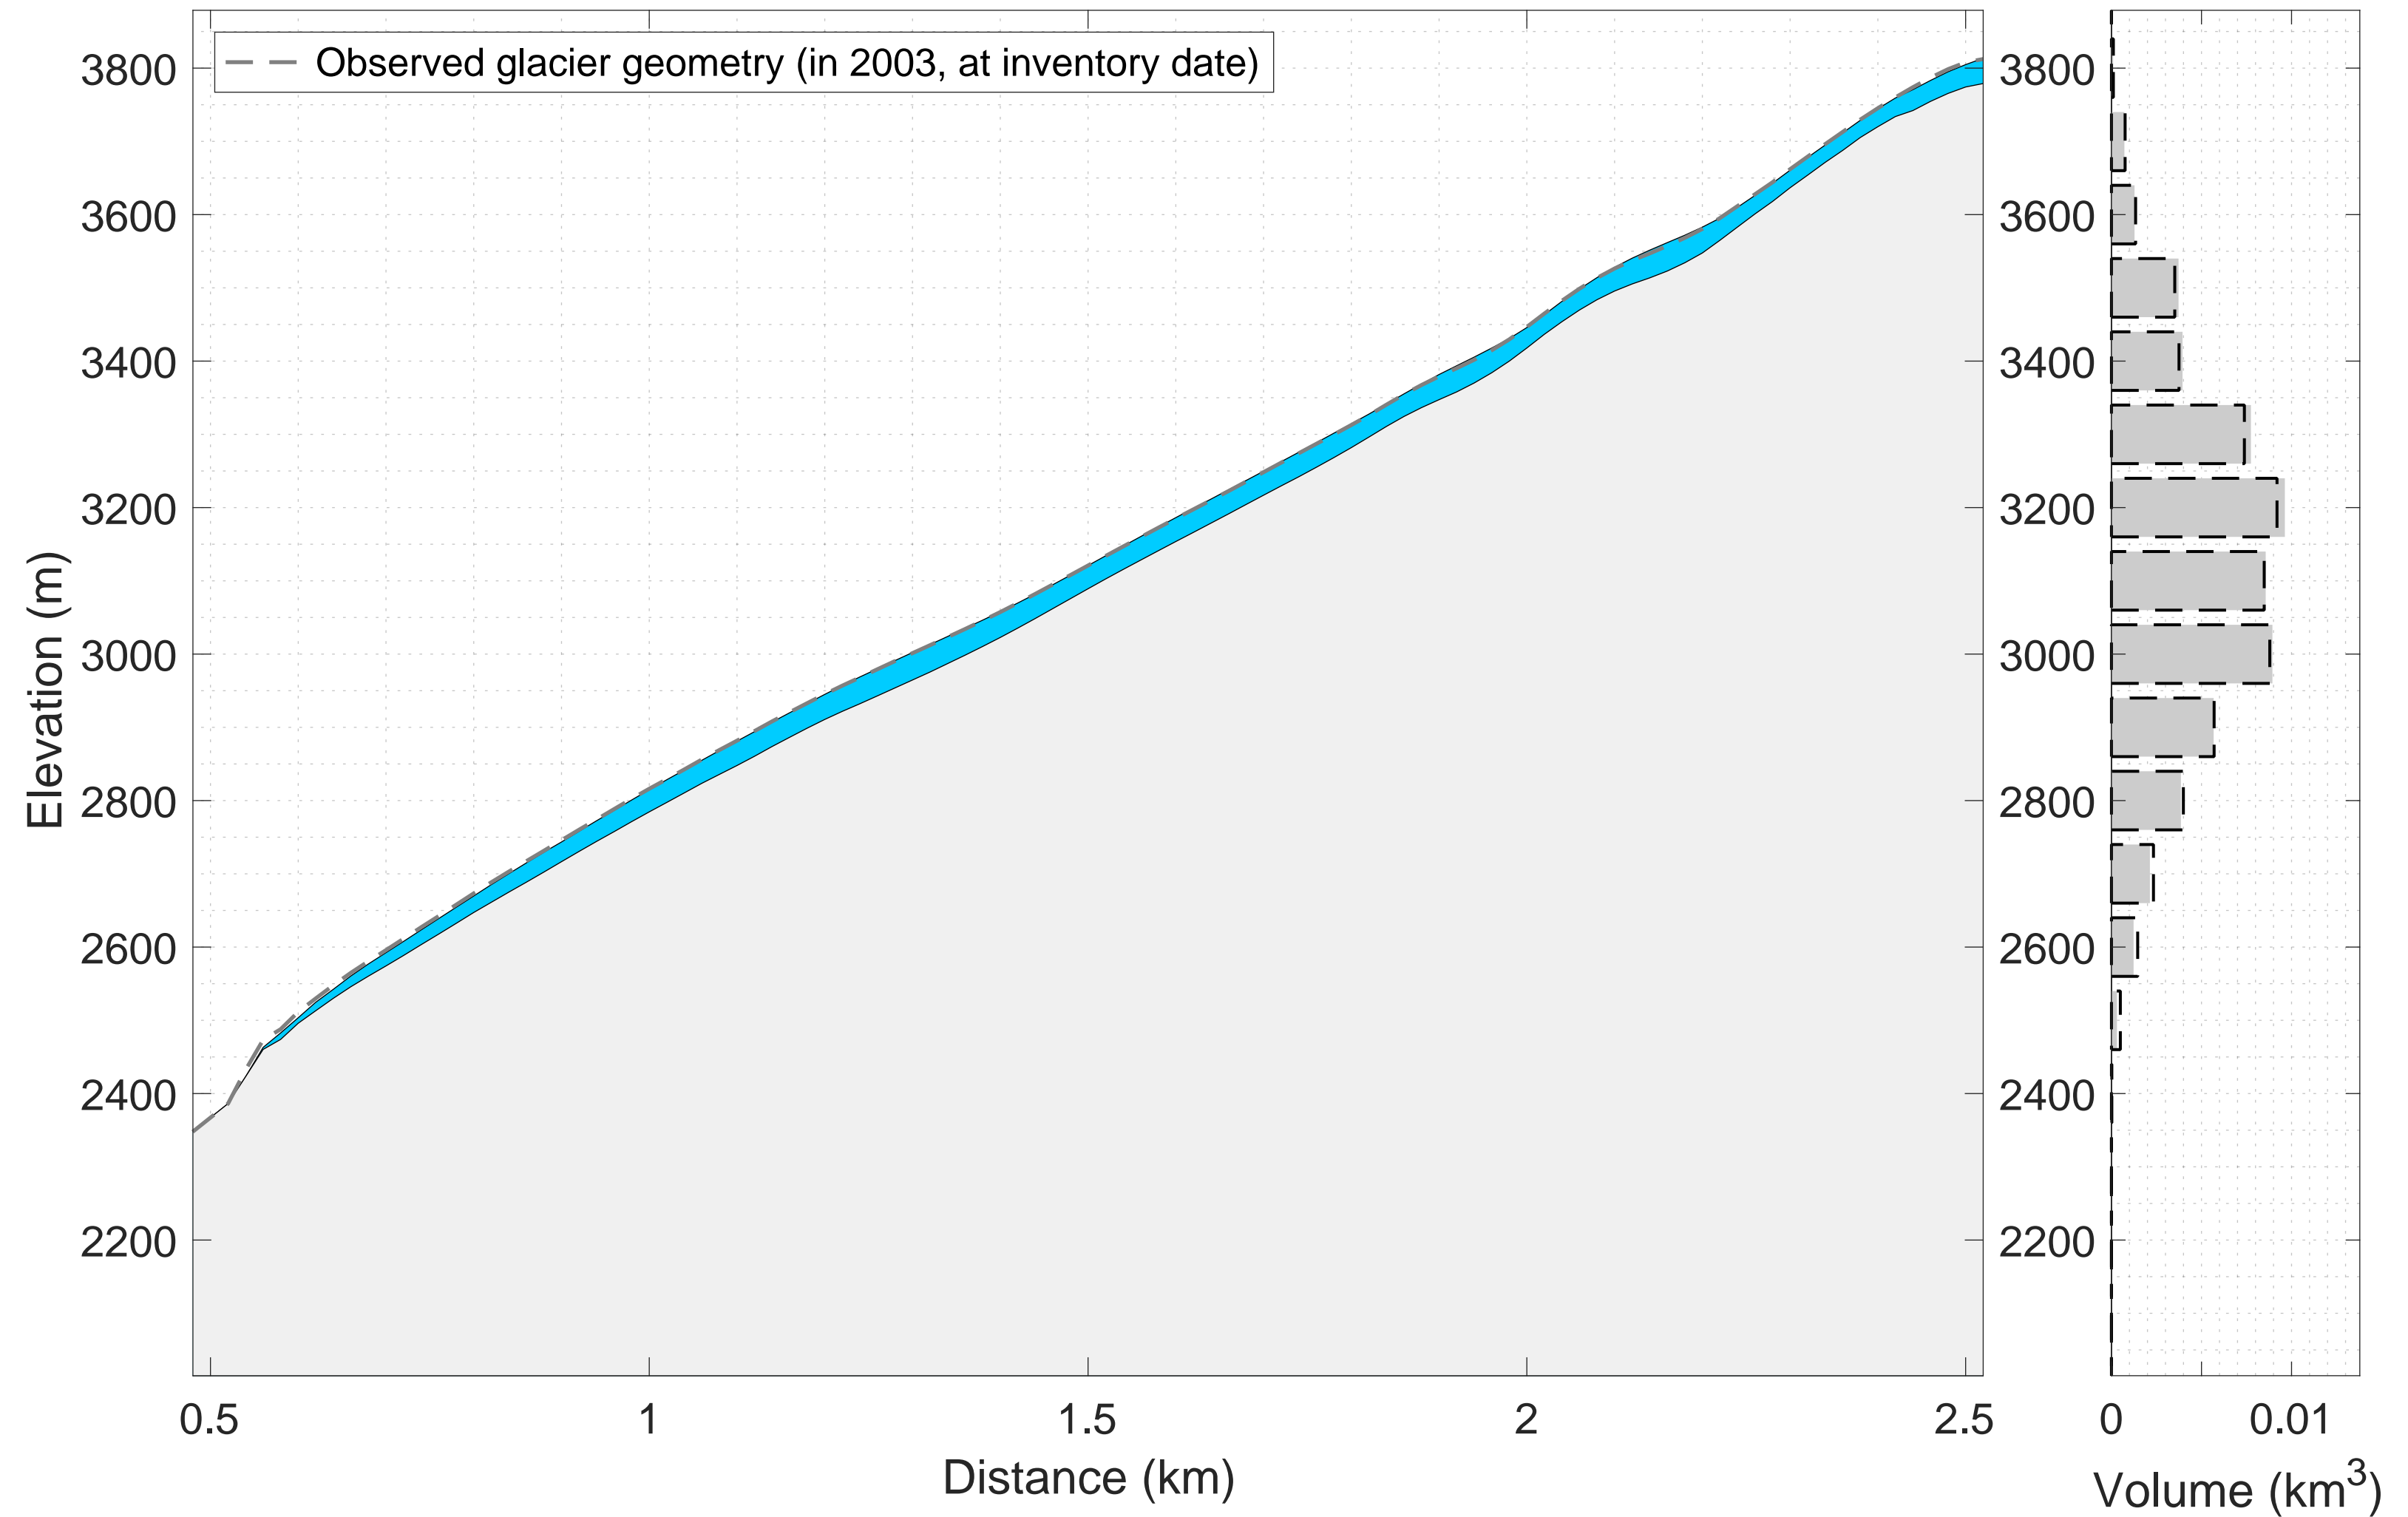

Supplement: Supplementary file 377 [file tc-13-1125-2019-supplement.zip]

**Modelled geometry (Glacier ID = 00906;  $A = 6.6096\text{e-}17 \text{ Pa}^{-3} \text{ a}^{-1}$ ;  $dx = 11 \text{ m}$ )**

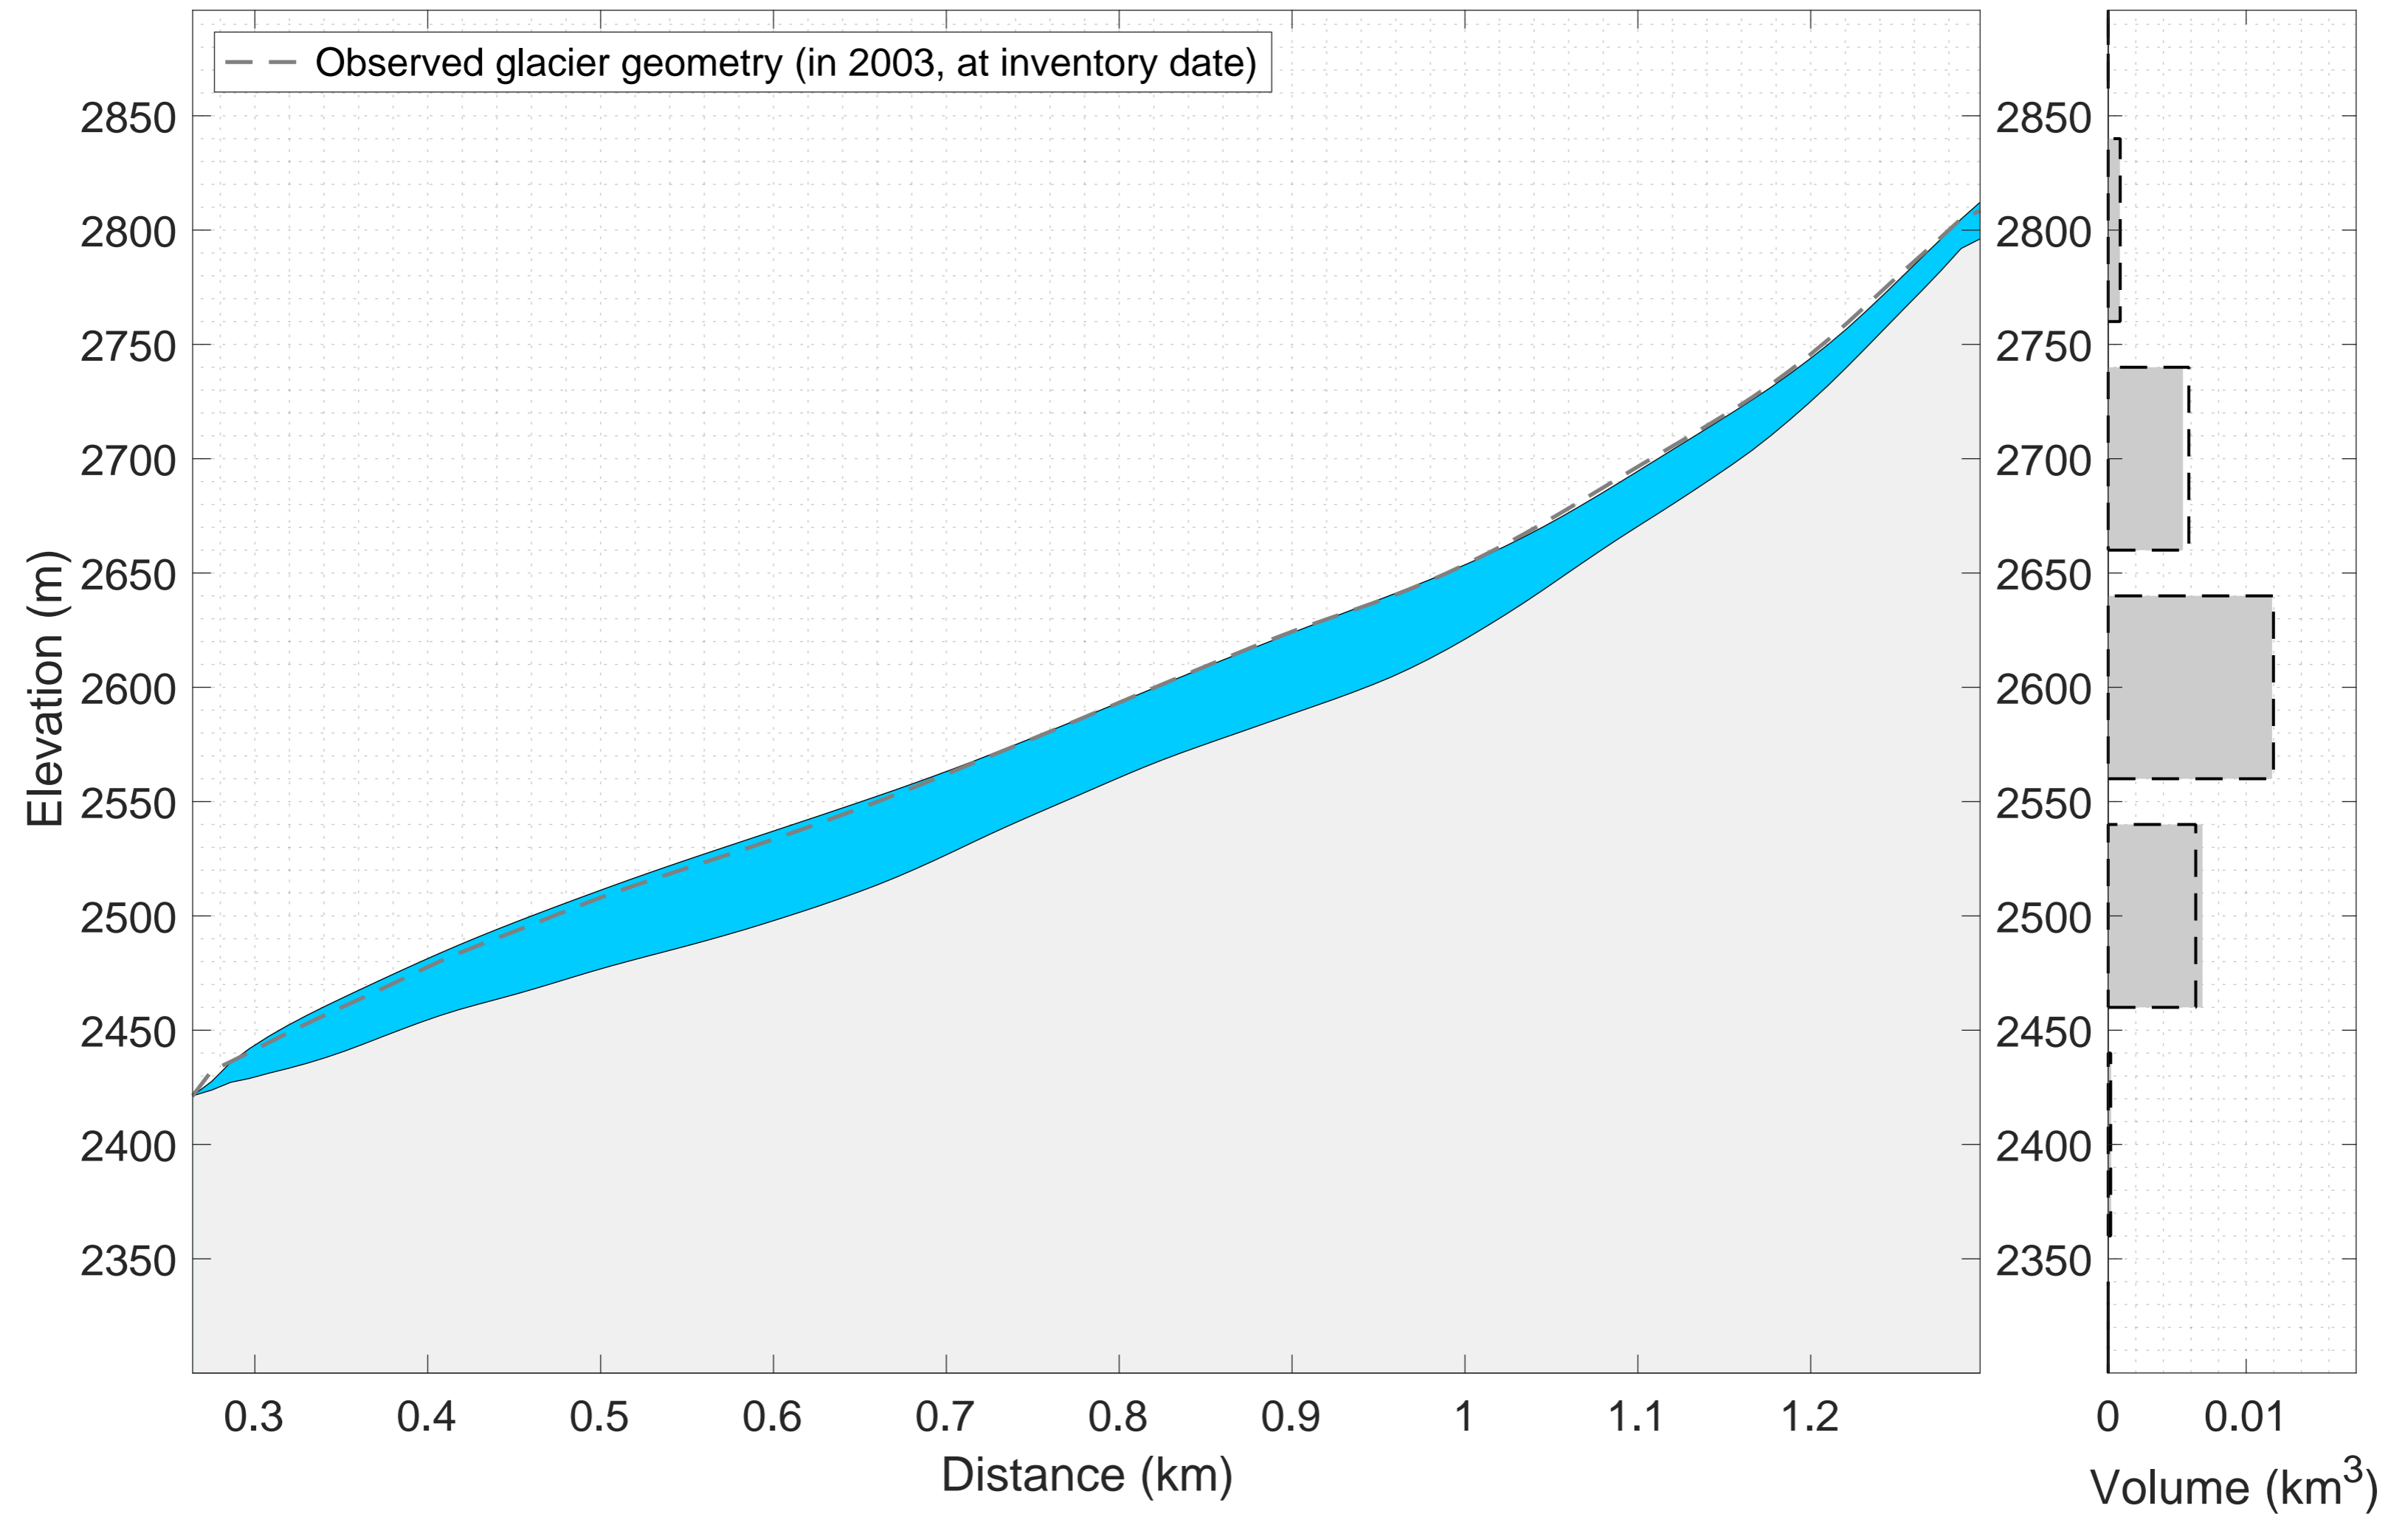

Supplement: Supplementary file 378 [file tc-13-1125-2019-supplement.zip]

**Modelled geometry (Glacier ID = 03701;  $A = 1.414\text{e-}16 \text{ Pa}^{-3} \text{ a}^{-1}$ ;  $dx = 20 \text{ m}$ )**

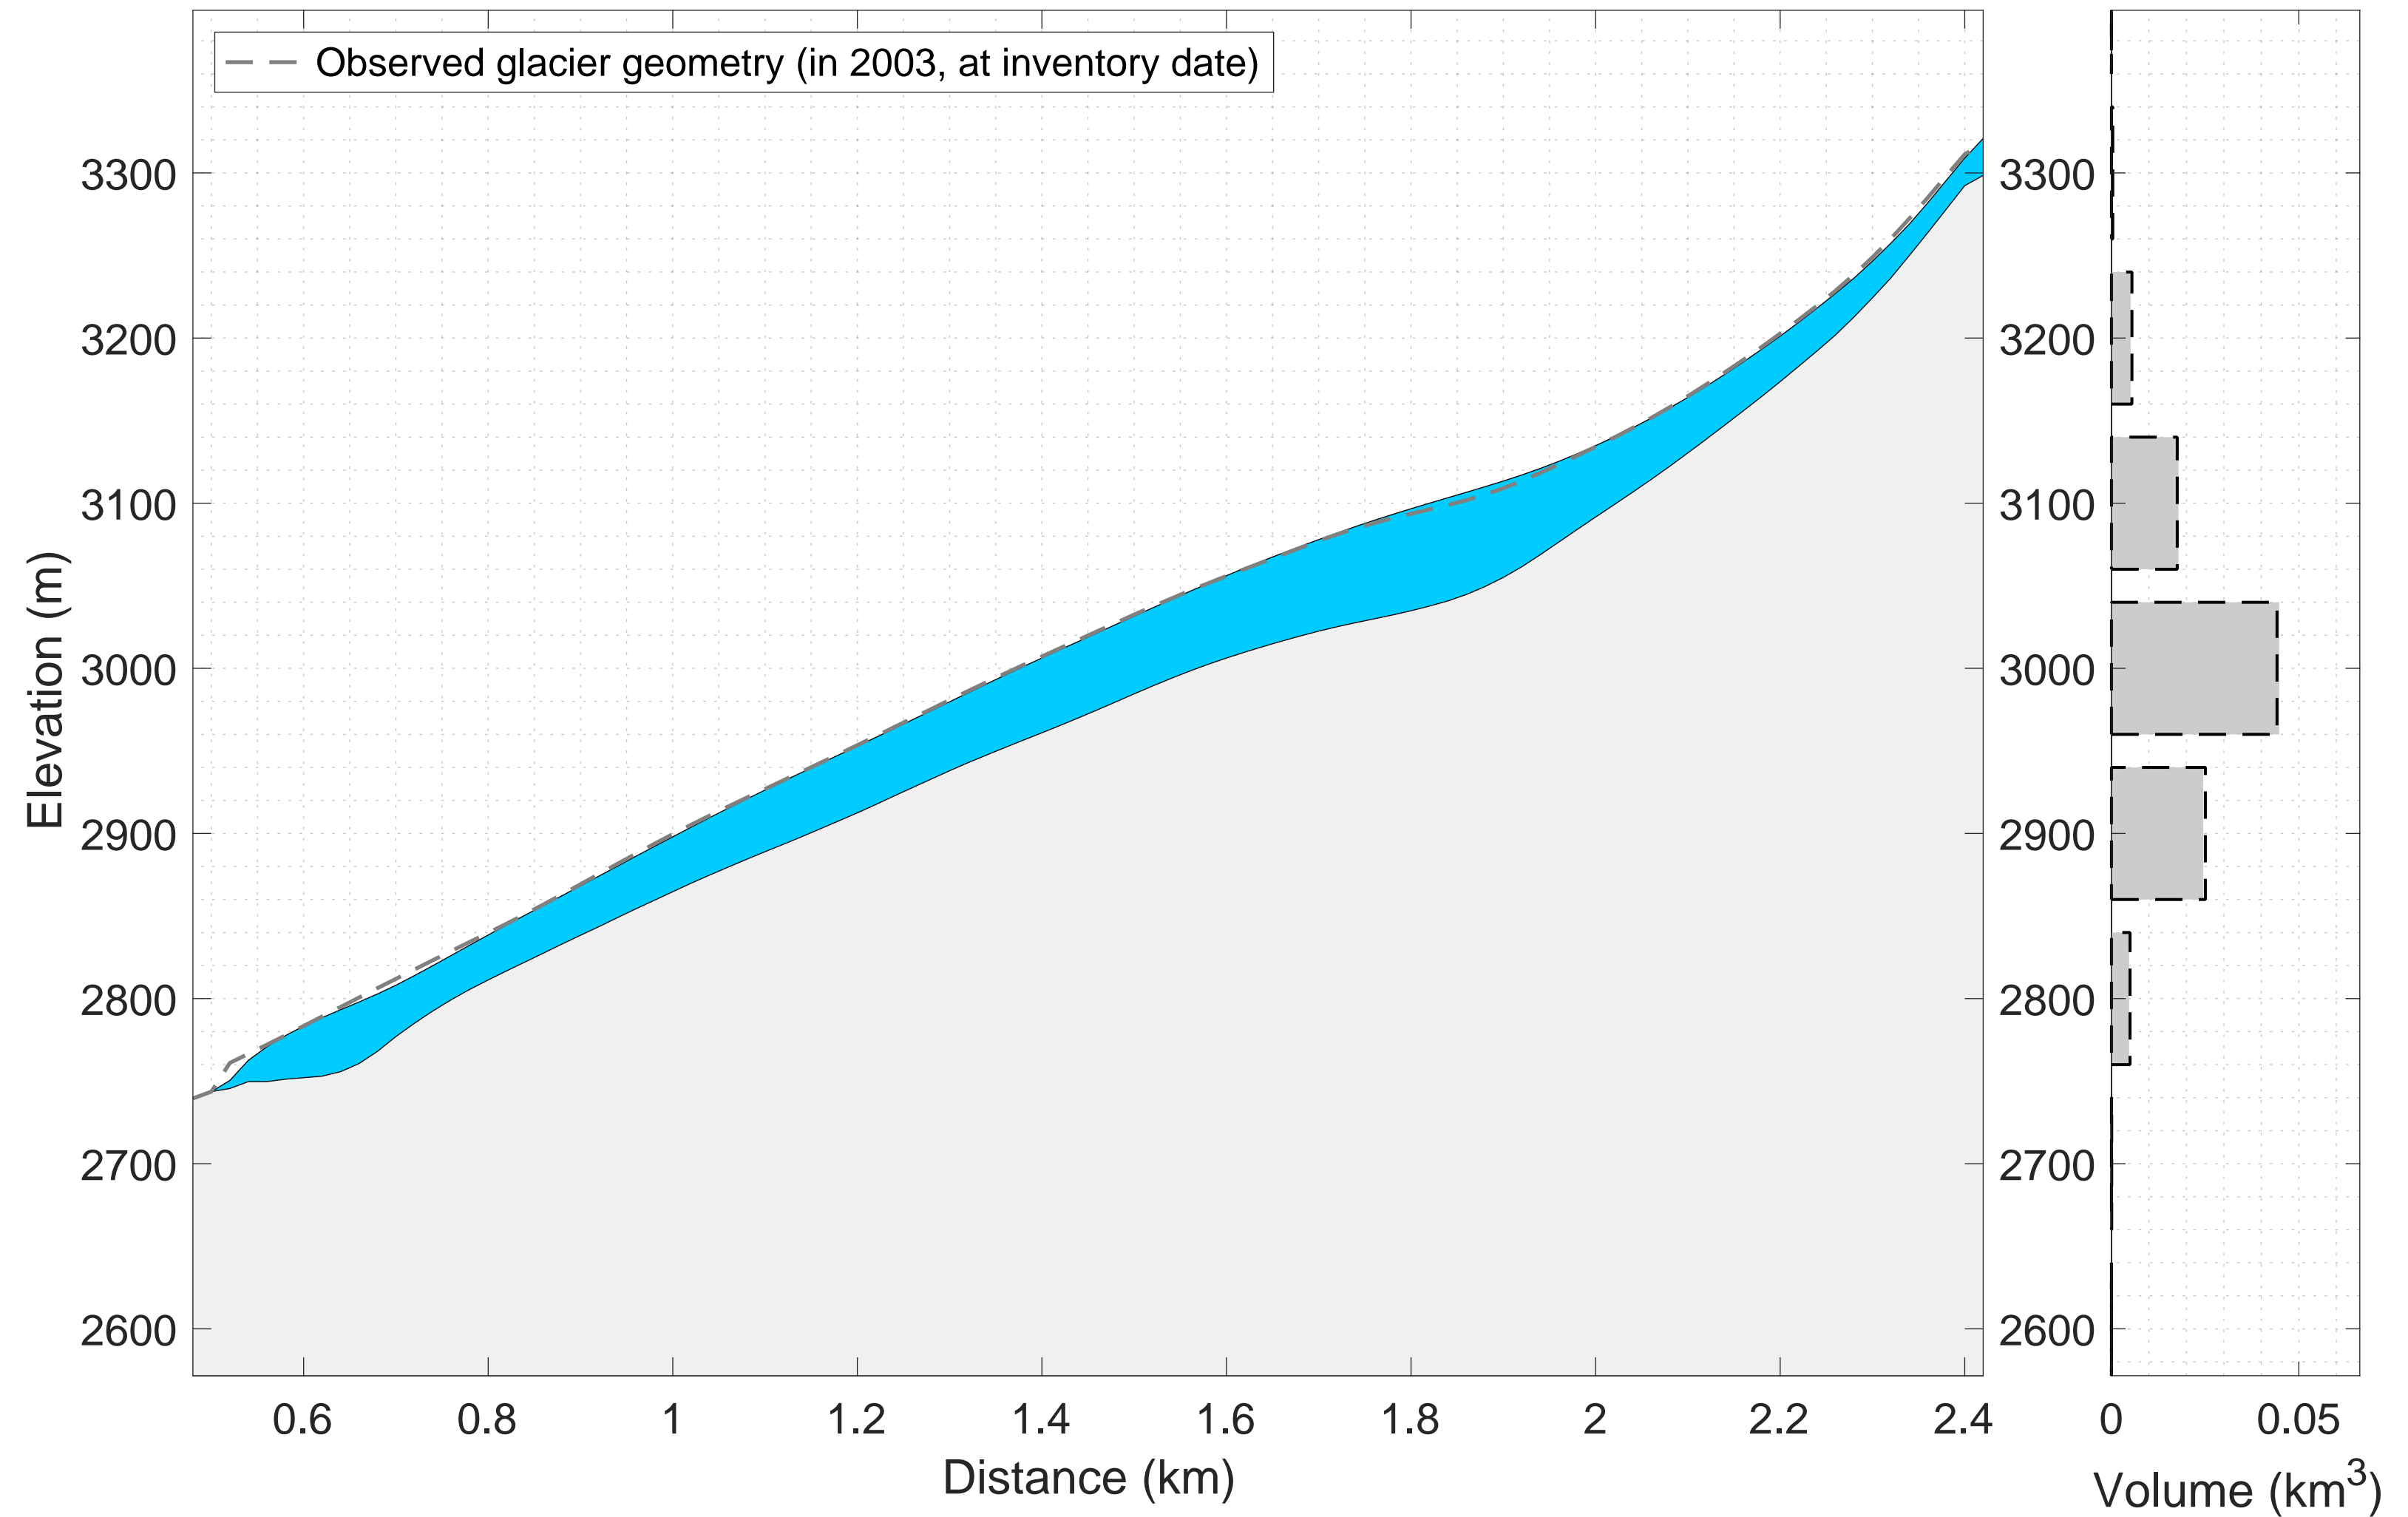

Supplement: Supplementary file 379 [file tc-13-1125-2019-supplement.zip]

**Modelled geometry (Glacier ID = 00066;  $A = 1.2813\text{e-}16 \text{ Pa}^{-3} \text{ a}^{-1}$ ;  $dx = 11 \text{ m}$ )**

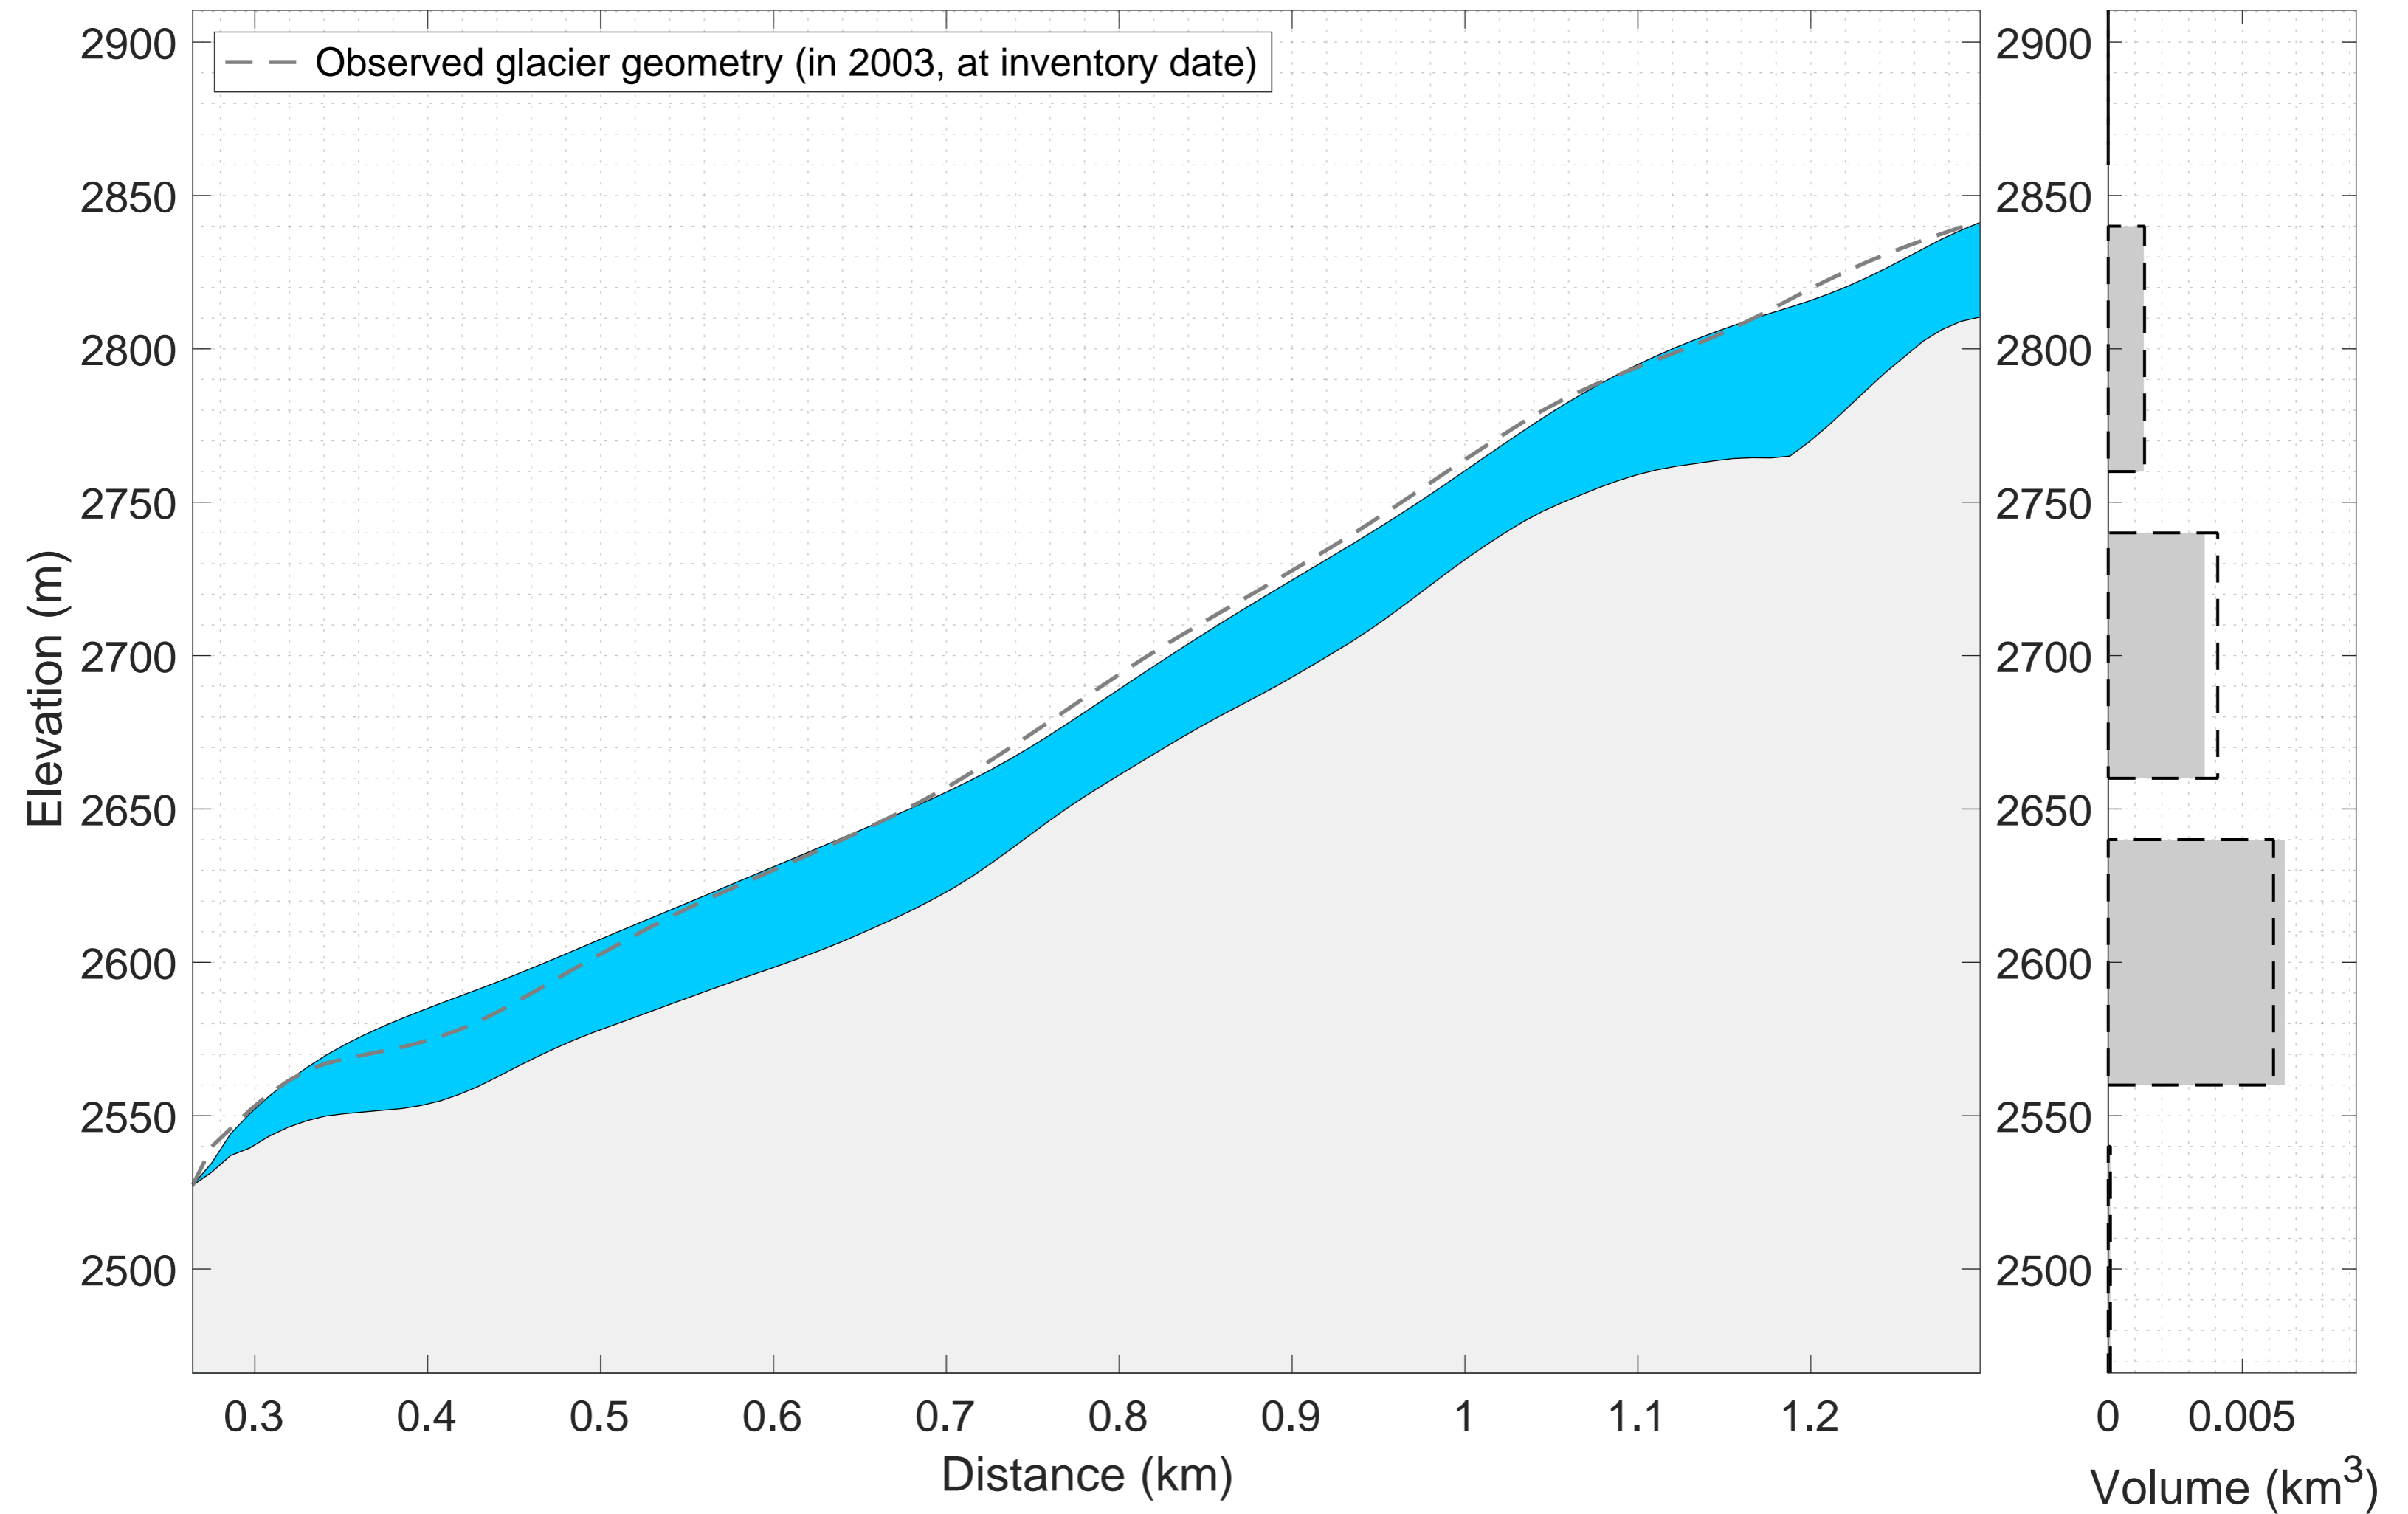

Supplement: Supplementary file 380 [file tc-13-1125-2019-supplement.zip]

**Modelled geometry (Glacier ID = 01629;  $A = 4.3045\text{e-}17 \text{ Pa}^{-3} \text{ a}^{-1}$ ;  $dx = 13 \text{ m}$ )**

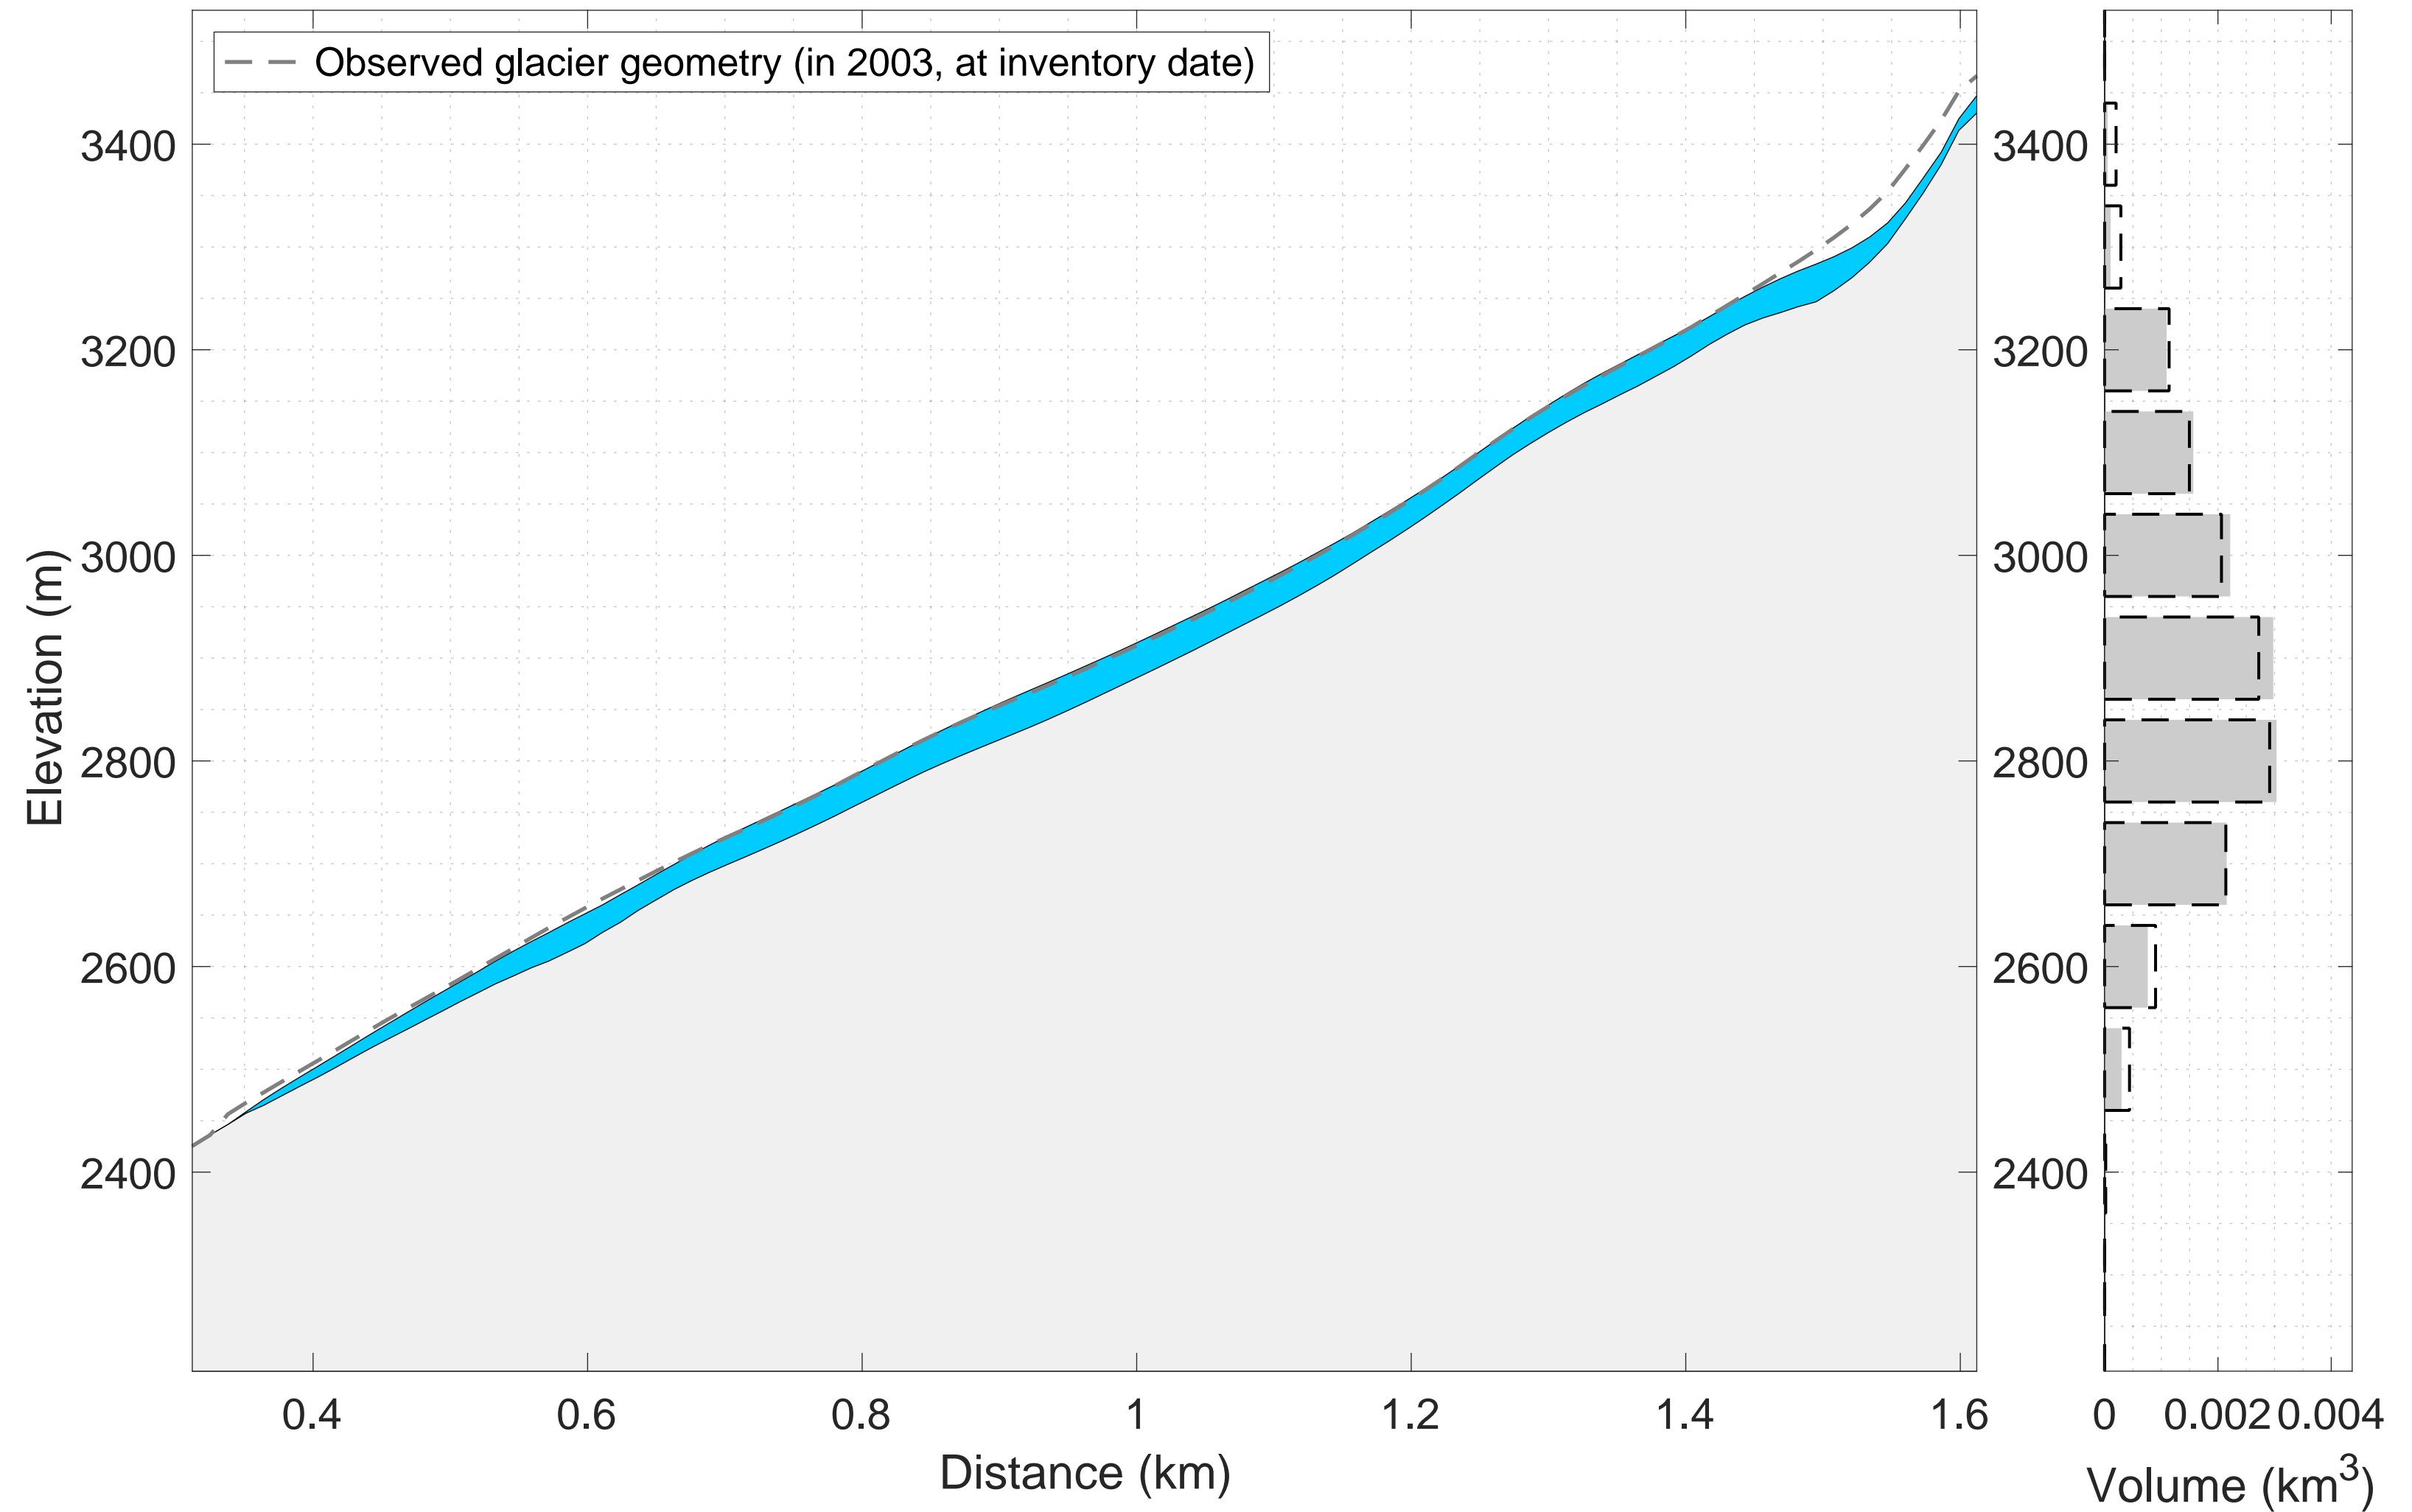

Supplement: Supplementary file 381 [file tc-13-1125-2019-supplement.zip]

**Modelled geometry (Glacier ID = 00719;  $A = 9.3582\text{e-}17 \text{ Pa}^{-3} \text{ a}^{-1}$ ;  $dx = 31 \text{ m}$ )**

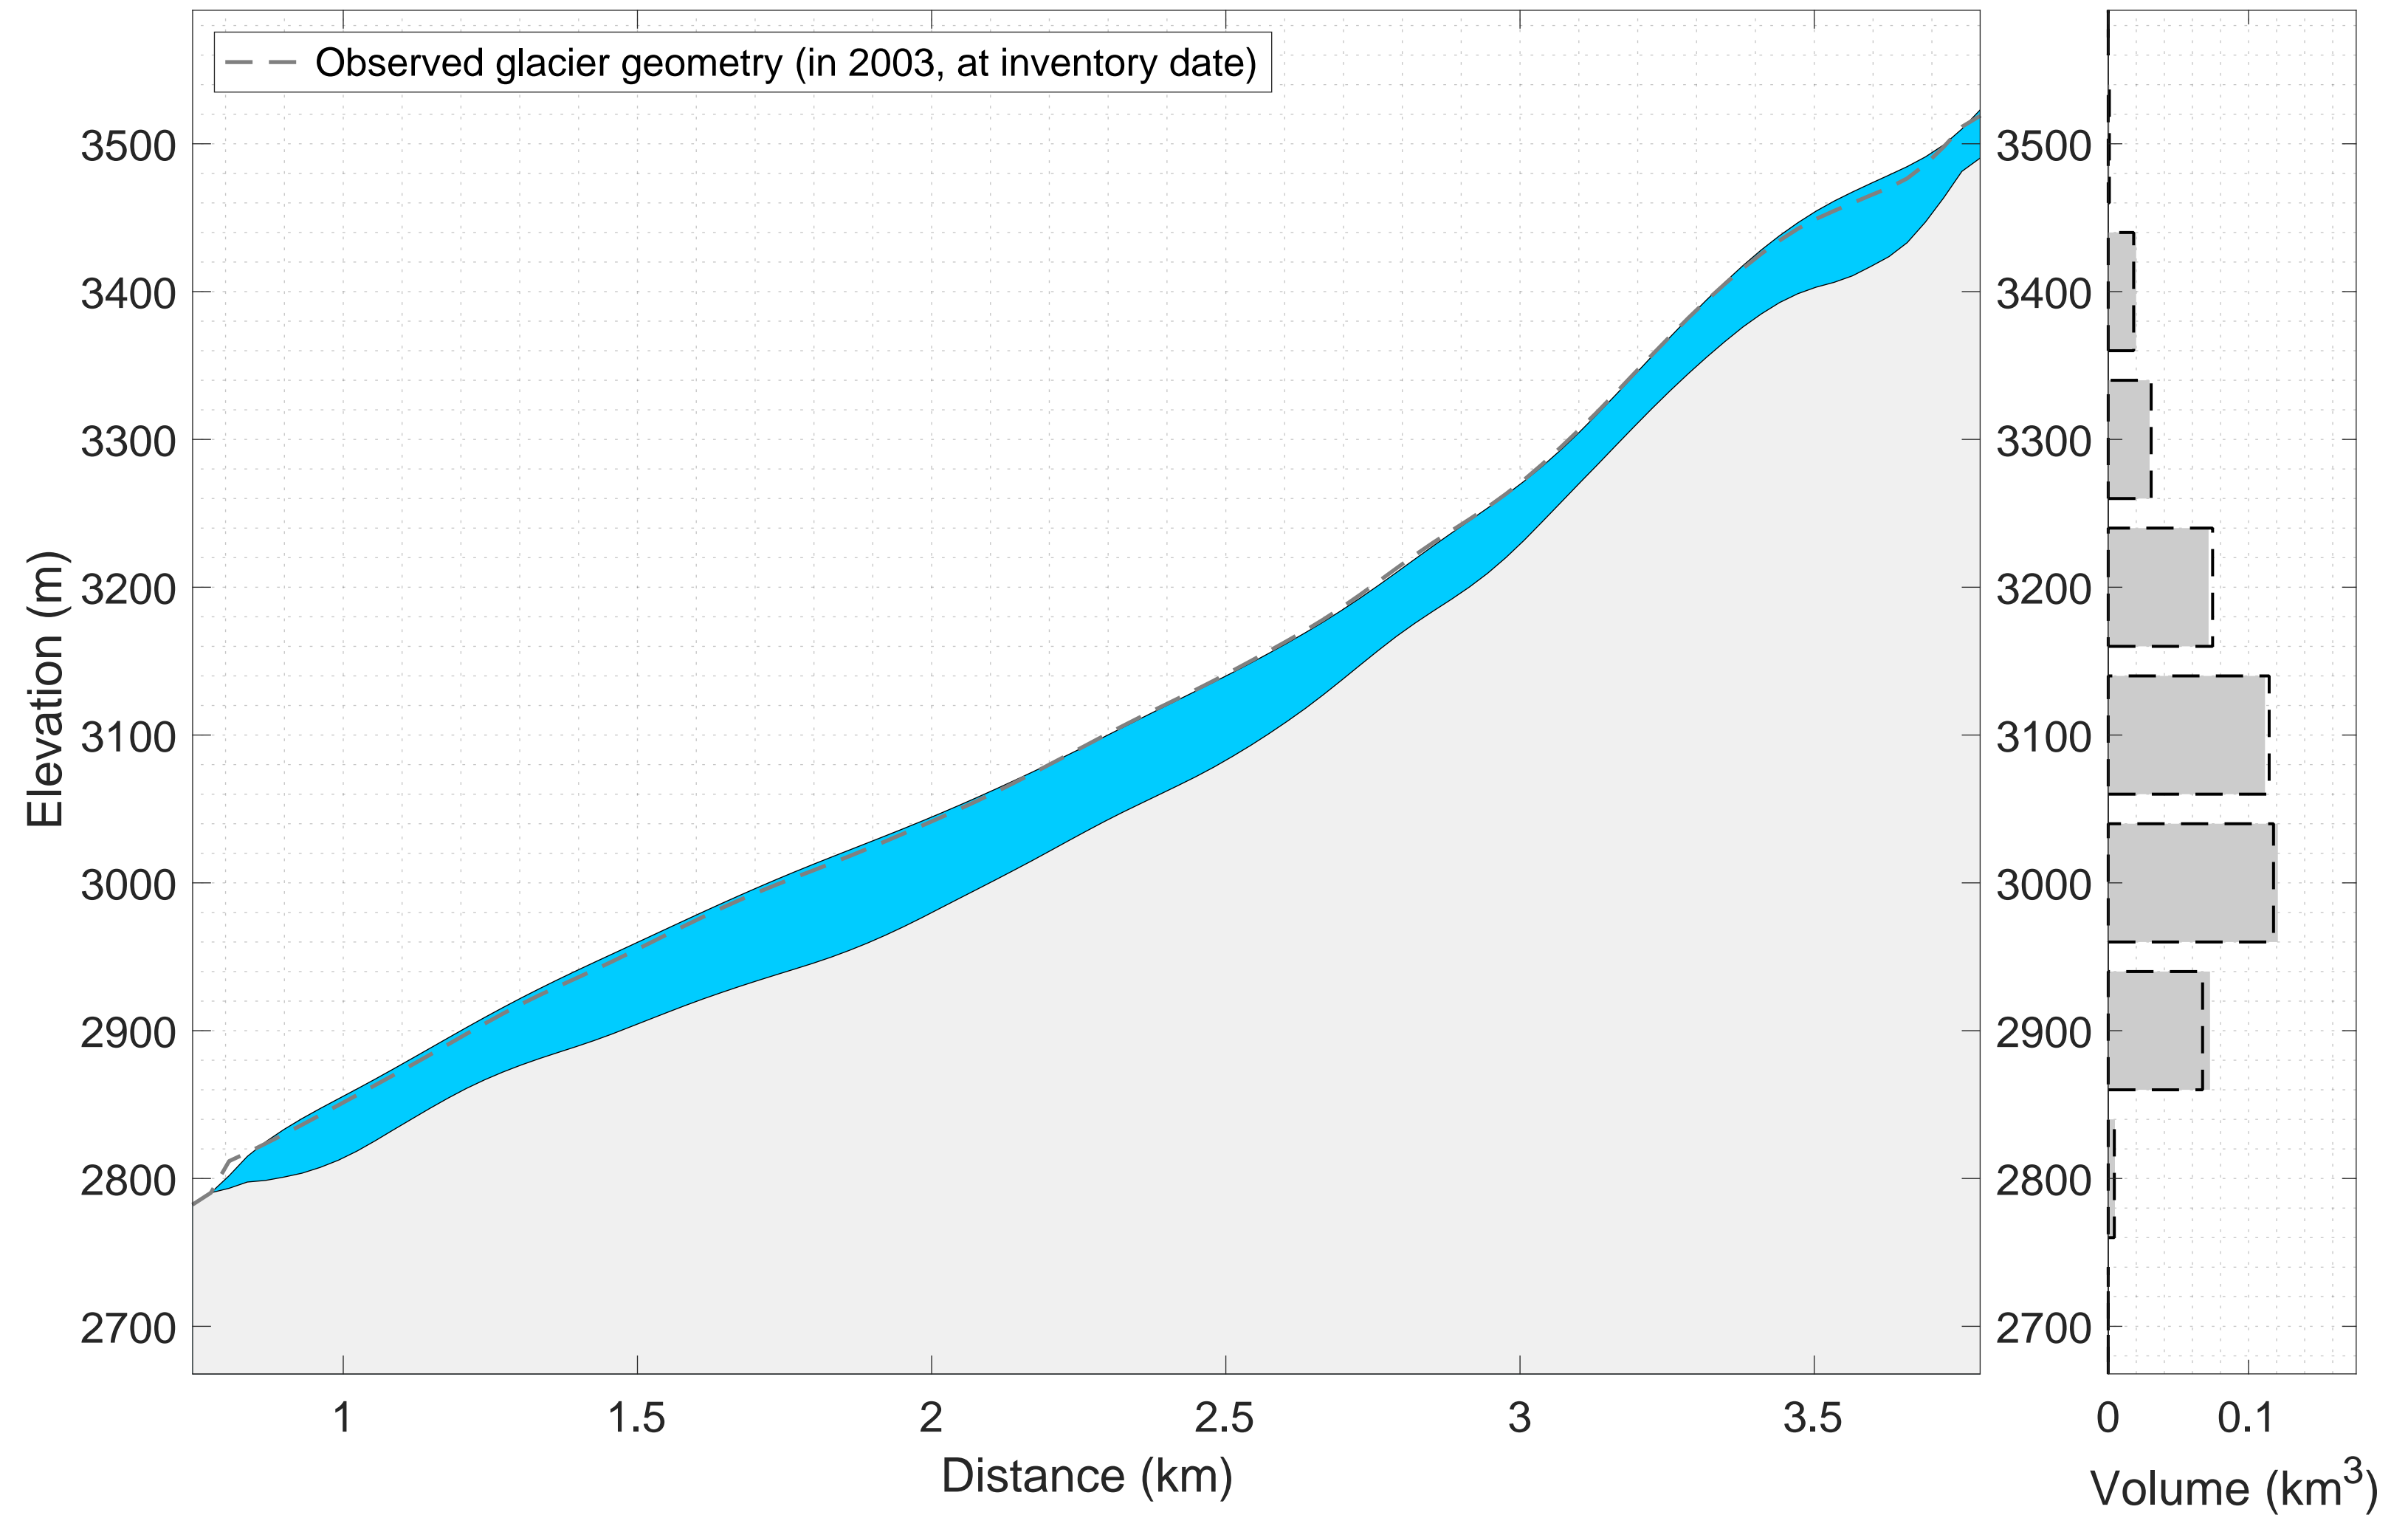

Supplement: Supplementary file 382 [file tc-13-1125-2019-supplement.zip]

**Modelled geometry (Glacier ID = 00932;  $A = 9.8739\text{e-}17 \text{ Pa}^{-3} \text{ a}^{-1}$ ;  $dx = 40 \text{ m}$ )**

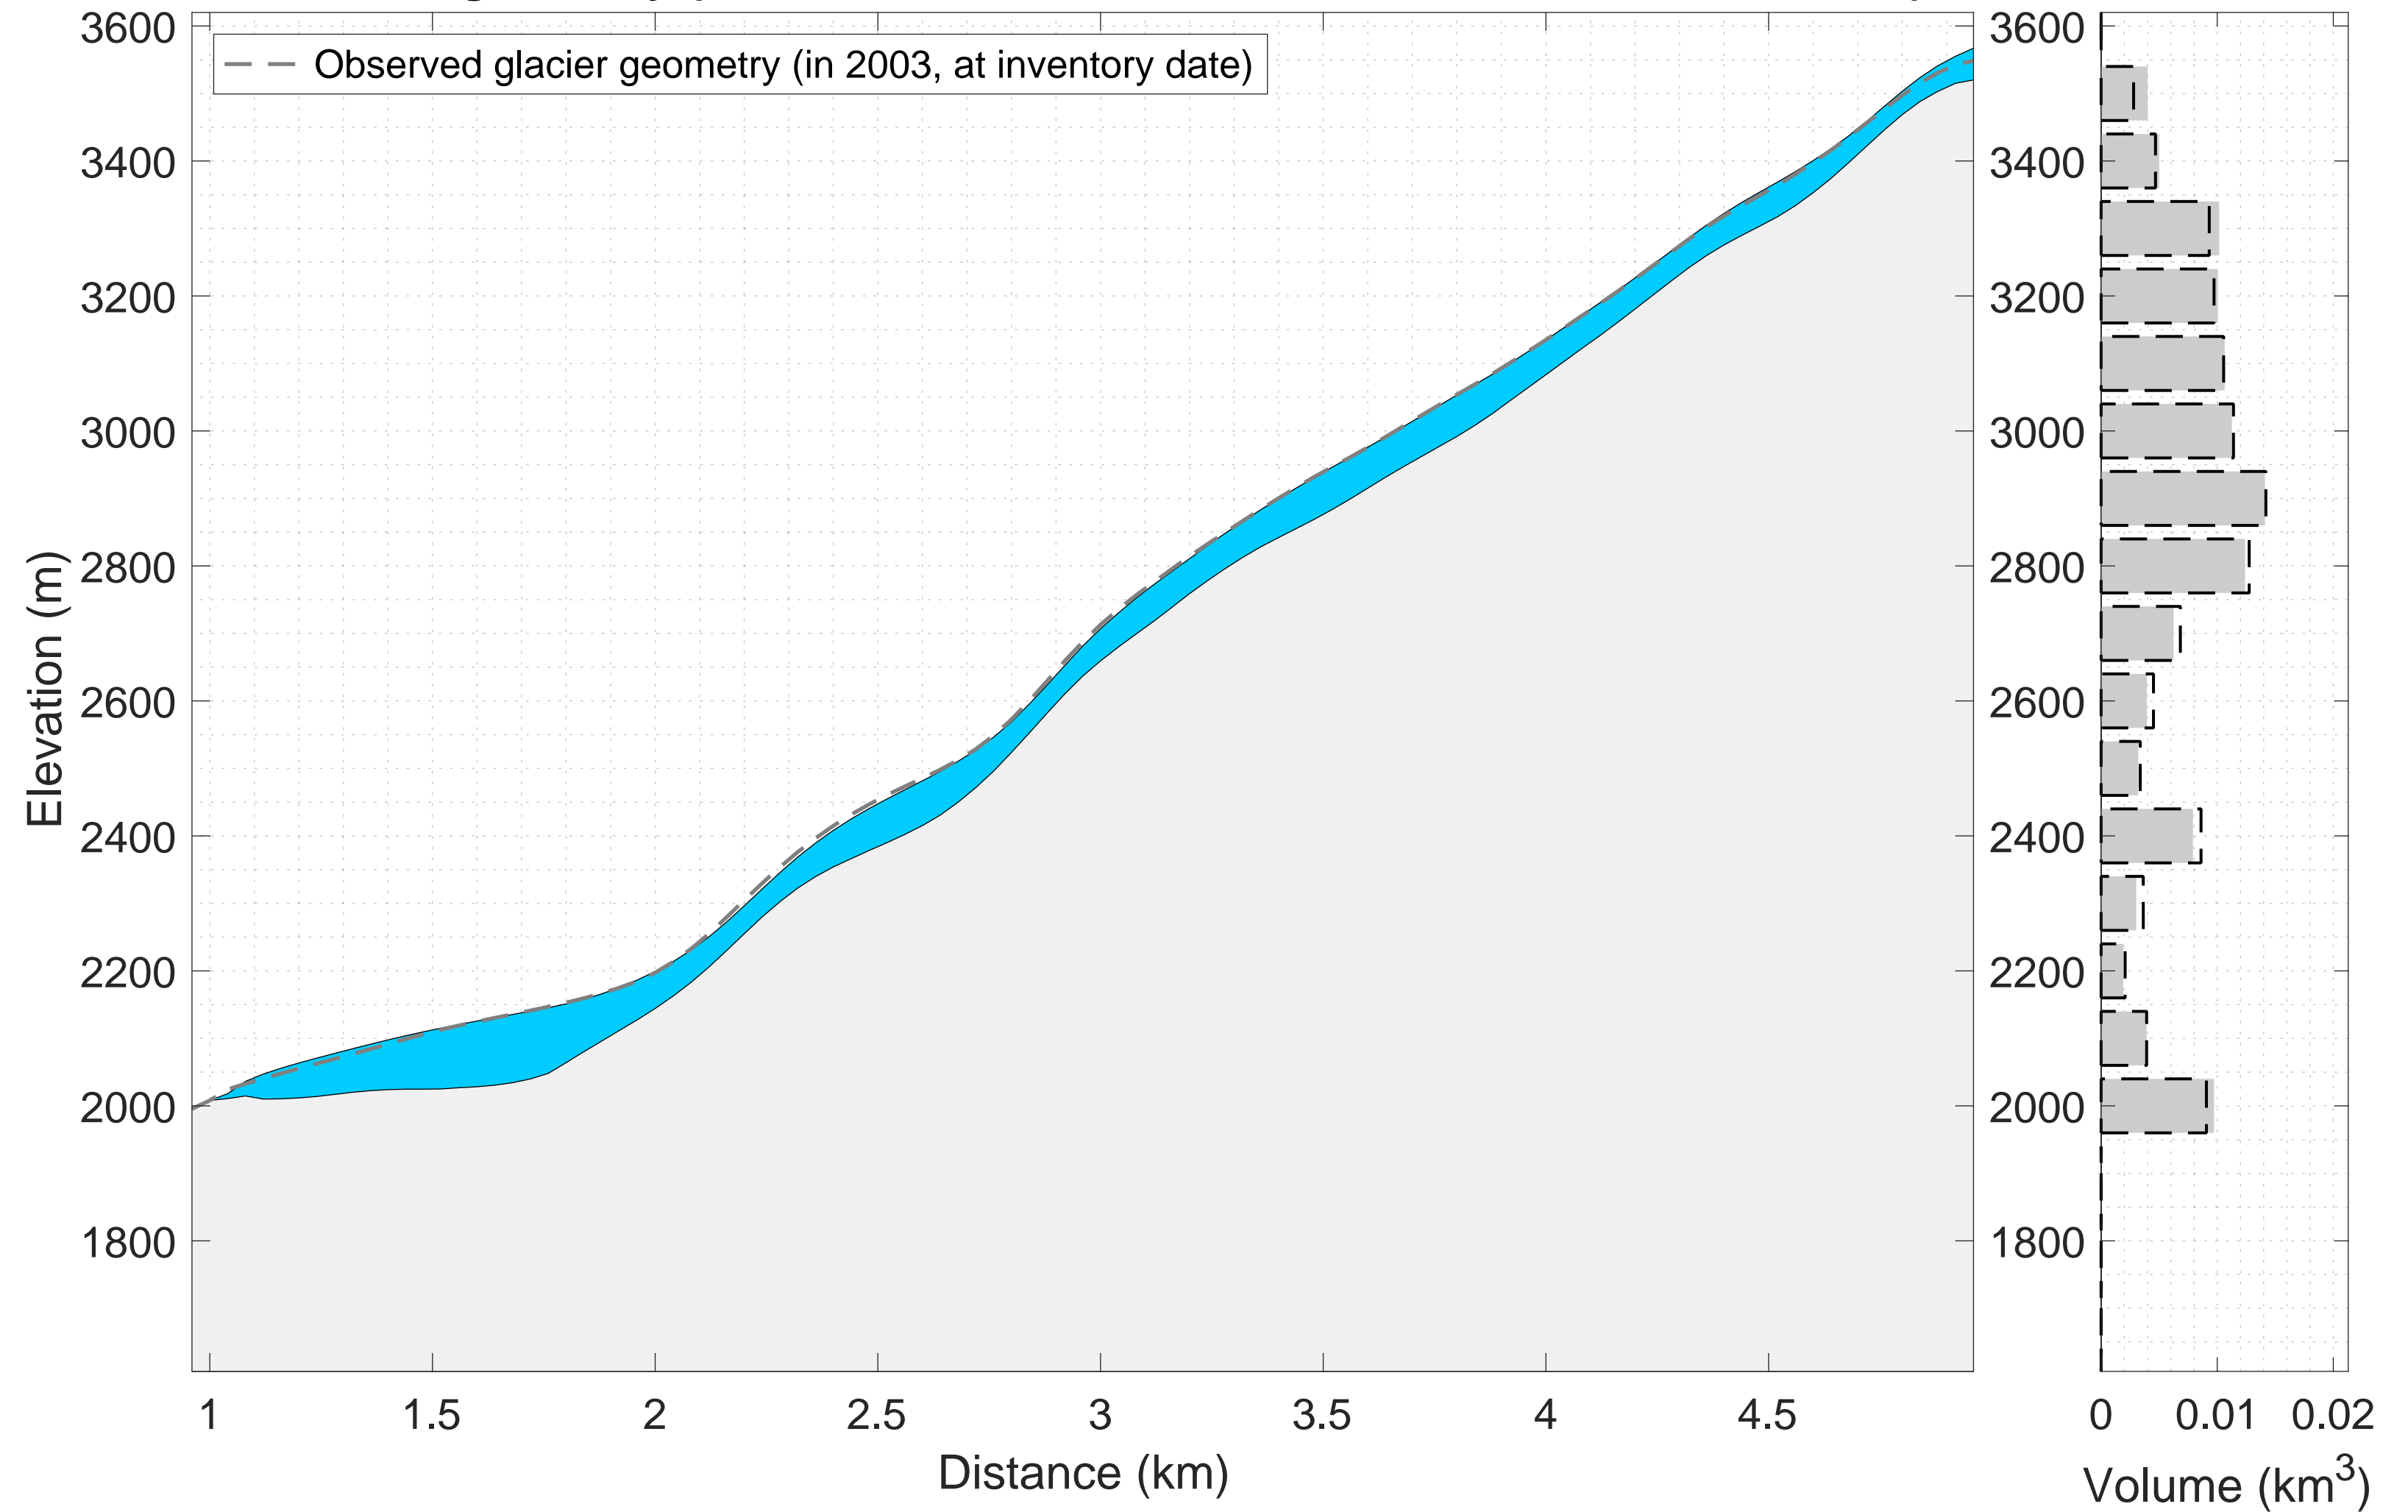

Supplement: Supplementary file 383 [file tc-13-1125-2019-supplement.zip]

**Modelled geometry (Glacier ID = 01968;  $A = 7.6068\text{e-}17 \text{ Pa}^{-3} \text{ a}^{-1}$ ;  $dx = 18 \text{ m}$ )**

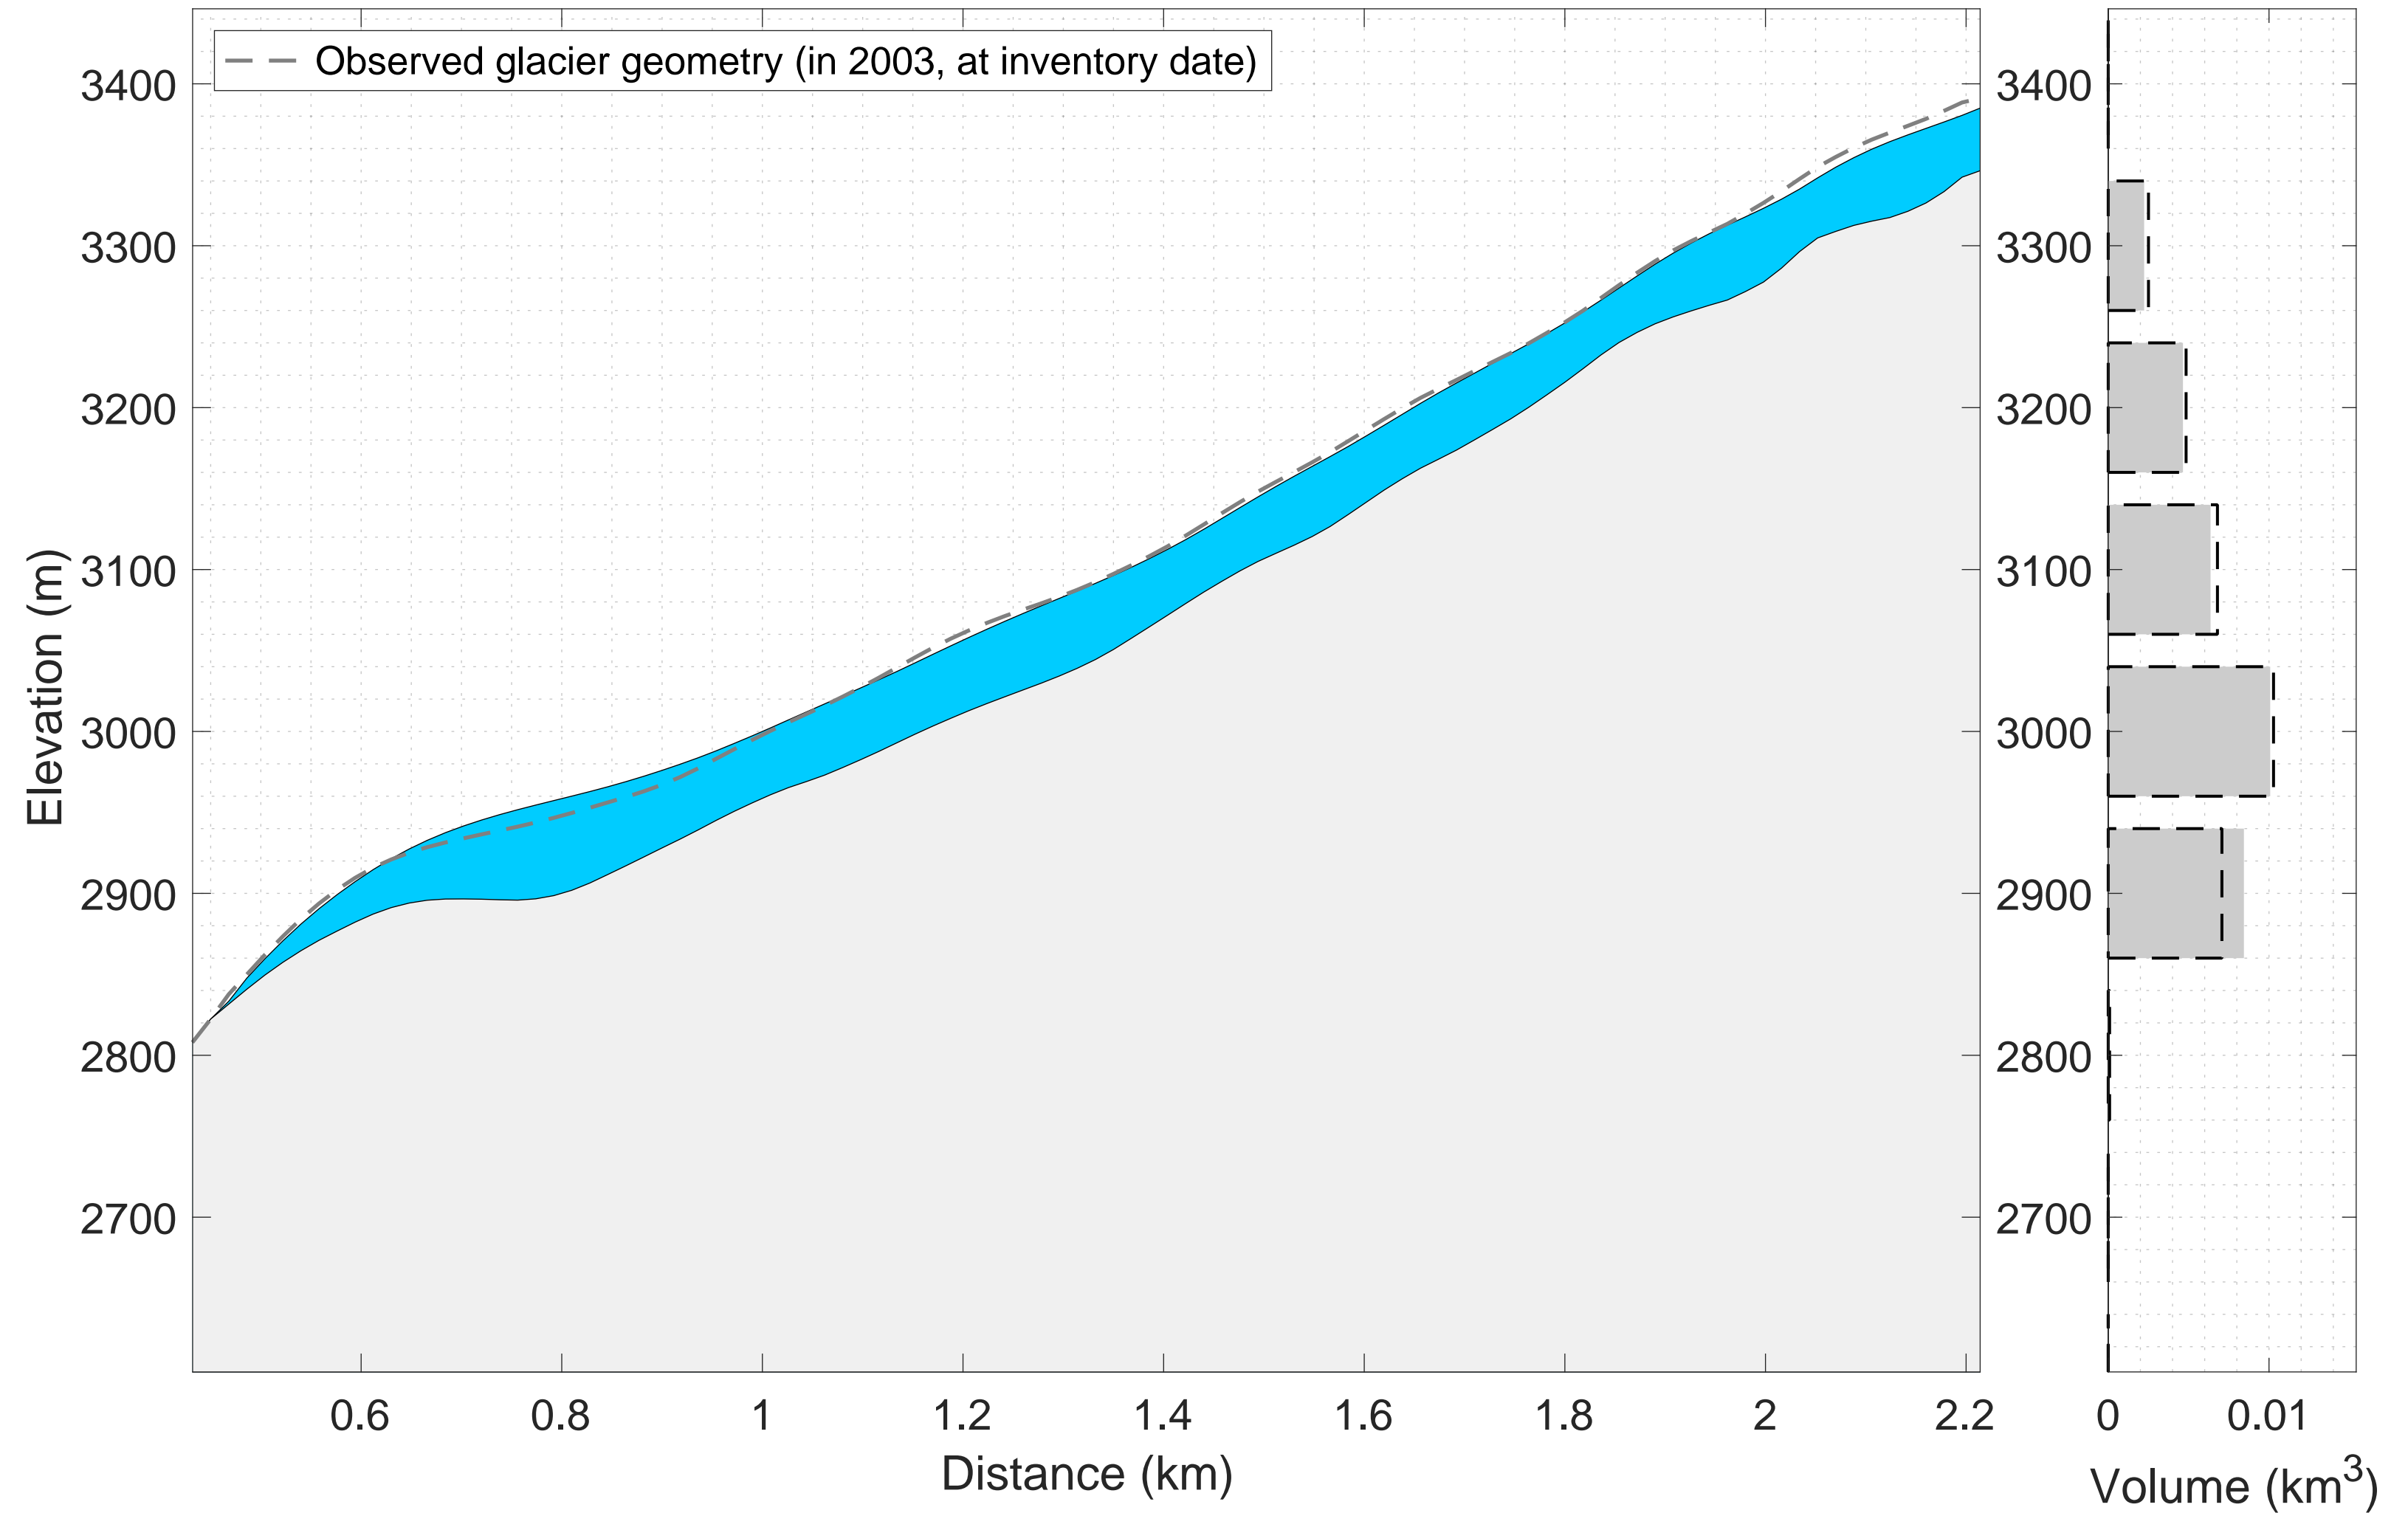

Supplement: Supplementary file 384 [file tc-13-1125-2019-supplement.zip]

**Modelled geometry (Glacier ID = 01108;  $A = 8.7772\text{e-}17 \text{ Pa}^{-3} \text{ a}^{-1}$ ;  $dx = 10 \text{ m}$ )**

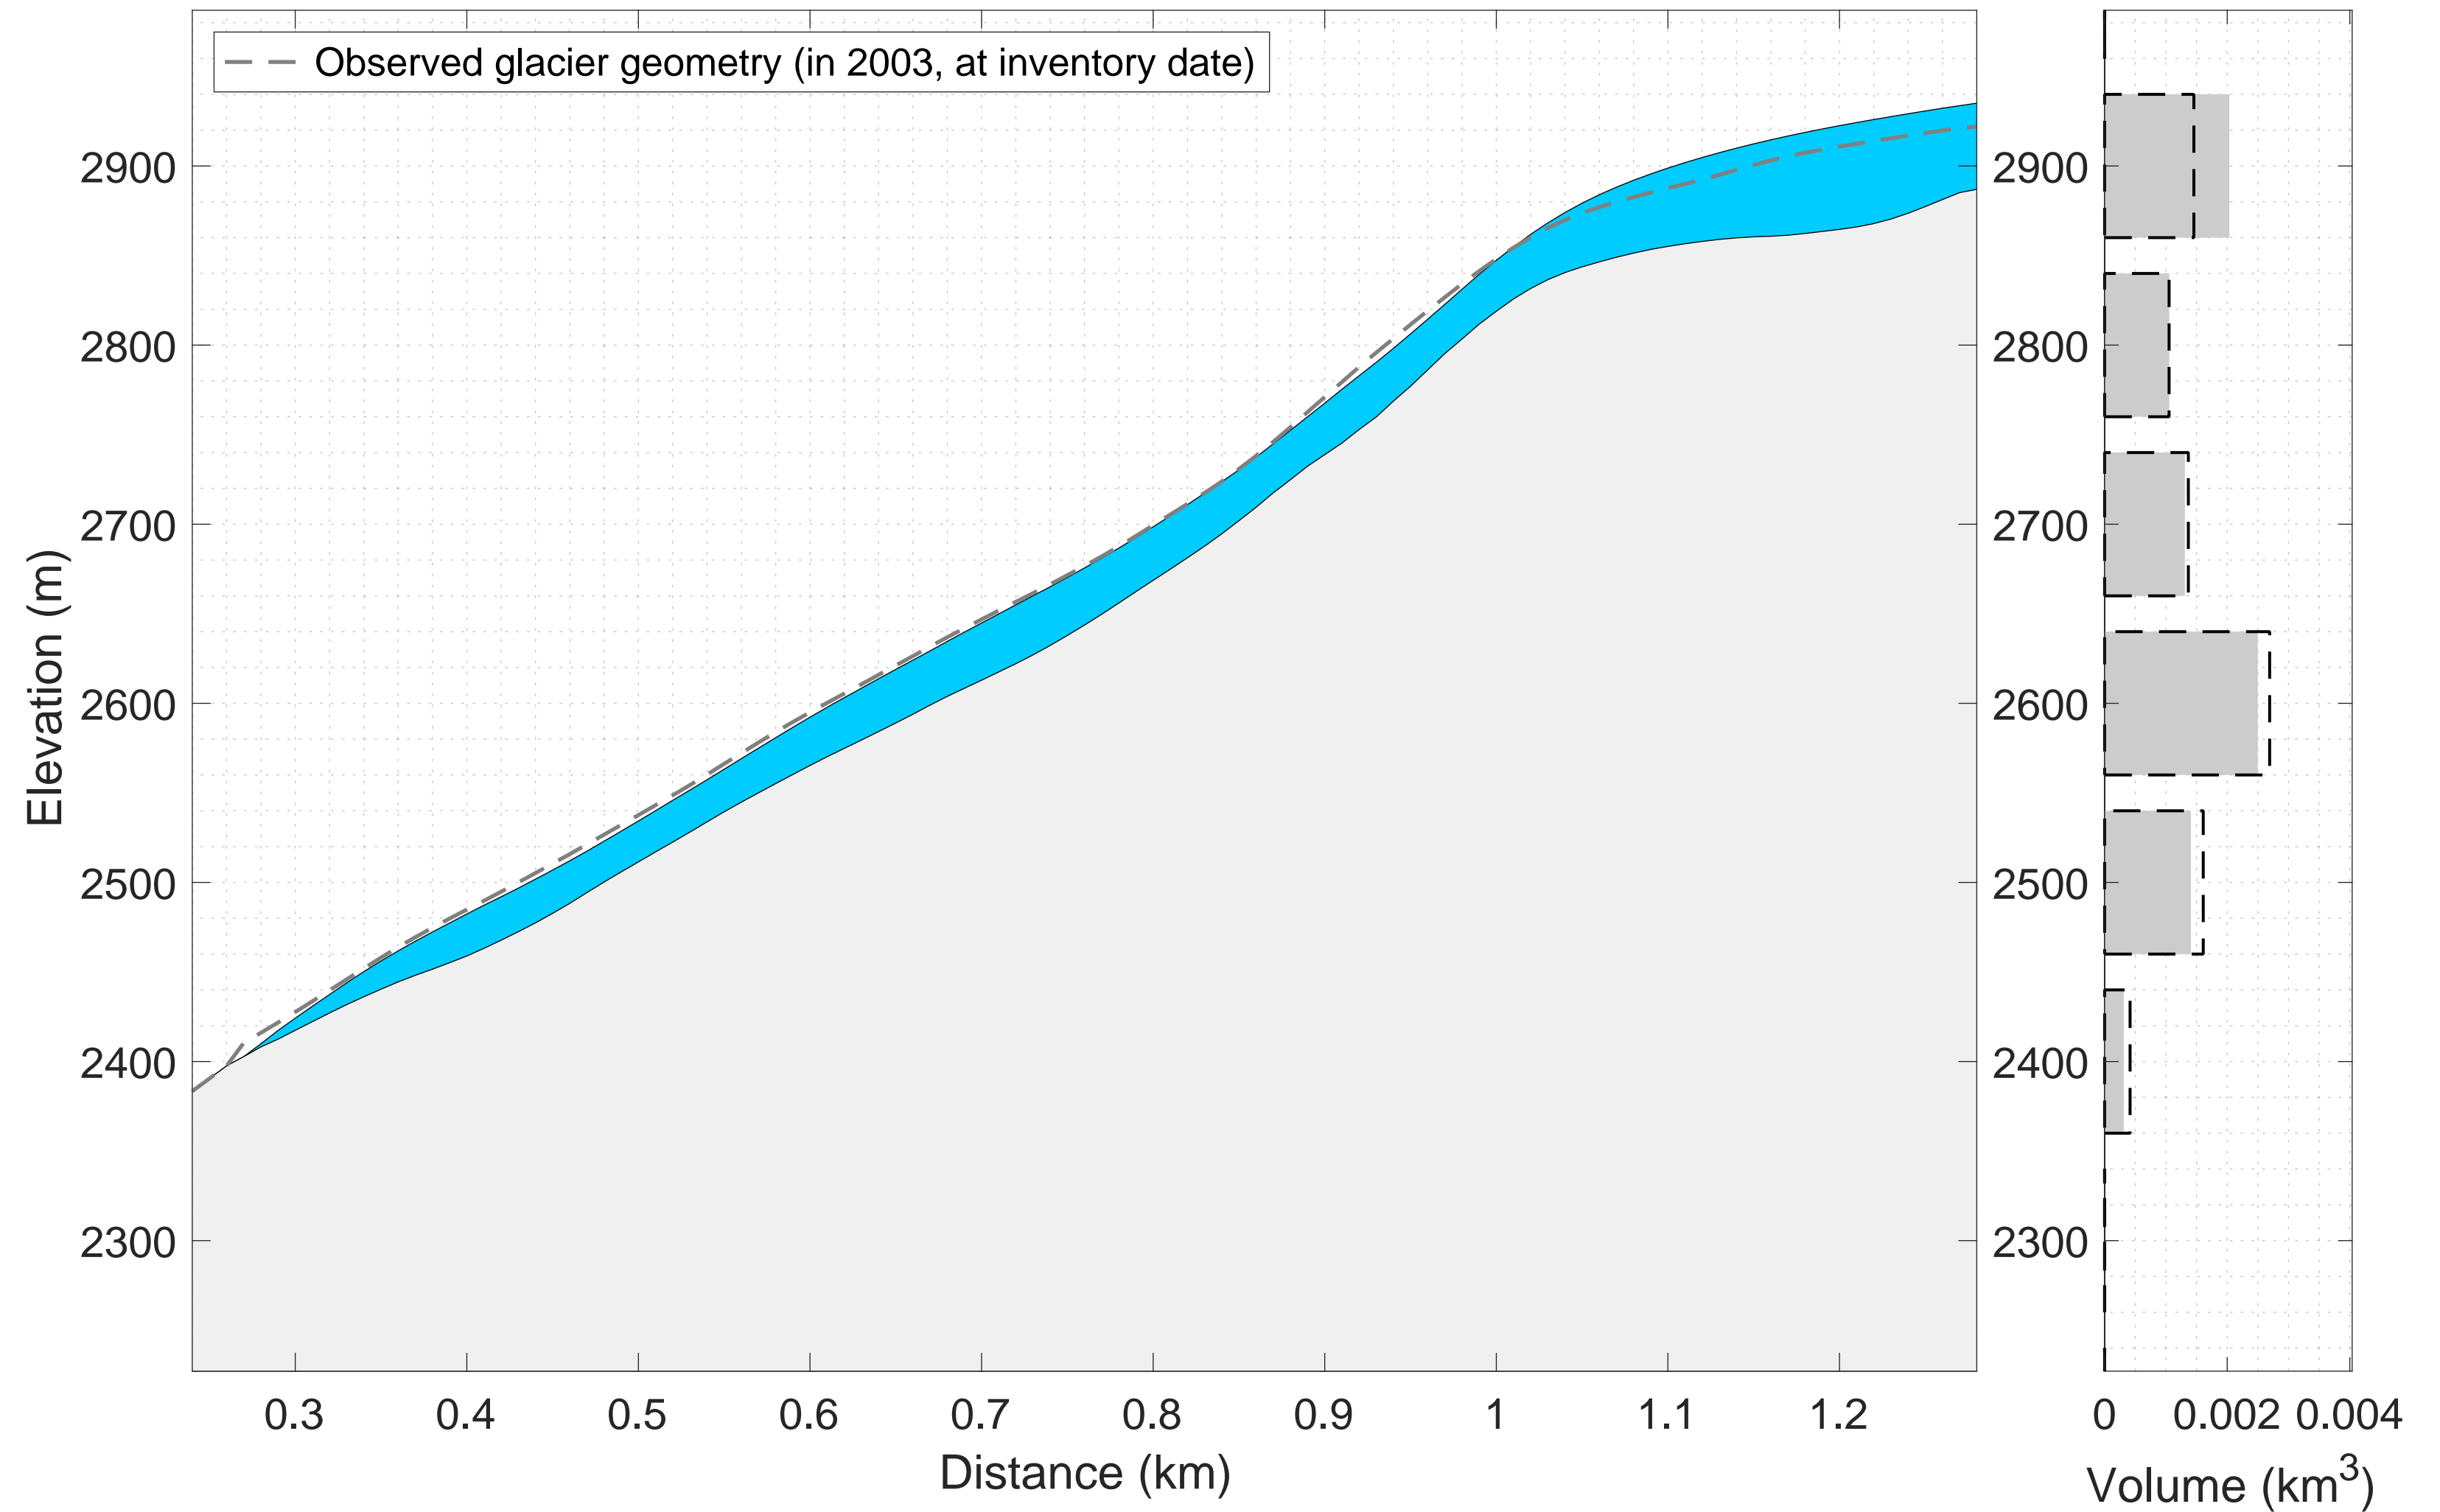

Supplement: Supplementary file 385 [file tc-13-1125-2019-supplement.zip]

**Modelled geometry (Glacier ID = 01193;  $A = 9.671\text{e-}17 \text{ Pa}^{-3} \text{ a}^{-1}$ ;  $dx = 31 \text{ m}$ )**

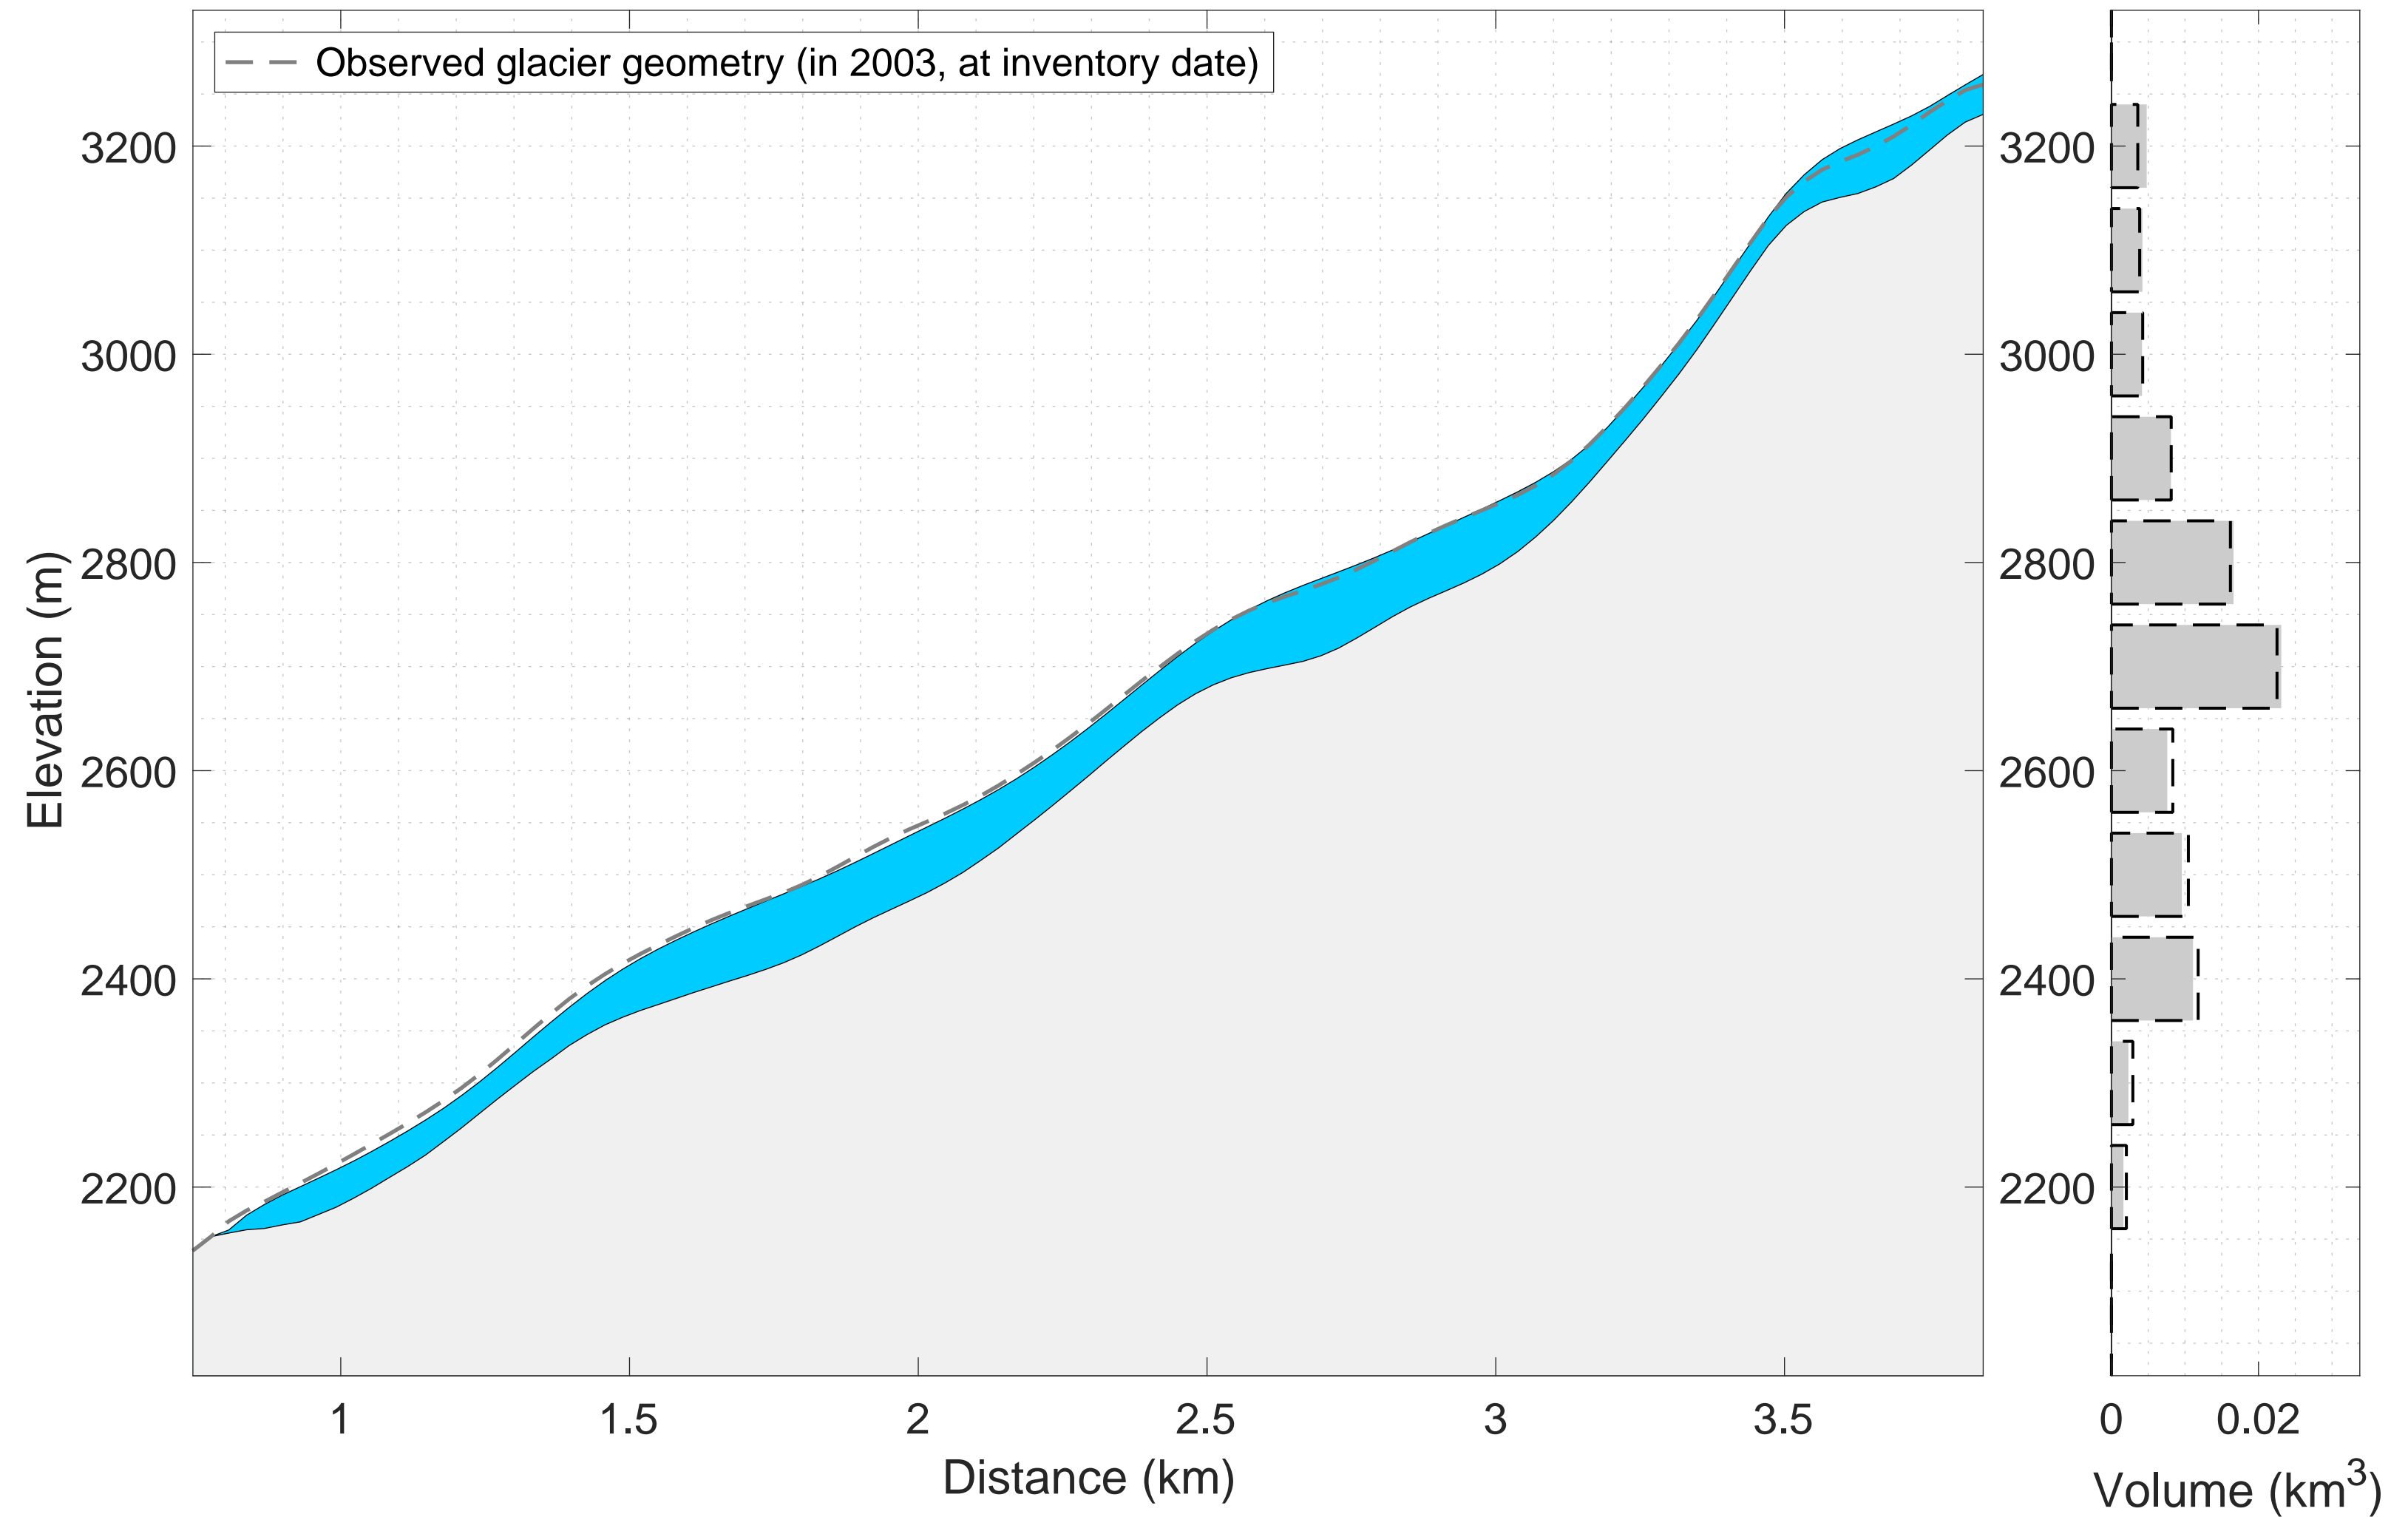

Supplement: Supplementary file 386 [file tc-13-1125-2019-supplement.zip]

**Modelled geometry (Glacier ID = 01431;  $A = 1.868\text{e-}16 \text{ Pa}^{-3} \text{ a}^{-1}$ ;  $dx = 24 \text{ m}$ )**

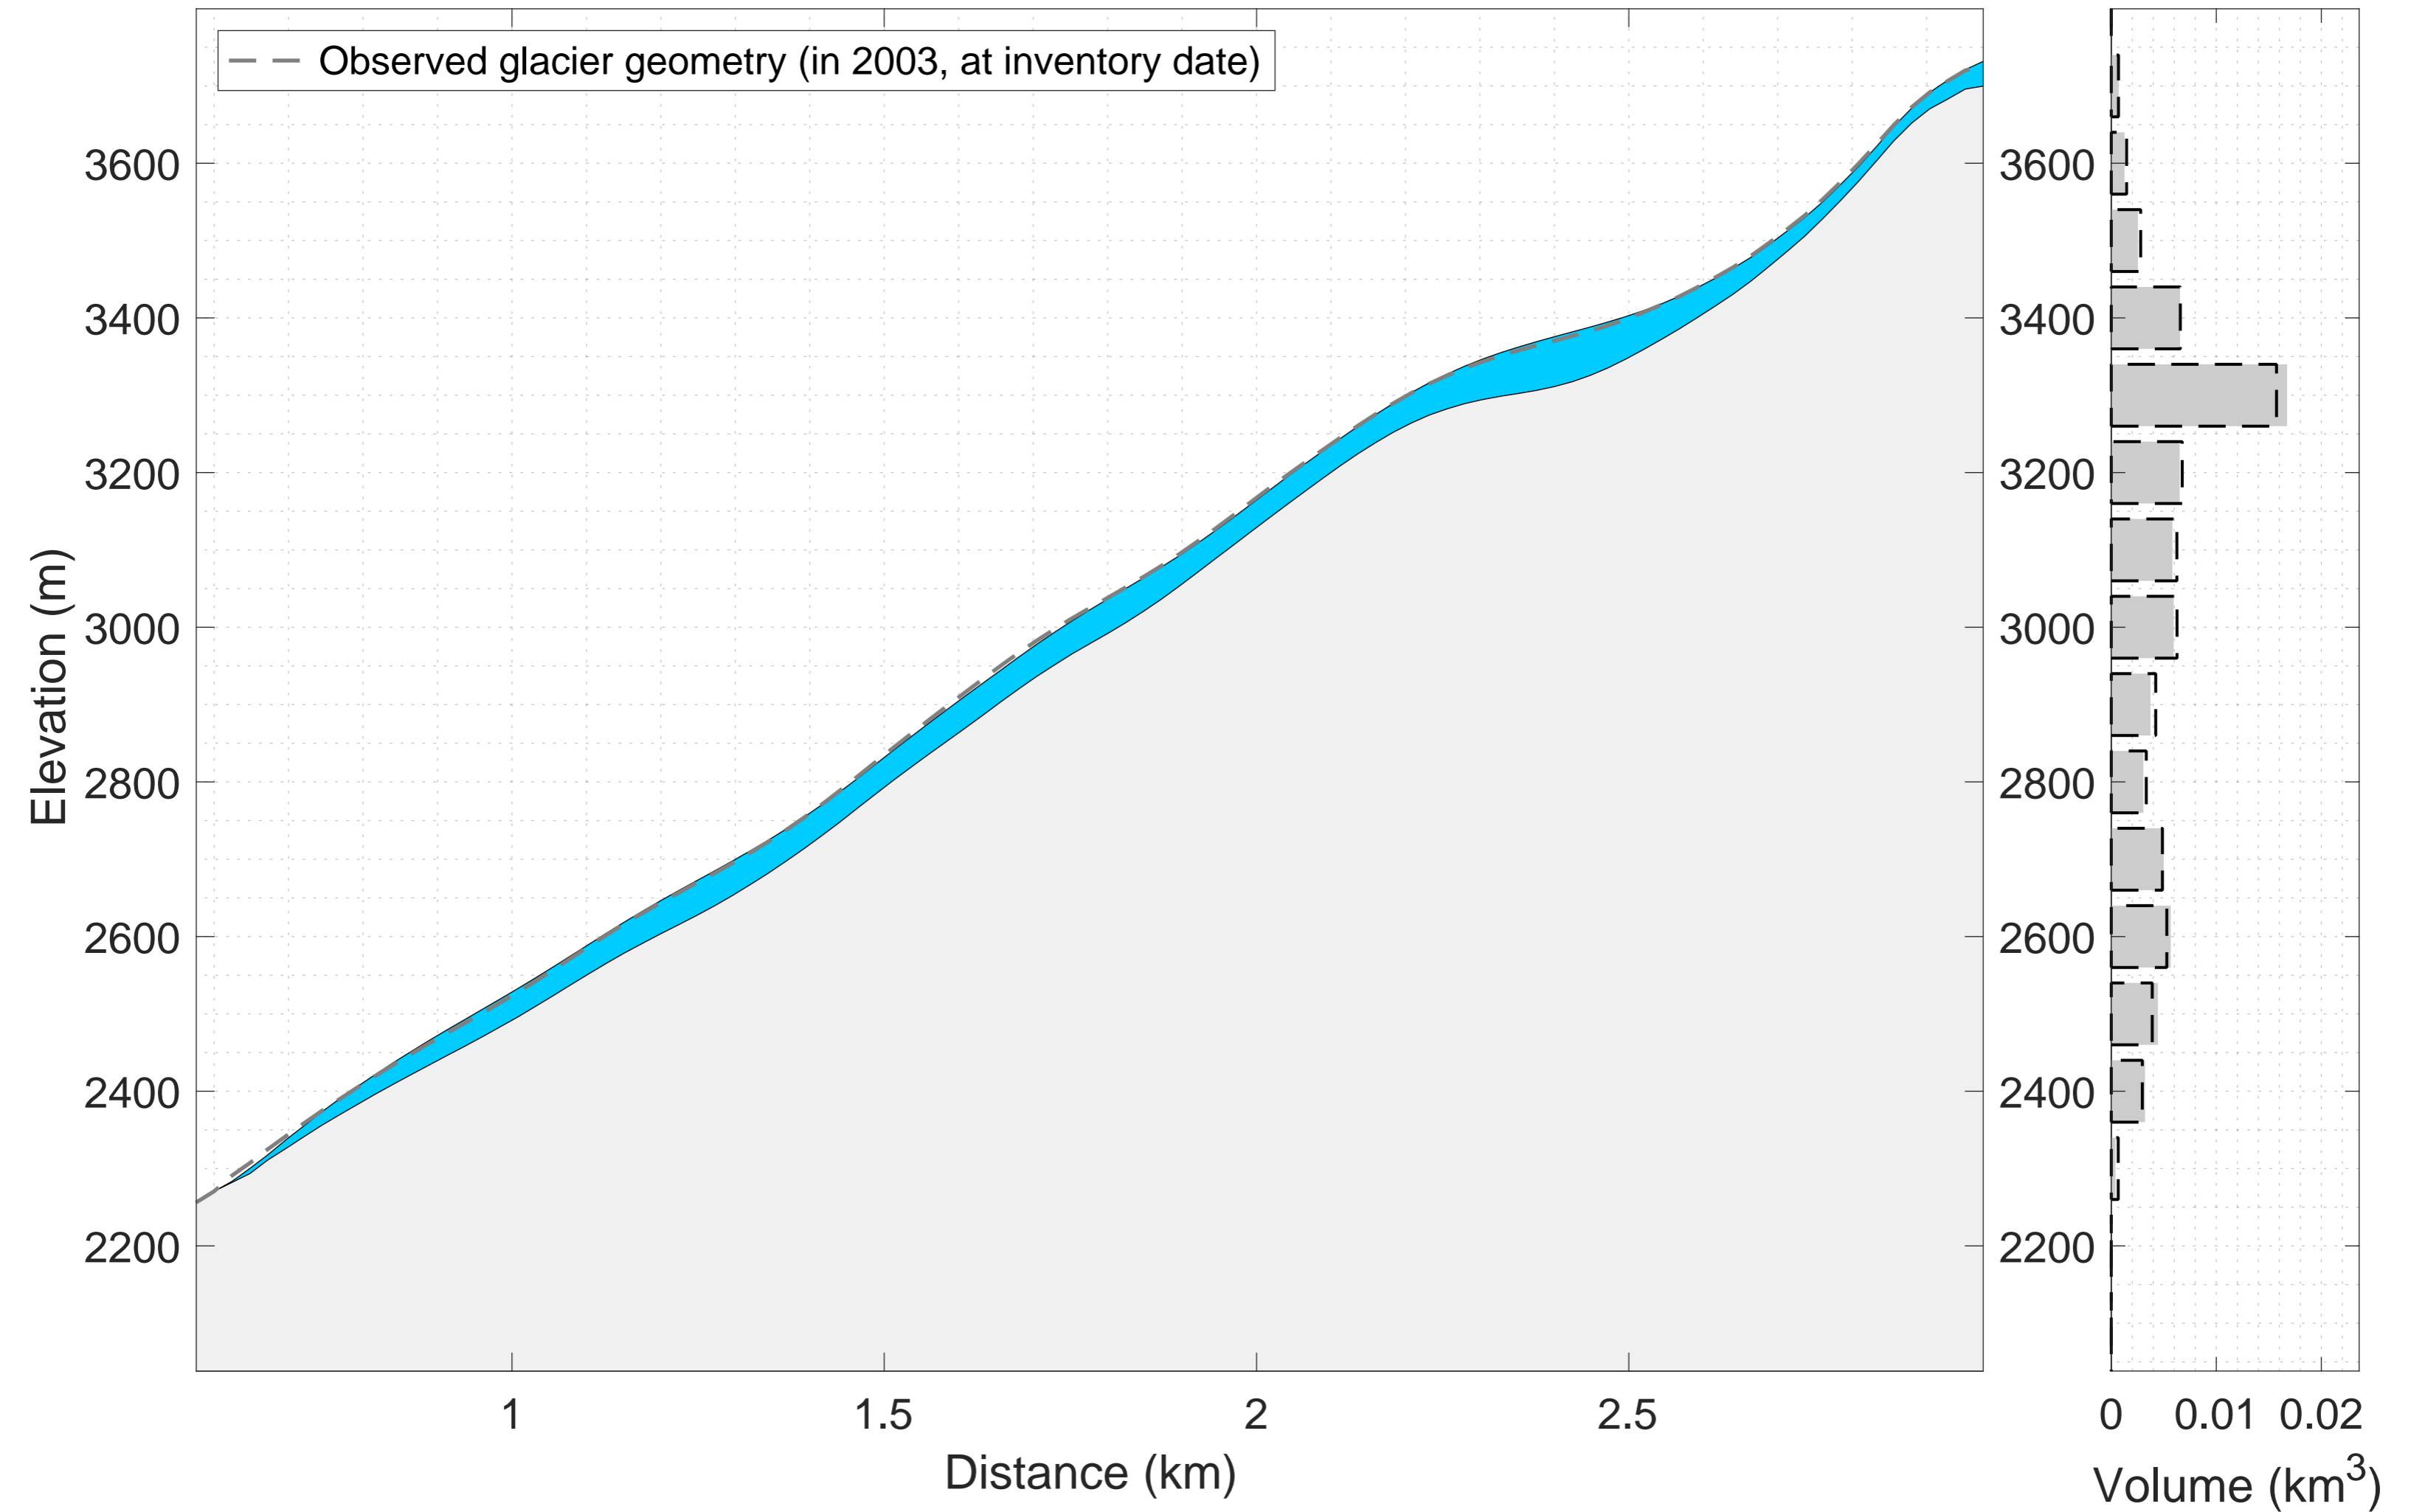

Supplement: Supplementary file 387 [file tc-13-1125-2019-supplement.zip]

**Modelled geometry (Glacier ID = 00852;  $A = 1.88\text{e-}16 \text{ Pa}^{-3} \text{ a}^{-1}$ ;  $dx = 13 \text{ m}$ )**

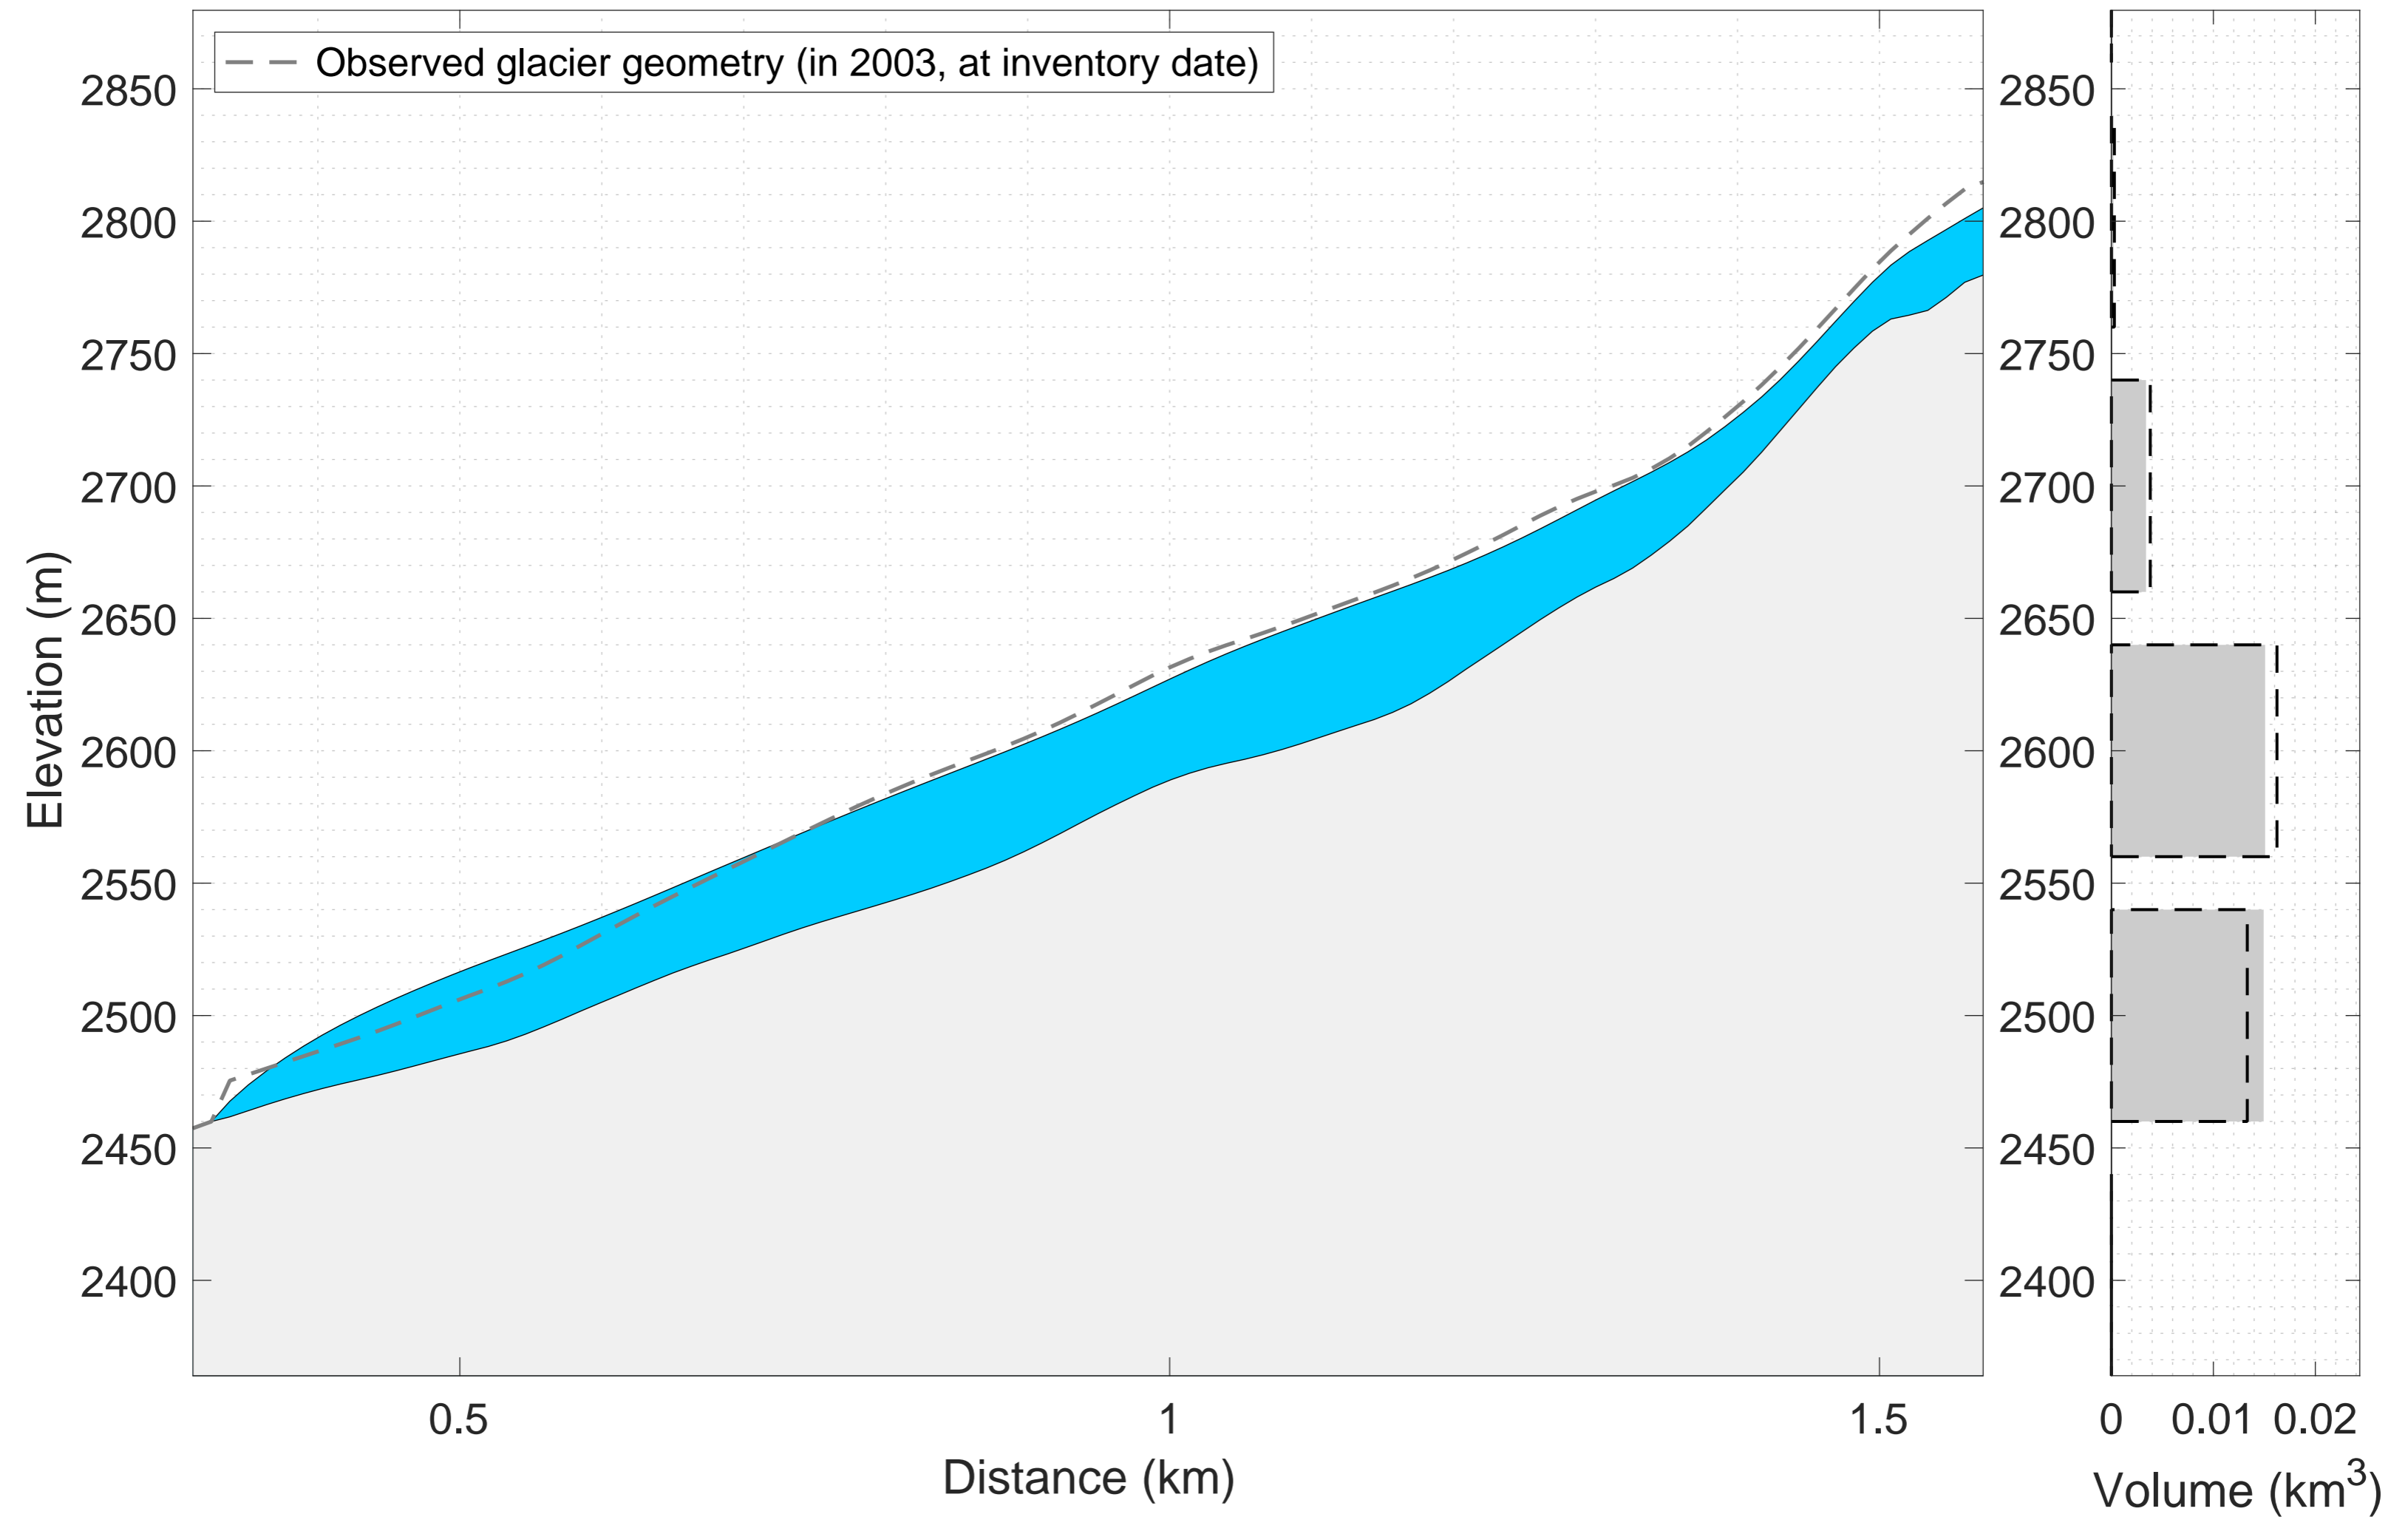

Supplement: Supplementary file 388 [file tc-13-1125-2019-supplement.zip]

**Modelled geometry (Glacier ID = 01419;  $A = 5.4502\text{e-}17 \text{ Pa}^{-3} \text{ a}^{-1}$ ;  $dx = 10 \text{ m}$ )**

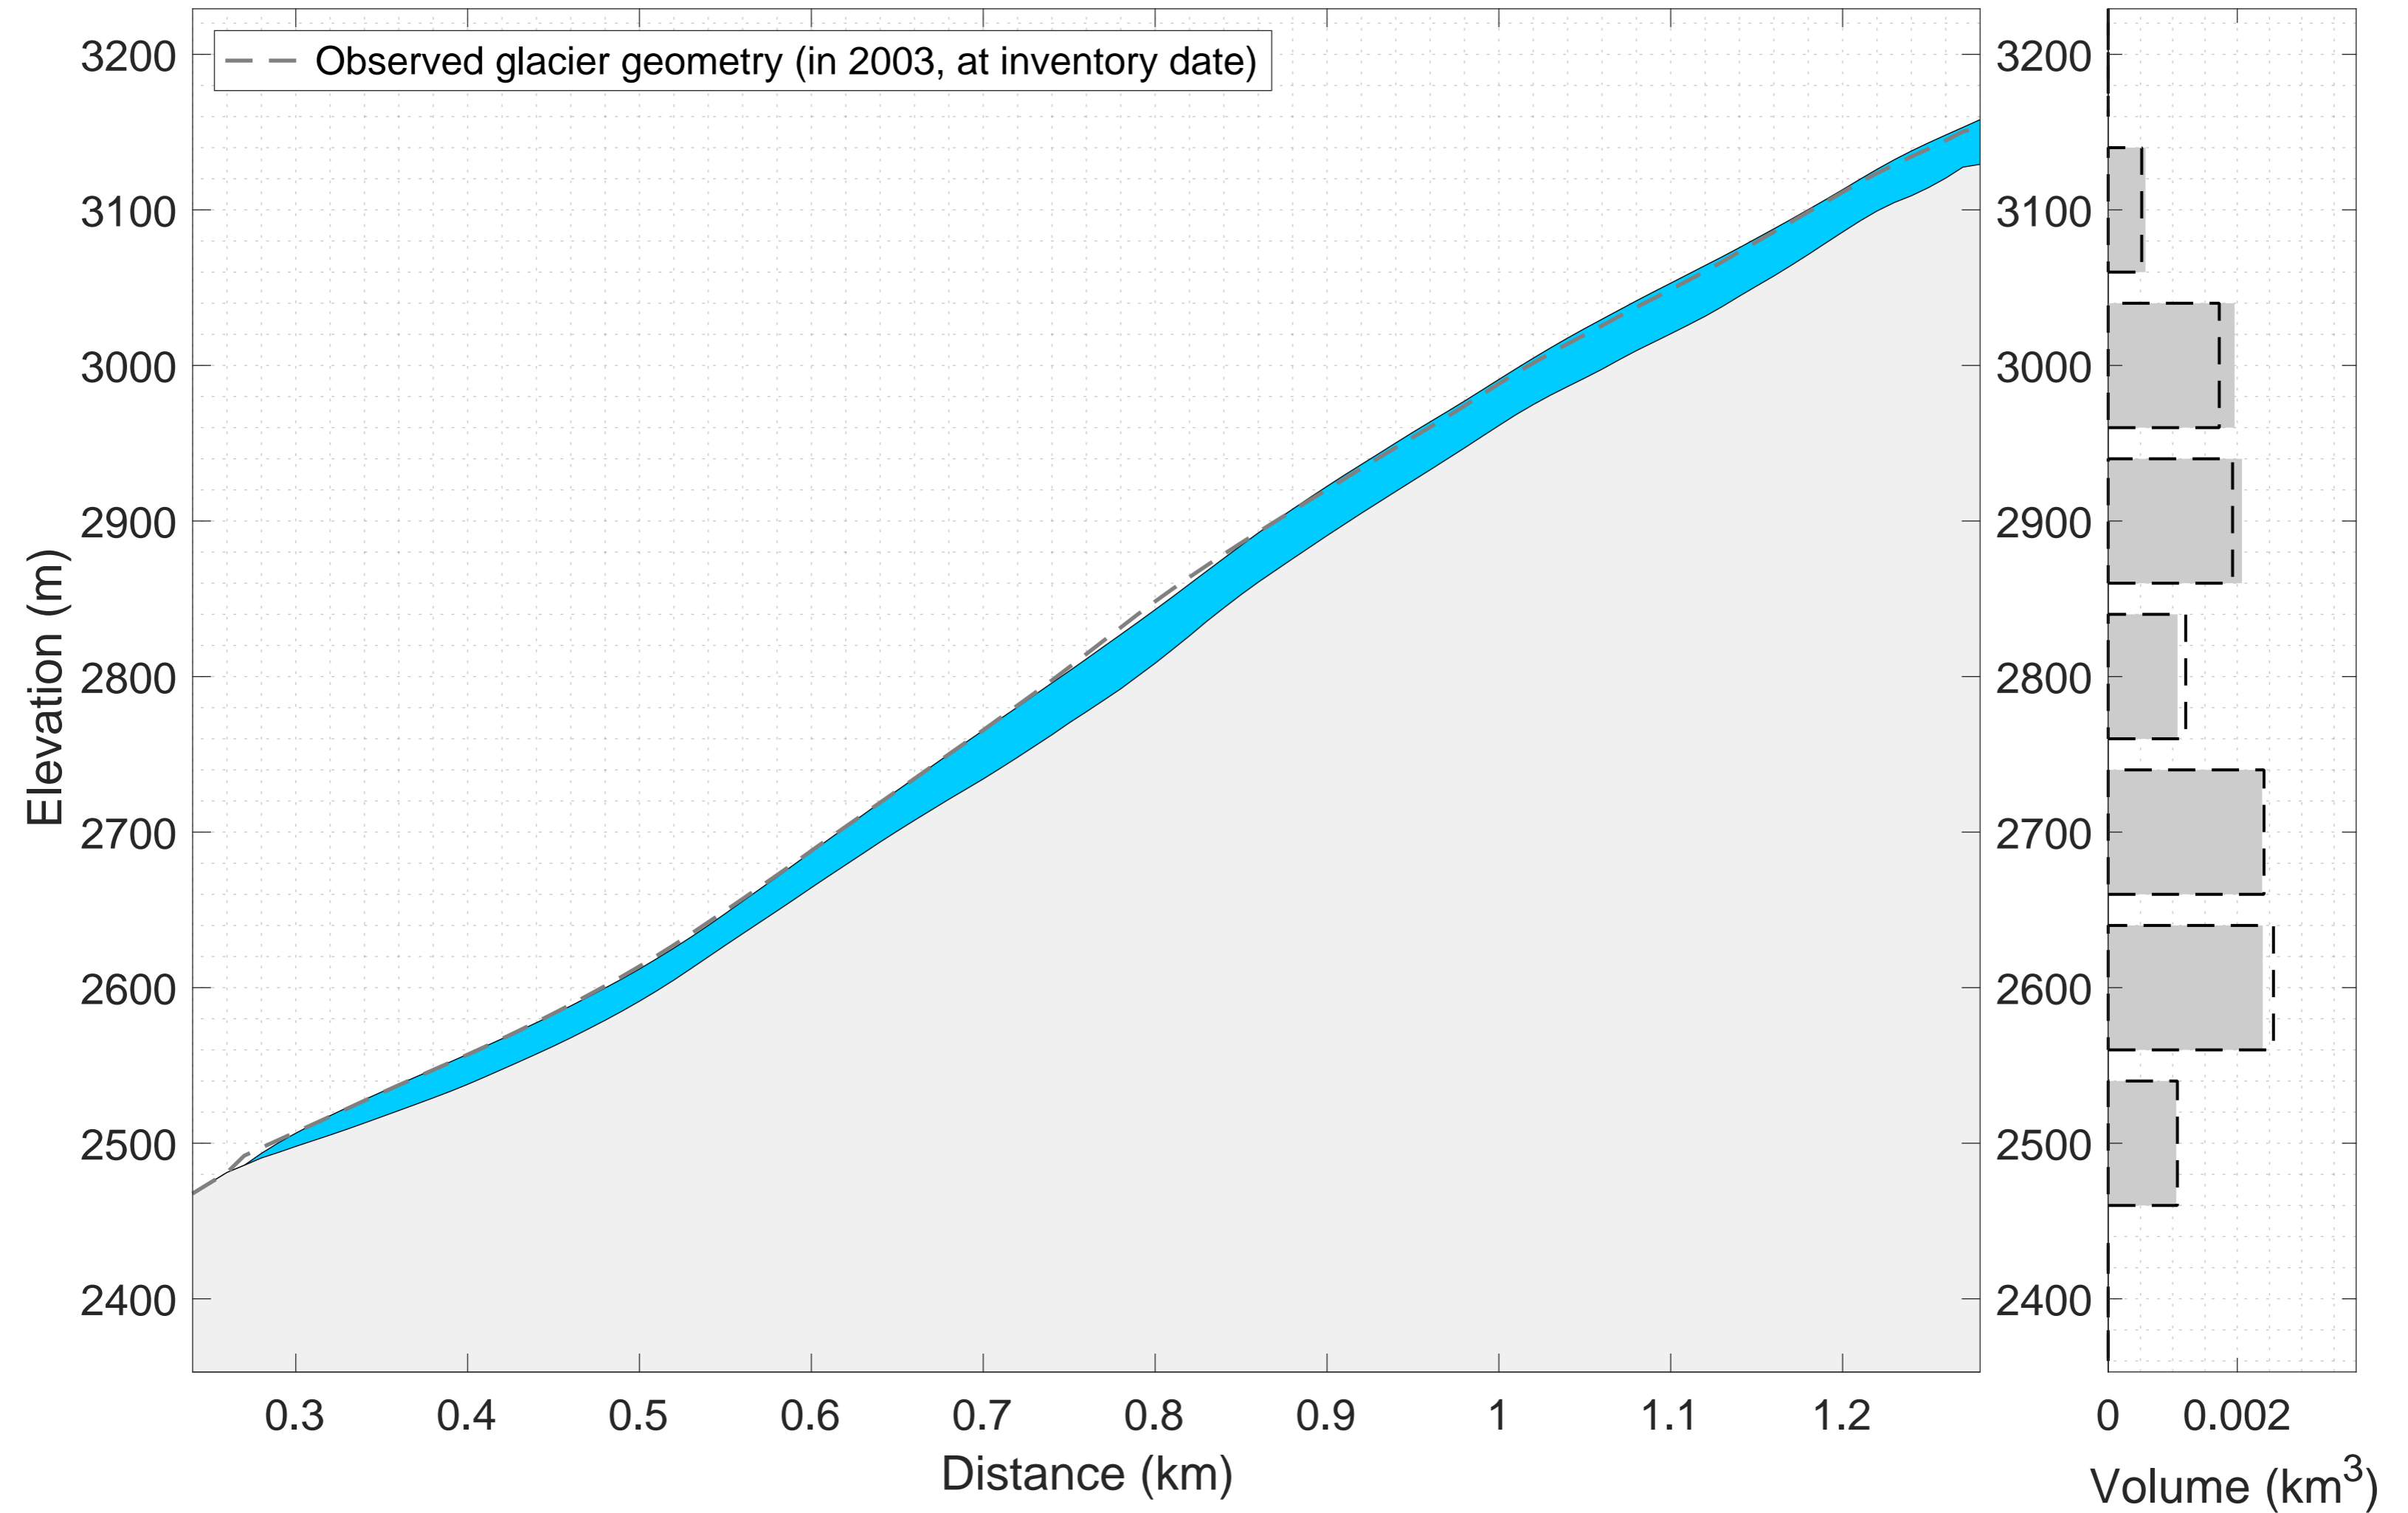

Supplement: Supplementary file 389 [file tc-13-1125-2019-supplement.zip]

**Modelled geometry (Glacier ID = 02464;  $A = 2.2585\text{e-}16 \text{ Pa}^{-3} \text{ a}^{-1}$ ;  $dx = 31 \text{ m}$ )**

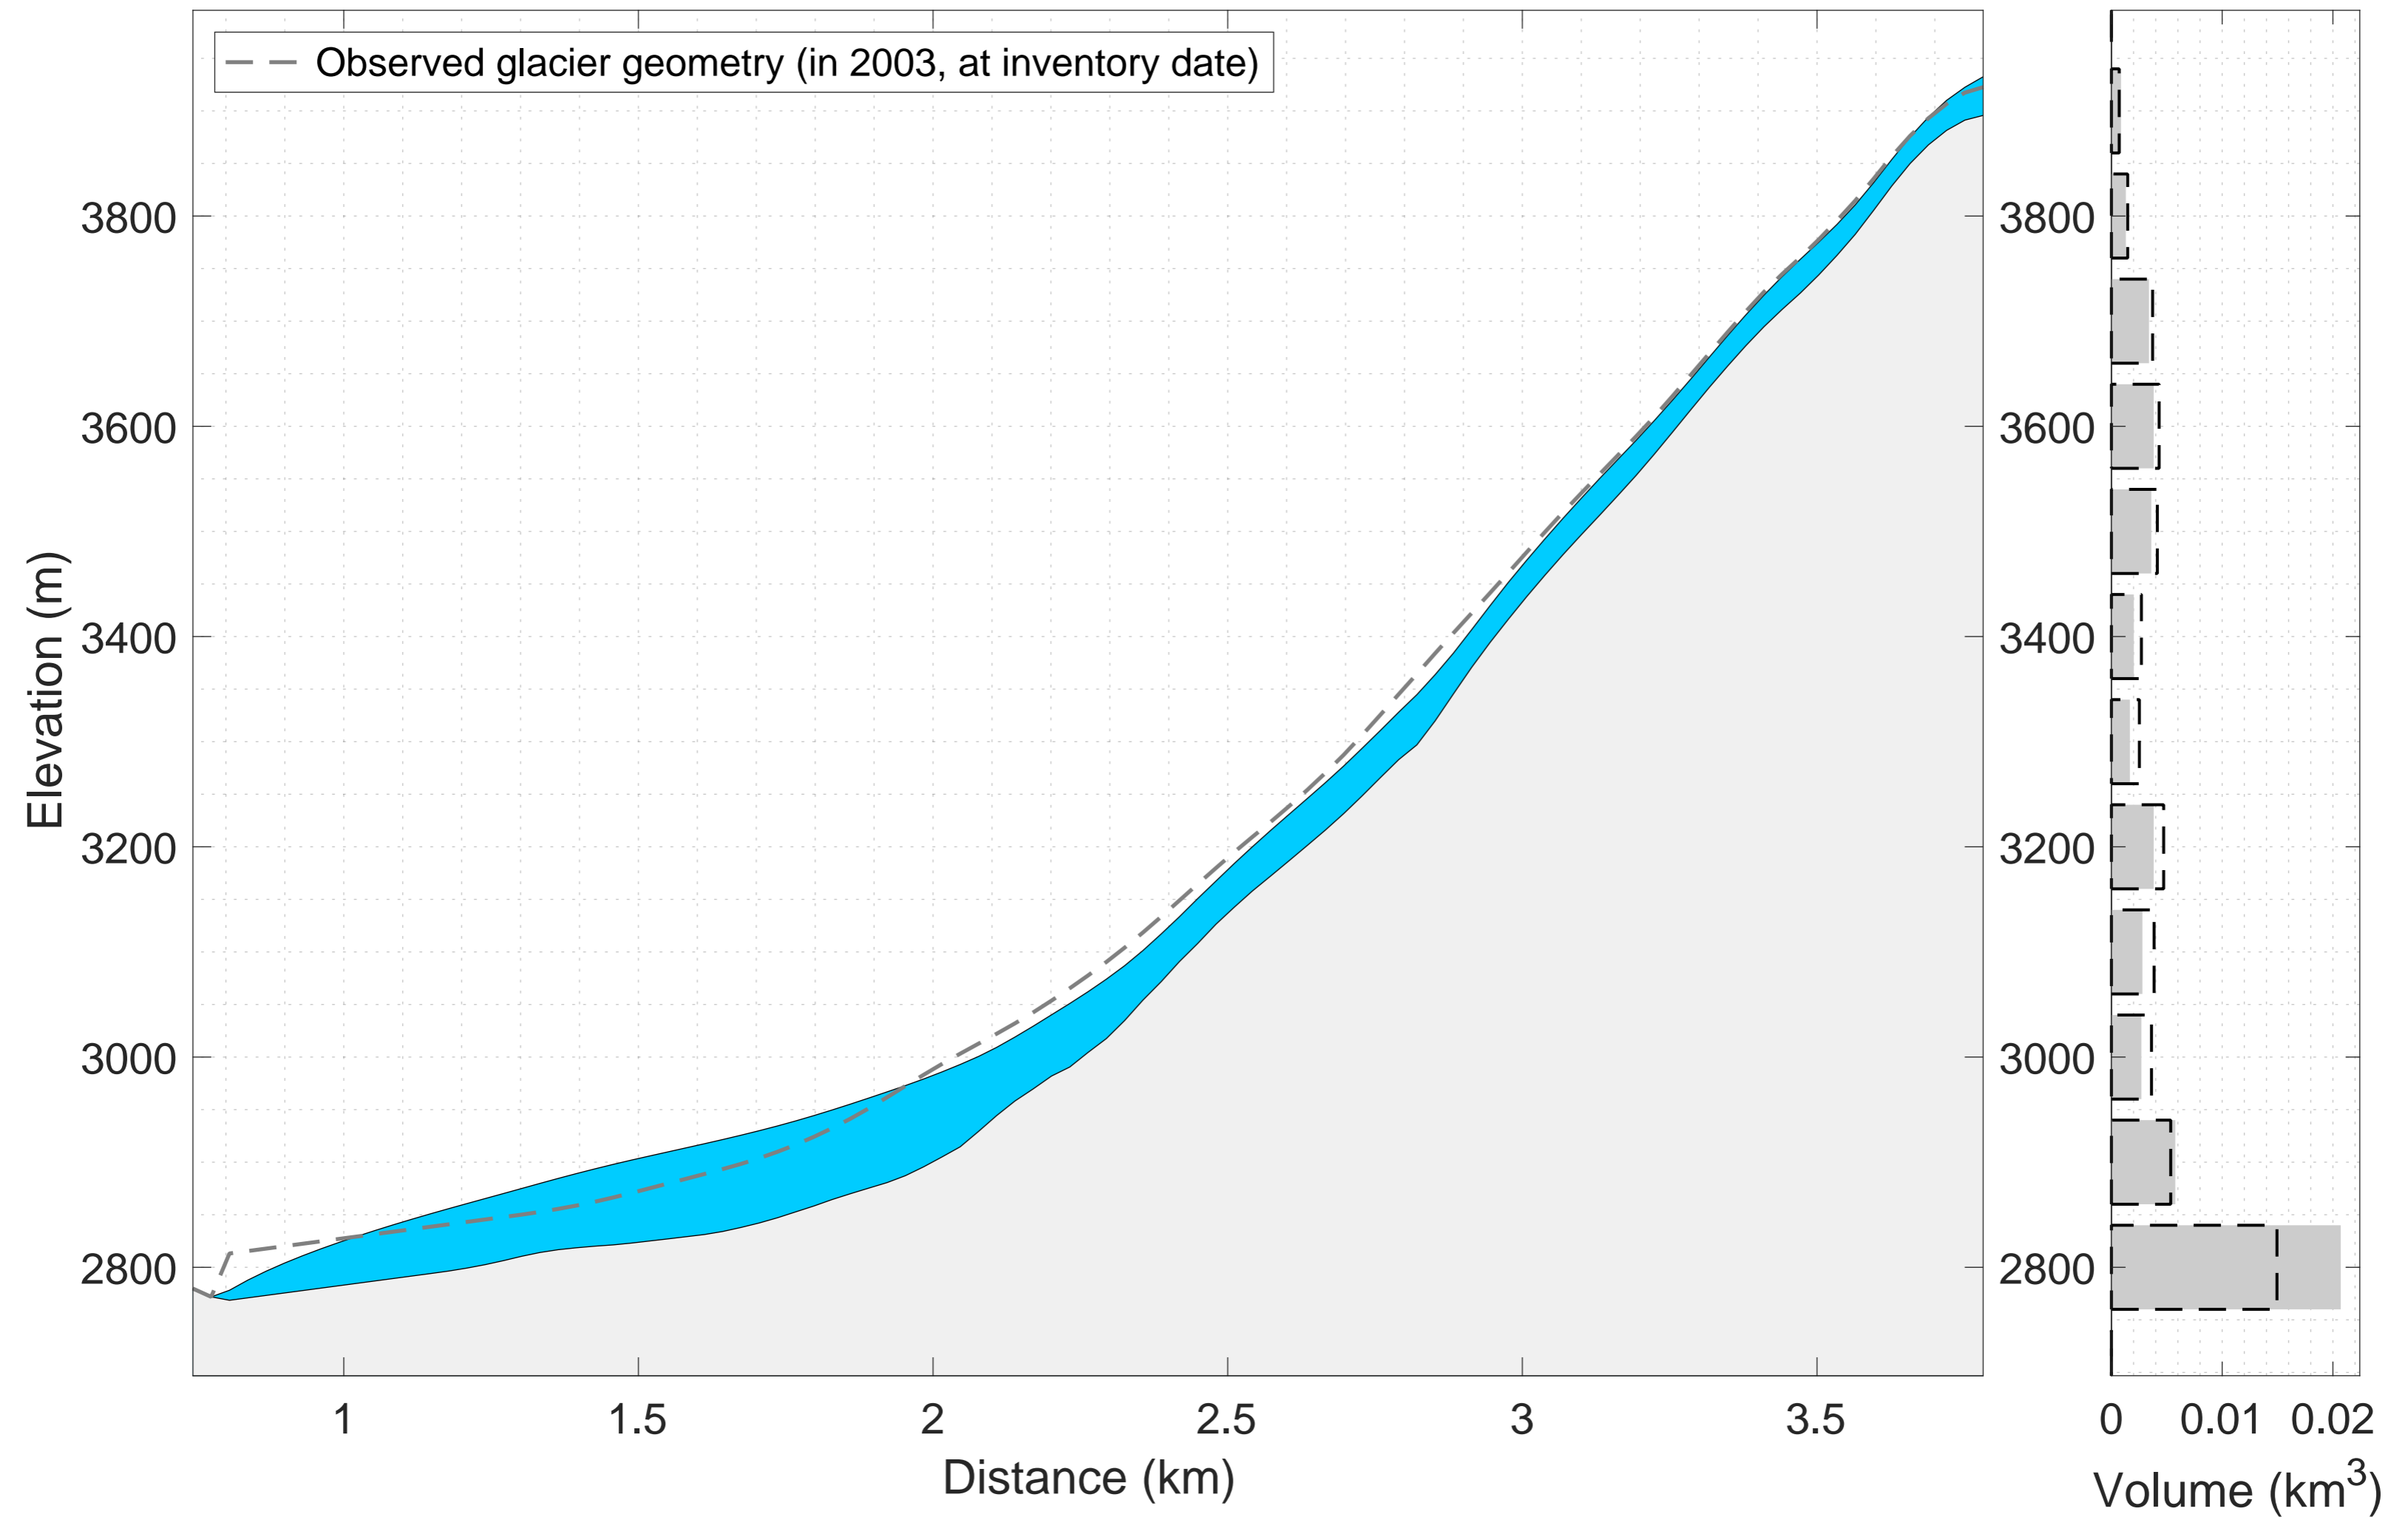

Supplement: Supplementary file 390 [file tc-13-1125-2019-supplement.zip]

**Modelled geometry (Glacier ID = 02261;  $A = 1.3713\text{e-}16 \text{ Pa}^{-3} \text{ a}^{-1}$ ;  $dx = 11 \text{ m}$ )**

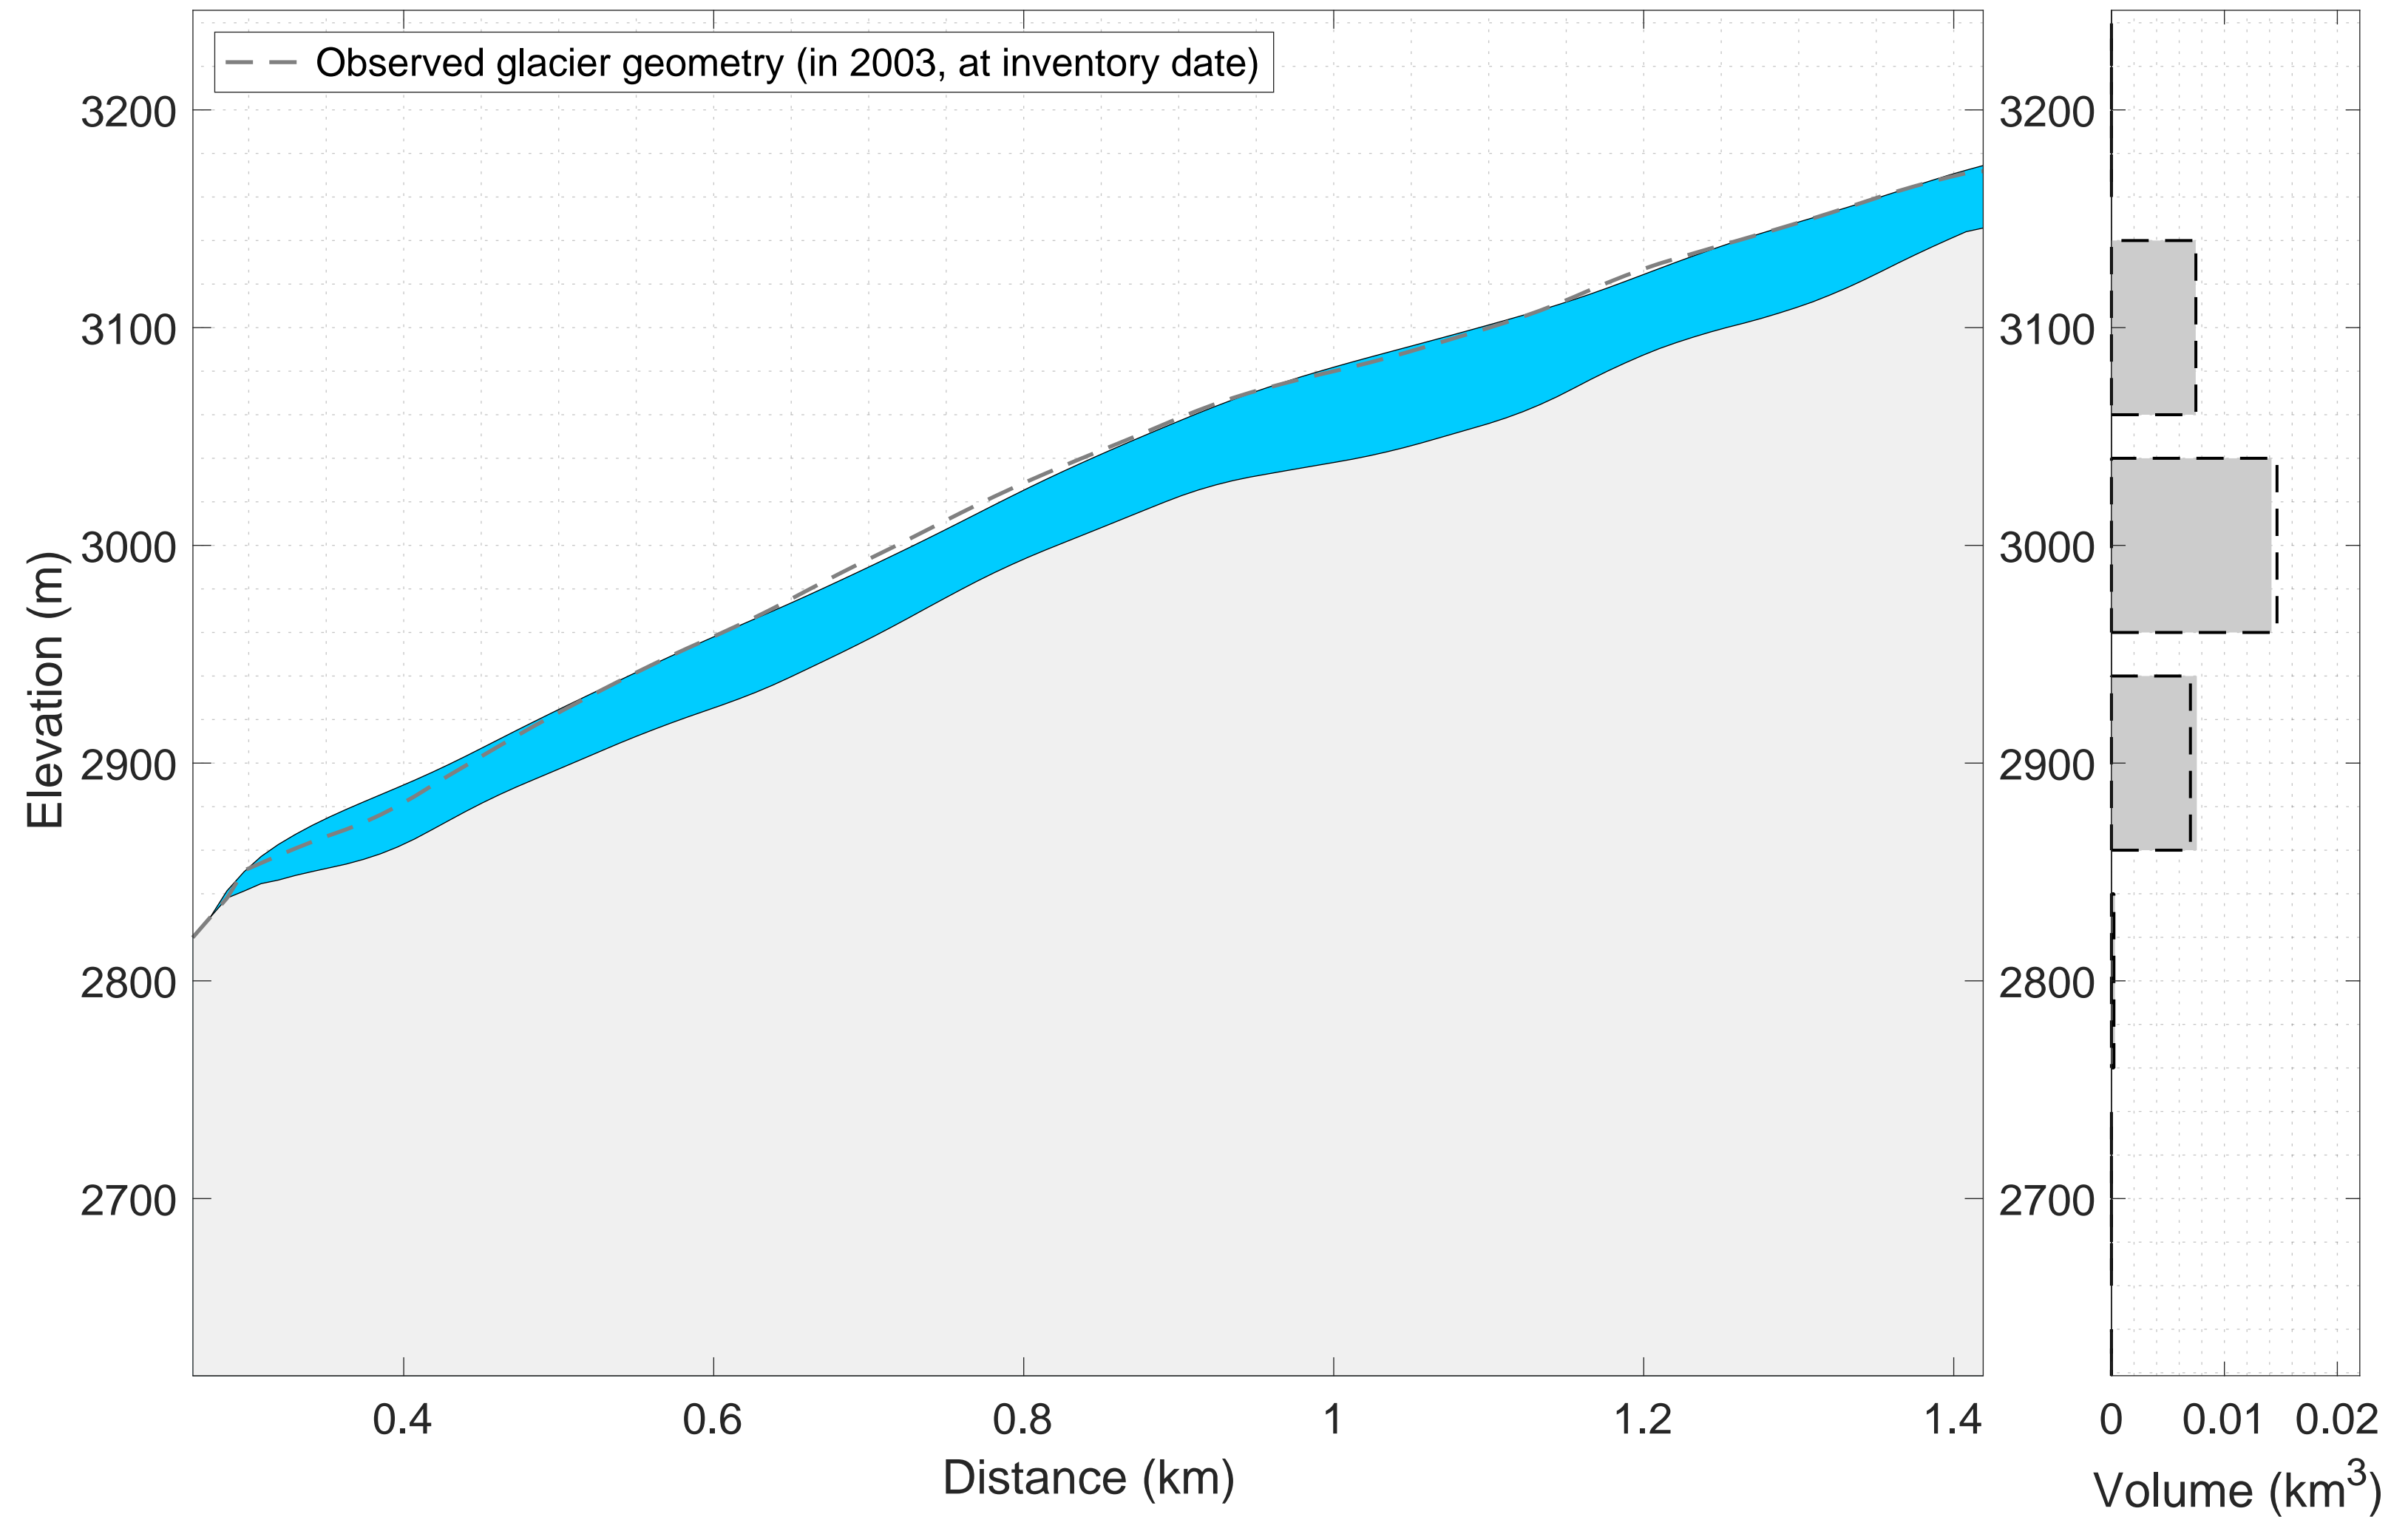

Supplement: Supplementary file 391 [file tc-13-1125-2019-supplement.zip]

**Modelled geometry (Glacier ID = 02187;  $A = 1.041\text{e-}16 \text{ Pa}^{-3} \text{ a}^{-1}$ ;  $dx = 14 \text{ m}$ )**

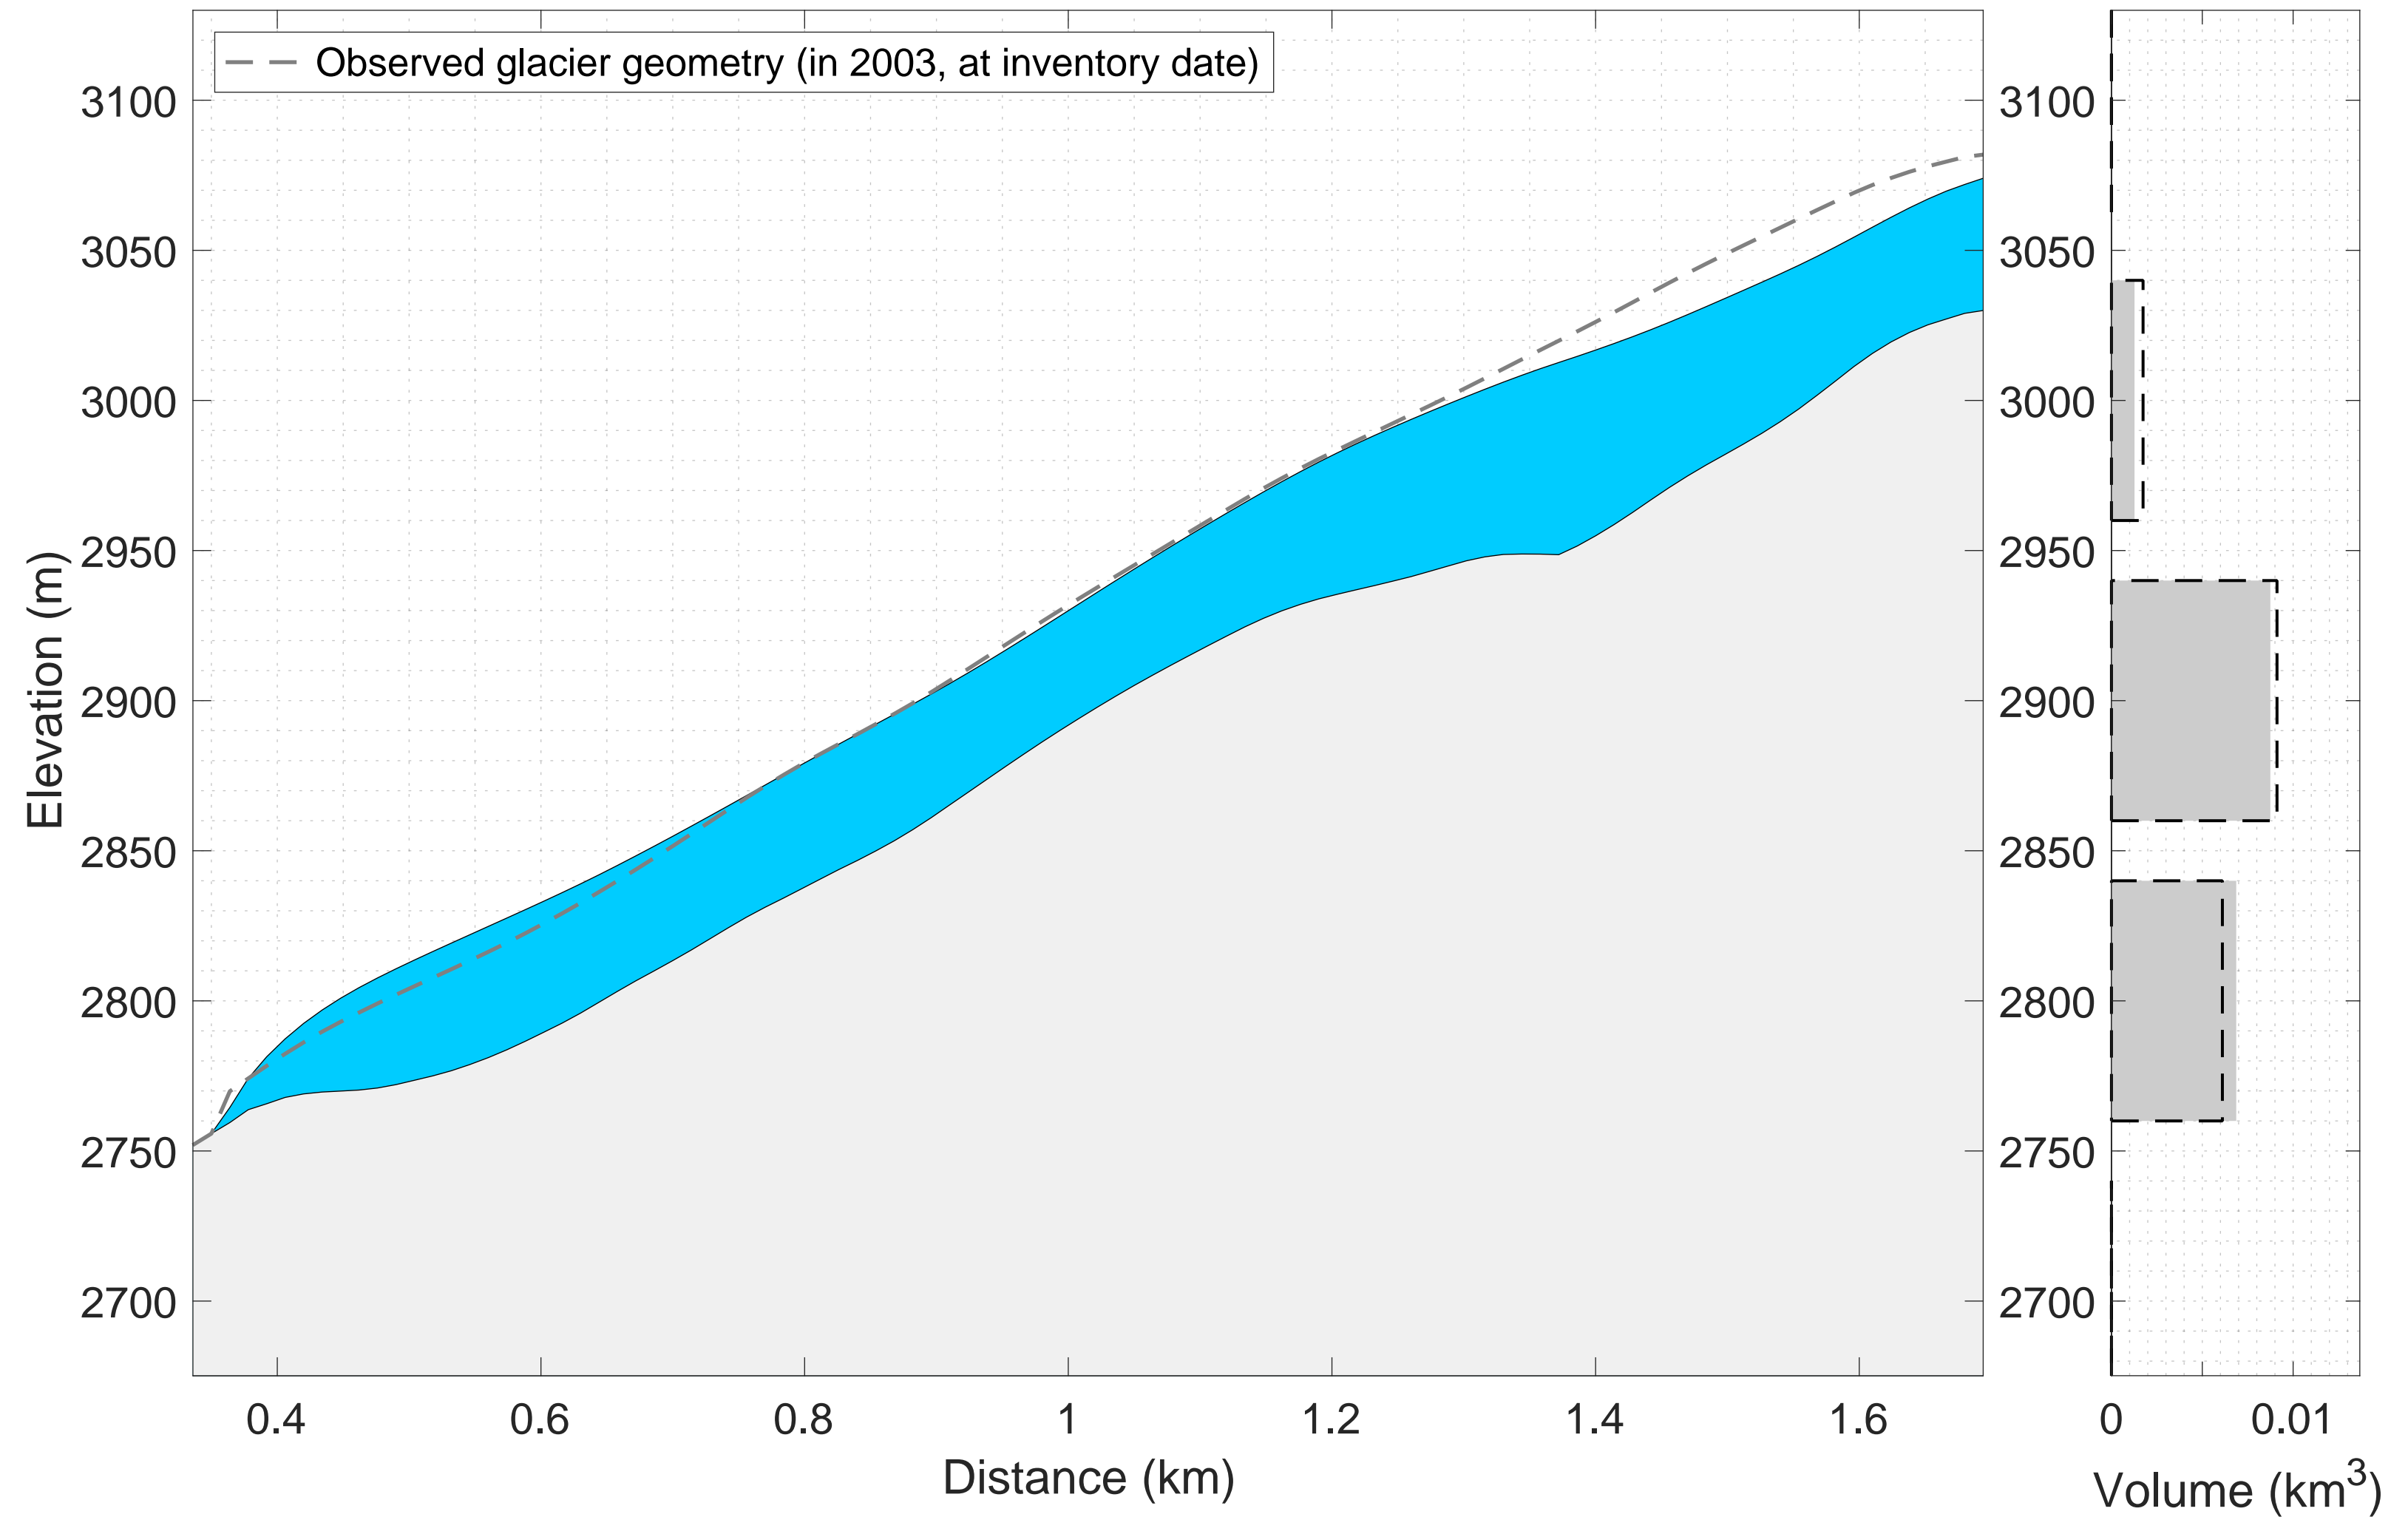

Supplement: Supplementary file 392 [file tc-13-1125-2019-supplement.zip]

**Modelled geometry (Glacier ID = 00257;  $A = 1.4274\text{e-}16 \text{ Pa}^{-3} \text{ a}^{-1}$ ;  $dx = 12 \text{ m}$ )**

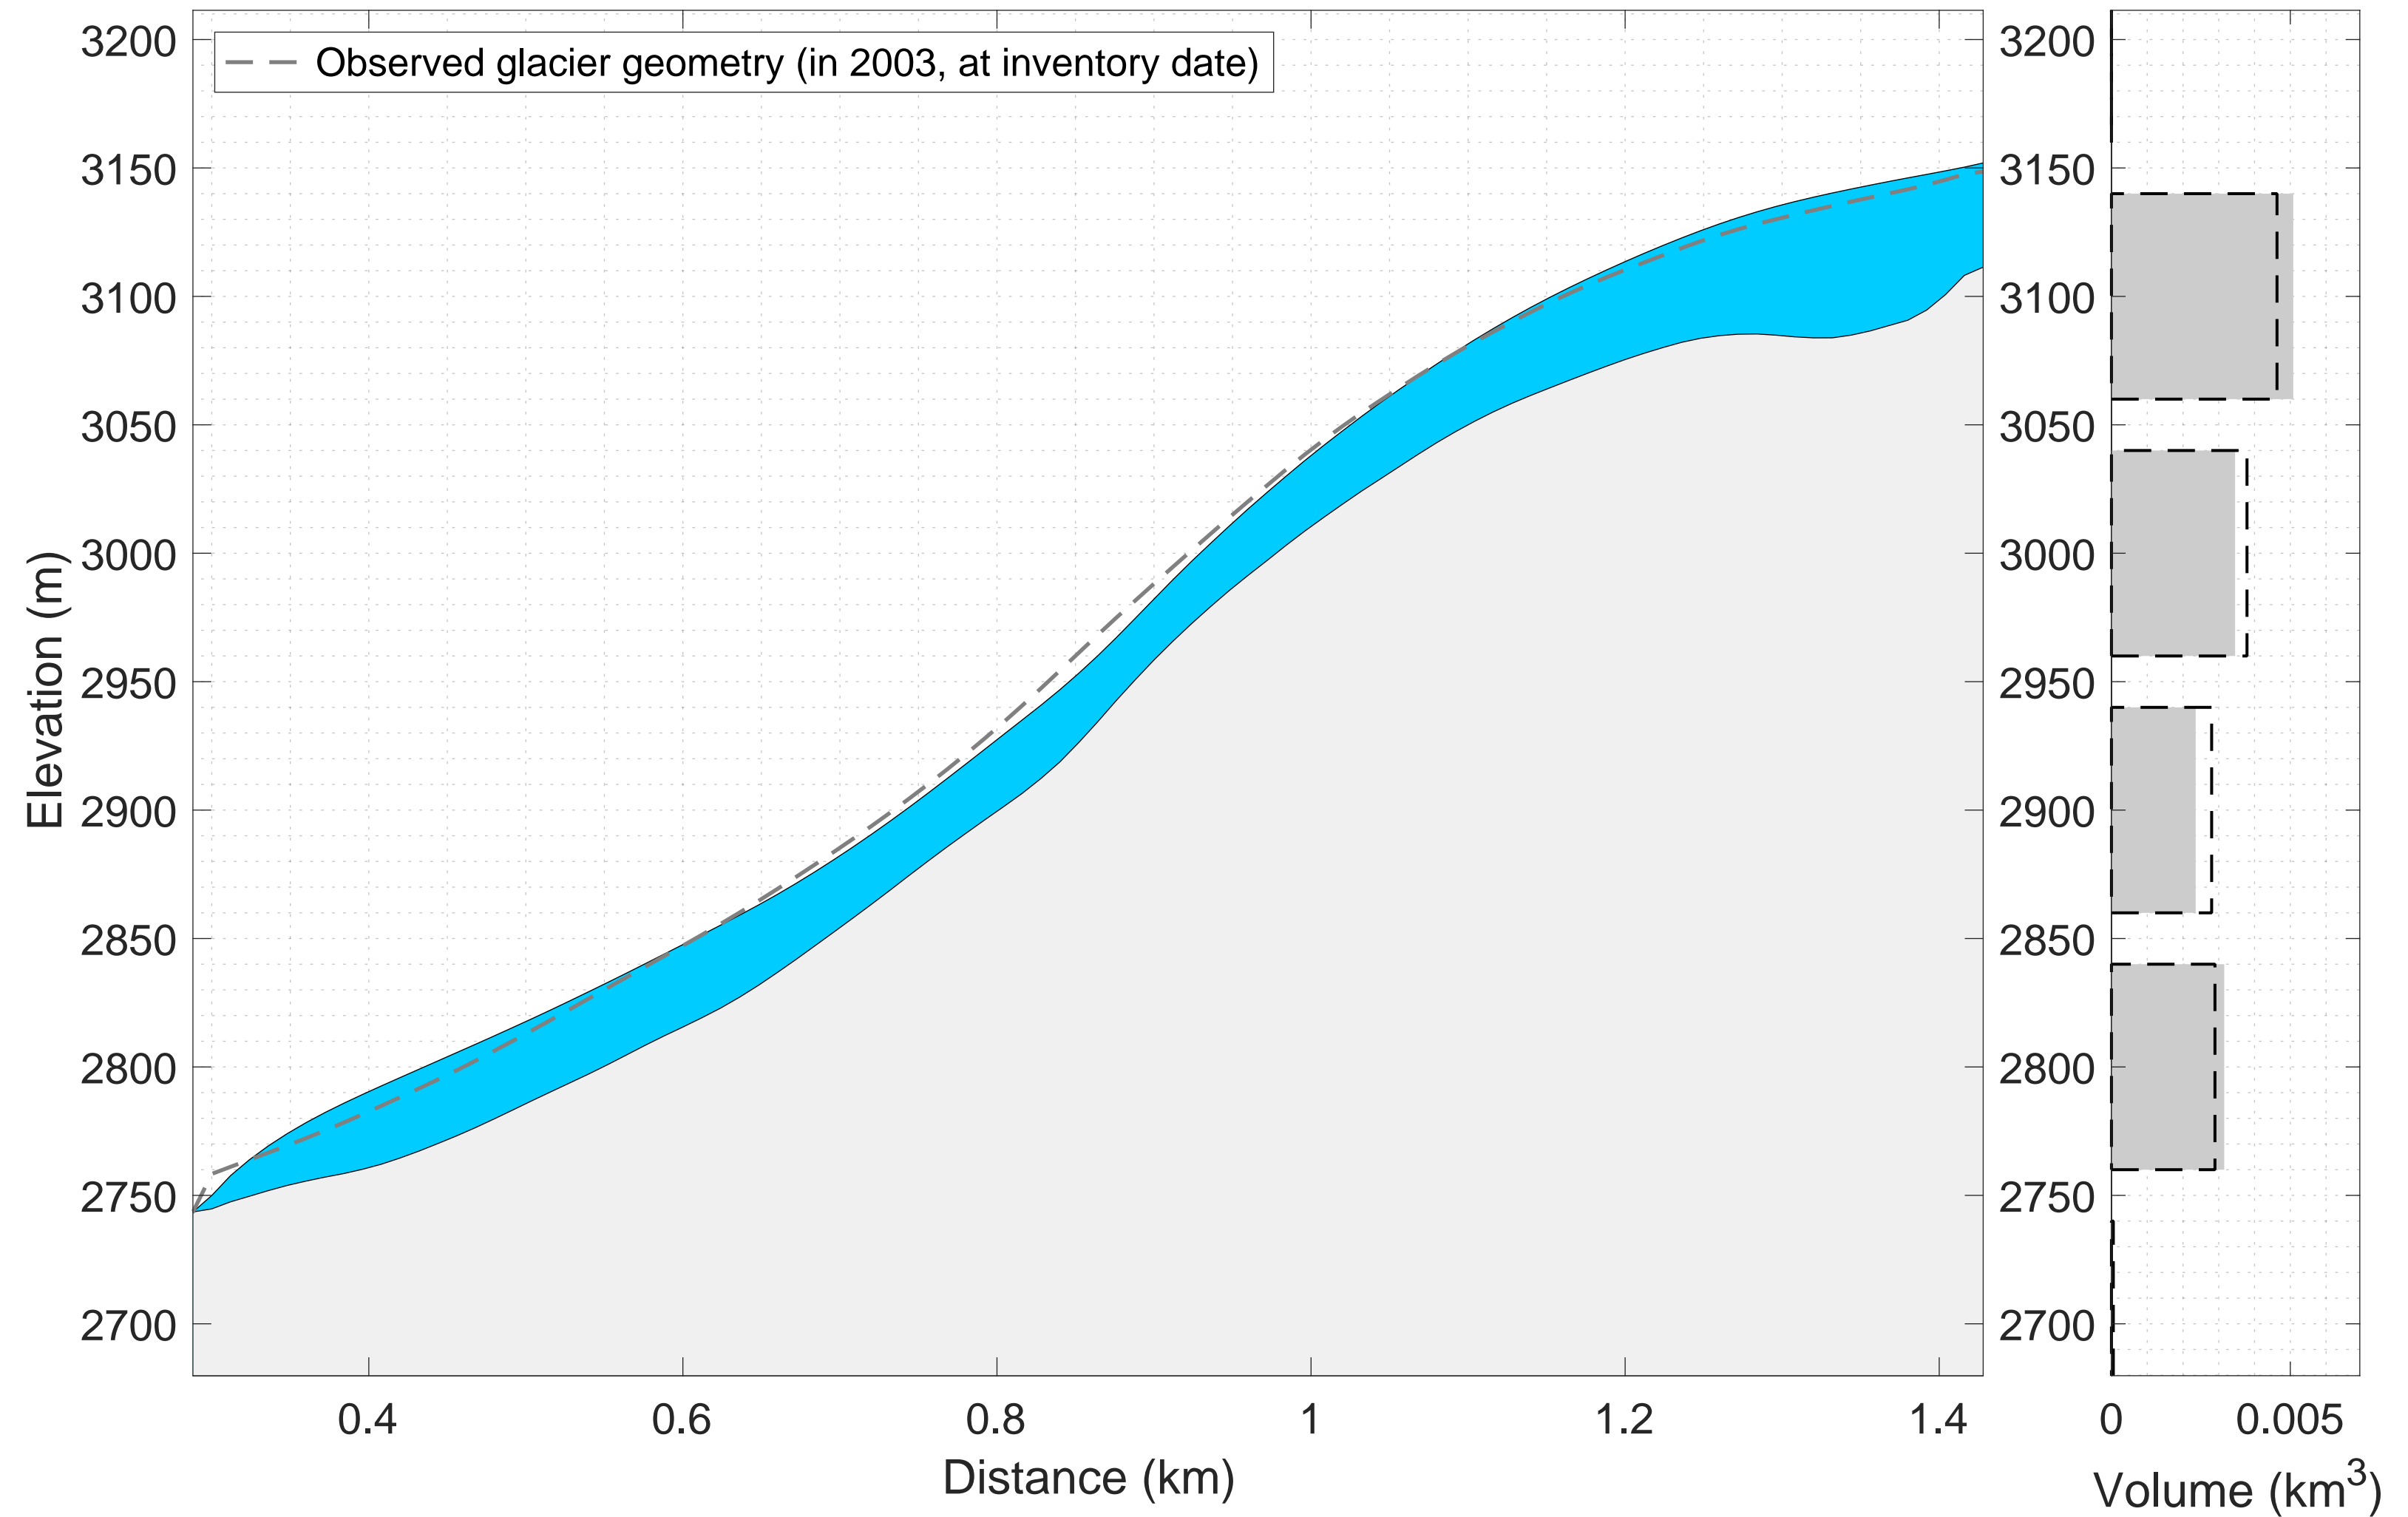

Supplement: Supplementary file 393 [file tc-13-1125-2019-supplement.zip]

**Modelled geometry (Glacier ID = 03647;  $A = 8.6293\text{e-}17 \text{ Pa}^{-3} \text{ a}^{-1}$ ;  $dx = 43 \text{ m}$ )**

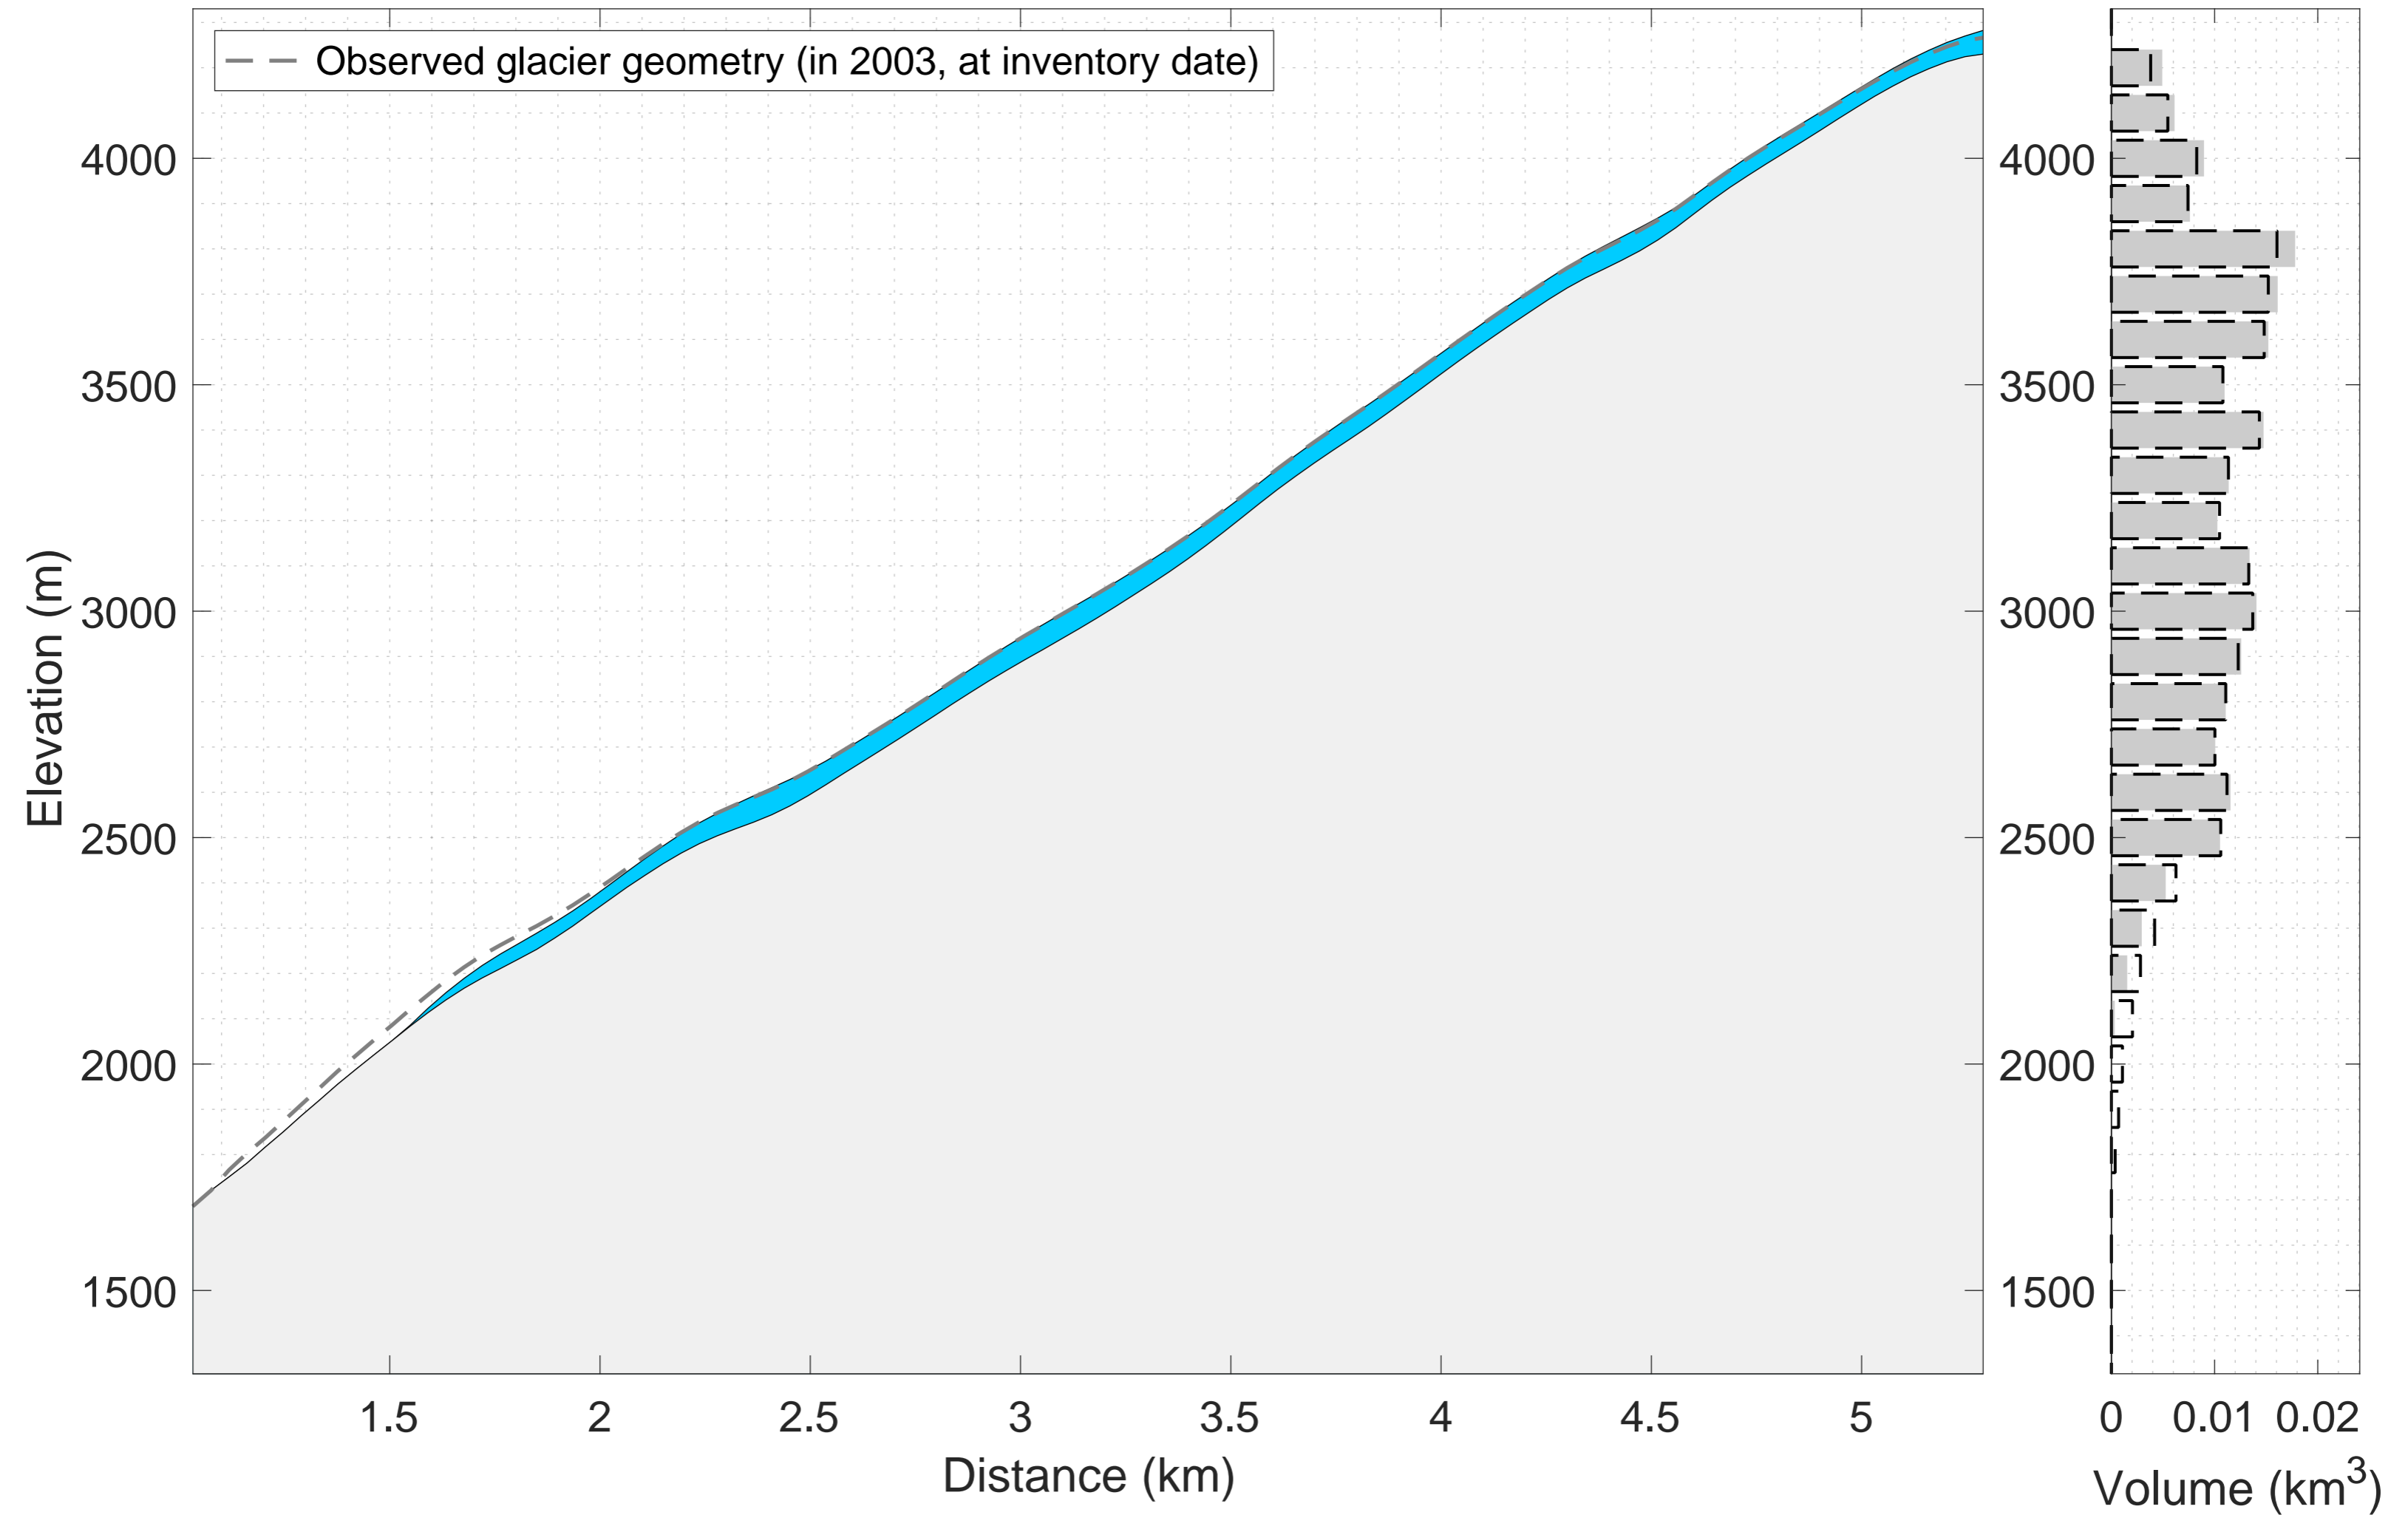

Supplement: Supplementary file 394 [file tc-13-1125-2019-supplement.zip]

**Modelled geometry (Glacier ID = 00538;  $A = 1.1159\text{e-}16 \text{ Pa}^{-3} \text{ a}^{-1}$ ;  $dx = 23 \text{ m}$ )**

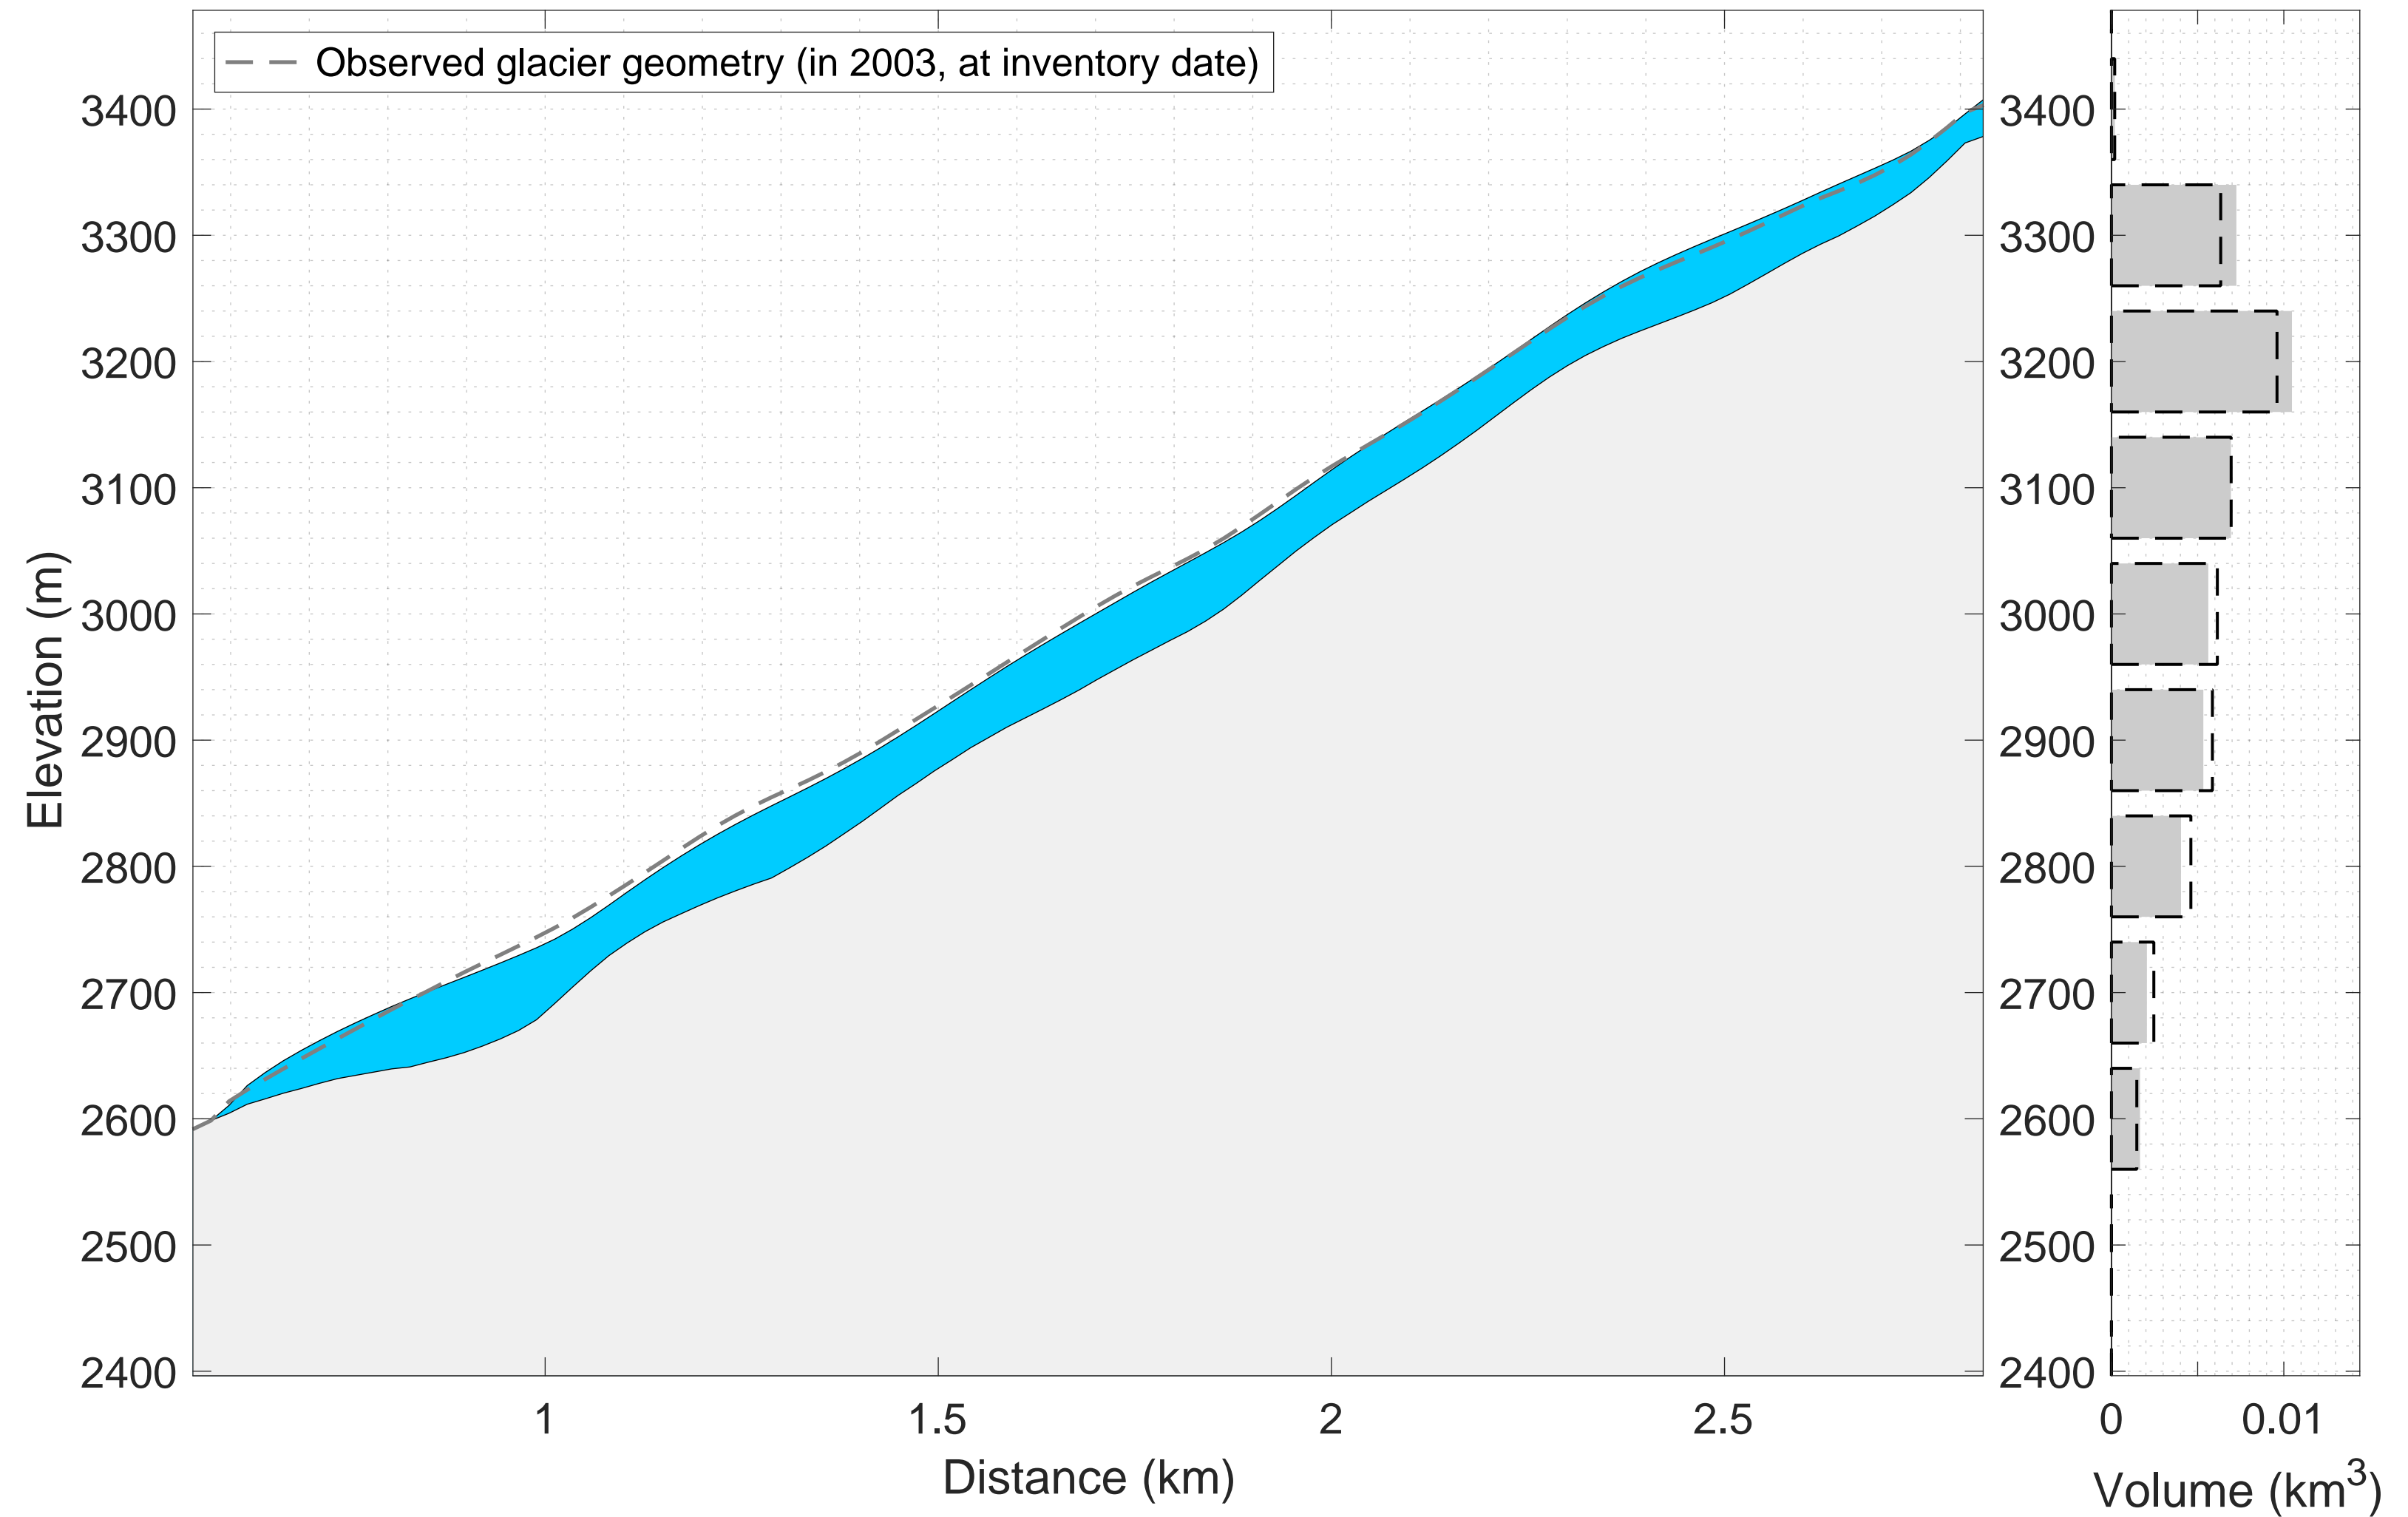

Supplement: Supplementary file 395 [file tc-13-1125-2019-supplement.zip]

**Modelled geometry (Glacier ID = 01362;  $A = 7.159\text{e-}17 \text{ Pa}^{-3} \text{ a}^{-1}$ ;  $dx = 24 \text{ m}$ )**

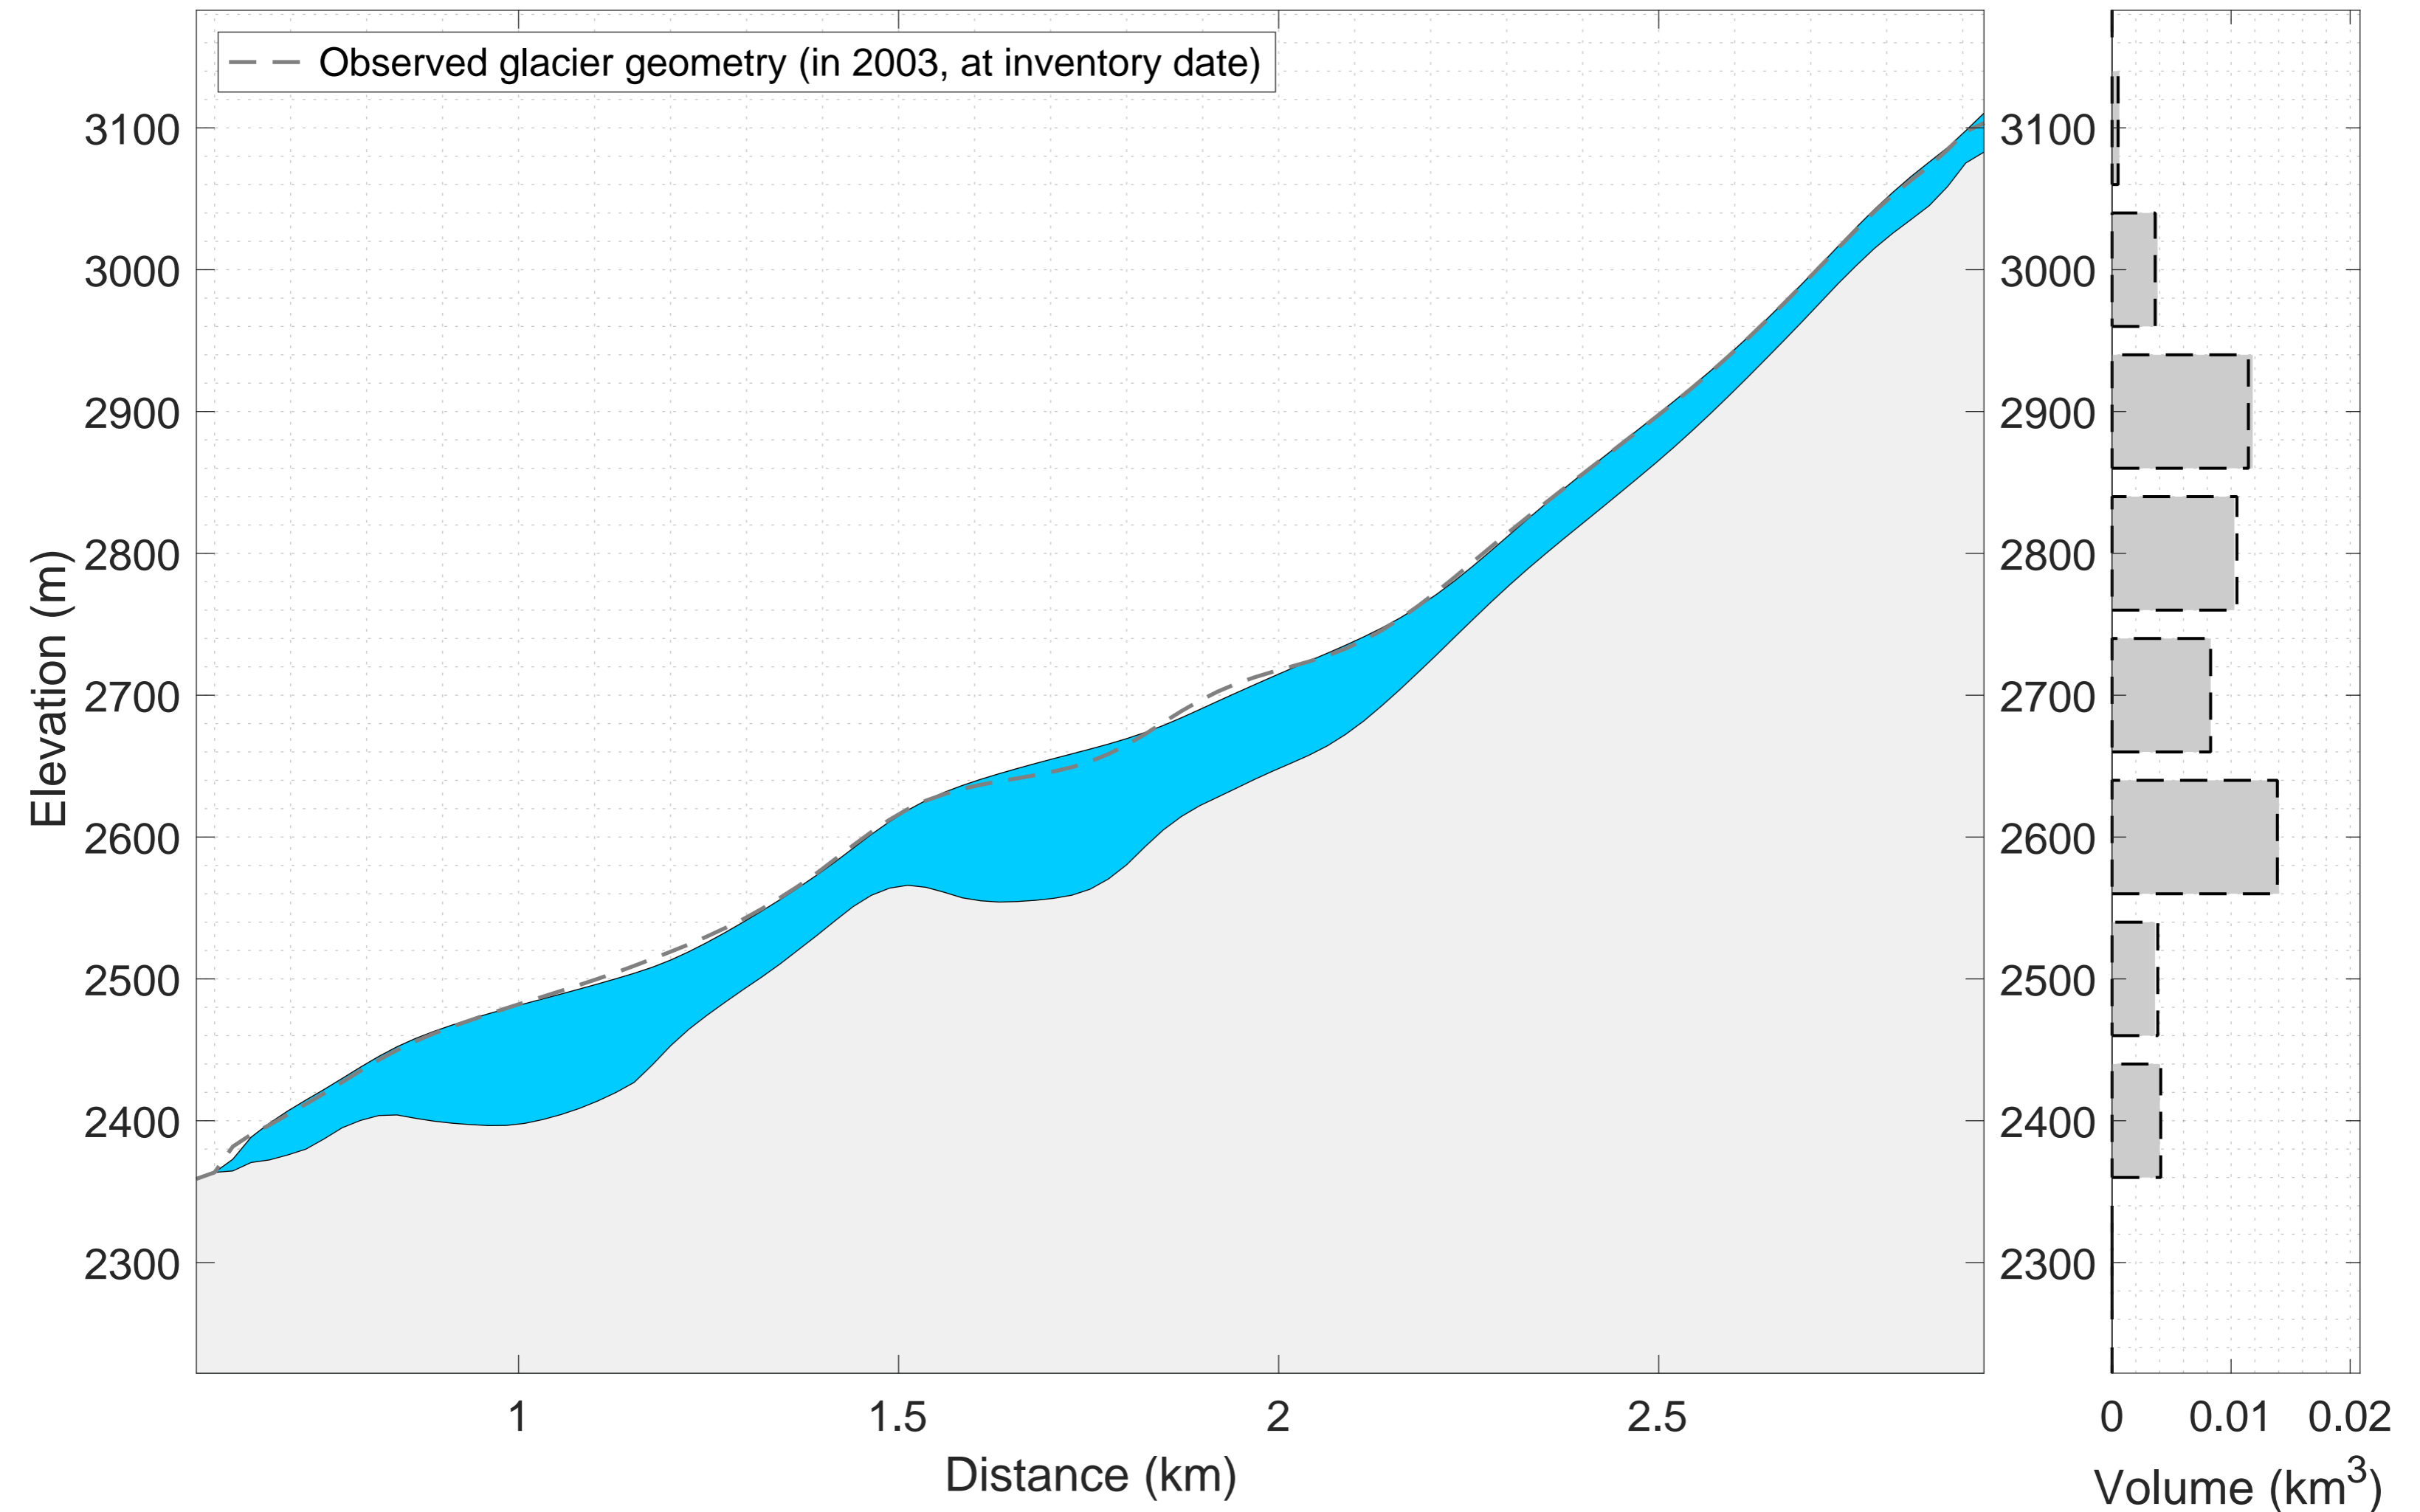

Supplement: Supplementary file 396 [file tc-13-1125-2019-supplement.zip]

**Modelled geometry (Glacier ID = 00905;  $A = 6.4206\text{e-}17 \text{ Pa}^{-3} \text{ a}^{-1}$ ;  $dx = 11 \text{ m}$ )**

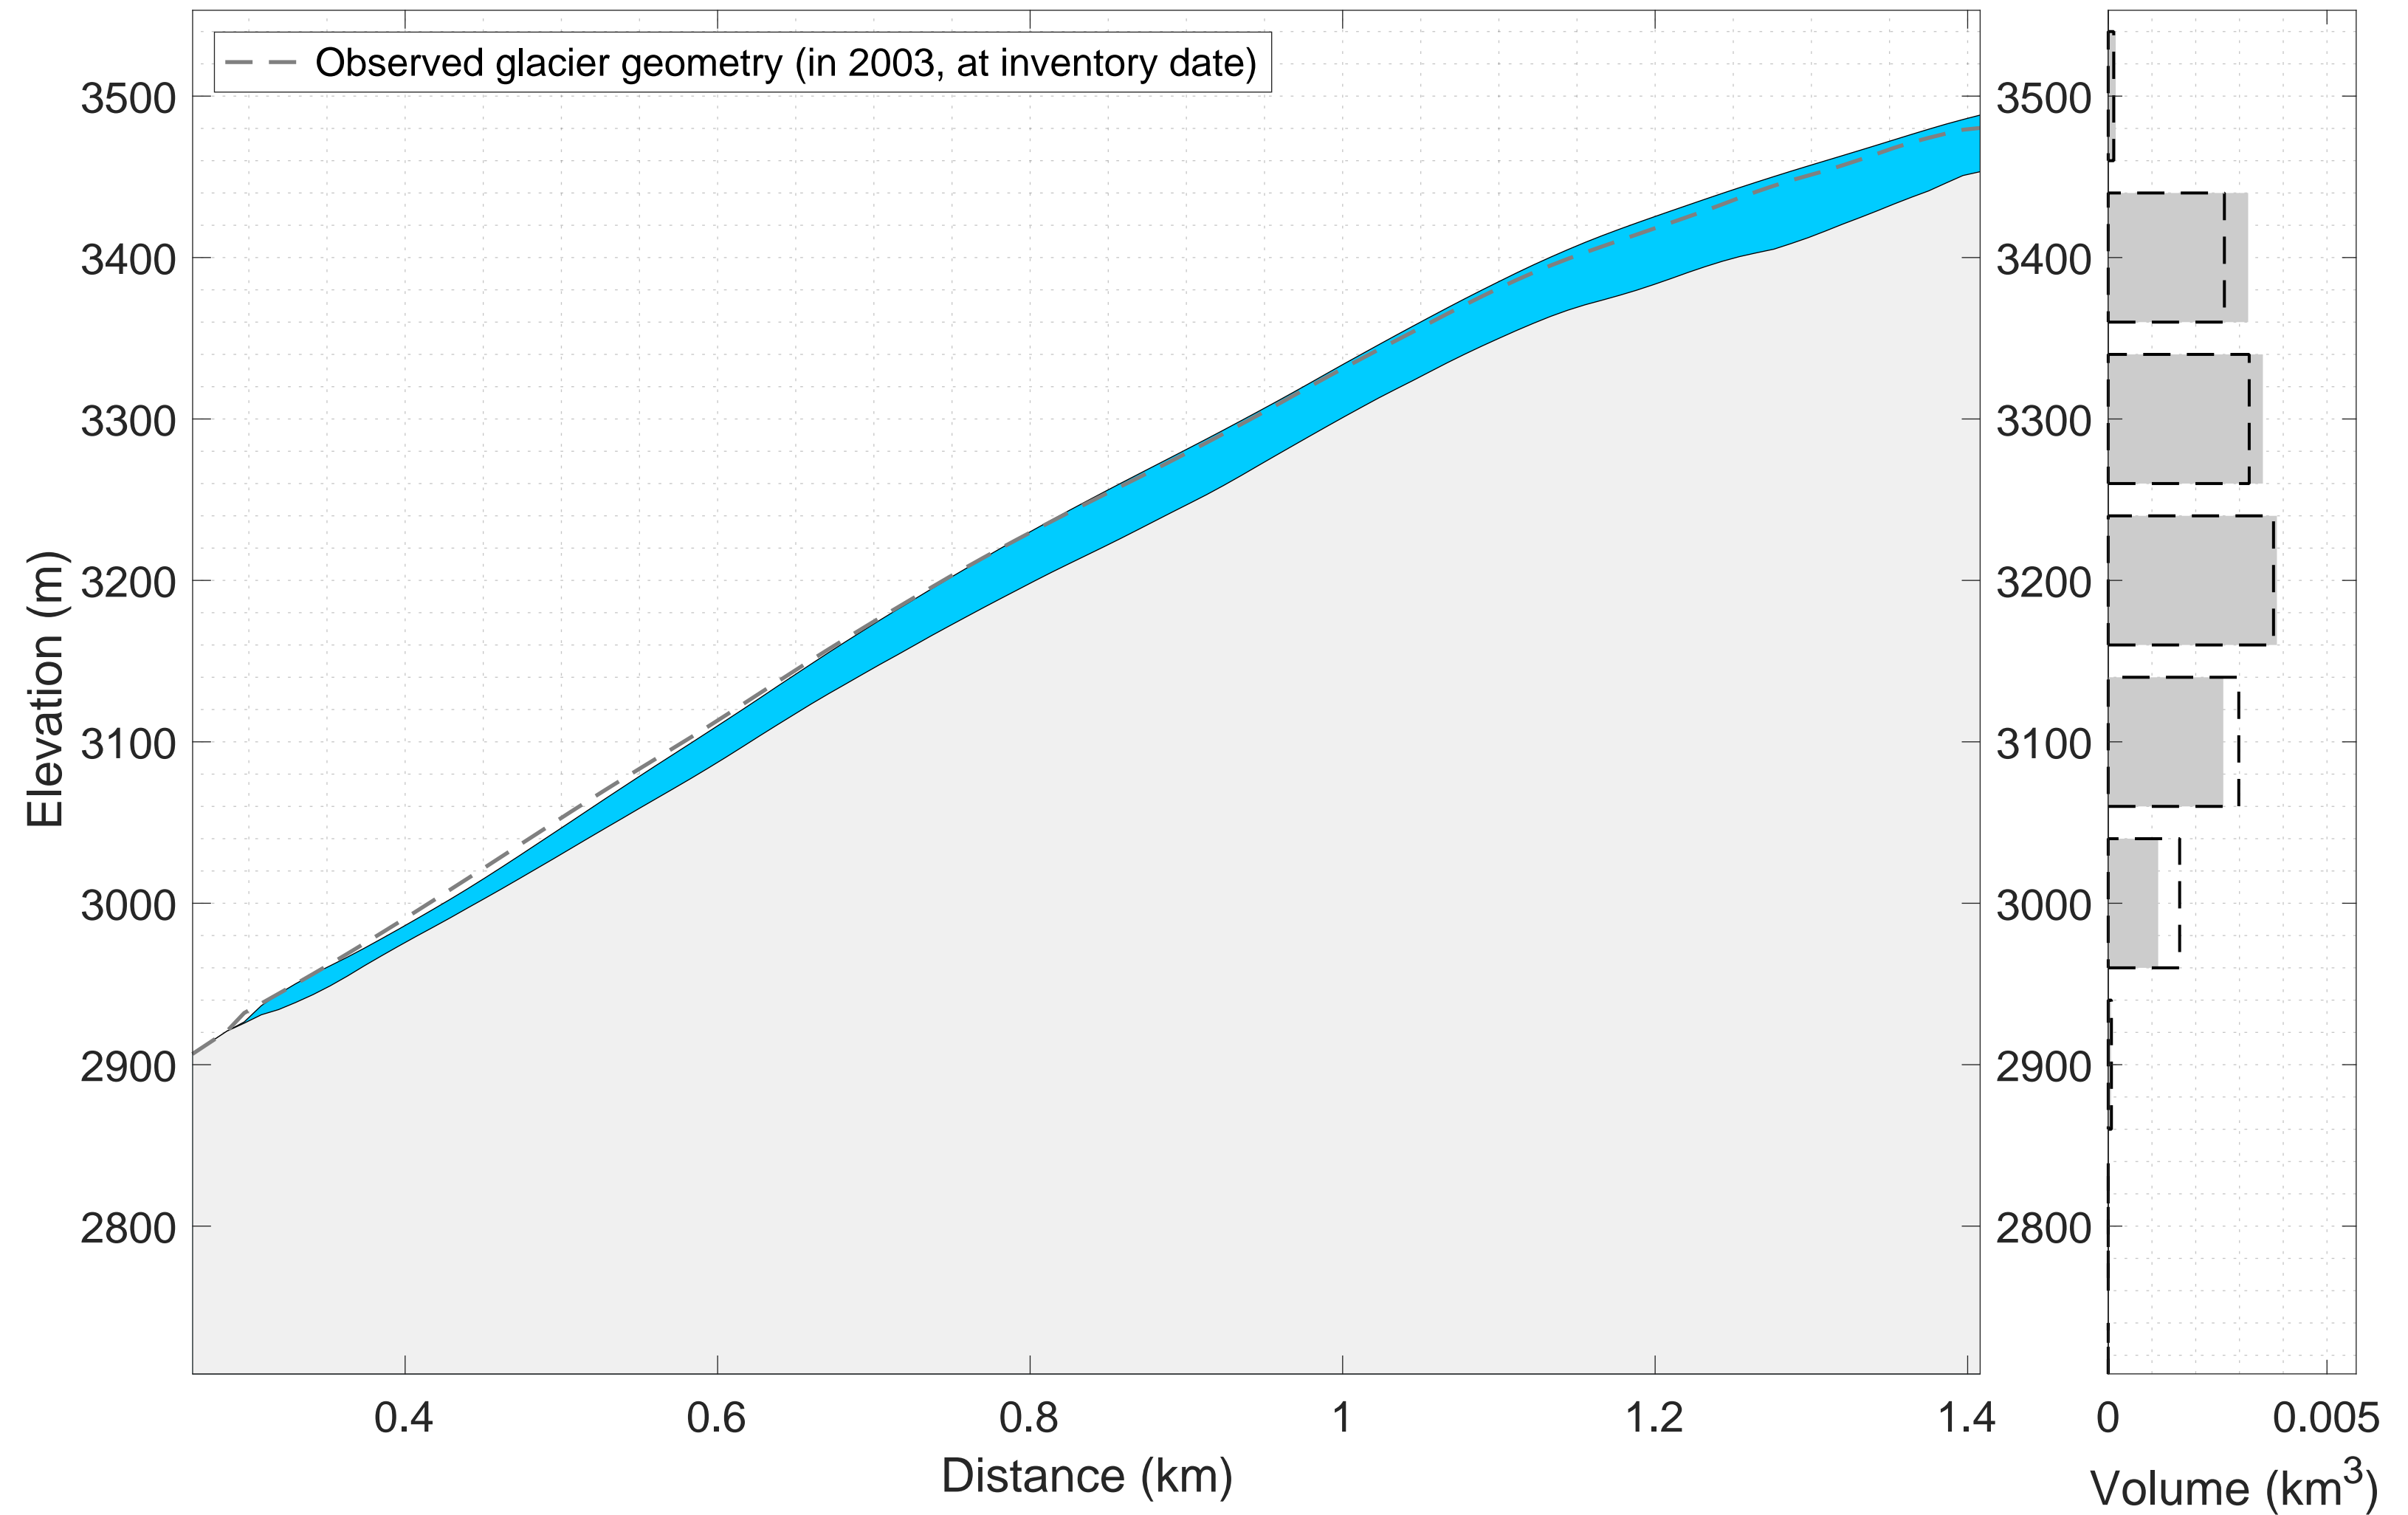

Supplement: Supplementary file 397 [file tc-13-1125-2019-supplement.zip]

**Modelled geometry (Glacier ID = 02094;  $A = 9.6328\text{e-}17 \text{ Pa}^{-3} \text{ a}^{-1}$ ;  $dx = 11 \text{ m}$ )**

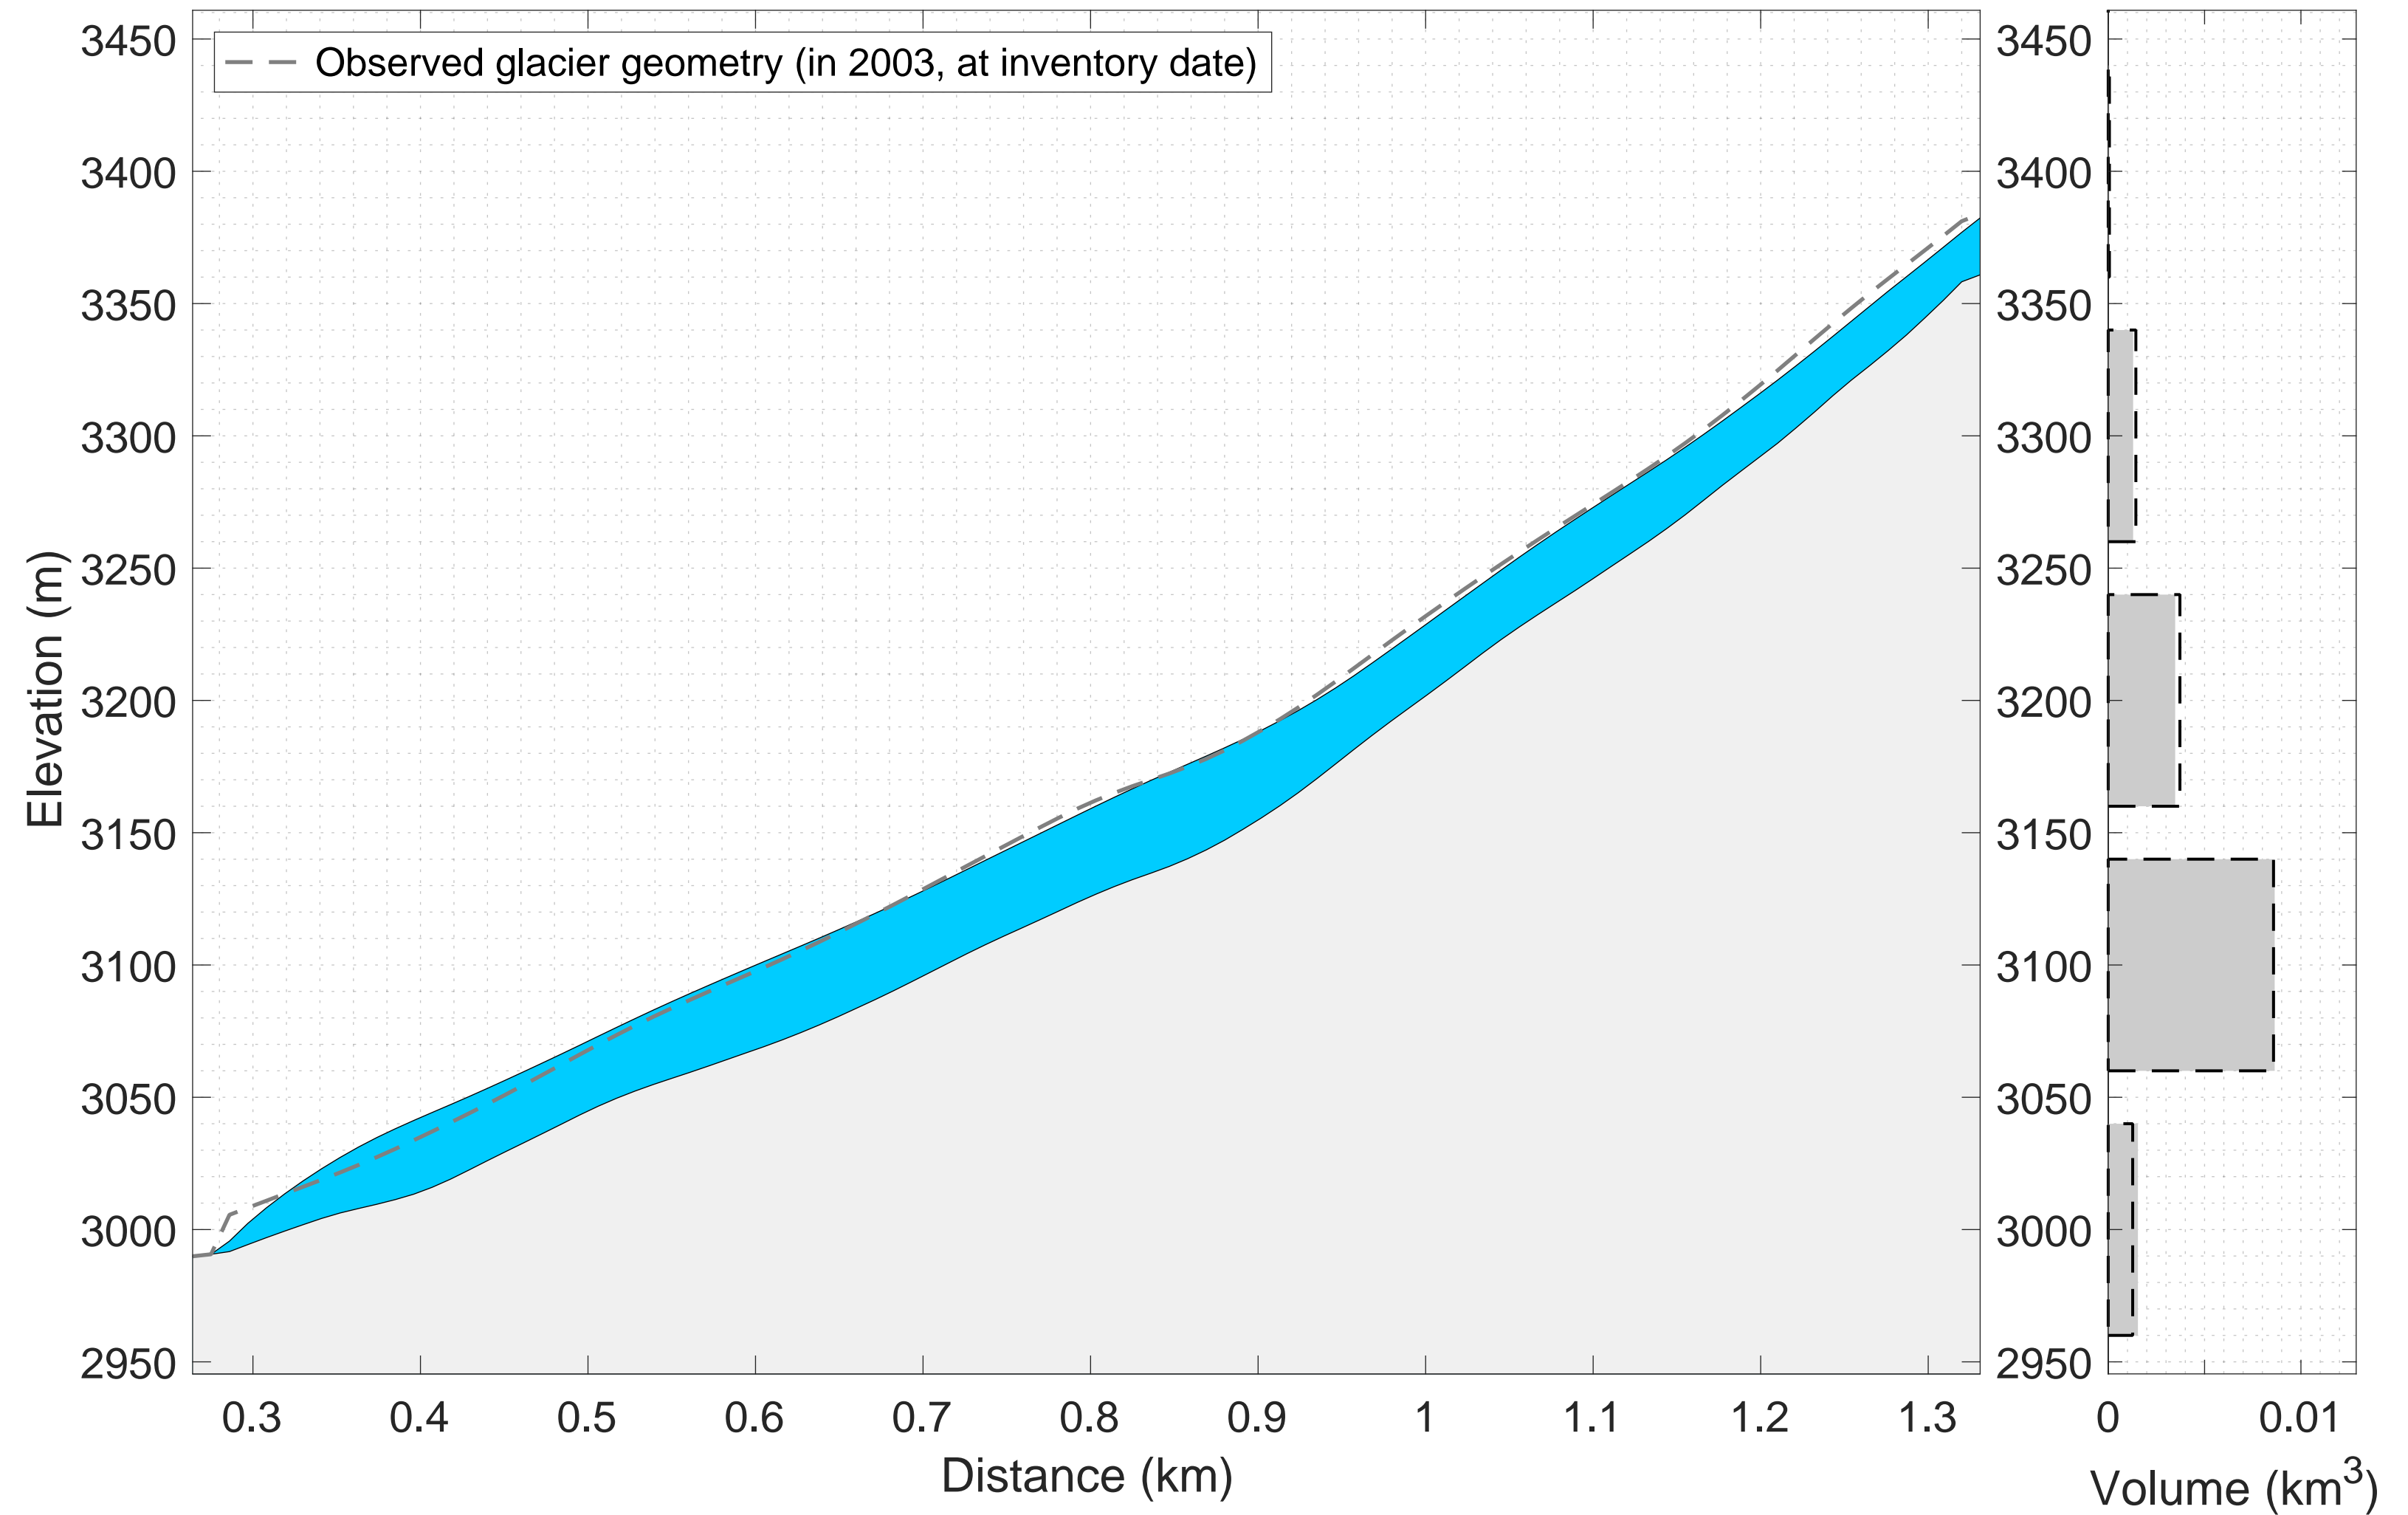

Supplement: Supplementary file 398 [file tc-13-1125-2019-supplement.zip]

**Modelled geometry (Glacier ID = 01468;  $A = 1.9079\text{e-}16 \text{ Pa}^{-3} \text{ a}^{-1}$ ;  $dx = 25 \text{ m}$ )**

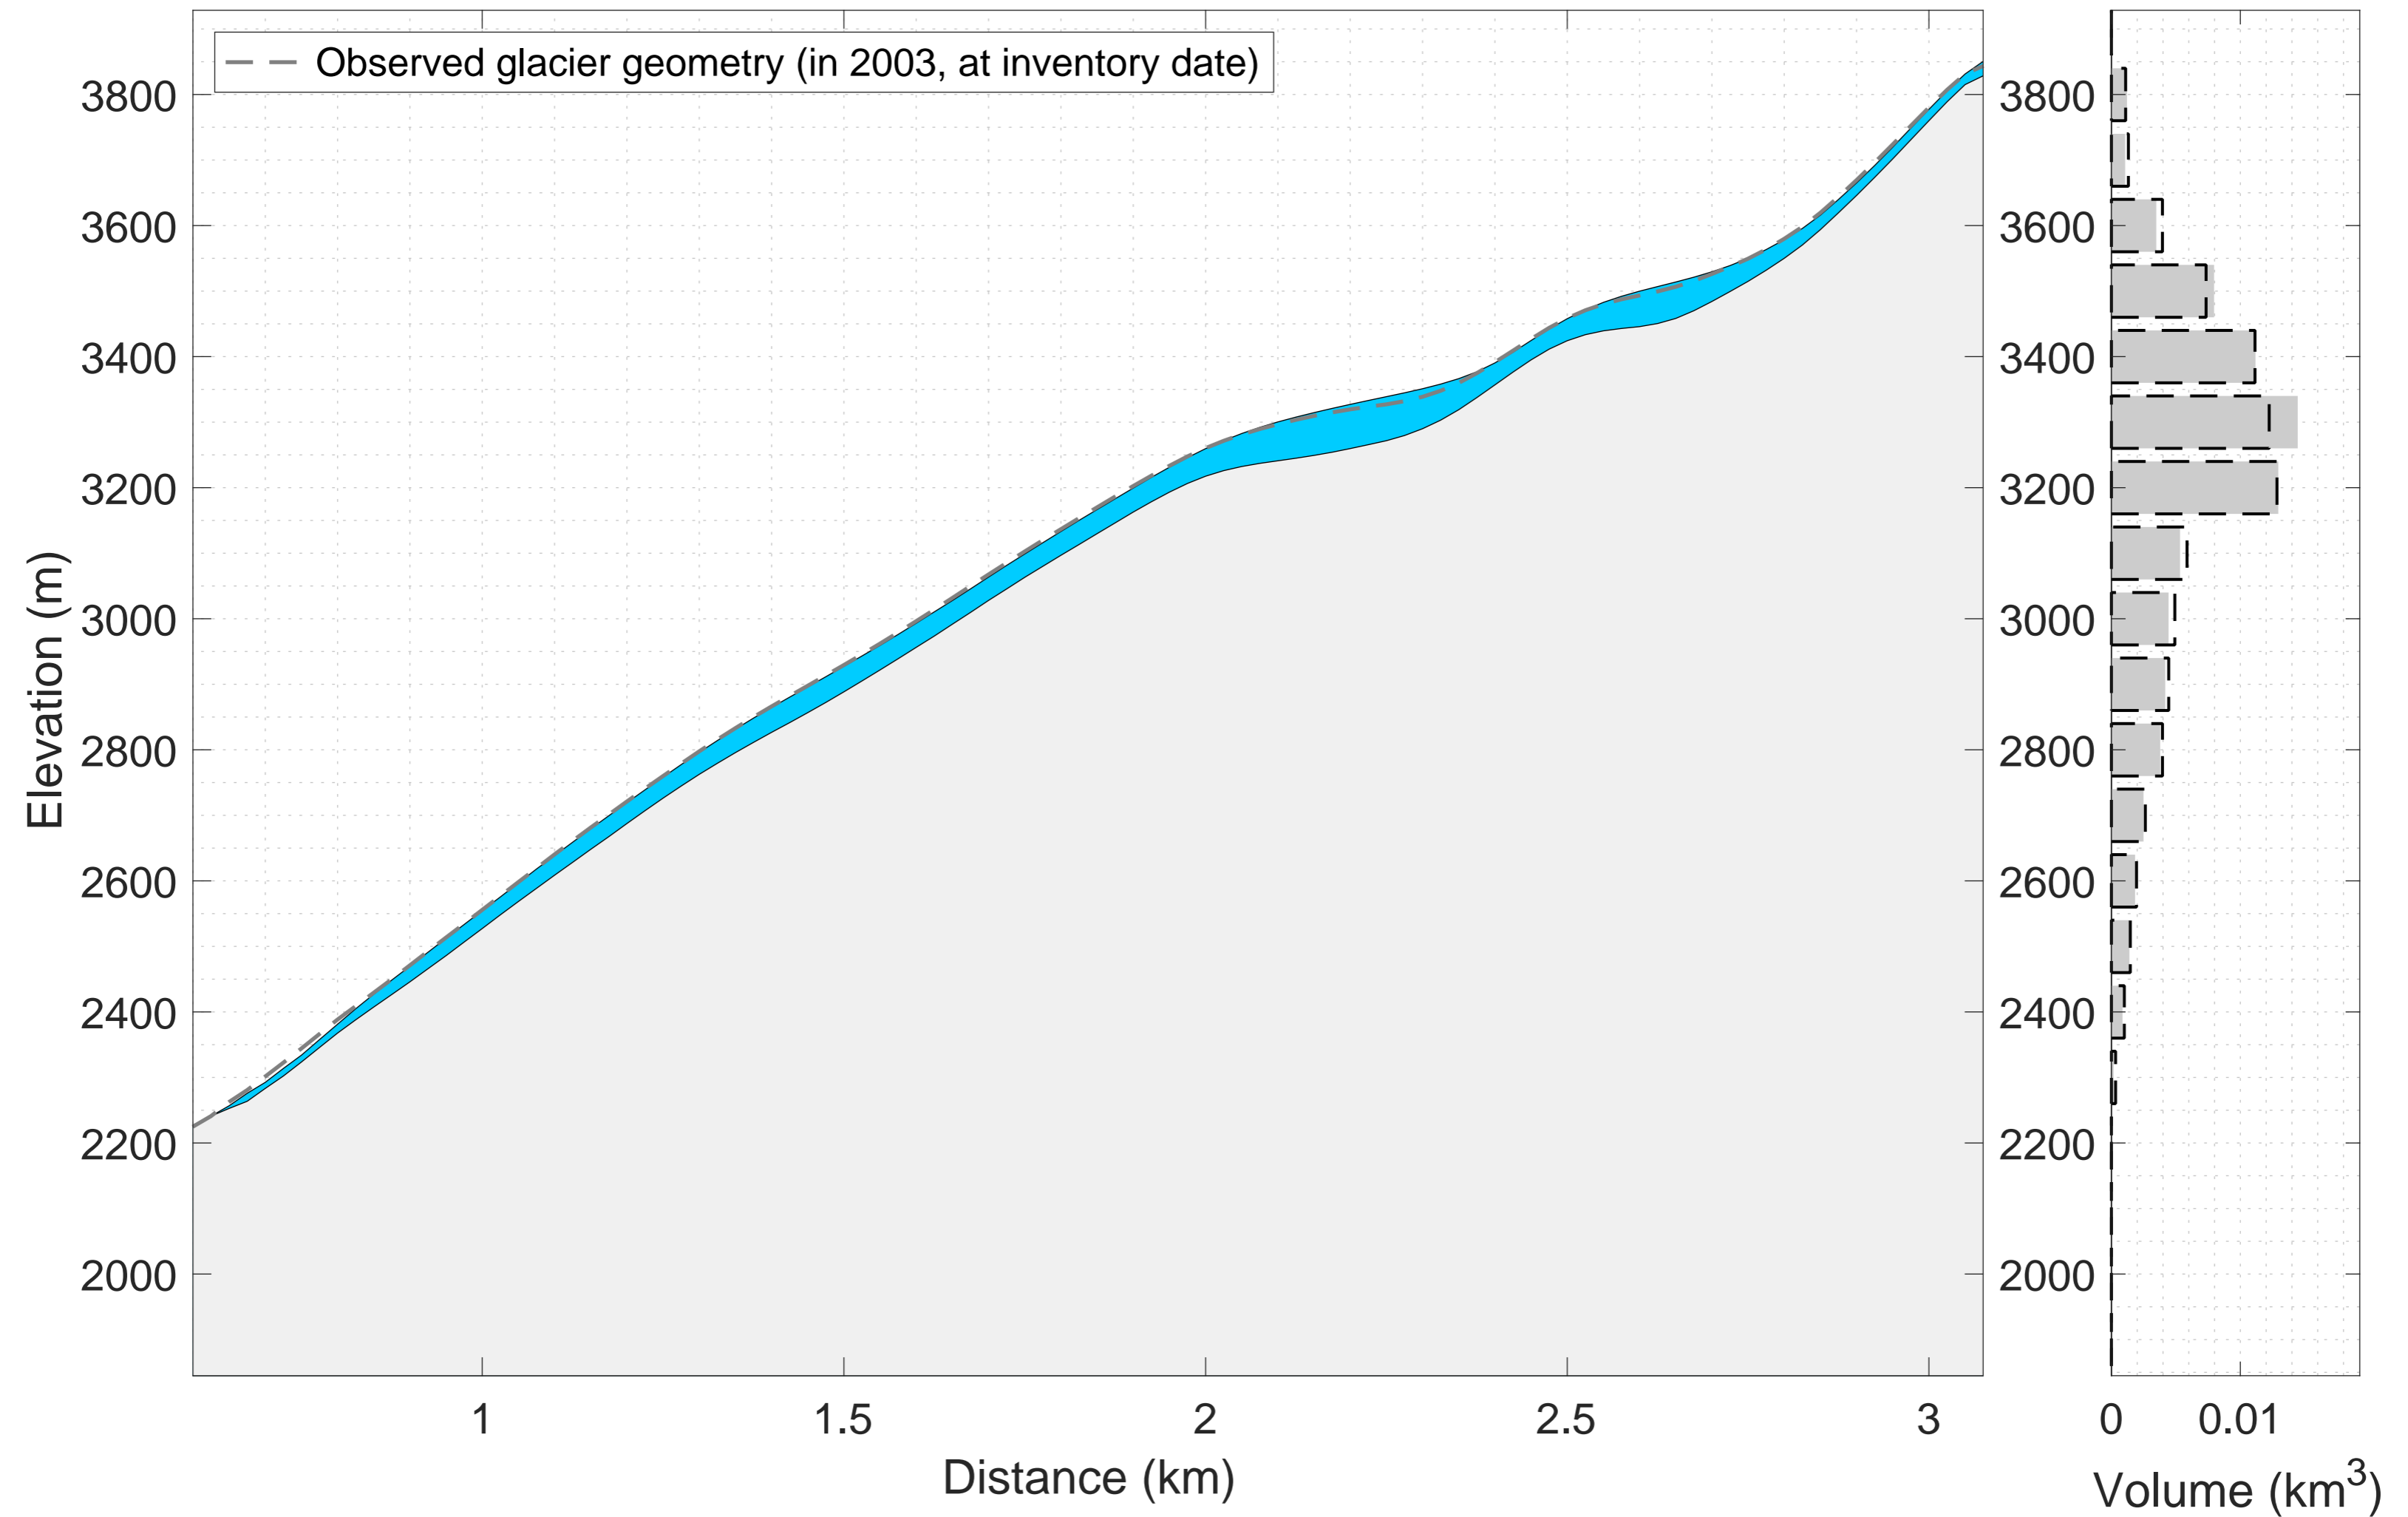

Supplement: Supplementary file 399 [file tc-13-1125-2019-supplement.zip]

**Modelled geometry (Glacier ID = 00689;  $A = 1.122\text{e-}16 \text{ Pa}^{-3} \text{ a}^{-1}$ ;  $dx = 12 \text{ m}$ )**

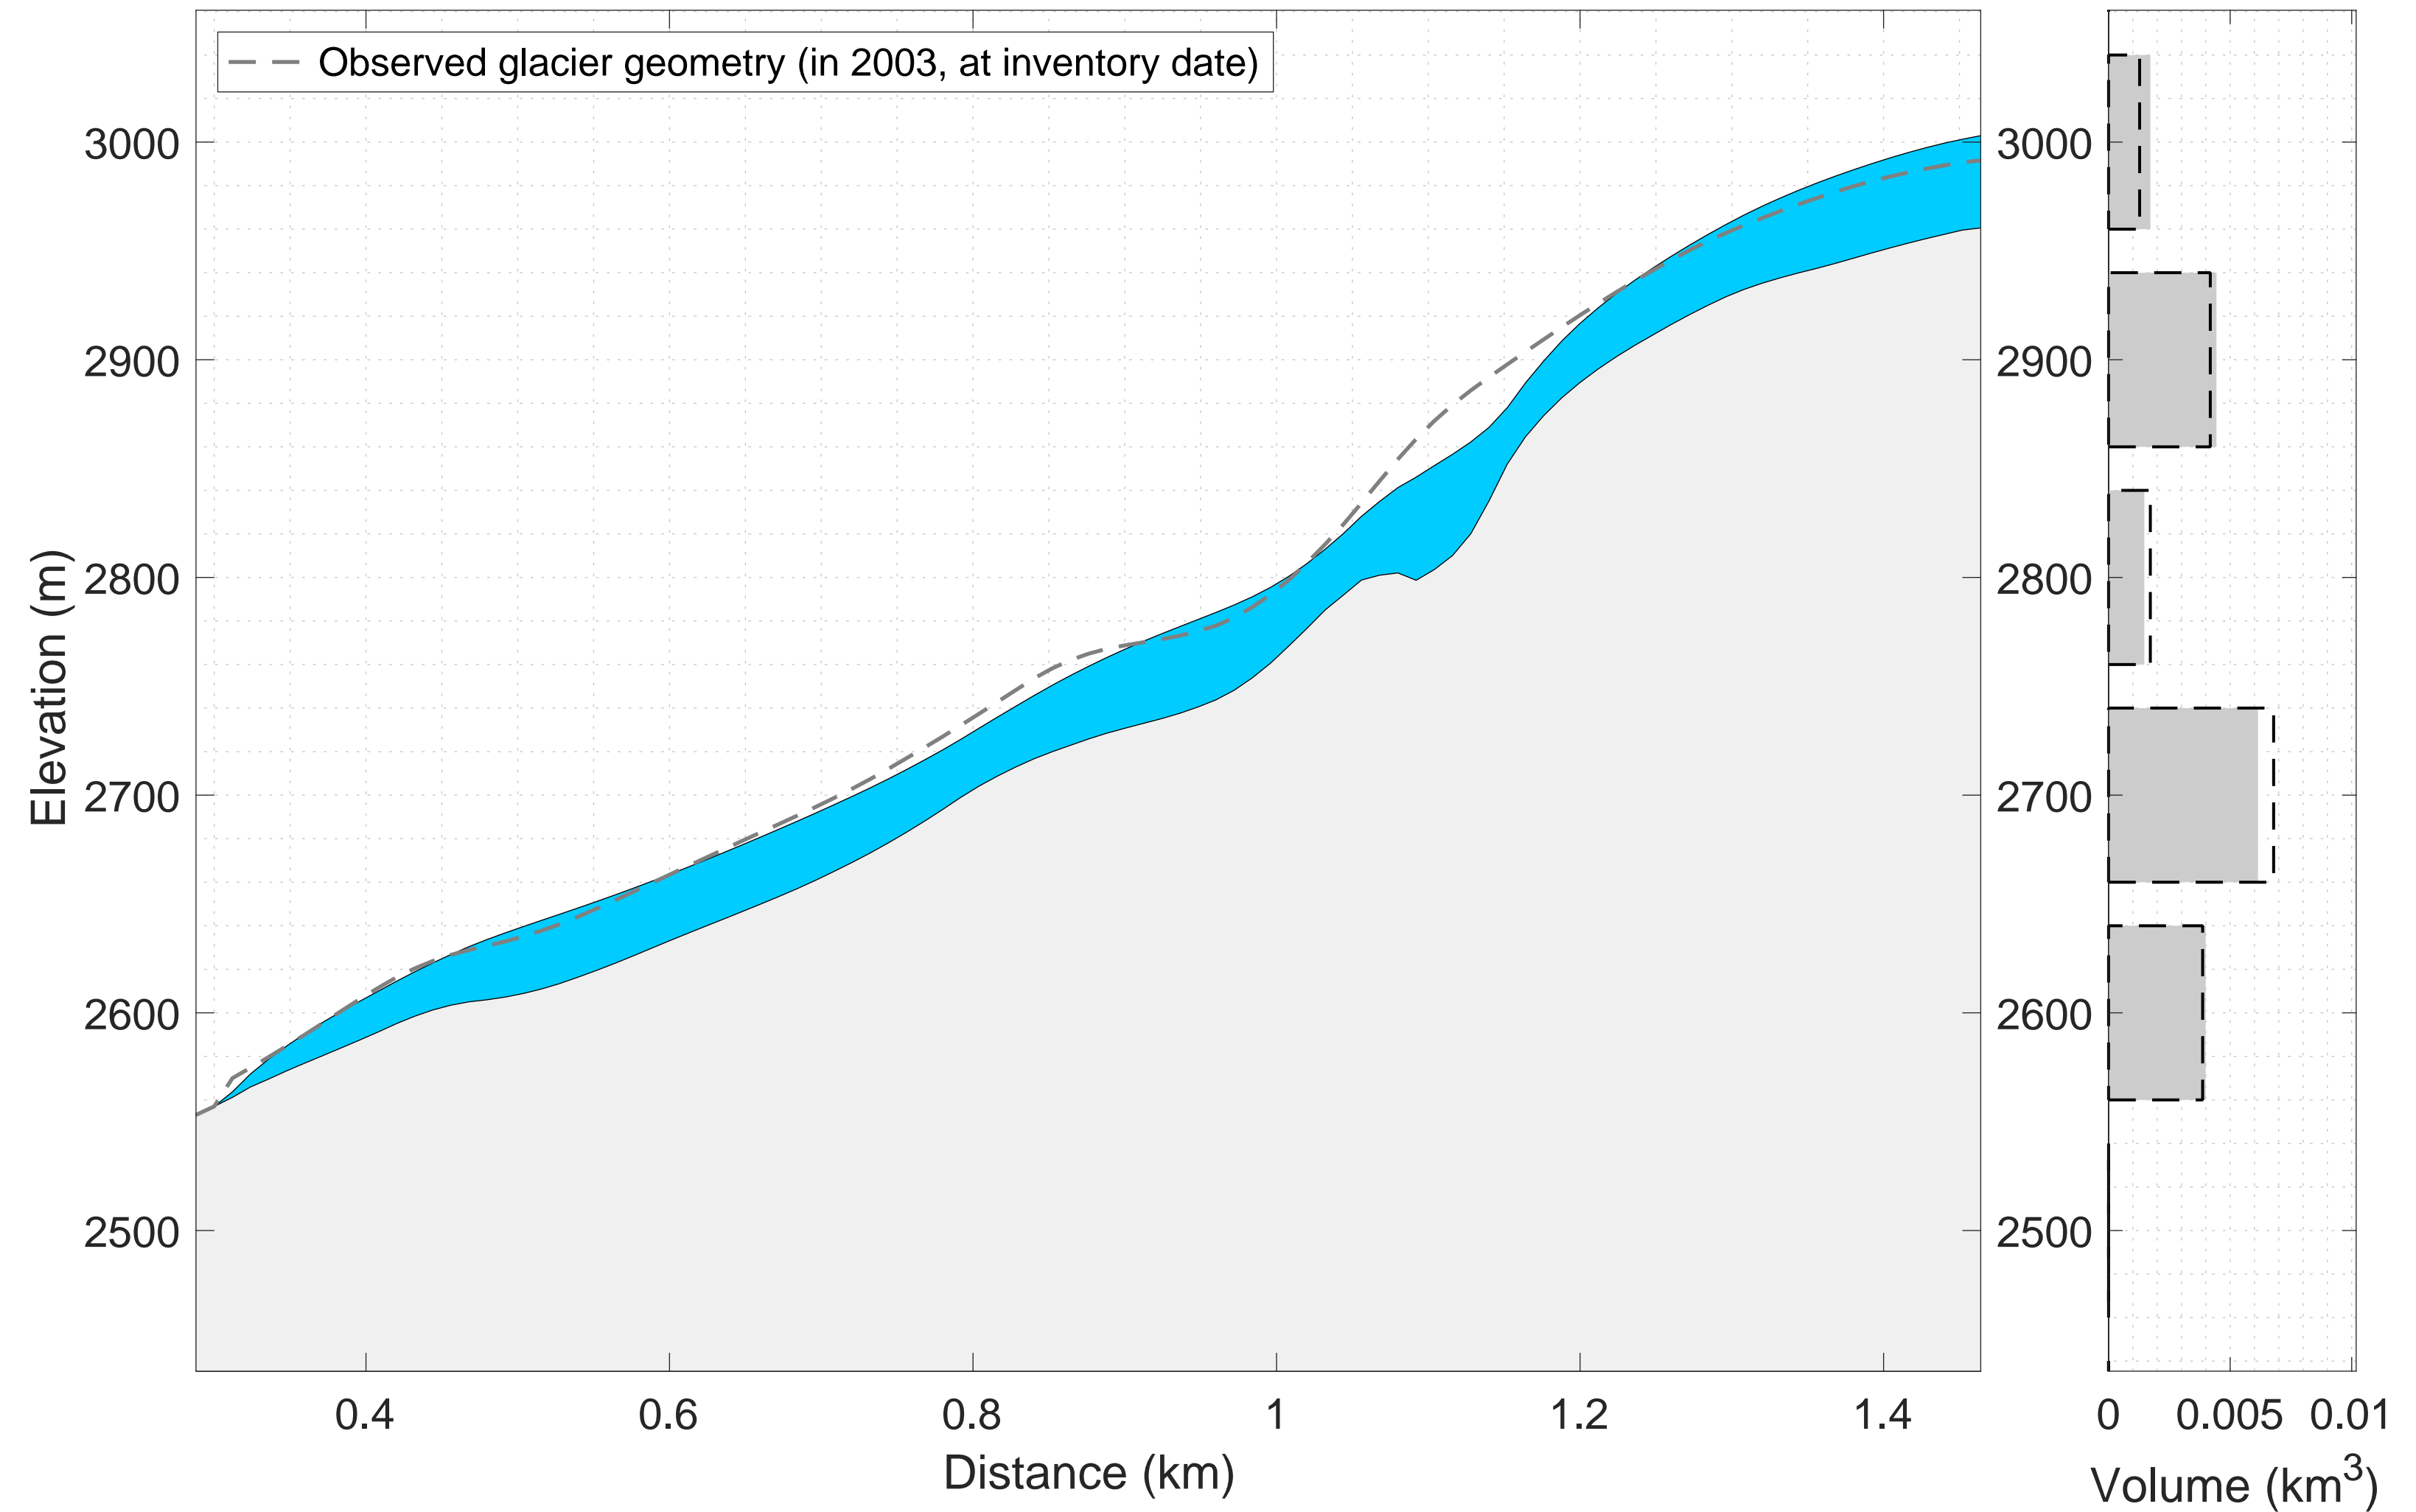

Supplement: Supplementary file 400 [file tc-13-1125-2019-supplement.zip]

# Modelled geometry (Glacier ID = 01038; $A = 9.2944\text{e-}17 \text{ Pa}^{-3} \text{ a}^{-1}$ ; $dx = 15 \text{ m}$ )

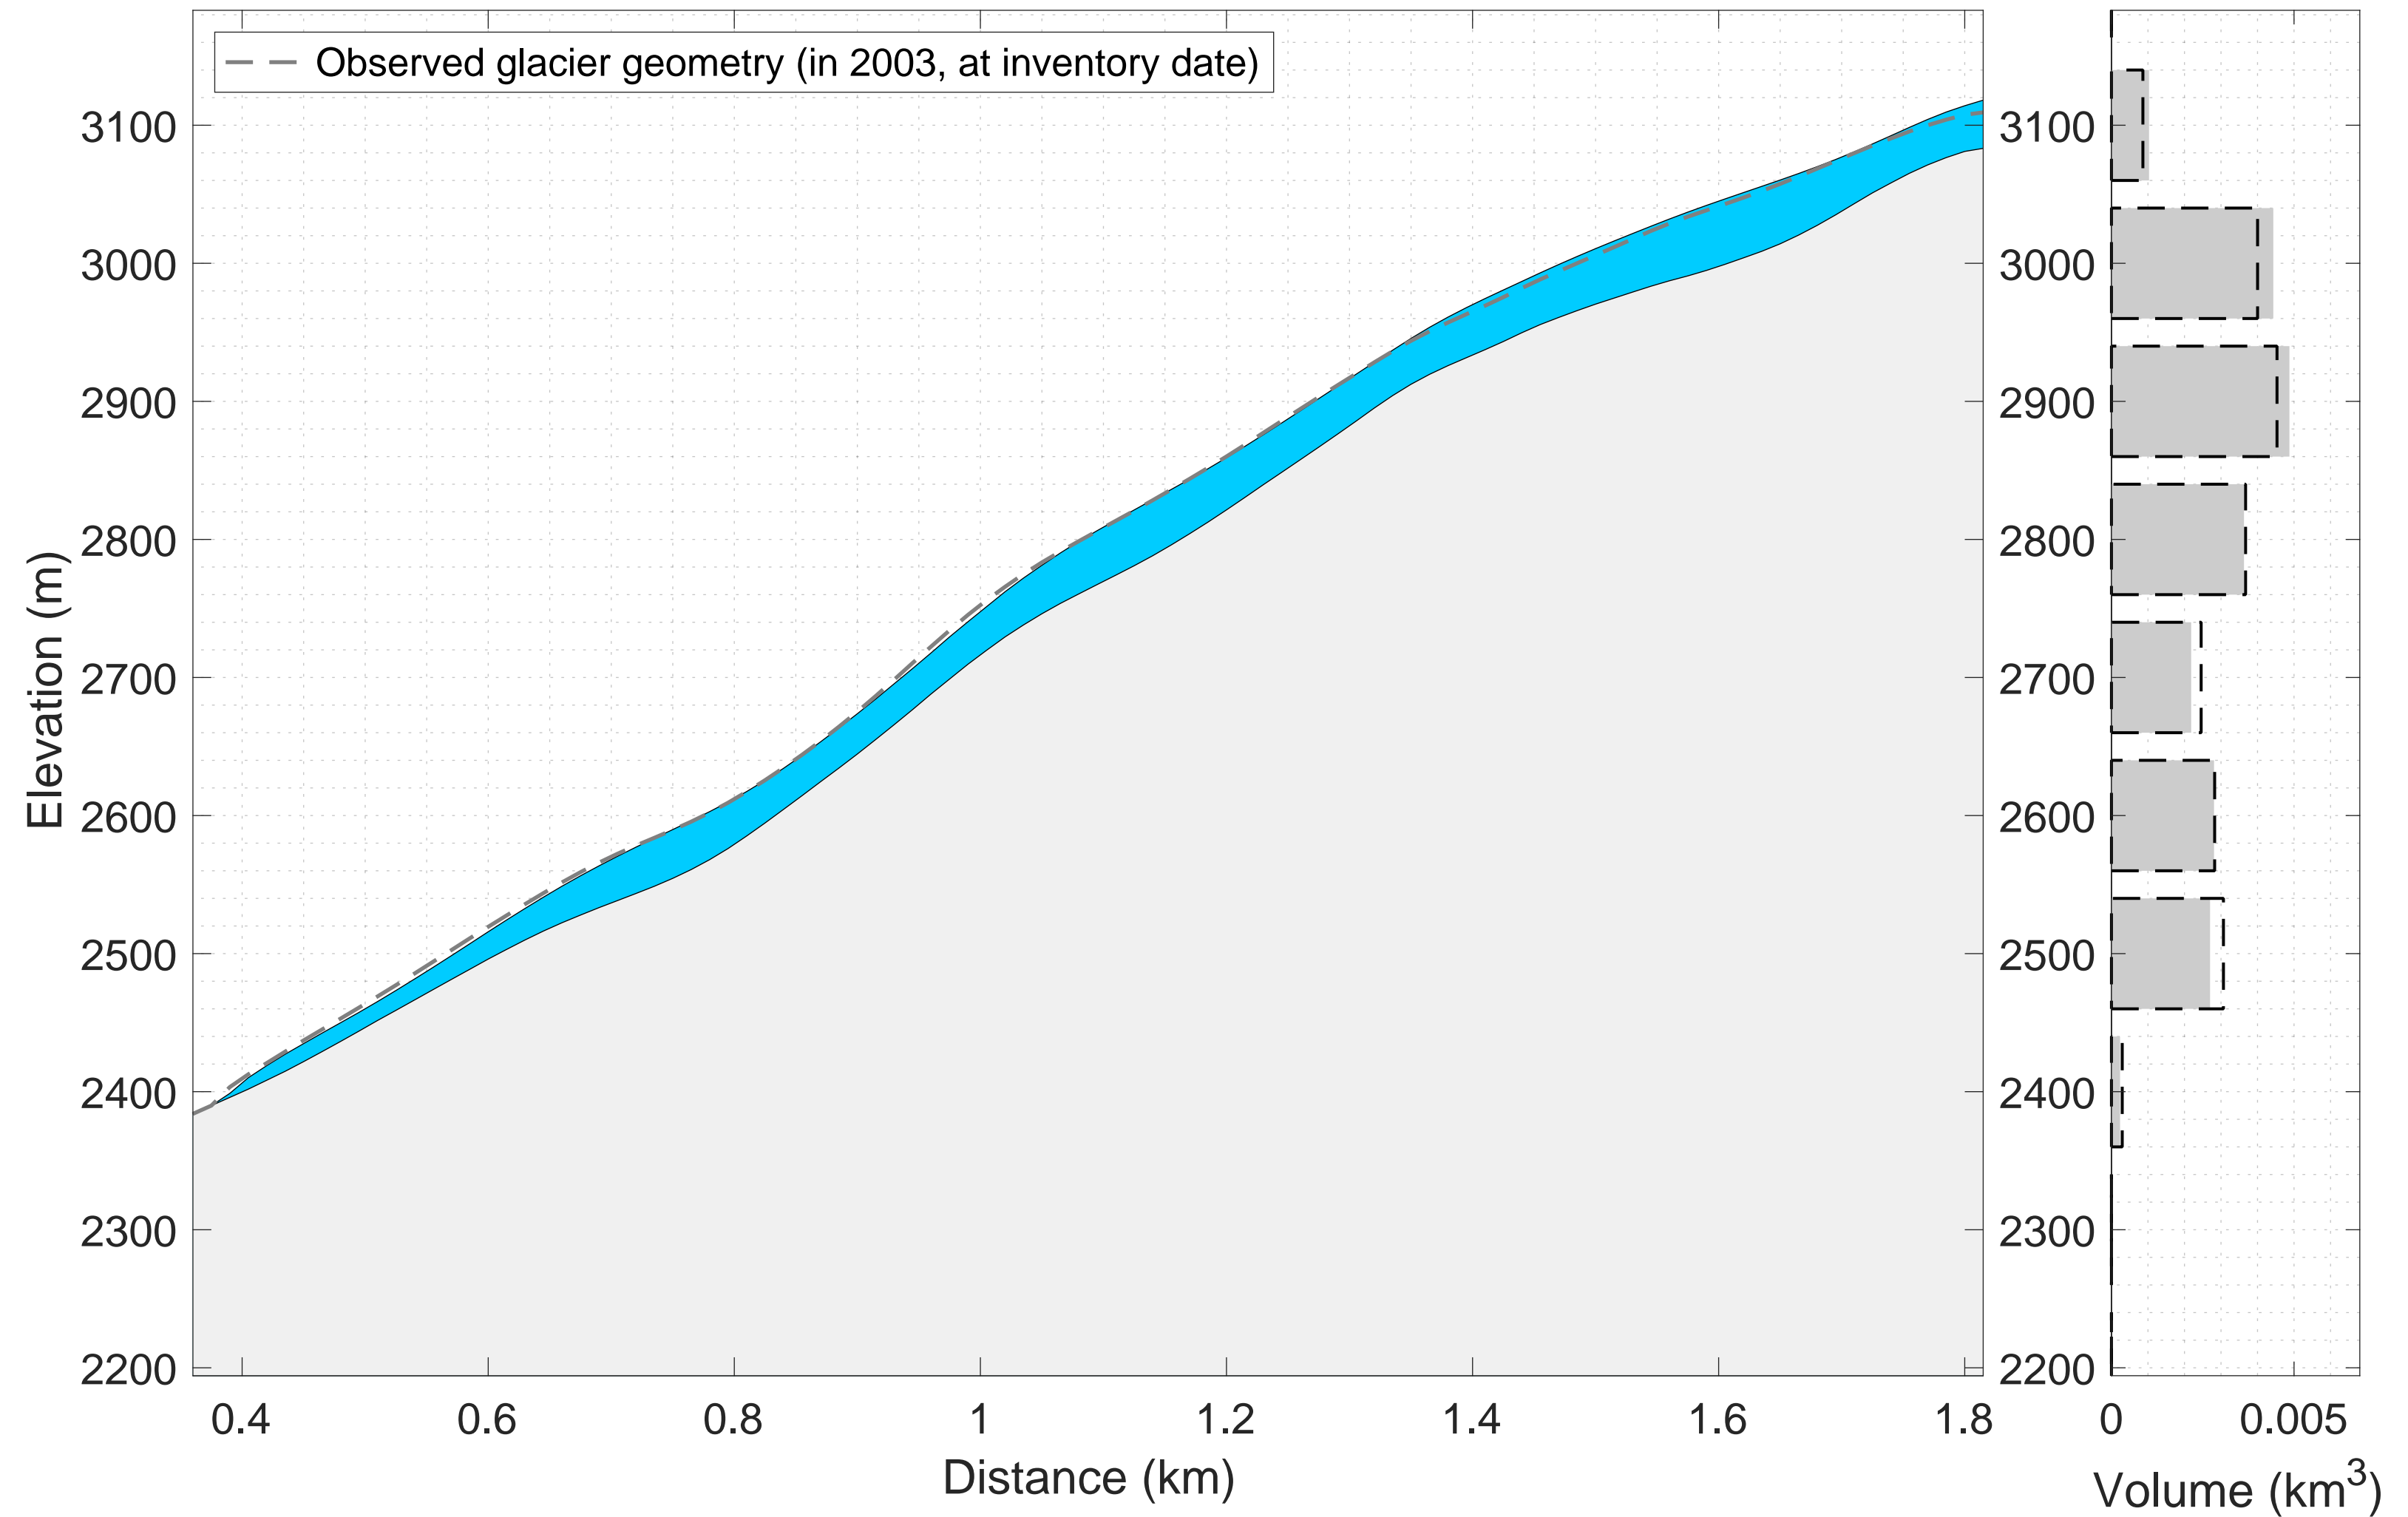

Supplement: Supplementary file 401 [file tc-13-1125-2019-supplement.zip]
