# Supplementary figures and images for: Modelling the future evolution of glaciers in the European Alps under the EURO-CORDEX RCM ensemble (part 5 of 8)
Source: Copernicus journal article supplement (doi:10.5194/tc-13-1125-2019), 2019-04-09

**Modelled geometry (Glacier ID = 00550;  $A = 6.2019\text{e-}17 \text{ Pa}^{-3} \text{ a}^{-1}$ ;  $dx = 12 \text{ m}$ )**

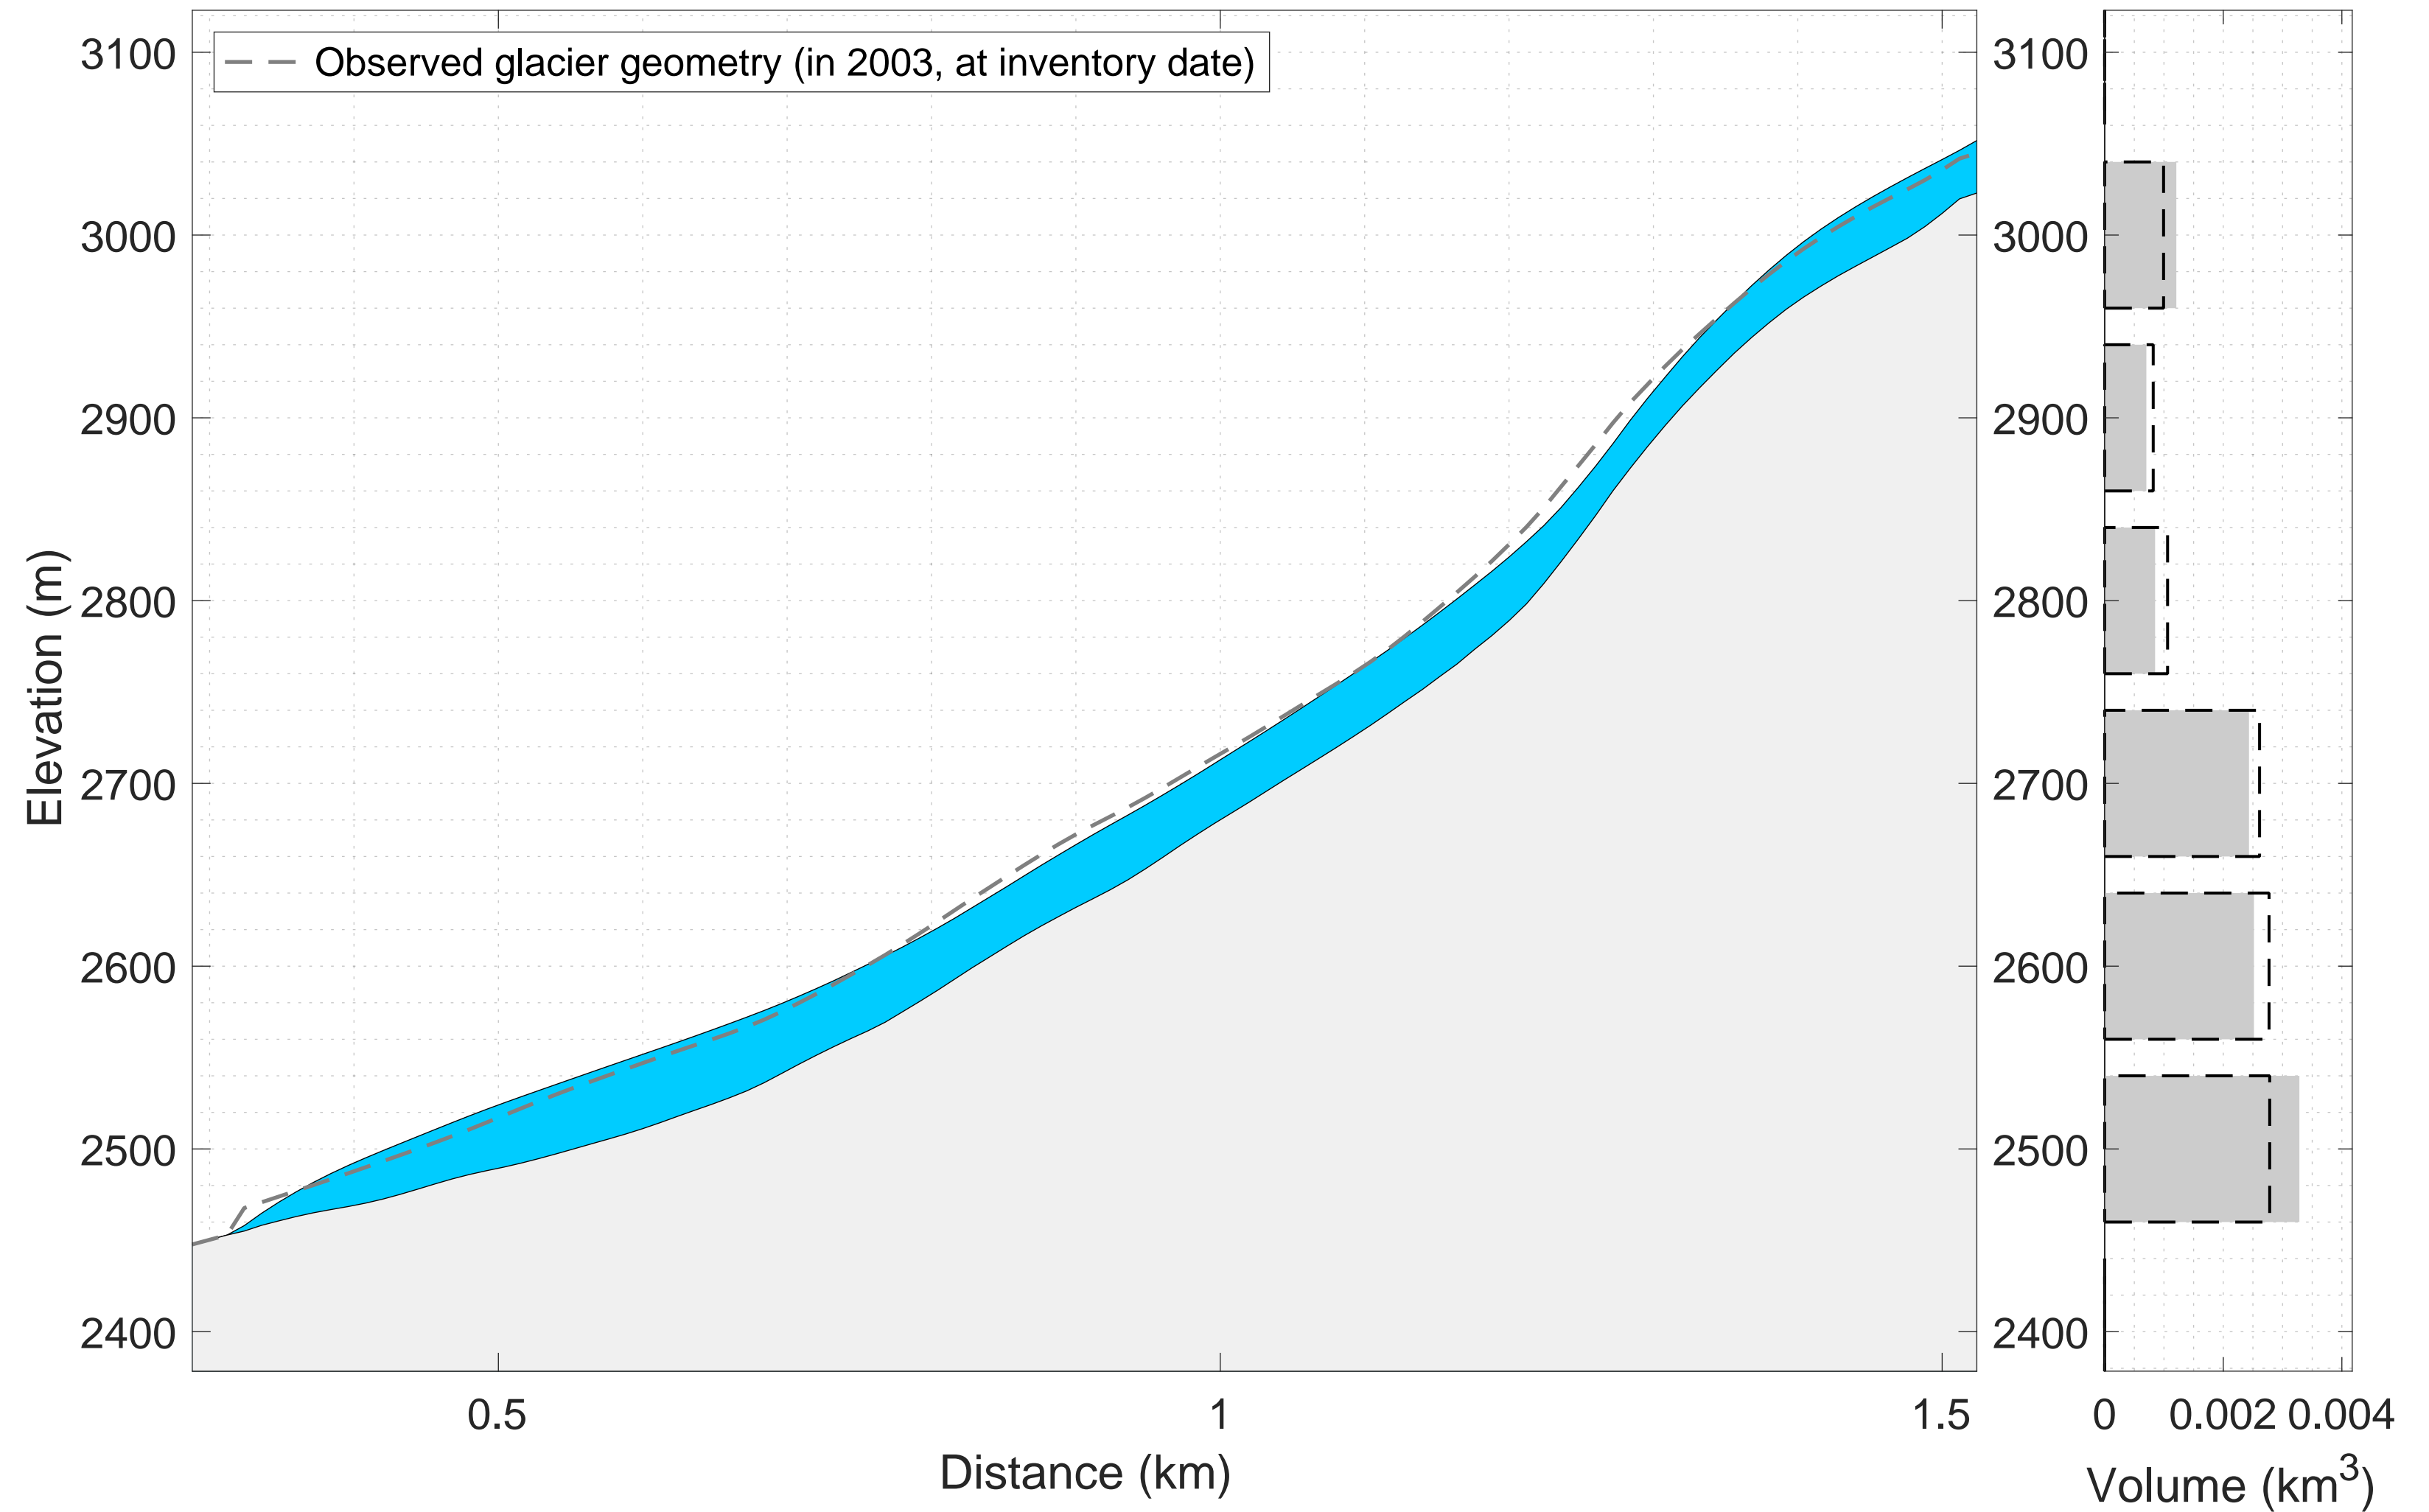

Supplement: Supplementary file 402 [file tc-13-1125-2019-supplement.zip]

**Modelled geometry (Glacier ID = 02075;  $A = 5.3836\text{e-}17 \text{ Pa}^{-3} \text{ a}^{-1}$ ;  $dx = 18 \text{ m}$ )**

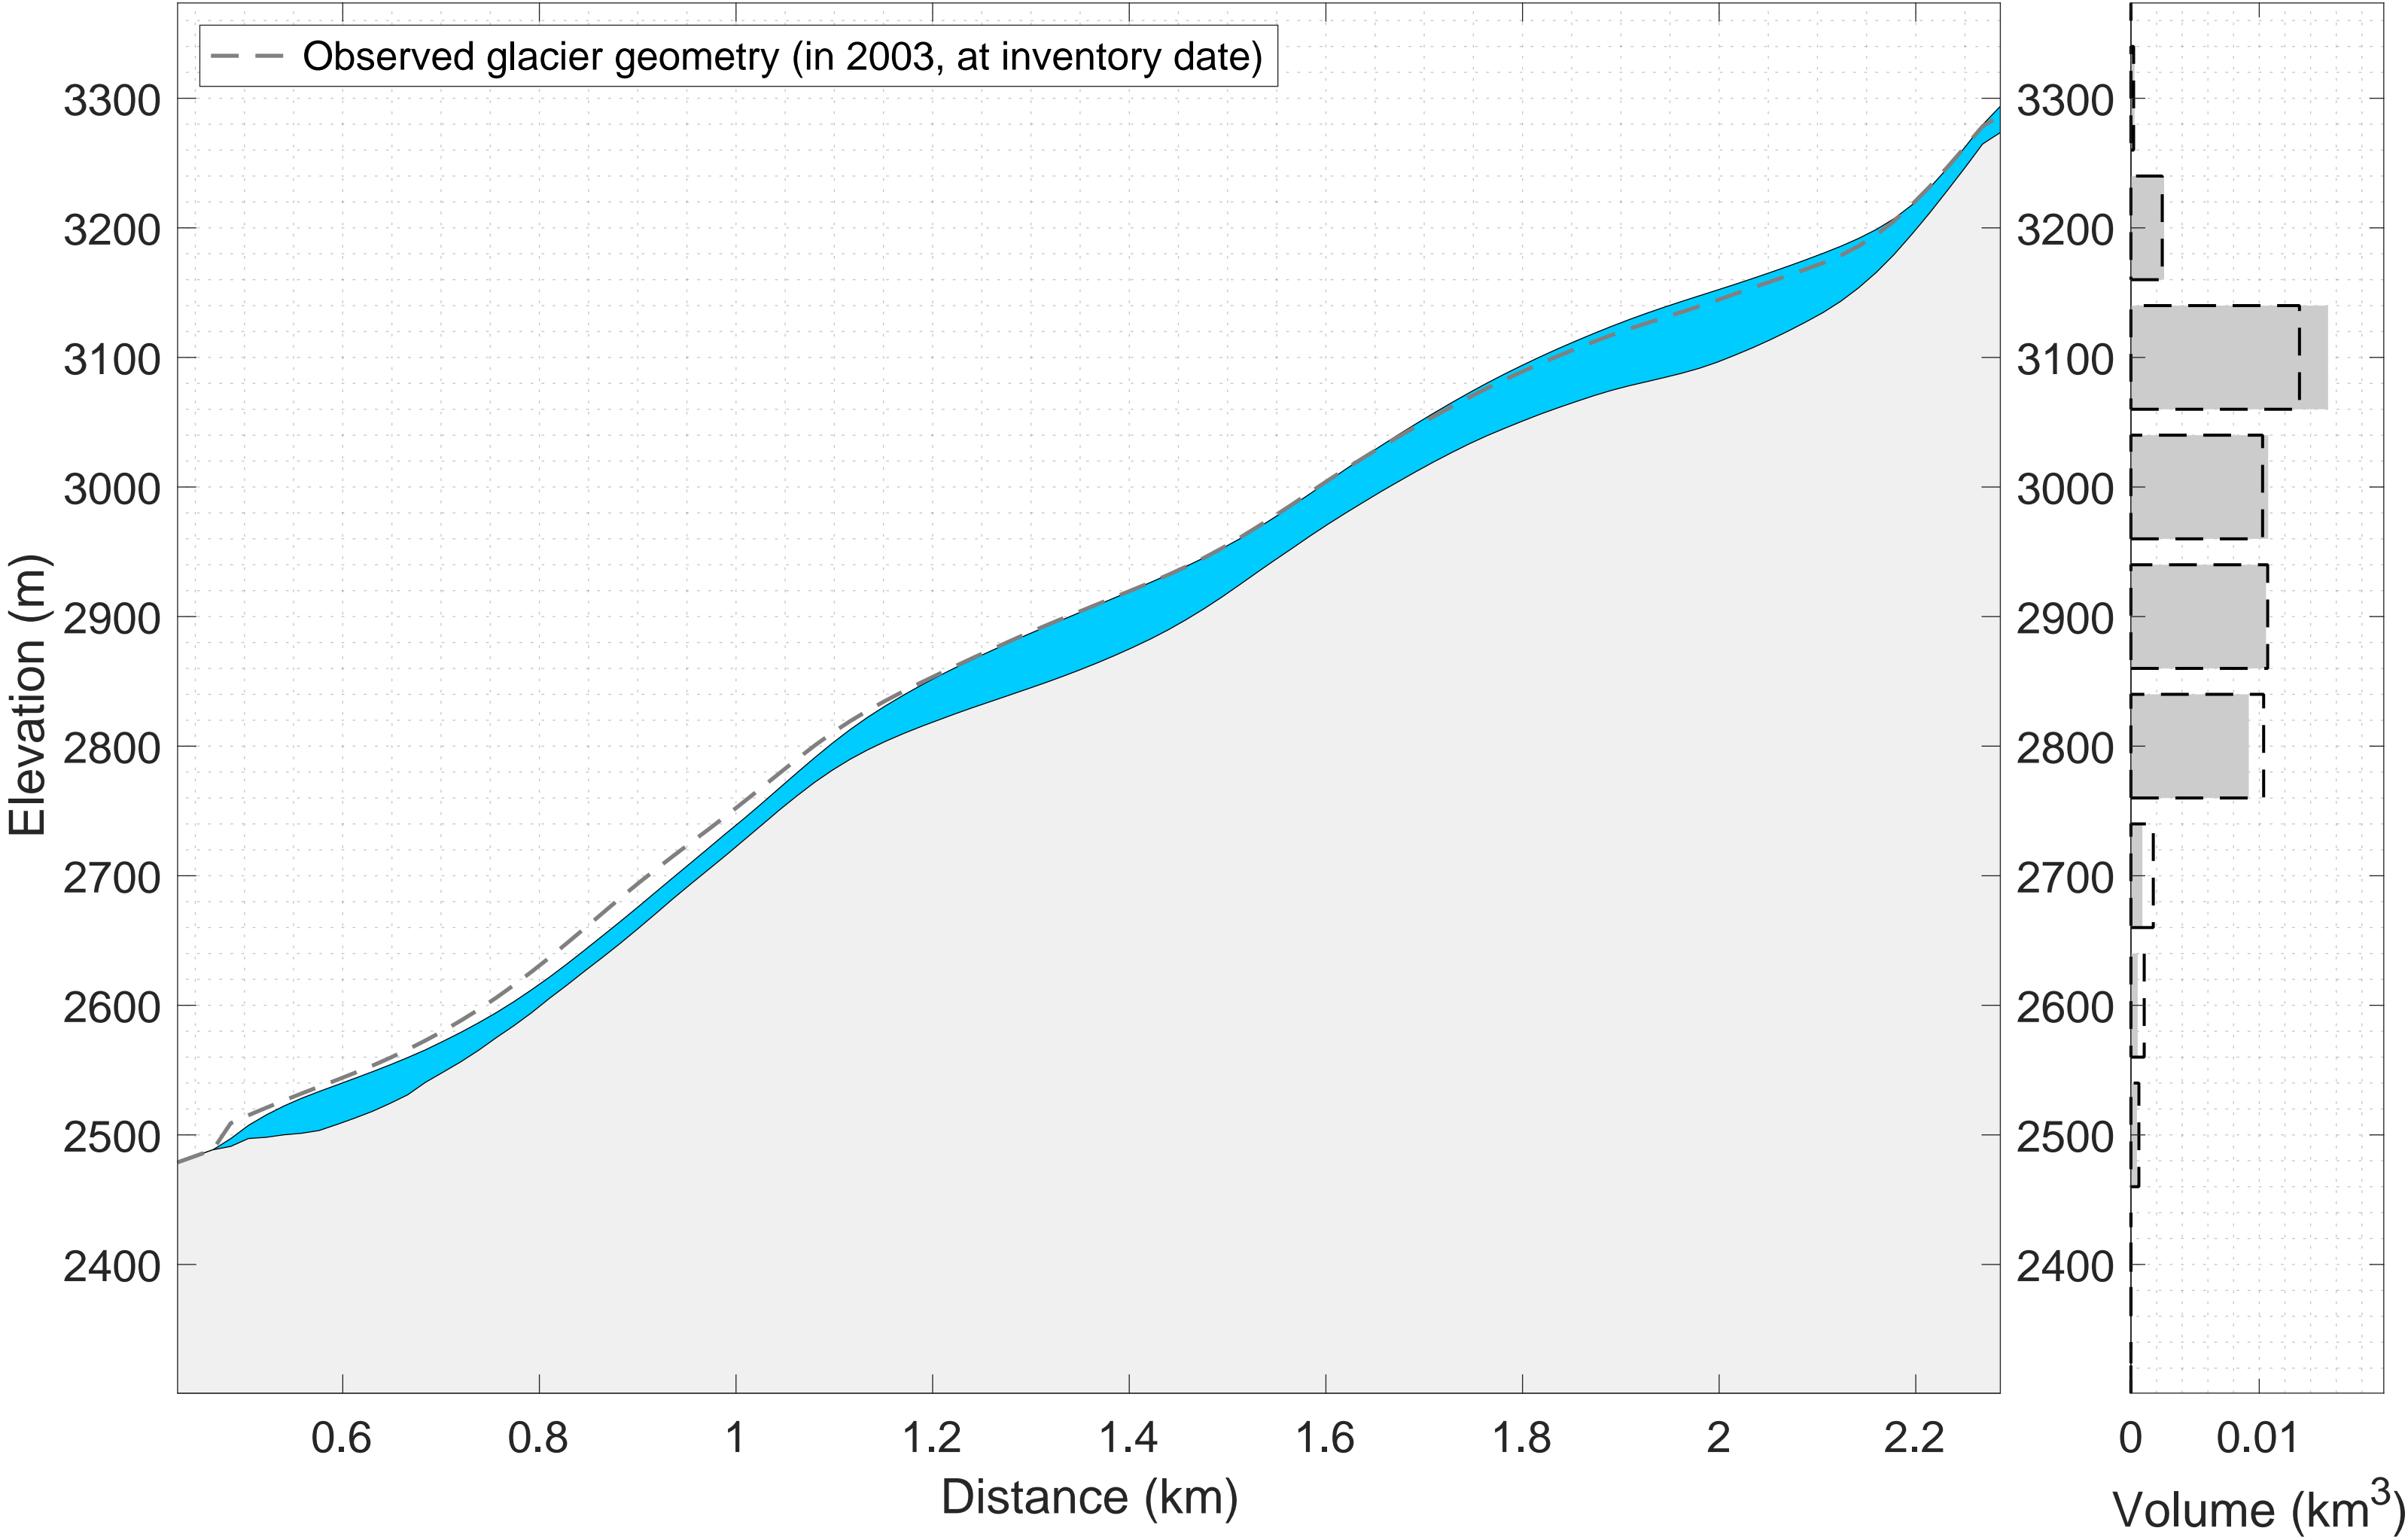

Supplement: Supplementary file 403 [file tc-13-1125-2019-supplement.zip]

**Modelled geometry (Glacier ID = 00608;  $A = 8.0568\text{e-}17 \text{ Pa}^{-3} \text{ a}^{-1}$ ;  $dx = 11 \text{ m}$ )**

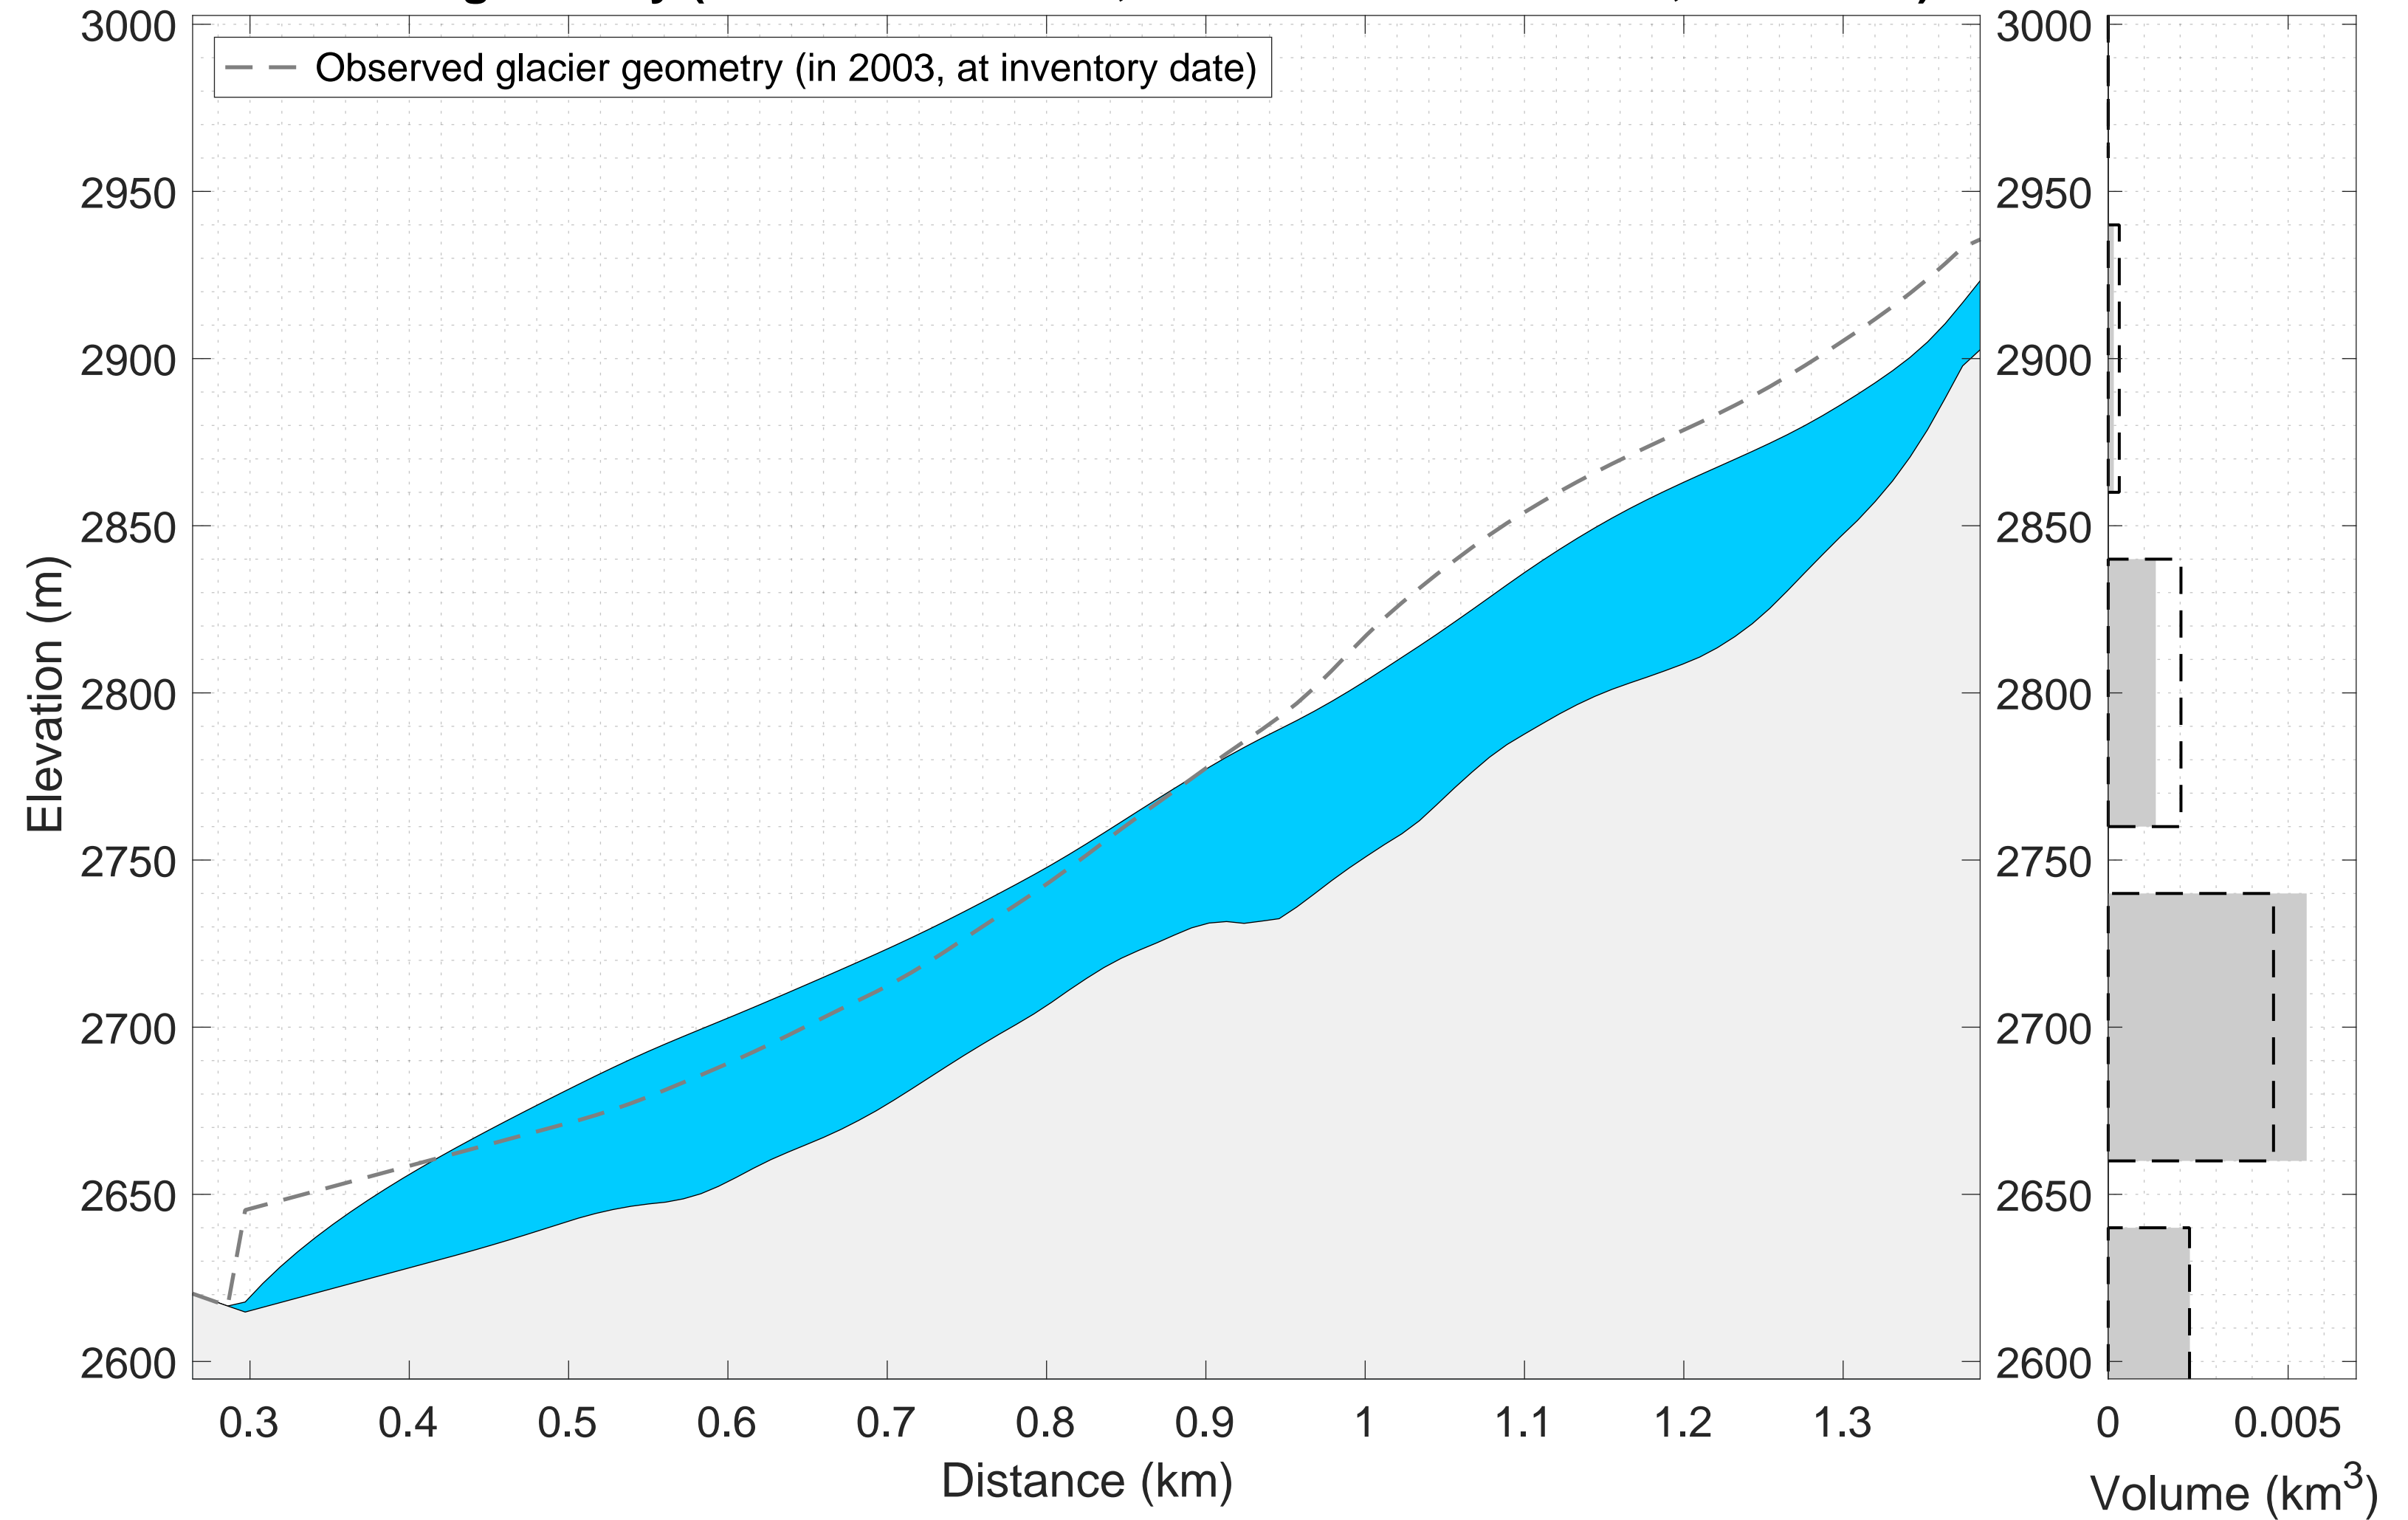

Supplement: Supplementary file 404 [file tc-13-1125-2019-supplement.zip]

**Modelled geometry (Glacier ID = 02822;  $A = 1.667\text{e-16 Pa}^{-3} \text{ a}^{-1}$ ;  $dx = 118 \text{ m}$ )**

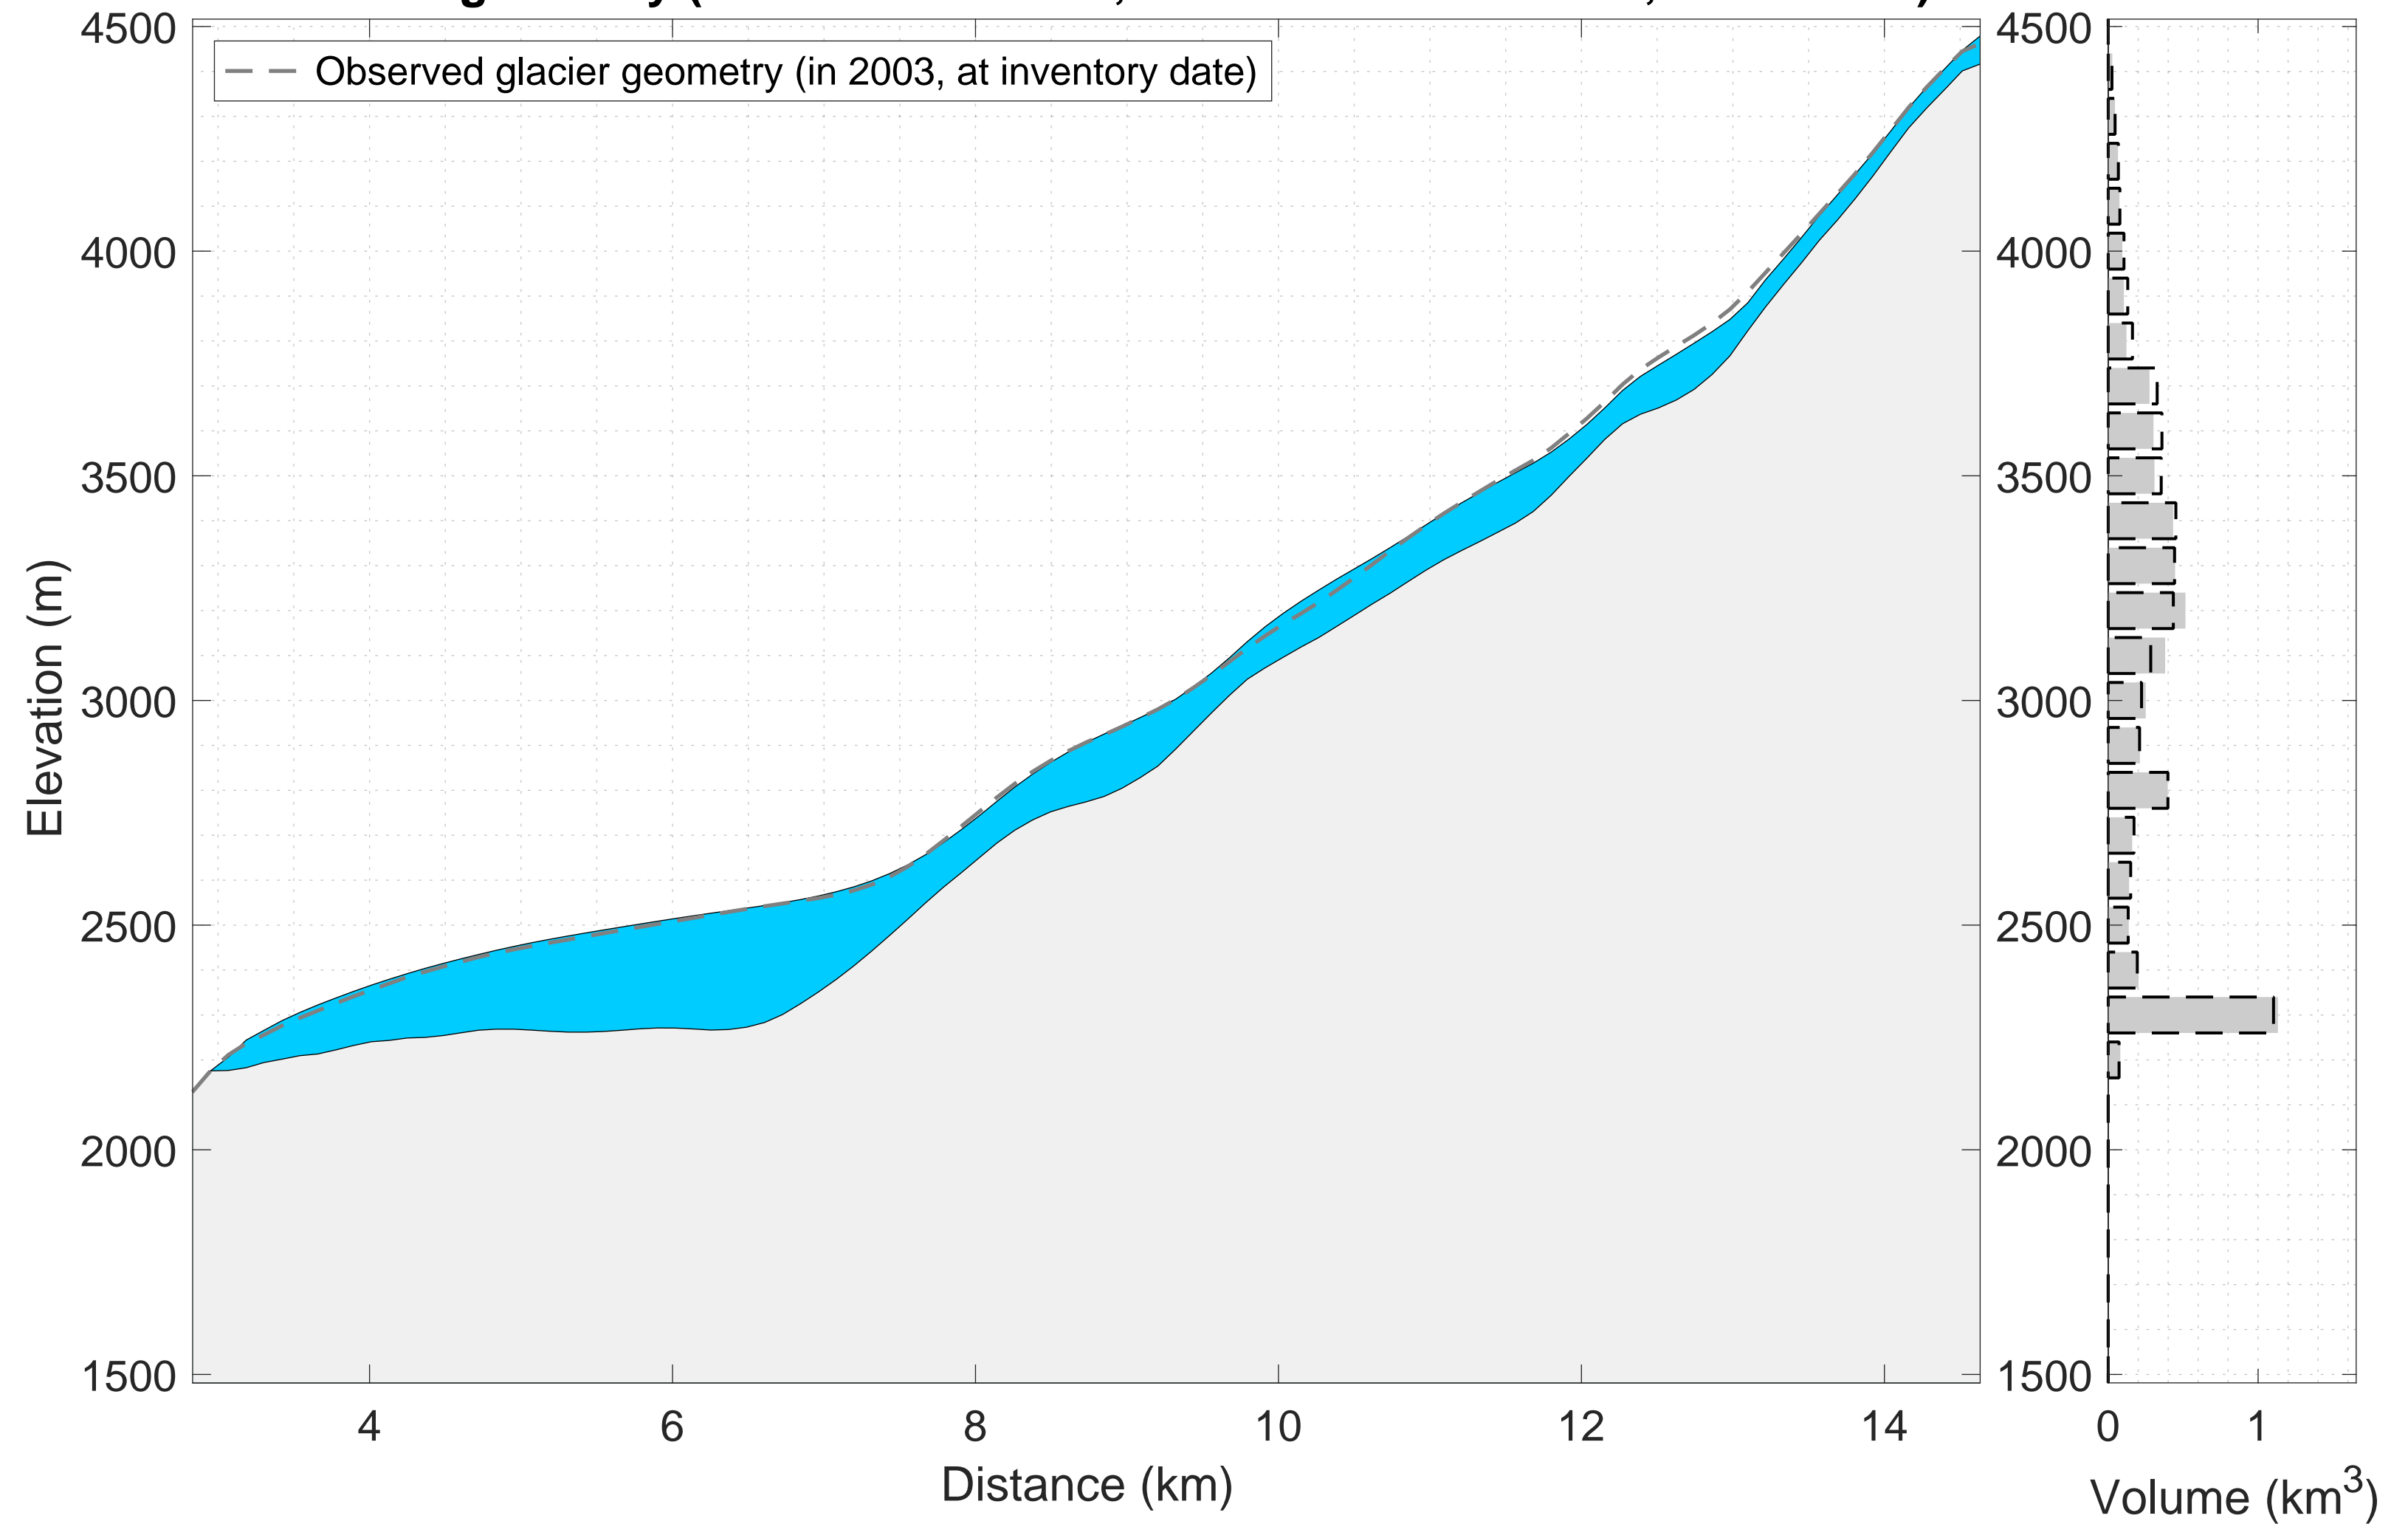

Supplement: Supplementary file 405 [file tc-13-1125-2019-supplement.zip]

**Modelled geometry (Glacier ID = 02752;  $A = 1.0224\text{e-}16 \text{ Pa}^{-3} \text{ a}^{-1}$ ;  $dx = 11 \text{ m}$ )**

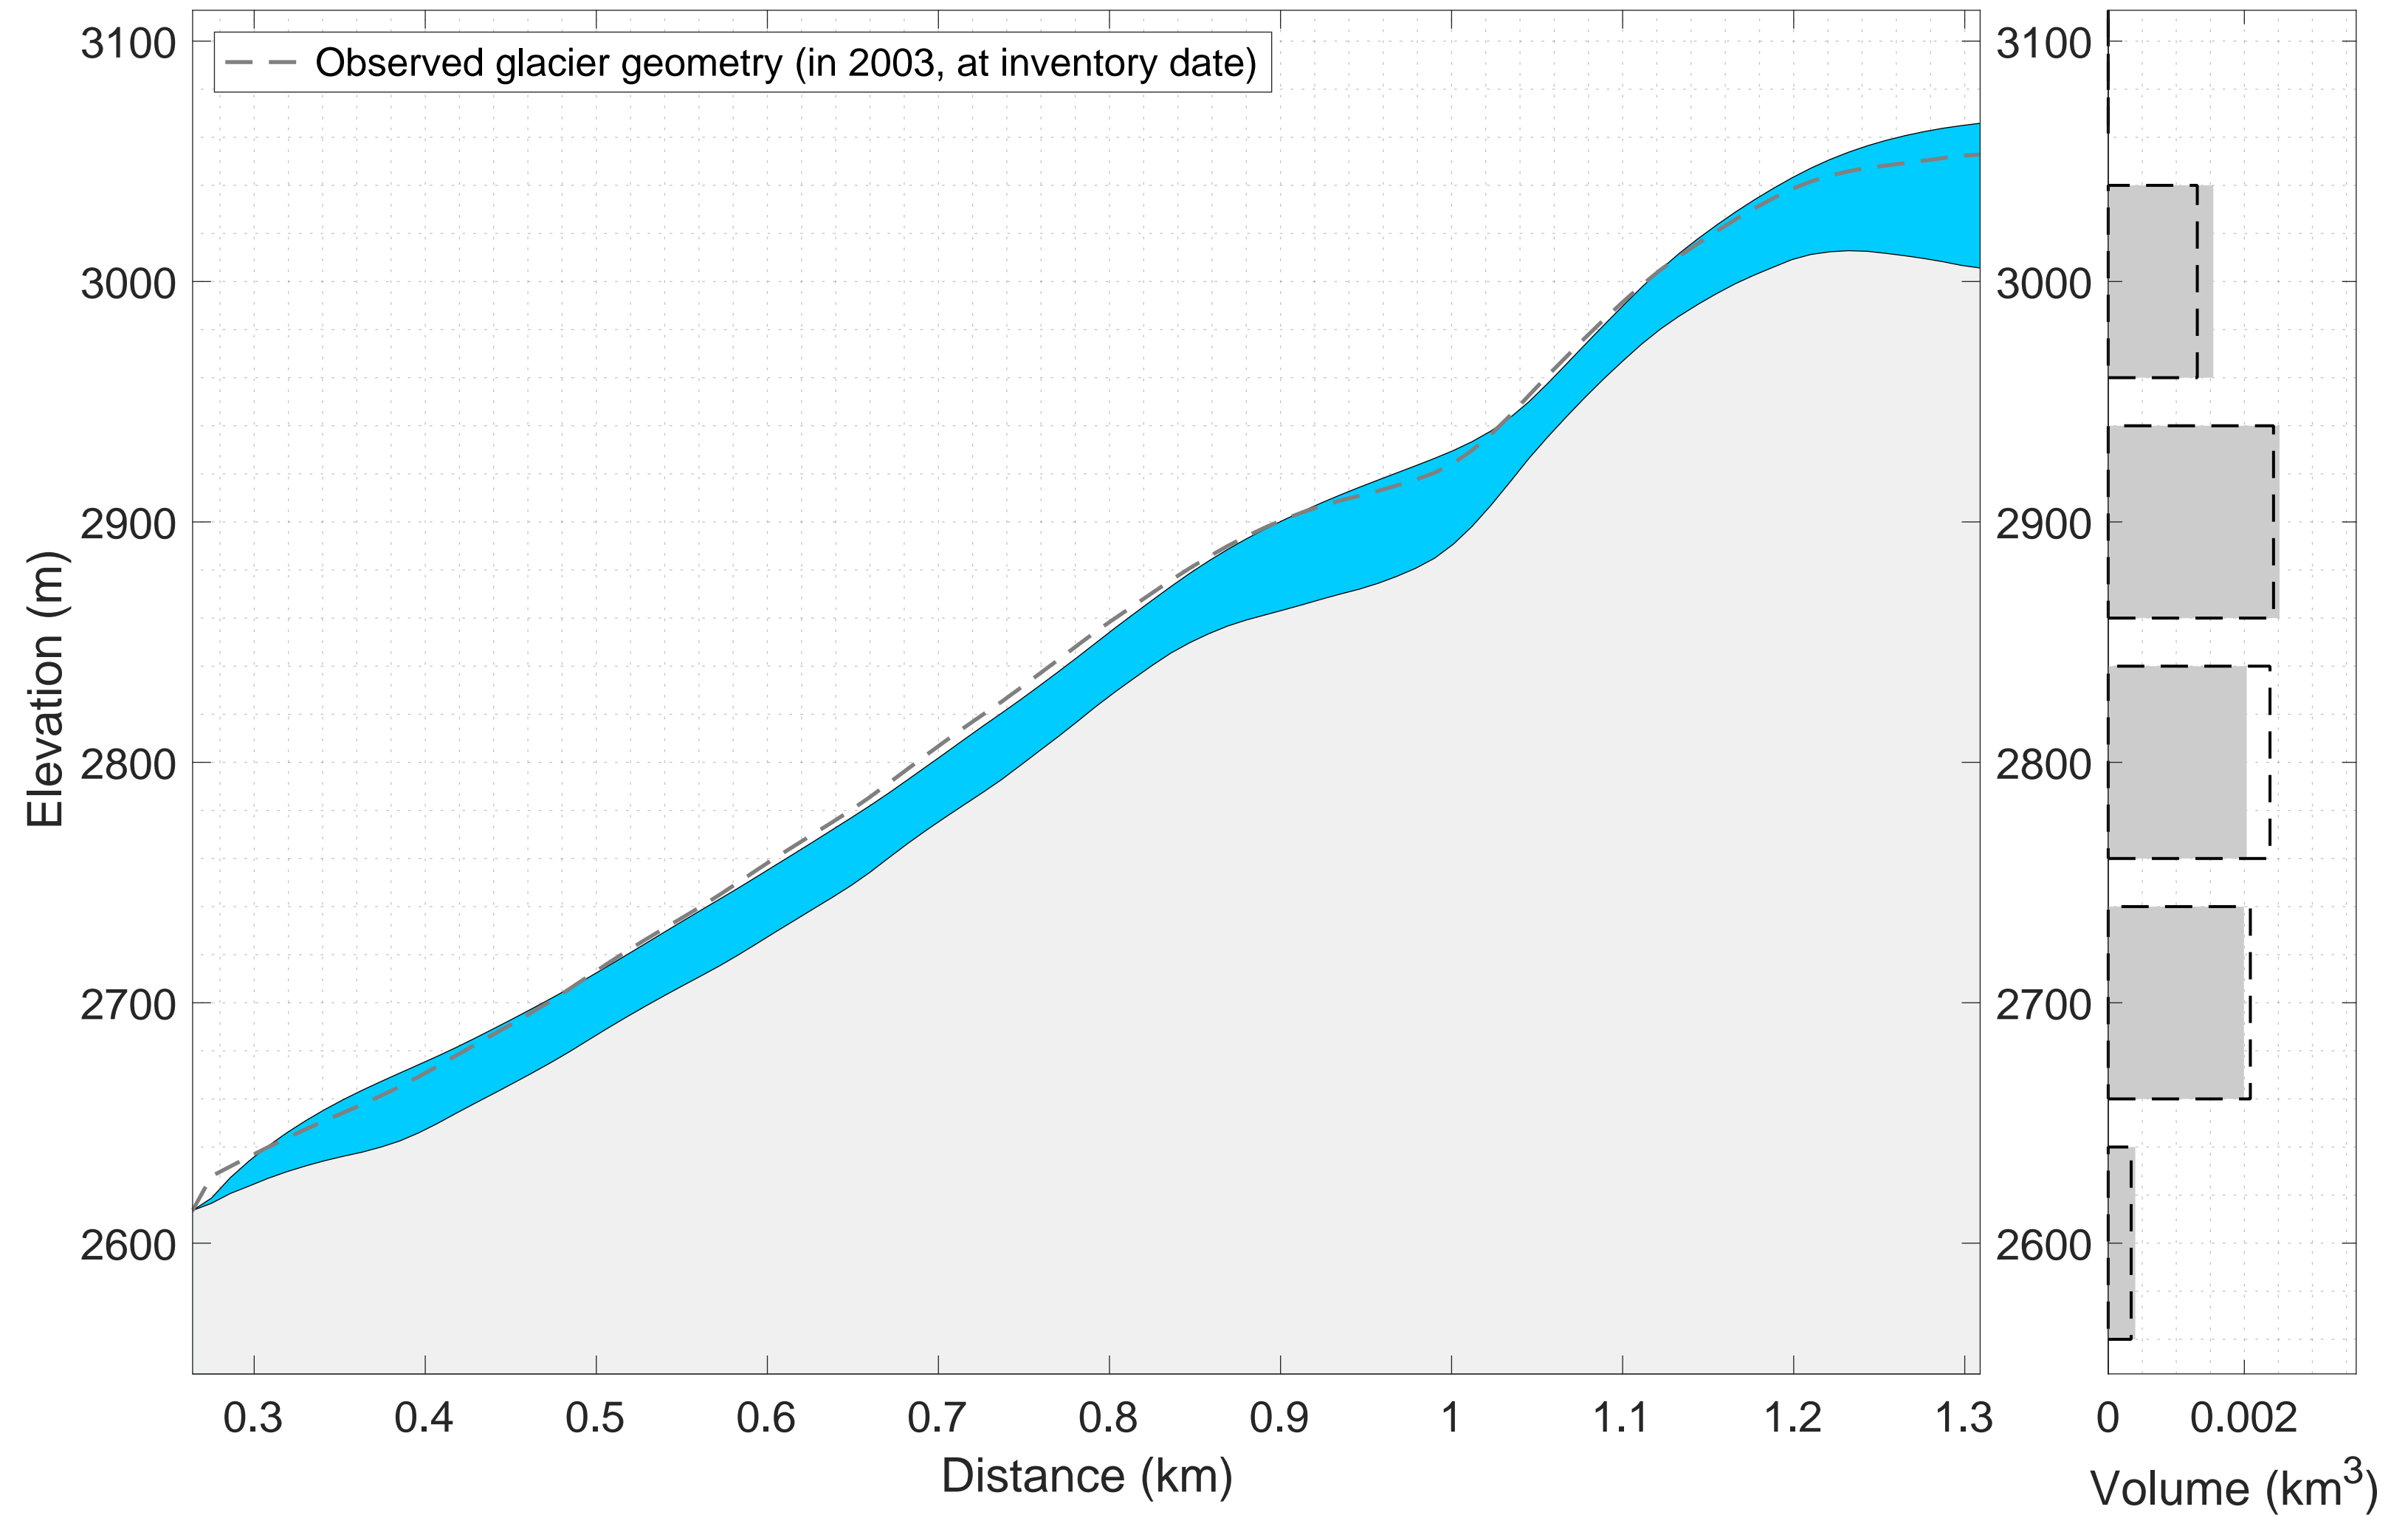

Supplement: Supplementary file 406 [file tc-13-1125-2019-supplement.zip]

**Modelled geometry (Glacier ID = 00450;  $A = 6.1729\text{e-}17 \text{ Pa}^{-3} \text{ a}^{-1}$ ;  $dx = 10 \text{ m}$ )**

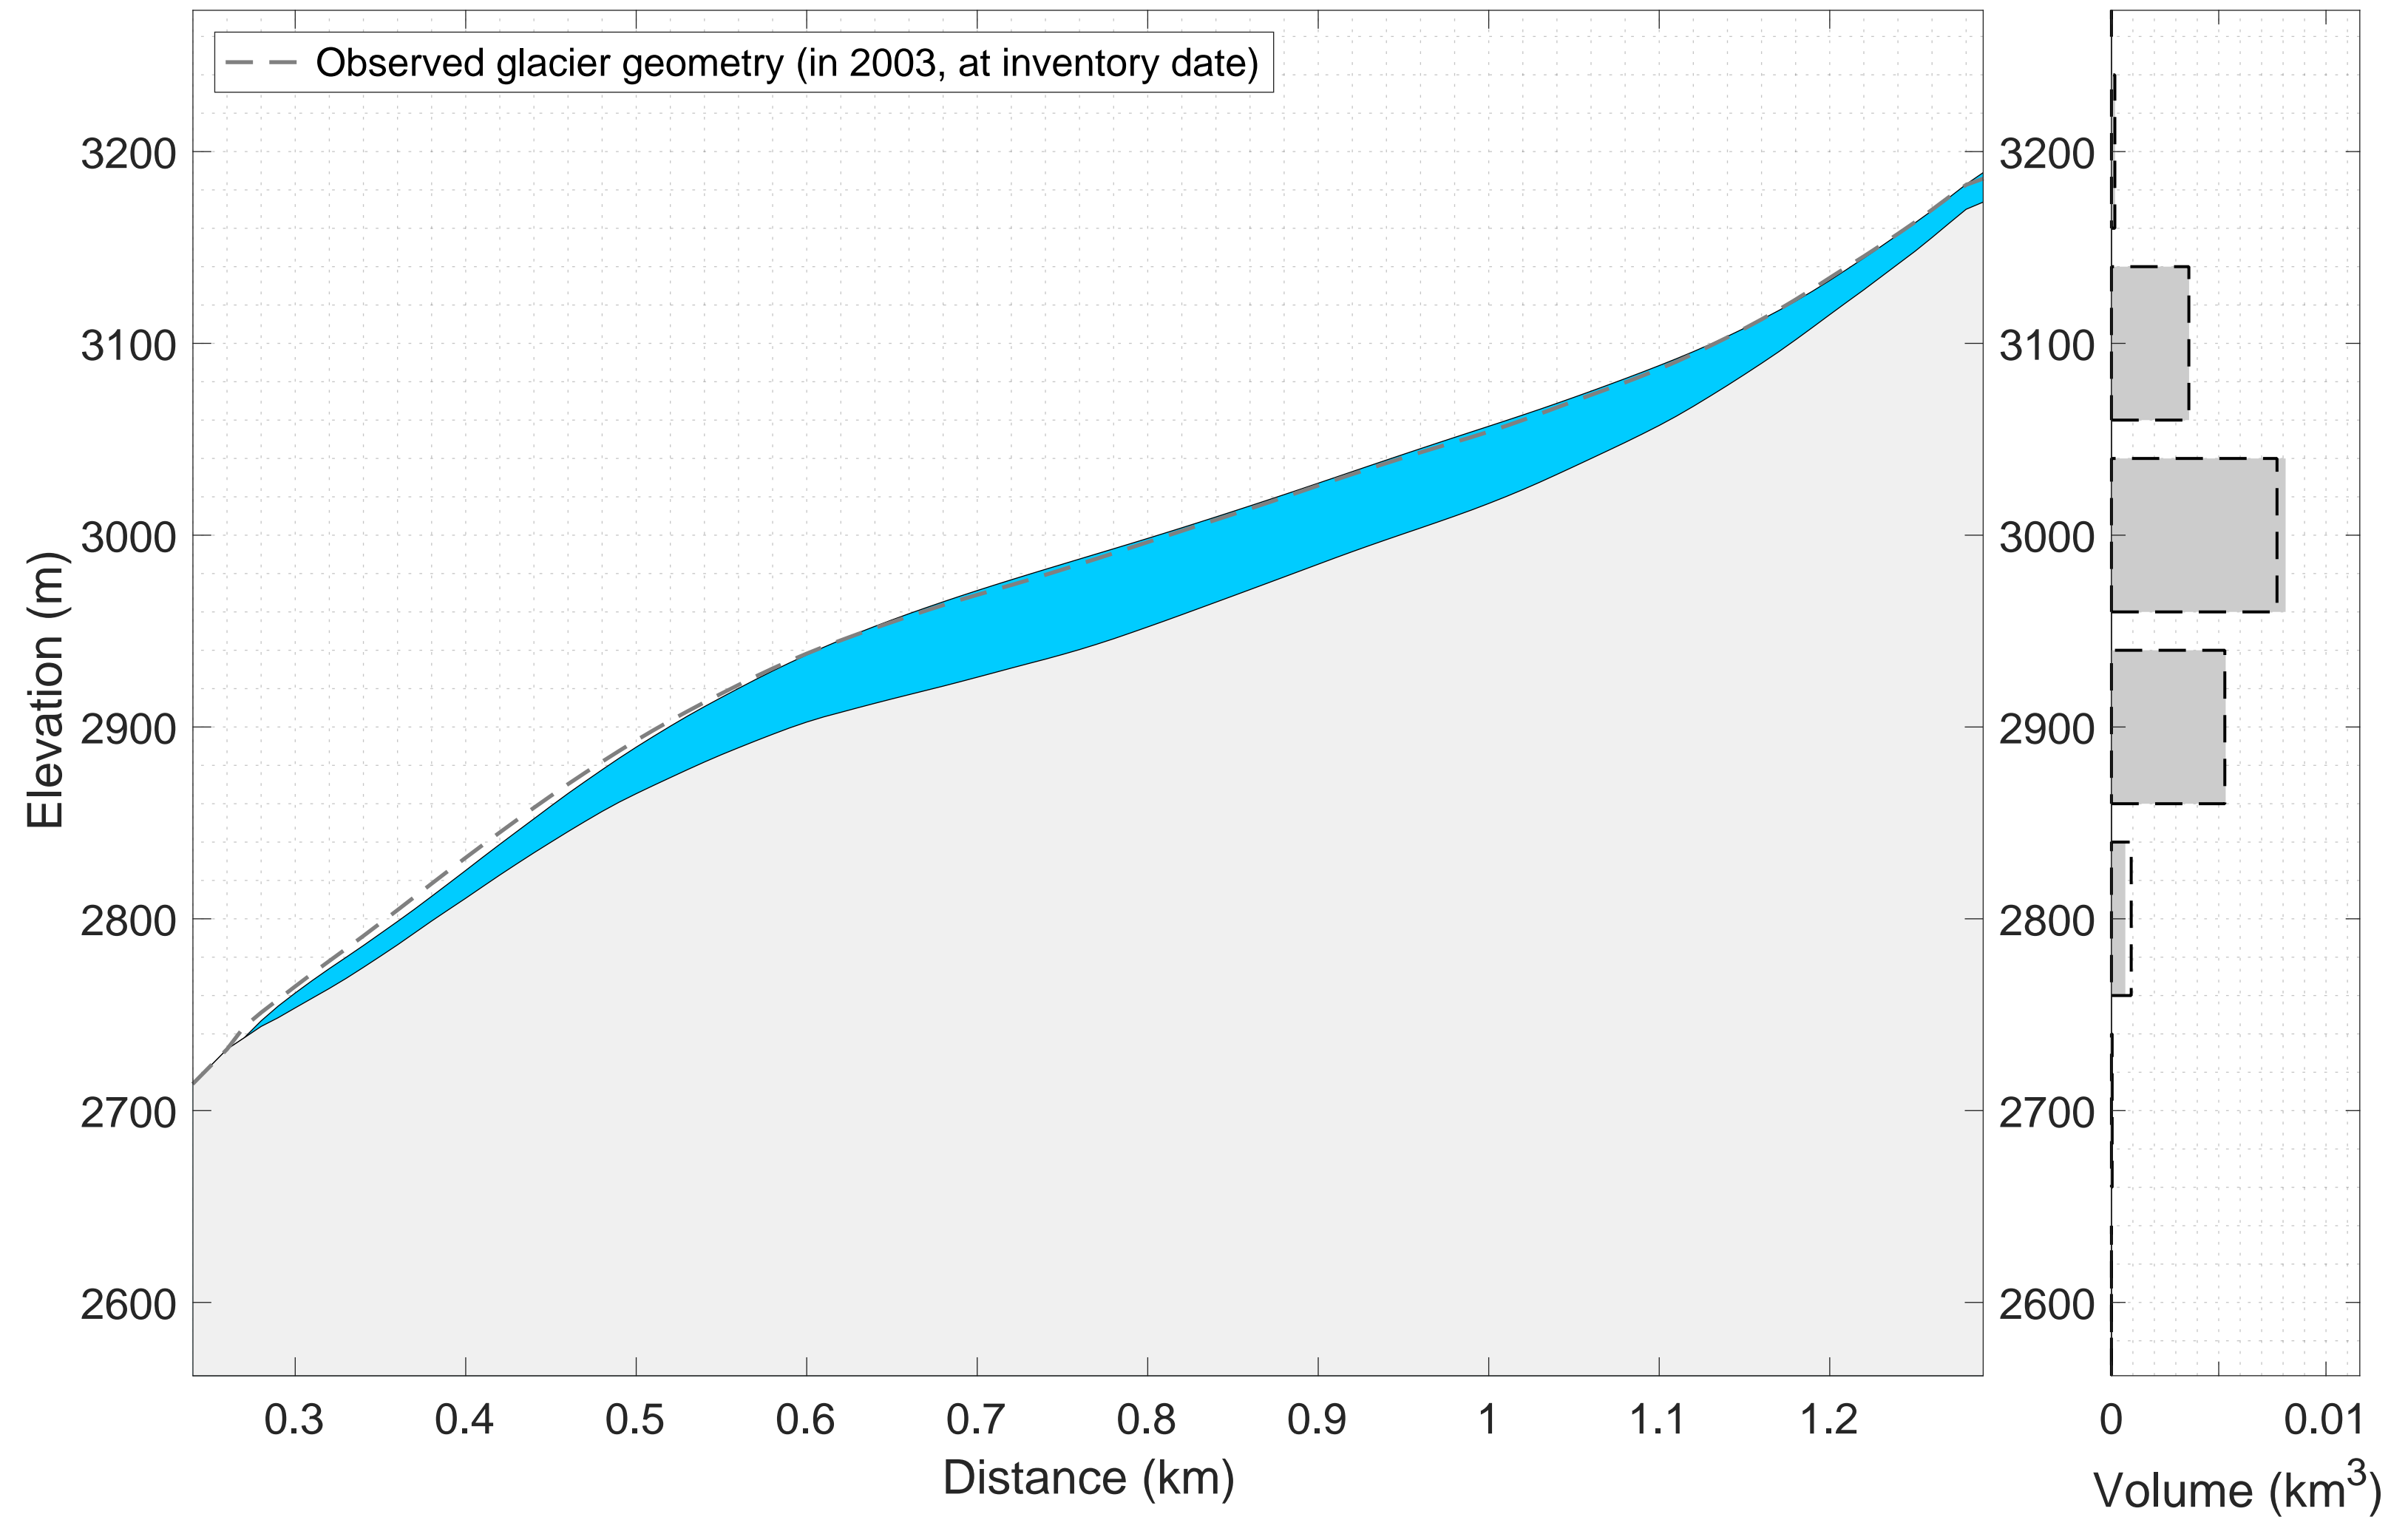

Supplement: Supplementary file 407 [file tc-13-1125-2019-supplement.zip]

**Modelled geometry (Glacier ID = 00070;  $A = 1.4828\text{e-}16 \text{ Pa}^{-3} \text{ a}^{-1}$ ;  $dx = 19 \text{ m}$ )**

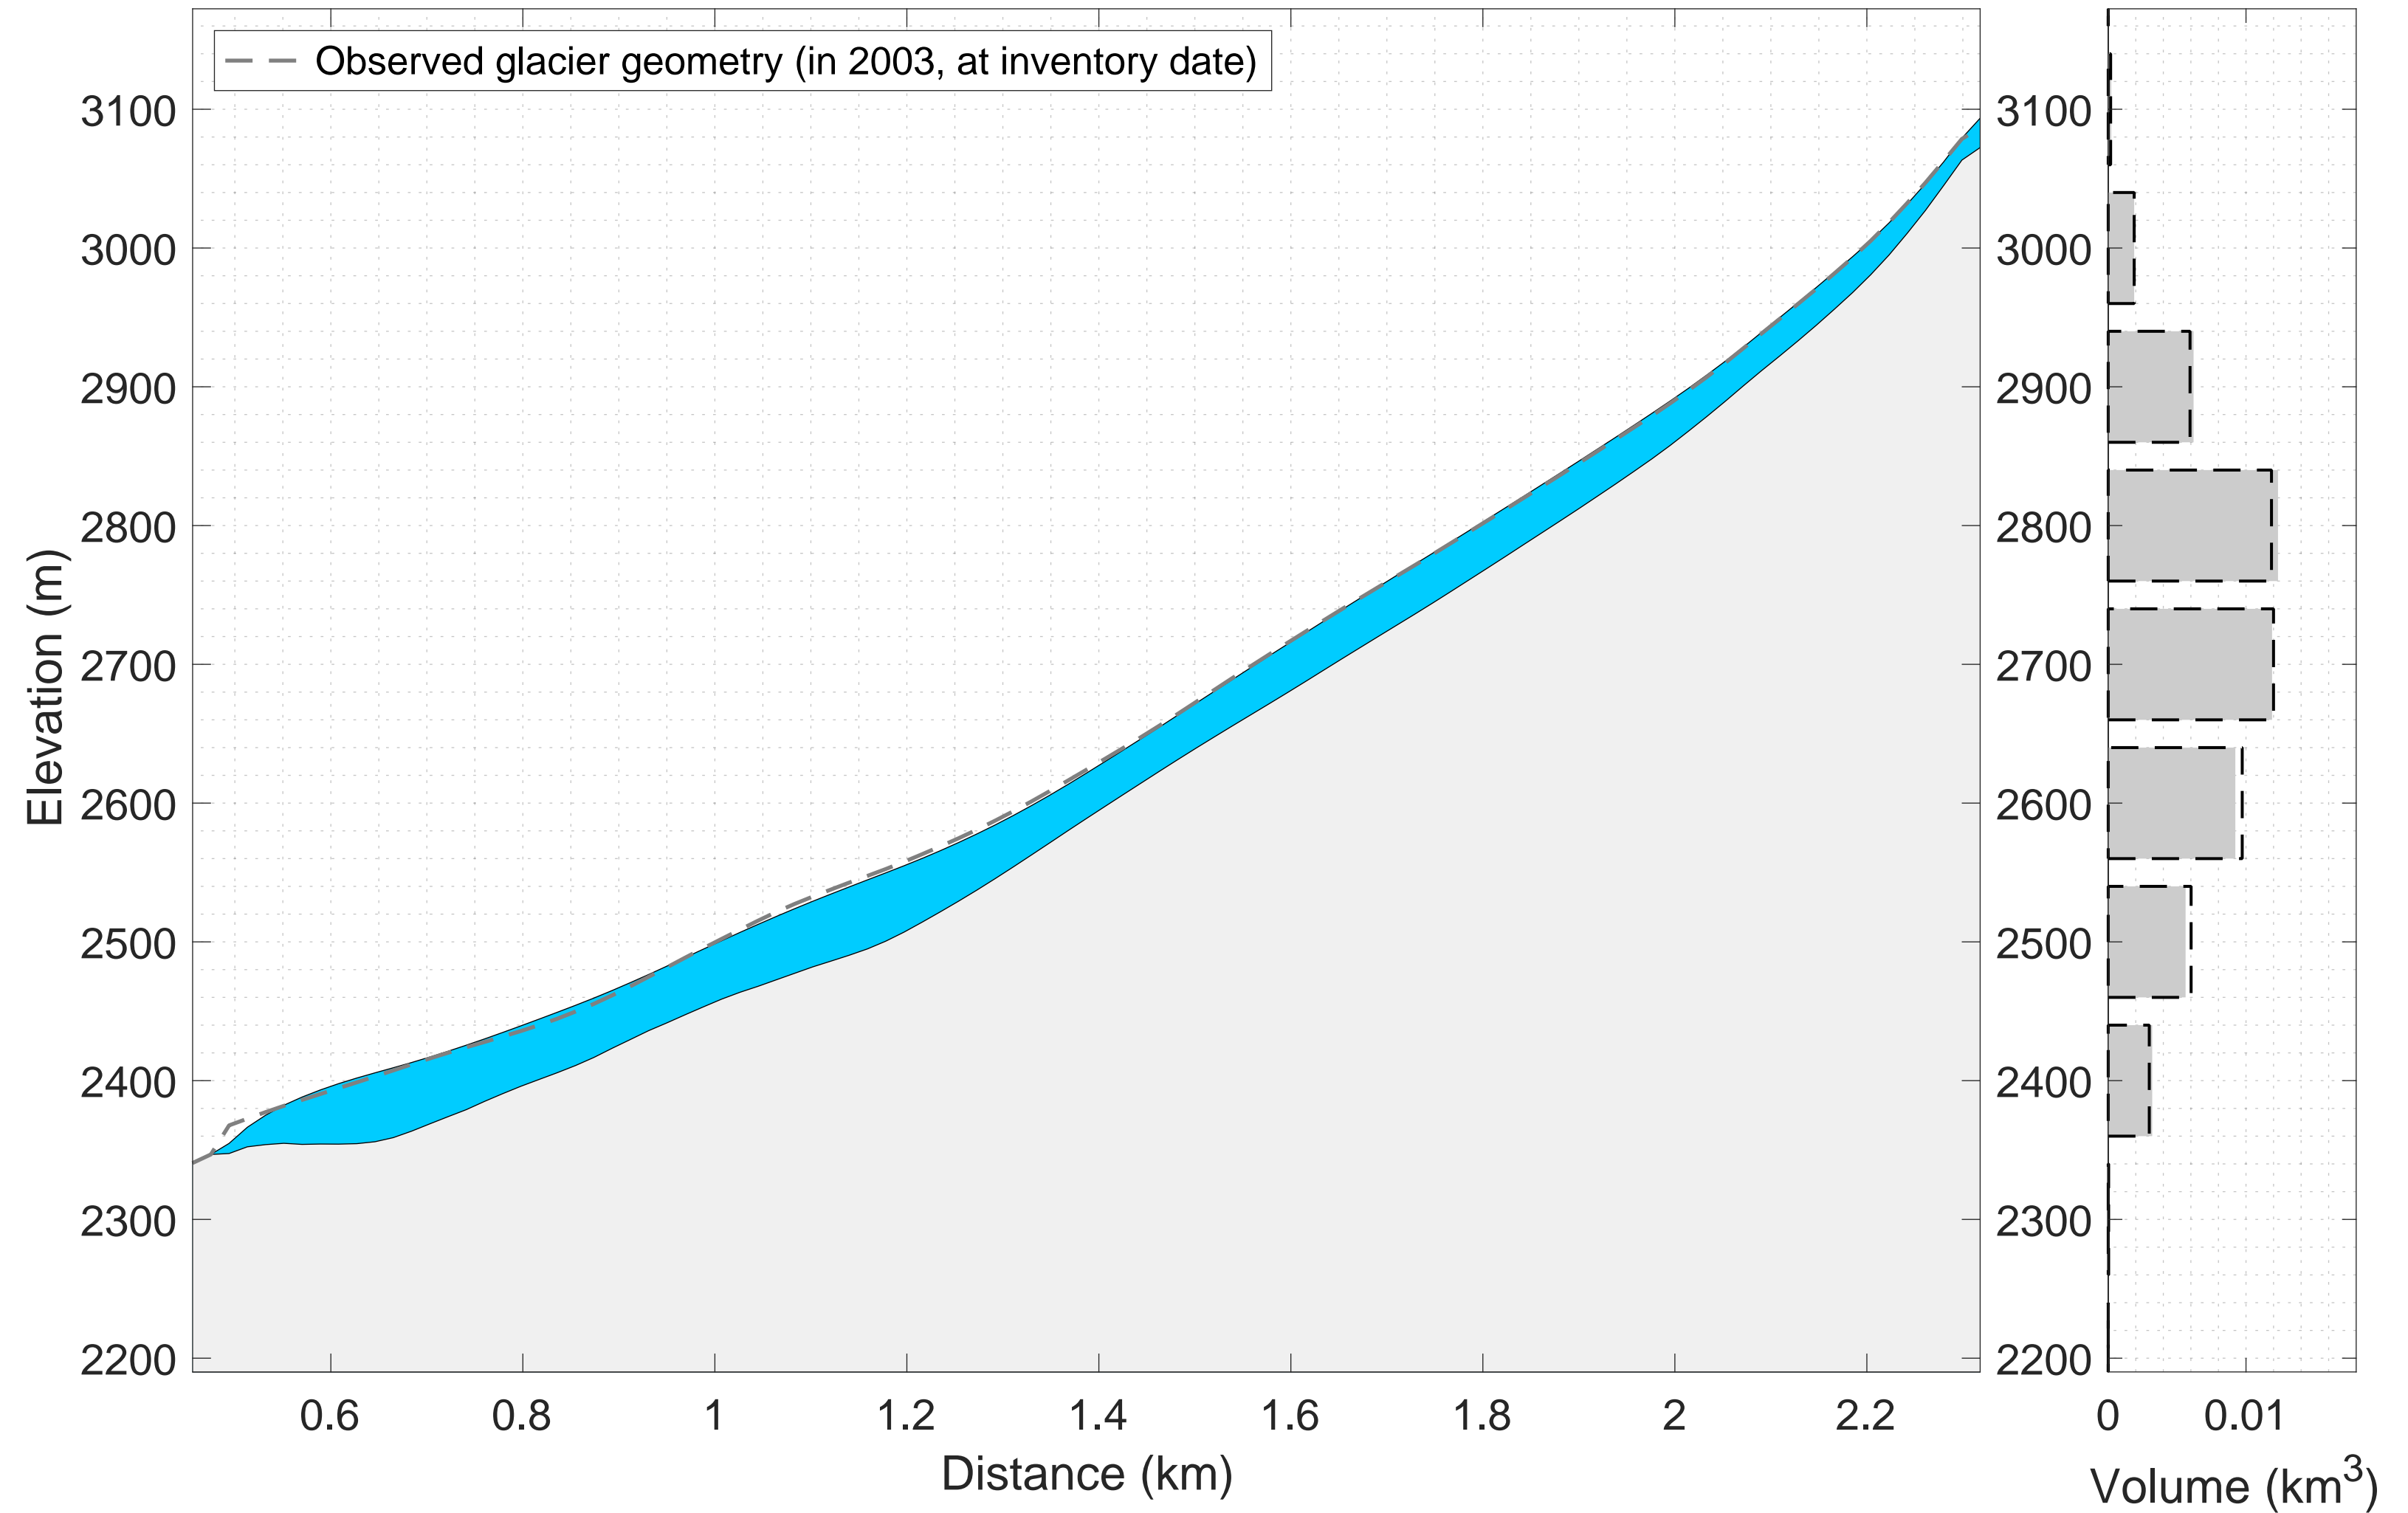

Supplement: Supplementary file 408 [file tc-13-1125-2019-supplement.zip]

**Modelled geometry (Glacier ID = 03295;  $A = 2.0867\text{e-}16 \text{ Pa}^{-3} \text{ a}^{-1}$ ;  $dx = 11 \text{ m}$ )**

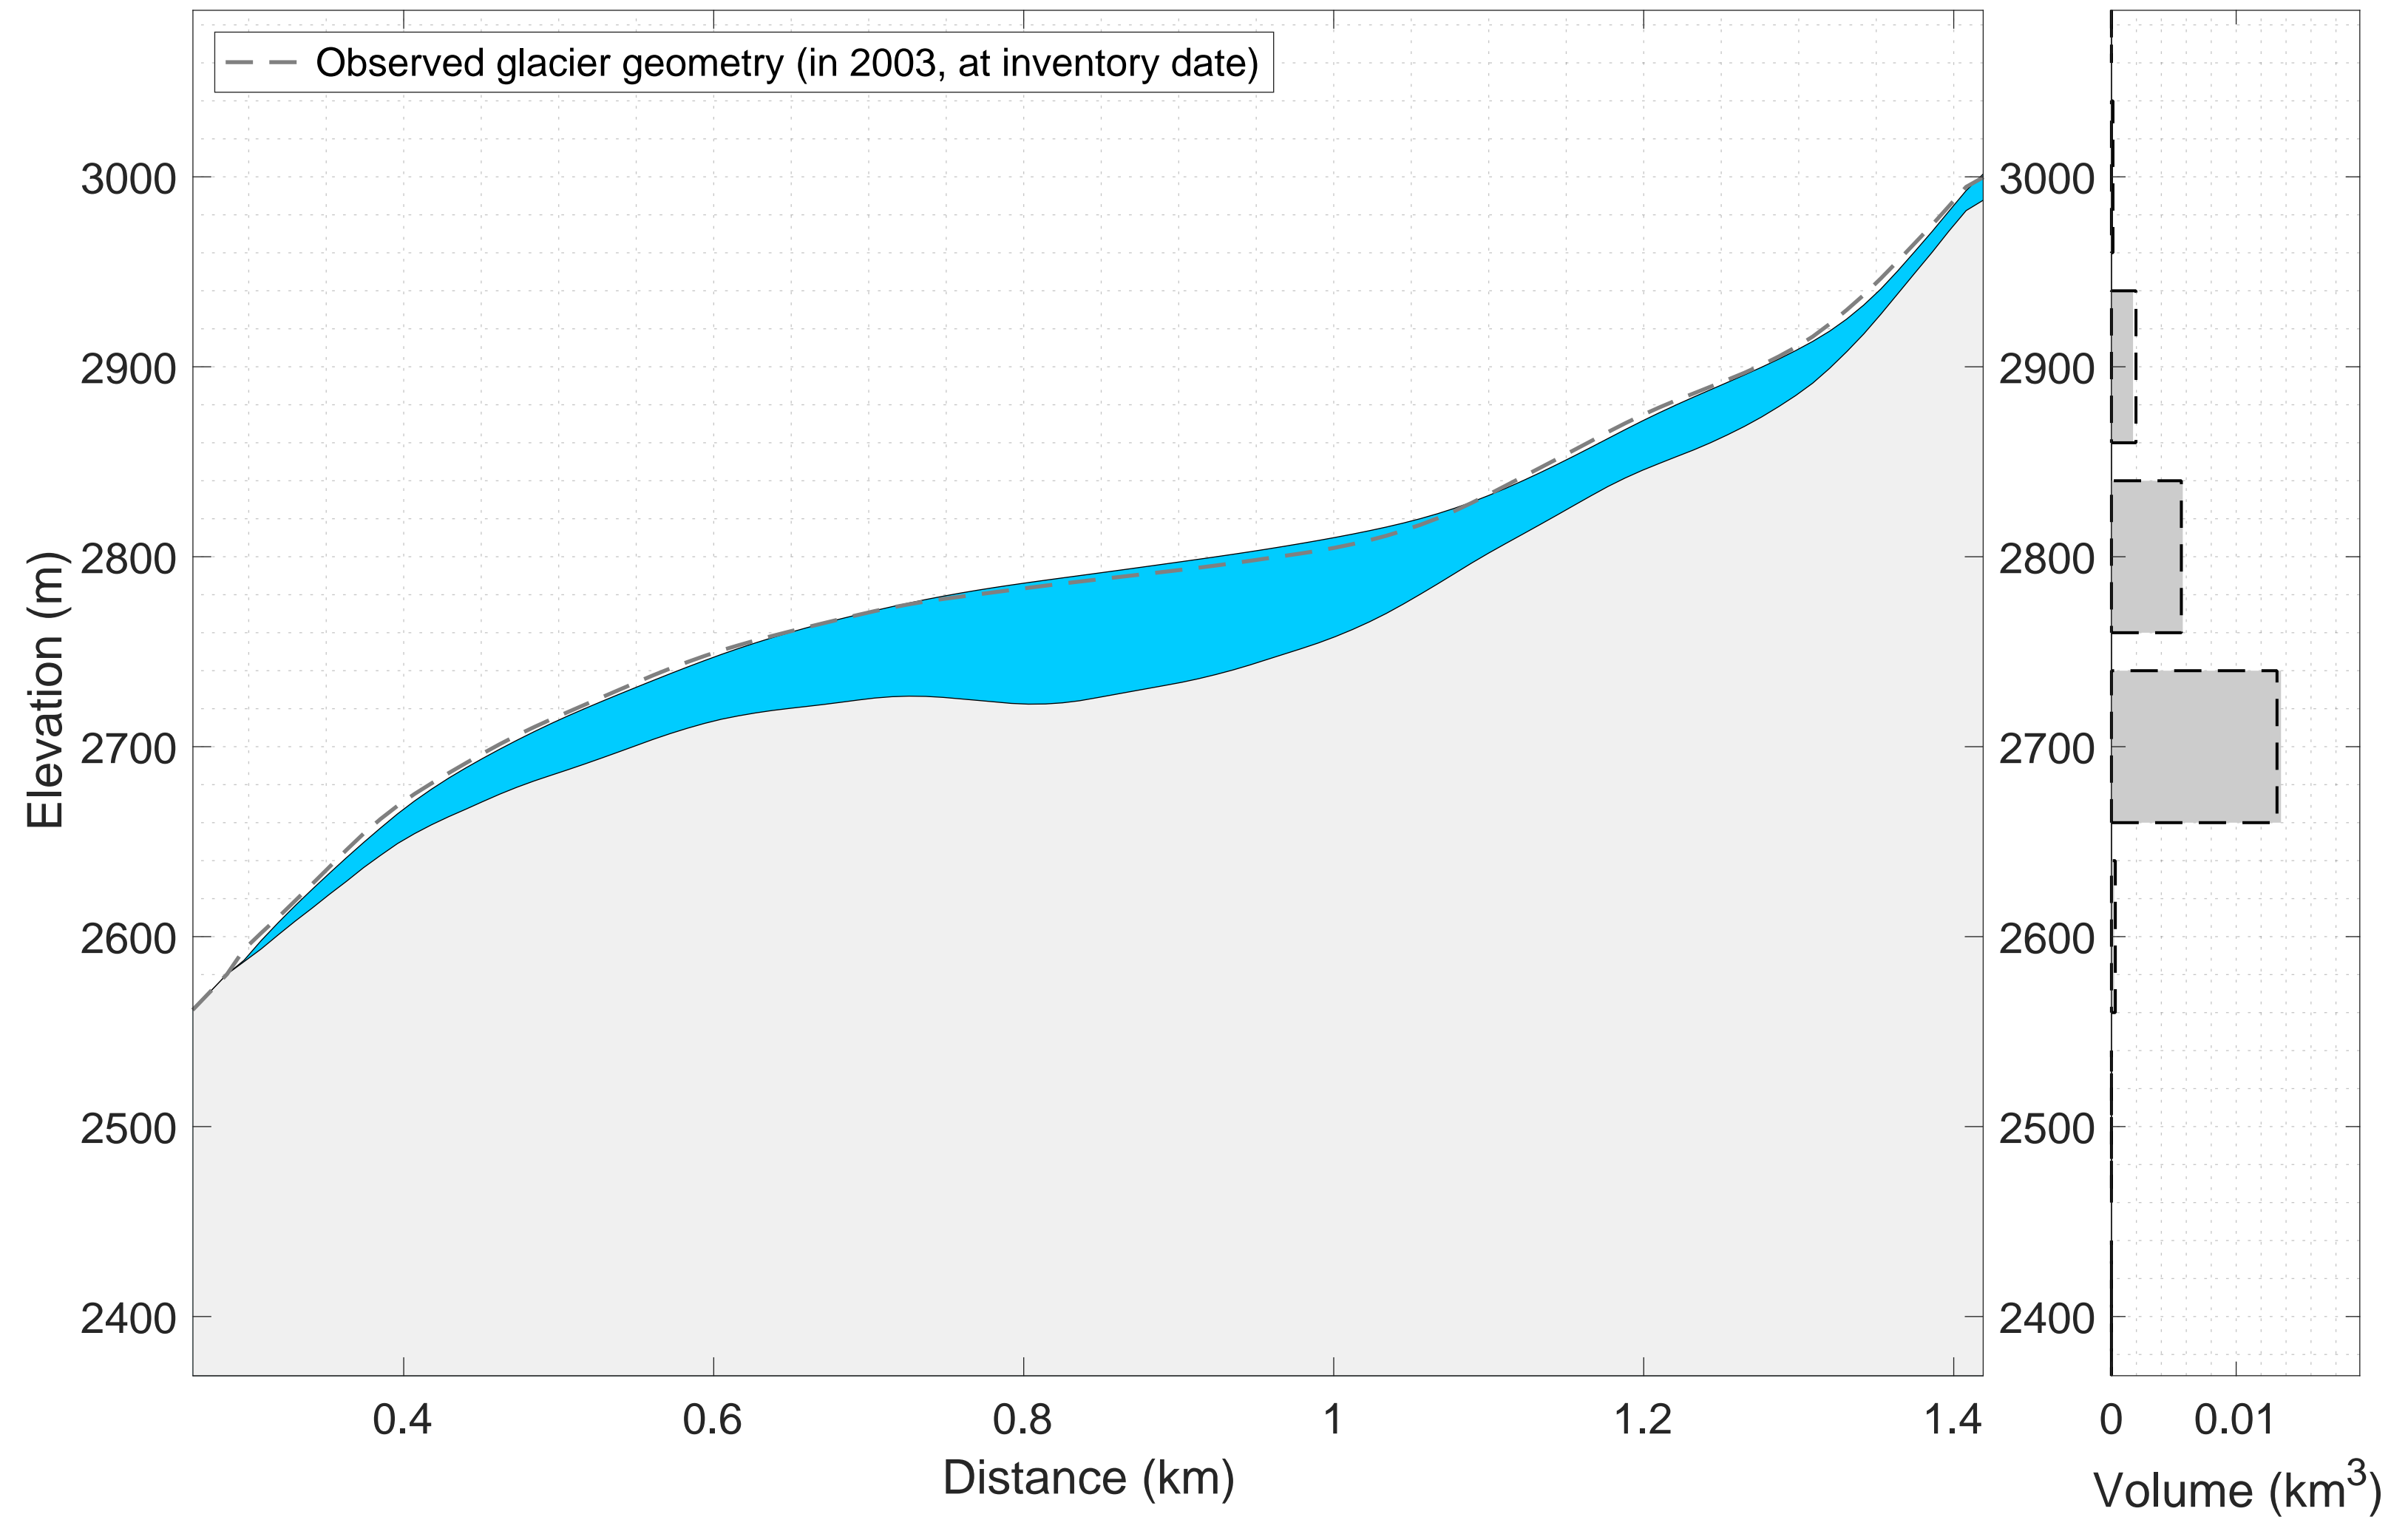

Supplement: Supplementary file 409 [file tc-13-1125-2019-supplement.zip]

**Modelled geometry (Glacier ID = 03272;  $A = 1.233\text{e-}16 \text{ Pa}^{-3} \text{ a}^{-1}$ ;  $dx = 20 \text{ m}$ )**

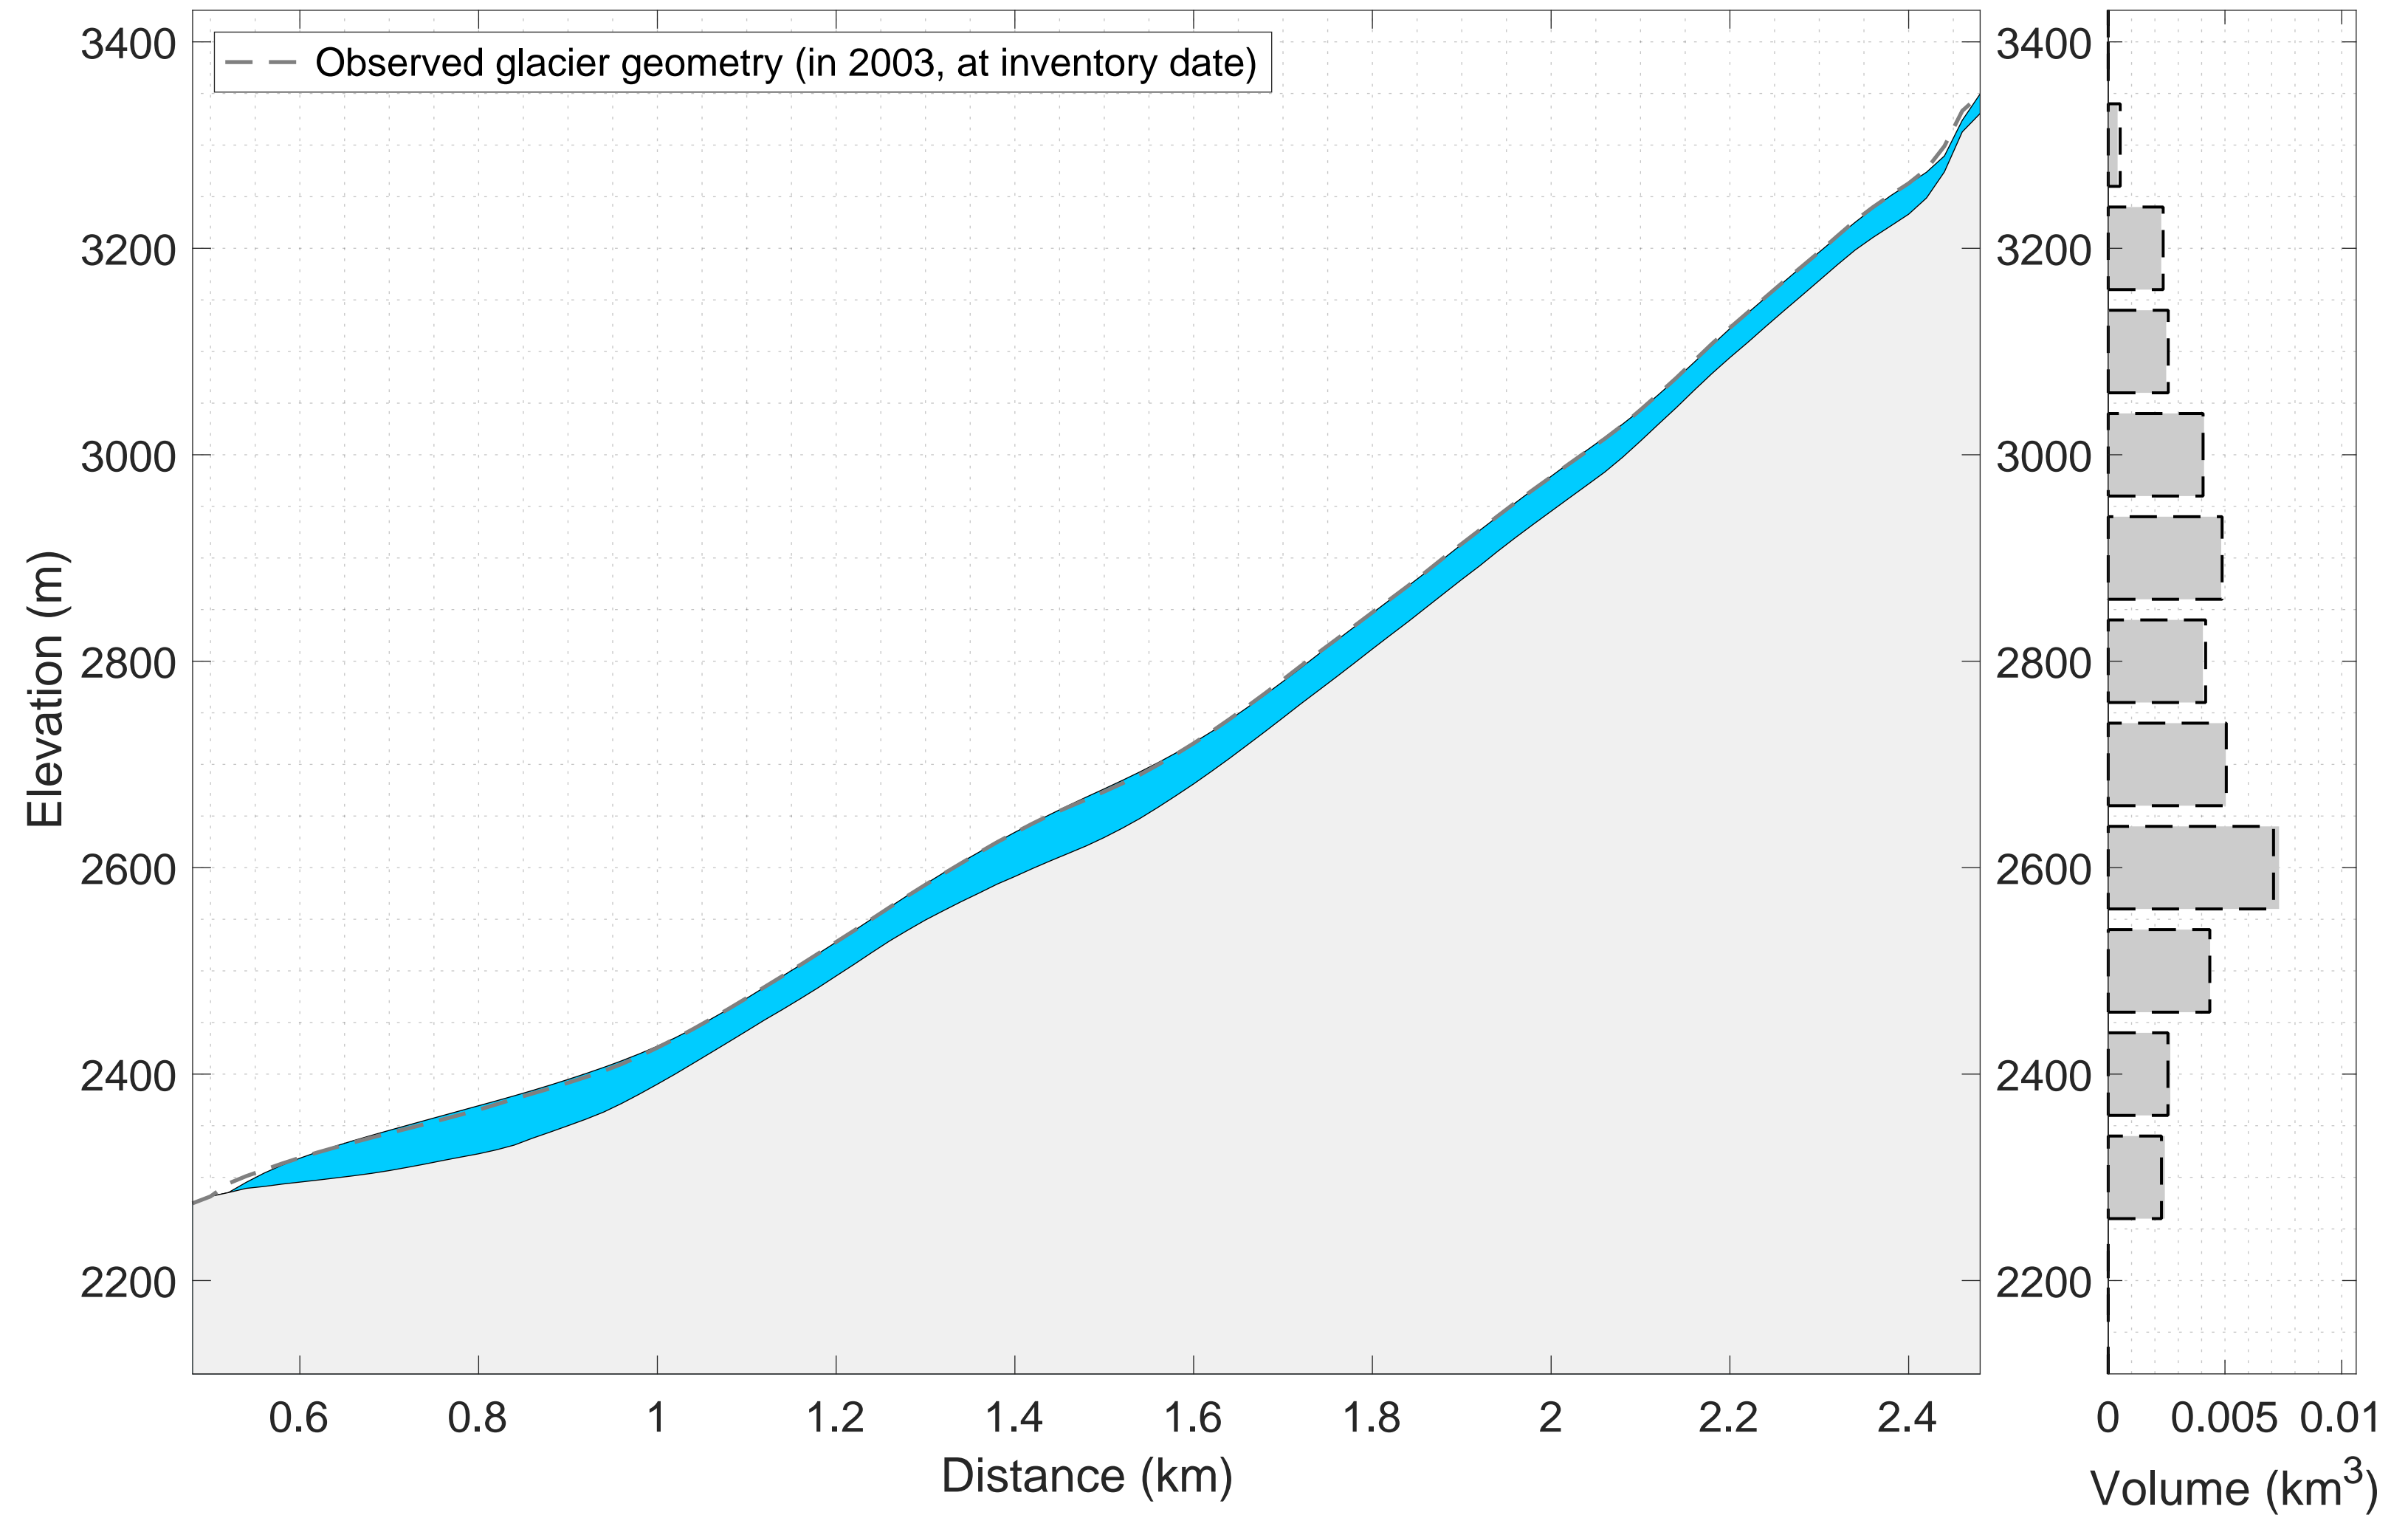

Supplement: Supplementary file 410 [file tc-13-1125-2019-supplement.zip]

**Modelled geometry (Glacier ID = 02970;  $A = 1.0649\text{e-}16 \text{ Pa}^{-3} \text{ a}^{-1}$ ;  $dx = 14 \text{ m}$ )**

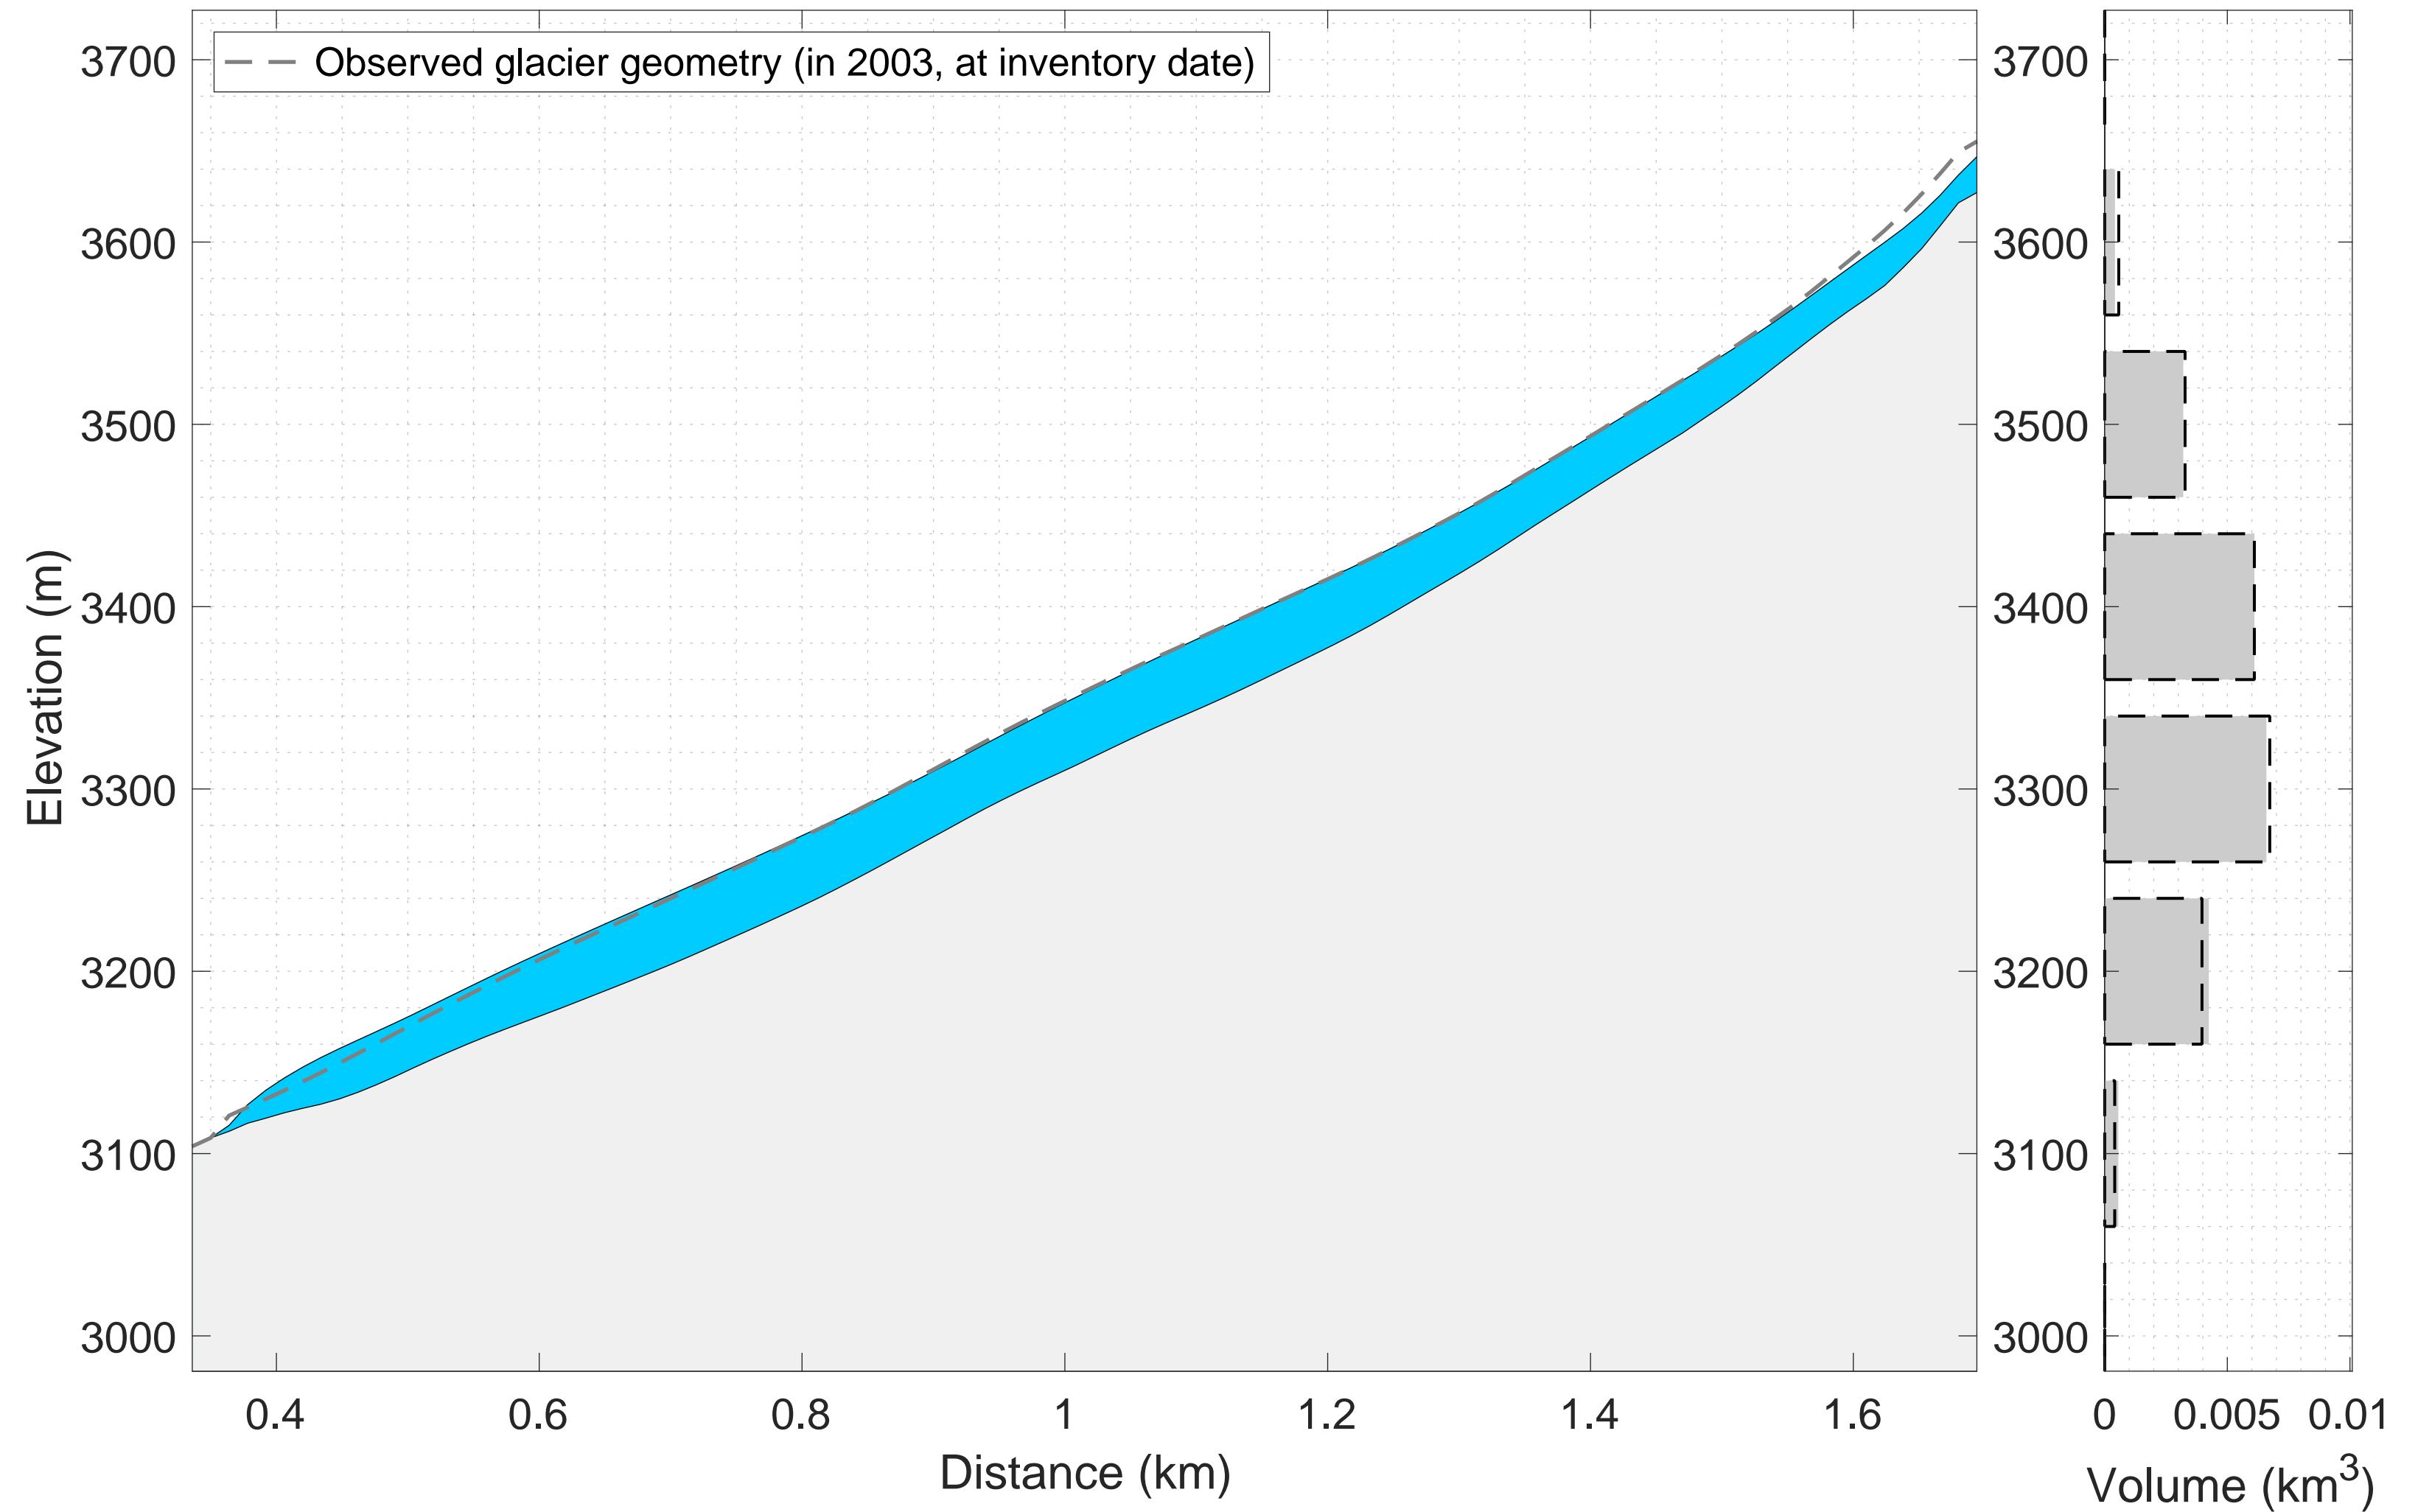

Supplement: Supplementary file 411 [file tc-13-1125-2019-supplement.zip]

**Modelled geometry (Glacier ID = 01144;  $A = 9.8732\text{e-}16 \text{ Pa}^{-3} \text{ a}^{-1}$ ;  $dx = 51 \text{ m}$ )**

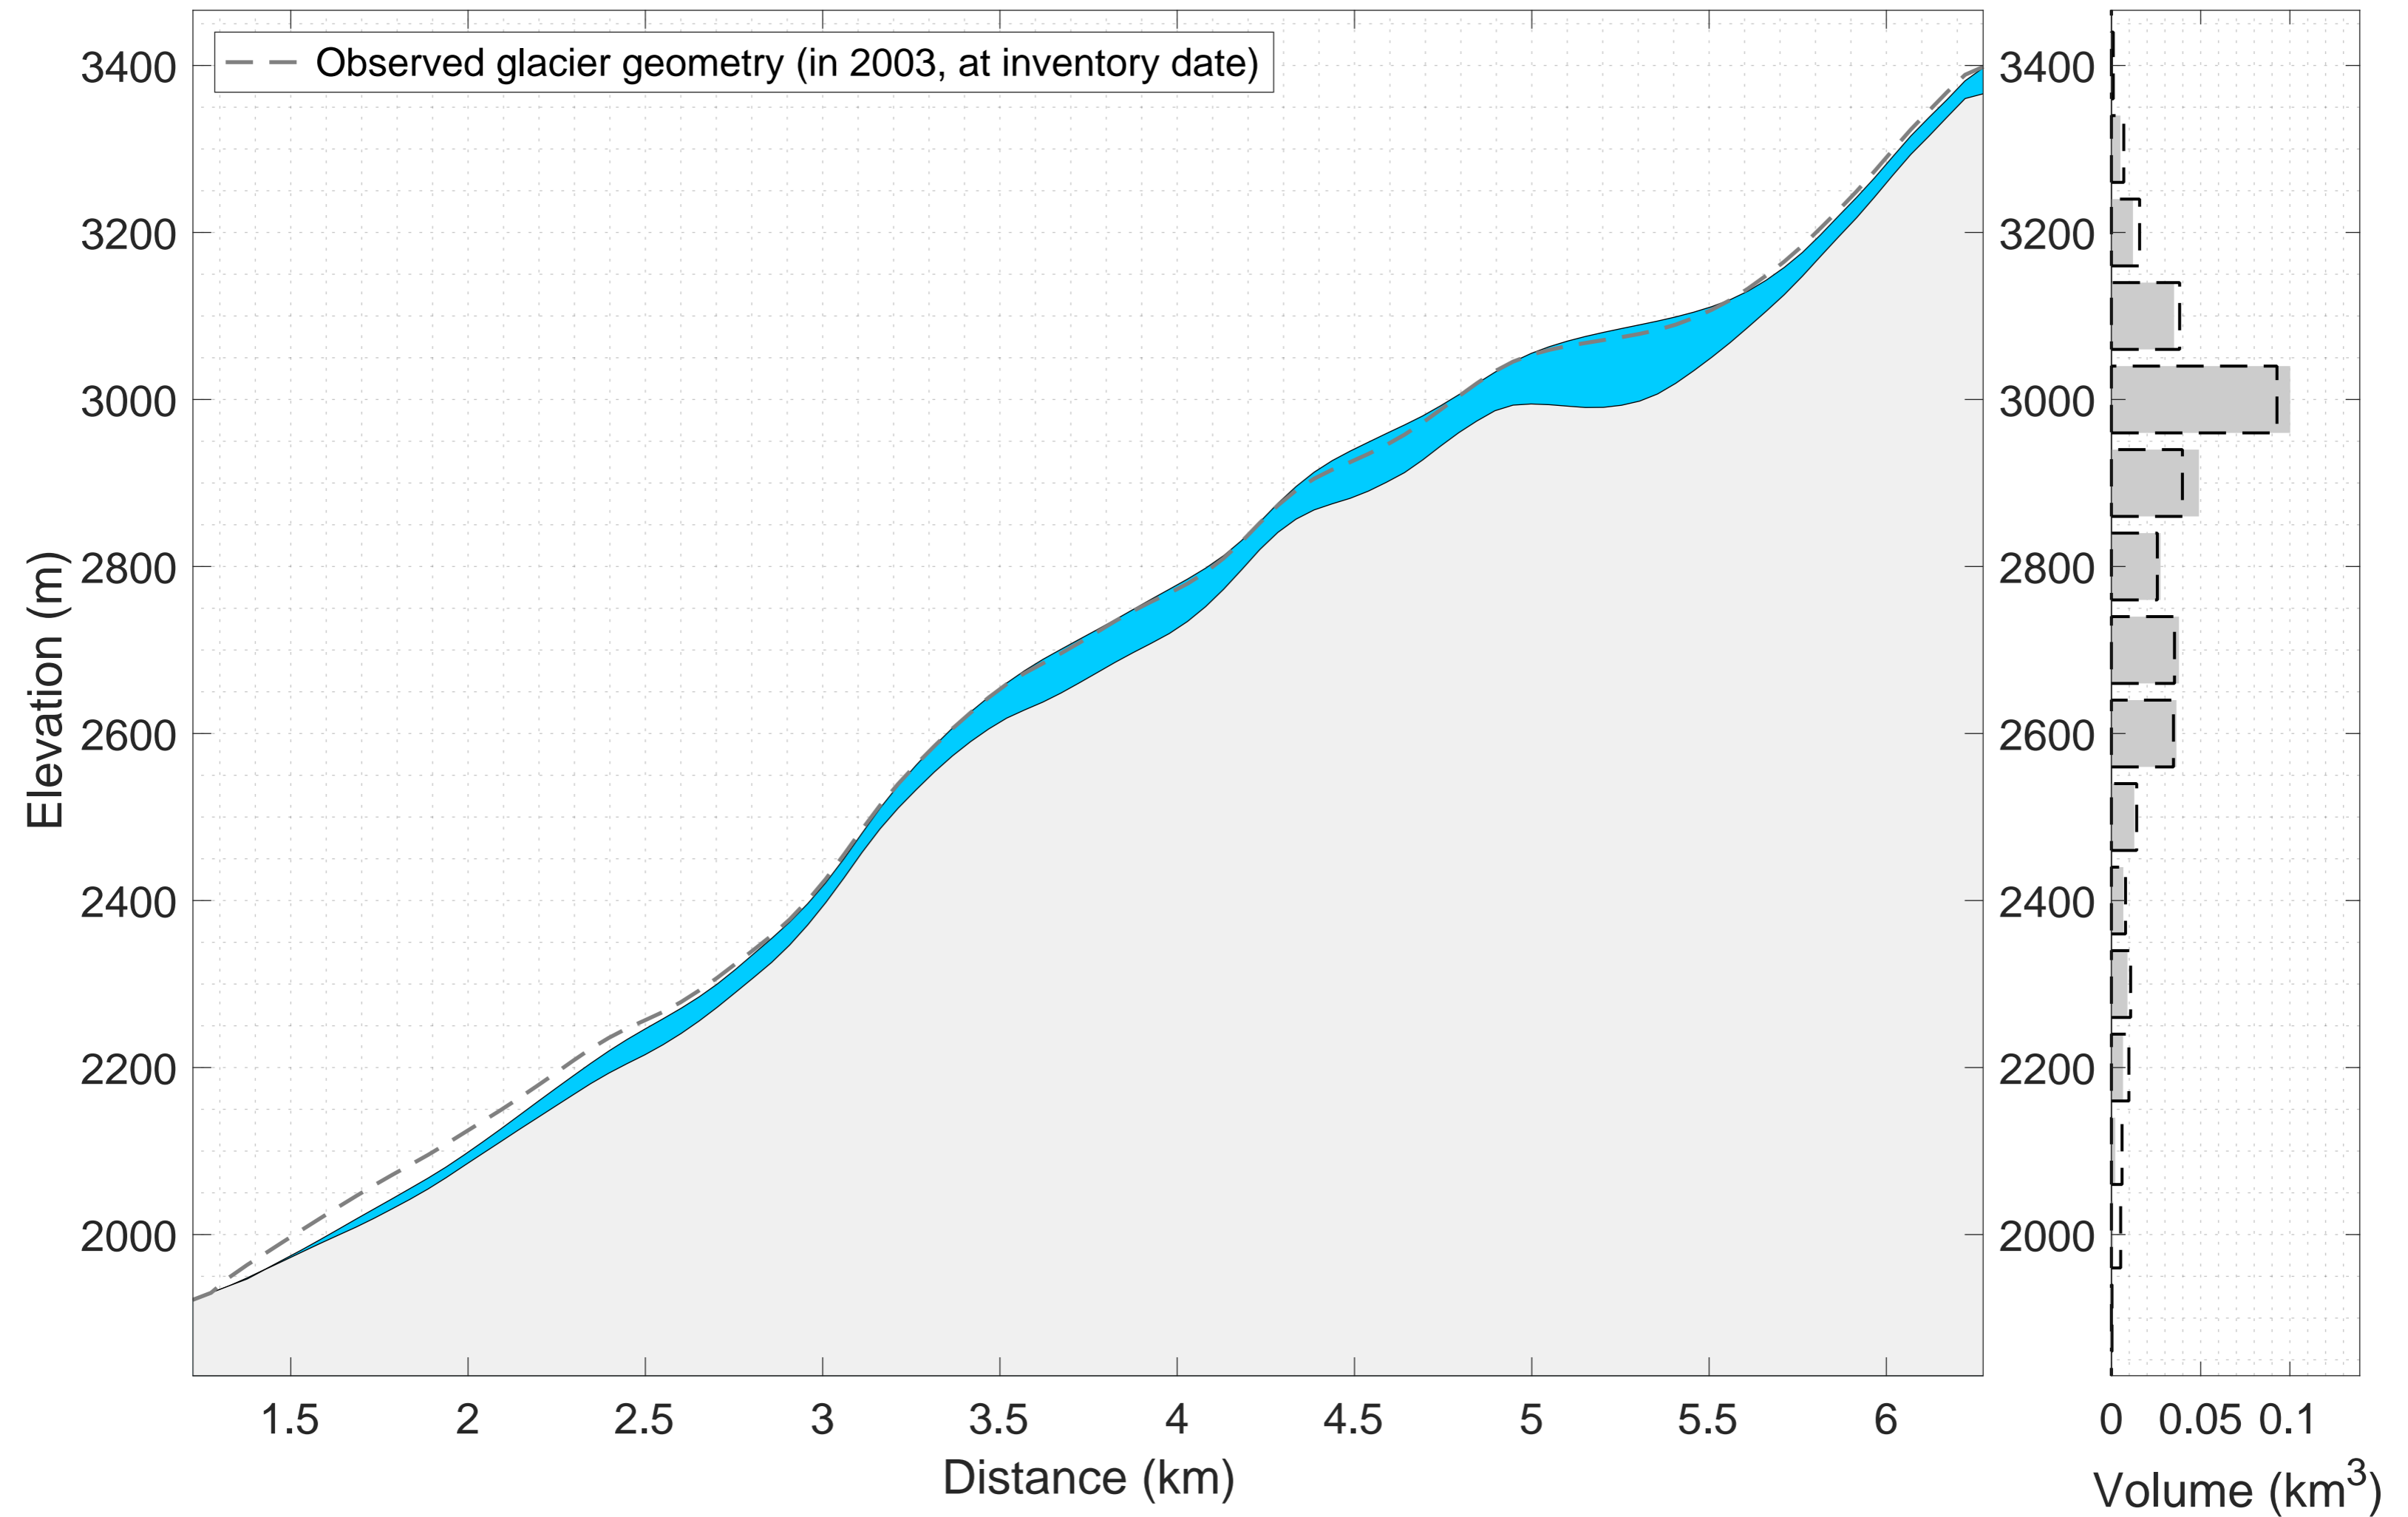

Supplement: Supplementary file 412 [file tc-13-1125-2019-supplement.zip]

**Modelled geometry (Glacier ID = 01621;  $A = 1.4962\text{e-}16 \text{ Pa}^{-3} \text{ a}^{-1}$ ;  $dx = 30 \text{ m}$ )**

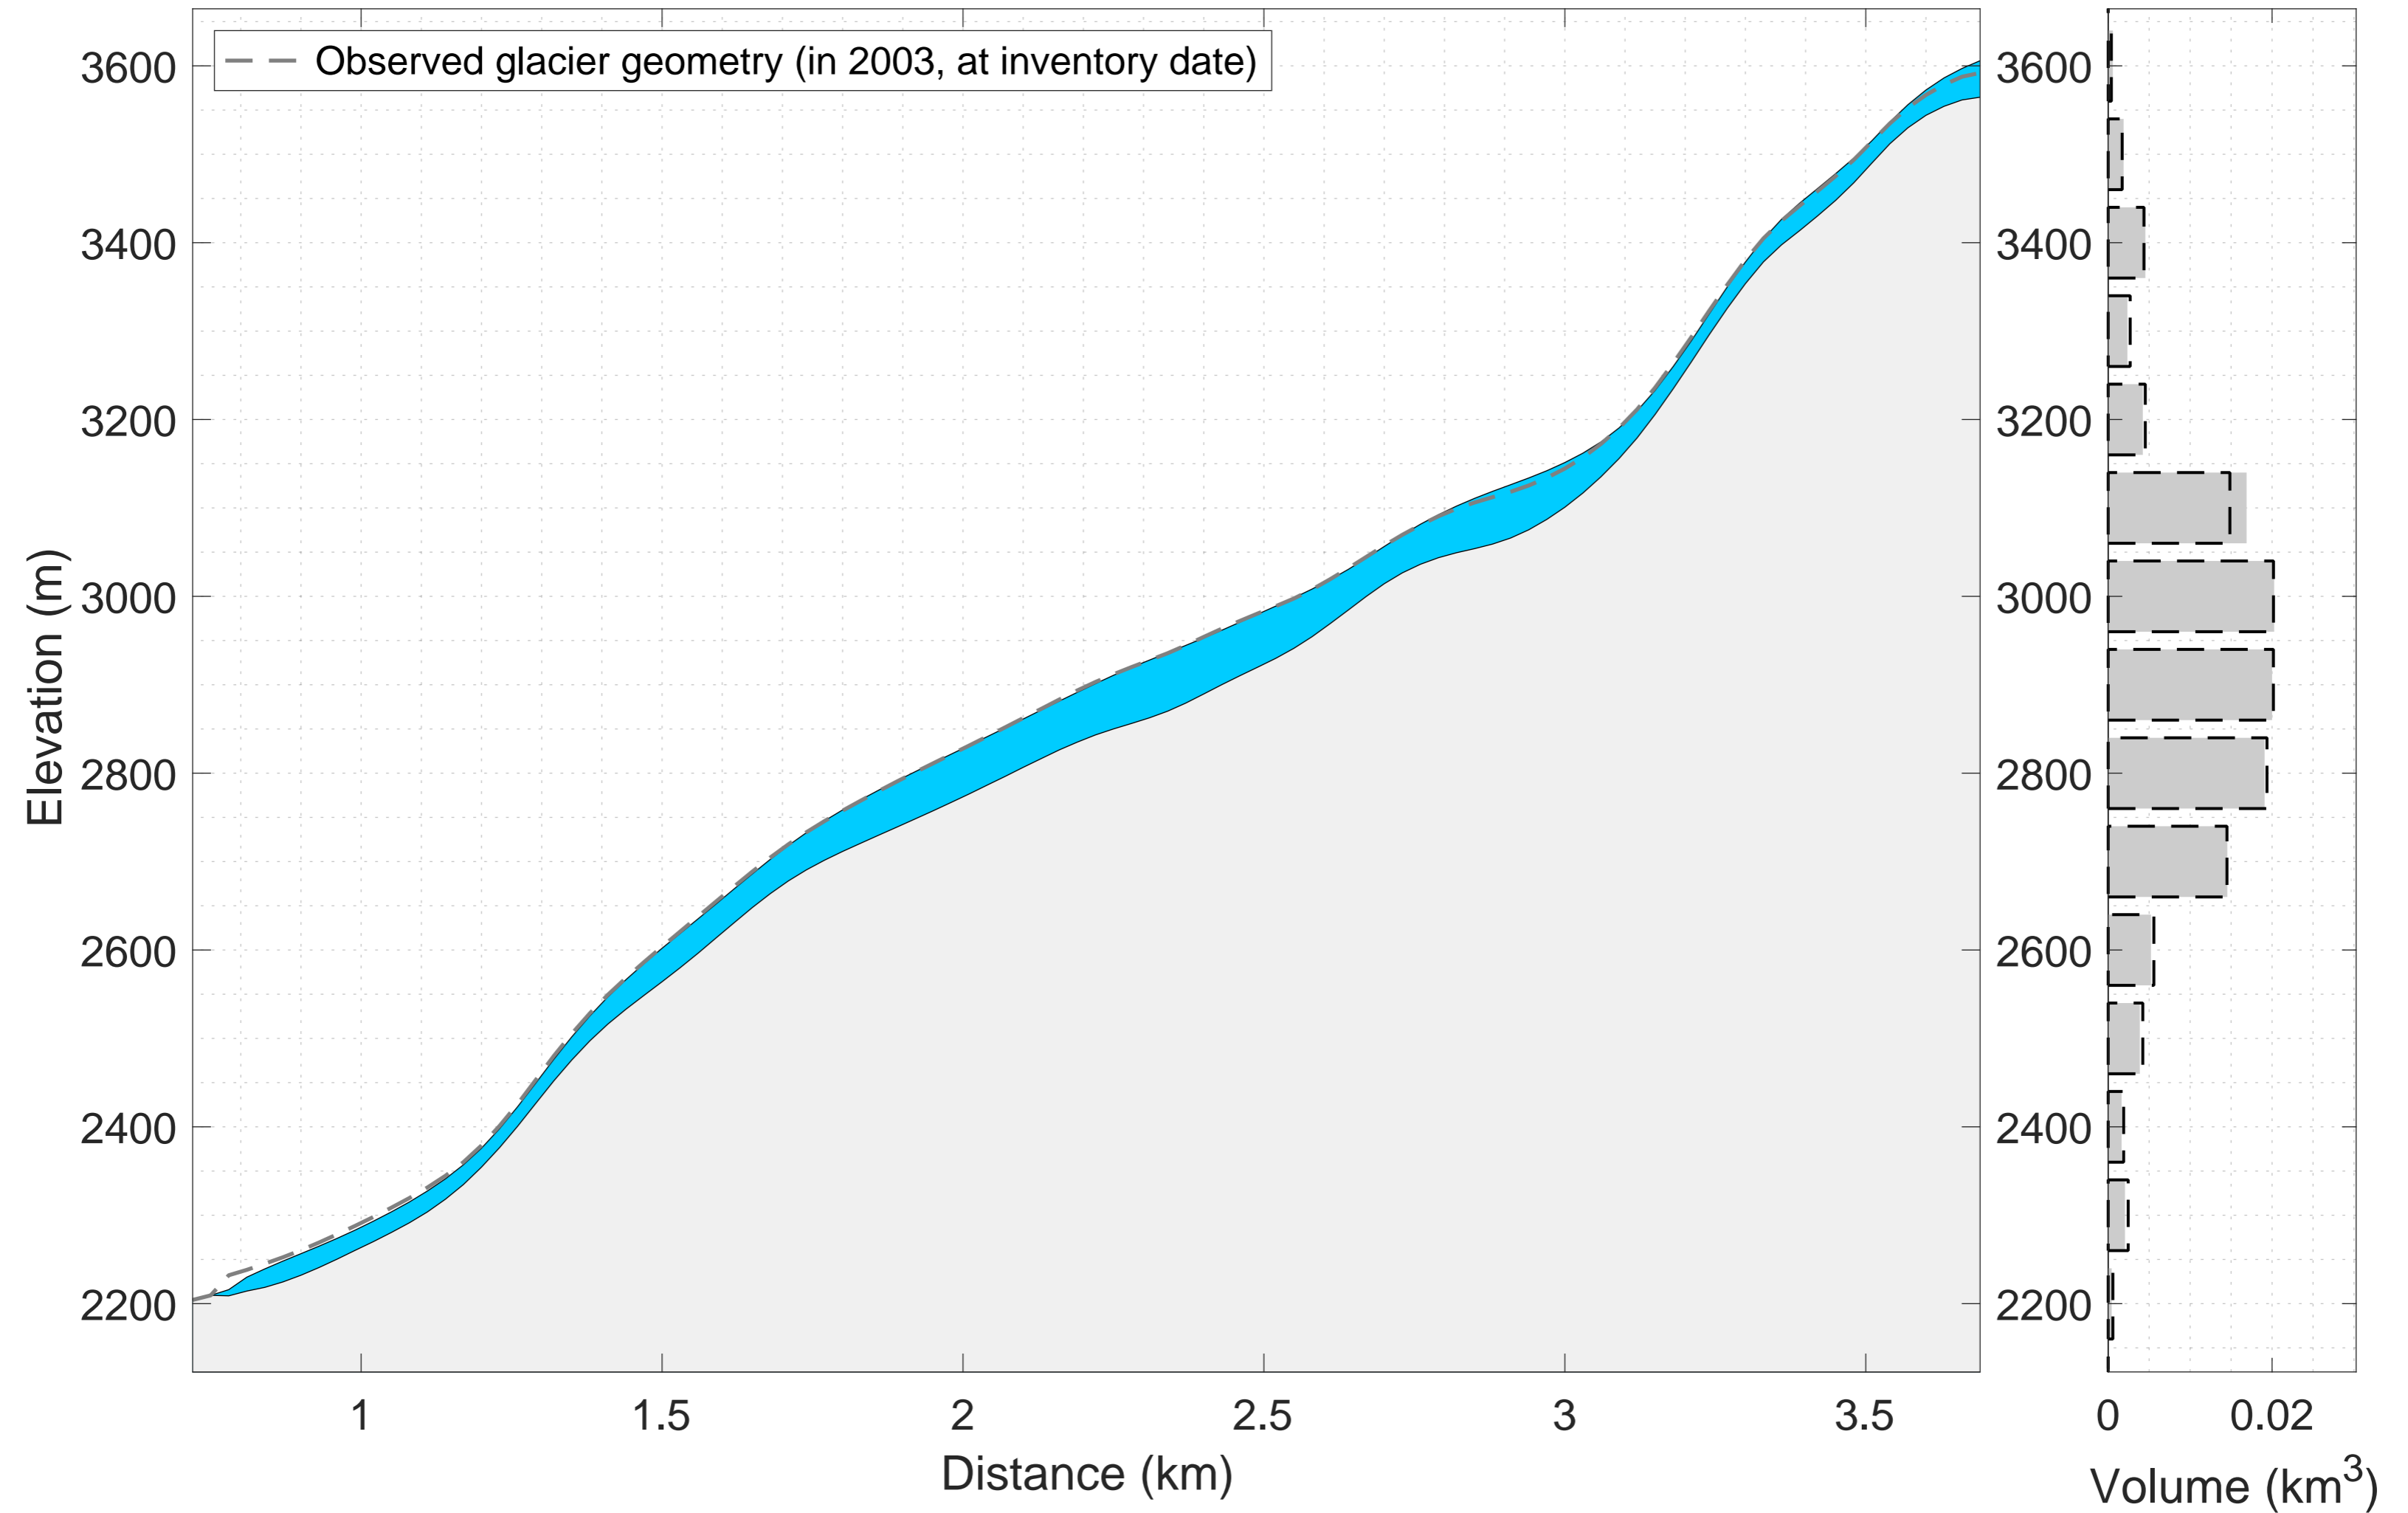

Supplement: Supplementary file 413 [file tc-13-1125-2019-supplement.zip]

Modelled geometry (Glacier ID = 02872;  $A = 1.9429\text{e-}16 \text{ Pa}^{-3} \text{ a}^{-1}$ ;  $dx = 20 \text{ m}$ )

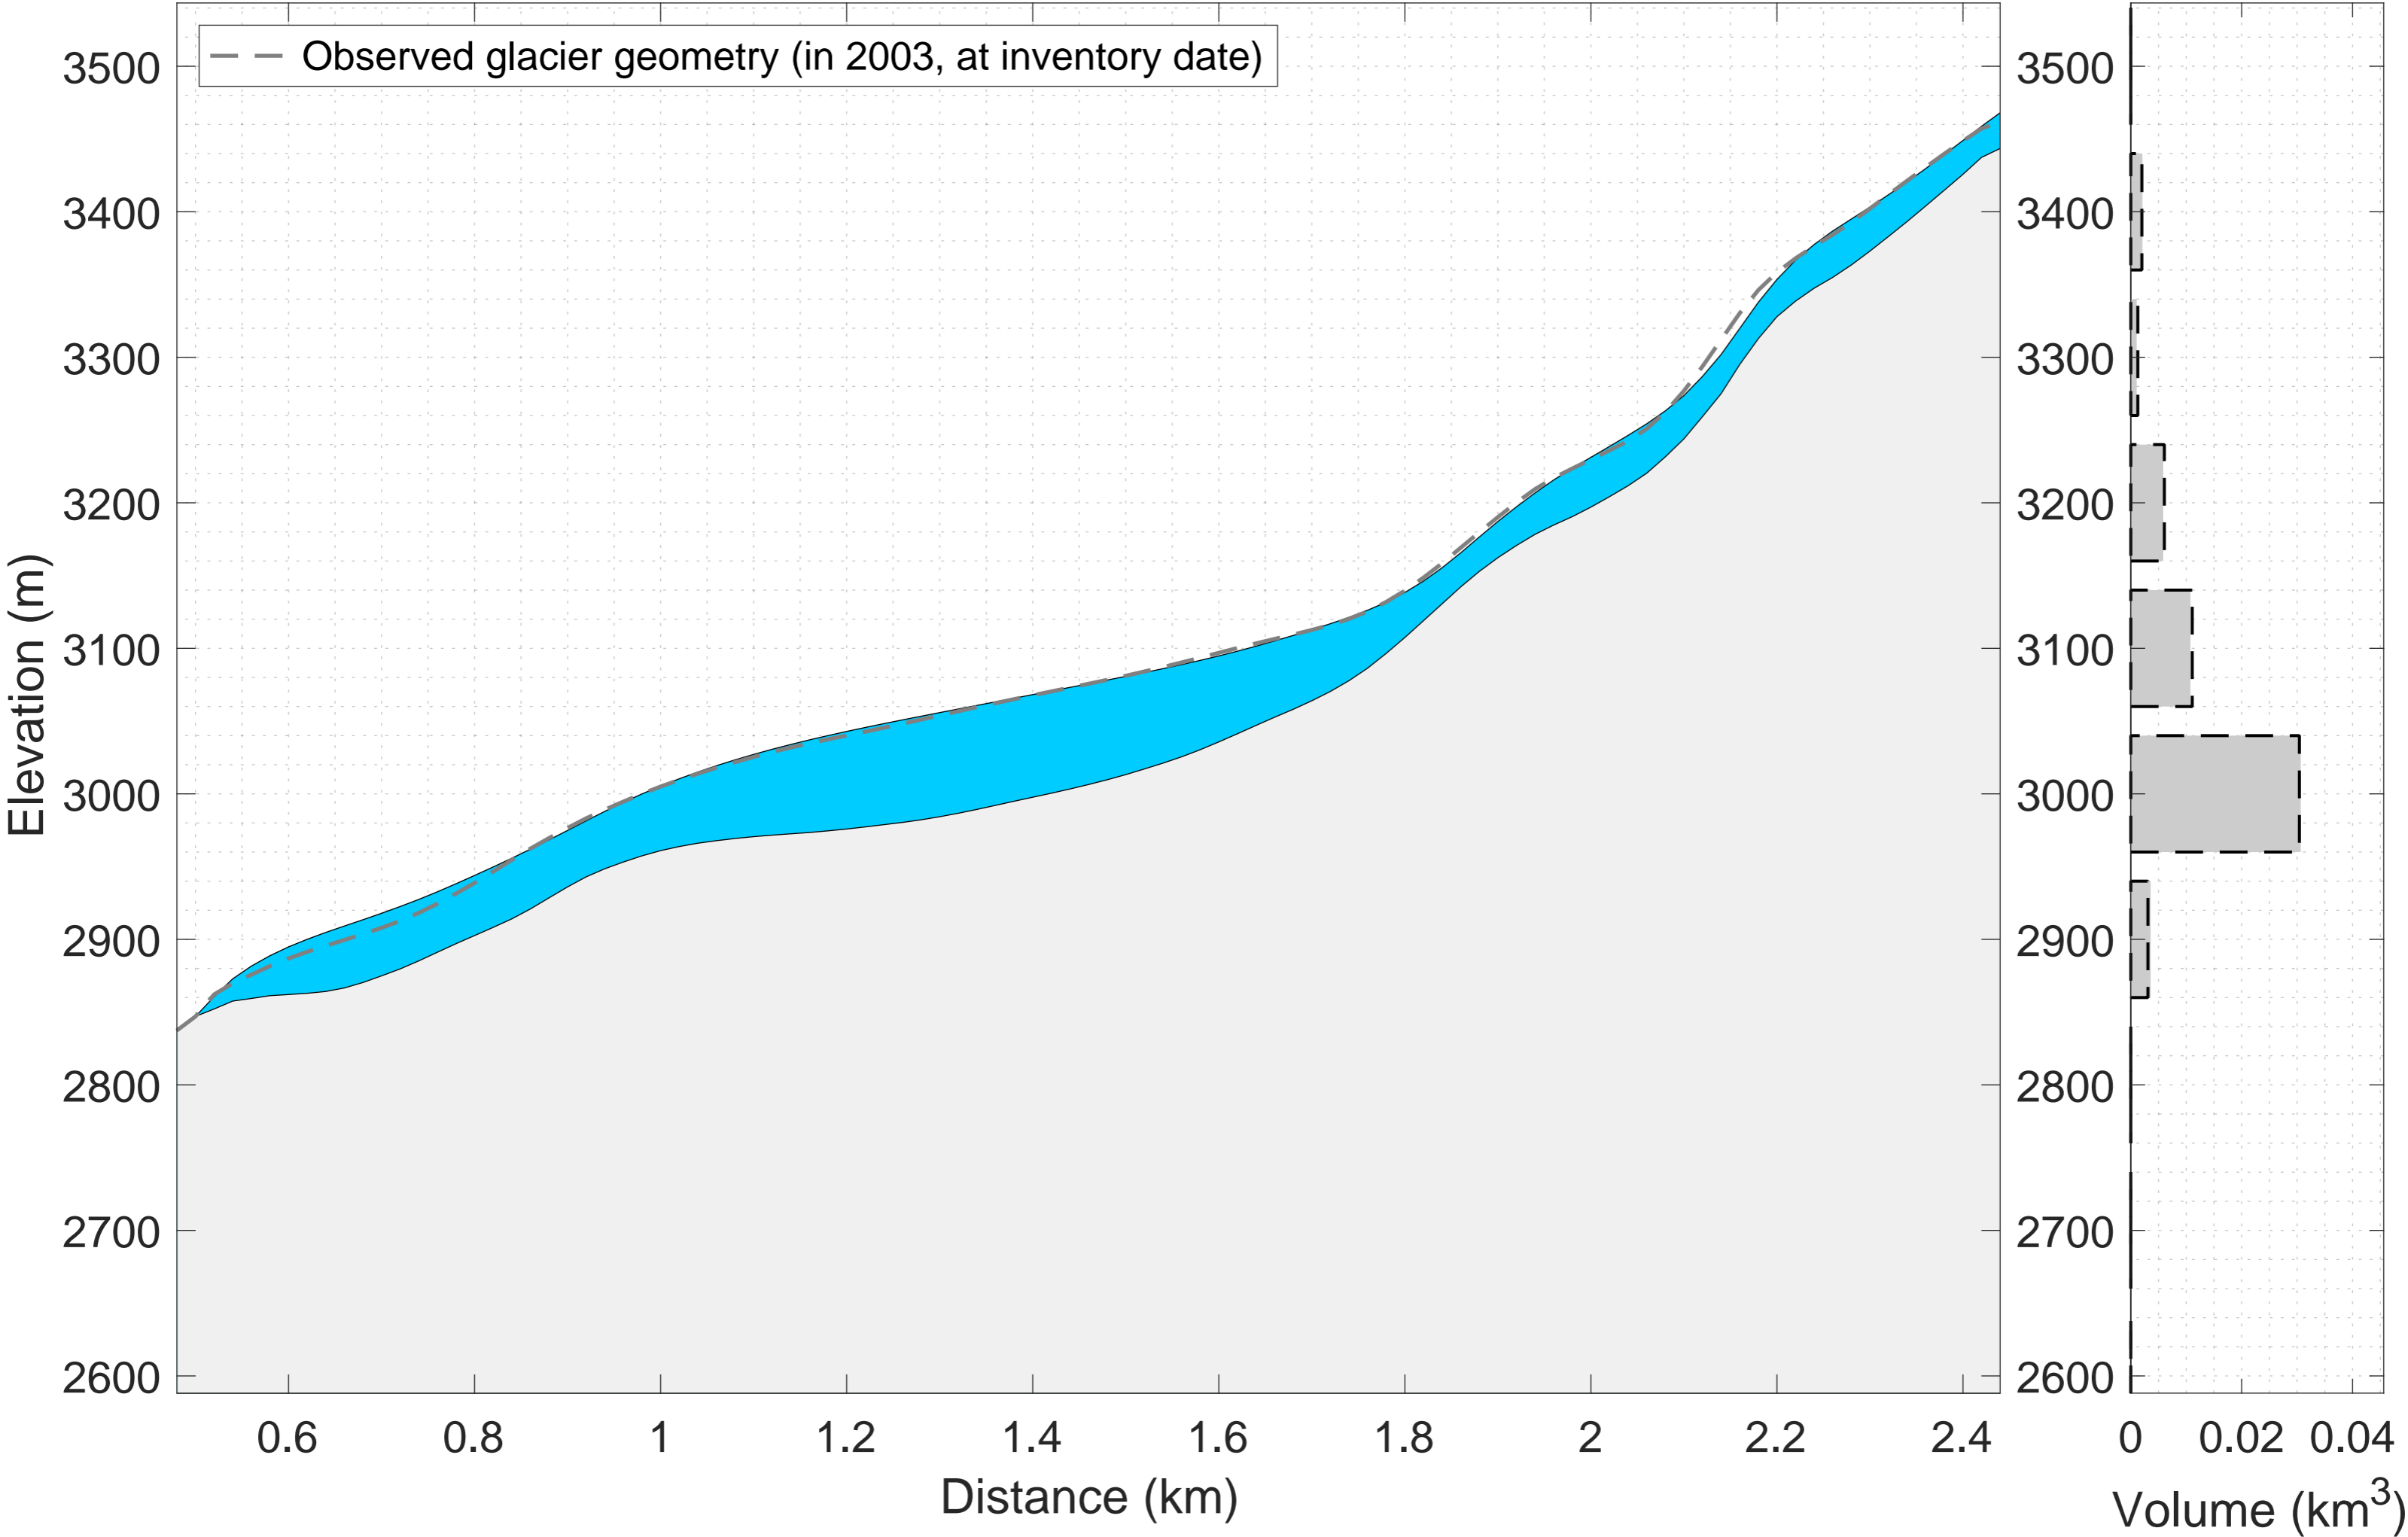

Supplement: Supplementary file 414 [file tc-13-1125-2019-supplement.zip]

**Modelled geometry (Glacier ID = 03077;  $A = 1.784\text{e-}16 \text{ Pa}^{-3} \text{ a}^{-1}$ ;  $dx = 13 \text{ m}$ )**

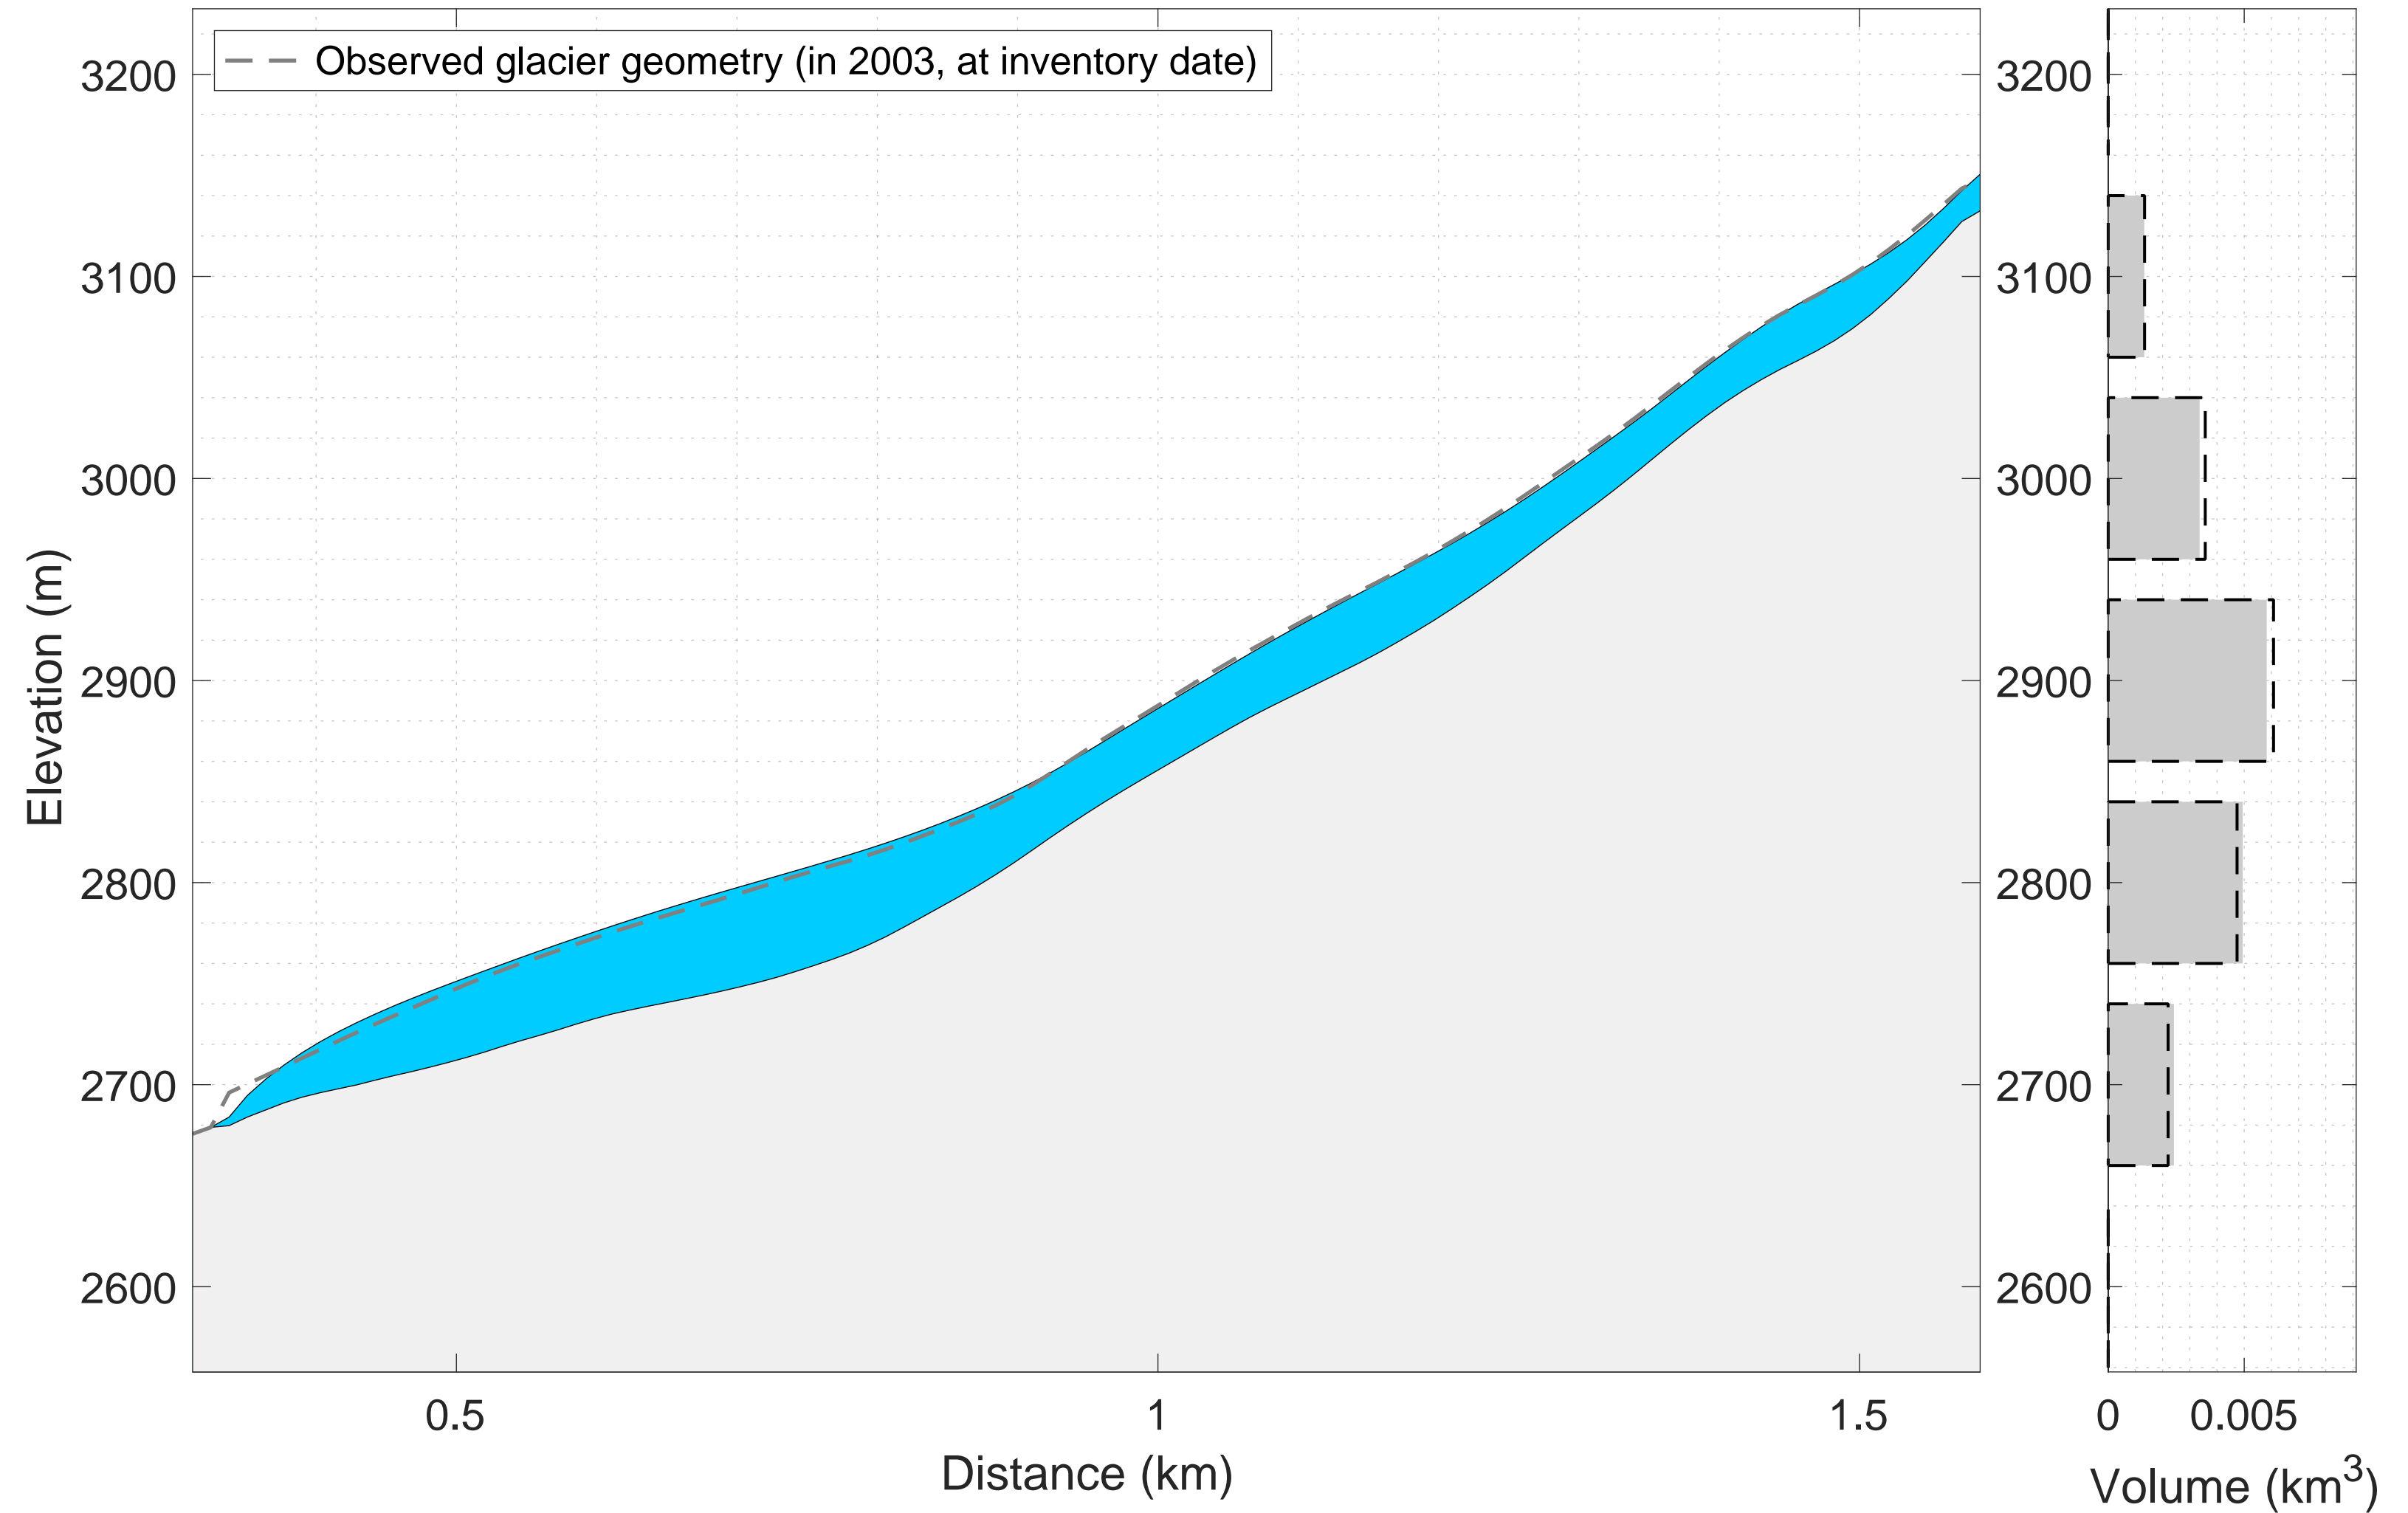

Supplement: Supplementary file 415 [file tc-13-1125-2019-supplement.zip]

**Modelled geometry (Glacier ID = 03166;  $A = 1.3363\text{e-}16 \text{ Pa}^{-3} \text{ a}^{-1}$ ;  $dx = 12 \text{ m}$ )**

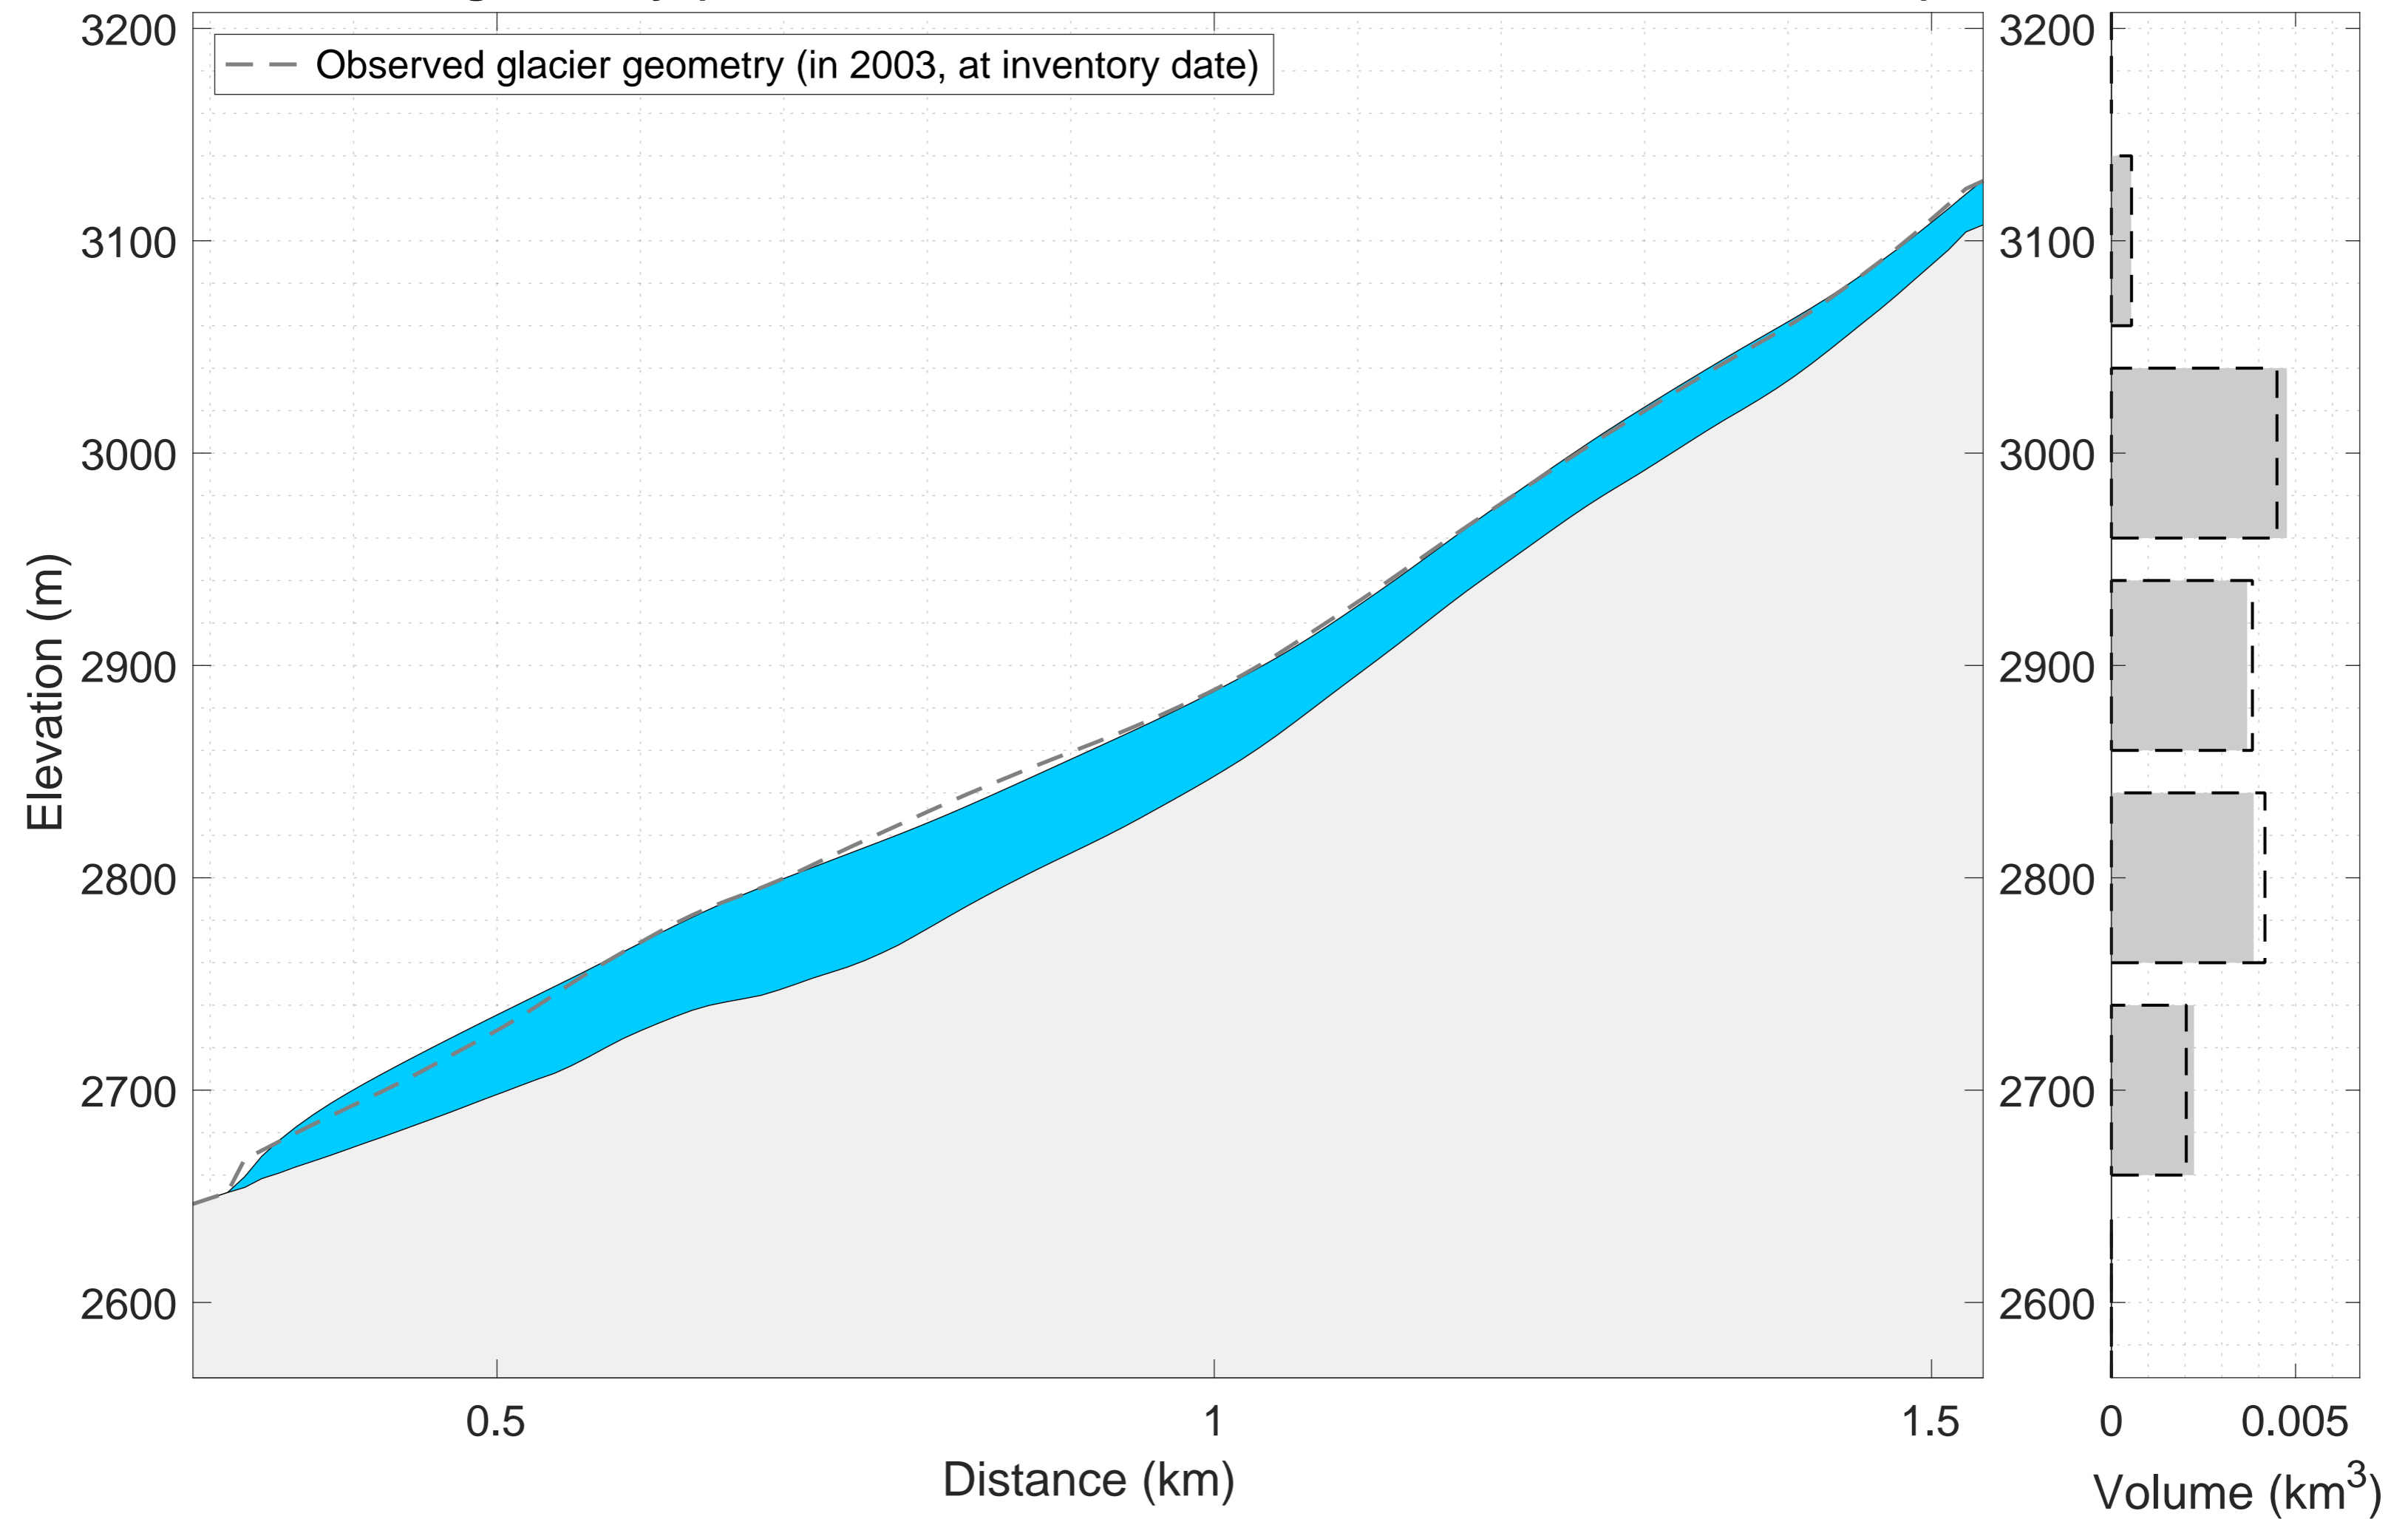

Supplement: Supplementary file 416 [file tc-13-1125-2019-supplement.zip]

**Modelled geometry (Glacier ID = 02366;  $A = 7.9845\text{e-}17 \text{ Pa}^{-3} \text{ a}^{-1}$ ;  $dx = 15 \text{ m}$ )**

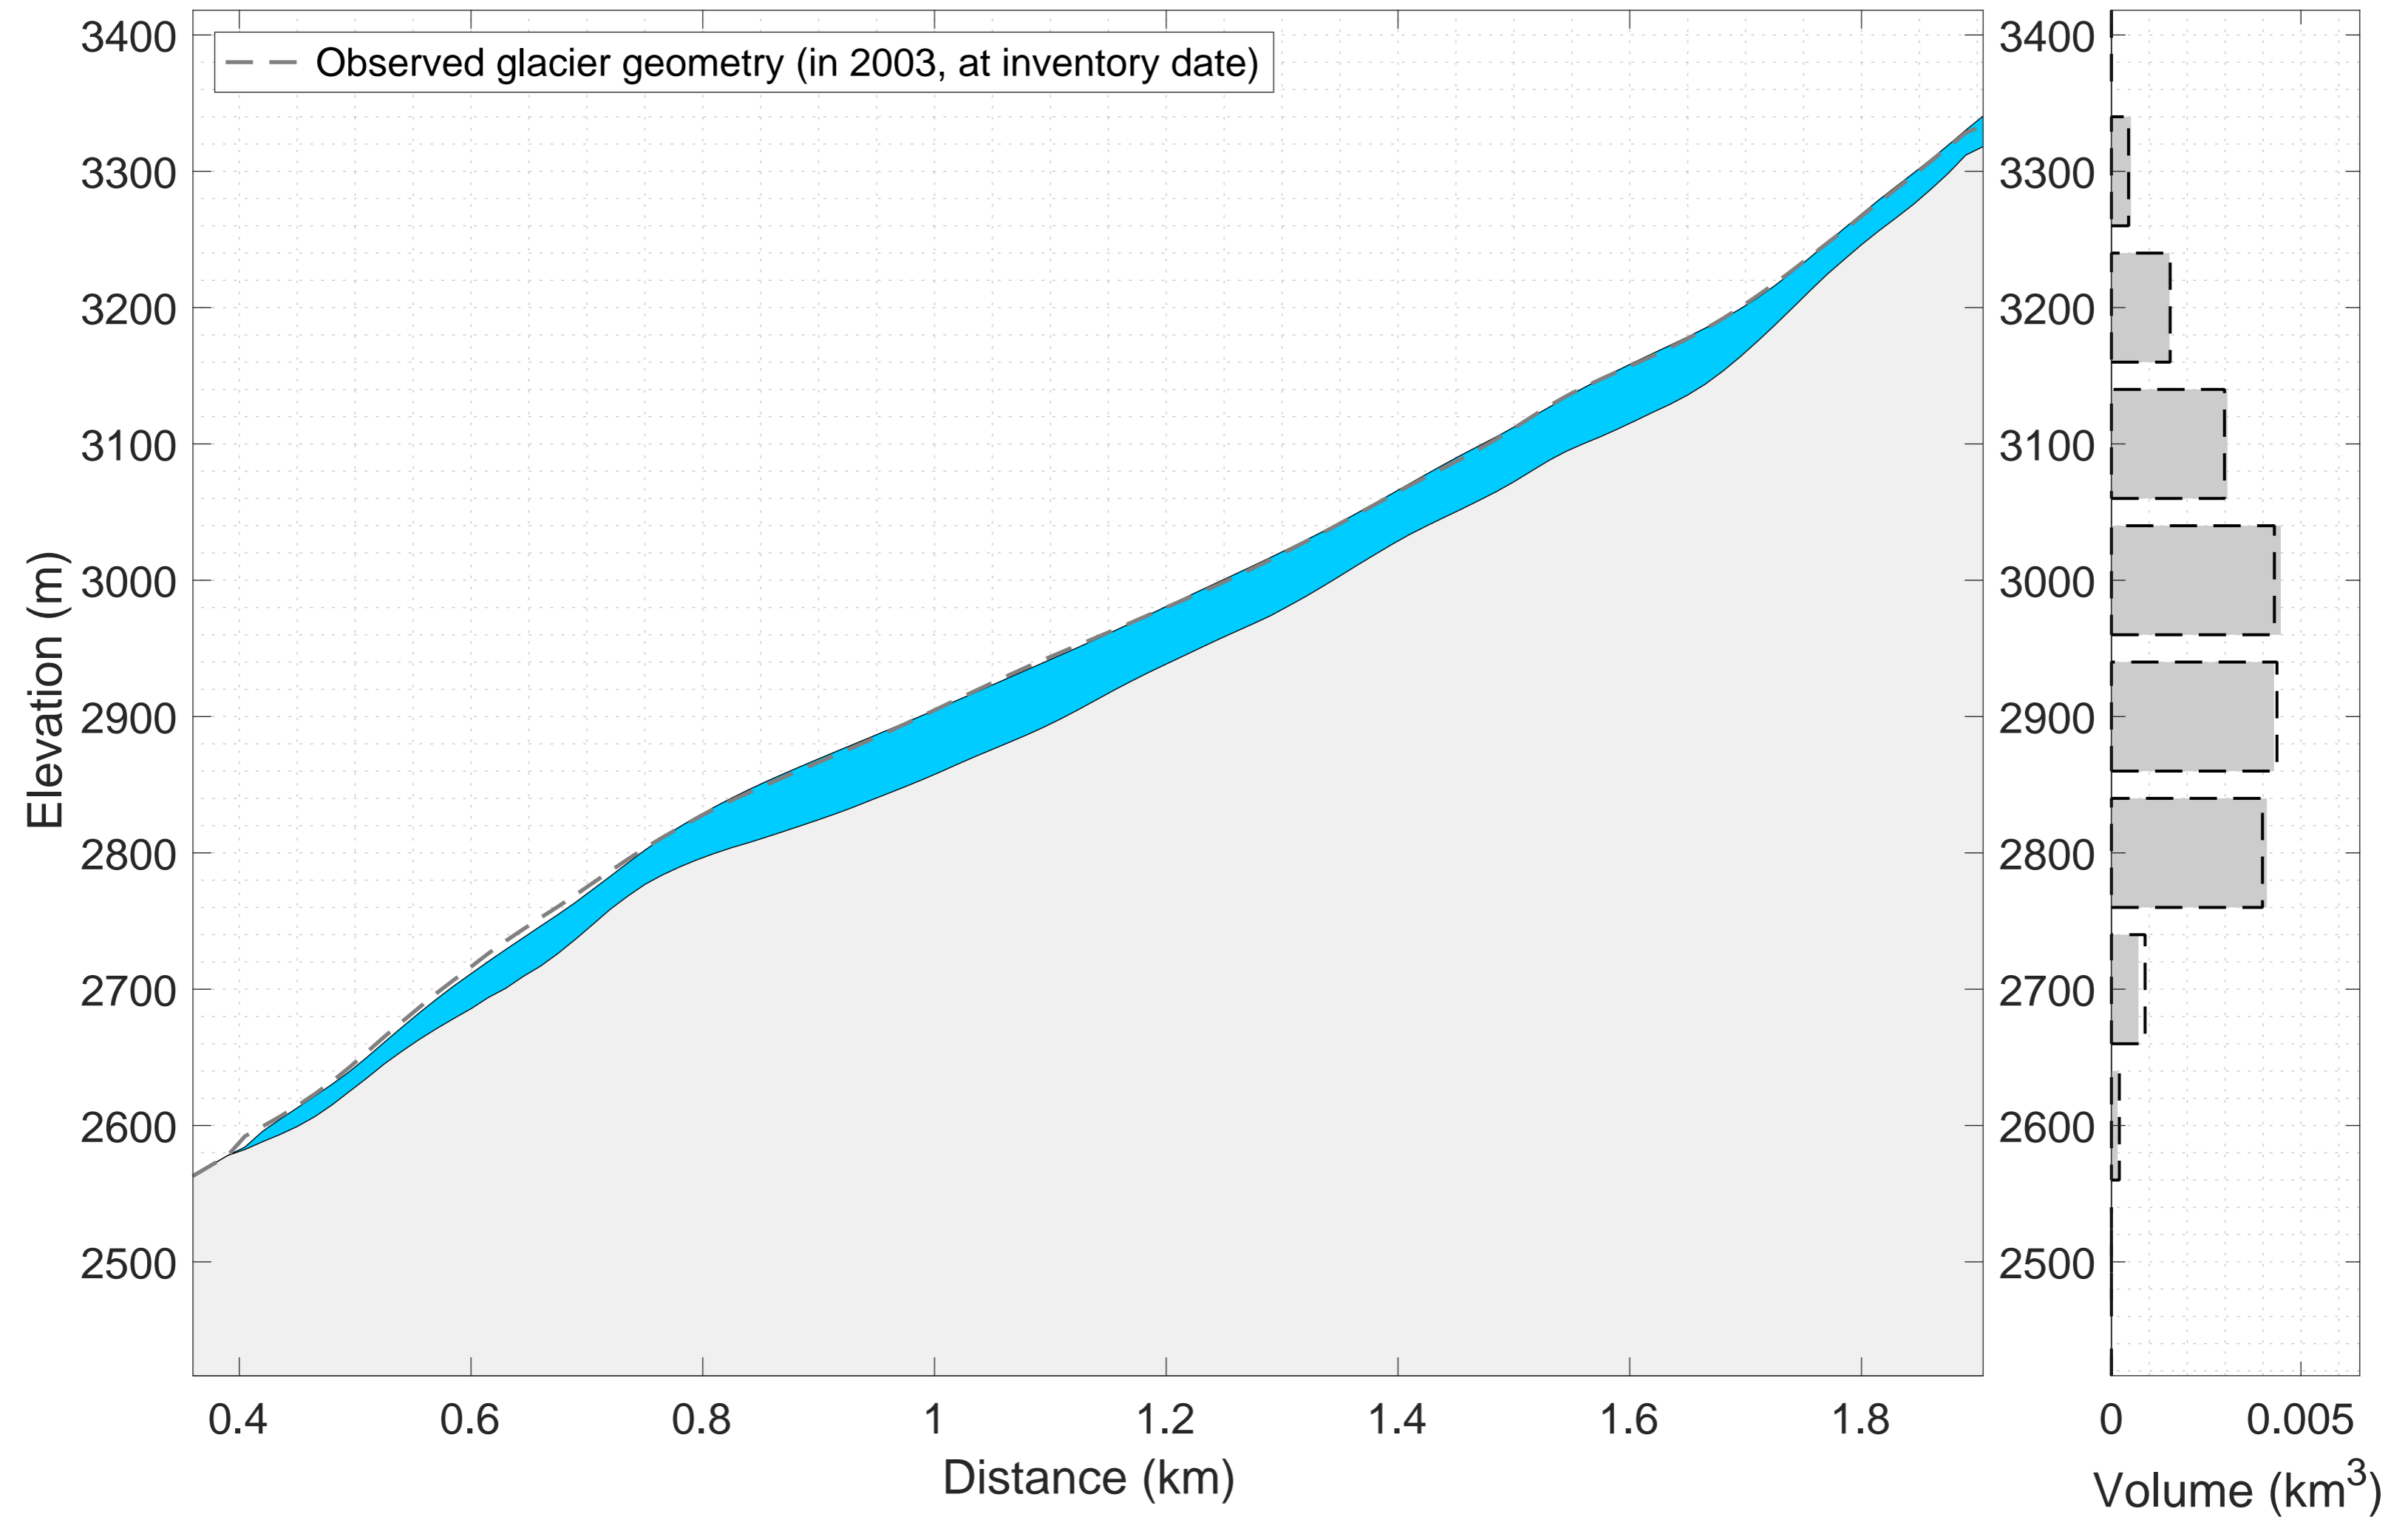

Supplement: Supplementary file 417 [file tc-13-1125-2019-supplement.zip]

**Modelled geometry (Glacier ID = 01238;  $A = 5.6066\text{e-}17 \text{ Pa}^{-3} \text{ a}^{-1}$ ;  $dx = 87 \text{ m}$ )**

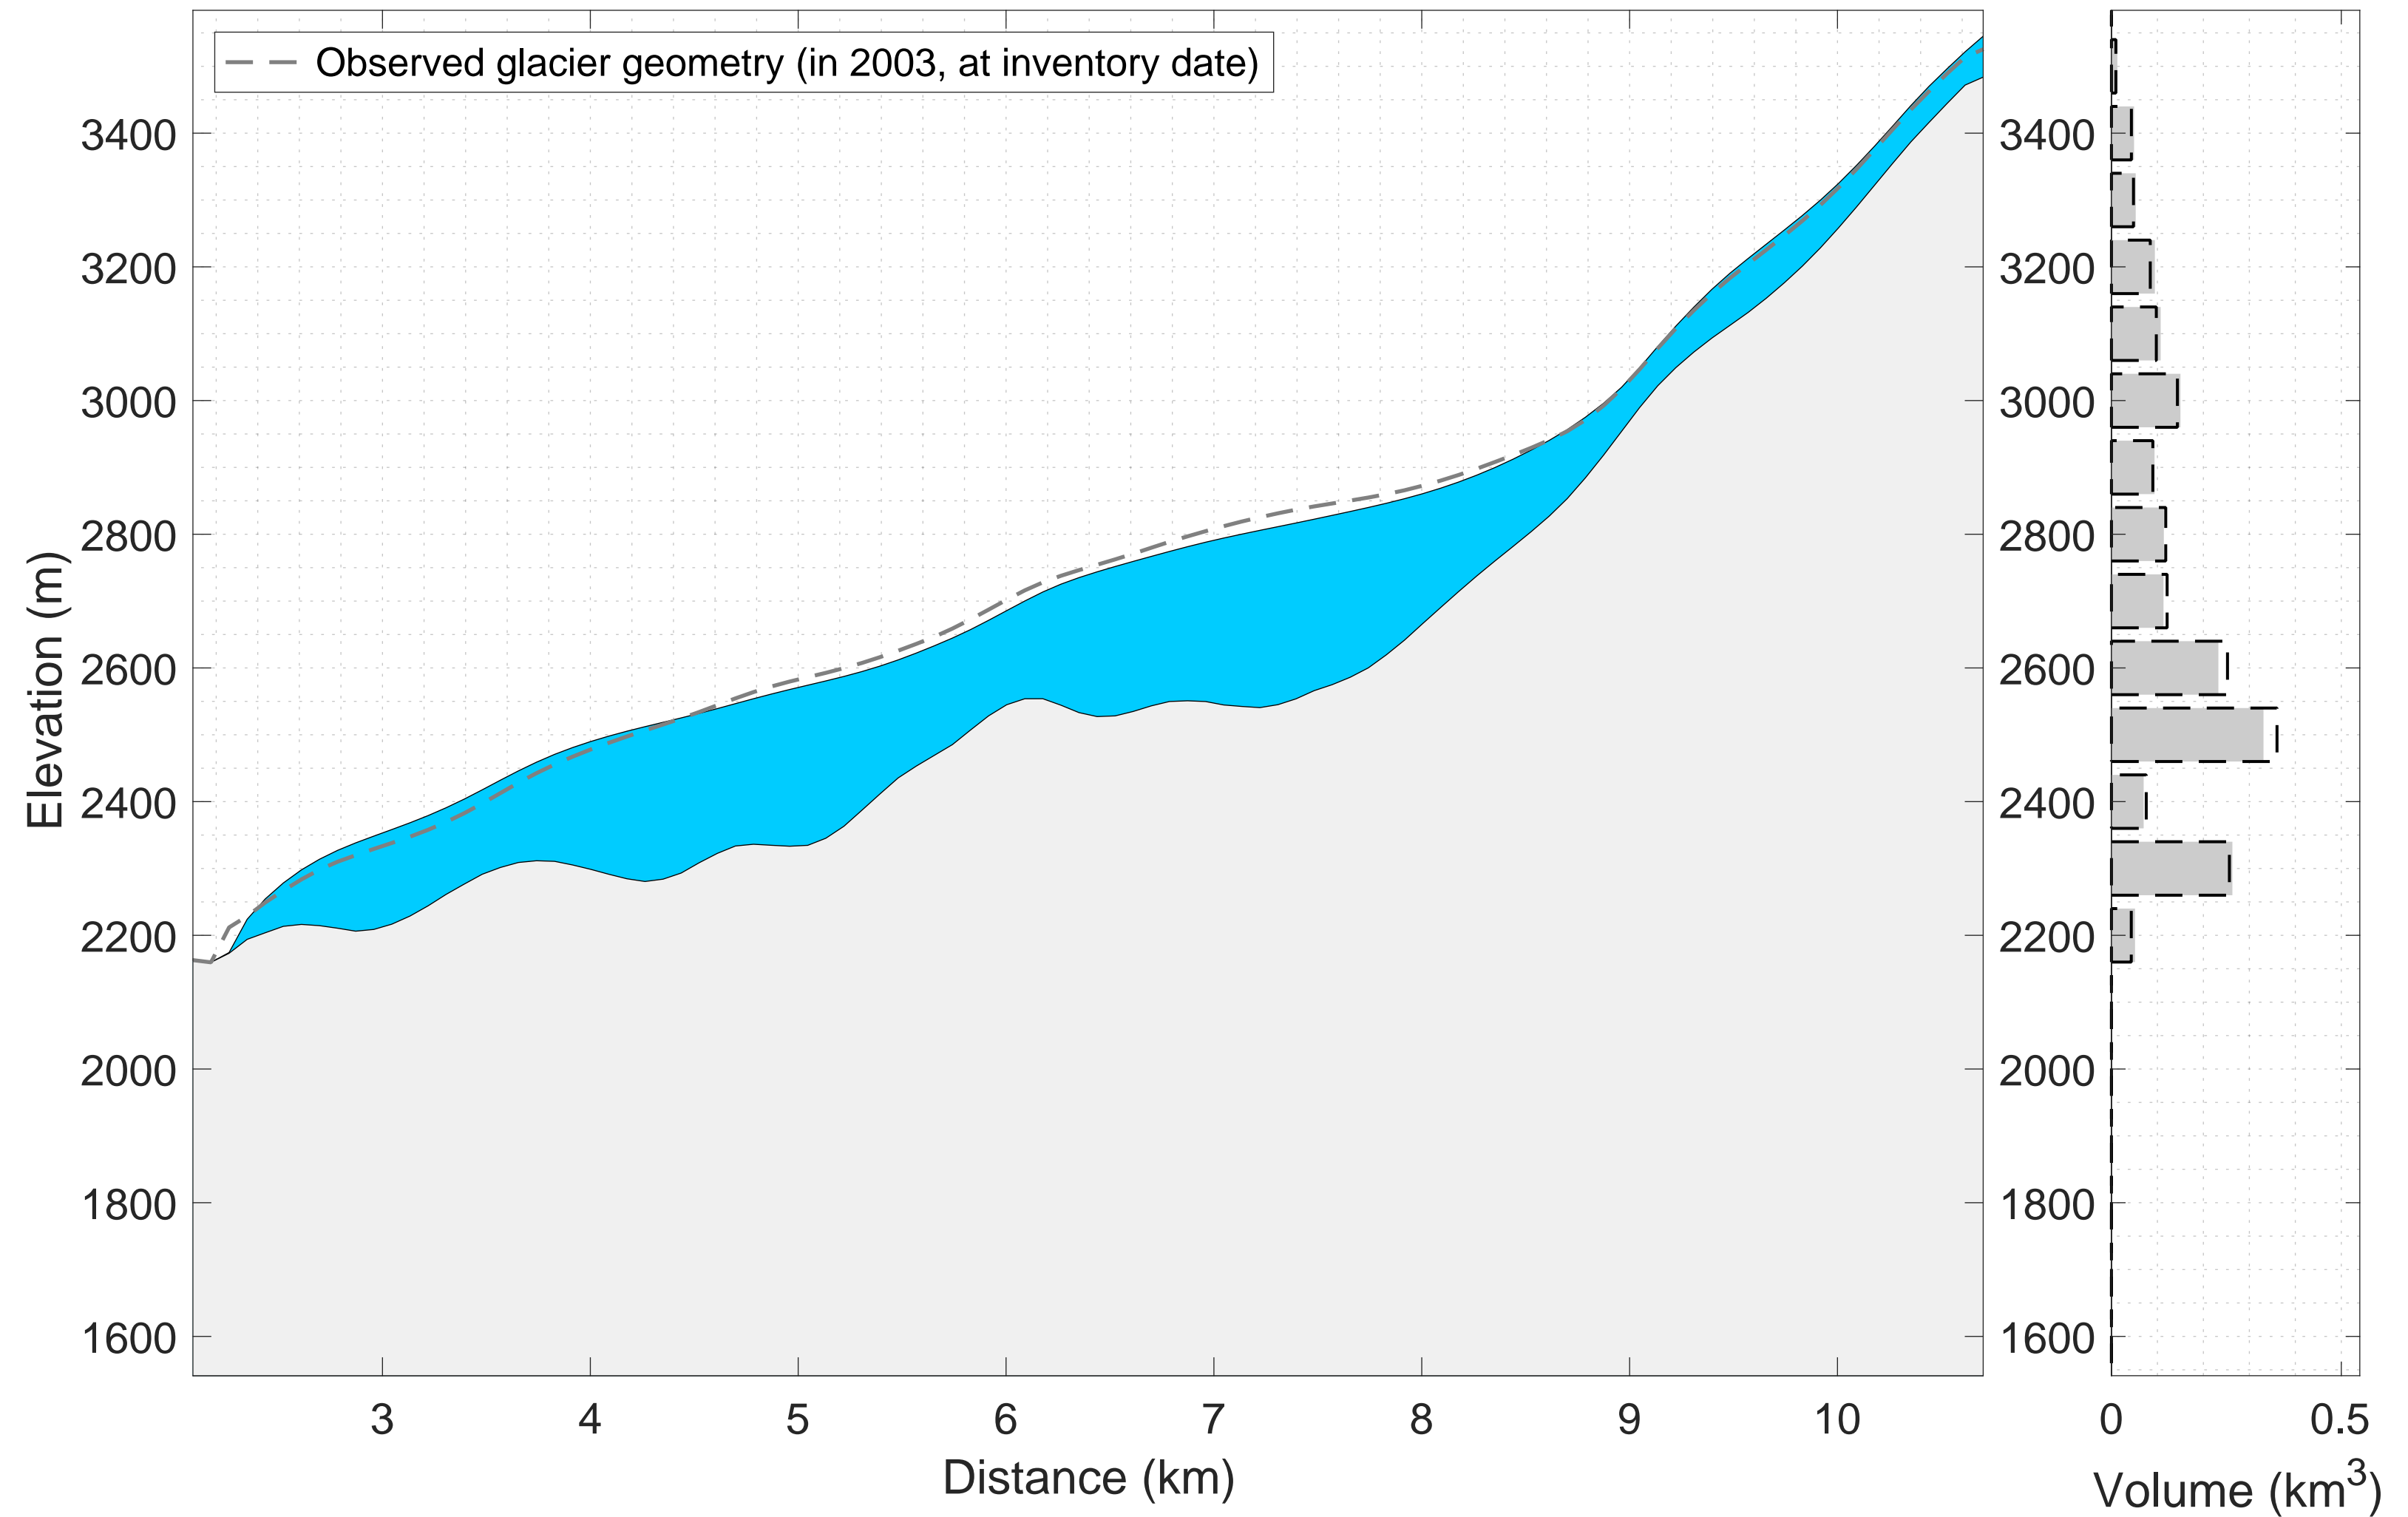

Supplement: Supplementary file 418 [file tc-13-1125-2019-supplement.zip]

**Modelled geometry (Glacier ID = 01024;  $A = 2.4563\text{e-}16 \text{ Pa}^{-3} \text{ a}^{-1}$ ;  $dx = 14 \text{ m}$ )**

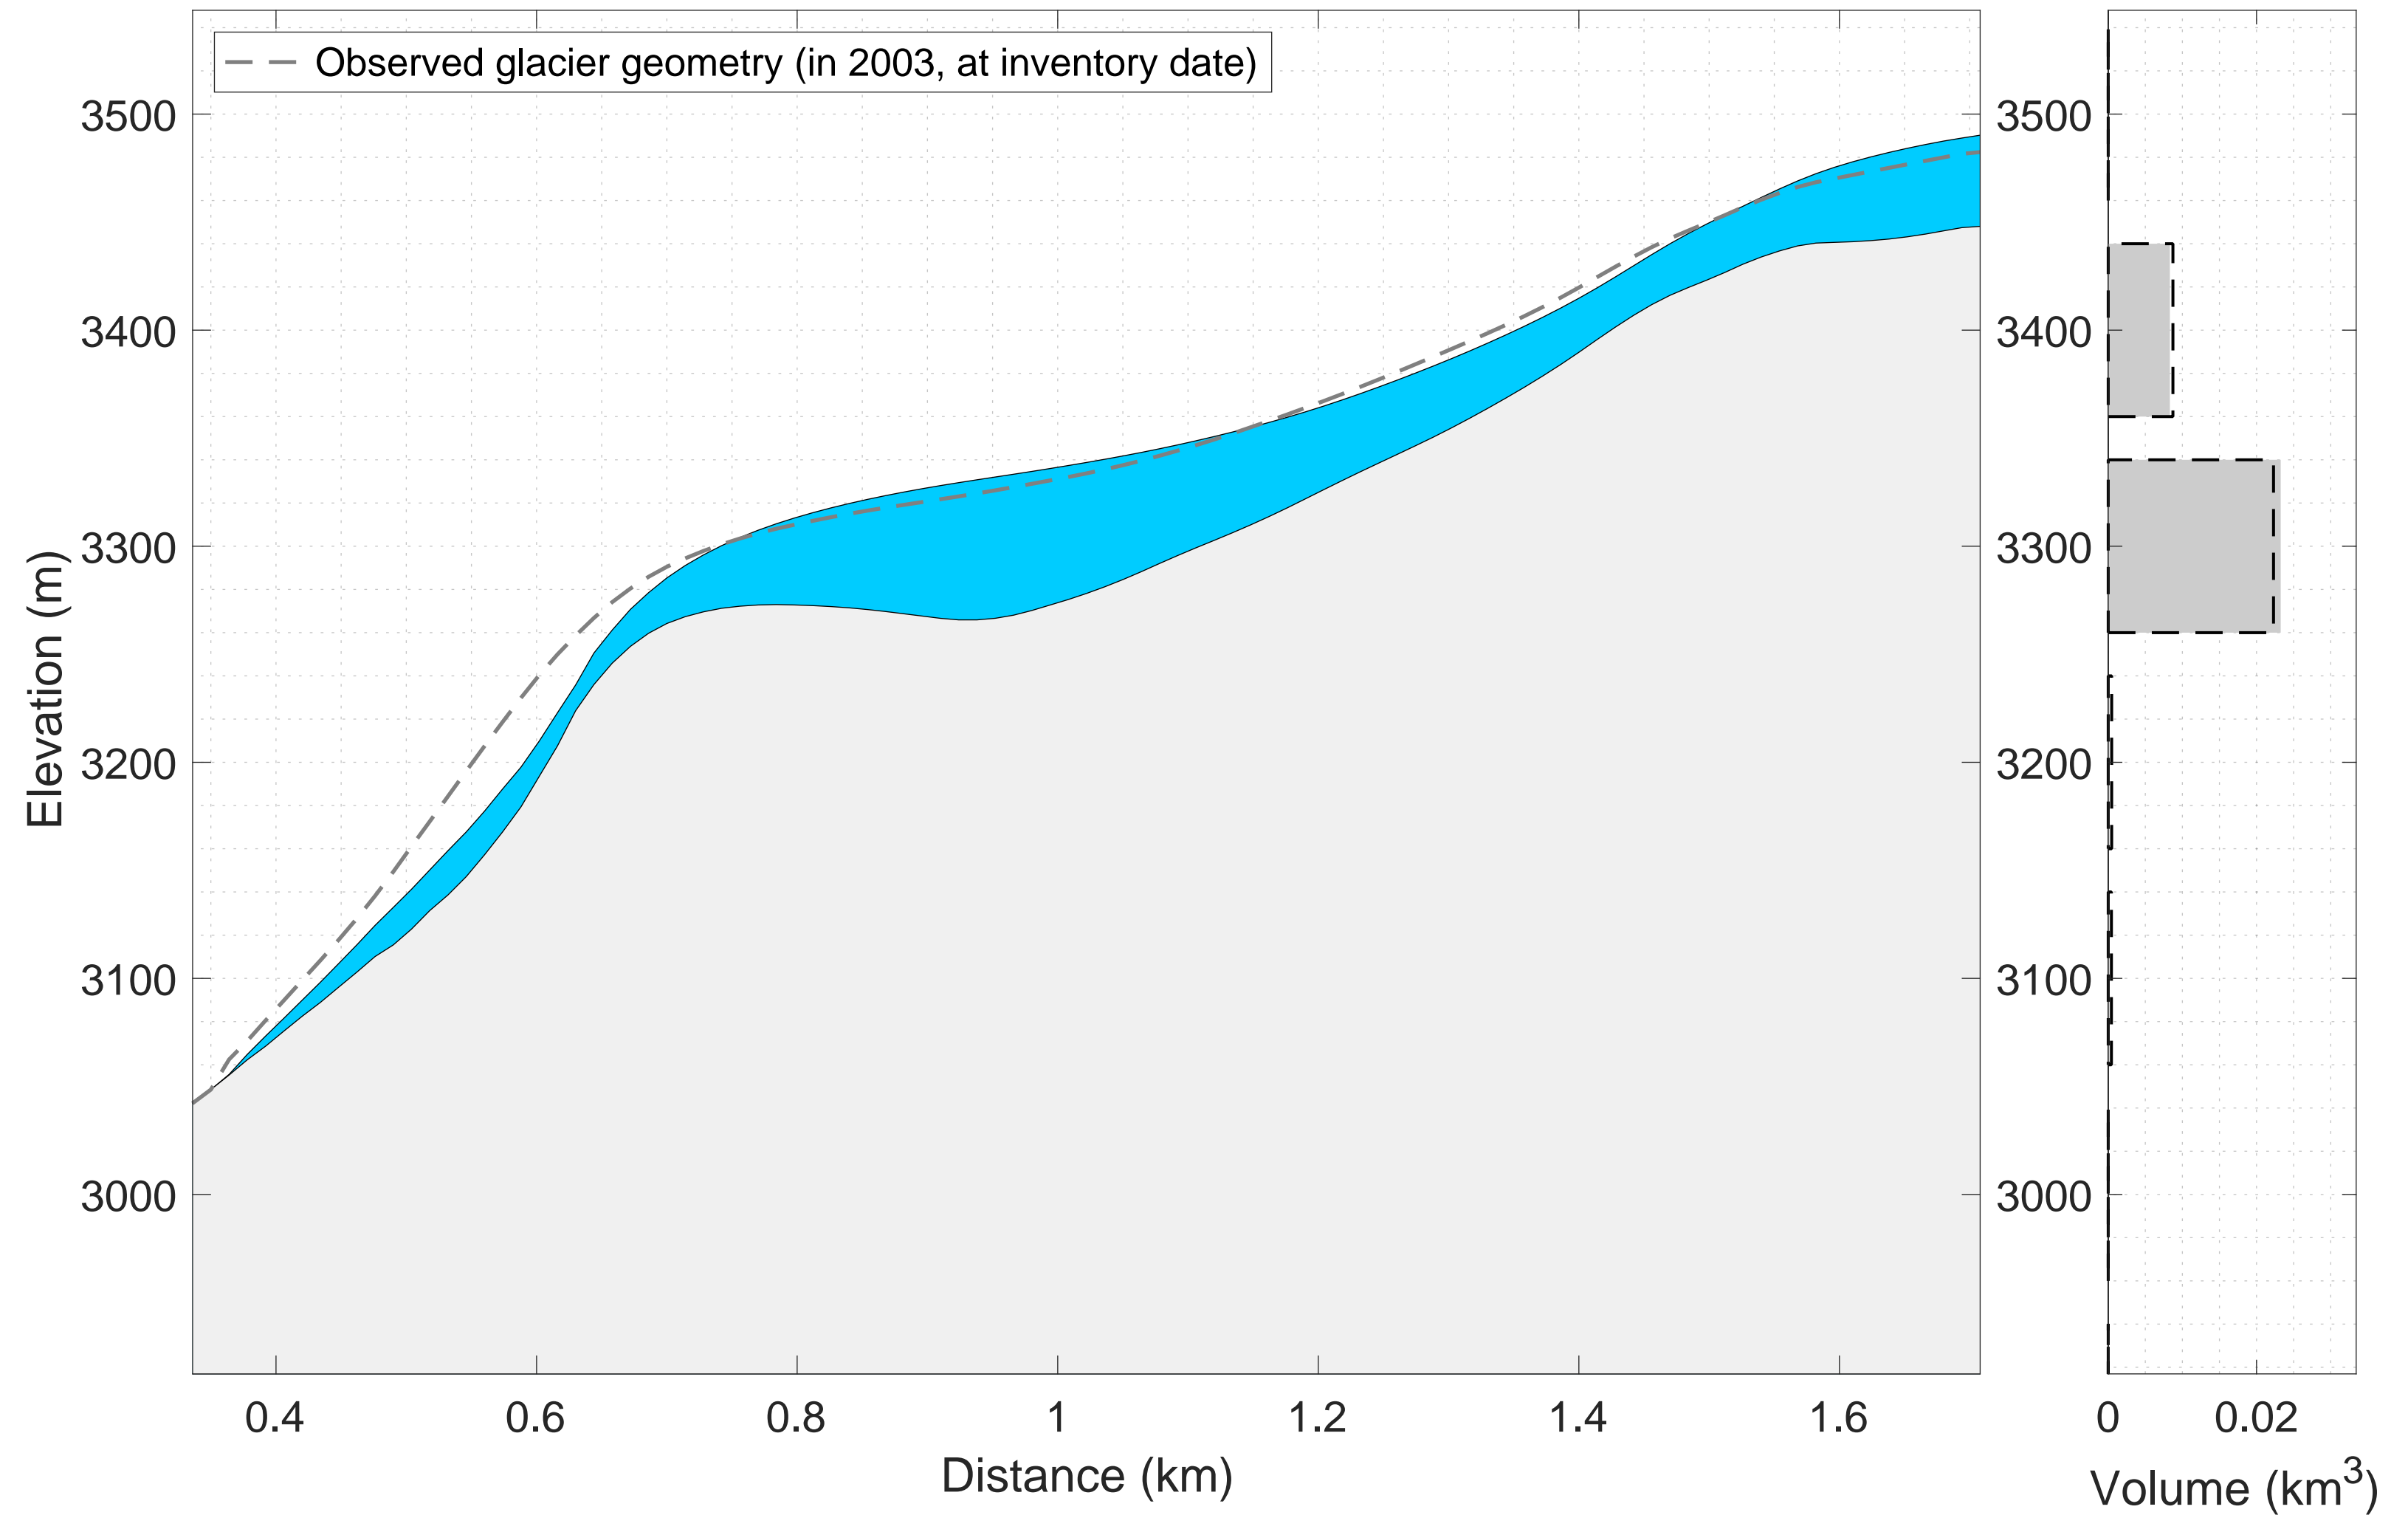

Supplement: Supplementary file 419 [file tc-13-1125-2019-supplement.zip]

**Modelled geometry (Glacier ID = 03373;  $A = 2.6482\text{e-}16 \text{ Pa}^{-3} \text{ a}^{-1}$ ;  $dx = 23 \text{ m}$ )**

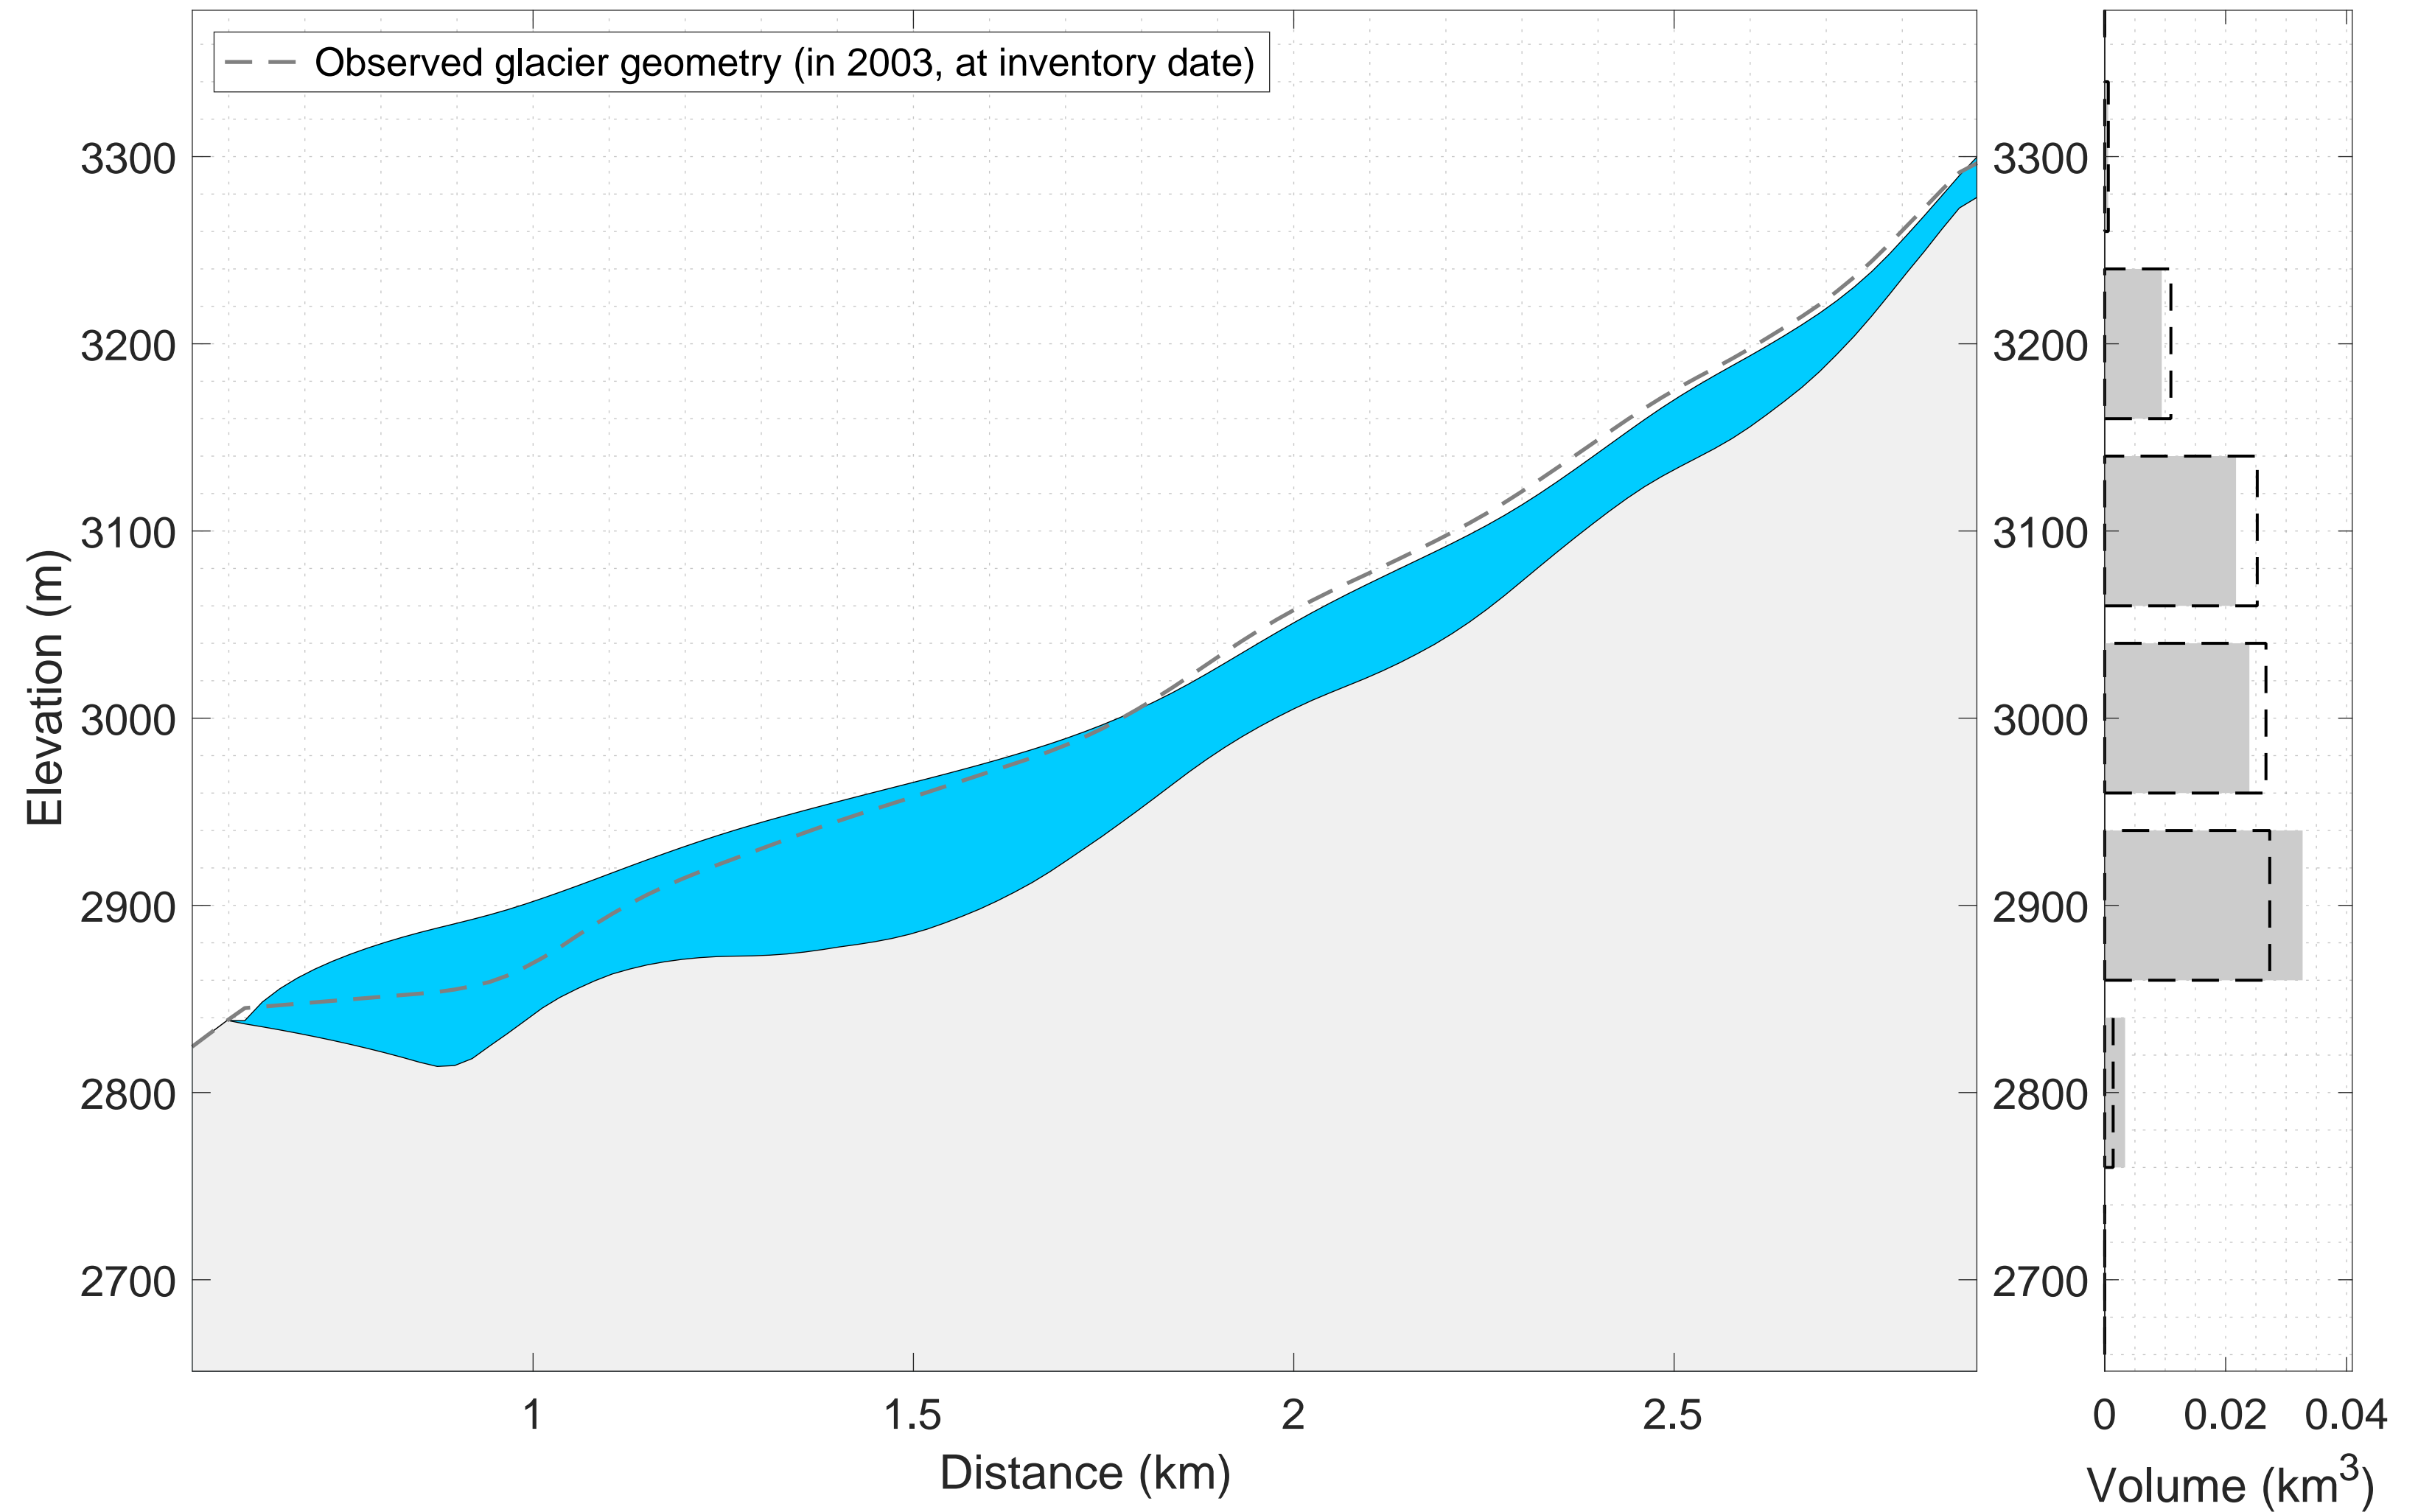

Supplement: Supplementary file 420 [file tc-13-1125-2019-supplement.zip]

**Modelled geometry (Glacier ID = 01753;  $A = 2.3543\text{e-}16 \text{ Pa}^{-3} \text{ a}^{-1}$ ;  $dx = 17 \text{ m}$ )**

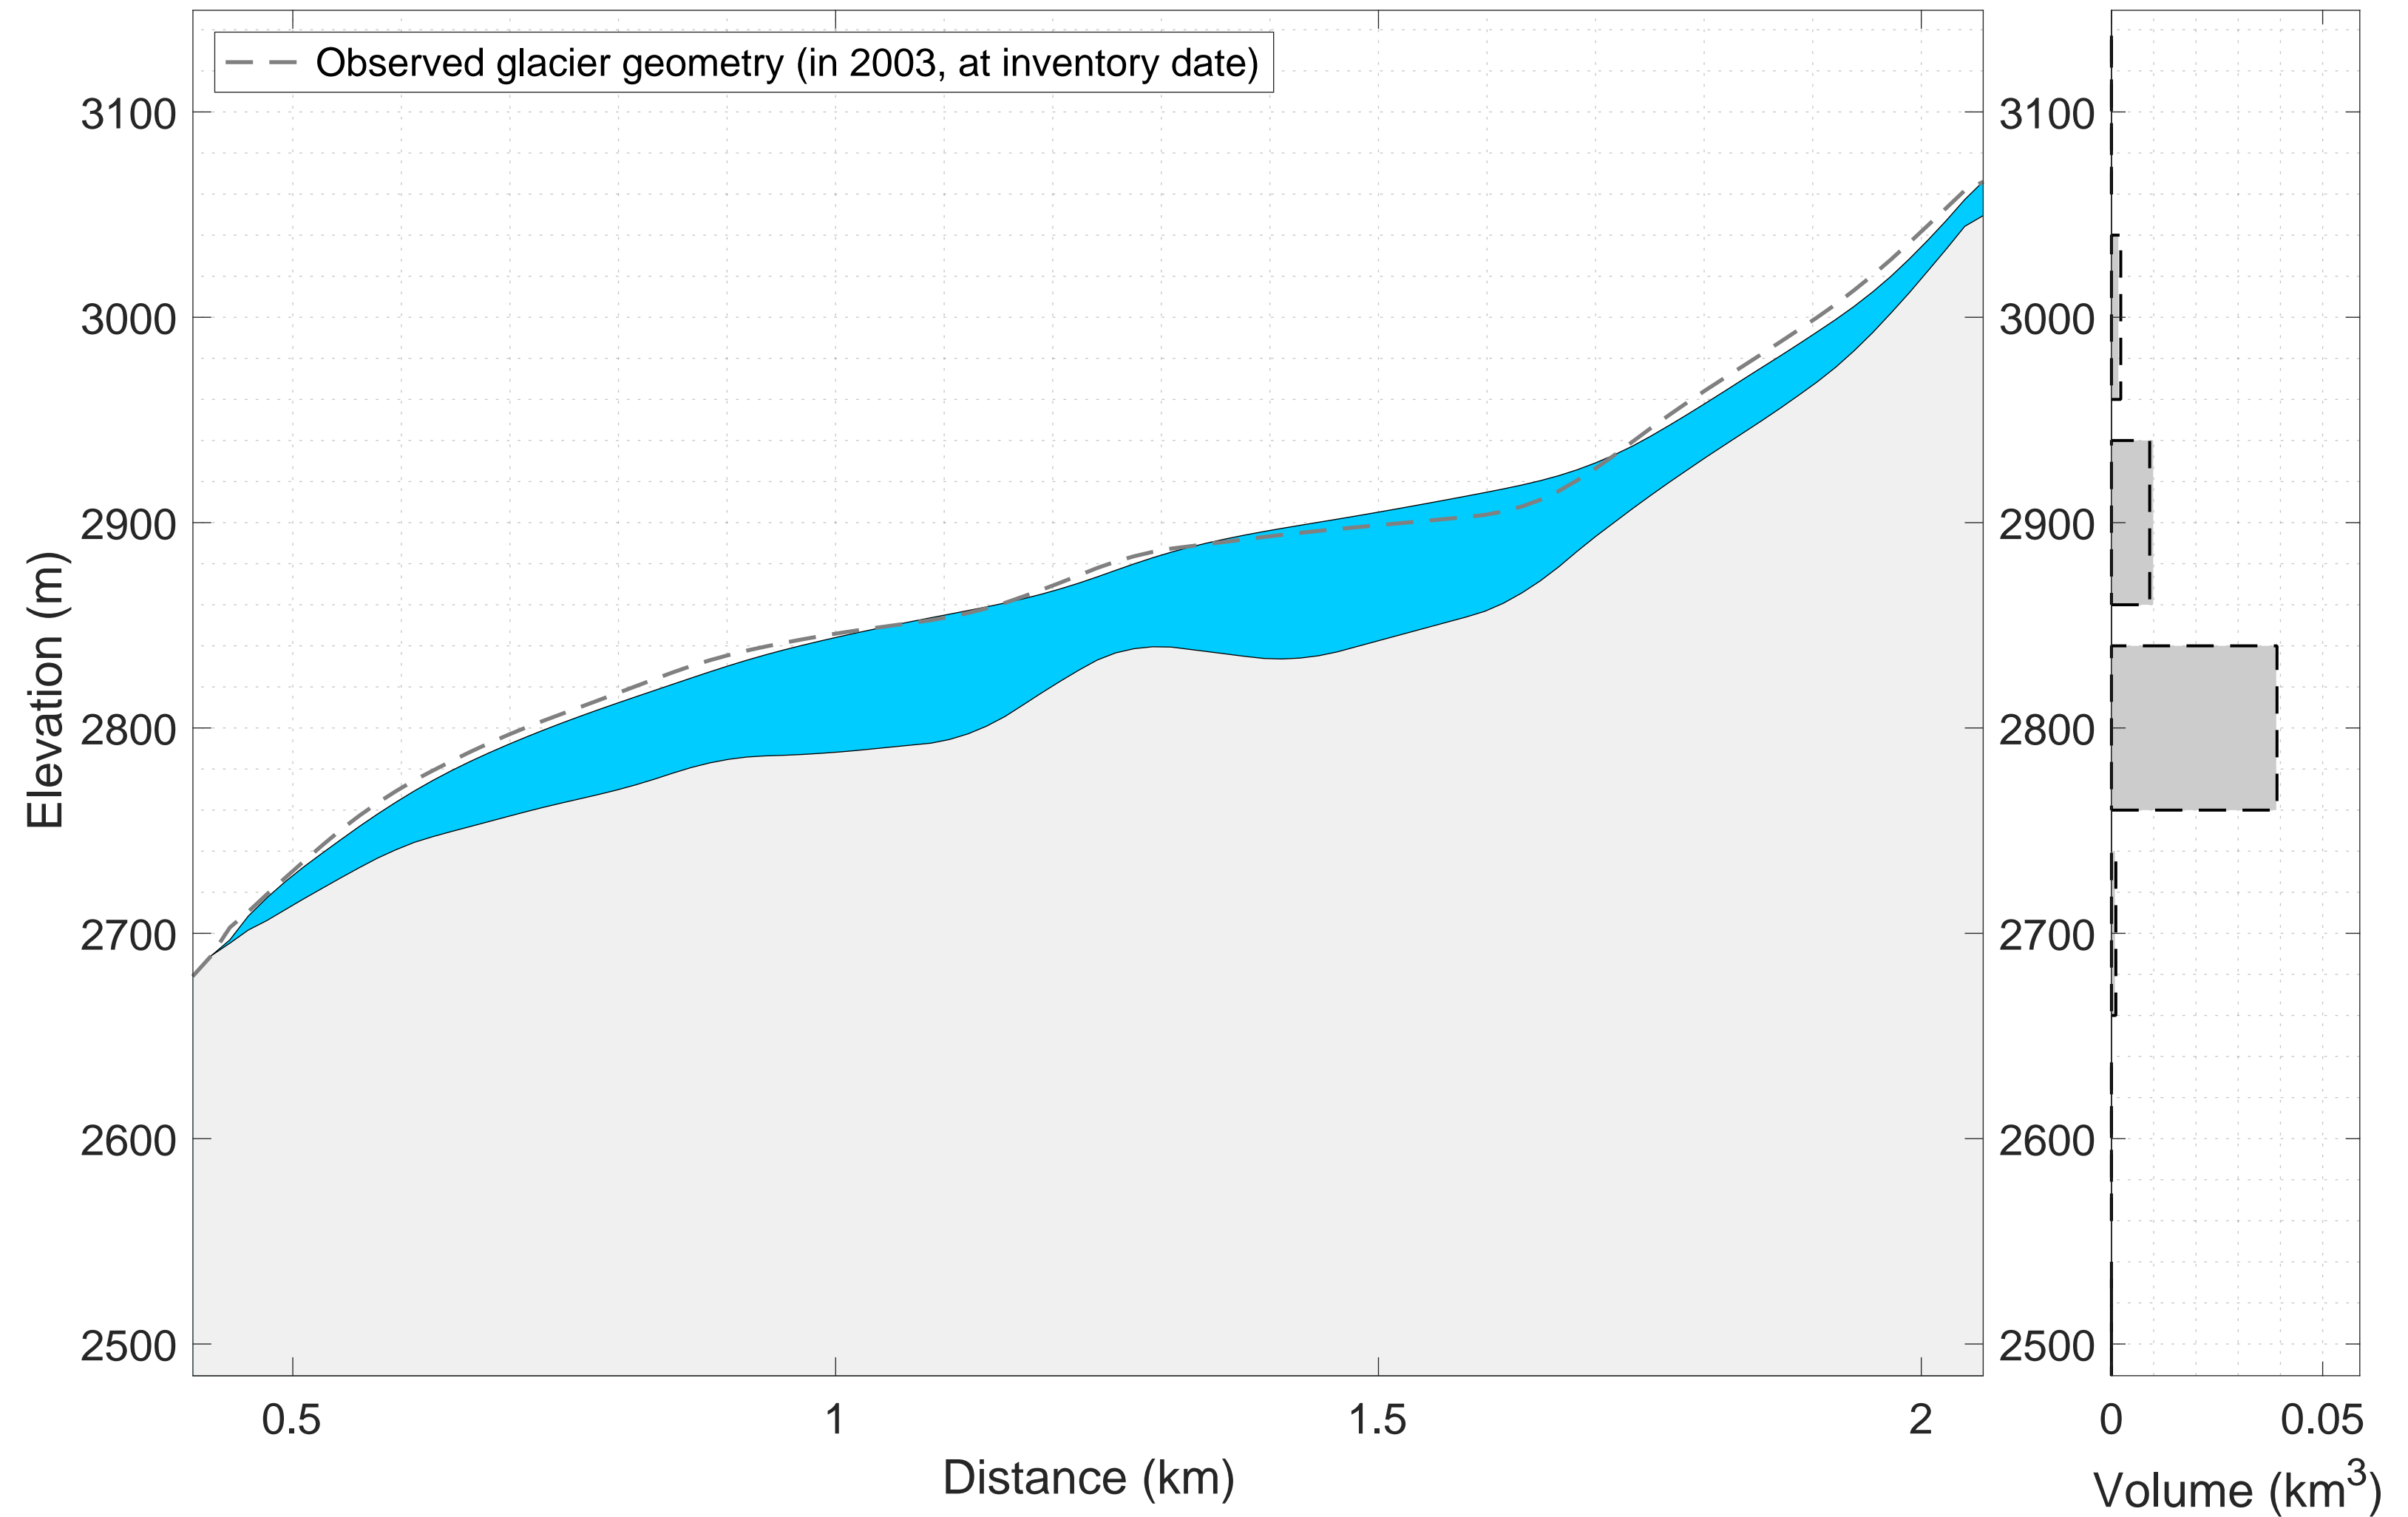

Supplement: Supplementary file 421 [file tc-13-1125-2019-supplement.zip]

**Modelled geometry (Glacier ID = 02113;  $A = 7.0253\text{e-}17 \text{ Pa}^{-3} \text{ a}^{-1}$ ;  $dx = 25 \text{ m}$ )**

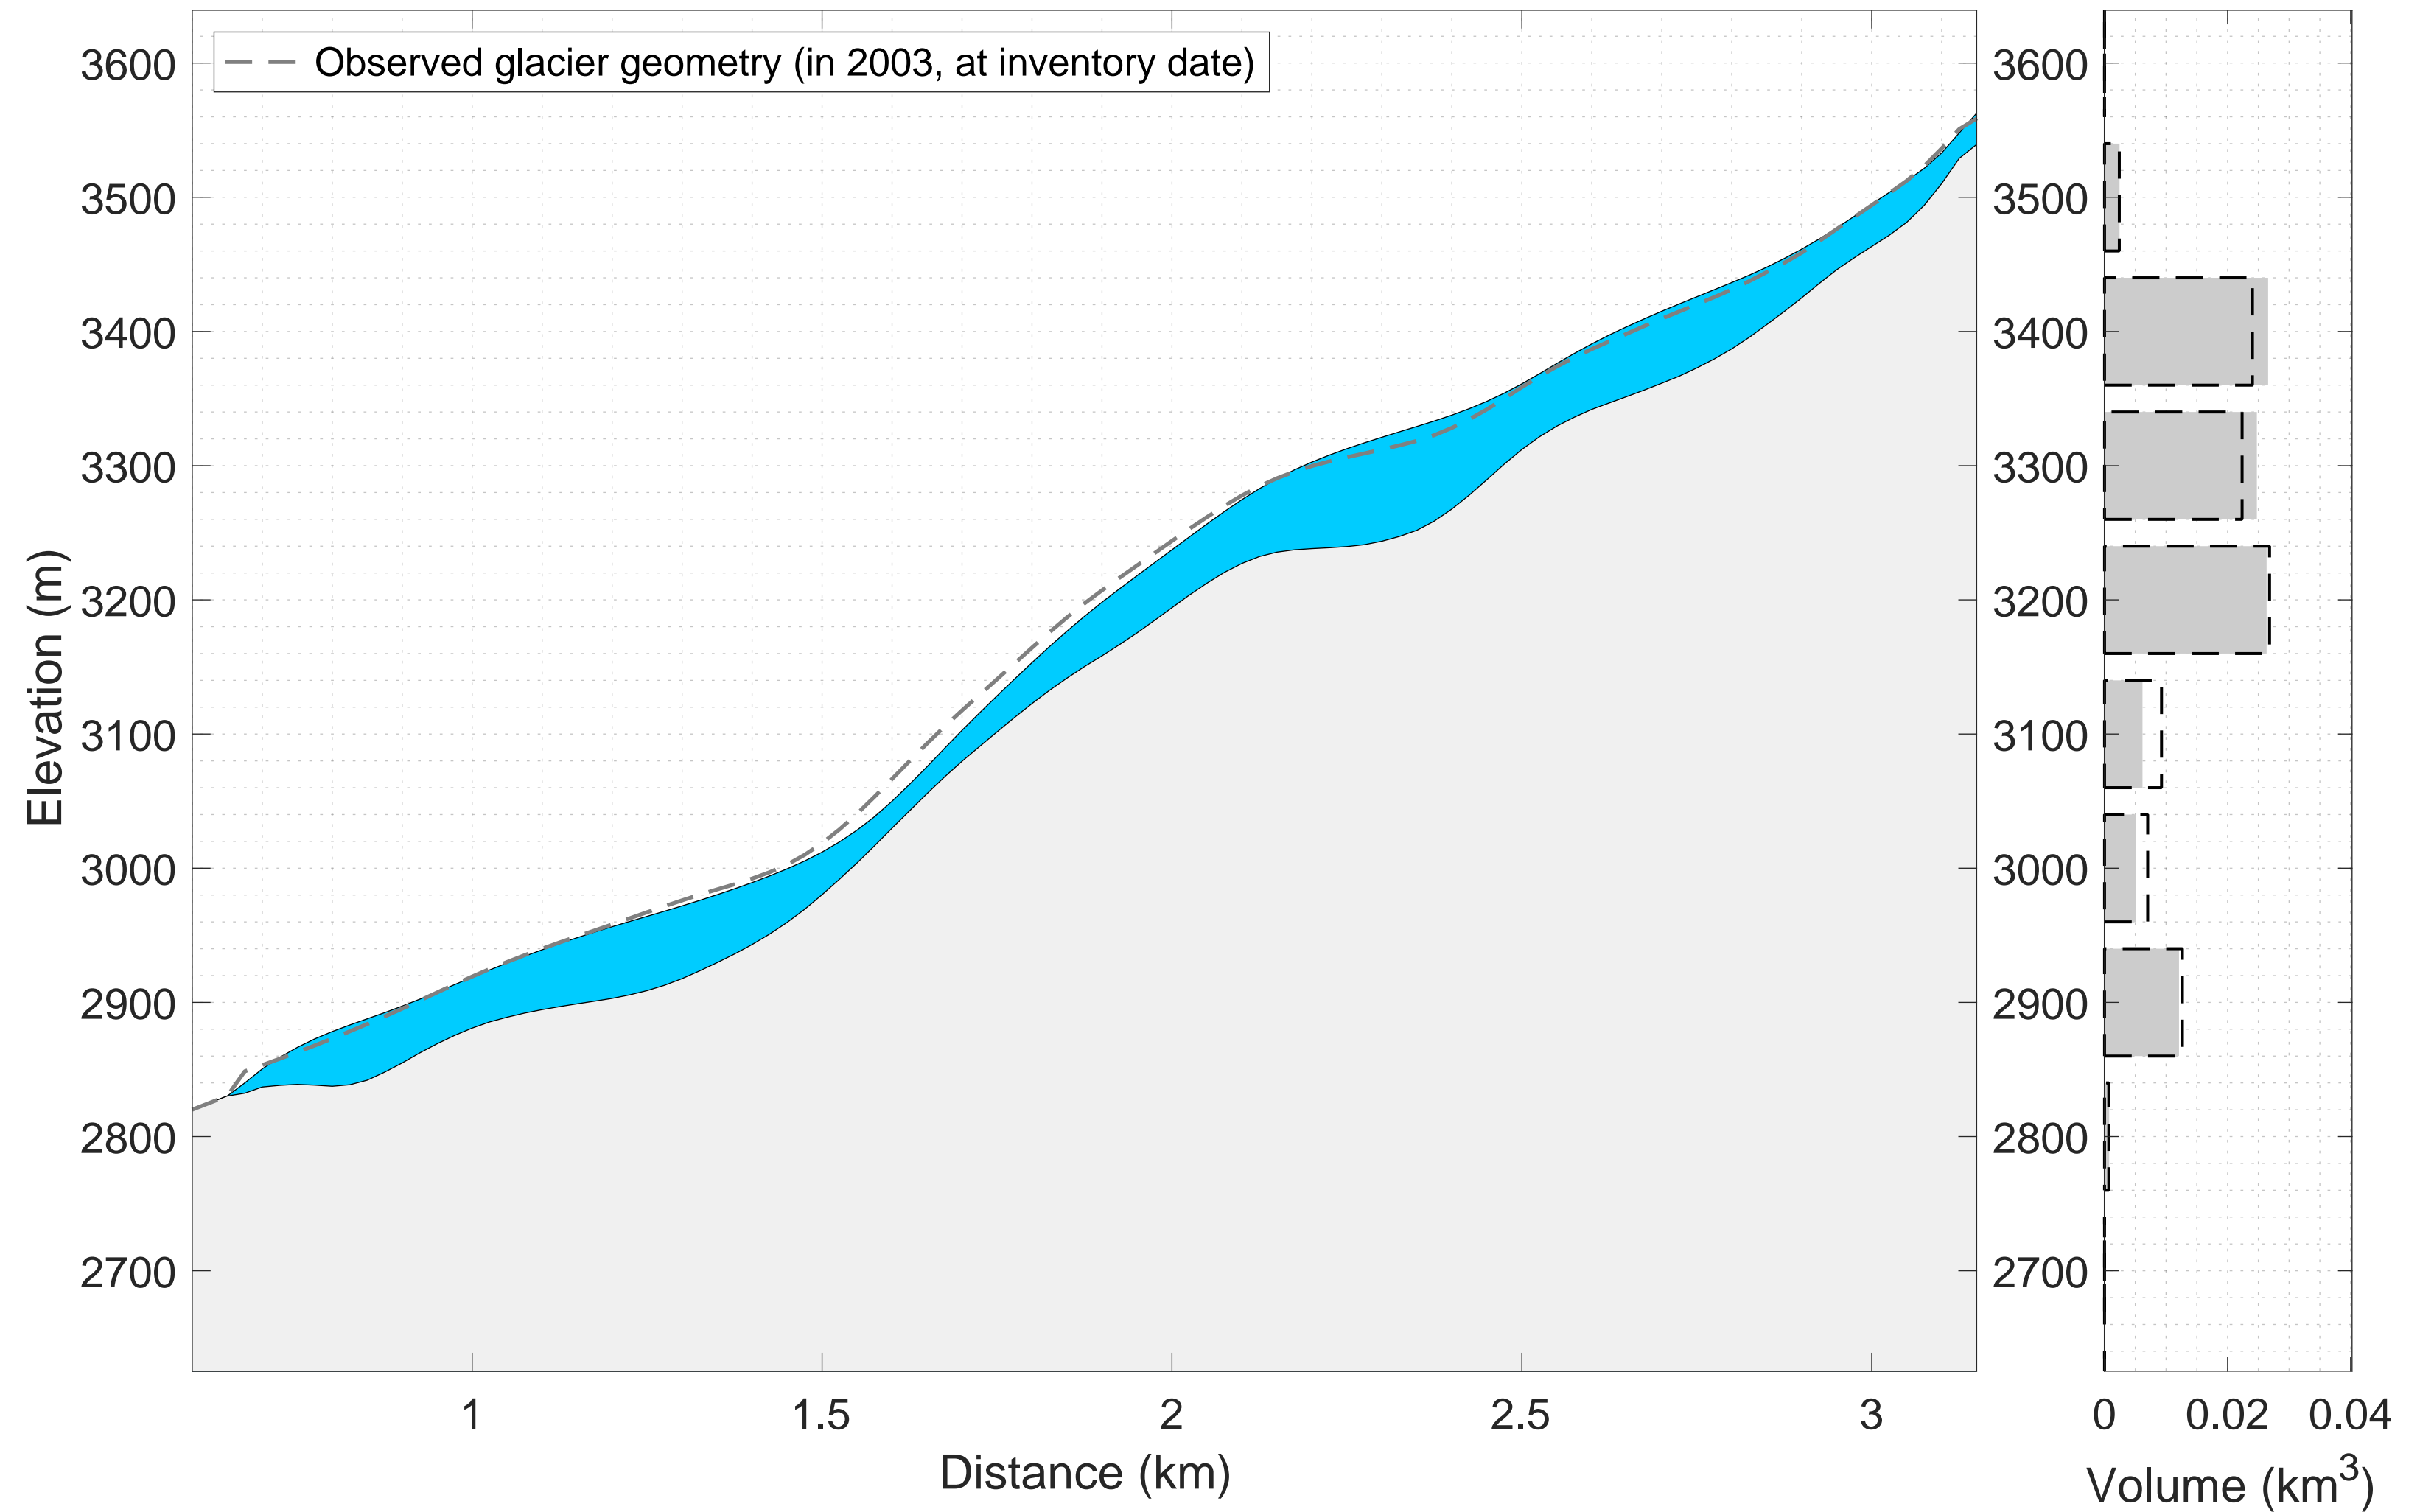

Supplement: Supplementary file 422 [file tc-13-1125-2019-supplement.zip]

**Modelled geometry (Glacier ID = 00770;  $A = 1.4882\text{e-}16 \text{ Pa}^{-3} \text{ a}^{-1}$ ;  $dx = 26 \text{ m}$ )**

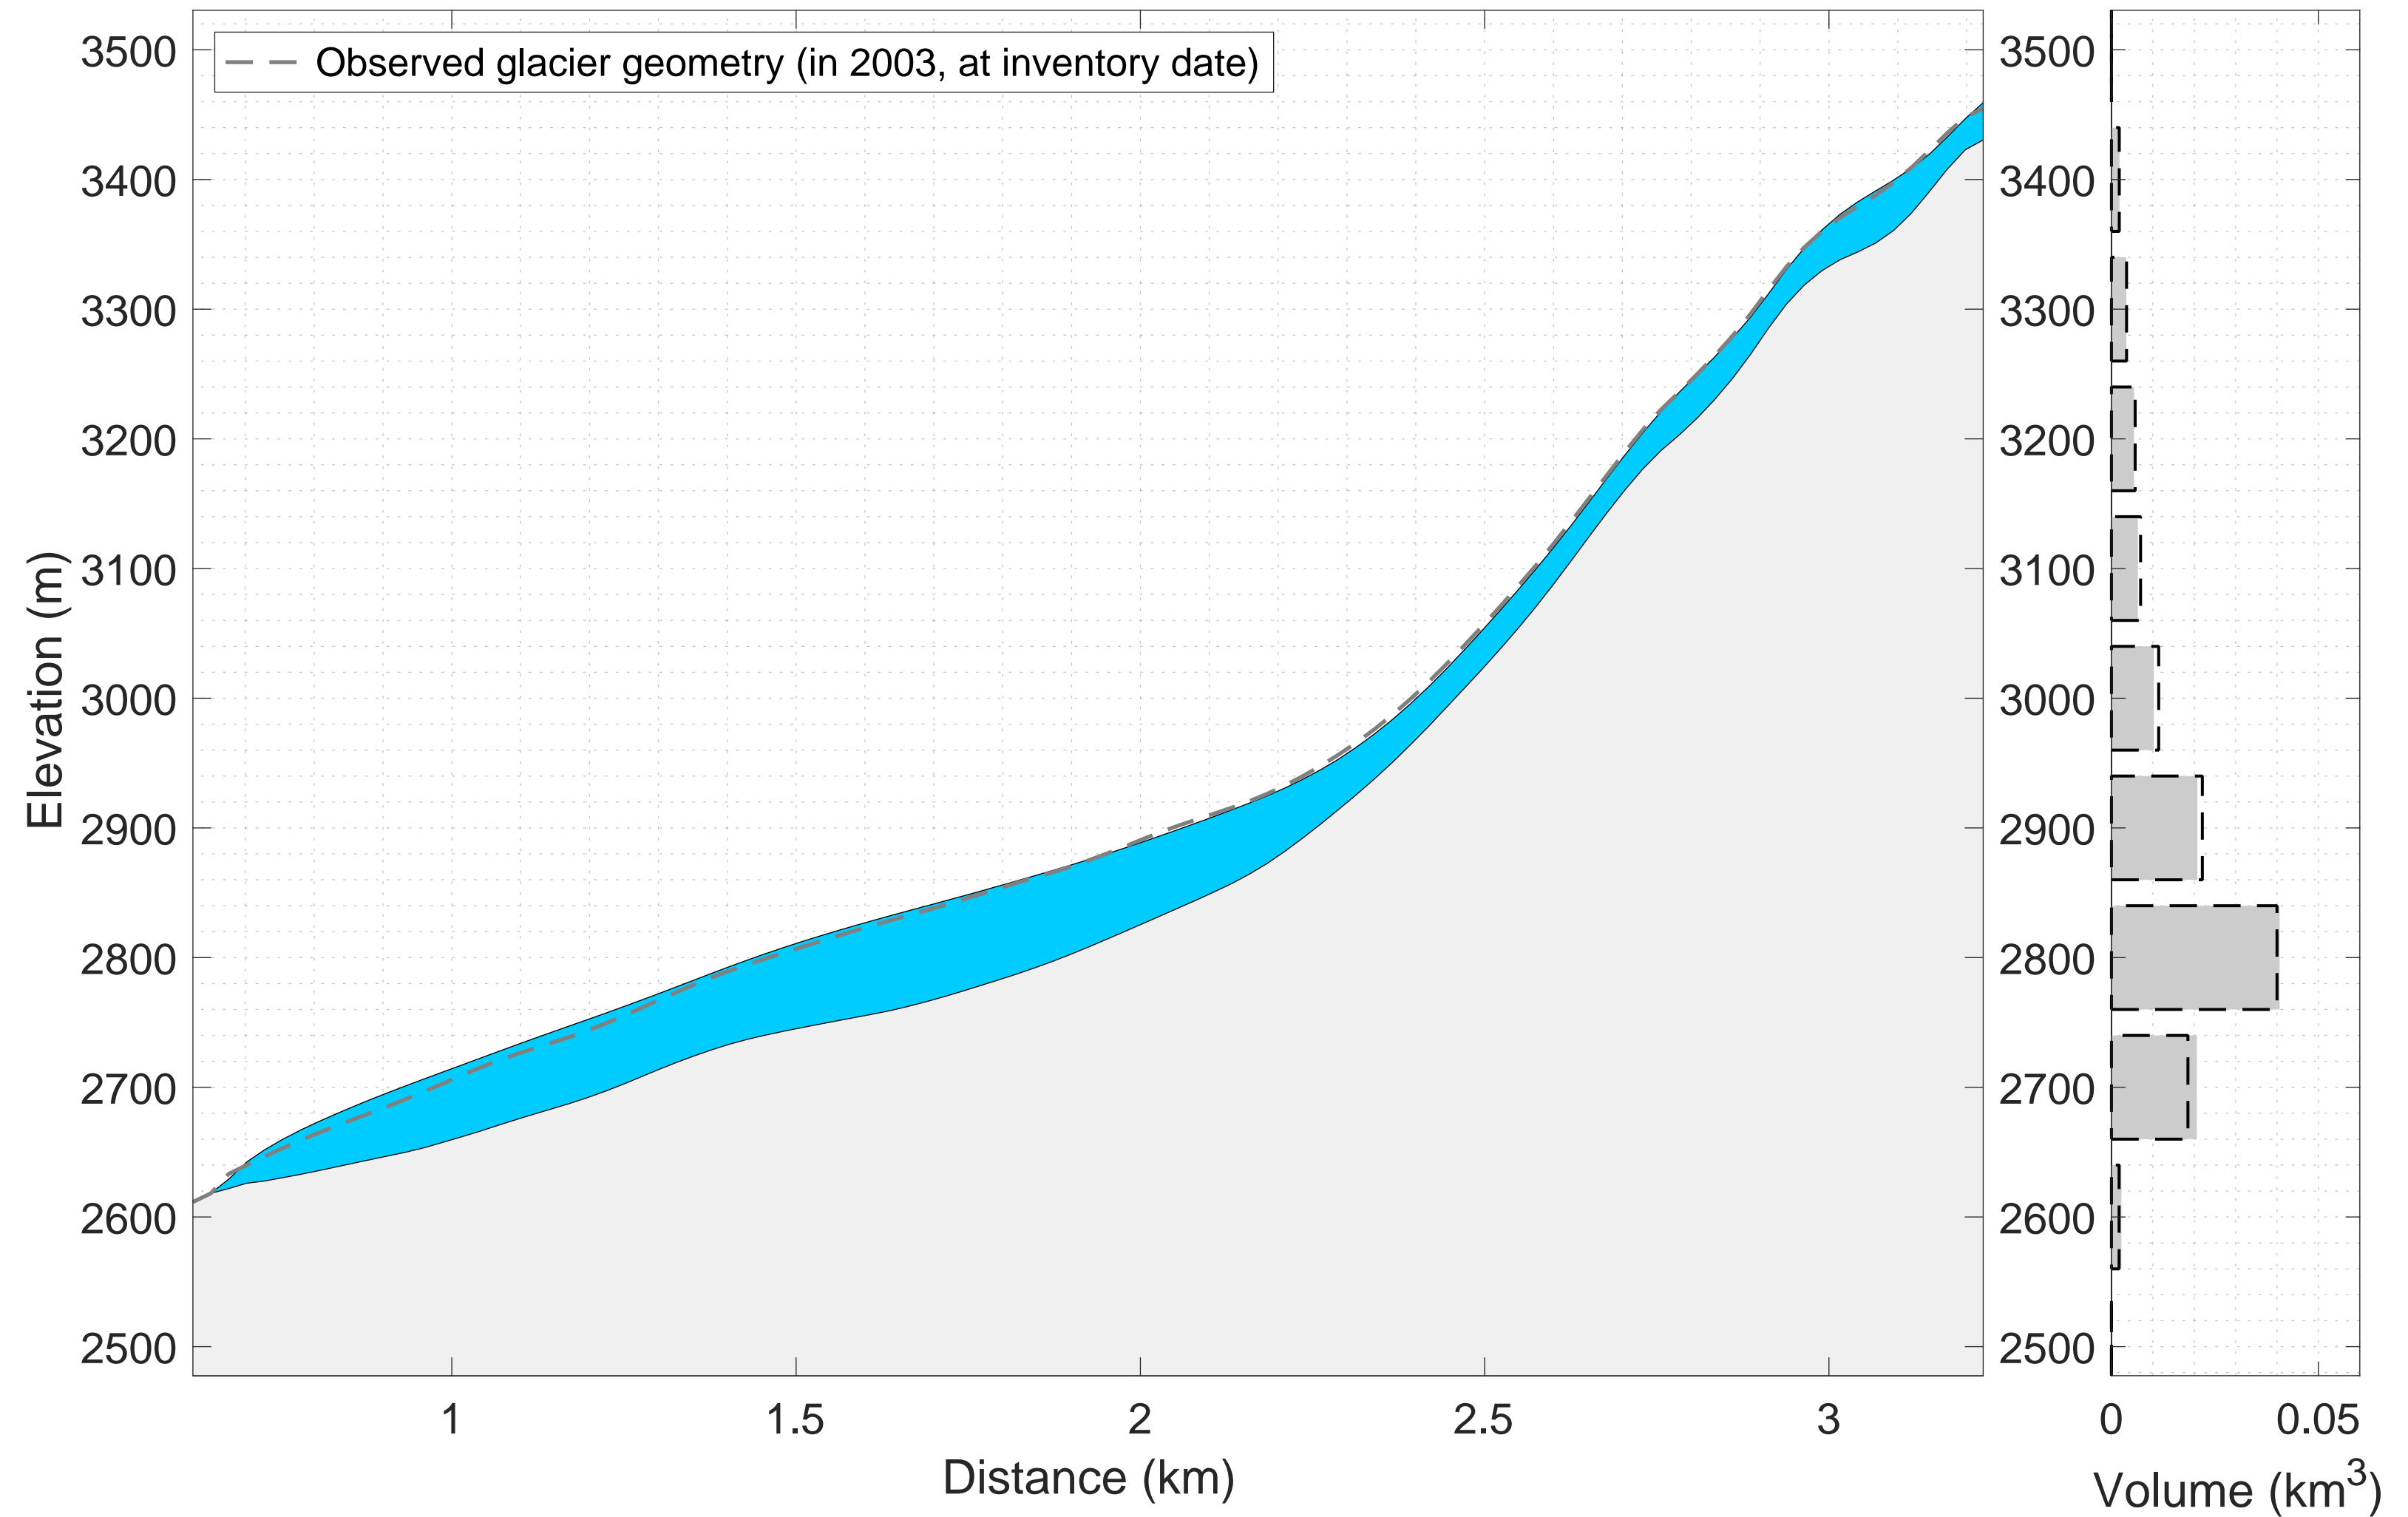

Supplement: Supplementary file 423 [file tc-13-1125-2019-supplement.zip]

**Modelled geometry (Glacier ID = 03066;  $A = 1.8315\text{e-}16 \text{ Pa}^{-3} \text{ a}^{-1}$ ;  $dx = 28 \text{ m}$ )**

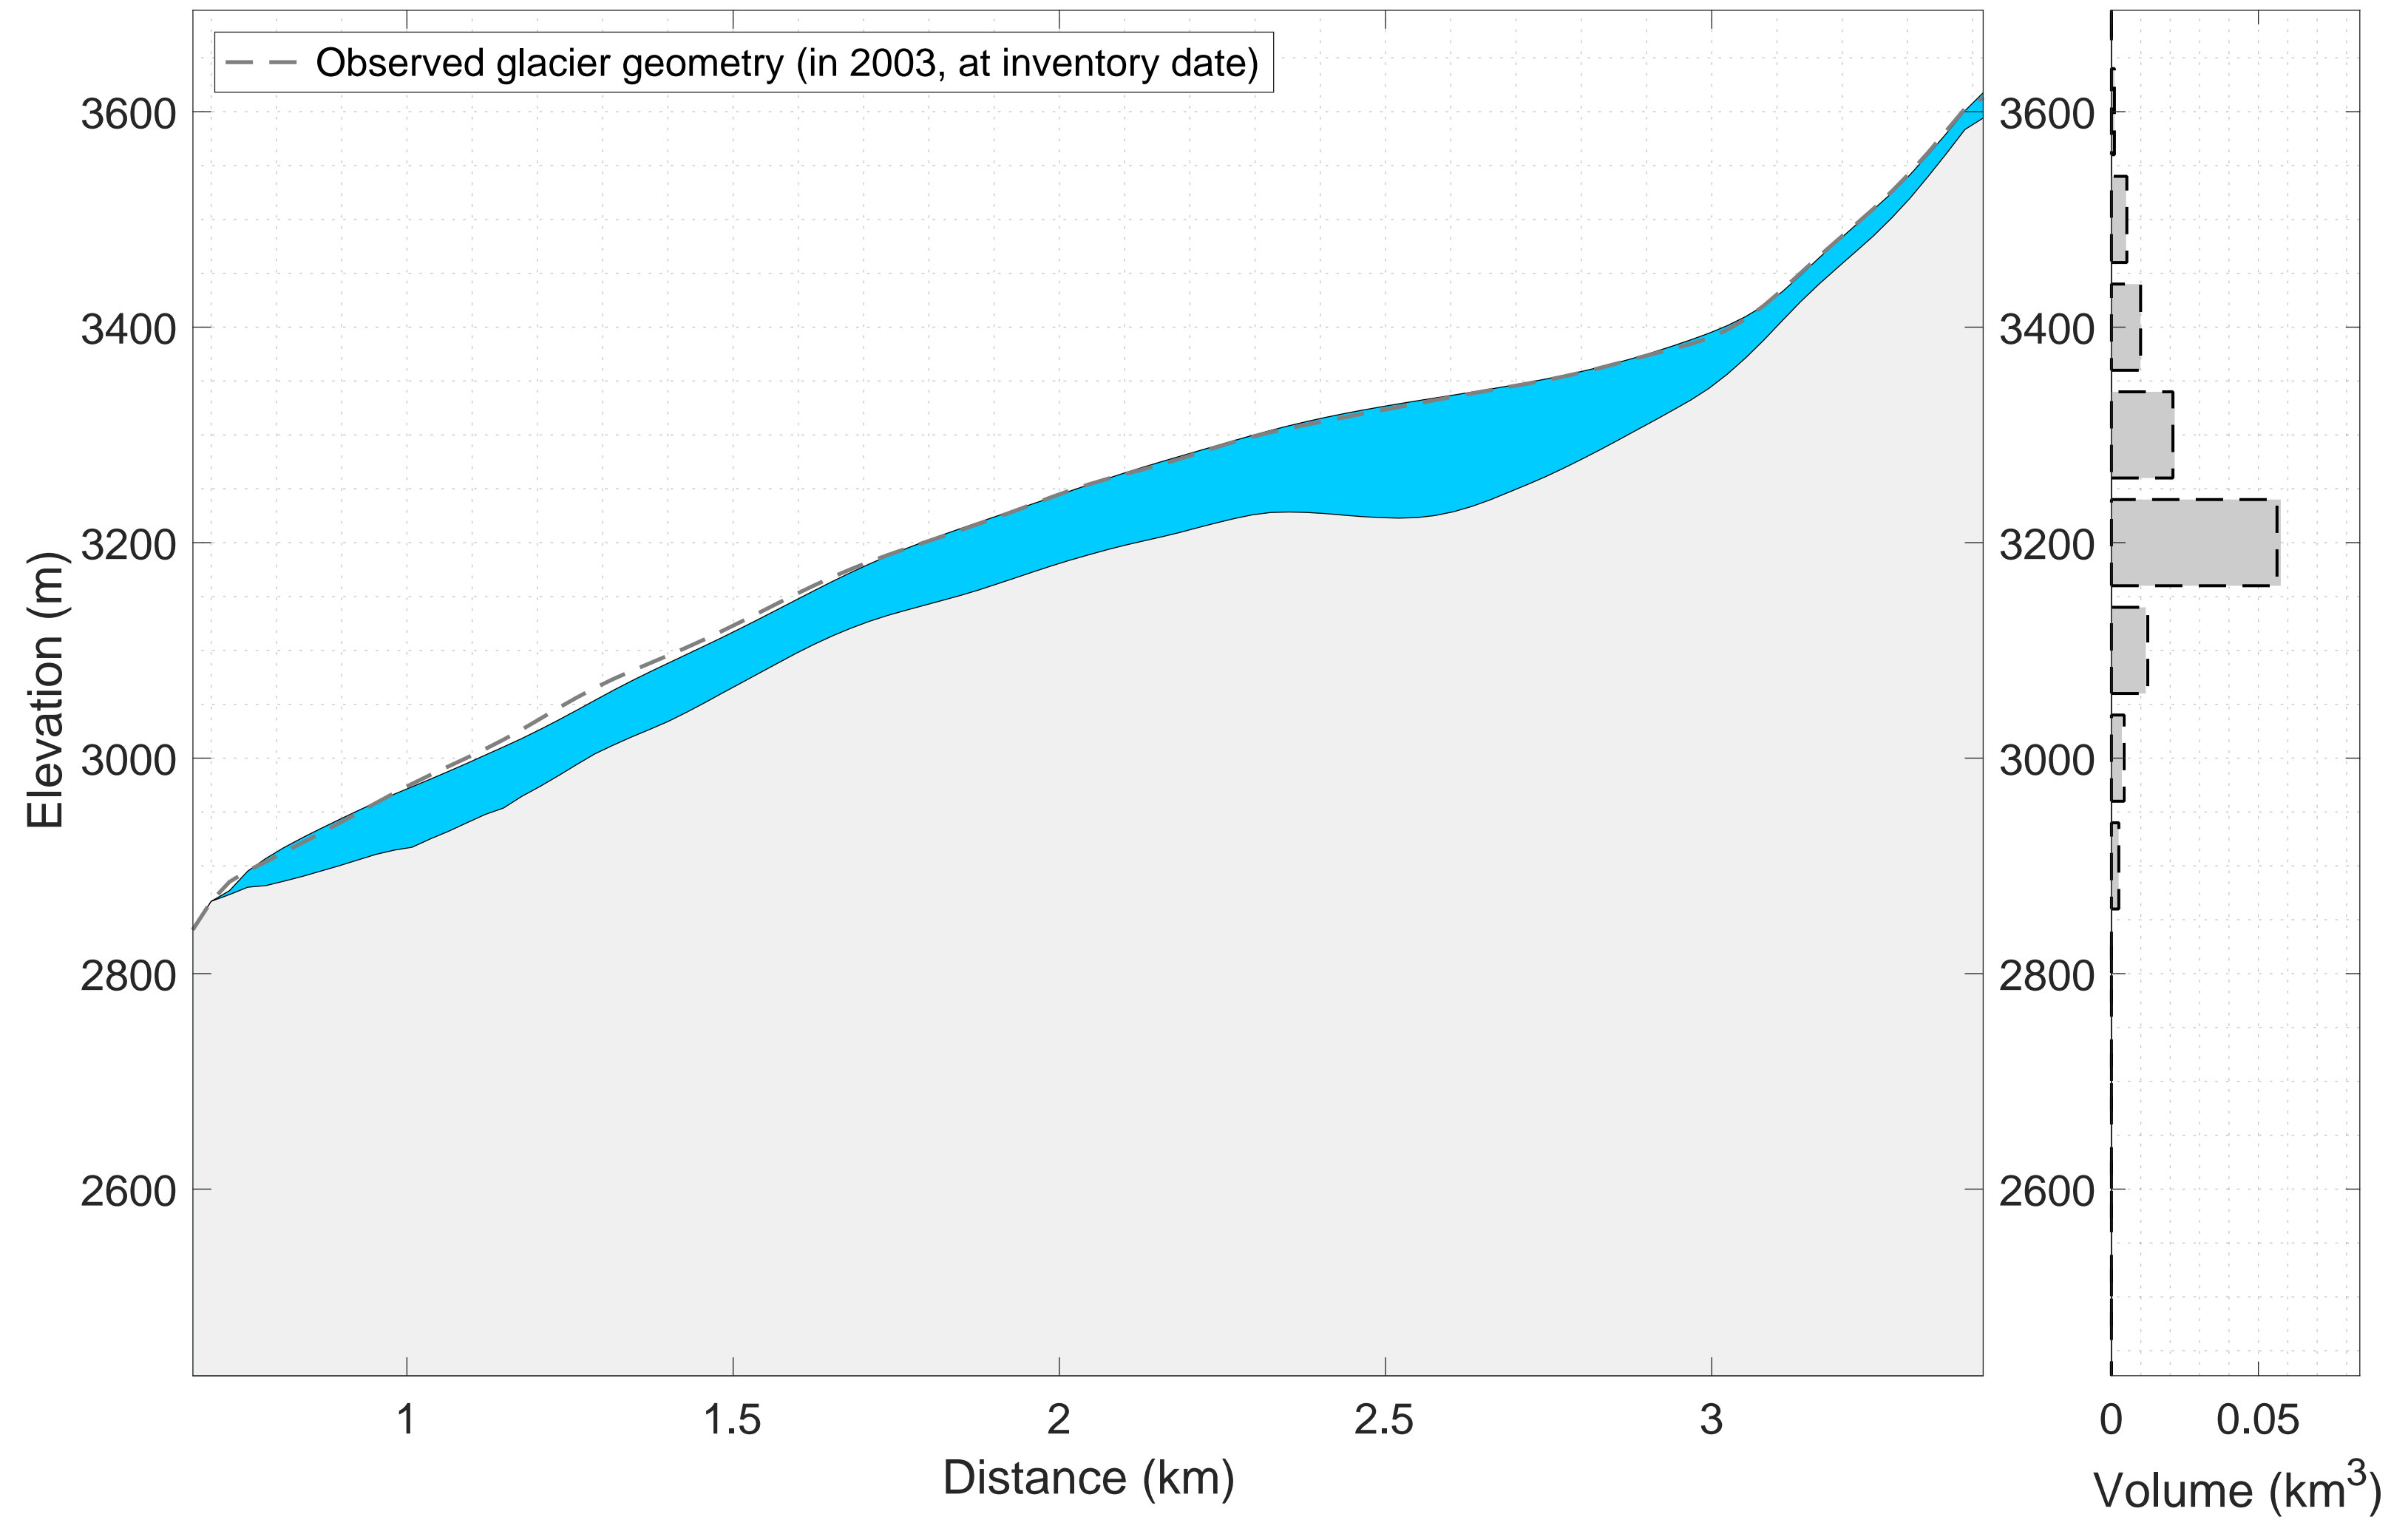

Supplement: Supplementary file 424 [file tc-13-1125-2019-supplement.zip]

**Modelled geometry (Glacier ID = 00502;  $A = 1.1463\text{e-}16 \text{ Pa}^{-3} \text{ a}^{-1}$ ;  $dx = 17 \text{ m}$ )**

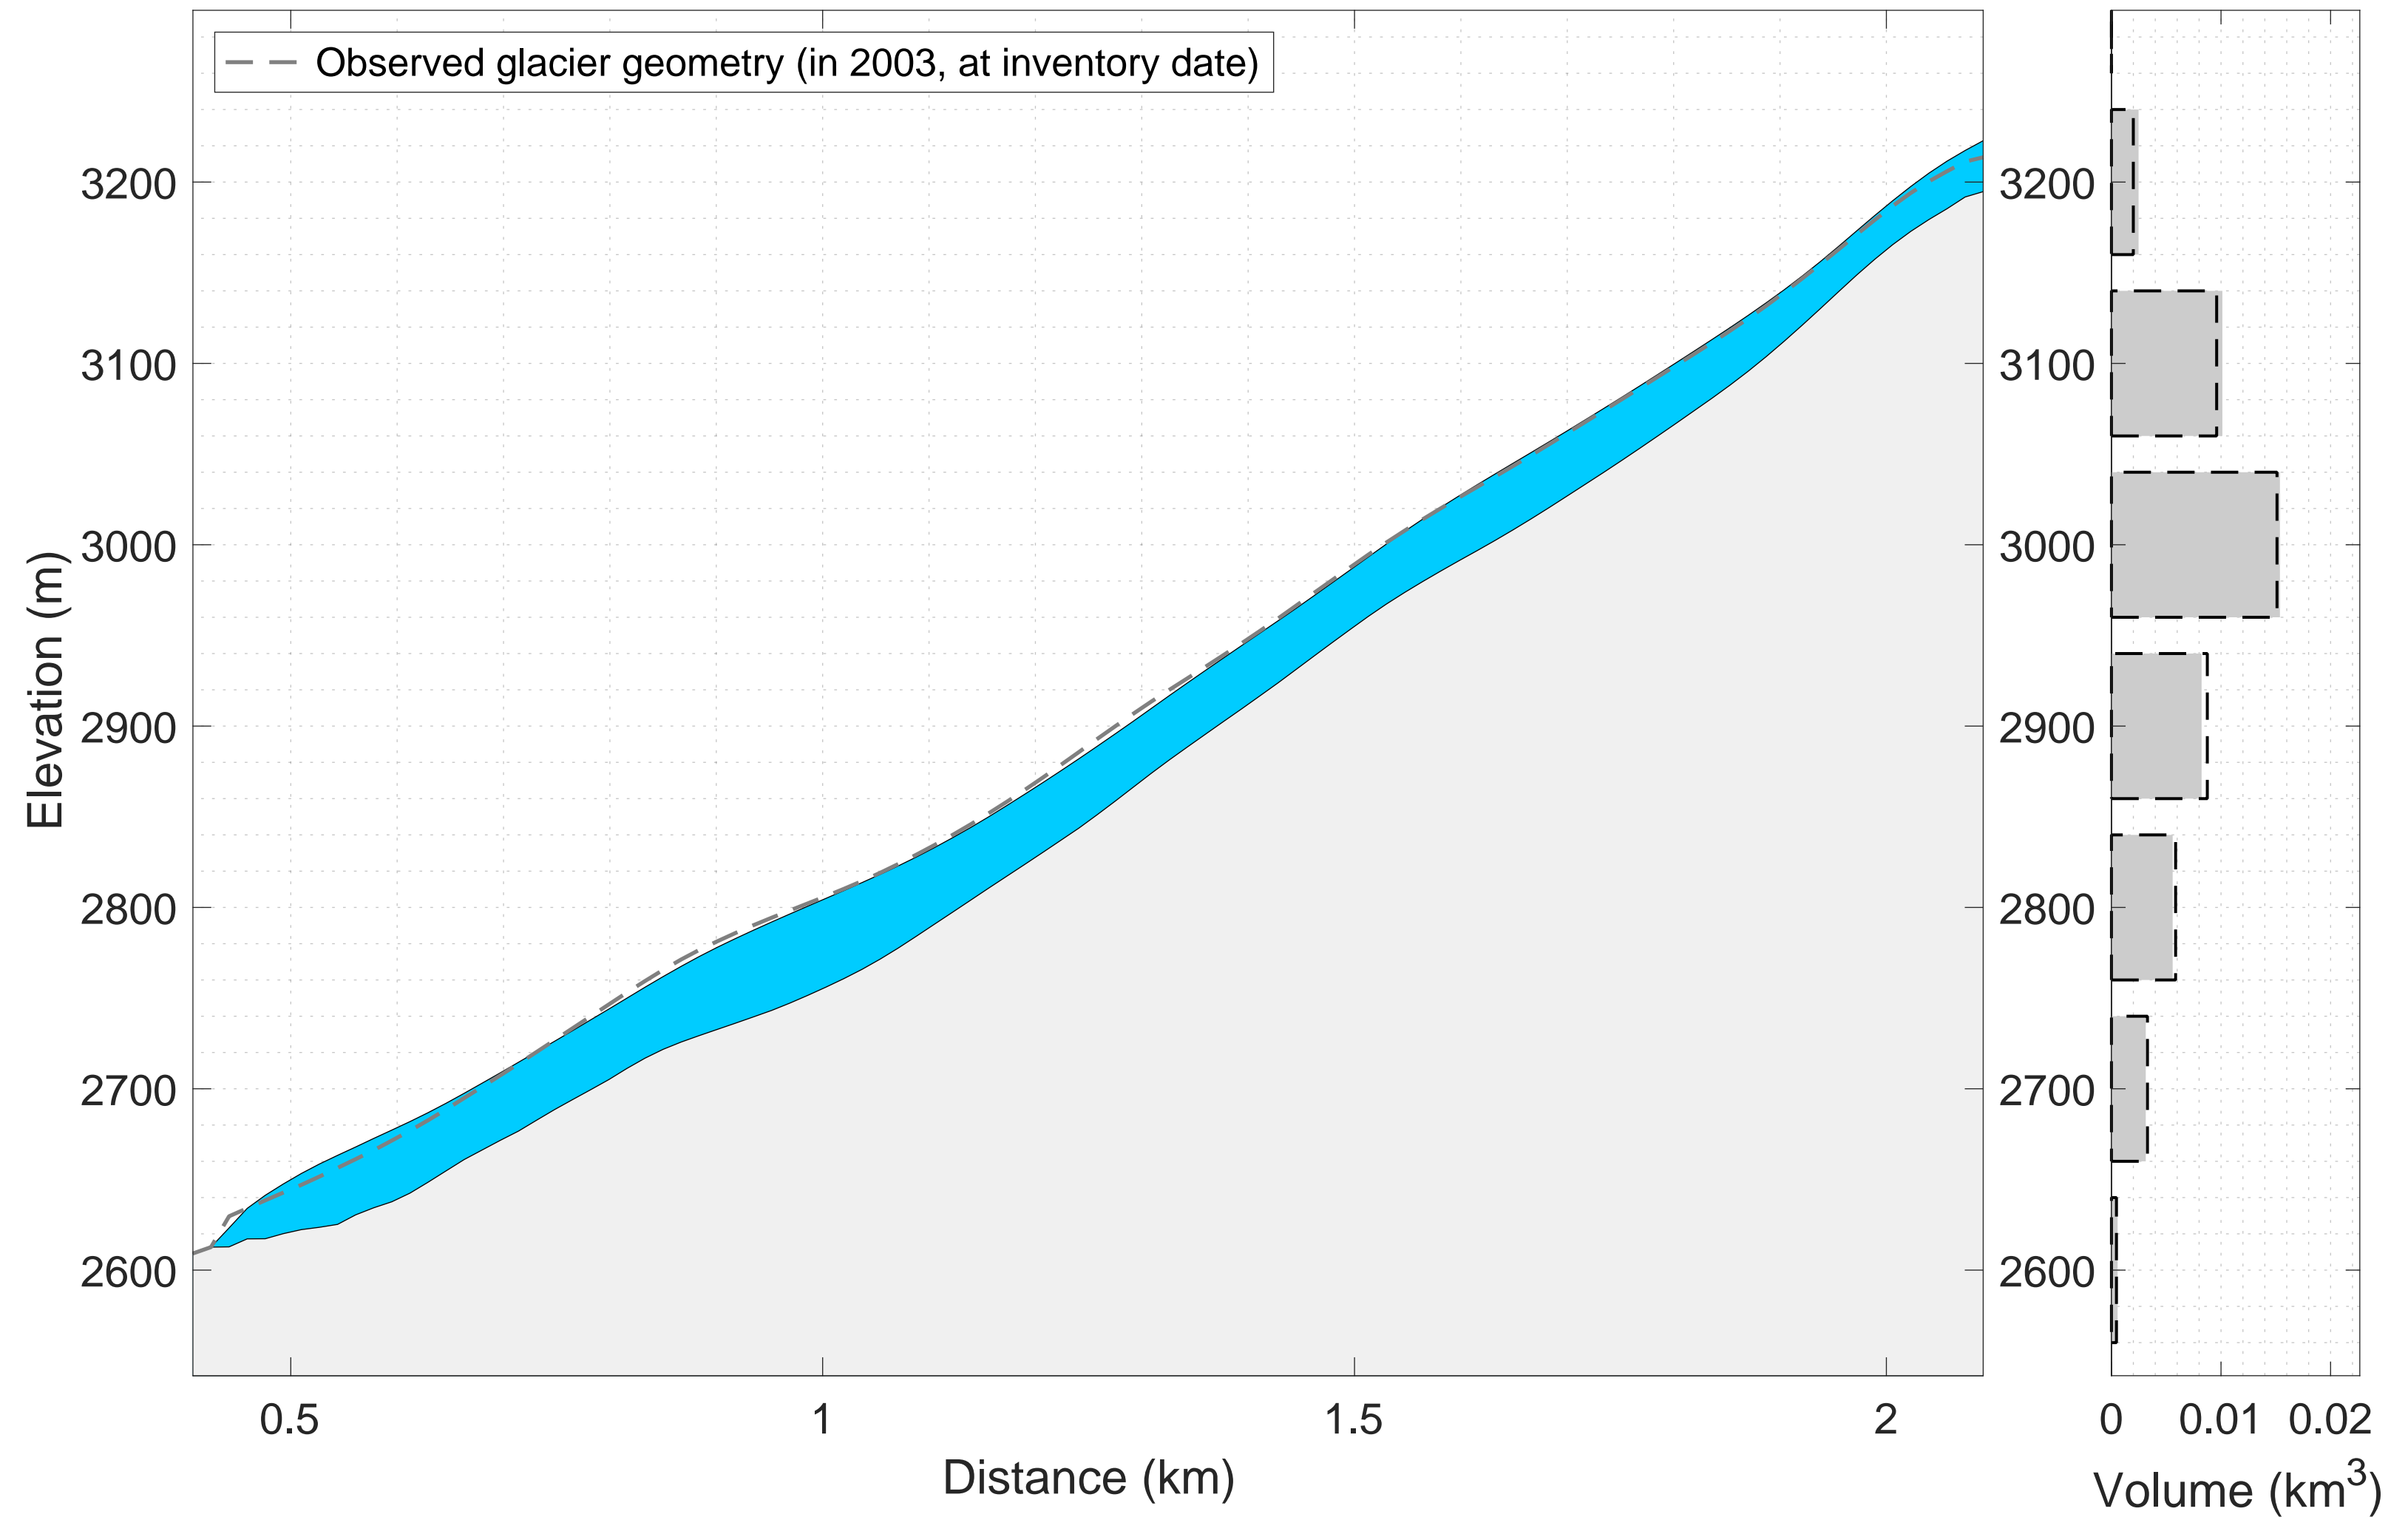

Supplement: Supplementary file 425 [file tc-13-1125-2019-supplement.zip]

**Modelled geometry (Glacier ID = 03609;  $A = 1.0982\text{e-}16 \text{ Pa}^{-3} \text{ a}^{-1}$ ;  $dx = 10 \text{ m}$ )**

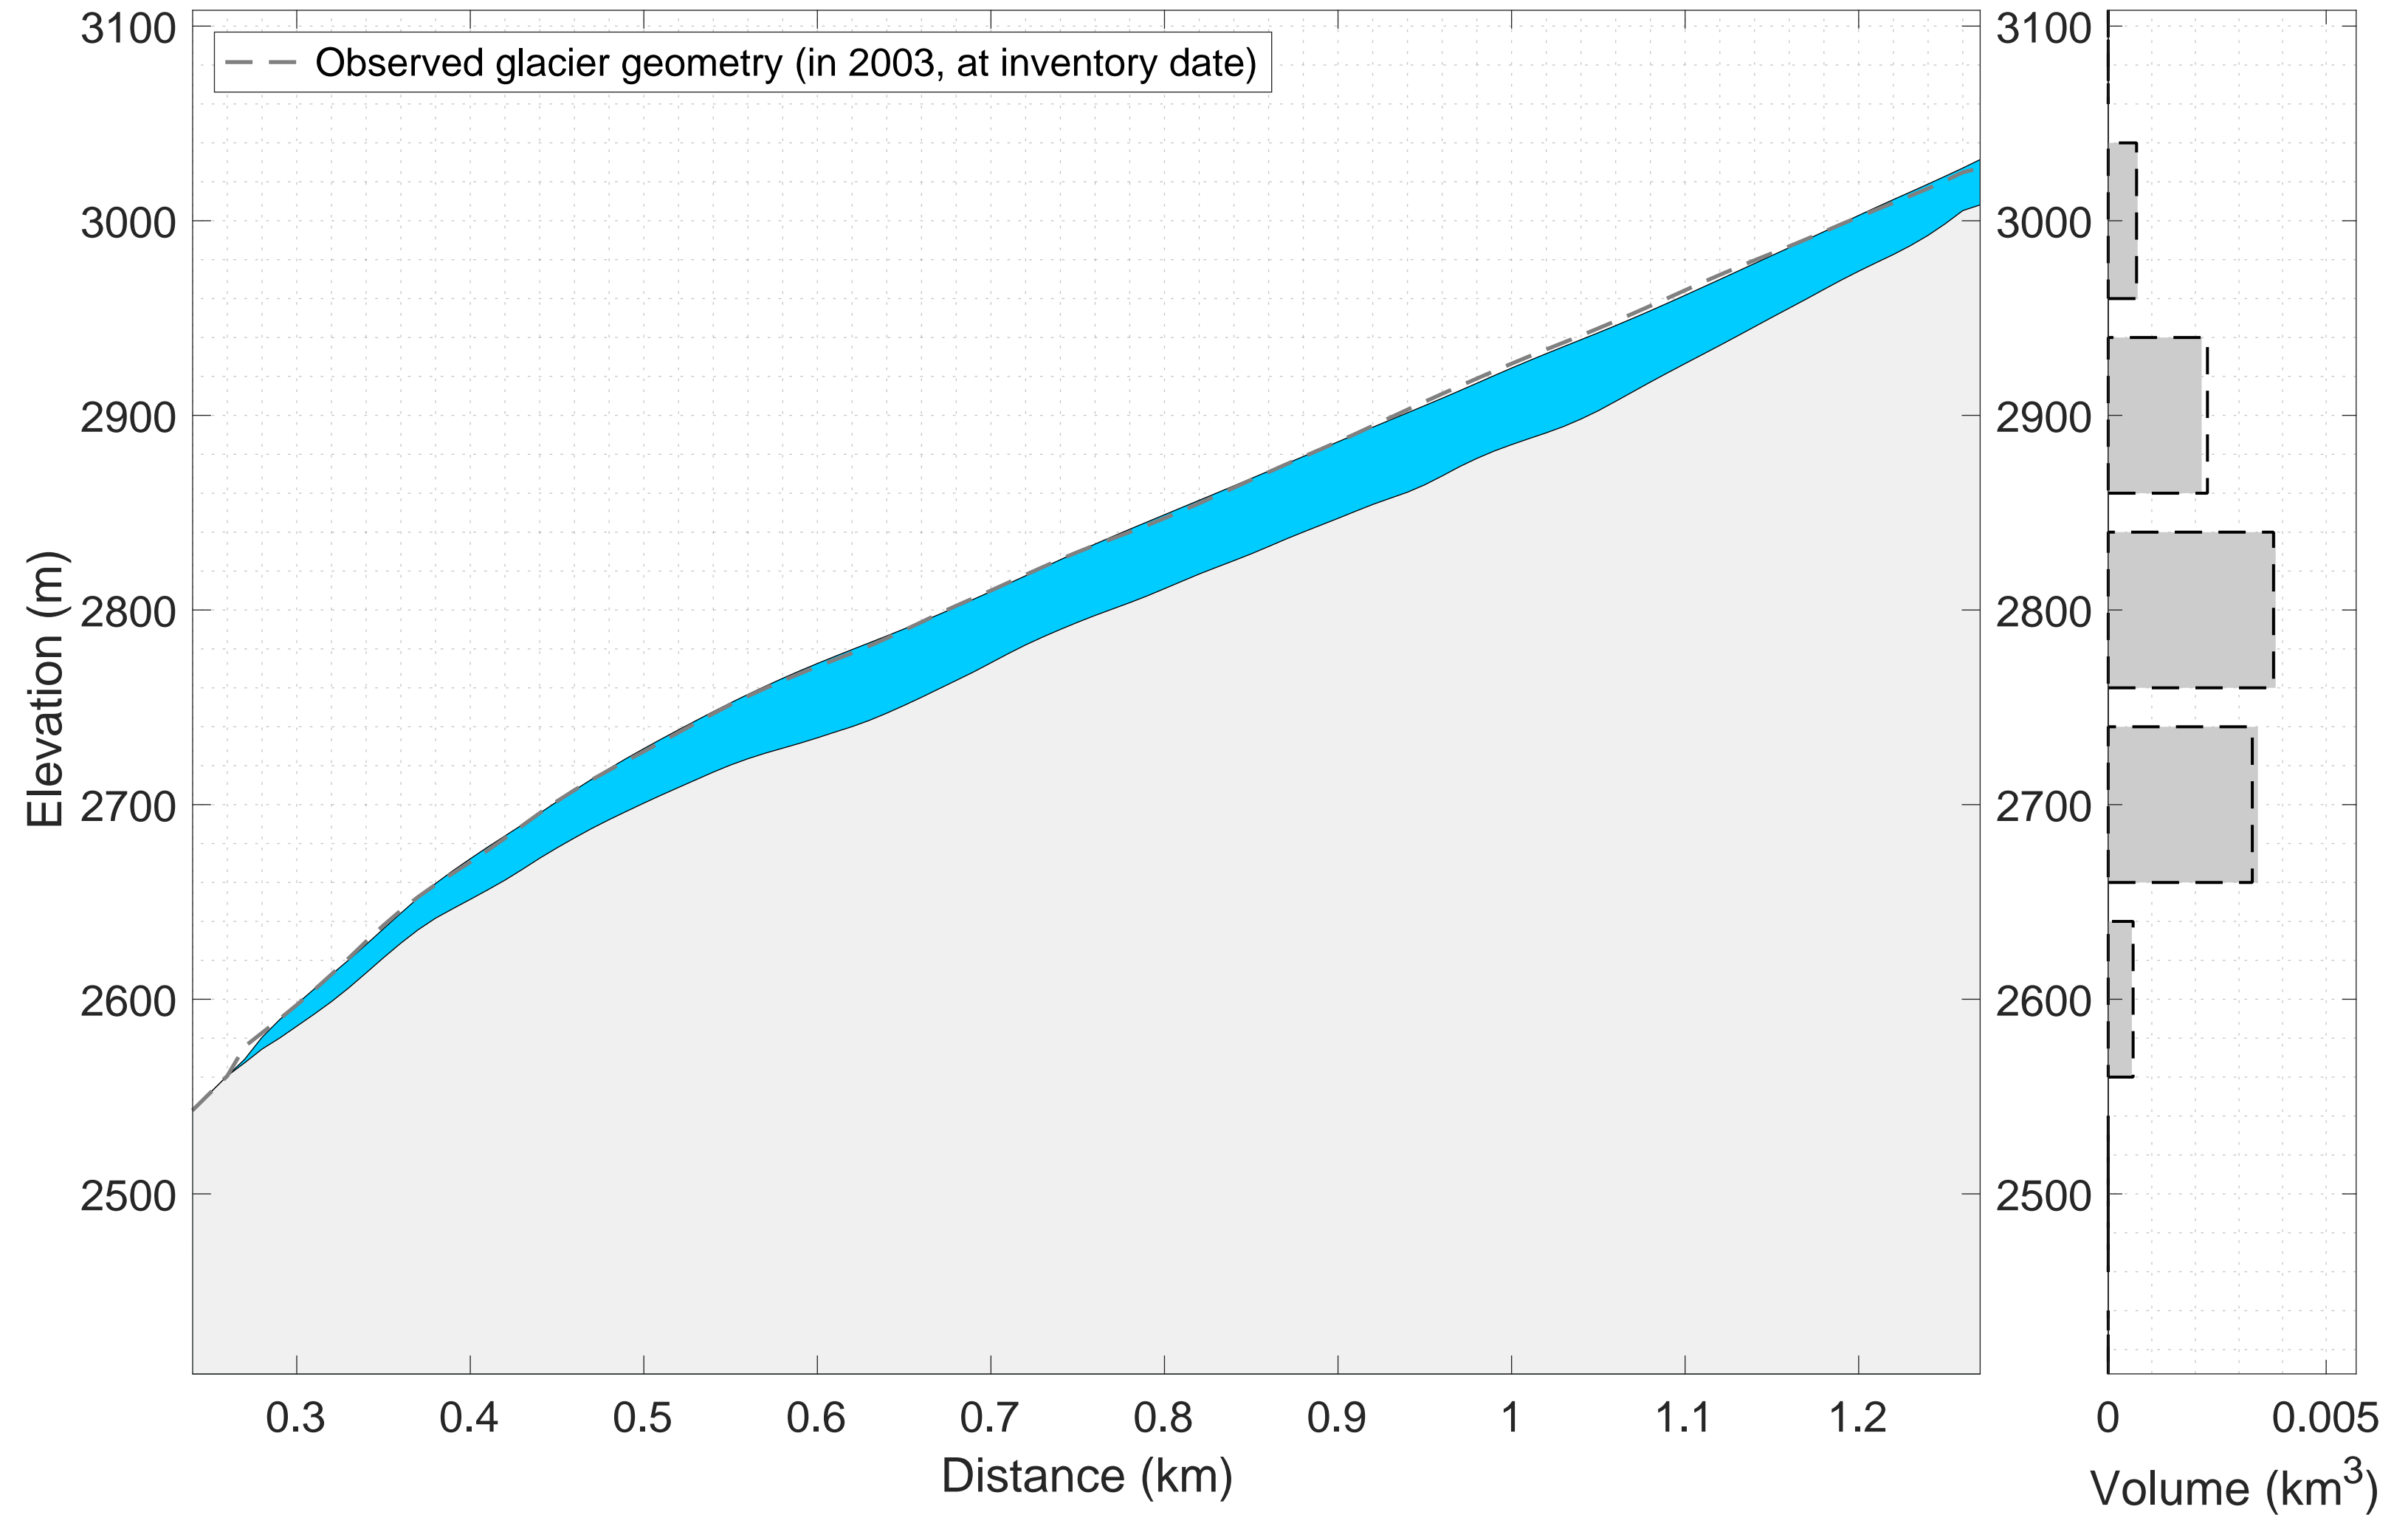

Supplement: Supplementary file 426 [file tc-13-1125-2019-supplement.zip]

**Modelled geometry (Glacier ID = 03359;  $A = 7.3024\text{e-}17 \text{ Pa}^{-3} \text{ a}^{-1}$ ;  $dx = 14 \text{ m}$ )**

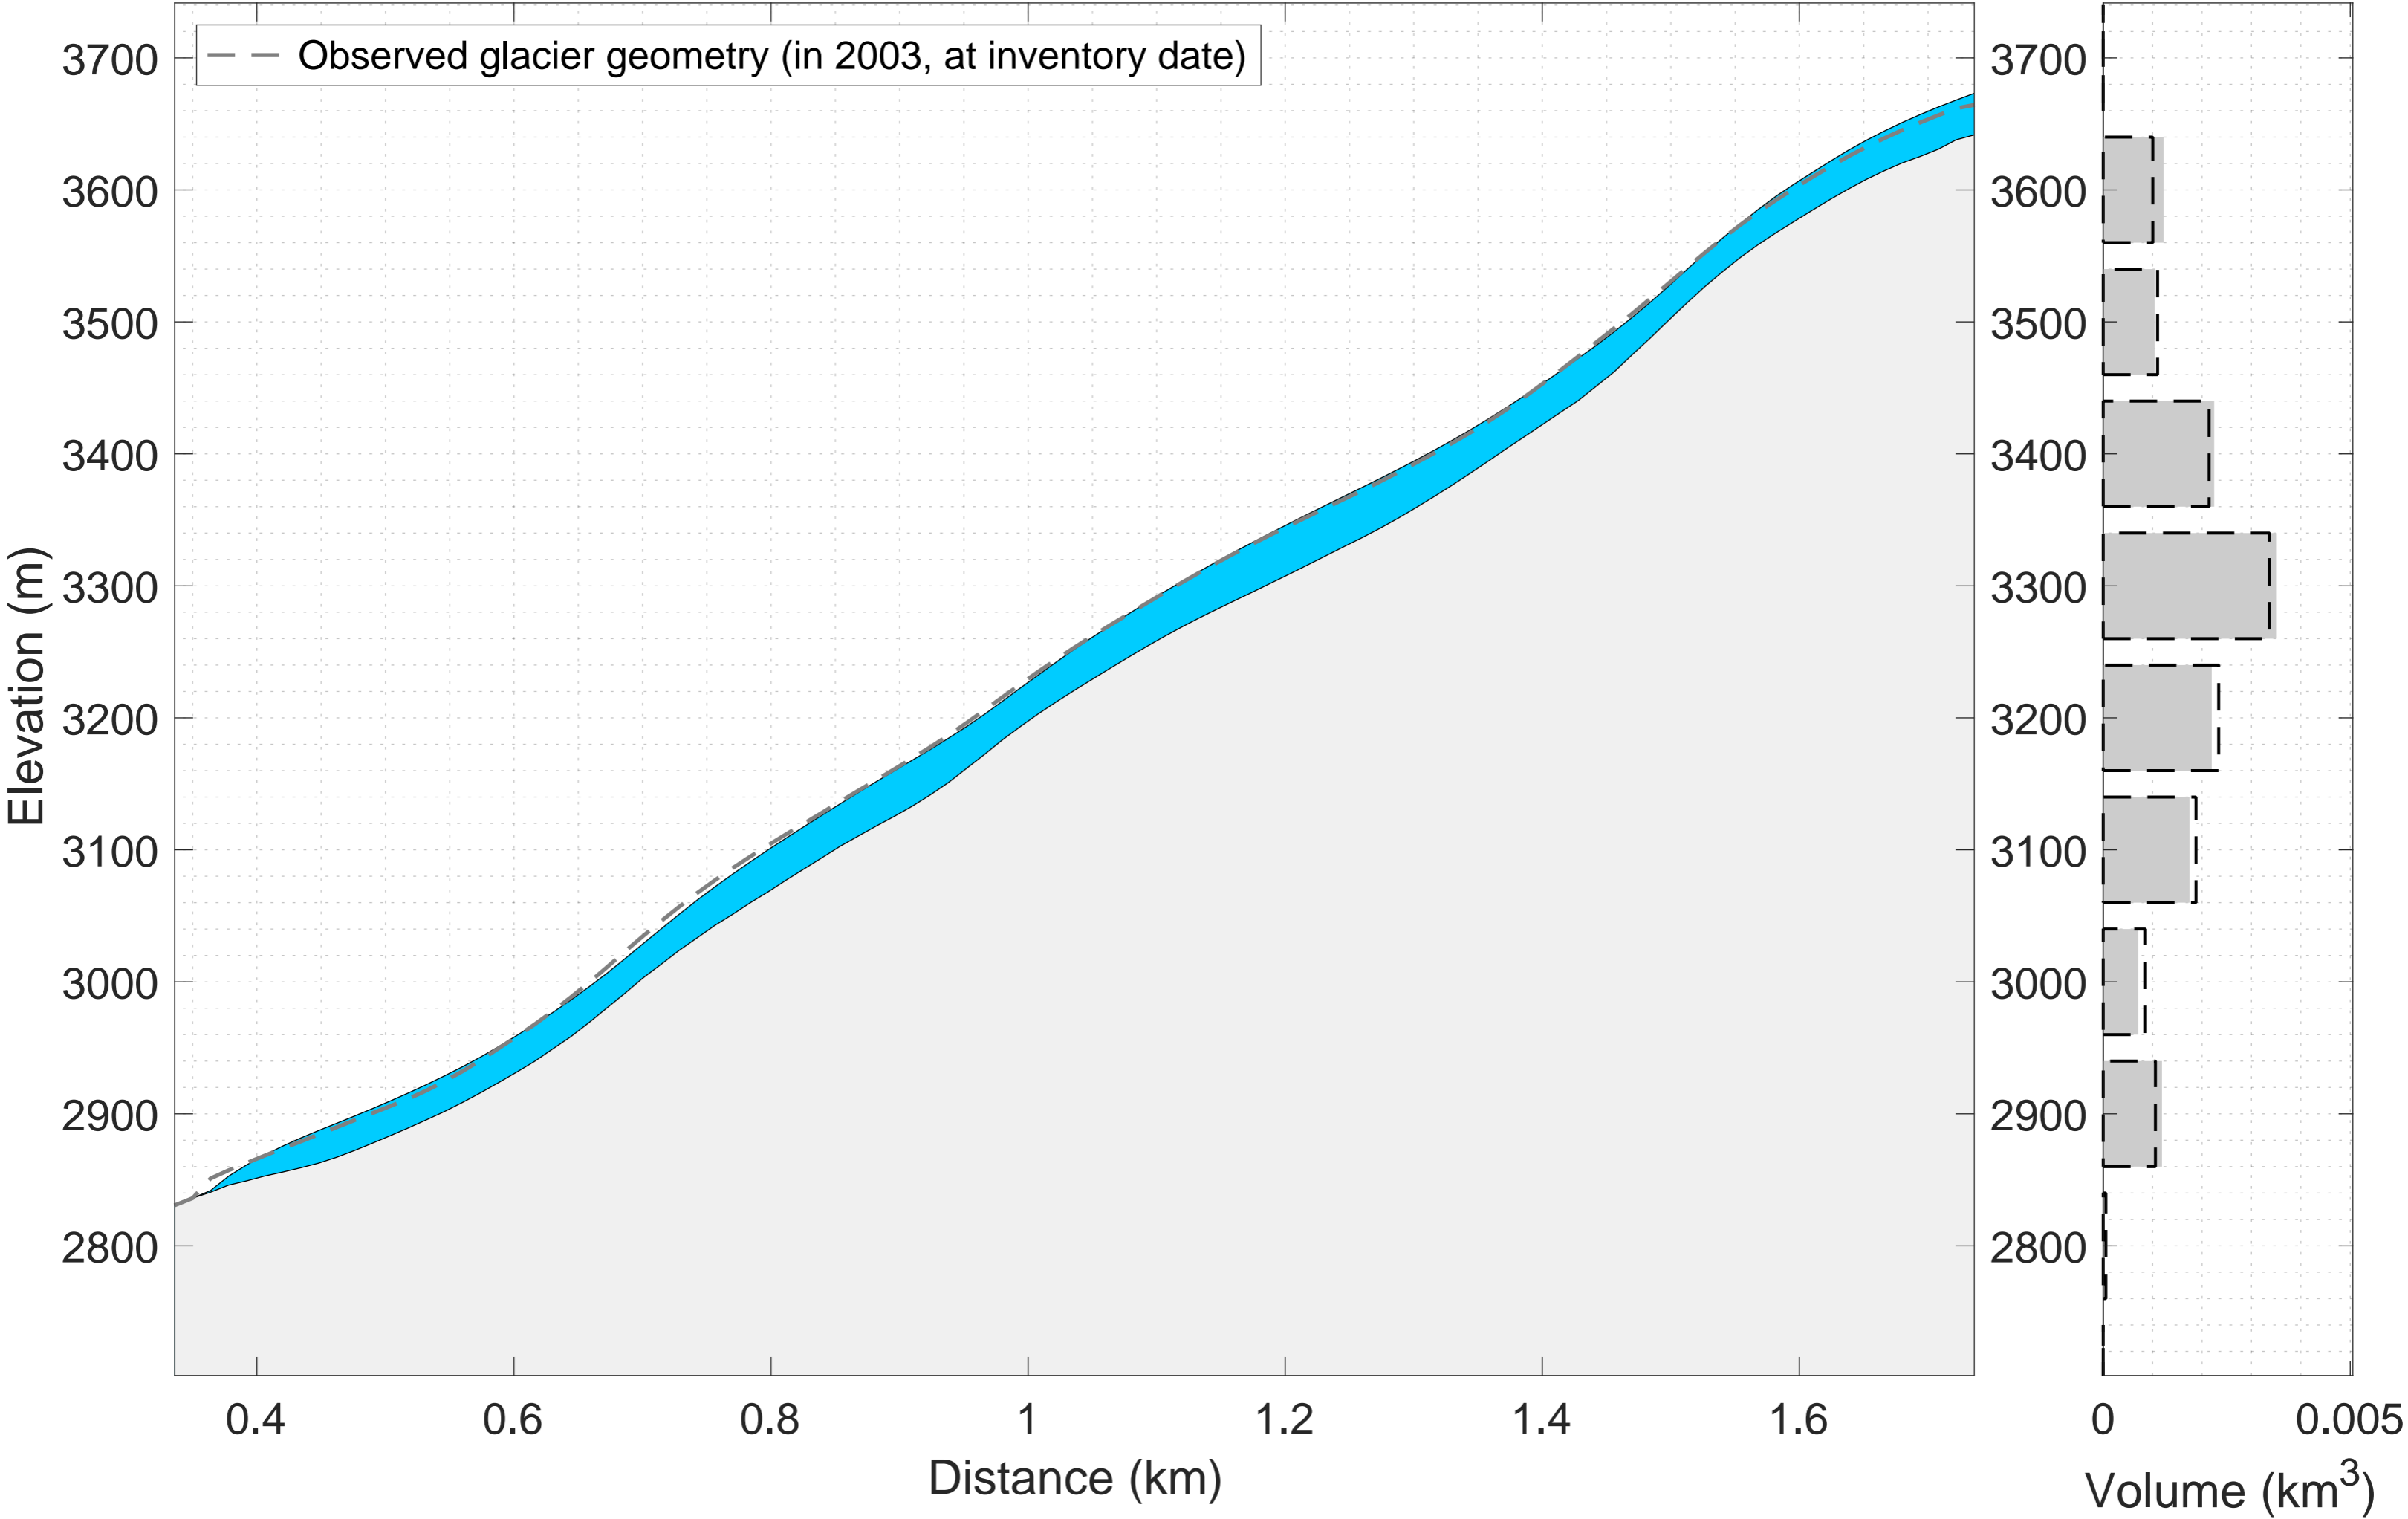

Supplement: Supplementary file 427 [file tc-13-1125-2019-supplement.zip]

**Modelled geometry (Glacier ID = 01522;  $A = 7.1786\text{e-}17 \text{ Pa}^{-3} \text{ a}^{-1}$ ;  $dx = 13 \text{ m}$ )**

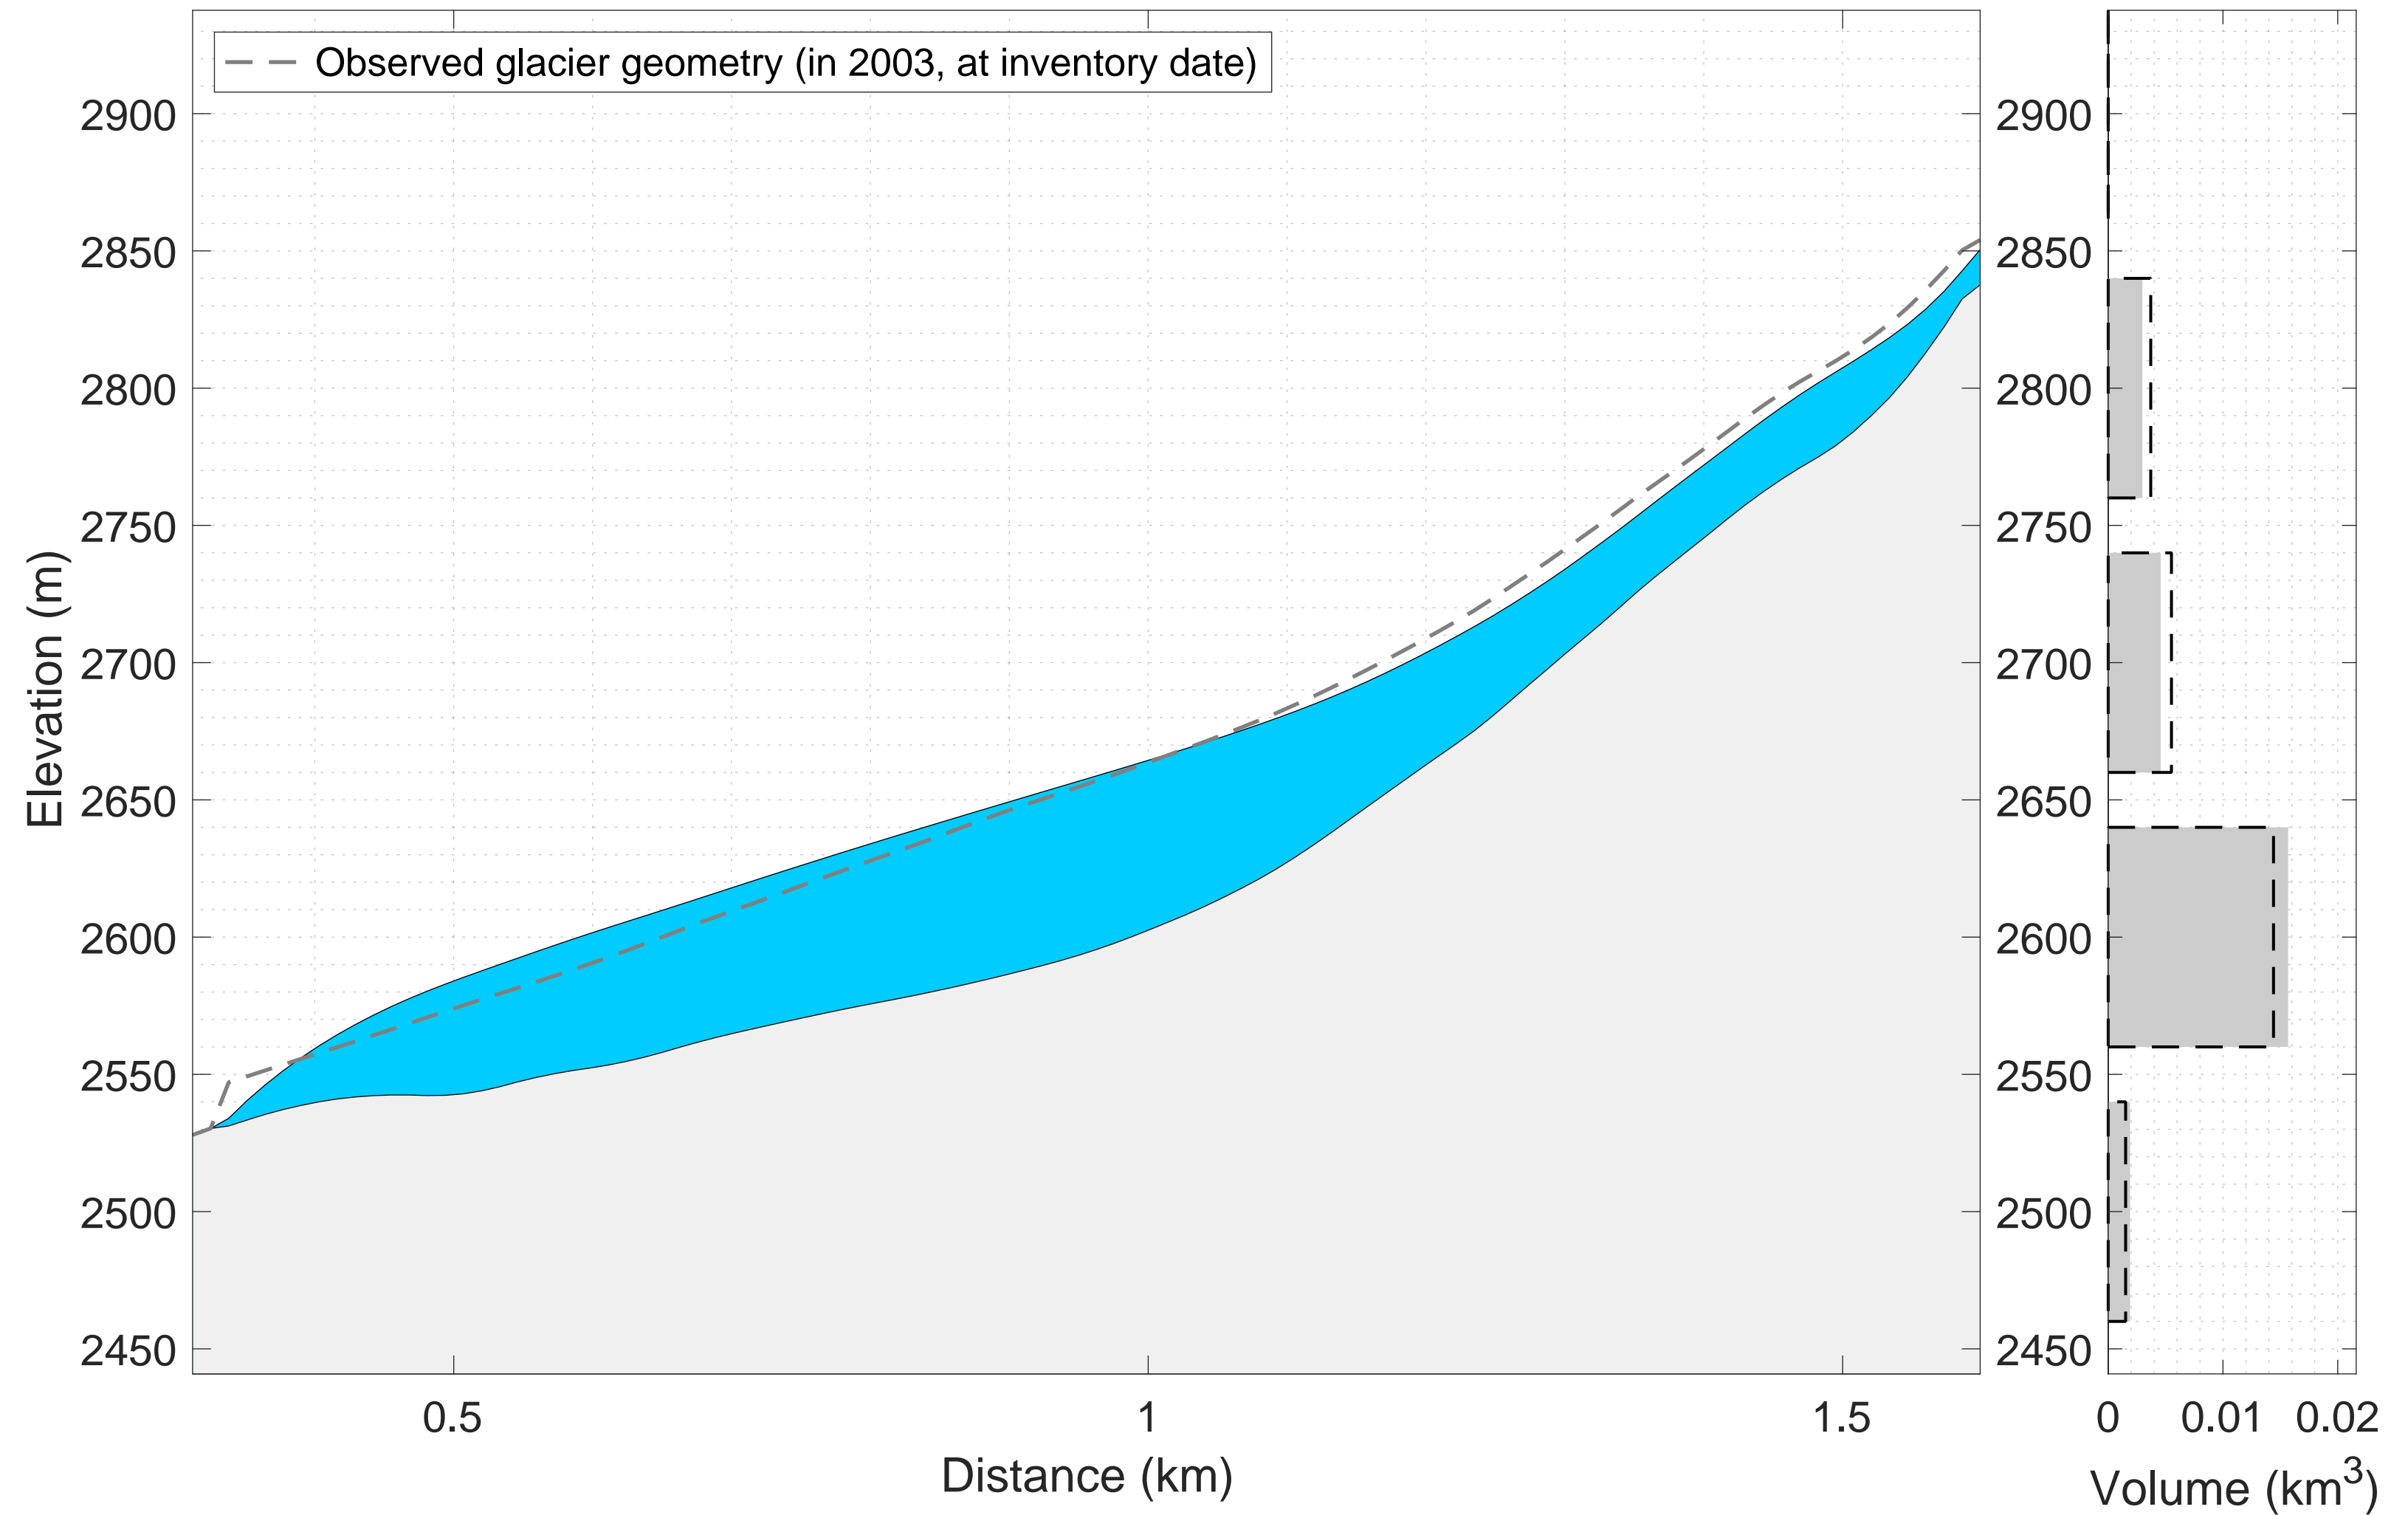

Supplement: Supplementary file 428 [file tc-13-1125-2019-supplement.zip]

**Modelled geometry (Glacier ID = 03384;  $A = 1.3248\text{e-}16 \text{ Pa}^{-3} \text{ a}^{-1}$ ;  $dx = 11 \text{ m}$ )**

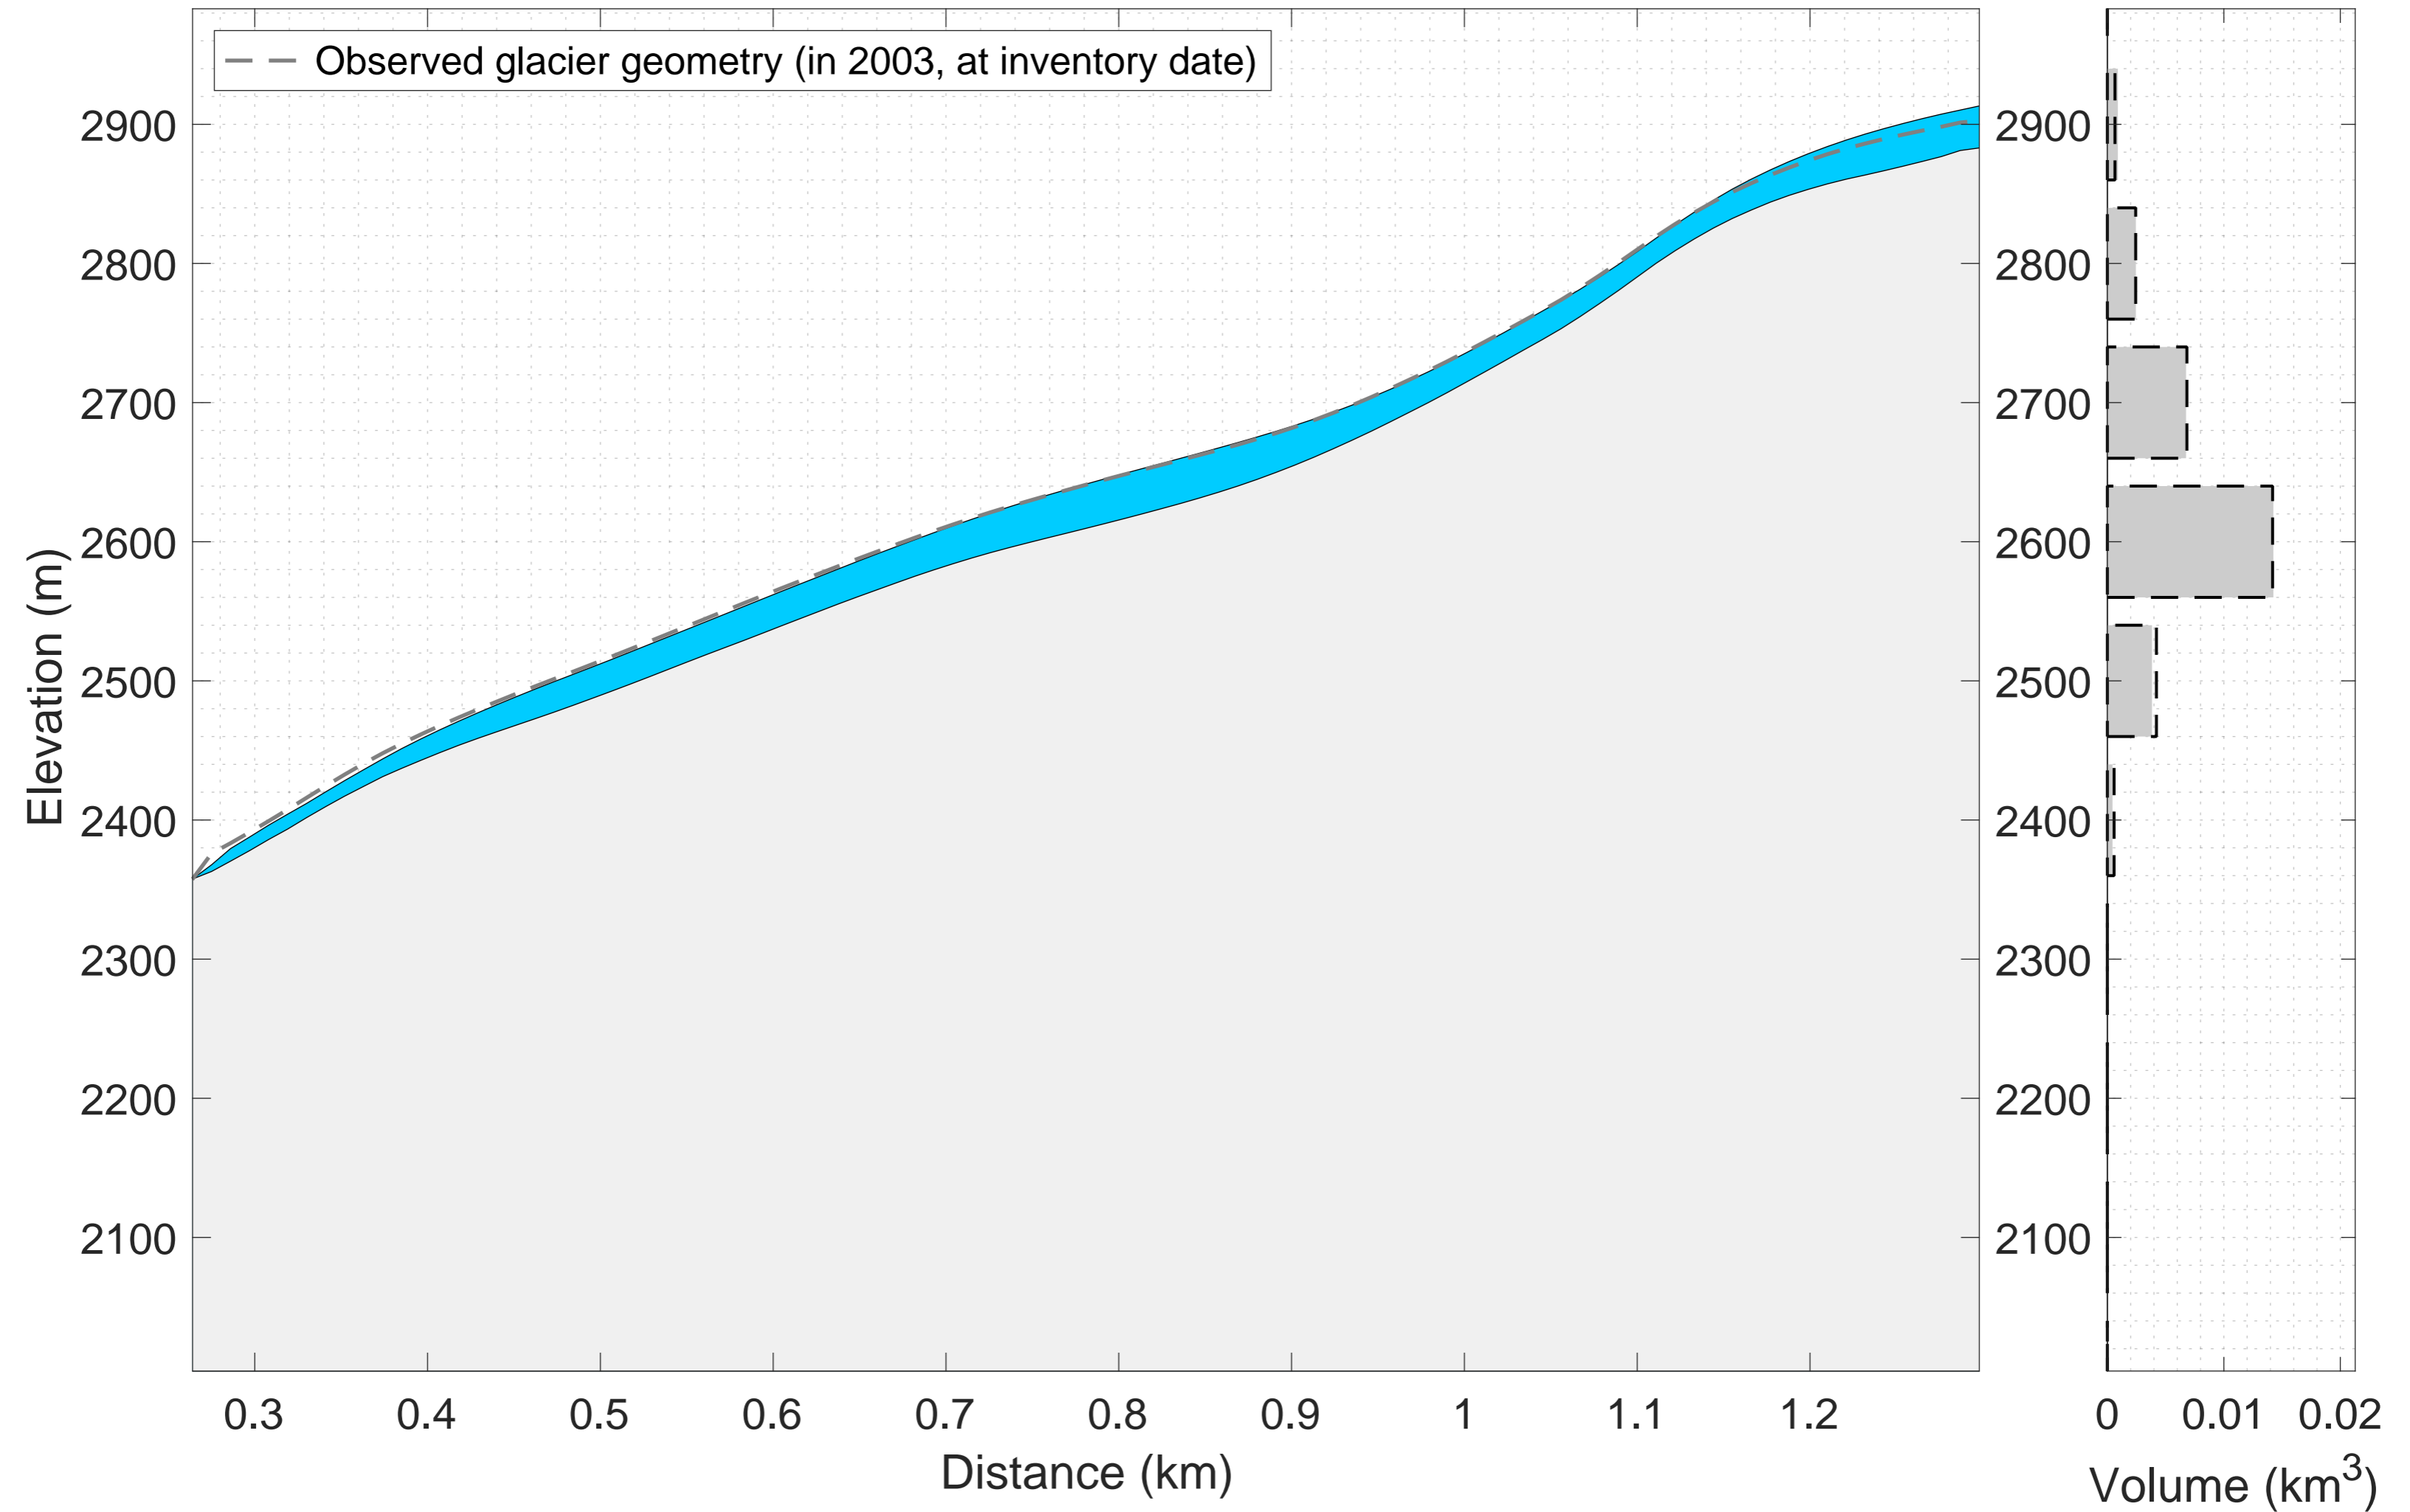

Supplement: Supplementary file 429 [file tc-13-1125-2019-supplement.zip]

**Modelled geometry (Glacier ID = 01116;  $A = 7.3643\text{e-}17 \text{ Pa}^{-3} \text{ a}^{-1}$ ;  $dx = 12 \text{ m}$ )**

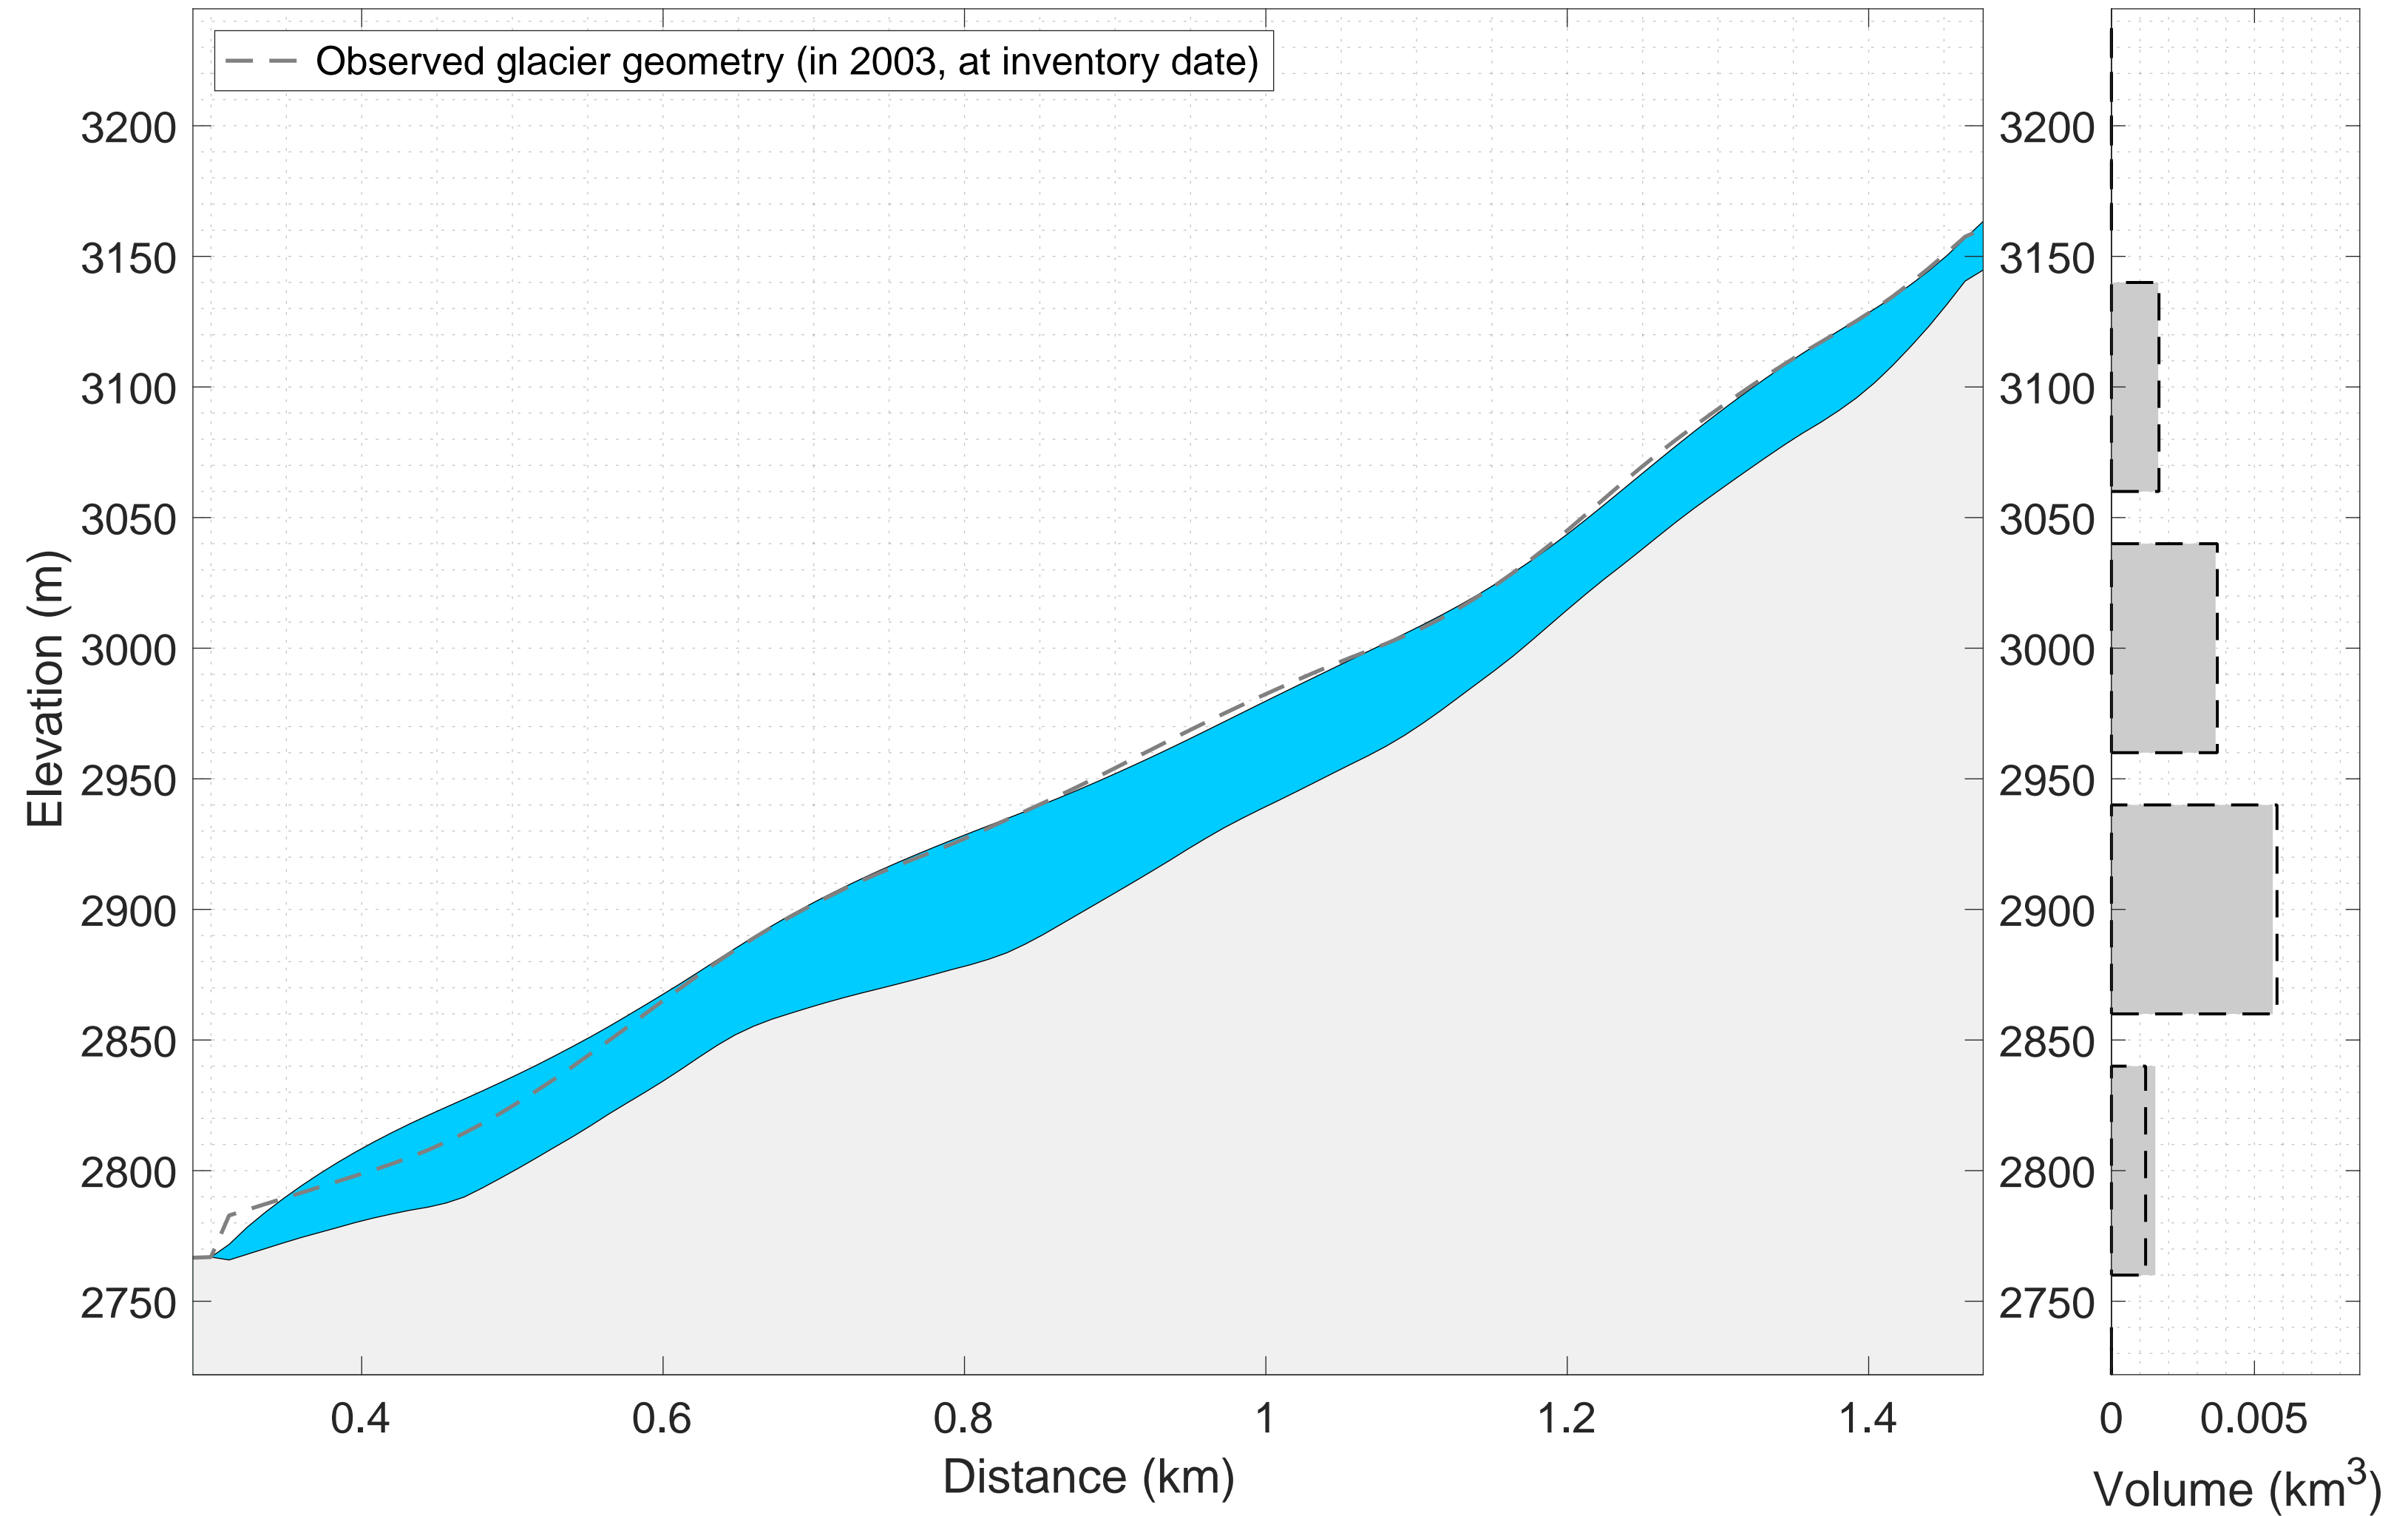

Supplement: Supplementary file 430 [file tc-13-1125-2019-supplement.zip]

**Modelled geometry (Glacier ID = 01198;  $A = 9.7533\text{e-}17 \text{ Pa}^{-3} \text{ a}^{-1}$ ;  $dx = 60 \text{ m}$ )**

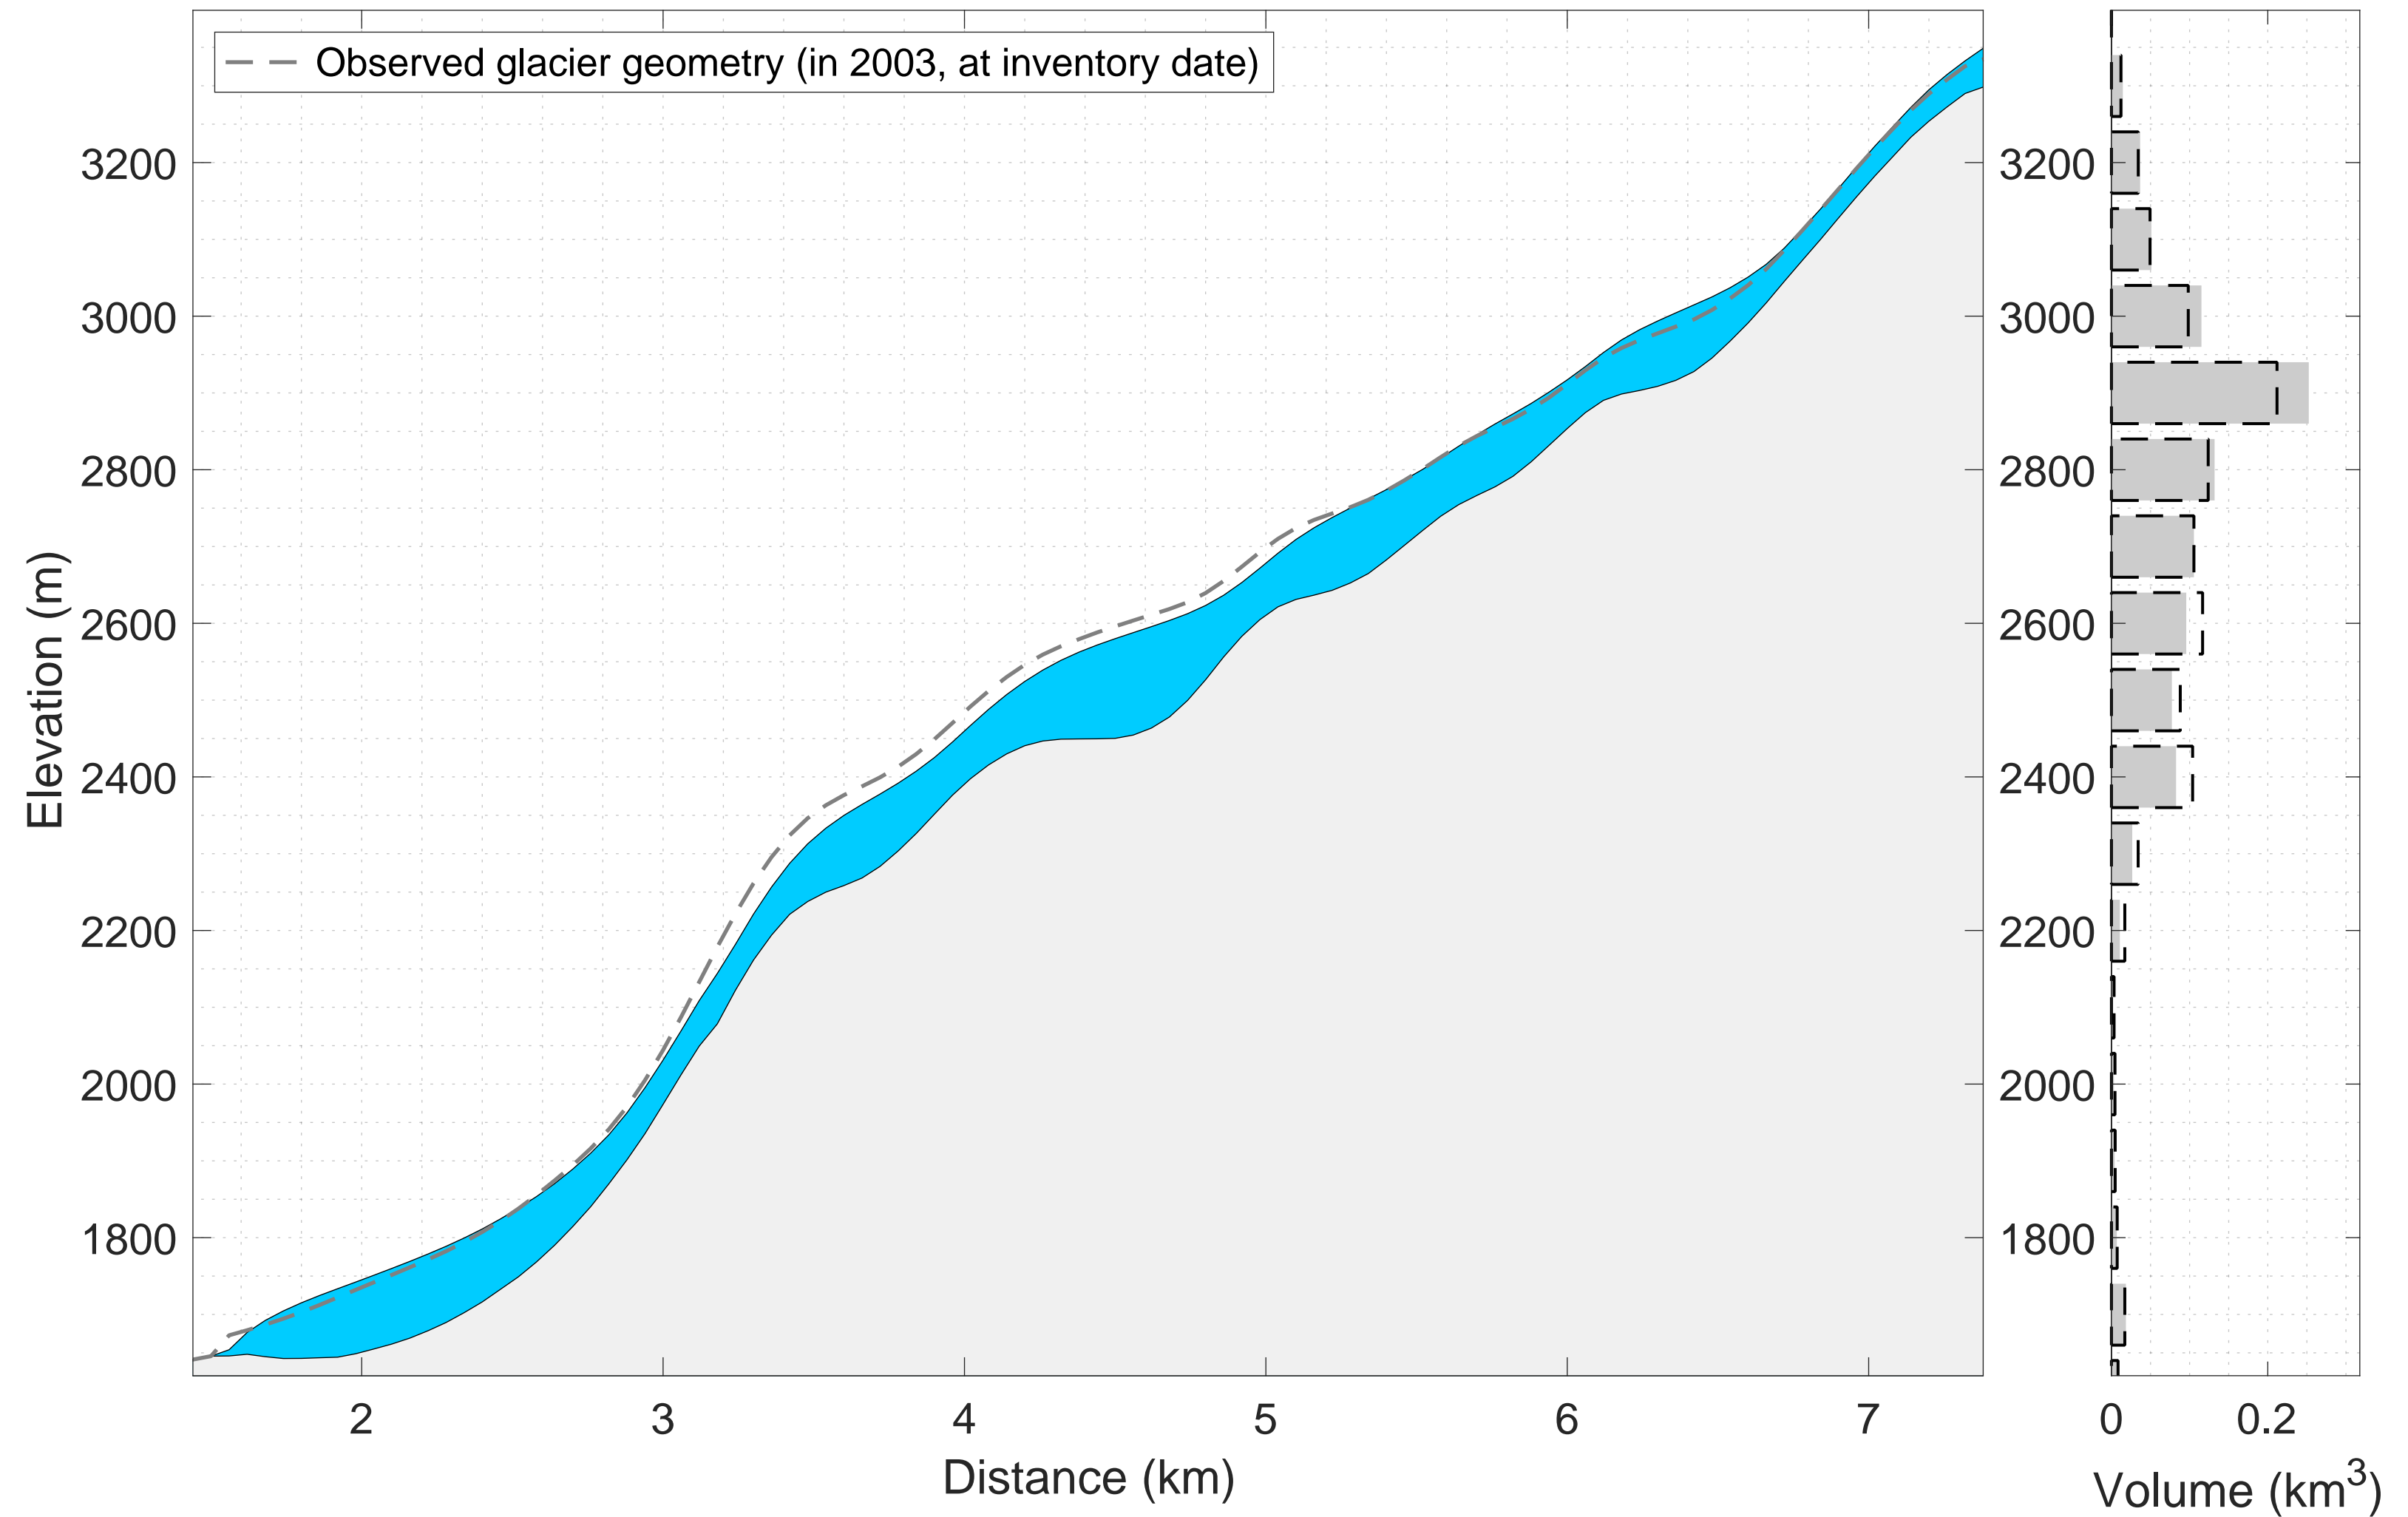

Supplement: Supplementary file 431 [file tc-13-1125-2019-supplement.zip]

**Modelled geometry (Glacier ID = 01111;  $A = 1.0461\text{e-}16 \text{ Pa}^{-3} \text{ a}^{-1}$ ;  $dx = 13 \text{ m}$ )**

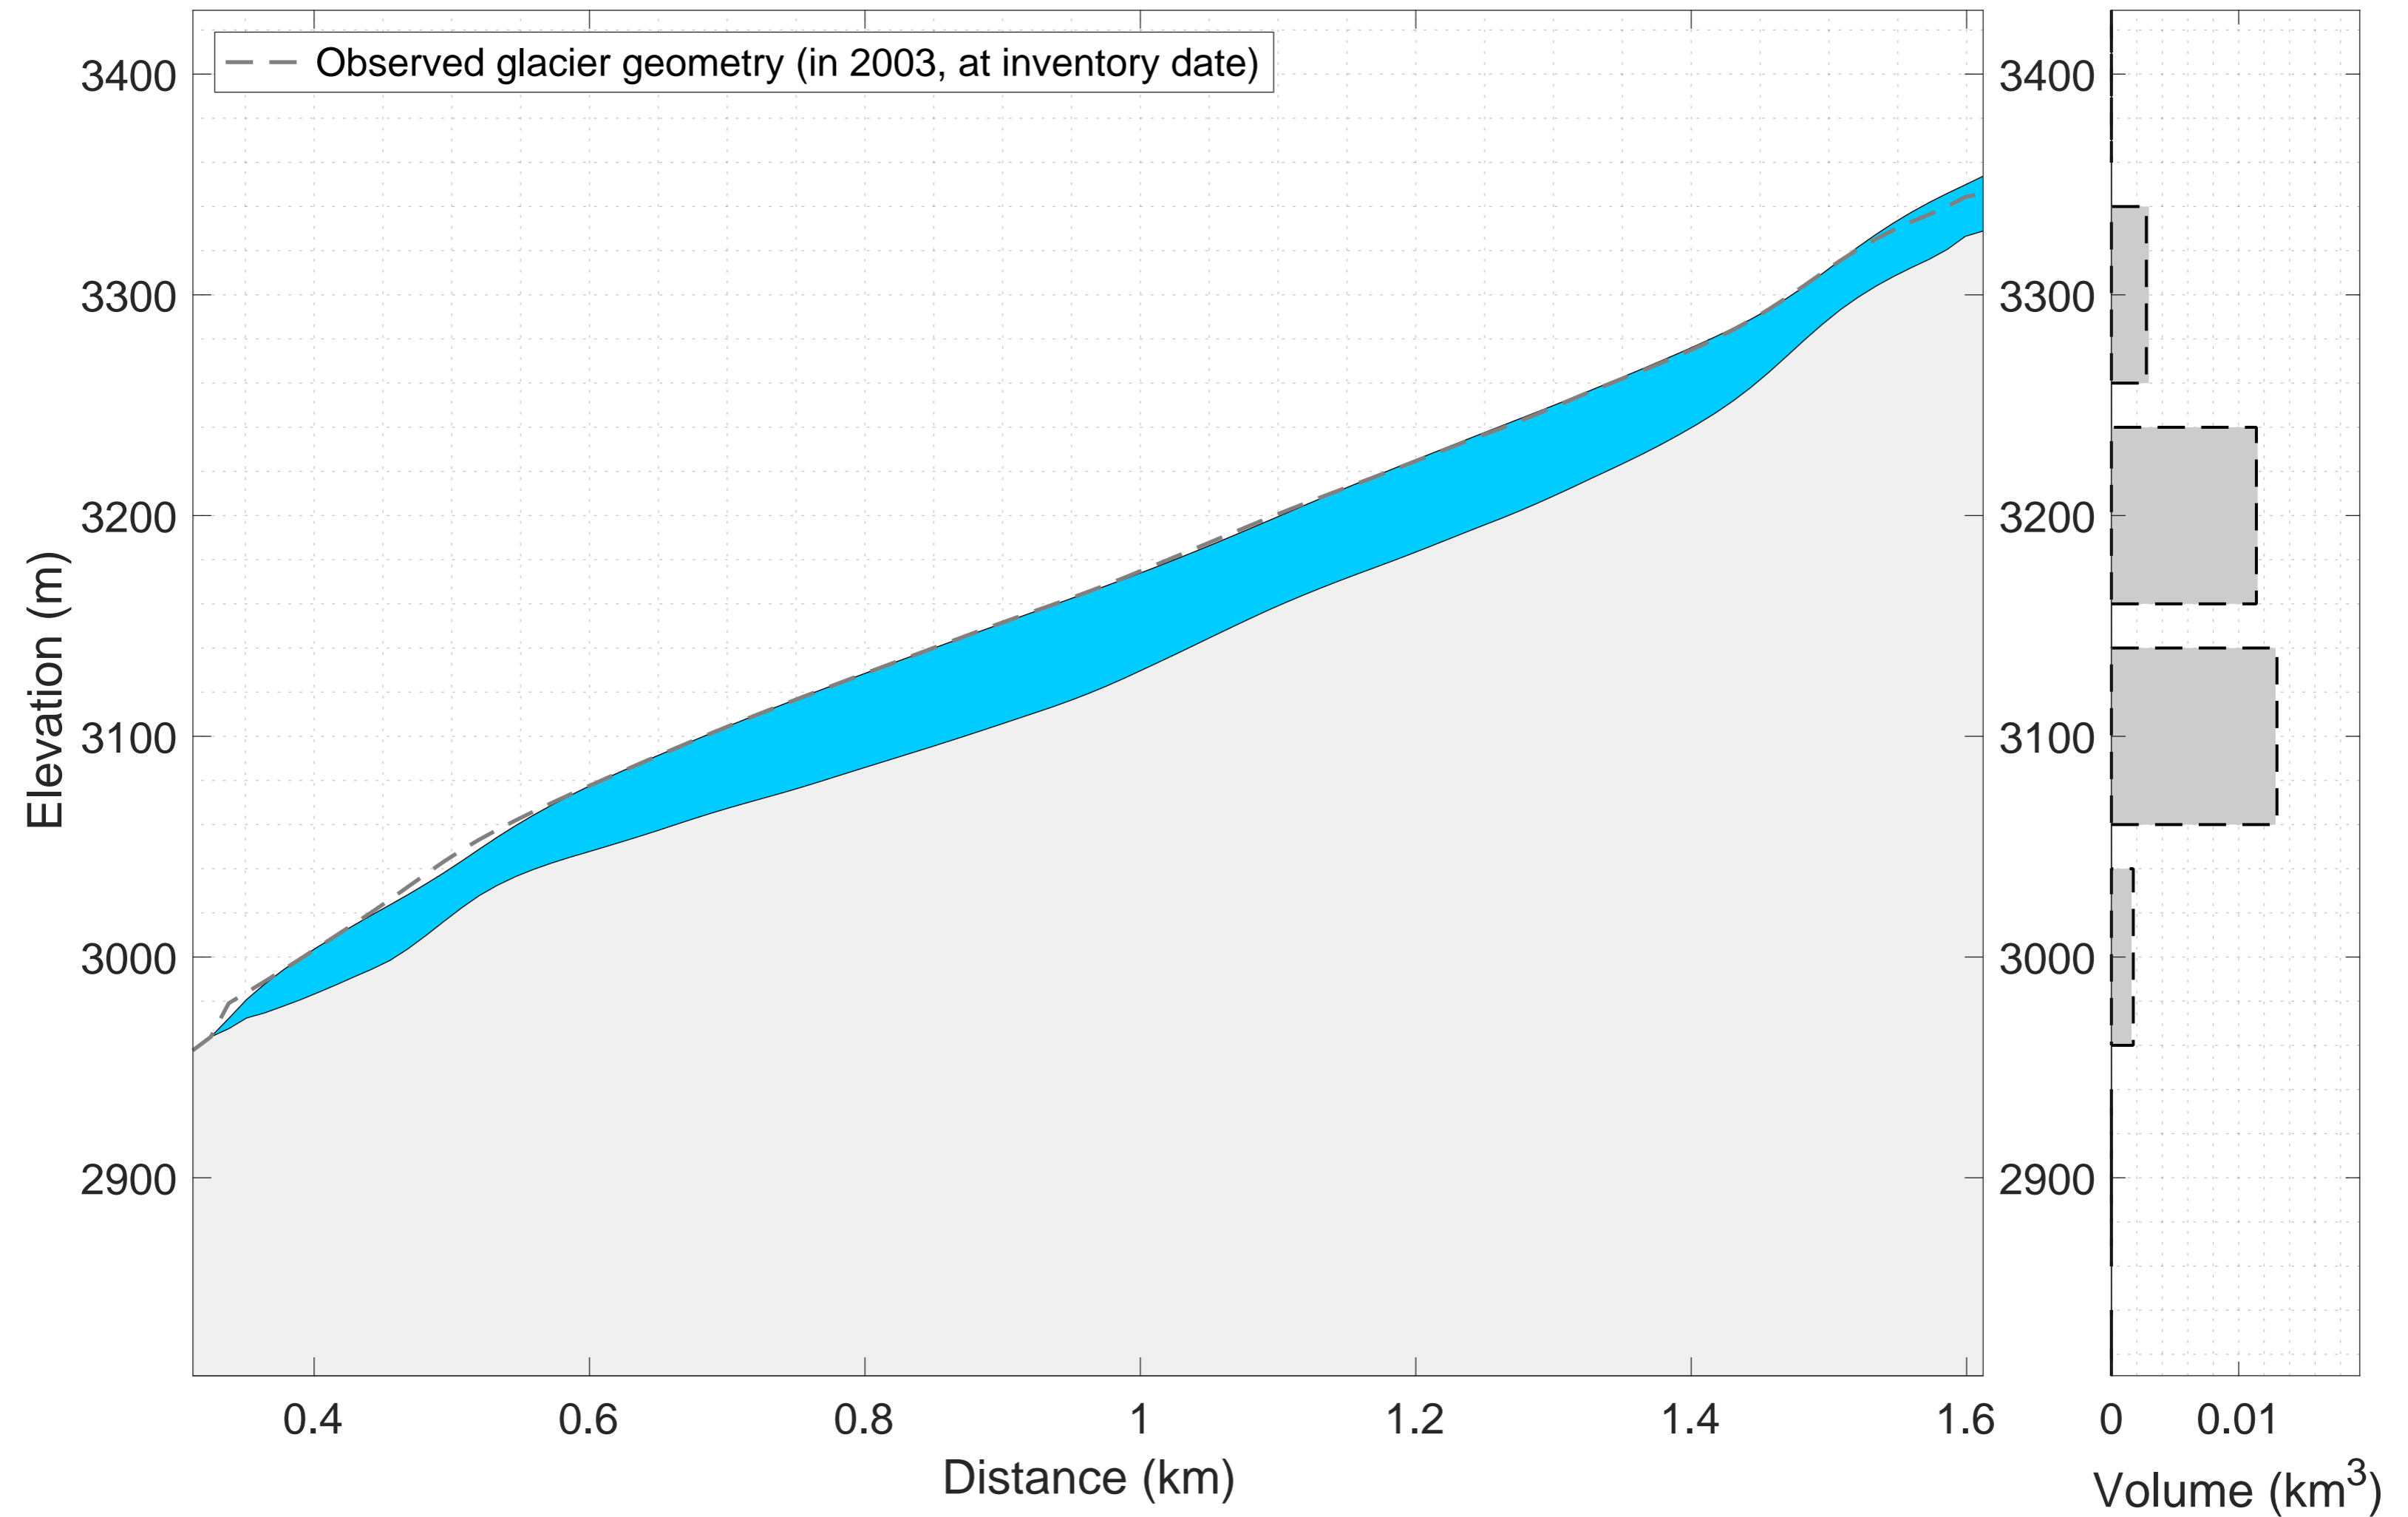

Supplement: Supplementary file 432 [file tc-13-1125-2019-supplement.zip]

**Modelled geometry (Glacier ID = 01199;  $A = 2.3162\text{e-}17 \text{ Pa}^{-3} \text{ a}^{-1}$ ;  $dx = 12 \text{ m}$ )**

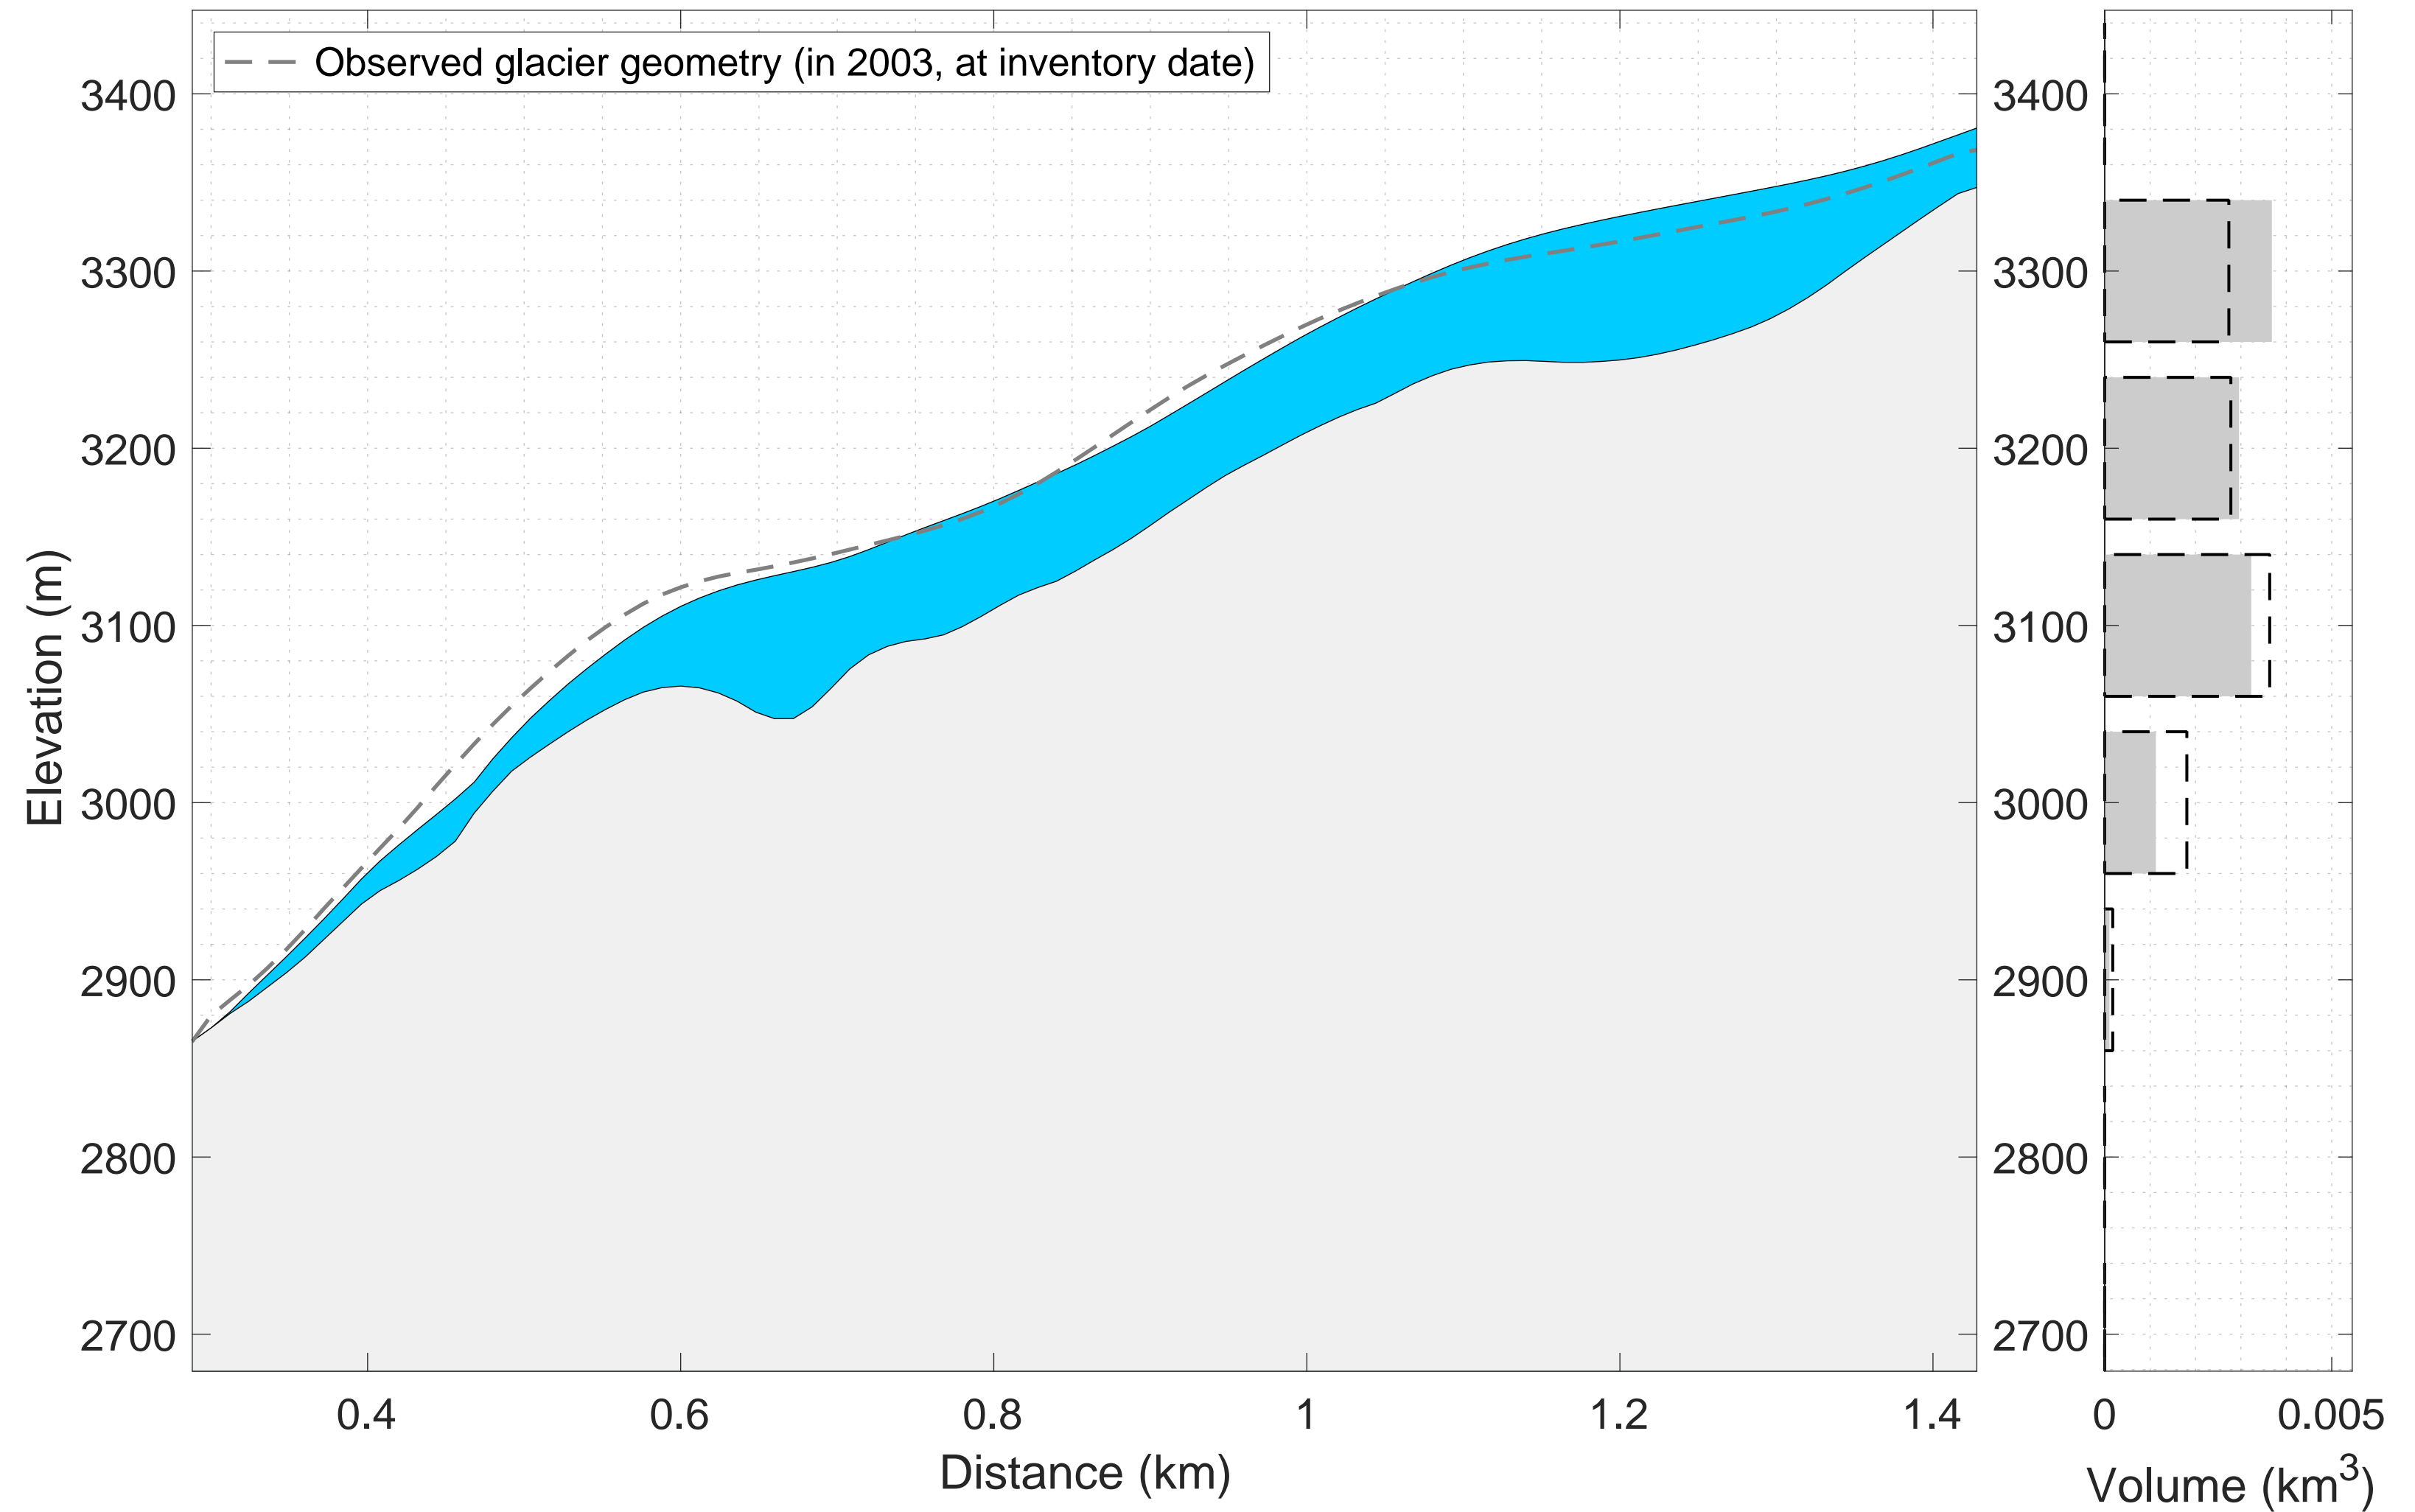

Supplement: Supplementary file 433 [file tc-13-1125-2019-supplement.zip]

**Modelled geometry (Glacier ID = 02773;  $A = 7.0058\text{e-}17 \text{ Pa}^{-3} \text{ a}^{-1}$ ;  $dx = 73 \text{ m}$ )**

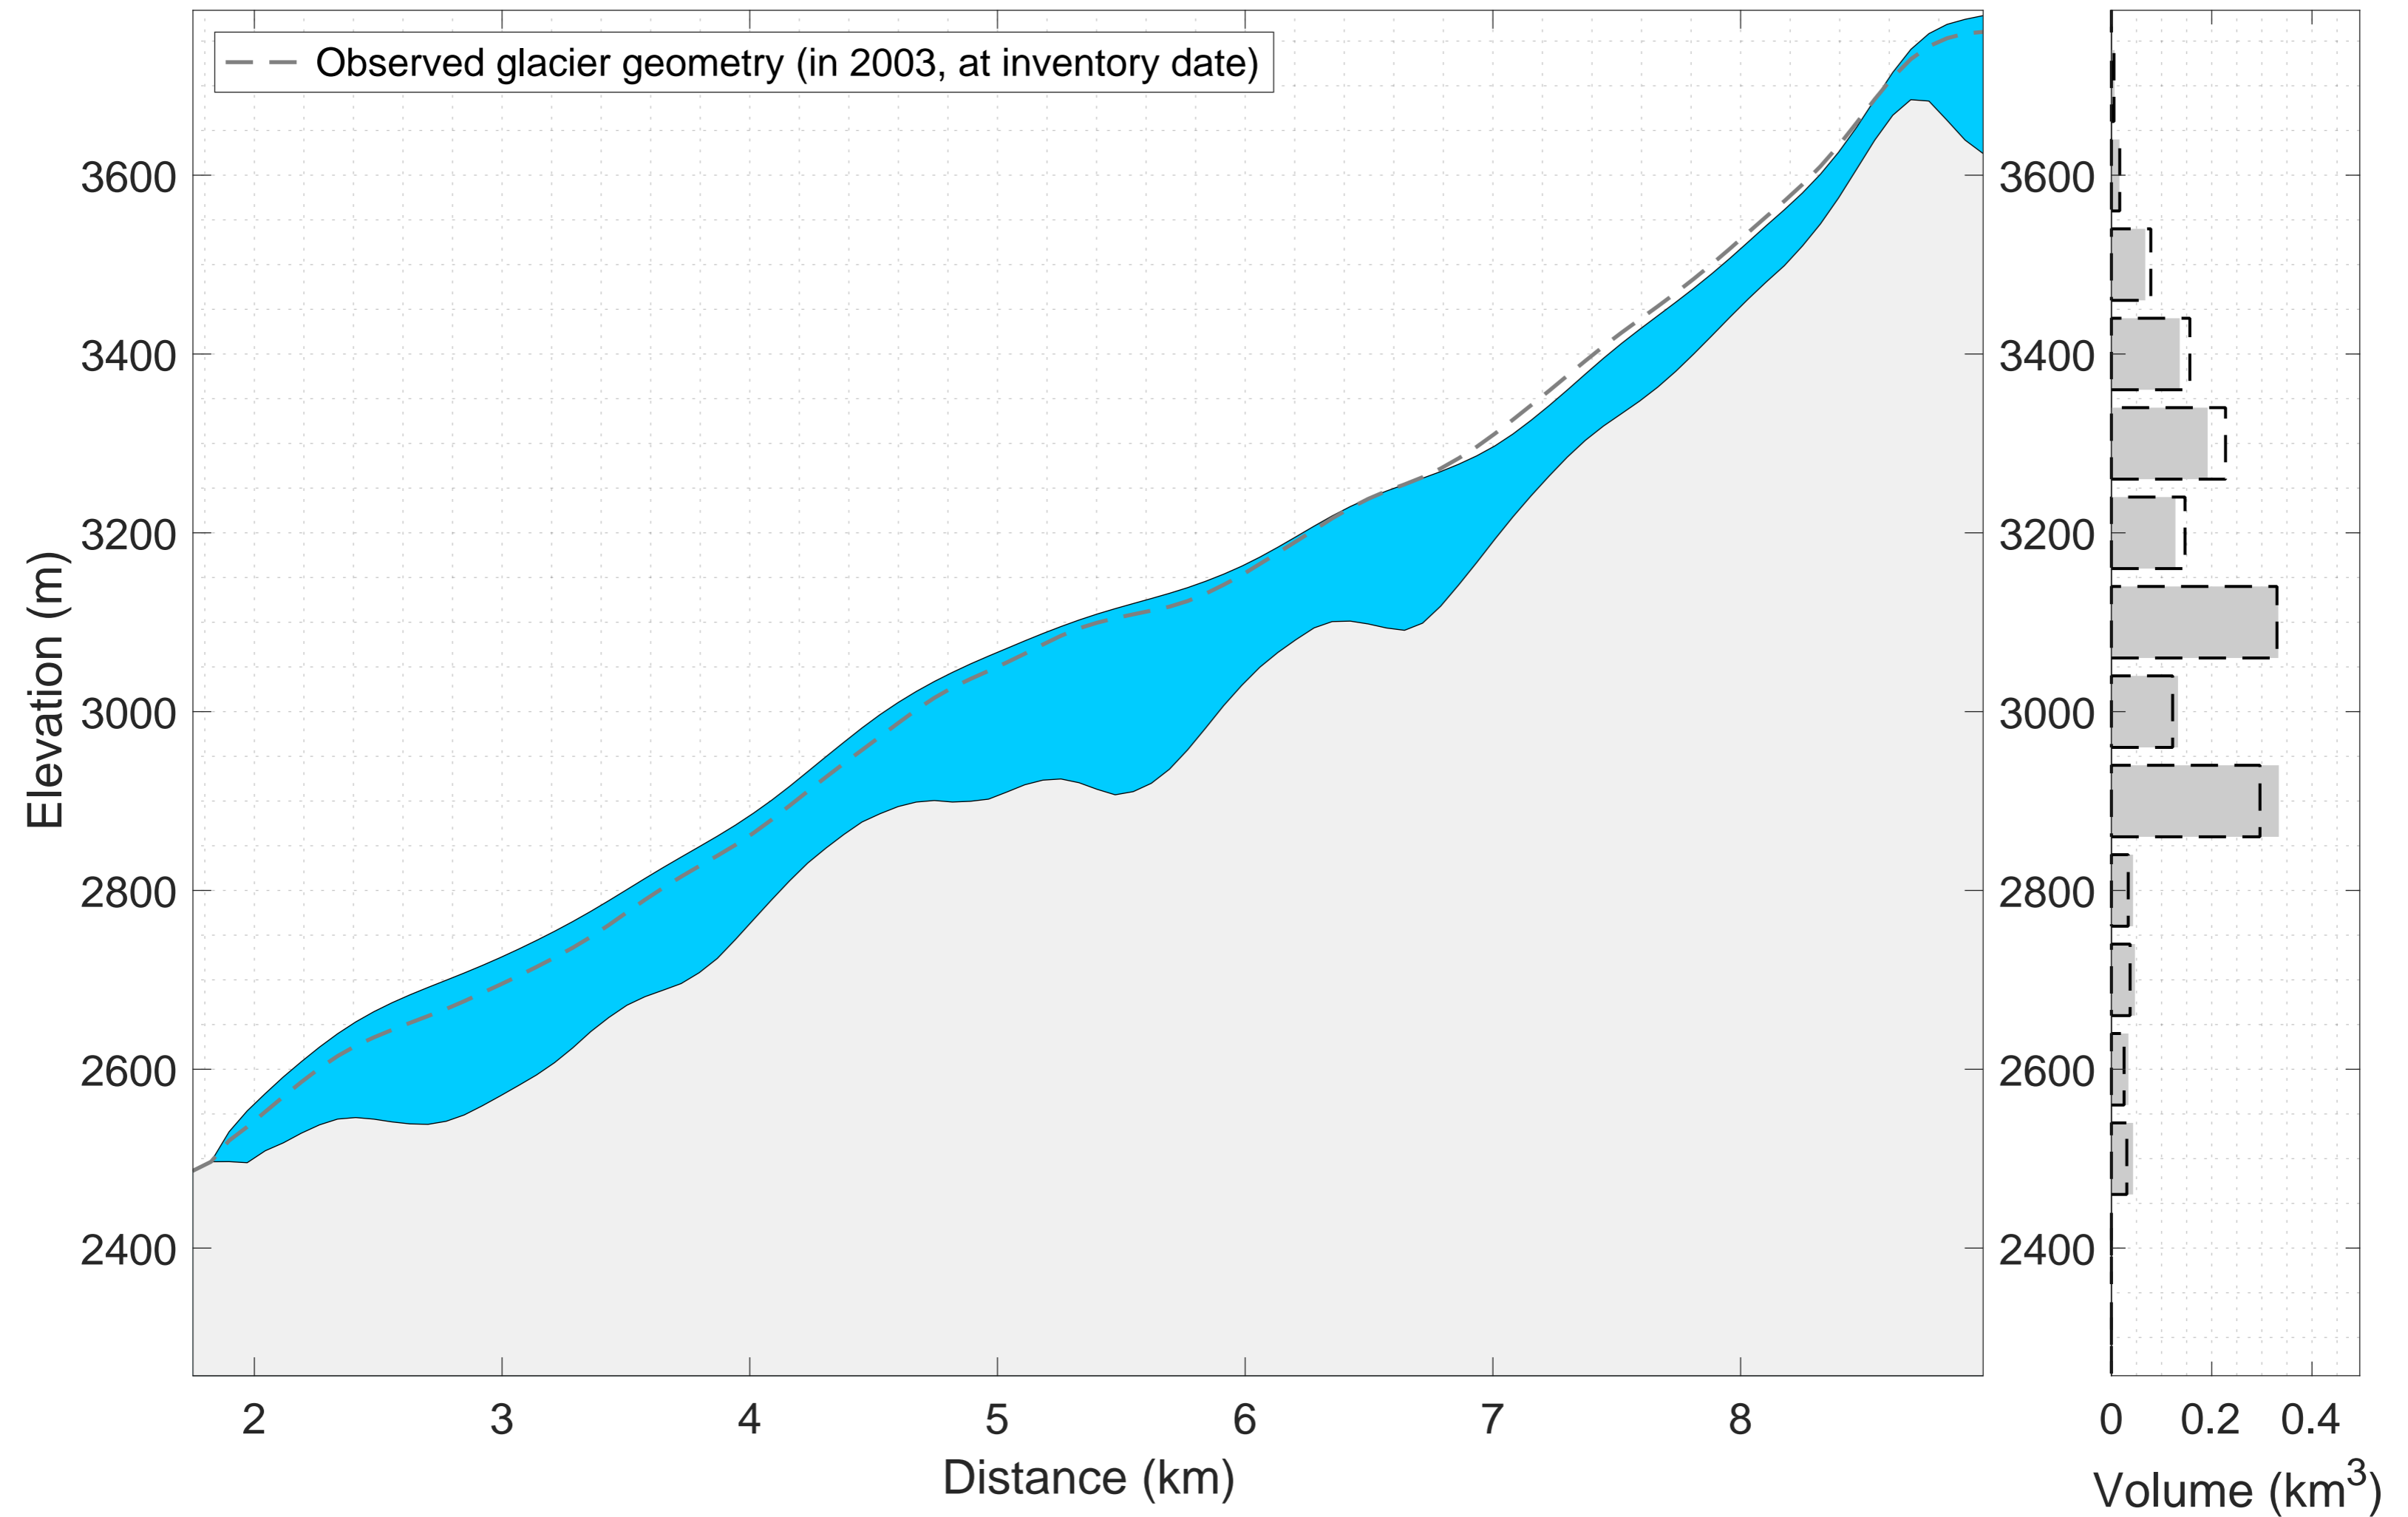

Supplement: Supplementary file 434 [file tc-13-1125-2019-supplement.zip]

**Modelled geometry (Glacier ID = 00924;  $A = 9.7058\text{e-}17 \text{ Pa}^{-3} \text{ a}^{-1}$ ;  $dx = 13 \text{ m}$ )**

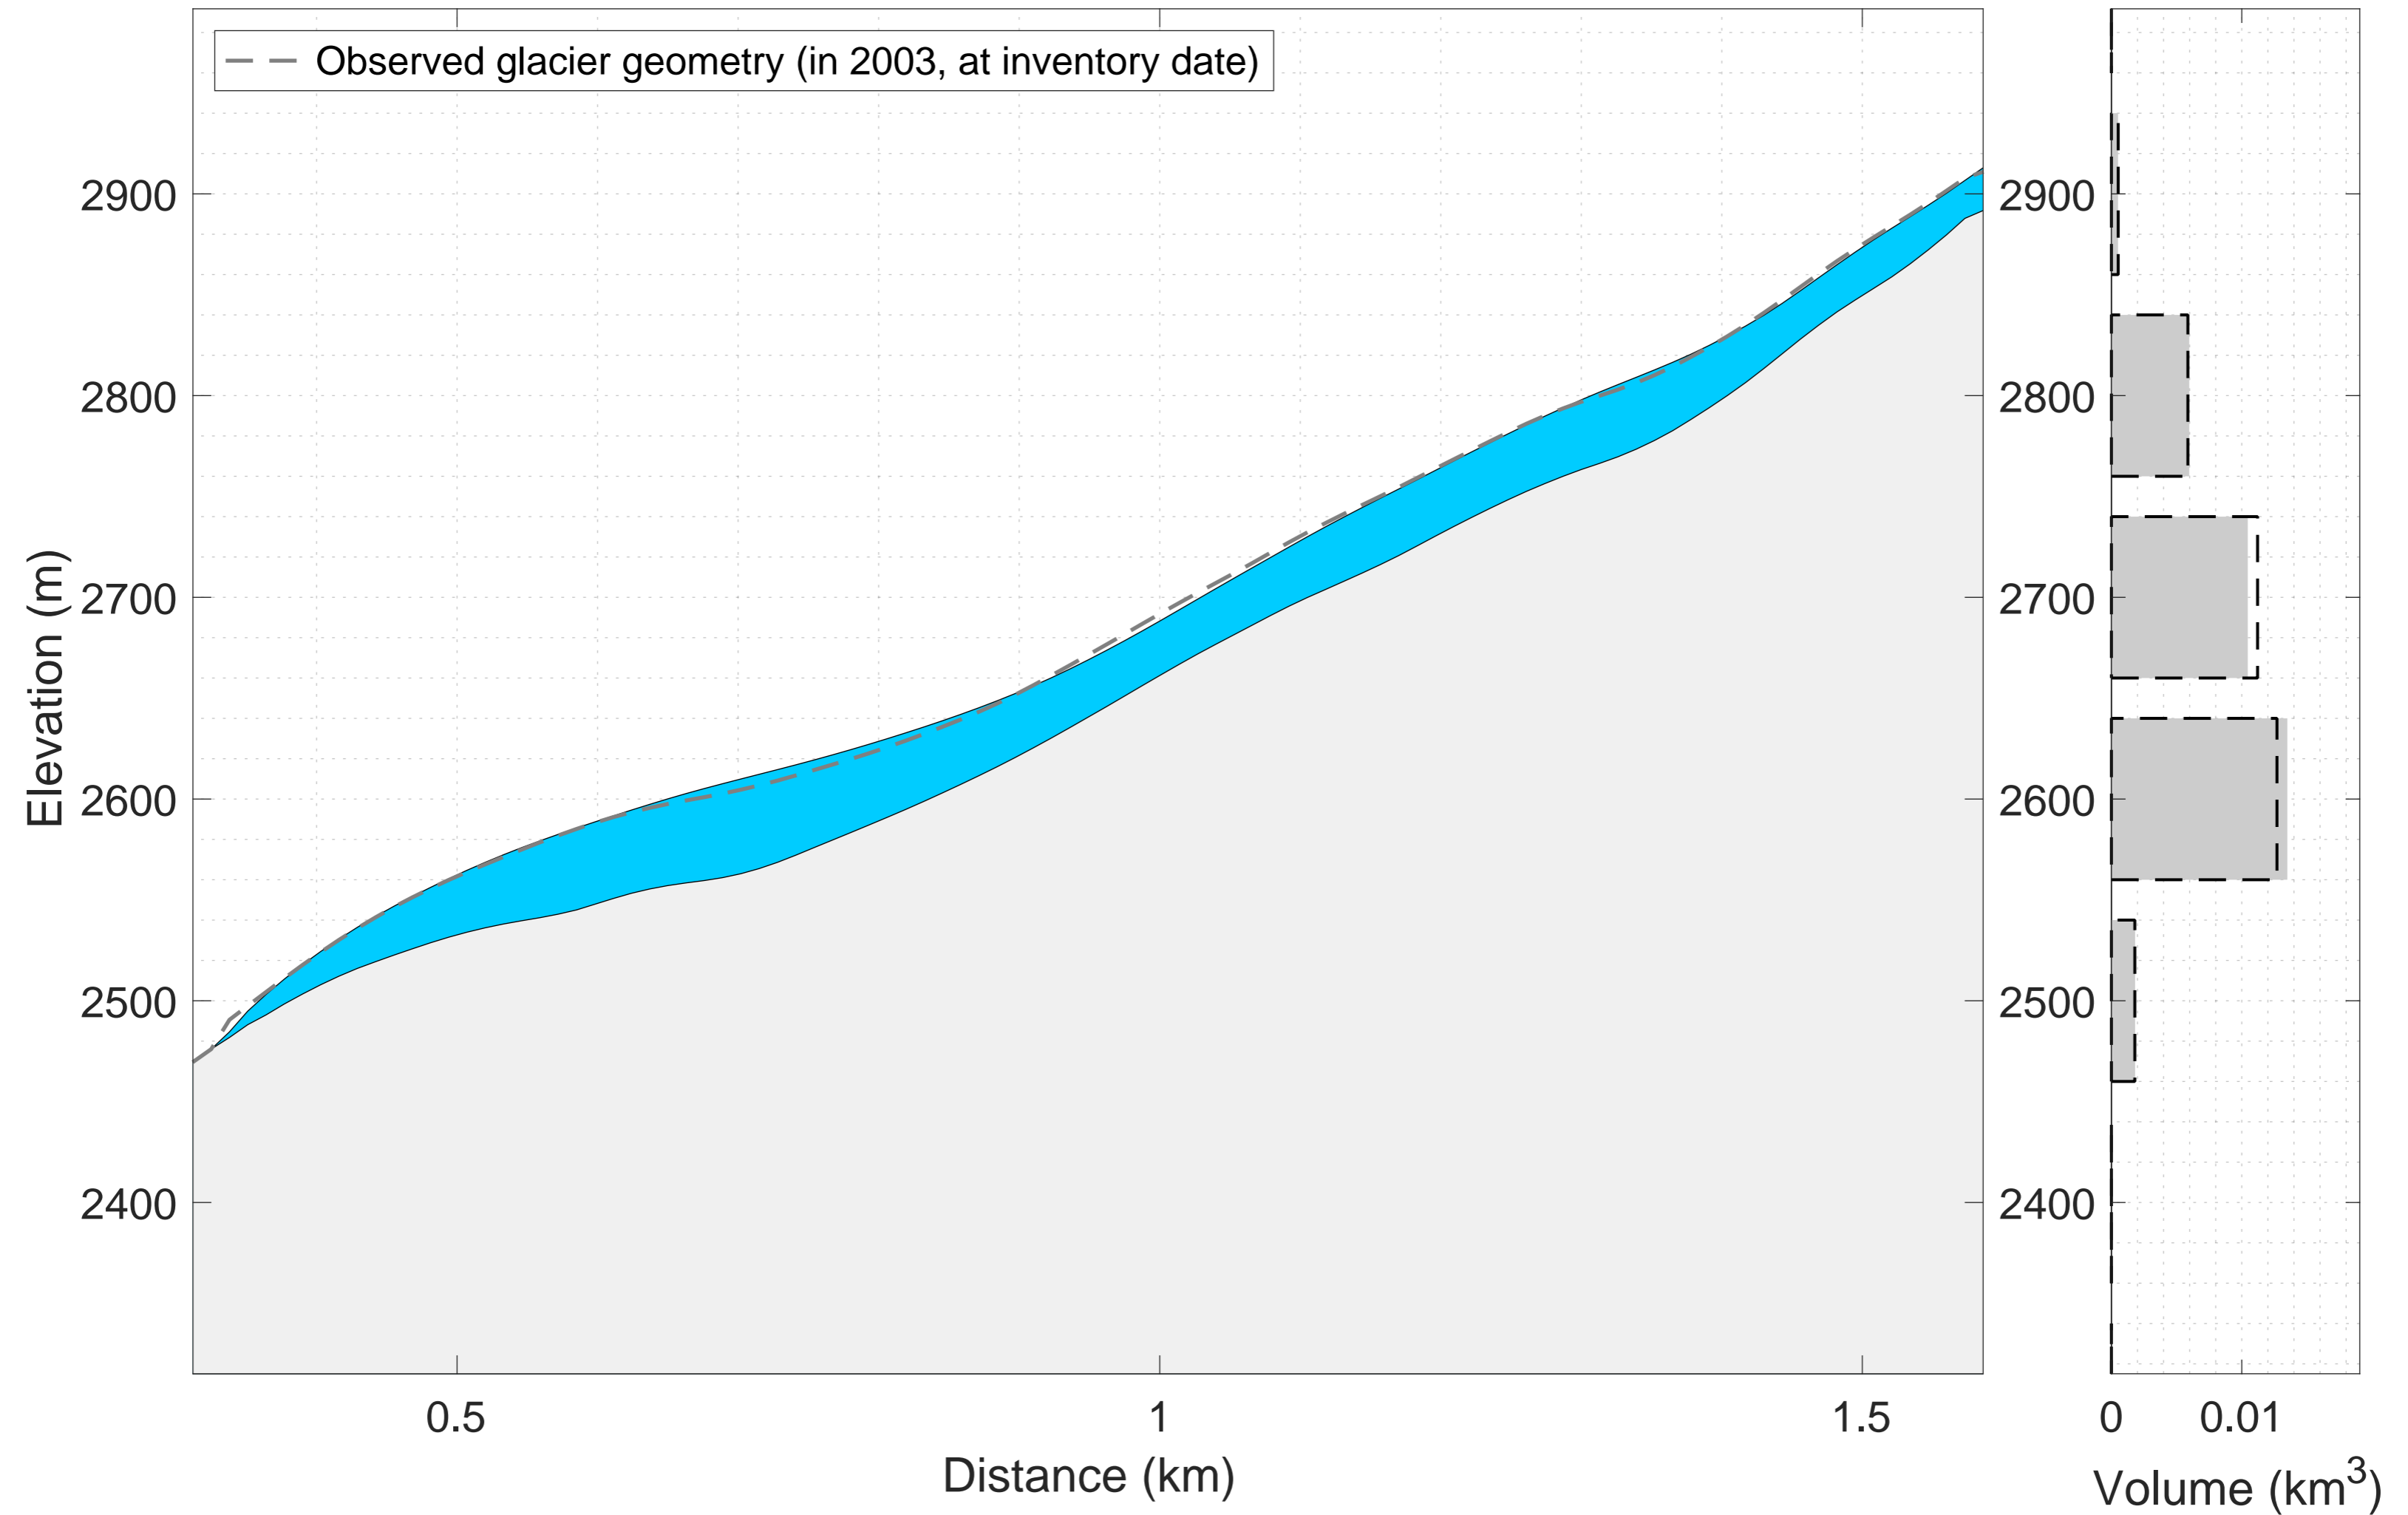

Supplement: Supplementary file 435 [file tc-13-1125-2019-supplement.zip]

**Modelled geometry (Glacier ID = 01246;  $A = 6.1393\text{e-}17 \text{ Pa}^{-3} \text{ a}^{-1}$ ;  $dx = 30 \text{ m}$ )**

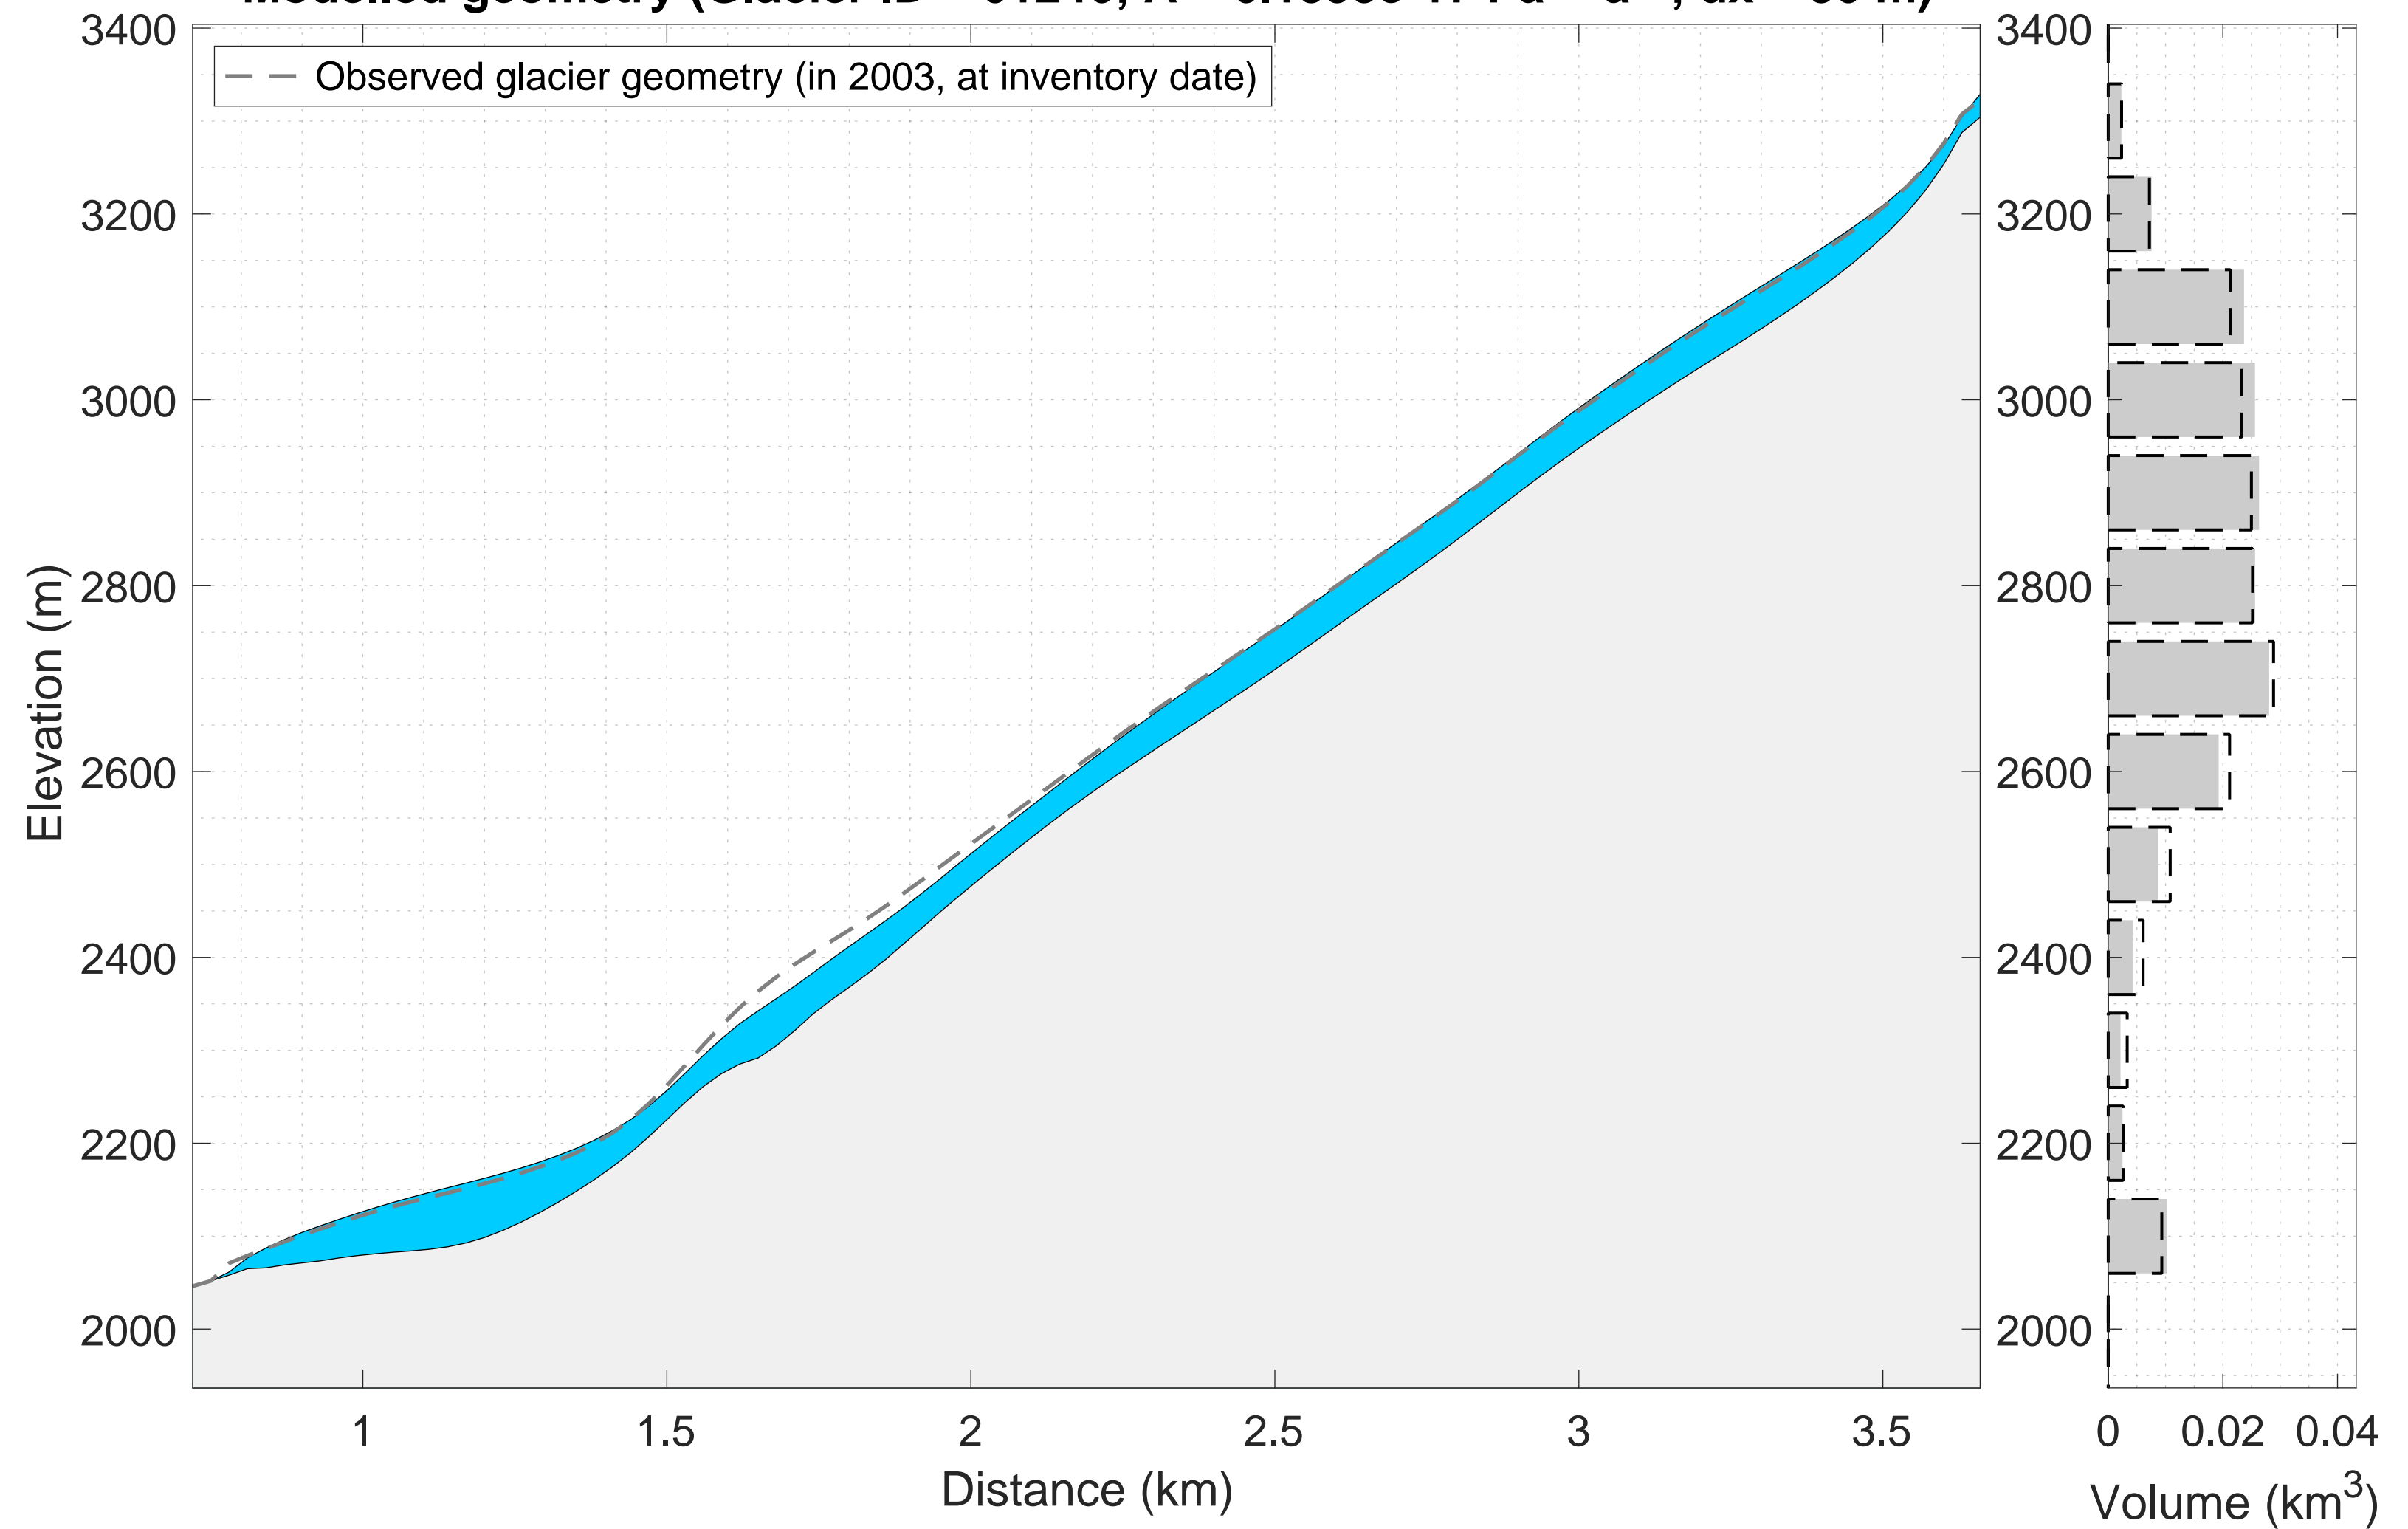

Supplement: Supplementary file 436 [file tc-13-1125-2019-supplement.zip]

**Modelled geometry (Glacier ID = 02426;  $A = 1.2895\text{e-}16 \text{ Pa}^{-3} \text{ a}^{-1}$ ;  $dx = 13 \text{ m}$ )**

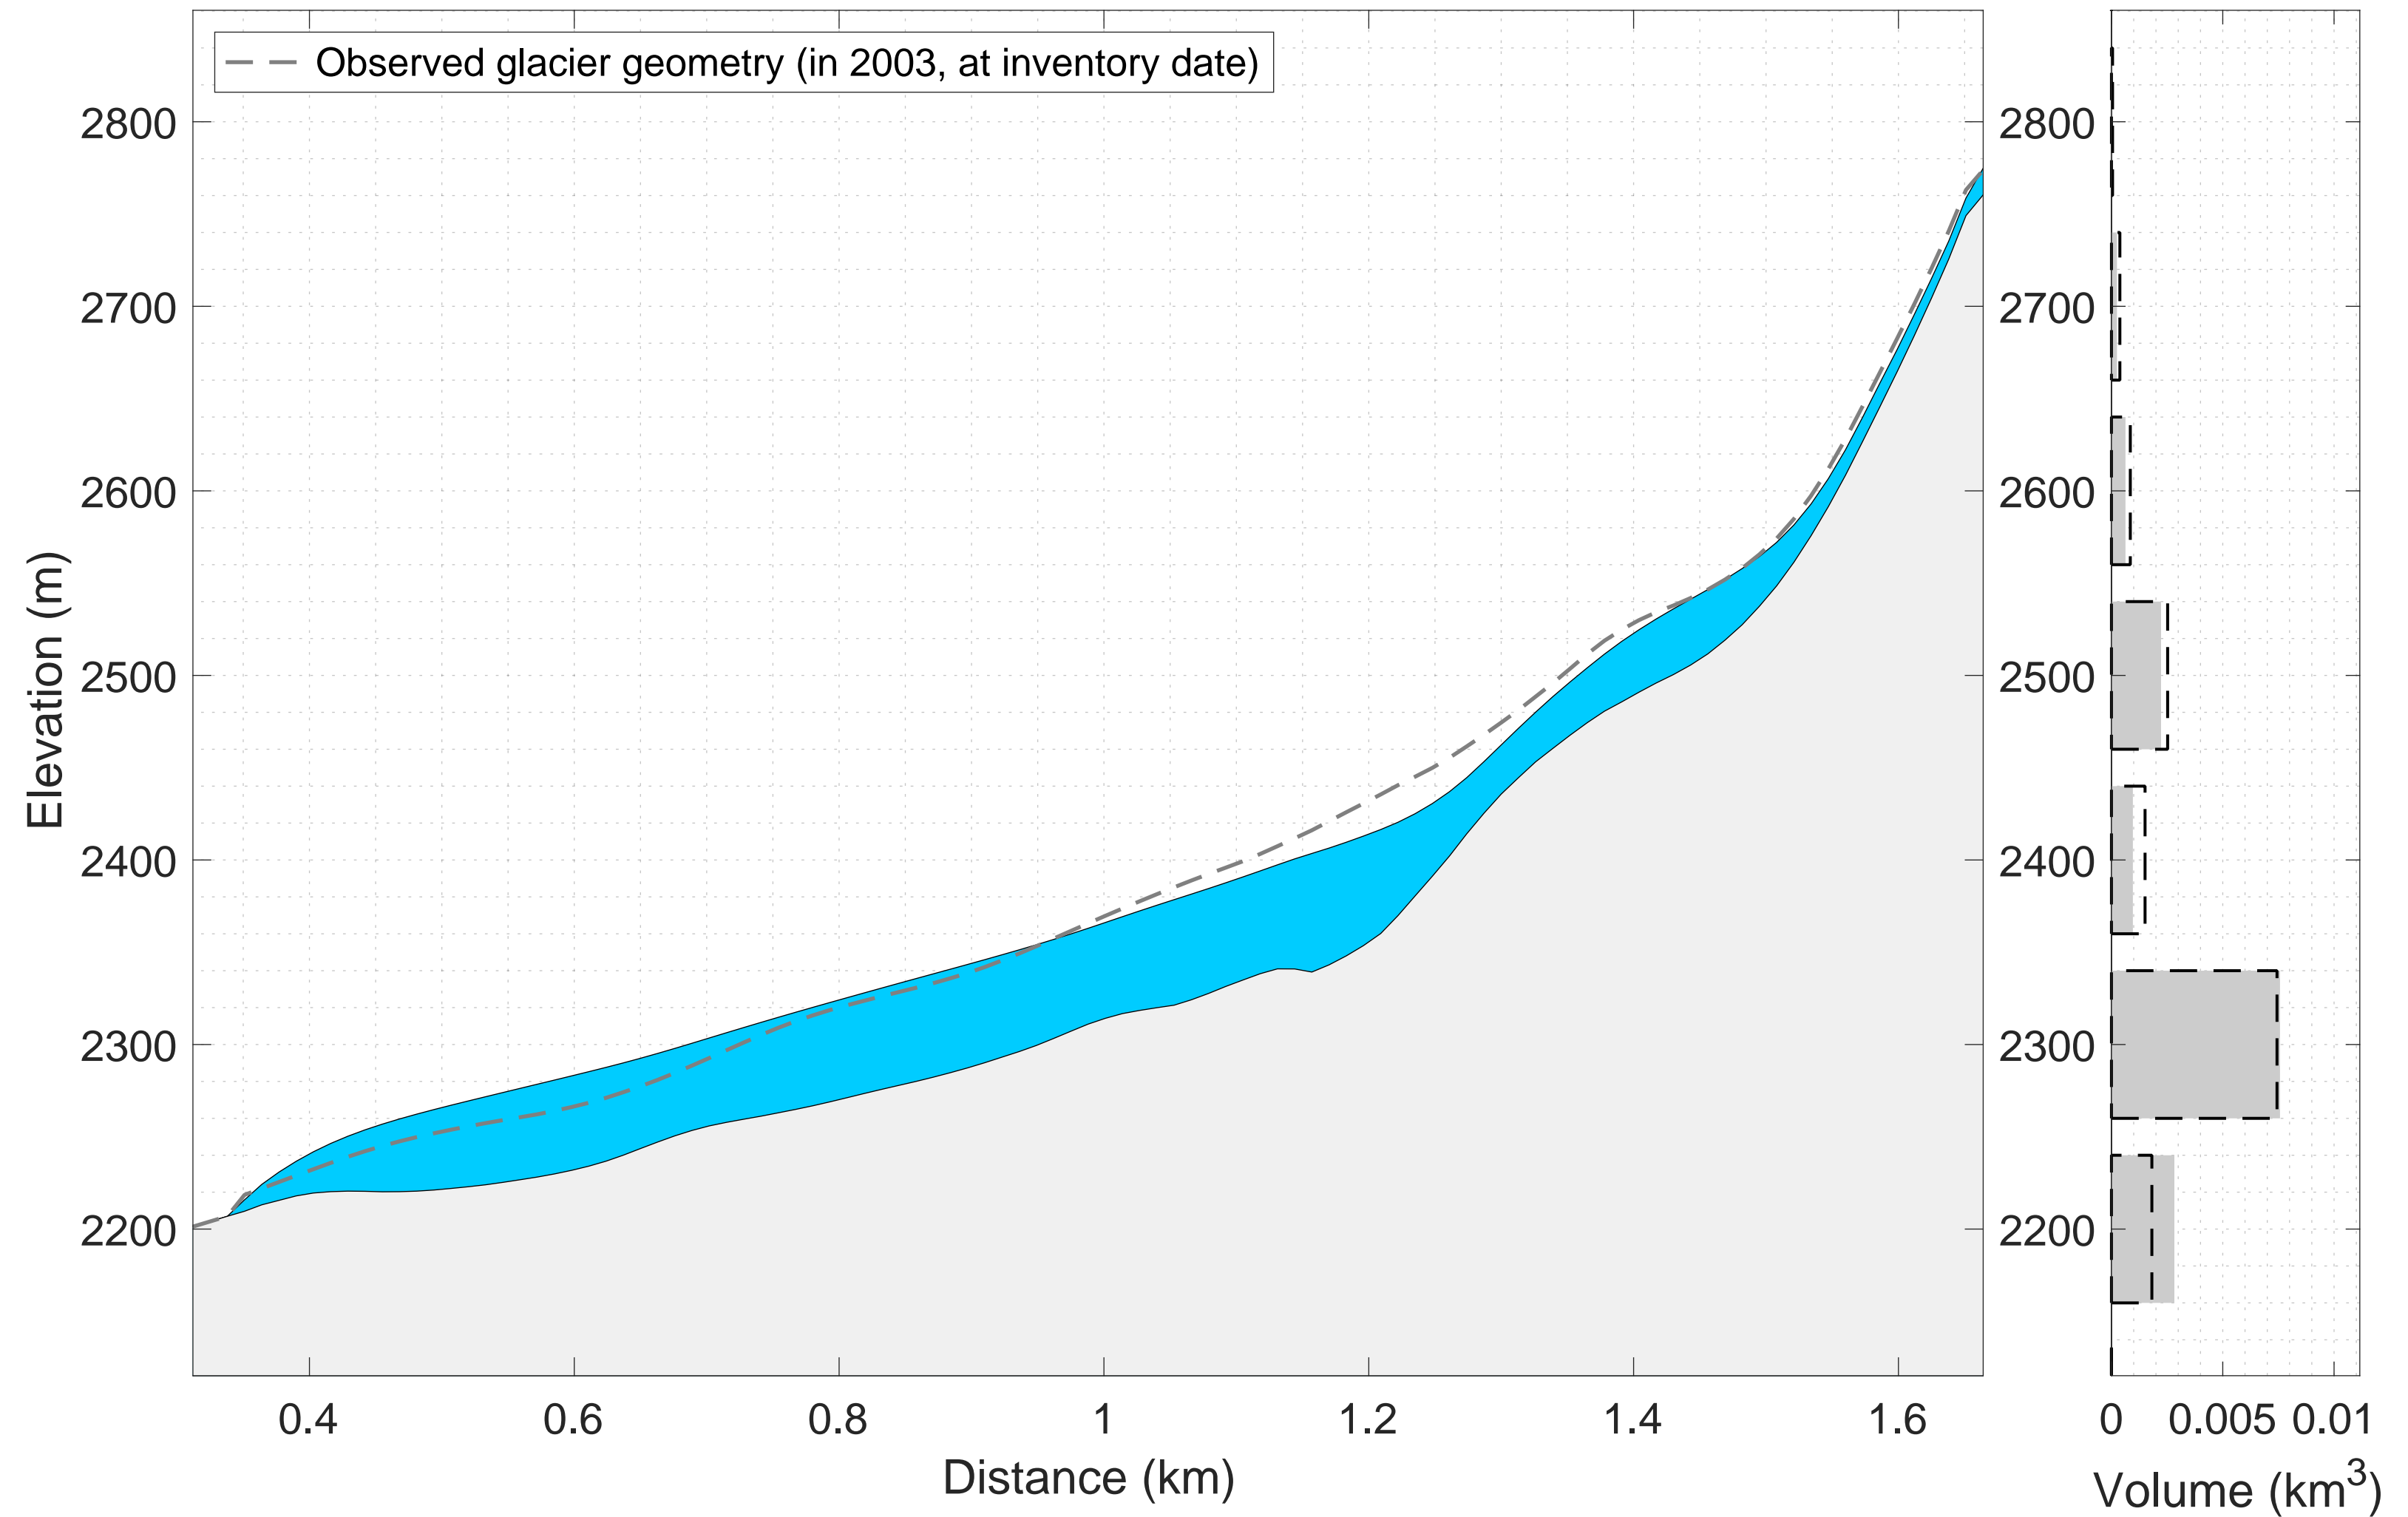

Supplement: Supplementary file 437 [file tc-13-1125-2019-supplement.zip]

**Modelled geometry (Glacier ID = 03100;  $A = 7.3648\text{e-}17 \text{ Pa}^{-3} \text{ a}^{-1}$ ;  $dx = 13 \text{ m}$ )**

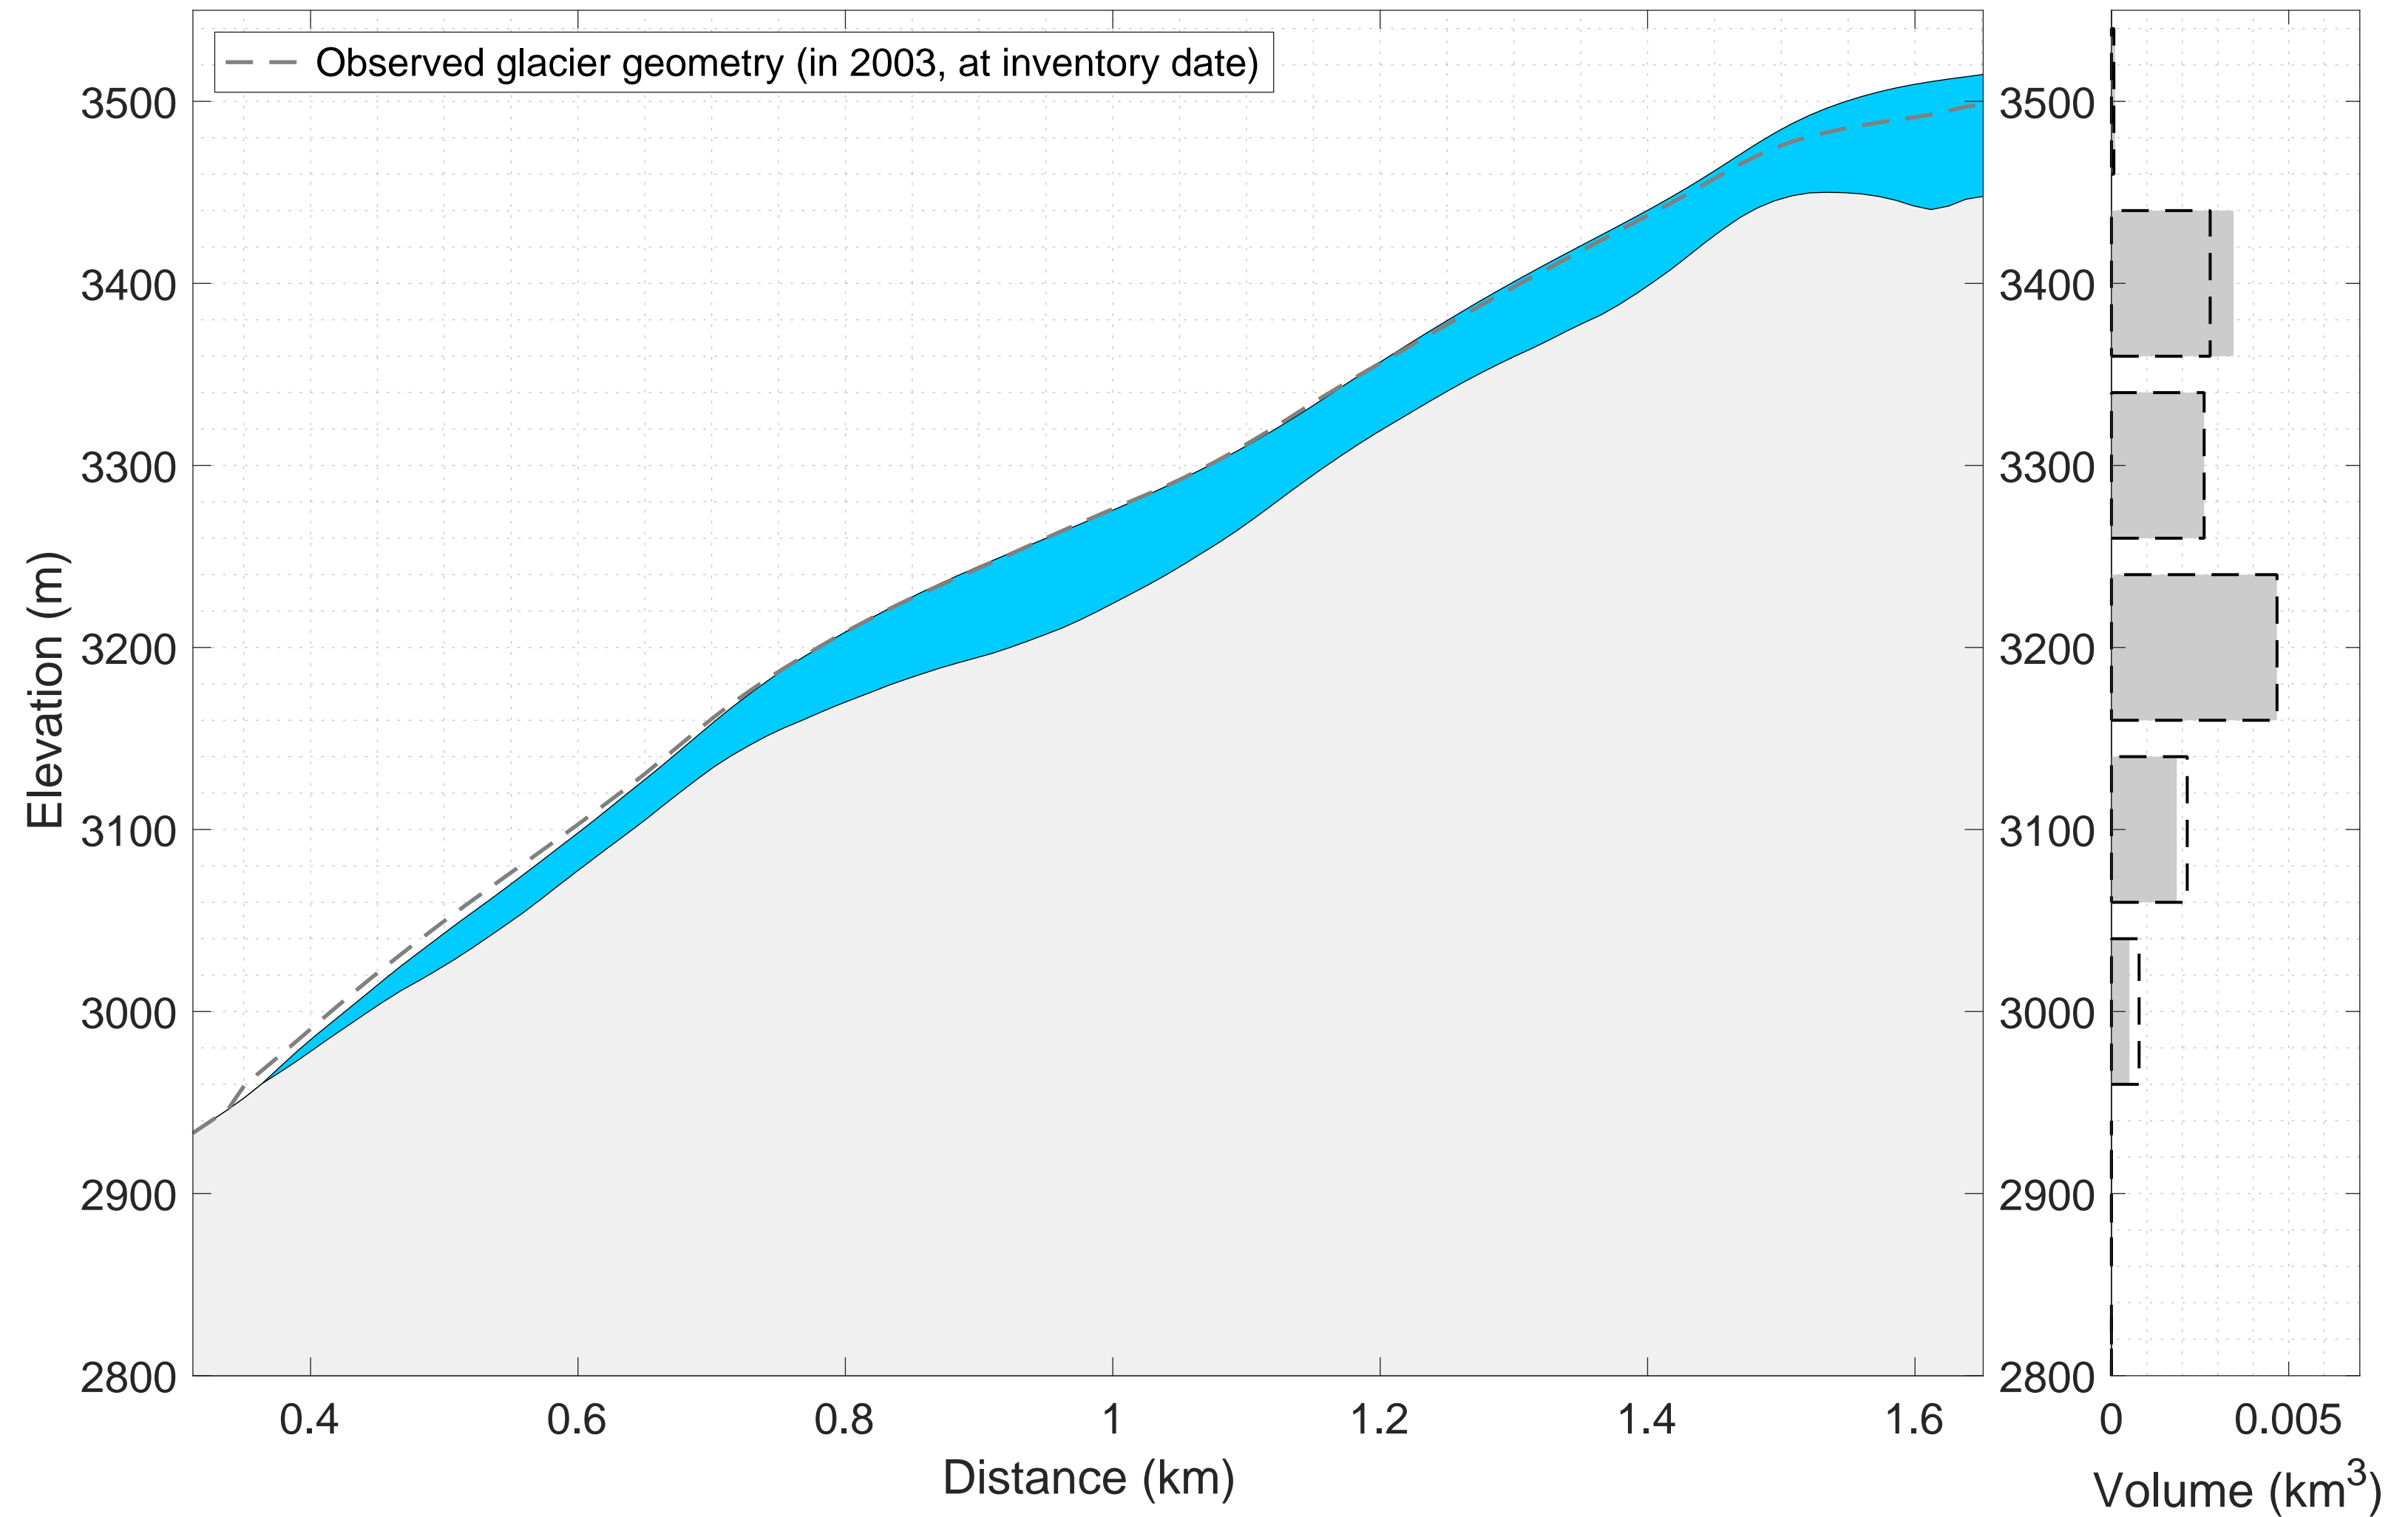

Supplement: Supplementary file 438 [file tc-13-1125-2019-supplement.zip]

**Modelled geometry (Glacier ID = 00080;  $A = 3.9527\text{e-}16 \text{ Pa}^{-3} \text{ a}^{-1}$ ;  $dx = 15 \text{ m}$ )**

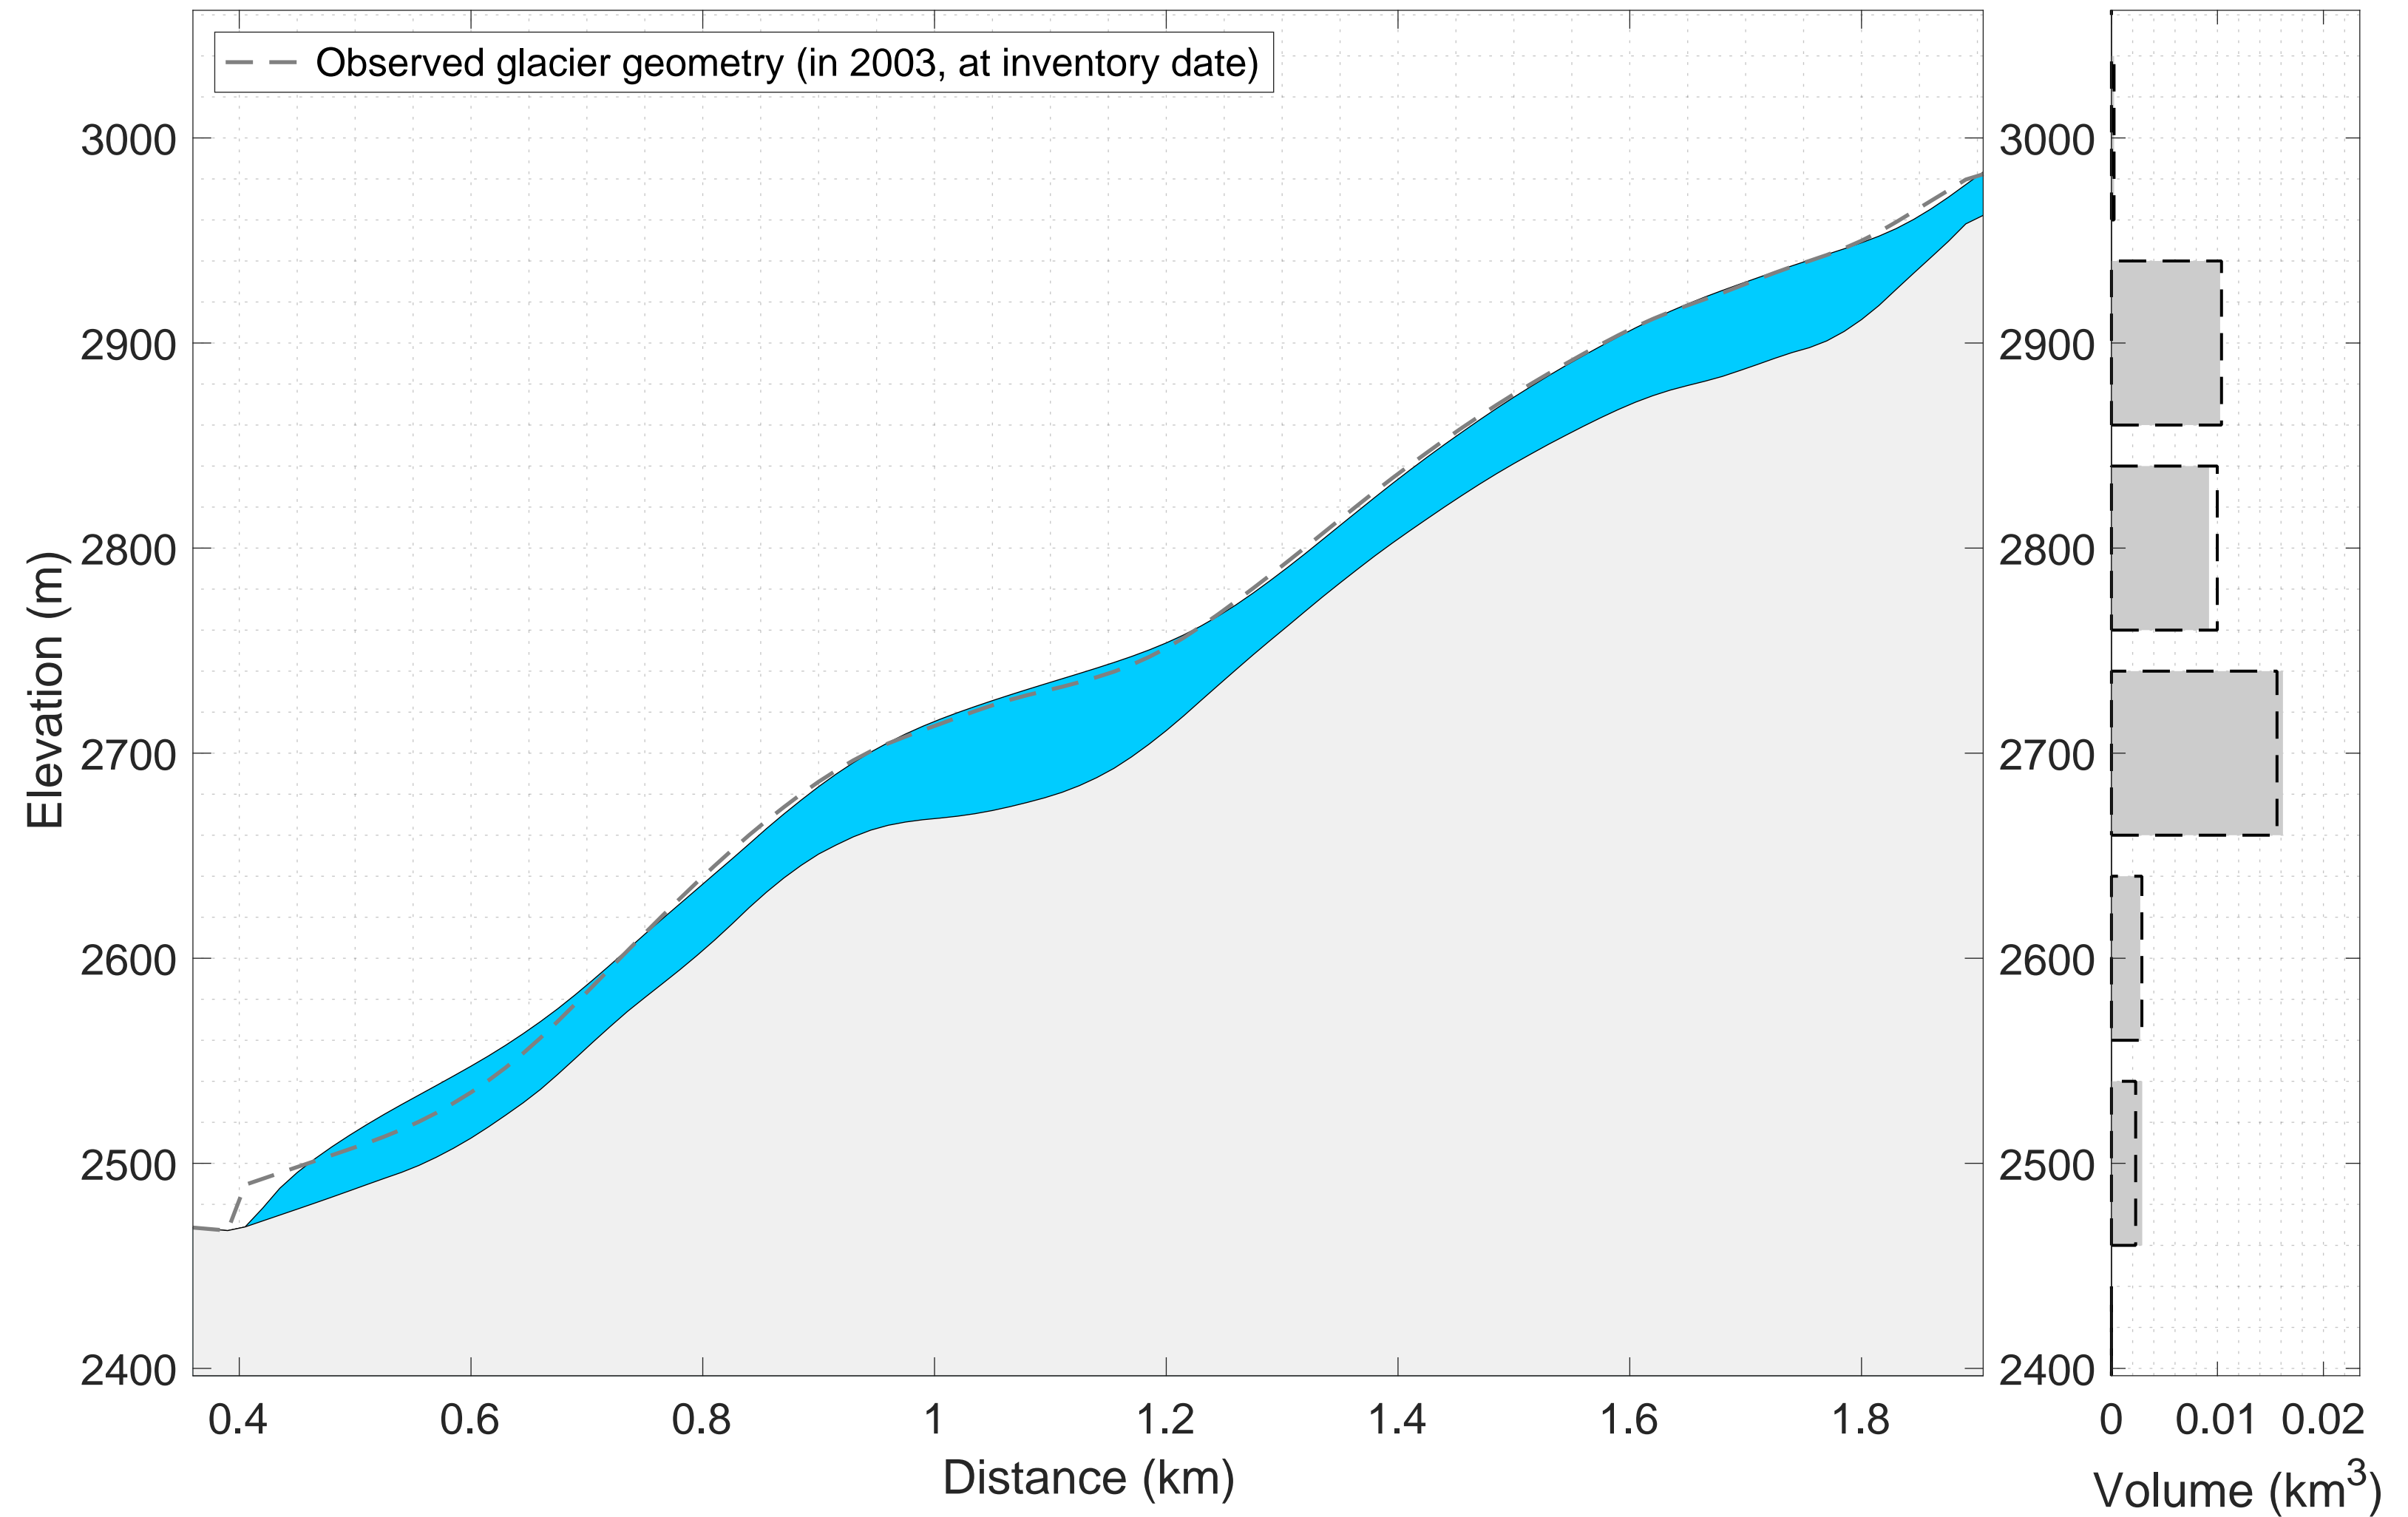

Supplement: Supplementary file 439 [file tc-13-1125-2019-supplement.zip]

**Modelled geometry (Glacier ID = 01346;  $A = 1.5764\text{e-}16 \text{ Pa}^{-3} \text{ a}^{-1}$ ;  $dx = 83 \text{ m}$ )**

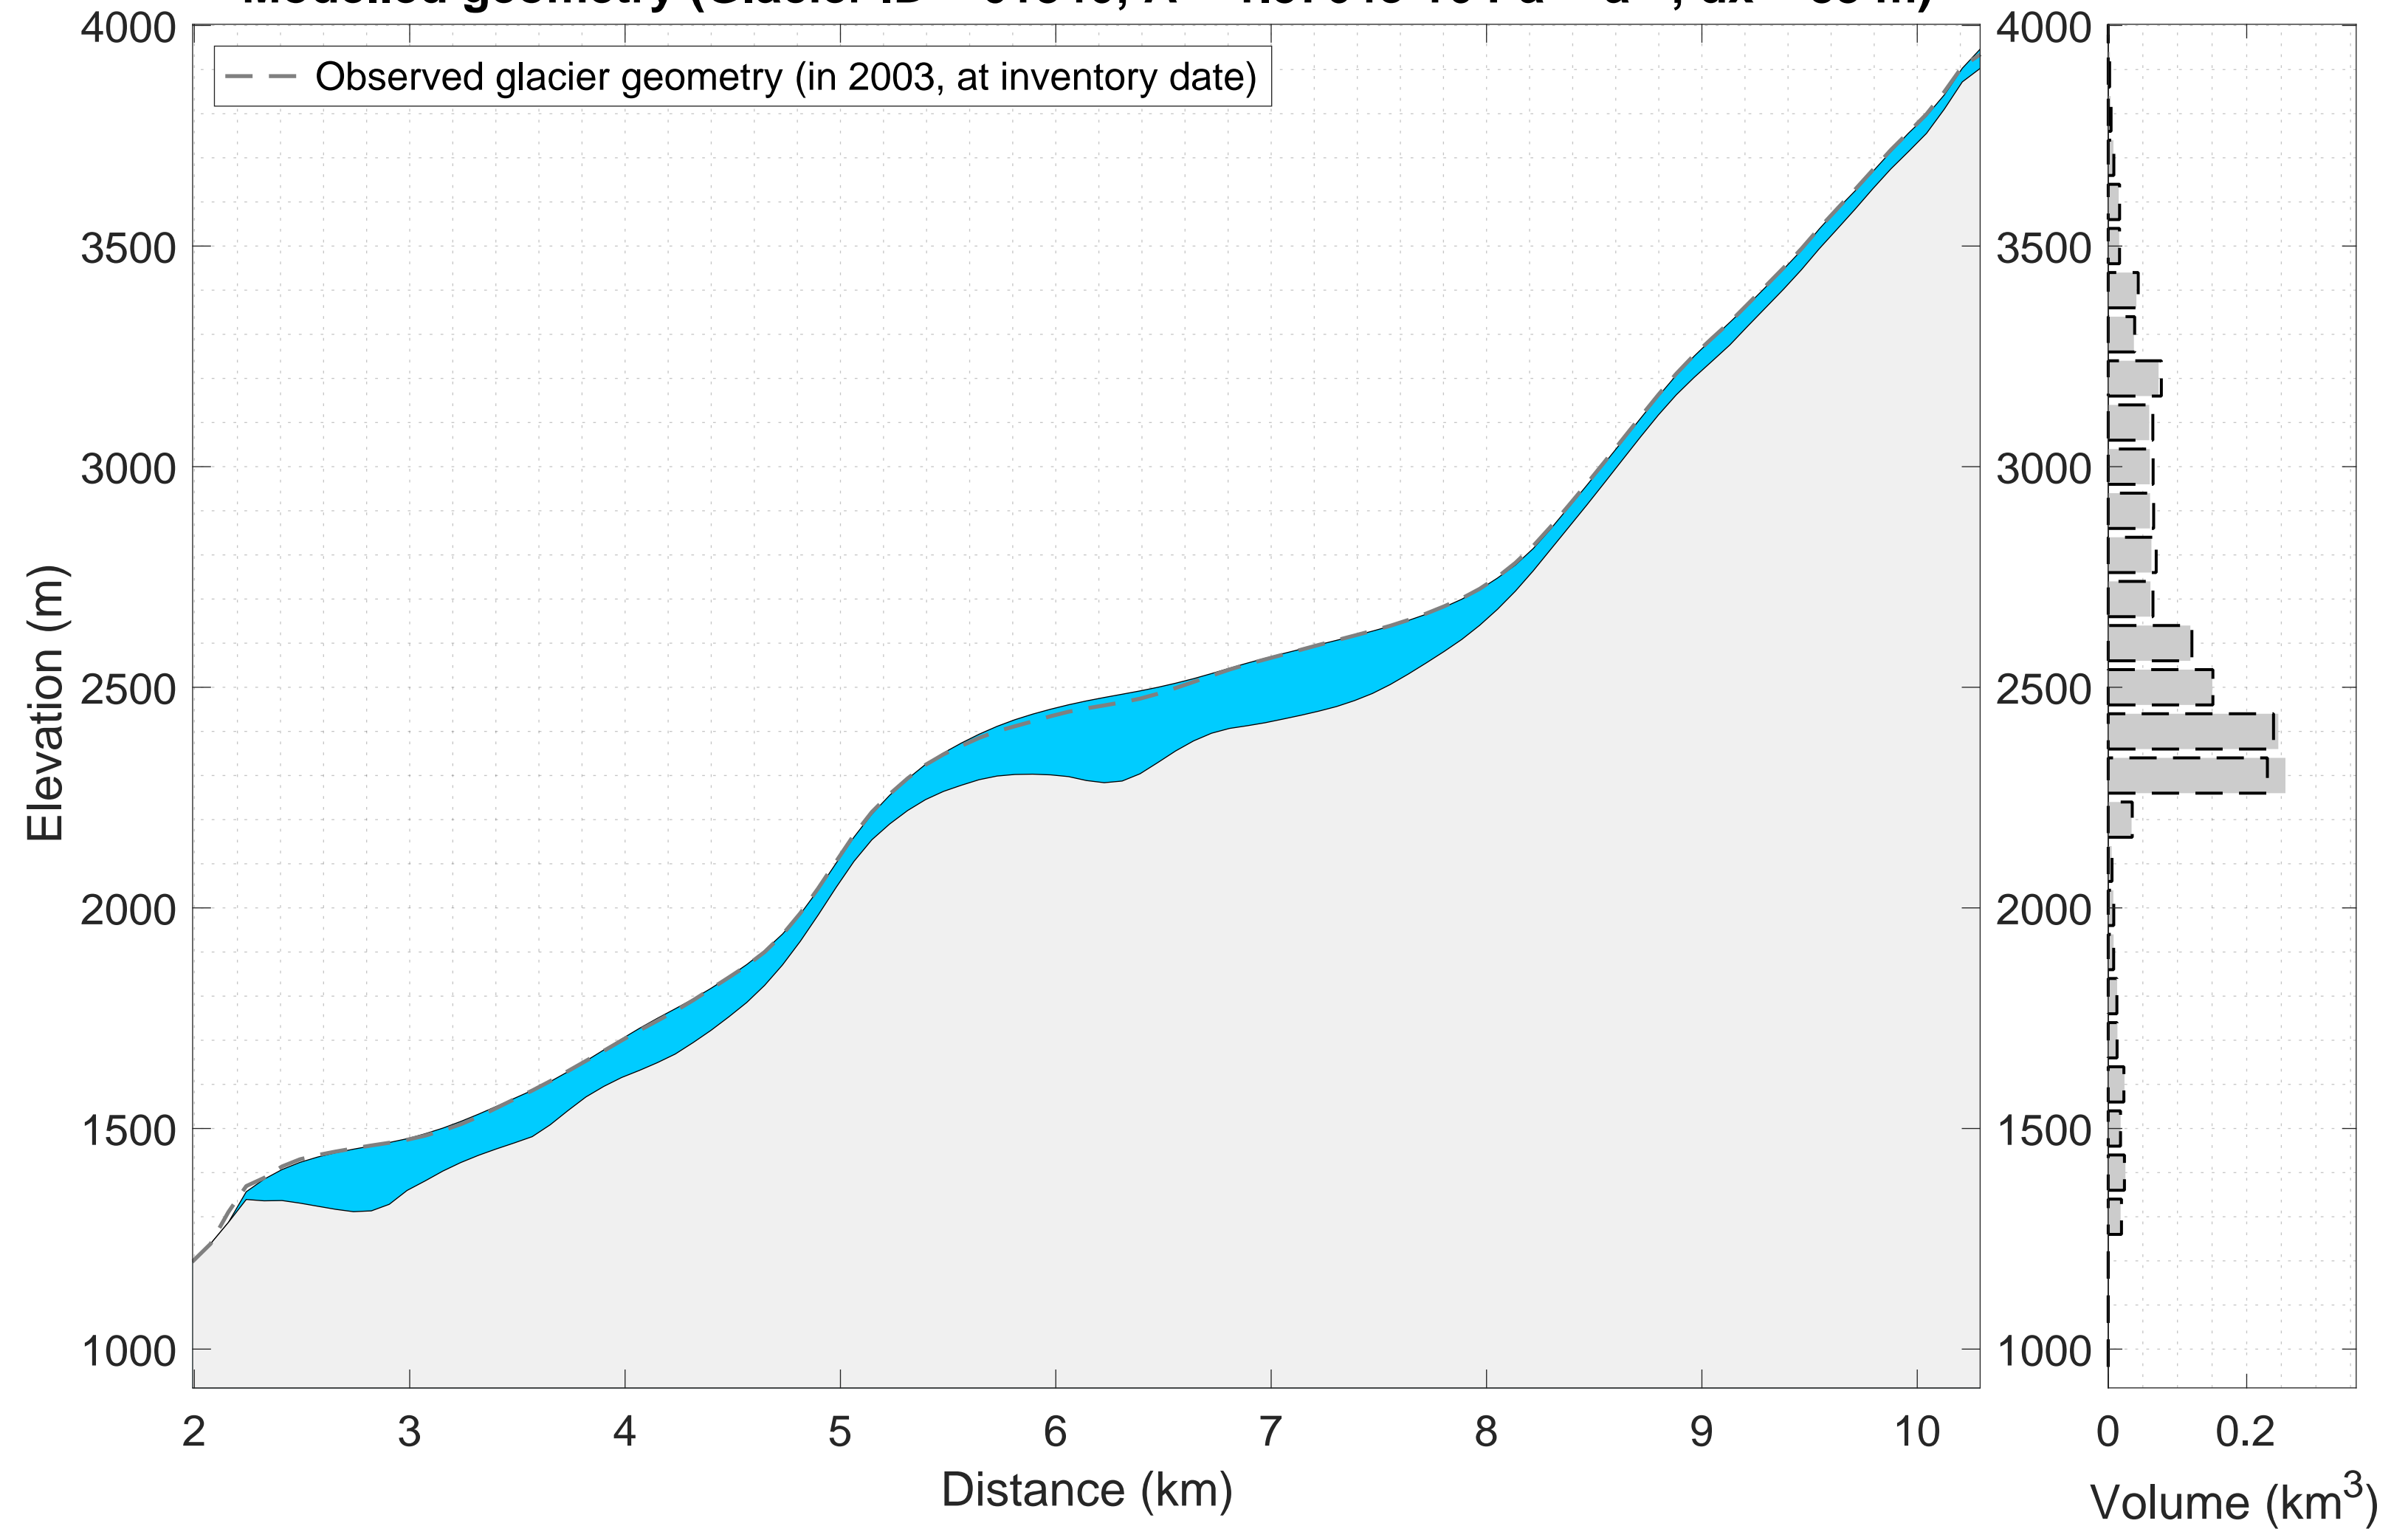

Supplement: Supplementary file 440 [file tc-13-1125-2019-supplement.zip]

**Modelled geometry (Glacier ID = 02780;  $A = 1.7387\text{e-}16 \text{ Pa}^{-3} \text{ a}^{-1}$ ;  $dx = 16 \text{ m}$ )**

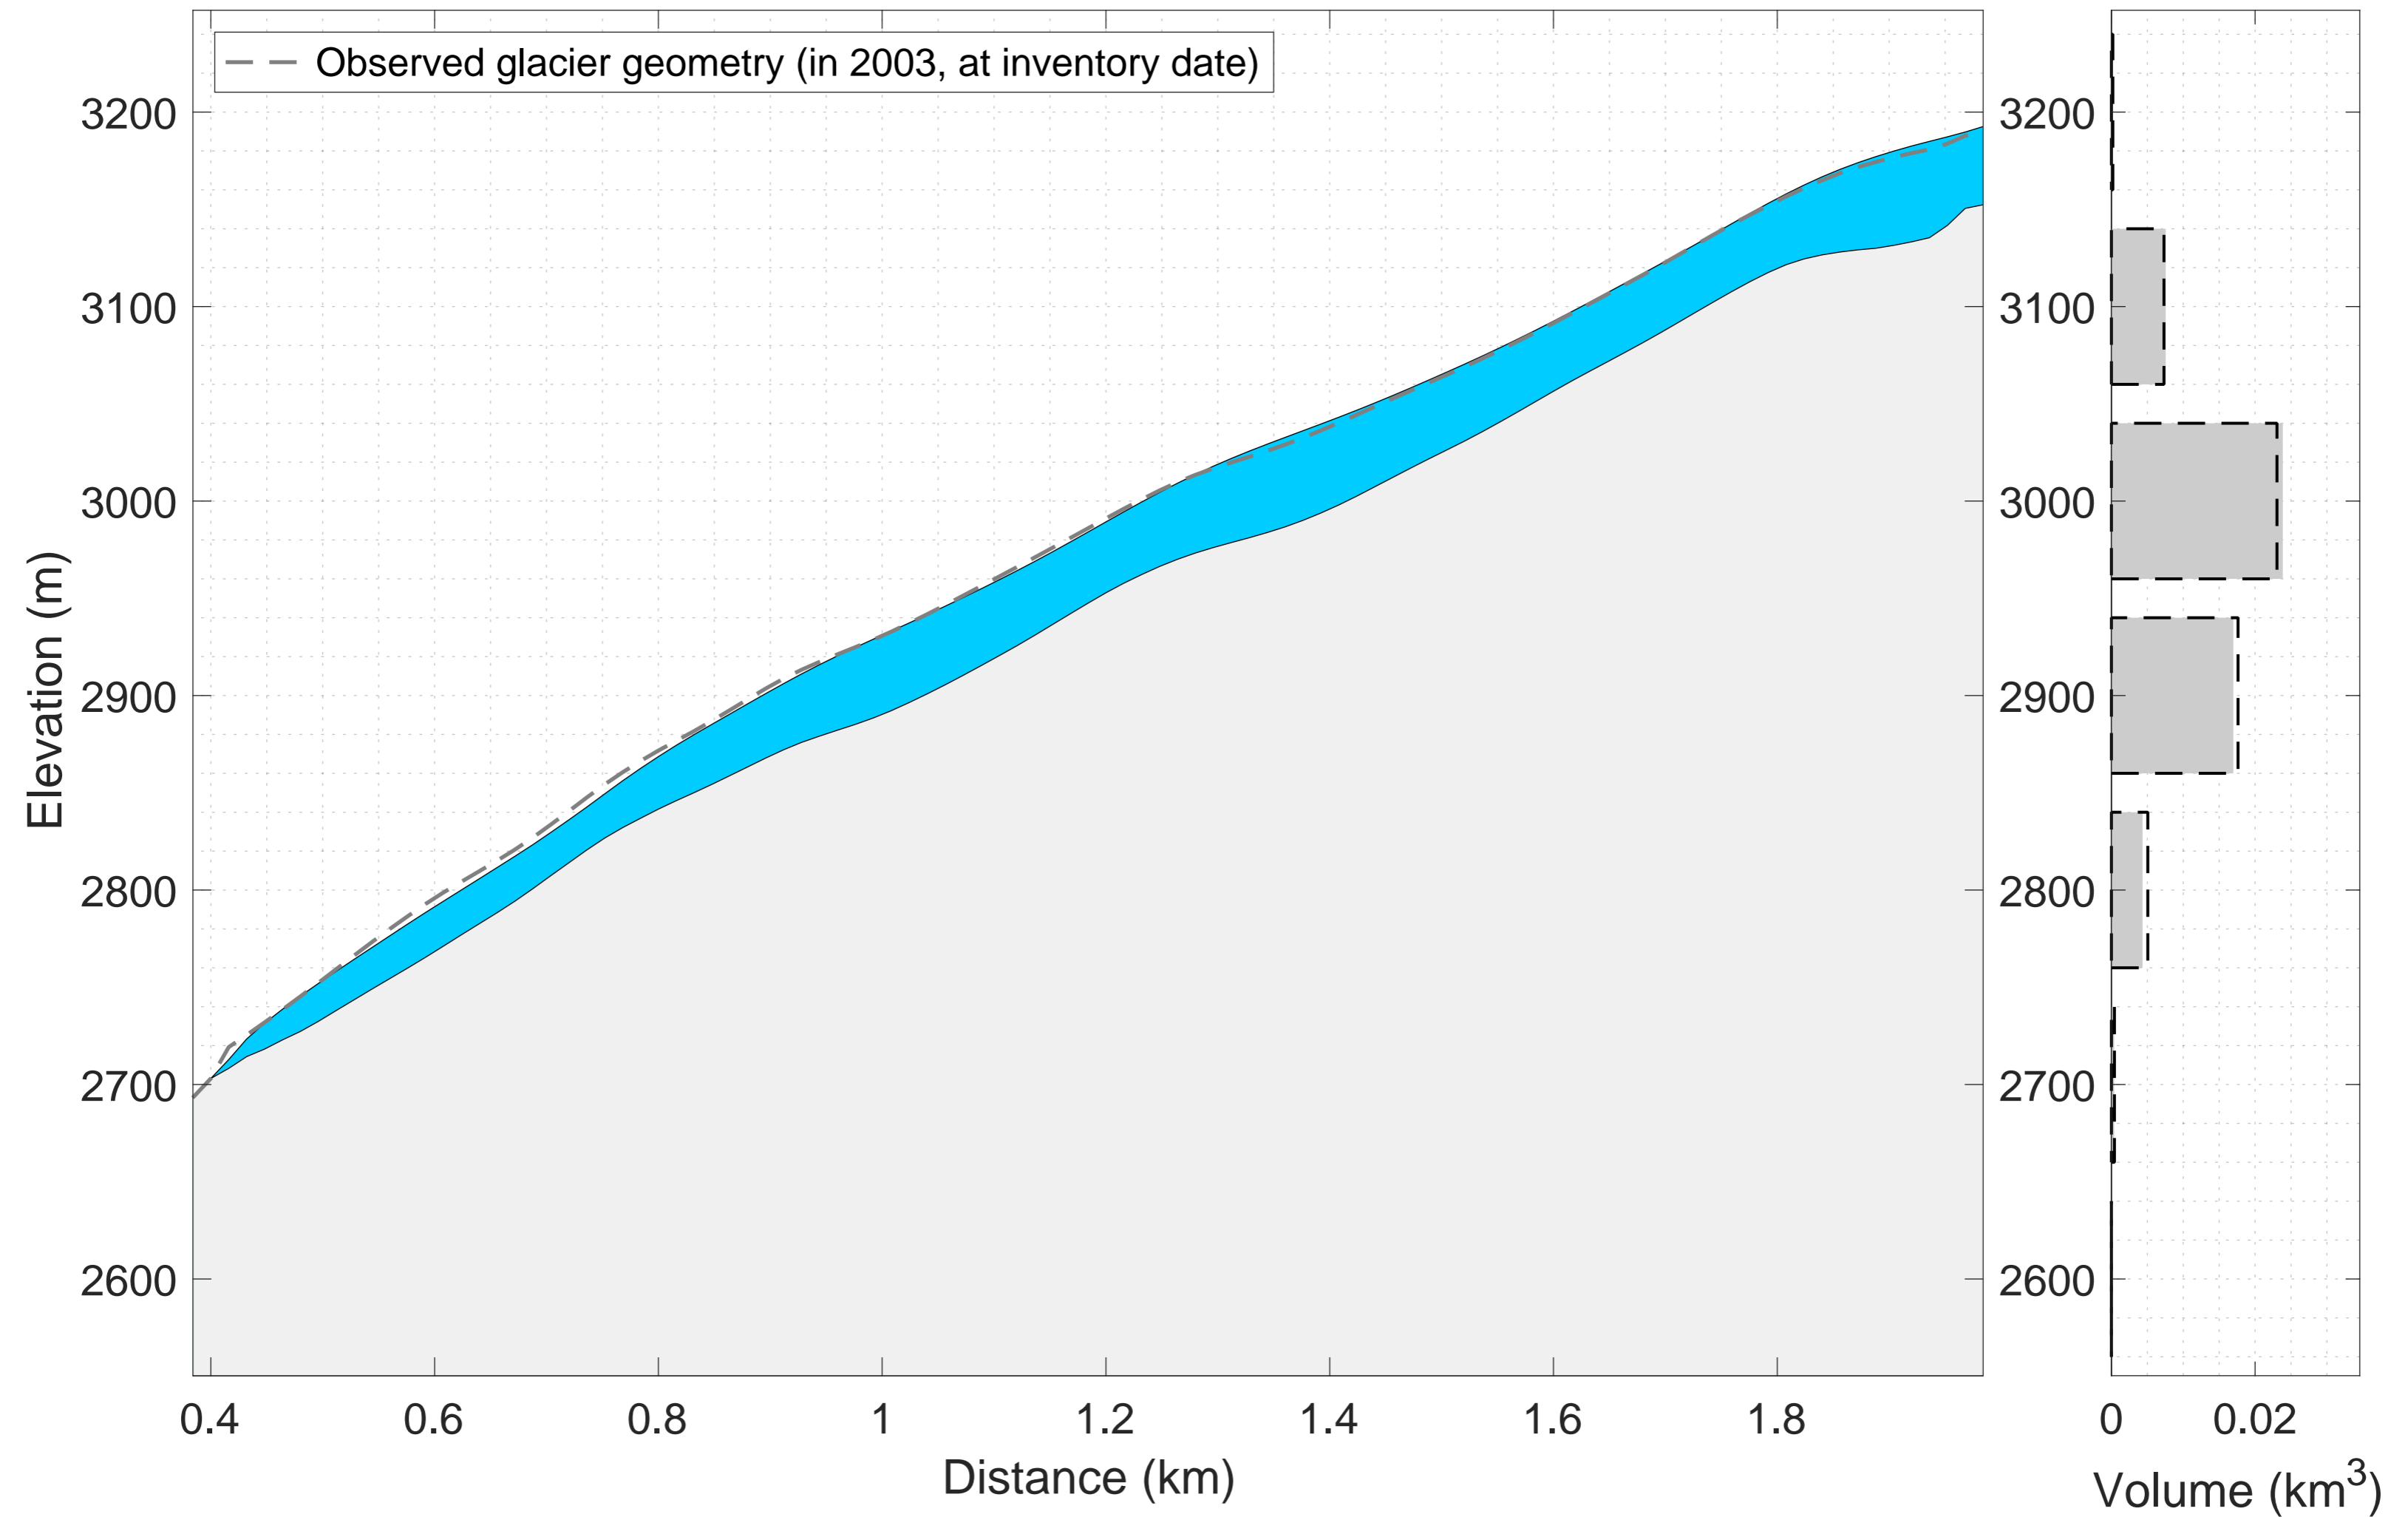

Supplement: Supplementary file 441 [file tc-13-1125-2019-supplement.zip]

**Modelled geometry (Glacier ID = 02607;  $A = 1.6859\text{e-}16 \text{ Pa}^{-3} \text{ a}^{-1}$ ;  $dx = 28 \text{ m}$ )**

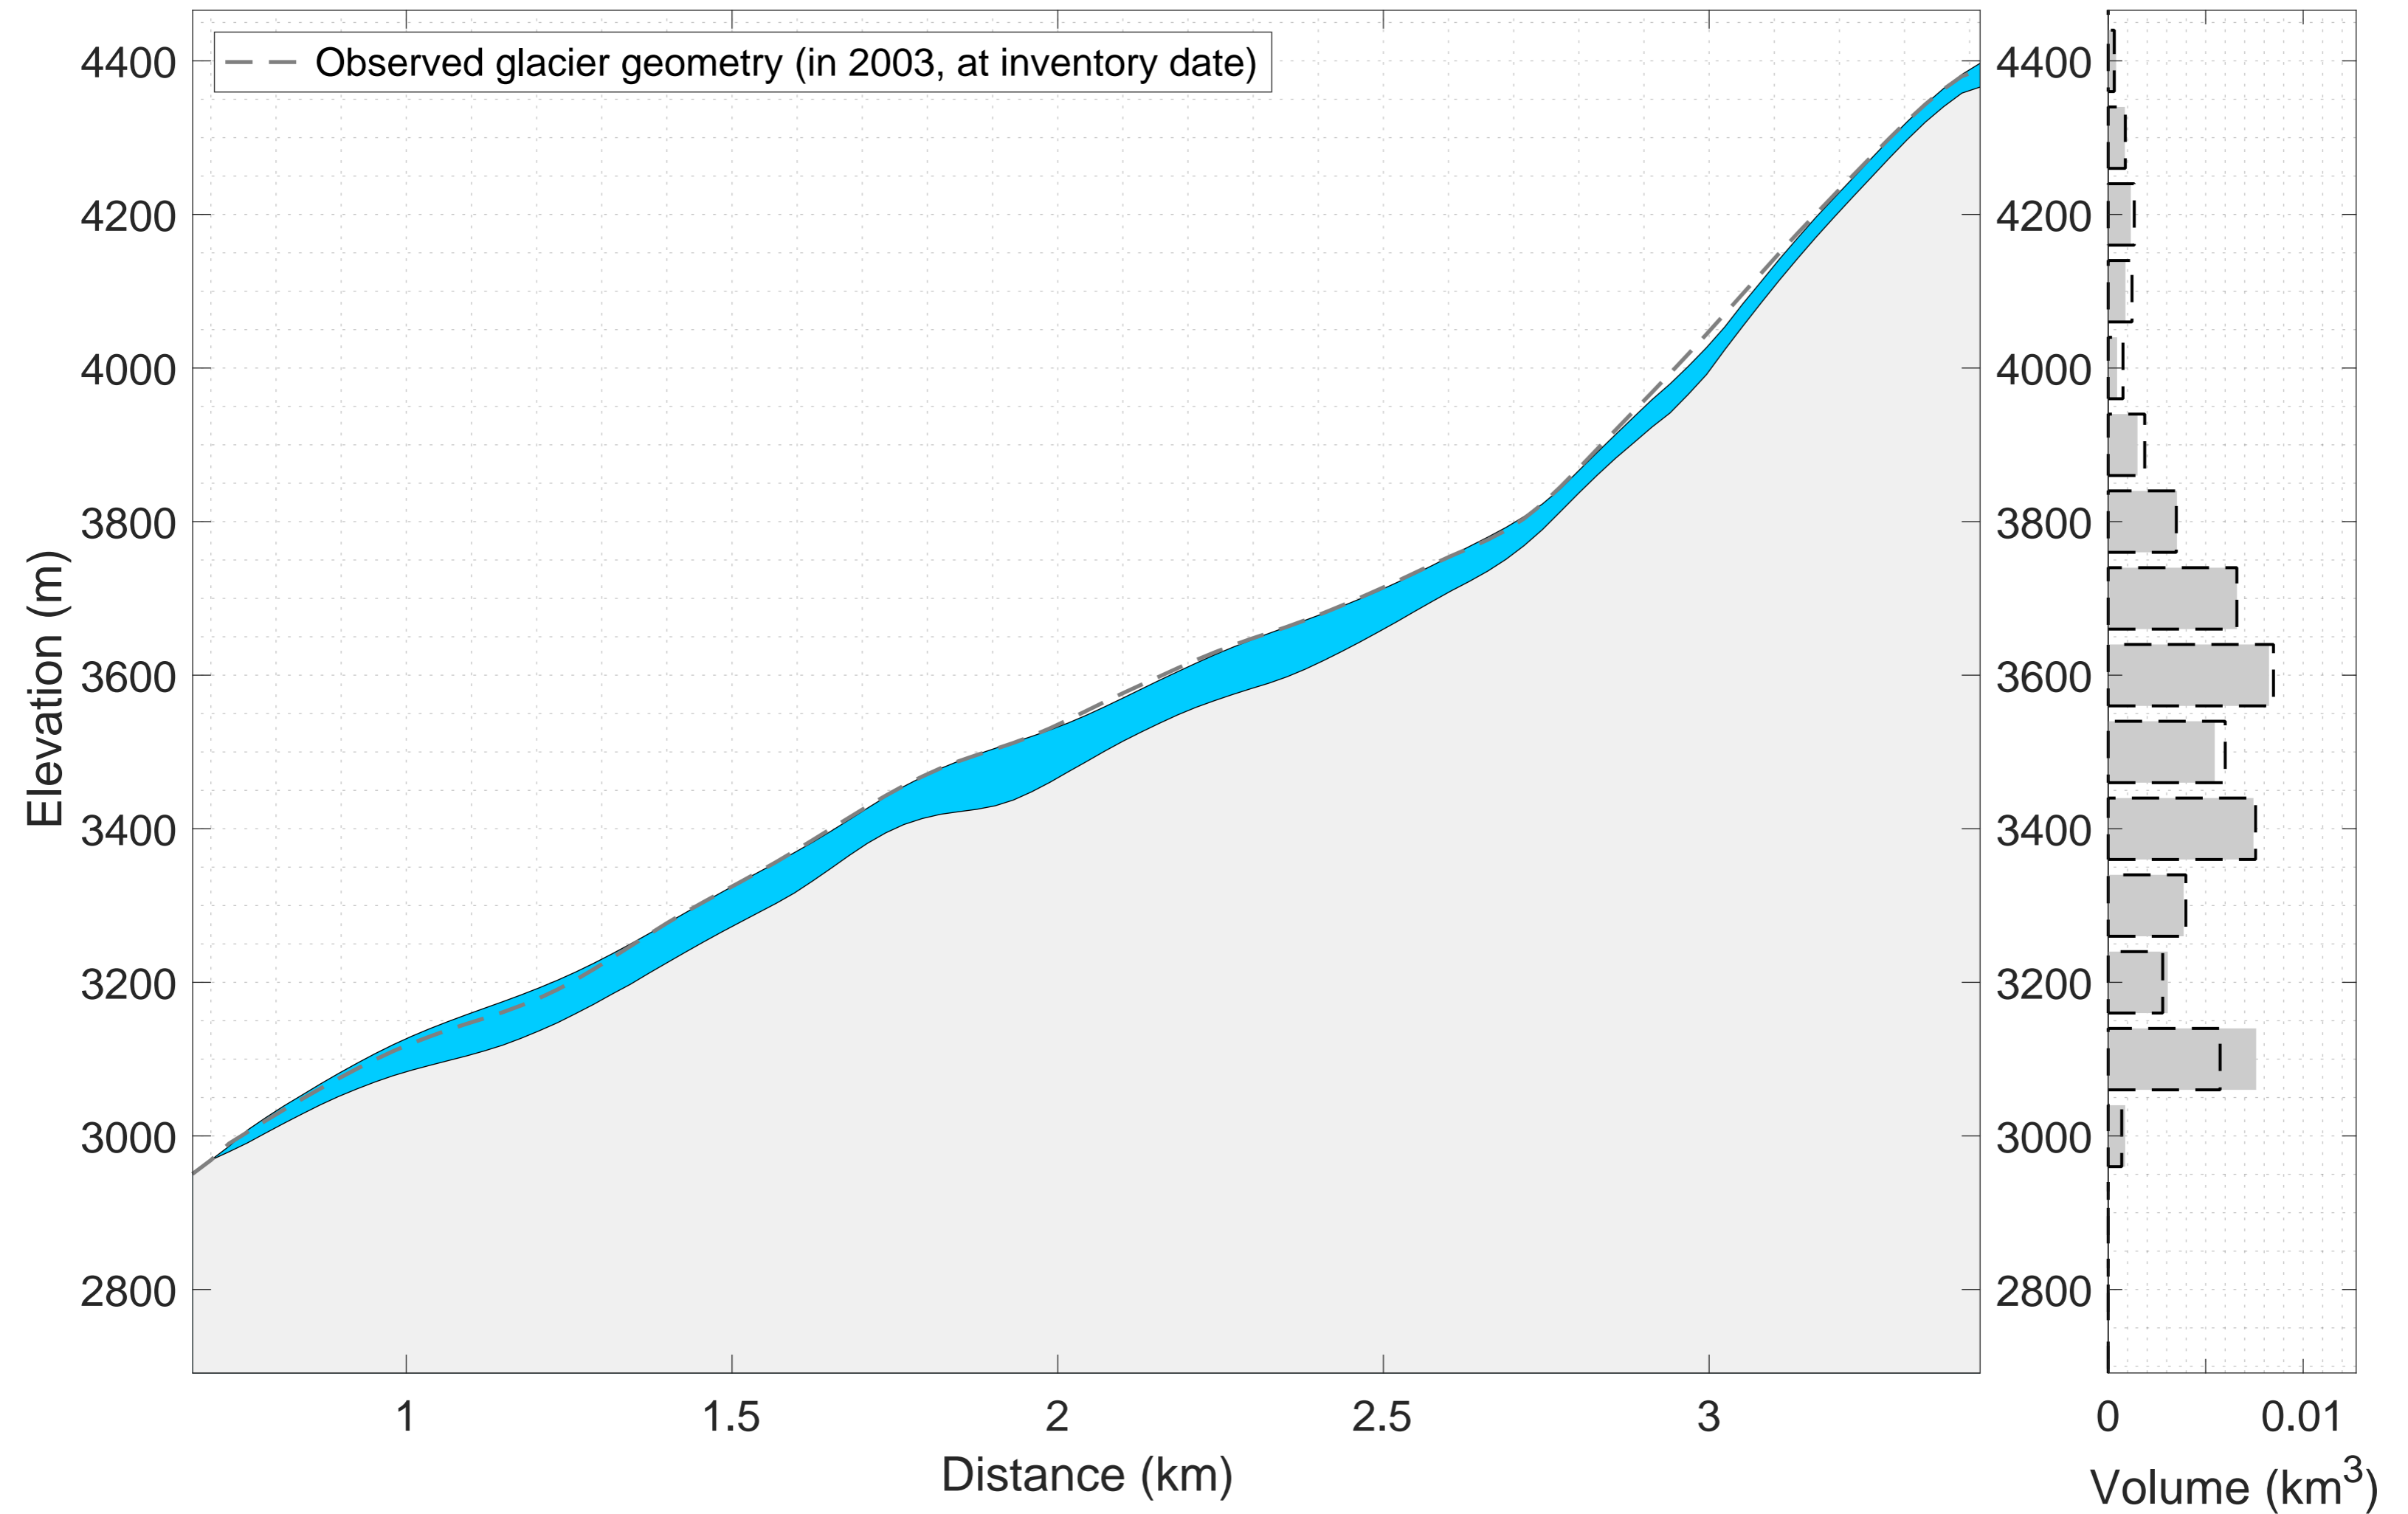

Supplement: Supplementary file 442 [file tc-13-1125-2019-supplement.zip]

**Modelled geometry (Glacier ID = 01078;  $A = 6.4929\text{e-}17 \text{ Pa}^{-3} \text{ a}^{-1}$ ;  $dx = 10 \text{ m}$ )**

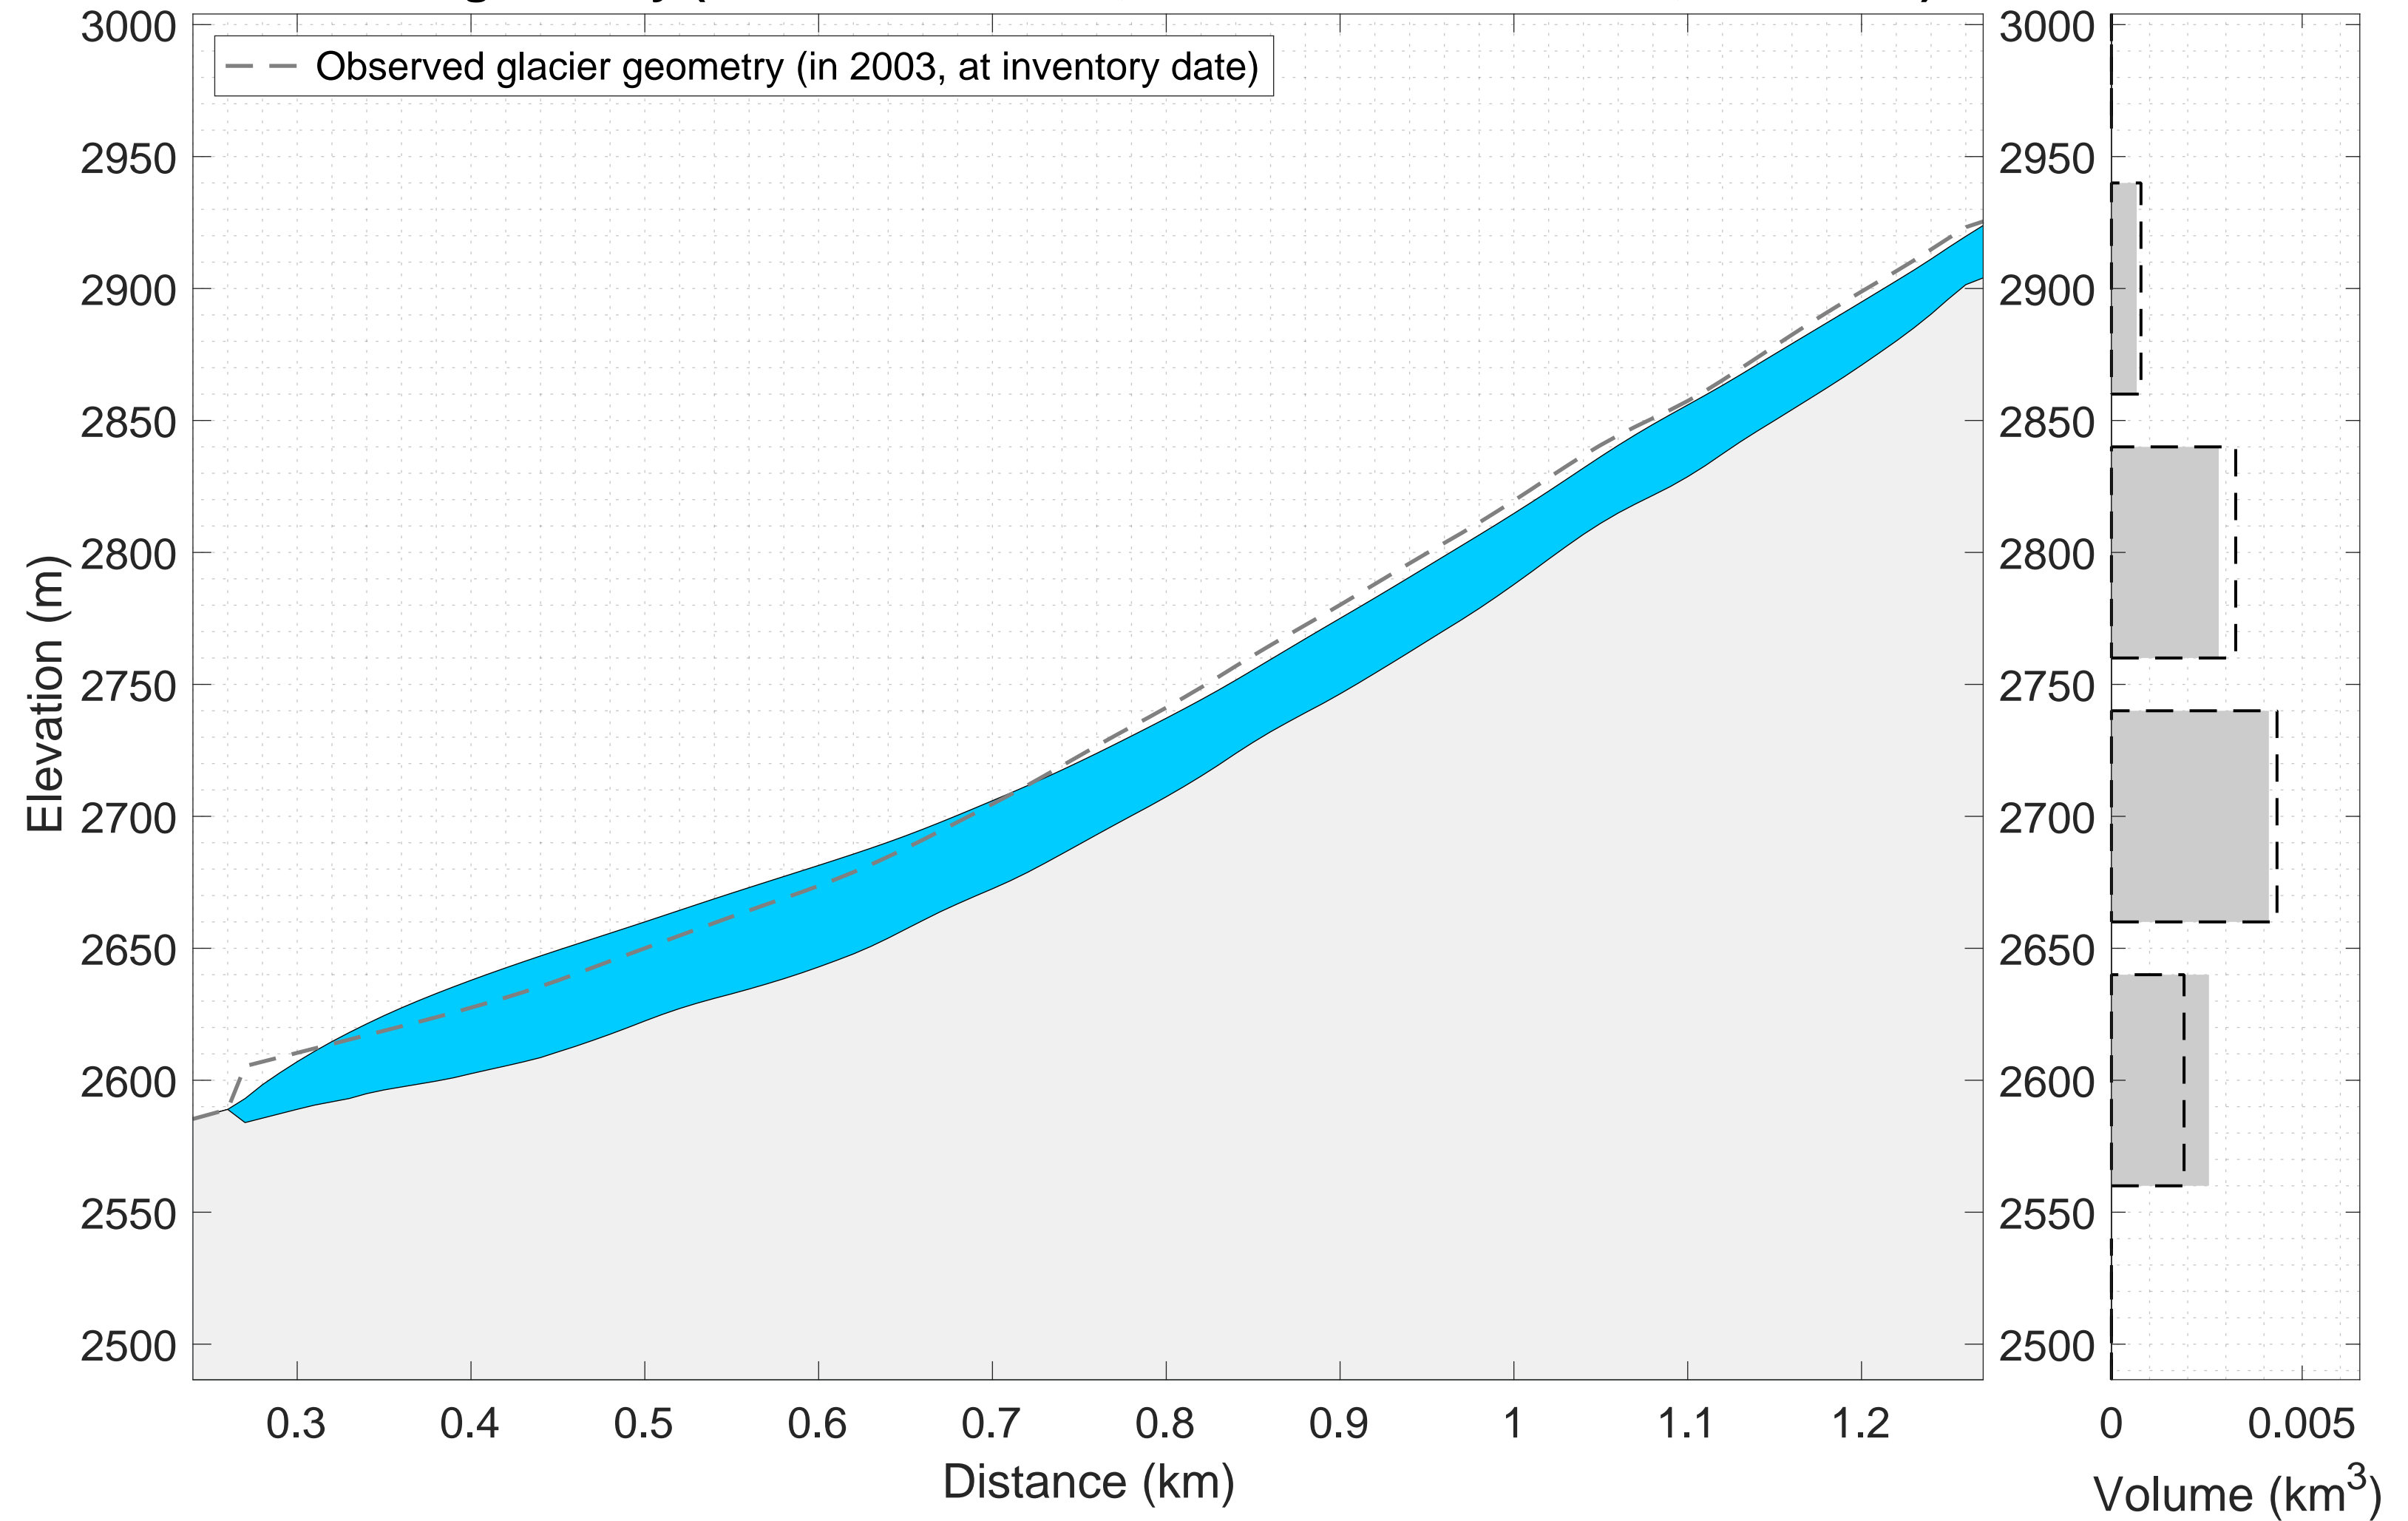

Supplement: Supplementary file 443 [file tc-13-1125-2019-supplement.zip]

**Modelled geometry (Glacier ID = 00135;  $A = 3.4589\text{e-}16 \text{ Pa}^{-3} \text{ a}^{-1}$ ;  $dx = 53 \text{ m}$ )**

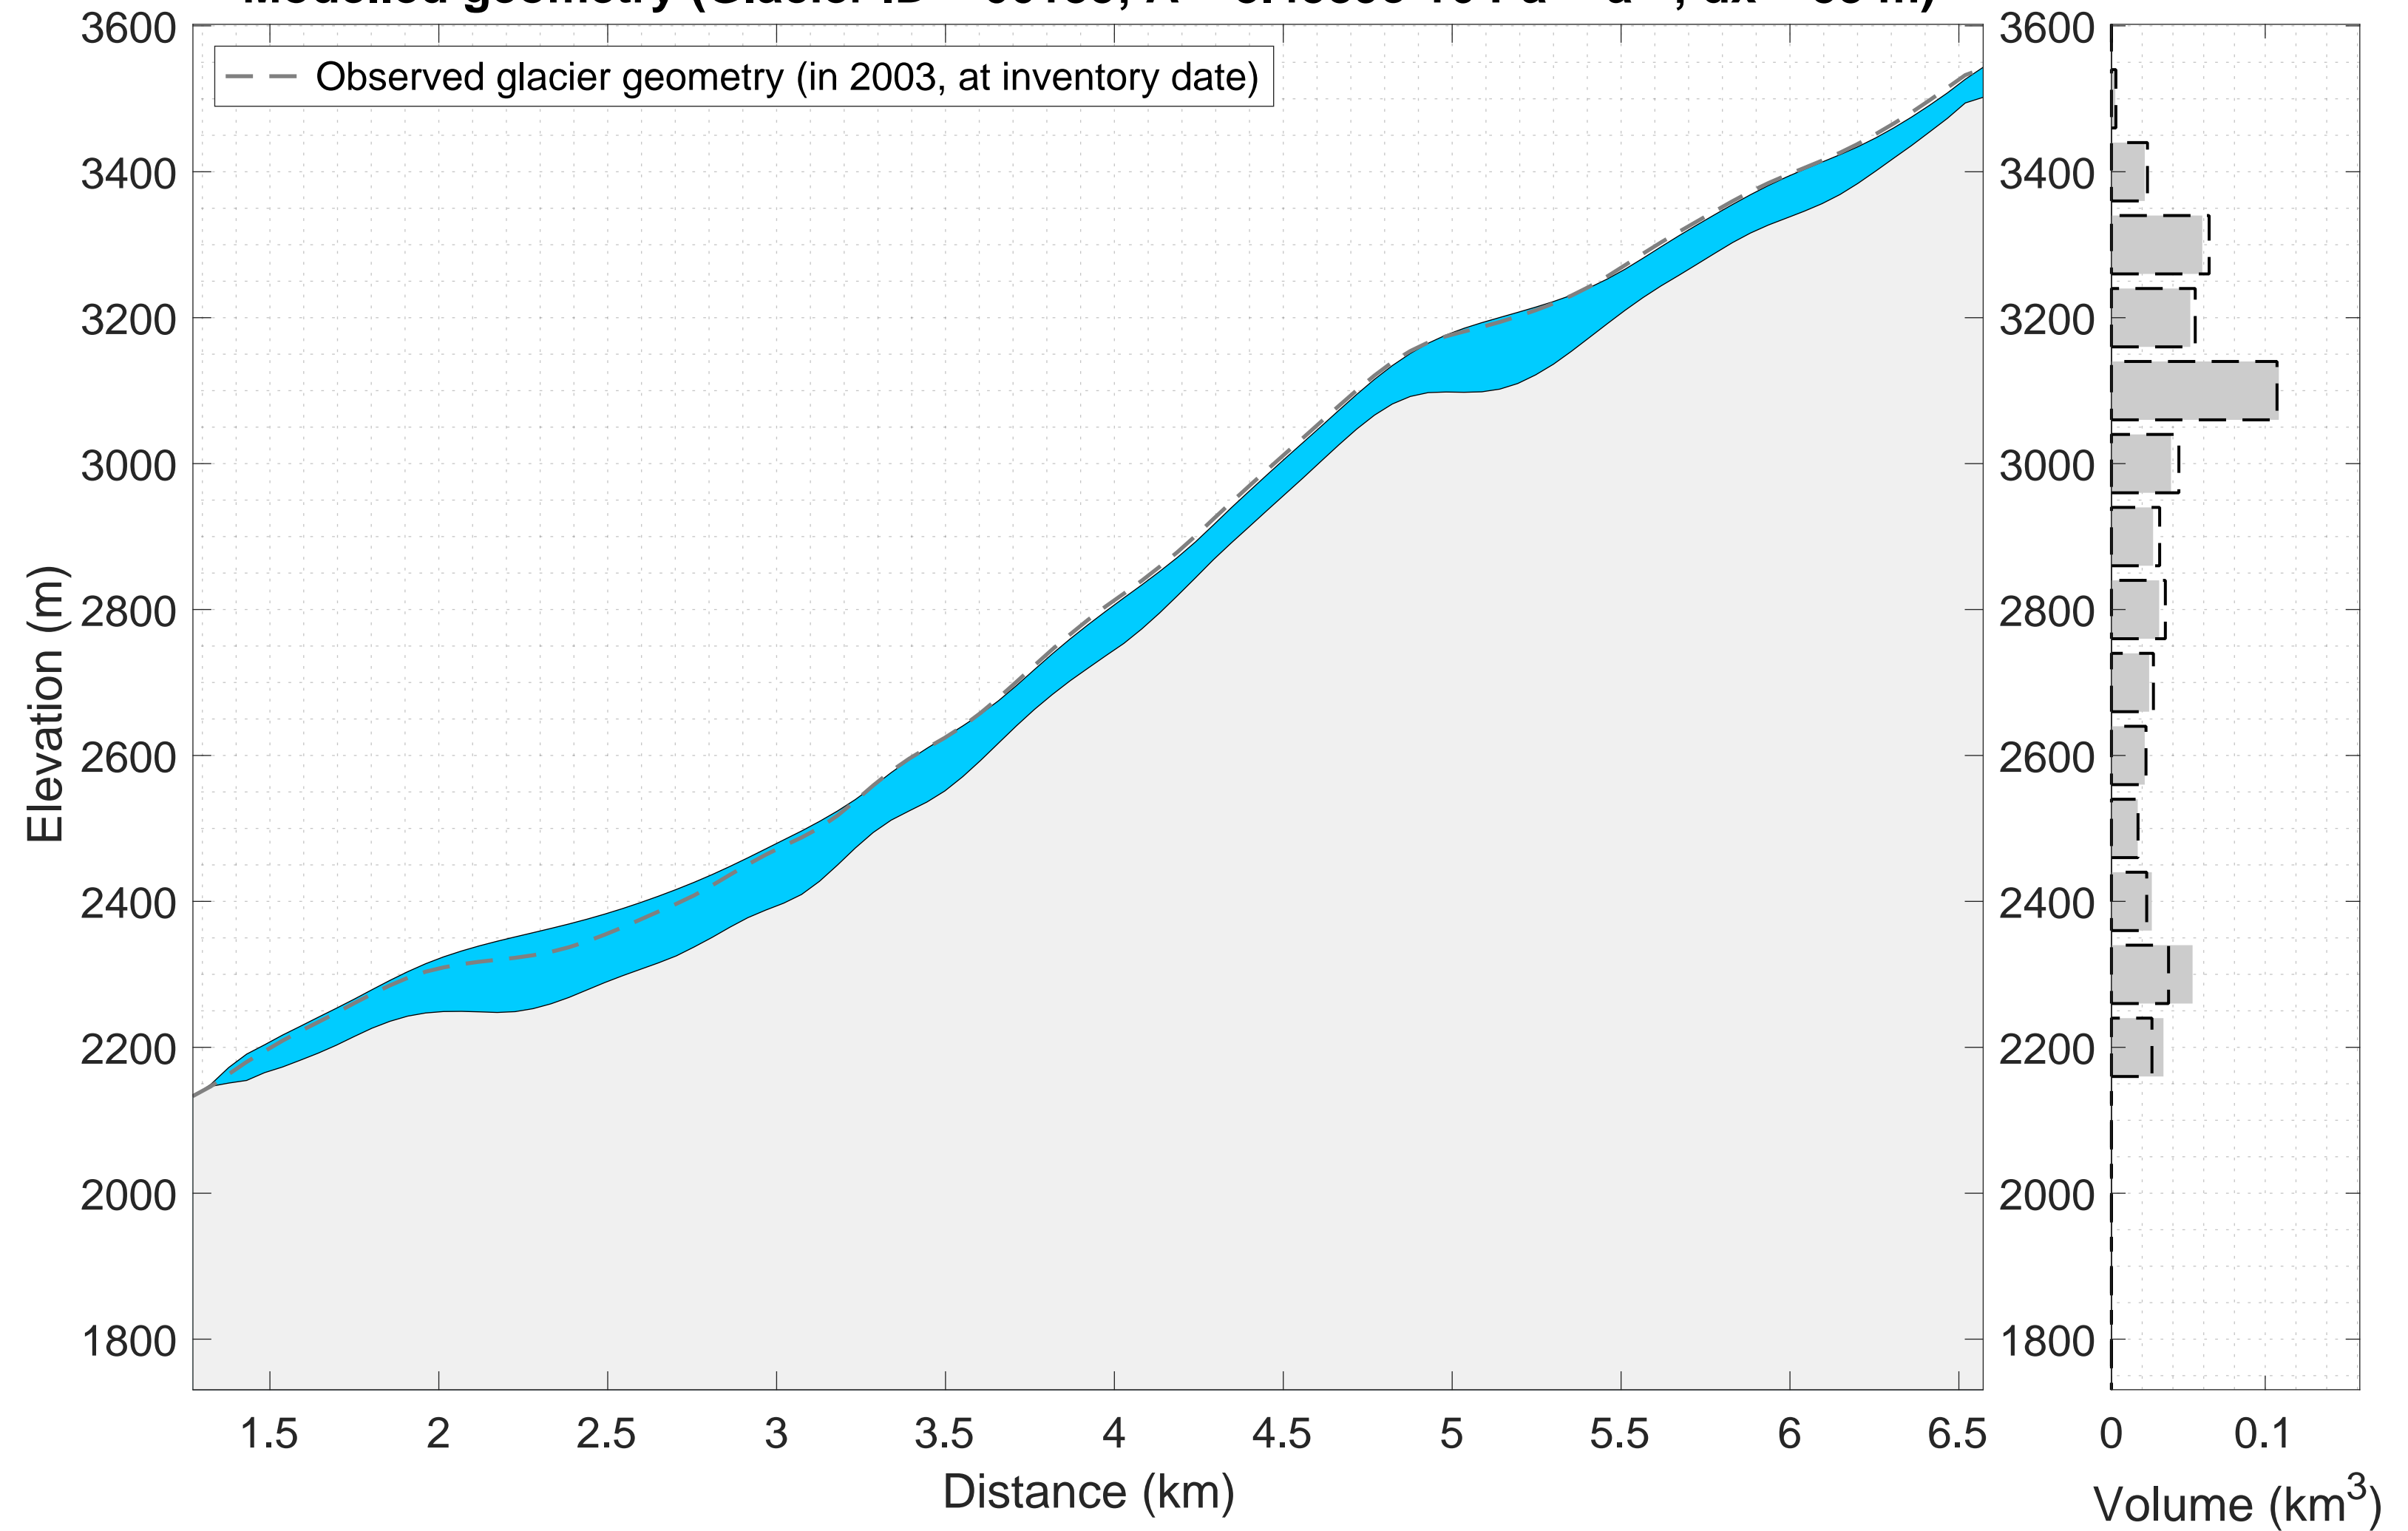

Supplement: Supplementary file 444 [file tc-13-1125-2019-supplement.zip]

**Modelled geometry (Glacier ID = 02643;  $A = 1.0445\text{e-}16 \text{ Pa}^{-3} \text{ a}^{-1}$ ;  $dx = 11 \text{ m}$ )**

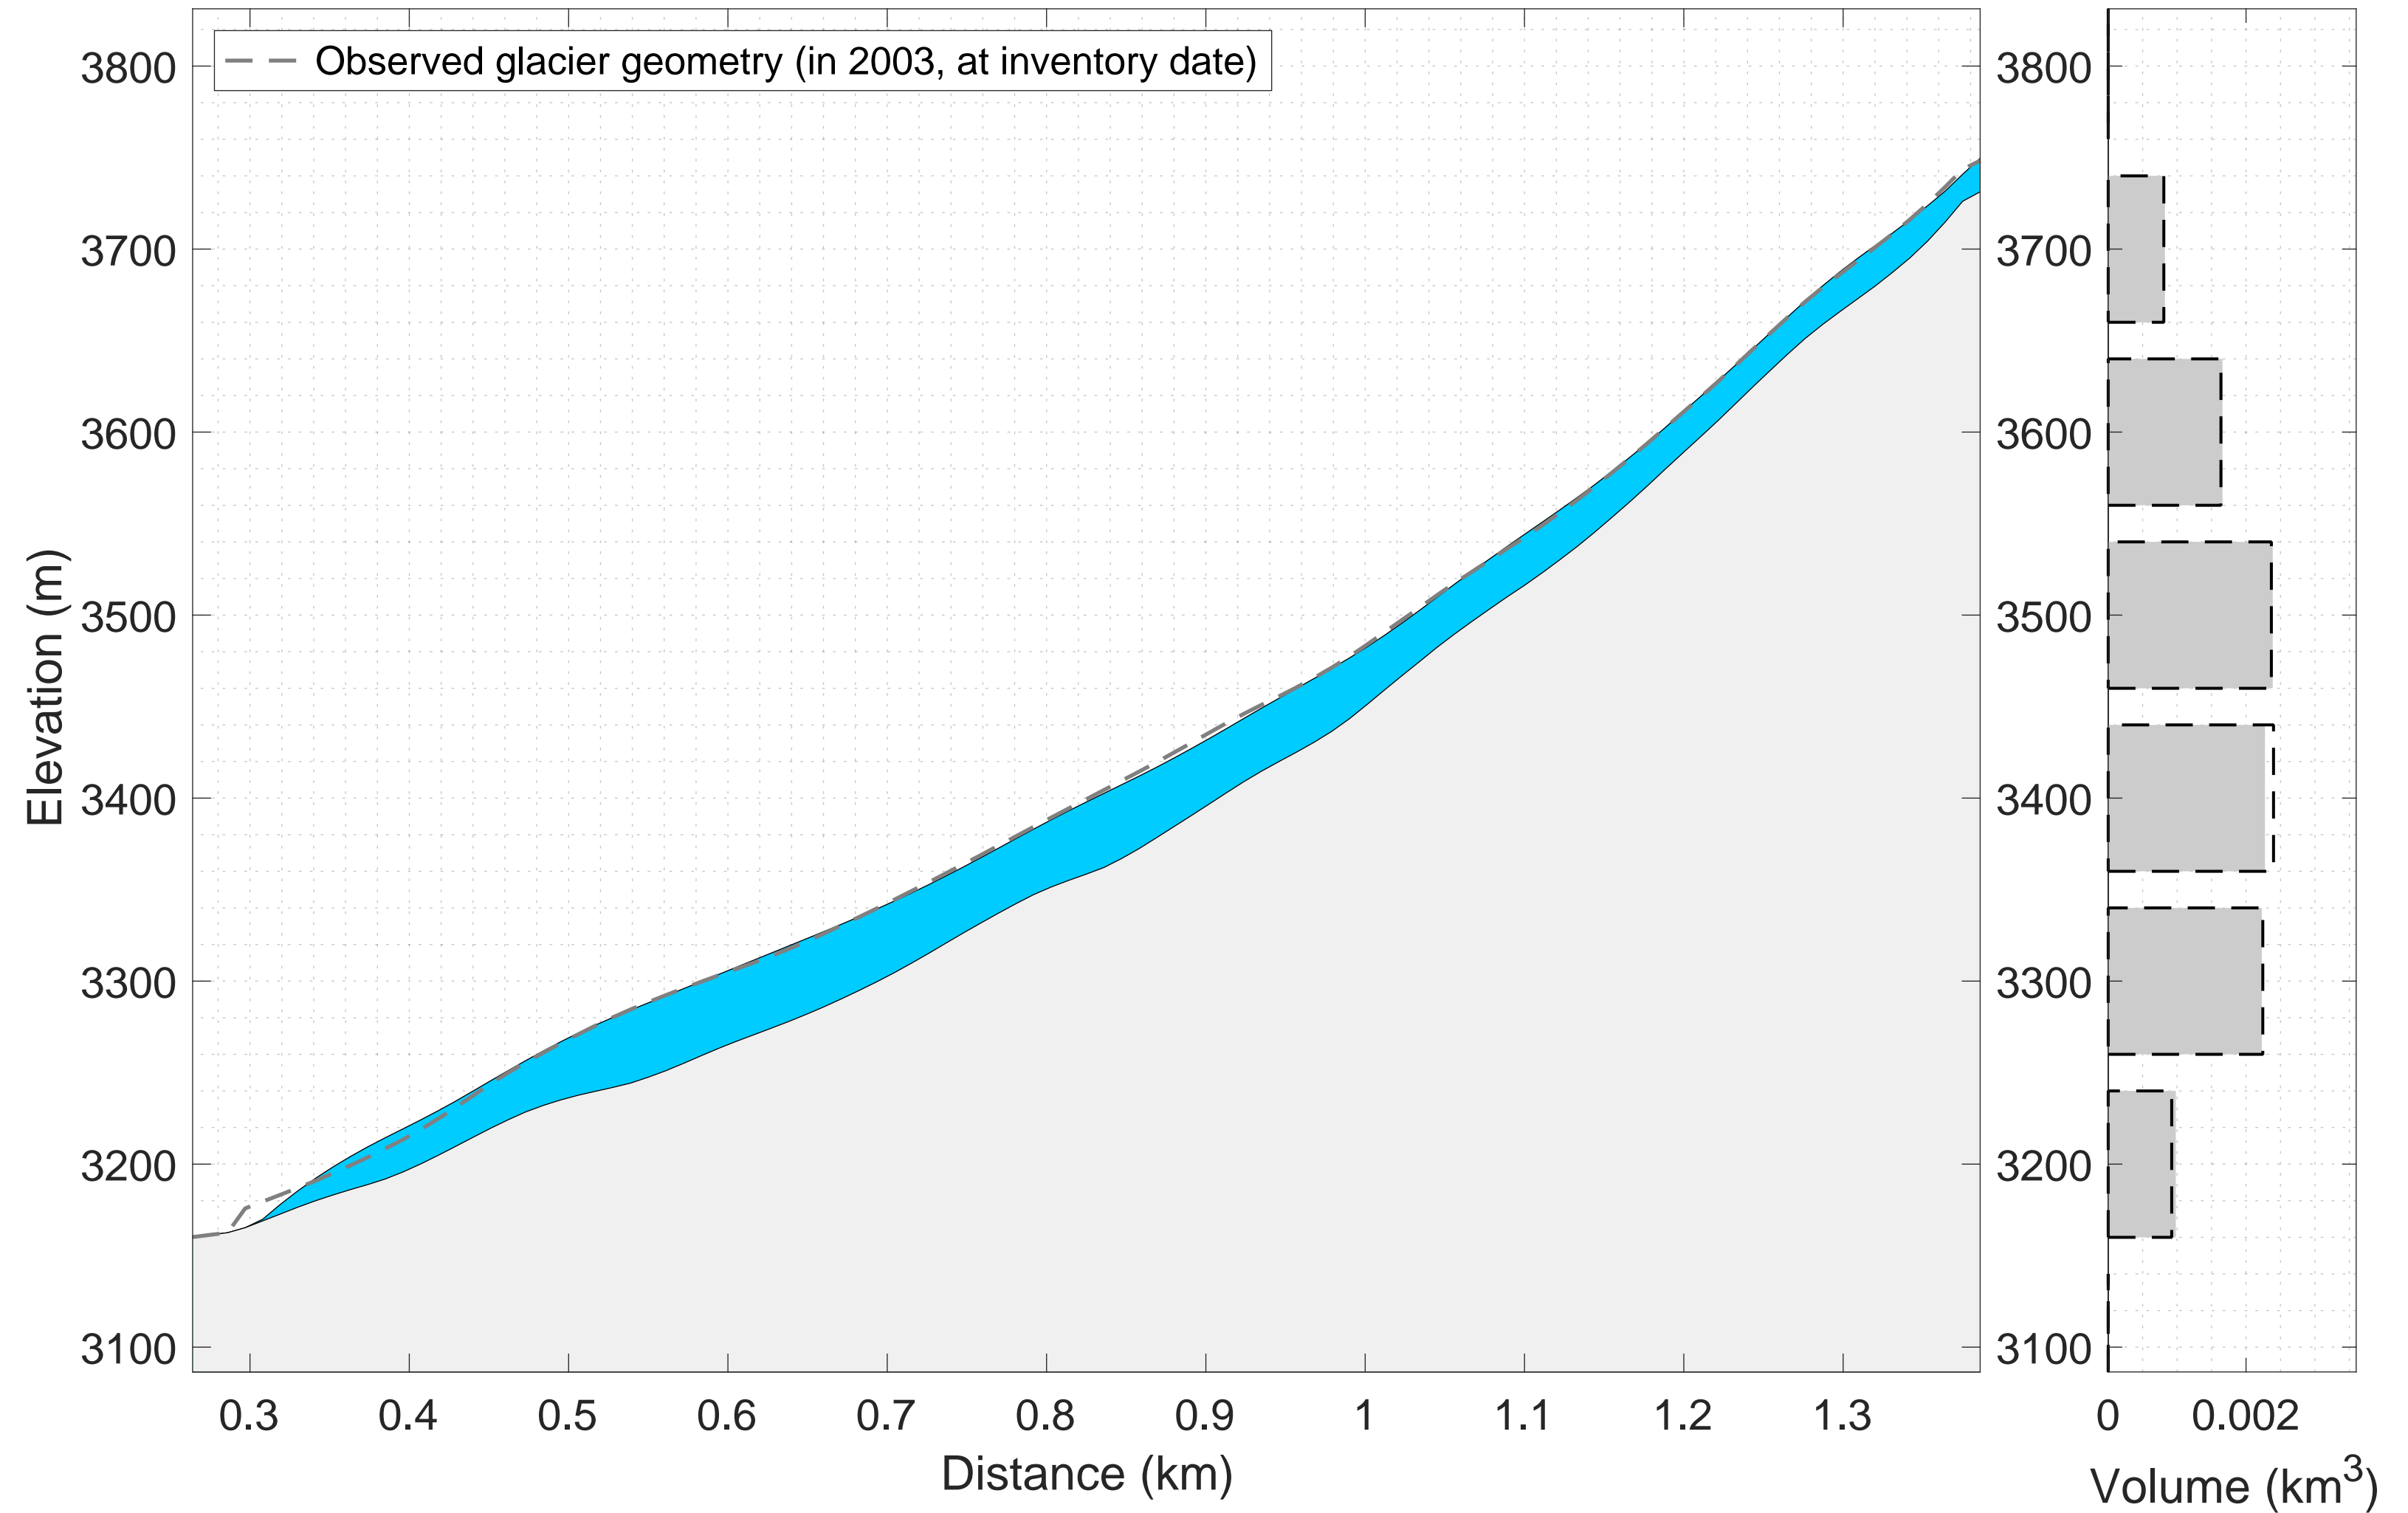

Supplement: Supplementary file 445 [file tc-13-1125-2019-supplement.zip]

**Modelled geometry (Glacier ID = 02039;  $A = 4.5327\text{e-}17 \text{ Pa}^{-3} \text{ a}^{-1}$ ;  $dx = 13 \text{ m}$ )**

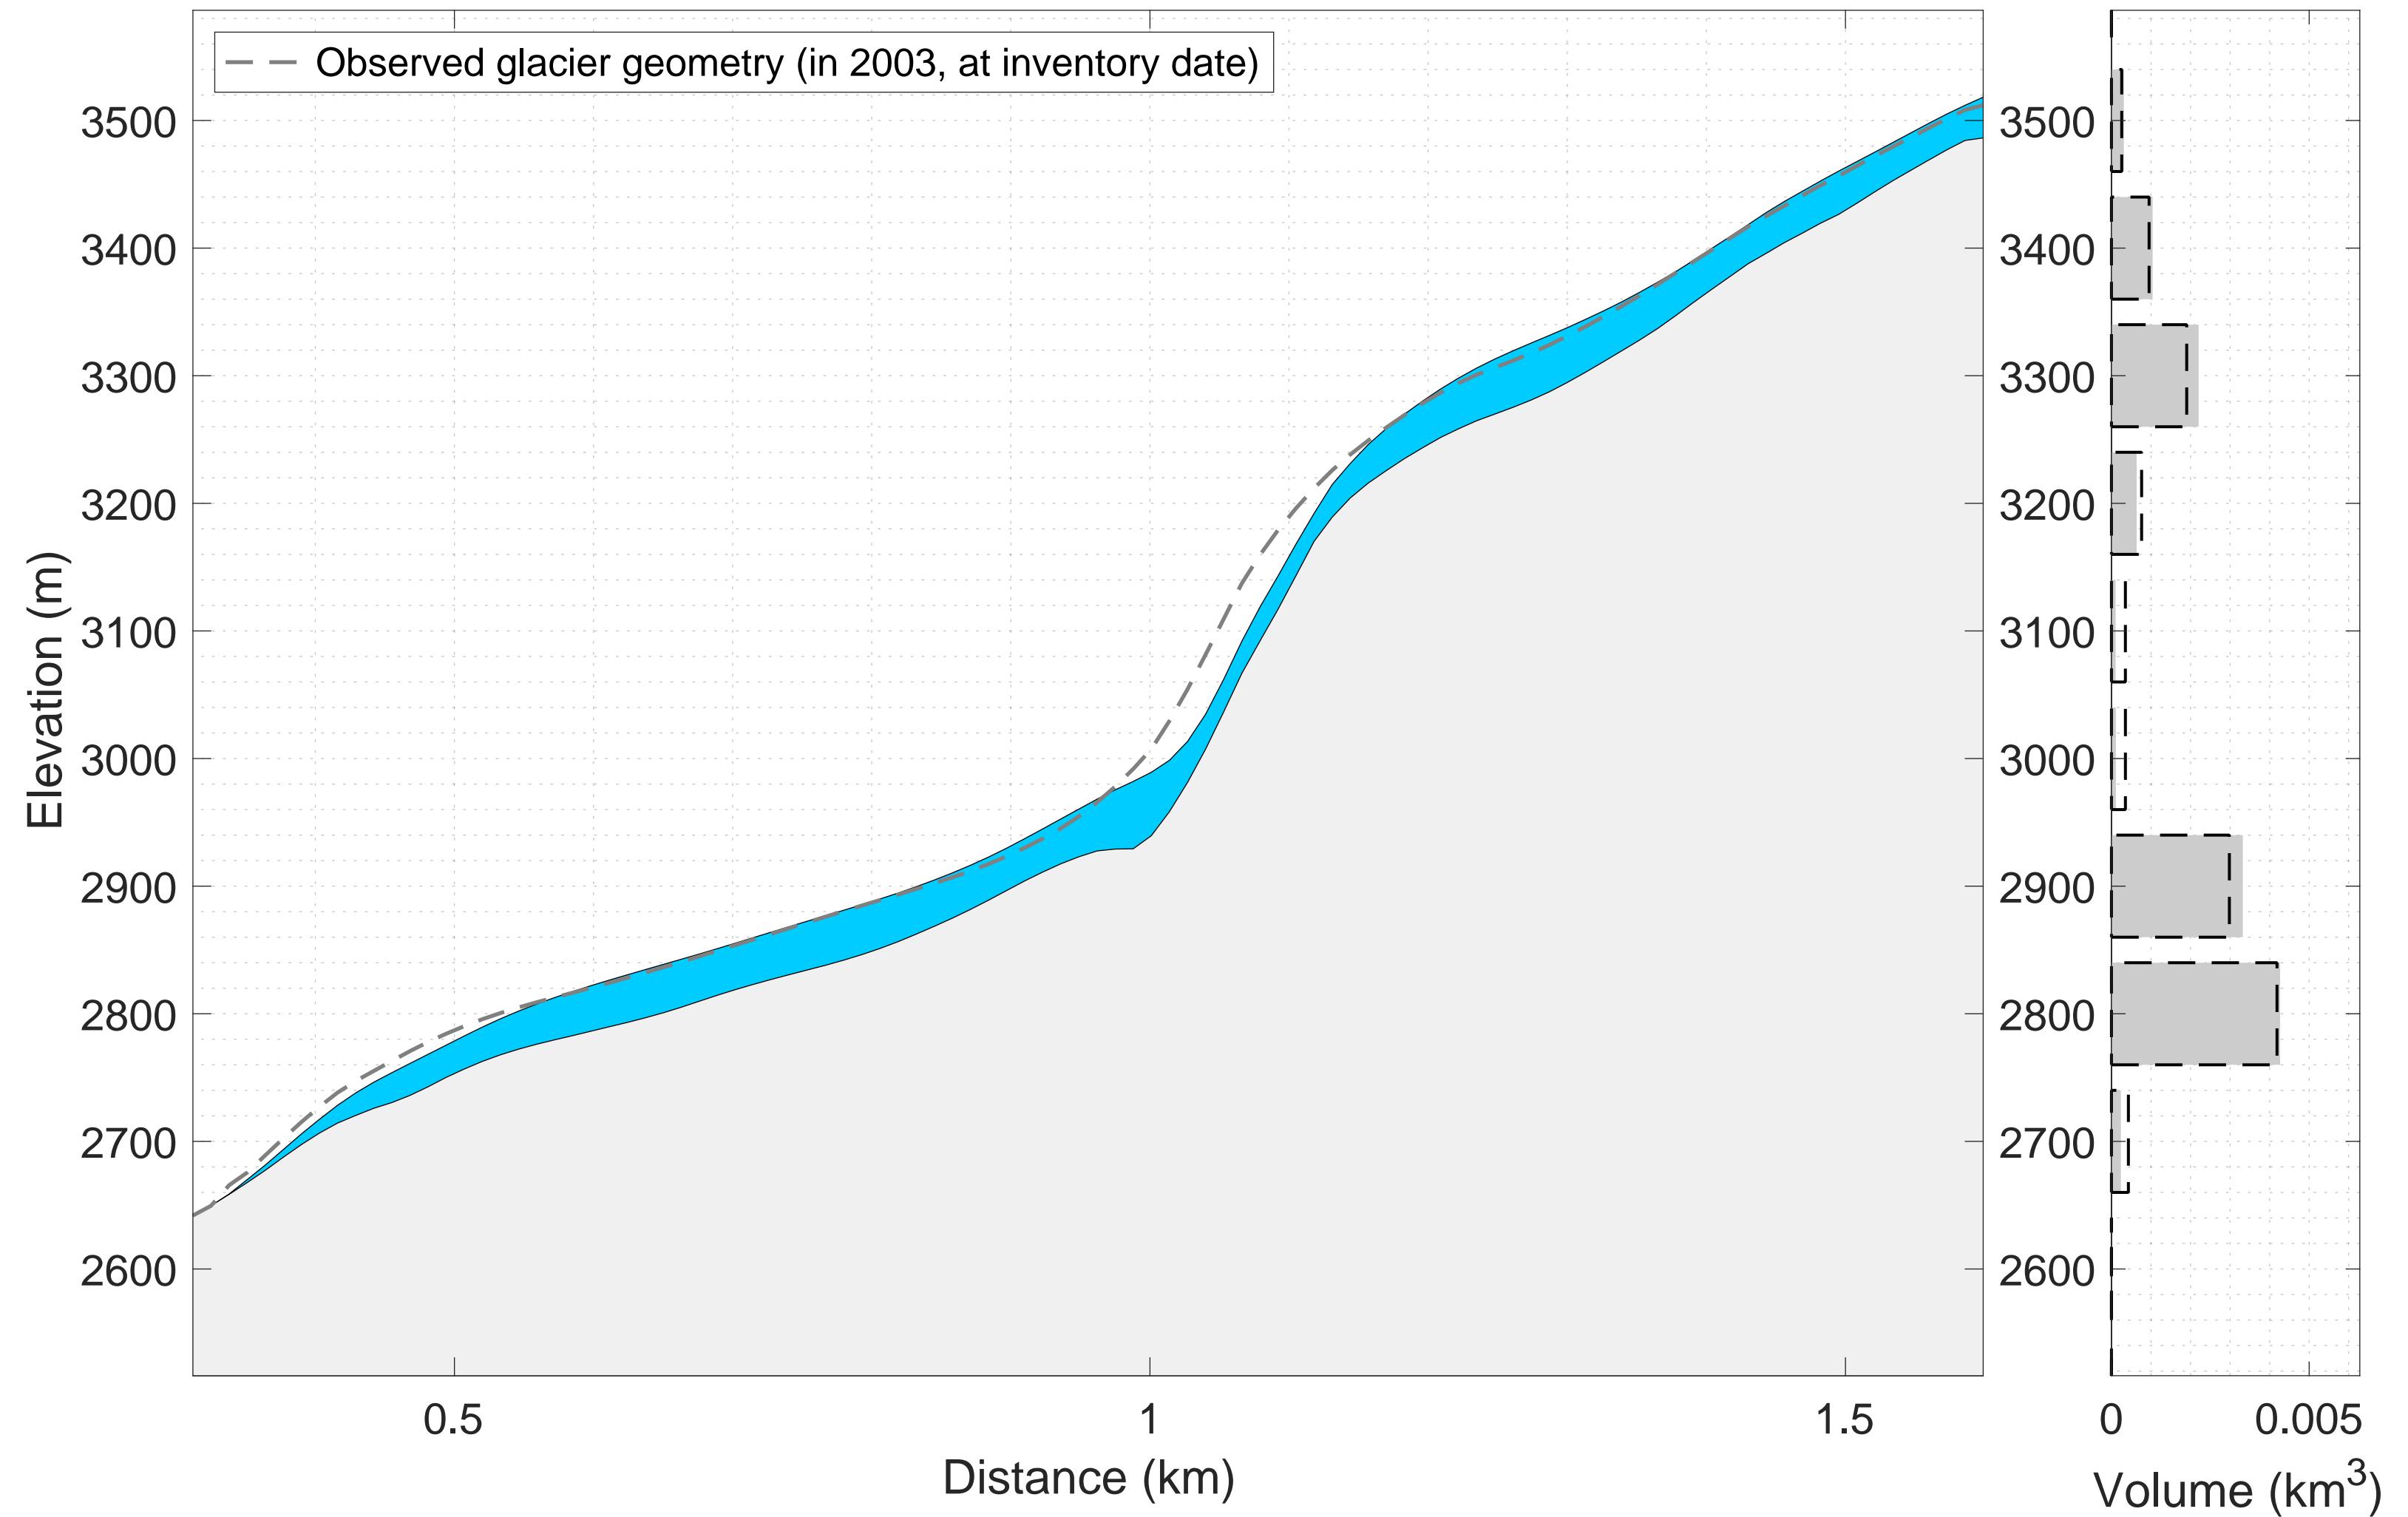

Supplement: Supplementary file 446 [file tc-13-1125-2019-supplement.zip]

**Modelled geometry (Glacier ID = 00793;  $A = 1.1004\text{e-}16 \text{ Pa}^{-3} \text{ a}^{-1}$ ;  $dx = 12 \text{ m}$ )**

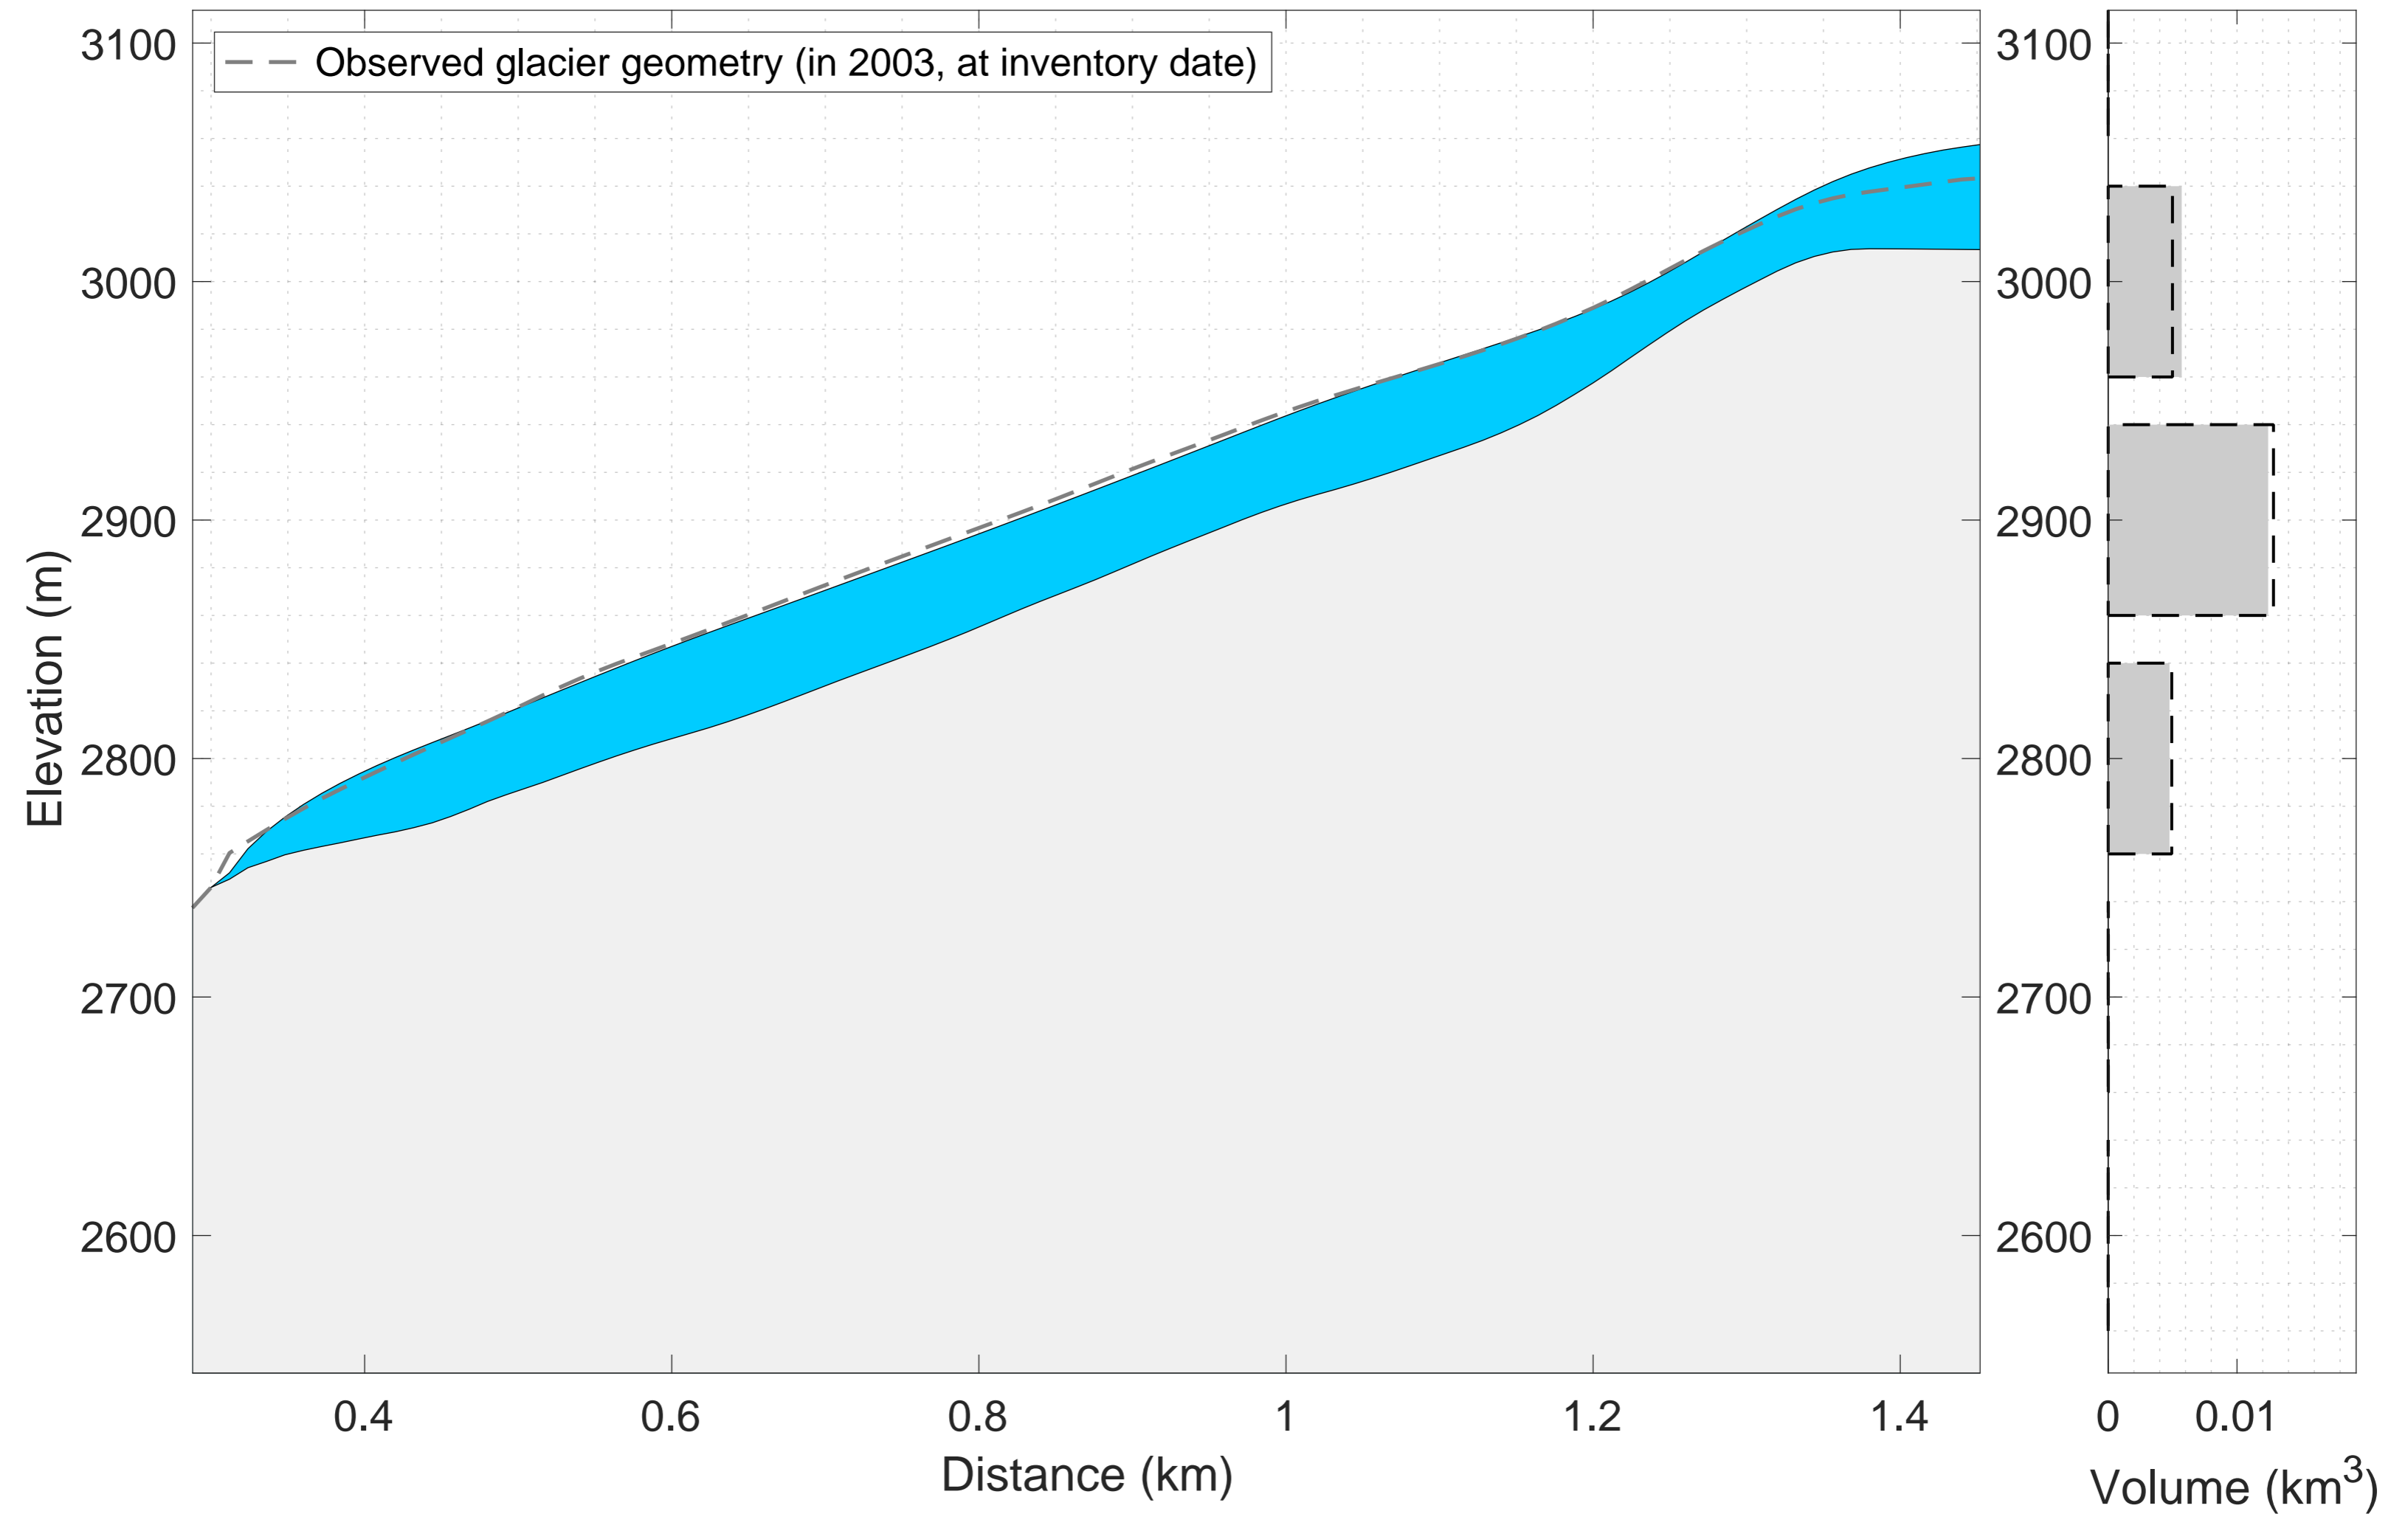

Supplement: Supplementary file 447 [file tc-13-1125-2019-supplement.zip]

**Modelled geometry (Glacier ID = 03503;  $A = 6.0441\text{e-}17 \text{ Pa}^{-3} \text{ a}^{-1}$ ;  $dx = 12 \text{ m}$ )**

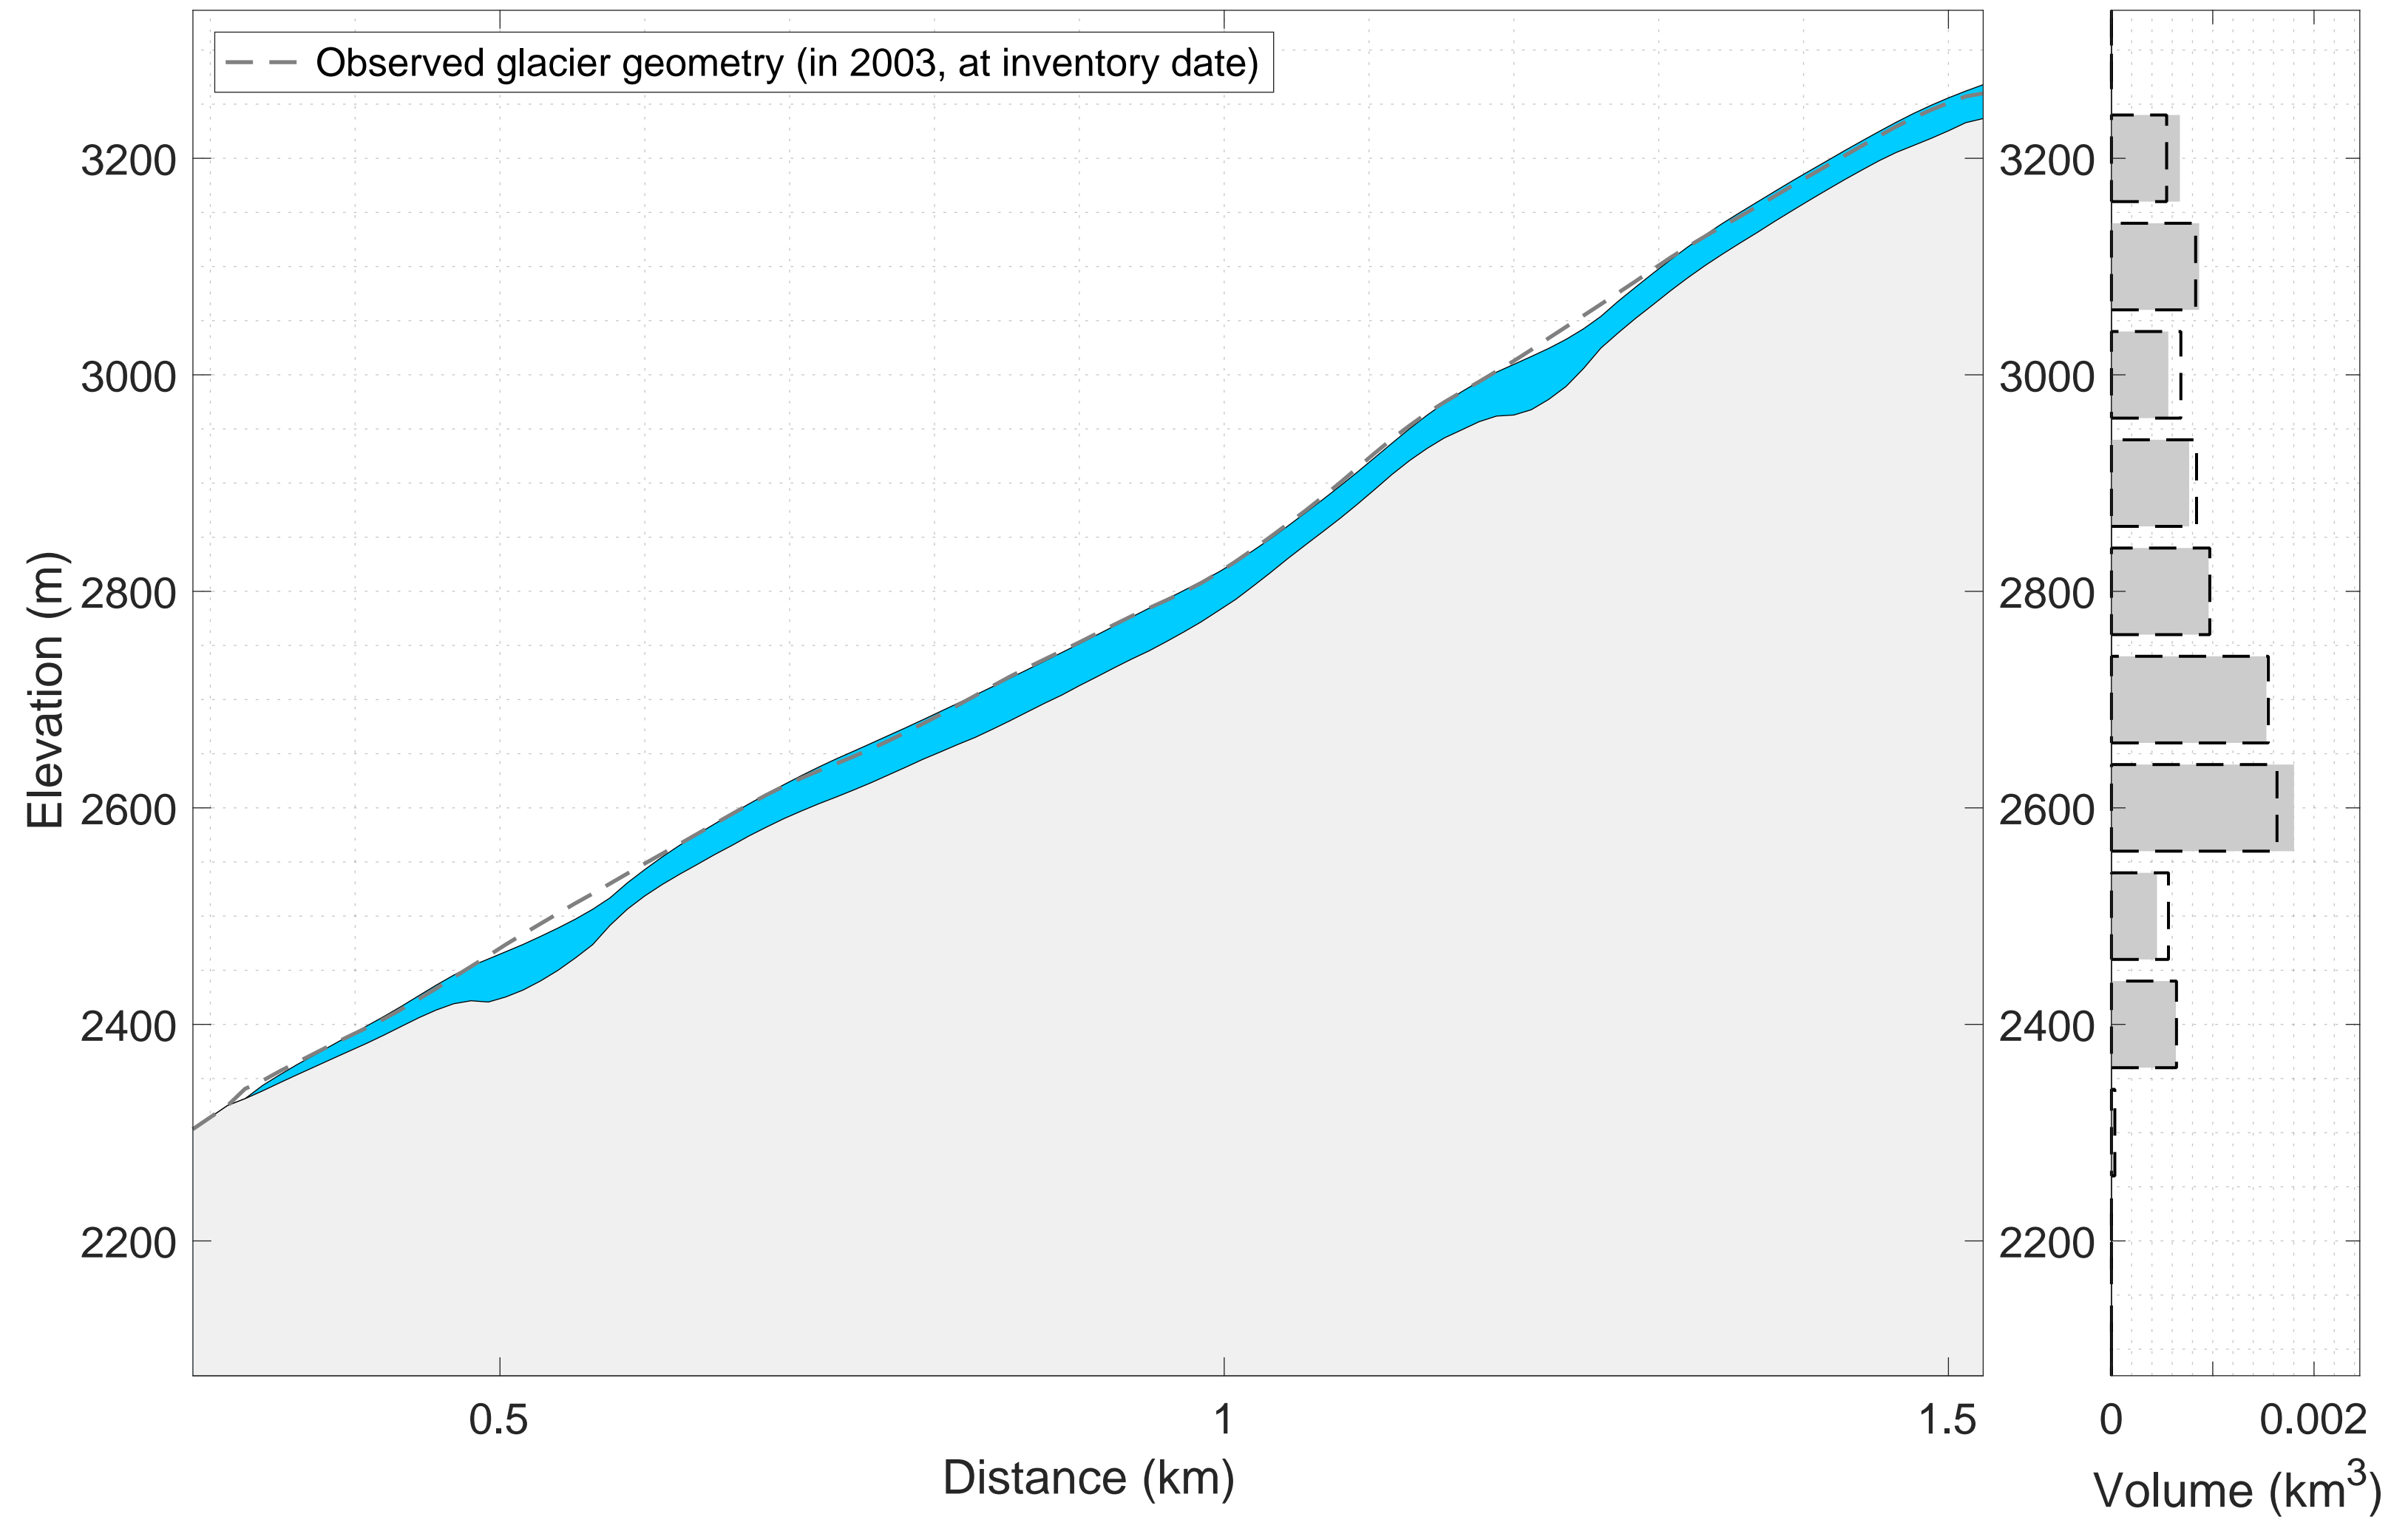

Supplement: Supplementary file 448 [file tc-13-1125-2019-supplement.zip]

**Modelled geometry (Glacier ID = 02627;  $A = 1.6815\text{e-}16 \text{ Pa}^{-3} \text{ a}^{-1}$ ;  $dx = 12 \text{ m}$ )**

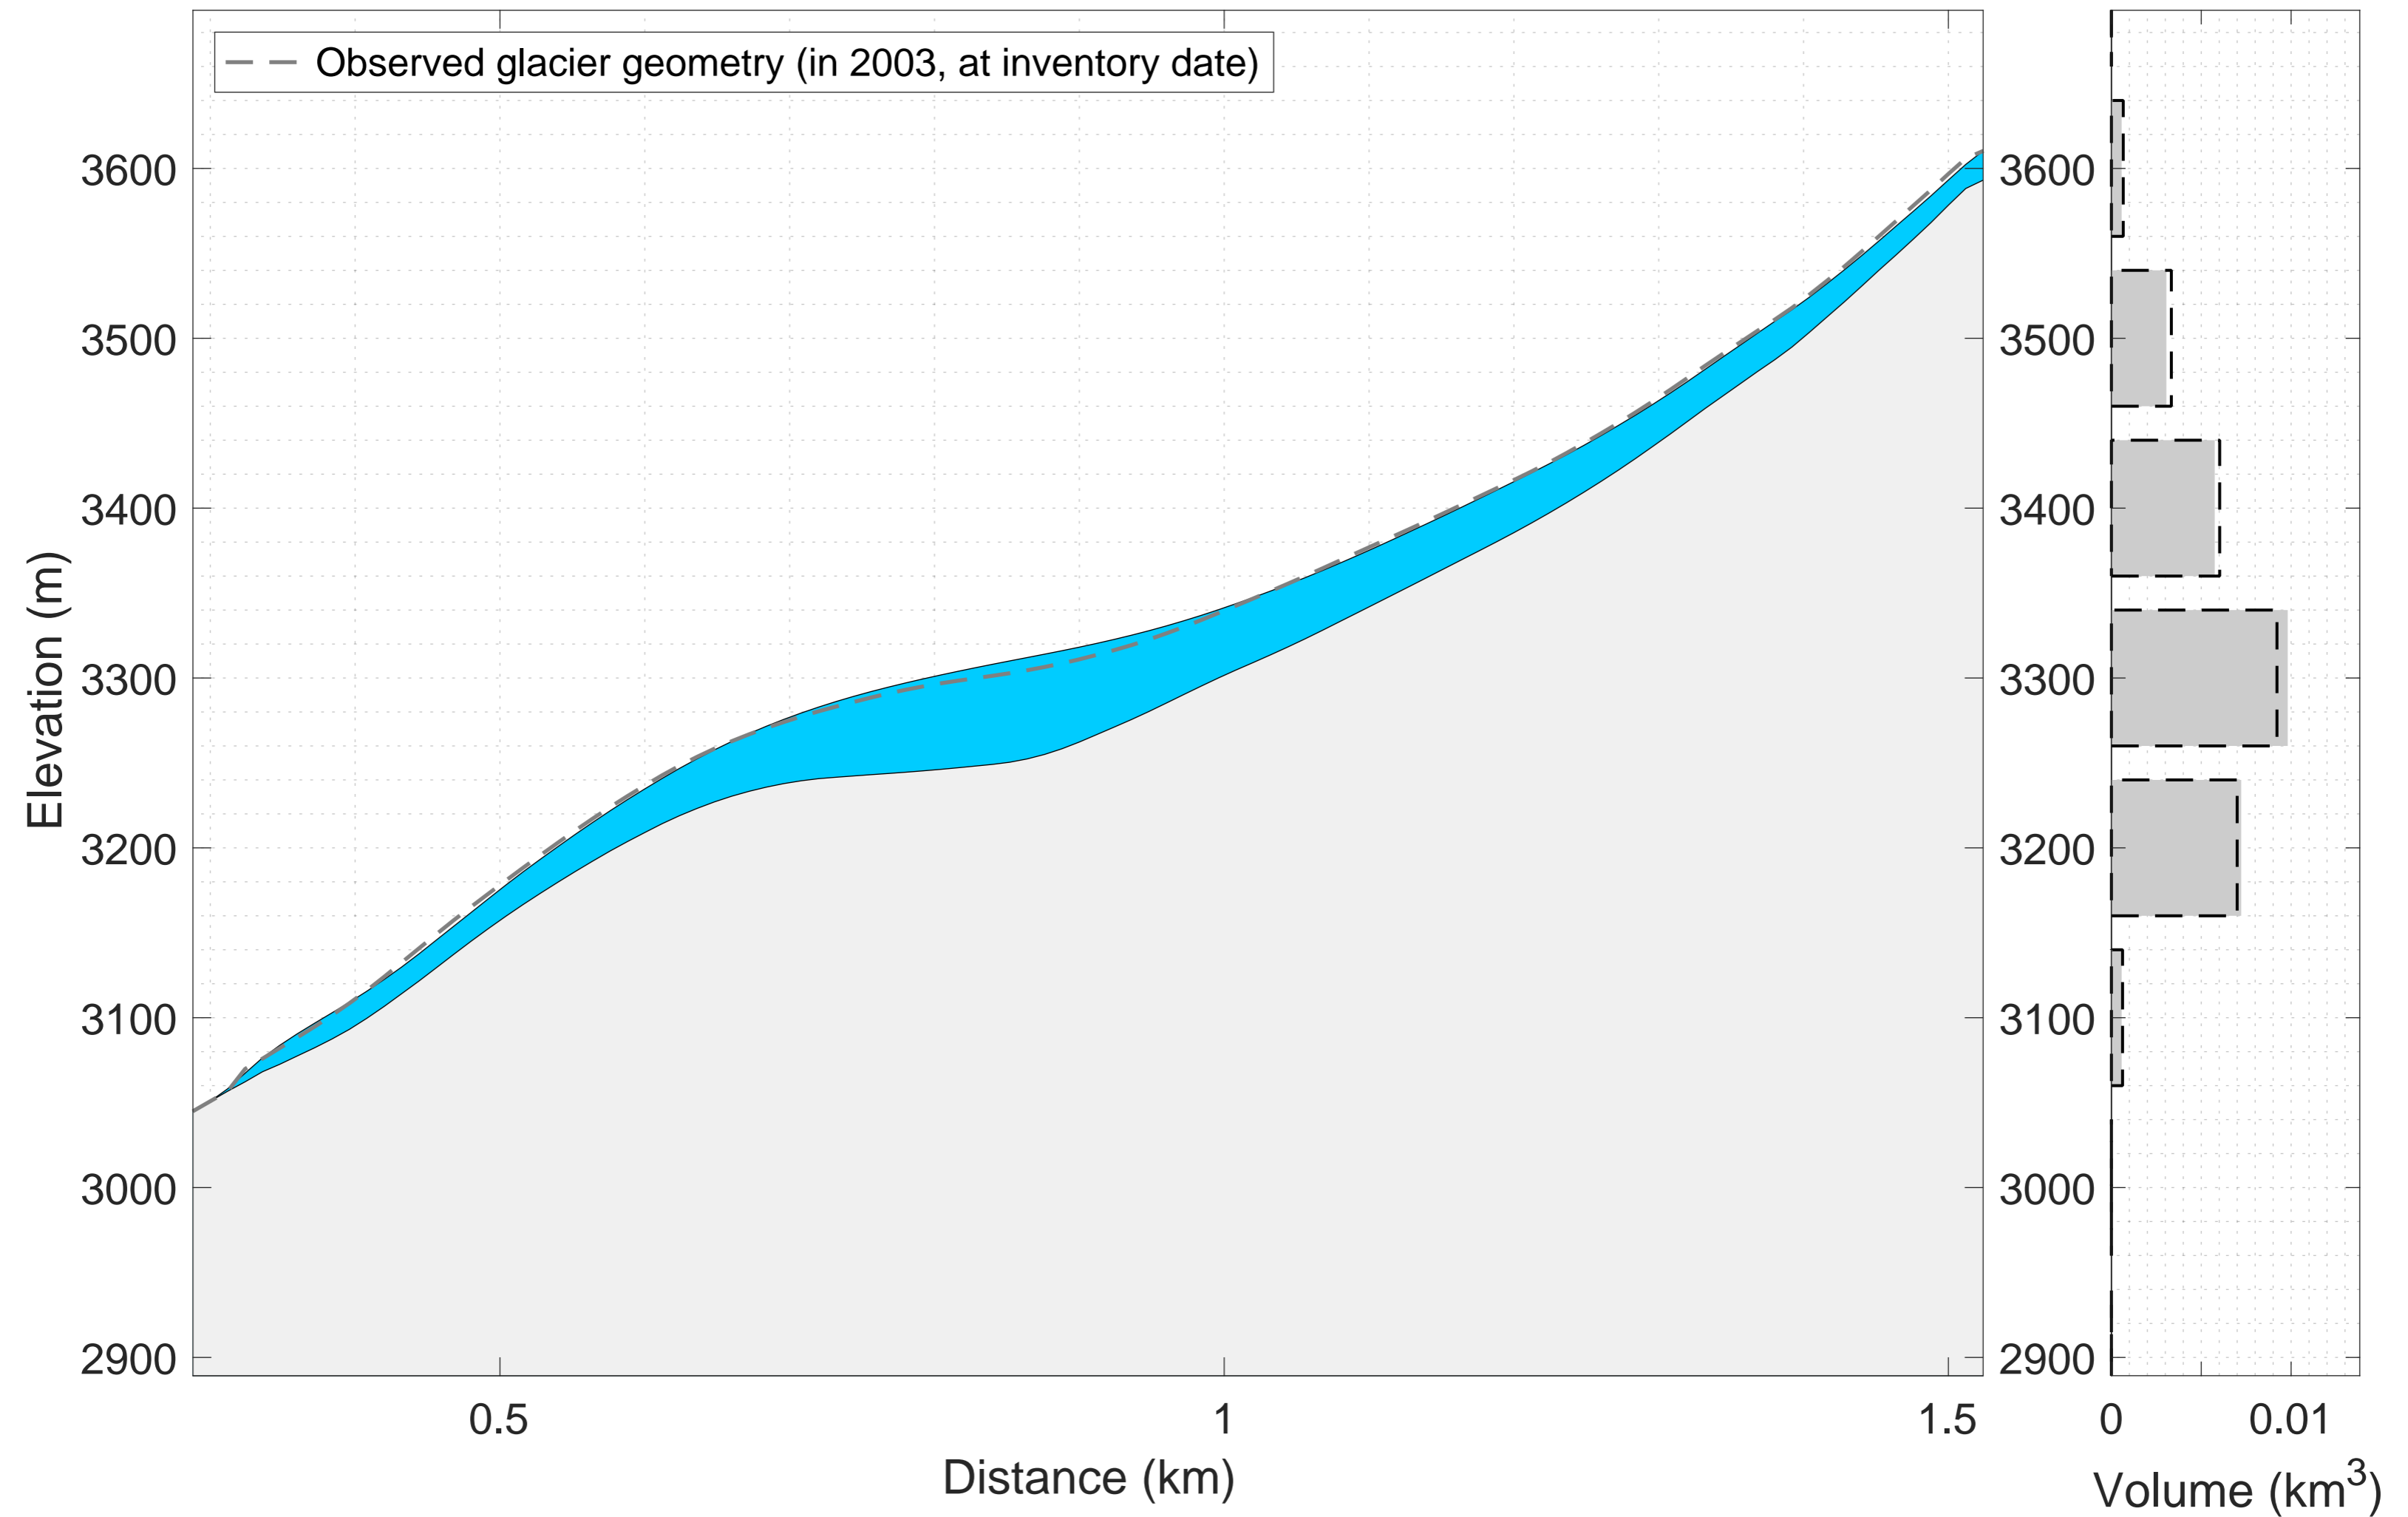

Supplement: Supplementary file 449 [file tc-13-1125-2019-supplement.zip]

**Modelled geometry (Glacier ID = 00828;  $A = 1.5191\text{e-}16 \text{ Pa}^{-3} \text{ a}^{-1}$ ;  $dx = 12 \text{ m}$ )**

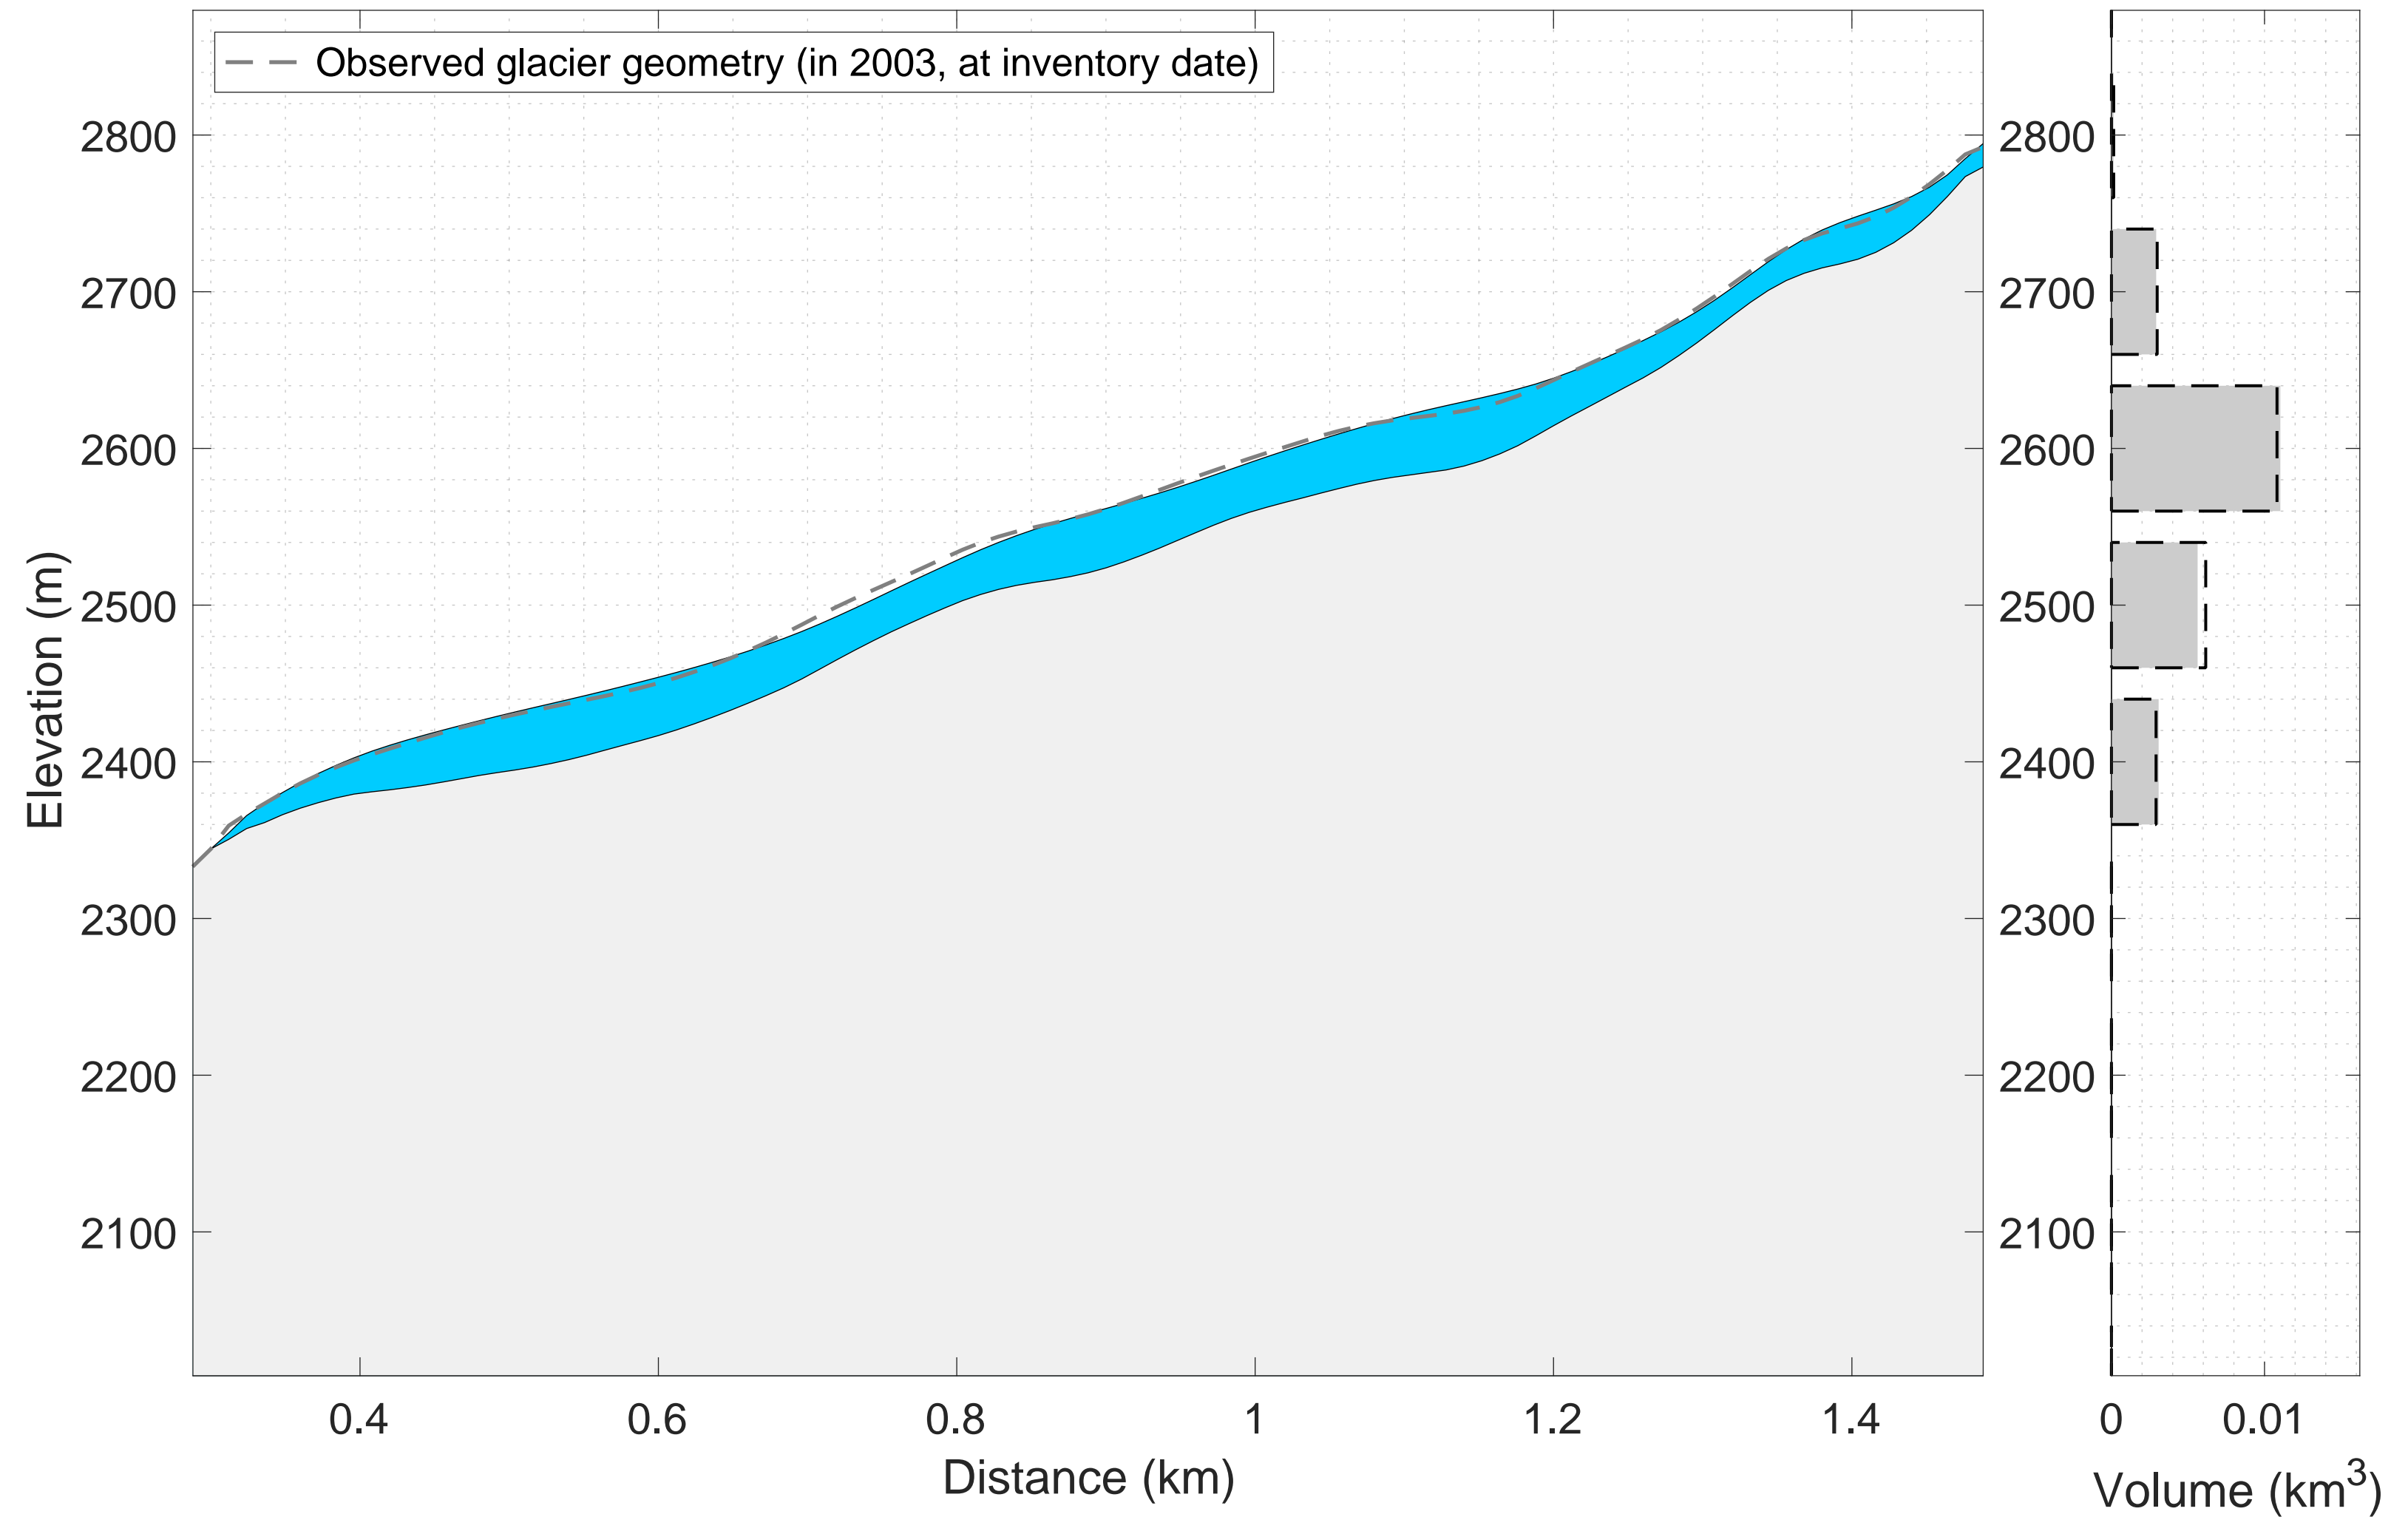

Supplement: Supplementary file 450 [file tc-13-1125-2019-supplement.zip]

**Modelled geometry (Glacier ID = 02920;  $A = 5.5484\text{e-}17 \text{ Pa}^{-3} \text{ a}^{-1}$ ;  $dx = 12 \text{ m}$ )**

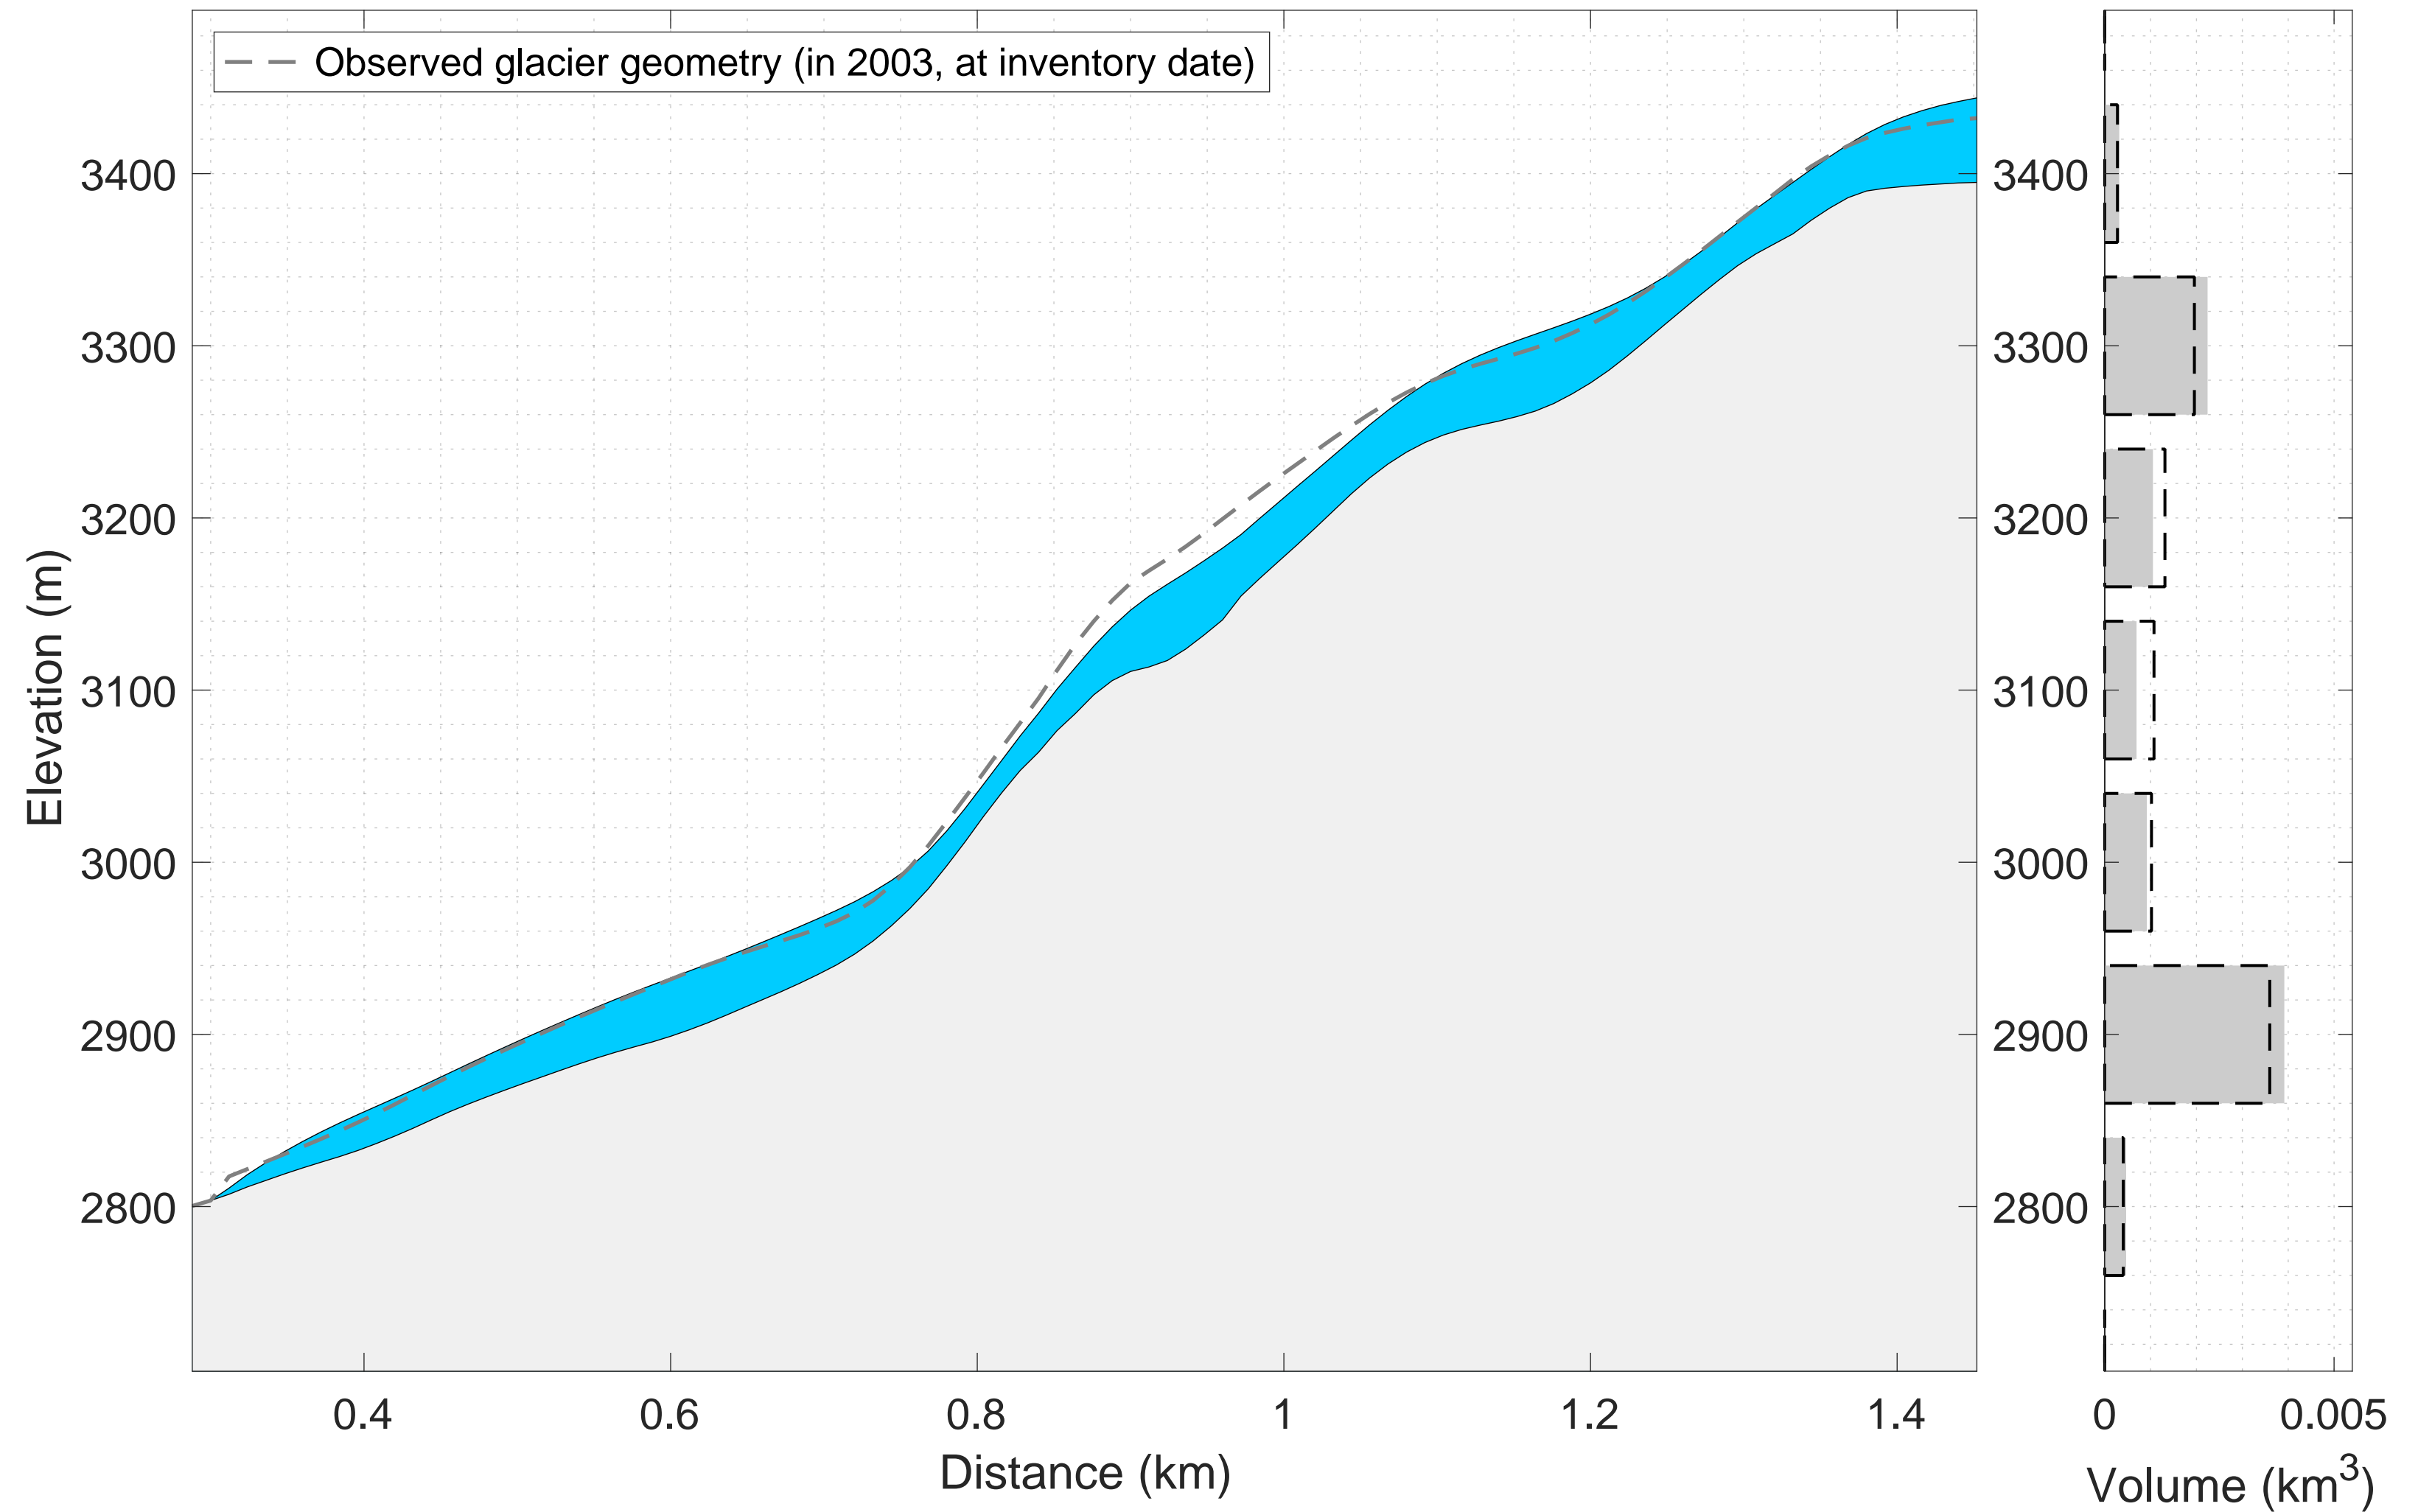

Supplement: Supplementary file 451 [file tc-13-1125-2019-supplement.zip]

**Modelled geometry (Glacier ID = 01275;  $A = 1.0901\text{e-}16 \text{ Pa}^{-3} \text{ a}^{-1}$ ;  $dx = 52 \text{ m}$ )**

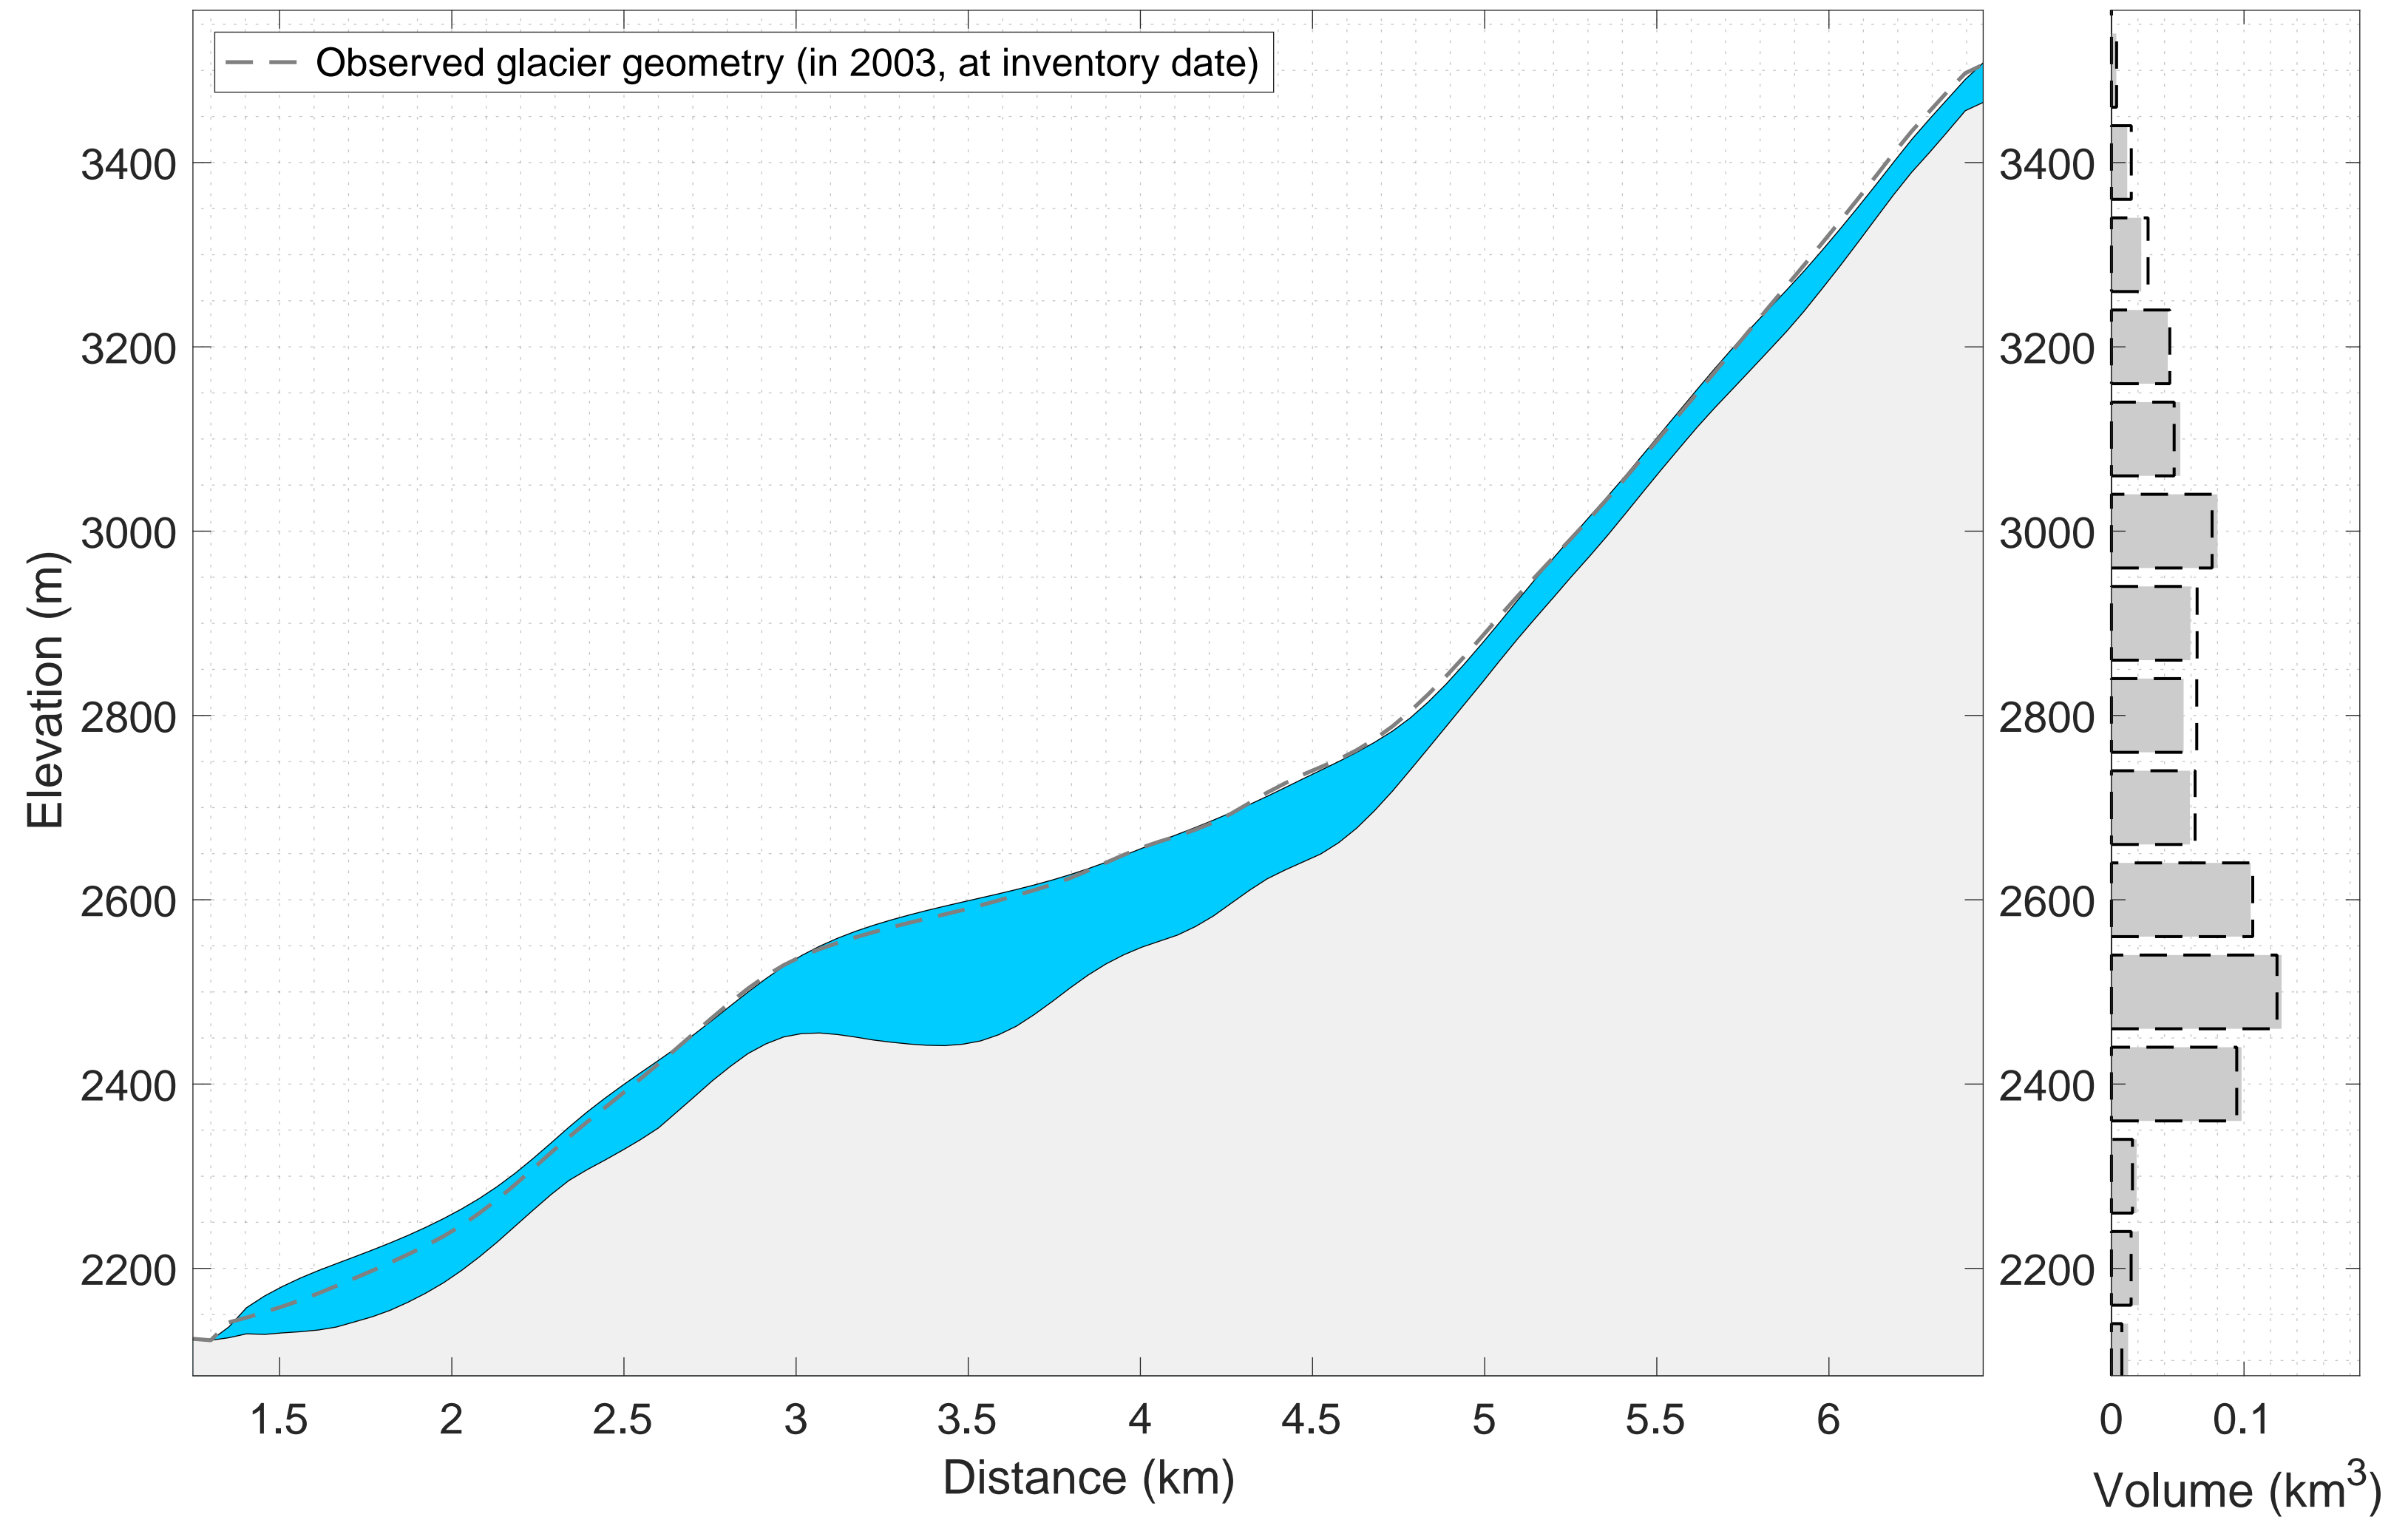

Supplement: Supplementary file 452 [file tc-13-1125-2019-supplement.zip]

**Modelled geometry (Glacier ID = 00994;  $A = 2.1796\text{e-}16 \text{ Pa}^{-3} \text{ a}^{-1}$ ;  $dx = 25 \text{ m}$ )**

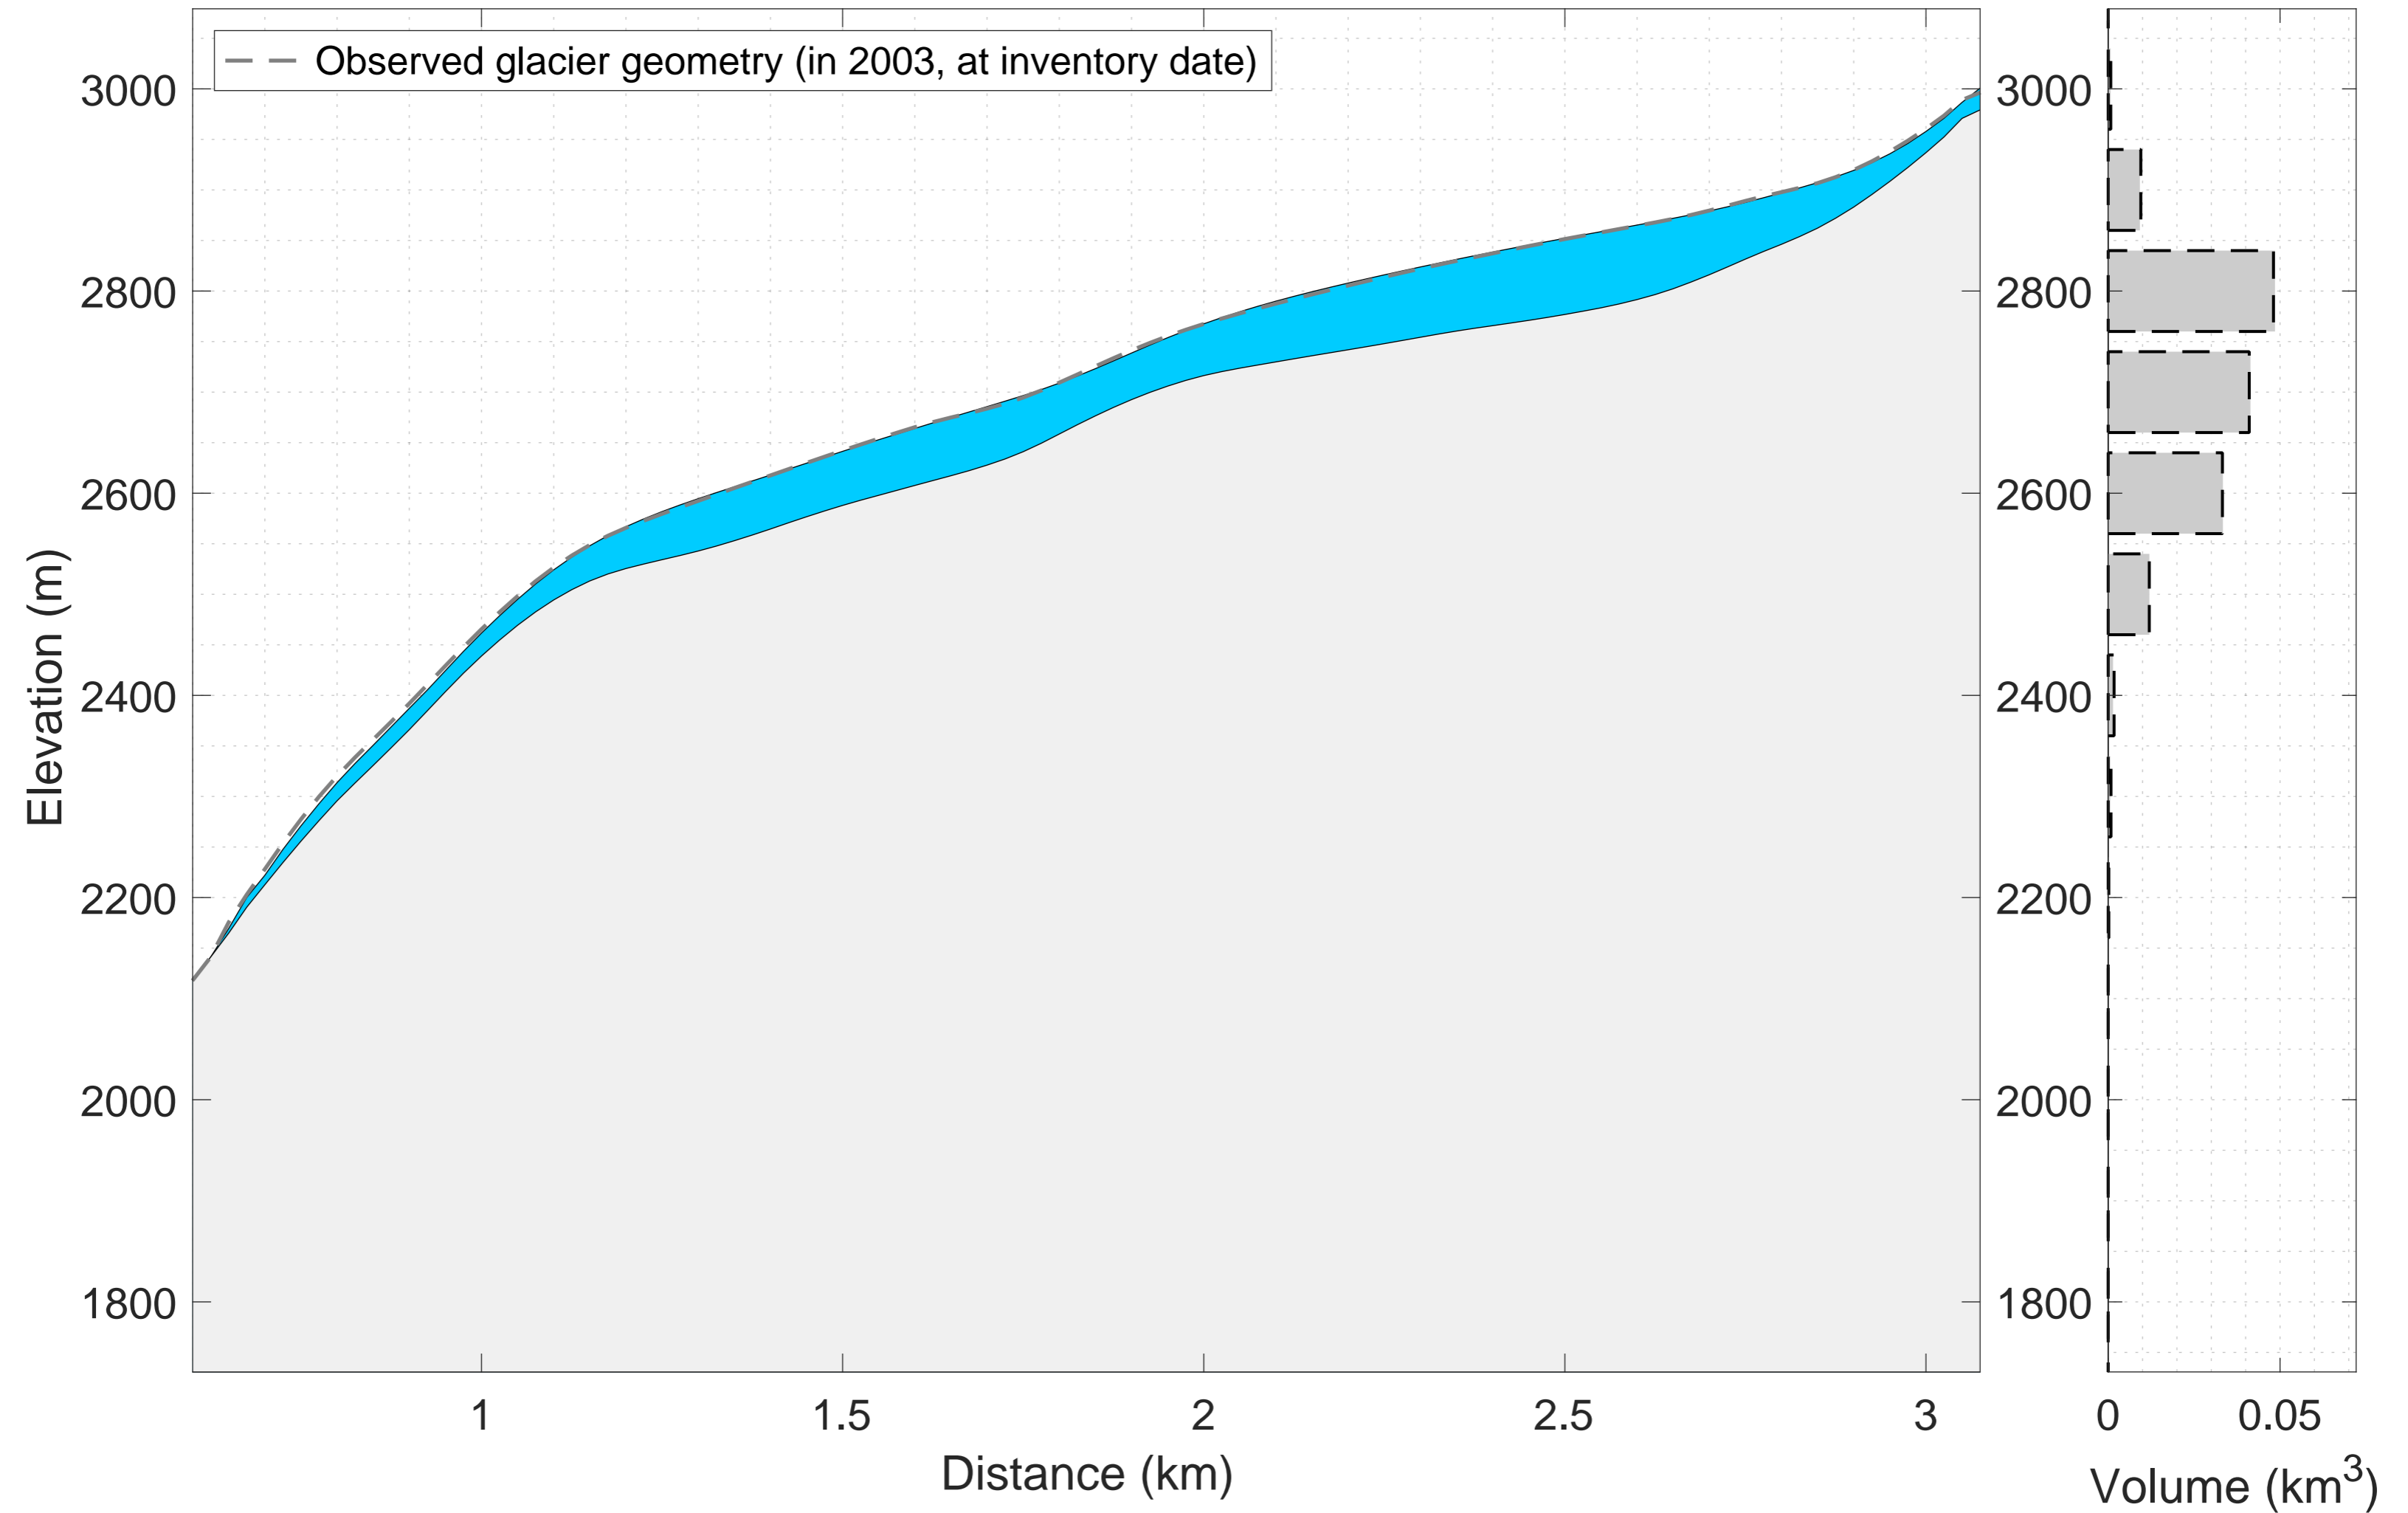

Supplement: Supplementary file 453 [file tc-13-1125-2019-supplement.zip]

**Modelled geometry (Glacier ID = 02774;  $A = 1.4625\text{e-}16 \text{ Pa}^{-3} \text{ a}^{-1}$ ;  $dx = 50 \text{ m}$ )**

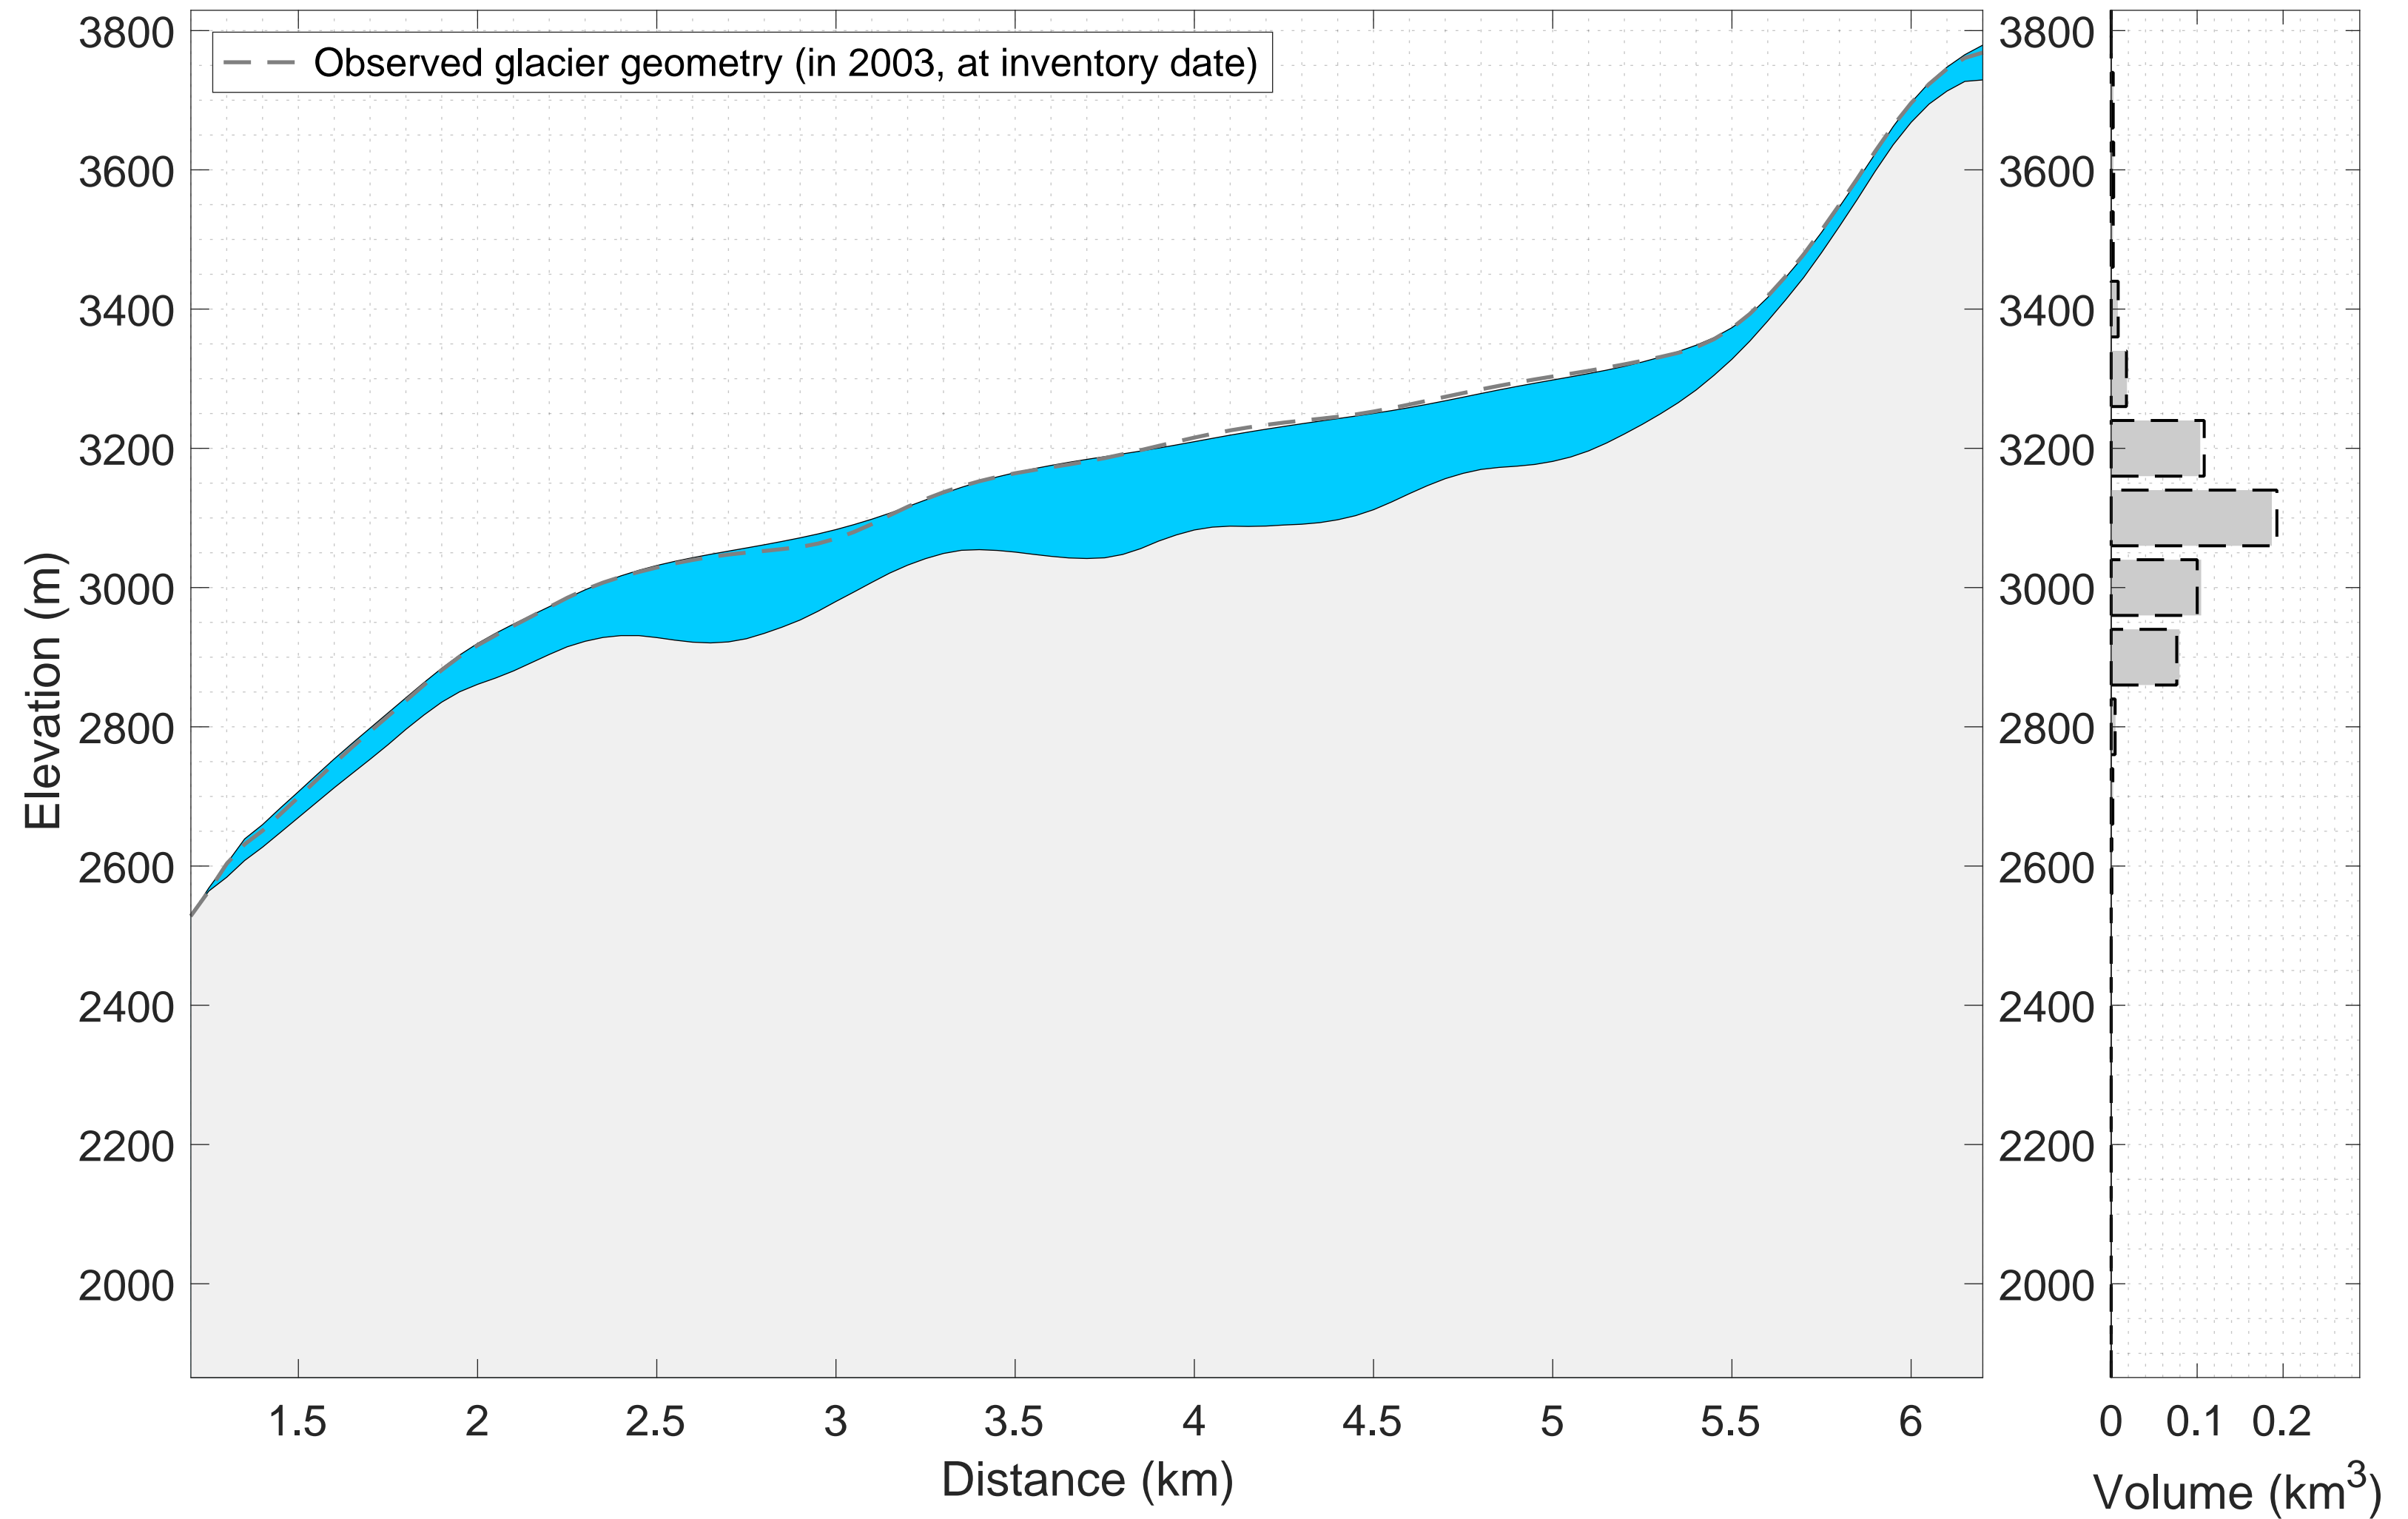

Supplement: Supplementary file 454 [file tc-13-1125-2019-supplement.zip]

**Modelled geometry (Glacier ID = 00878;  $A = 1.5369\text{e-}16 \text{ Pa}^{-3} \text{ a}^{-1}$ ;  $dx = 19 \text{ m}$ )**

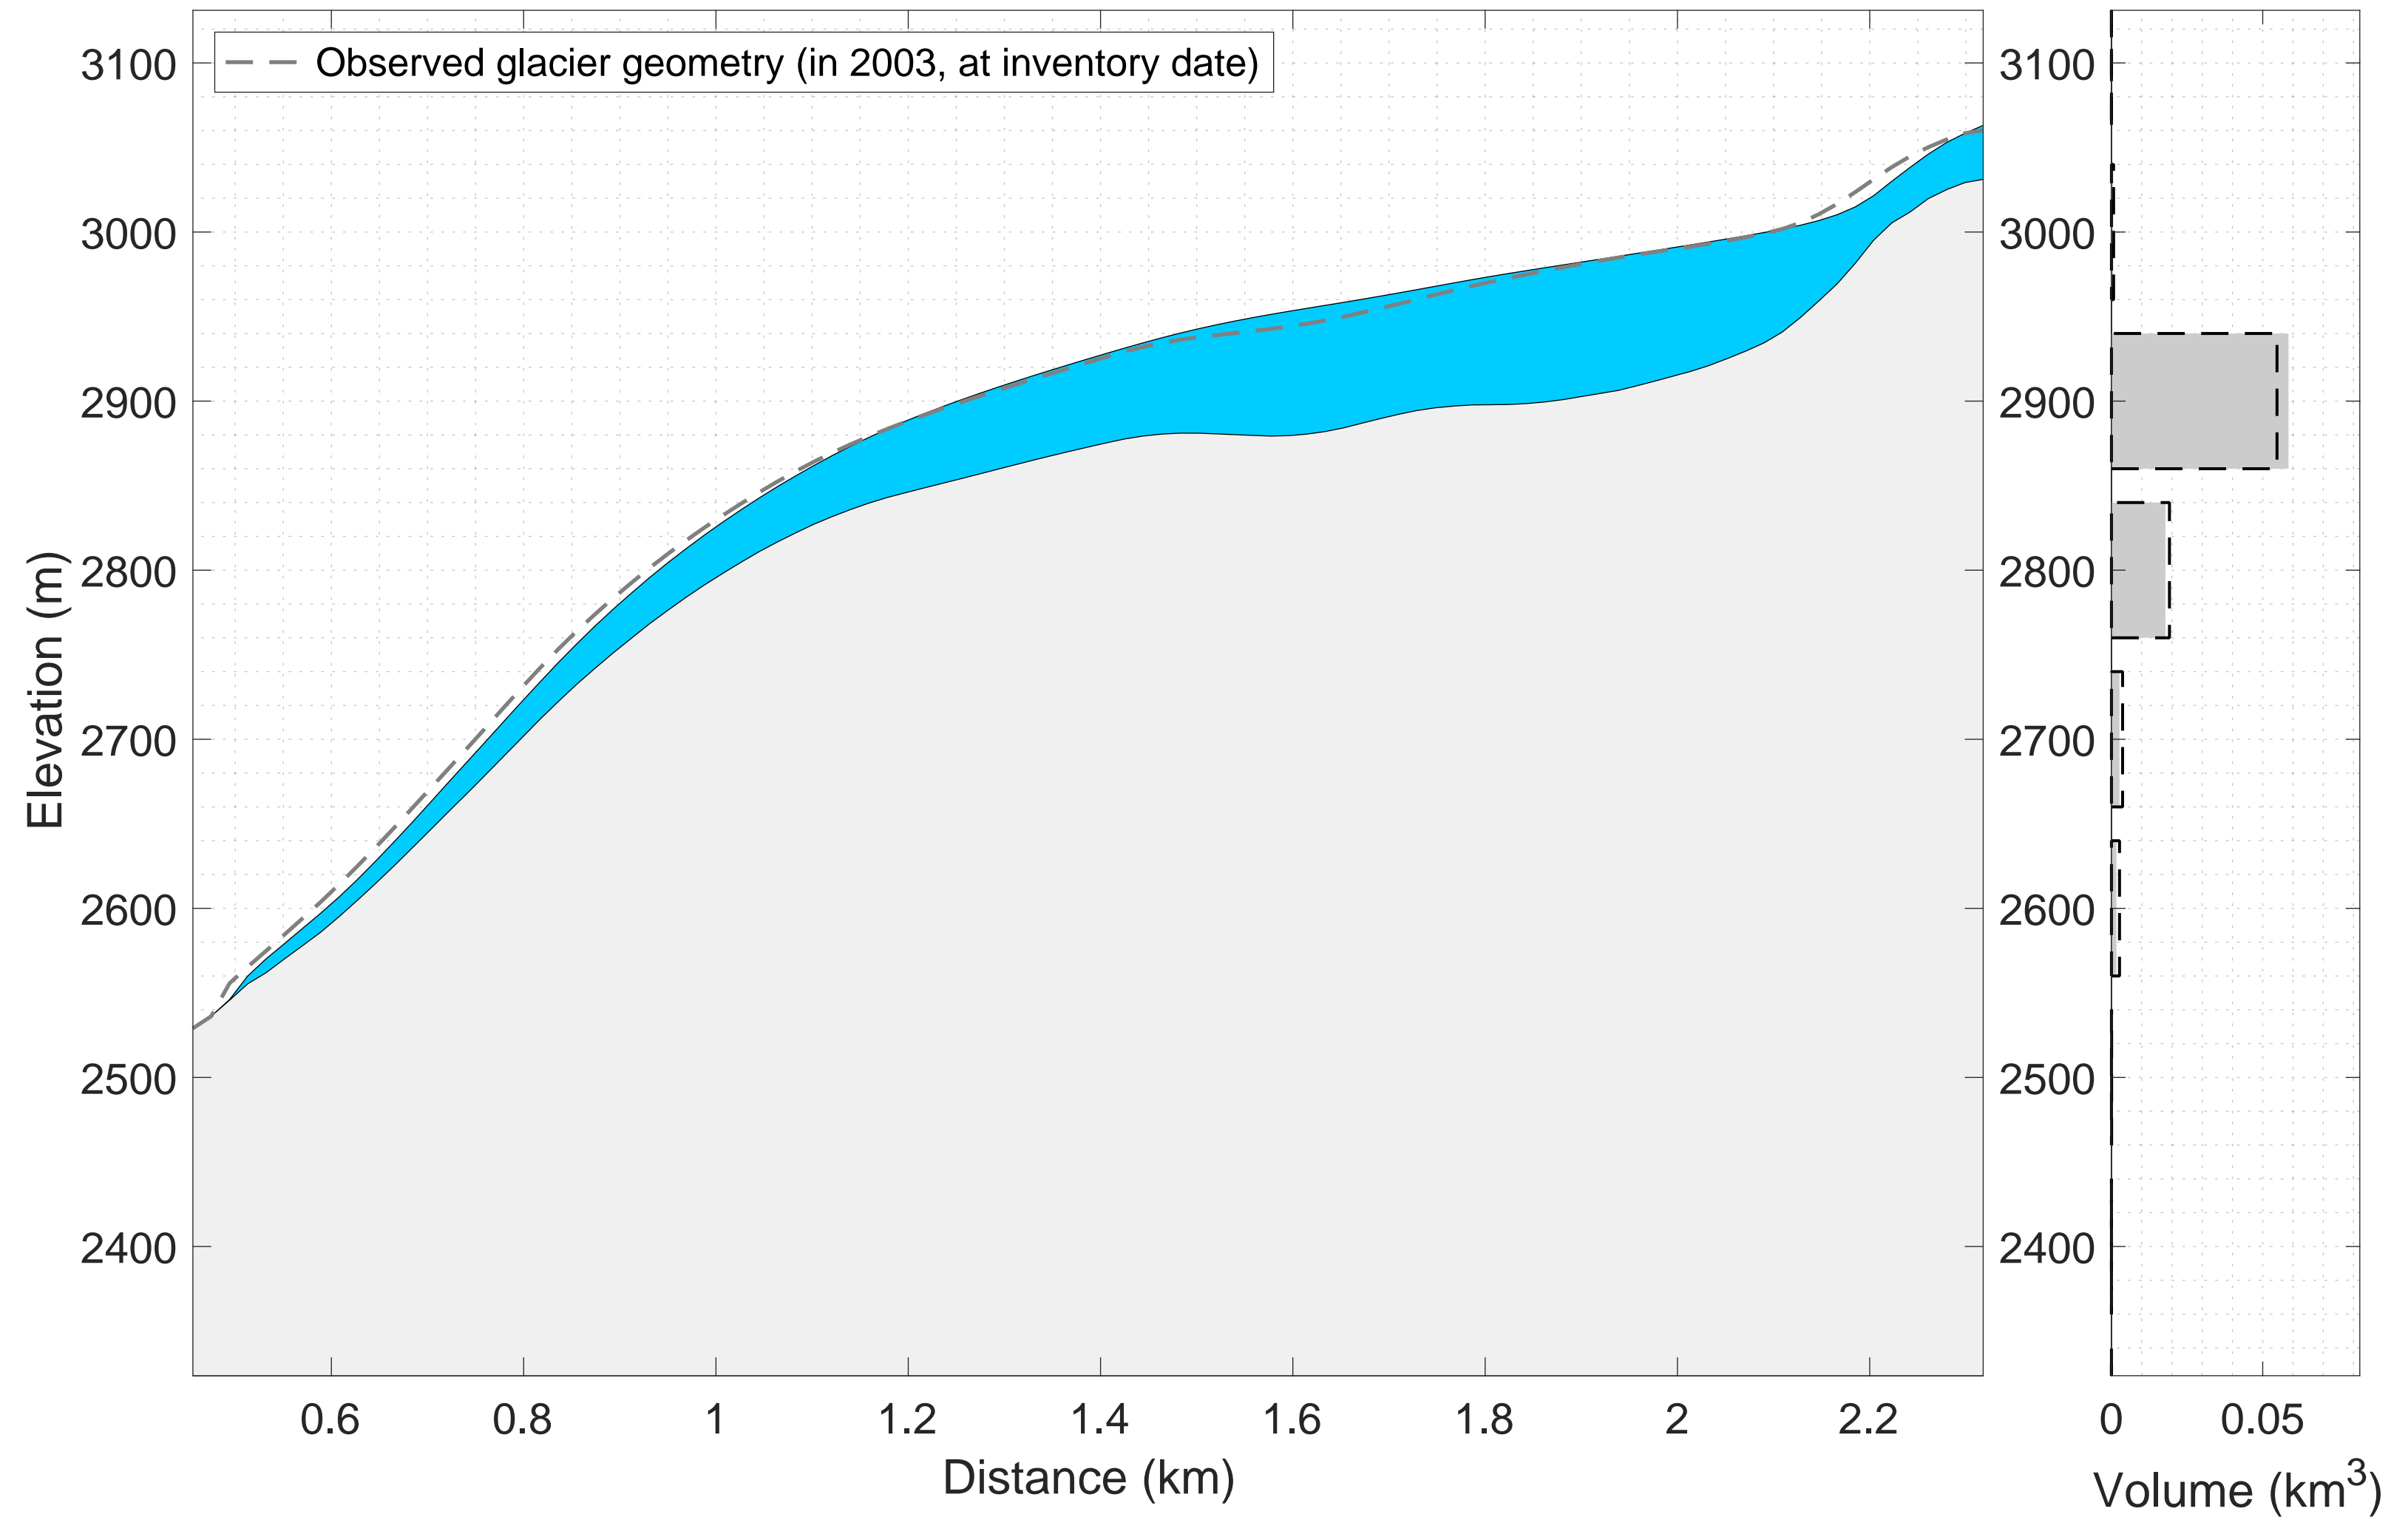

Supplement: Supplementary file 455 [file tc-13-1125-2019-supplement.zip]

**Modelled geometry (Glacier ID = 02991;  $A = 6.6612\text{e-}17 \text{ Pa}^{-3} \text{ a}^{-1}$ ;  $dx = 25 \text{ m}$ )**

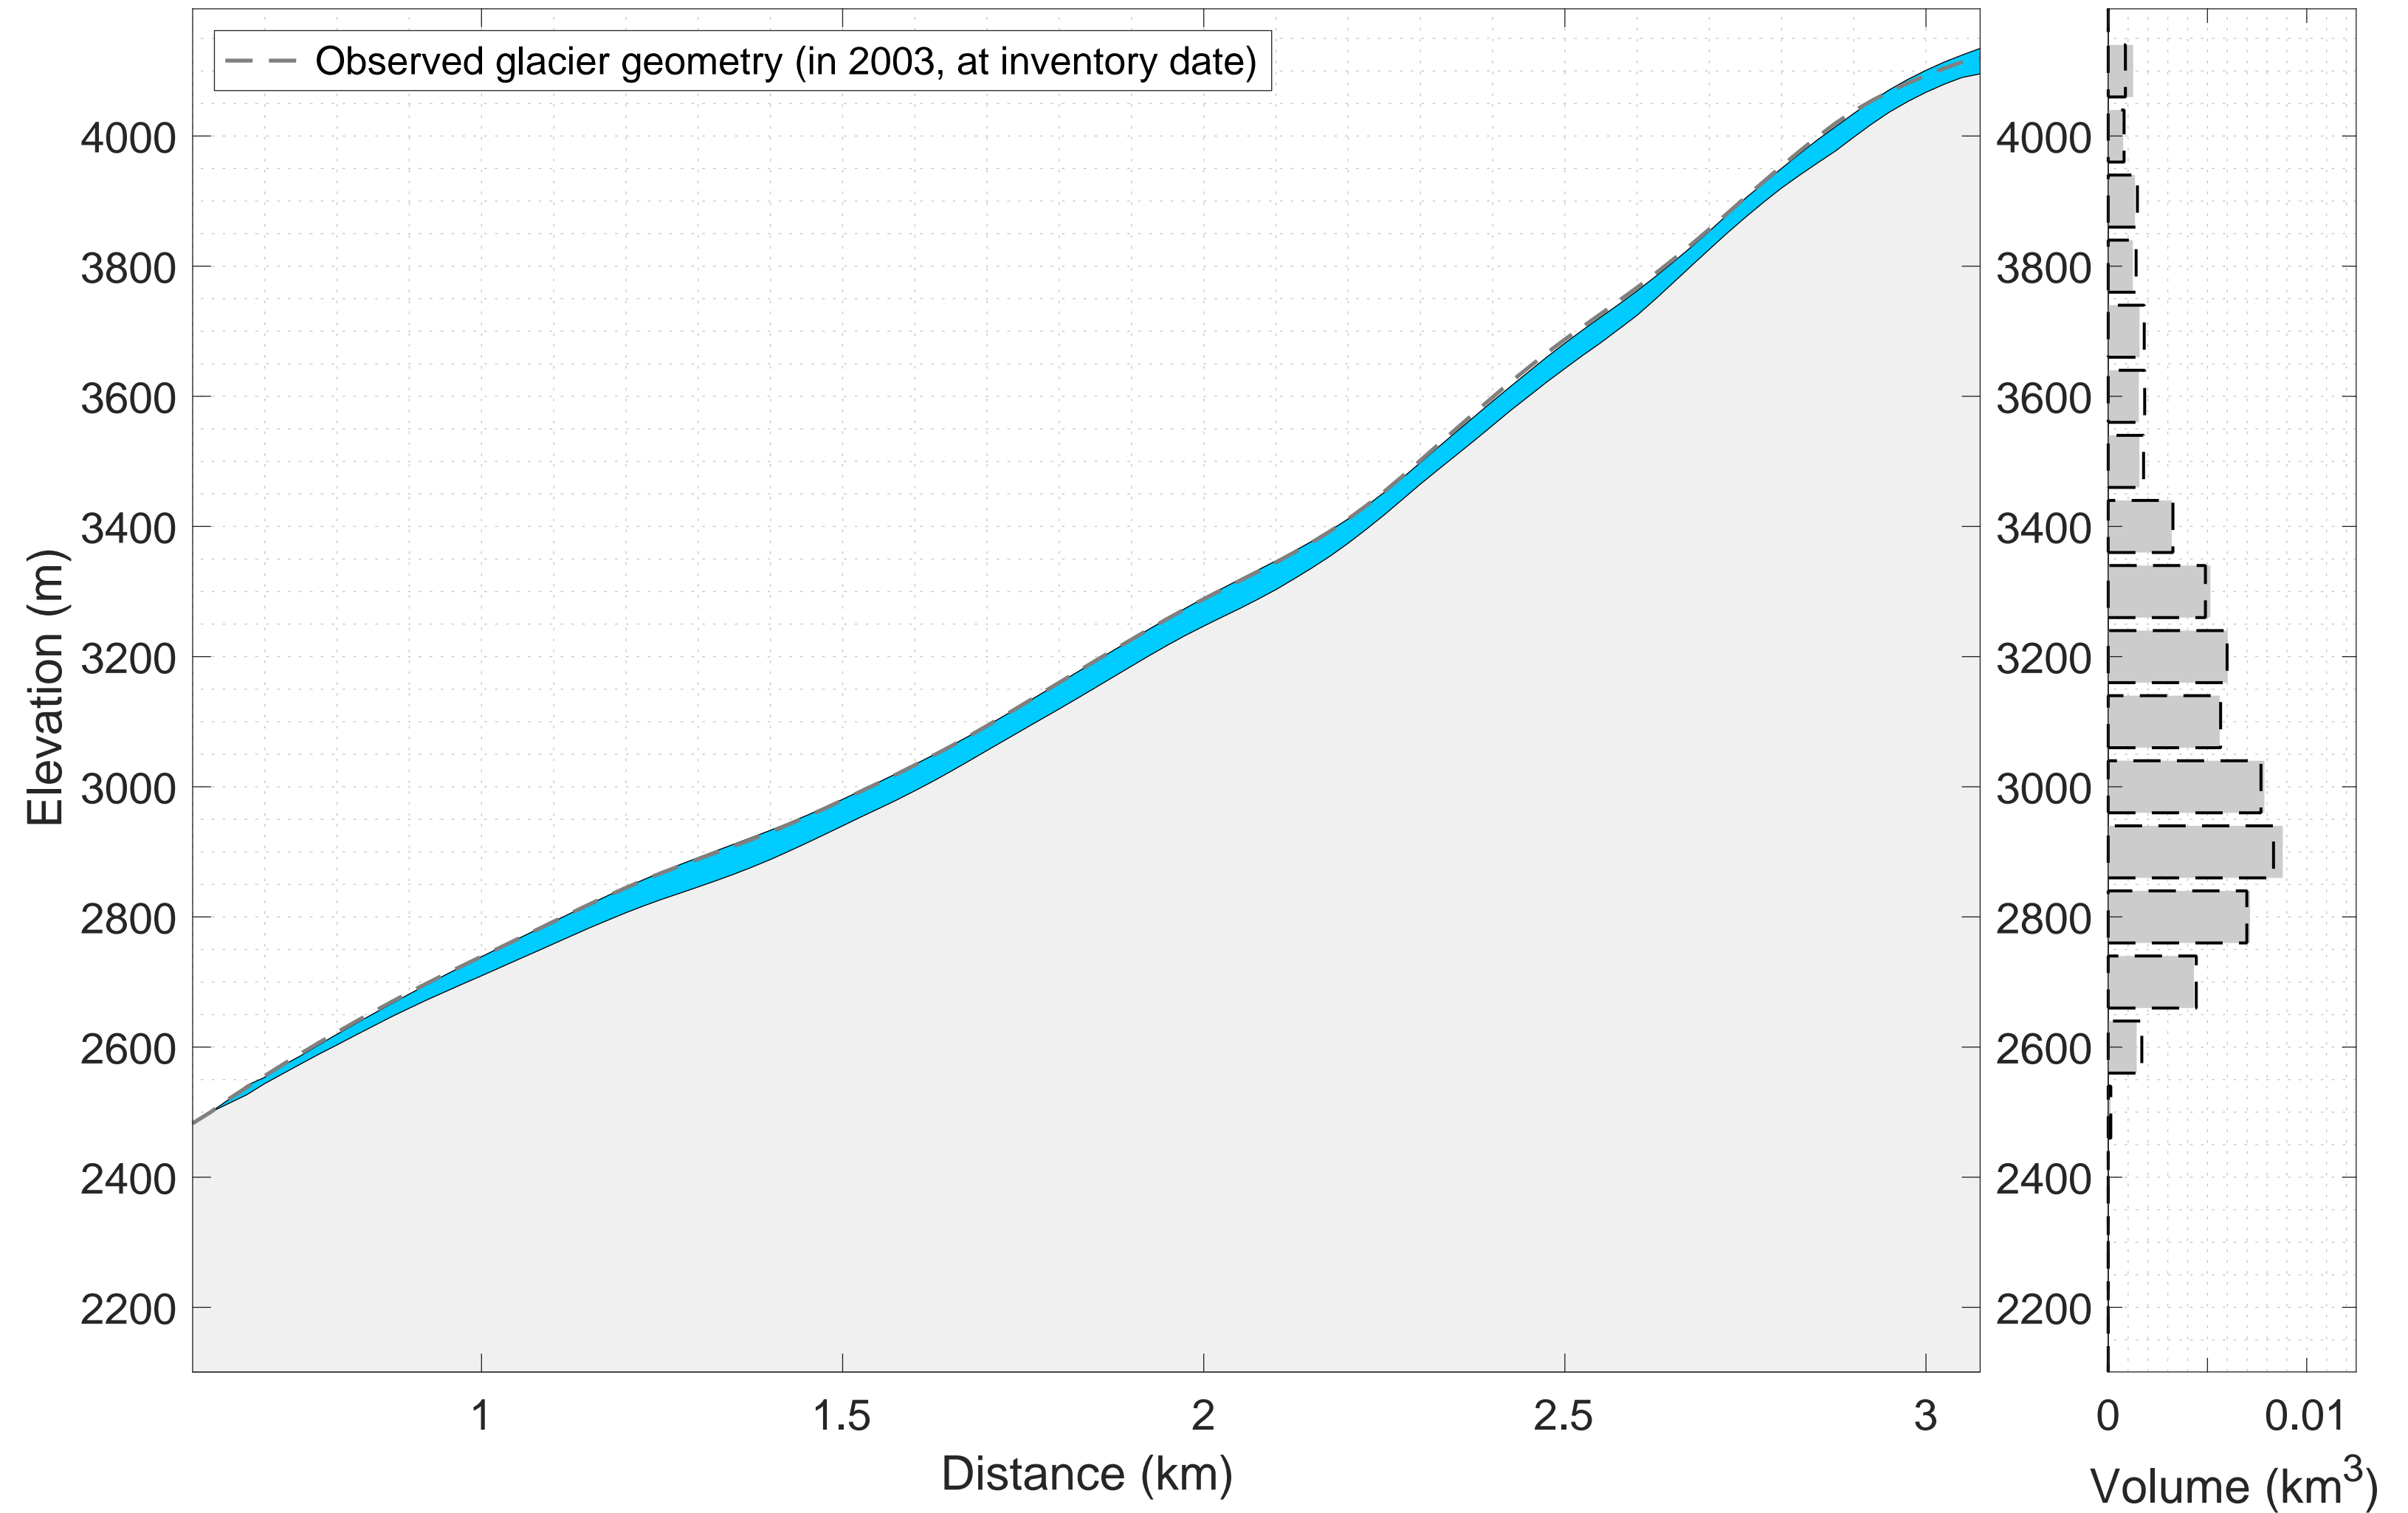

Supplement: Supplementary file 456 [file tc-13-1125-2019-supplement.zip]

**Modelled geometry (Glacier ID = 01085;  $A = 7.189\text{e-}17 \text{ Pa}^{-3} \text{ a}^{-1}$ ;  $dx = 11 \text{ m}$ )**

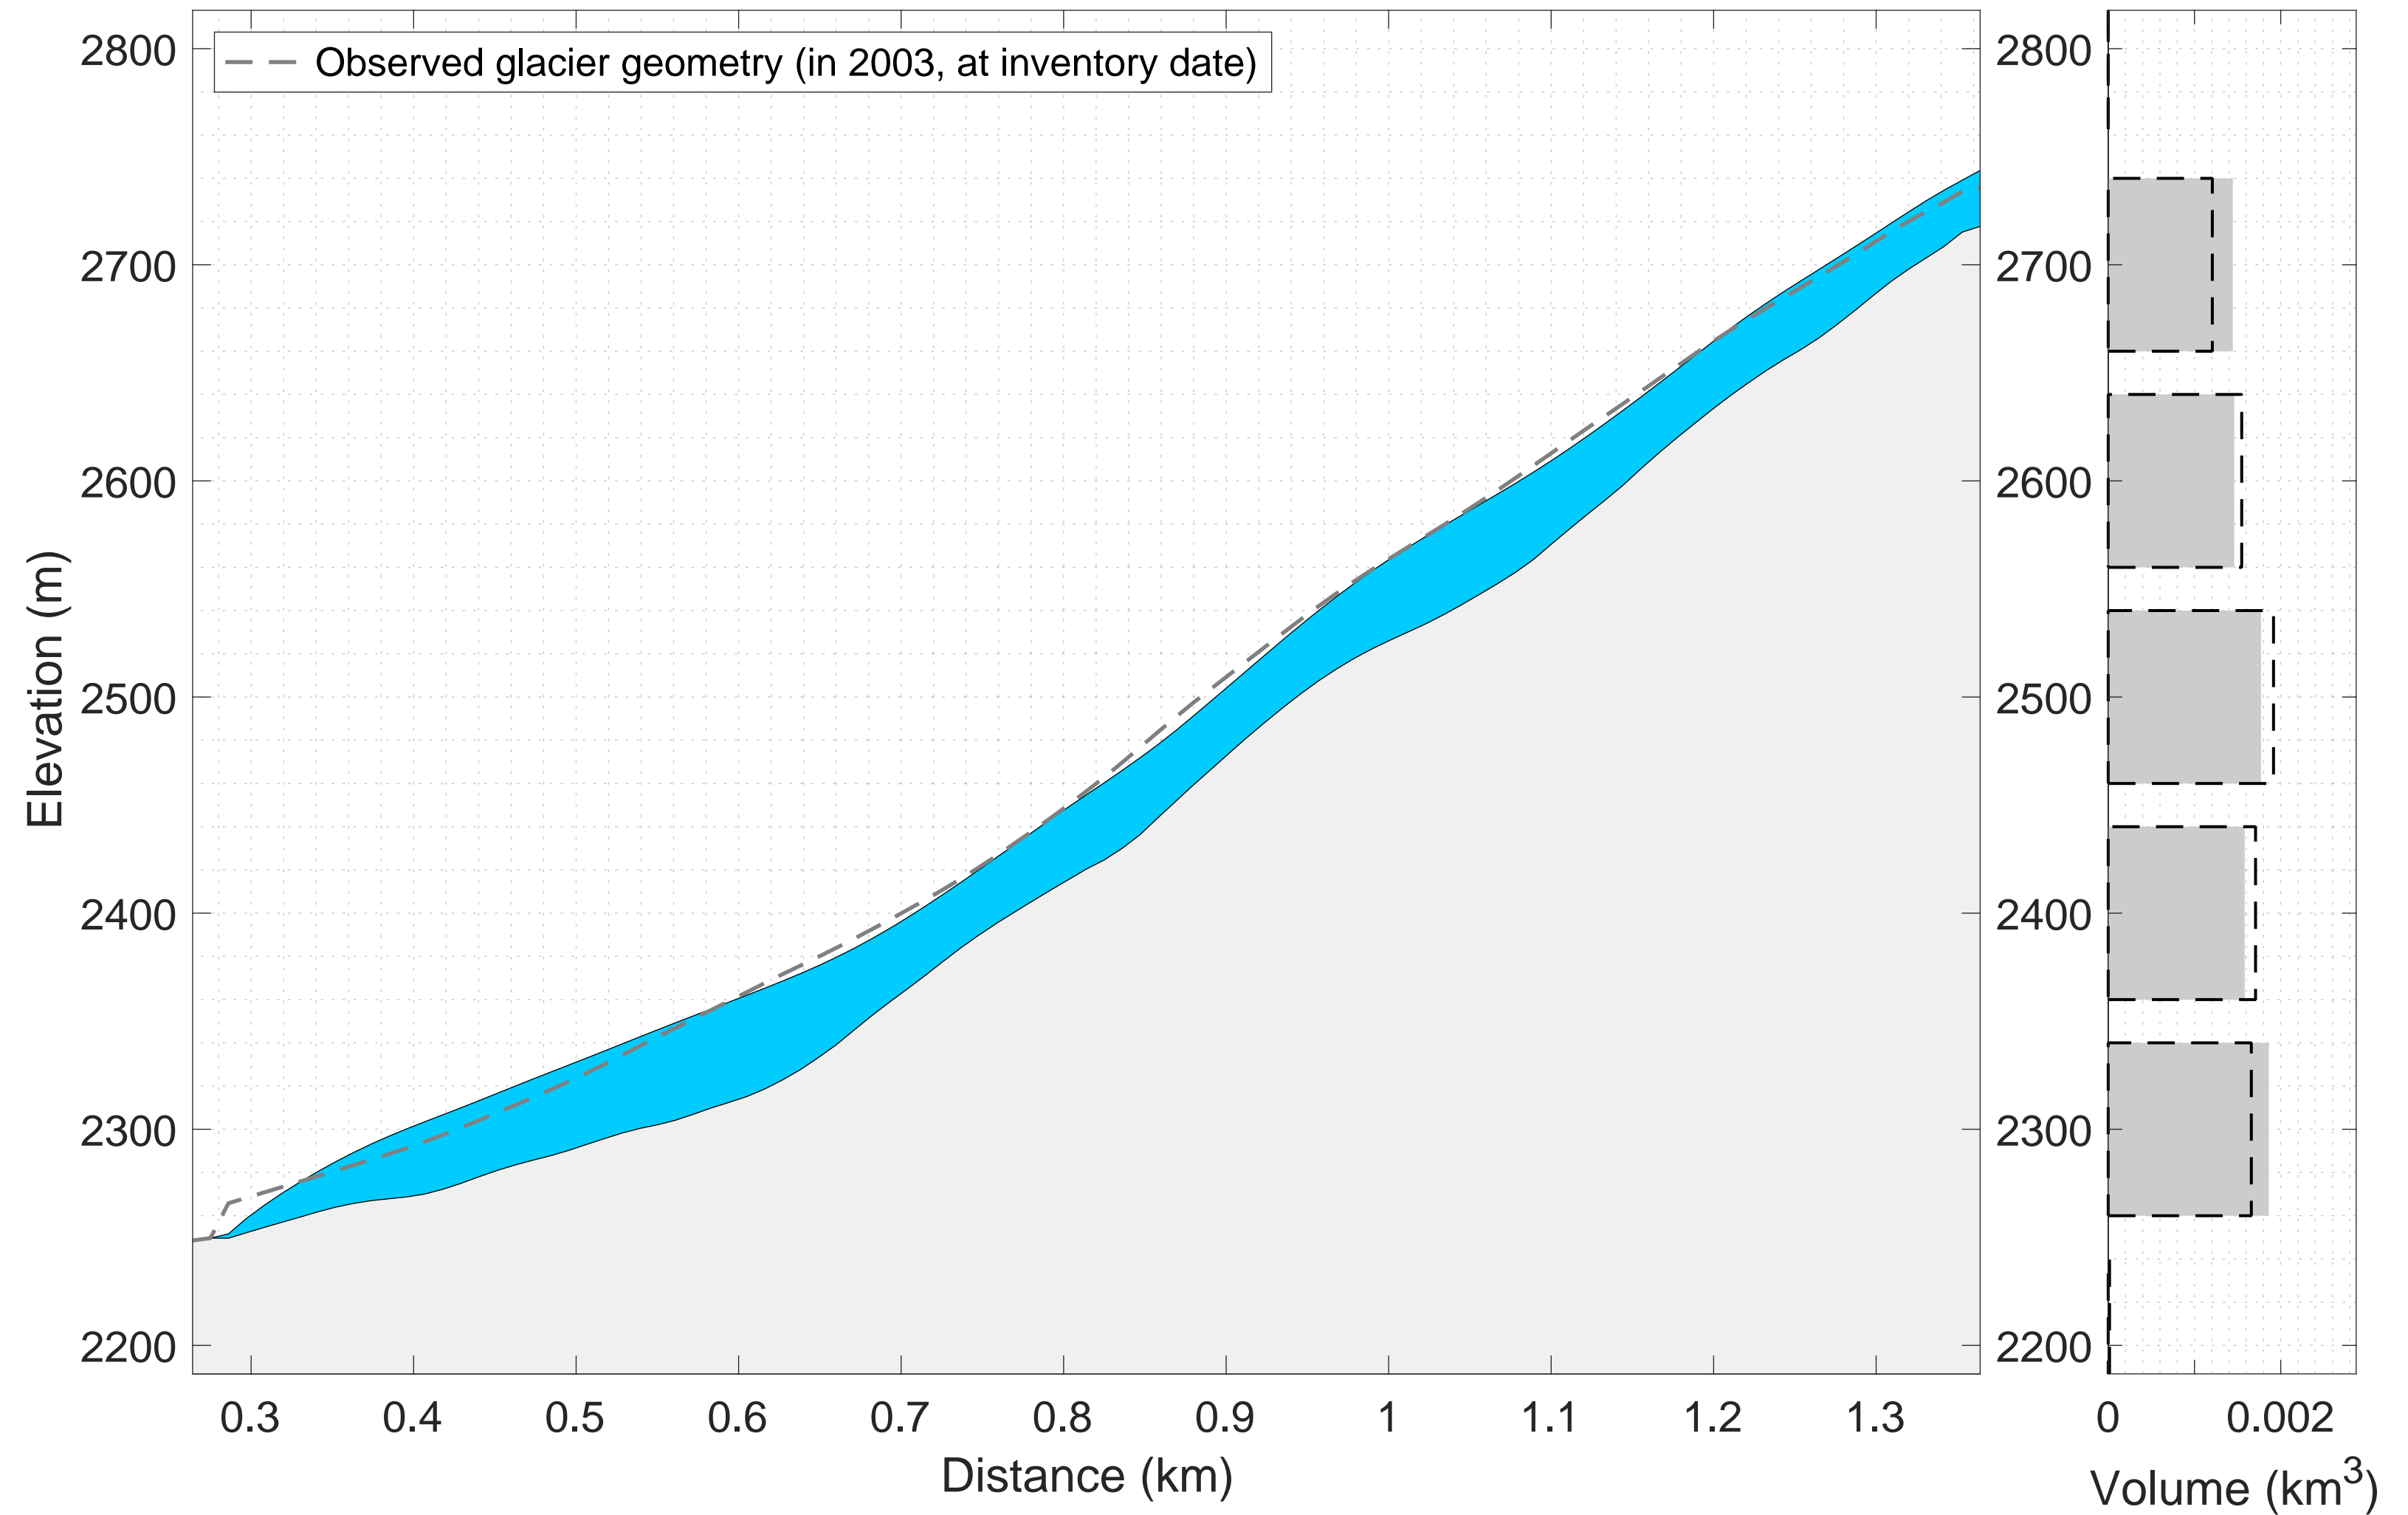

Supplement: Supplementary file 457 [file tc-13-1125-2019-supplement.zip]

**Modelled geometry (Glacier ID = 03649;  $A = 1.5399\text{e-}16 \text{ Pa}^{-3} \text{ a}^{-1}$ ;  $dx = 26 \text{ m}$ )**

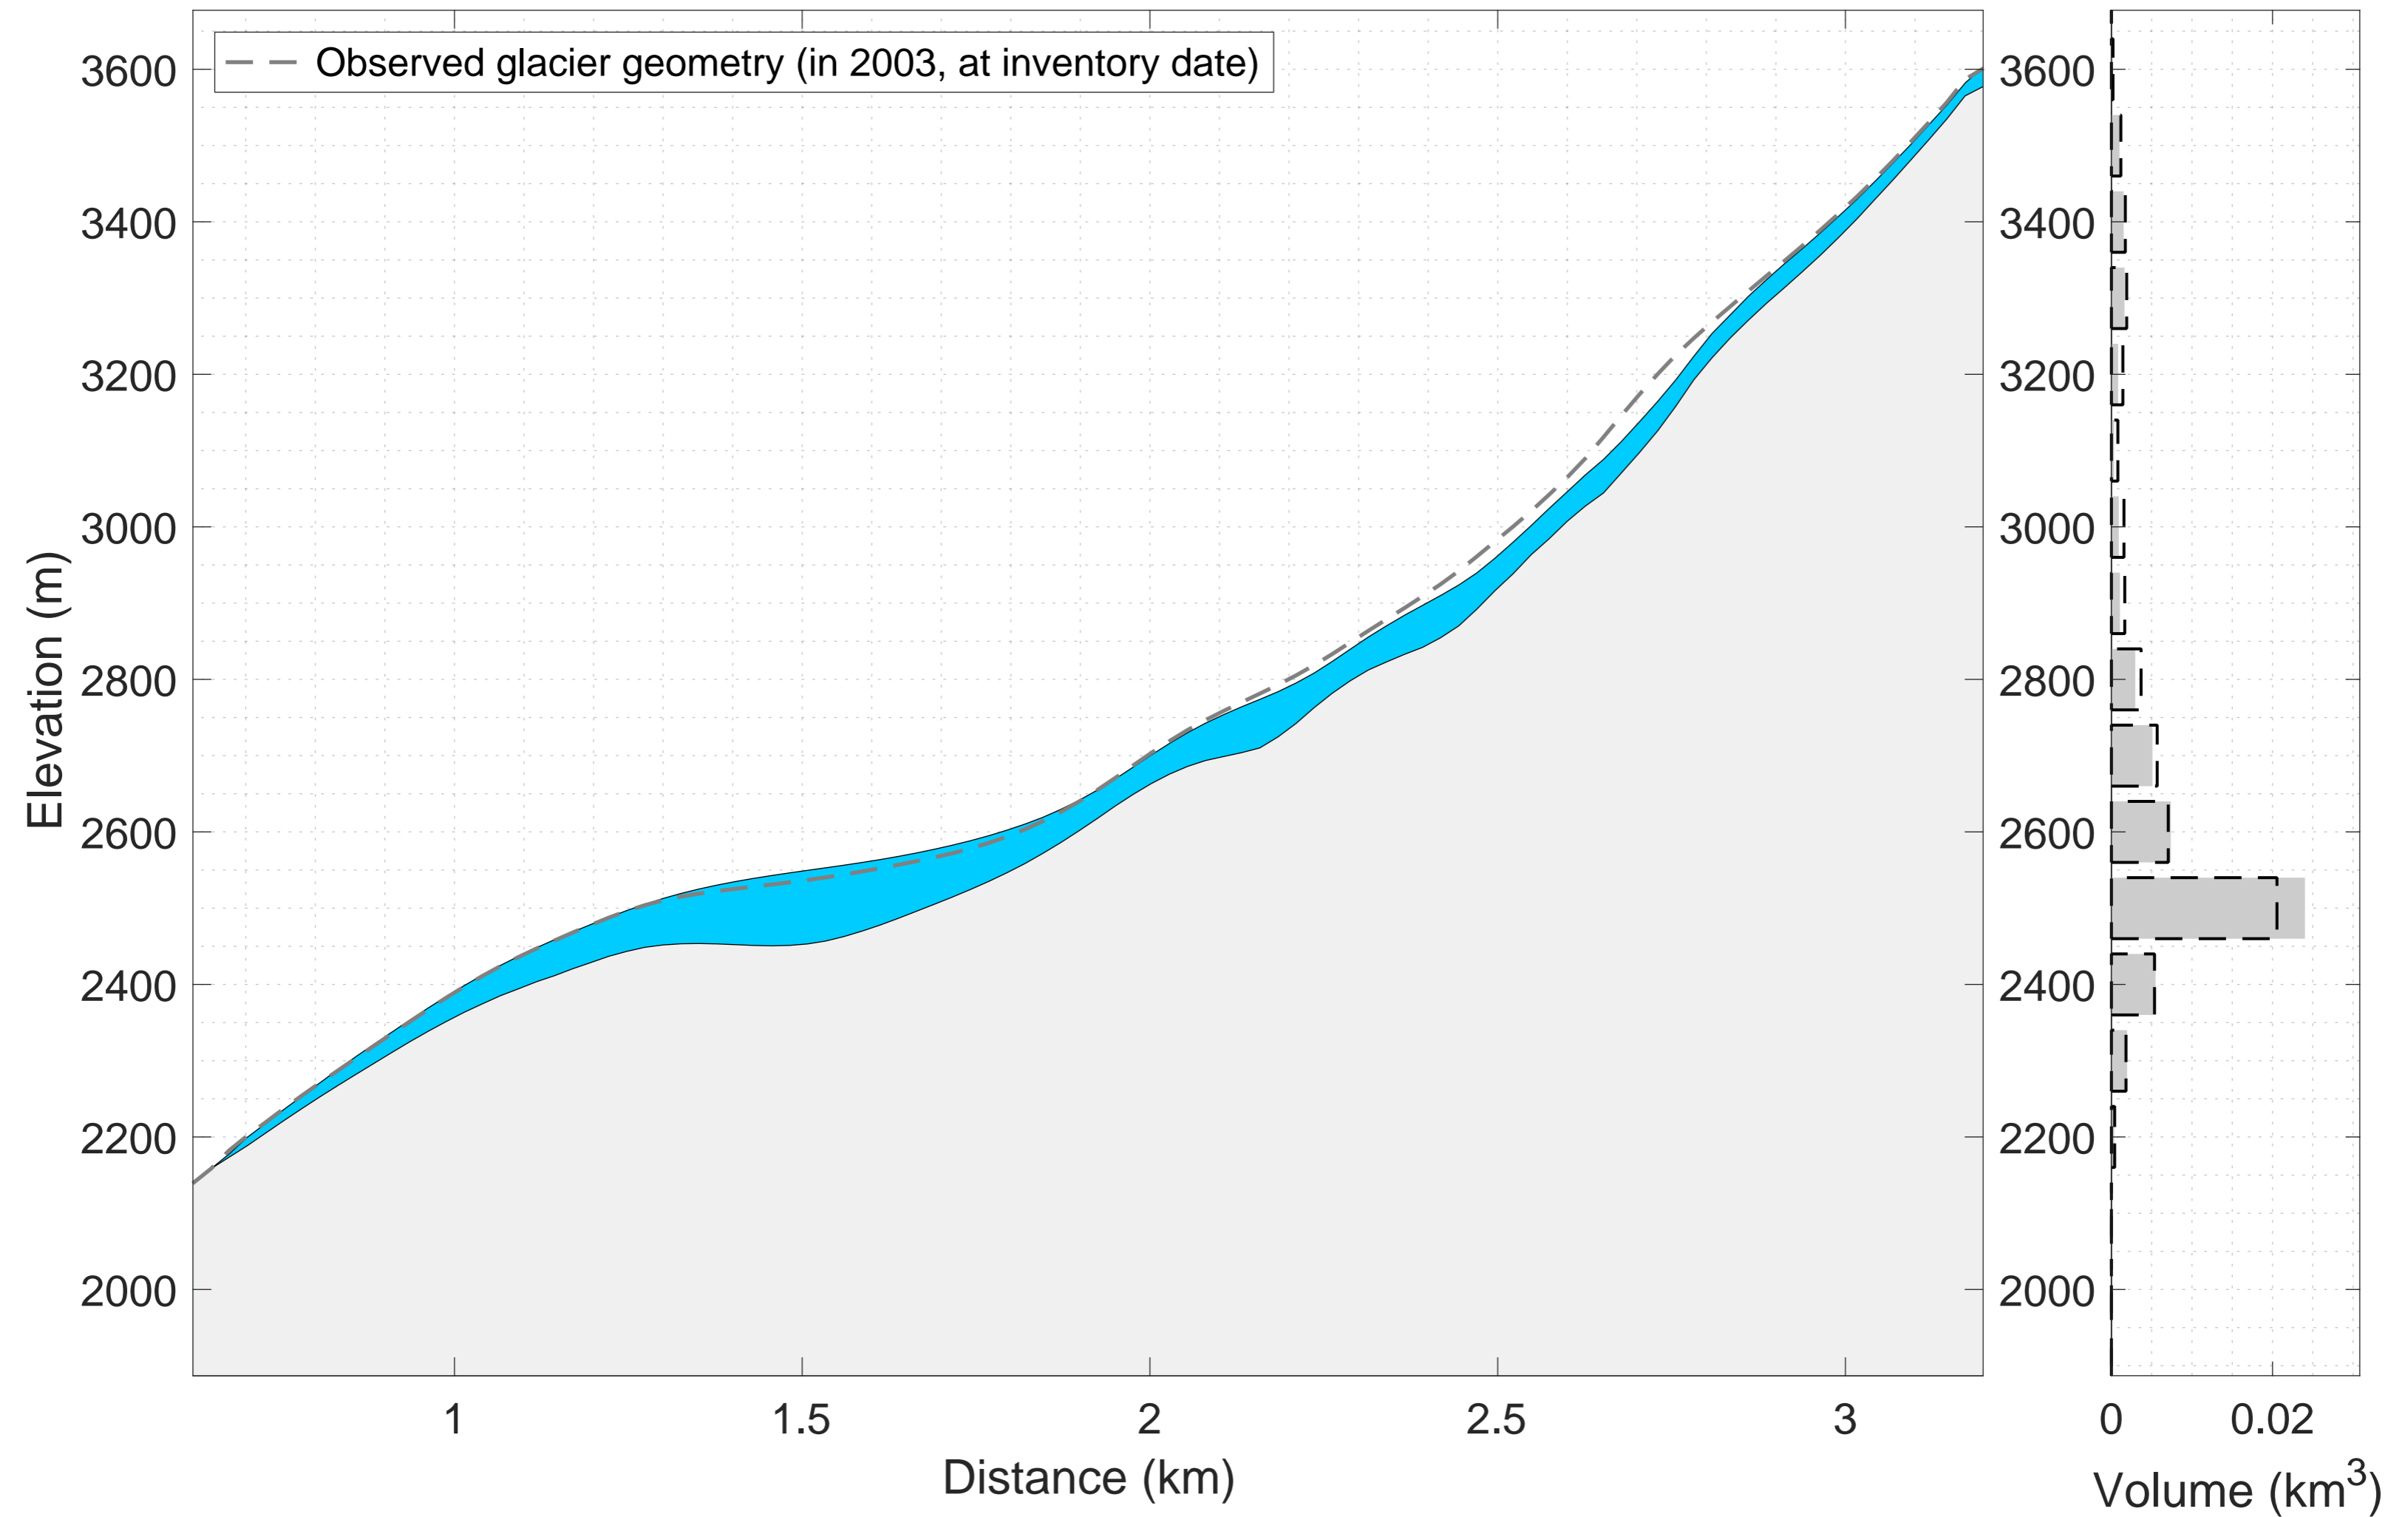

Supplement: Supplementary file 458 [file tc-13-1125-2019-supplement.zip]

**Modelled geometry (Glacier ID = 02351;  $A = 1.0109\text{e-}16 \text{ Pa}^{-3} \text{ a}^{-1}$ ;  $dx = 32 \text{ m}$ )**

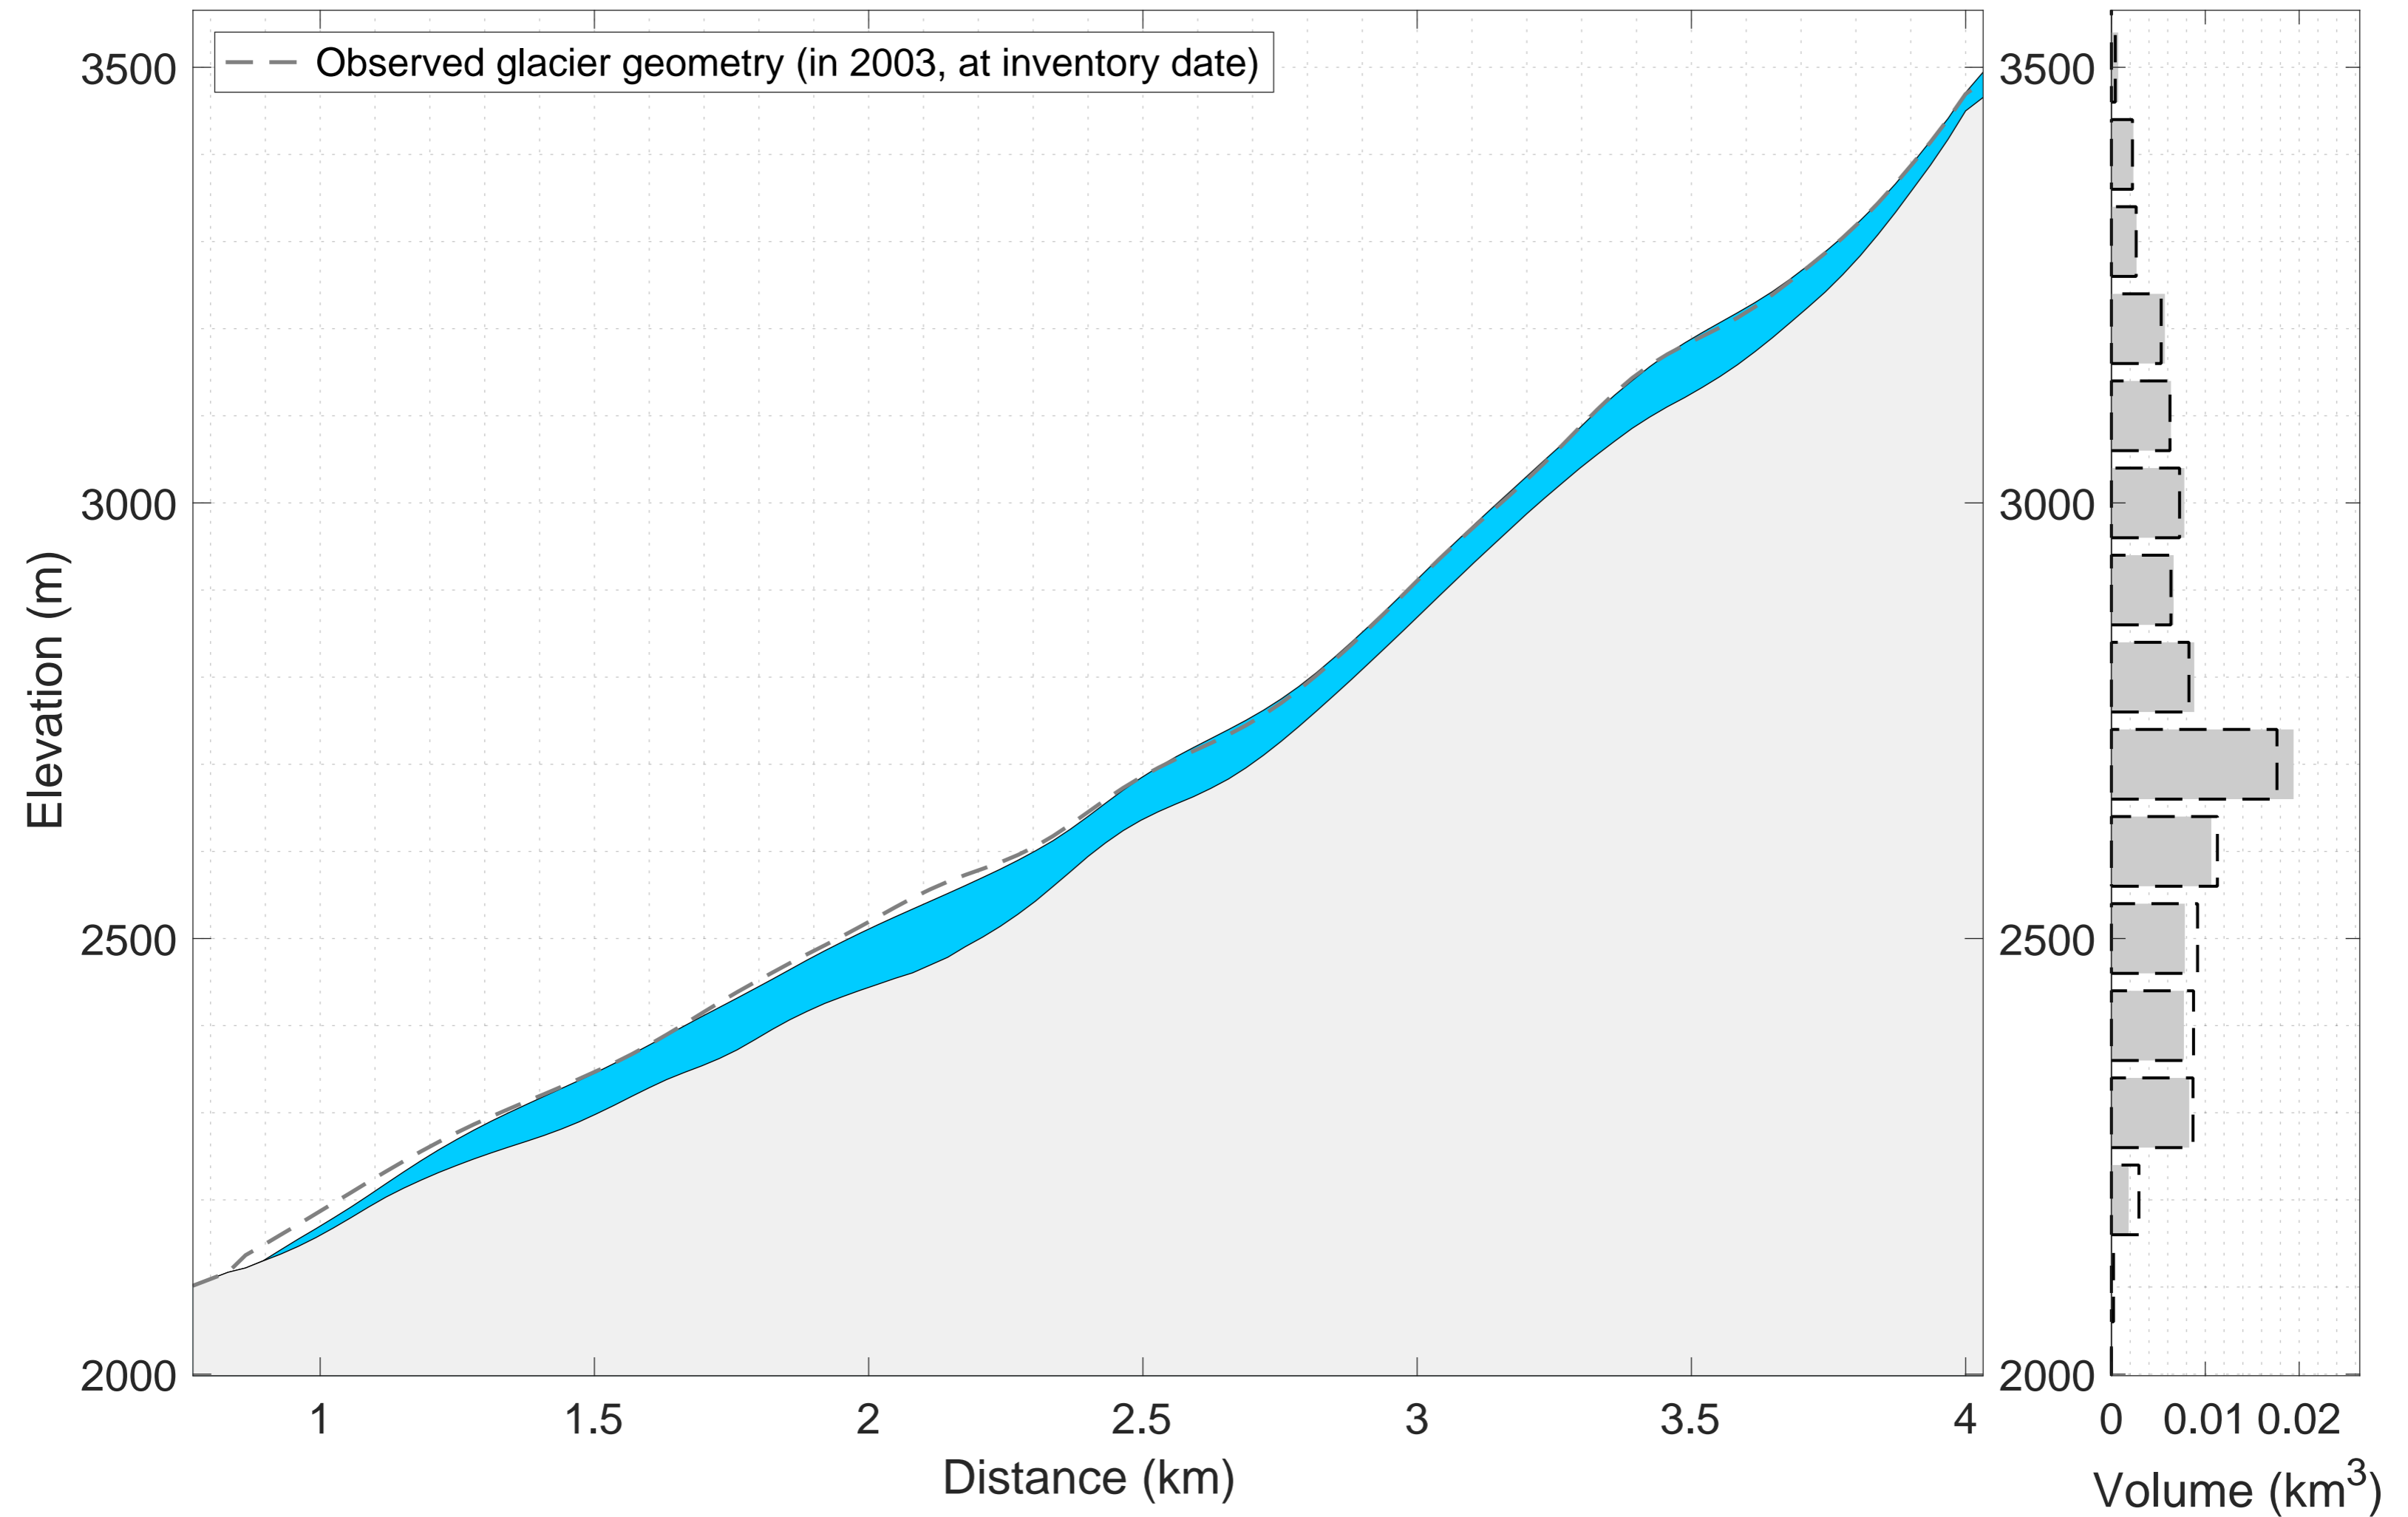

Supplement: Supplementary file 459 [file tc-13-1125-2019-supplement.zip]

**Modelled geometry (Glacier ID = 00574;  $A = 1.0873\text{e-}16 \text{ Pa}^{-3} \text{ a}^{-1}$ ;  $dx = 13 \text{ m}$ )**

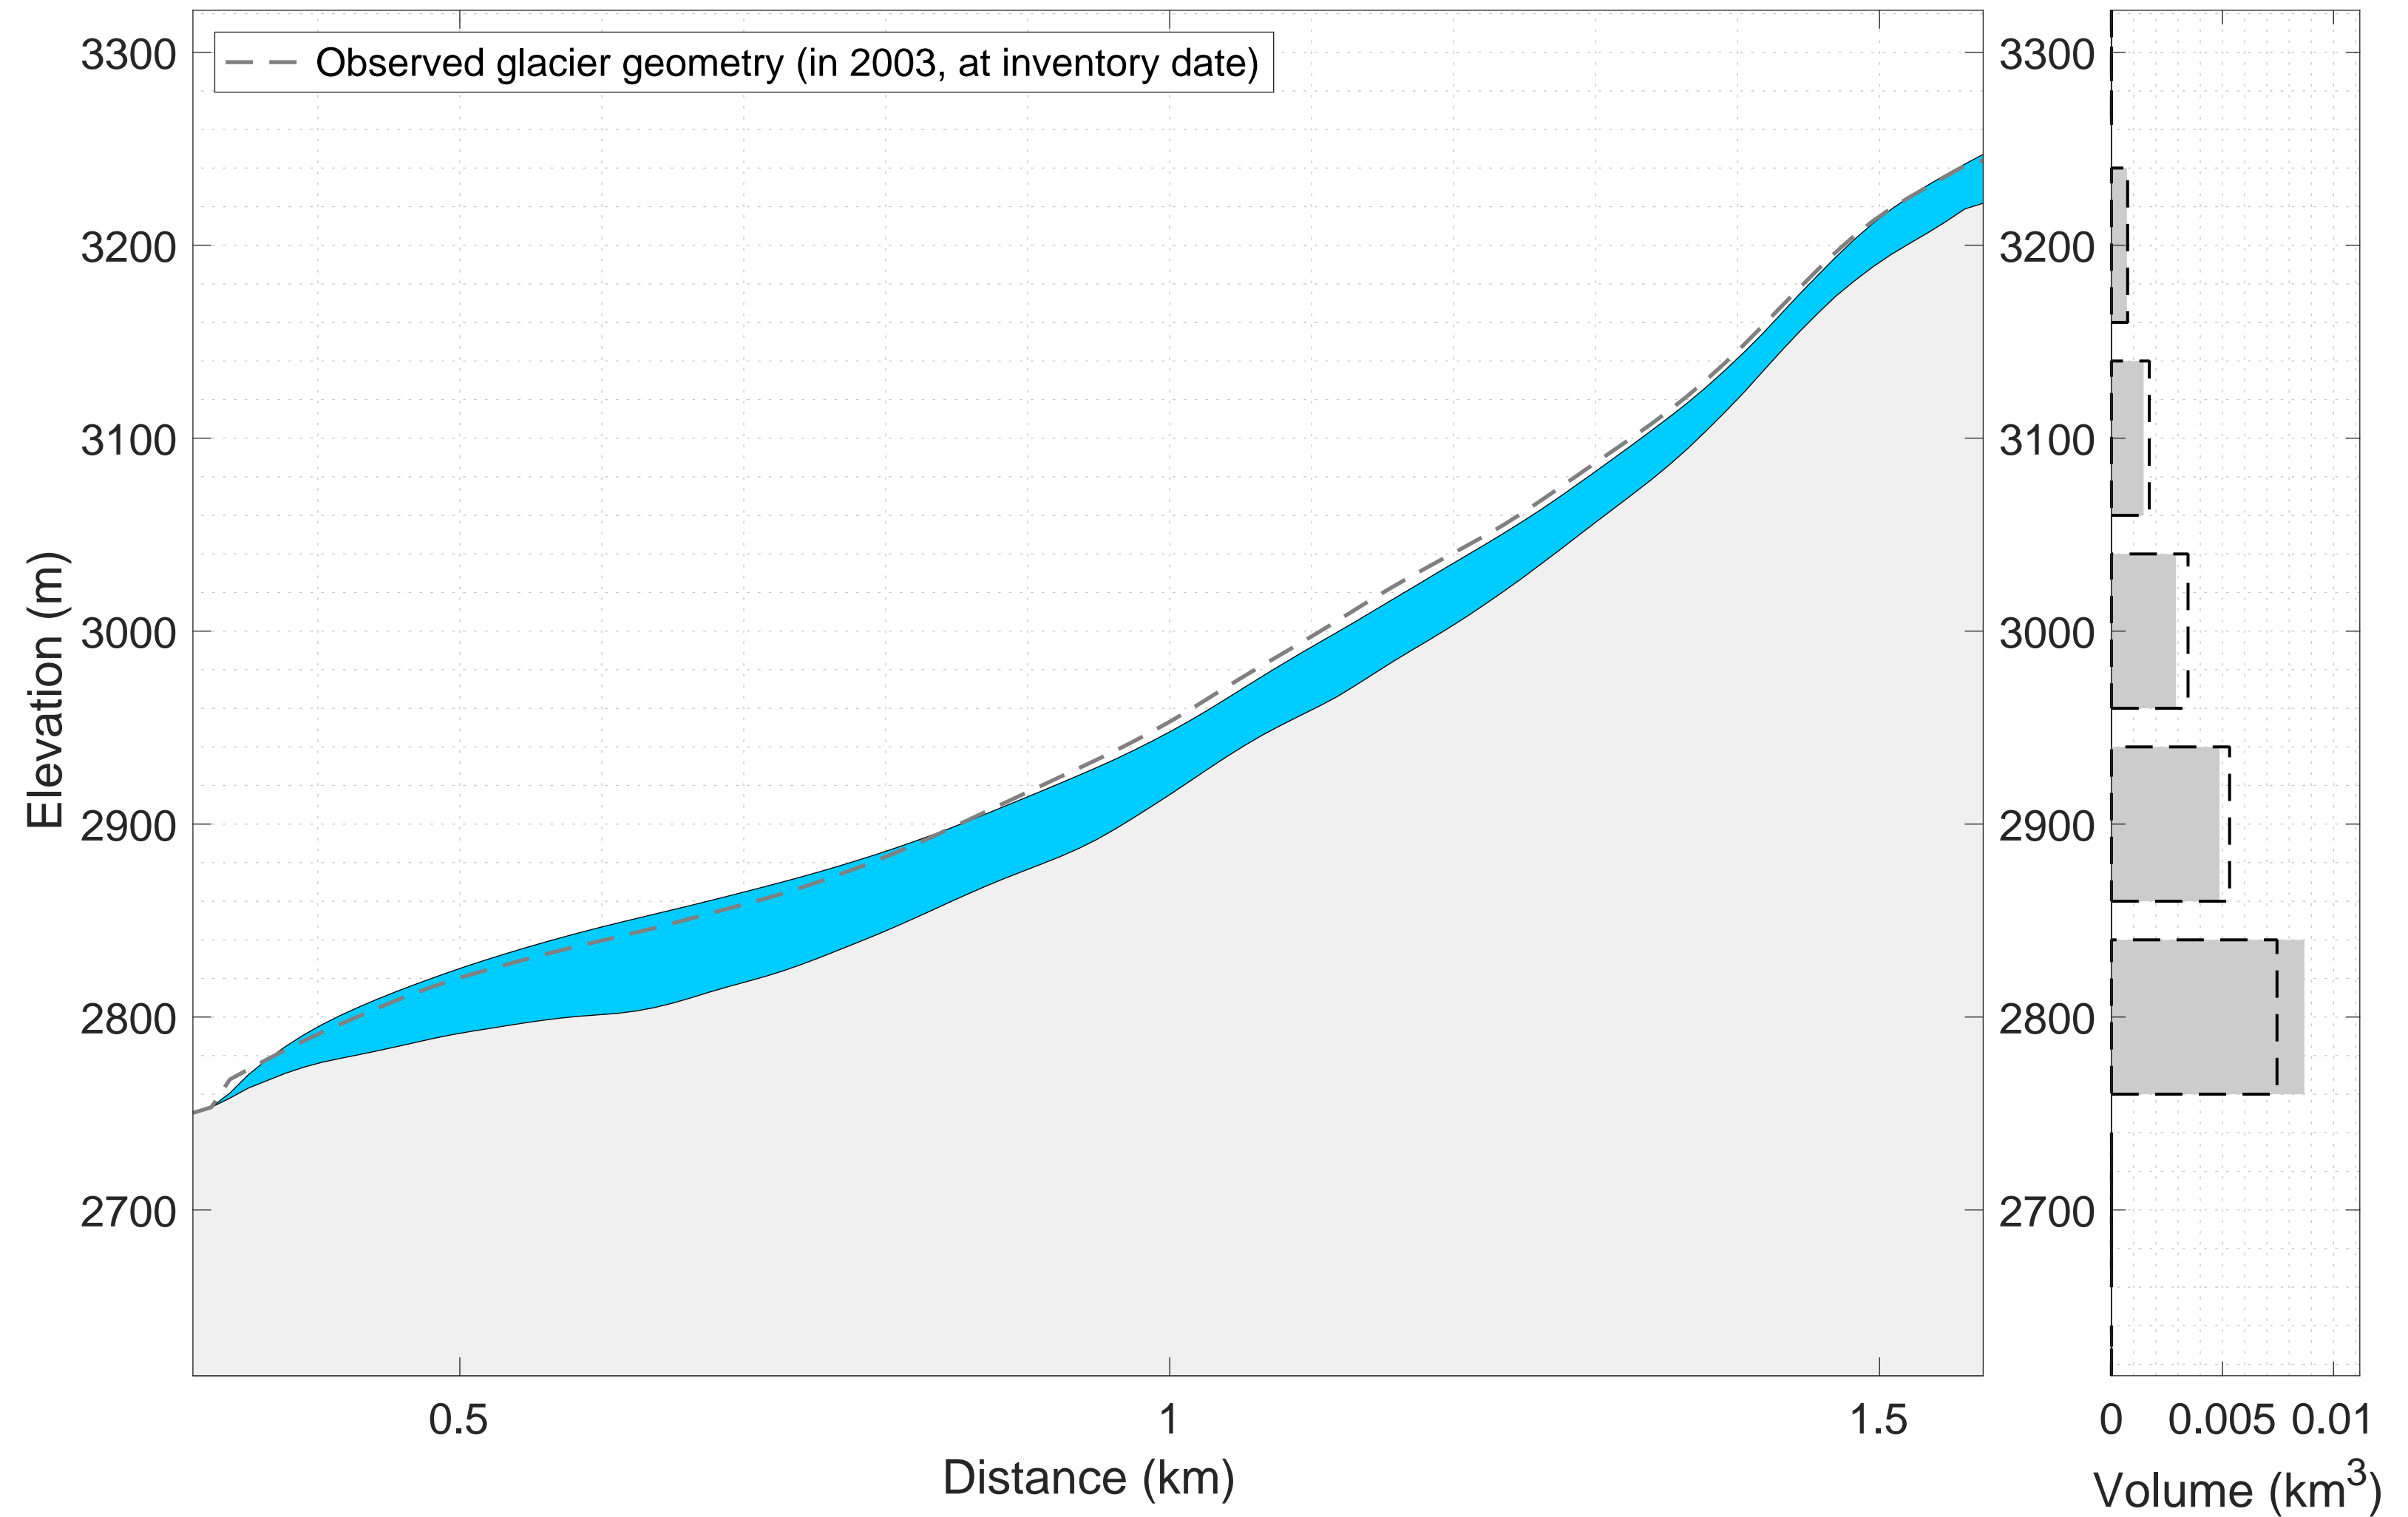

Supplement: Supplementary file 460 [file tc-13-1125-2019-supplement.zip]

**Modelled geometry (Glacier ID = 01656;  $A = 1.7336\text{e-}16 \text{ Pa}^{-3} \text{ a}^{-1}$ ;  $dx = 12 \text{ m}$ )**

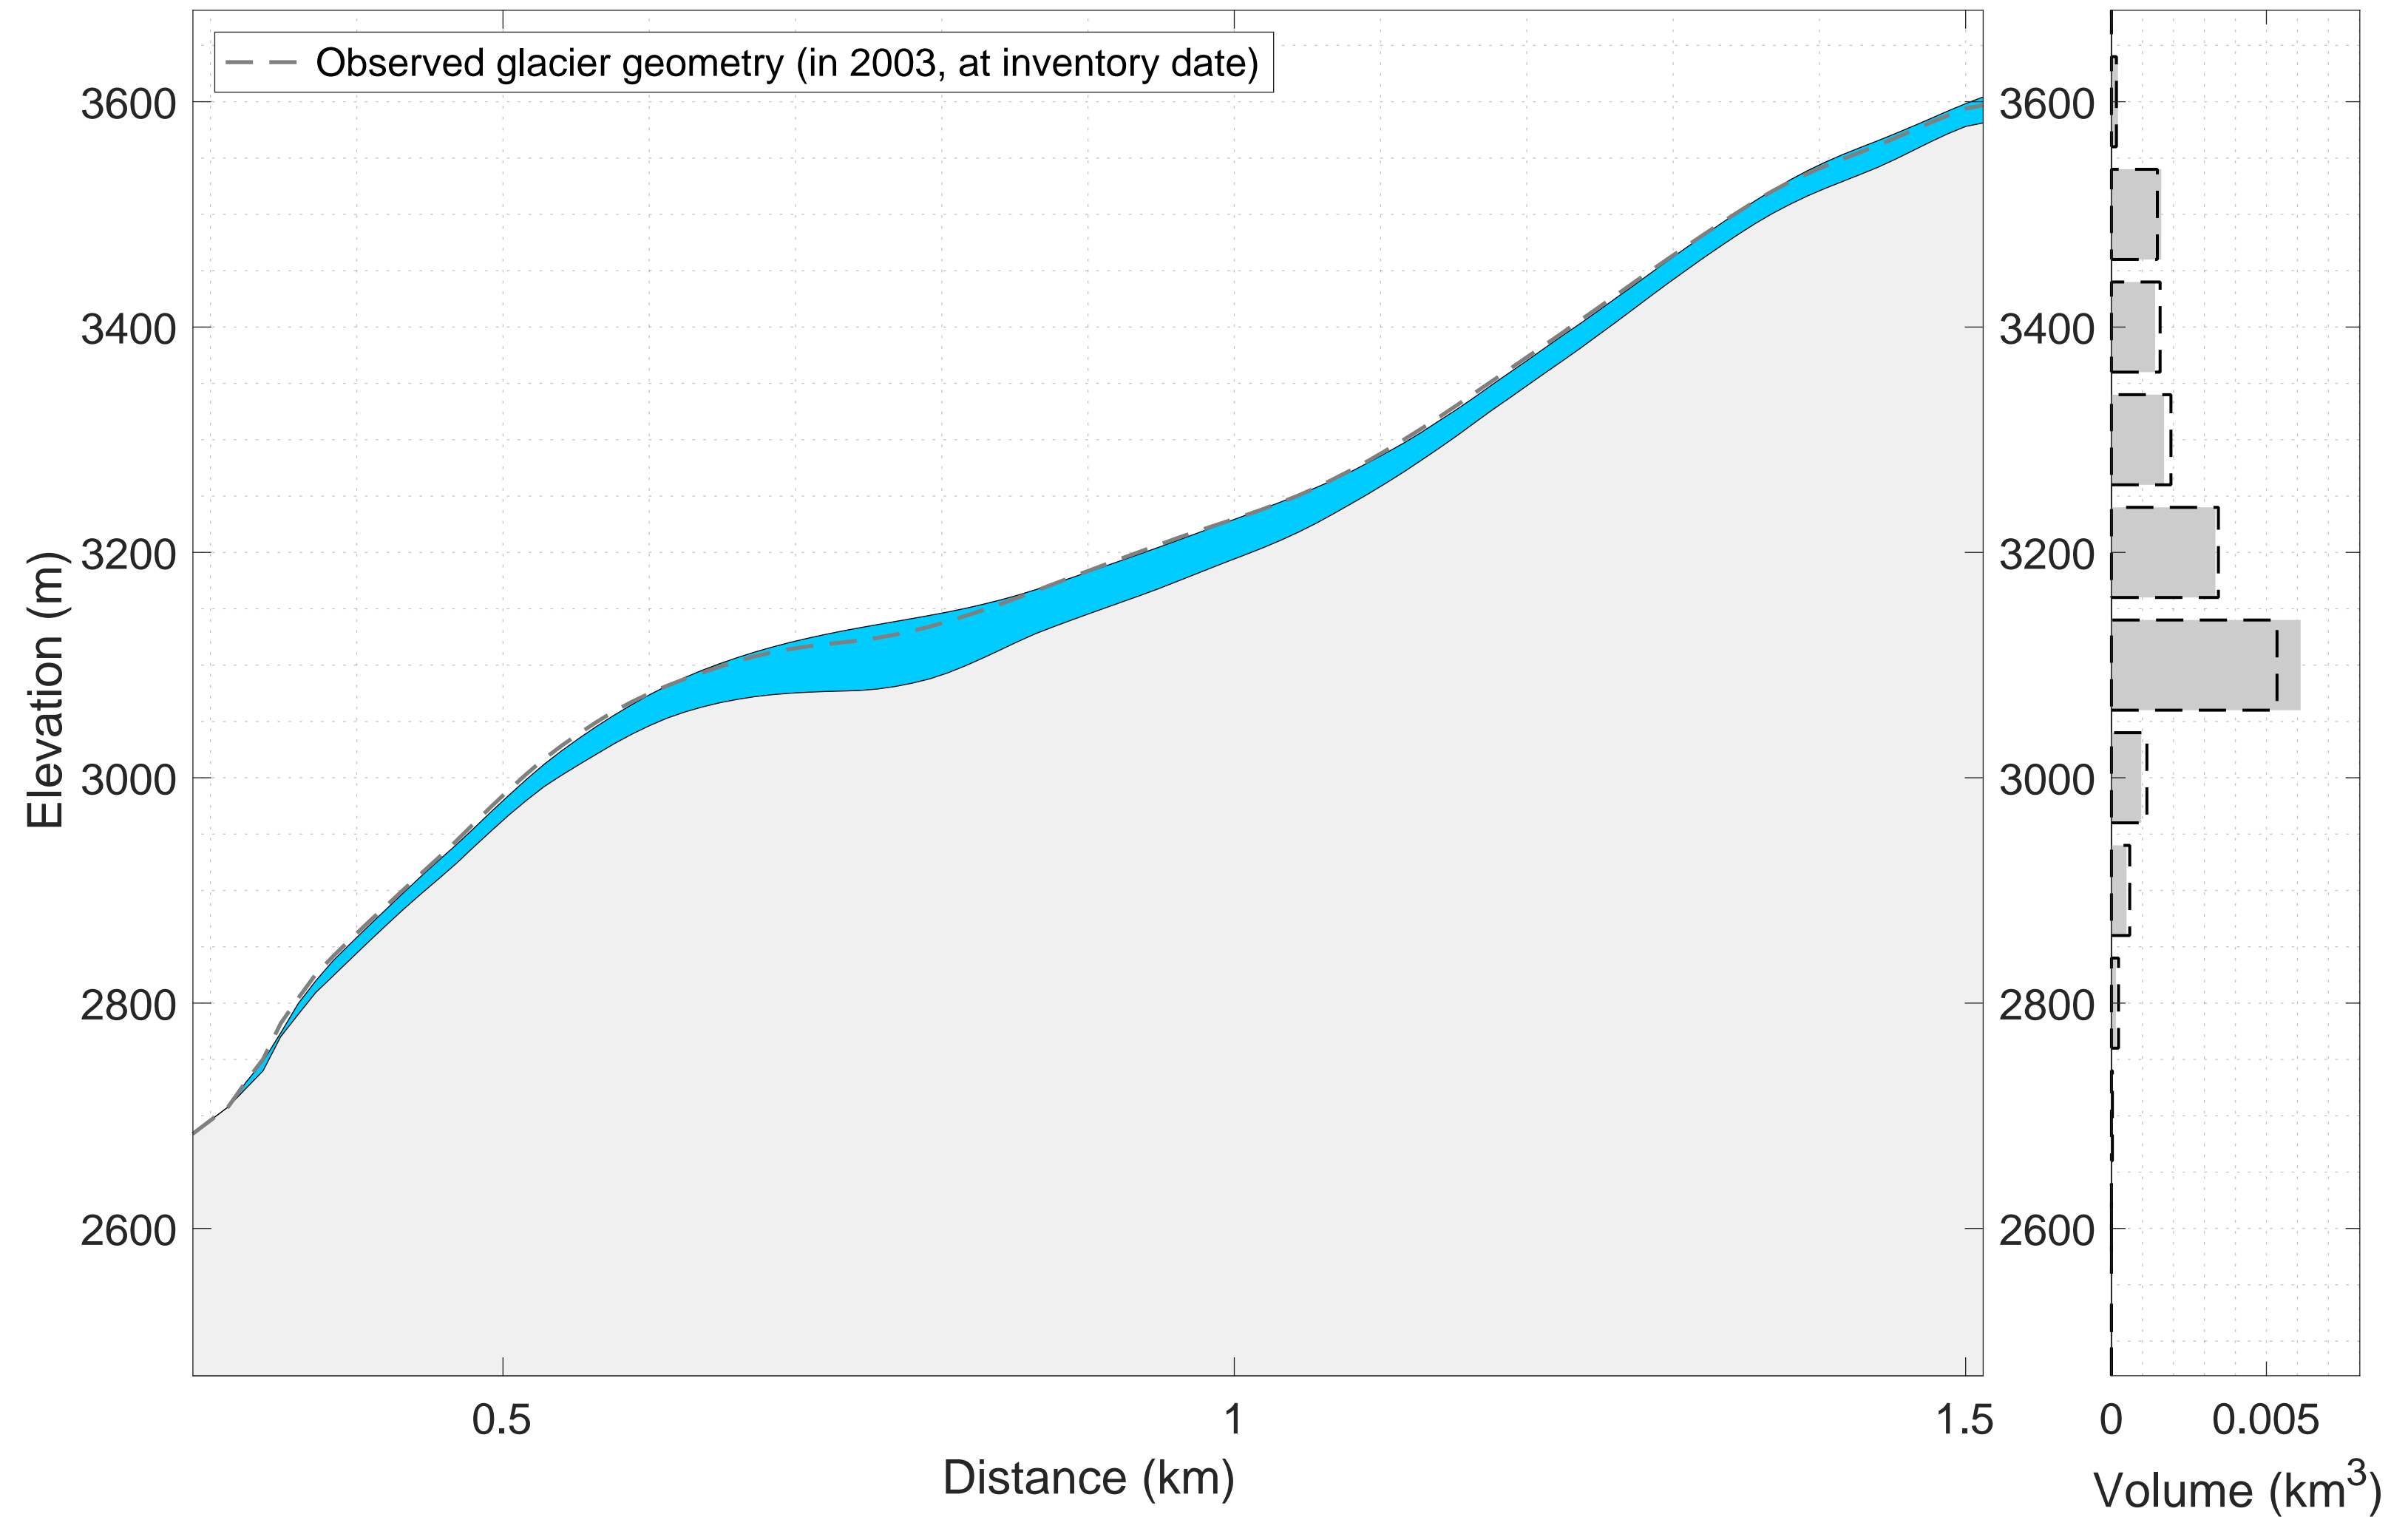

Supplement: Supplementary file 461 [file tc-13-1125-2019-supplement.zip]

**Modelled geometry (Glacier ID = 01187;  $A = 5.7001\text{e-}17 \text{ Pa}^{-3} \text{ a}^{-1}$ ;  $dx = 17 \text{ m}$ )**

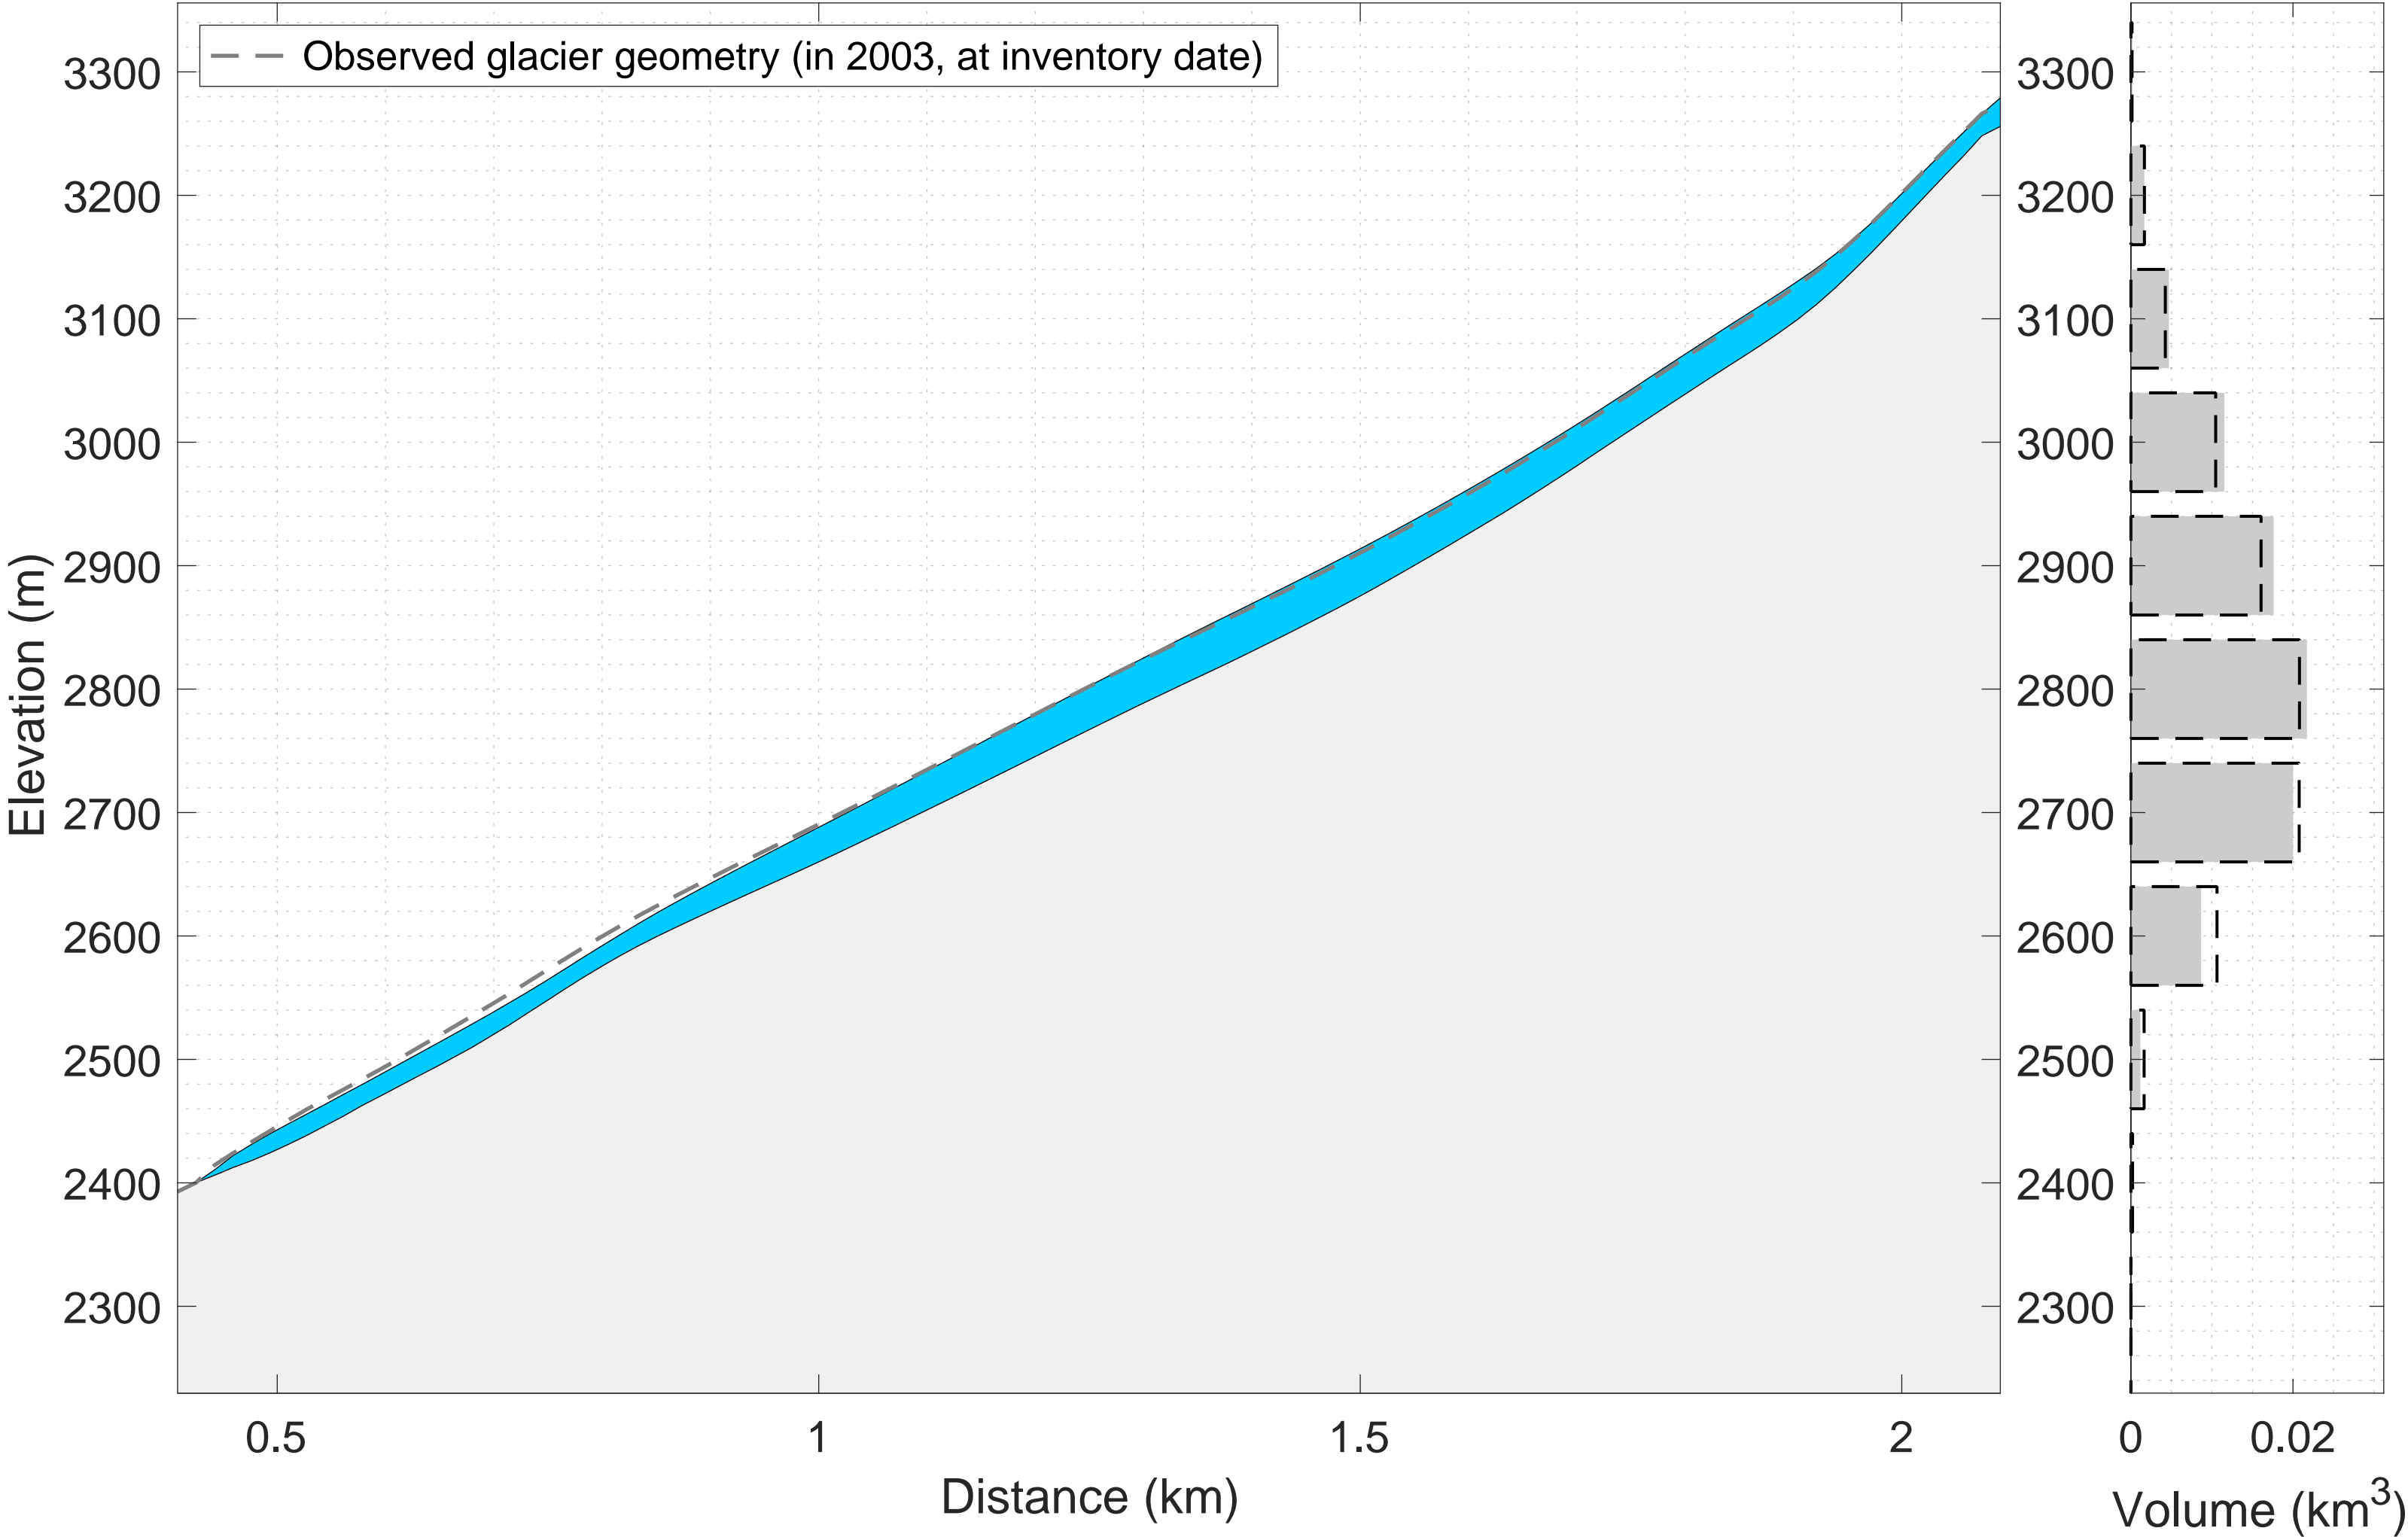

Supplement: Supplementary file 462 [file tc-13-1125-2019-supplement.zip]

**Modelled geometry (Glacier ID = 00731;  $A = 6.3002\text{e-}17 \text{ Pa}^{-3} \text{ a}^{-1}$ ;  $dx = 11 \text{ m}$ )**

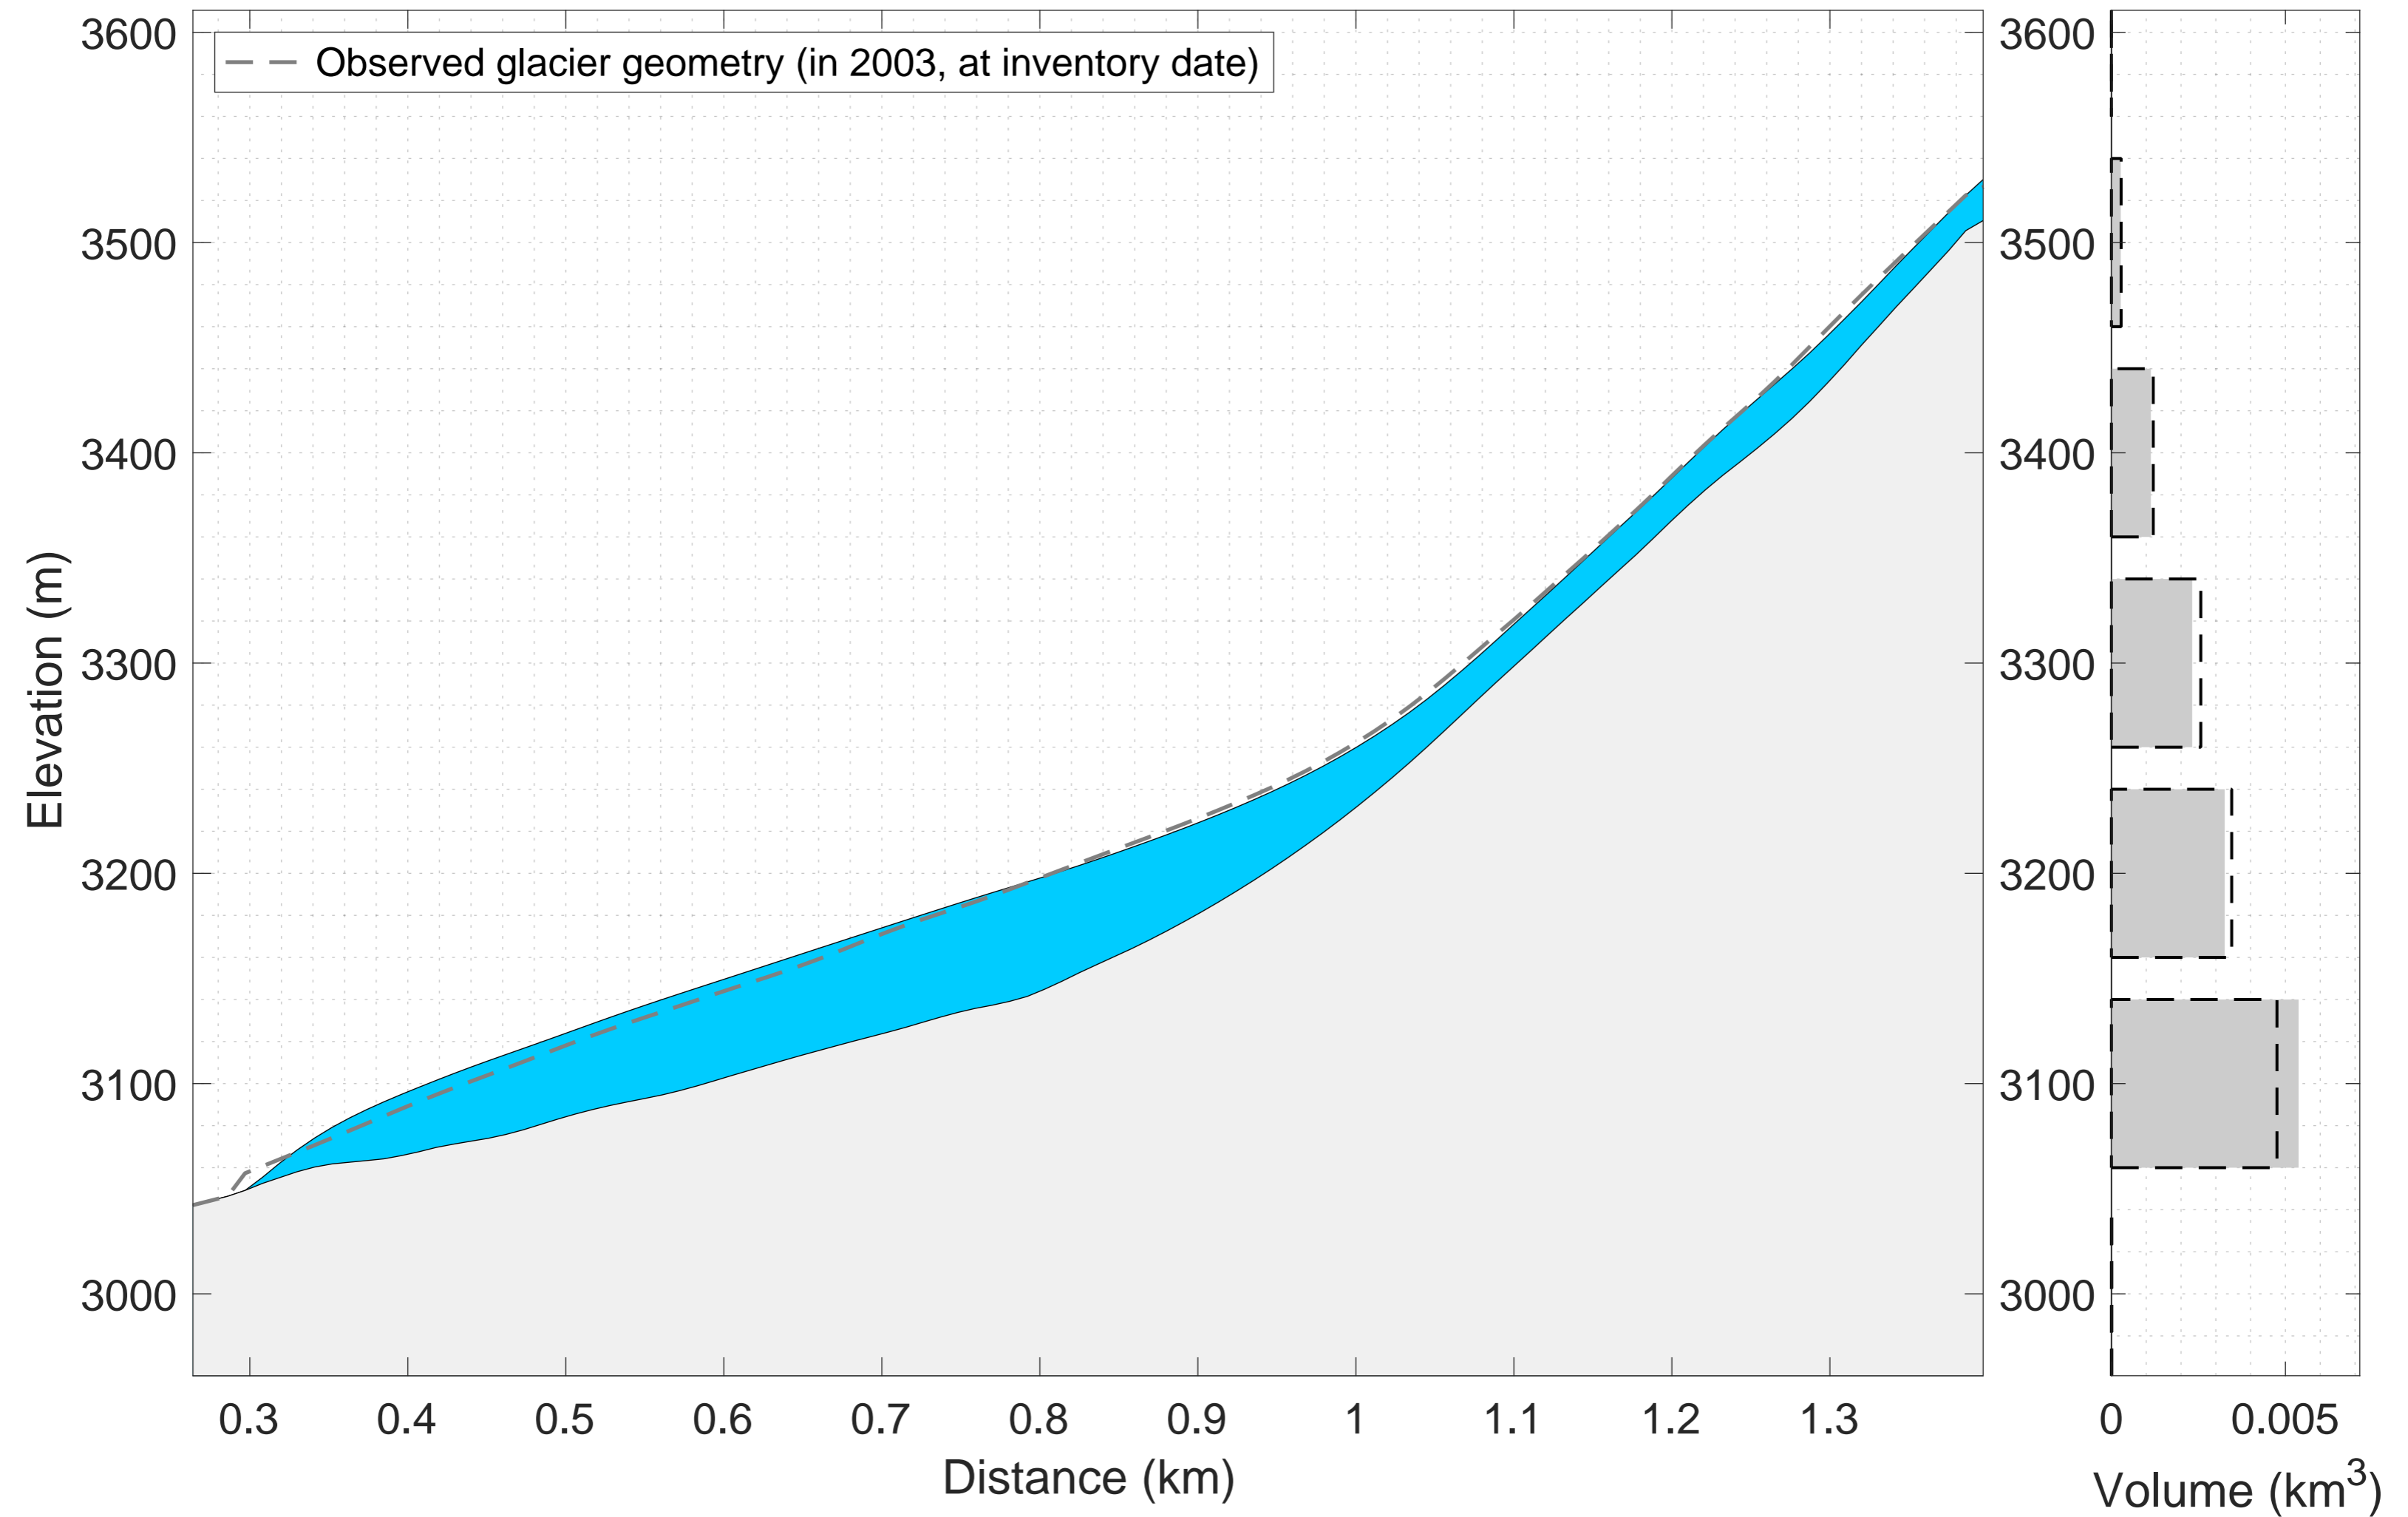

Supplement: Supplementary file 463 [file tc-13-1125-2019-supplement.zip]

**Modelled geometry (Glacier ID = 01202;  $A = 4.6338\text{e-}17 \text{ Pa}^{-3} \text{ a}^{-1}$ ;  $dx = 13 \text{ m}$ )**

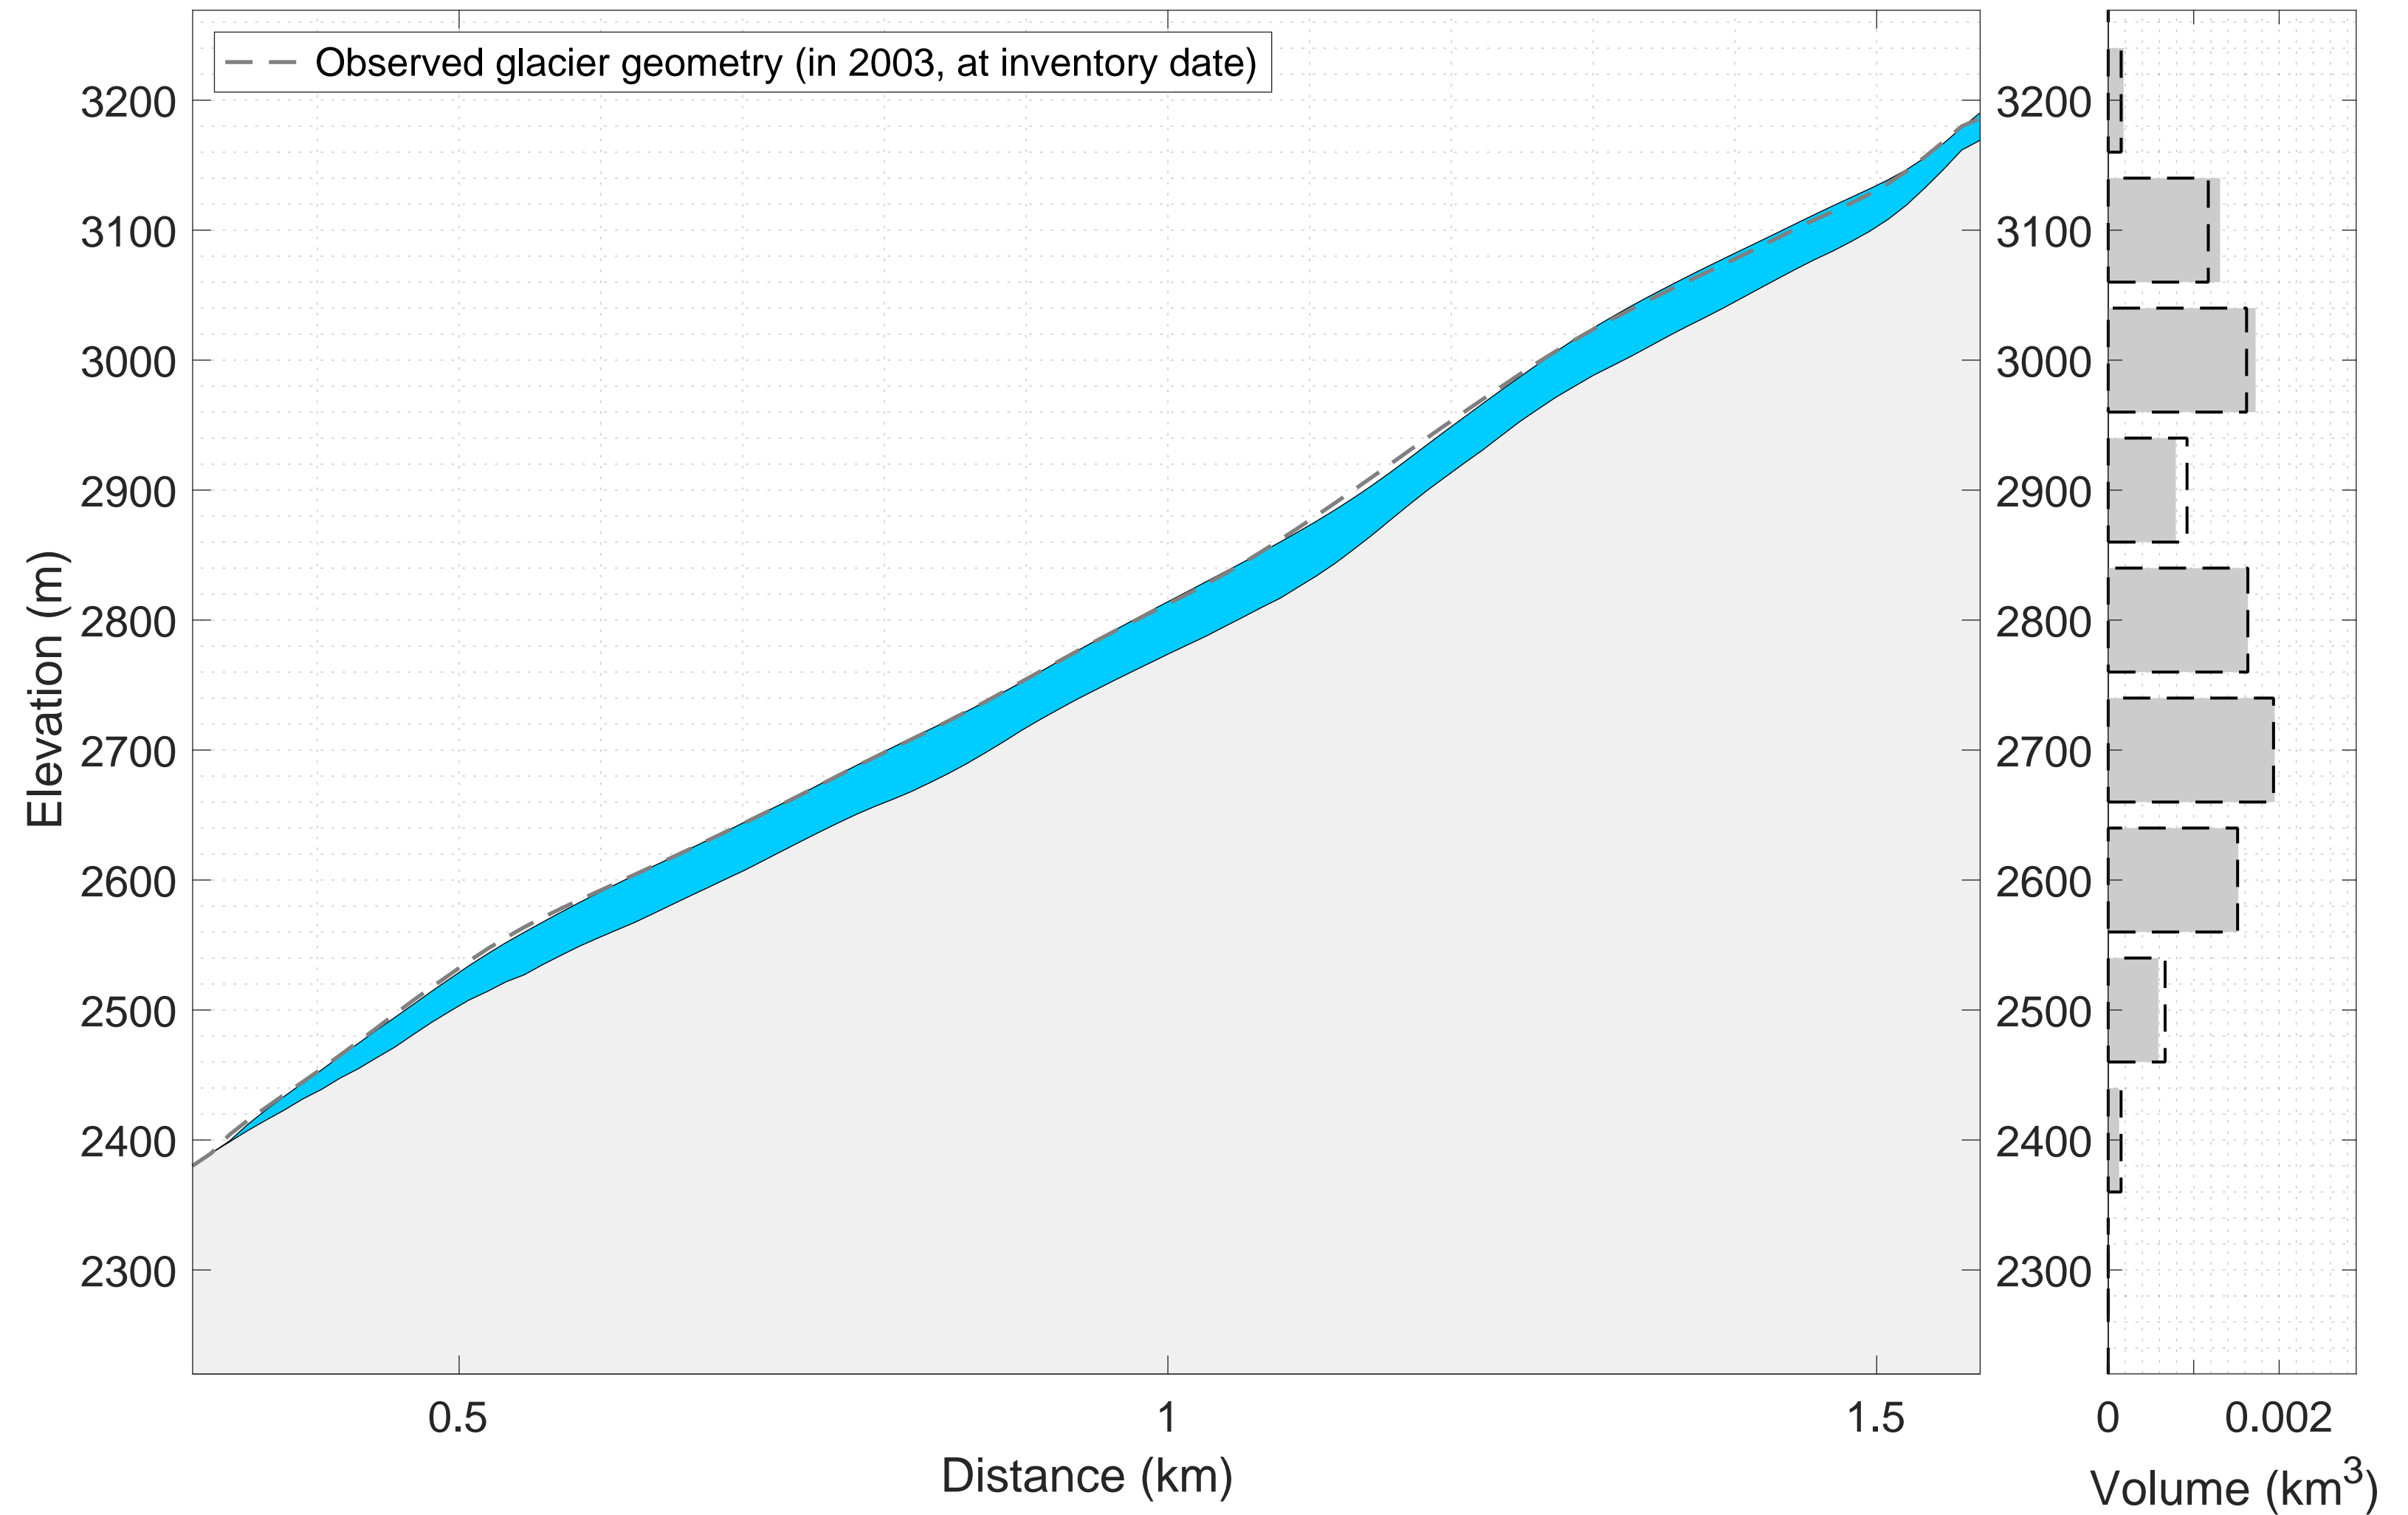

Supplement: Supplementary file 464 [file tc-13-1125-2019-supplement.zip]

**Modelled geometry (Glacier ID = 01925;  $A = 6.9689\text{e-}17 \text{ Pa}^{-3} \text{ a}^{-1}$ ;  $dx = 13 \text{ m}$ )**

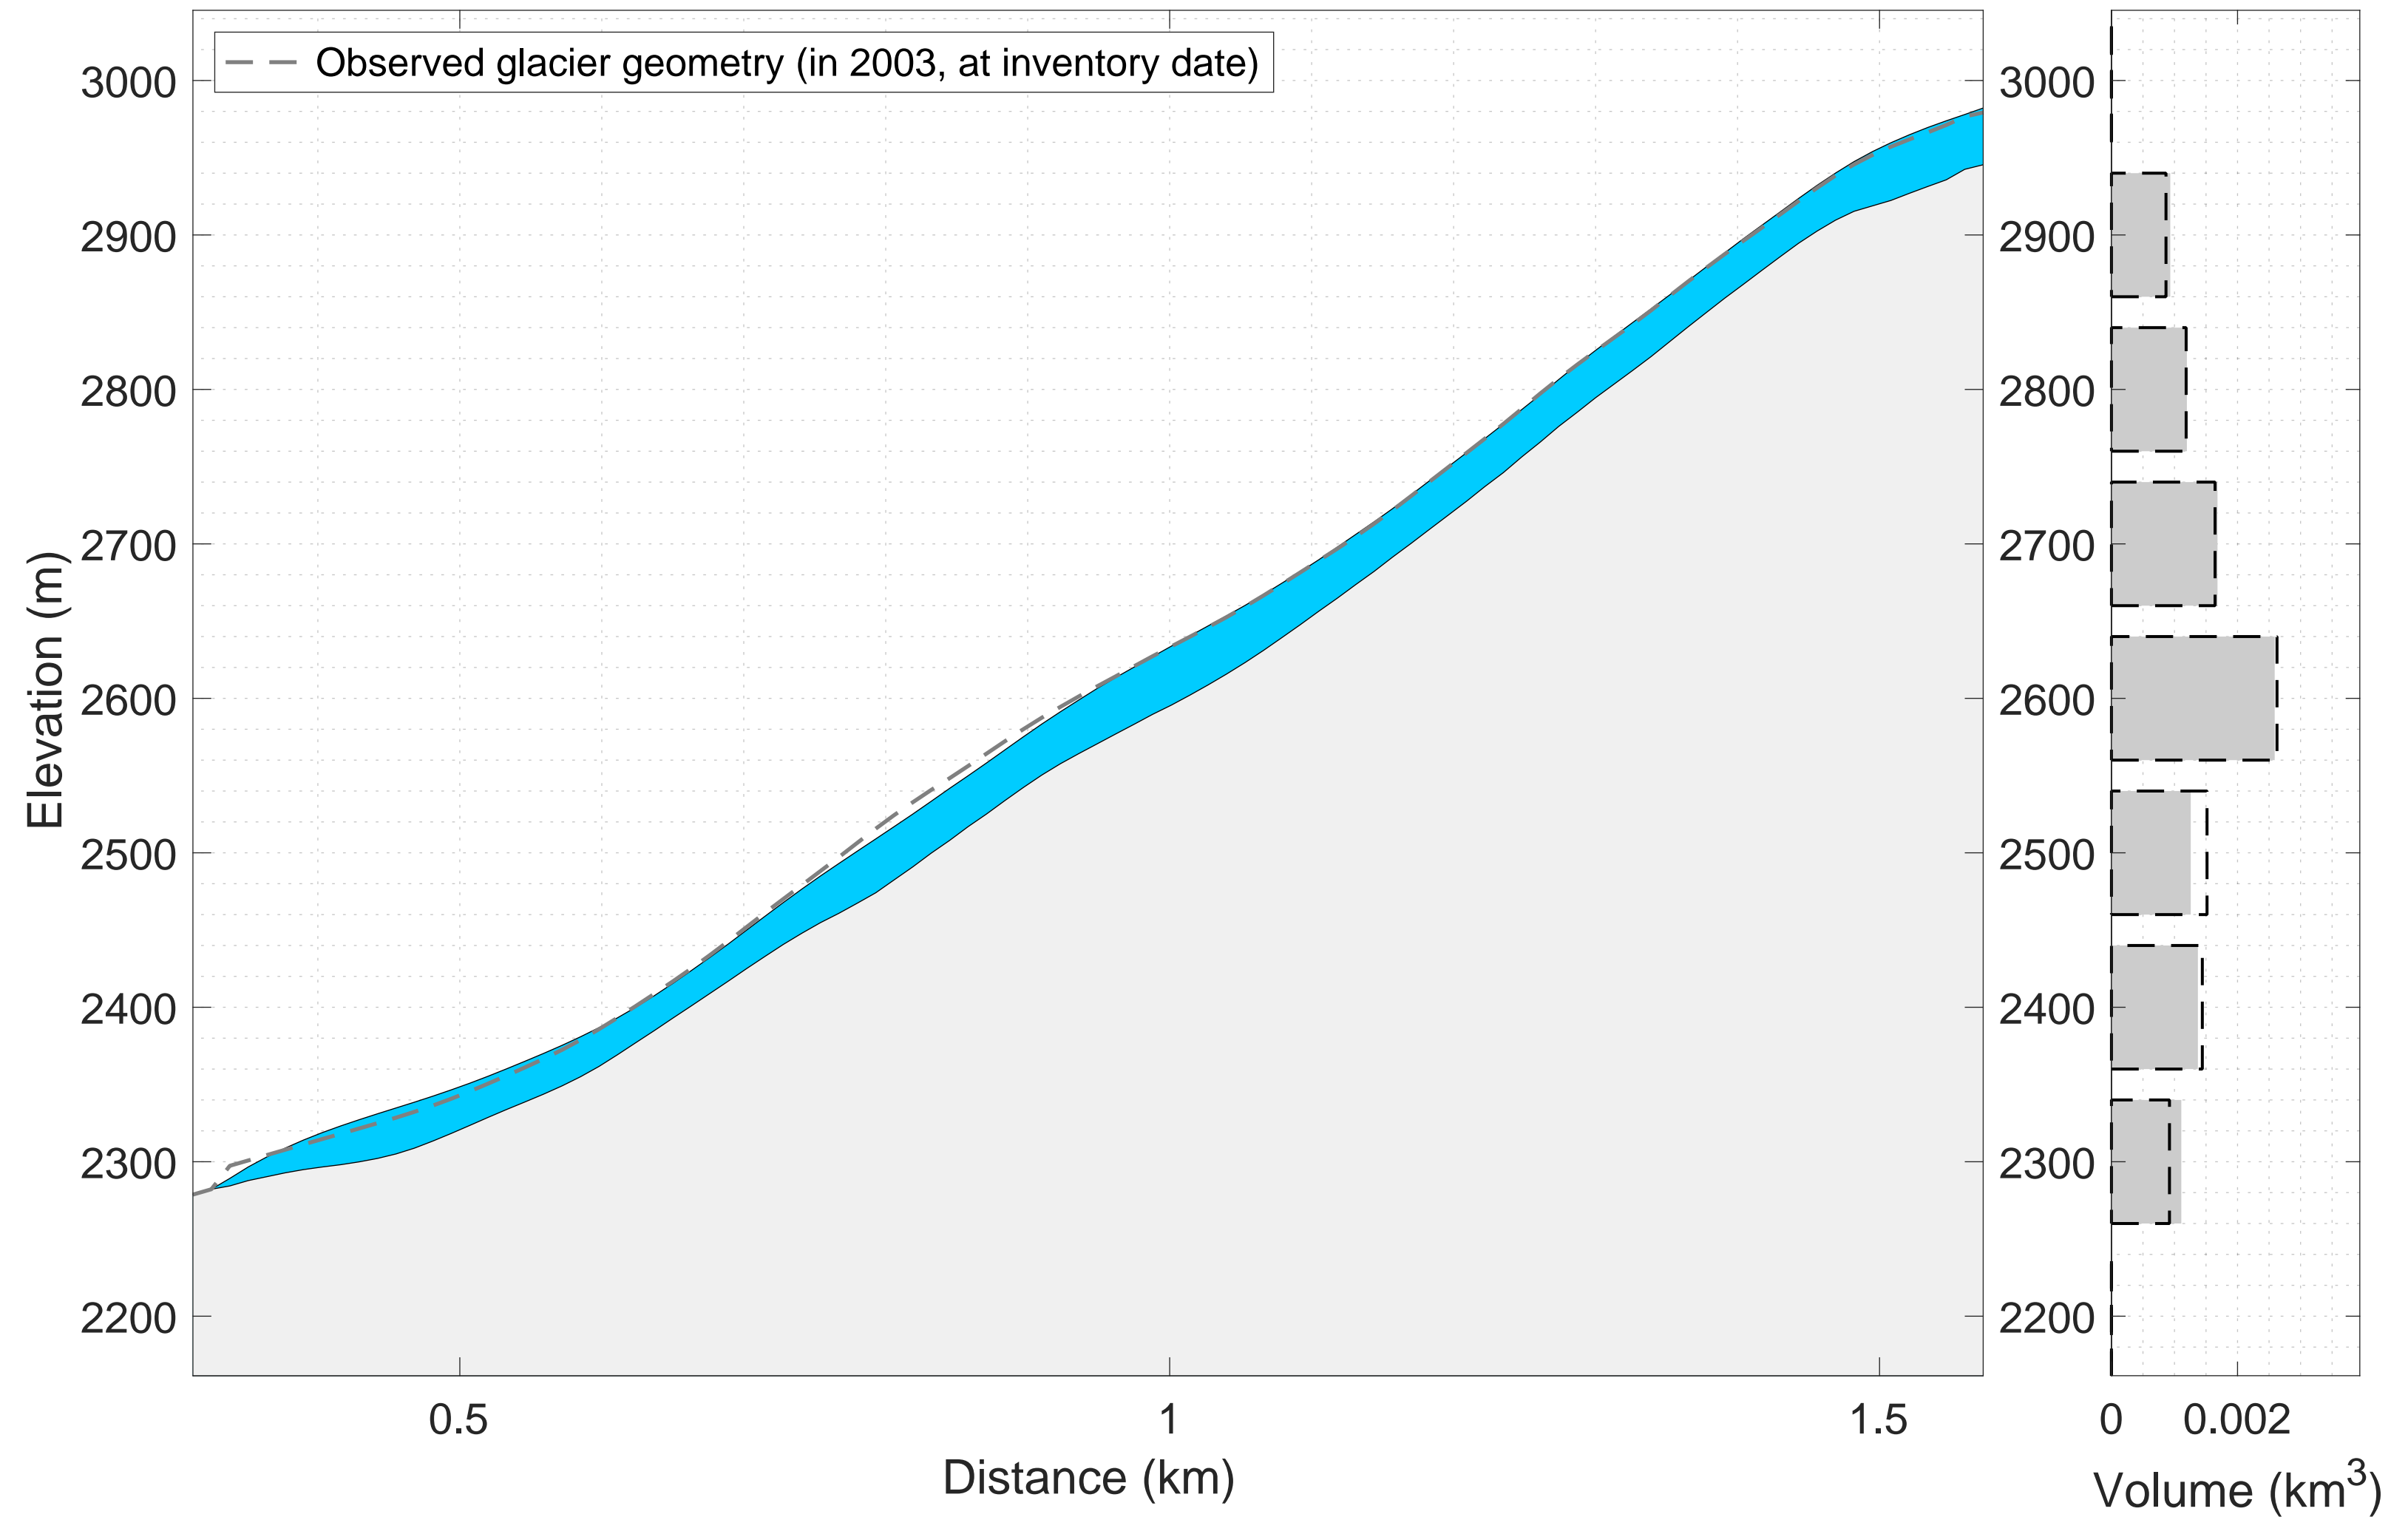

Supplement: Supplementary file 465 [file tc-13-1125-2019-supplement.zip]

**Modelled geometry (Glacier ID = 01928;  $A = 1.1399\text{e-}16 \text{ Pa}^{-3} \text{ a}^{-1}$ ;  $dx = 13 \text{ m}$ )**

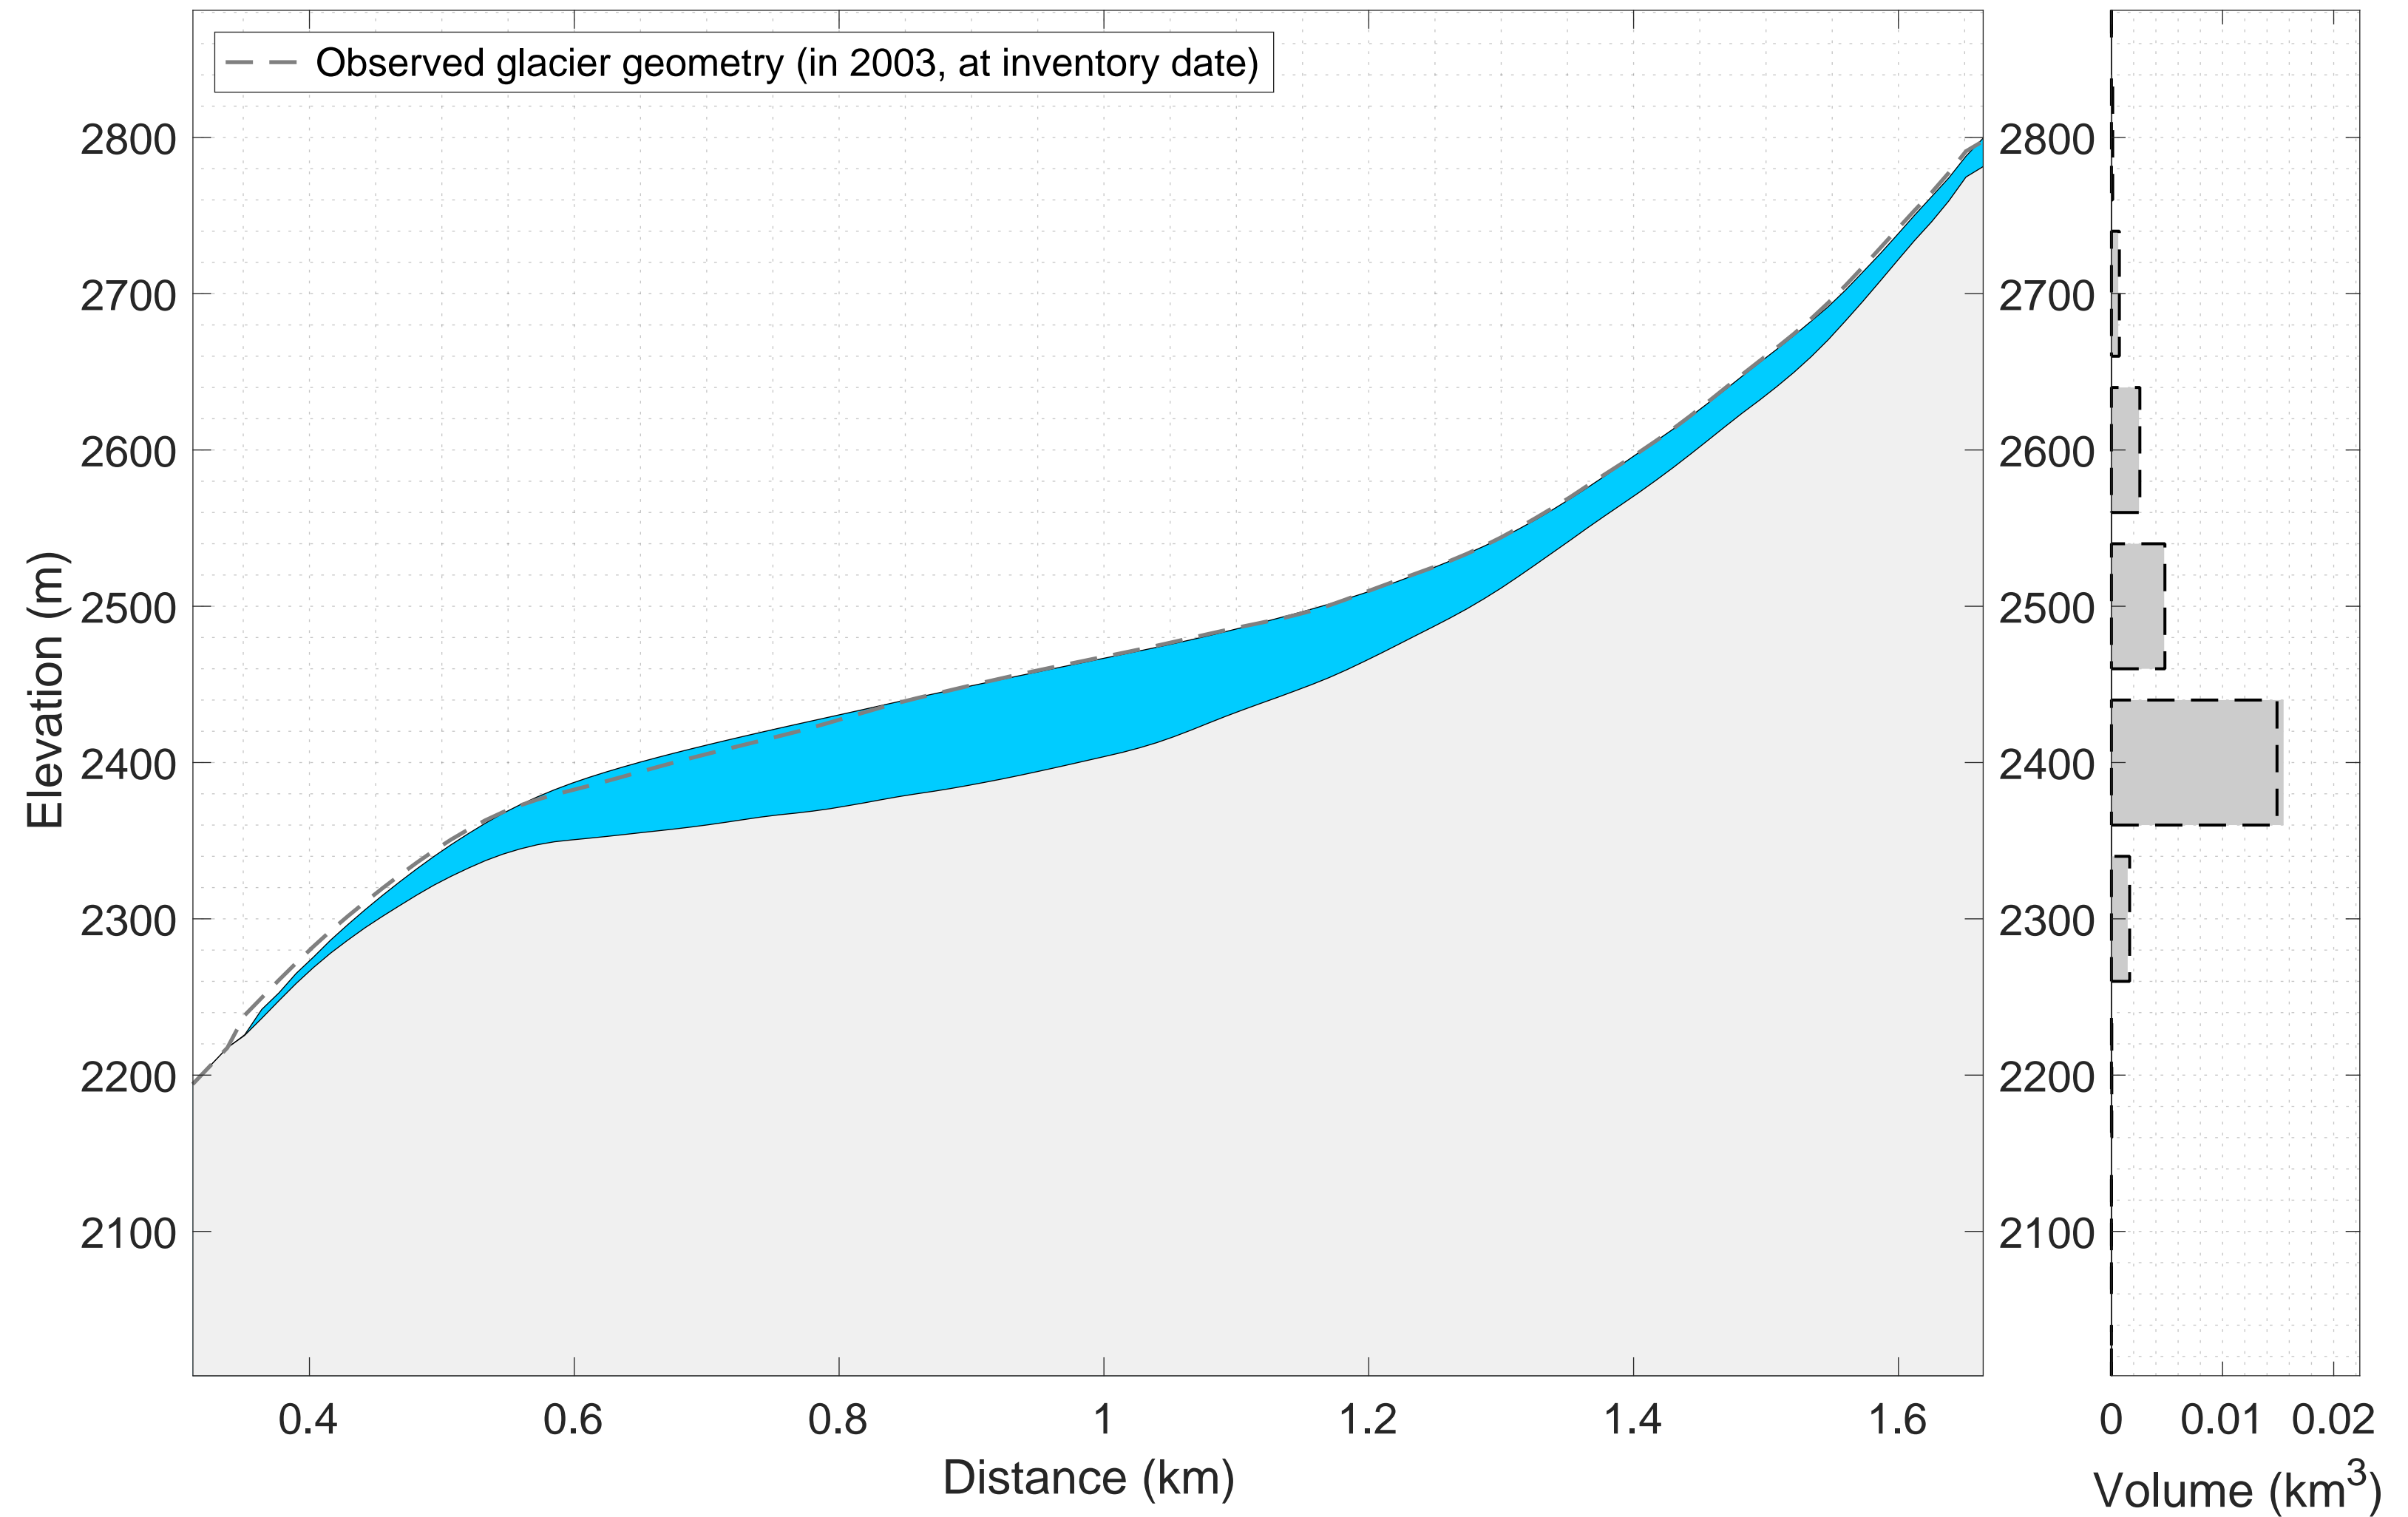

Supplement: Supplementary file 466 [file tc-13-1125-2019-supplement.zip]

**Modelled geometry (Glacier ID = 02718;  $A = 1.6155\text{e-}16 \text{ Pa}^{-3} \text{ a}^{-1}$ ;  $dx = 22 \text{ m}$ )**

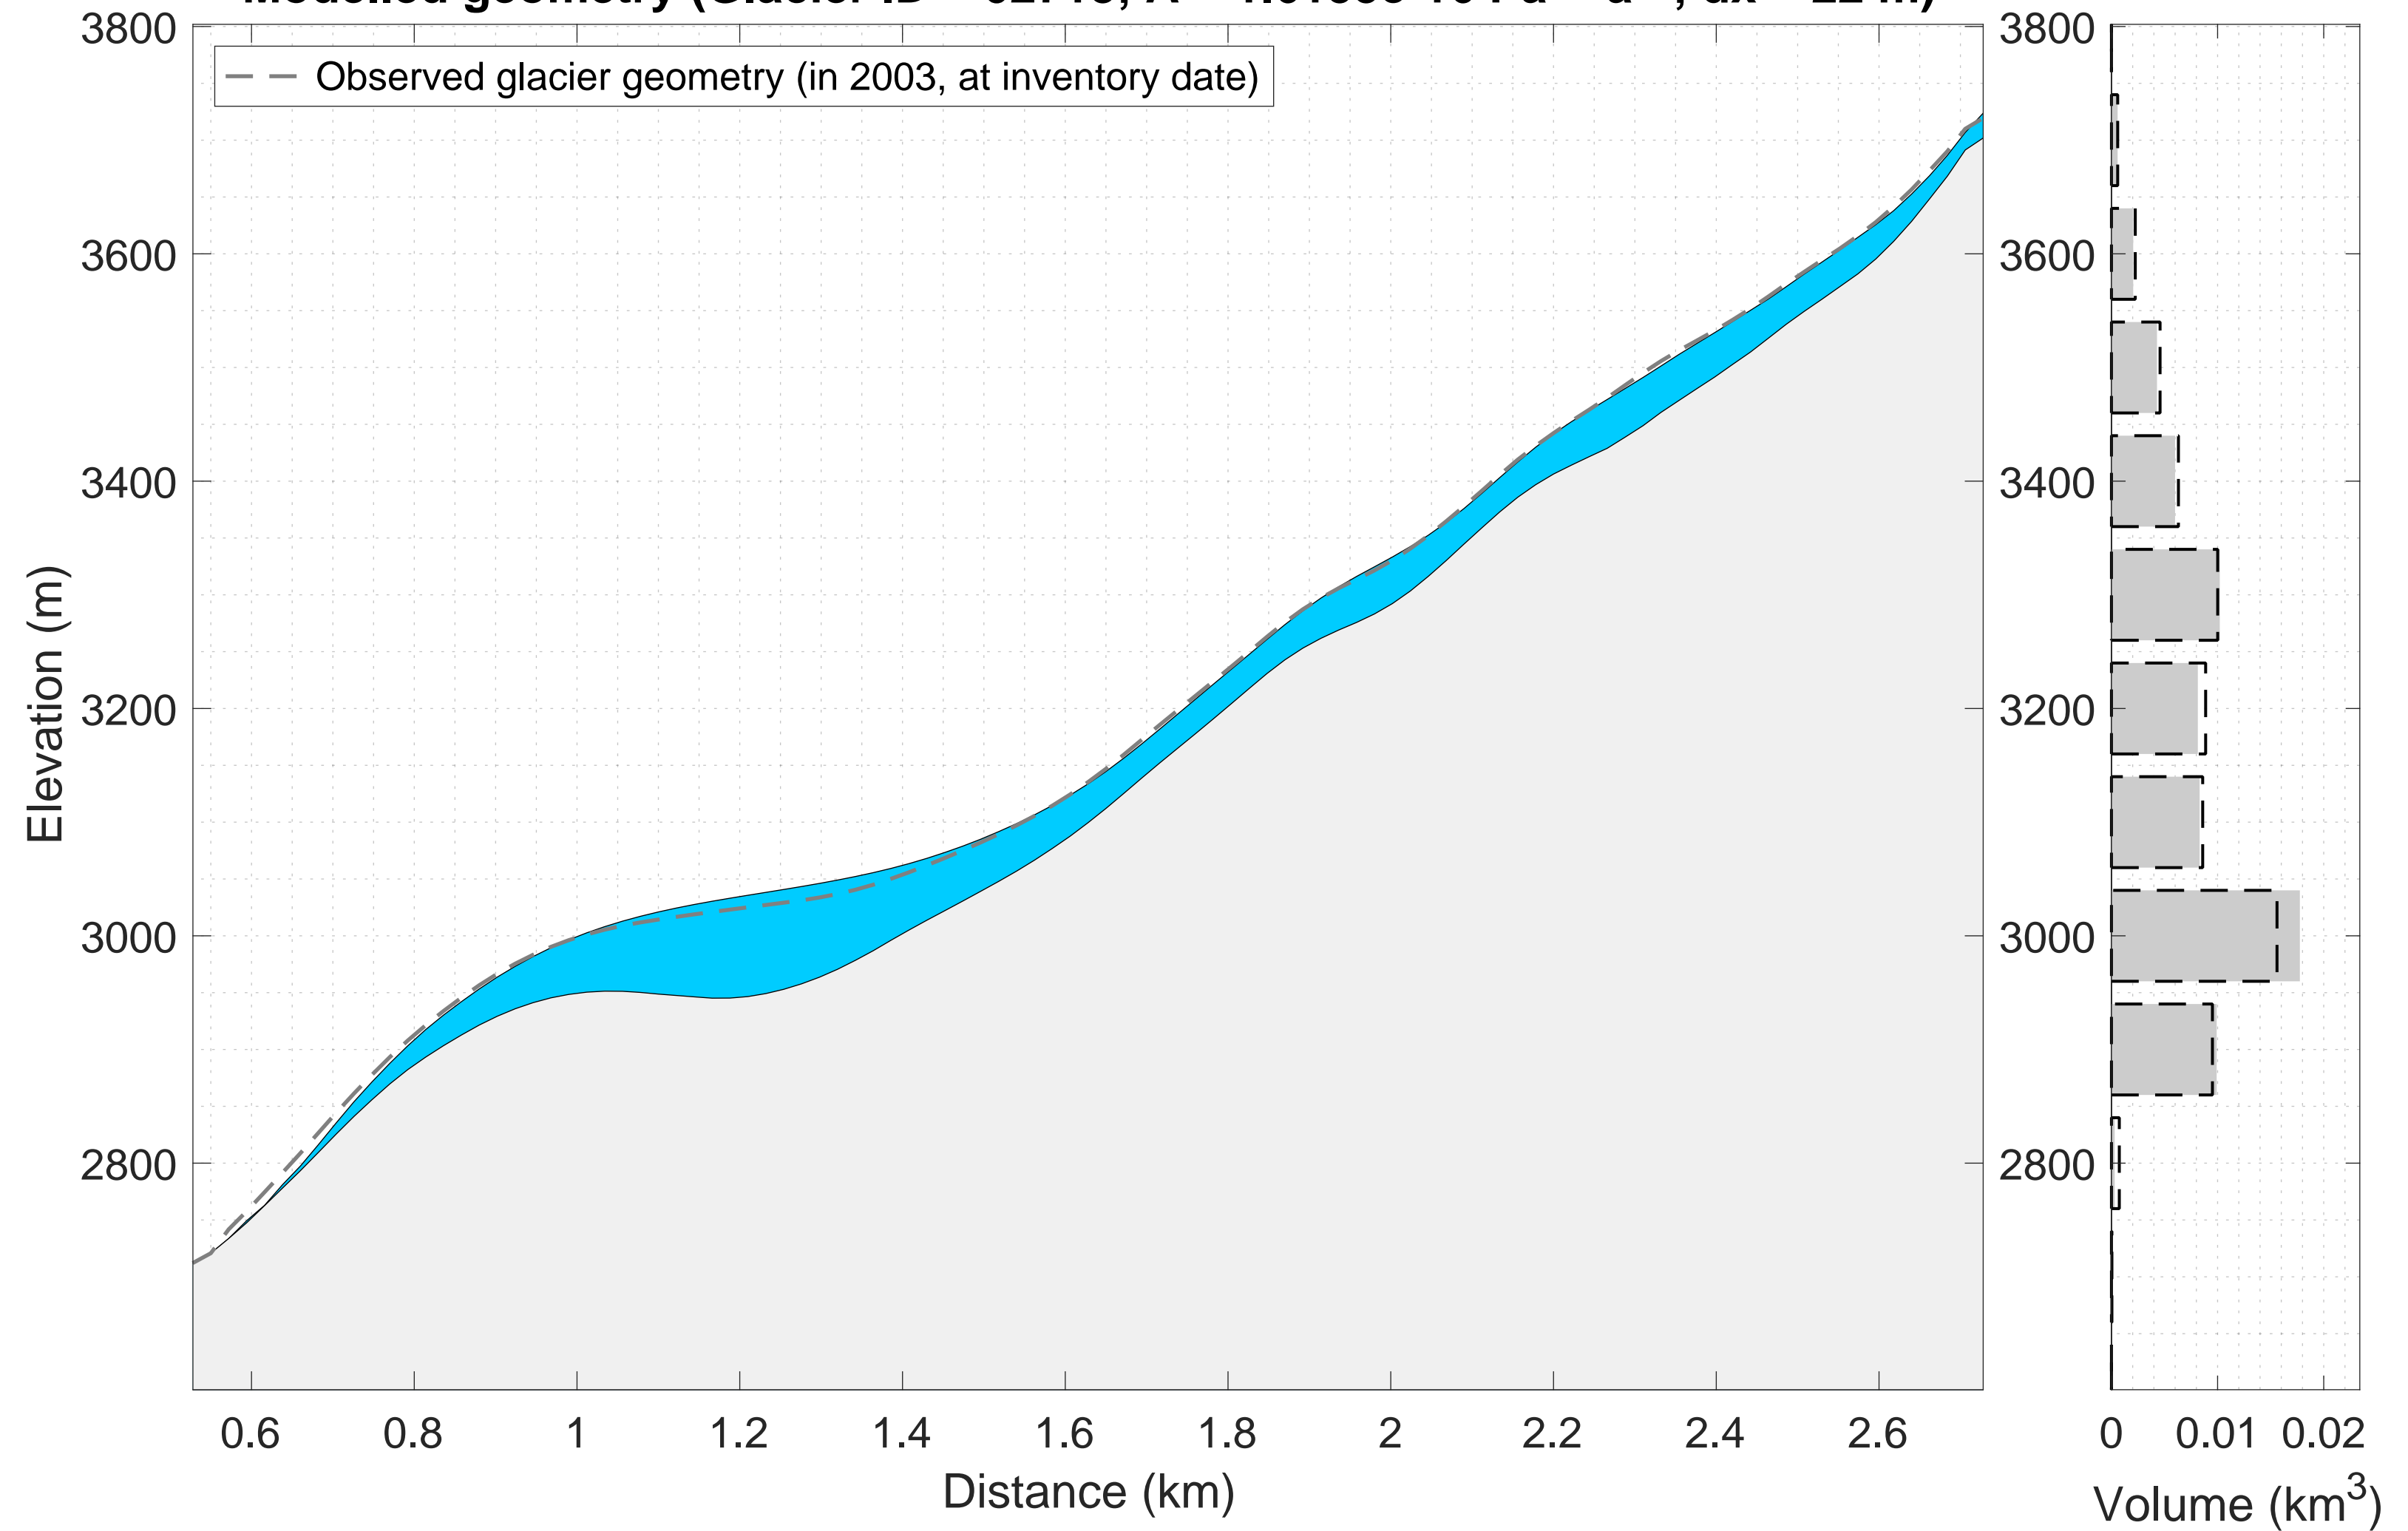

Supplement: Supplementary file 467 [file tc-13-1125-2019-supplement.zip]

**Modelled geometry (Glacier ID = 00803;  $A = 1.1634\text{e-}16 \text{ Pa}^{-3} \text{ a}^{-1}$ ;  $dx = 12 \text{ m}$ )**

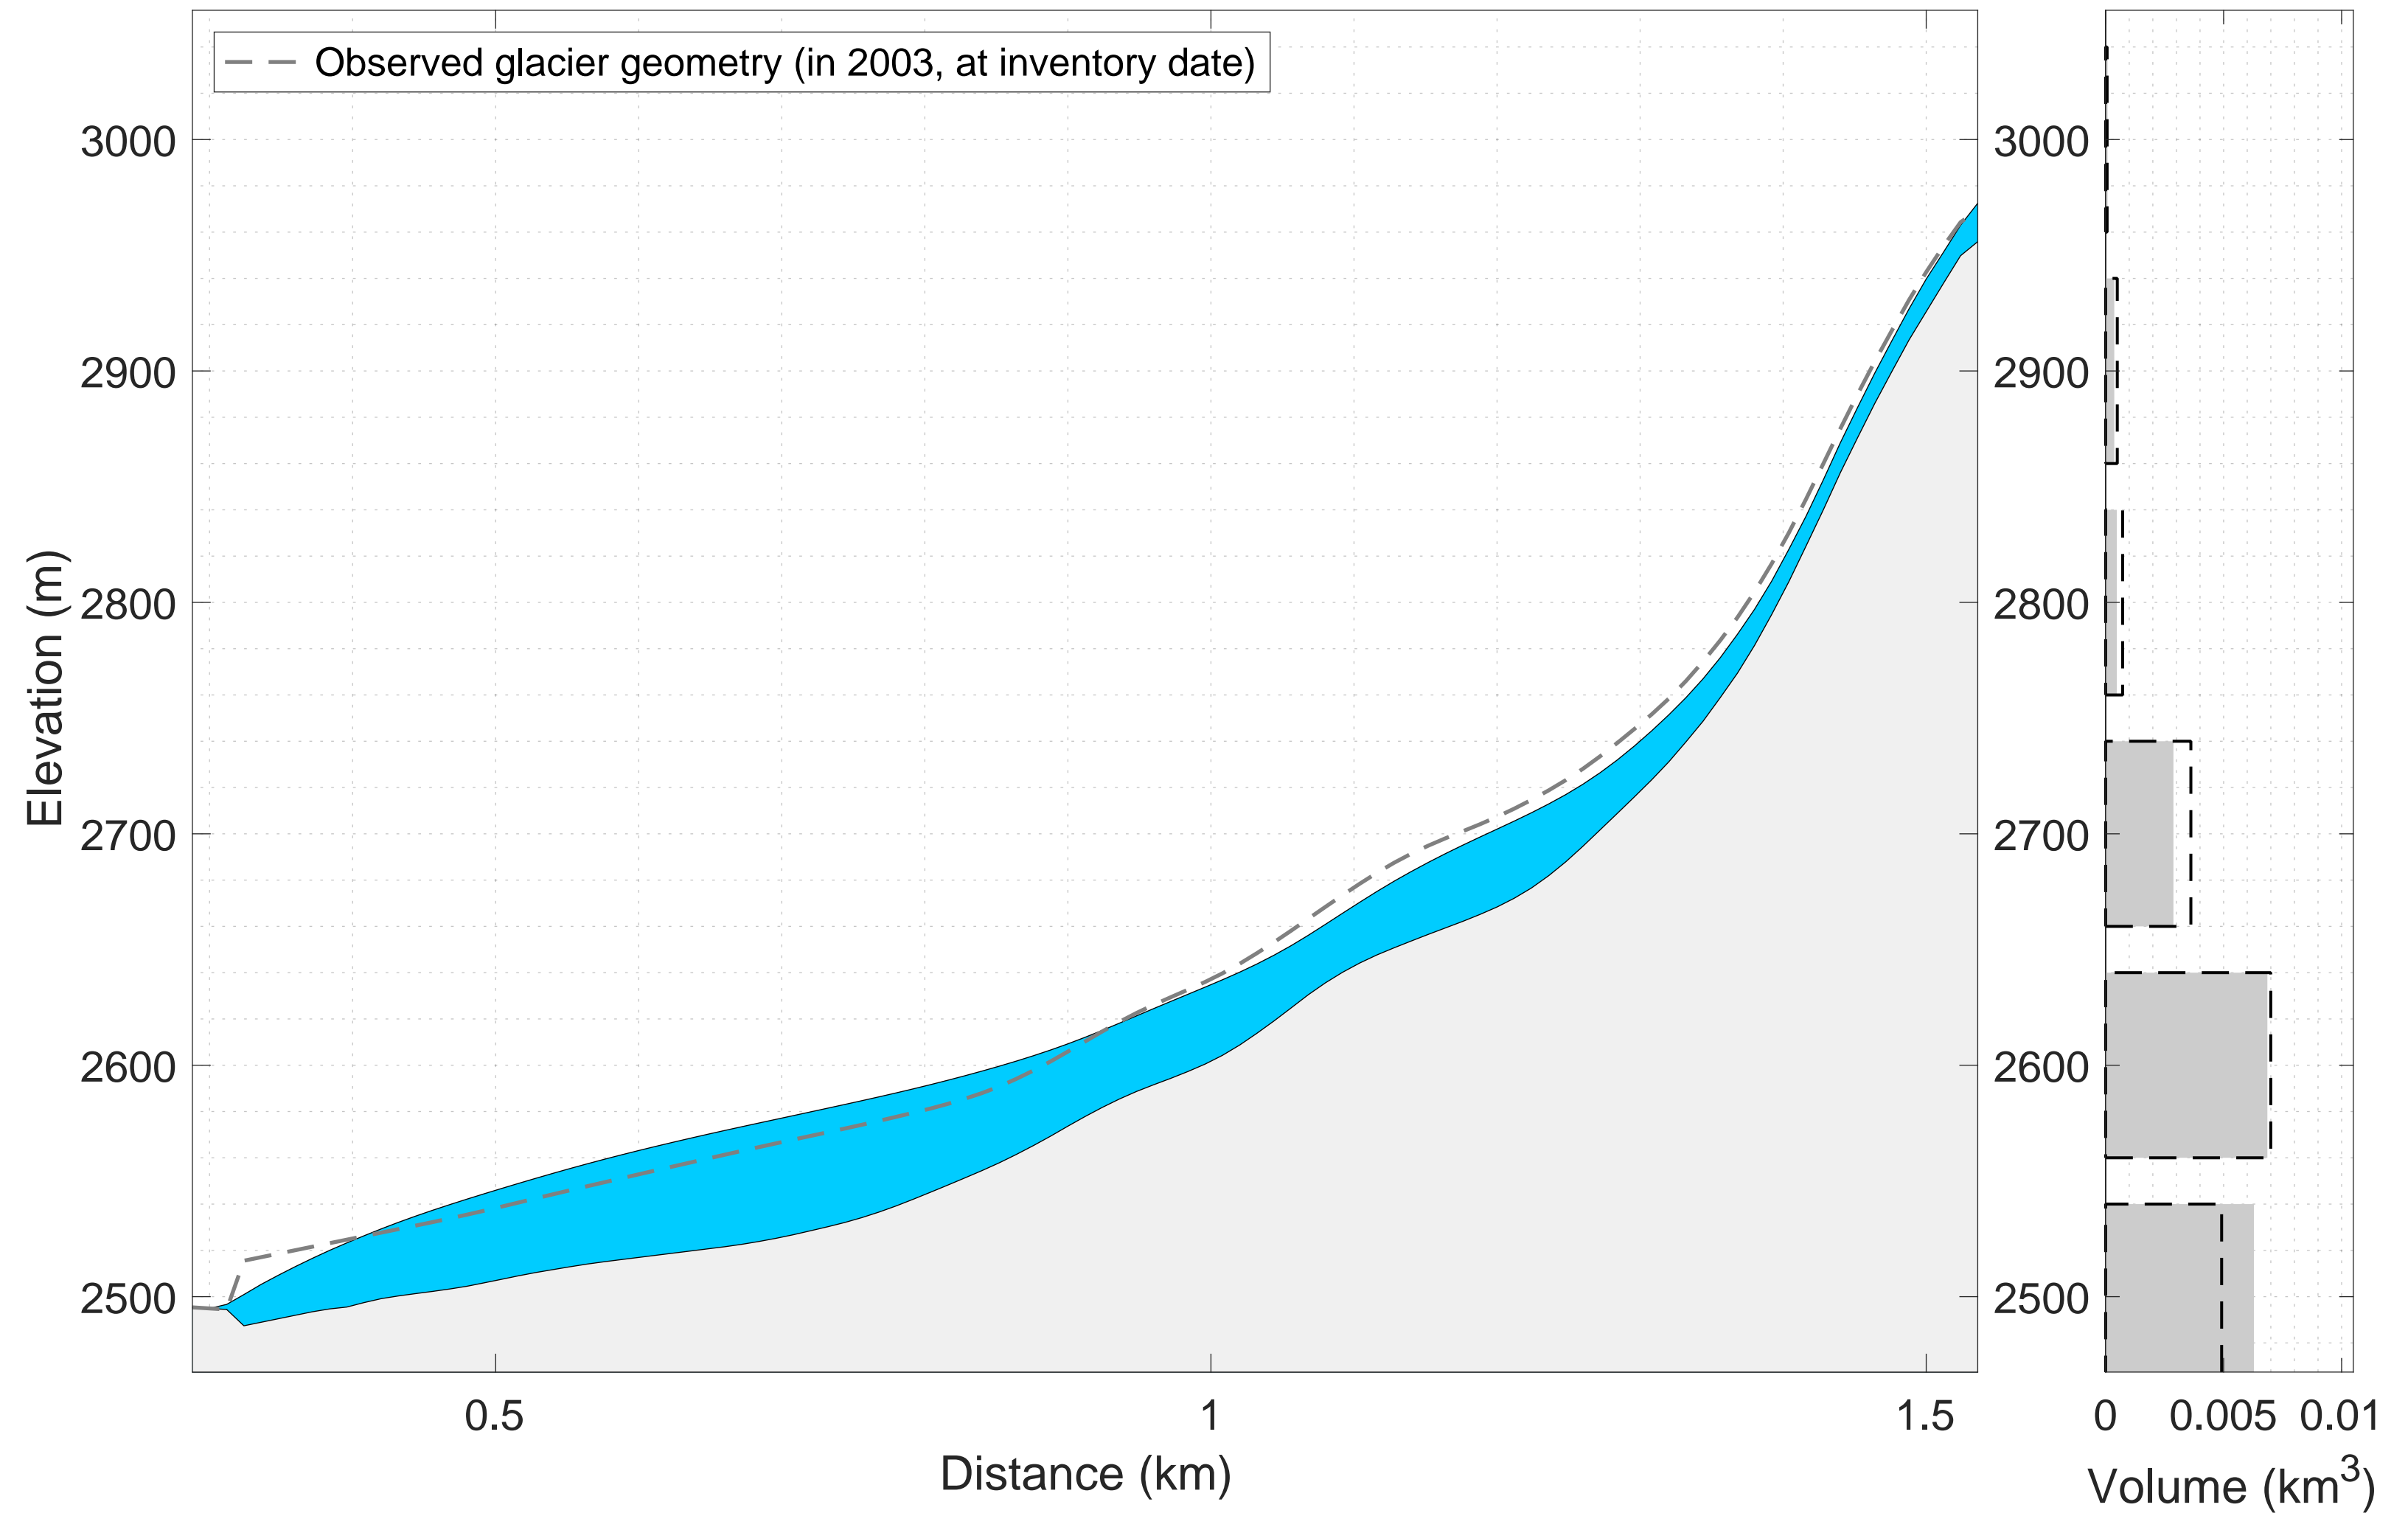

Supplement: Supplementary file 468 [file tc-13-1125-2019-supplement.zip]

**Modelled geometry (Glacier ID = 00943;  $A = 1.2141\text{e-}16 \text{ Pa}^{-3} \text{ a}^{-1}$ ;  $dx = 22 \text{ m}$ )**

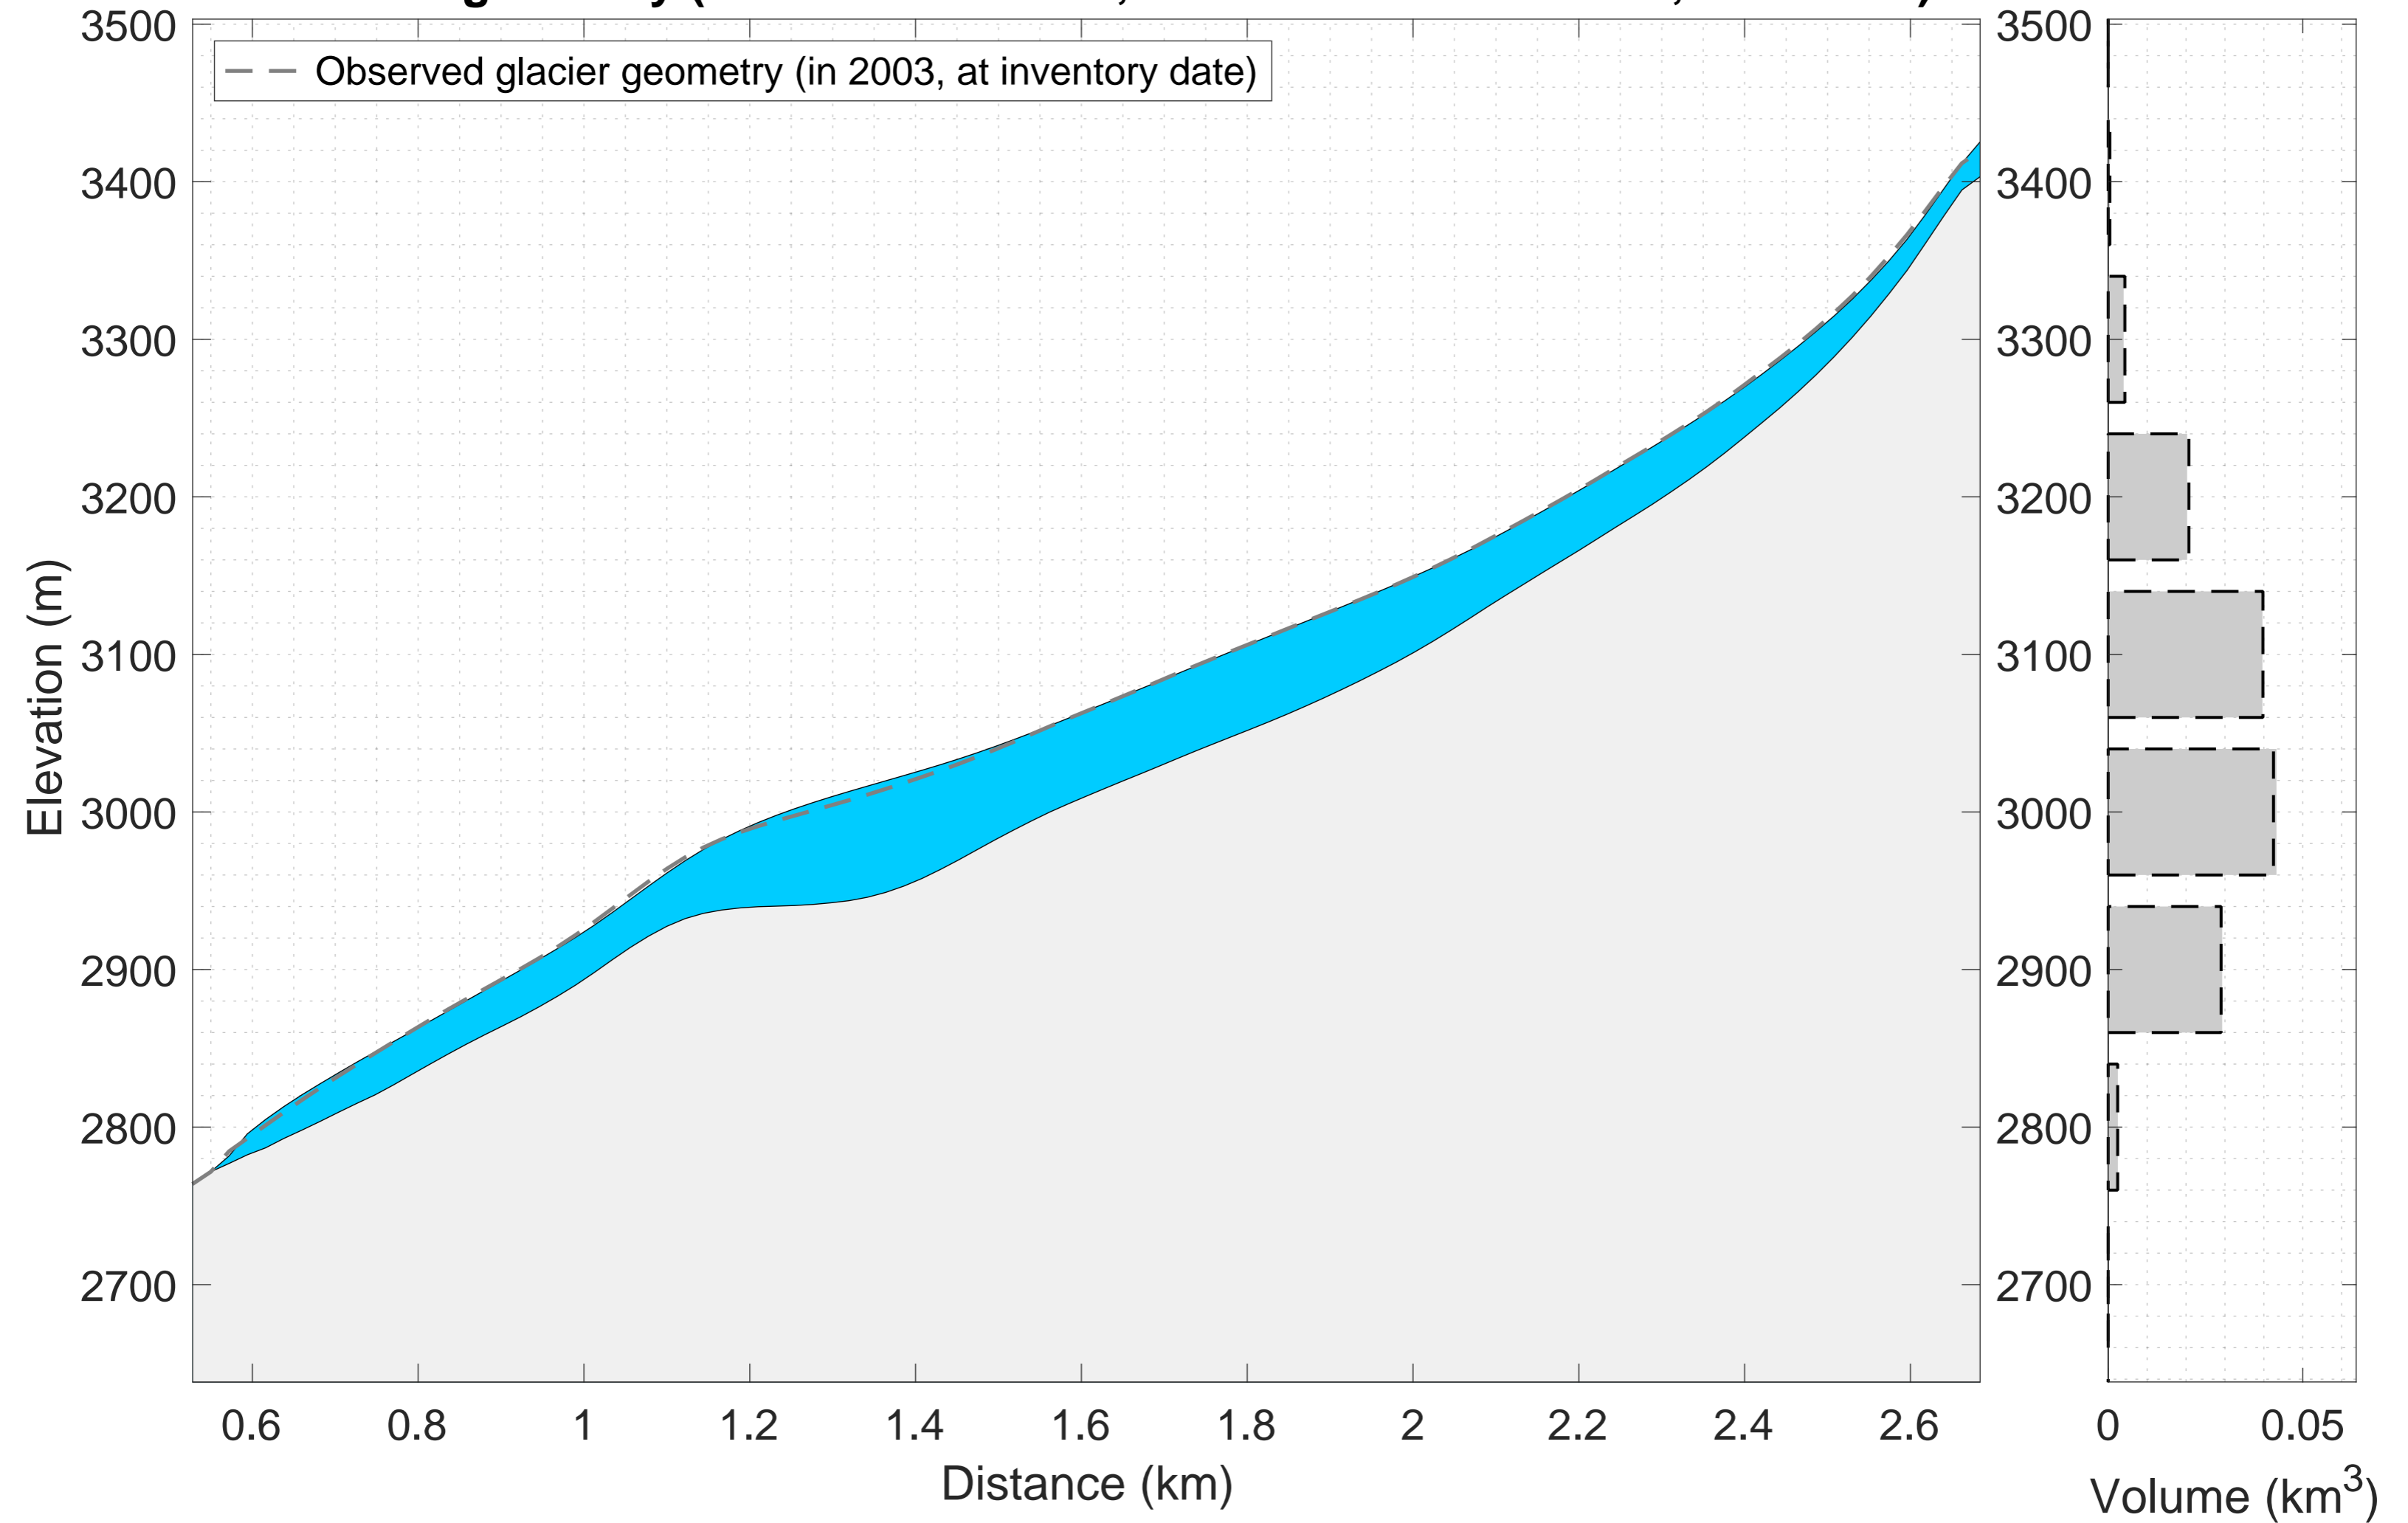

Supplement: Supplementary file 469 [file tc-13-1125-2019-supplement.zip]

**Modelled geometry (Glacier ID = 02072;  $A = 7.2797\text{e-}17 \text{ Pa}^{-3} \text{ a}^{-1}$ ;  $dx = 40 \text{ m}$ )**

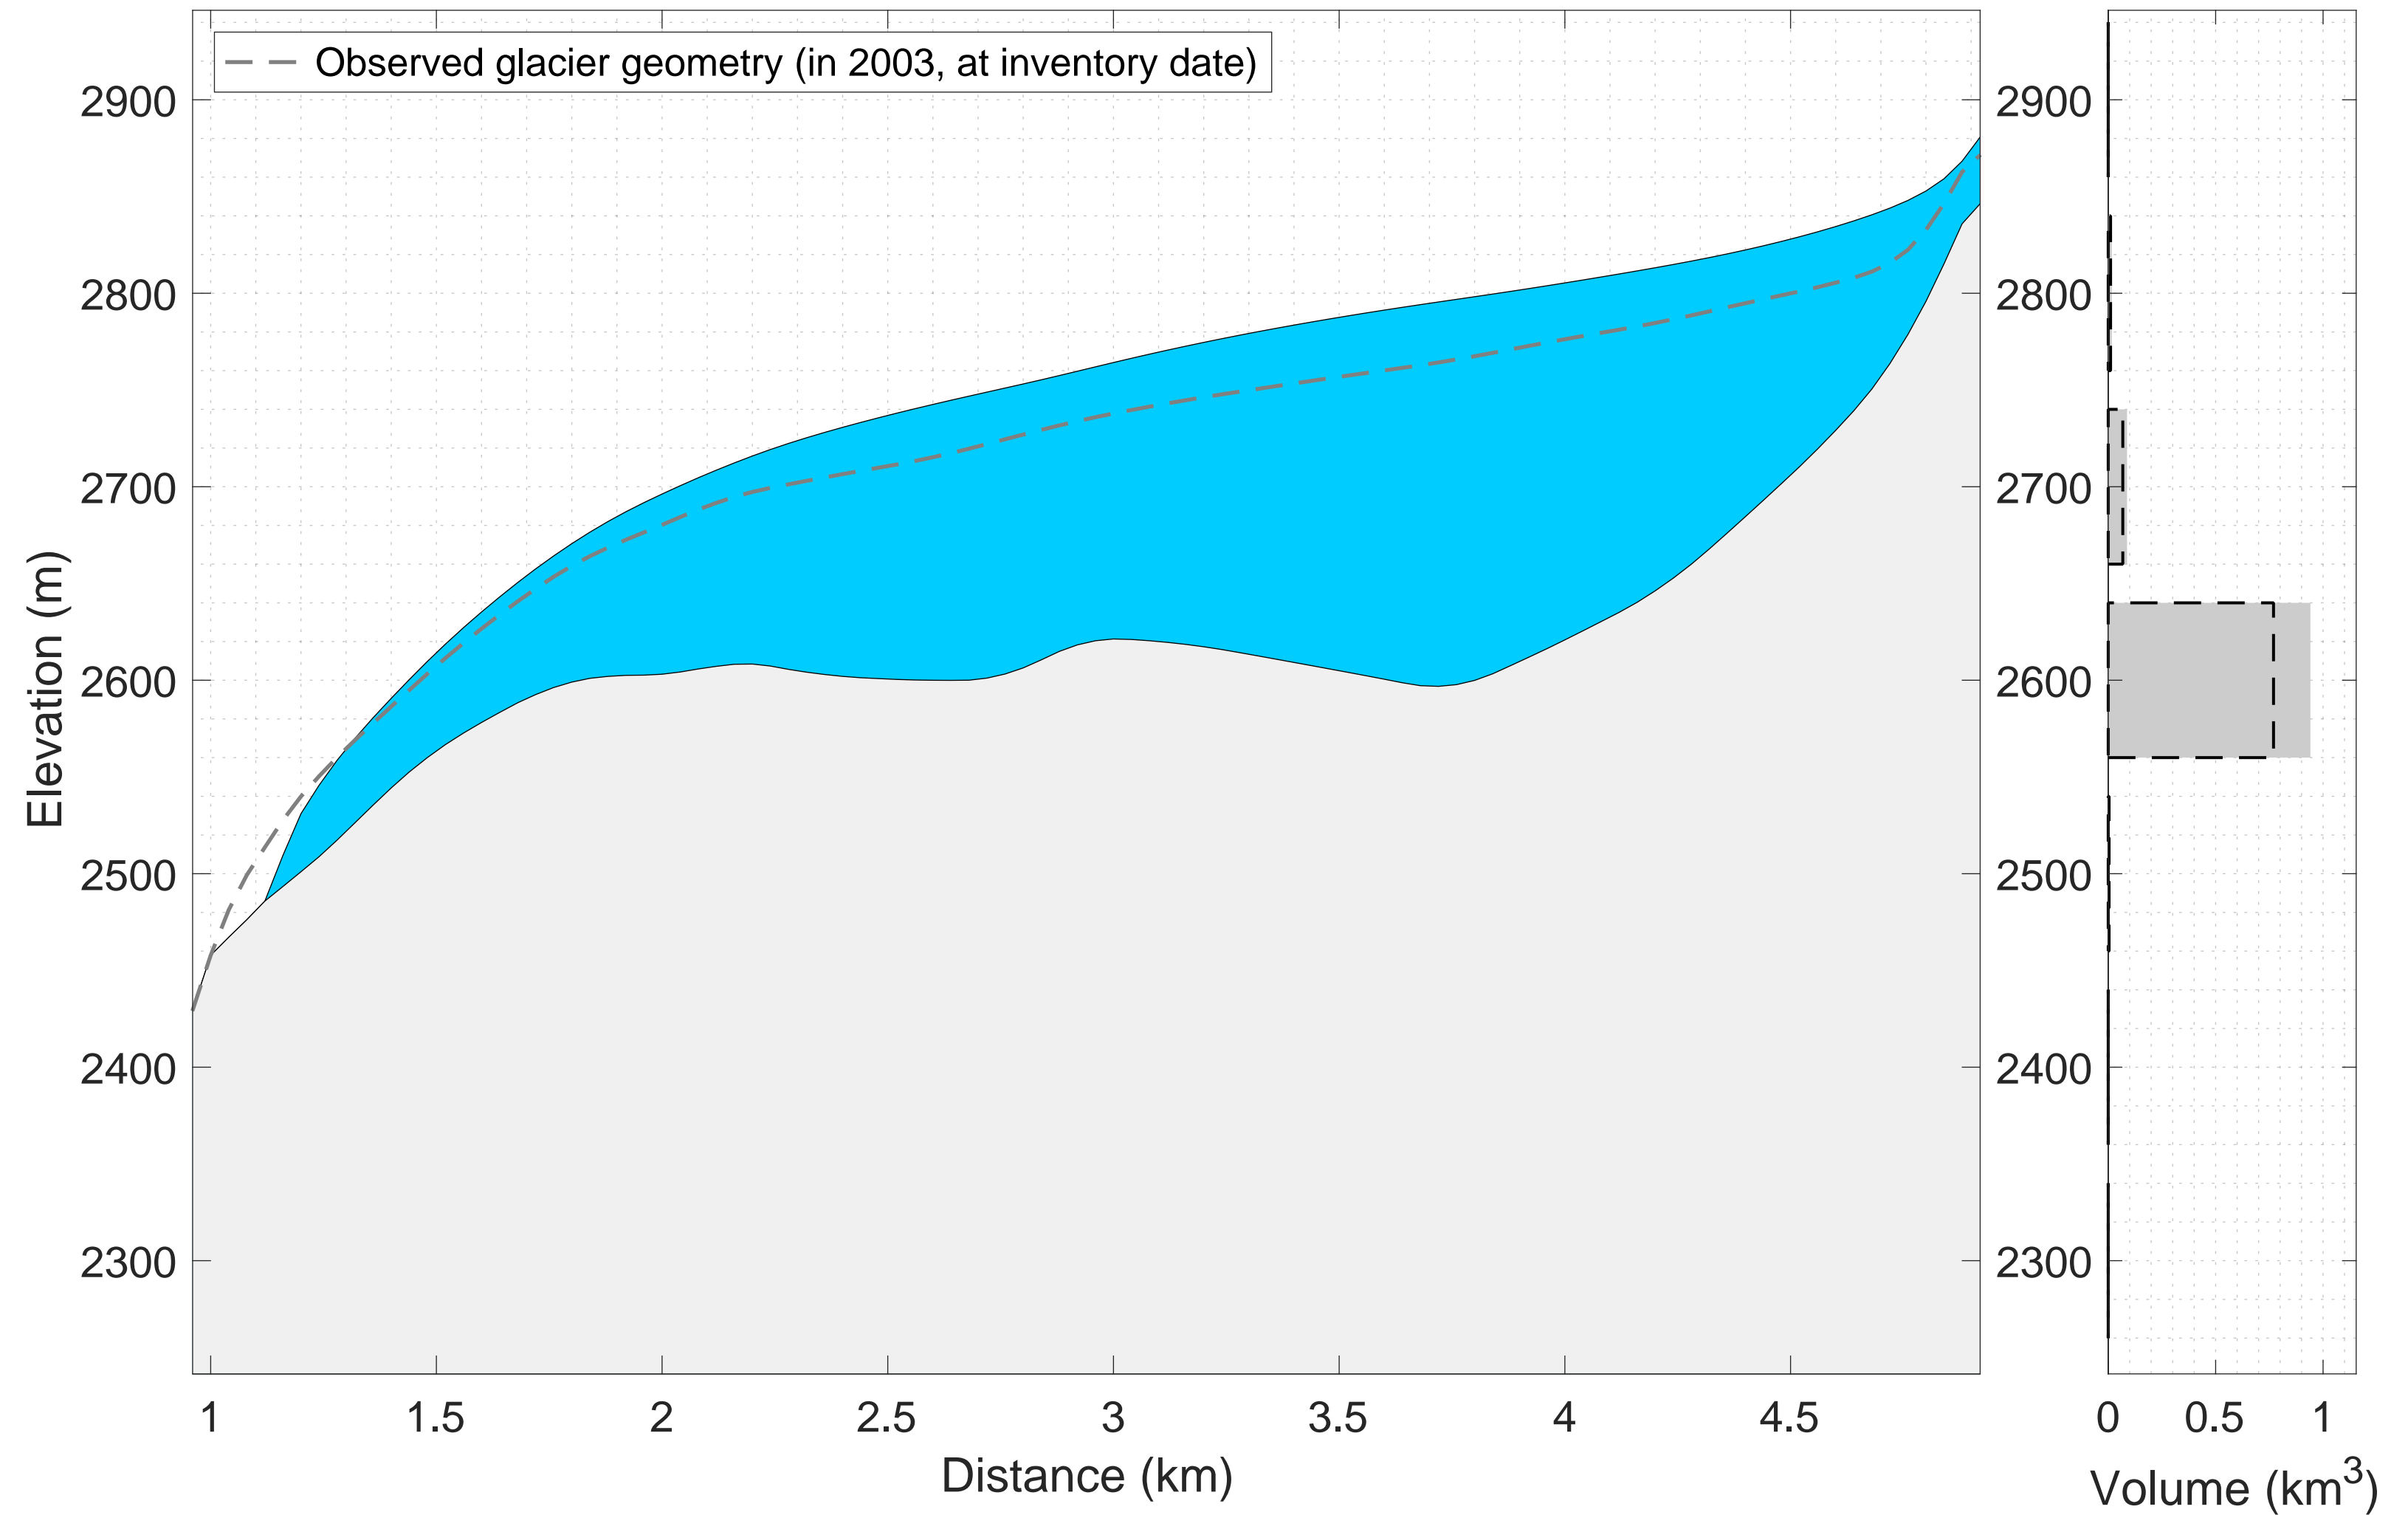

Supplement: Supplementary file 470 [file tc-13-1125-2019-supplement.zip]

**Modelled geometry (Glacier ID = 02566;  $A = 3.095\text{e-}16 \text{ Pa}^{-3} \text{ a}^{-1}$ ;  $dx = 28 \text{ m}$ )**

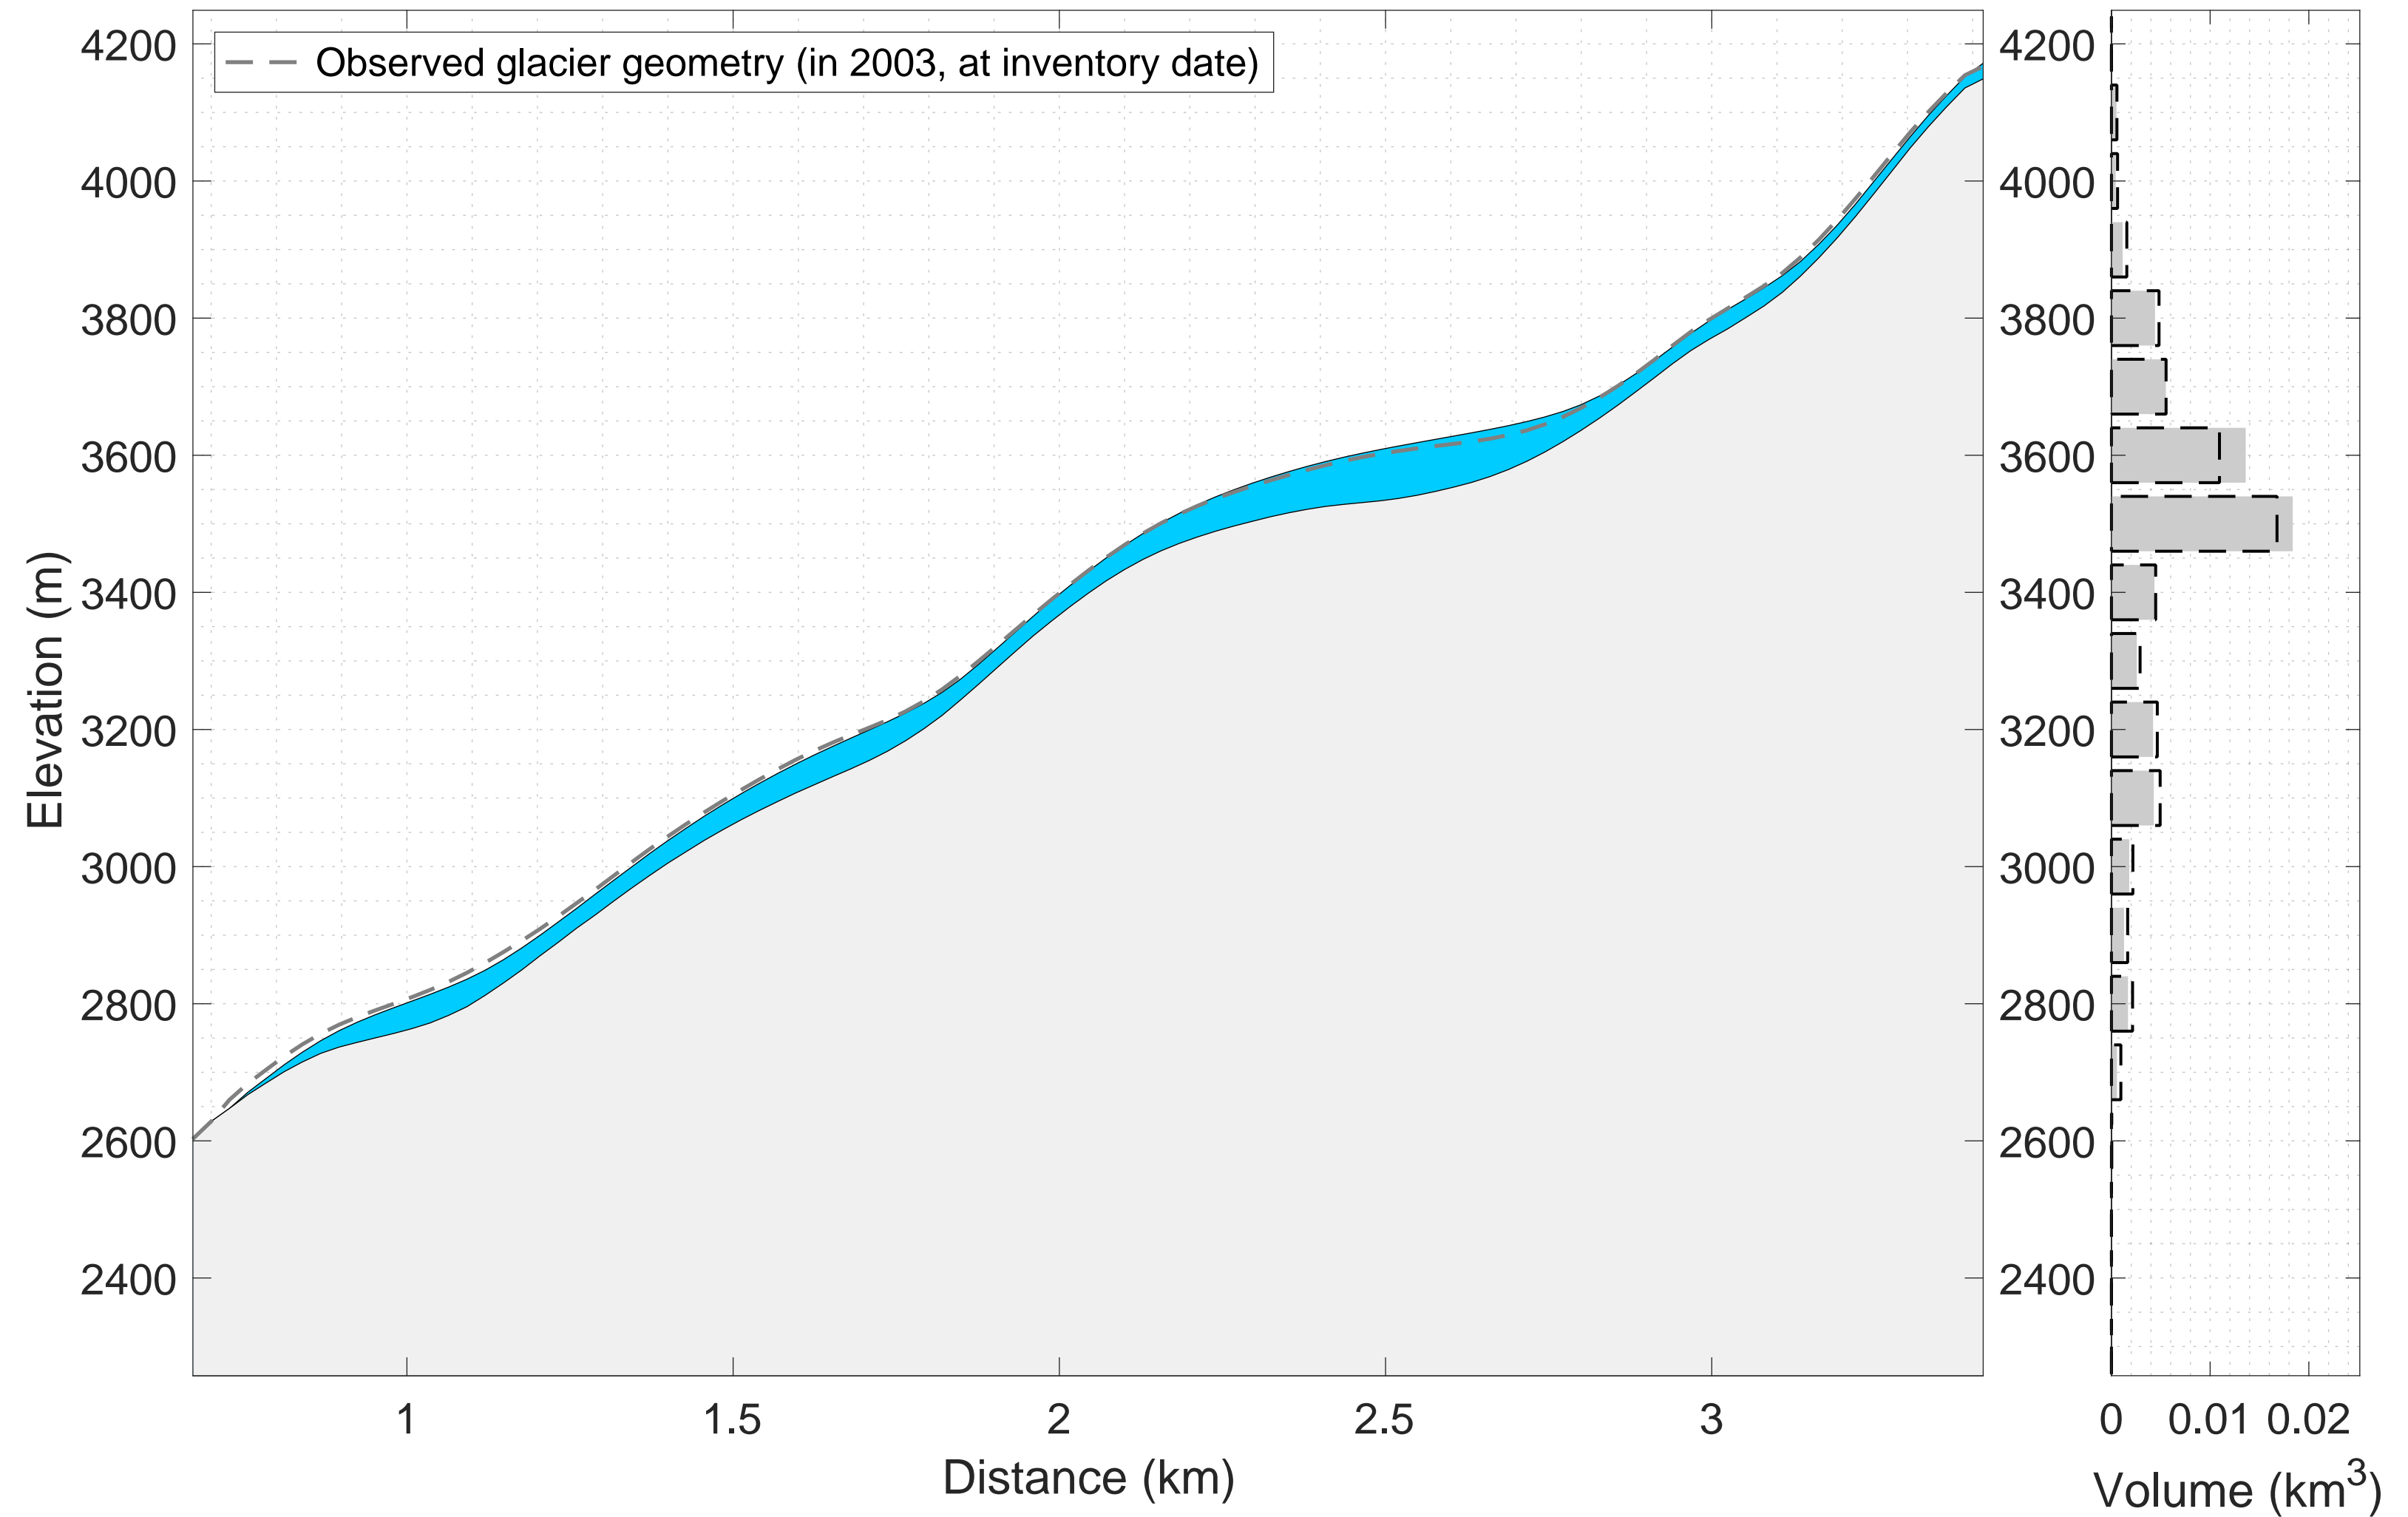

Supplement: Supplementary file 471 [file tc-13-1125-2019-supplement.zip]

**Modelled geometry (Glacier ID = 01935;  $A = 4.2289\text{e-}17 \text{ Pa}^{-3} \text{ a}^{-1}$ ;  $dx = 16 \text{ m}$ )**

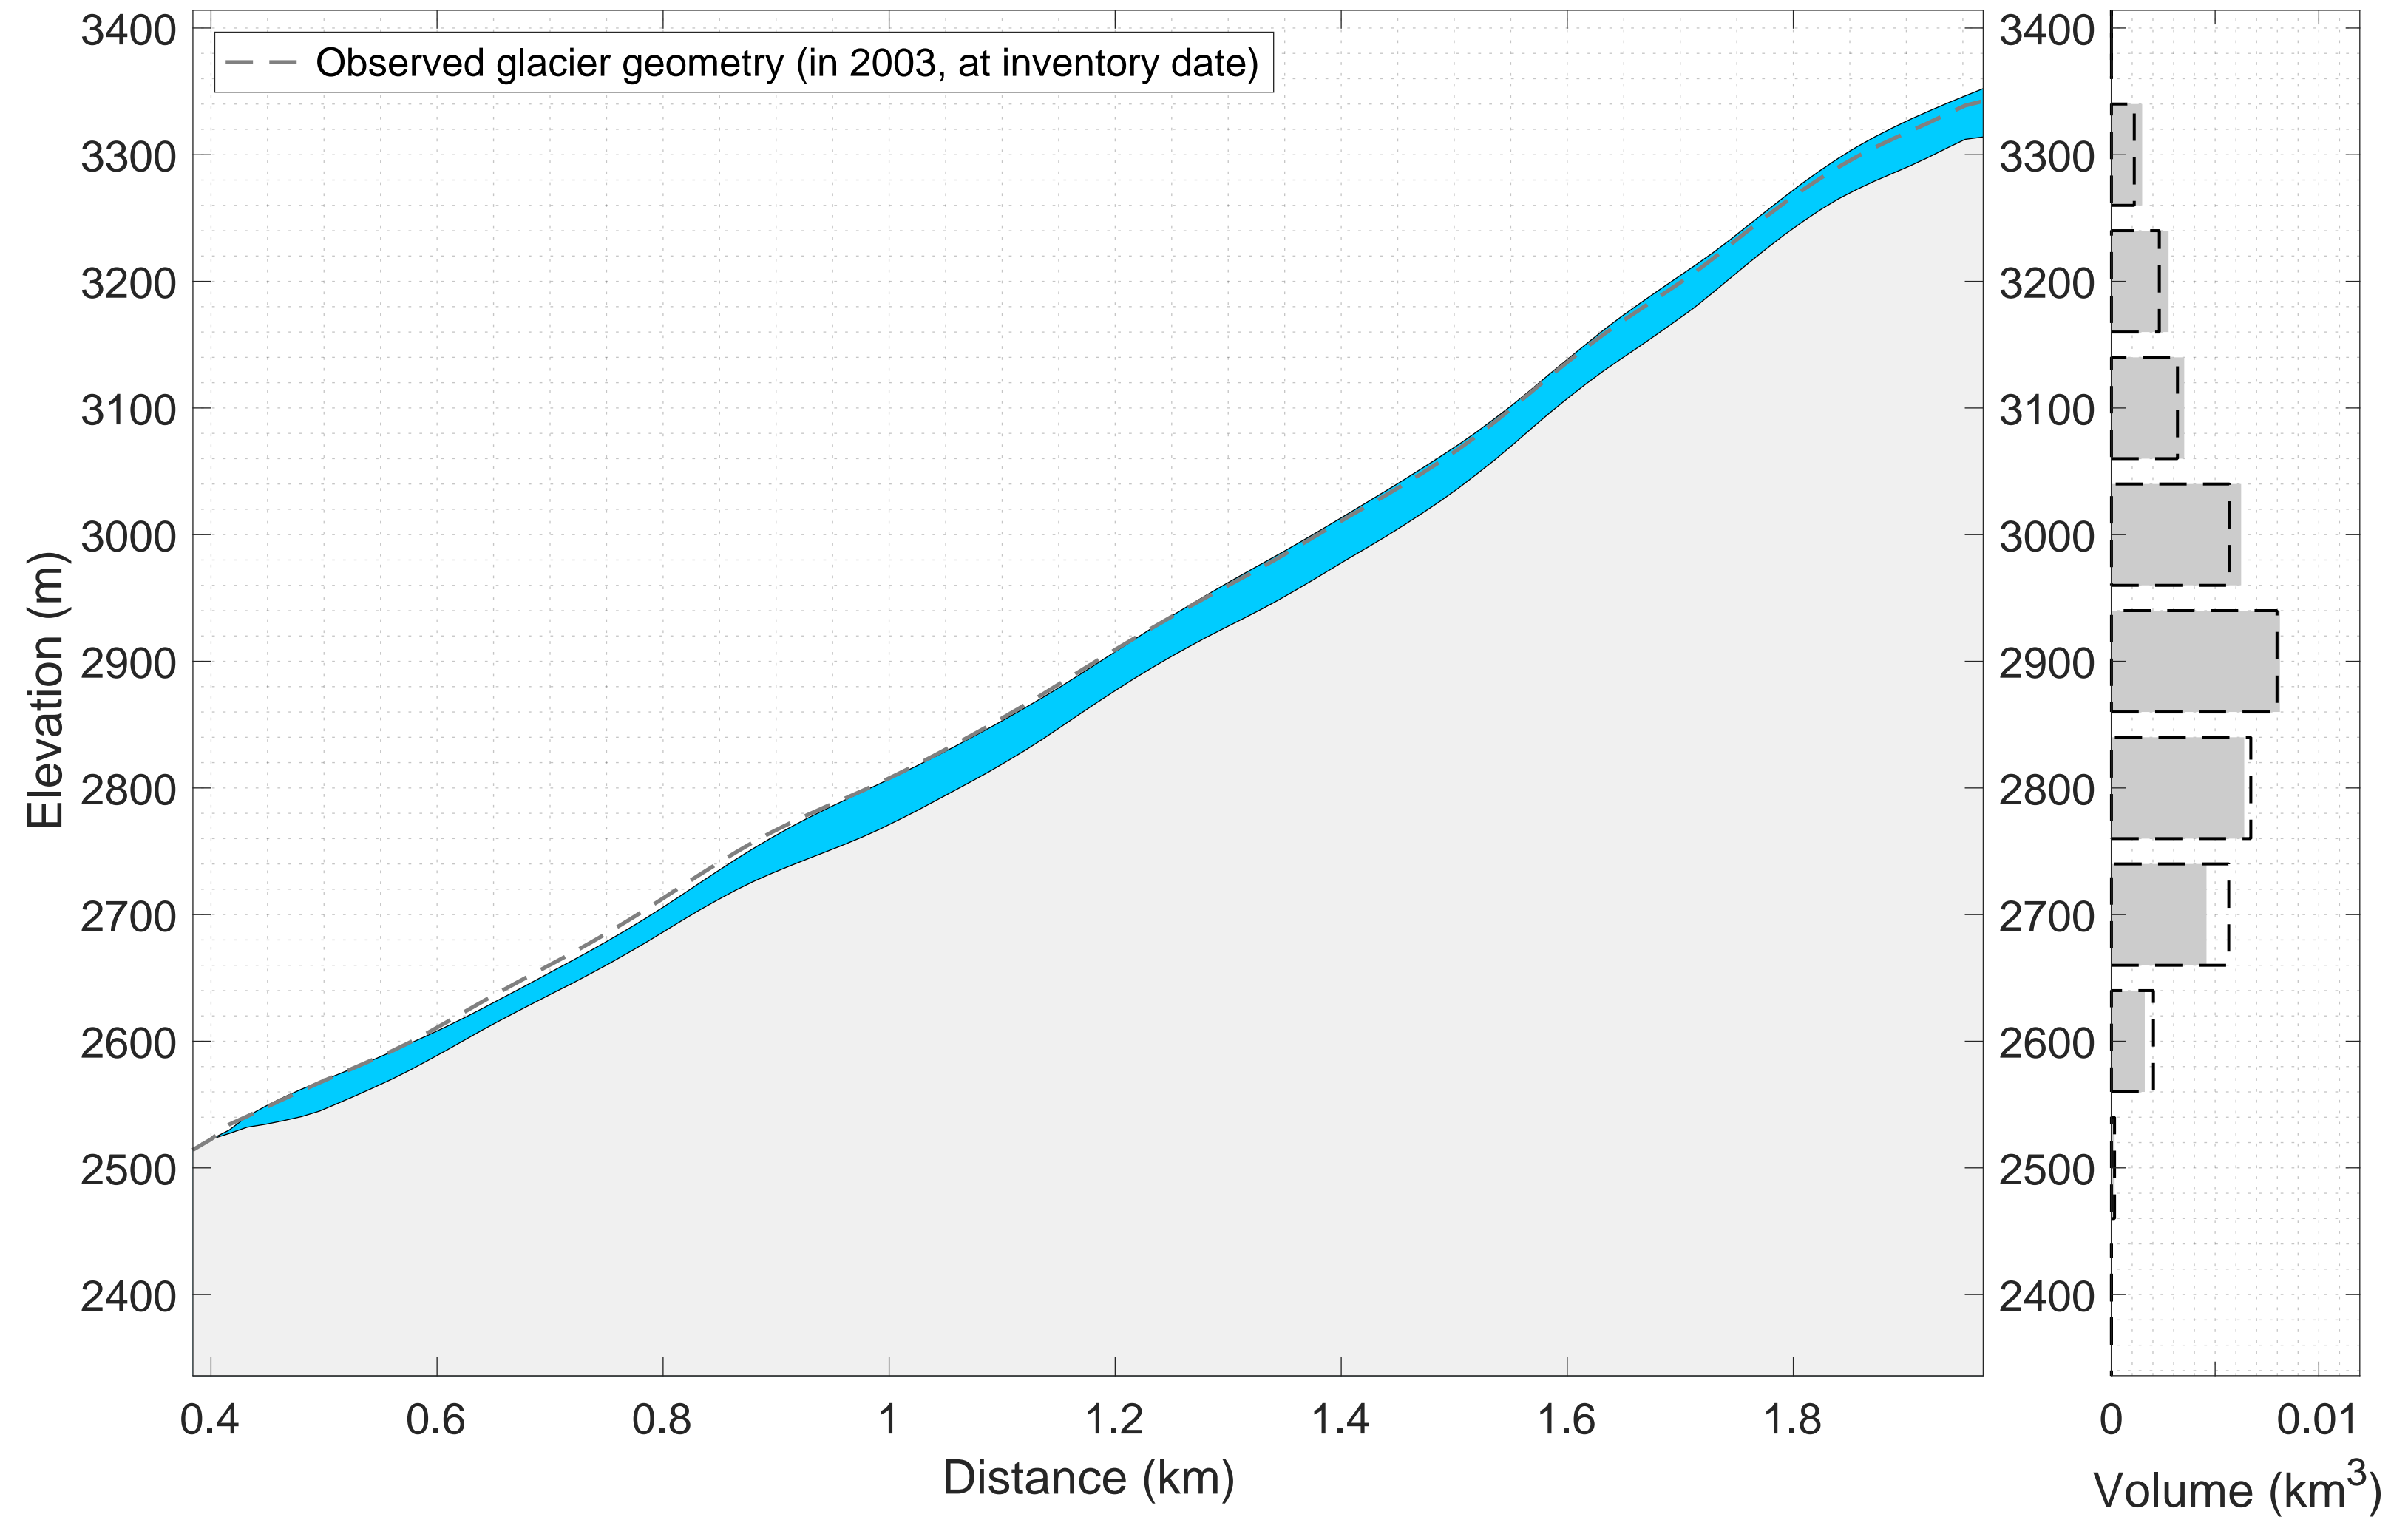

Supplement: Supplementary file 472 [file tc-13-1125-2019-supplement.zip]

**Modelled geometry (Glacier ID = 01765;  $A = 3.6019\text{e-}17 \text{ Pa}^{-3} \text{ a}^{-1}$ ;  $dx = 17 \text{ m}$ )**

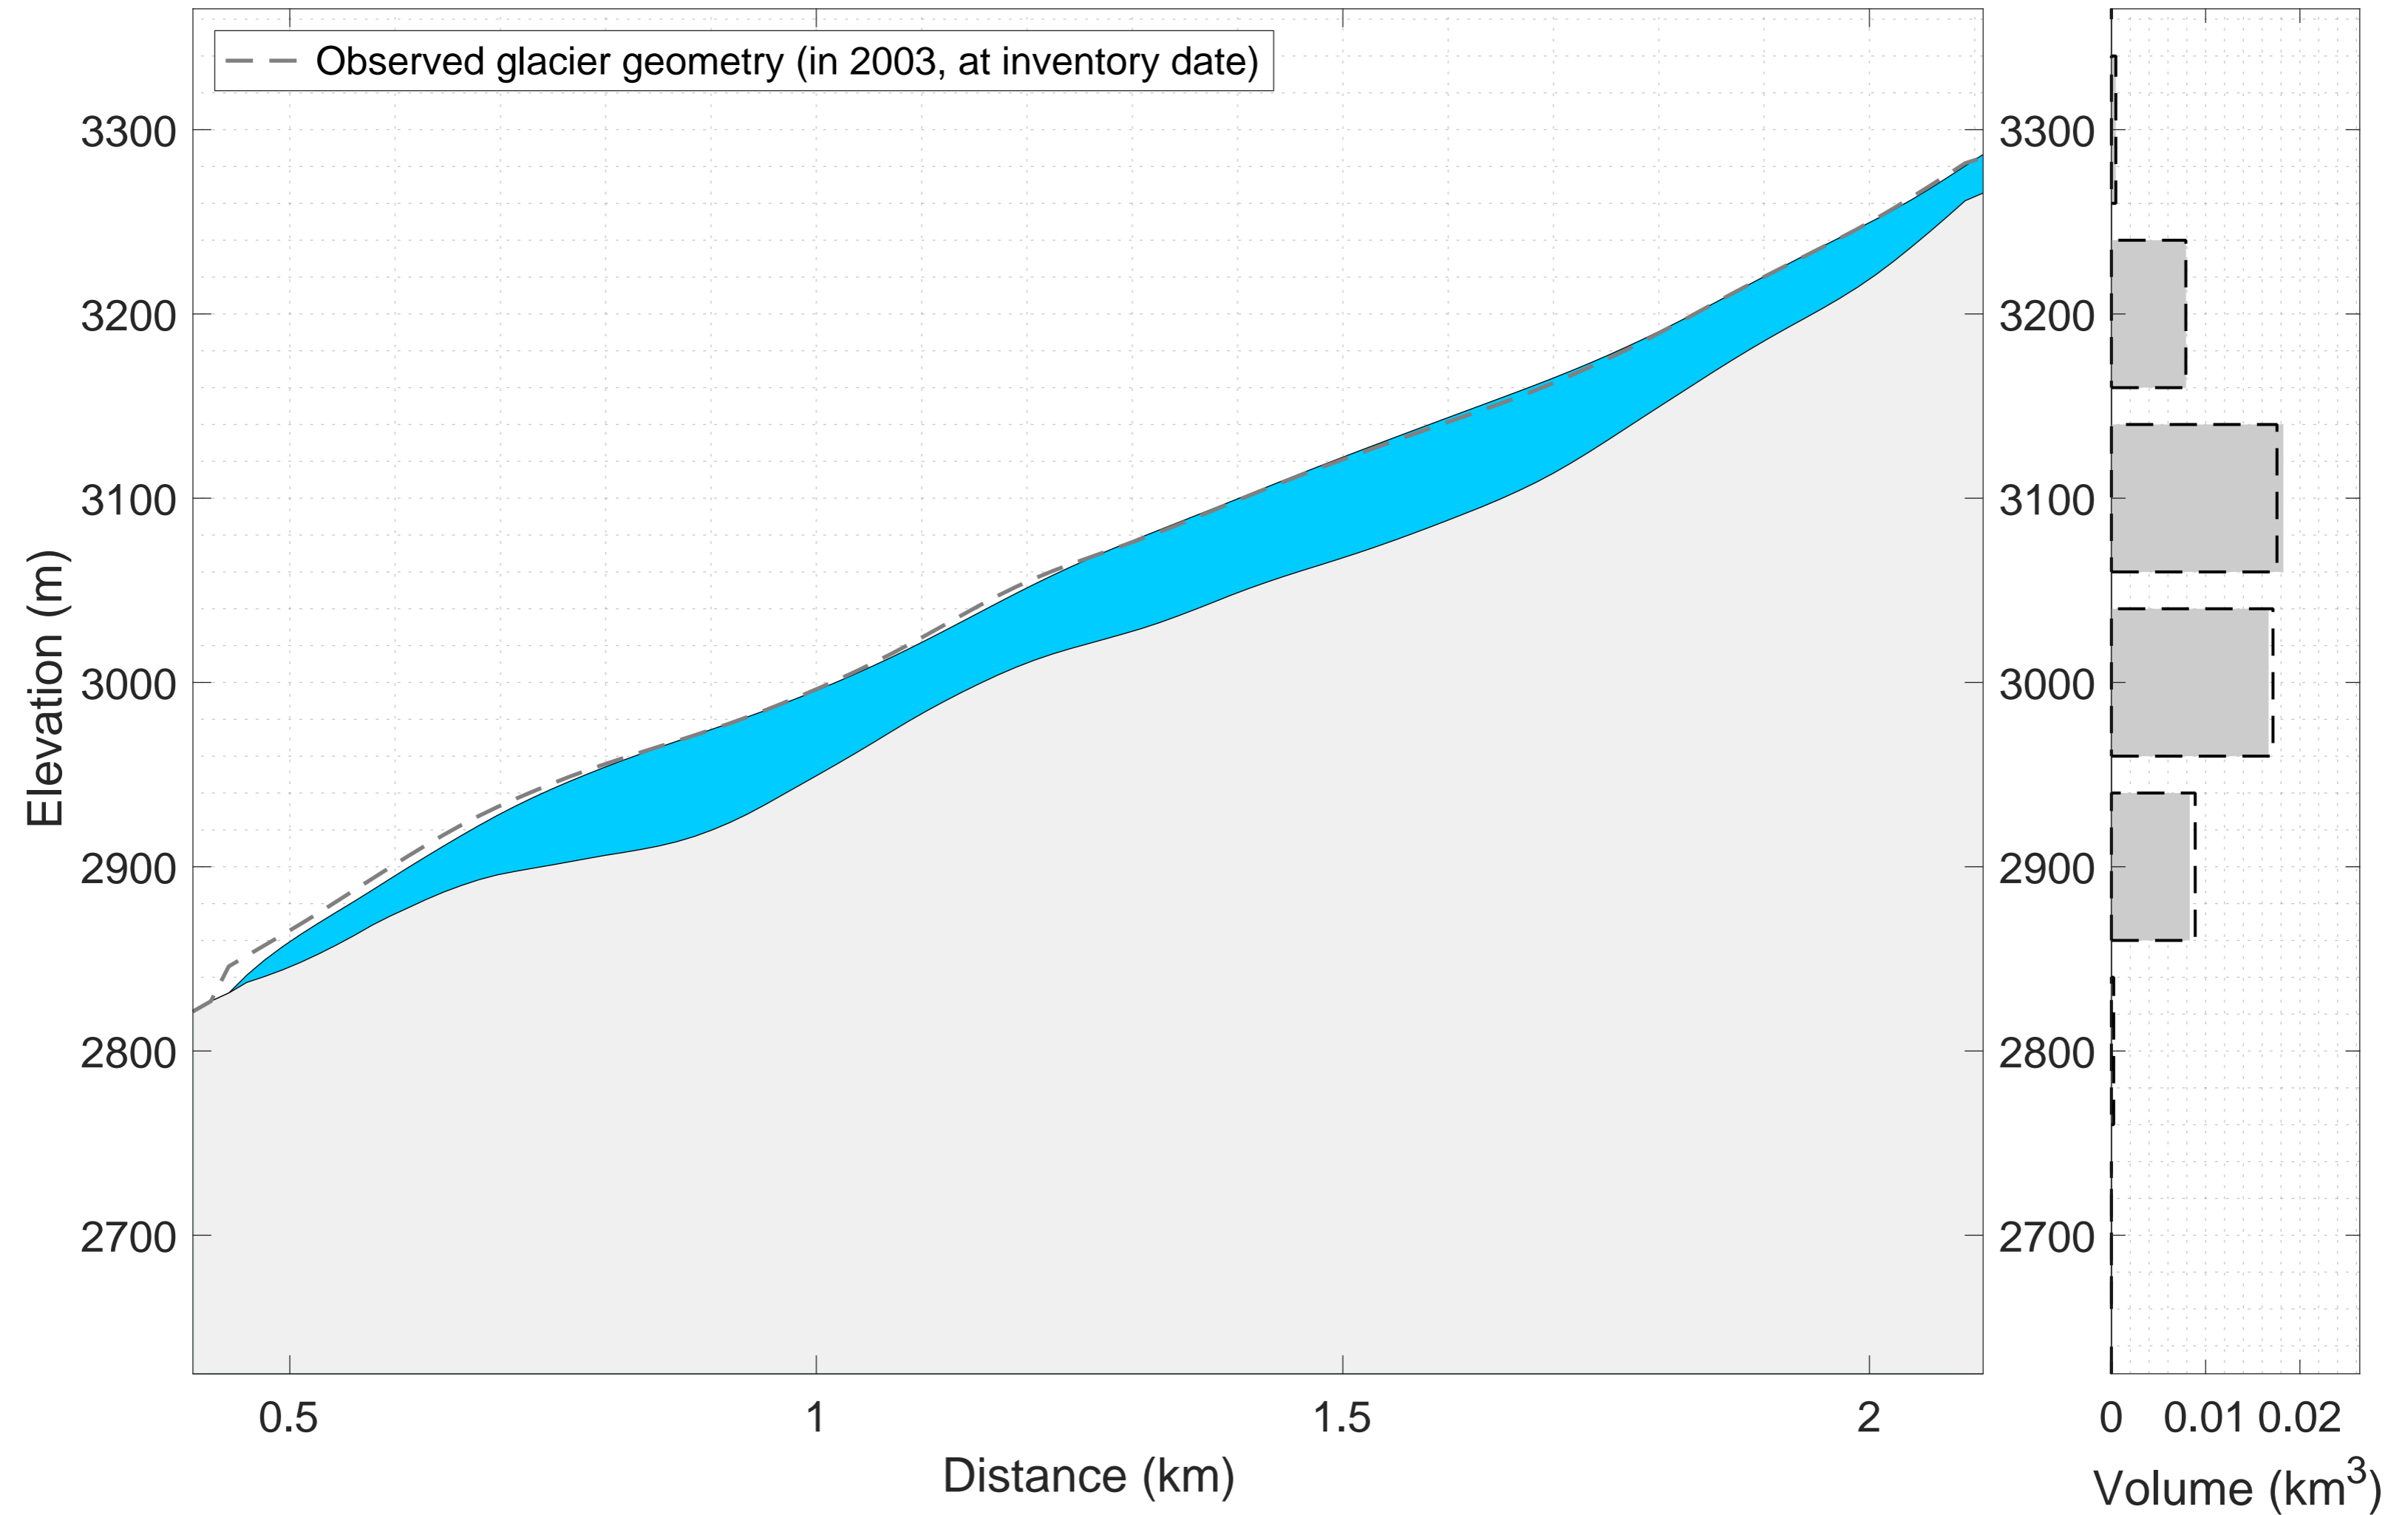

Supplement: Supplementary file 473 [file tc-13-1125-2019-supplement.zip]

**Modelled geometry (Glacier ID = 03669;  $A = 1.0229\text{e-}16 \text{ Pa}^{-3} \text{ a}^{-1}$ ;  $dx = 17 \text{ m}$ )**

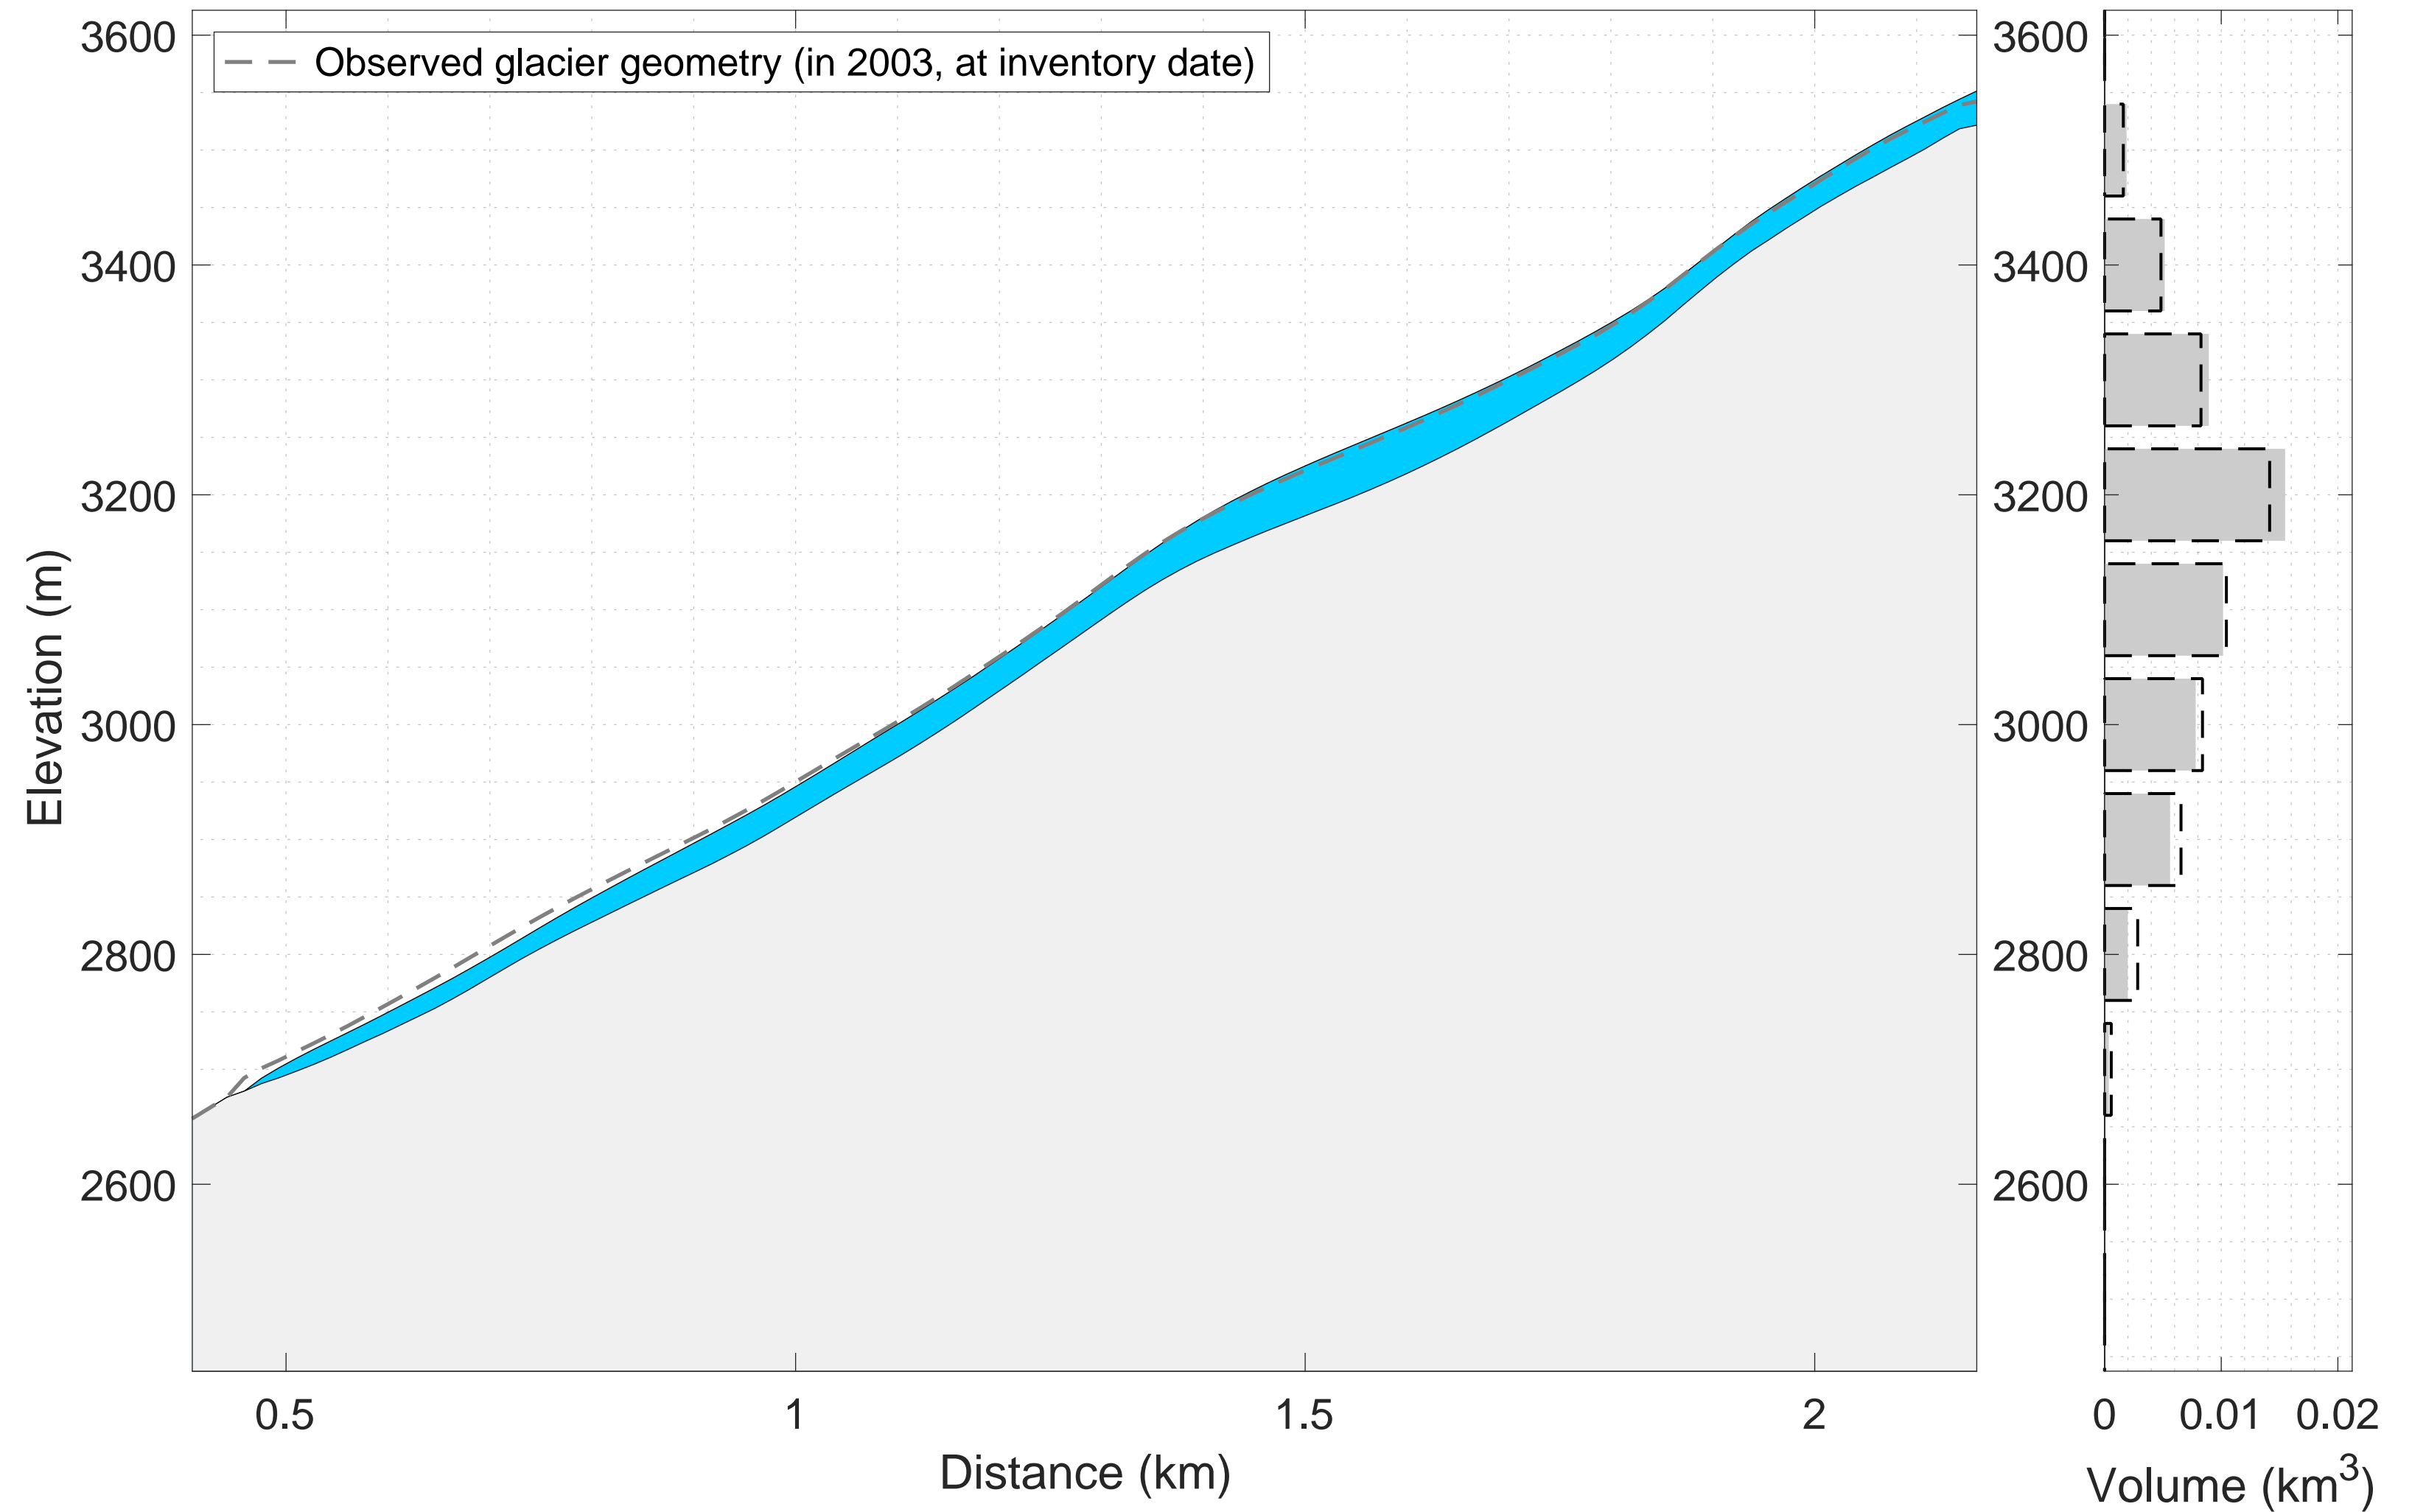

Supplement: Supplementary file 474 [file tc-13-1125-2019-supplement.zip]

**Modelled geometry (Glacier ID = 00663;  $A = 1.7174\text{e-}16 \text{ Pa}^{-3} \text{ a}^{-1}$ ;  $dx = 19 \text{ m}$ )**

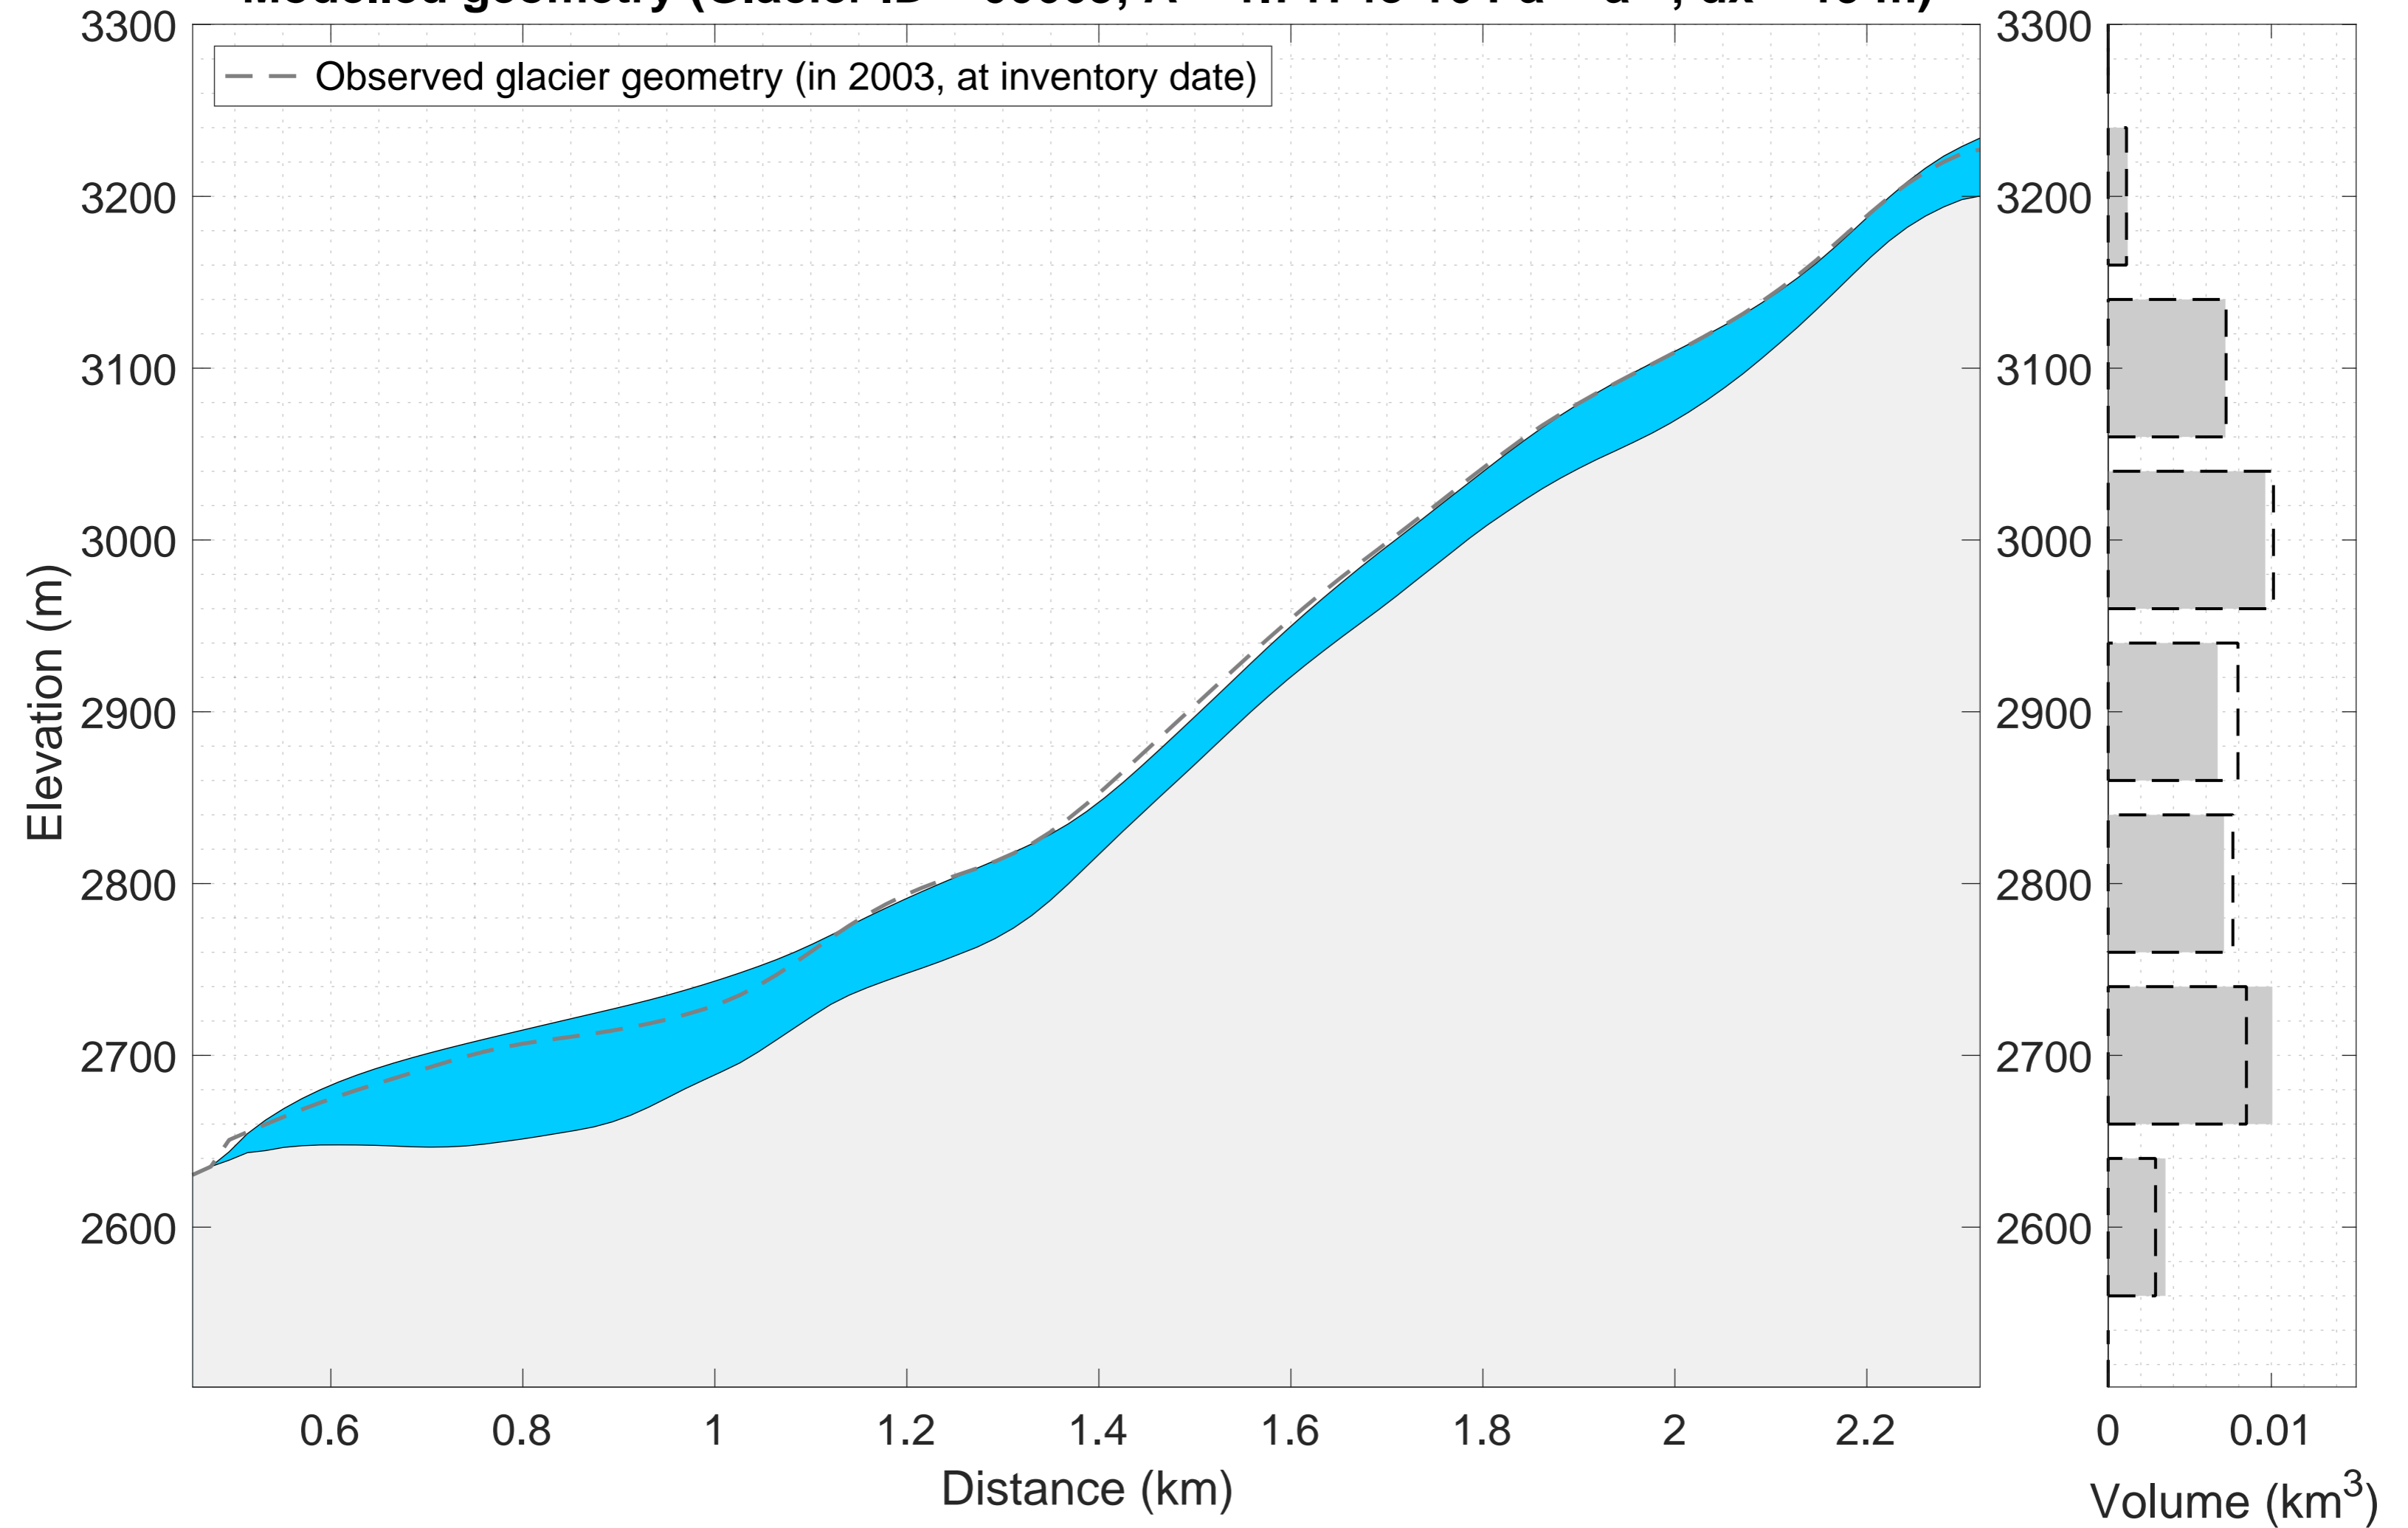

Supplement: Supplementary file 475 [file tc-13-1125-2019-supplement.zip]

**Modelled geometry (Glacier ID = 00072;  $A = 1.8652\text{e-}16 \text{ Pa}^{-3} \text{ a}^{-1}$ ;  $dx = 16 \text{ m}$ )**

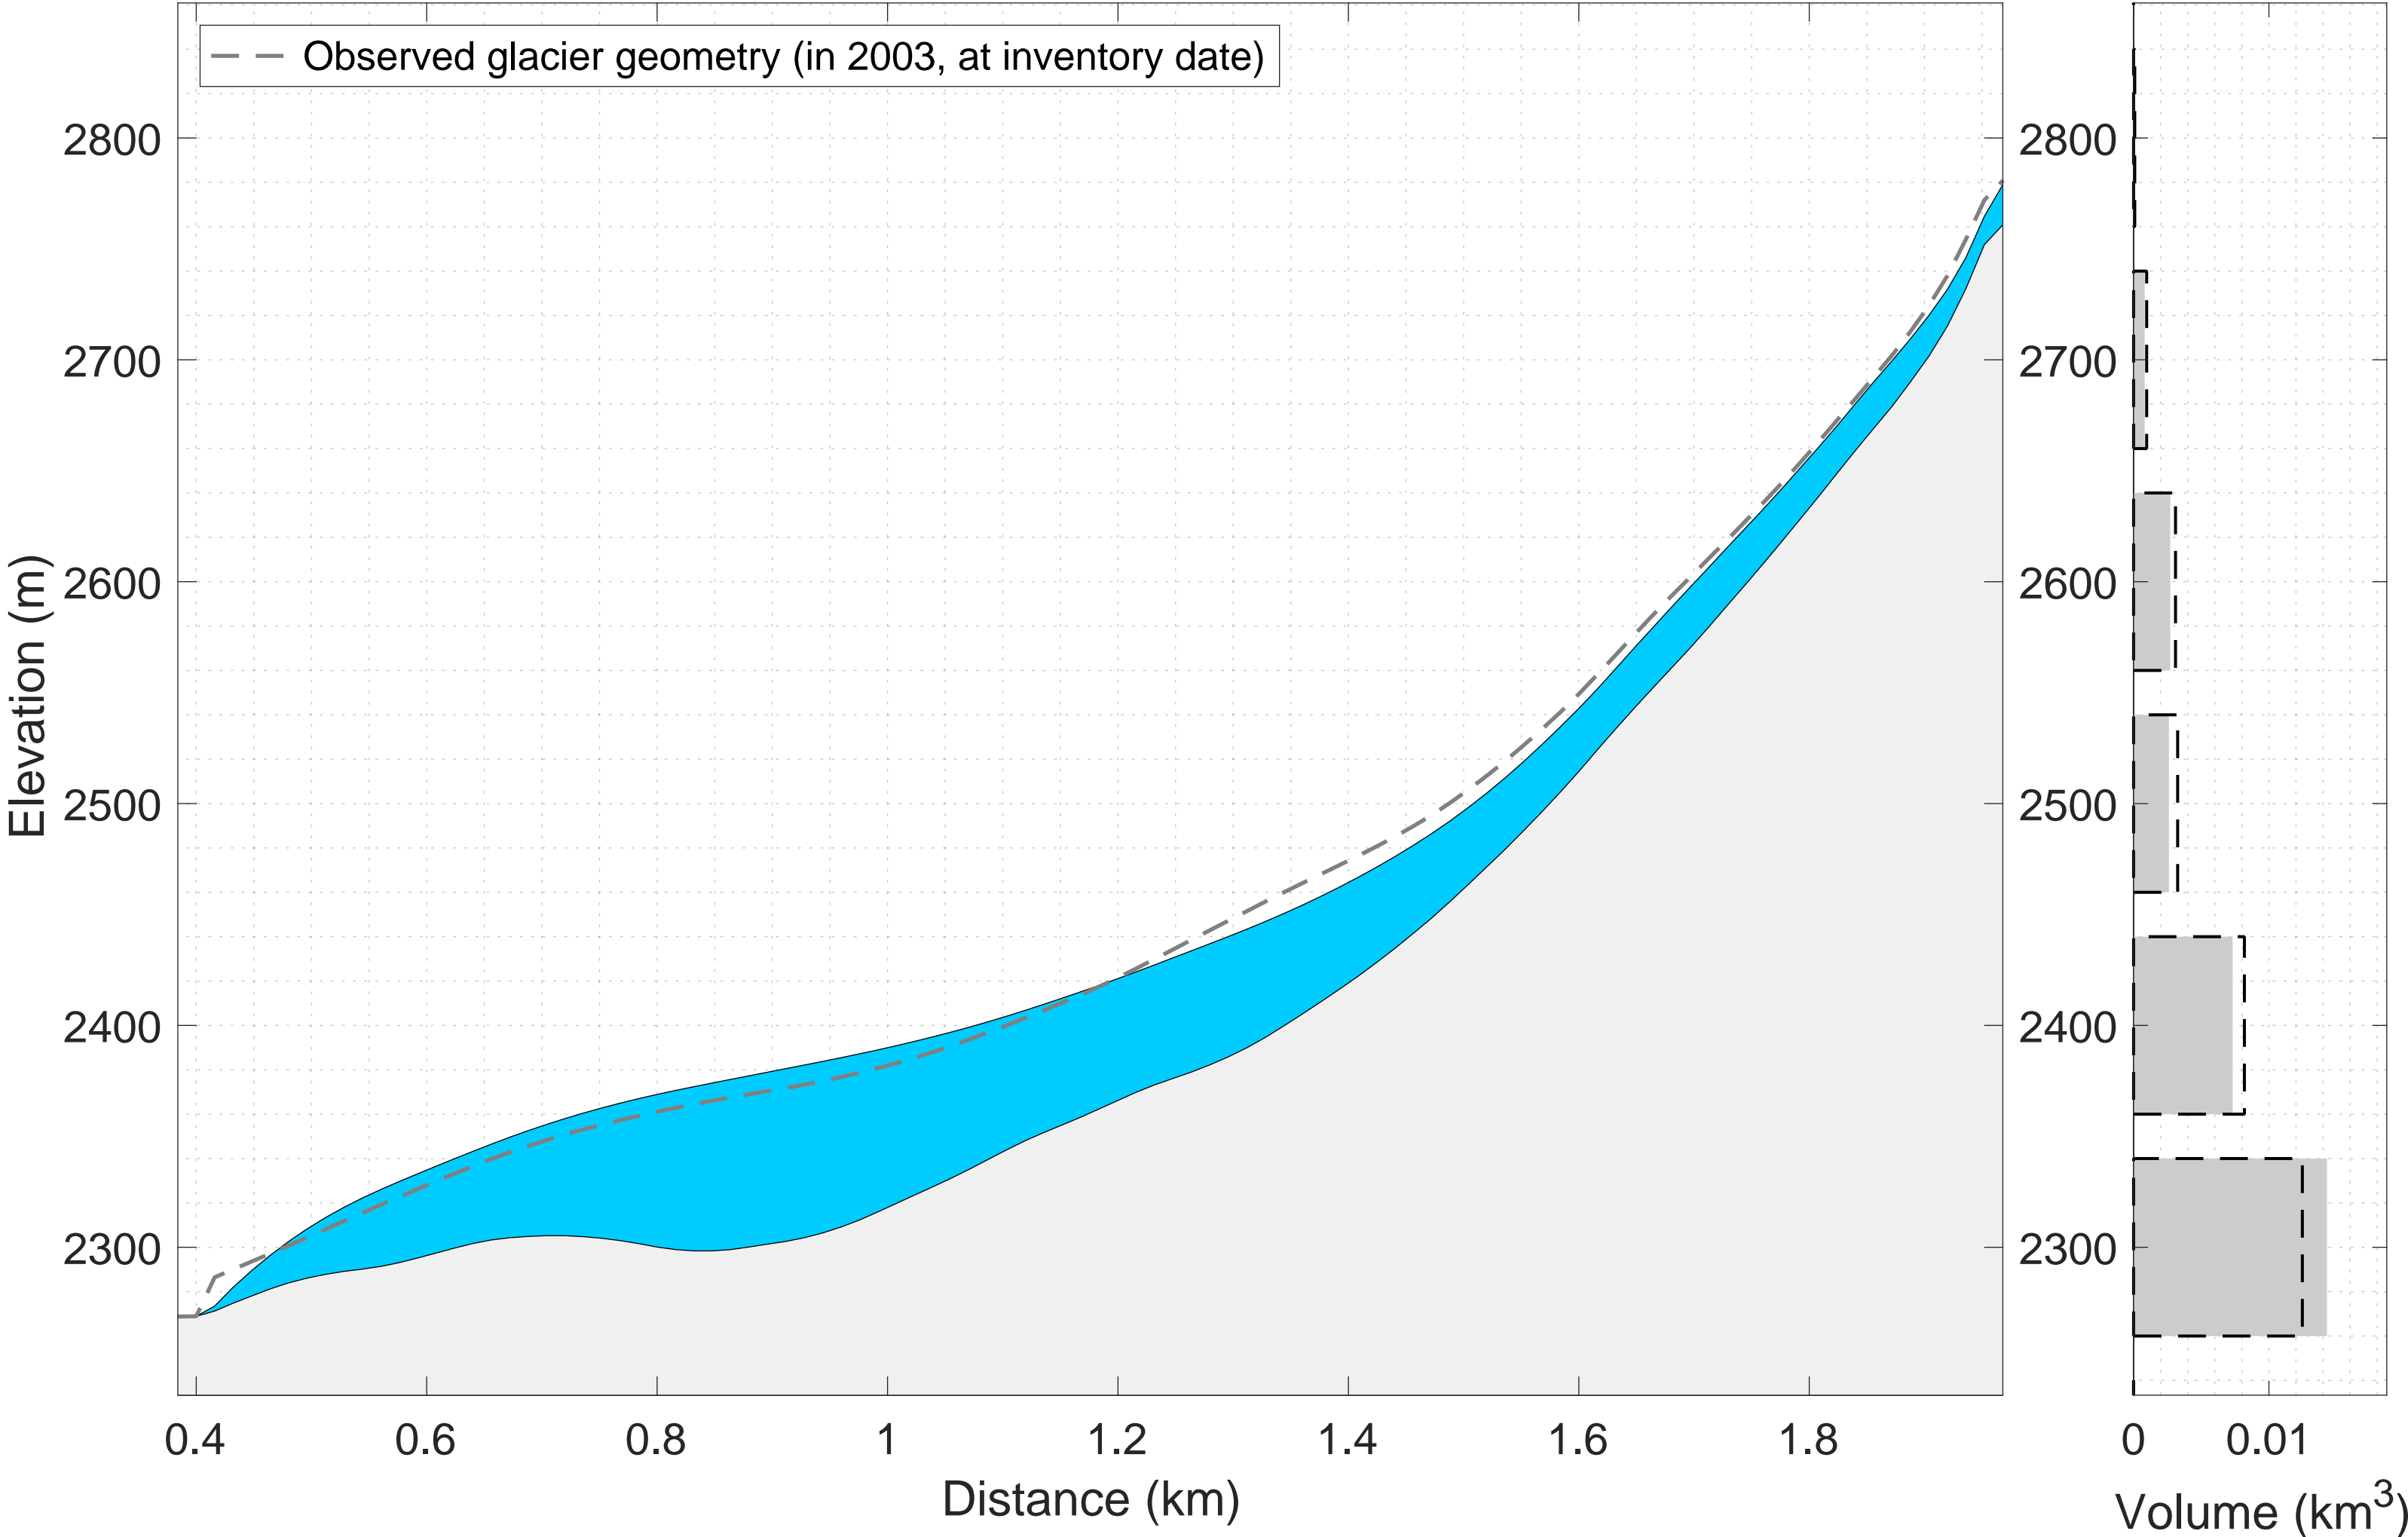

Supplement: Supplementary file 476 [file tc-13-1125-2019-supplement.zip]

**Modelled geometry (Glacier ID = 02706;  $A = 1.724\text{e-}16 \text{ Pa}^{-3} \text{ a}^{-1}$ ;  $dx = 15 \text{ m}$ )**

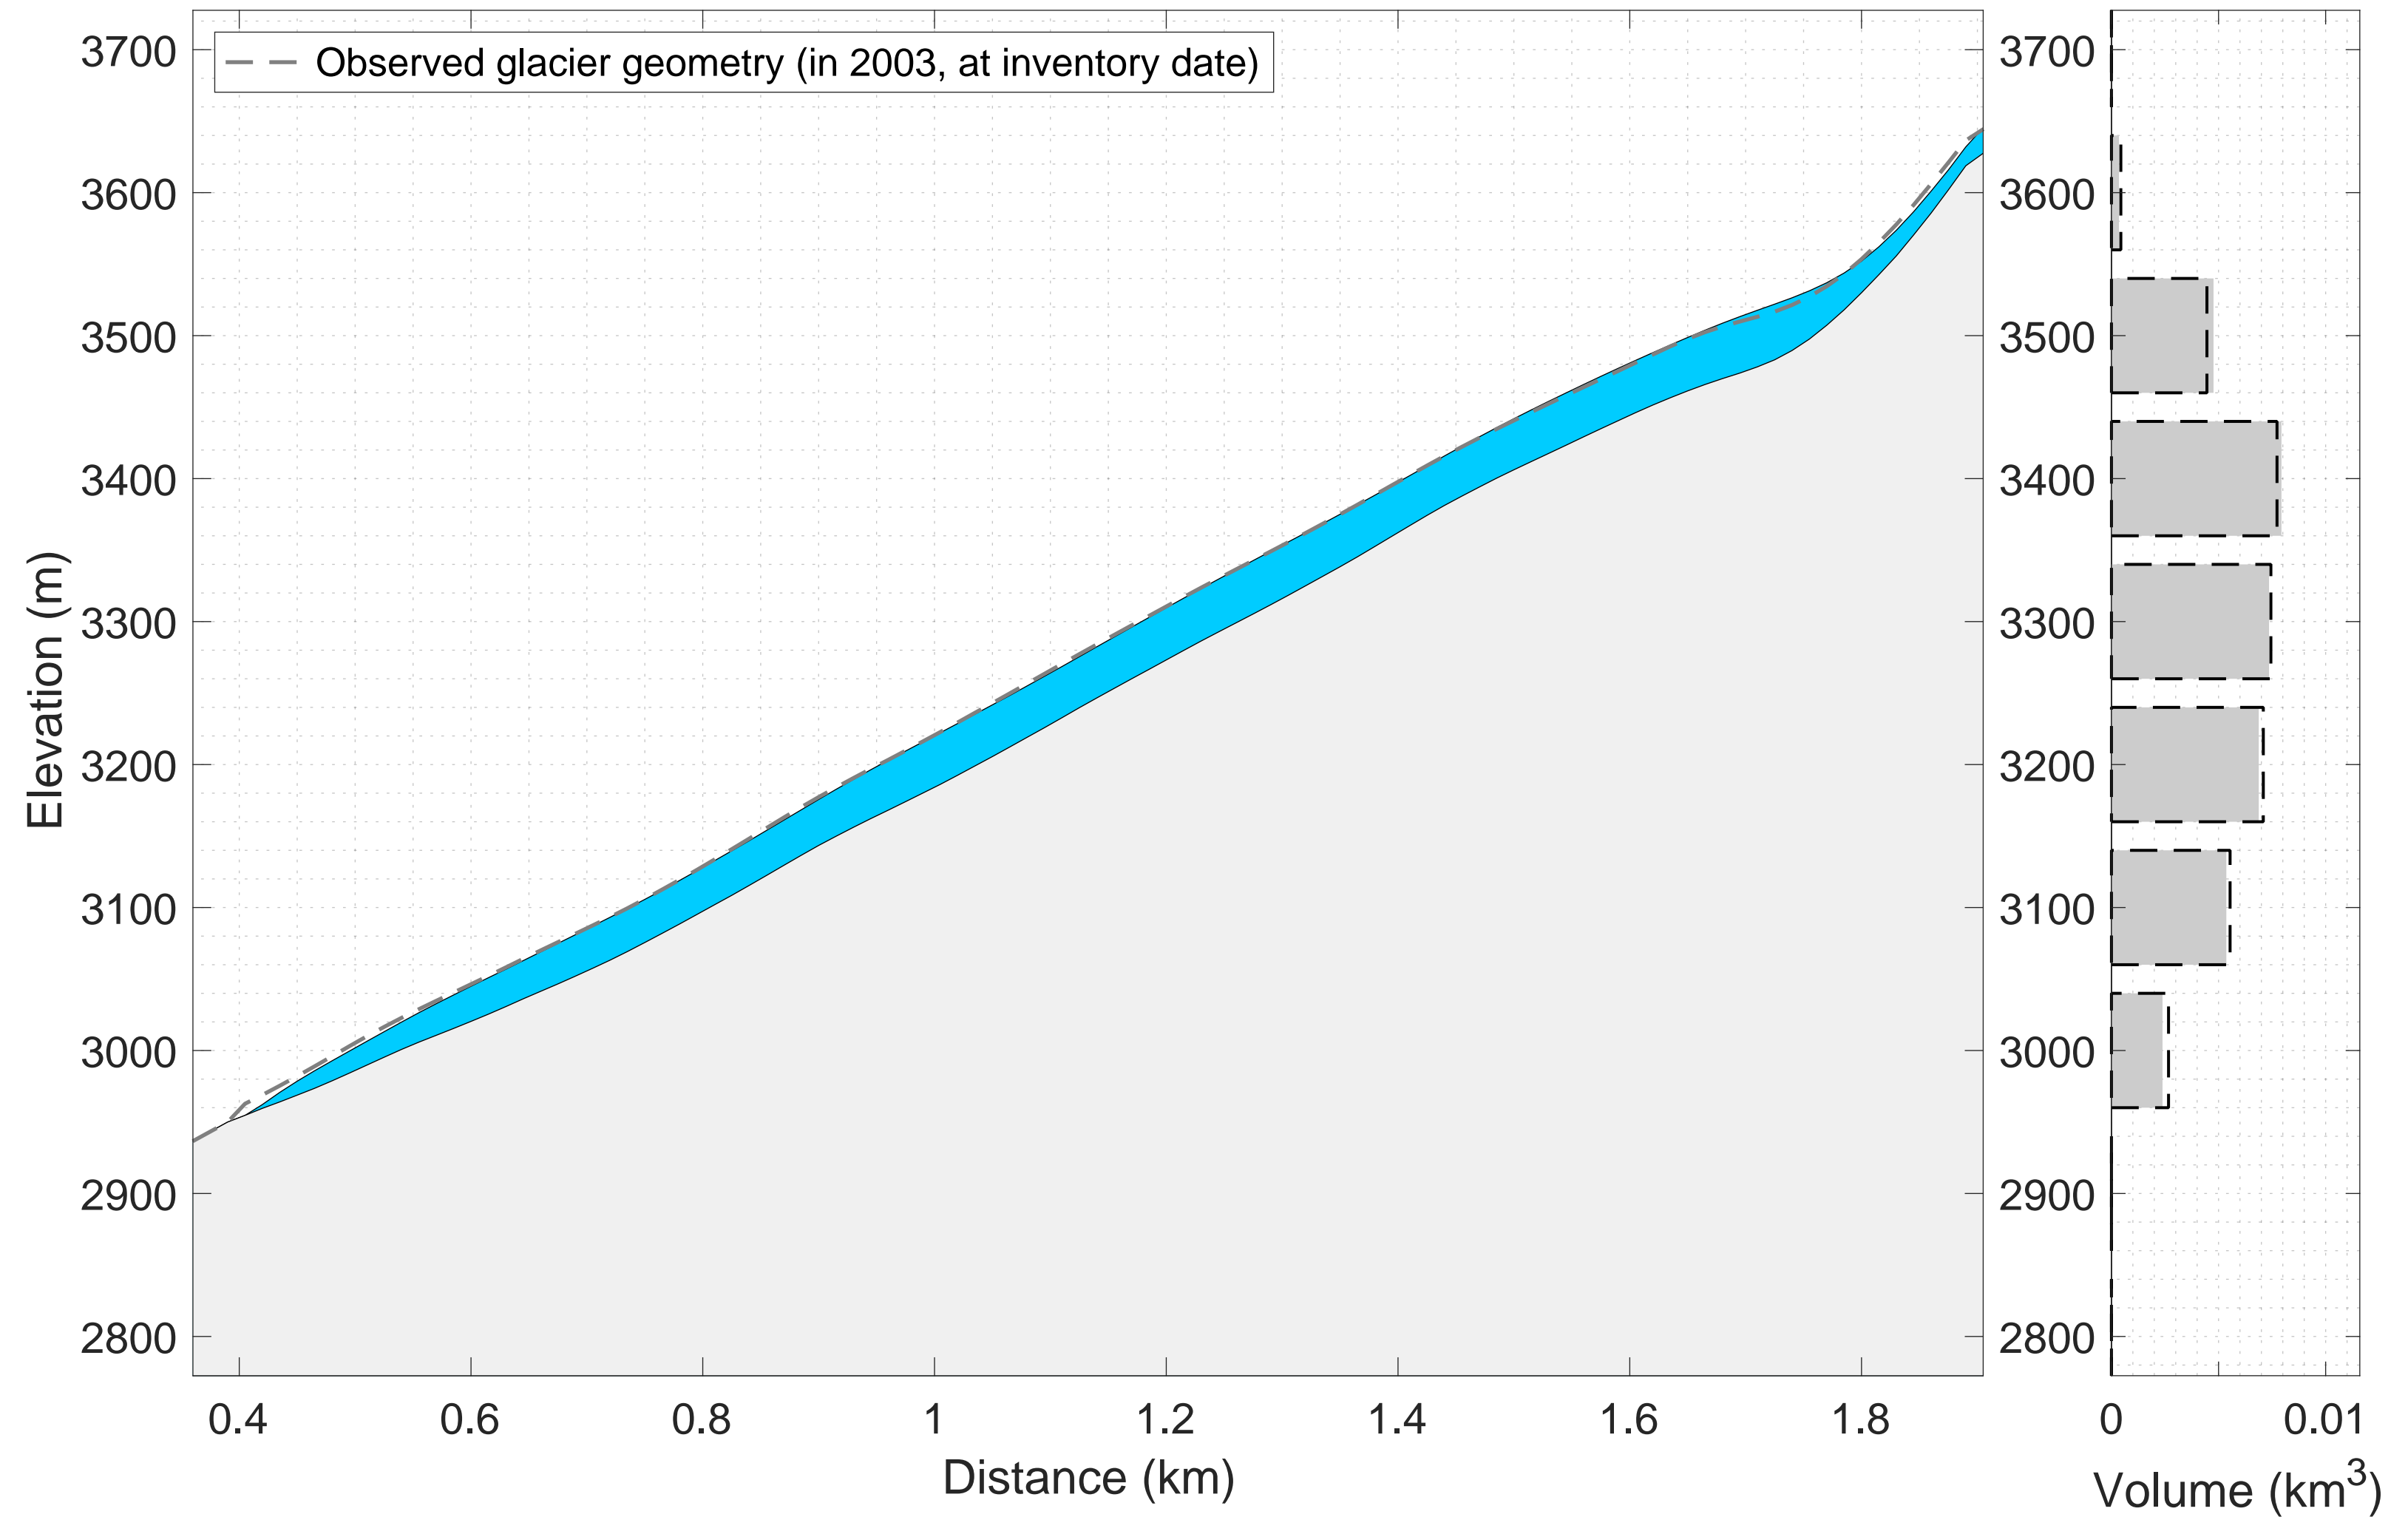

Supplement: Supplementary file 477 [file tc-13-1125-2019-supplement.zip]

**Modelled geometry (Glacier ID = 01839;  $A = 4.4824\text{e-}17 \text{ Pa}^{-3} \text{ a}^{-1}$ ;  $dx = 11 \text{ m}$ )**

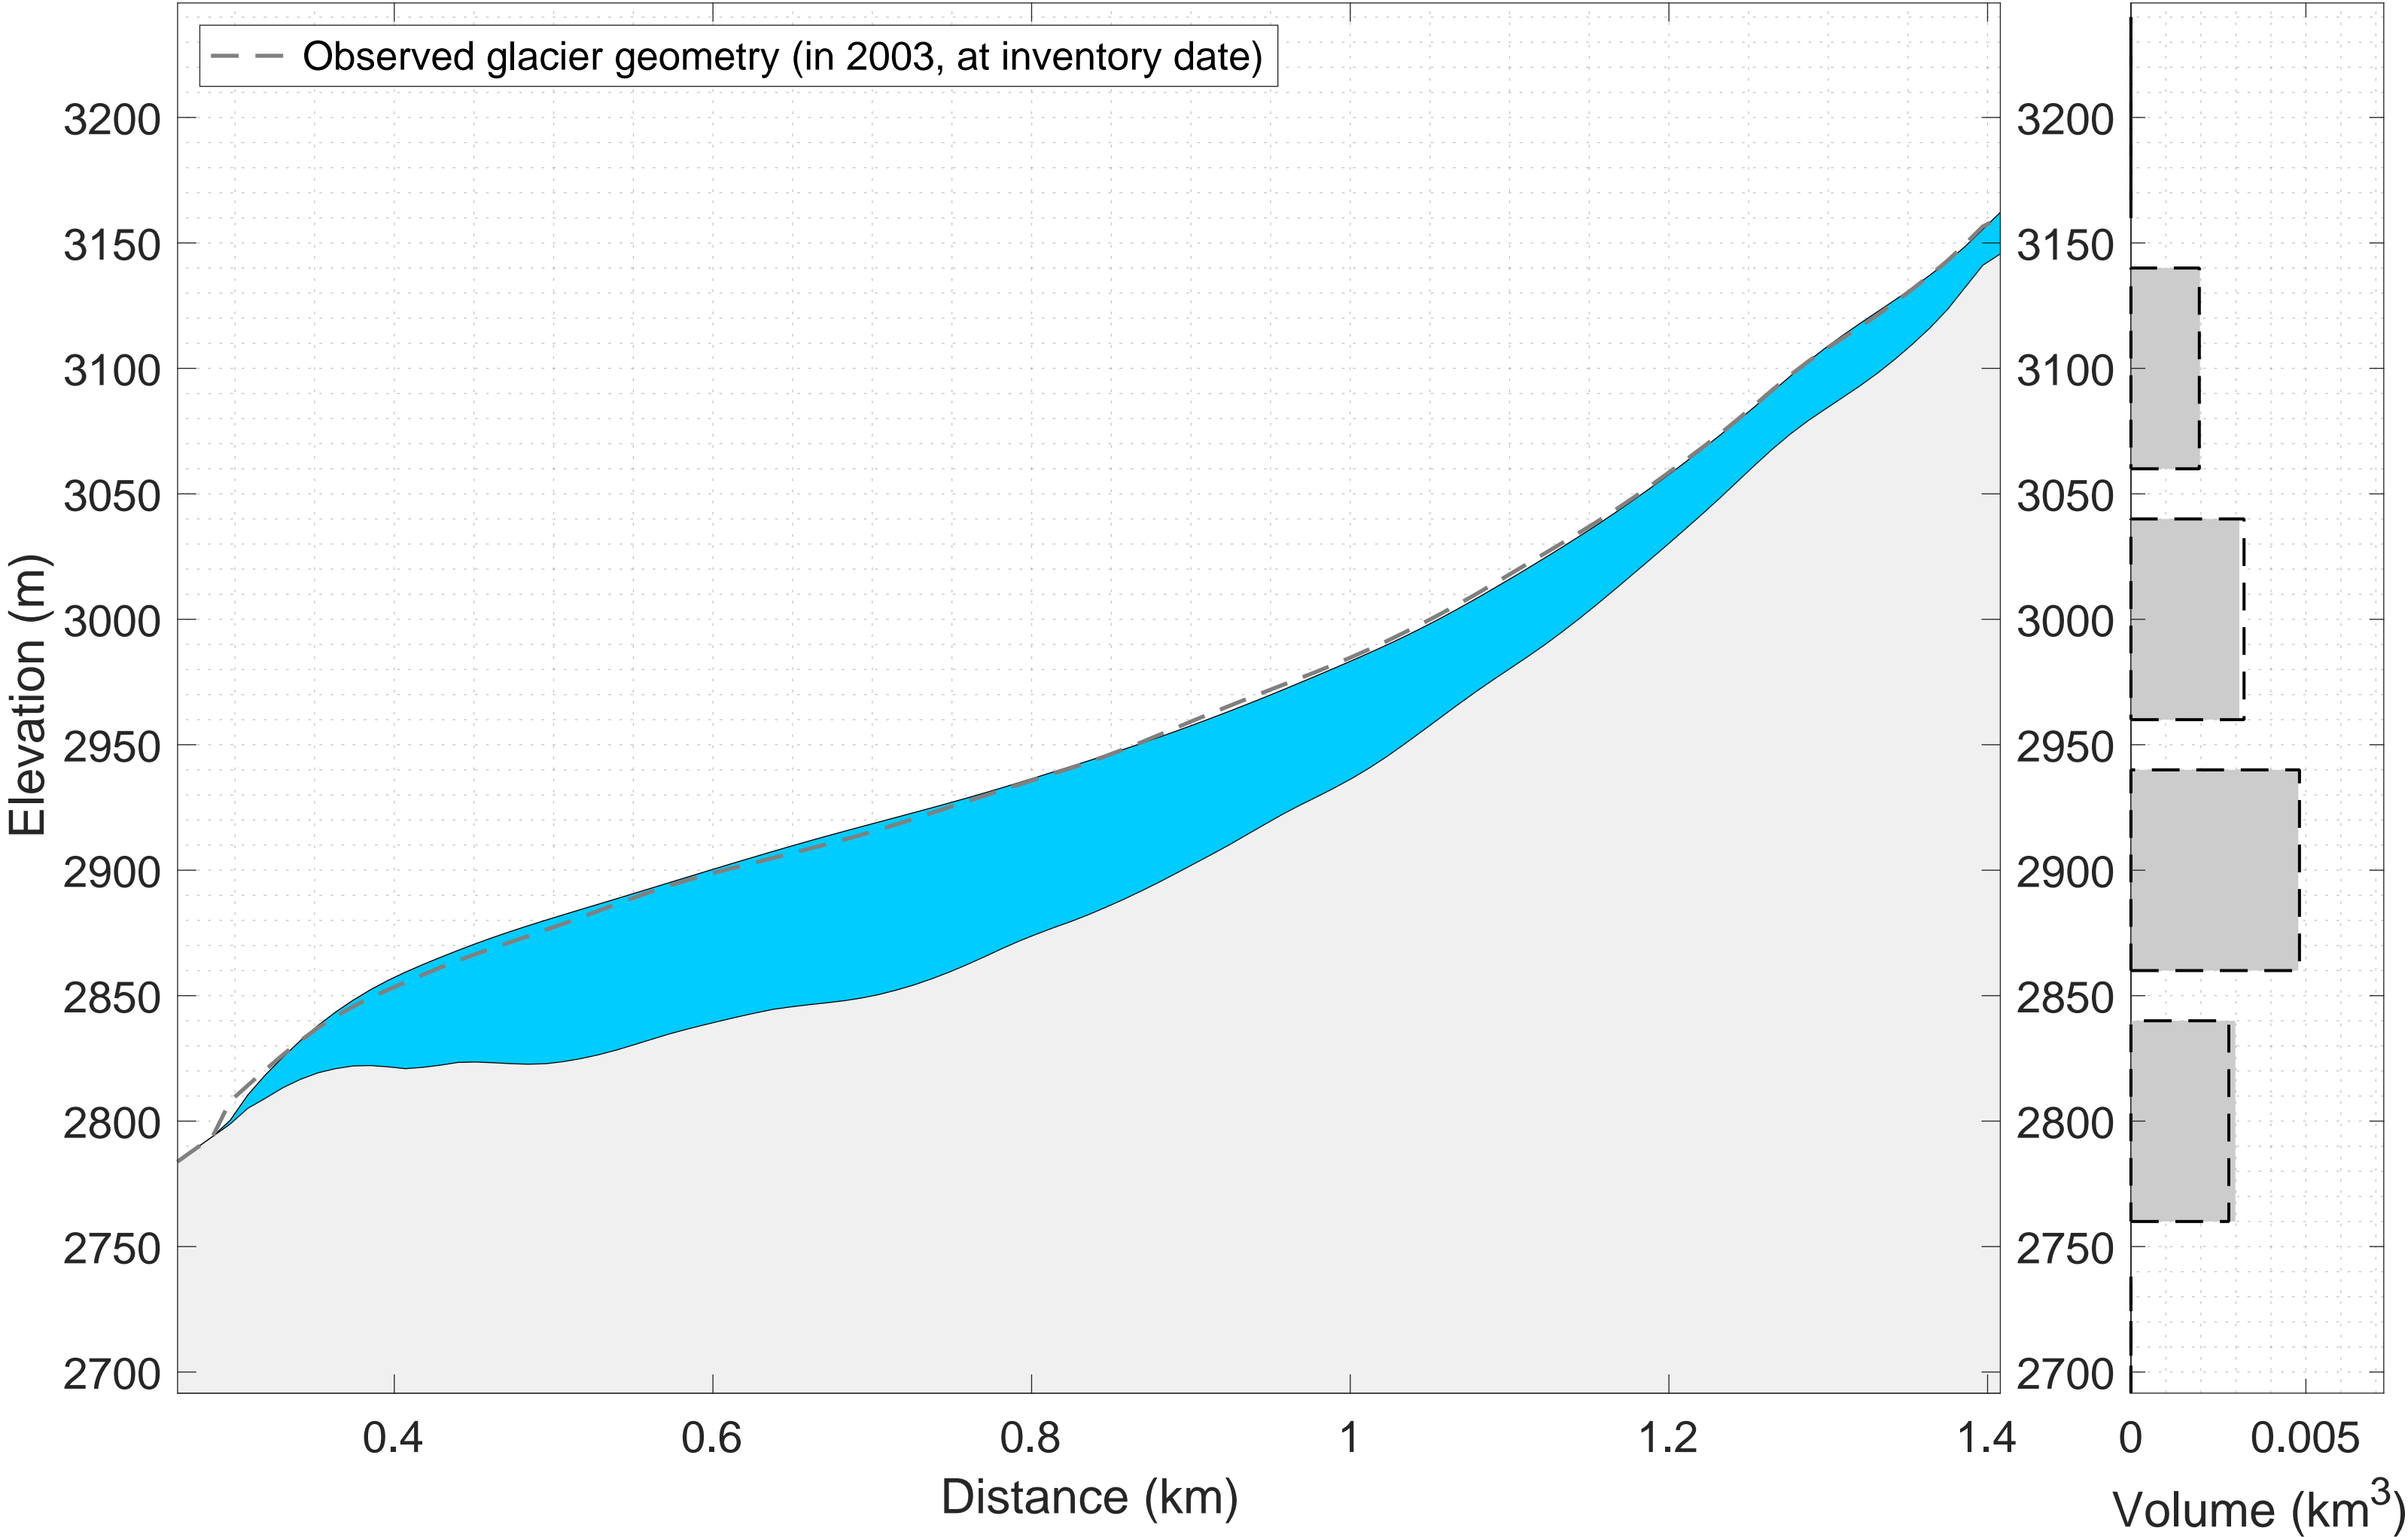

Supplement: Supplementary file 478 [file tc-13-1125-2019-supplement.zip]

**Modelled geometry (Glacier ID = 02495;  $A = 5.278\text{e-}17 \text{ Pa}^{-3} \text{ a}^{-1}$ ;  $dx = 61 \text{ m}$ )**

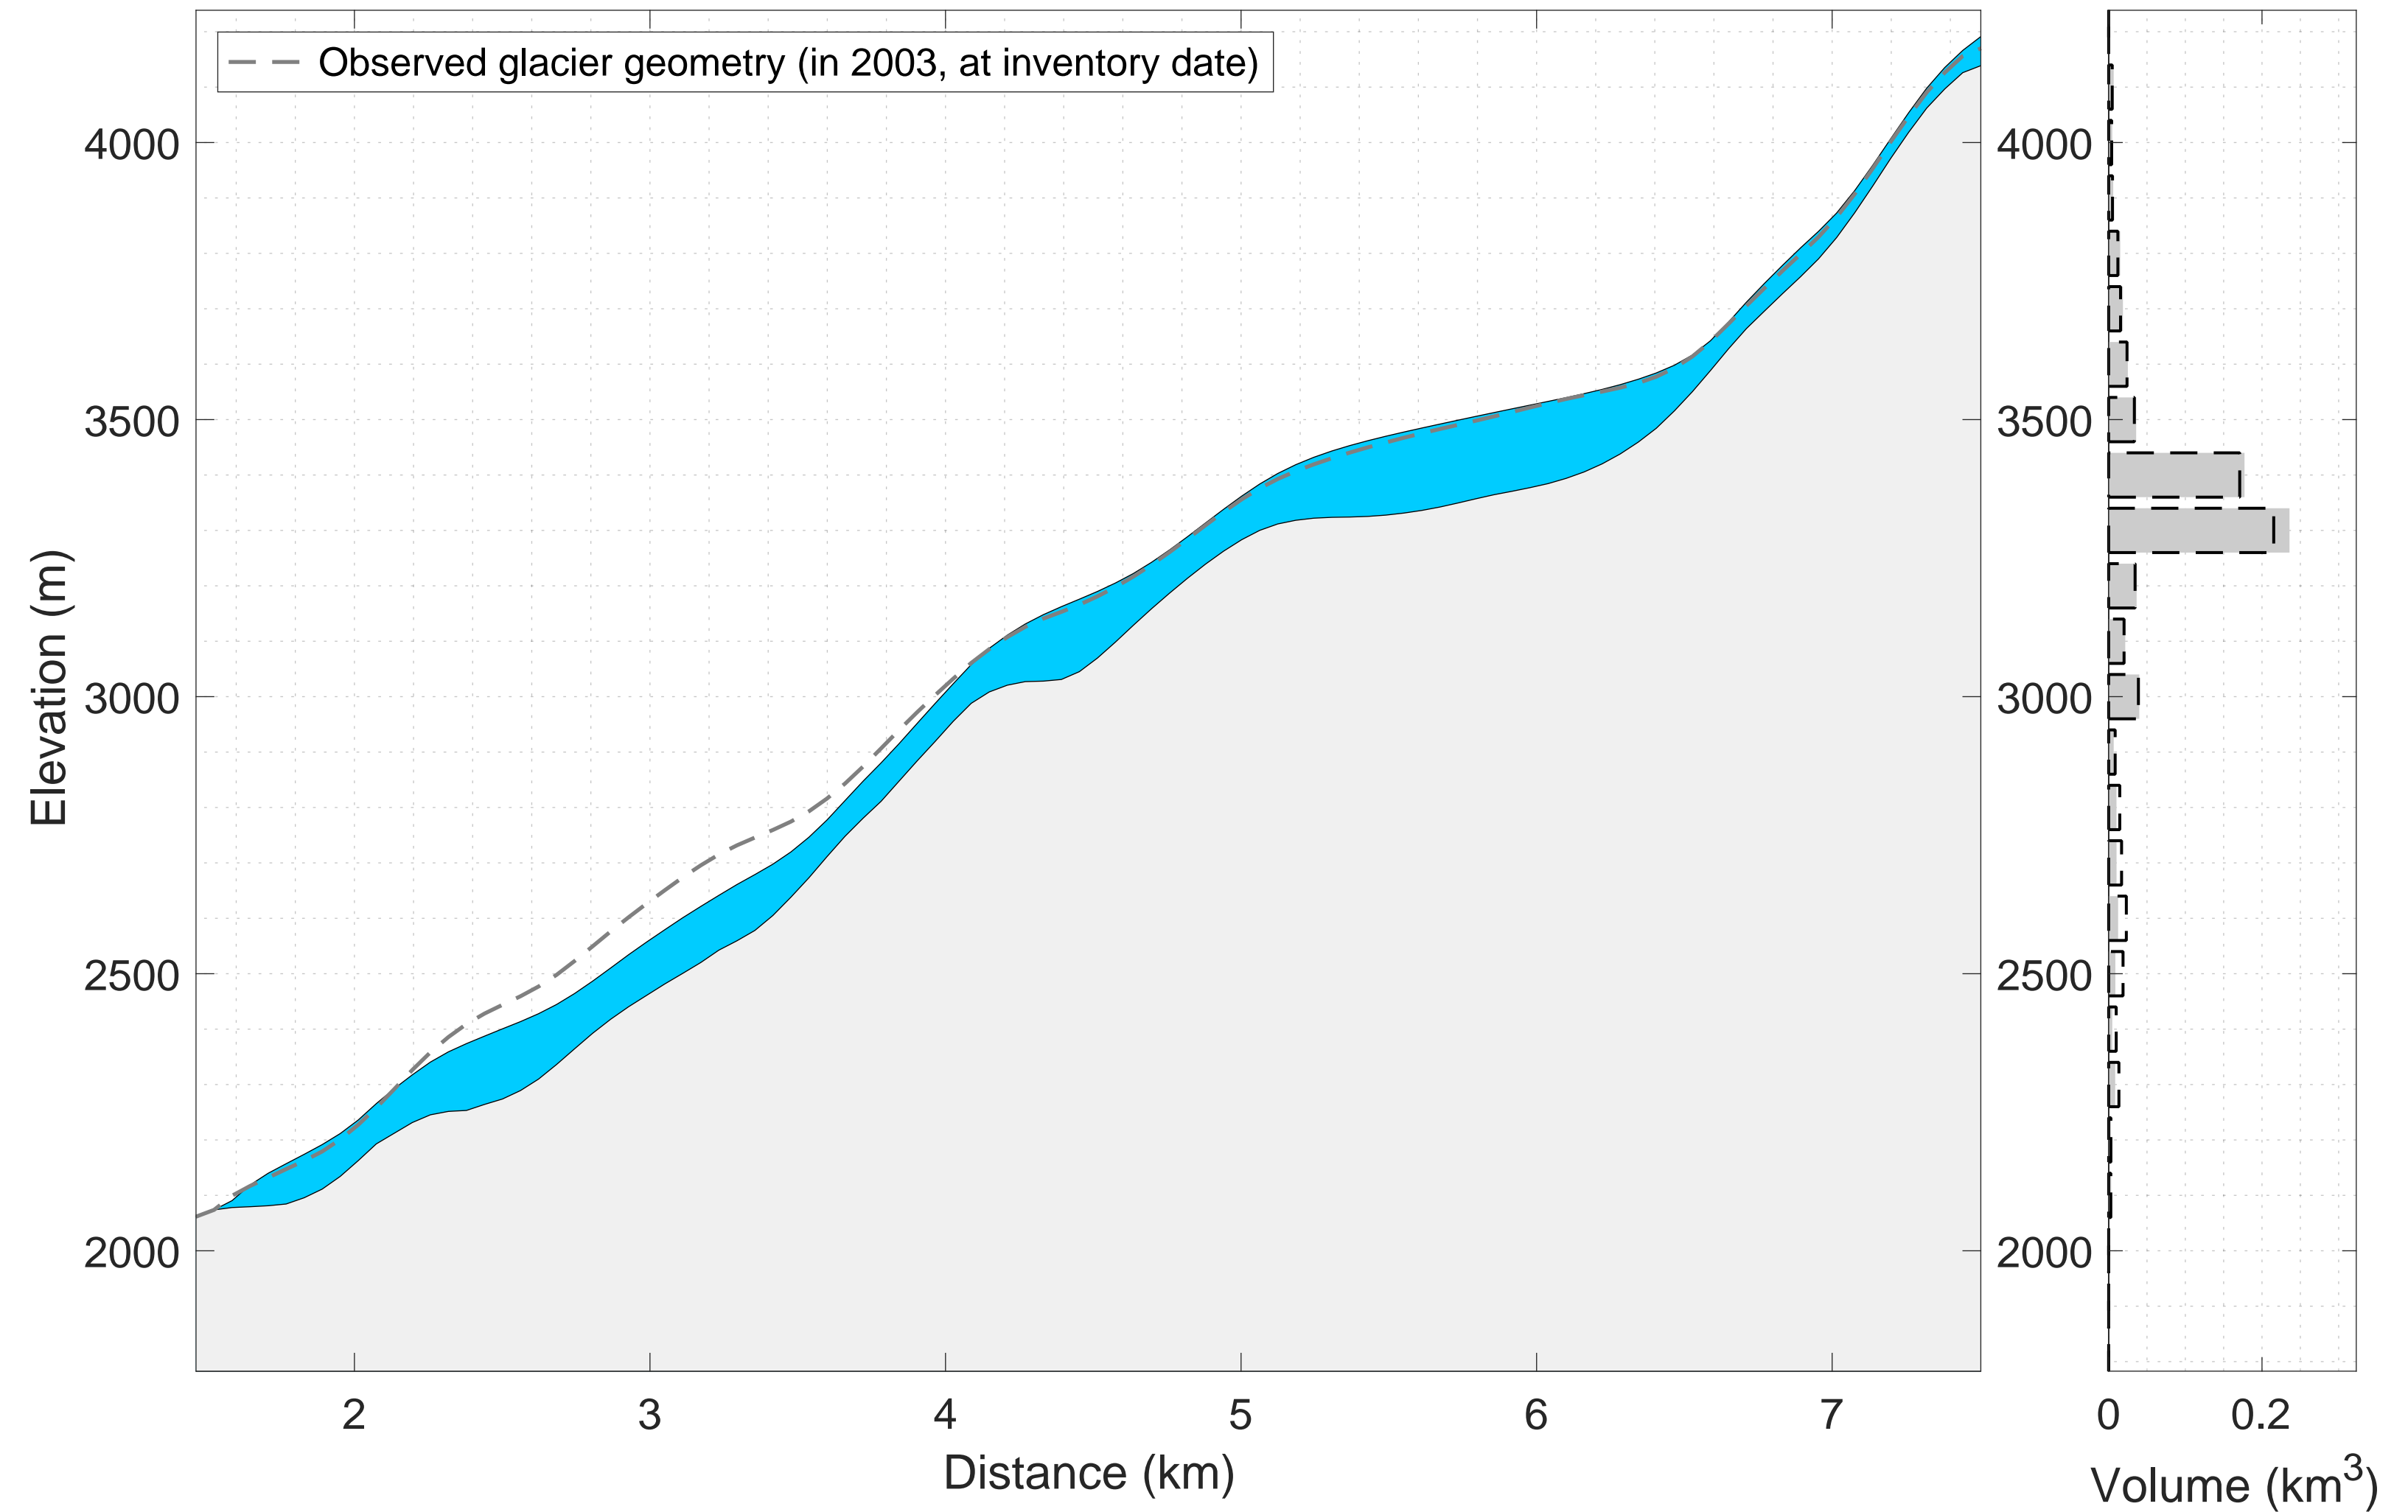

Supplement: Supplementary file 479 [file tc-13-1125-2019-supplement.zip]

**Modelled geometry (Glacier ID = 01719;  $A = 1.291\text{e-}16 \text{ Pa}^{-3} \text{ a}^{-1}$ ;  $dx = 28 \text{ m}$ )**

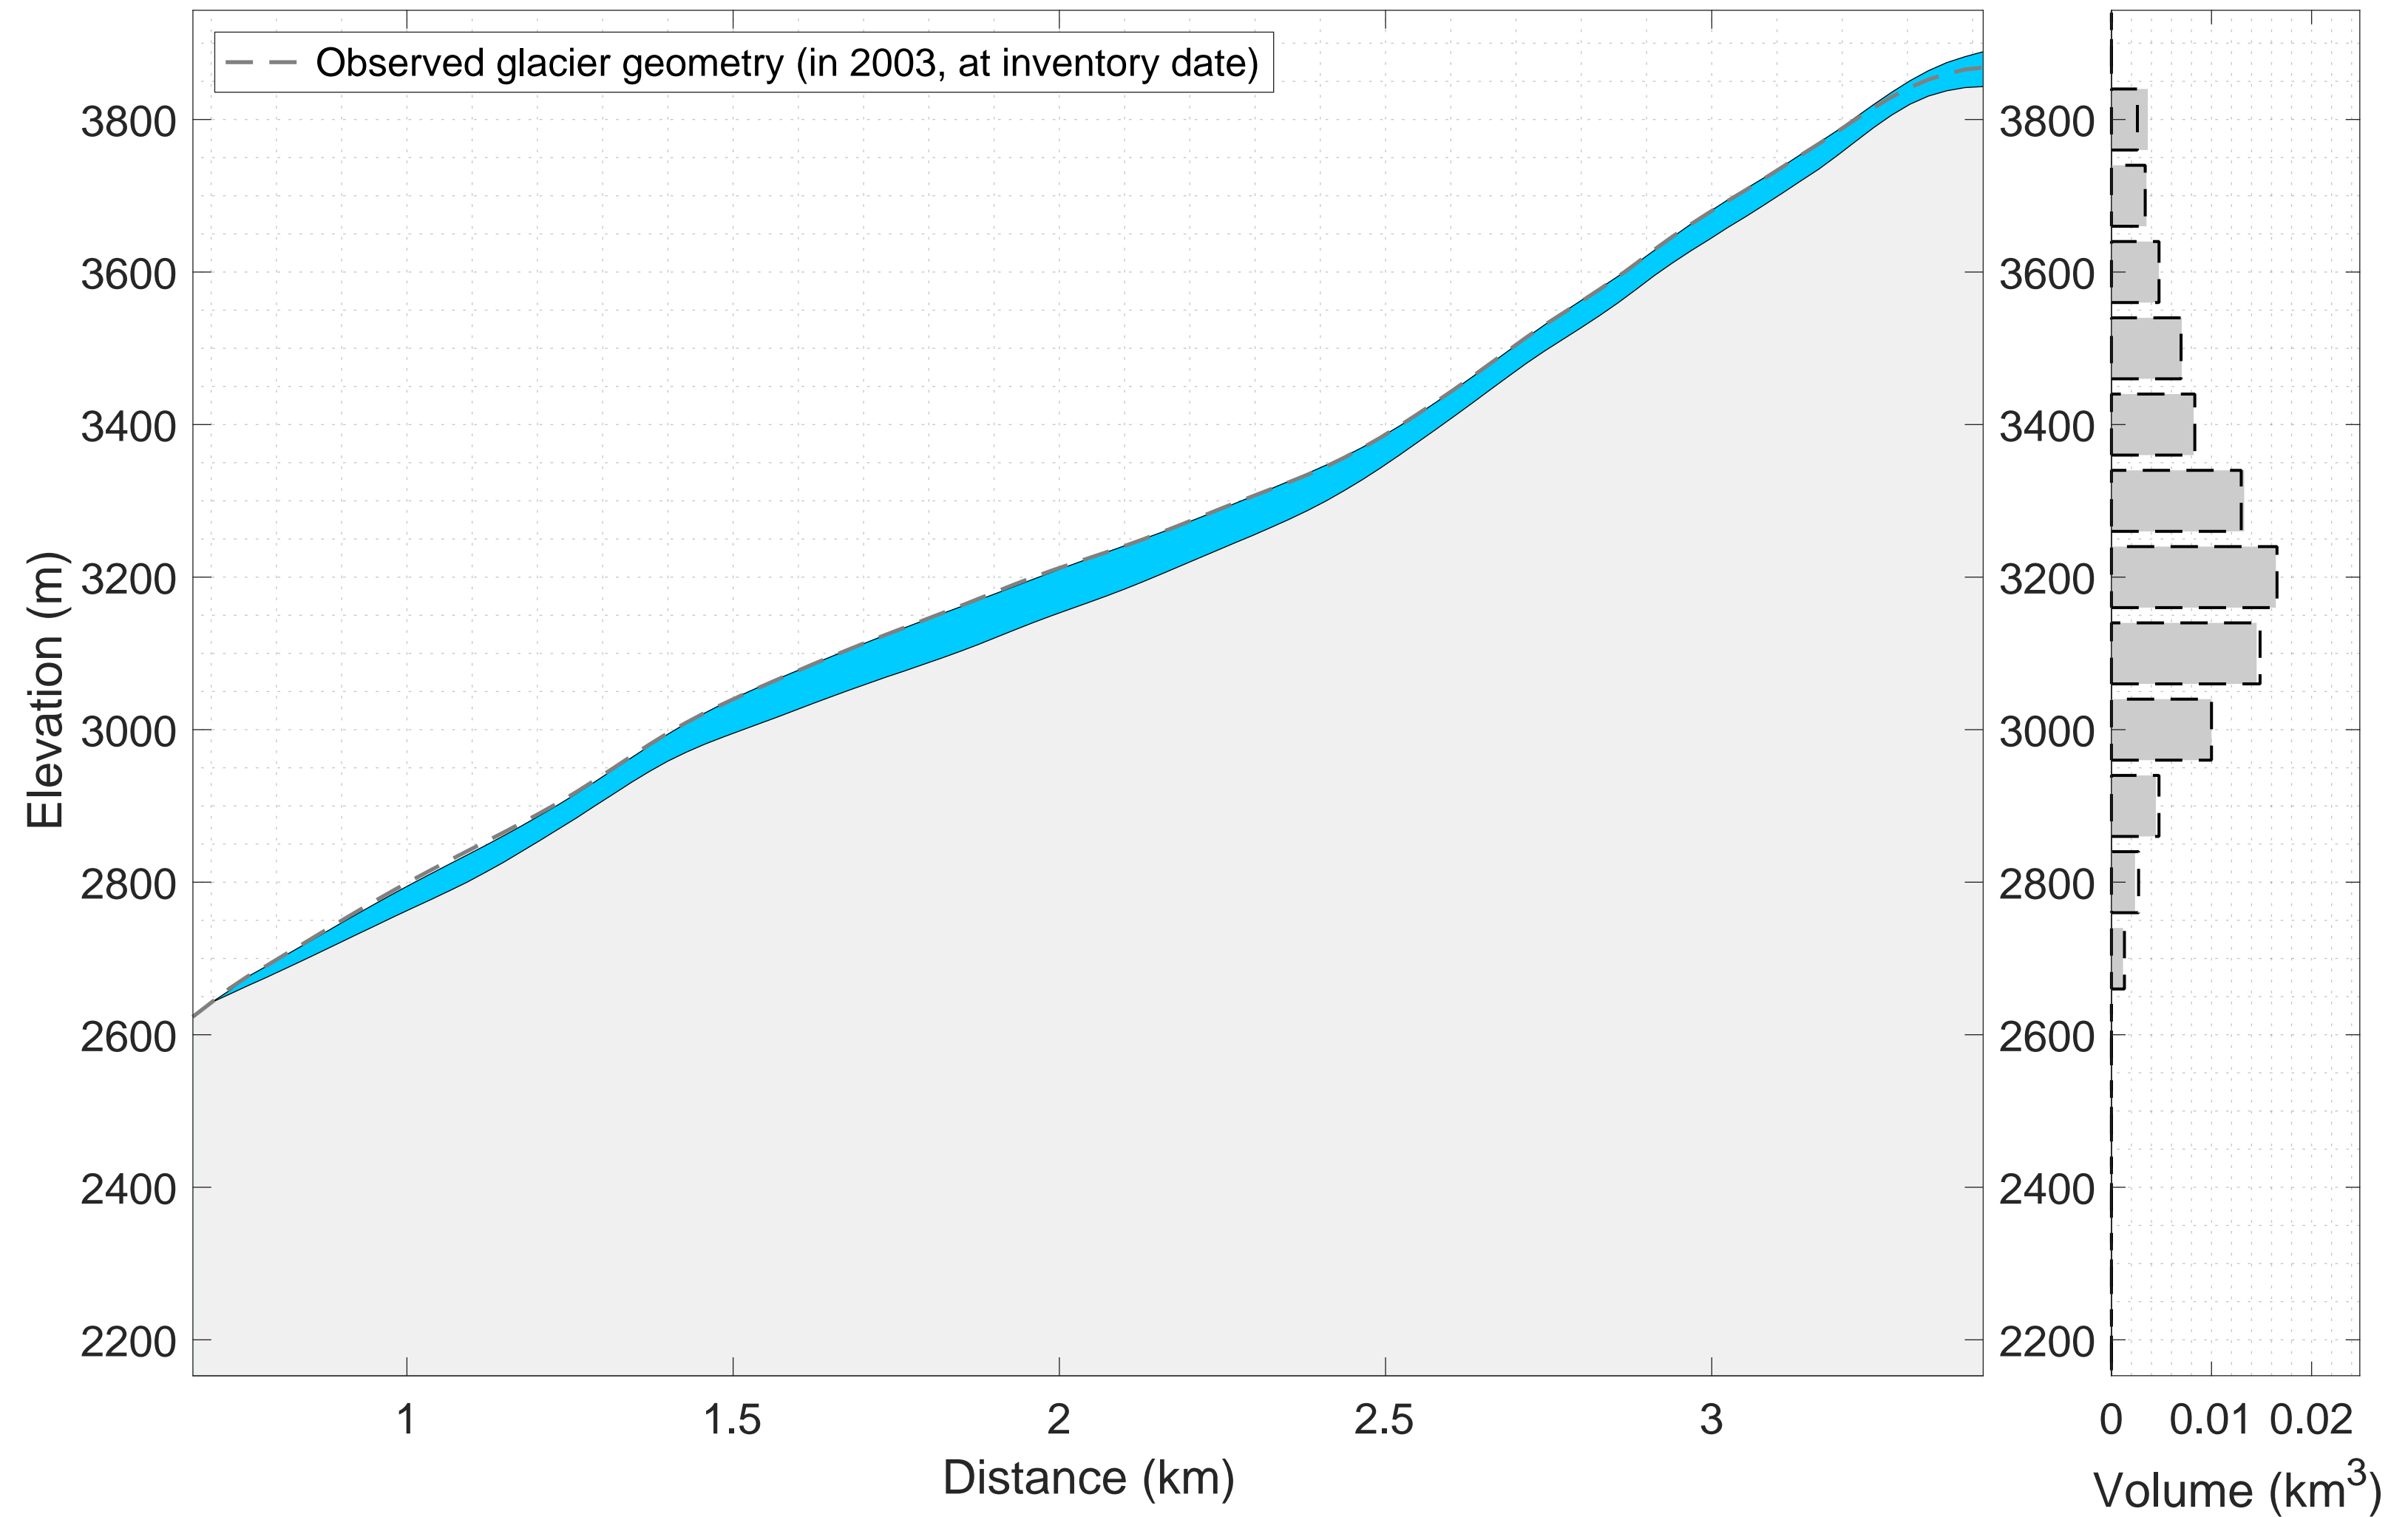

Supplement: Supplementary file 480 [file tc-13-1125-2019-supplement.zip]

**Modelled geometry (Glacier ID = 01261;  $A = 1.1902\text{e-}16 \text{ Pa}^{-3} \text{ a}^{-1}$ ;  $dx = 15 \text{ m}$ )**

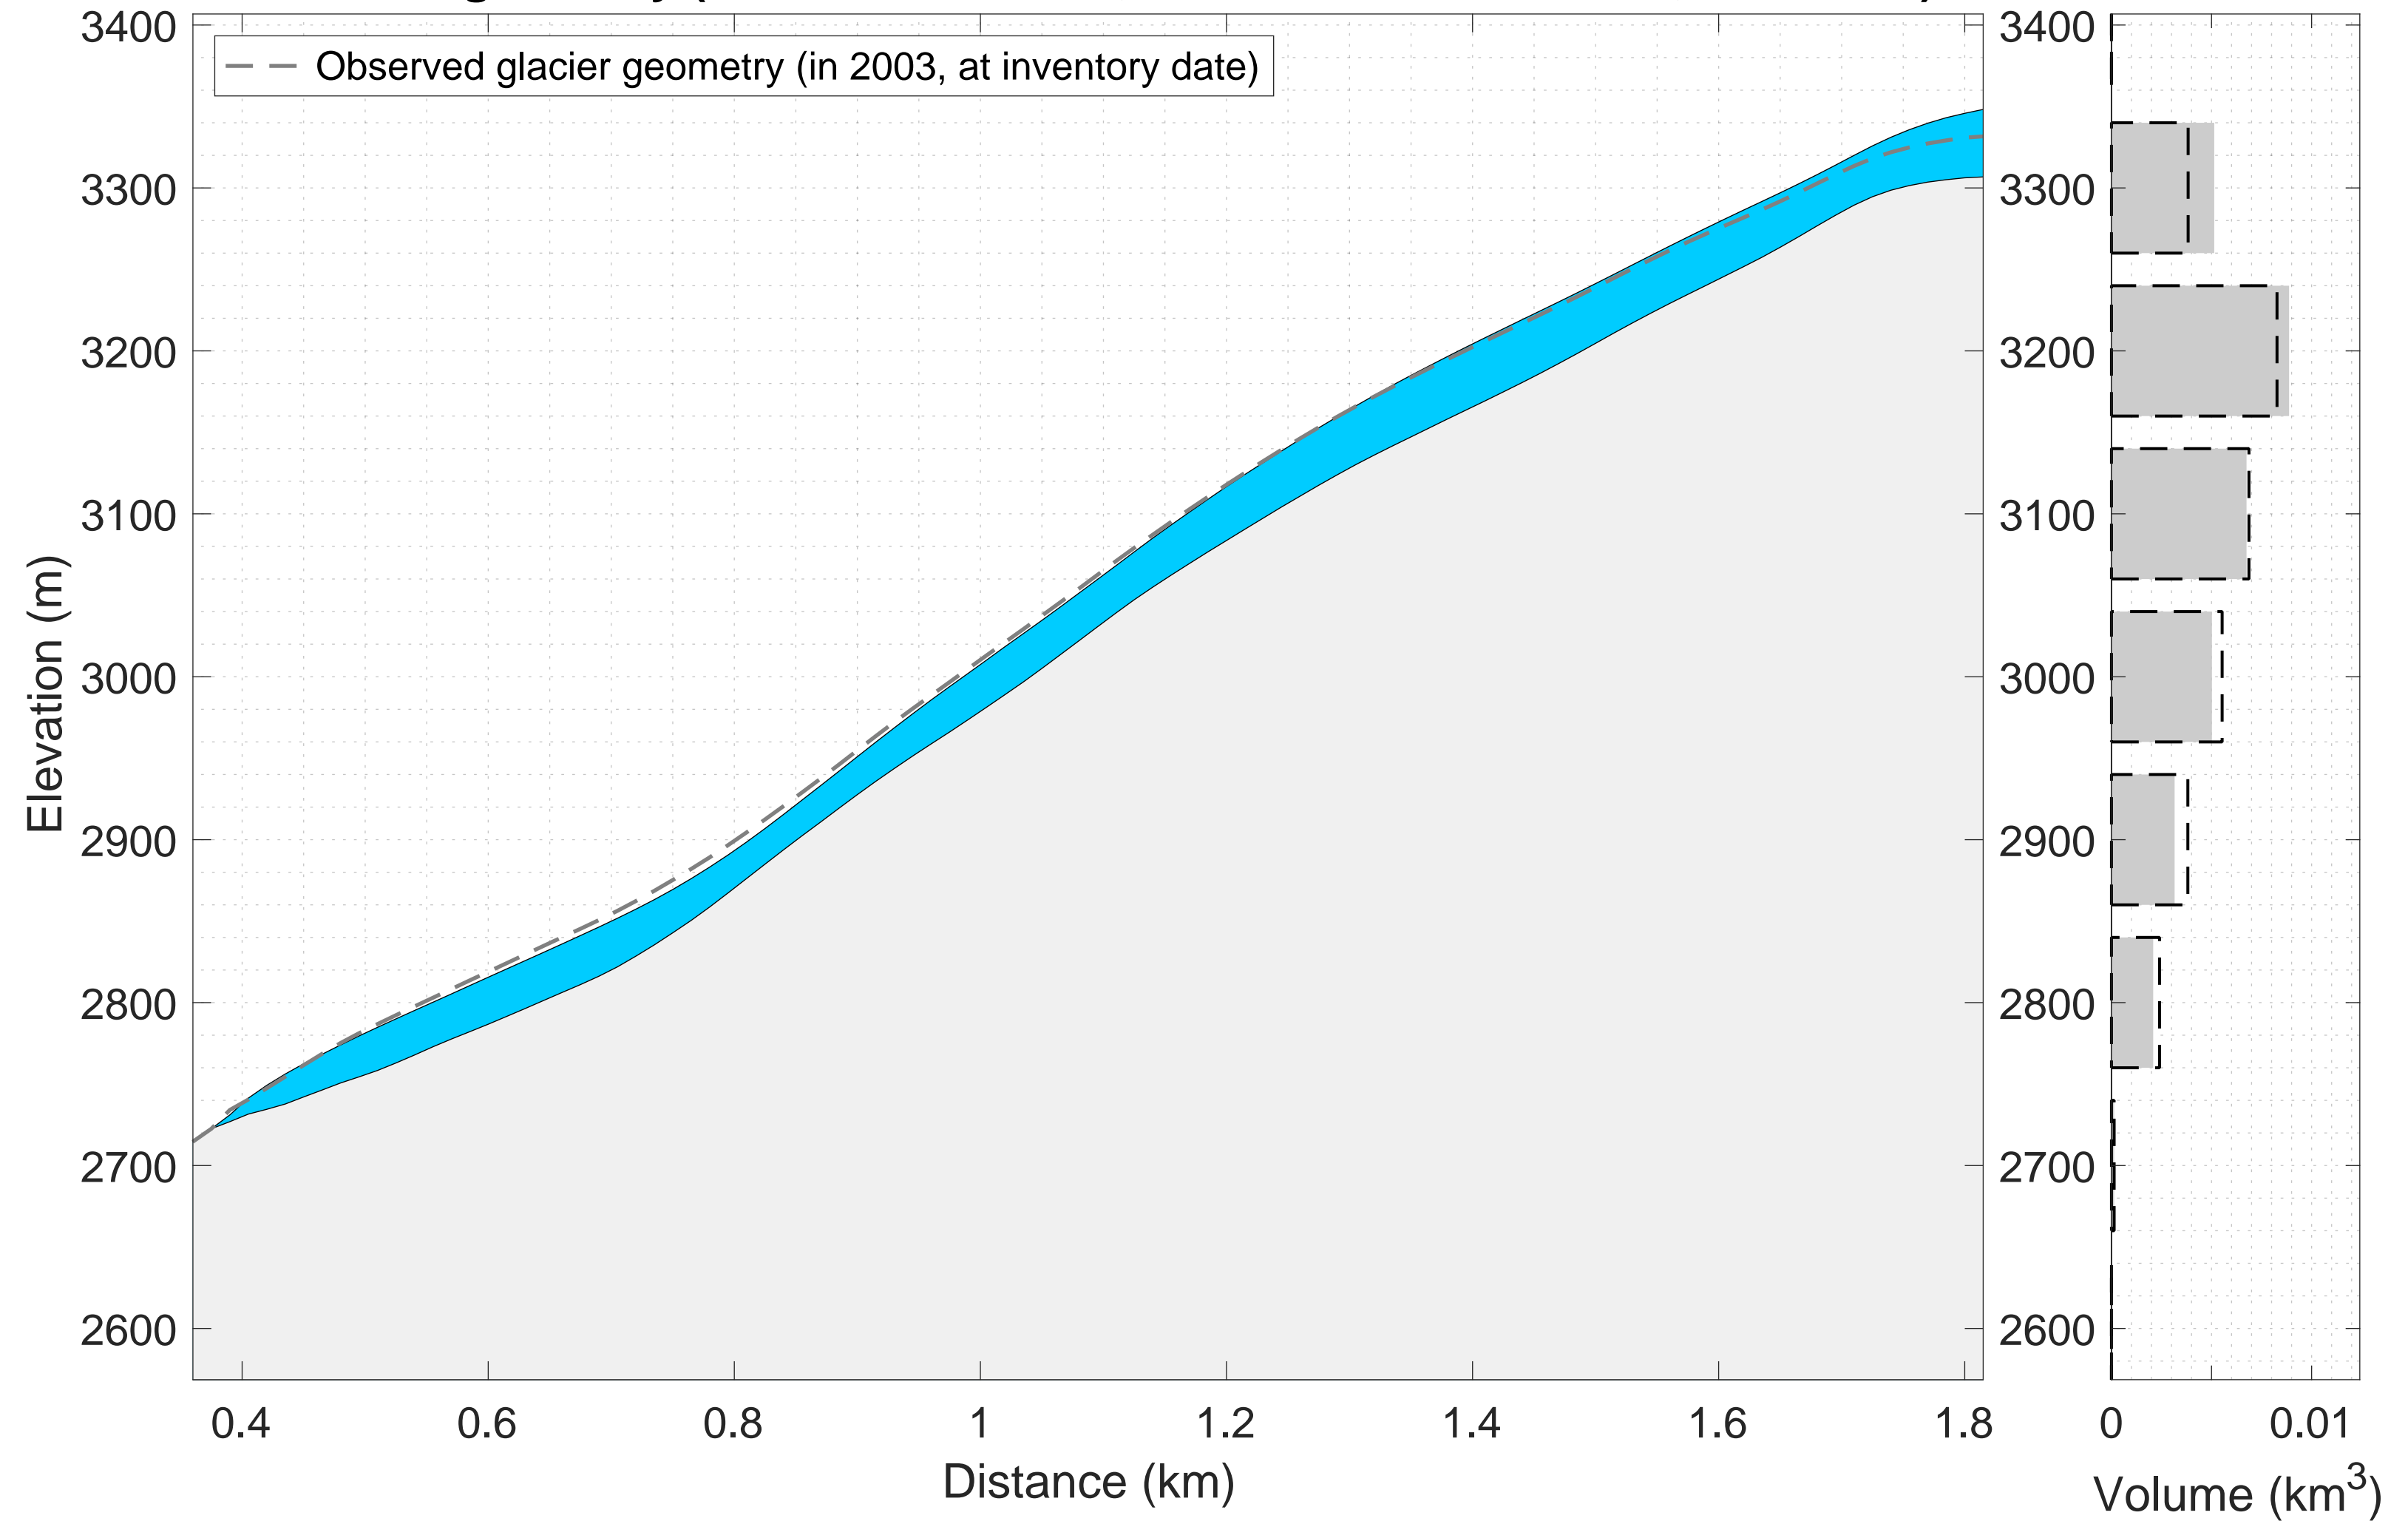

Supplement: Supplementary file 481 [file tc-13-1125-2019-supplement.zip]

**Modelled geometry (Glacier ID = 02749;  $A = 2.5394\text{e-}16 \text{ Pa}^{-3} \text{ a}^{-1}$ ;  $dx = 40 \text{ m}$ )**

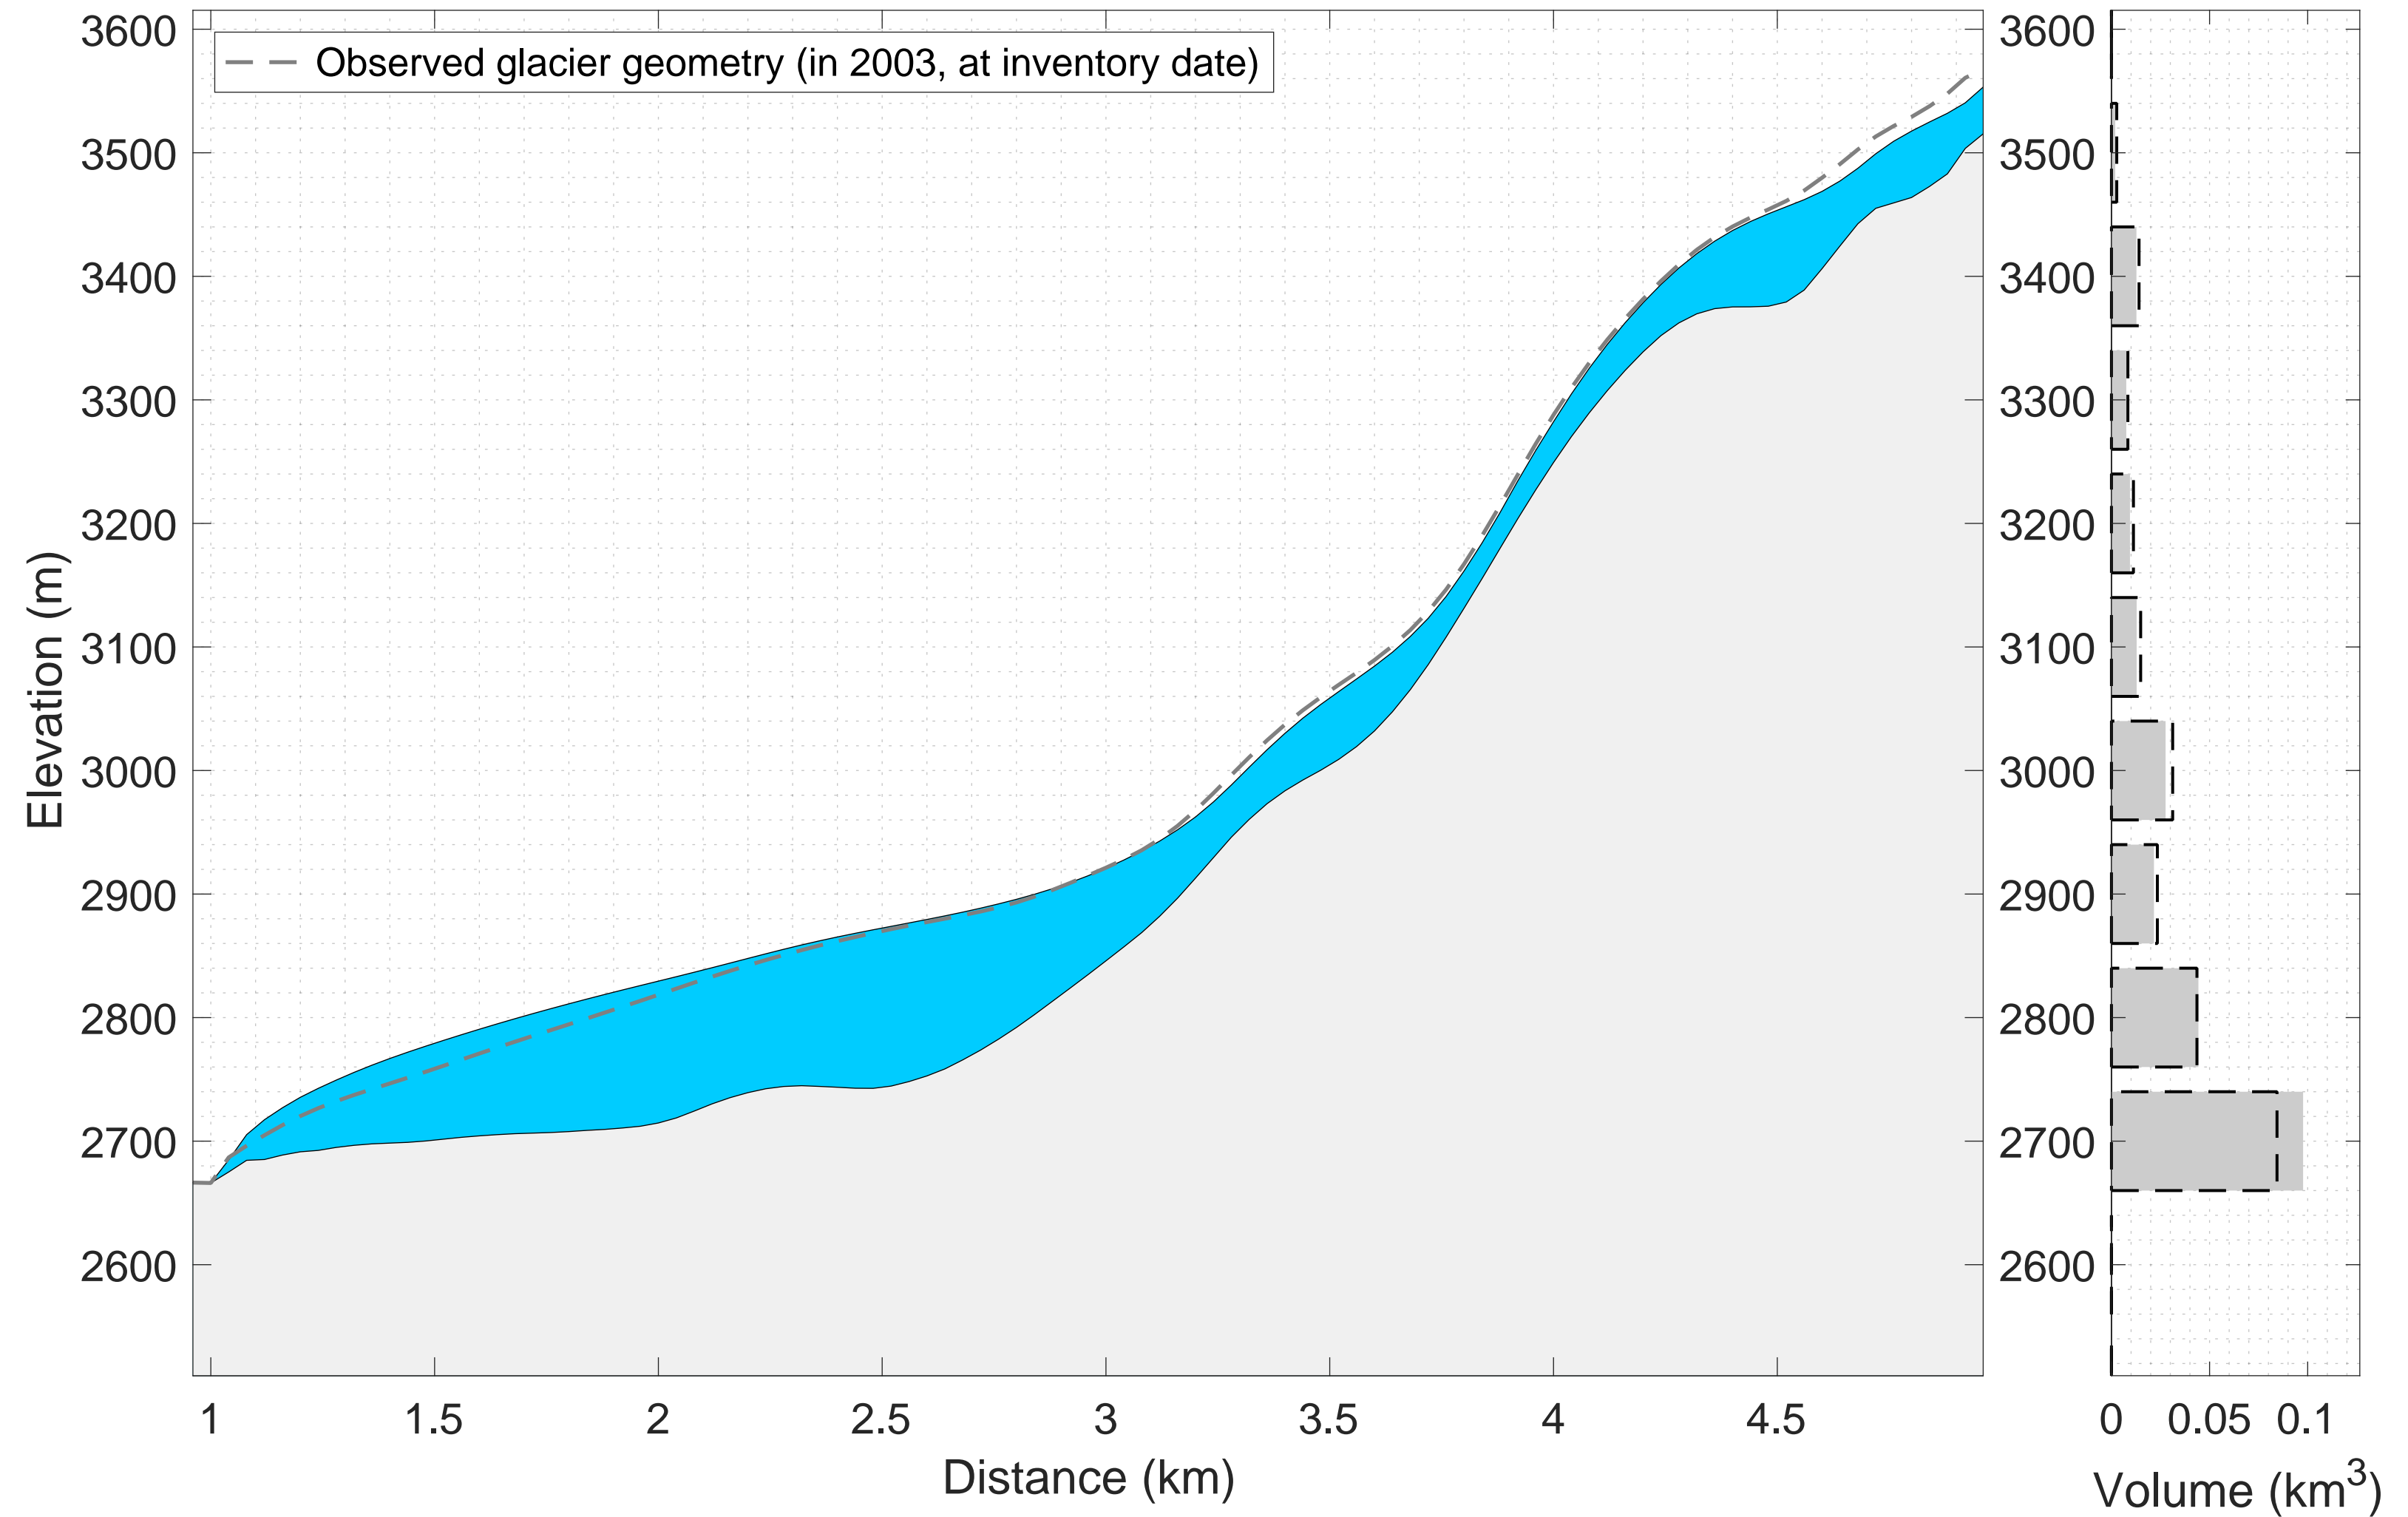

Supplement: Supplementary file 482 [file tc-13-1125-2019-supplement.zip]

**Modelled geometry (Glacier ID = 03671;  $A = 1.989\text{e-}16 \text{ Pa}^{-3} \text{ a}^{-1}$ ;  $dx = 37 \text{ m}$ )**

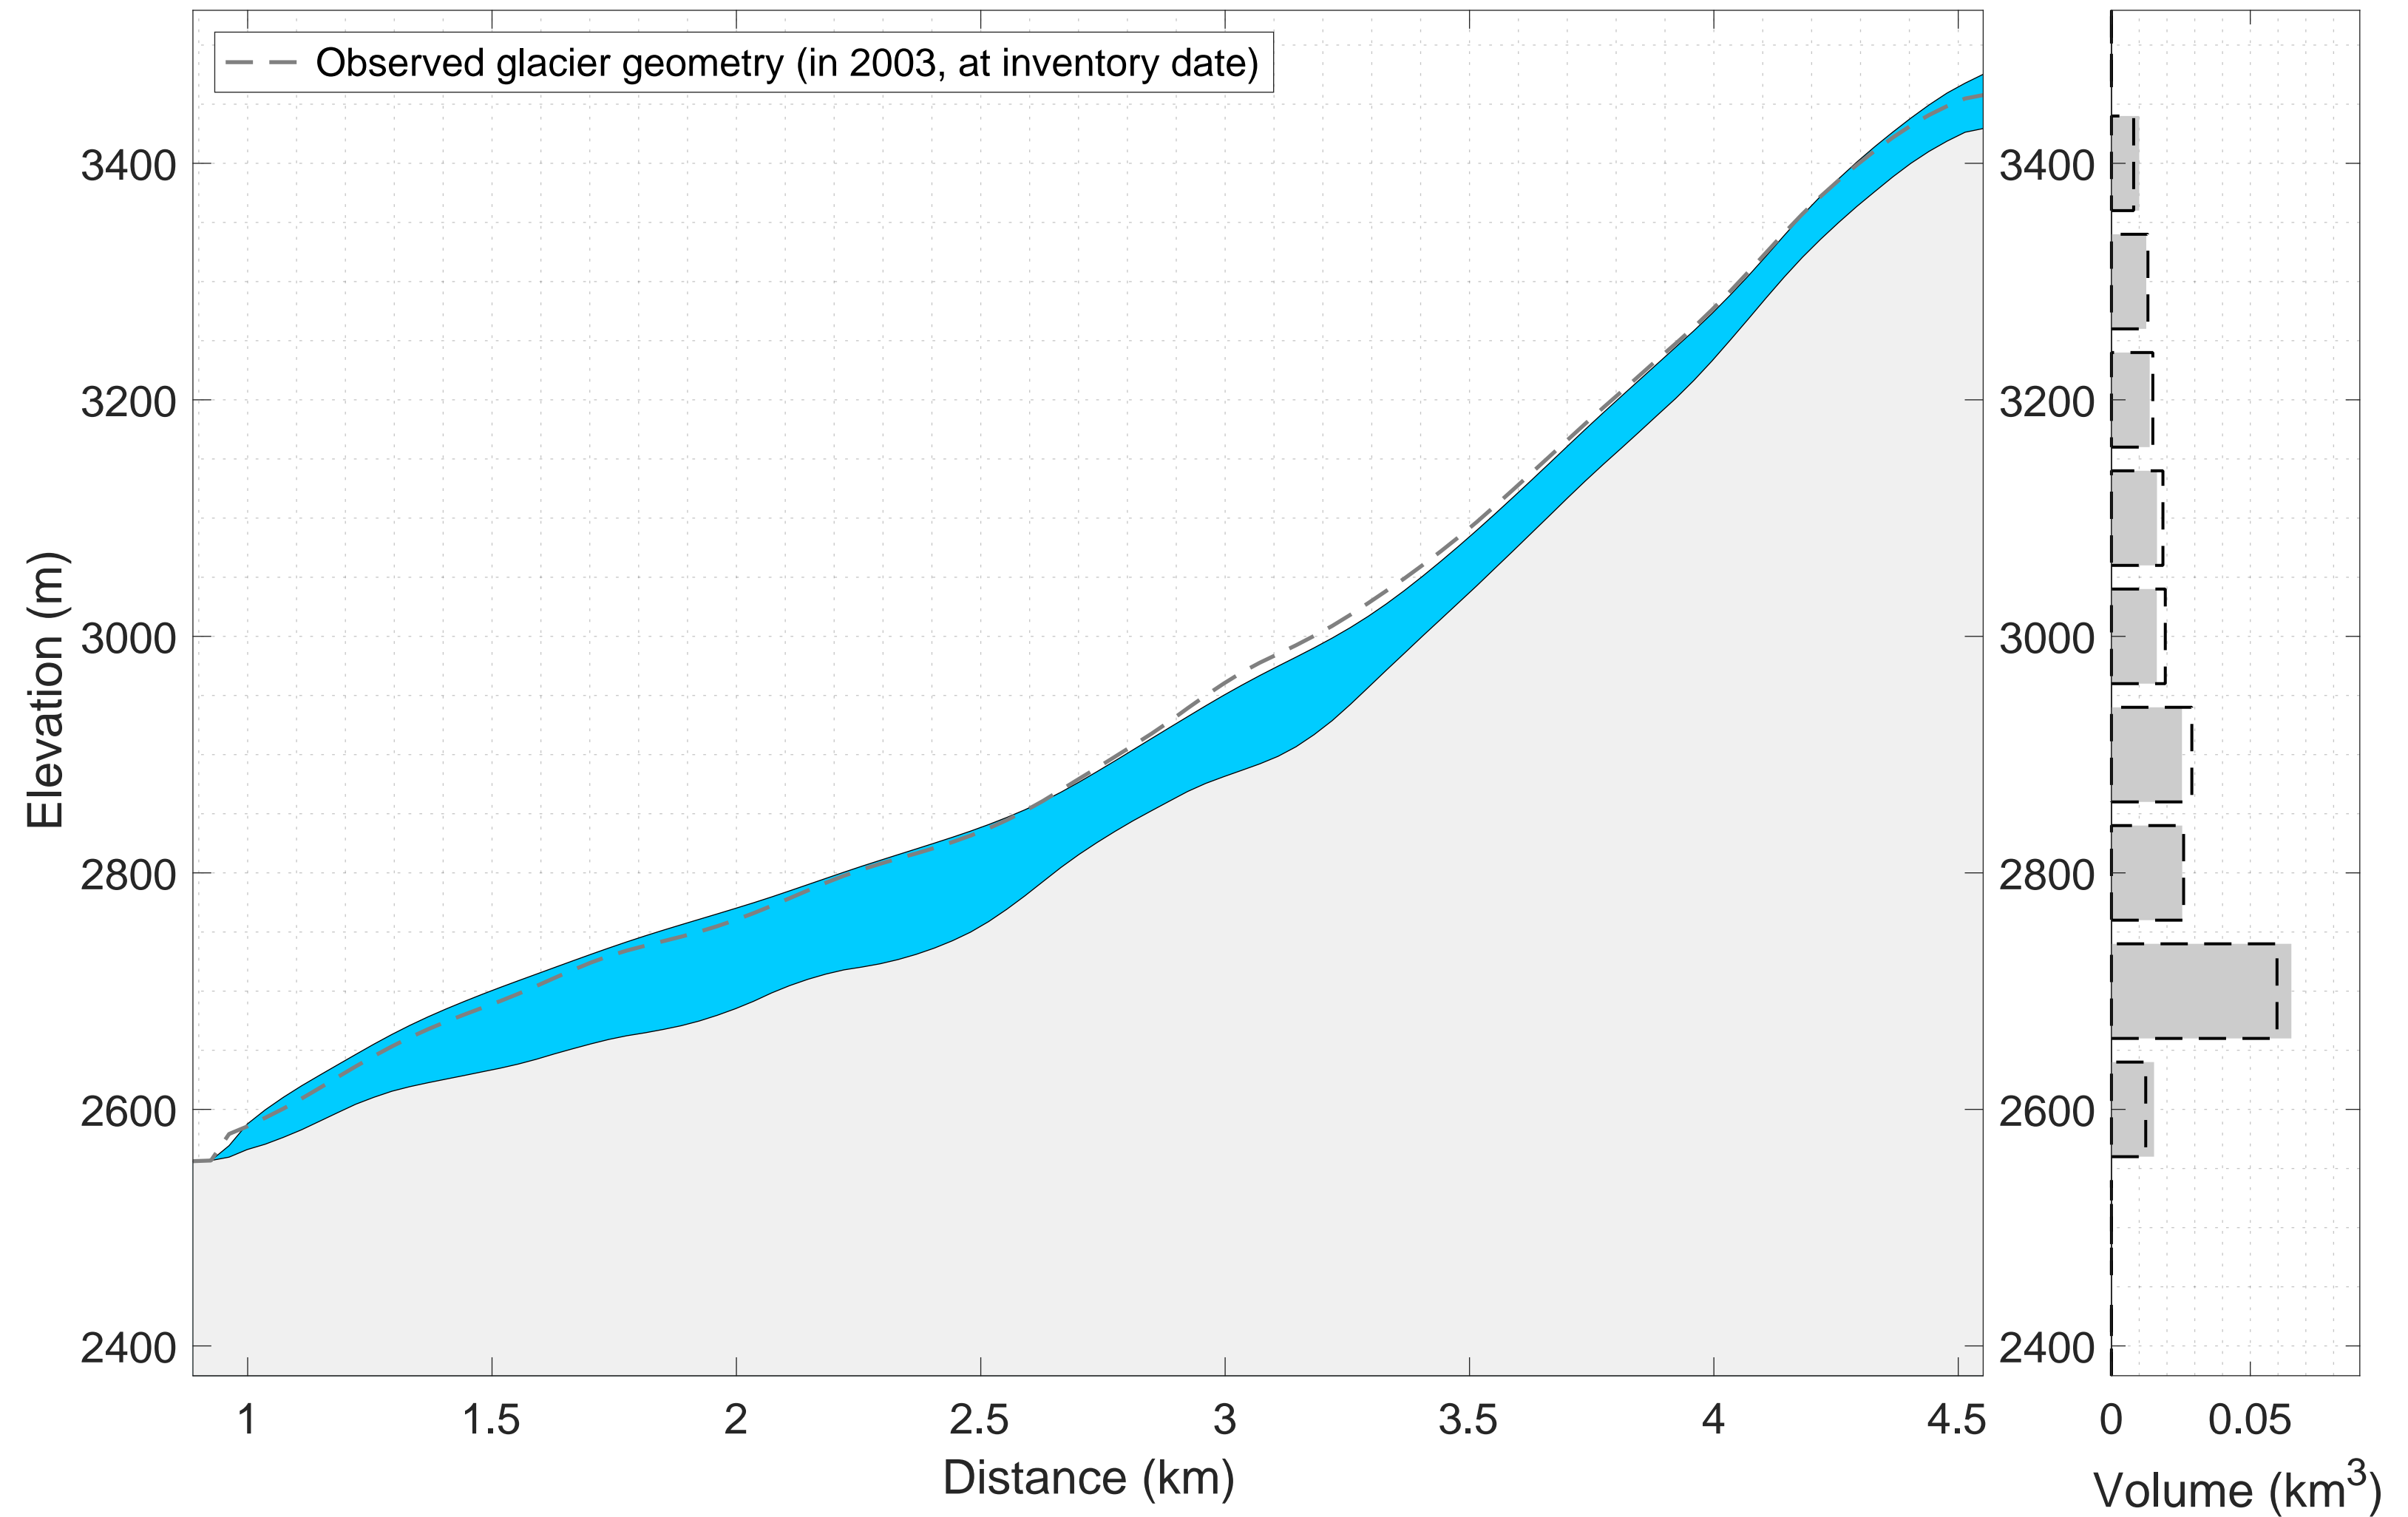

Supplement: Supplementary file 483 [file tc-13-1125-2019-supplement.zip]

**Modelled geometry (Glacier ID = 00868;  $A = 1.2126\text{e-}16 \text{ Pa}^{-3} \text{ a}^{-1}$ ;  $dx = 12 \text{ m}$ )**

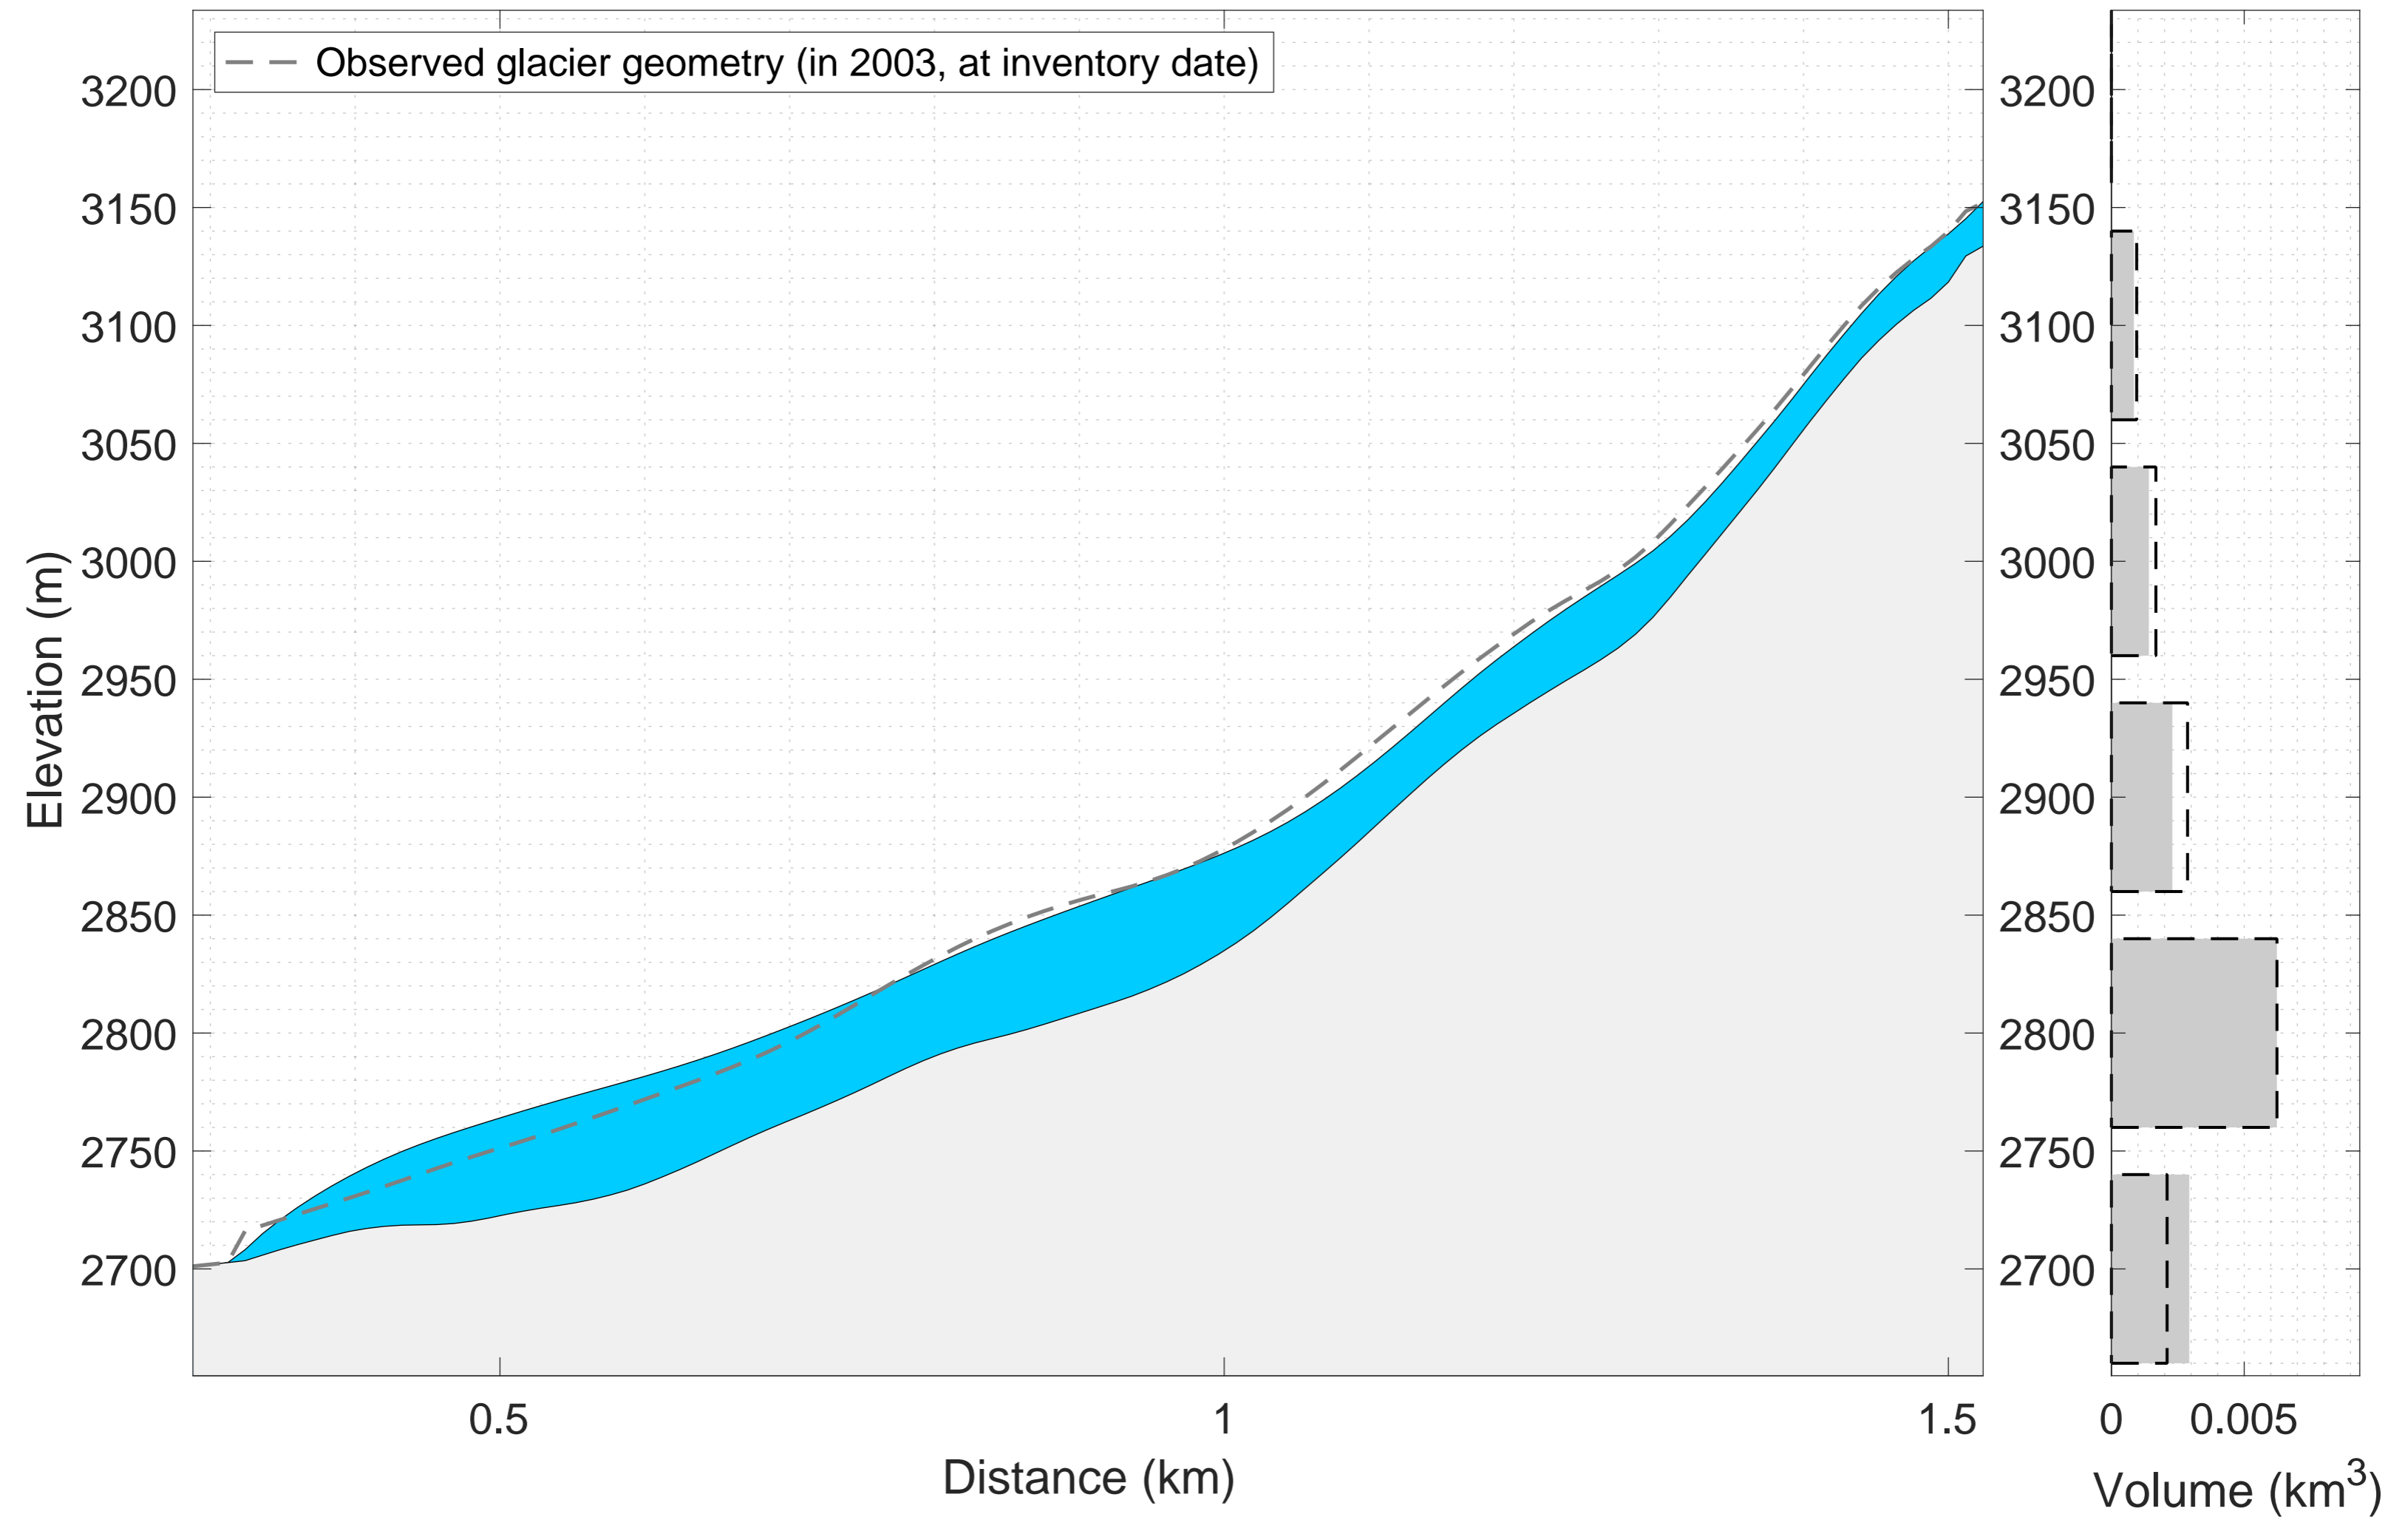

Supplement: Supplementary file 484 [file tc-13-1125-2019-supplement.zip]

**Modelled geometry (Glacier ID = 02421;  $A = 3.661\text{e-}17 \text{ Pa}^{-3} \text{ a}^{-1}$ ;  $dx = 22 \text{ m}$ )**

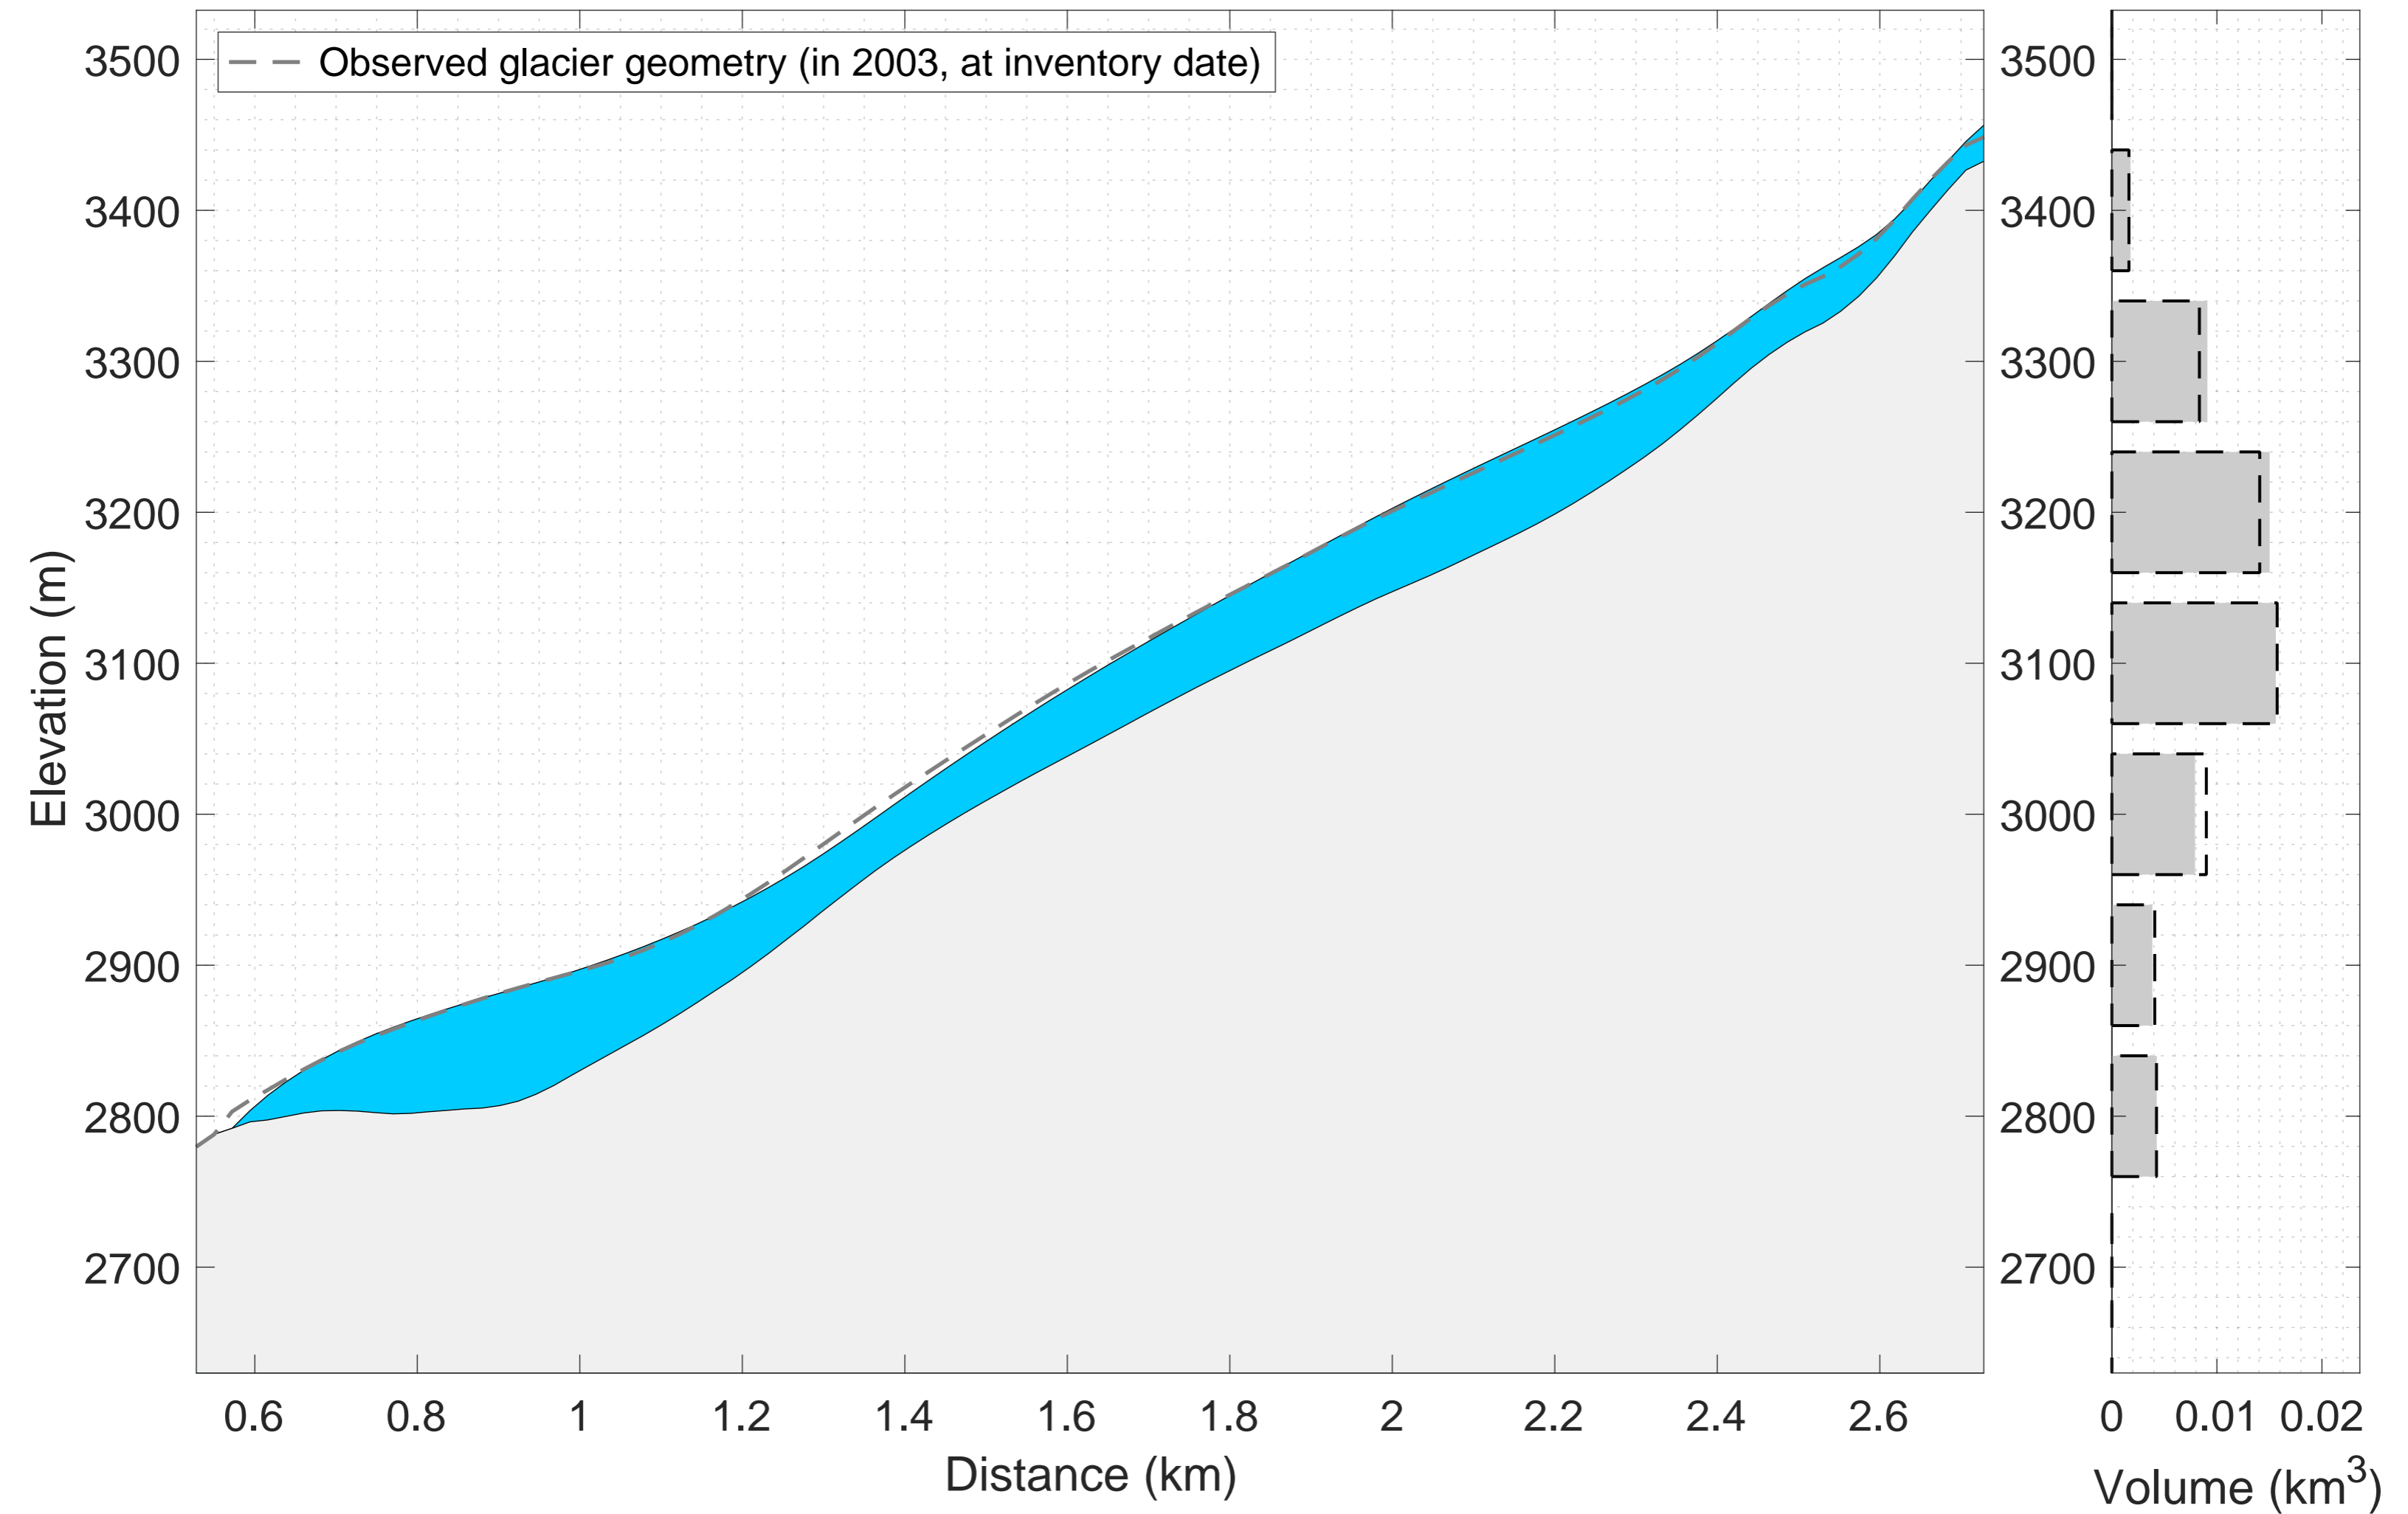

Supplement: Supplementary file 485 [file tc-13-1125-2019-supplement.zip]

**Modelled geometry (Glacier ID = 01505;  $A = 7.0826\text{e-}17 \text{ Pa}^{-3} \text{ a}^{-1}$ ;  $dx = 16 \text{ m}$ )**

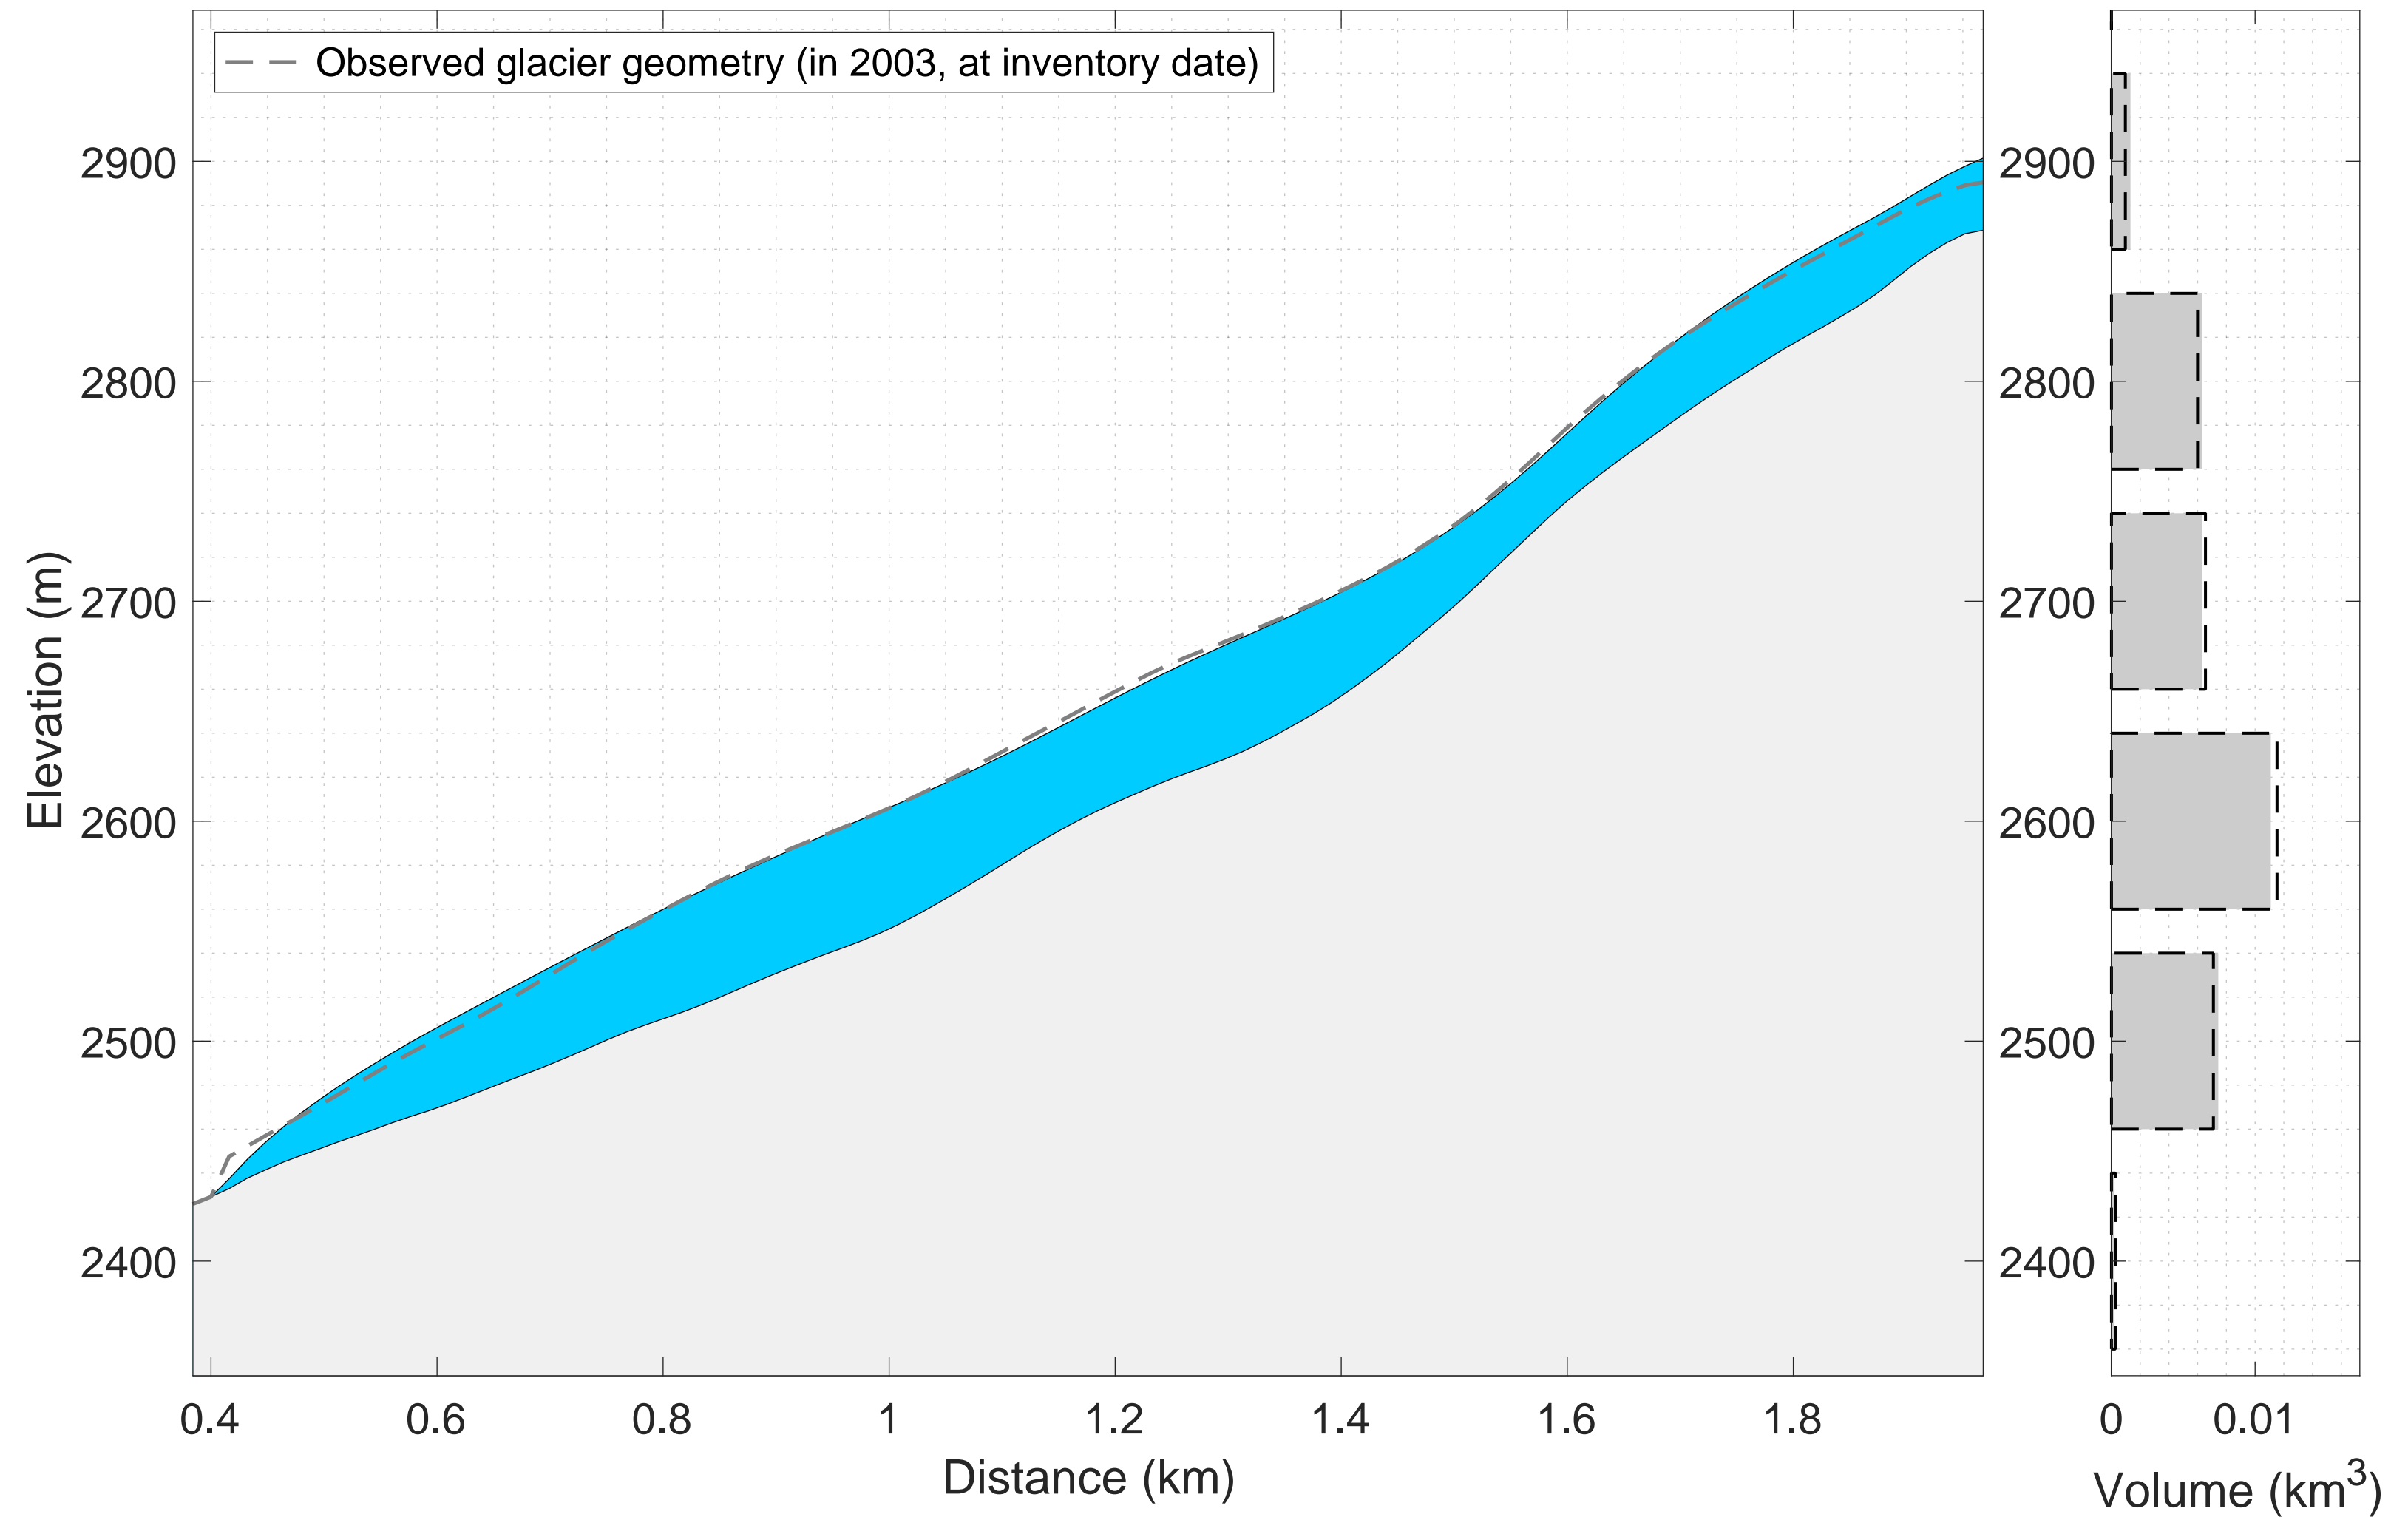

Supplement: Supplementary file 486 [file tc-13-1125-2019-supplement.zip]

**Modelled geometry (Glacier ID = 00923;  $A = 9.1205\text{e-}17 \text{ Pa}^{-3} \text{ a}^{-1}$ ;  $dx = 13 \text{ m}$ )**

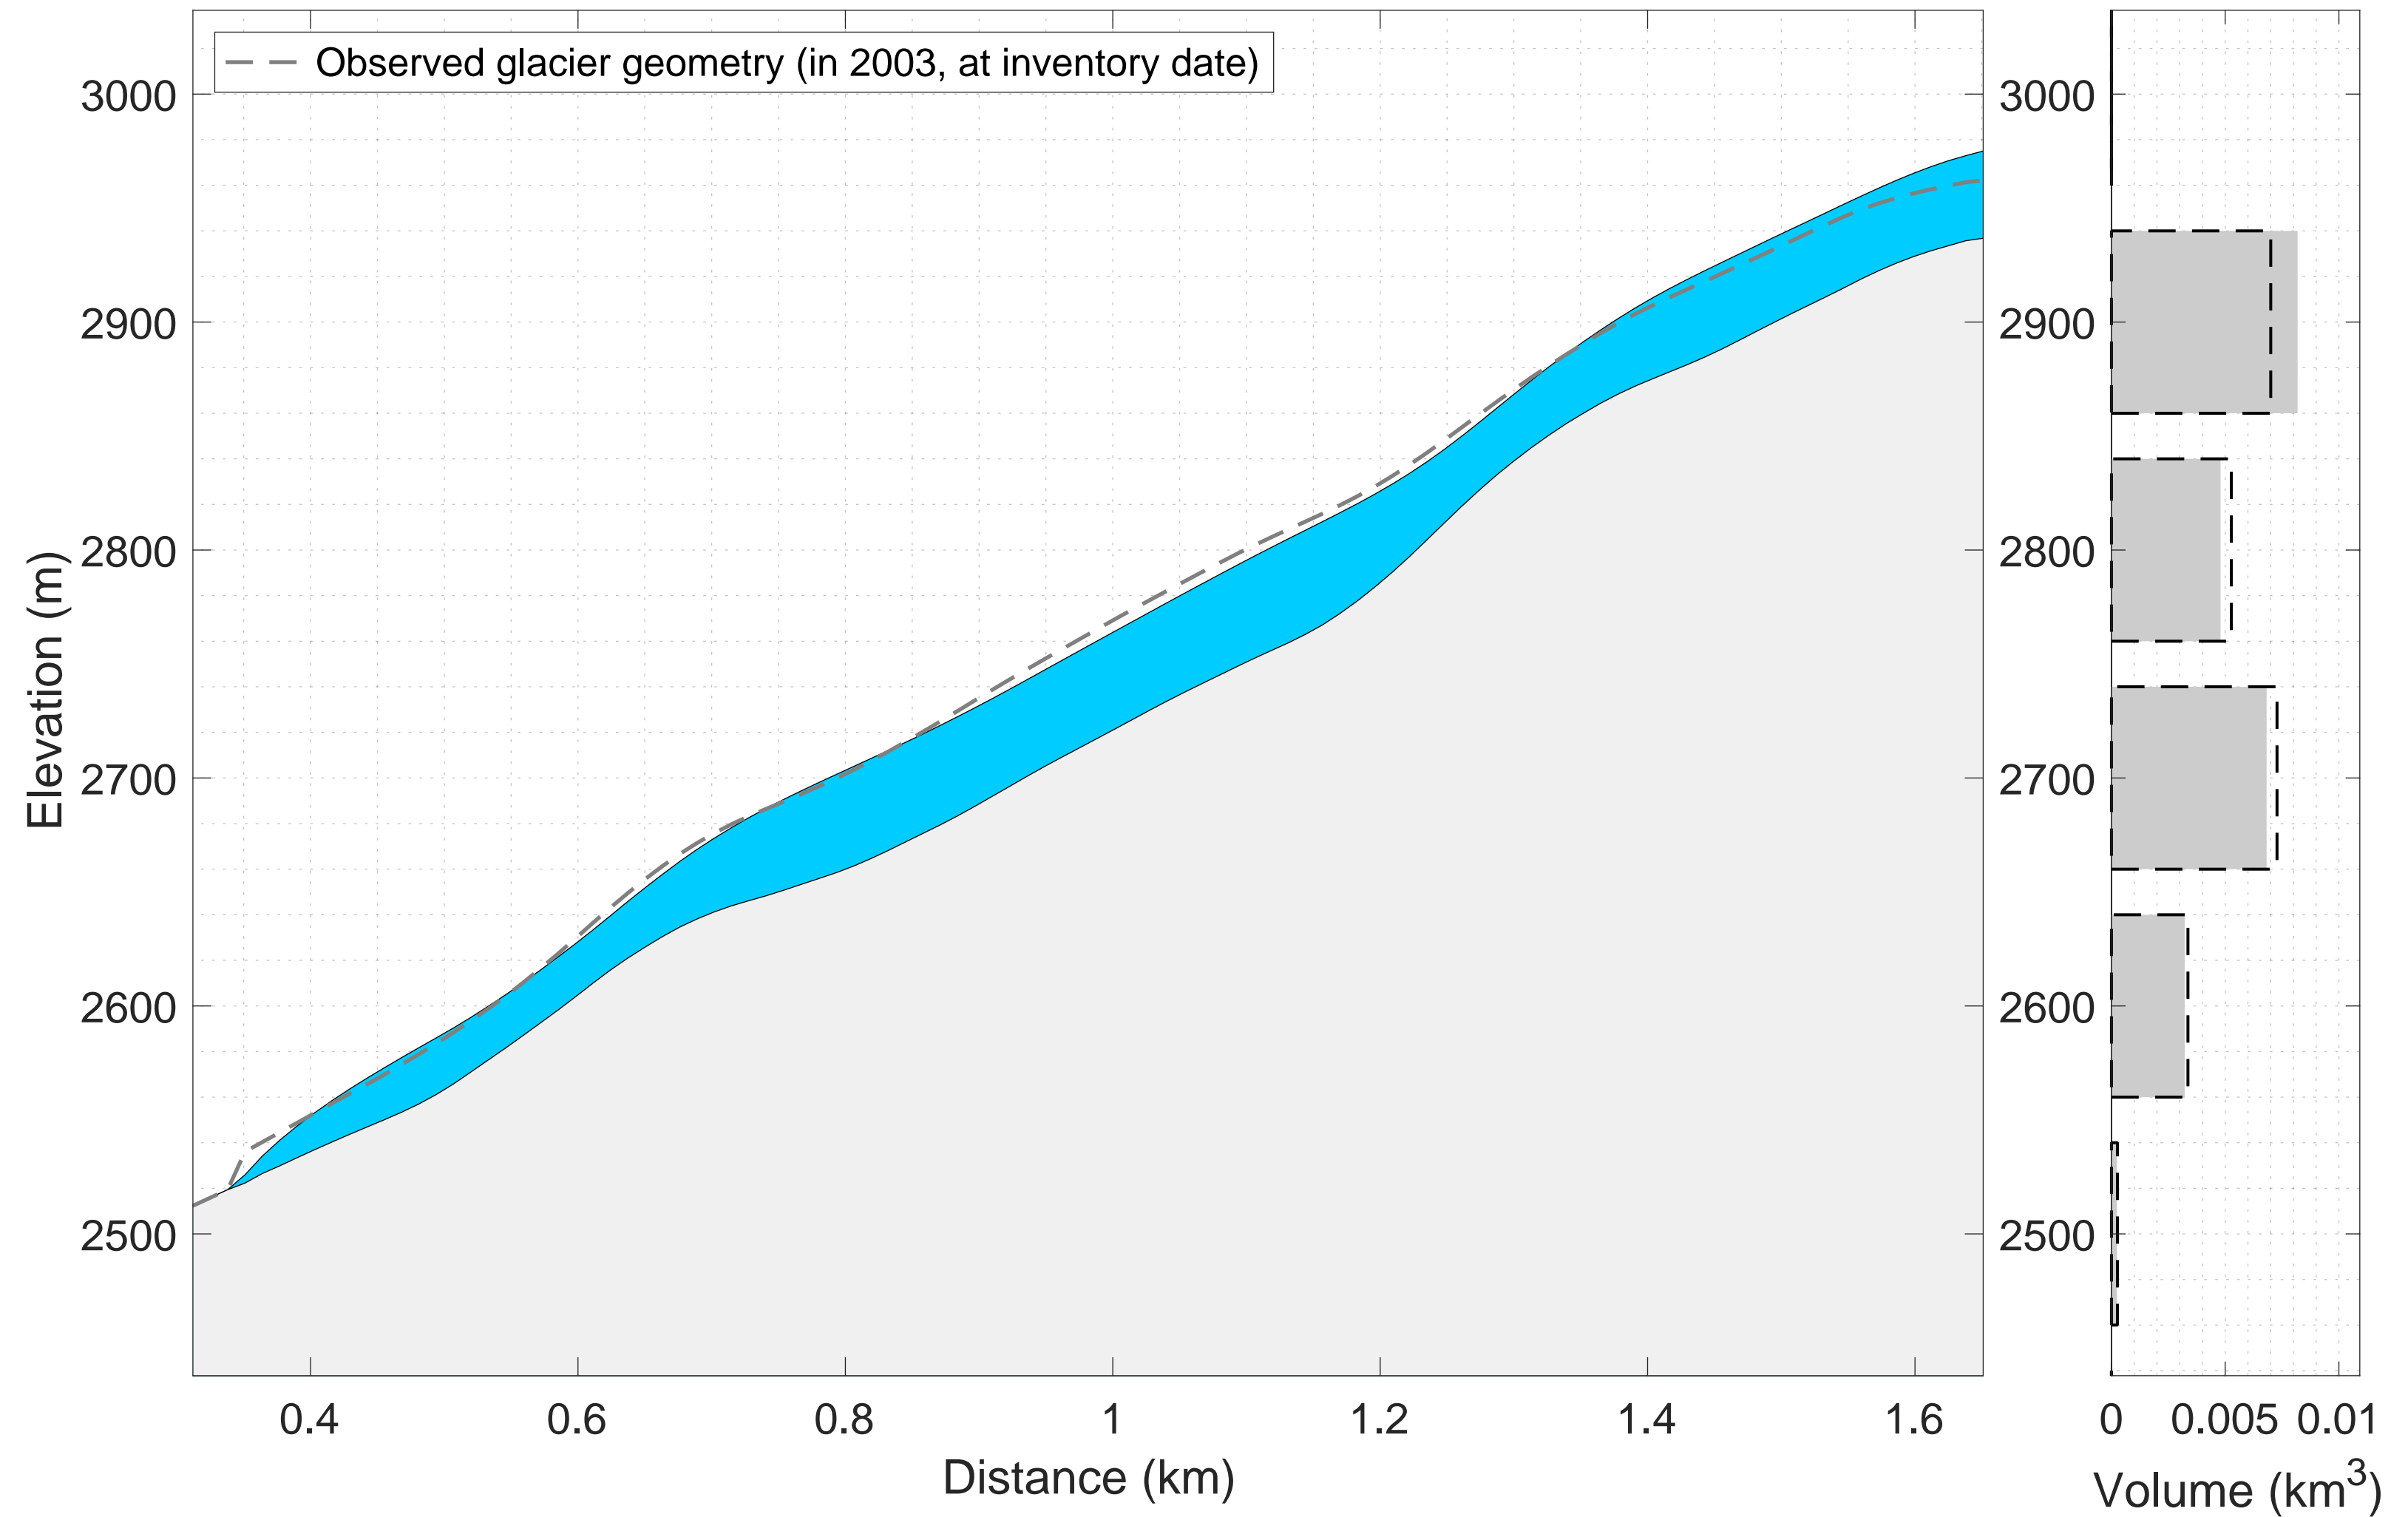

Supplement: Supplementary file 487 [file tc-13-1125-2019-supplement.zip]

**Modelled geometry (Glacier ID = 00380;  $A = 5.0091\text{e-}17 \text{ Pa}^{-3} \text{ a}^{-1}$ ;  $dx = 13 \text{ m}$ )**

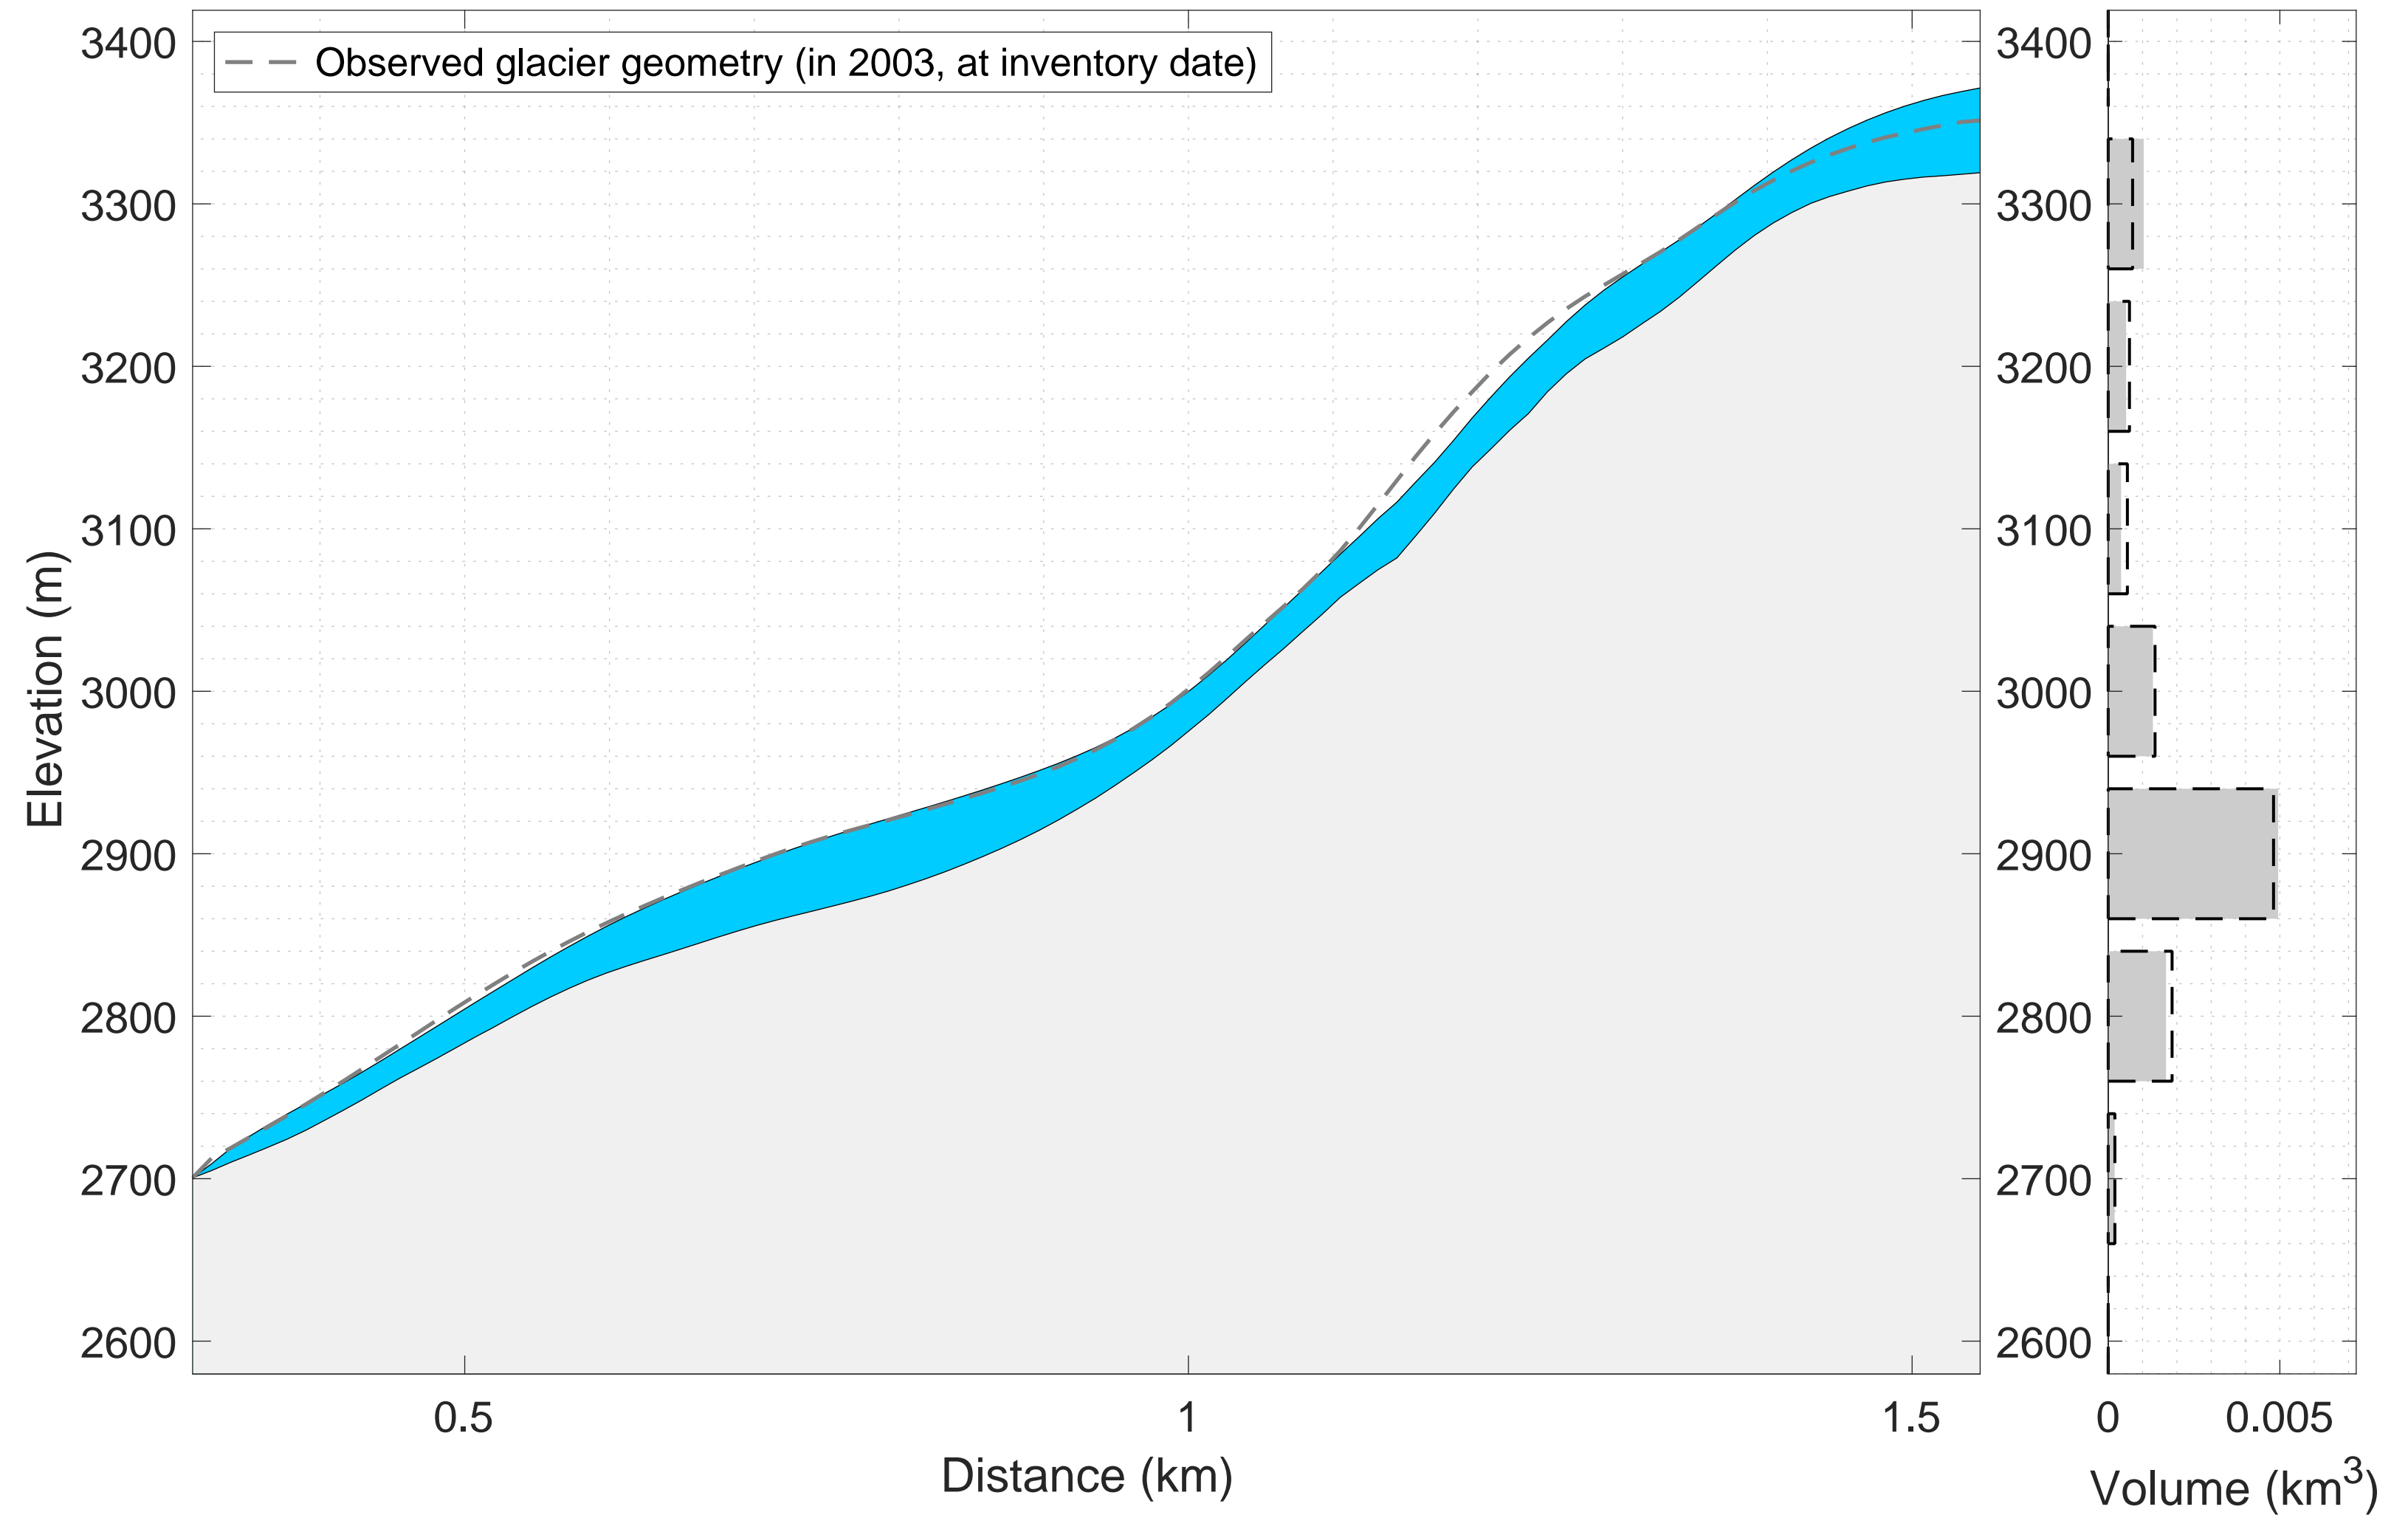

Supplement: Supplementary file 488 [file tc-13-1125-2019-supplement.zip]

**Modelled geometry (Glacier ID = 01885;  $A = 1.0278\text{e-}16 \text{ Pa}^{-3} \text{ a}^{-1}$ ;  $dx = 24 \text{ m}$ )**

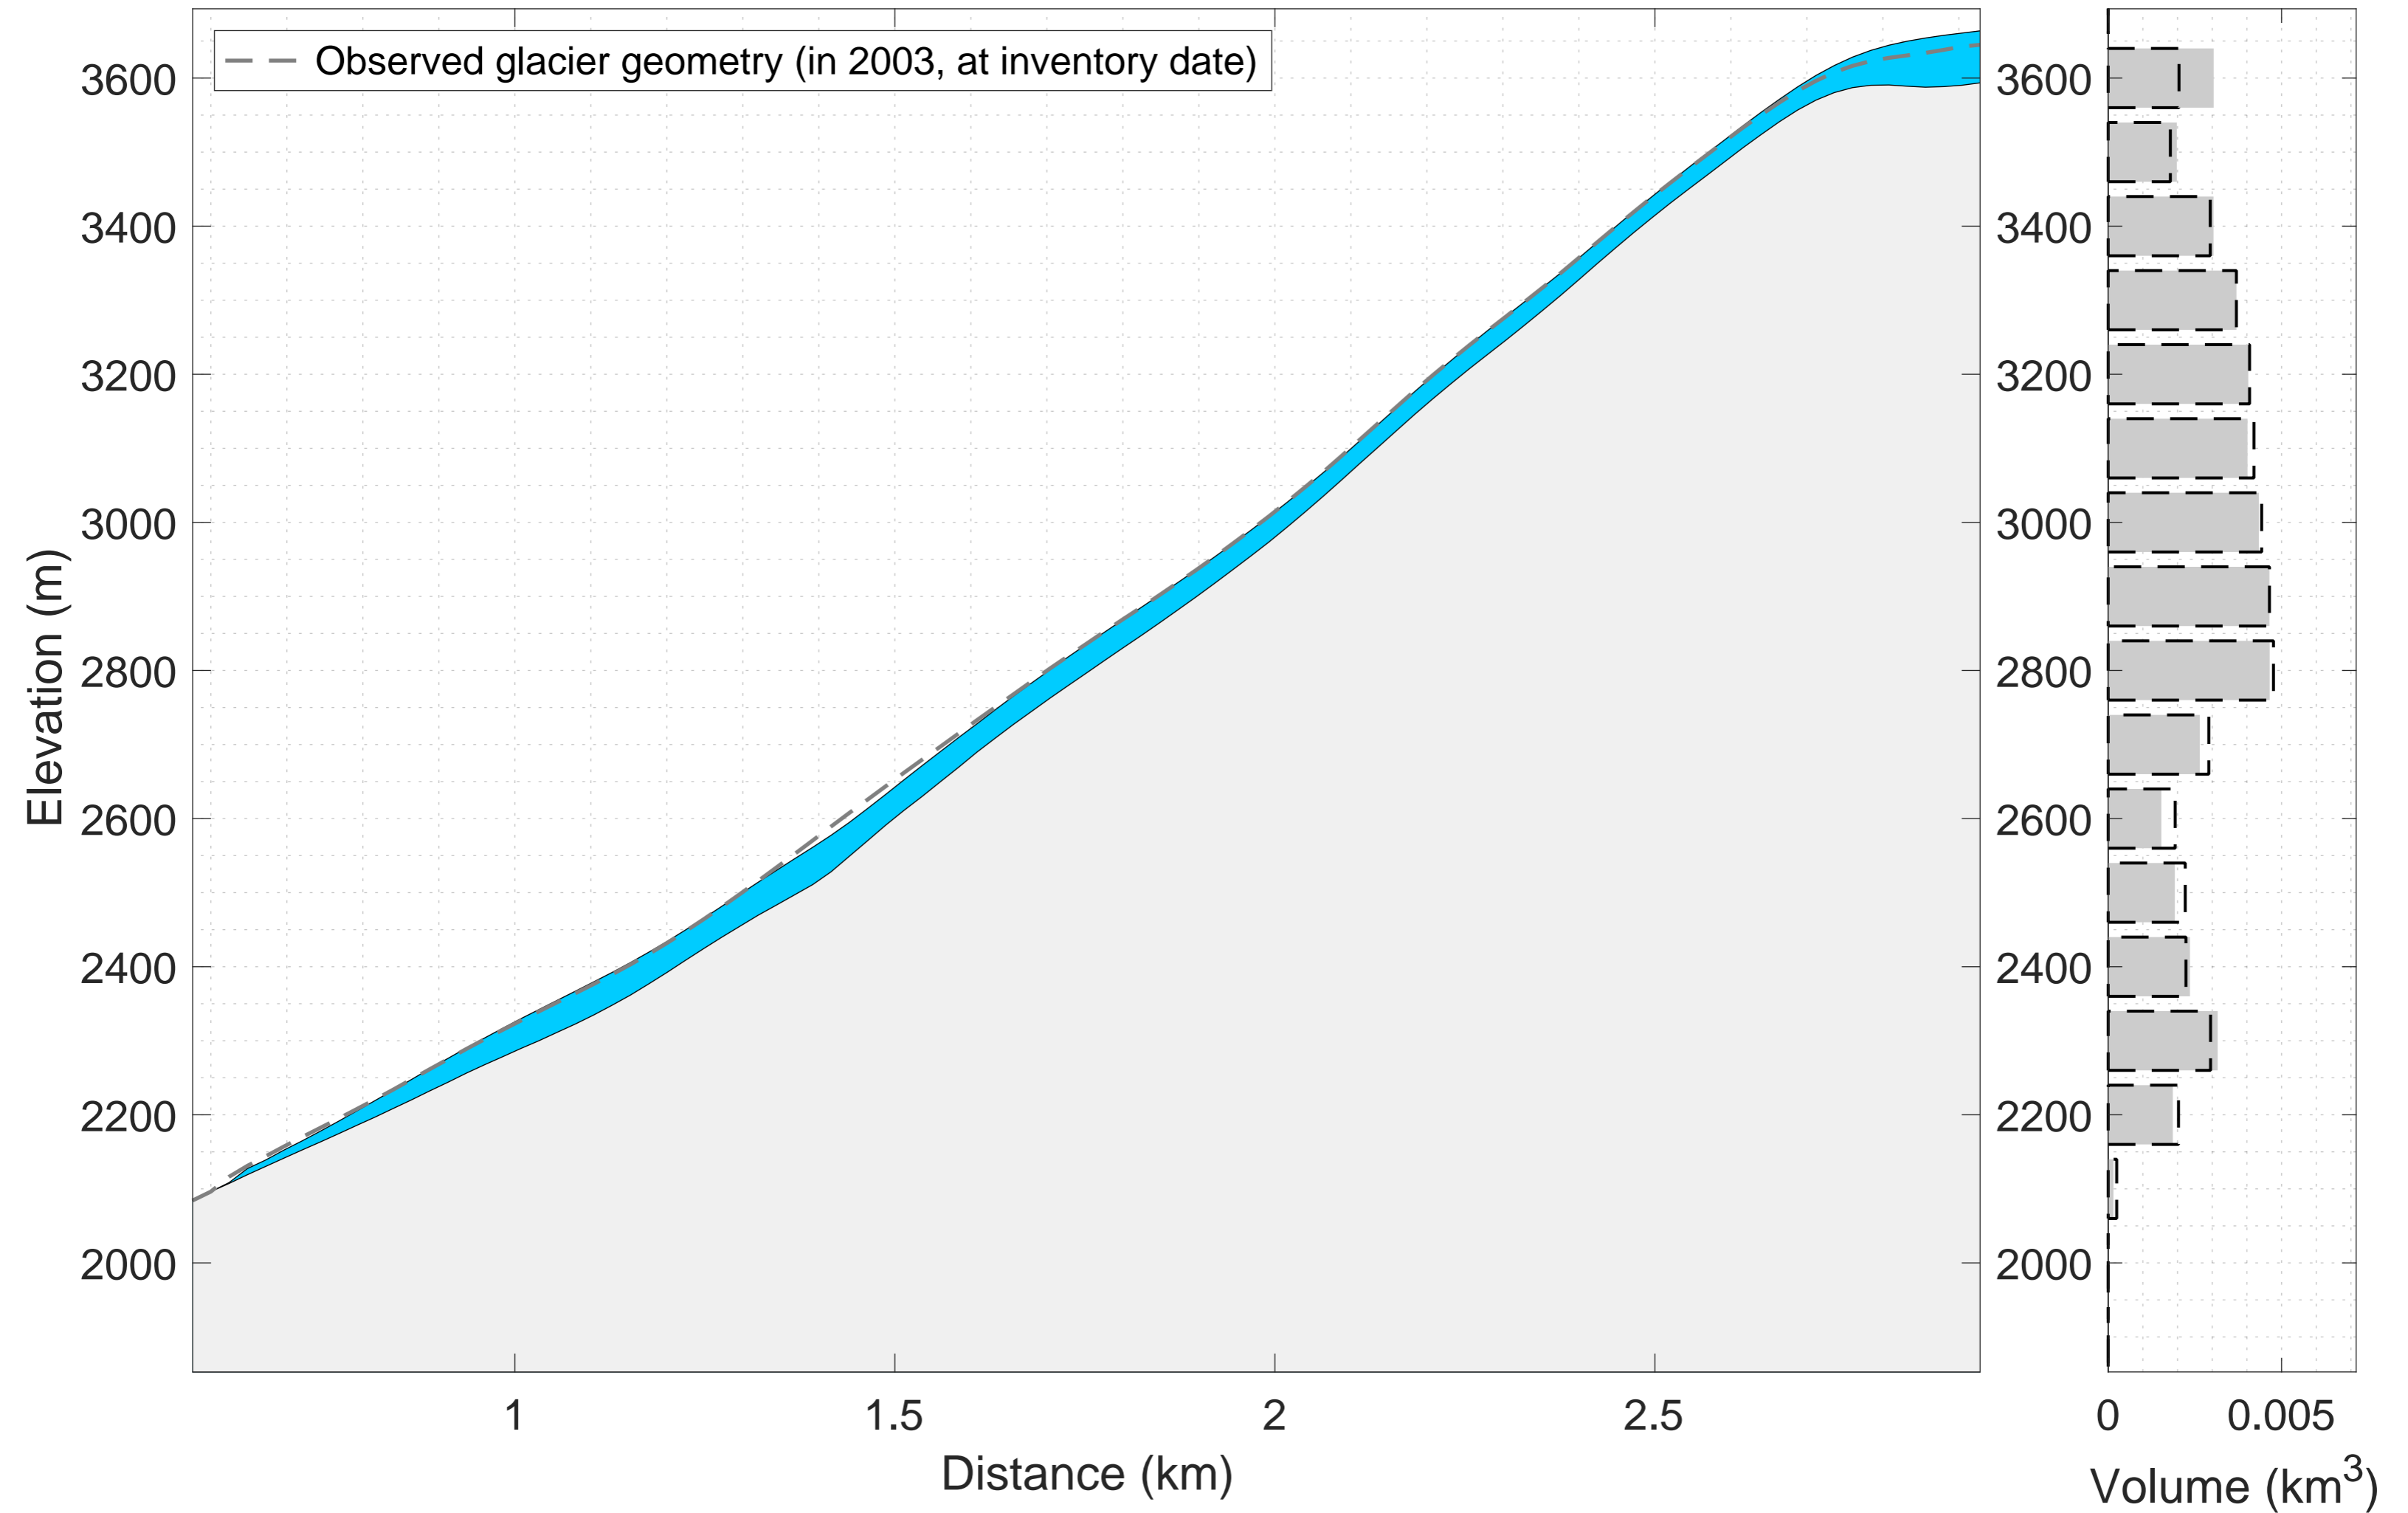

Supplement: Supplementary file 489 [file tc-13-1125-2019-supplement.zip]

**Modelled geometry (Glacier ID = 02771;  $A = 1.2559\text{e-}16 \text{ Pa}^{-3} \text{ a}^{-1}$ ;  $dx = 29 \text{ m}$ )**

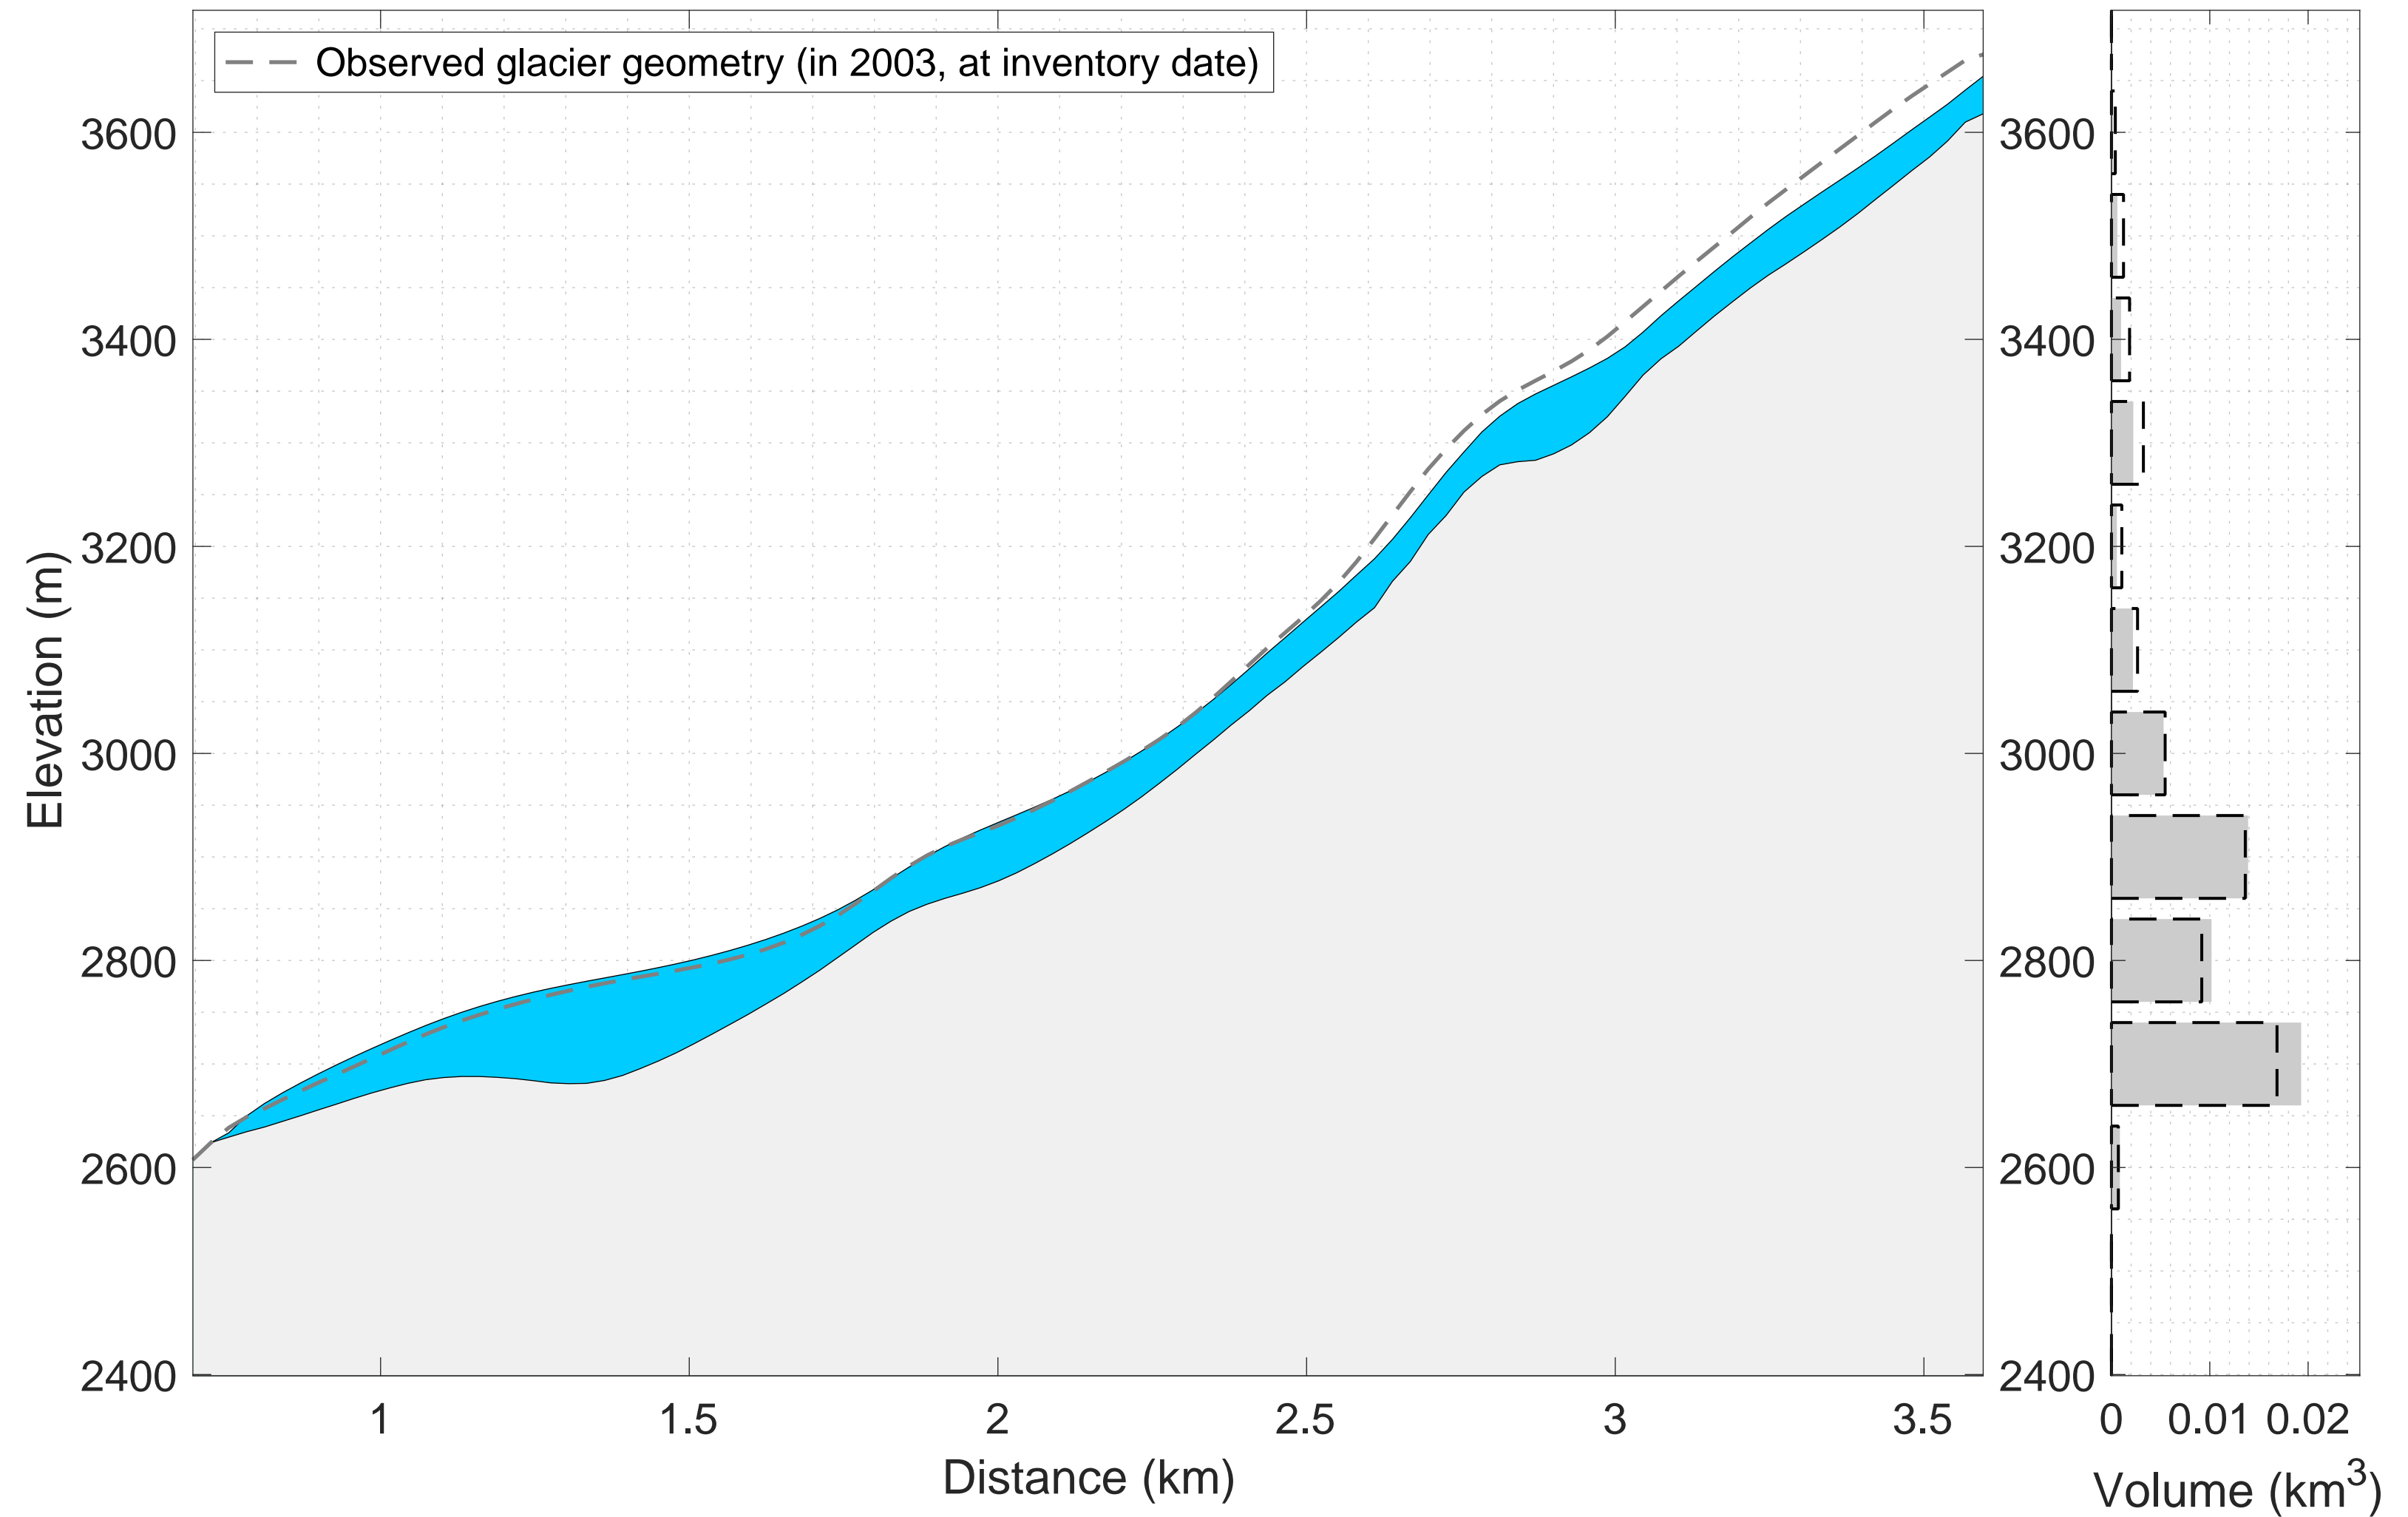

Supplement: Supplementary file 490 [file tc-13-1125-2019-supplement.zip]

**Modelled geometry (Glacier ID = 00774;  $A = 6.3146\text{e-}17 \text{ Pa}^{-3} \text{ a}^{-1}$ ;  $dx = 12 \text{ m}$ )**

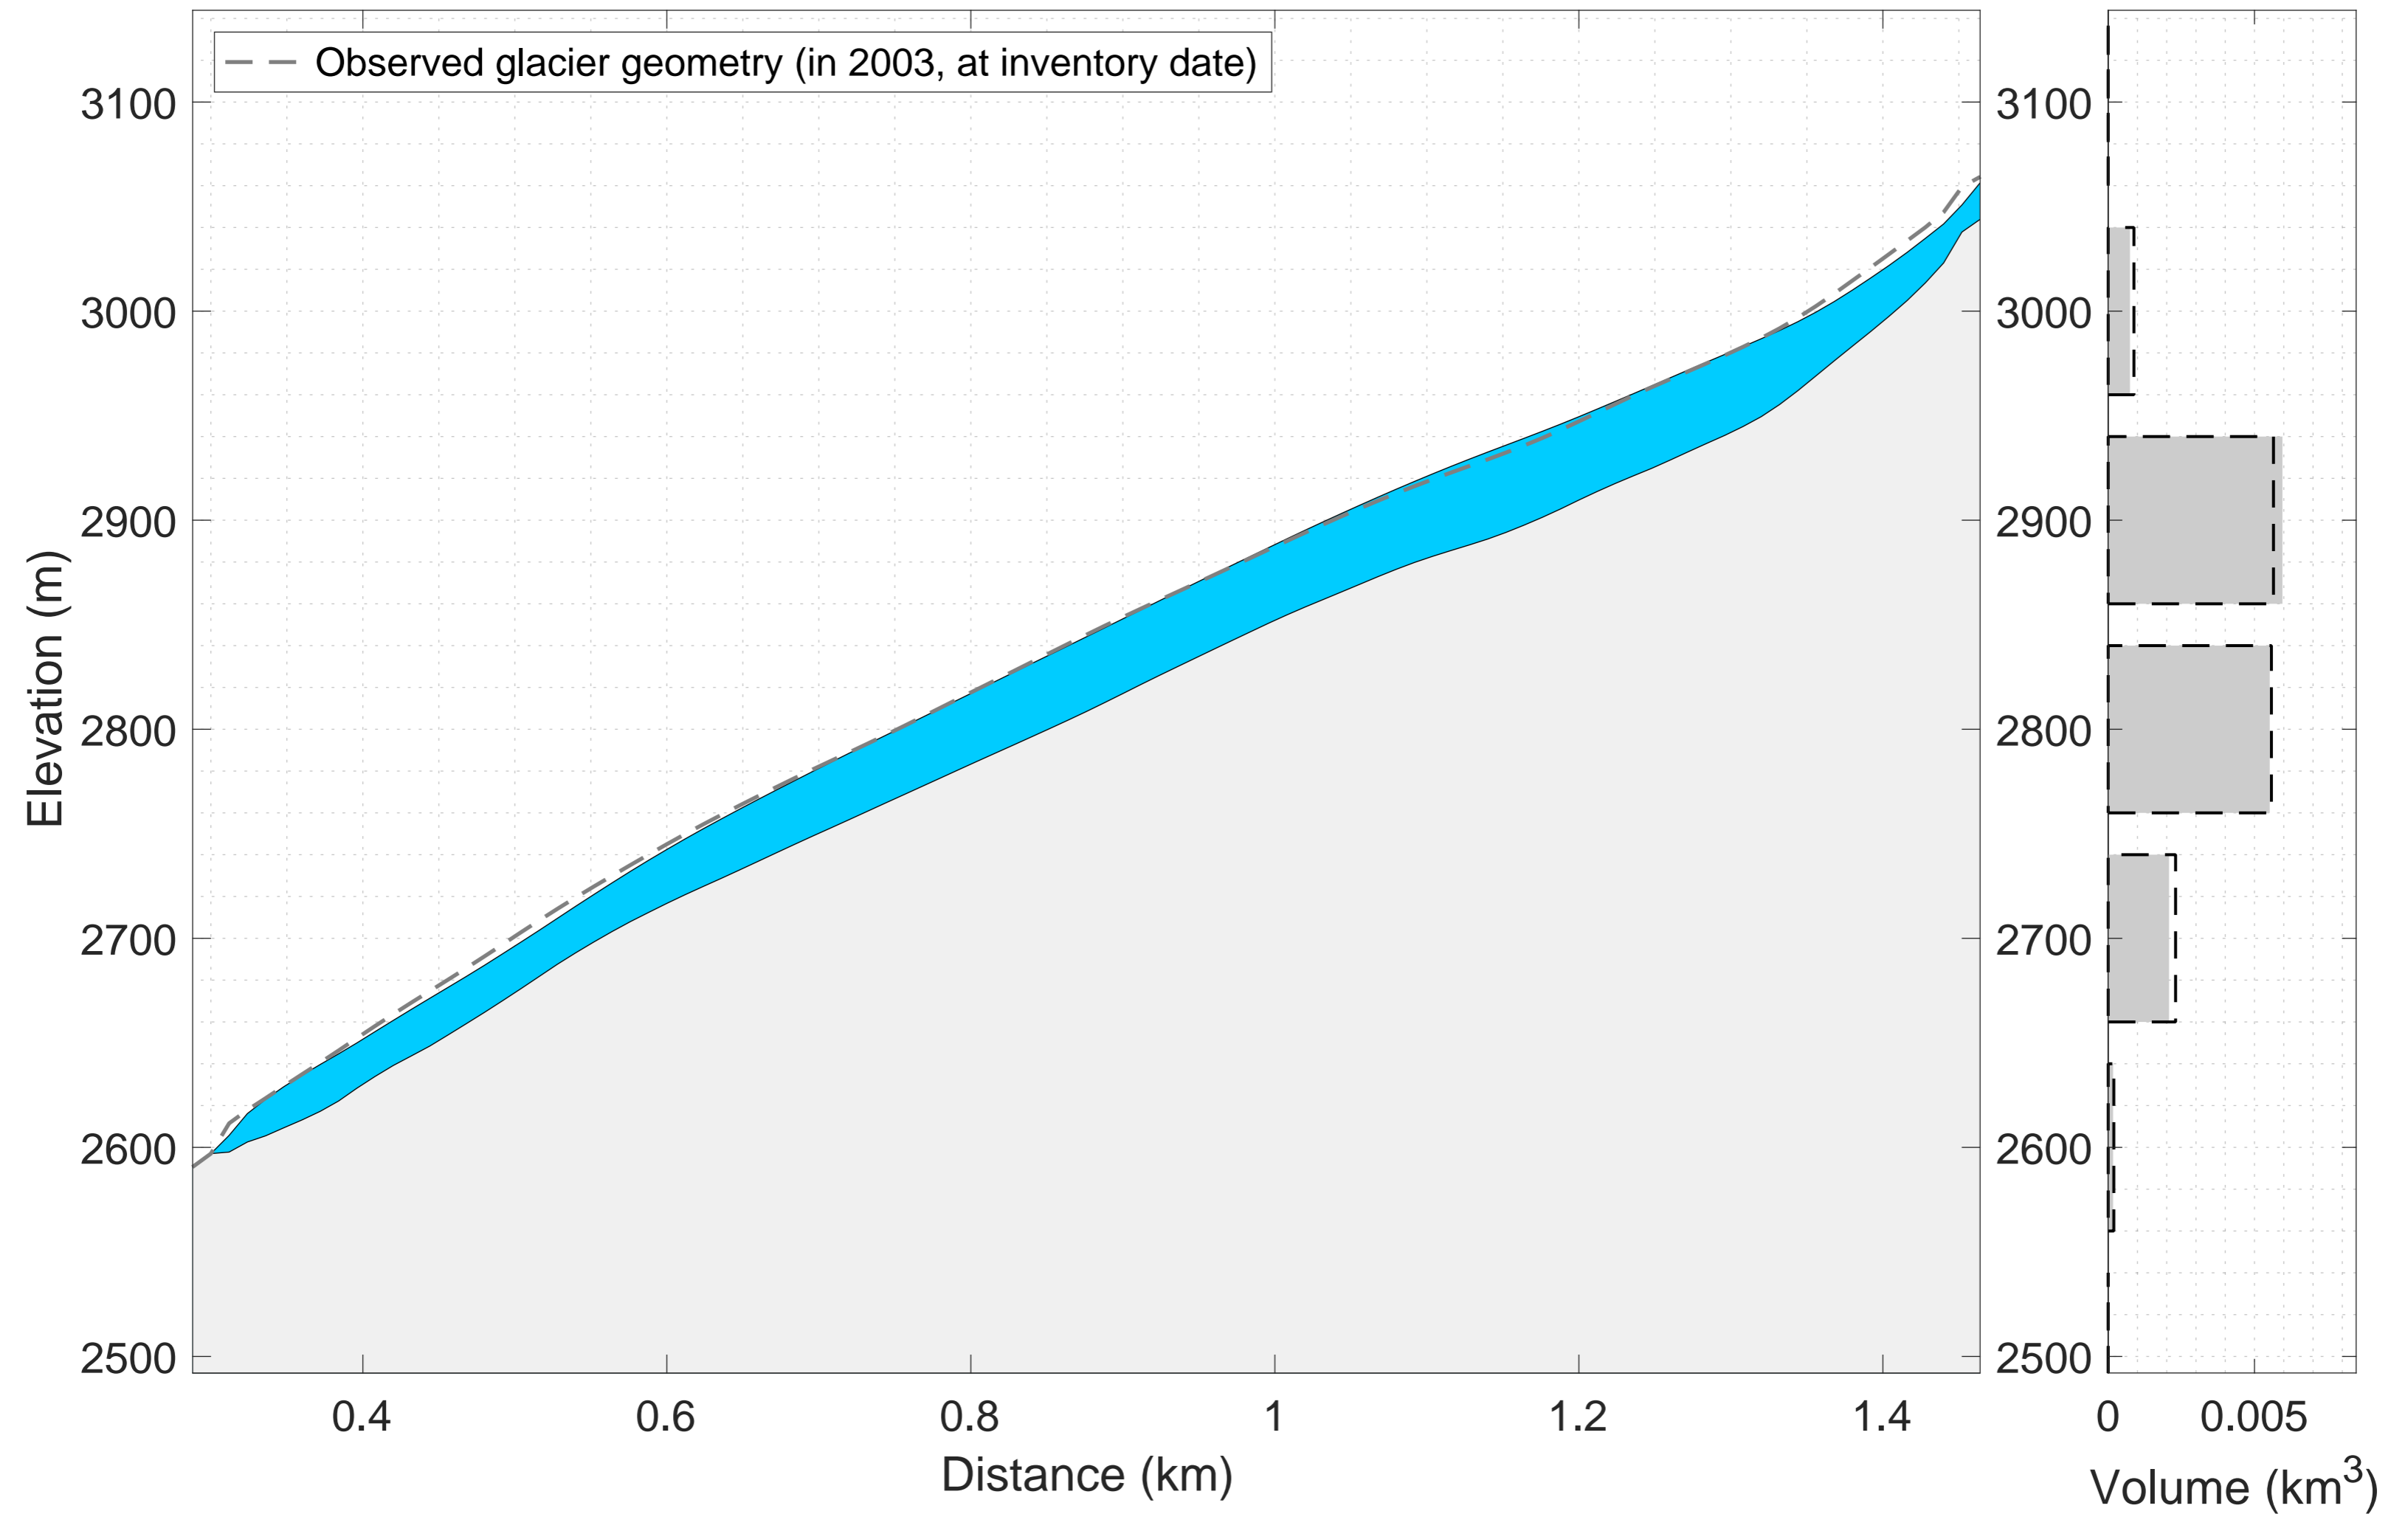

Supplement: Supplementary file 491 [file tc-13-1125-2019-supplement.zip]

**Modelled geometry (Glacier ID = 00562;  $A = 1.1186\text{e-}16 \text{ Pa}^{-3} \text{ a}^{-1}$ ;  $dx = 28 \text{ m}$ )**

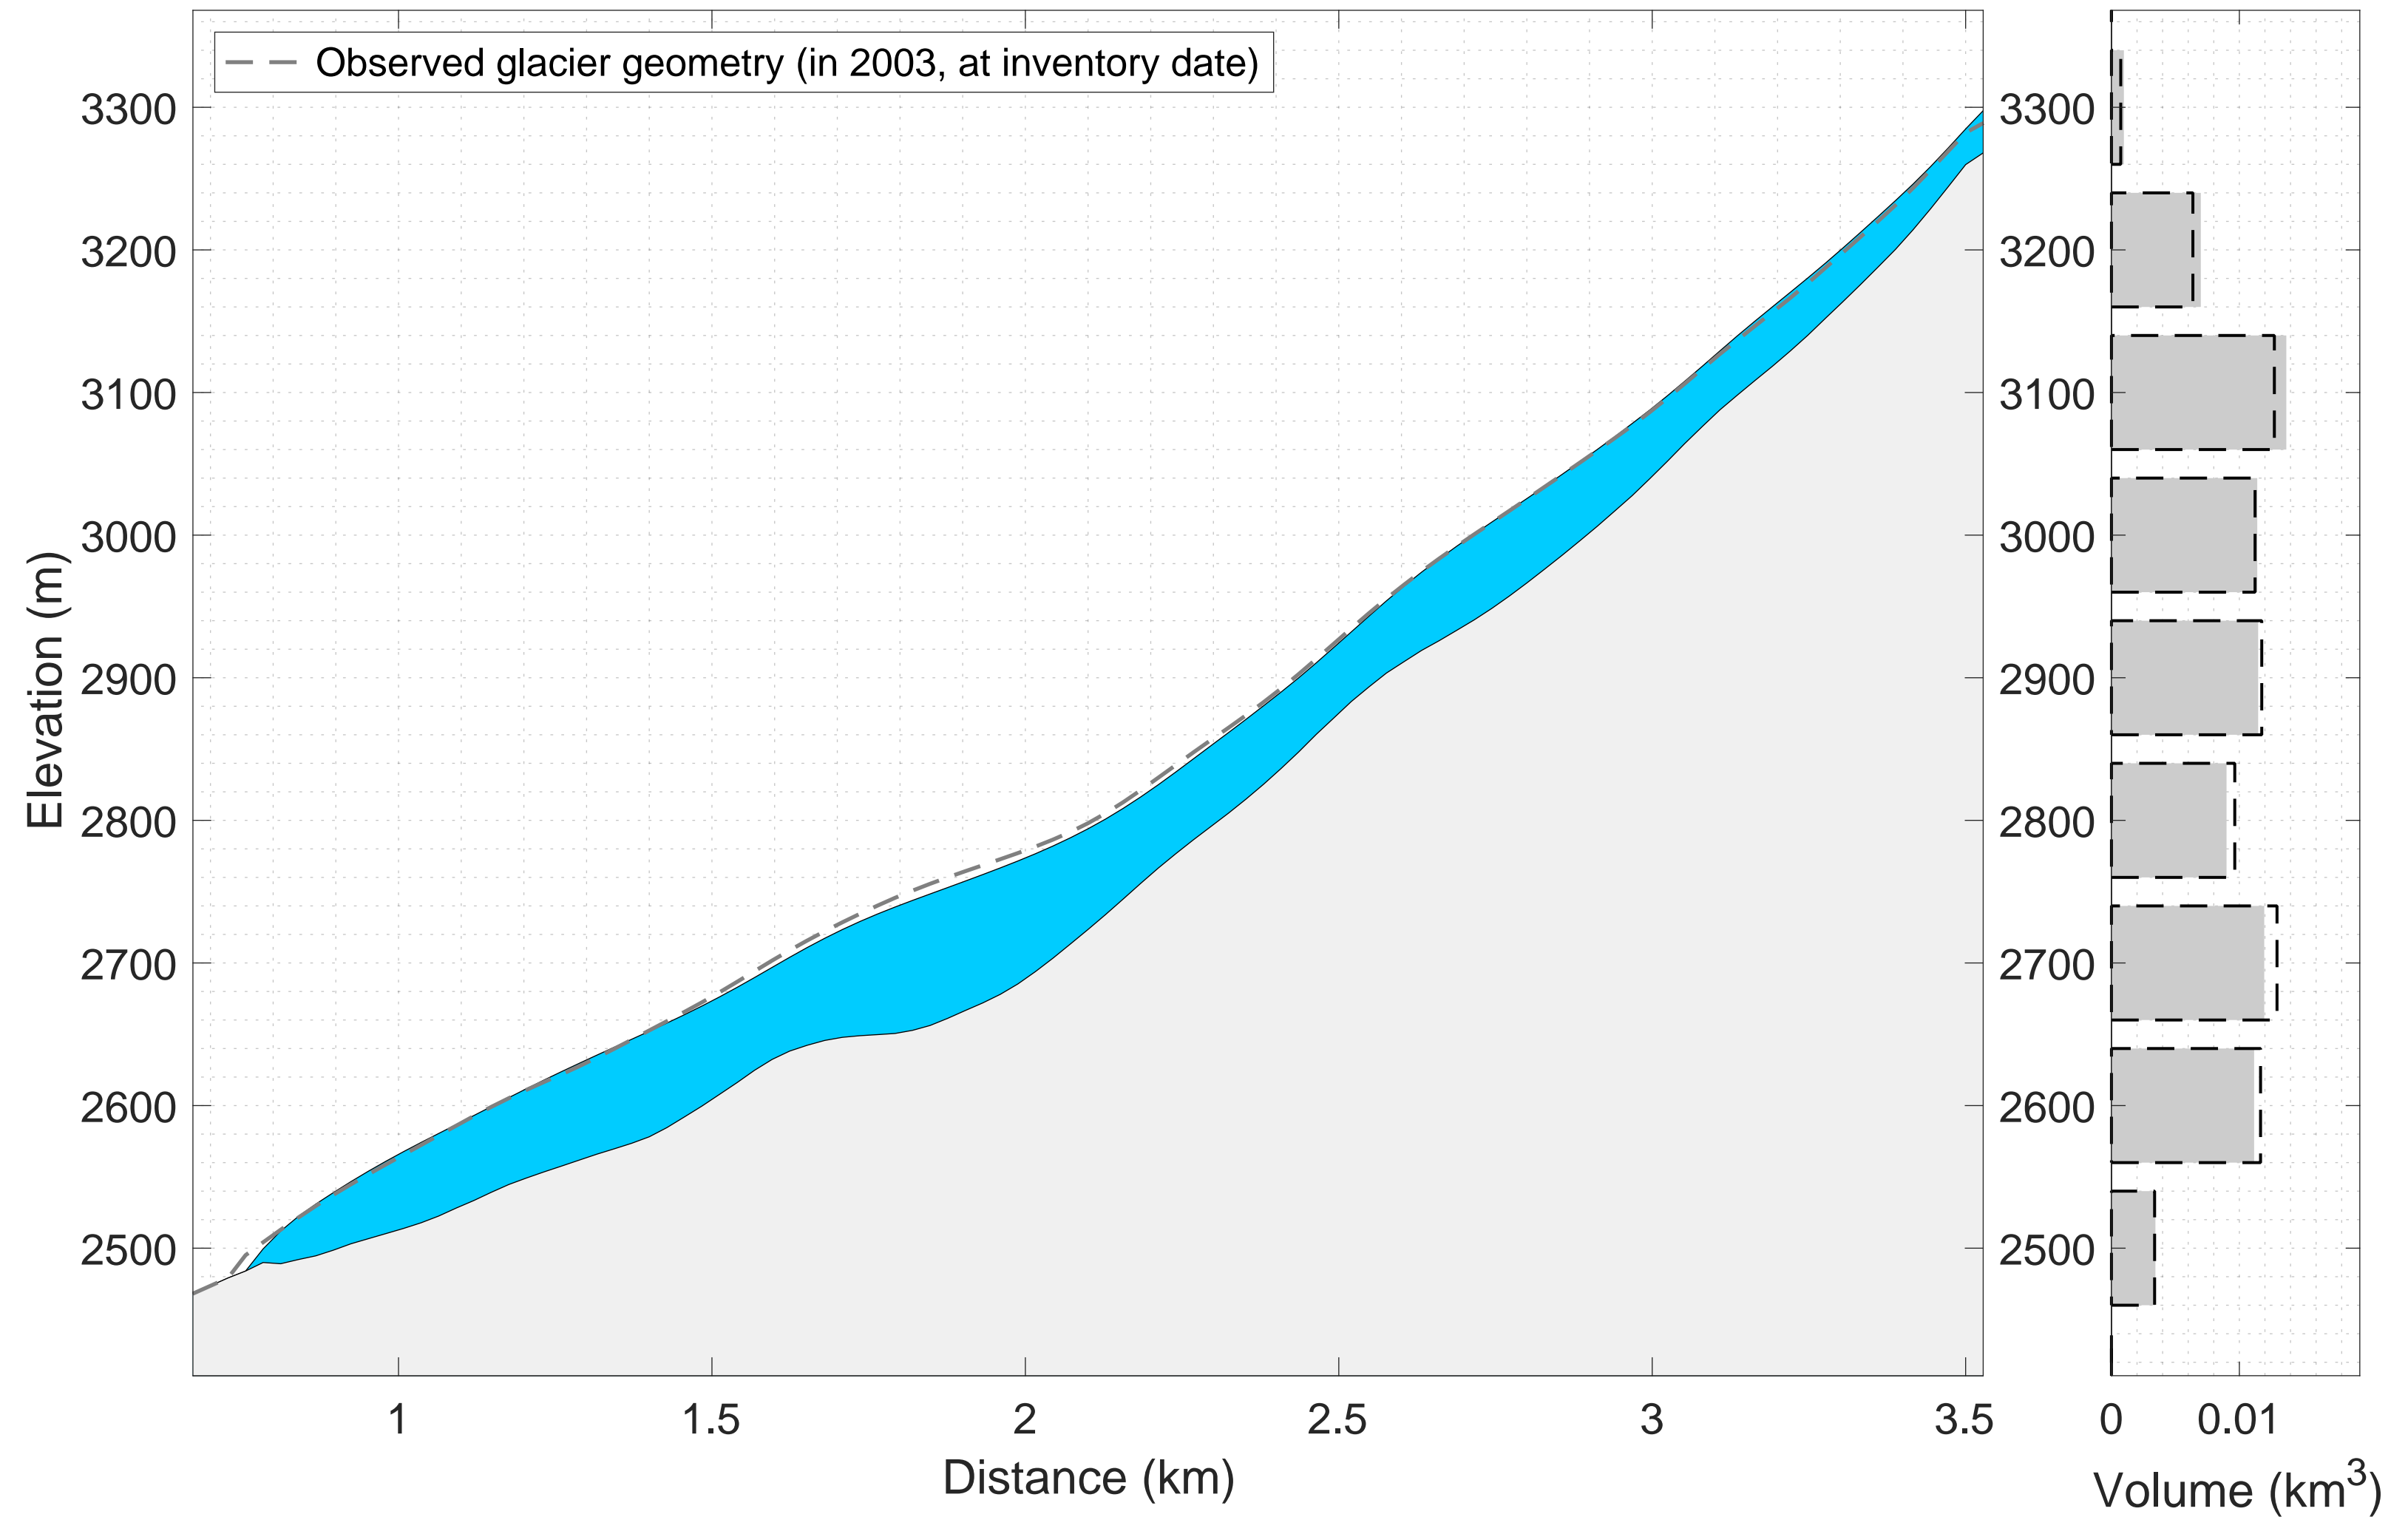

Supplement: Supplementary file 492 [file tc-13-1125-2019-supplement.zip]

**Modelled geometry (Glacier ID = 00647;  $A = 1.4067\text{e-}16 \text{ Pa}^{-3} \text{ a}^{-1}$ ;  $dx = 19 \text{ m}$ )**

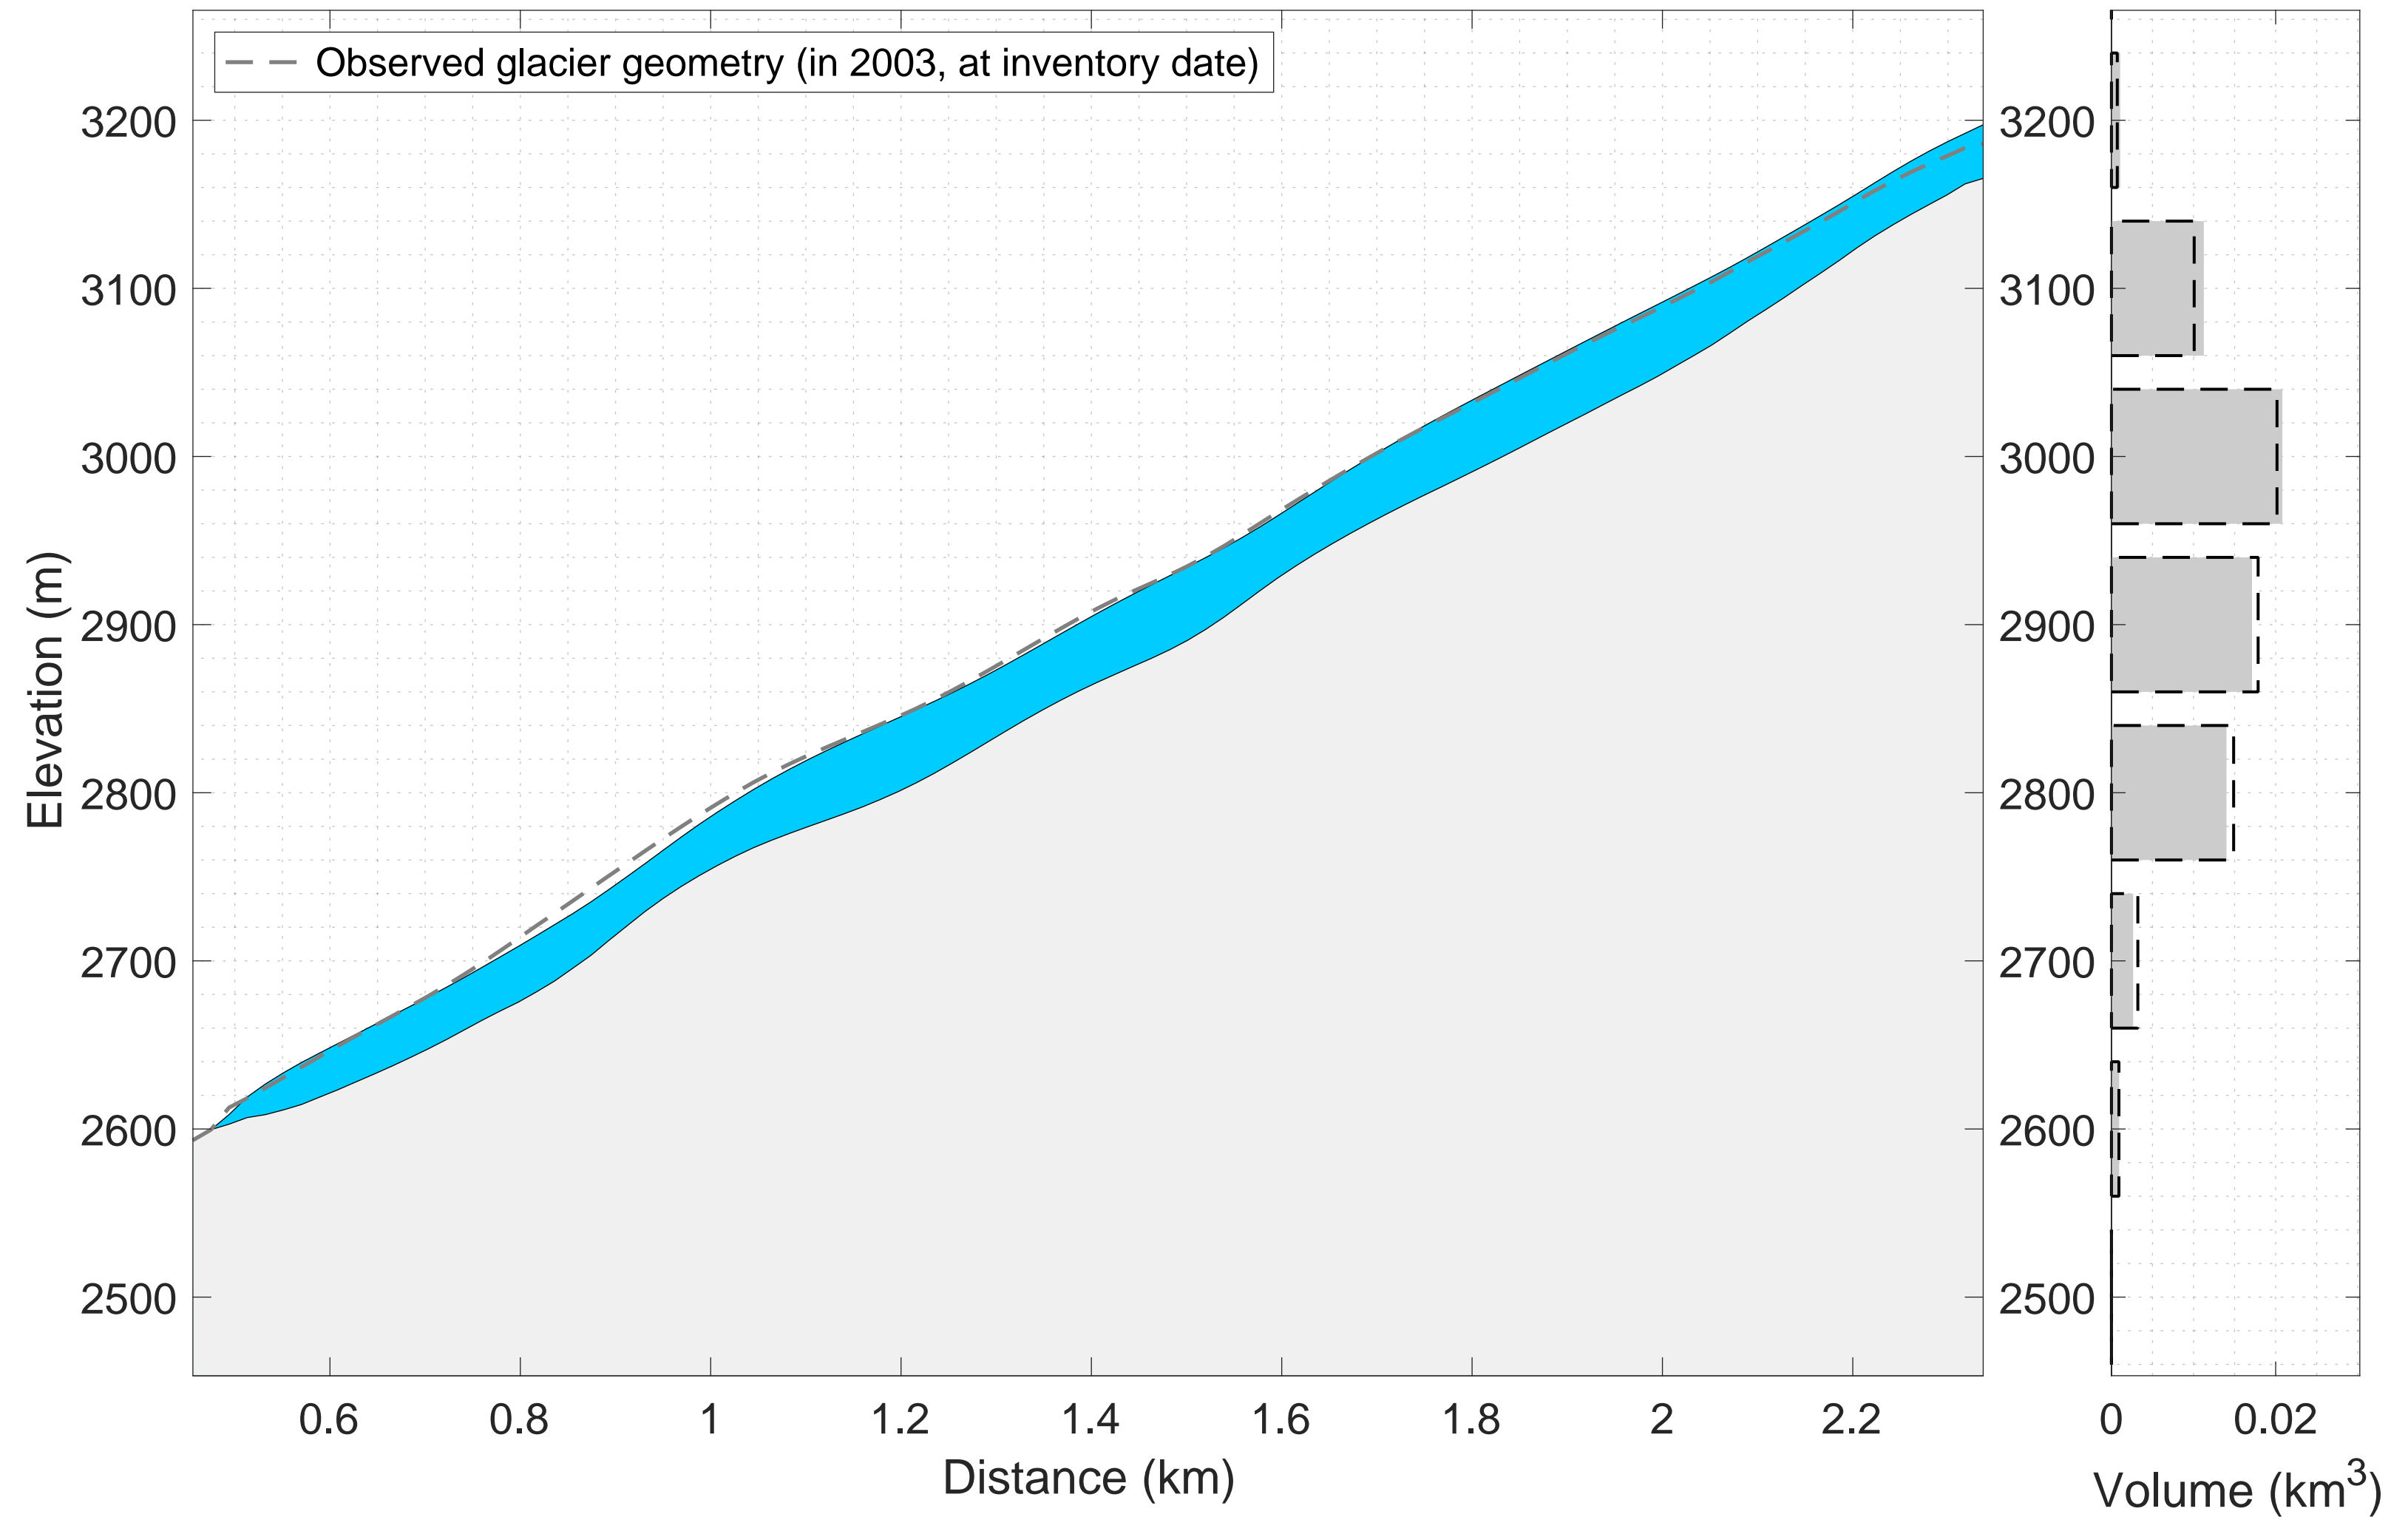

Supplement: Supplementary file 493 [file tc-13-1125-2019-supplement.zip]

**Modelled geometry (Glacier ID = 02450;  $A = 1.5659\text{e-}16 \text{ Pa}^{-3} \text{ a}^{-1}$ ;  $dx = 10 \text{ m}$ )**

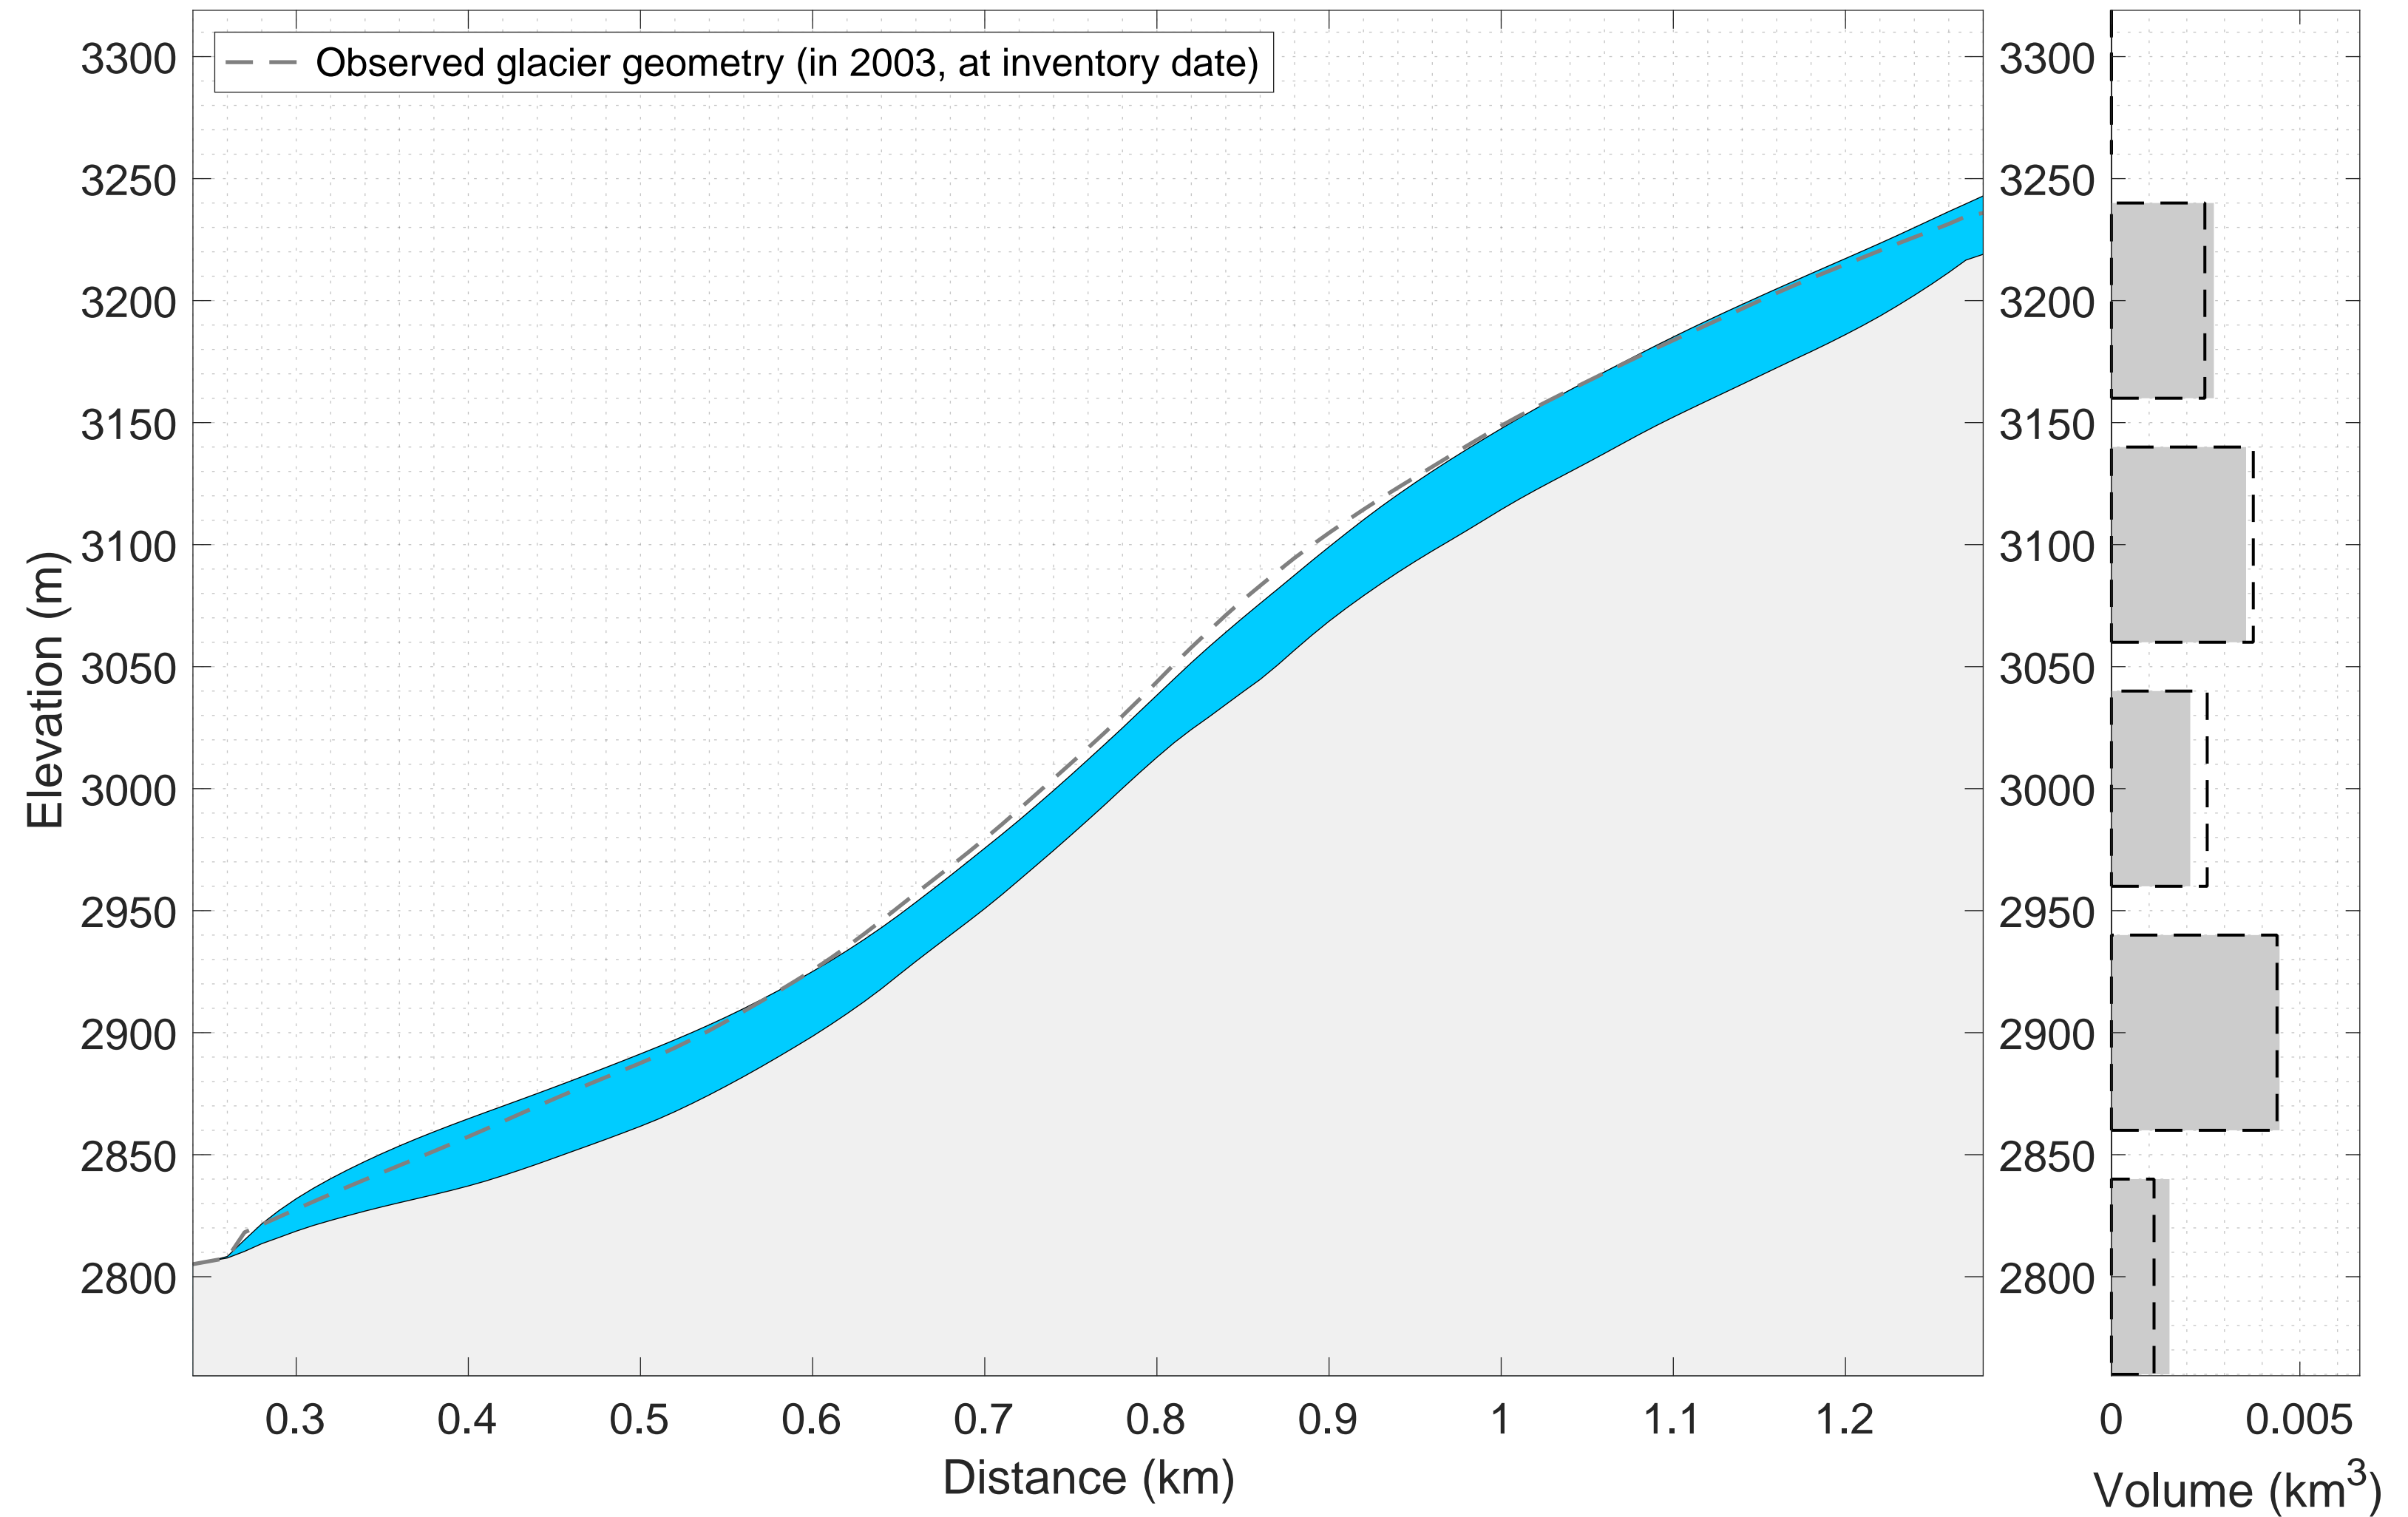

Supplement: Supplementary file 494 [file tc-13-1125-2019-supplement.zip]

**Modelled geometry (Glacier ID = 03303;  $A = 1.7089\text{e-}16 \text{ Pa}^{-3} \text{ a}^{-1}$ ;  $dx = 20 \text{ m}$ )**

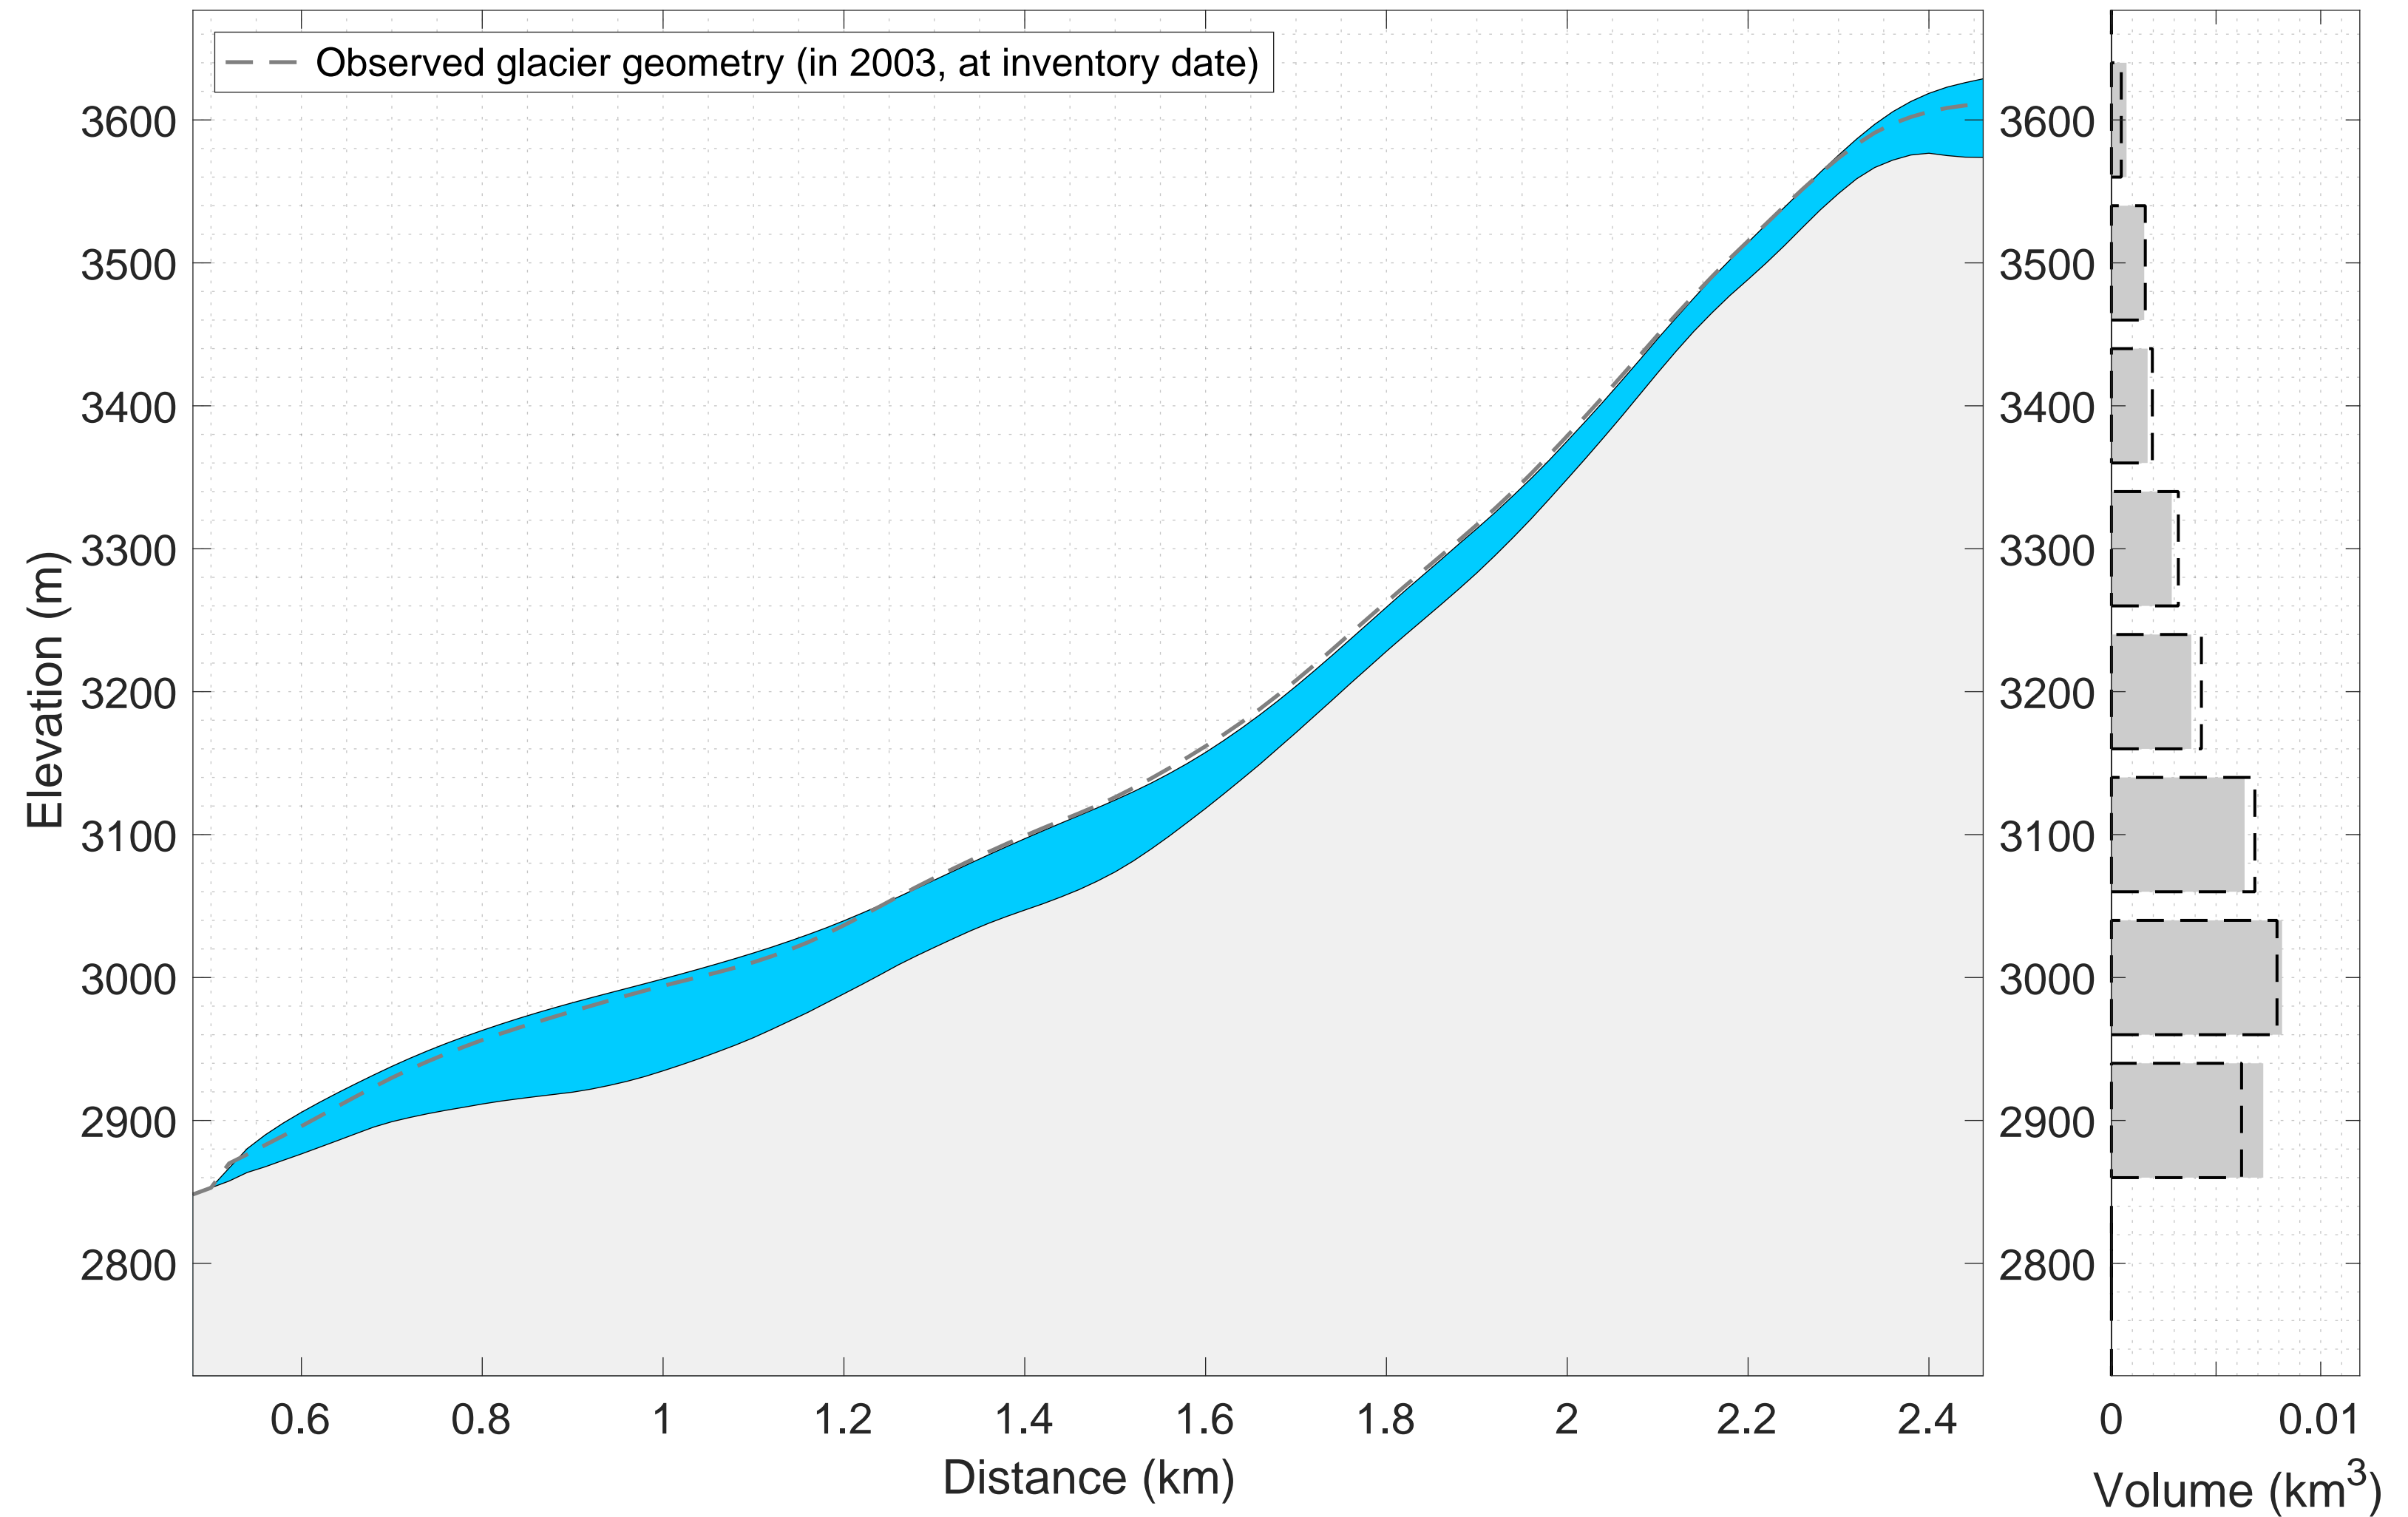

Supplement: Supplementary file 495 [file tc-13-1125-2019-supplement.zip]

**Modelled geometry (Glacier ID = 01999;  $A = 5.9303\text{e-}17 \text{ Pa}^{-3} \text{ a}^{-1}$ ;  $dx = 11 \text{ m}$ )**

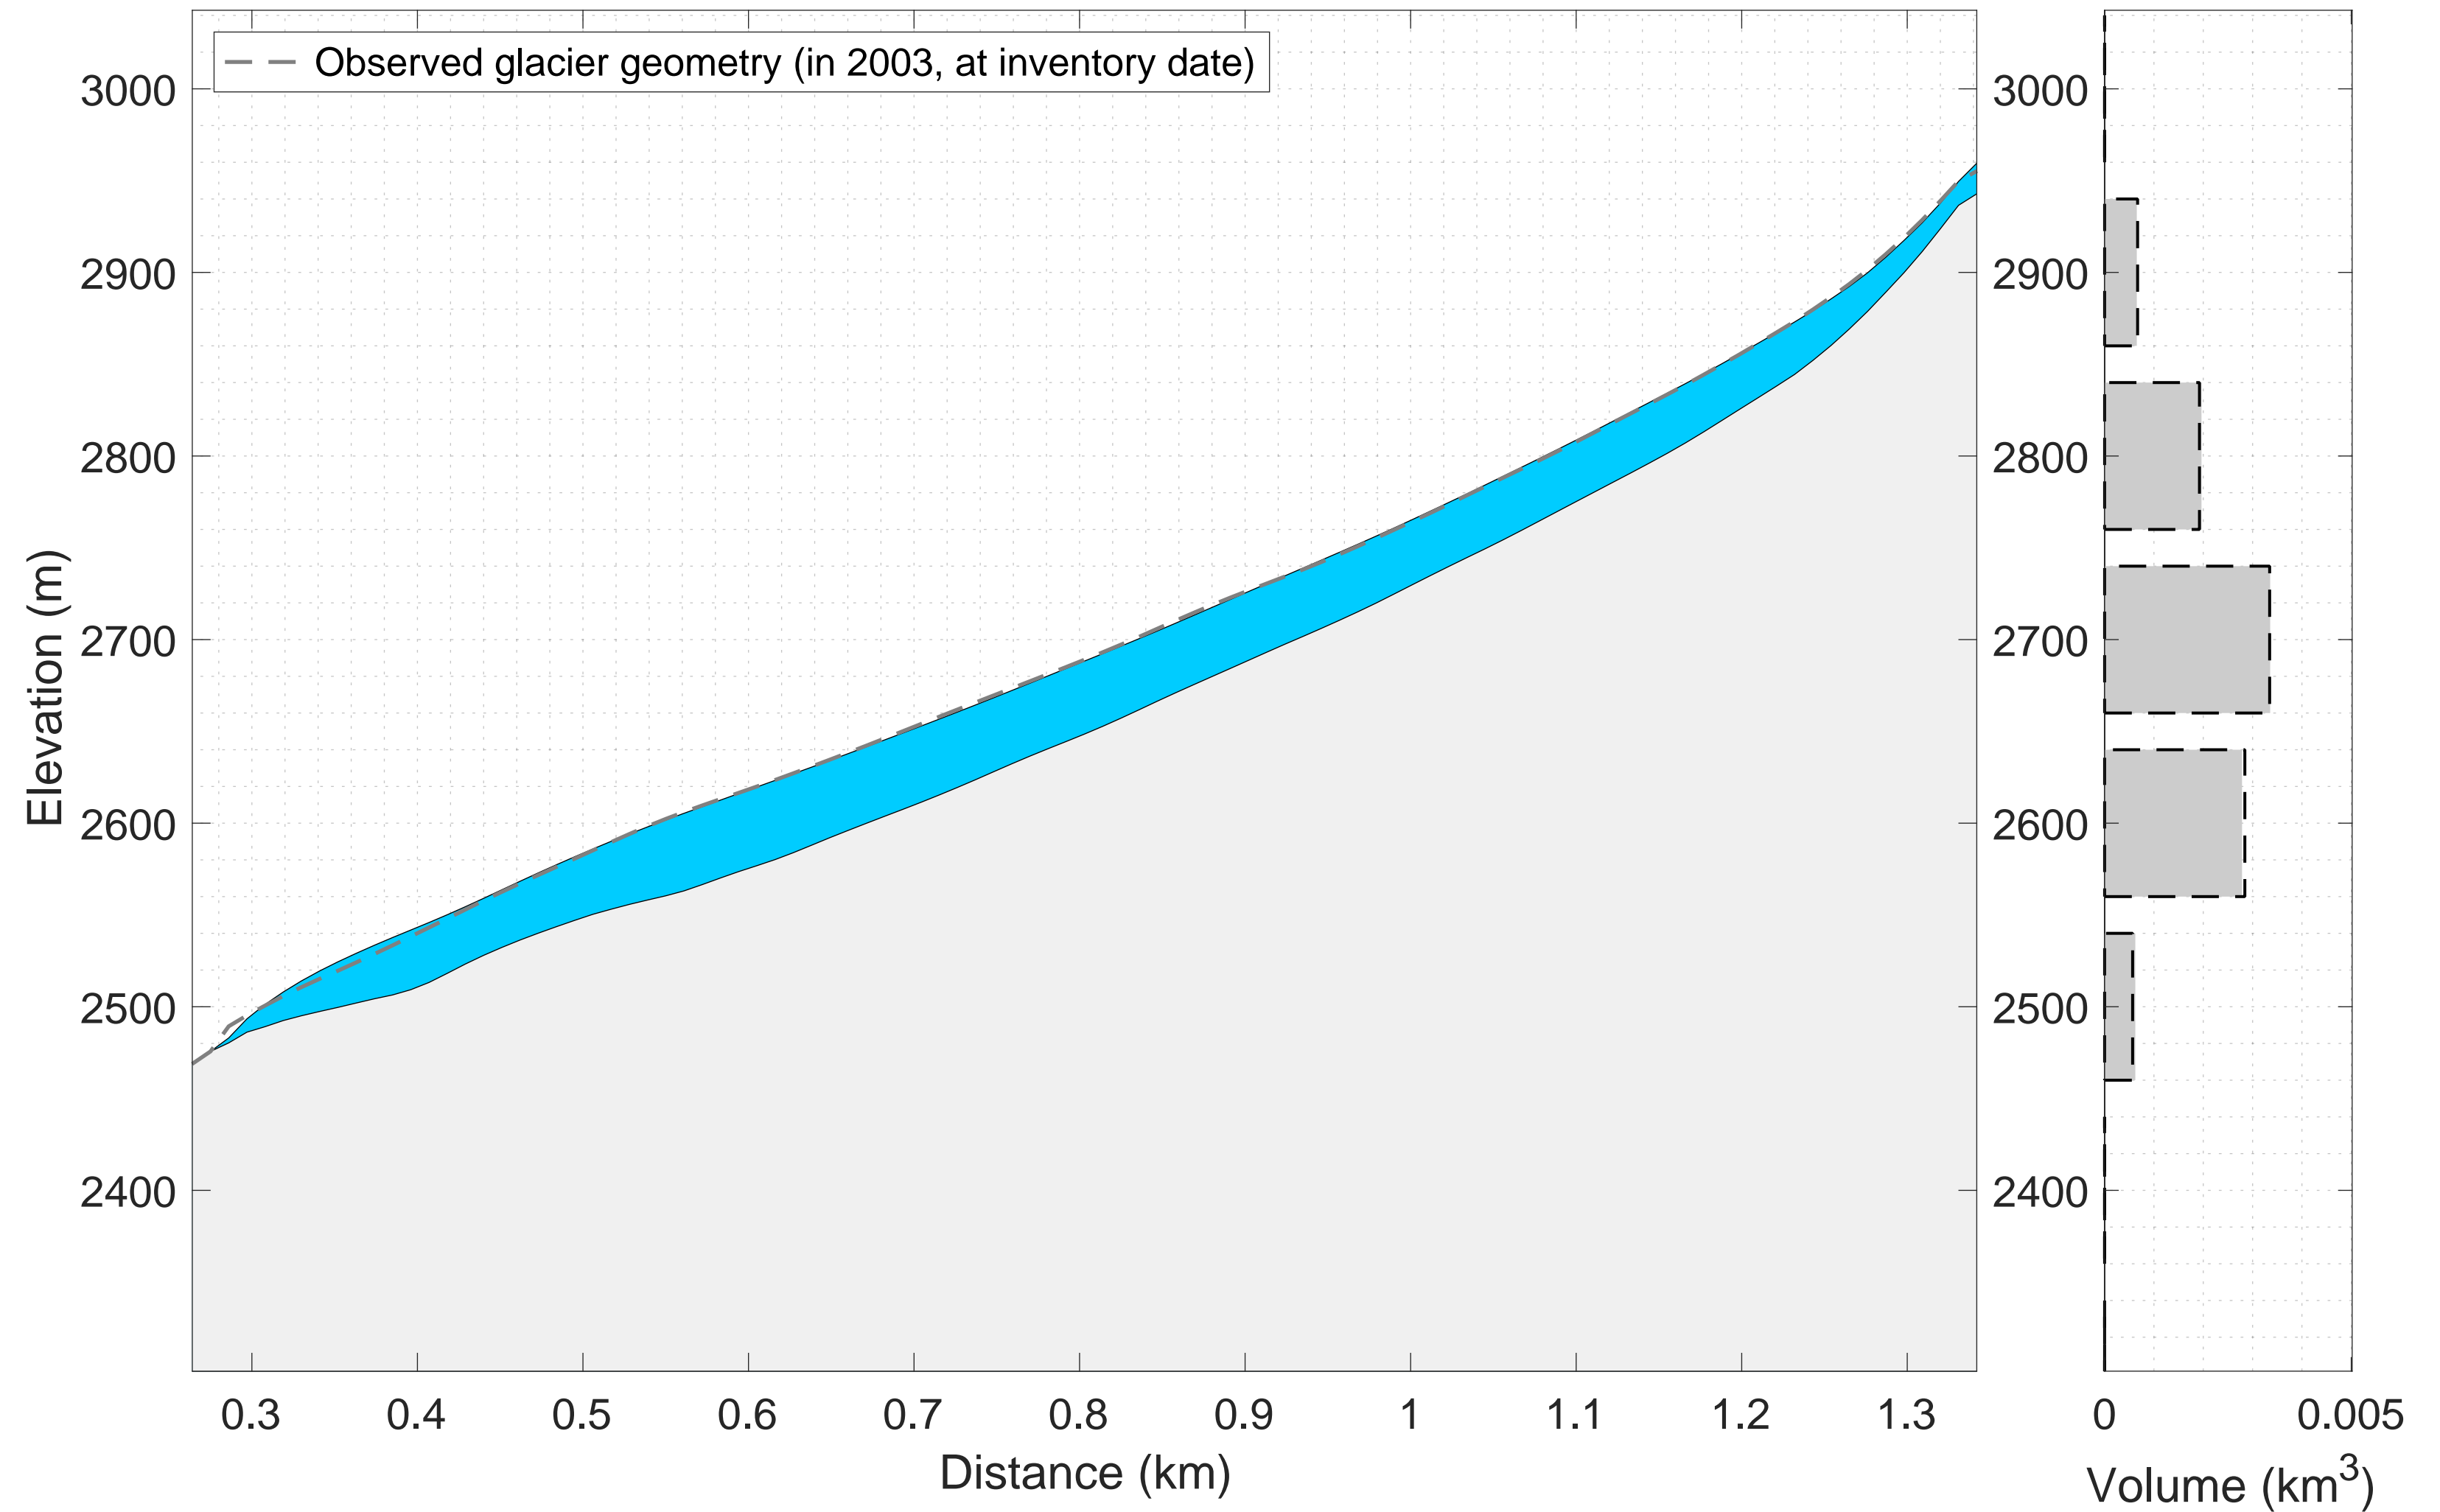

Supplement: Supplementary file 496 [file tc-13-1125-2019-supplement.zip]

**Modelled geometry (Glacier ID = 01948;  $A = 6.0945\text{e-}17 \text{ Pa}^{-3} \text{ a}^{-1}$ ;  $dx = 22 \text{ m}$ )**

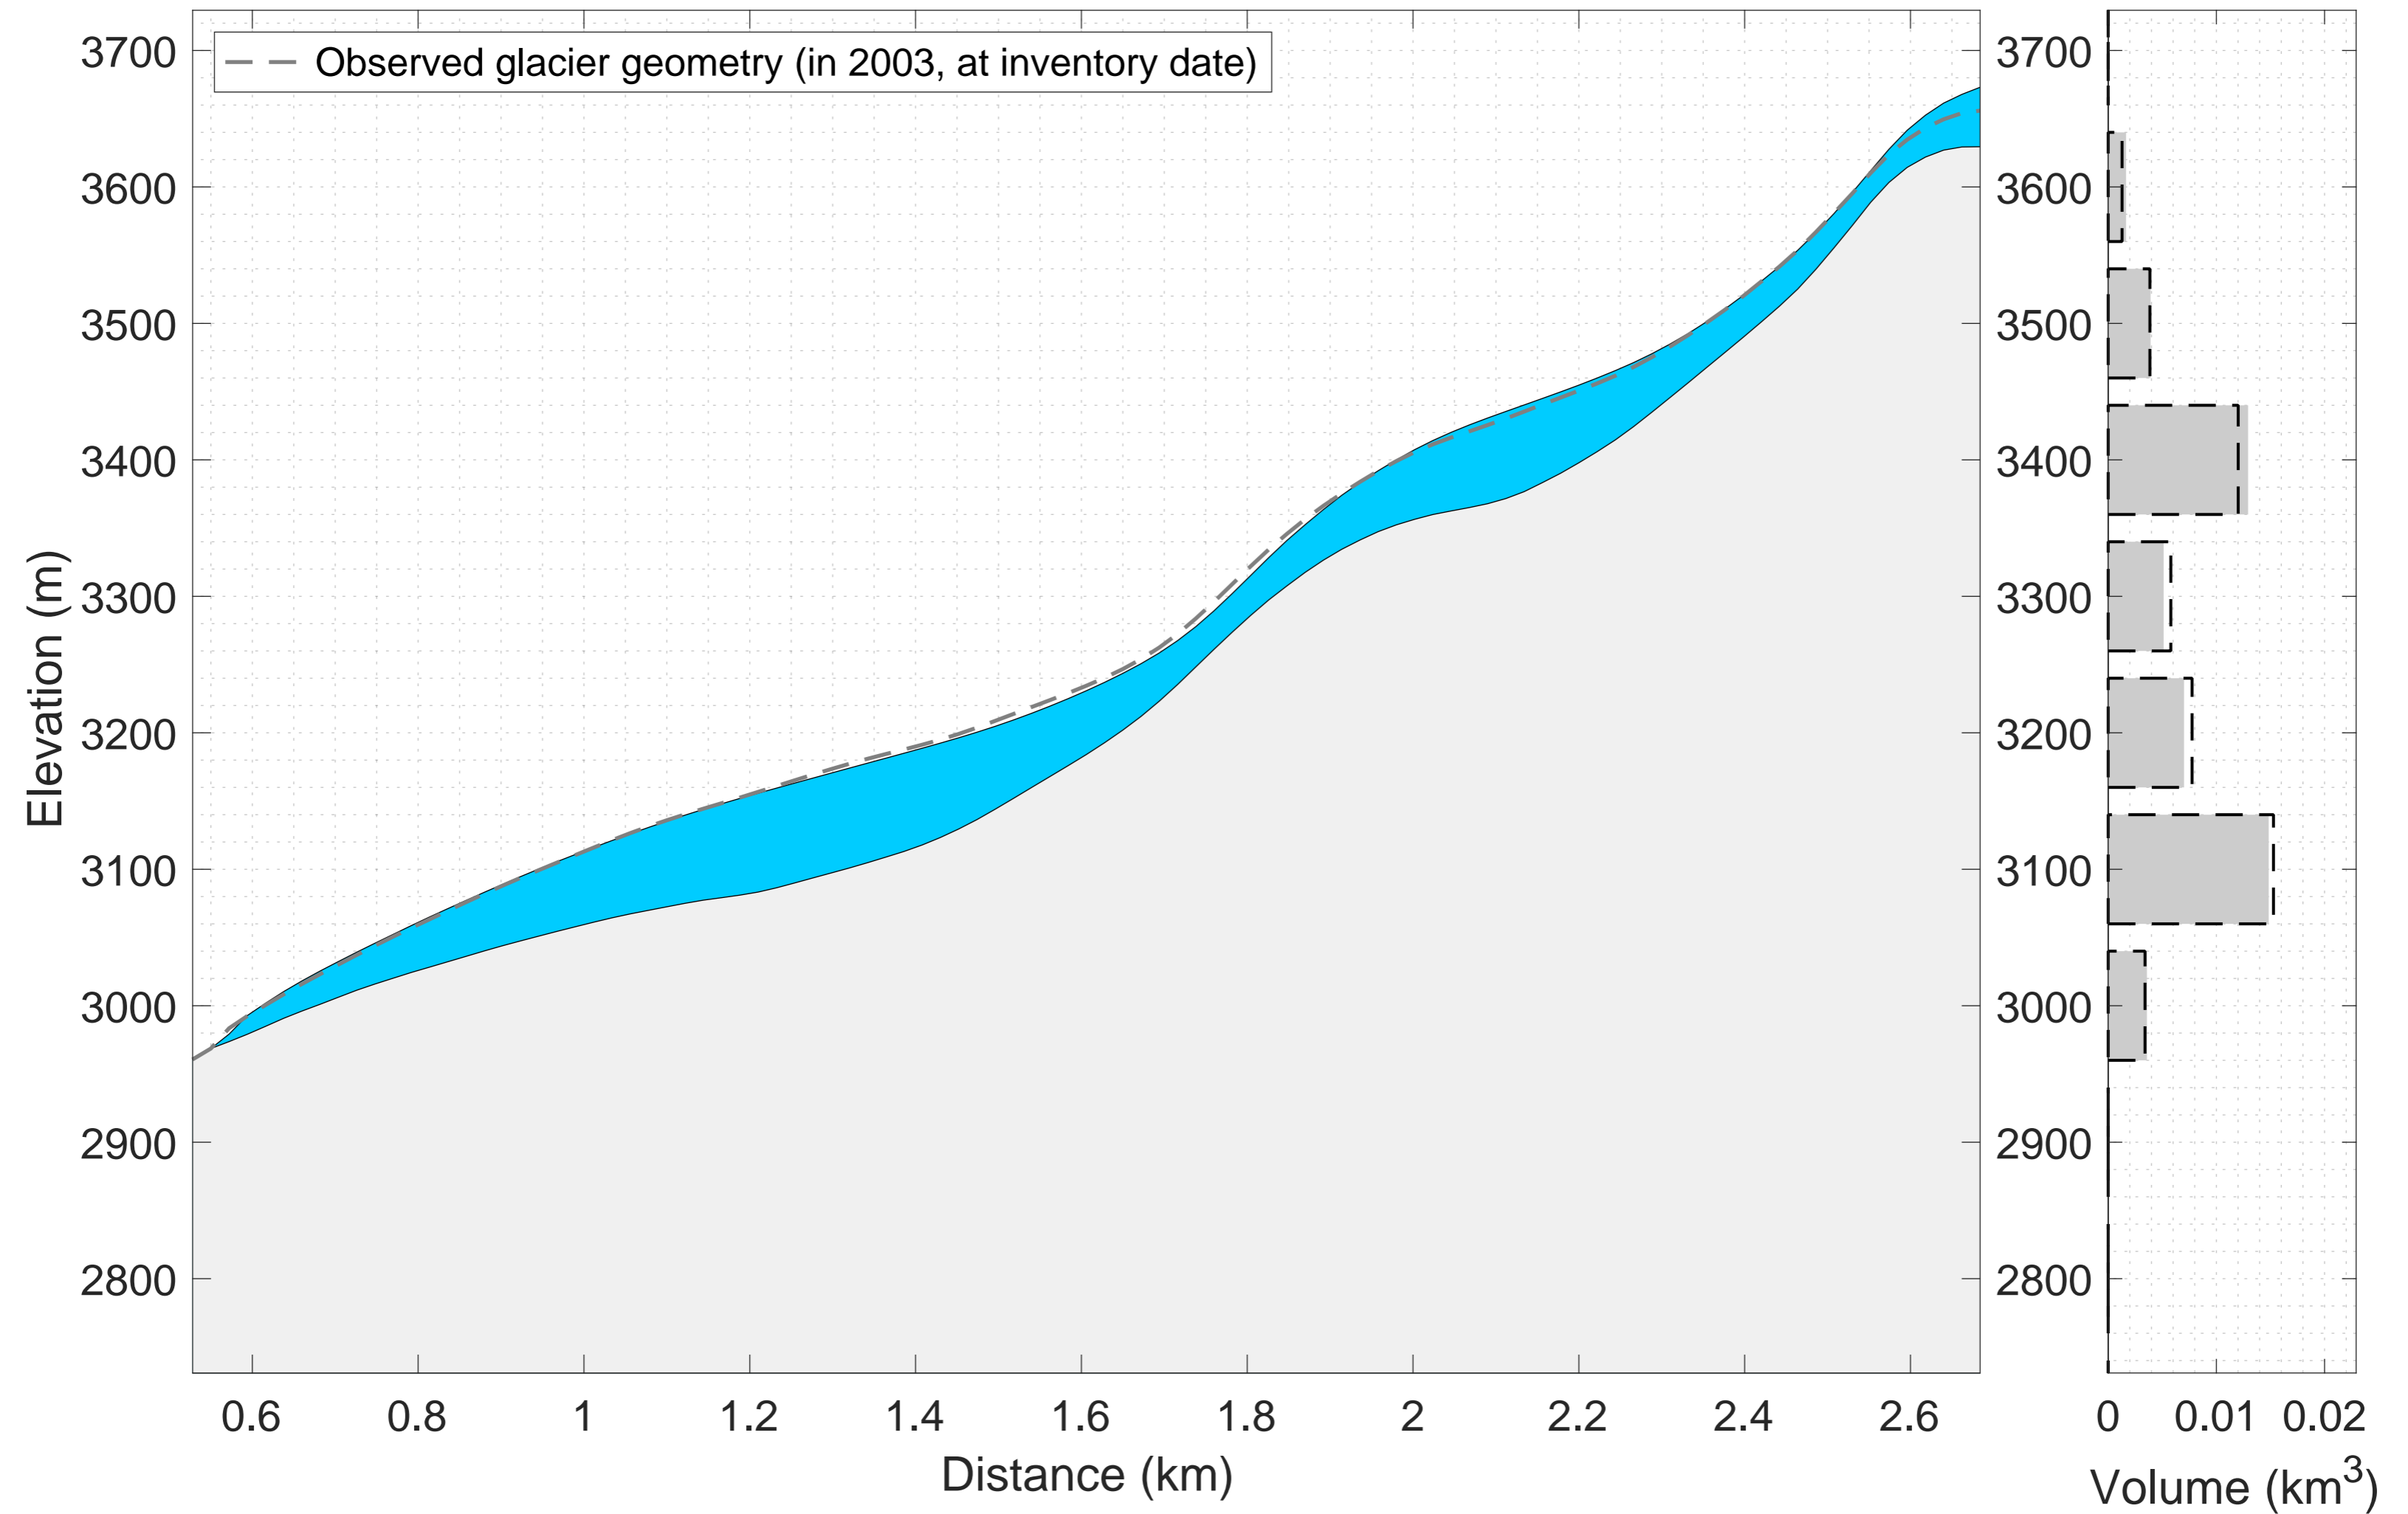

Supplement: Supplementary file 497 [file tc-13-1125-2019-supplement.zip]

**Modelled geometry (Glacier ID = 00182;  $A = 1.8453\text{e-}16 \text{ Pa}^{-3} \text{ a}^{-1}$ ;  $dx = 29 \text{ m}$ )**

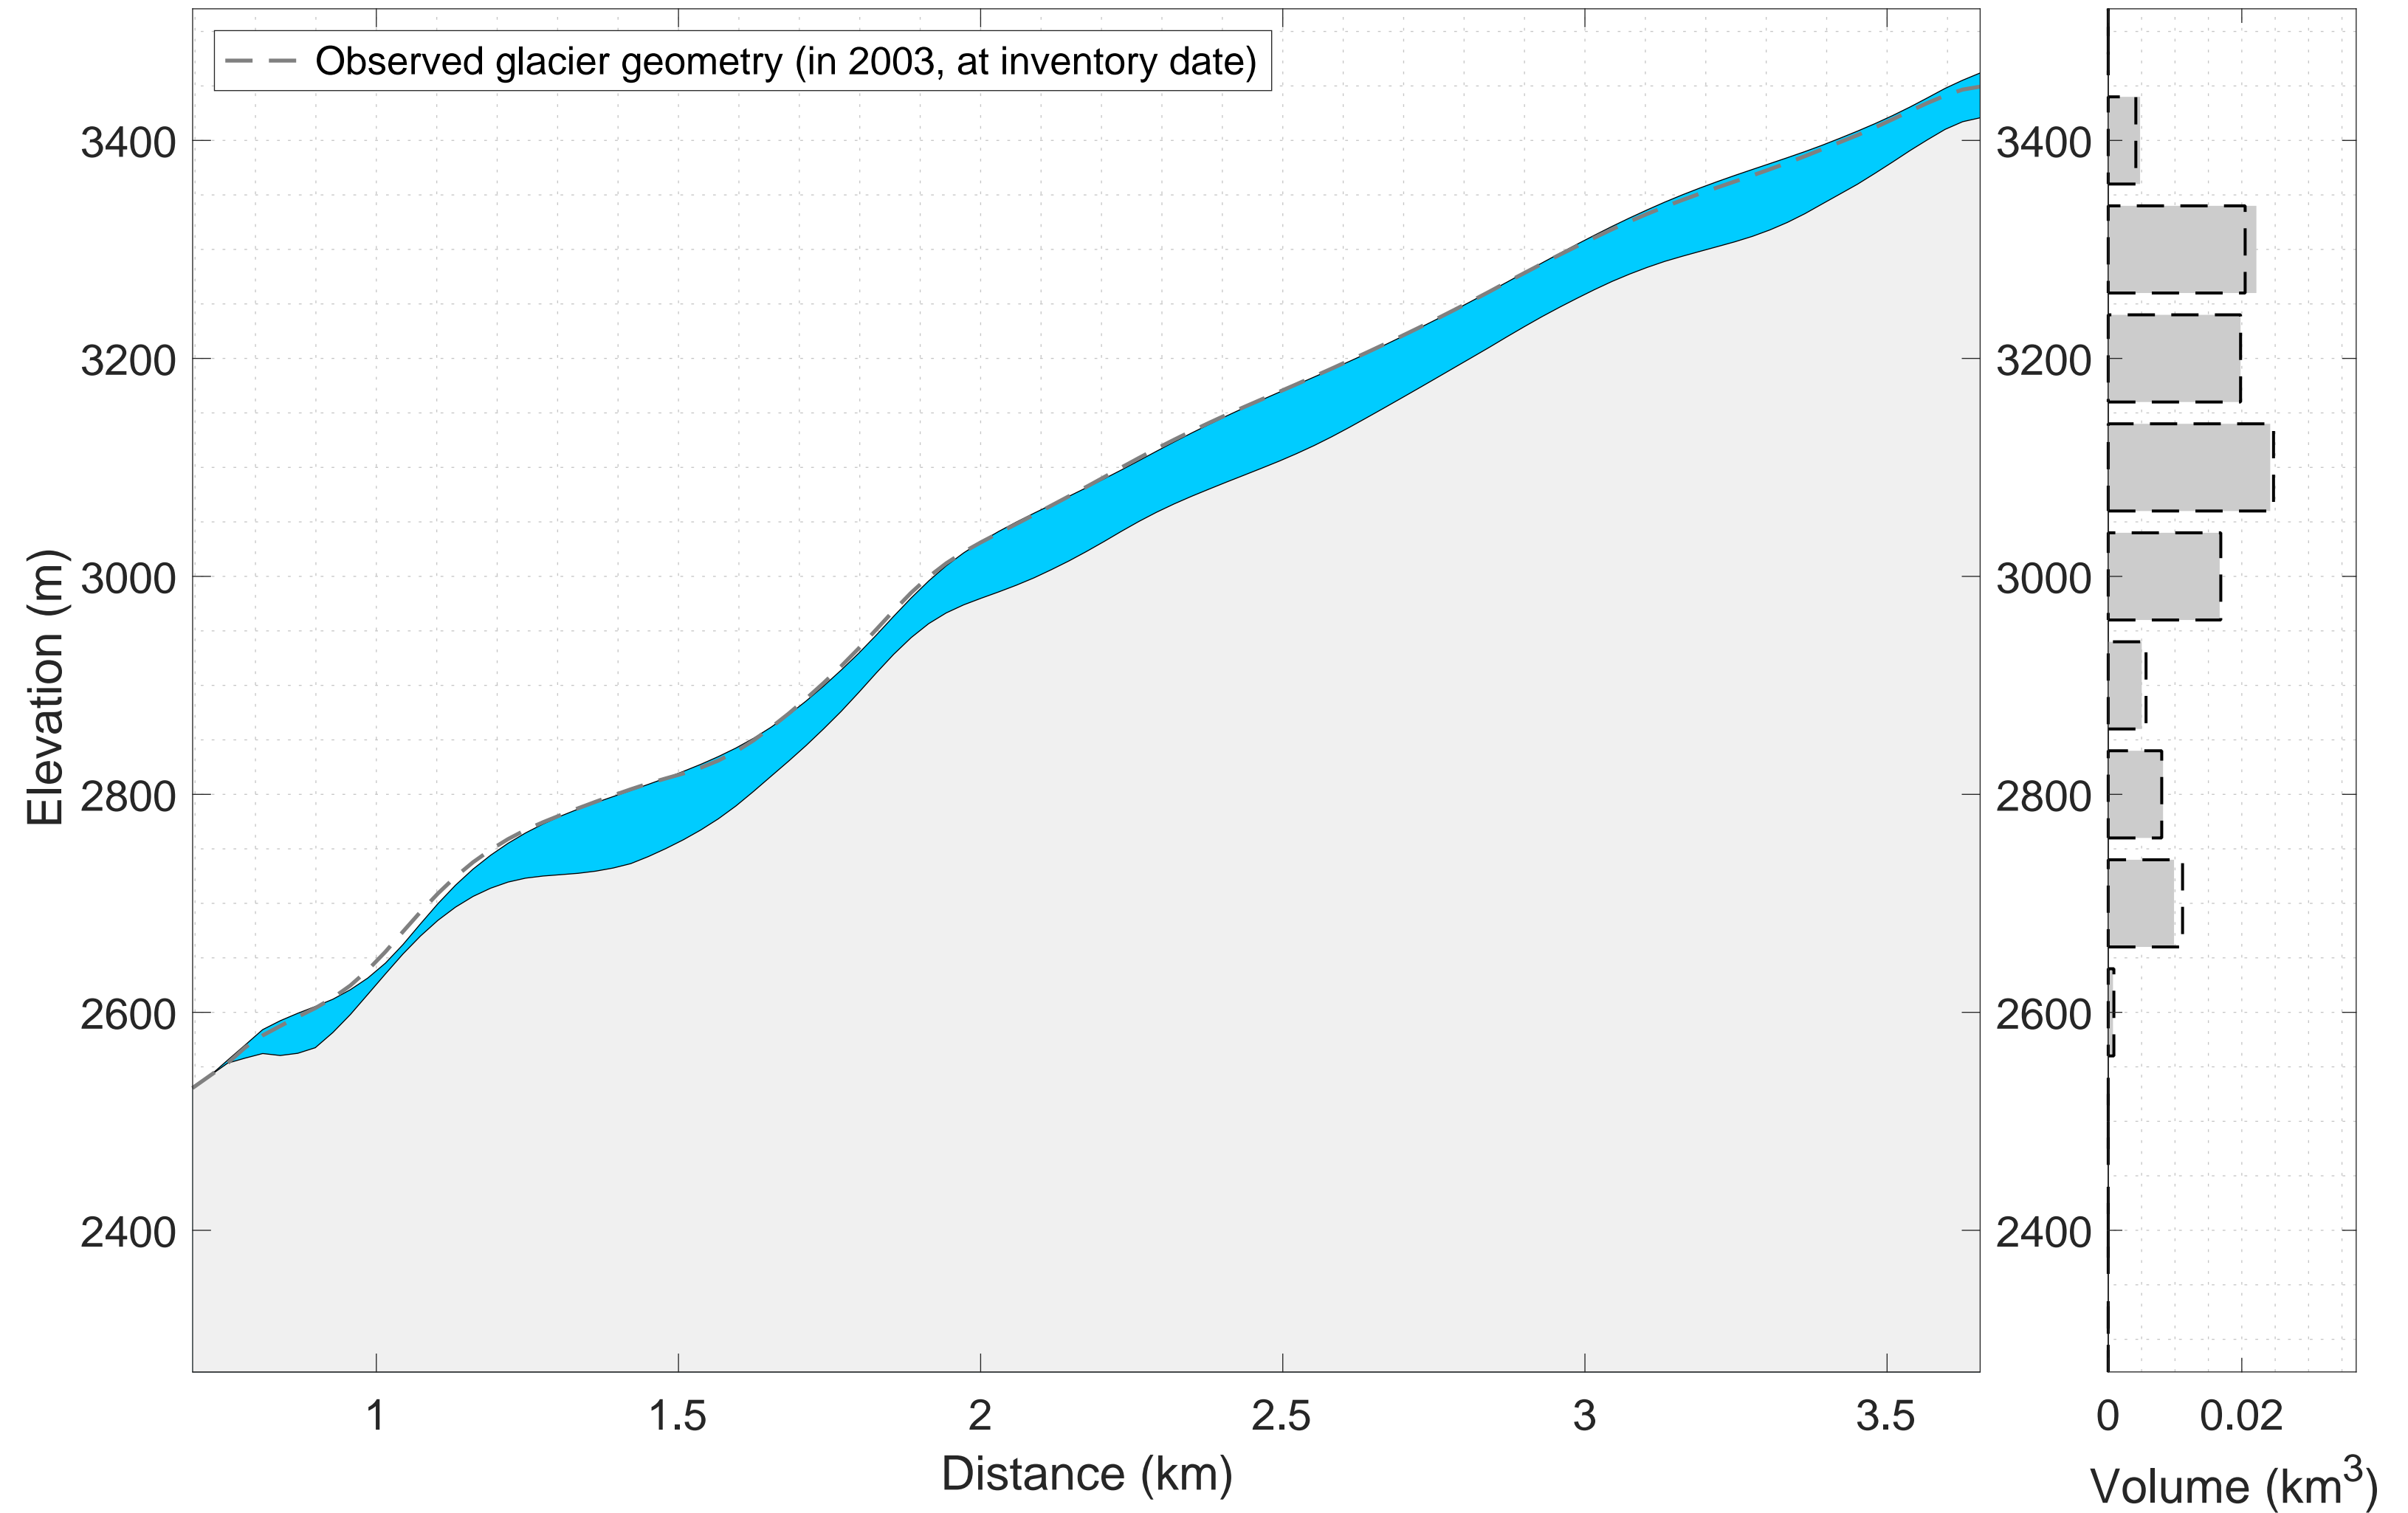

Supplement: Supplementary file 498 [file tc-13-1125-2019-supplement.zip]

**Modelled geometry (Glacier ID = 03013;  $A = 8.989\text{e-}17 \text{ Pa}^{-3} \text{ a}^{-1}$ ;  $dx = 24 \text{ m}$ )**

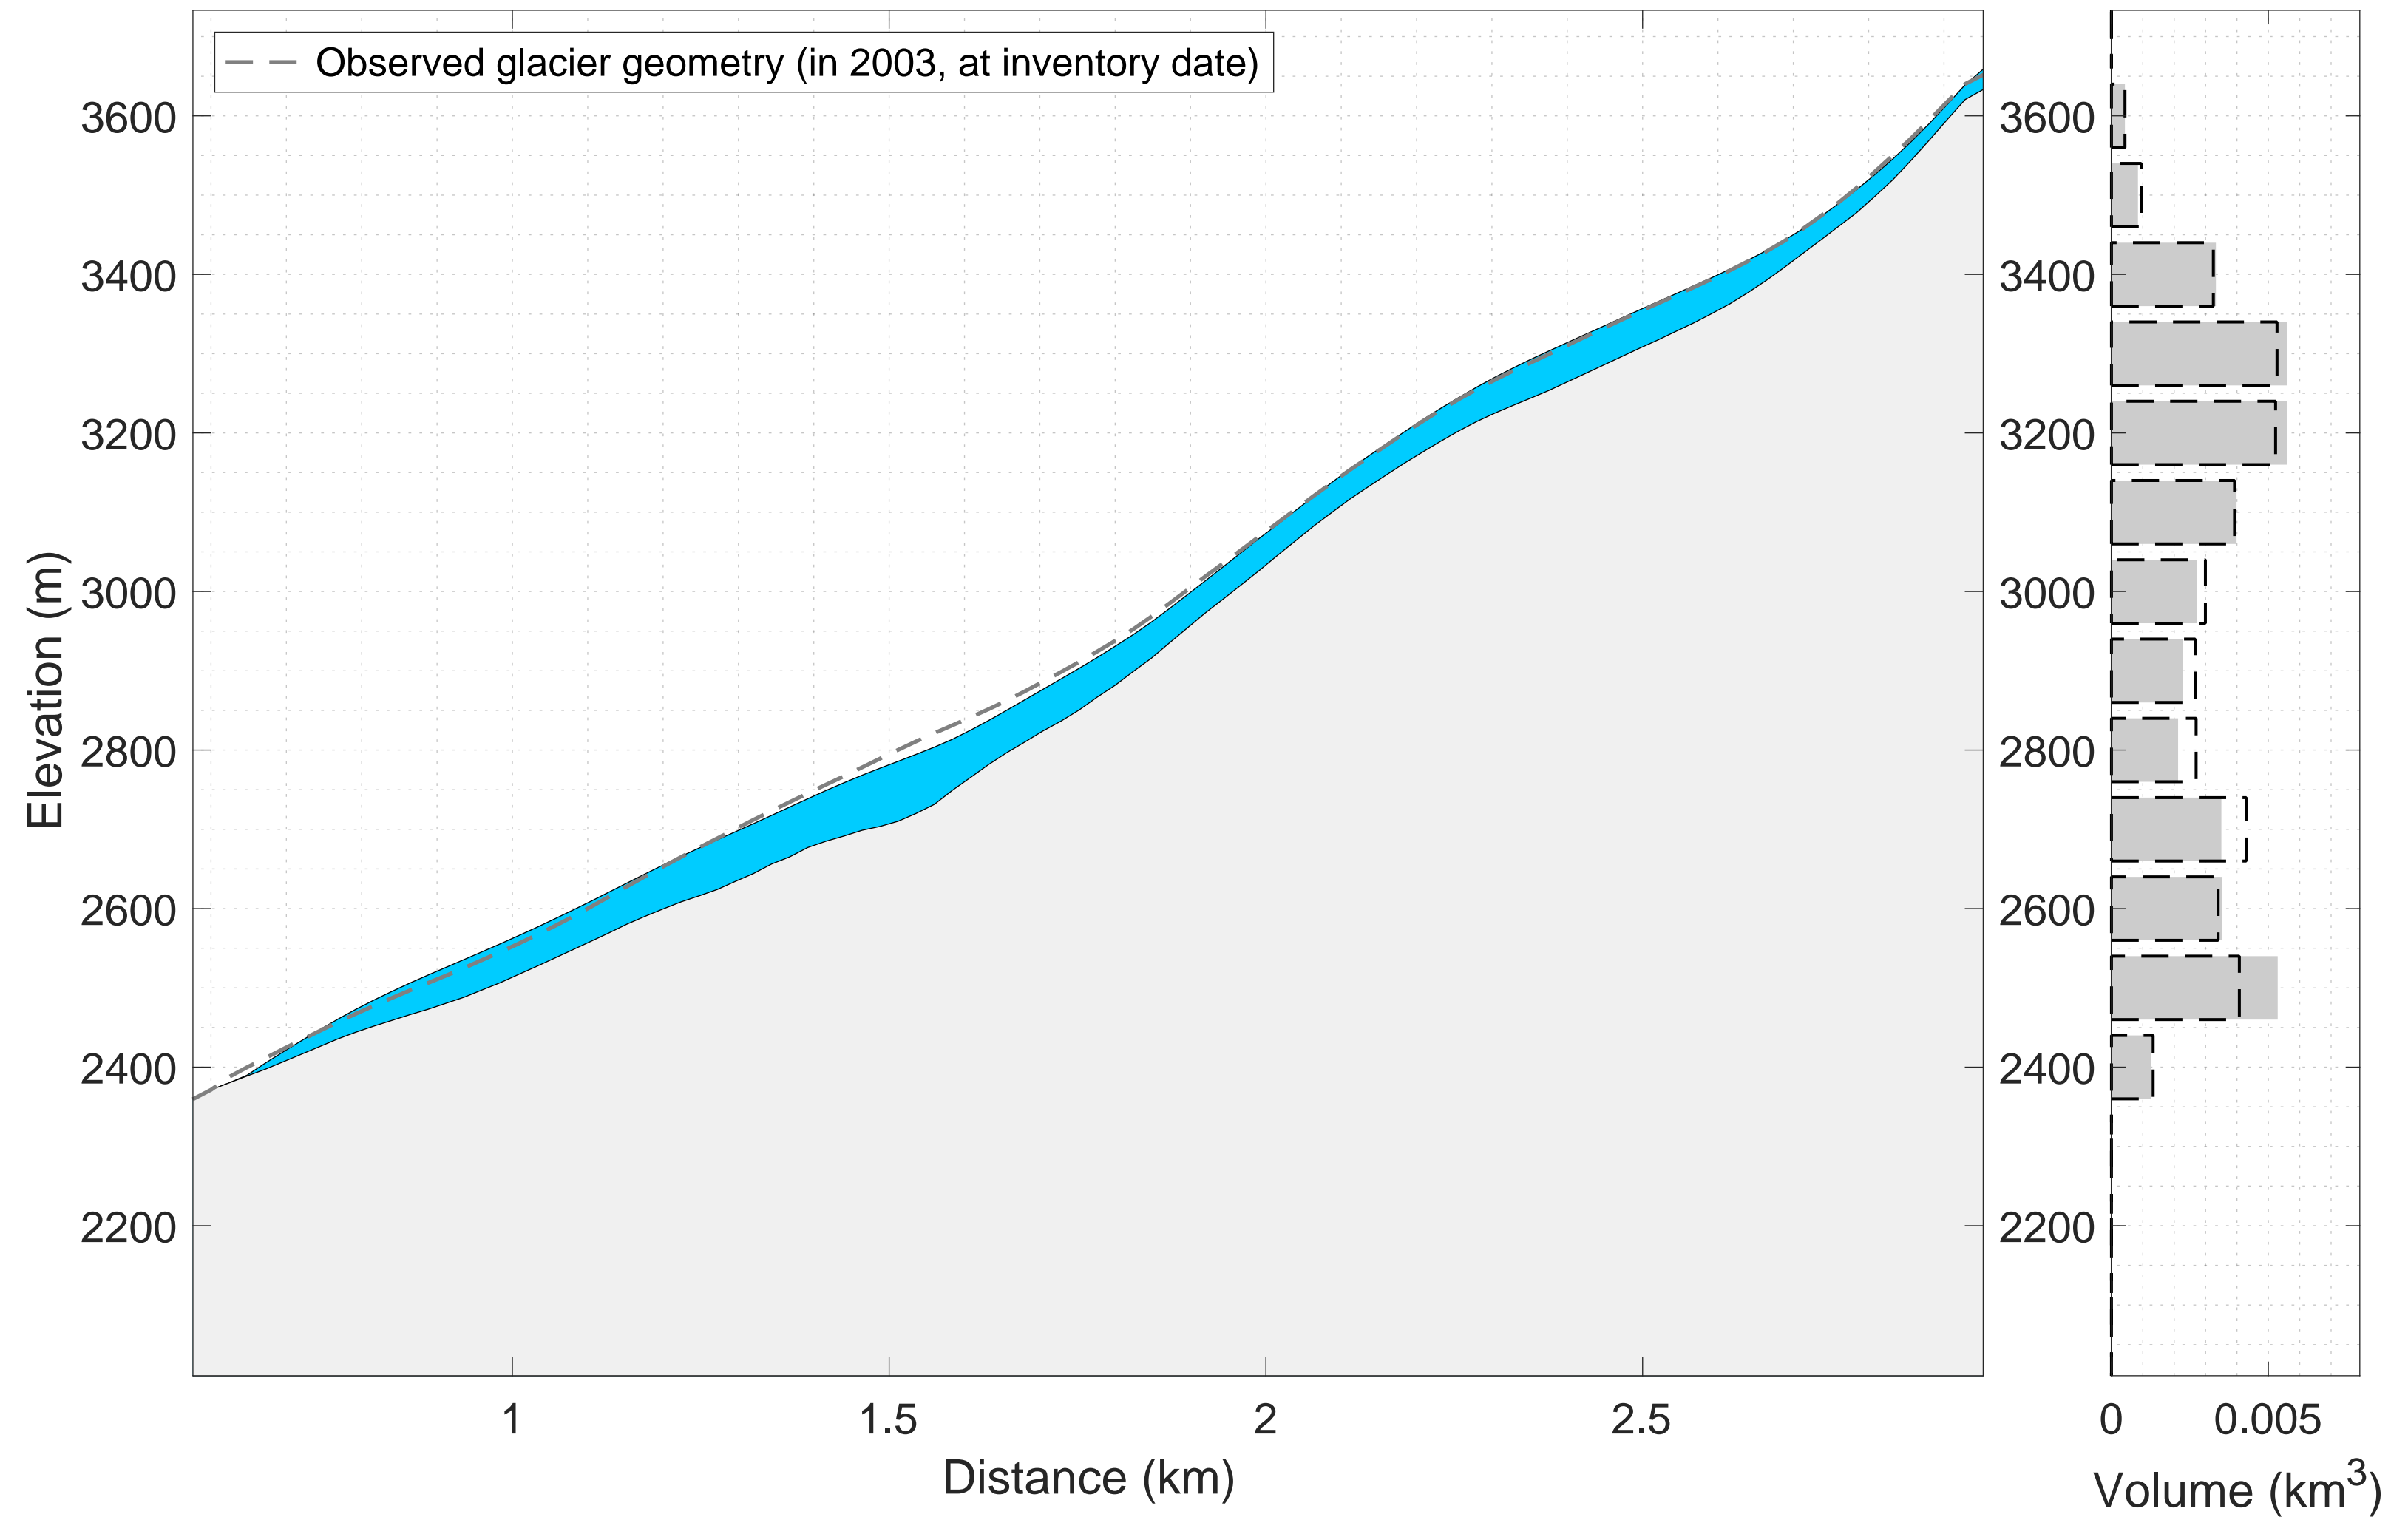

Supplement: Supplementary file 499 [file tc-13-1125-2019-supplement.zip]

**Modelled geometry (Glacier ID = 00376;  $A = 1.4144\text{e-}16 \text{ Pa}^{-3} \text{ a}^{-1}$ ;  $dx = 32 \text{ m}$ )**

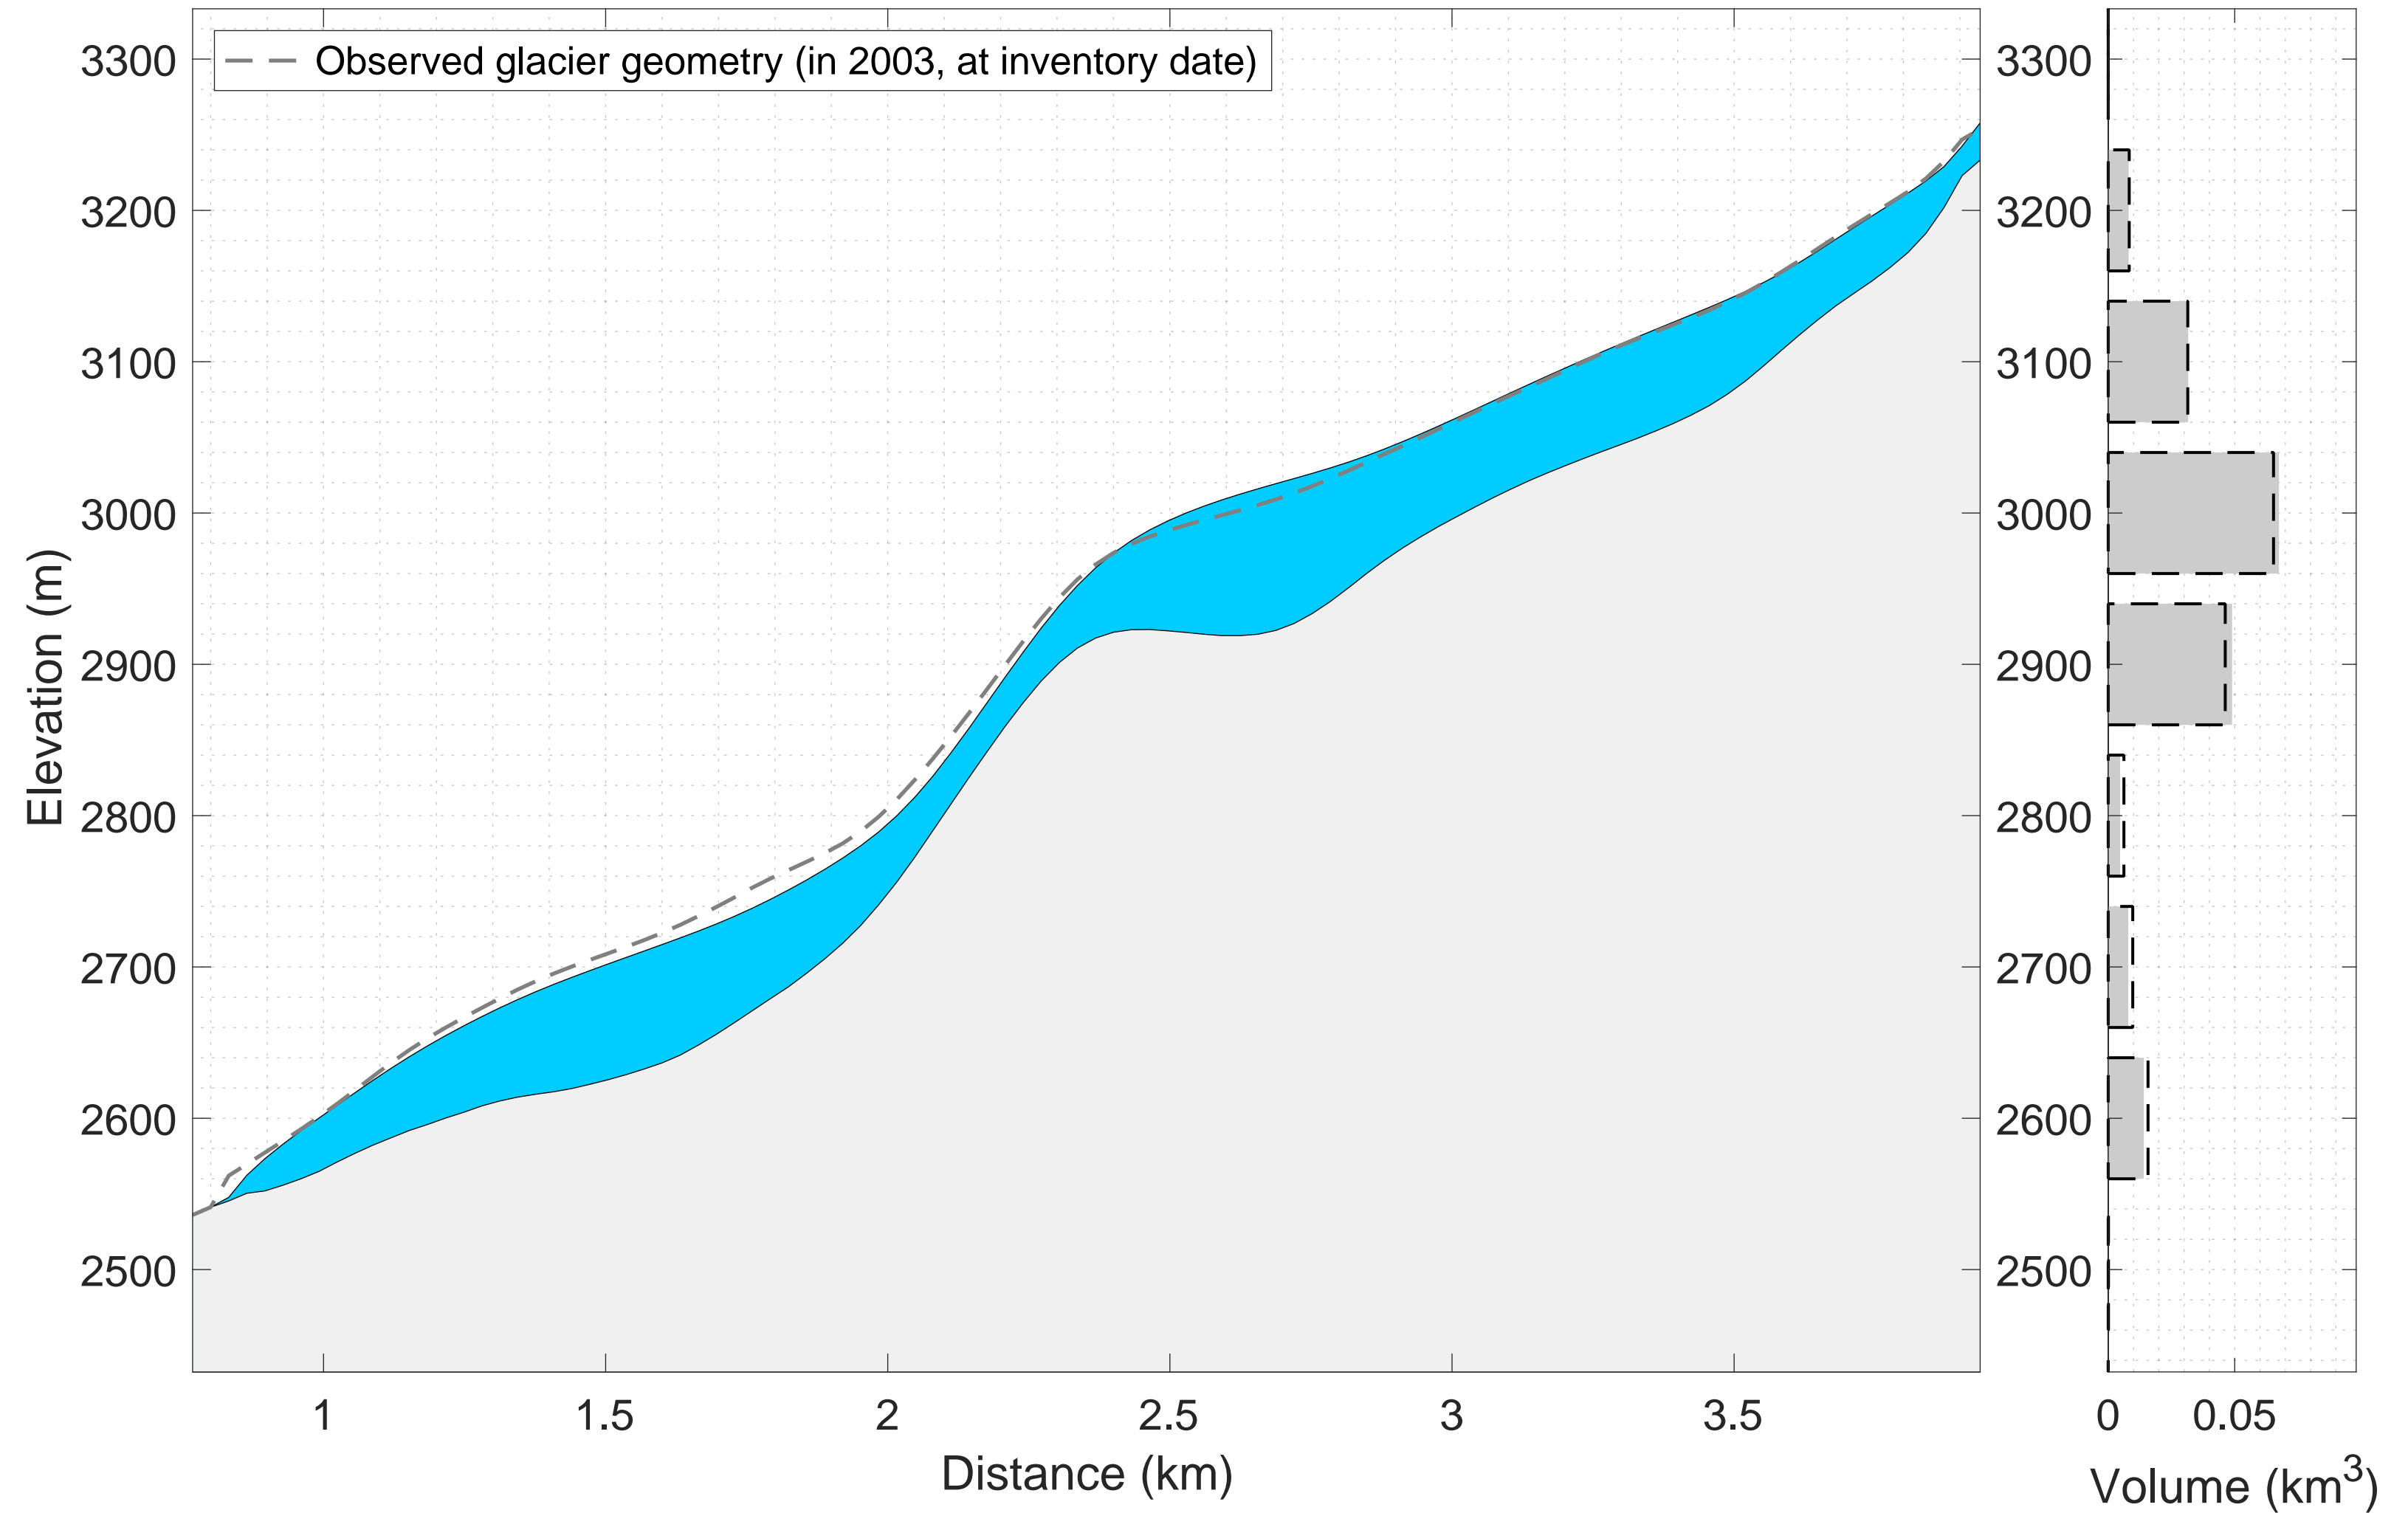

Supplement: Supplementary file 500 [file tc-13-1125-2019-supplement.zip]

**Modelled geometry (Glacier ID = 02144;  $A = 6.825\text{e-}17 \text{ Pa}^{-3} \text{ a}^{-1}$ ;  $dx = 34 \text{ m}$ )**

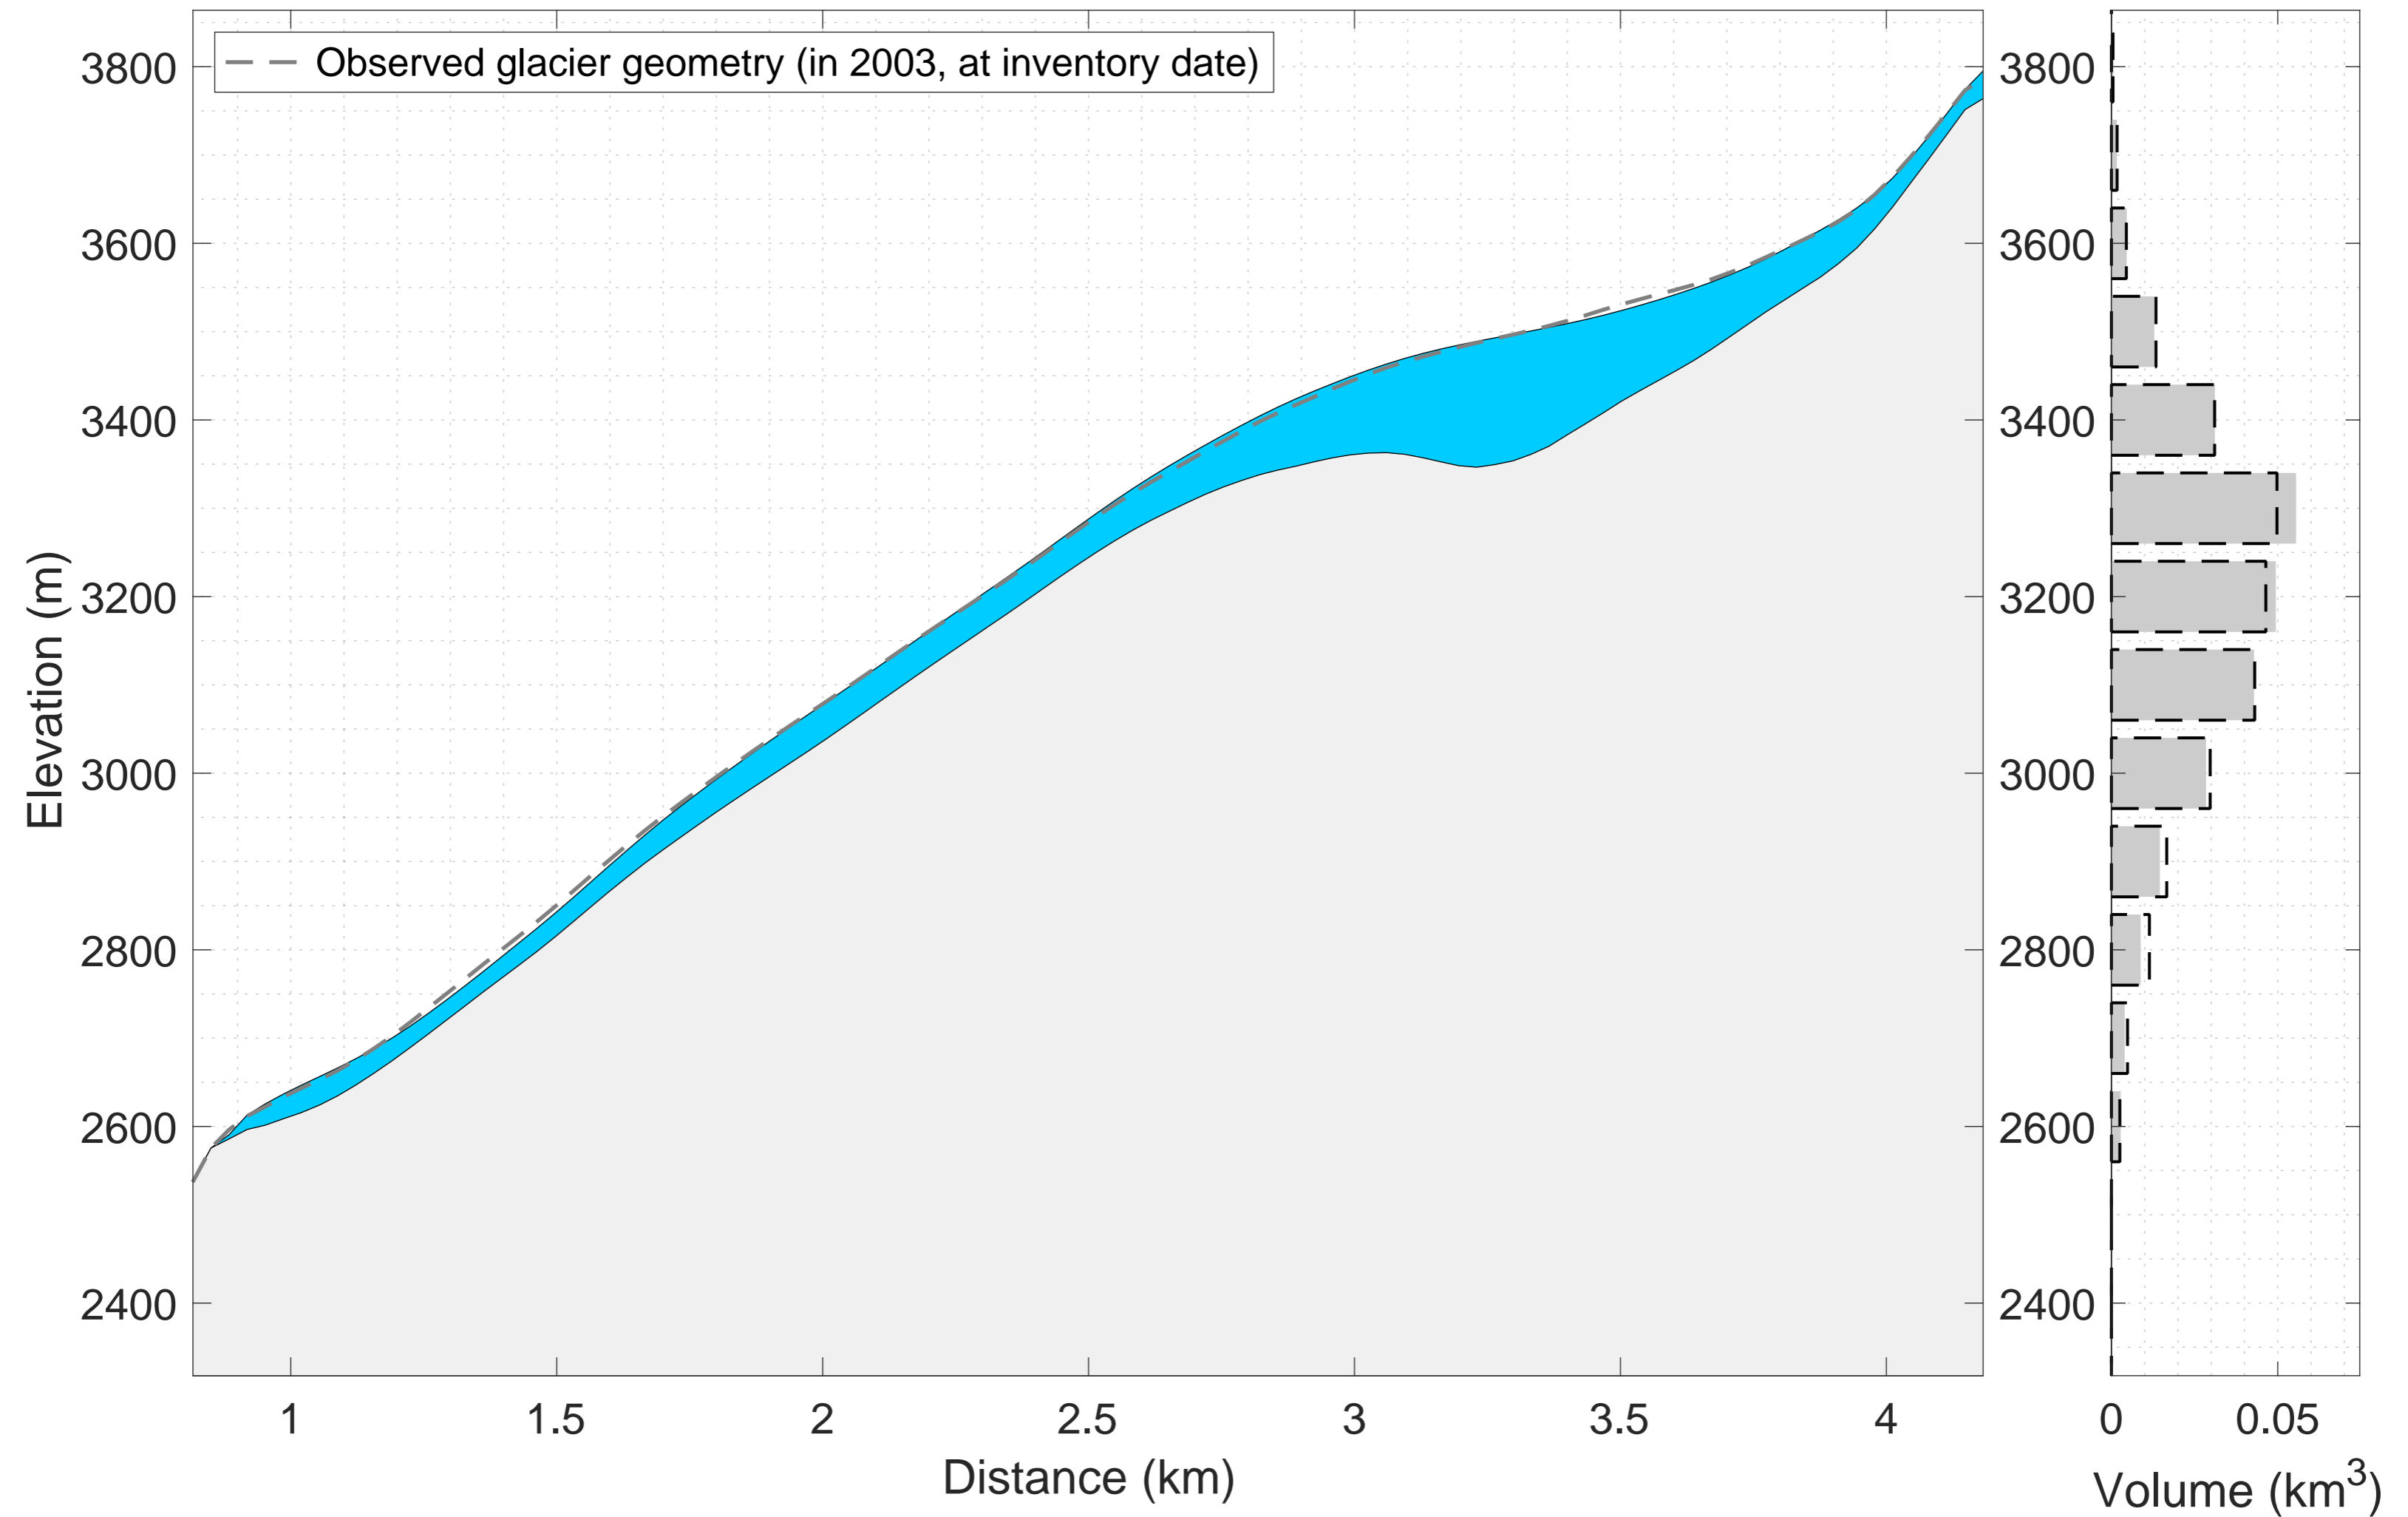

Supplement: Supplementary file 501 [file tc-13-1125-2019-supplement.zip]
