# Supplementary figures and images for: Modelling the future evolution of glaciers in the European Alps under the EURO-CORDEX RCM ensemble (part 6 of 8)
Source: Copernicus journal article supplement (doi:10.5194/tc-13-1125-2019), 2019-04-09

**Modelled geometry (Glacier ID = 03731;  $A = 2.2425\text{e-}16 \text{ Pa}^{-3} \text{ a}^{-1}$ ;  $dx = 17 \text{ m}$ )**

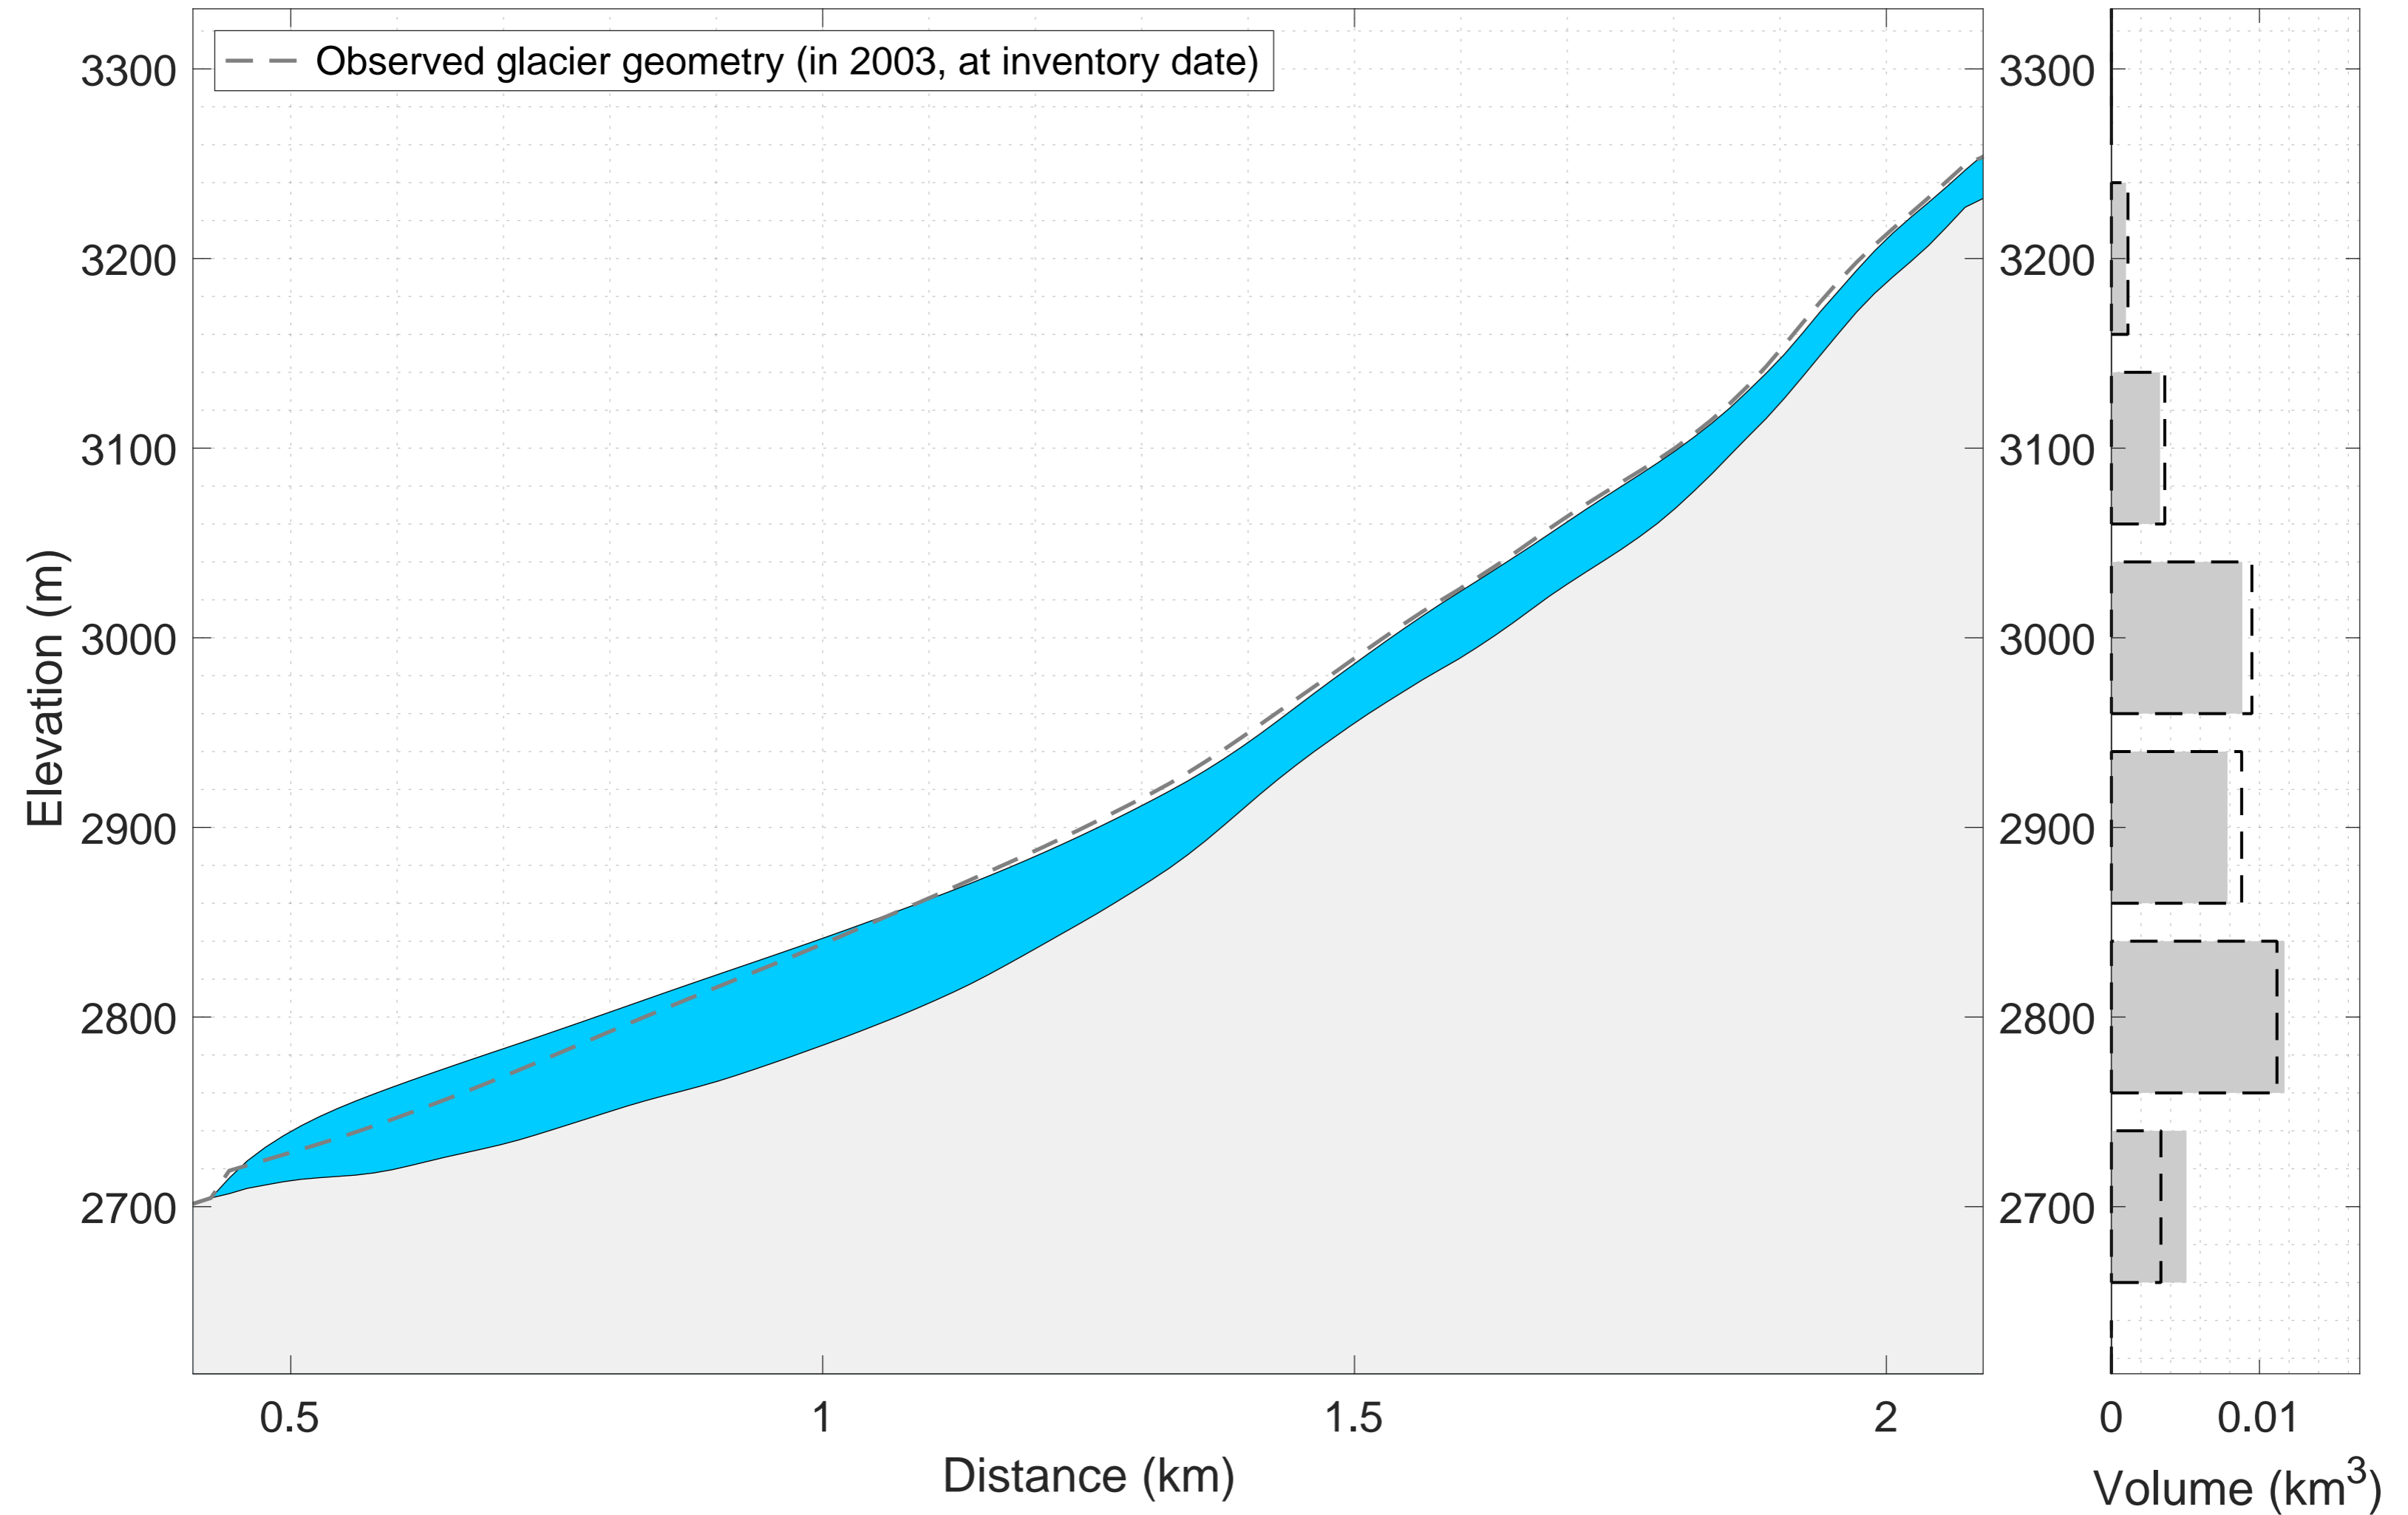

Supplement: Supplementary file 502 [file tc-13-1125-2019-supplement.zip]

**Modelled geometry (Glacier ID = 00981;  $A = 7.5535\text{e-}17 \text{ Pa}^{-3} \text{ a}^{-1}$ ;  $dx = 13 \text{ m}$ )**

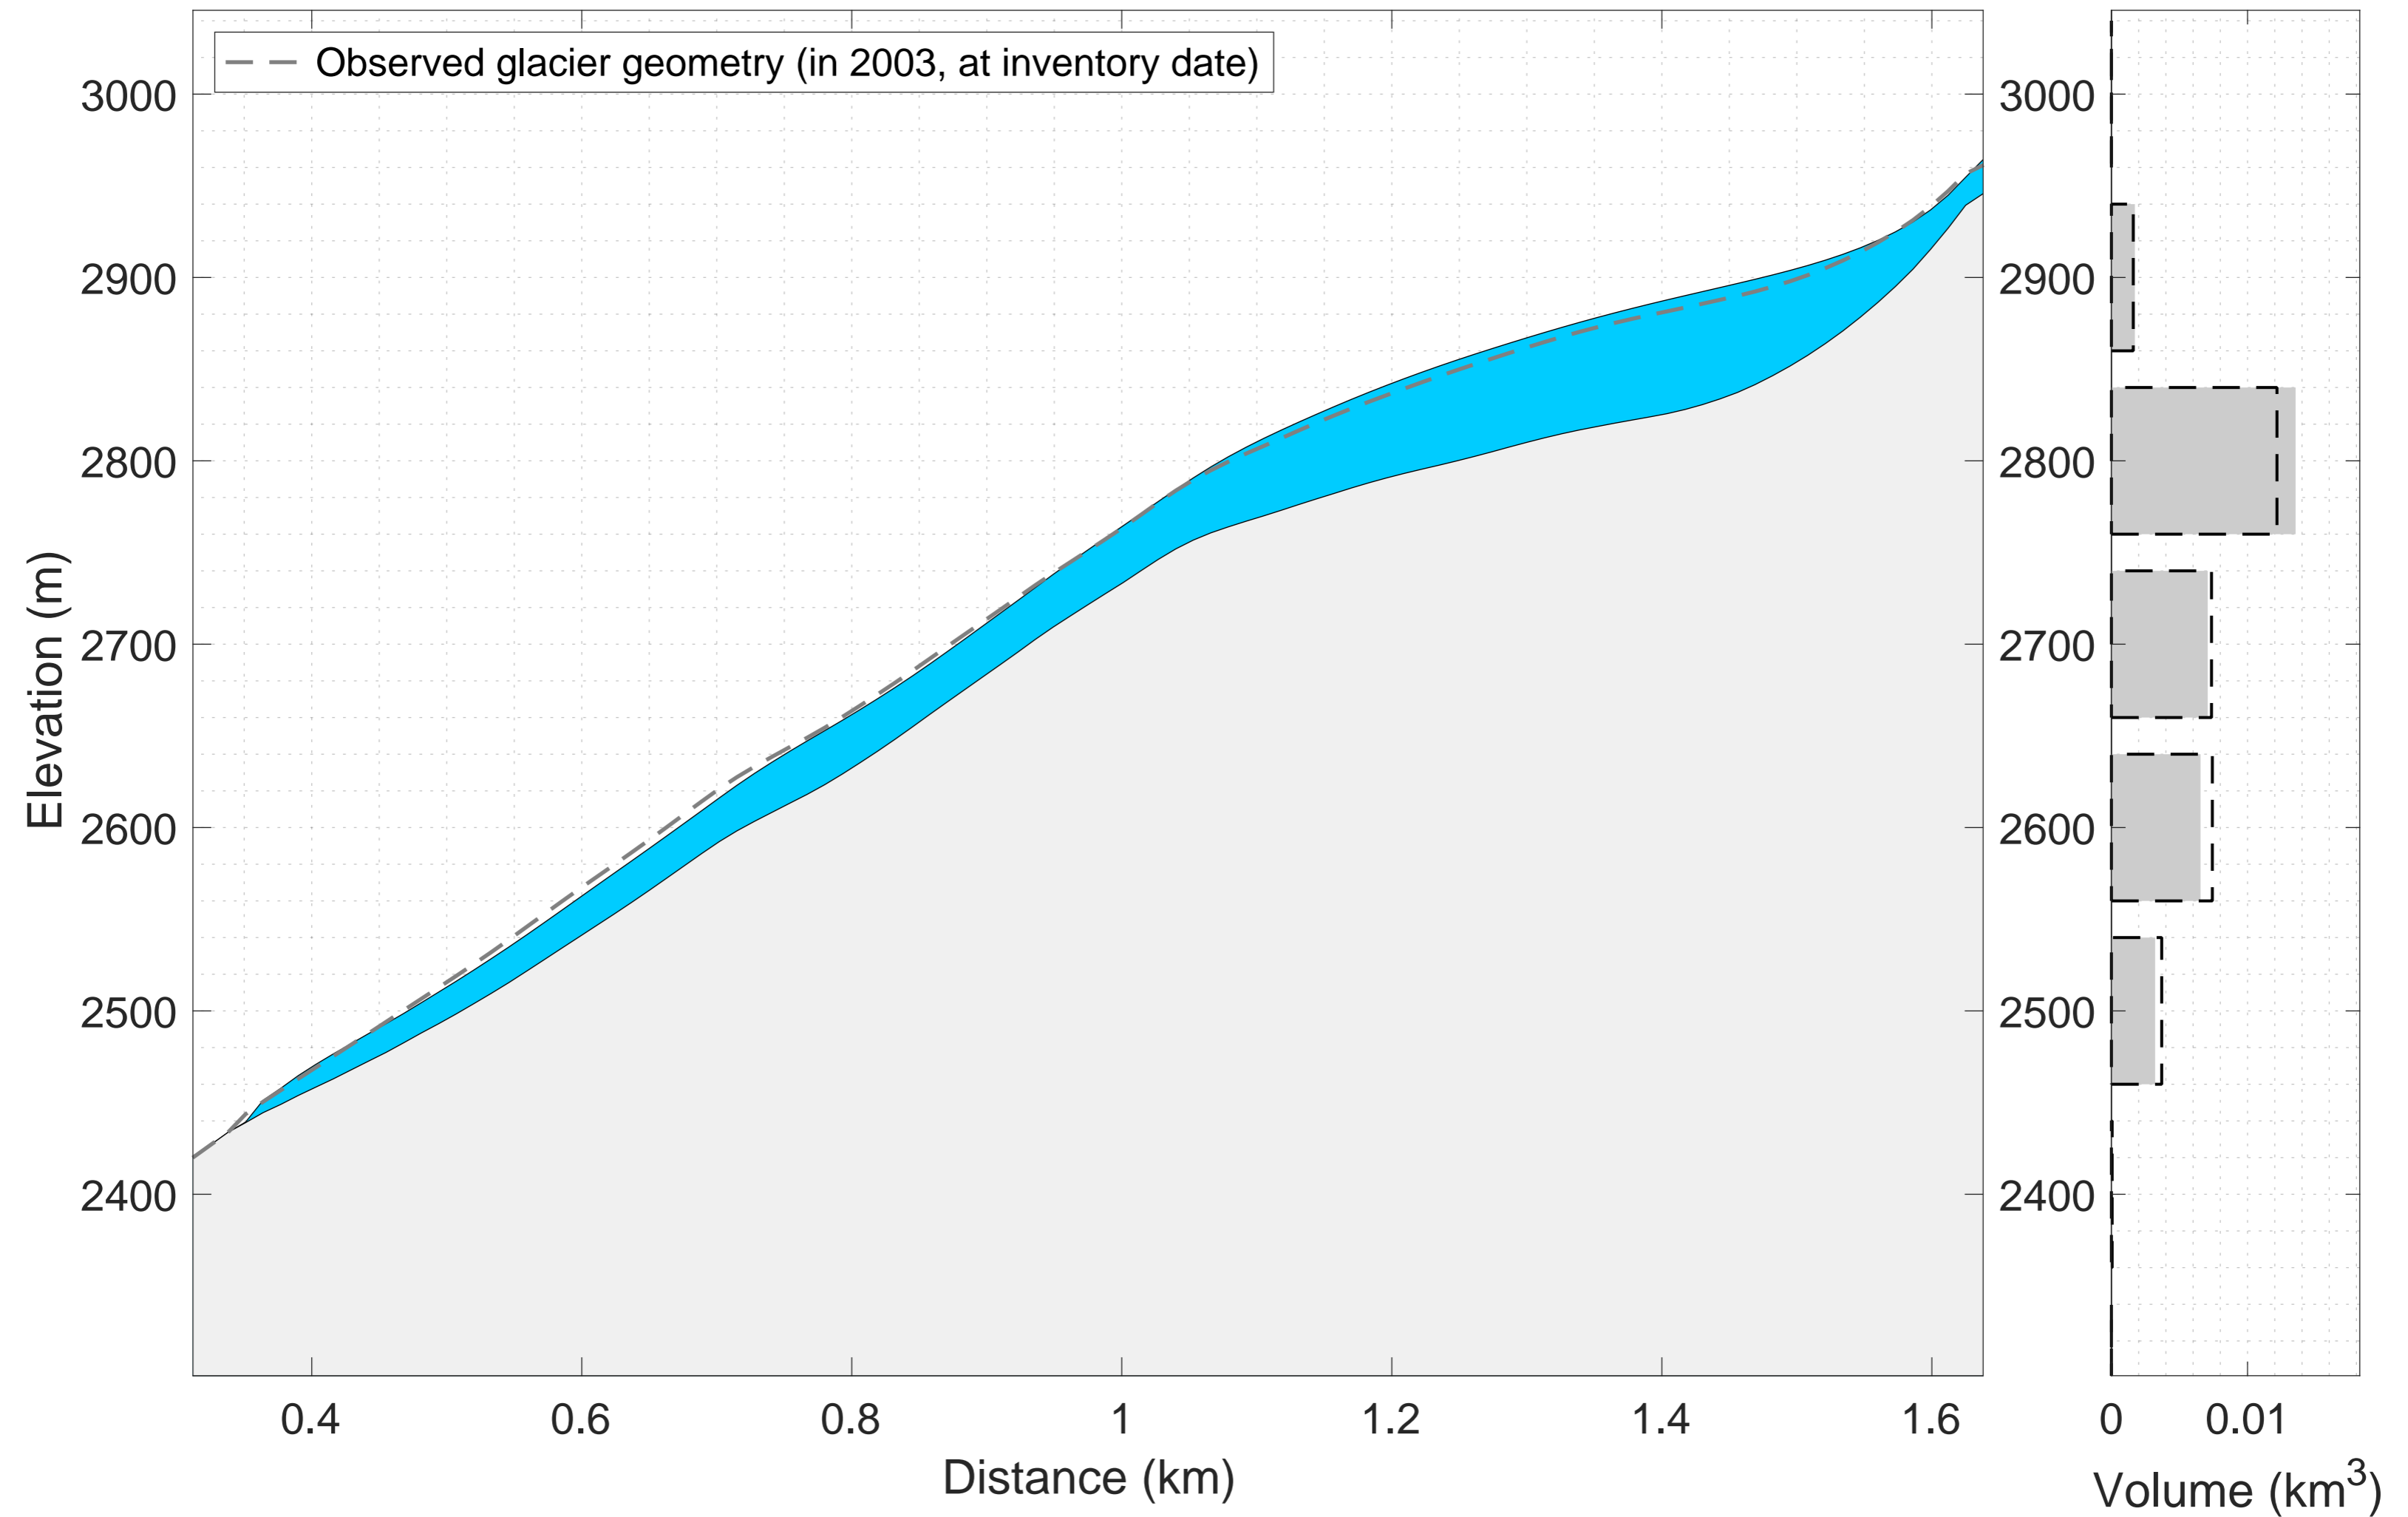

Supplement: Supplementary file 503 [file tc-13-1125-2019-supplement.zip]

**Modelled geometry (Glacier ID = 03556;  $A = 1.2782\text{e-}16 \text{ Pa}^{-3} \text{ a}^{-1}$ ;  $dx = 21 \text{ m}$ )**

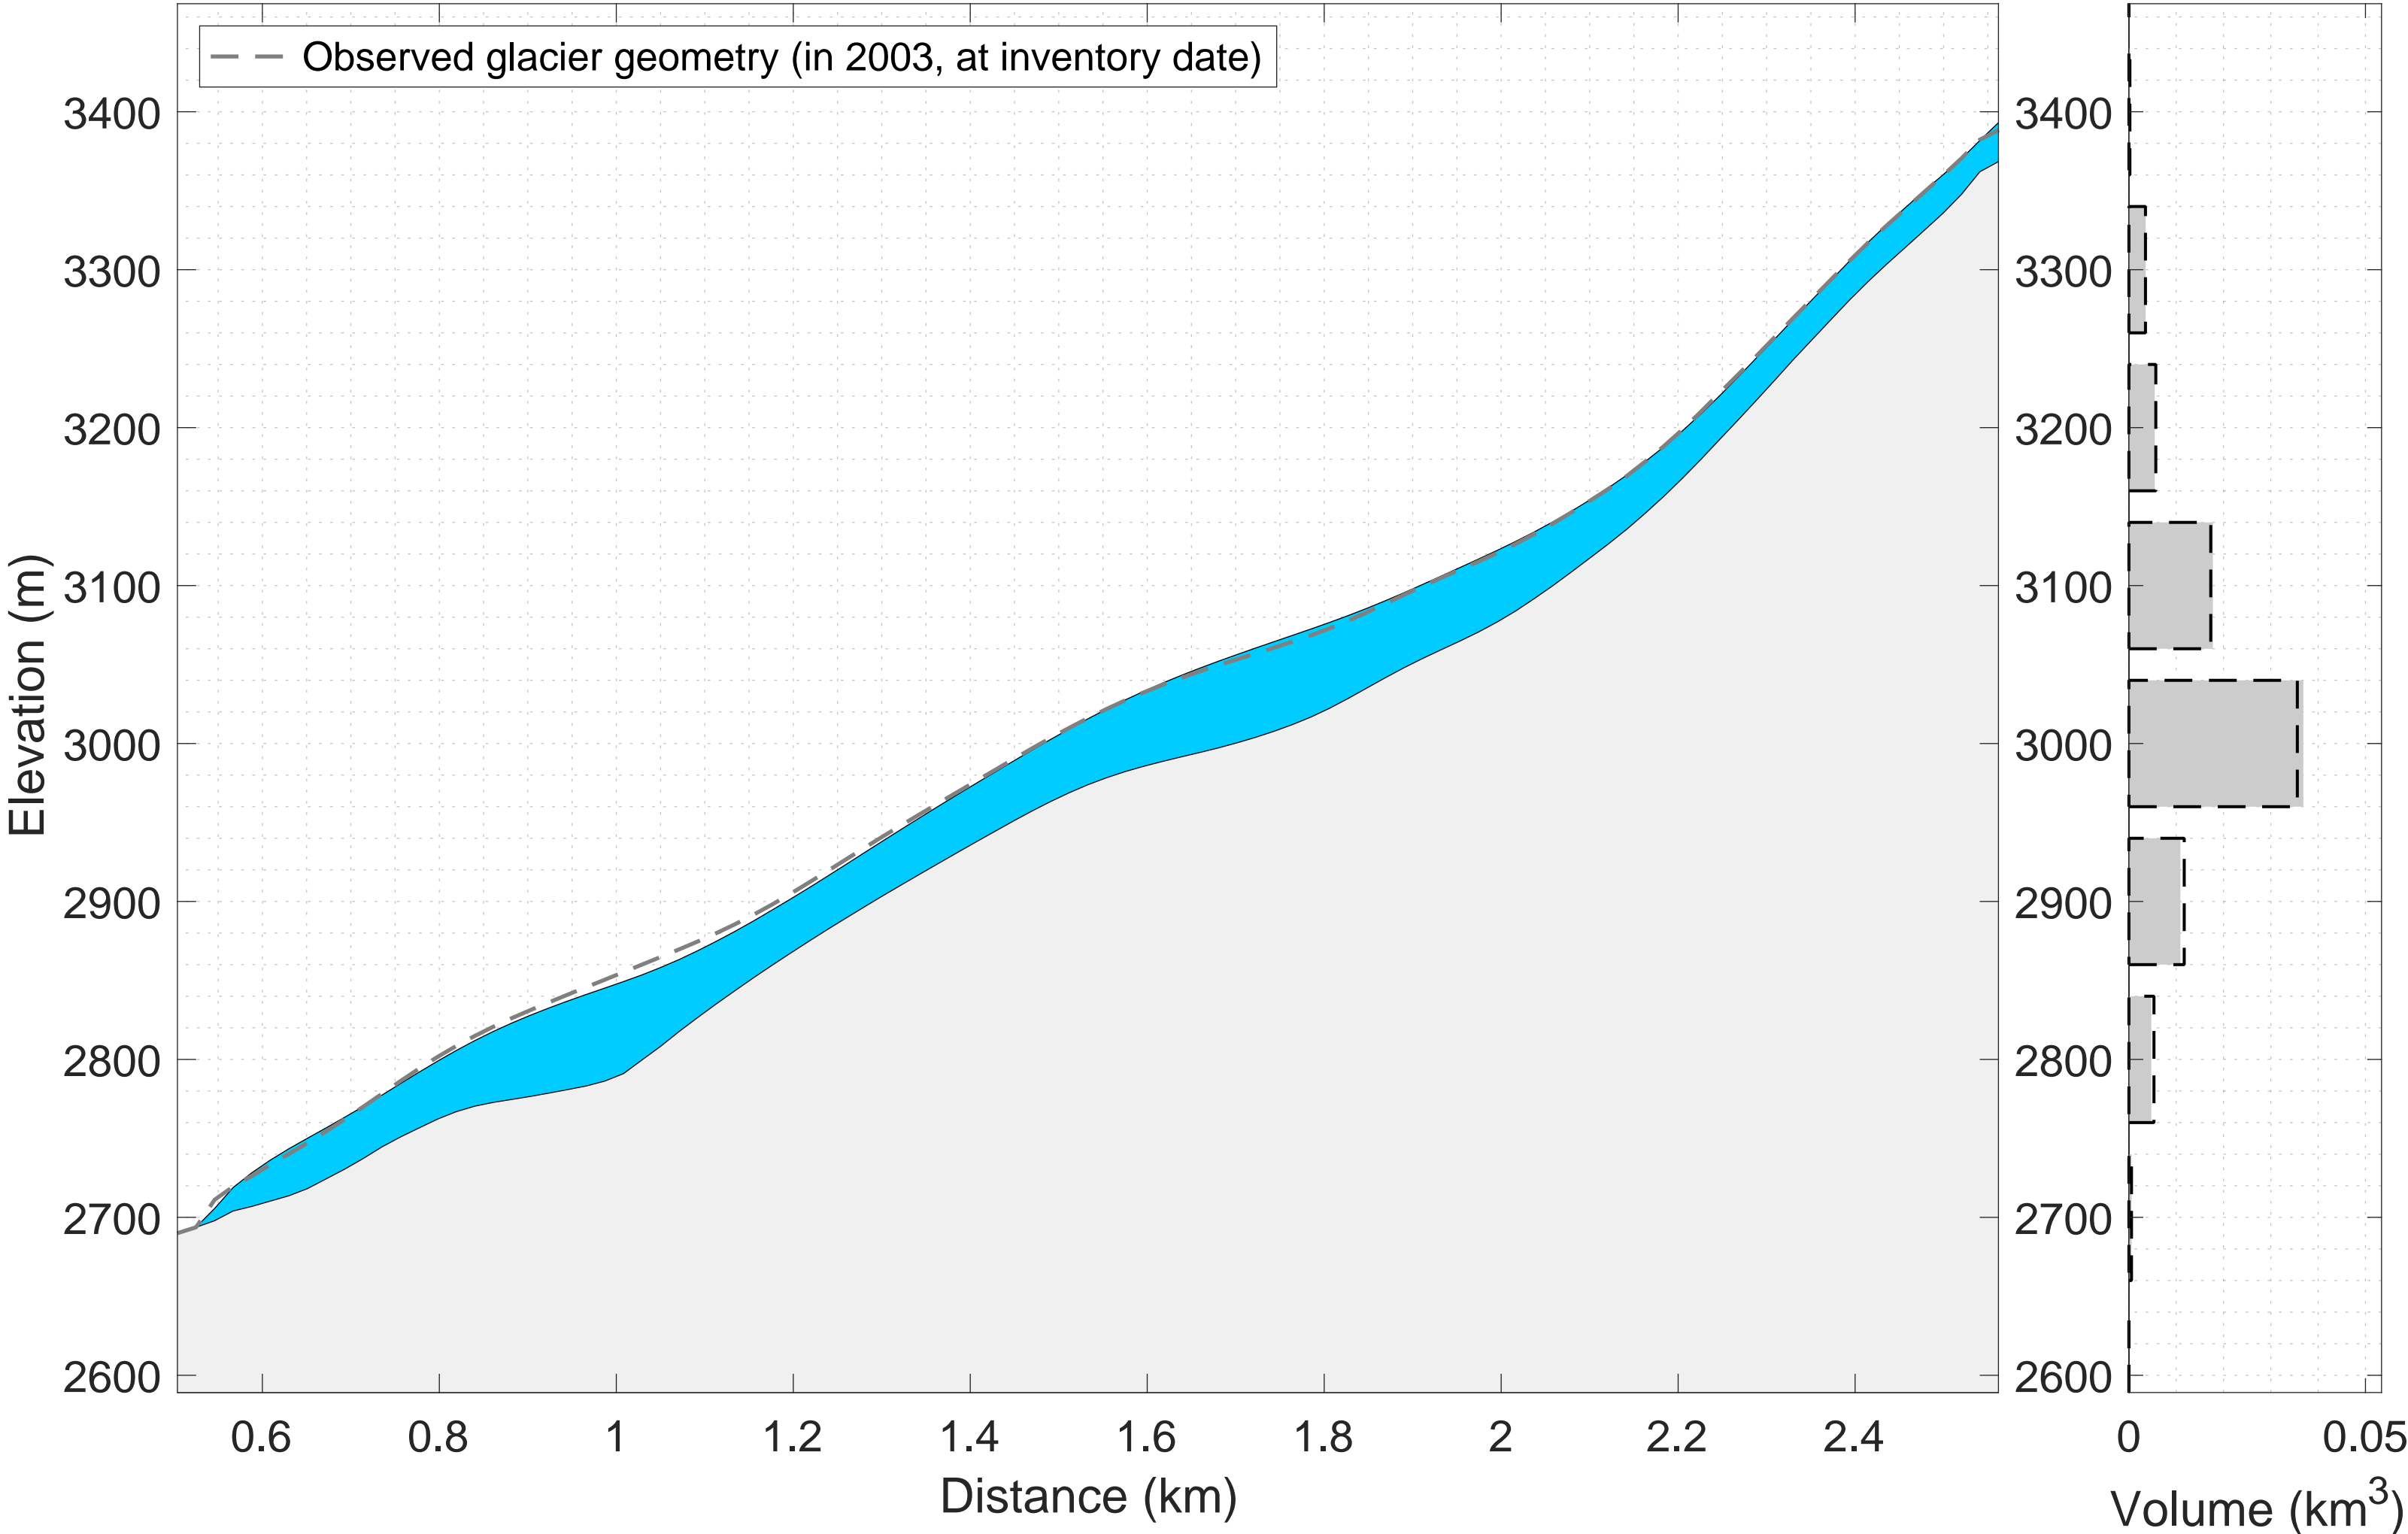

Supplement: Supplementary file 504 [file tc-13-1125-2019-supplement.zip]

**Modelled geometry (Glacier ID = 02734;  $A = 1.6397\text{e-}16 \text{ Pa}^{-3} \text{ a}^{-1}$ ;  $dx = 23 \text{ m}$ )**

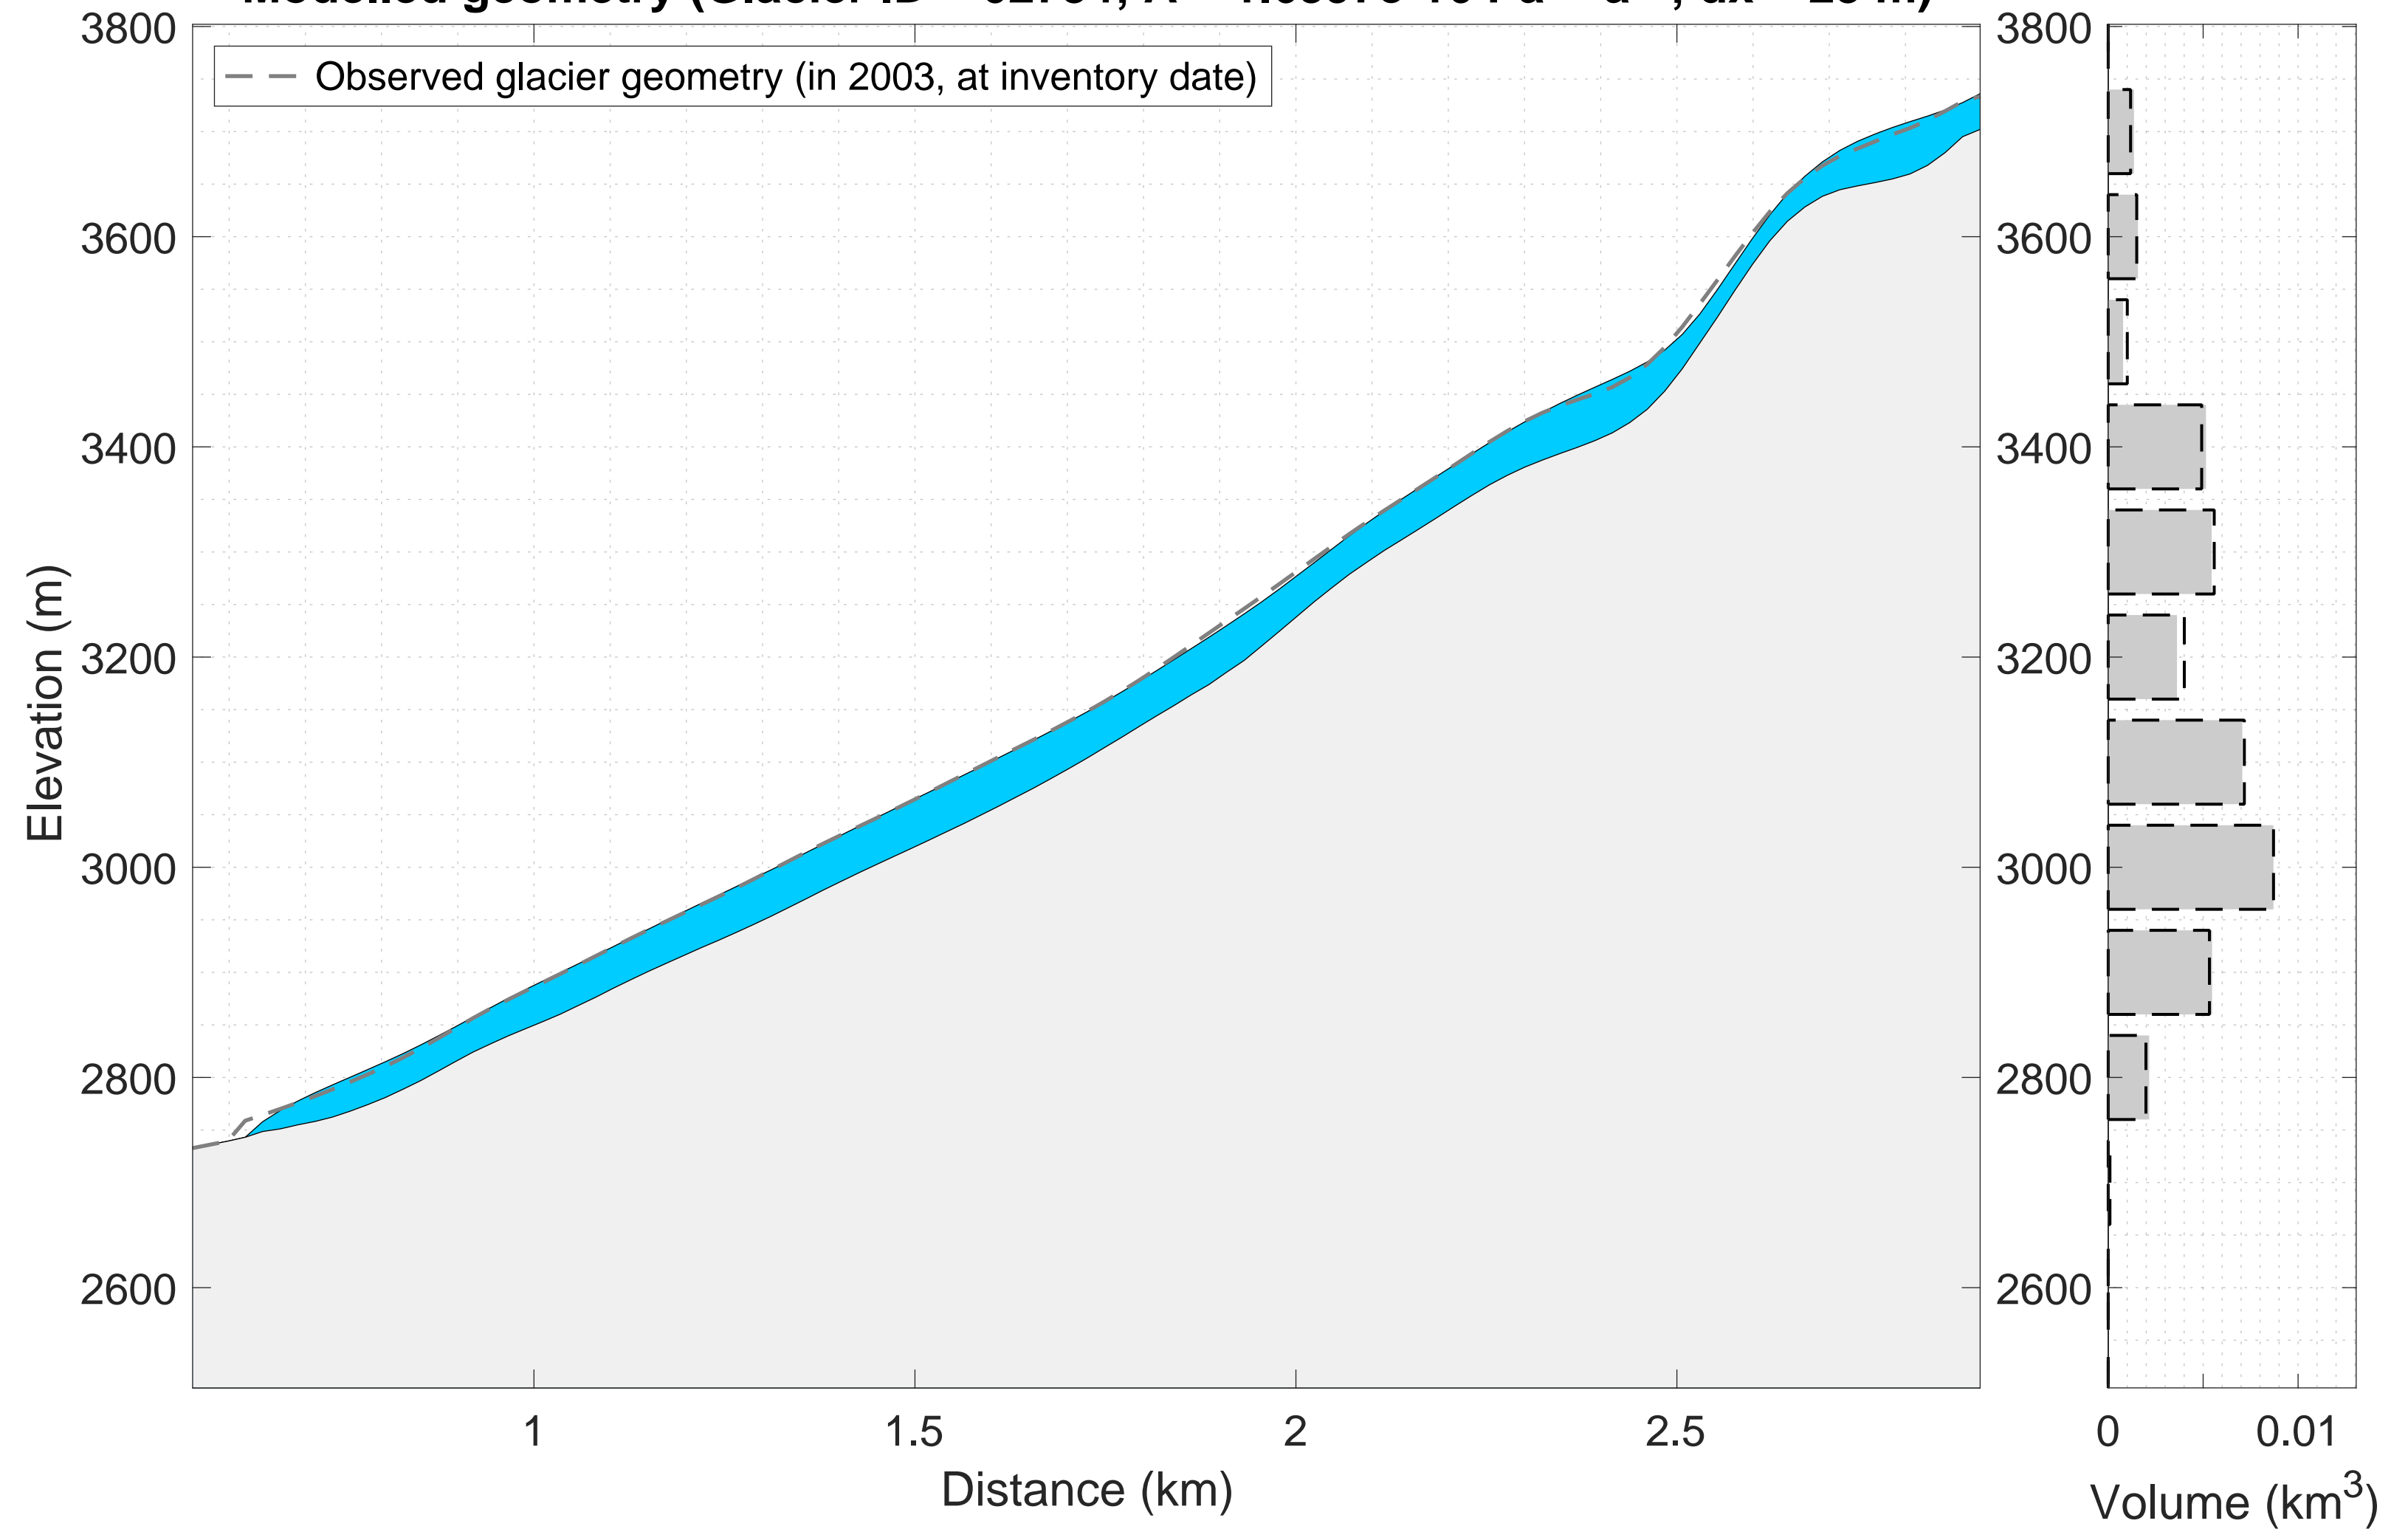

Supplement: Supplementary file 505 [file tc-13-1125-2019-supplement.zip]

**Modelled geometry (Glacier ID = 02634;  $A = 1.5372\text{e-}16 \text{ Pa}^{-3} \text{ a}^{-1}$ ;  $dx = 16 \text{ m}$ )**

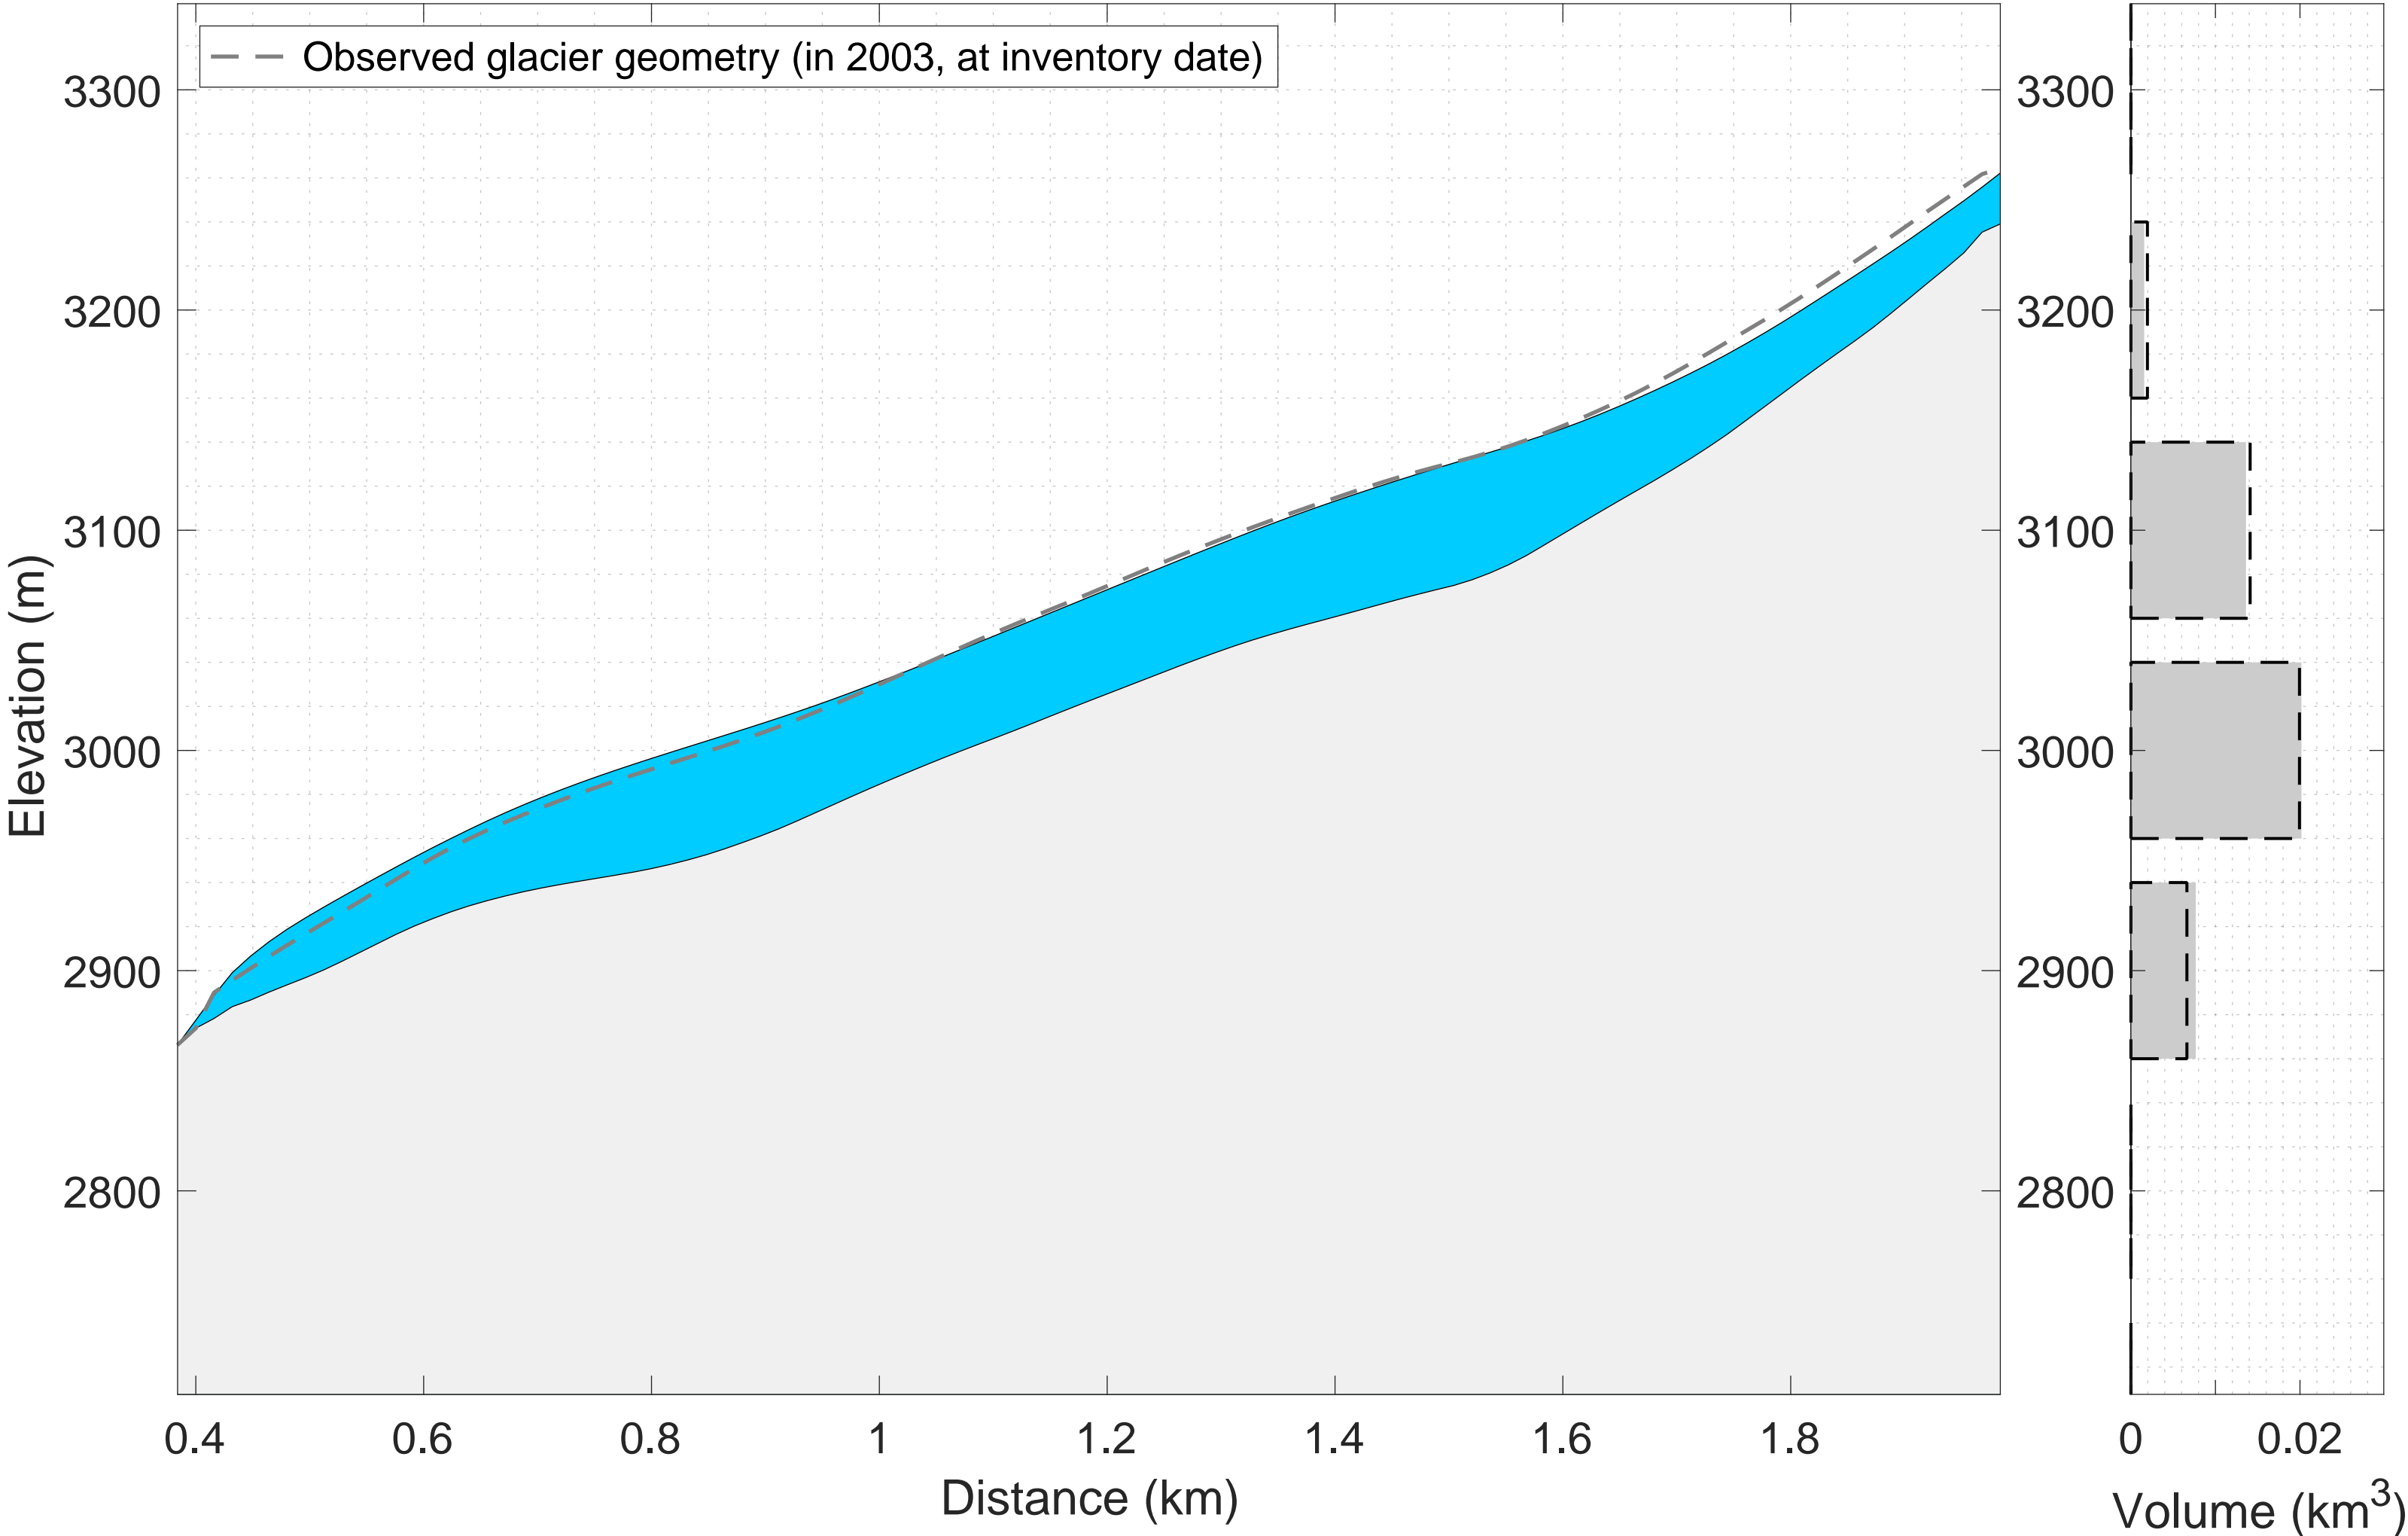

Supplement: Supplementary file 506 [file tc-13-1125-2019-supplement.zip]

**Modelled geometry (Glacier ID = 00497;  $A = 5.6573\text{e-}17 \text{ Pa}^{-3} \text{ a}^{-1}$ ;  $dx = 12 \text{ m}$ )**

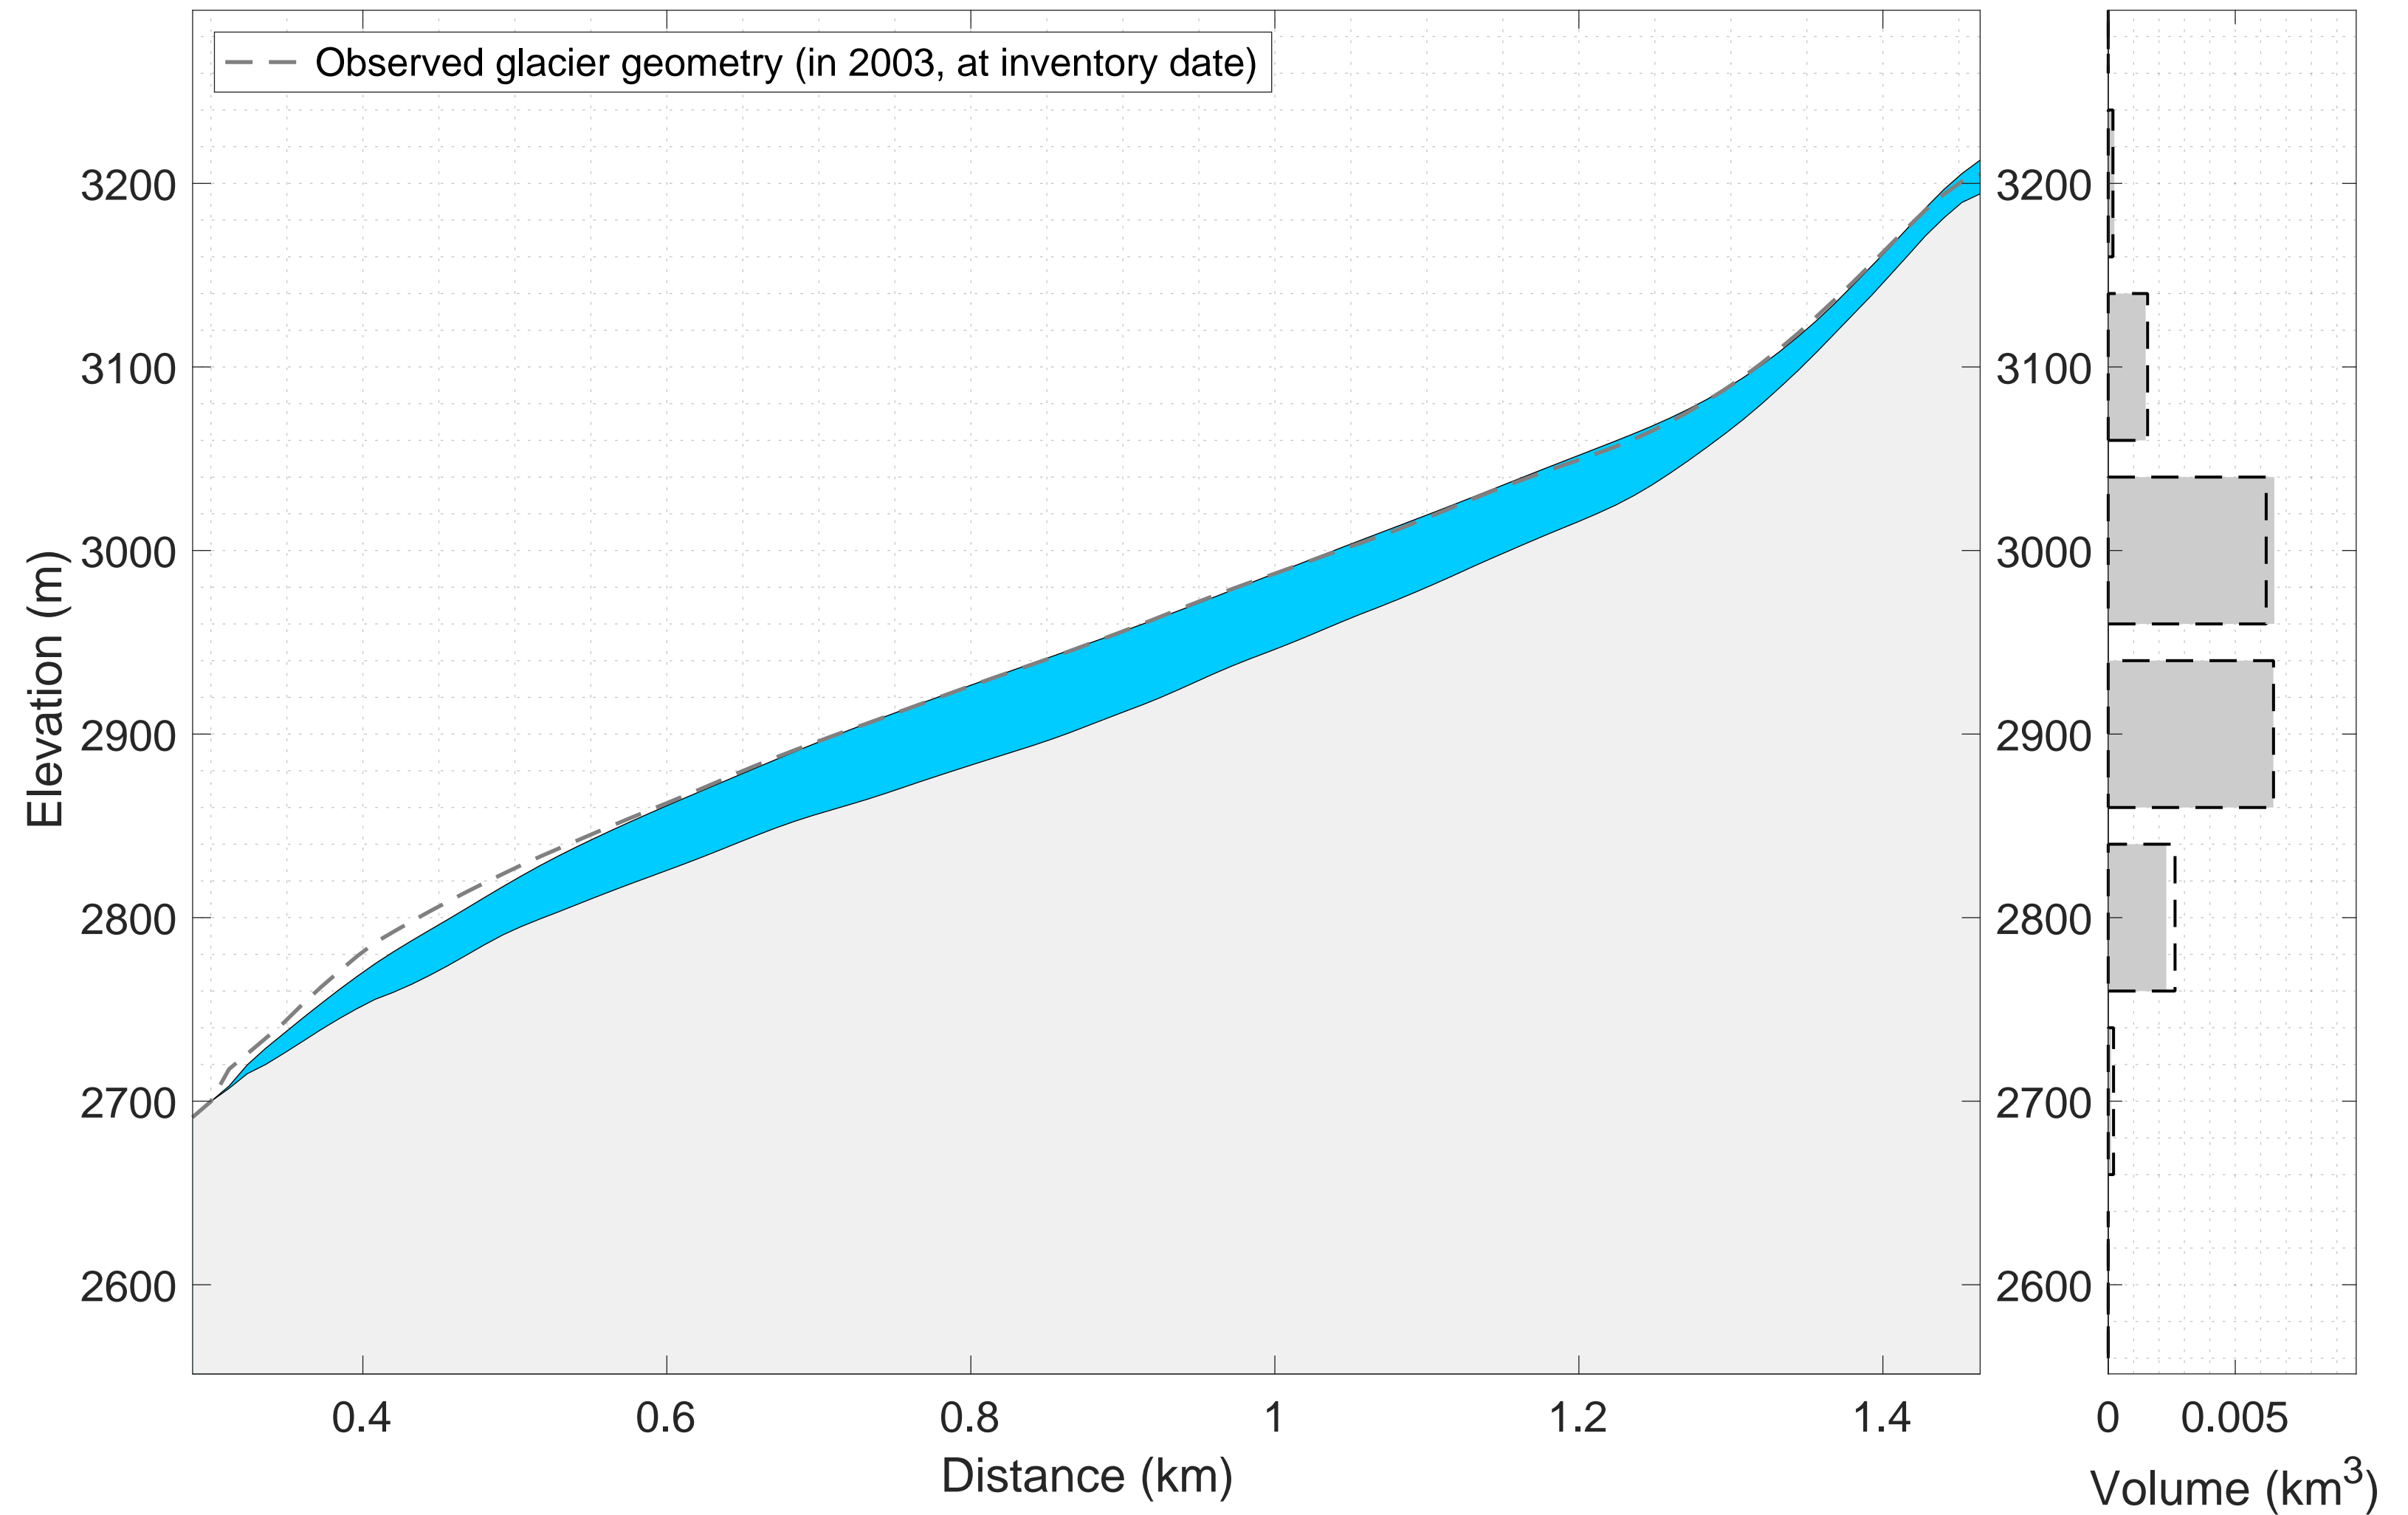

Supplement: Supplementary file 507 [file tc-13-1125-2019-supplement.zip]

**Modelled geometry (Glacier ID = 01041;  $A = 1.5767\text{e-}16 \text{ Pa}^{-3} \text{ a}^{-1}$ ;  $dx = 16 \text{ m}$ )**

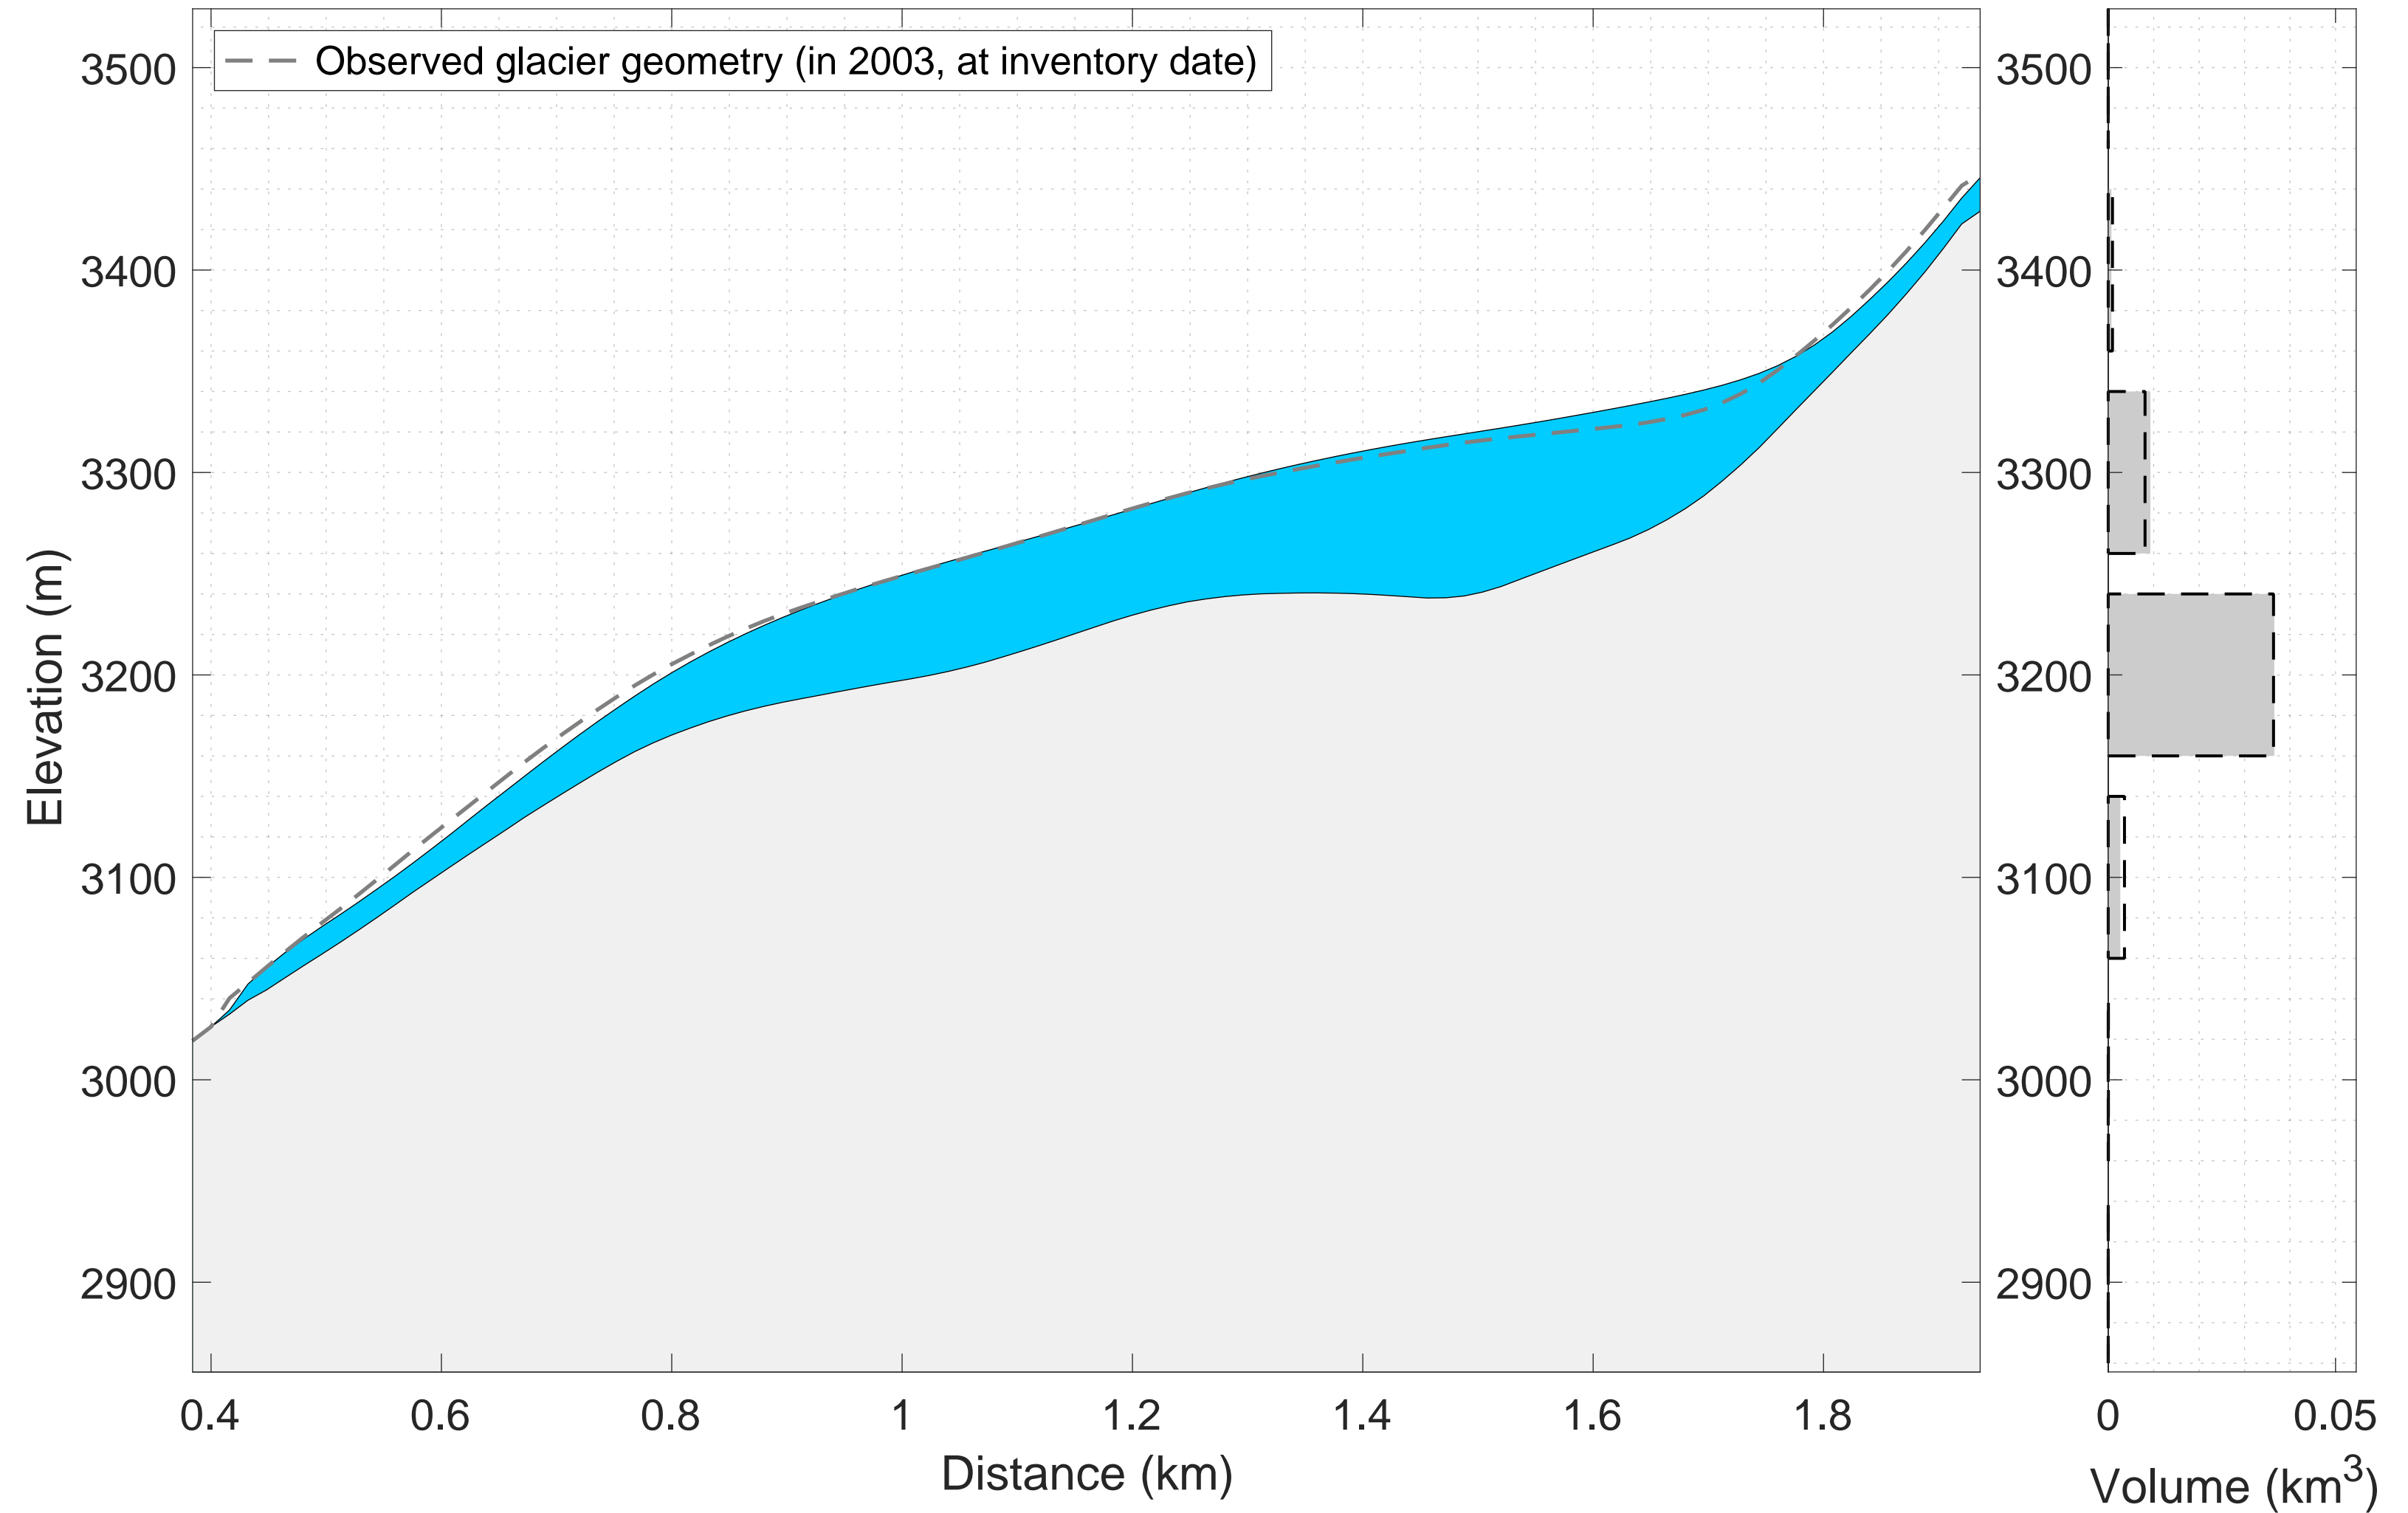

Supplement: Supplementary file 508 [file tc-13-1125-2019-supplement.zip]

**Modelled geometry (Glacier ID = 00325;  $A = 1.7283\text{e-}16 \text{ Pa}^{-3} \text{ a}^{-1}$ ;  $dx = 21 \text{ m}$ )**

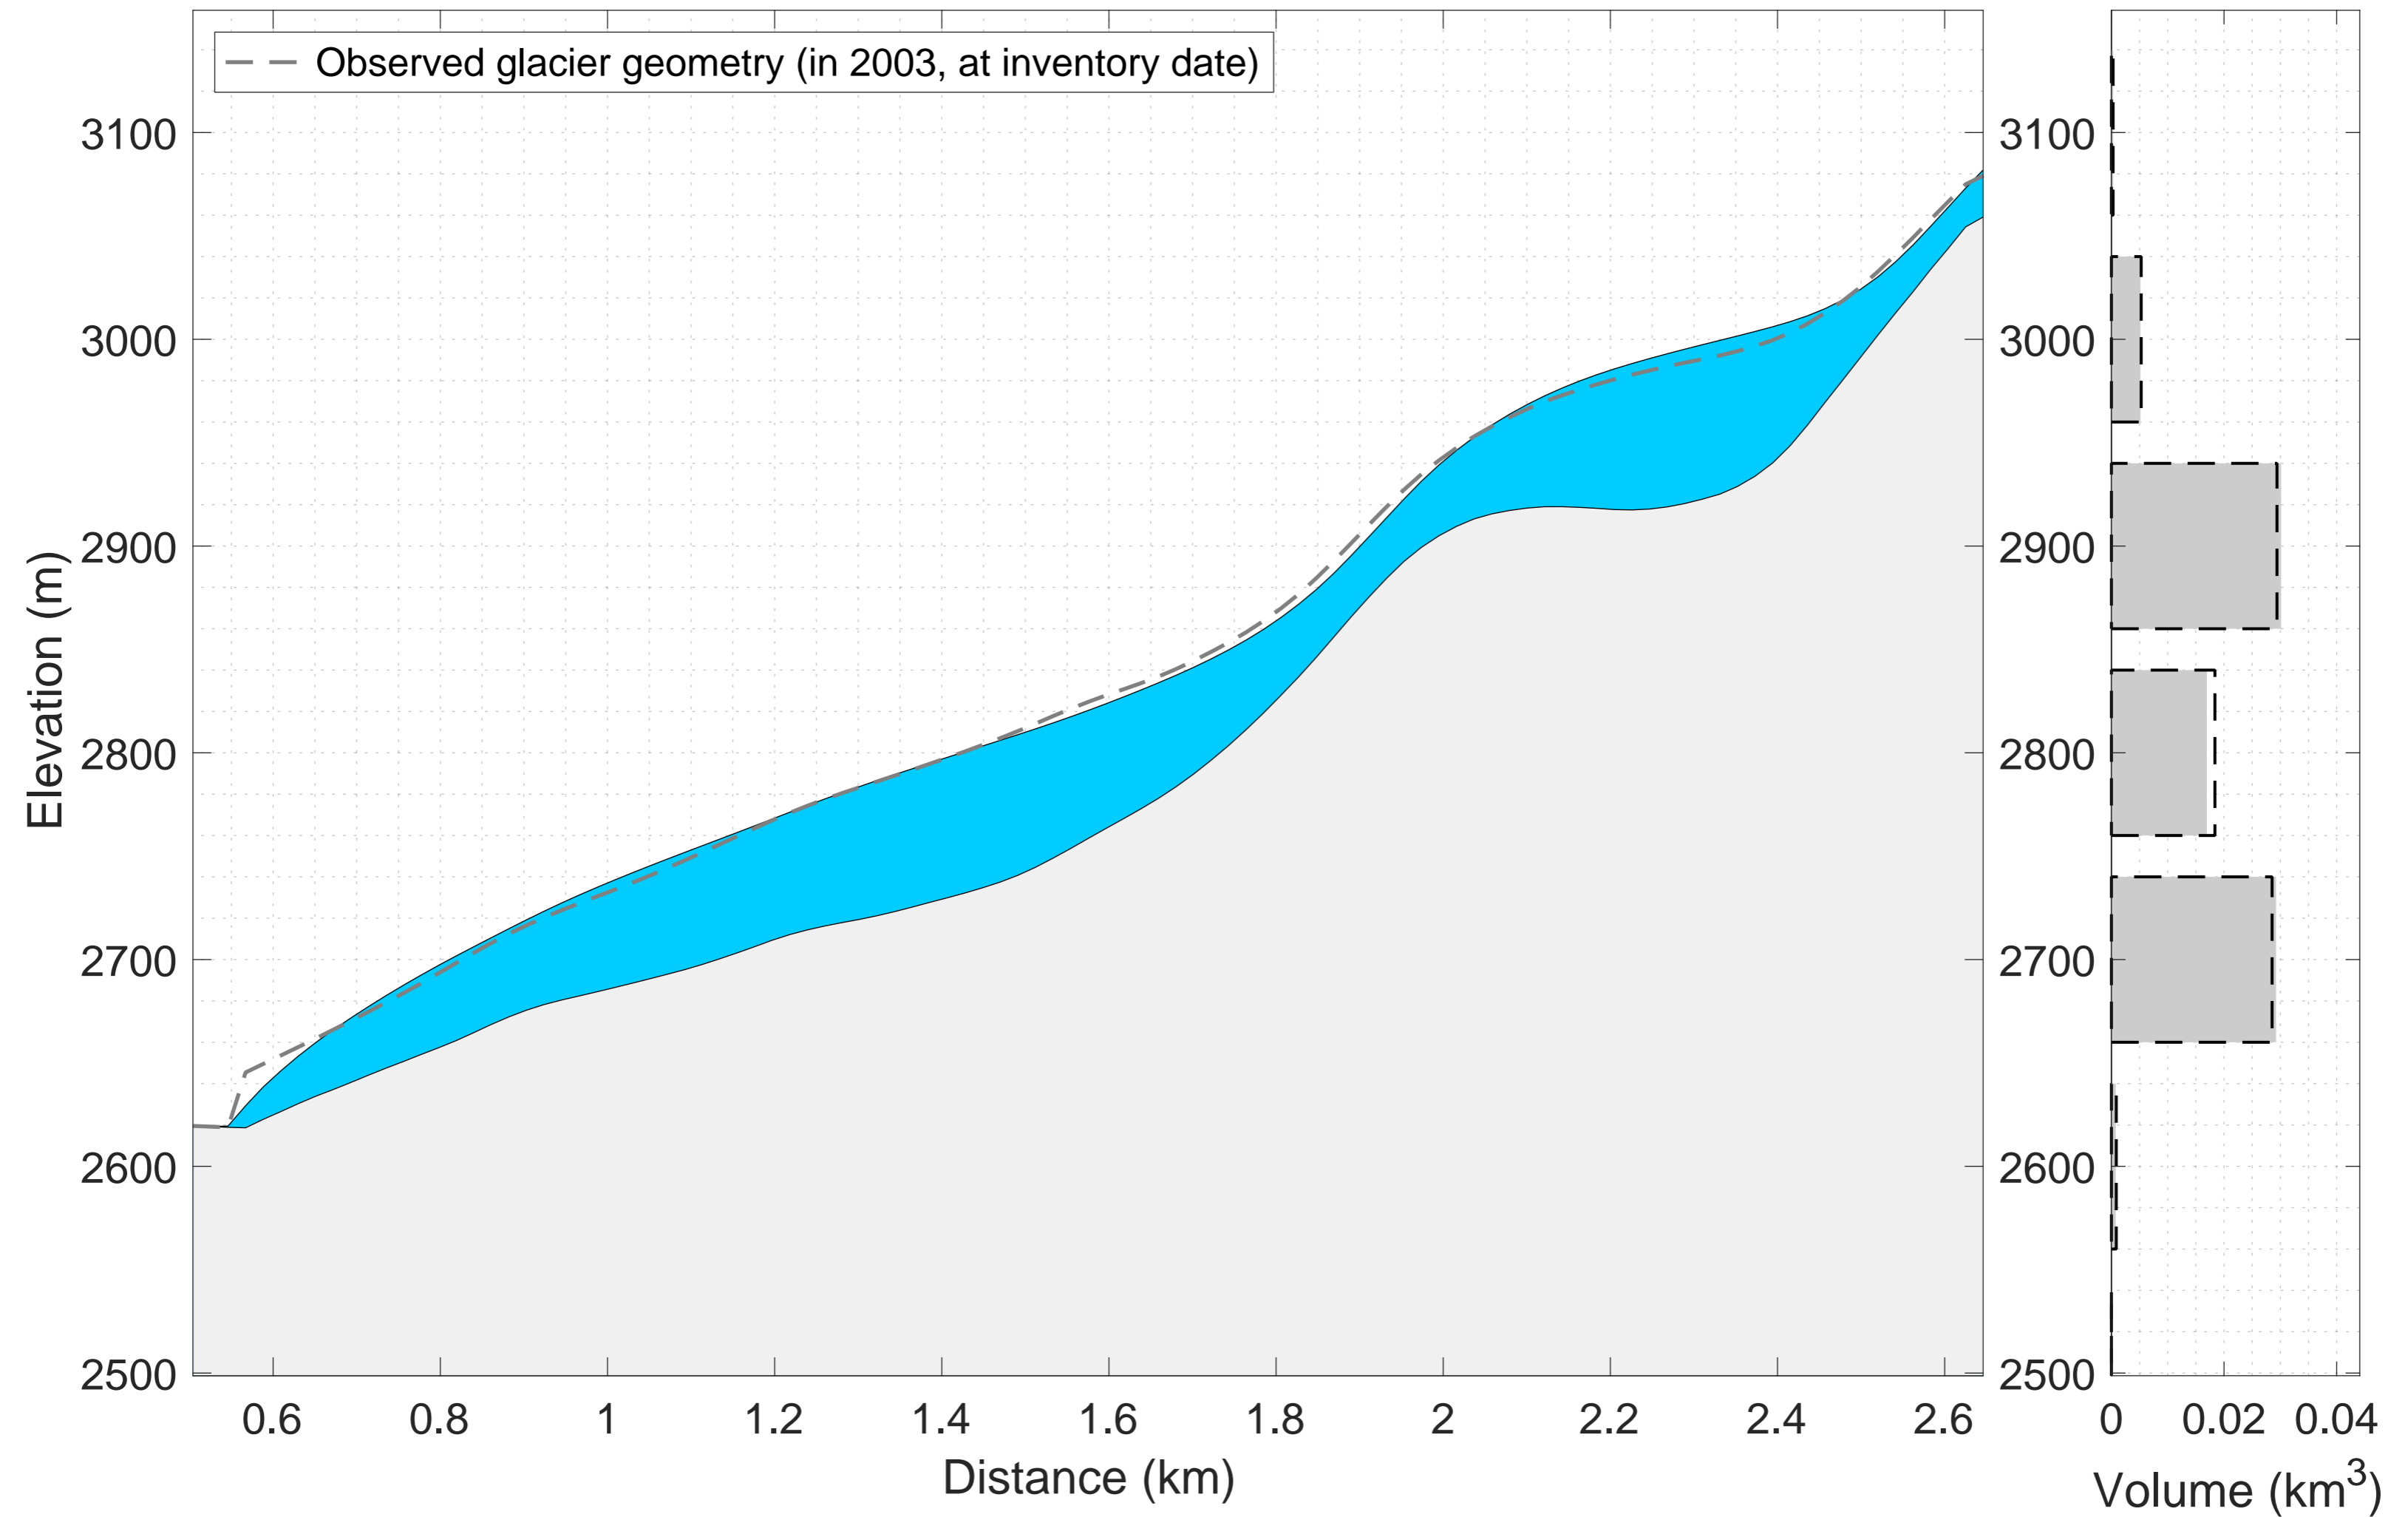

Supplement: Supplementary file 509 [file tc-13-1125-2019-supplement.zip]

**Modelled geometry (Glacier ID = 03659;  $A = 1.6466\text{e-}16 \text{ Pa}^{-3} \text{ a}^{-1}$ ;  $dx = 10 \text{ m}$ )**

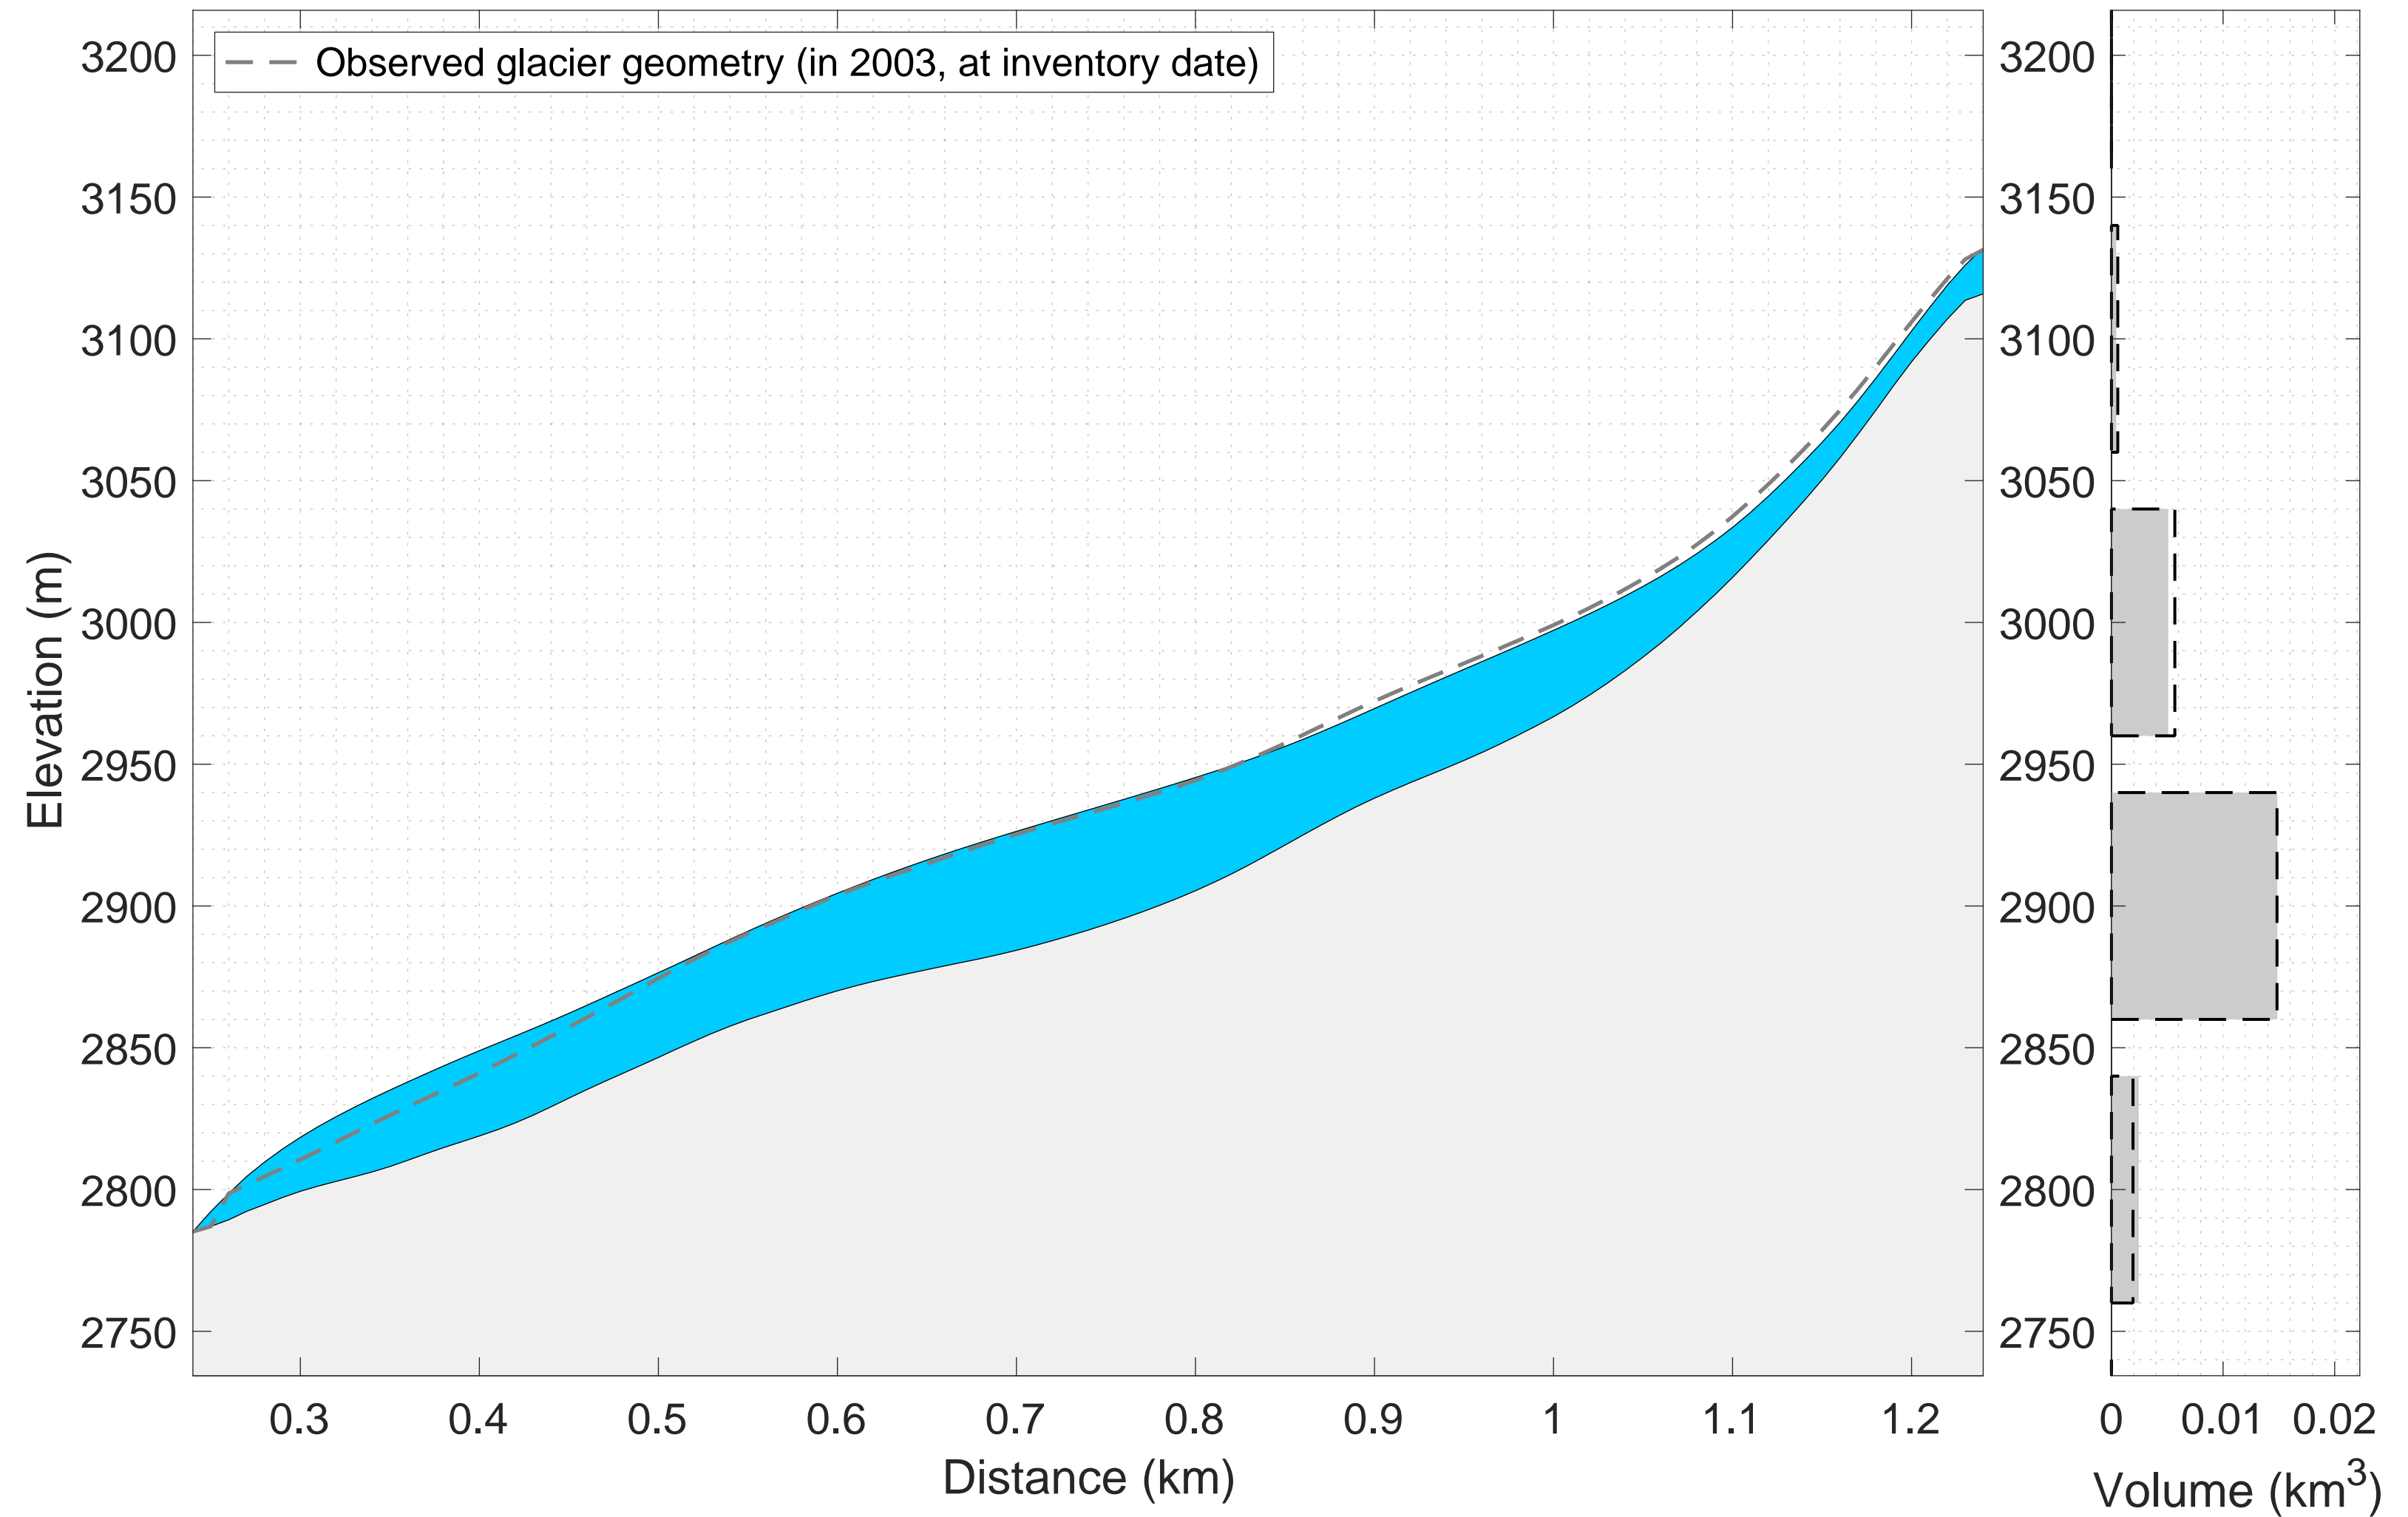

Supplement: Supplementary file 510 [file tc-13-1125-2019-supplement.zip]

**Modelled geometry (Glacier ID = 00887;  $A = 1.8044\text{e-}16 \text{ Pa}^{-3} \text{ a}^{-1}$ ;  $dx = 58 \text{ m}$ )**

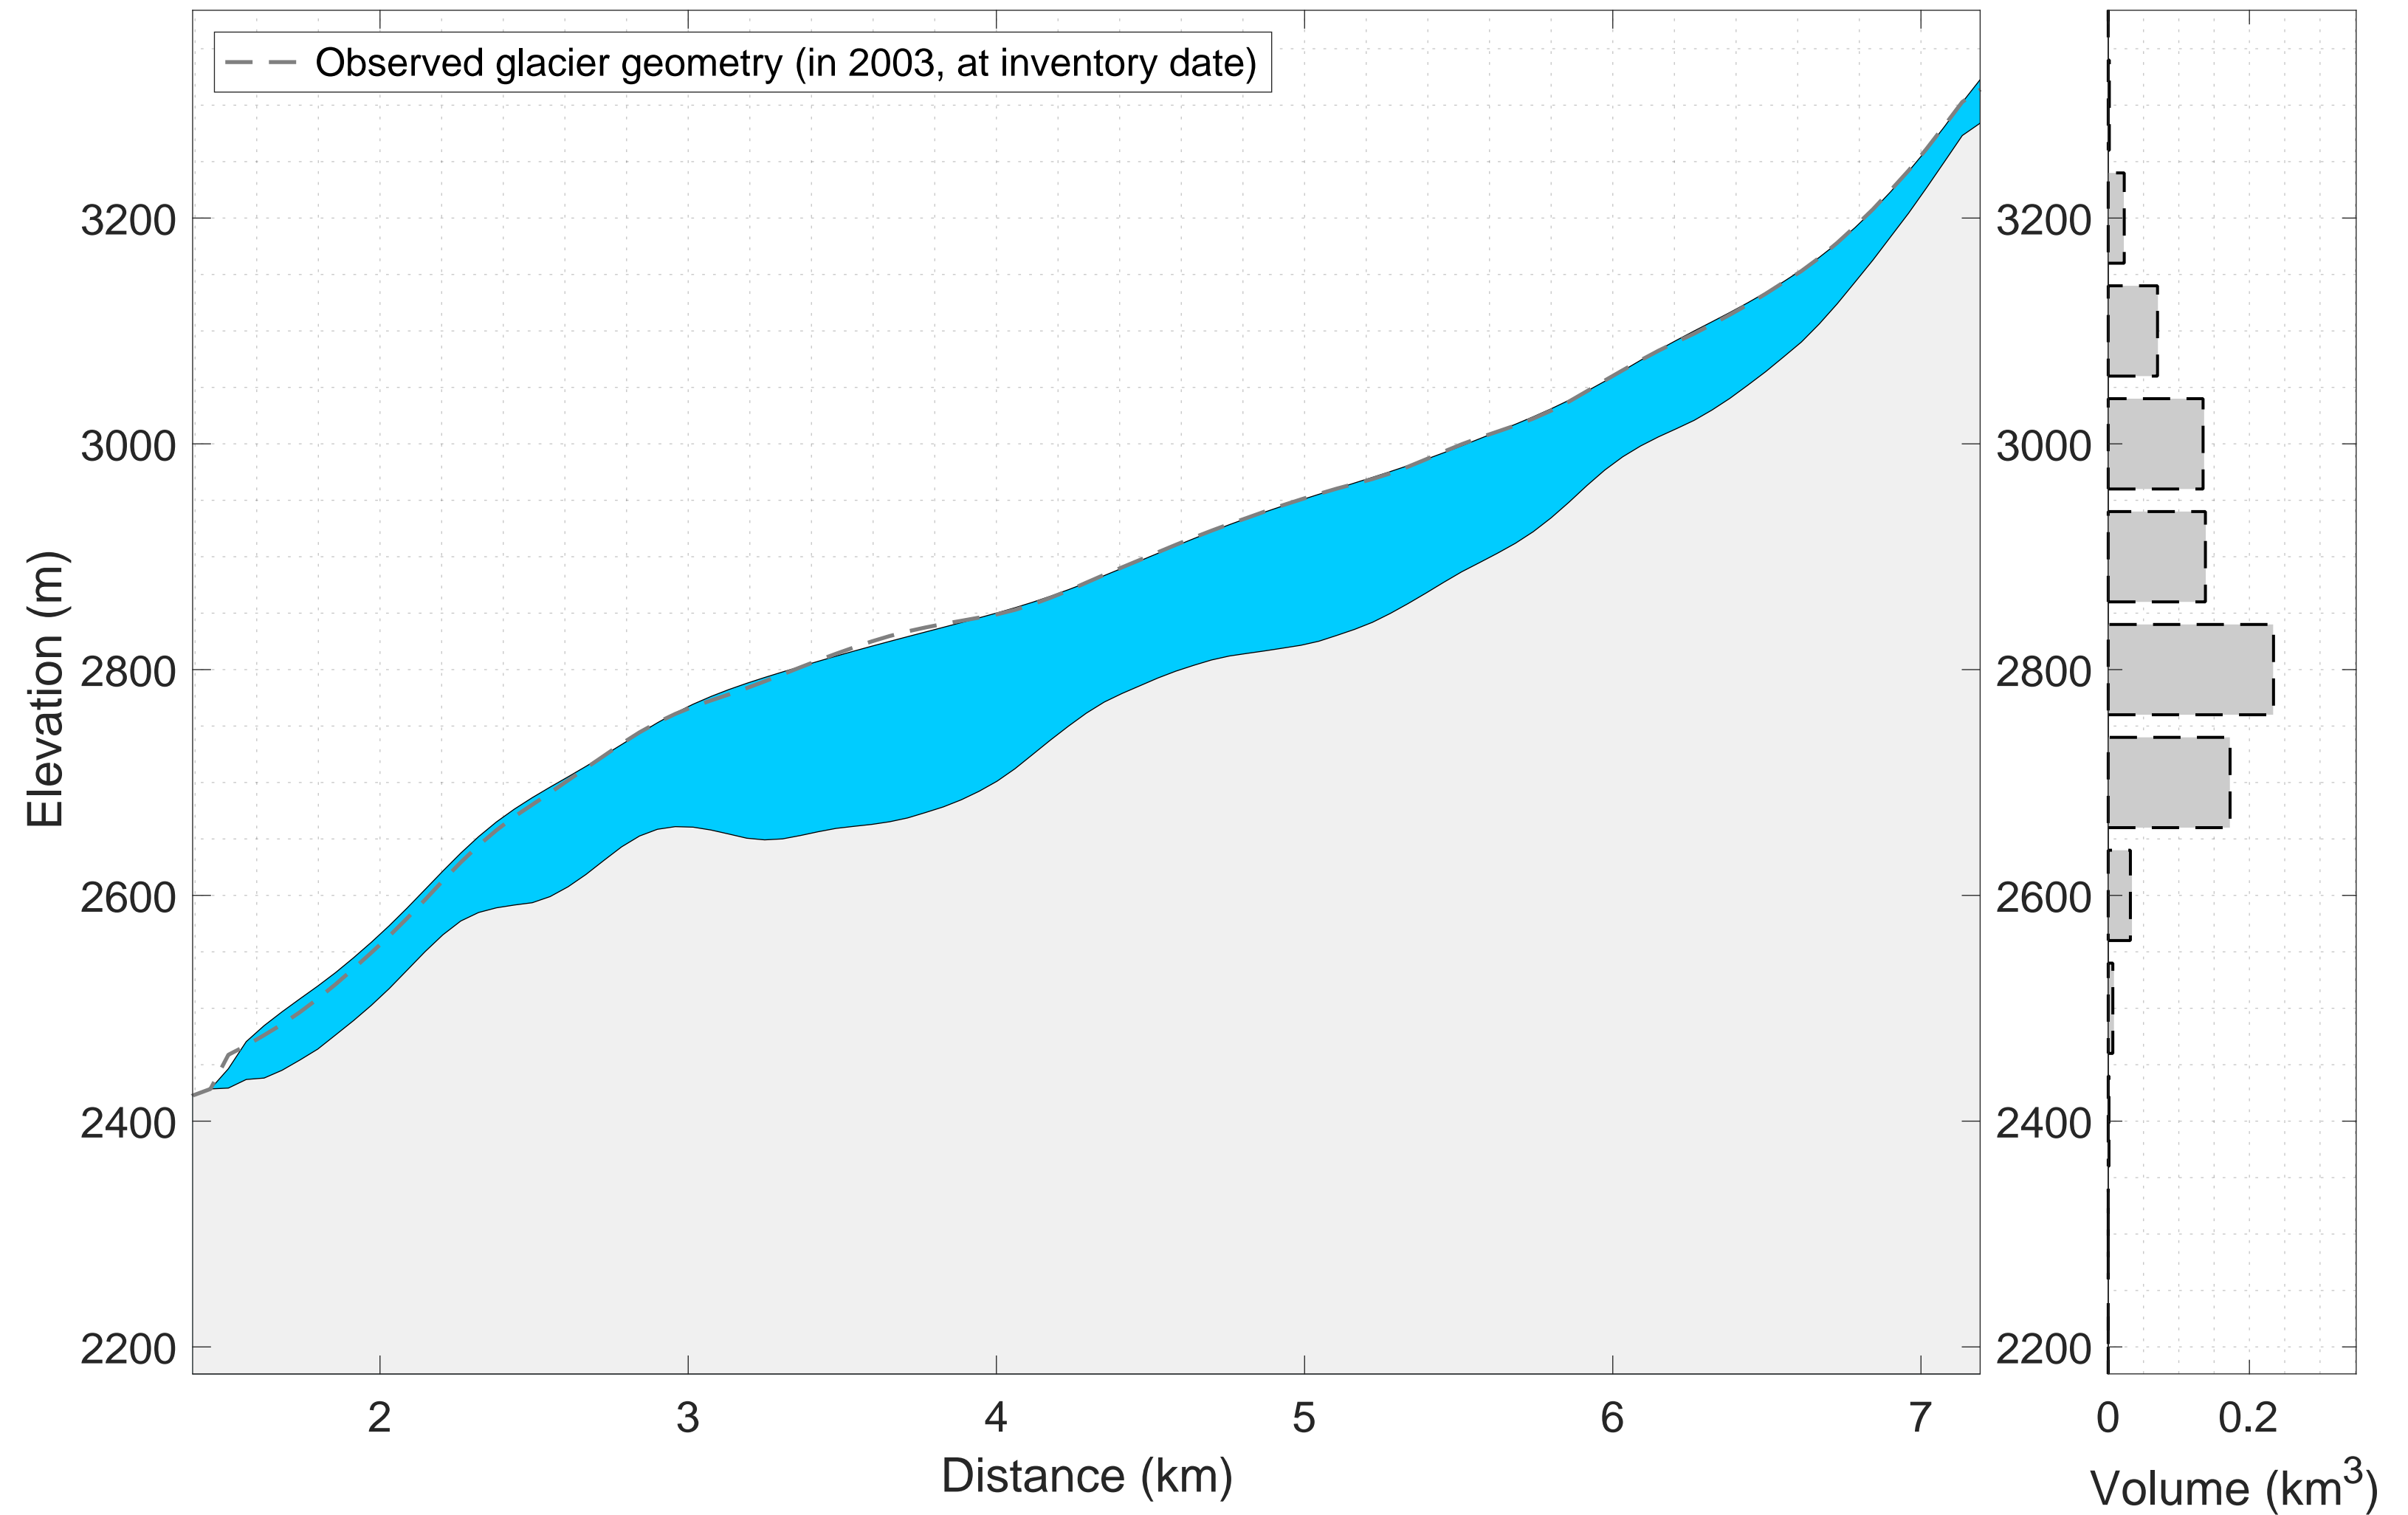

Supplement: Supplementary file 511 [file tc-13-1125-2019-supplement.zip]

**Modelled geometry (Glacier ID = 01827;  $A = 5.393\text{e-}17 \text{ Pa}^{-3} \text{ a}^{-1}$ ;  $dx = 71 \text{ m}$ )**

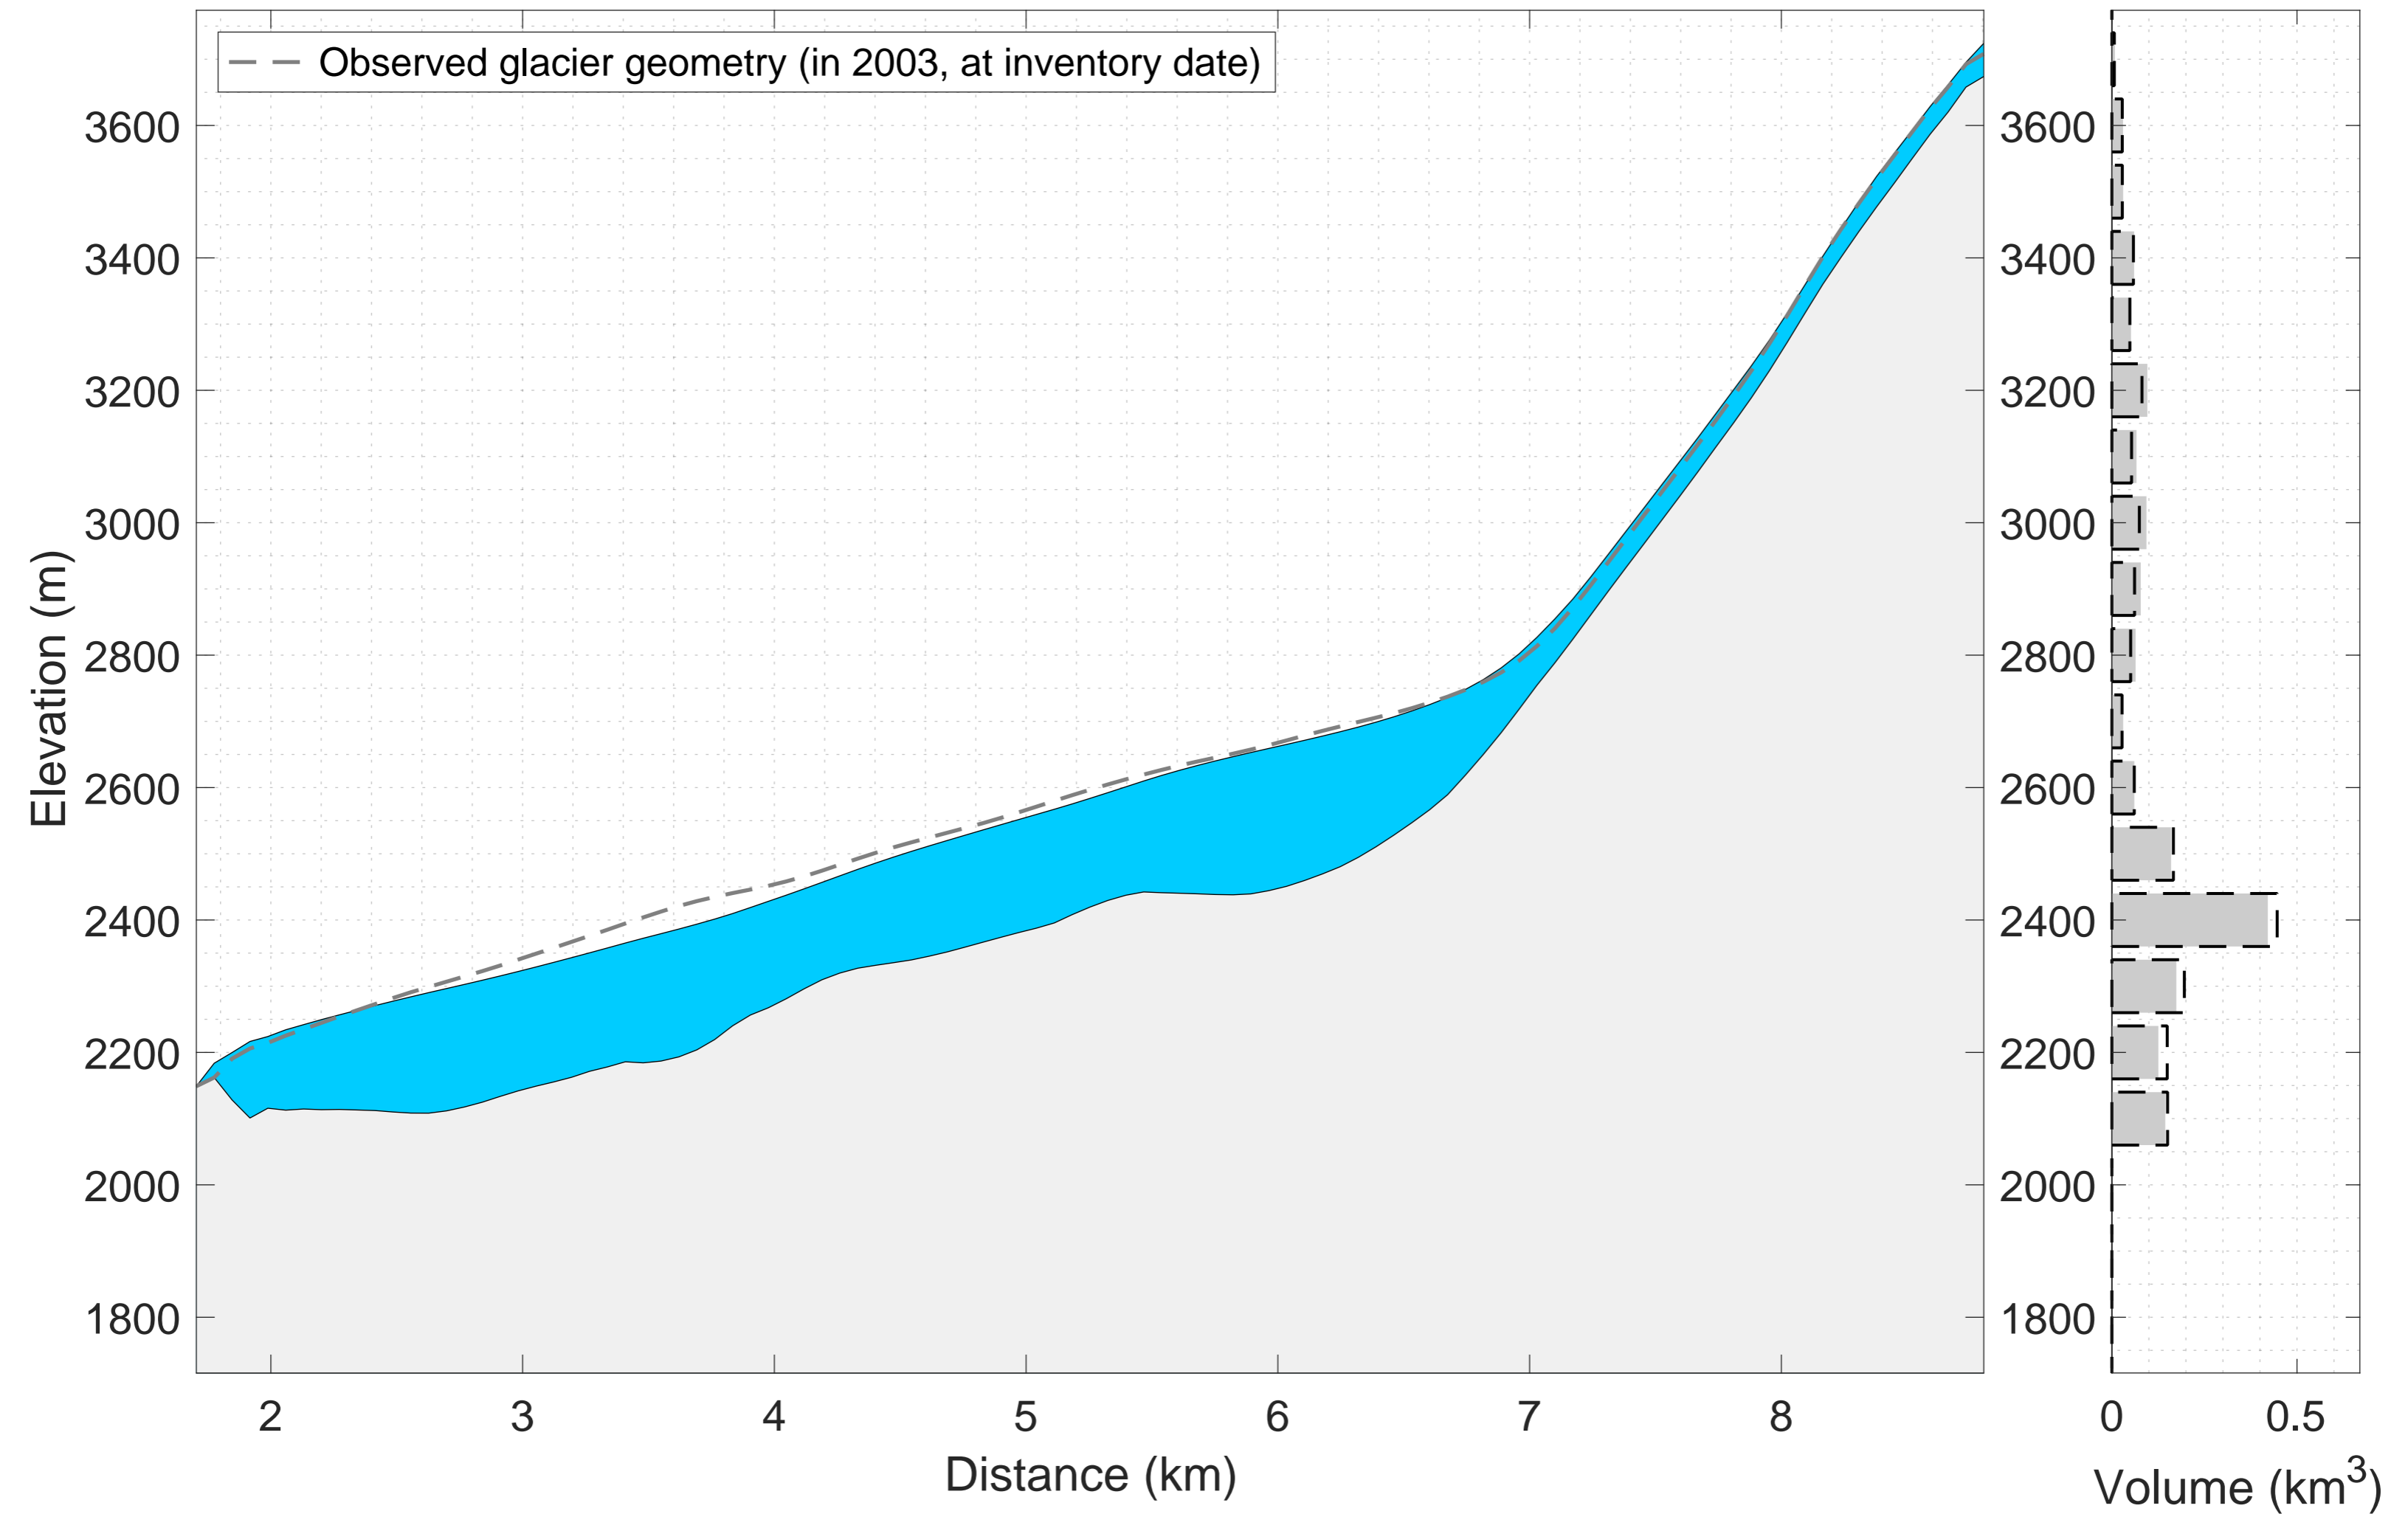

Supplement: Supplementary file 512 [file tc-13-1125-2019-supplement.zip]

**Modelled geometry (Glacier ID = 02964;  $A = 8.9419\text{e-}17 \text{ Pa}^{-3} \text{ a}^{-1}$ ;  $dx = 19 \text{ m}$ )**

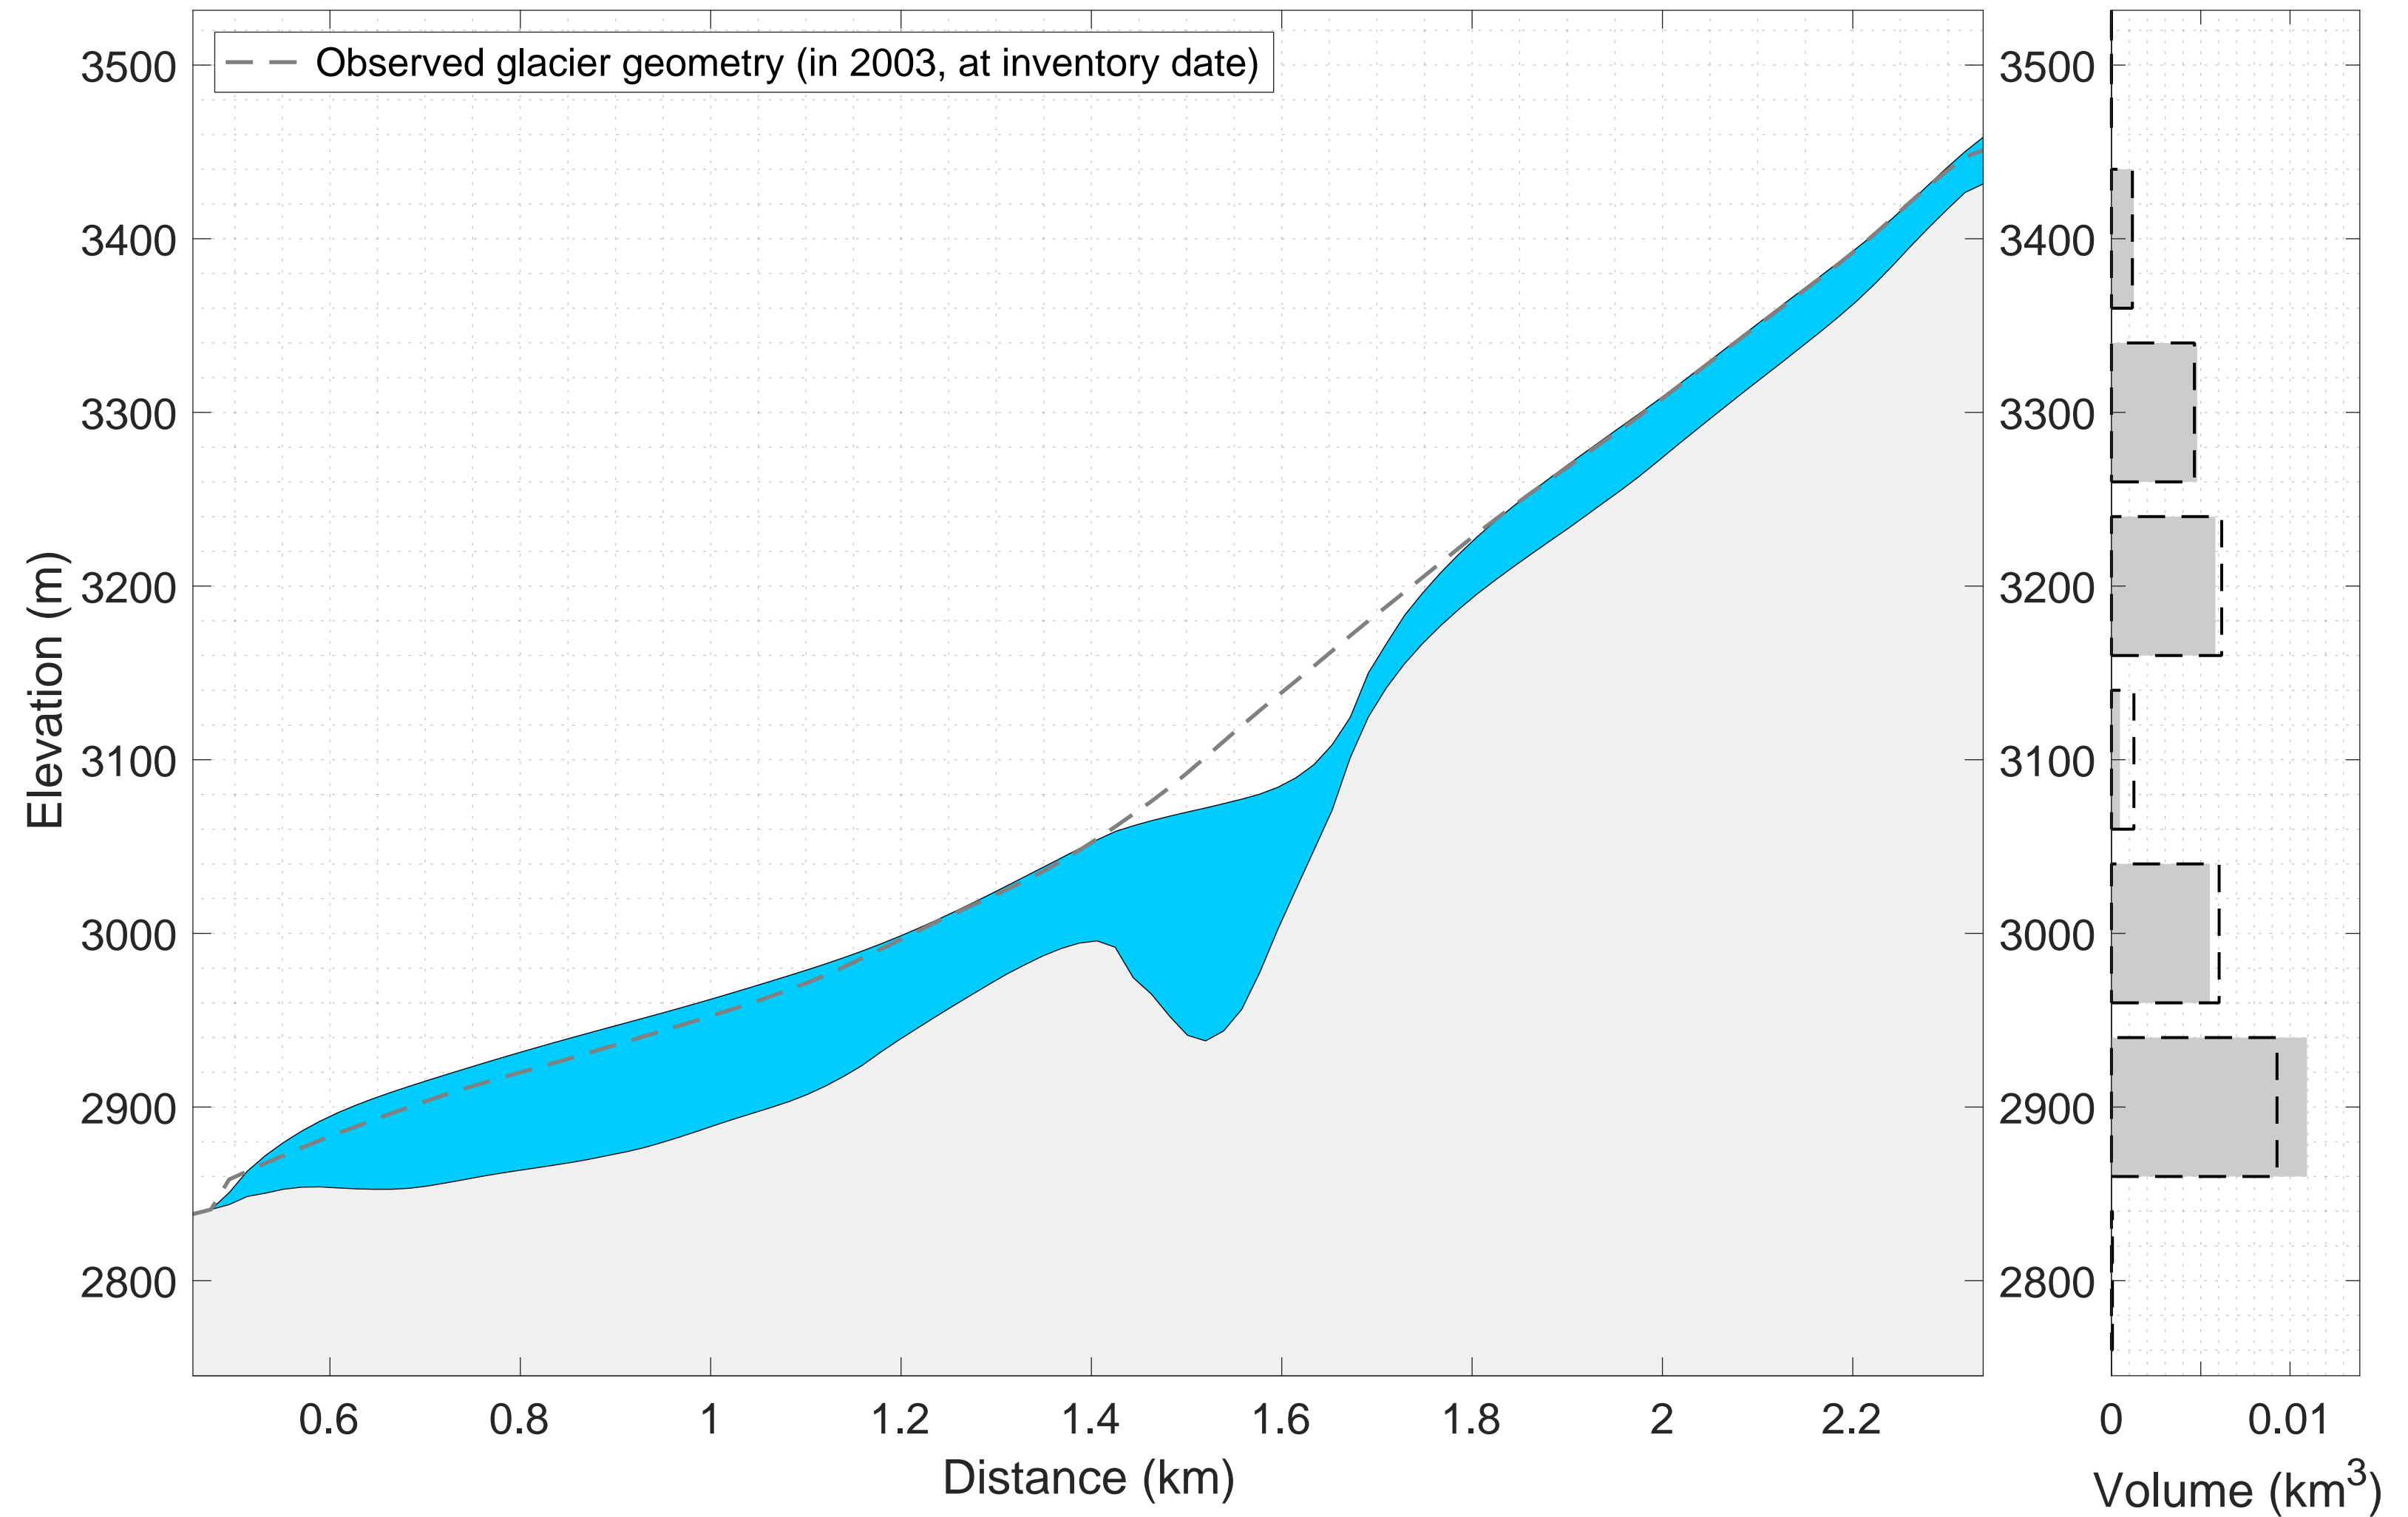

Supplement: Supplementary file 513 [file tc-13-1125-2019-supplement.zip]

**Modelled geometry (Glacier ID = 03690;  $A = 9.7982\text{e-}17 \text{ Pa}^{-3} \text{ a}^{-1}$ ;  $dx = 11 \text{ m}$ )**

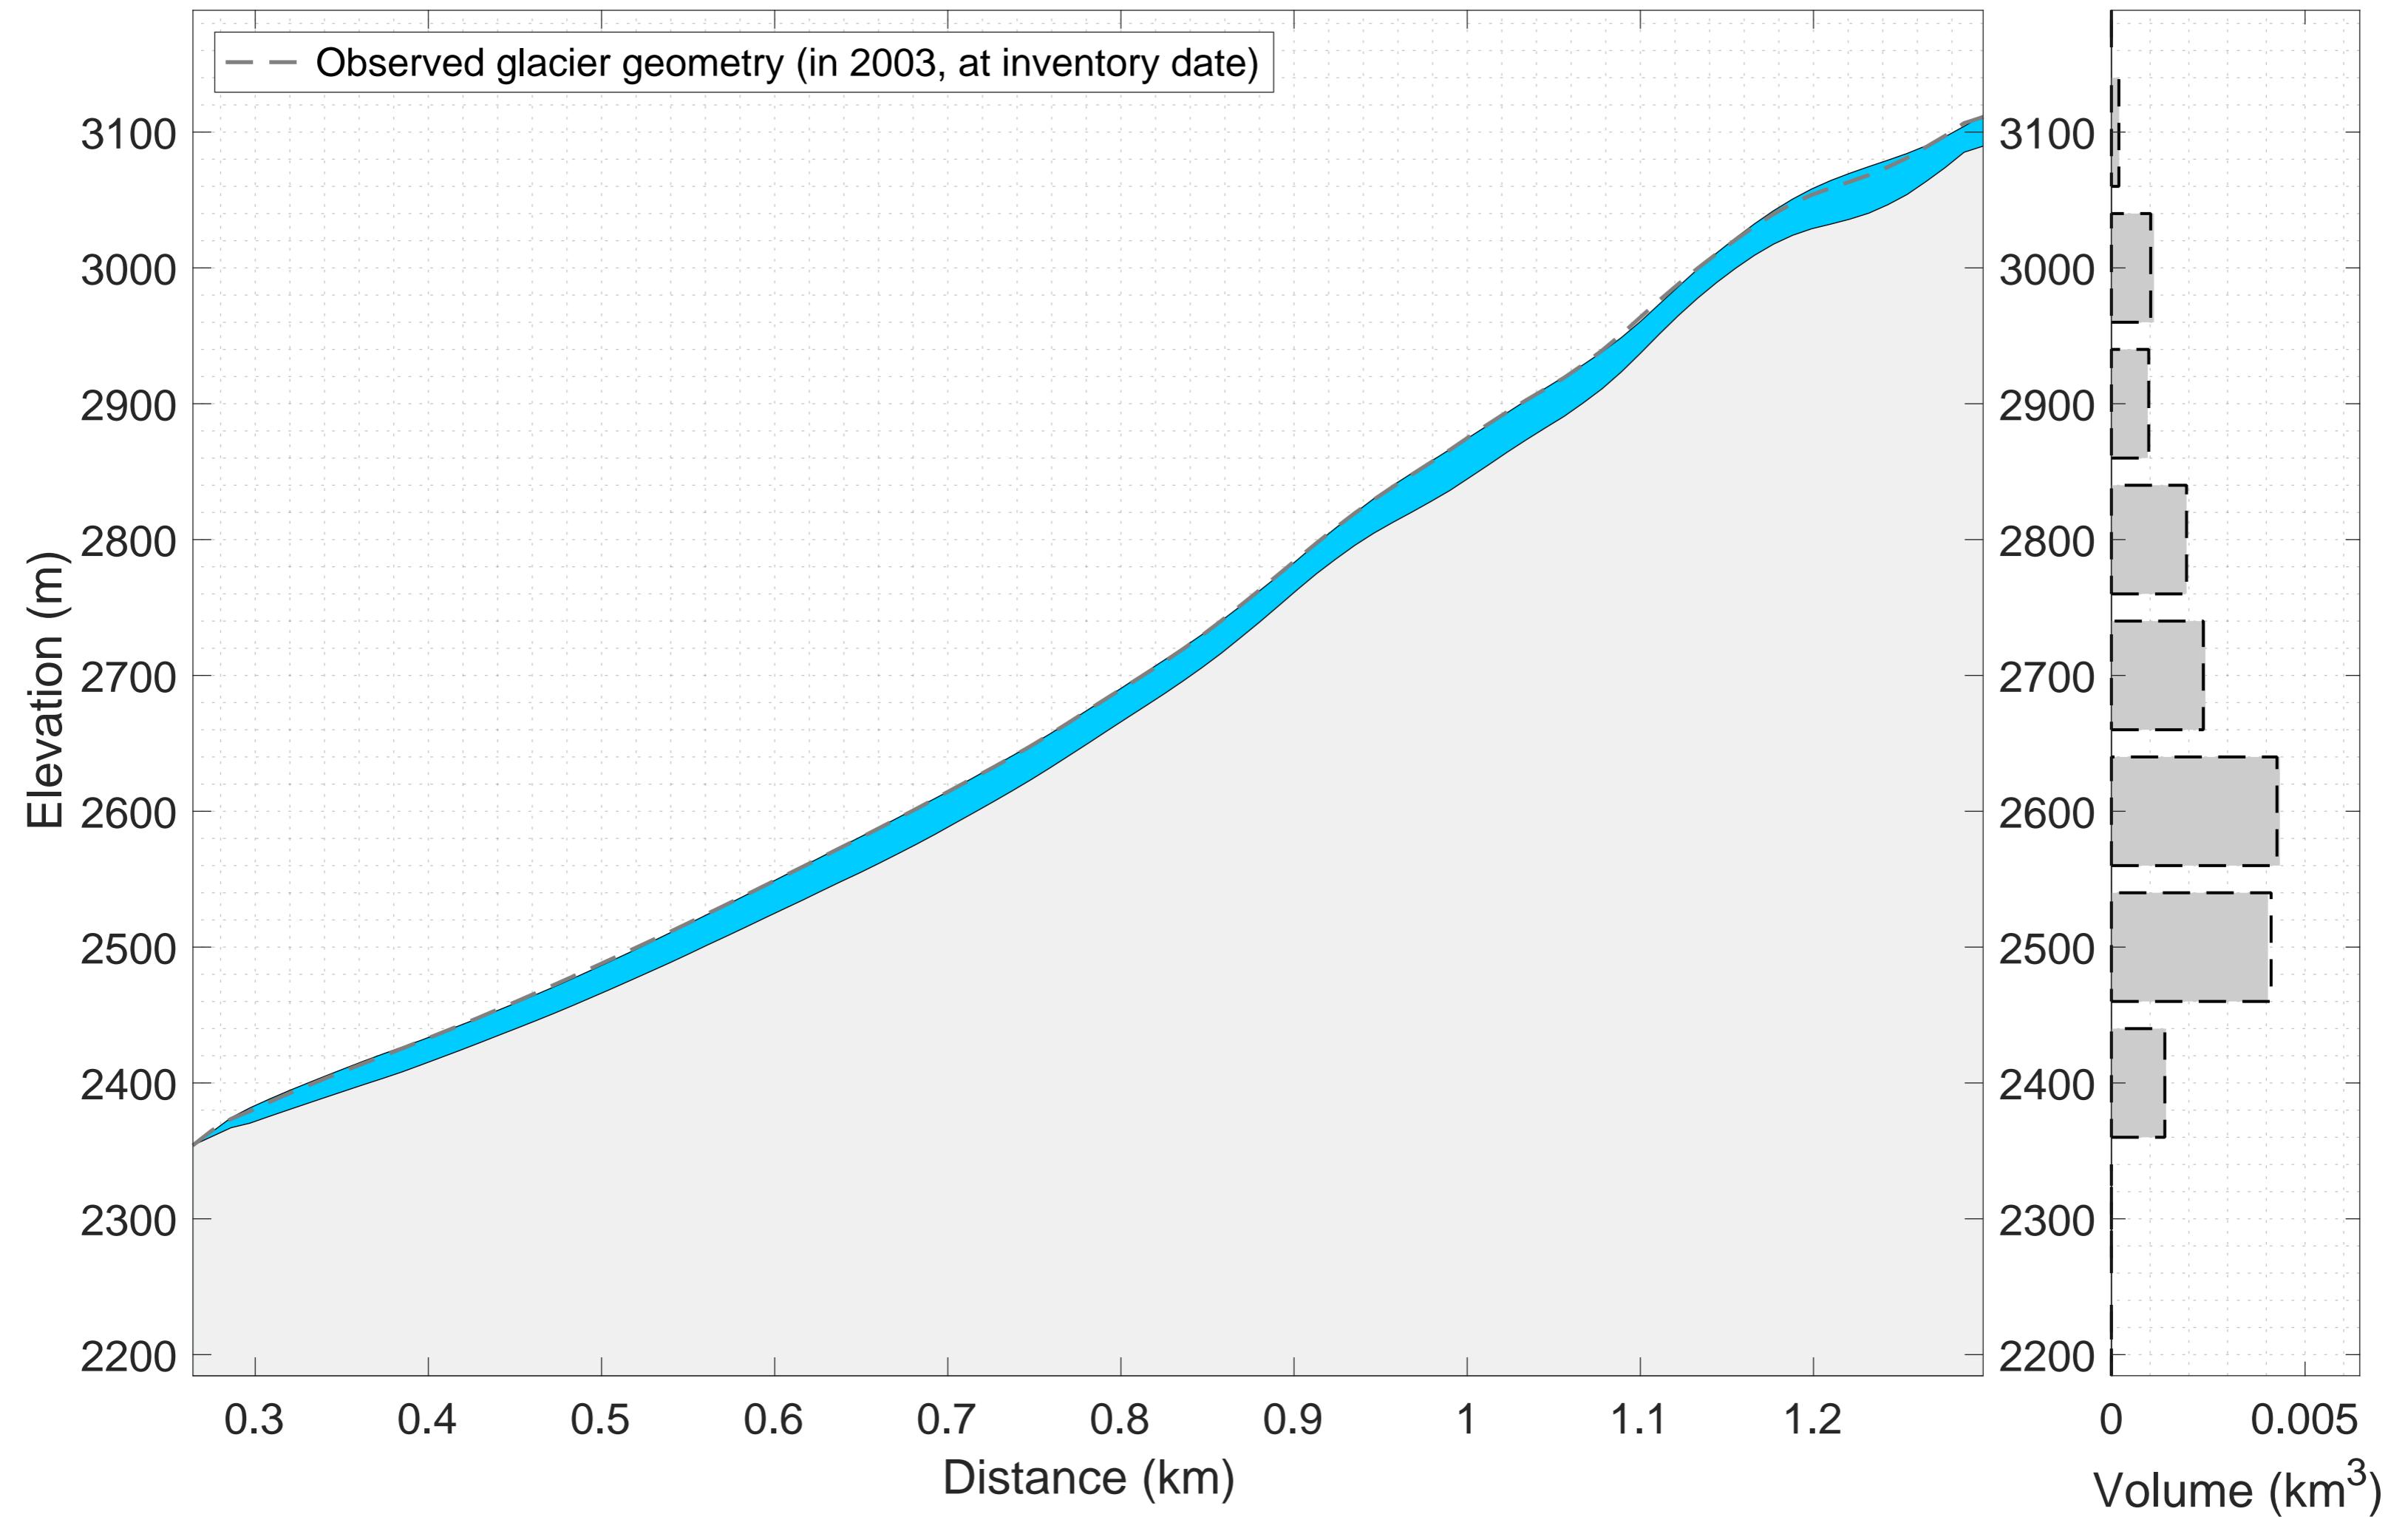

Supplement: Supplementary file 514 [file tc-13-1125-2019-supplement.zip]

**Modelled geometry (Glacier ID = 01627;  $A = 8.7587\text{e-}17 \text{ Pa}^{-3} \text{ a}^{-1}$ ;  $dx = 11 \text{ m}$ )**

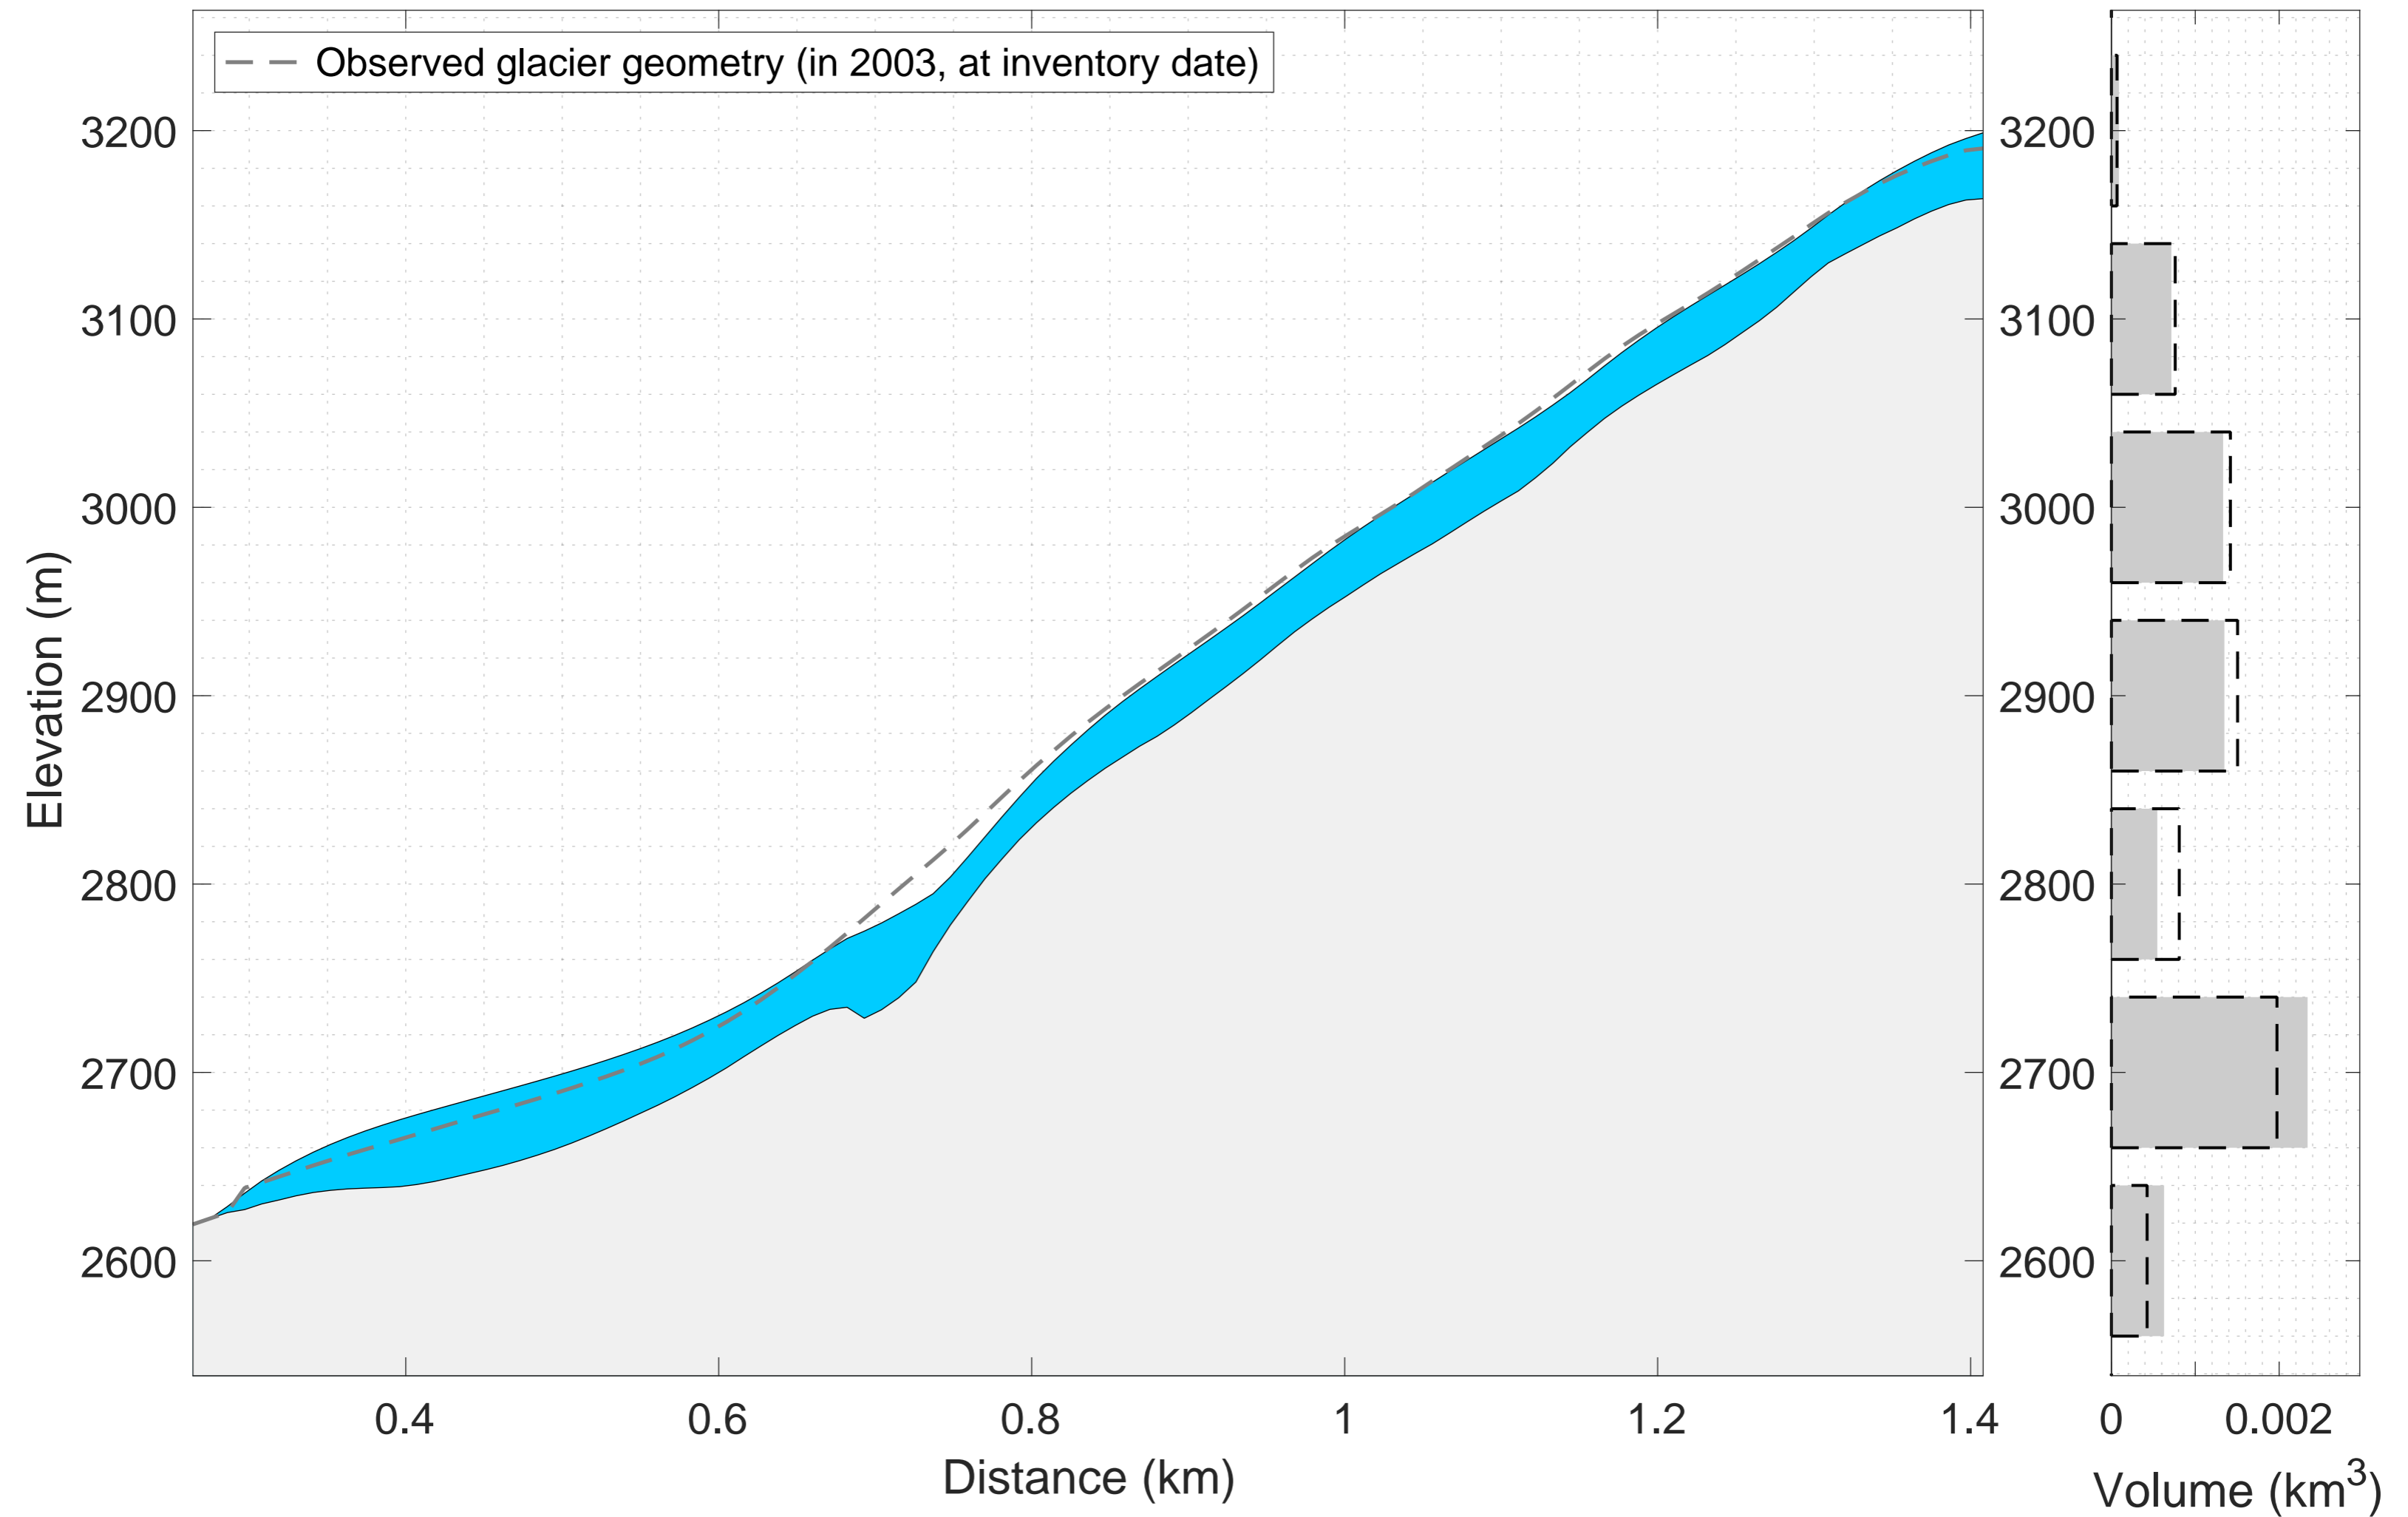

Supplement: Supplementary file 515 [file tc-13-1125-2019-supplement.zip]

**Modelled geometry (Glacier ID = 01786;  $A = 7.7267\text{e-}17 \text{ Pa}^{-3} \text{ a}^{-1}$ ;  $dx = 12 \text{ m}$ )**

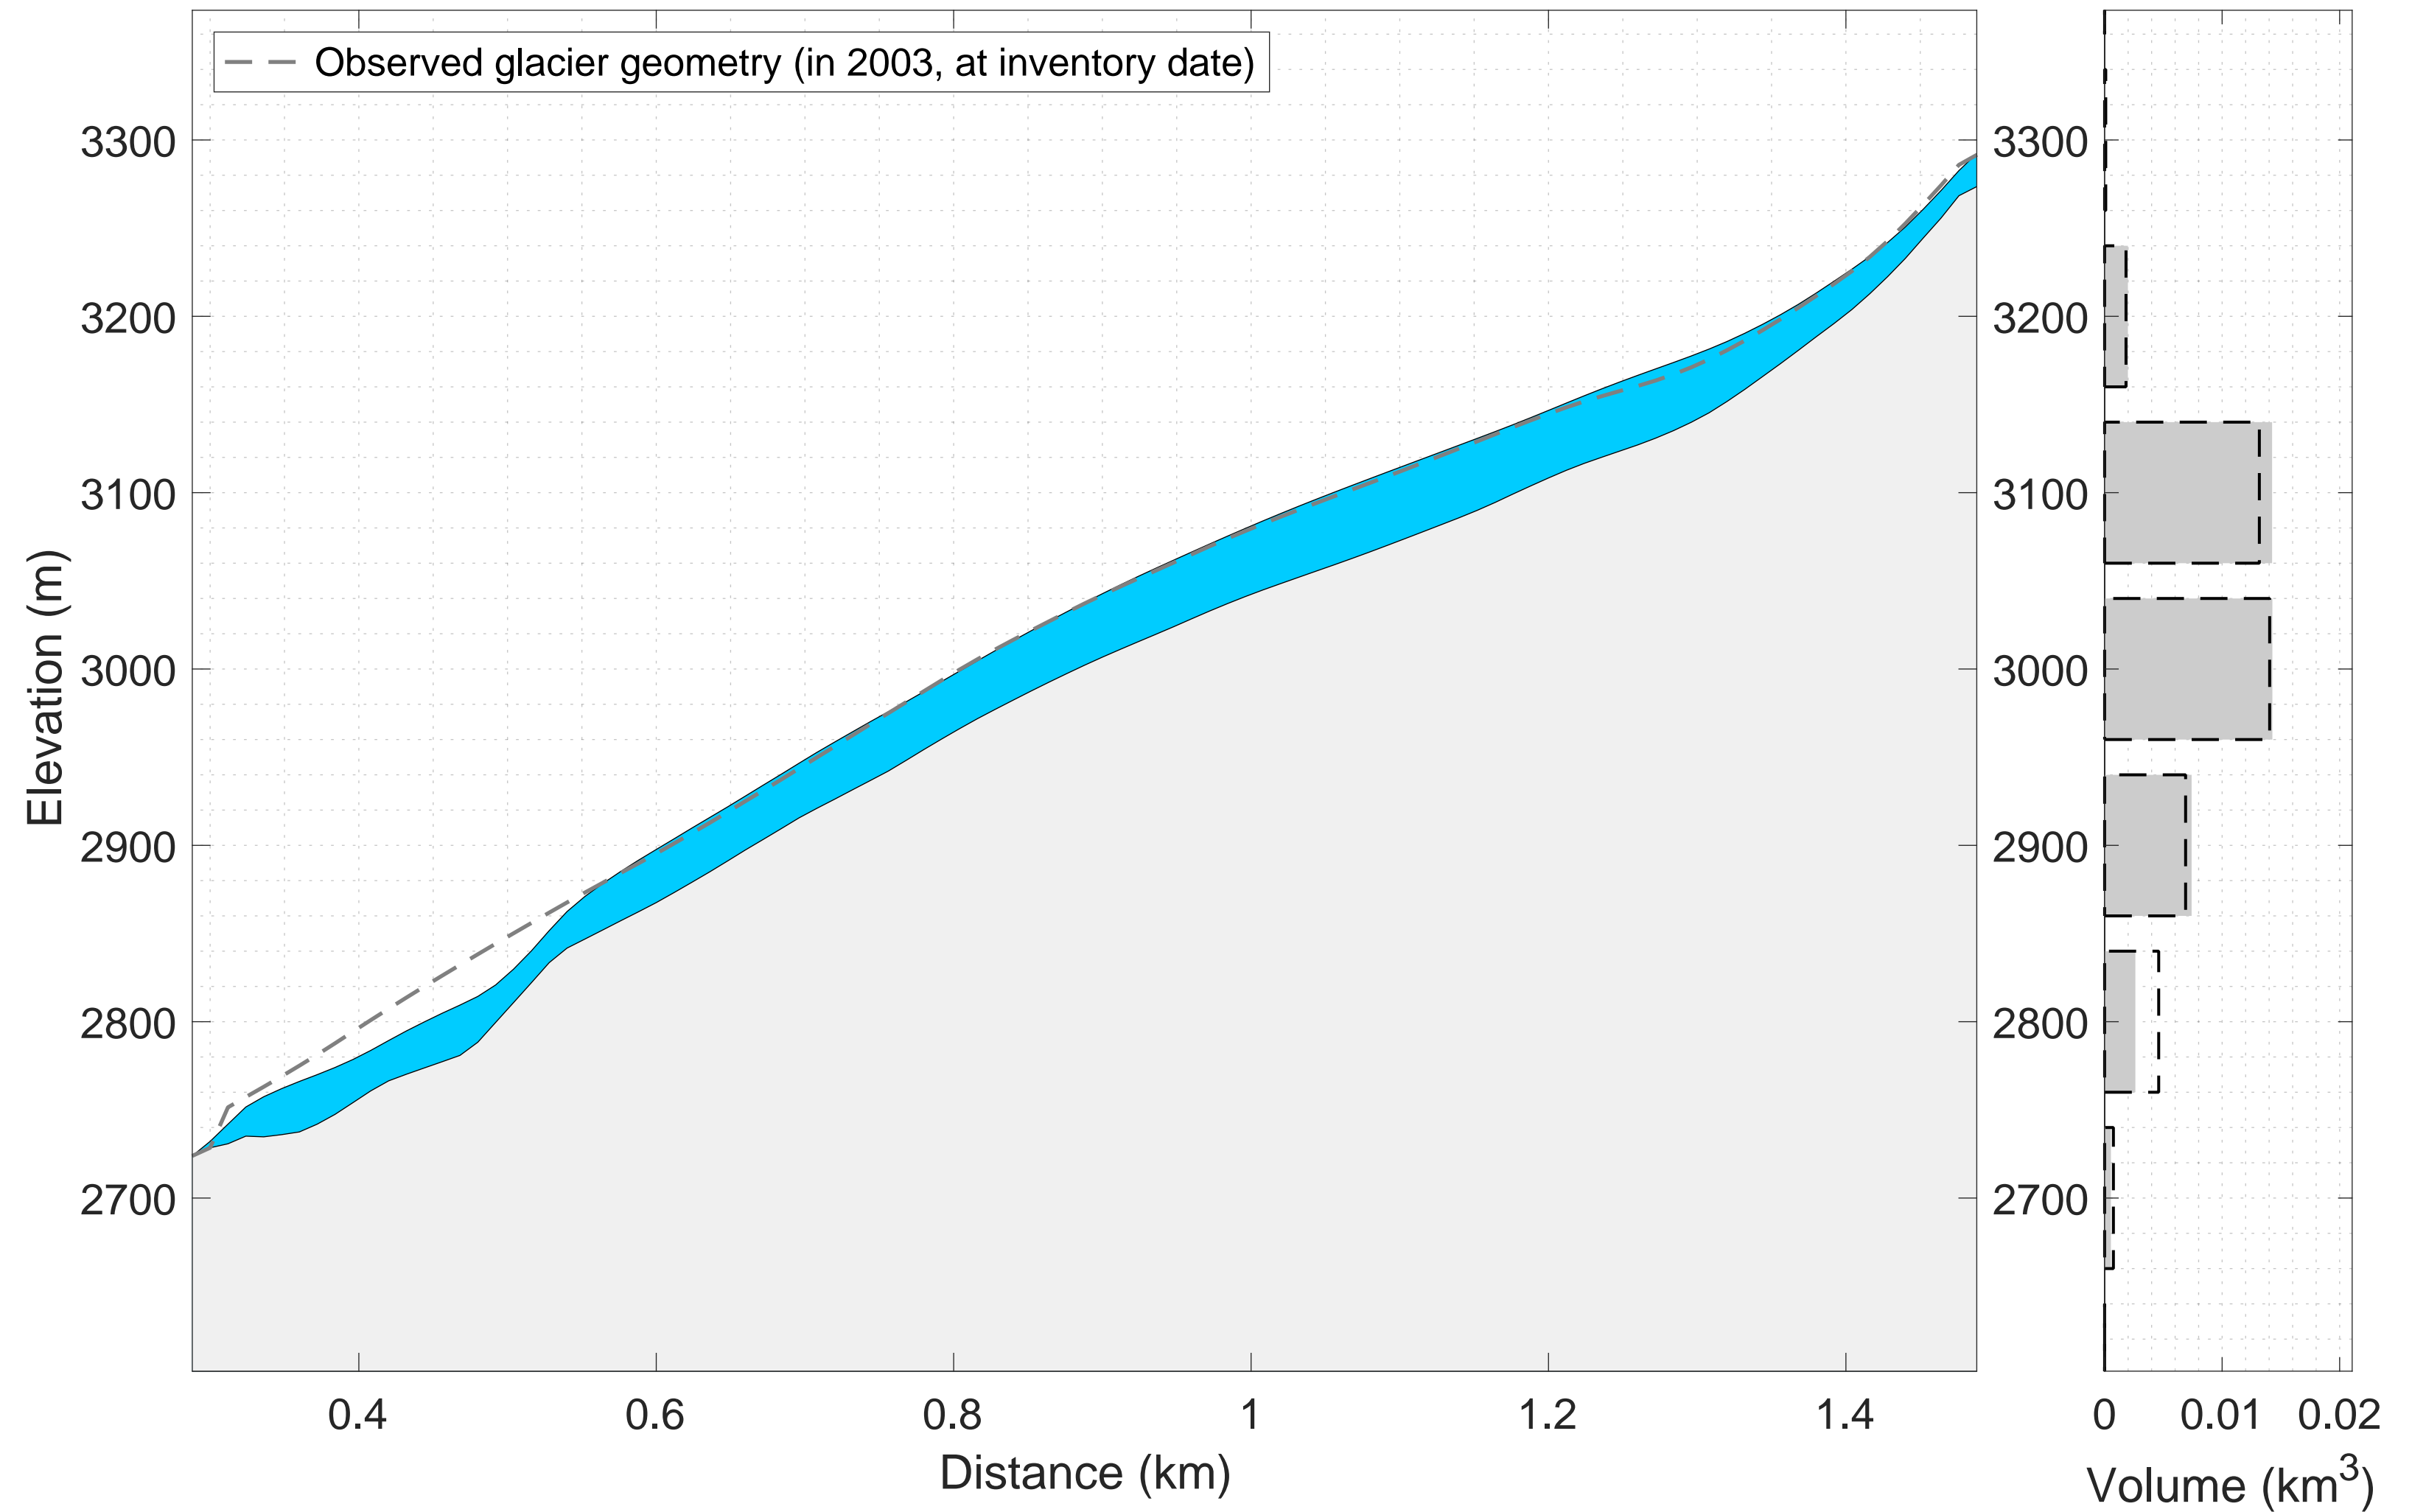

Supplement: Supplementary file 516 [file tc-13-1125-2019-supplement.zip]

**Modelled geometry (Glacier ID = 02078;  $A = 4.4383\text{e-}17 \text{ Pa}^{-3} \text{ a}^{-1}$ ;  $dx = 16 \text{ m}$ )**

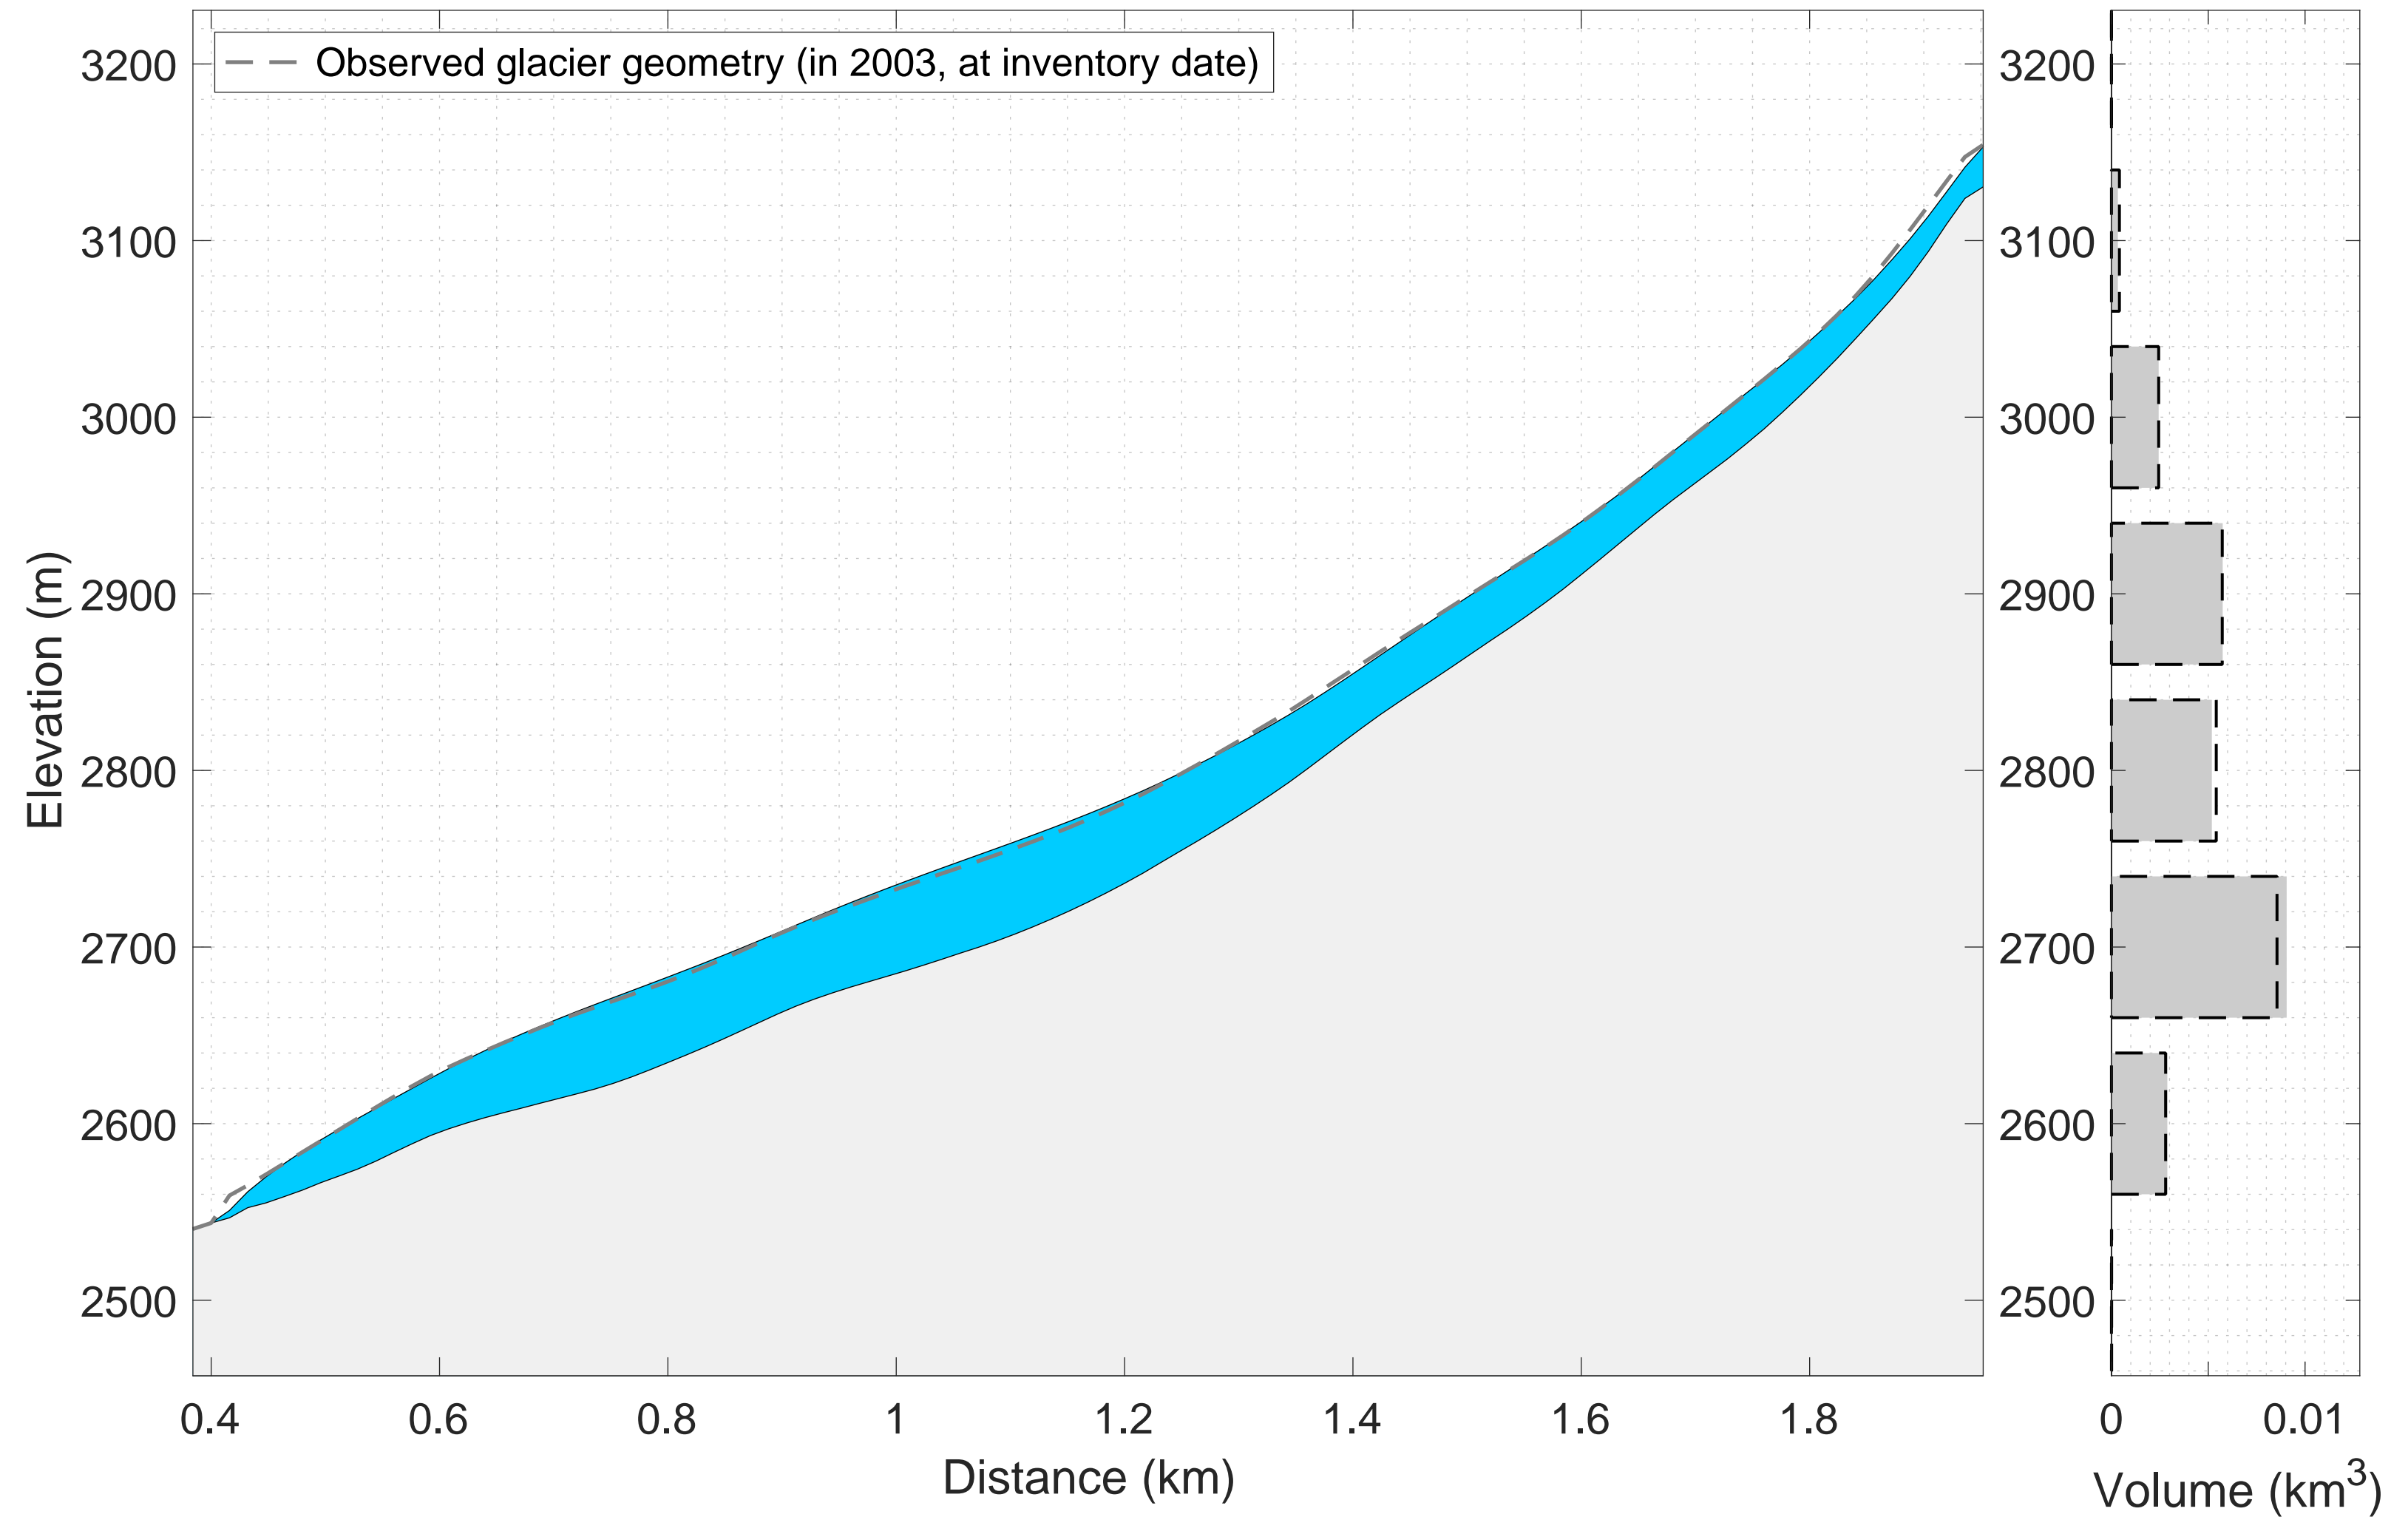

Supplement: Supplementary file 517 [file tc-13-1125-2019-supplement.zip]

**Modelled geometry (Glacier ID = 02268;  $A = 8.541\text{e-}17 \text{ Pa}^{-3} \text{ a}^{-1}$ ;  $dx = 15 \text{ m}$ )**

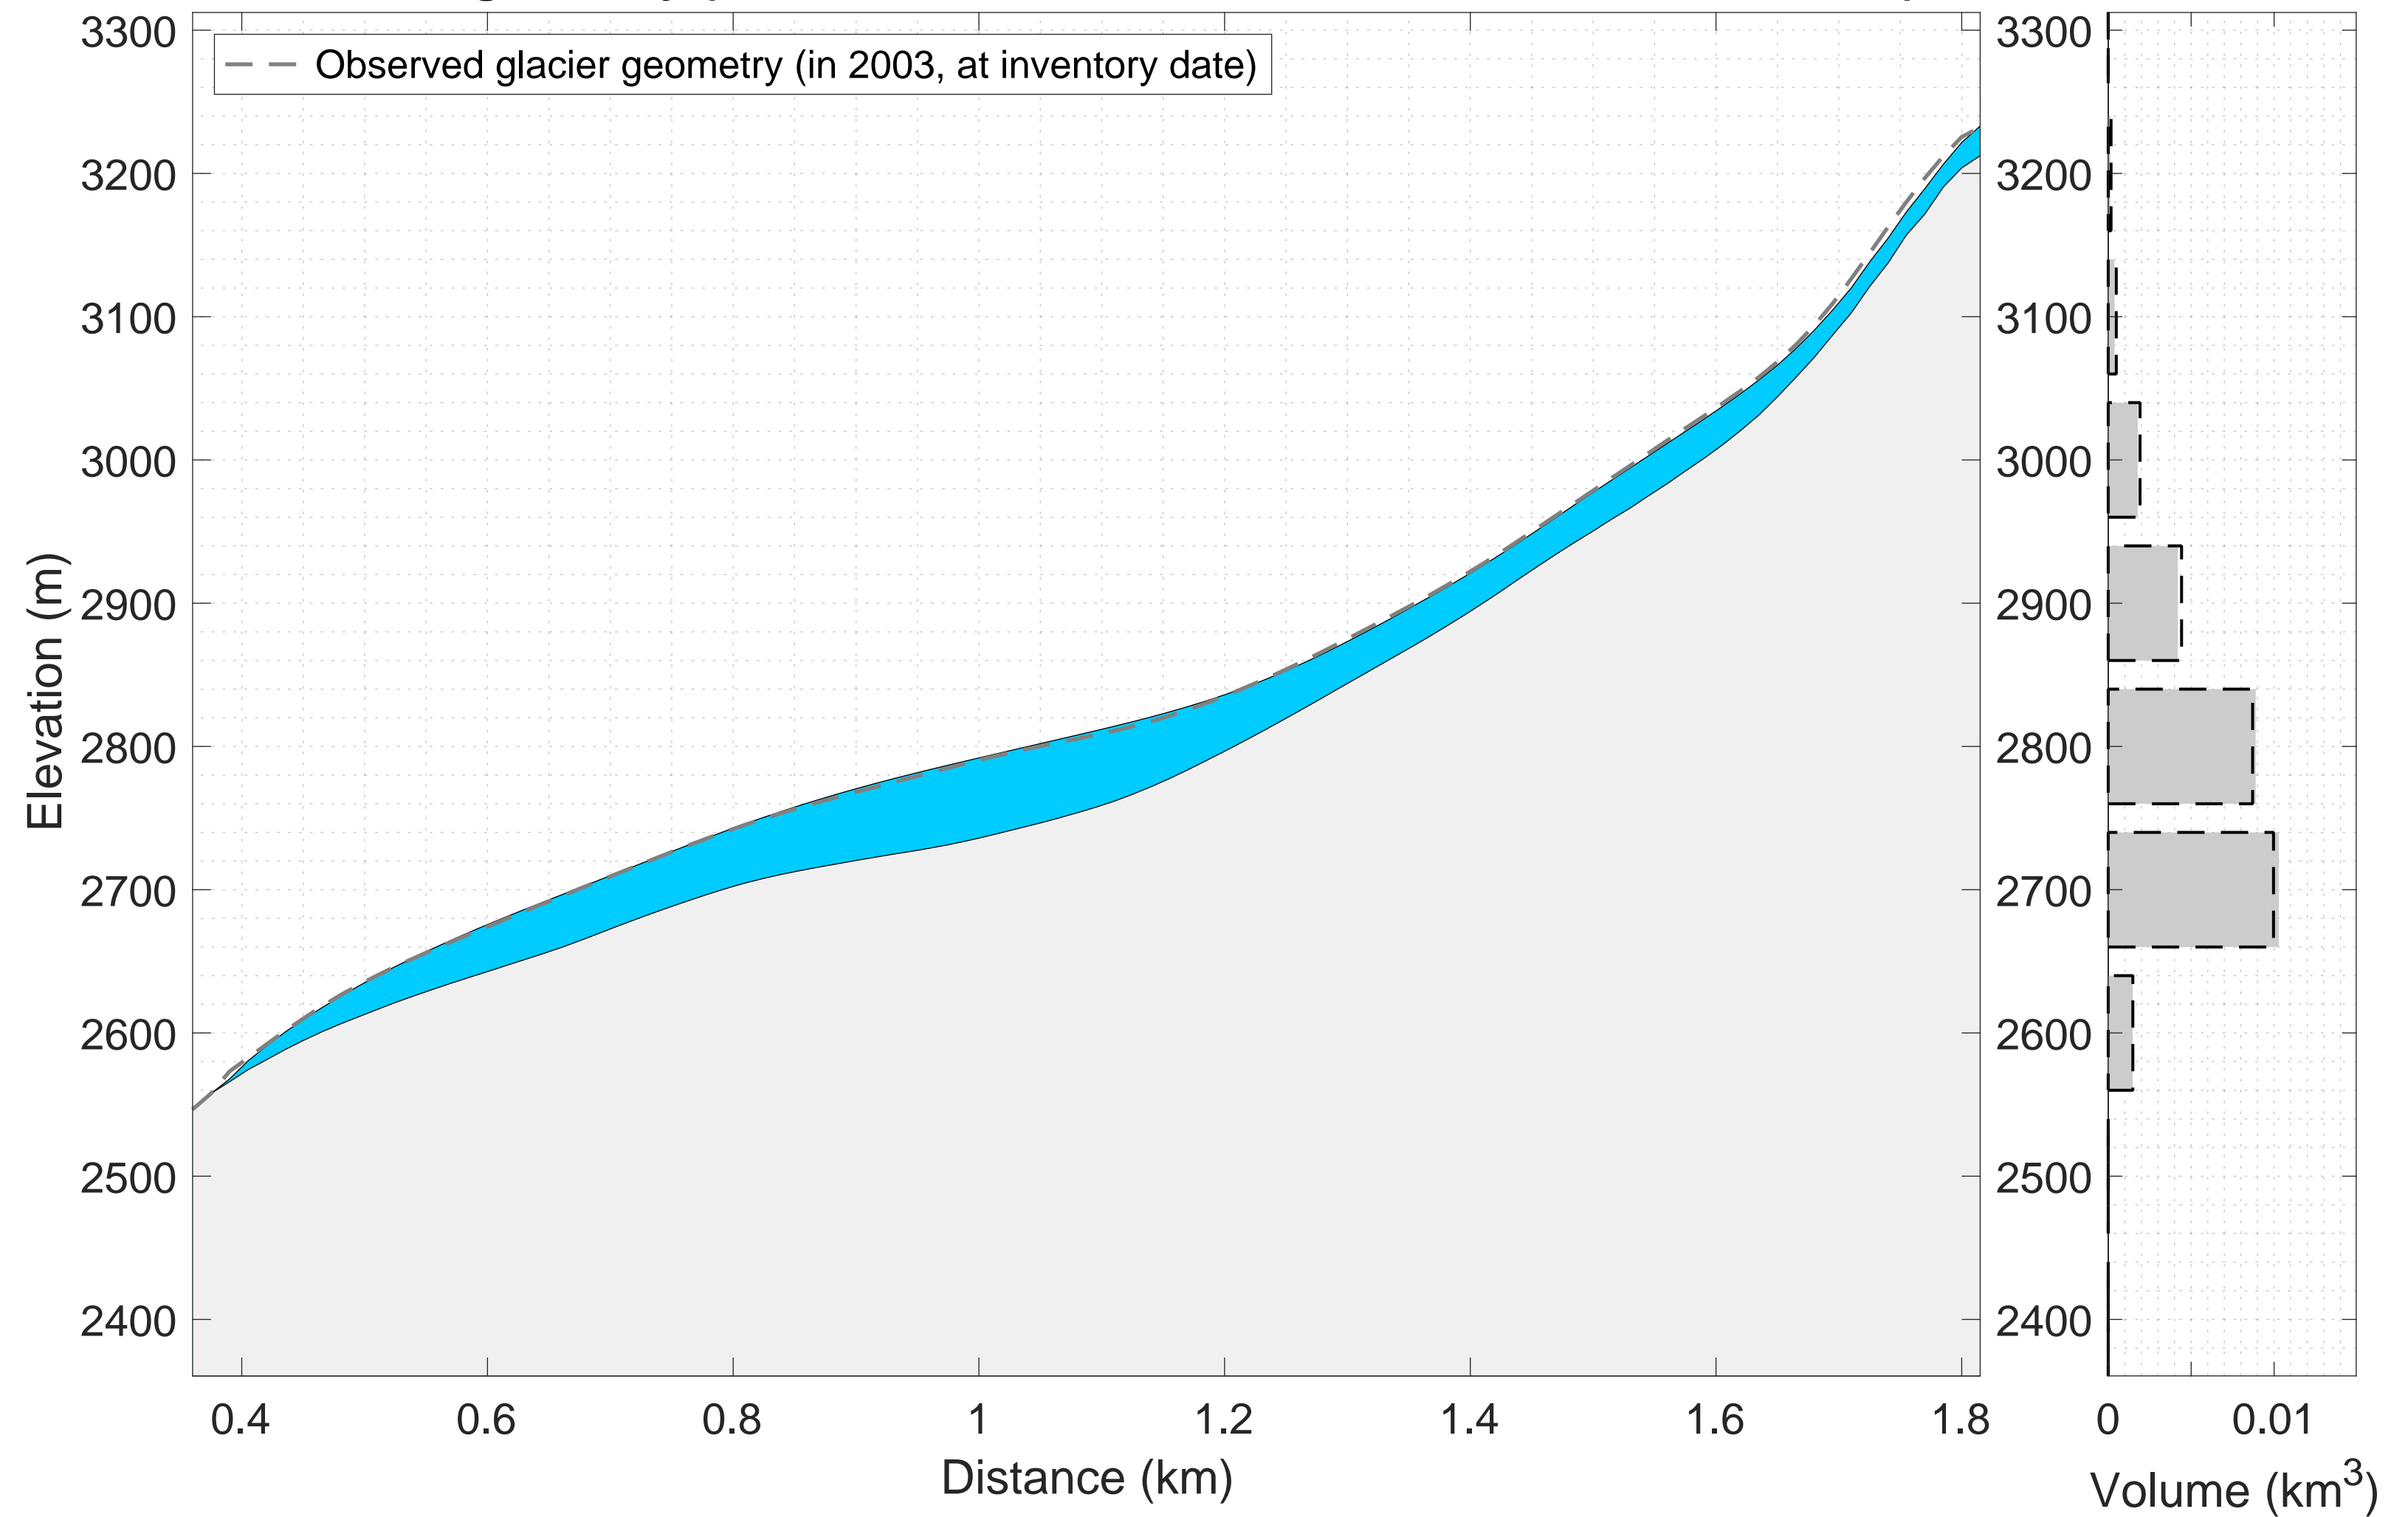

Supplement: Supplementary file 518 [file tc-13-1125-2019-supplement.zip]

**Modelled geometry (Glacier ID = 03356;  $A = 5.374\text{e-}17 \text{ Pa}^{-3} \text{ a}^{-1}$ ;  $dx = 15 \text{ m}$ )**

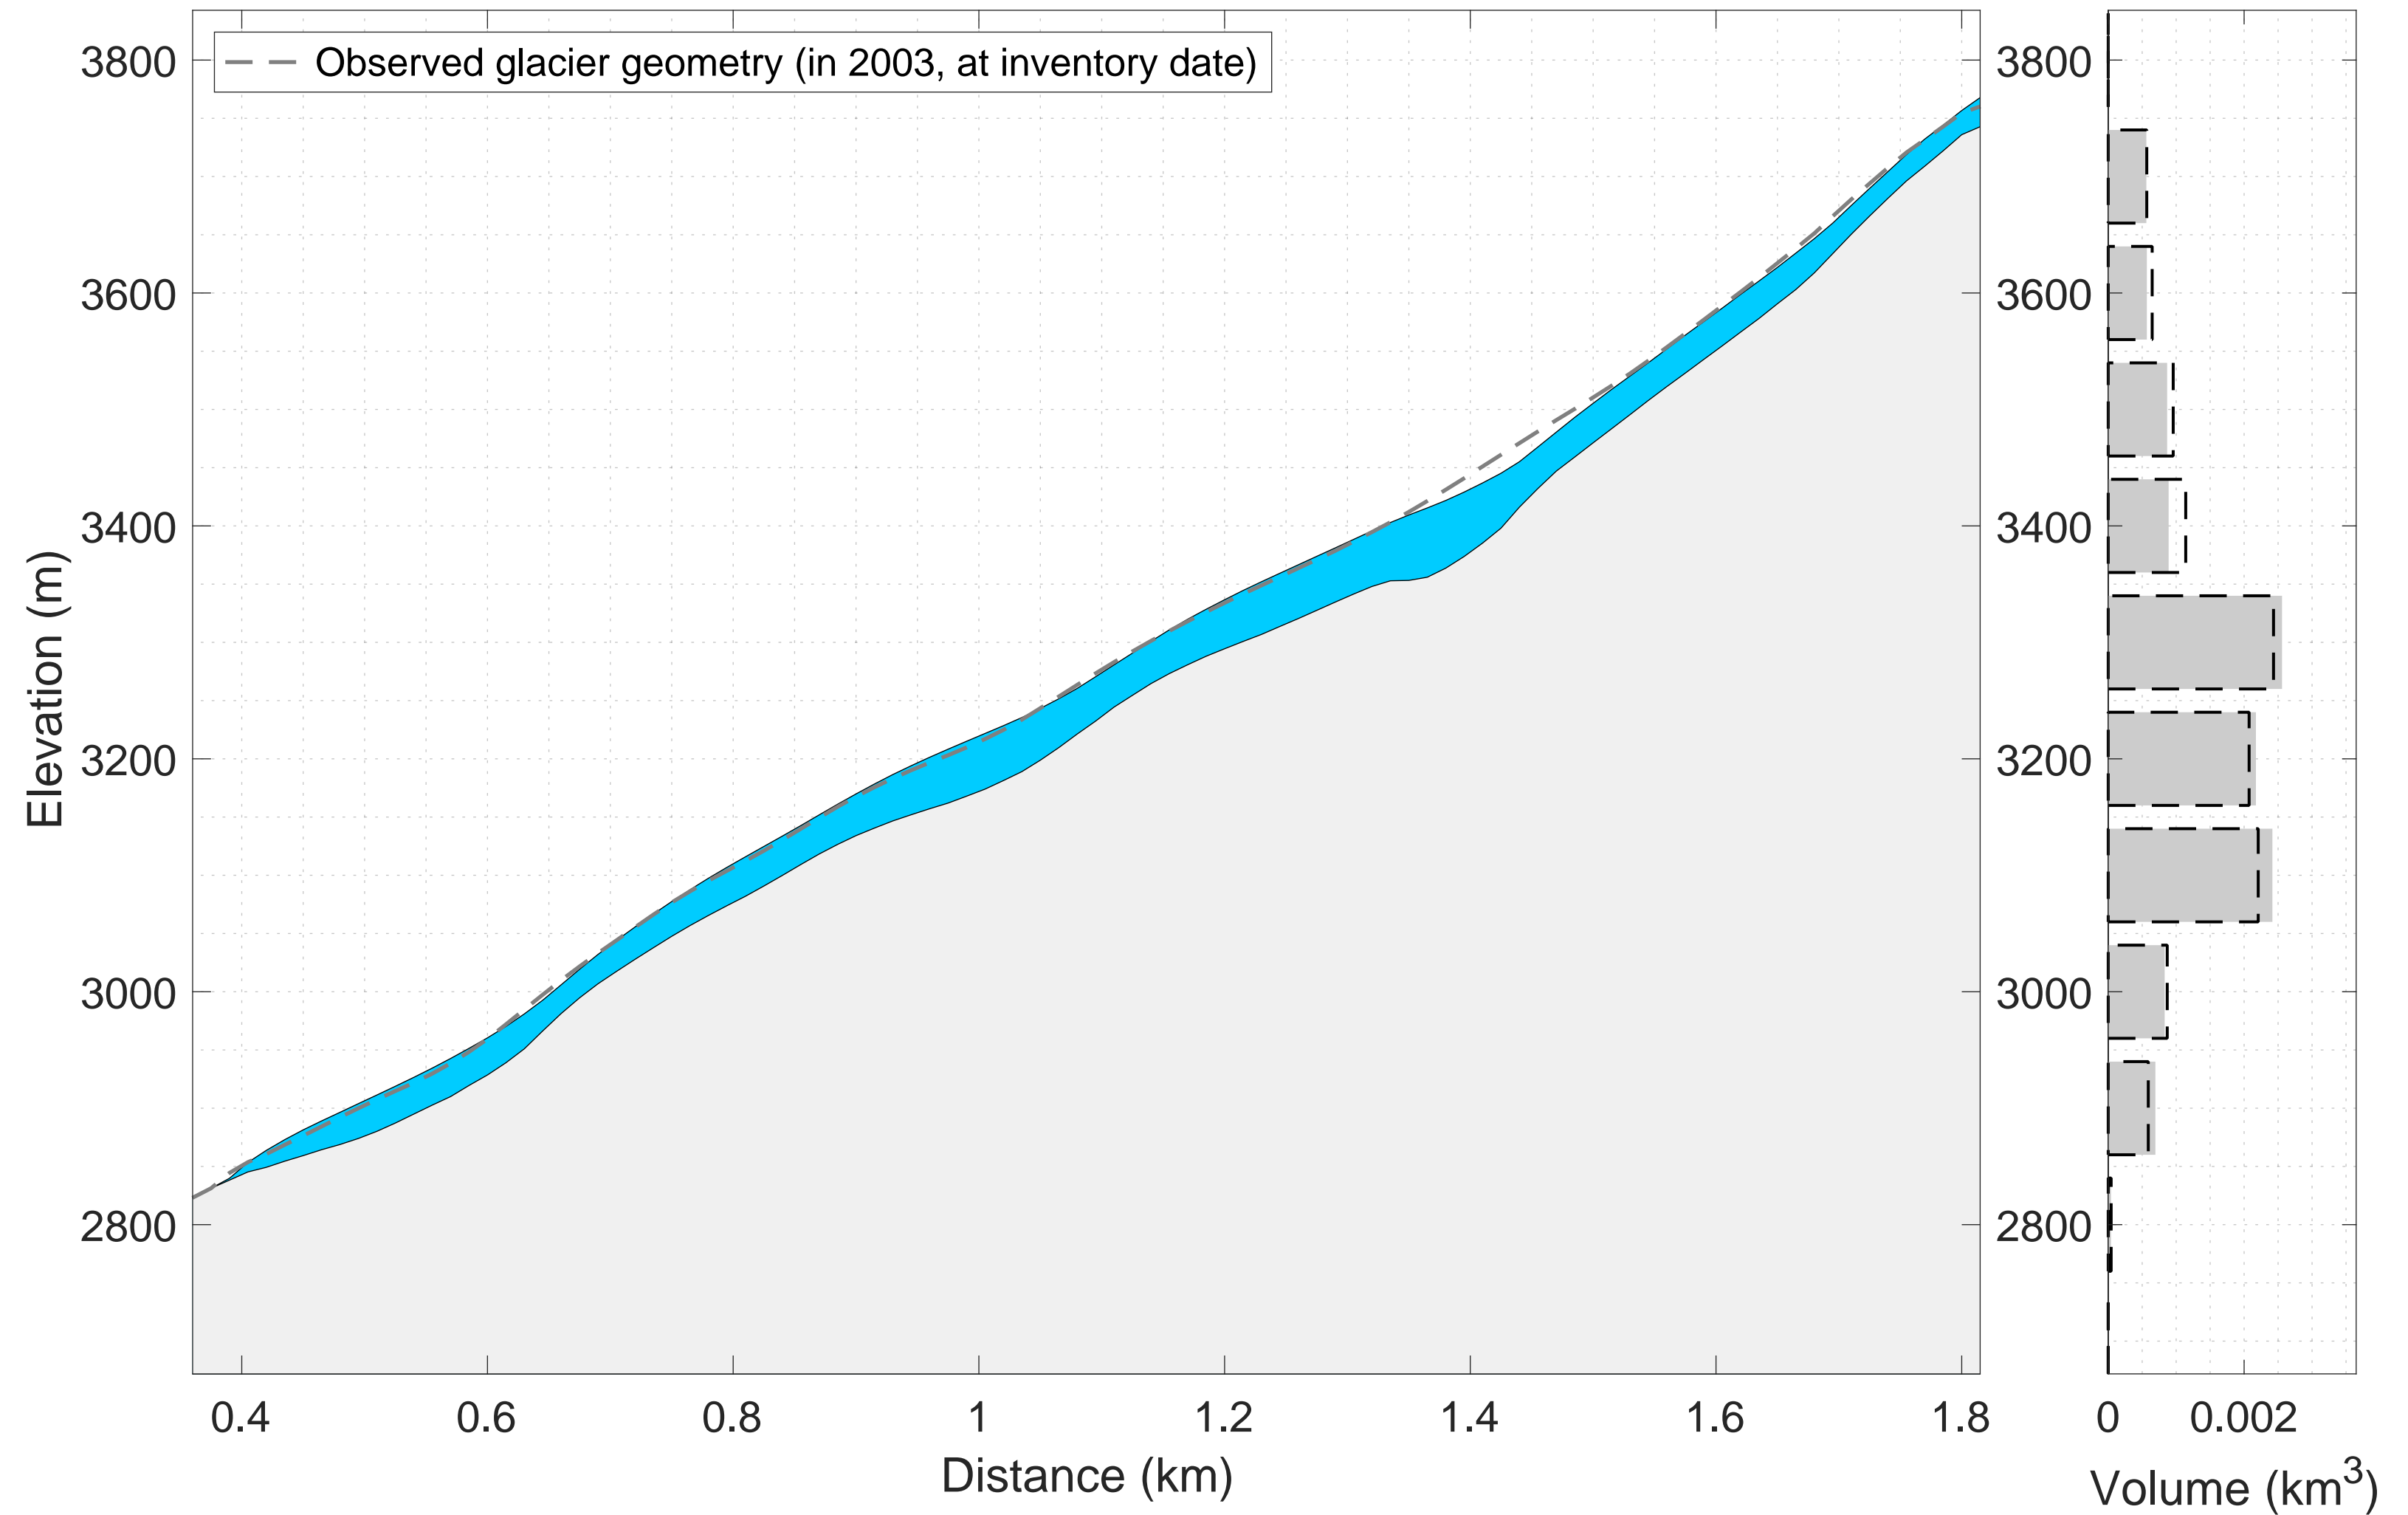

Supplement: Supplementary file 519 [file tc-13-1125-2019-supplement.zip]

**Modelled geometry (Glacier ID = 03605;  $A = 1.9852\text{e-}16 \text{ Pa}^{-3} \text{ a}^{-1}$ ;  $dx = 12 \text{ m}$ )**

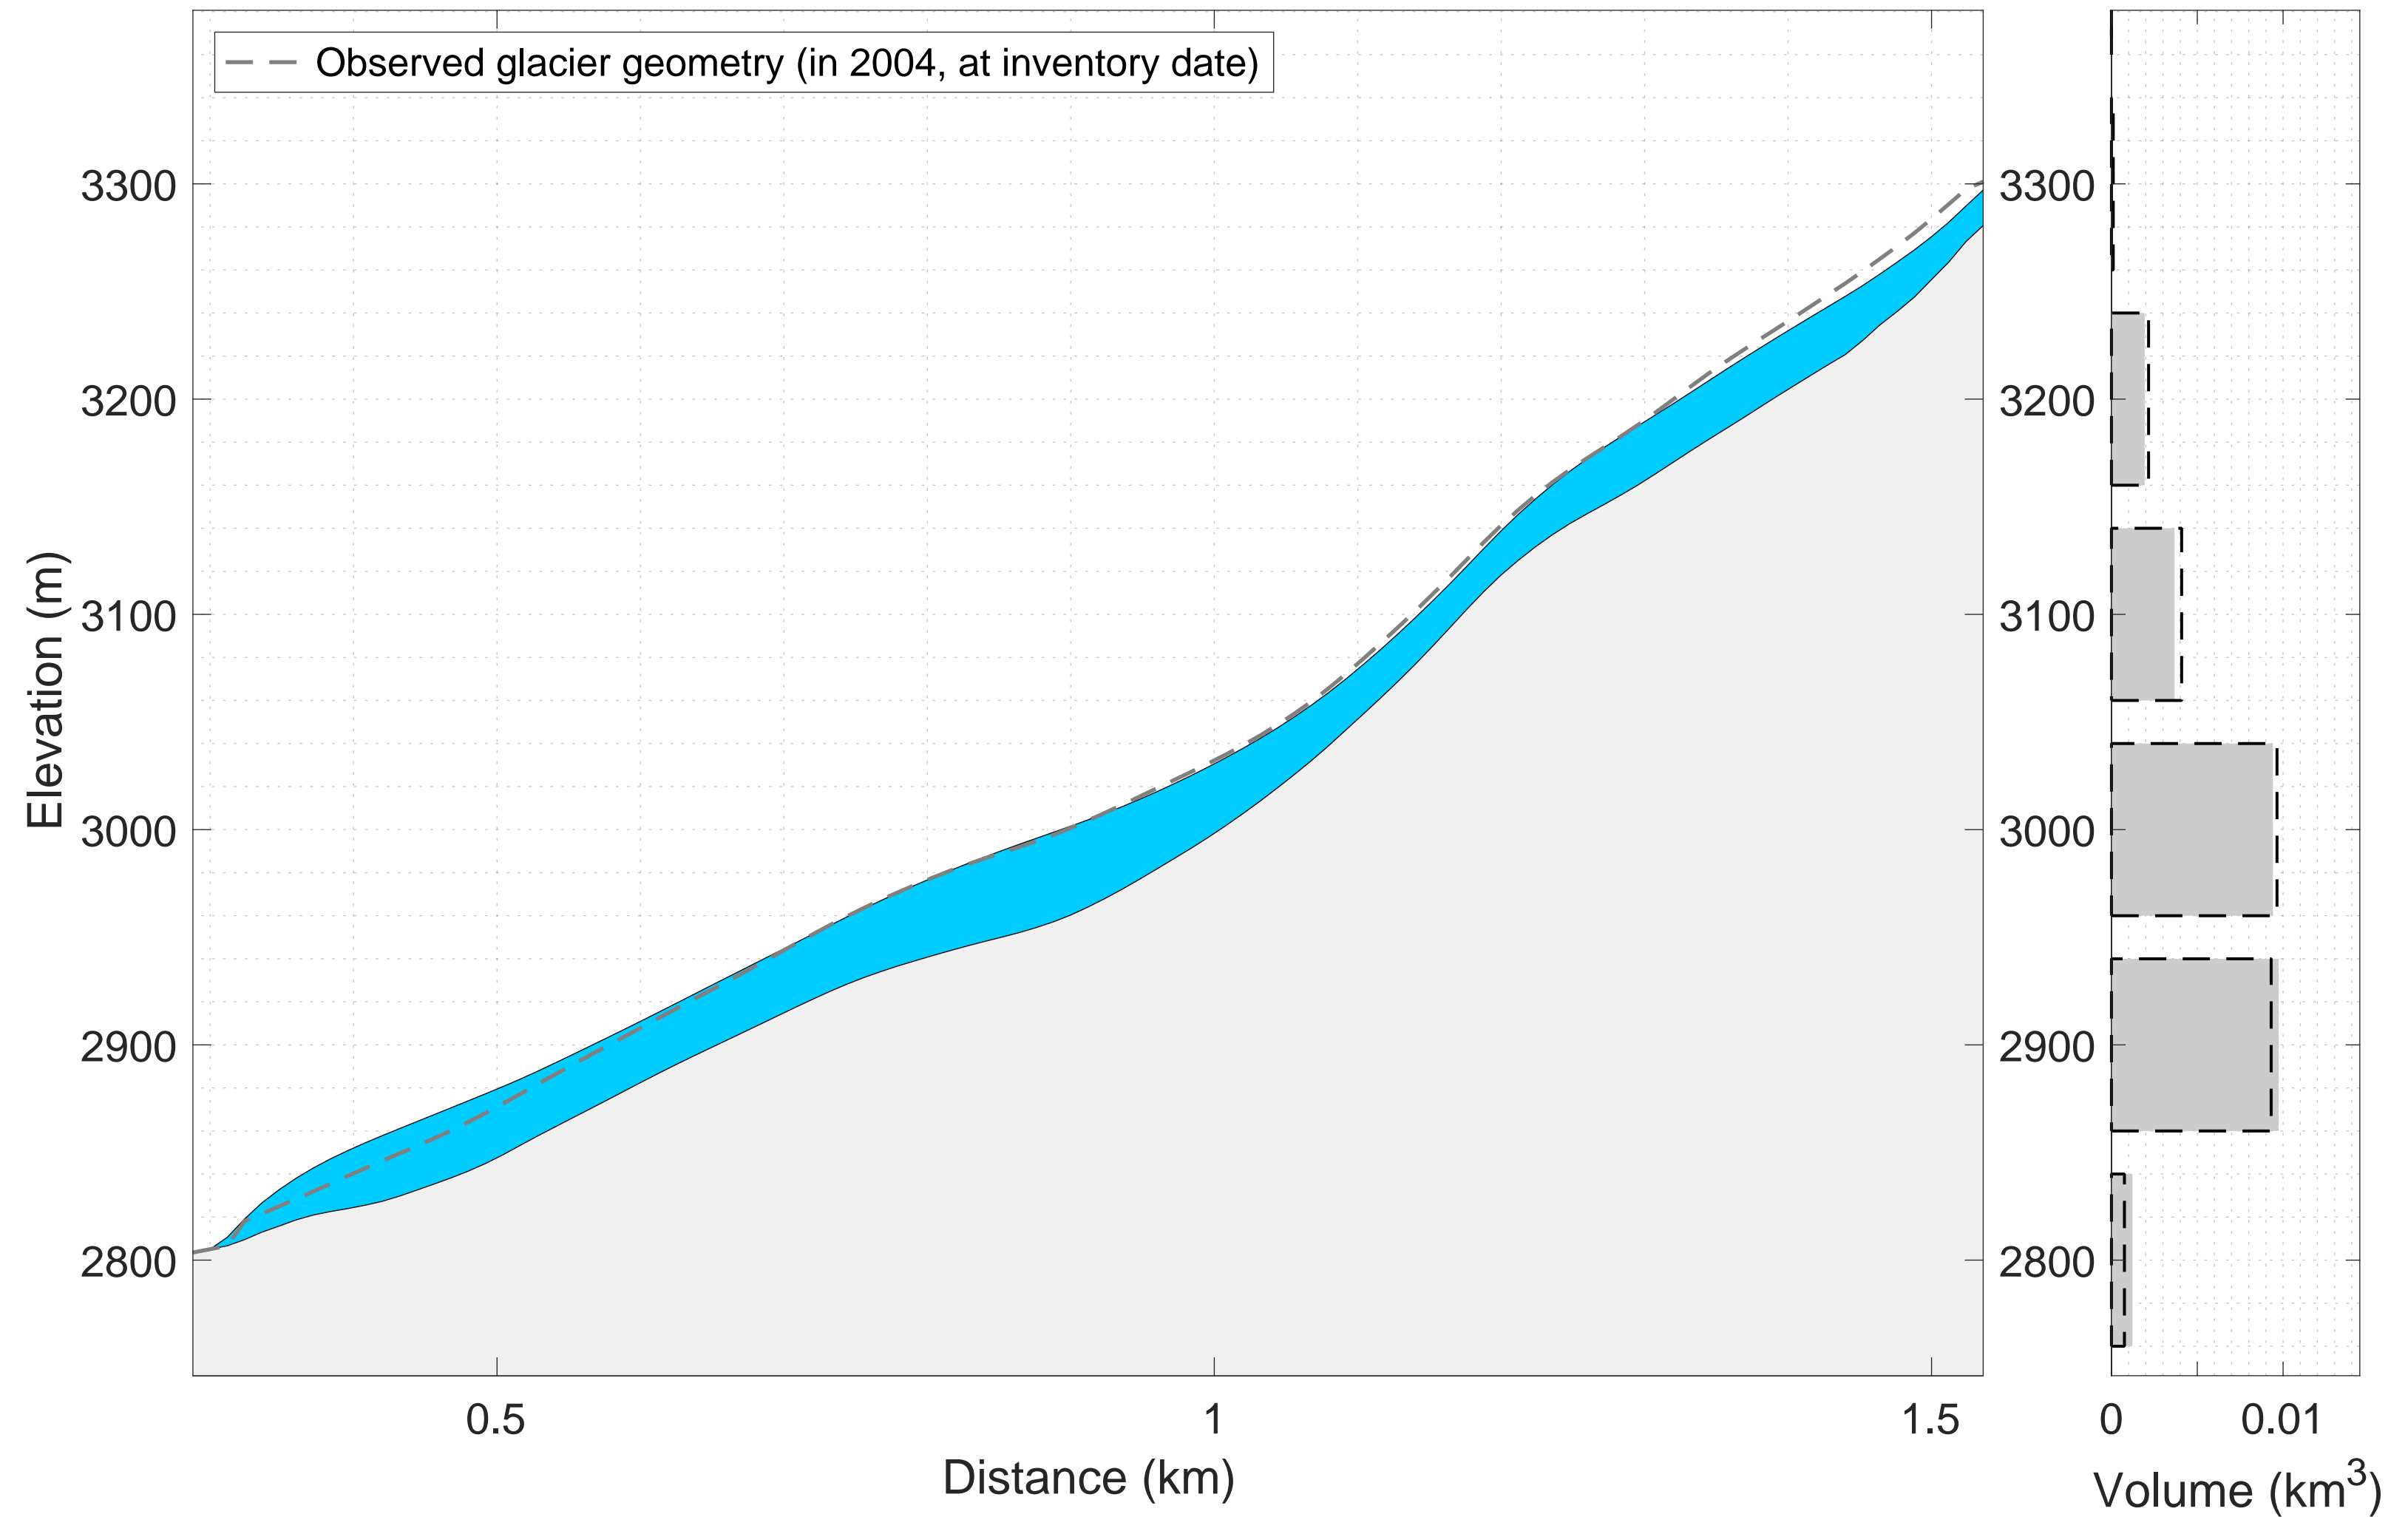

Supplement: Supplementary file 520 [file tc-13-1125-2019-supplement.zip]

Modelled geometry (Glacier ID = 03020;  $A = 1.0361\text{e-}16 \text{ Pa}^{-3} \text{ a}^{-1}$ ;  $dx = 31 \text{ m}$ )

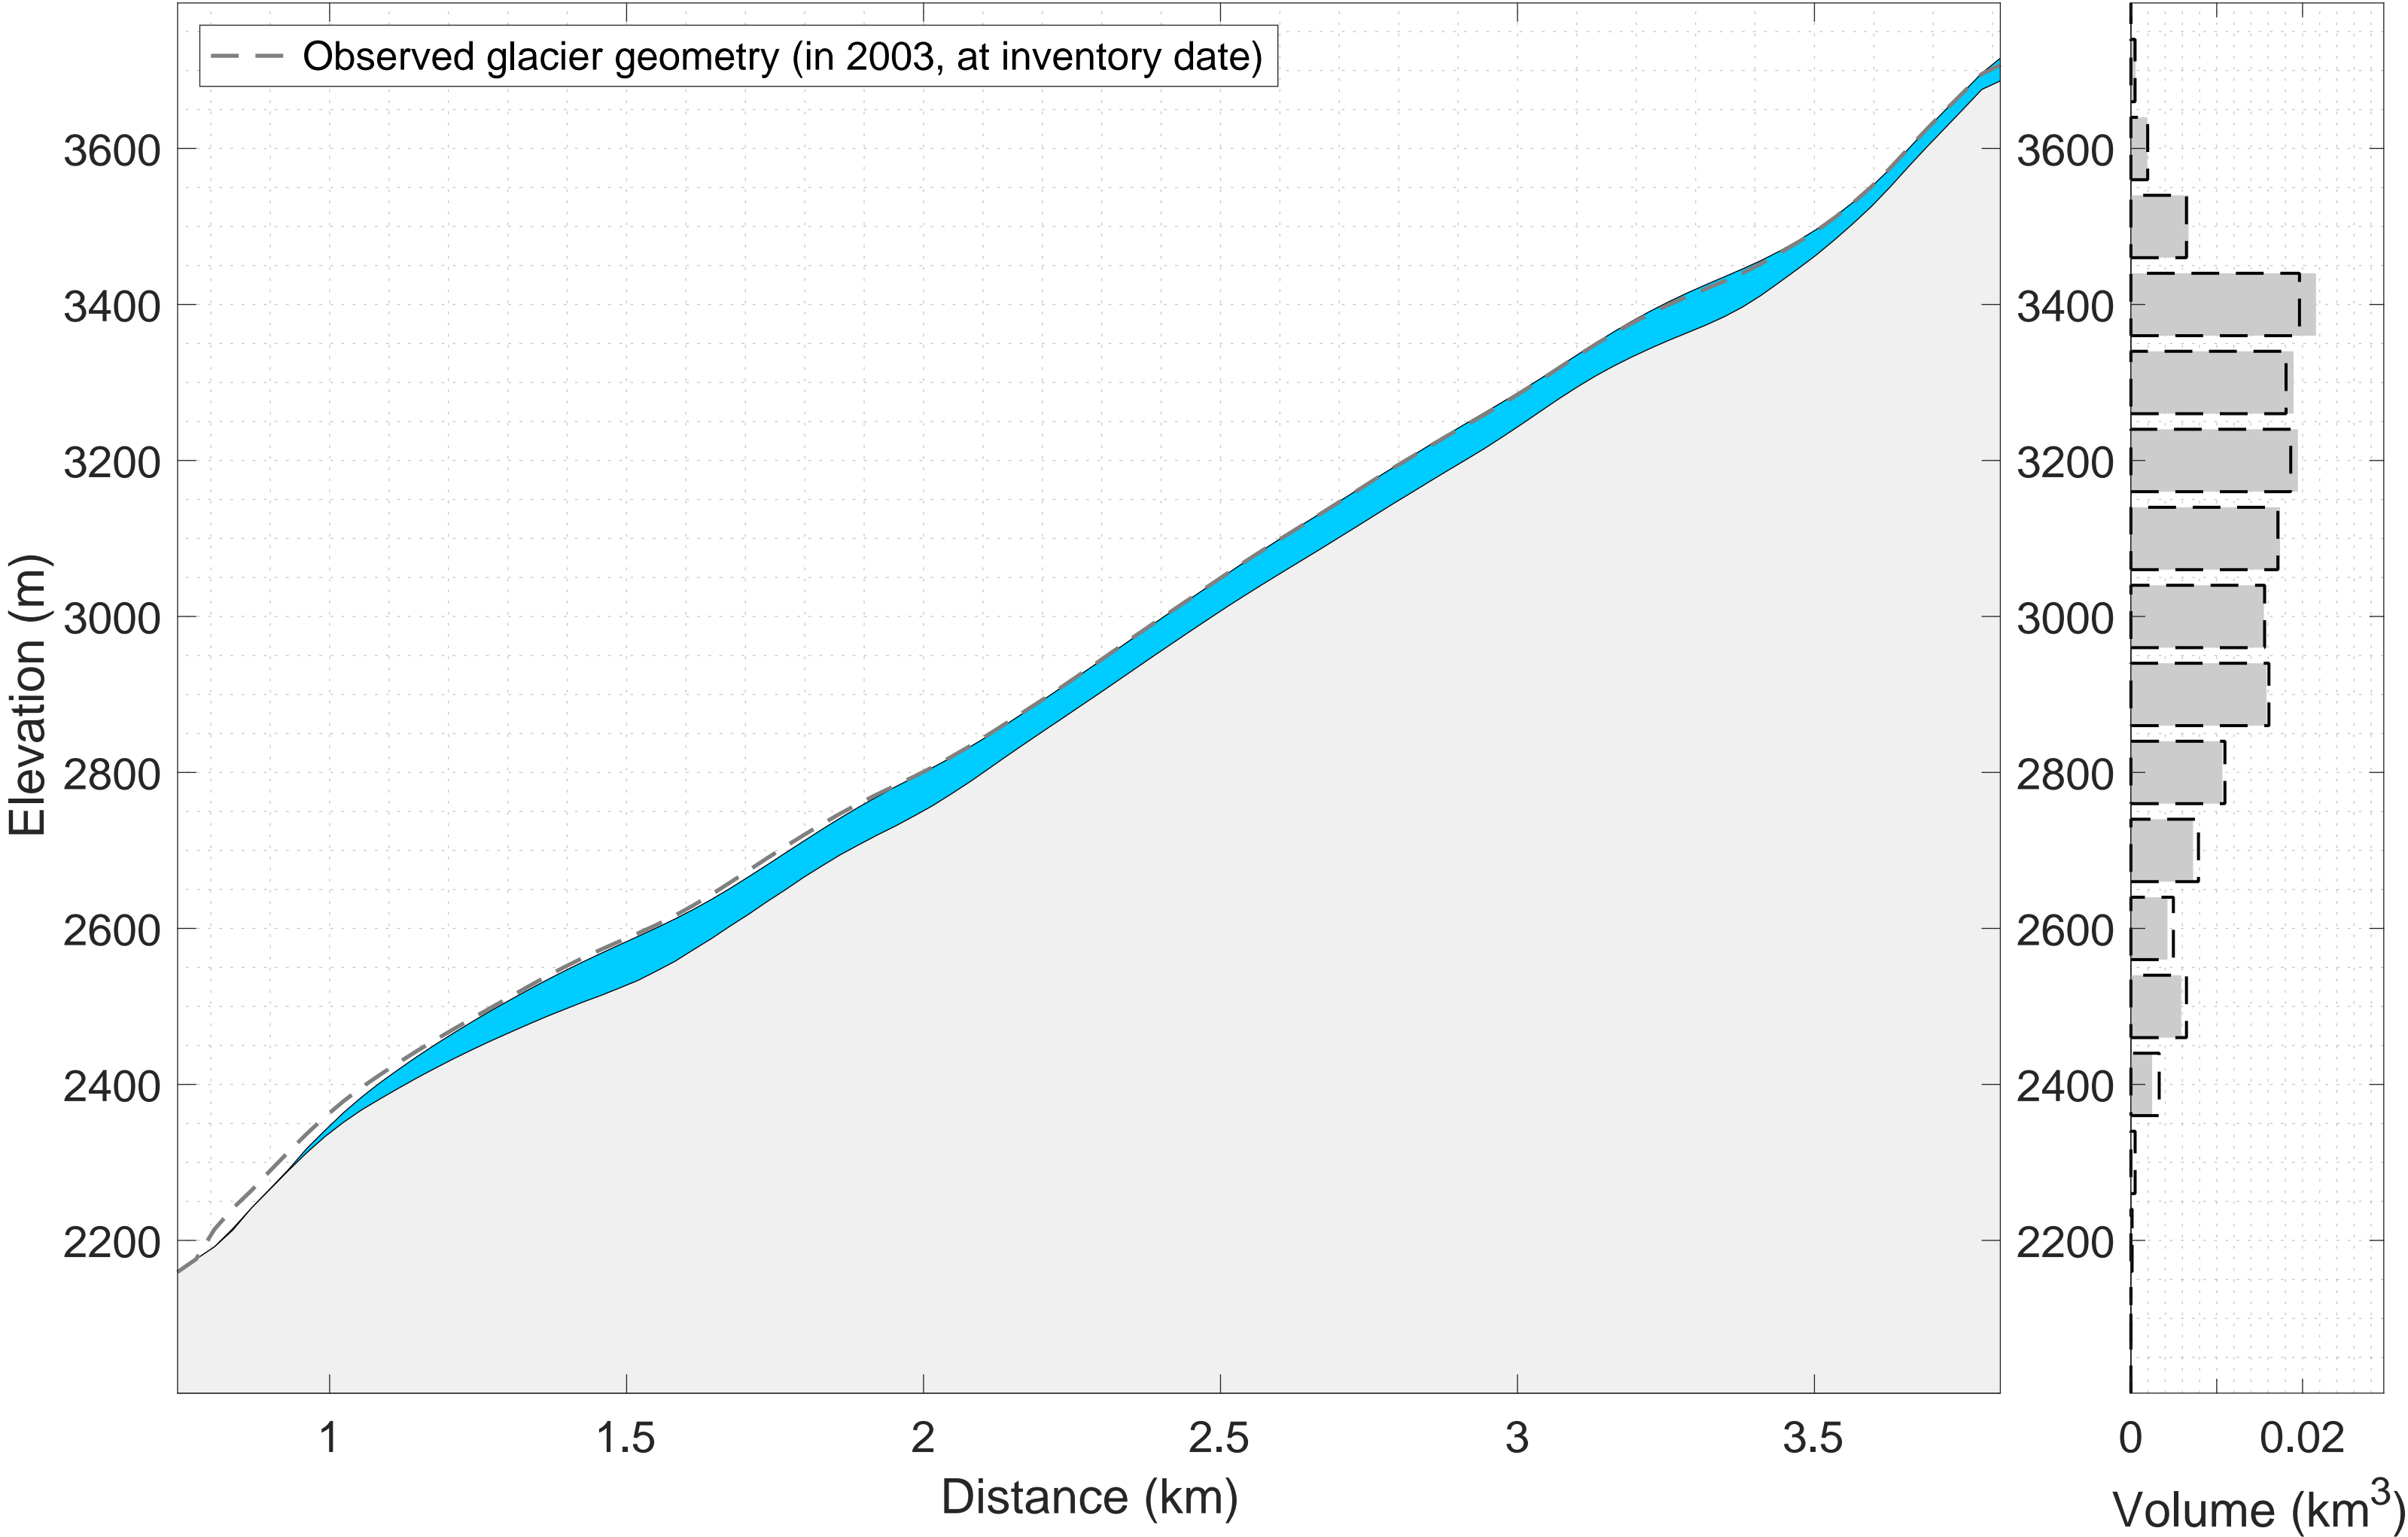

Supplement: Supplementary file 521 [file tc-13-1125-2019-supplement.zip]

**Modelled geometry (Glacier ID = 00286;  $A = 9.2356\text{e-}17 \text{ Pa}^{-3} \text{ a}^{-1}$ ;  $dx = 18 \text{ m}$ )**

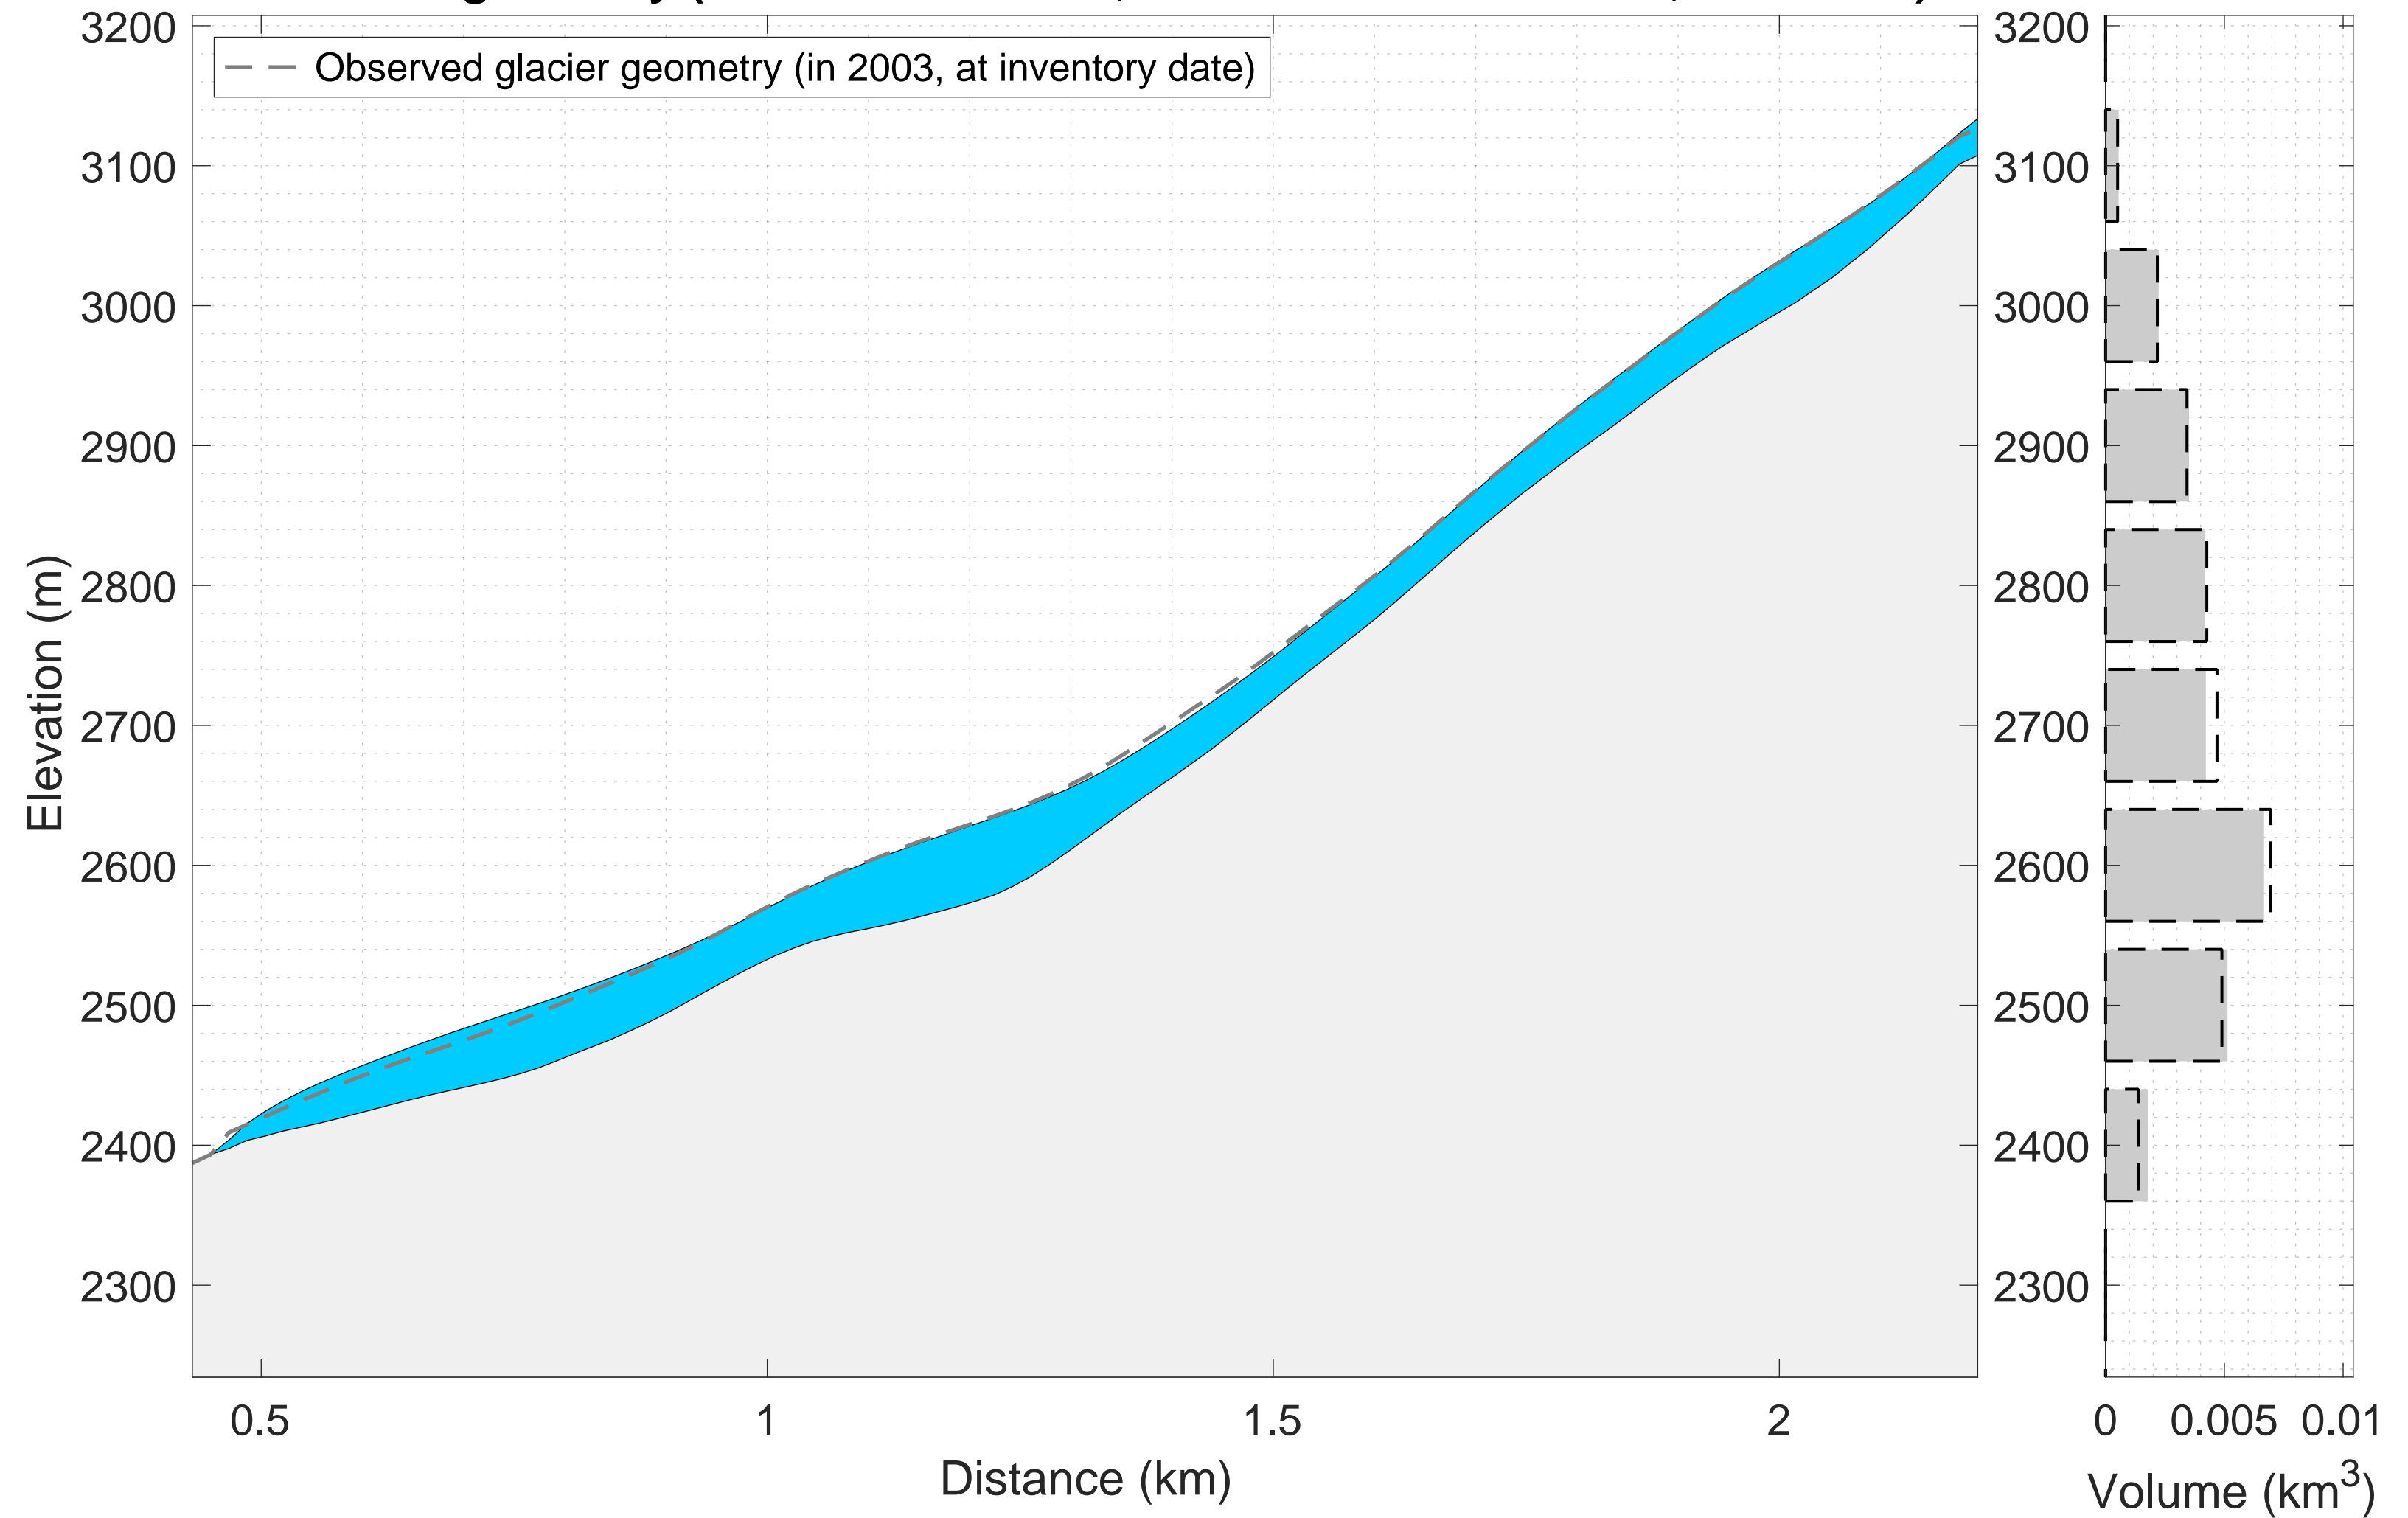

Supplement: Supplementary file 522 [file tc-13-1125-2019-supplement.zip]

**Modelled geometry (Glacier ID = 02600;  $A = 2.8484\text{e-}16 \text{ Pa}^{-3} \text{ a}^{-1}$ ;  $dx = 15 \text{ m}$ )**

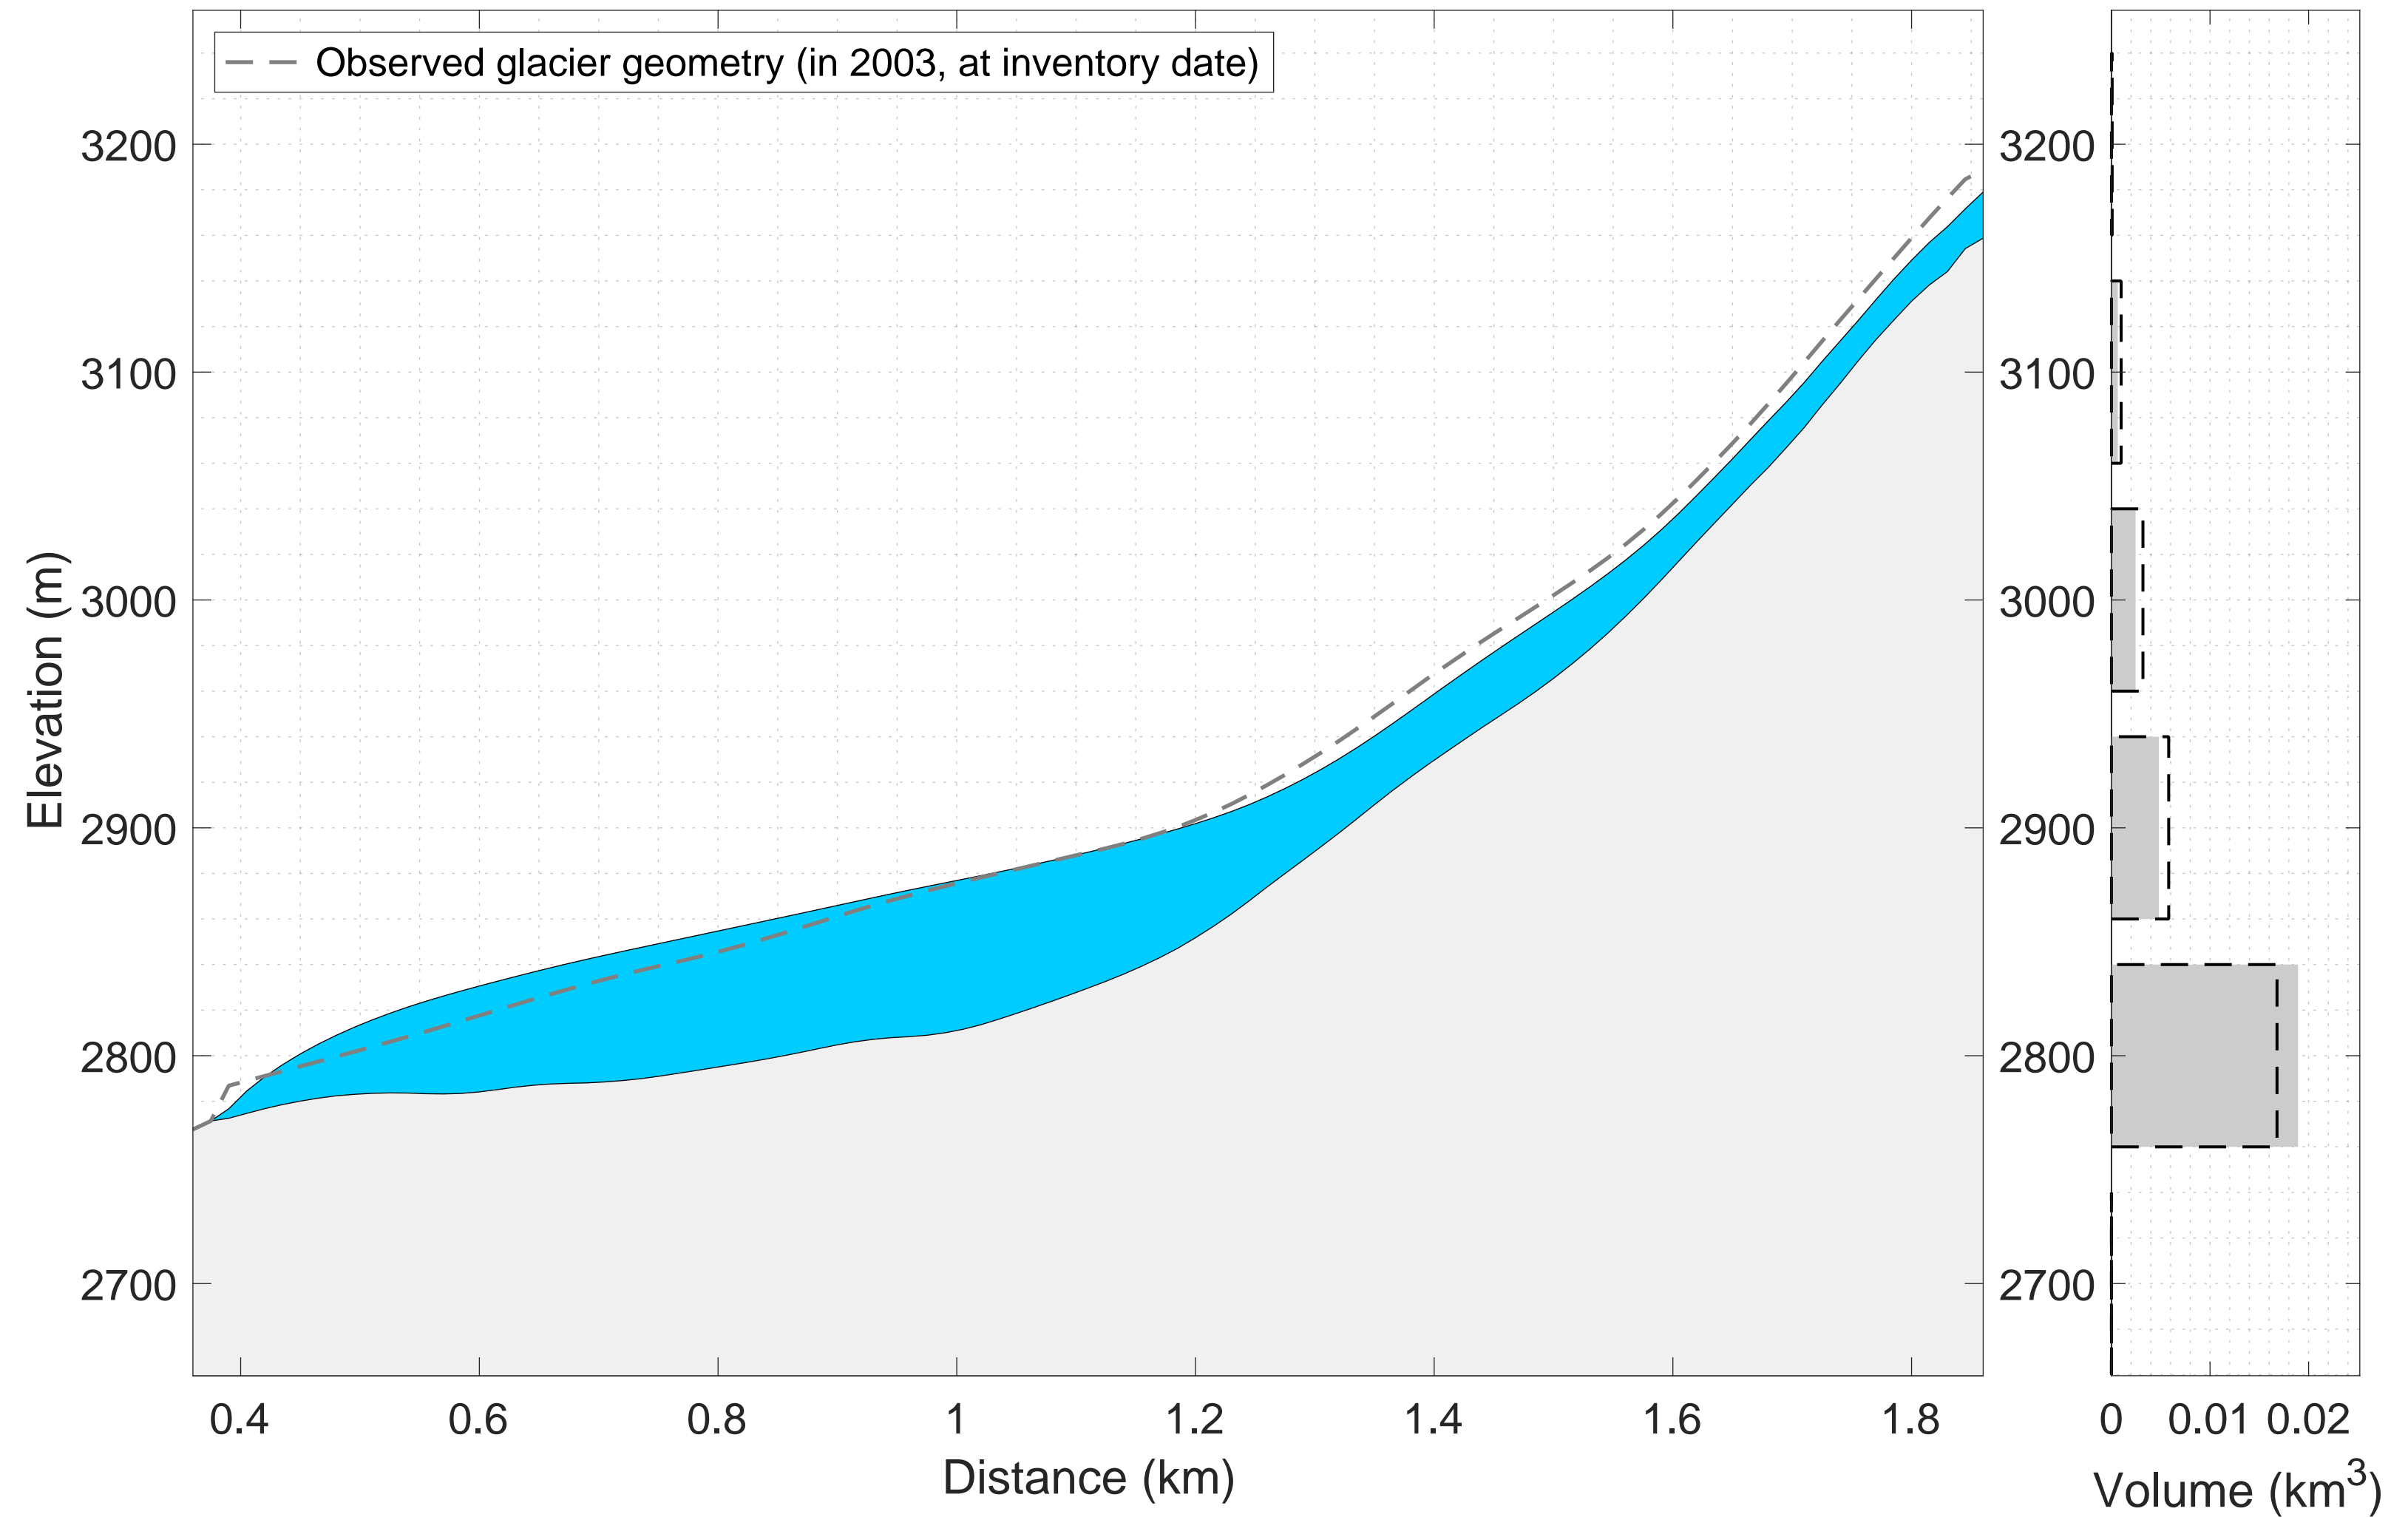

Supplement: Supplementary file 523 [file tc-13-1125-2019-supplement.zip]

**Modelled geometry (Glacier ID = 01102;  $A = 5.3324\text{e-}17 \text{ Pa}^{-3} \text{ a}^{-1}$ ;  $dx = 10 \text{ m}$ )**

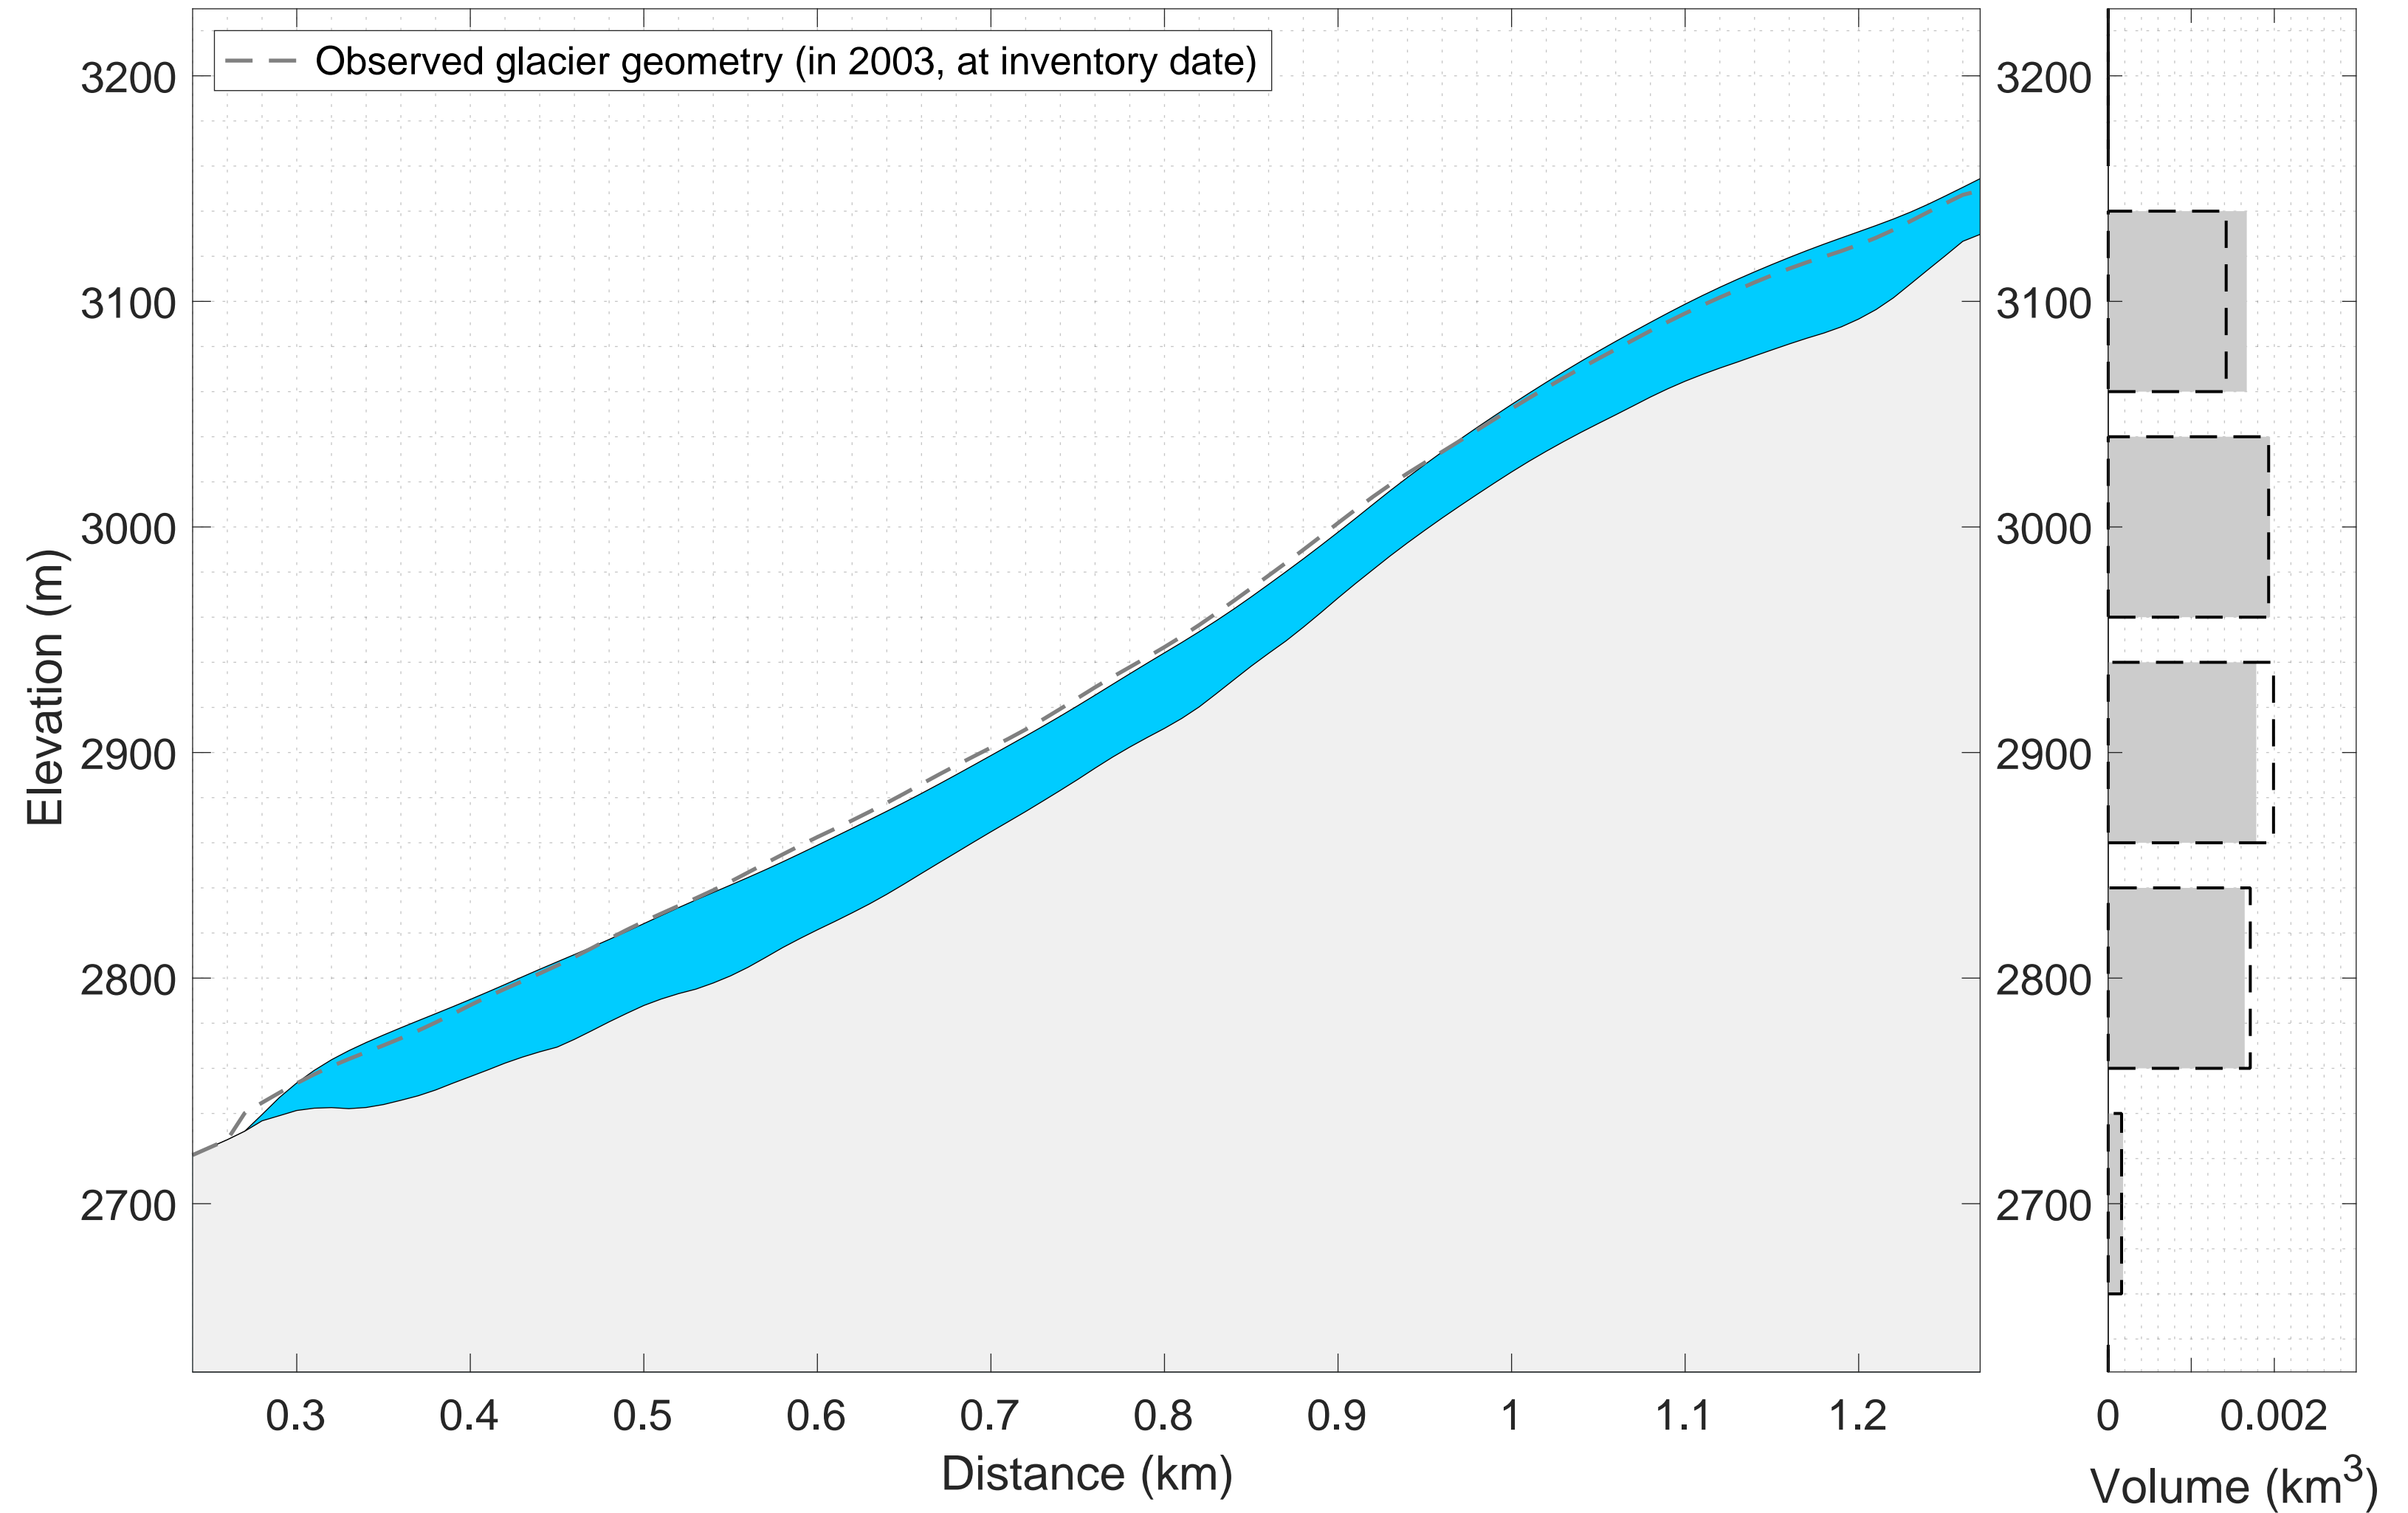

Supplement: Supplementary file 524 [file tc-13-1125-2019-supplement.zip]

**Modelled geometry (Glacier ID = 02742;  $A = 1.4948\text{e-}16 \text{ Pa}^{-3} \text{ a}^{-1}$ ;  $dx = 20 \text{ m}$ )**

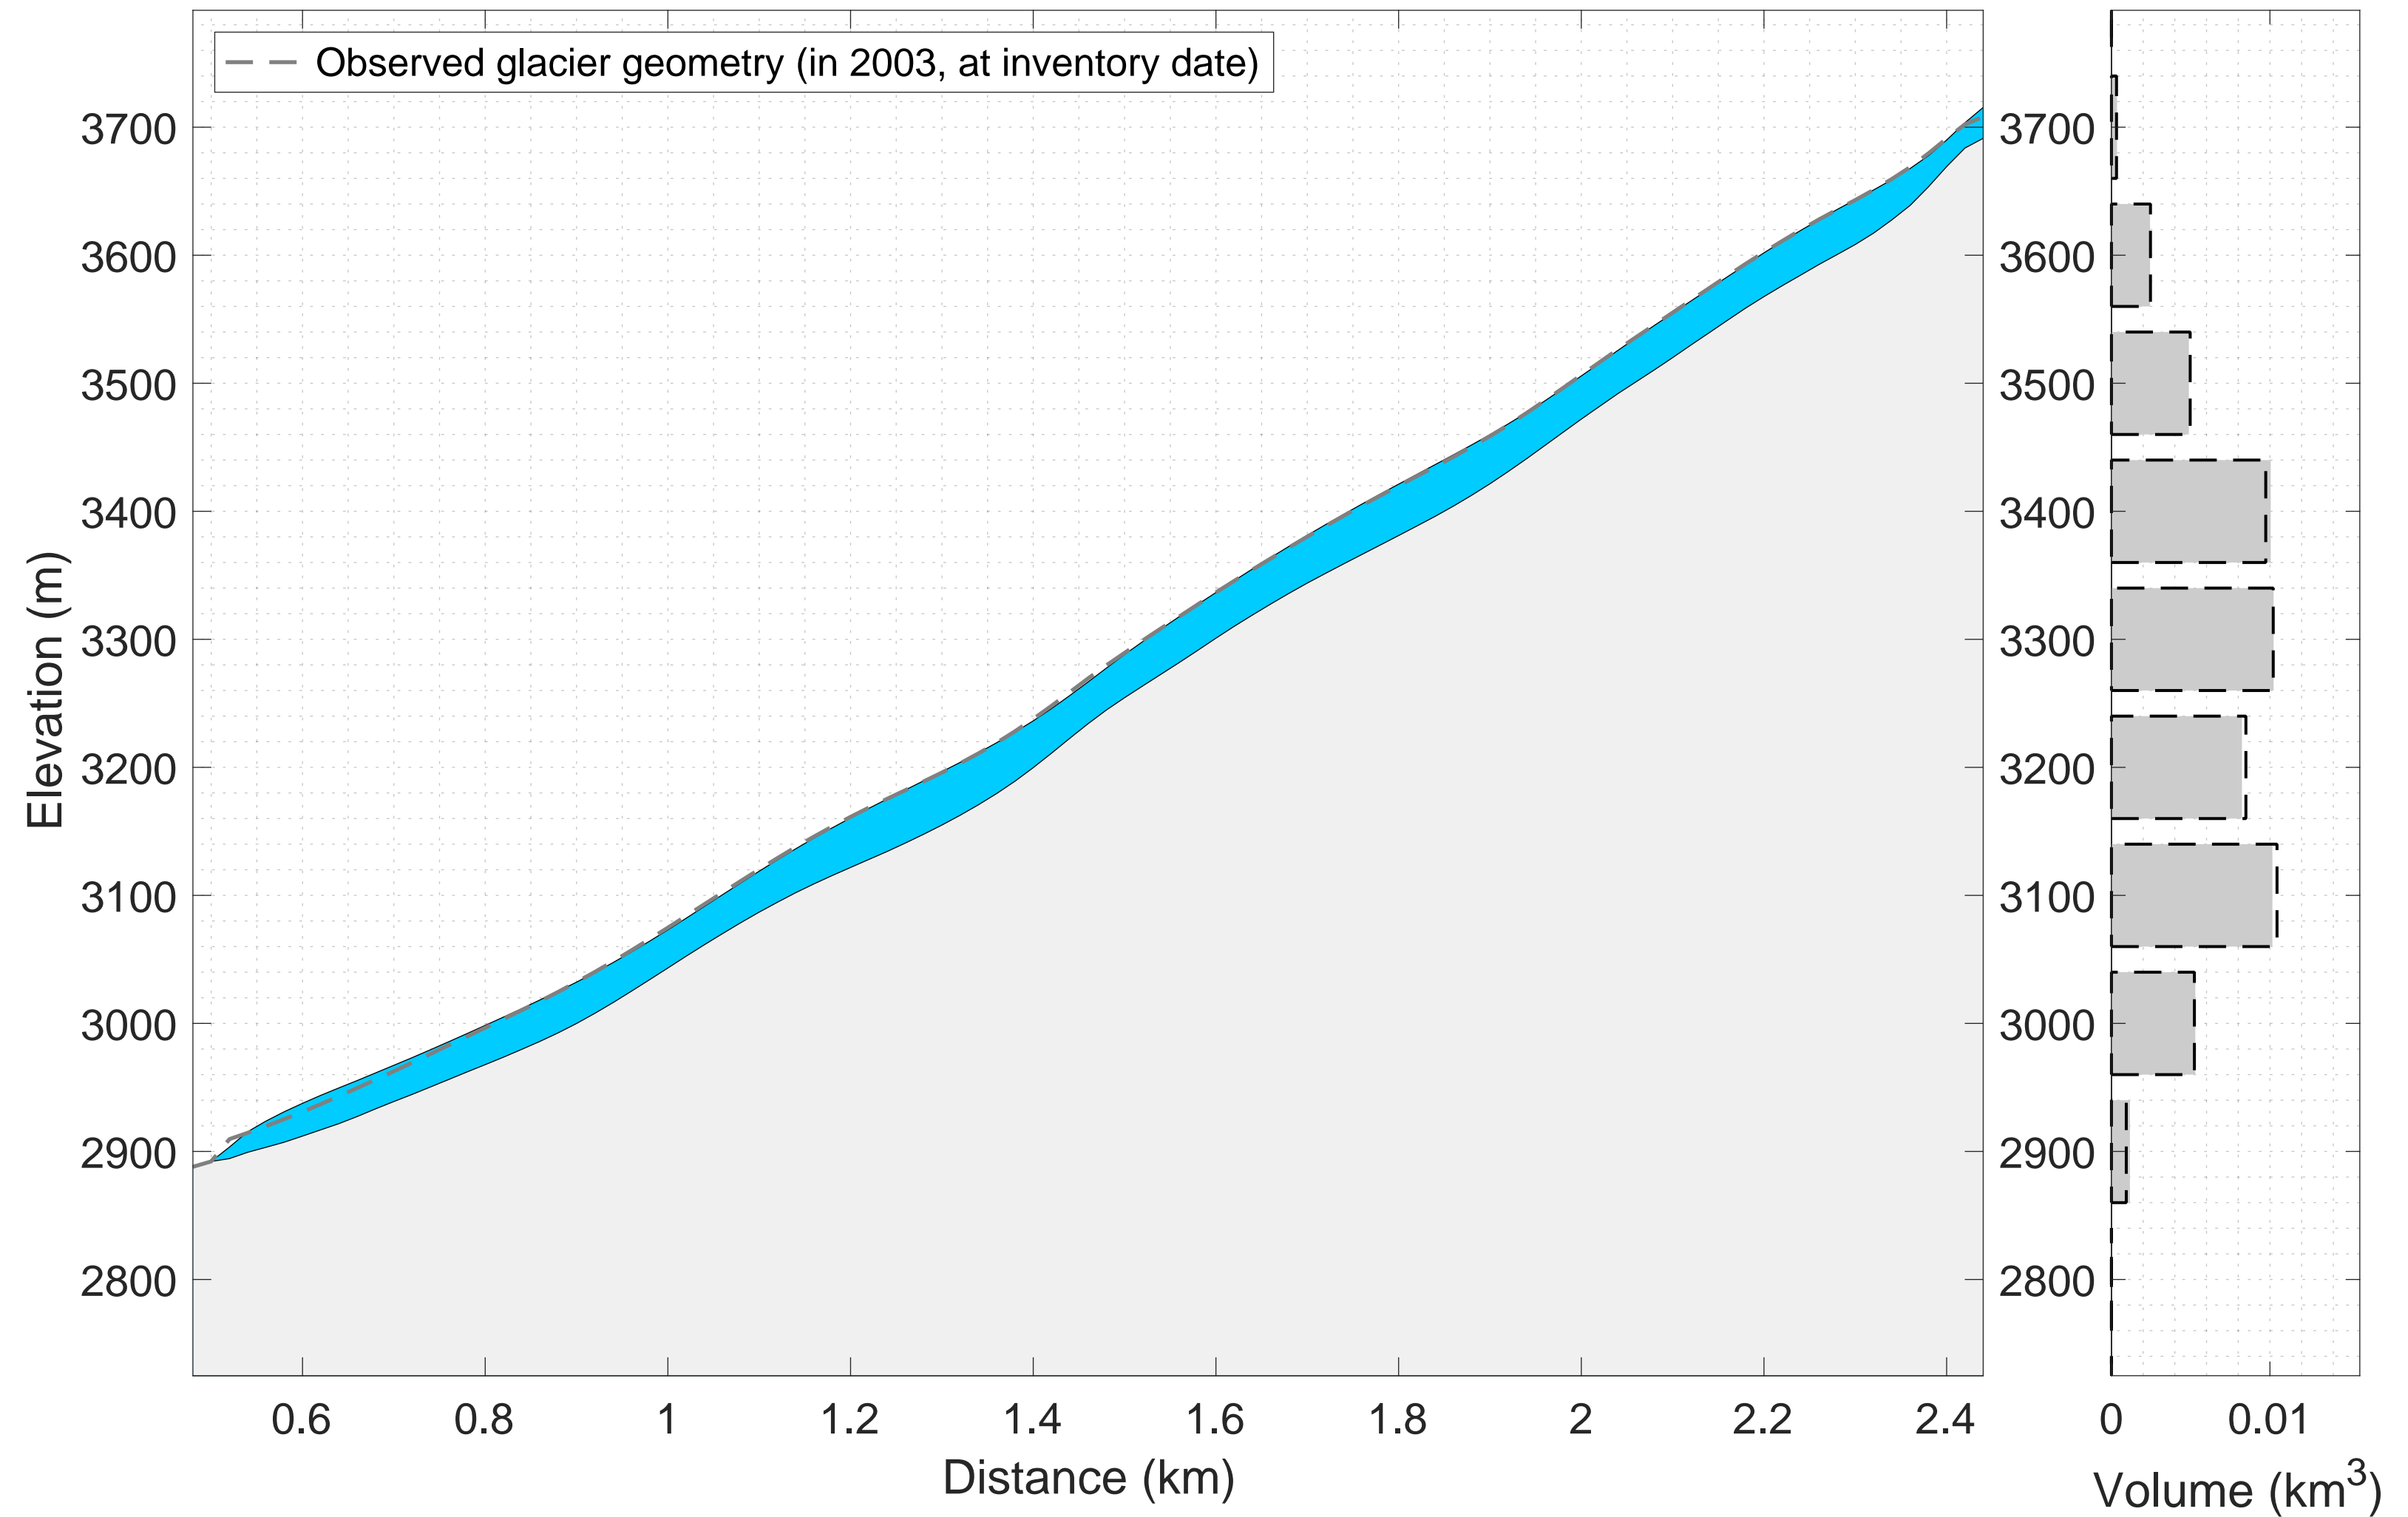

Supplement: Supplementary file 525 [file tc-13-1125-2019-supplement.zip]

**Modelled geometry (Glacier ID = 03184;  $A = 1.5355\text{e-}16 \text{ Pa}^{-3} \text{ a}^{-1}$ ;  $dx = 16 \text{ m}$ )**

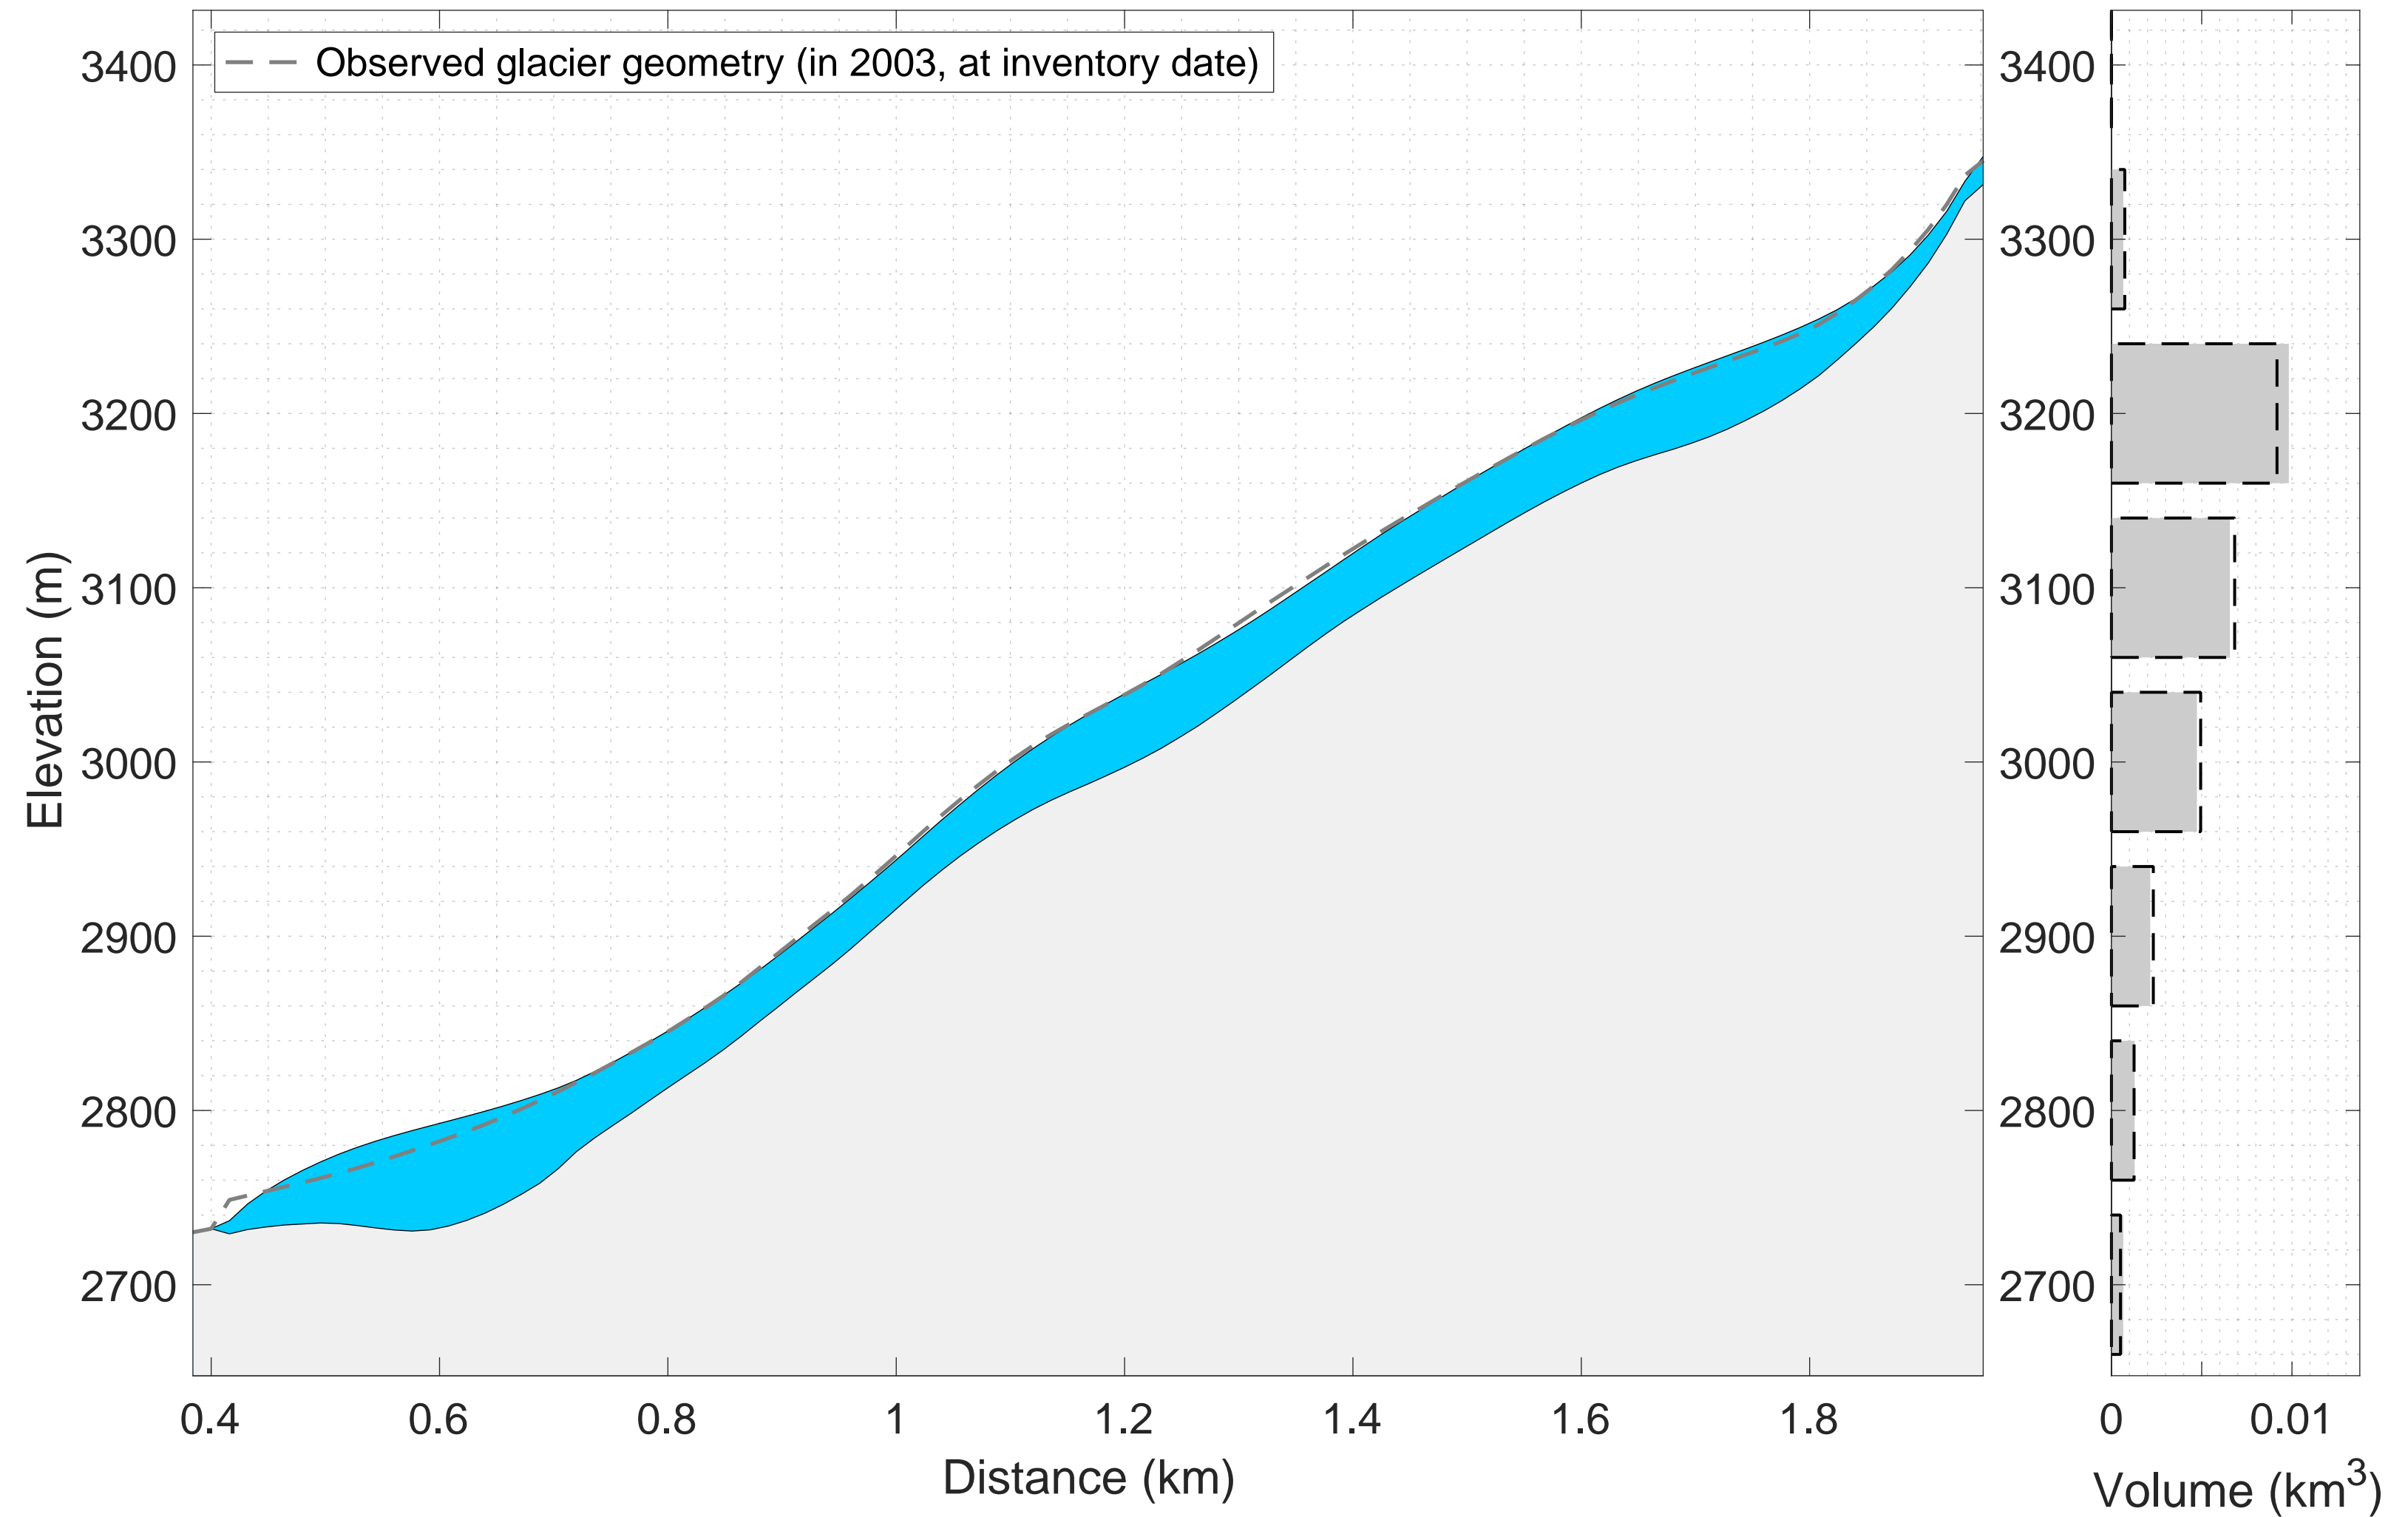

Supplement: Supplementary file 526 [file tc-13-1125-2019-supplement.zip]

**Modelled geometry (Glacier ID = 03668;  $A = 2.6232\text{e-}16 \text{ Pa}^{-3} \text{ a}^{-1}$ ;  $dx = 22 \text{ m}$ )**

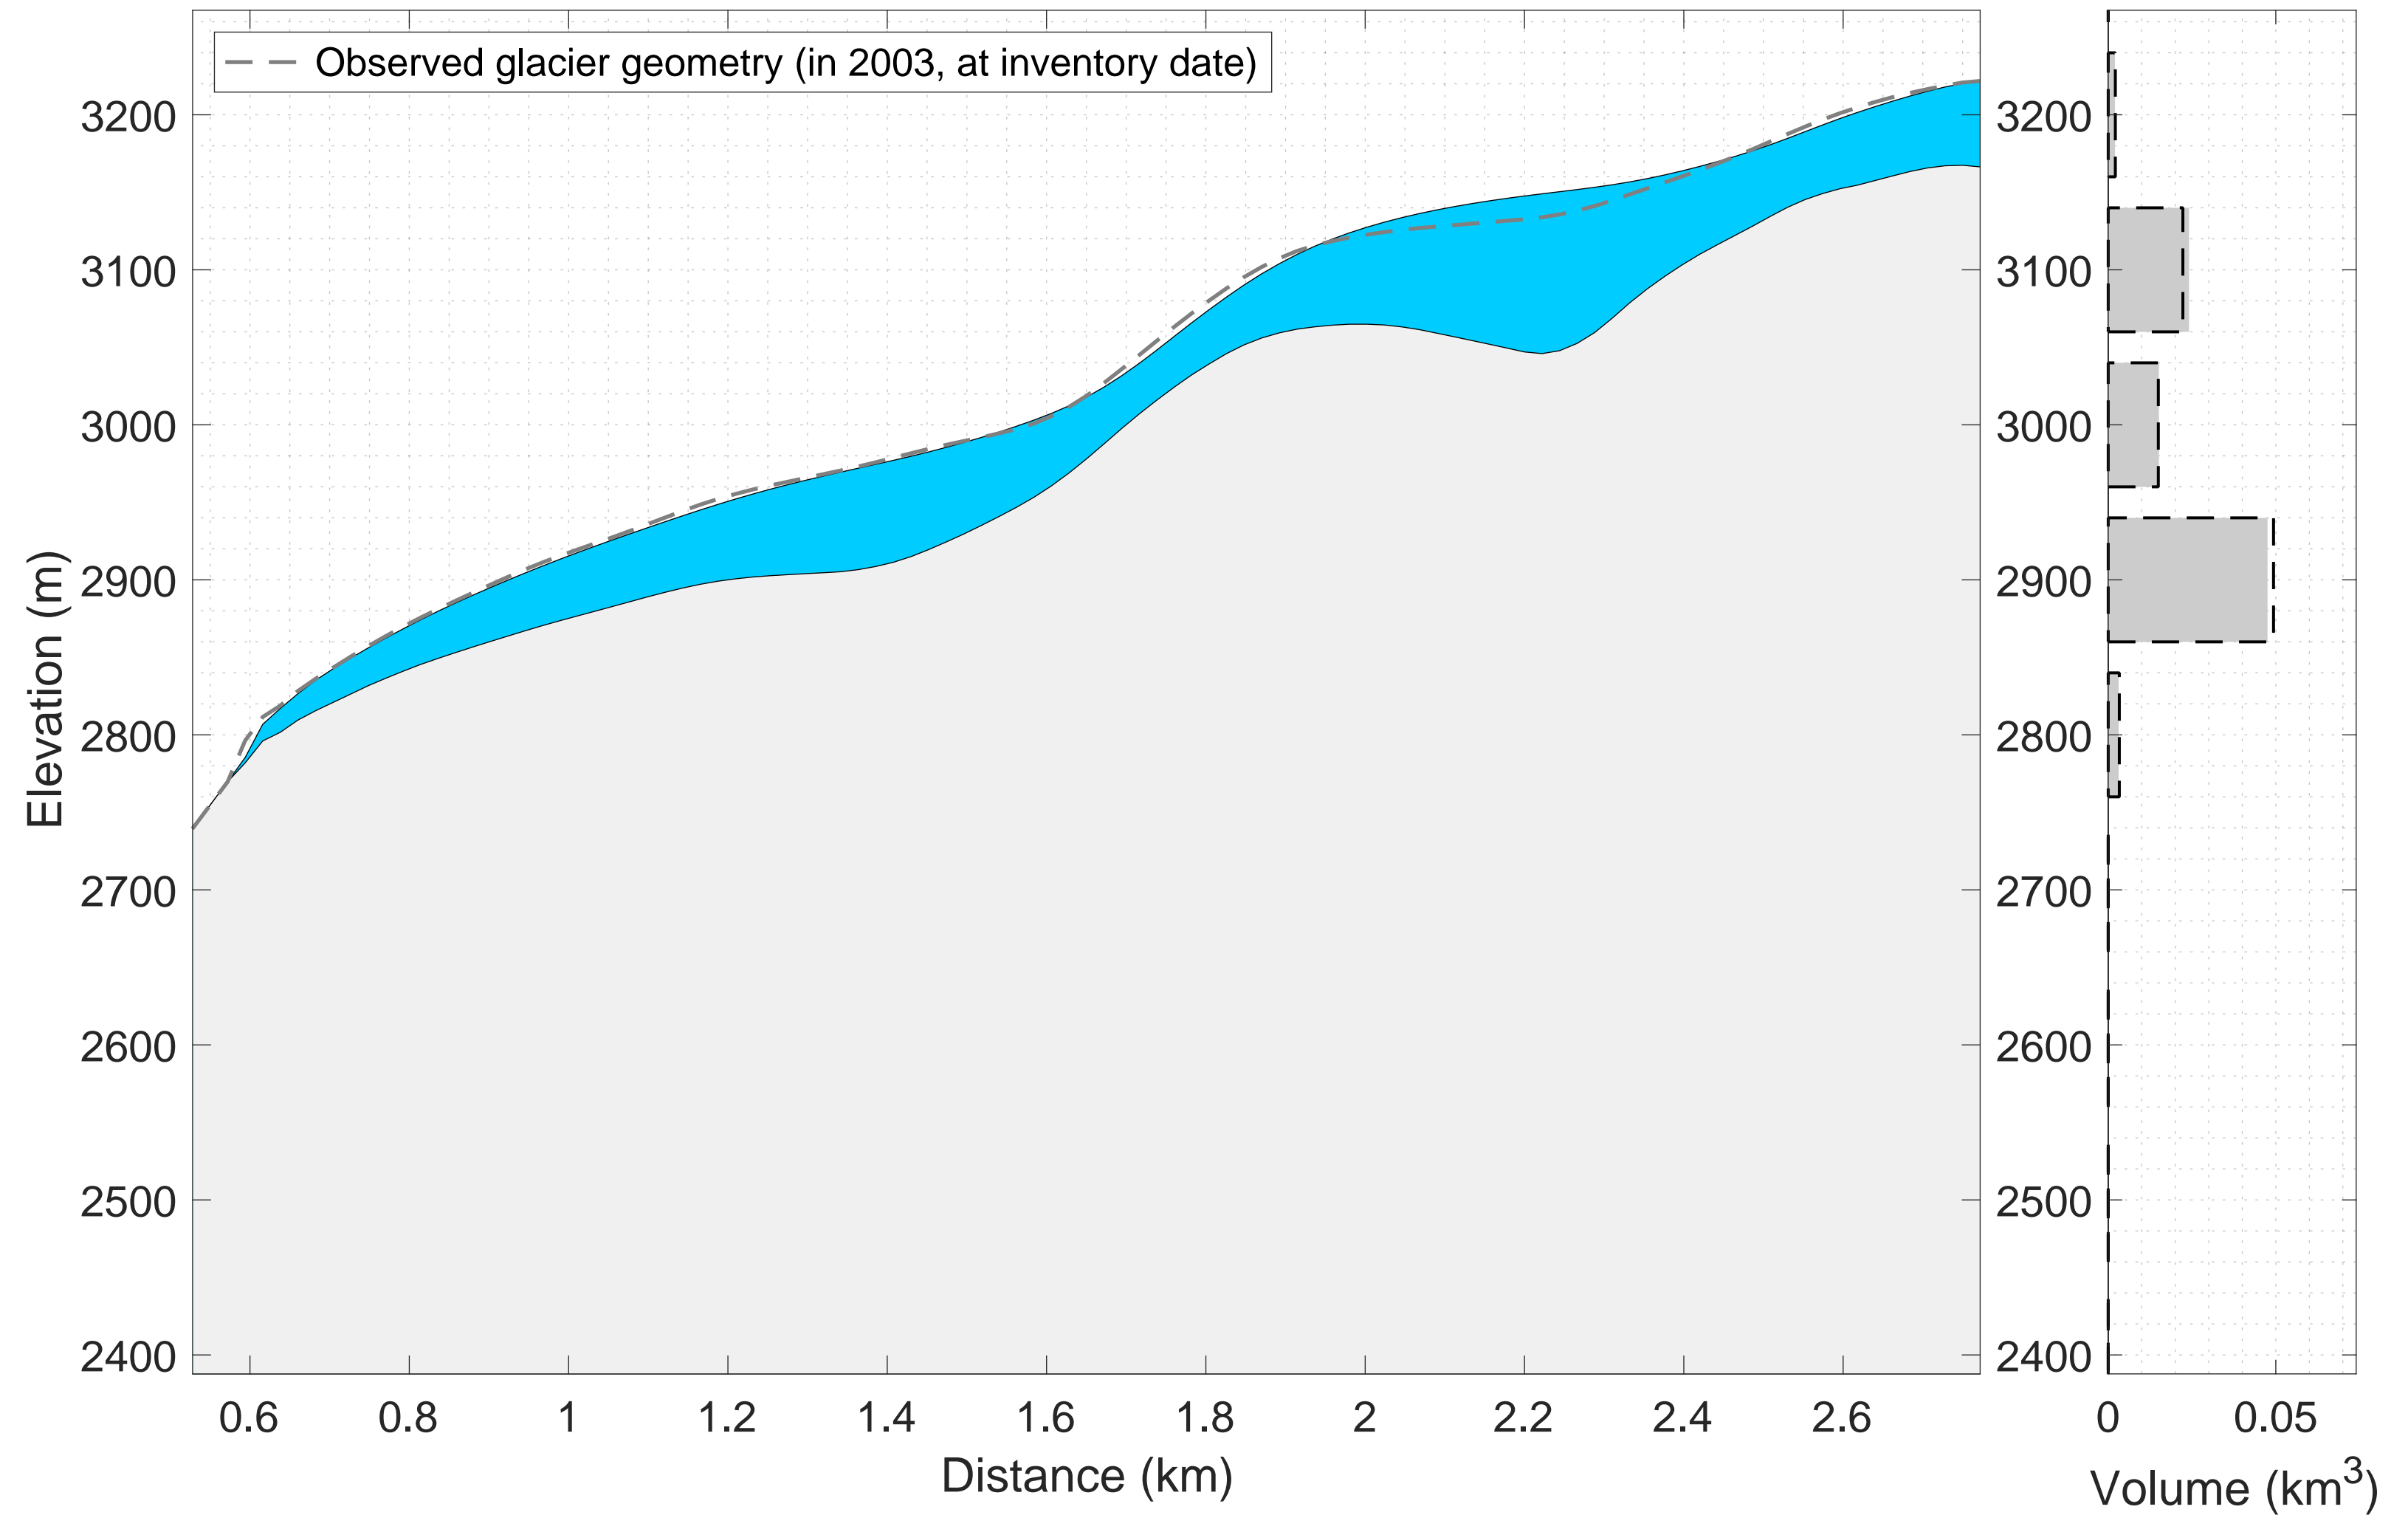

Supplement: Supplementary file 527 [file tc-13-1125-2019-supplement.zip]

**Modelled geometry (Glacier ID = 02709;  $A = 7.202\text{e-}16 \text{ Pa}^{-3} \text{ a}^{-1}$ ;  $dx = 70 \text{ m}$ )**

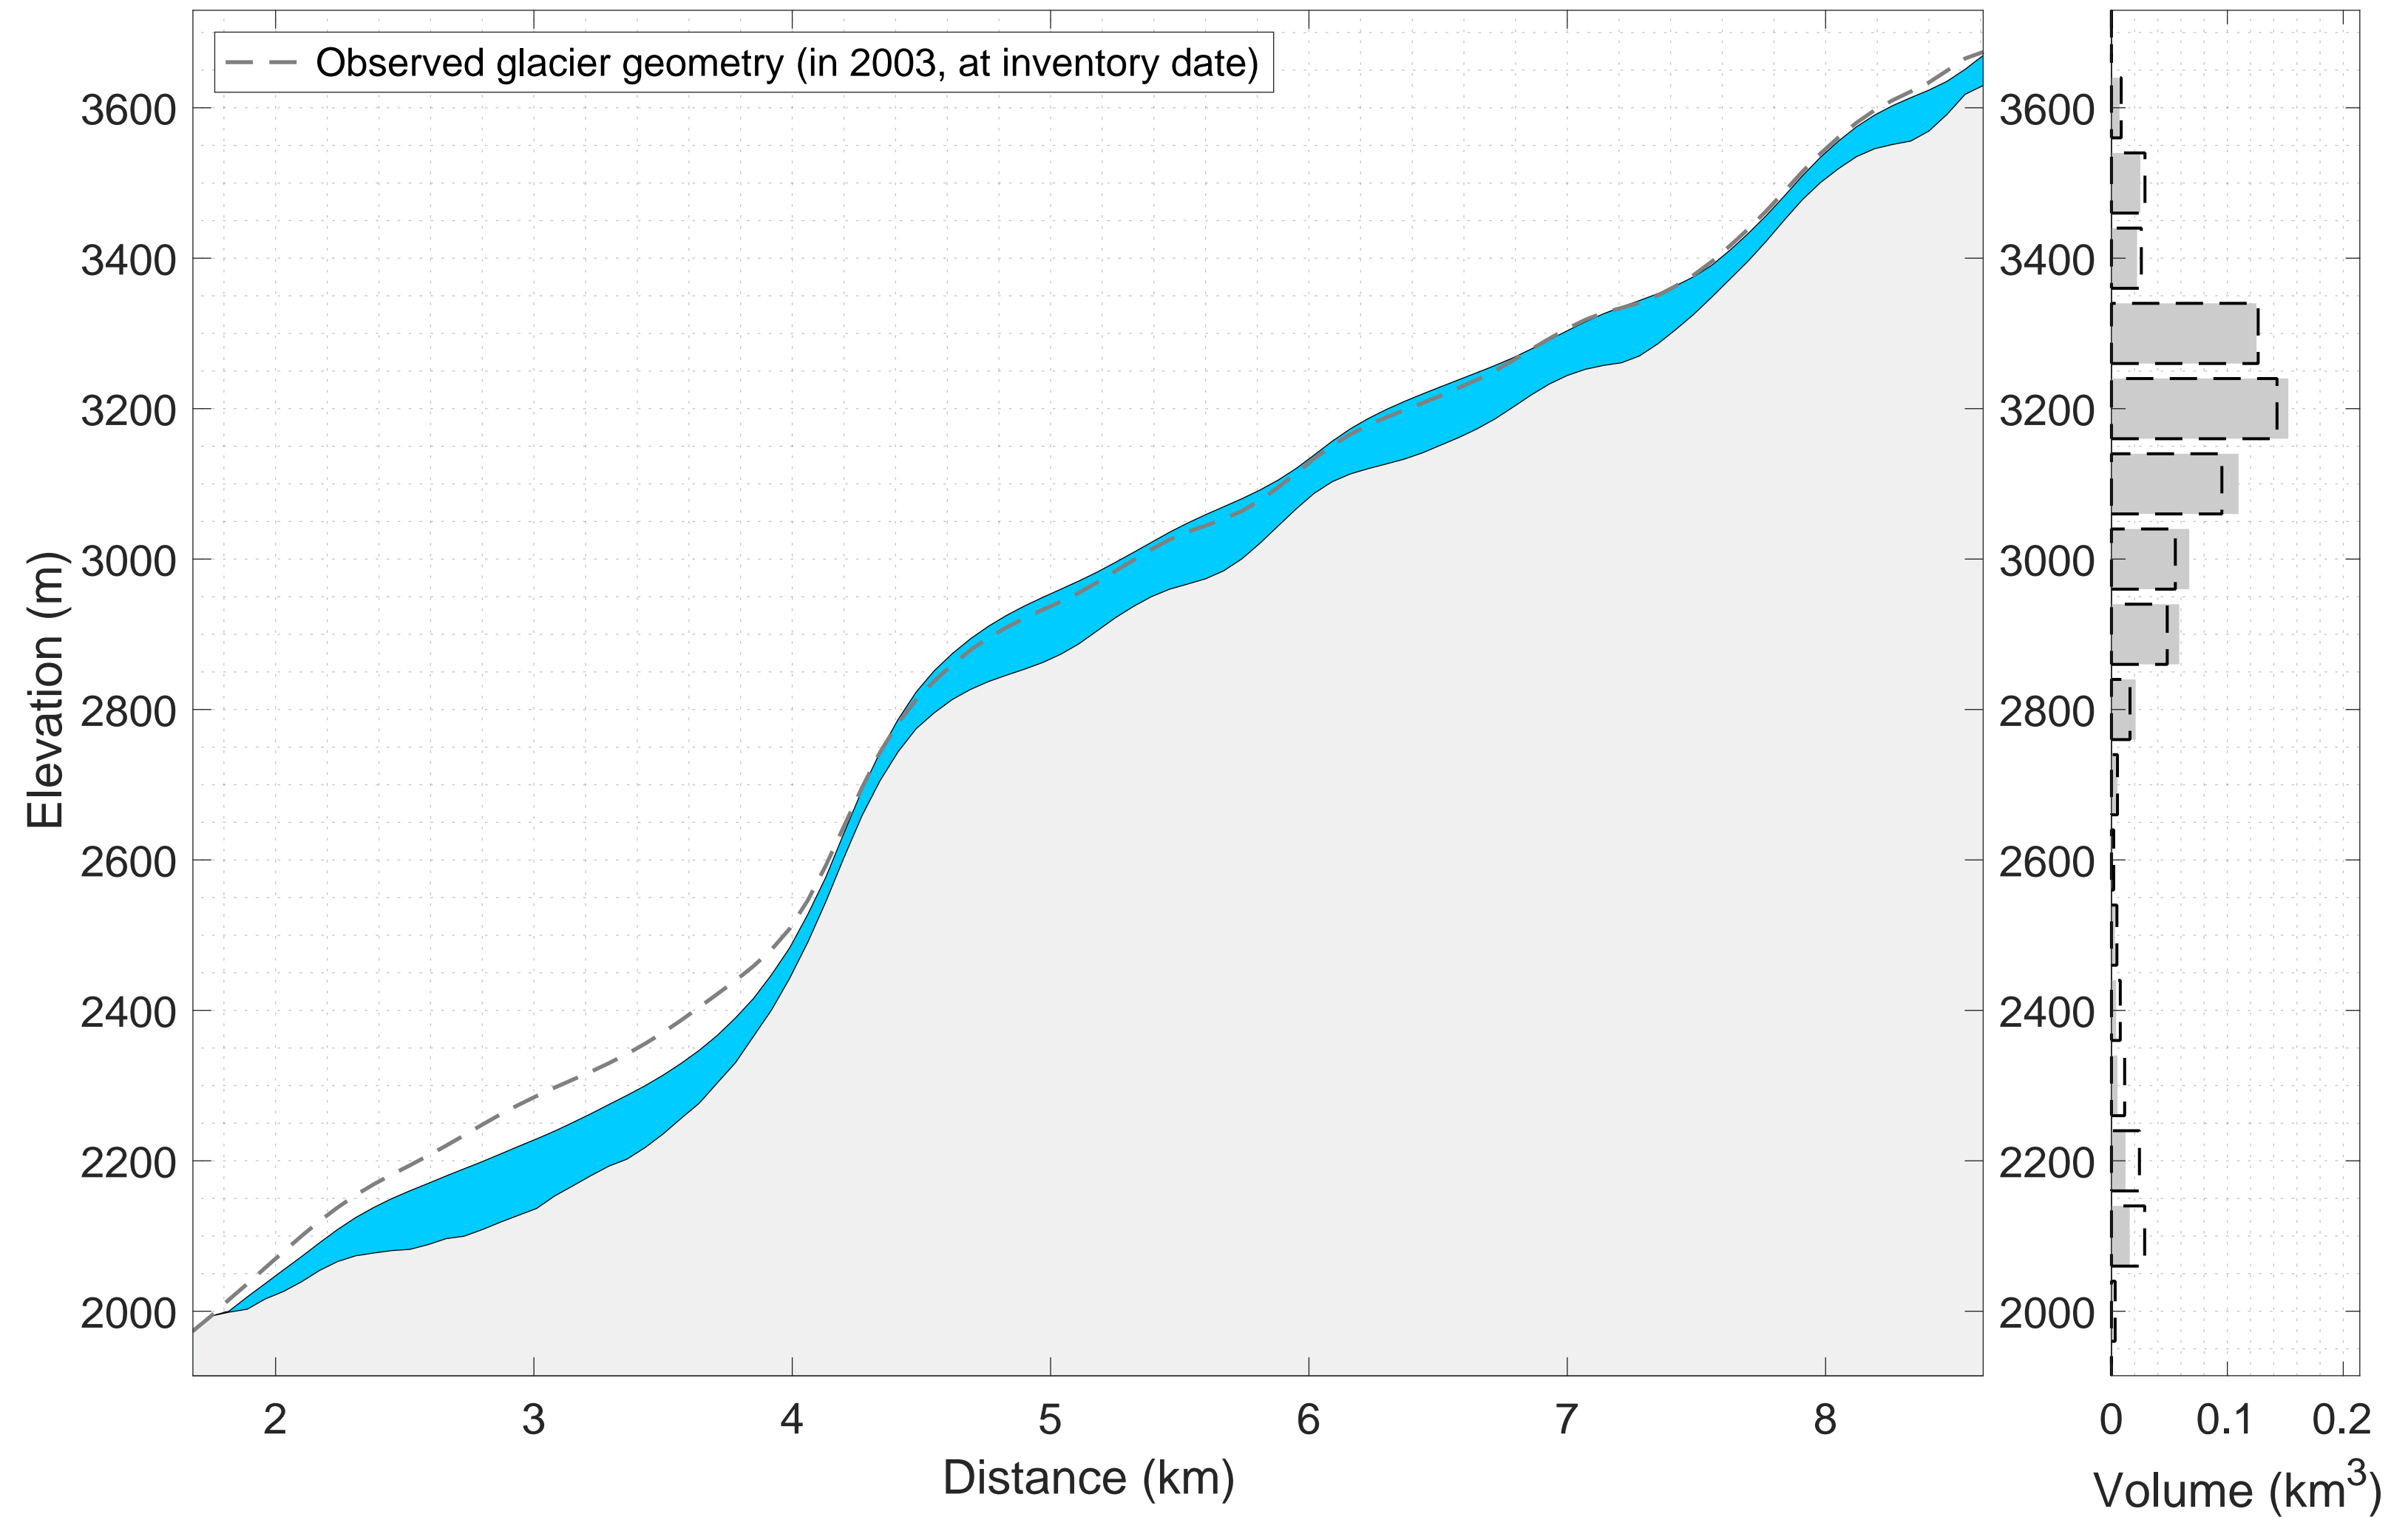

Supplement: Supplementary file 528 [file tc-13-1125-2019-supplement.zip]

**Modelled geometry (Glacier ID = 00929;  $A = 1.1038\text{e-}16 \text{ Pa}^{-3} \text{ a}^{-1}$ ;  $dx = 39 \text{ m}$ )**

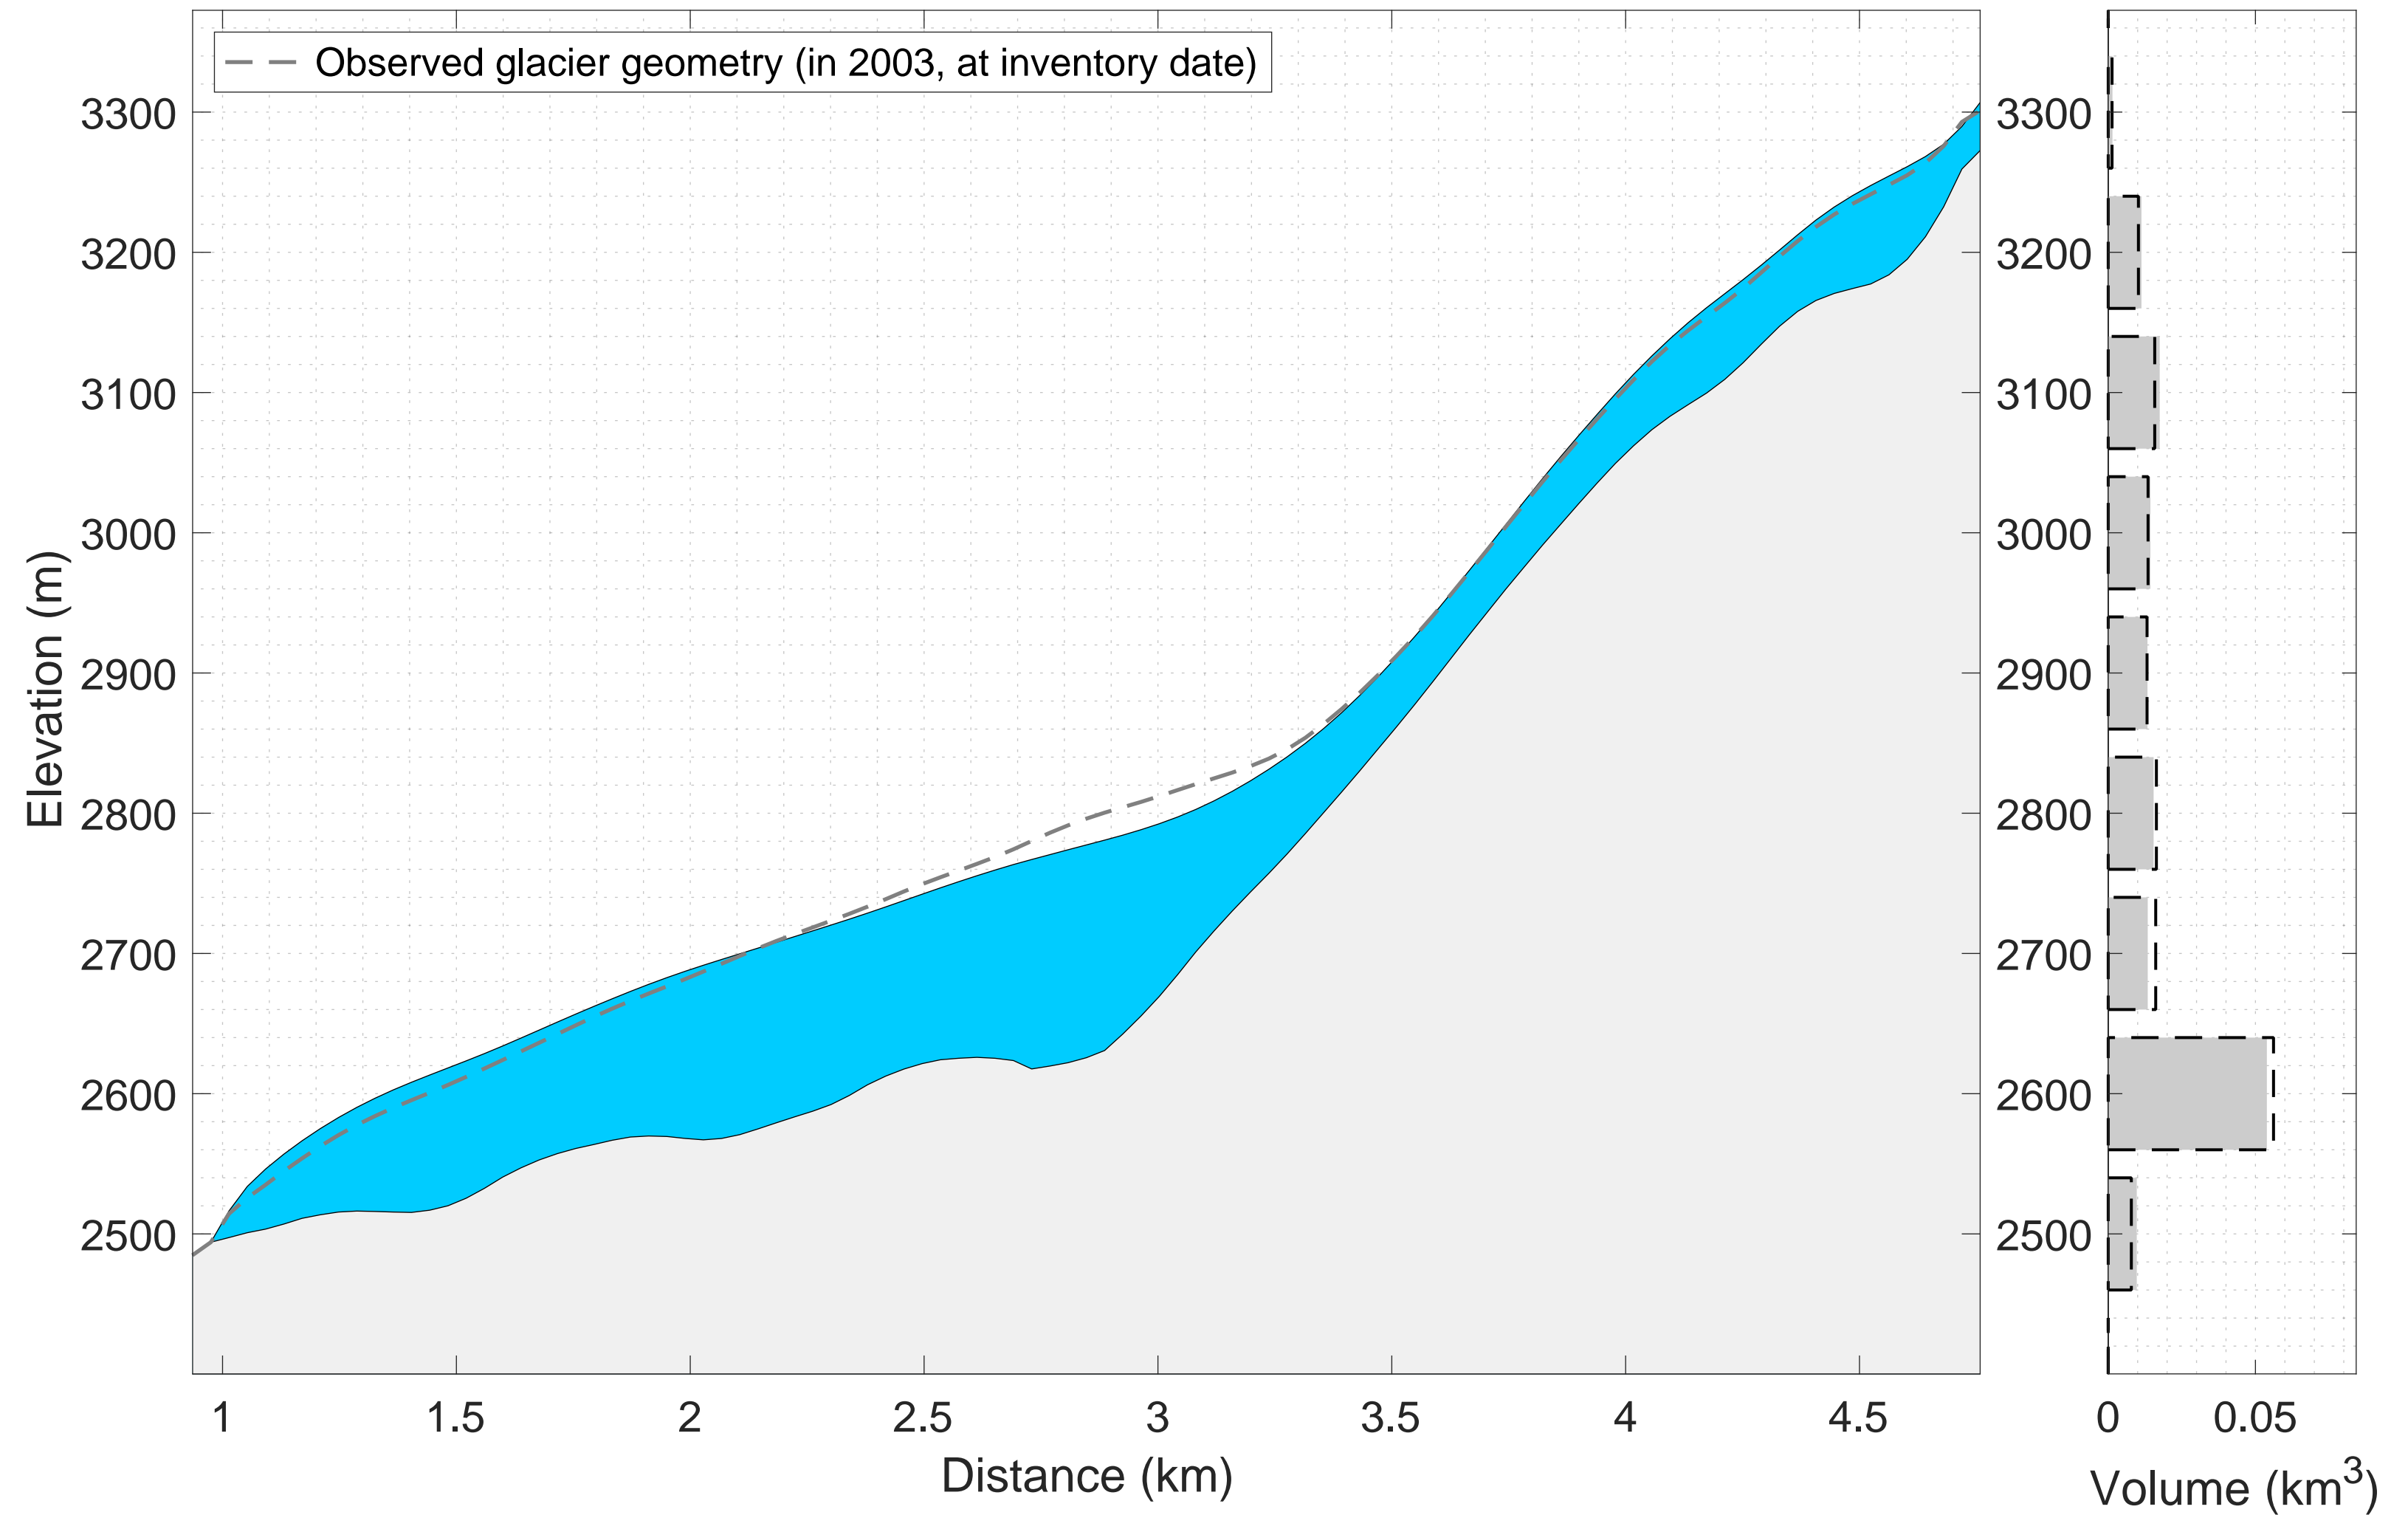

Supplement: Supplementary file 529 [file tc-13-1125-2019-supplement.zip]

**Modelled geometry (Glacier ID = 03473;  $A = 1.7399\text{e-}16 \text{ Pa}^{-3} \text{ a}^{-1}$ ;  $dx = 25 \text{ m}$ )**

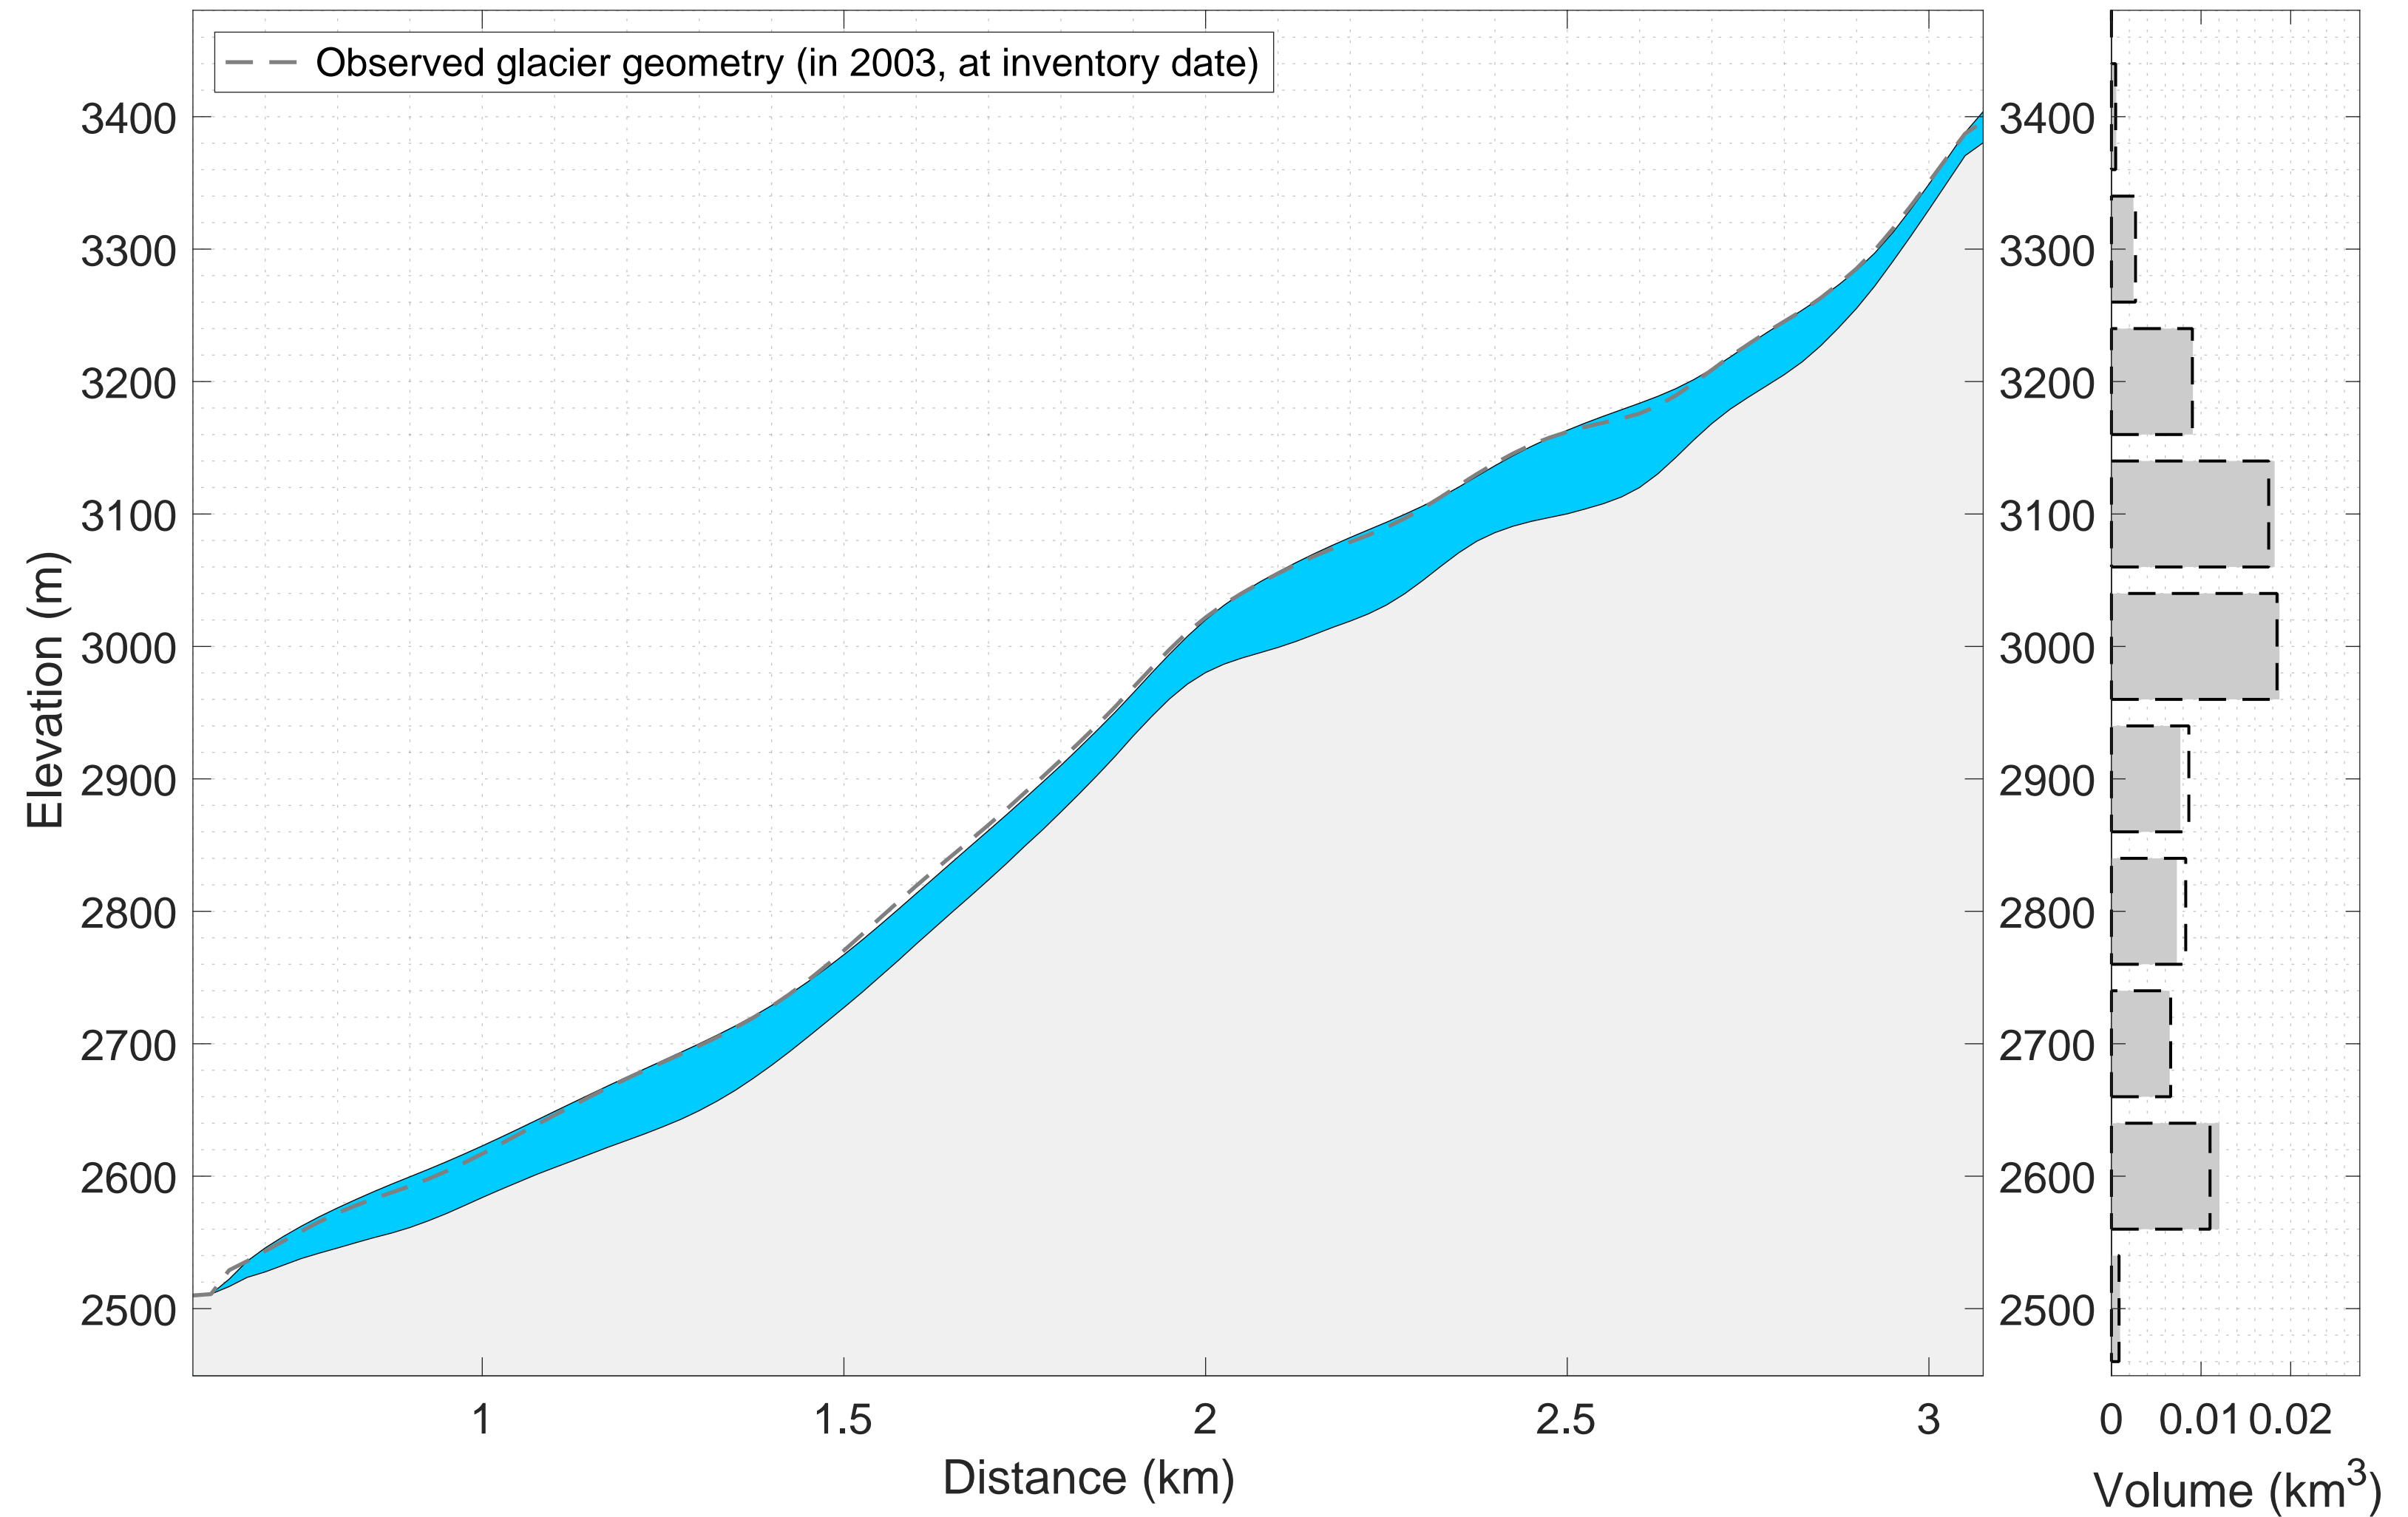

Supplement: Supplementary file 530 [file tc-13-1125-2019-supplement.zip]

**Modelled geometry (Glacier ID = 03676;  $A = 1.8547\text{e-}16 \text{ Pa}^{-3} \text{ a}^{-1}$ ;  $dx = 30 \text{ m}$ )**

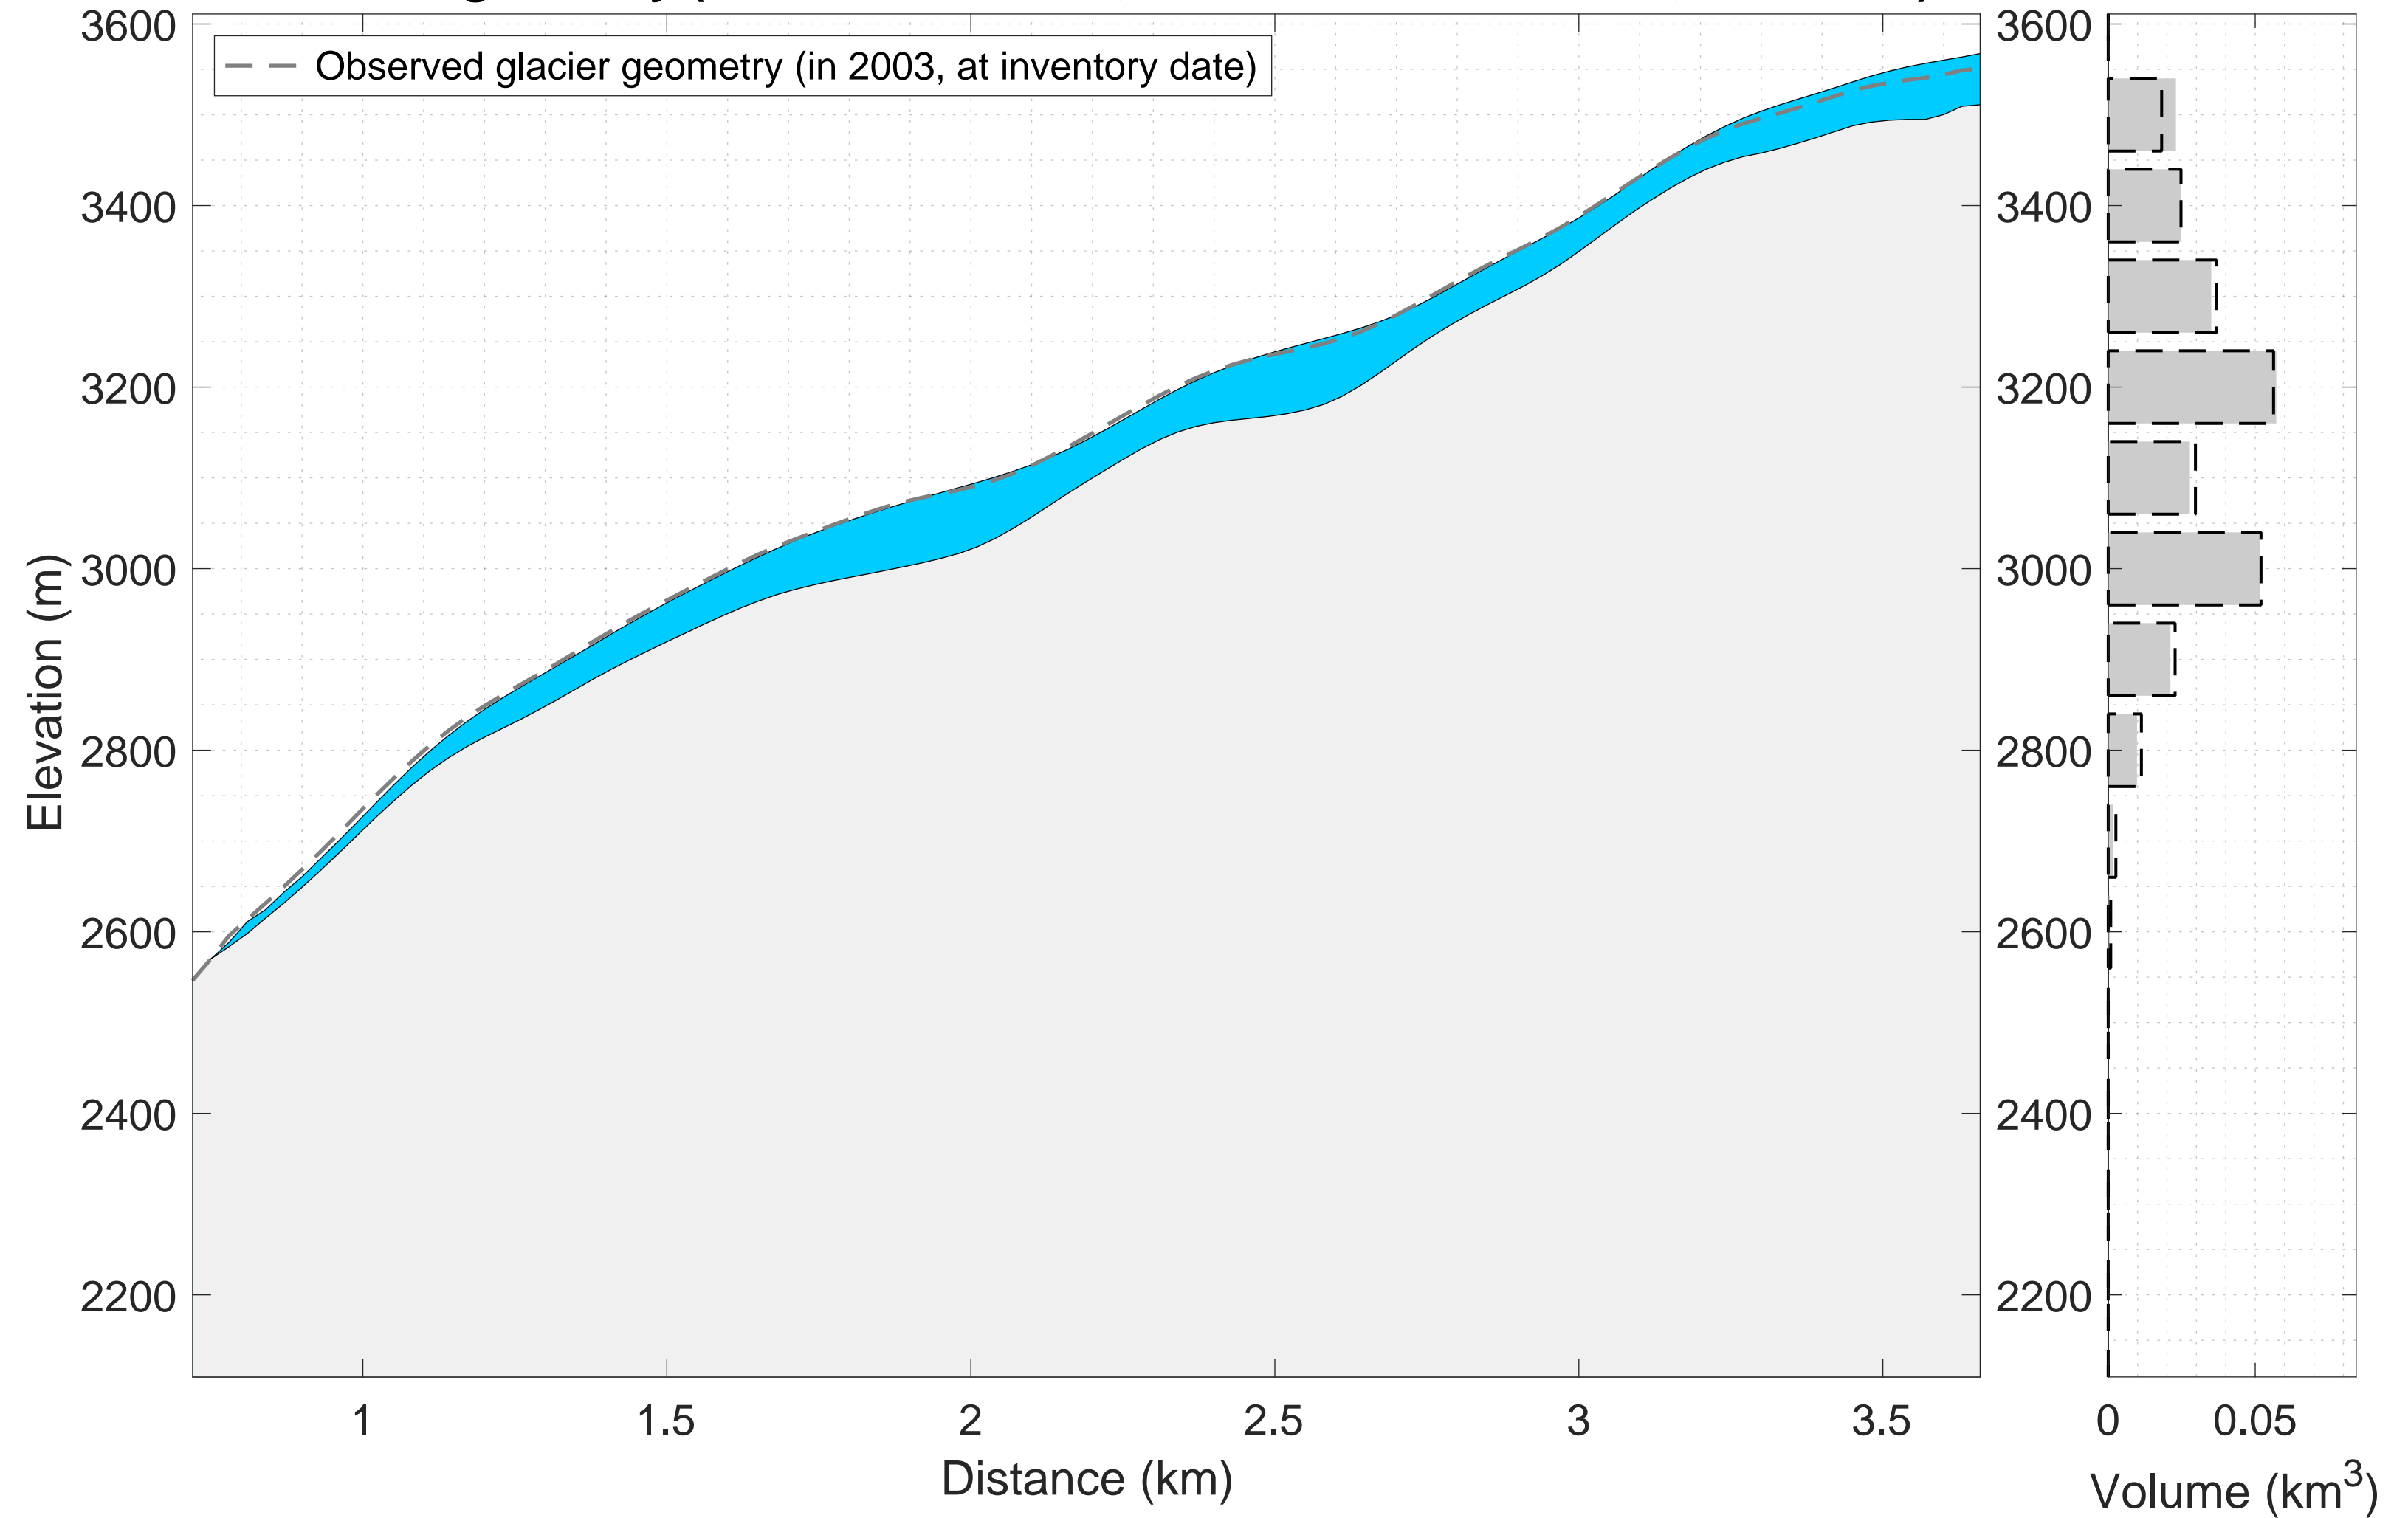

Supplement: Supplementary file 531 [file tc-13-1125-2019-supplement.zip]

**Modelled geometry (Glacier ID = 00342;  $A = 5.8843\text{e-}17 \text{ Pa}^{-3} \text{ a}^{-1}$ ;  $dx = 11 \text{ m}$ )**

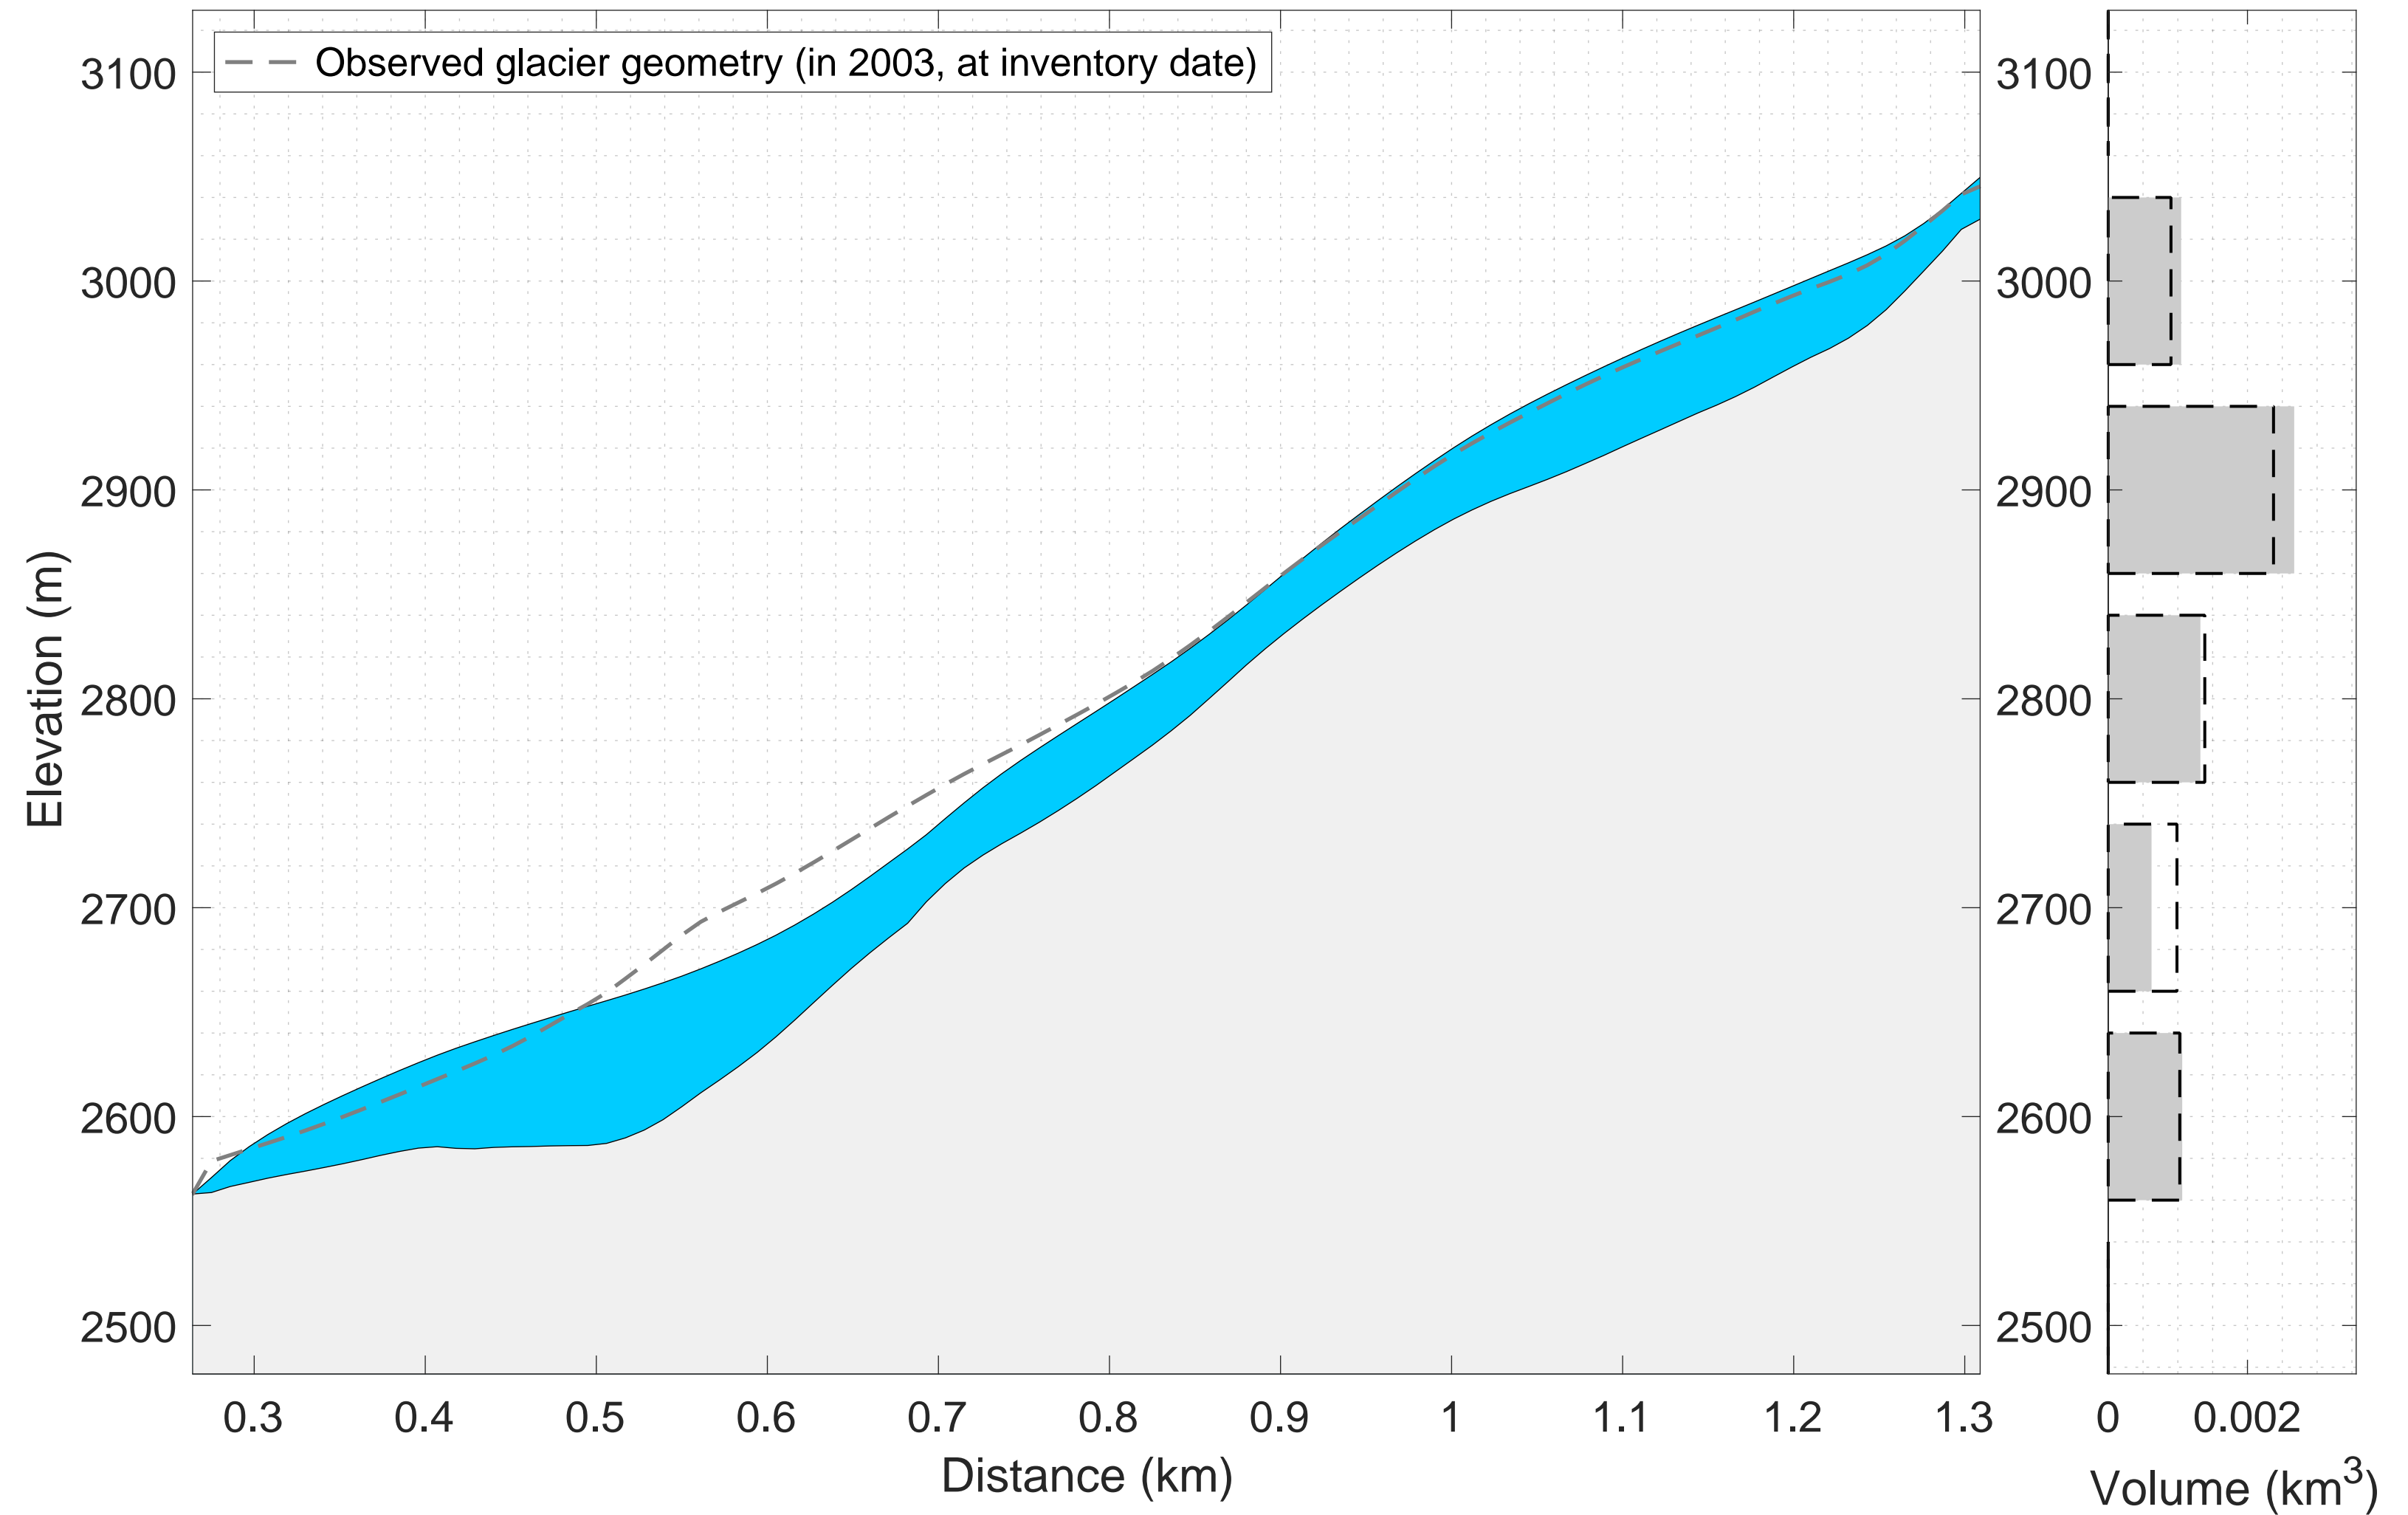

Supplement: Supplementary file 532 [file tc-13-1125-2019-supplement.zip]

**Modelled geometry (Glacier ID = 02927;  $A = 1.0297\text{e-}16 \text{ Pa}^{-3} \text{ a}^{-1}$ ;  $dx = 37 \text{ m}$ )**

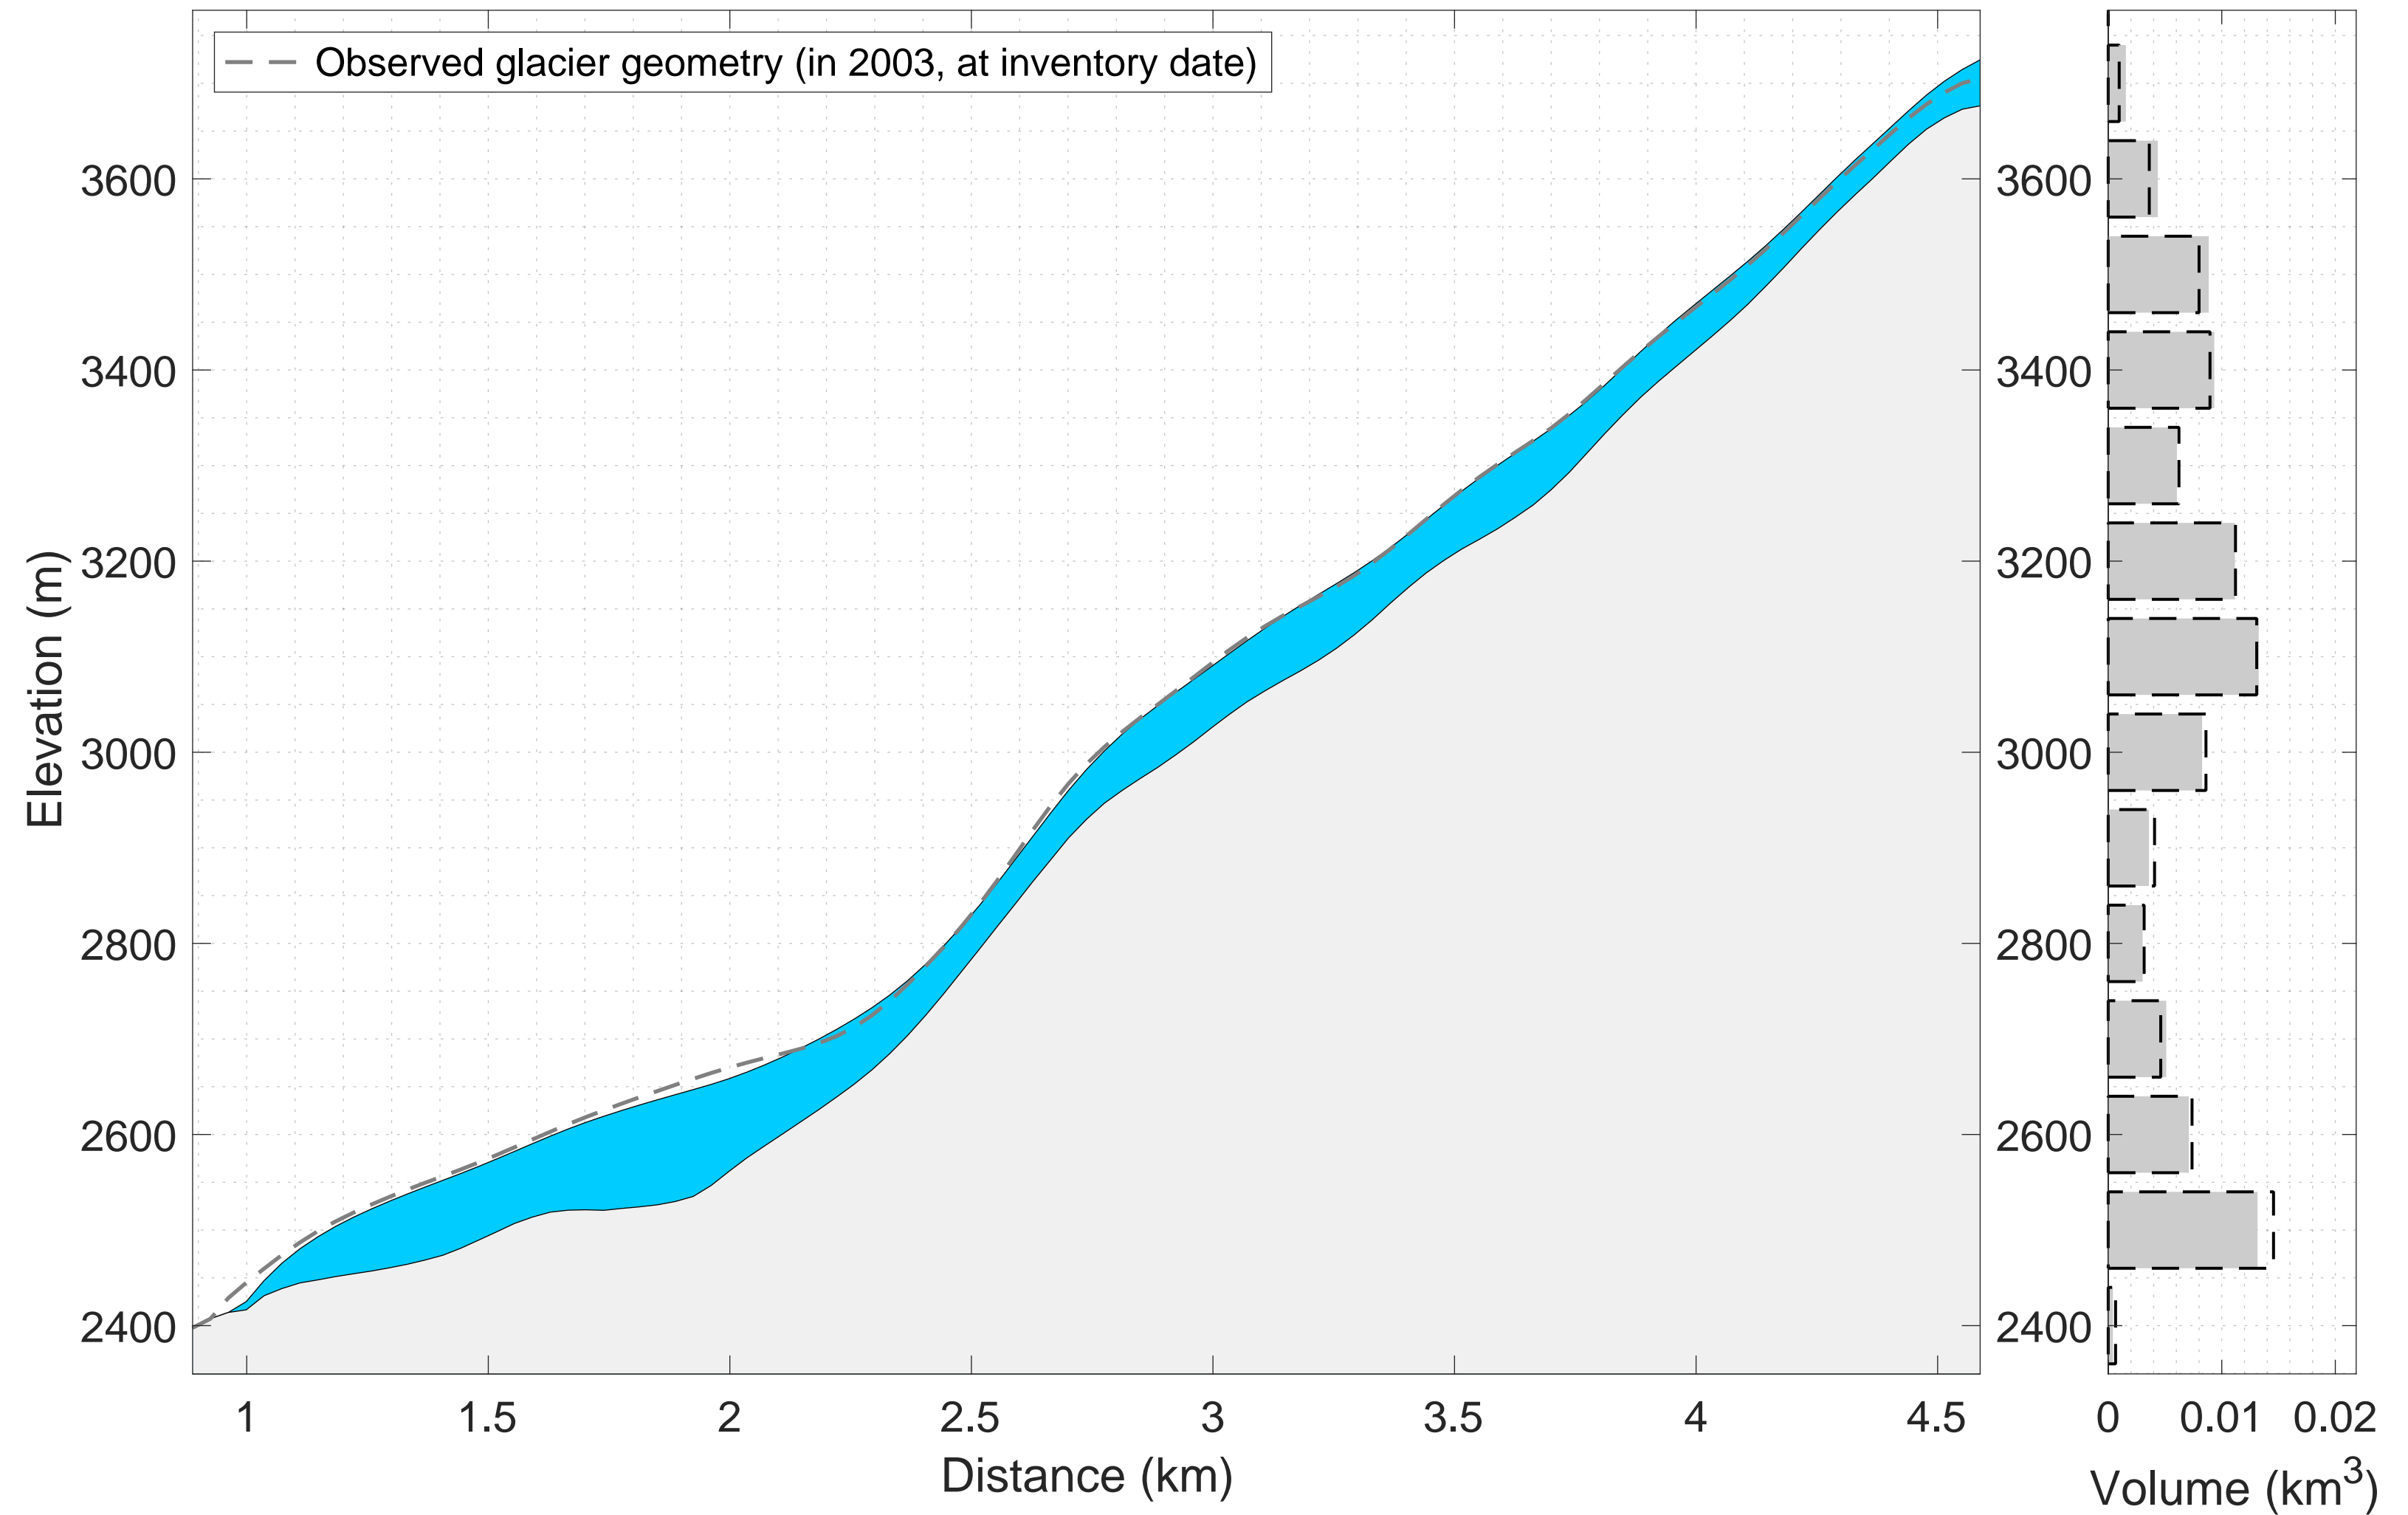

Supplement: Supplementary file 533 [file tc-13-1125-2019-supplement.zip]

**Modelled geometry (Glacier ID = 03114;  $A = 1.5042\text{e-}16 \text{ Pa}^{-3} \text{ a}^{-1}$ ;  $dx = 28 \text{ m}$ )**

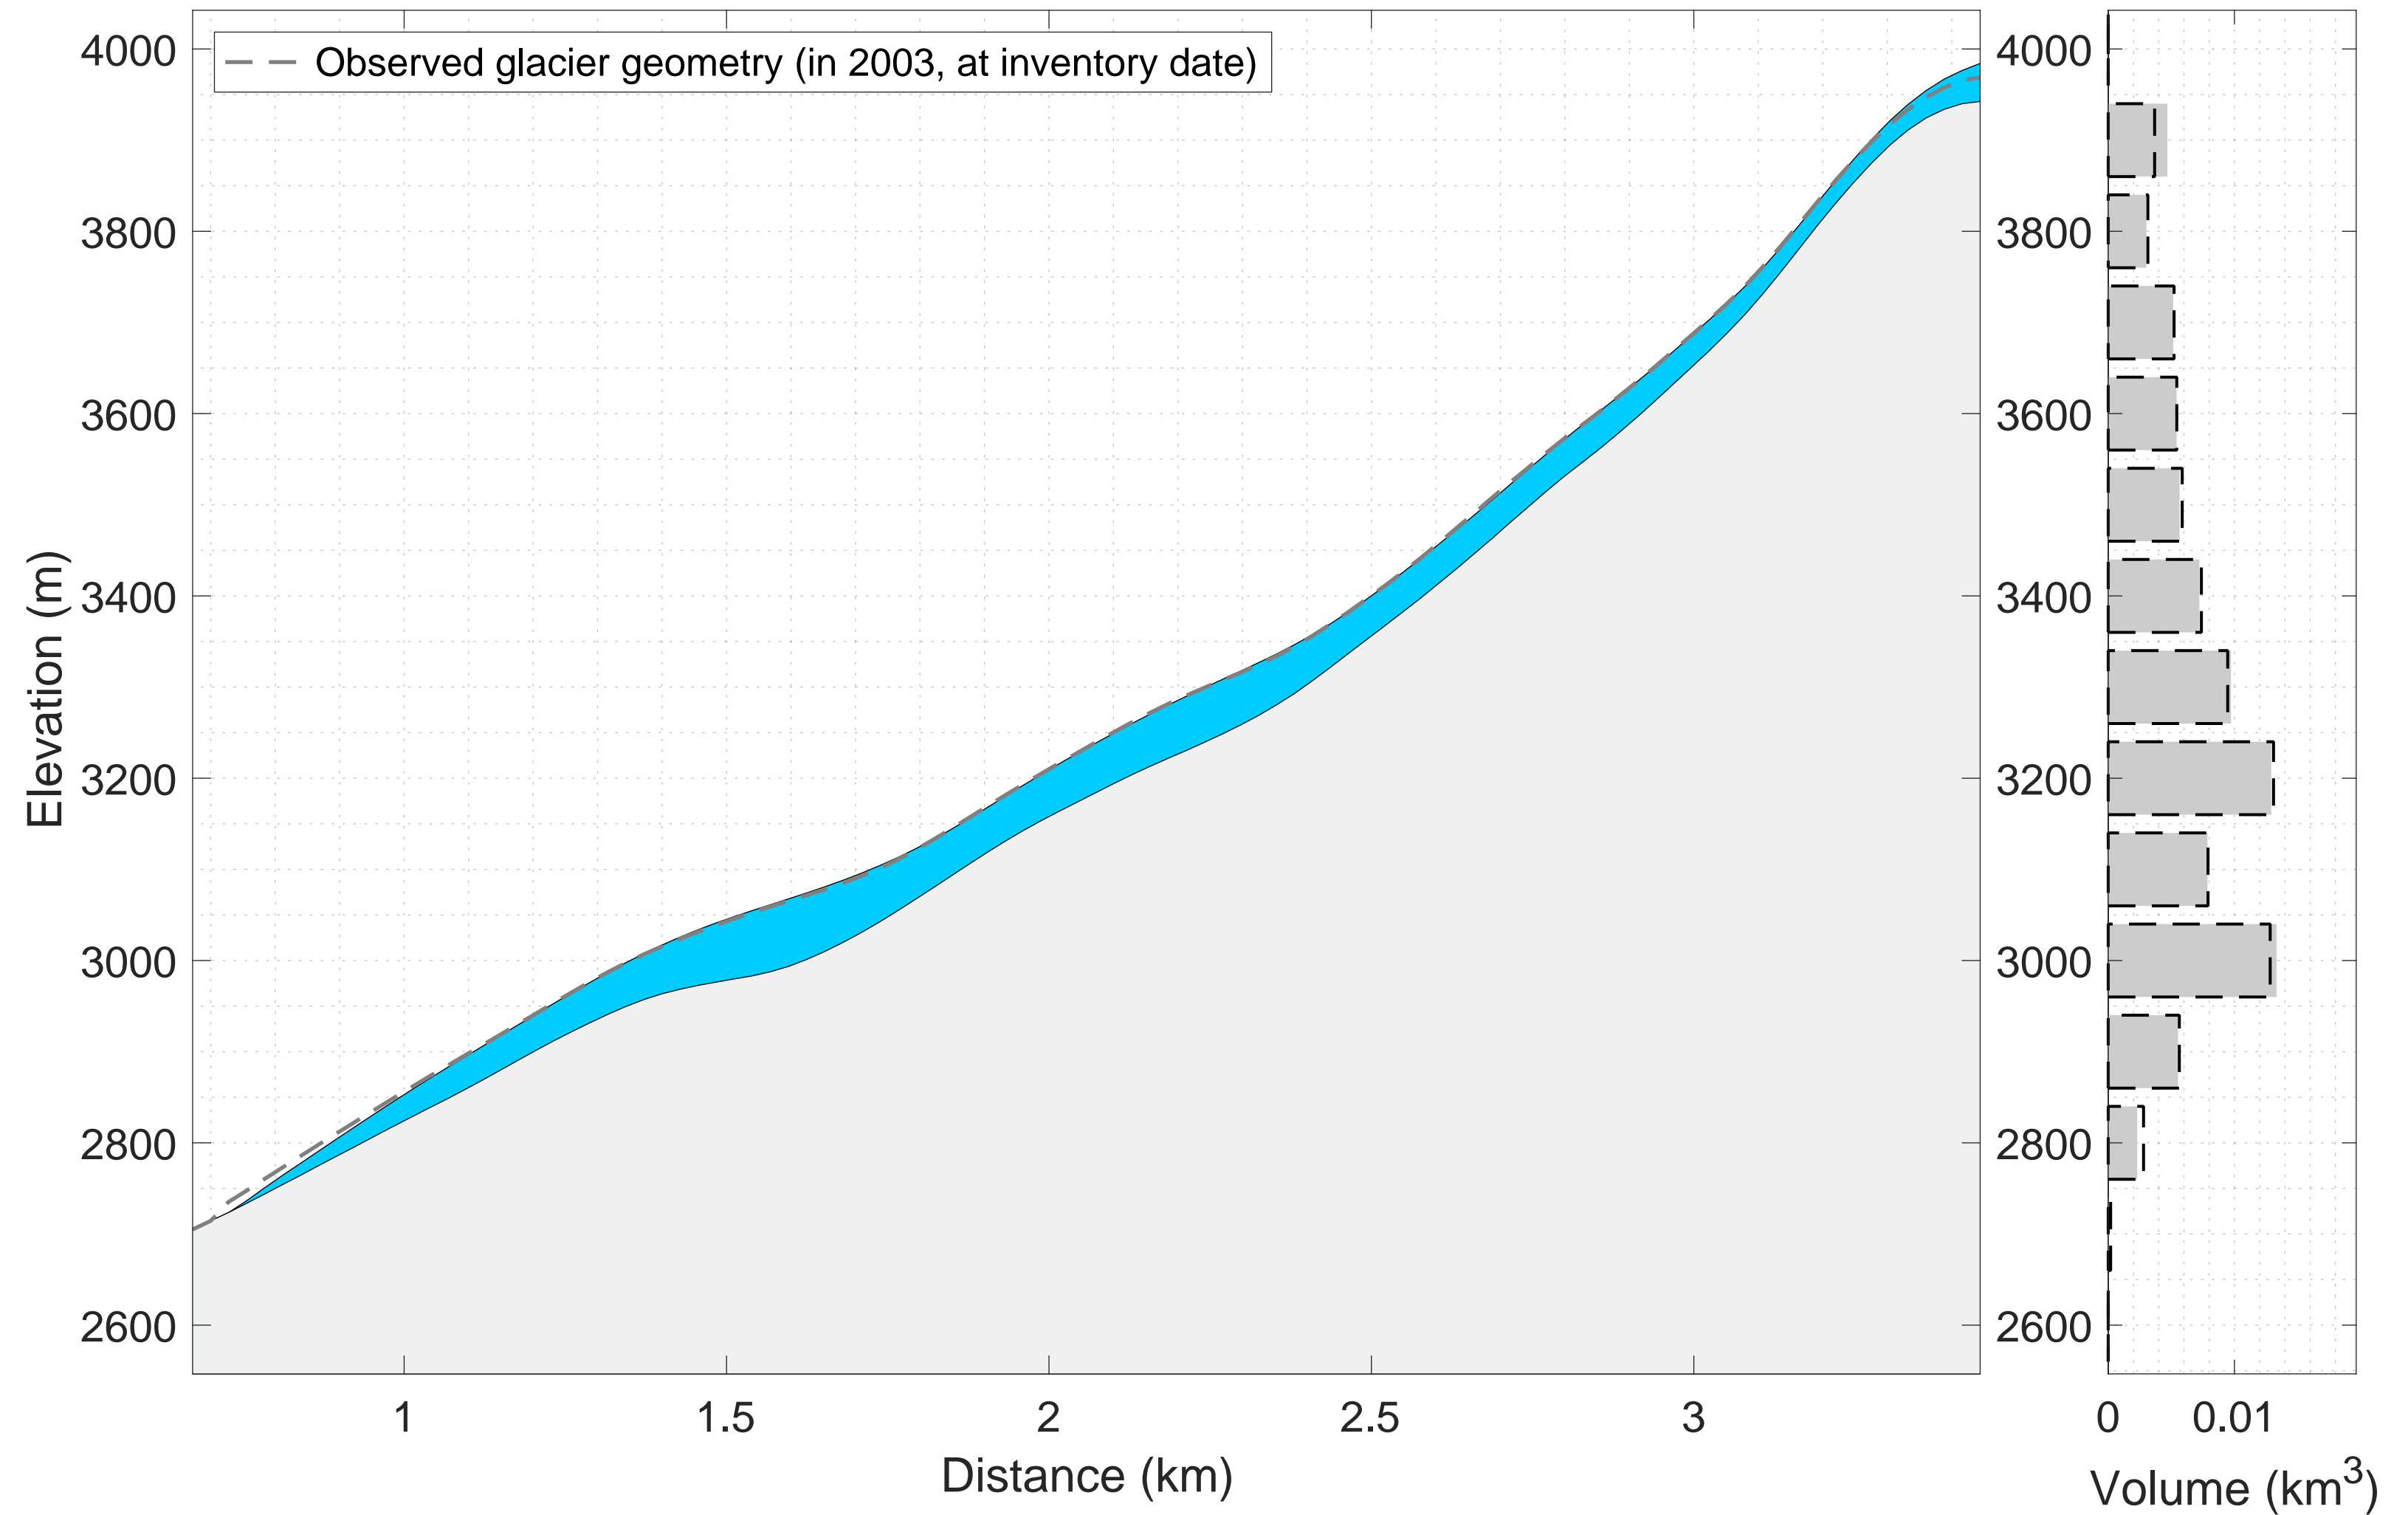

Supplement: Supplementary file 534 [file tc-13-1125-2019-supplement.zip]

**Modelled geometry (Glacier ID = 00895;  $A = 6.1375\text{e-}17 \text{ Pa}^{-3} \text{ a}^{-1}$ ;  $dx = 11 \text{ m}$ )**

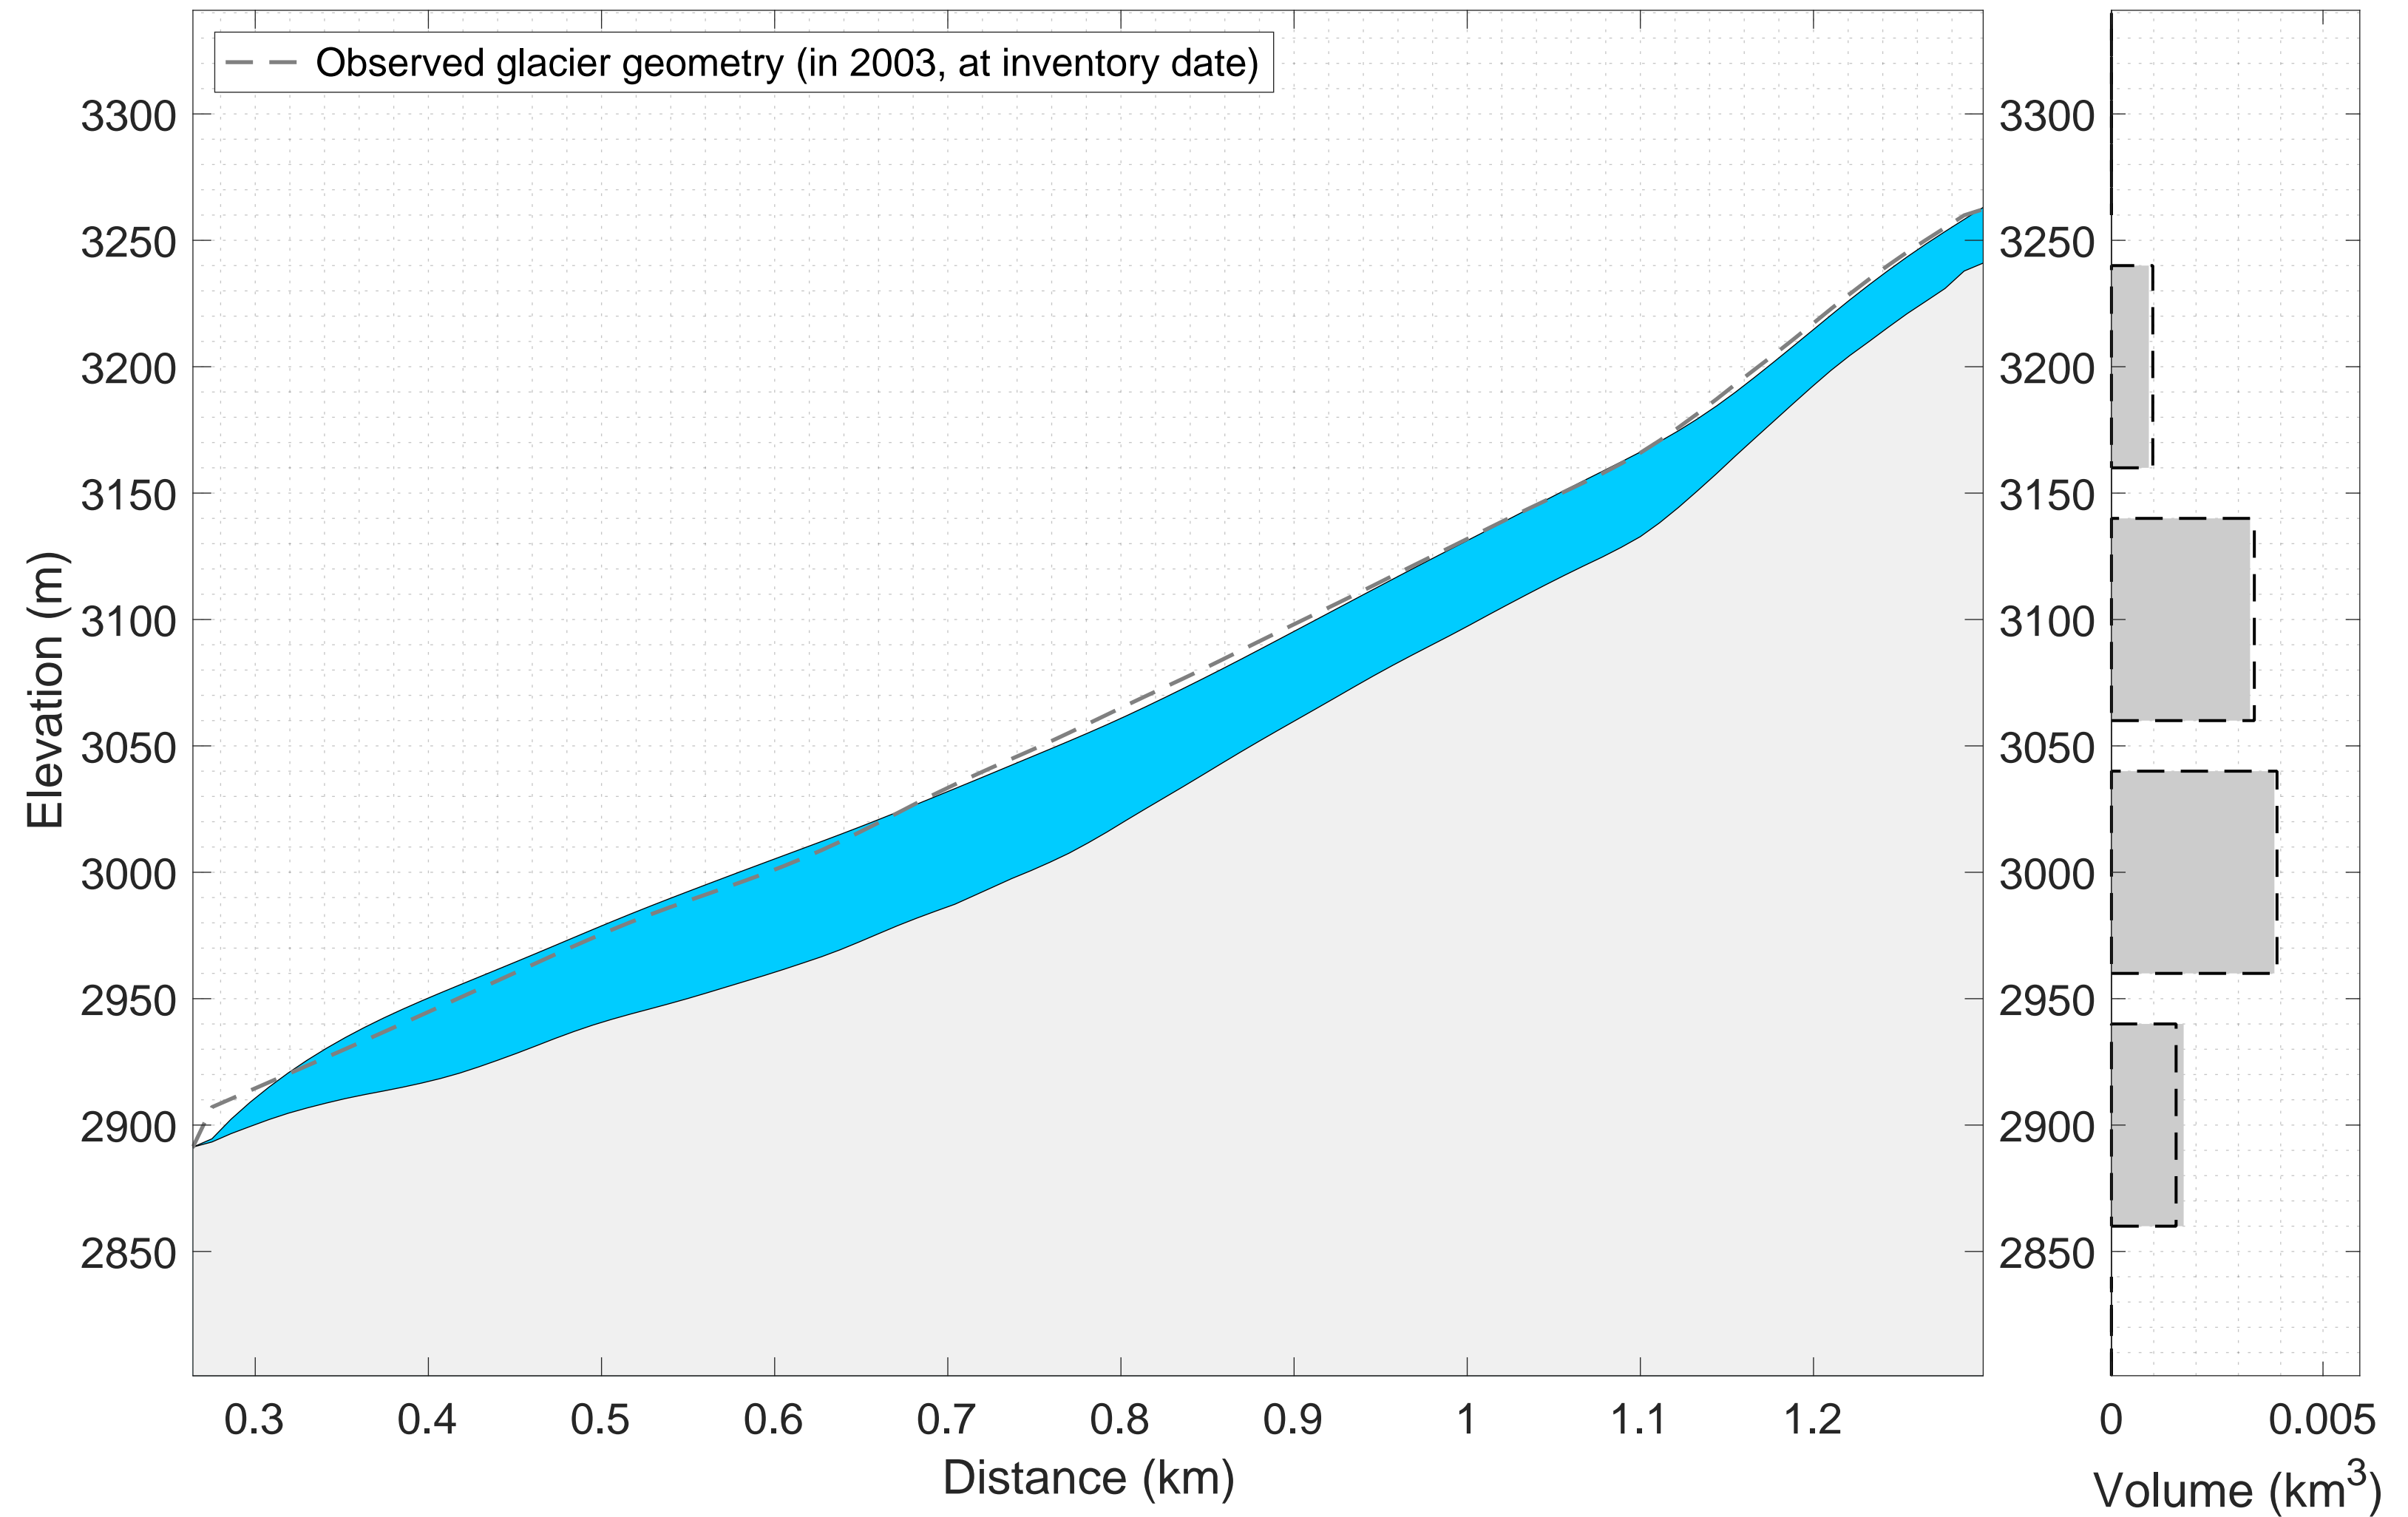

Supplement: Supplementary file 535 [file tc-13-1125-2019-supplement.zip]

**Modelled geometry (Glacier ID = 00204;  $A = 1.6549\text{e-}16 \text{ Pa}^{-3} \text{ a}^{-1}$ ;  $dx = 12 \text{ m}$ )**

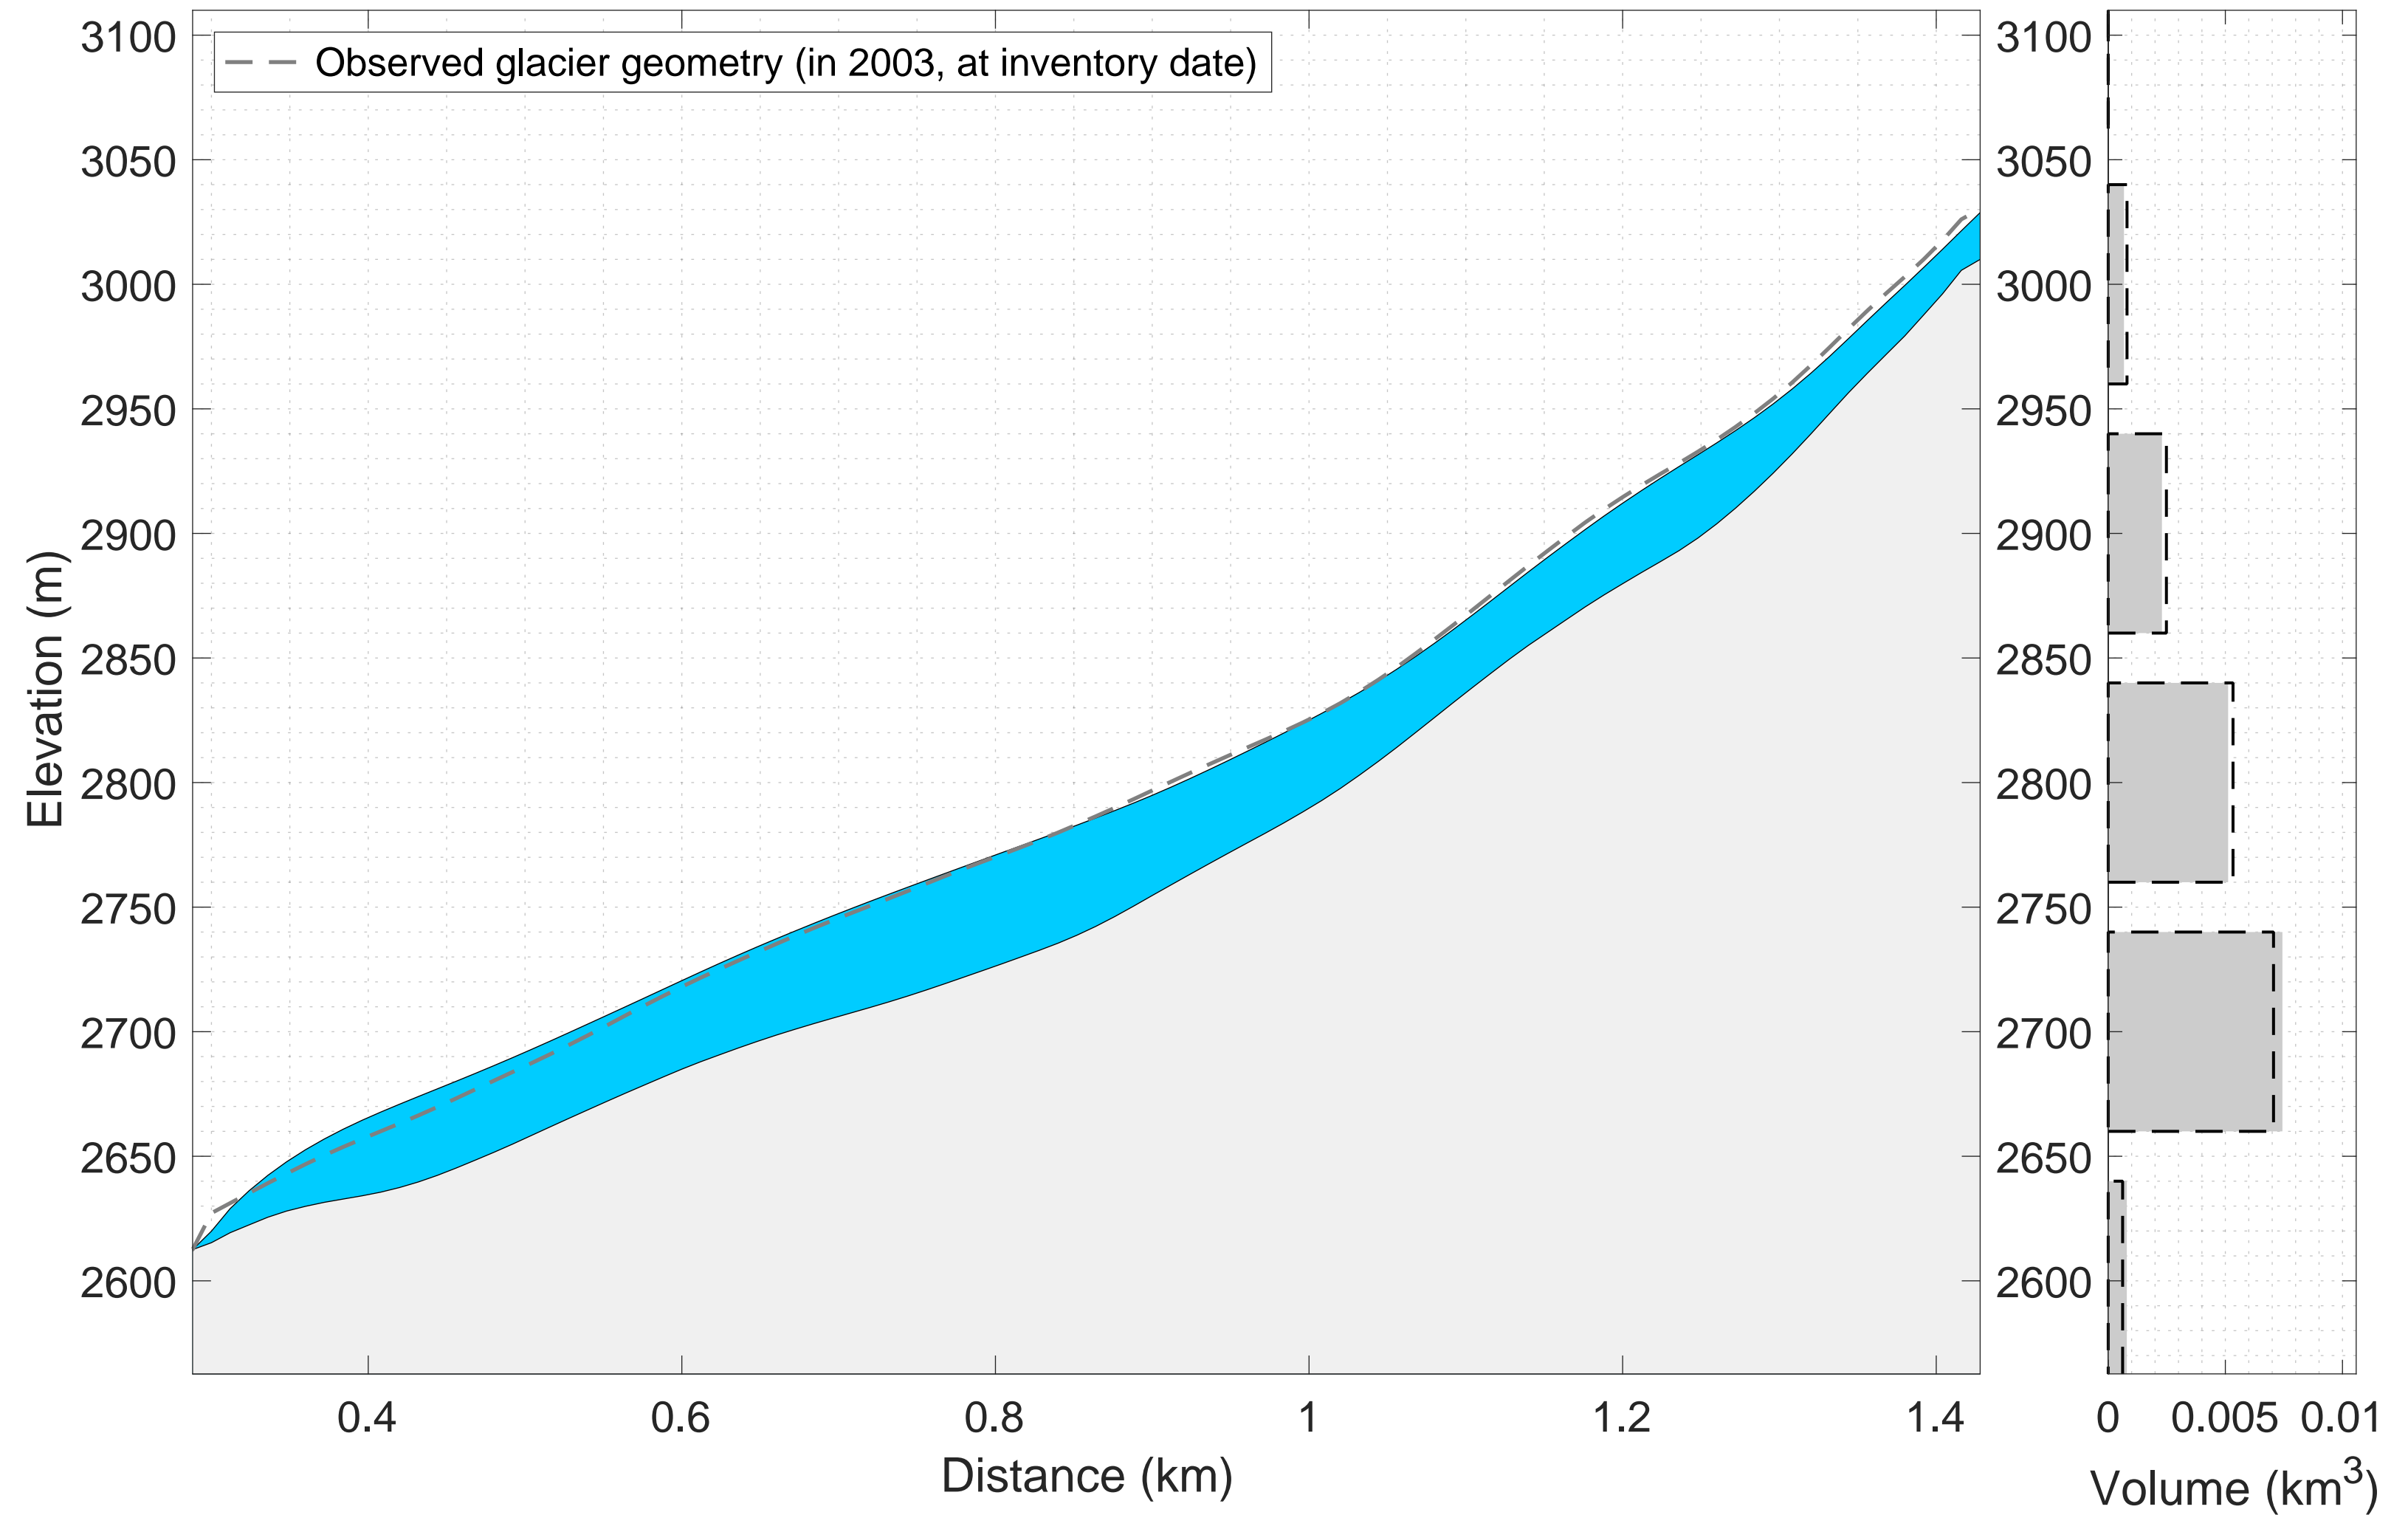

Supplement: Supplementary file 536 [file tc-13-1125-2019-supplement.zip]

**Modelled geometry (Glacier ID = 02679;  $A = 8.522\text{e-}18 \text{ Pa}^{-3} \text{ a}^{-1}$ ;  $dx = 34 \text{ m}$ )**

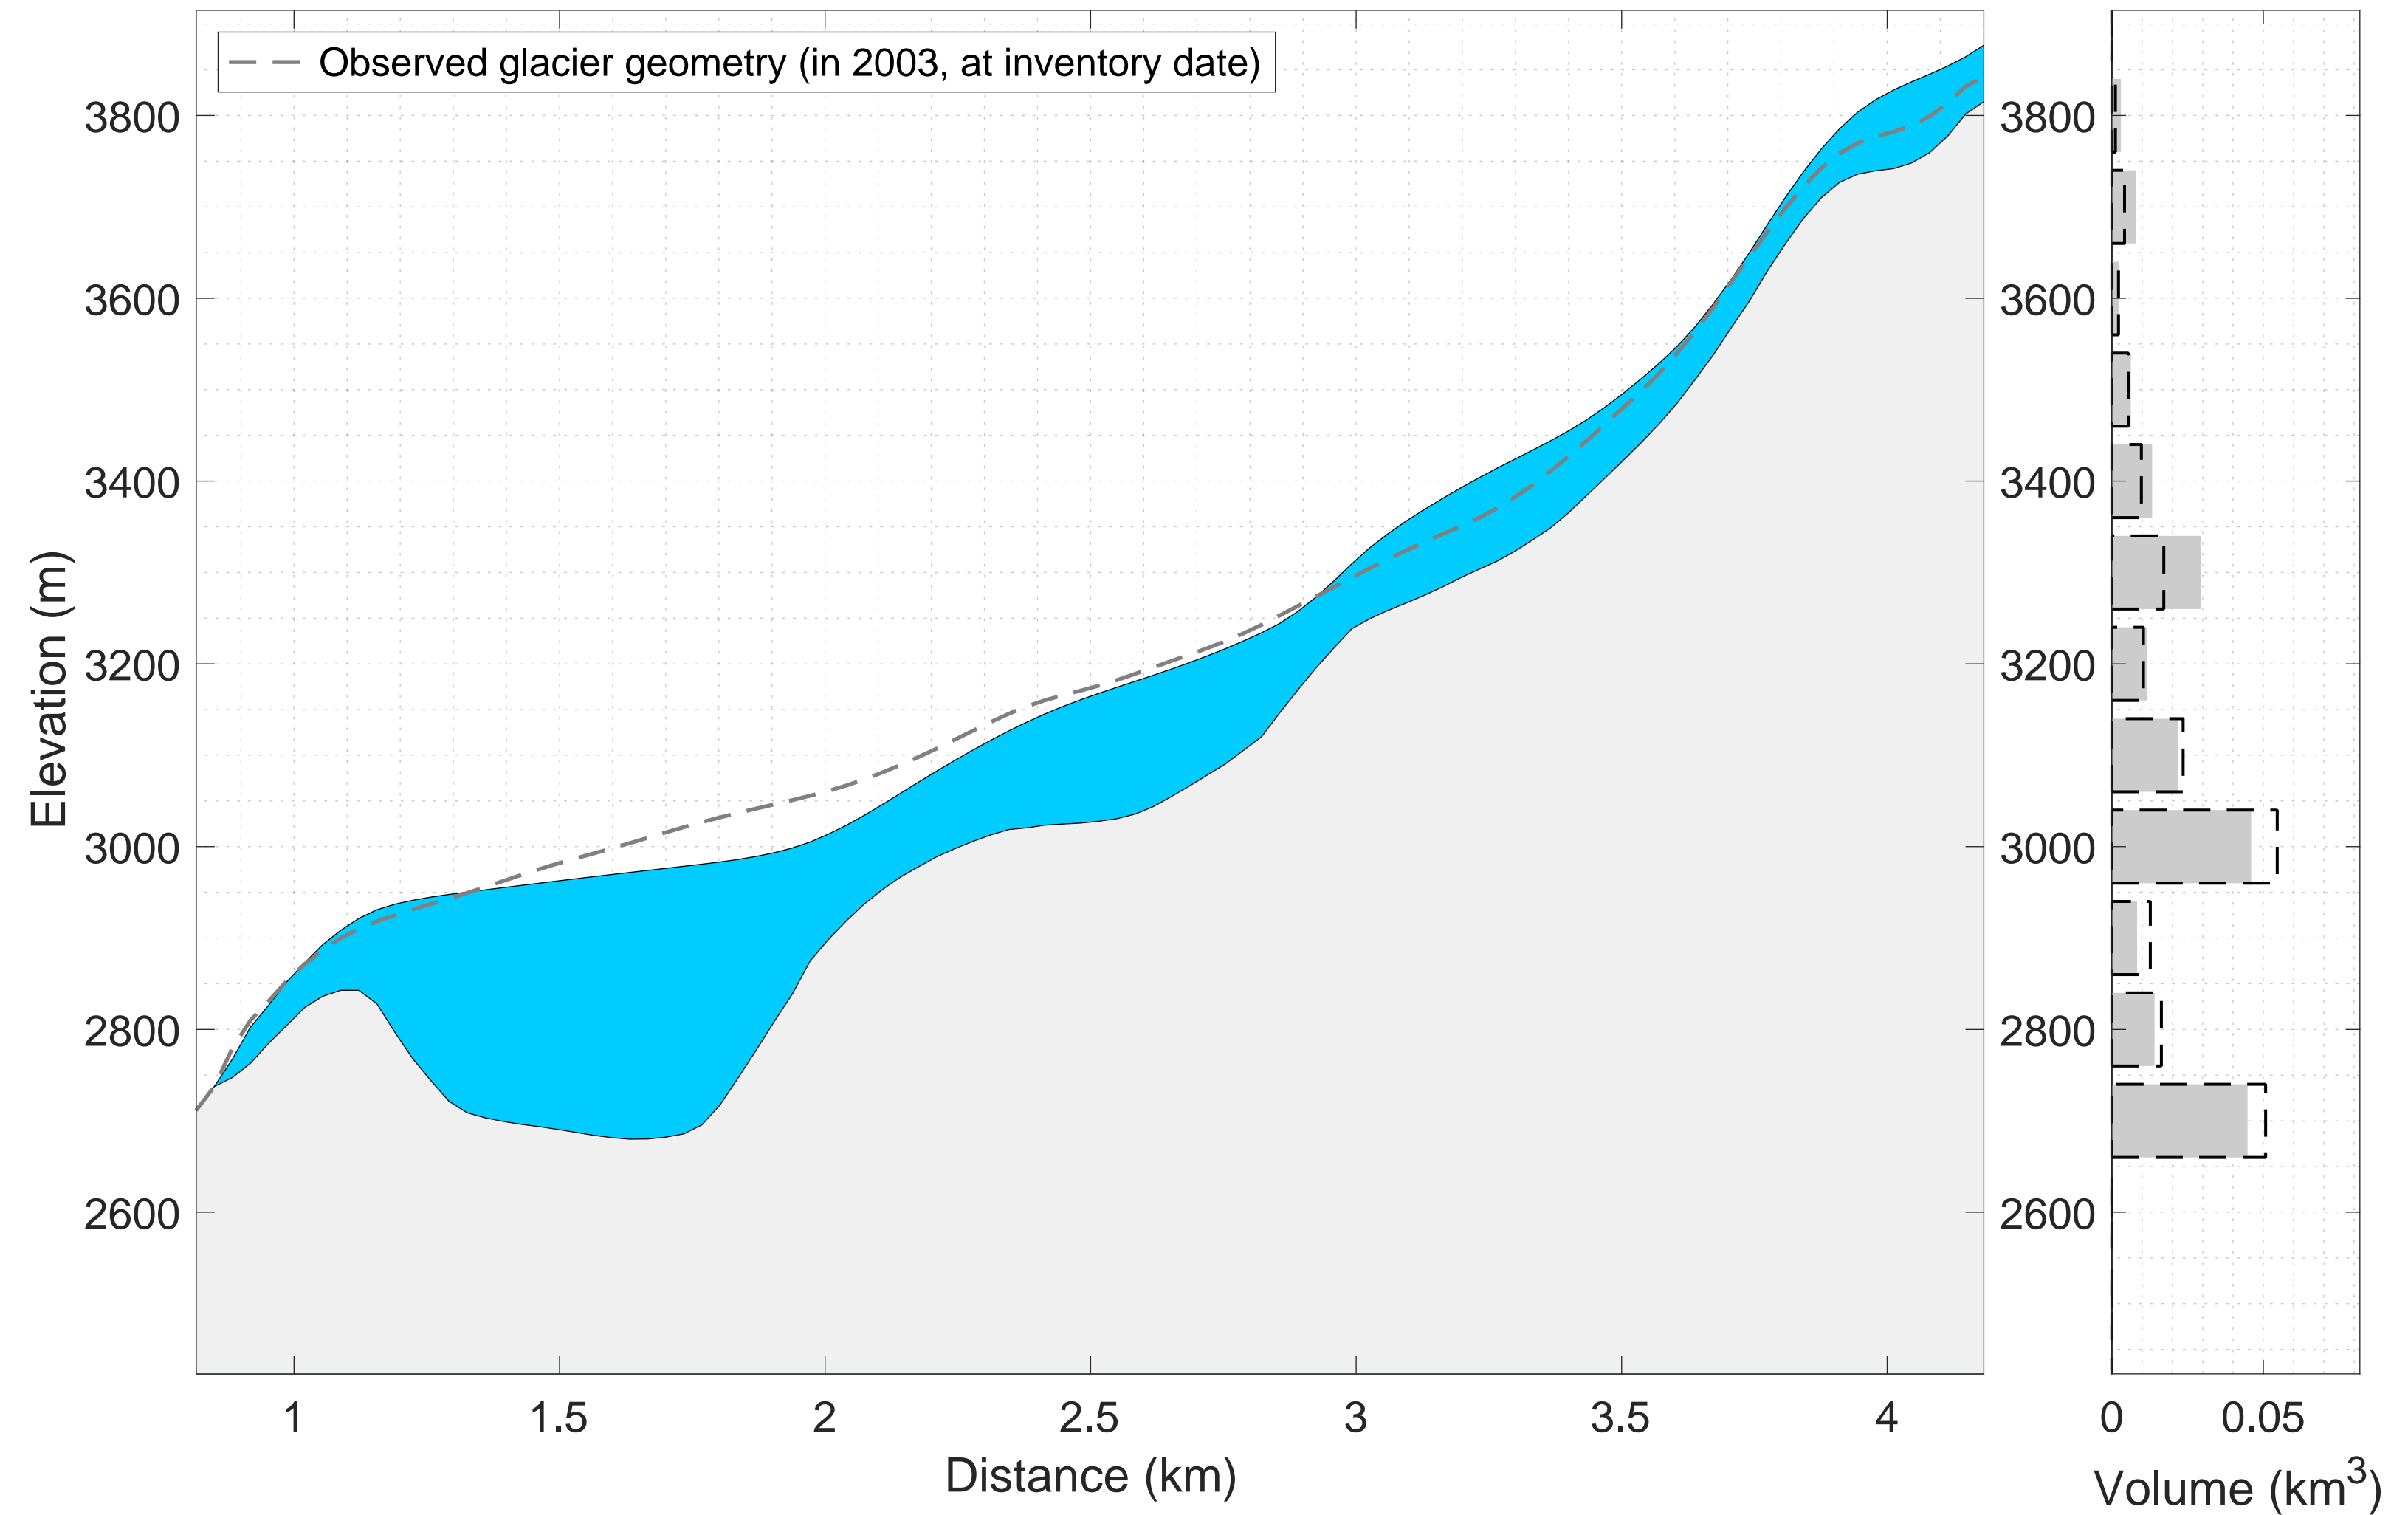

Supplement: Supplementary file 537 [file tc-13-1125-2019-supplement.zip]

**Modelled geometry (Glacier ID = 00223;  $A = 1.3338\text{e-}16 \text{ Pa}^{-3} \text{ a}^{-1}$ ;  $dx = 18 \text{ m}$ )**

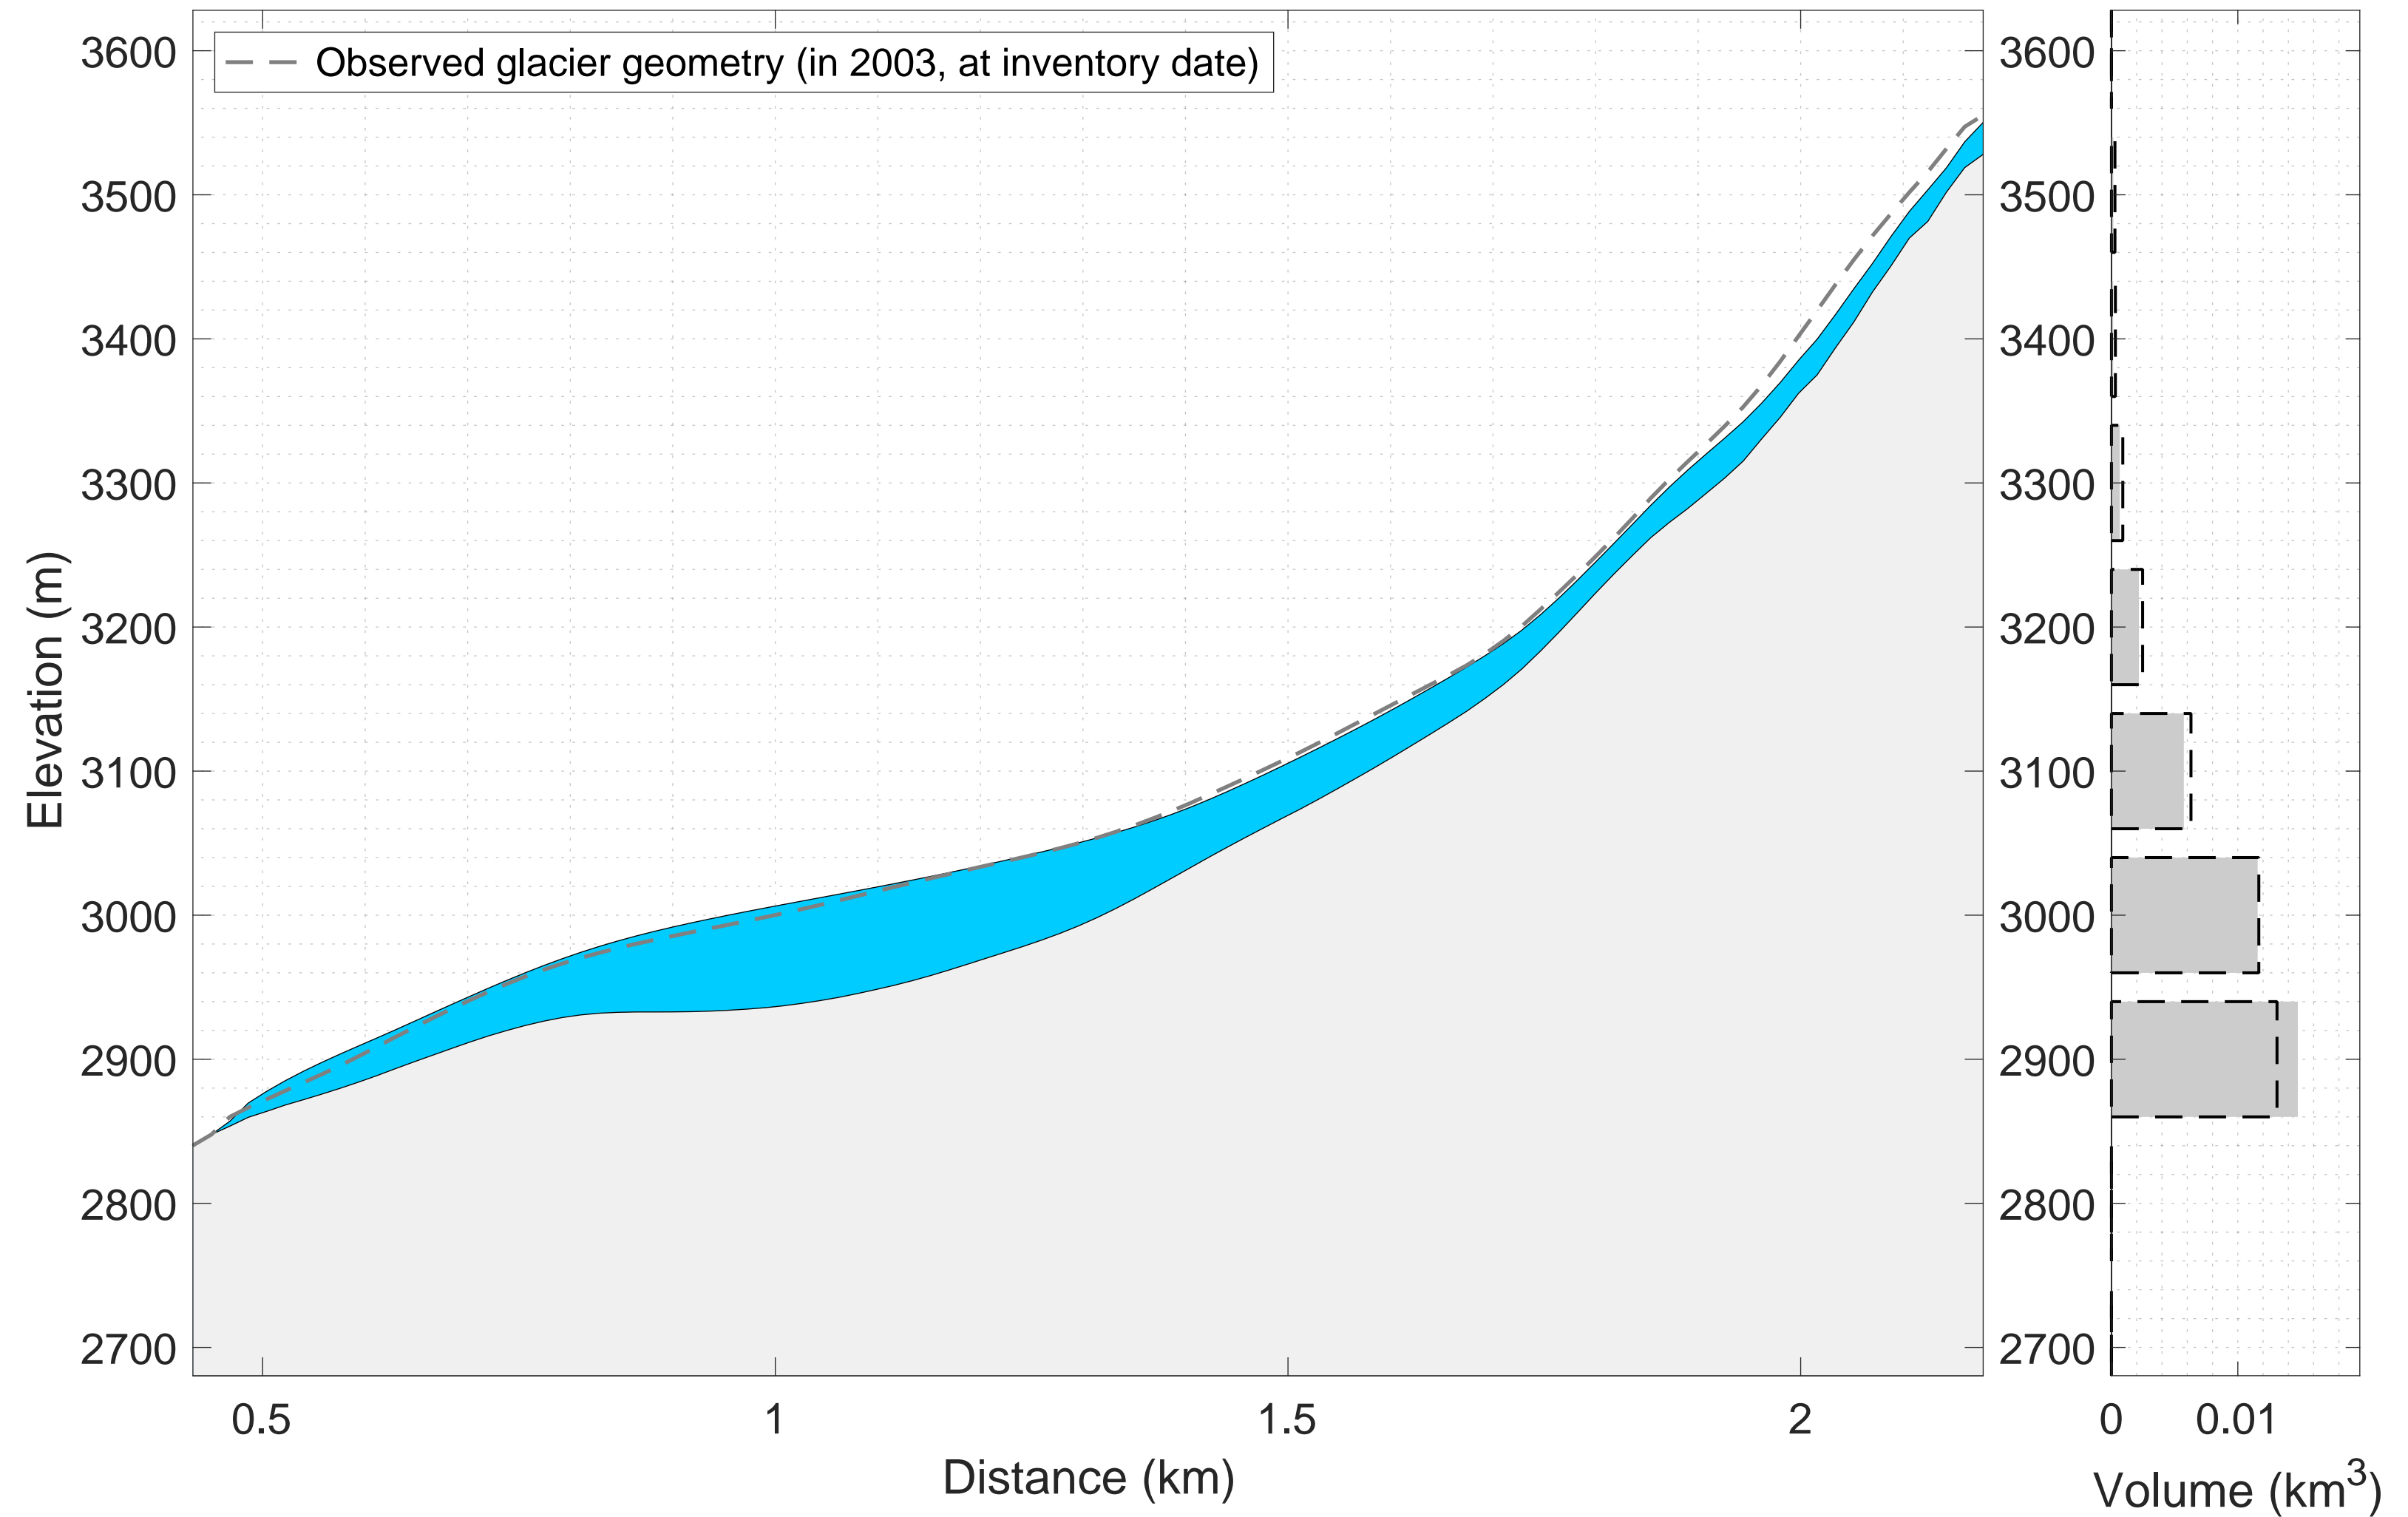

Supplement: Supplementary file 538 [file tc-13-1125-2019-supplement.zip]

**Modelled geometry (Glacier ID = 03651;  $A = 1.814\text{e-}16 \text{ Pa}^{-3} \text{ a}^{-1}$ ;  $dx = 59 \text{ m}$ )**

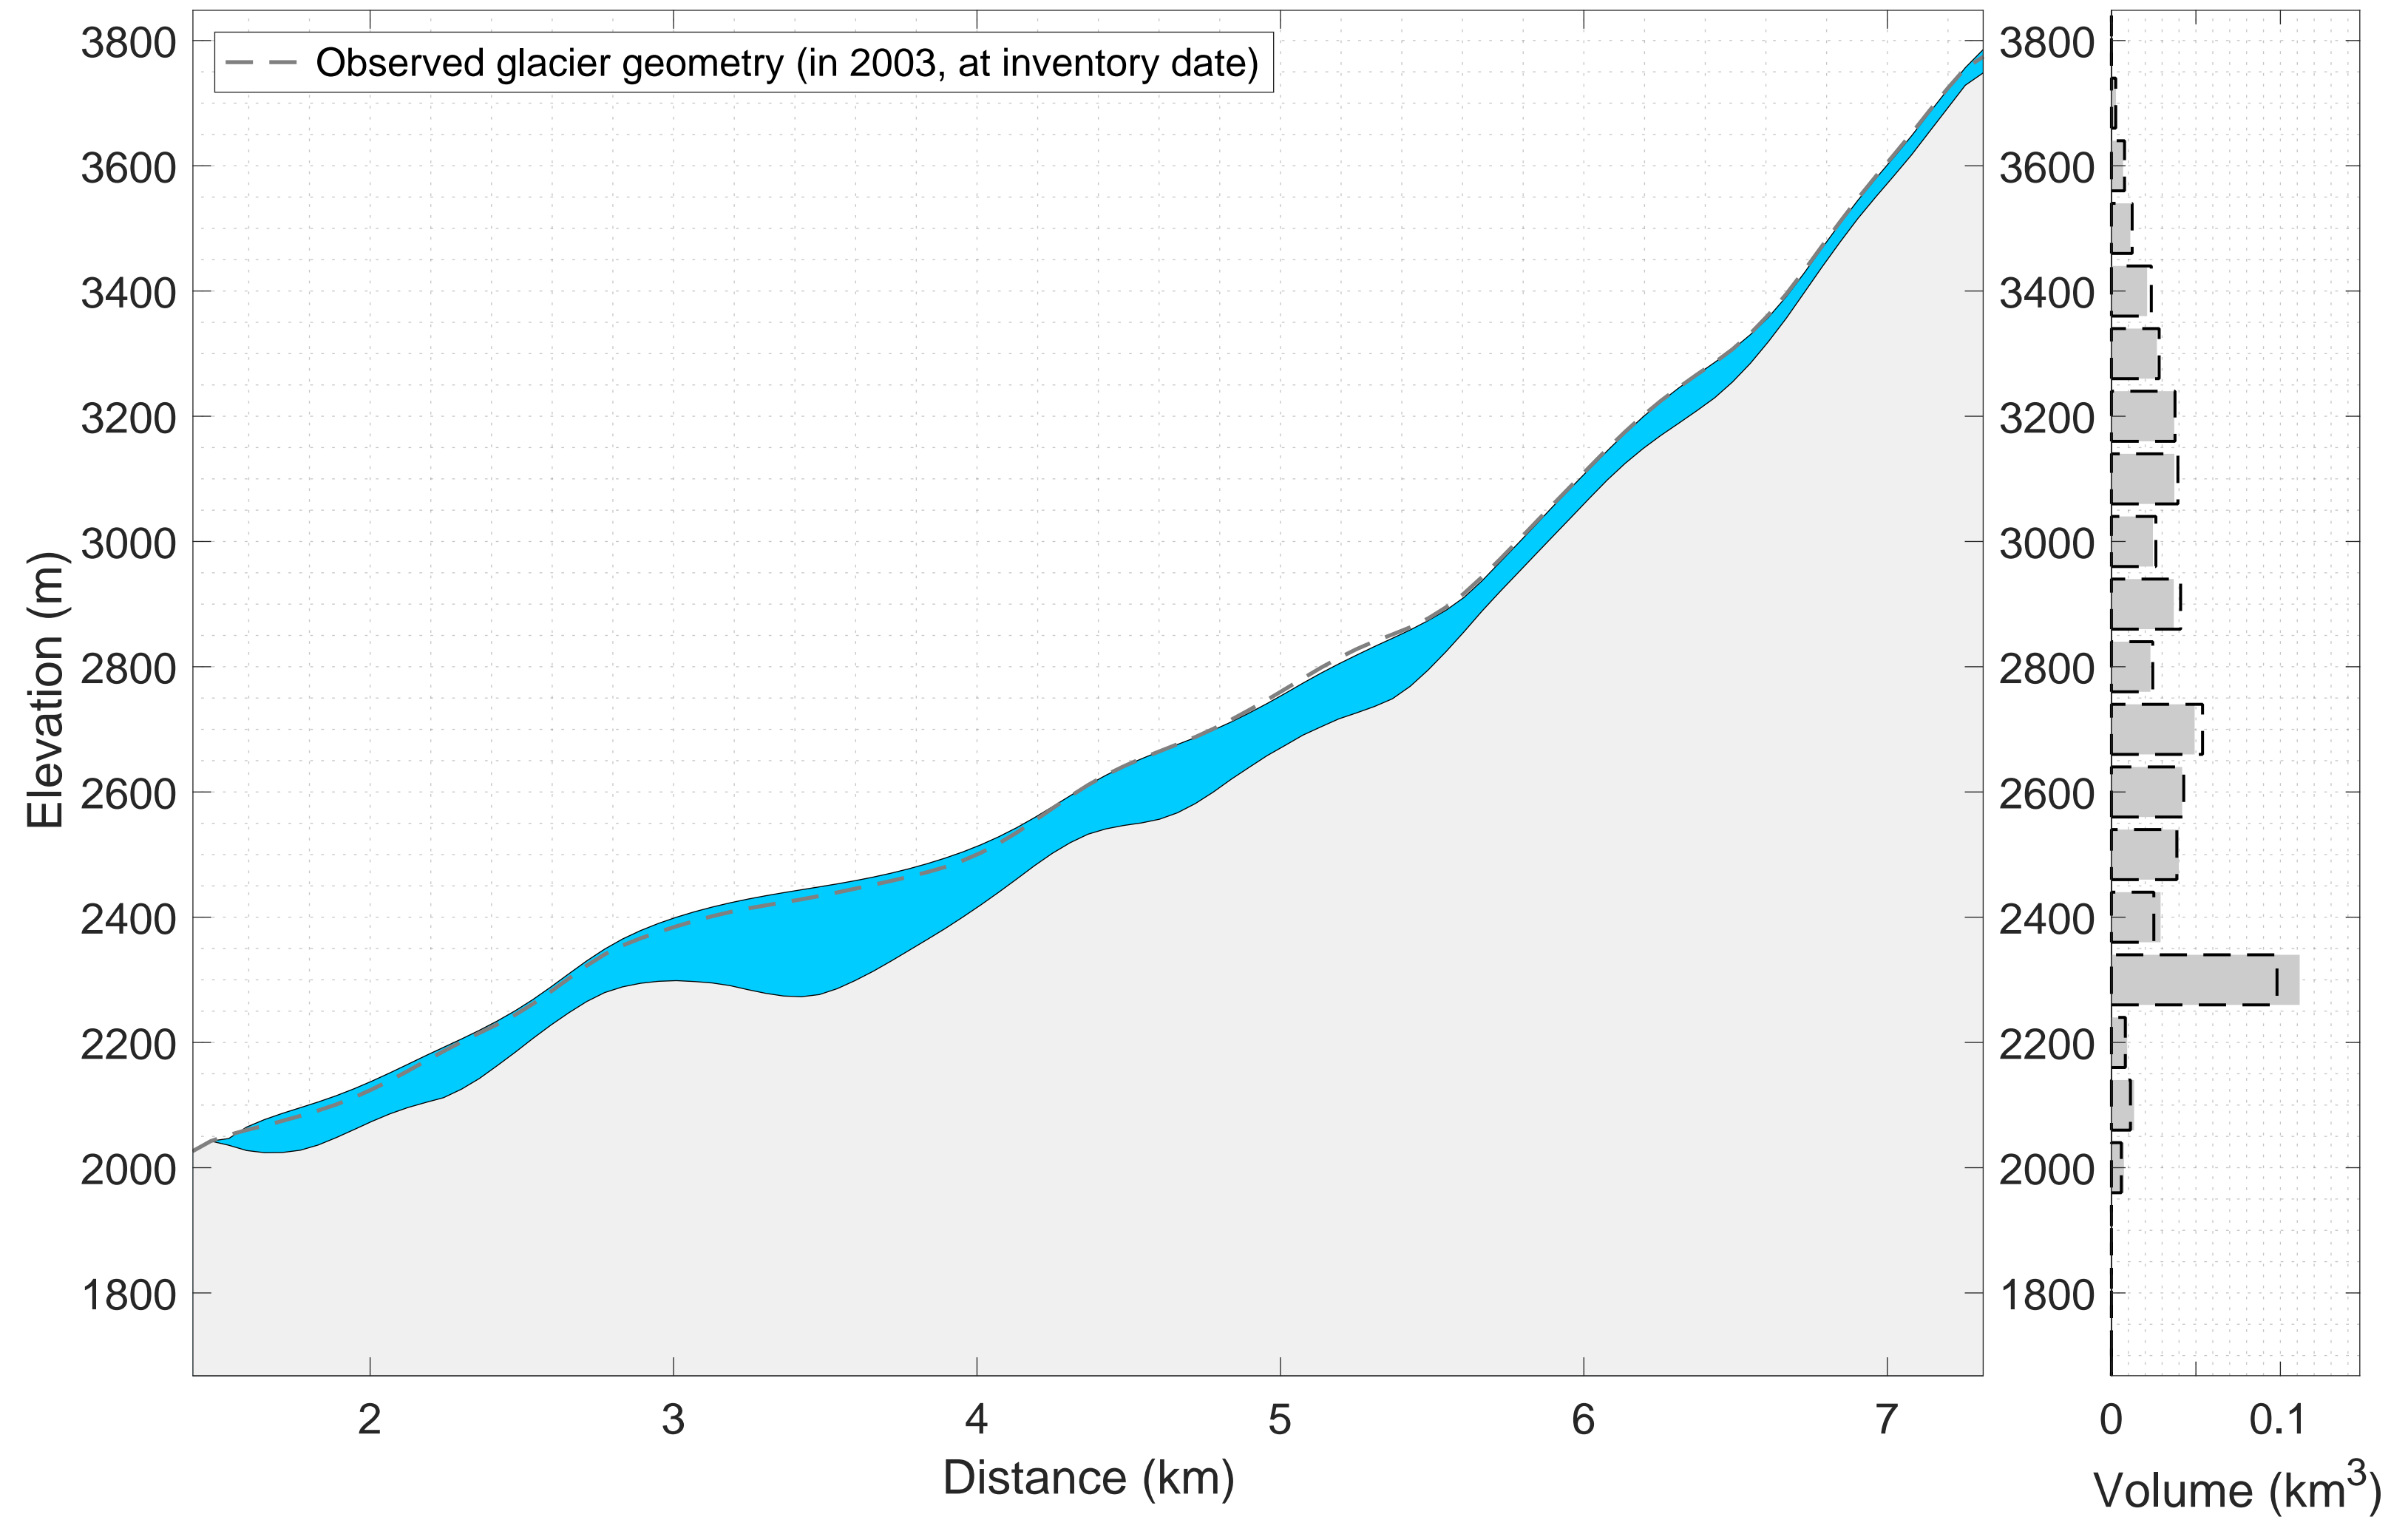

Supplement: Supplementary file 539 [file tc-13-1125-2019-supplement.zip]

**Modelled geometry (Glacier ID = 00362;  $A = 7.5088\text{e-}17 \text{ Pa}^{-3} \text{ a}^{-1}$ ;  $dx = 12 \text{ m}$ )**

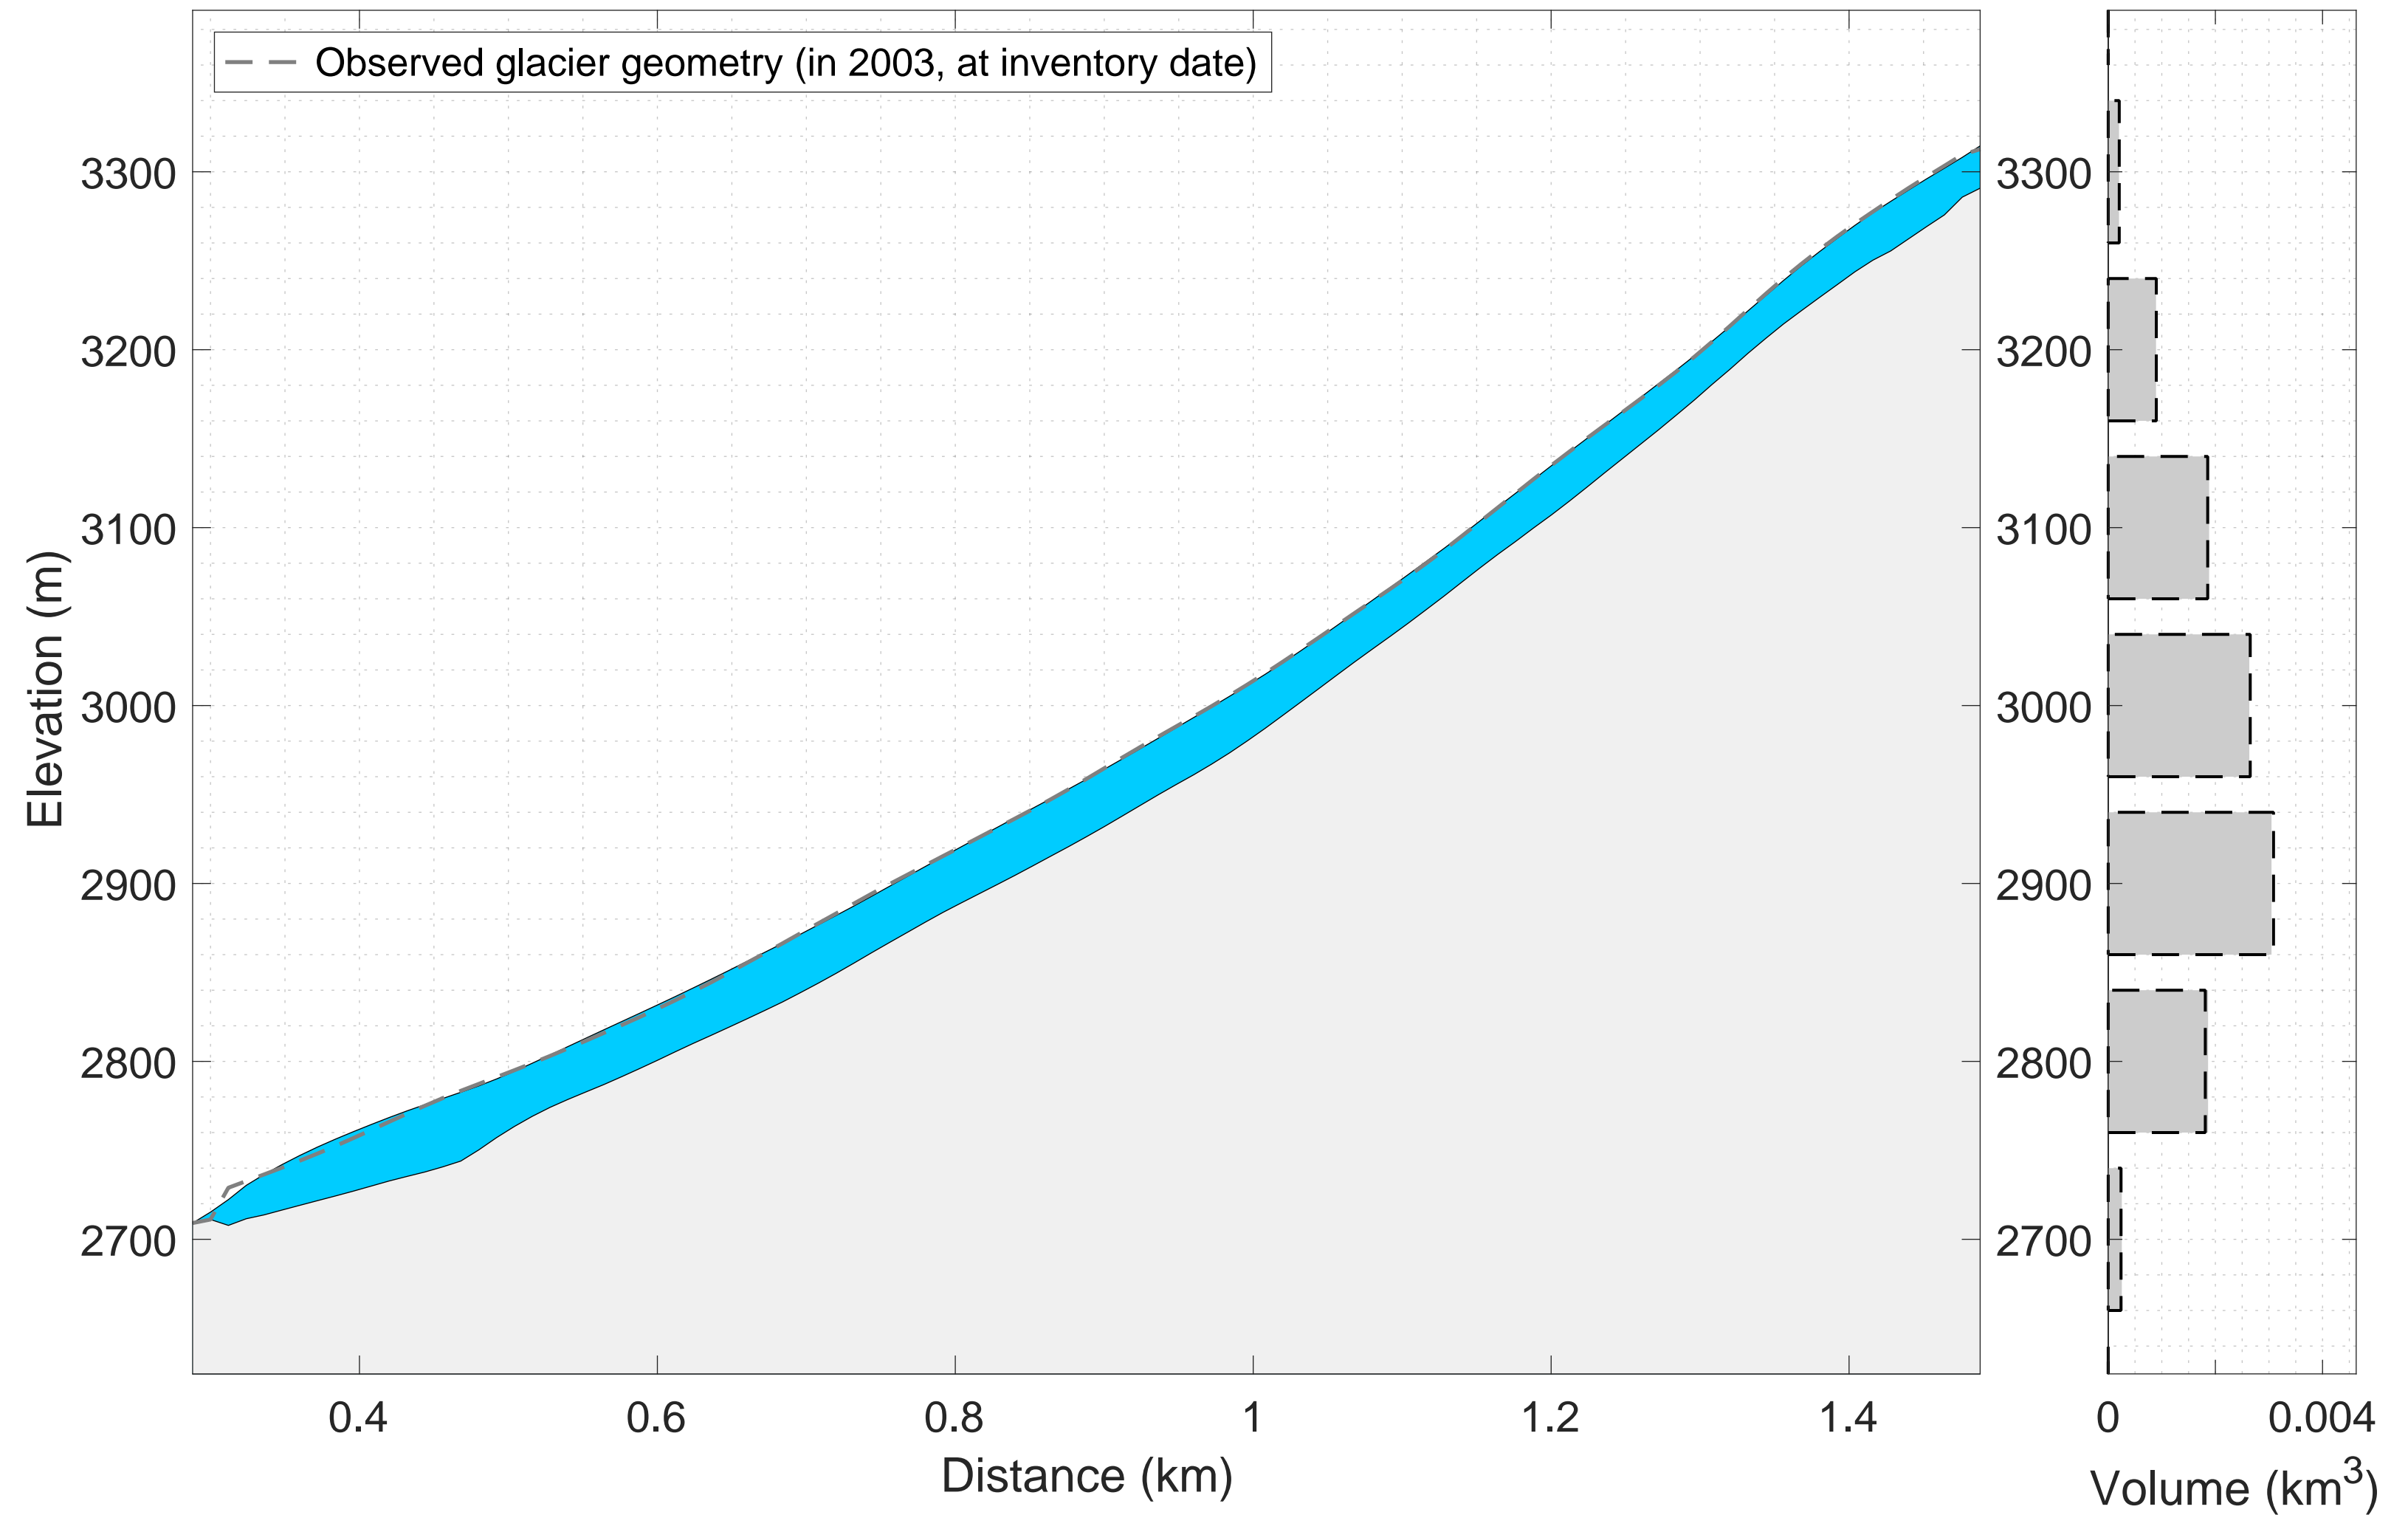

Supplement: Supplementary file 540 [file tc-13-1125-2019-supplement.zip]

**Modelled geometry (Glacier ID = 00078;  $A = 7.6178\text{e-}17 \text{ Pa}^{-3} \text{ a}^{-1}$ ;  $dx = 13 \text{ m}$ )**

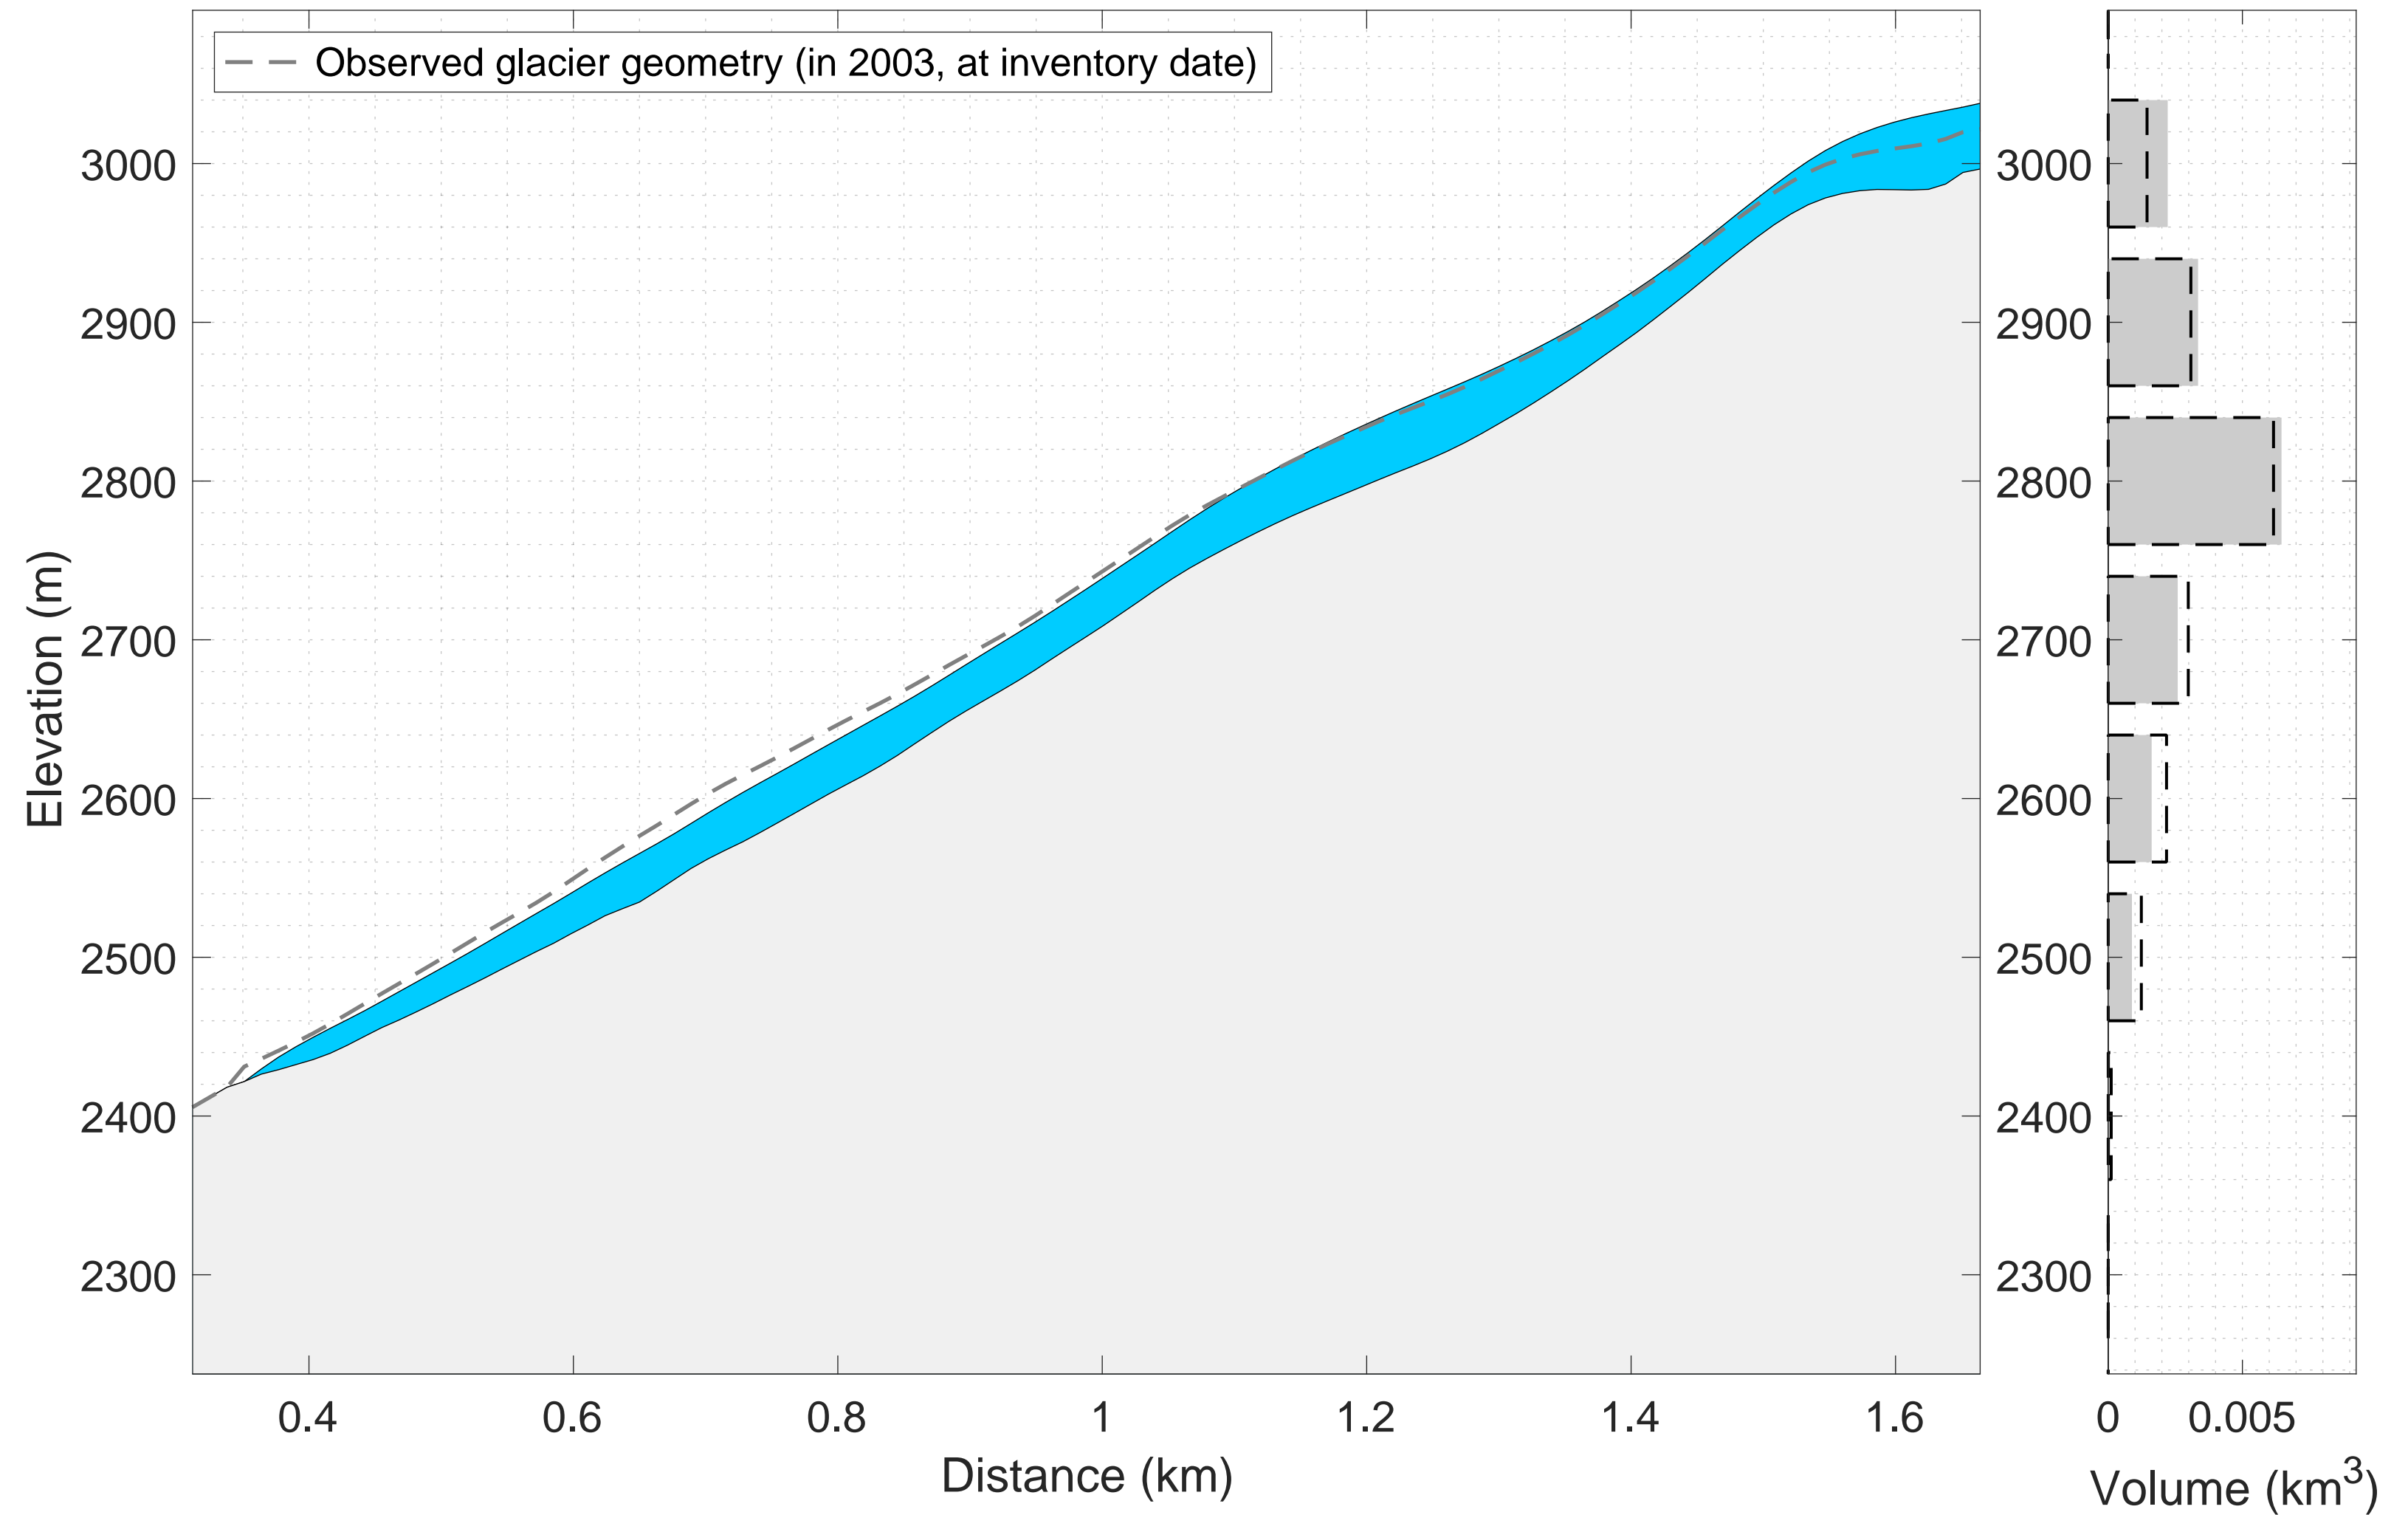

Supplement: Supplementary file 541 [file tc-13-1125-2019-supplement.zip]

**Modelled geometry (Glacier ID = 02691;  $A = 1.3139\text{e-}16 \text{ Pa}^{-3} \text{ a}^{-1}$ ;  $dx = 14 \text{ m}$ )**

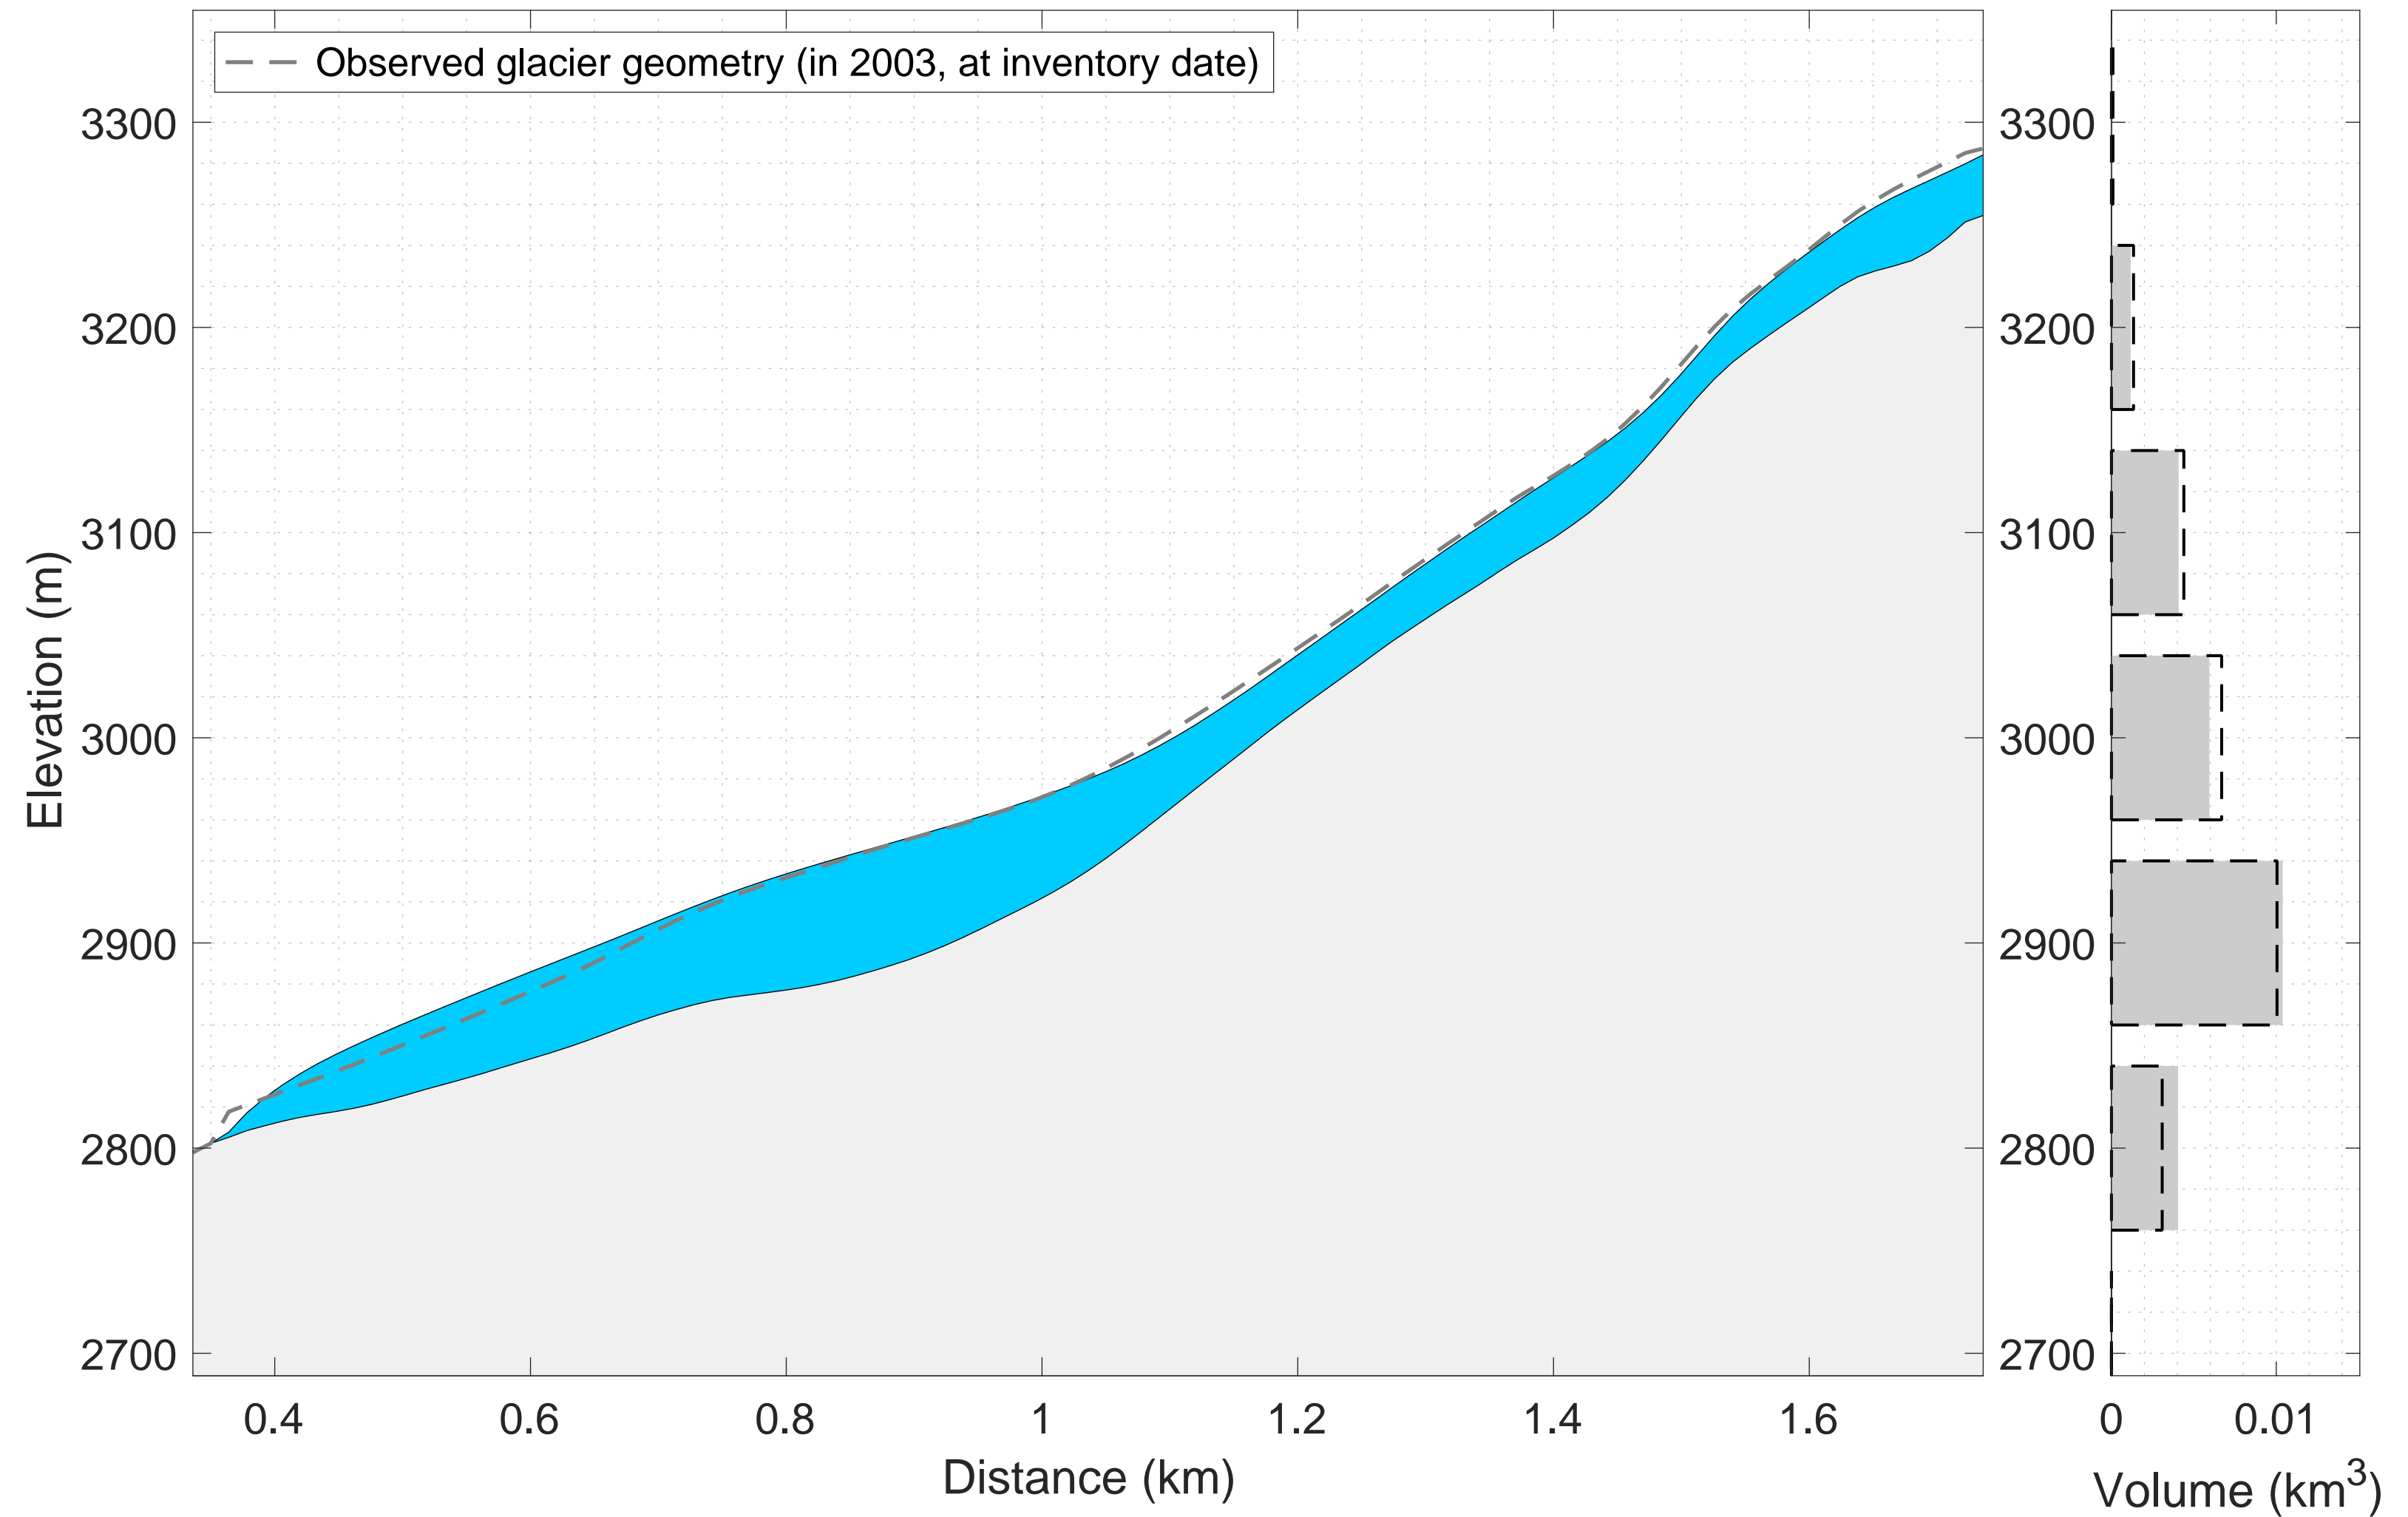

Supplement: Supplementary file 542 [file tc-13-1125-2019-supplement.zip]

**Modelled geometry (Glacier ID = 00338;  $A = 1.3478\text{e-}16 \text{ Pa}^{-3} \text{ a}^{-1}$ ;  $dx = 12 \text{ m}$ )**

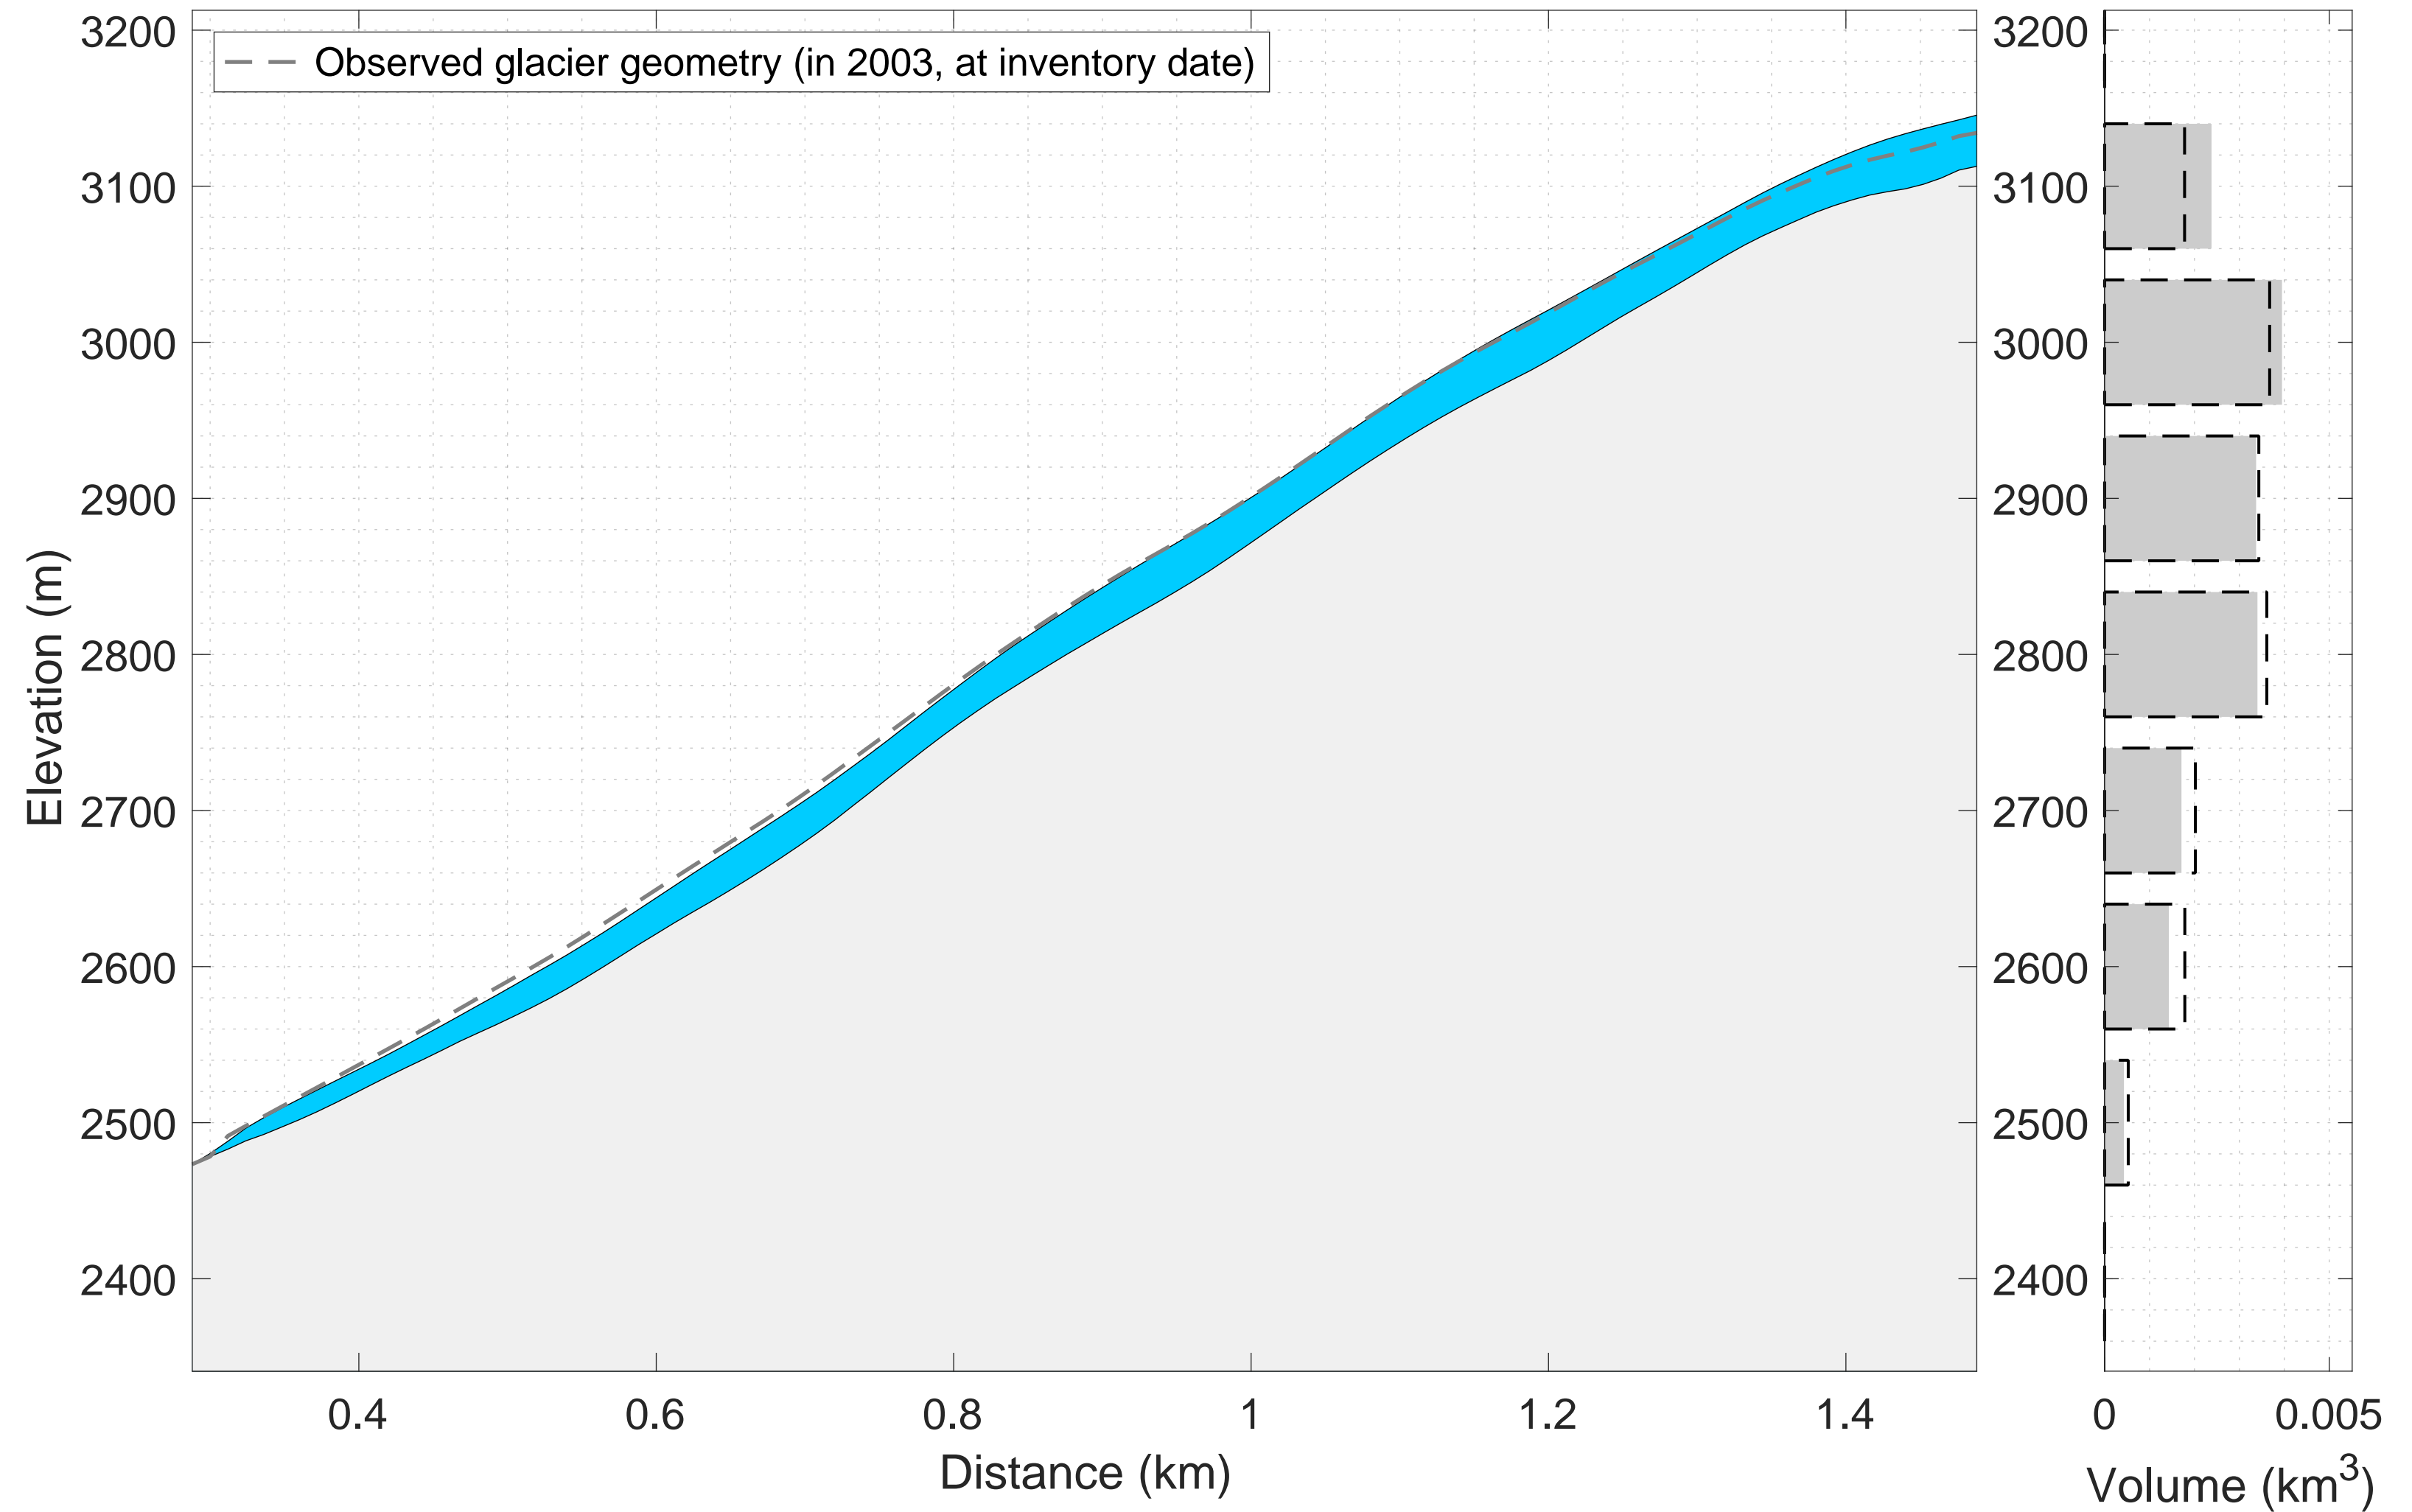

Supplement: Supplementary file 543 [file tc-13-1125-2019-supplement.zip]

**Modelled geometry (Glacier ID = 01817;  $A = 3.6368\text{e-}17 \text{ Pa}^{-3} \text{ a}^{-1}$ ;  $dx = 11 \text{ m}$ )**

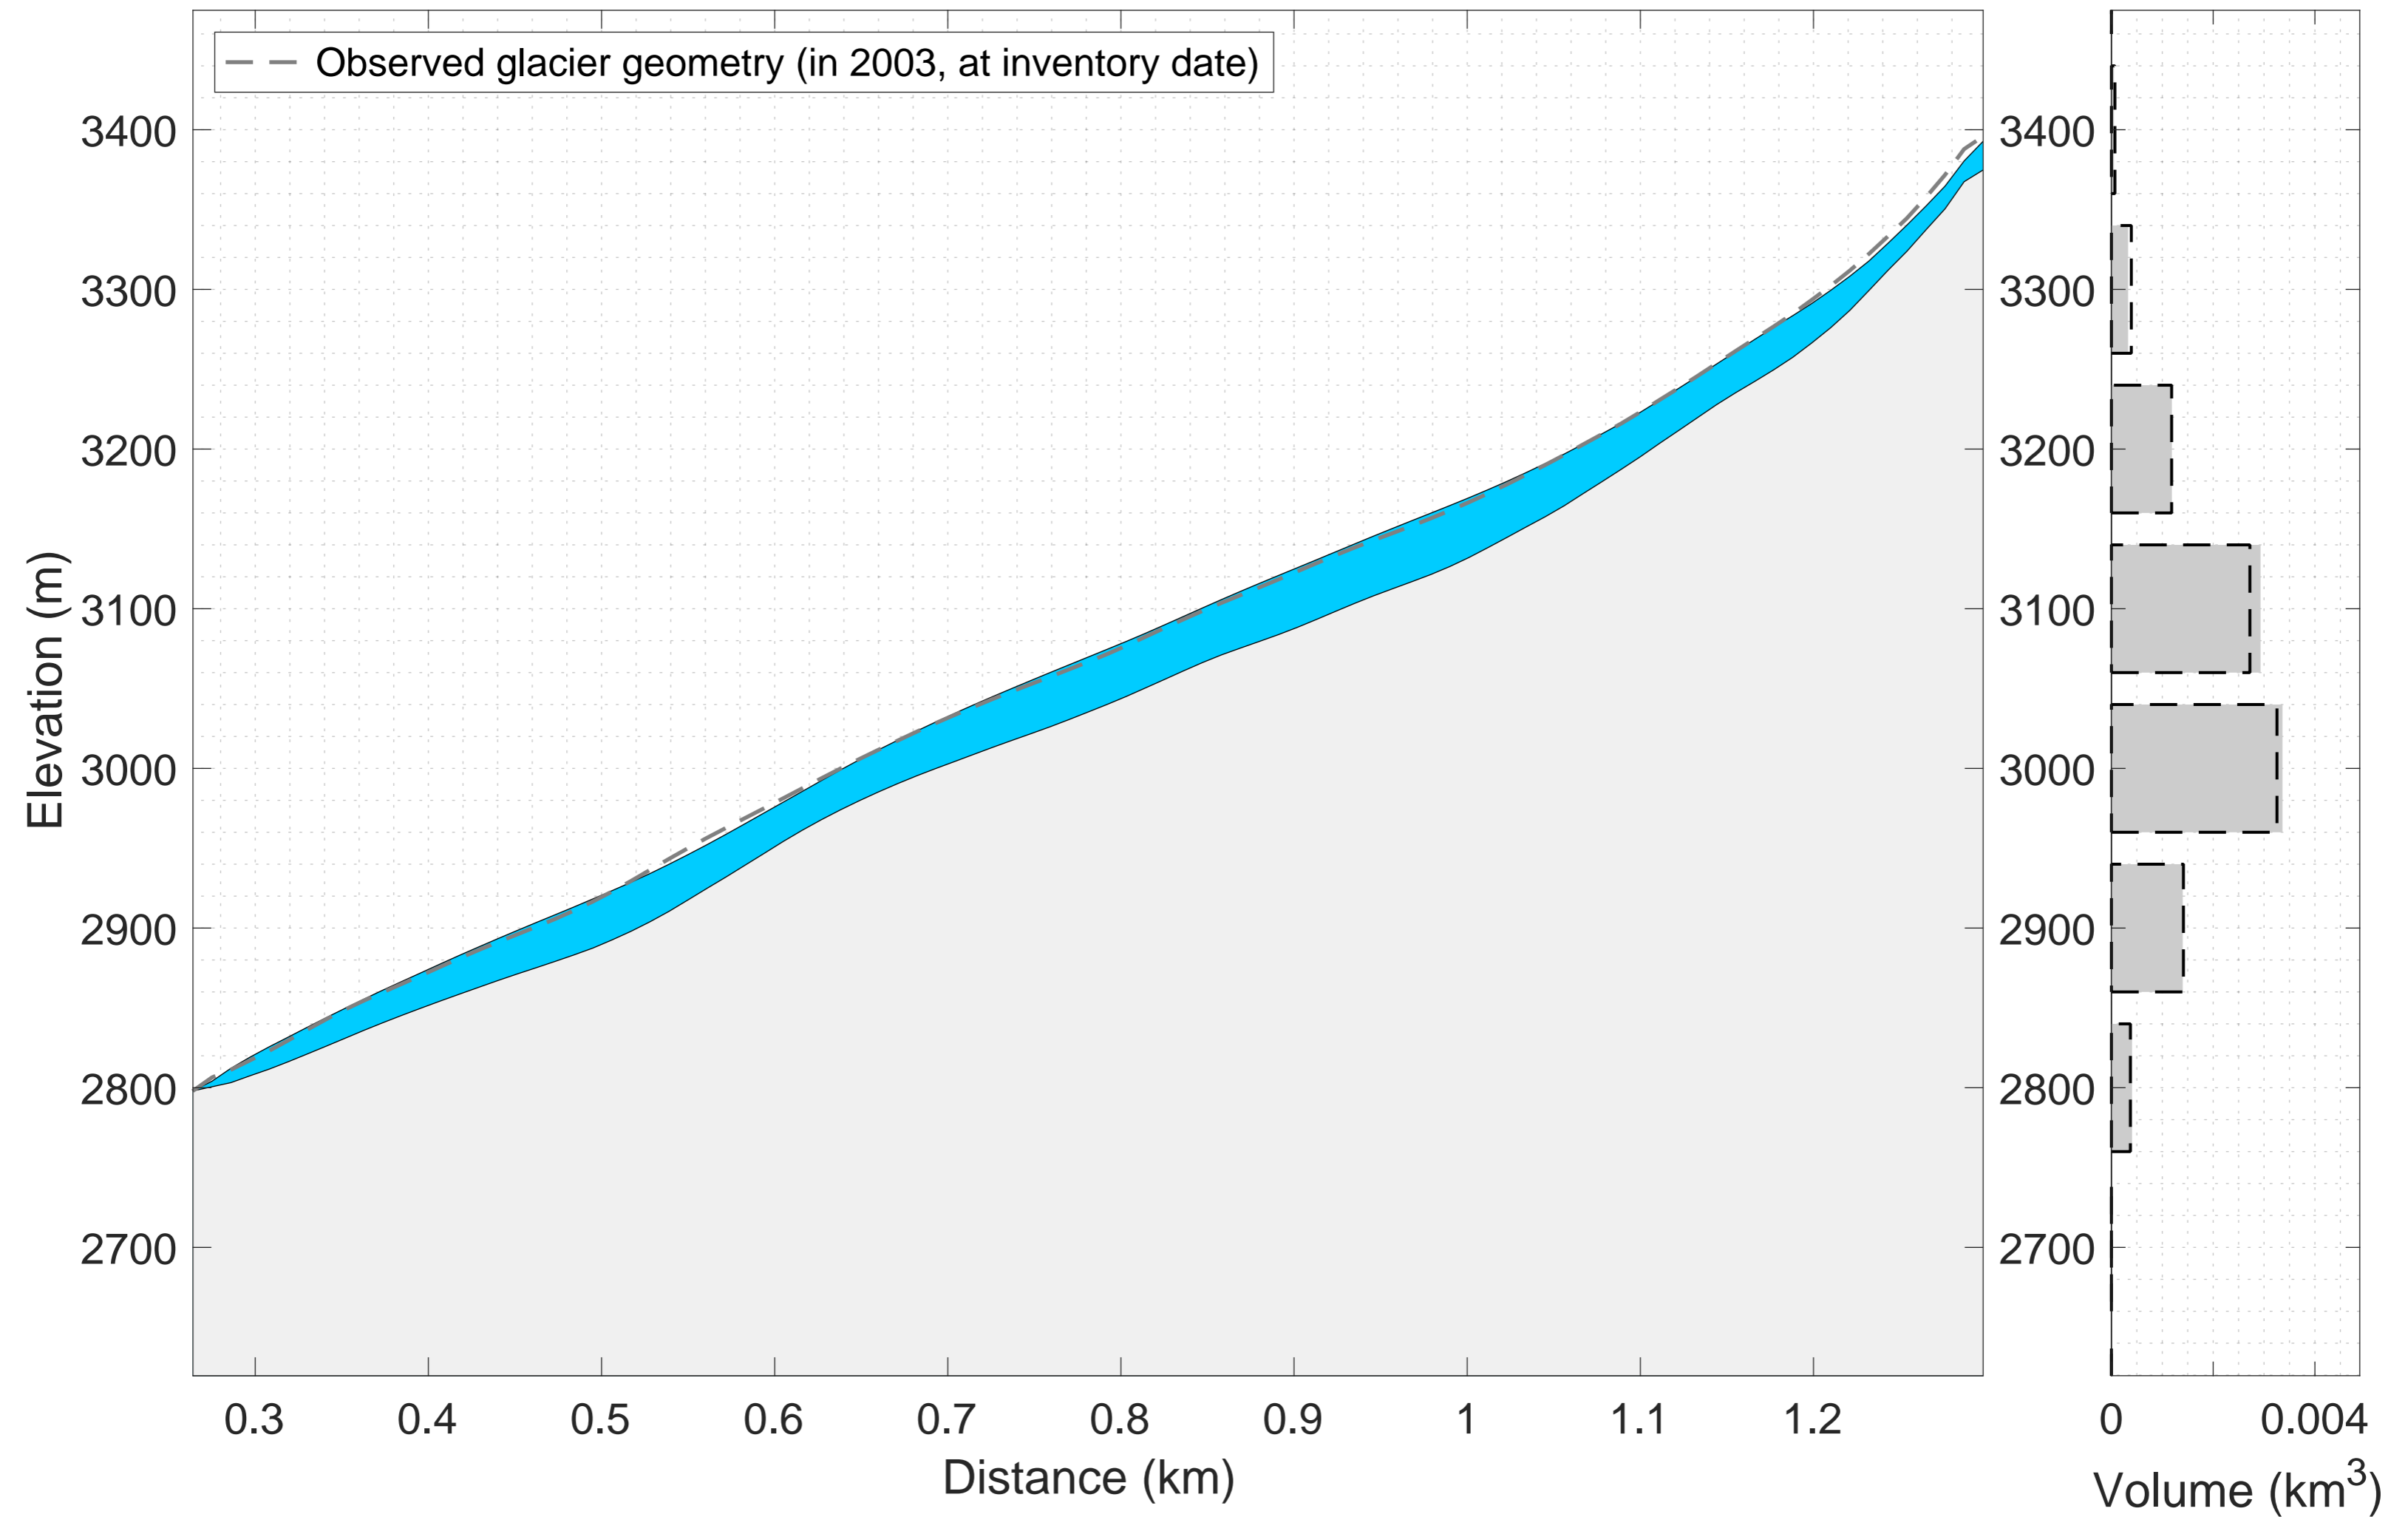

Supplement: Supplementary file 544 [file tc-13-1125-2019-supplement.zip]

**Modelled geometry (Glacier ID = 00819;  $A = 1.7095\text{e-}16 \text{ Pa}^{-3} \text{ a}^{-1}$ ;  $dx = 12 \text{ m}$ )**

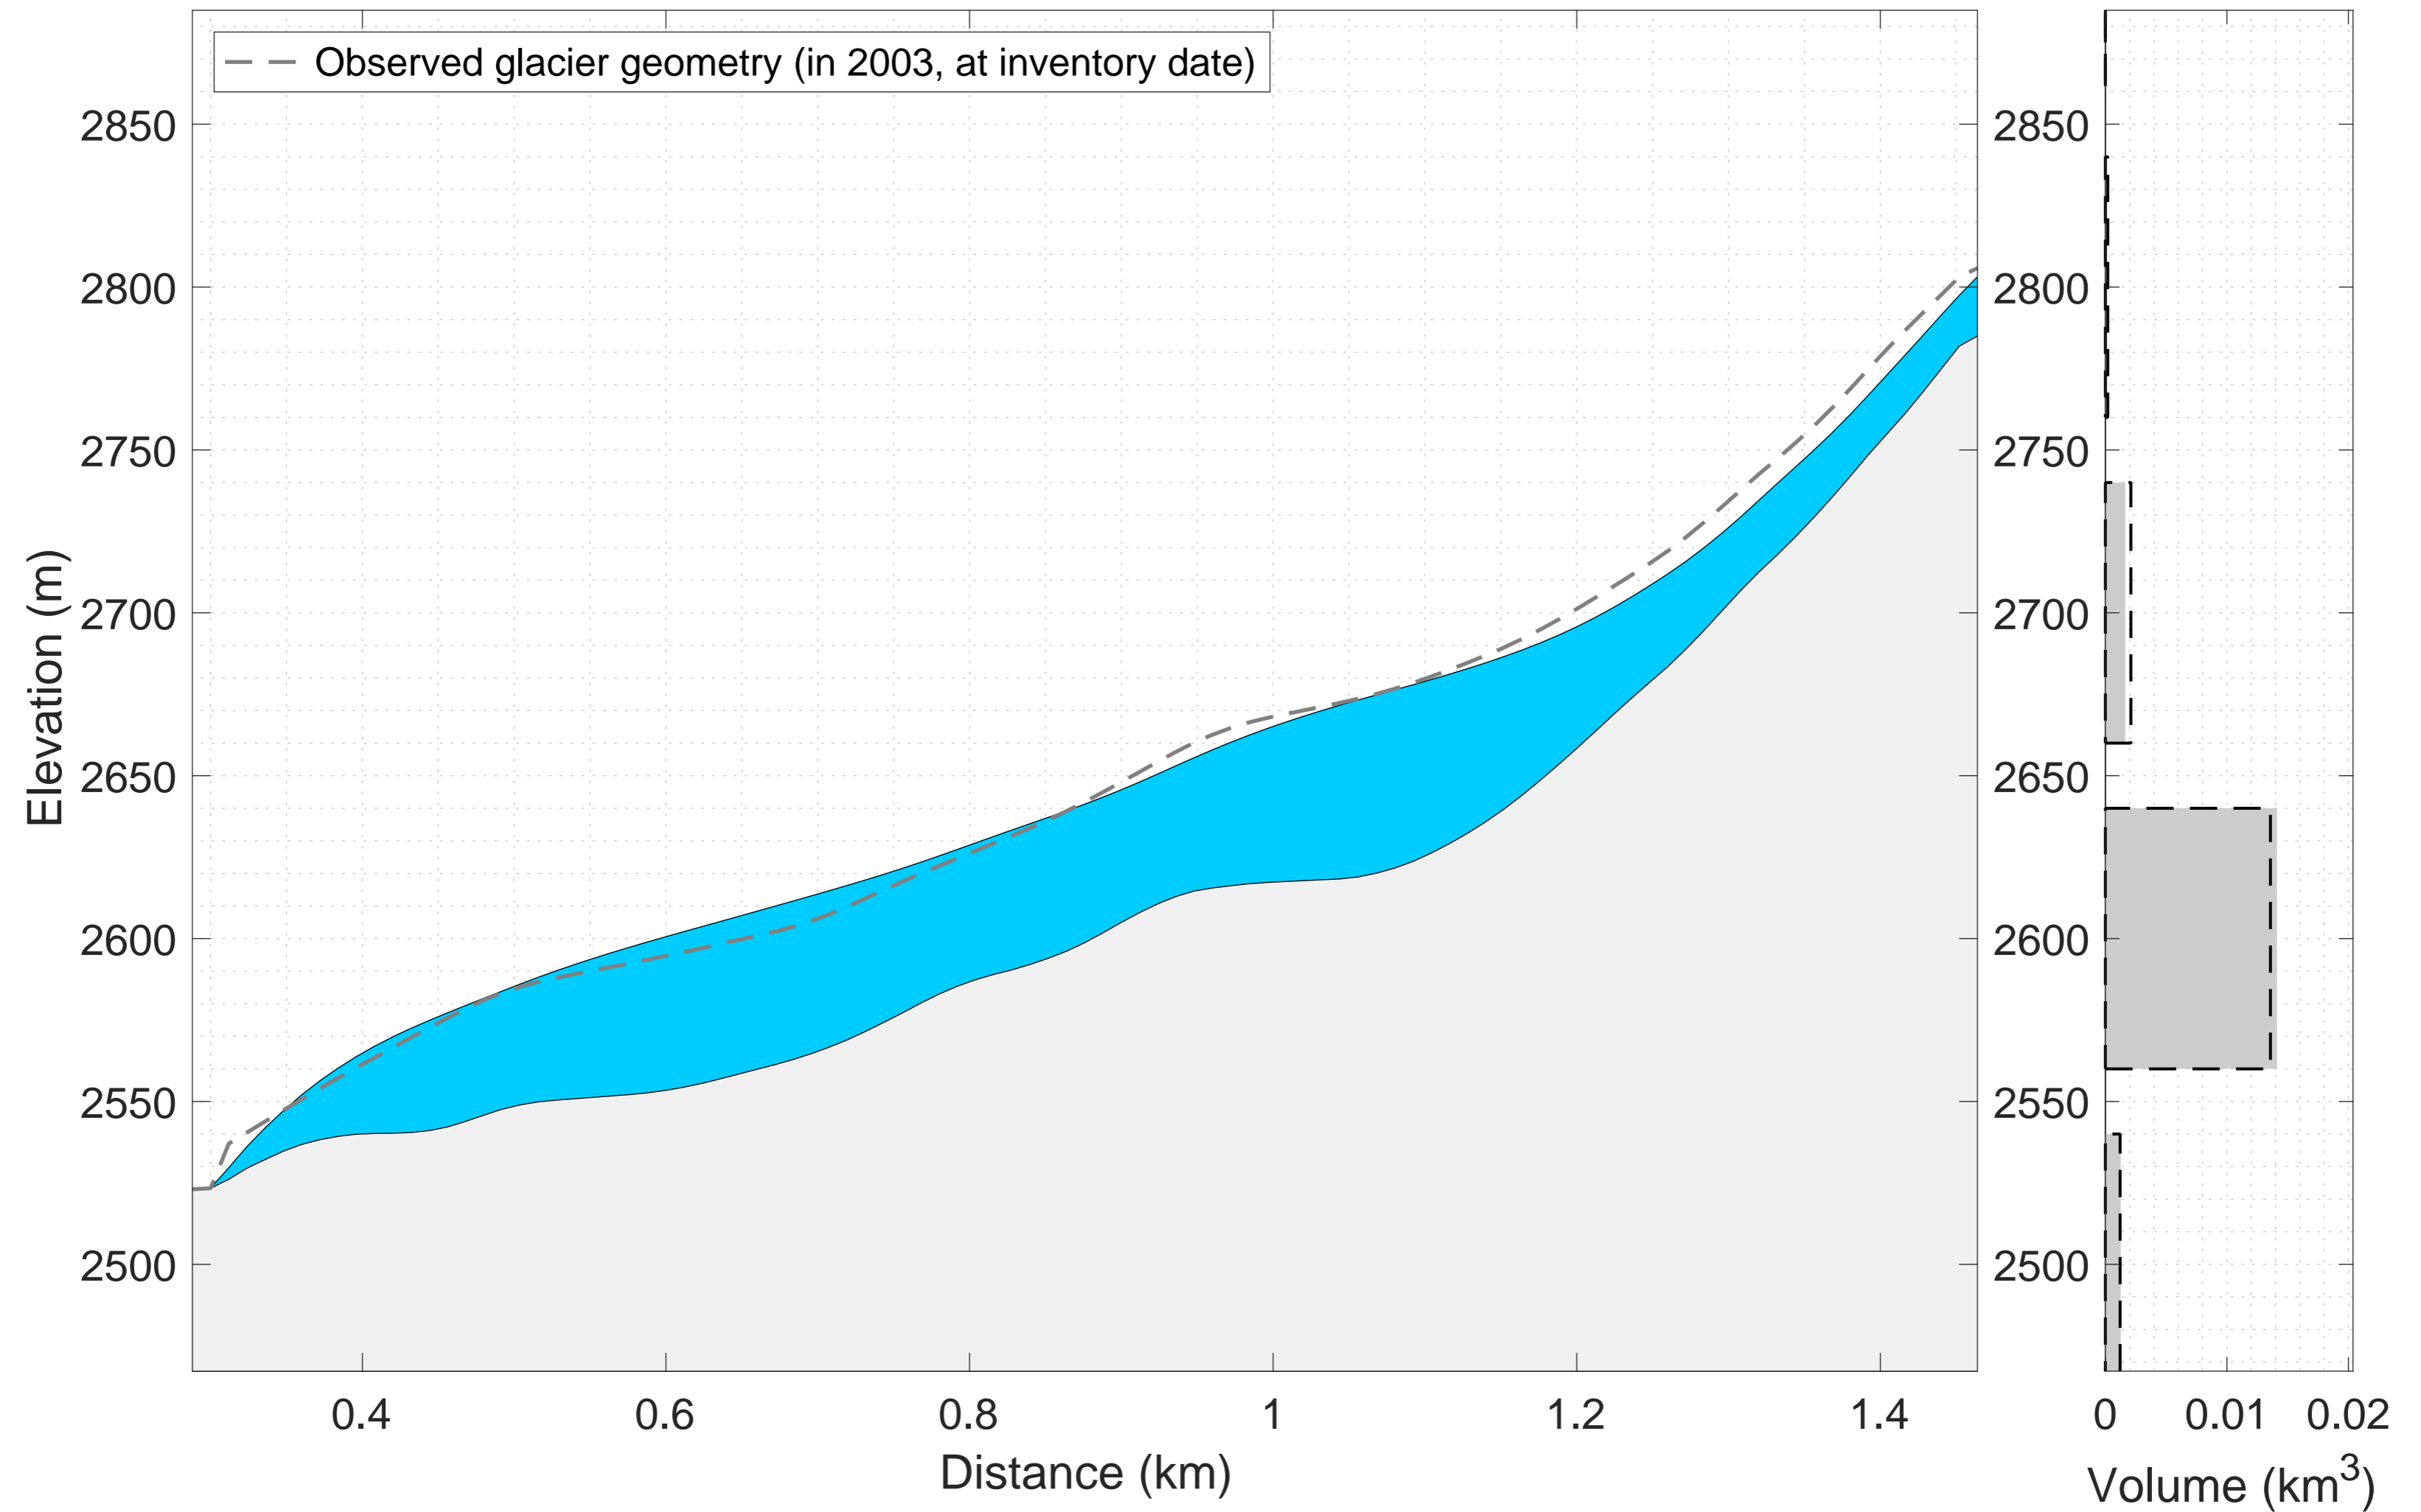

Supplement: Supplementary file 545 [file tc-13-1125-2019-supplement.zip]

**Modelled geometry (Glacier ID = 03014;  $A = 7.4456\text{e-}17 \text{ Pa}^{-3} \text{ a}^{-1}$ ;  $dx = 26 \text{ m}$ )**

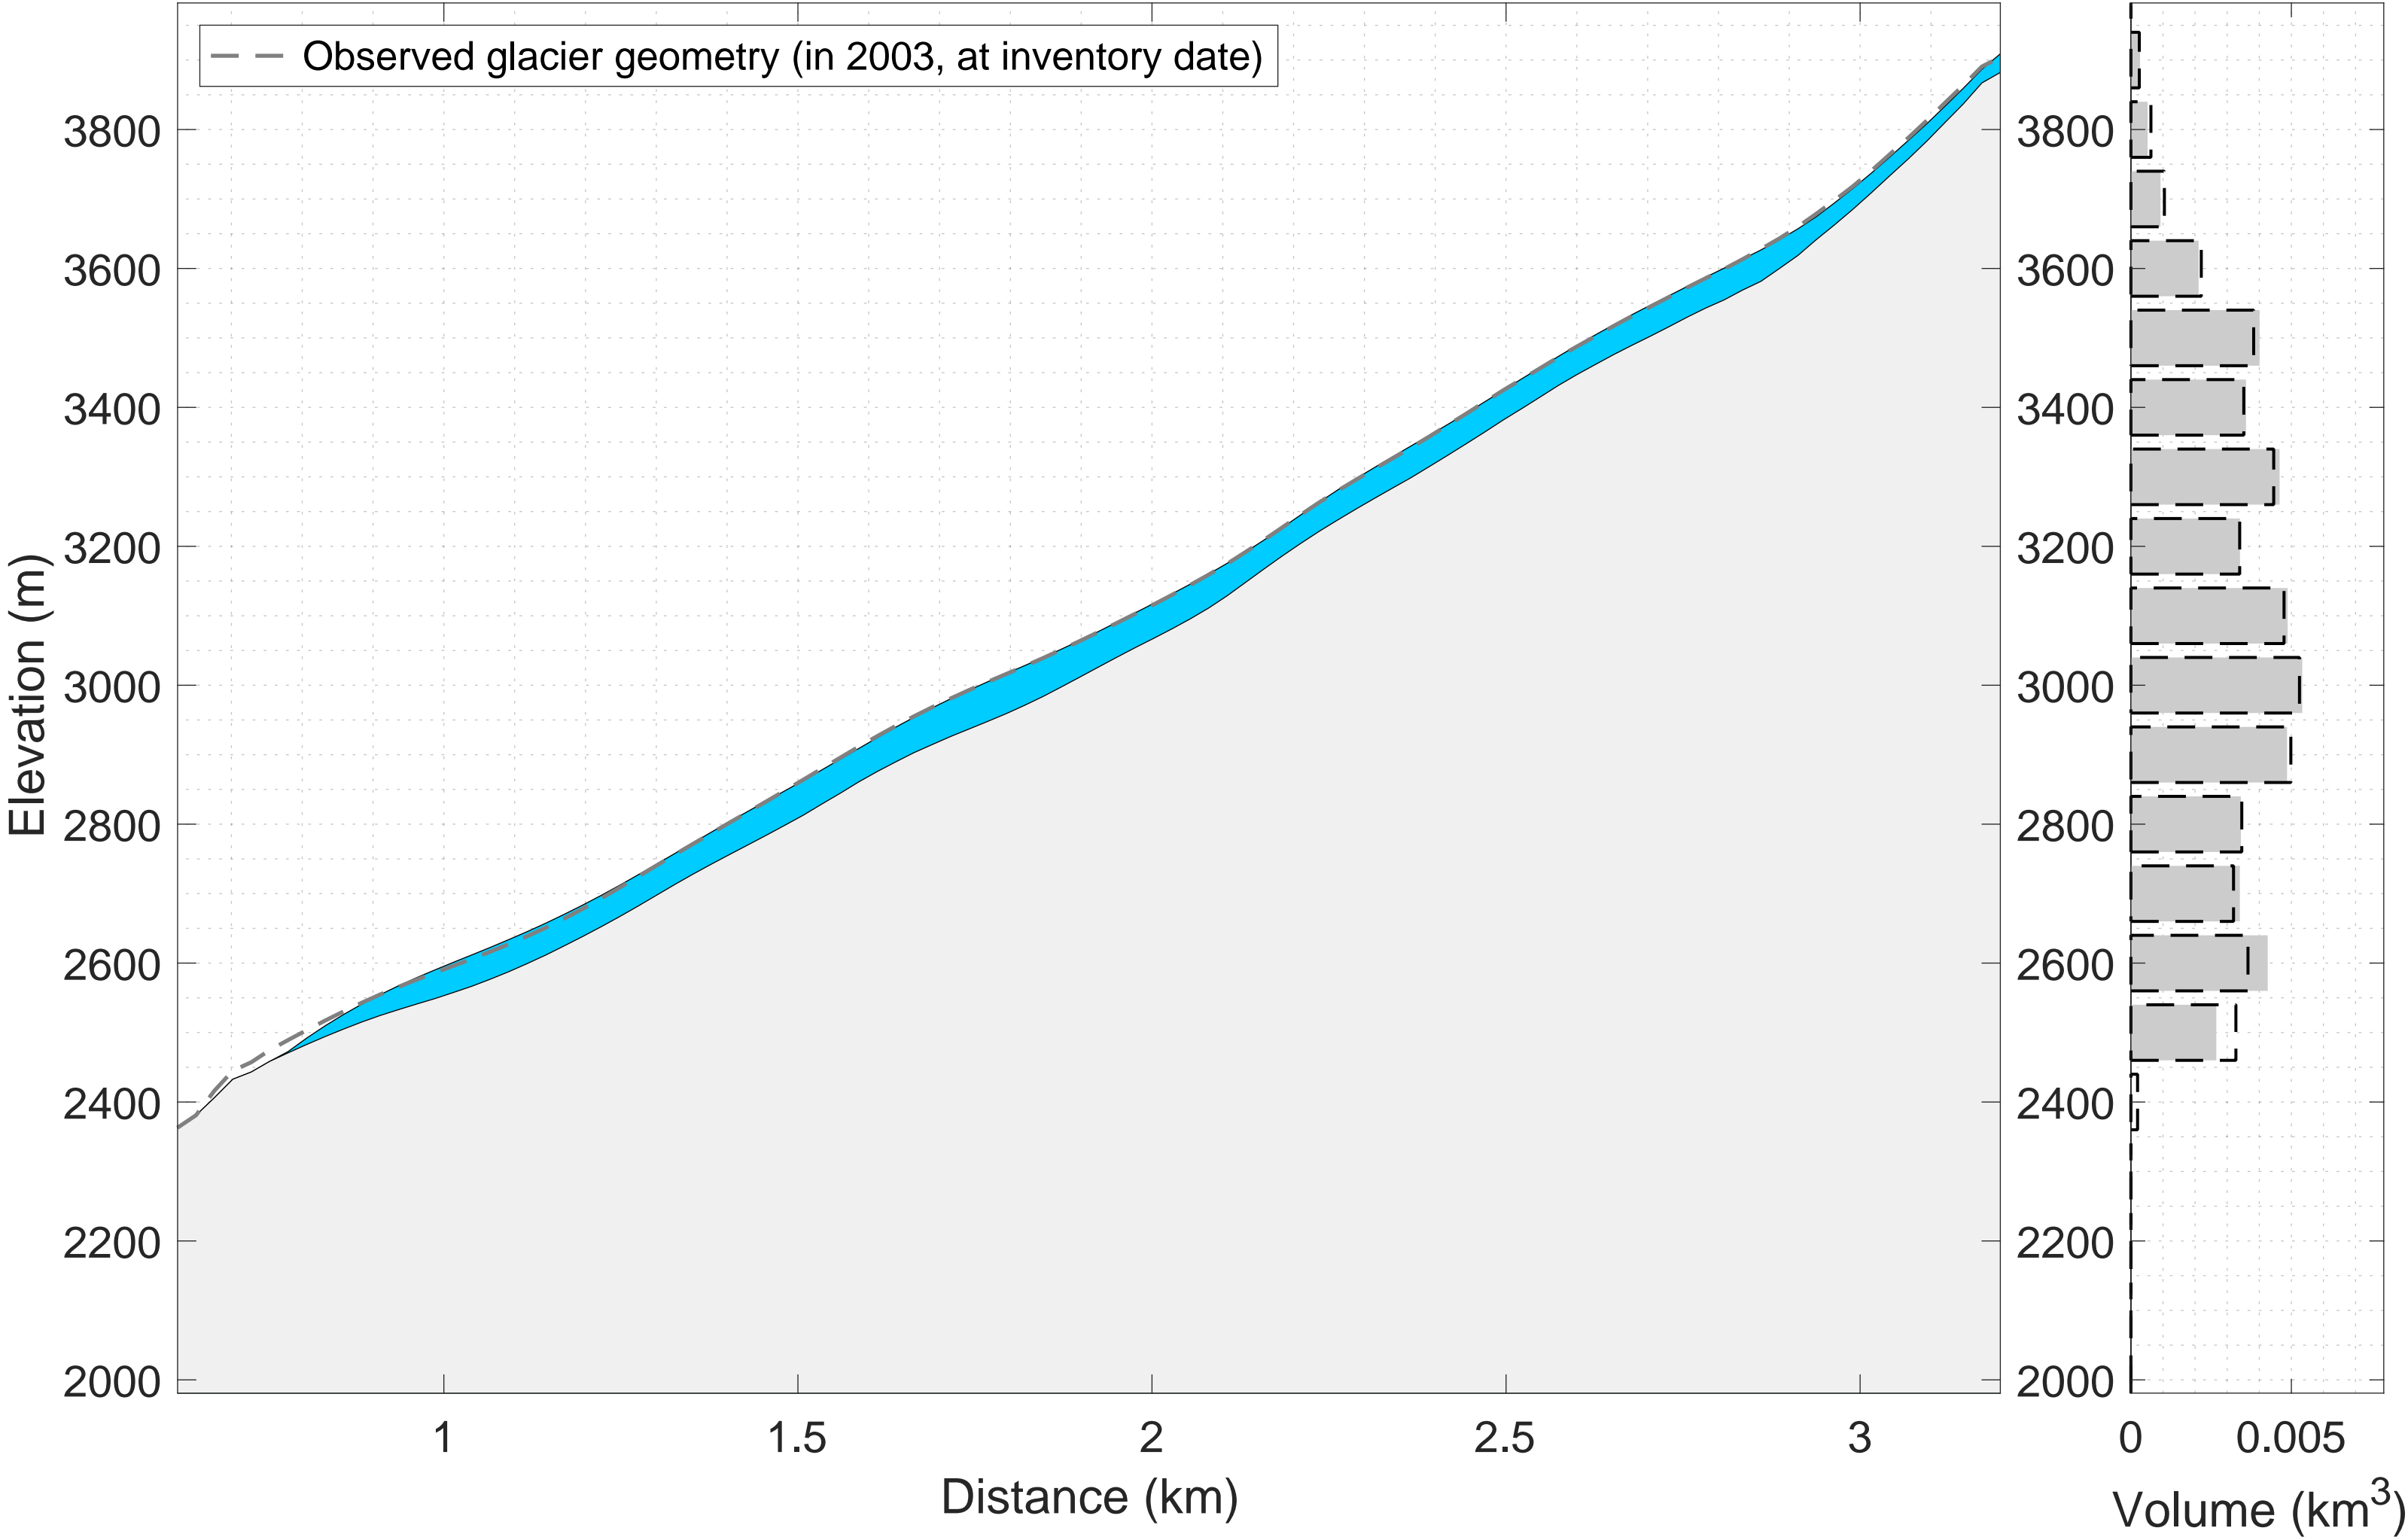

Supplement: Supplementary file 546 [file tc-13-1125-2019-supplement.zip]

**Modelled geometry (Glacier ID = 01288;  $A = 7.4046\text{e-}17 \text{ Pa}^{-3} \text{ a}^{-1}$ ;  $dx = 11 \text{ m}$ )**

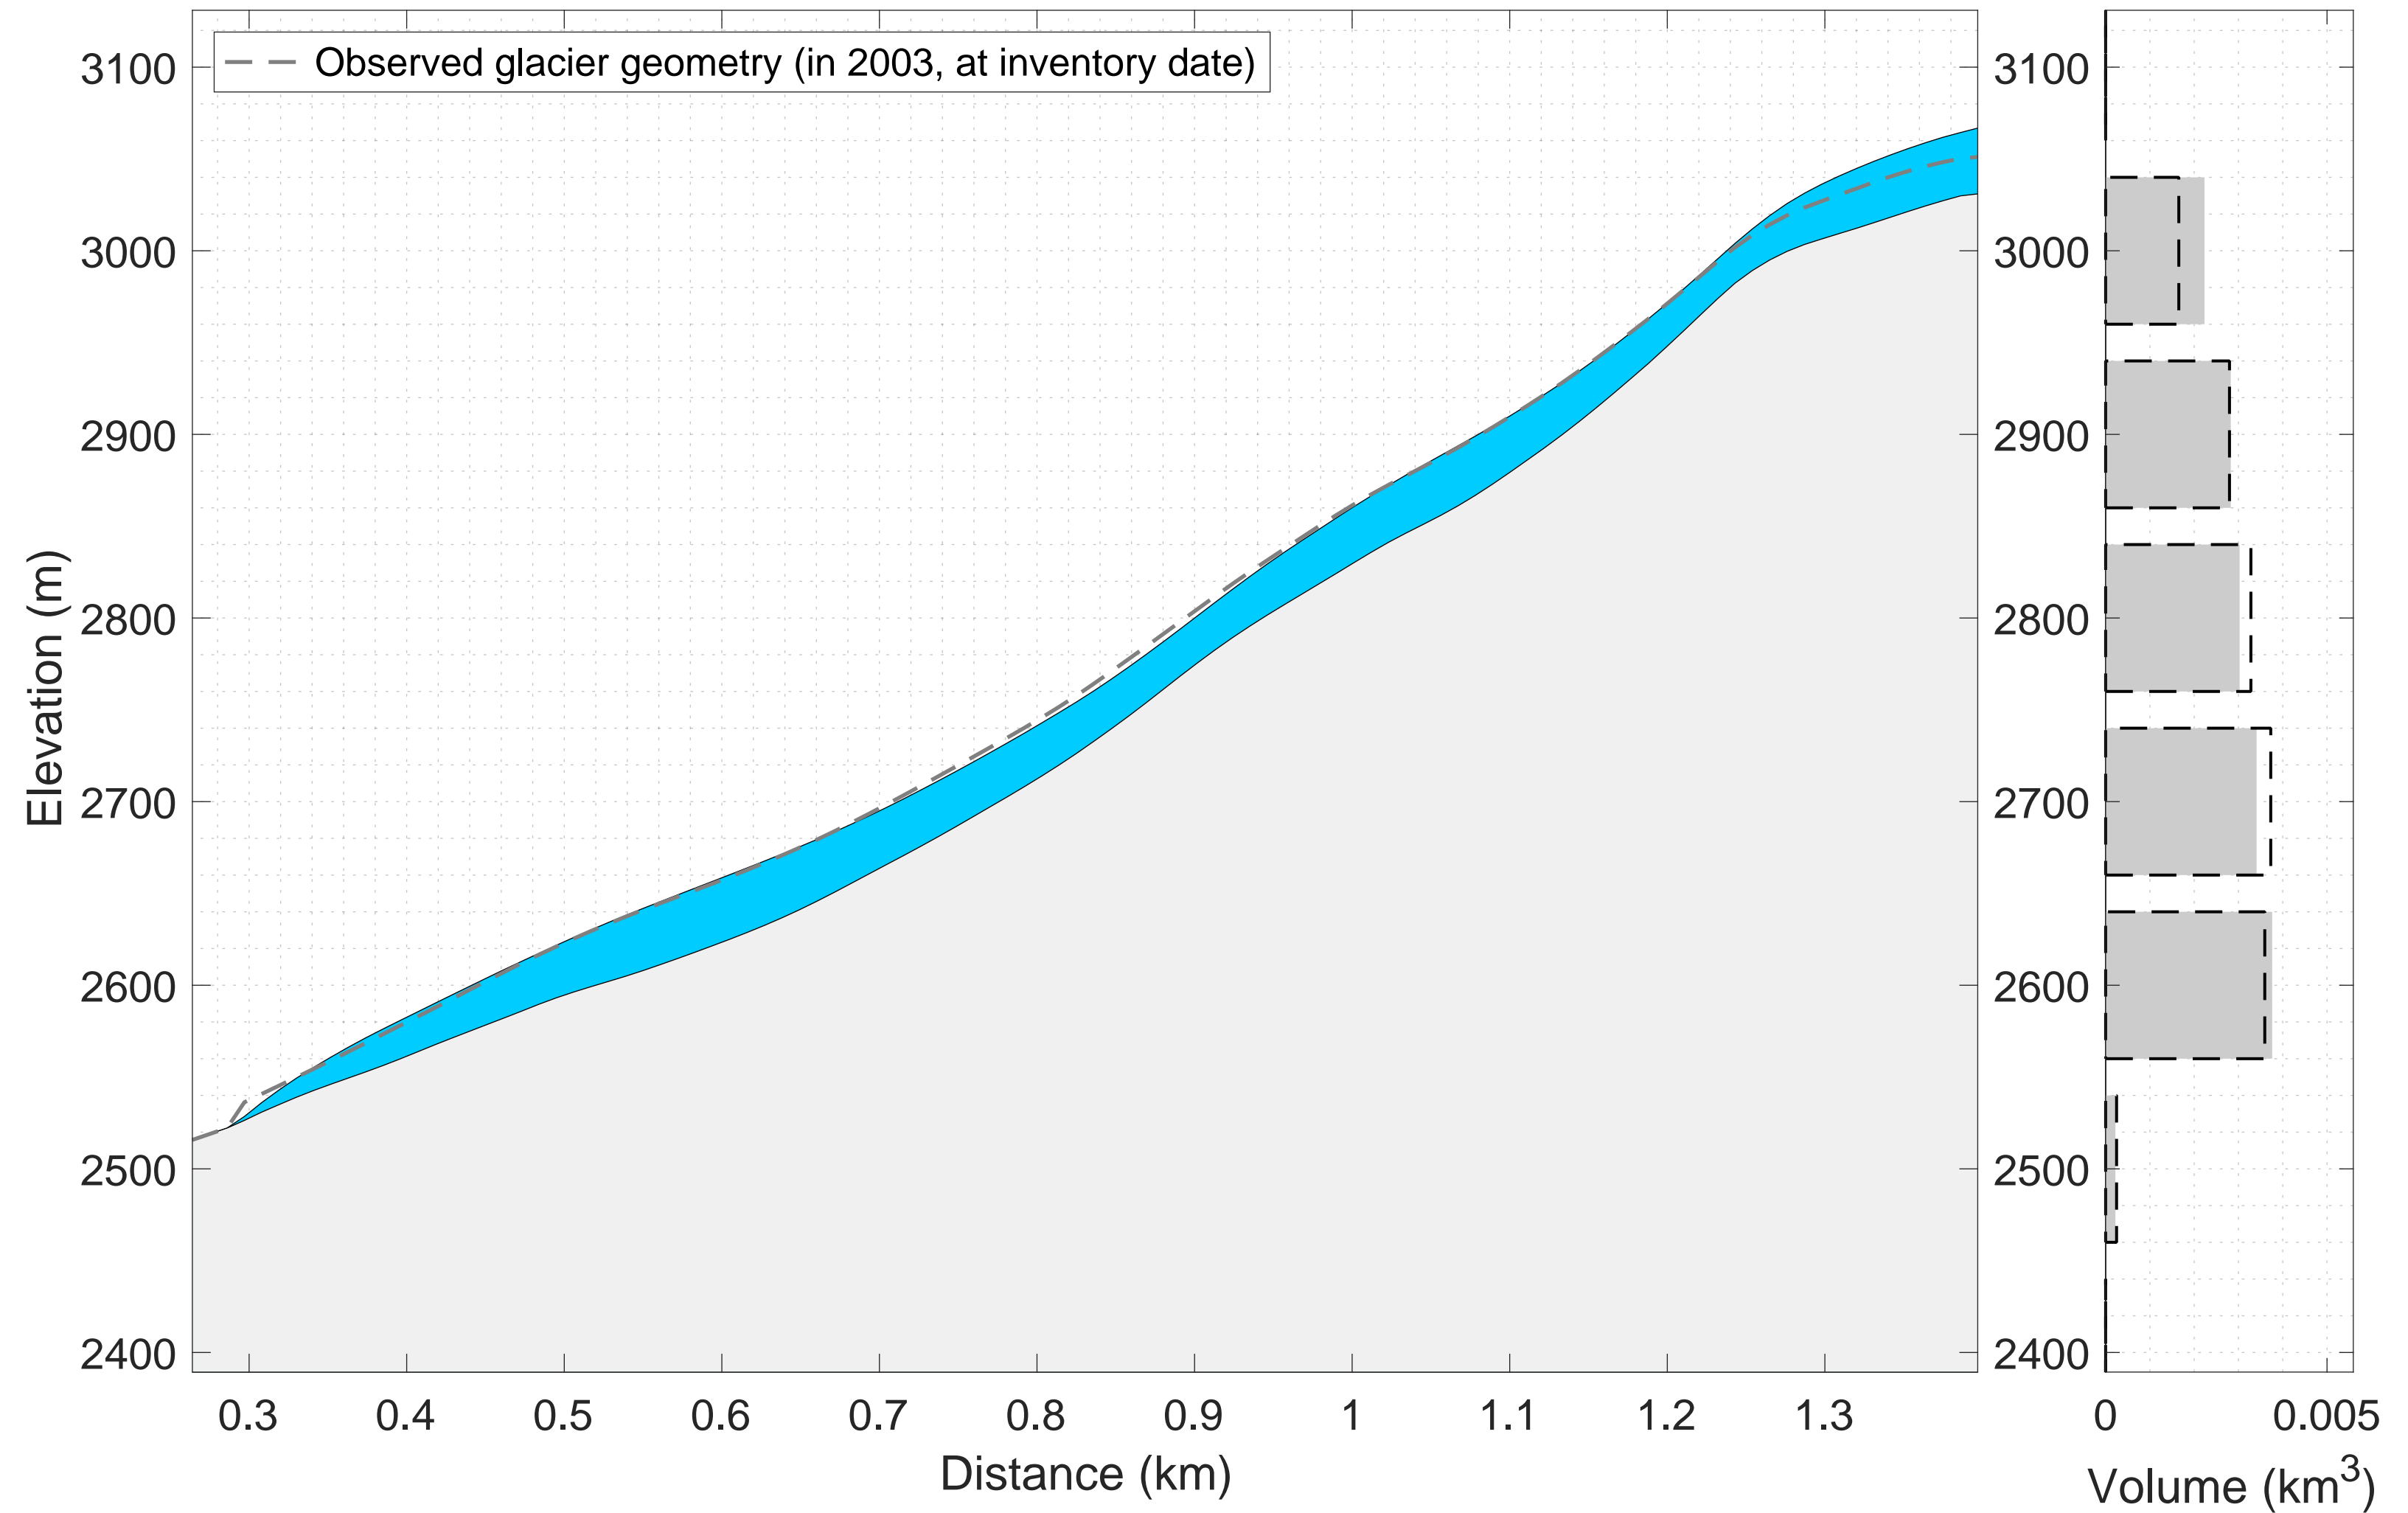

Supplement: Supplementary file 547 [file tc-13-1125-2019-supplement.zip]

**Modelled geometry (Glacier ID = 02549;  $A = 7.2124\text{e-}17 \text{ Pa}^{-3} \text{ a}^{-1}$ ;  $dx = 12 \text{ m}$ )**

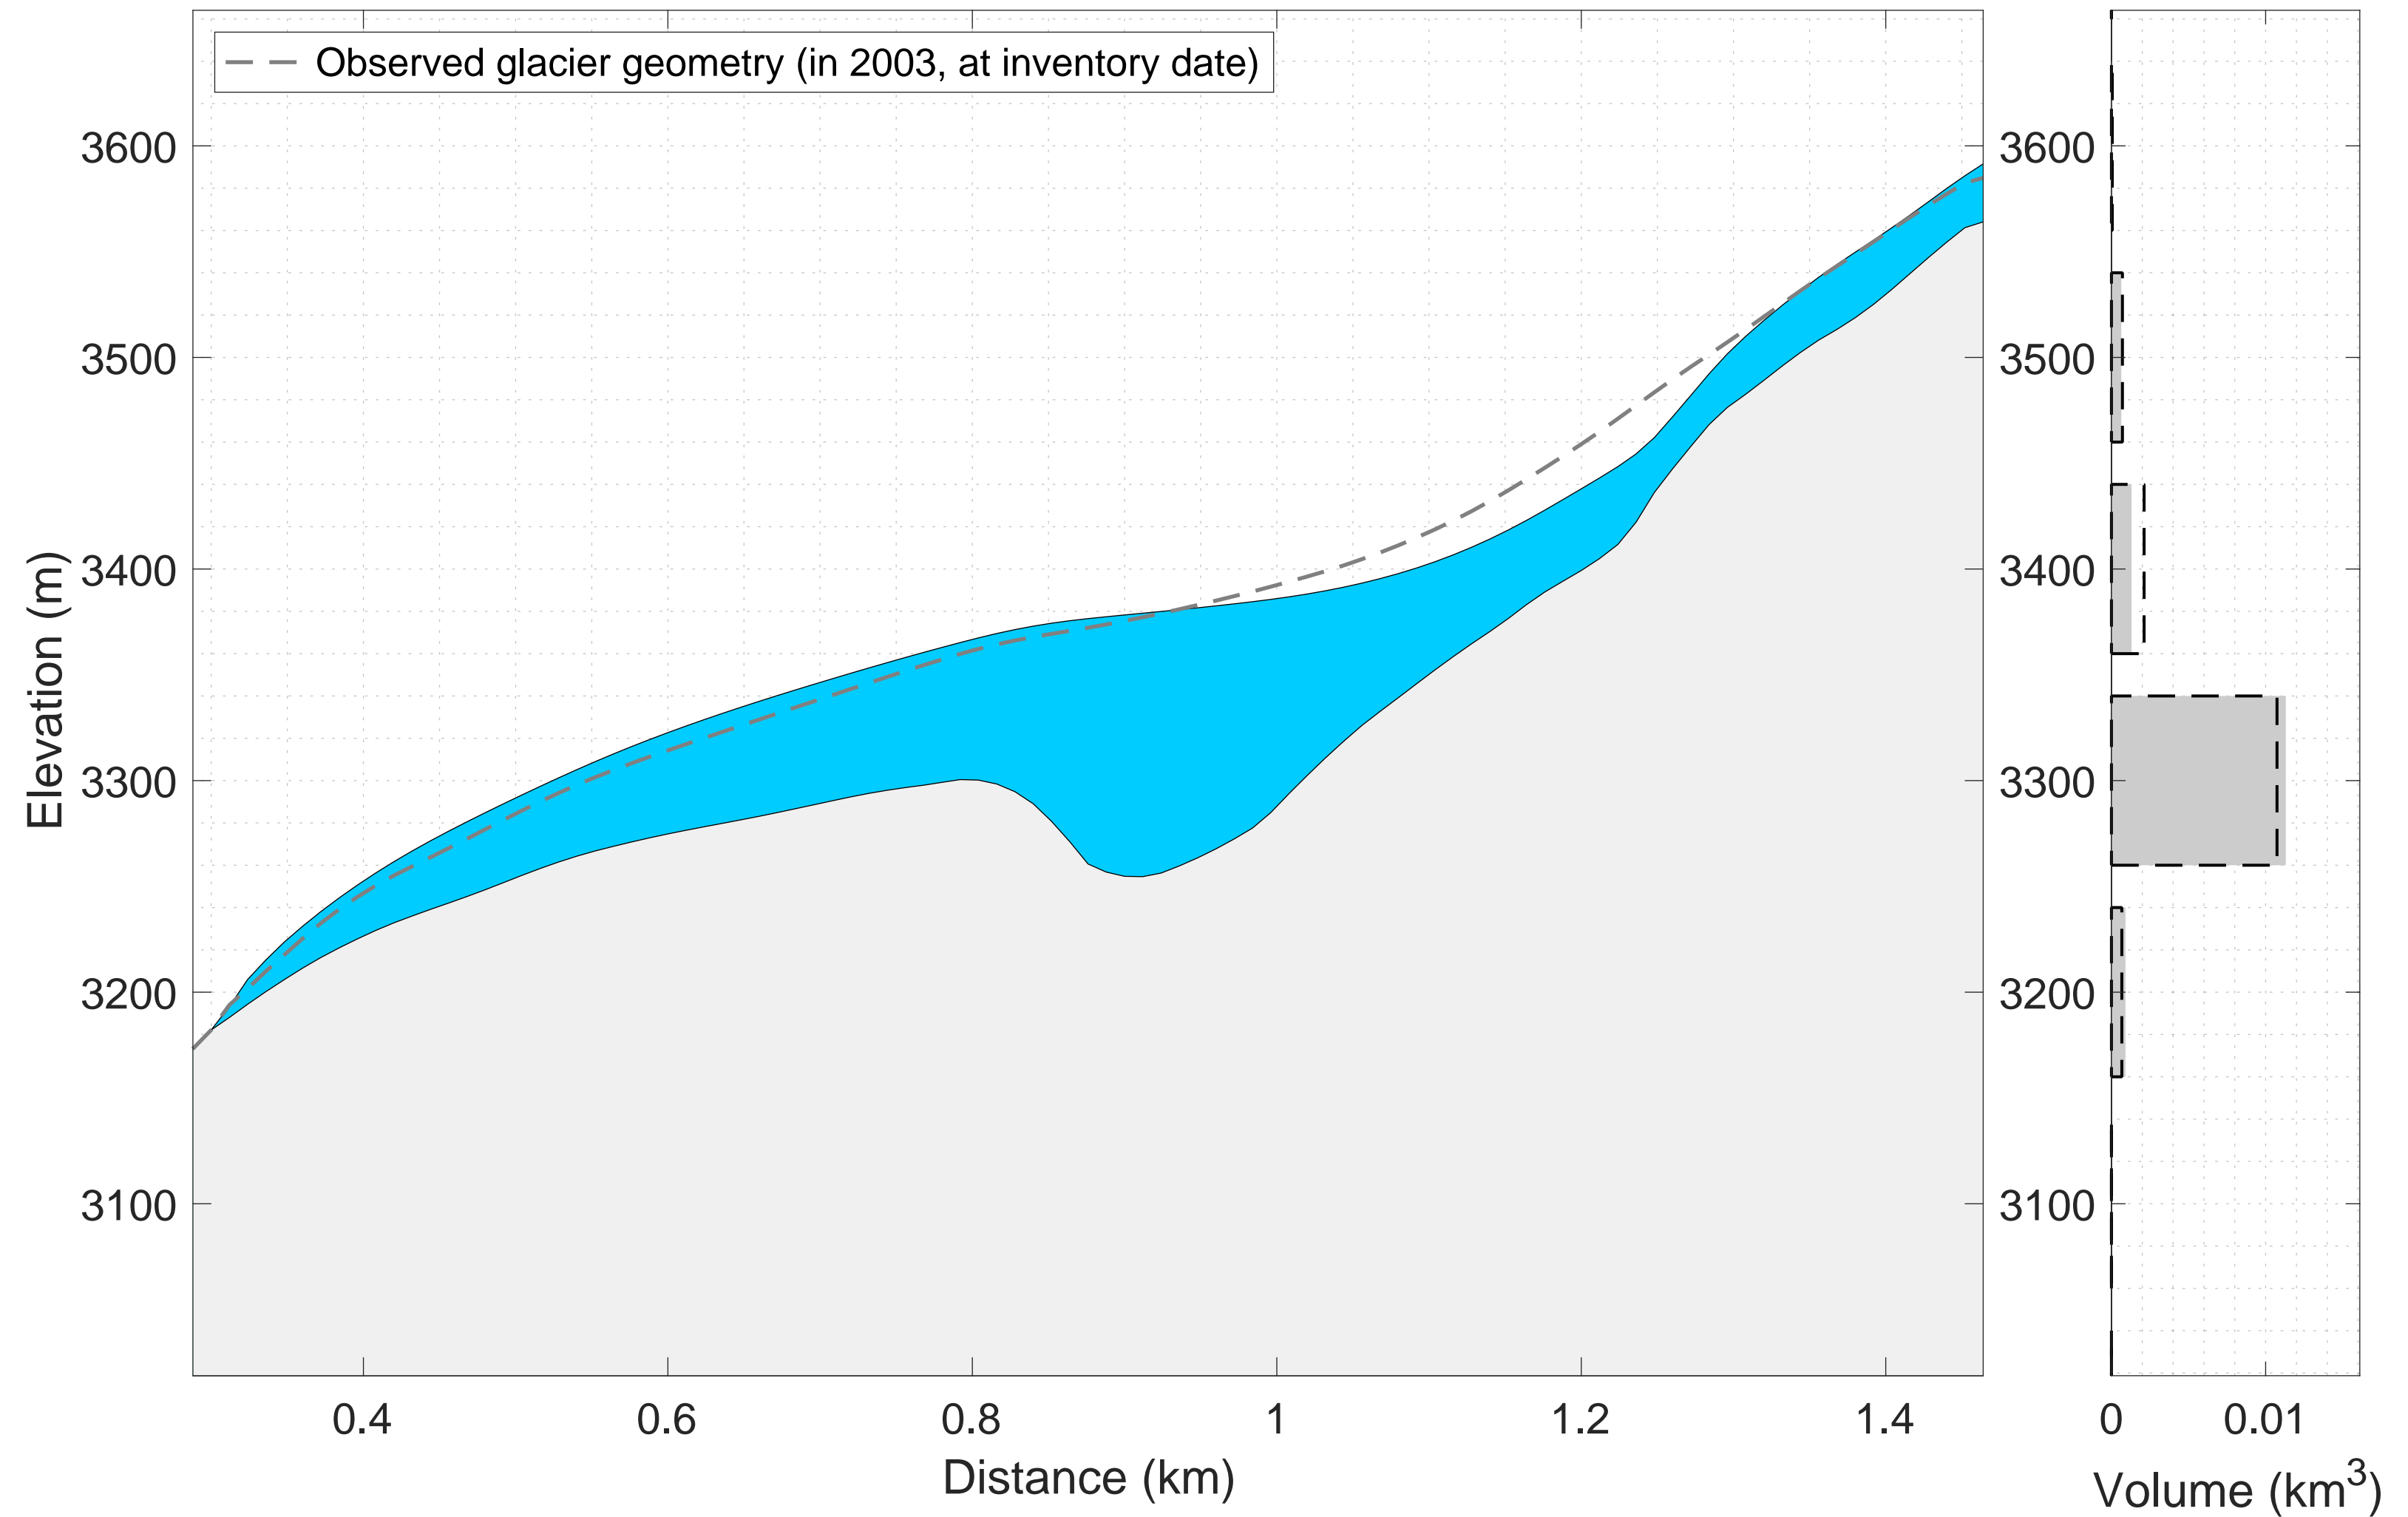

Supplement: Supplementary file 548 [file tc-13-1125-2019-supplement.zip]

**Modelled geometry (Glacier ID = 02743;  $A = 1.0224\text{e-}16 \text{ Pa}^{-3} \text{ a}^{-1}$ ;  $dx = 19 \text{ m}$ )**

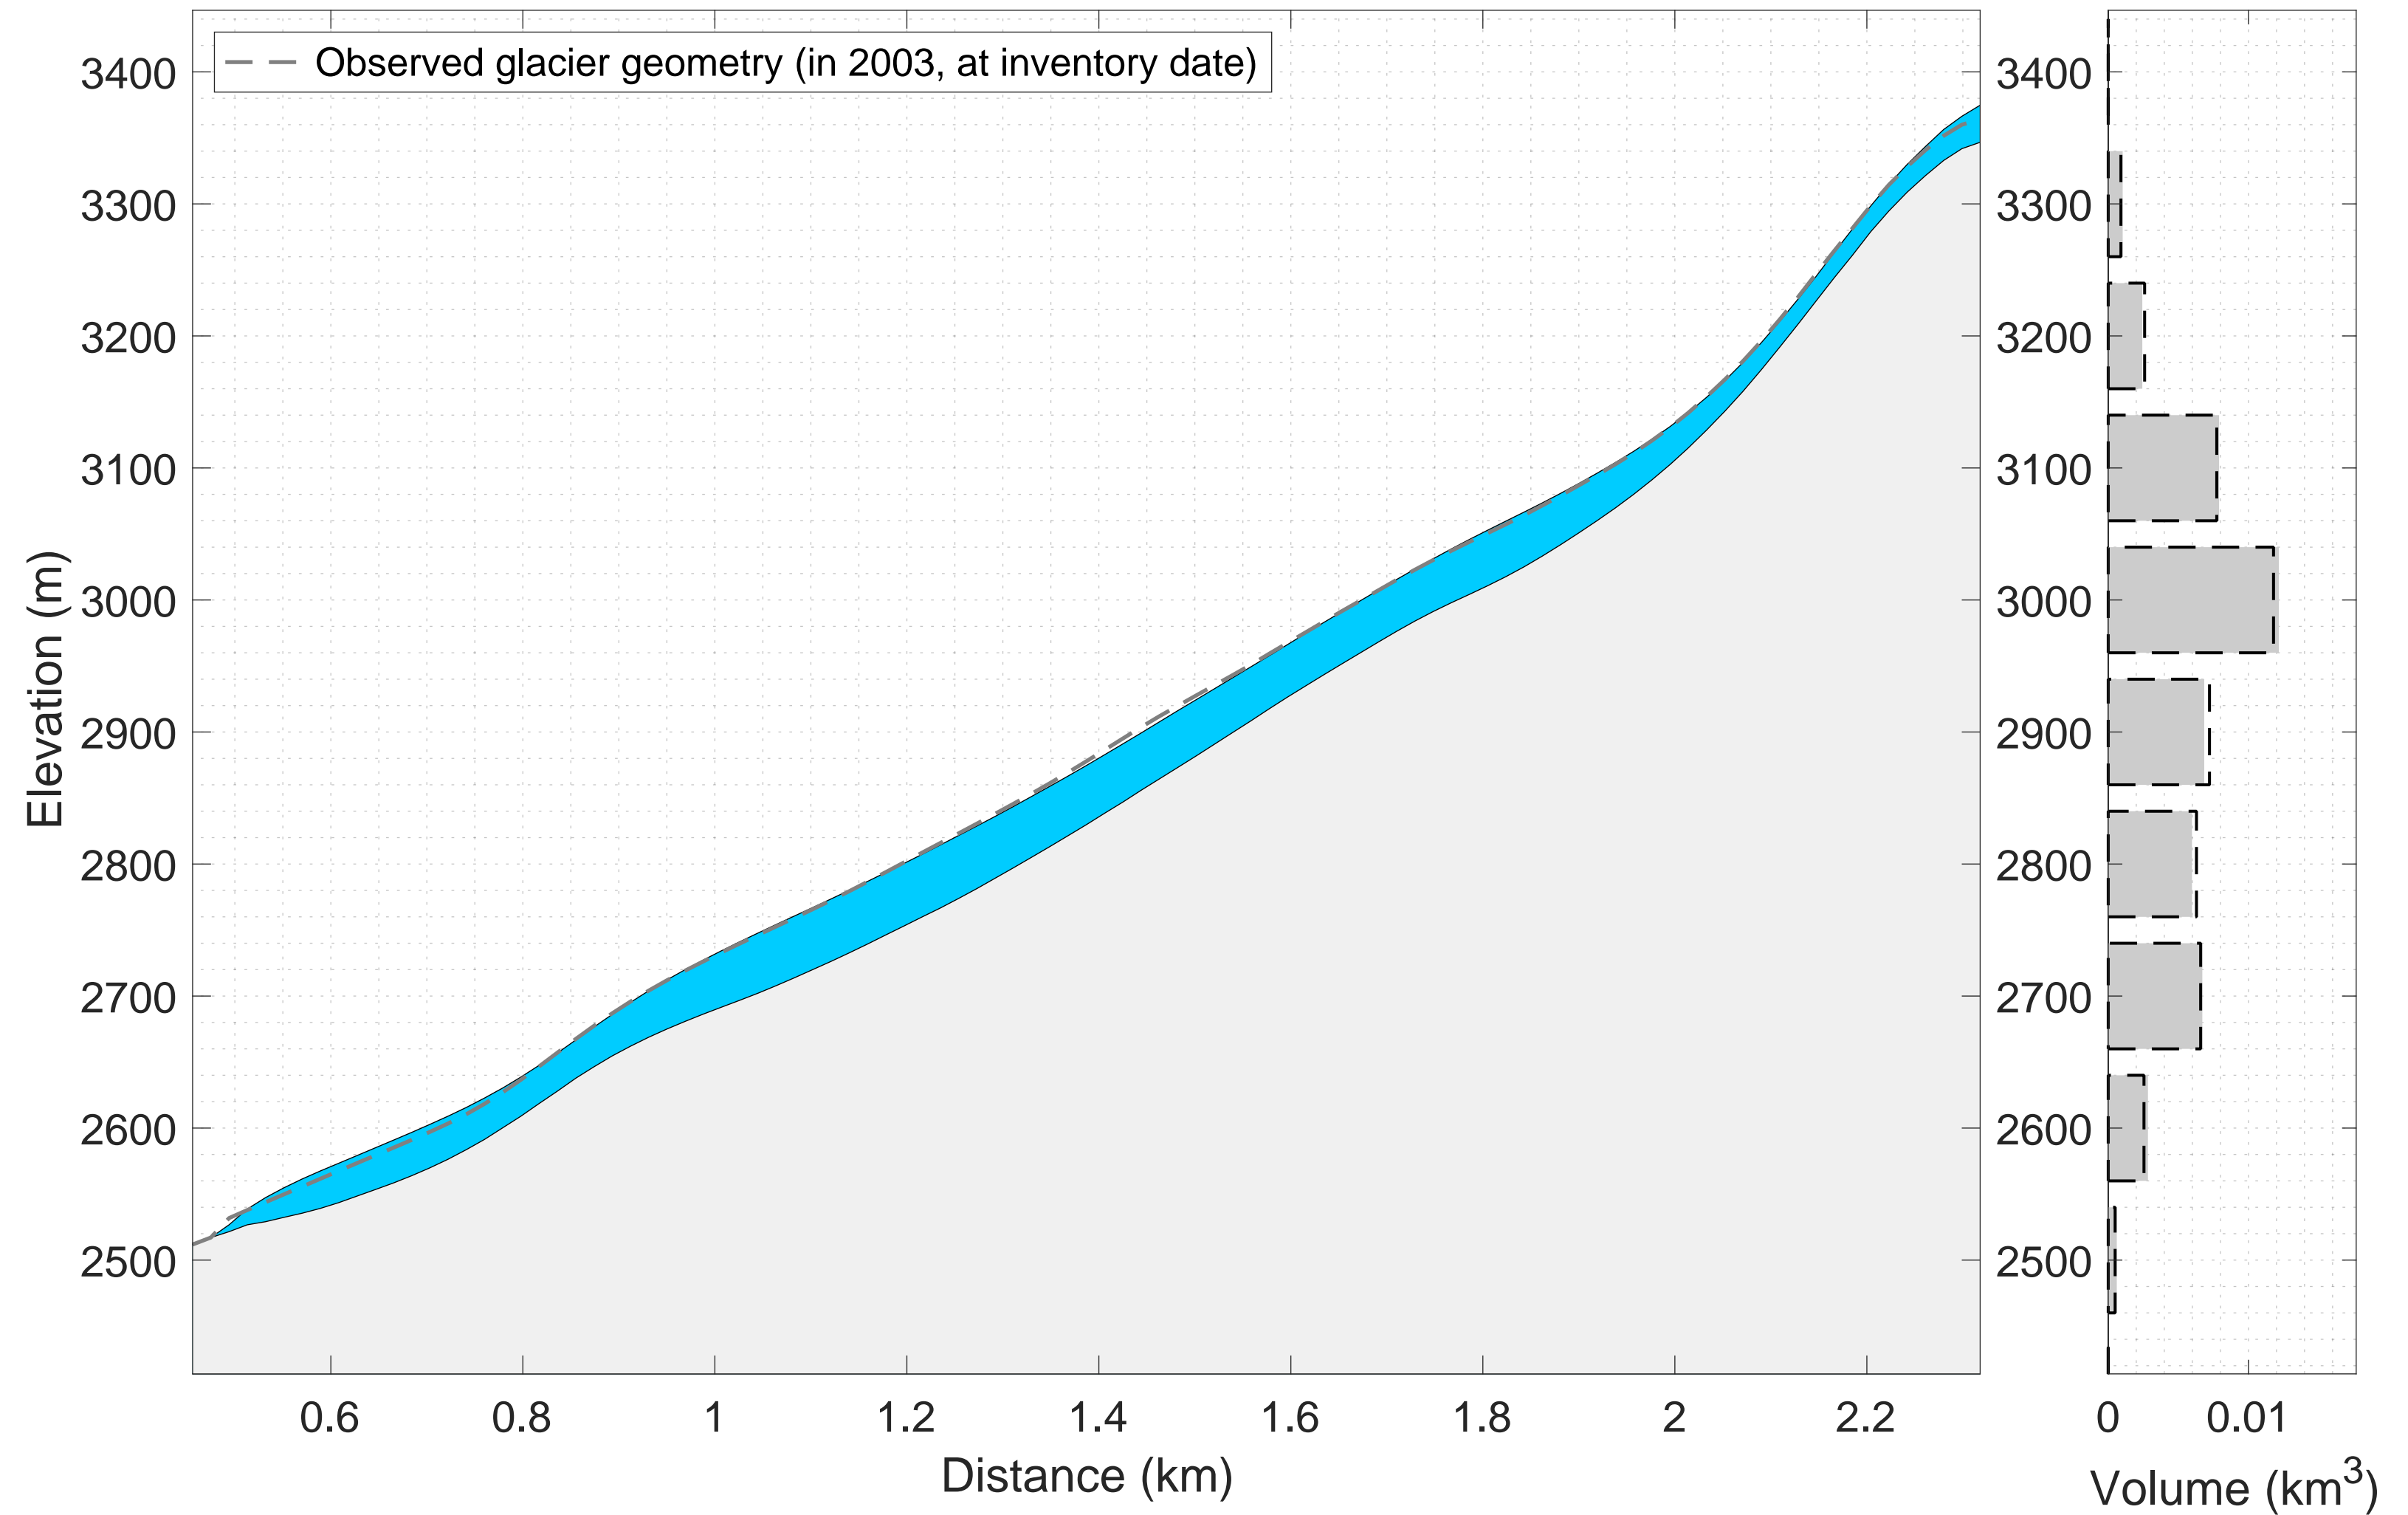

Supplement: Supplementary file 549 [file tc-13-1125-2019-supplement.zip]

**Modelled geometry (Glacier ID = 02208;  $A = 3.4627\text{e-}17 \text{ Pa}^{-3} \text{ a}^{-1}$ ;  $dx = 14 \text{ m}$ )**

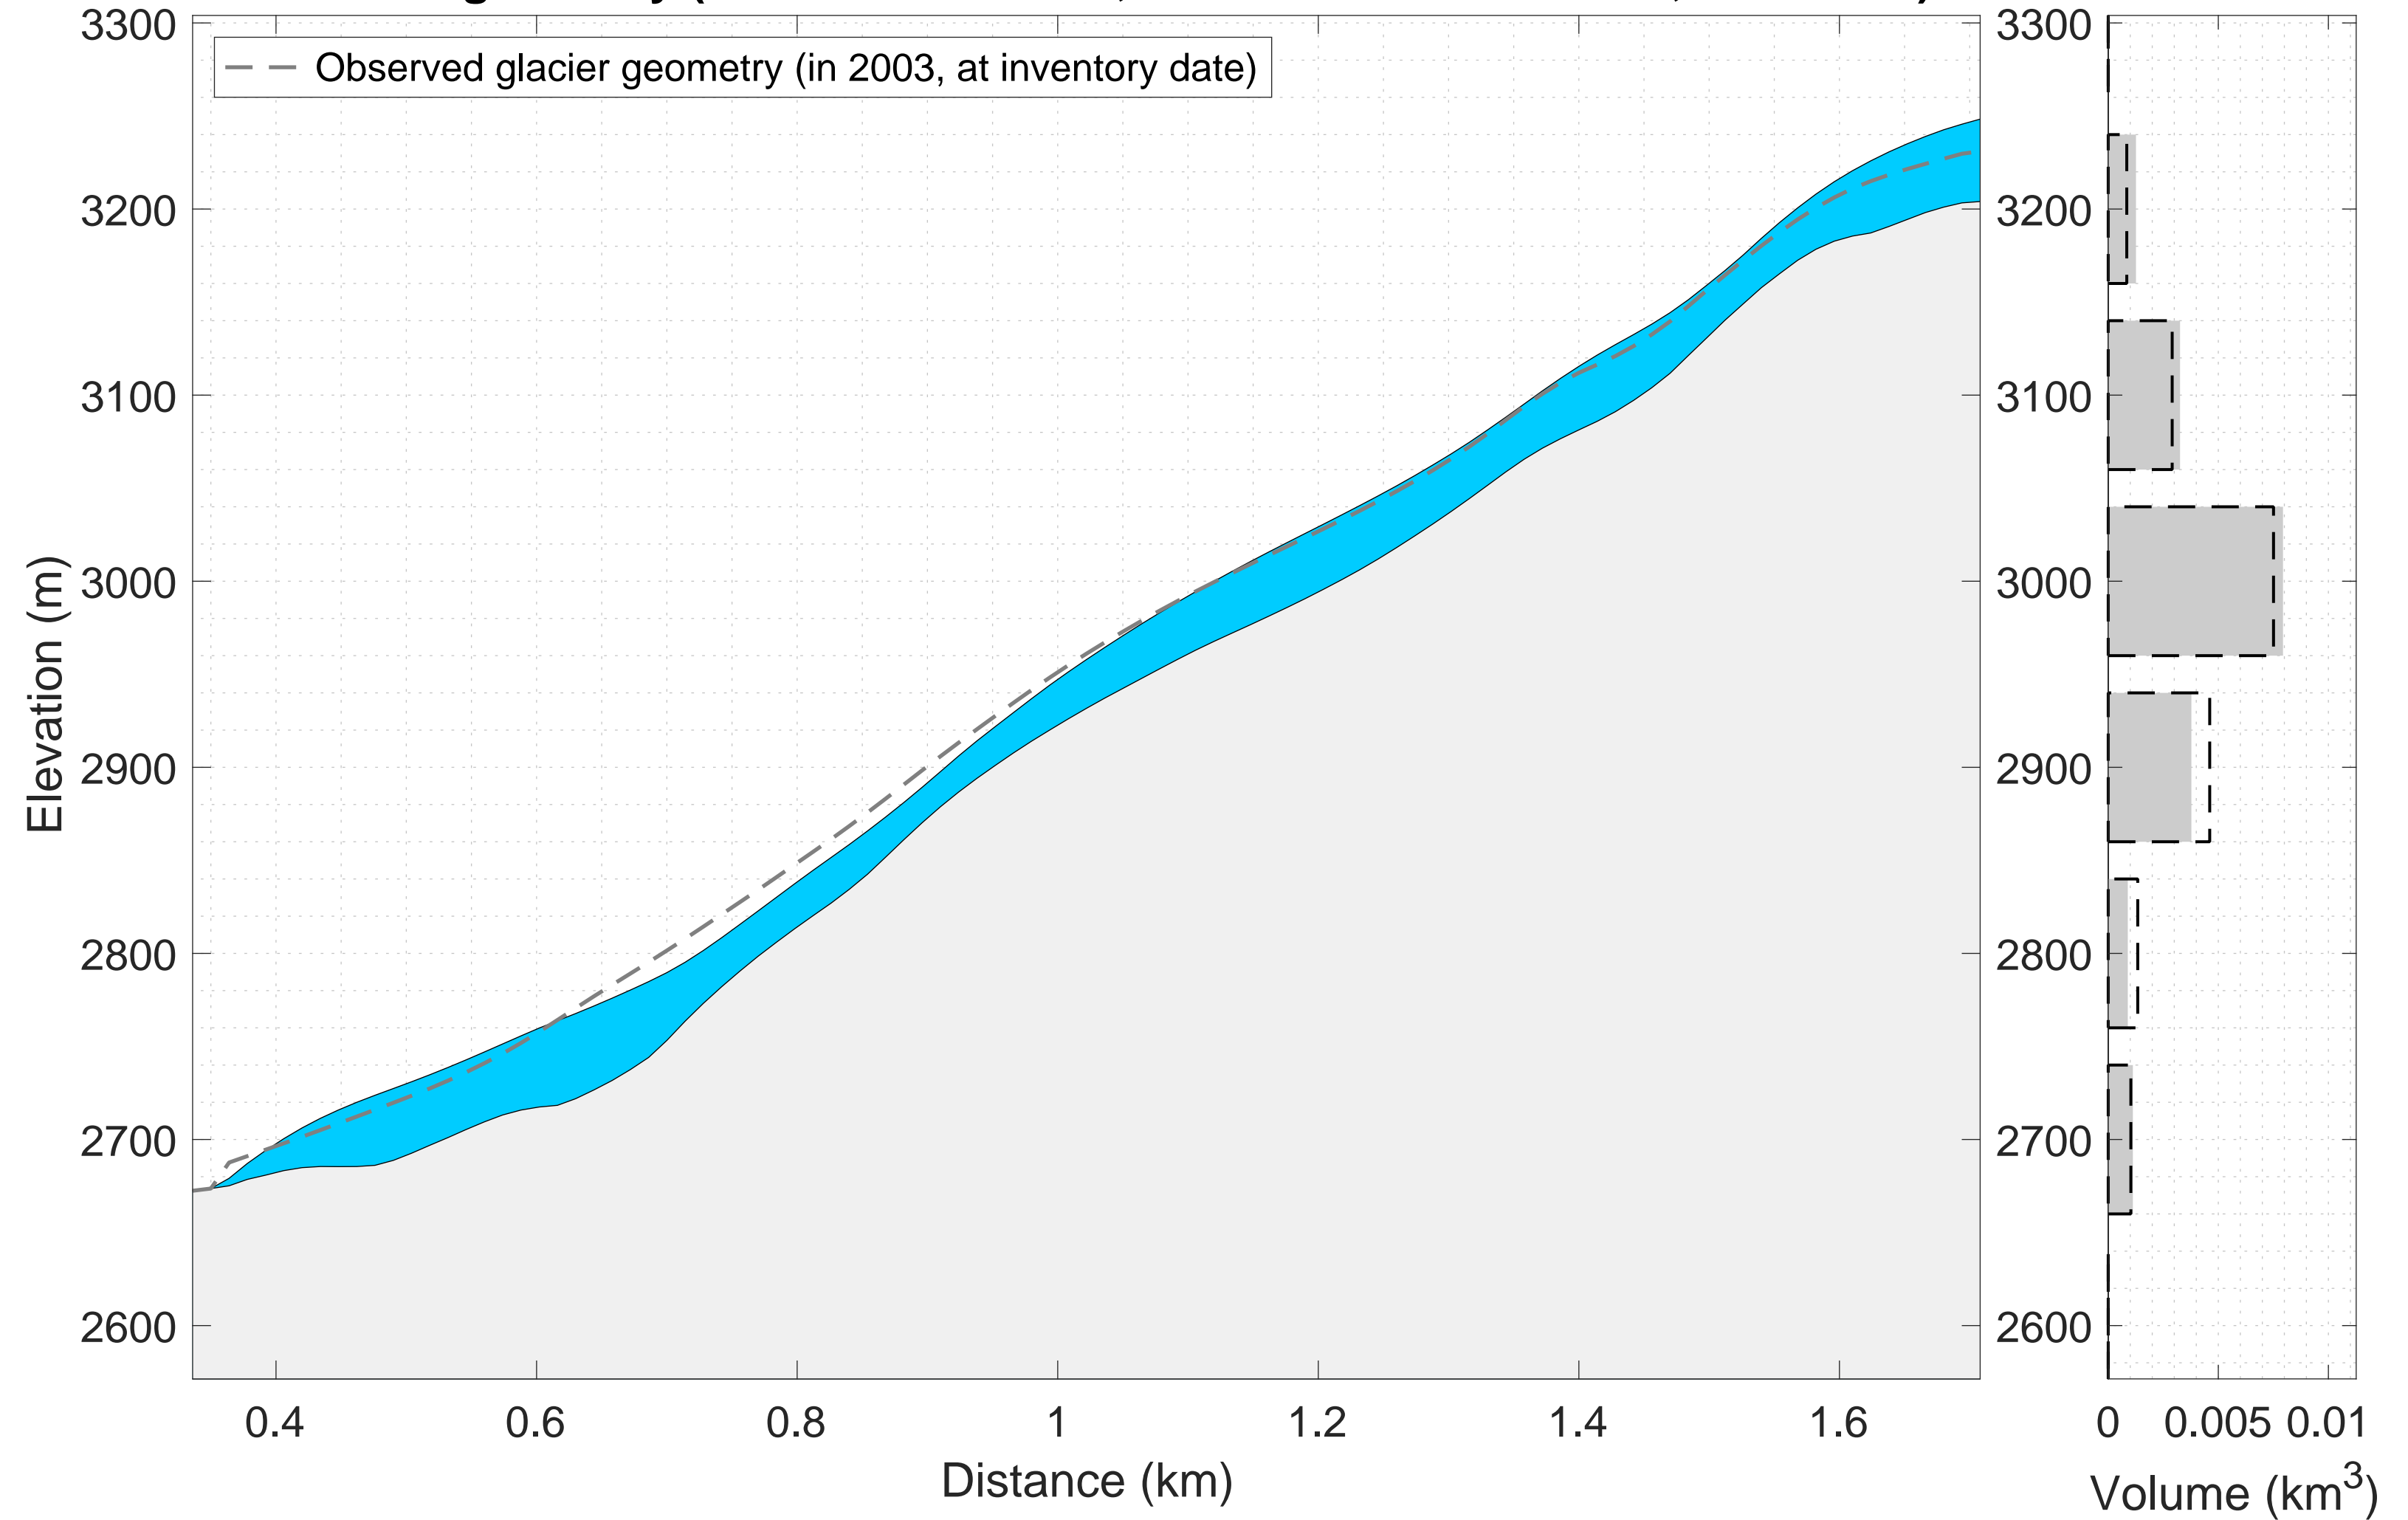

Supplement: Supplementary file 550 [file tc-13-1125-2019-supplement.zip]

**Modelled geometry (Glacier ID = 03625;  $A = 9.3608\text{e-}17 \text{ Pa}^{-3} \text{ a}^{-1}$ ;  $dx = 17 \text{ m}$ )**

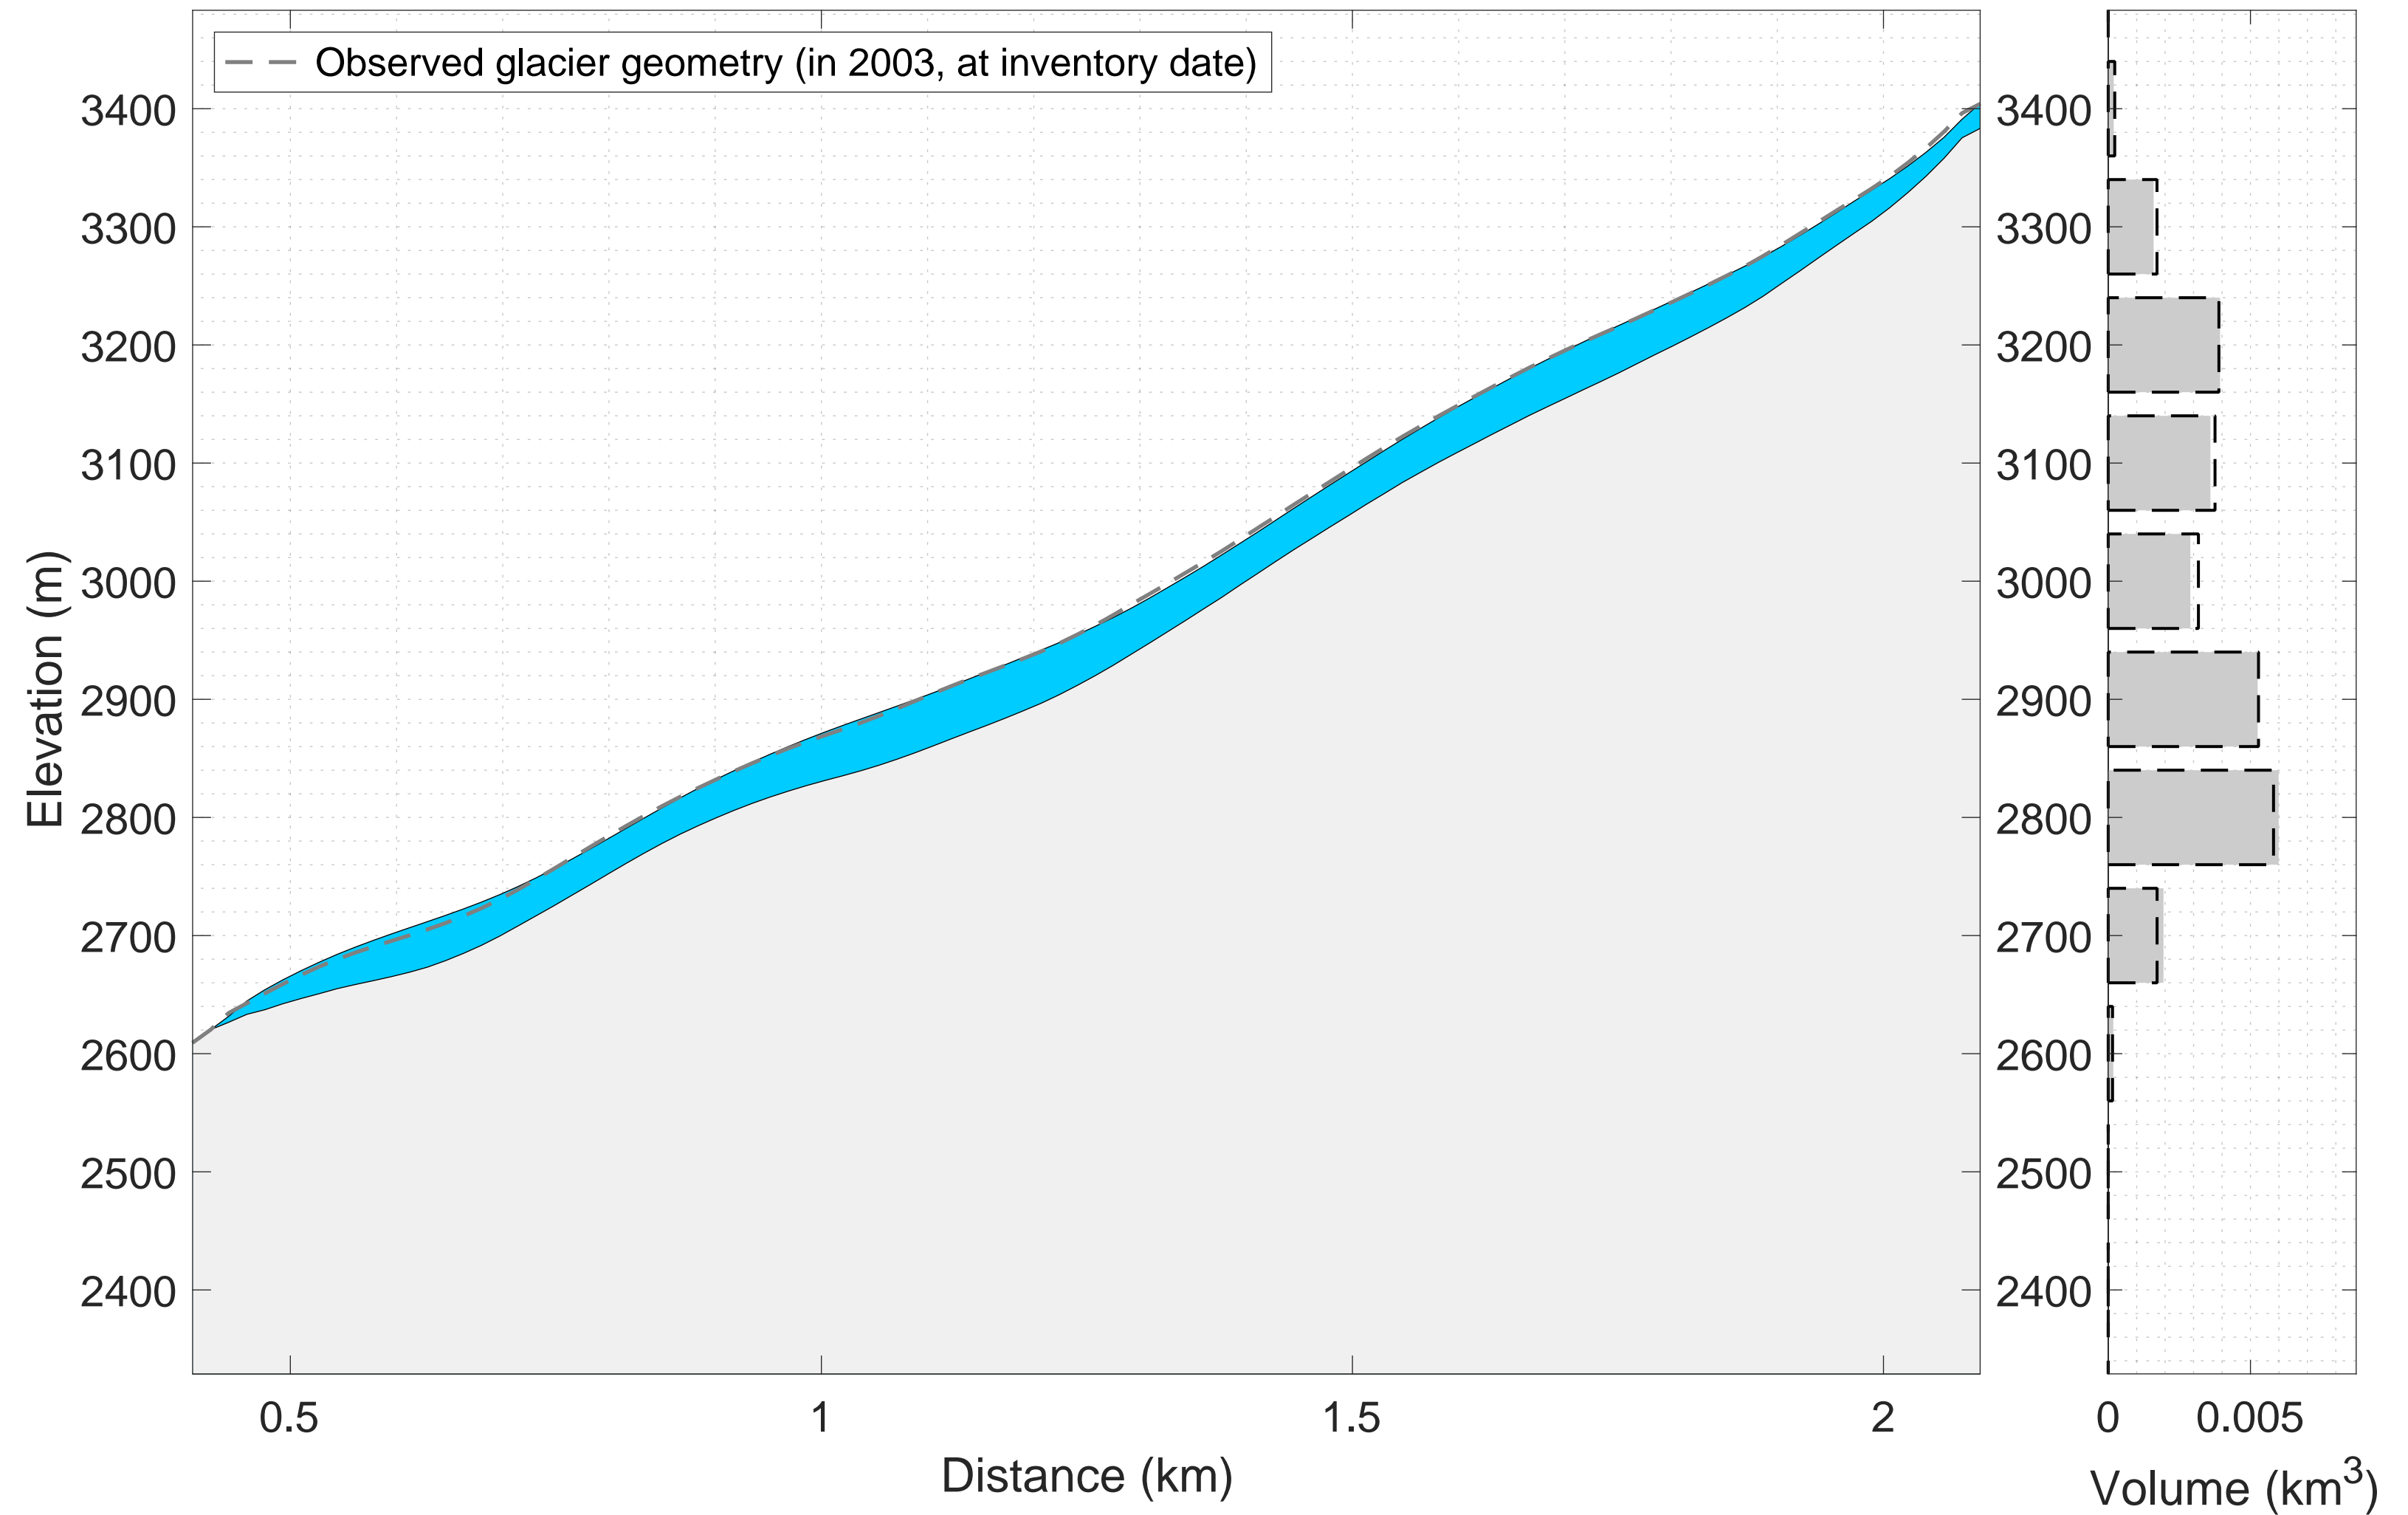

Supplement: Supplementary file 551 [file tc-13-1125-2019-supplement.zip]

**Modelled geometry (Glacier ID = 00457;  $A = 1.5949\text{e-}16 \text{ Pa}^{-3} \text{ a}^{-1}$ ;  $dx = 11 \text{ m}$ )**

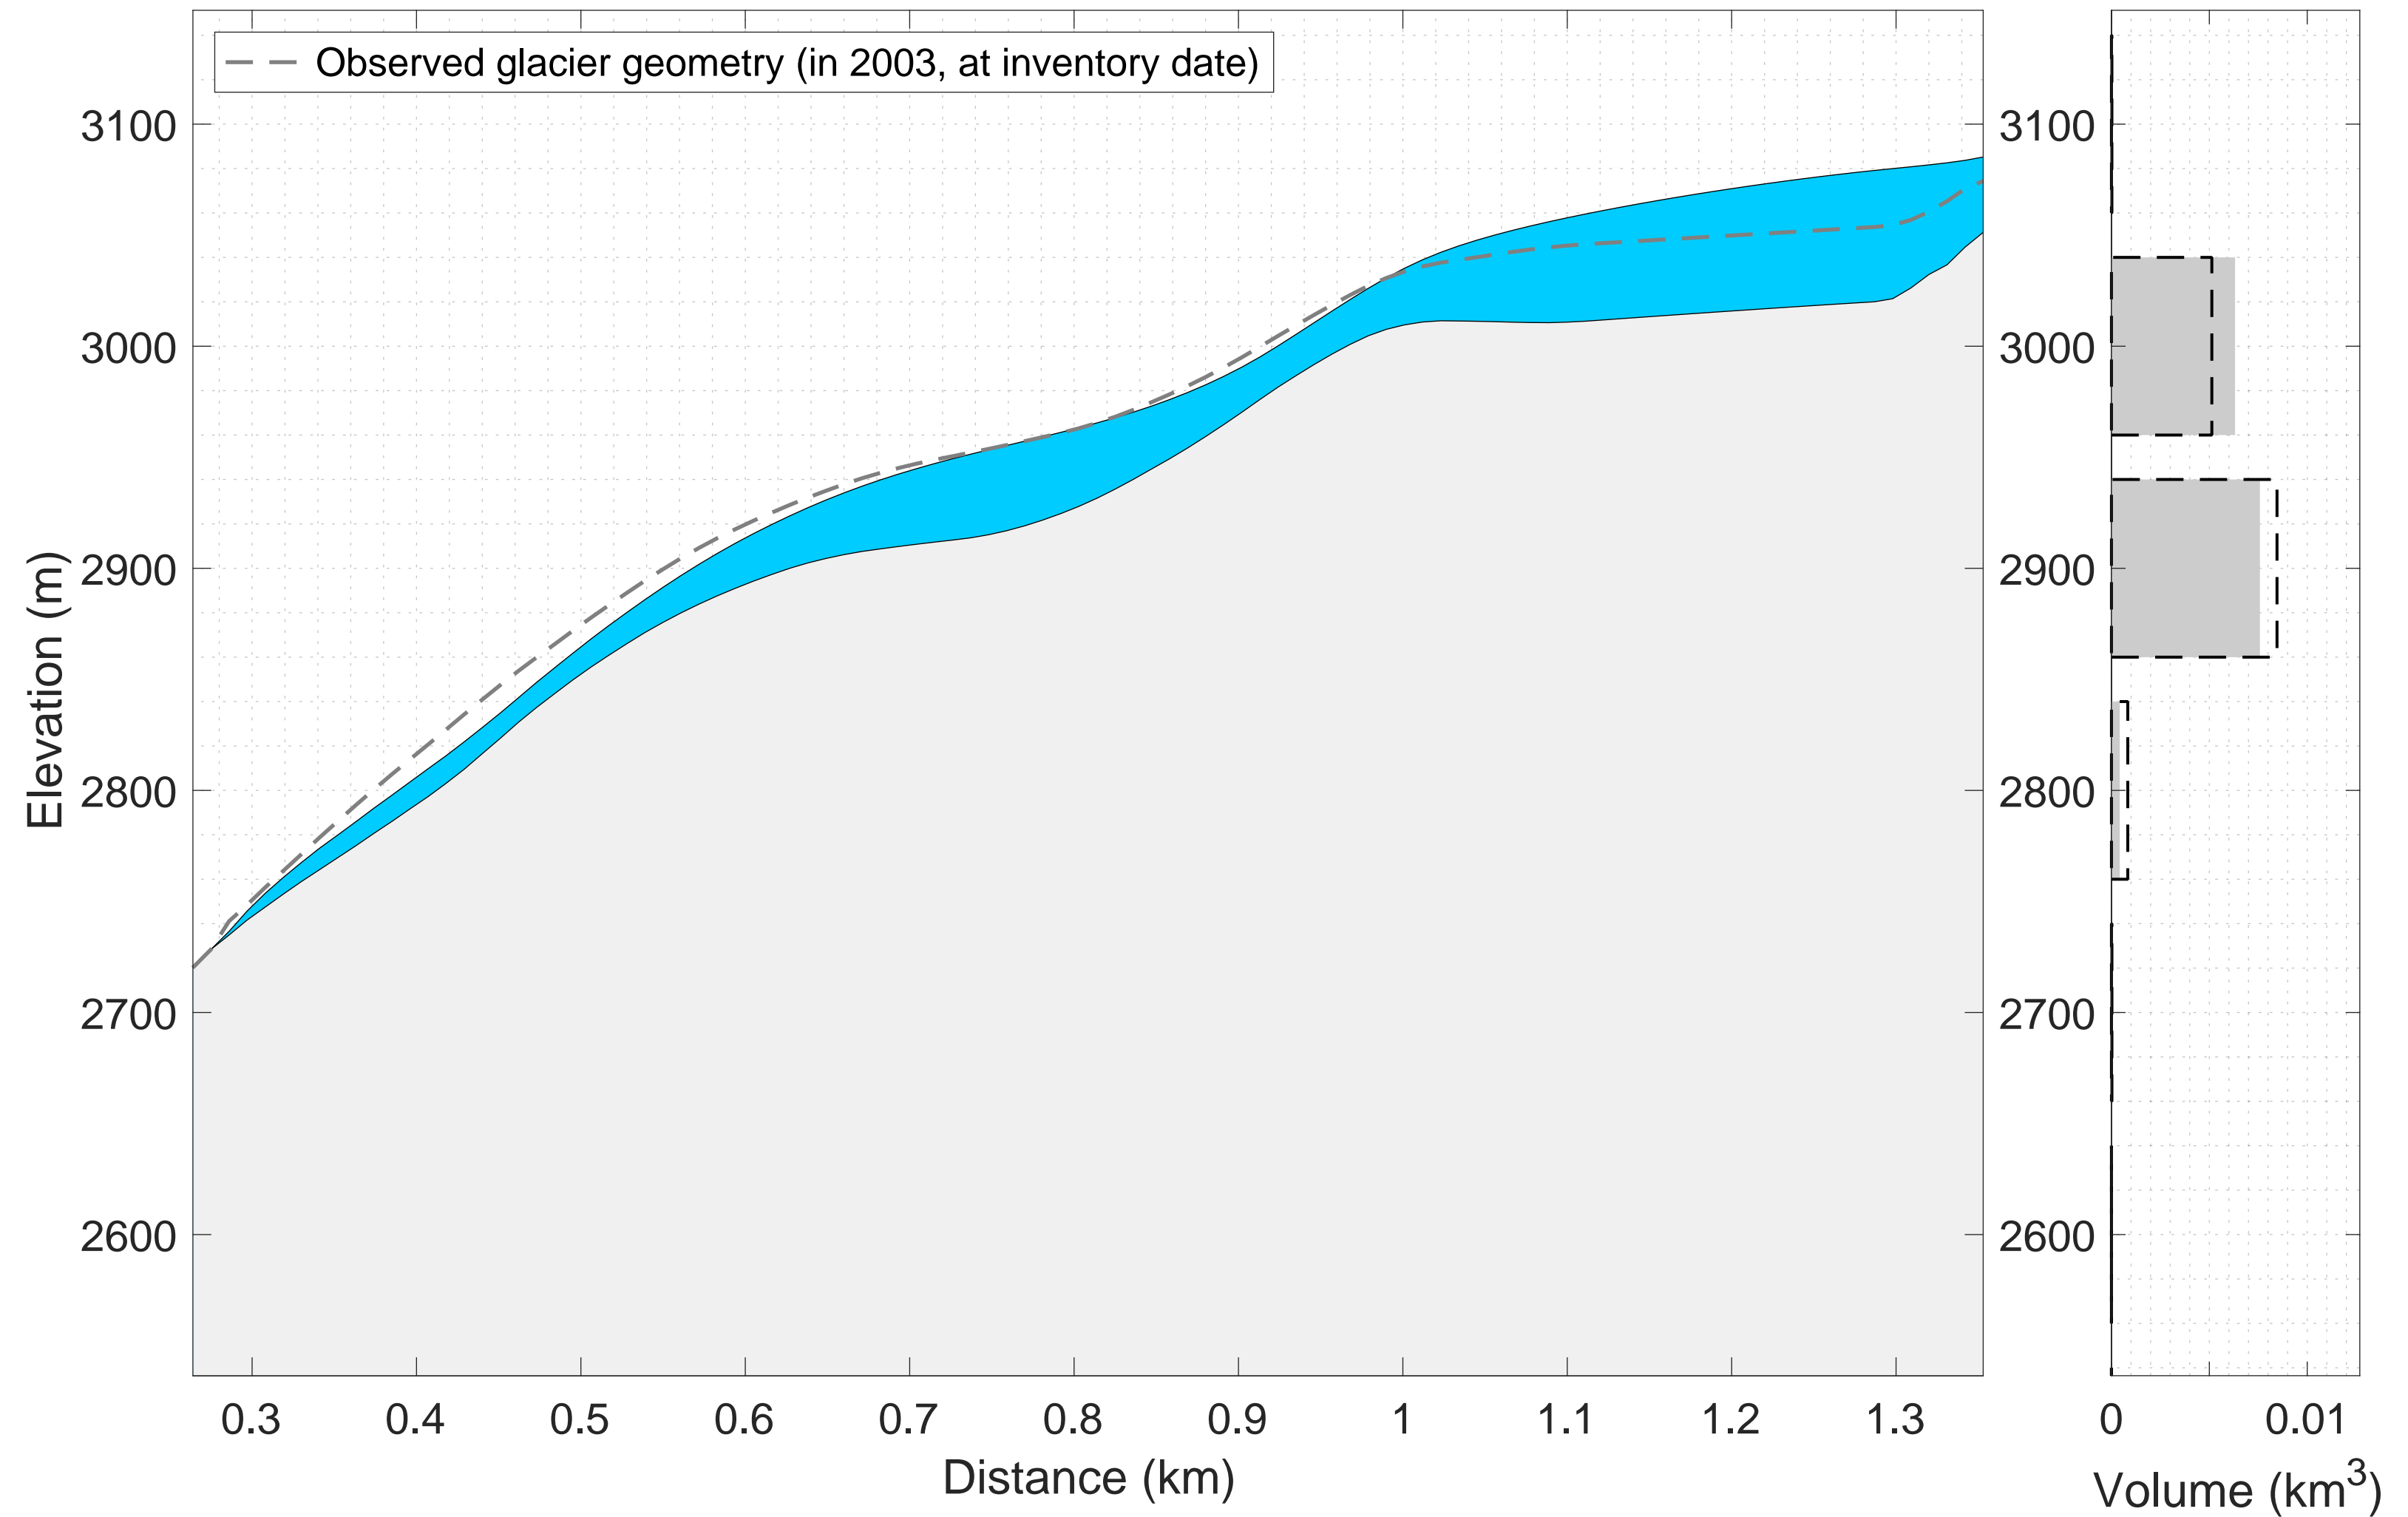

Supplement: Supplementary file 552 [file tc-13-1125-2019-supplement.zip]

**Modelled geometry (Glacier ID = 02285;  $A = 1.5371\text{e-}16 \text{ Pa}^{-3} \text{ a}^{-1}$ ;  $dx = 33 \text{ m}$ )**

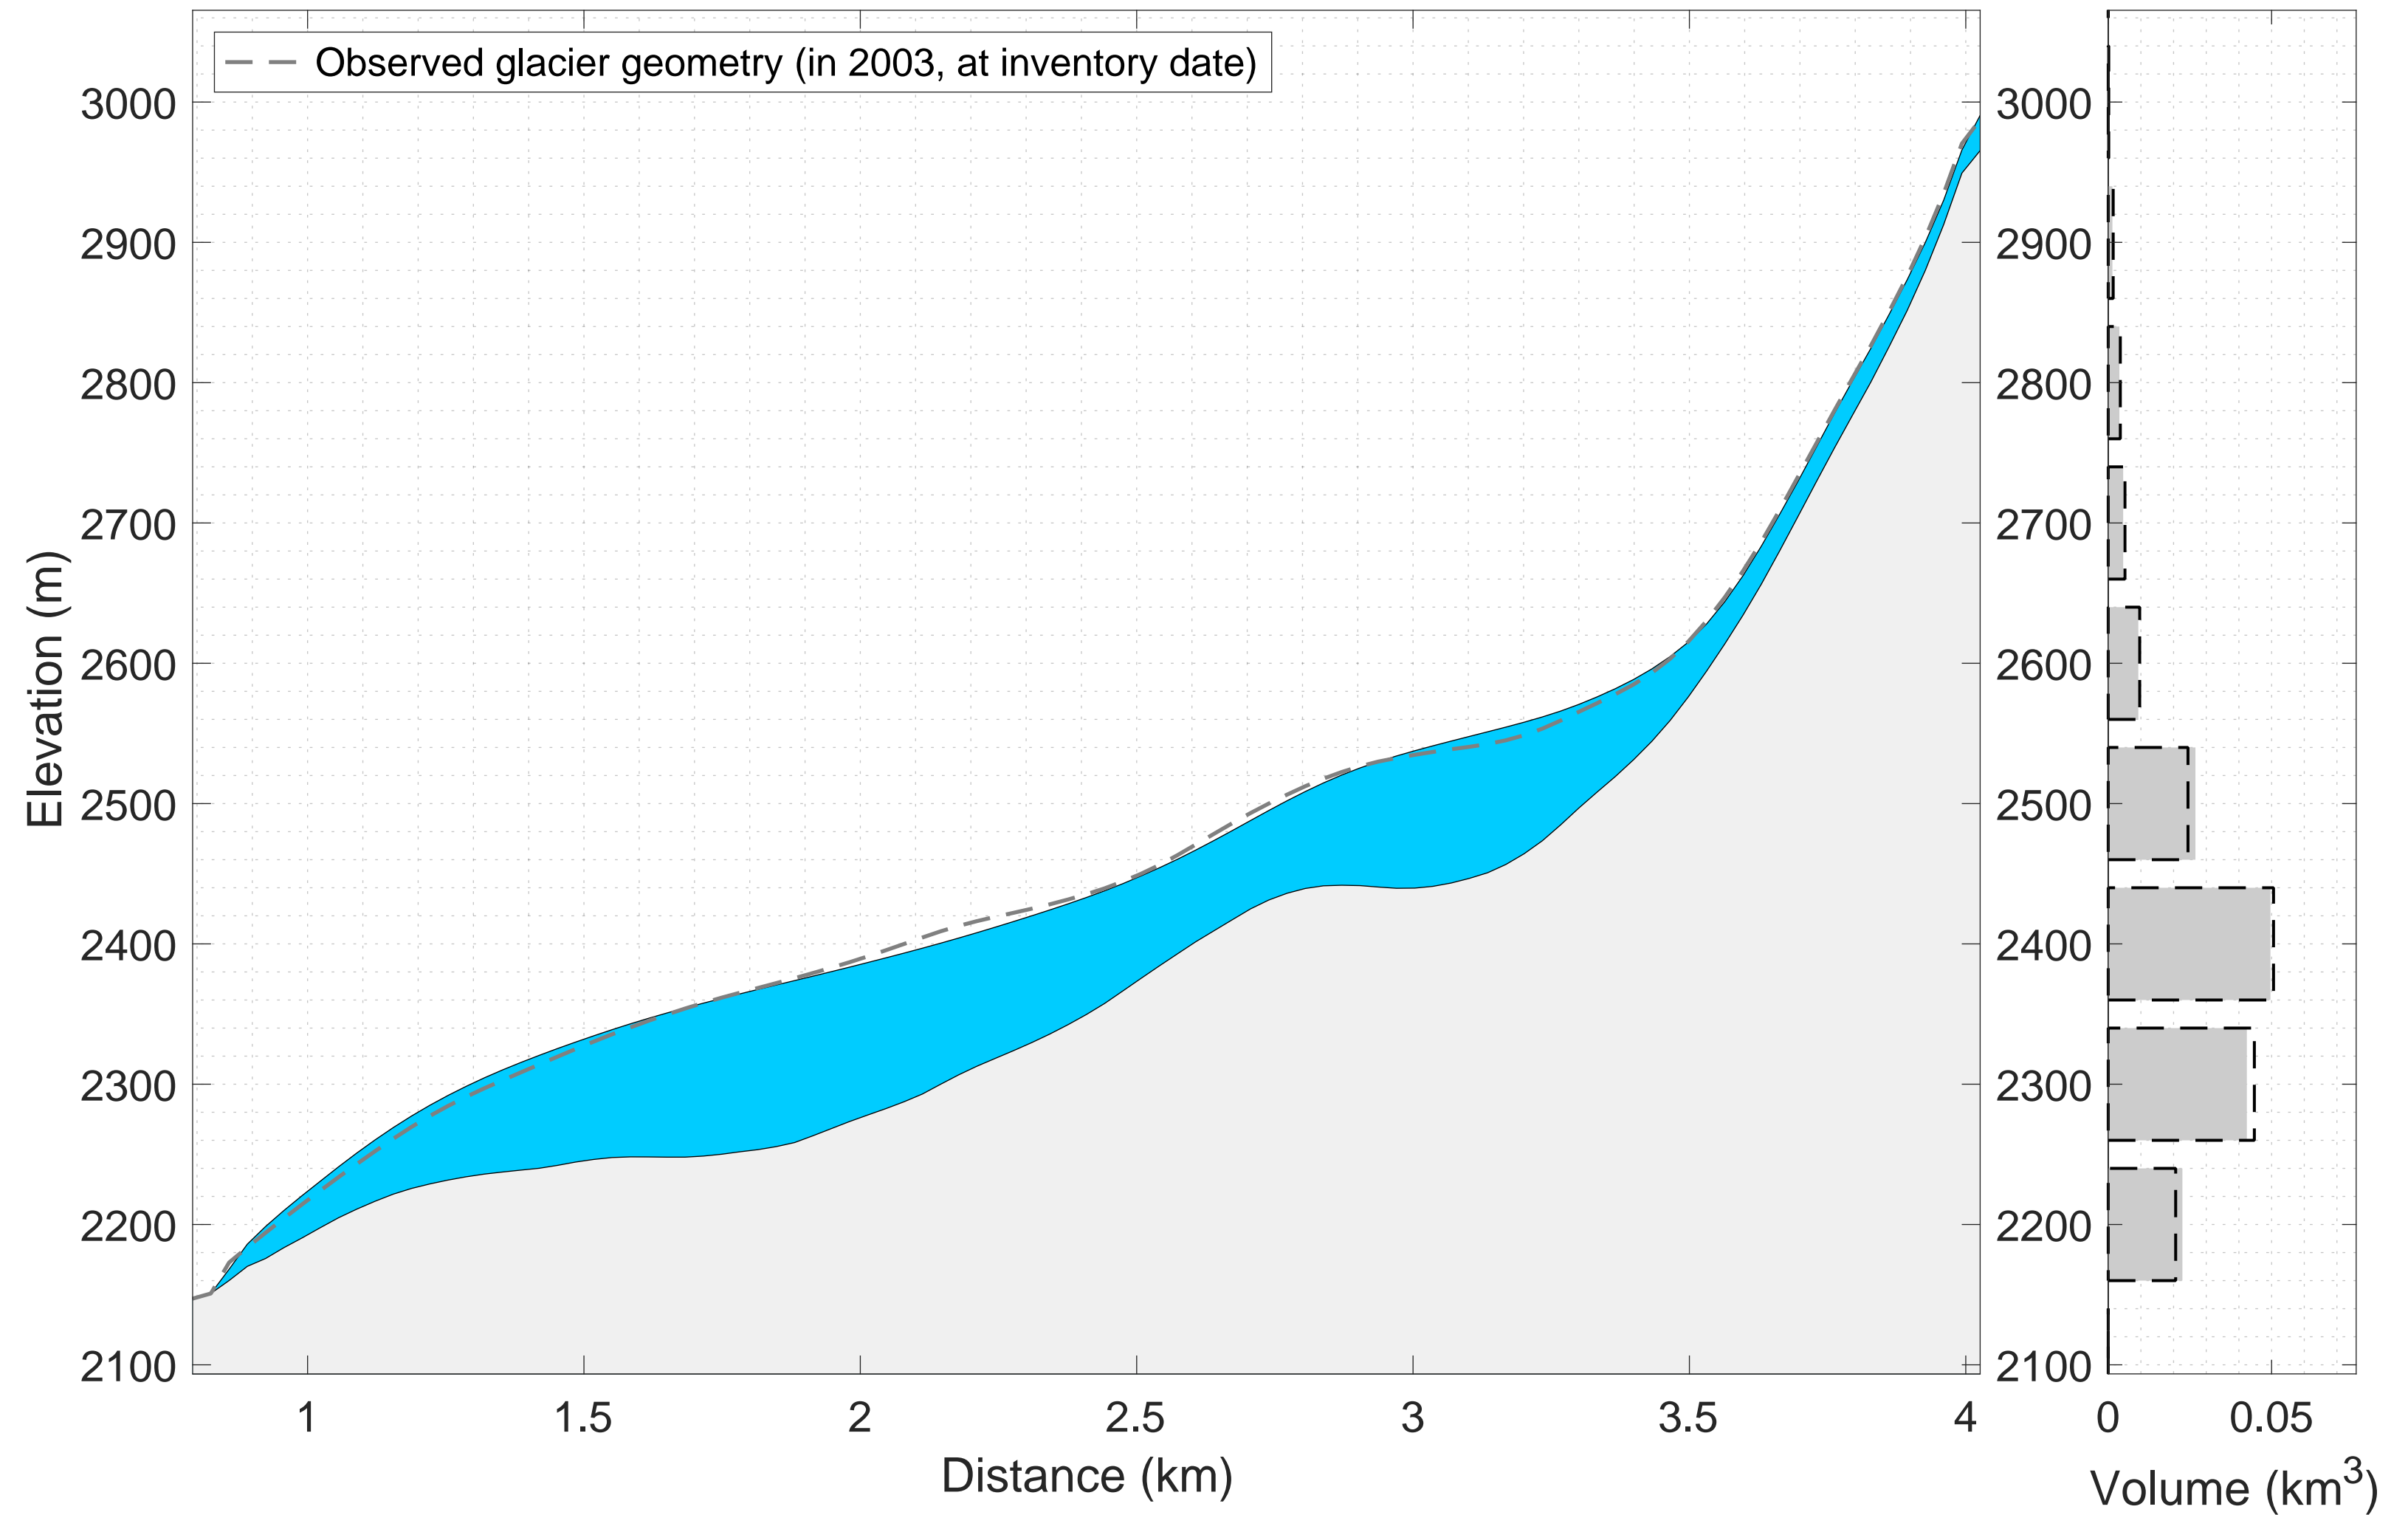

Supplement: Supplementary file 553 [file tc-13-1125-2019-supplement.zip]

**Modelled geometry (Glacier ID = 03001;  $A = 1.6864\text{e-}16 \text{ Pa}^{-3} \text{ a}^{-1}$ ;  $dx = 75 \text{ m}$ )**

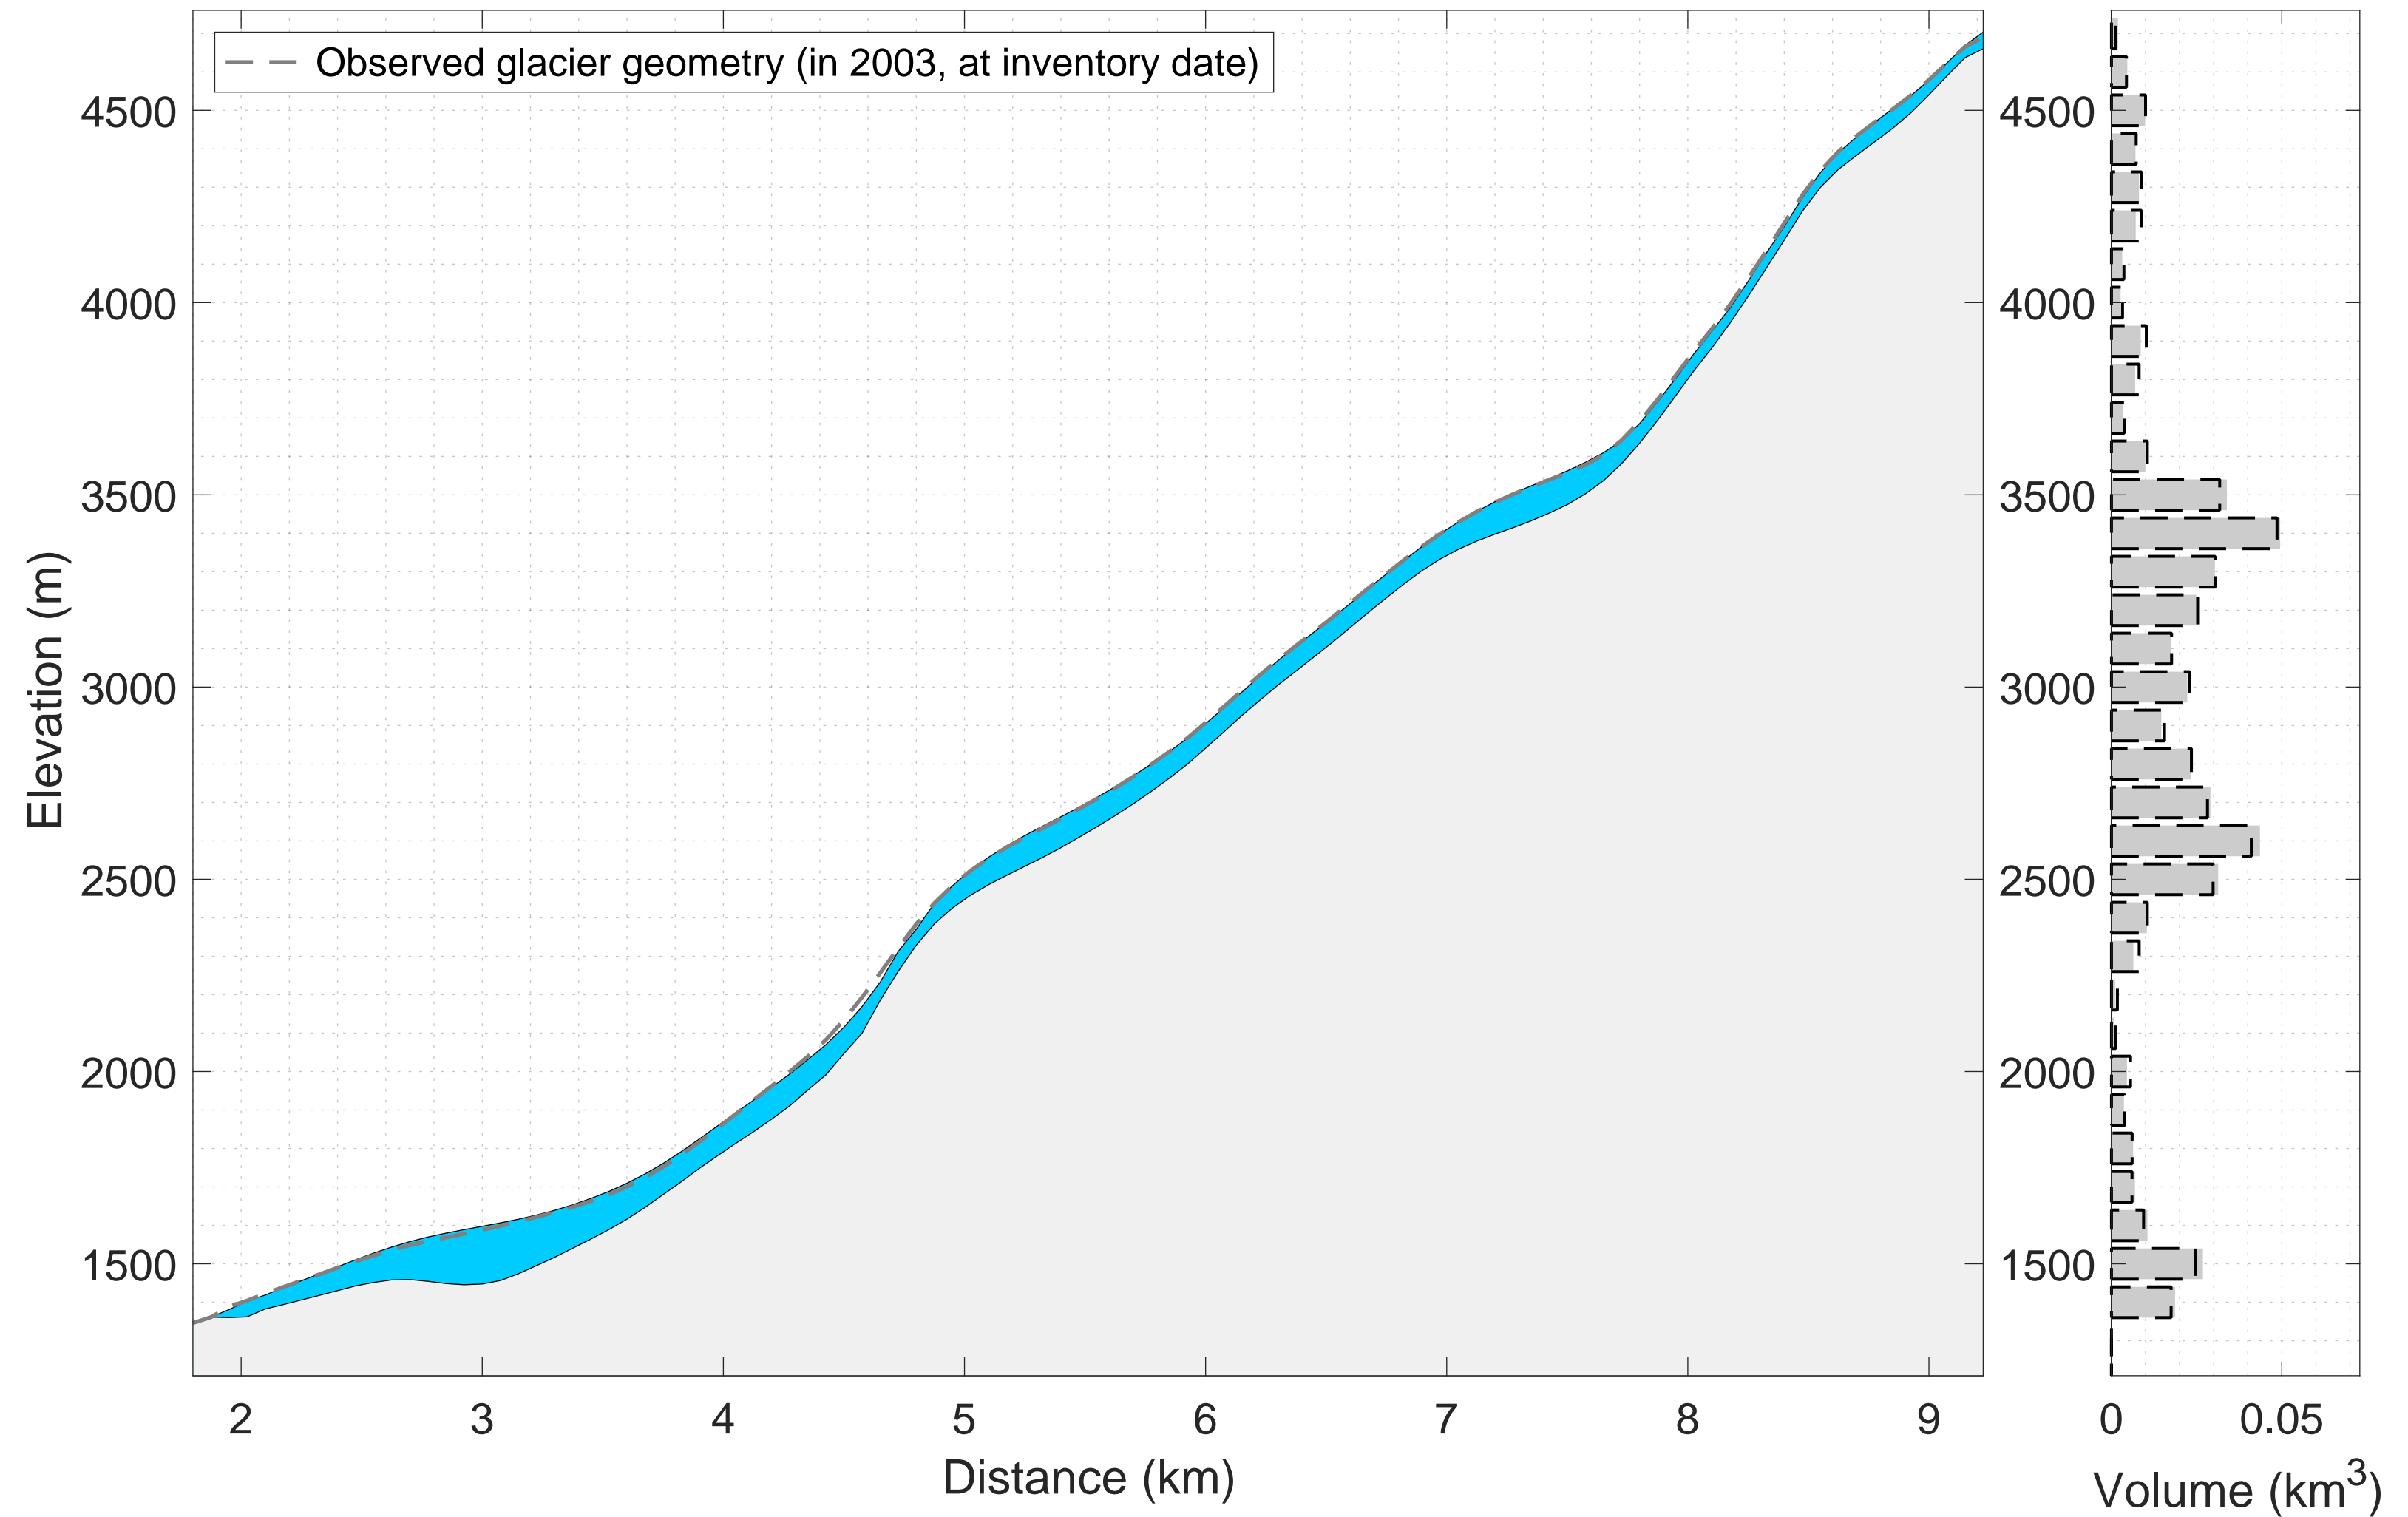

Supplement: Supplementary file 554 [file tc-13-1125-2019-supplement.zip]

**Modelled geometry (Glacier ID = 00408;  $A = 4.3223\text{e-}16 \text{ Pa}^{-3} \text{ a}^{-1}$ ;  $dx = 14 \text{ m}$ )**

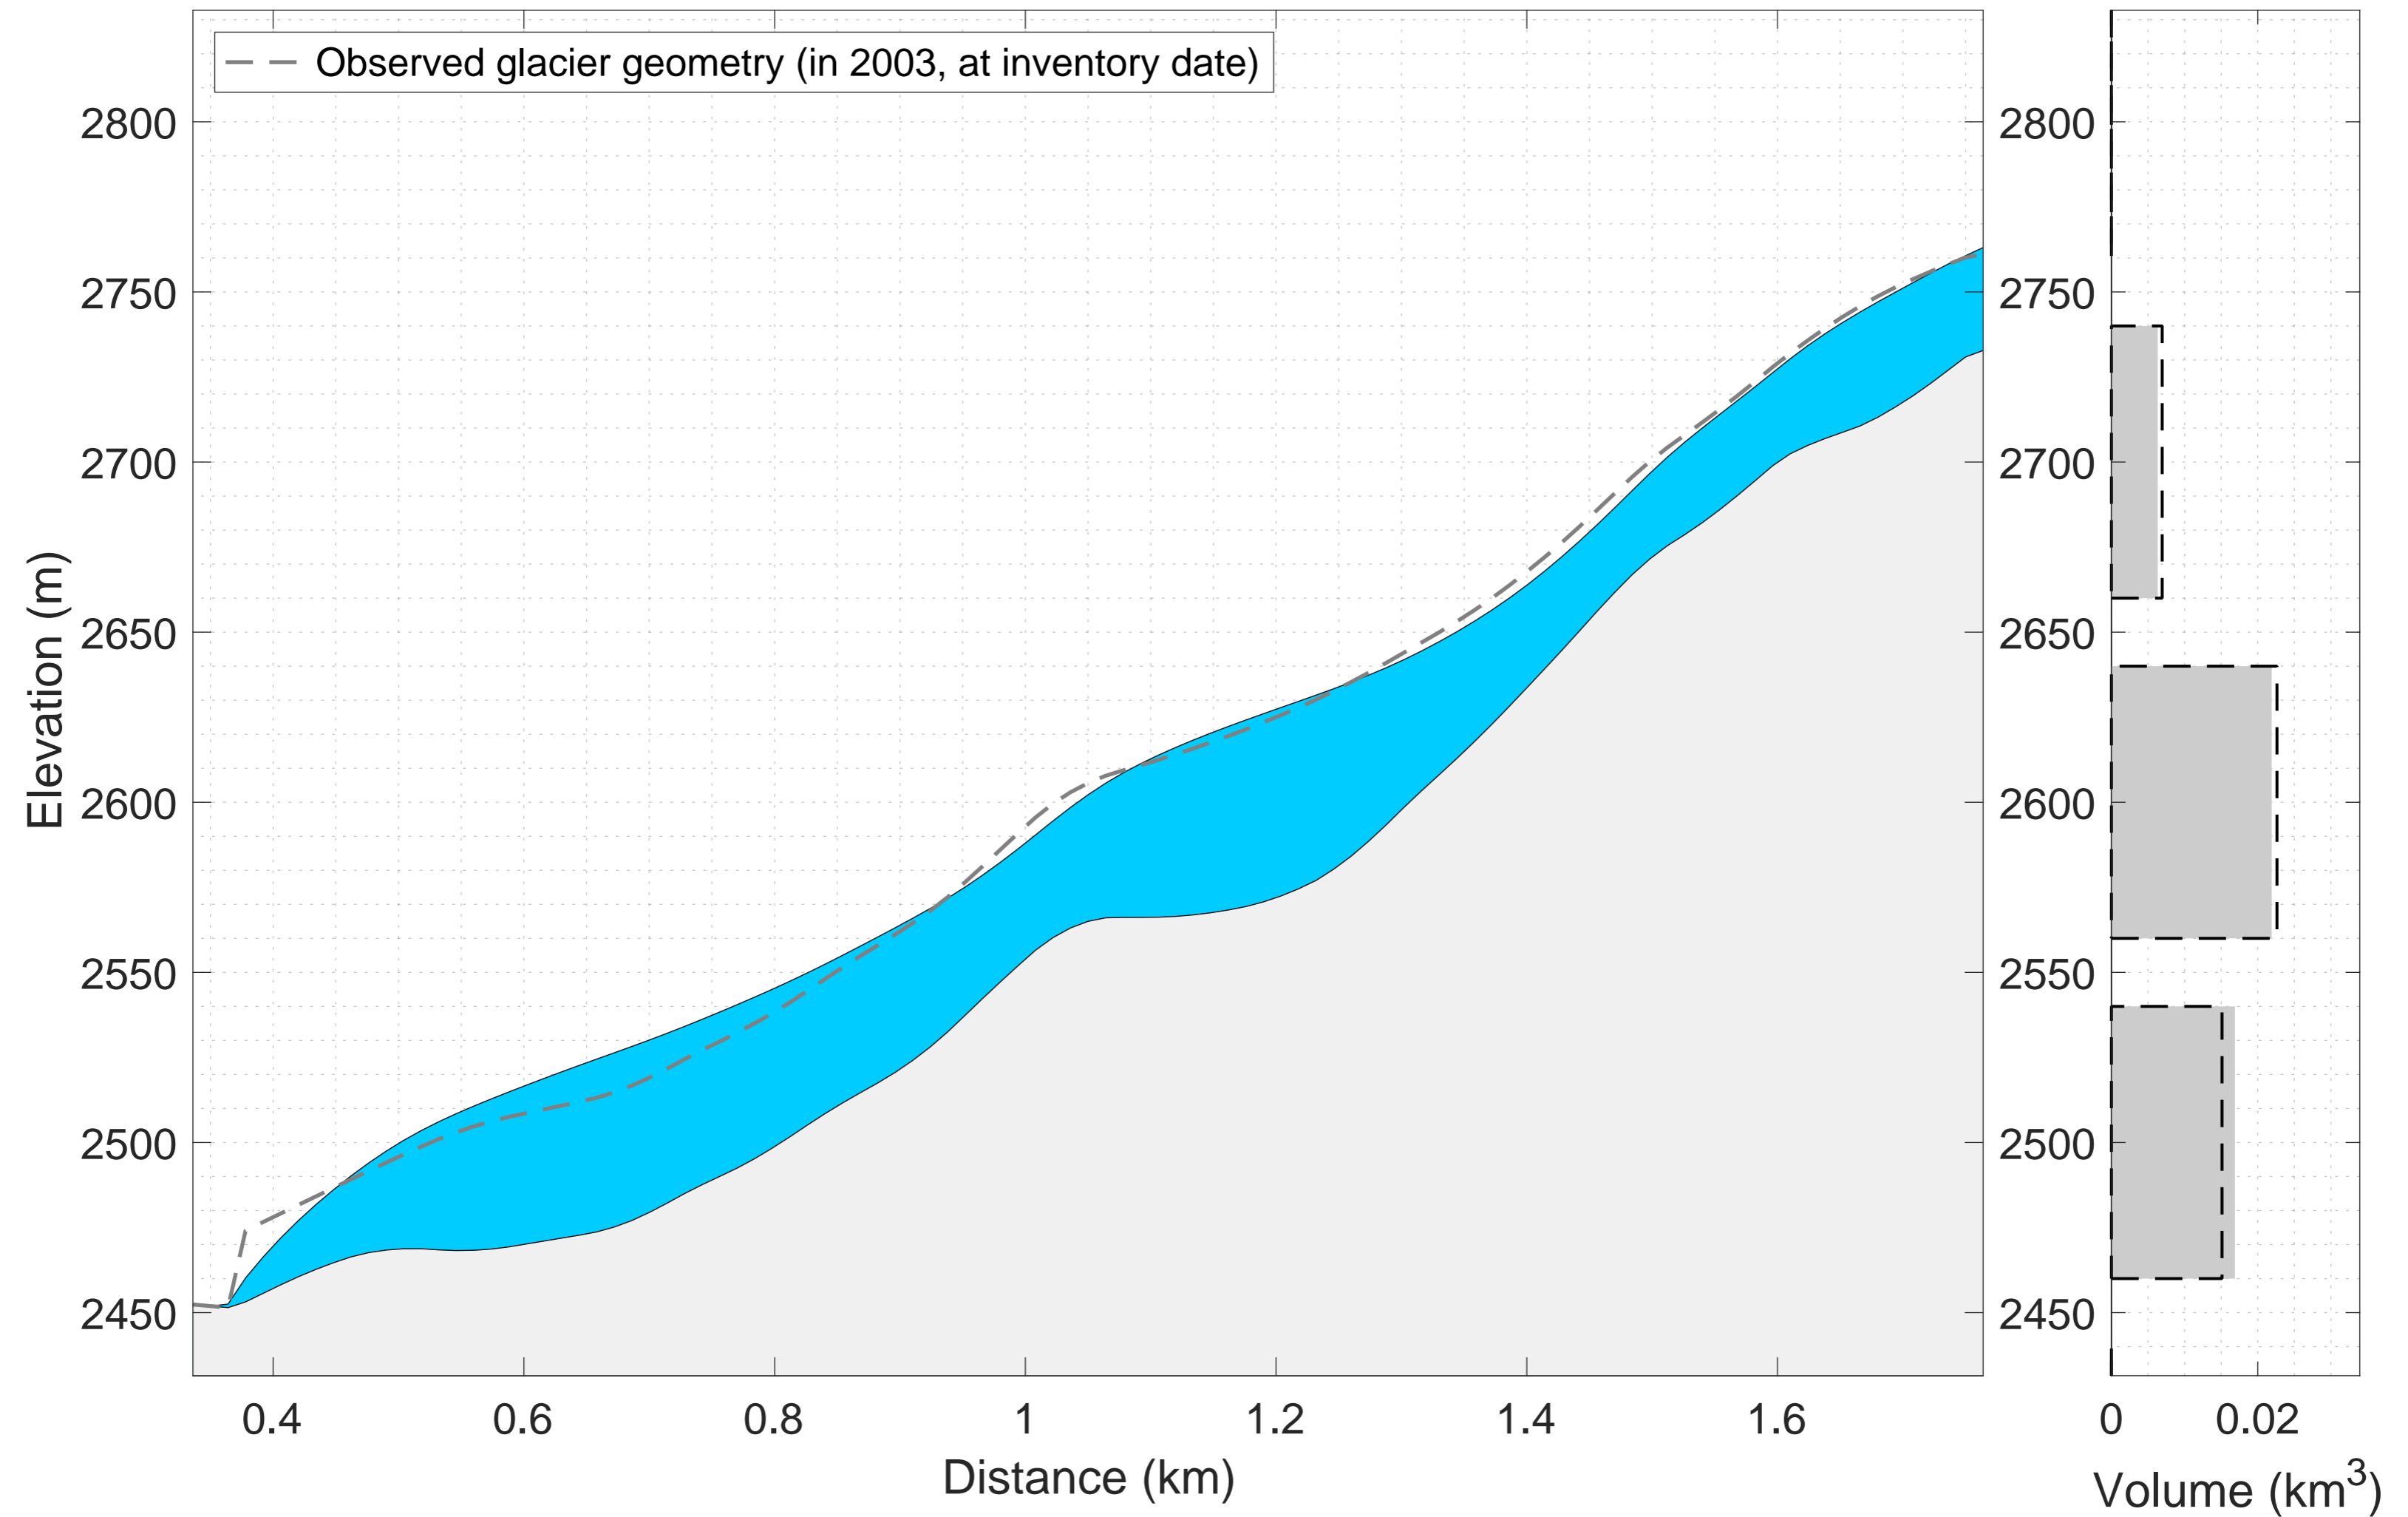

Supplement: Supplementary file 555 [file tc-13-1125-2019-supplement.zip]

**Modelled geometry (Glacier ID = 00548;  $A = 8.9509\text{e-}17 \text{ Pa}^{-3} \text{ a}^{-1}$ ;  $dx = 19 \text{ m}$ )**

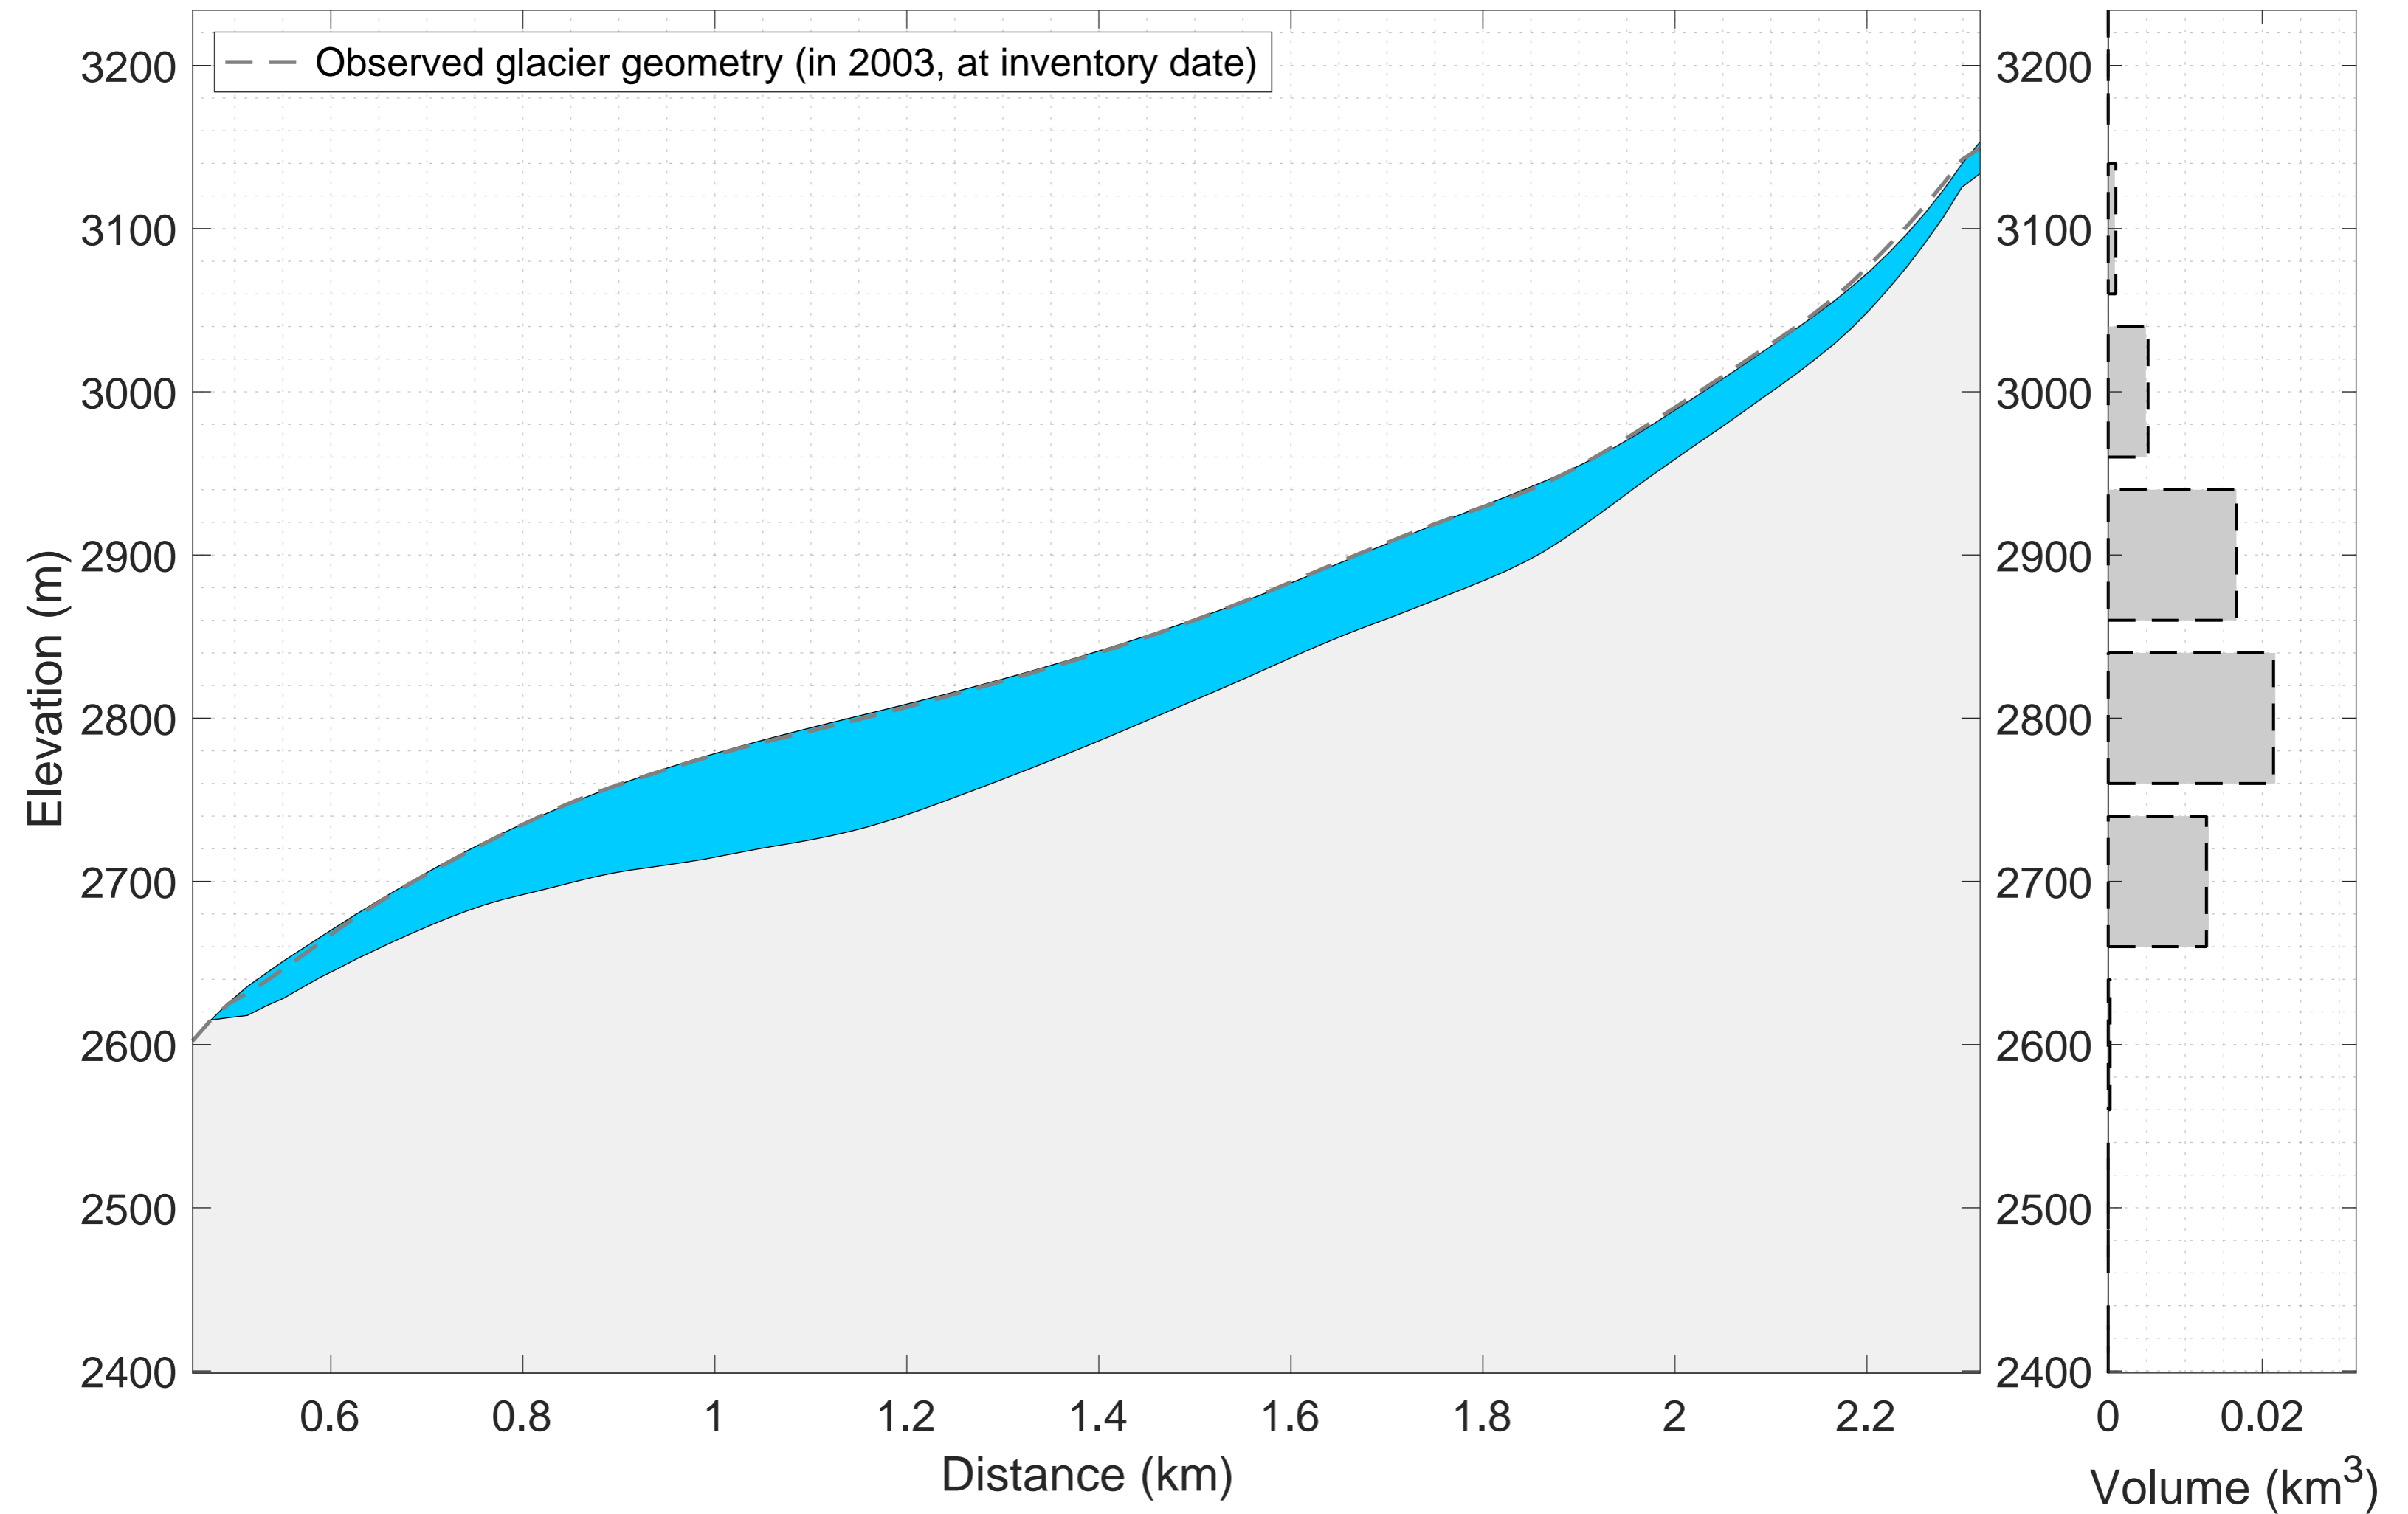

Supplement: Supplementary file 556 [file tc-13-1125-2019-supplement.zip]

**Modelled geometry (Glacier ID = 02095;  $A = 1.2202\text{e-}16 \text{ Pa}^{-3} \text{ a}^{-1}$ ;  $dx = 11 \text{ m}$ )**

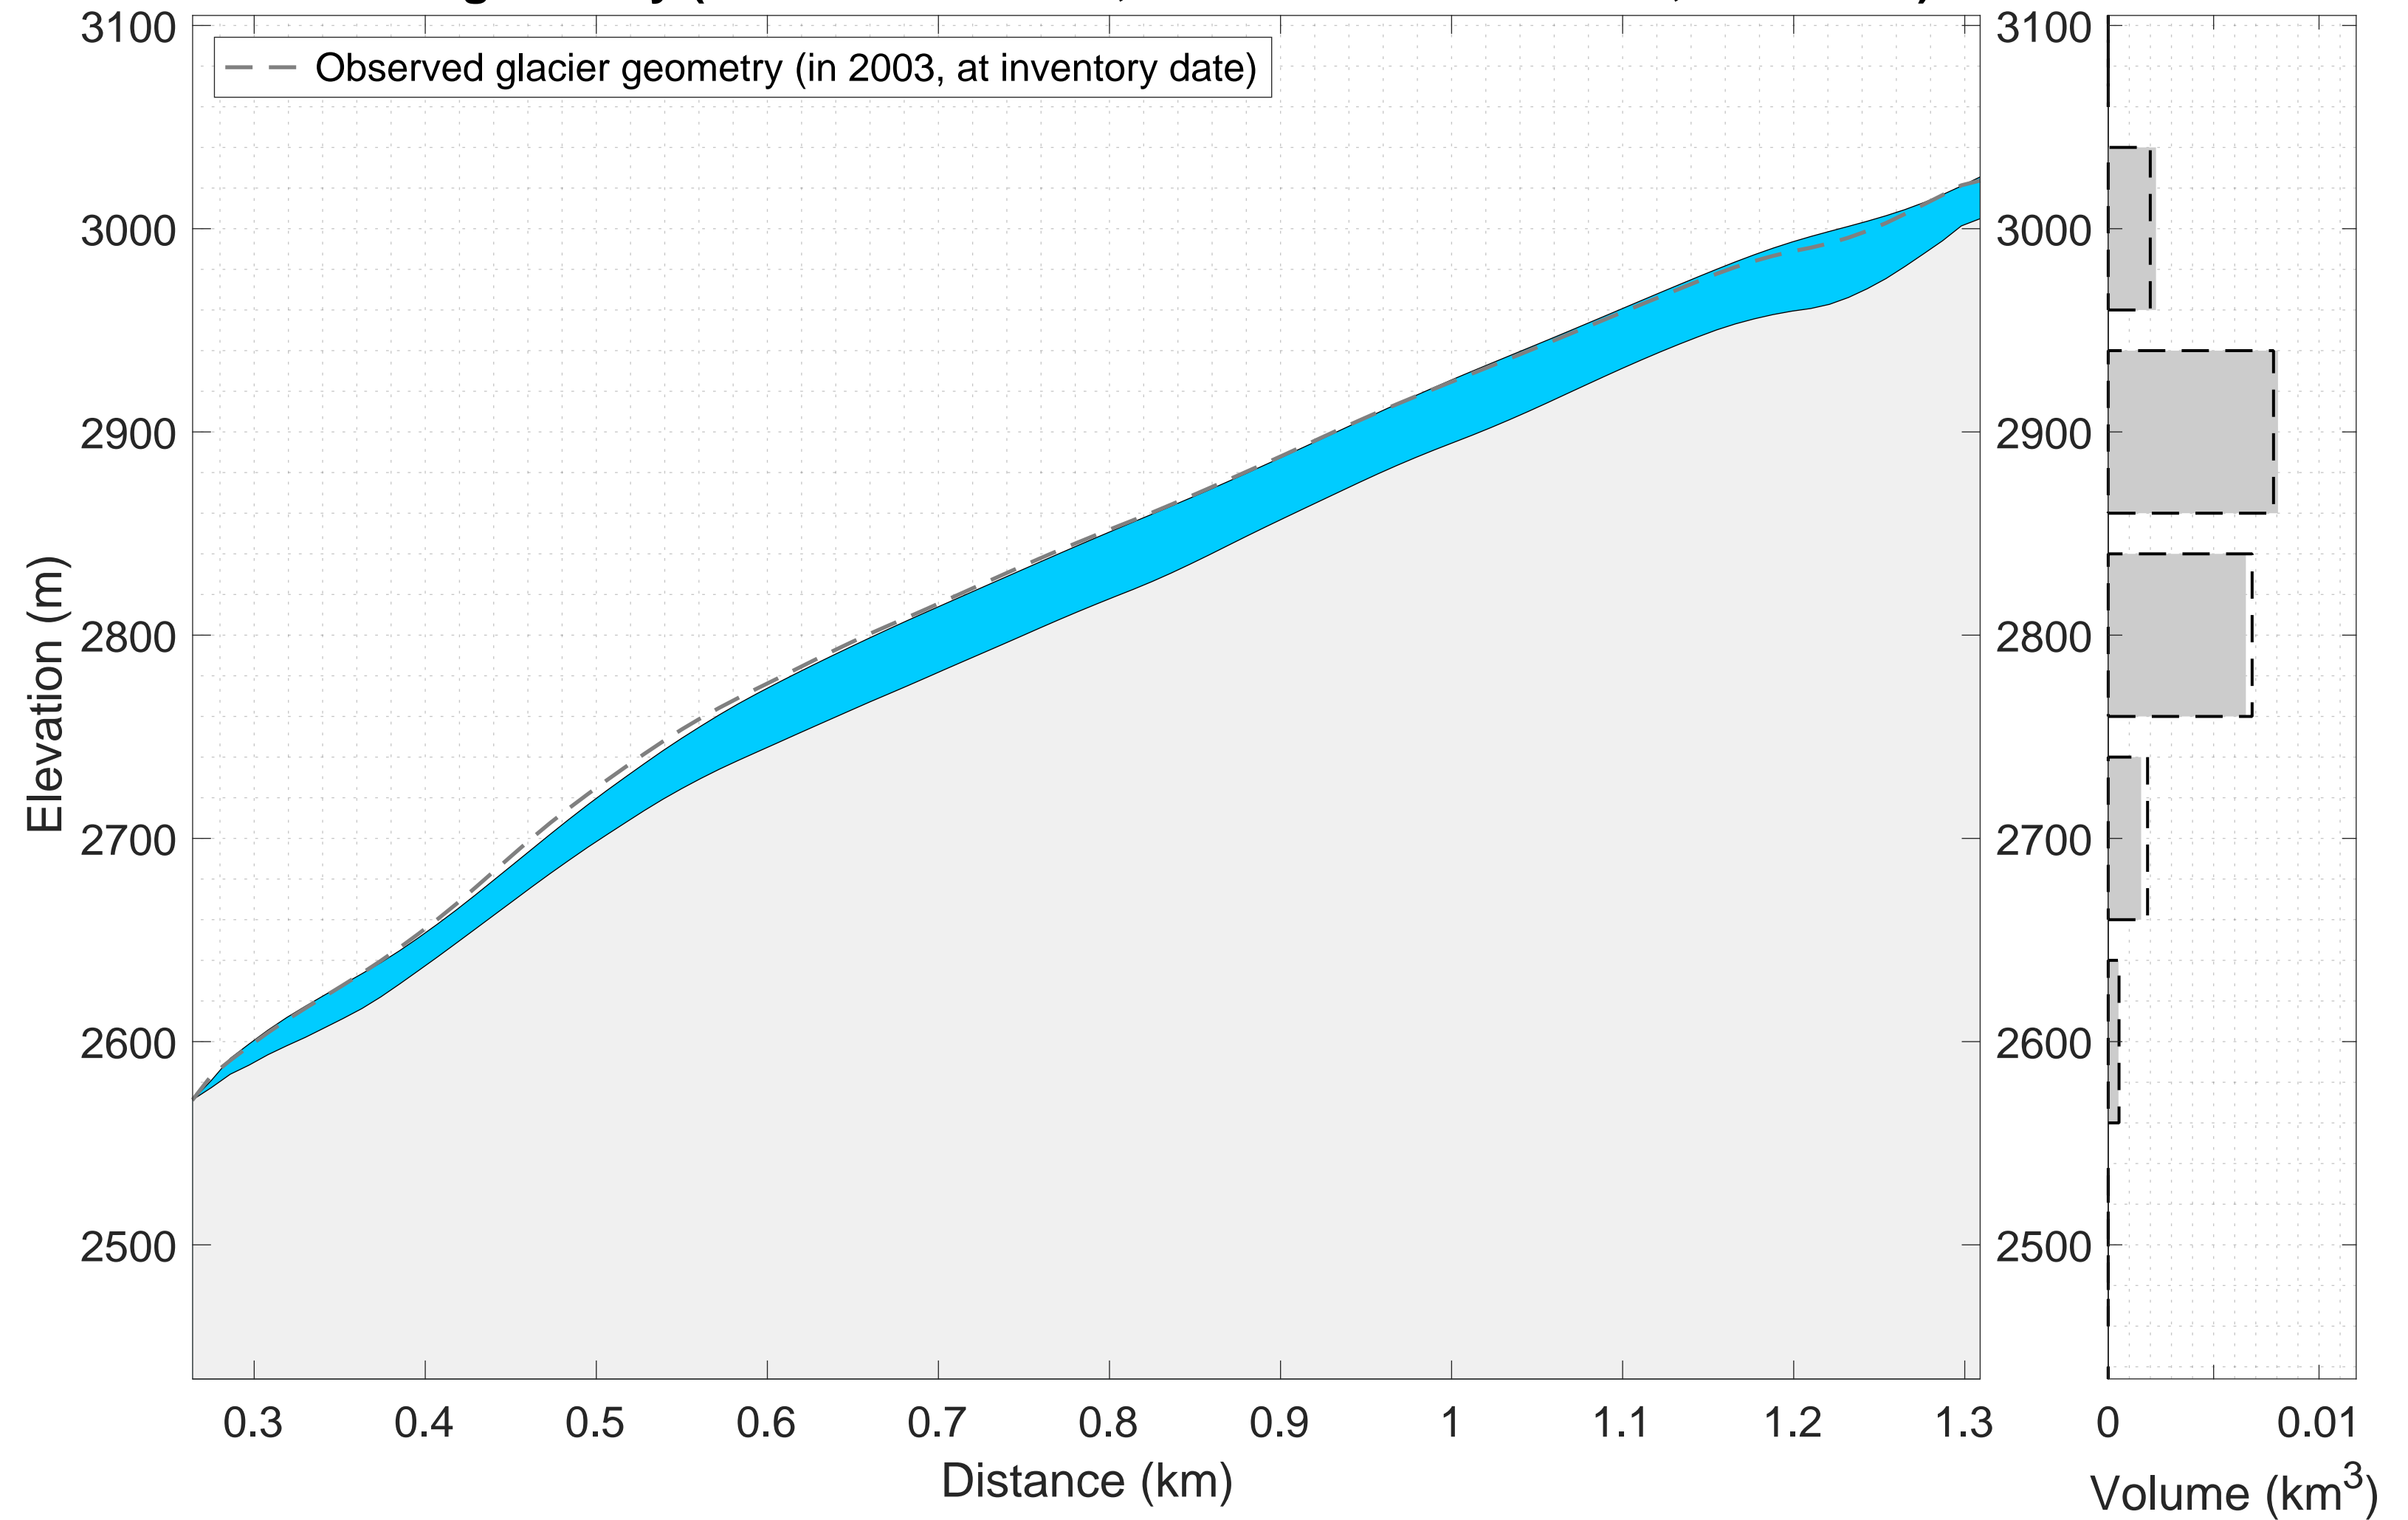

Supplement: Supplementary file 557 [file tc-13-1125-2019-supplement.zip]

**Modelled geometry (Glacier ID = 02357;  $A = 7.2483\text{e-}17 \text{ Pa}^{-3} \text{ a}^{-1}$ ;  $dx = 21 \text{ m}$ )**

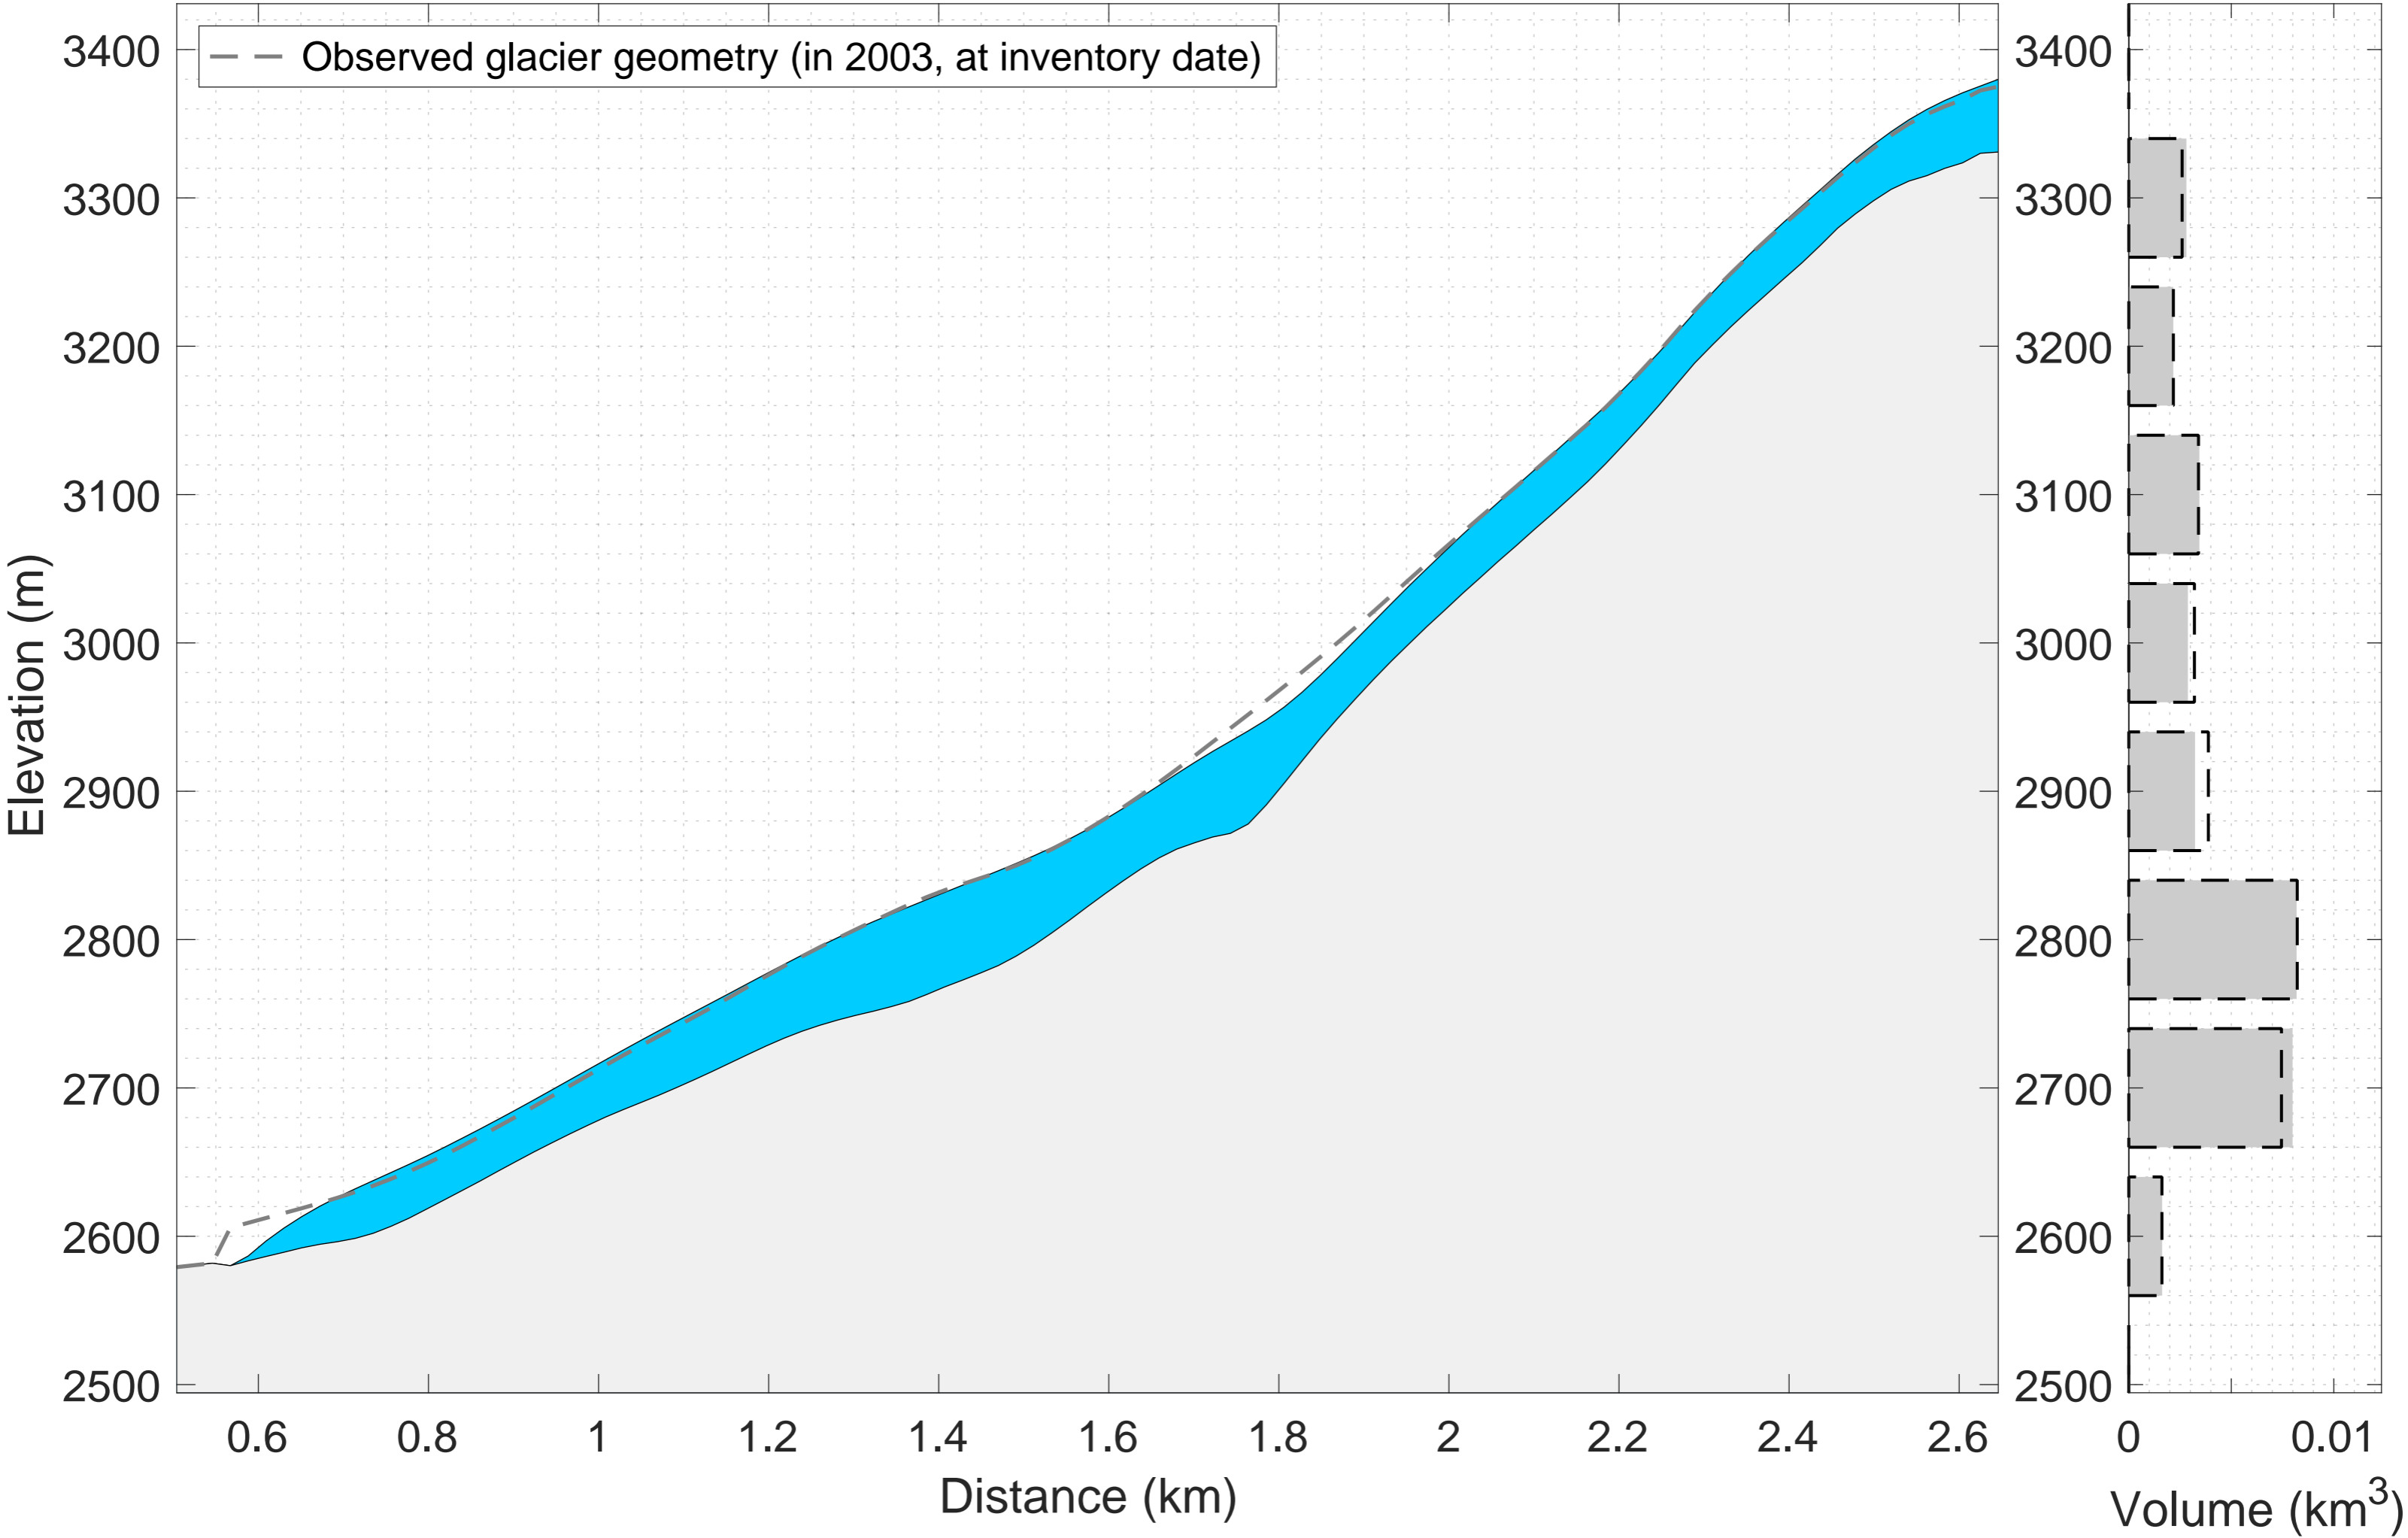

Supplement: Supplementary file 558 [file tc-13-1125-2019-supplement.zip]

**Modelled geometry (Glacier ID = 02979;  $A = 7.443\text{e-}17 \text{ Pa}^{-3} \text{ a}^{-1}$ ;  $dx = 18 \text{ m}$ )**

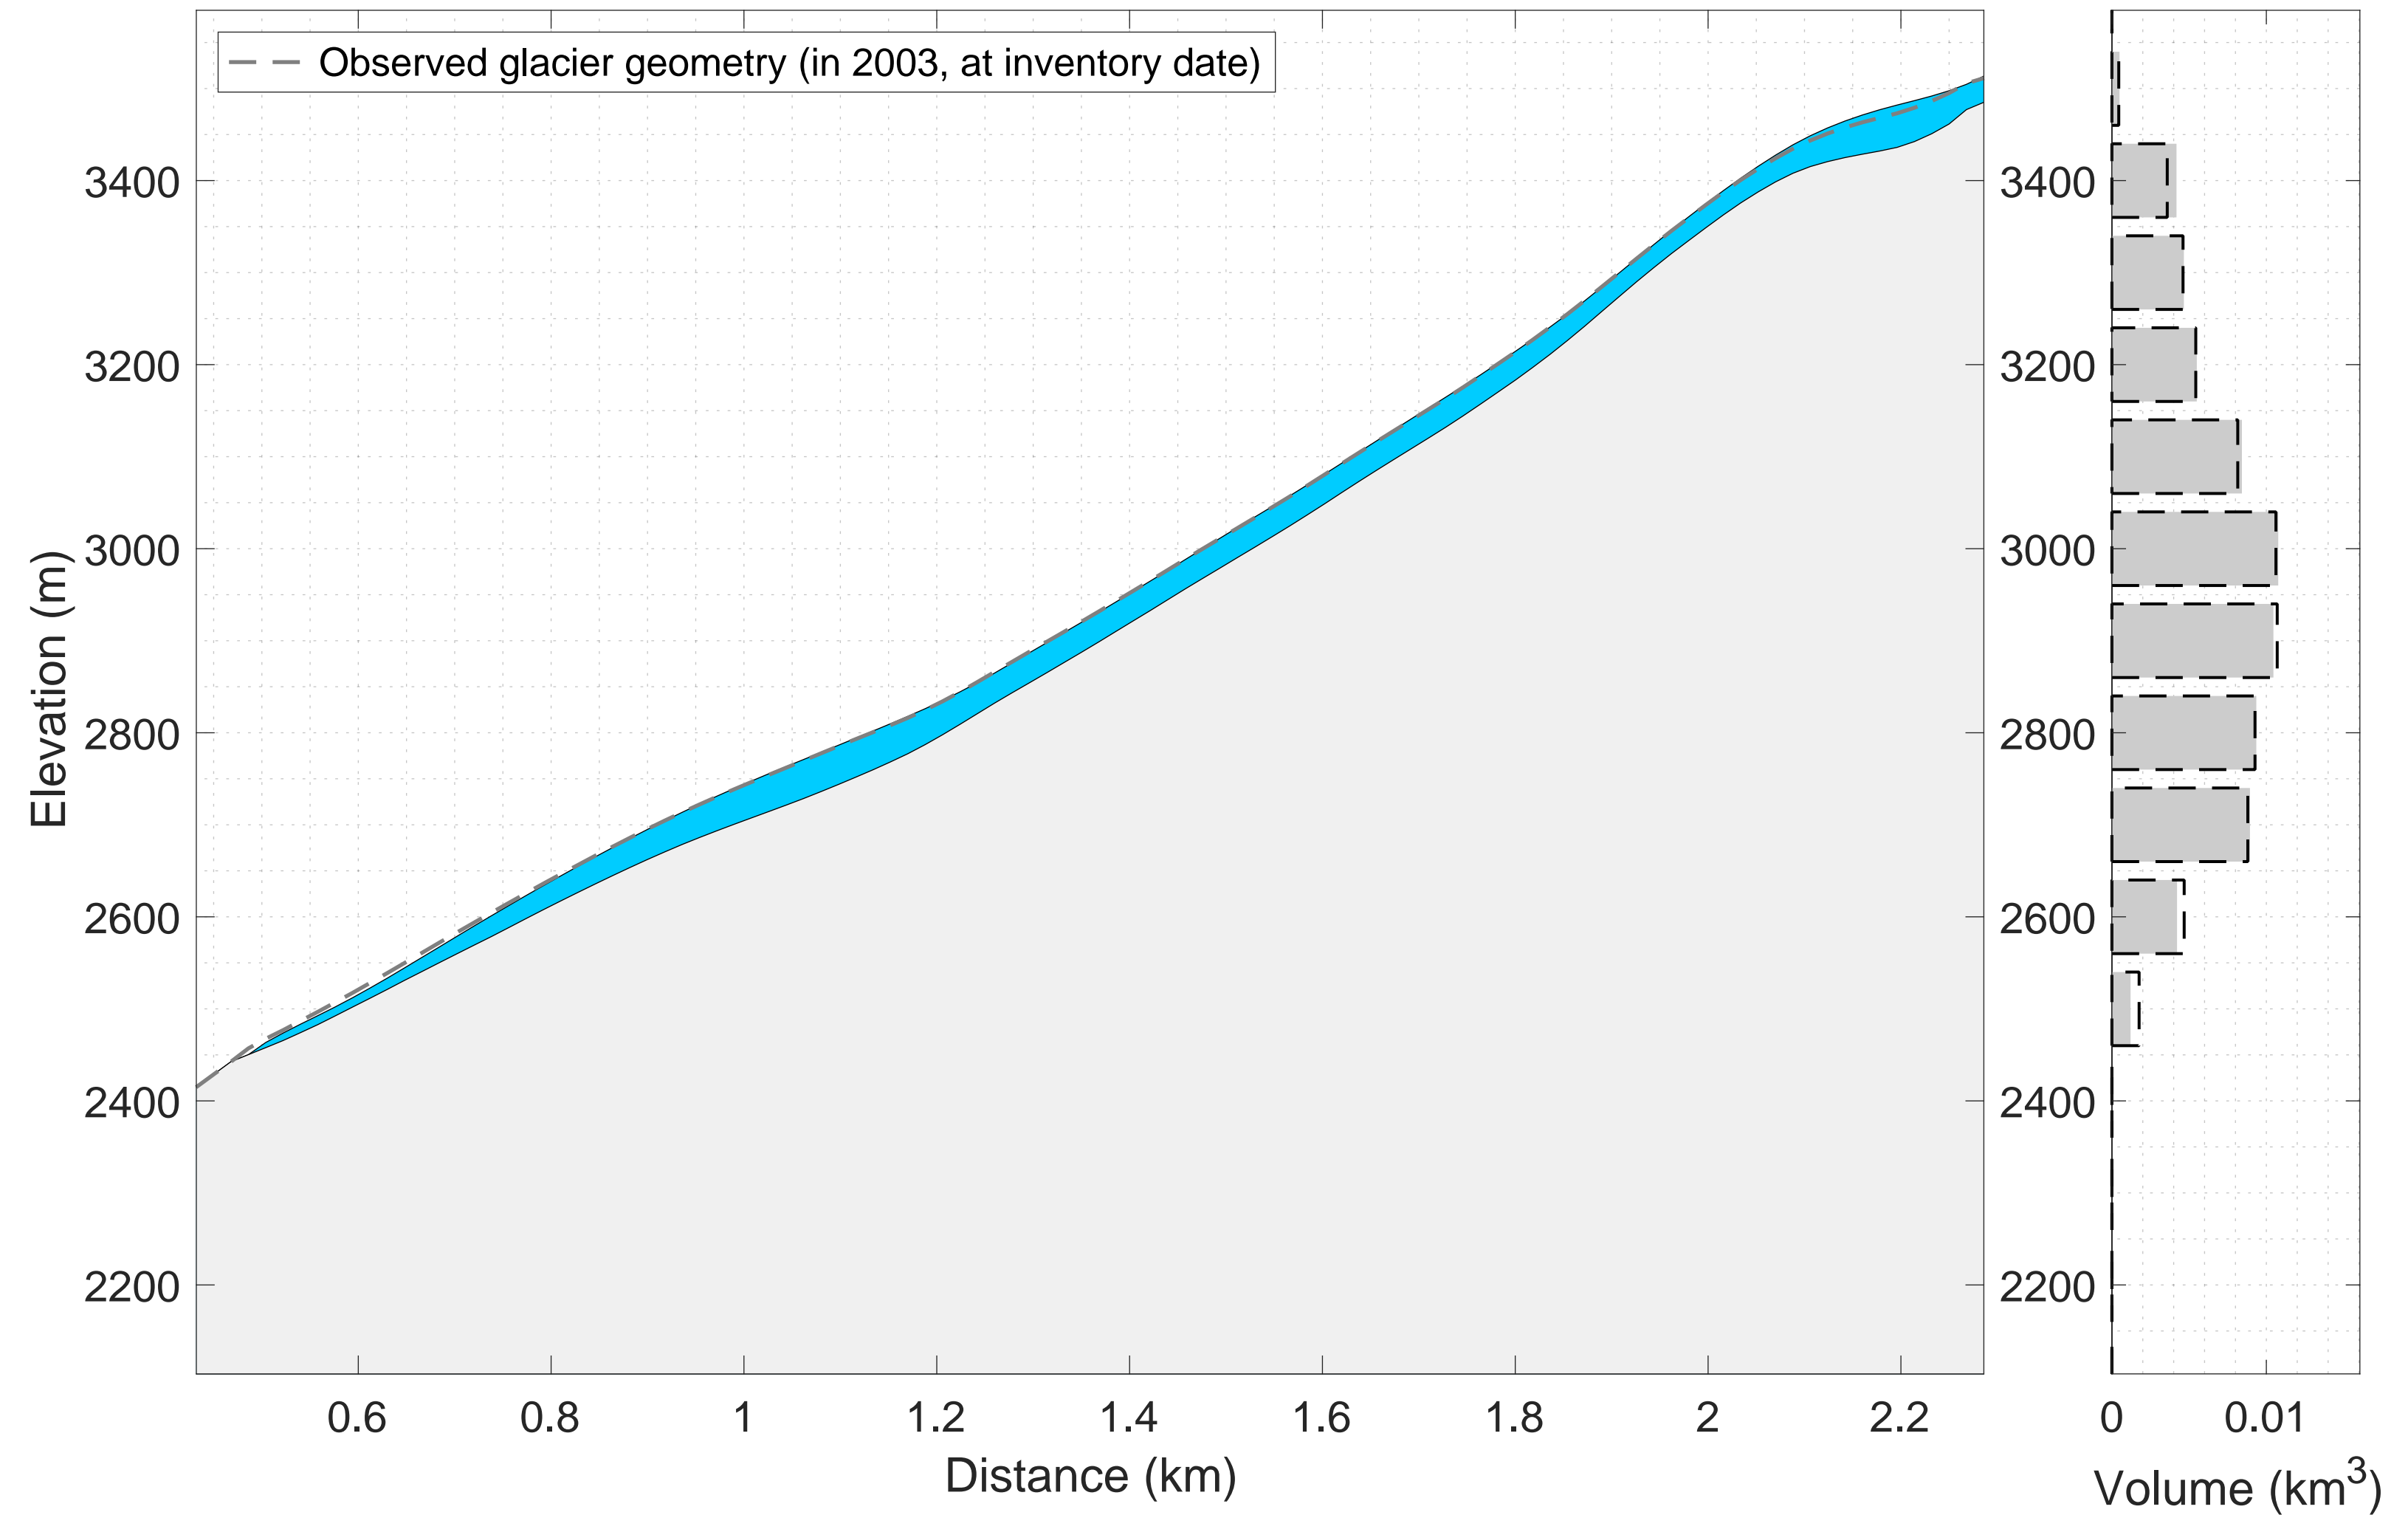

Supplement: Supplementary file 559 [file tc-13-1125-2019-supplement.zip]

**Modelled geometry (Glacier ID = 00391;  $A = 1\text{e-}16 \text{ Pa}^{-3} \text{ a}^{-1}$ ;  $dx = 11 \text{ m}$ )**

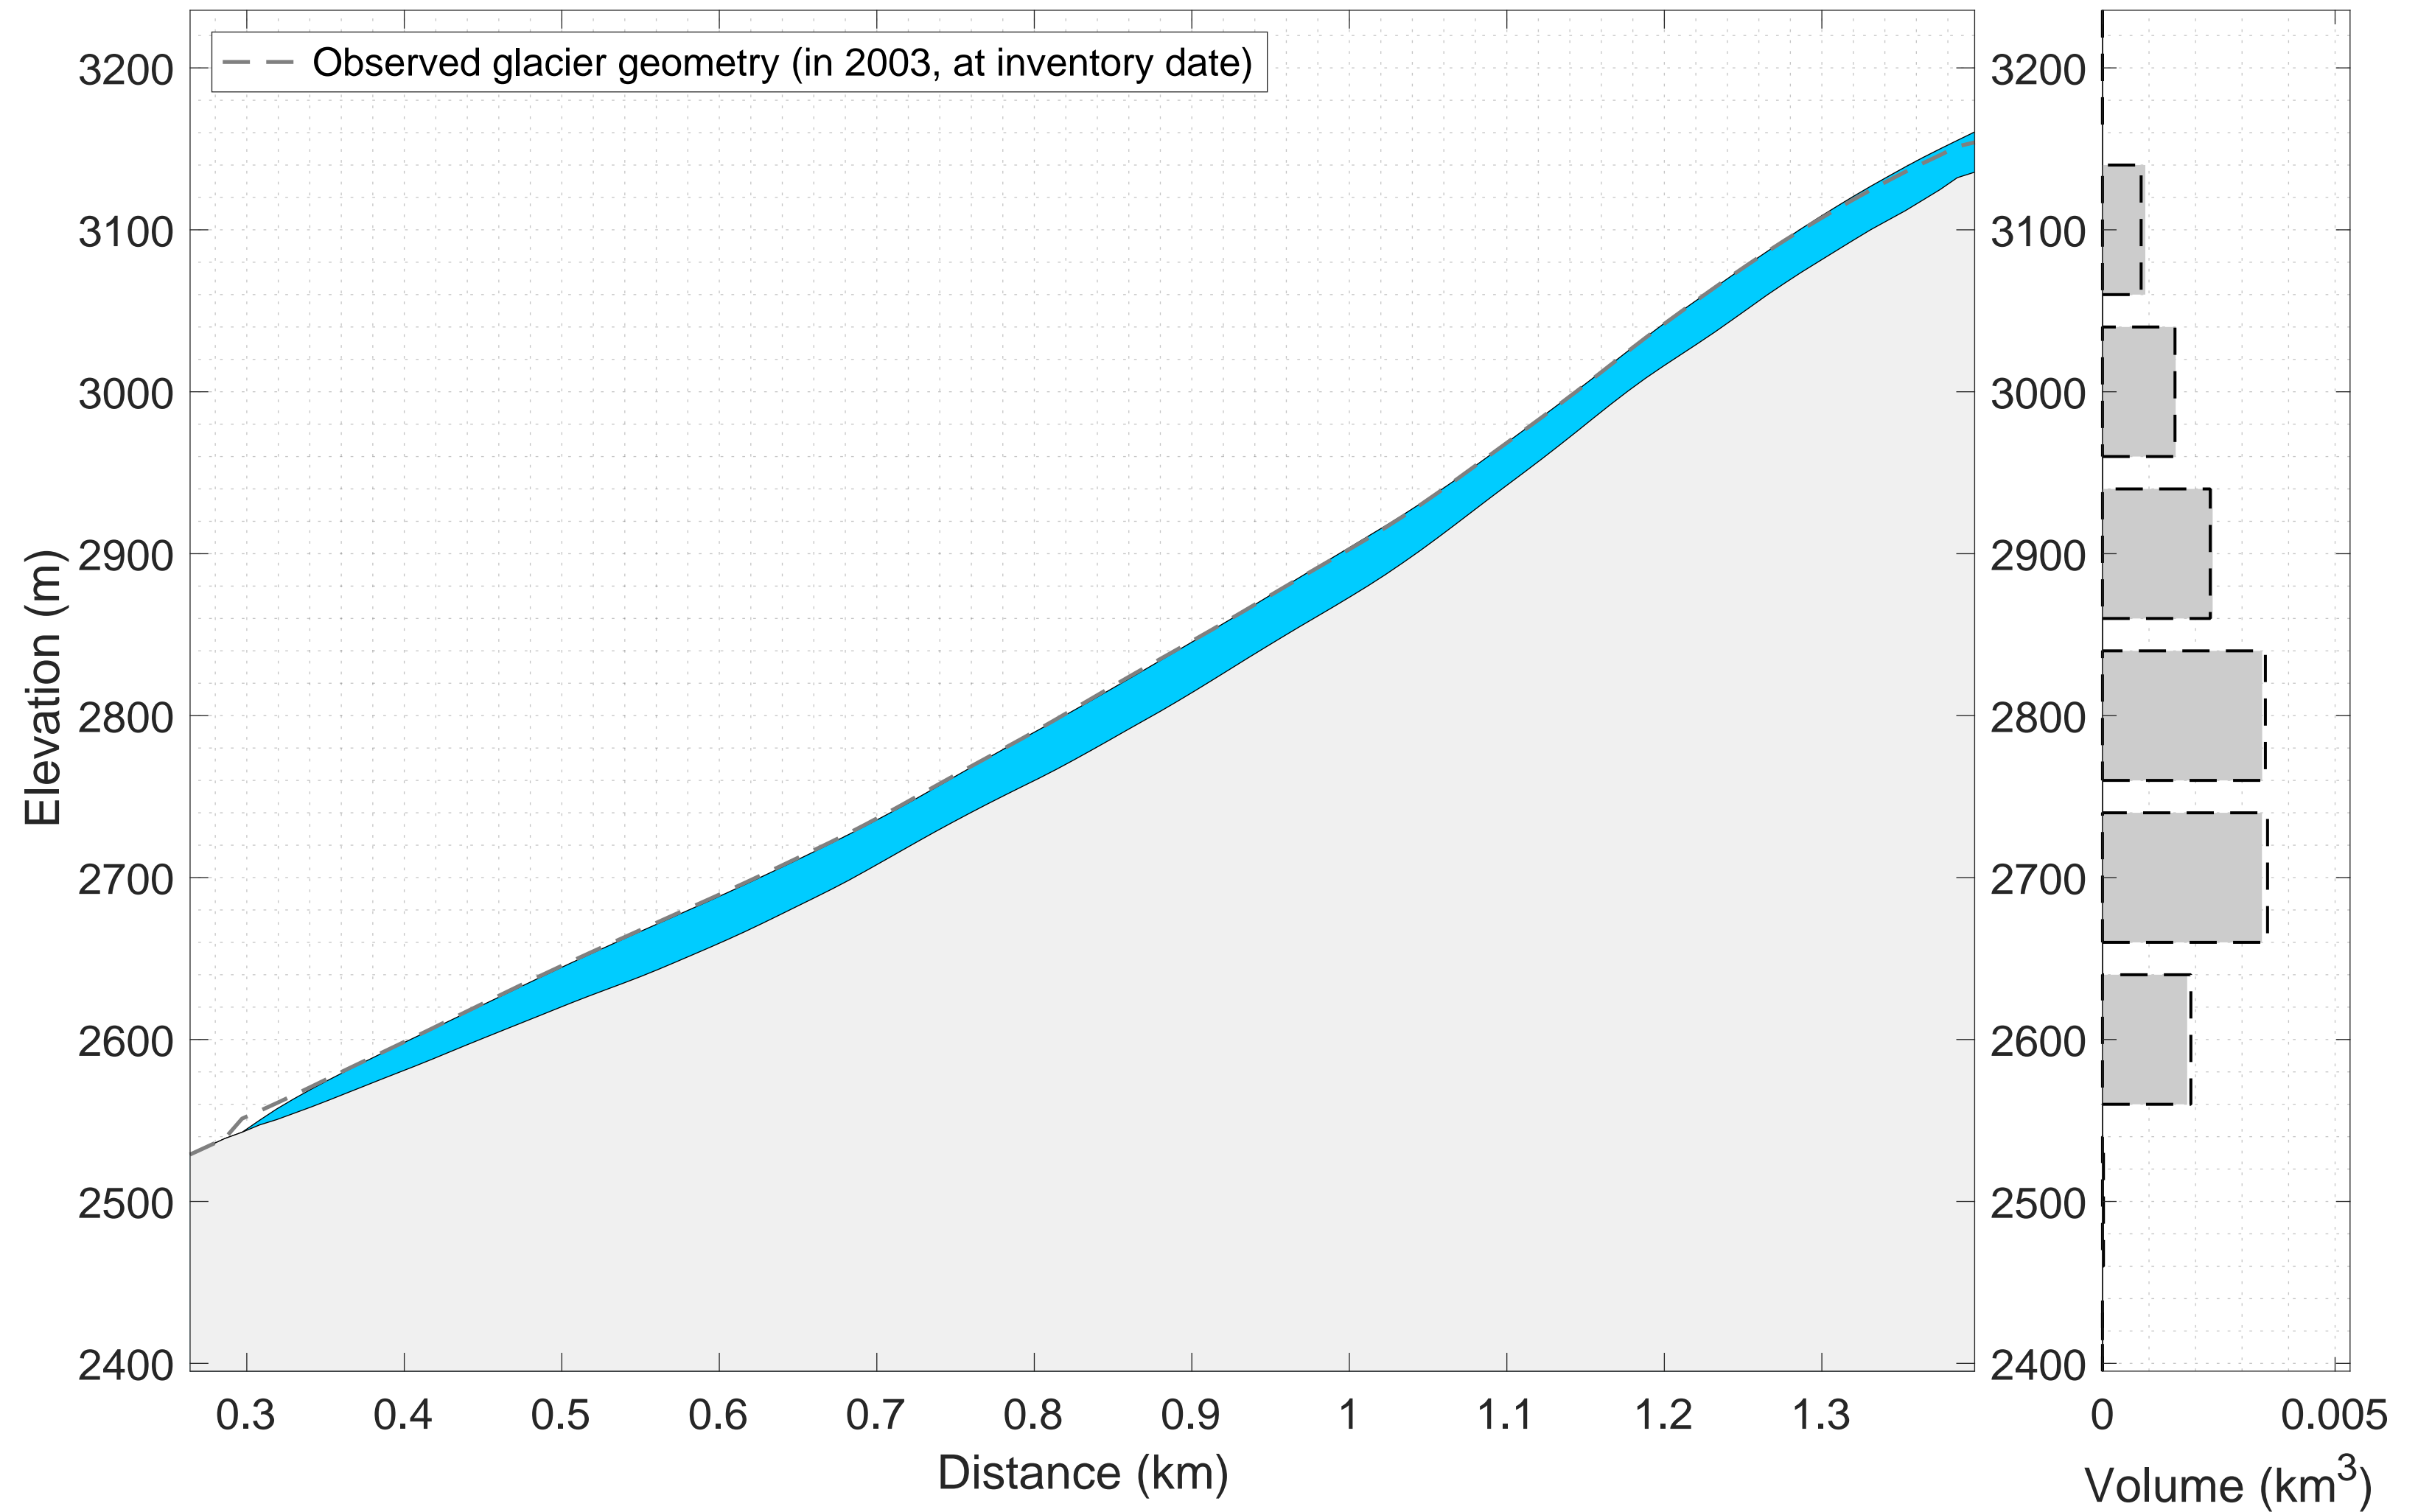

Supplement: Supplementary file 560 [file tc-13-1125-2019-supplement.zip]

**Modelled geometry (Glacier ID = 02442;  $A = 1.2632\text{e-}16 \text{ Pa}^{-3} \text{ a}^{-1}$ ;  $dx = 25 \text{ m}$ )**

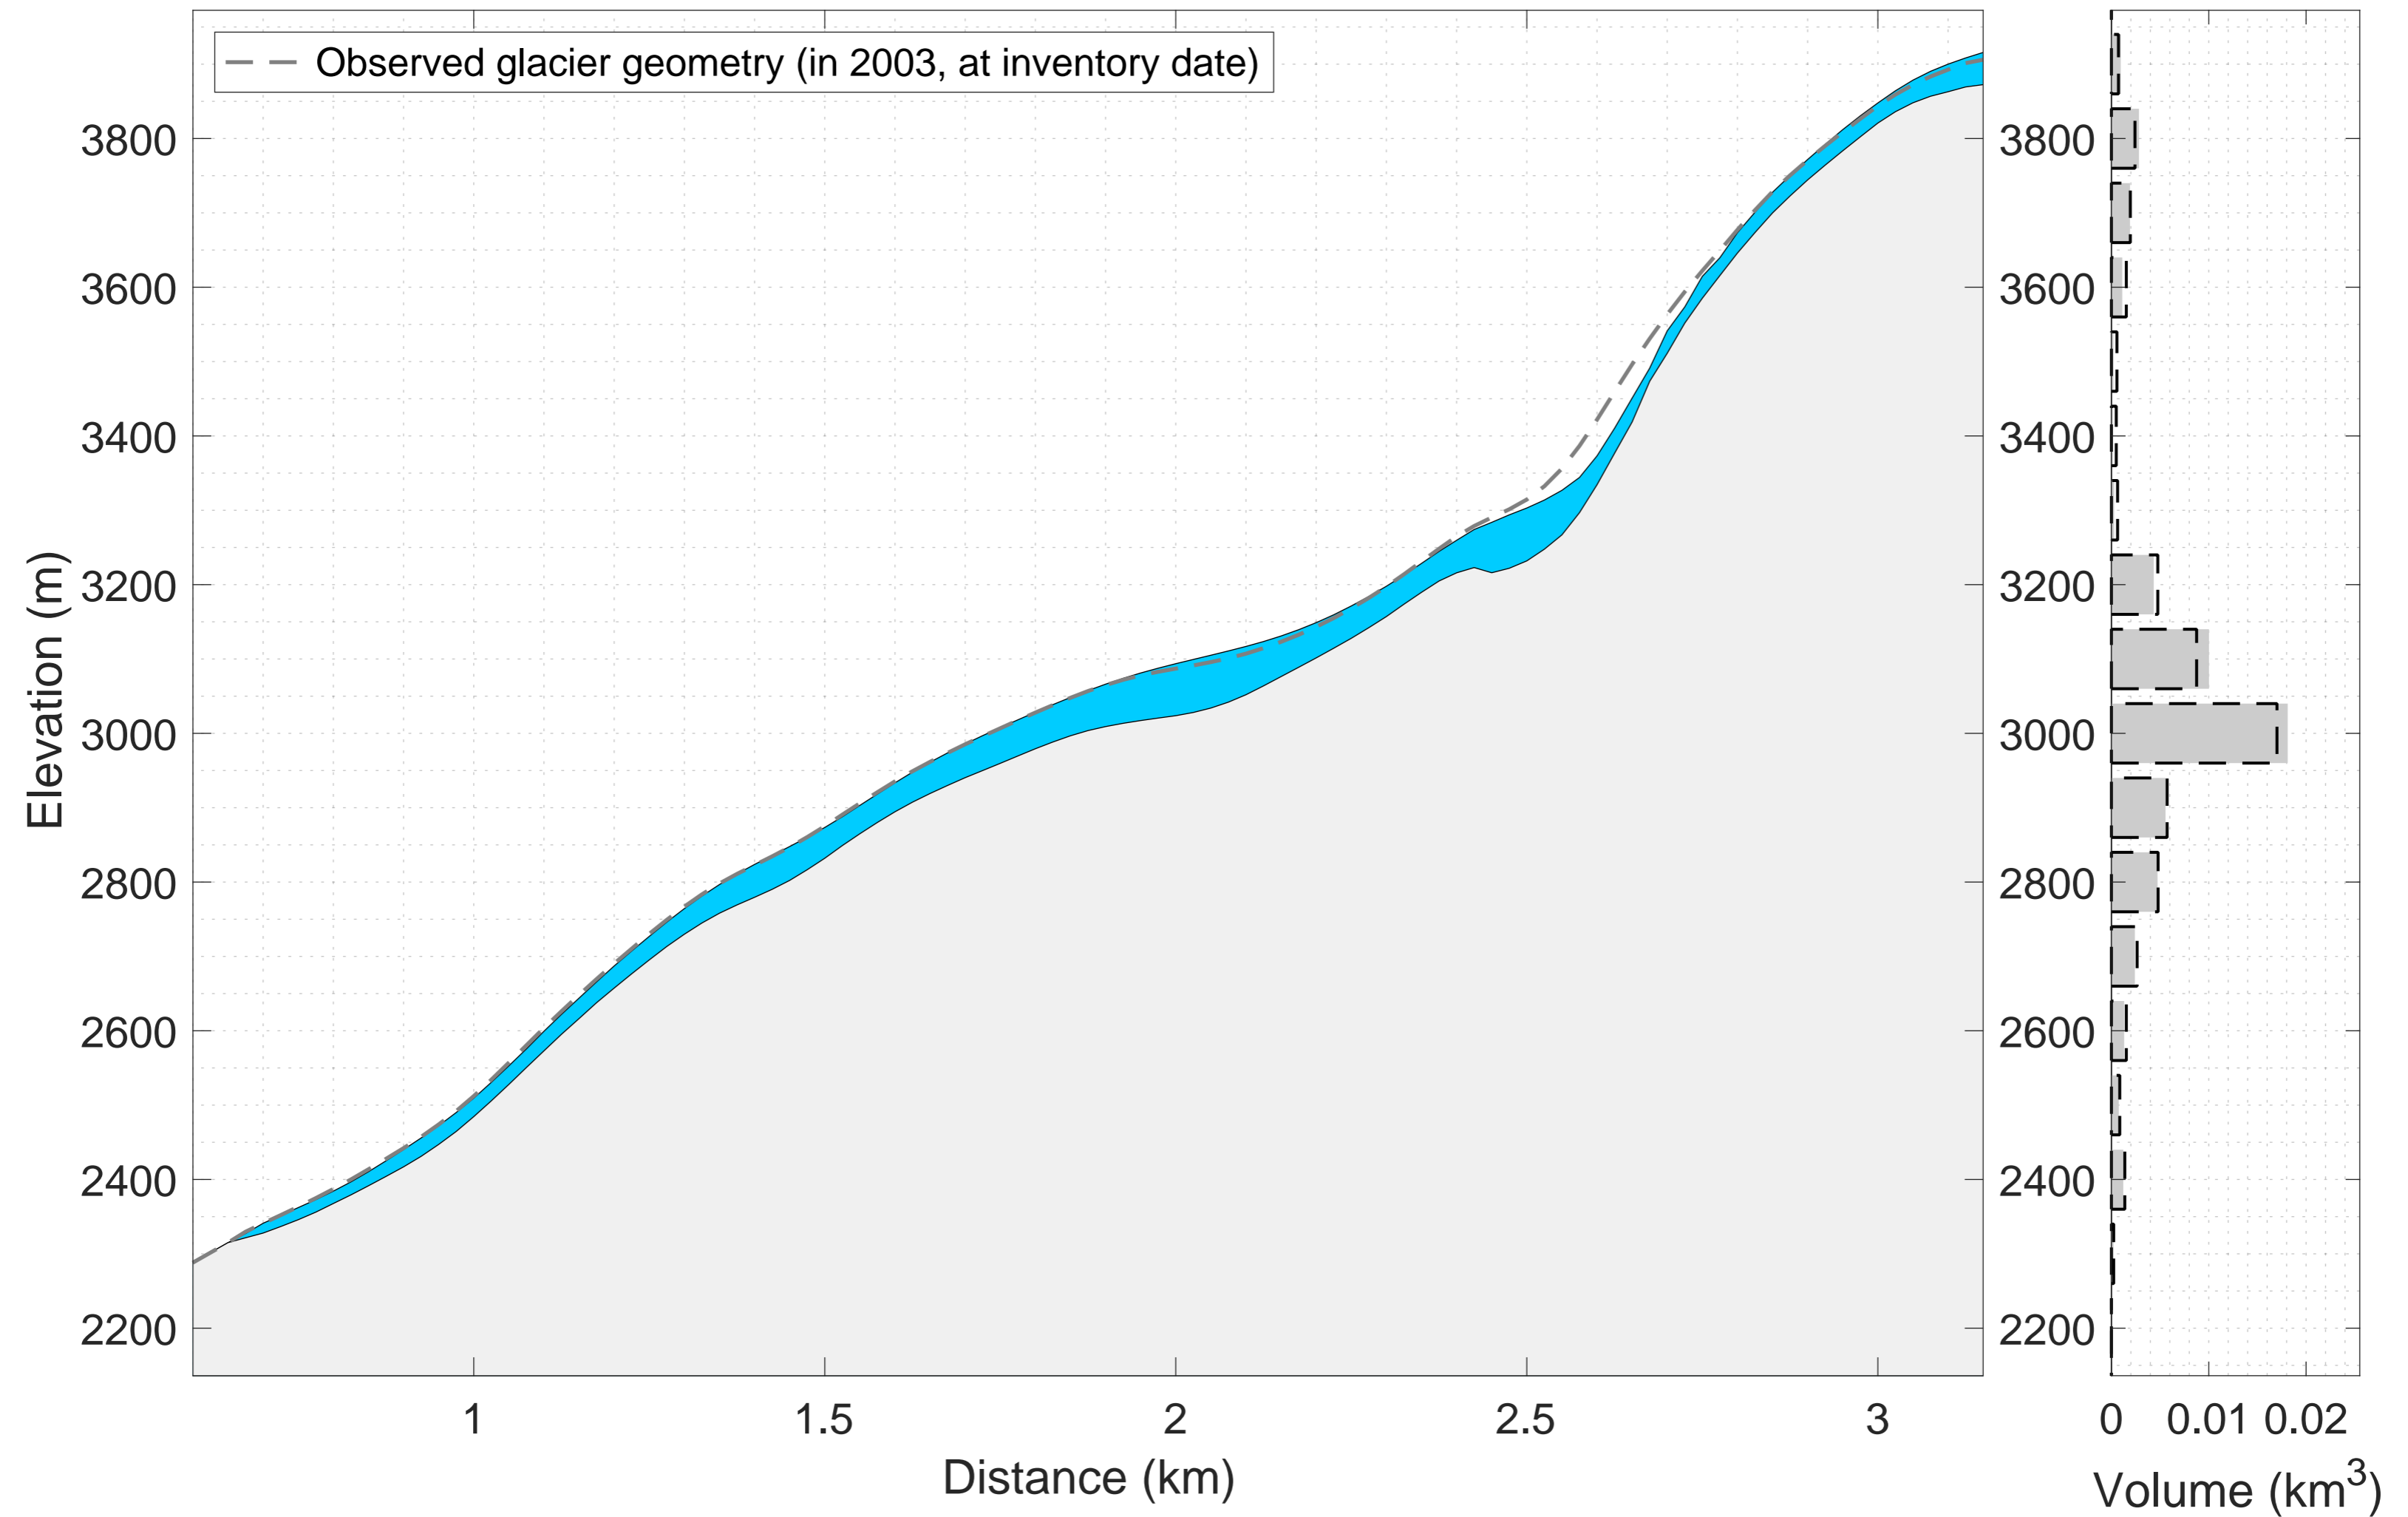

Supplement: Supplementary file 561 [file tc-13-1125-2019-supplement.zip]

**Modelled geometry (Glacier ID = 01427;  $A = 5.3344\text{e-}17 \text{ Pa}^{-3} \text{ a}^{-1}$ ;  $dx = 11 \text{ m}$ )**

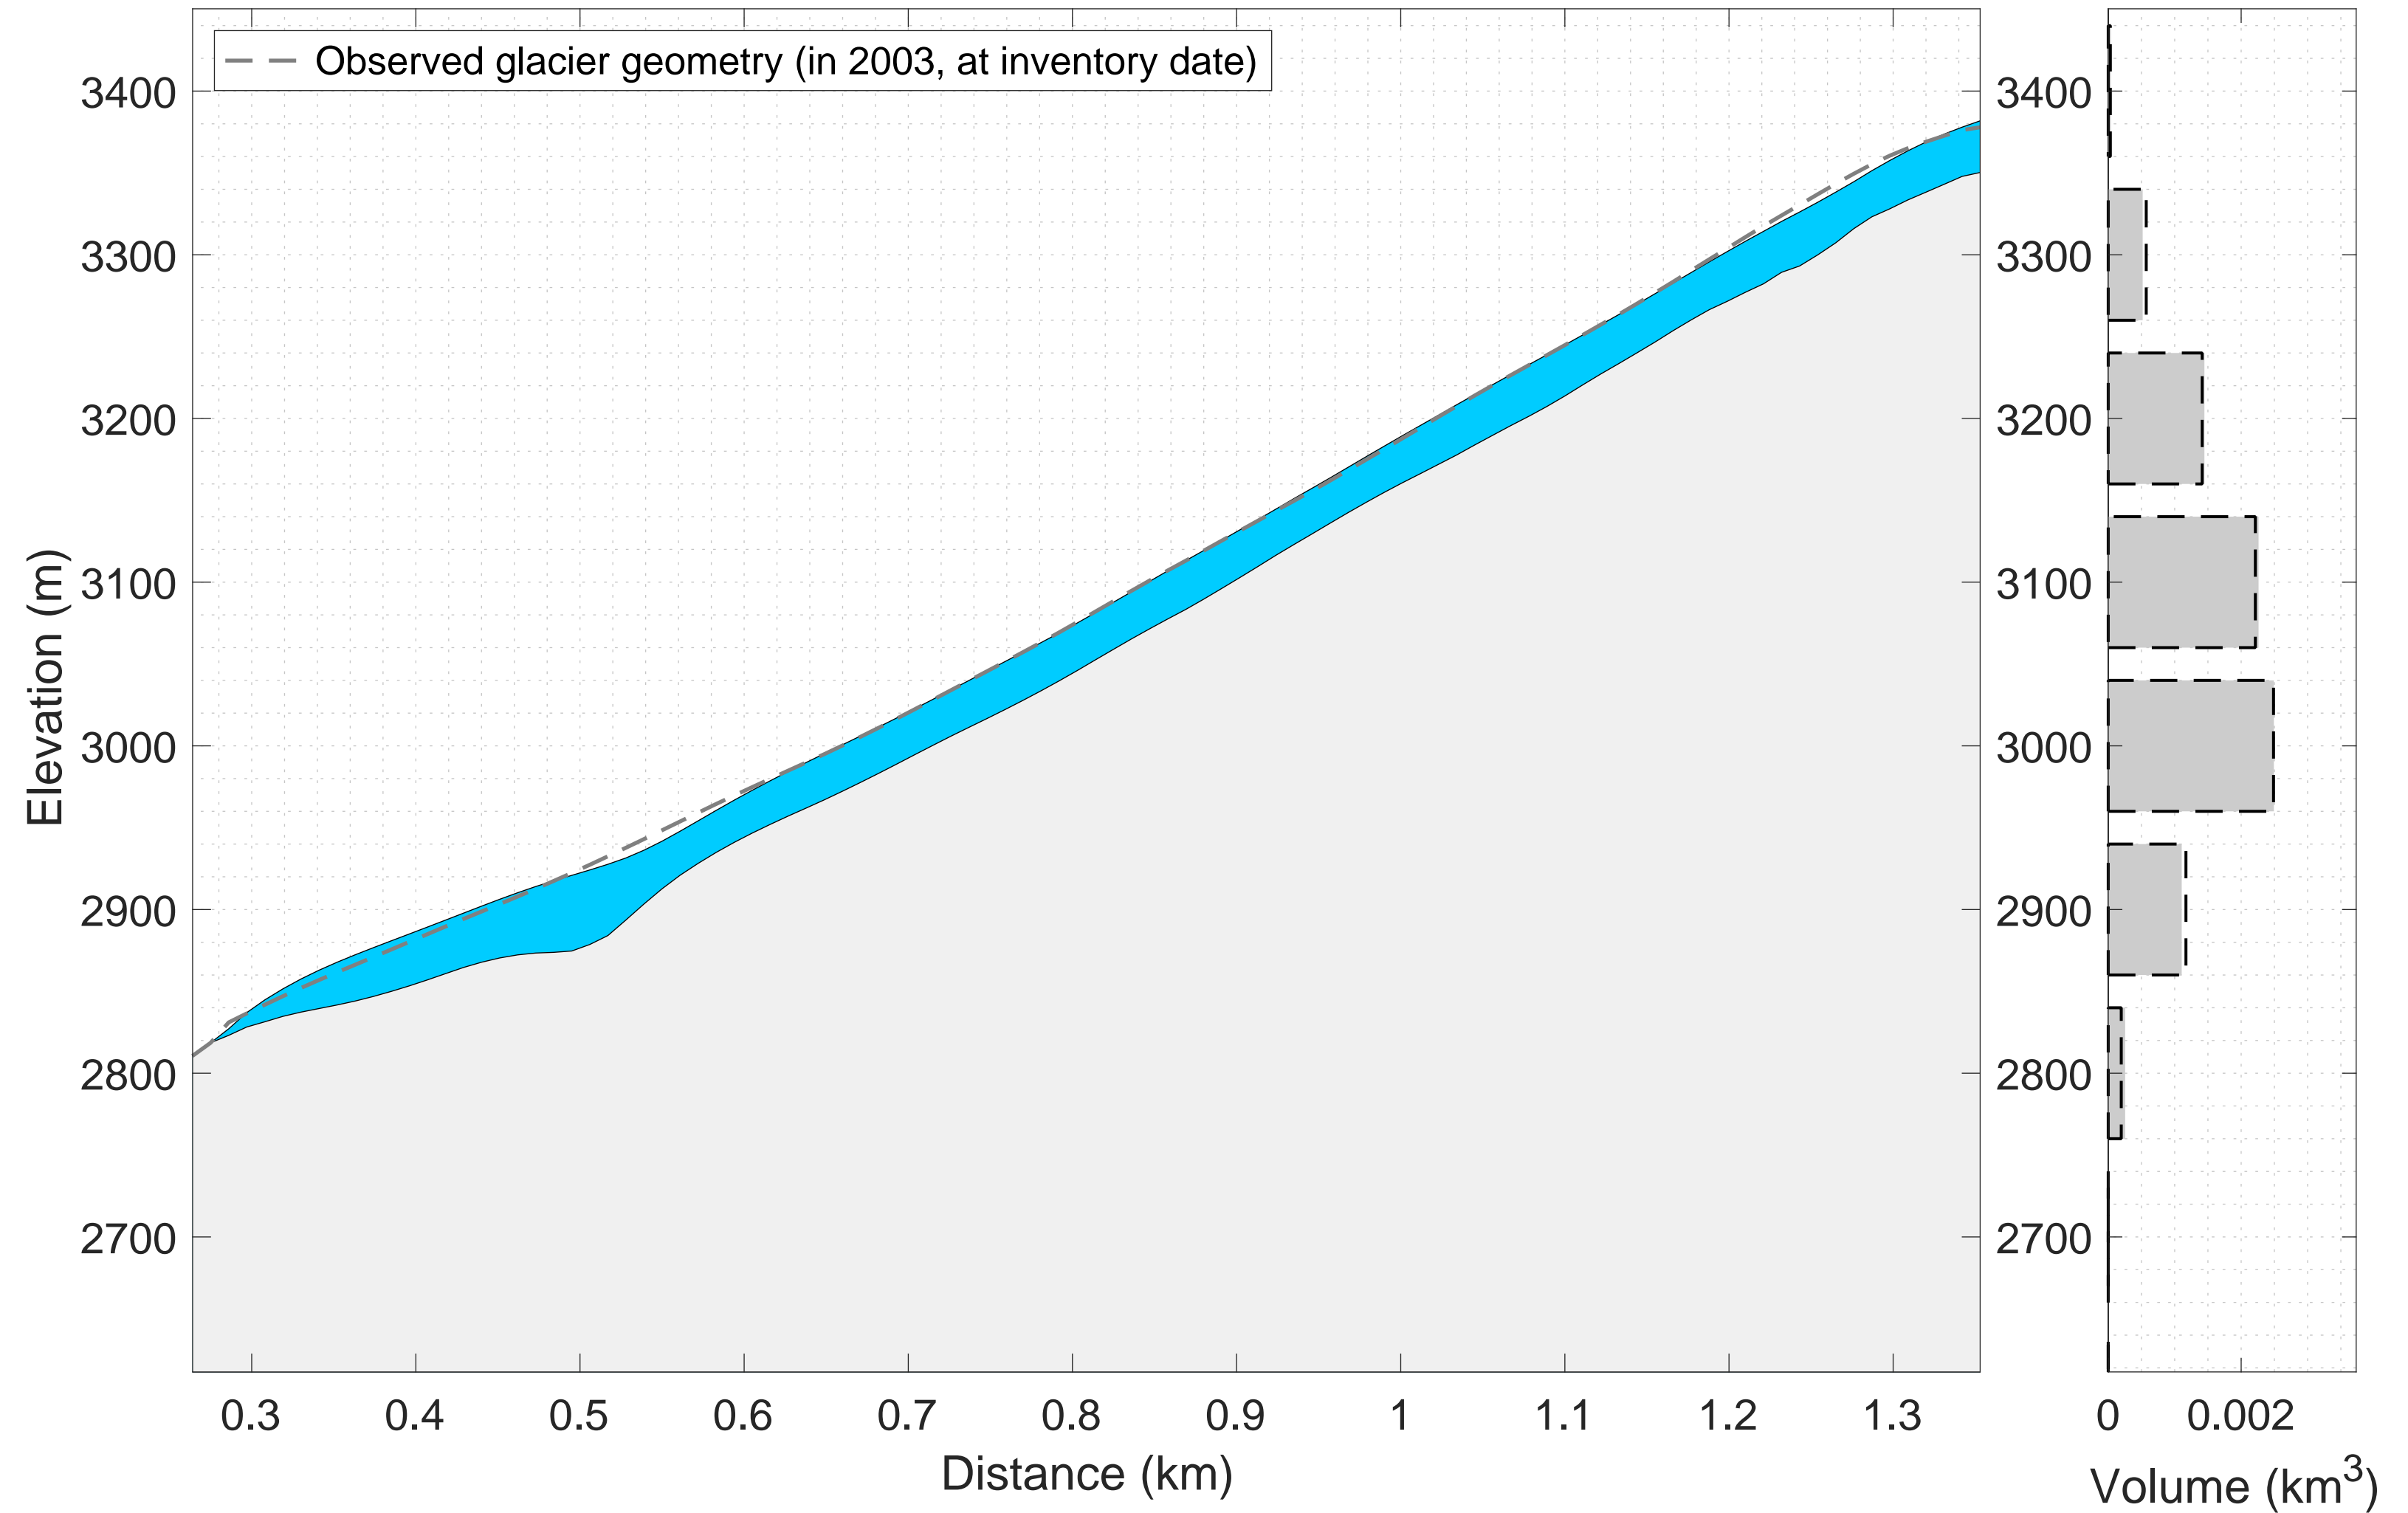

Supplement: Supplementary file 562 [file tc-13-1125-2019-supplement.zip]

**Modelled geometry (Glacier ID = 01570;  $A = 7.5657\text{e-}17 \text{ Pa}^{-3} \text{ a}^{-1}$ ;  $dx = 27 \text{ m}$ )**

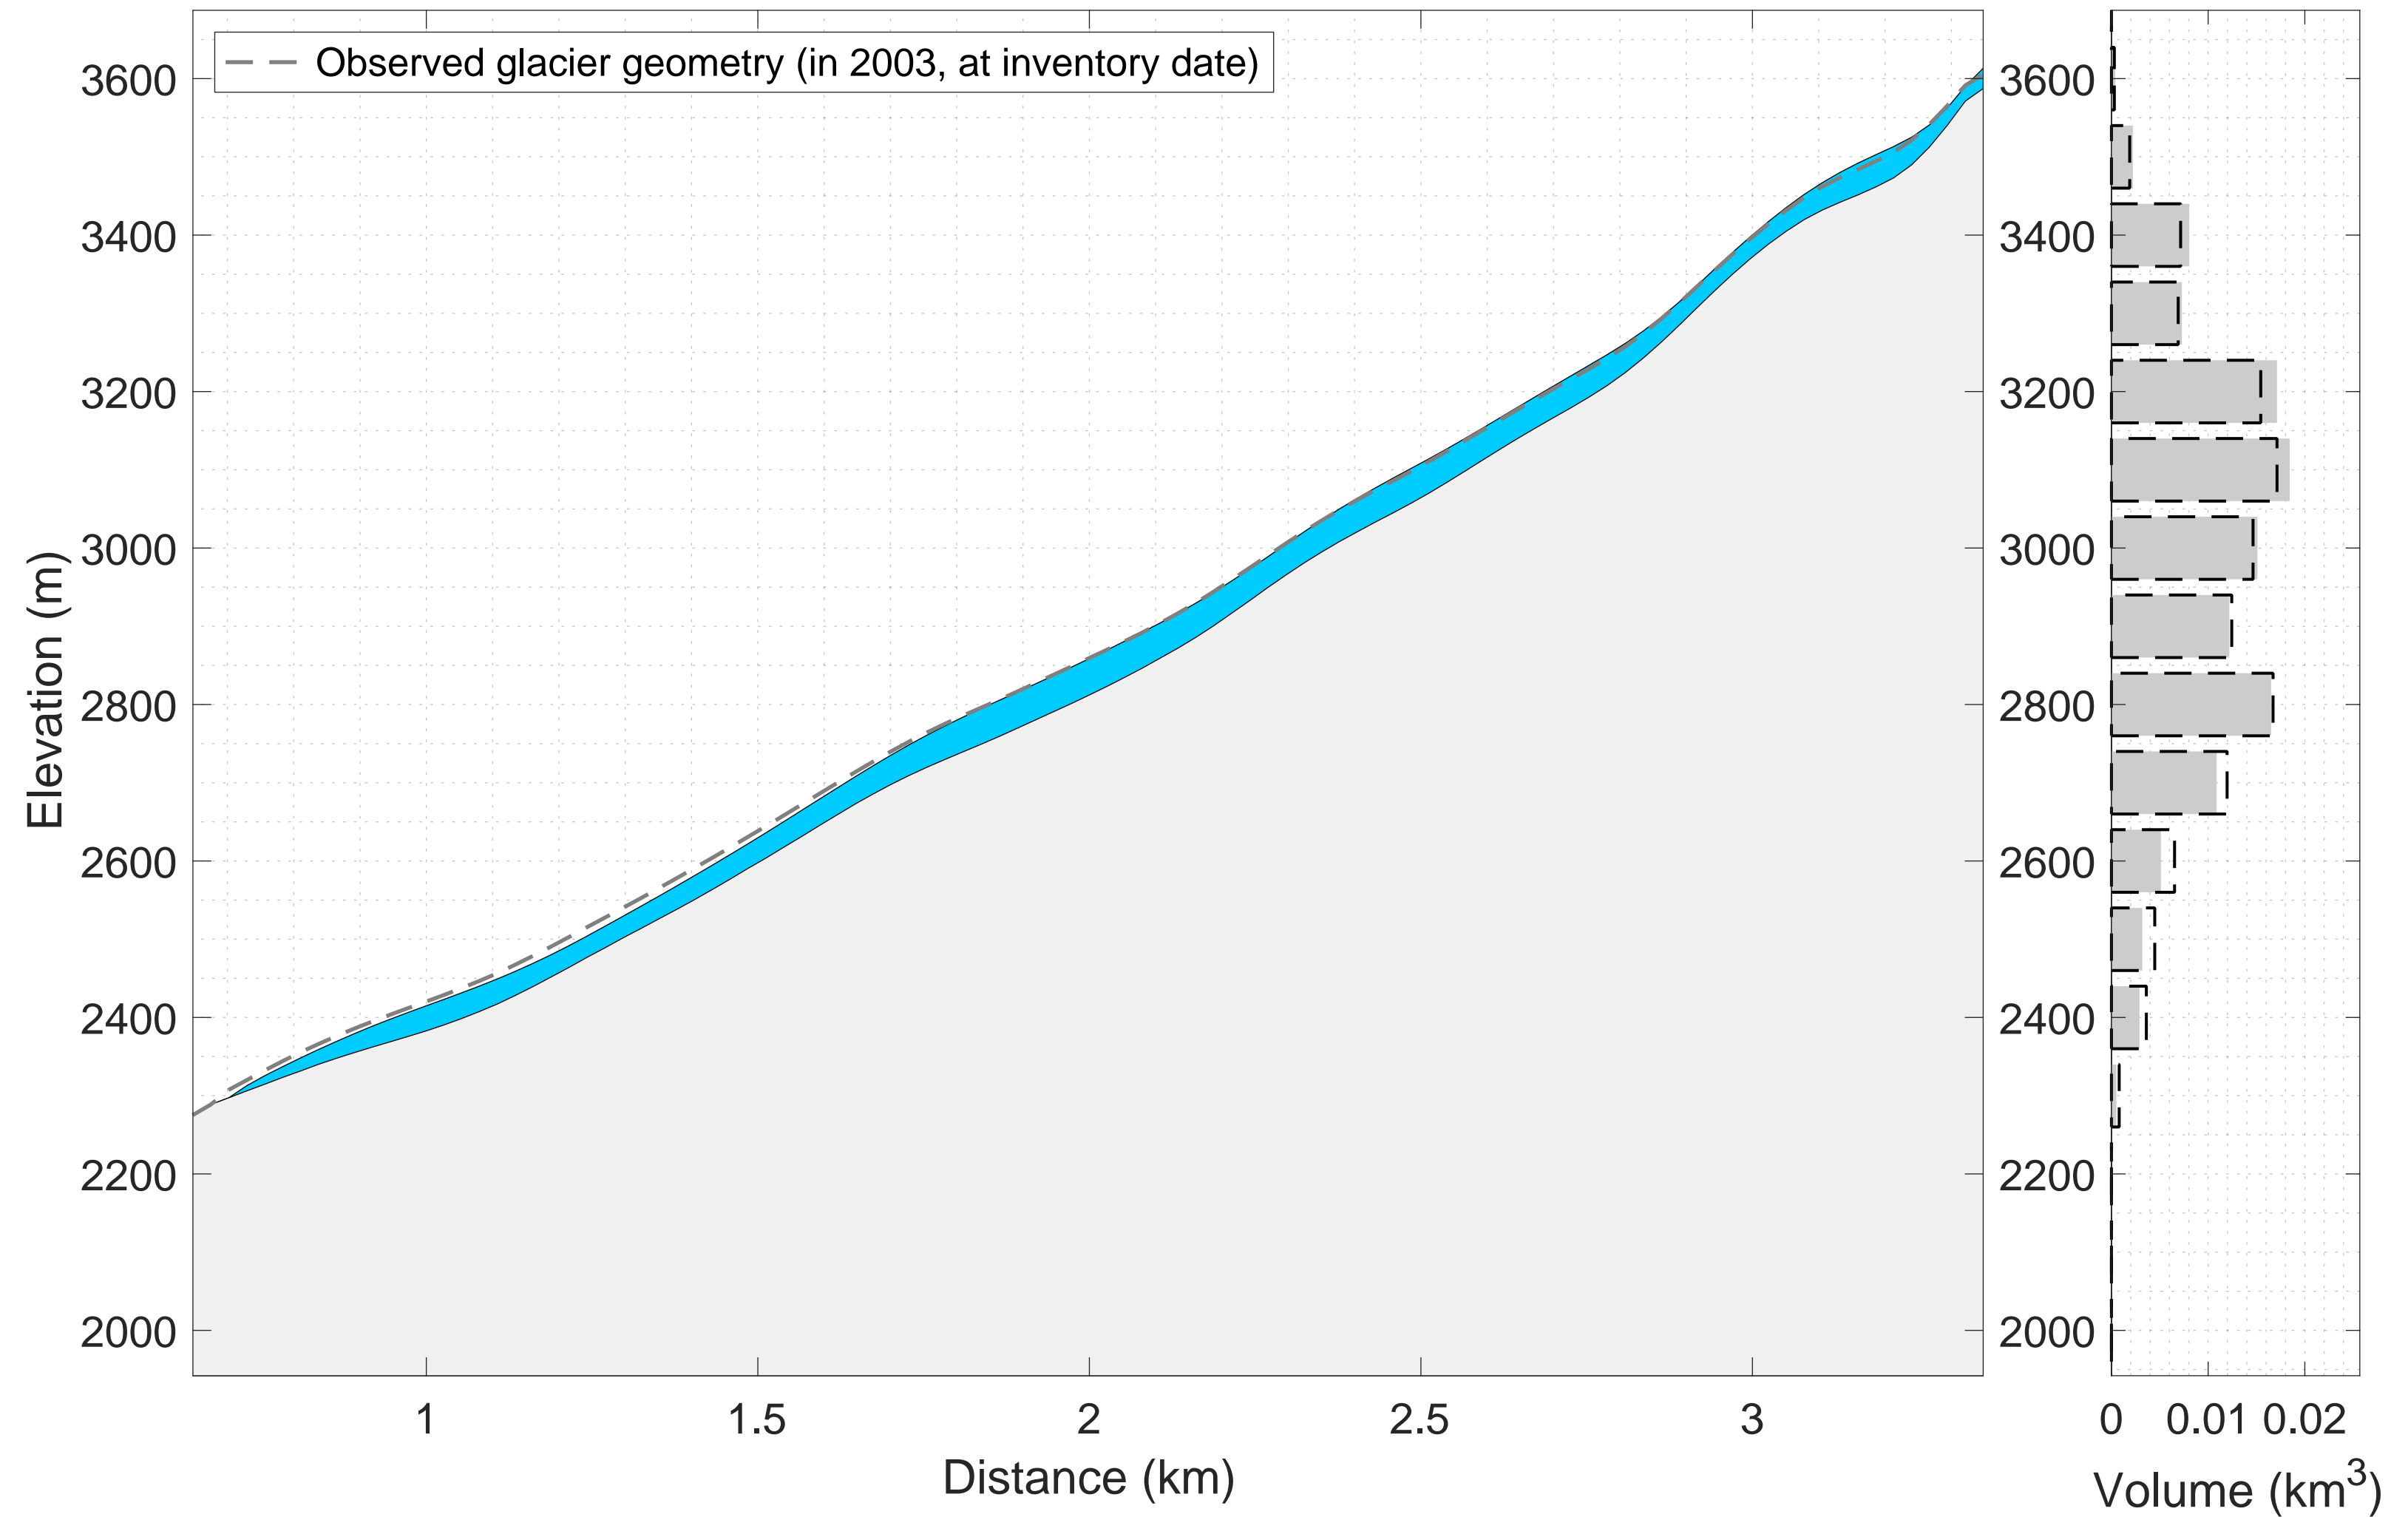

Supplement: Supplementary file 563 [file tc-13-1125-2019-supplement.zip]

**Modelled geometry (Glacier ID = 01524;  $A = 6.9404\text{e-}17 \text{ Pa}^{-3} \text{ a}^{-1}$ ;  $dx = 12 \text{ m}$ )**

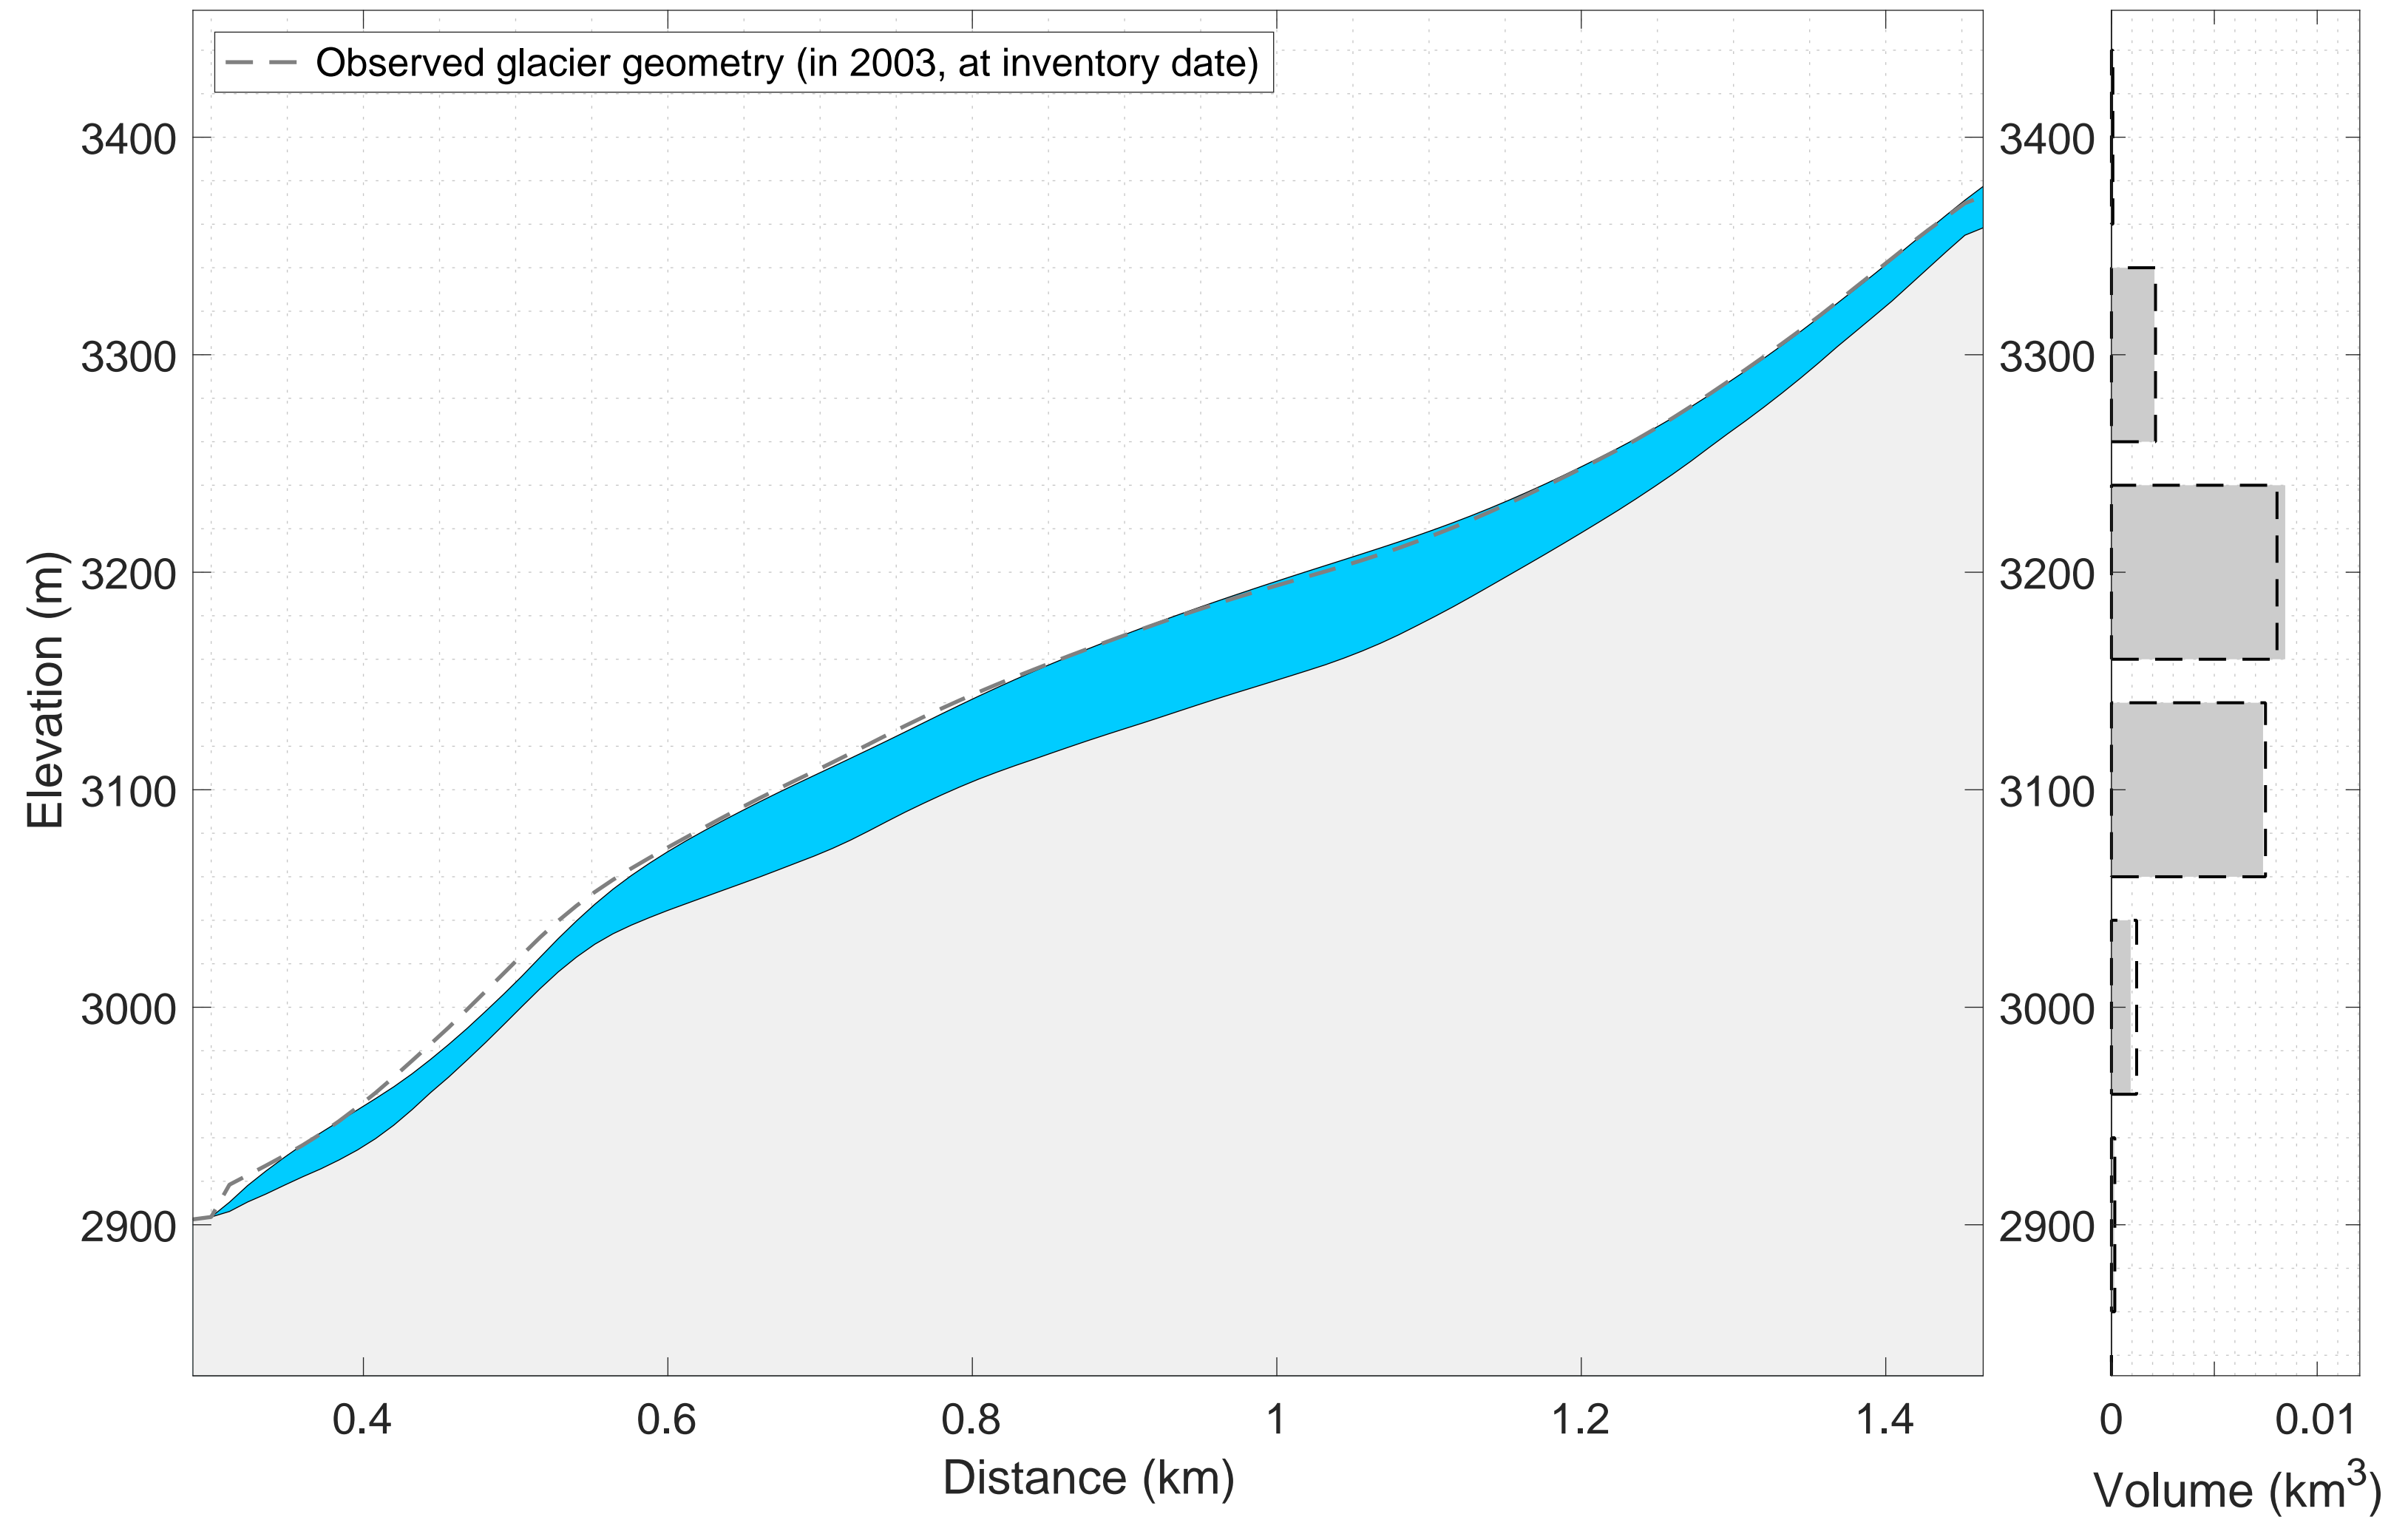

Supplement: Supplementary file 564 [file tc-13-1125-2019-supplement.zip]

**Modelled geometry (Glacier ID = 02194;  $A = 1.0083\text{e-}16 \text{ Pa}^{-3} \text{ a}^{-1}$ ;  $dx = 37 \text{ m}$ )**

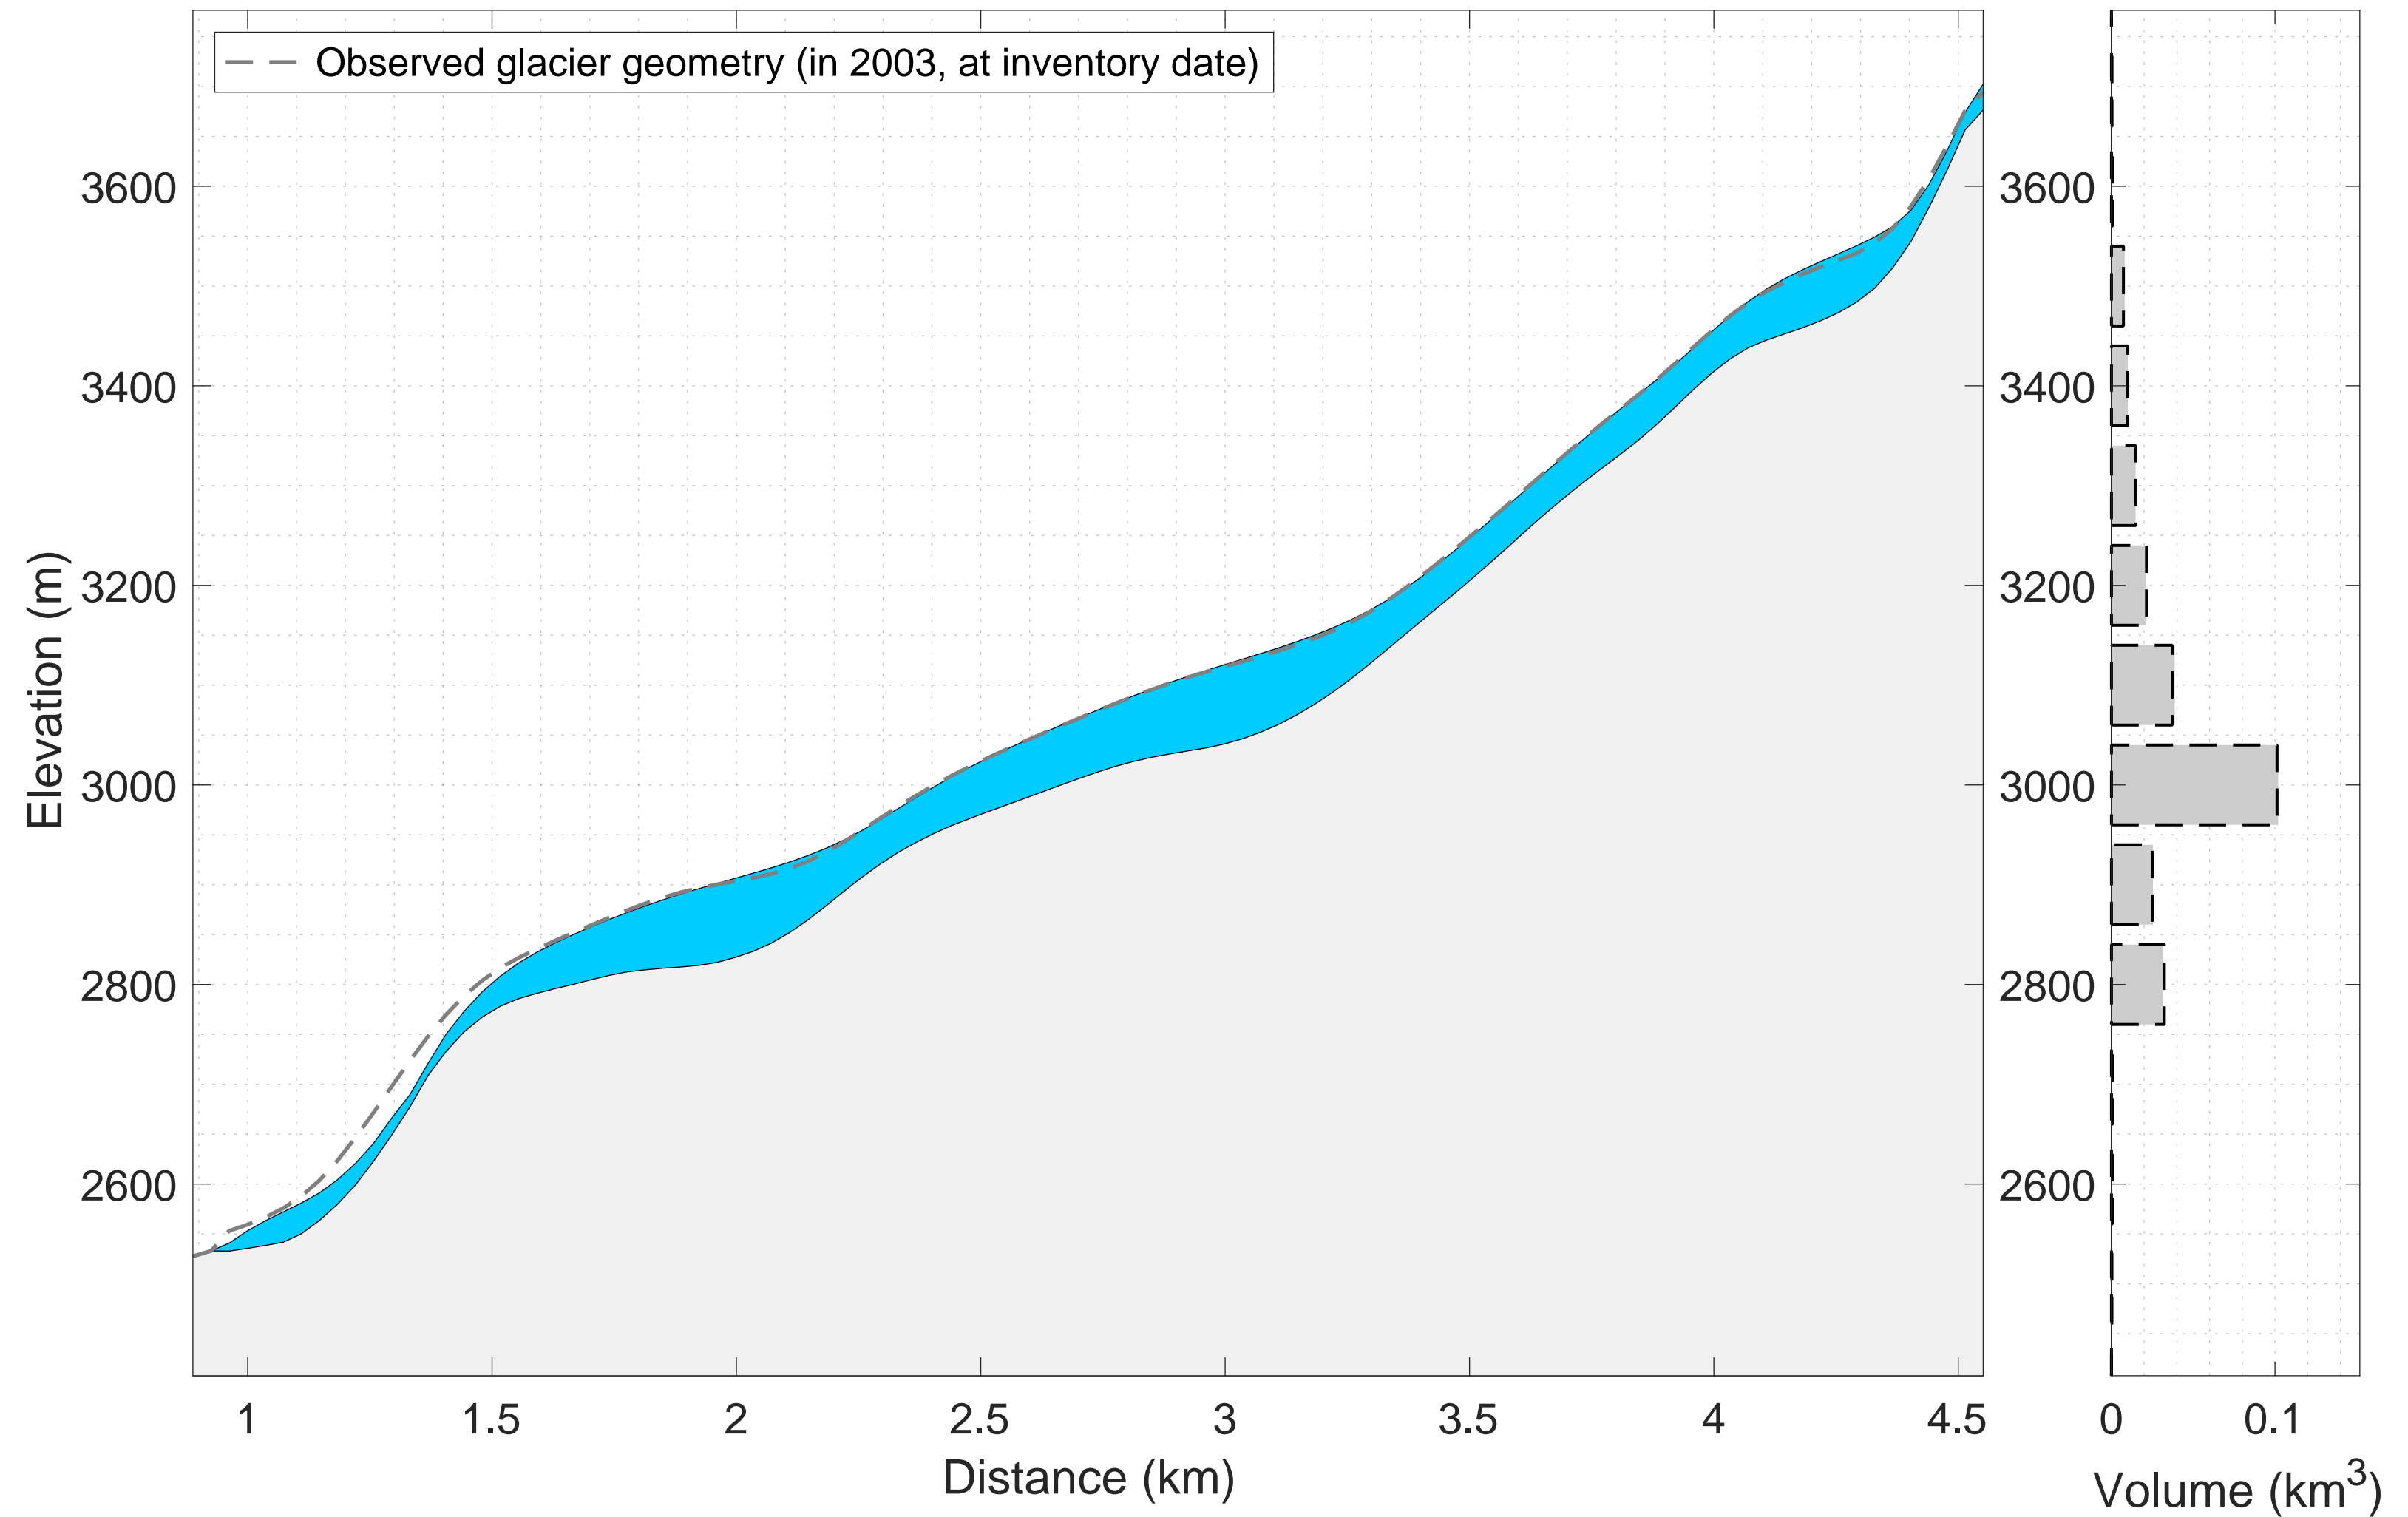

Supplement: Supplementary file 565 [file tc-13-1125-2019-supplement.zip]

**Modelled geometry (Glacier ID = 00364;  $A = 6.9582\text{e-}17 \text{ Pa}^{-3} \text{ a}^{-1}$ ;  $dx = 12 \text{ m}$ )**

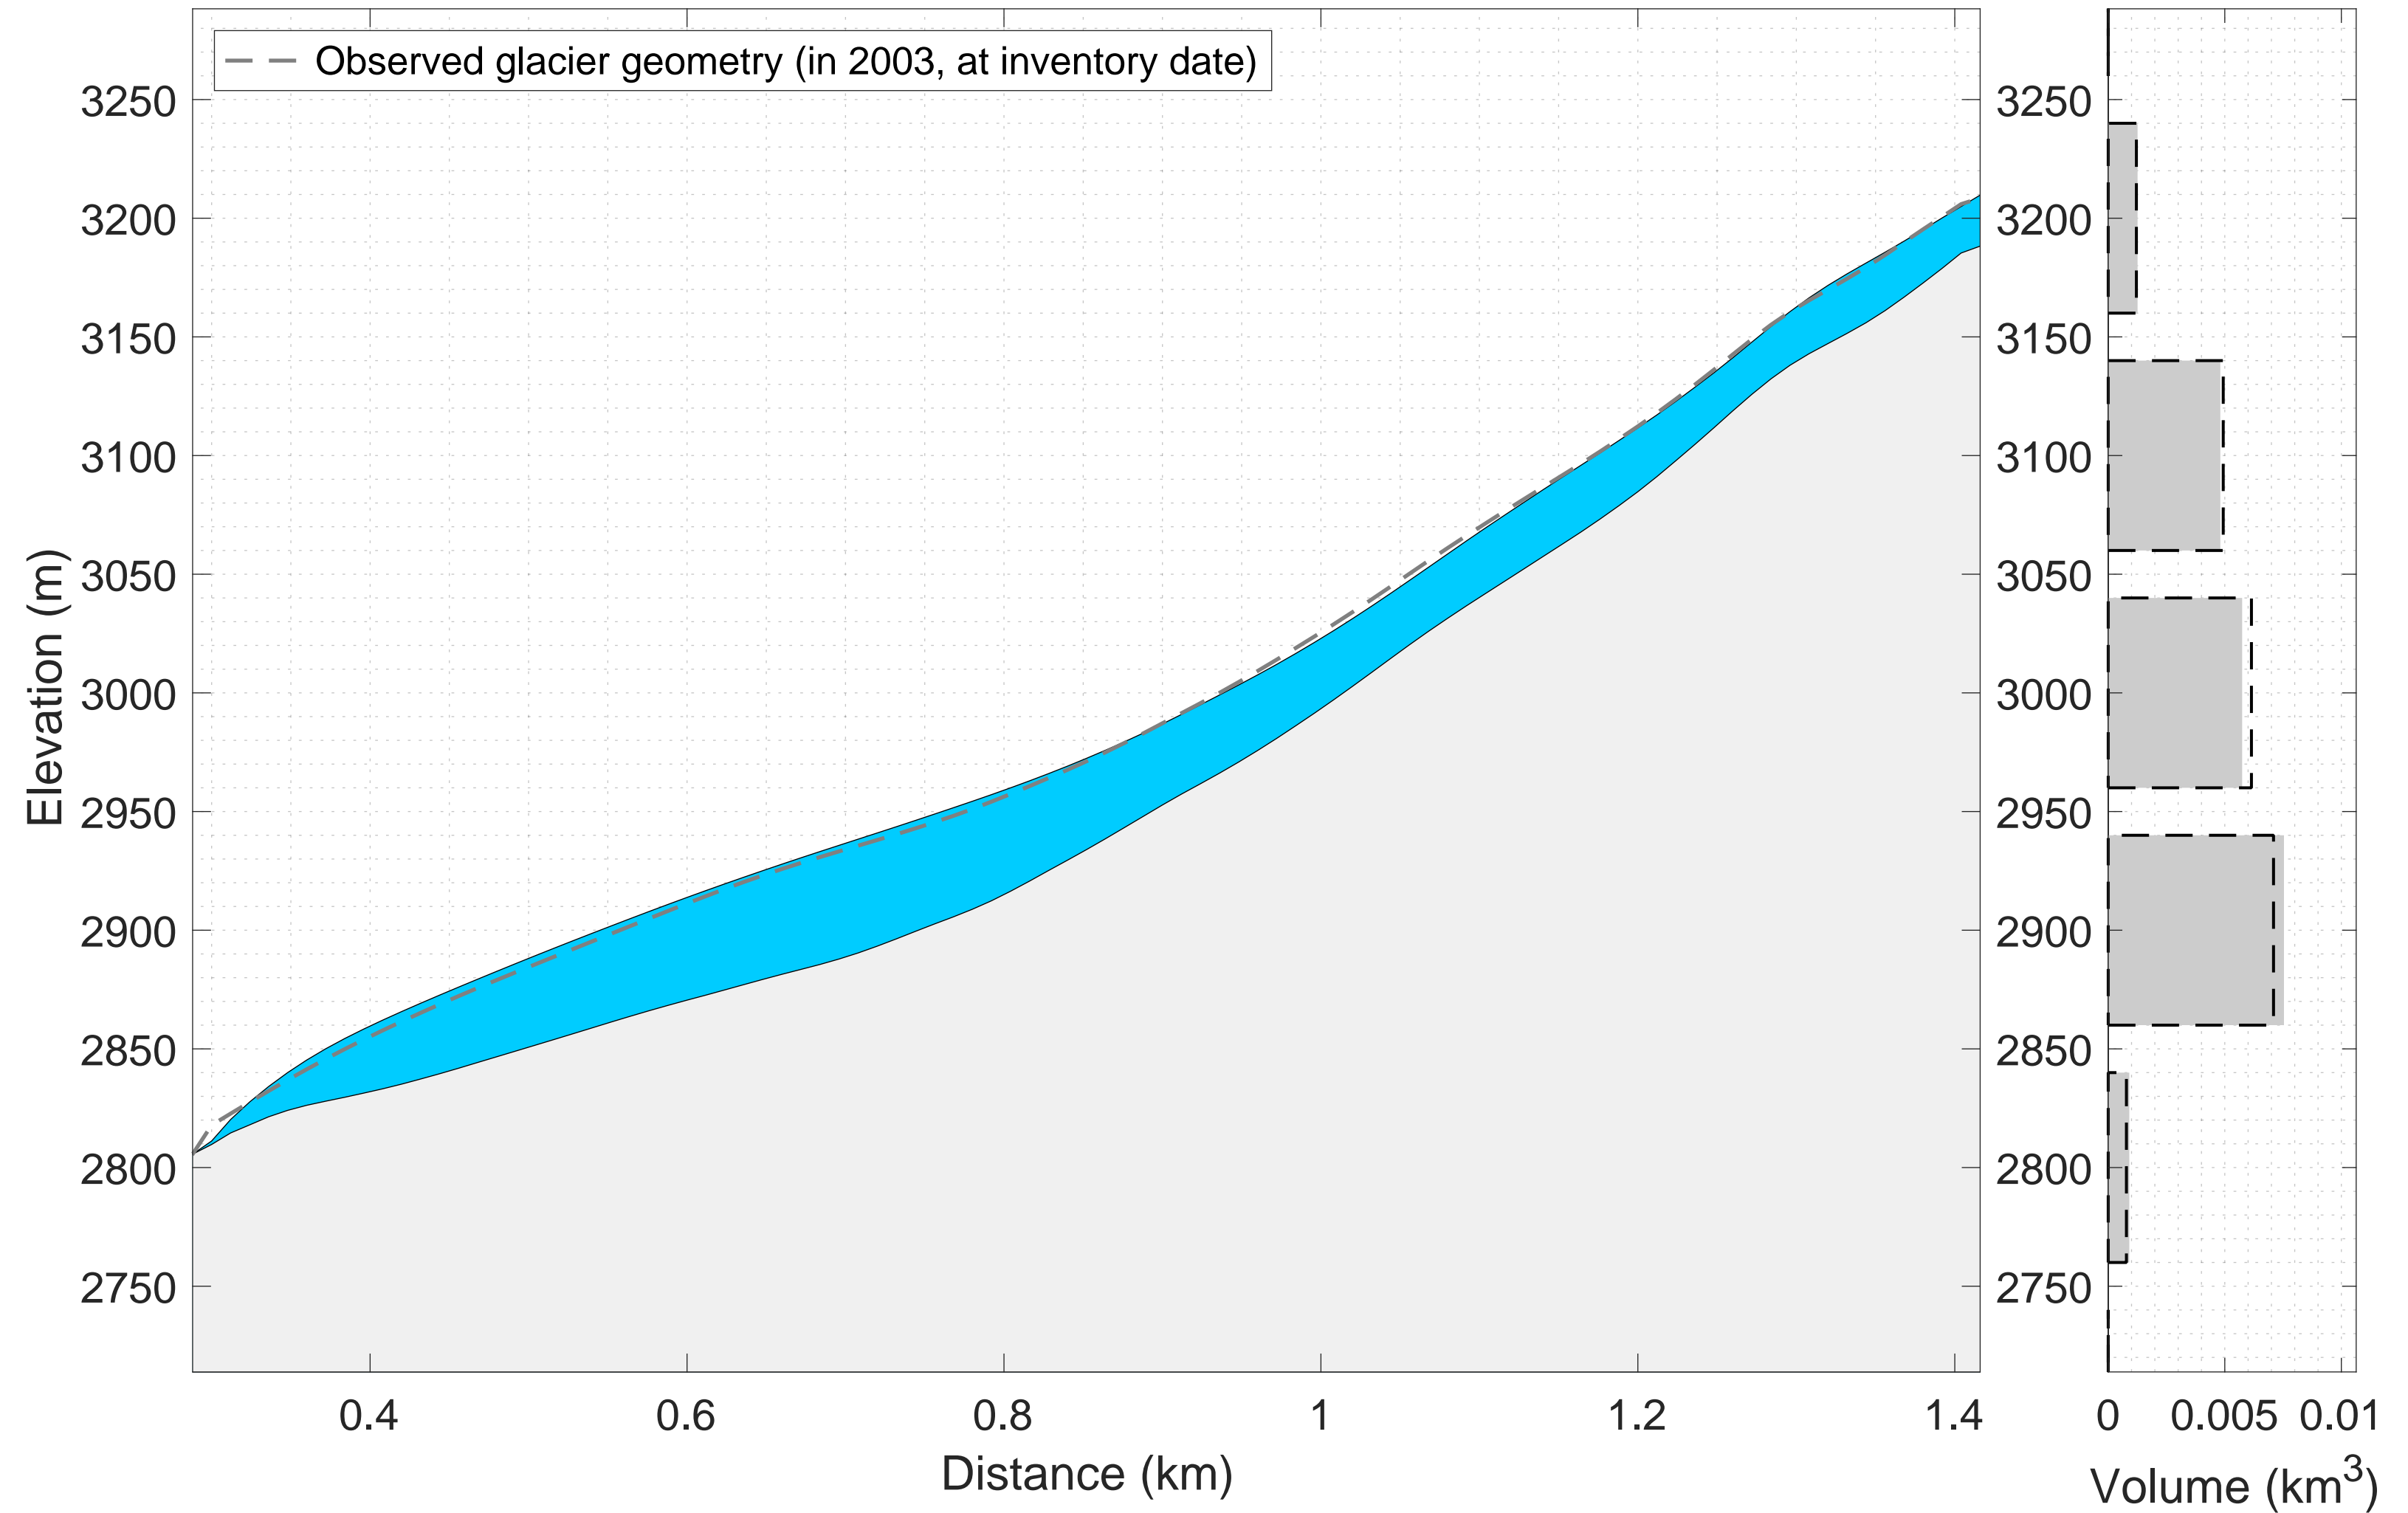

Supplement: Supplementary file 566 [file tc-13-1125-2019-supplement.zip]

**Modelled geometry (Glacier ID = 02353;  $A = 5.6079\text{e-}17 \text{ Pa}^{-3} \text{ a}^{-1}$ ;  $dx = 16 \text{ m}$ )**

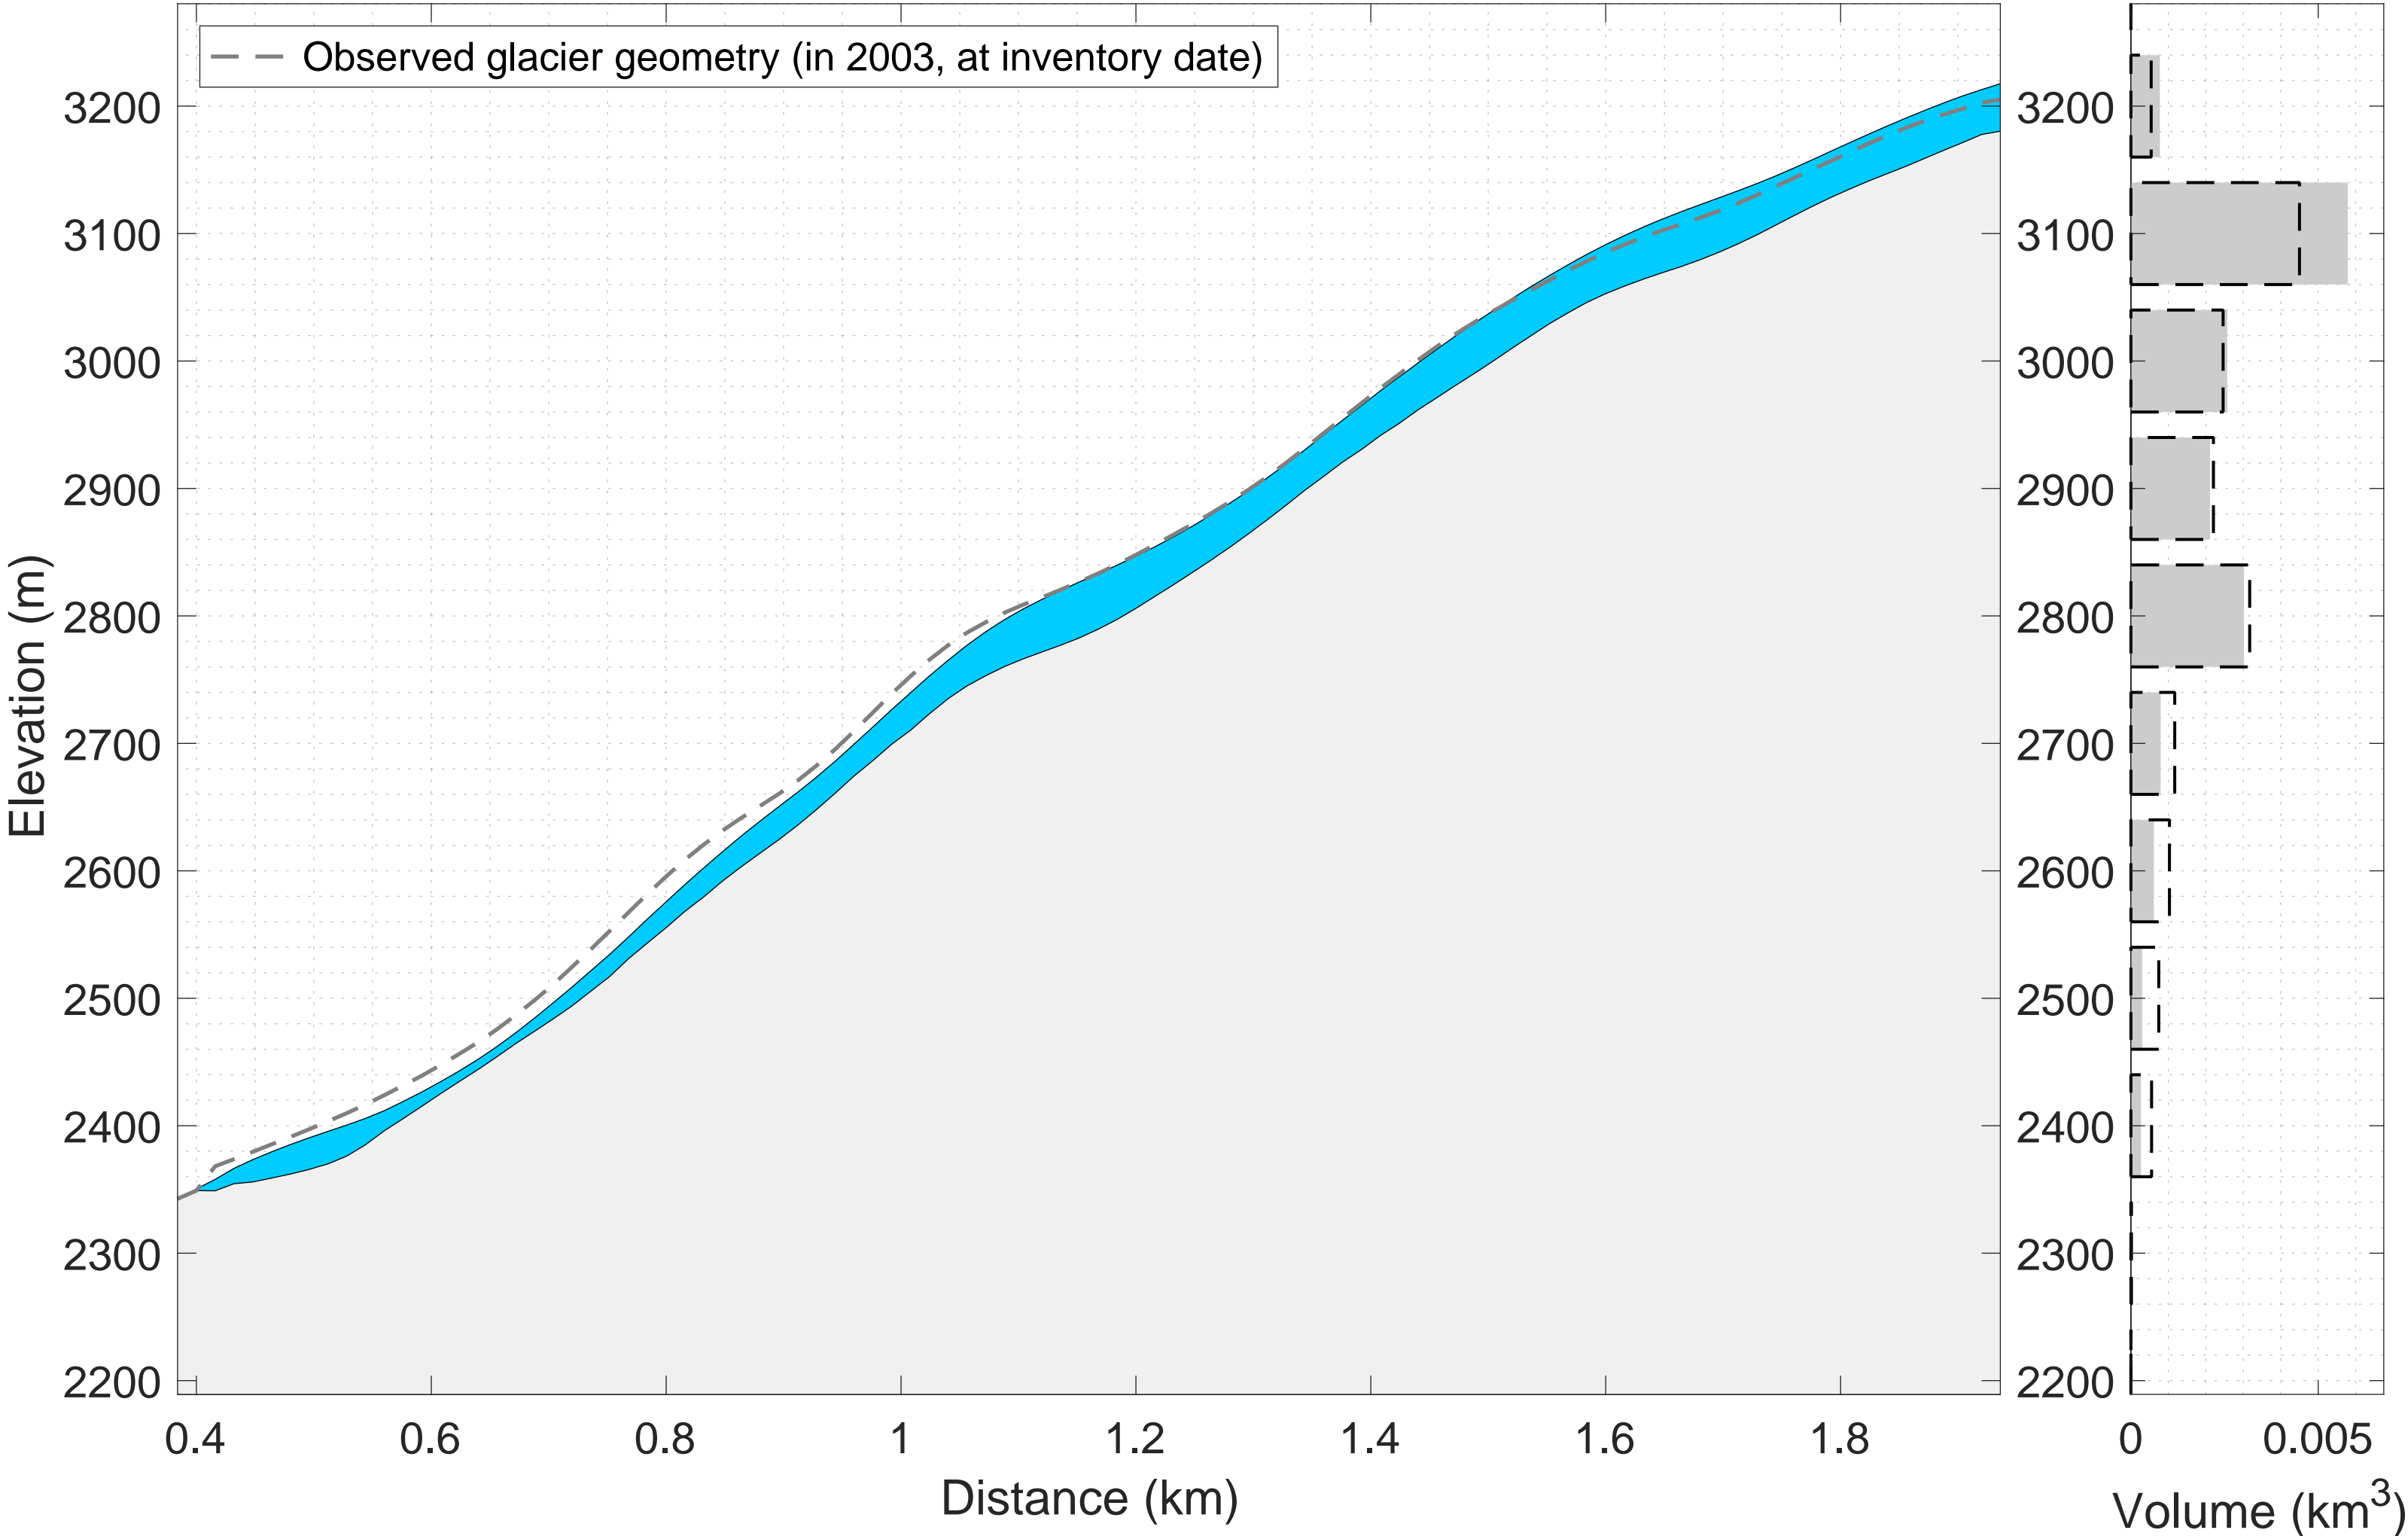

Supplement: Supplementary file 567 [file tc-13-1125-2019-supplement.zip]

**Modelled geometry (Glacier ID = 03642;  $A = 1.5968\text{e-}16 \text{ Pa}^{-3} \text{ a}^{-1}$ ;  $dx = 61 \text{ m}$ )**

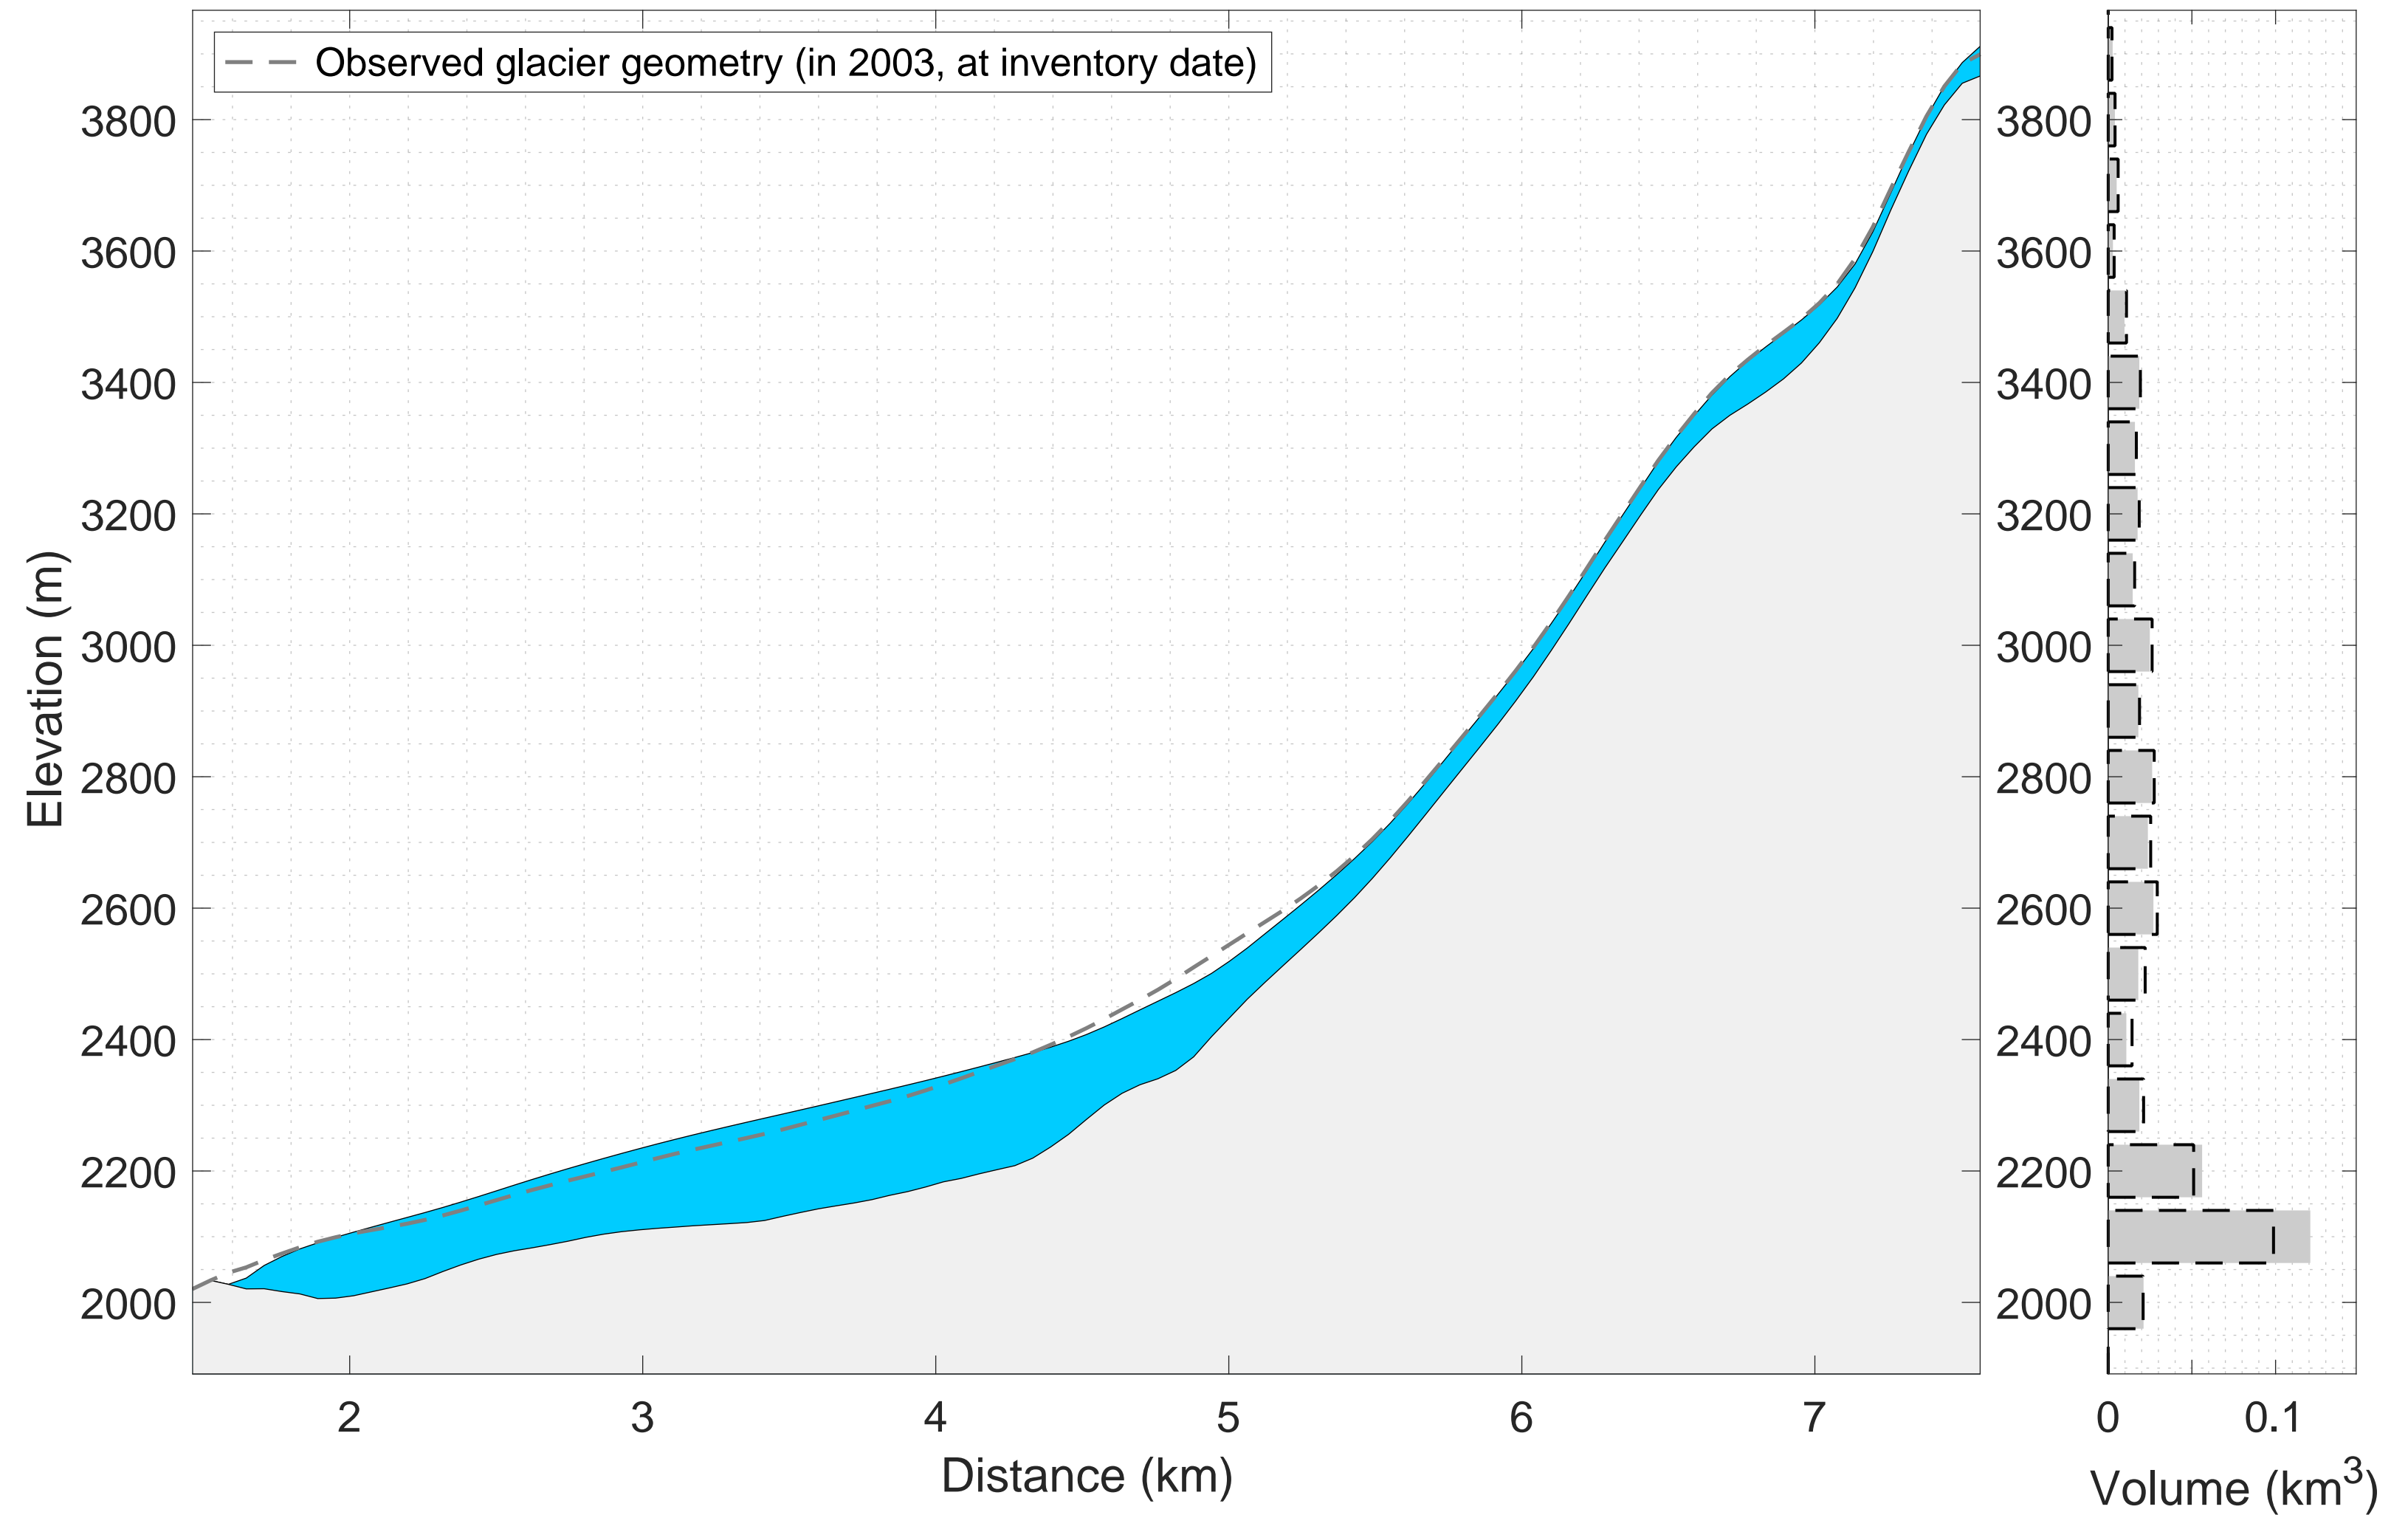

Supplement: Supplementary file 568 [file tc-13-1125-2019-supplement.zip]

**Modelled geometry (Glacier ID = 00958;  $A = 2.2049\text{e-}16 \text{ Pa}^{-3} \text{ a}^{-1}$ ;  $dx = 40 \text{ m}$ )**

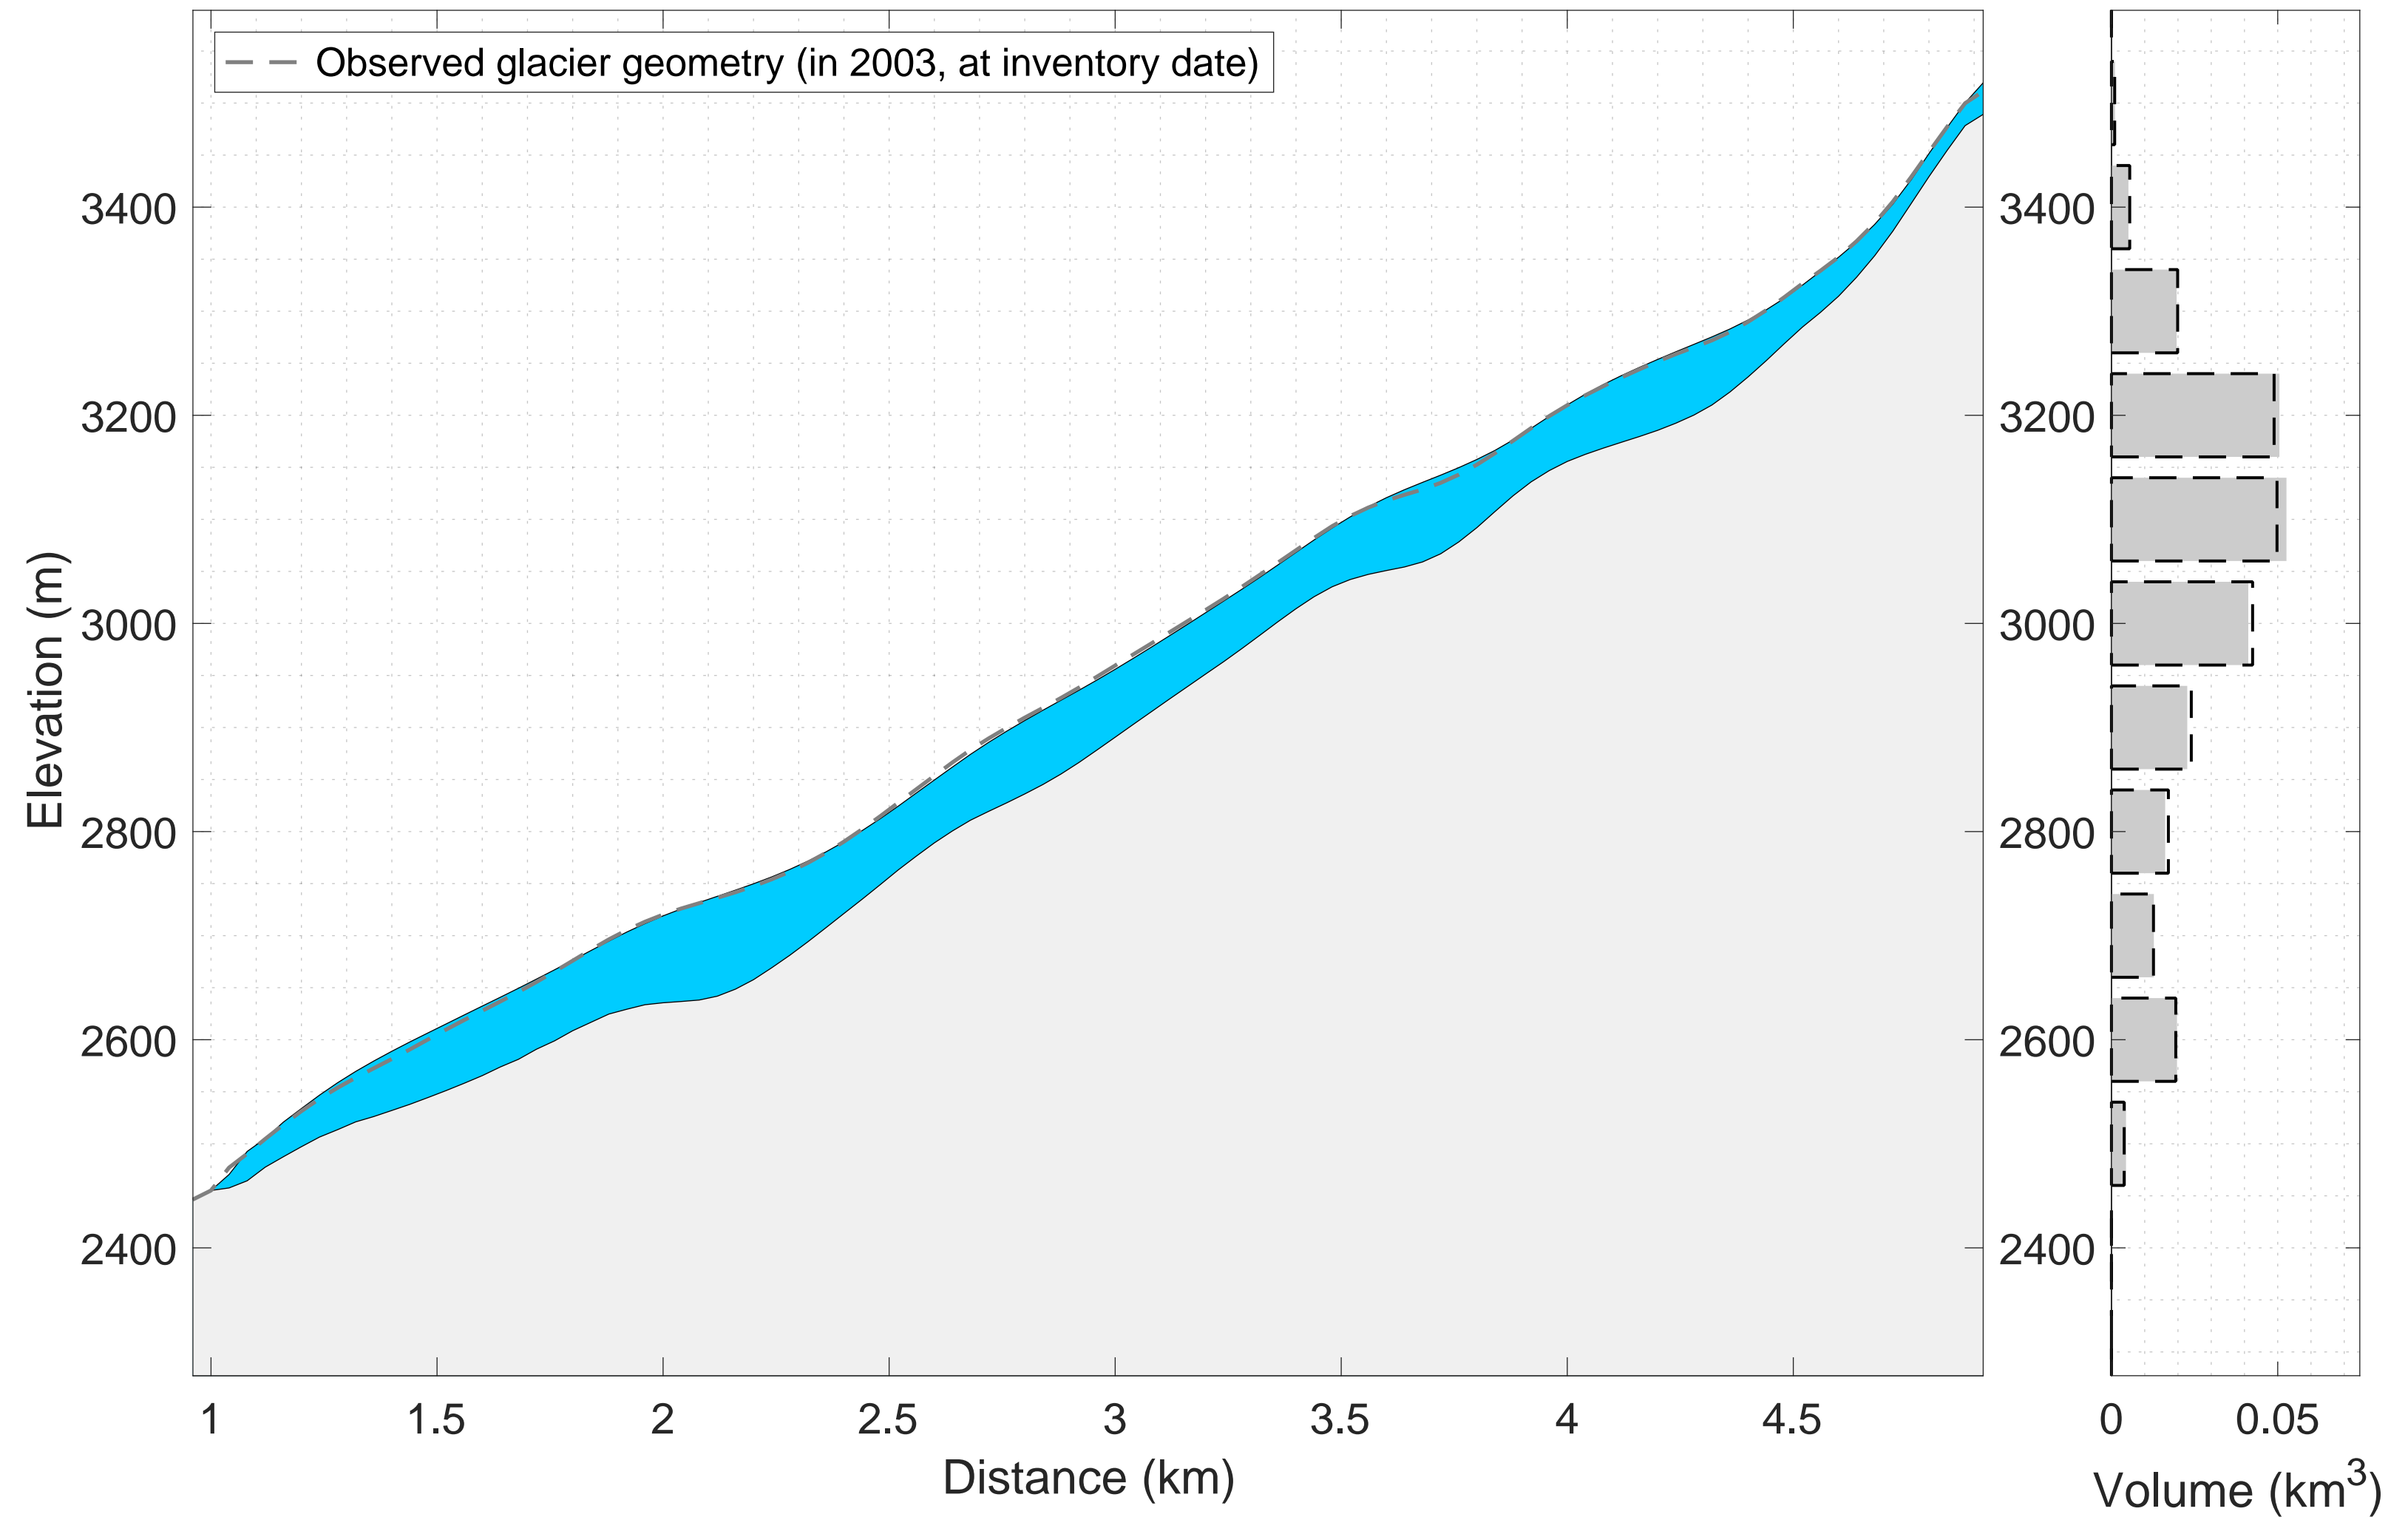

Supplement: Supplementary file 569 [file tc-13-1125-2019-supplement.zip]

**Modelled geometry (Glacier ID = 00637;  $A = 6.7924\text{e-}17 \text{ Pa}^{-3} \text{ a}^{-1}$ ;  $dx = 12 \text{ m}$ )**

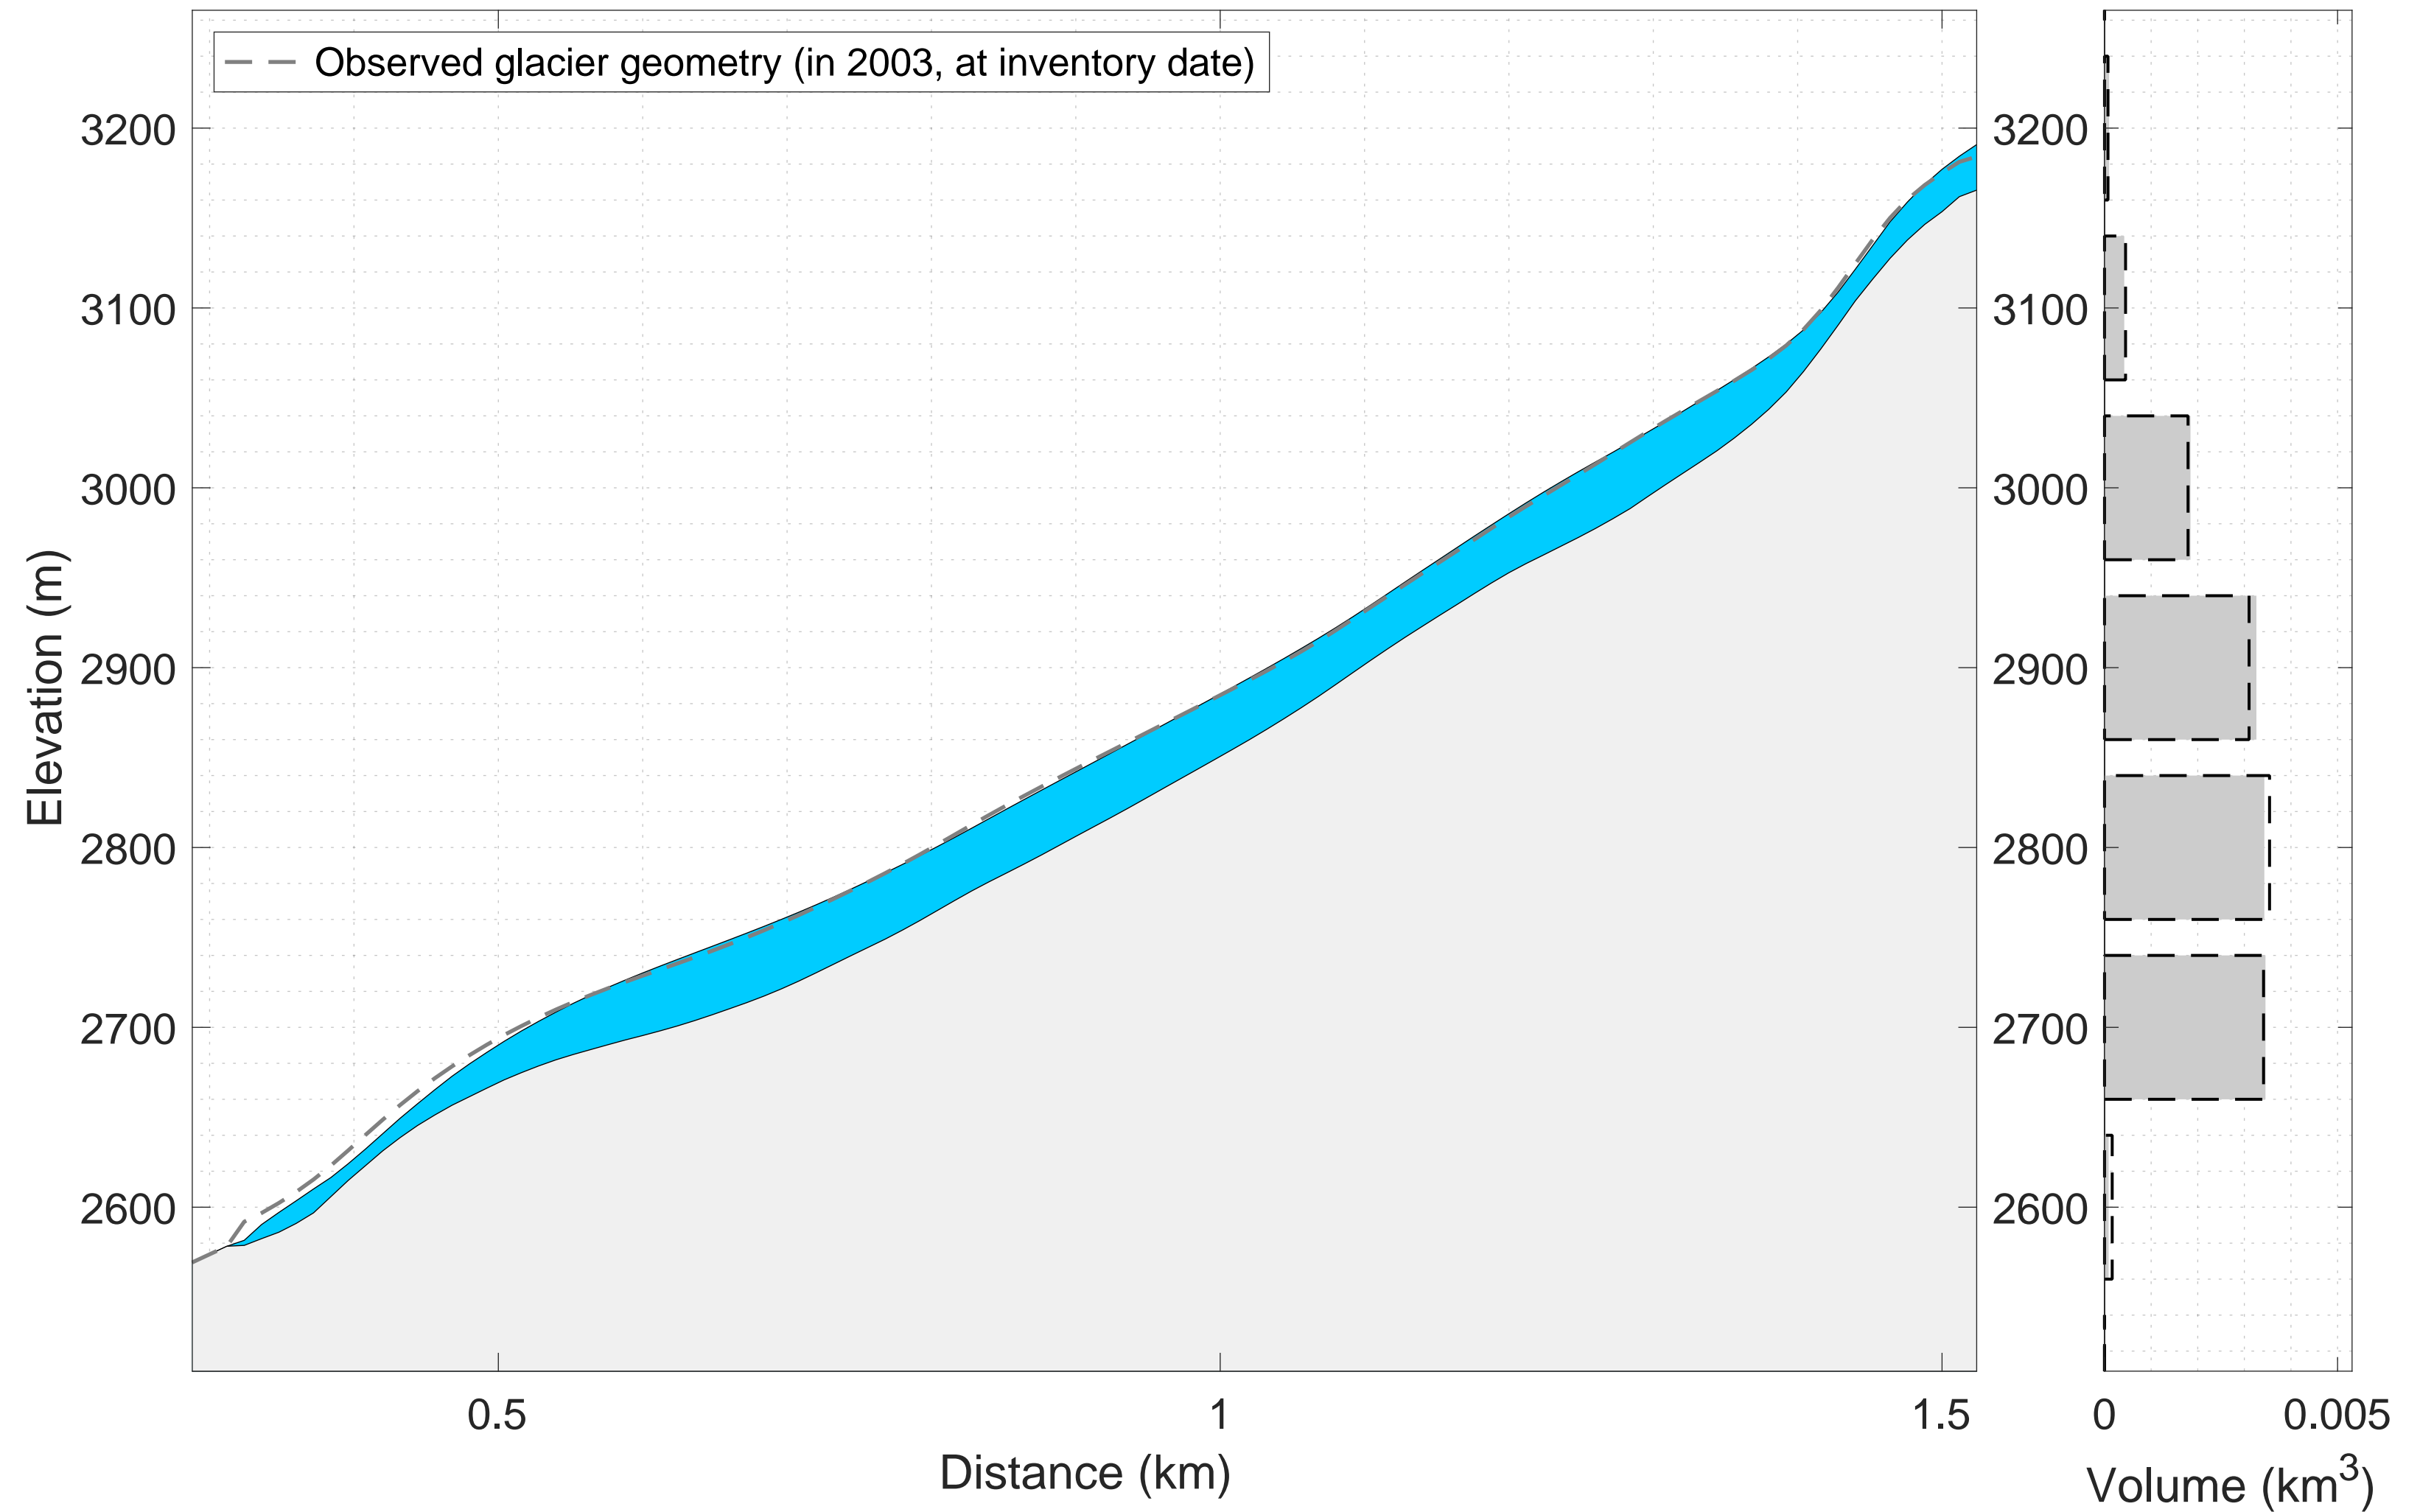

Supplement: Supplementary file 570 [file tc-13-1125-2019-supplement.zip]

**Modelled geometry (Glacier ID = 03662;  $A = 2.0829\text{e-}16 \text{ Pa}^{-3} \text{ a}^{-1}$ ;  $dx = 30 \text{ m}$ )**

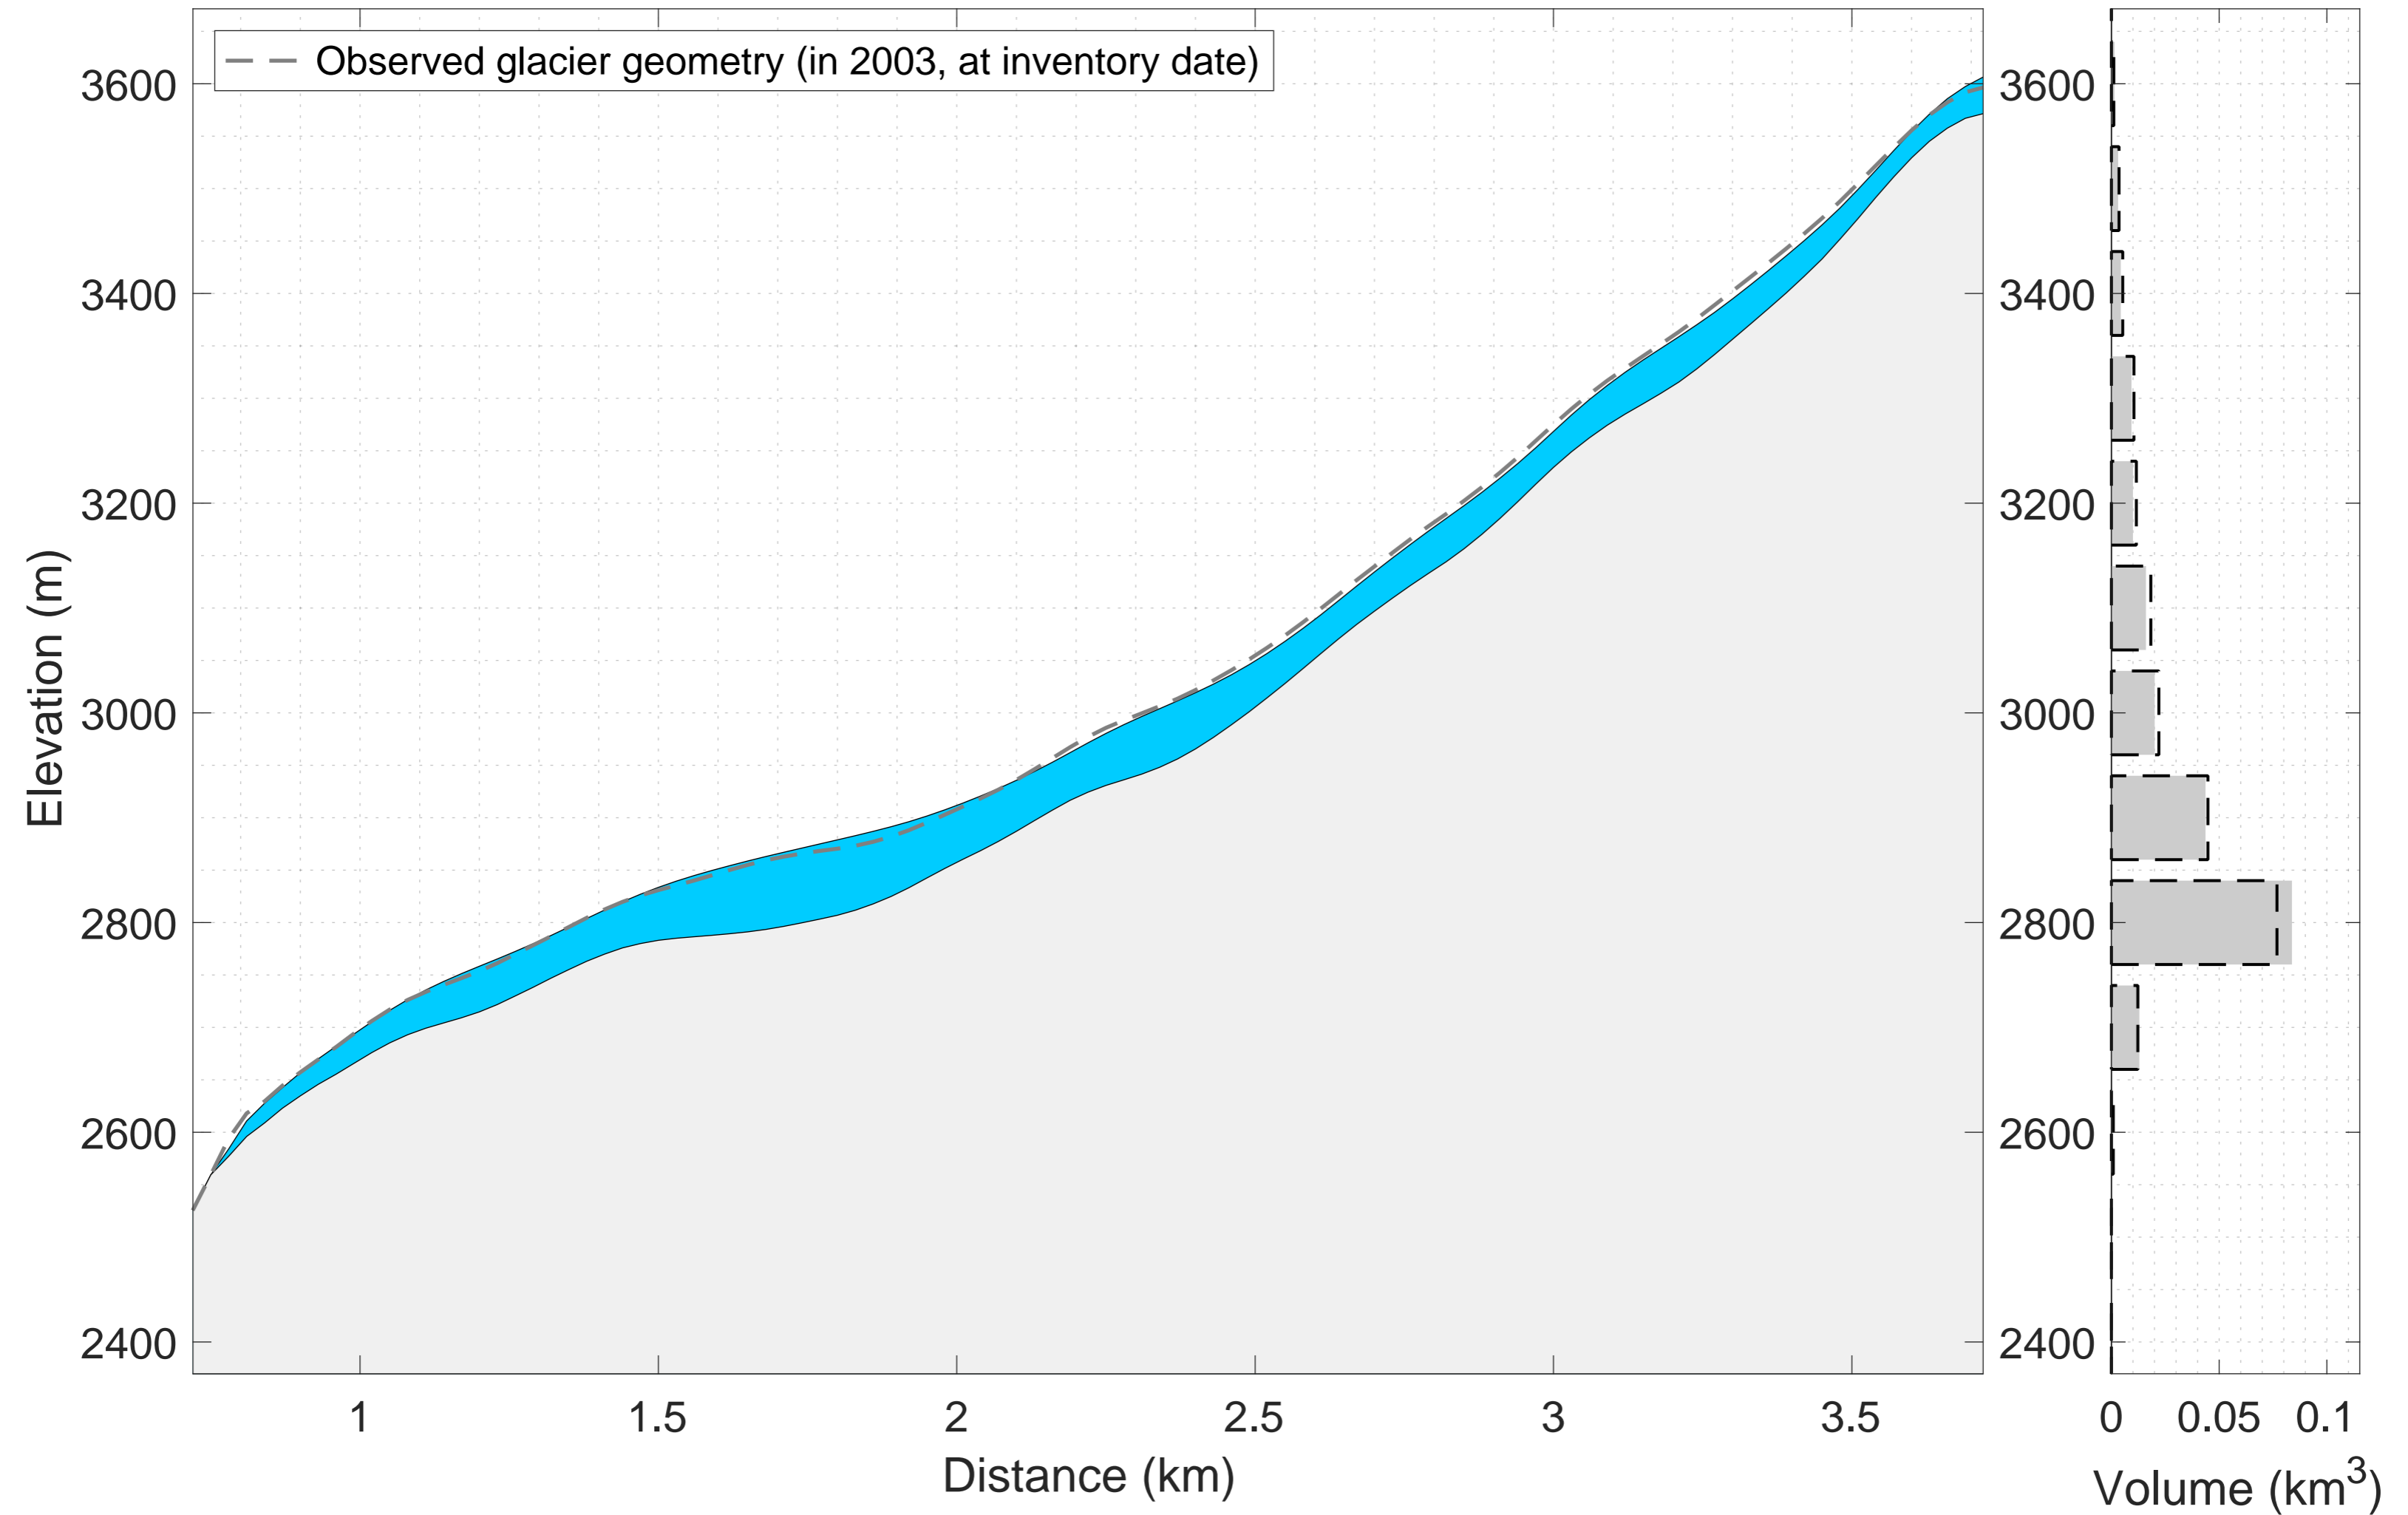

Supplement: Supplementary file 571 [file tc-13-1125-2019-supplement.zip]

**Modelled geometry (Glacier ID = 02736;  $A = 8.1075\text{e-}17 \text{ Pa}^{-3} \text{ a}^{-1}$ ;  $dx = 10 \text{ m}$ )**

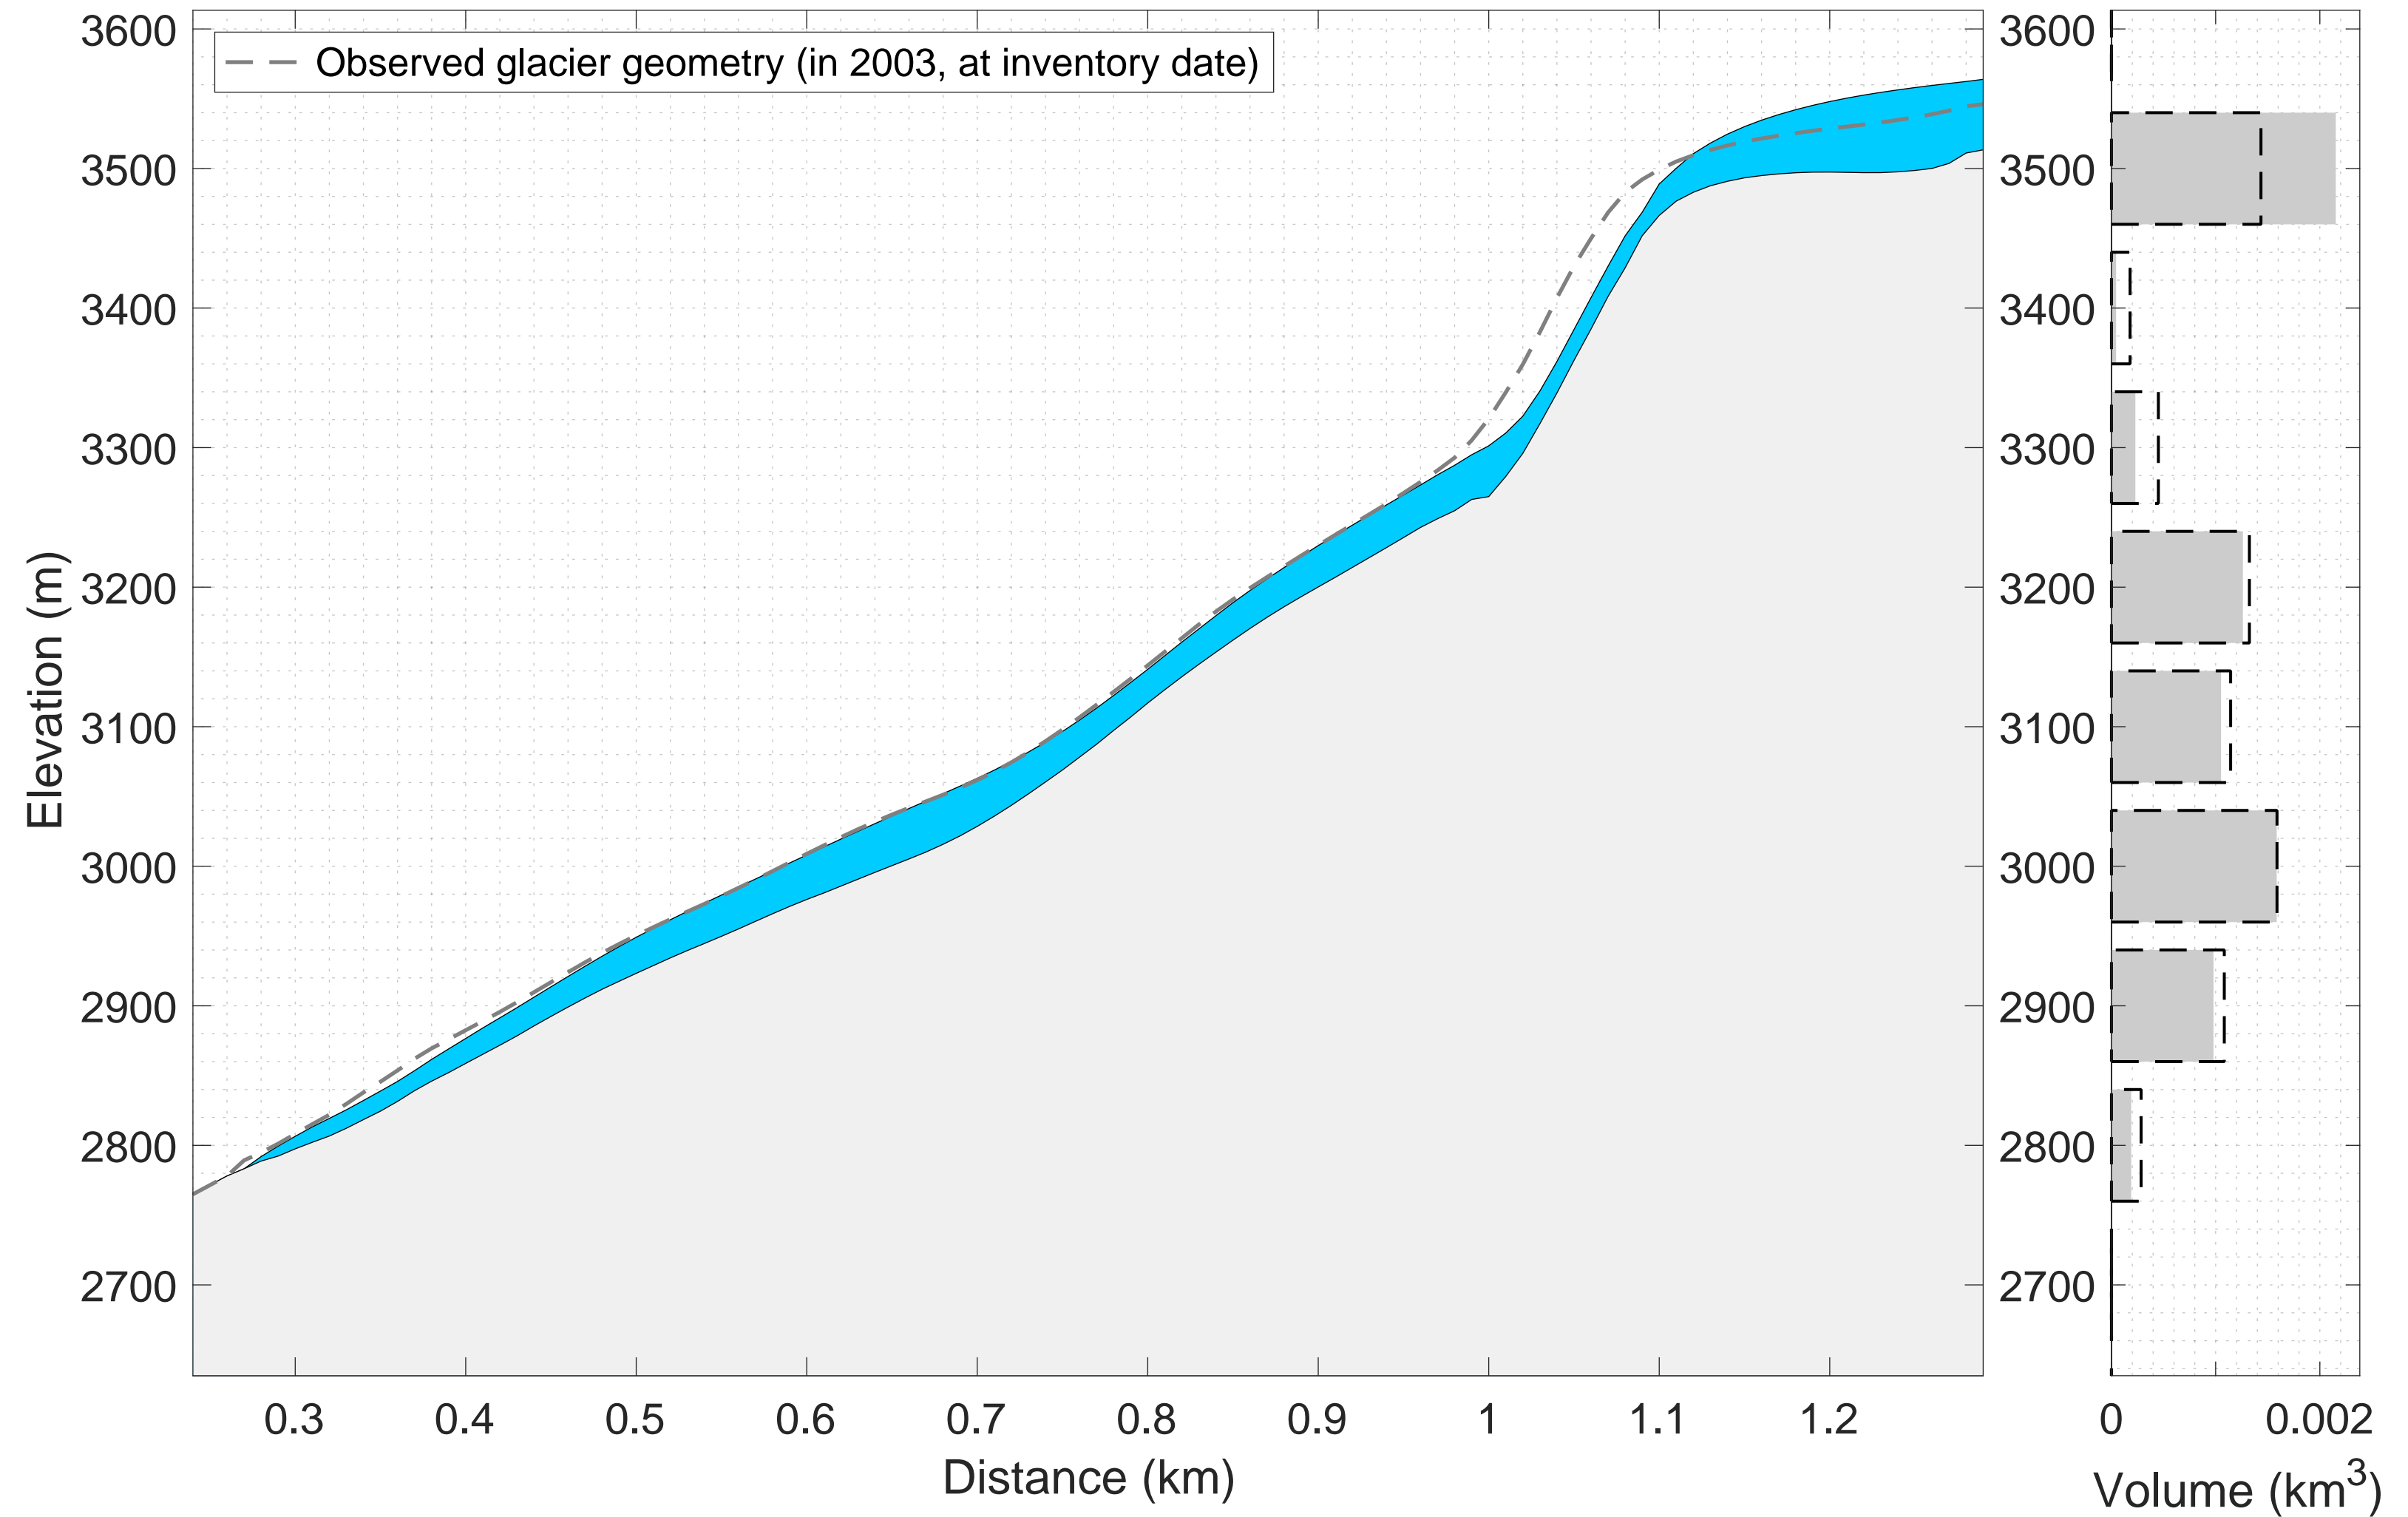

Supplement: Supplementary file 572 [file tc-13-1125-2019-supplement.zip]

**Modelled geometry (Glacier ID = 01258;  $A = 6.1203\text{e-}17 \text{ Pa}^{-3} \text{ a}^{-1}$ ;  $dx = 14 \text{ m}$ )**

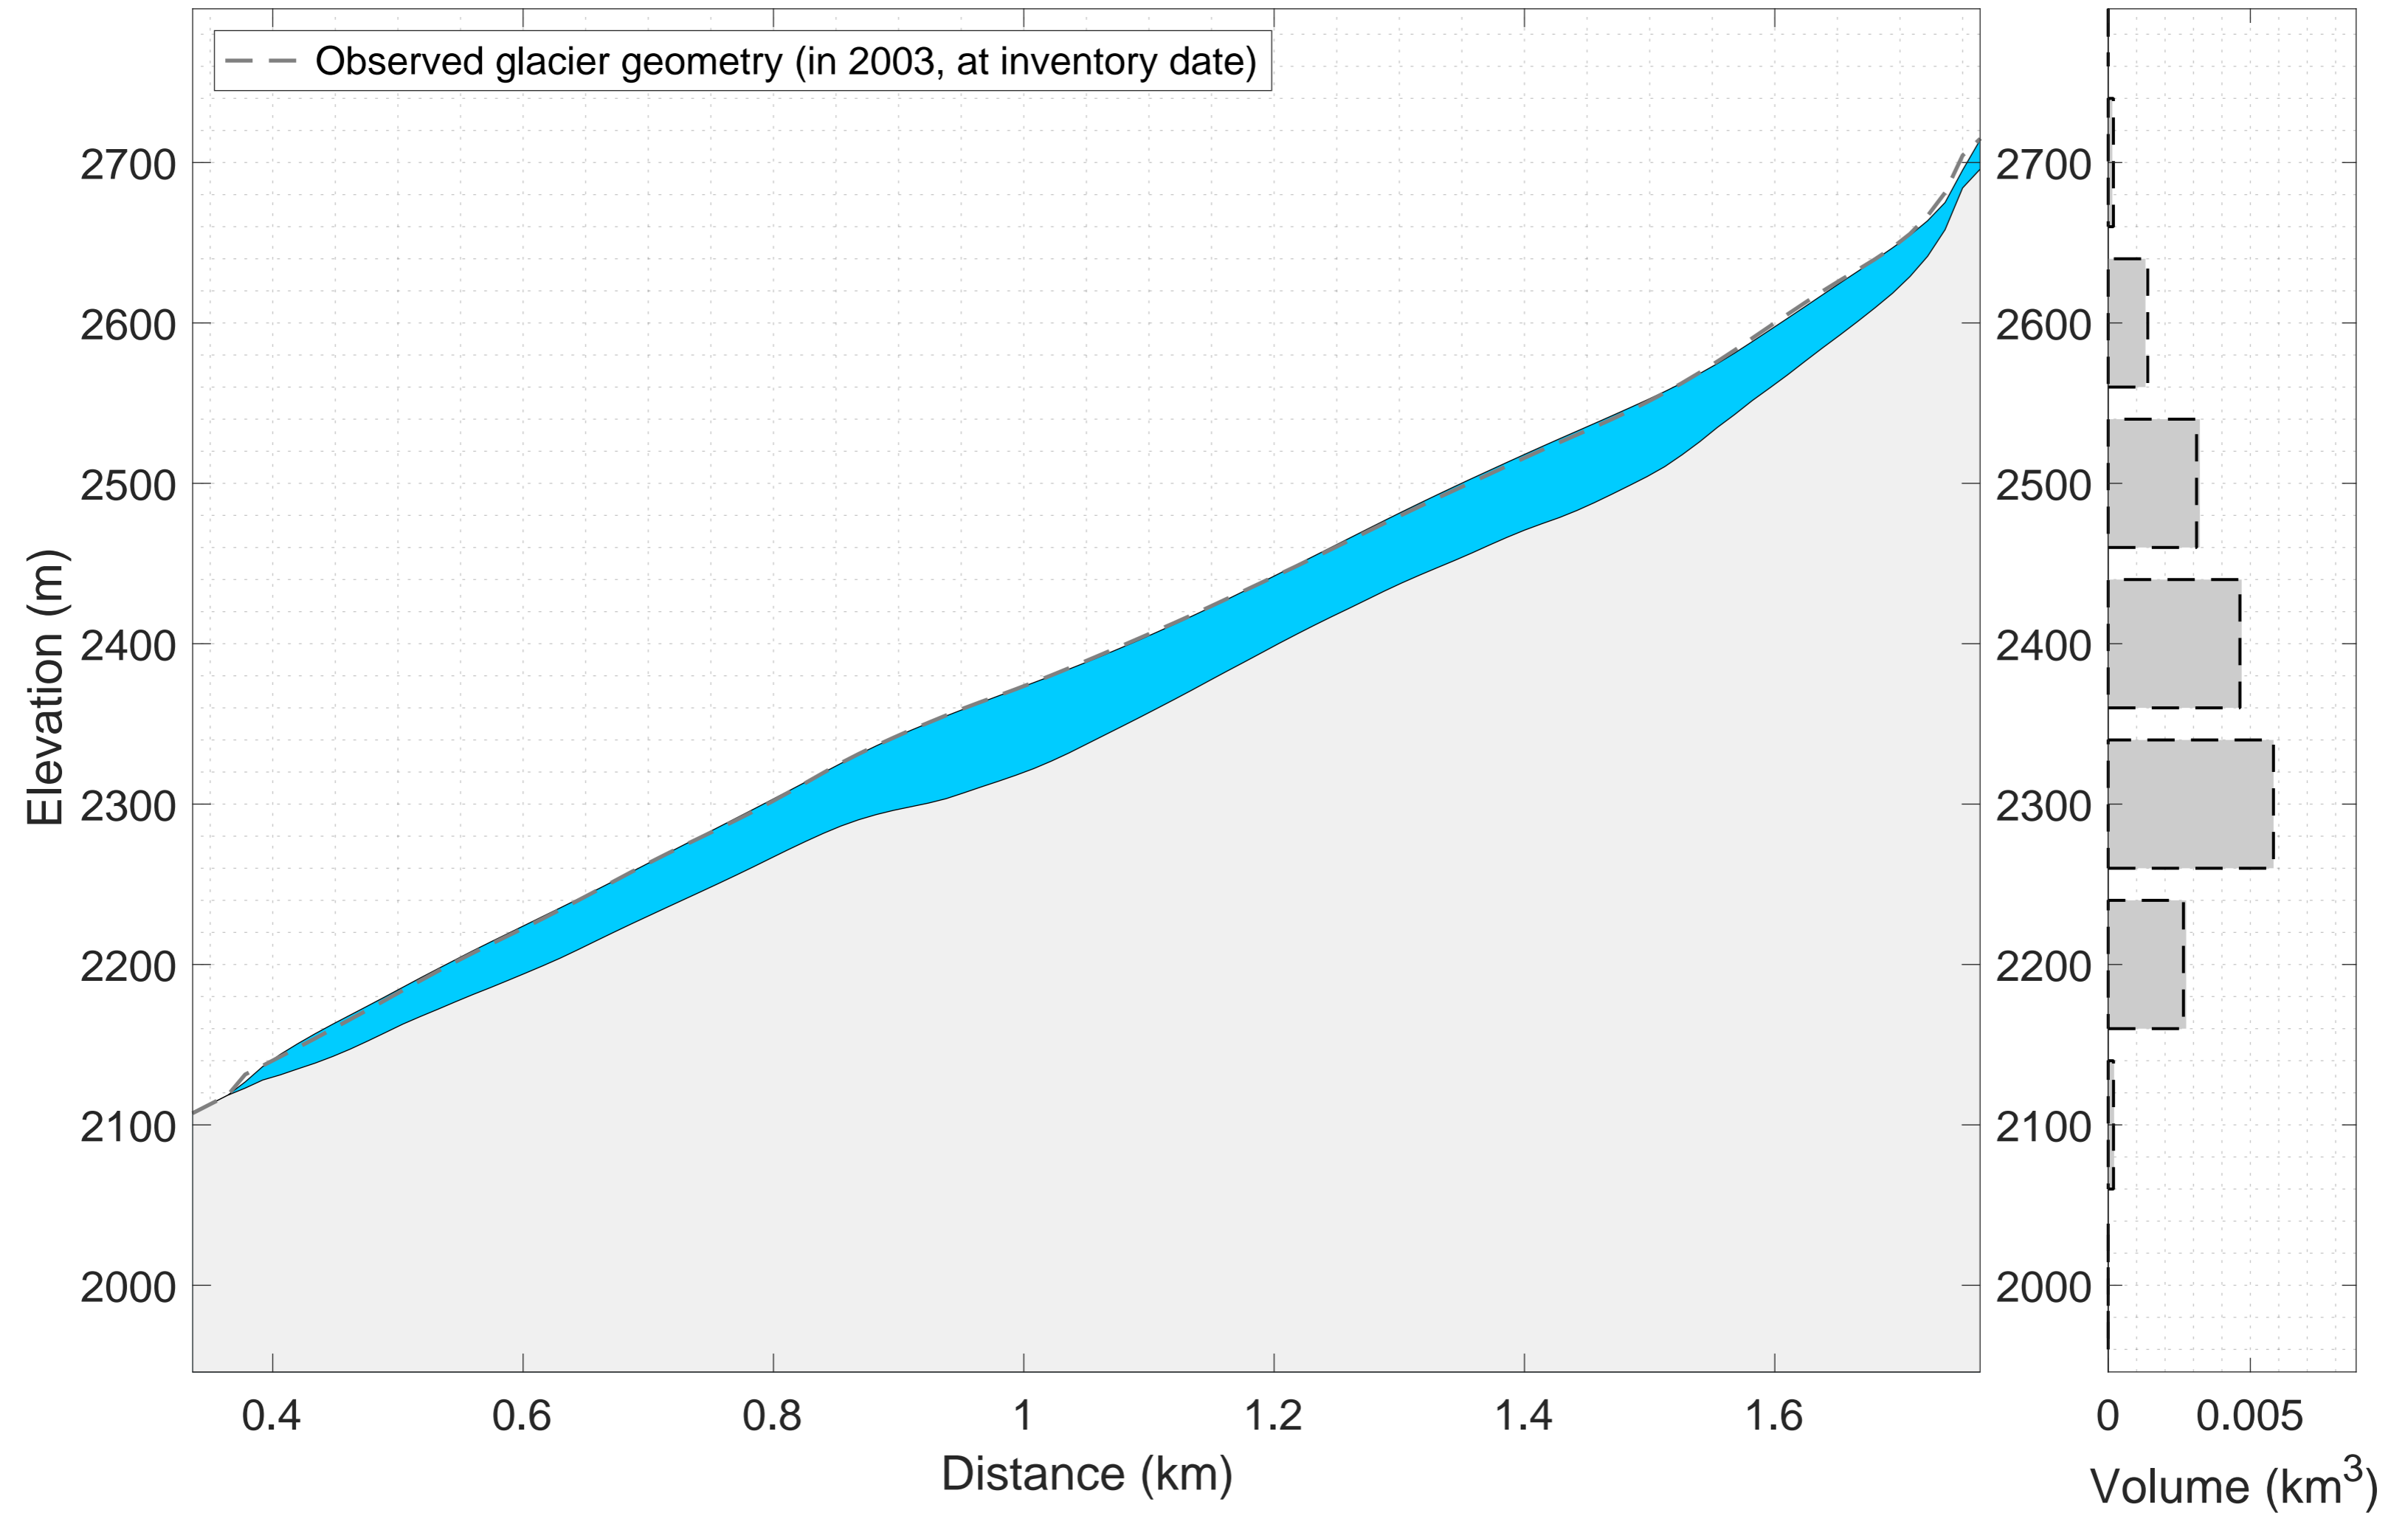

Supplement: Supplementary file 573 [file tc-13-1125-2019-supplement.zip]

**Modelled geometry (Glacier ID = 02197;  $A = 1.5751\text{e-}16 \text{ Pa}^{-3} \text{ a}^{-1}$ ;  $dx = 13 \text{ m}$ )**

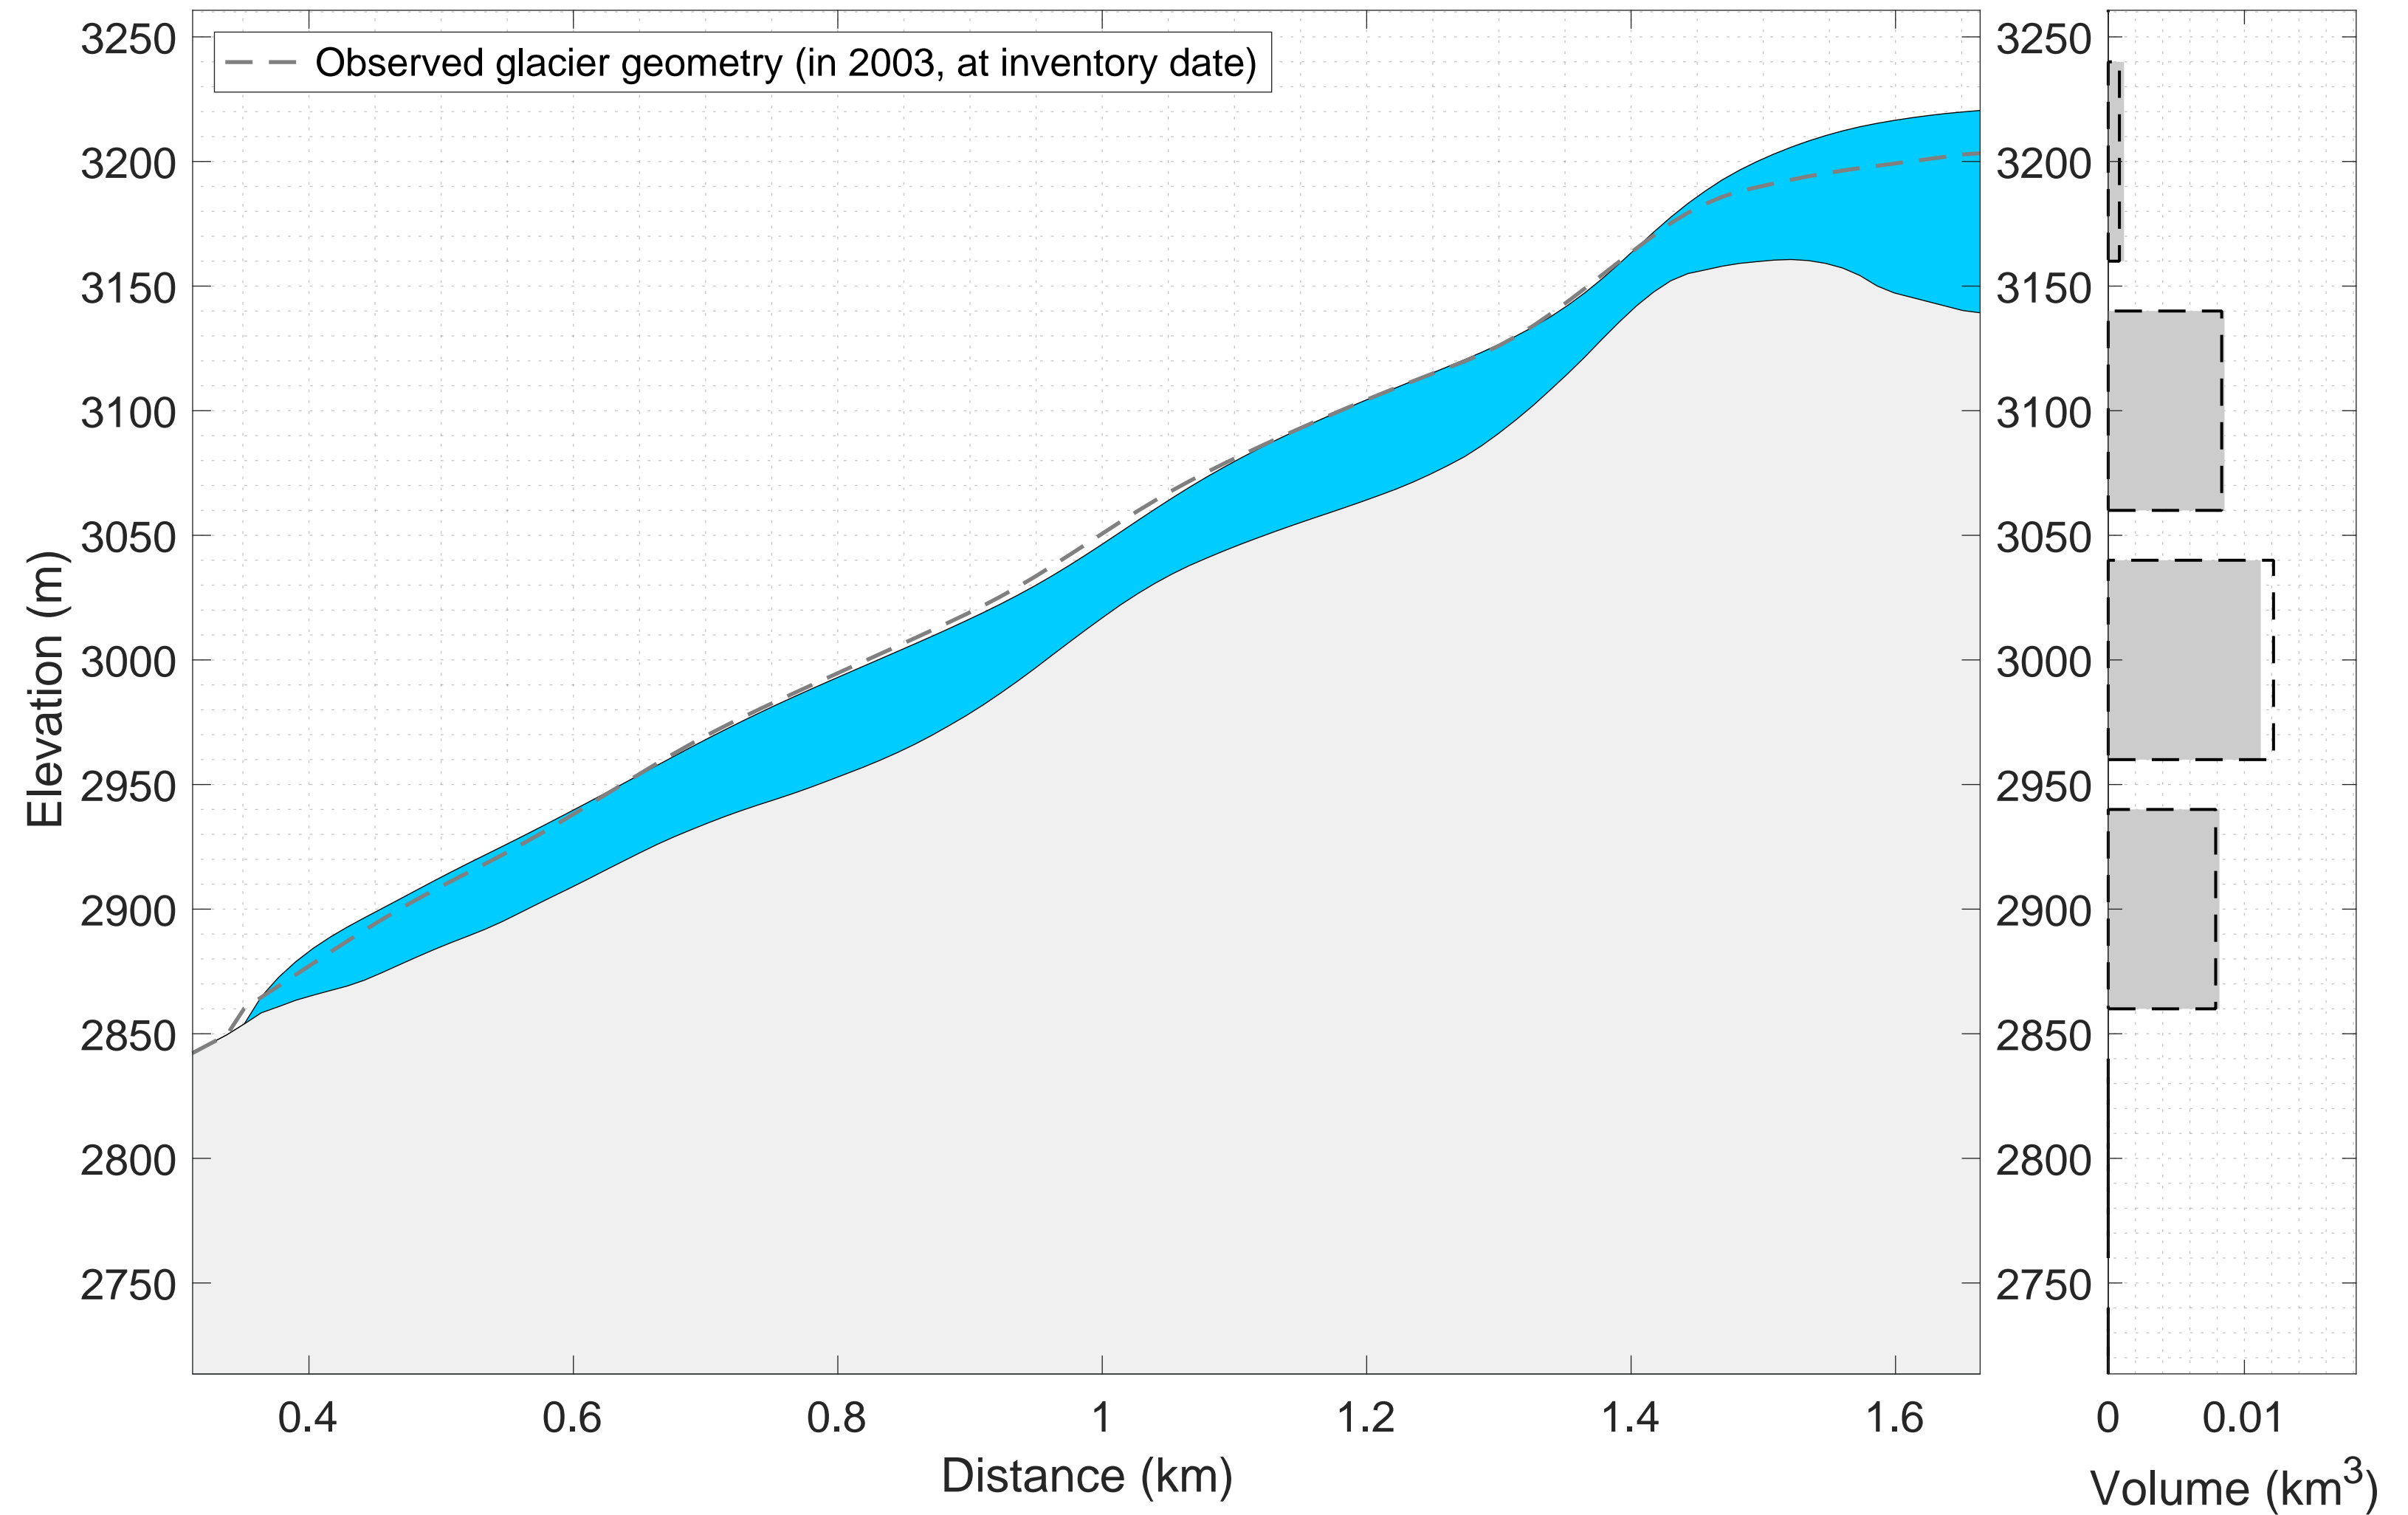

Supplement: Supplementary file 574 [file tc-13-1125-2019-supplement.zip]

**Modelled geometry (Glacier ID = 02000;  $A = 7.0487\text{e-}17 \text{ Pa}^{-3} \text{ a}^{-1}$ ;  $dx = 11 \text{ m}$ )**

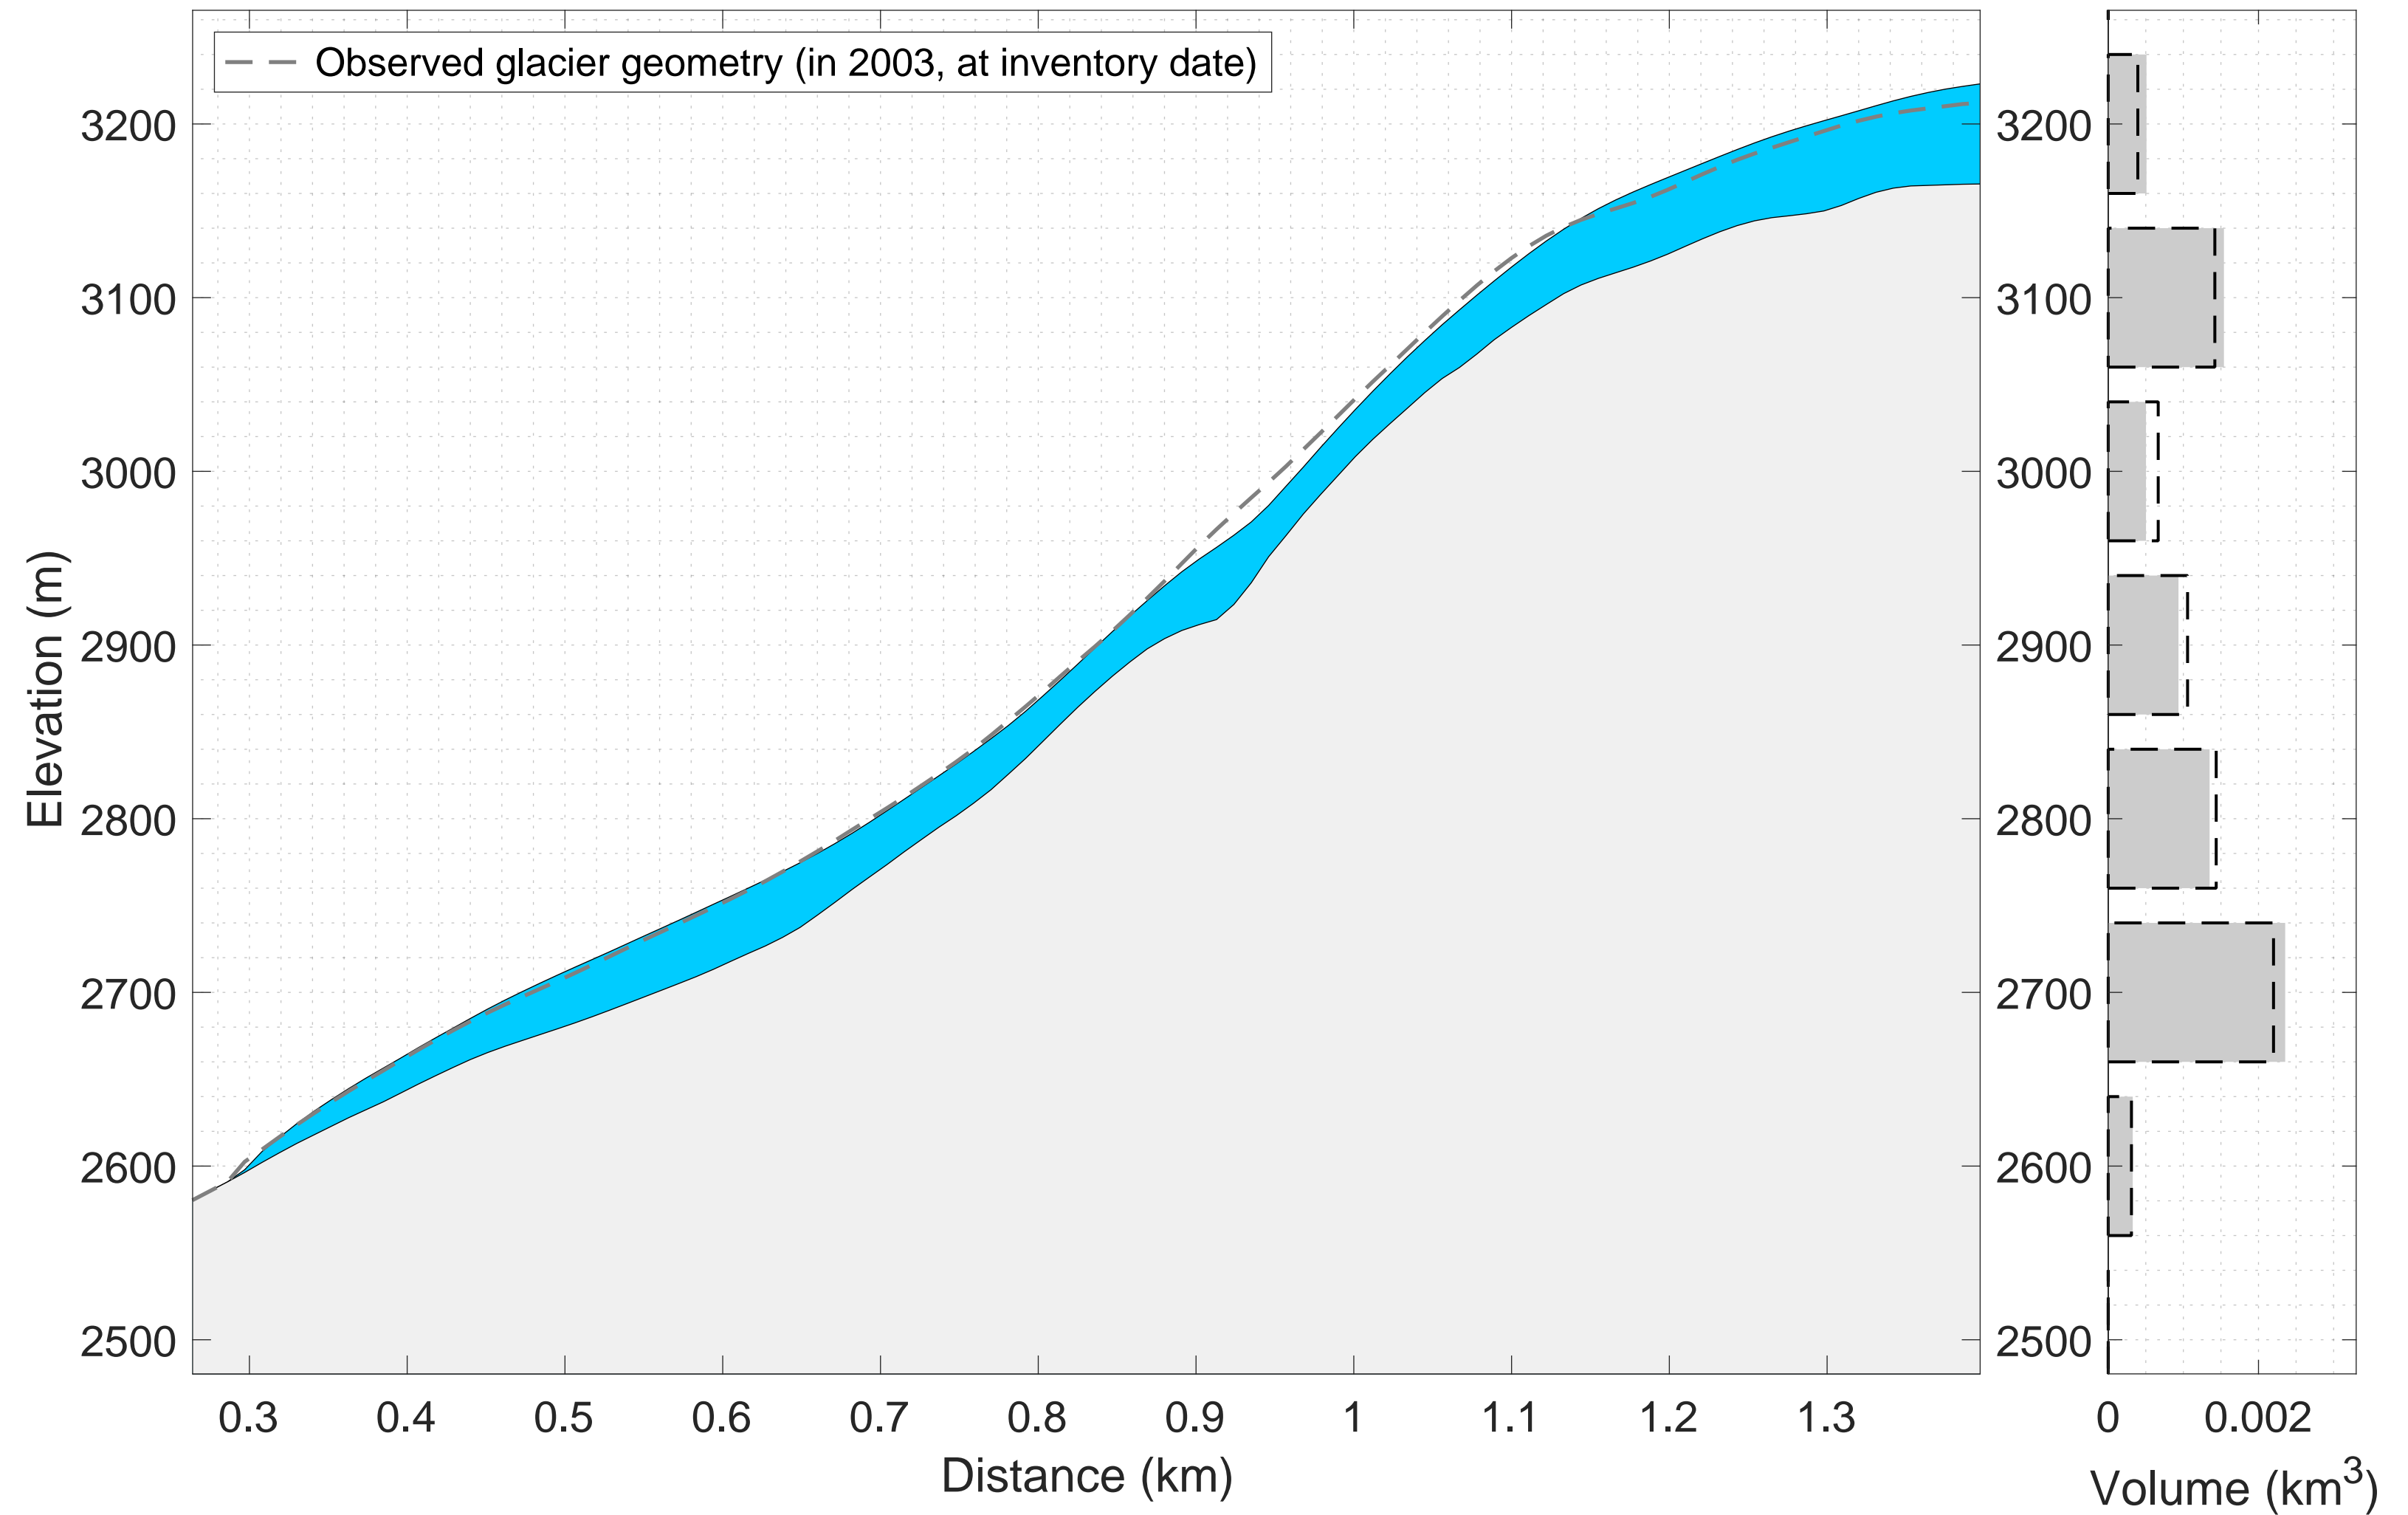

Supplement: Supplementary file 575 [file tc-13-1125-2019-supplement.zip]

**Modelled geometry (Glacier ID = 00014;  $A = 1.2647\text{e-}16 \text{ Pa}^{-3} \text{ a}^{-1}$ ;  $dx = 14 \text{ m}$ )**

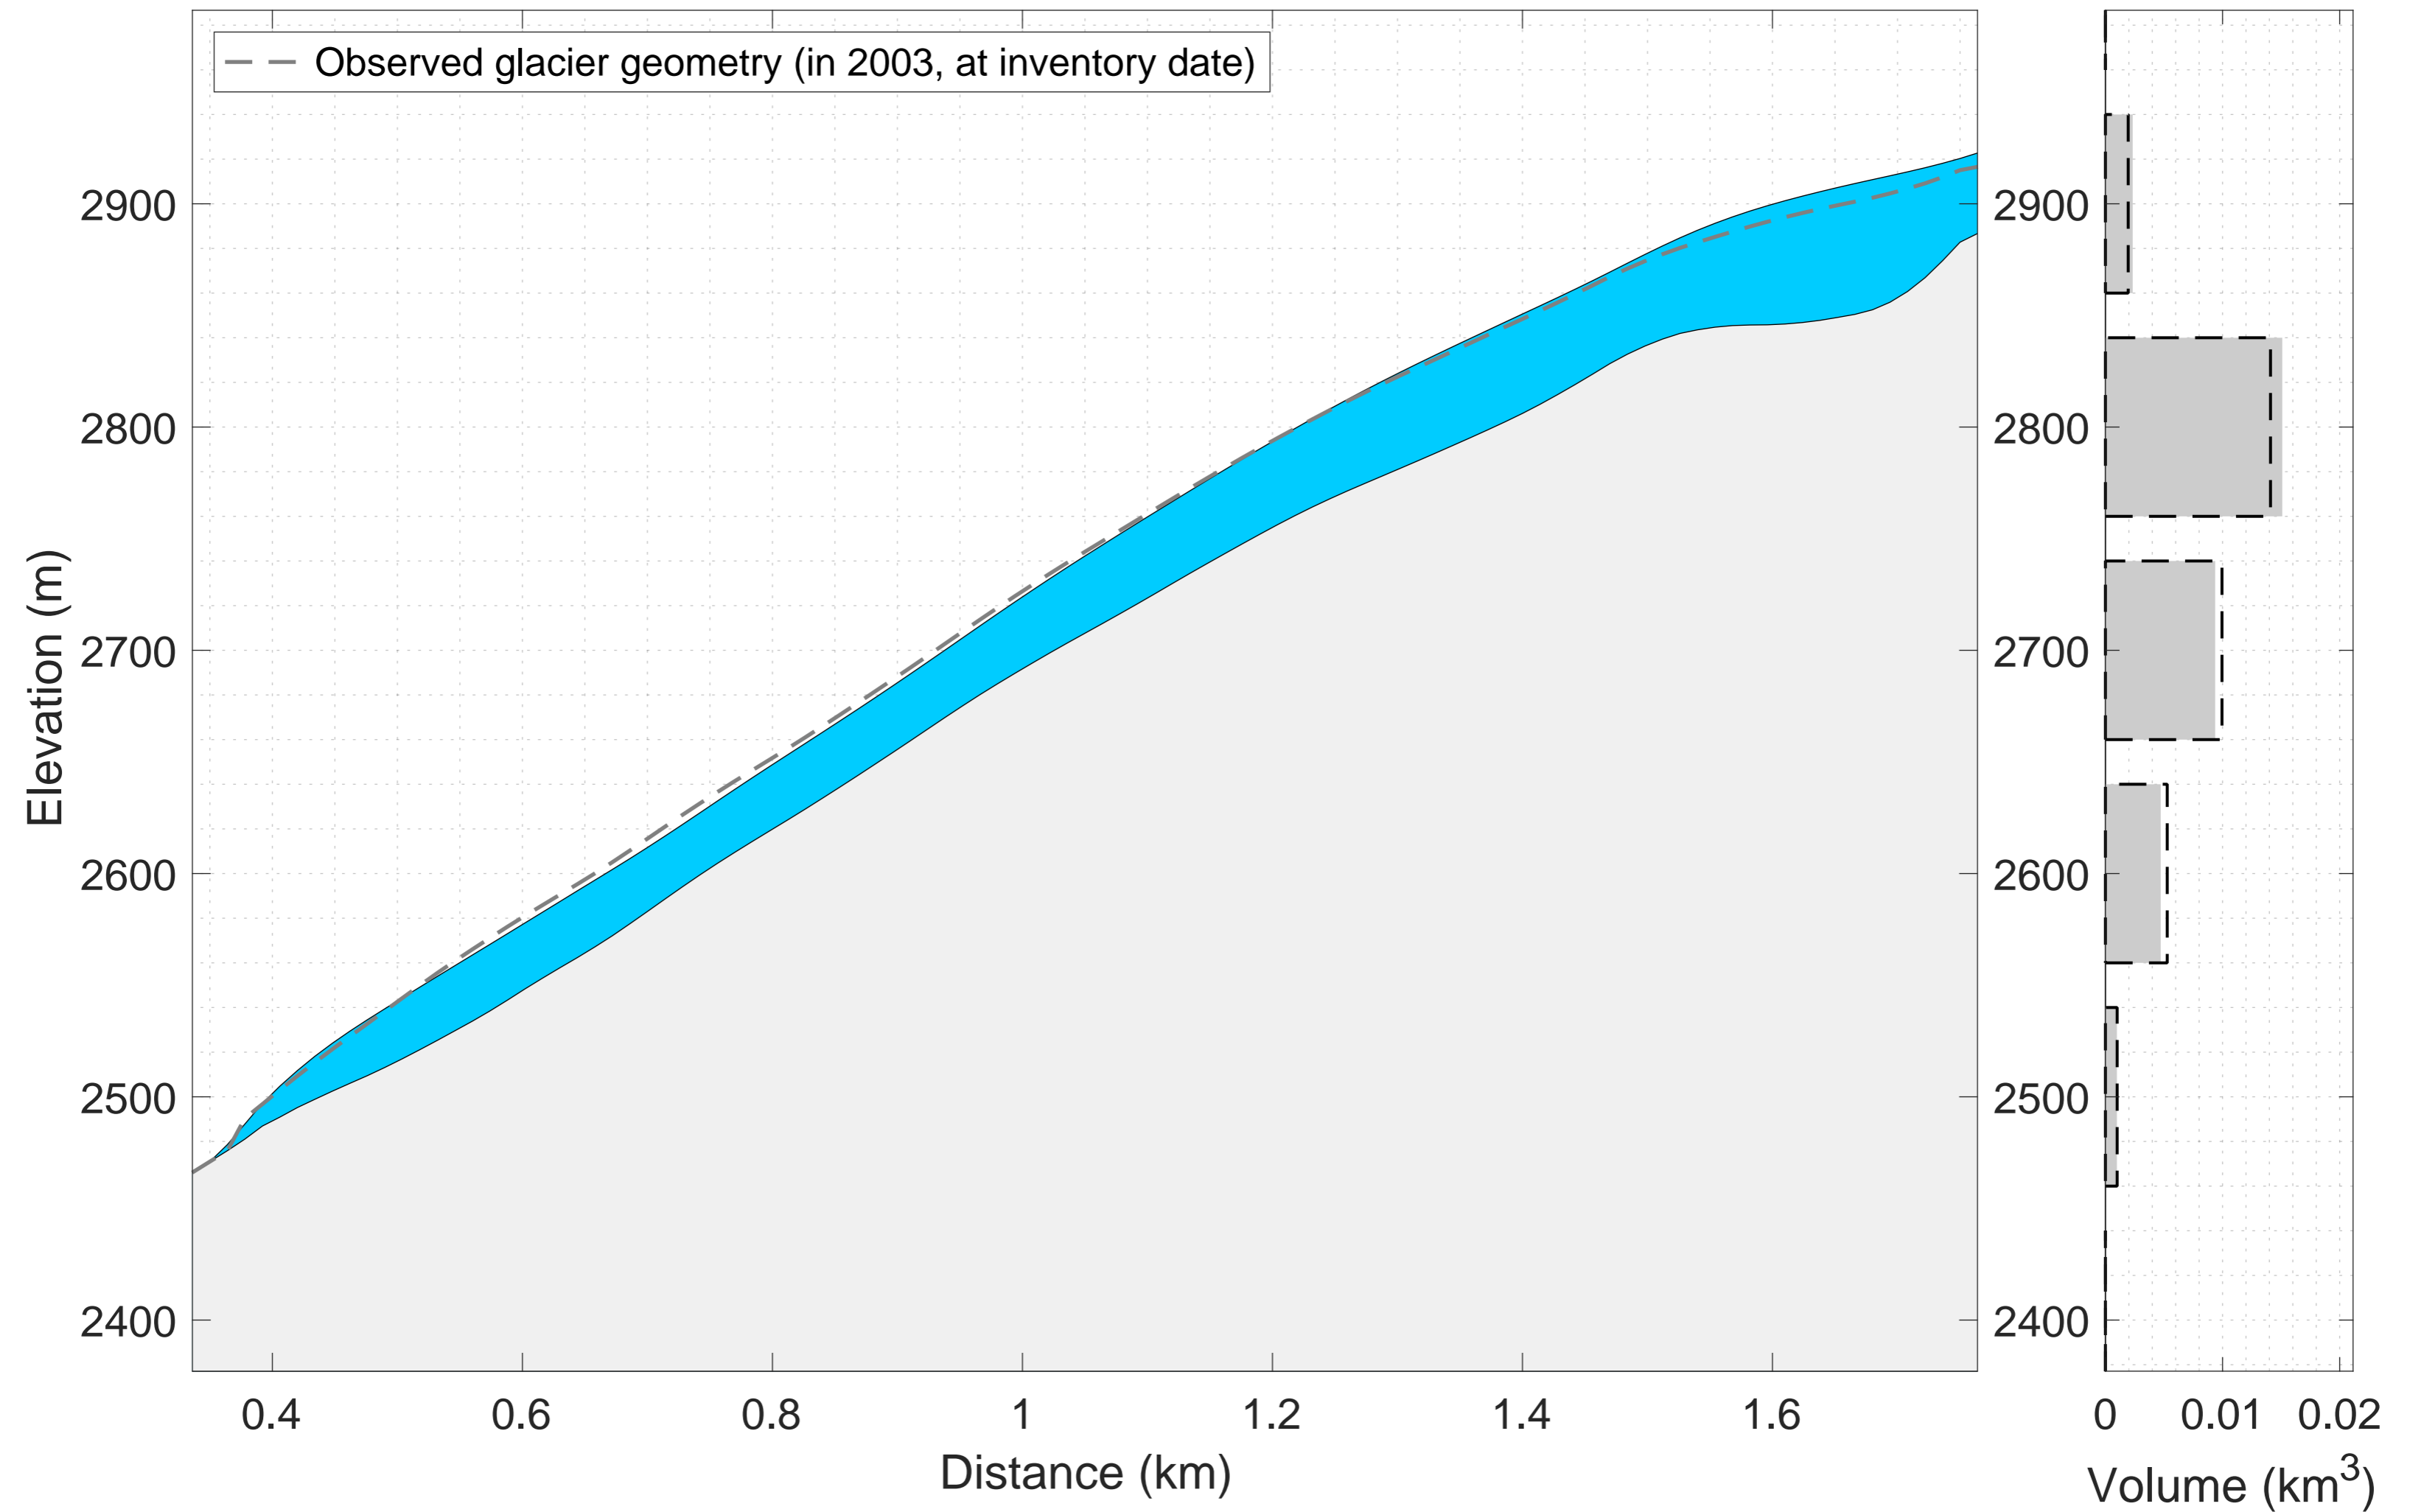

Supplement: Supplementary file 576 [file tc-13-1125-2019-supplement.zip]

**Modelled geometry (Glacier ID = 00360;  $A = 5.6227\text{e-}17 \text{ Pa}^{-3} \text{ a}^{-1}$ ;  $dx = 13 \text{ m}$ )**

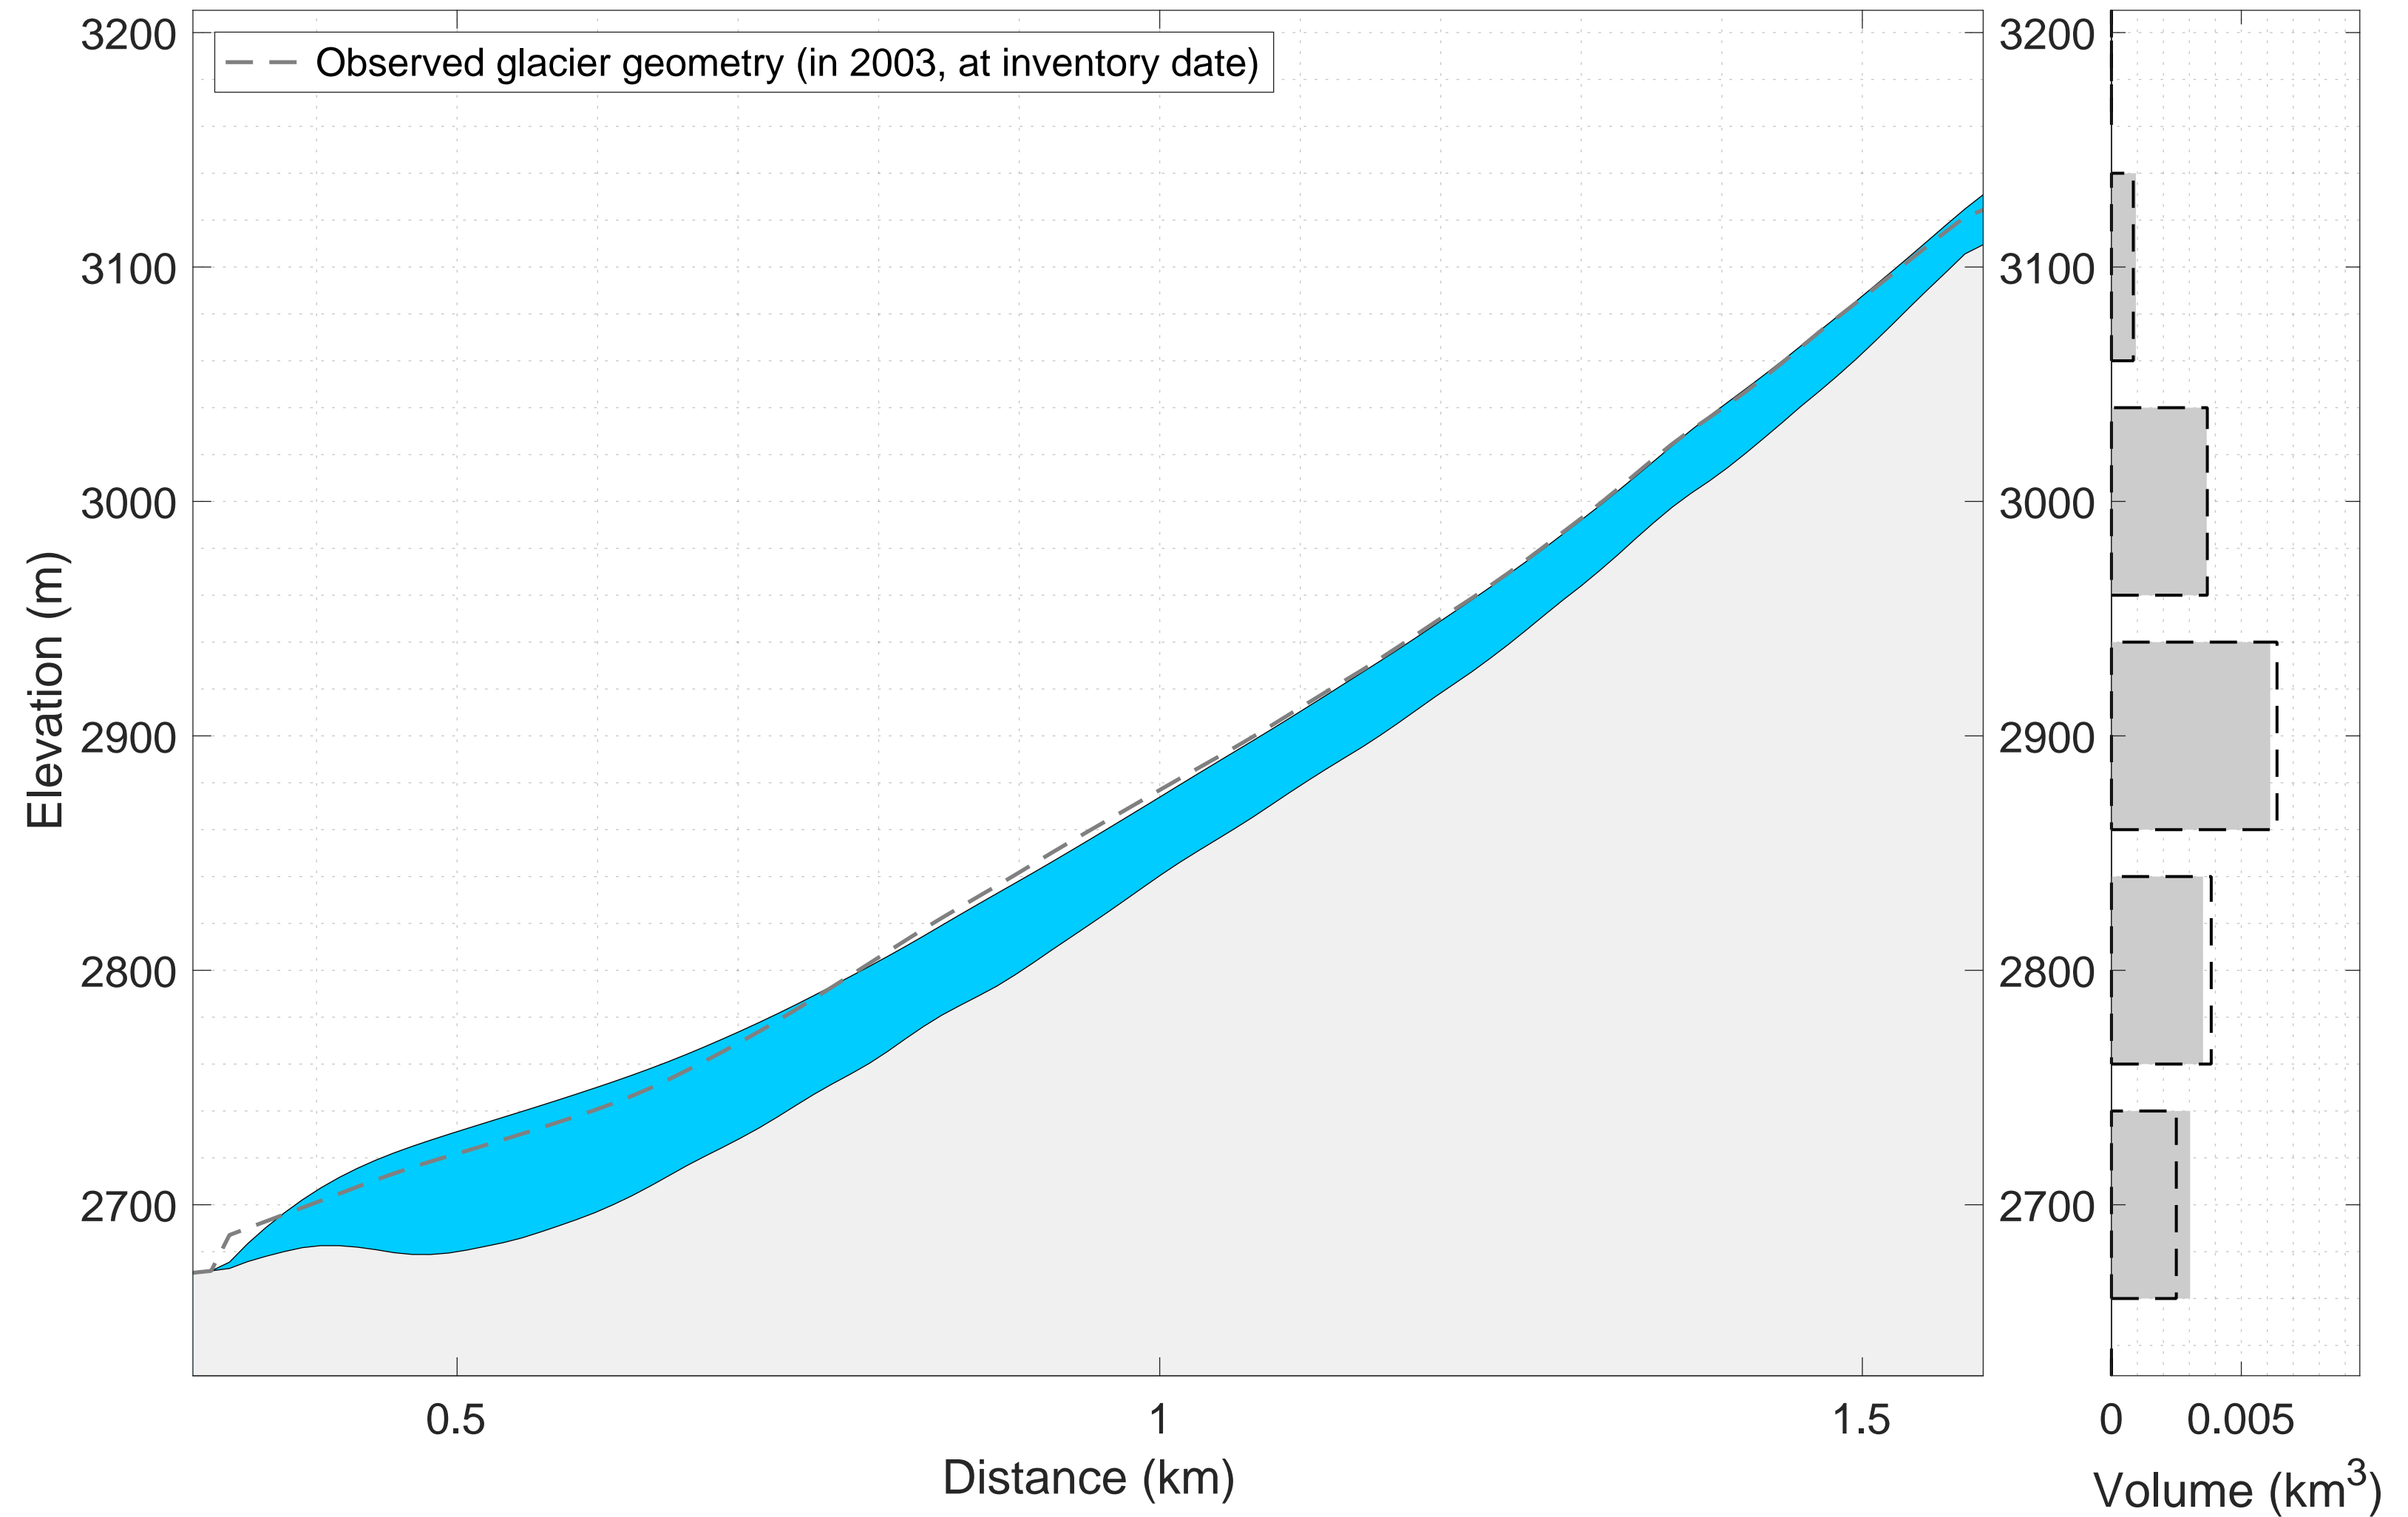

Supplement: Supplementary file 577 [file tc-13-1125-2019-supplement.zip]

**Modelled geometry (Glacier ID = 00106;  $A = 2.8101\text{e-}16 \text{ Pa}^{-3} \text{ a}^{-1}$ ;  $dx = 76 \text{ m}$ )**

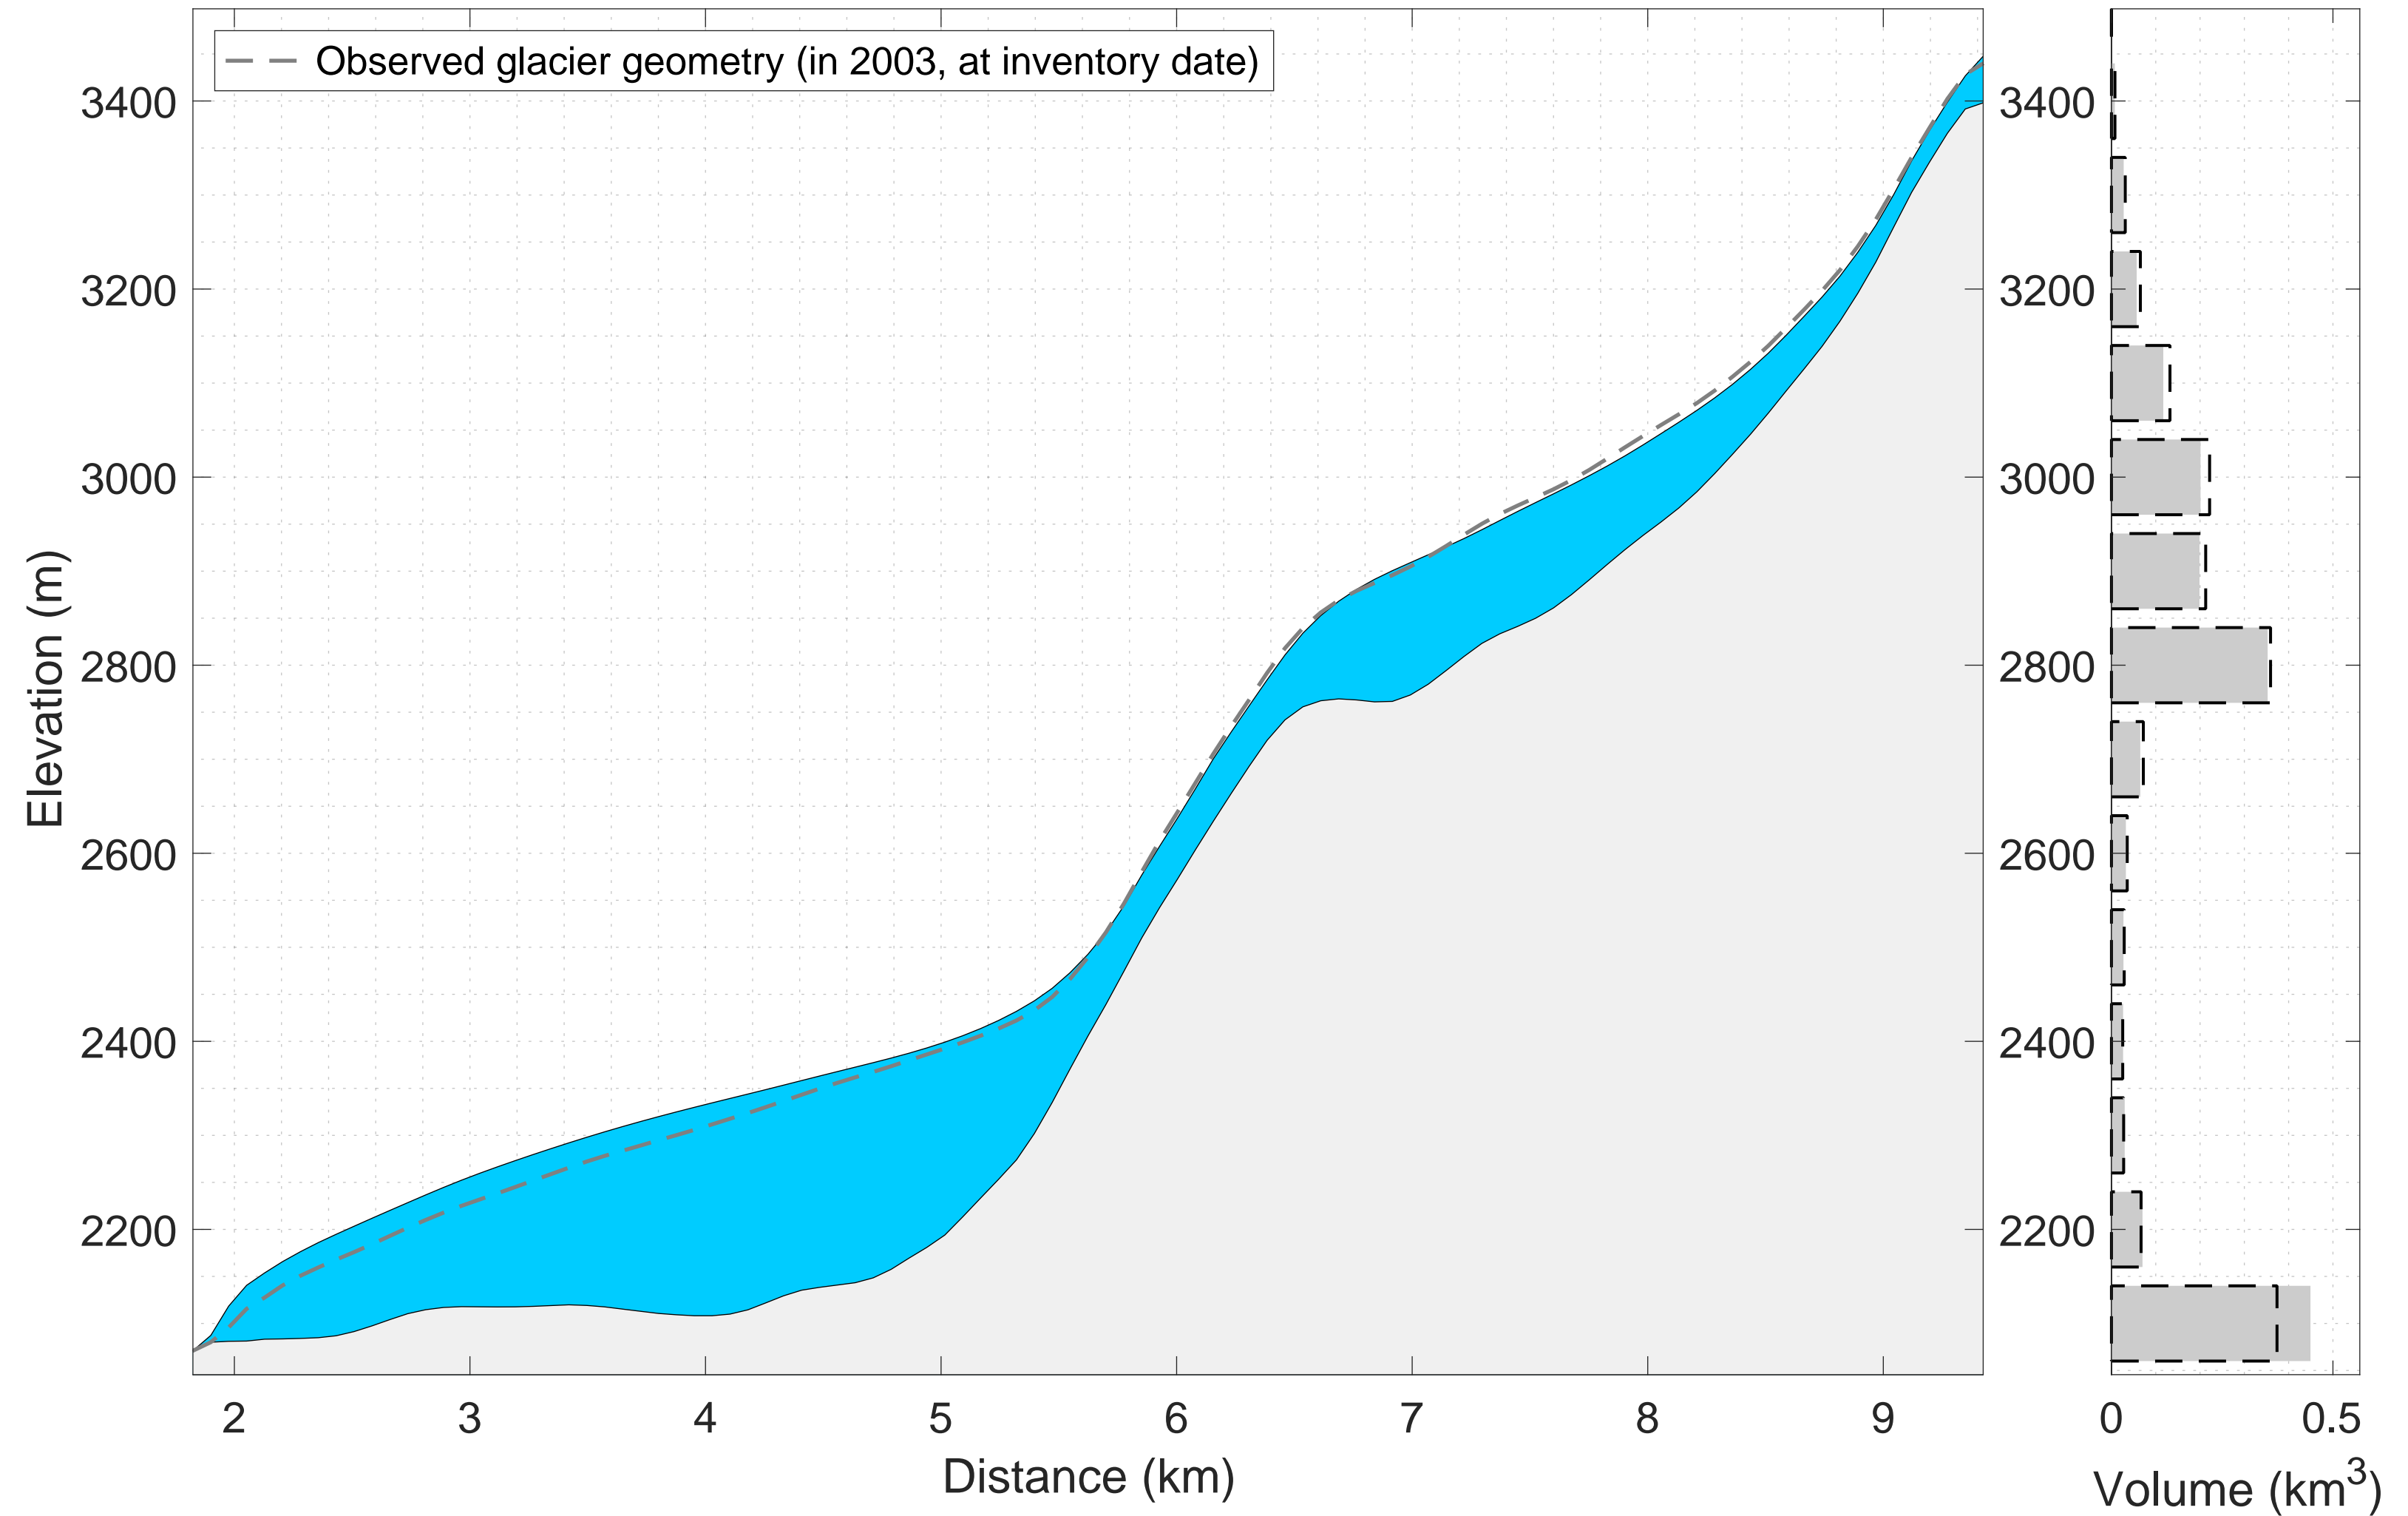

Supplement: Supplementary file 578 [file tc-13-1125-2019-supplement.zip]

**Modelled geometry (Glacier ID = 02591;  $A = 8.5372\text{e-}17 \text{ Pa}^{-3} \text{ a}^{-1}$ ;  $dx = 12 \text{ m}$ )**

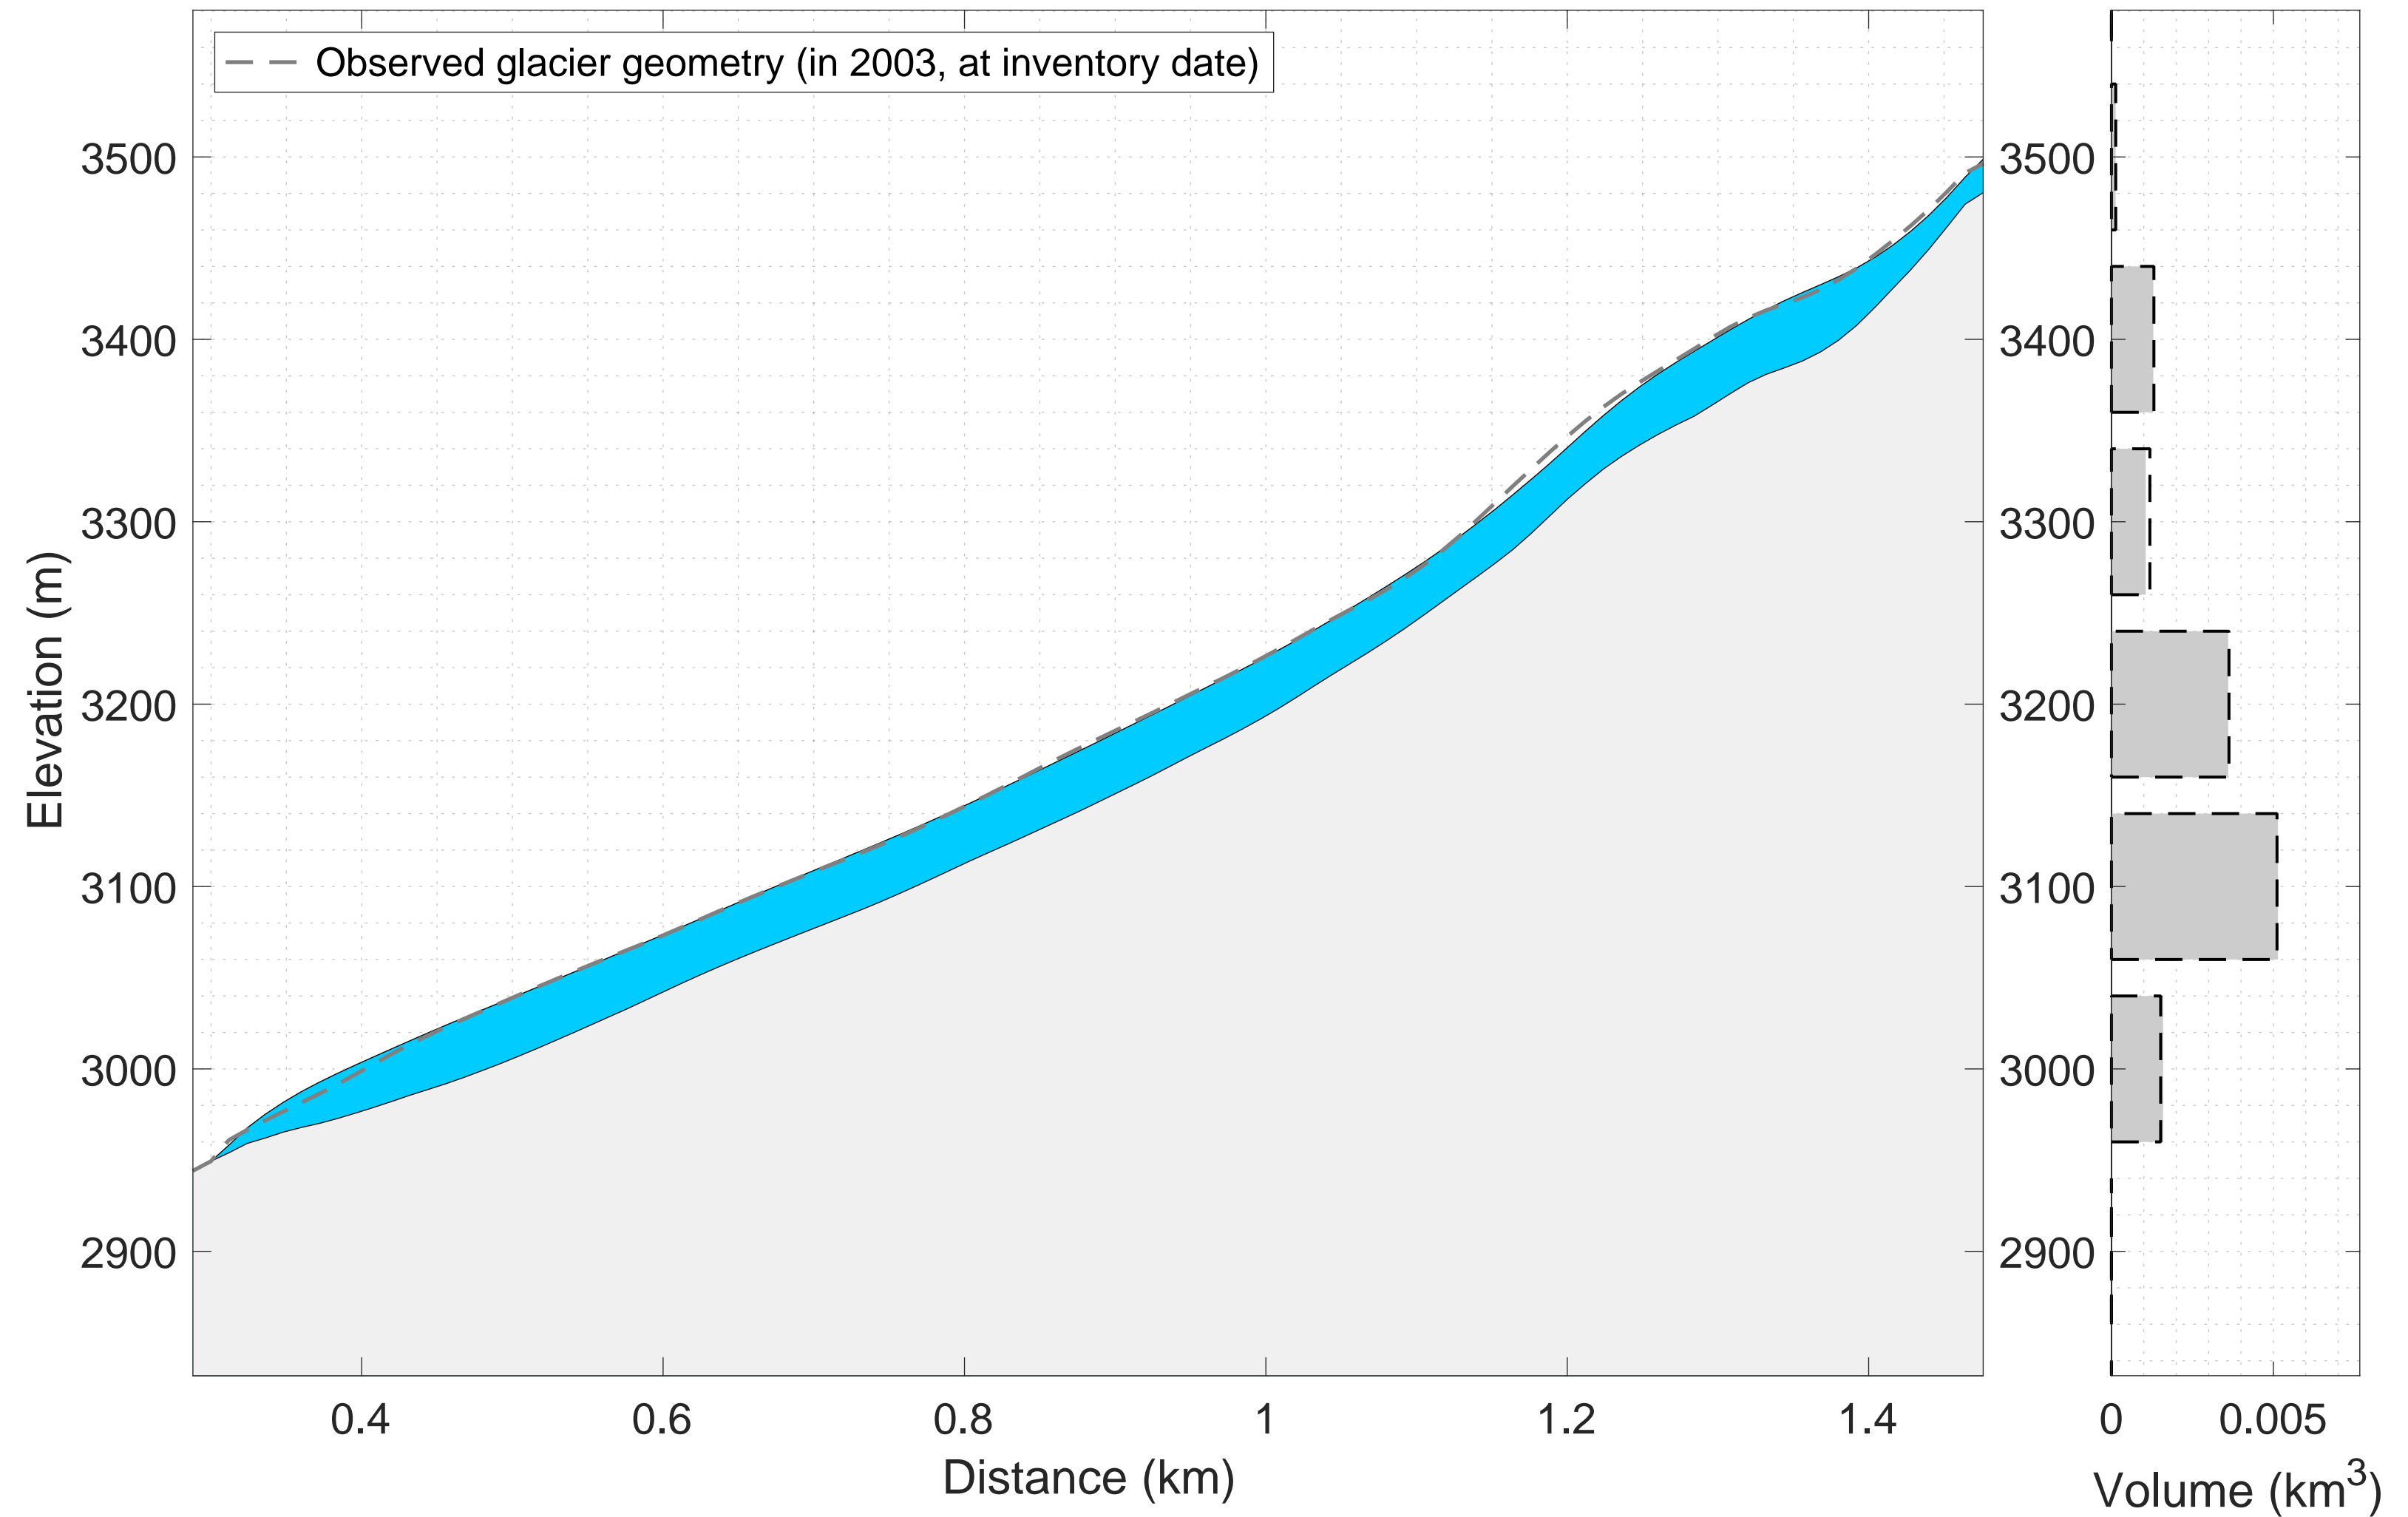

Supplement: Supplementary file 579 [file tc-13-1125-2019-supplement.zip]

**Modelled geometry (Glacier ID = 02209;  $A = 1.1286\text{e-}16 \text{ Pa}^{-3} \text{ a}^{-1}$ ;  $dx = 32 \text{ m}$ )**

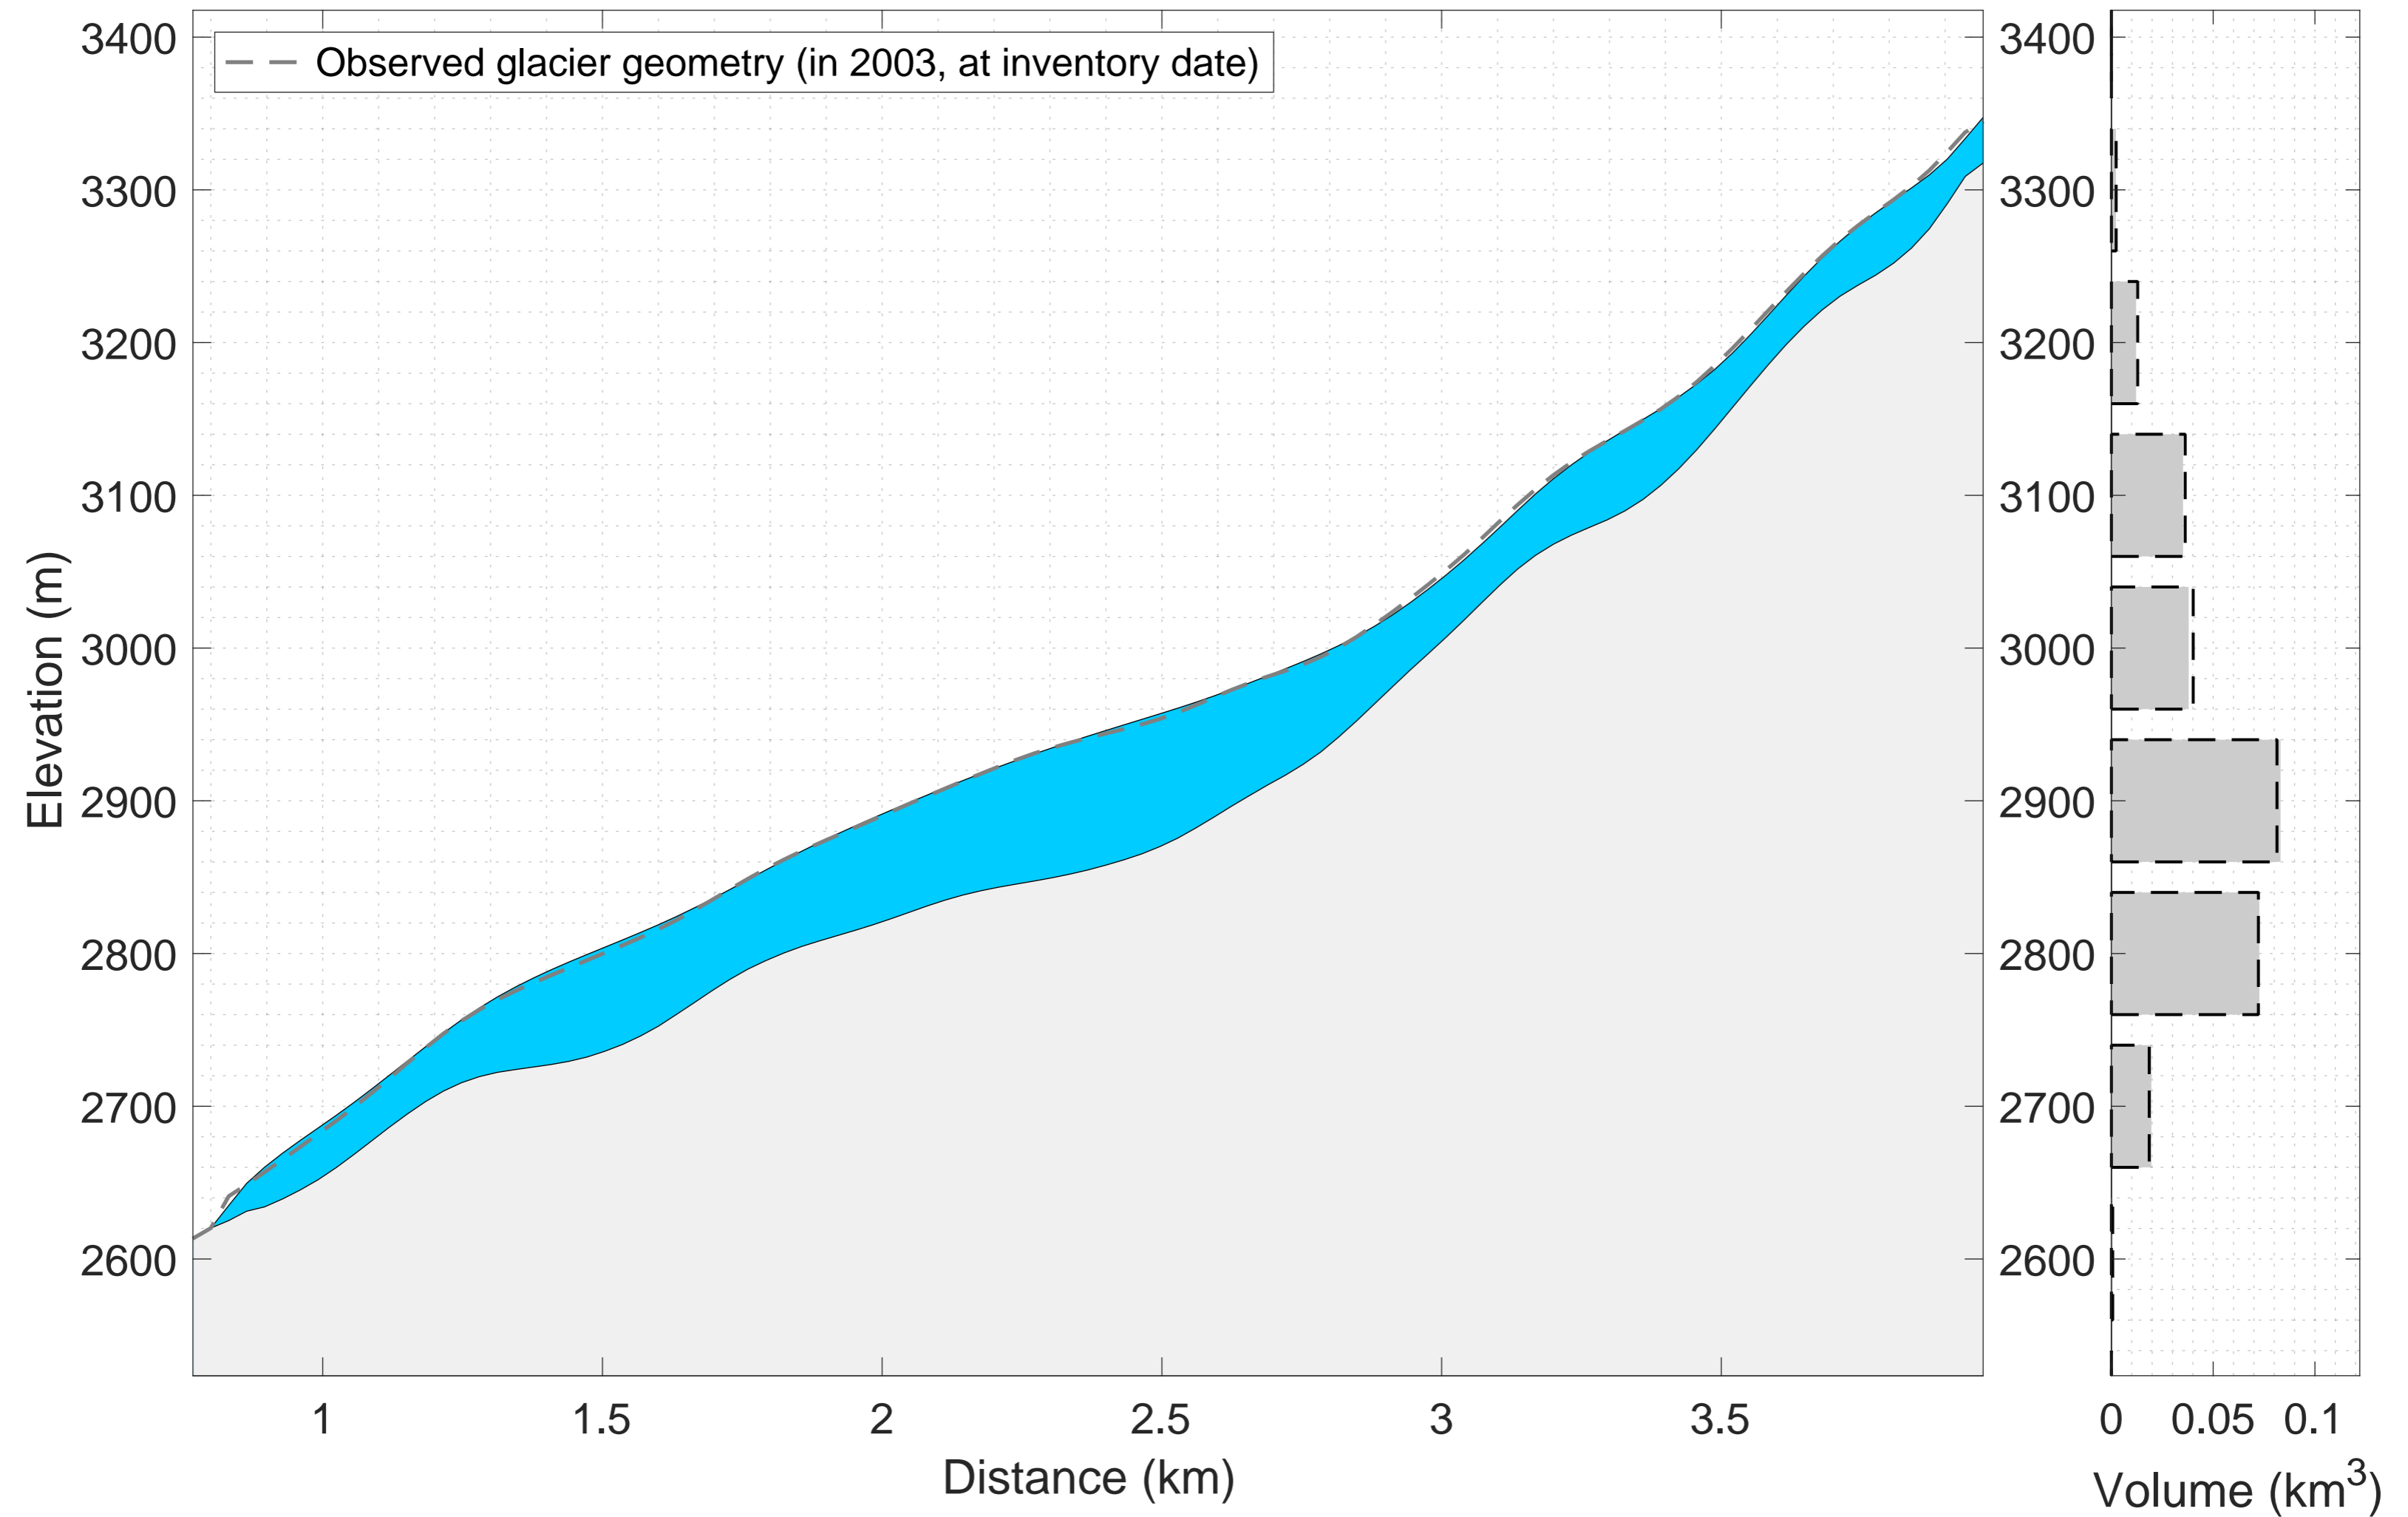

Supplement: Supplementary file 580 [file tc-13-1125-2019-supplement.zip]

Modelled geometry (Glacier ID = 03154;  $A = 2.1946\text{e-}16 \text{ Pa}^{-3} \text{ a}^{-1}$ ;  $dx = 37 \text{ m}$ )

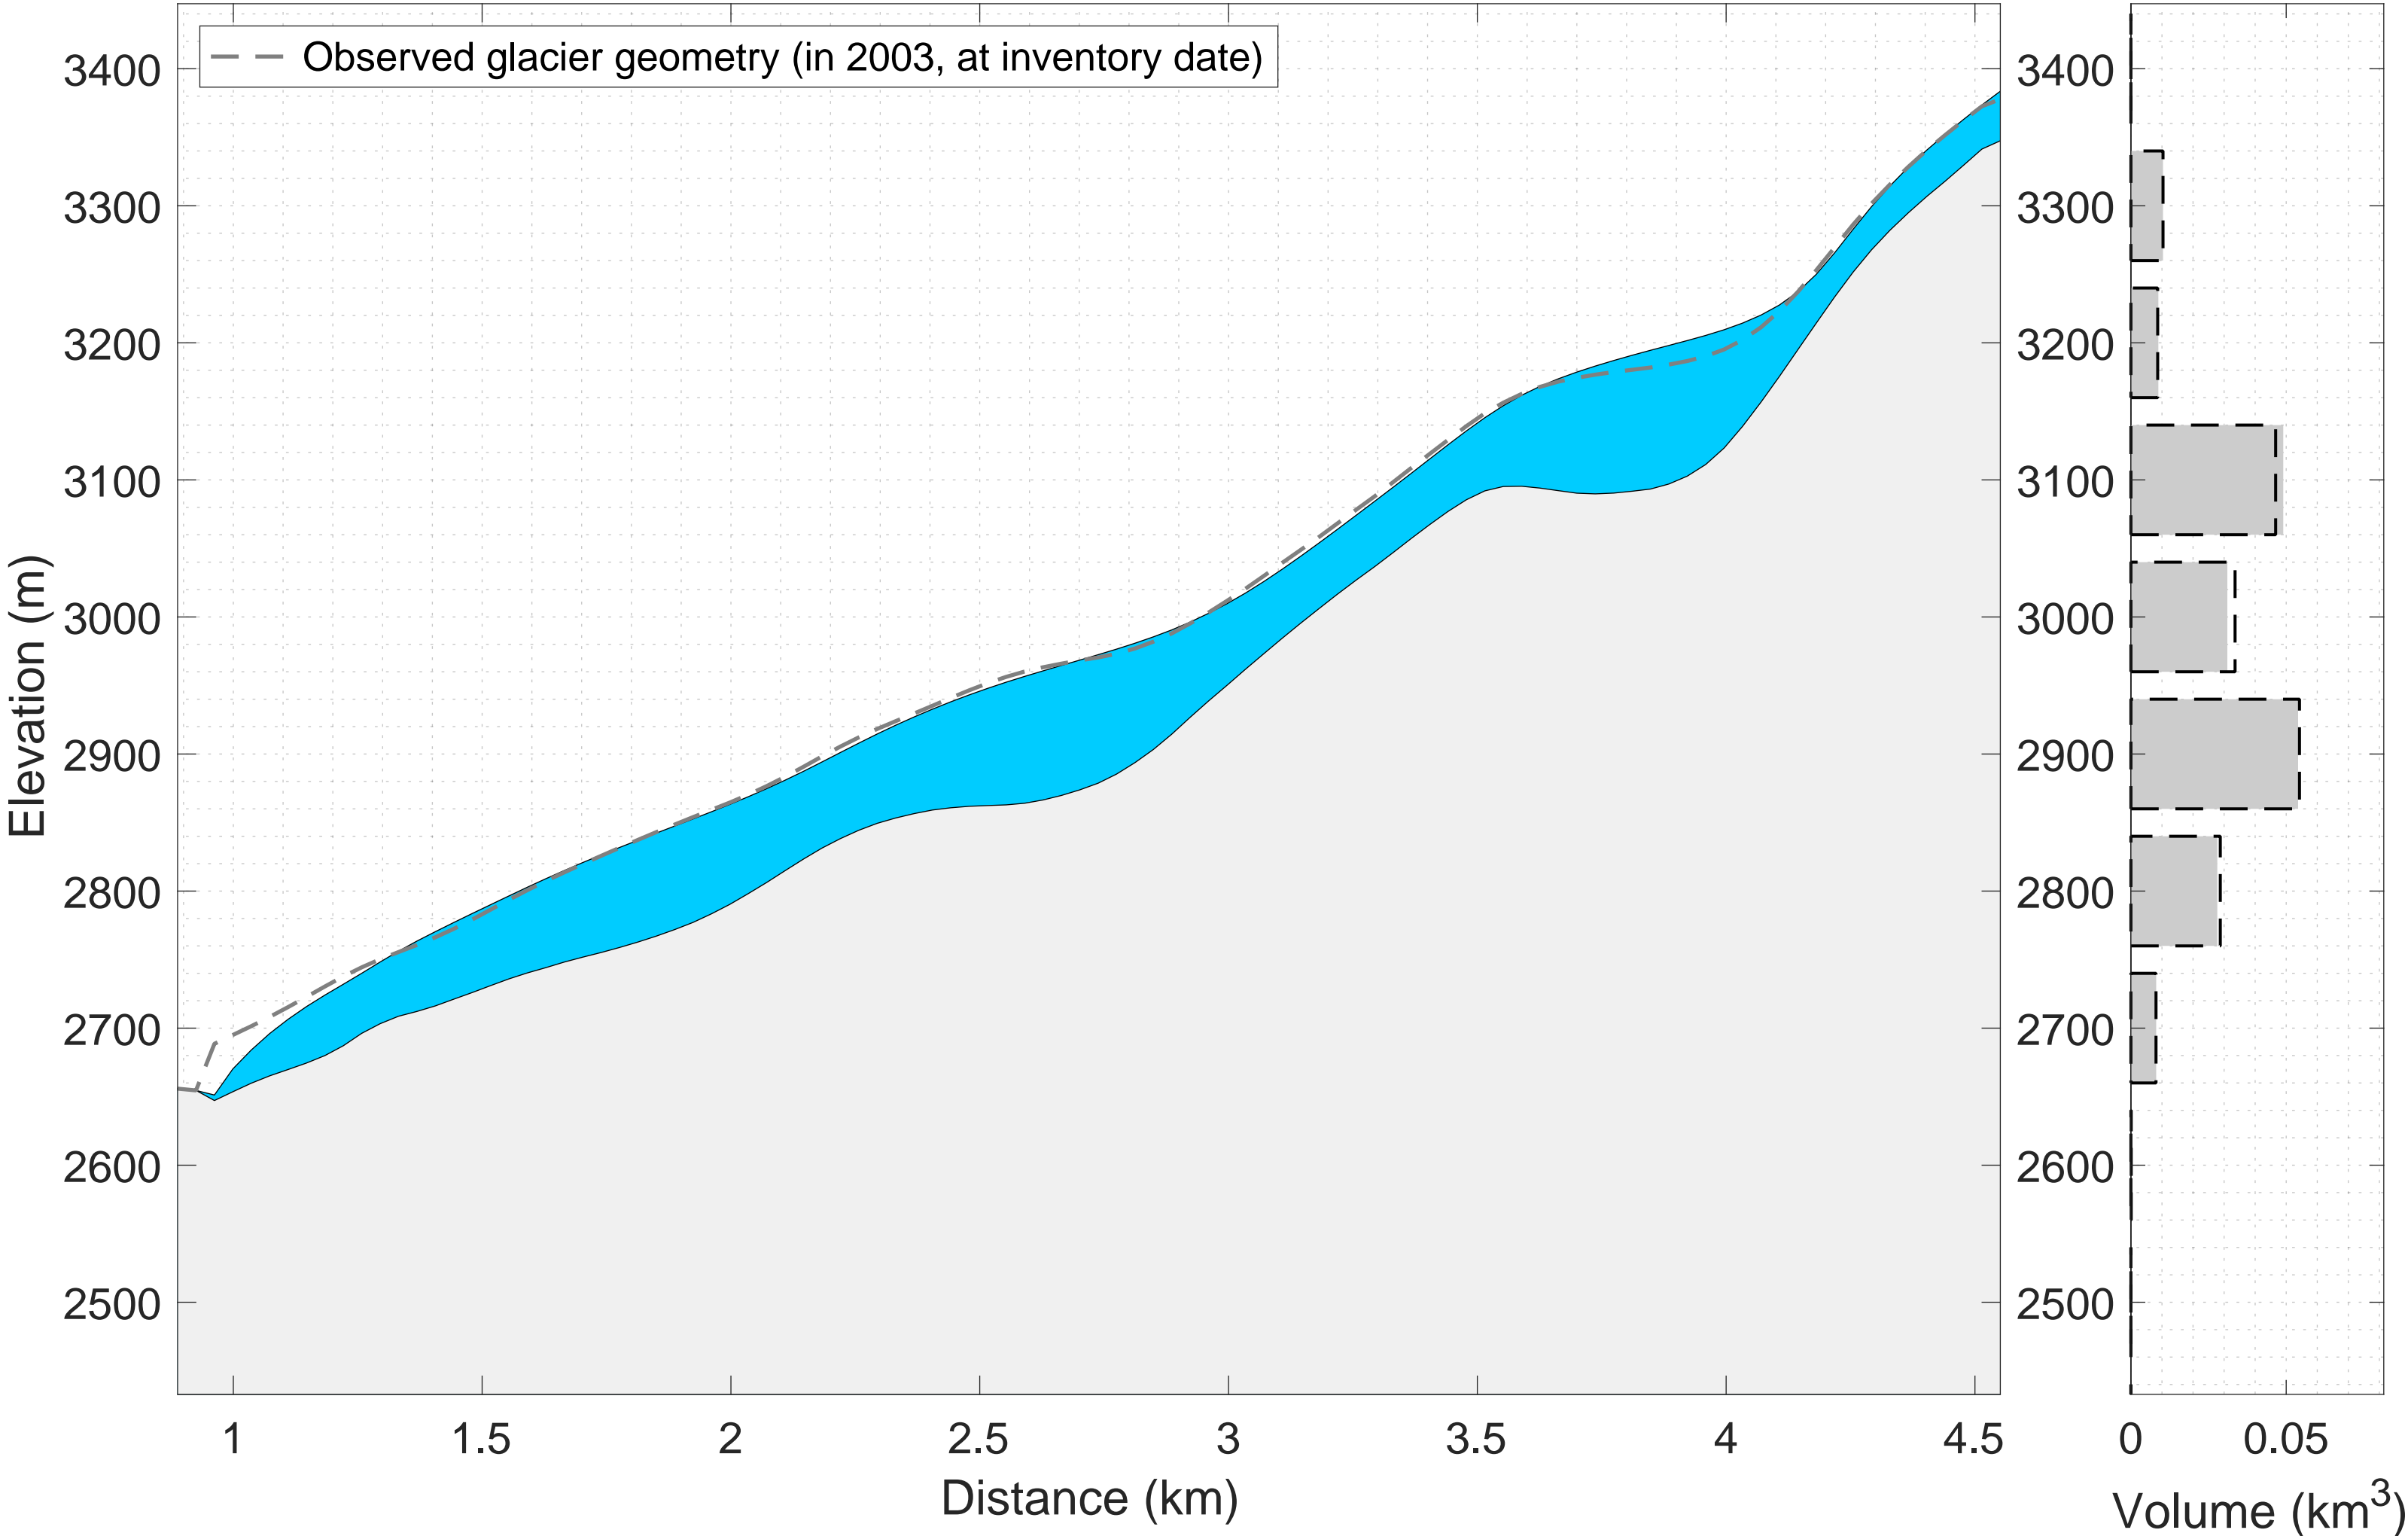

Supplement: Supplementary file 581 [file tc-13-1125-2019-supplement.zip]

**Modelled geometry (Glacier ID = 01234;  $A = 2.9453\text{e-}17 \text{ Pa}^{-3} \text{ a}^{-1}$ ;  $dx = 13 \text{ m}$ )**

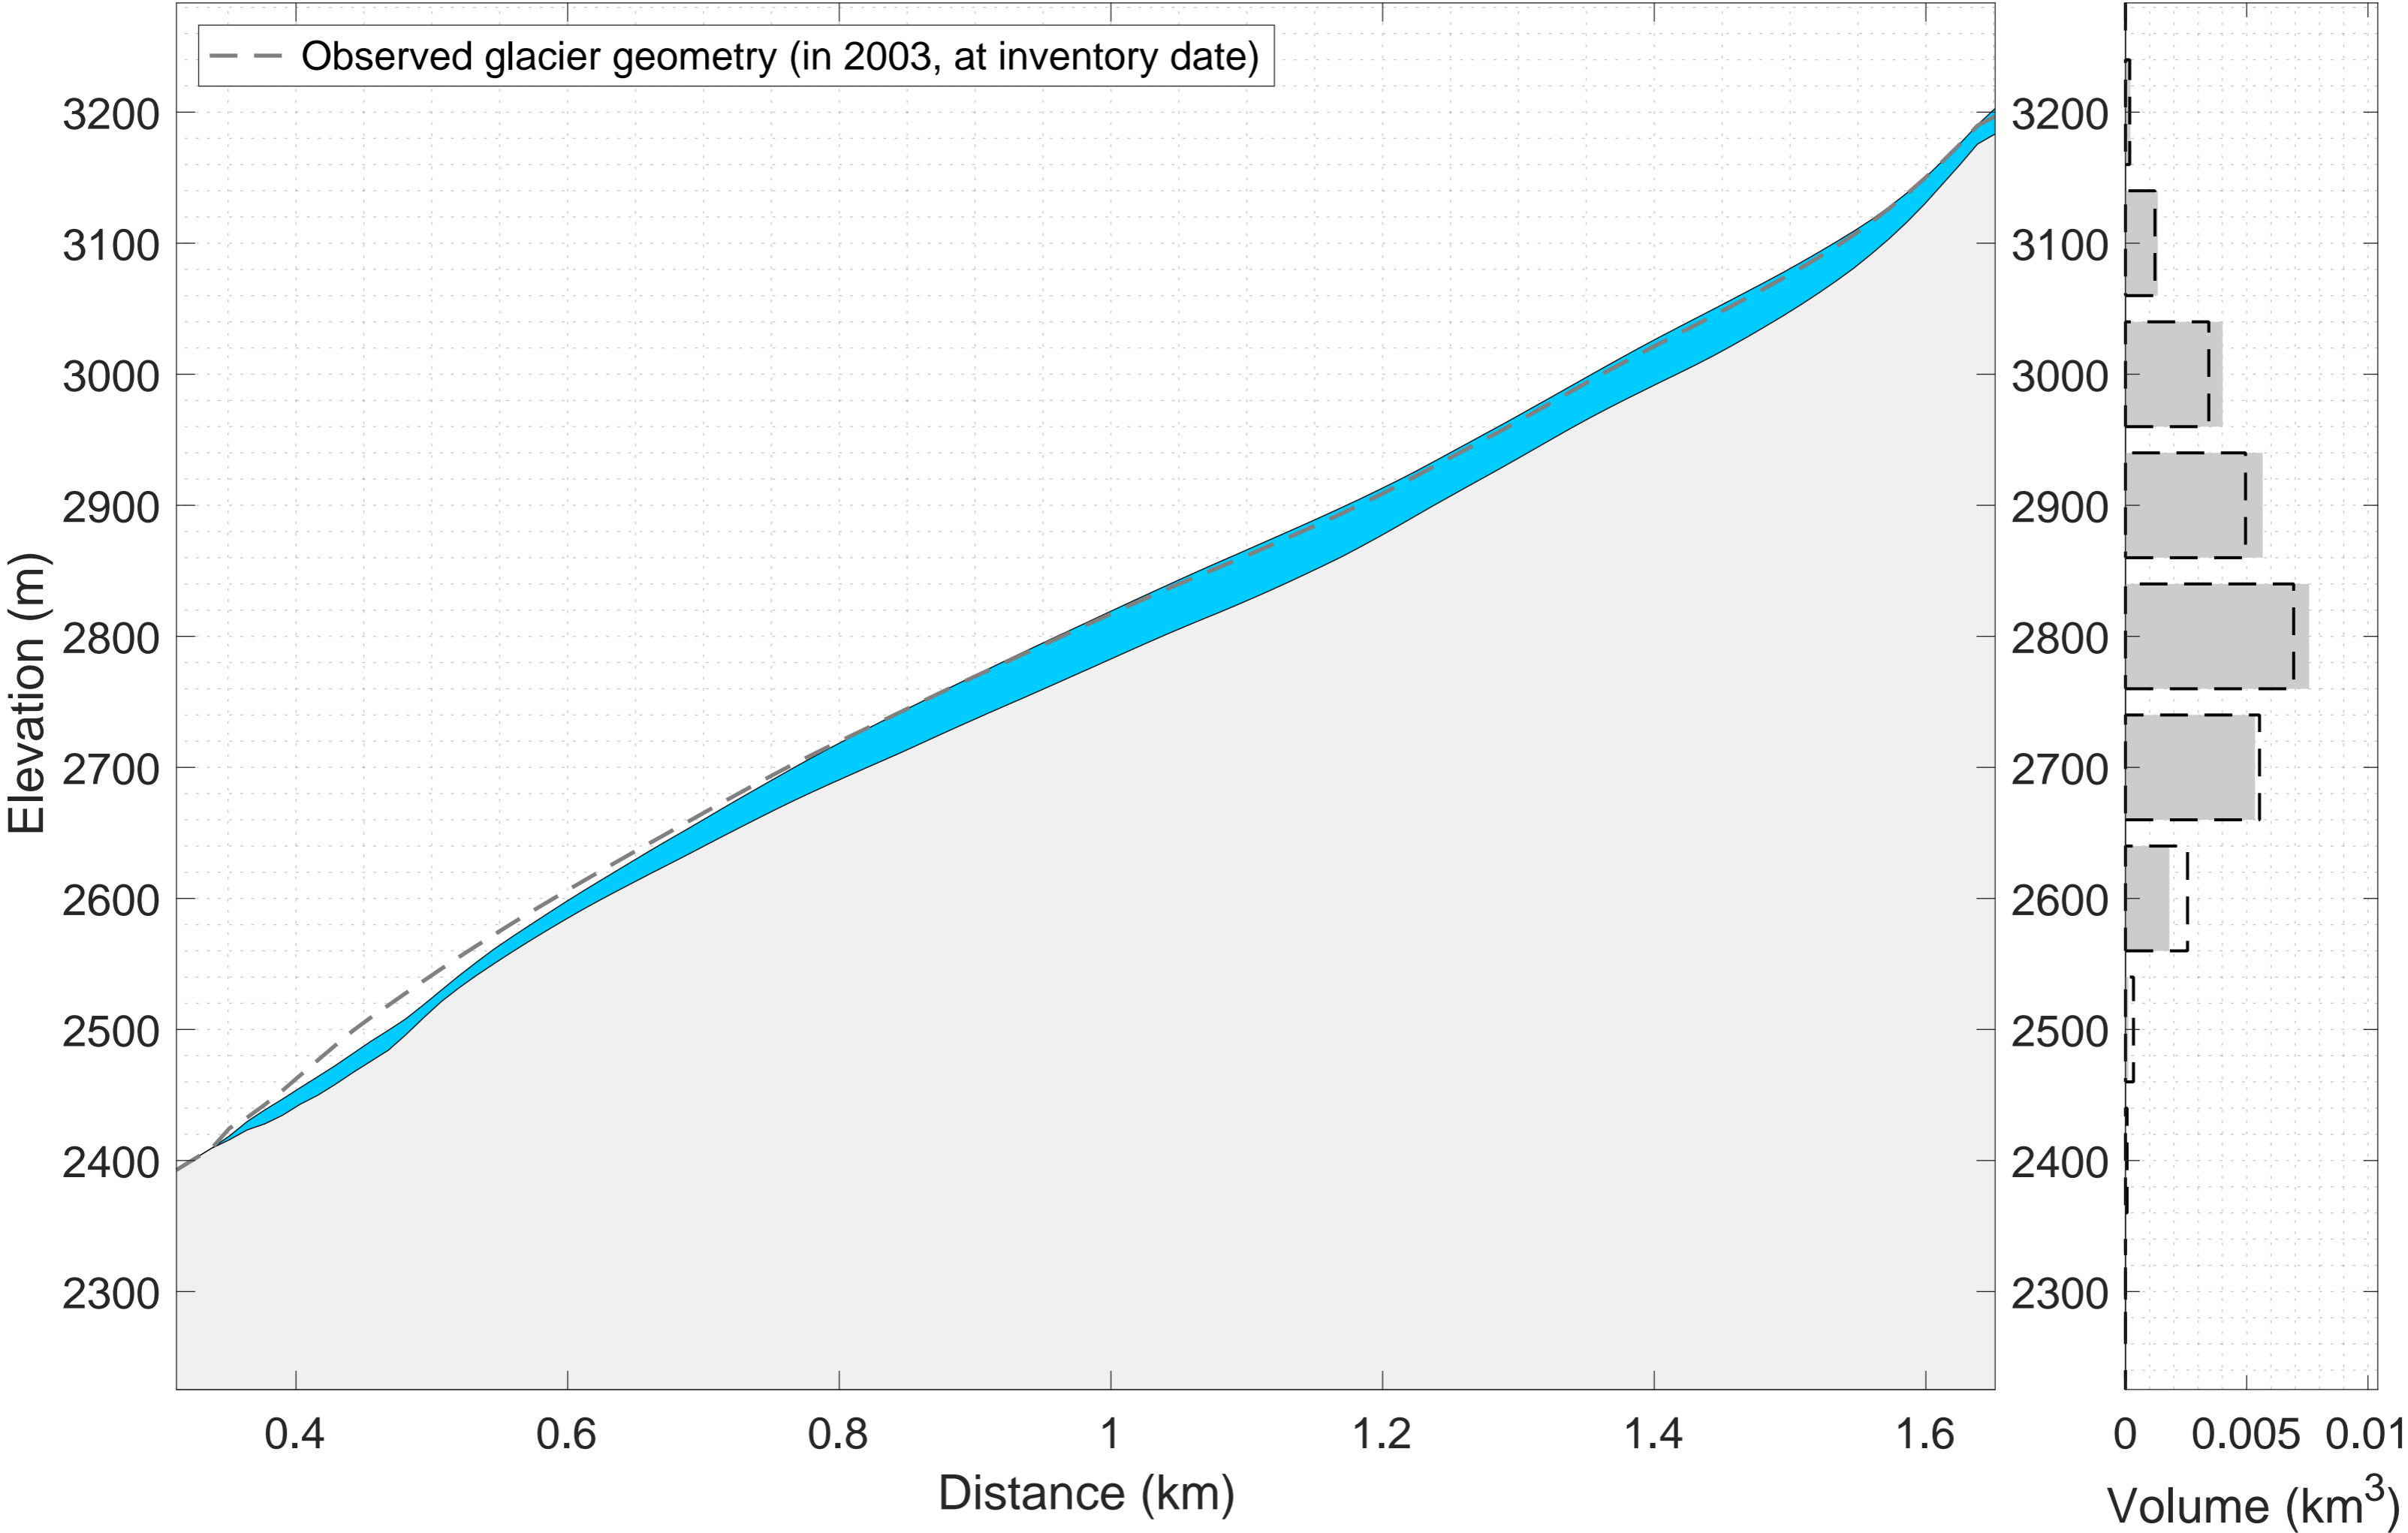

Supplement: Supplementary file 582 [file tc-13-1125-2019-supplement.zip]

**Modelled geometry (Glacier ID = 01986;  $A = 1.0787\text{e-}16 \text{ Pa}^{-3} \text{ a}^{-1}$ ;  $dx = 25 \text{ m}$ )**

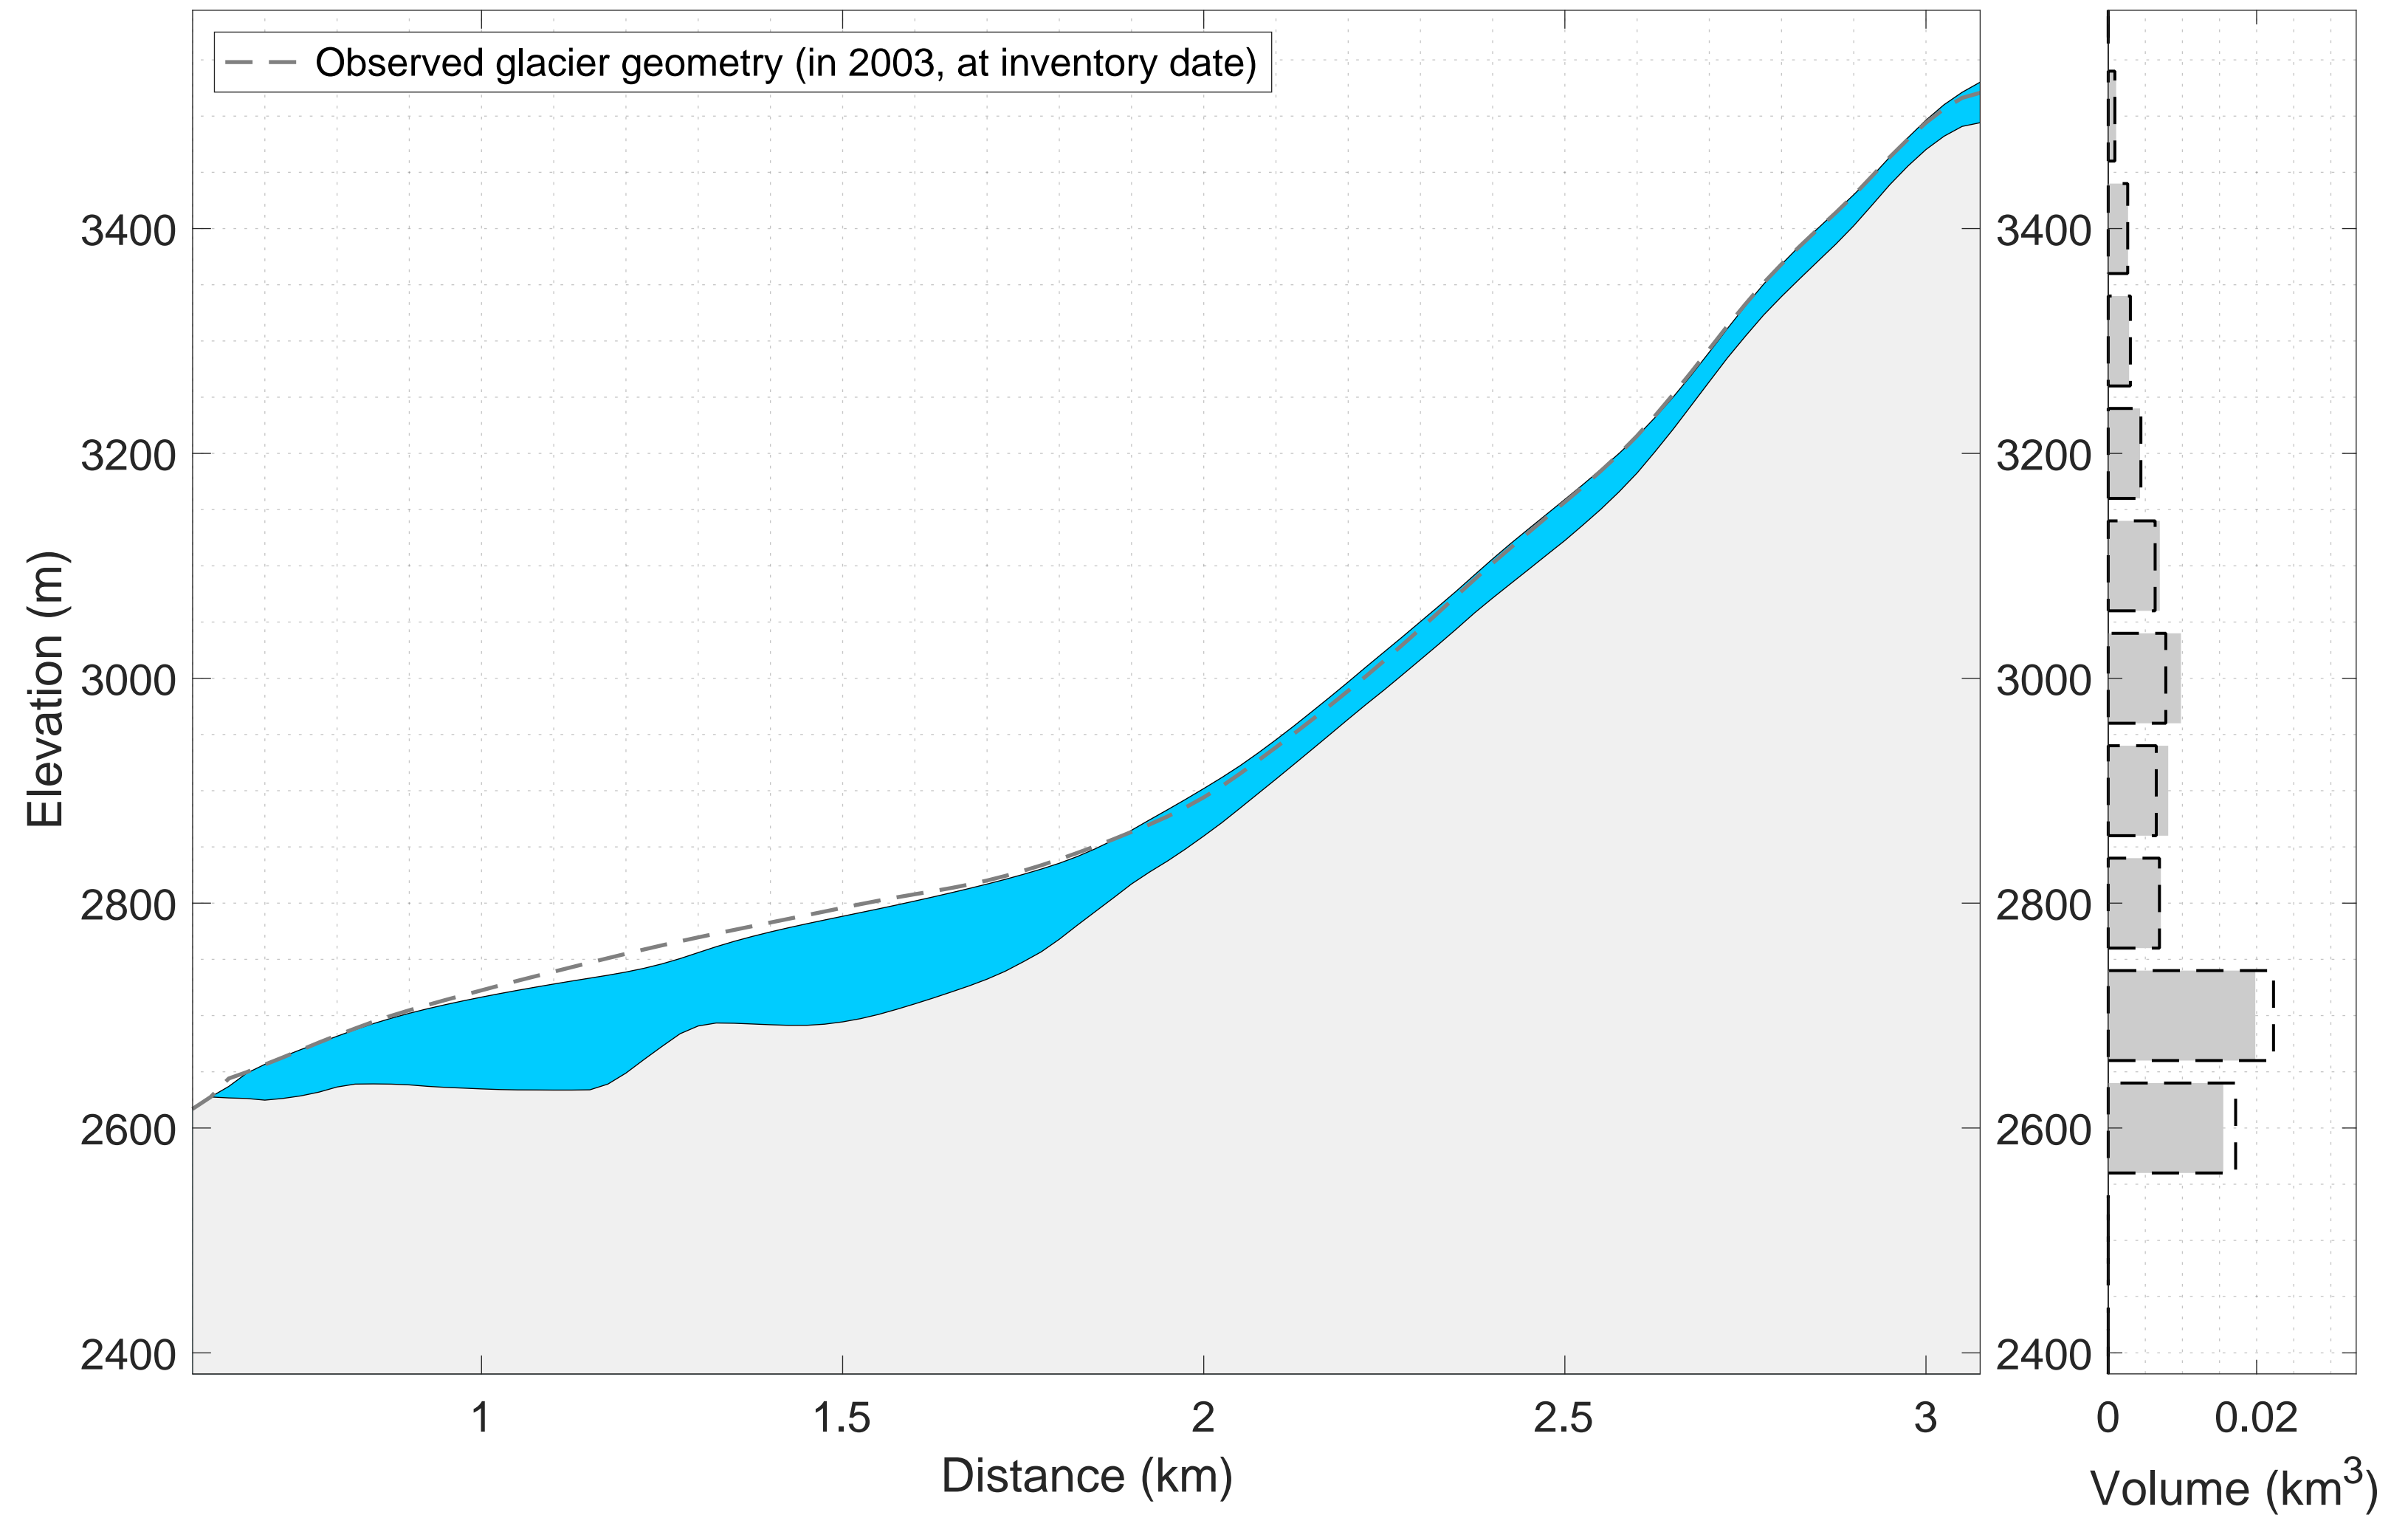

Supplement: Supplementary file 583 [file tc-13-1125-2019-supplement.zip]

**Modelled geometry (Glacier ID = 01582;  $A = 9.5583\text{e-}17 \text{ Pa}^{-3} \text{ a}^{-1}$ ;  $dx = 16 \text{ m}$ )**

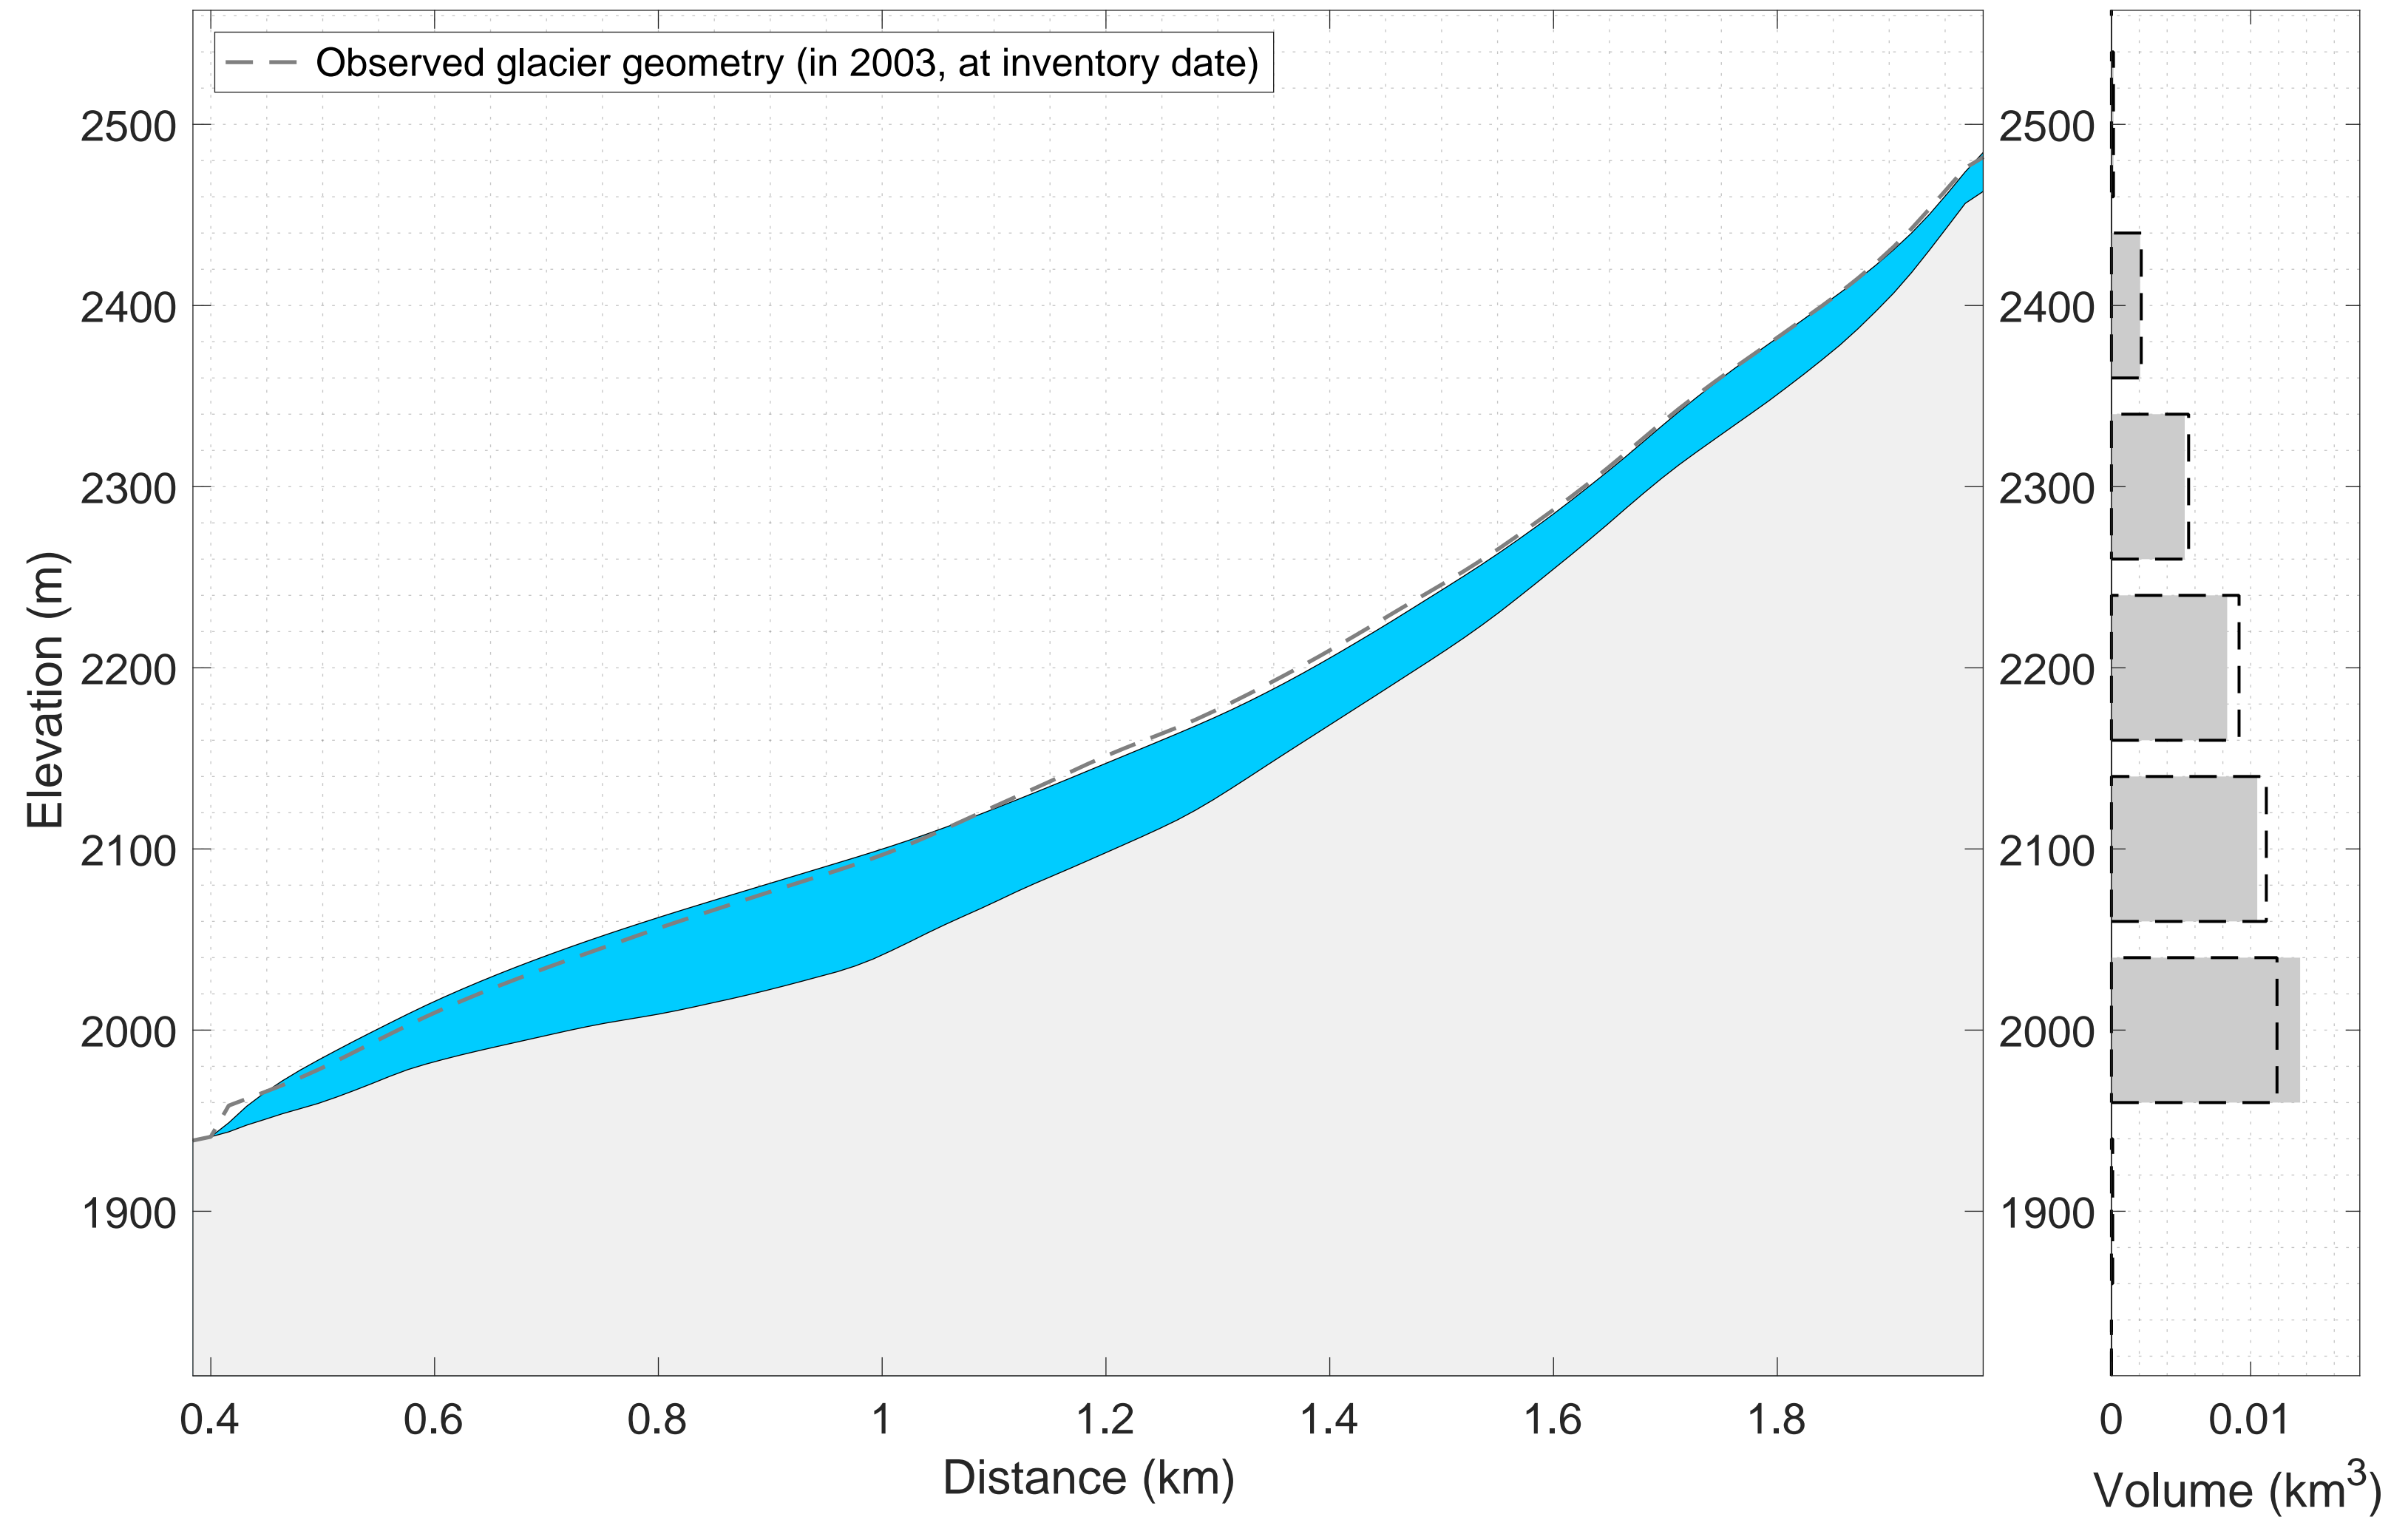

Supplement: Supplementary file 584 [file tc-13-1125-2019-supplement.zip]

**Modelled geometry (Glacier ID = 03369;  $A = 5.9266\text{e-}17 \text{ Pa}^{-3} \text{ a}^{-1}$ ;  $dx = 11 \text{ m}$ )**

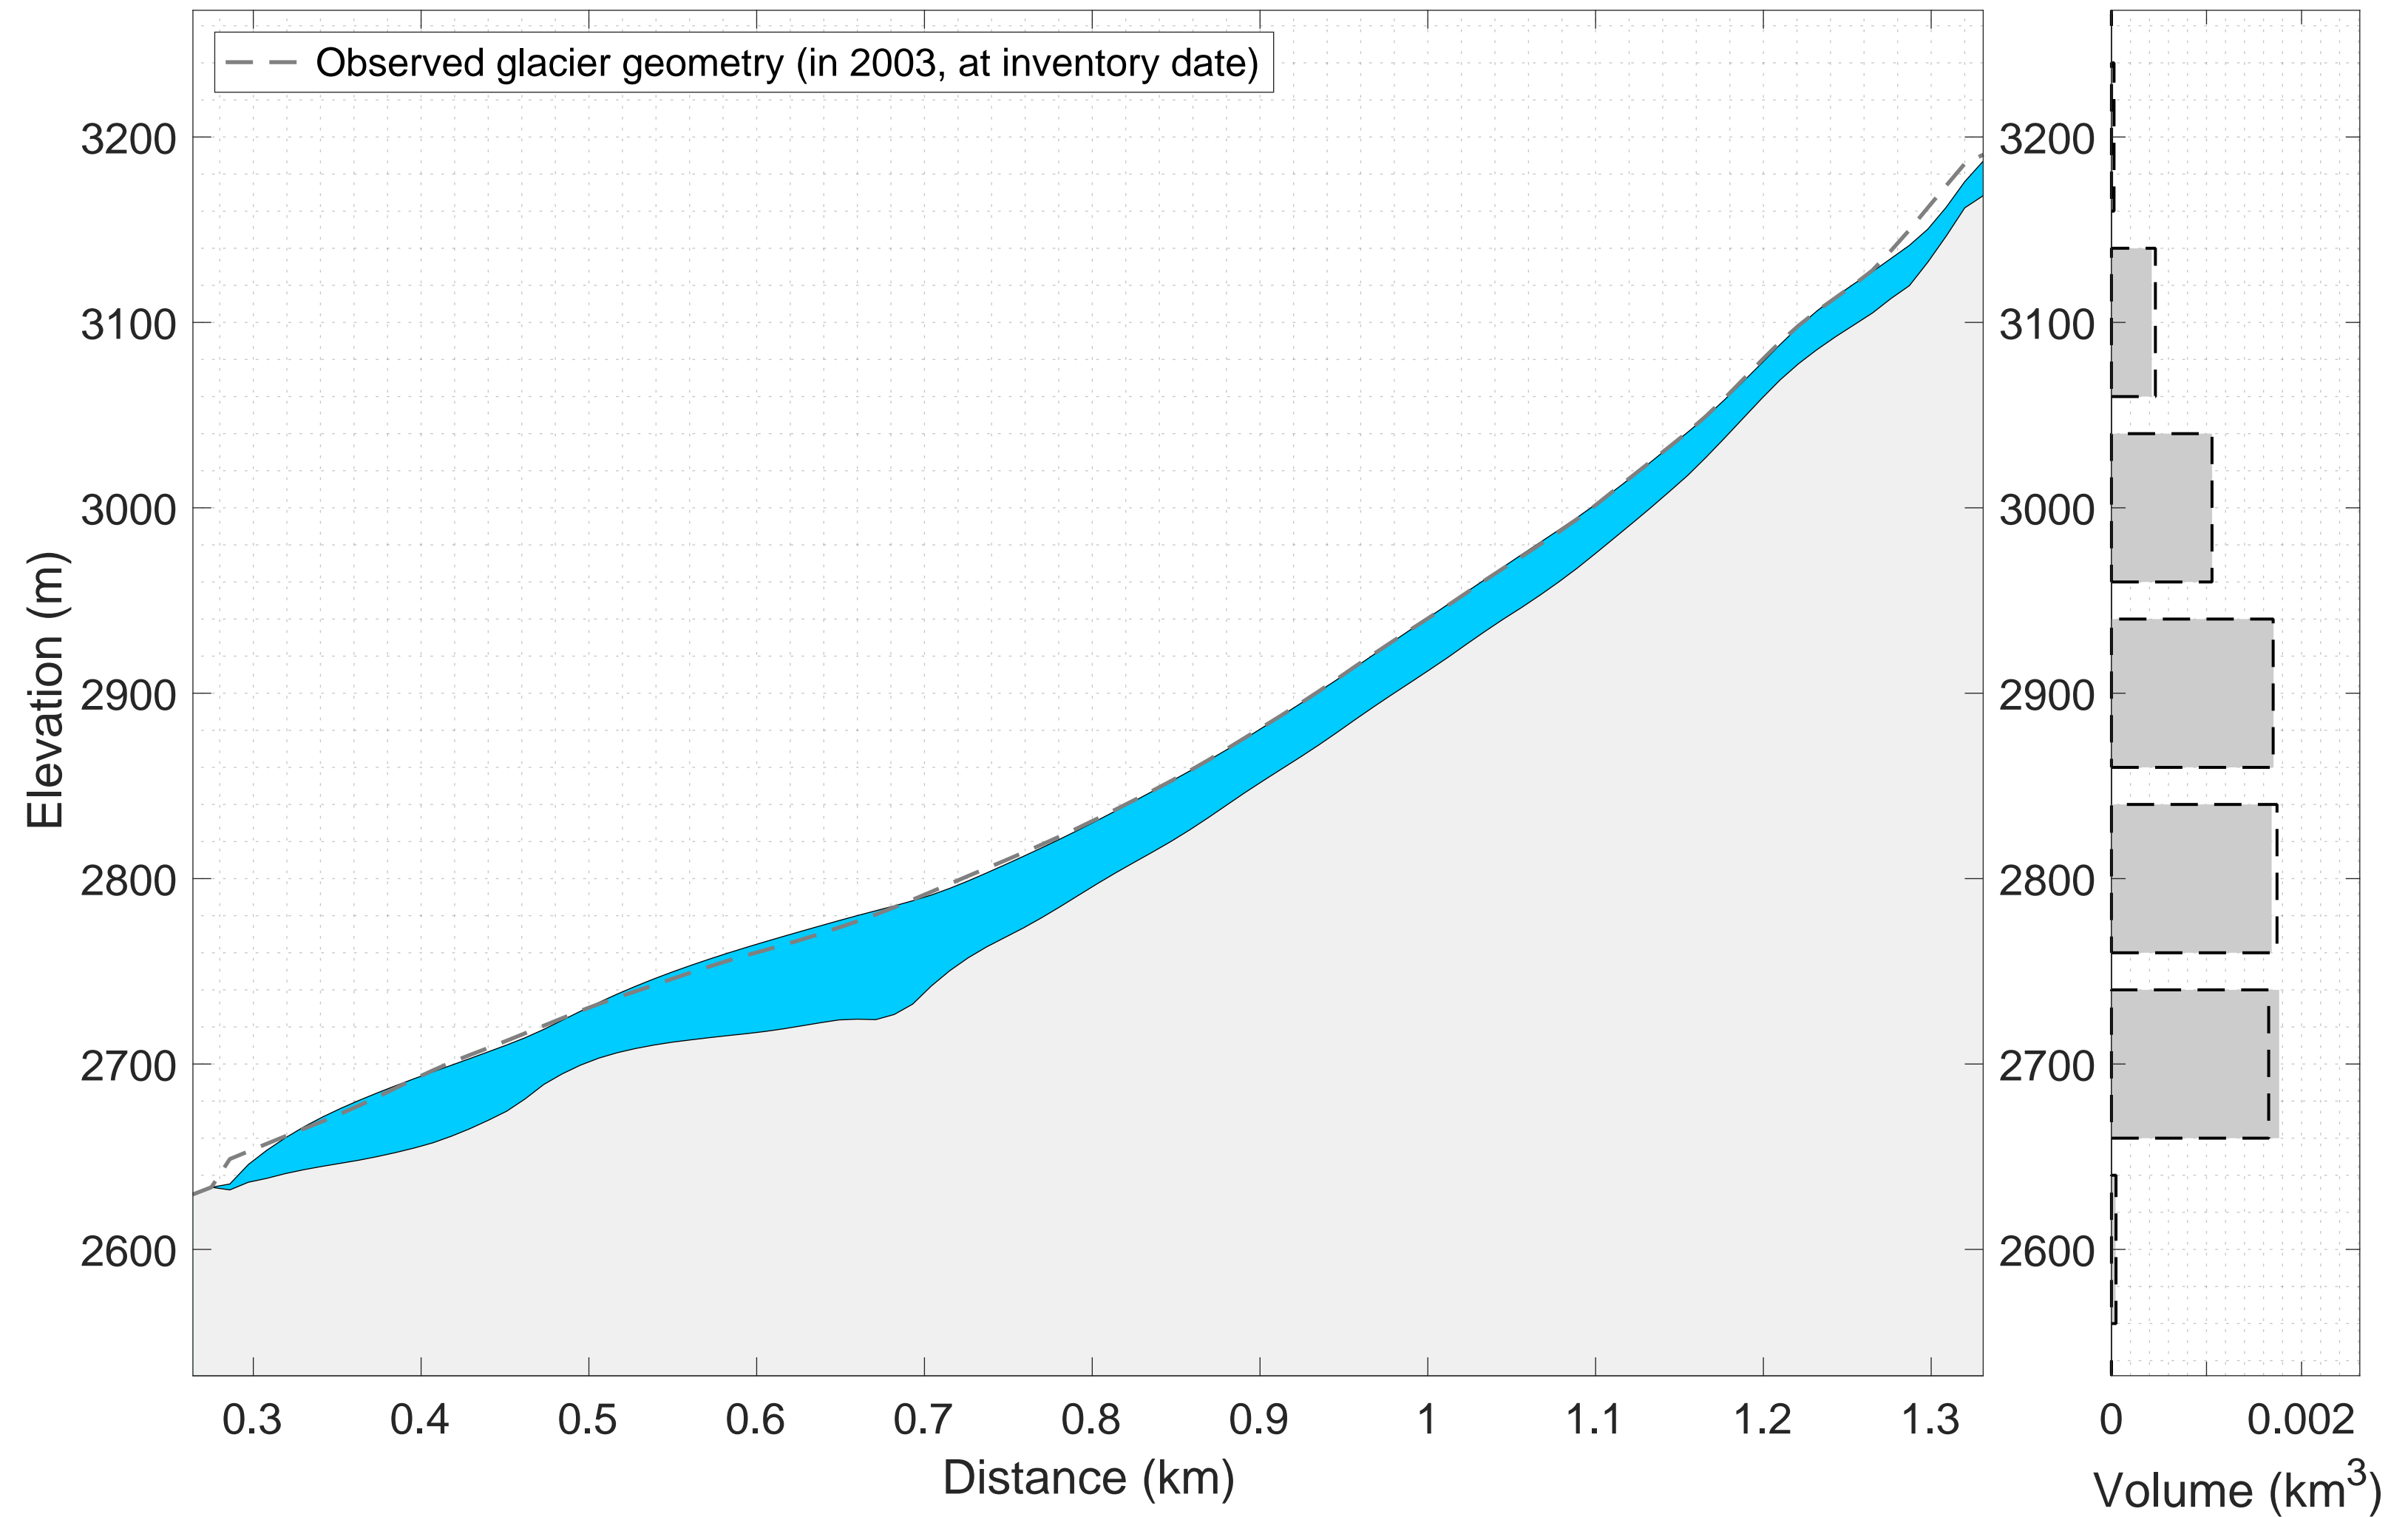

Supplement: Supplementary file 585 [file tc-13-1125-2019-supplement.zip]

**Modelled geometry (Glacier ID = 00411;  $A = 8.2751\text{e-}17 \text{ Pa}^{-3} \text{ a}^{-1}$ ;  $dx = 12 \text{ m}$ )**

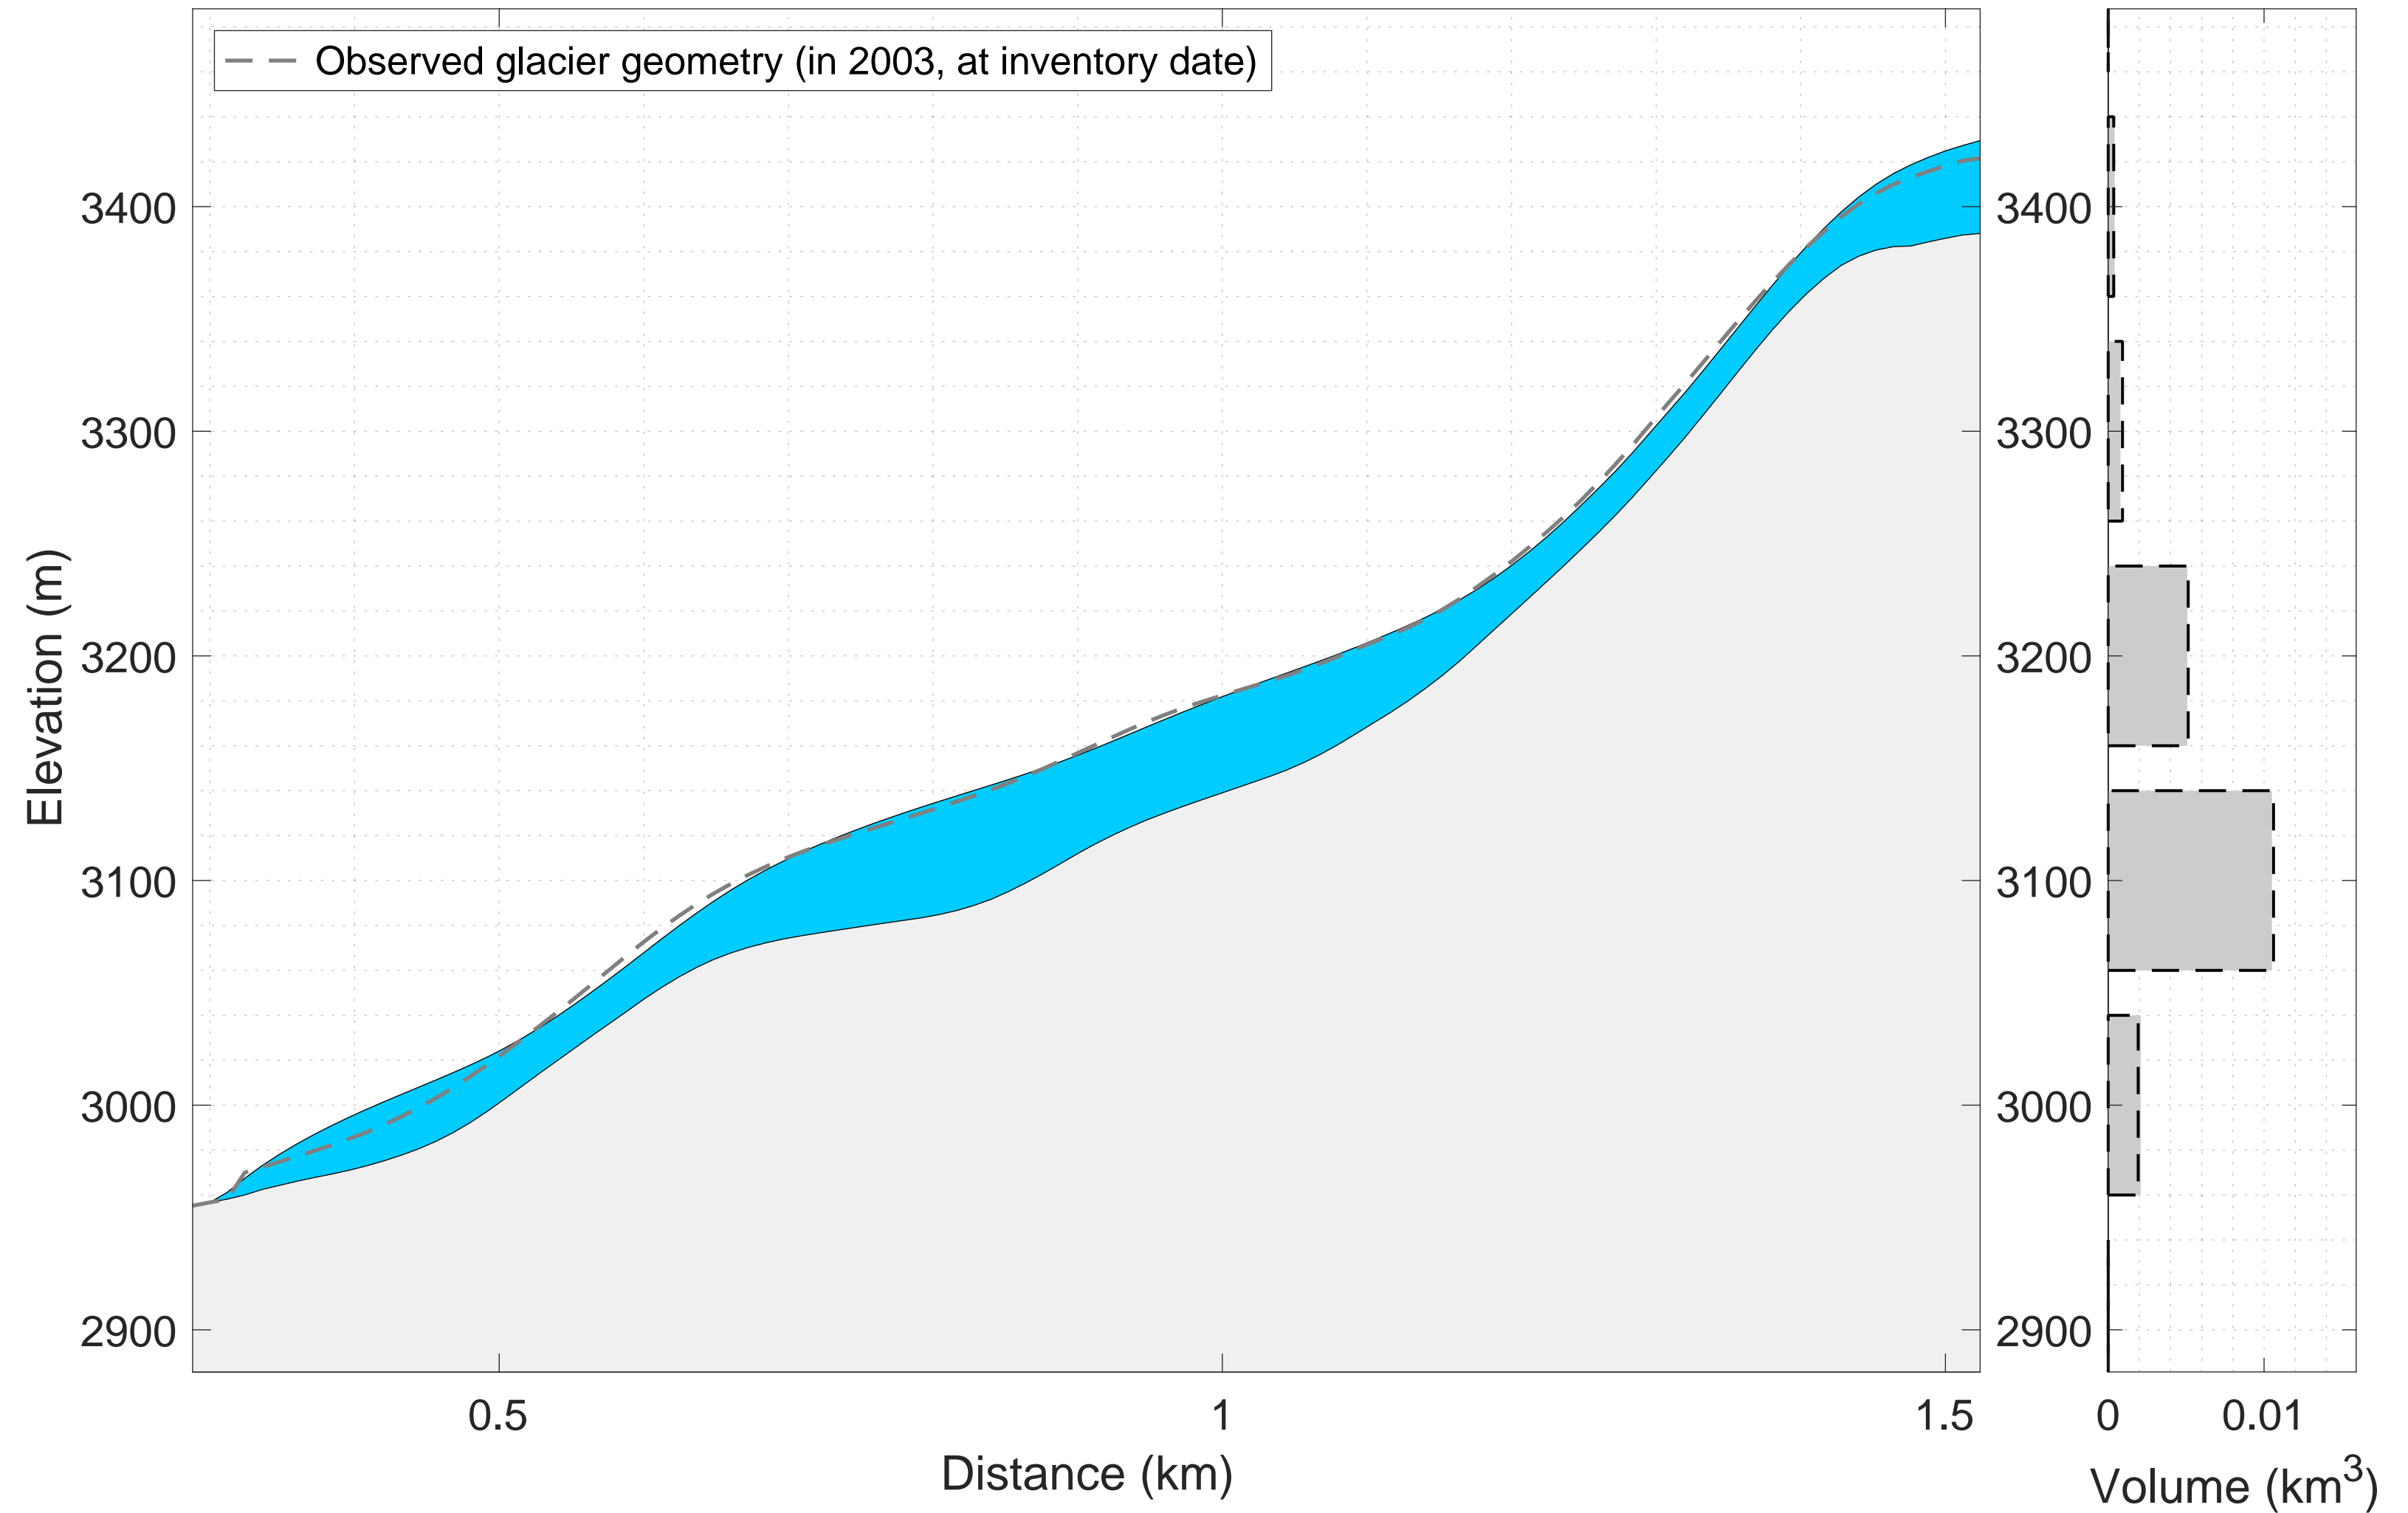

Supplement: Supplementary file 587 [file tc-13-1125-2019-supplement.zip]

Modelled geometry (Glacier ID = 03264;  $A = 2.1615\text{e-}16 \text{ Pa}^{-3} \text{ a}^{-1}$ ;  $dx = 26 \text{ m}$ )

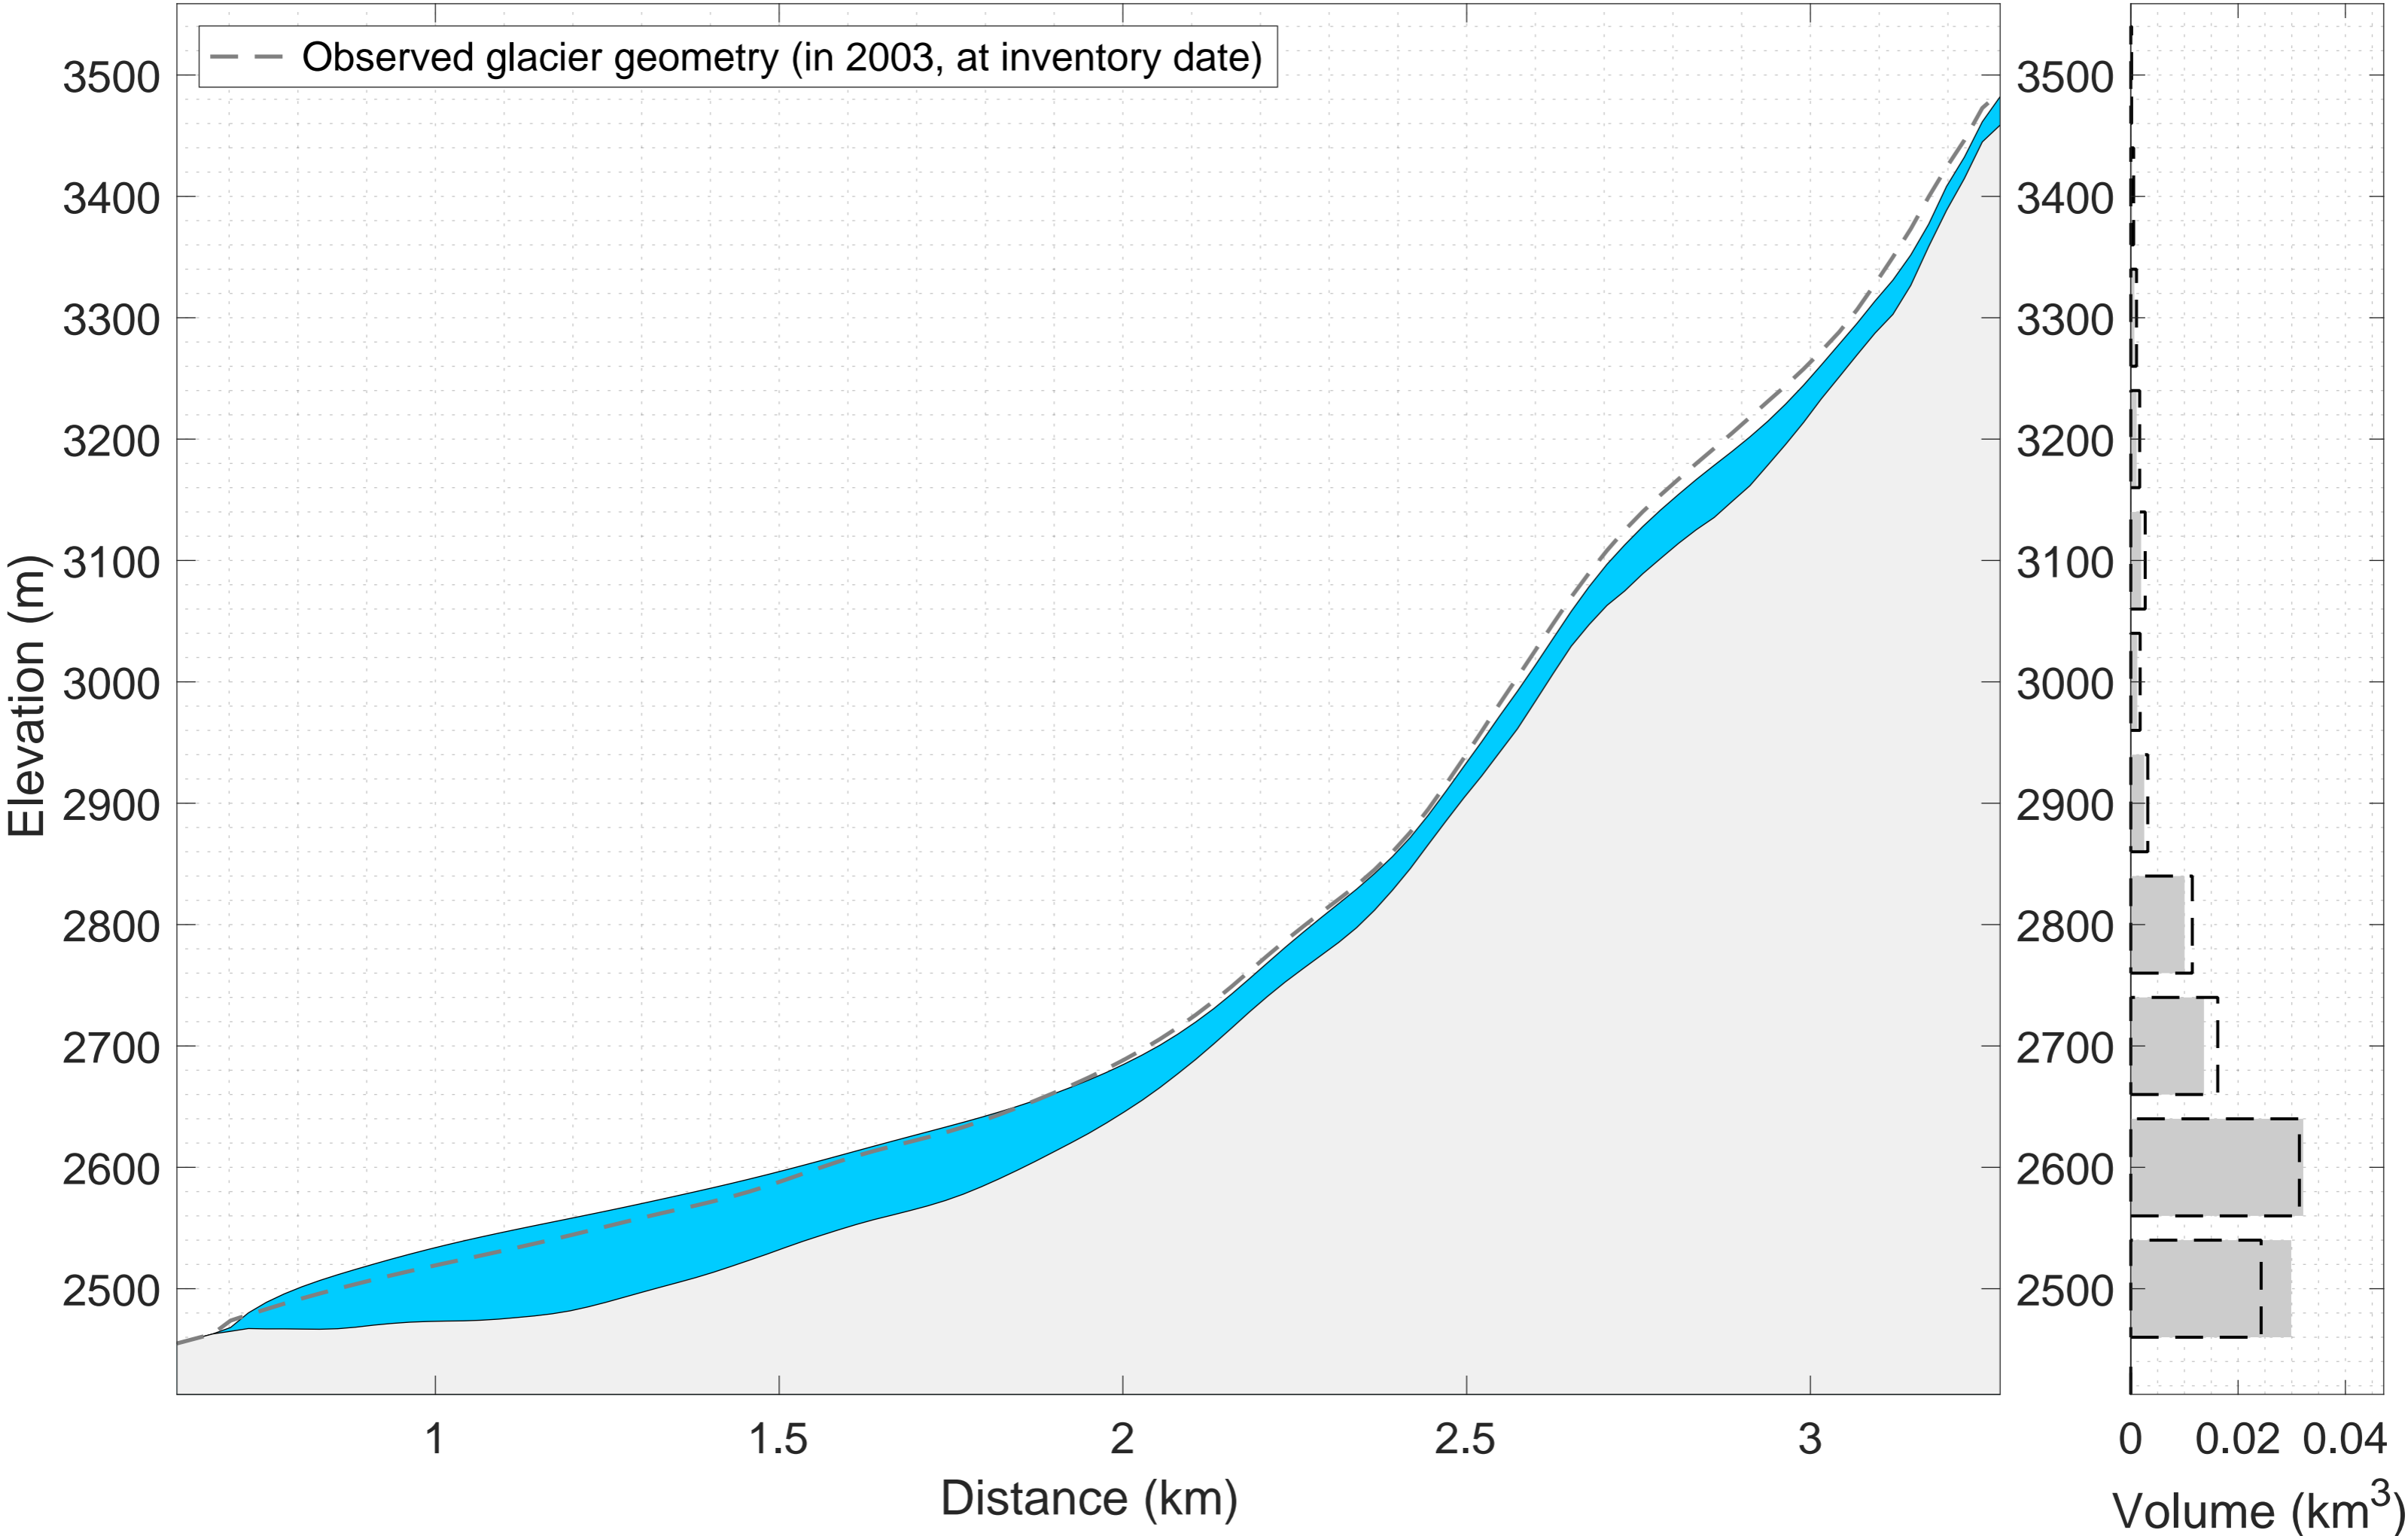

Supplement: Supplementary file 588 [file tc-13-1125-2019-supplement.zip]

**Modelled geometry (Glacier ID = 03638;  $A = 9.24\text{e-}17 \text{ Pa}^{-3} \text{ a}^{-1}$ ;  $dx = 87 \text{ m}$ )**

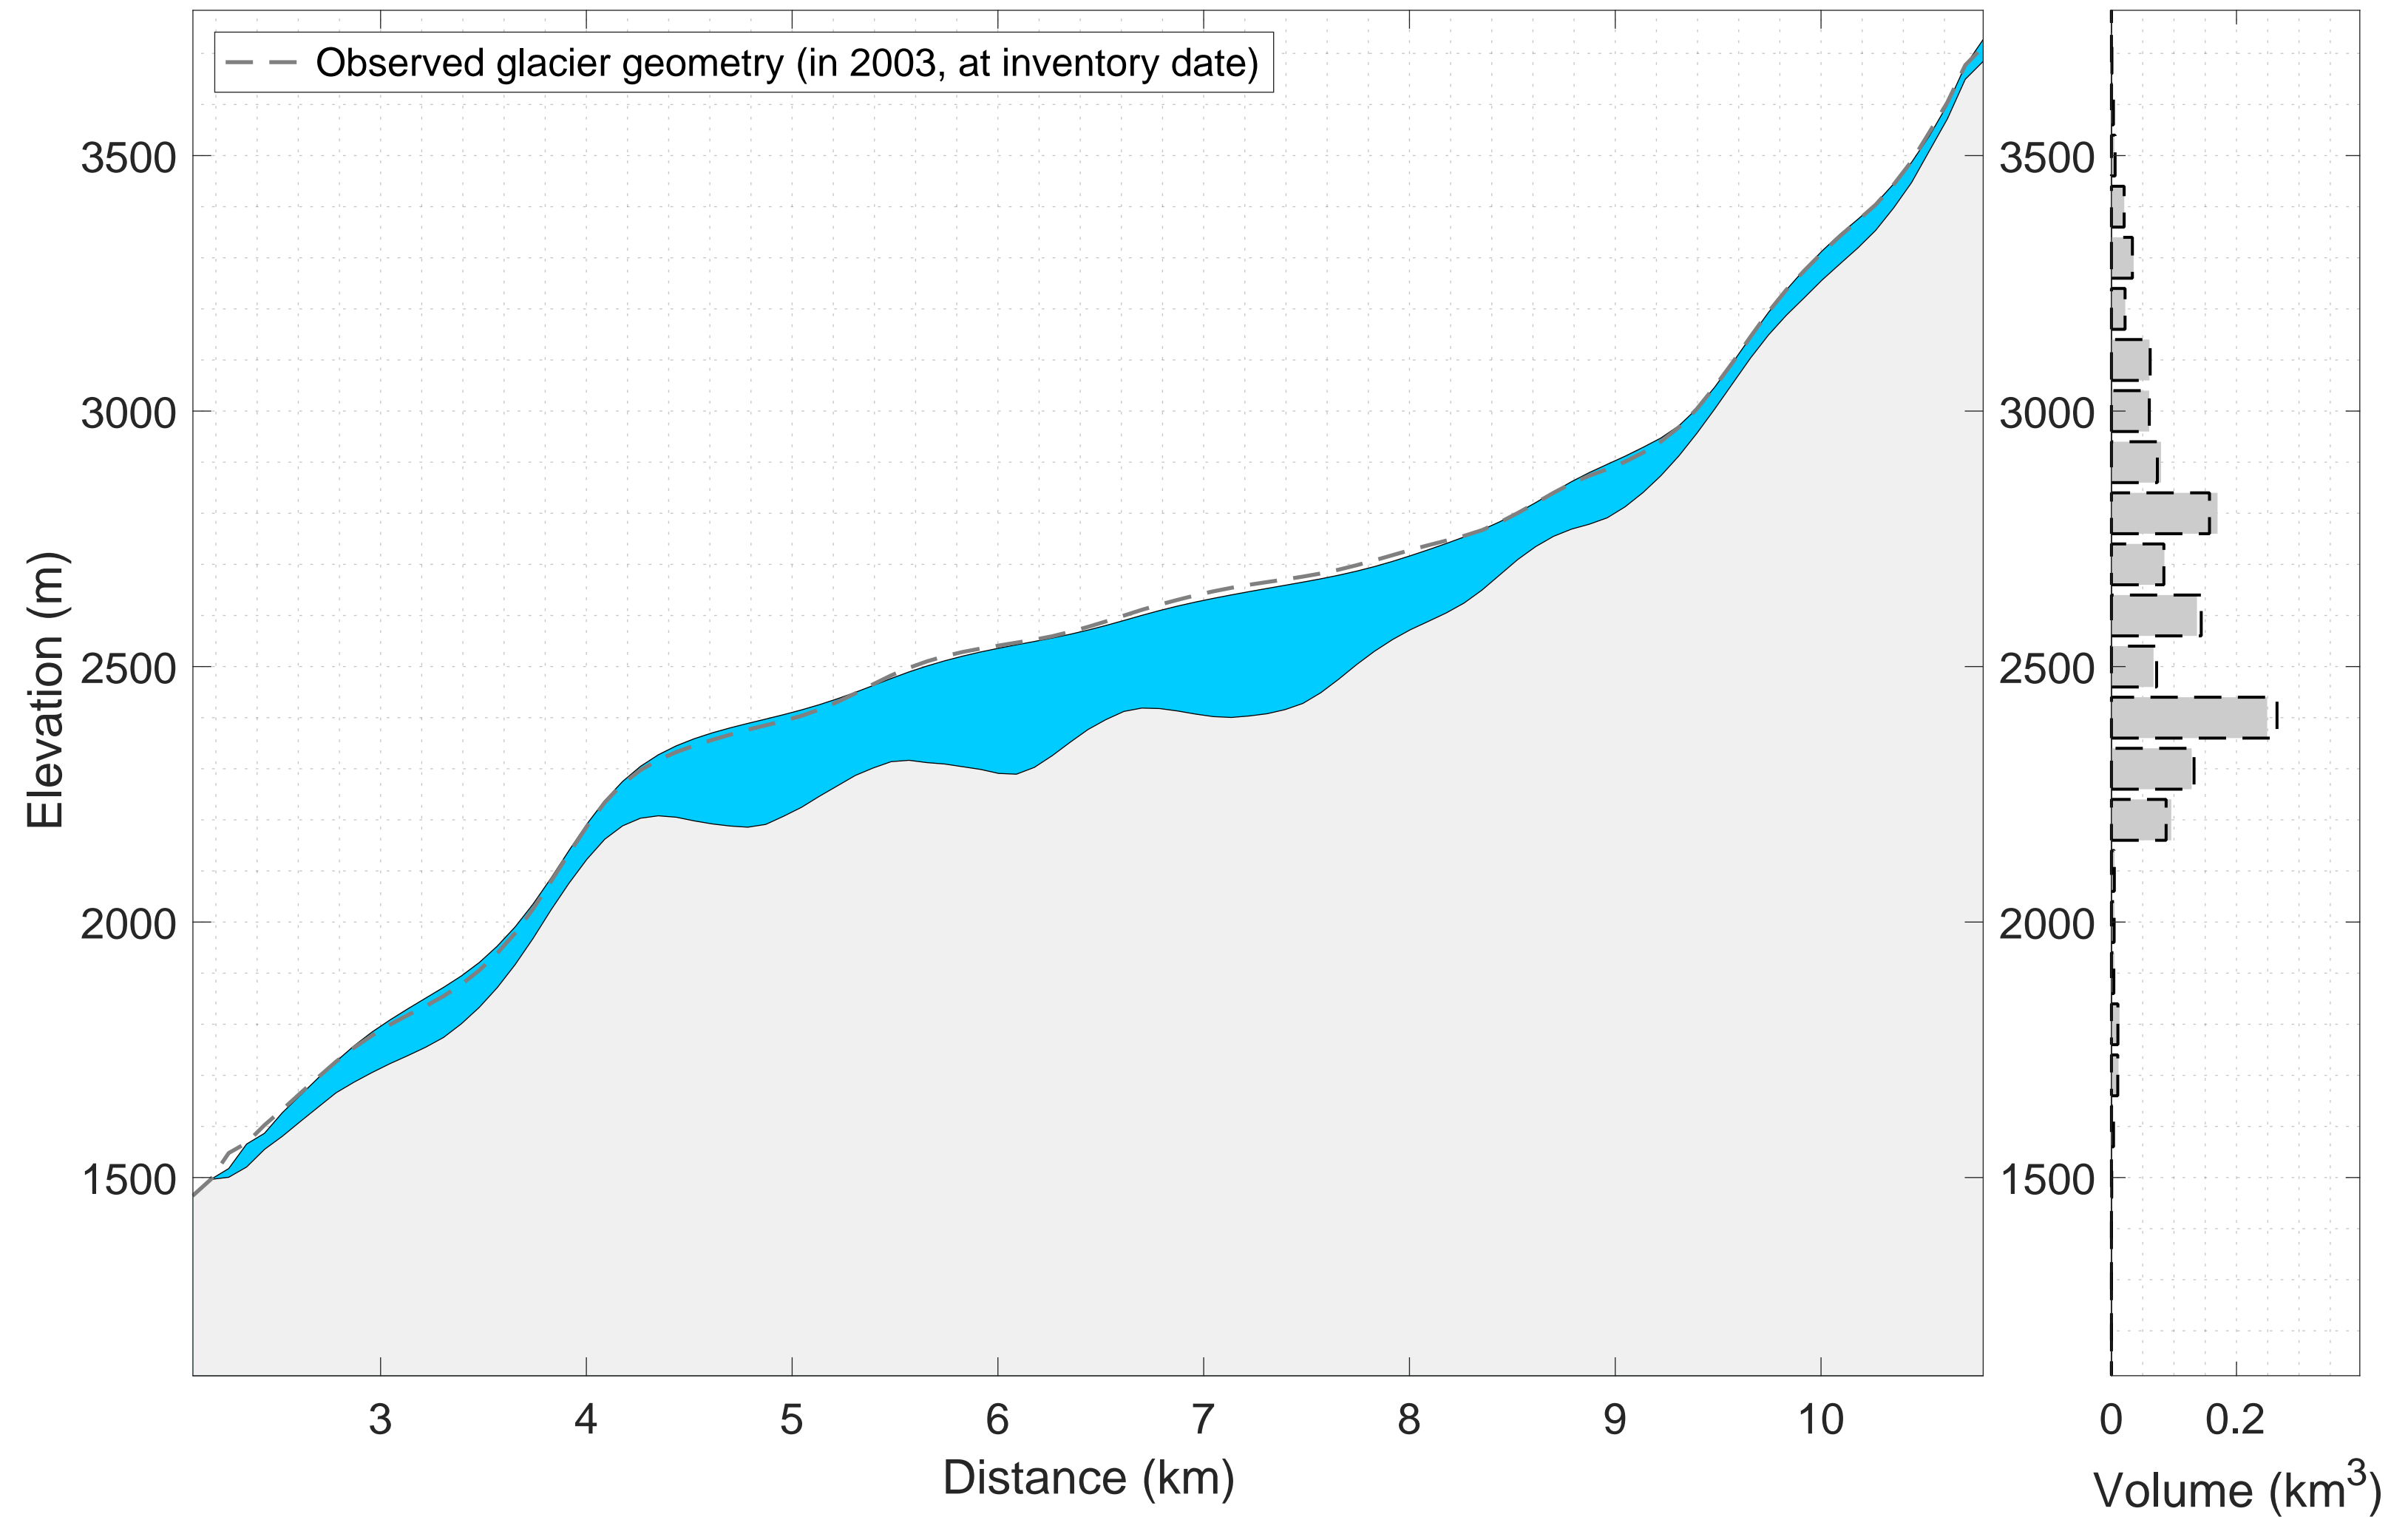

Supplement: Supplementary file 589 [file tc-13-1125-2019-supplement.zip]

**Modelled geometry (Glacier ID = 02704;  $A = 2.6738\text{e-}17 \text{ Pa}^{-3} \text{ a}^{-1}$ ;  $dx = 57 \text{ m}$ )**

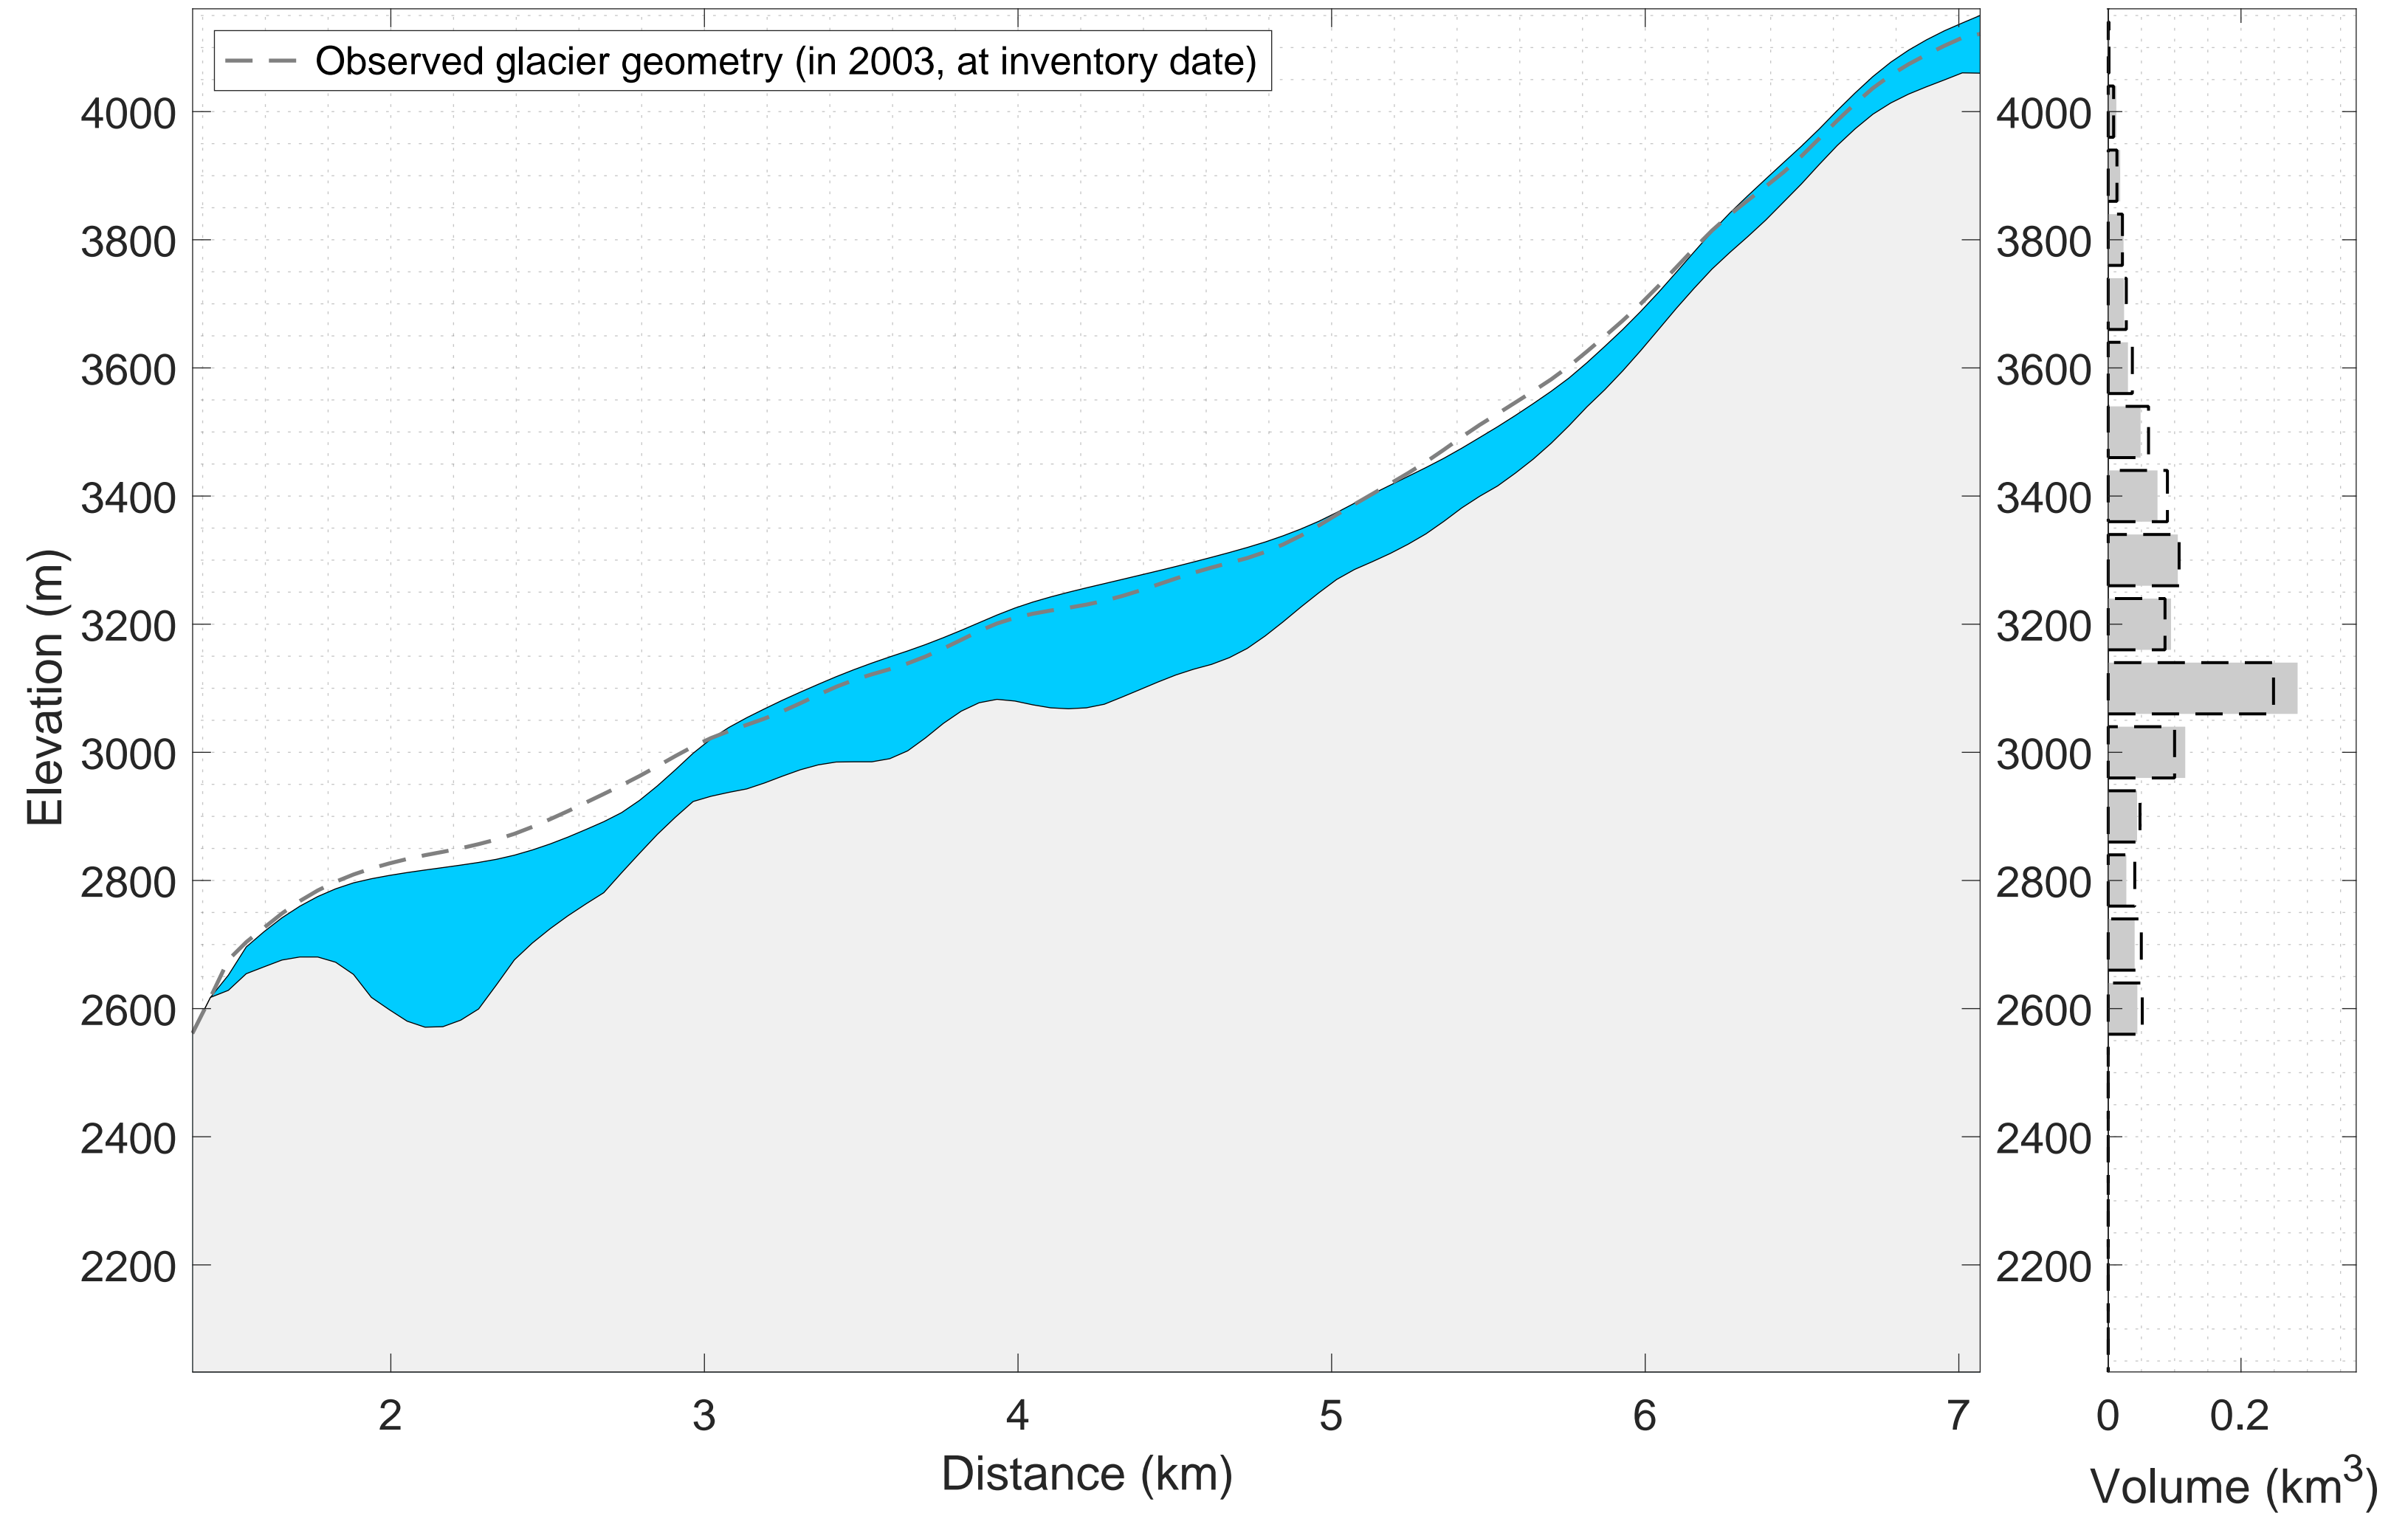

Supplement: Supplementary file 590 [file tc-13-1125-2019-supplement.zip]

**Modelled geometry (Glacier ID = 03341;  $A = 8.8893\text{e-}17 \text{ Pa}^{-3} \text{ a}^{-1}$ ;  $dx = 10 \text{ m}$ )**

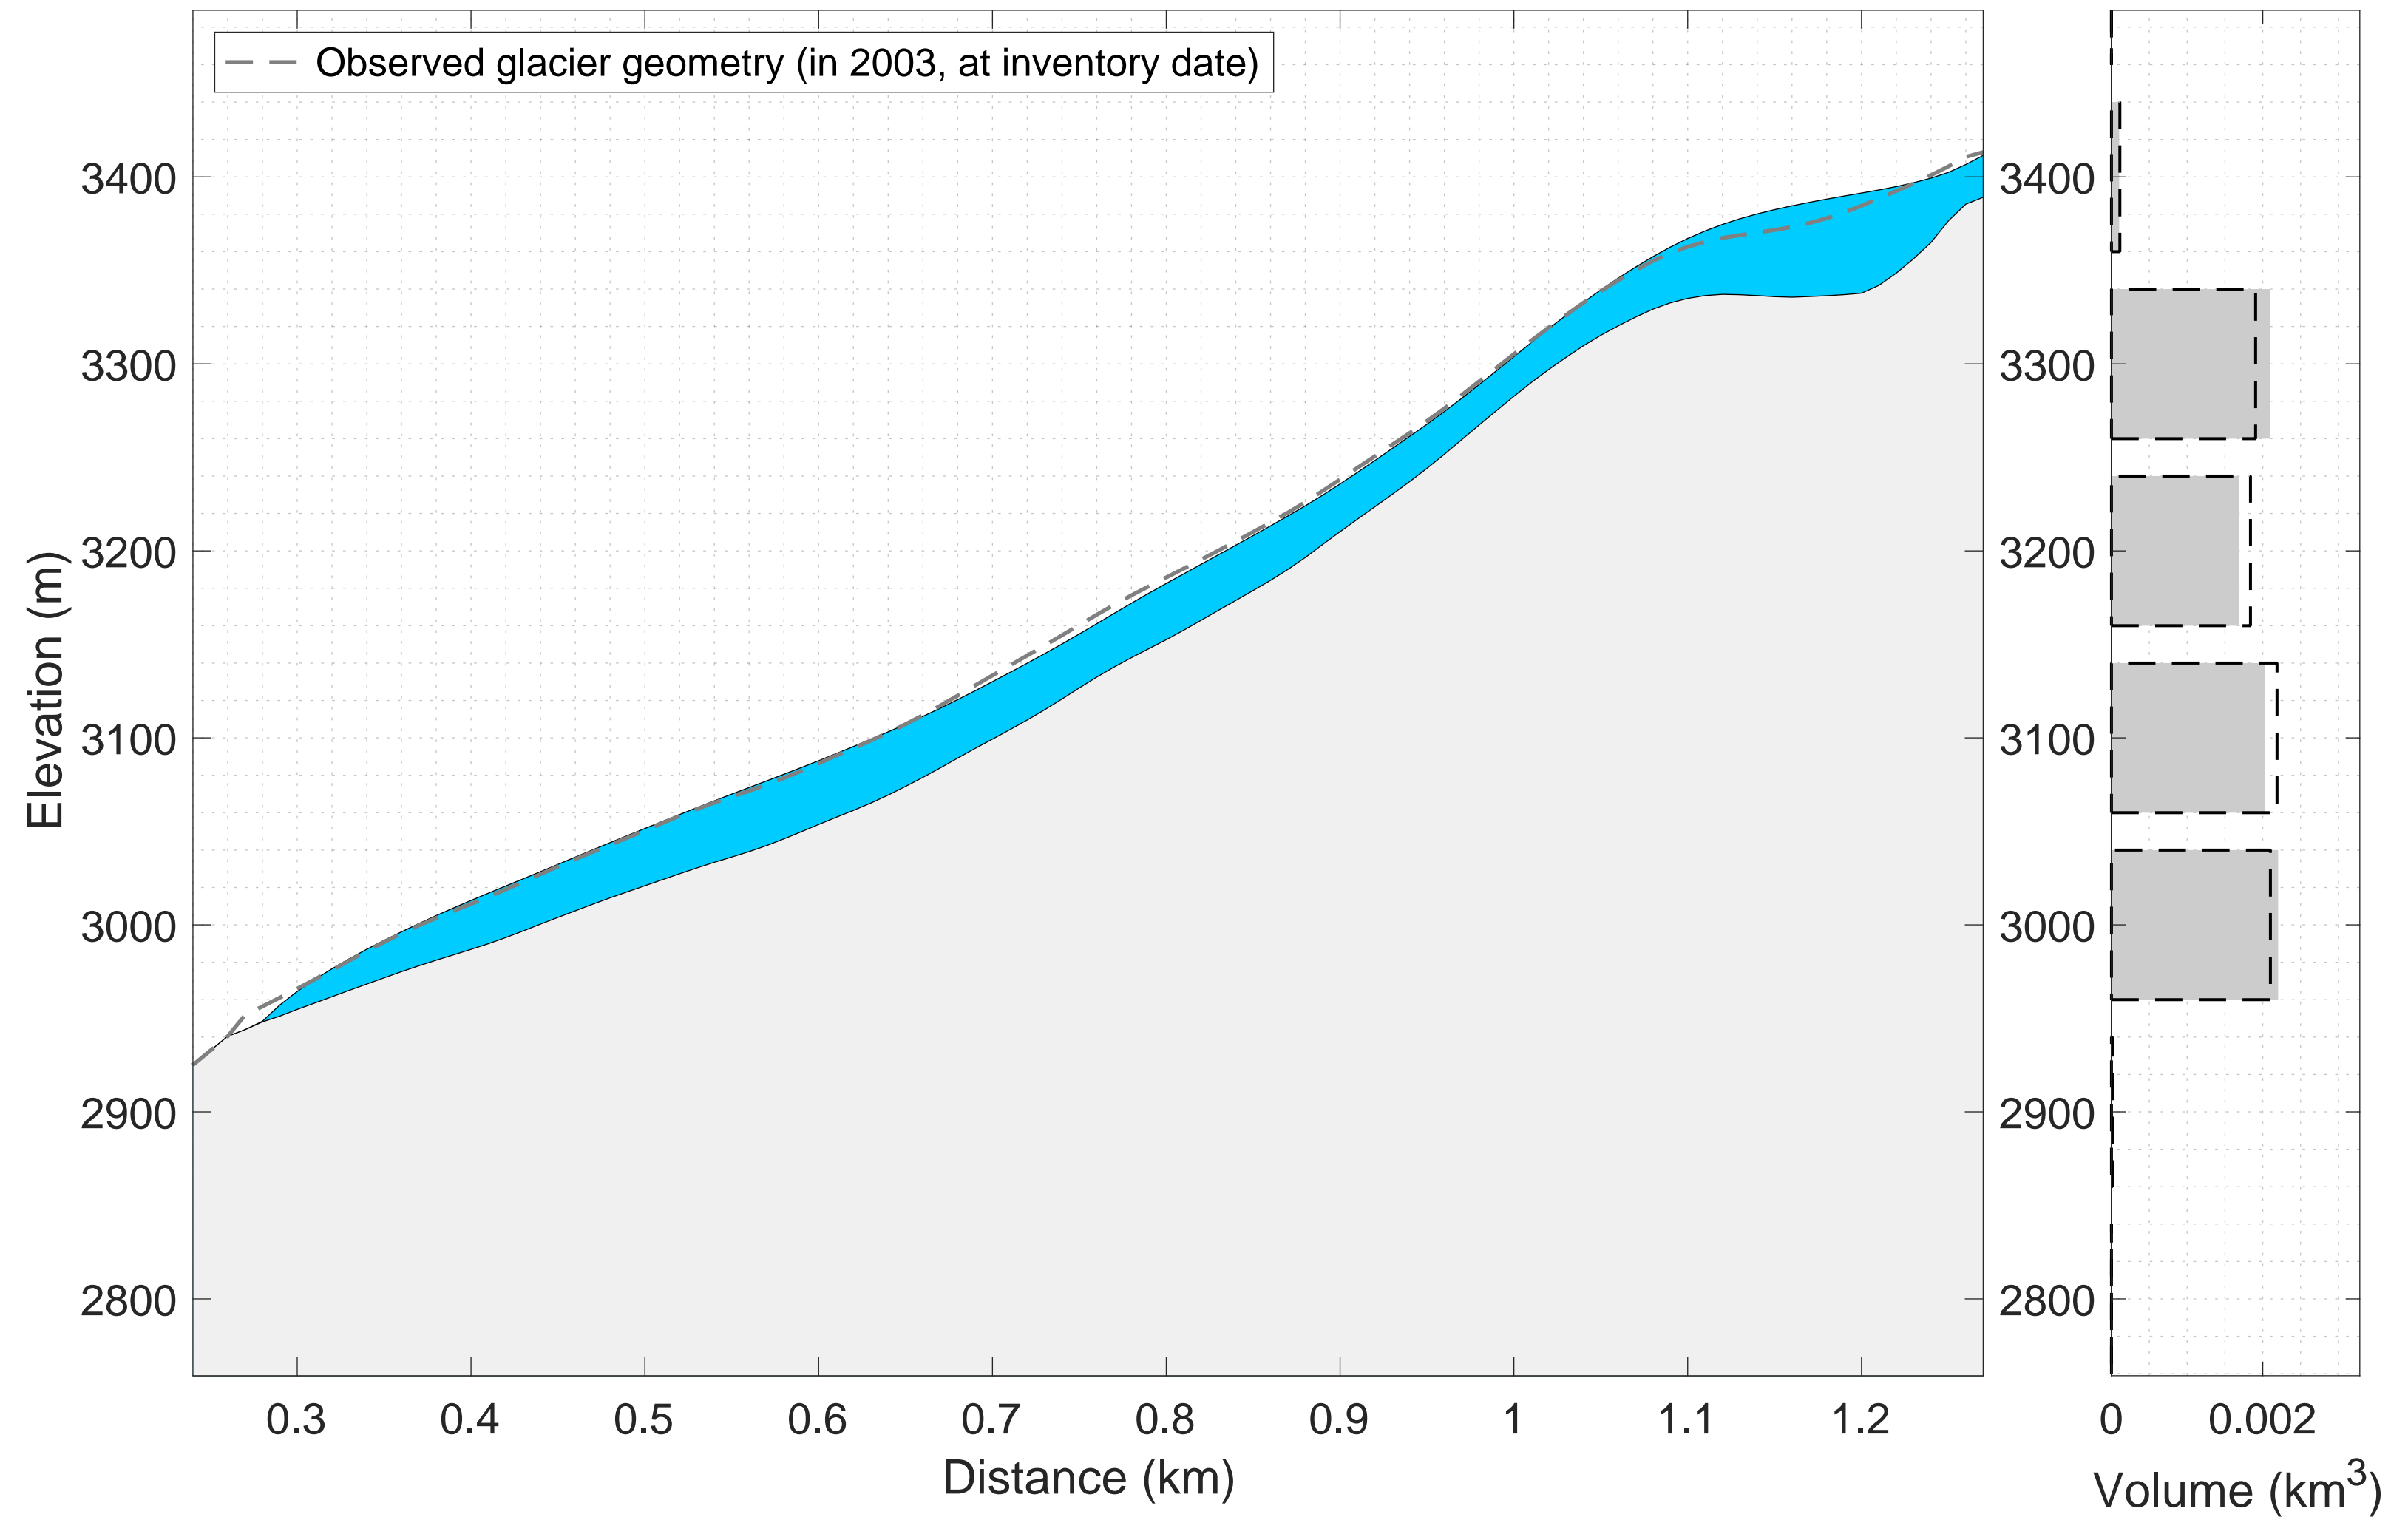

Supplement: Supplementary file 591 [file tc-13-1125-2019-supplement.zip]

**Modelled geometry (Glacier ID = 02222;  $A = 1.1833\text{e-}16 \text{ Pa}^{-3} \text{ a}^{-1}$ ;  $dx = 23 \text{ m}$ )**

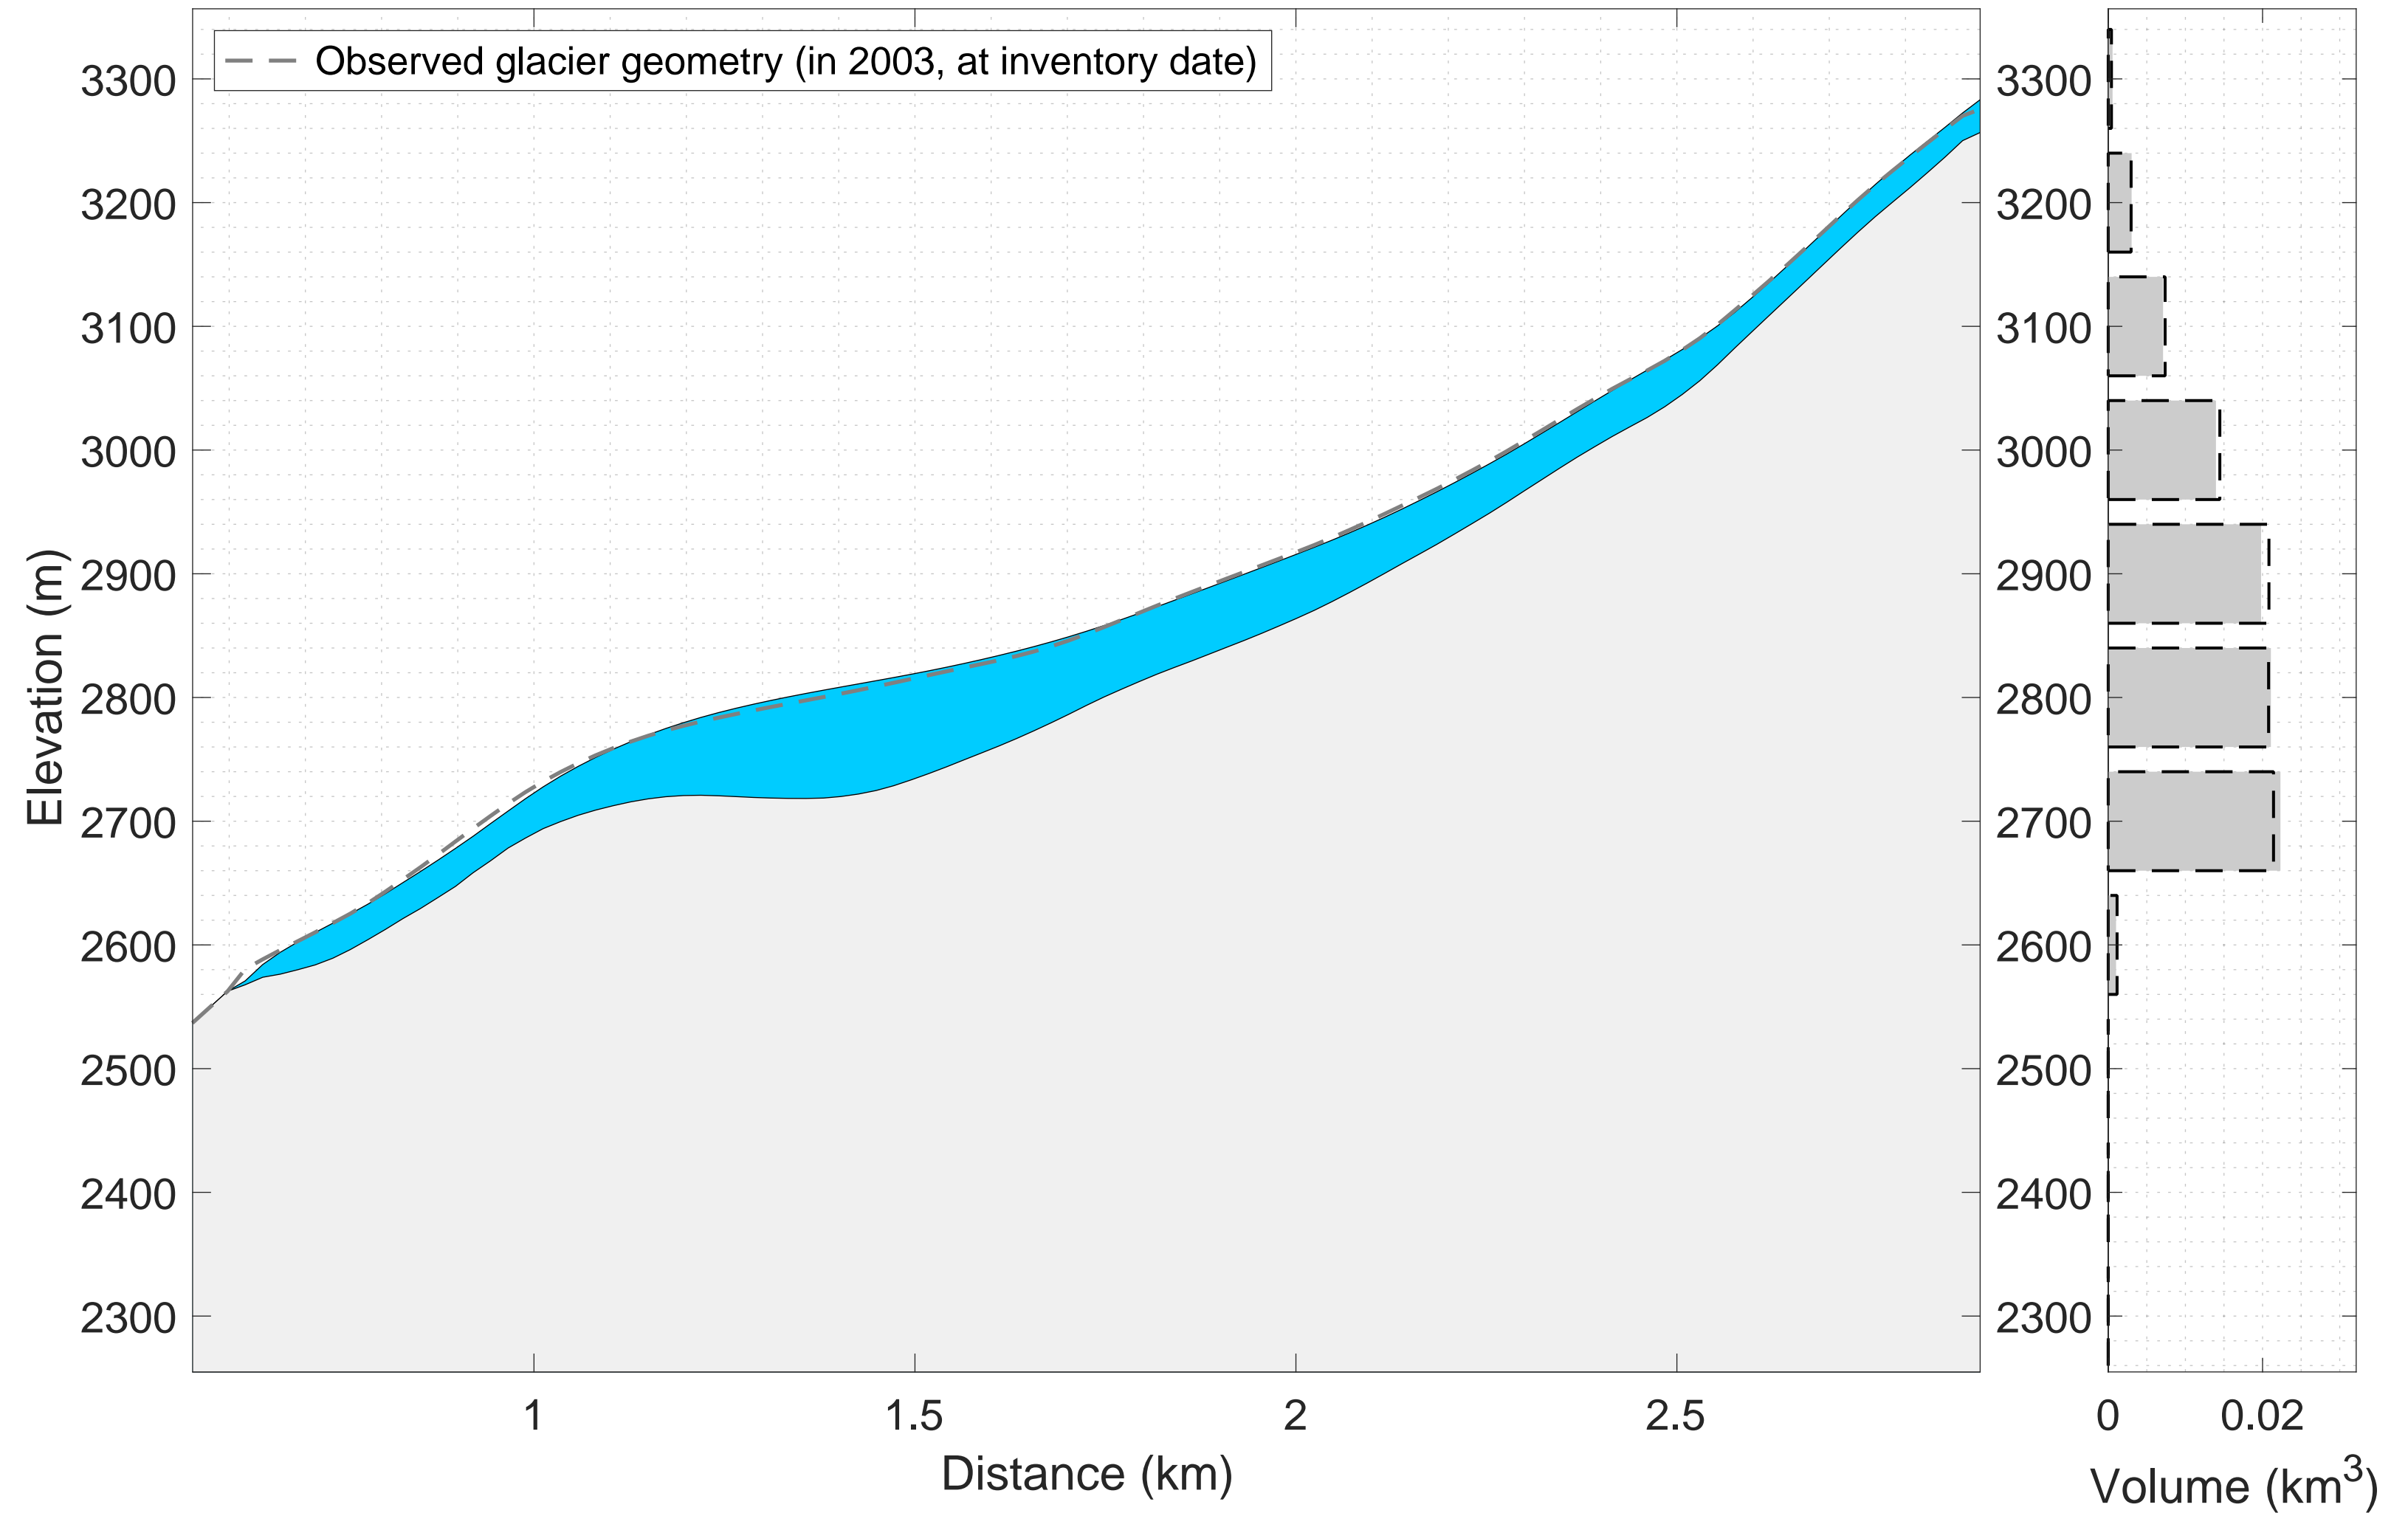

Supplement: Supplementary file 592 [file tc-13-1125-2019-supplement.zip]

**Modelled geometry (Glacier ID = 02858;  $A = 1.5352\text{e-}16 \text{ Pa}^{-3} \text{ a}^{-1}$ ;  $dx = 62 \text{ m}$ )**

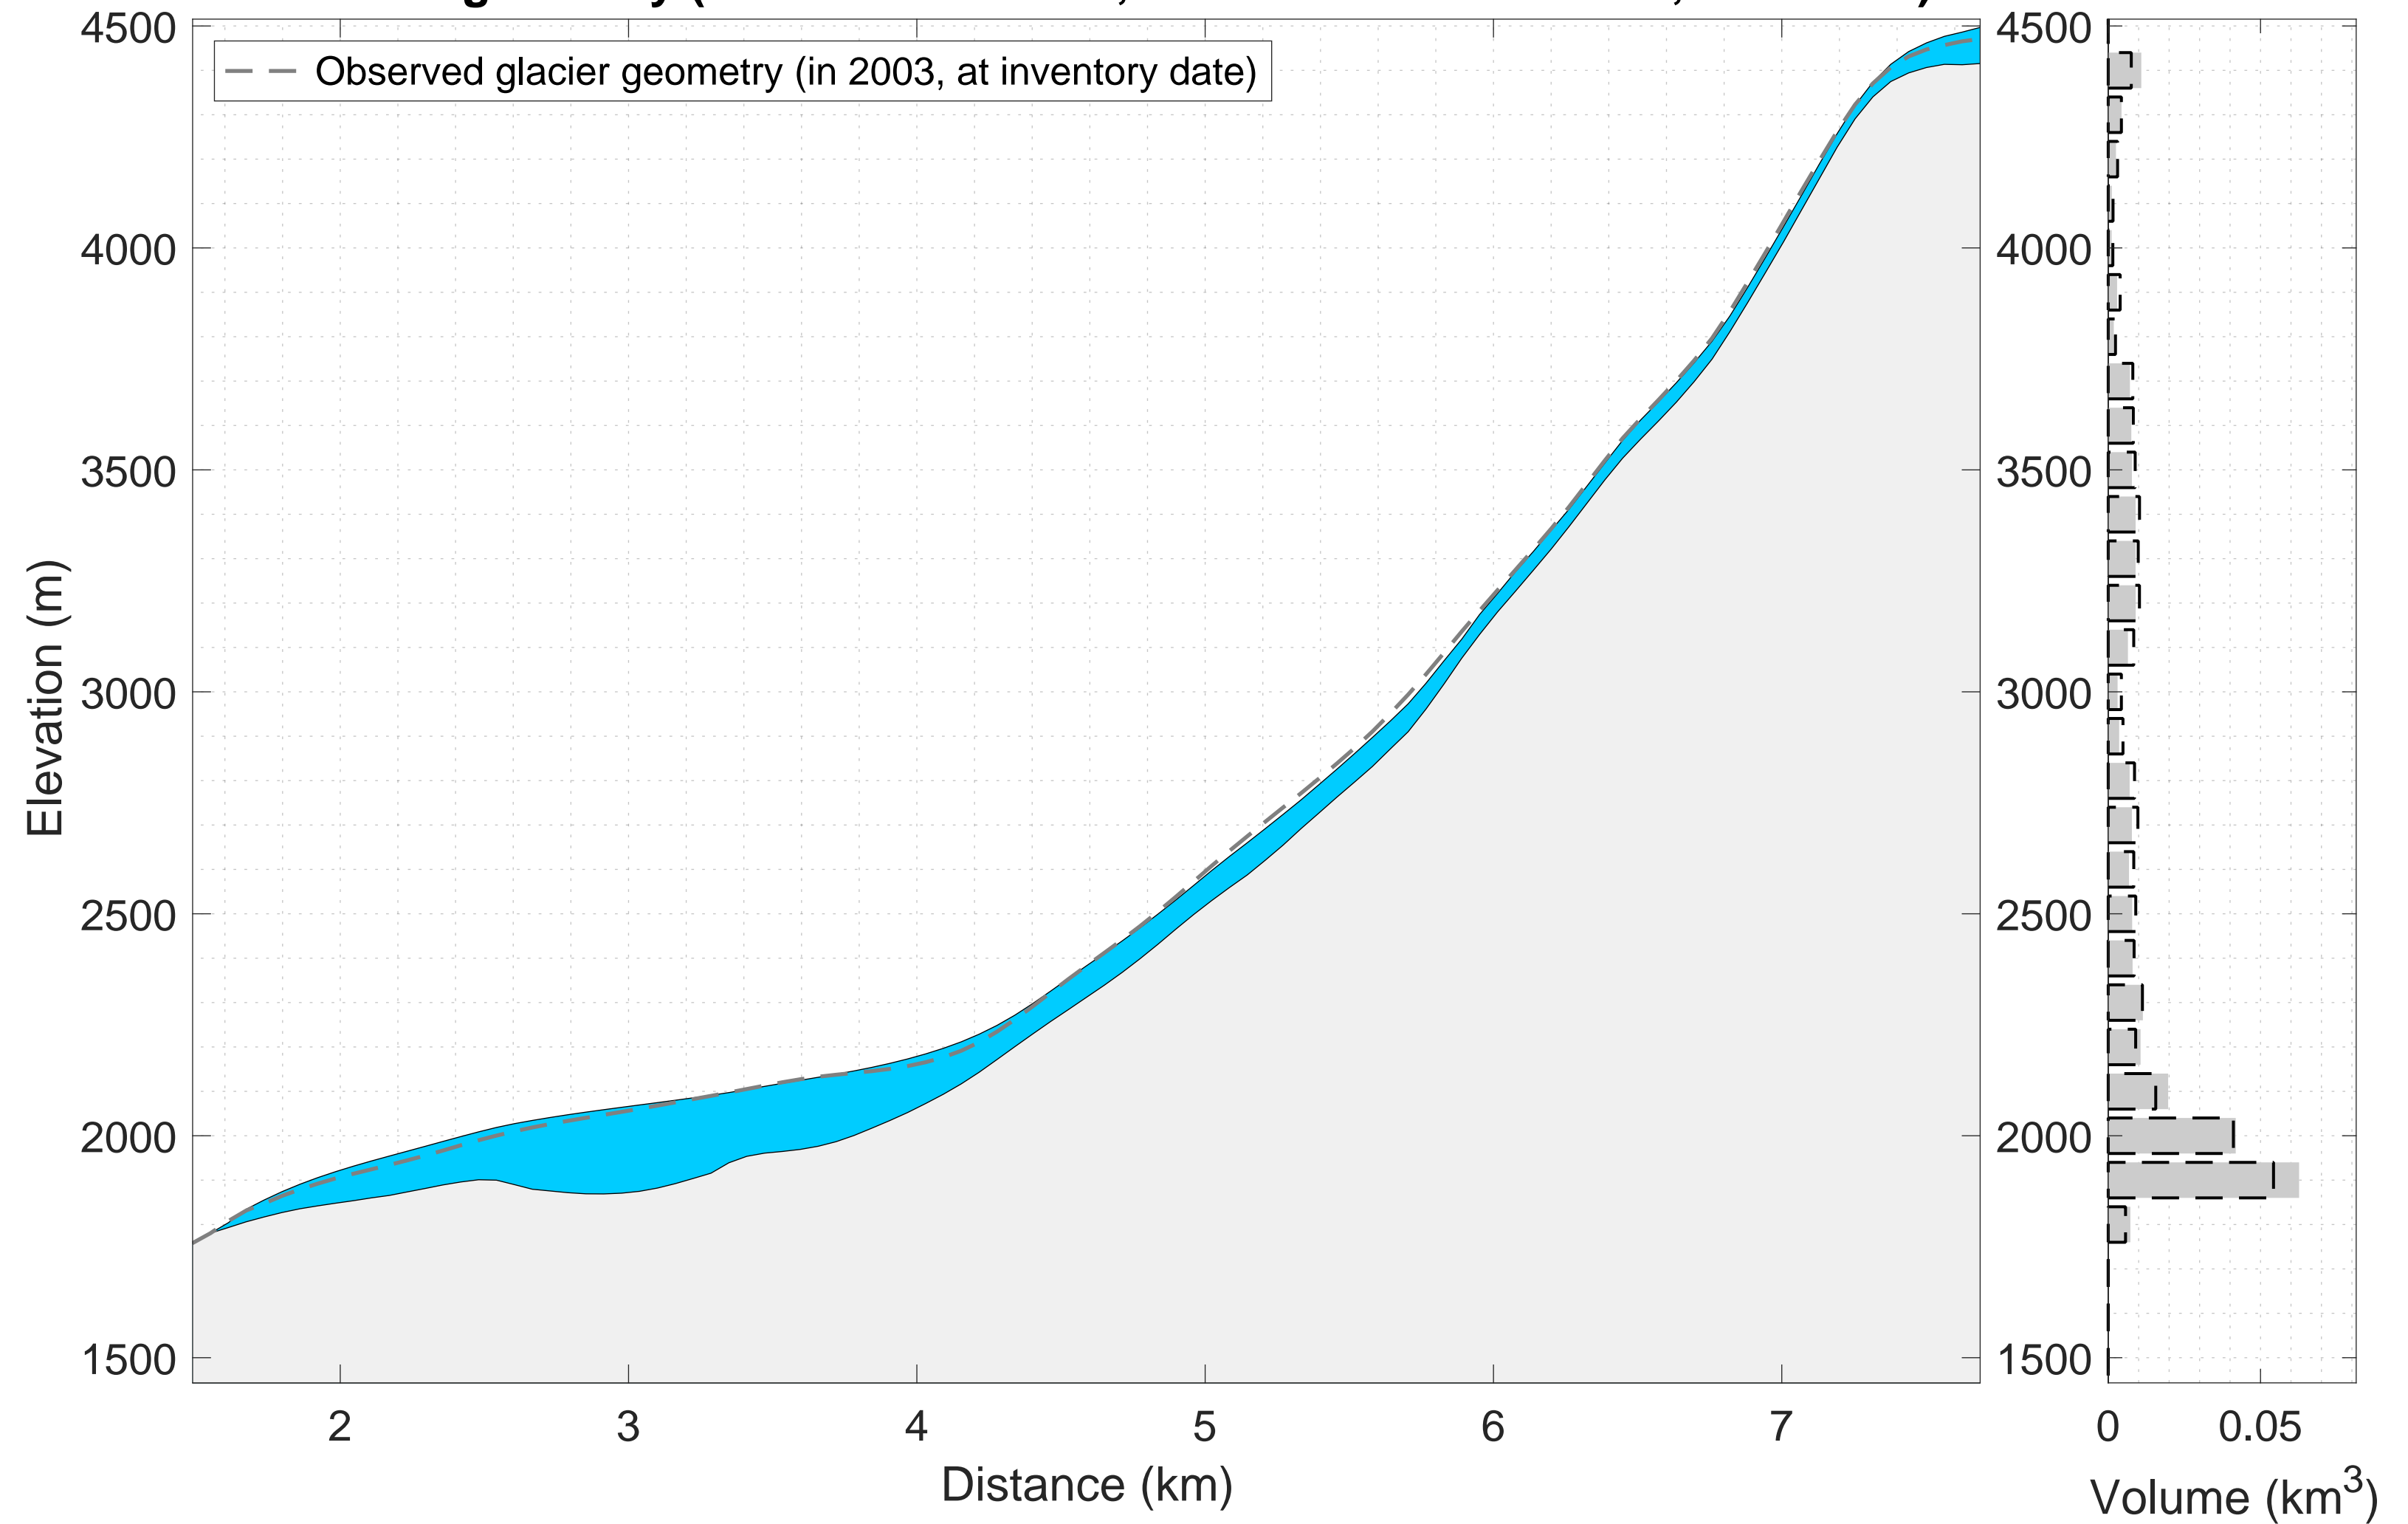

Supplement: Supplementary file 593 [file tc-13-1125-2019-supplement.zip]

**Modelled geometry (Glacier ID = 02924;  $A = 1.5452\text{e-}16 \text{ Pa}^{-3} \text{ a}^{-1}$ ;  $dx = 28 \text{ m}$ )**

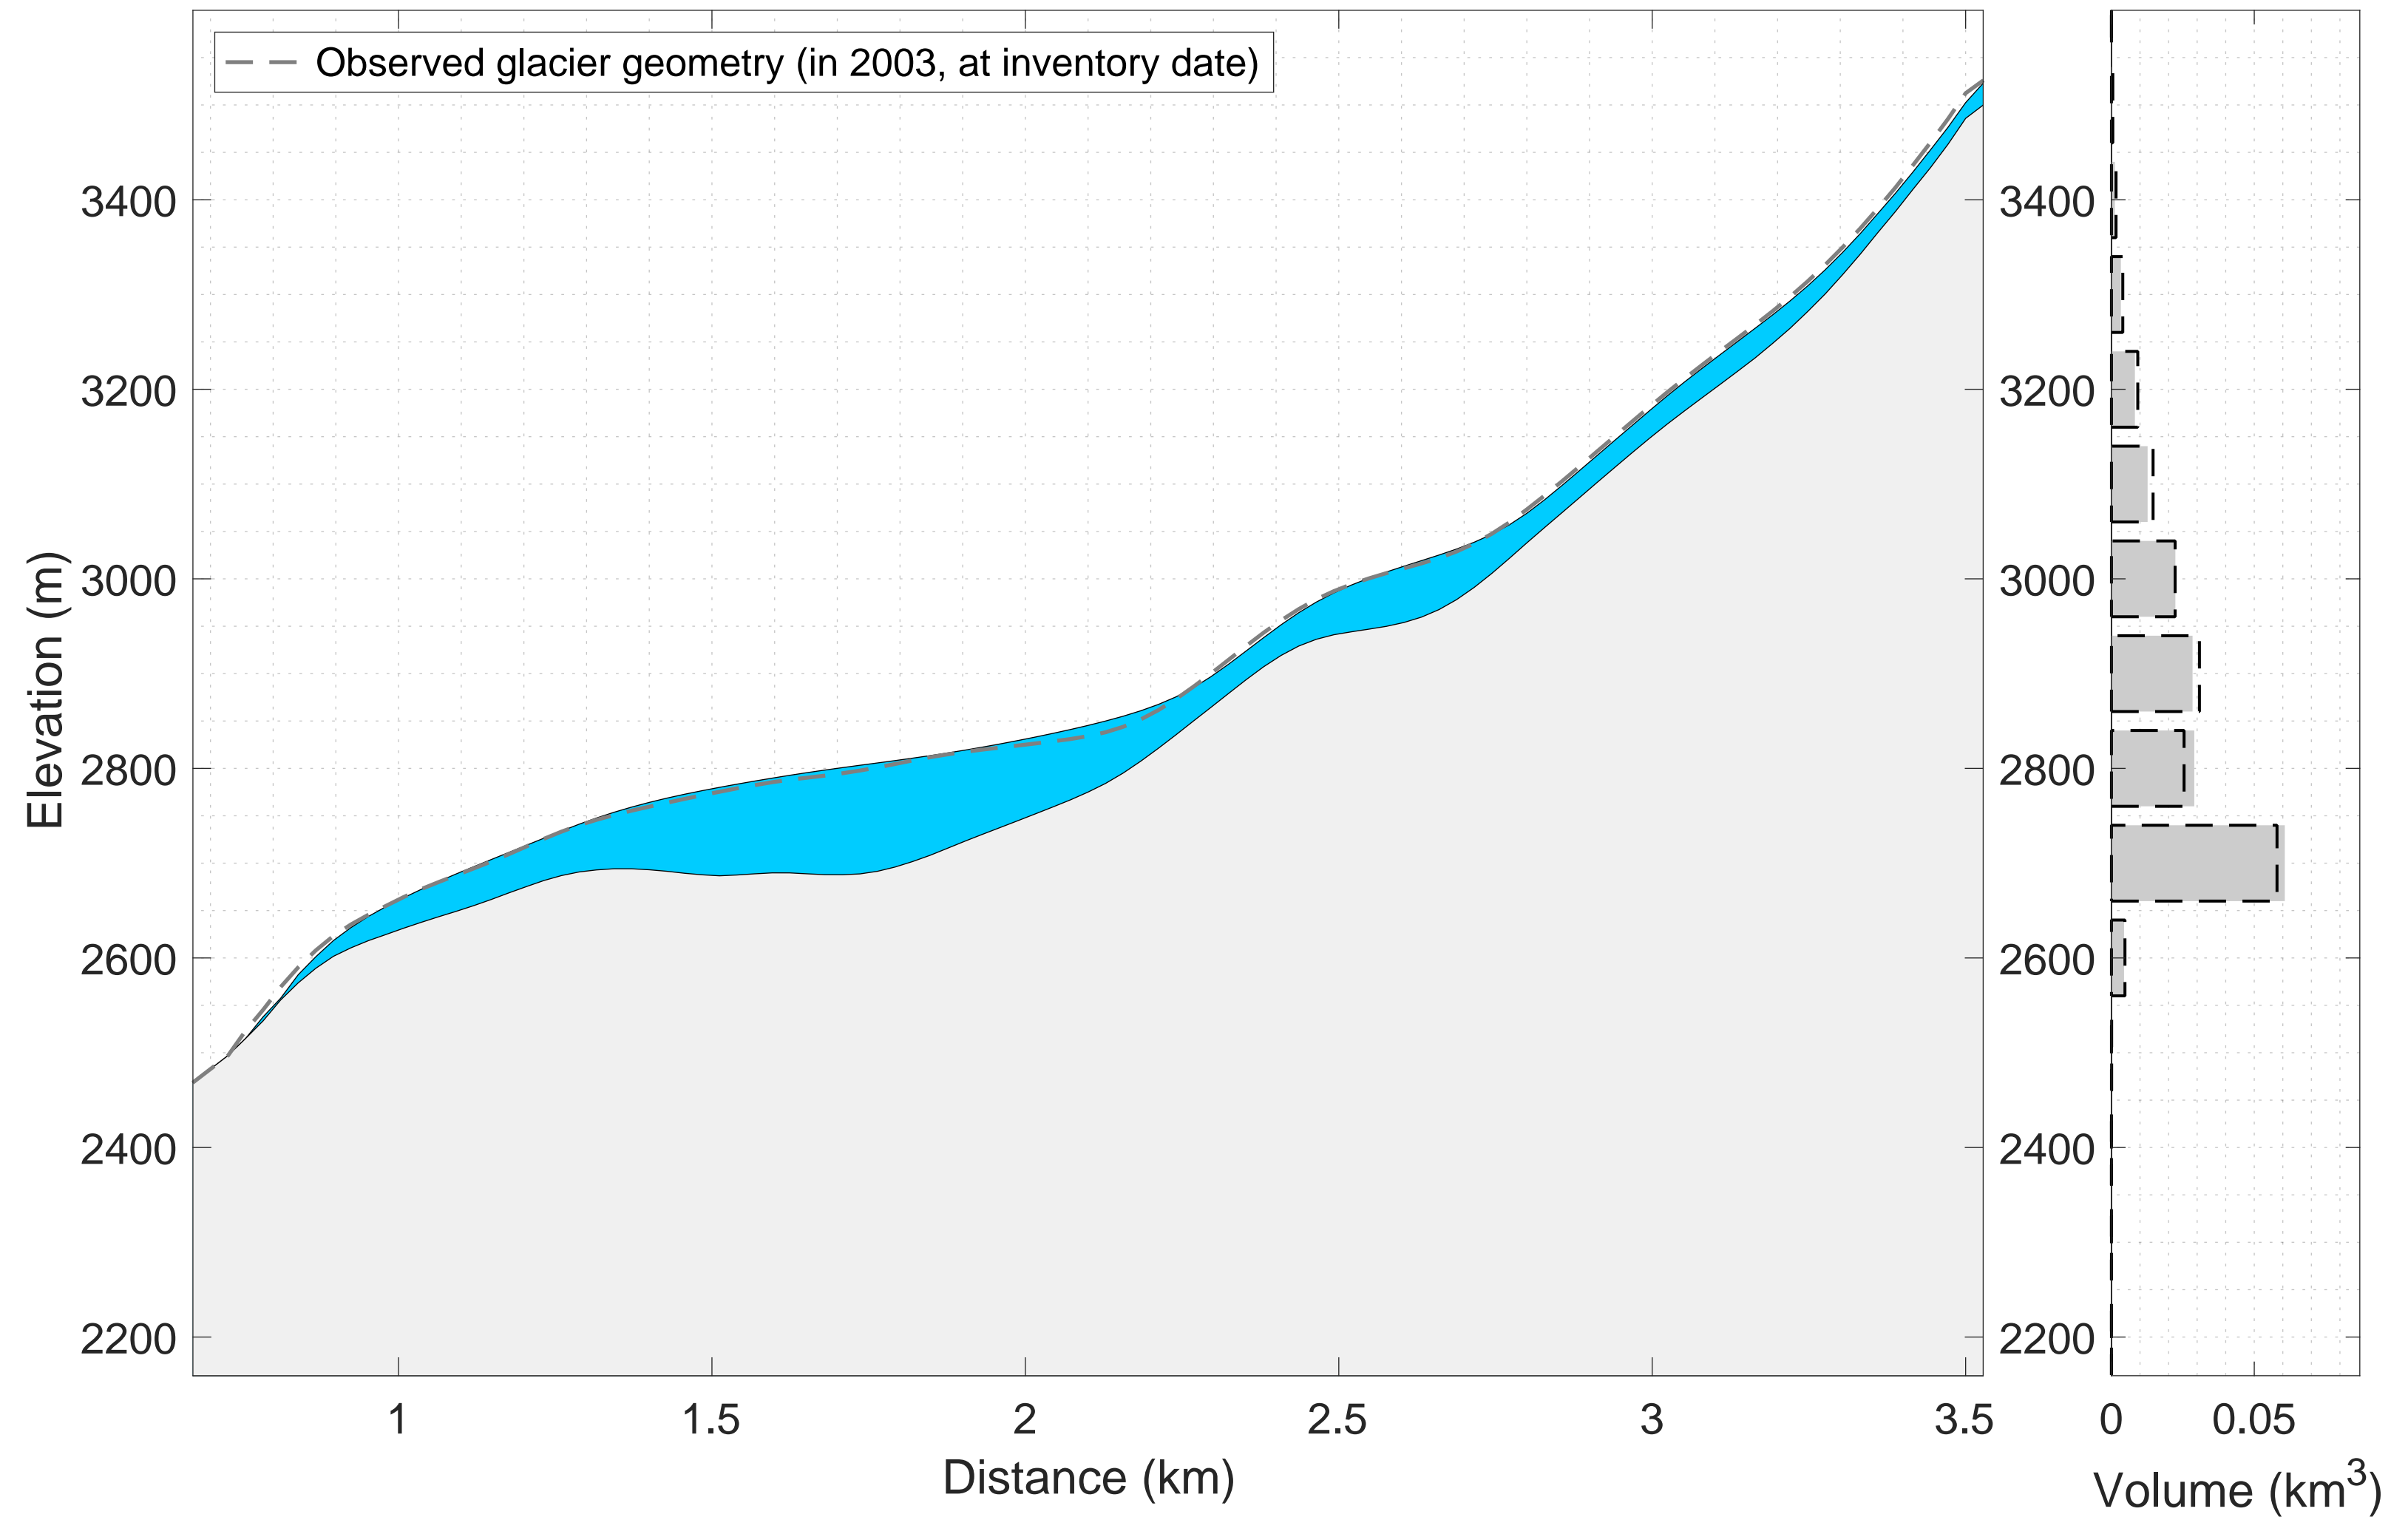

Supplement: Supplementary file 594 [file tc-13-1125-2019-supplement.zip]

**Modelled geometry (Glacier ID = 02764;  $A = 1.2059\text{e-}16 \text{ Pa}^{-3} \text{ a}^{-1}$ ;  $dx = 31 \text{ m}$ )**

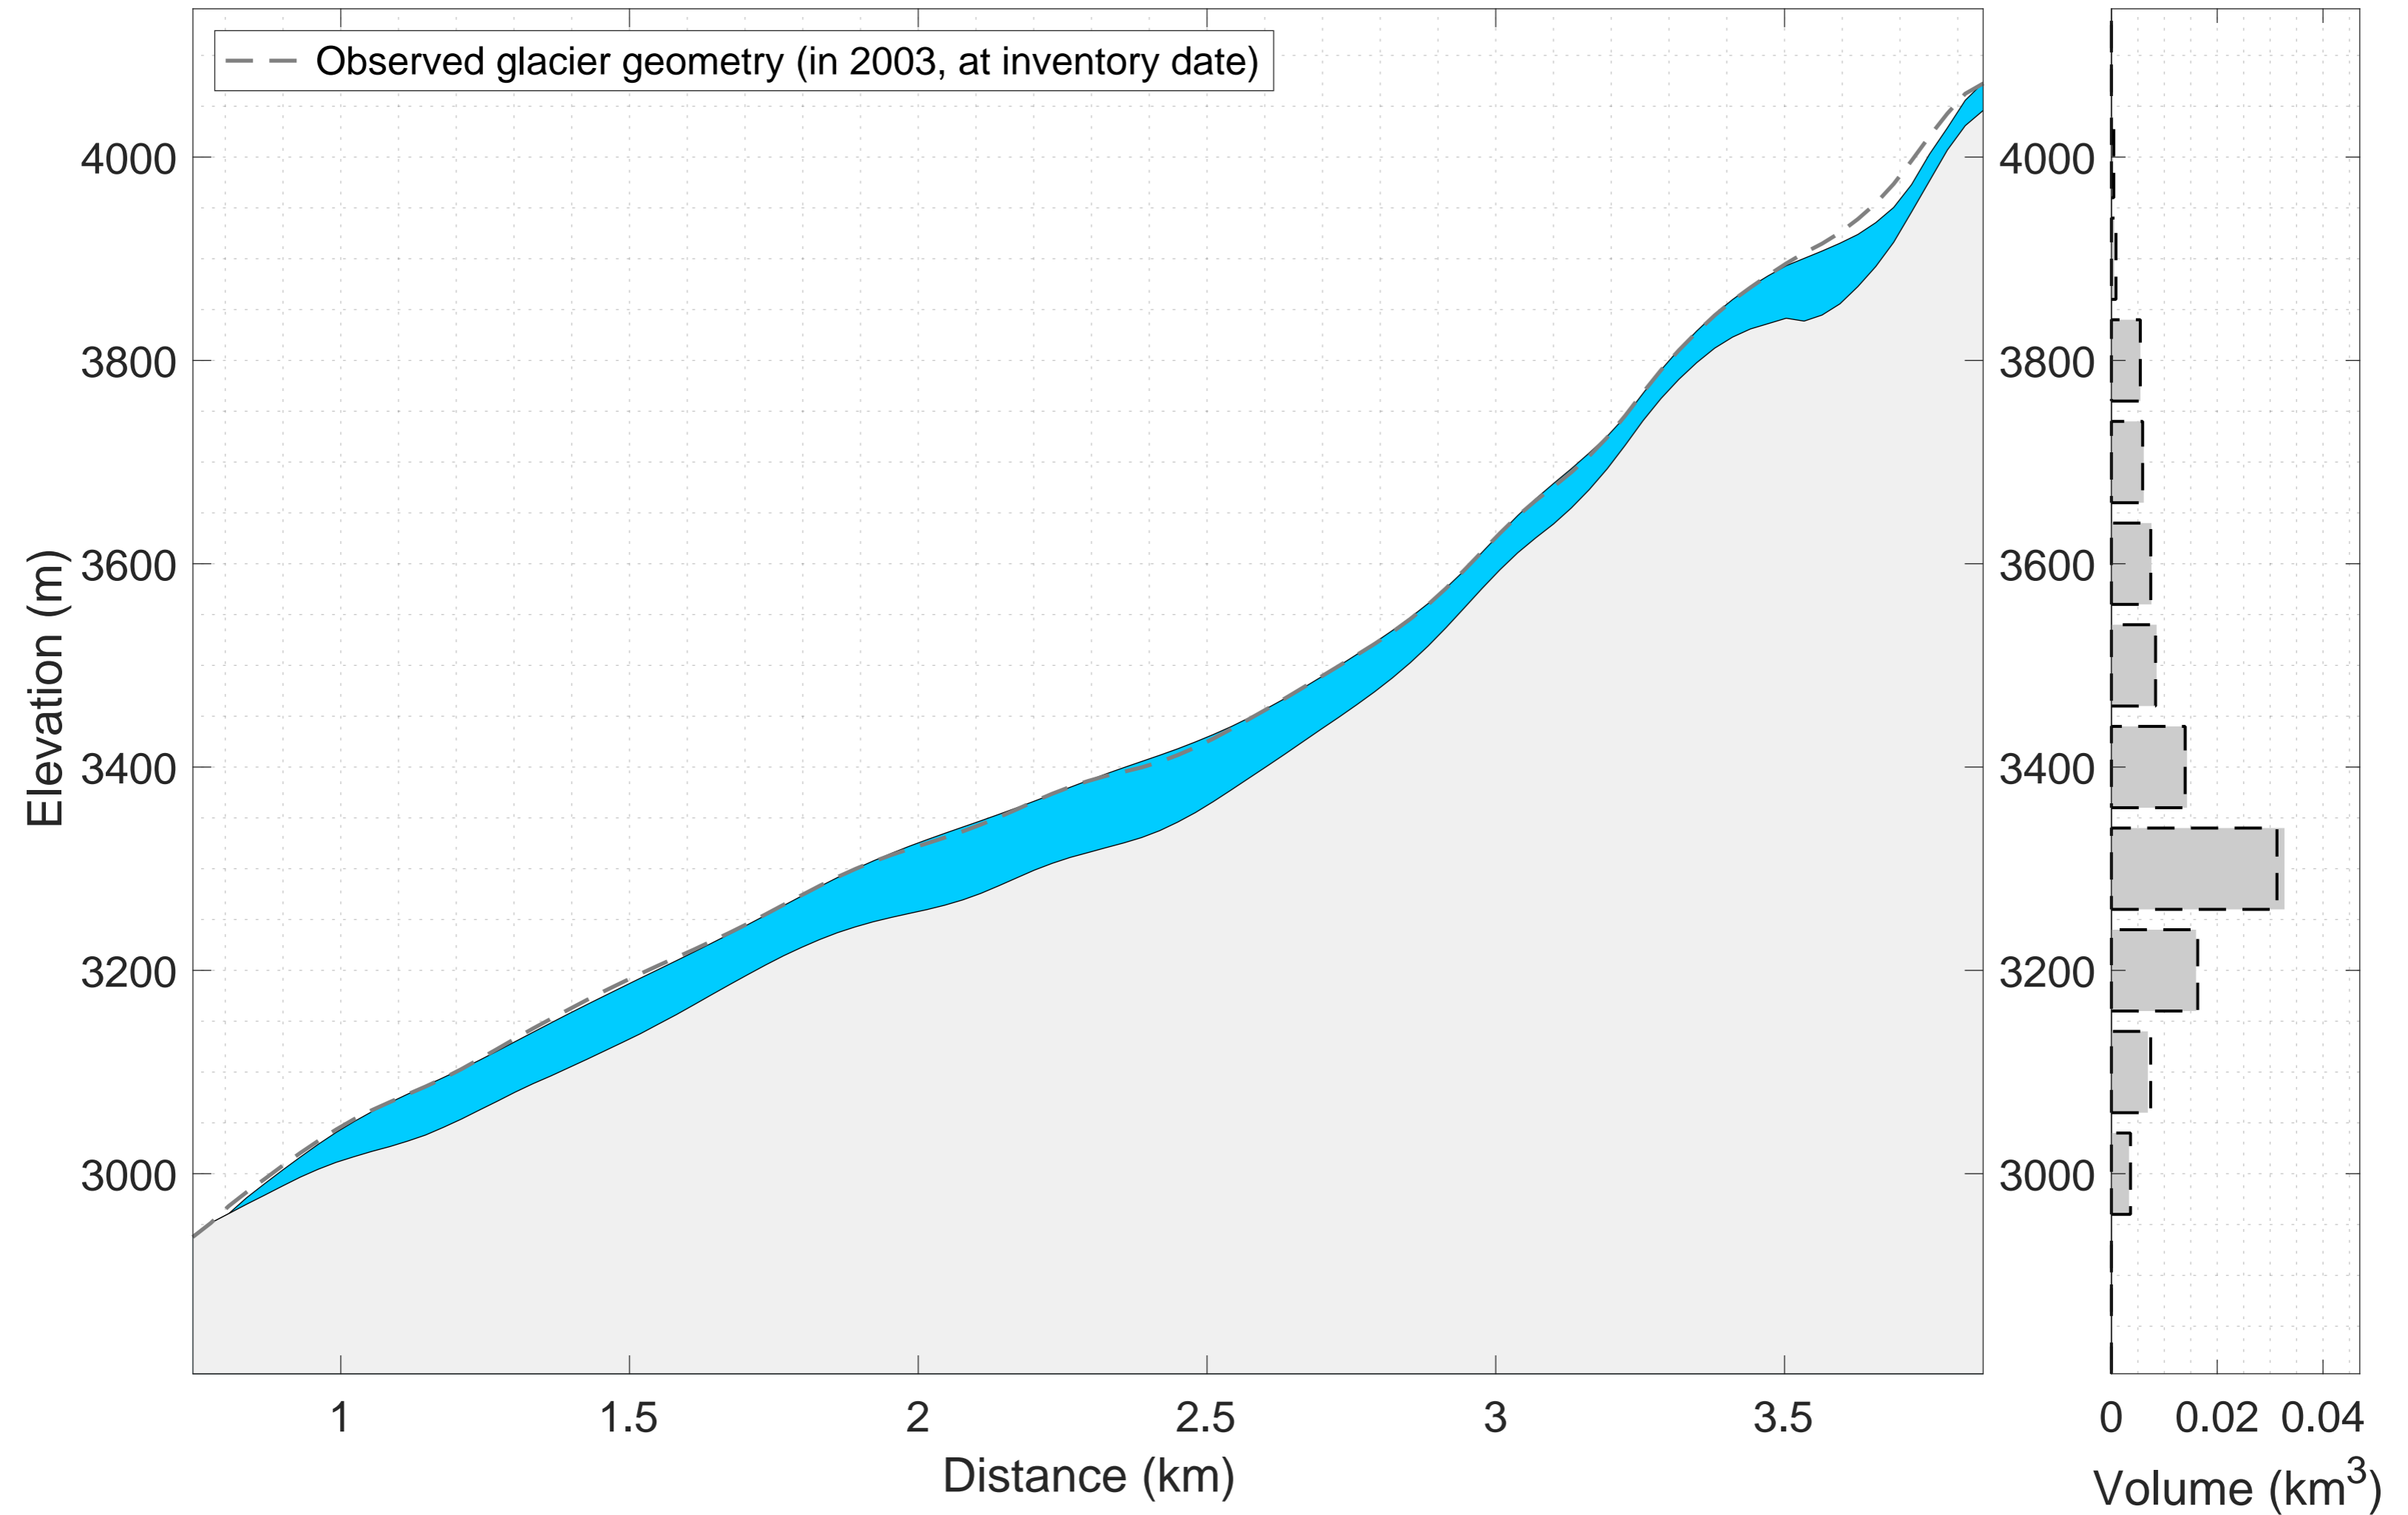

Supplement: Supplementary file 595 [file tc-13-1125-2019-supplement.zip]

**Modelled geometry (Glacier ID = 03682;  $A = 1.0989\text{e-}16 \text{ Pa}^{-3} \text{ a}^{-1}$ ;  $dx = 11 \text{ m}$ )**

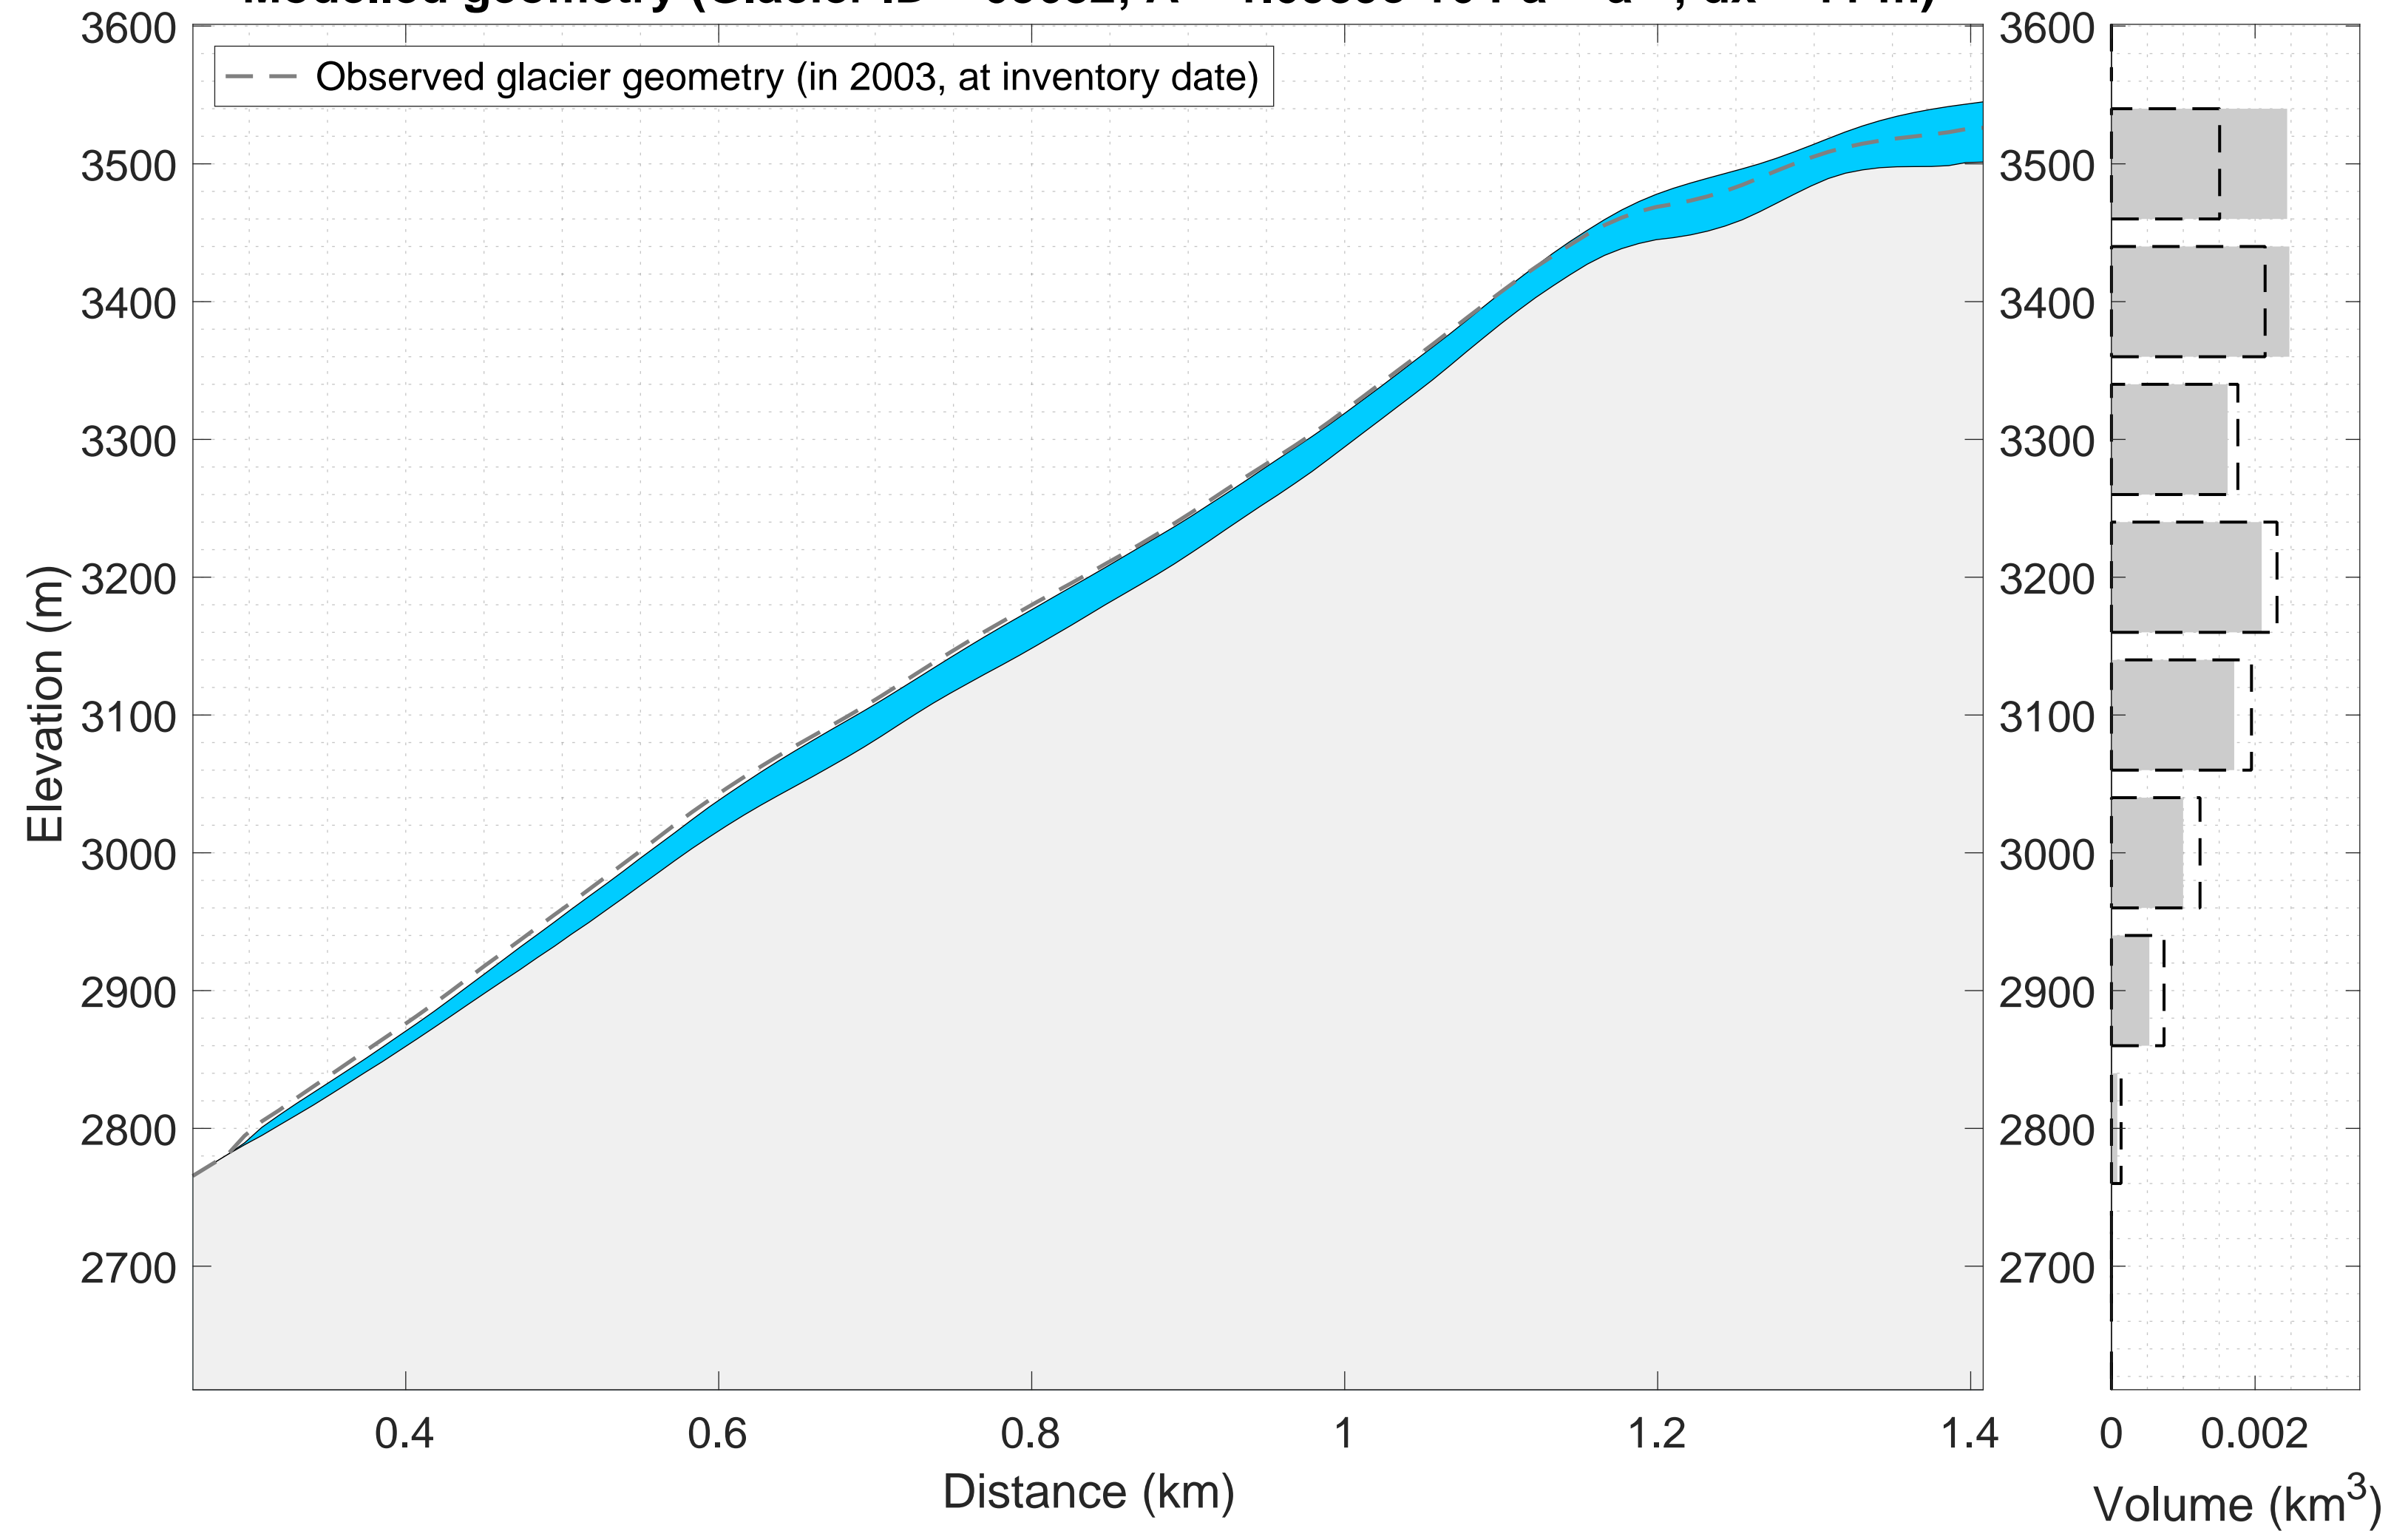

Supplement: Supplementary file 596 [file tc-13-1125-2019-supplement.zip]

**Modelled geometry (Glacier ID = 00002;  $A = 3.4281\text{e-}16 \text{ Pa}^{-3} \text{ a}^{-1}$ ;  $dx = 20 \text{ m}$ )**

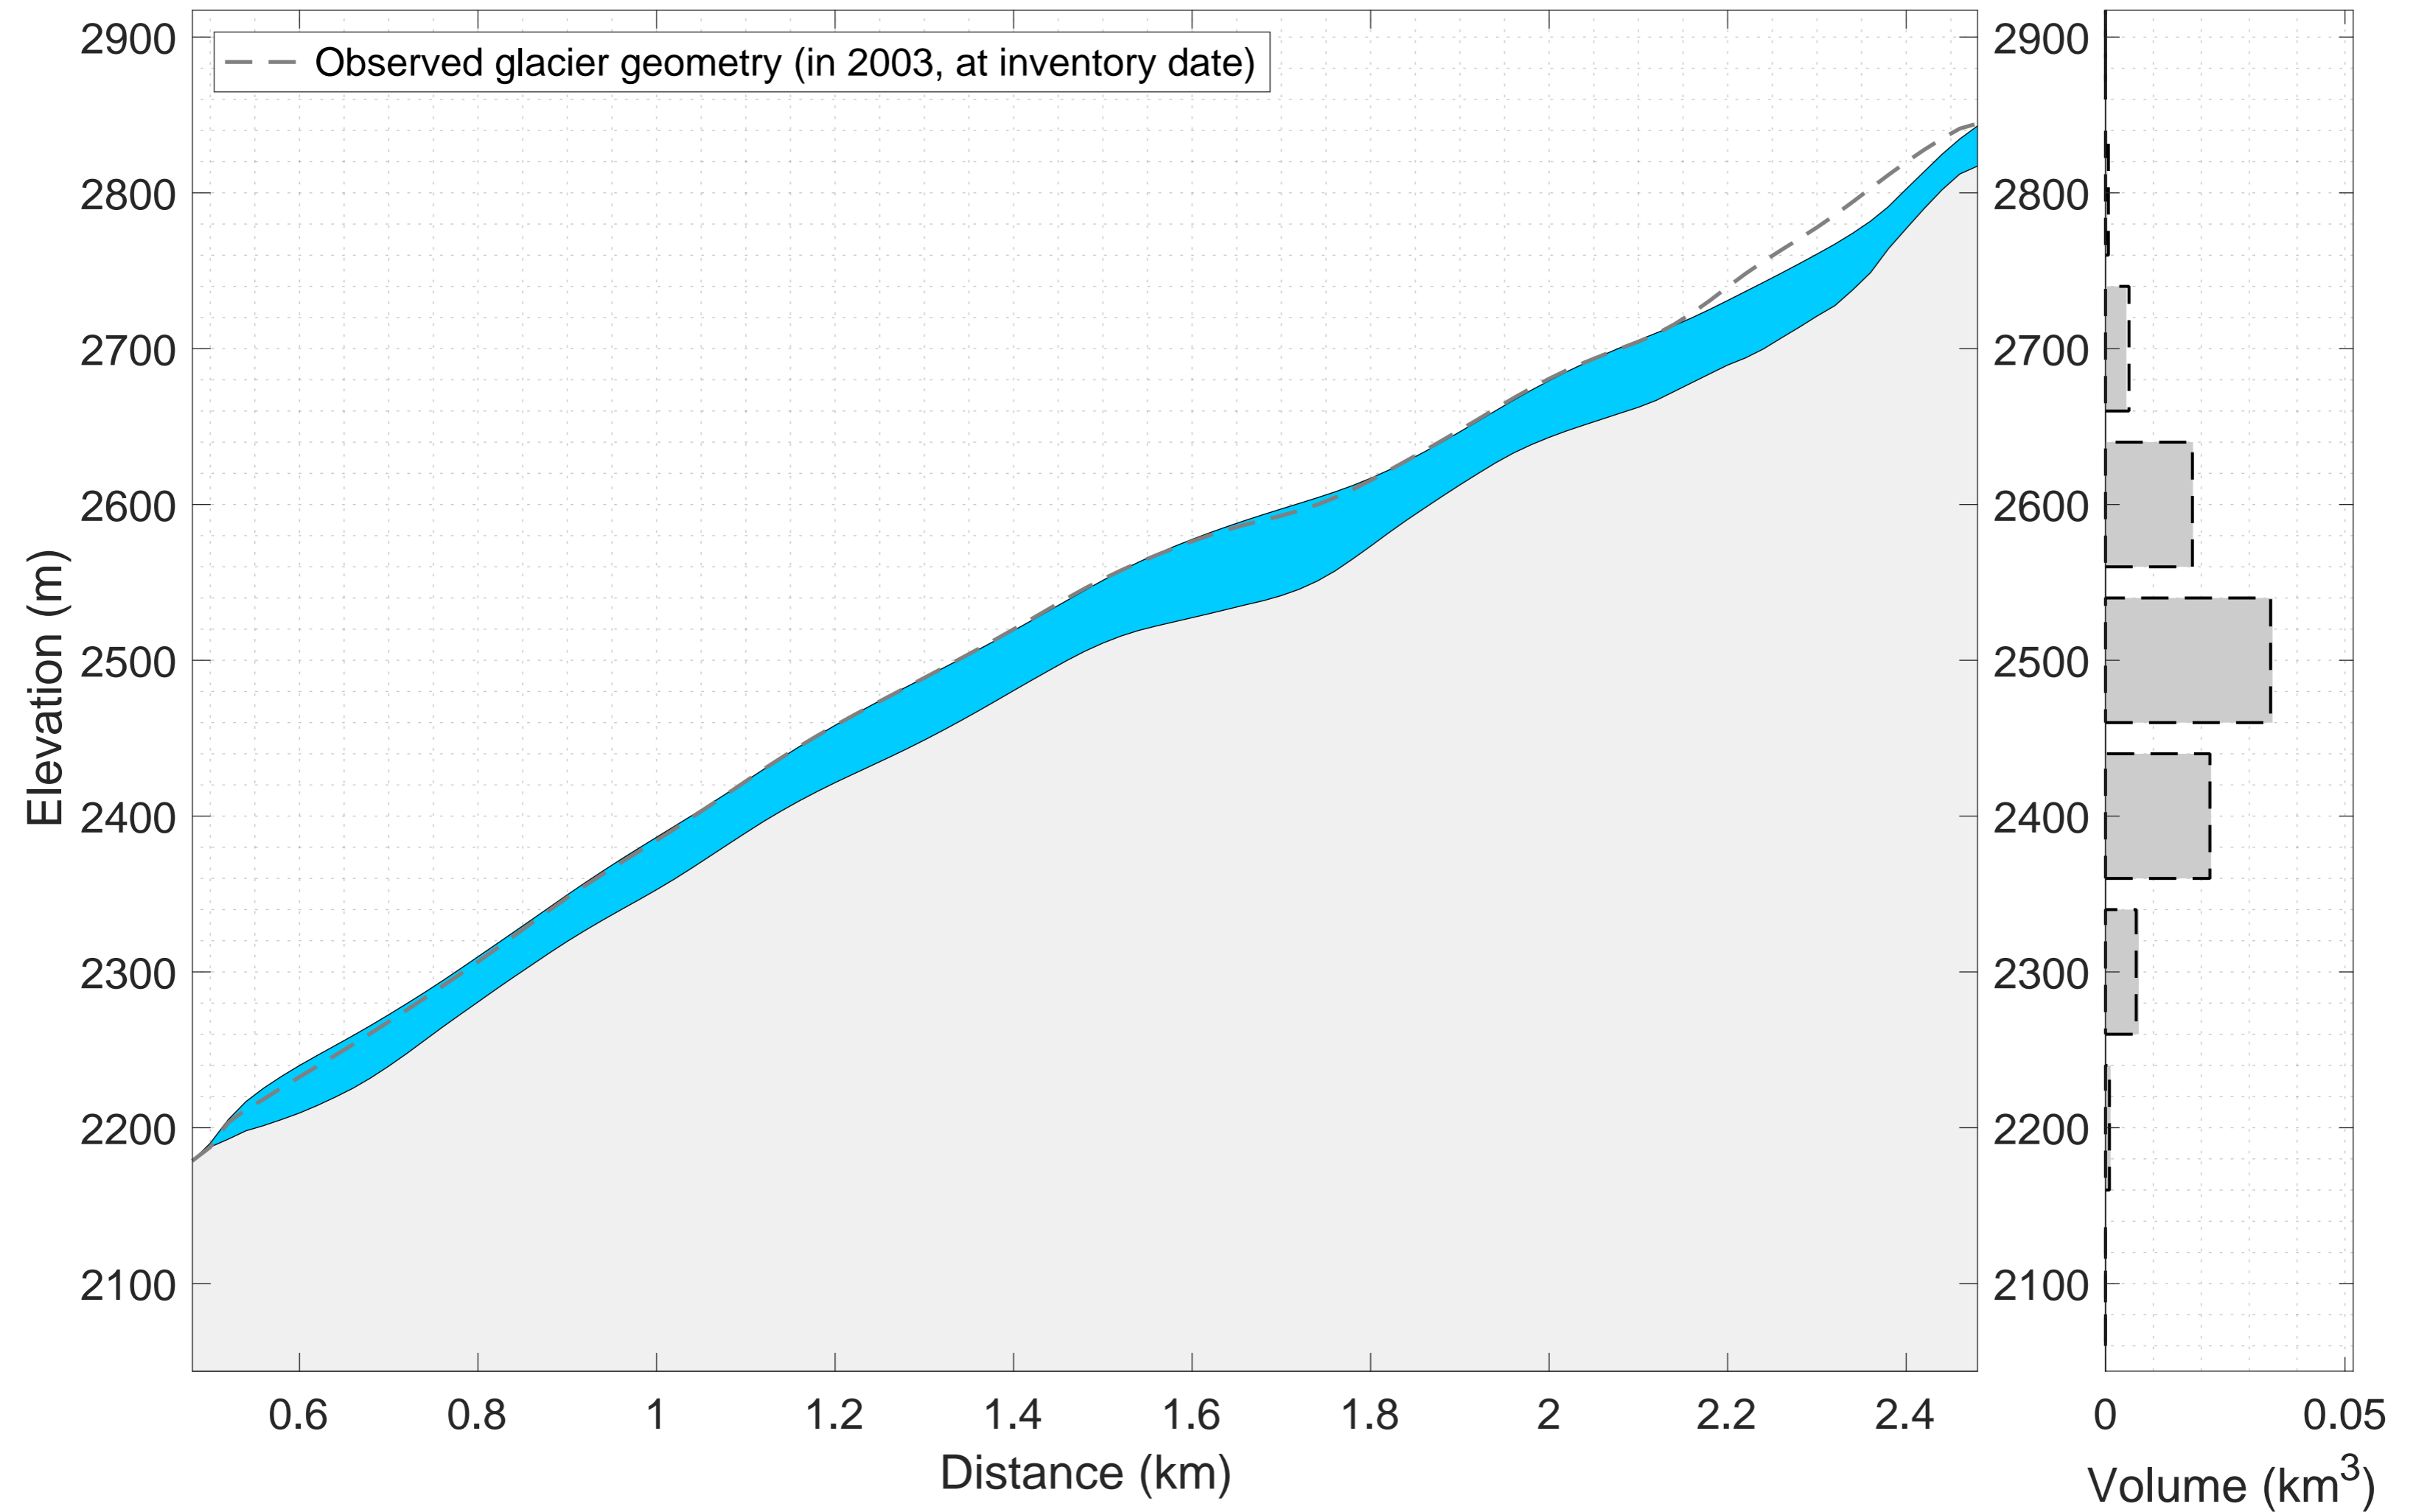

Supplement: Supplementary file 597 [file tc-13-1125-2019-supplement.zip]

**Modelled geometry (Glacier ID = 02640;  $A = 1.6094\text{e-}16 \text{ Pa}^{-3} \text{ a}^{-1}$ ;  $dx = 17 \text{ m}$ )**

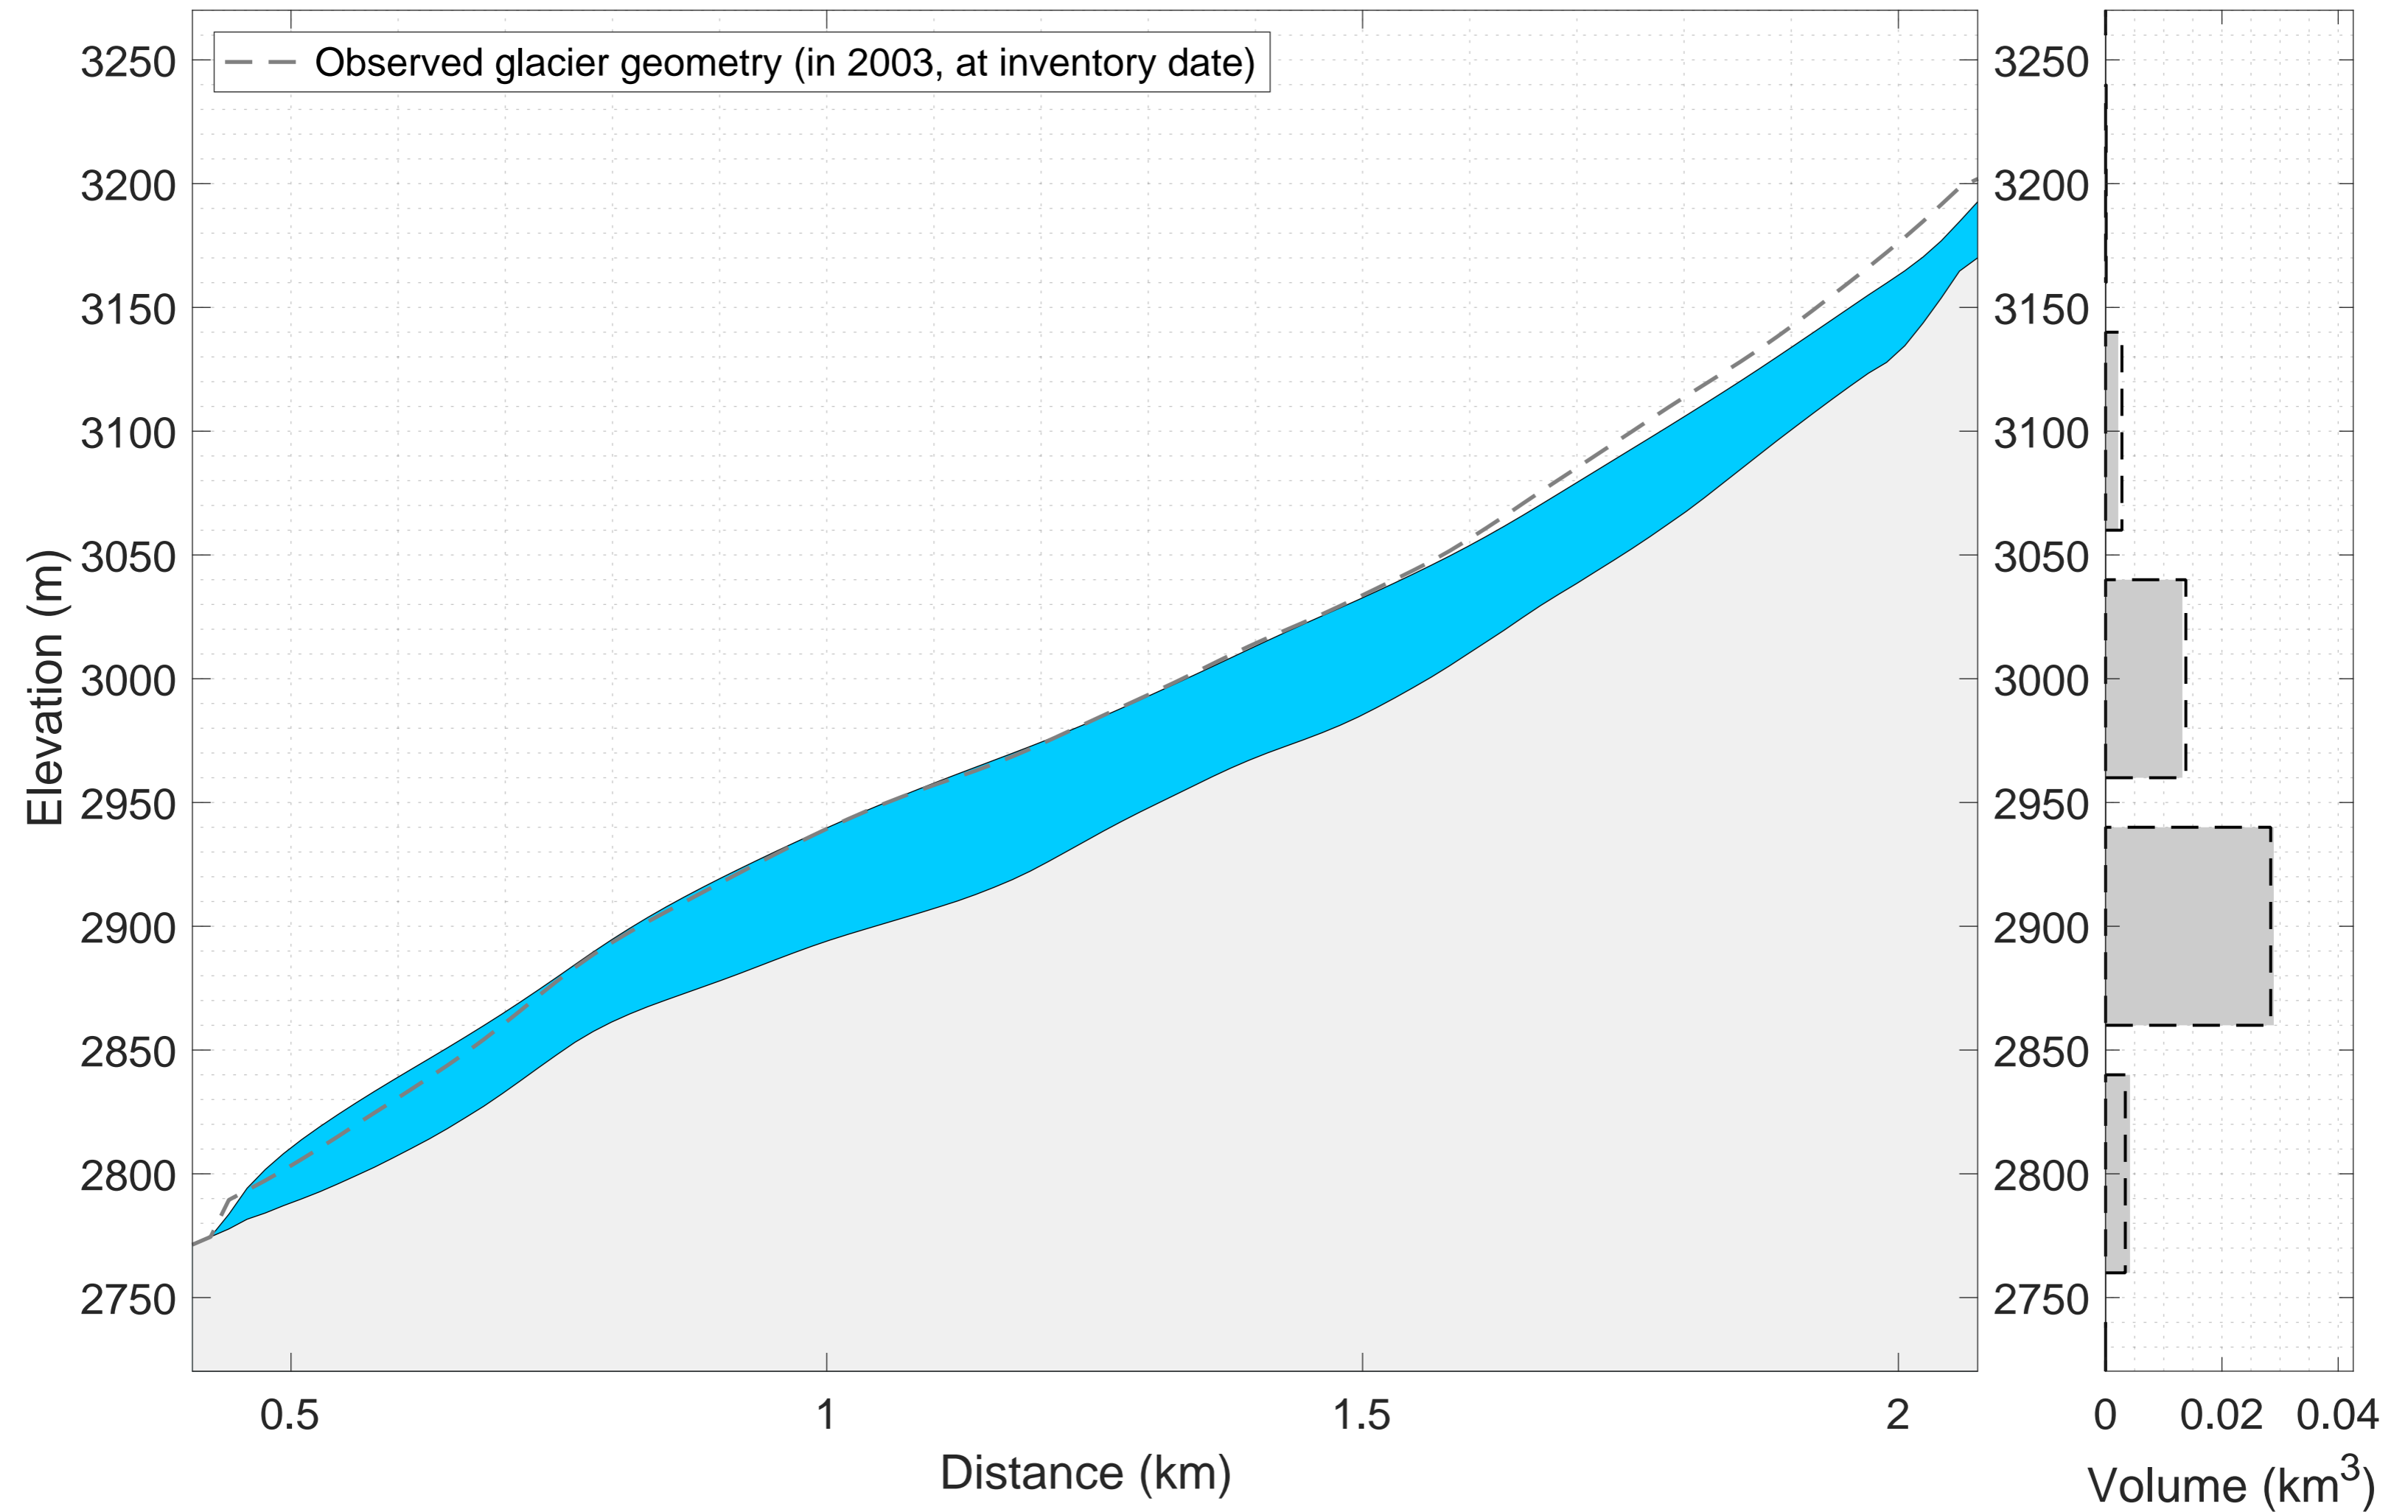

Supplement: Supplementary file 598 [file tc-13-1125-2019-supplement.zip]

**Modelled geometry (Glacier ID = 01173;  $A = 7.4621\text{e-}17 \text{ Pa}^{-3} \text{ a}^{-1}$ ;  $dx = 14 \text{ m}$ )**

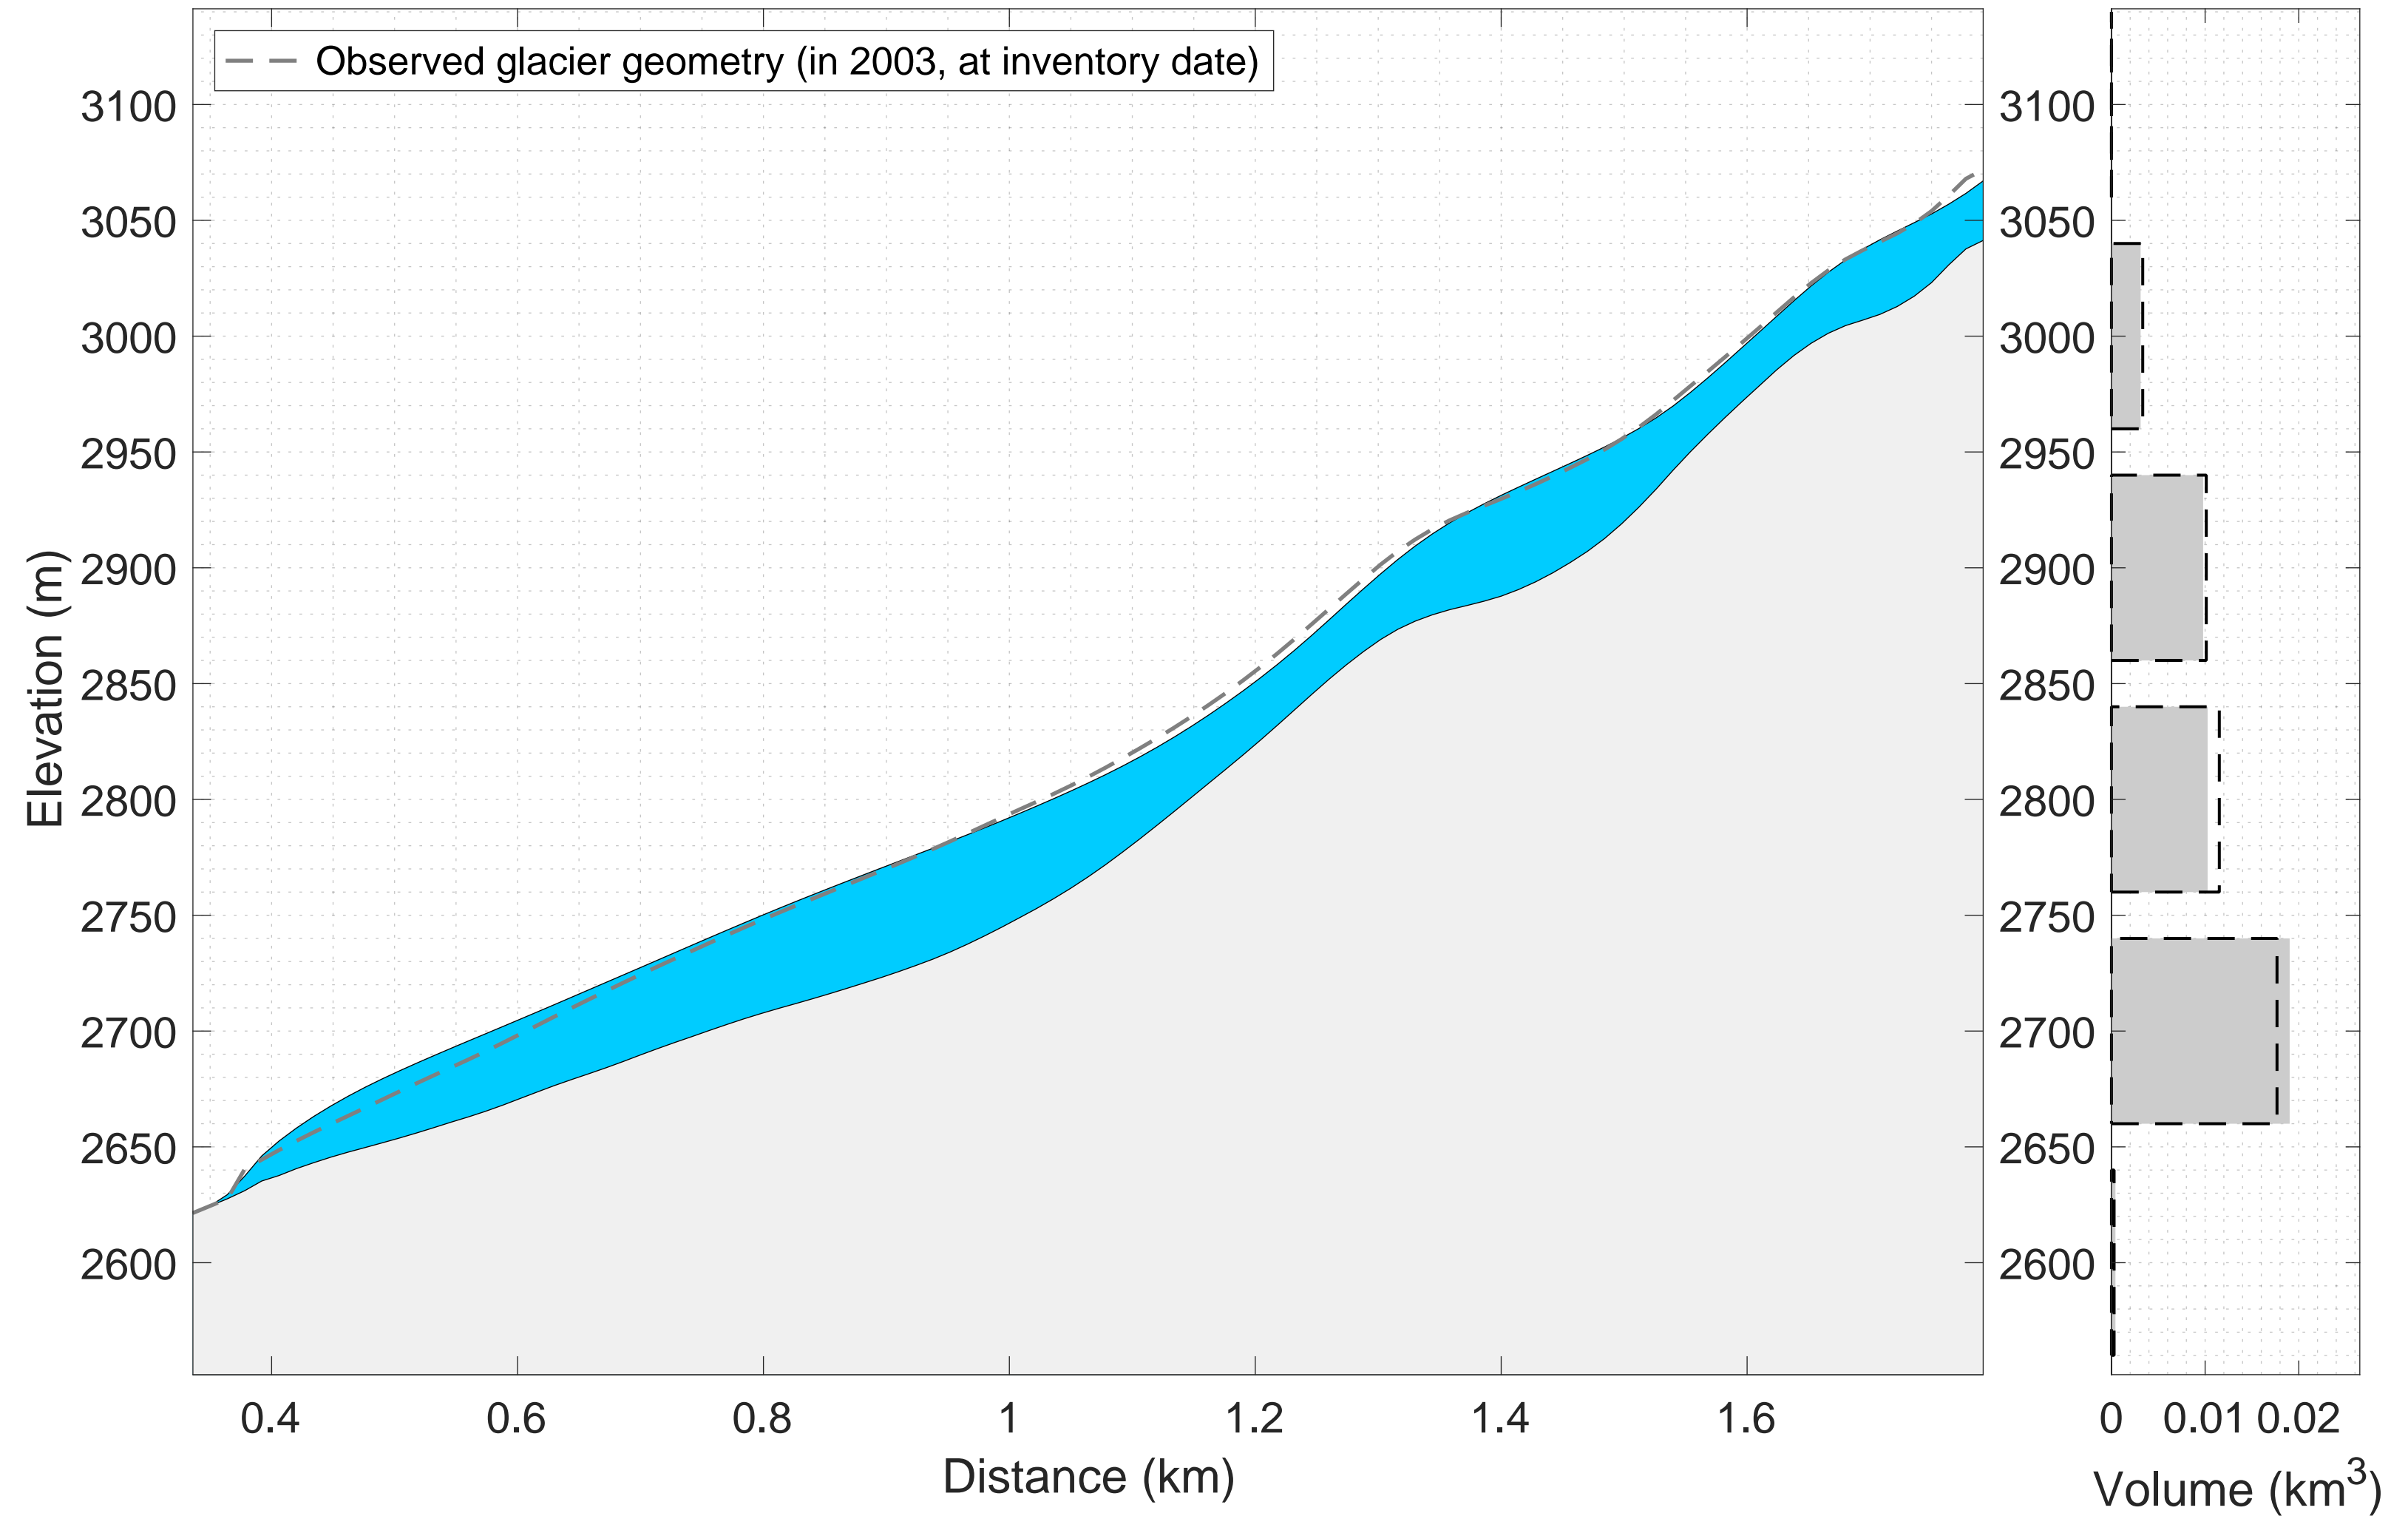

Supplement: Supplementary file 599 [file tc-13-1125-2019-supplement.zip]

**Modelled geometry (Glacier ID = 00295;  $A = 1.3447\text{e-}16 \text{ Pa}^{-3} \text{ a}^{-1}$ ;  $dx = 31 \text{ m}$ )**

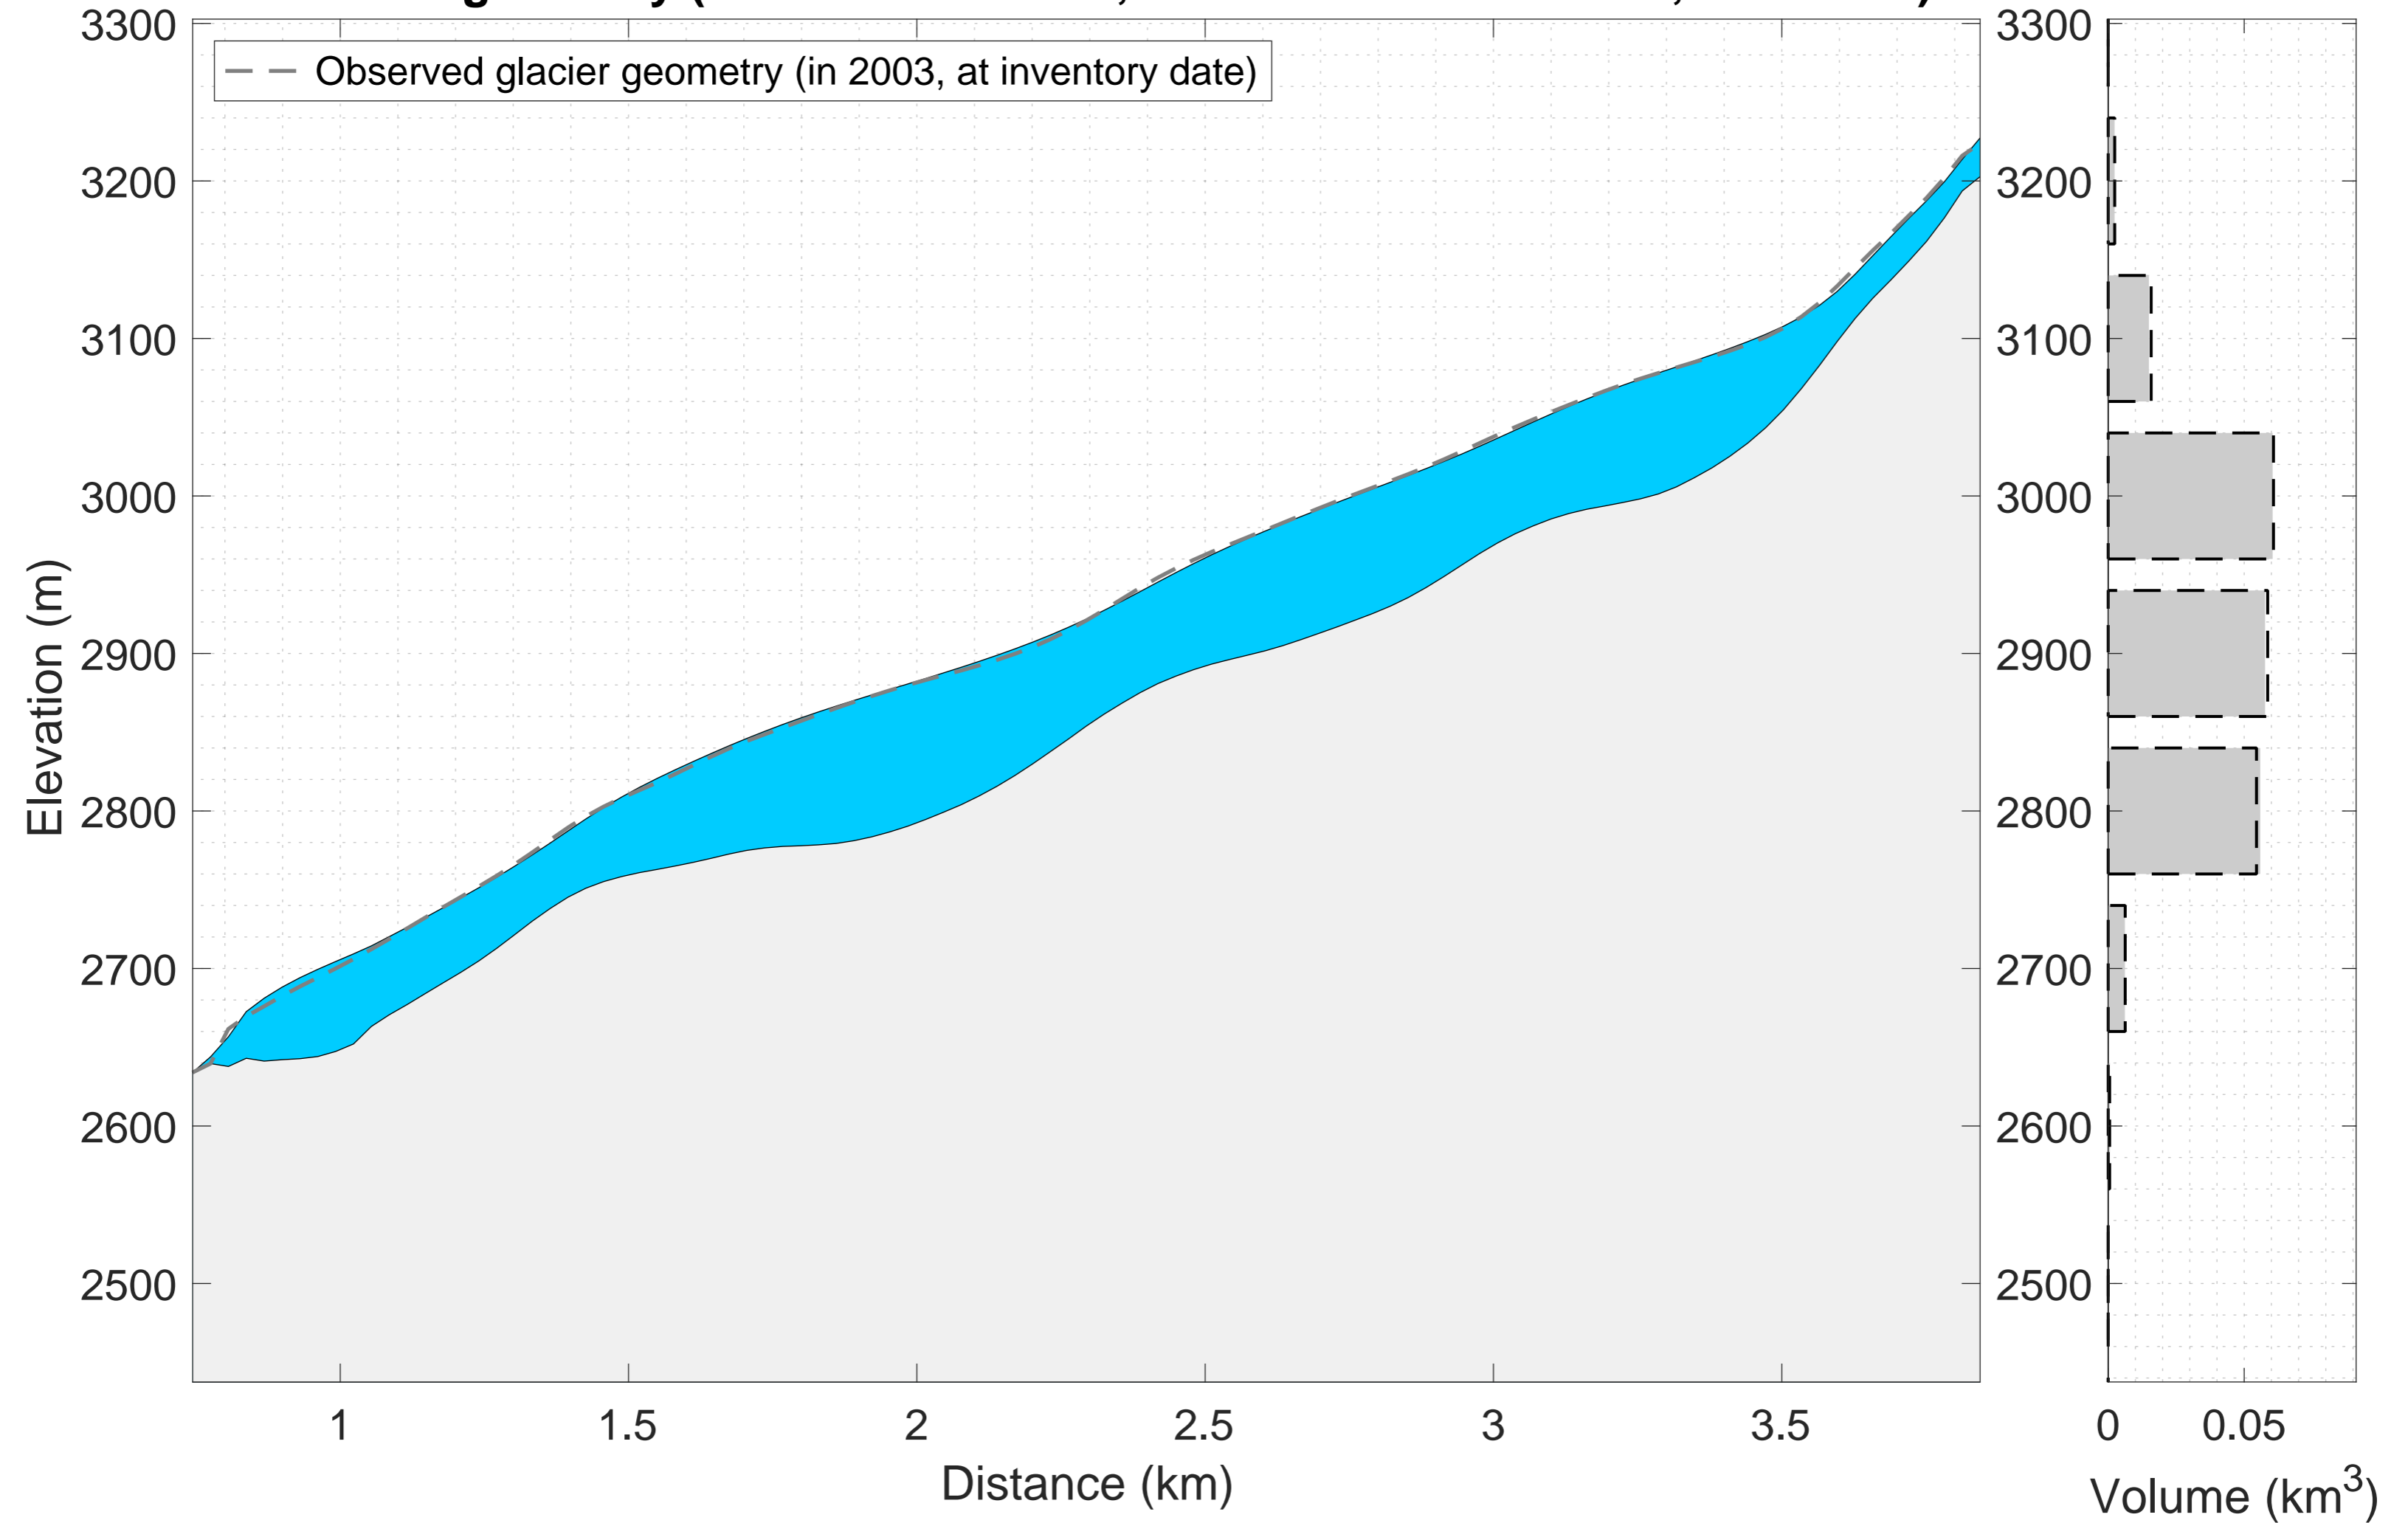

Supplement: Supplementary file 600 [file tc-13-1125-2019-supplement.zip]

**Modelled geometry (Glacier ID = 01892;  $A = 7.9239\text{e-}17 \text{ Pa}^{-3} \text{ a}^{-1}$ ;  $dx = 12 \text{ m}$ )**

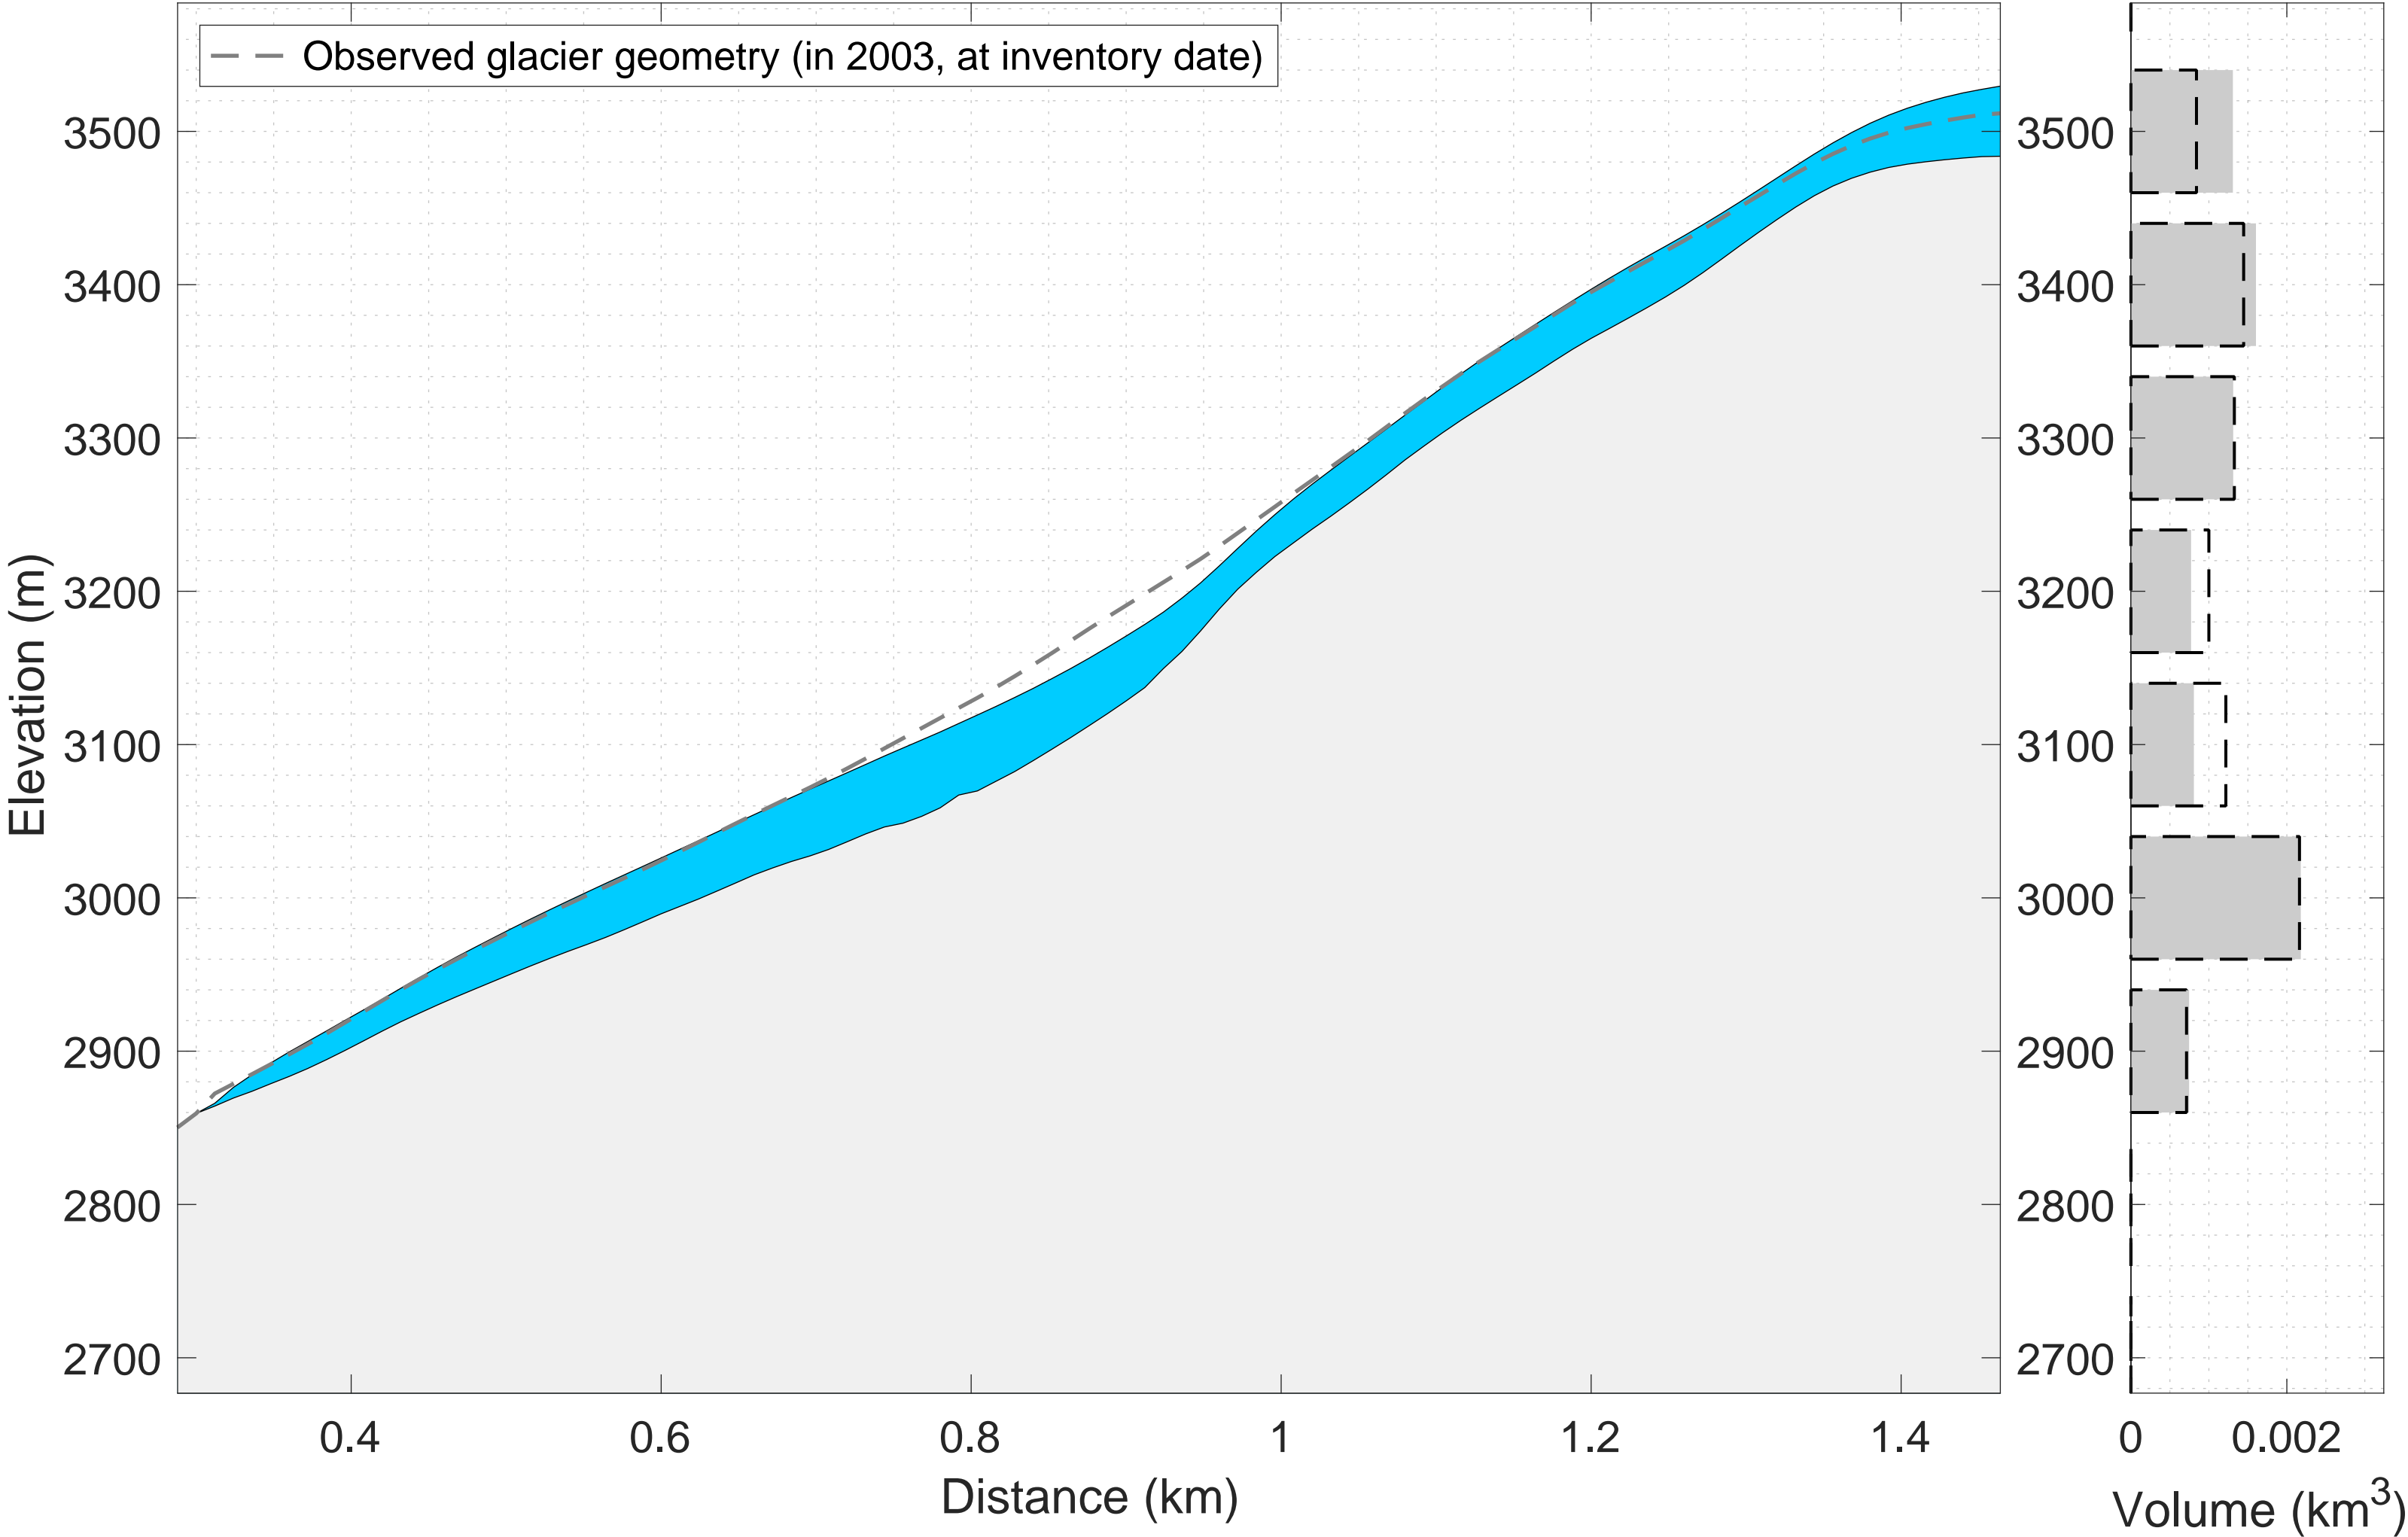

Supplement: Supplementary file 601 [file tc-13-1125-2019-supplement.zip]

**Modelled geometry (Glacier ID = 03518;  $A = 1.8917\text{e-}16 \text{ Pa}^{-3} \text{ a}^{-1}$ ;  $dx = 13 \text{ m}$ )**

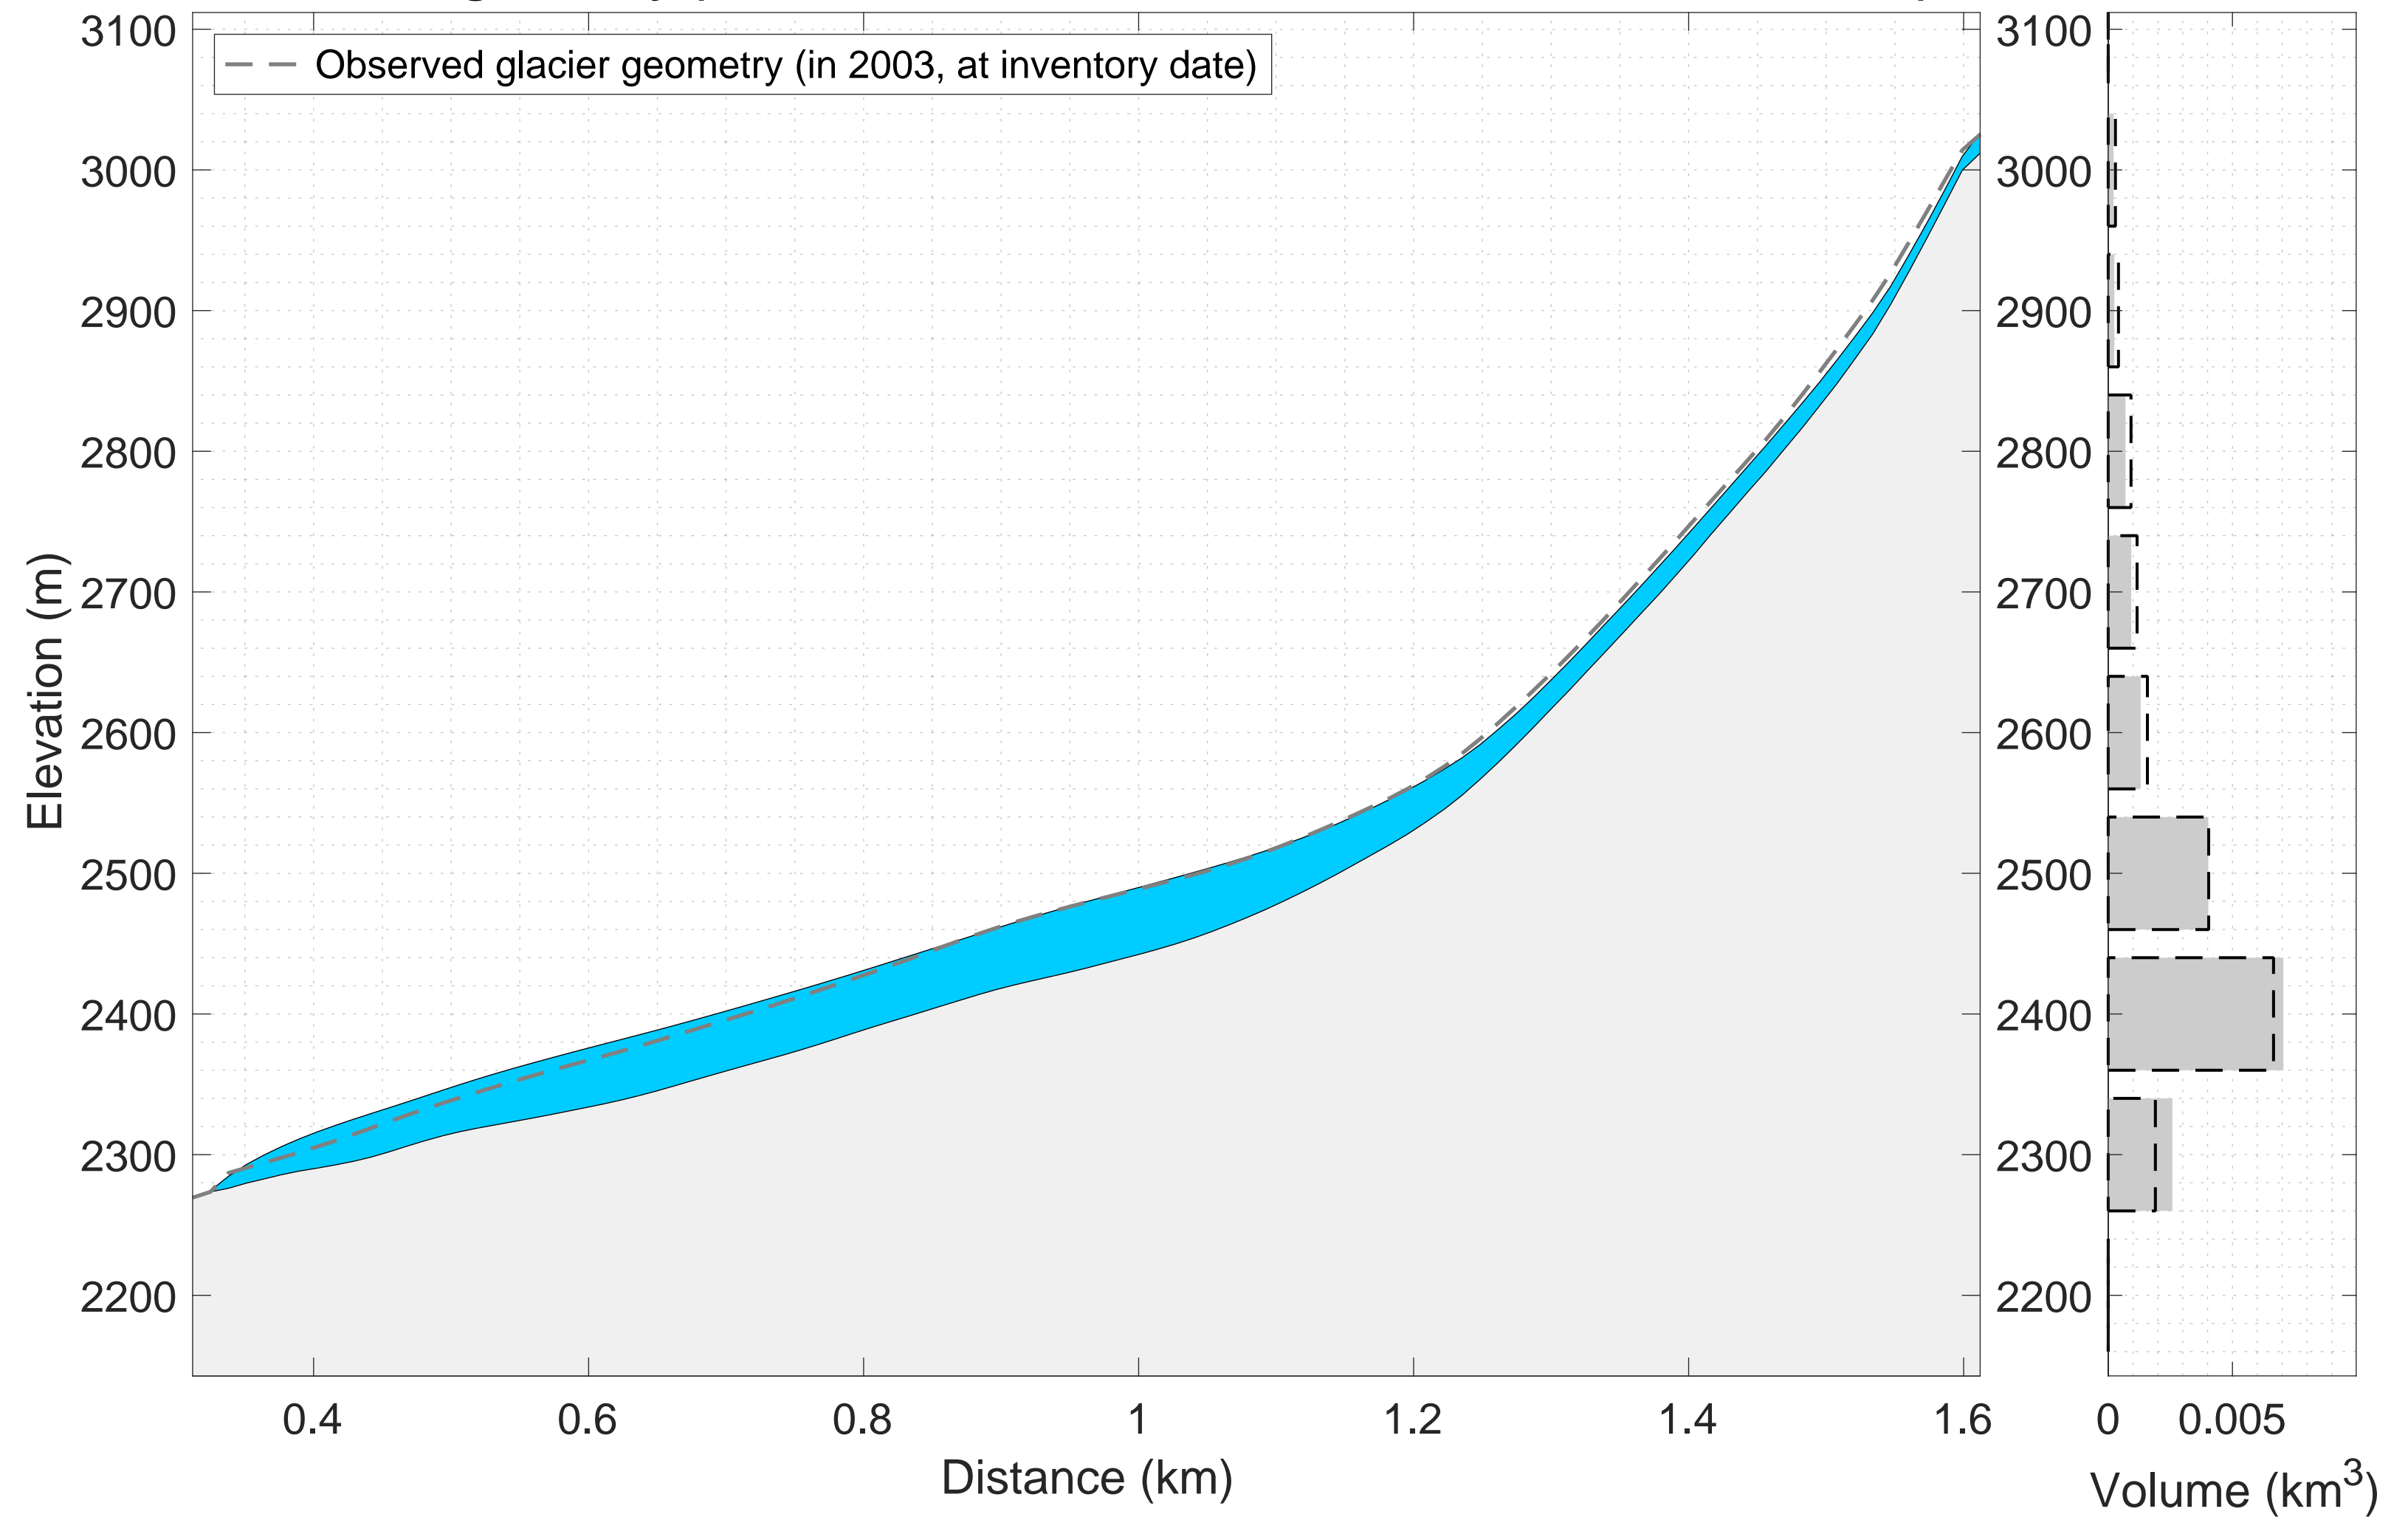

Supplement: Supplementary file 602 [file tc-13-1125-2019-supplement.zip]
