# Supplementary figures and images for: Modelling the future evolution of glaciers in the European Alps under the EURO-CORDEX RCM ensemble (part 7 of 8)
Source: Copernicus journal article supplement (doi:10.5194/tc-13-1125-2019), 2019-04-09

**Modelled geometry (Glacier ID = 01338;  $A = 8.2773\text{e-}17 \text{ Pa}^{-3} \text{ a}^{-1}$ ;  $dx = 16 \text{ m}$ )**

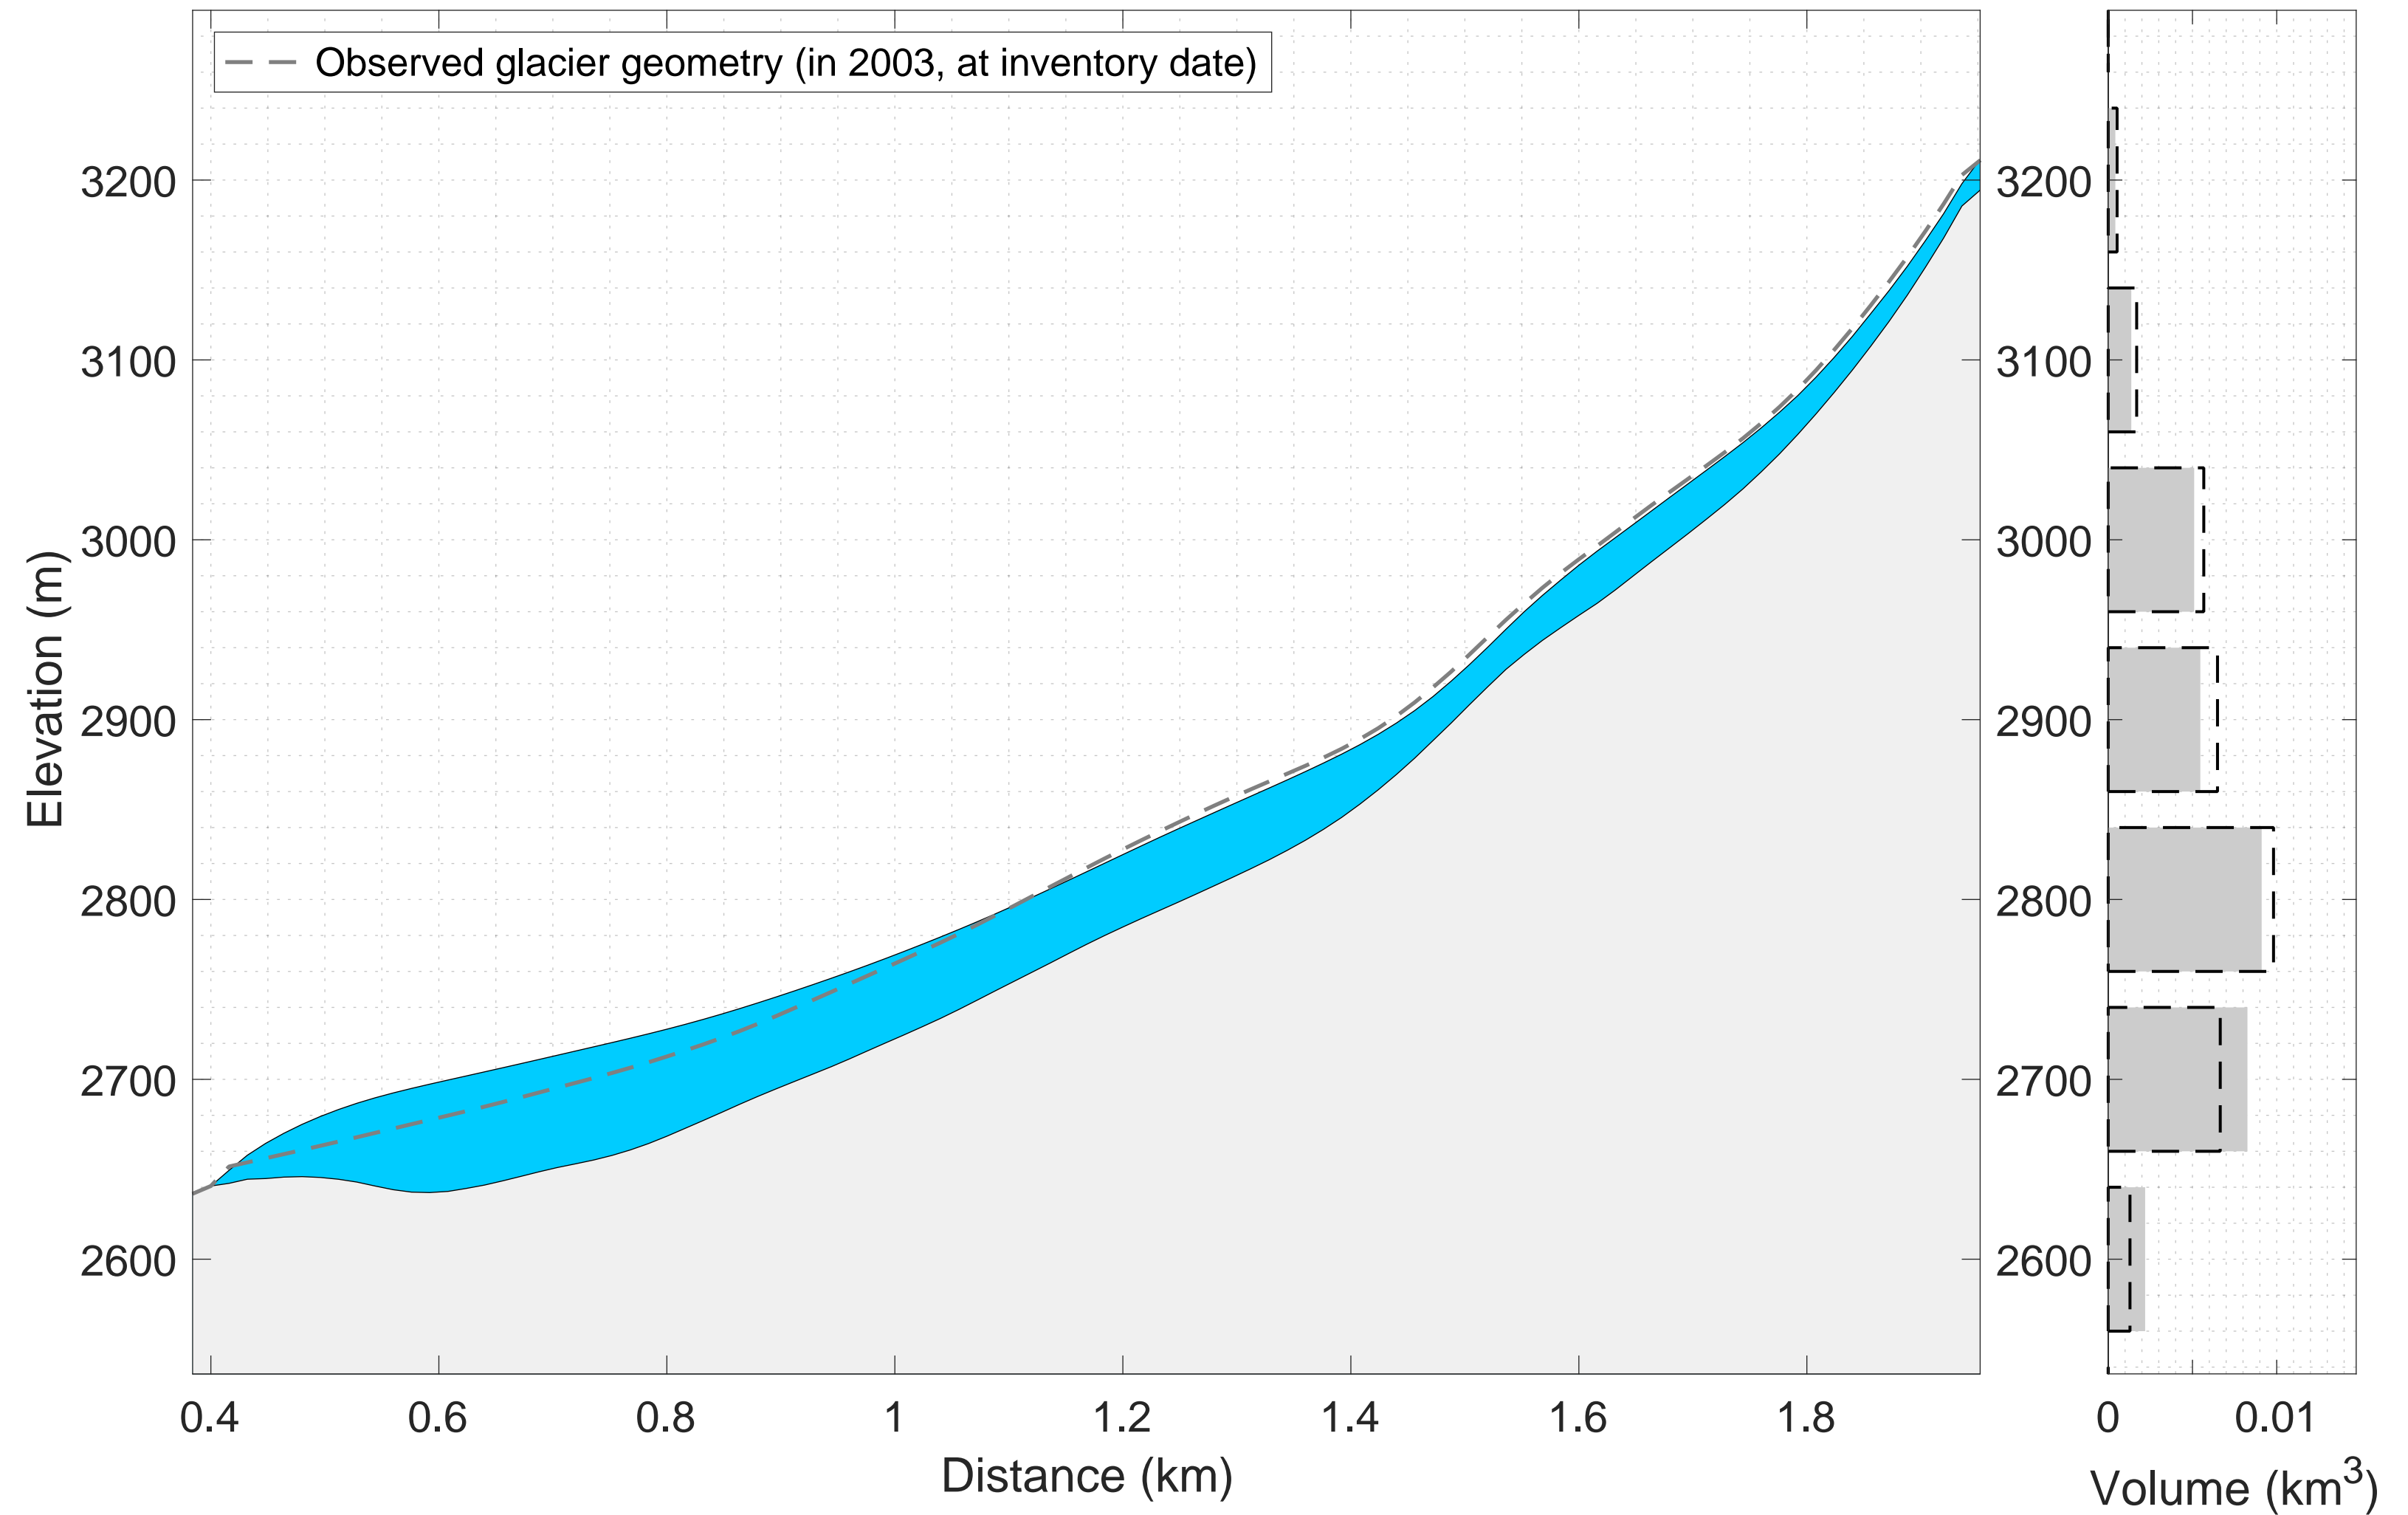

Supplement: Supplementary file 603 [file tc-13-1125-2019-supplement.zip]

**Modelled geometry (Glacier ID = 02463;  $A = 6.4081\text{e-}17 \text{ Pa}^{-3} \text{ a}^{-1}$ ;  $dx = 10 \text{ m}$ )**

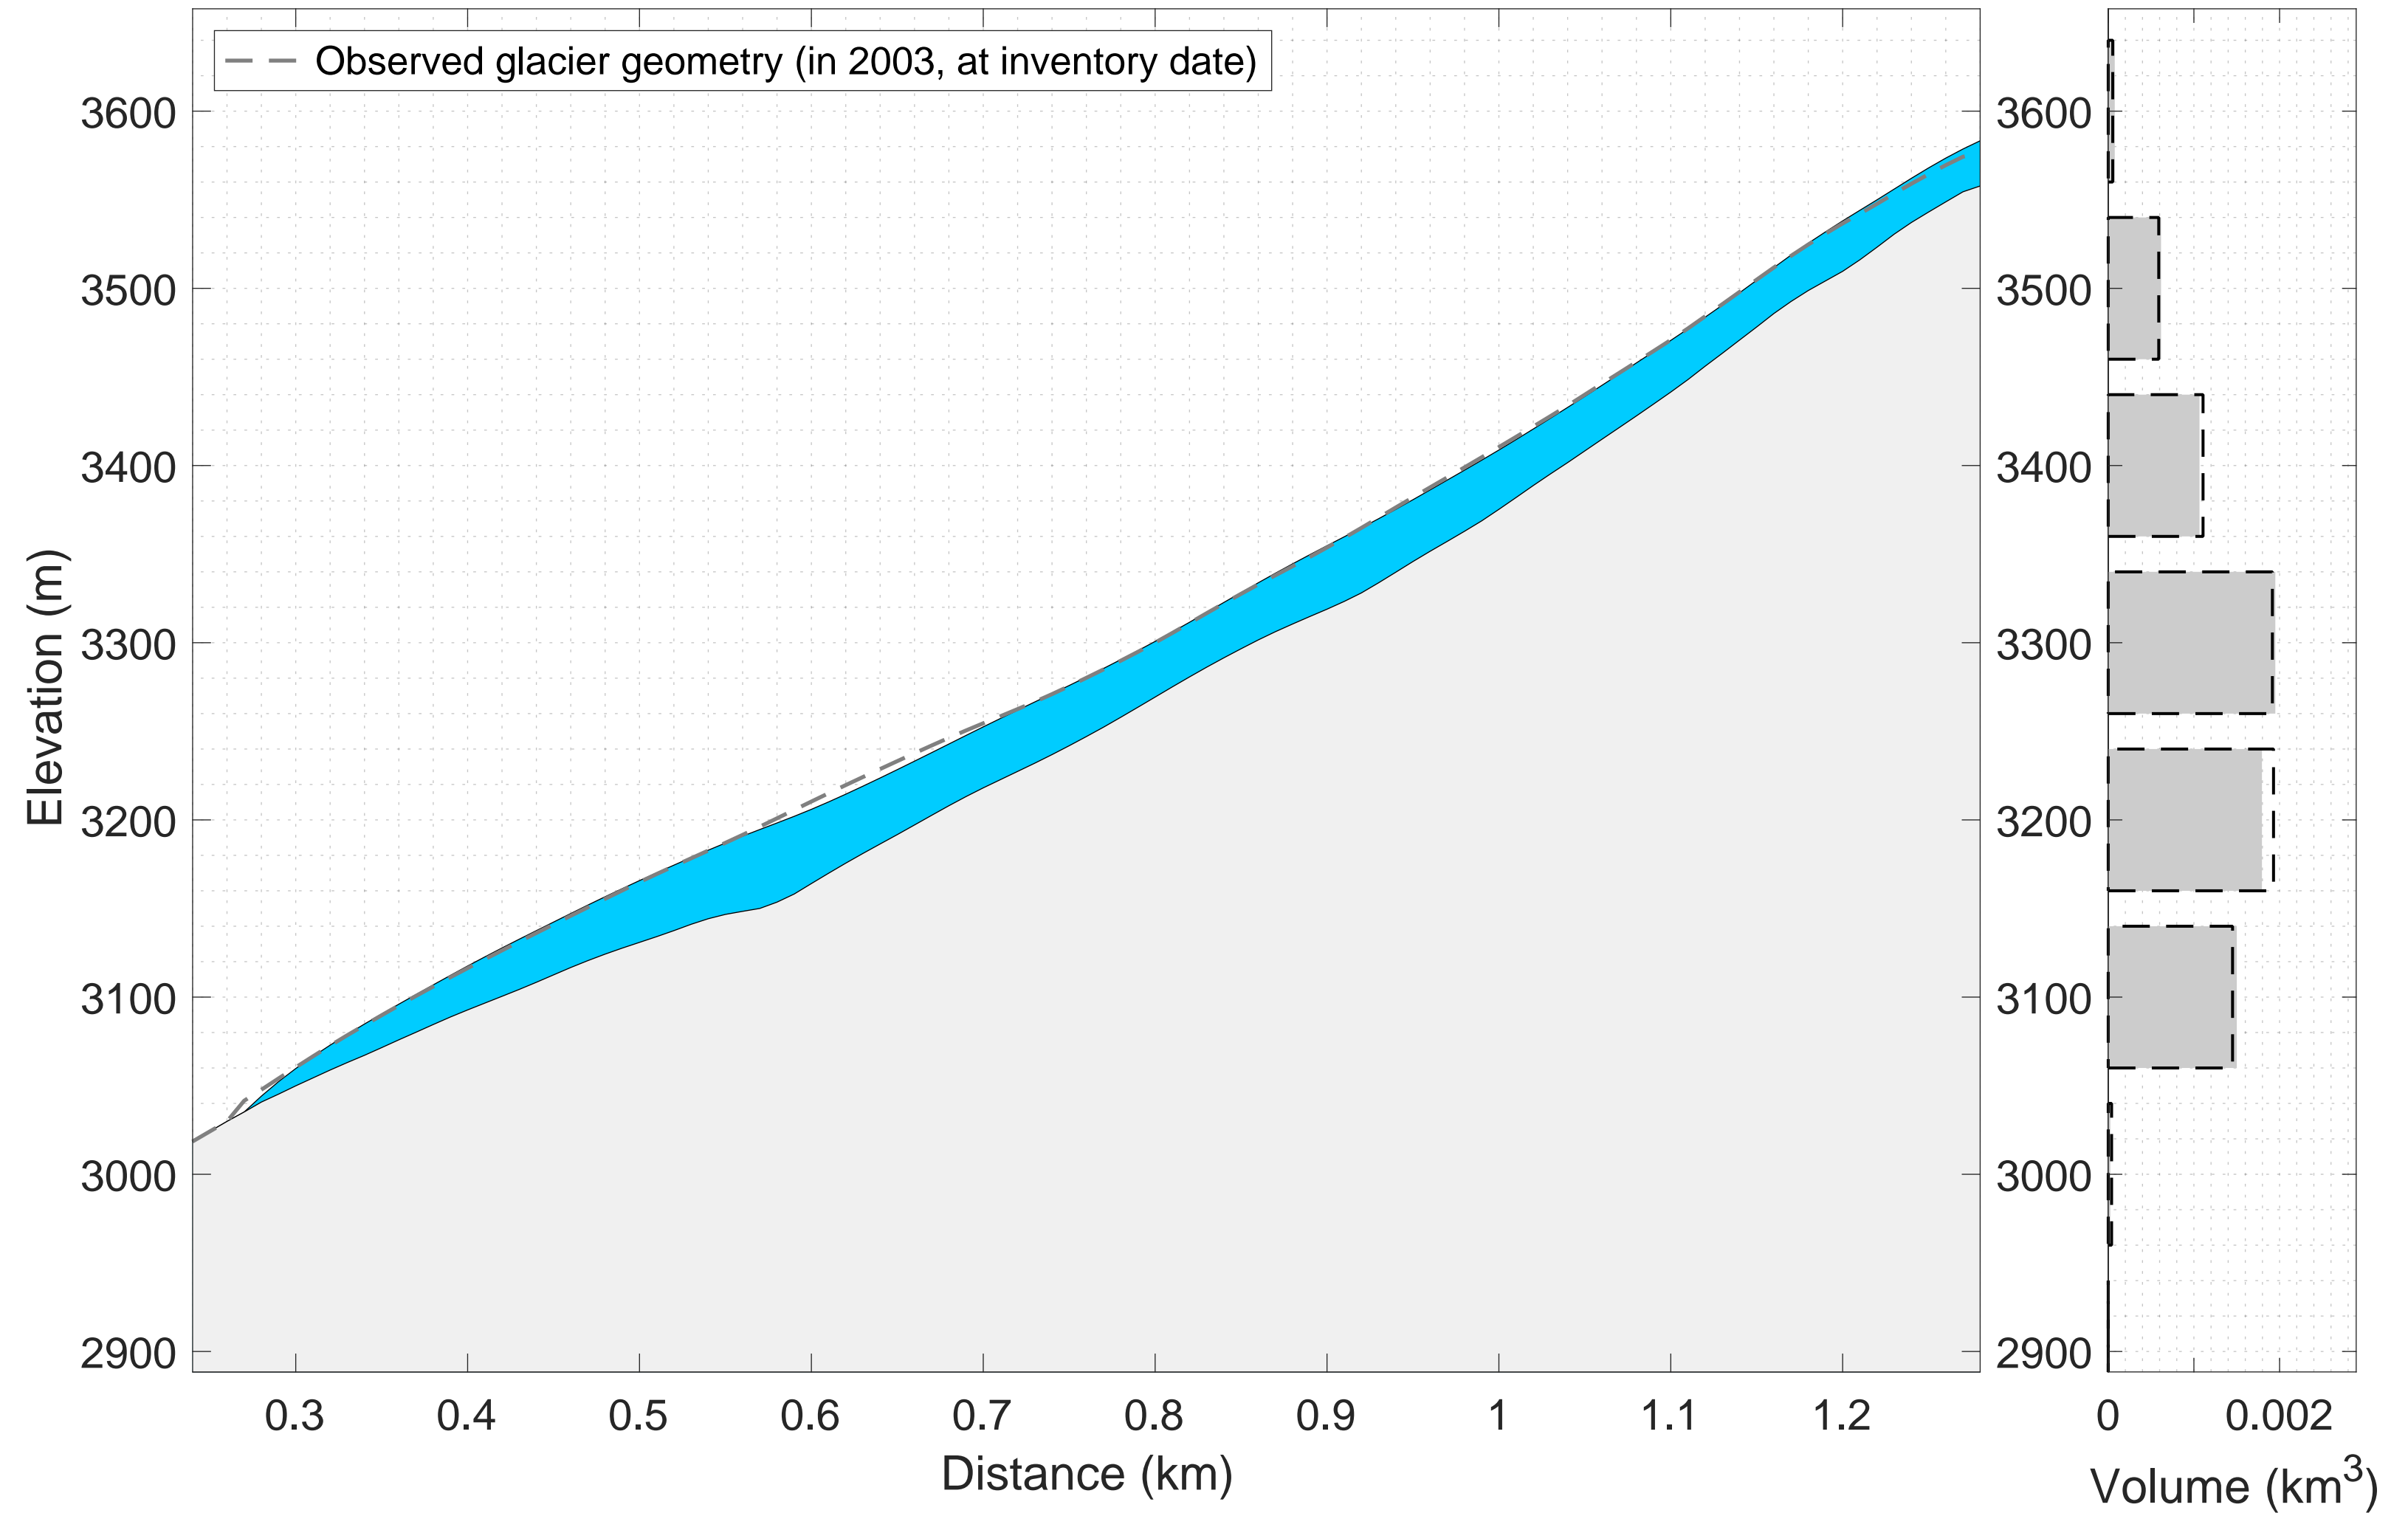

Supplement: Supplementary file 604 [file tc-13-1125-2019-supplement.zip]

**Modelled geometry (Glacier ID = 00627;  $A = 5.5241\text{e-}17 \text{ Pa}^{-3} \text{ a}^{-1}$ ;  $dx = 11 \text{ m}$ )**

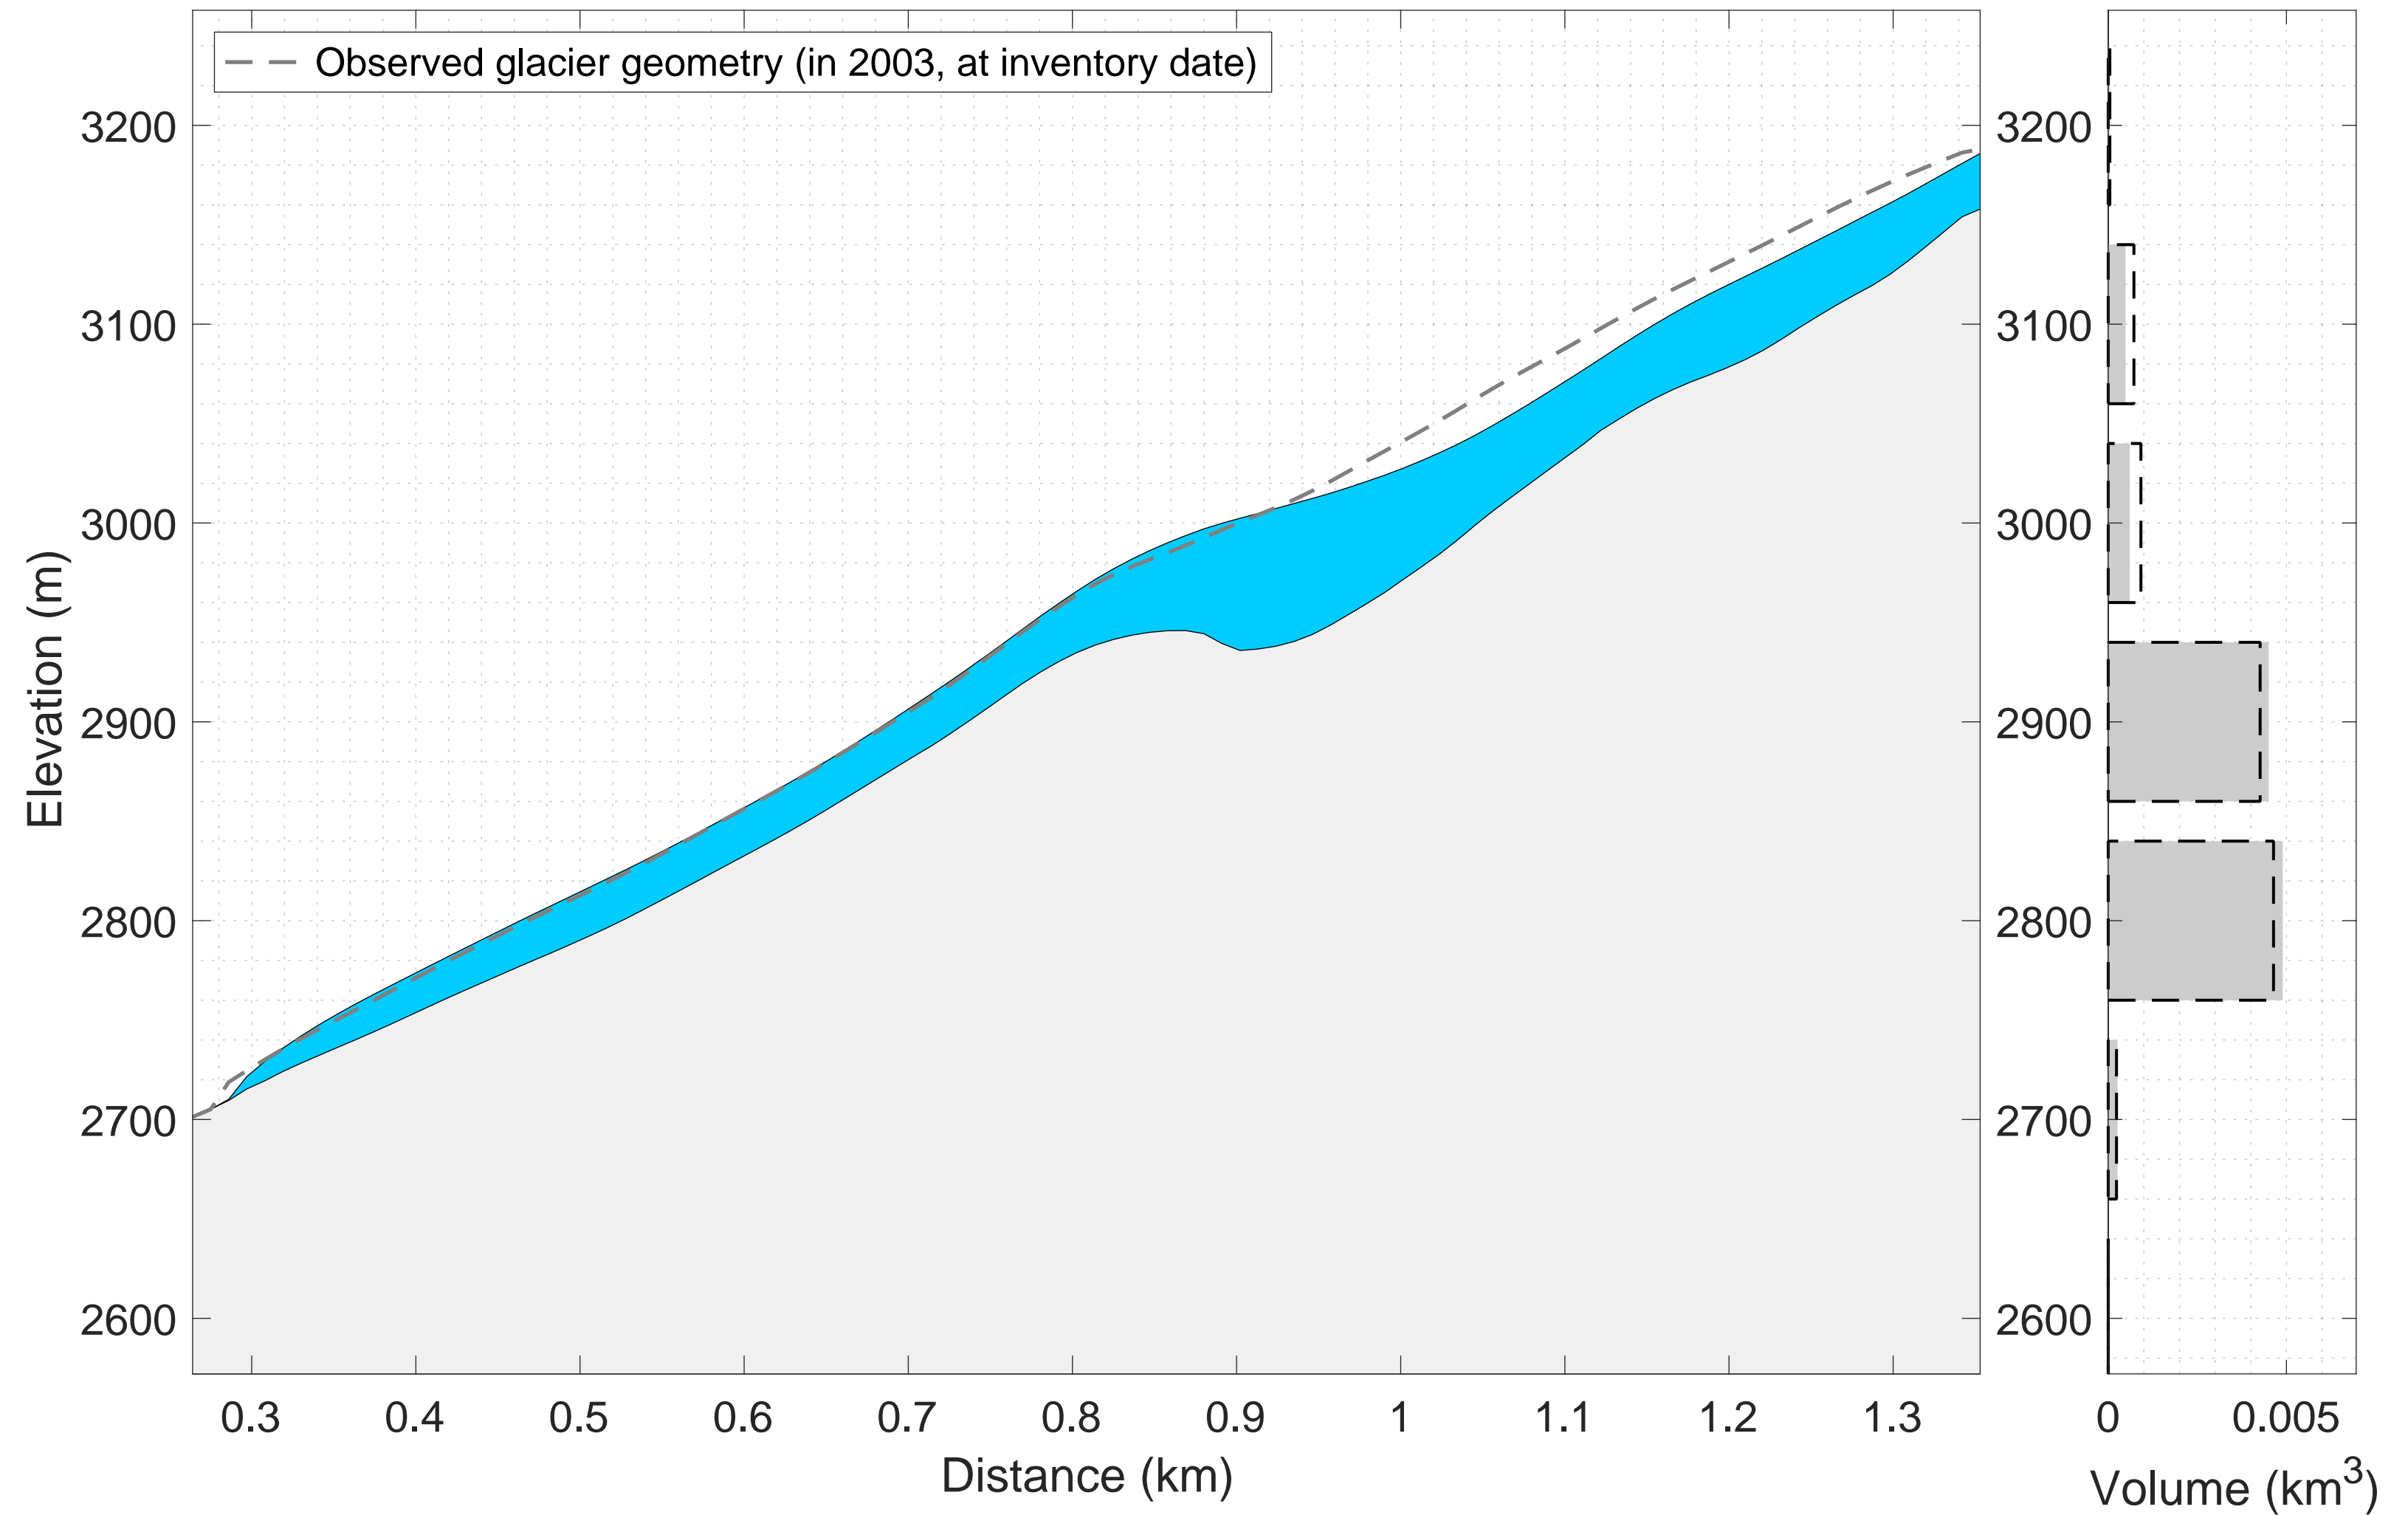

Supplement: Supplementary file 605 [file tc-13-1125-2019-supplement.zip]

**Modelled geometry (Glacier ID = 00782;  $A = 1.0412\text{e-}16 \text{ Pa}^{-3} \text{ a}^{-1}$ ;  $dx = 17 \text{ m}$ )**

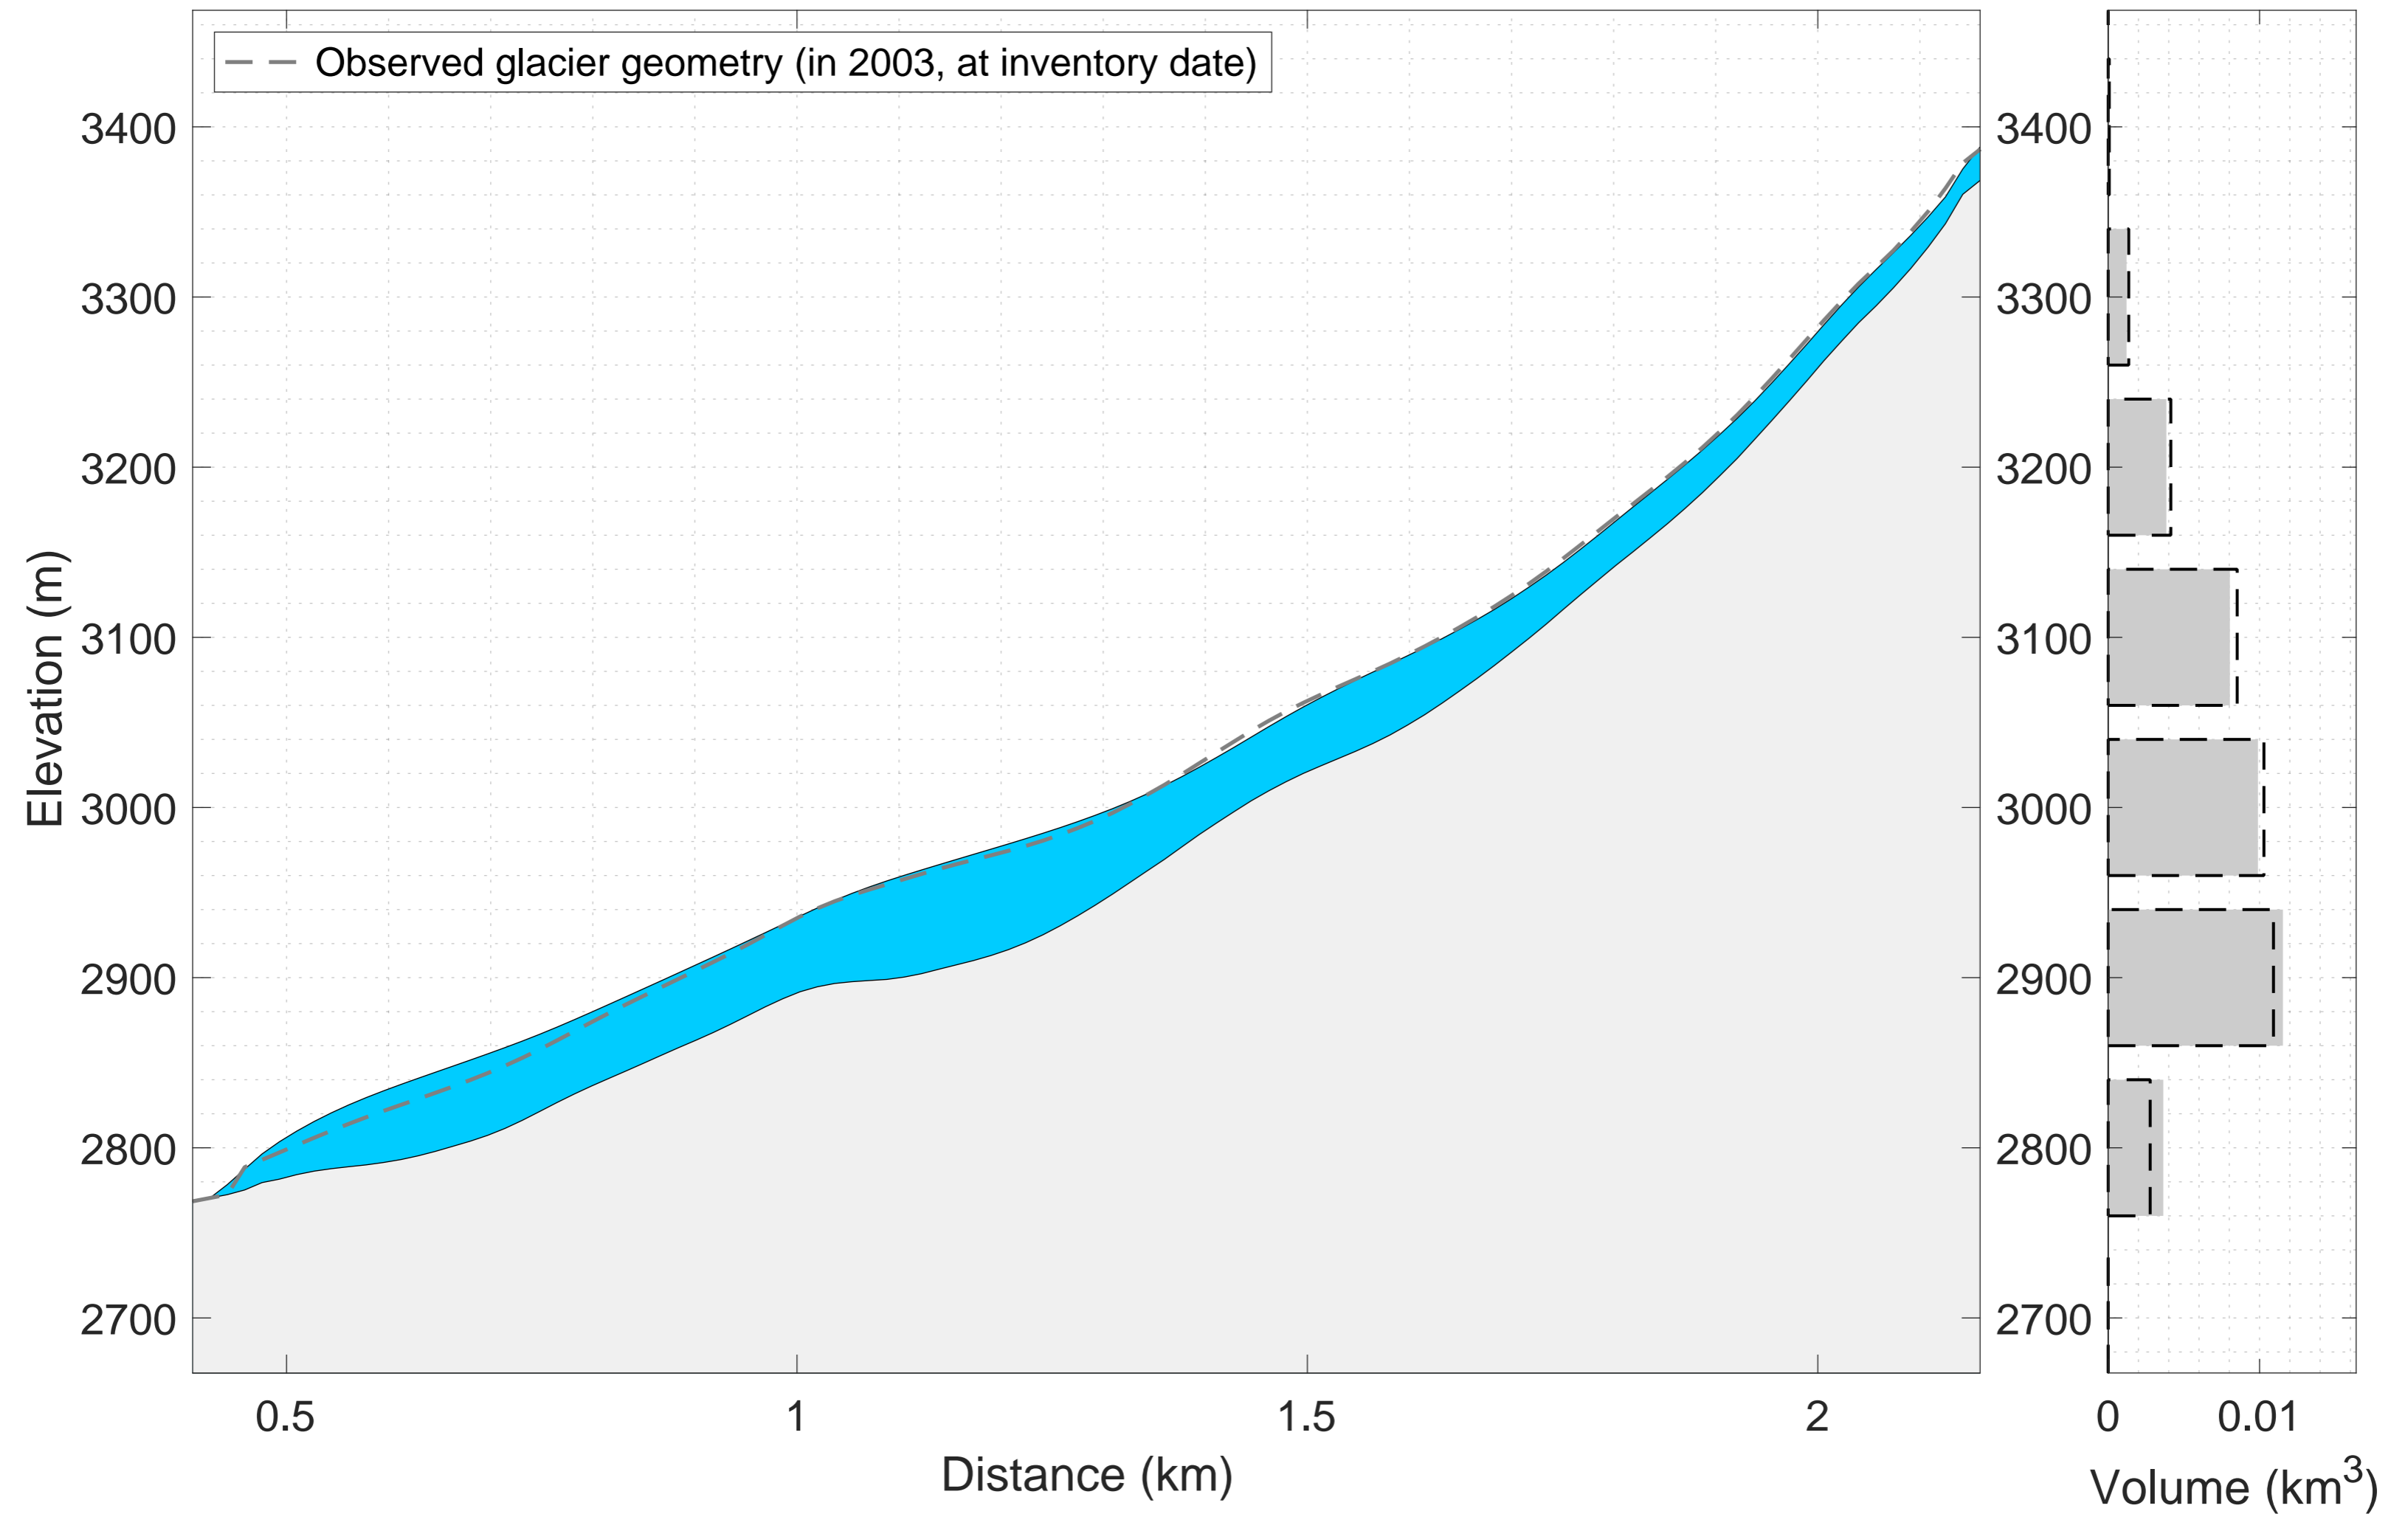

Supplement: Supplementary file 606 [file tc-13-1125-2019-supplement.zip]

**Modelled geometry (Glacier ID = 03687;  $A = 1.1429\text{e-}16 \text{ Pa}^{-3} \text{ a}^{-1}$ ;  $dx = 30 \text{ m}$ )**

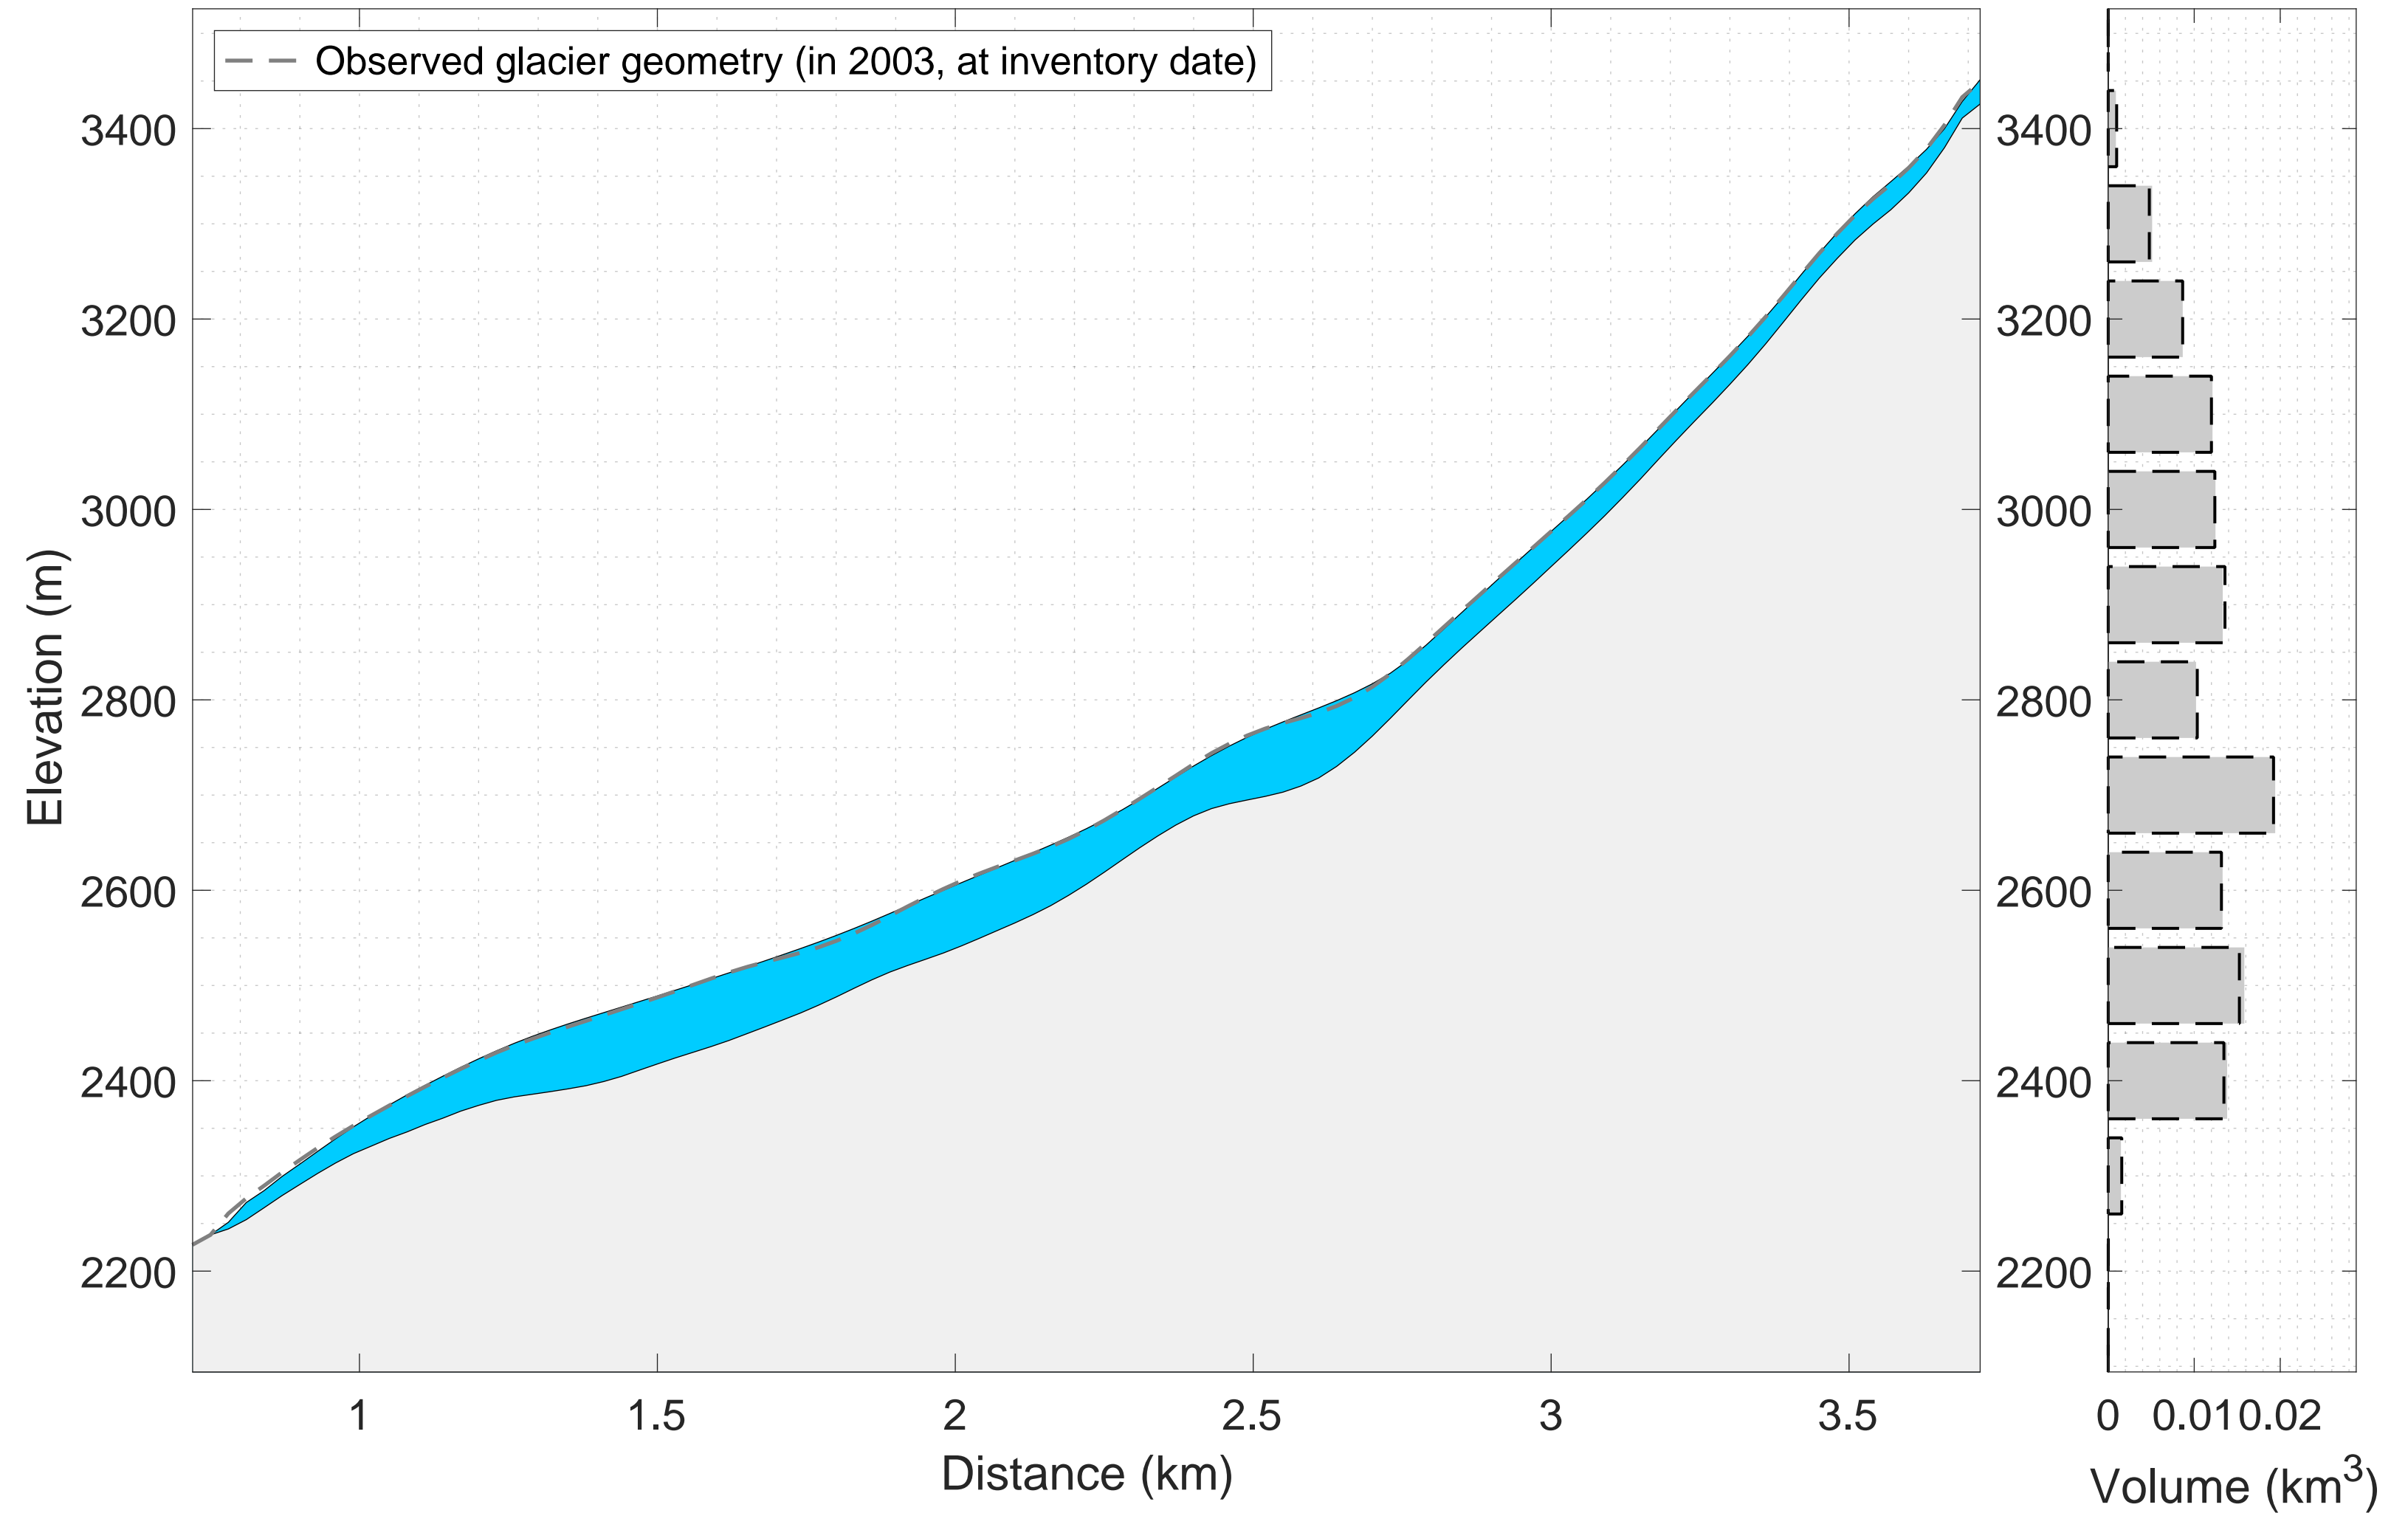

Supplement: Supplementary file 607 [file tc-13-1125-2019-supplement.zip]

**Modelled geometry (Glacier ID = 03292;  $A = 1.1745\text{e-}16 \text{ Pa}^{-3} \text{ a}^{-1}$ ;  $dx = 18 \text{ m}$ )**

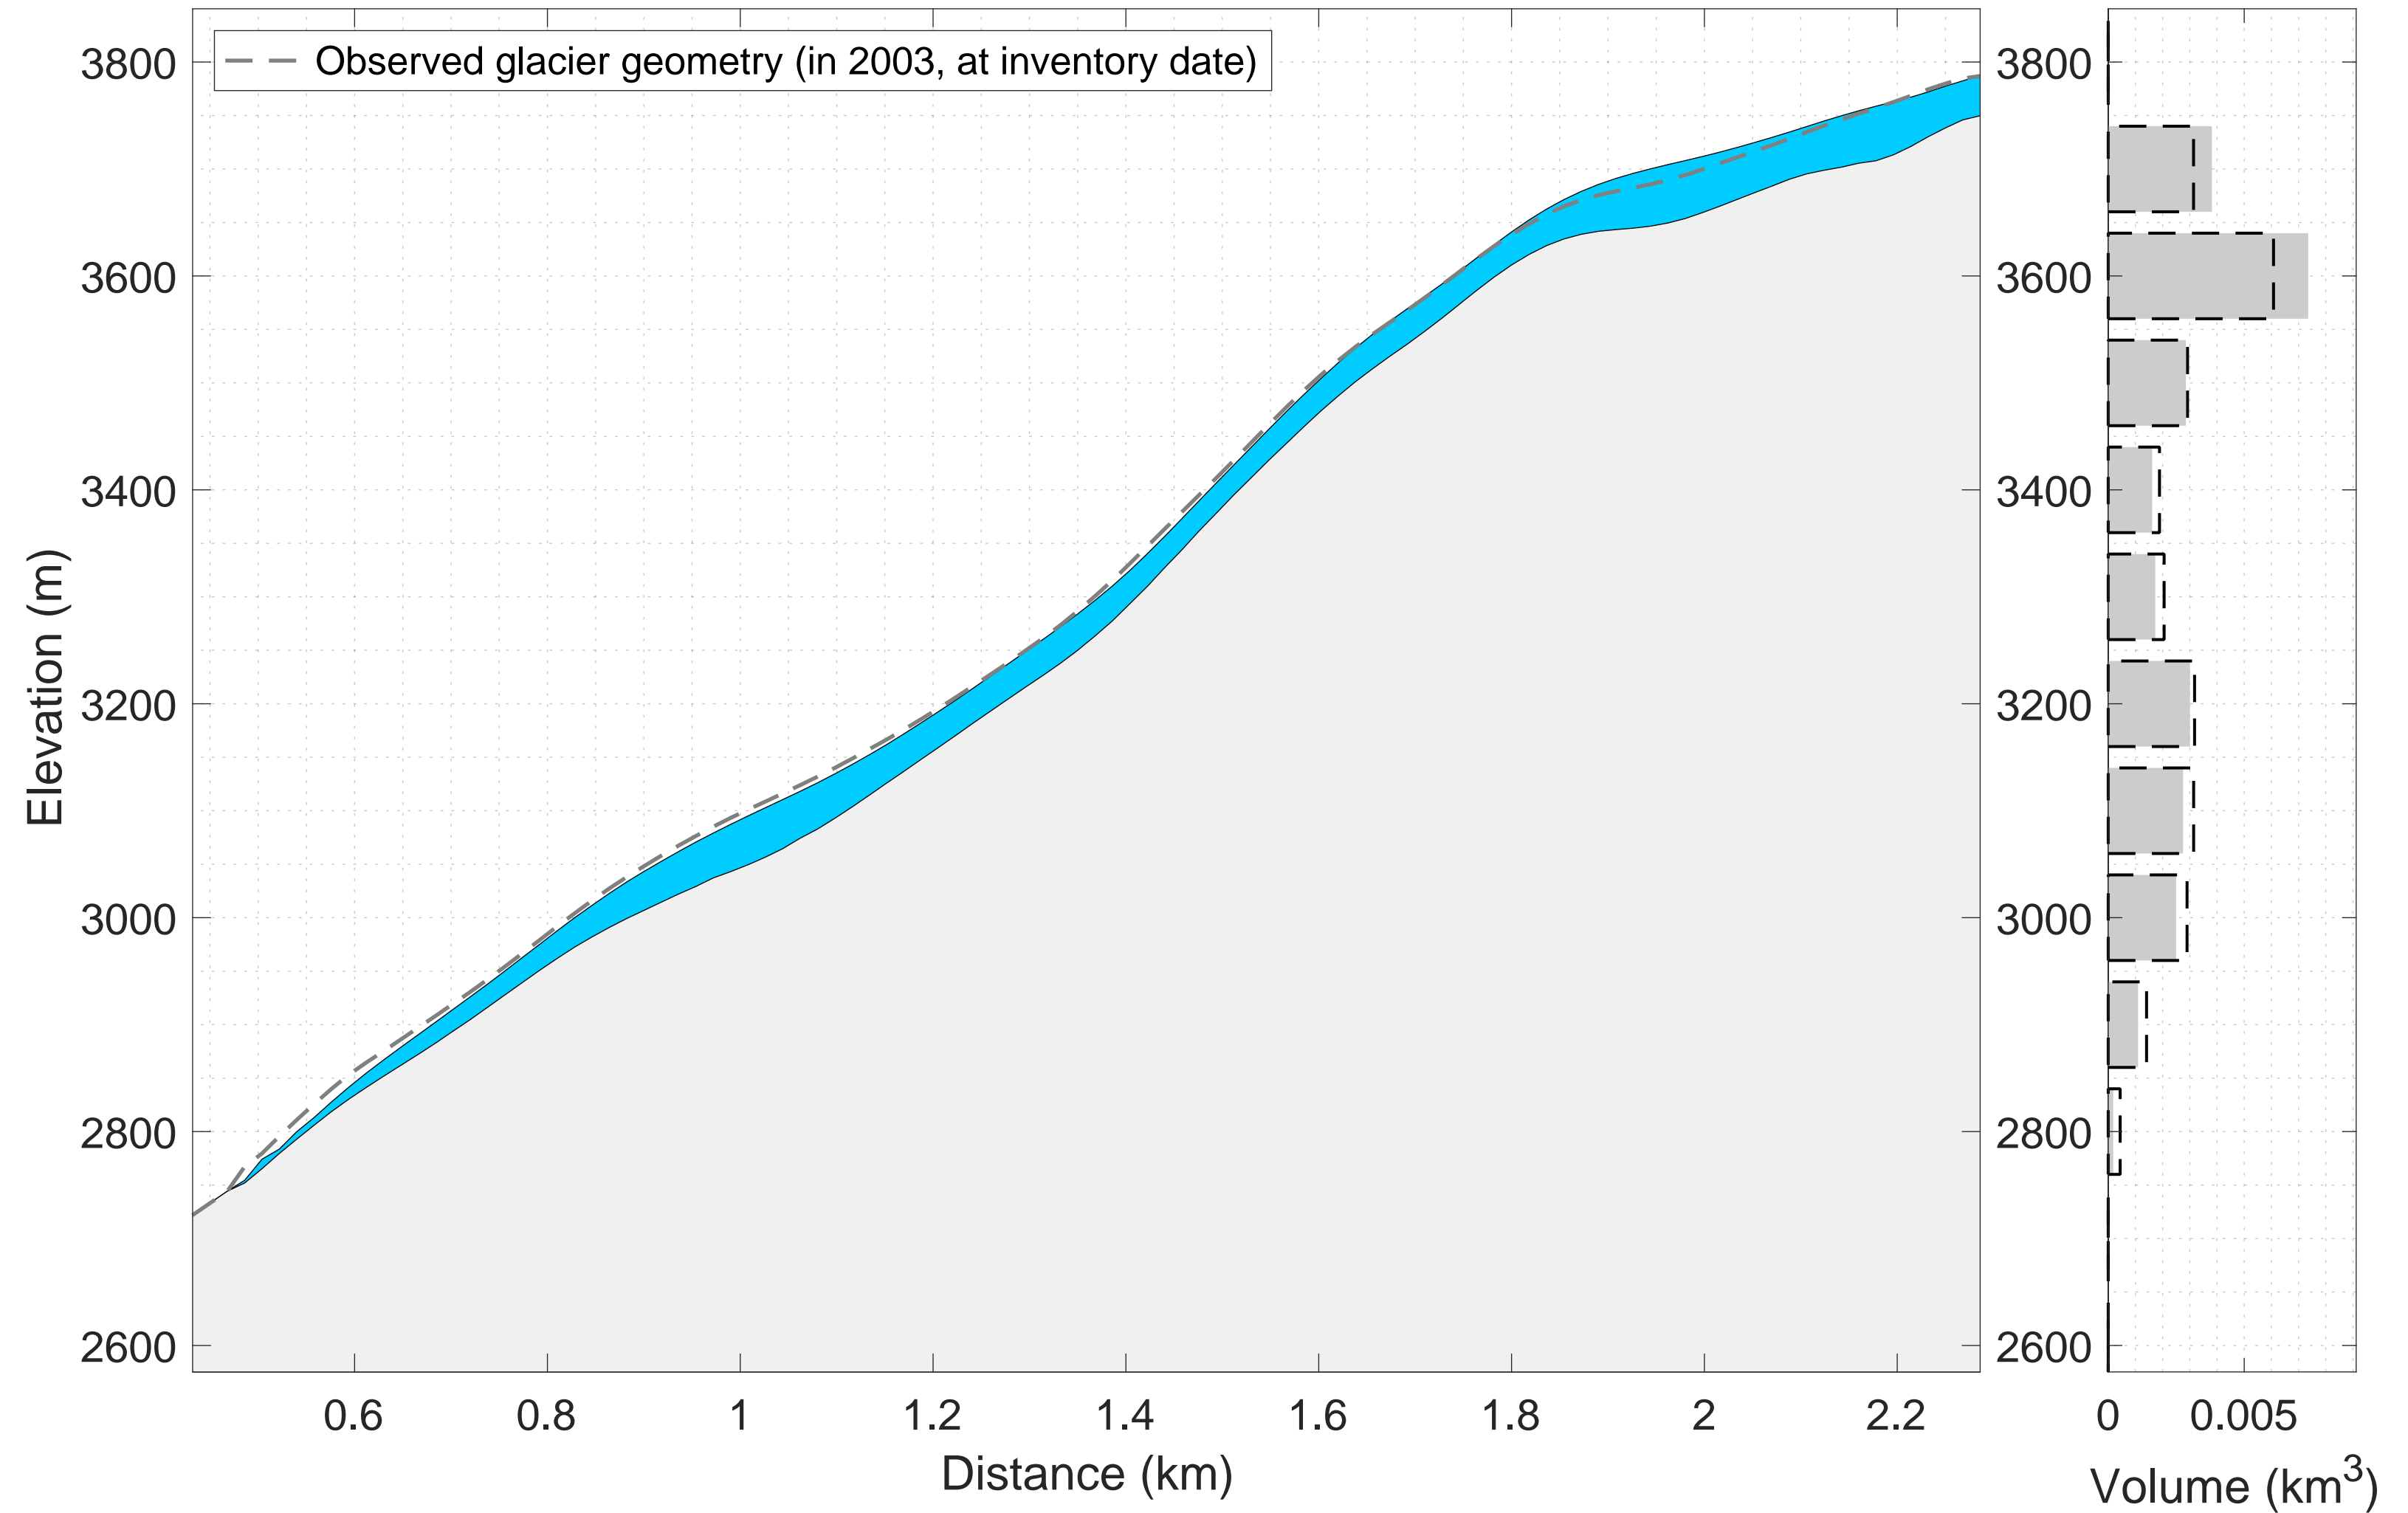

Supplement: Supplementary file 608 [file tc-13-1125-2019-supplement.zip]

**Modelled geometry (Glacier ID = 02838;  $A = 6.2411\text{e-}17 \text{ Pa}^{-3} \text{ a}^{-1}$ ;  $dx = 16 \text{ m}$ )**

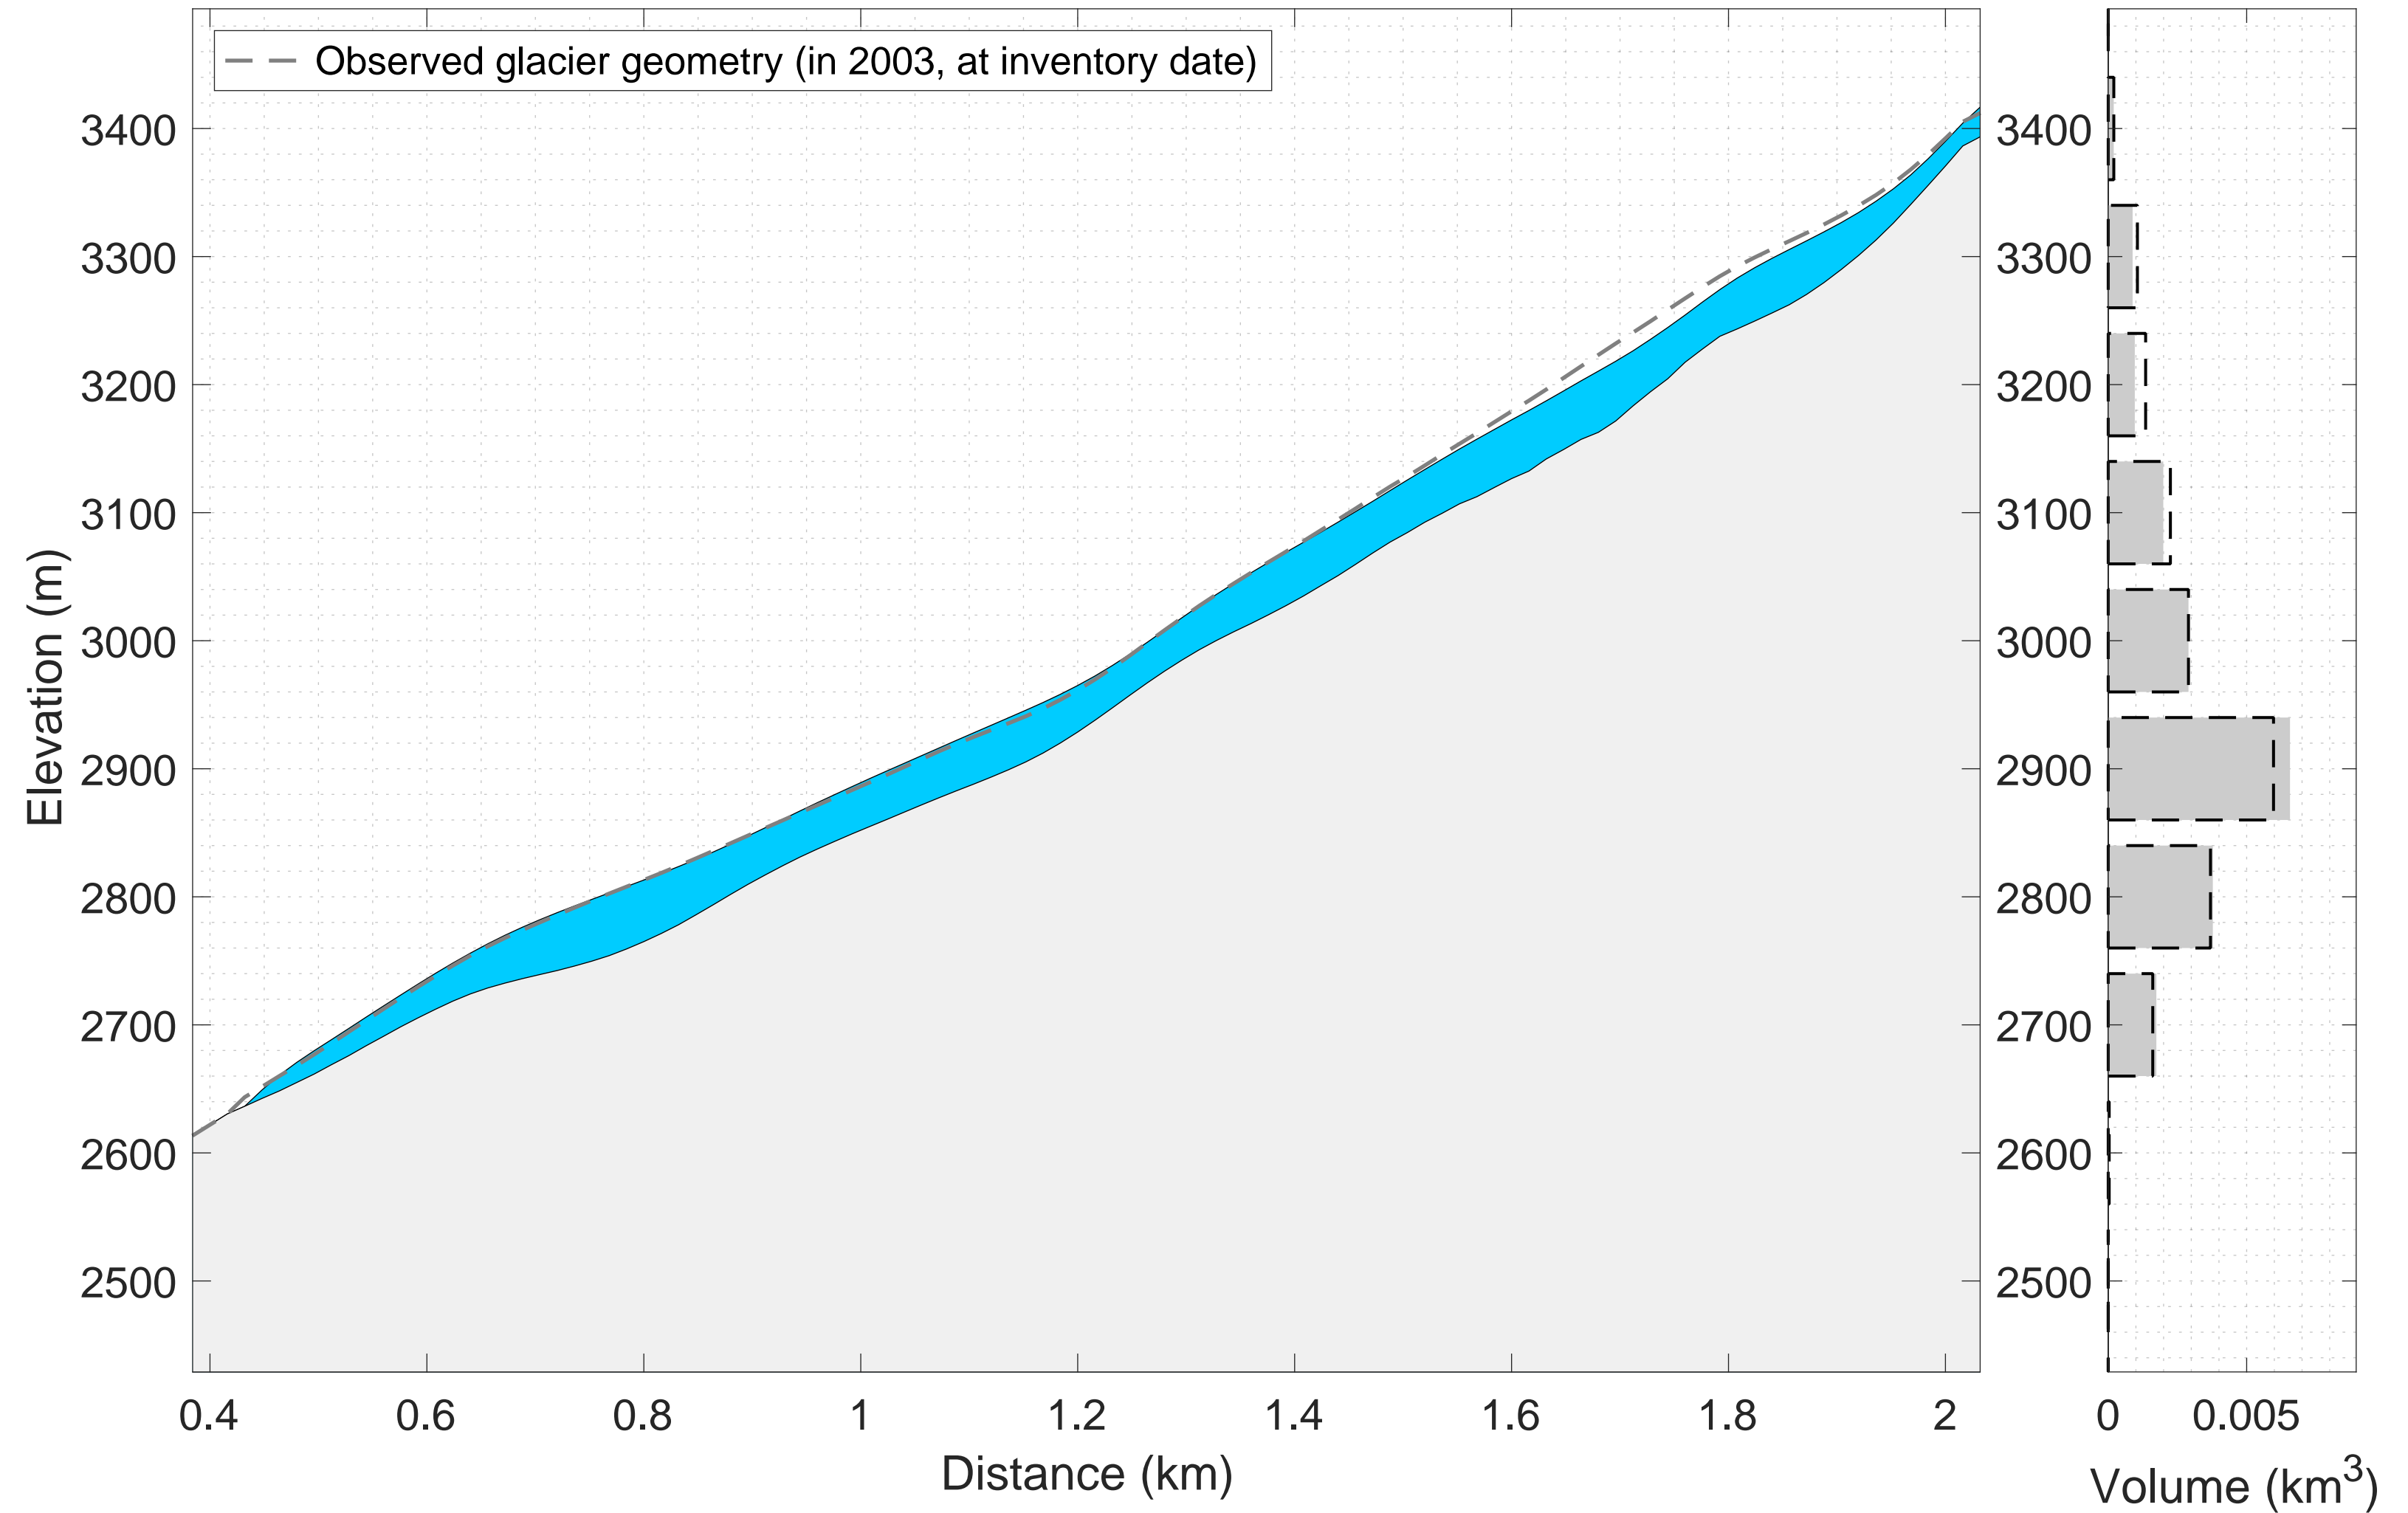

Supplement: Supplementary file 609 [file tc-13-1125-2019-supplement.zip]

**Modelled geometry (Glacier ID = 01222;  $A = 2.1215\text{e-}16 \text{ Pa}^{-3} \text{ a}^{-1}$ ;  $dx = 53 \text{ m}$ )**

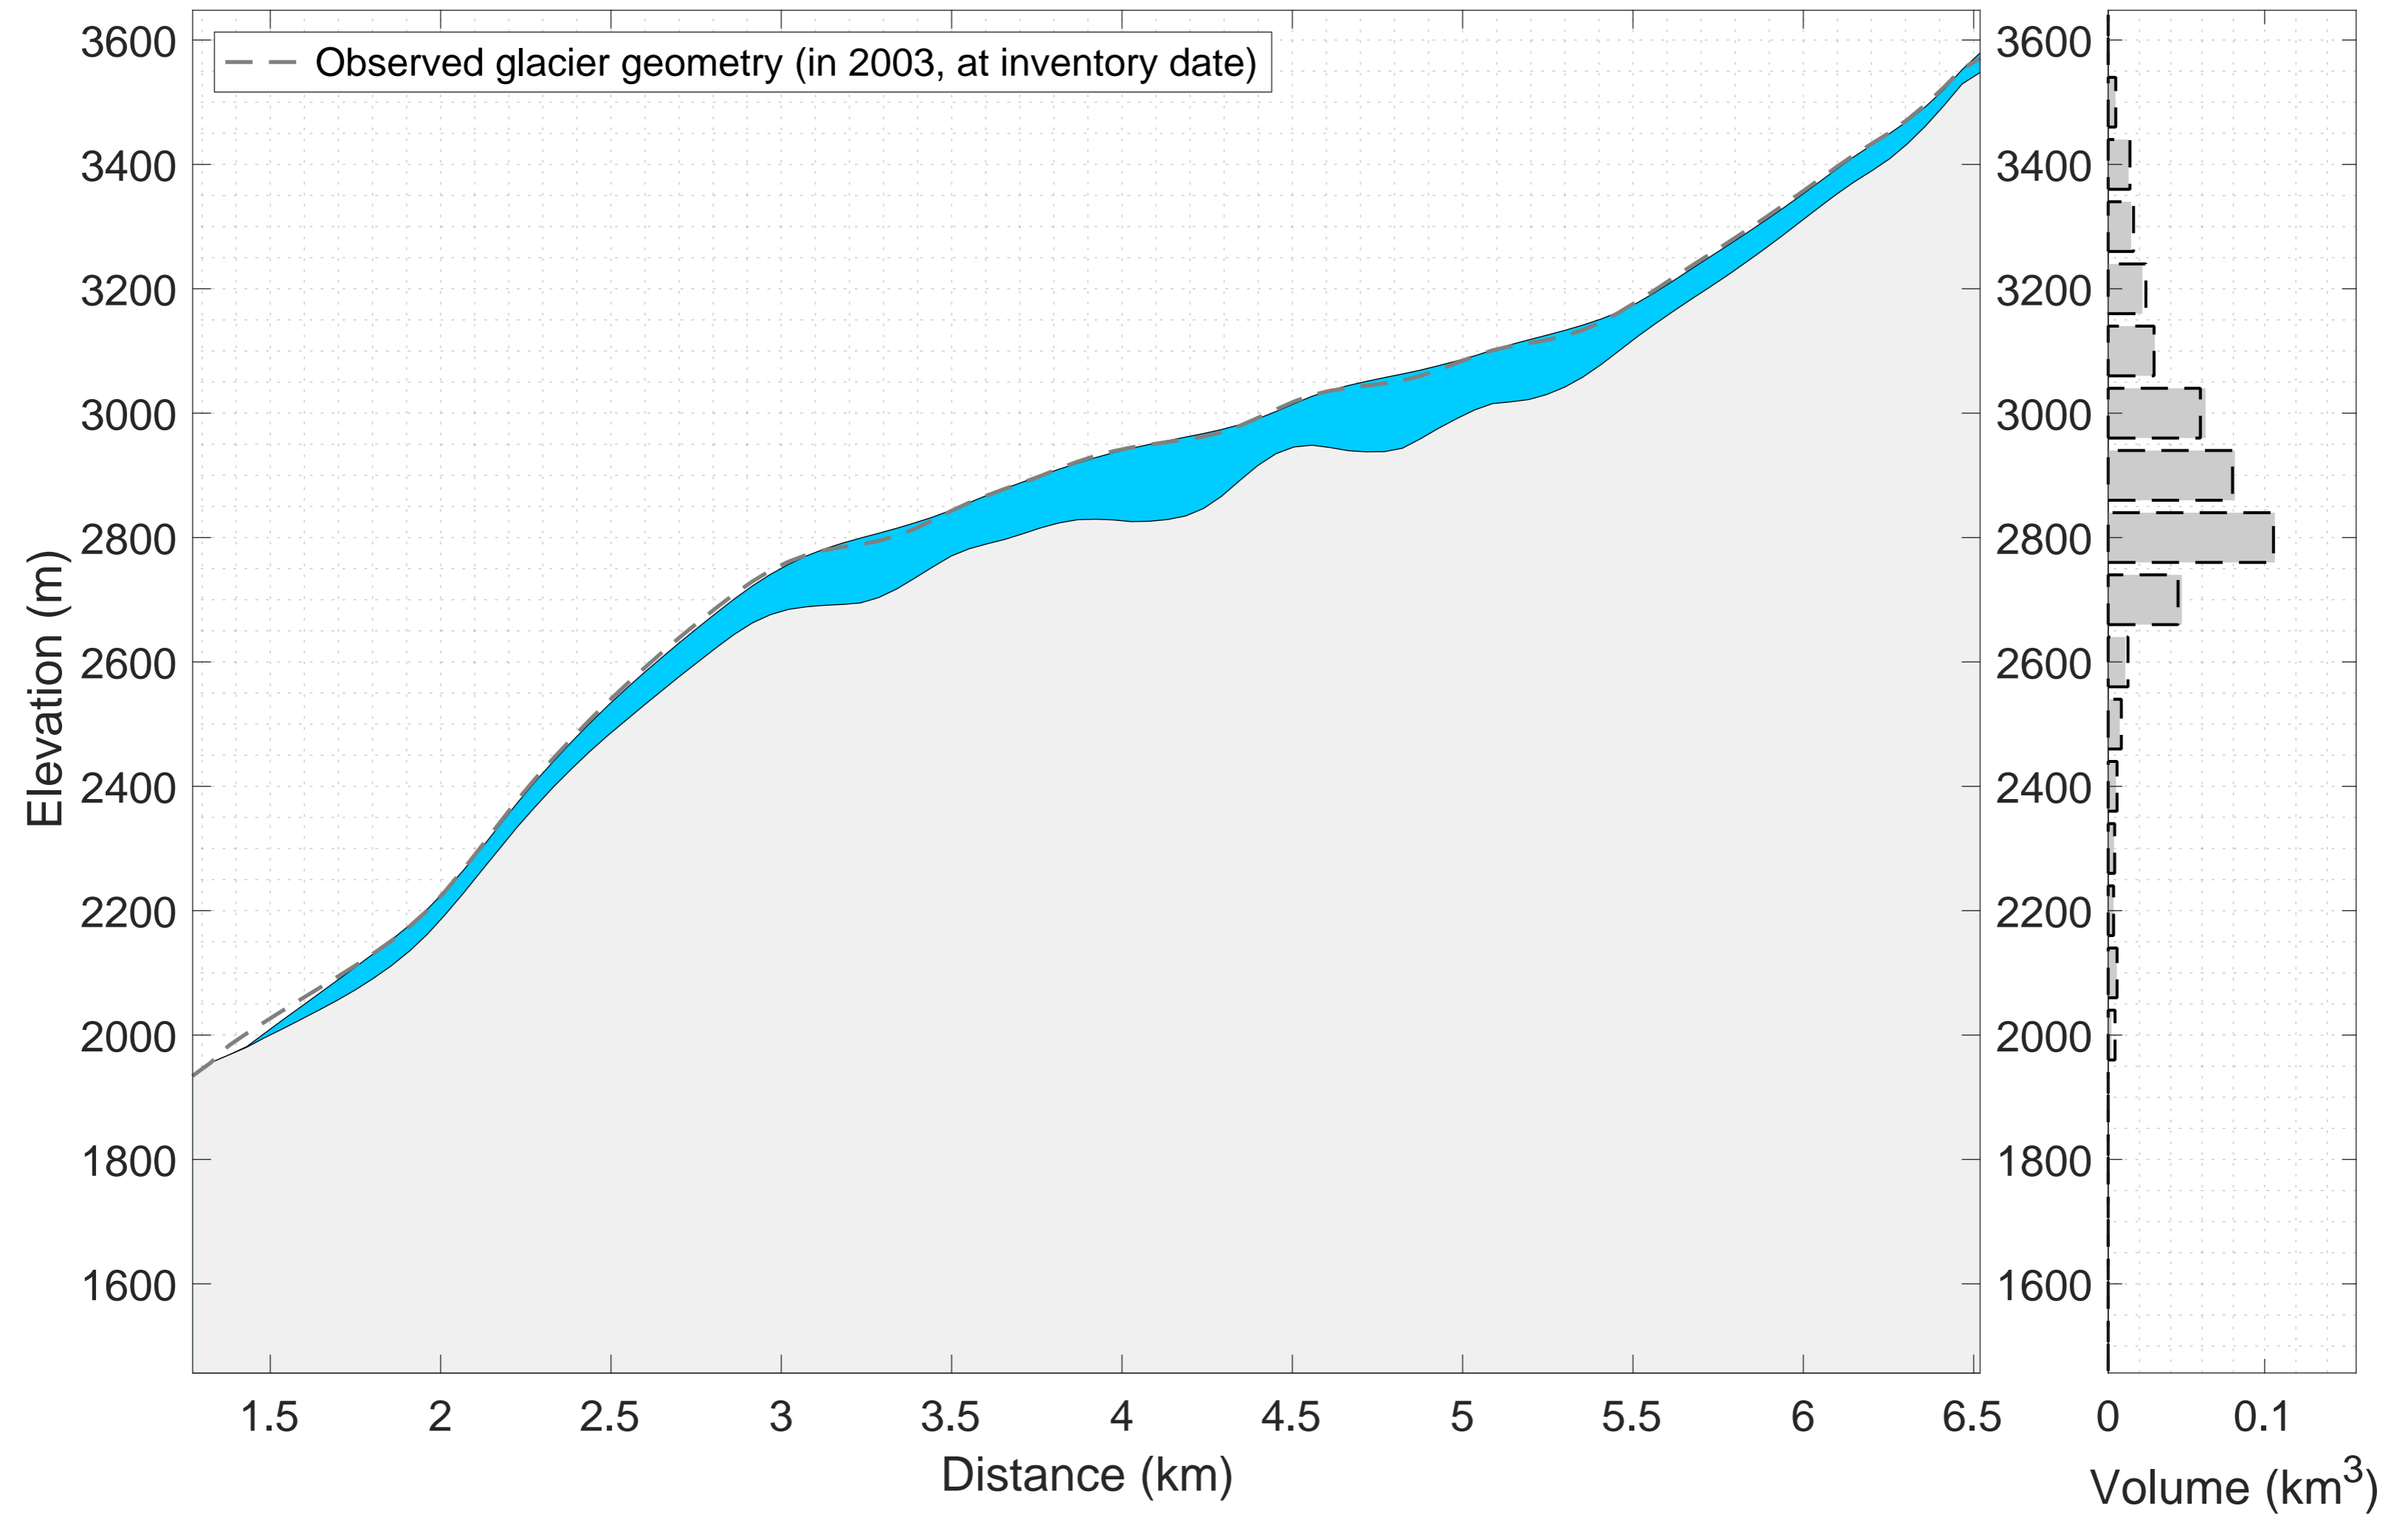

Supplement: Supplementary file 610 [file tc-13-1125-2019-supplement.zip]

**Modelled geometry (Glacier ID = 01946;  $A = 1.0161\text{e-}16 \text{ Pa}^{-3} \text{ a}^{-1}$ ;  $dx = 82 \text{ m}$ )**

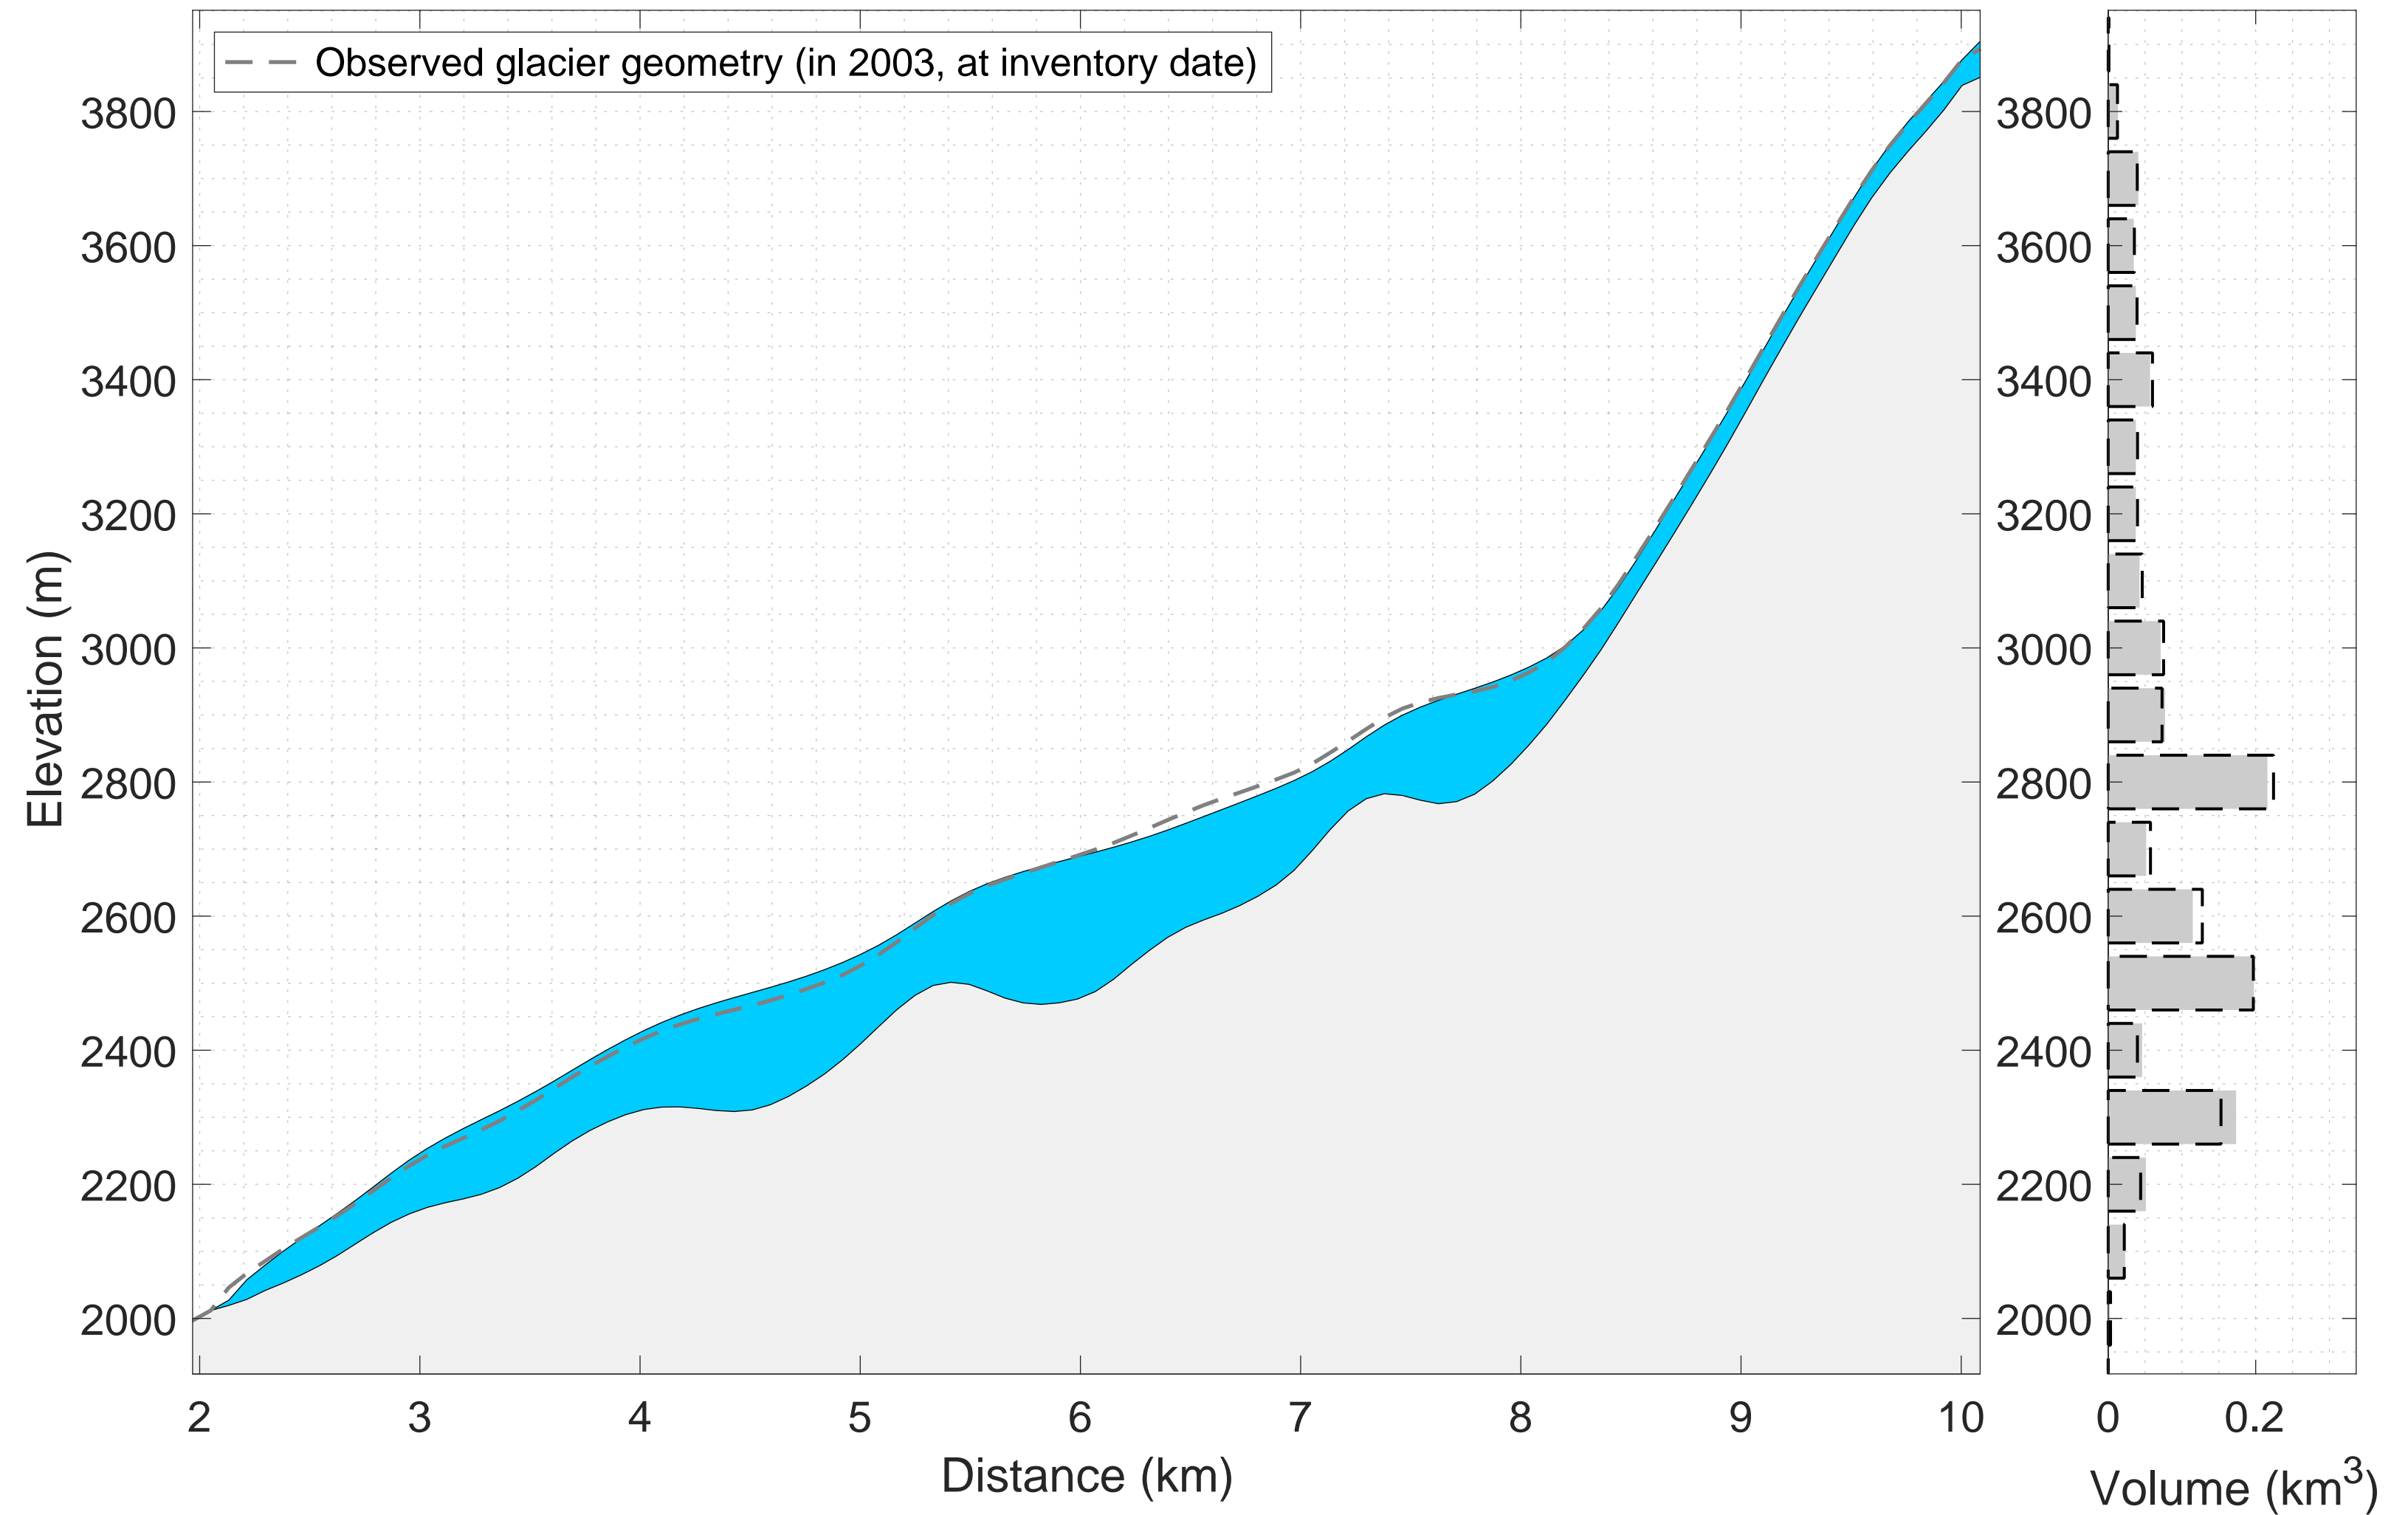

Supplement: Supplementary file 611 [file tc-13-1125-2019-supplement.zip]

**Modelled geometry (Glacier ID = 01527;  $A = 1.7532\text{e-}16 \text{ Pa}^{-3} \text{ a}^{-1}$ ;  $dx = 19 \text{ m}$ )**

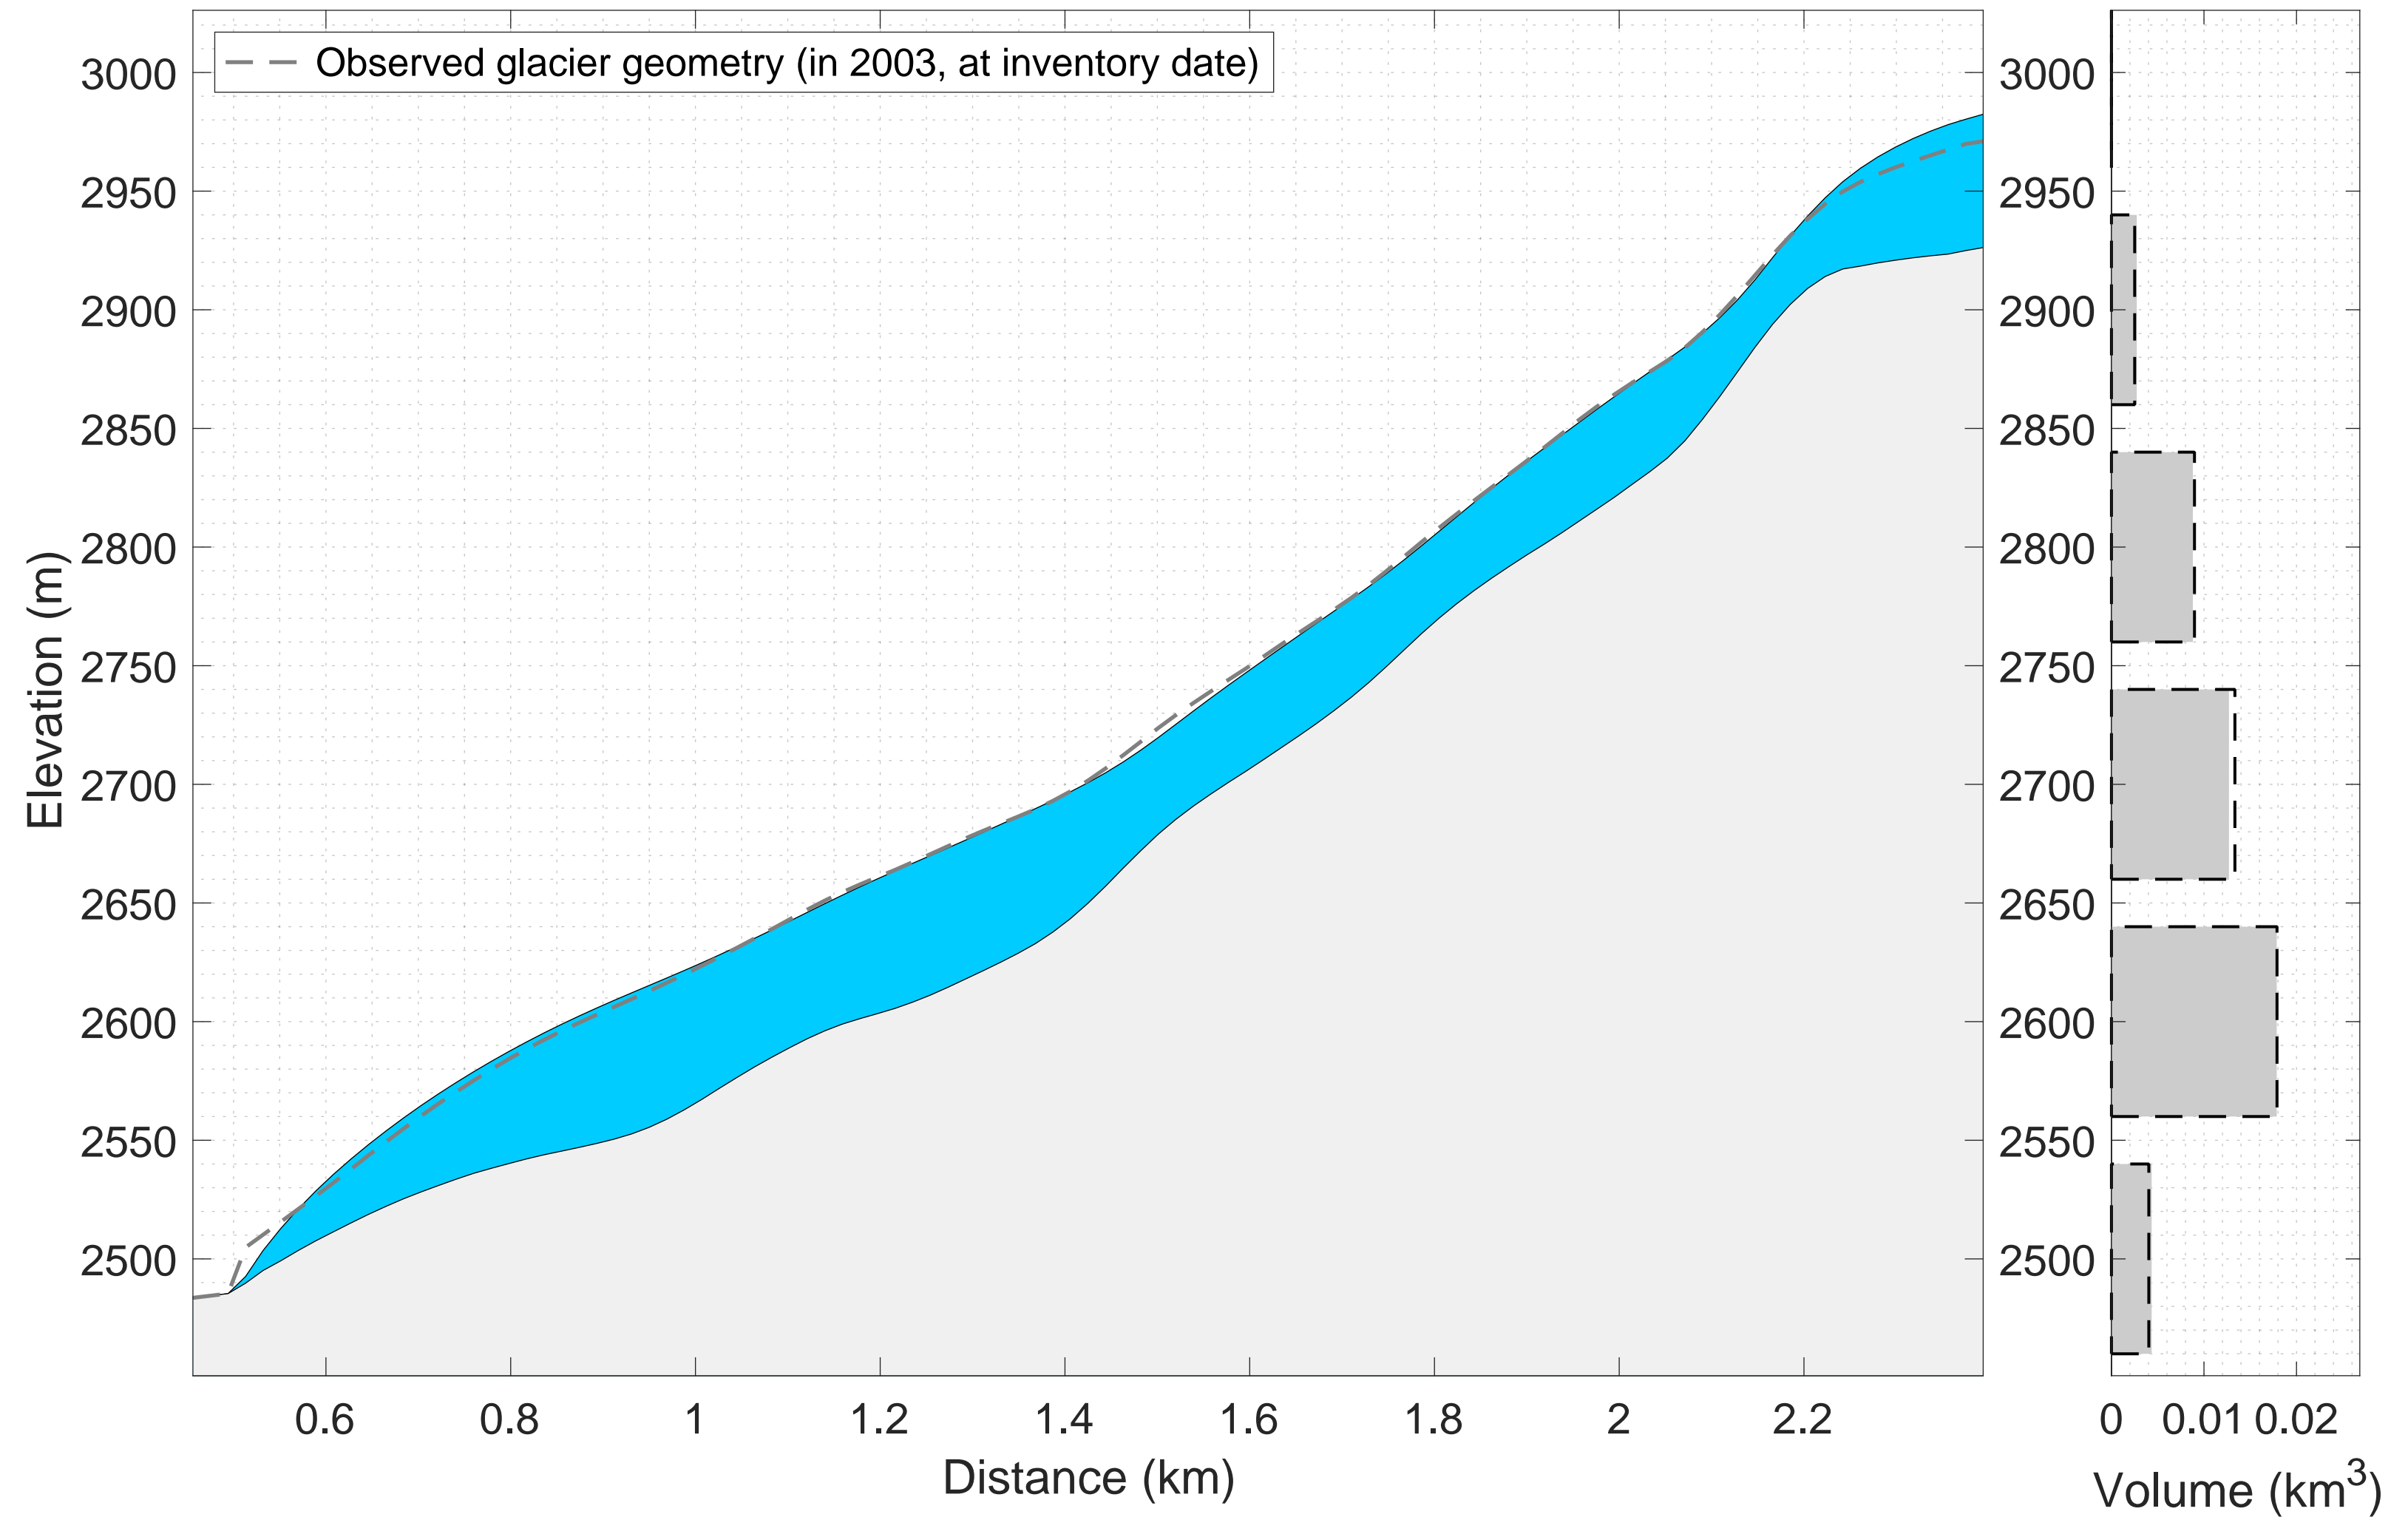

Supplement: Supplementary file 612 [file tc-13-1125-2019-supplement.zip]

**Modelled geometry (Glacier ID = 01750;  $A = 1.0845\text{e-}16 \text{ Pa}^{-3} \text{ a}^{-1}$ ;  $dx = 18 \text{ m}$ )**

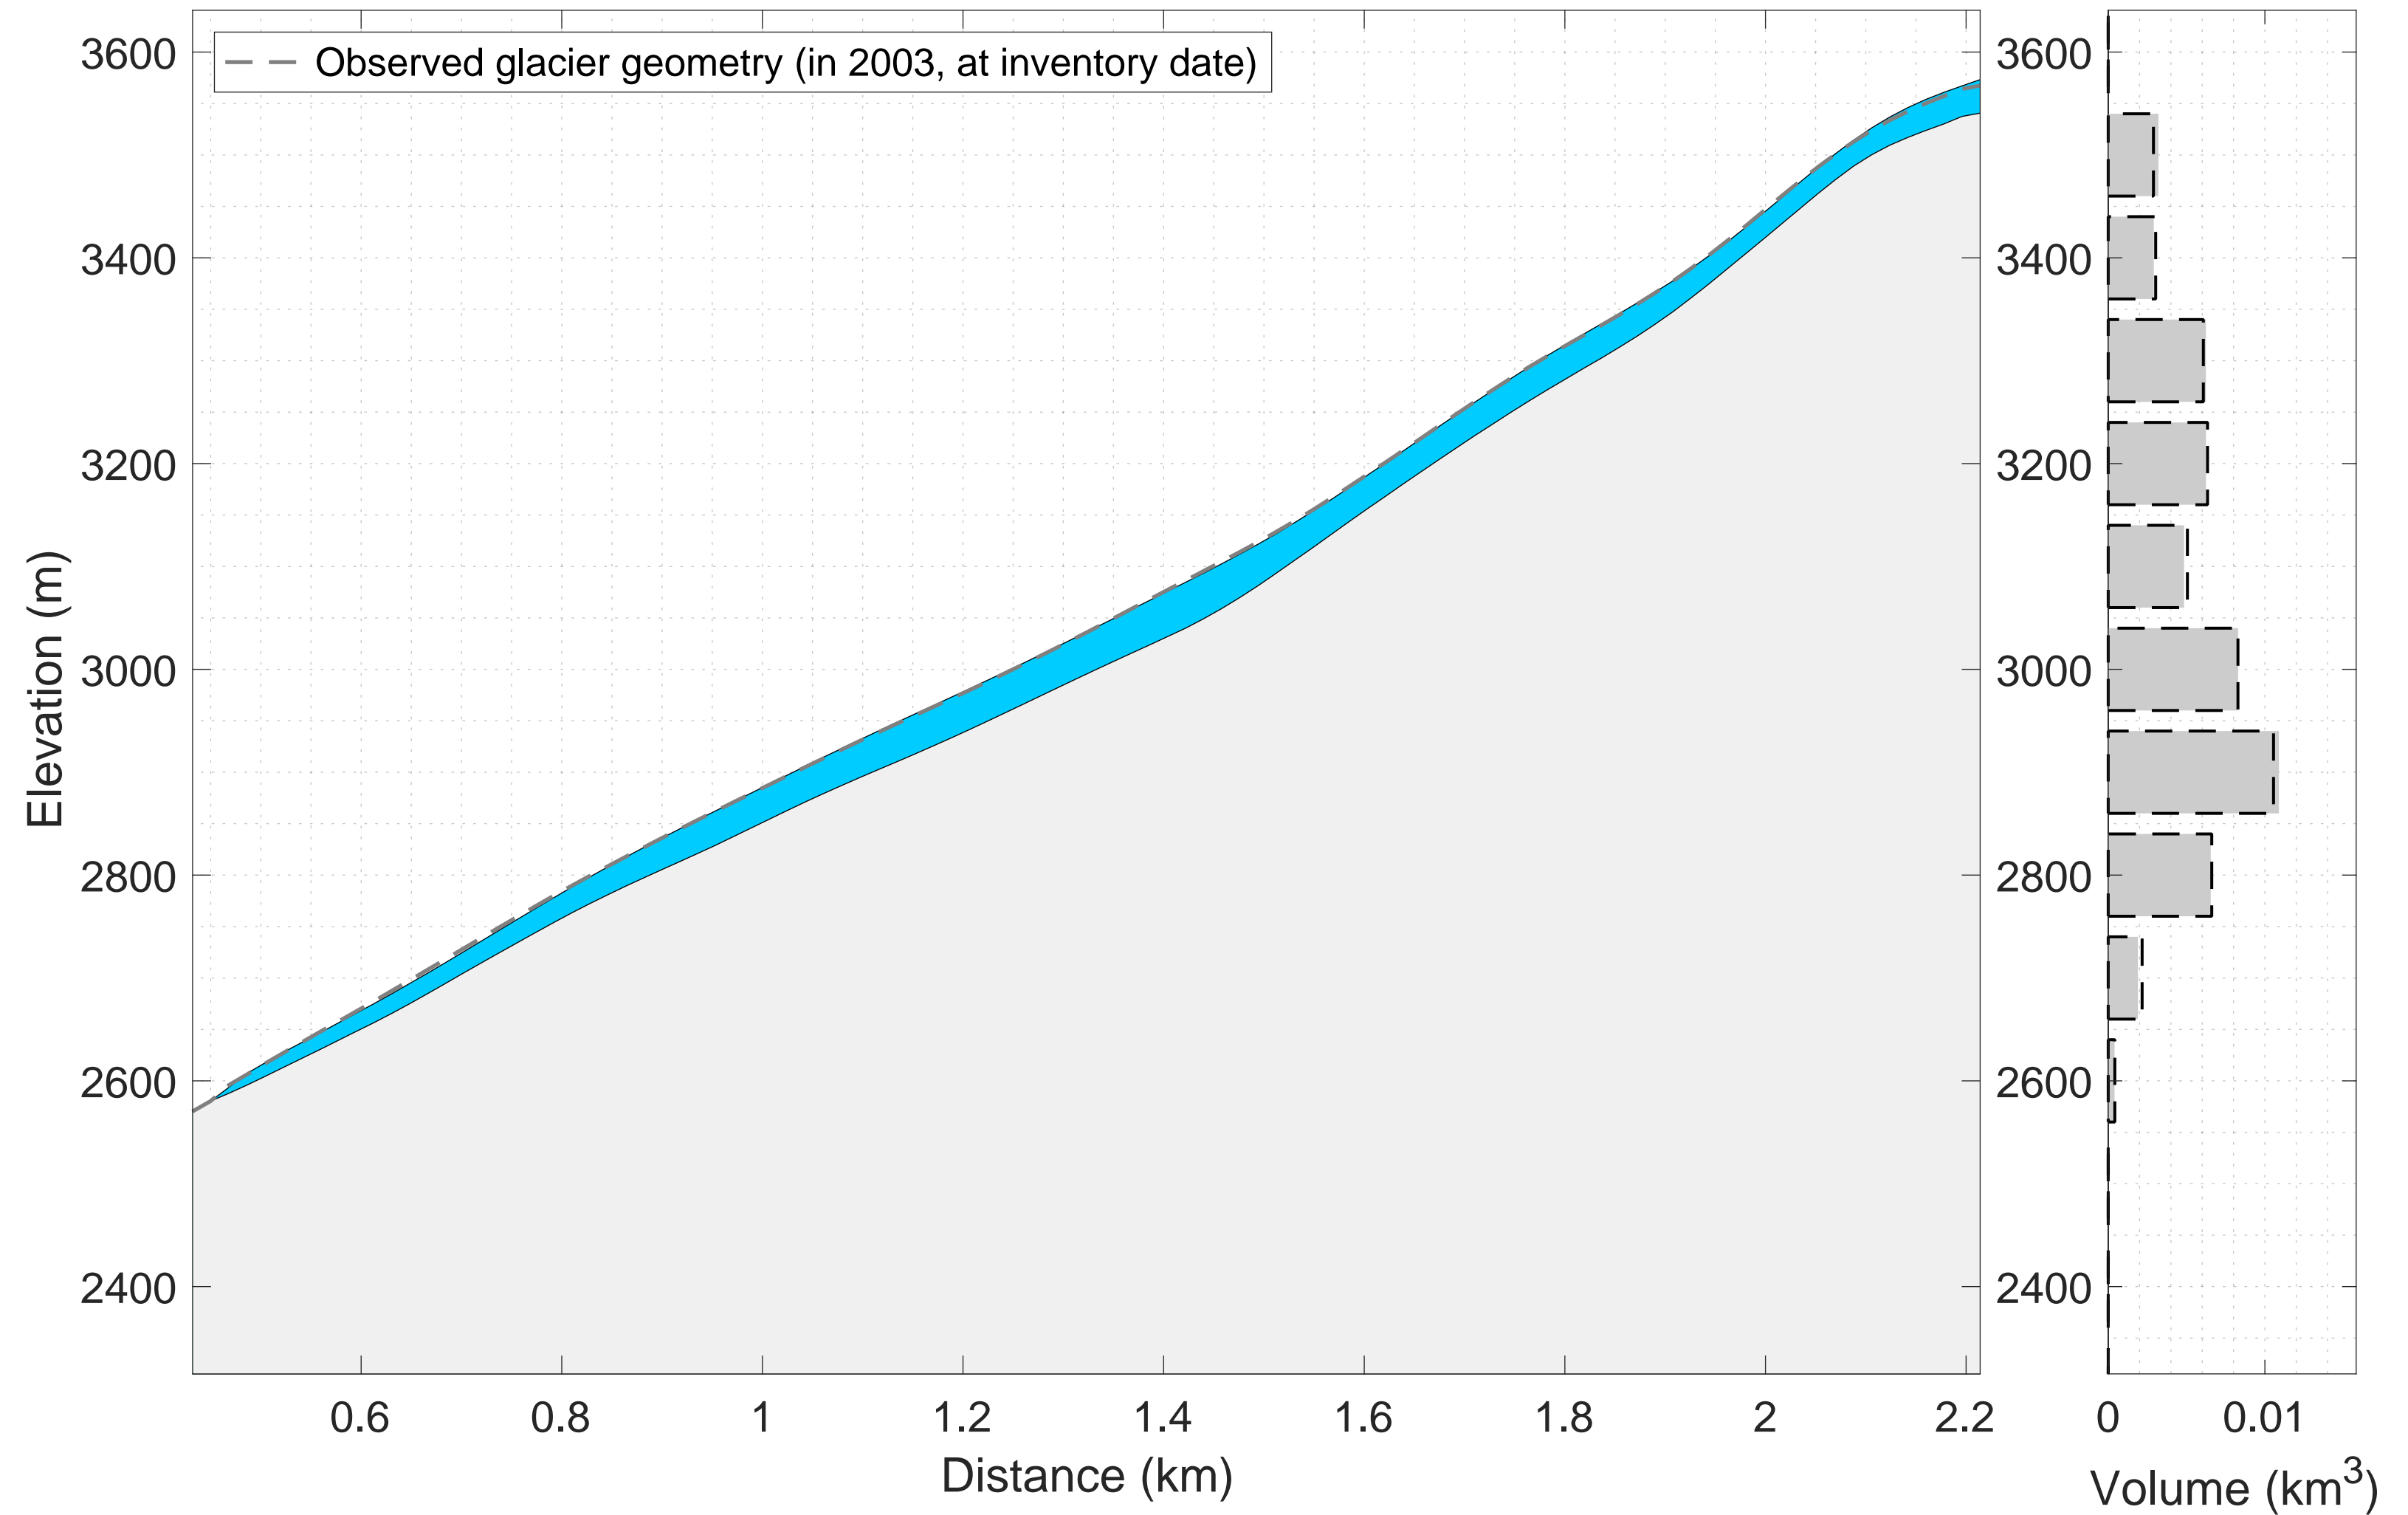

Supplement: Supplementary file 613 [file tc-13-1125-2019-supplement.zip]

**Modelled geometry (Glacier ID = 01302;  $A = 1.0267\text{e-}16 \text{ Pa}^{-3} \text{ a}^{-1}$ ;  $dx = 17 \text{ m}$ )**

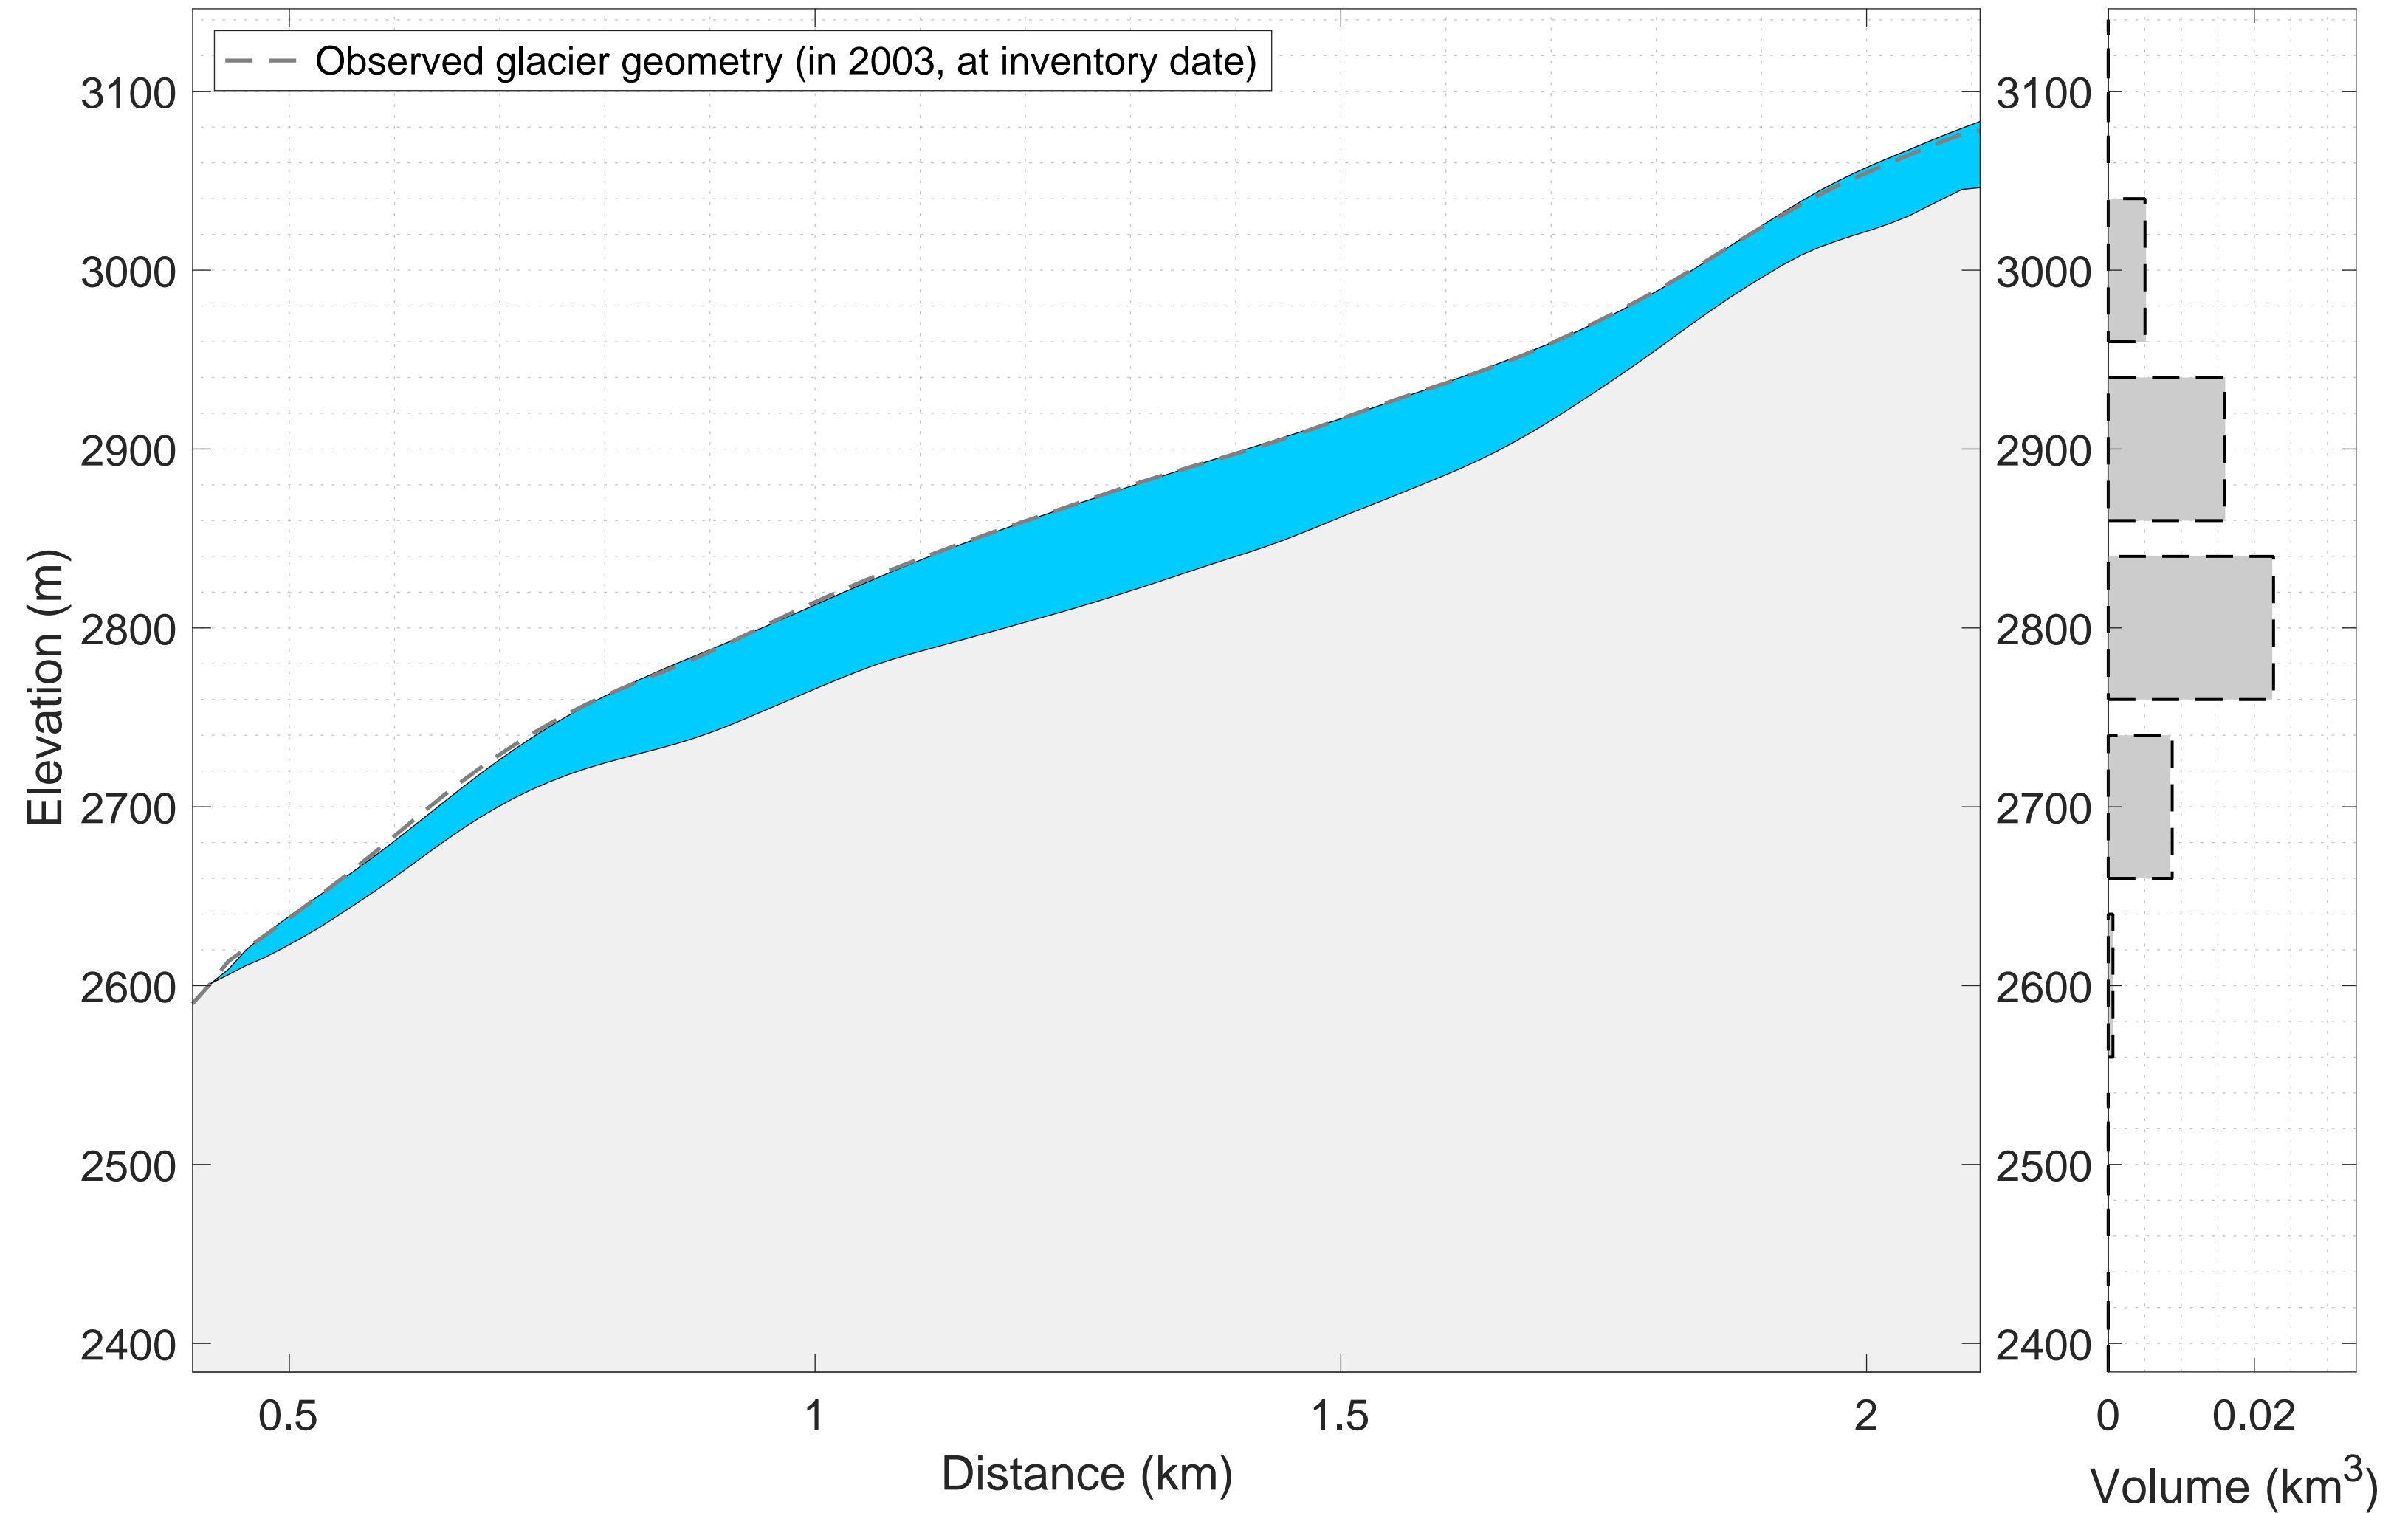

Supplement: Supplementary file 614 [file tc-13-1125-2019-supplement.zip]

**Modelled geometry (Glacier ID = 01814;  $A = 2.9604\text{e-}17 \text{ Pa}^{-3} \text{ a}^{-1}$ ;  $dx = 10 \text{ m}$ )**

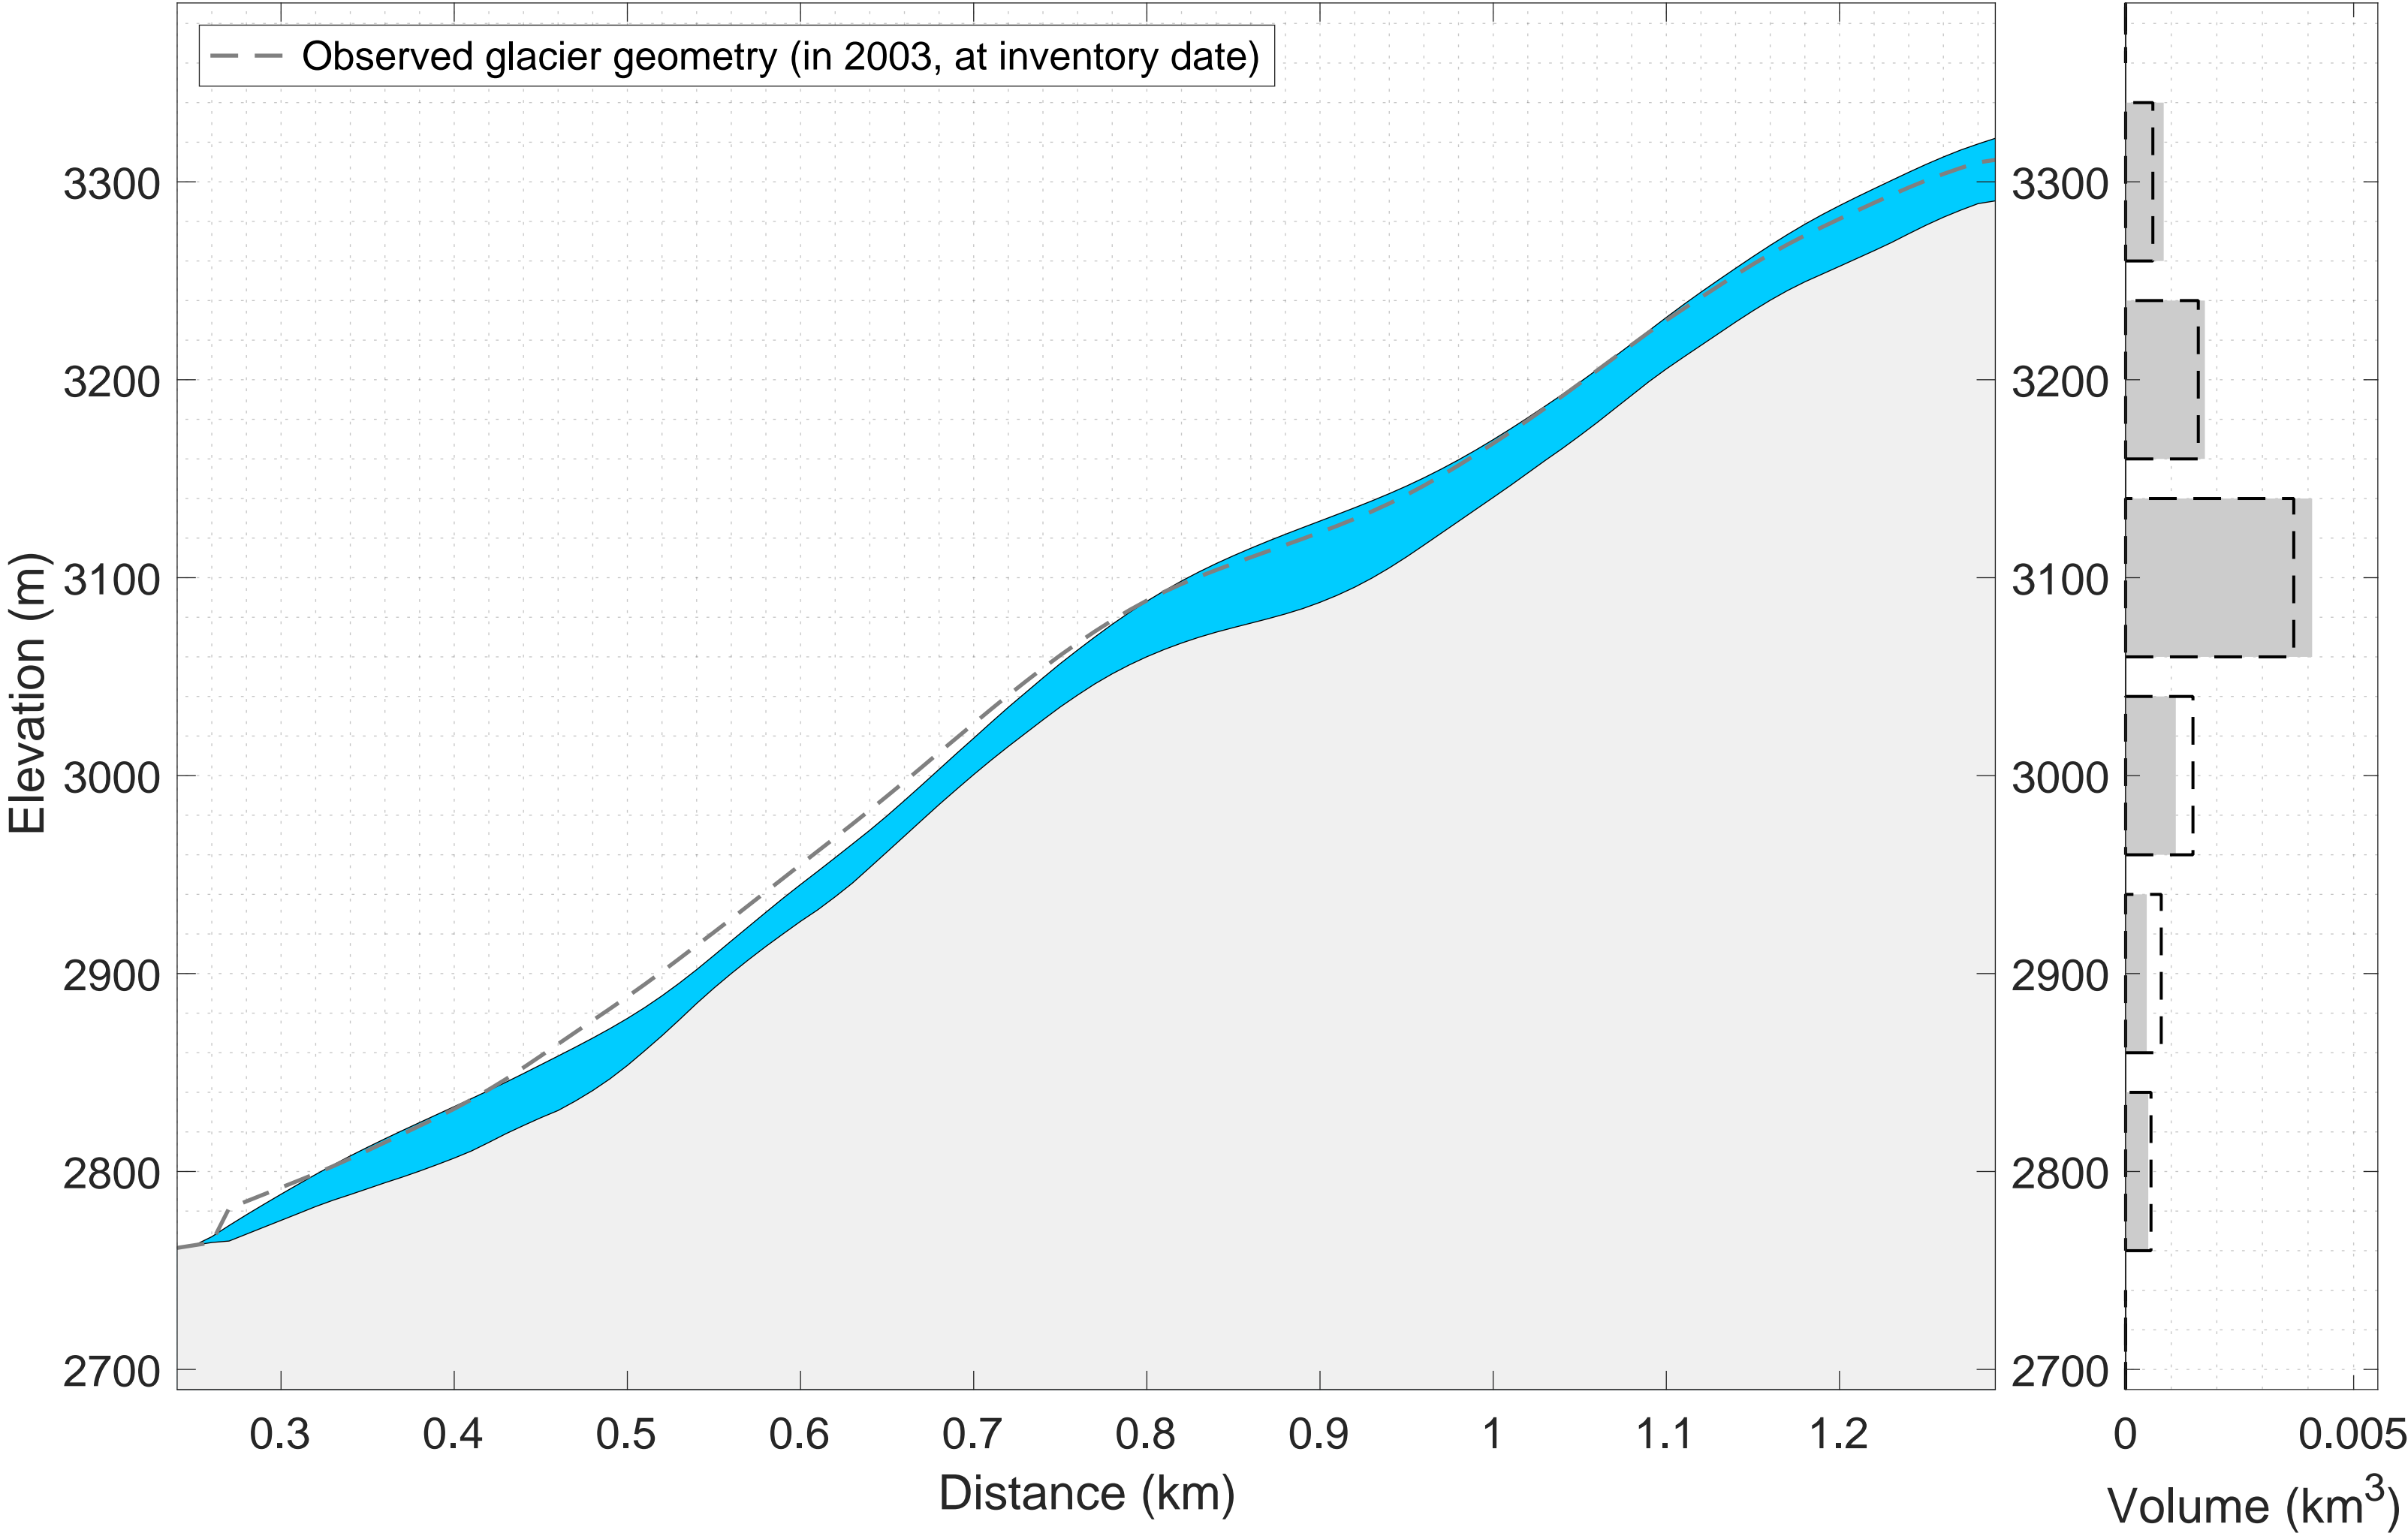

Supplement: Supplementary file 615 [file tc-13-1125-2019-supplement.zip]

**Modelled geometry (Glacier ID = 03653;  $A = 1.0266\text{e-}16 \text{ Pa}^{-3} \text{ a}^{-1}$ ;  $dx = 29 \text{ m}$ )**

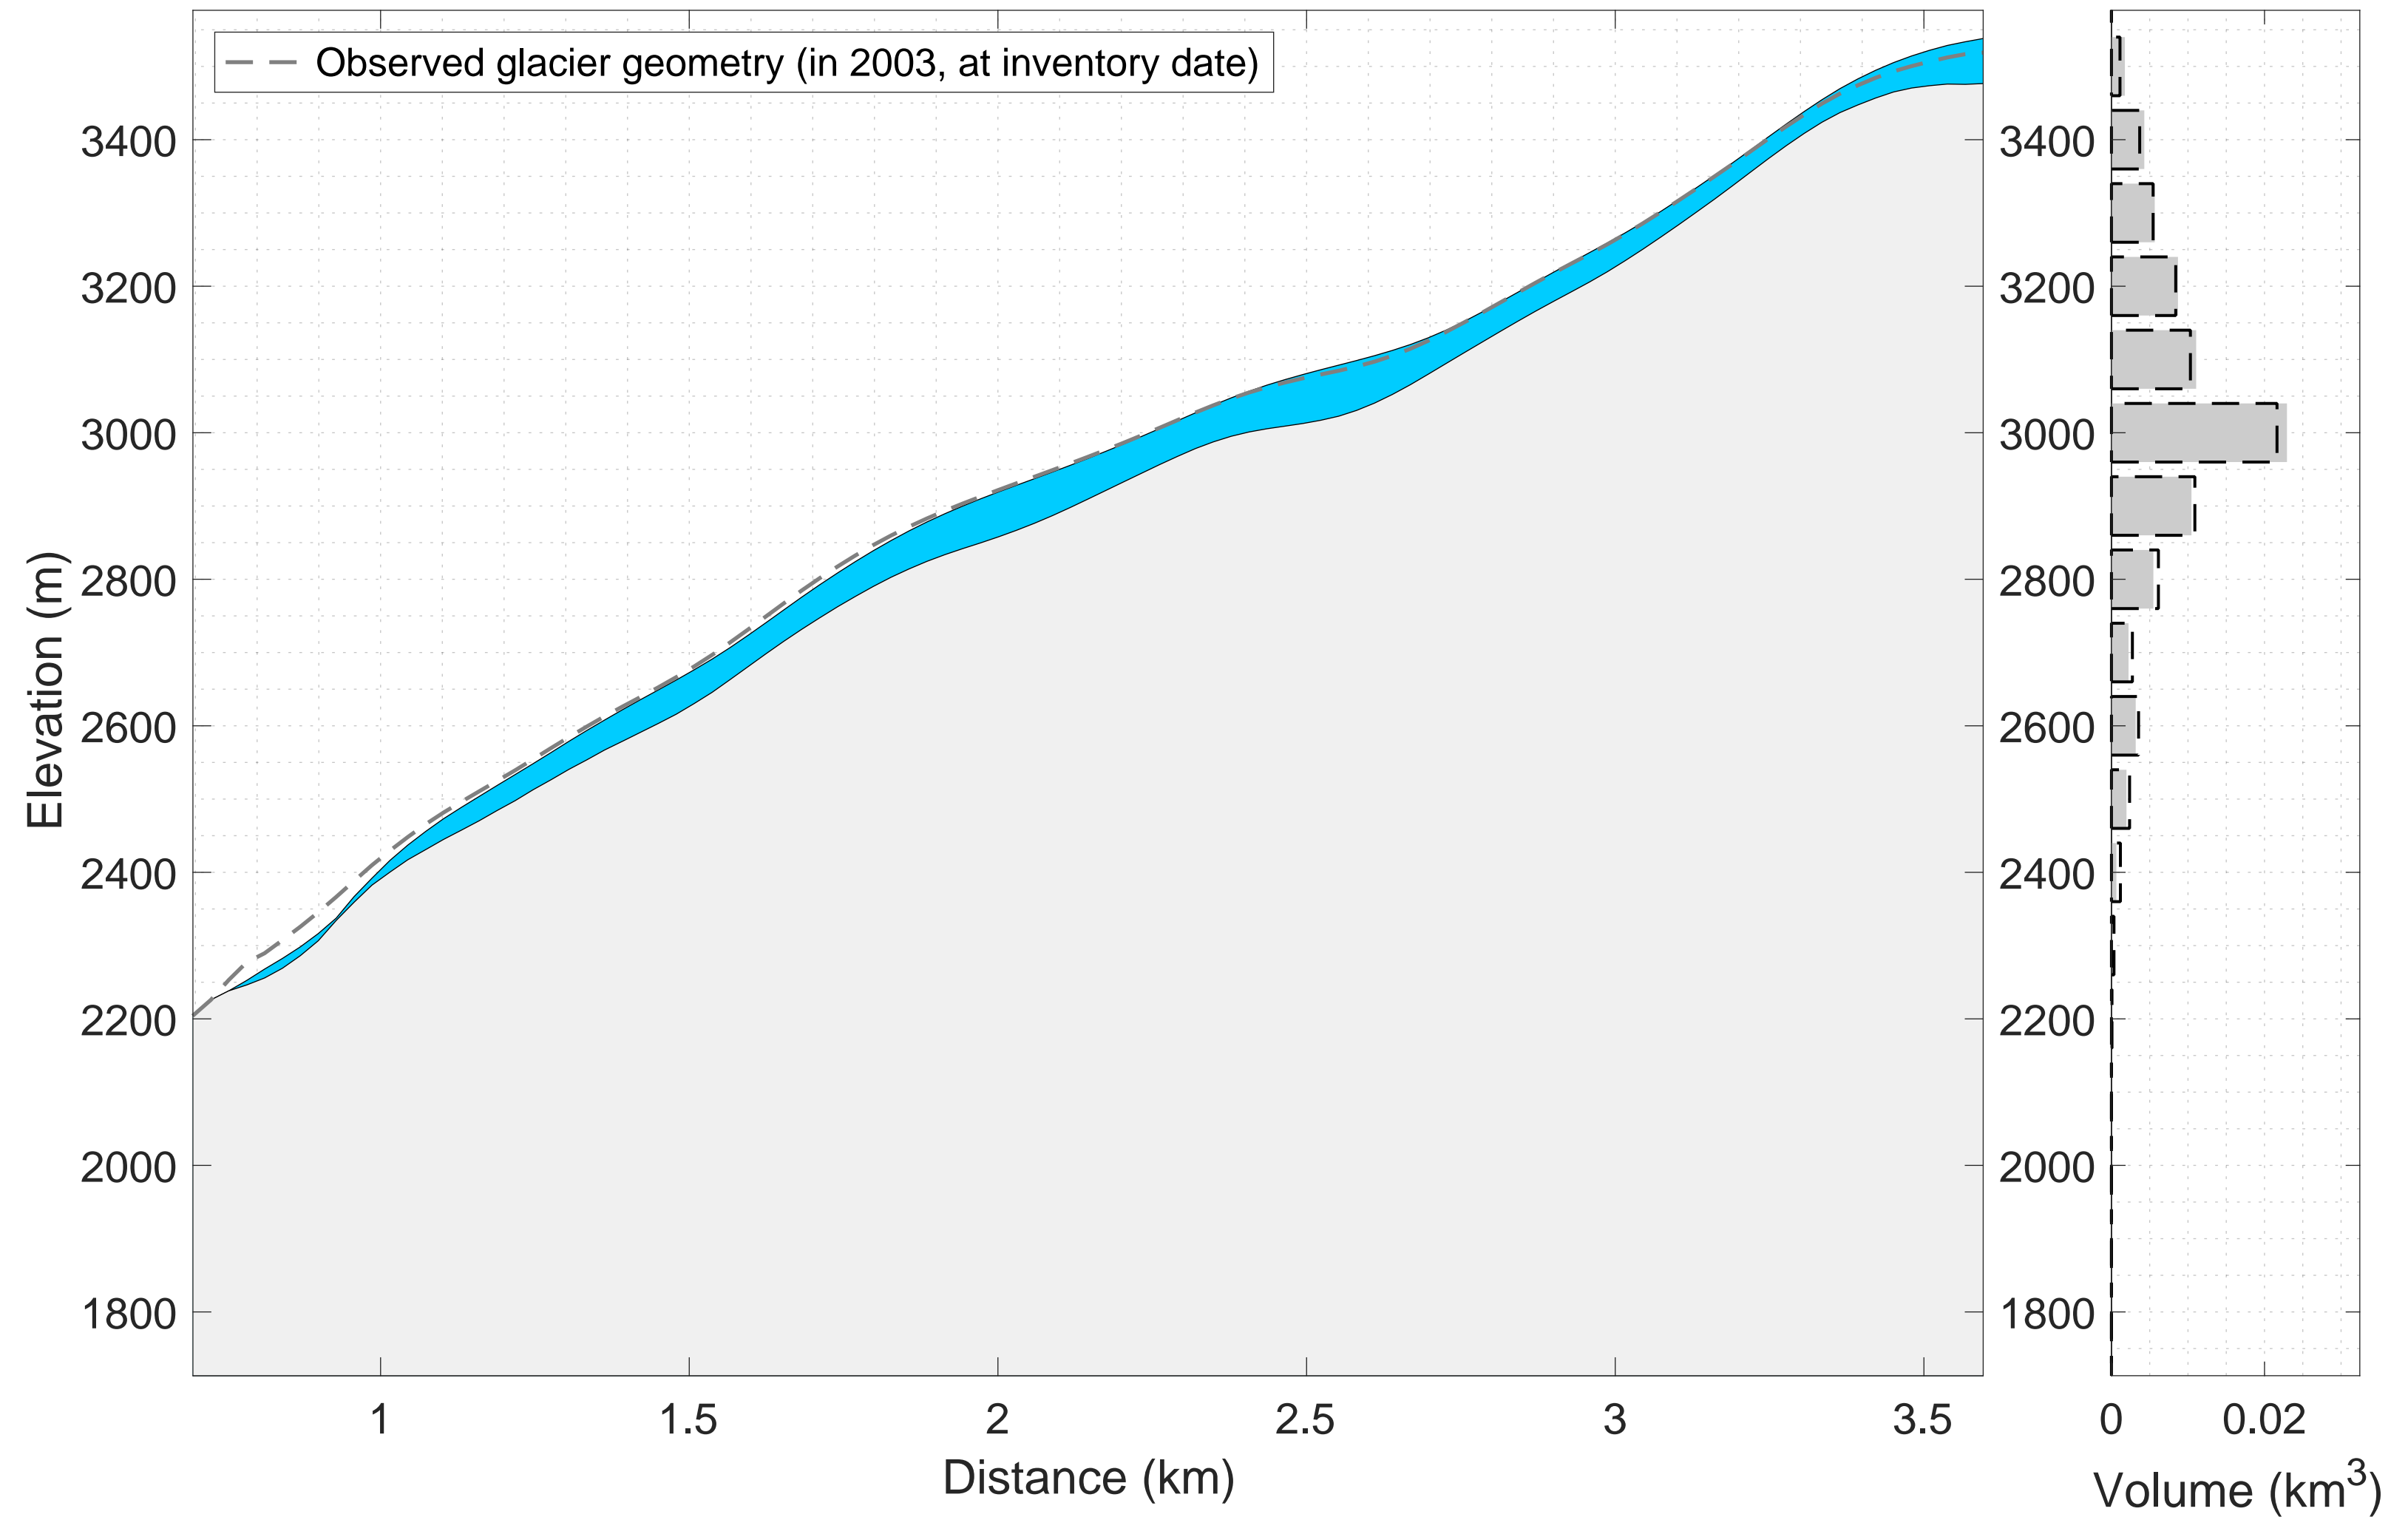

Supplement: Supplementary file 616 [file tc-13-1125-2019-supplement.zip]

**Modelled geometry (Glacier ID = 01971;  $A = 8.0609\text{e-}17 \text{ Pa}^{-3} \text{ a}^{-1}$ ;  $dx = 12 \text{ m}$ )**

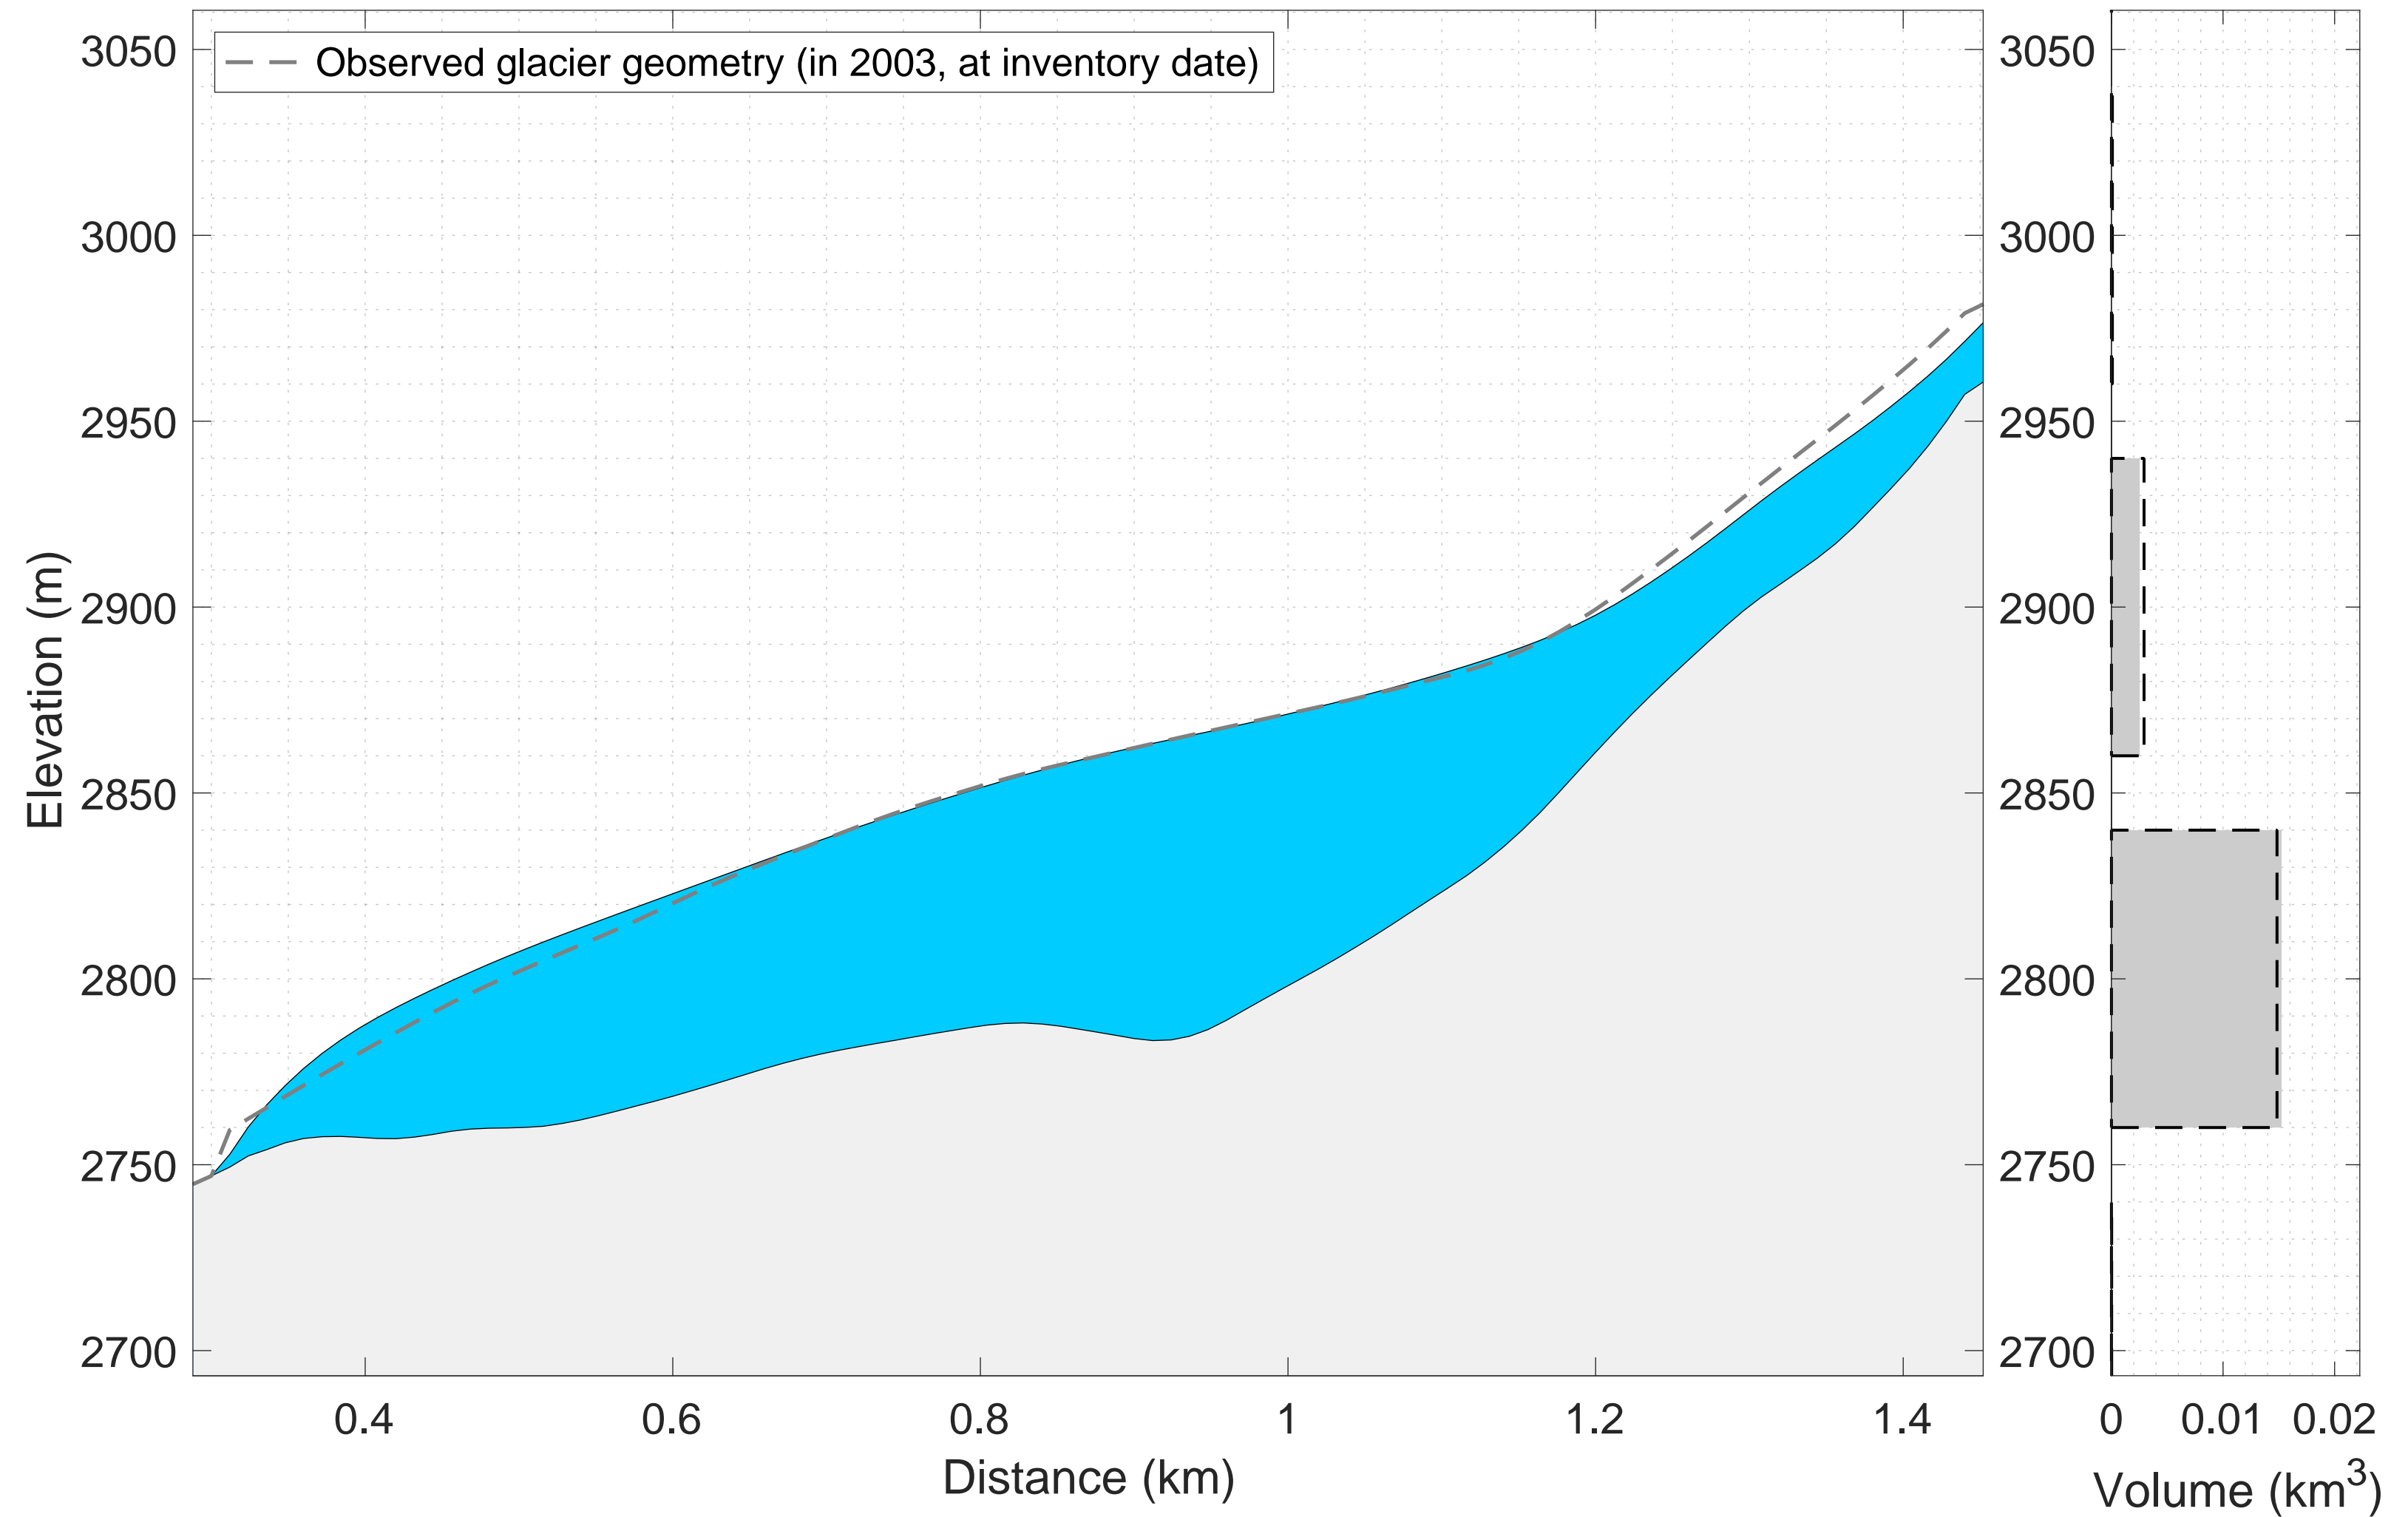

Supplement: Supplementary file 617 [file tc-13-1125-2019-supplement.zip]

**Modelled geometry (Glacier ID = 00834;  $A = 1.1769\text{e-}16 \text{ Pa}^{-3} \text{ a}^{-1}$ ;  $dx = 14 \text{ m}$ )**

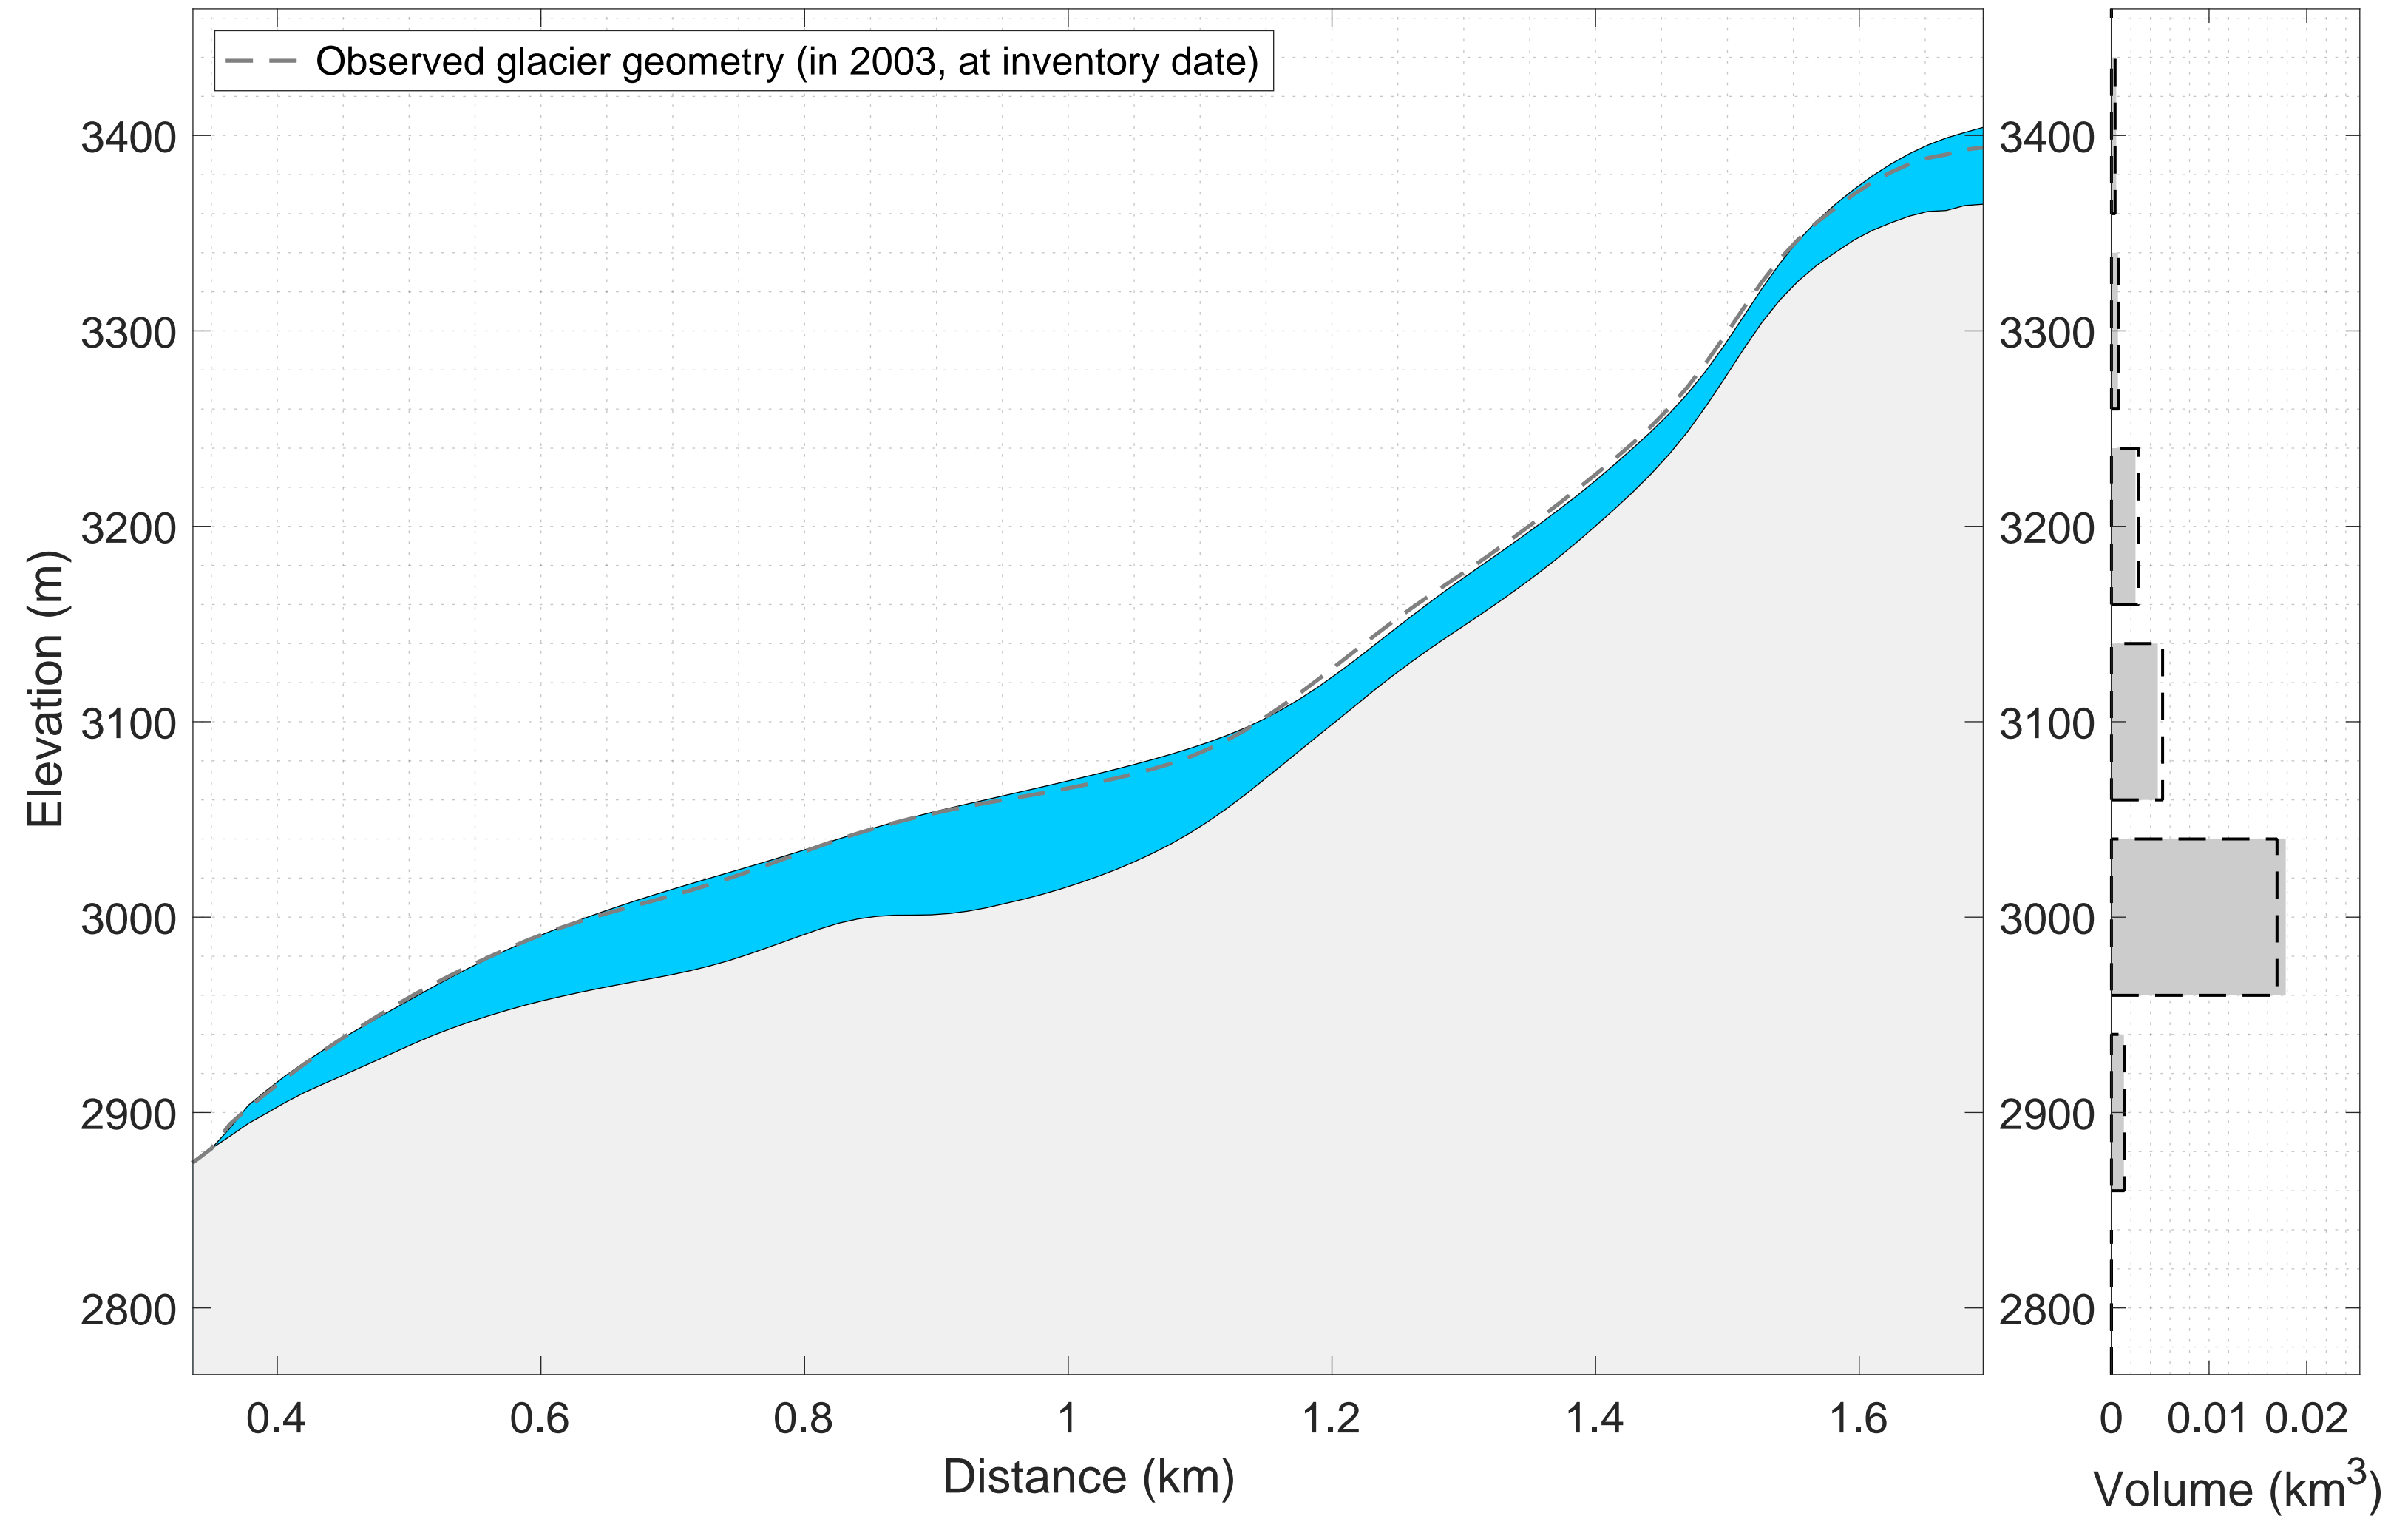

Supplement: Supplementary file 618 [file tc-13-1125-2019-supplement.zip]

**Modelled geometry (Glacier ID = 00843;  $A = 2.1522\text{e-}17 \text{ Pa}^{-3} \text{ a}^{-1}$ ;  $dx = 28 \text{ m}$ )**

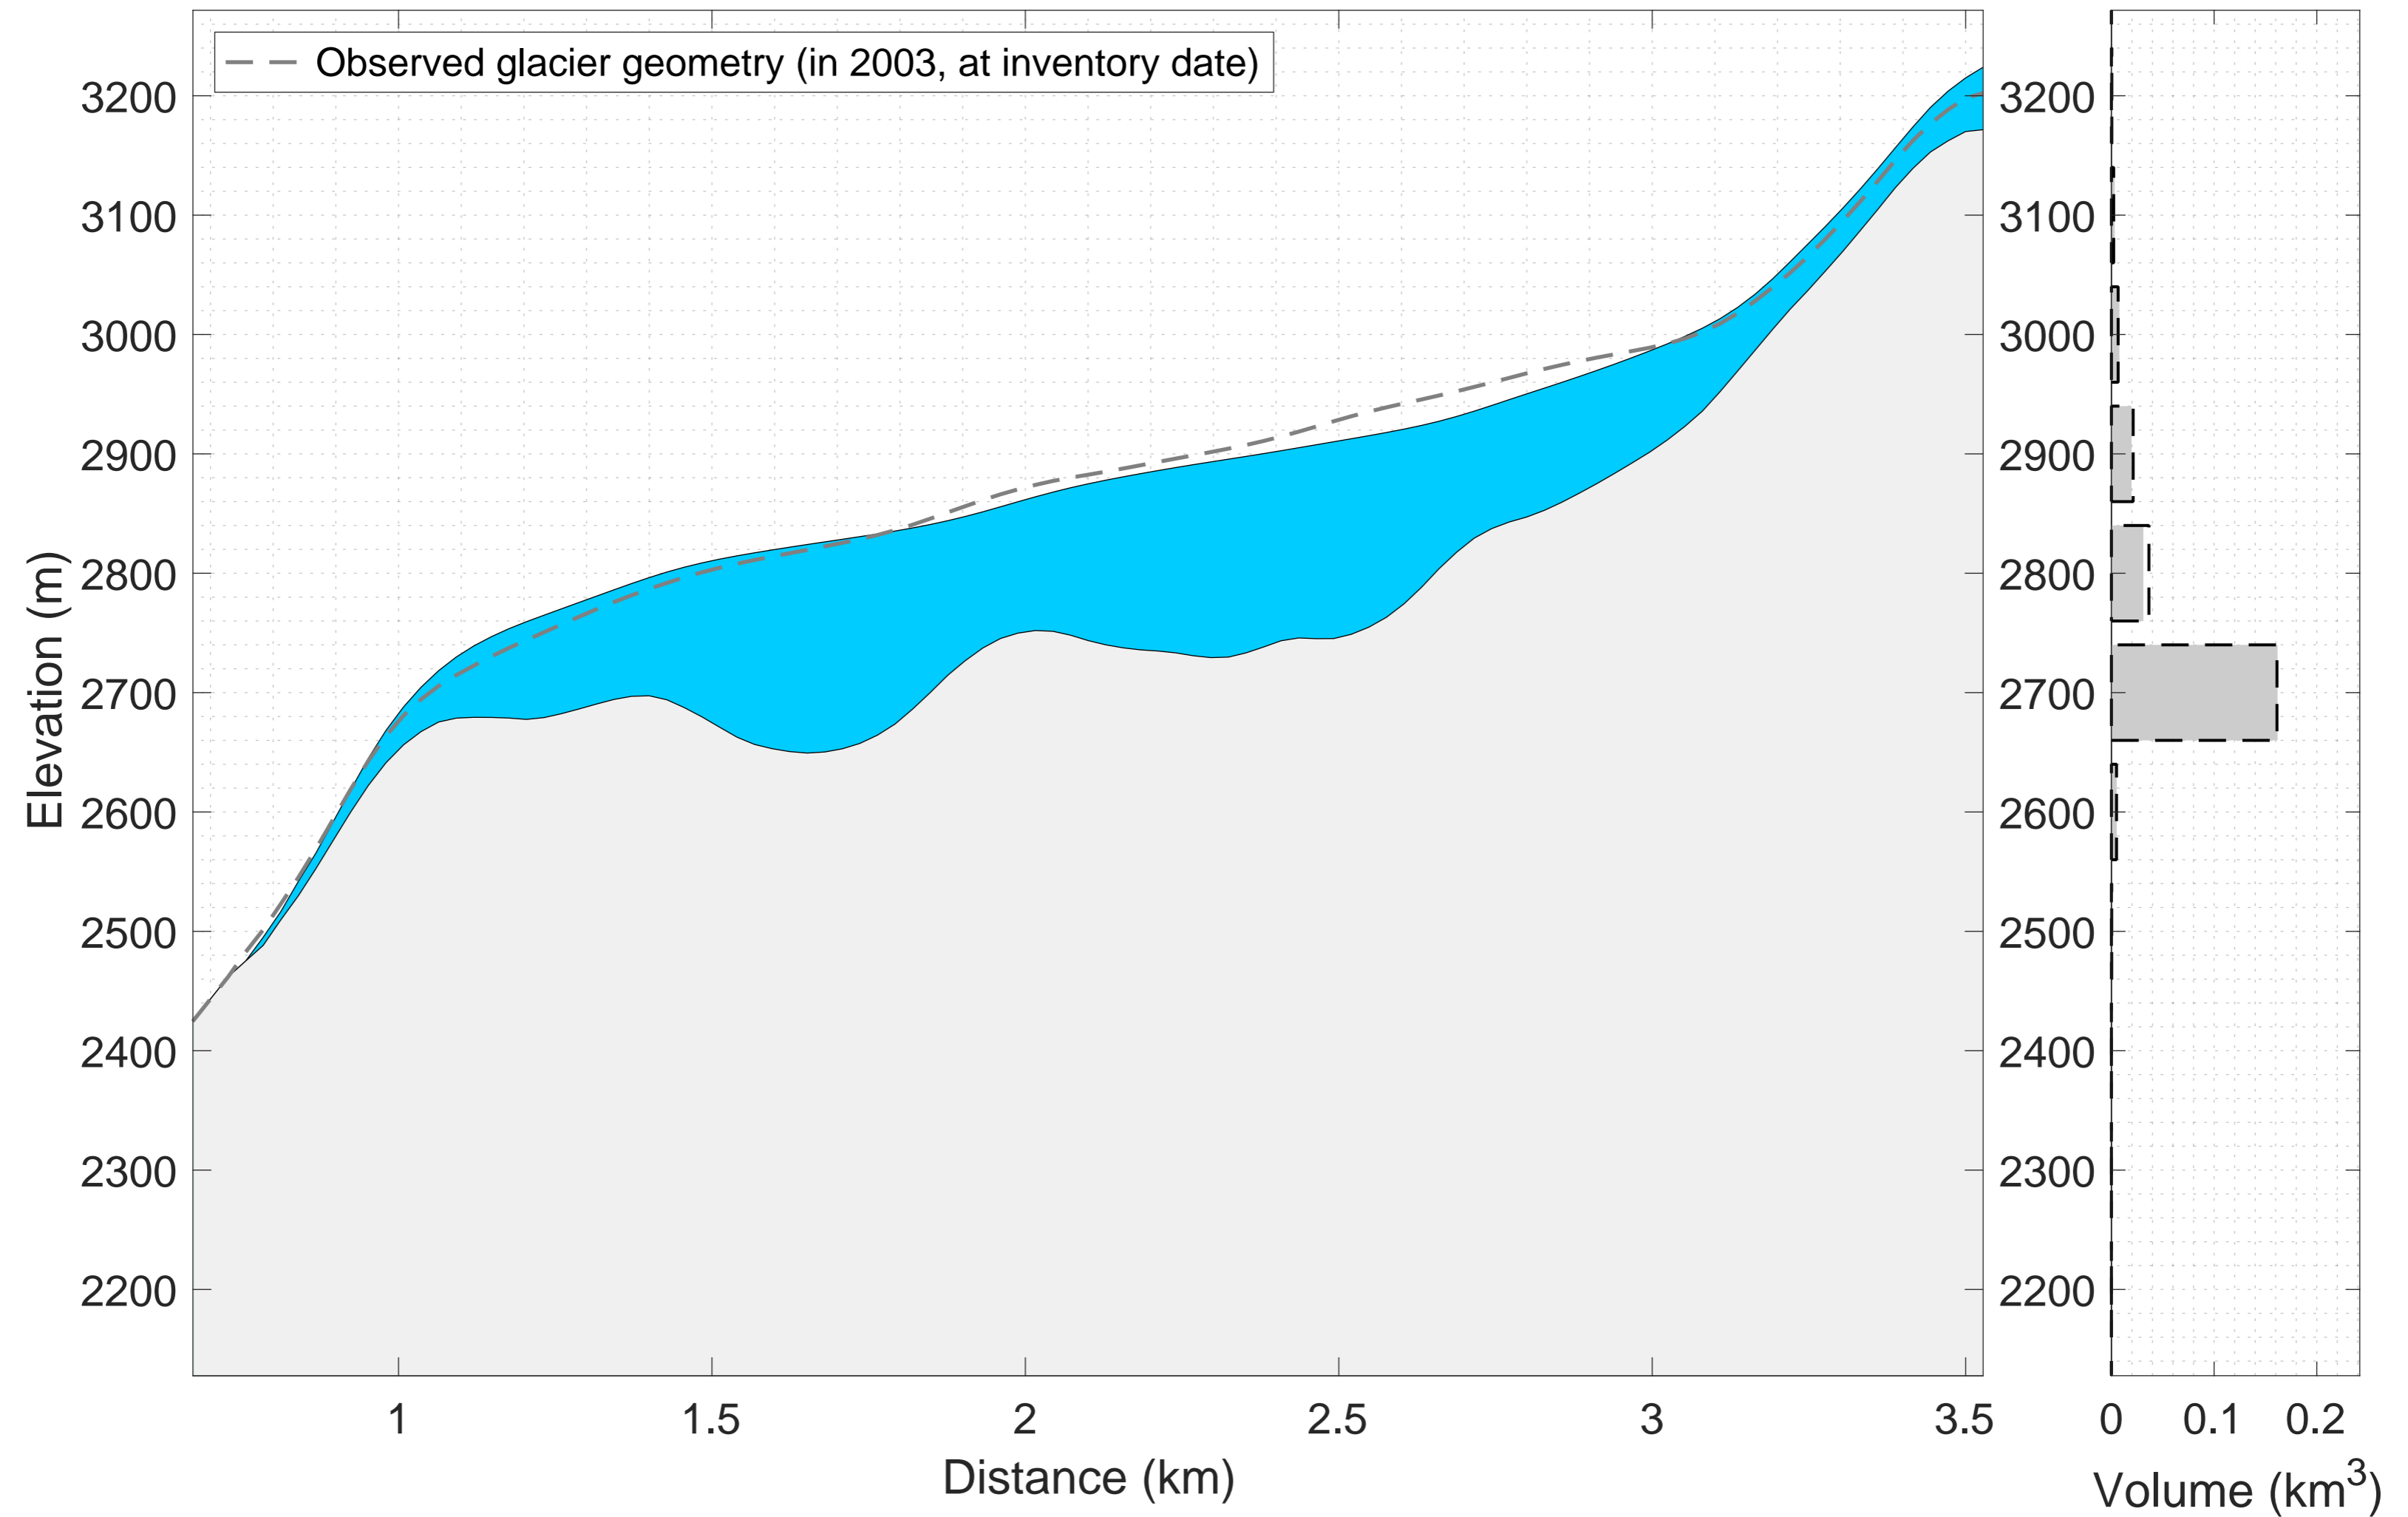

Supplement: Supplementary file 619 [file tc-13-1125-2019-supplement.zip]

**Modelled geometry (Glacier ID = 03437;  $A = 8.7477\text{e-}17 \text{ Pa}^{-3} \text{ a}^{-1}$ ;  $dx = 14 \text{ m}$ )**

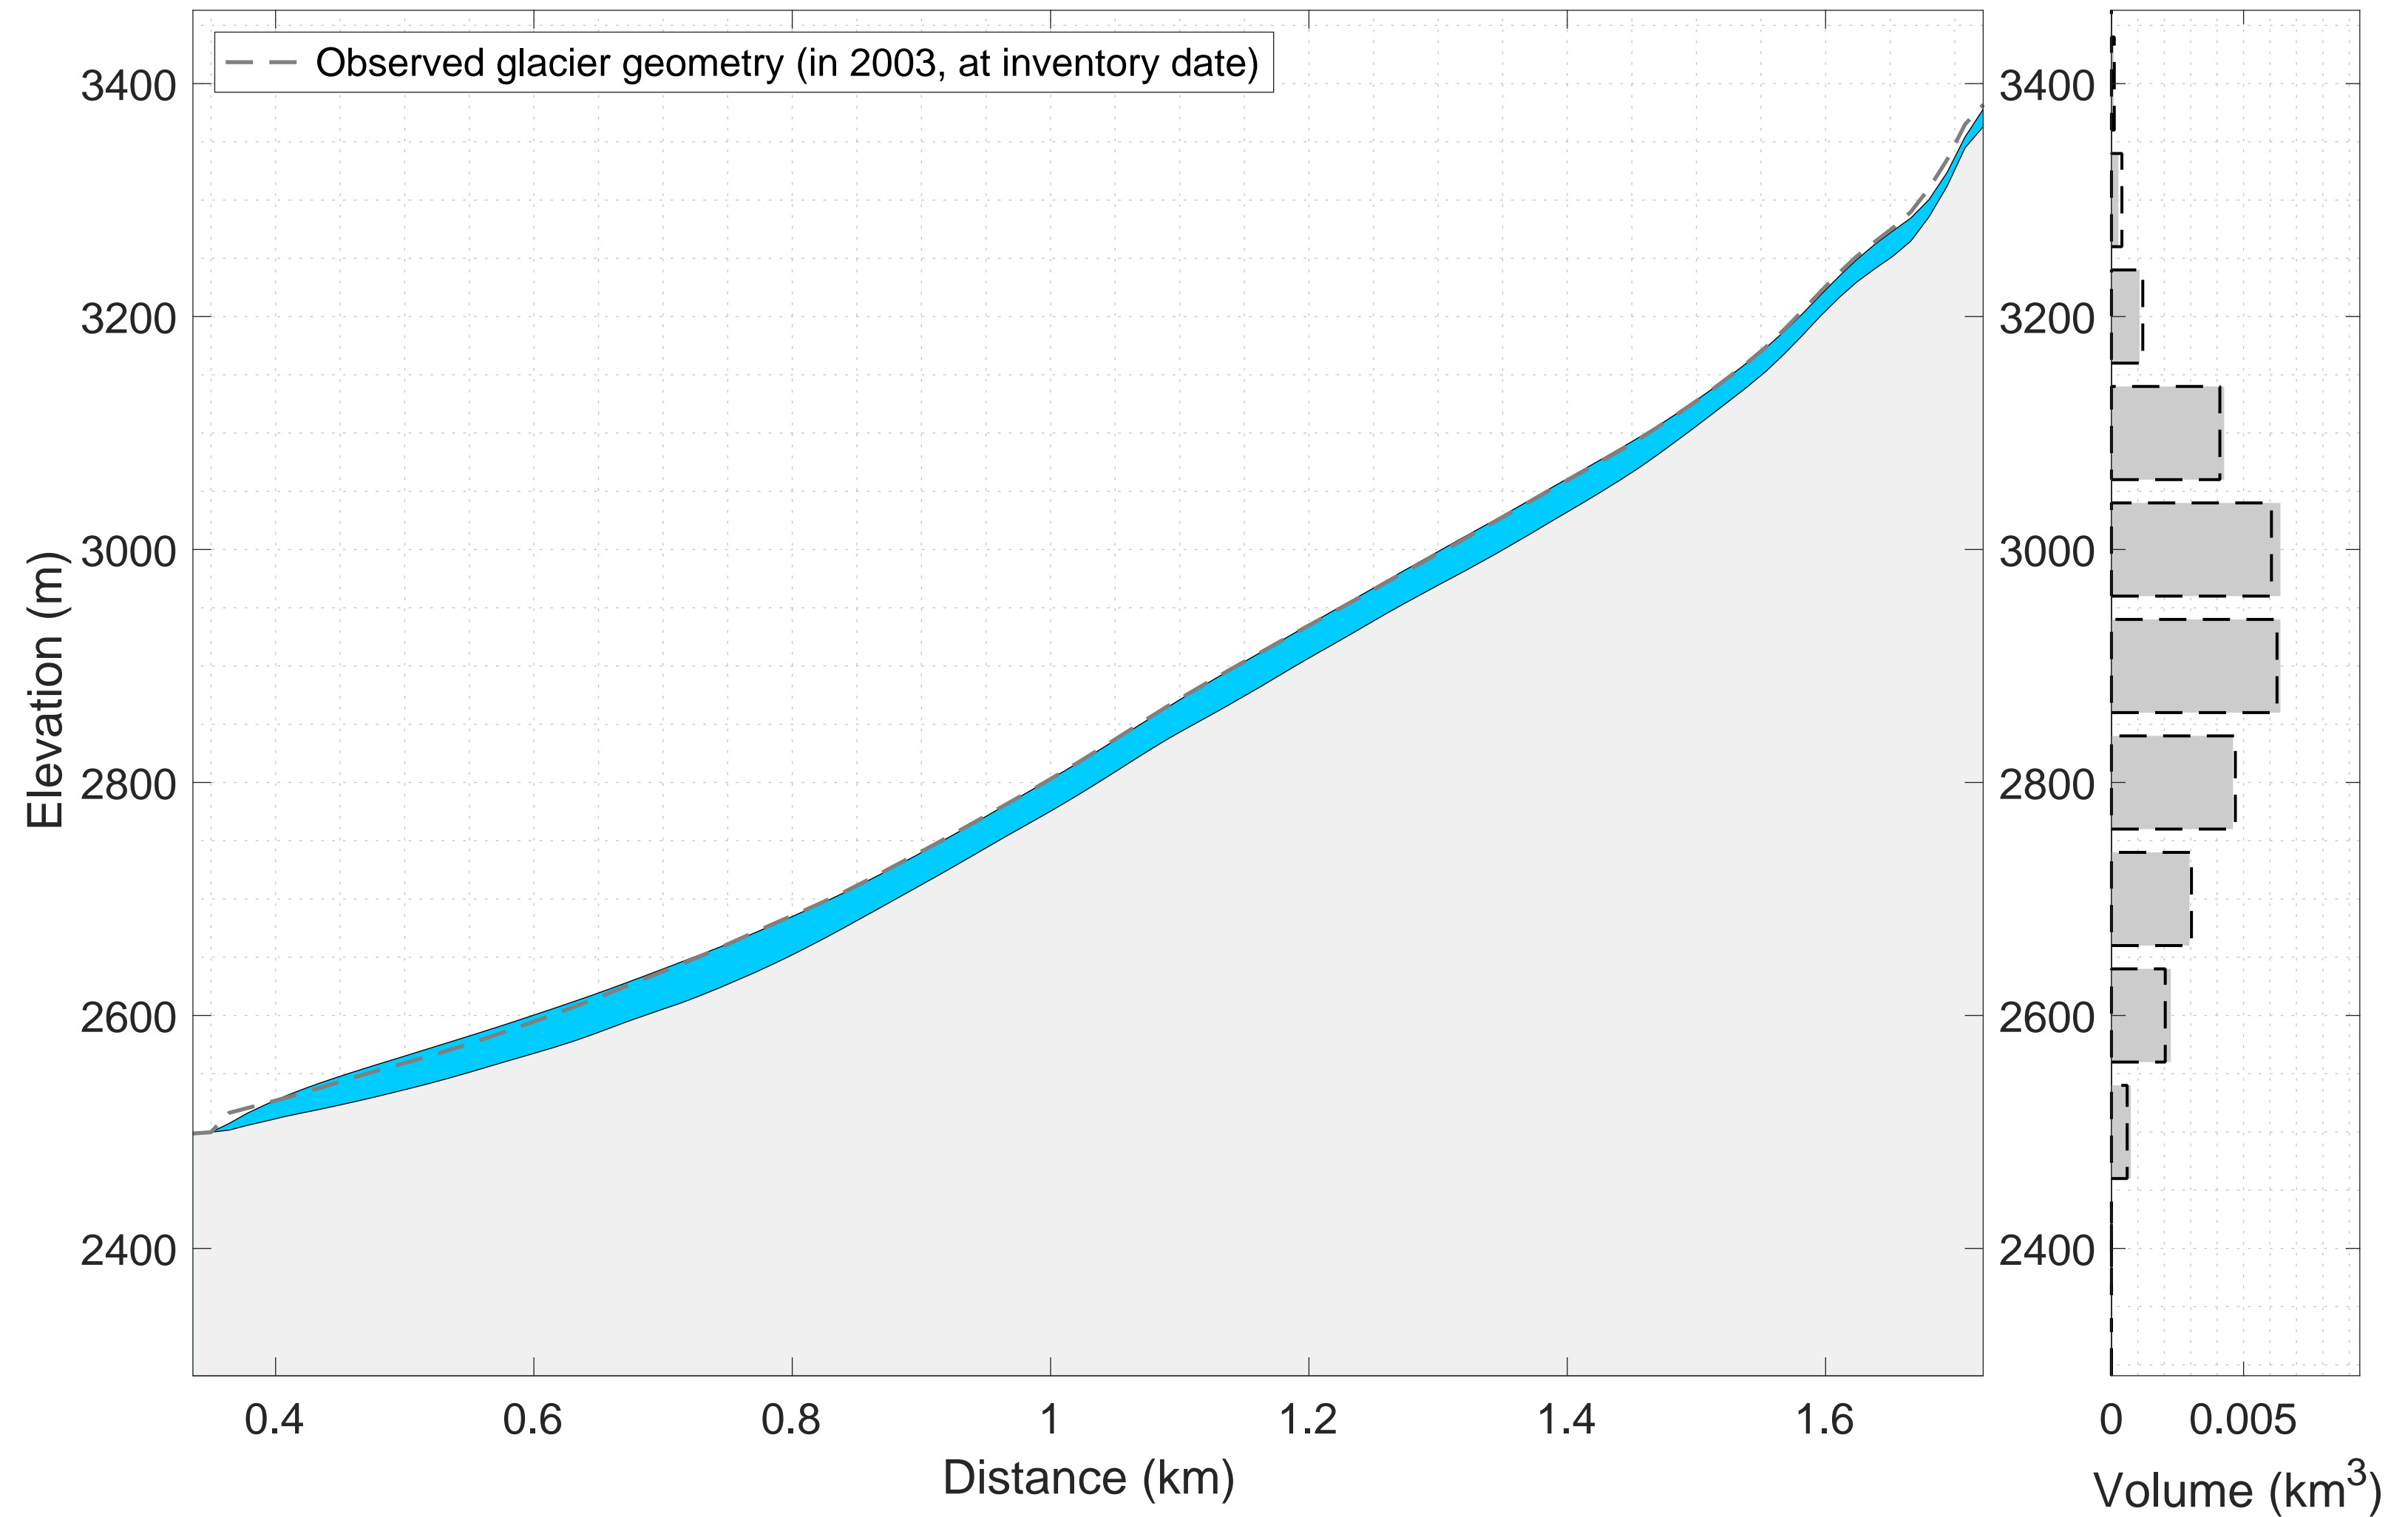

Supplement: Supplementary file 620 [file tc-13-1125-2019-supplement.zip]

**Modelled geometry (Glacier ID = 01783;  $A = 3.56\text{e-}17 \text{ Pa}^{-3} \text{ a}^{-1}$ ;  $dx = 11 \text{ m}$ )**

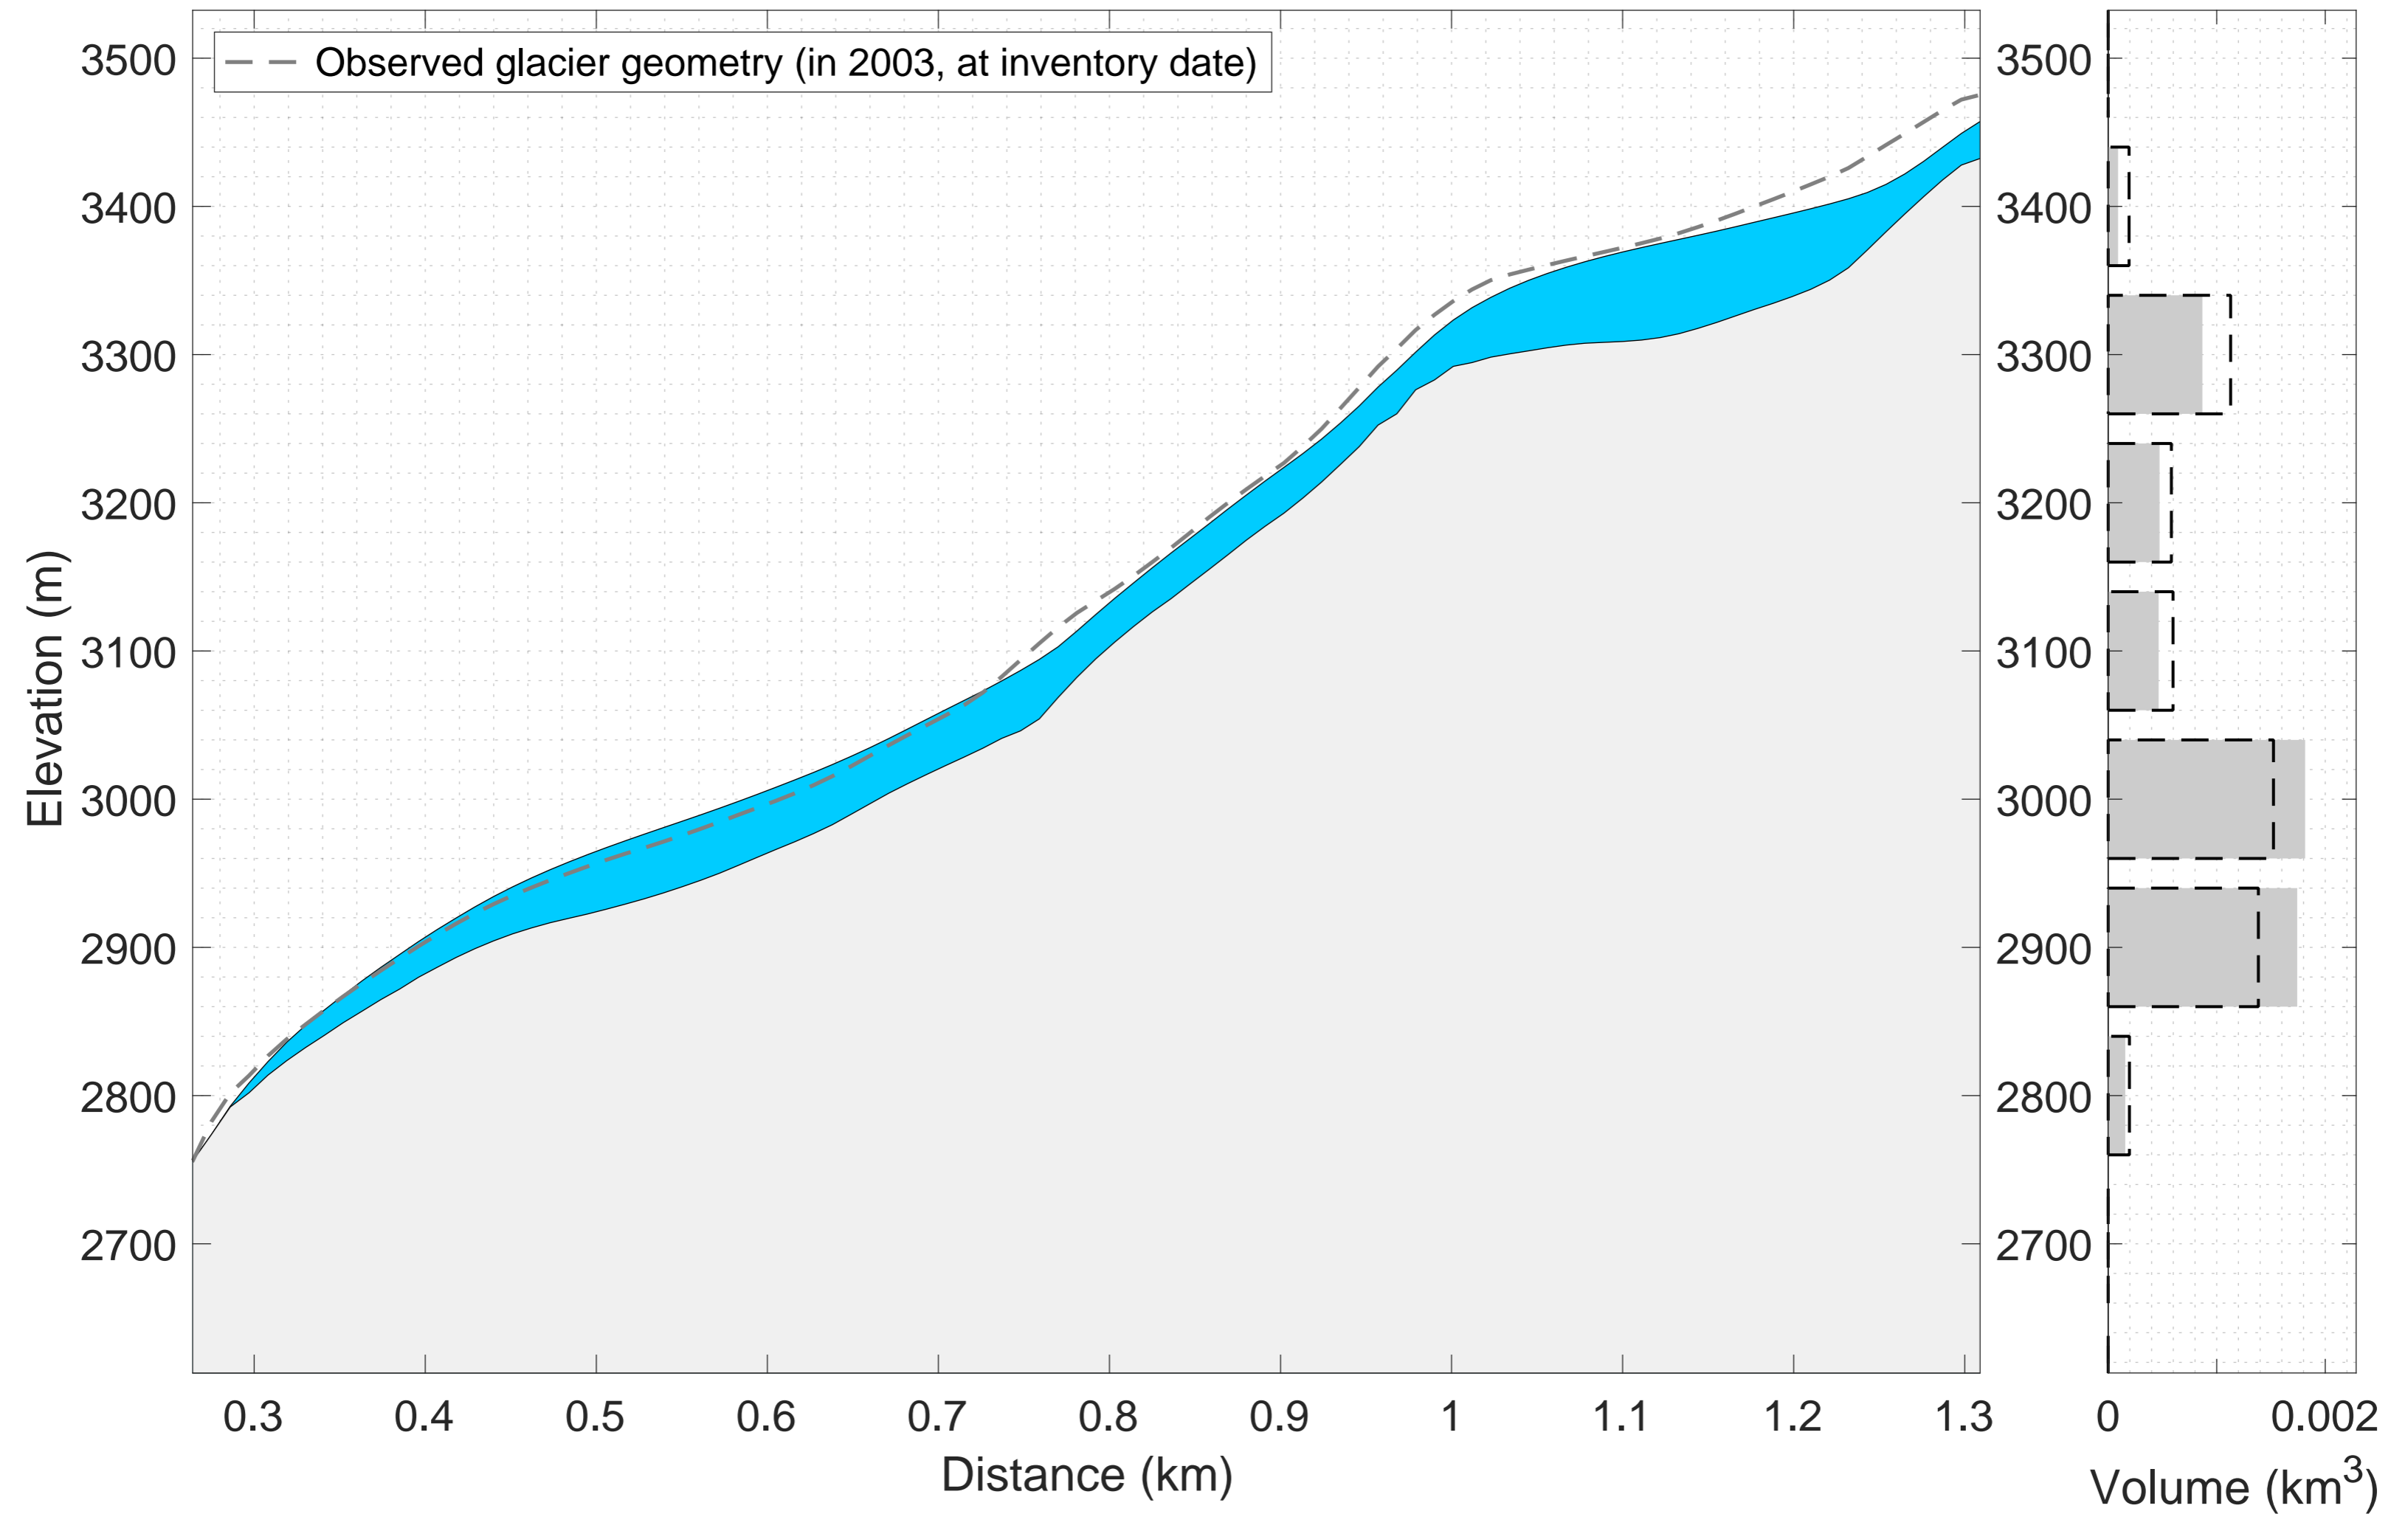

Supplement: Supplementary file 621 [file tc-13-1125-2019-supplement.zip]

**Modelled geometry (Glacier ID = 01156;  $A = 9.1947\text{e-}17 \text{ Pa}^{-3} \text{ a}^{-1}$ ;  $dx = 23 \text{ m}$ )**

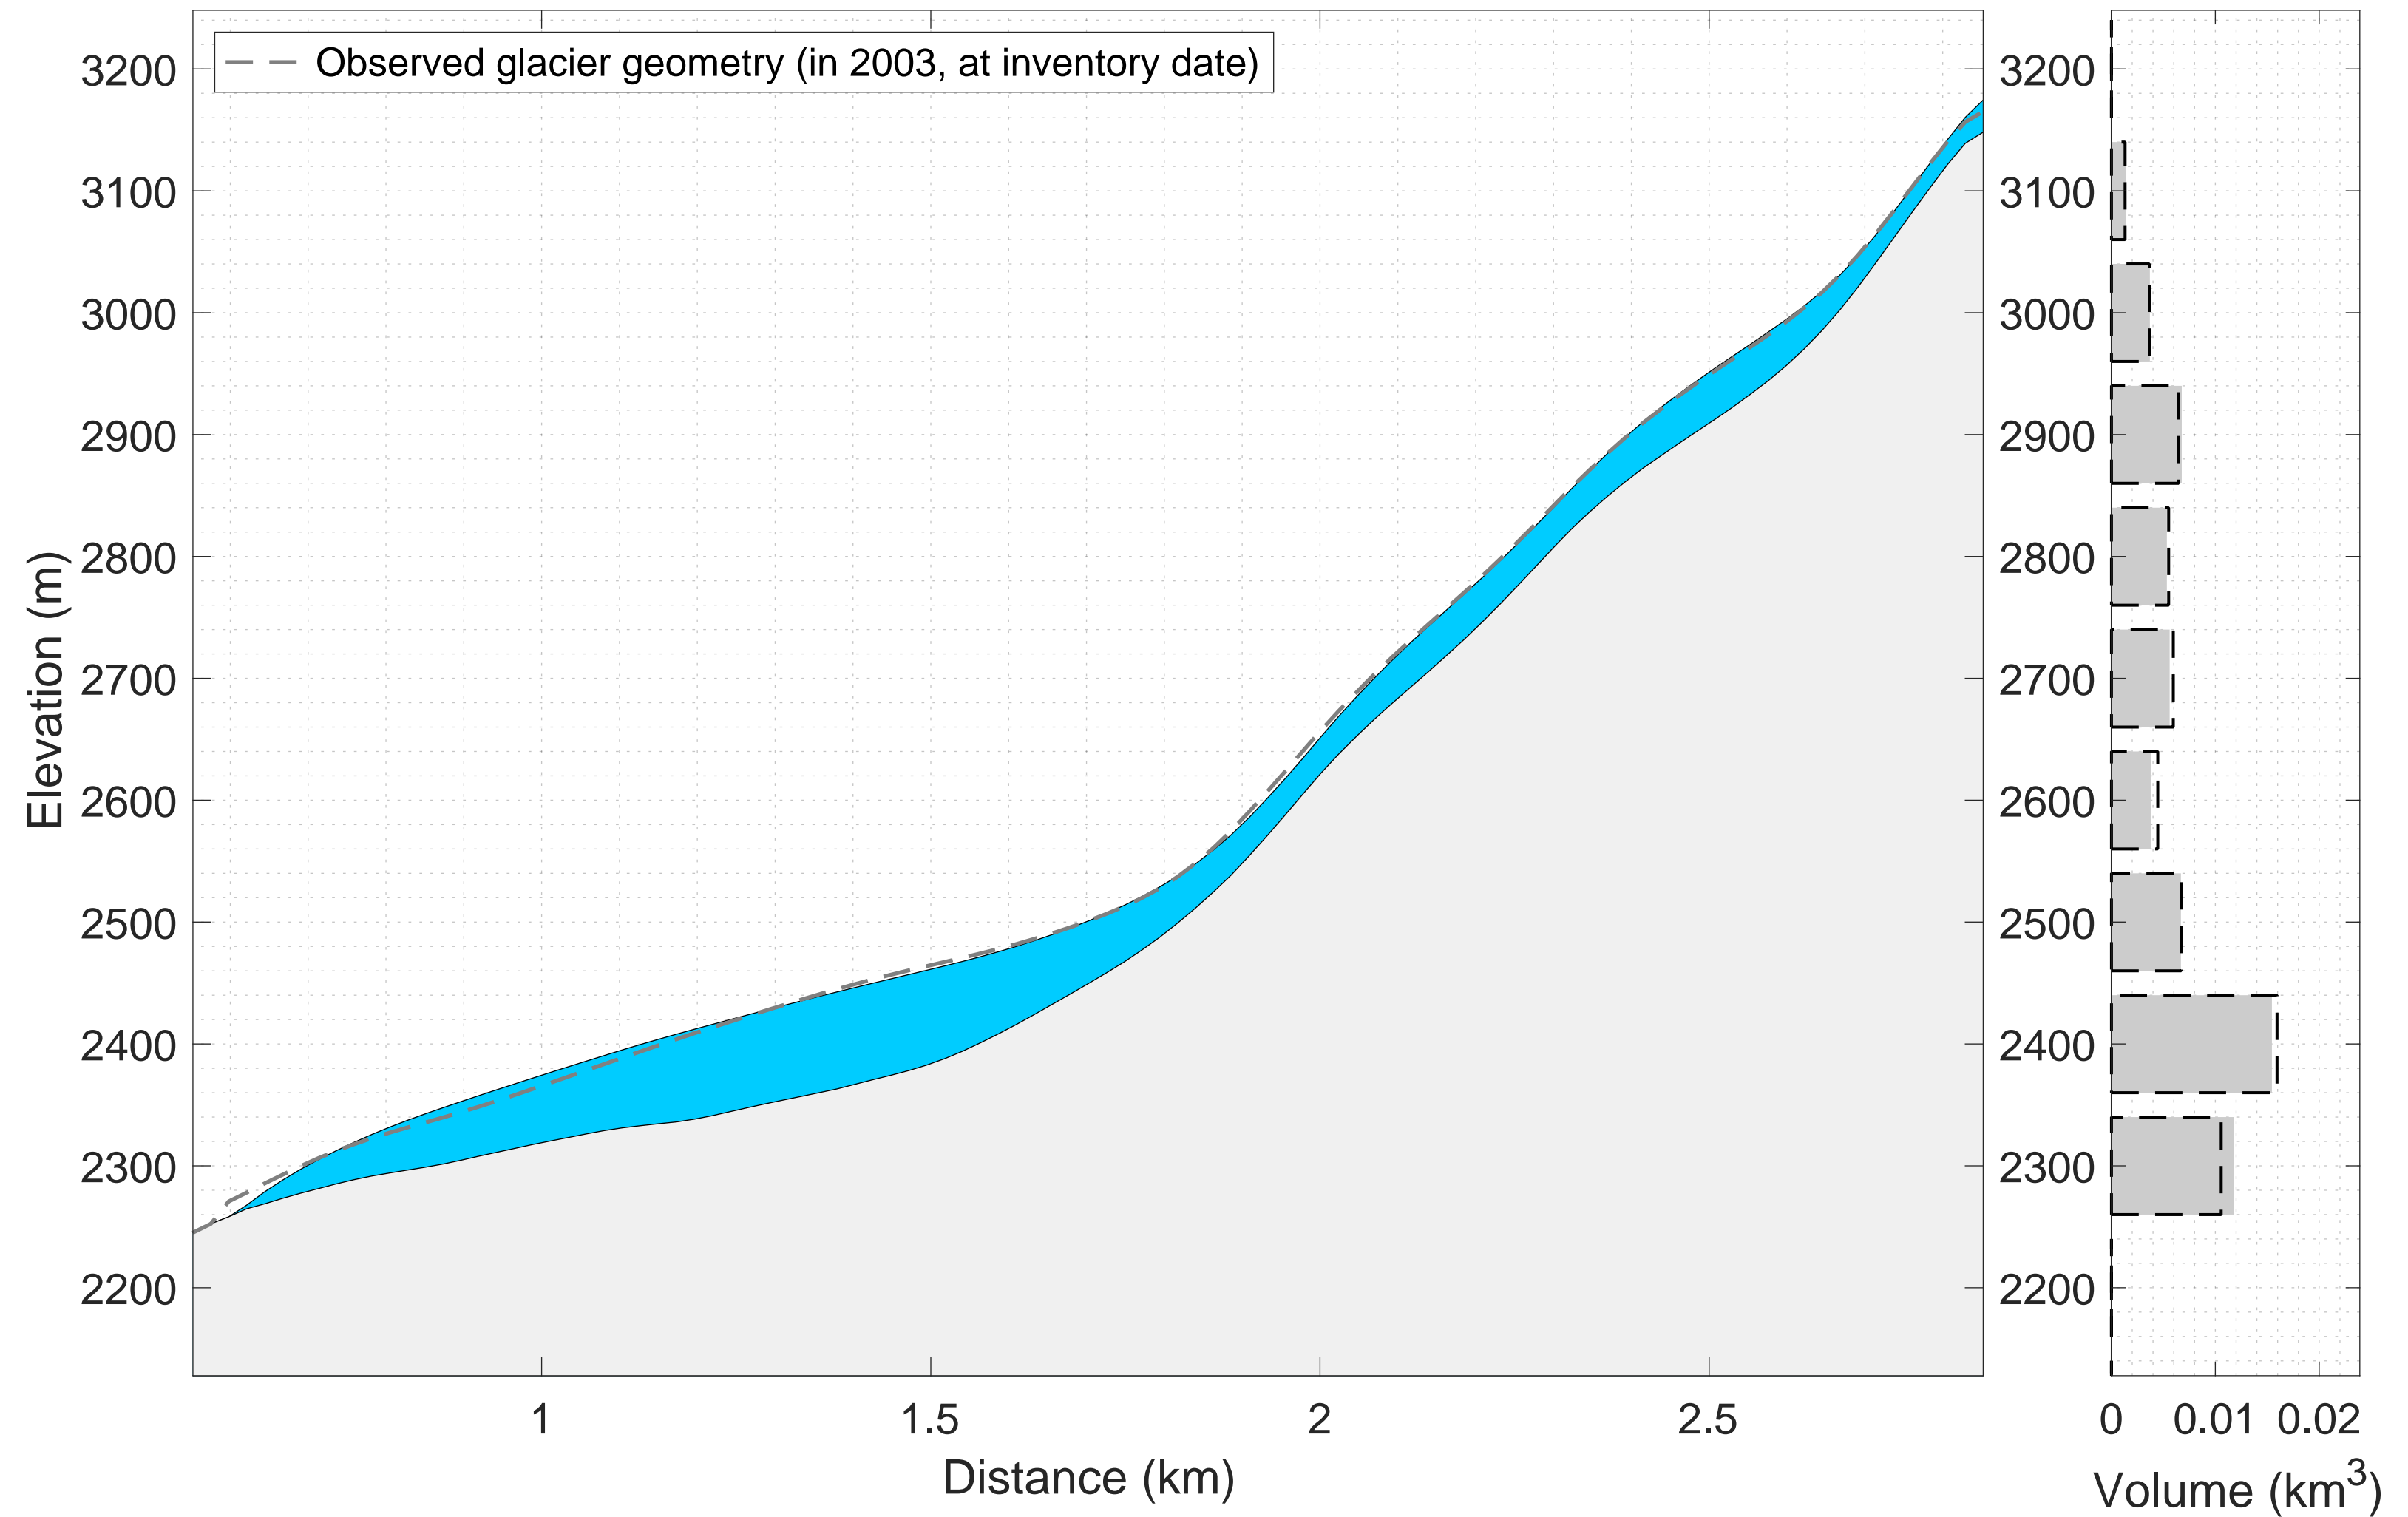

Supplement: Supplementary file 622 [file tc-13-1125-2019-supplement.zip]

**Modelled geometry (Glacier ID = 03664;  $A = 1.7253\text{e-}16 \text{ Pa}^{-3} \text{ a}^{-1}$ ;  $dx = 14 \text{ m}$ )**

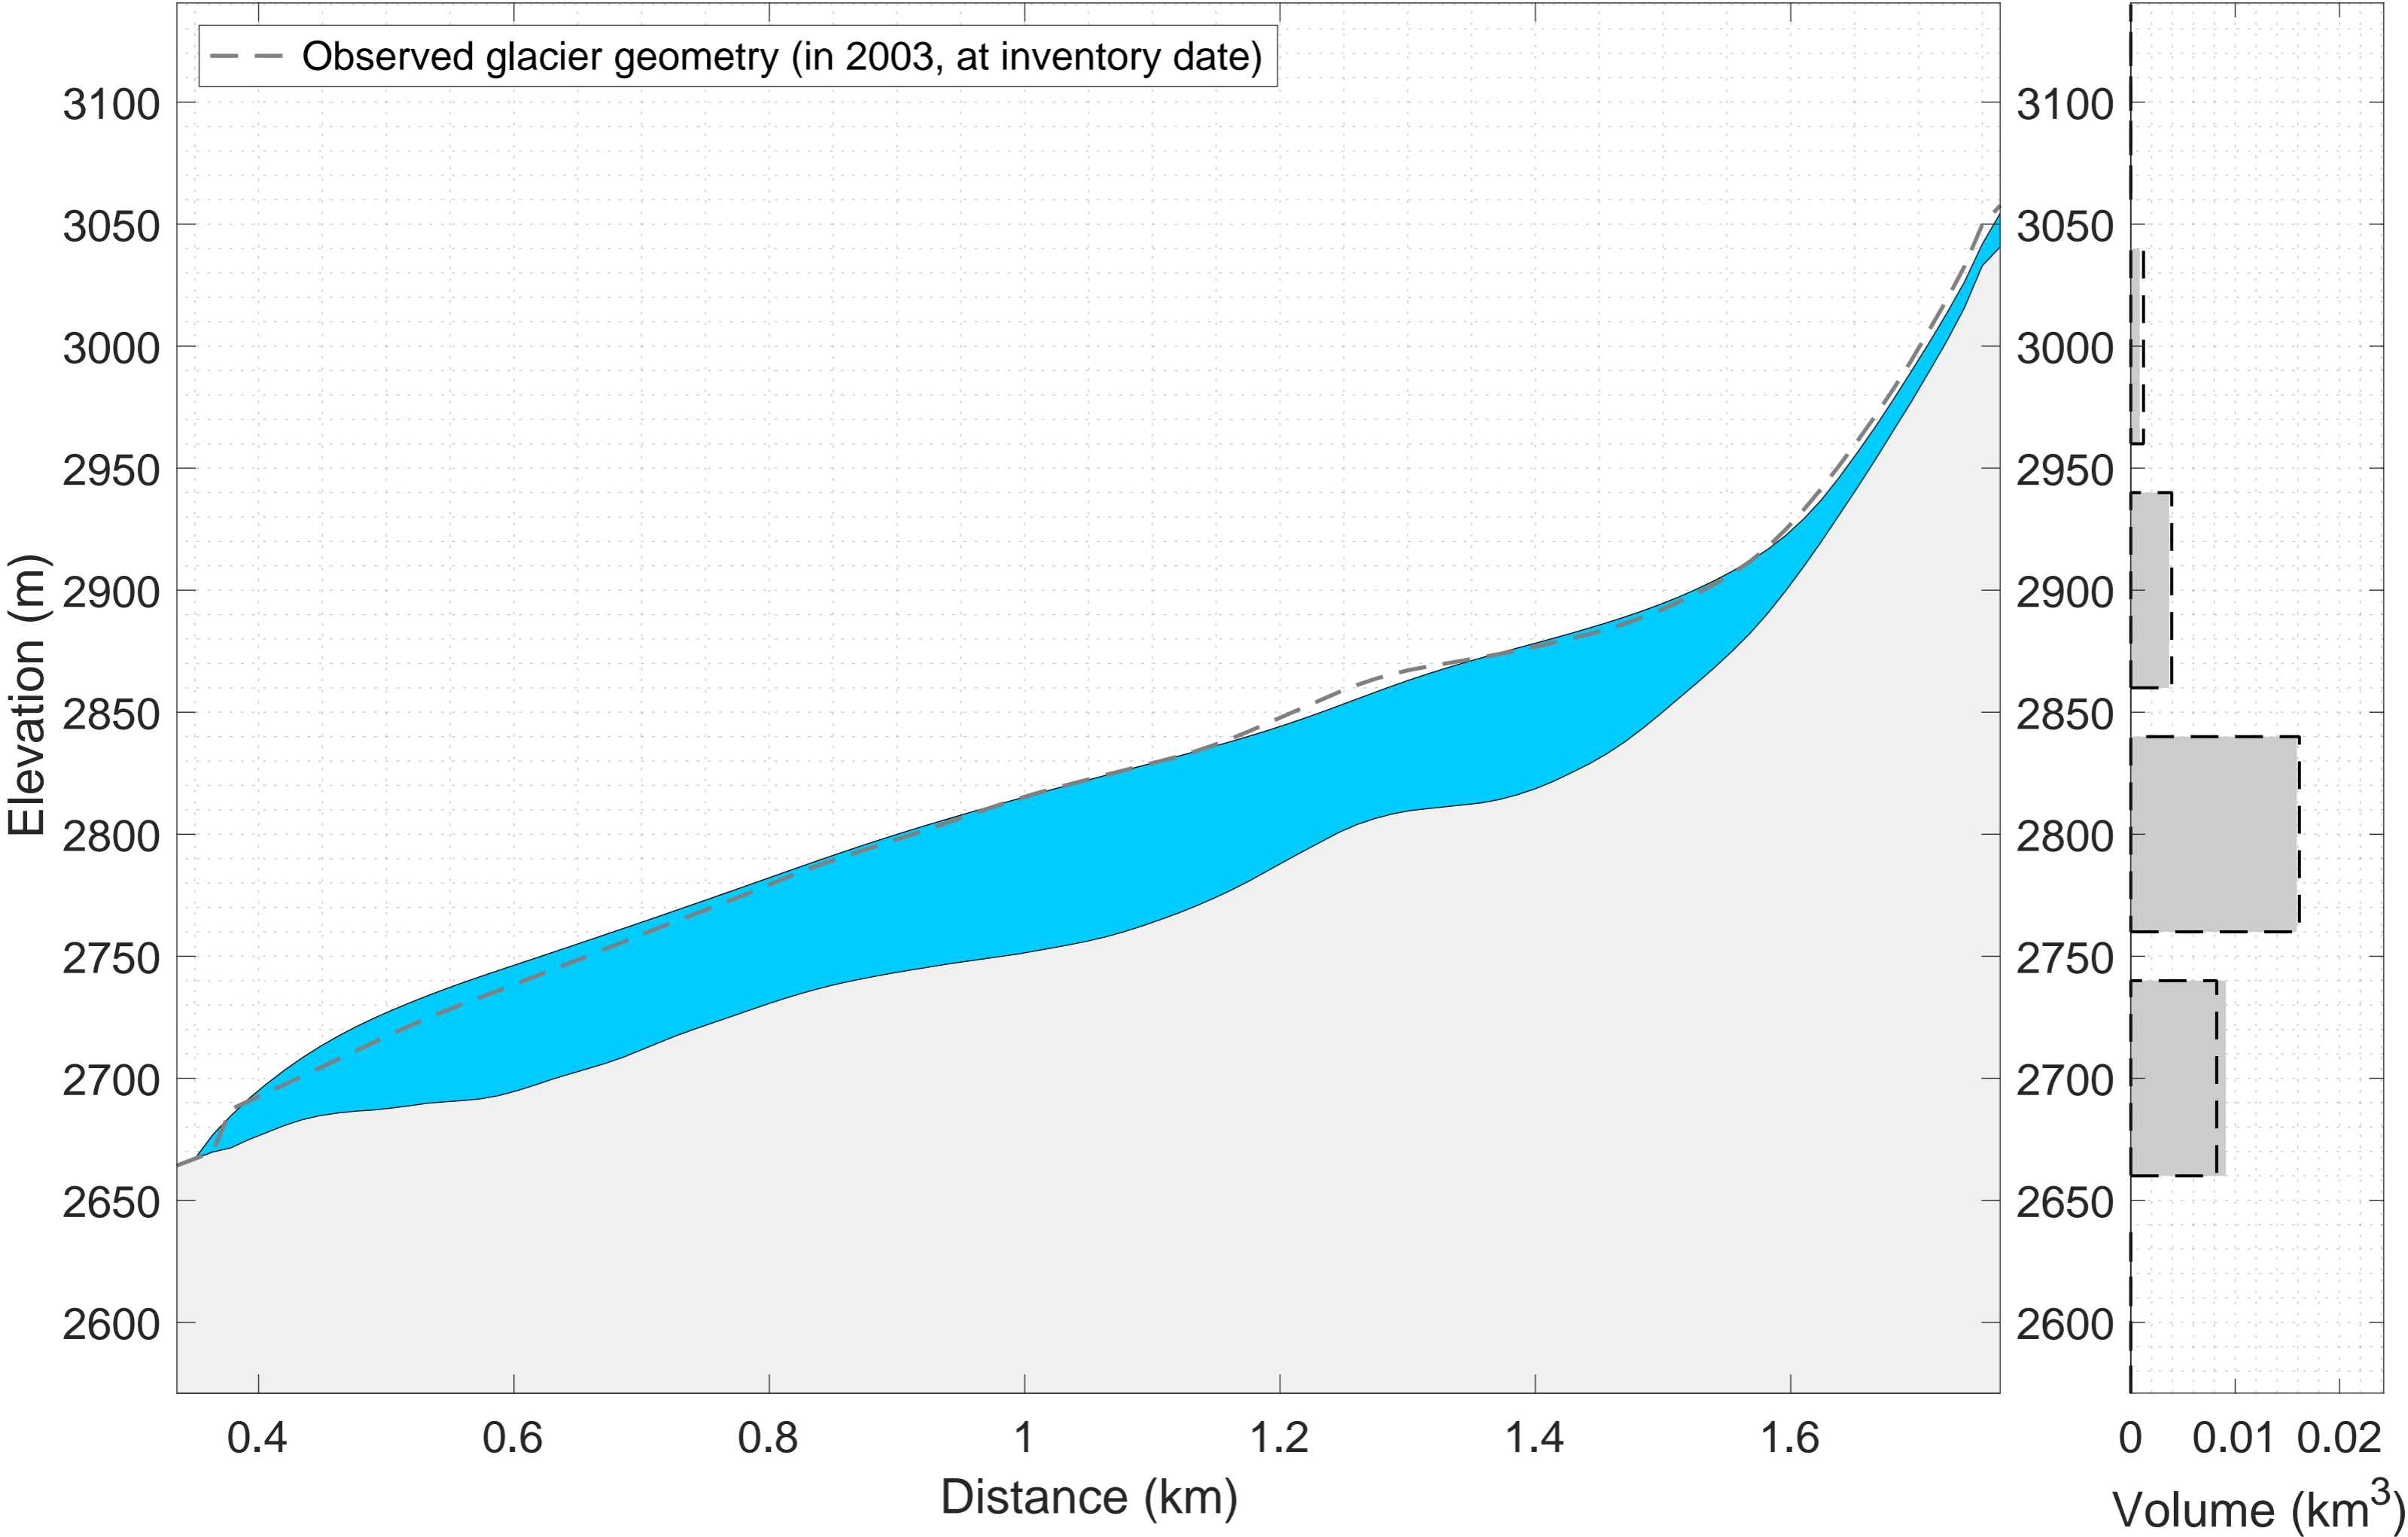

Supplement: Supplementary file 623 [file tc-13-1125-2019-supplement.zip]

**Modelled geometry (Glacier ID = 02676;  $A = 3.2284\text{e-}16 \text{ Pa}^{-3} \text{ a}^{-1}$ ;  $dx = 28 \text{ m}$ )**

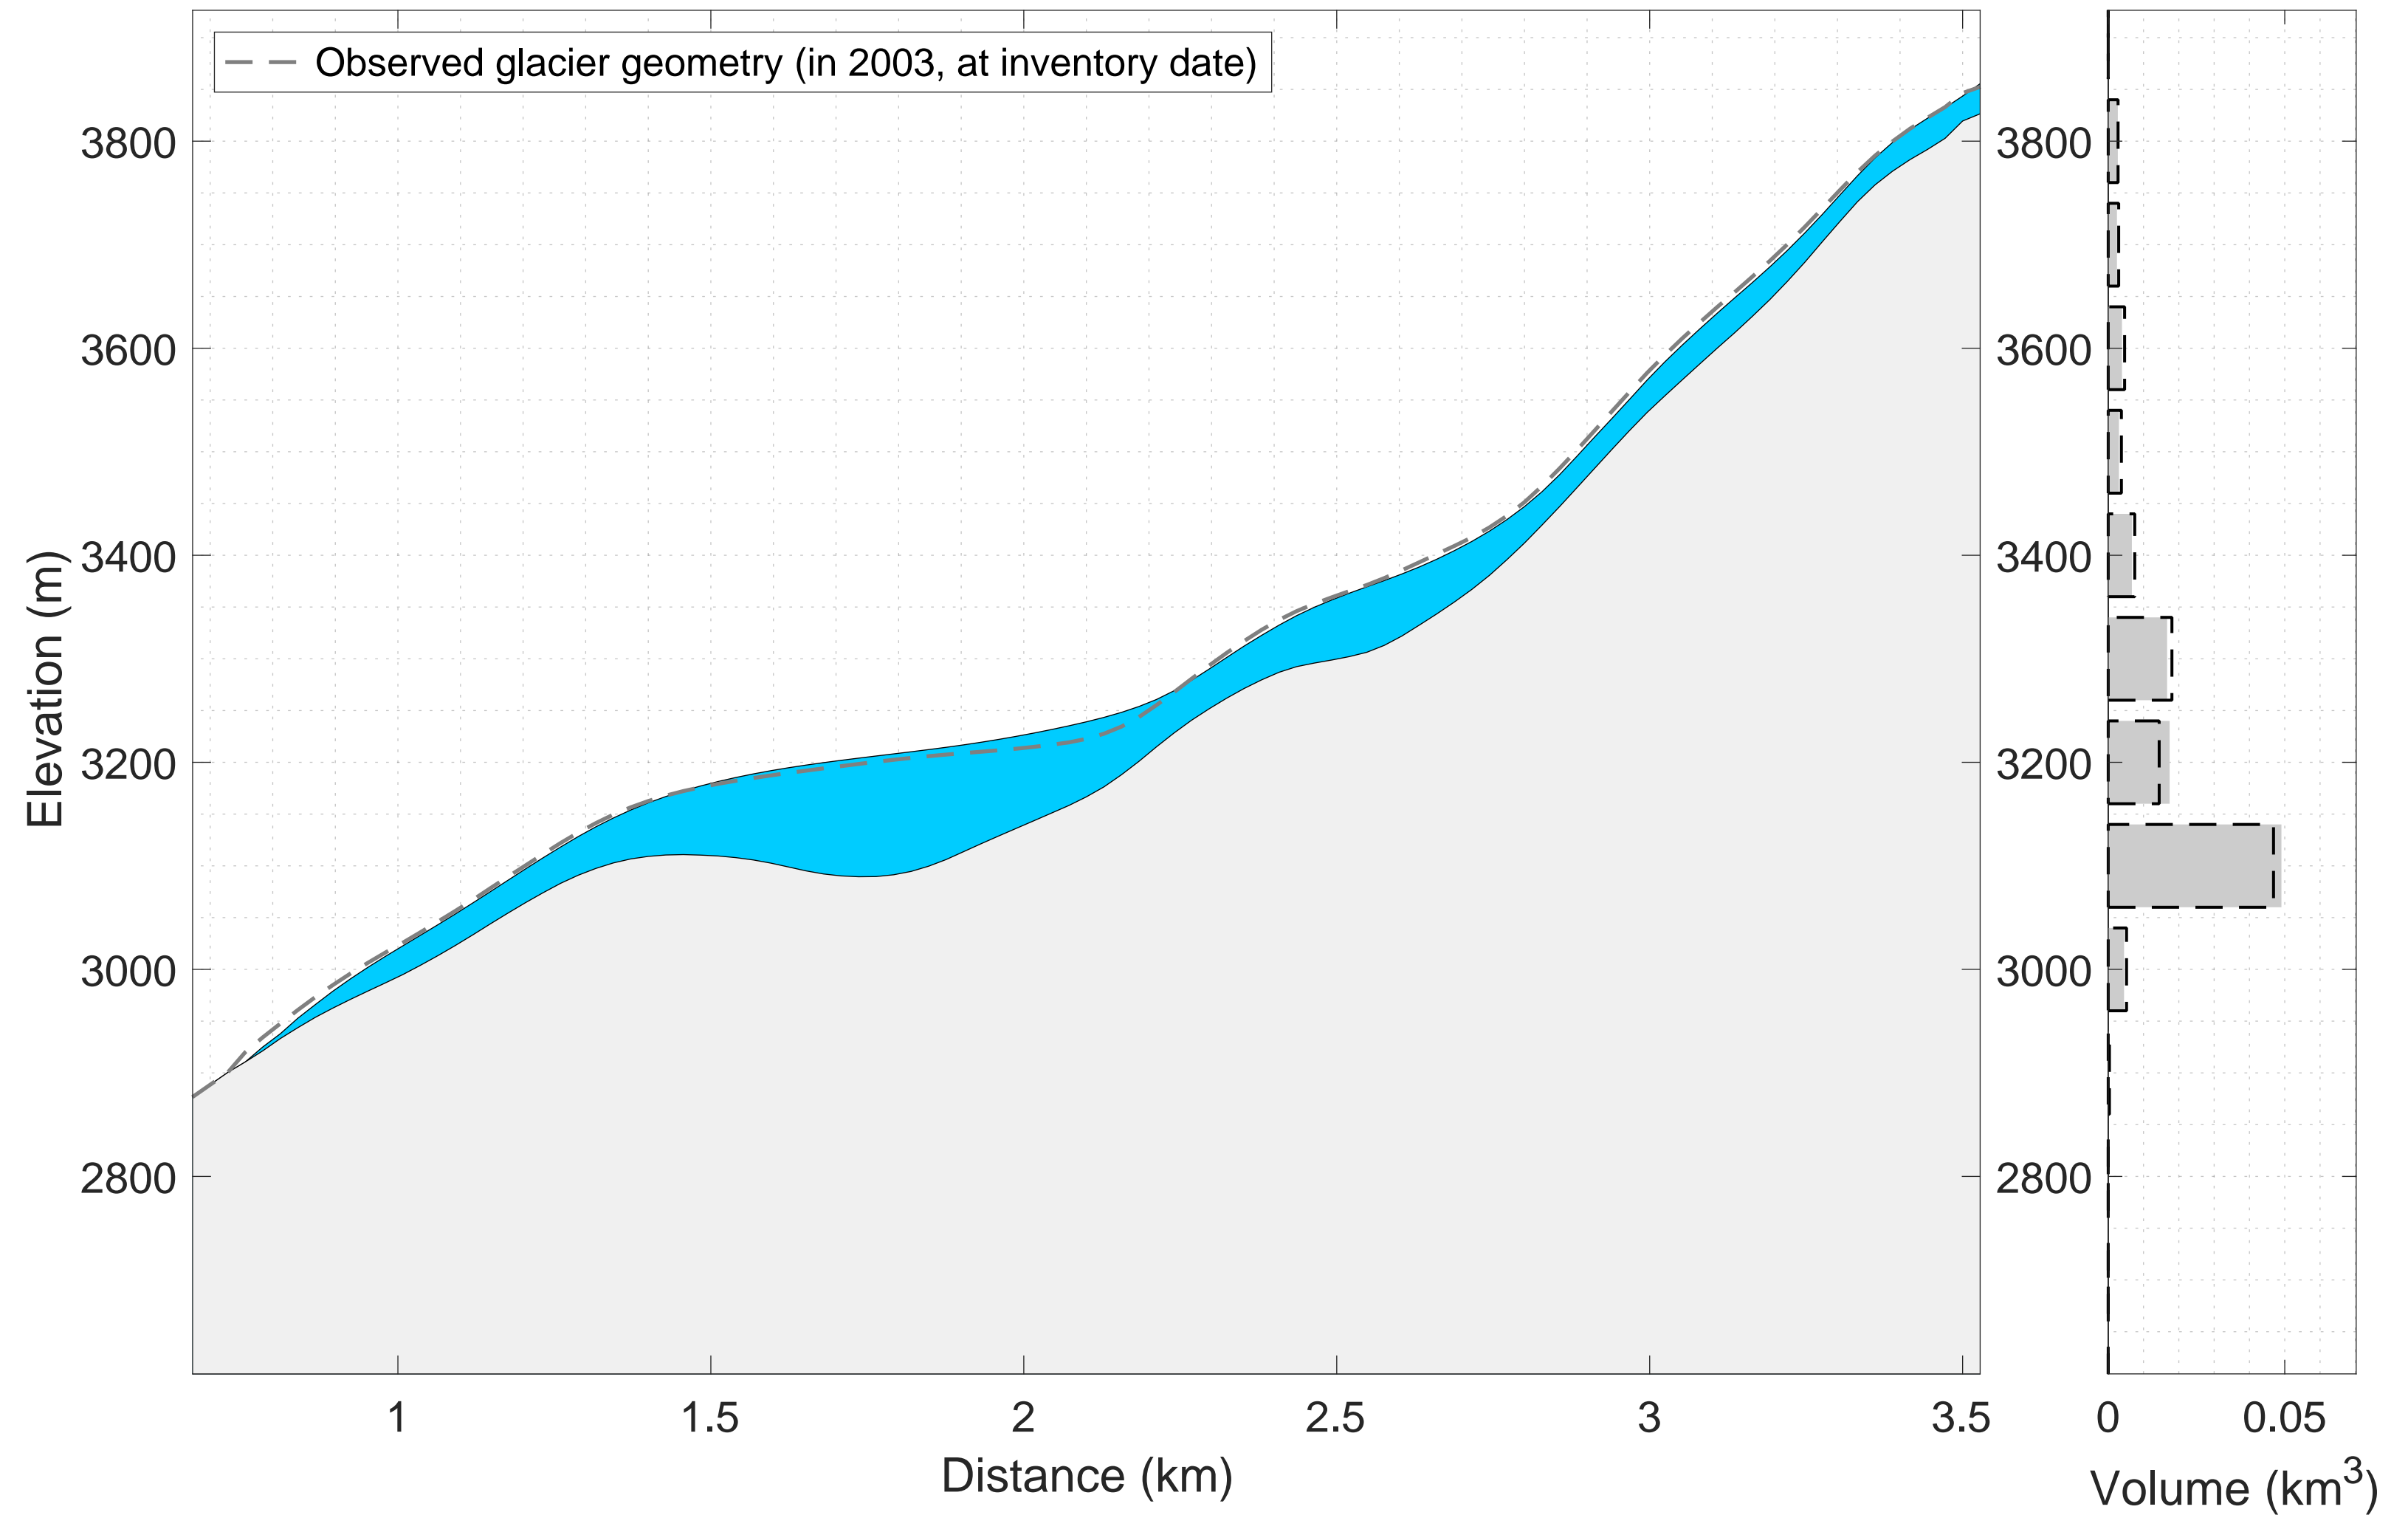

Supplement: Supplementary file 624 [file tc-13-1125-2019-supplement.zip]

**Modelled geometry (Glacier ID = 00200;  $A = 1\text{e-}16 \text{ Pa}^{-3} \text{ a}^{-1}$ ;  $dx = 11 \text{ m}$ )**

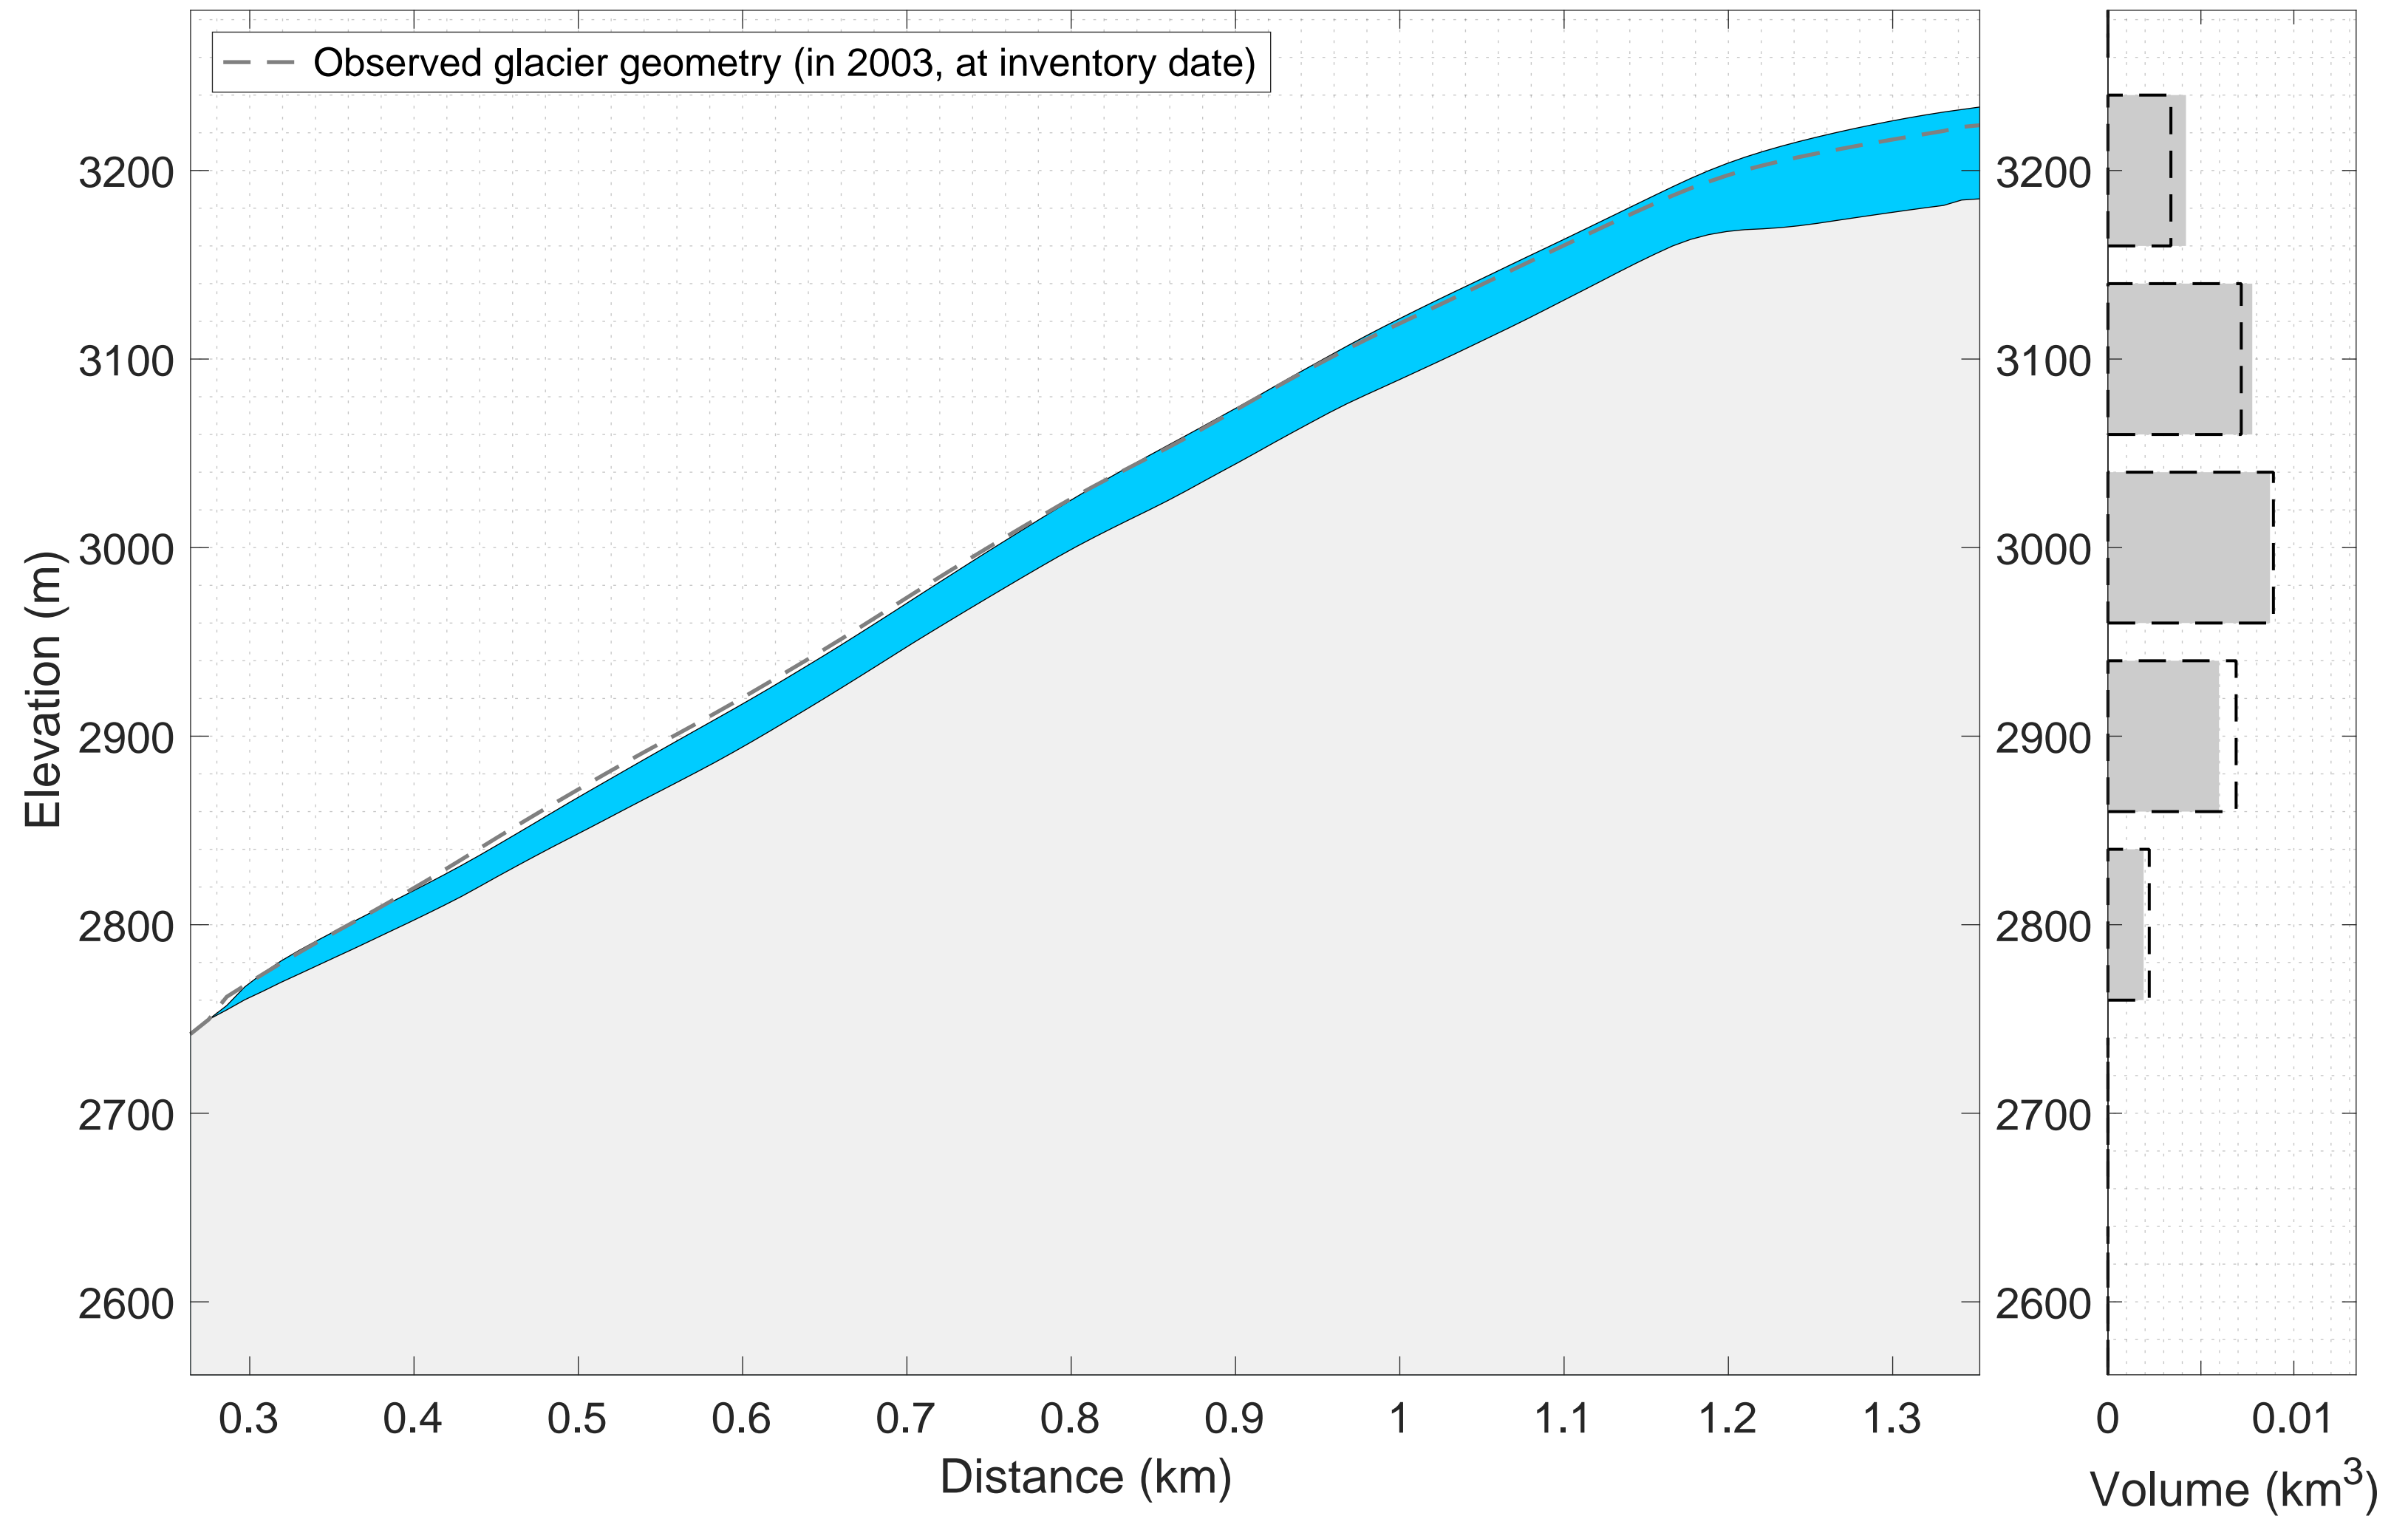

Supplement: Supplementary file 625 [file tc-13-1125-2019-supplement.zip]

**Modelled geometry (Glacier ID = 01450;  $A = 5.5493\text{e-}17 \text{ Pa}^{-3} \text{ a}^{-1}$ ;  $dx = 202 \text{ m}$ )**

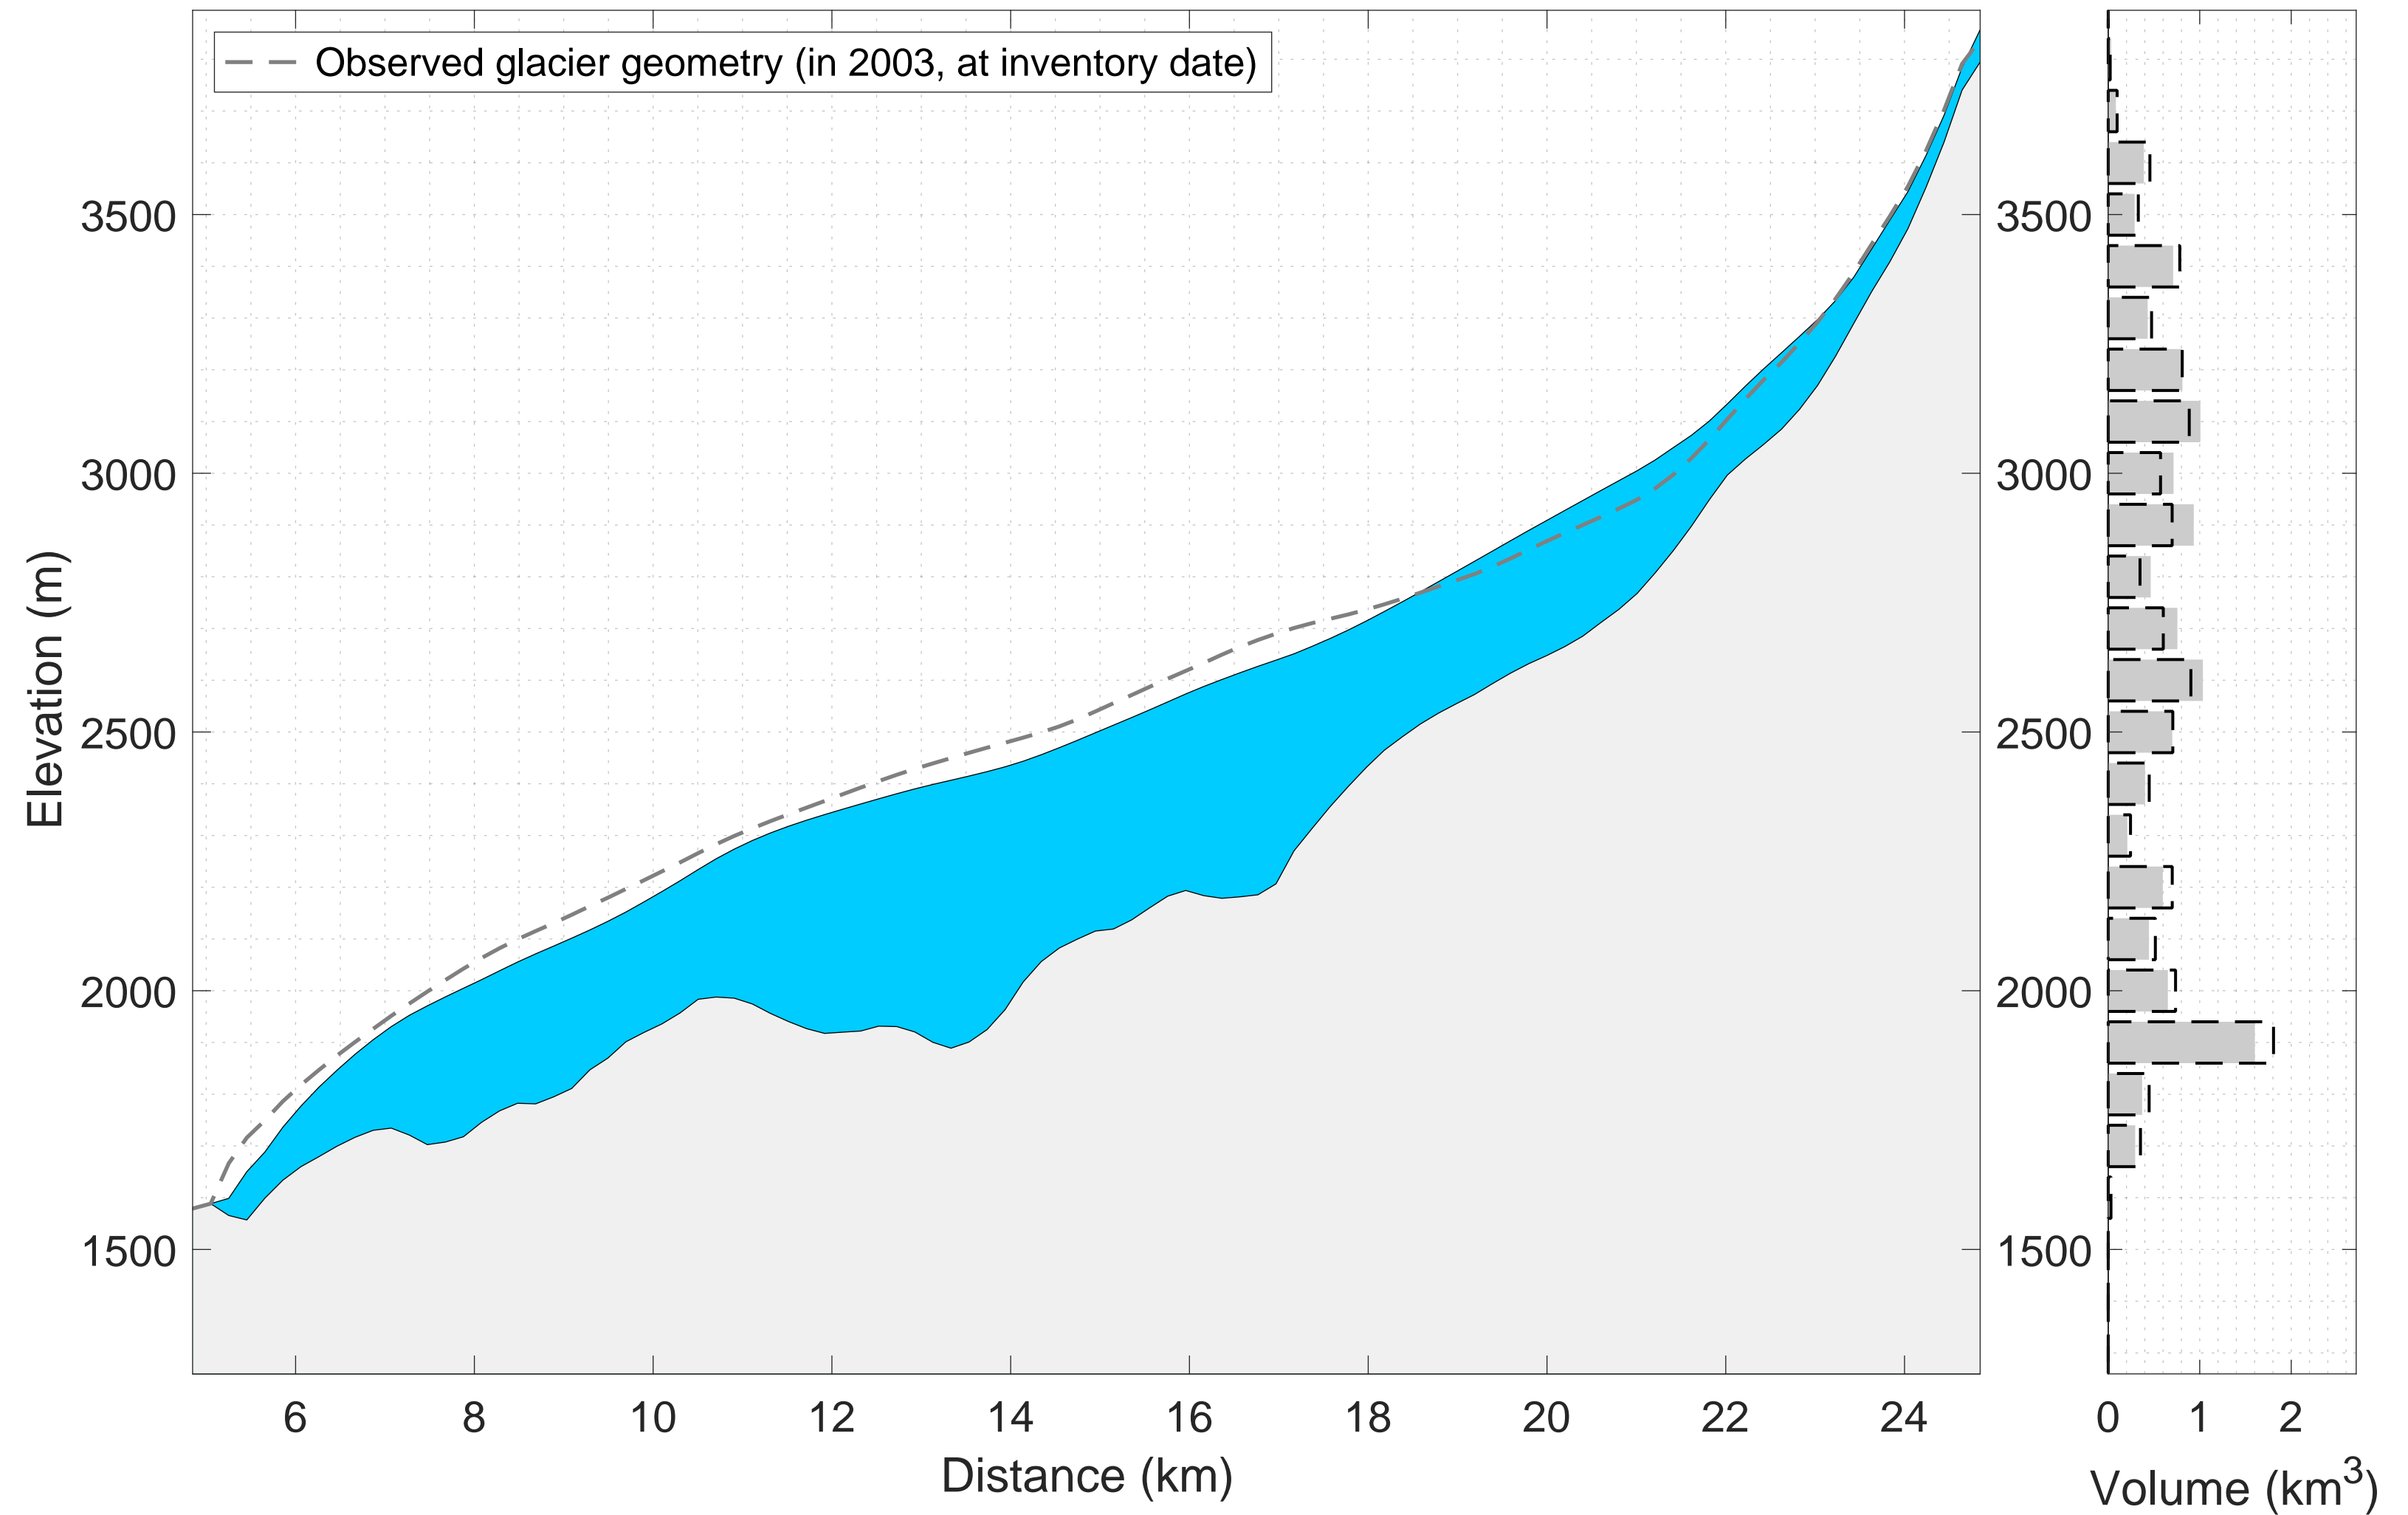

Supplement: Supplementary file 626 [file tc-13-1125-2019-supplement.zip]

**Modelled geometry (Glacier ID = 00830;  $A = 2.2161\text{e-}16 \text{ Pa}^{-3} \text{ a}^{-1}$ ;  $dx = 20 \text{ m}$ )**

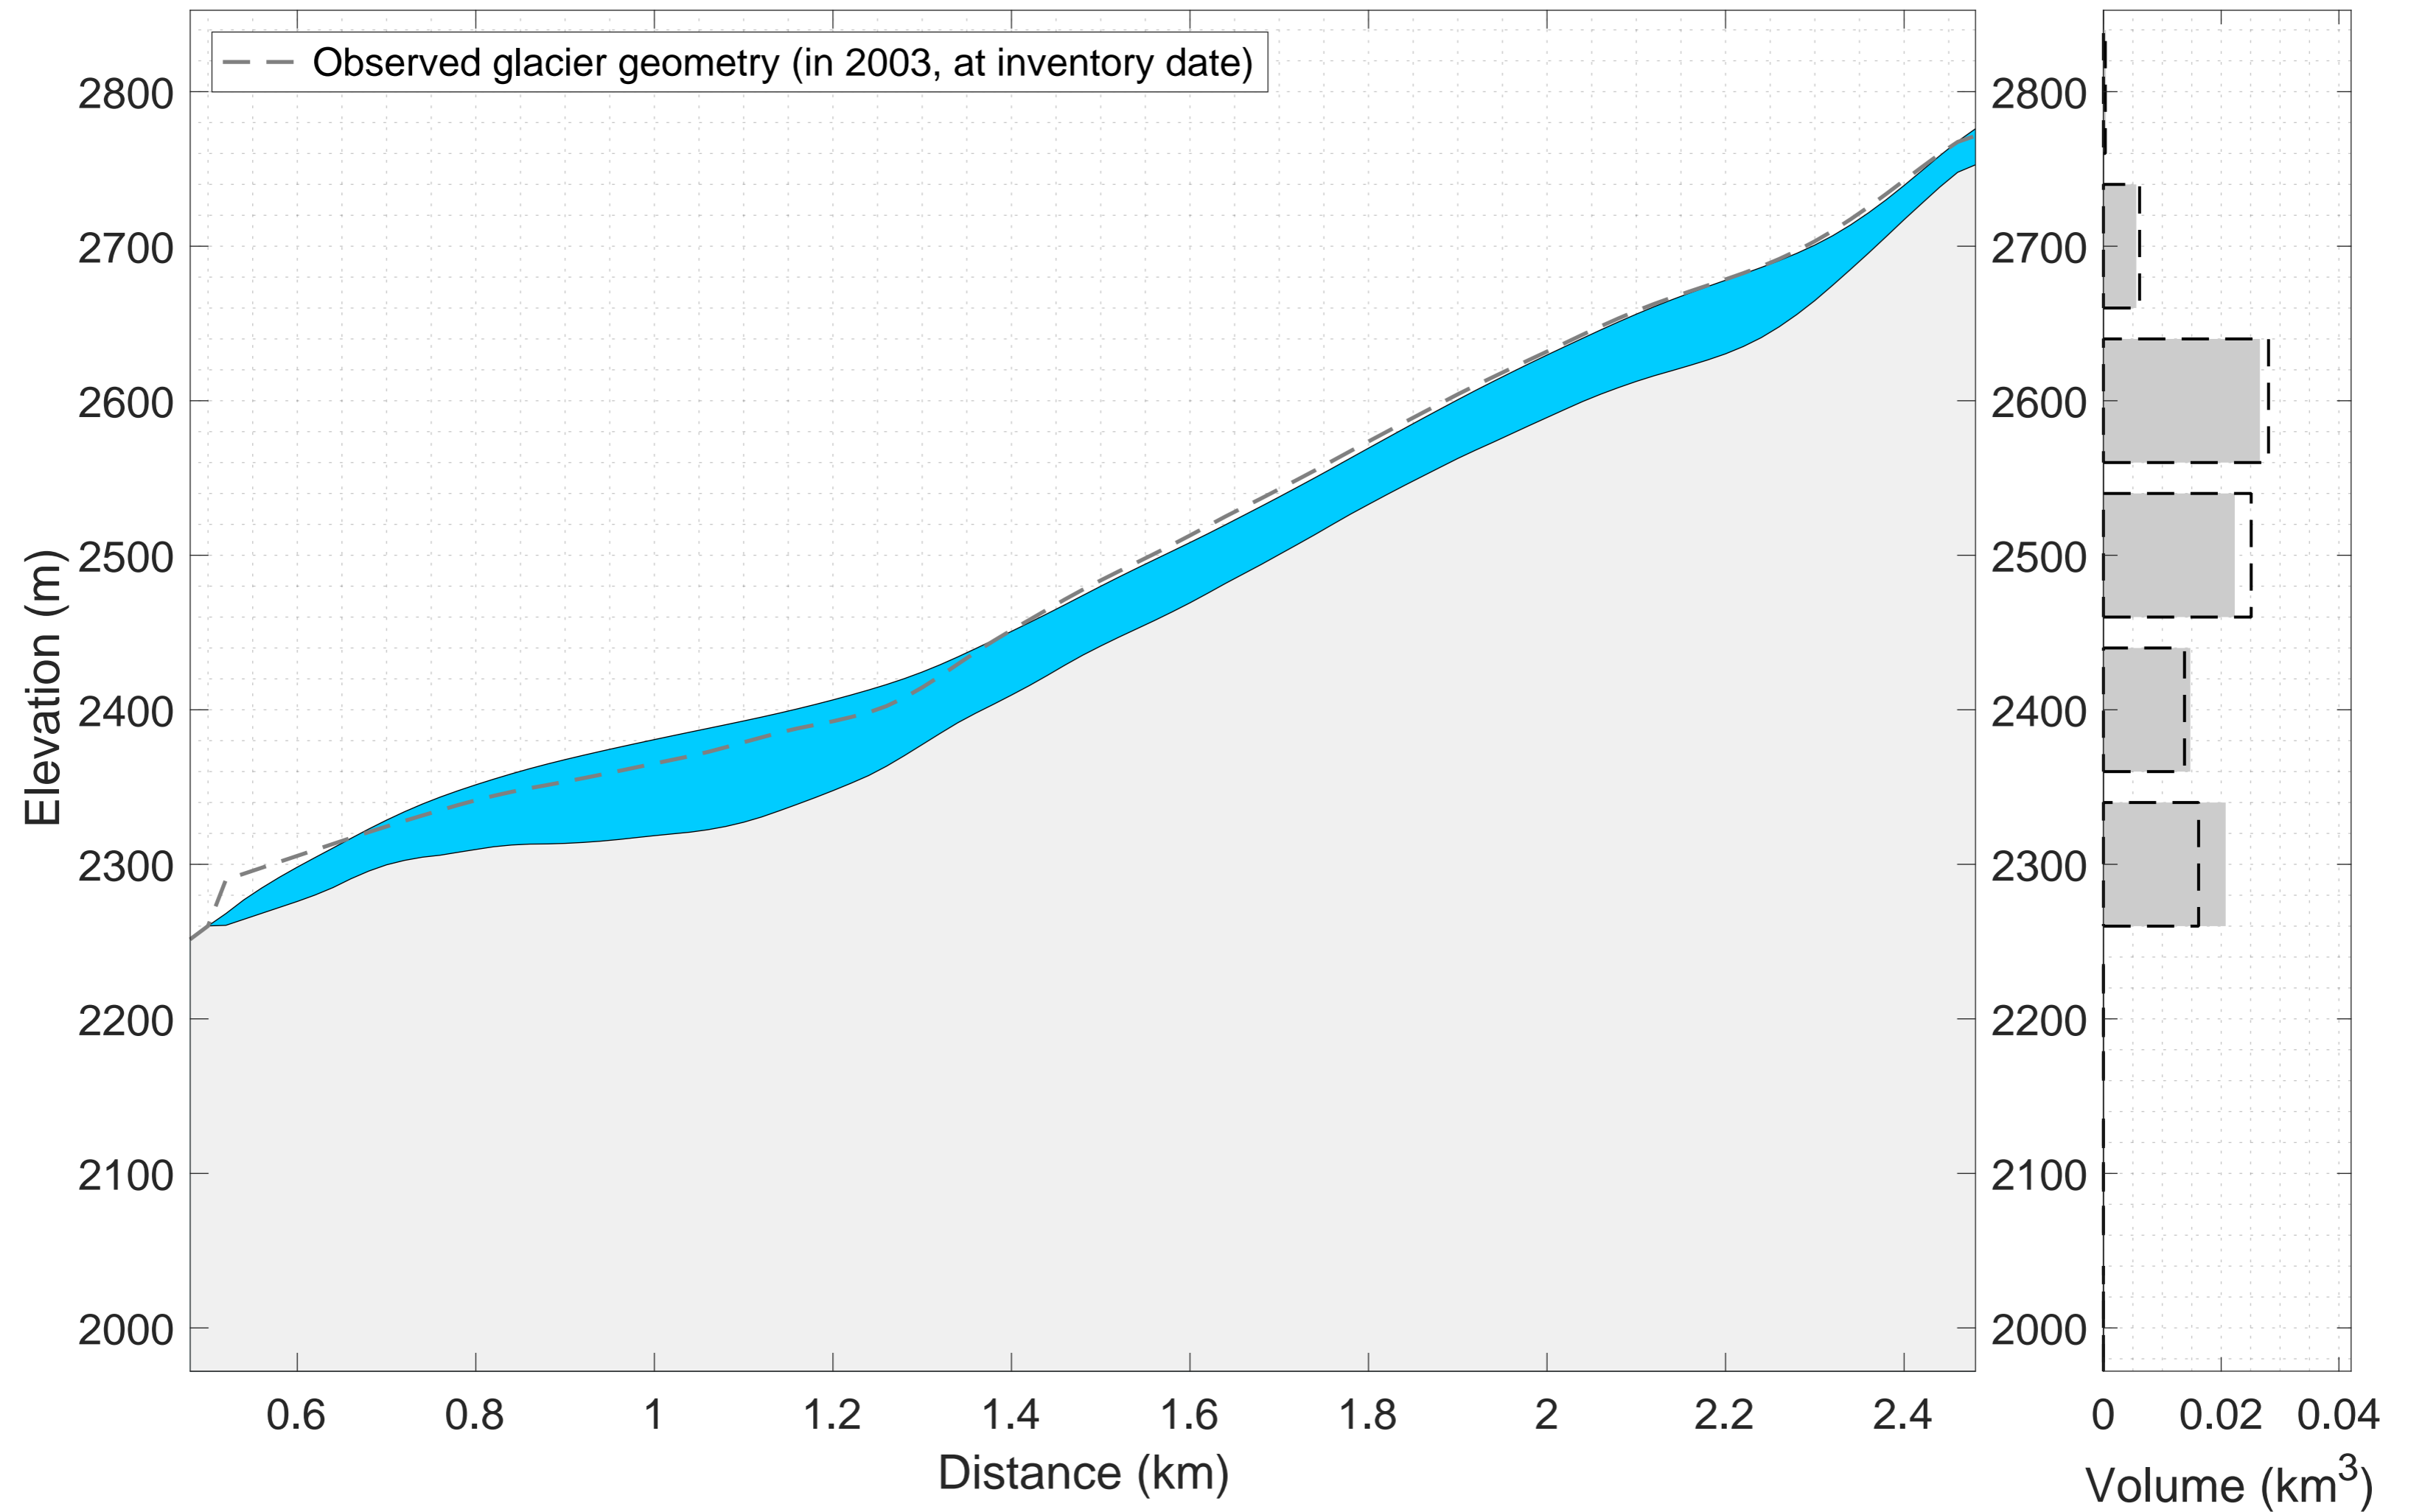

Supplement: Supplementary file 627 [file tc-13-1125-2019-supplement.zip]

**Modelled geometry (Glacier ID = 00992;  $A = 1.2966\text{e-}16 \text{ Pa}^{-3} \text{ a}^{-1}$ ;  $dx = 26 \text{ m}$ )**

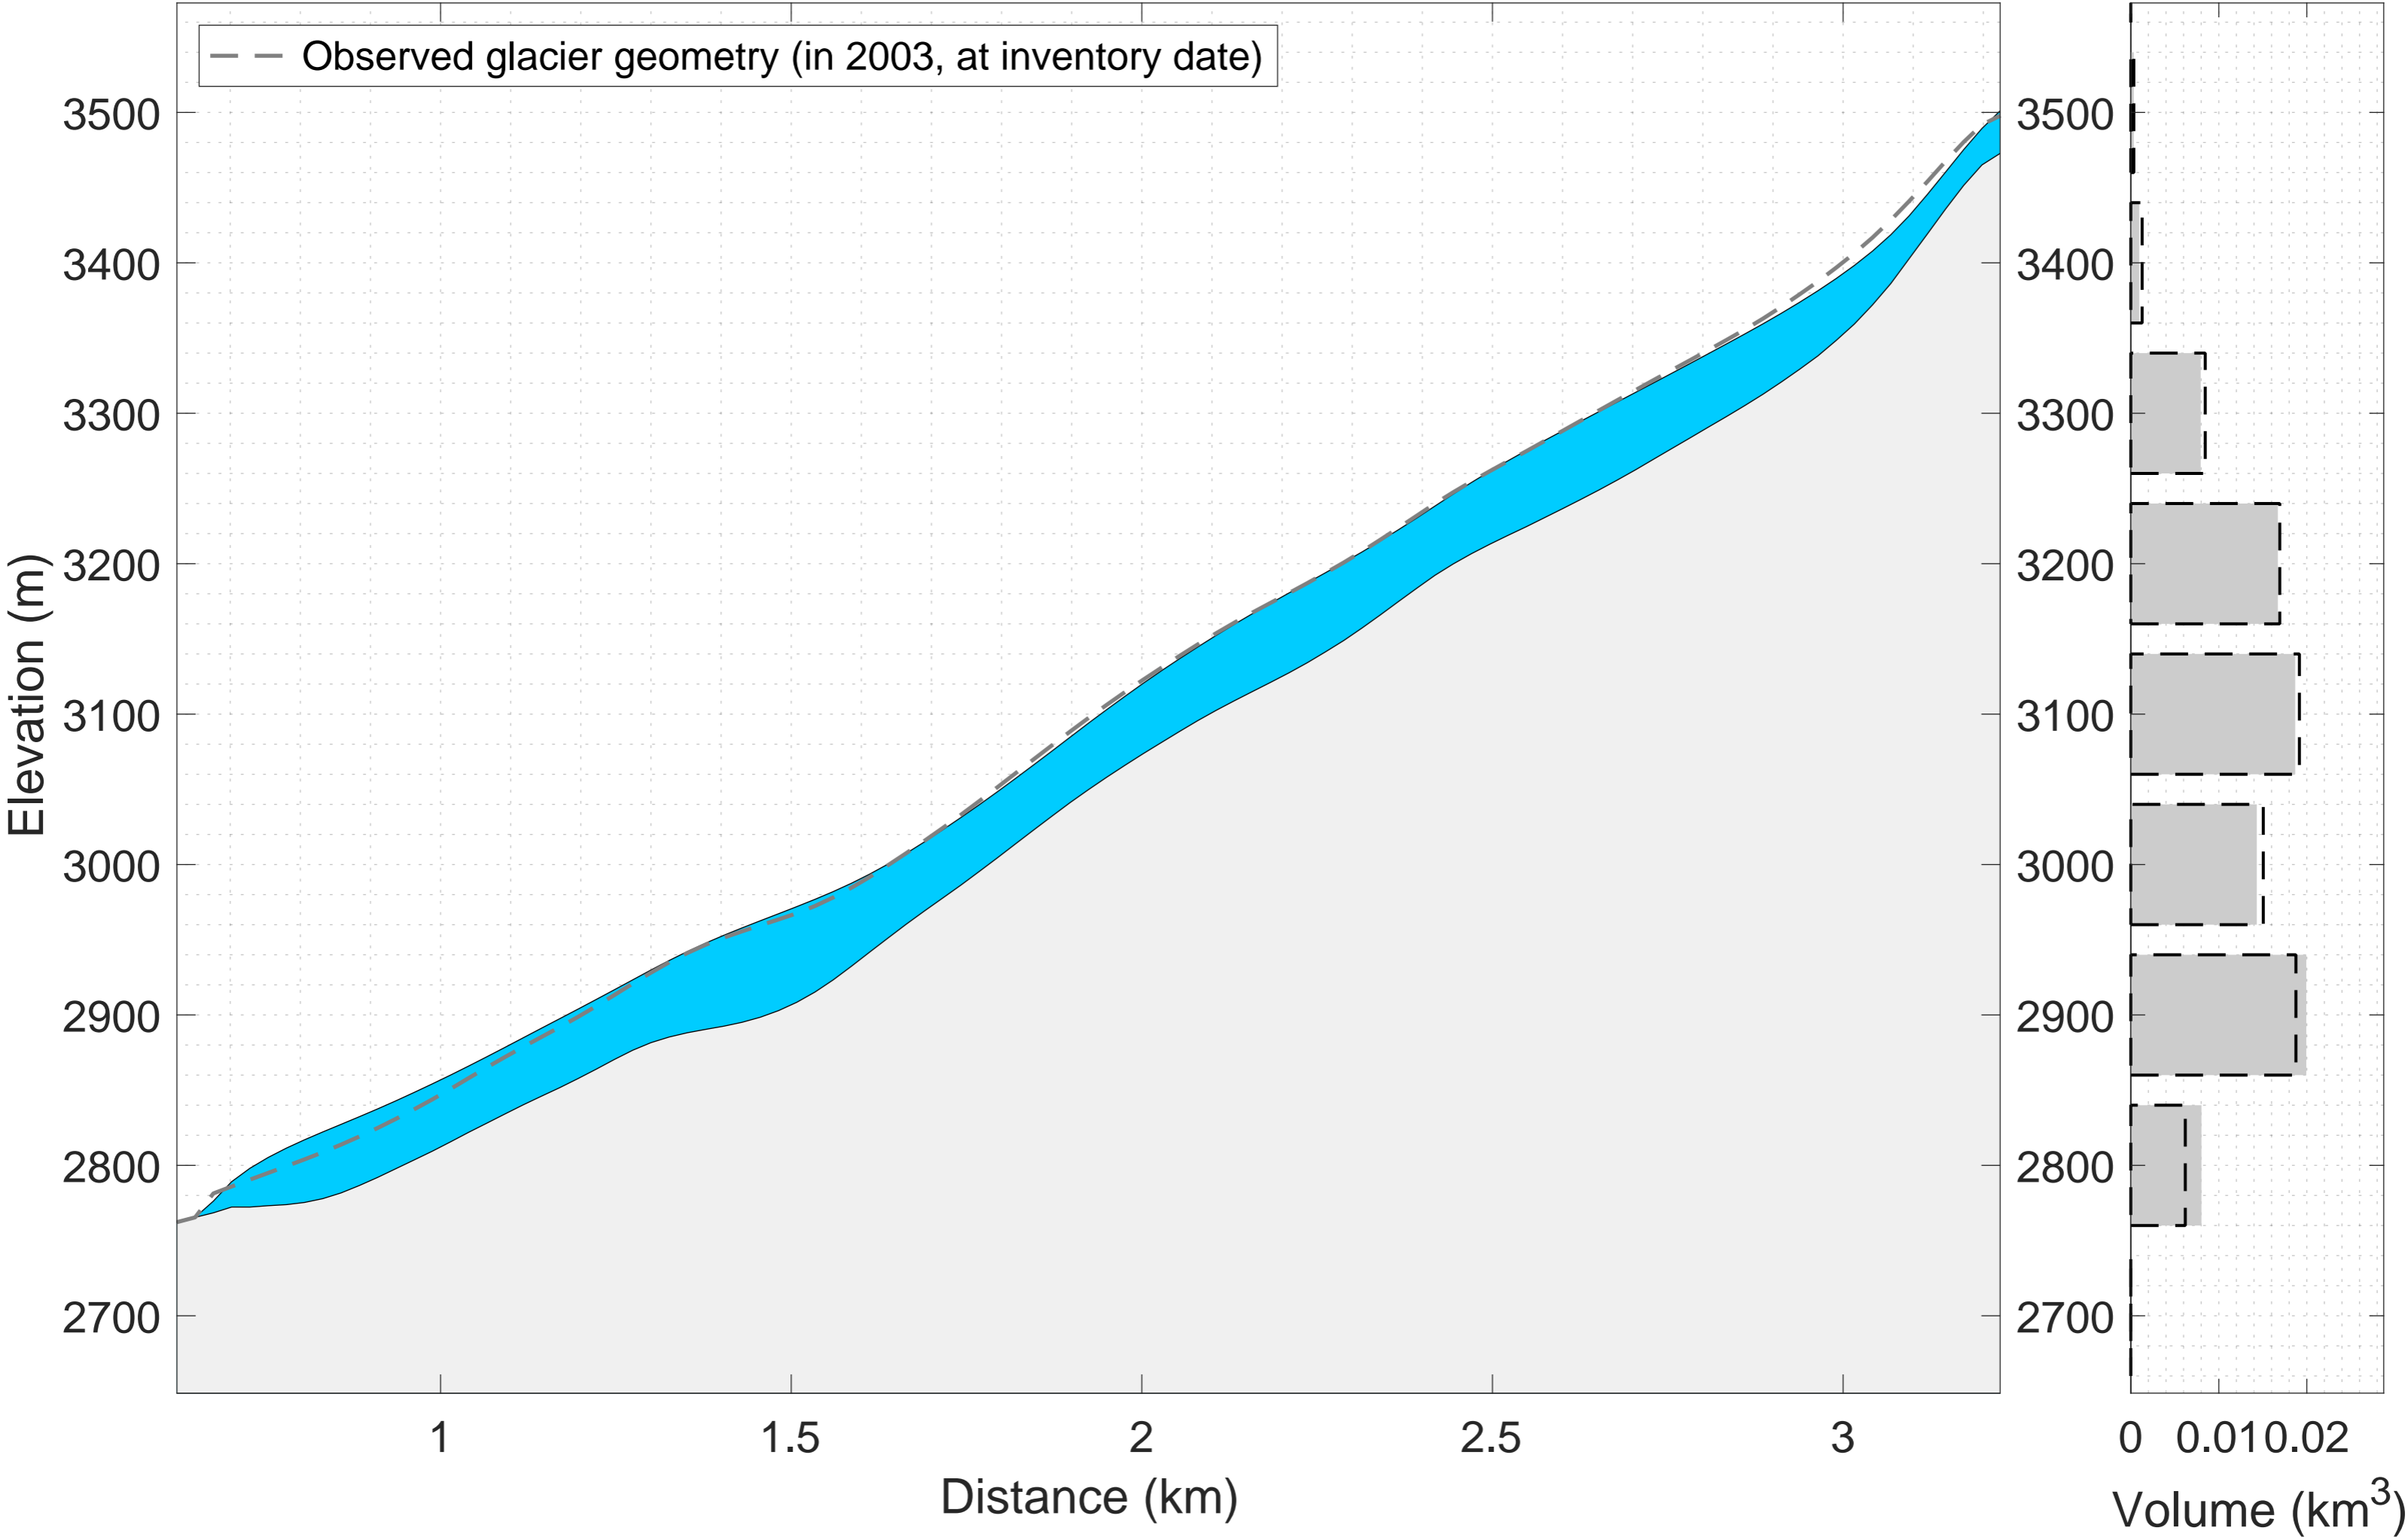

Supplement: Supplementary file 628 [file tc-13-1125-2019-supplement.zip]

**Modelled geometry (Glacier ID = 00846;  $A = 2.2543\text{e-}16 \text{ Pa}^{-3} \text{ a}^{-1}$ ;  $dx = 50 \text{ m}$ )**

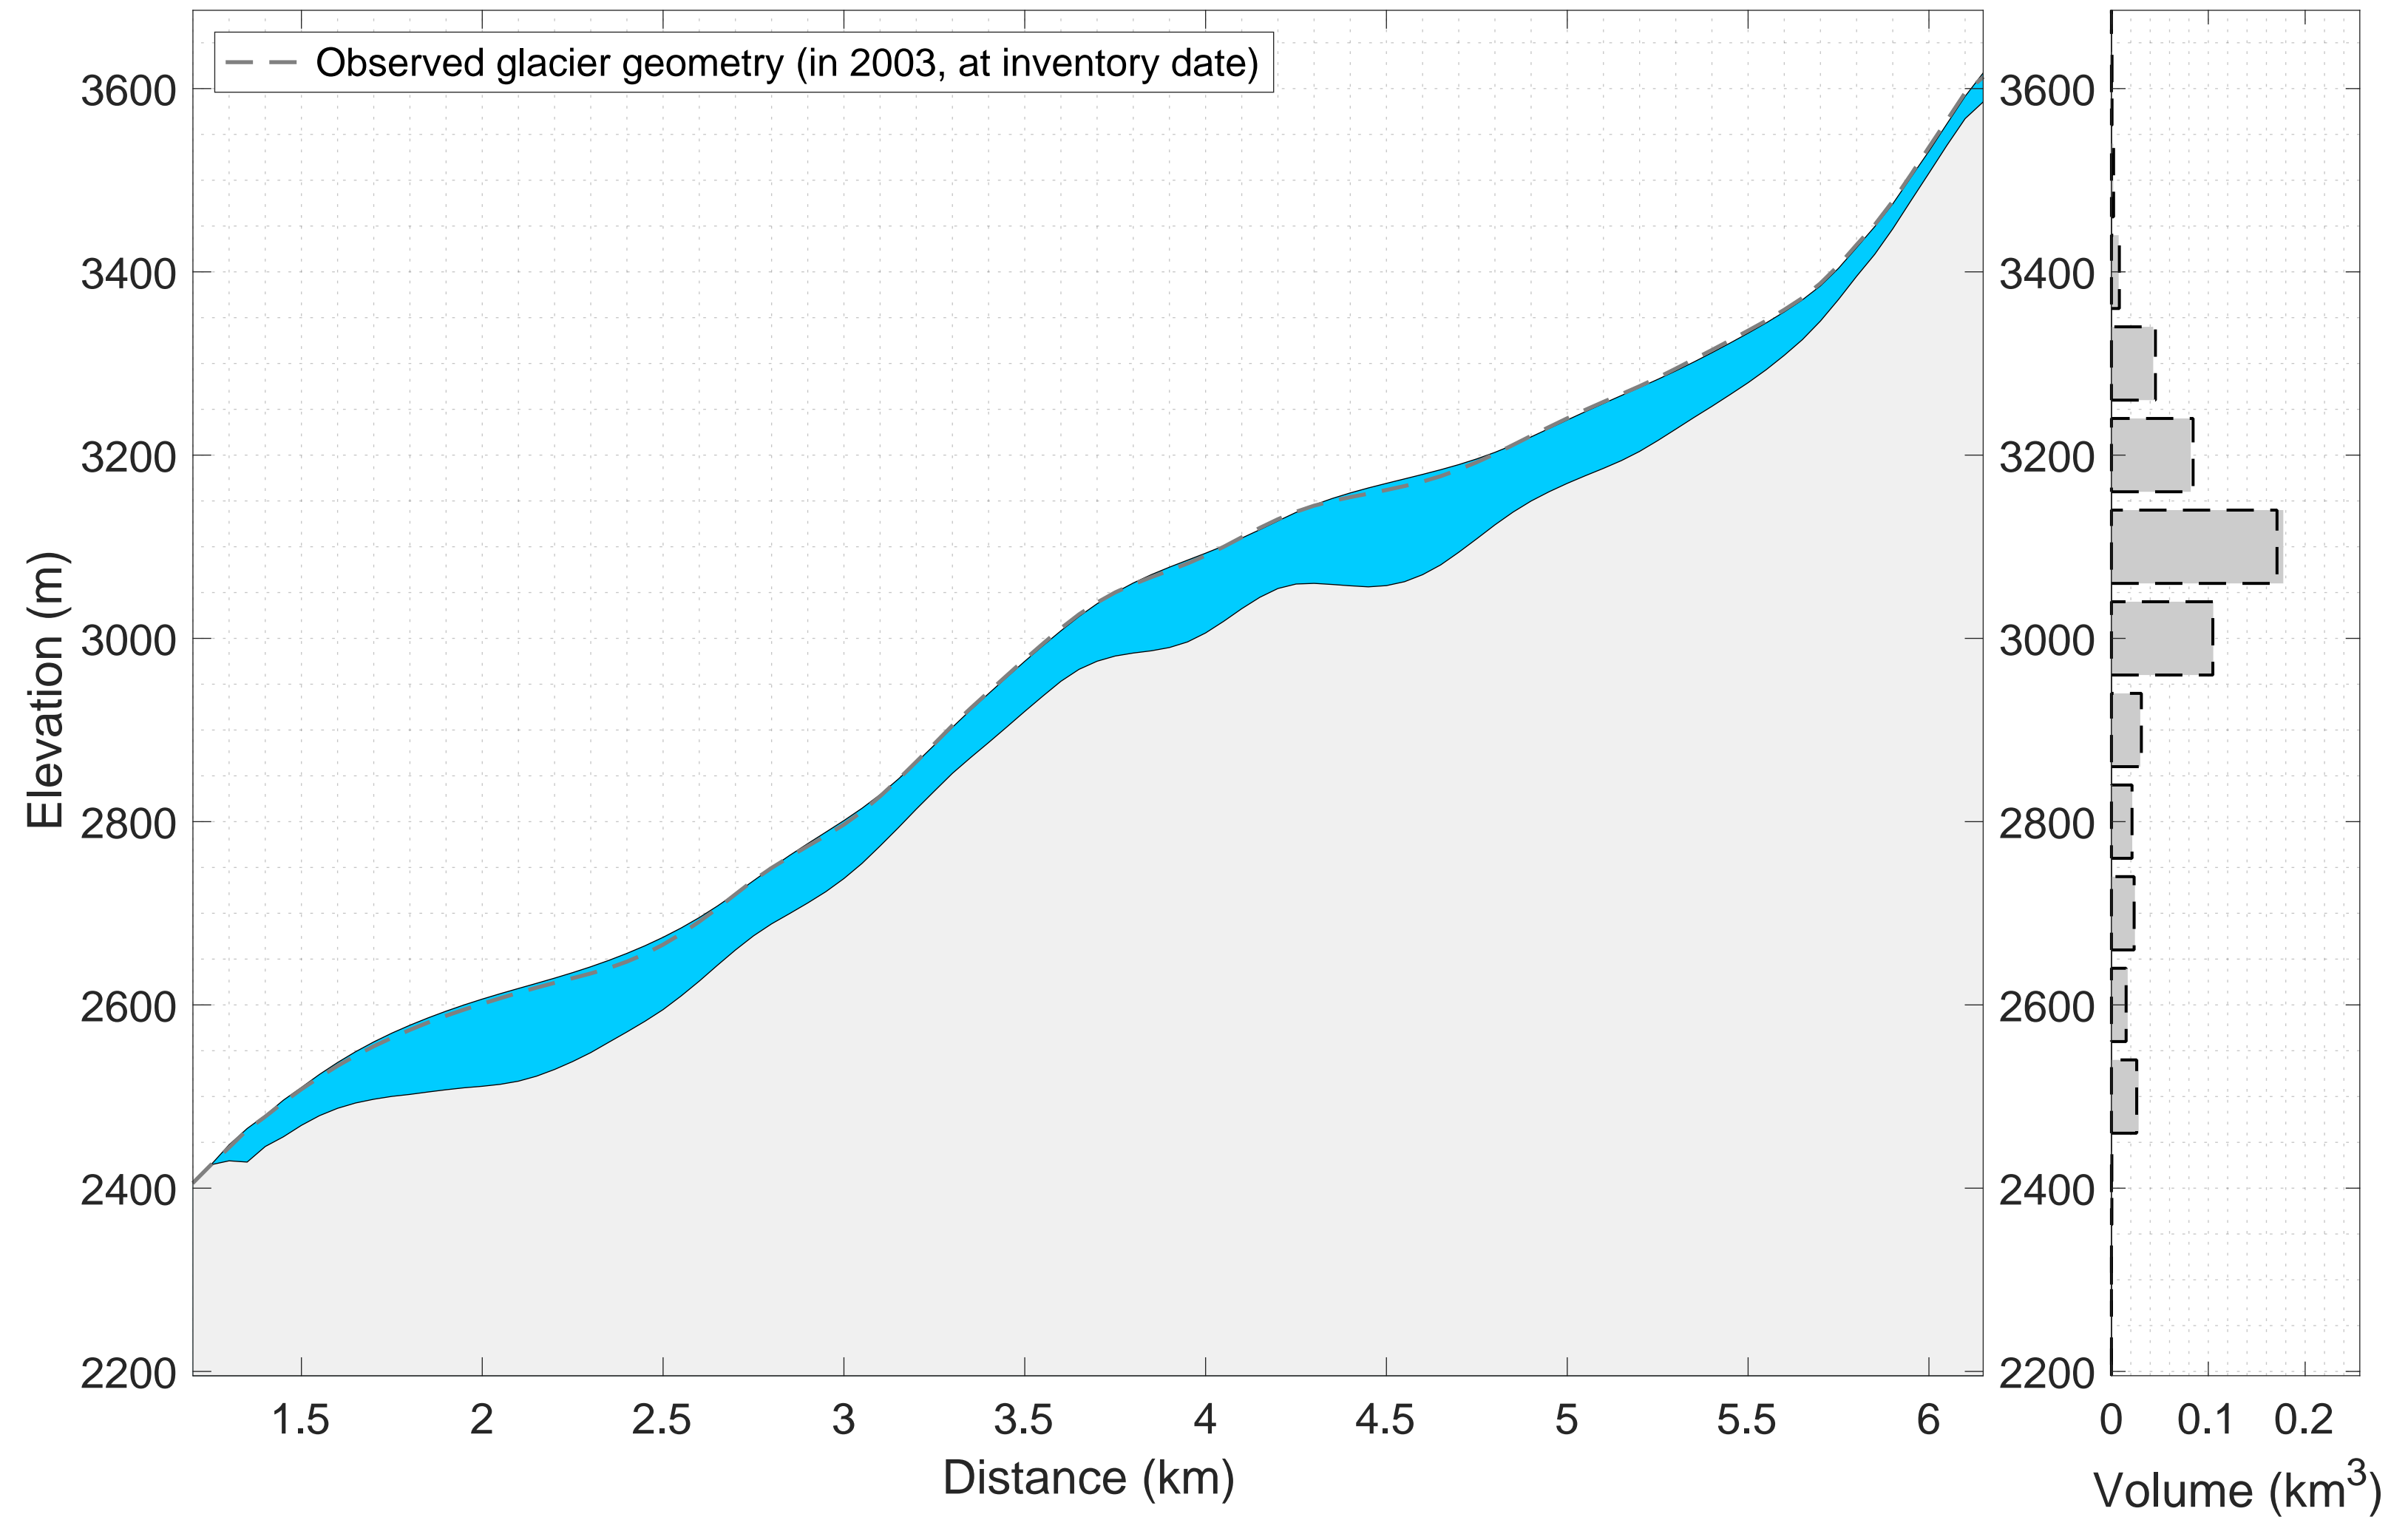

Supplement: Supplementary file 629 [file tc-13-1125-2019-supplement.zip]

**Modelled geometry (Glacier ID = 02755;  $A = 6.0709\text{e-}17 \text{ Pa}^{-3} \text{ a}^{-1}$ ;  $dx = 52 \text{ m}$ )**

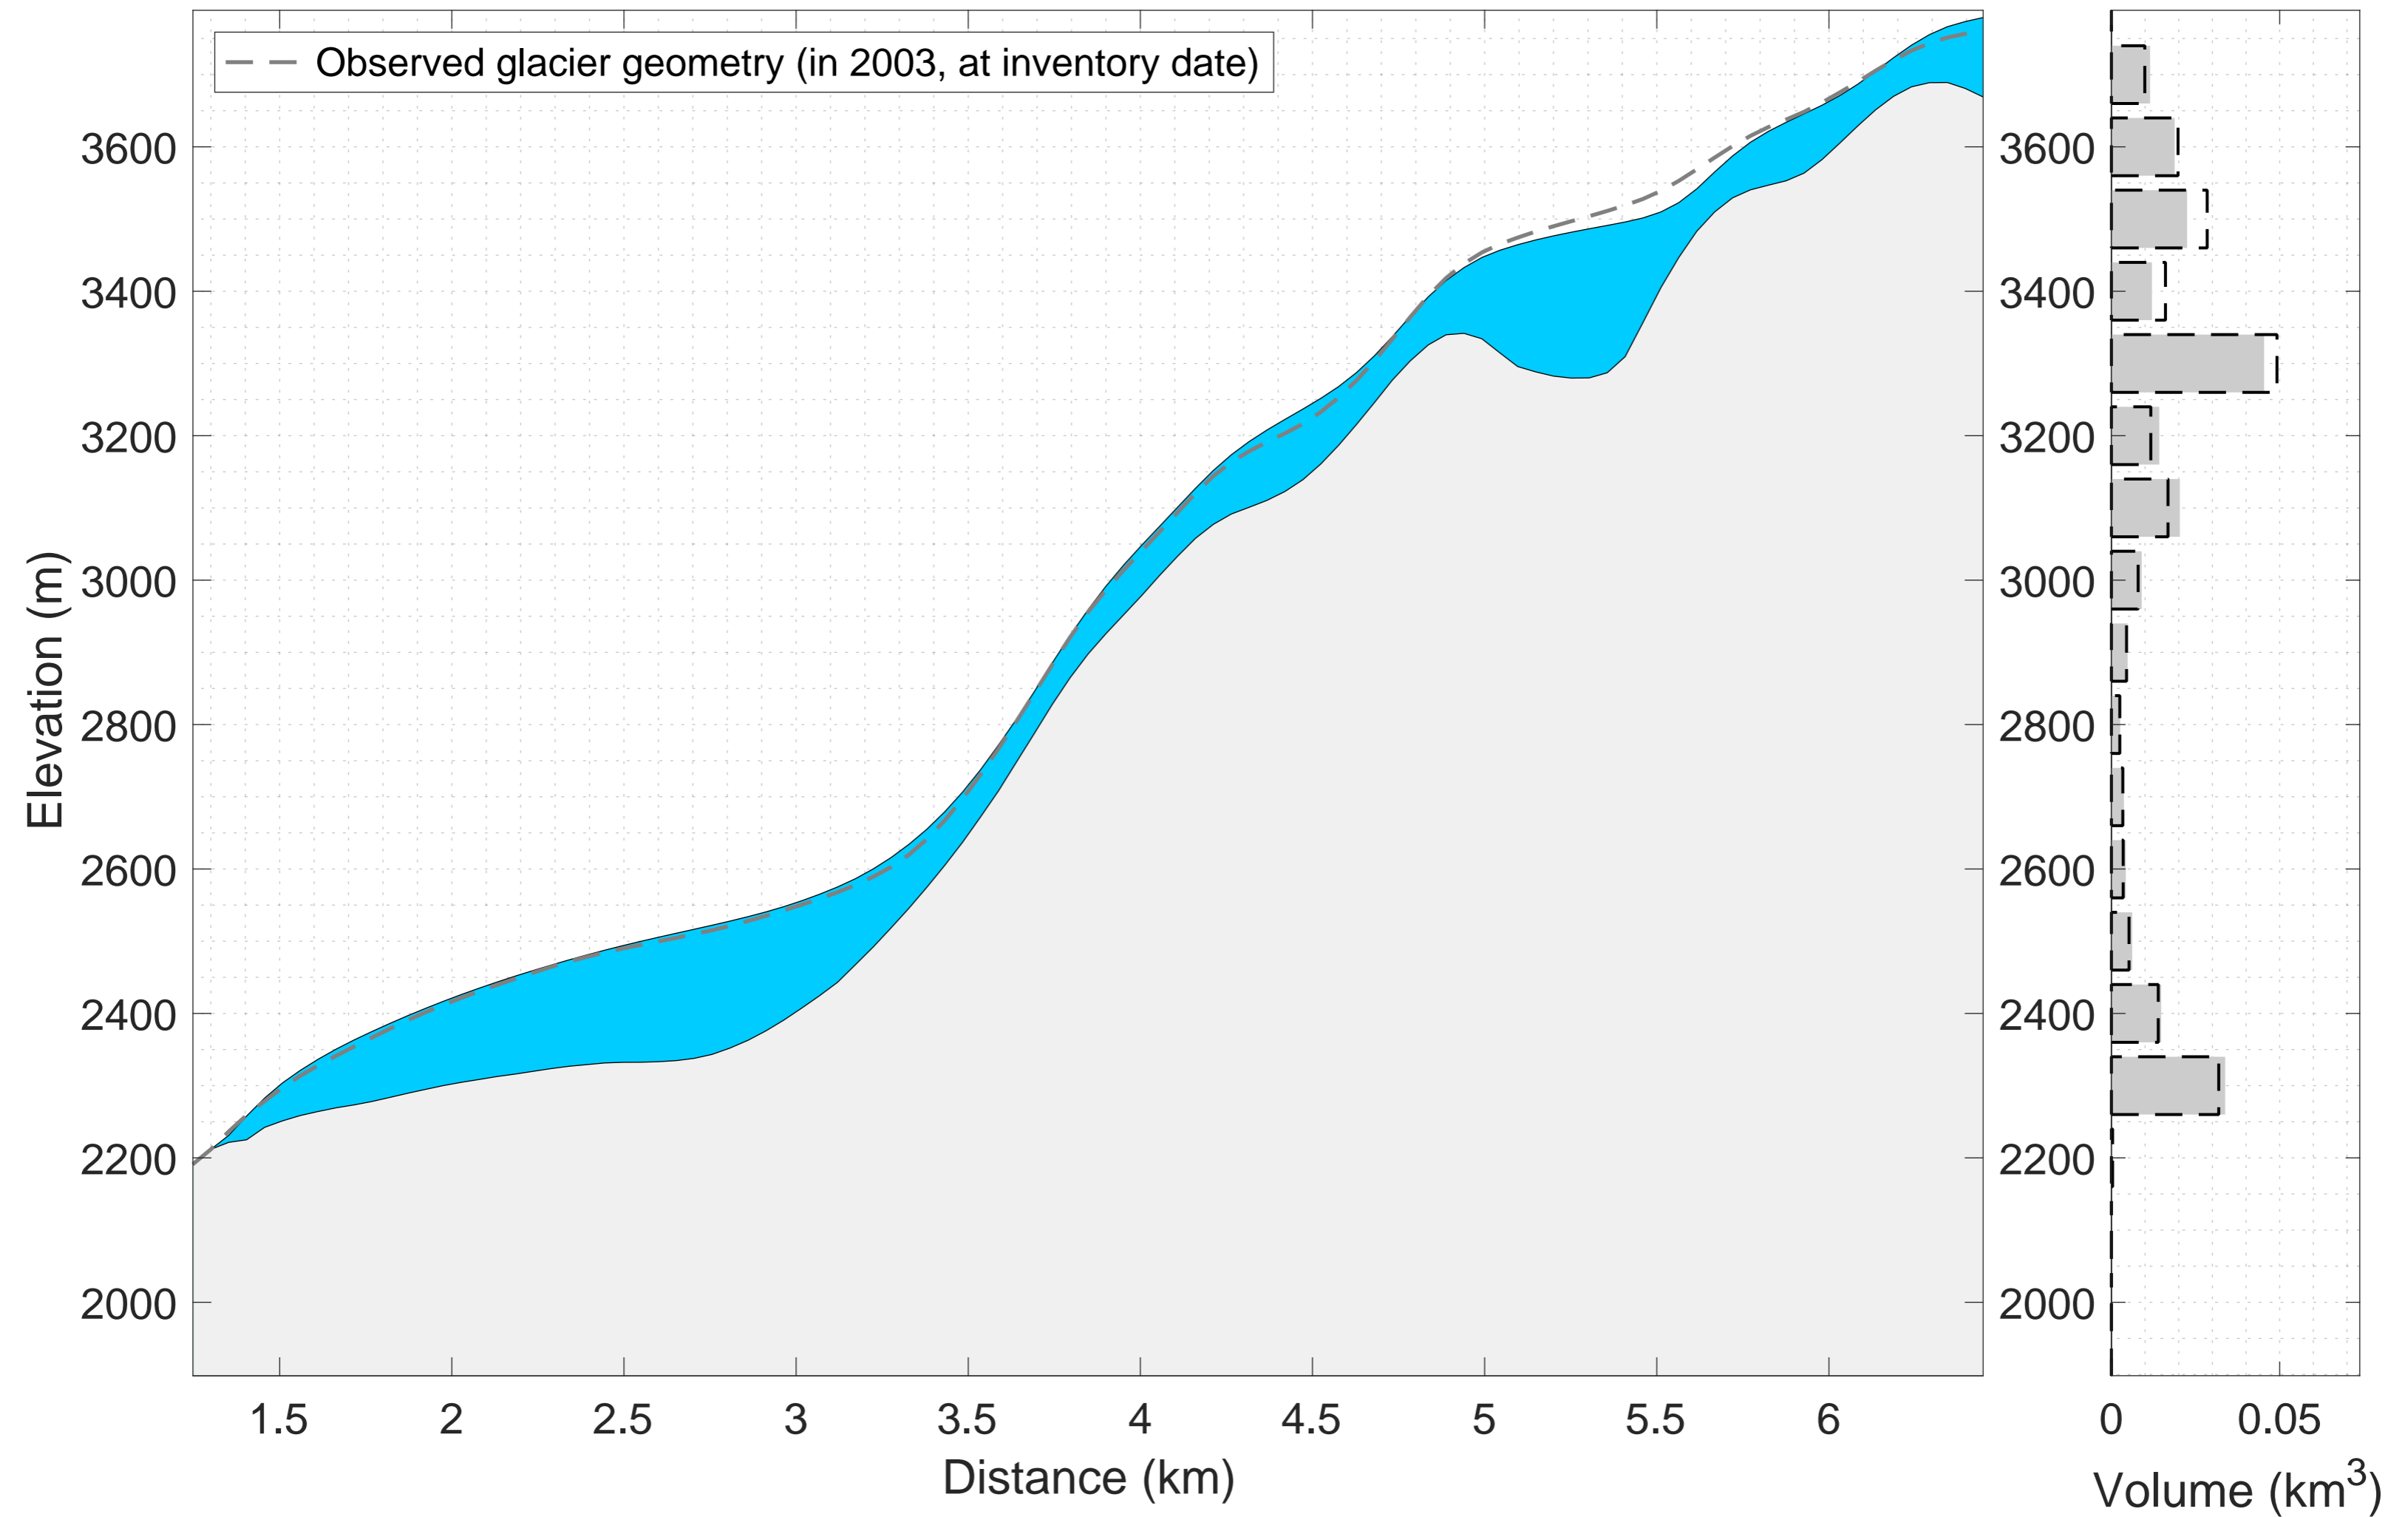

Supplement: Supplementary file 630 [file tc-13-1125-2019-supplement.zip]

**Modelled geometry (Glacier ID = 01007;  $A = 3.8547\text{e-}17 \text{ Pa}^{-3} \text{ a}^{-1}$ ;  $dx = 11 \text{ m}$ )**

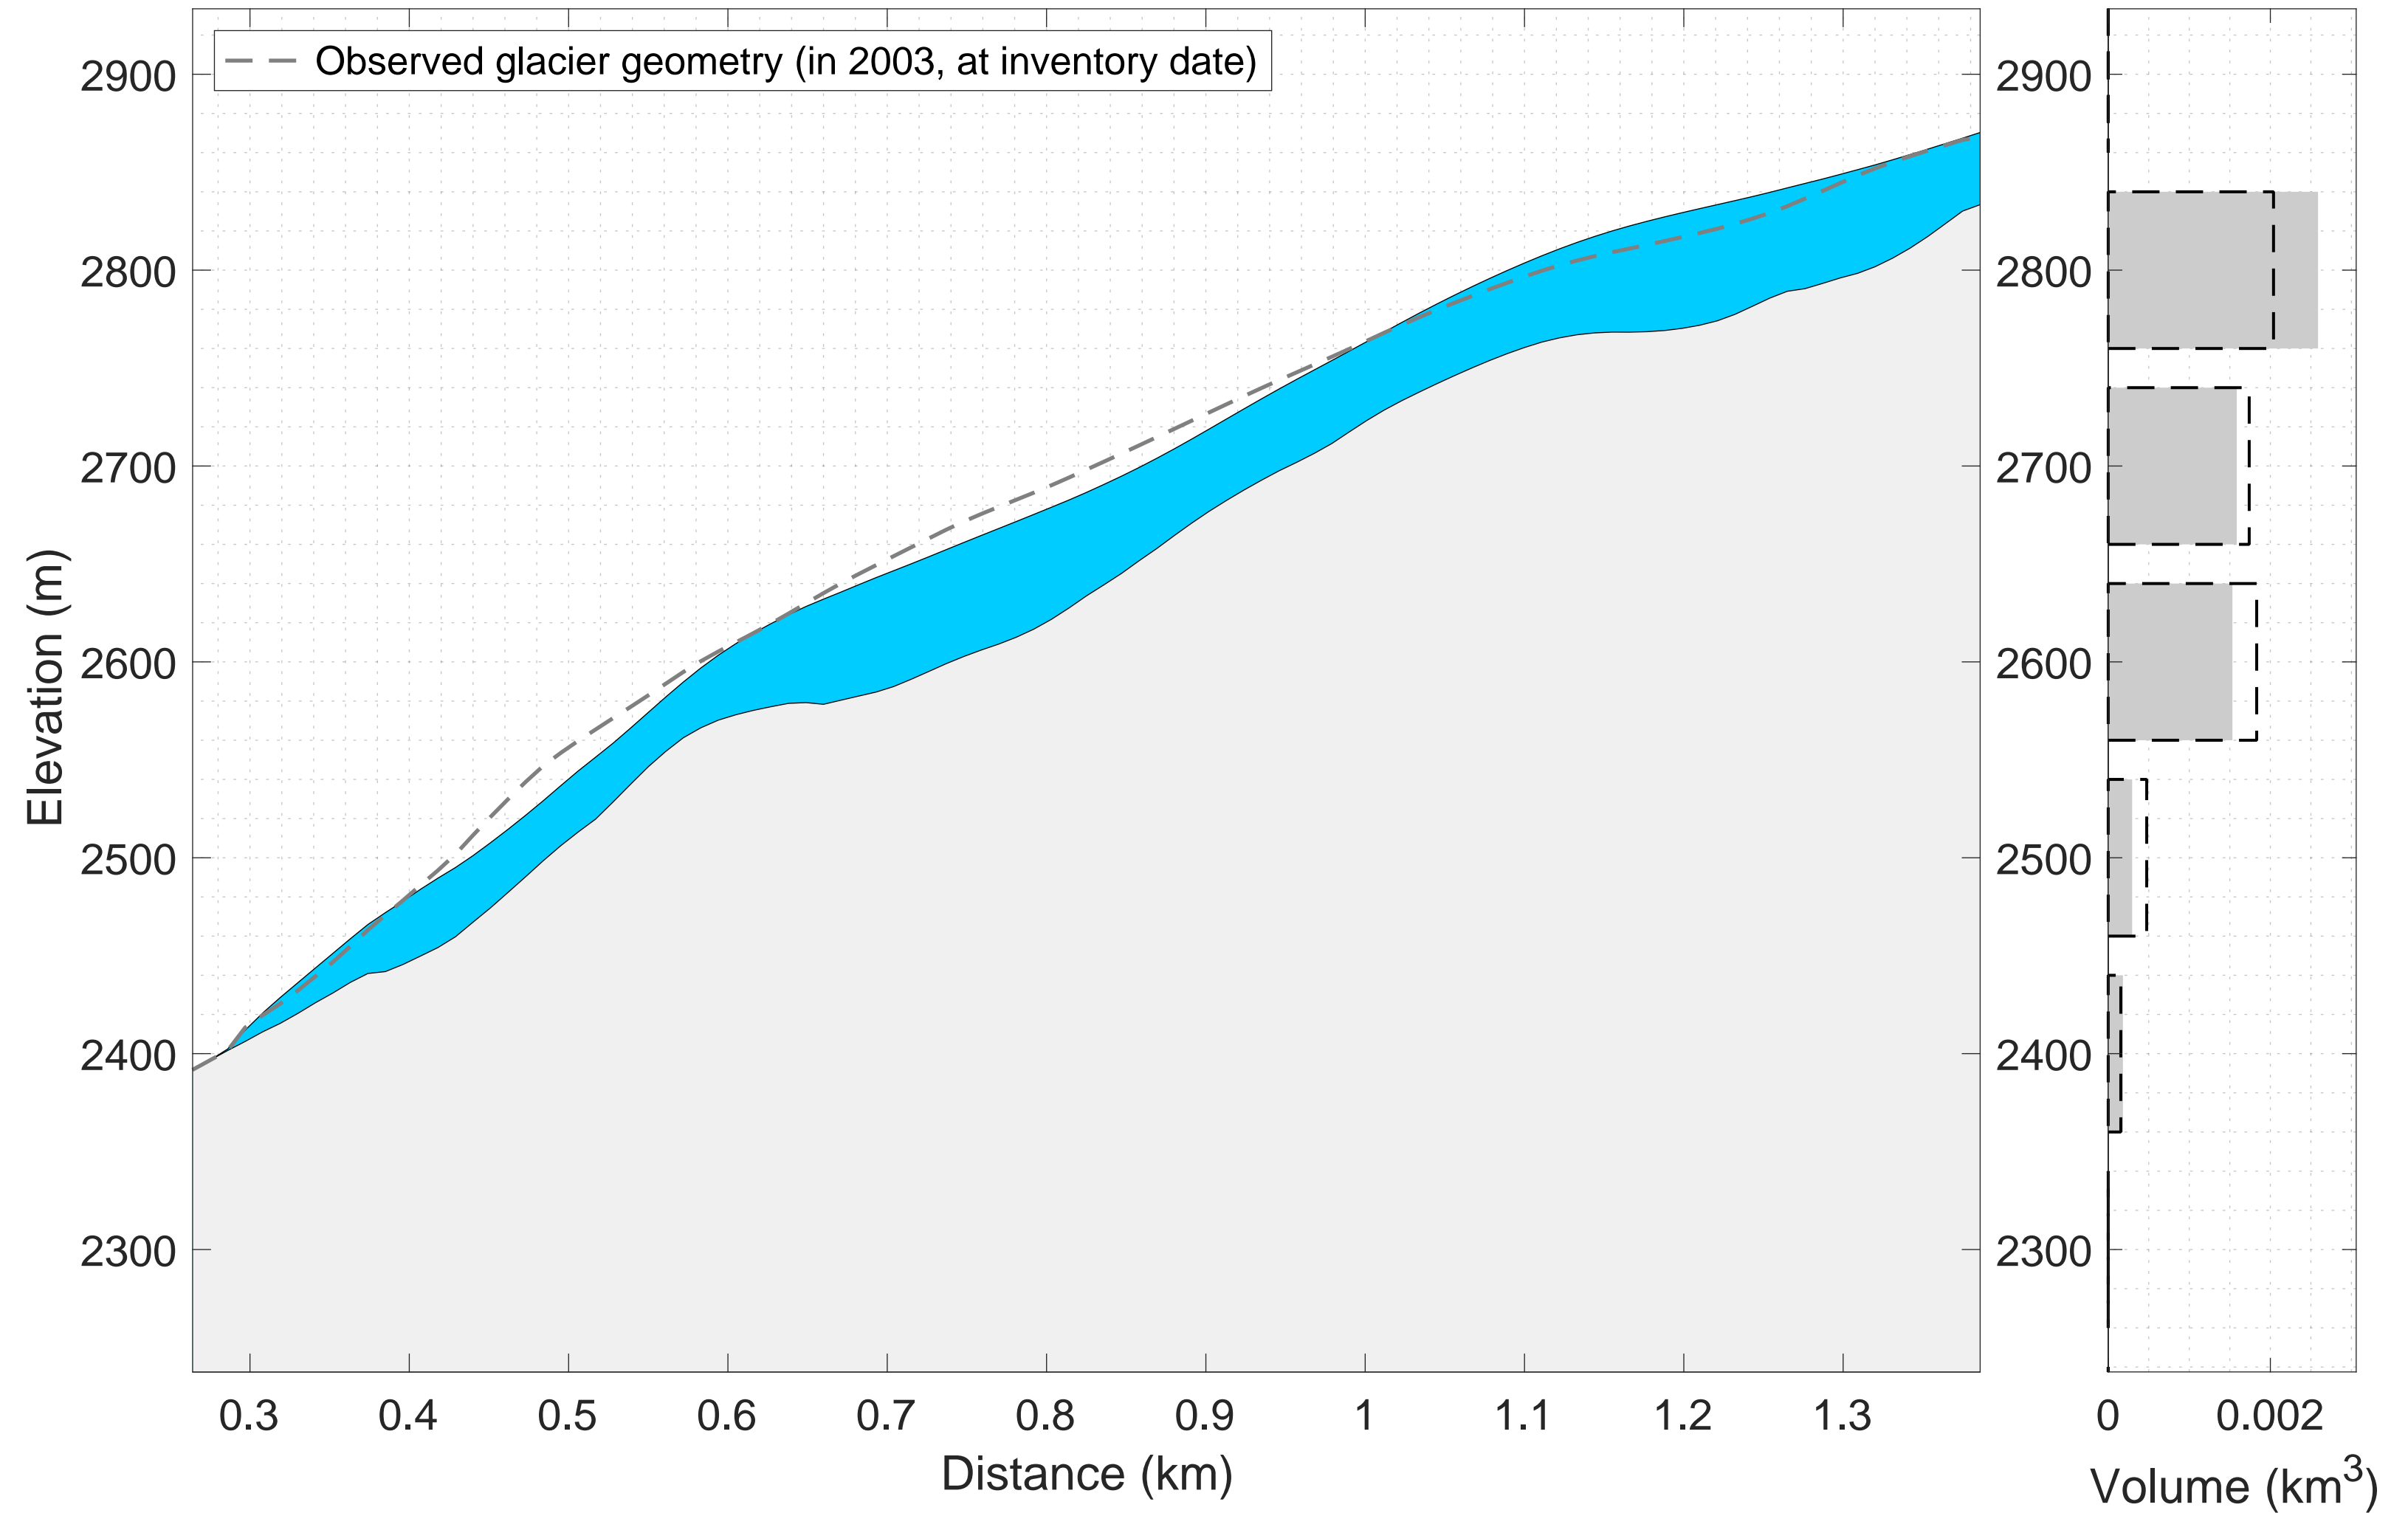

Supplement: Supplementary file 631 [file tc-13-1125-2019-supplement.zip]

**Modelled geometry (Glacier ID = 02006;  $A = 3.0097\text{e-}16 \text{ Pa}^{-3} \text{ a}^{-1}$ ;  $dx = 29 \text{ m}$ )**

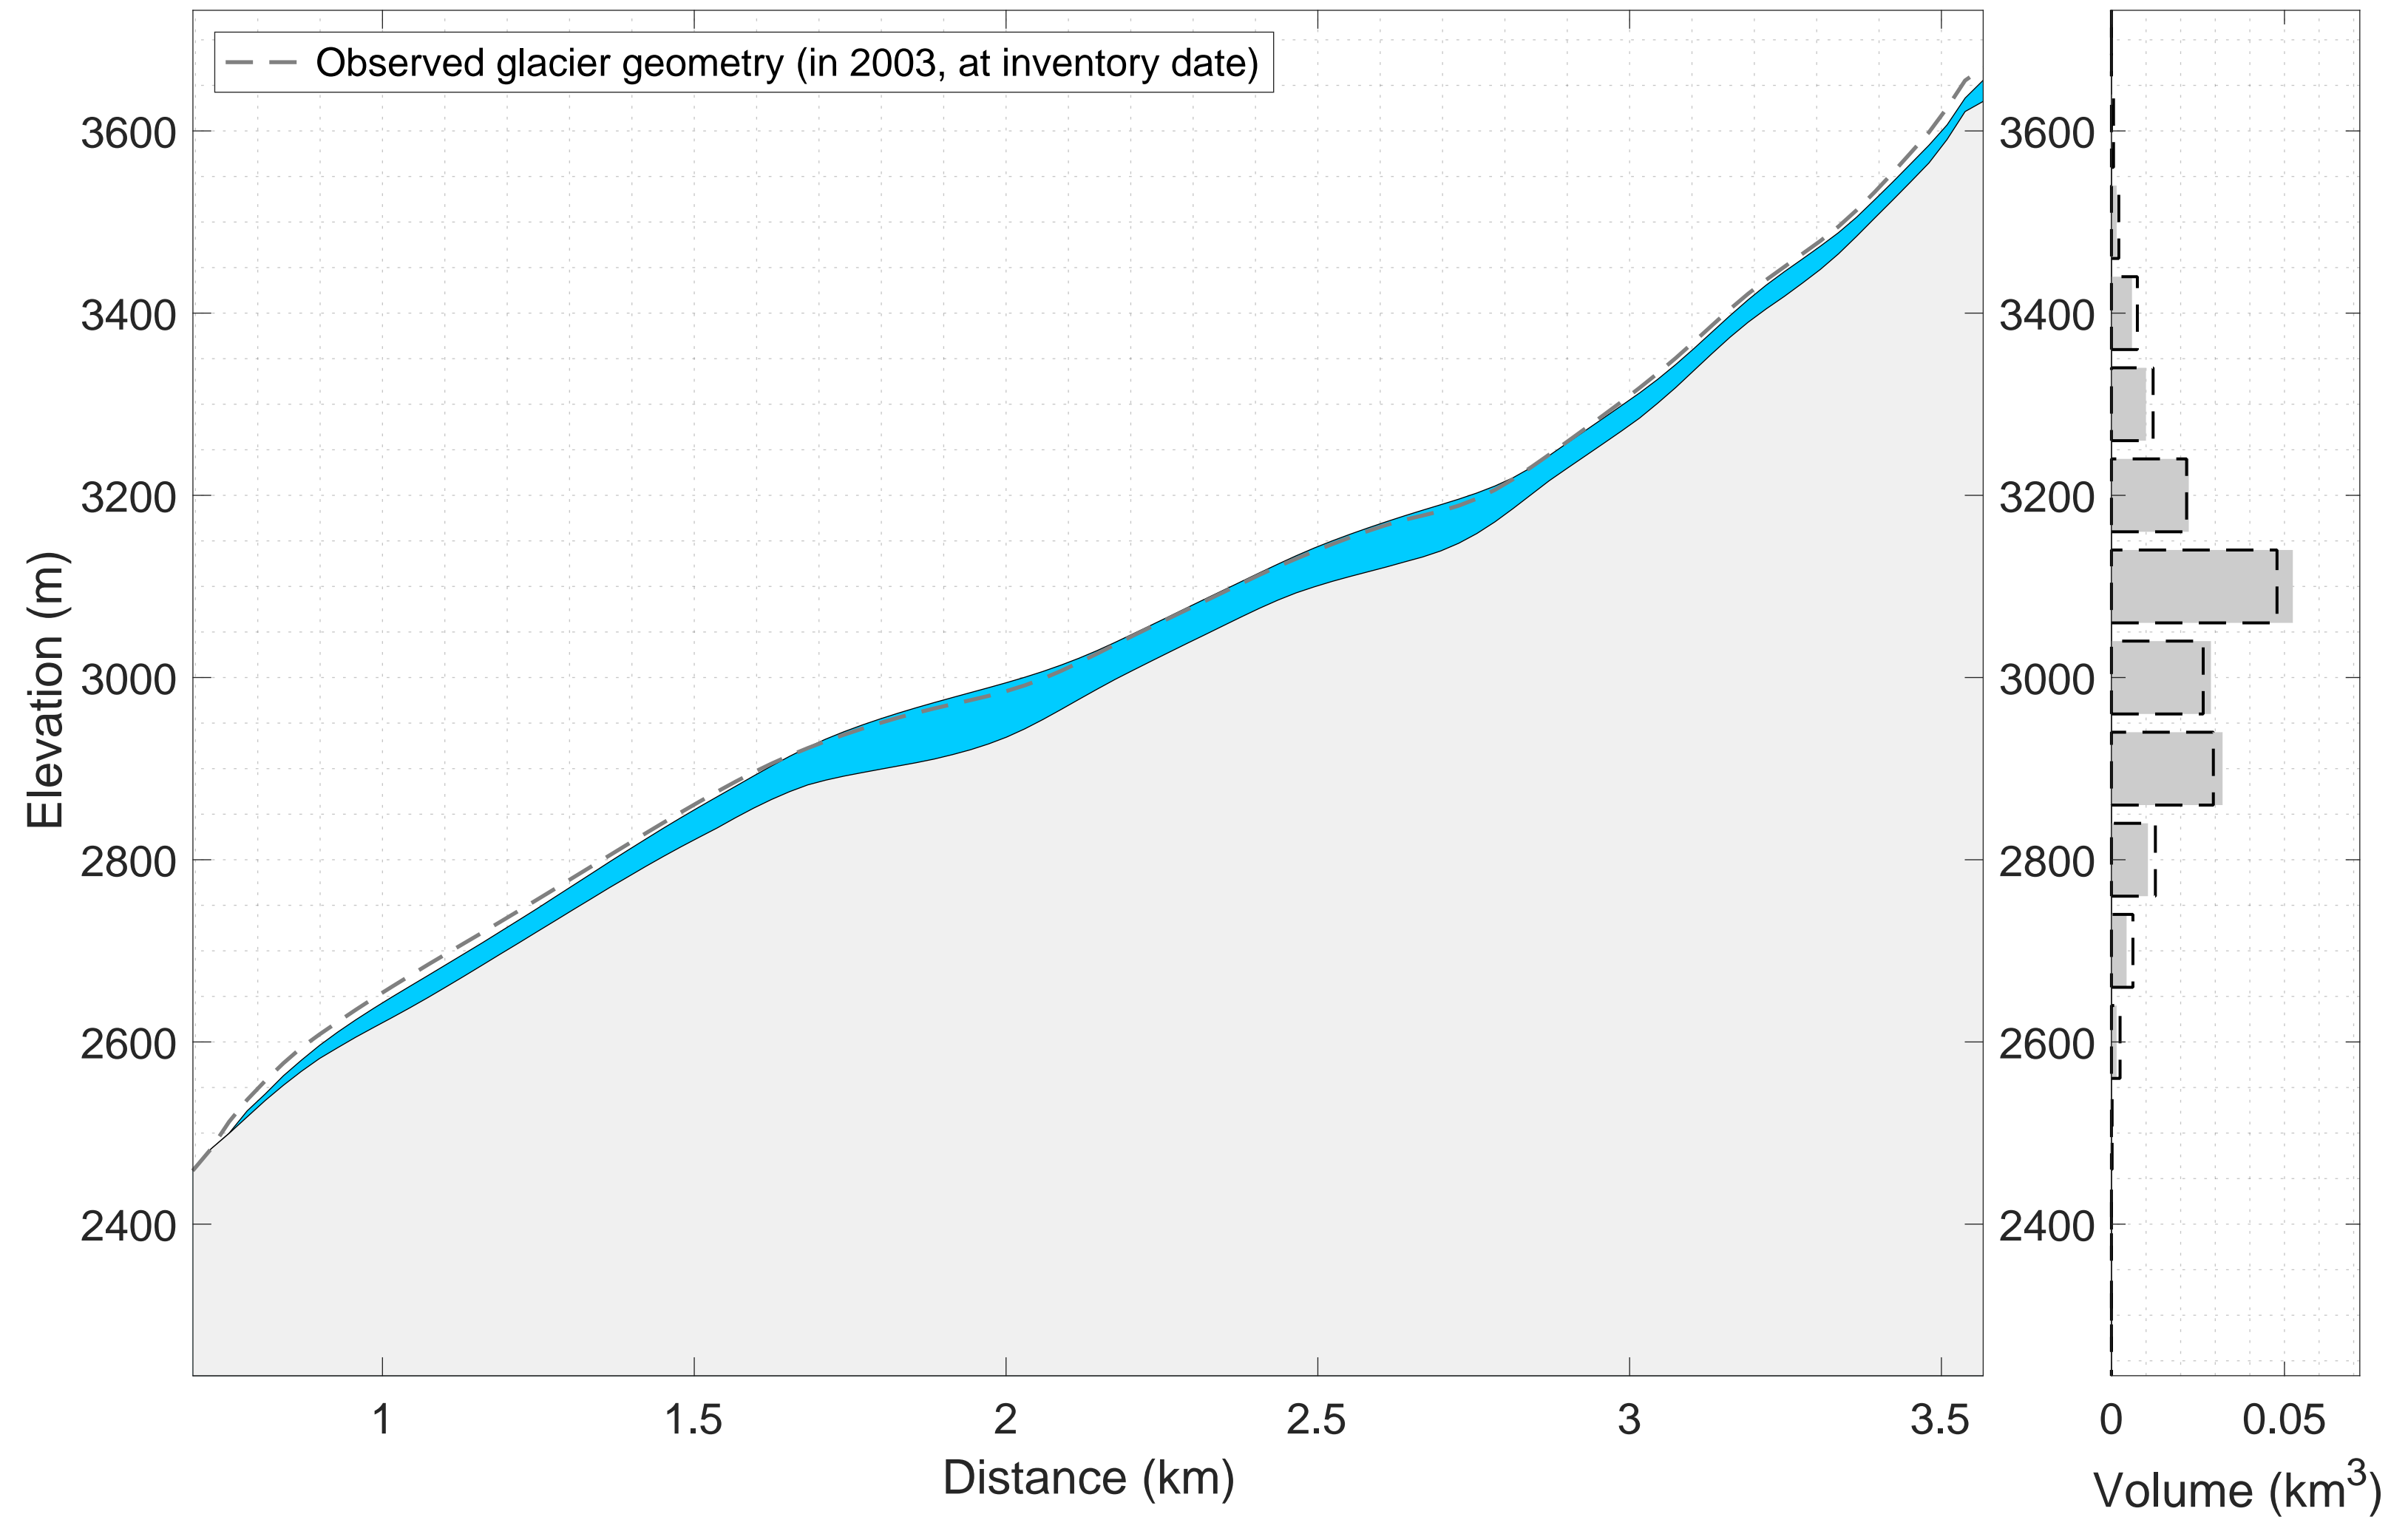

Supplement: Supplementary file 632 [file tc-13-1125-2019-supplement.zip]

**Modelled geometry (Glacier ID = 01257;  $A = 5.1913\text{e-}17 \text{ Pa}^{-3} \text{ a}^{-1}$ ;  $dx = 10 \text{ m}$ )**

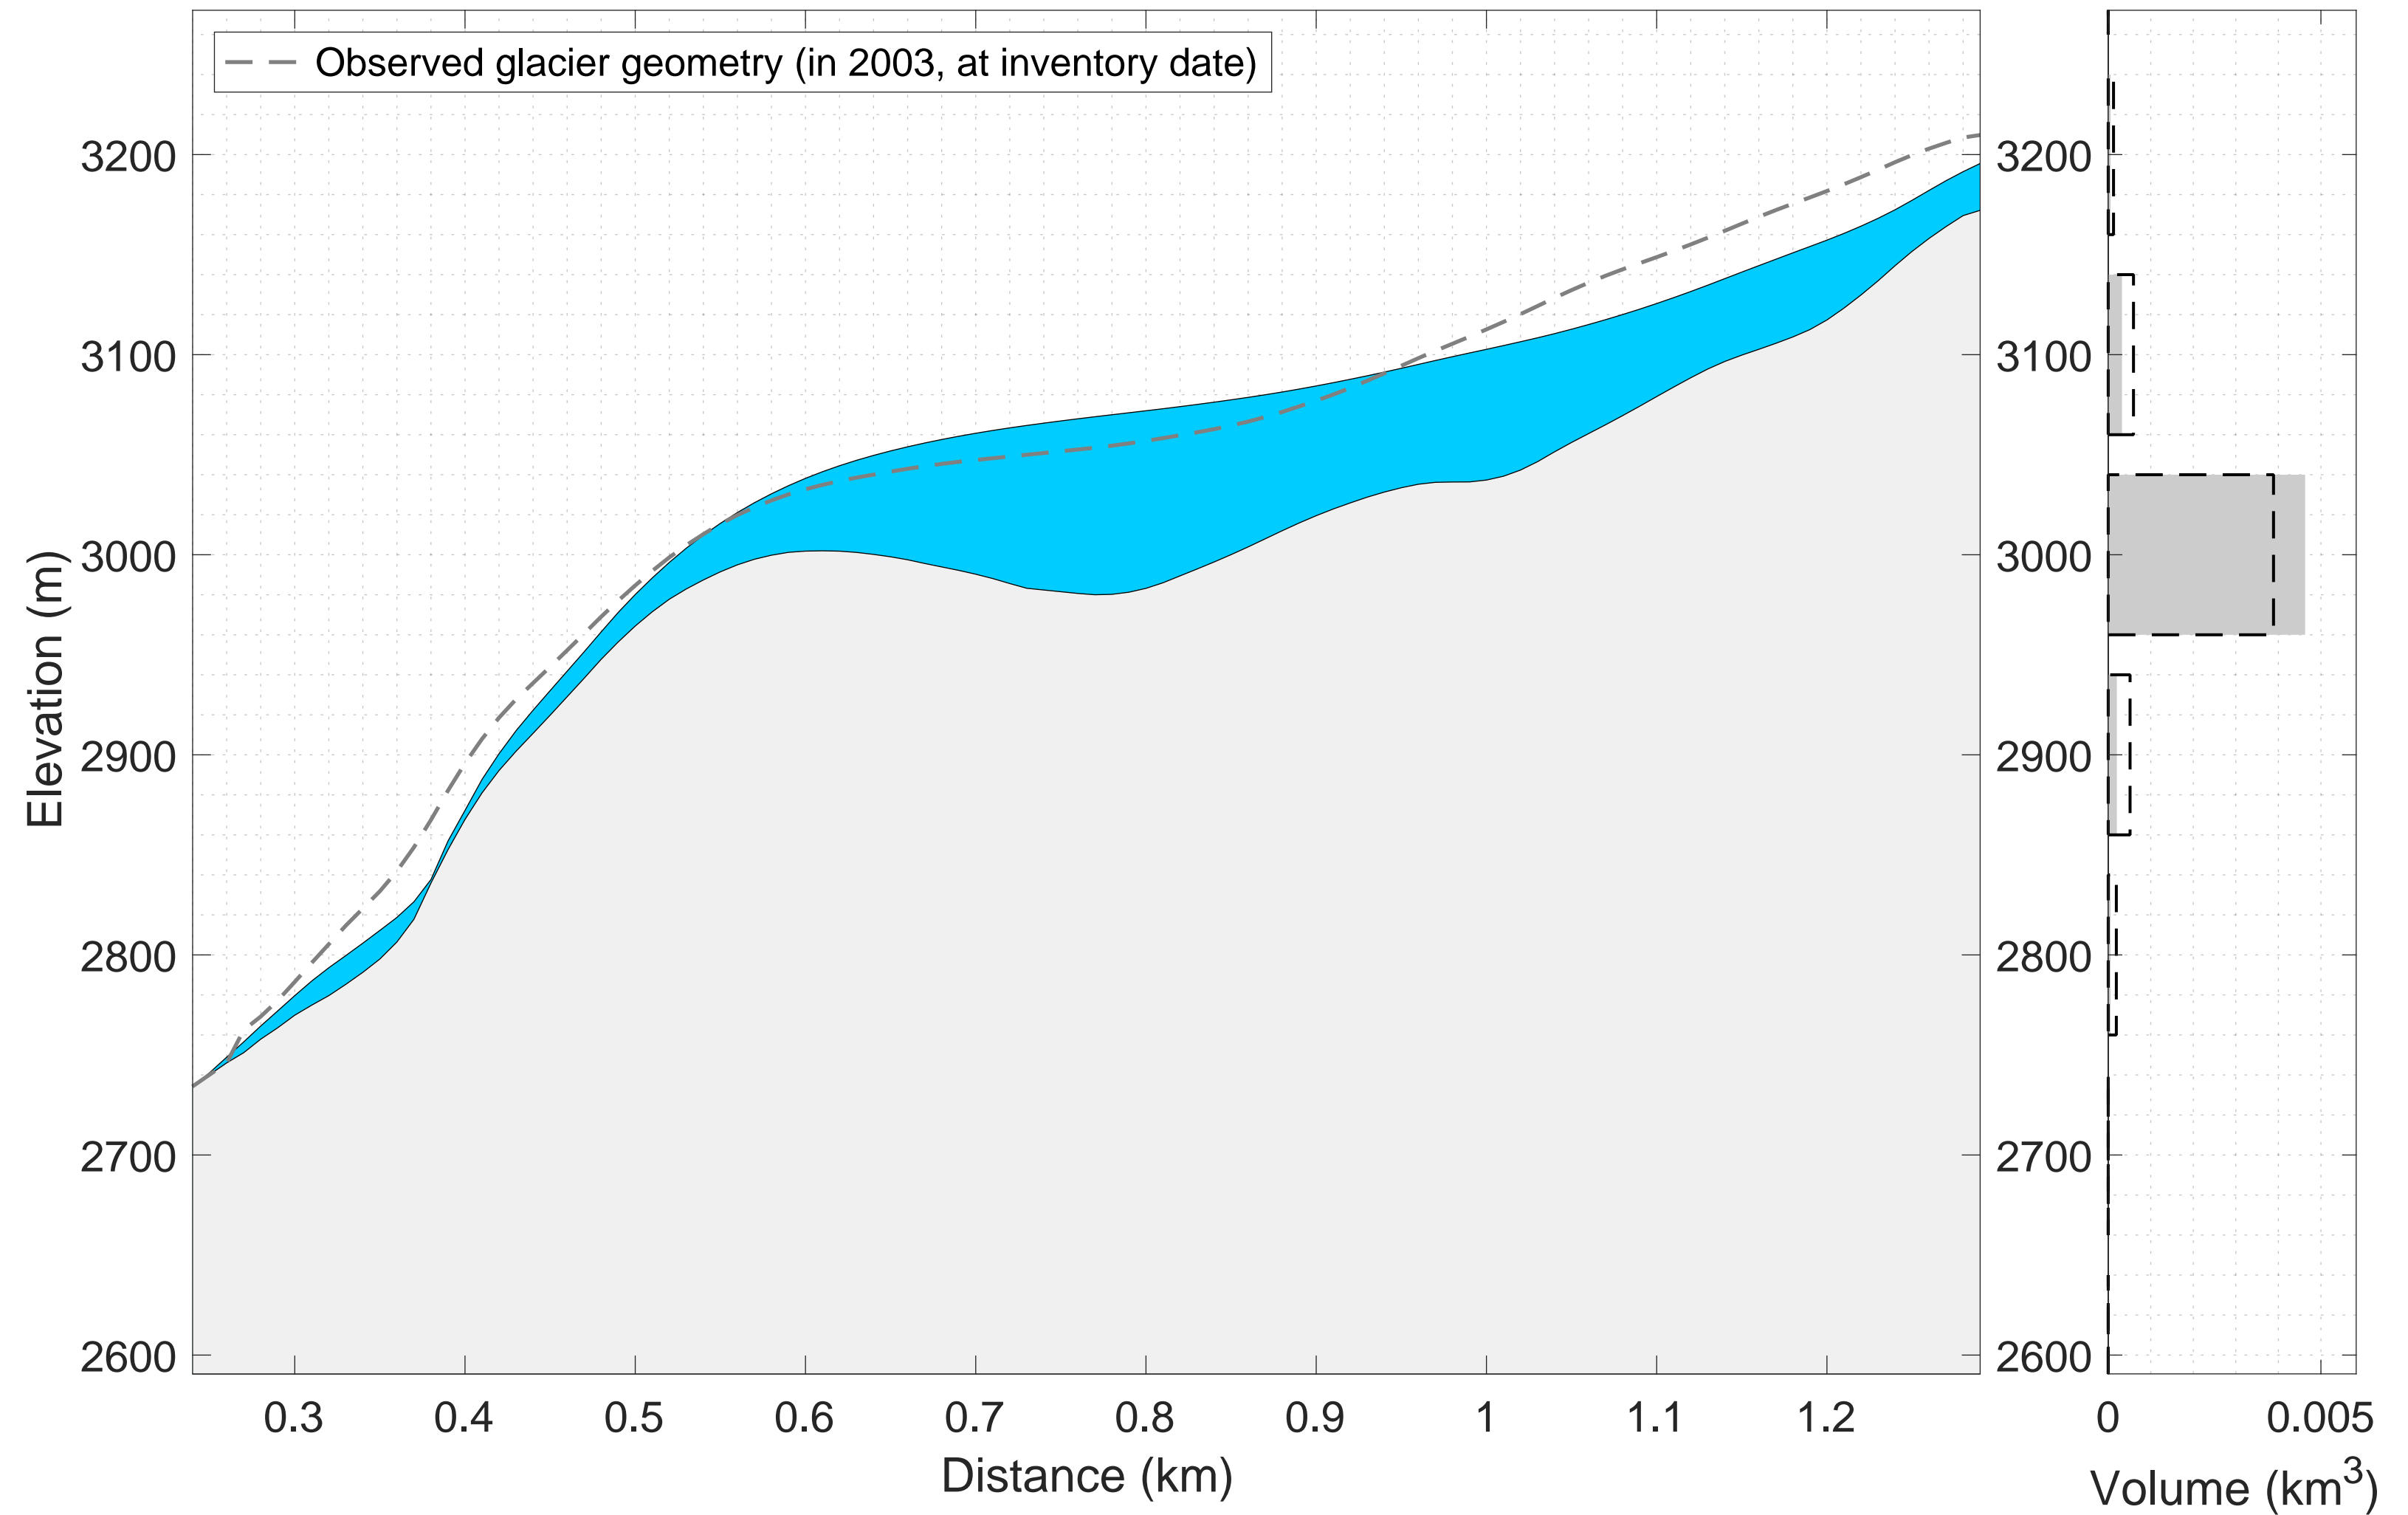

Supplement: Supplementary file 633 [file tc-13-1125-2019-supplement.zip]

**Modelled geometry (Glacier ID = 02568;  $A = 2.5846\text{e-}17 \text{ Pa}^{-3} \text{ a}^{-1}$ ;  $dx = 14 \text{ m}$ )**

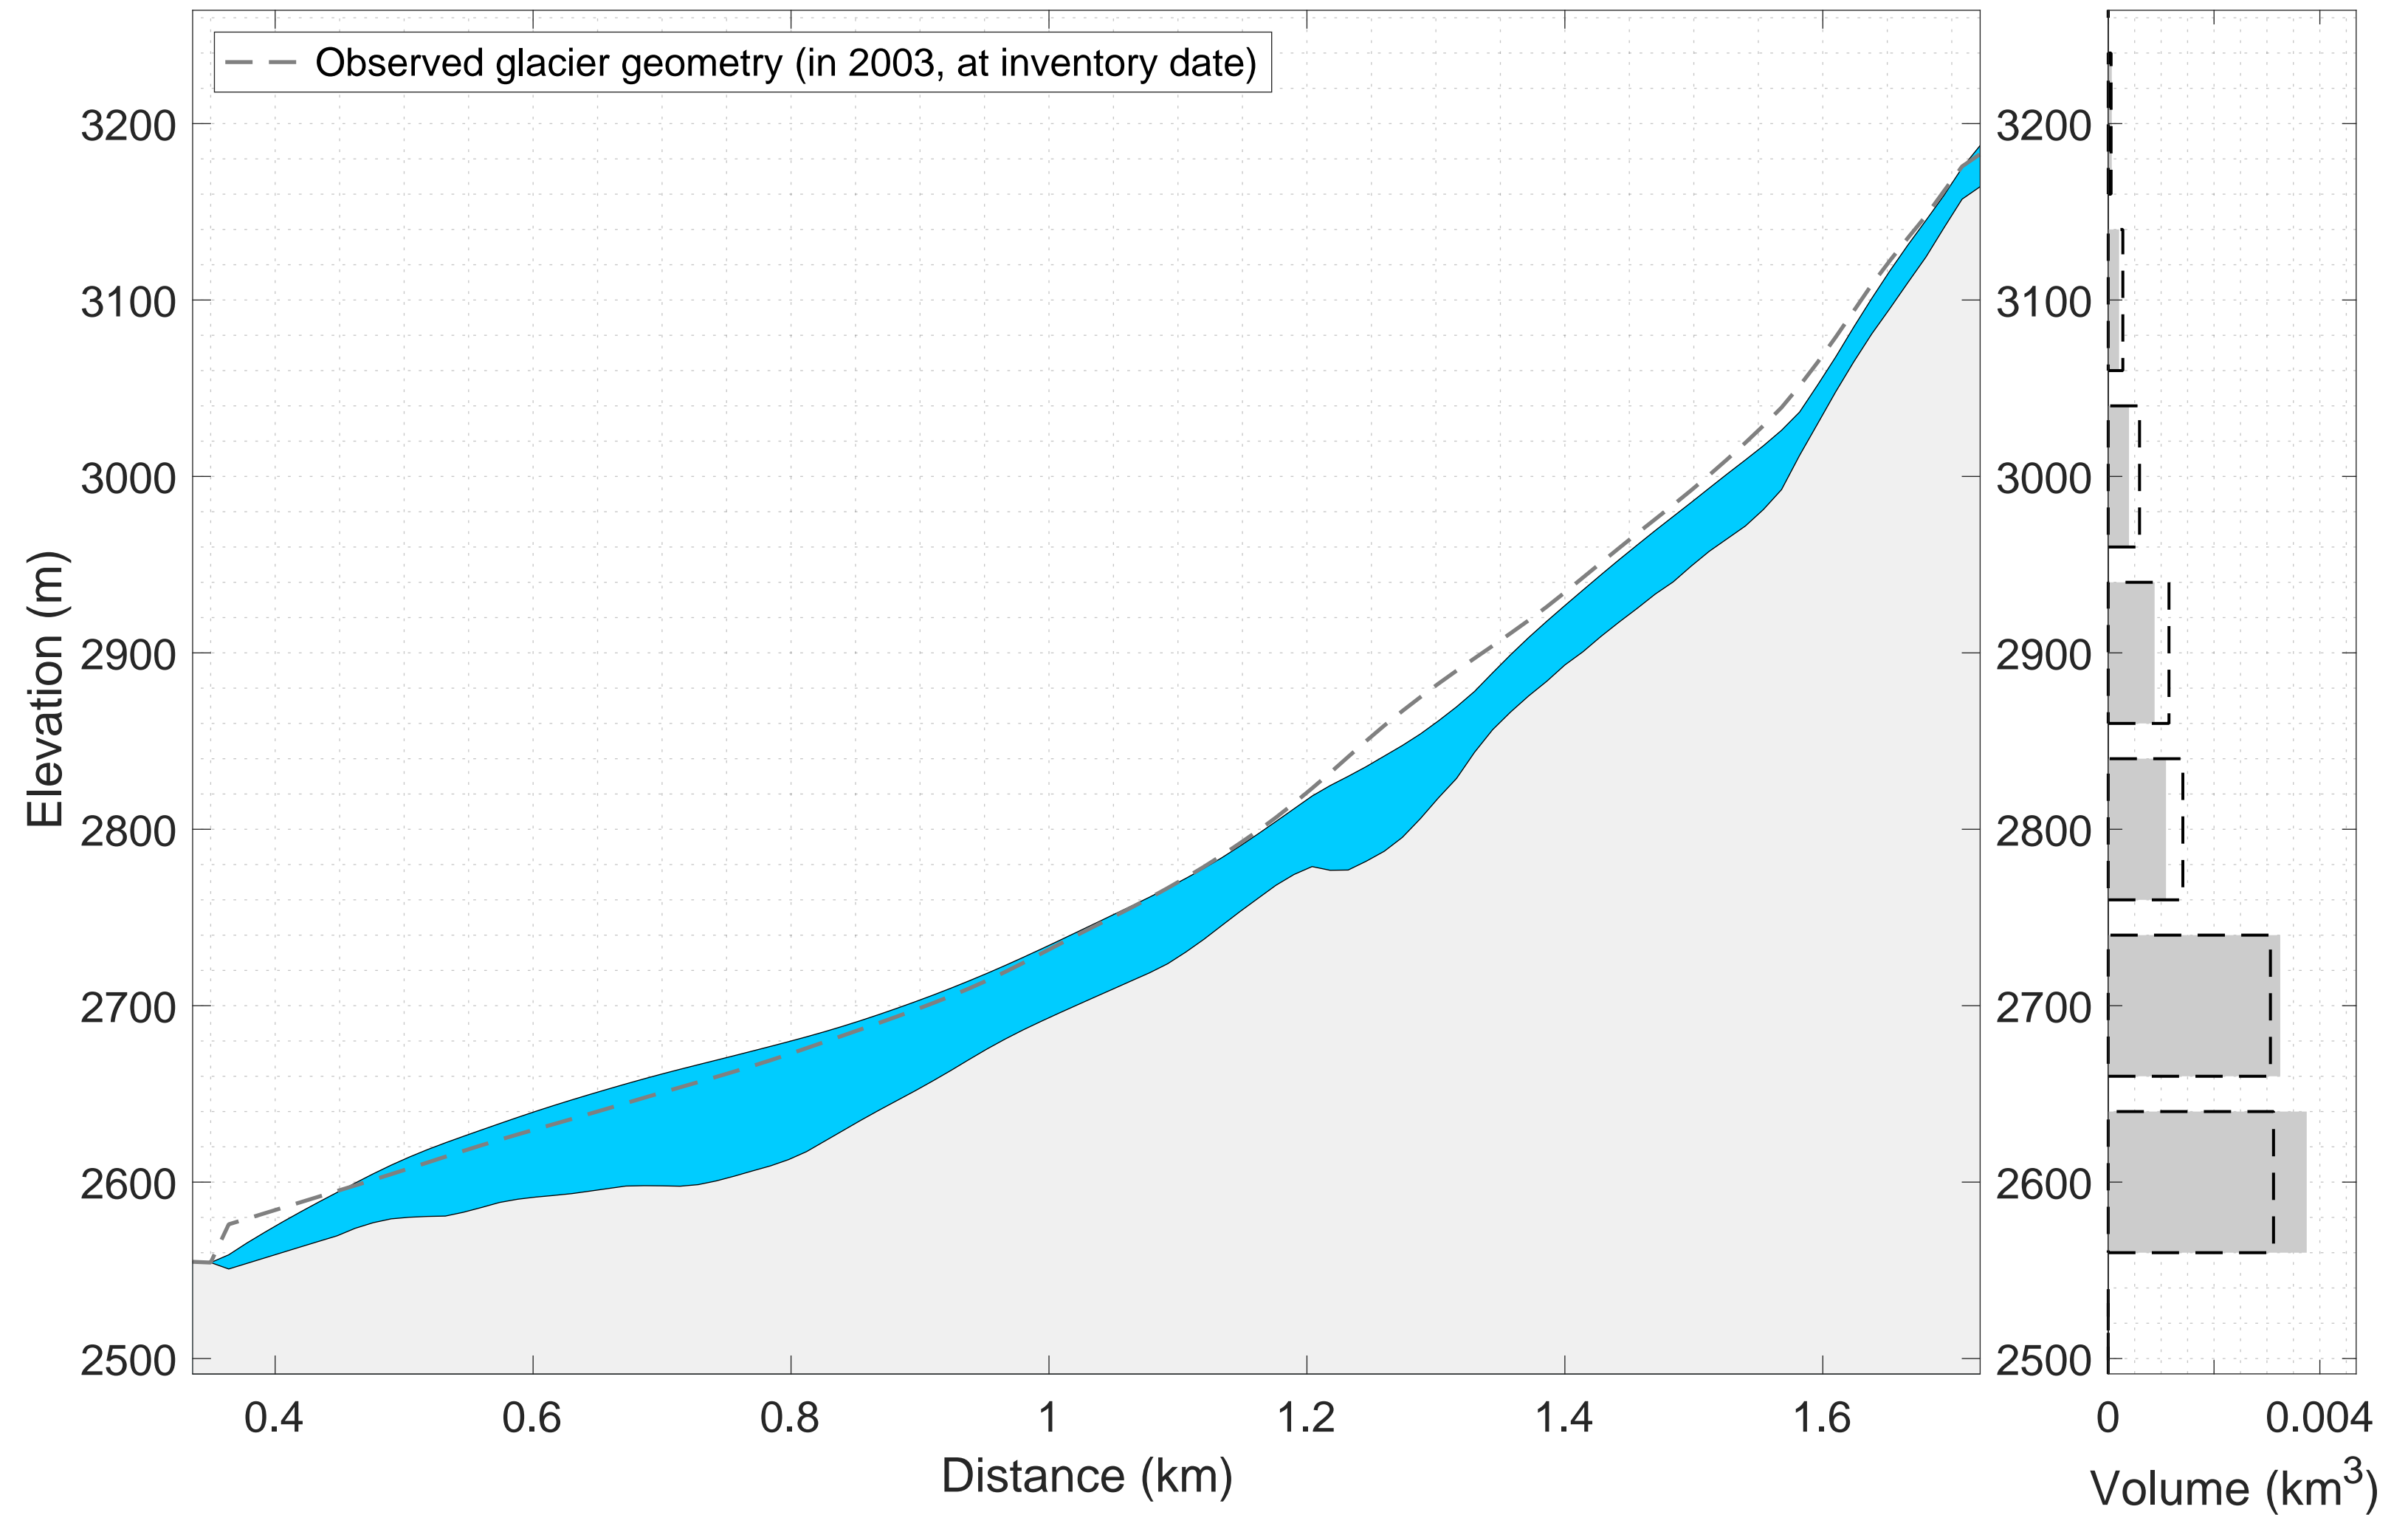

Supplement: Supplementary file 634 [file tc-13-1125-2019-supplement.zip]

**Modelled geometry (Glacier ID = 03670;  $A = 9.467\text{e-}17 \text{ Pa}^{-3} \text{ a}^{-1}$ ;  $dx = 17 \text{ m}$ )**

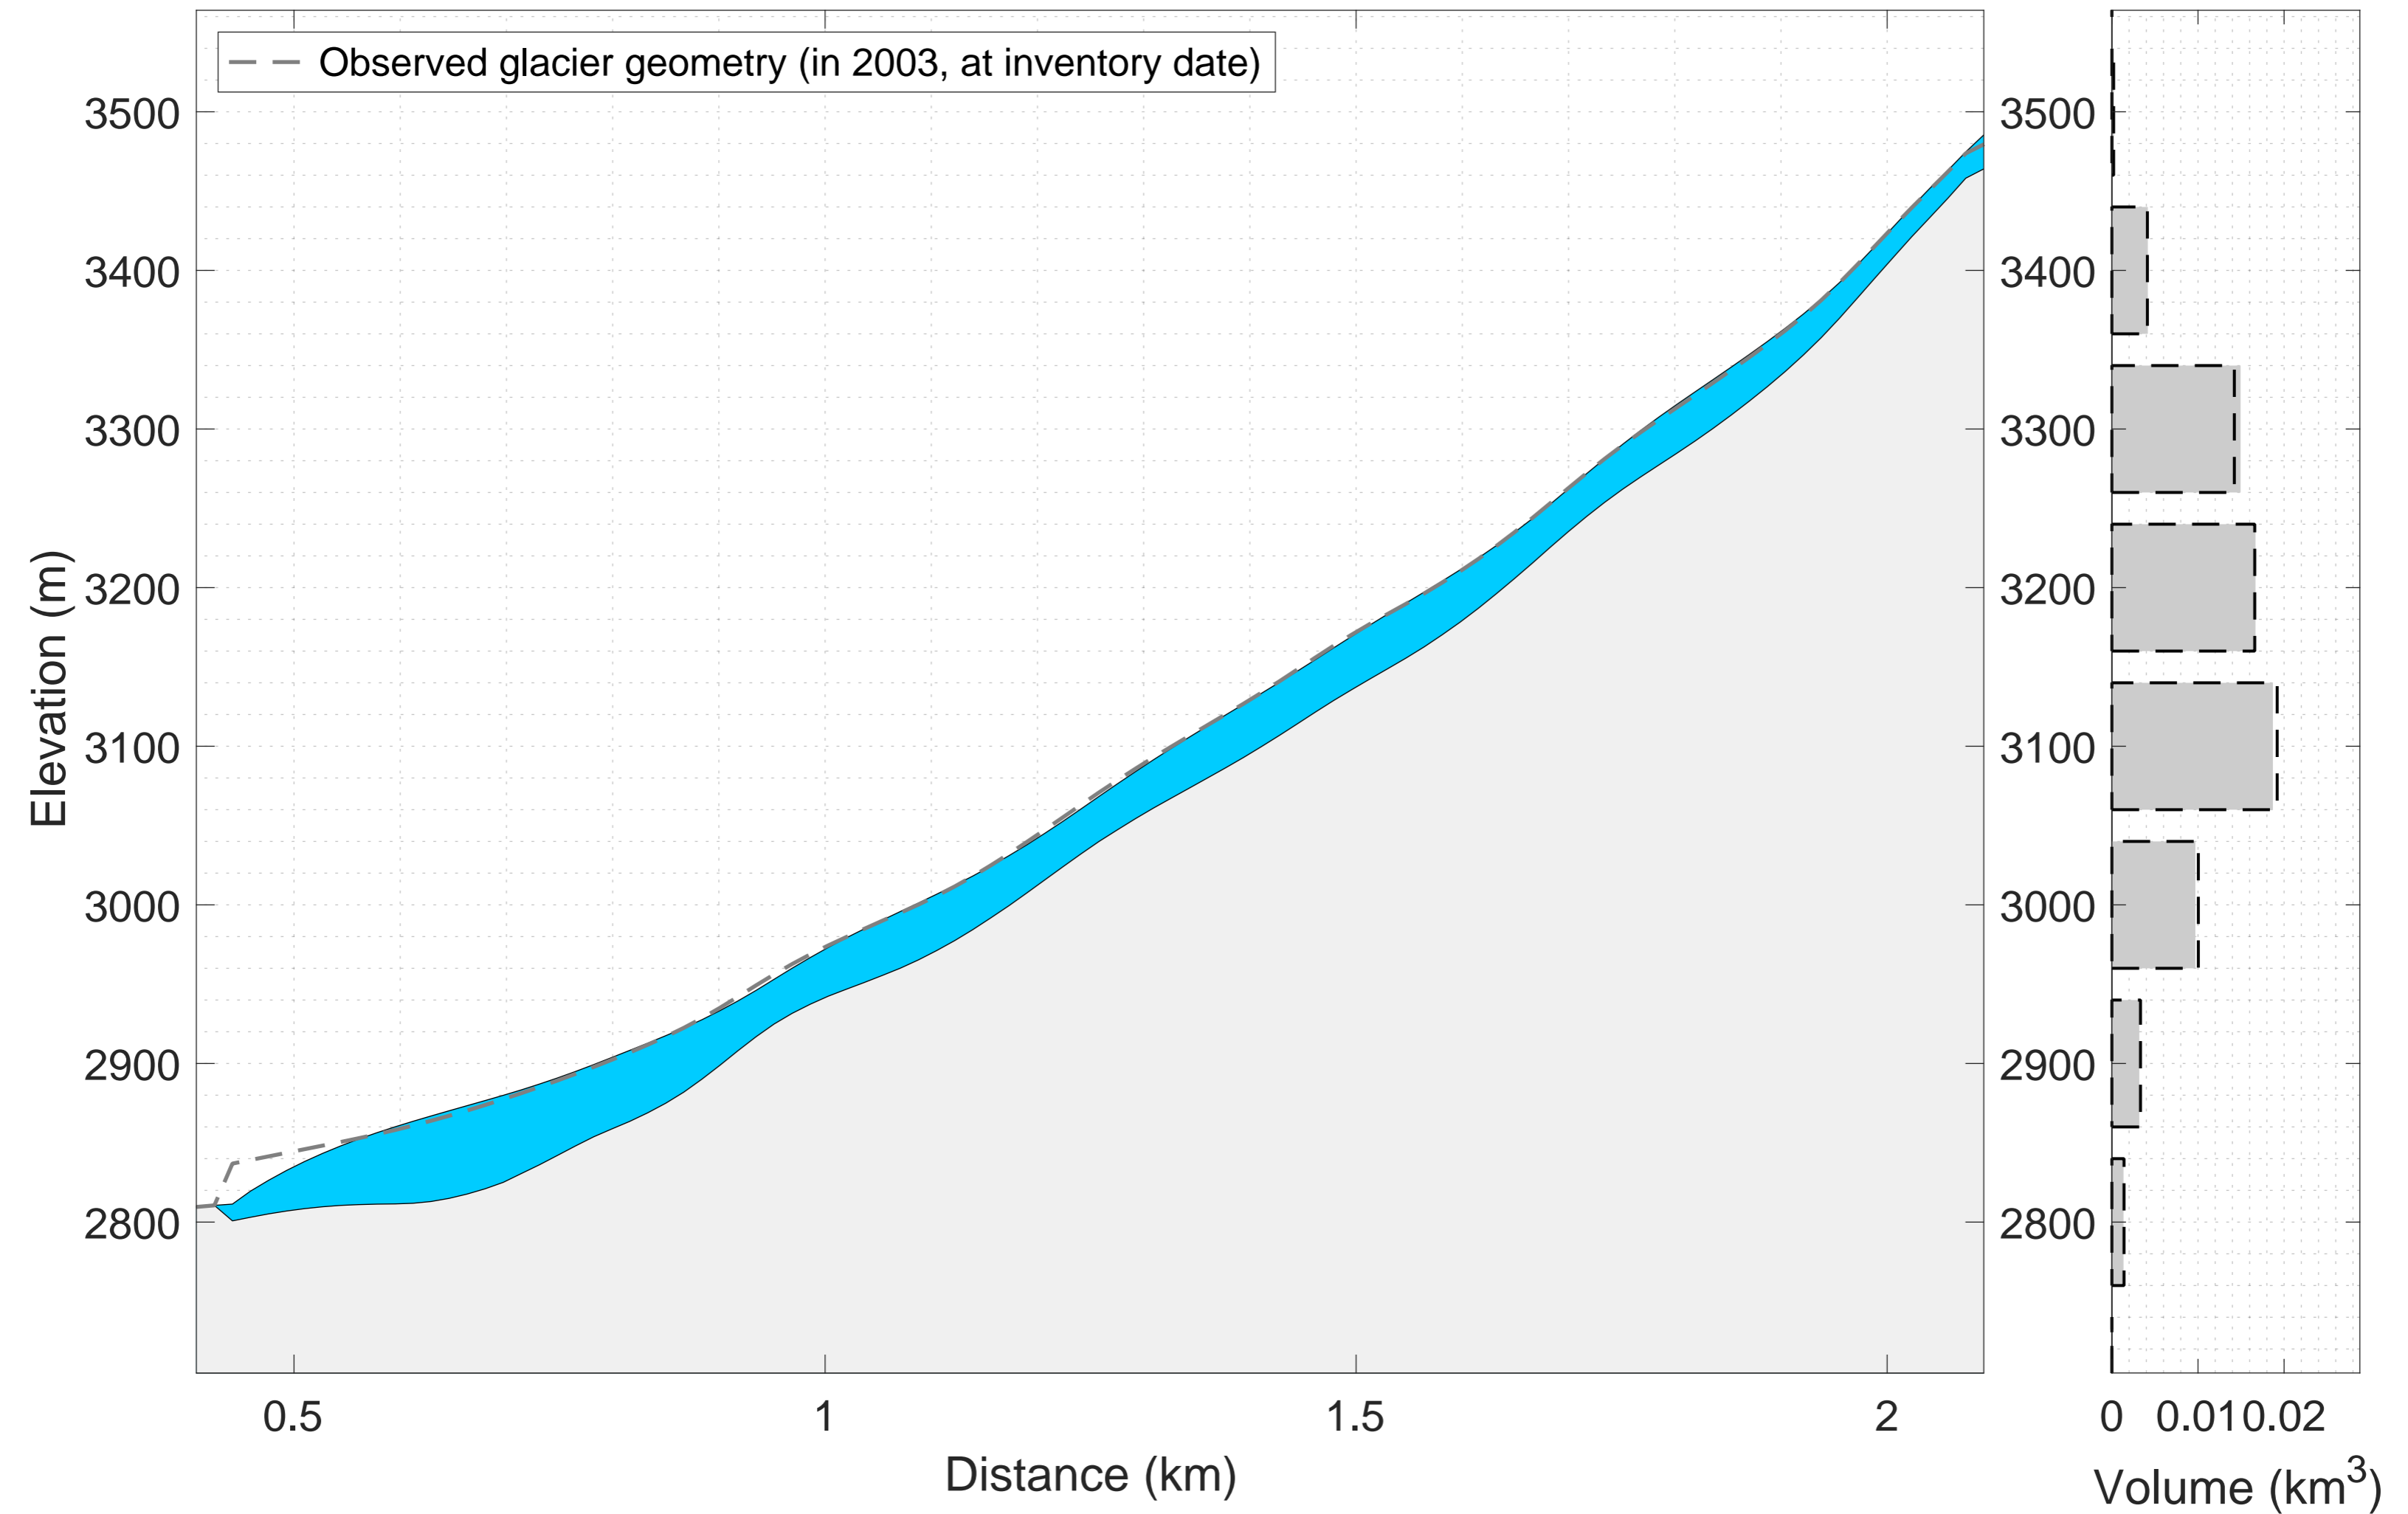

Supplement: Supplementary file 635 [file tc-13-1125-2019-supplement.zip]

**Modelled geometry (Glacier ID = 00804;  $A = 4.0473\text{e-}17 \text{ Pa}^{-3} \text{ a}^{-1}$ ;  $dx = 32 \text{ m}$ )**

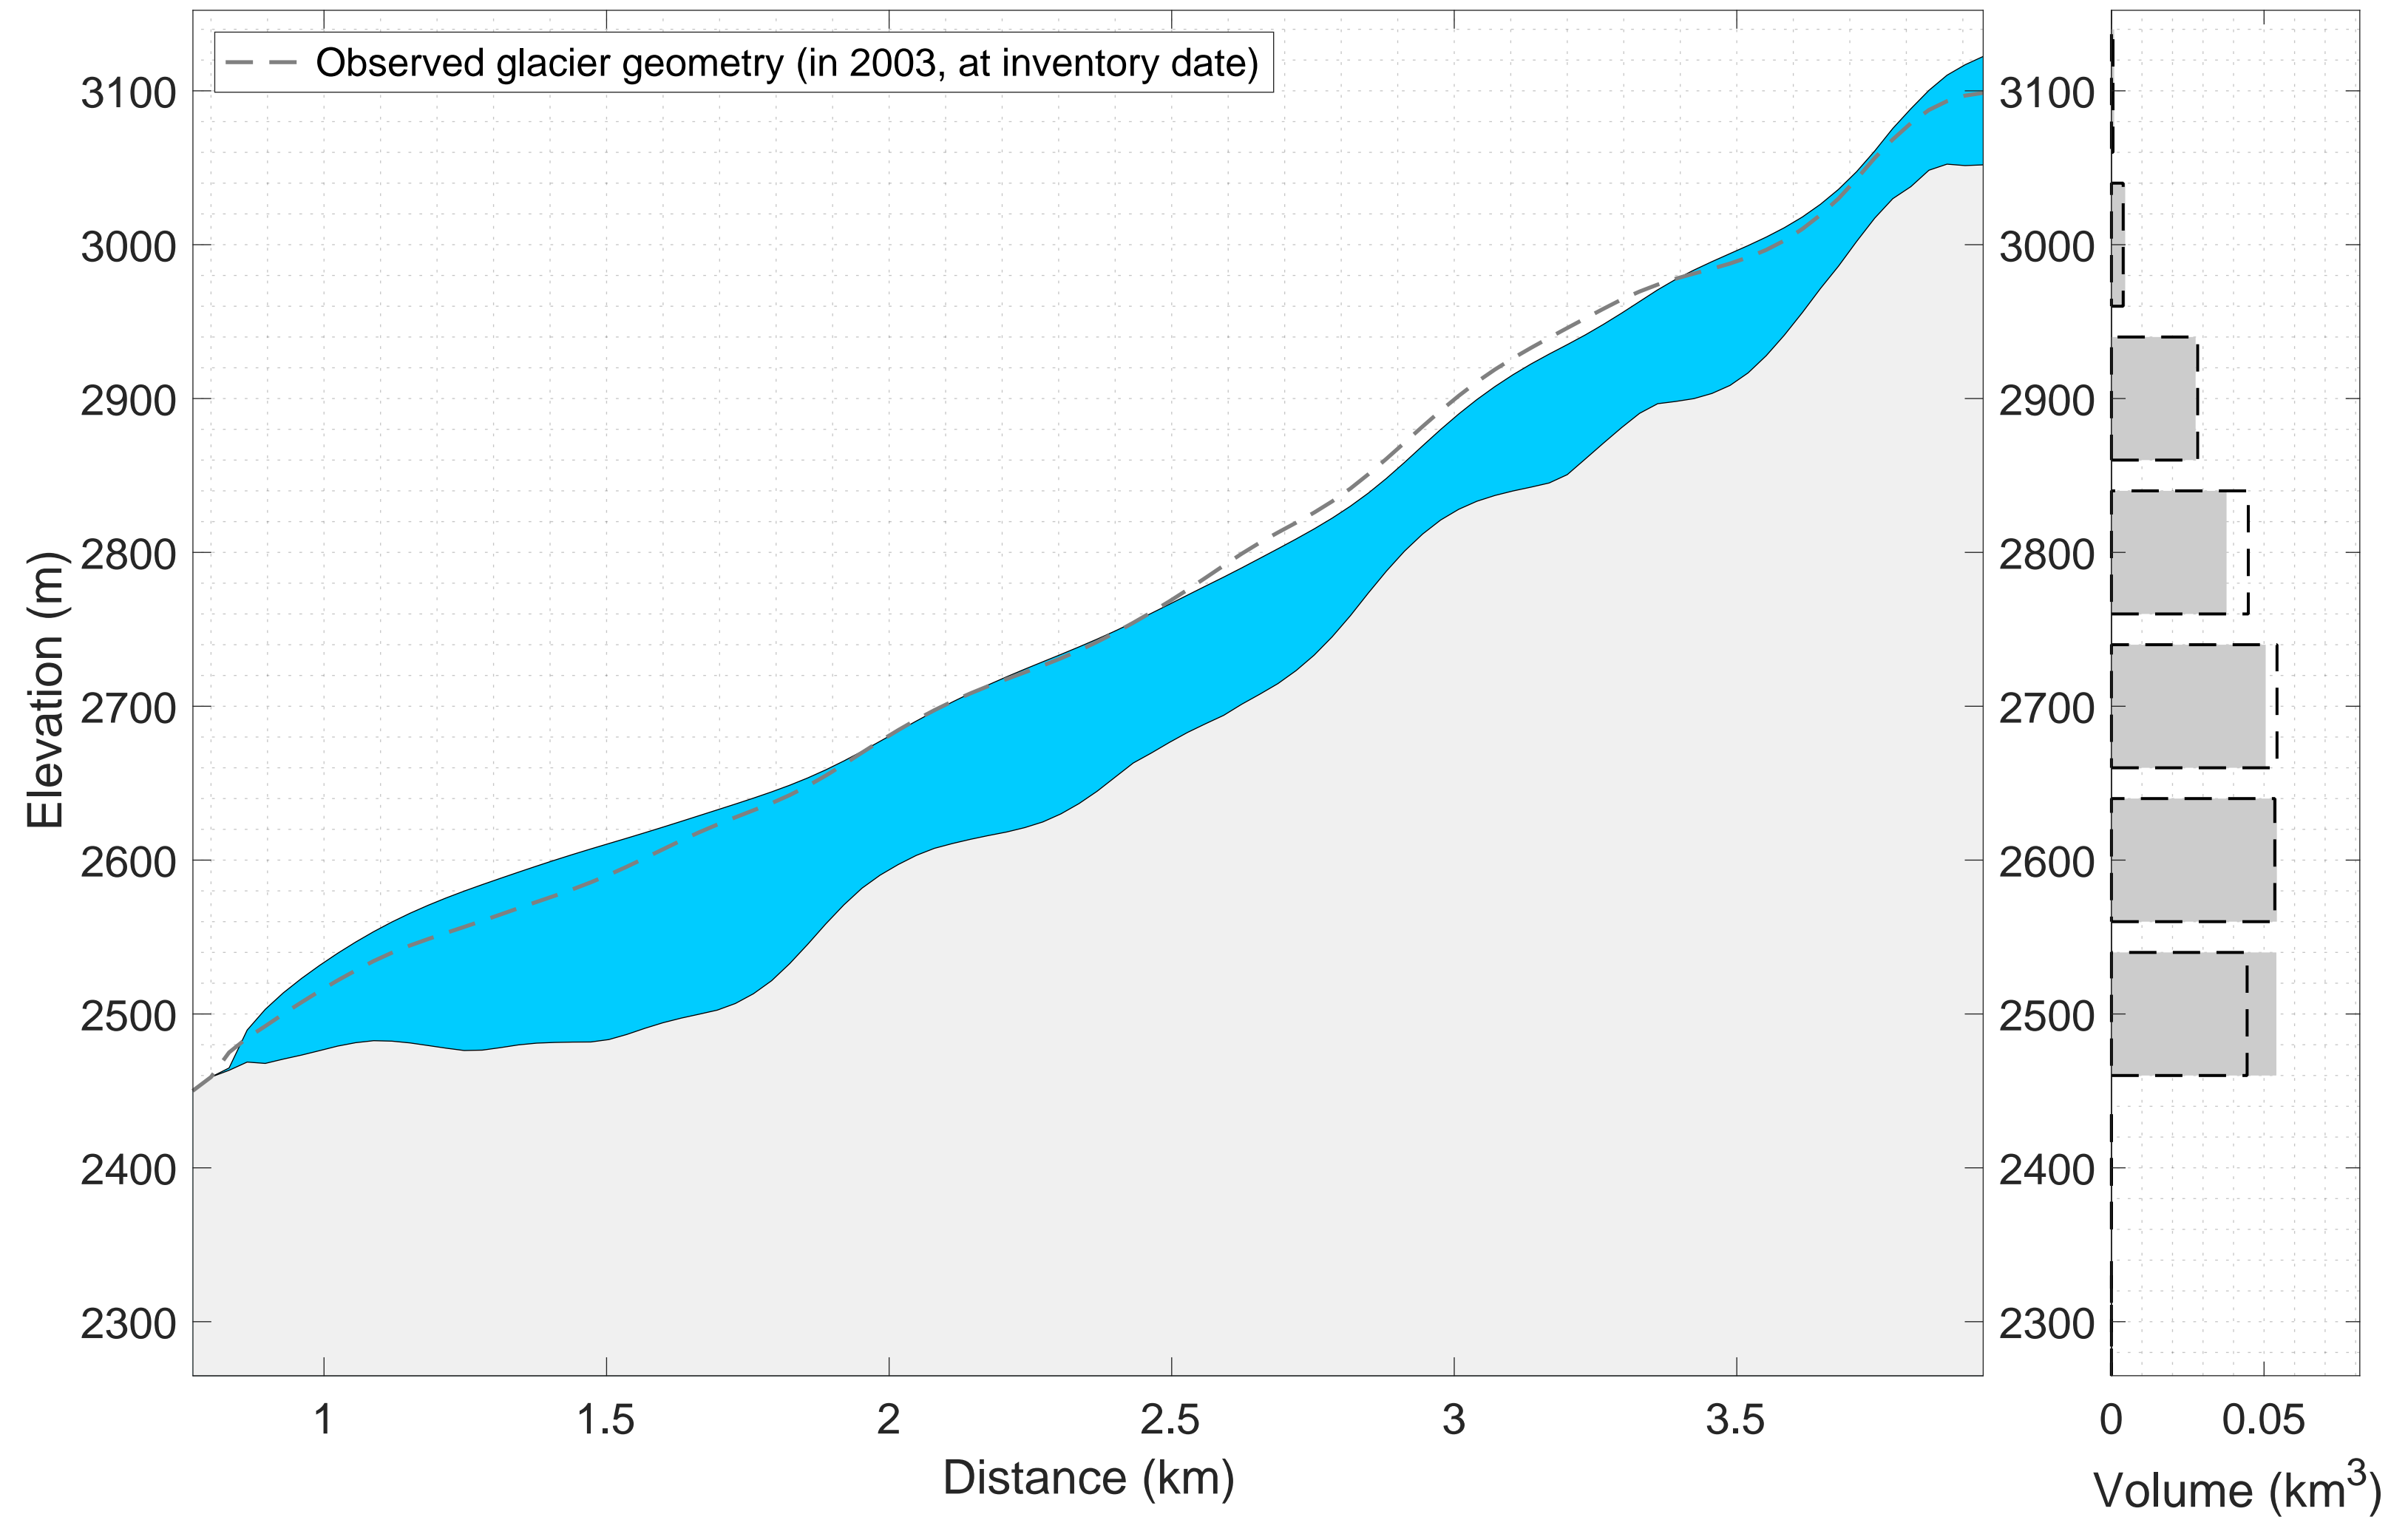

Supplement: Supplementary file 636 [file tc-13-1125-2019-supplement.zip]

**Modelled geometry (Glacier ID = 01622;  $A = 2.2839\text{e-}16 \text{ Pa}^{-3} \text{ a}^{-1}$ ;  $dx = 42 \text{ m}$ )**

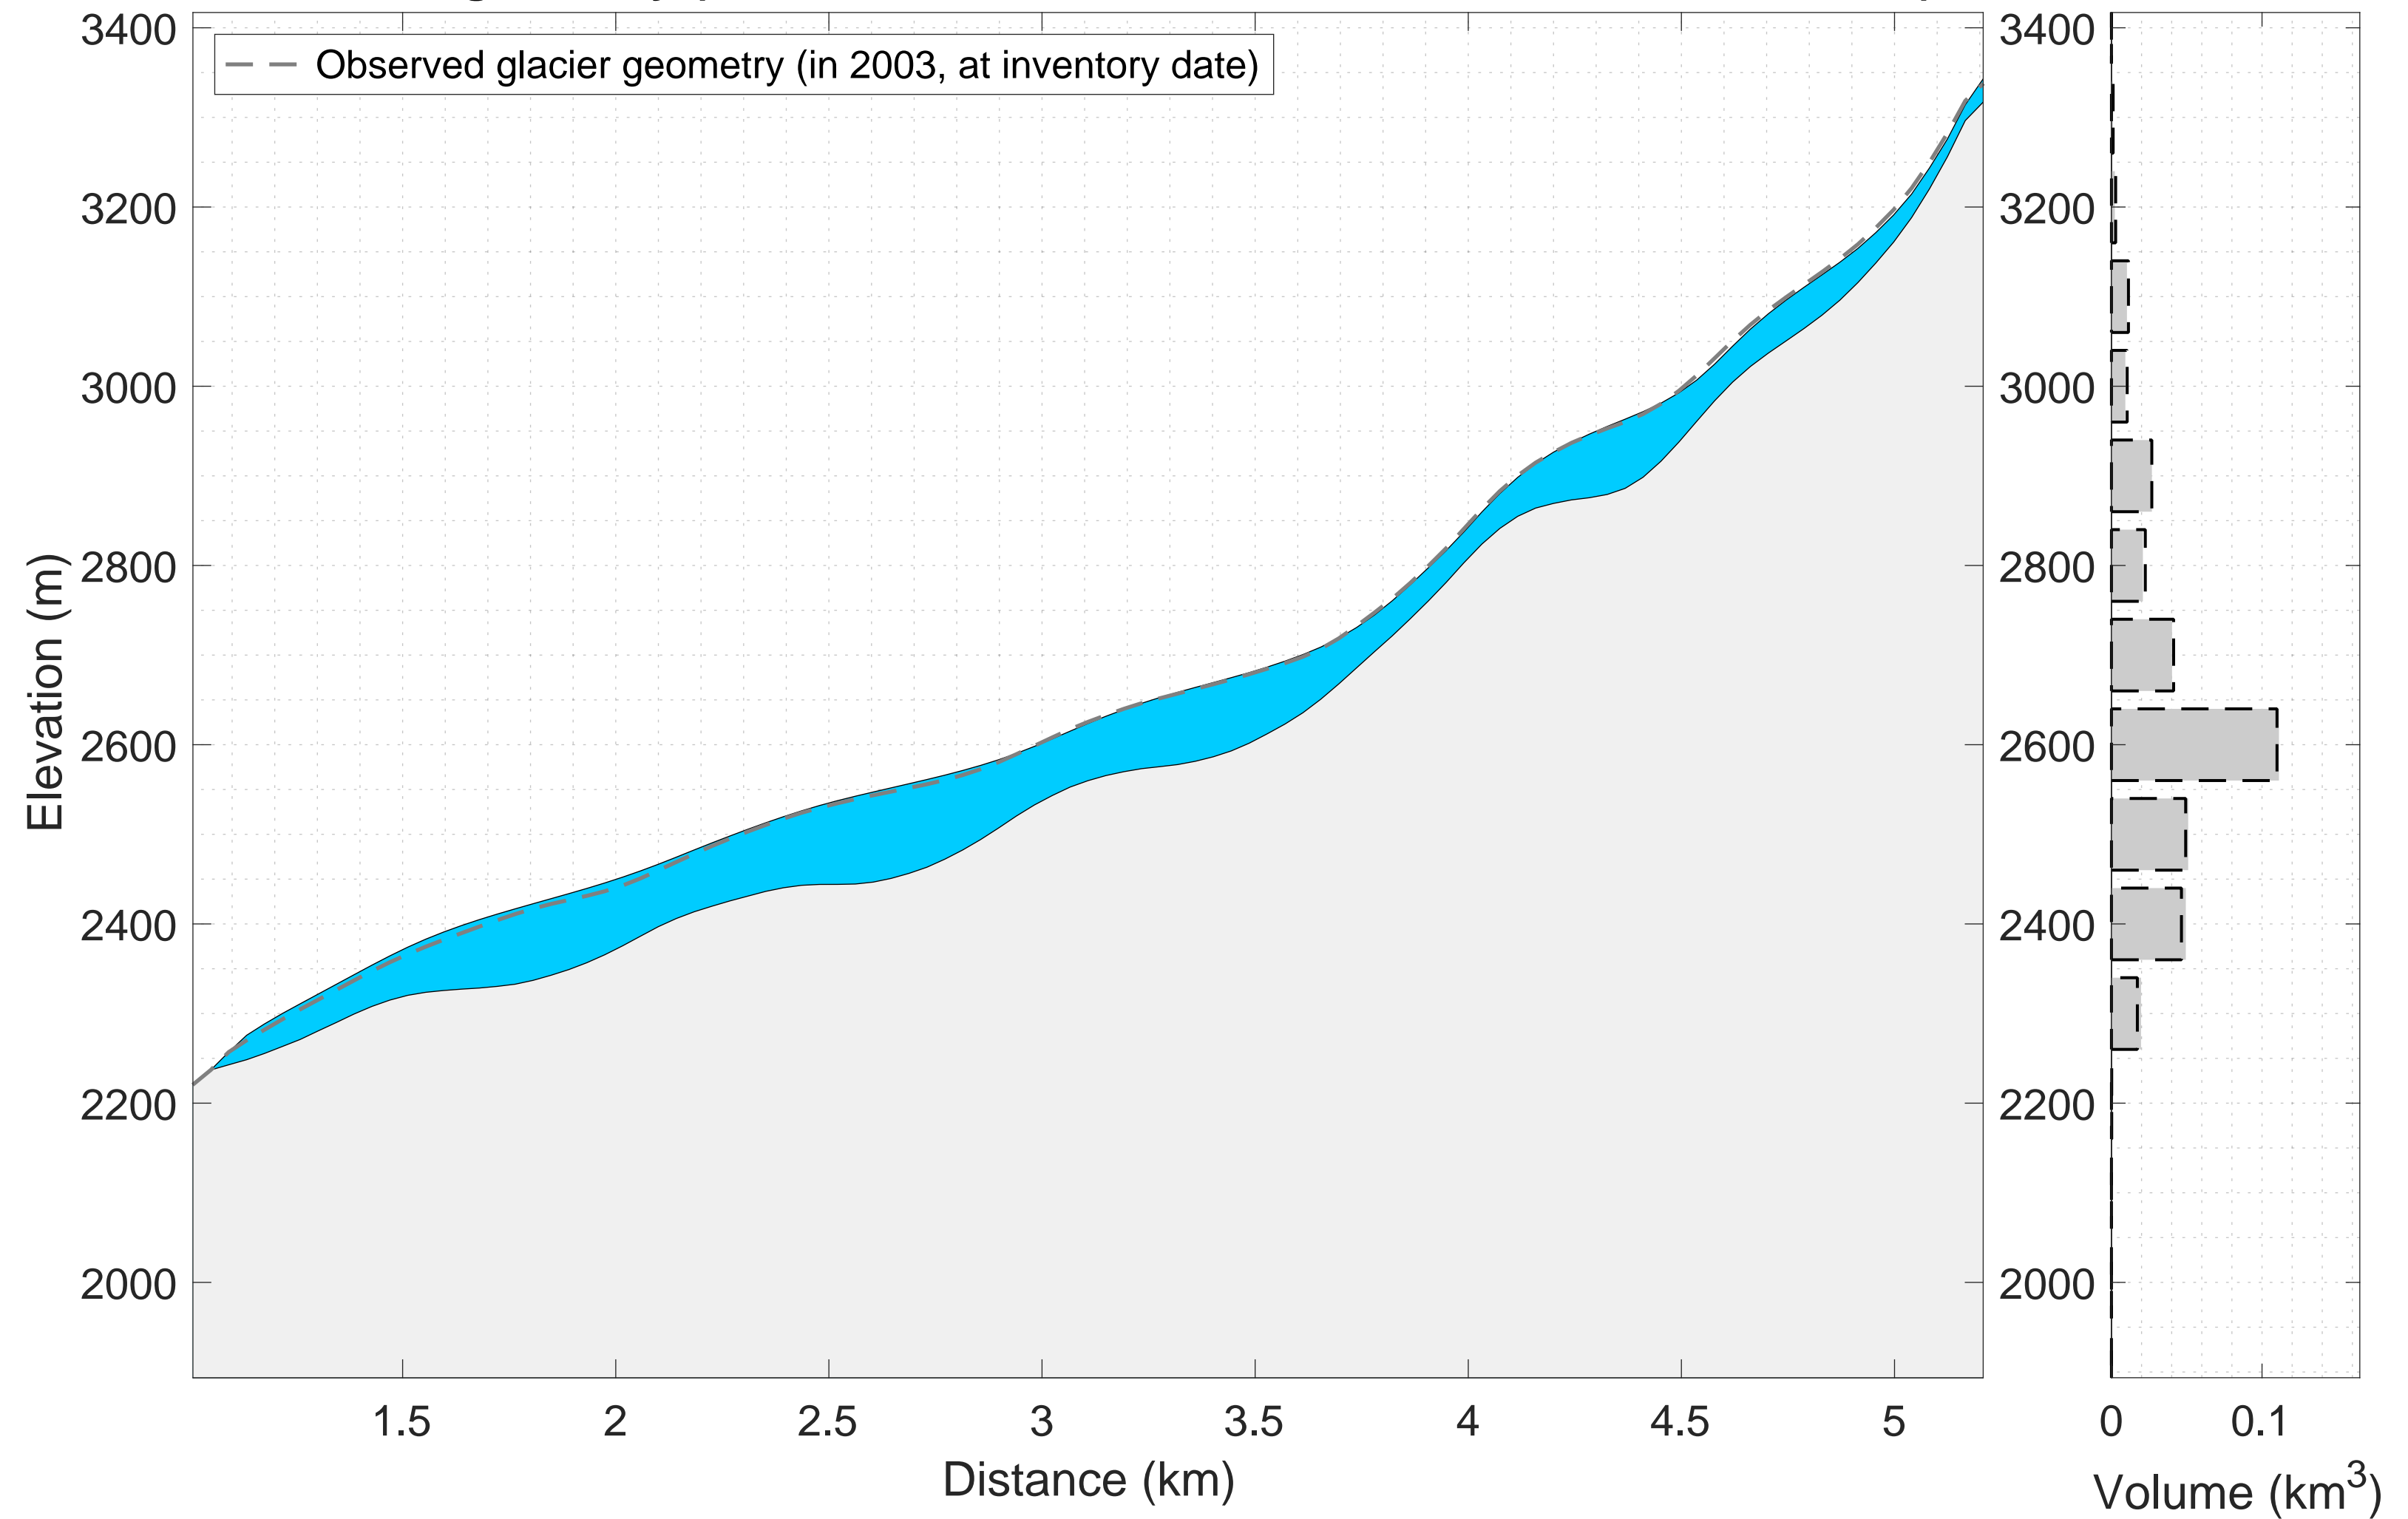

Supplement: Supplementary file 637 [file tc-13-1125-2019-supplement.zip]

**Modelled geometry (Glacier ID = 02432;  $A = 1.4141\text{e-}16 \text{ Pa}^{-3} \text{ a}^{-1}$ ;  $dx = 18 \text{ m}$ )**

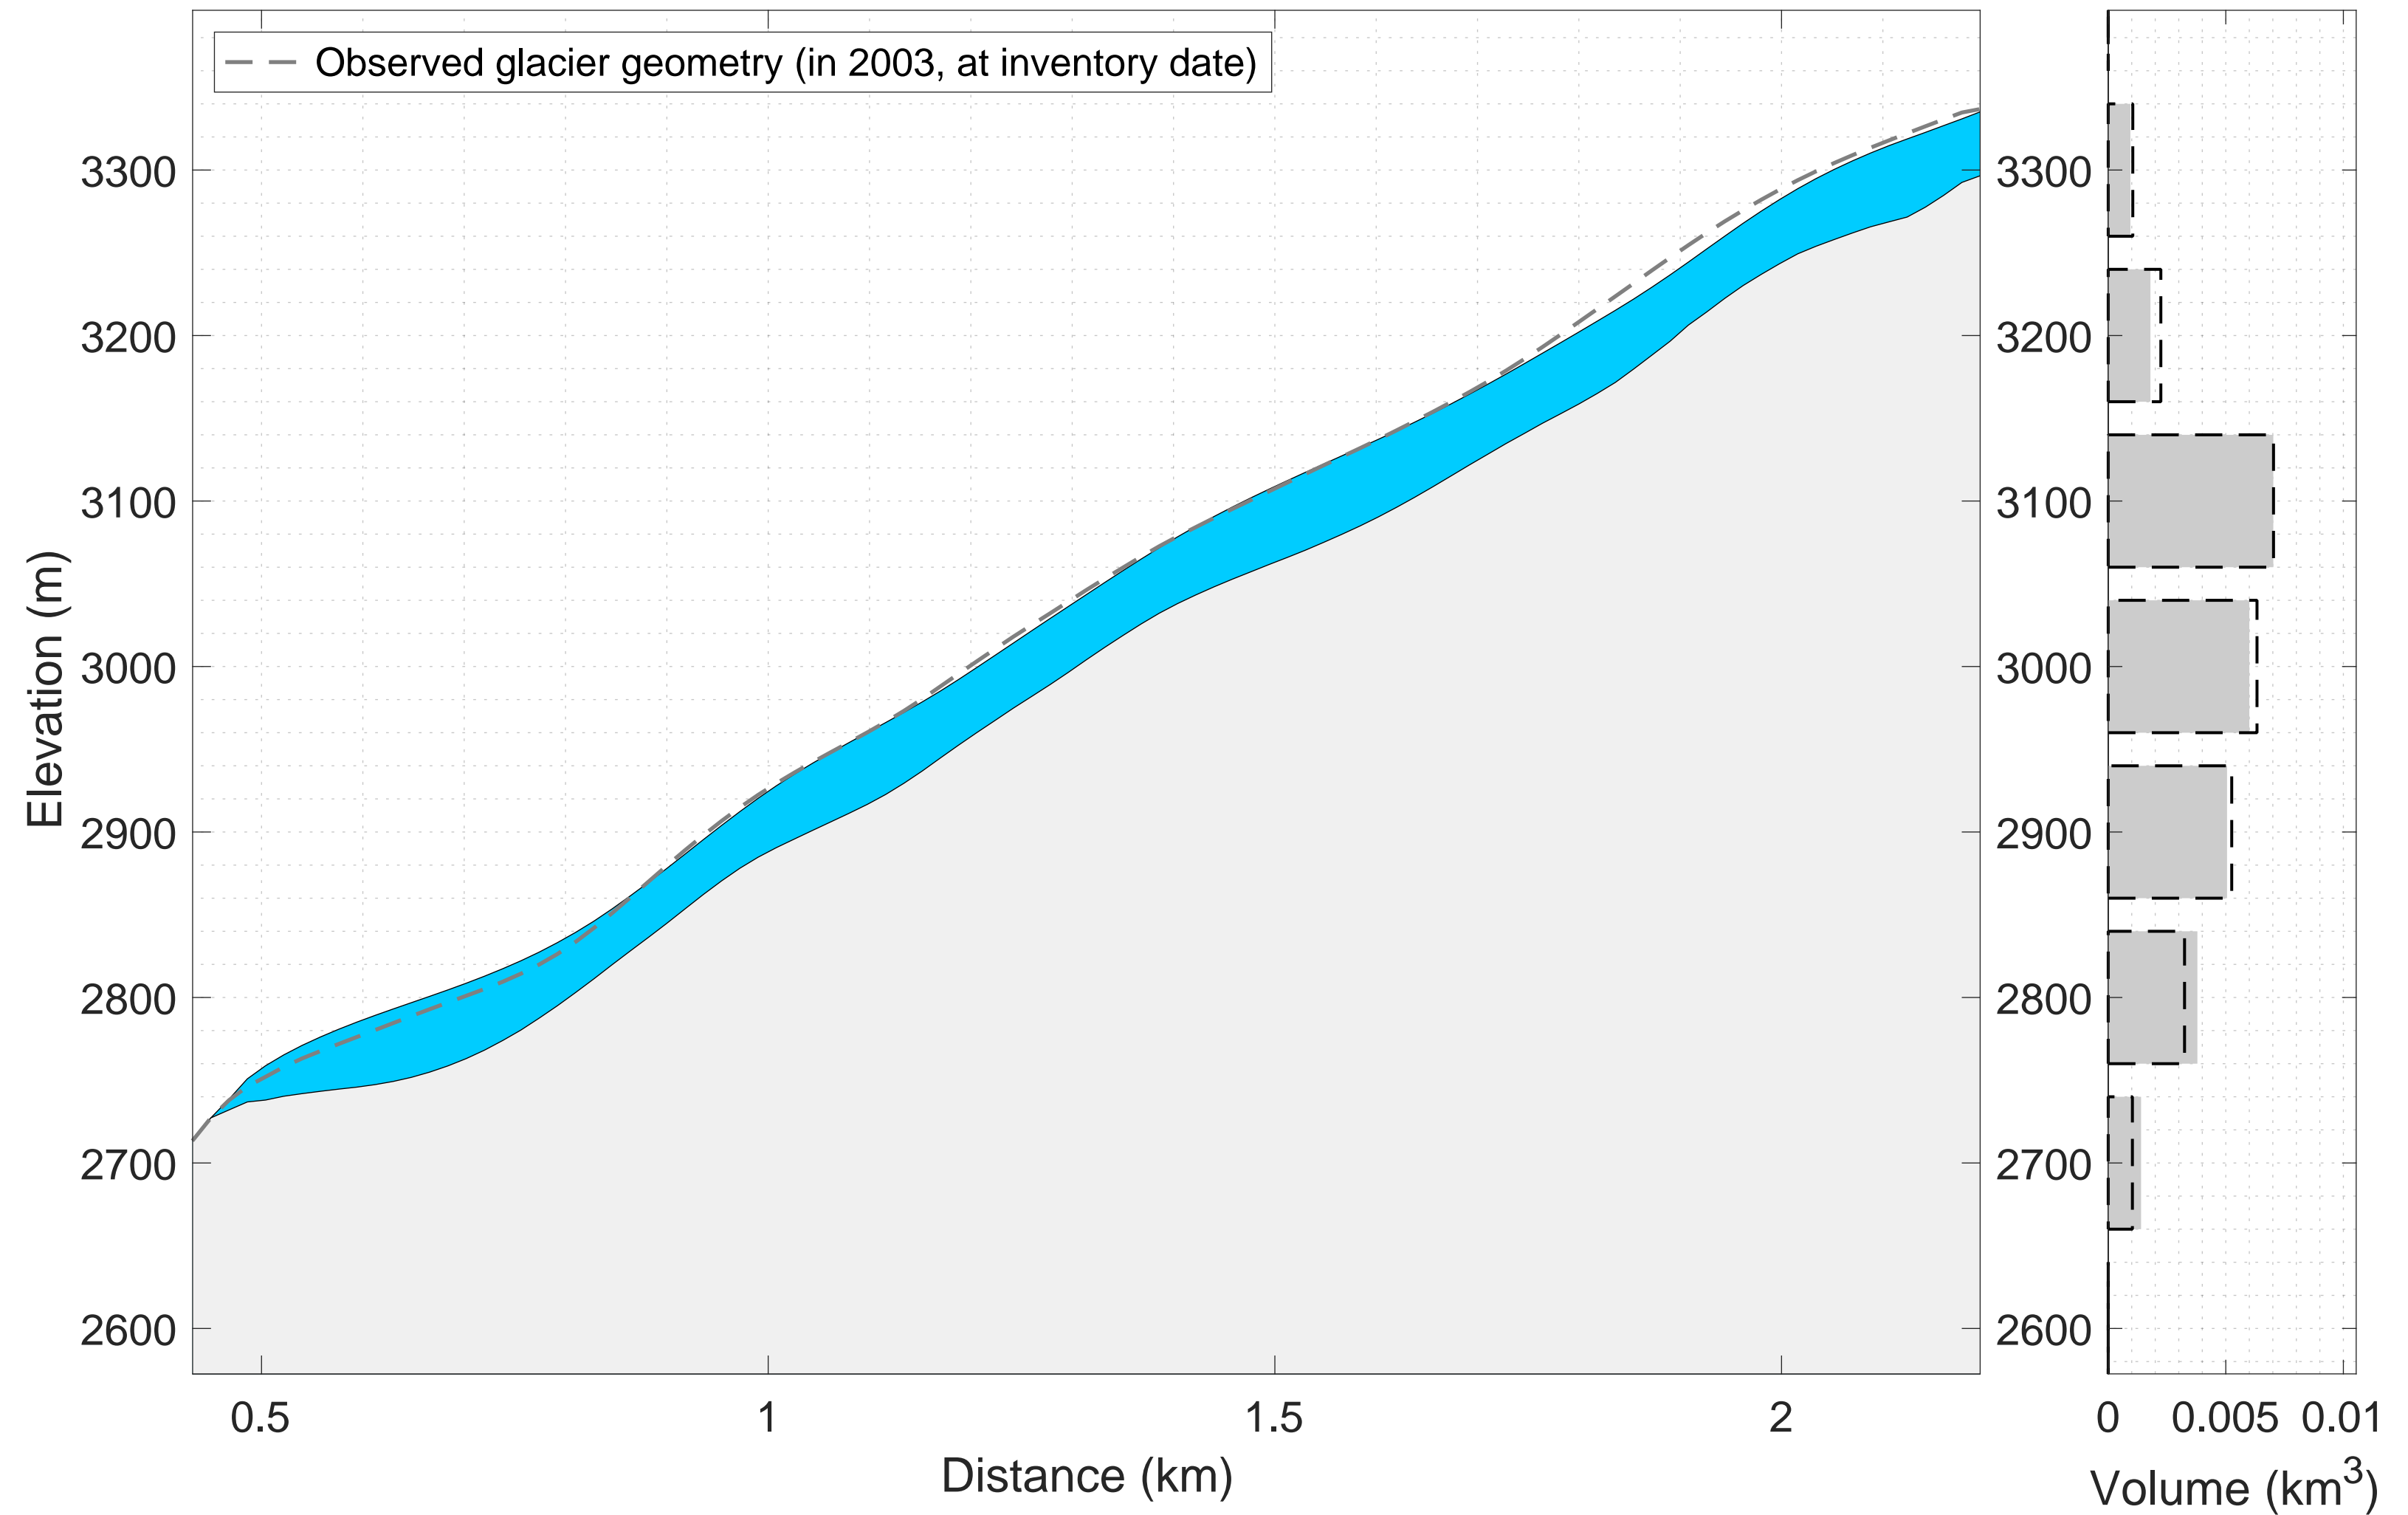

Supplement: Supplementary file 638 [file tc-13-1125-2019-supplement.zip]

**Modelled geometry (Glacier ID = 01545;  $A = 8.7618\text{e-}17 \text{ Pa}^{-3} \text{ a}^{-1}$ ;  $dx = 12 \text{ m}$ )**

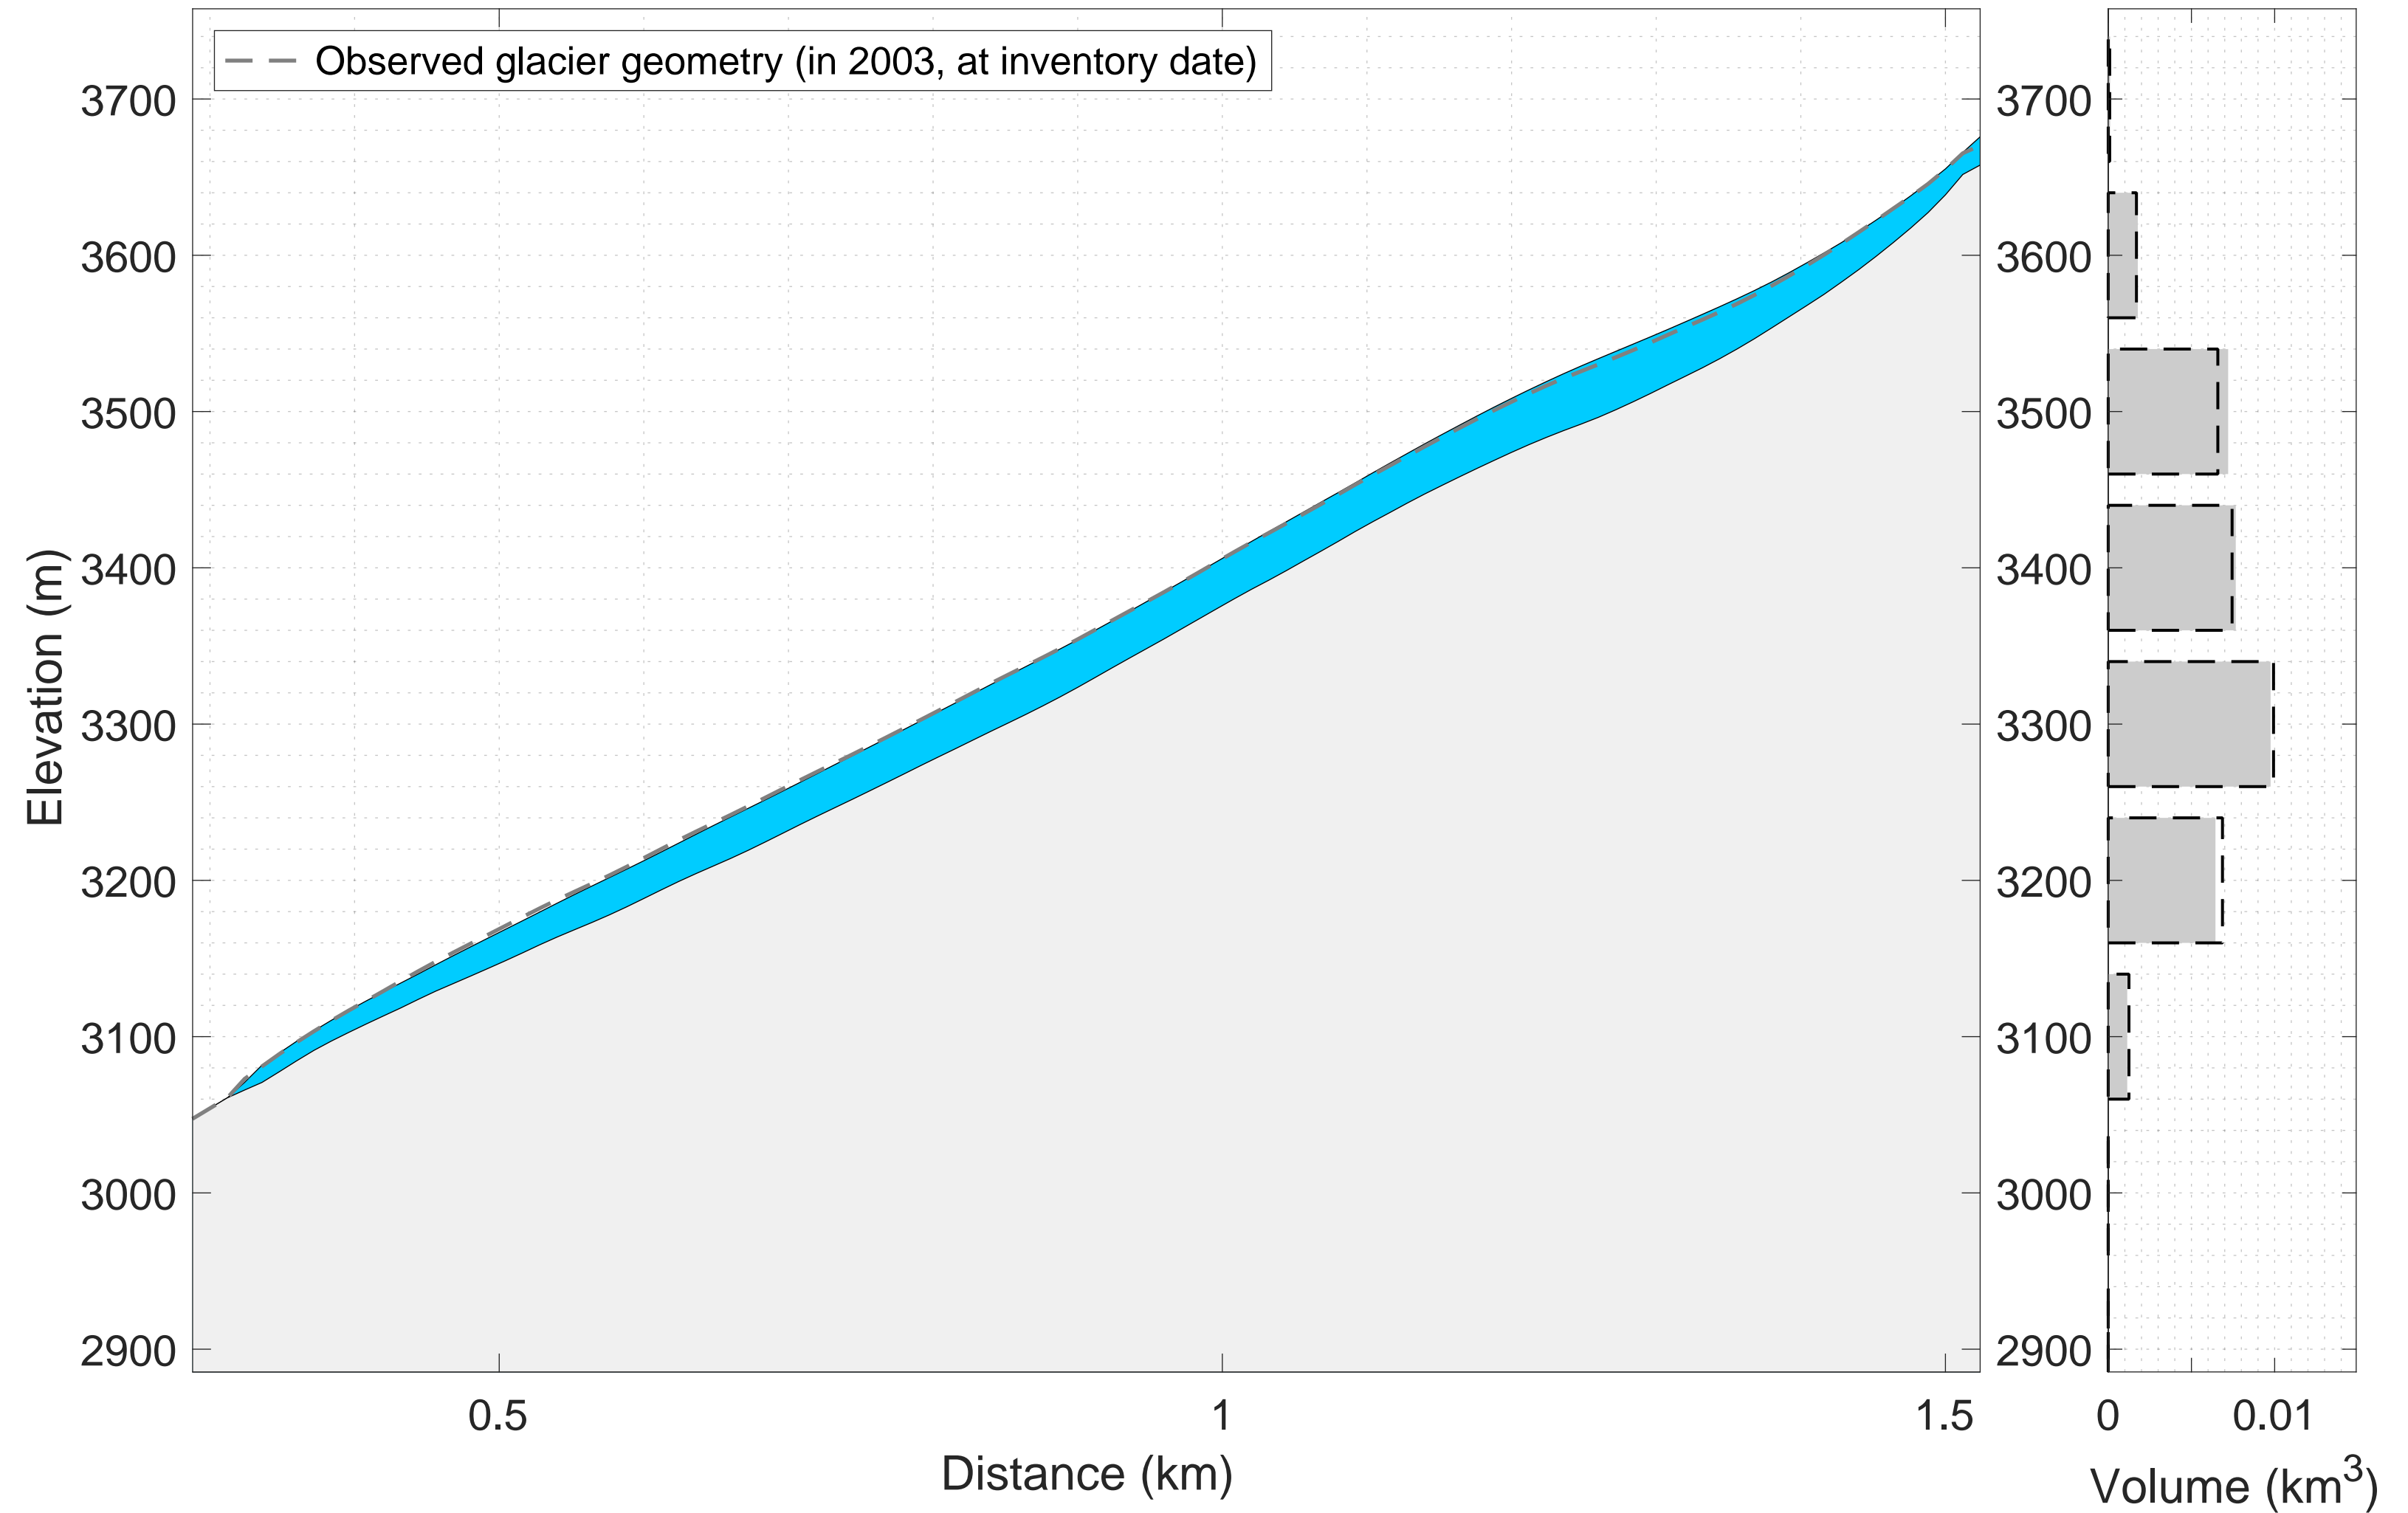

Supplement: Supplementary file 639 [file tc-13-1125-2019-supplement.zip]

**Modelled geometry (Glacier ID = 02762;  $A = 1.1116\text{e-}16 \text{ Pa}^{-3} \text{ a}^{-1}$ ;  $dx = 12 \text{ m}$ )**

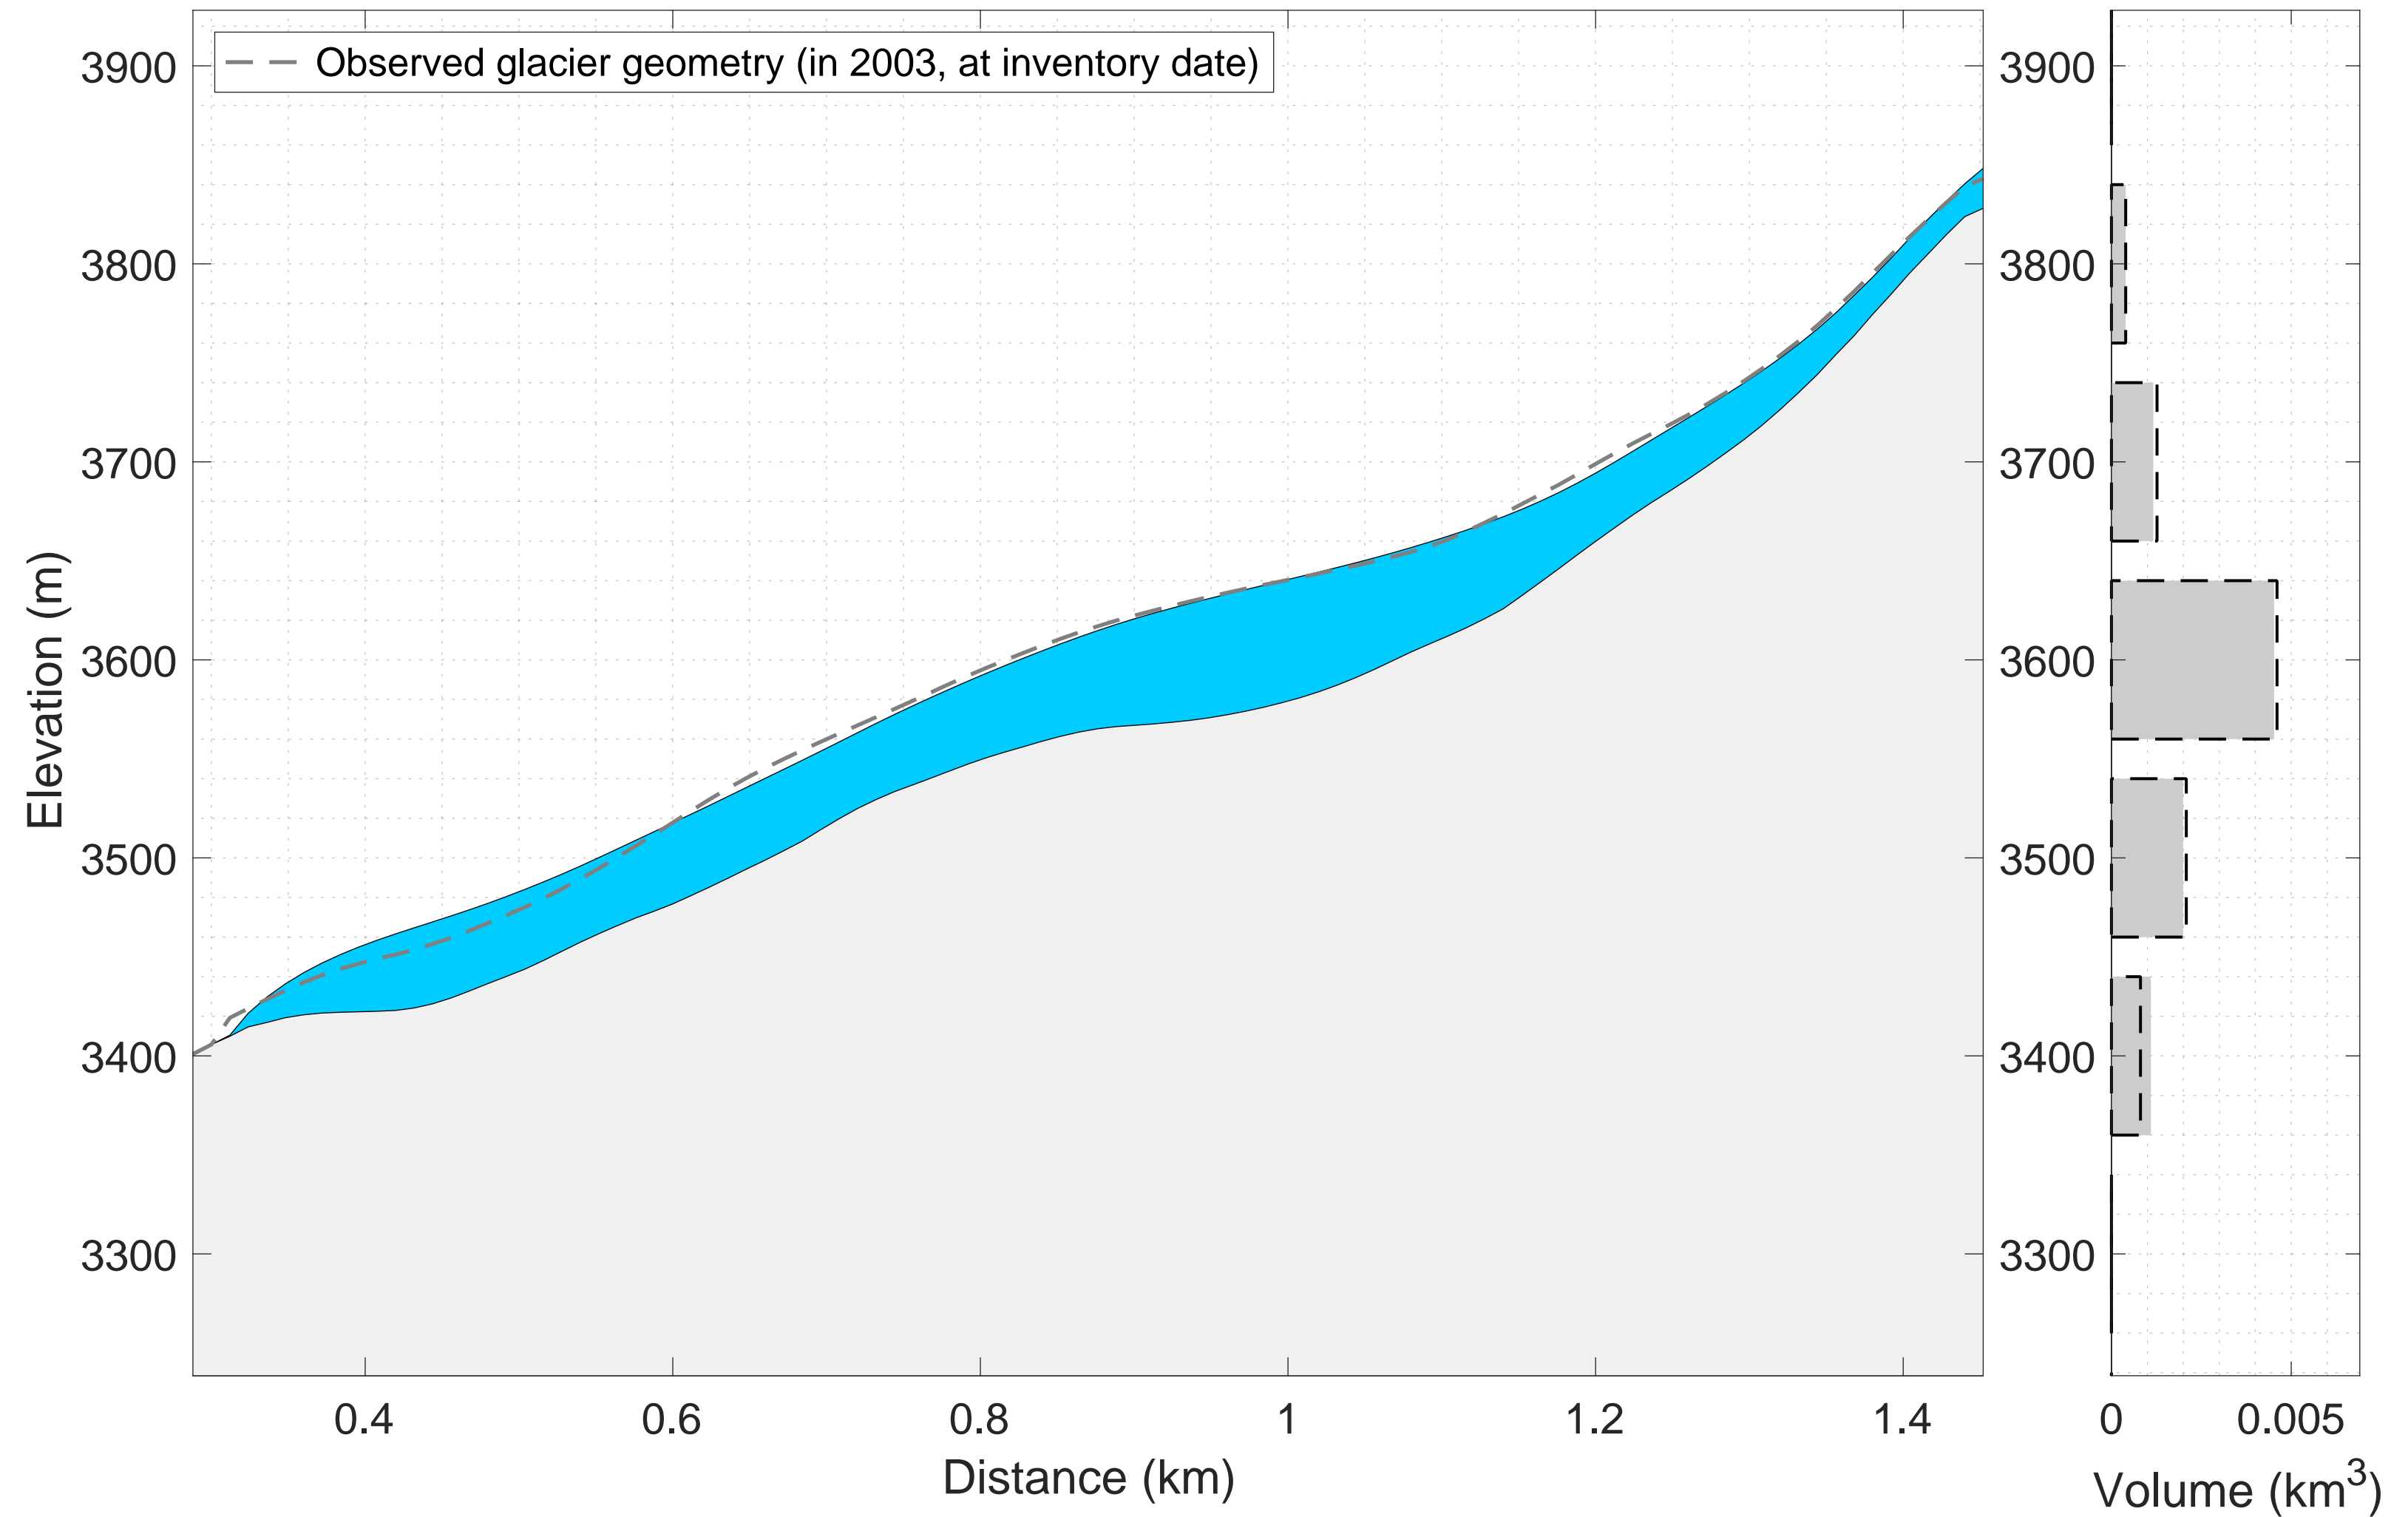

Supplement: Supplementary file 640 [file tc-13-1125-2019-supplement.zip]

**Modelled geometry (Glacier ID = 02739;  $A = 2.5306\text{e-}16 \text{ Pa}^{-3} \text{ a}^{-1}$ ;  $dx = 82 \text{ m}$ )**

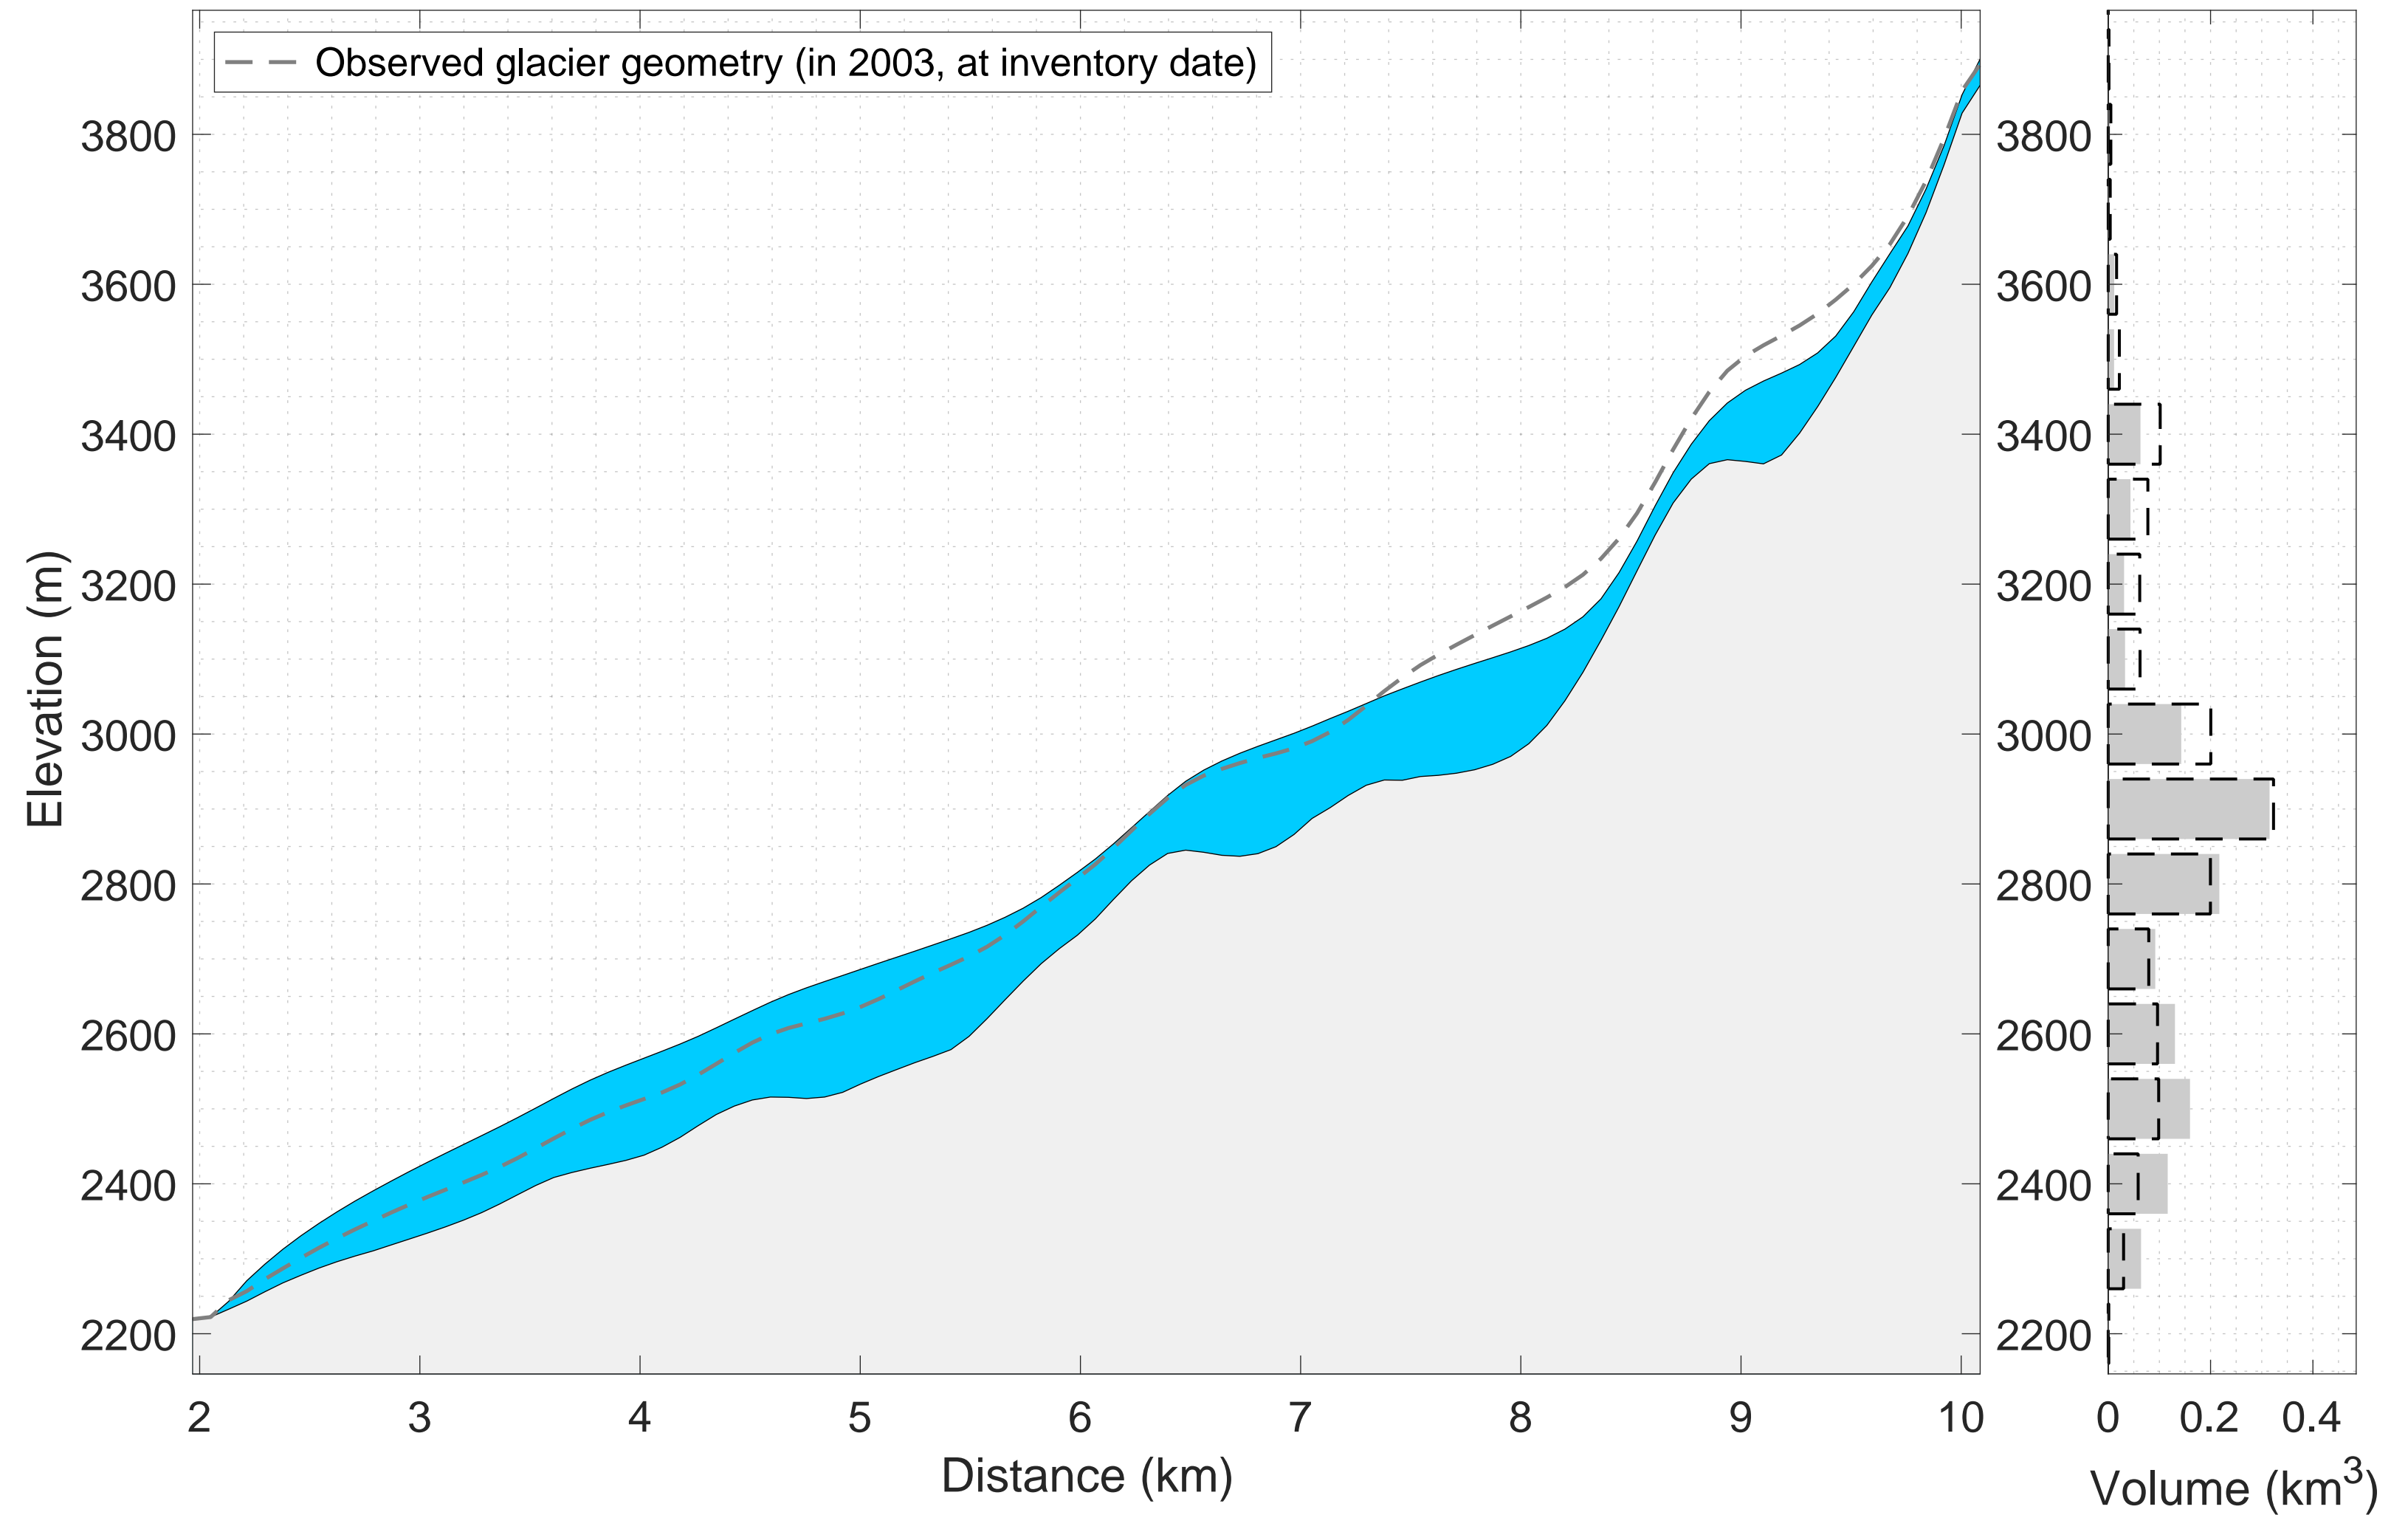

Supplement: Supplementary file 641 [file tc-13-1125-2019-supplement.zip]

**Modelled geometry (Glacier ID = 02151;  $A = 1.1498\text{e-}16 \text{ Pa}^{-3} \text{ a}^{-1}$ ;  $dx = 13 \text{ m}$ )**

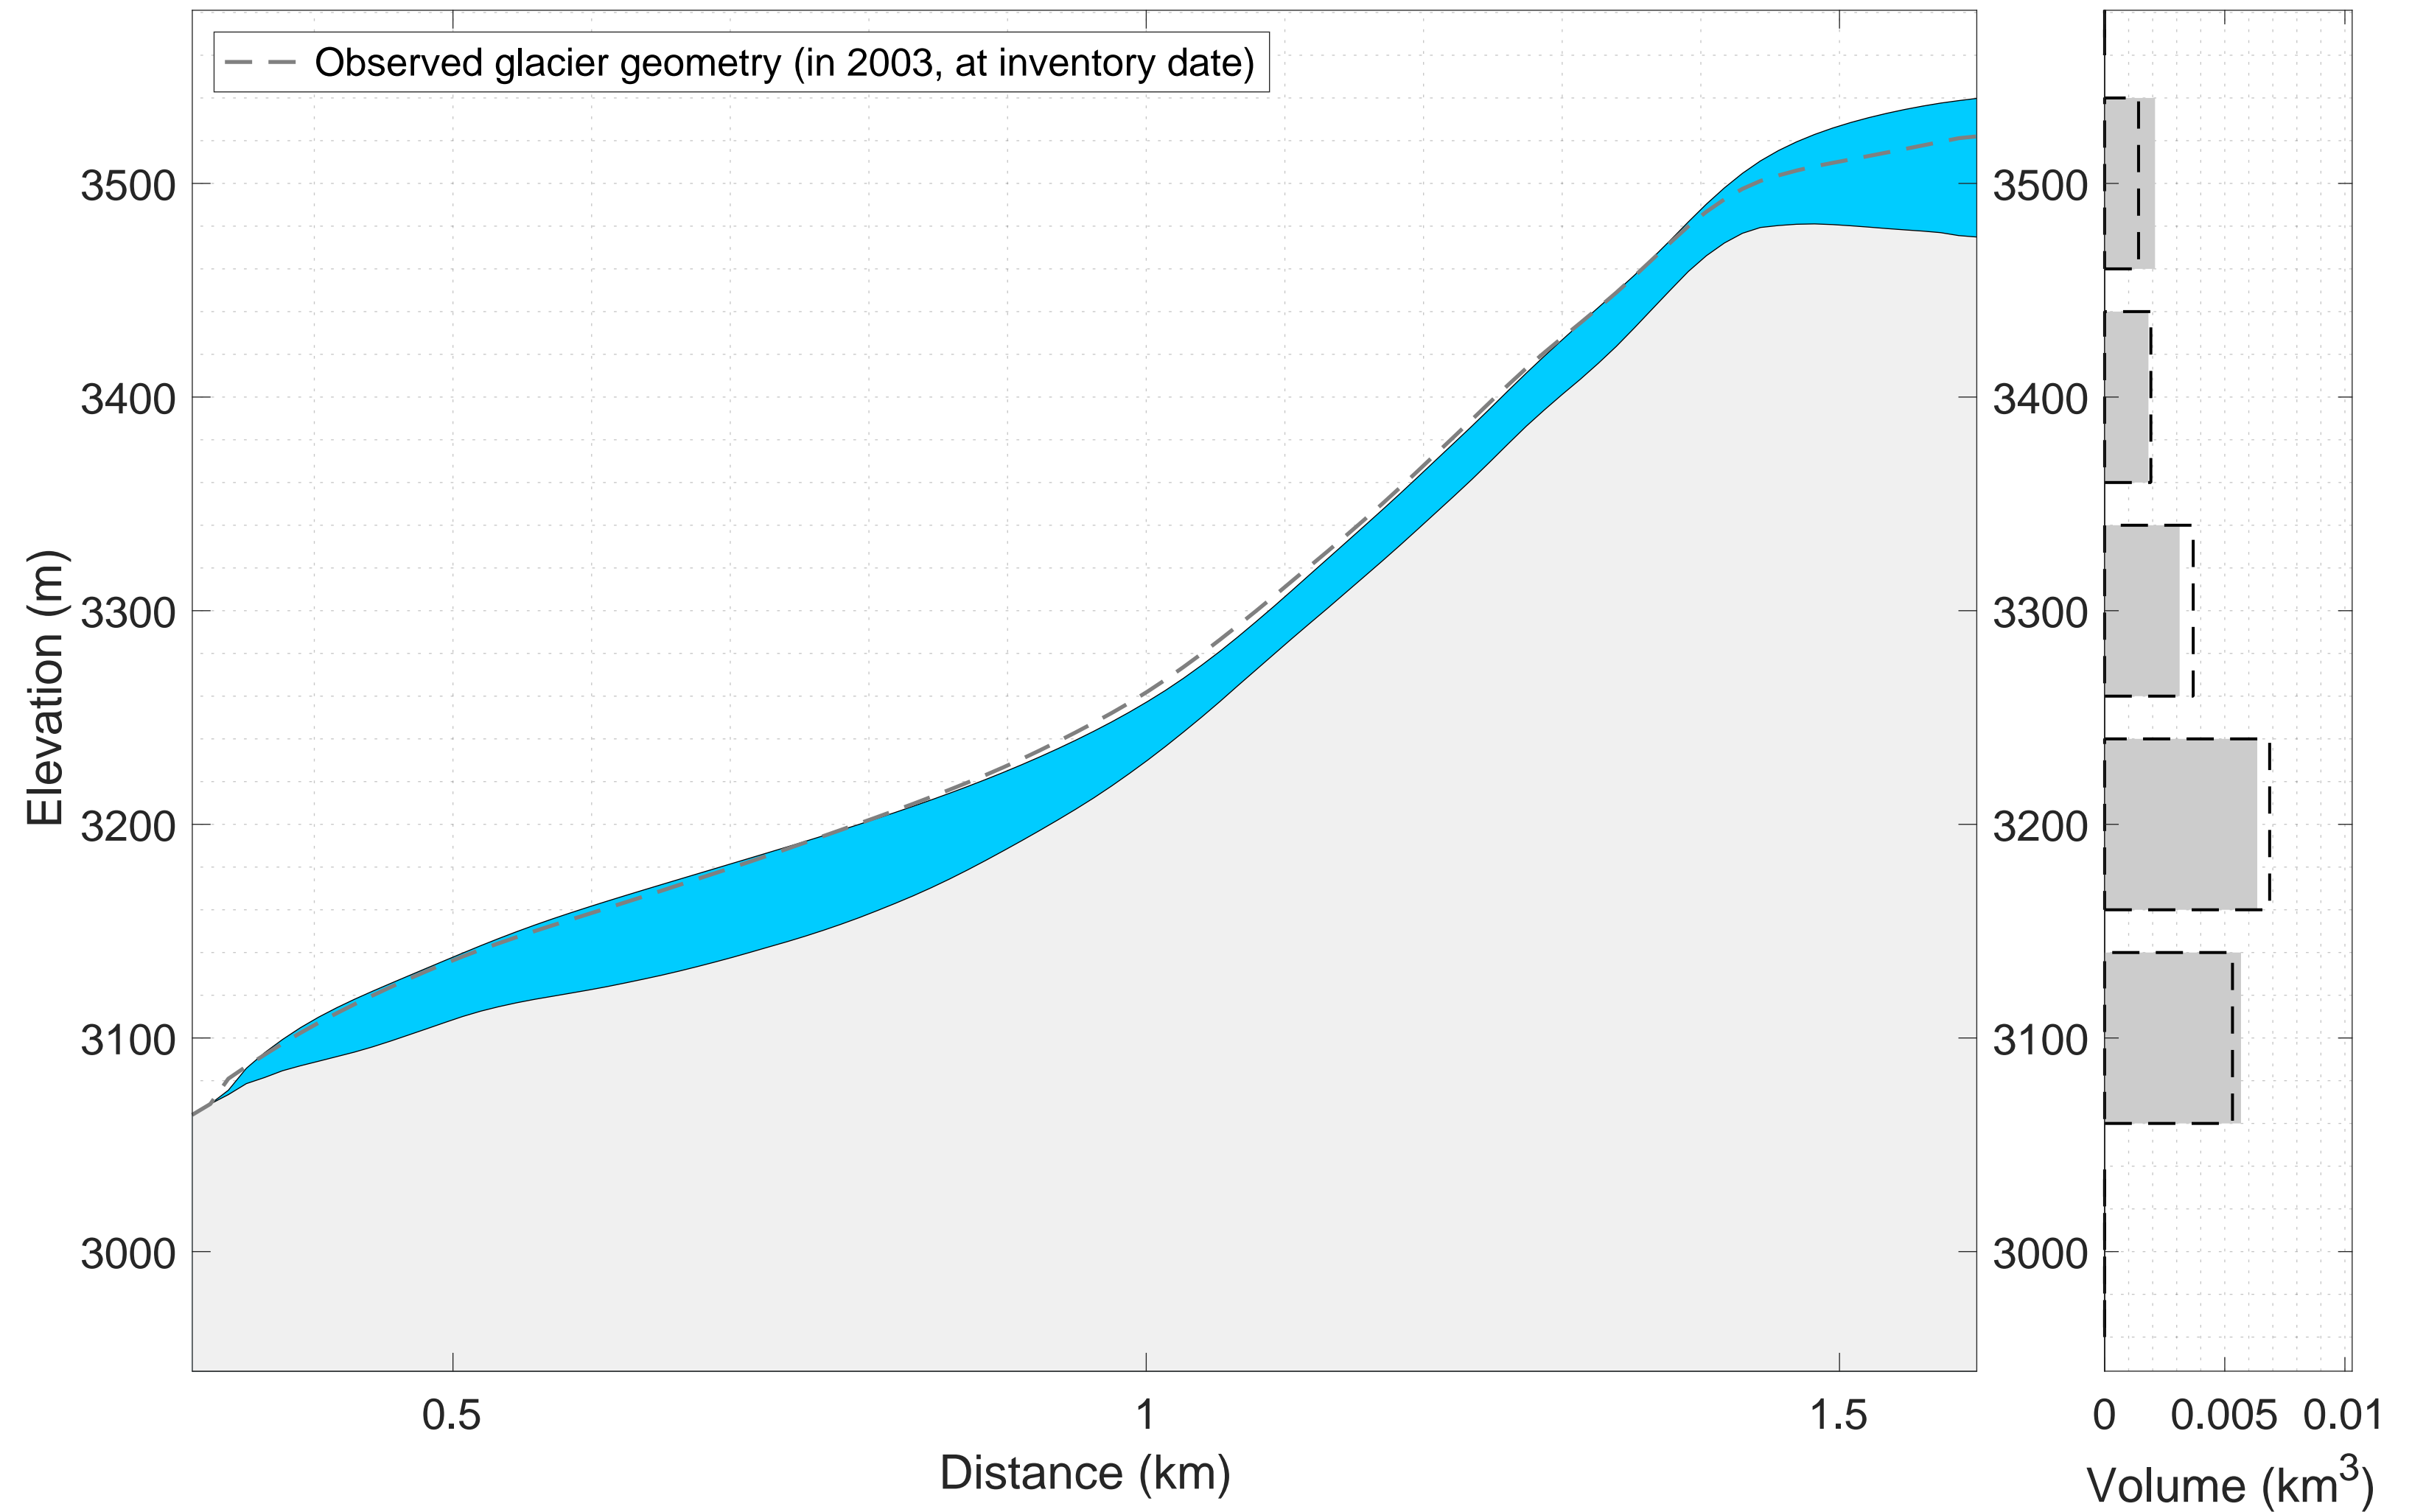

Supplement: Supplementary file 642 [file tc-13-1125-2019-supplement.zip]

**Modelled geometry (Glacier ID = 02437;  $A = 1.2652\text{e-}16 \text{ Pa}^{-3} \text{ a}^{-1}$ ;  $dx = 57 \text{ m}$ )**

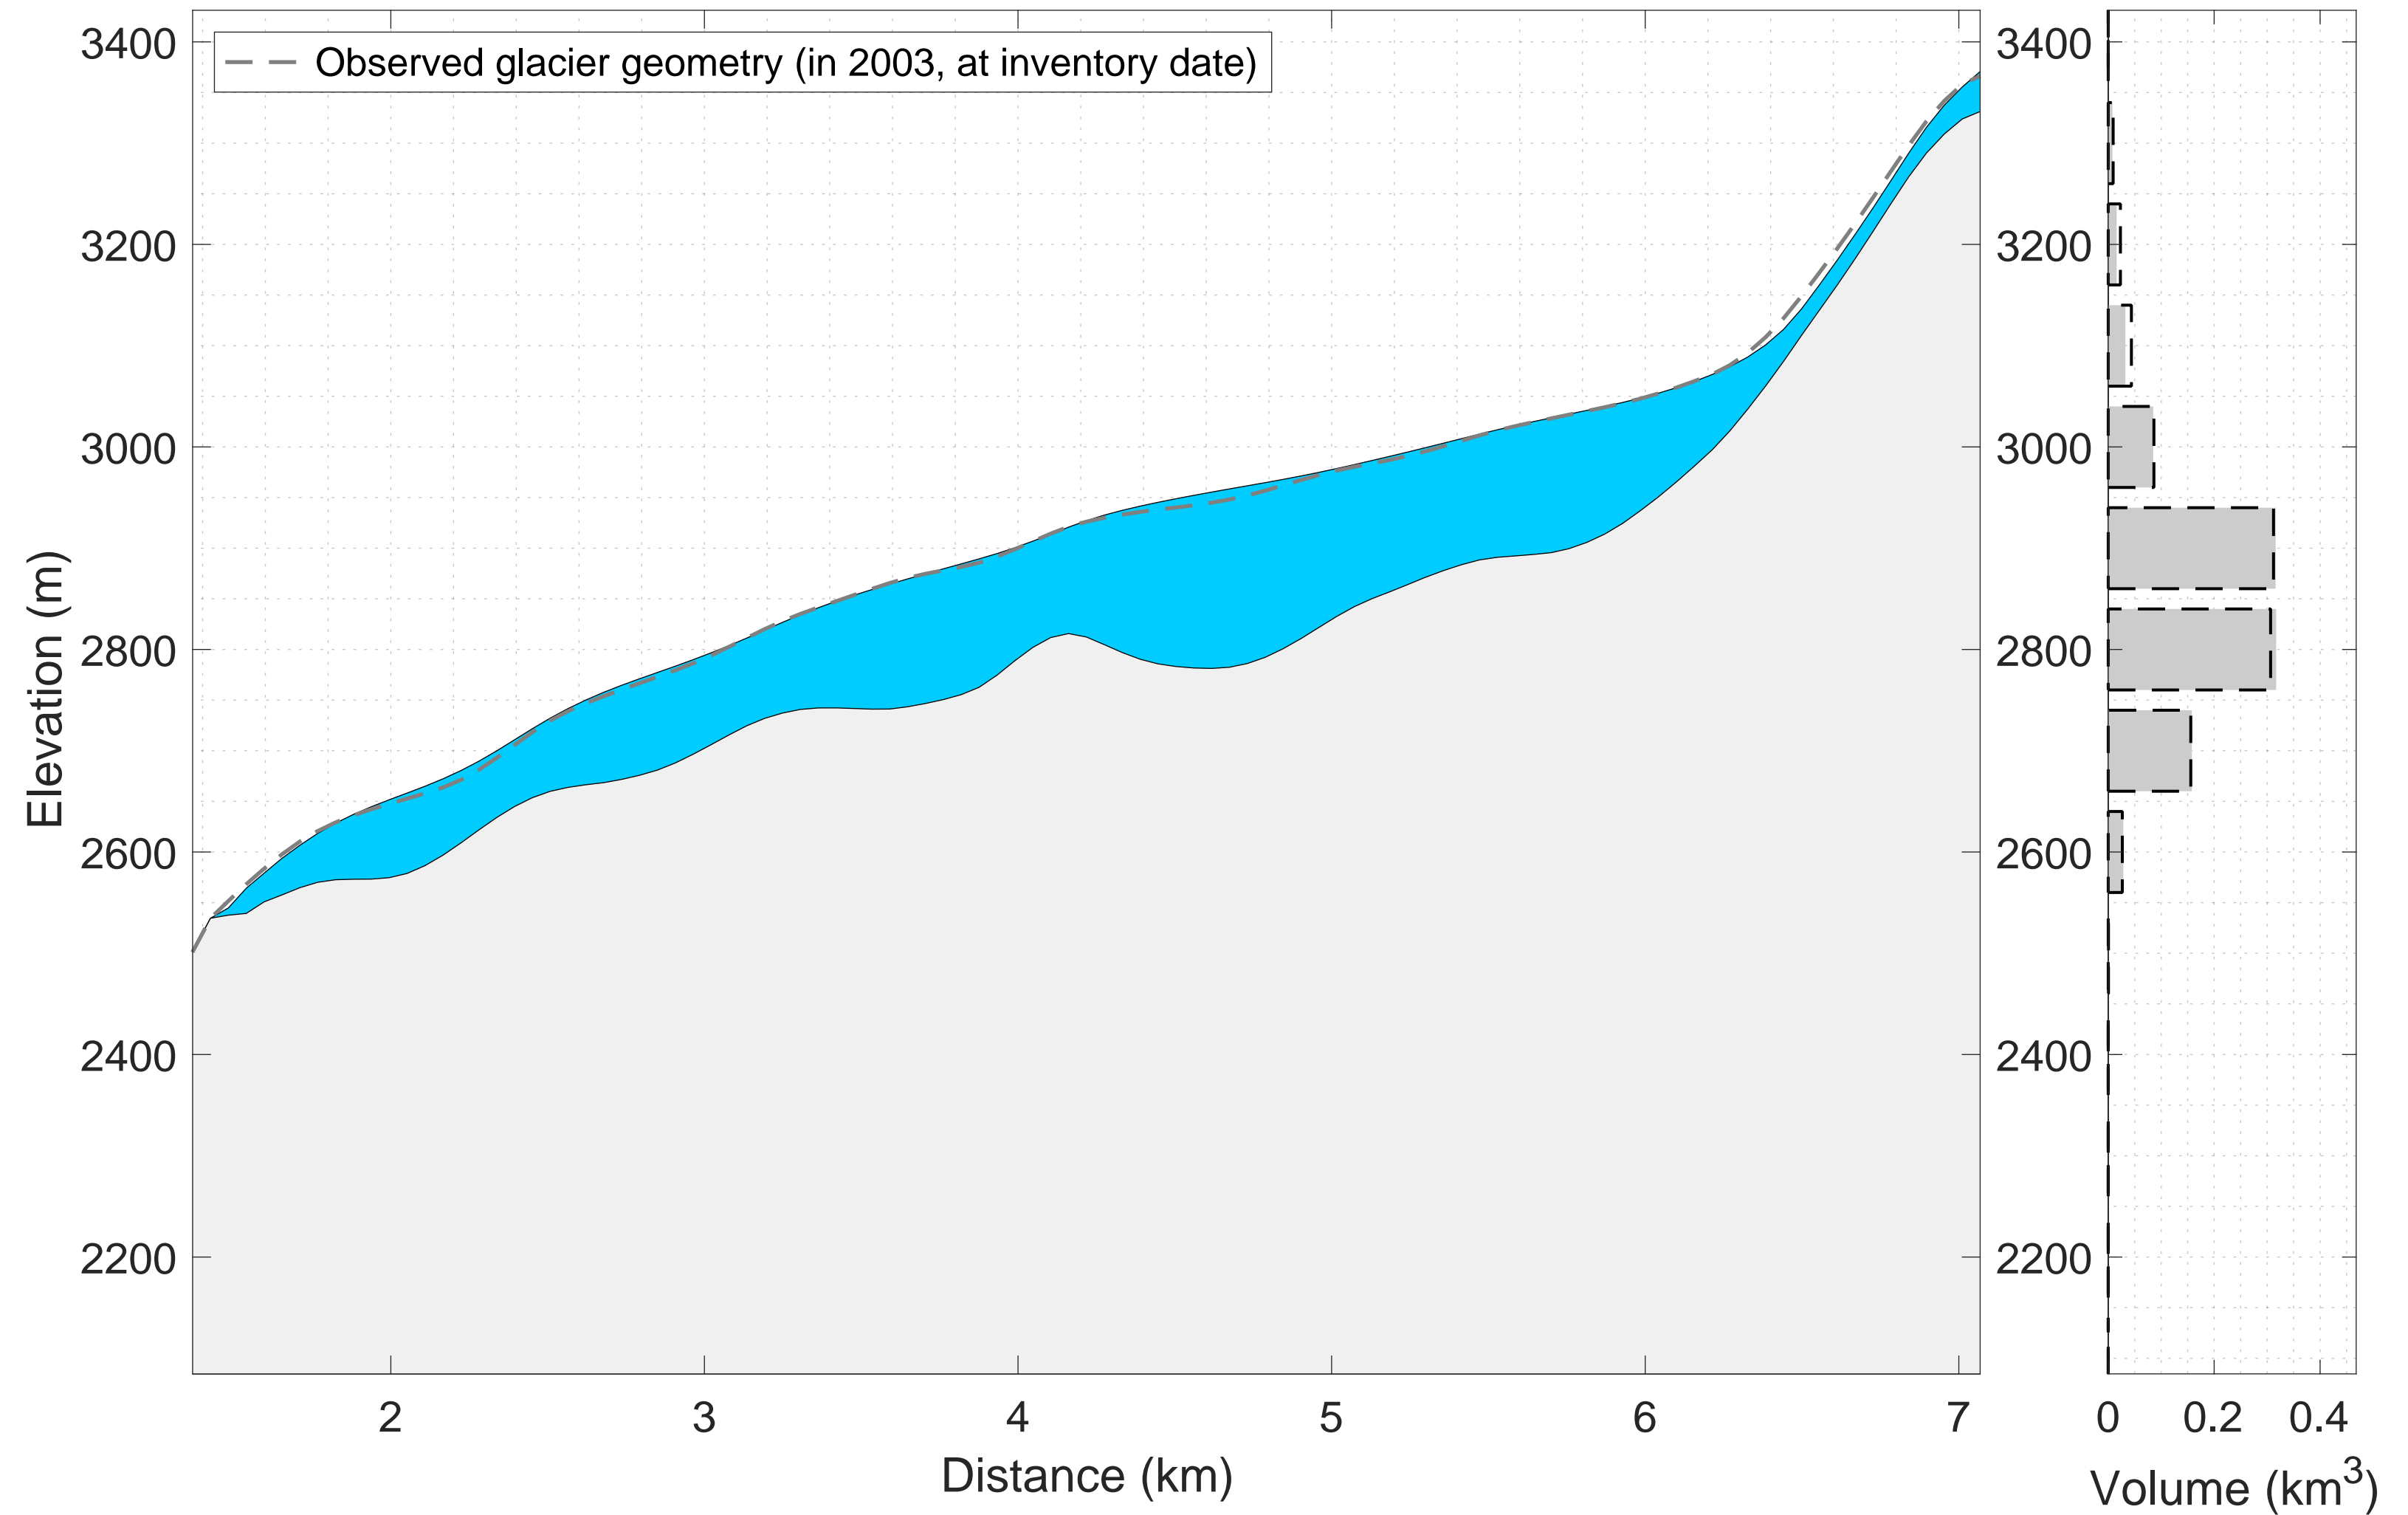

Supplement: Supplementary file 643 [file tc-13-1125-2019-supplement.zip]

**Modelled geometry (Glacier ID = 02599;  $A = 8.3572\text{e-}17 \text{ Pa}^{-3} \text{ a}^{-1}$ ;  $dx = 10 \text{ m}$ )**

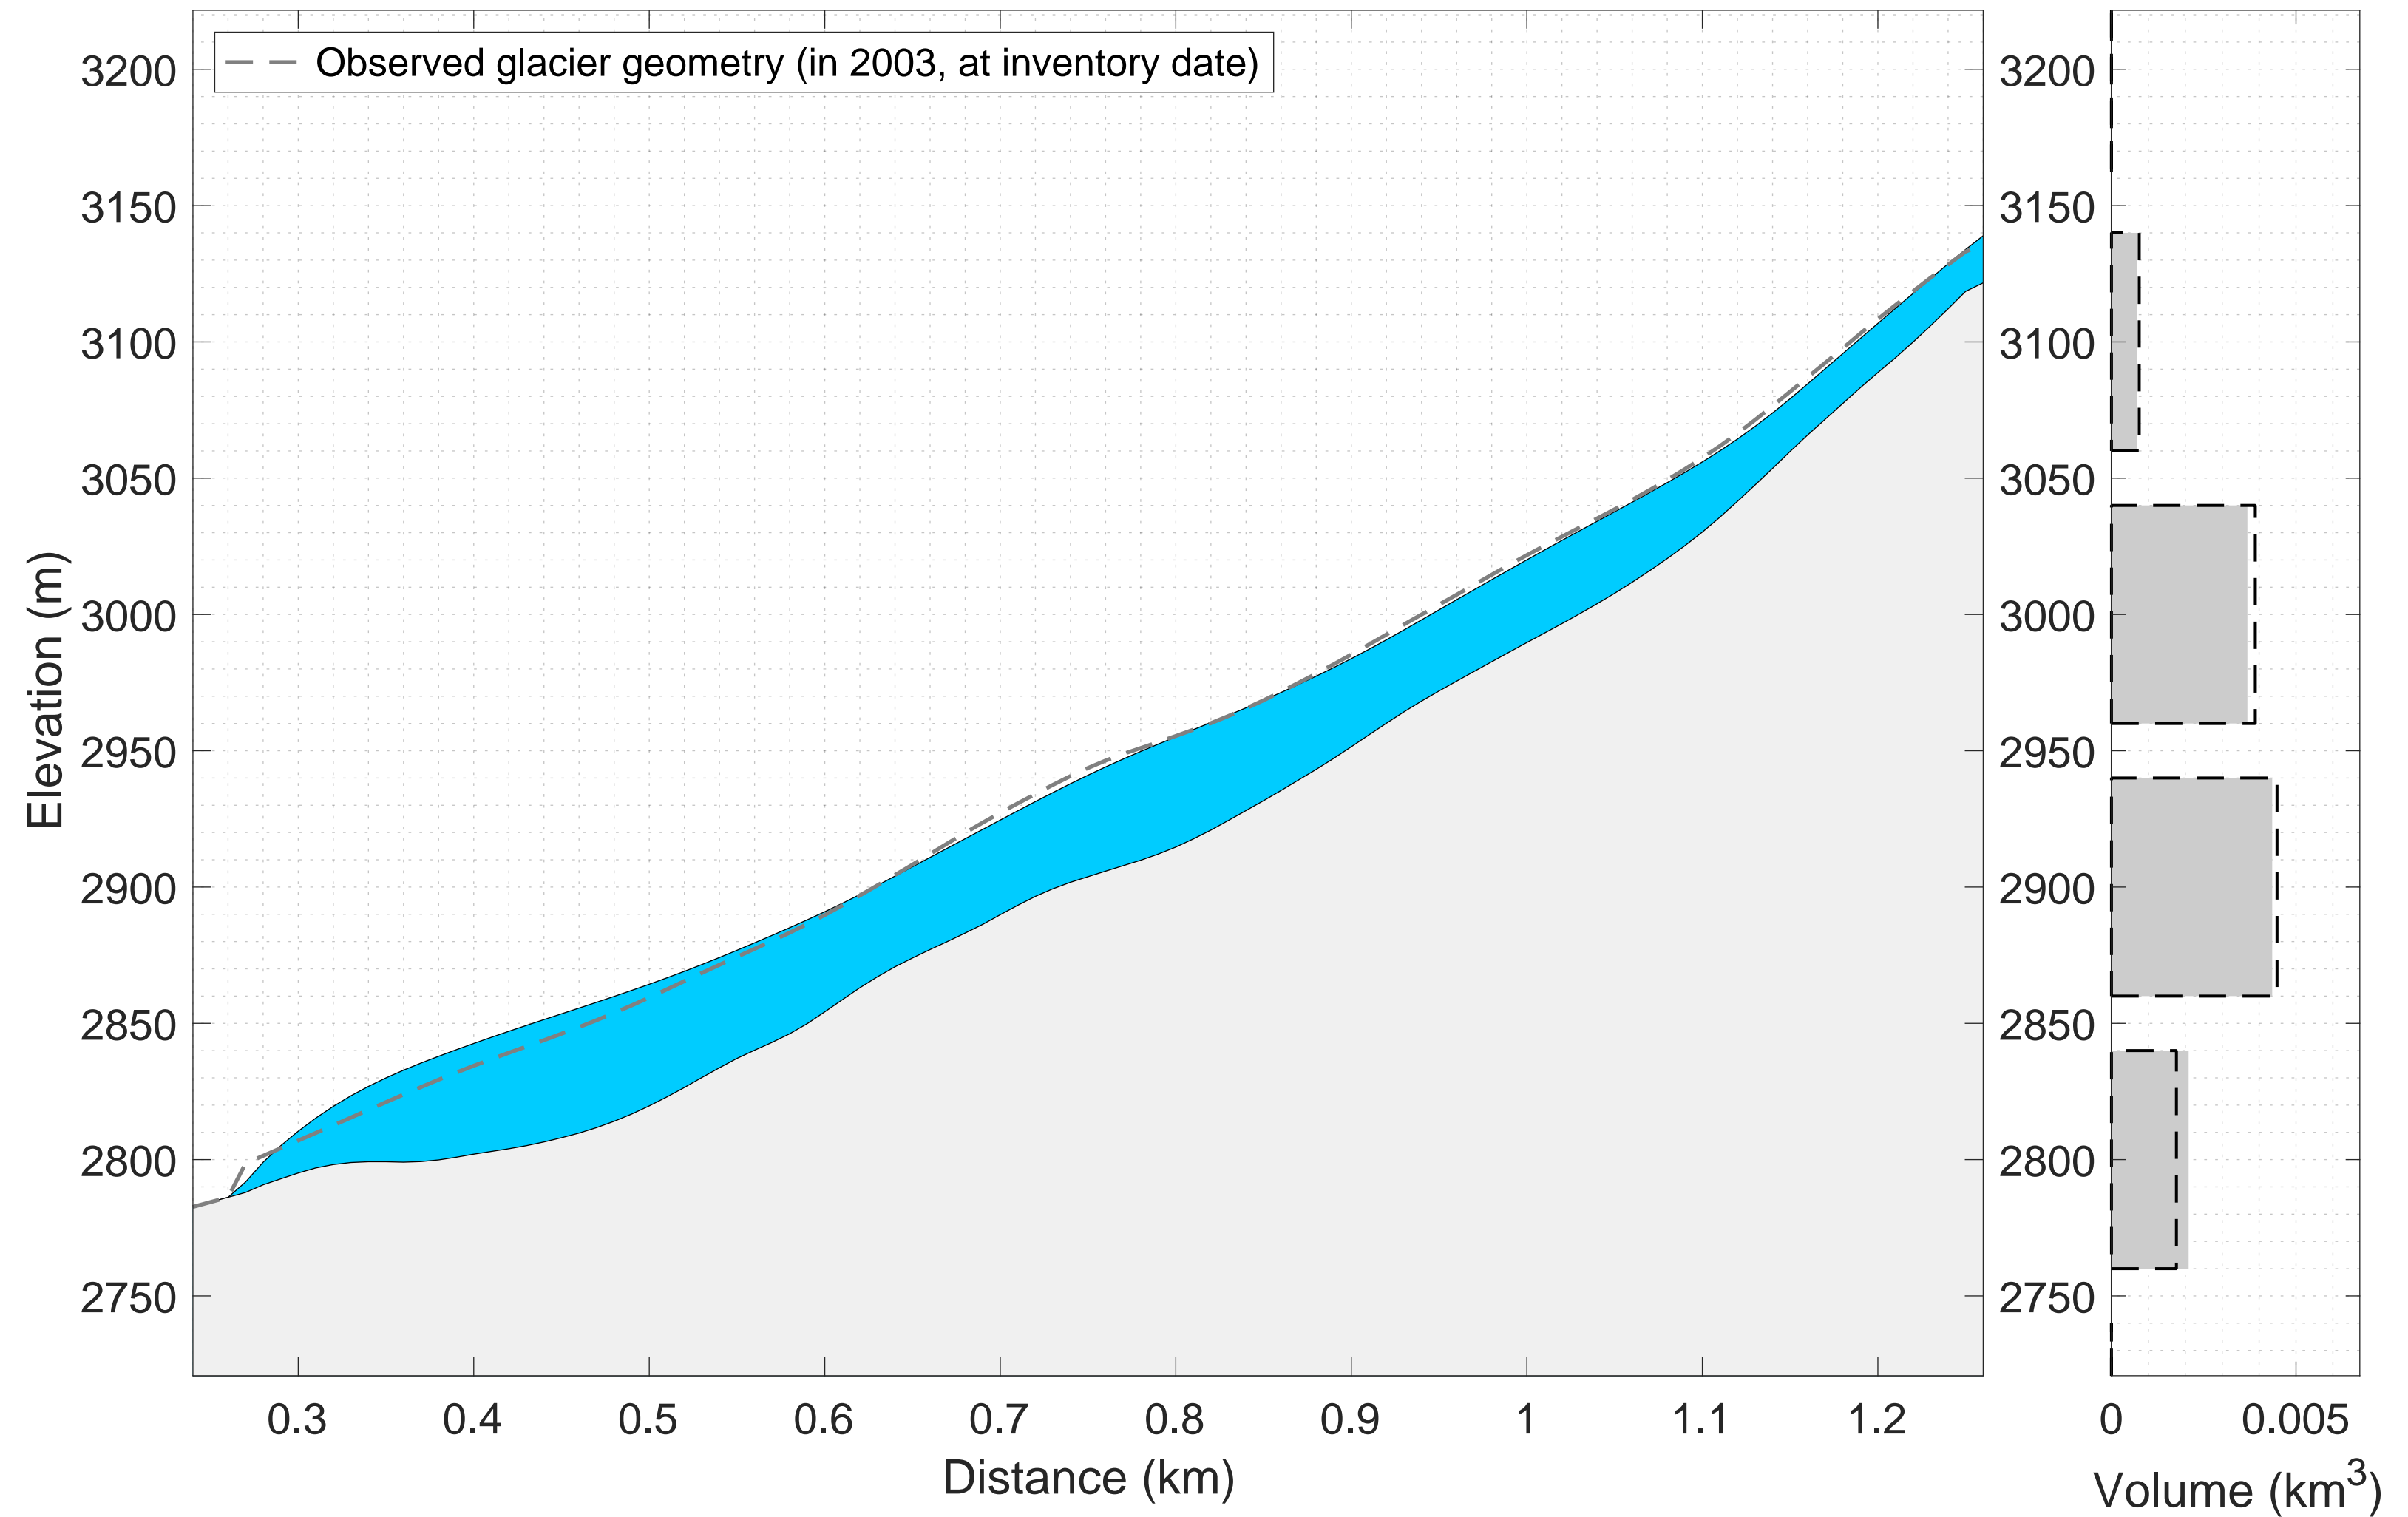

Supplement: Supplementary file 644 [file tc-13-1125-2019-supplement.zip]

**Modelled geometry (Glacier ID = 03643;  $A = 1.1594\text{e-}16 \text{ Pa}^{-3} \text{ a}^{-1}$ ;  $dx = 109 \text{ m}$ )**

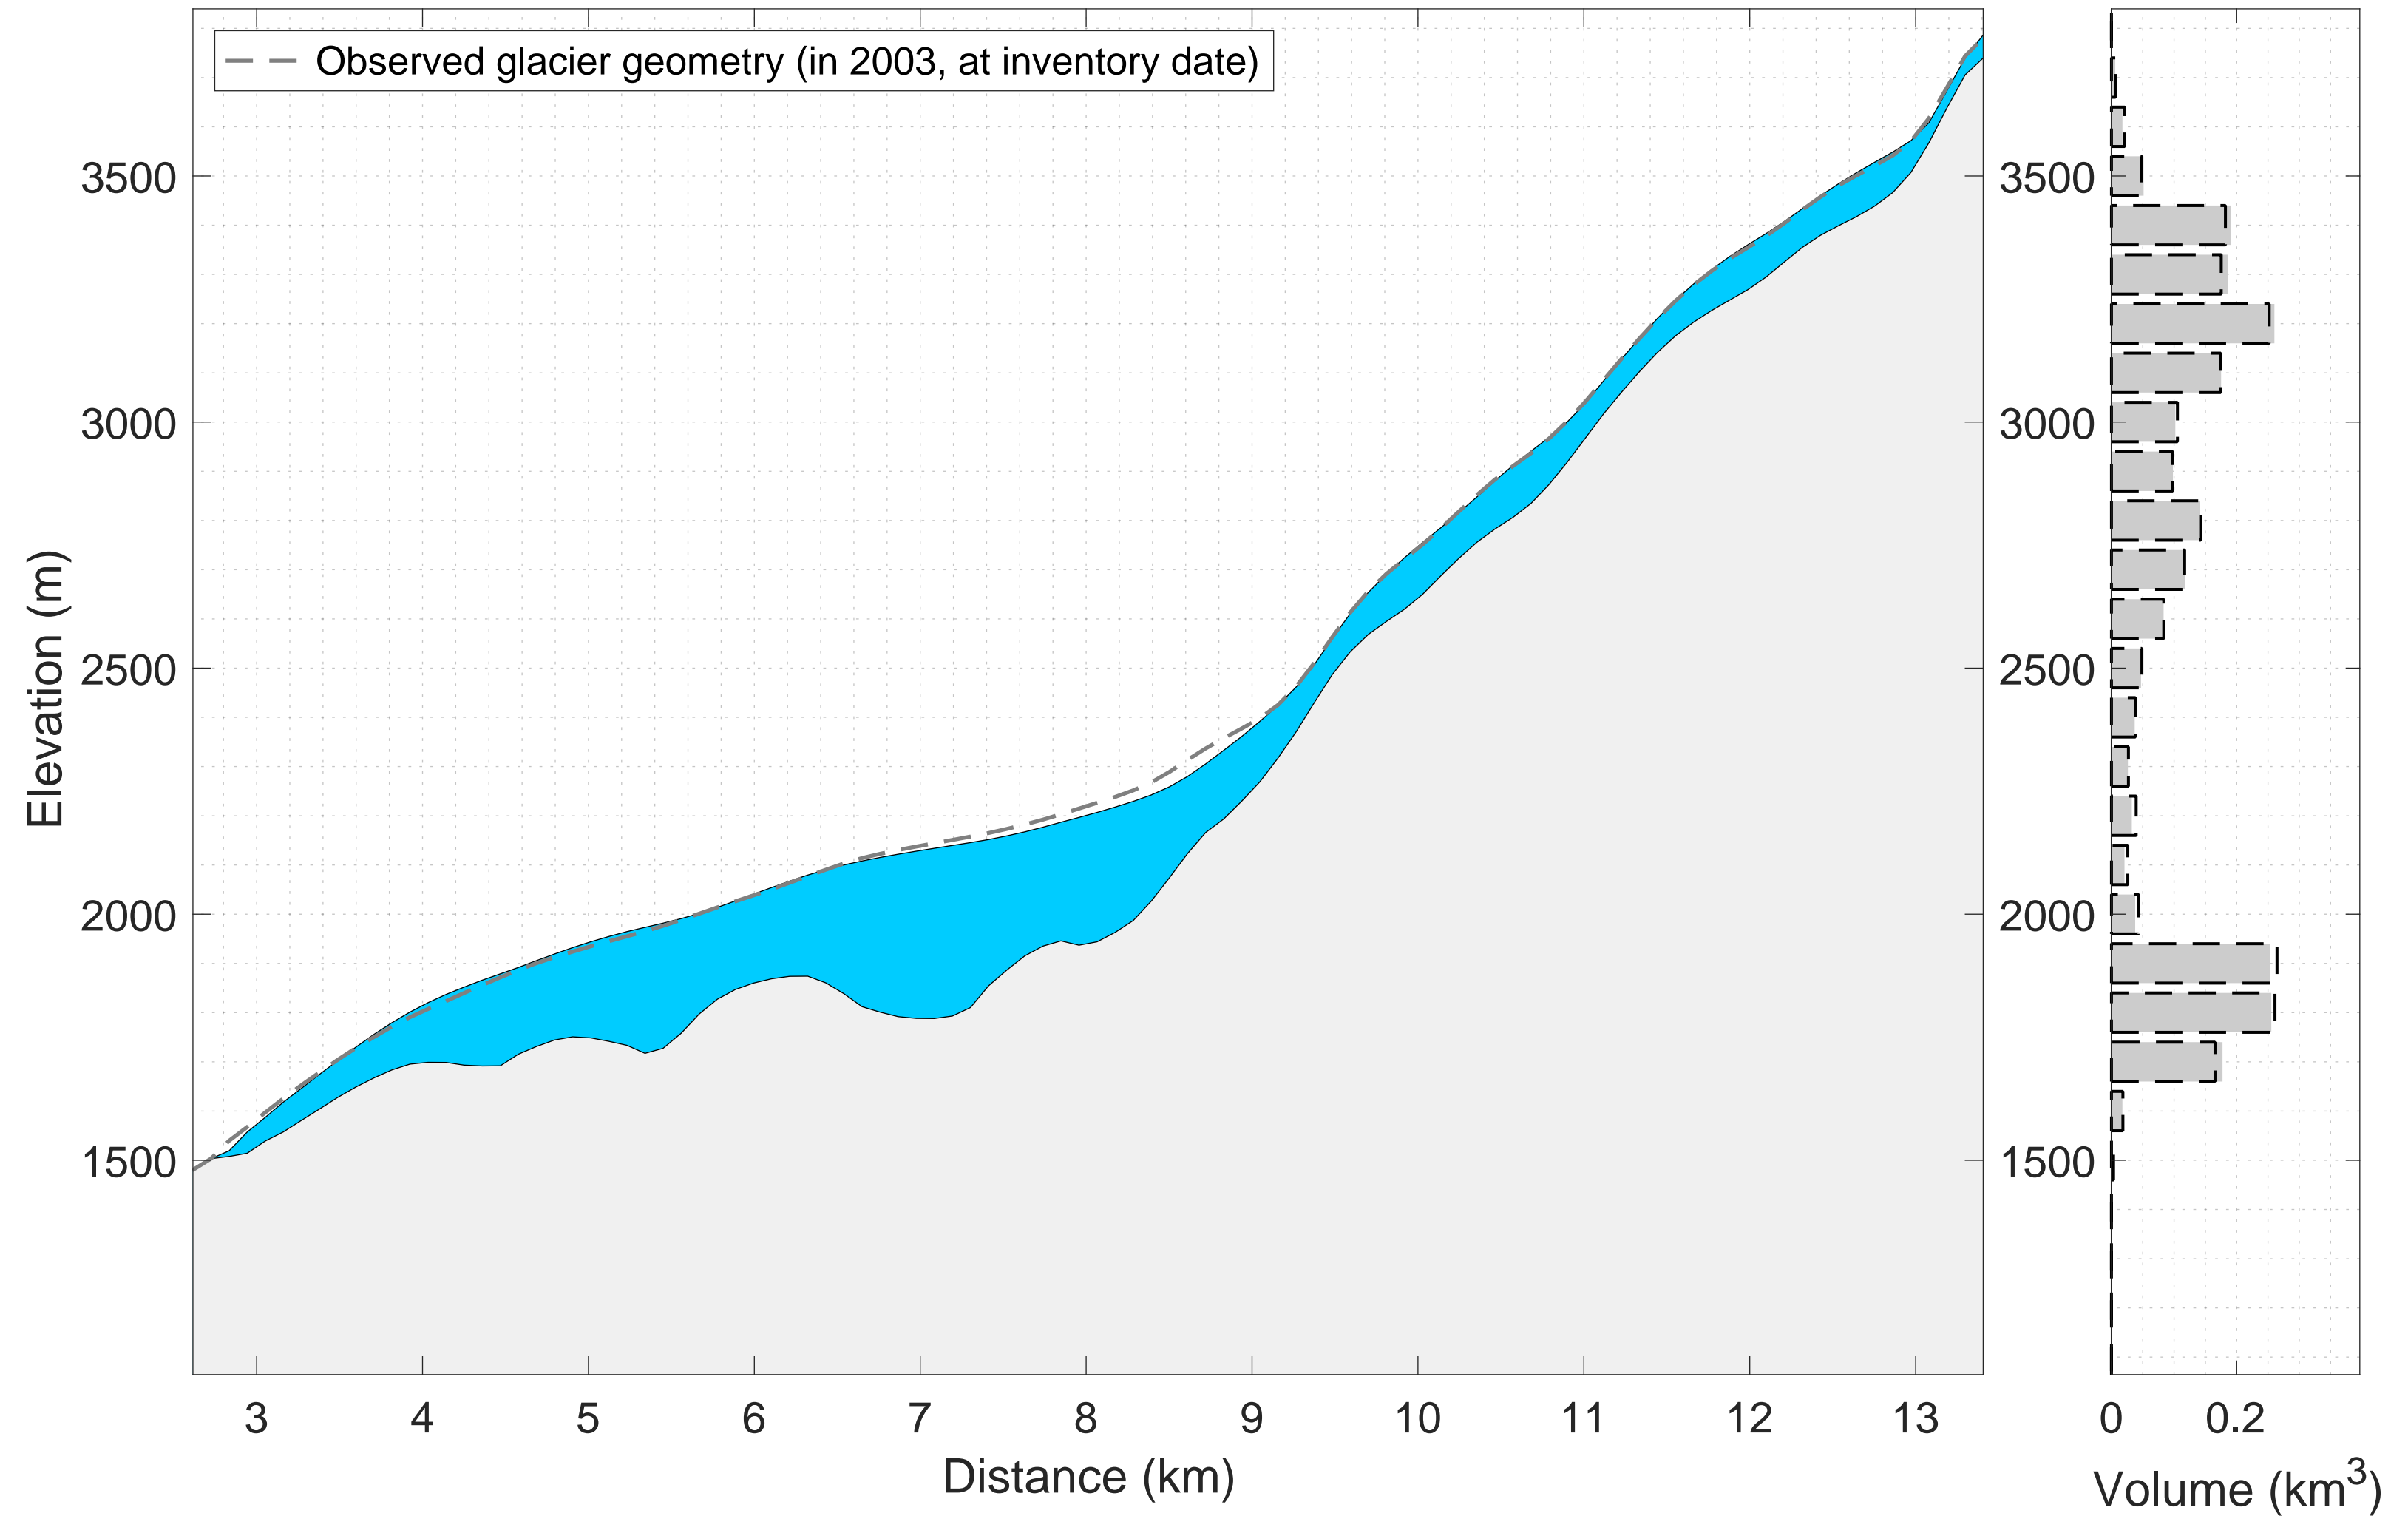

Supplement: Supplementary file 645 [file tc-13-1125-2019-supplement.zip]

**Modelled geometry (Glacier ID = 02766;  $A = 1.5018\text{e-}16 \text{ Pa}^{-3} \text{ a}^{-1}$ ;  $dx = 97 \text{ m}$ )**

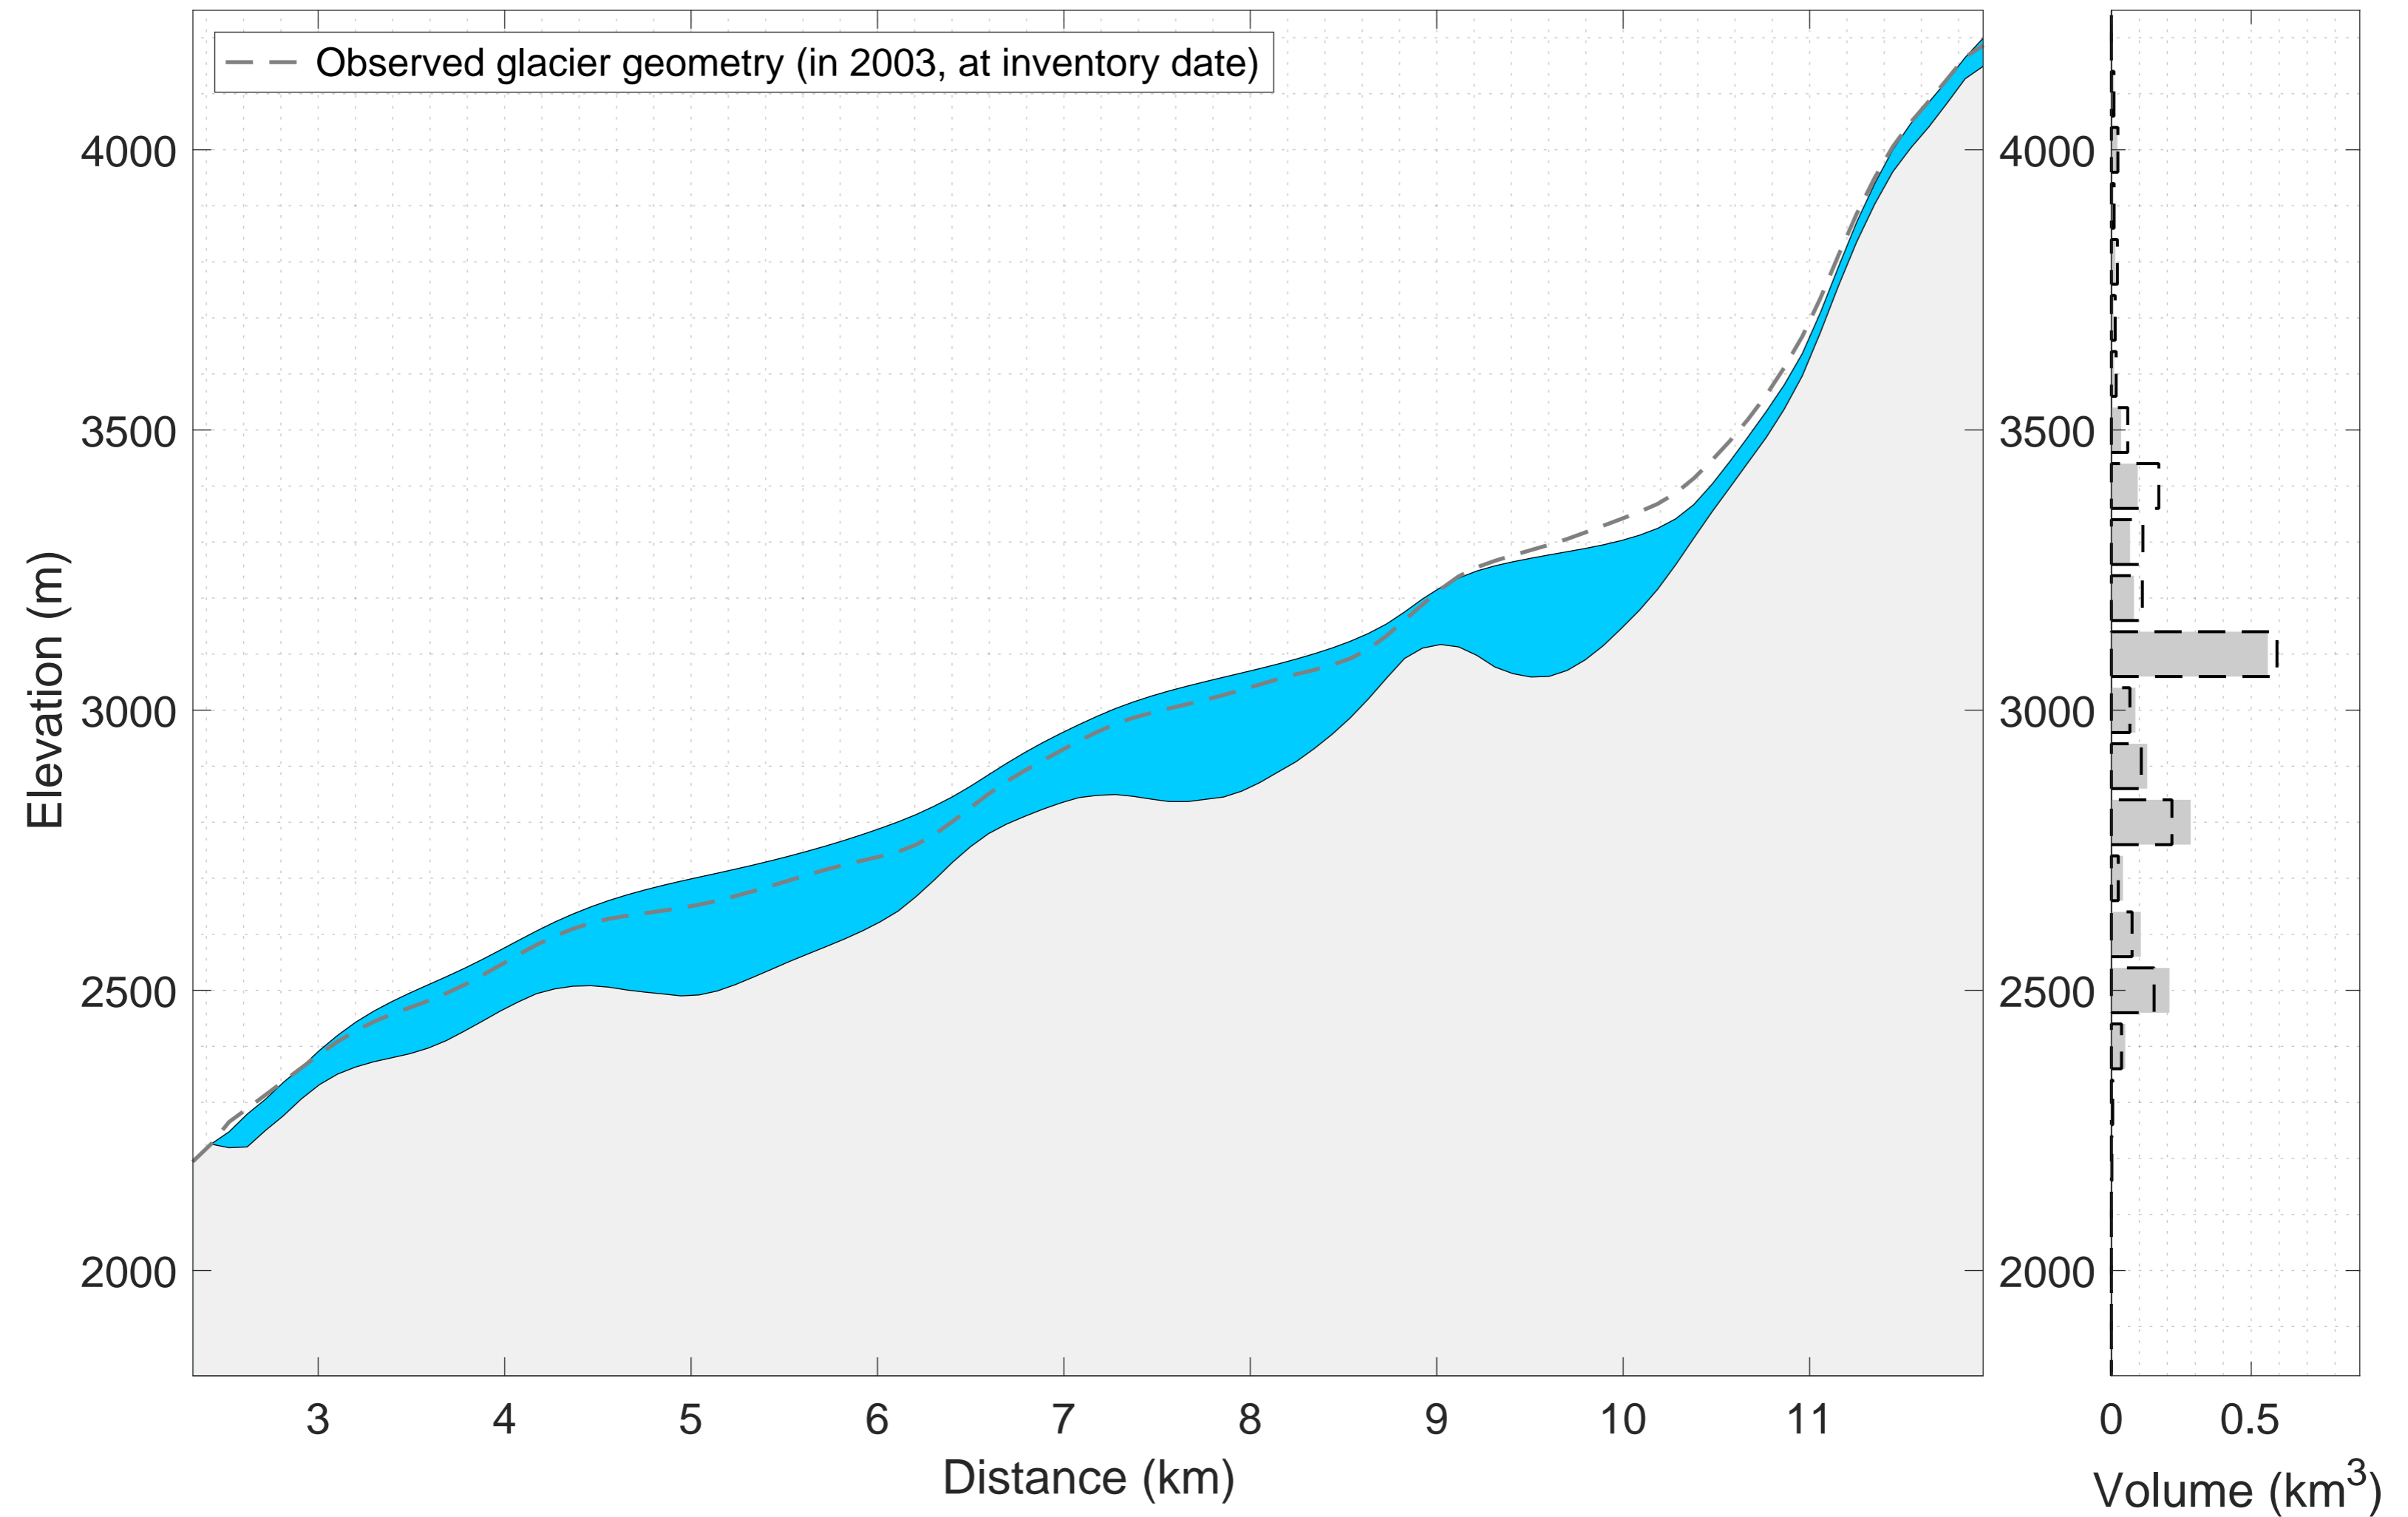

Supplement: Supplementary file 646 [file tc-13-1125-2019-supplement.zip]

**Modelled geometry (Glacier ID = 01663;  $A = 5.437\text{e-}17 \text{ Pa}^{-3} \text{ a}^{-1}$ ;  $dx = 22 \text{ m}$ )**

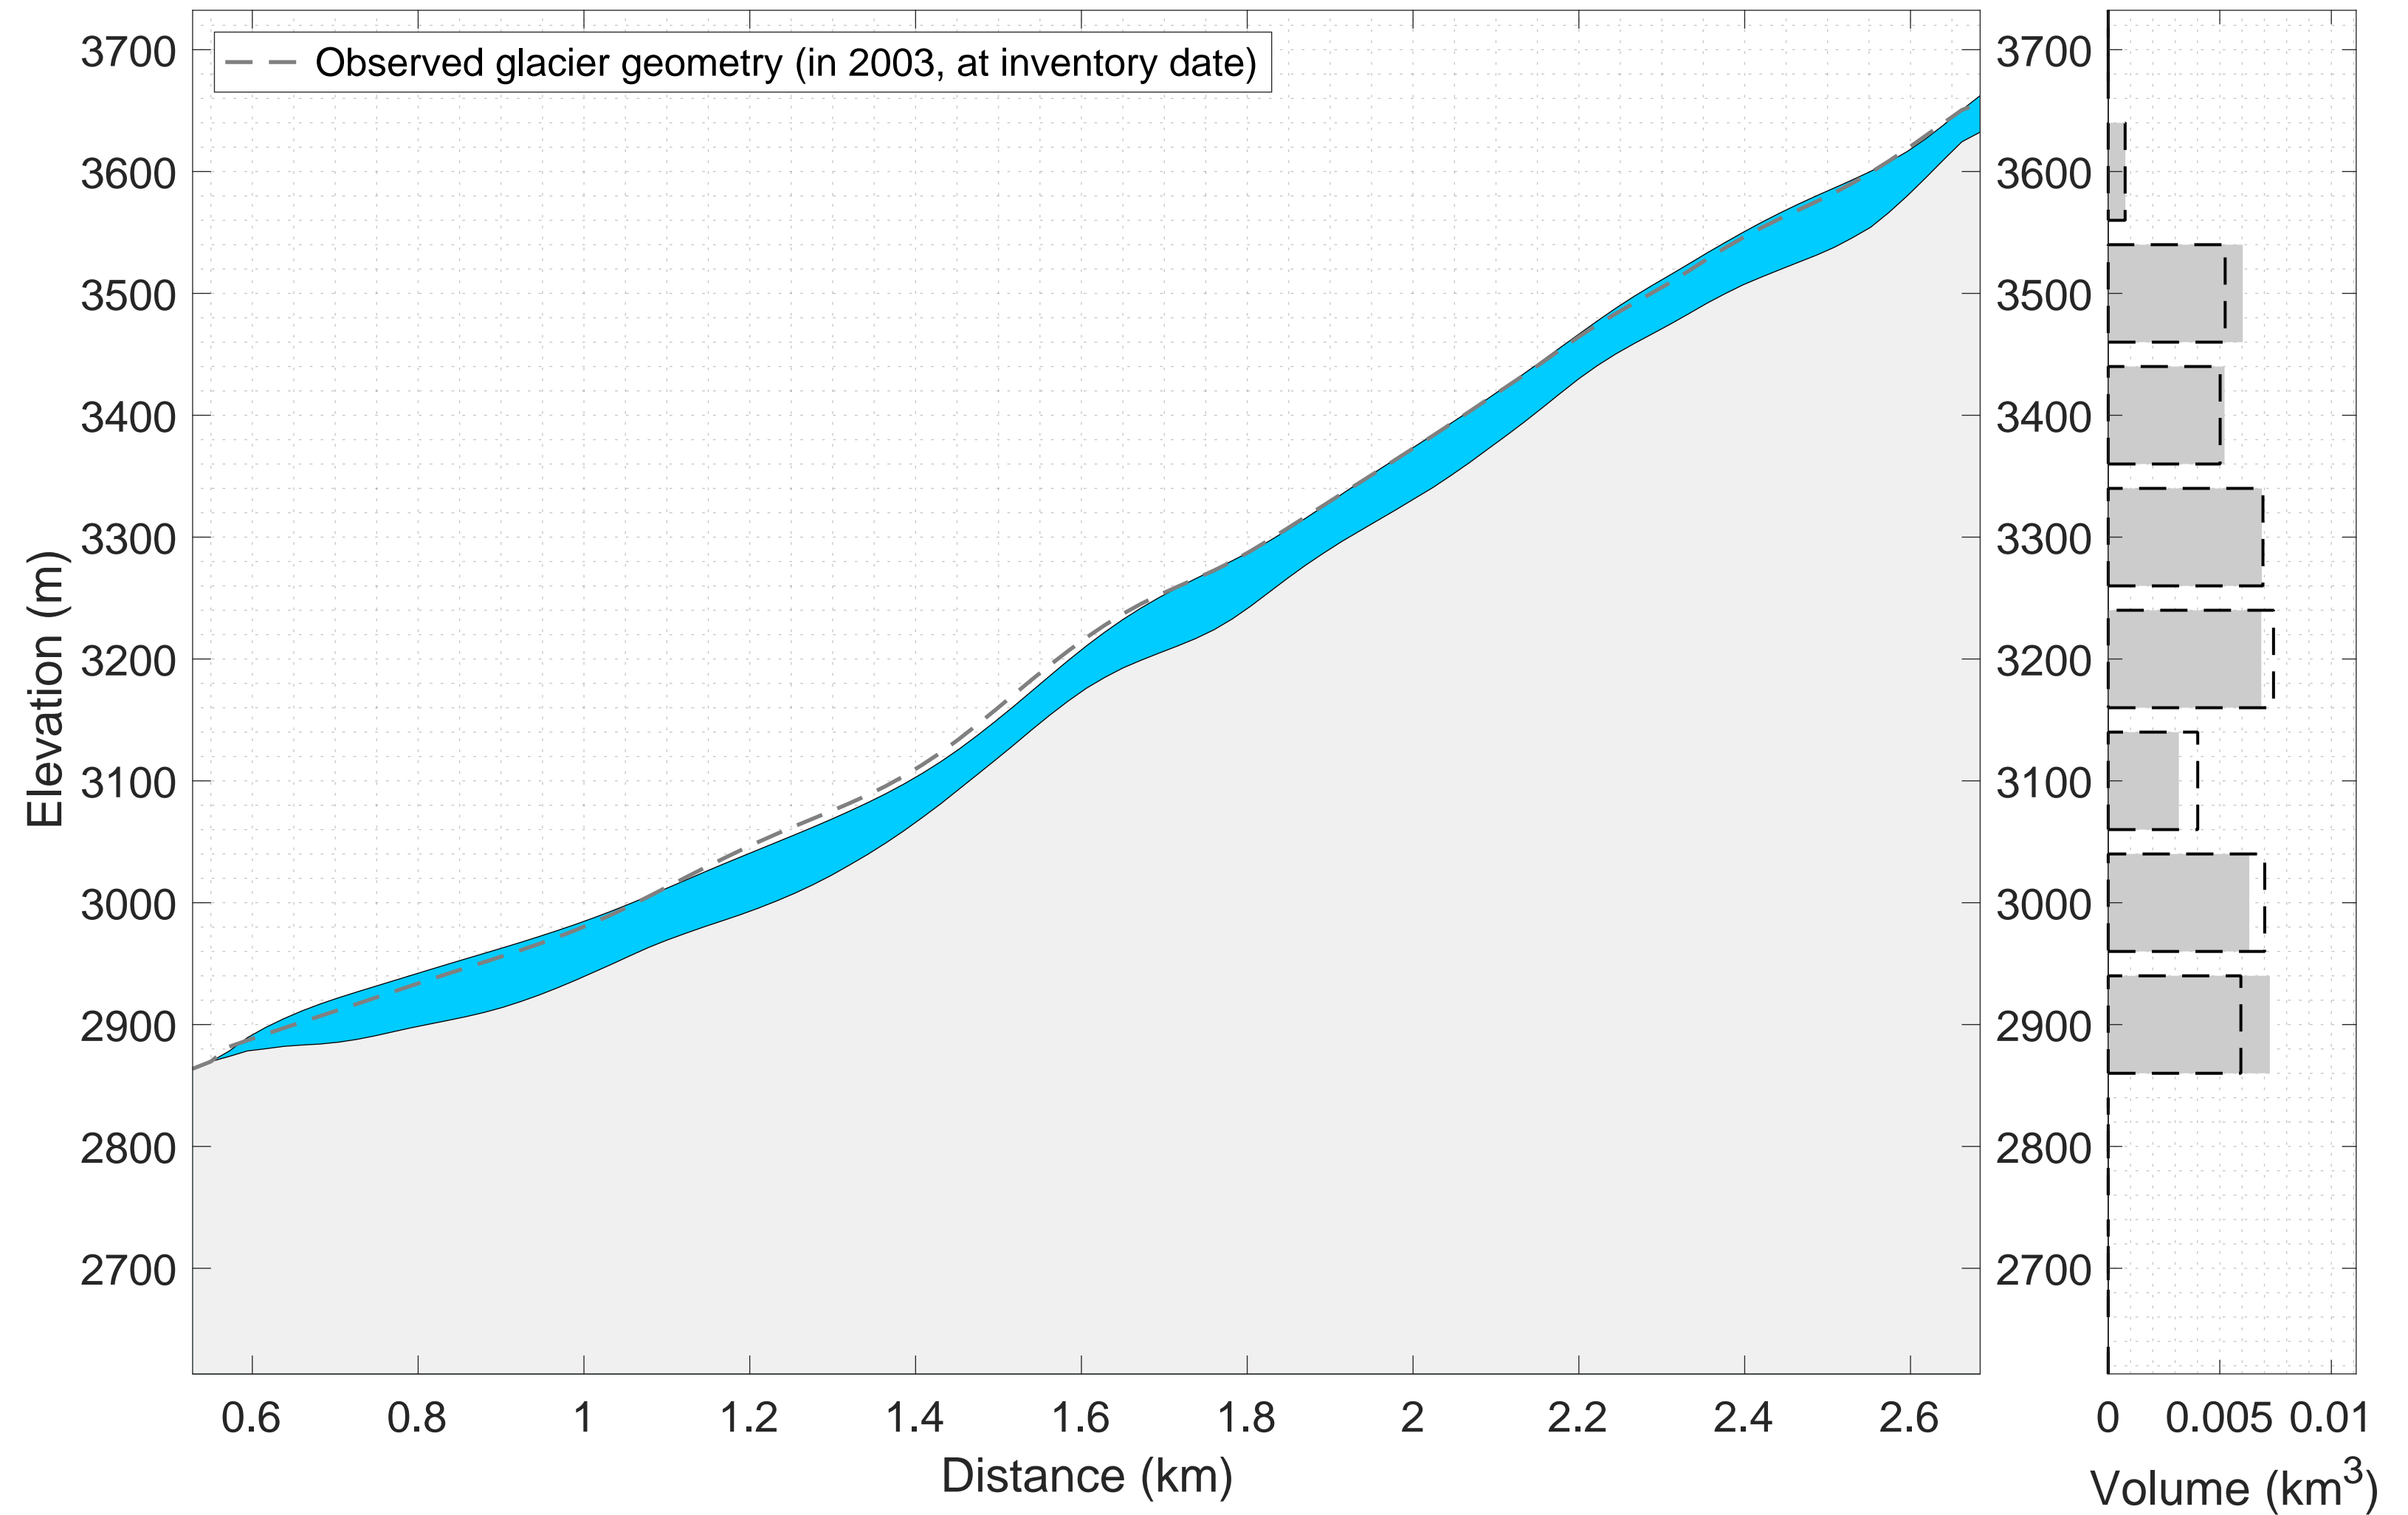

Supplement: Supplementary file 647 [file tc-13-1125-2019-supplement.zip]

**Modelled geometry (Glacier ID = 00373;  $A = 8.8868\text{e-}17 \text{ Pa}^{-3} \text{ a}^{-1}$ ;  $dx = 14 \text{ m}$ )**

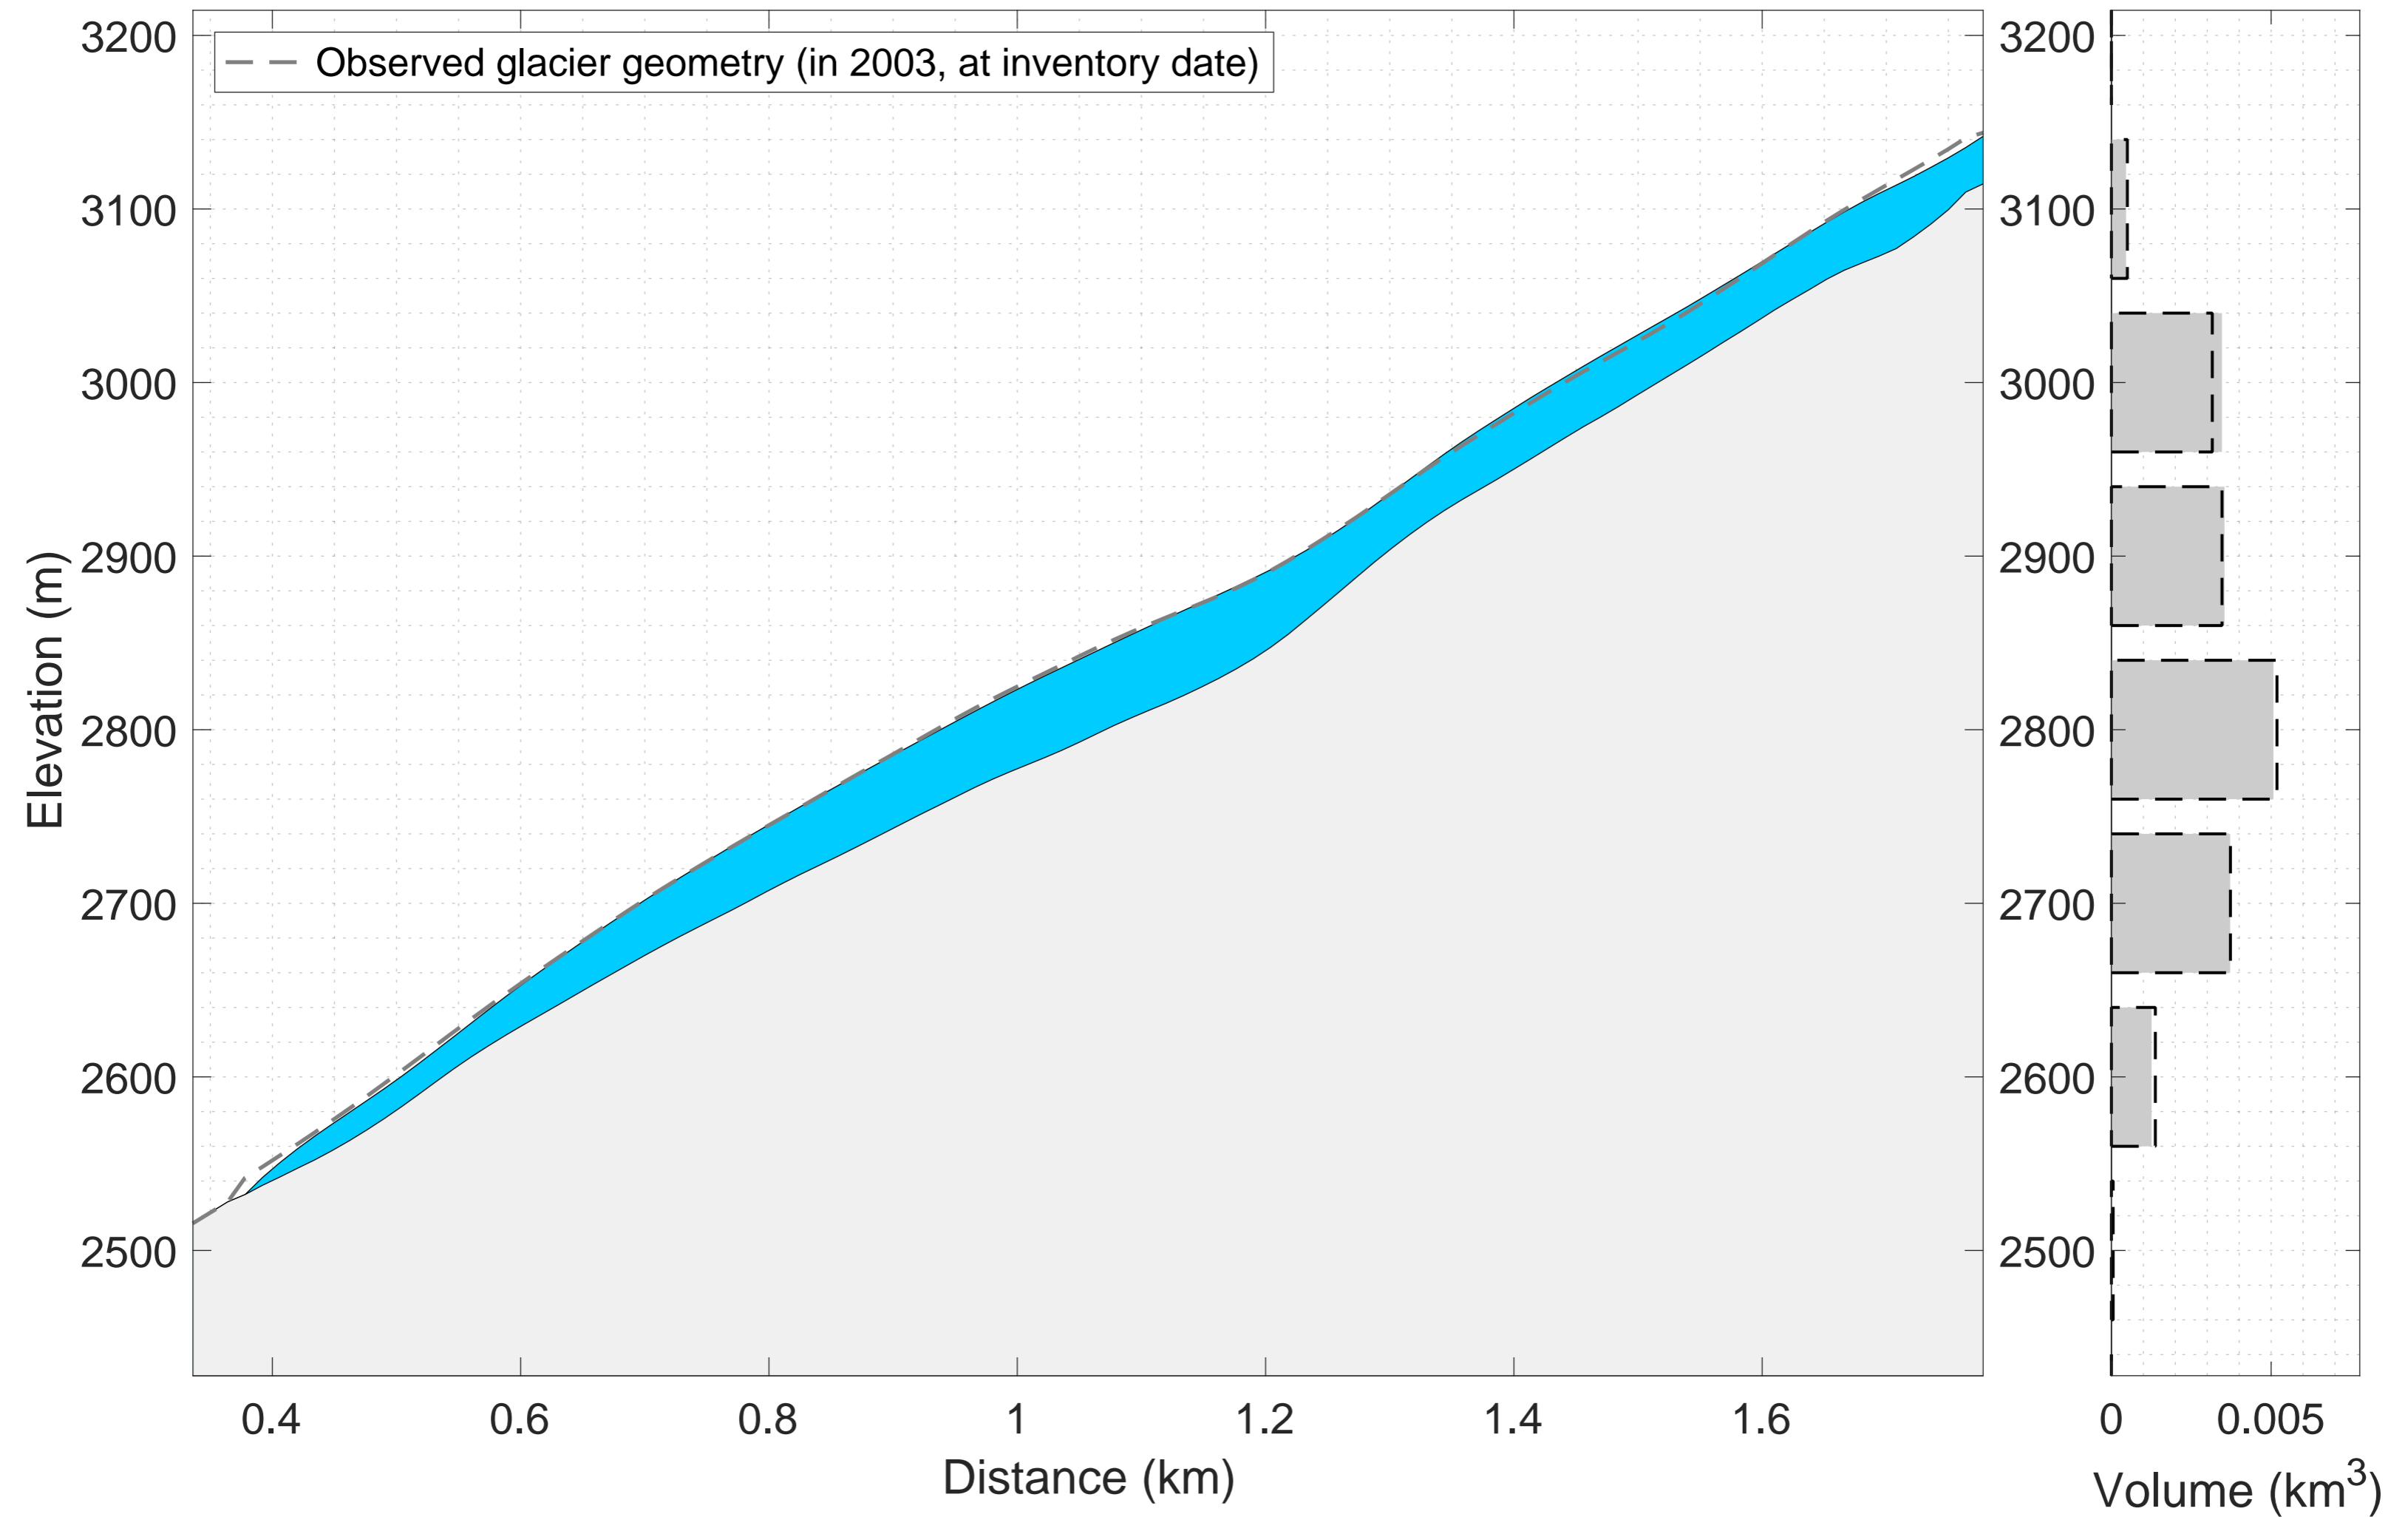

Supplement: Supplementary file 648 [file tc-13-1125-2019-supplement.zip]

**Modelled geometry (Glacier ID = 00251;  $A = 2.2008\text{e-}16 \text{ Pa}^{-3} \text{ a}^{-1}$ ;  $dx = 12 \text{ m}$ )**

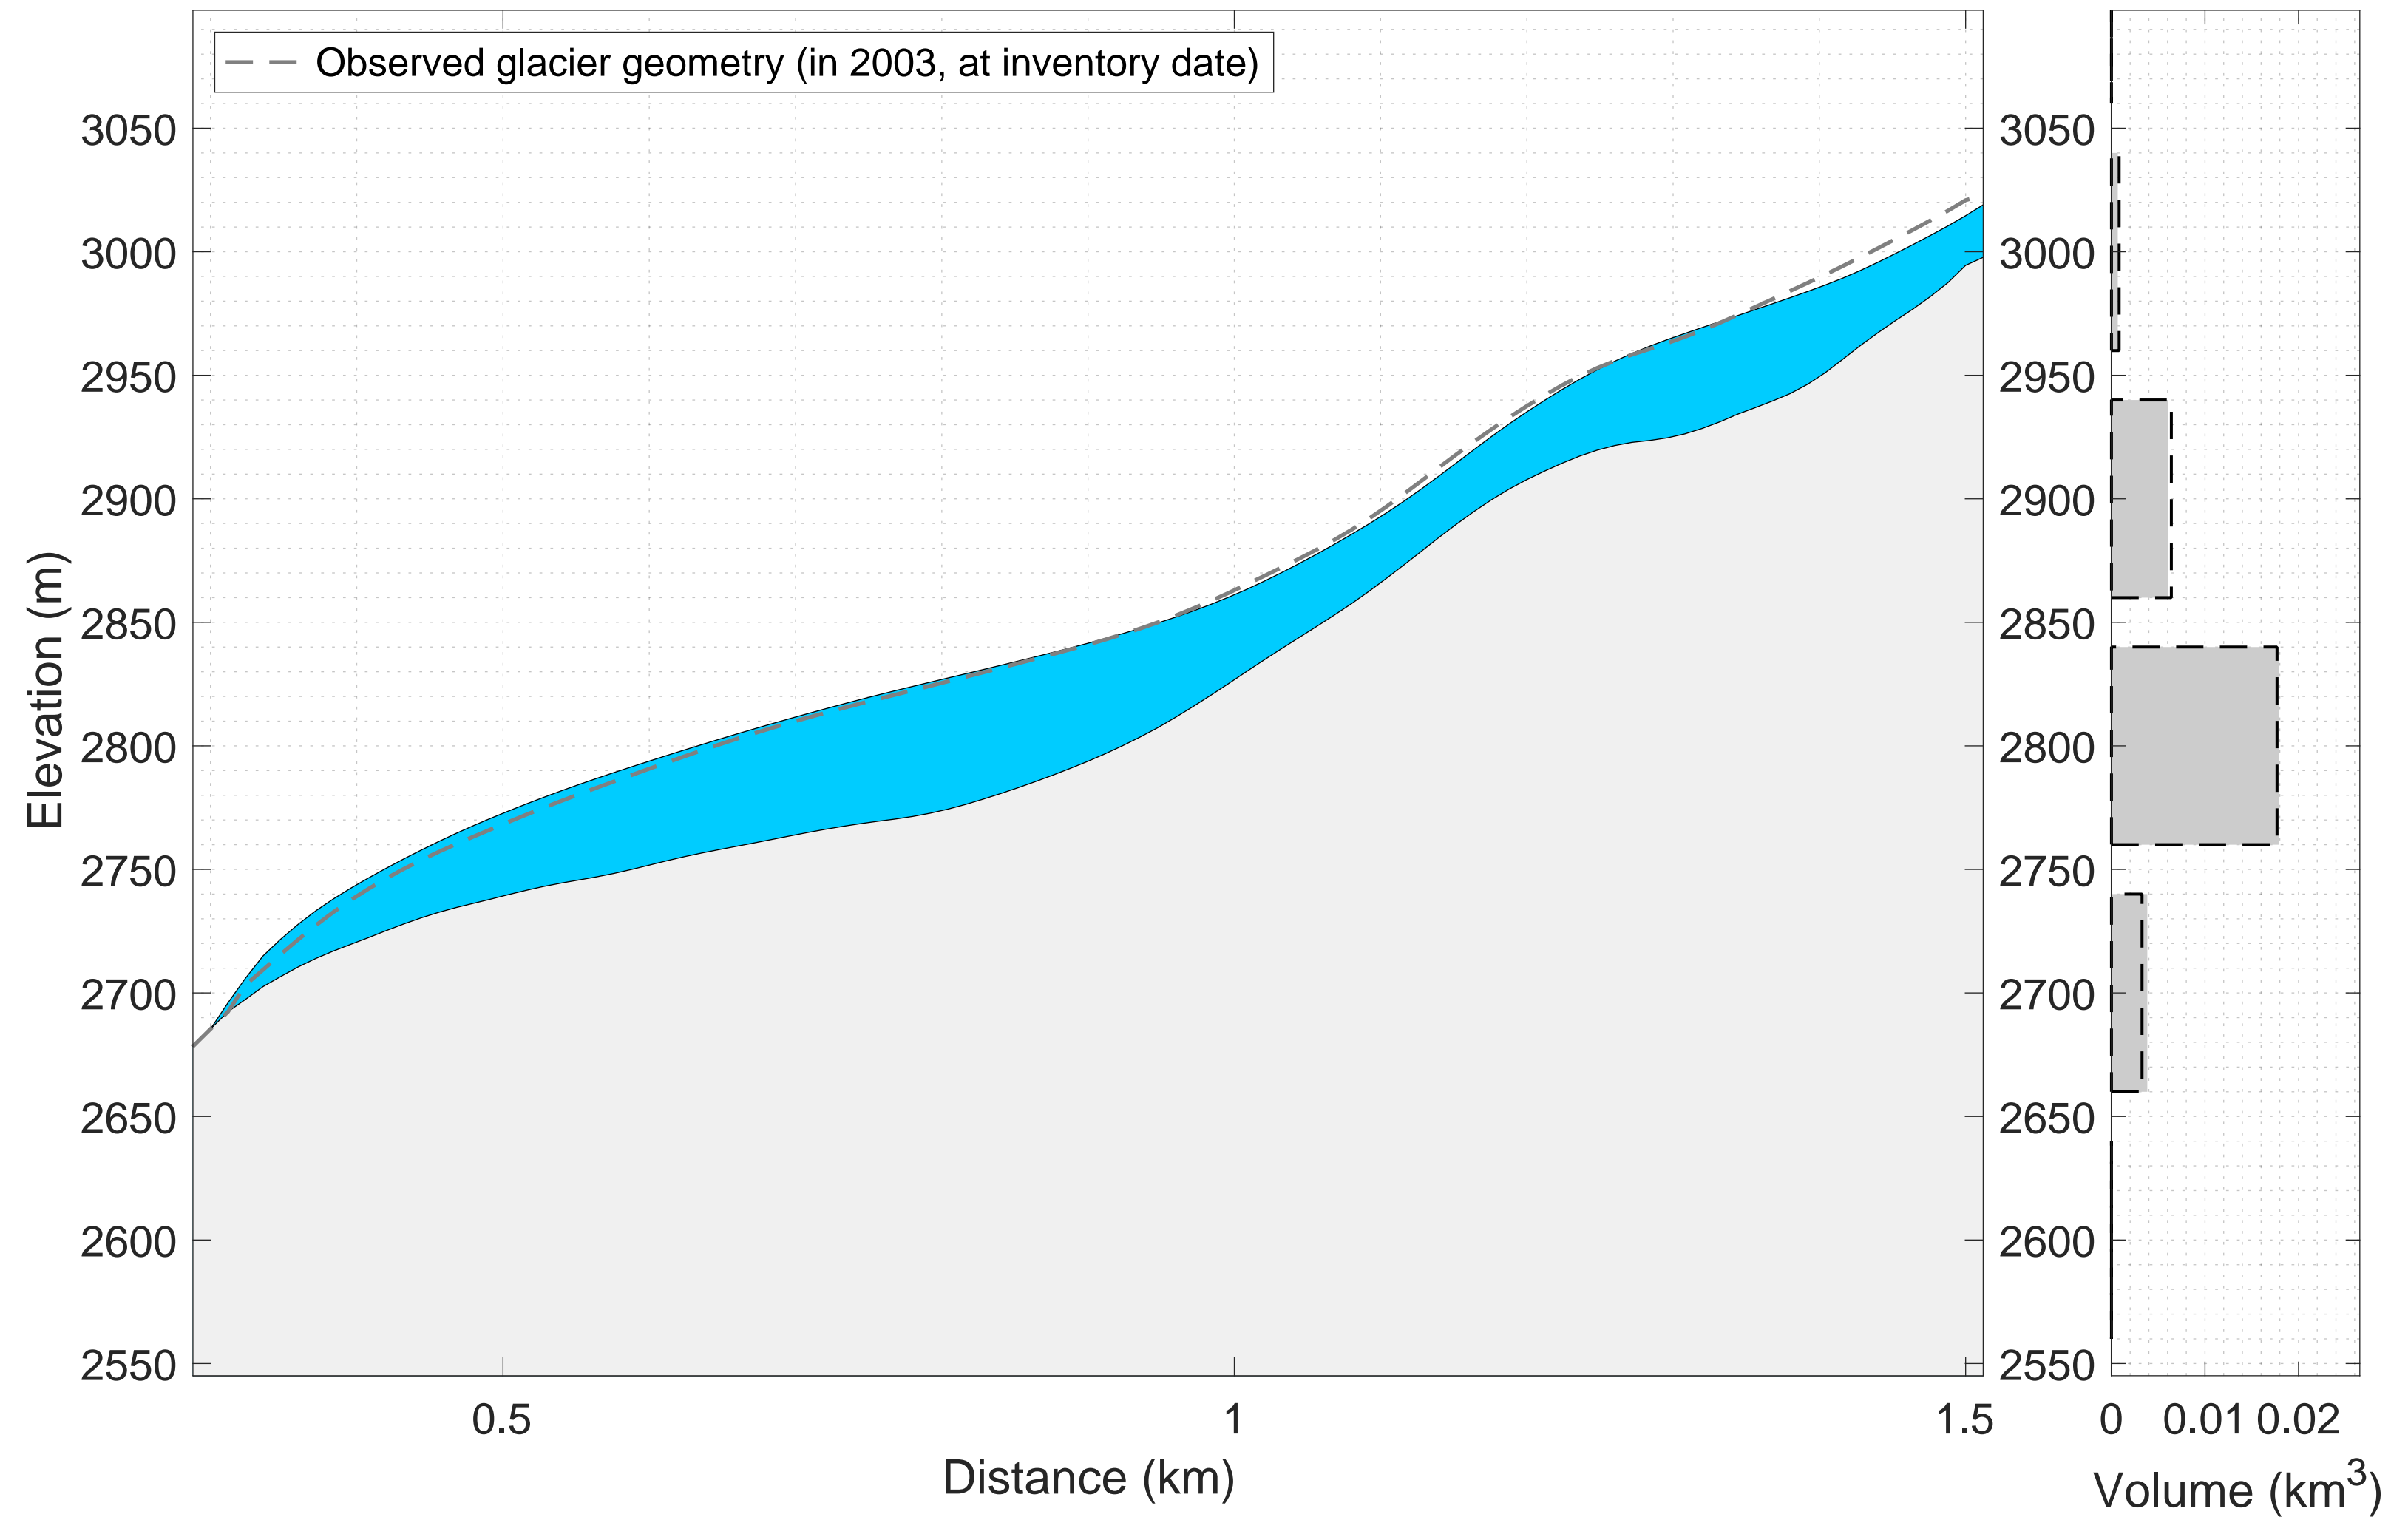

Supplement: Supplementary file 649 [file tc-13-1125-2019-supplement.zip]

**Modelled geometry (Glacier ID = 00893;  $A = 1.2891\text{e-}16 \text{ Pa}^{-3} \text{ a}^{-1}$ ;  $dx = 11 \text{ m}$ )**

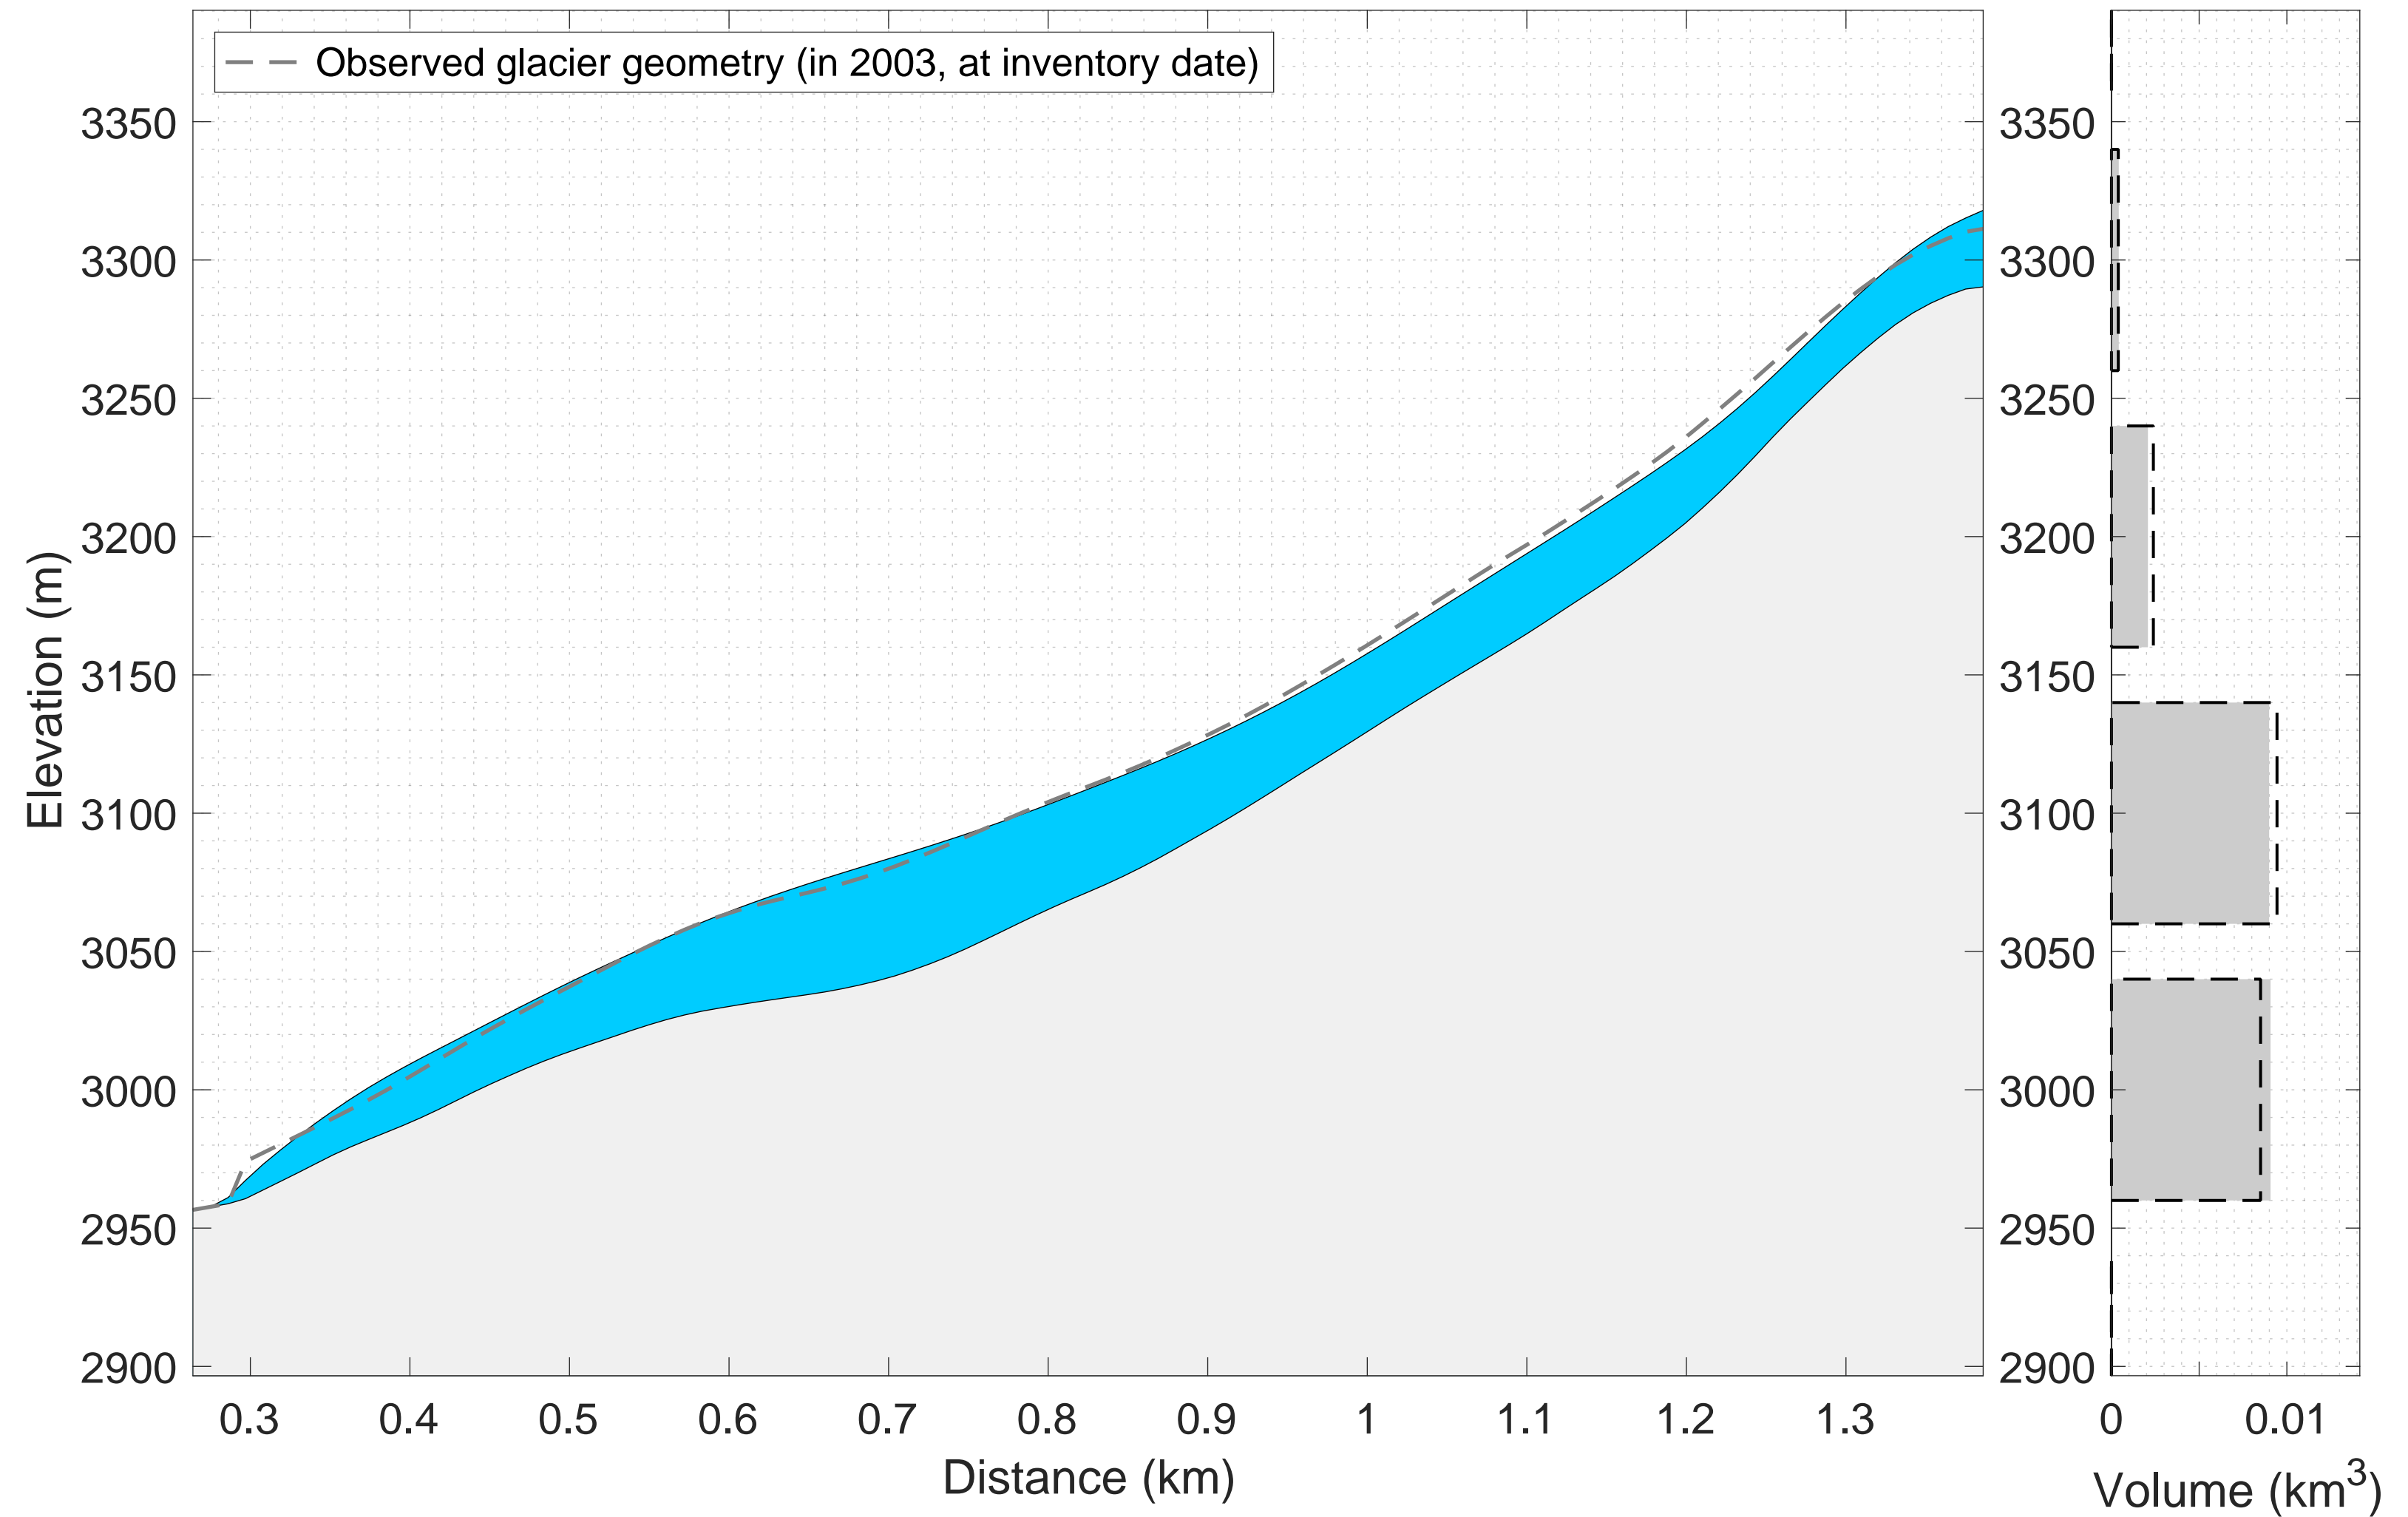

Supplement: Supplementary file 650 [file tc-13-1125-2019-supplement.zip]

**Modelled geometry (Glacier ID = 03385;  $A = 3.9102\text{e-}17 \text{ Pa}^{-3} \text{ a}^{-1}$ ;  $dx = 11 \text{ m}$ )**

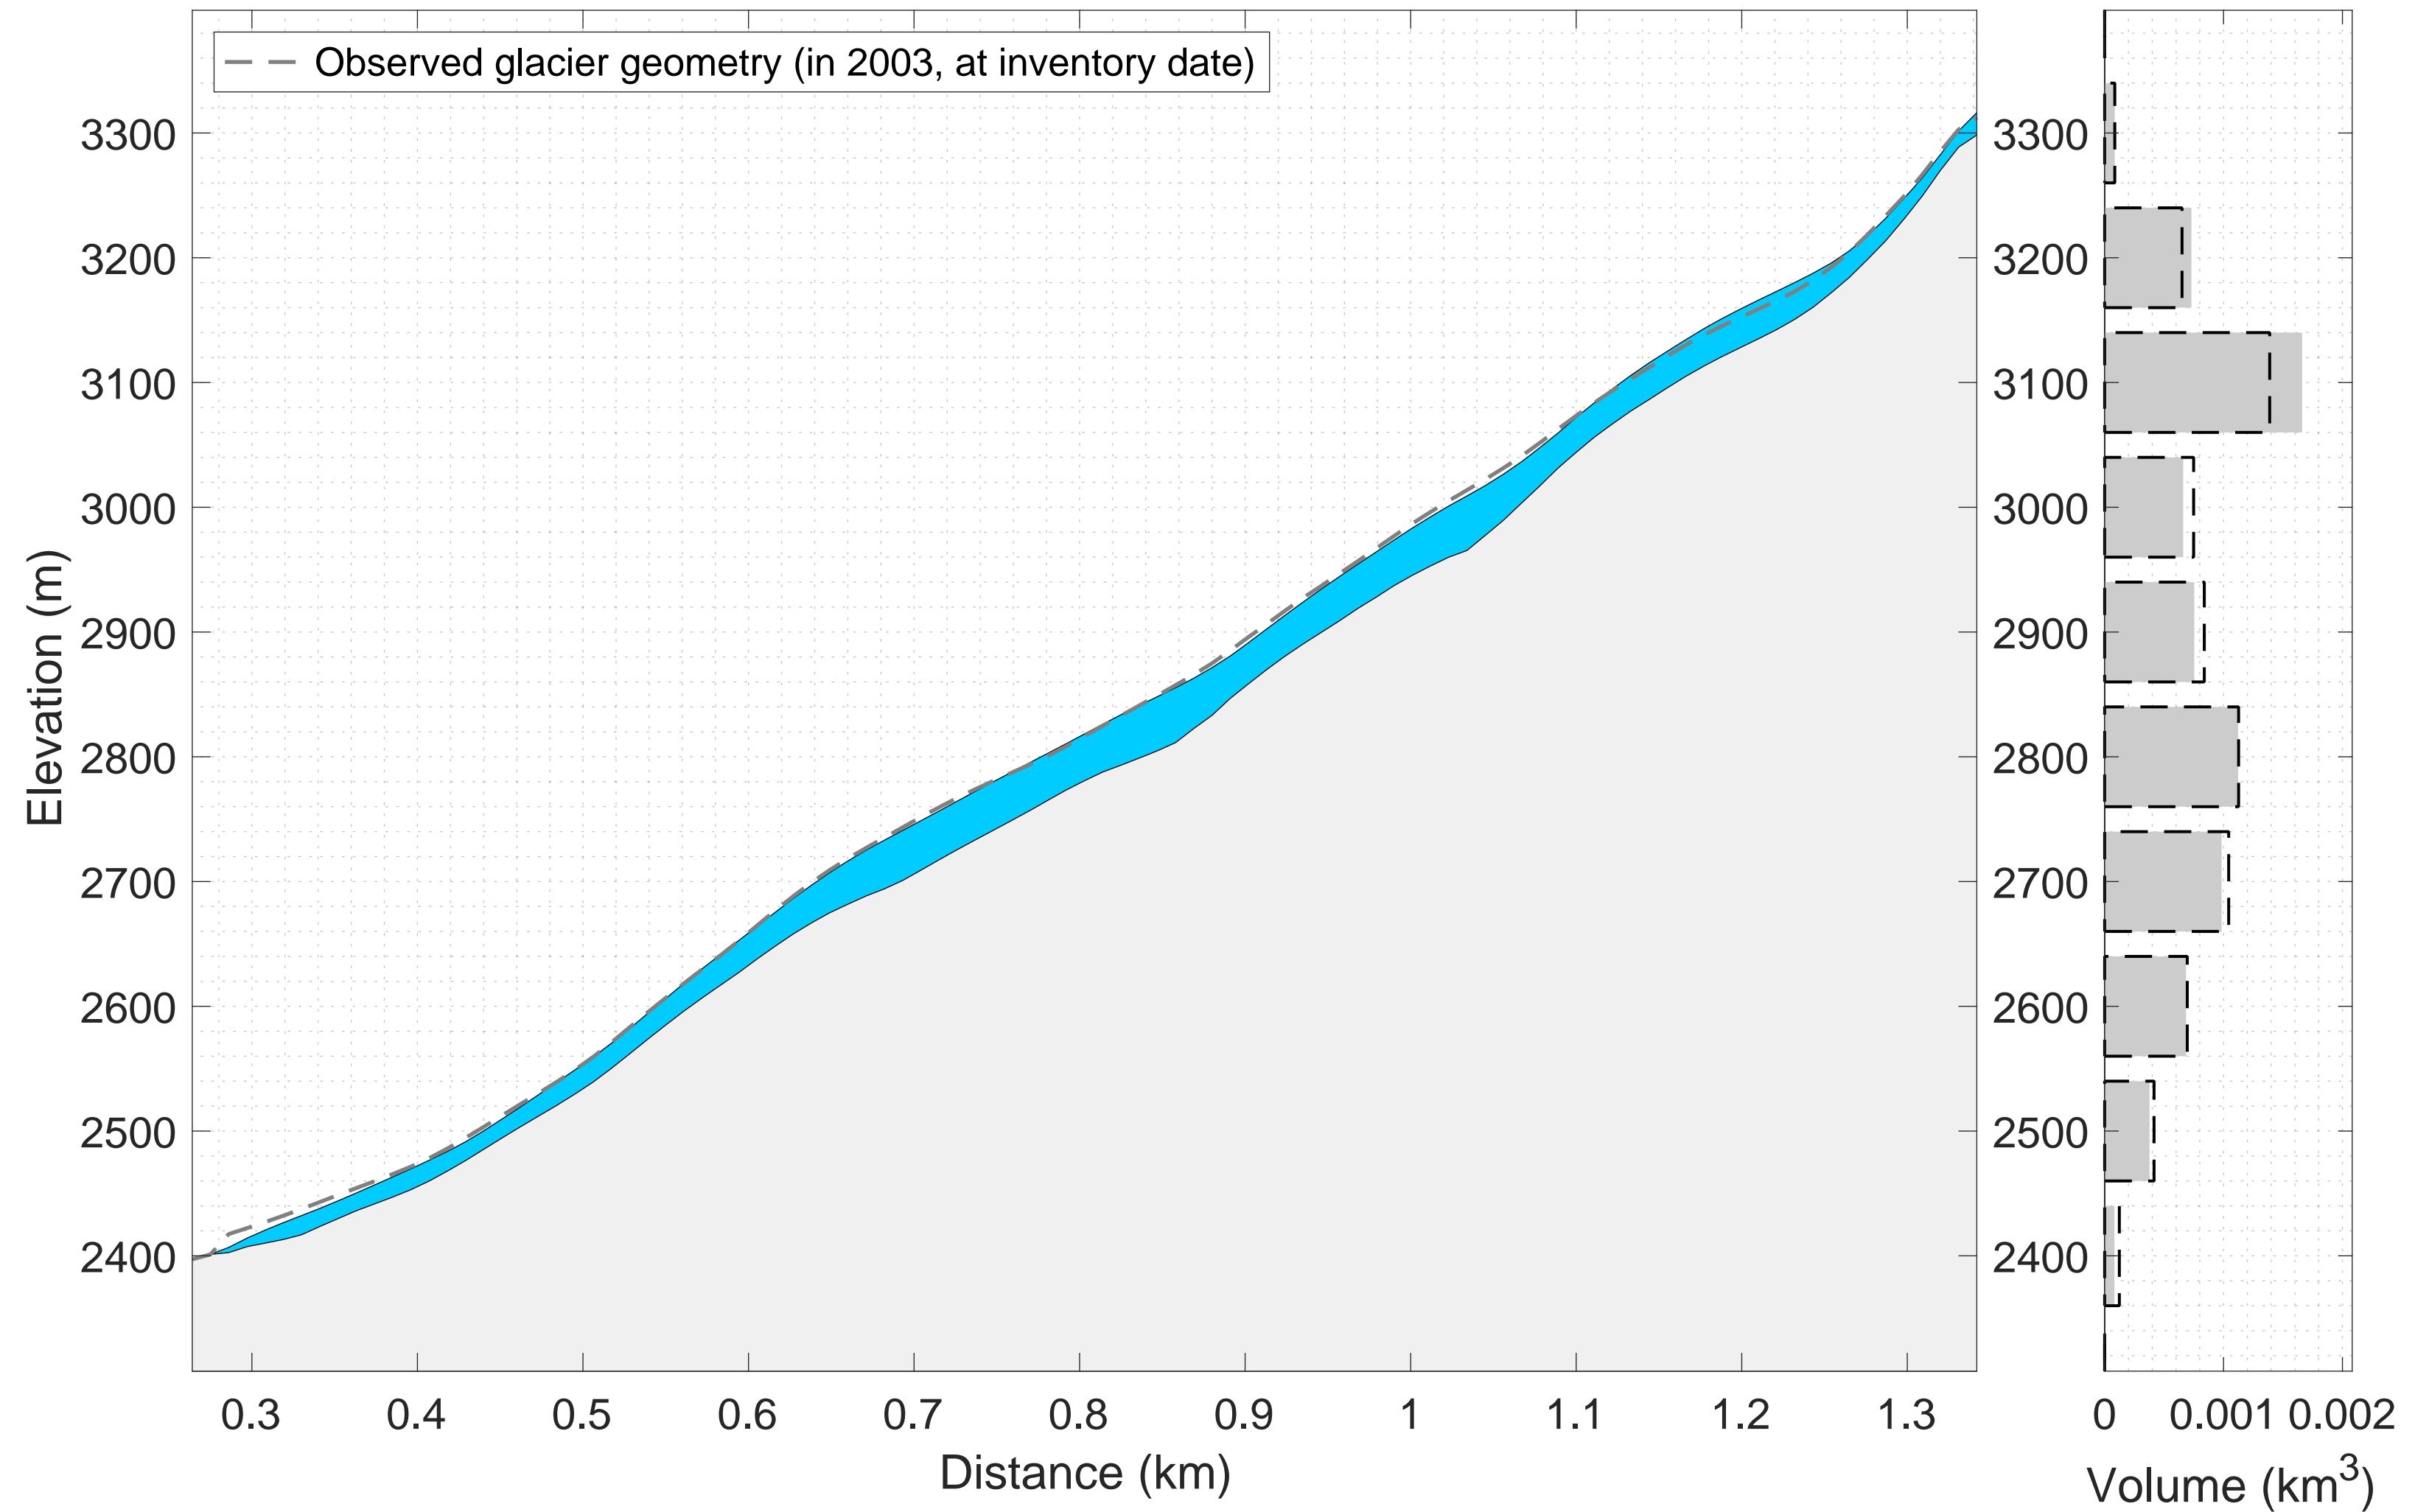

Supplement: Supplementary file 651 [file tc-13-1125-2019-supplement.zip]

**Modelled geometry (Glacier ID = 01690;  $A = 7.5401\text{e-}17 \text{ Pa}^{-3} \text{ a}^{-1}$ ;  $dx = 11 \text{ m}$ )**

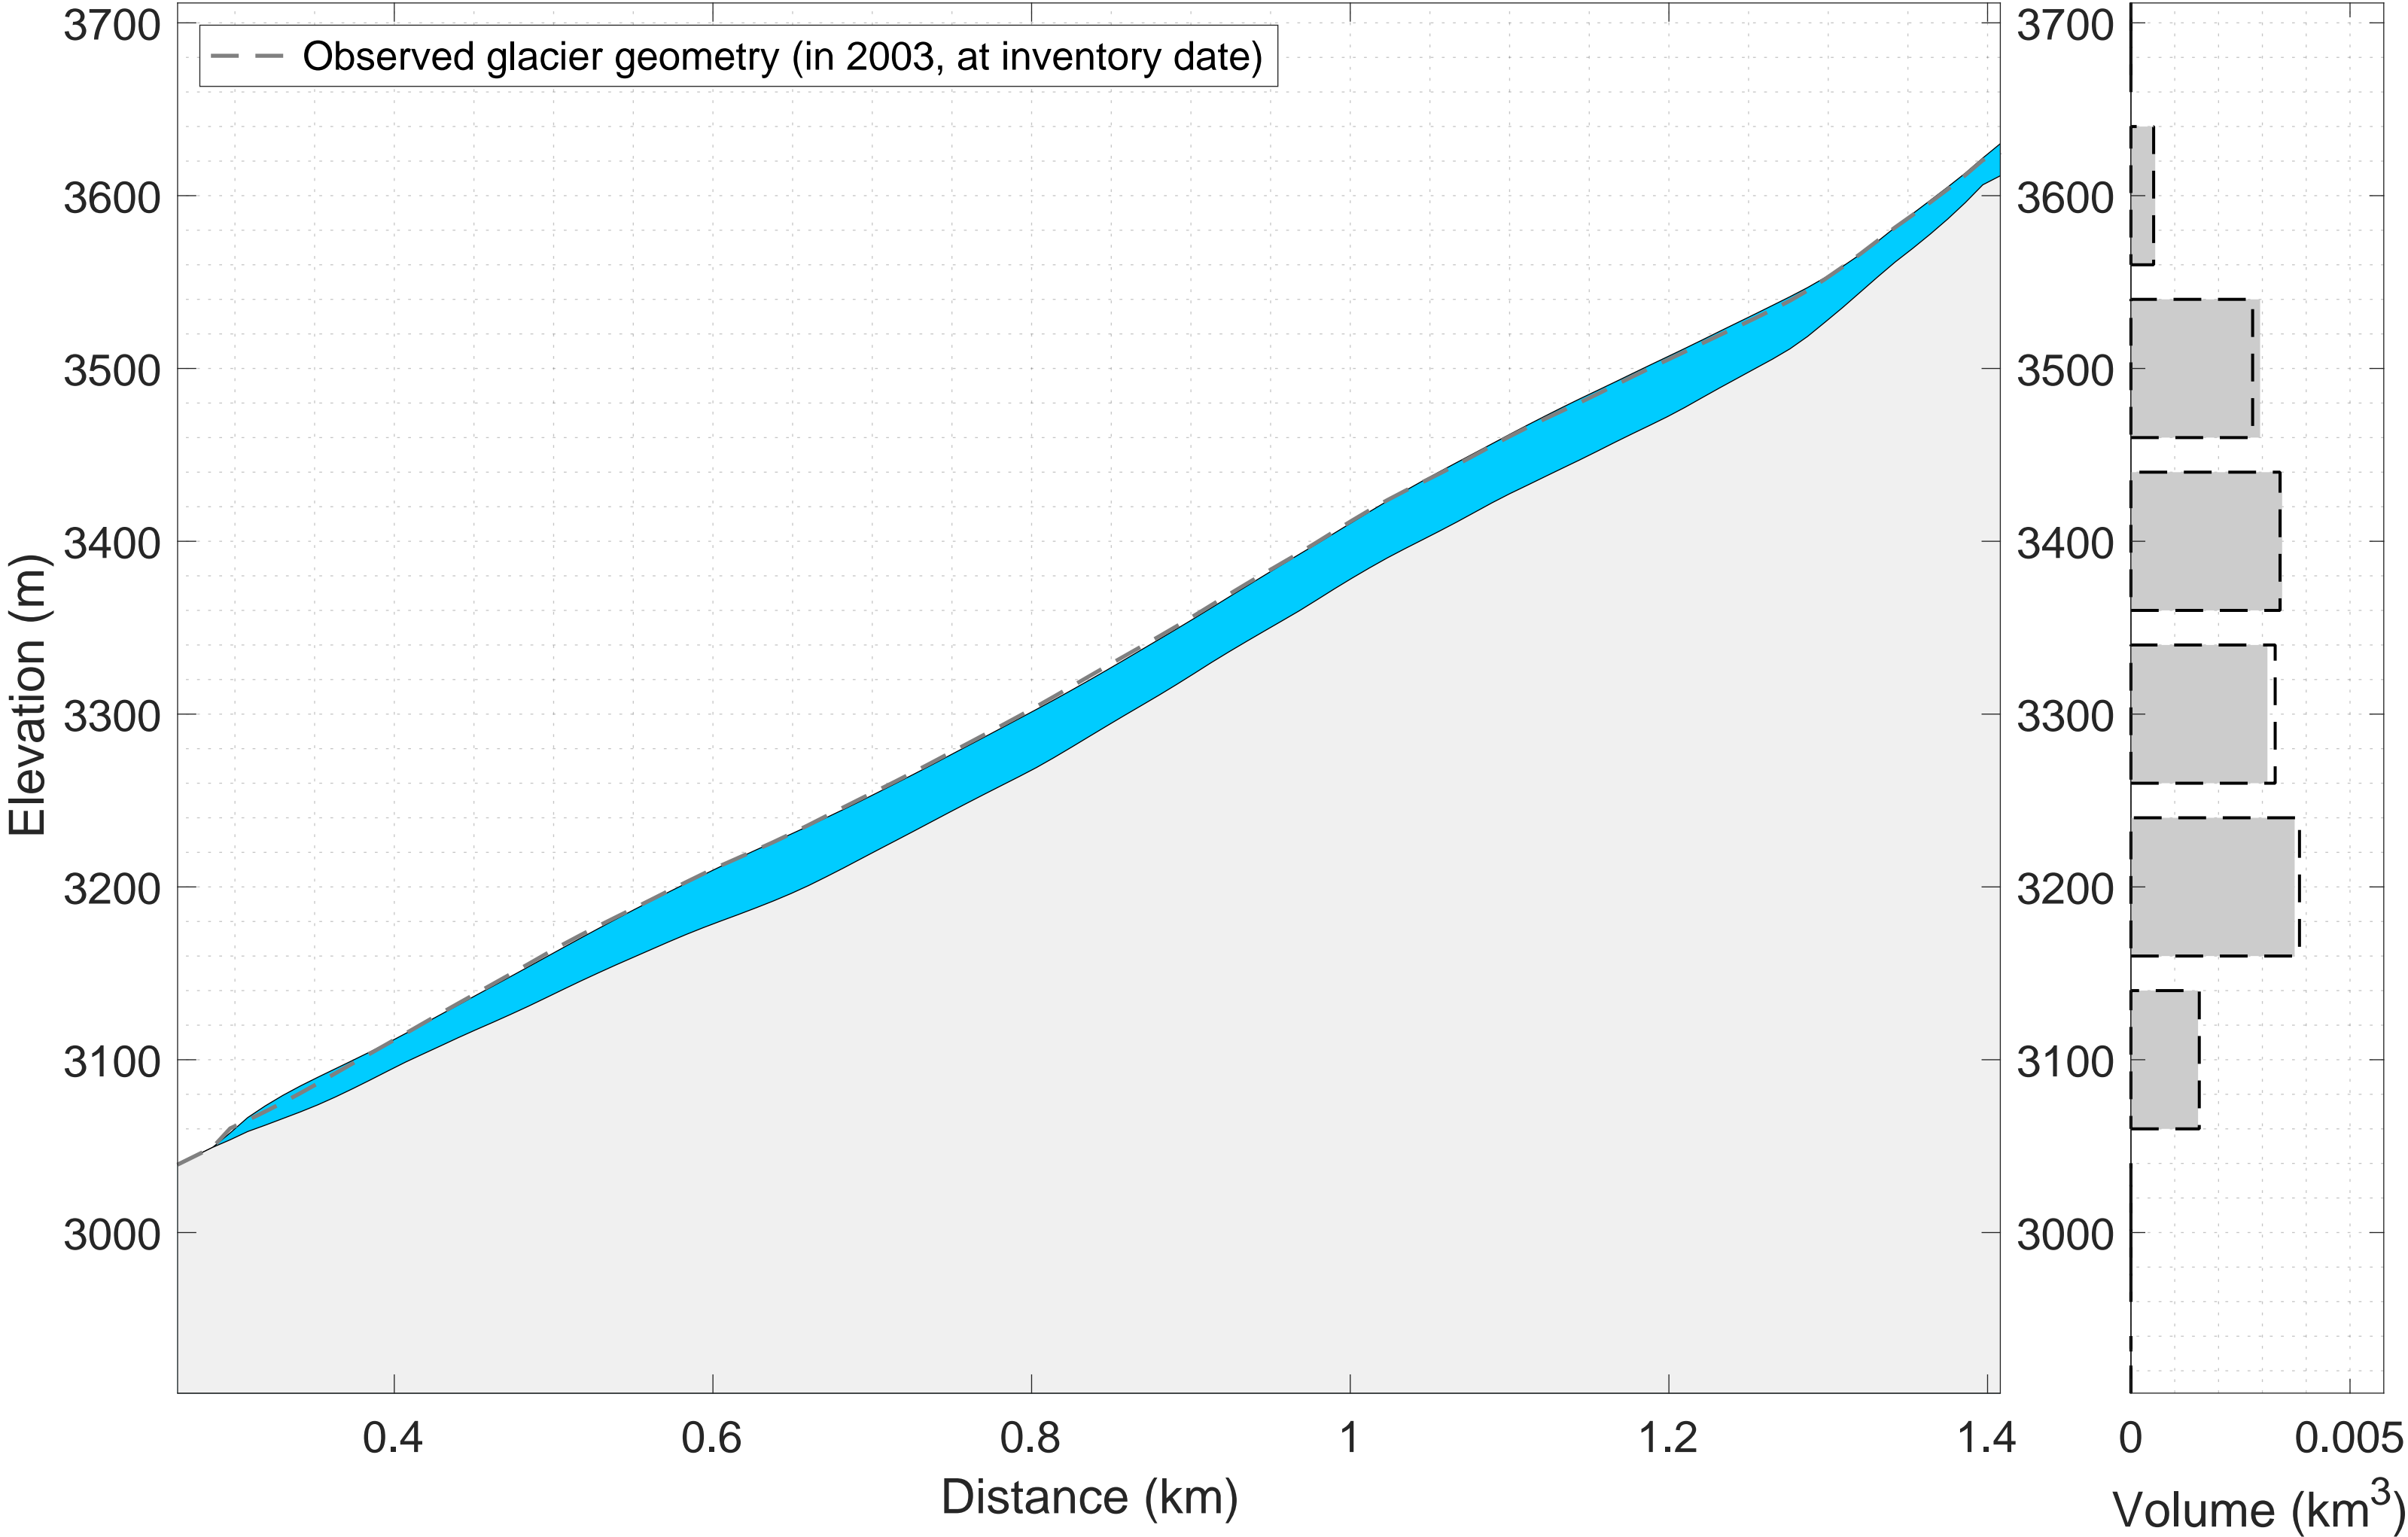

Supplement: Supplementary file 652 [file tc-13-1125-2019-supplement.zip]

**Modelled geometry (Glacier ID = 00964;  $A = 8.3788\text{e-}17 \text{ Pa}^{-3} \text{ a}^{-1}$ ;  $dx = 19 \text{ m}$ )**

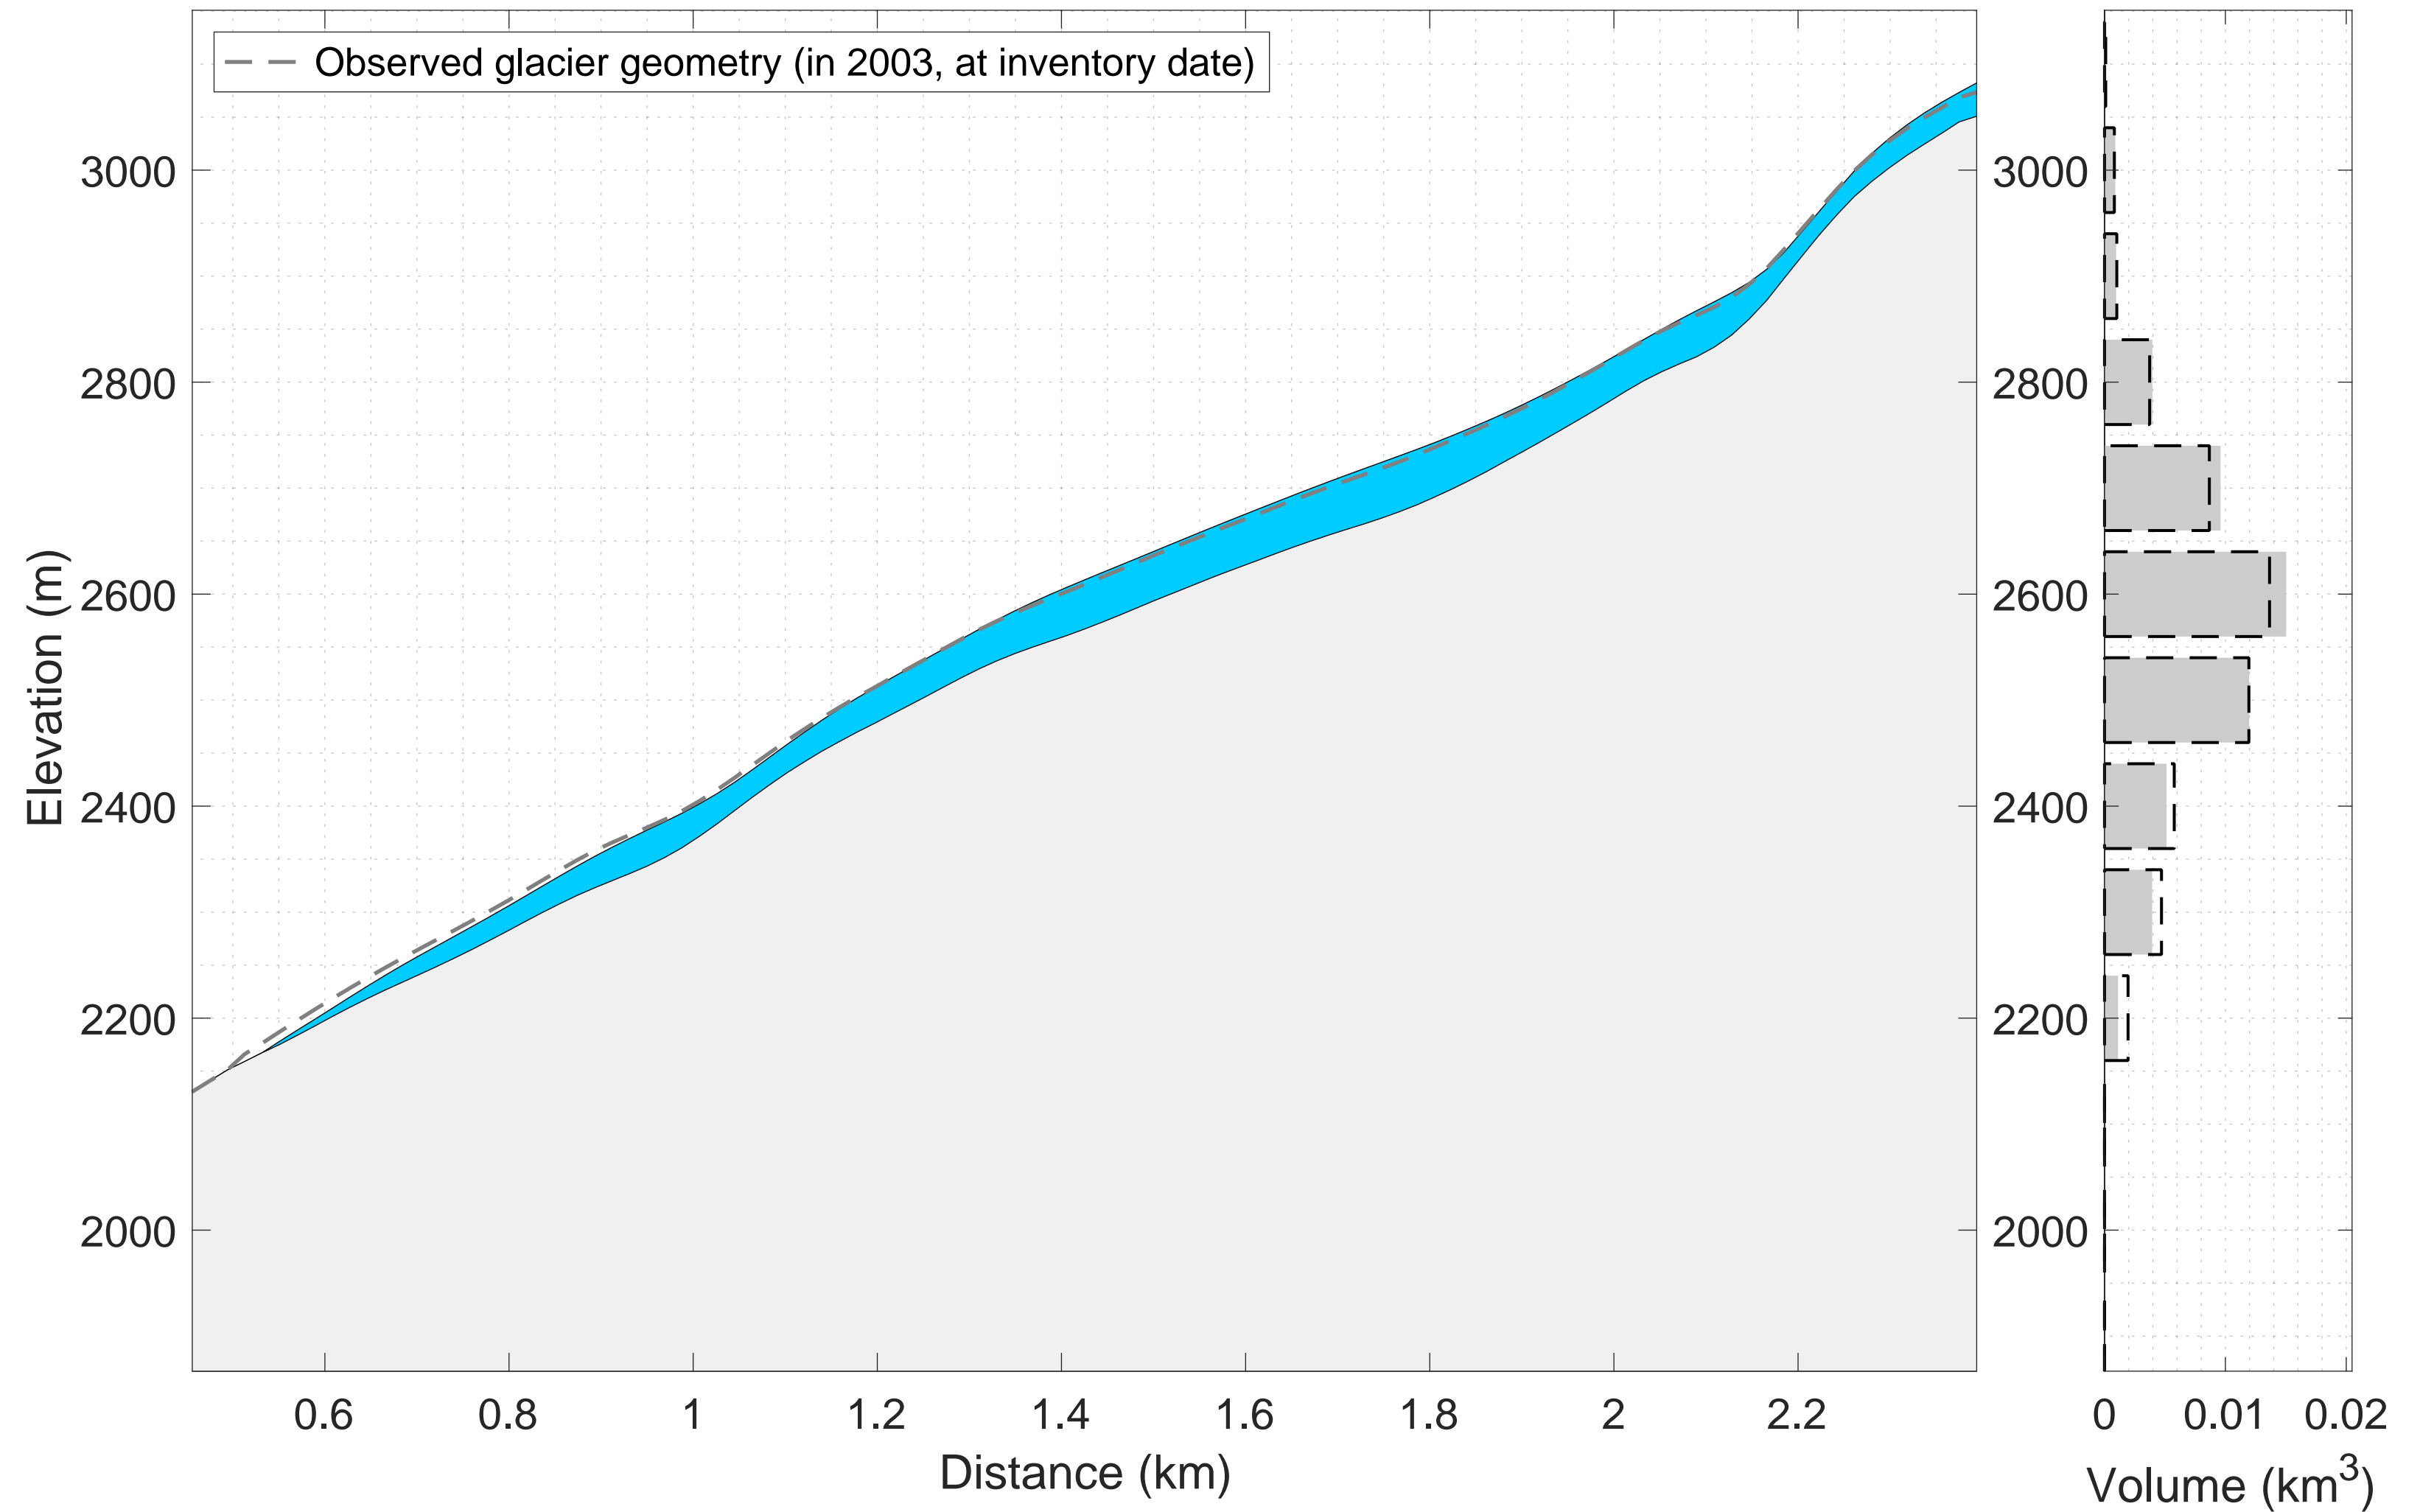

Supplement: Supplementary file 653 [file tc-13-1125-2019-supplement.zip]

**Modelled geometry (Glacier ID = 00604;  $A = 7.7966\text{e-}17 \text{ Pa}^{-3} \text{ a}^{-1}$ ;  $dx = 13 \text{ m}$ )**

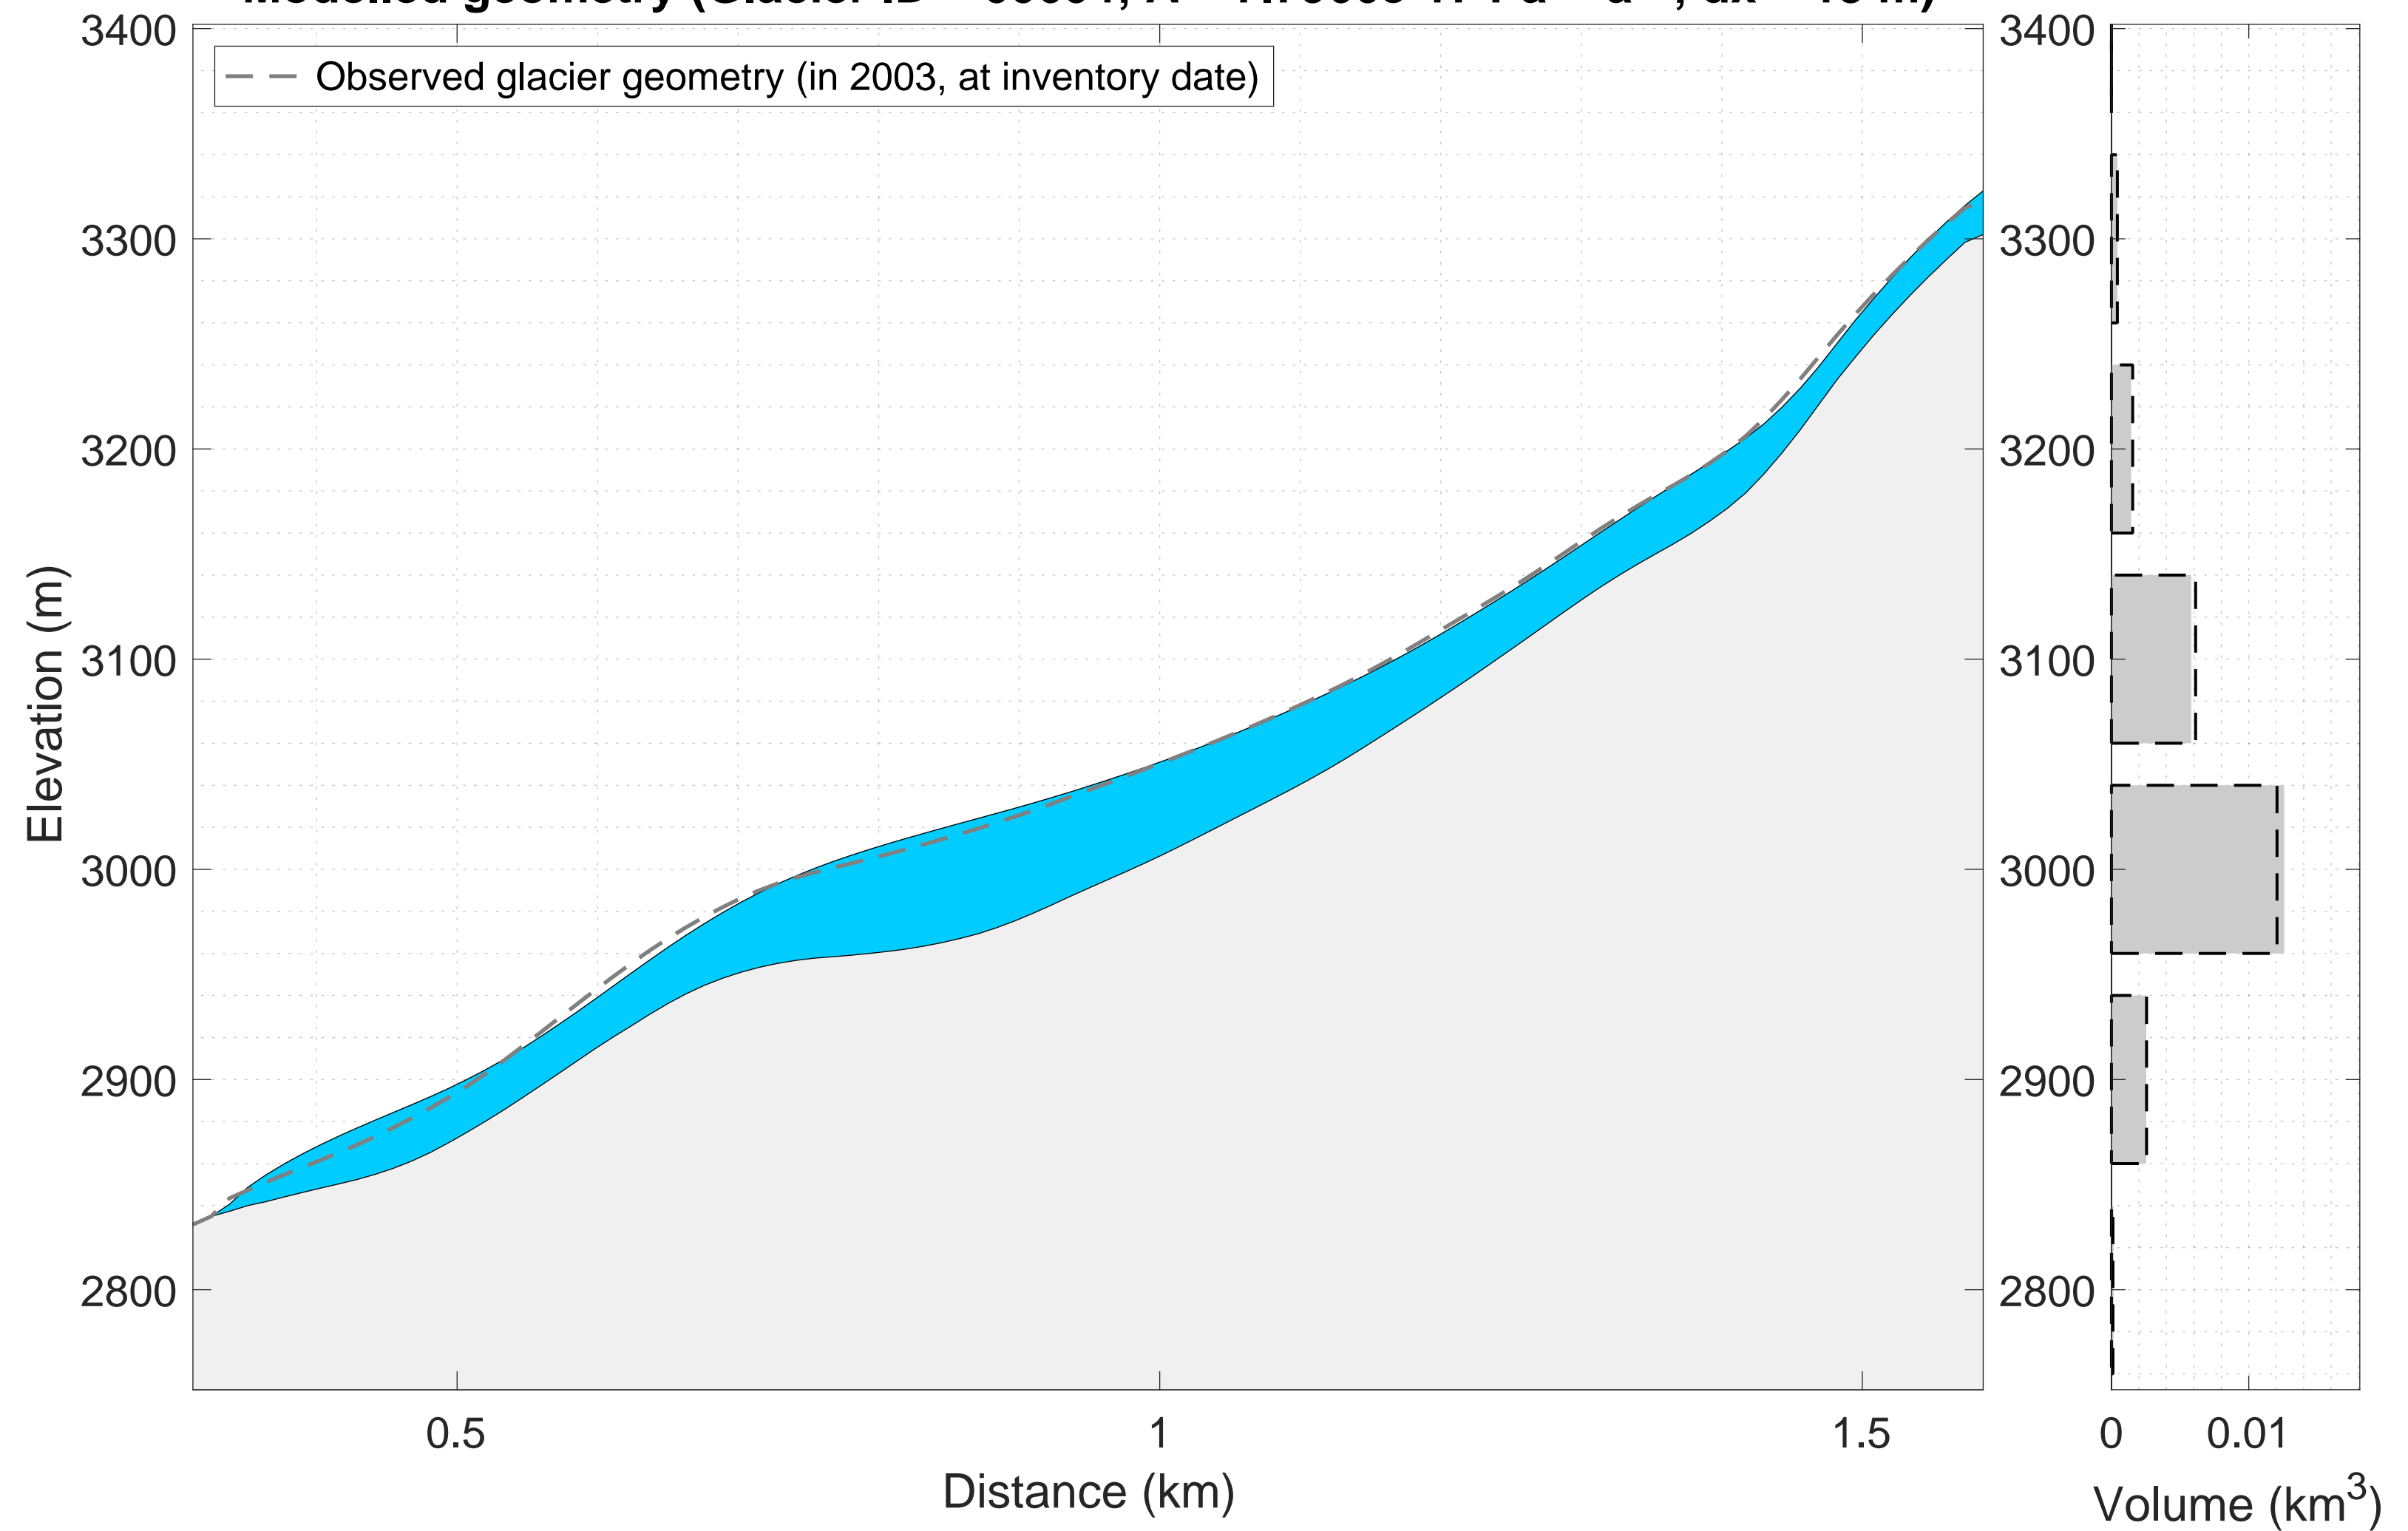

Supplement: Supplementary file 654 [file tc-13-1125-2019-supplement.zip]

**Modelled geometry (Glacier ID = 01030;  $A = 4.784\text{e-}17 \text{ Pa}^{-3} \text{ a}^{-1}$ ;  $dx = 11 \text{ m}$ )**

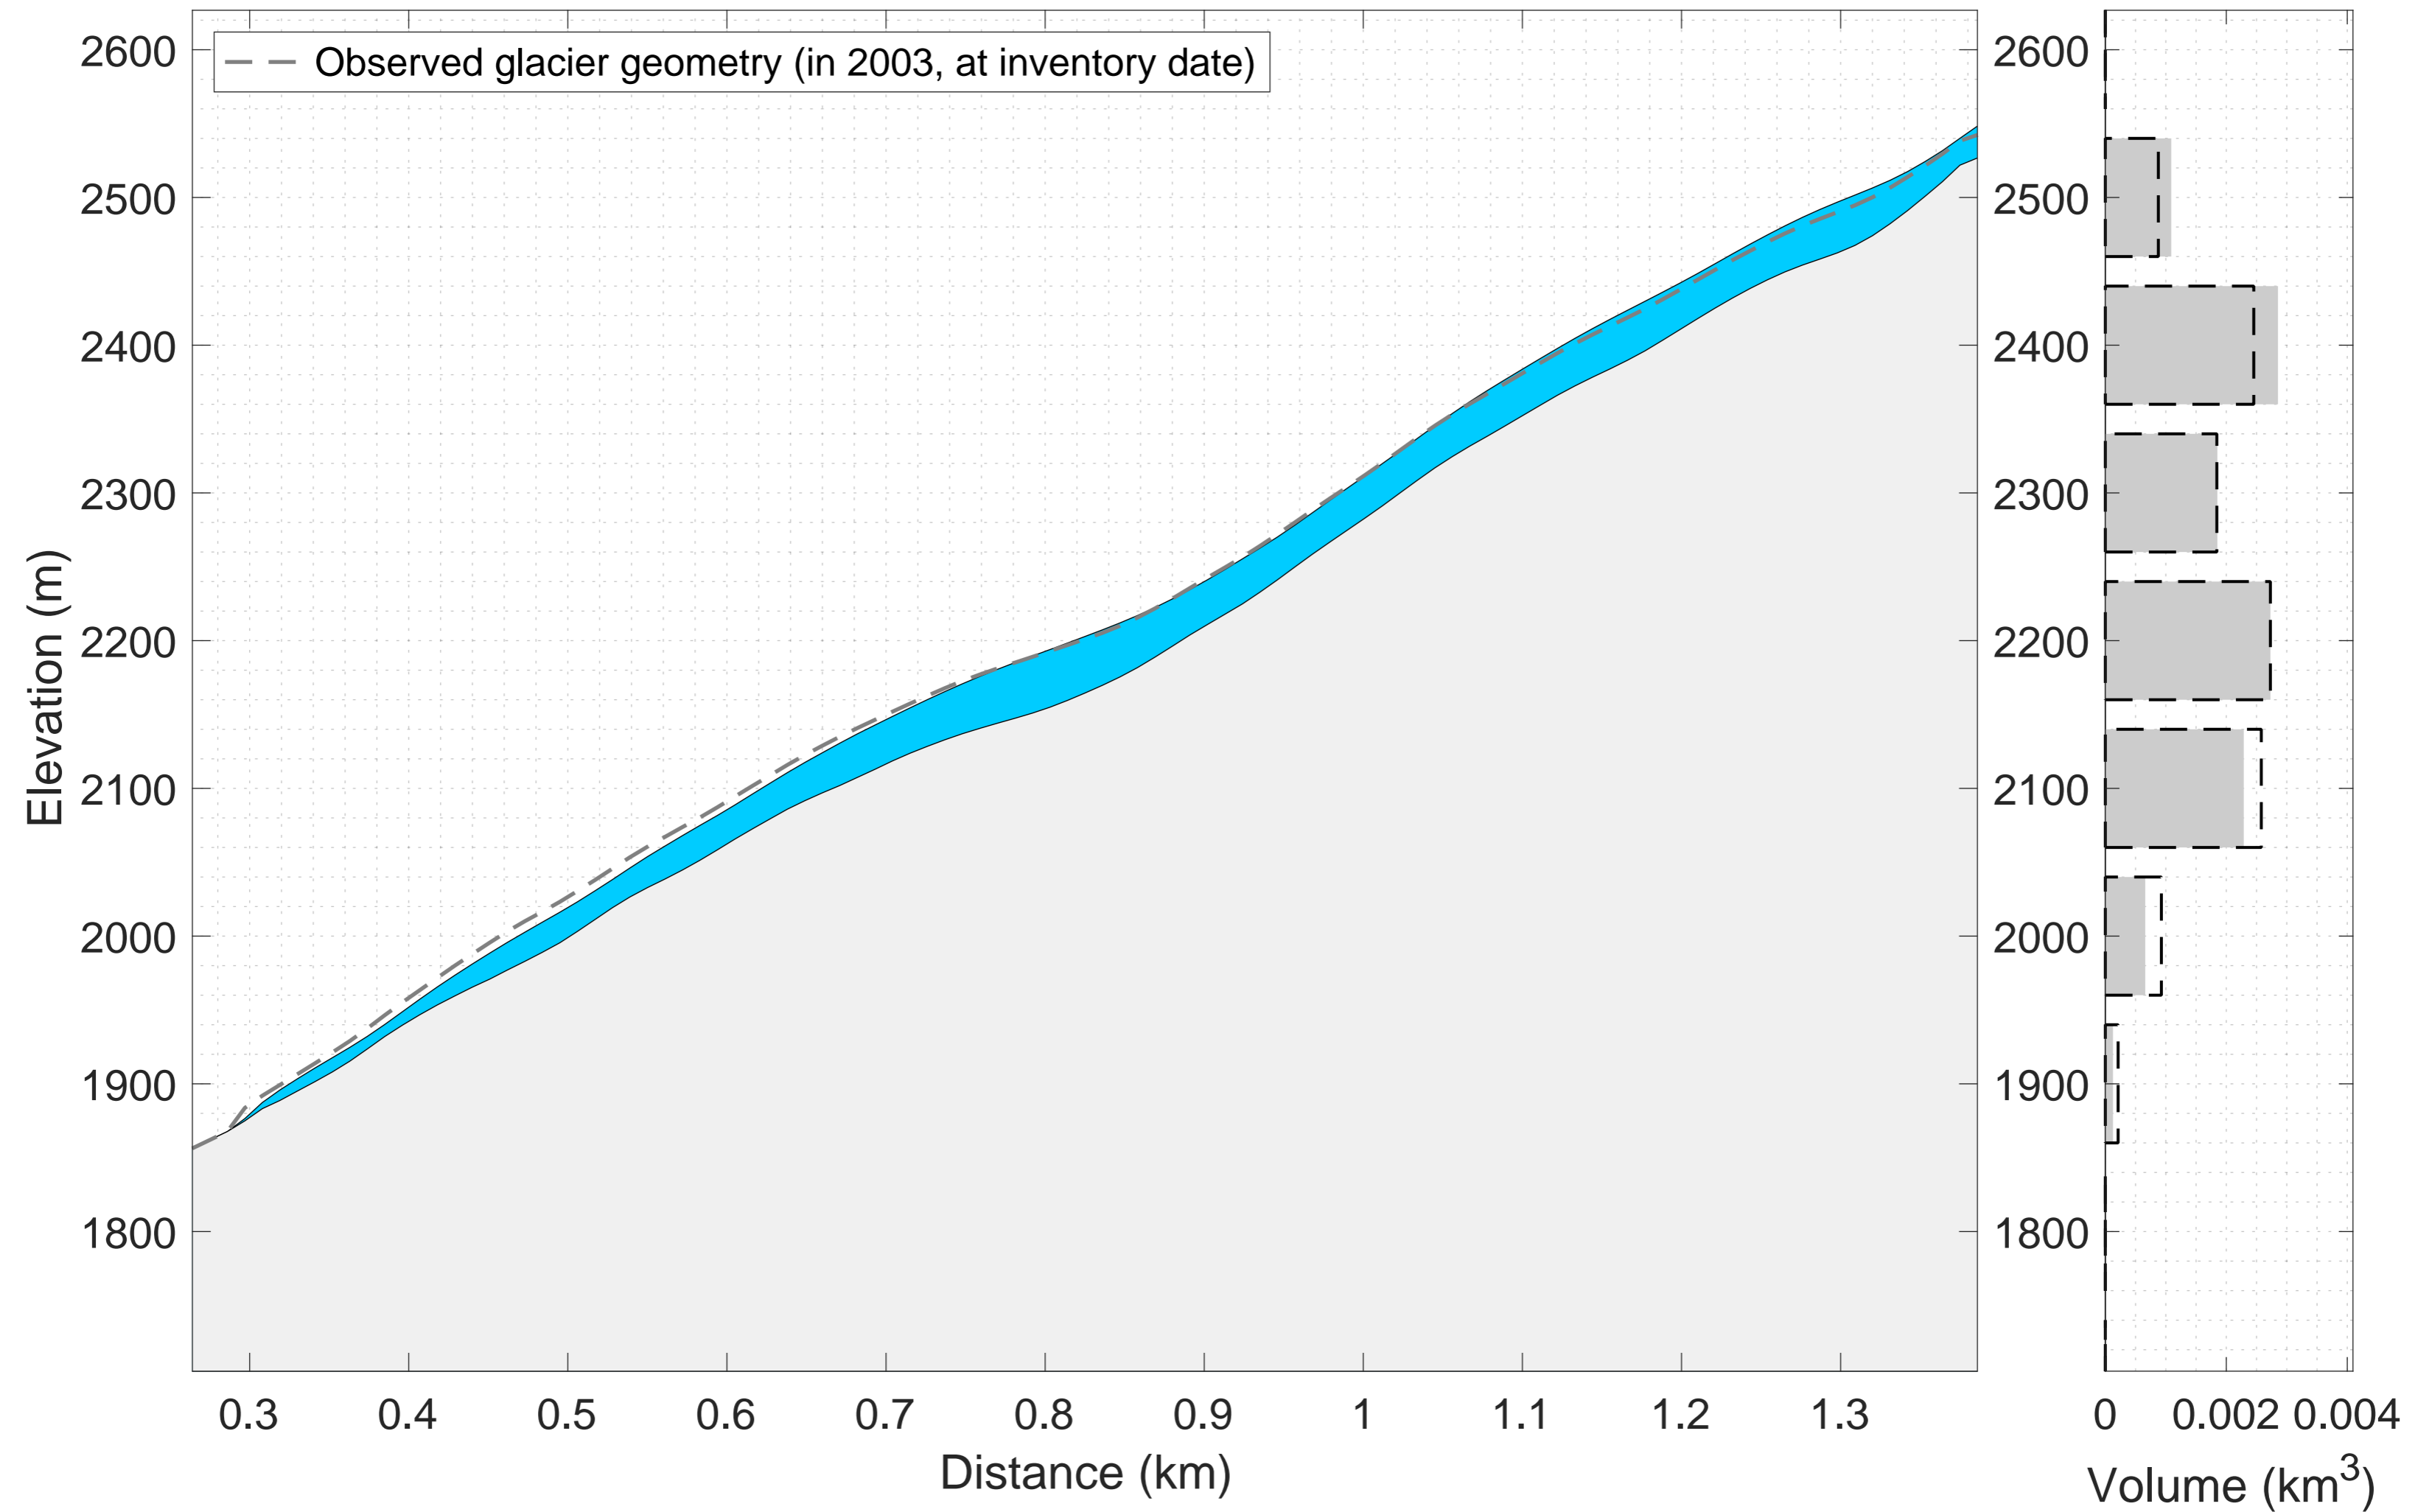

Supplement: Supplementary file 655 [file tc-13-1125-2019-supplement.zip]

**Modelled geometry (Glacier ID = 01006;  $A = 1.7674\text{e-}16 \text{ Pa}^{-3} \text{ a}^{-1}$ ;  $dx = 14 \text{ m}$ )**

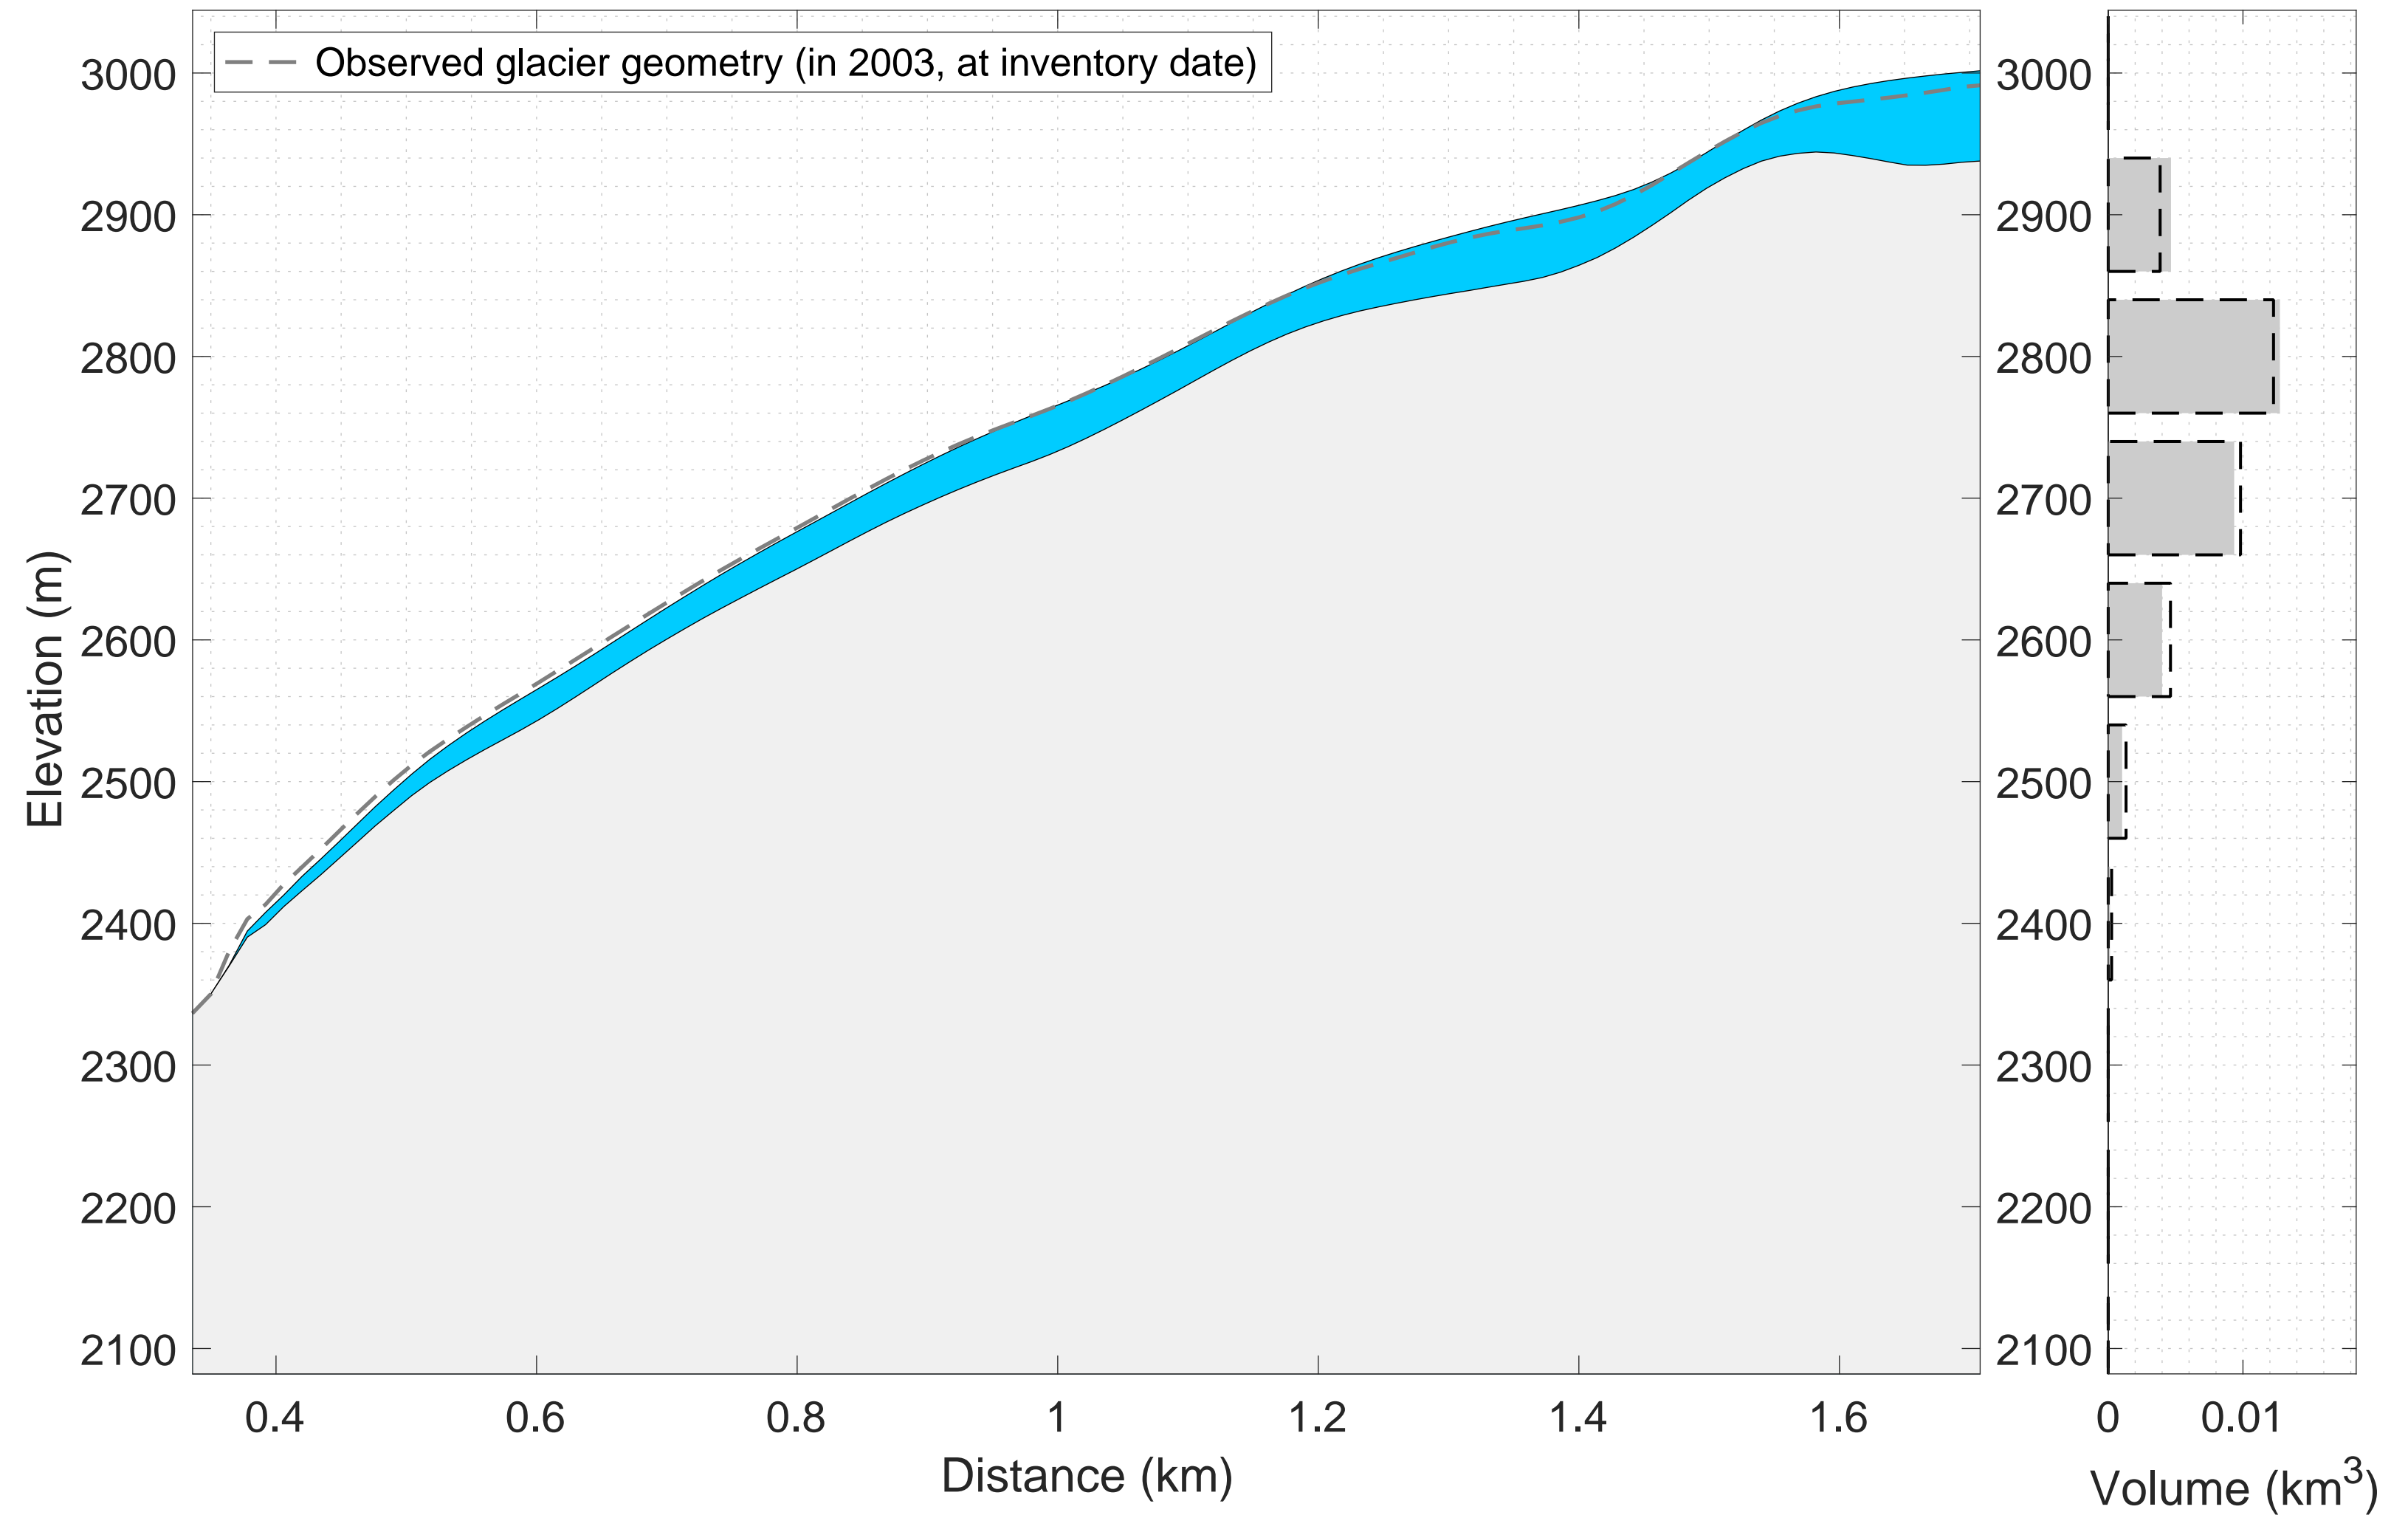

Supplement: Supplementary file 656 [file tc-13-1125-2019-supplement.zip]

**Modelled geometry (Glacier ID = 02737;  $A = 3.6579\text{e-}16 \text{ Pa}^{-3} \text{ a}^{-1}$ ;  $dx = 23 \text{ m}$ )**

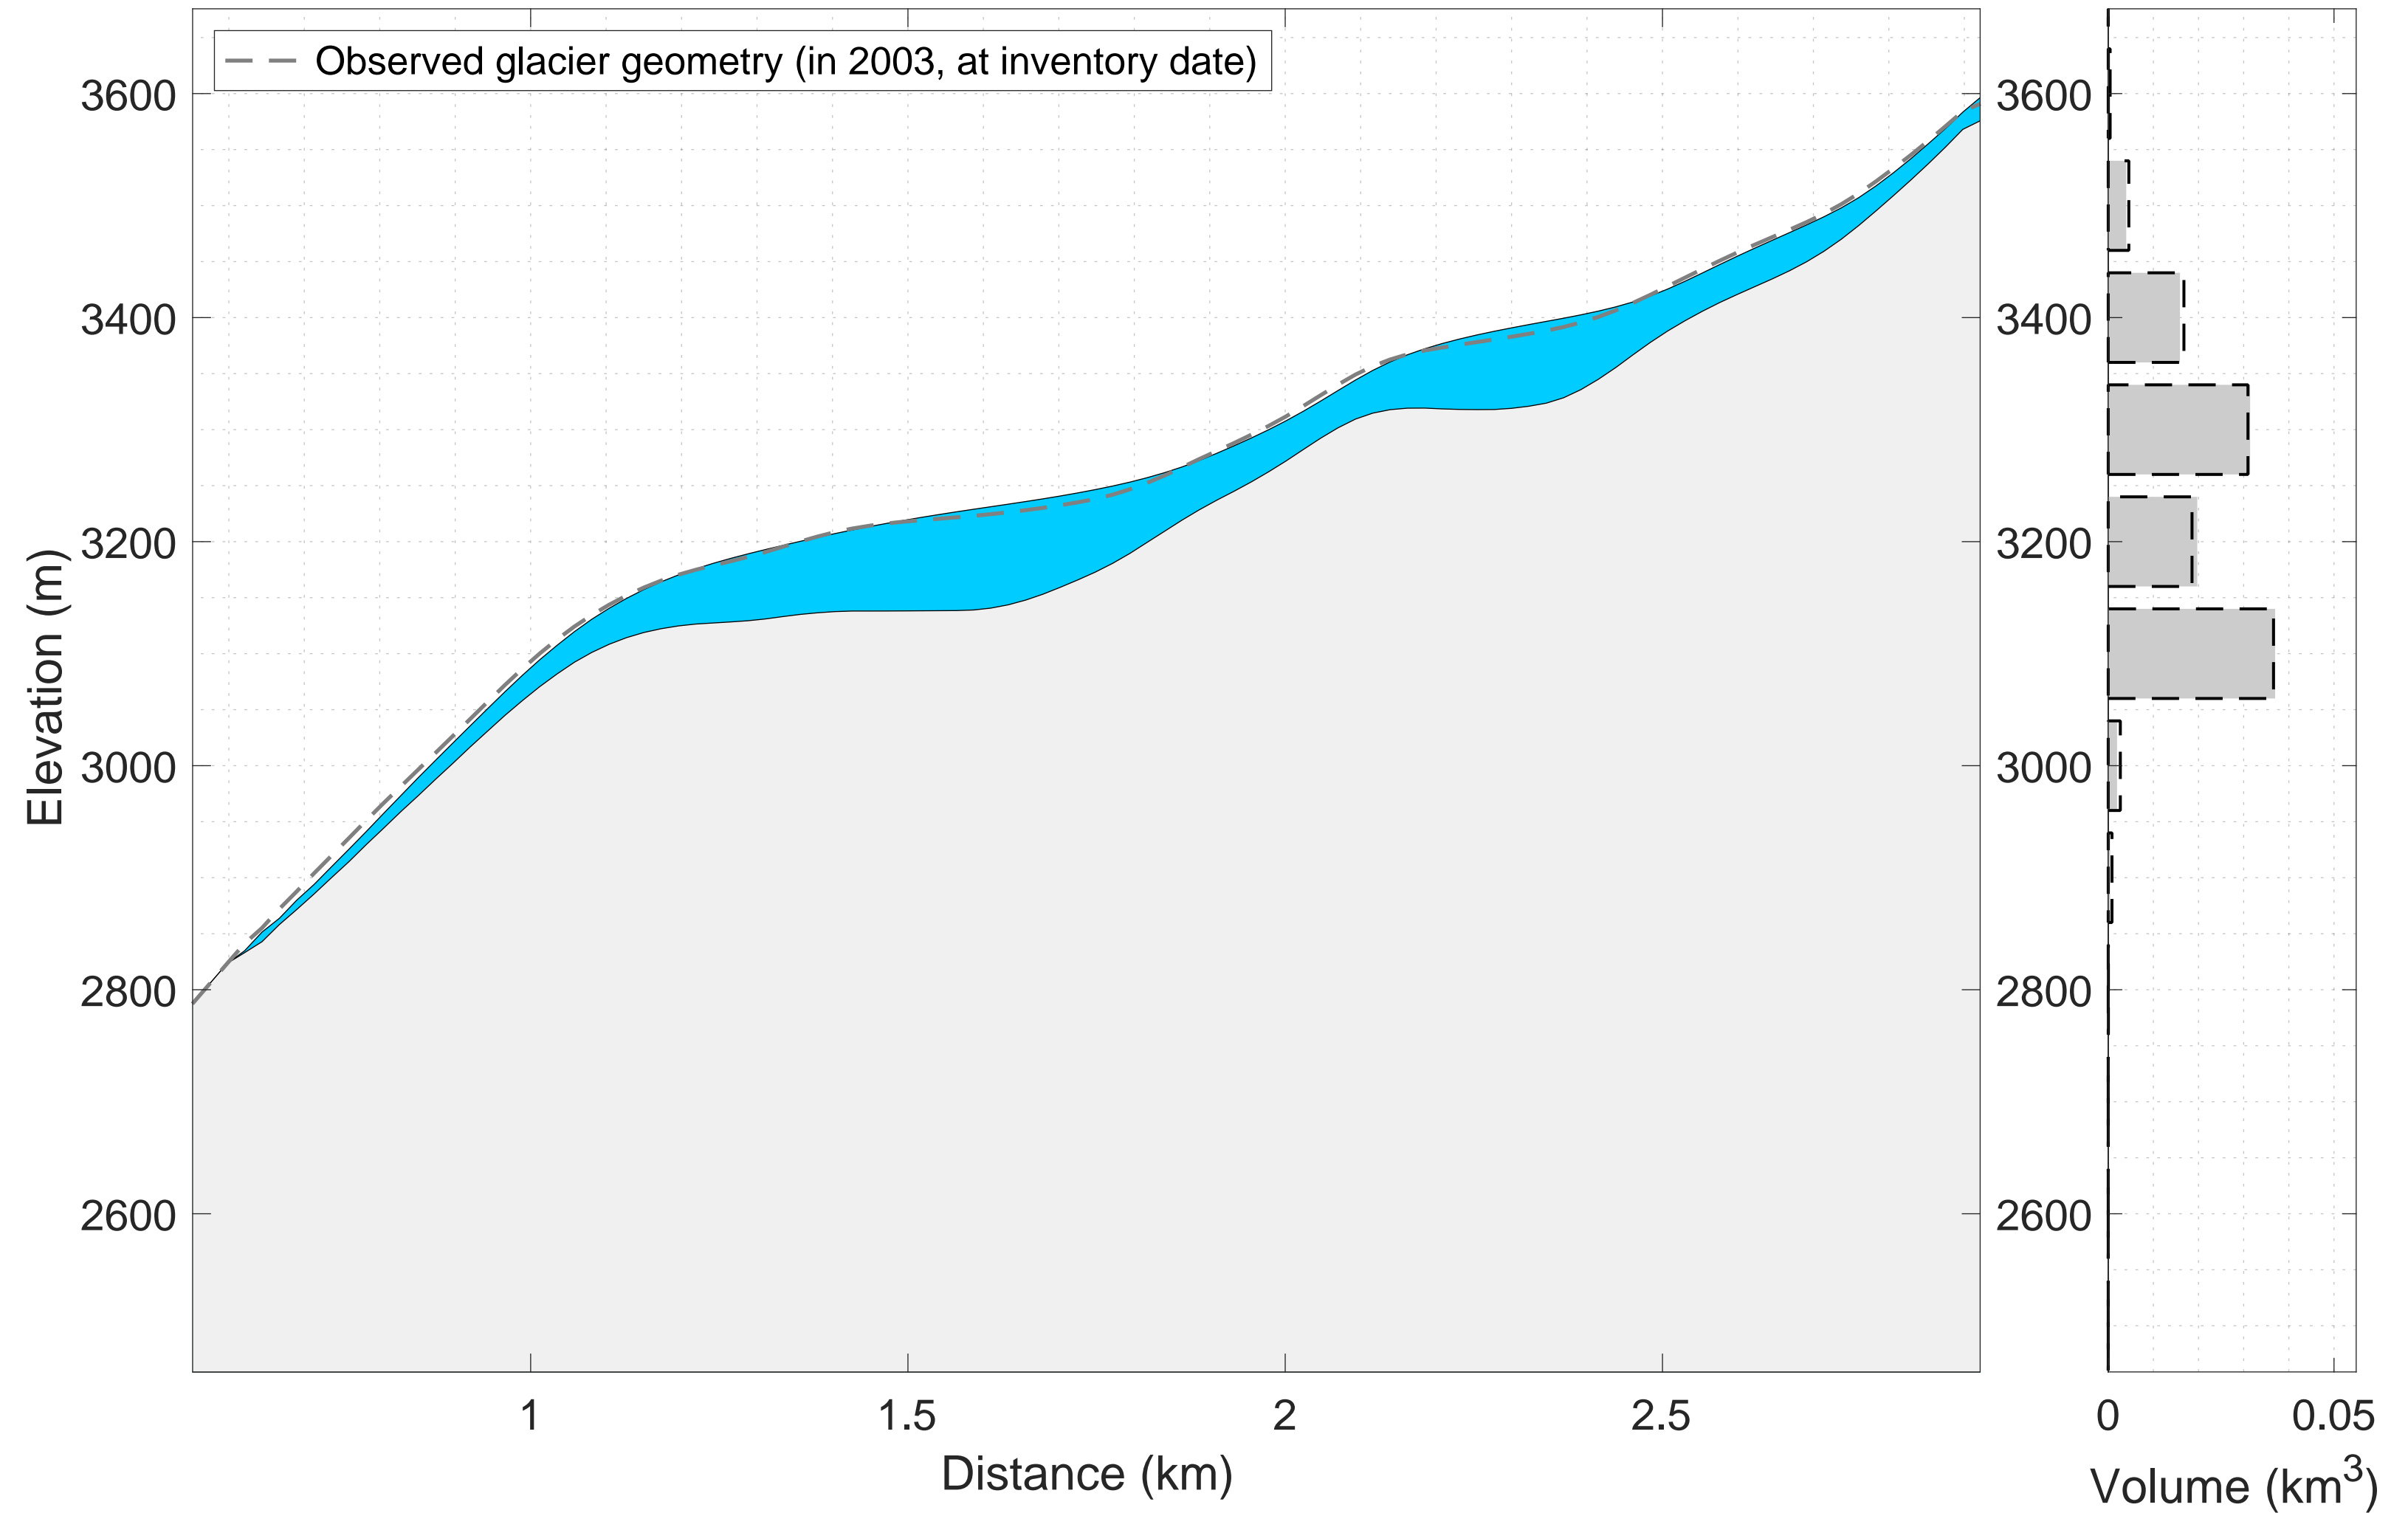

Supplement: Supplementary file 657 [file tc-13-1125-2019-supplement.zip]

**Modelled geometry (Glacier ID = 03667;  $A = 2.4989\text{e-}16 \text{ Pa}^{-3} \text{ a}^{-1}$ ;  $dx = 36 \text{ m}$ )**

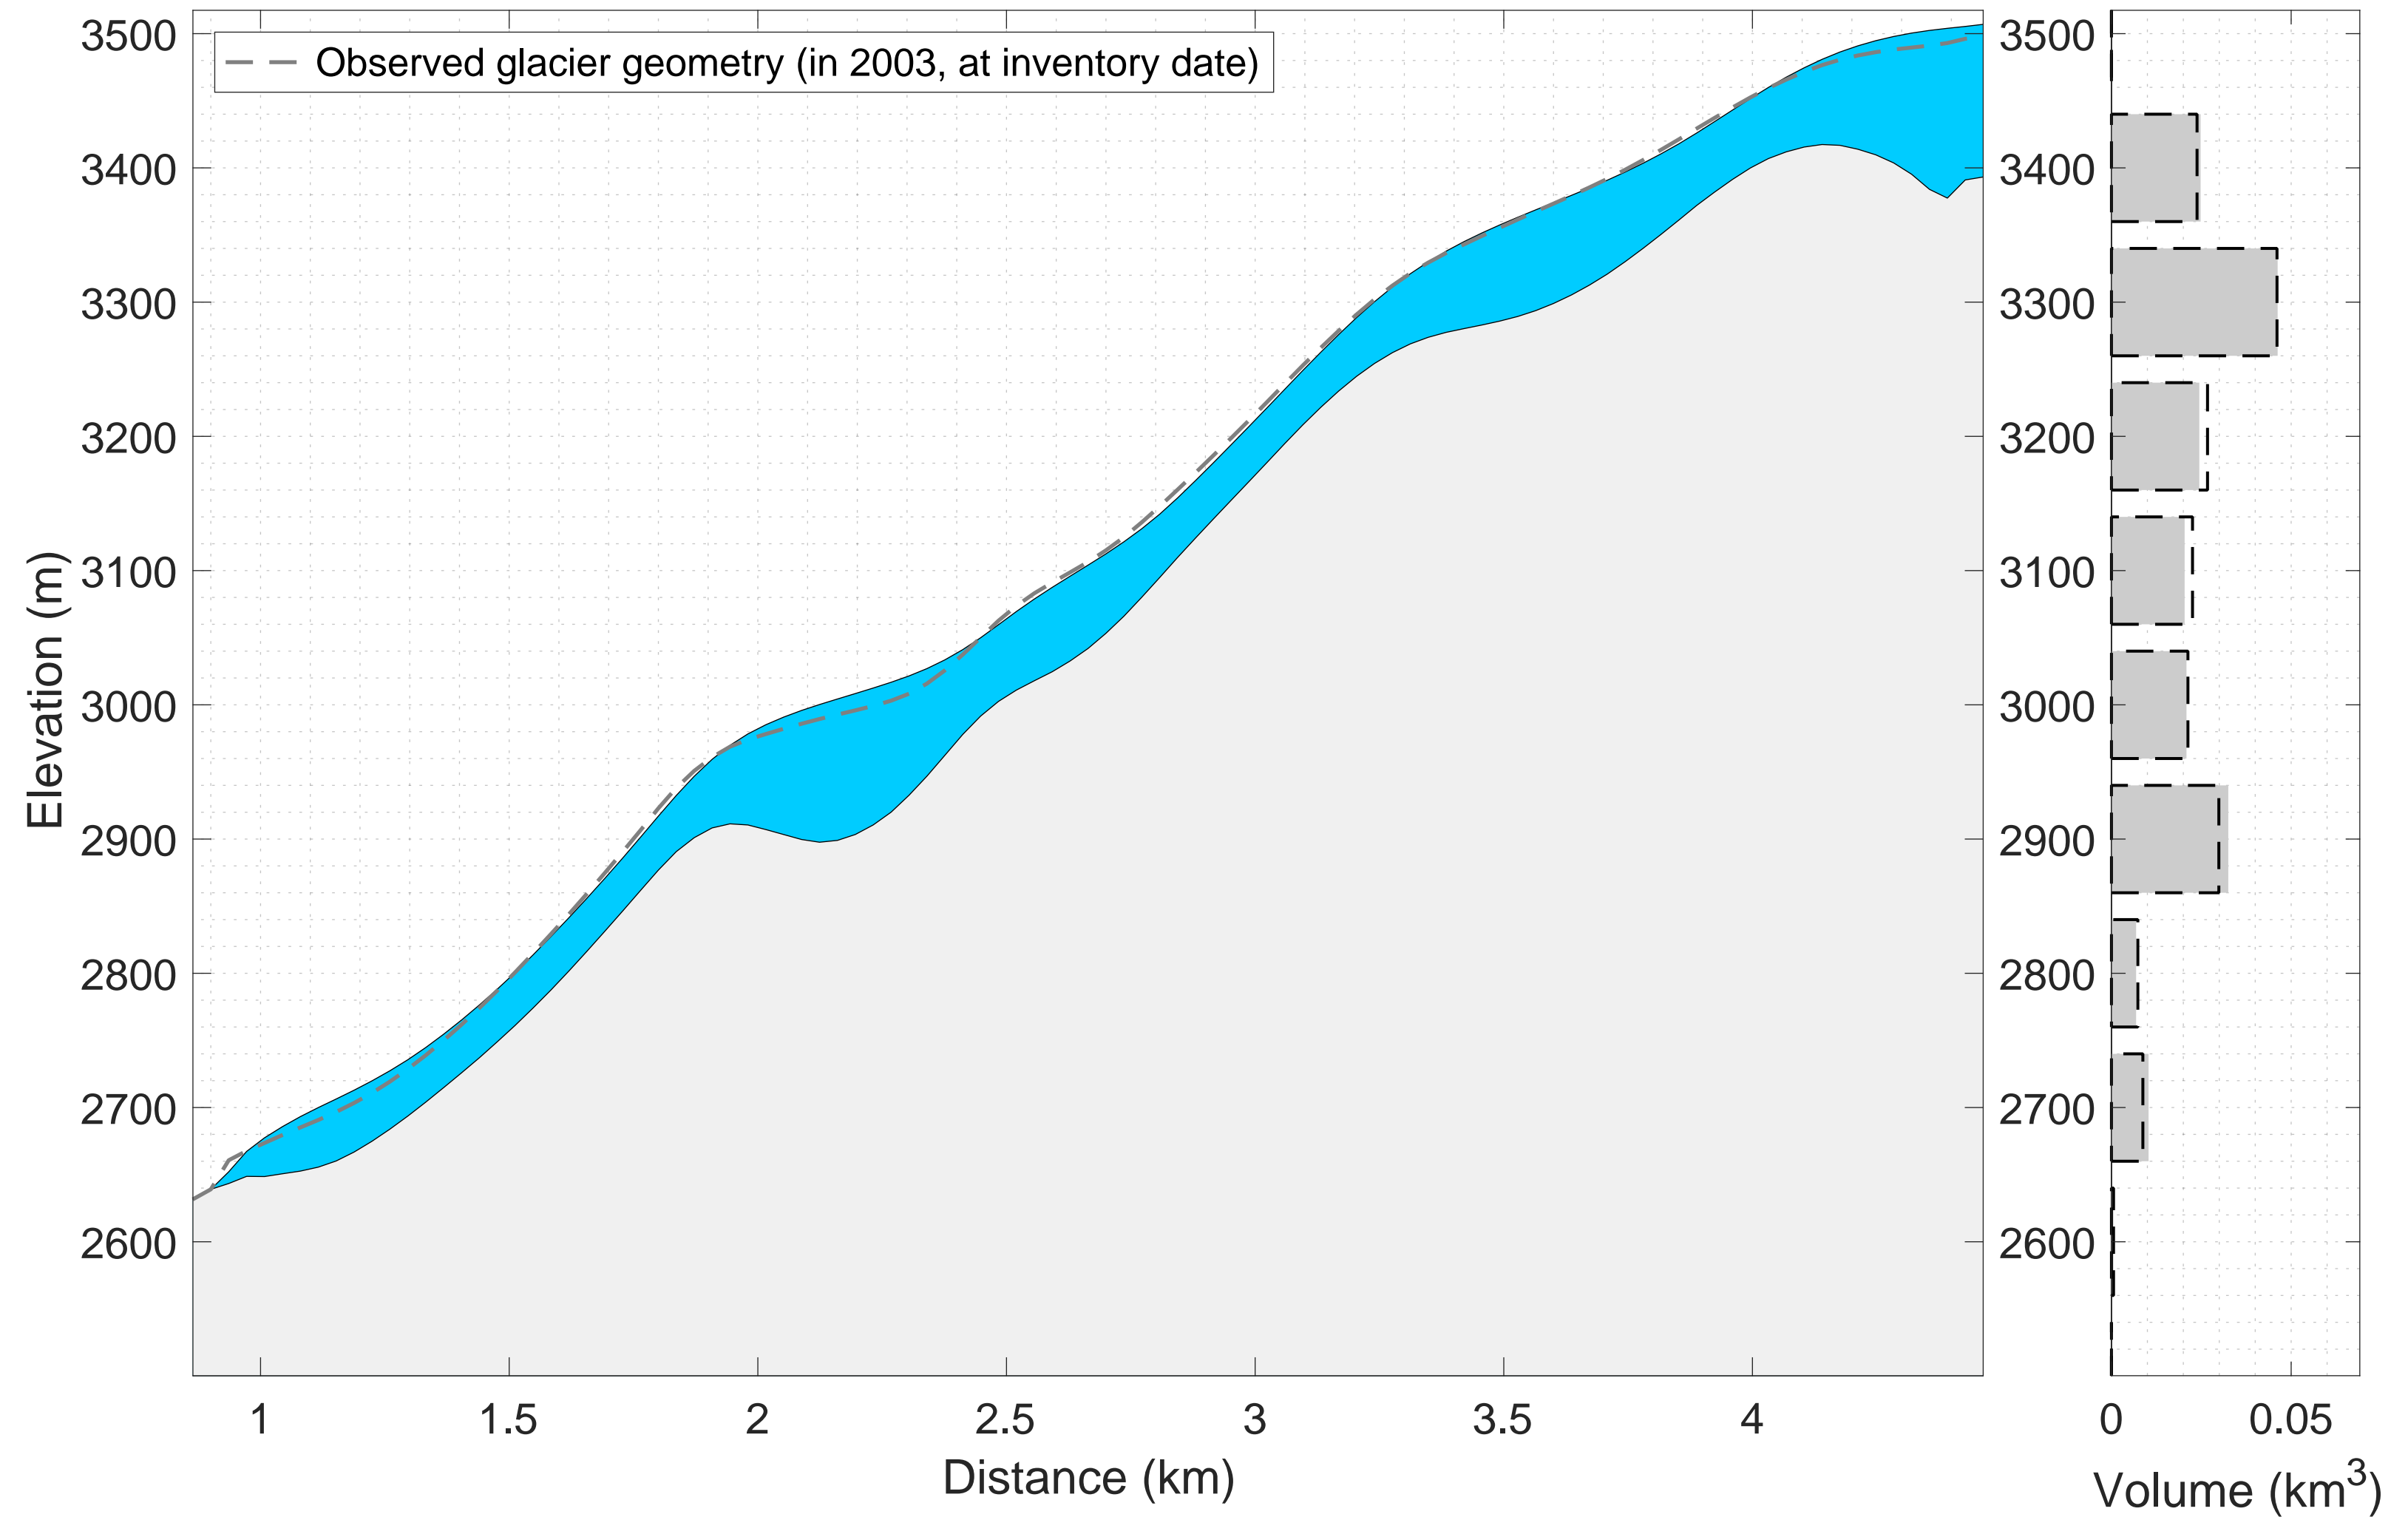

Supplement: Supplementary file 658 [file tc-13-1125-2019-supplement.zip]

**Modelled geometry (Glacier ID = 01394;  $A = 4.7997\text{e-}17 \text{ Pa}^{-3} \text{ a}^{-1}$ ;  $dx = 11 \text{ m}$ )**

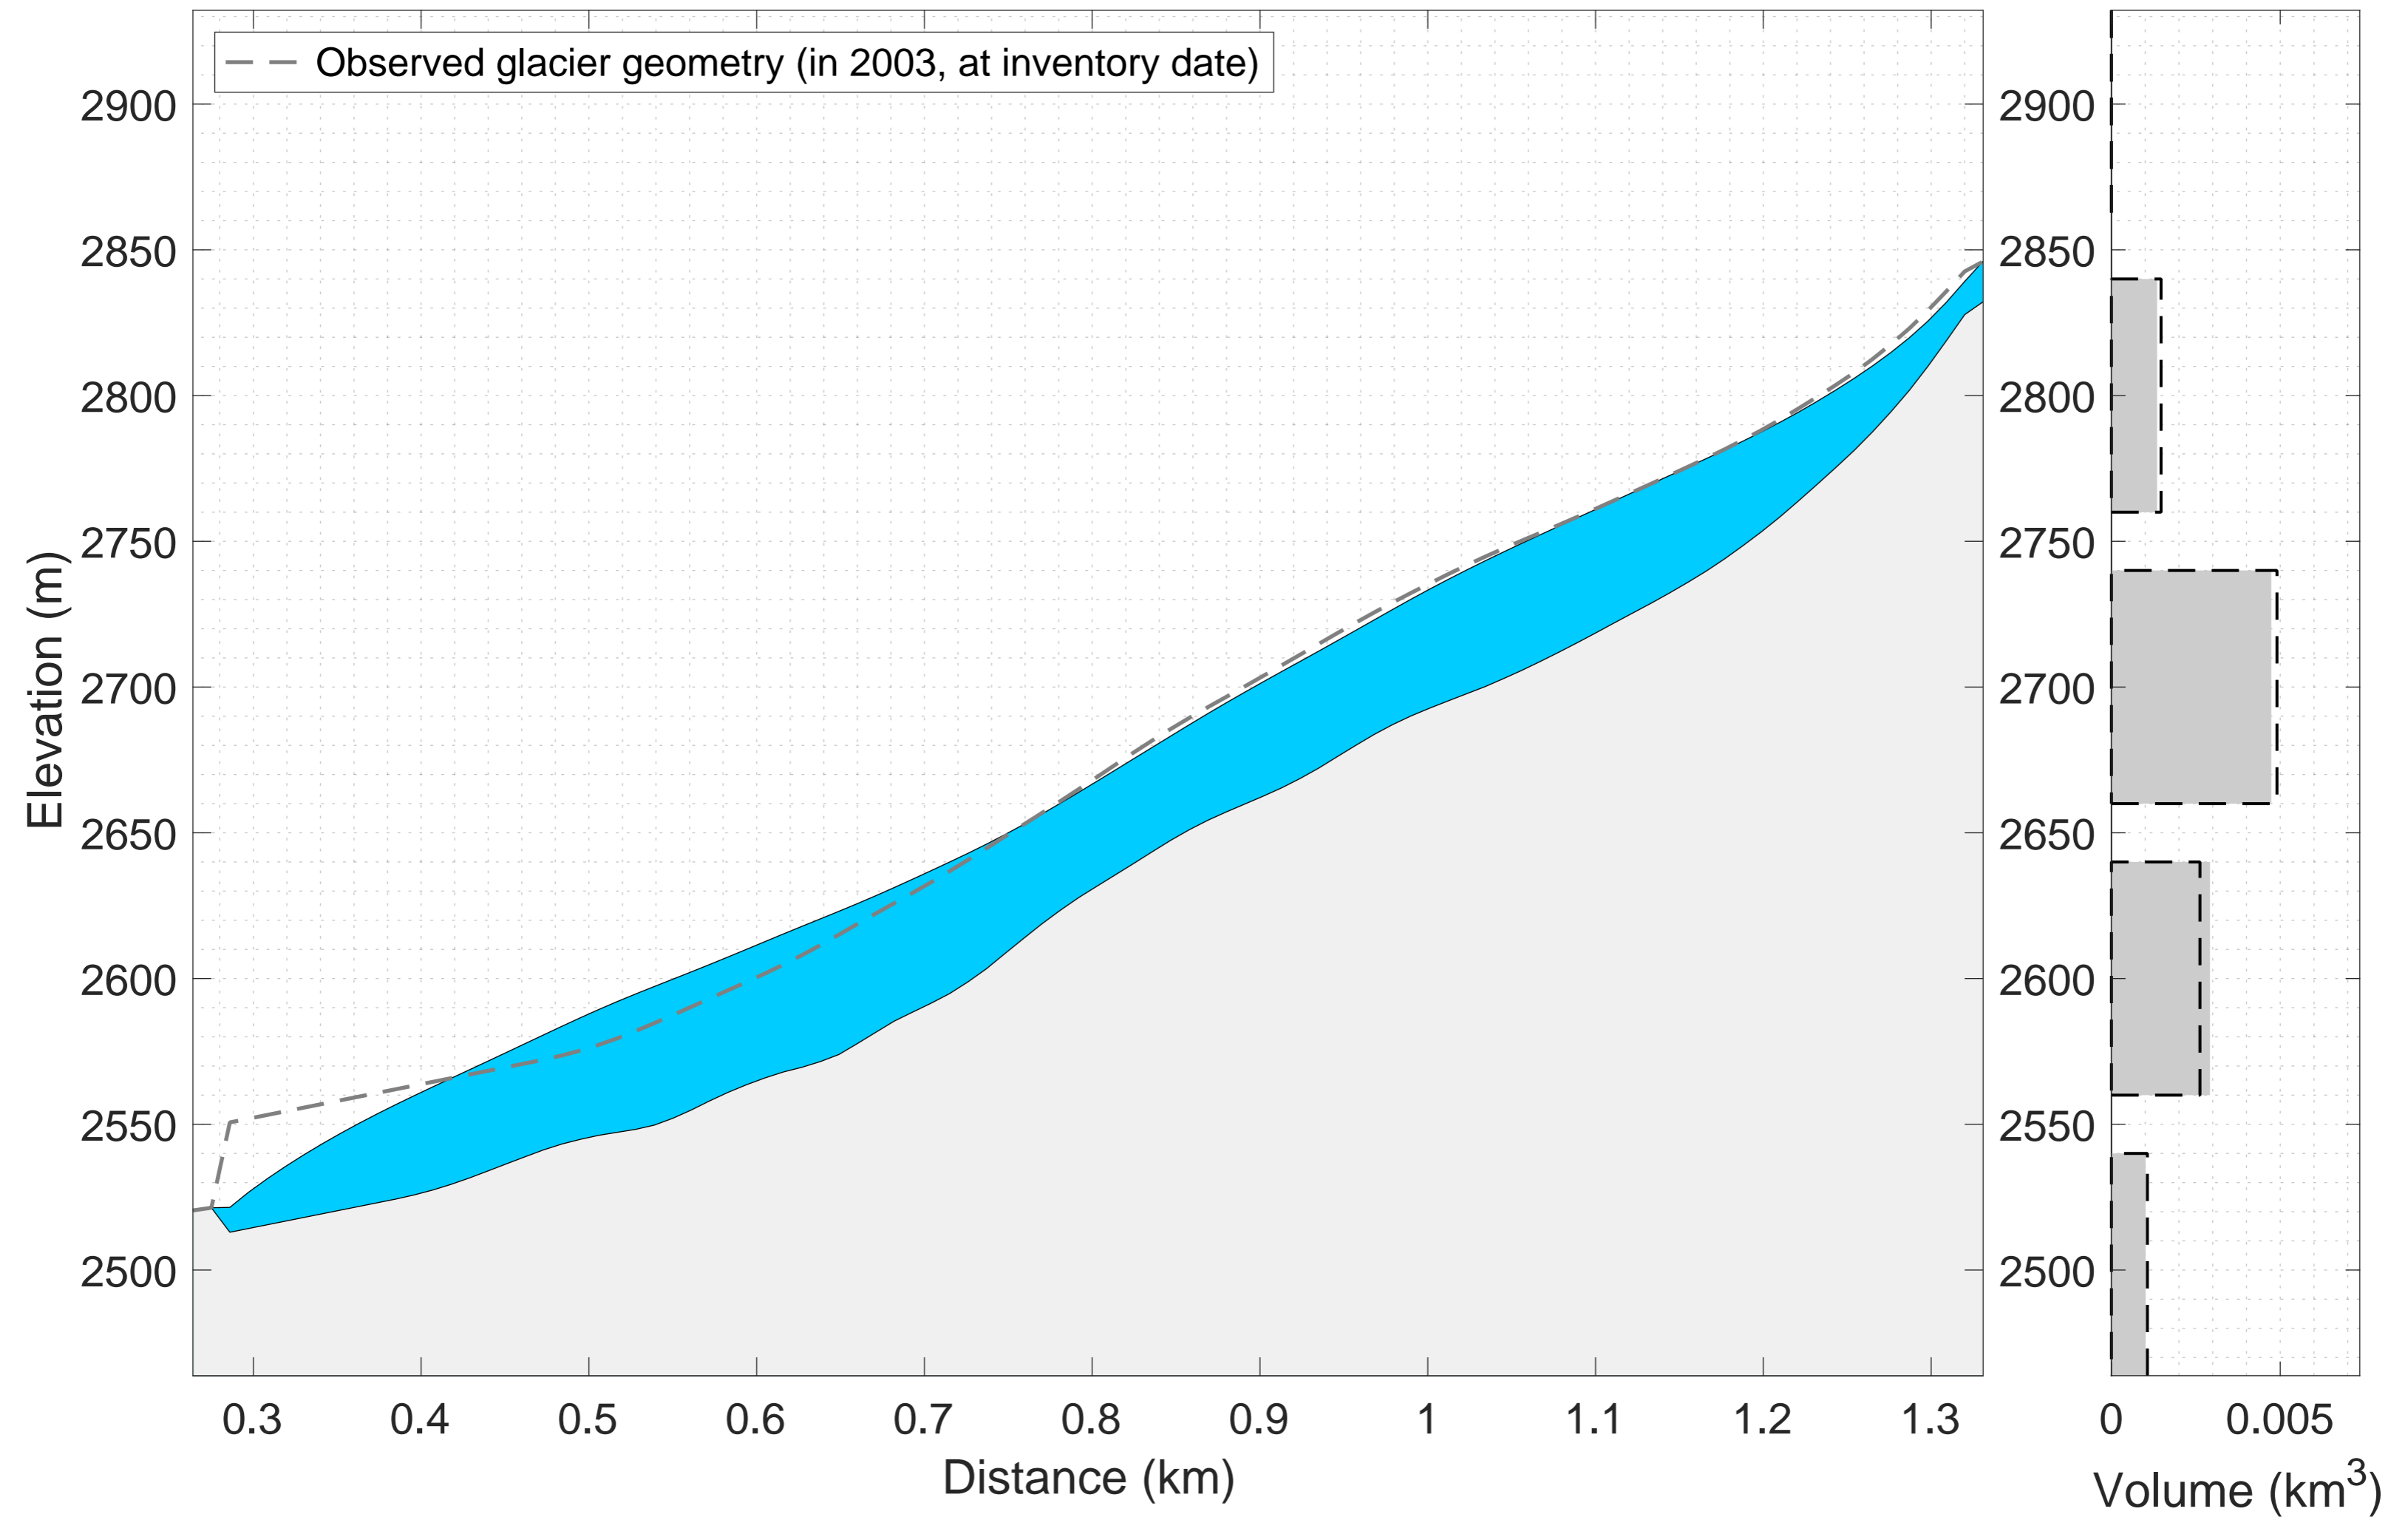

Supplement: Supplementary file 659 [file tc-13-1125-2019-supplement.zip]

**Modelled geometry (Glacier ID = 02629;  $A = 2.2206\text{e-}16 \text{ Pa}^{-3} \text{ a}^{-1}$ ;  $dx = 10 \text{ m}$ )**

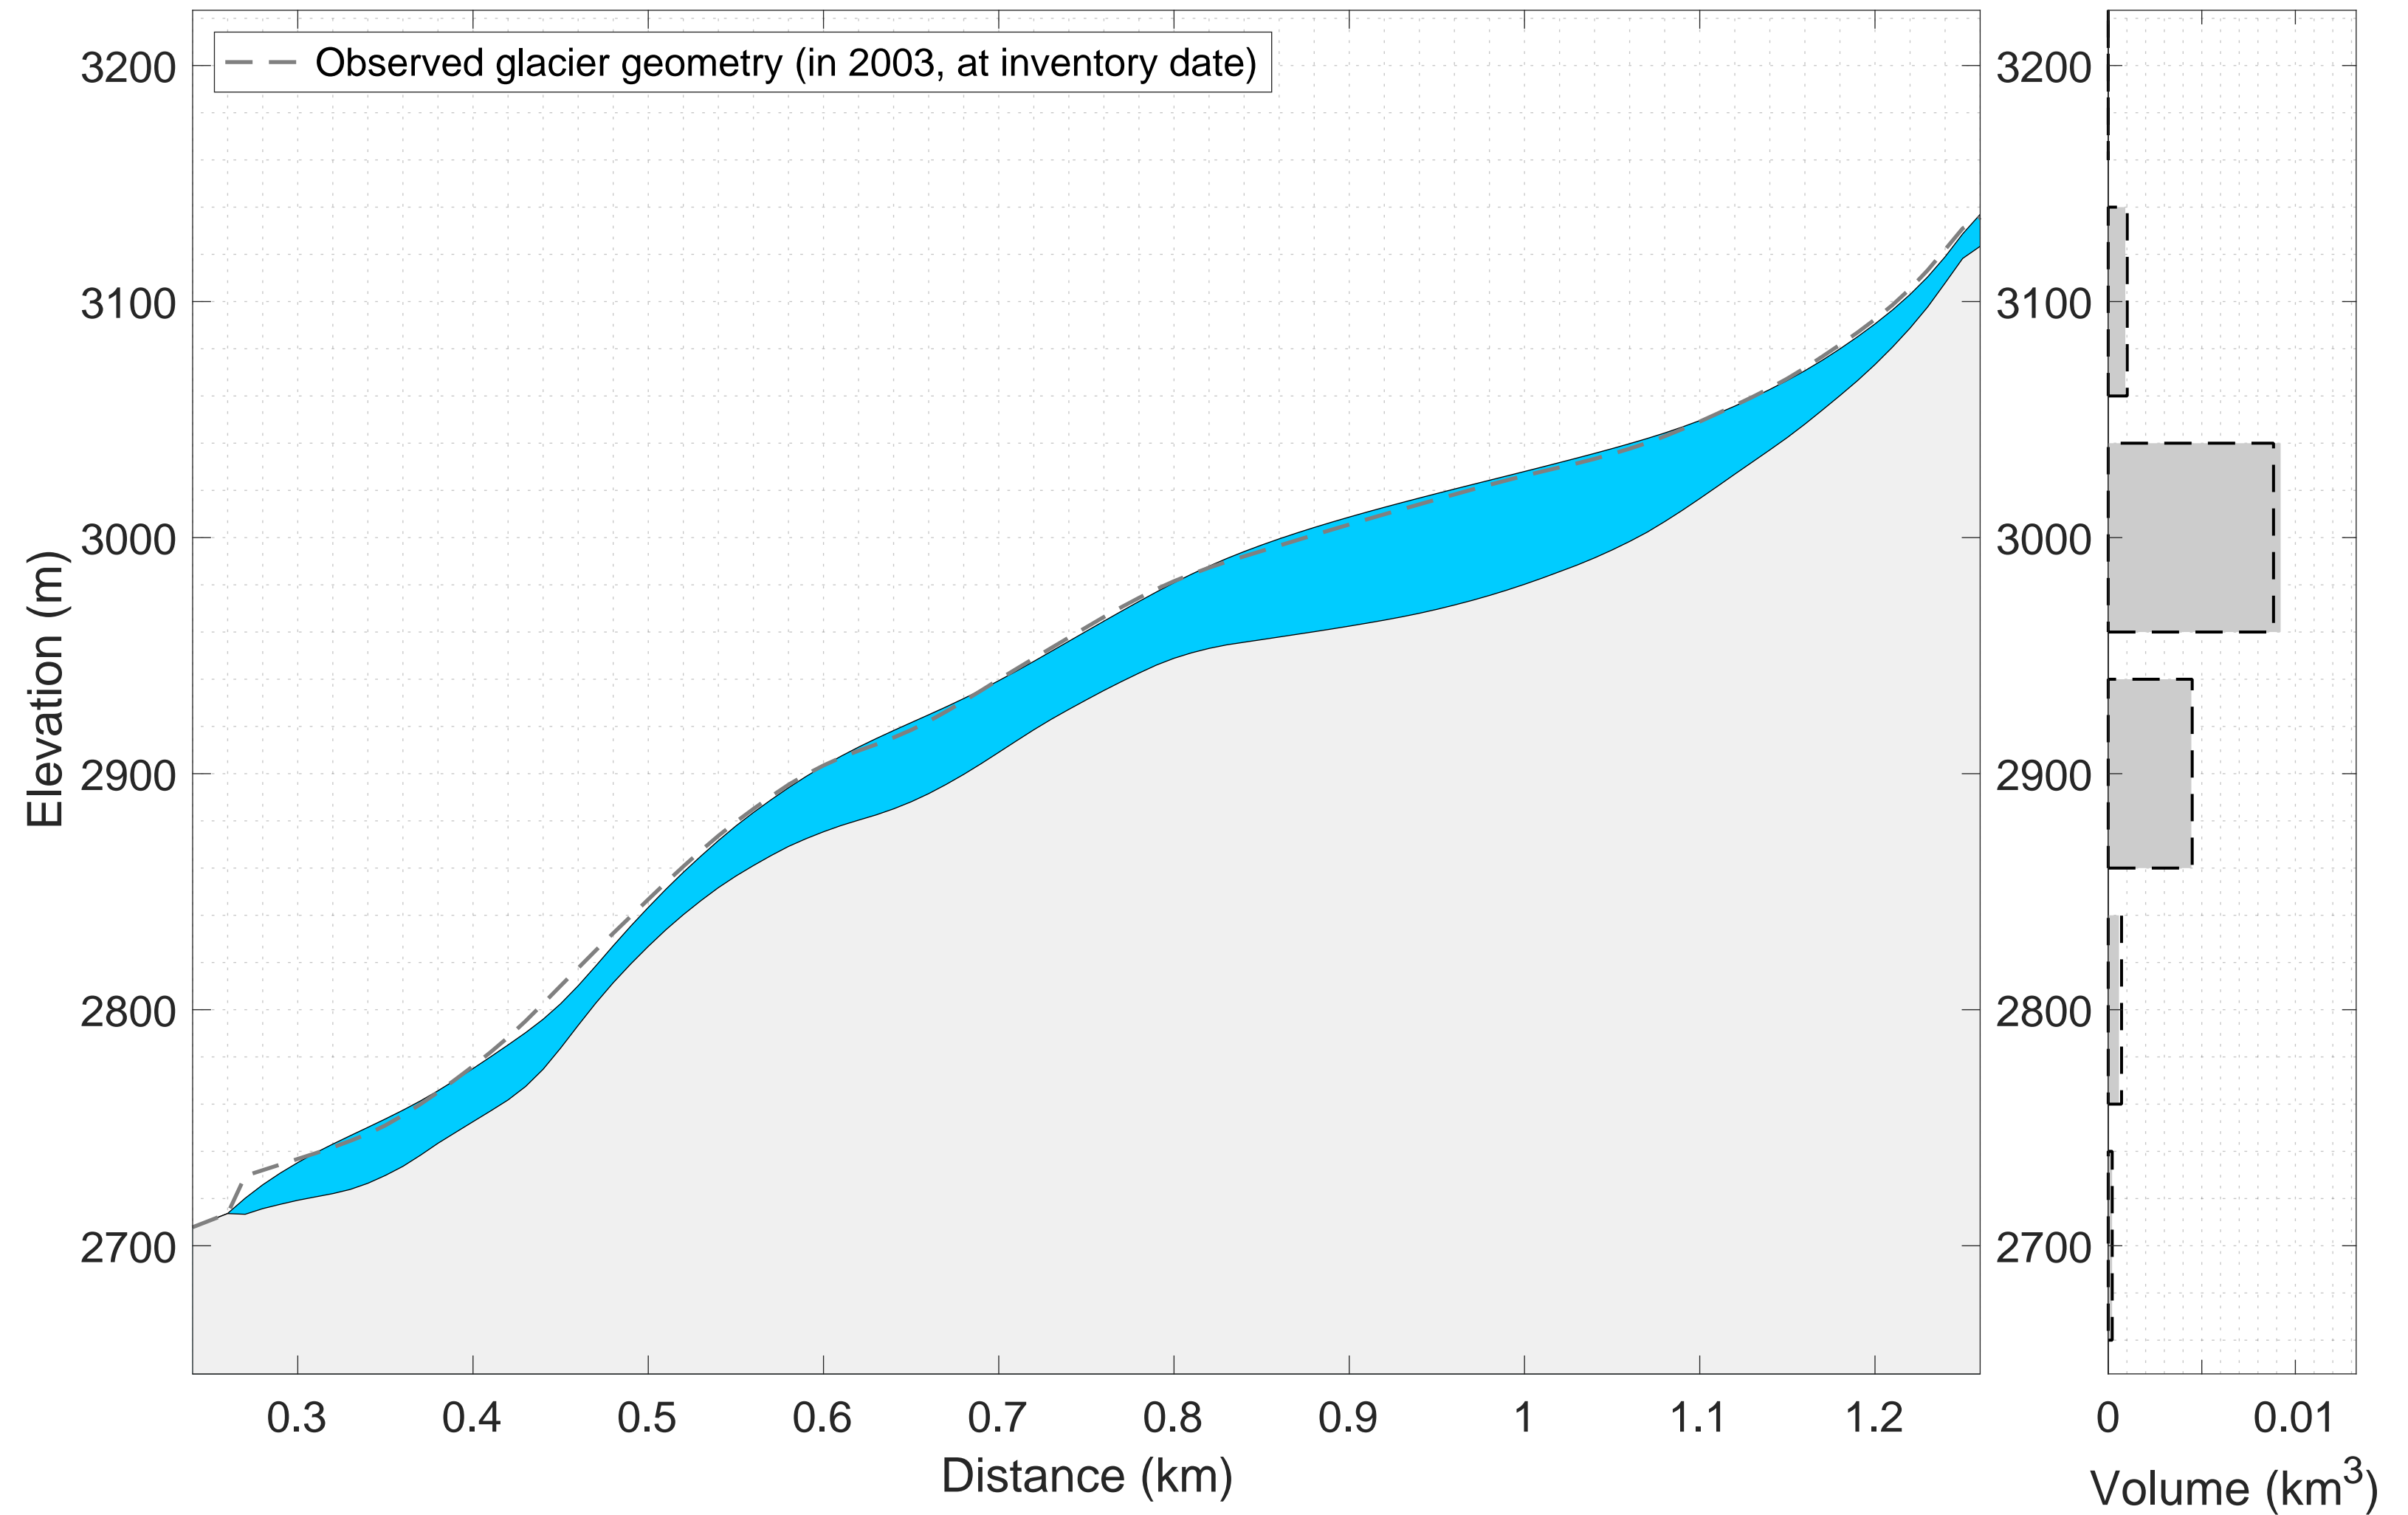

Supplement: Supplementary file 660 [file tc-13-1125-2019-supplement.zip]

**Modelled geometry (Glacier ID = 02978;  $A = 4.3267\text{e-}17 \text{ Pa}^{-3} \text{ a}^{-1}$ ;  $dx = 13 \text{ m}$ )**

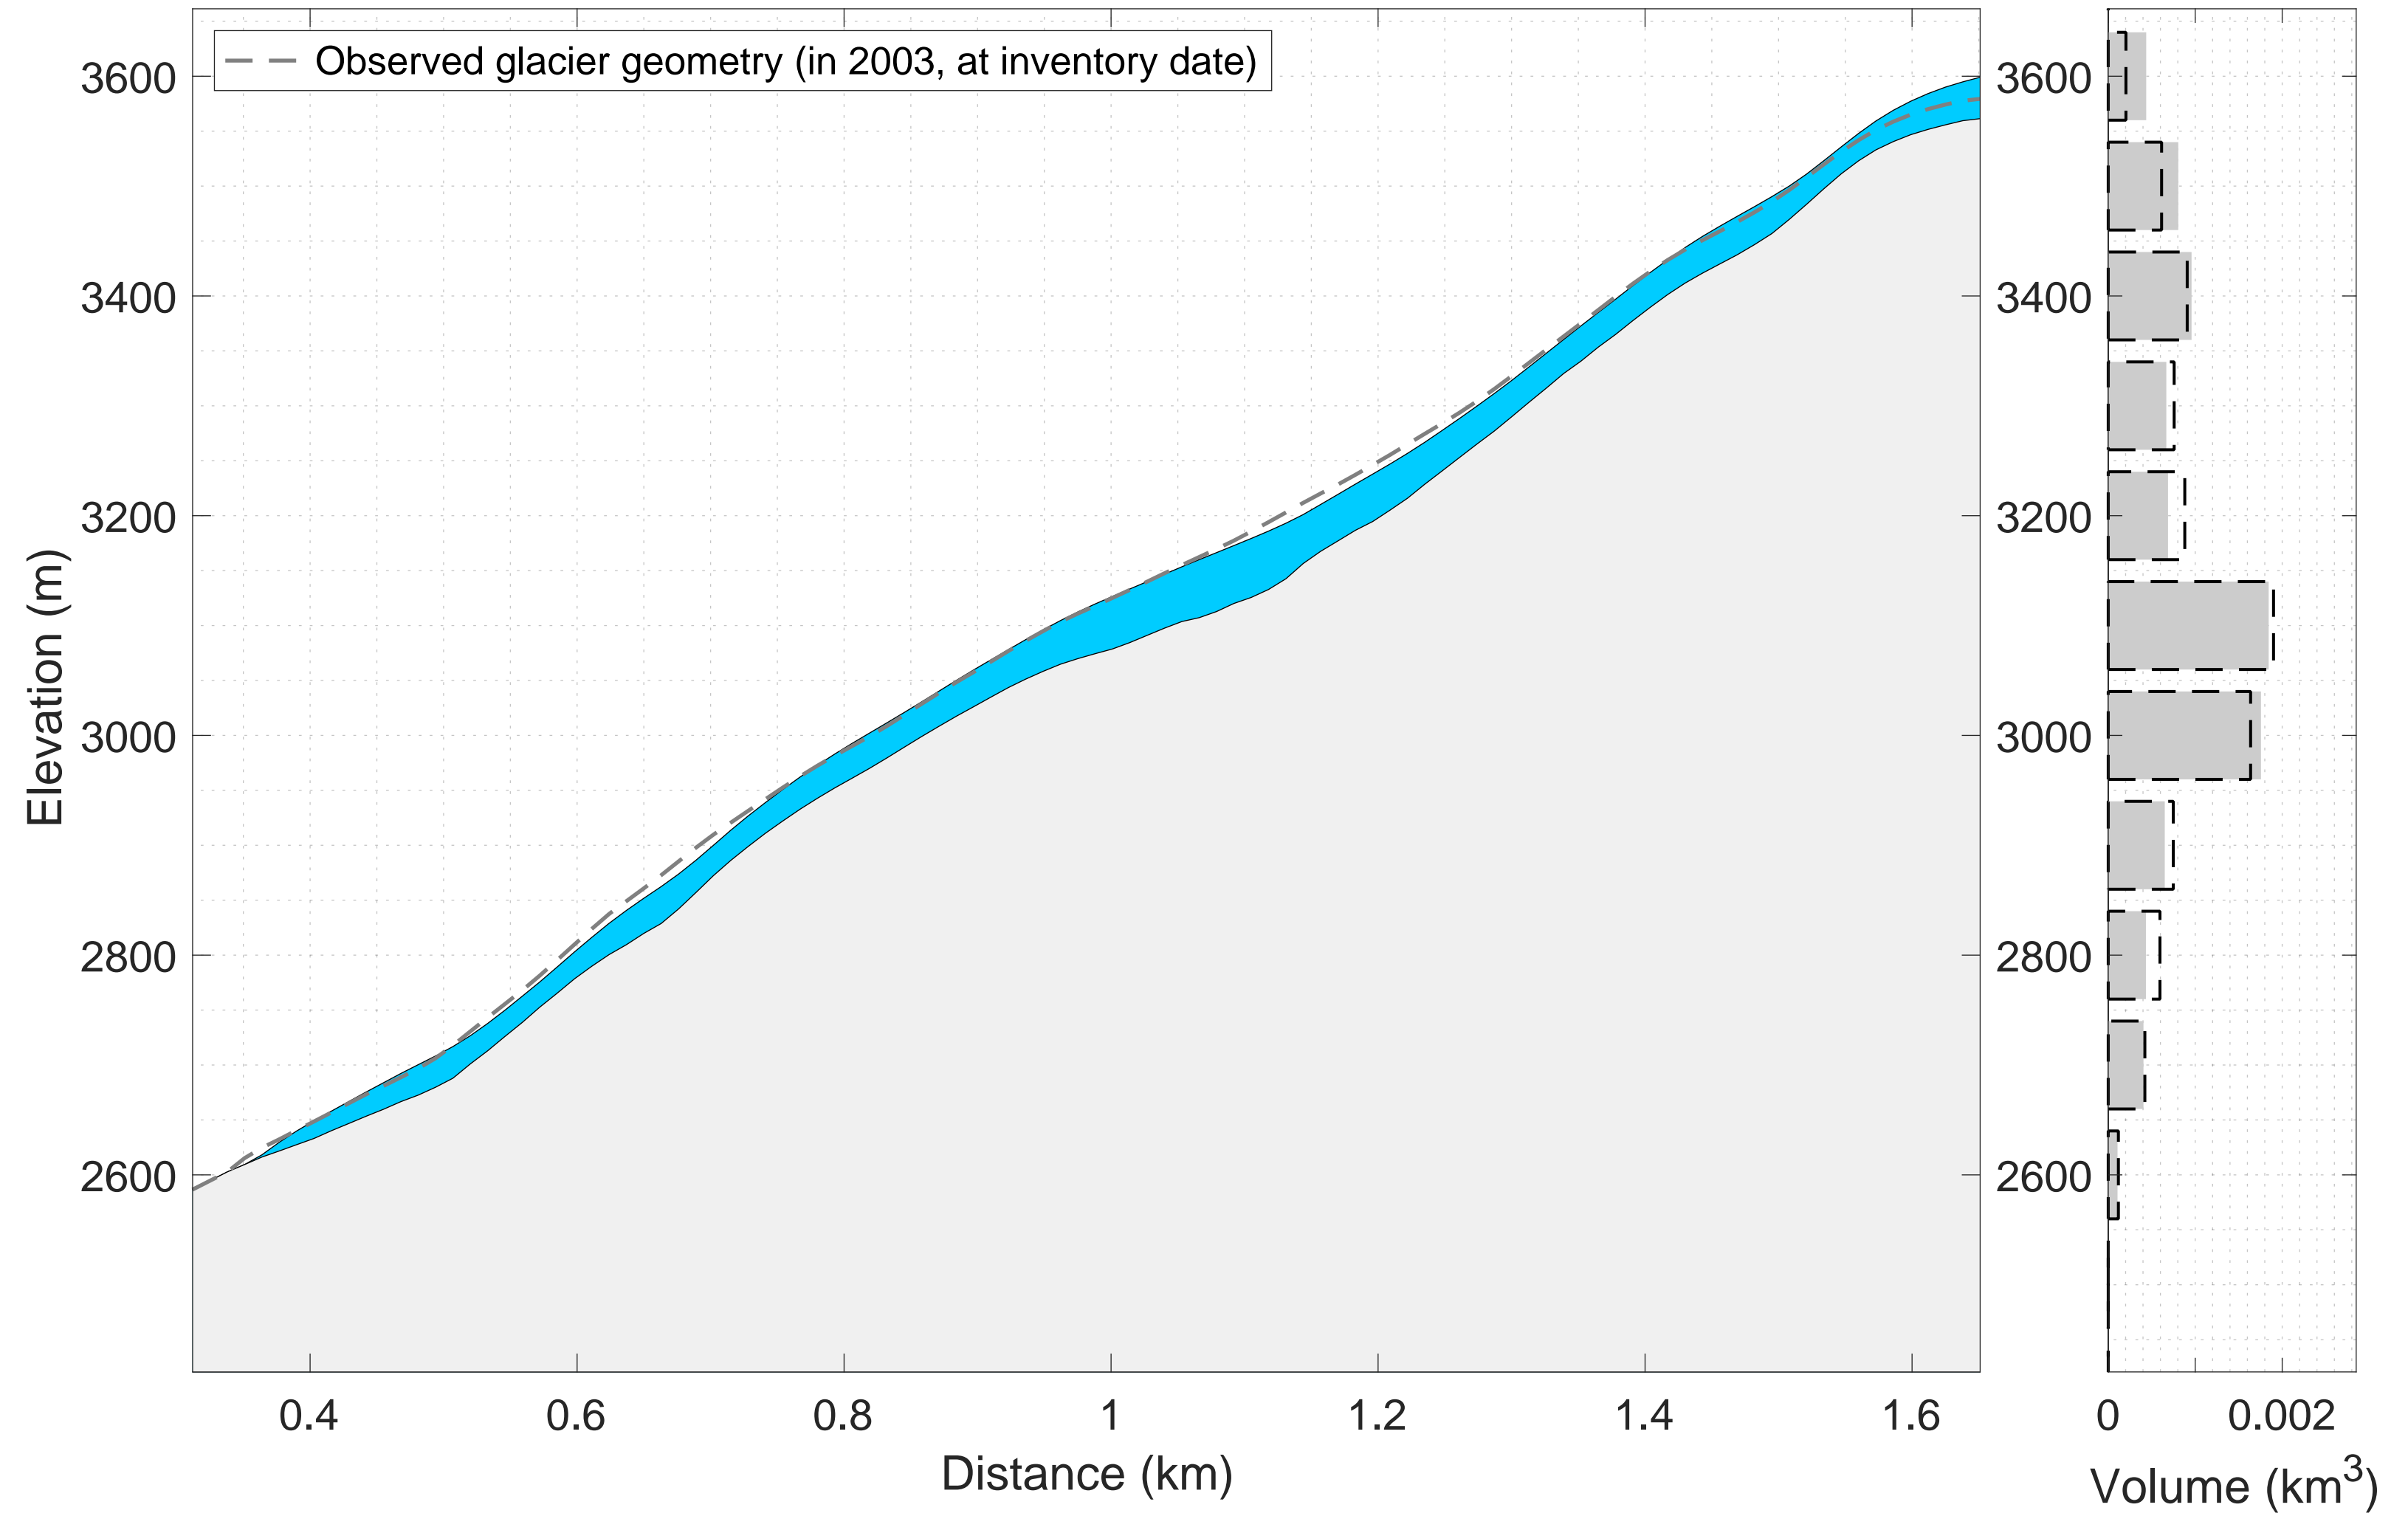

Supplement: Supplementary file 661 [file tc-13-1125-2019-supplement.zip]

**Modelled geometry (Glacier ID = 02012;  $A = 1.1465\text{e-}16 \text{ Pa}^{-3} \text{ a}^{-1}$ ;  $dx = 23 \text{ m}$ )**

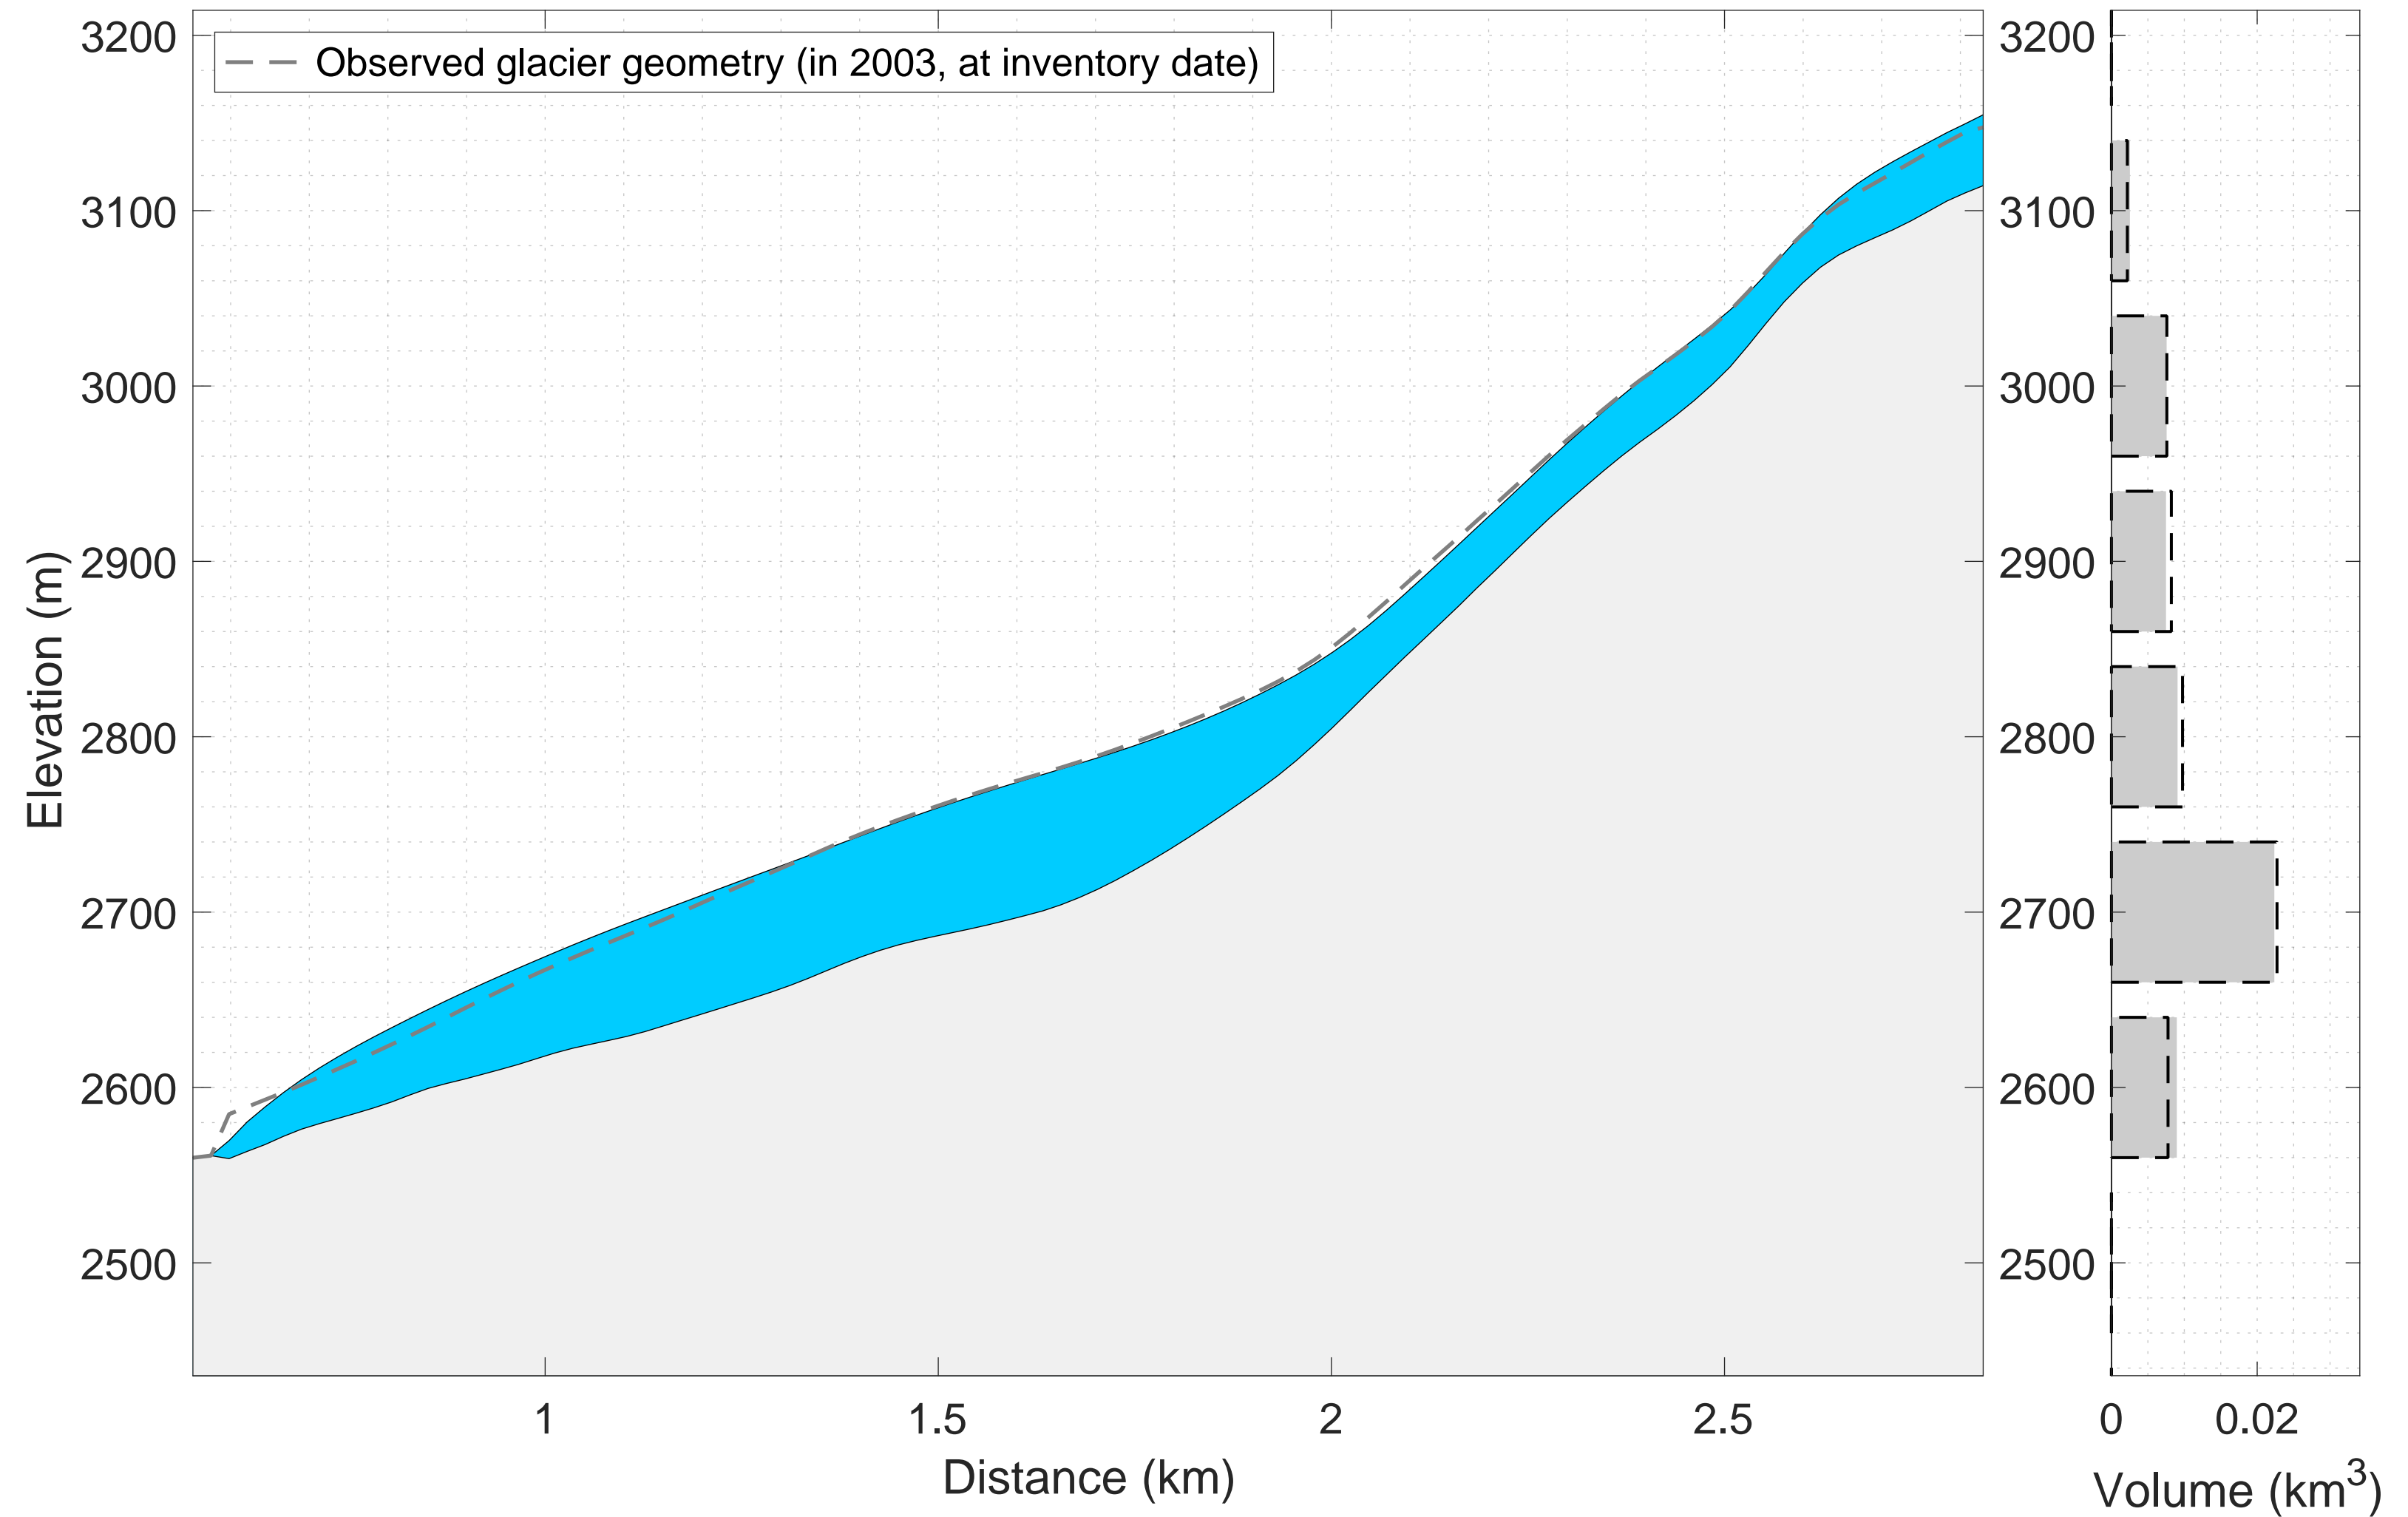

Supplement: Supplementary file 662 [file tc-13-1125-2019-supplement.zip]

**Modelled geometry (Glacier ID = 03758;  $A = 1.1355\text{e-16 Pa}^{-3} \text{ a}^{-1}$ ;  $dx = 12 \text{ m}$ )**

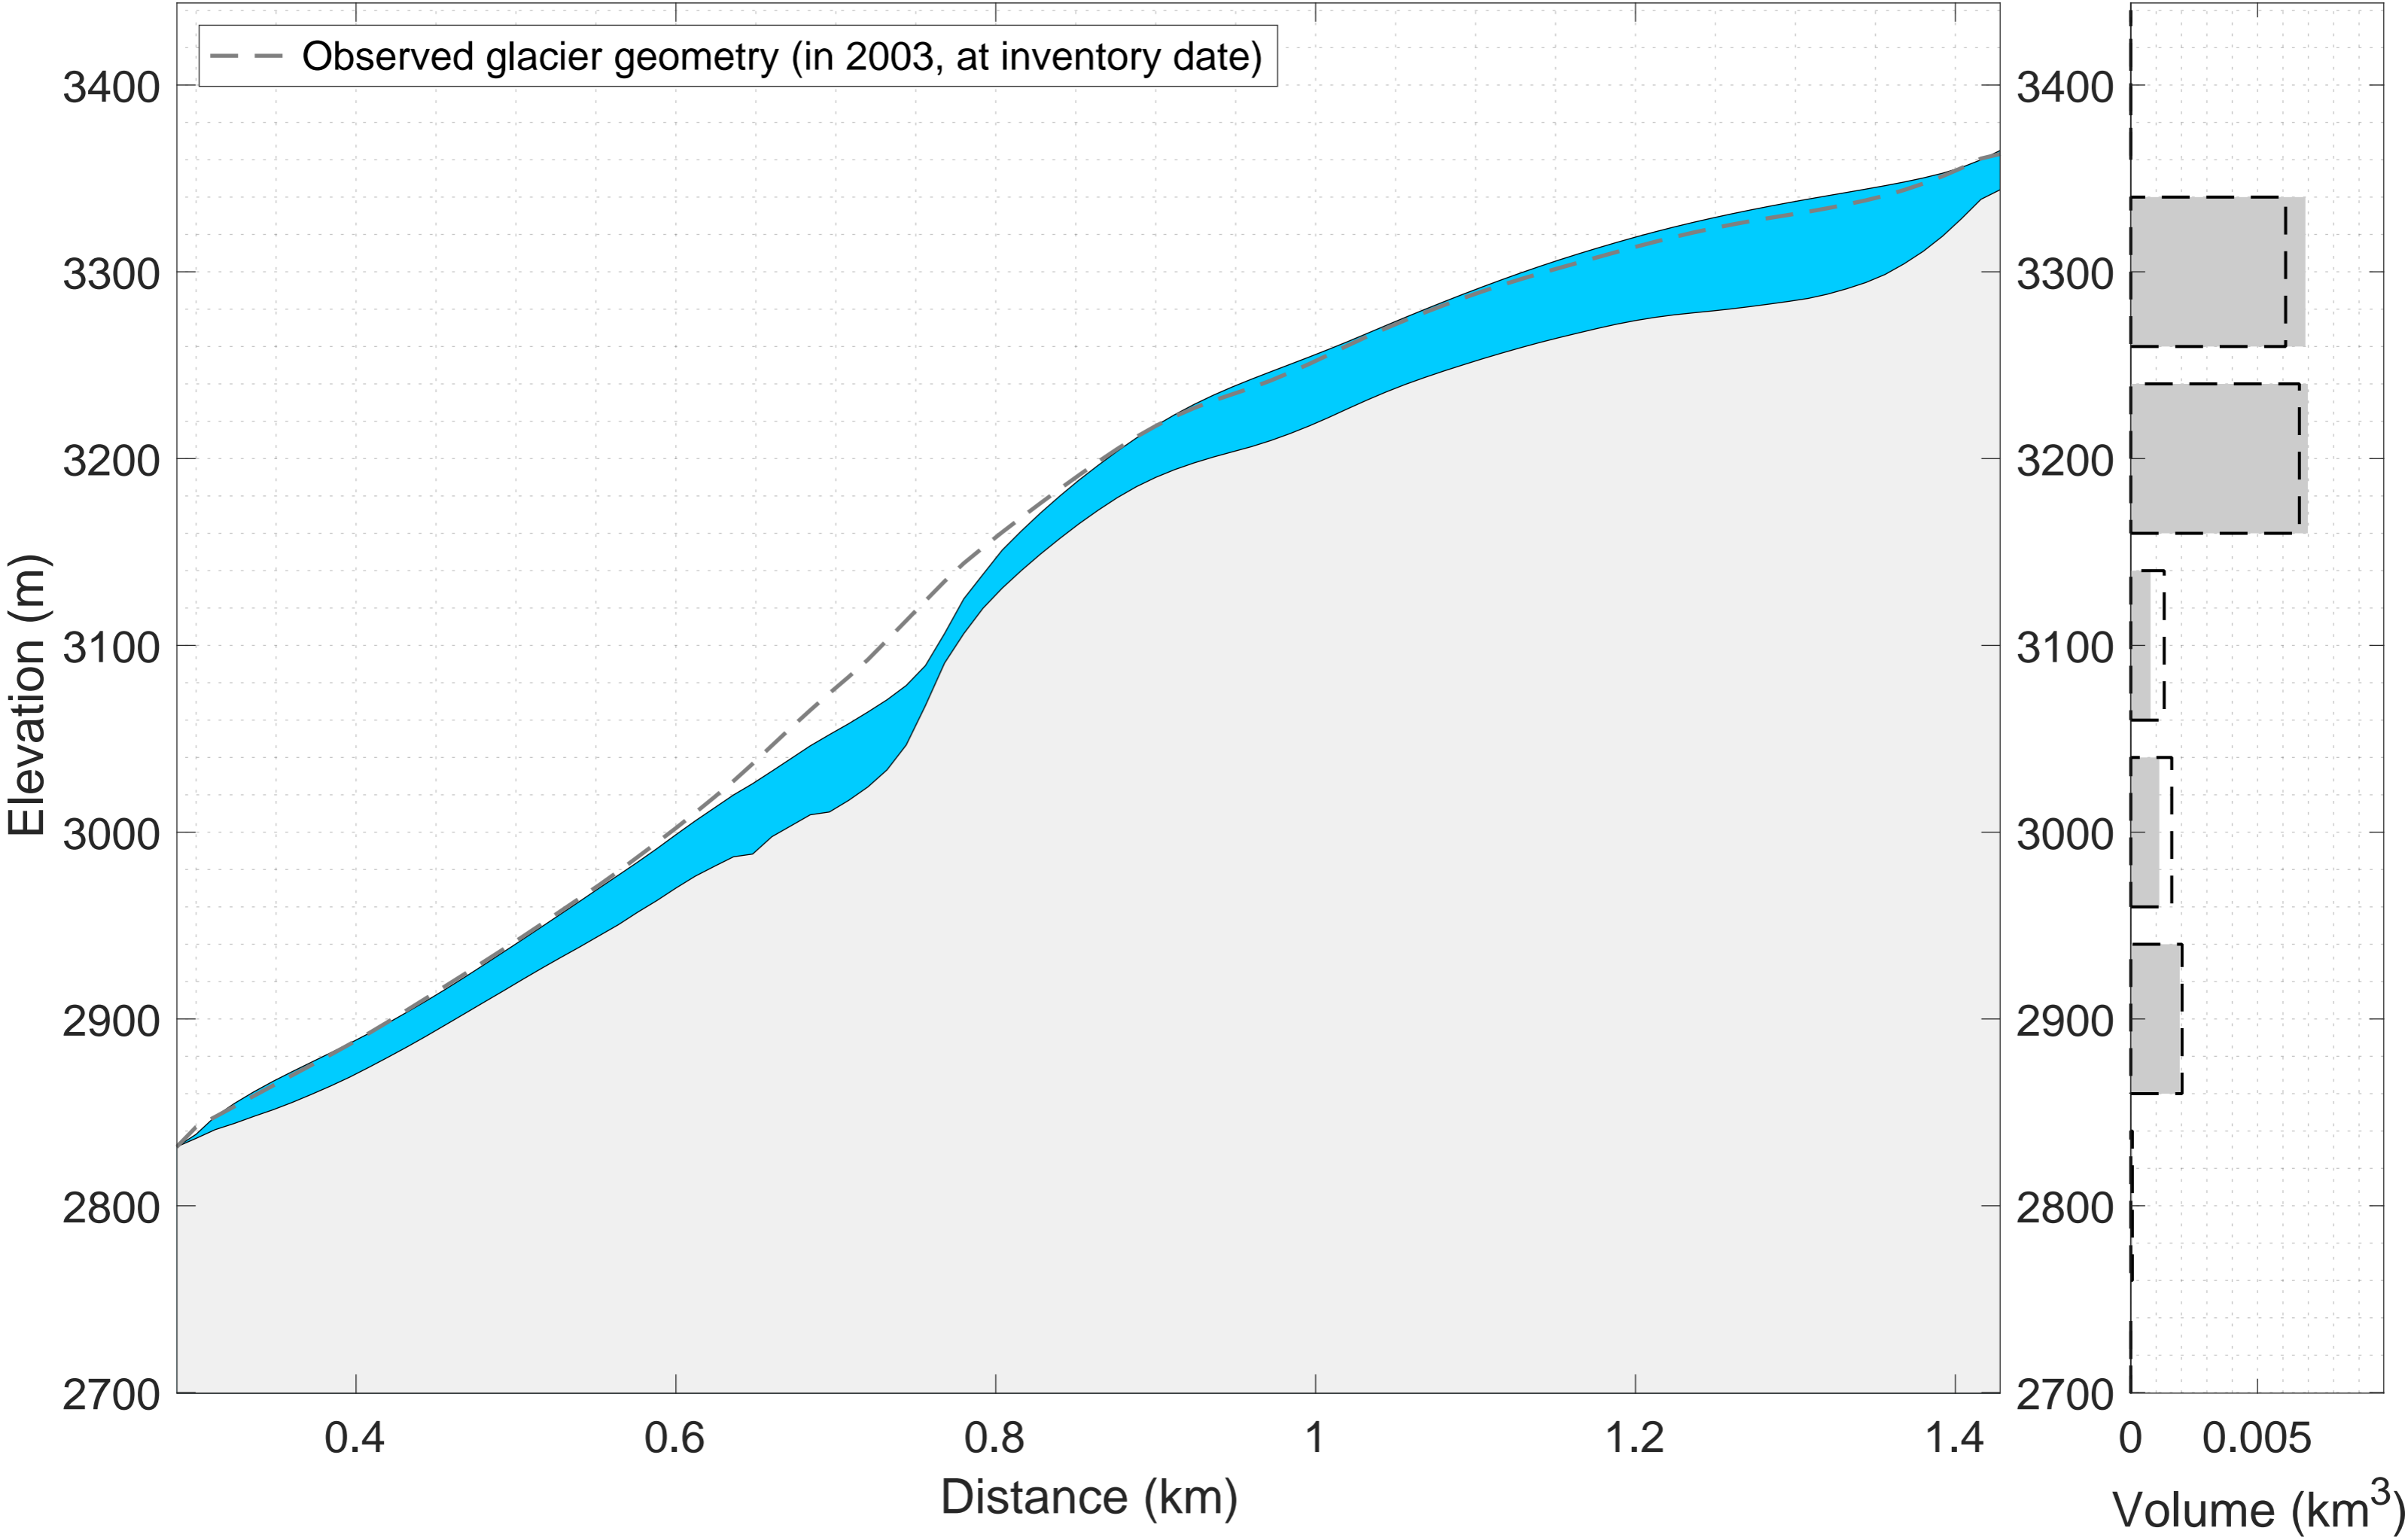

Supplement: Supplementary file 663 [file tc-13-1125-2019-supplement.zip]

# Modelled geometry (Glacier ID = 01704; $A = 7.5172\text{e-}17 \text{ Pa}^{-3} \text{ a}^{-1}$ ; $dx = 10 \text{ m}$ )

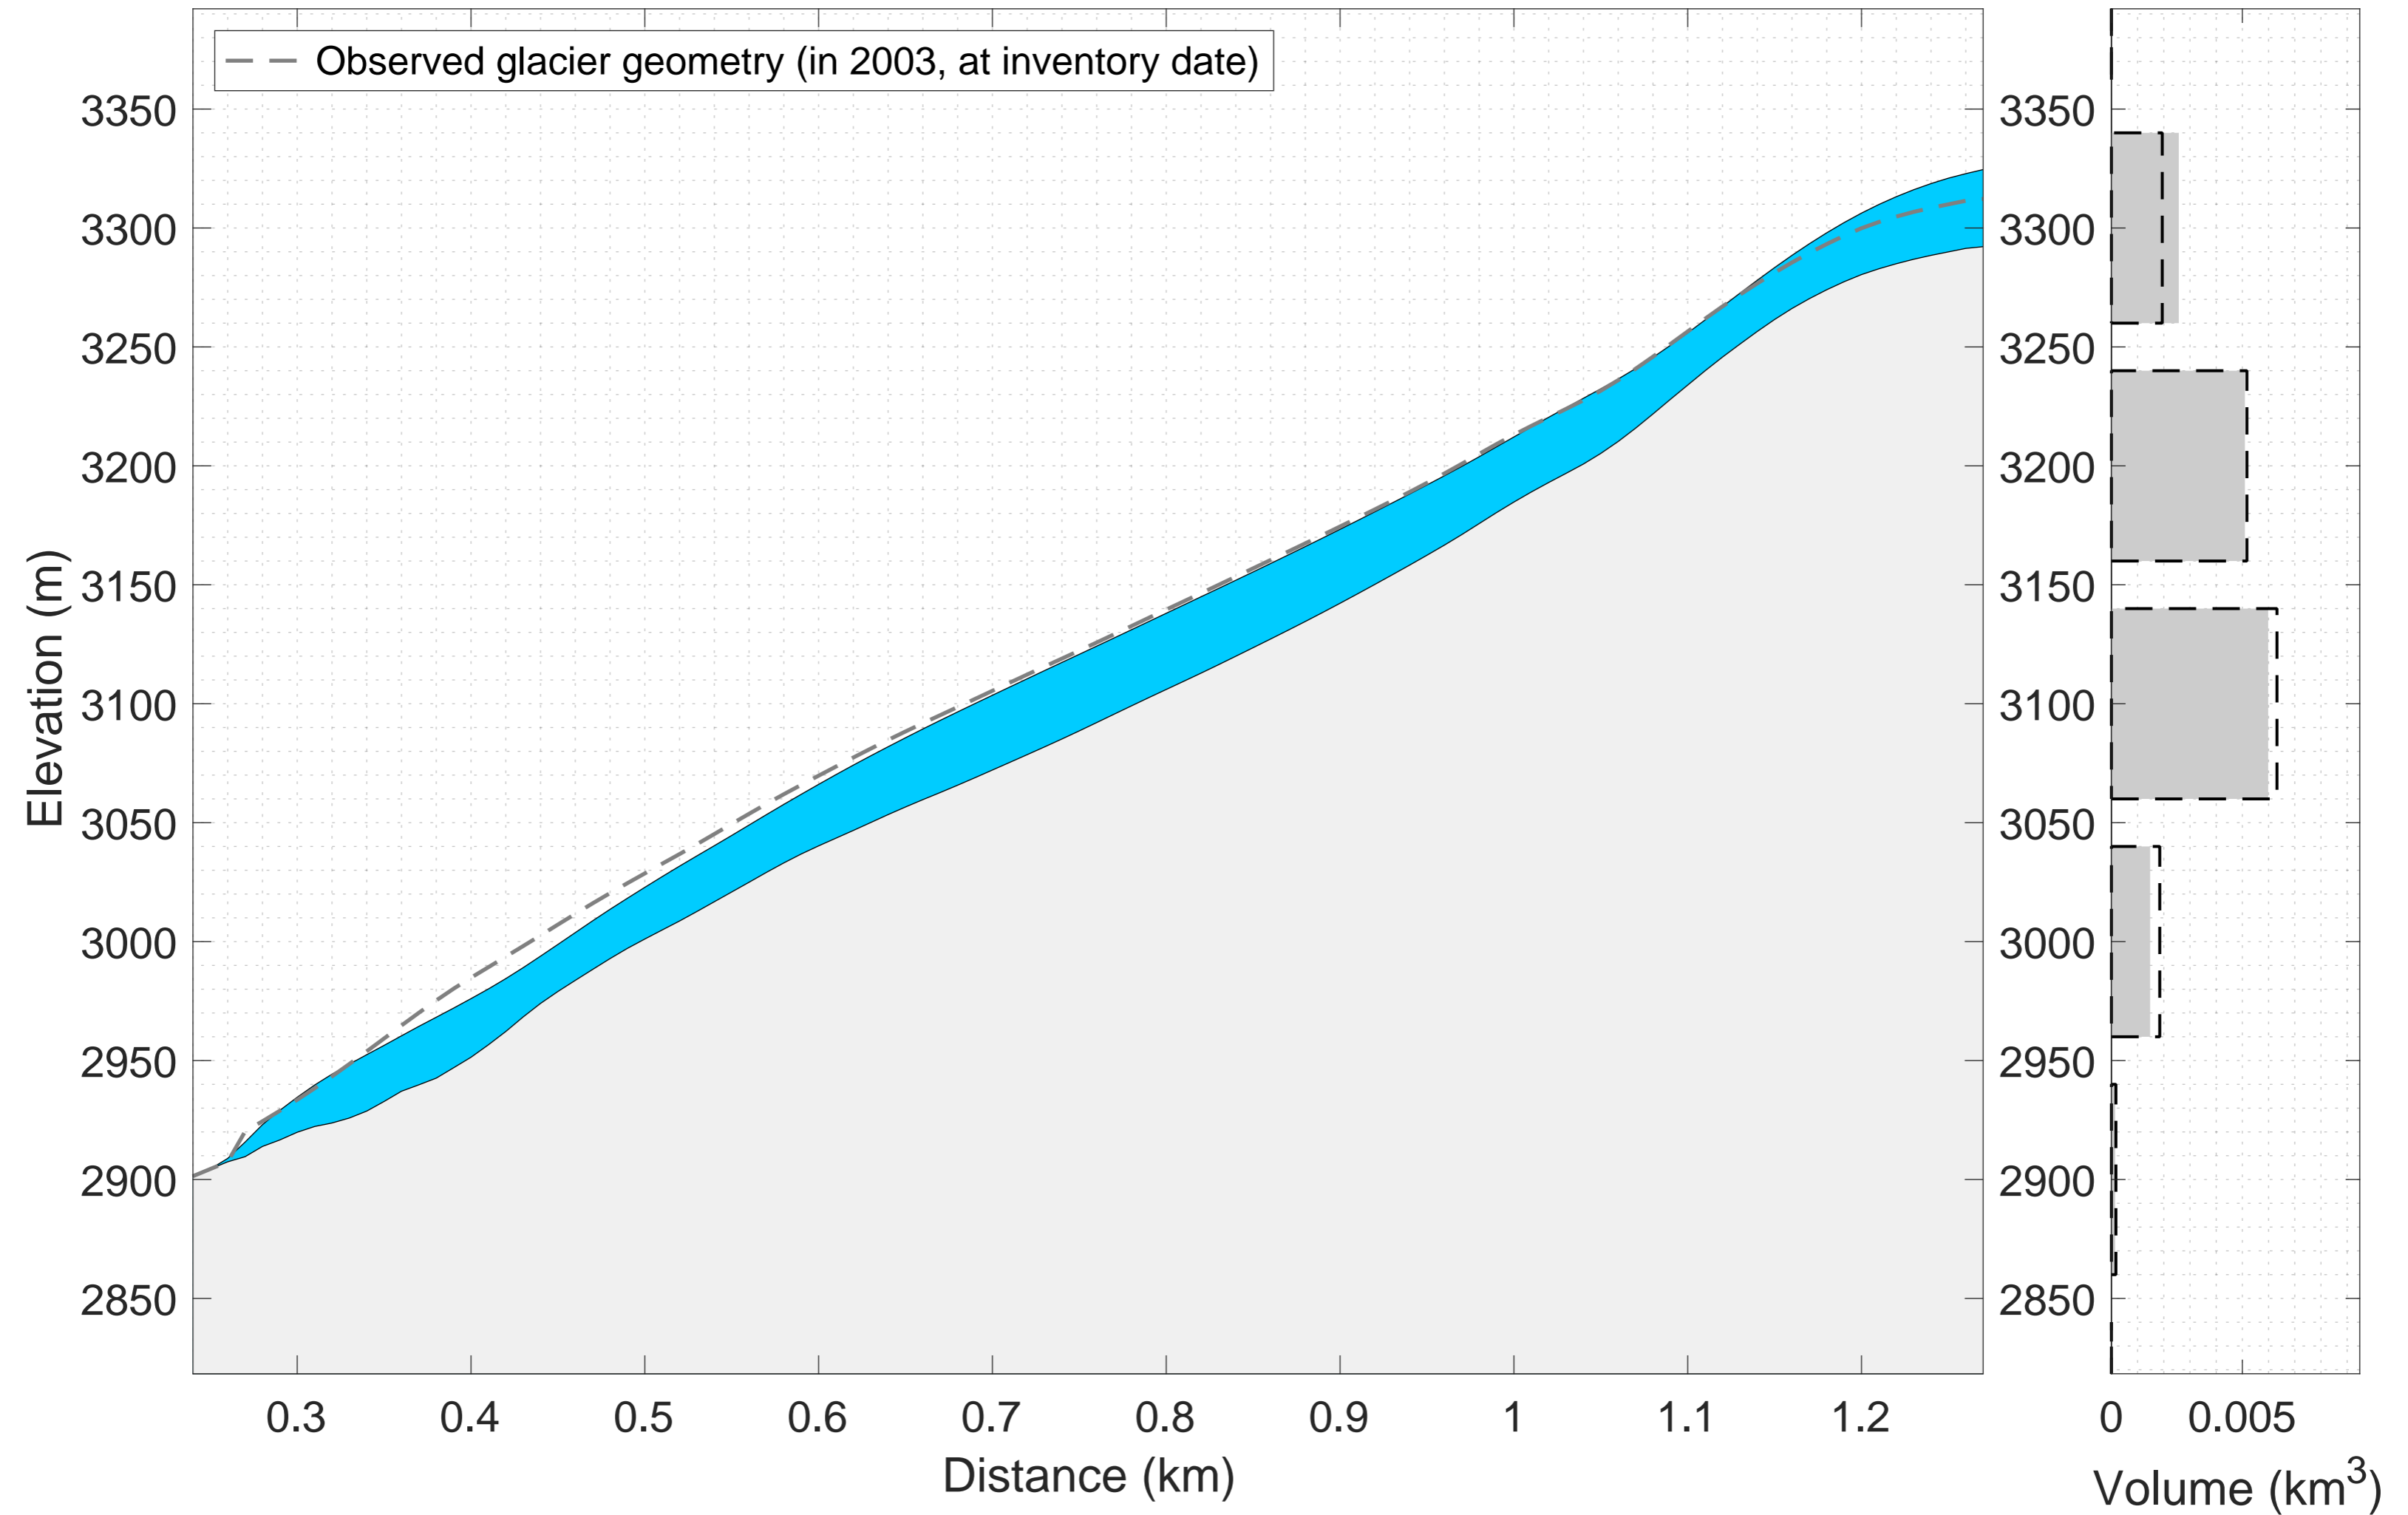

Supplement: Supplementary file 664 [file tc-13-1125-2019-supplement.zip]

**Modelled geometry (Glacier ID = 00925;  $A = 5.9798\text{e-}17 \text{ Pa}^{-3} \text{ a}^{-1}$ ;  $dx = 12 \text{ m}$ )**

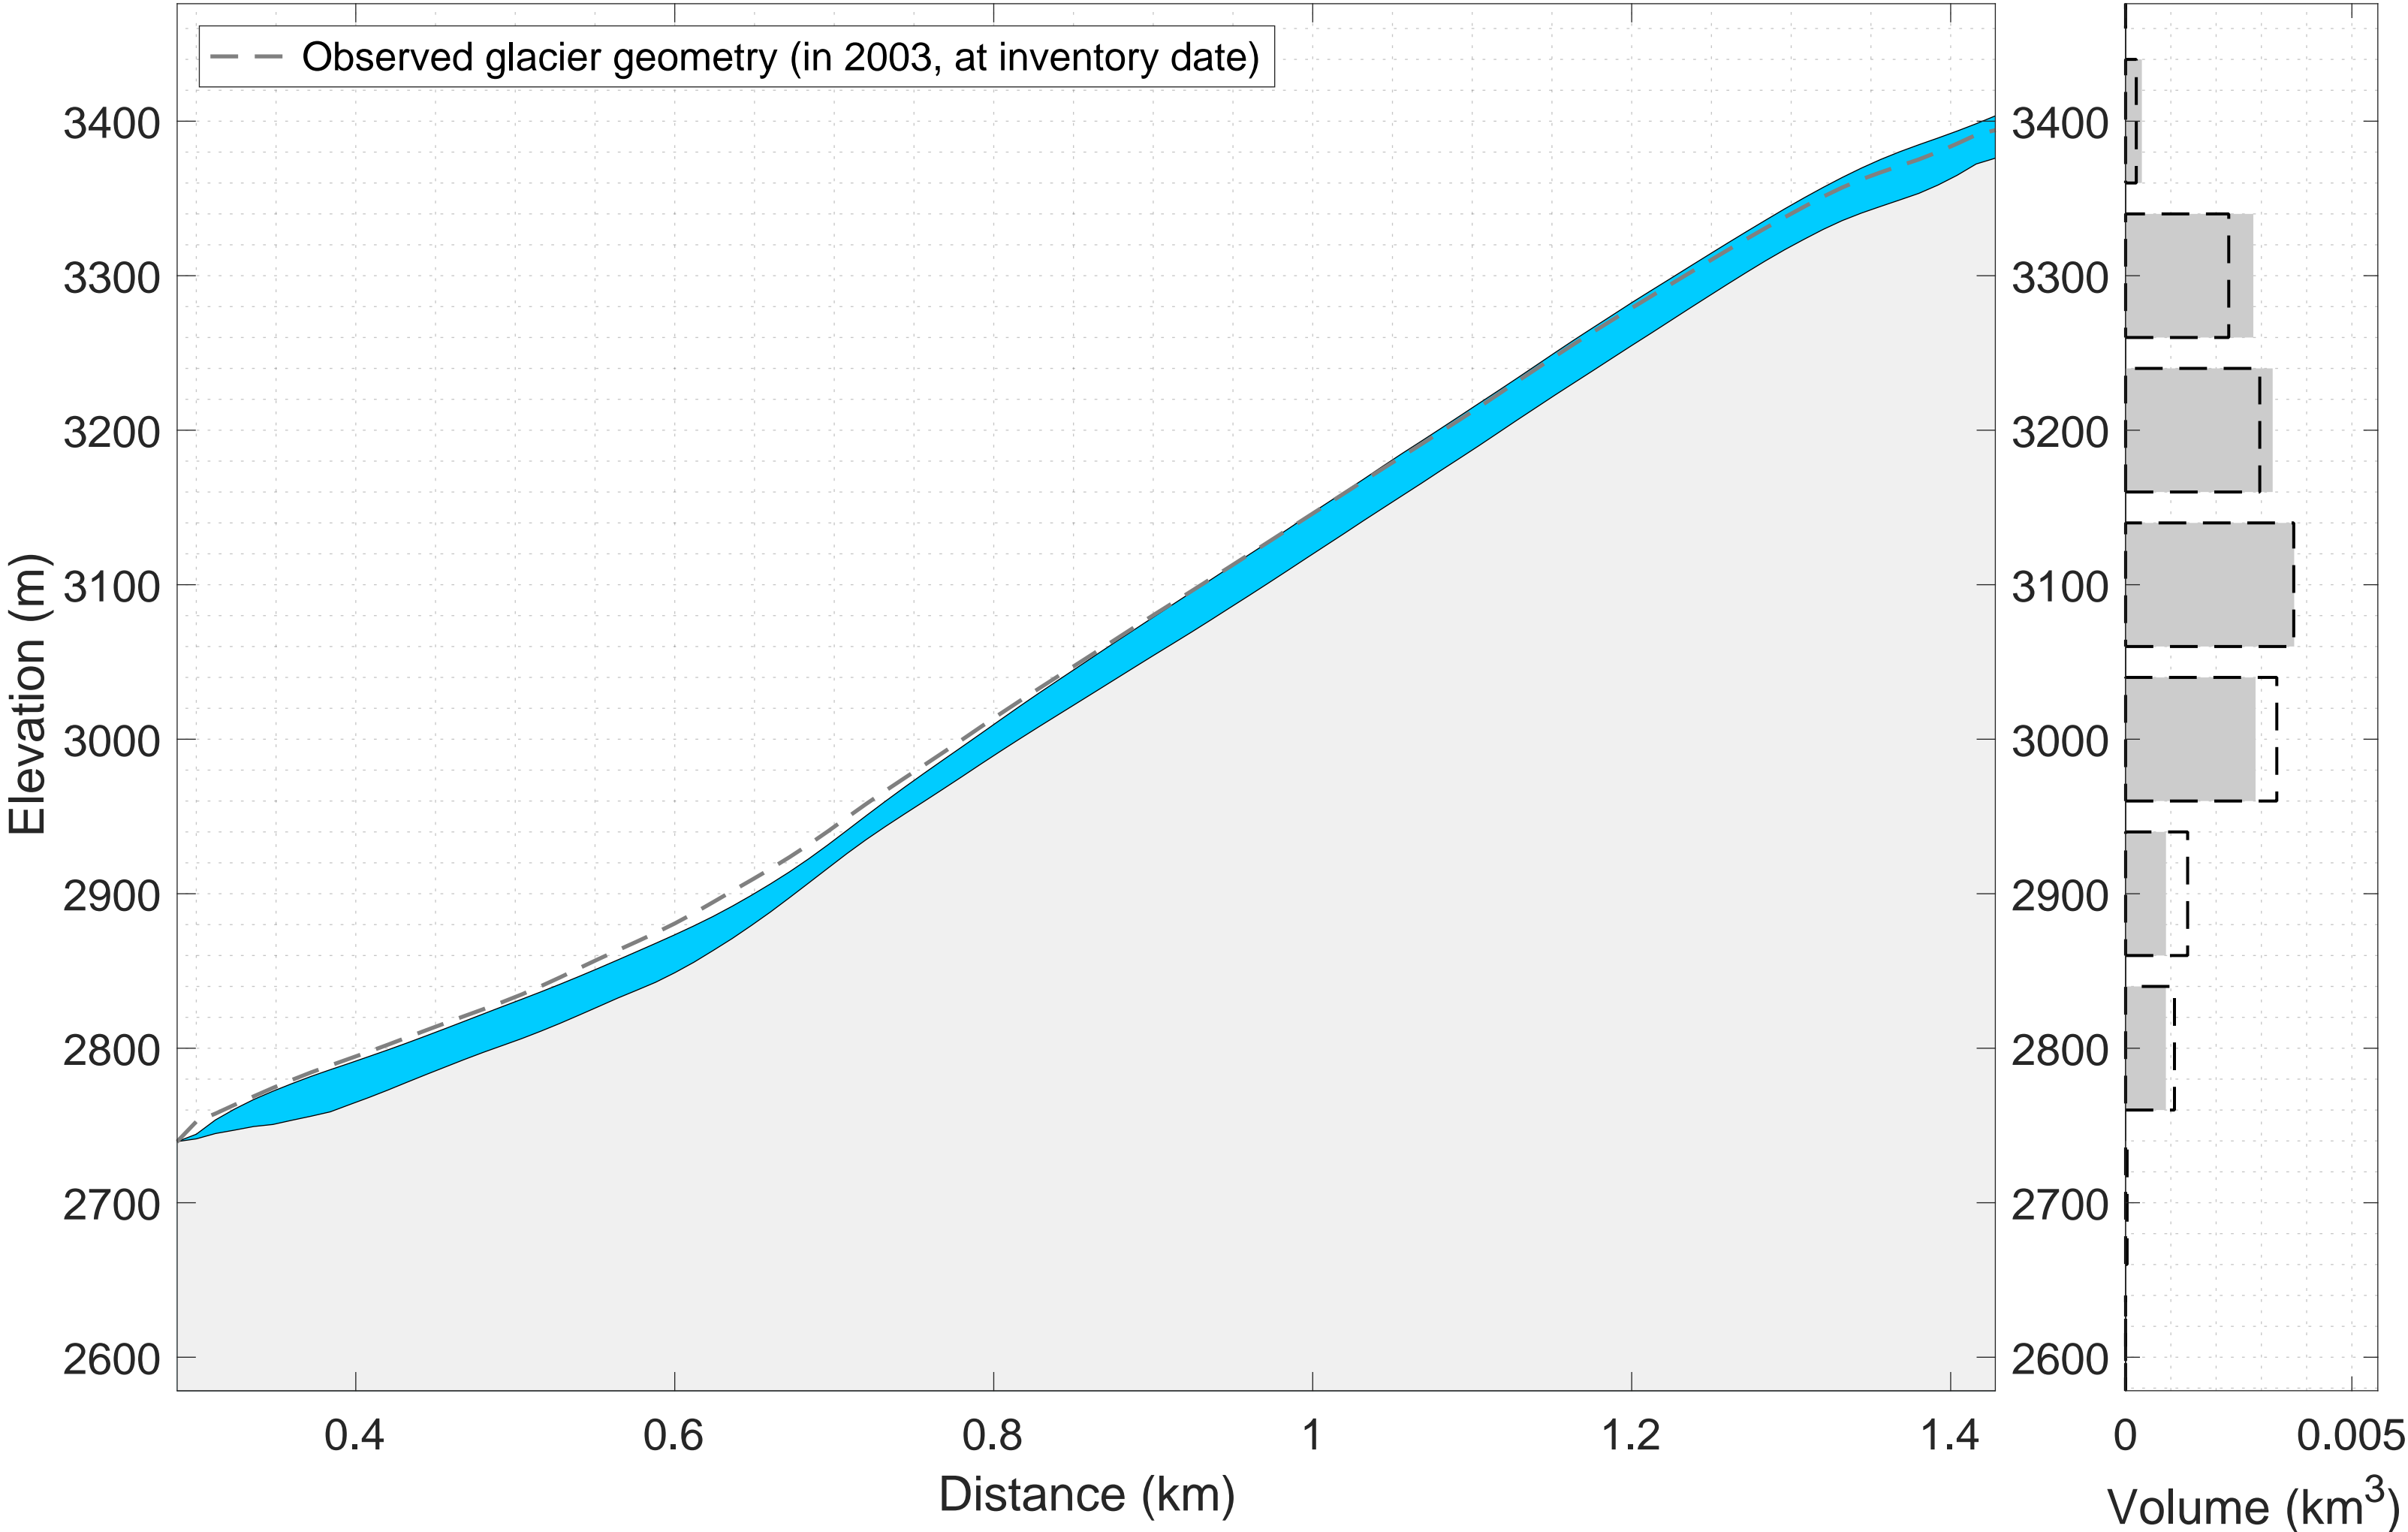

Supplement: Supplementary file 665 [file tc-13-1125-2019-supplement.zip]

**Modelled geometry (Glacier ID = 00554;  $A = 1\text{e-}16 \text{ Pa}^{-3} \text{ a}^{-1}$ ;  $dx = 27 \text{ m}$ )**

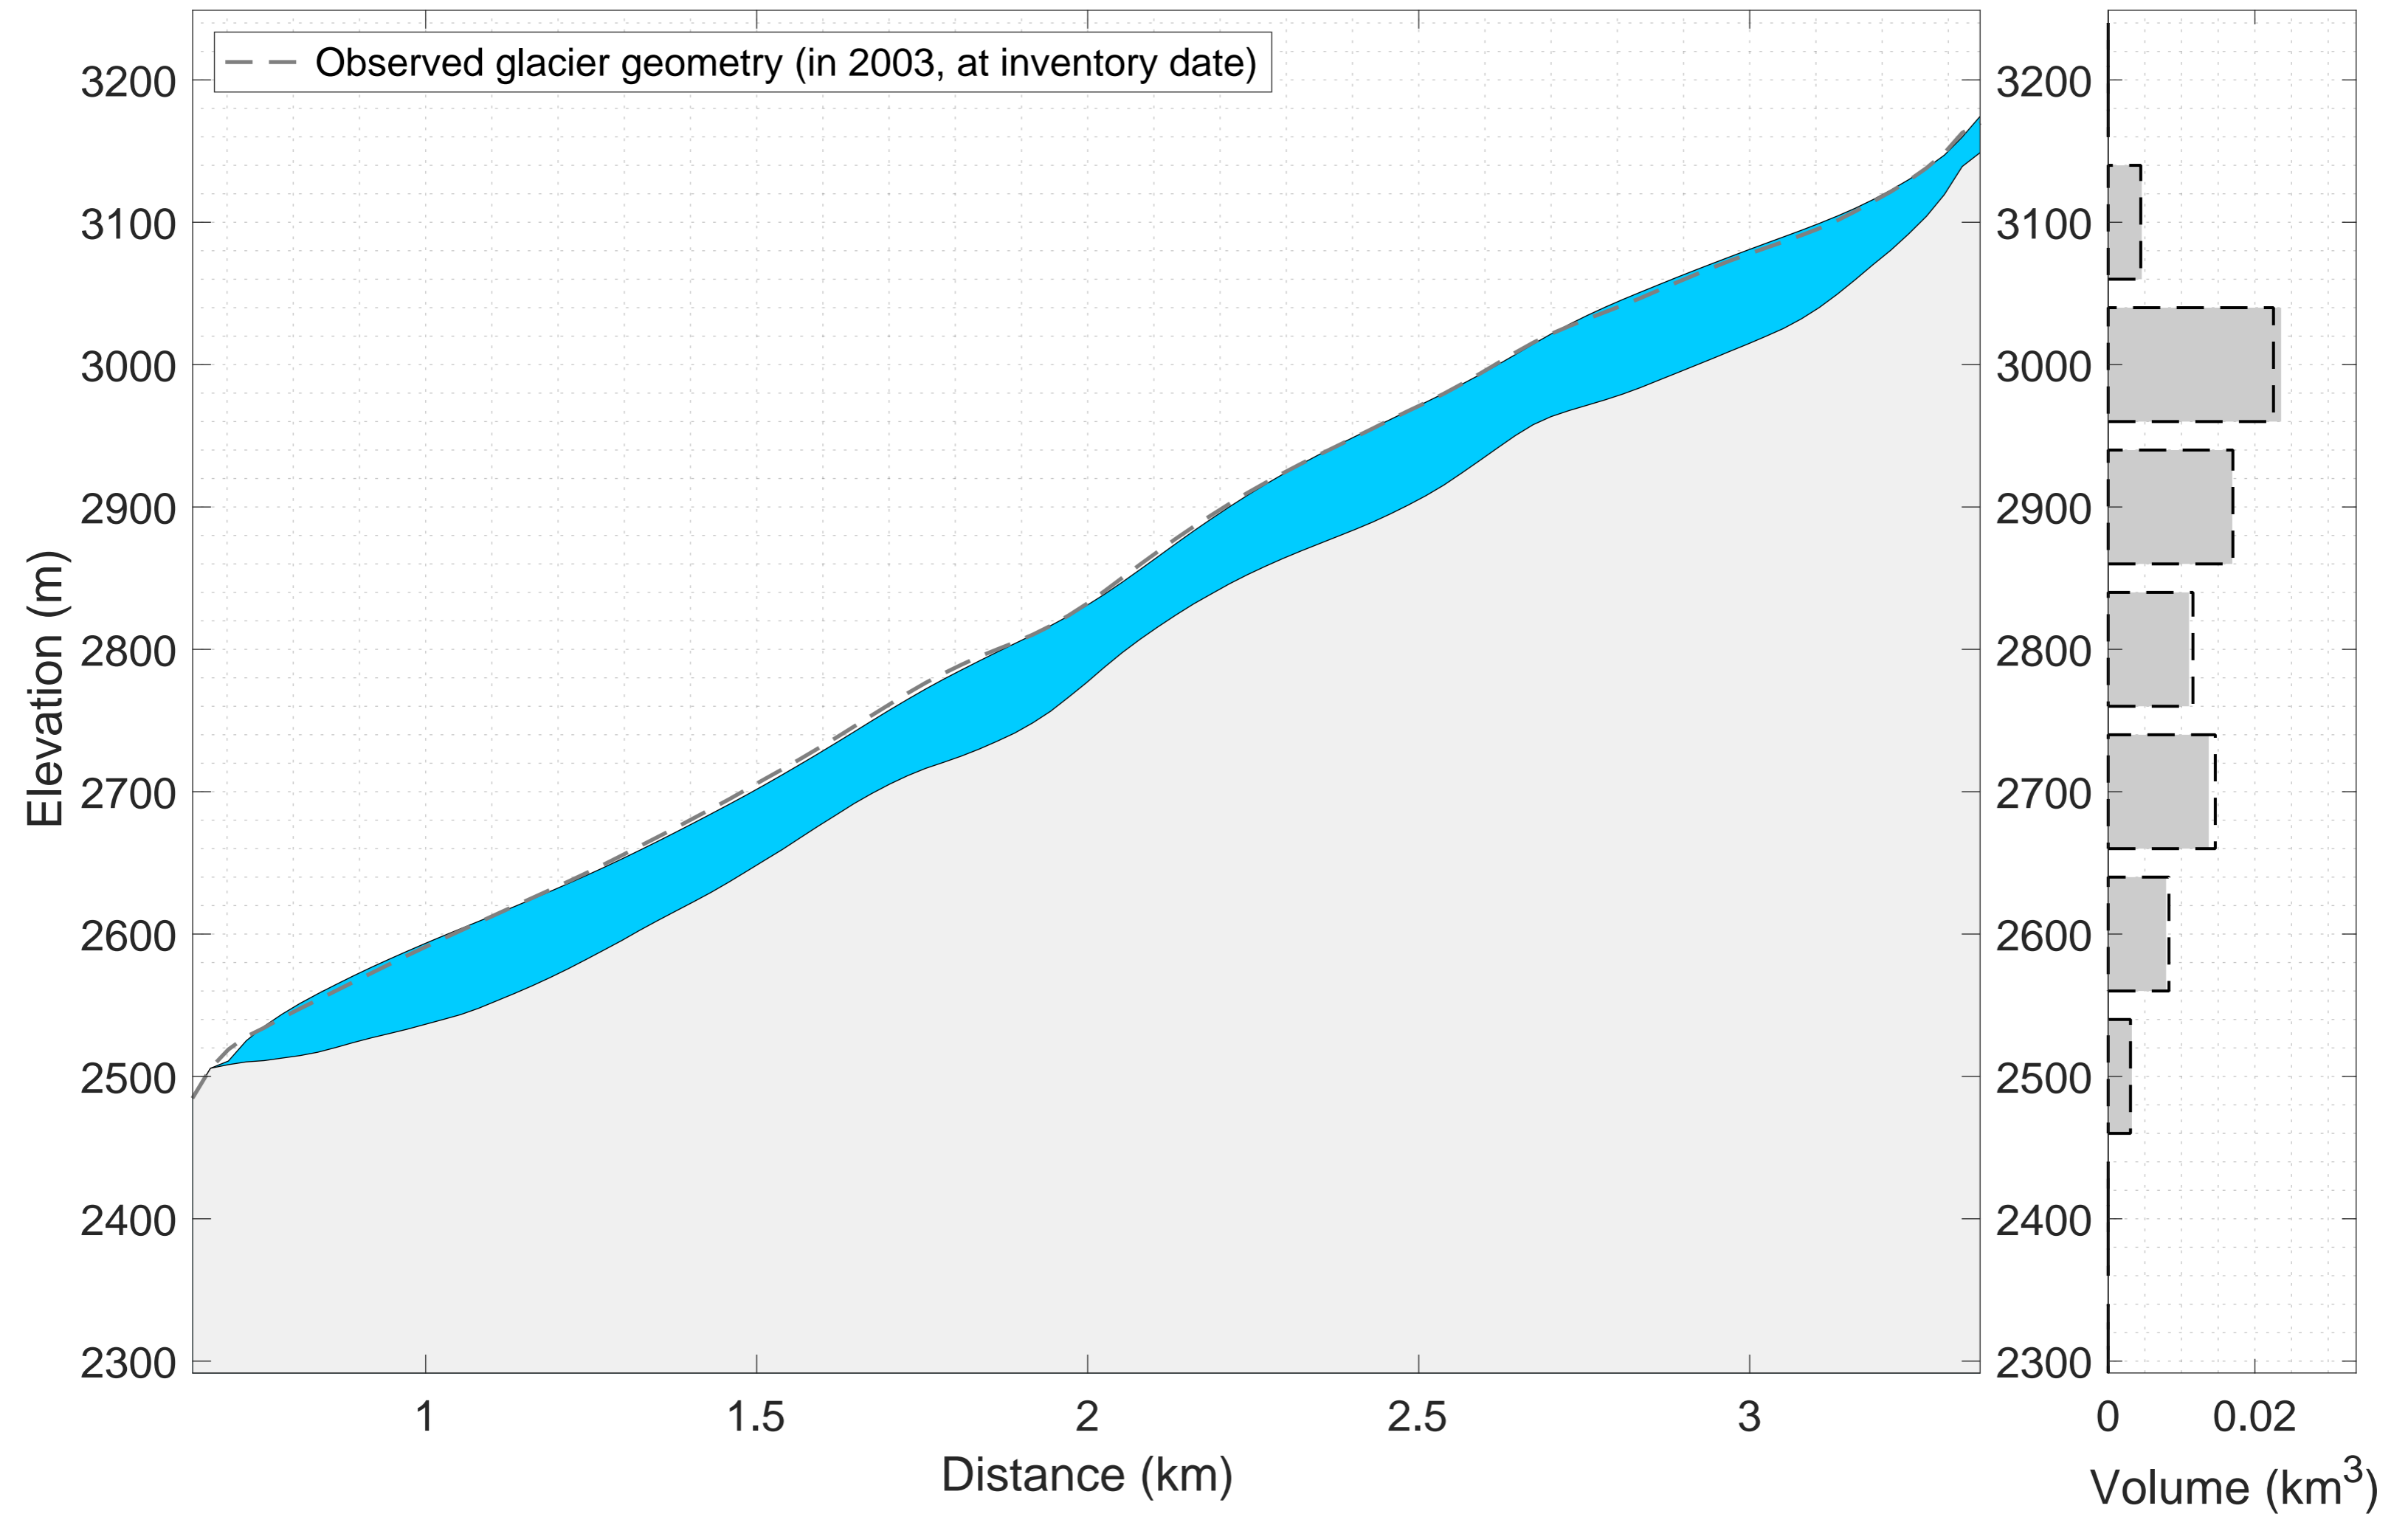

Supplement: Supplementary file 666 [file tc-13-1125-2019-supplement.zip]

**Modelled geometry (Glacier ID = 01688;  $A = 1.9259\text{e-}16 \text{ Pa}^{-3} \text{ a}^{-1}$ ;  $dx = 17 \text{ m}$ )**

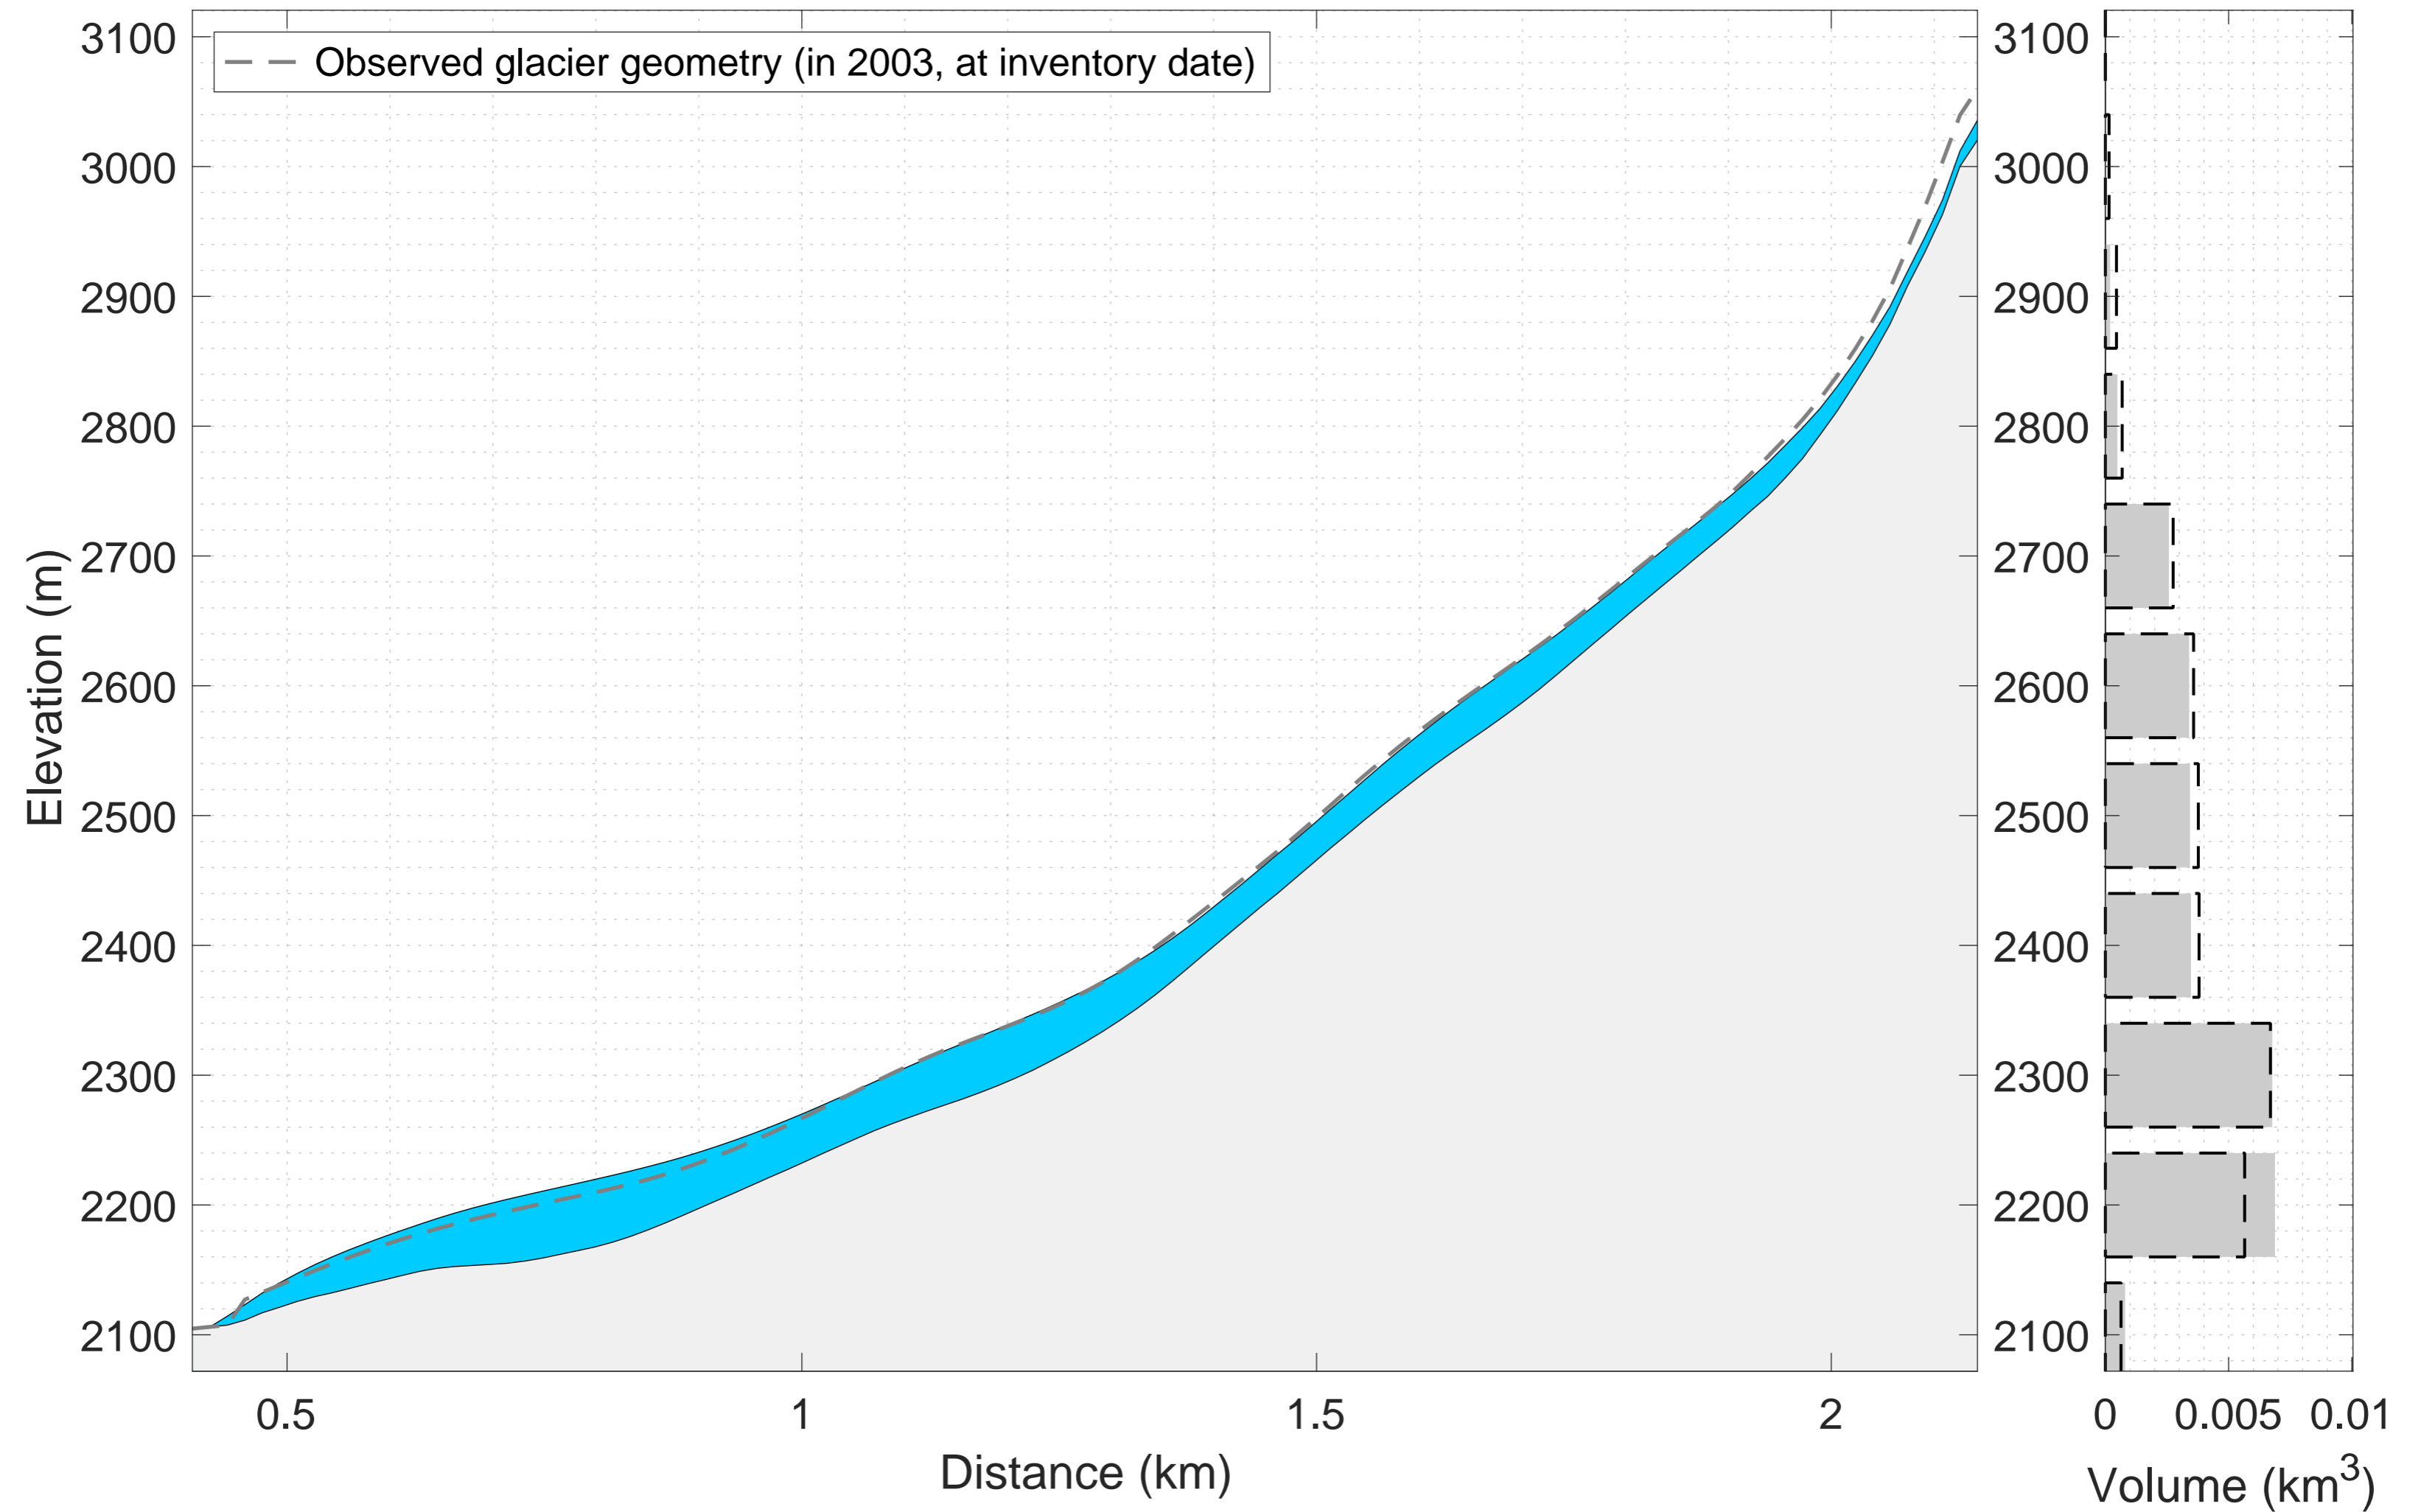

Supplement: Supplementary file 667 [file tc-13-1125-2019-supplement.zip]

**Modelled geometry (Glacier ID = 00871;  $A = 1.245\text{e-}16 \text{ Pa}^{-3} \text{ a}^{-1}$ ;  $dx = 26 \text{ m}$ )**

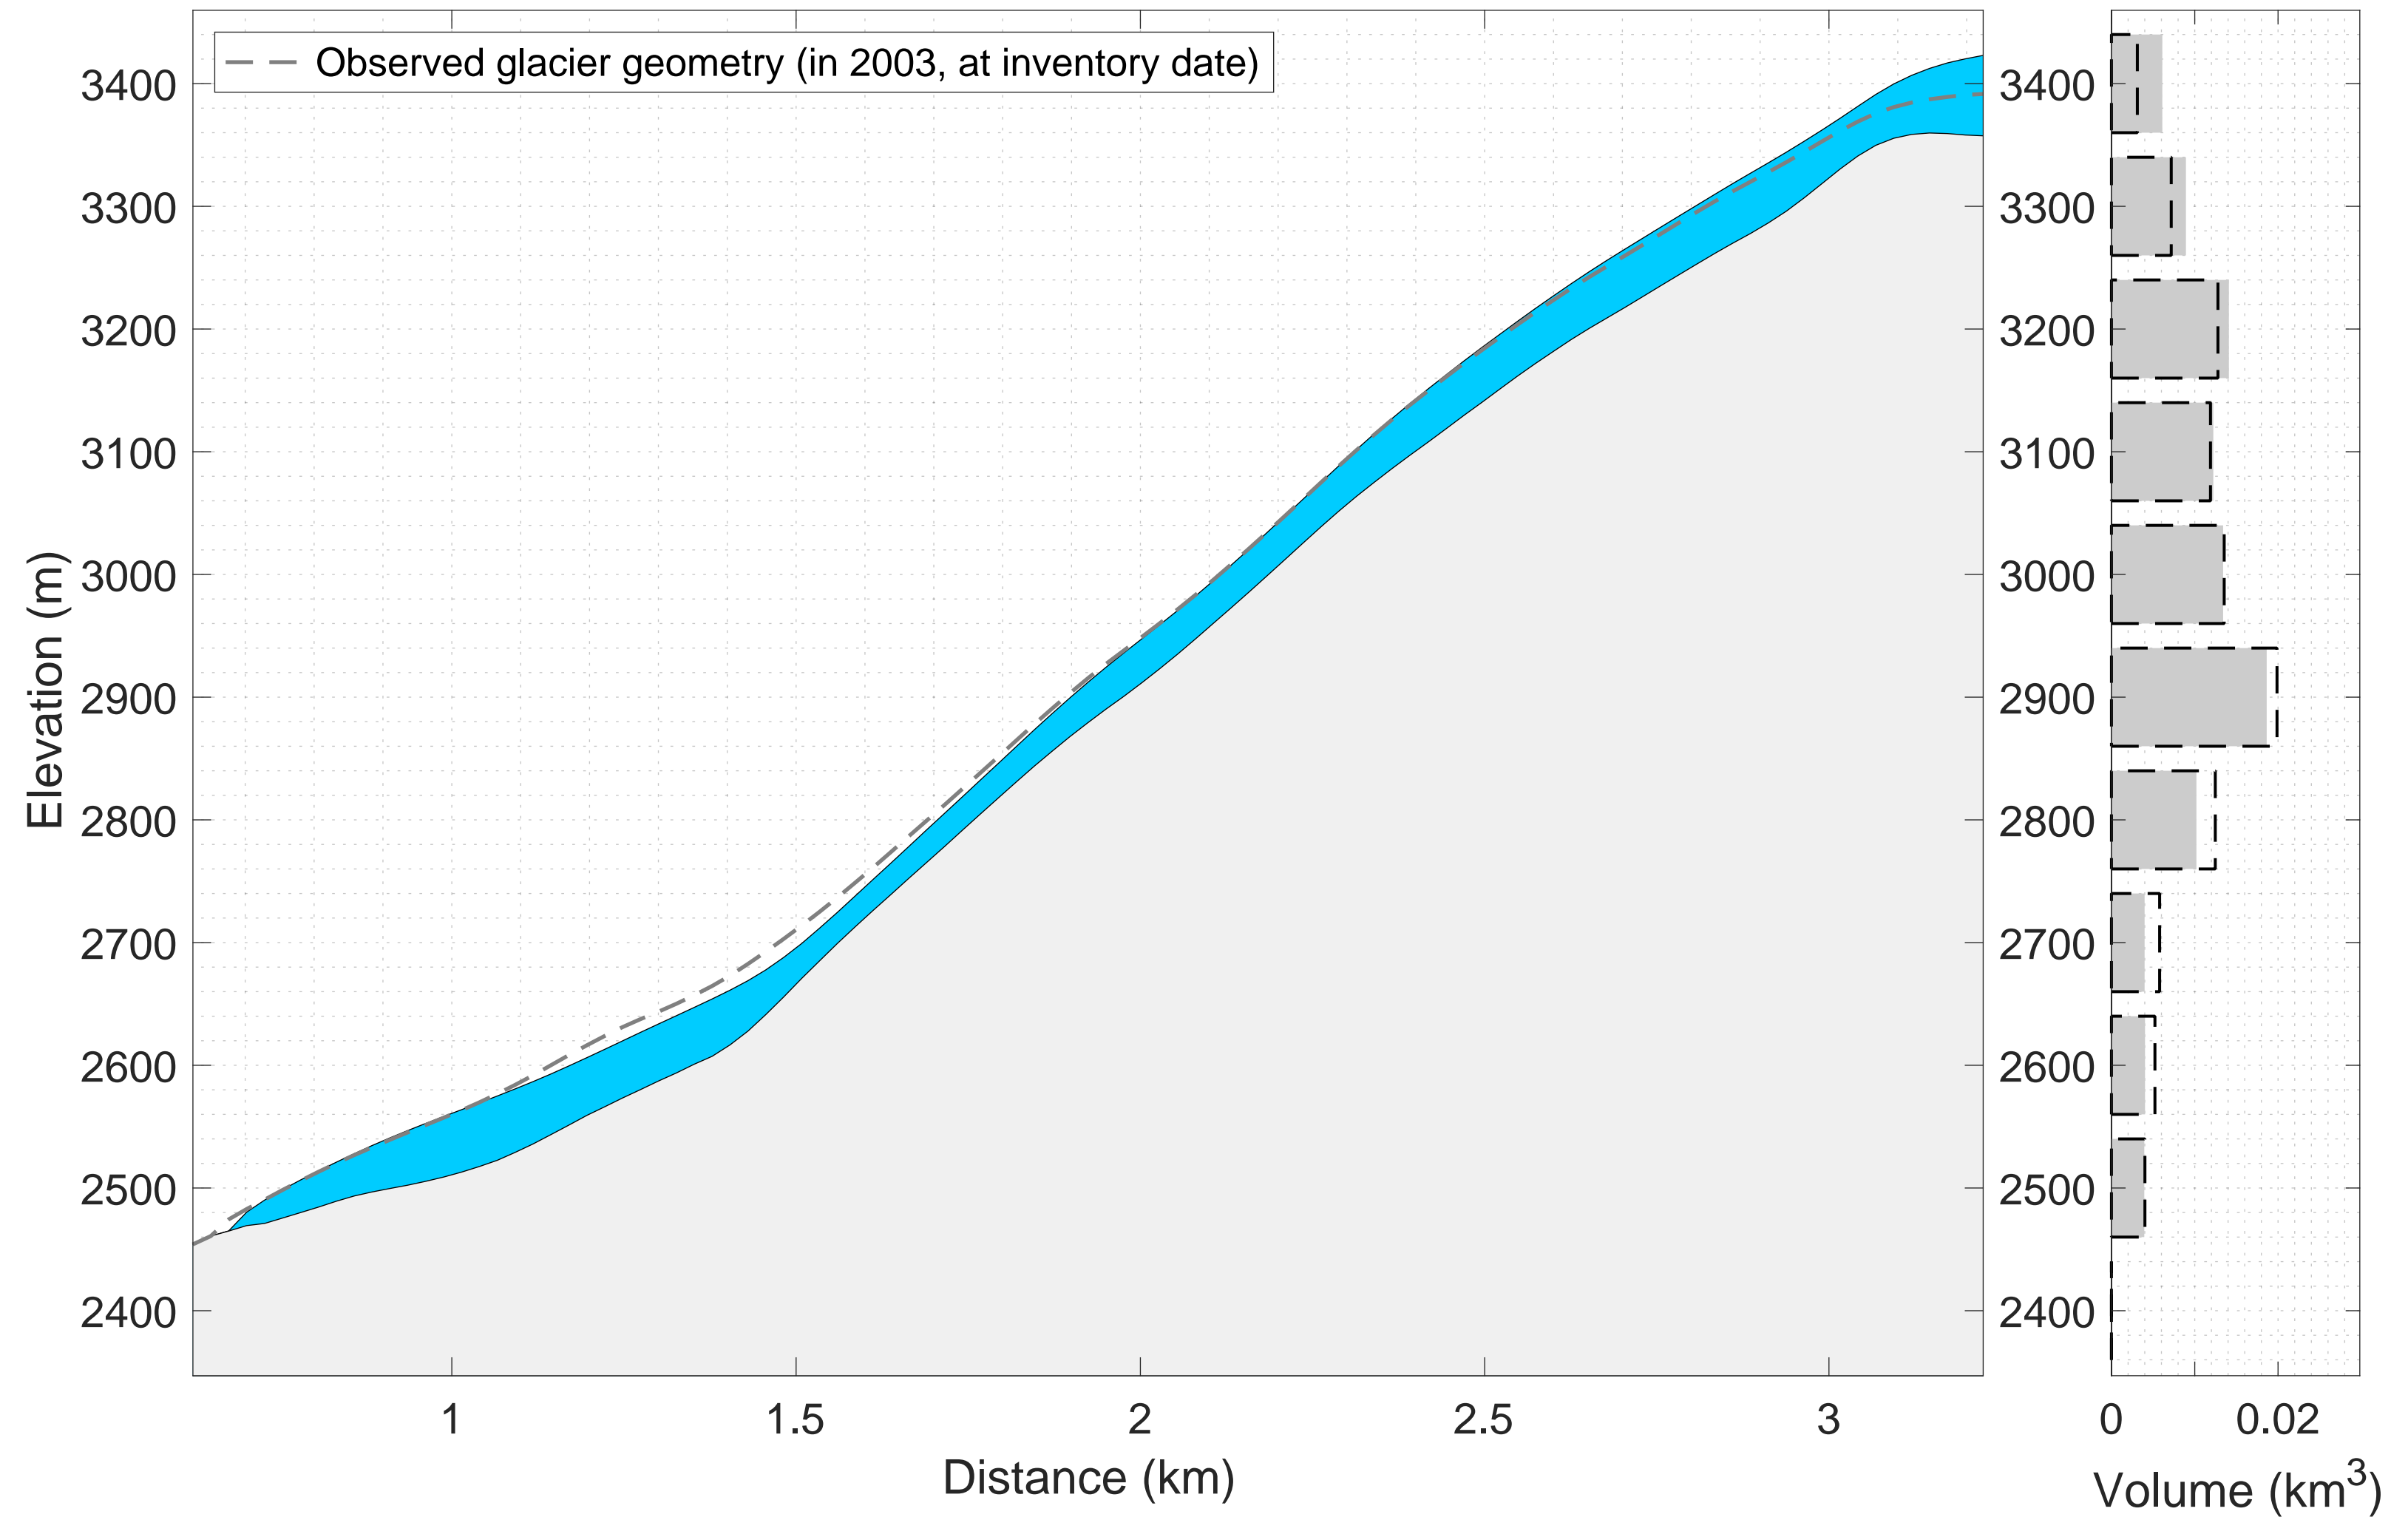

Supplement: Supplementary file 668 [file tc-13-1125-2019-supplement.zip]

**Modelled geometry (Glacier ID = 01671;  $A = 1.1086\text{e-16 Pa}^{-3} \text{ a}^{-1}$ ;  $dx = 11 \text{ m}$ )**

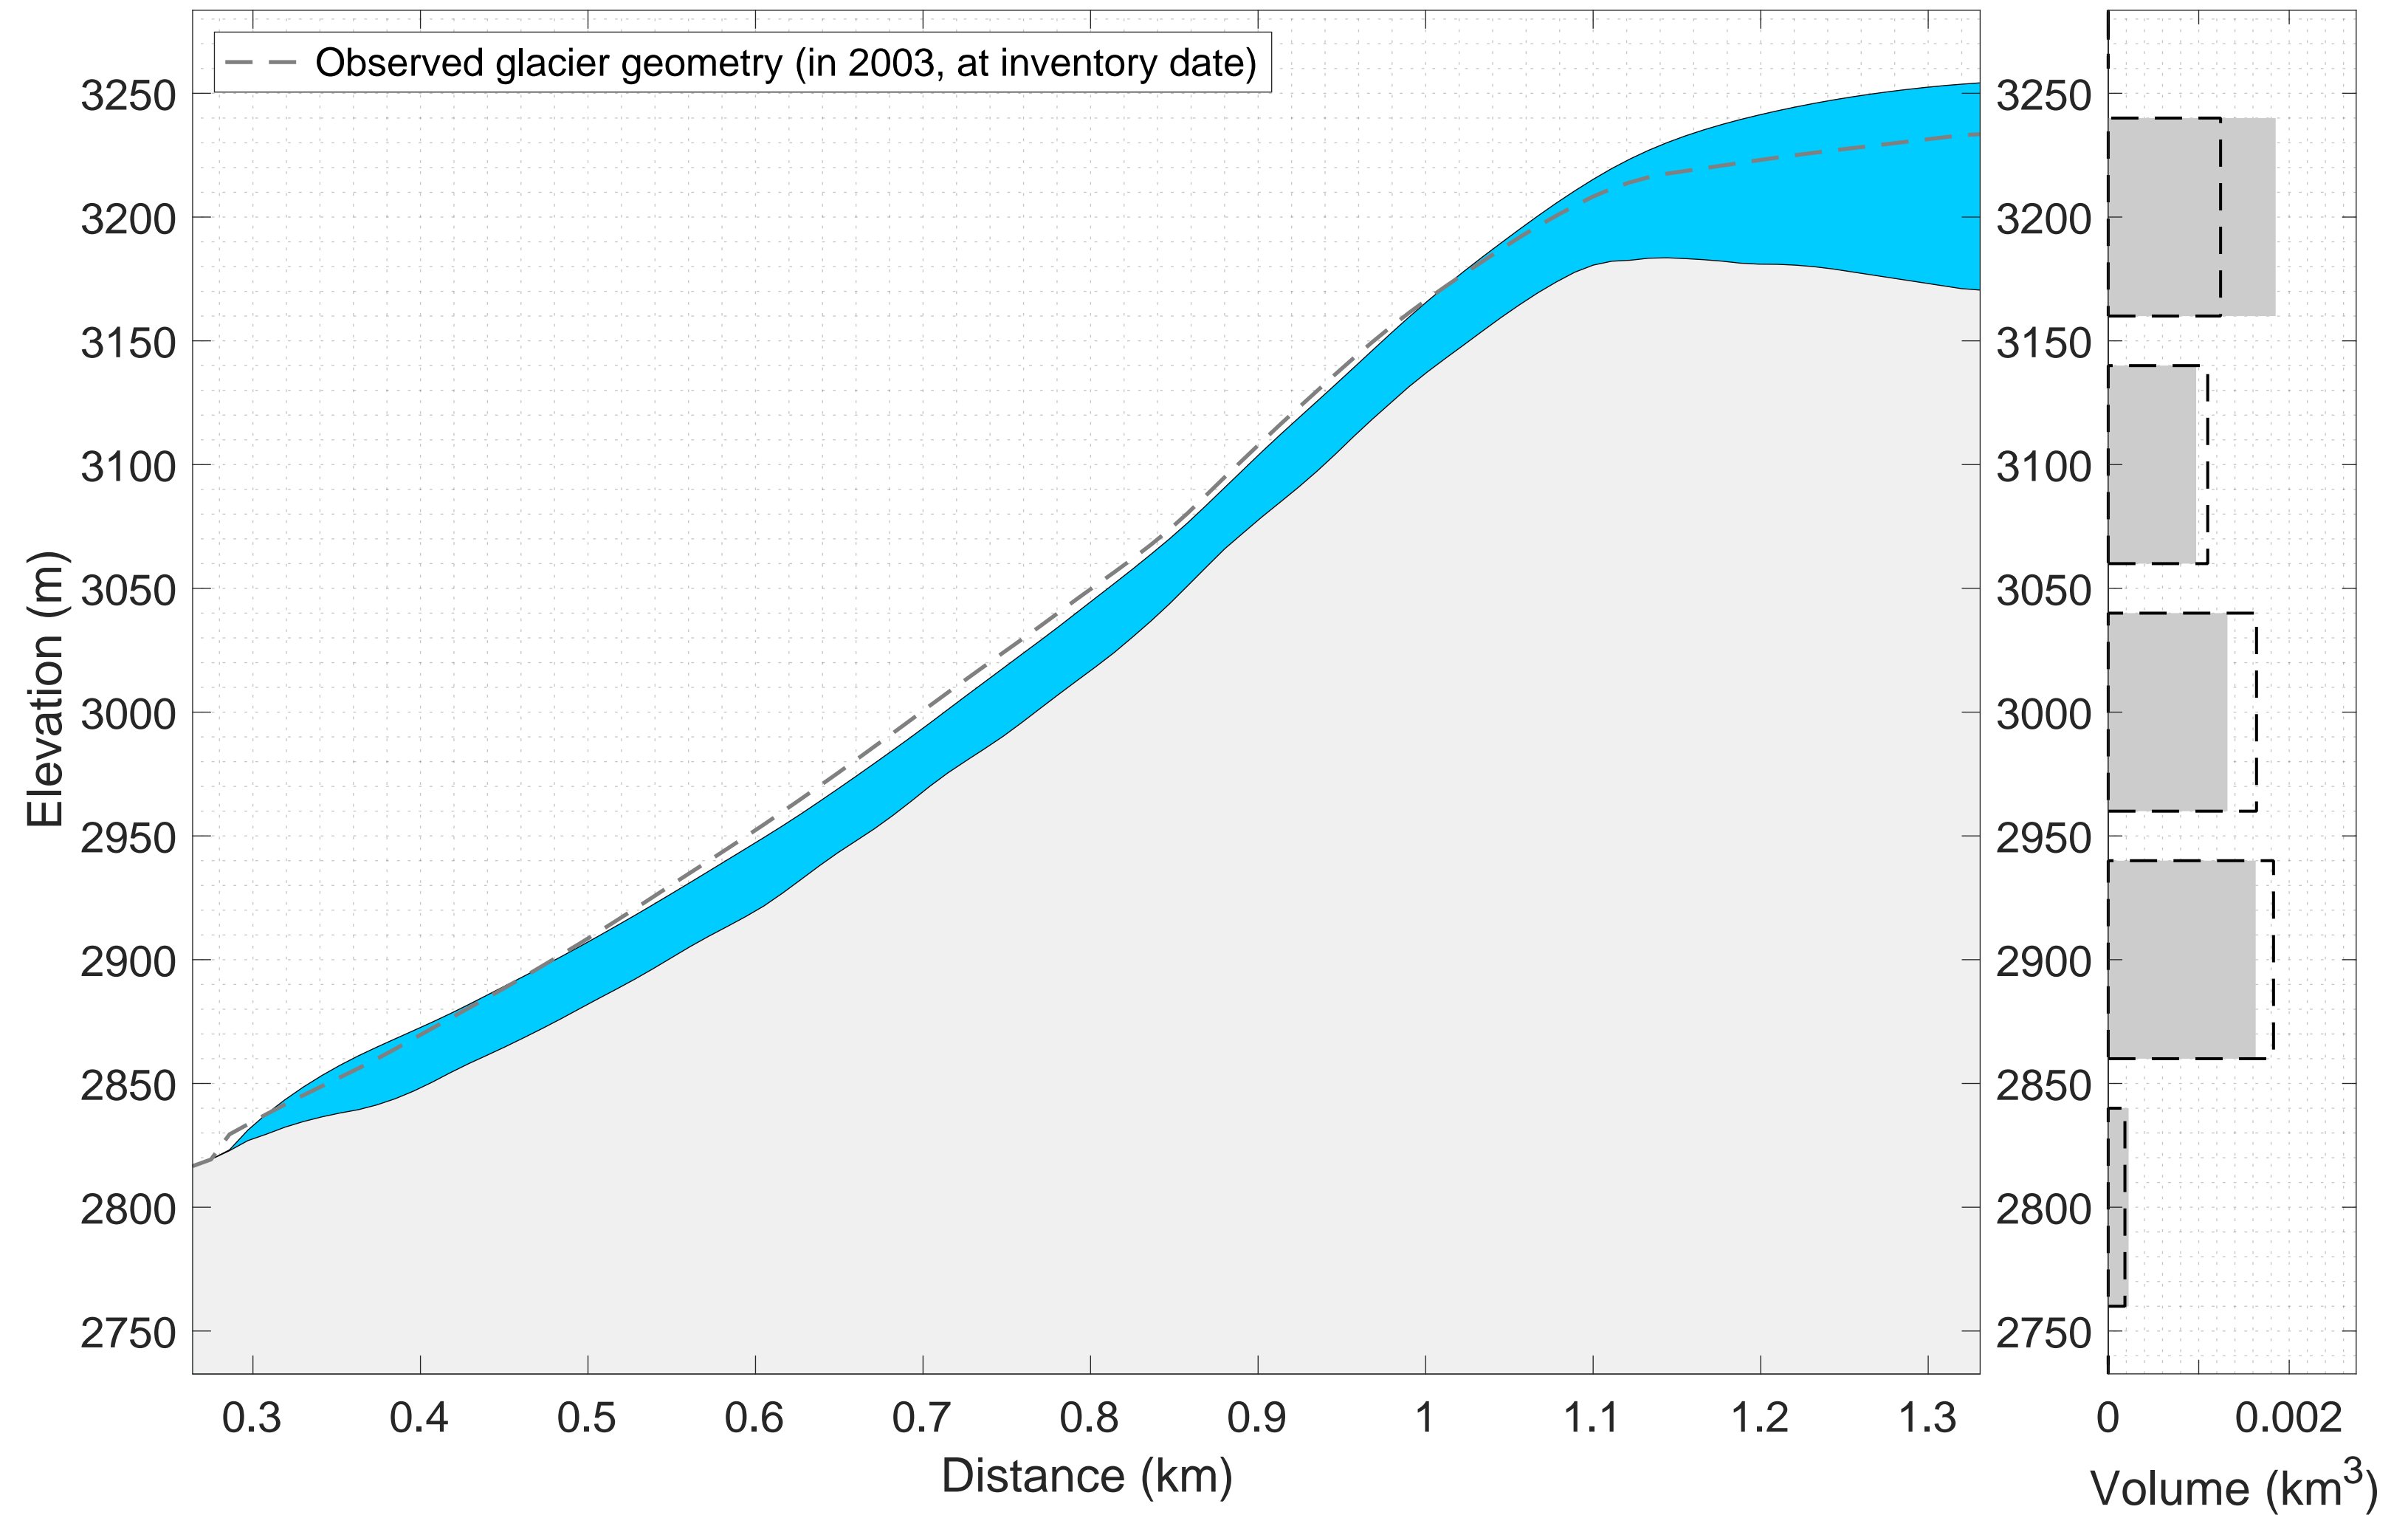

Supplement: Supplementary file 669 [file tc-13-1125-2019-supplement.zip]

**Modelled geometry (Glacier ID = 03655;  $A = 2.2673\text{e-}16 \text{ Pa}^{-3} \text{ a}^{-1}$ ;  $dx = 24 \text{ m}$ )**

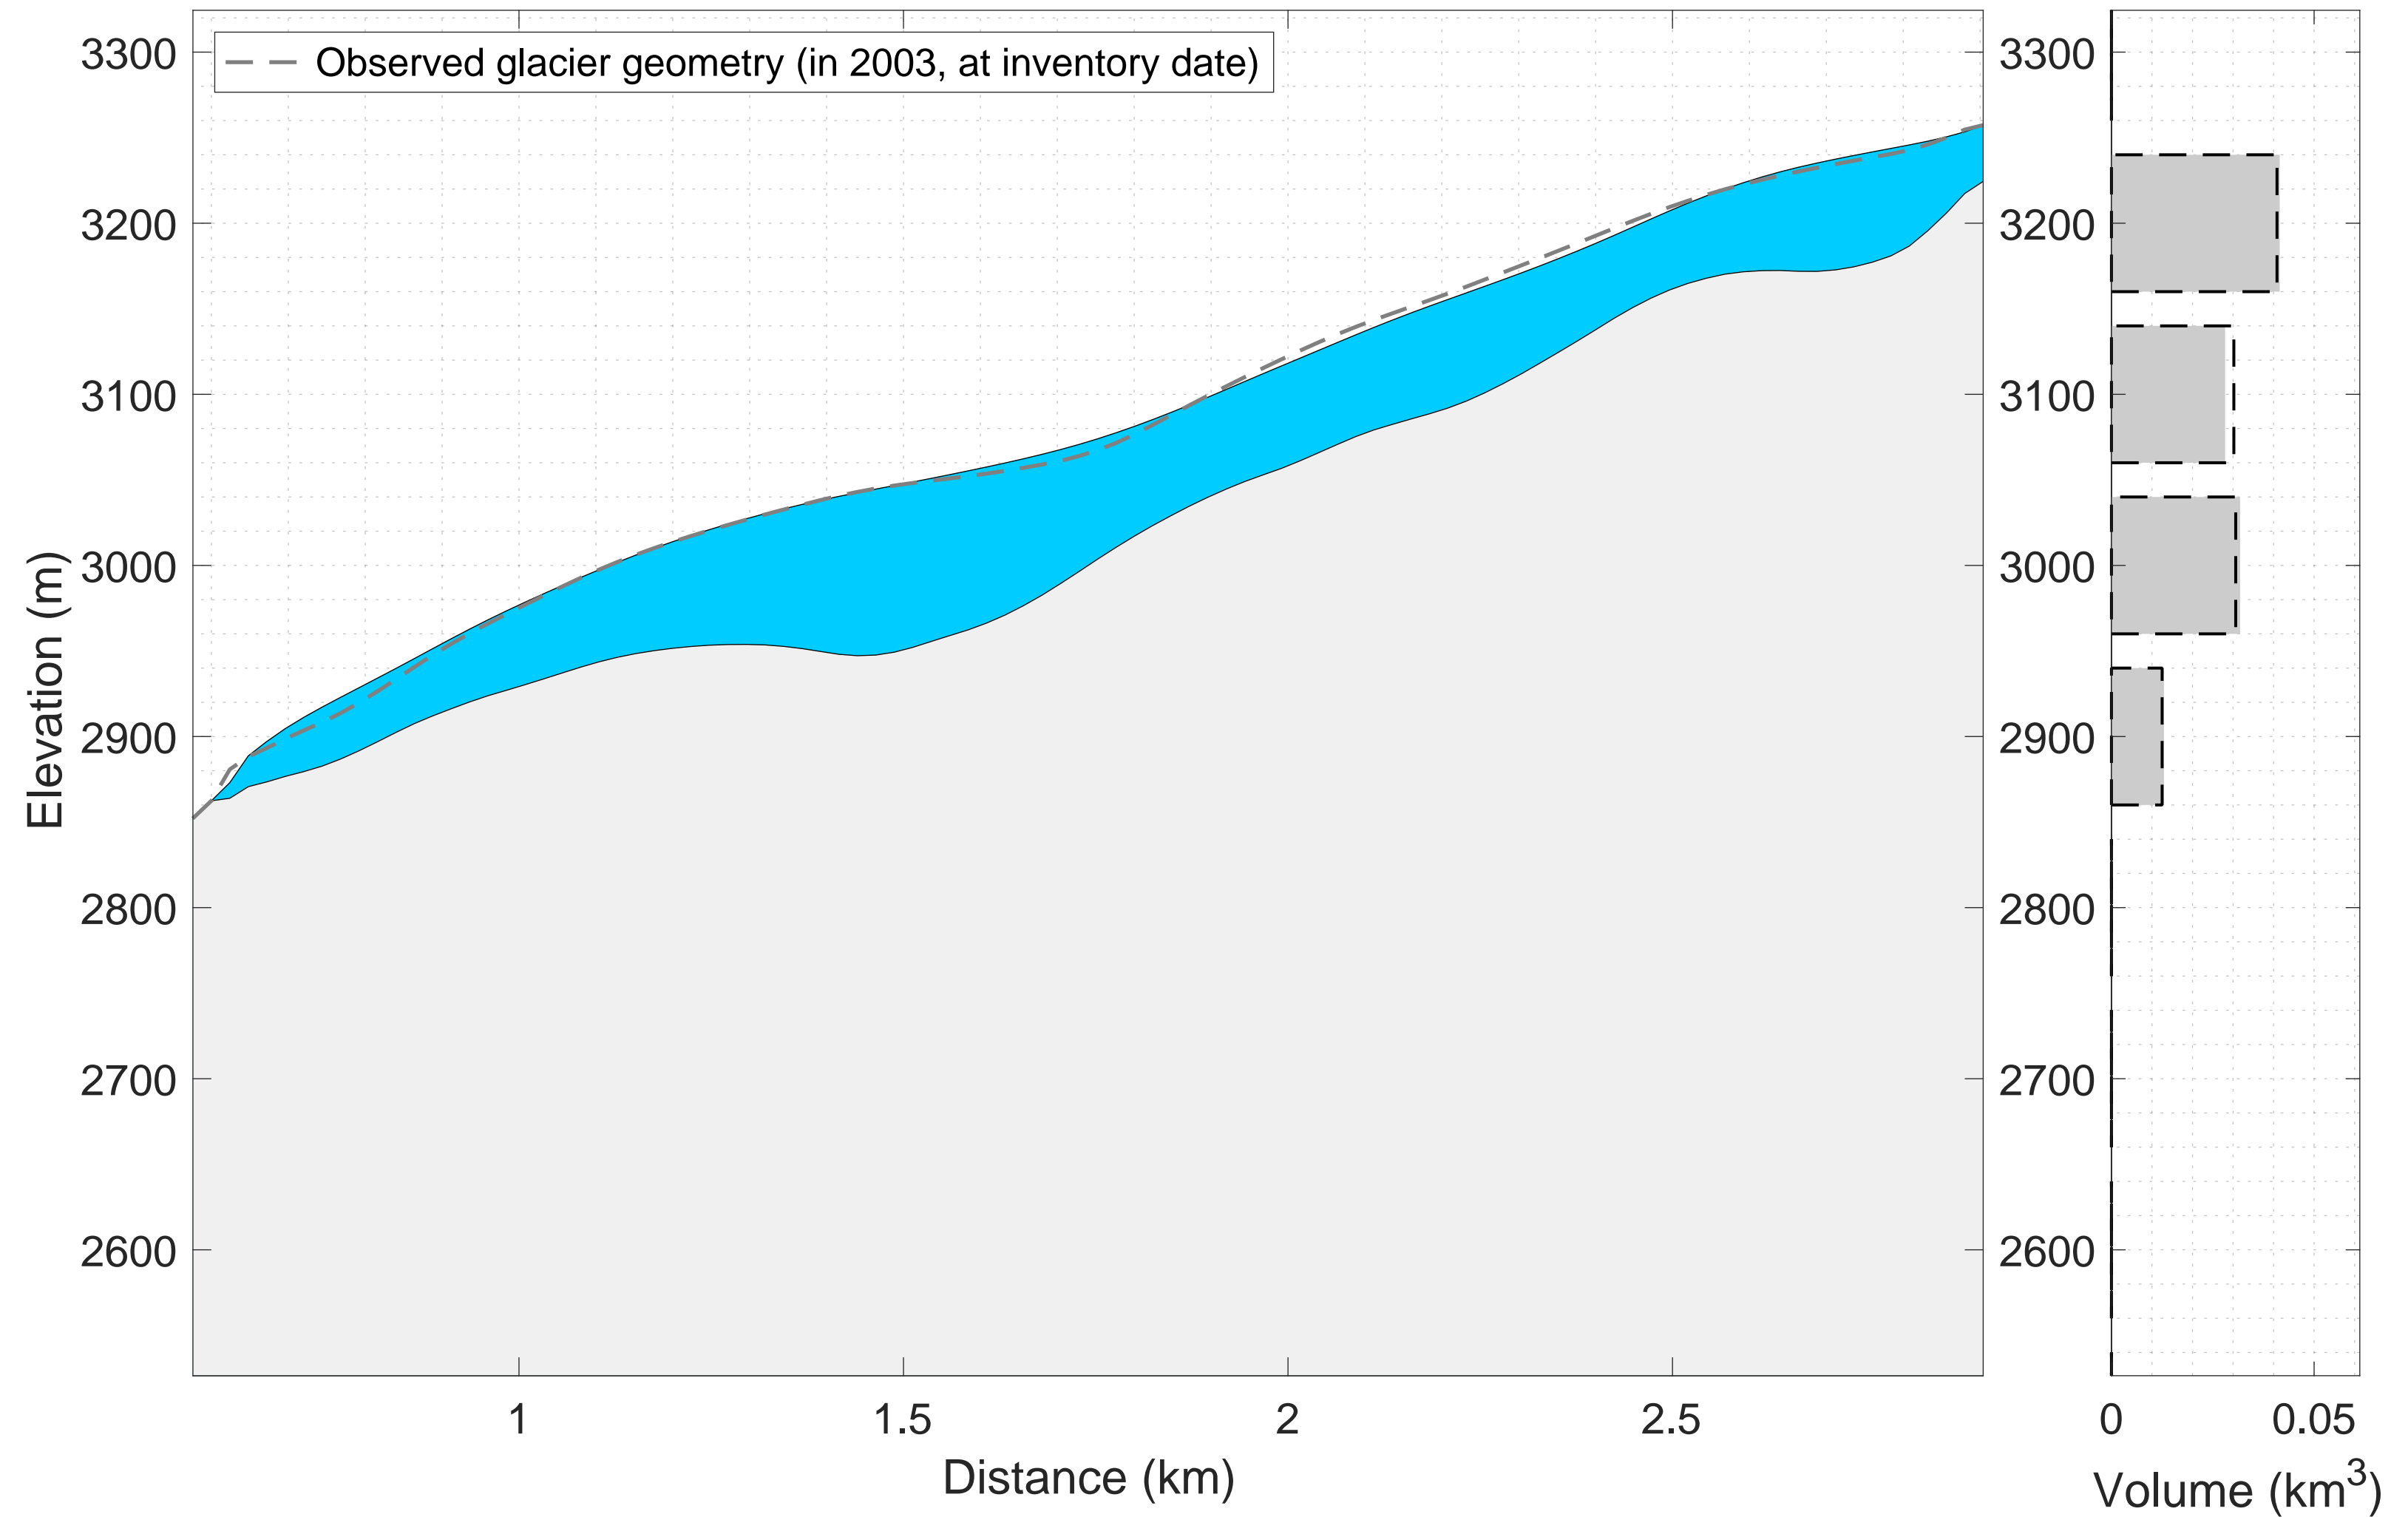

Supplement: Supplementary file 670 [file tc-13-1125-2019-supplement.zip]

**Modelled geometry (Glacier ID = 00110;  $A = 1.4219\text{e-}16 \text{ Pa}^{-3} \text{ a}^{-1}$ ;  $dx = 31 \text{ m}$ )**

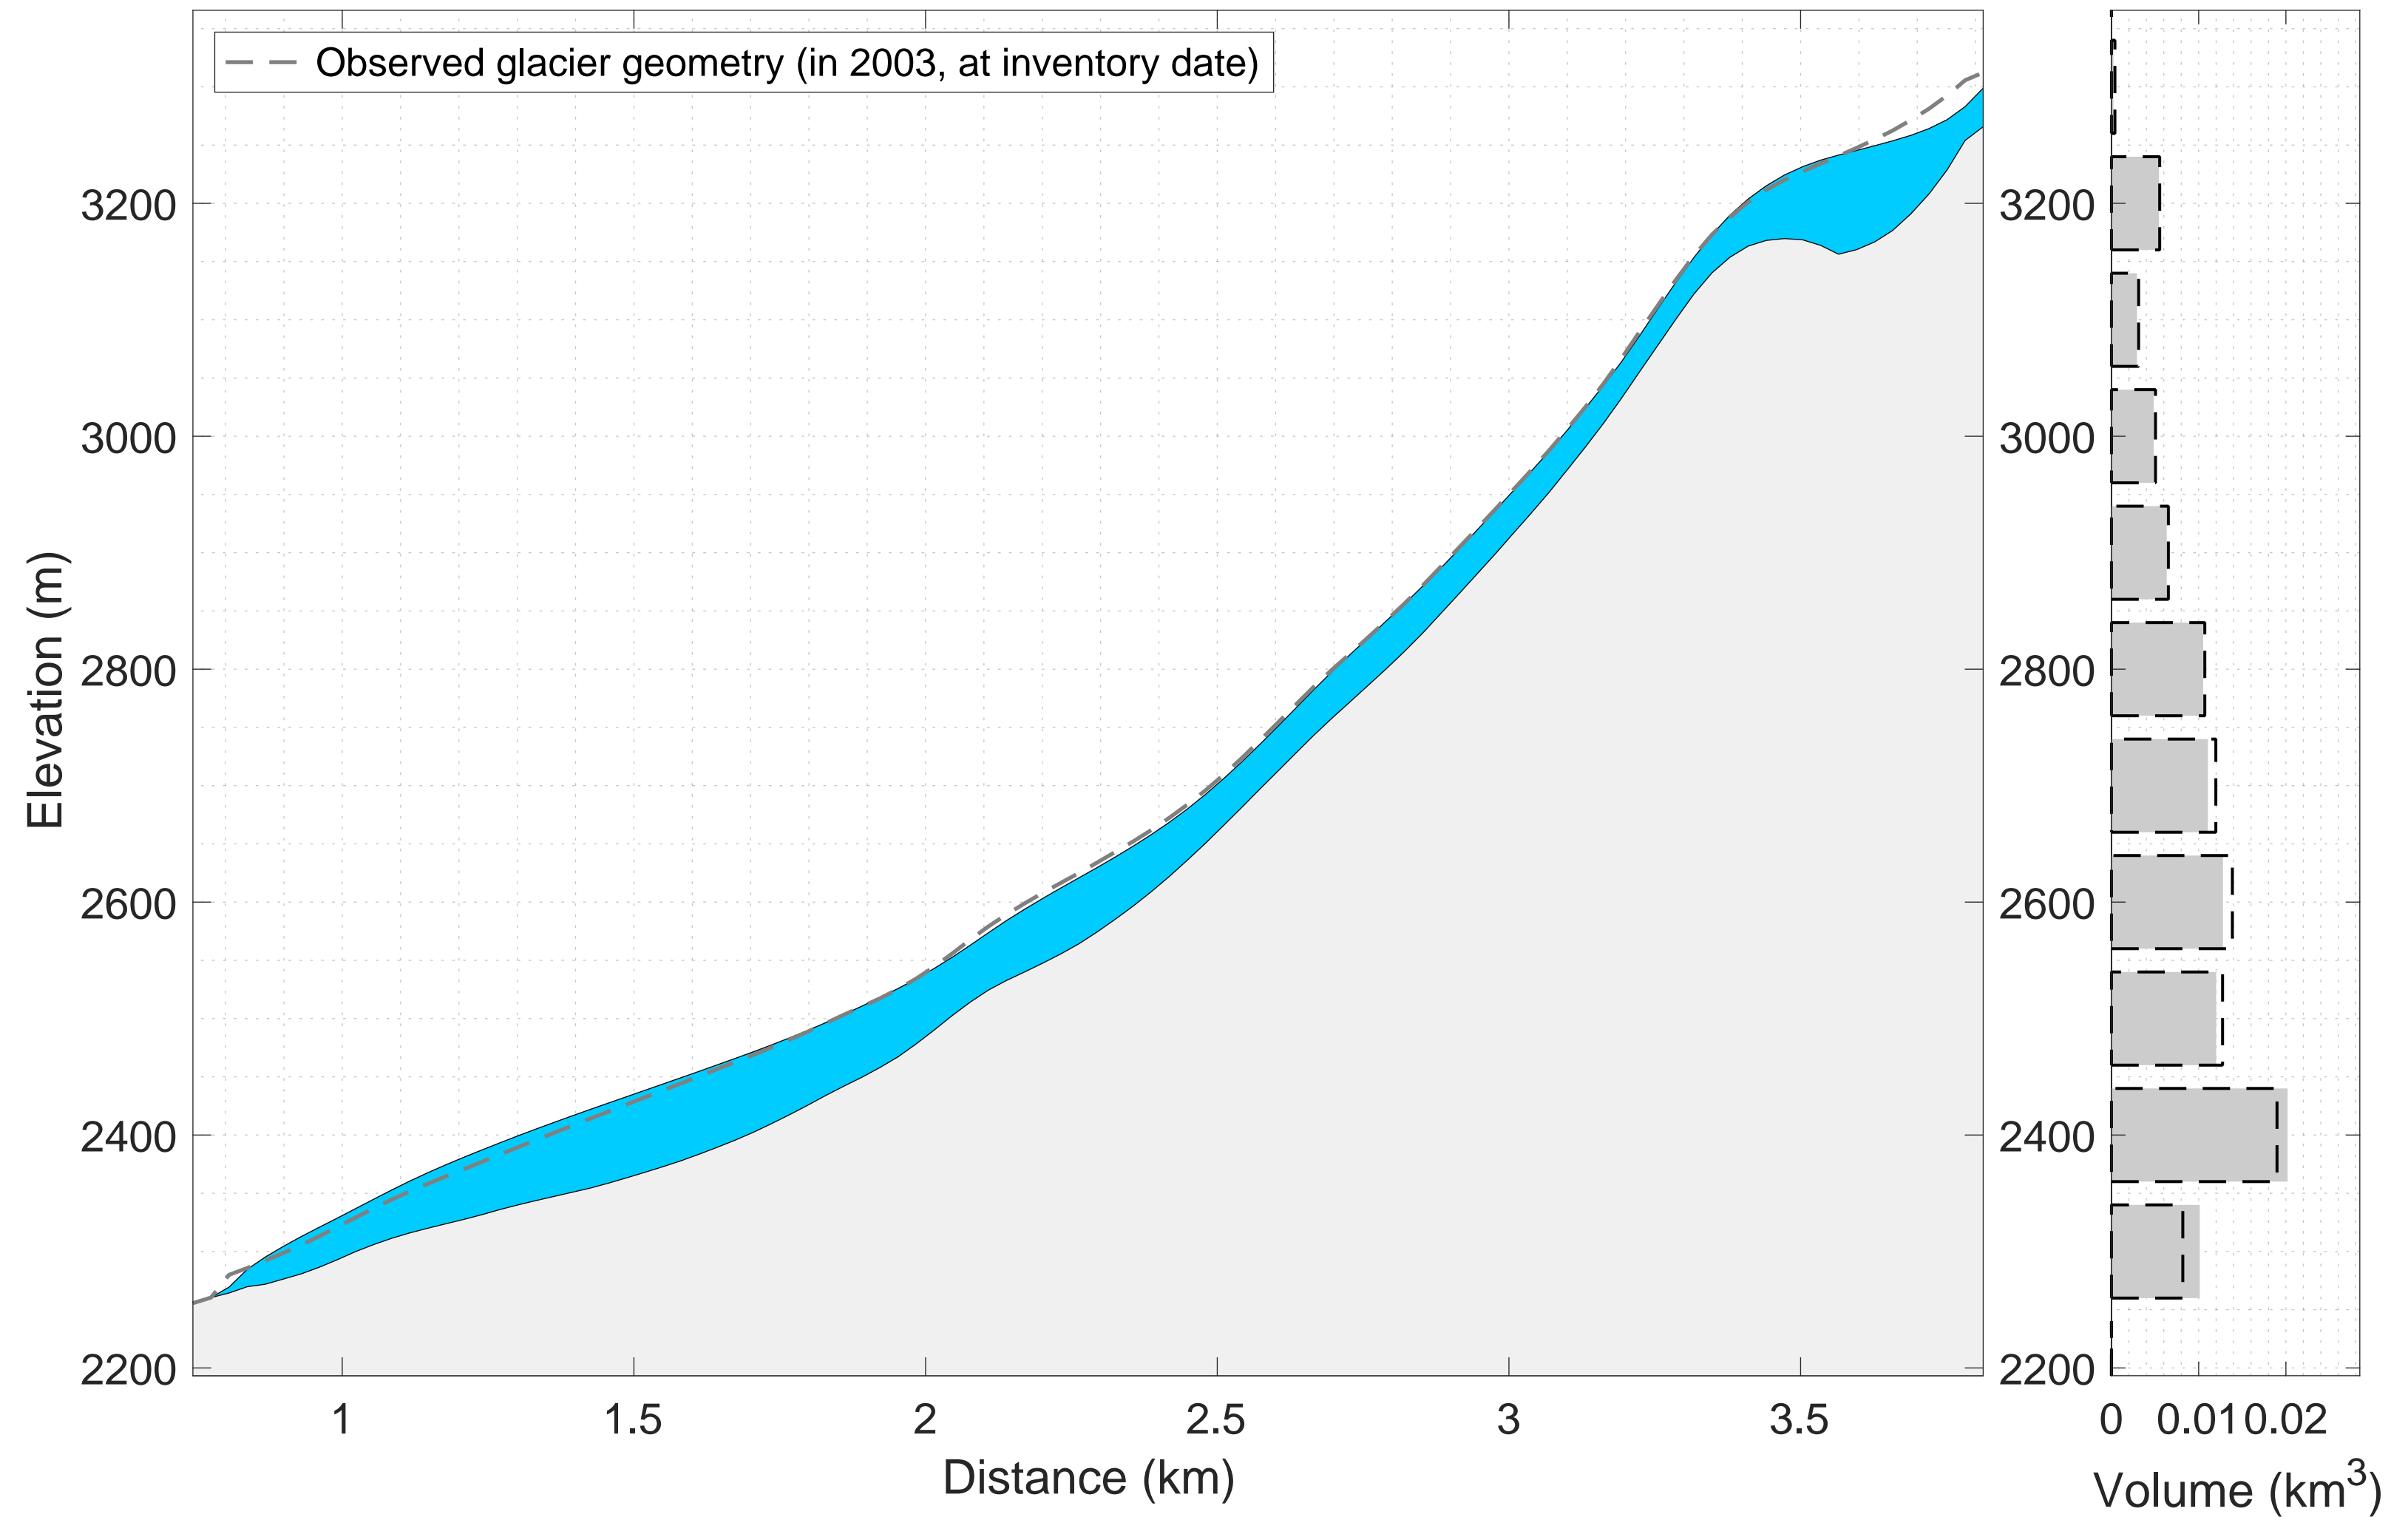

Supplement: Supplementary file 671 [file tc-13-1125-2019-supplement.zip]

**Modelled geometry (Glacier ID = 02864;  $A = 6.2715\text{e-}17 \text{ Pa}^{-3} \text{ a}^{-1}$ ;  $dx = 18 \text{ m}$ )**

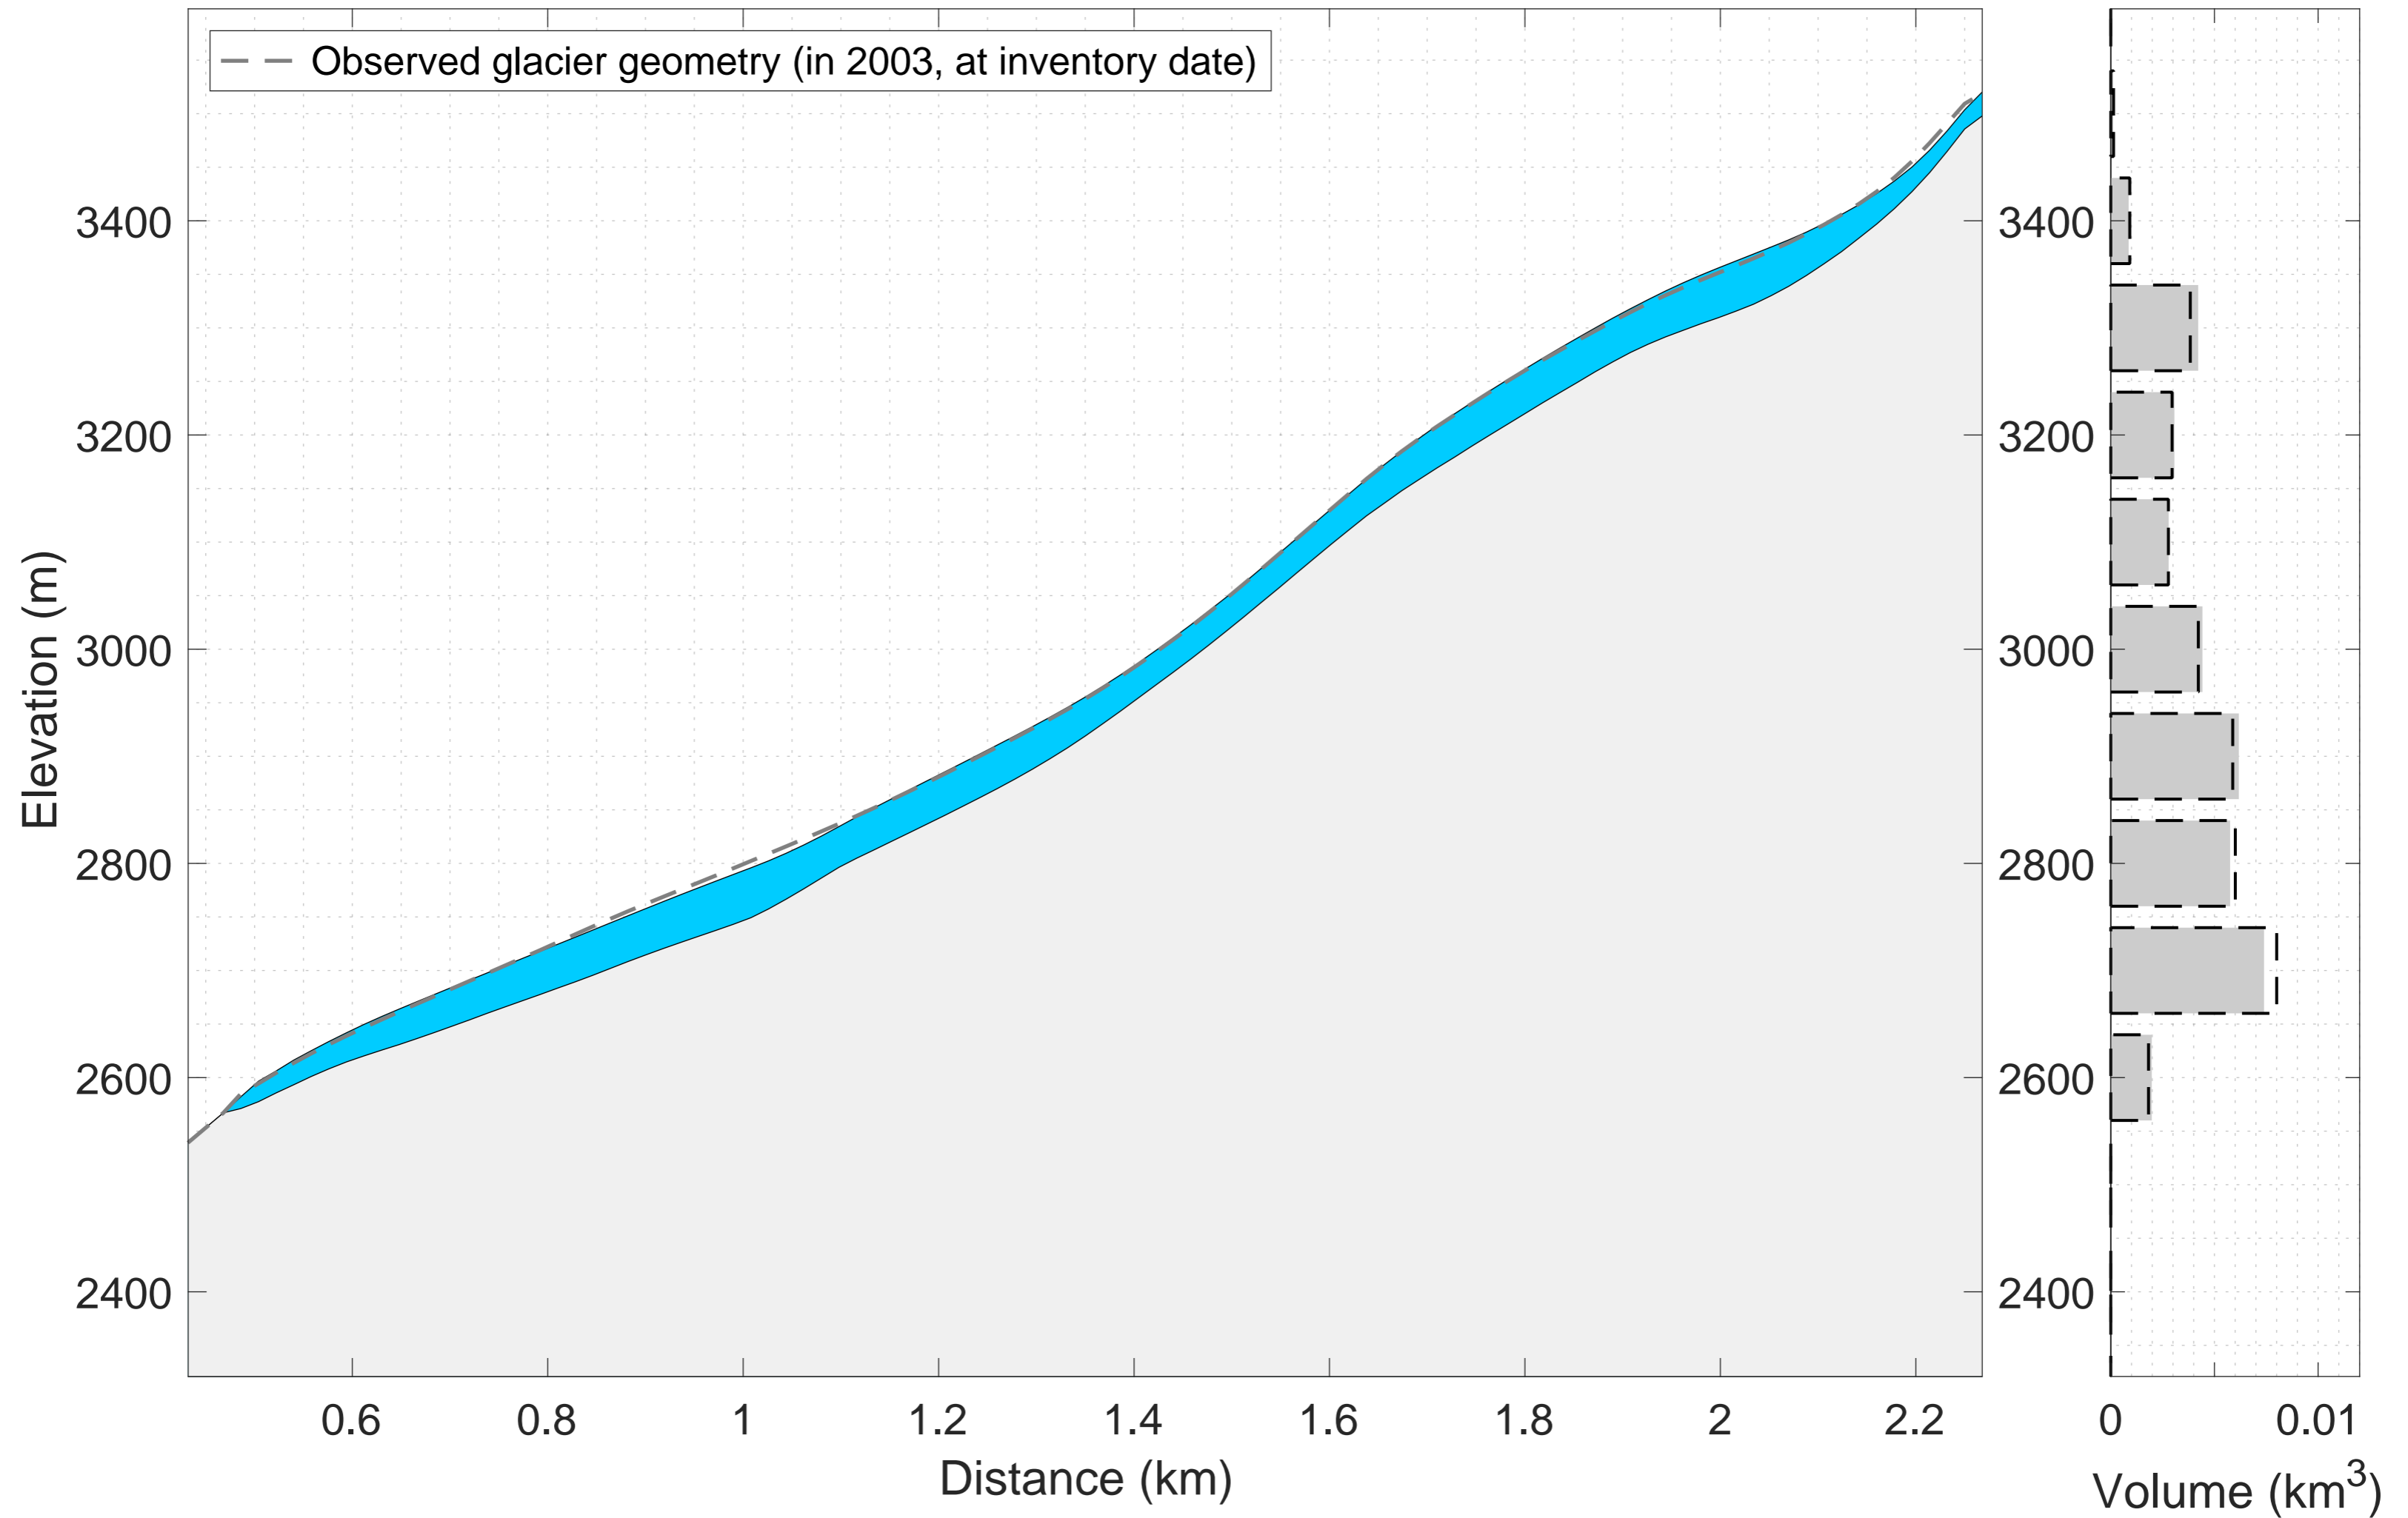

Supplement: Supplementary file 672 [file tc-13-1125-2019-supplement.zip]

**Modelled geometry (Glacier ID = 03663;  $A = 1.8403\text{e-}16 \text{ Pa}^{-3} \text{ a}^{-1}$ ;  $dx = 26 \text{ m}$ )**

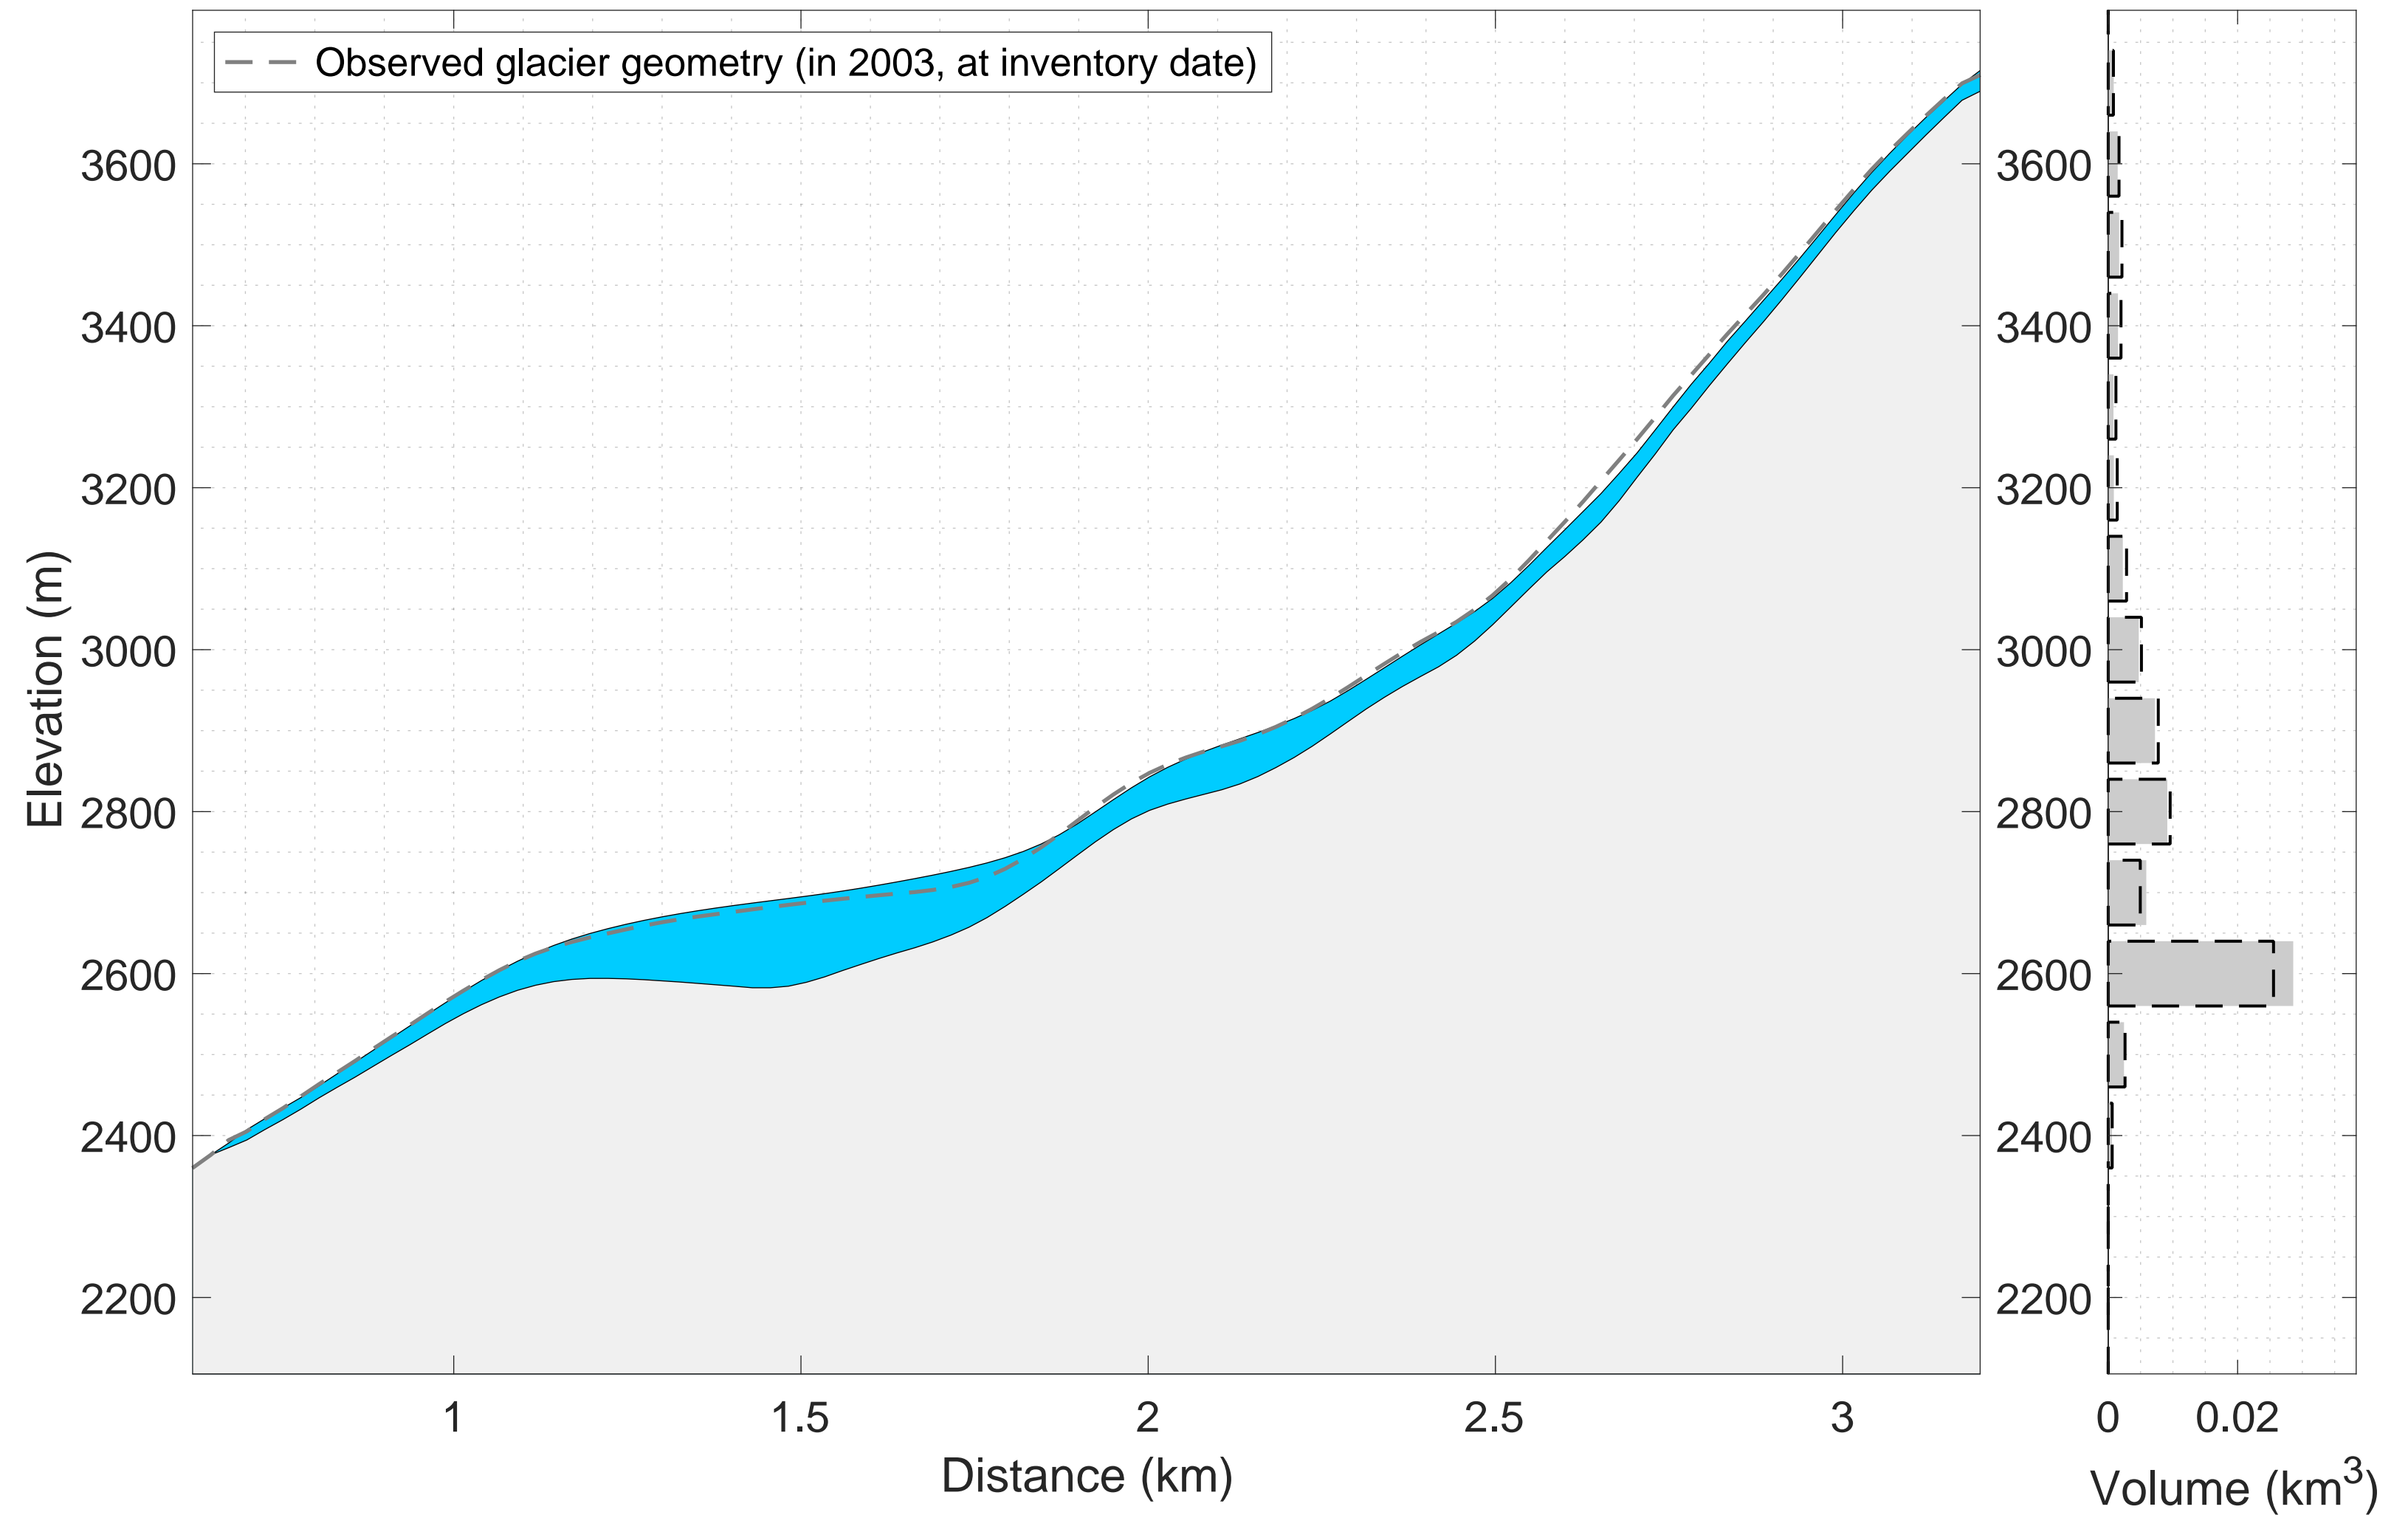

Supplement: Supplementary file 673 [file tc-13-1125-2019-supplement.zip]

**Modelled geometry (Glacier ID = 00471;  $A = 9.7143\text{e-}17 \text{ Pa}^{-3} \text{ a}^{-1}$ ;  $dx = 11 \text{ m}$ )**

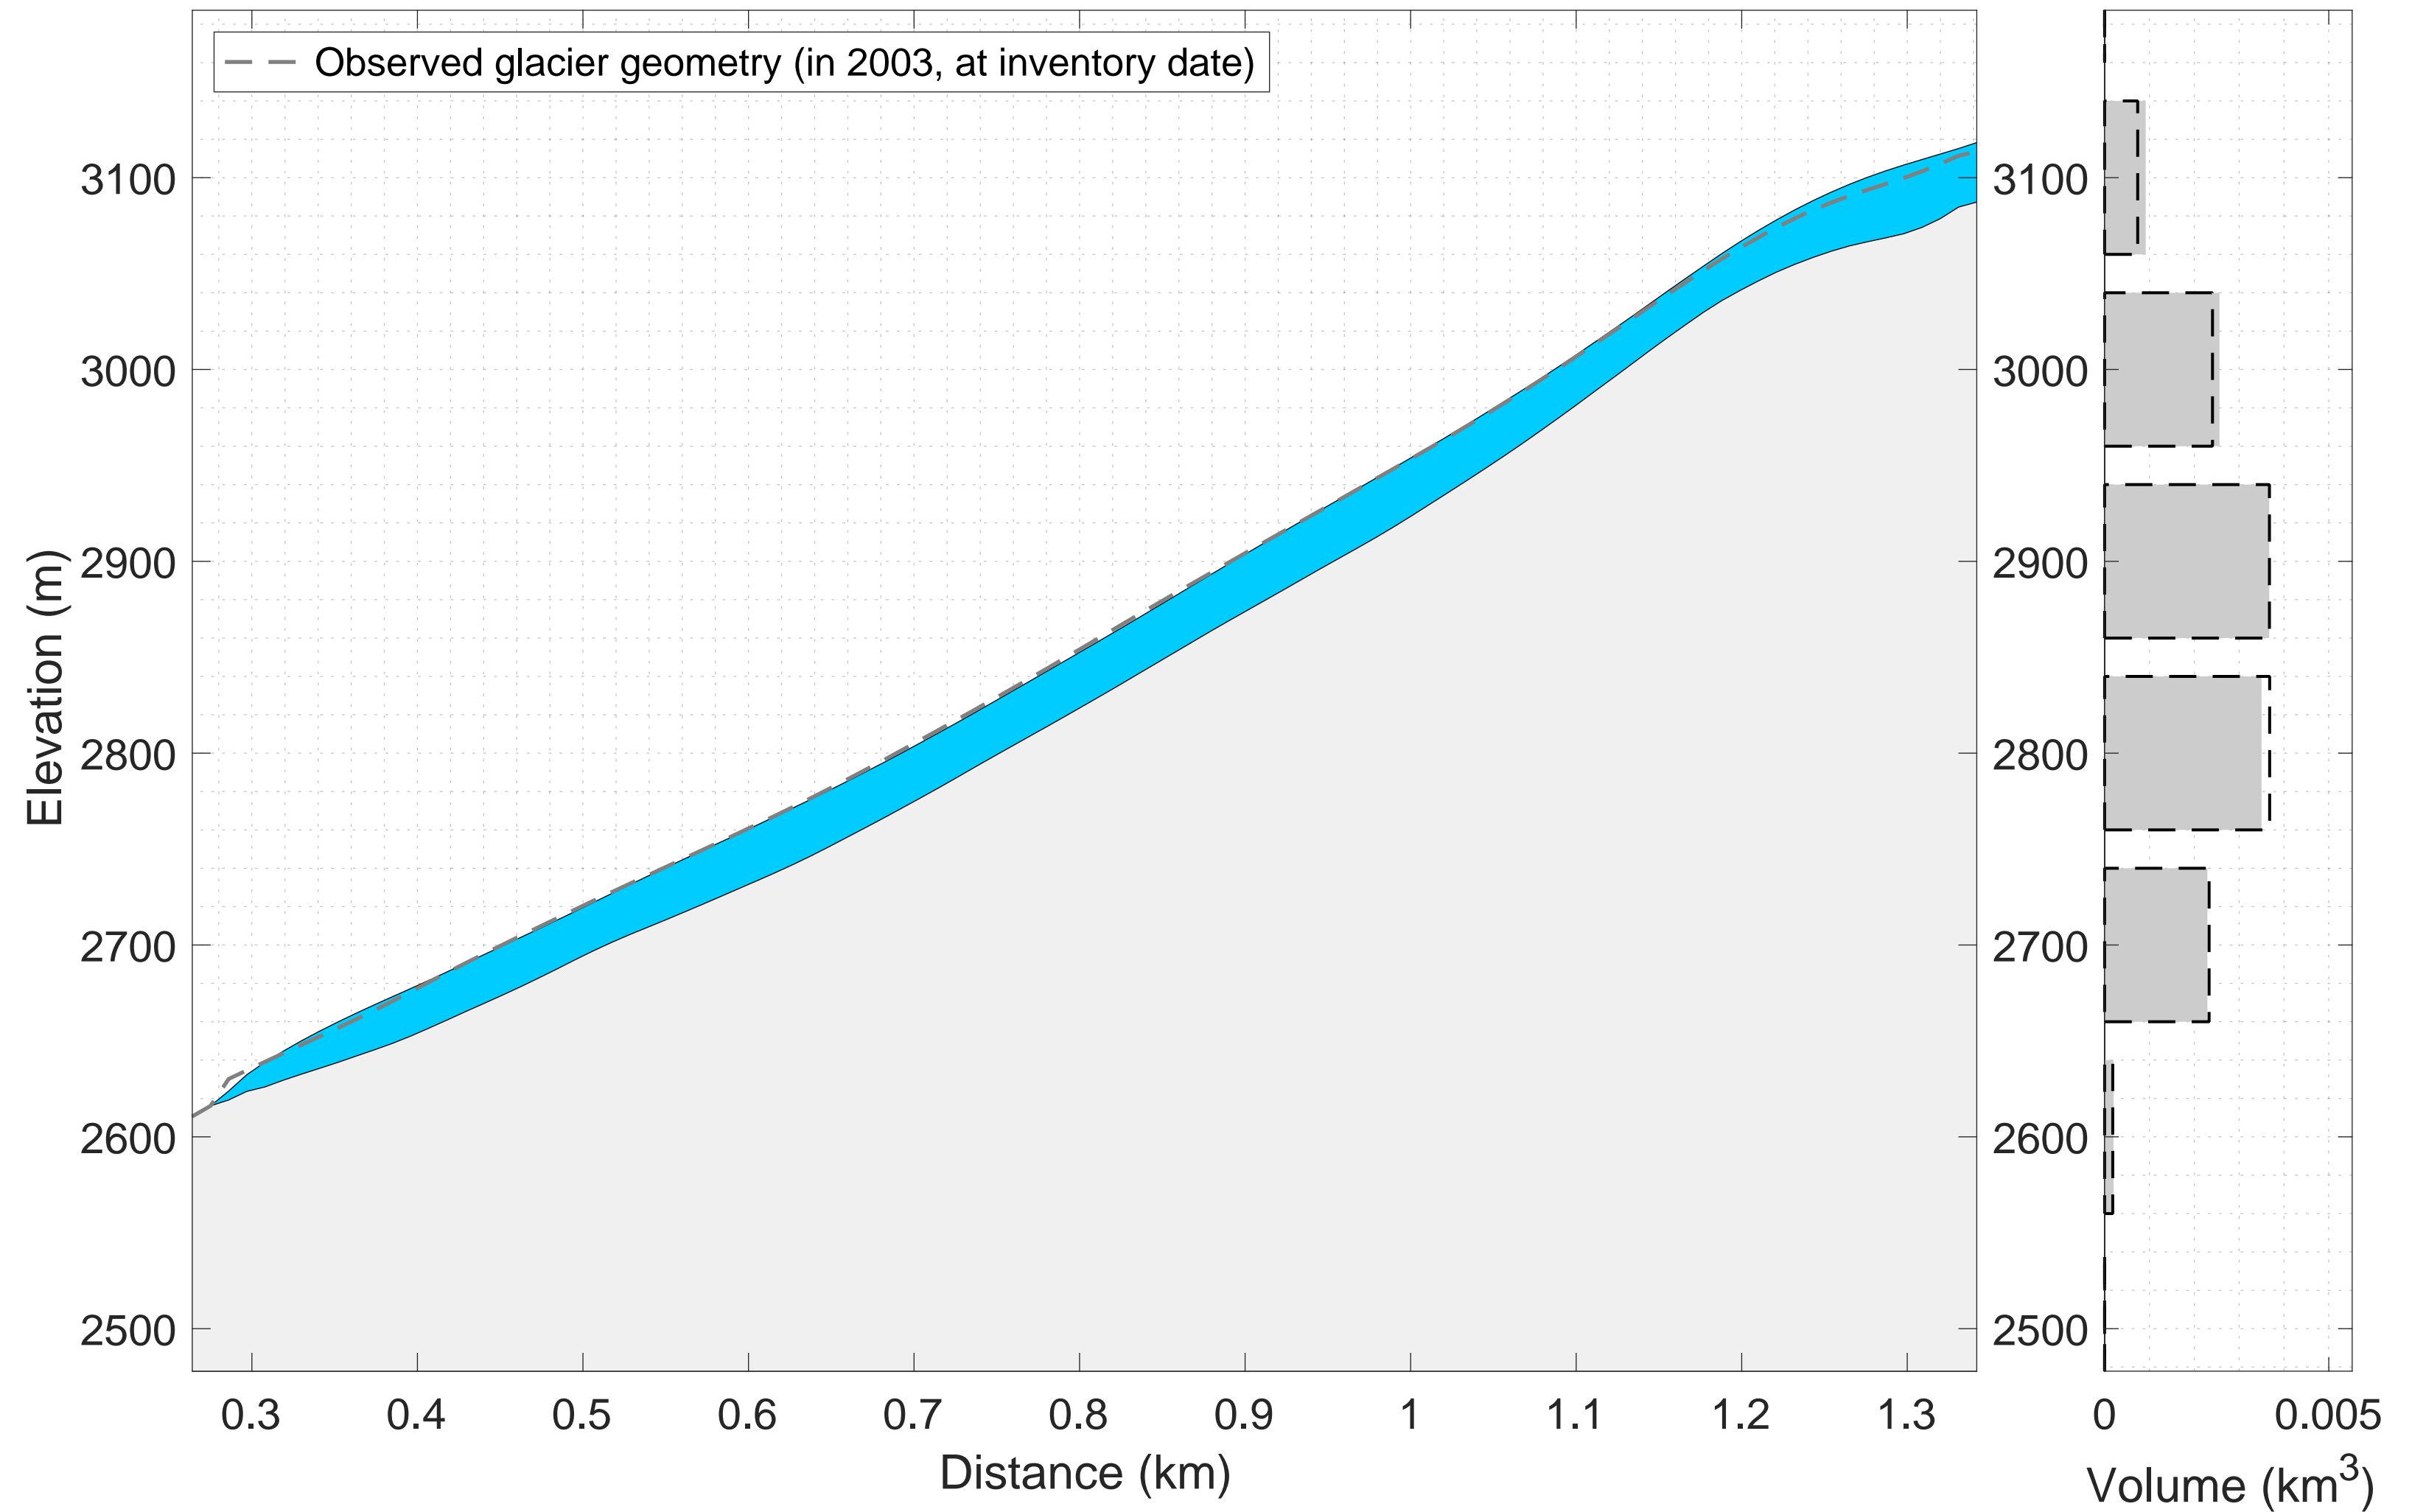

Supplement: Supplementary file 674 [file tc-13-1125-2019-supplement.zip]

**Modelled geometry (Glacier ID = 02843;  $A = 2.177\text{e-}16 \text{ Pa}^{-3} \text{ a}^{-1}$ ;  $dx = 36 \text{ m}$ )**

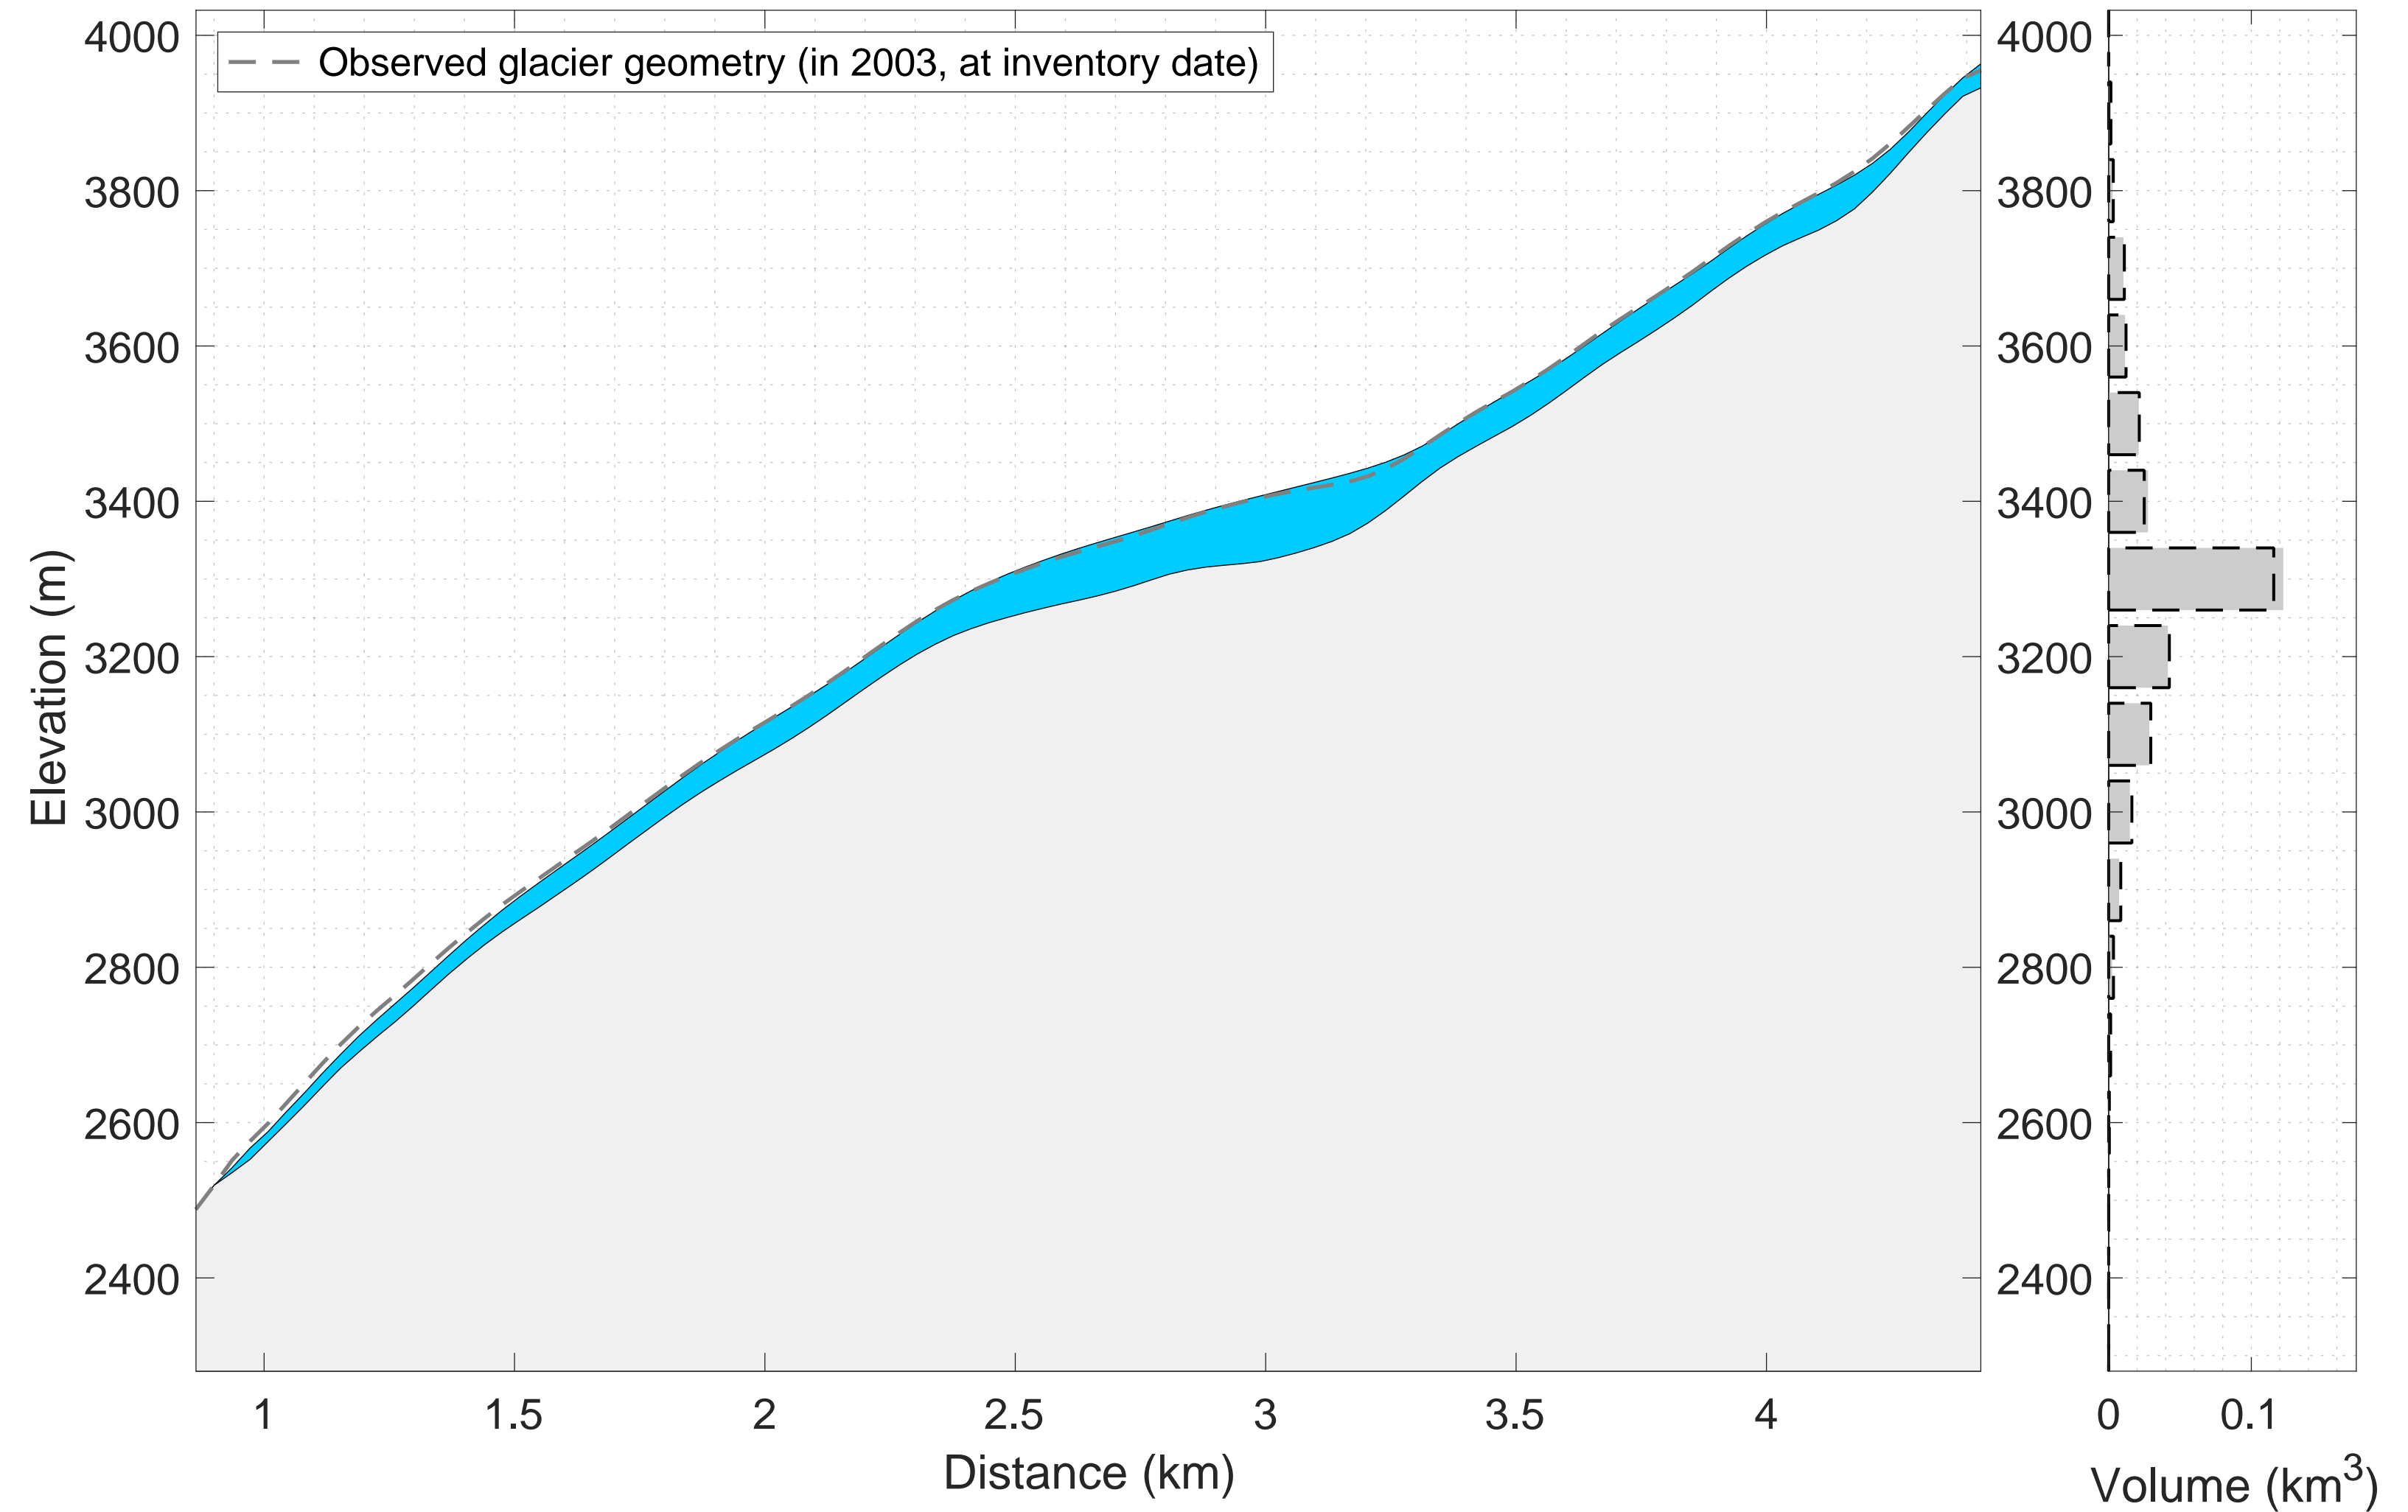

Supplement: Supplementary file 675 [file tc-13-1125-2019-supplement.zip]

**Modelled geometry (Glacier ID = 02851;  $A = 1.8431\text{e-}16 \text{ Pa}^{-3} \text{ a}^{-1}$ ;  $dx = 16 \text{ m}$ )**

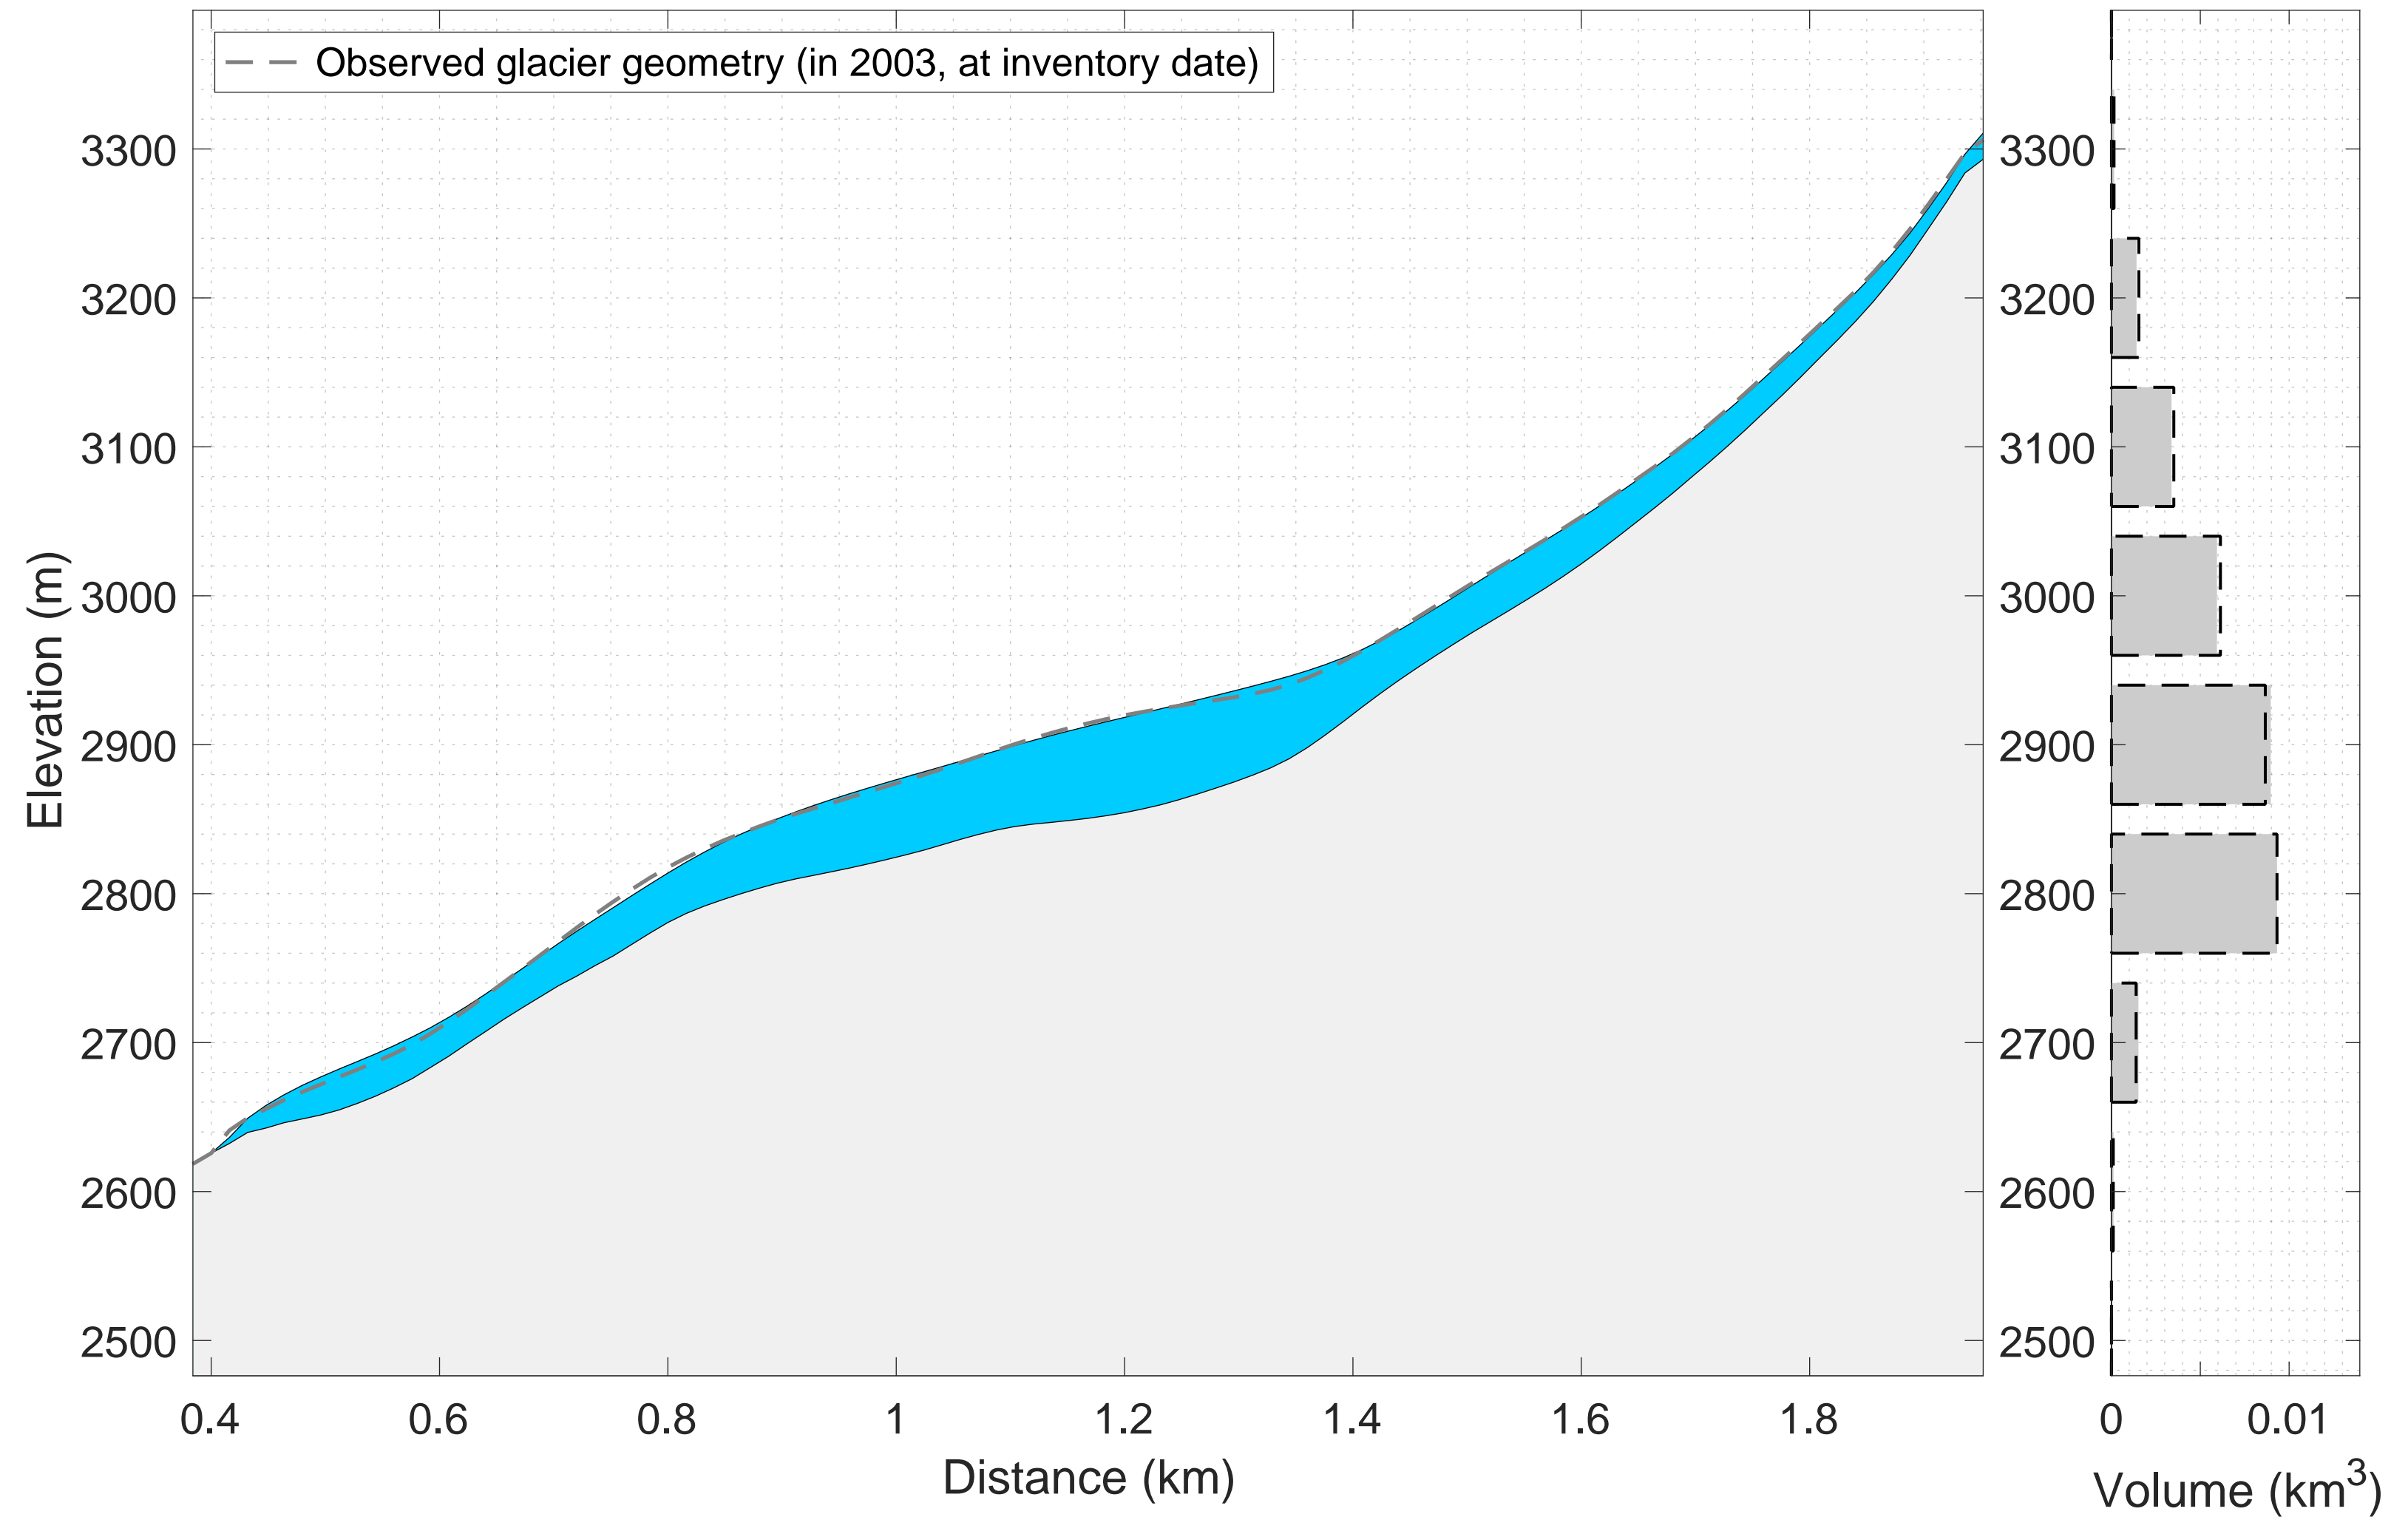

Supplement: Supplementary file 676 [file tc-13-1125-2019-supplement.zip]

**Modelled geometry (Glacier ID = 02477;  $A = 3.6142\text{e-}16 \text{ Pa}^{-3} \text{ a}^{-1}$ ;  $dx = 38 \text{ m}$ )**

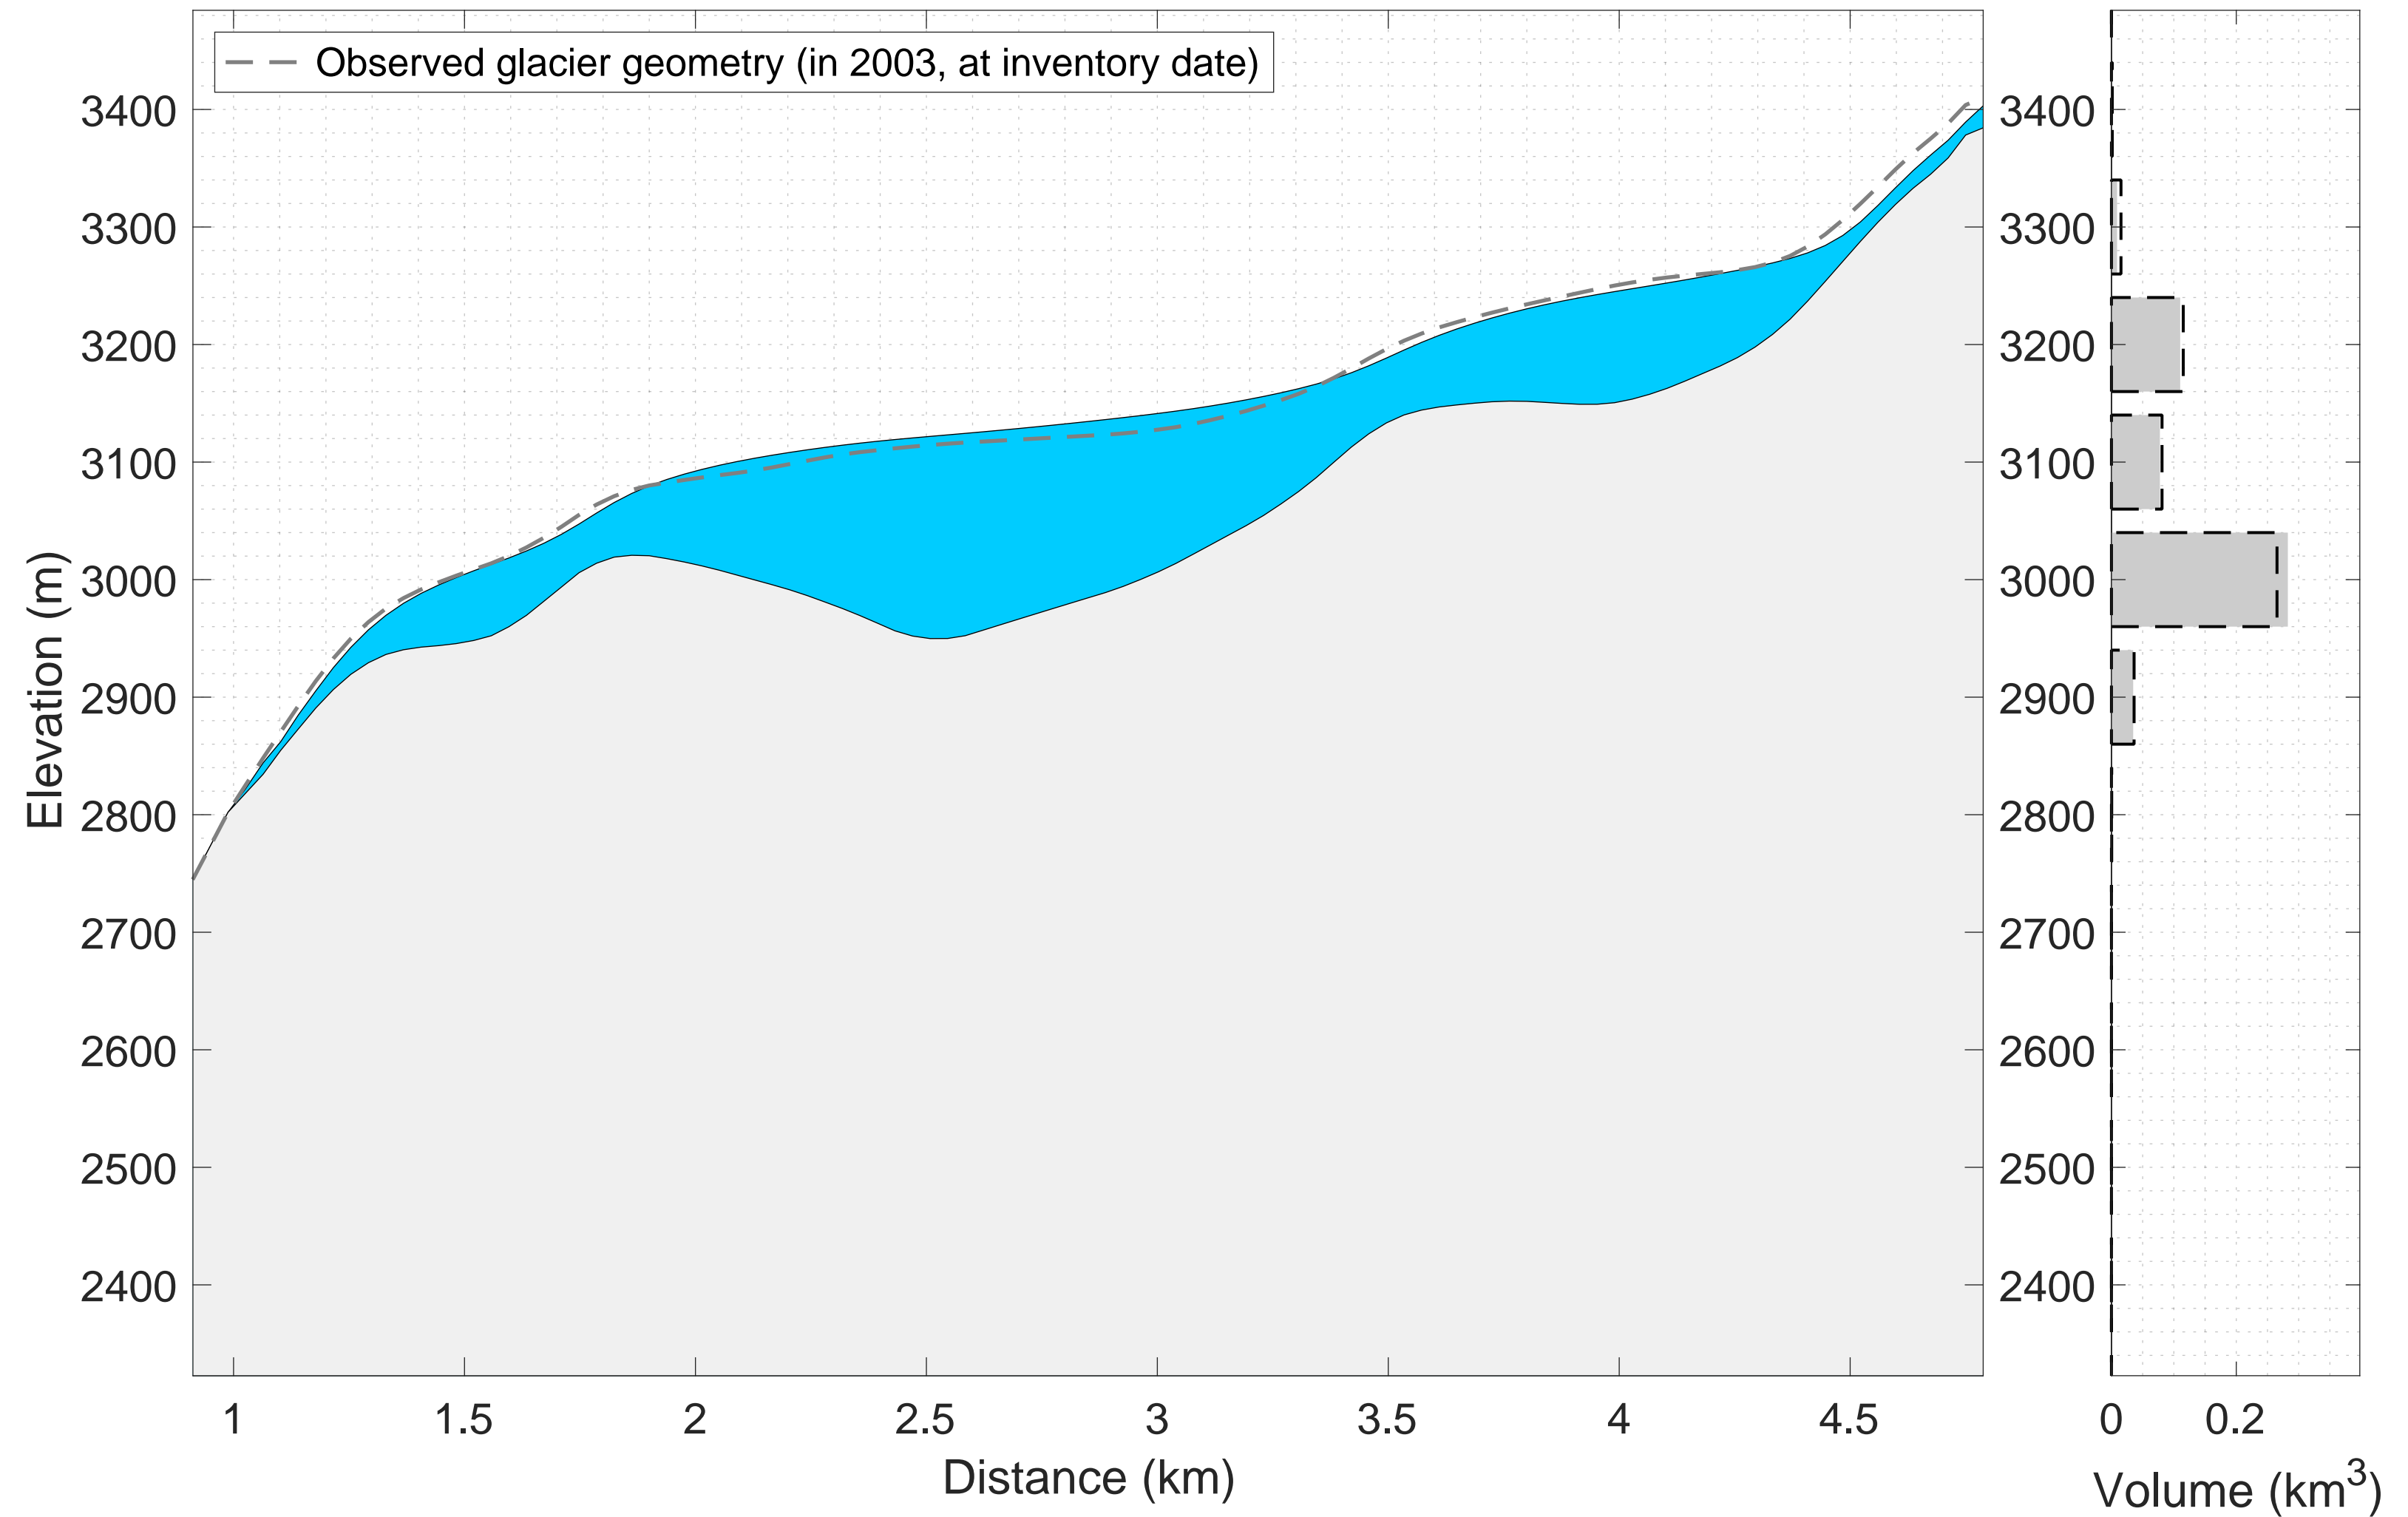

Supplement: Supplementary file 677 [file tc-13-1125-2019-supplement.zip]

**Modelled geometry (Glacier ID = 01166;  $A = 9.2973\text{e-}17 \text{ Pa}^{-3} \text{ a}^{-1}$ ;  $dx = 14 \text{ m}$ )**

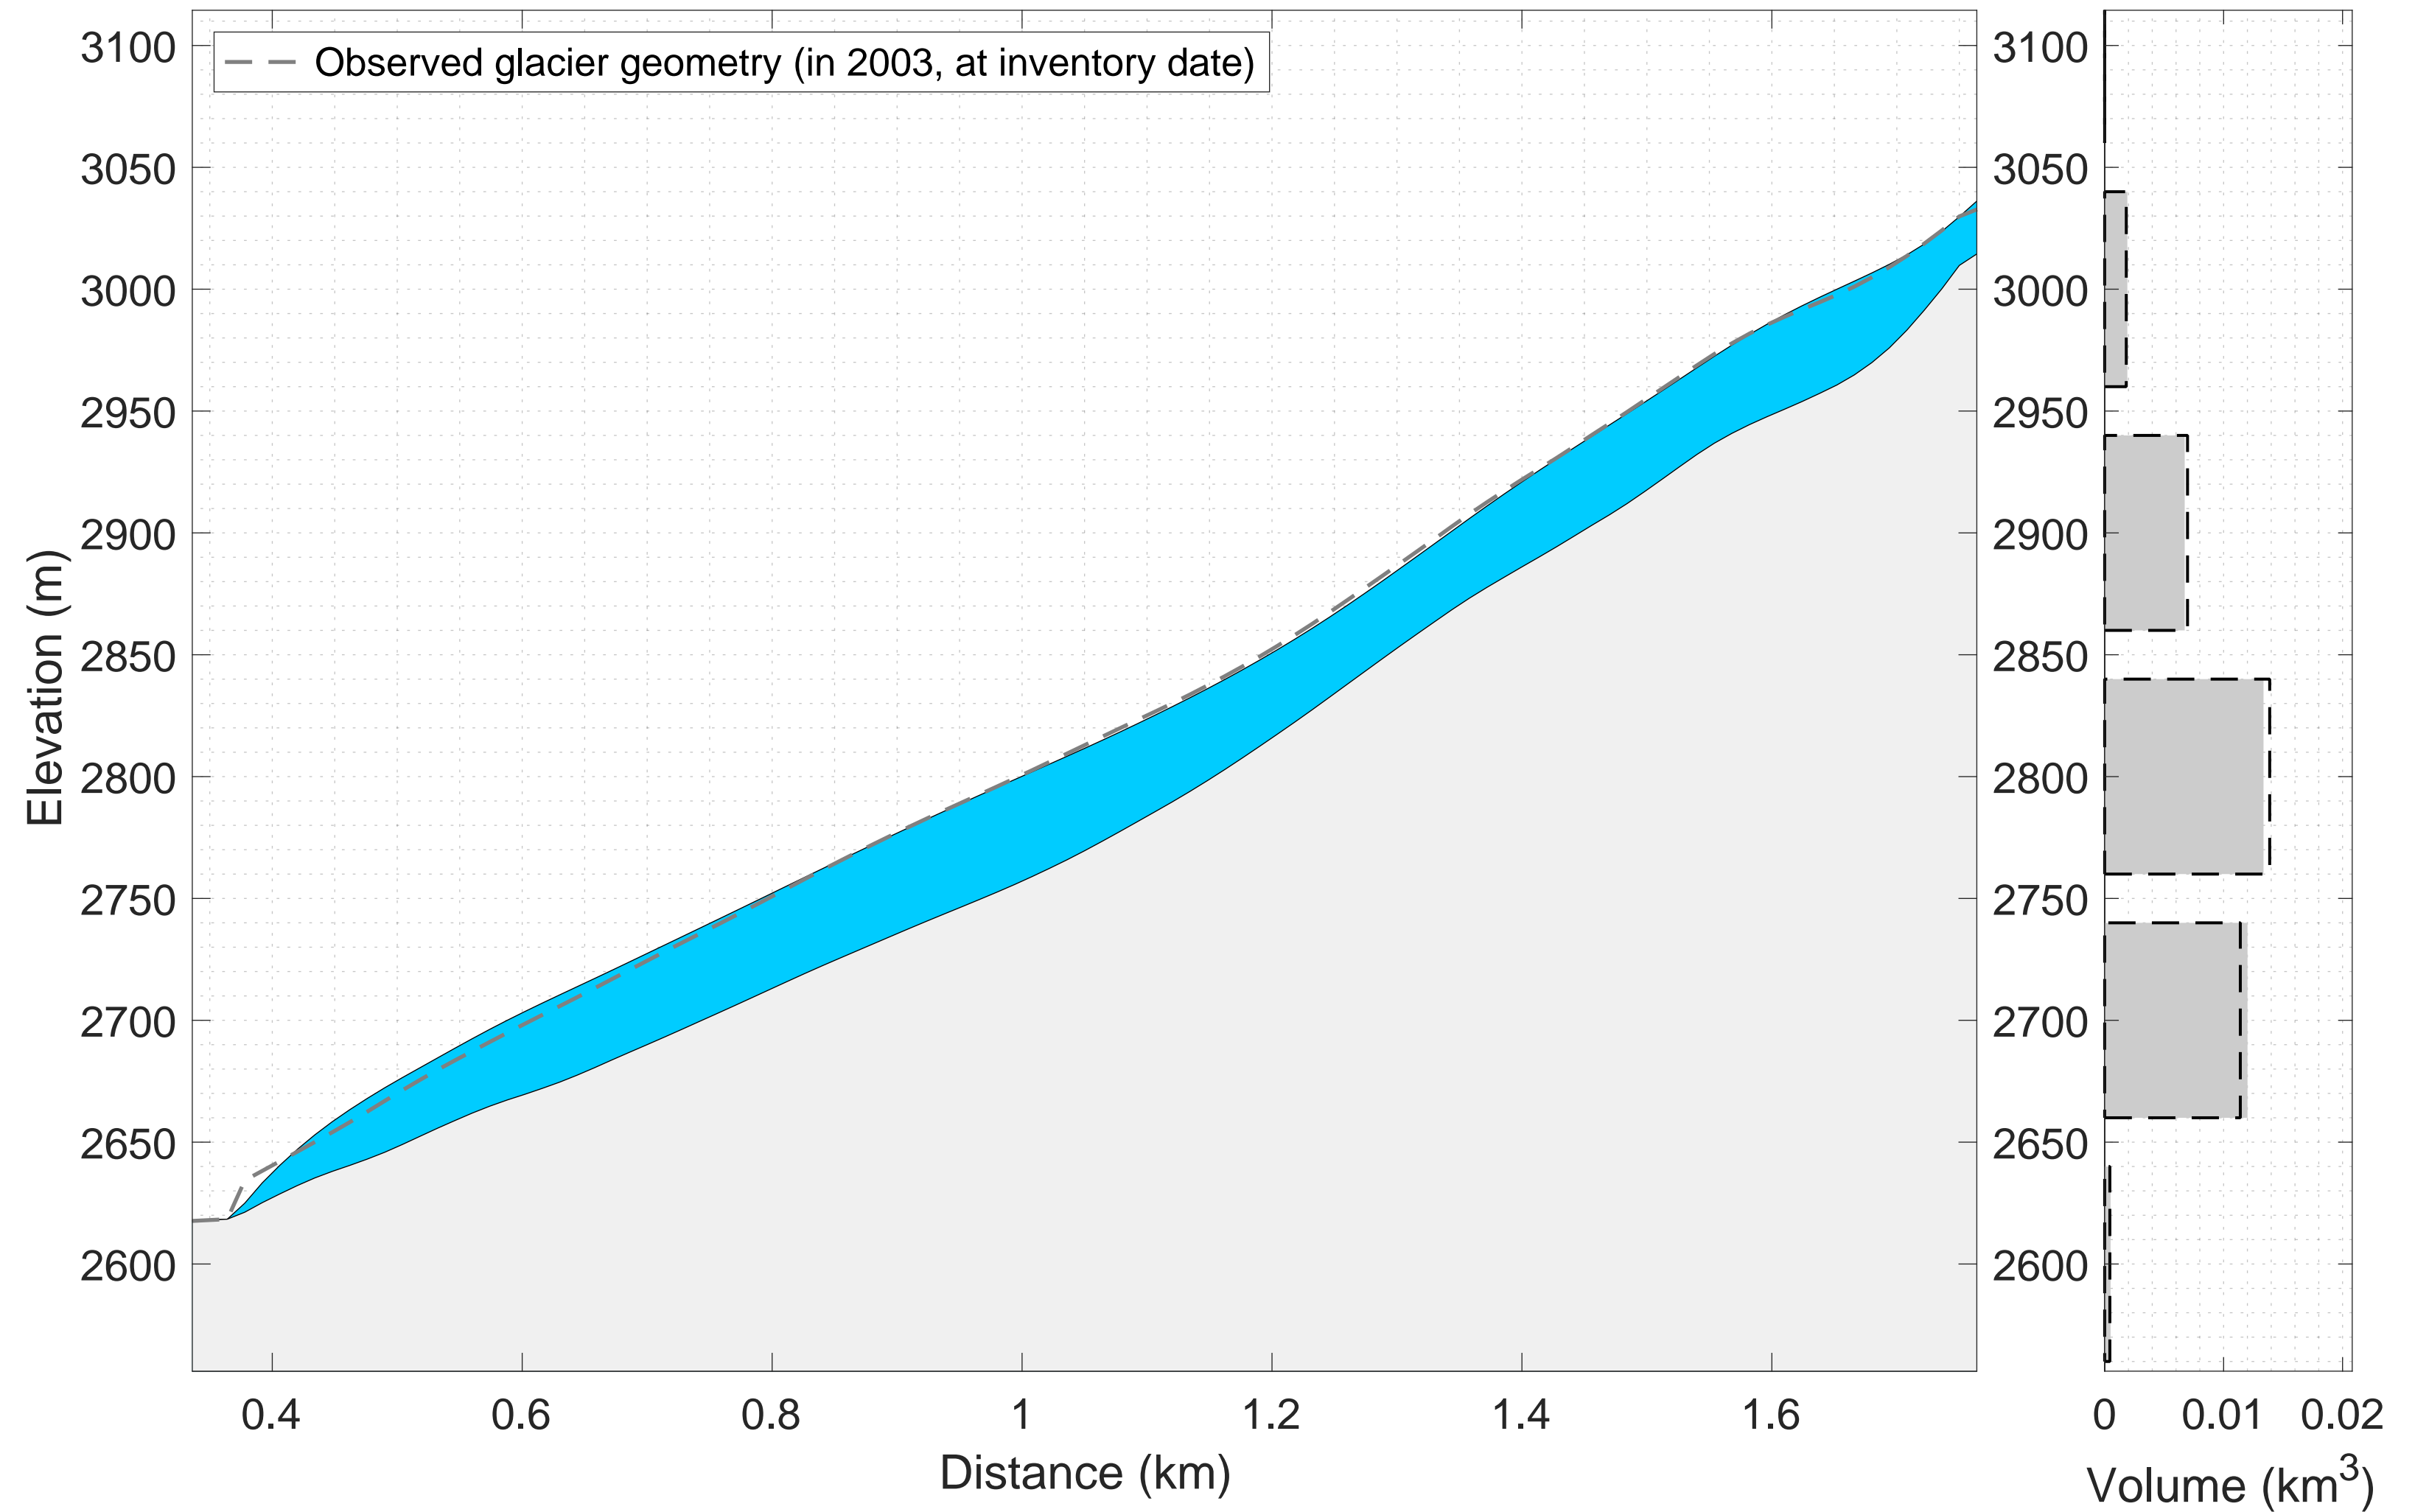

Supplement: Supplementary file 678 [file tc-13-1125-2019-supplement.zip]

**Modelled geometry (Glacier ID = 02805;  $A = 1.4669\text{e-}16 \text{ Pa}^{-3} \text{ a}^{-1}$ ;  $dx = 13 \text{ m}$ )**

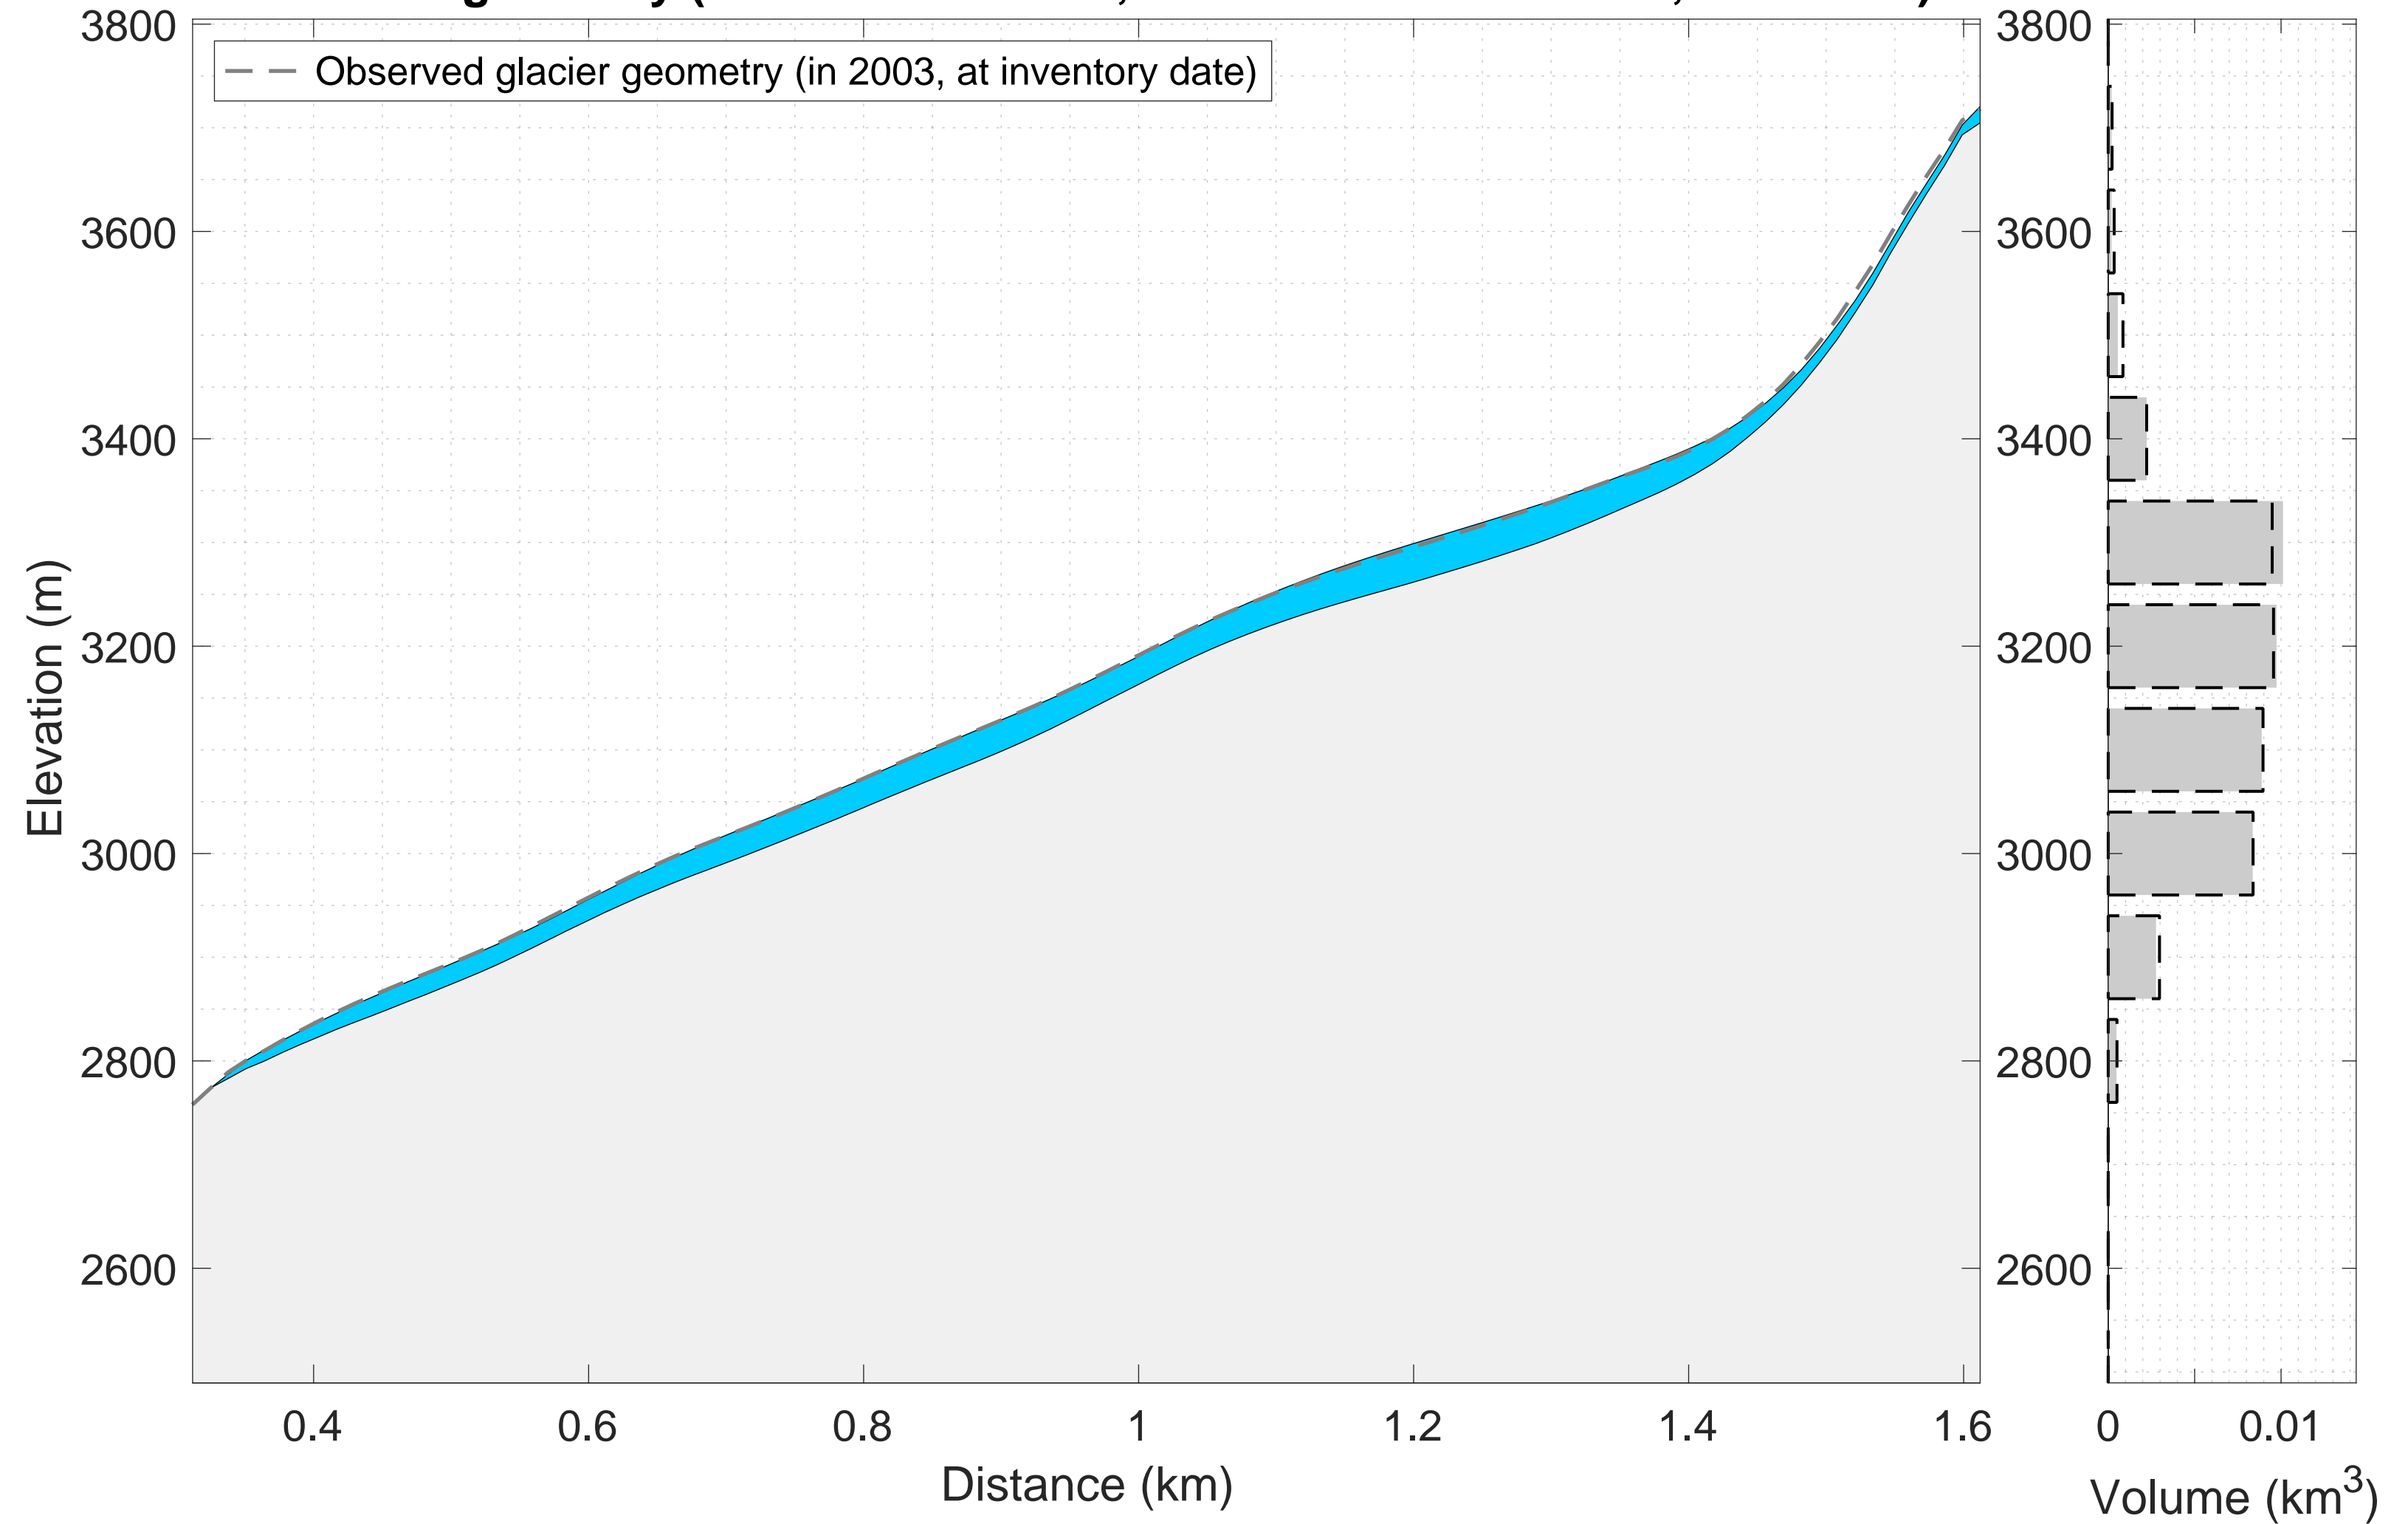

Supplement: Supplementary file 679 [file tc-13-1125-2019-supplement.zip]

**Modelled geometry (Glacier ID = 01048;  $A = 1.0255\text{e-}16 \text{ Pa}^{-3} \text{ a}^{-1}$ ;  $dx = 10 \text{ m}$ )**

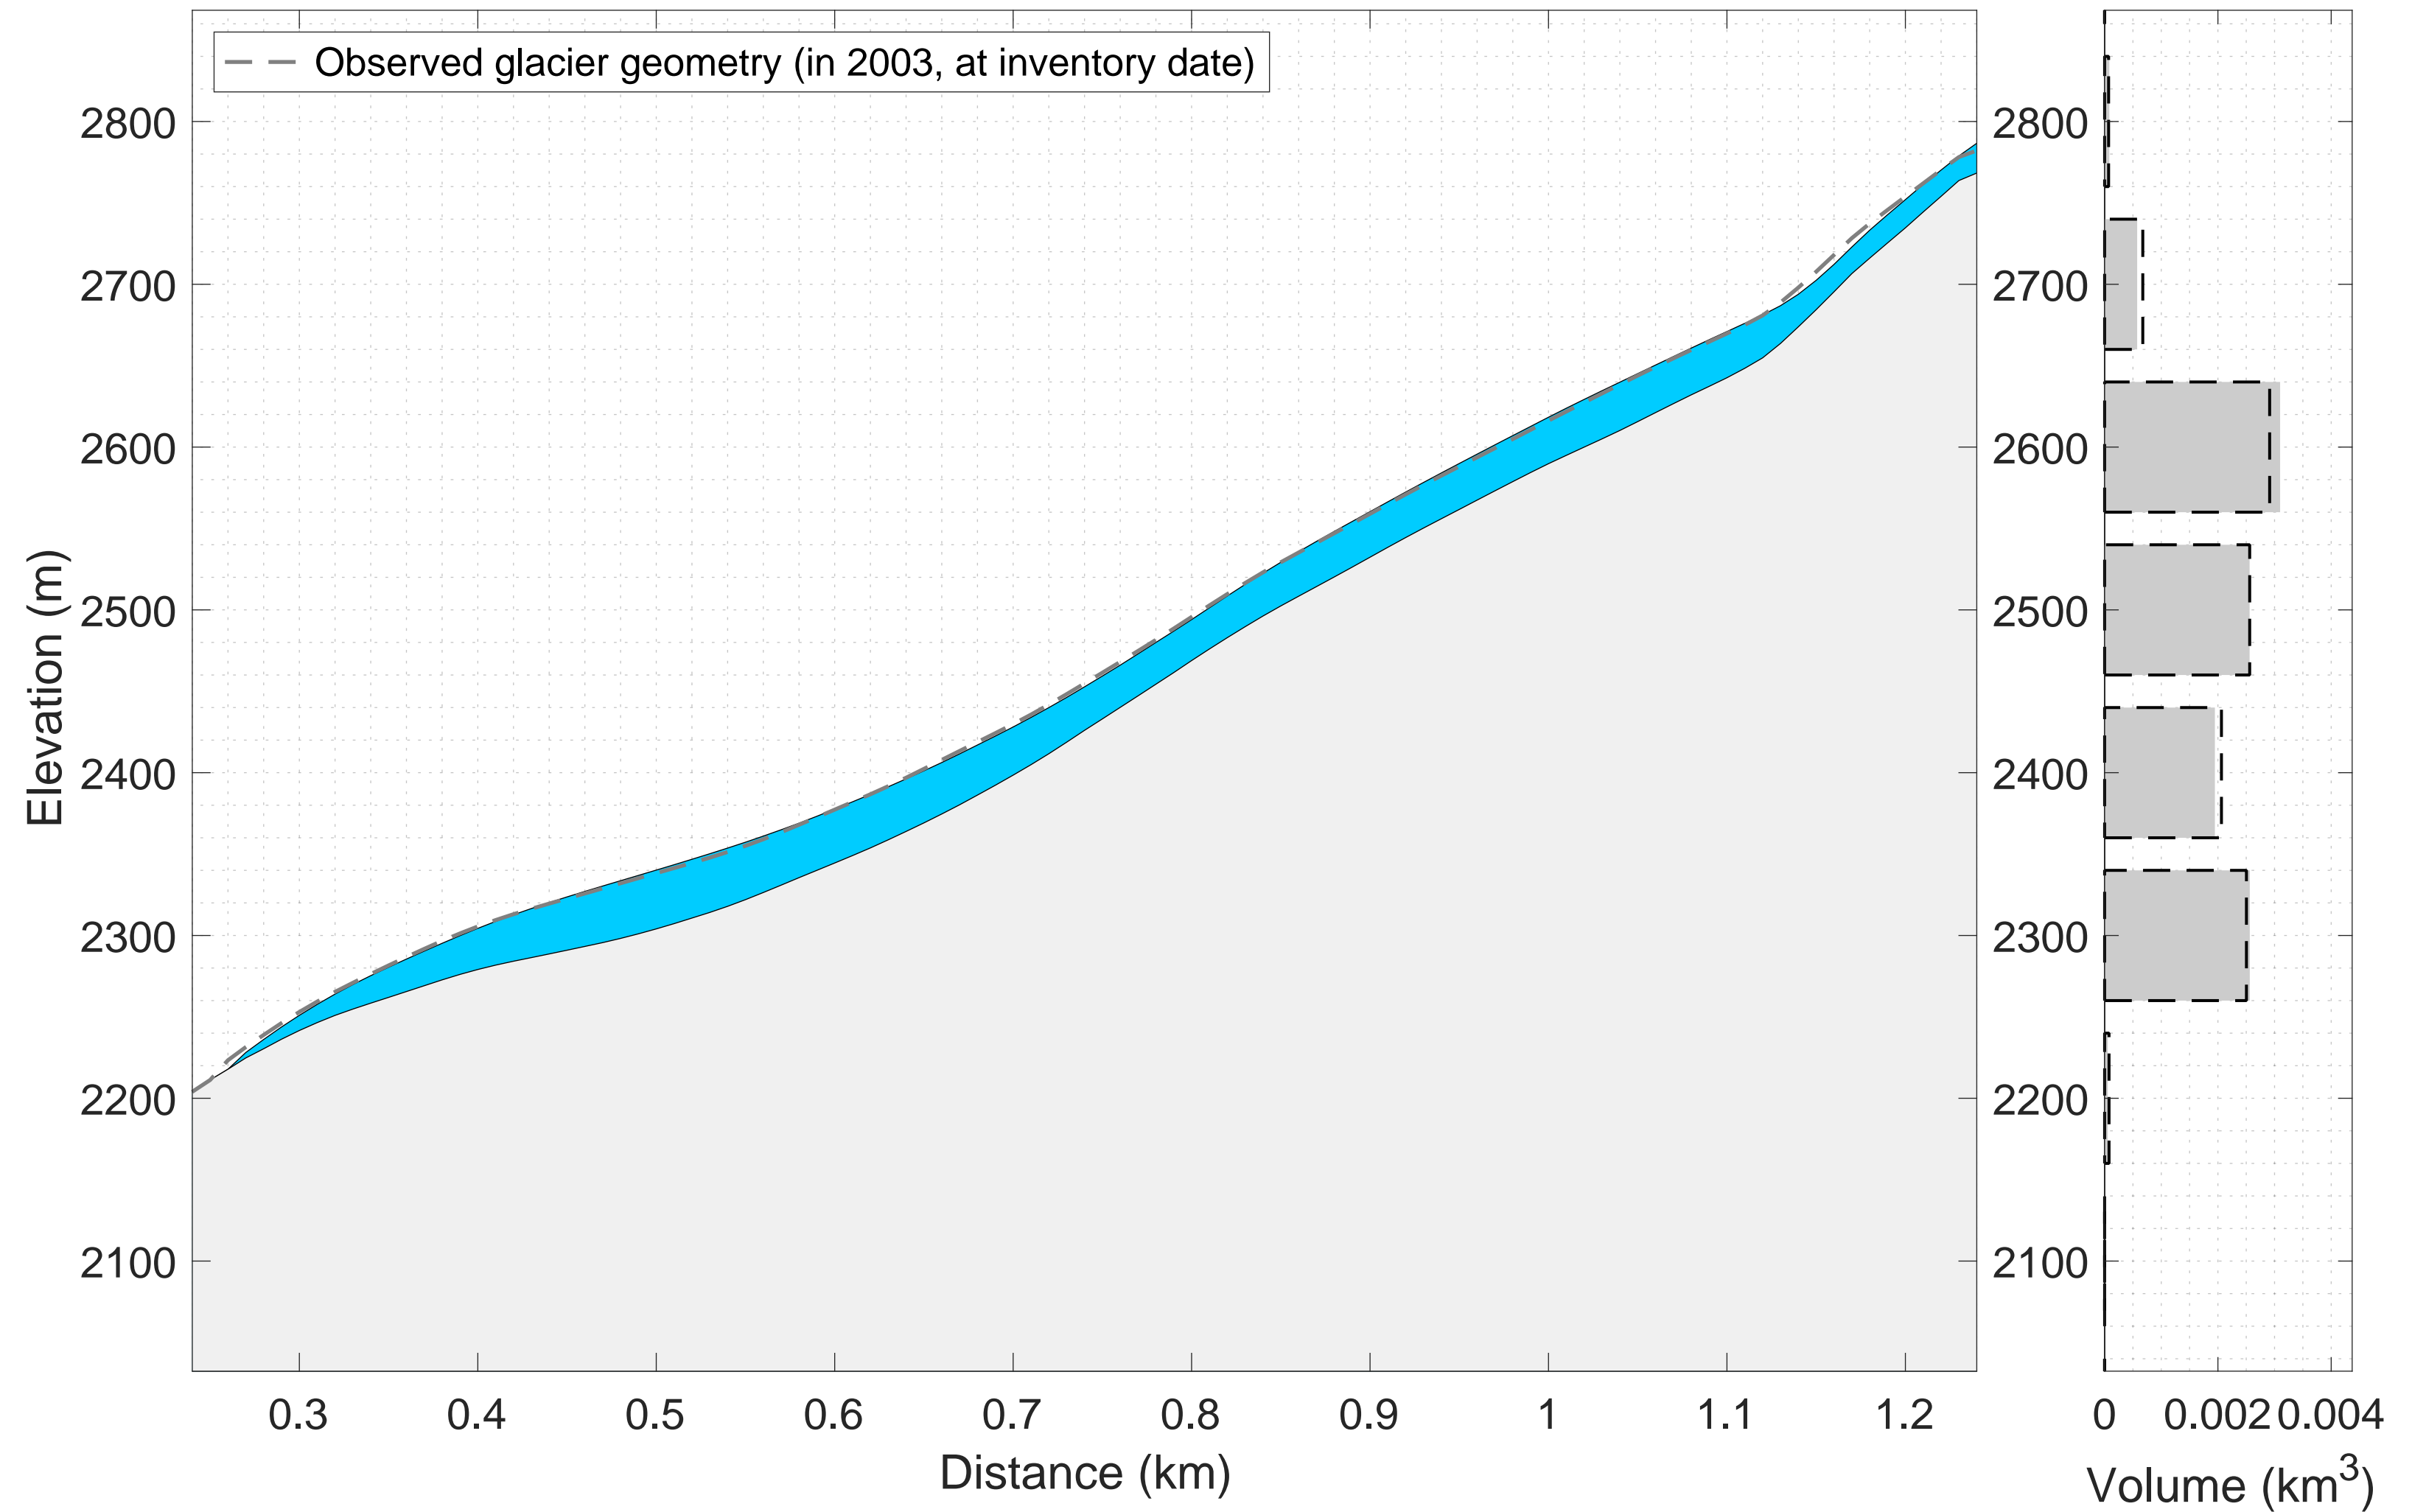

Supplement: Supplementary file 680 [file tc-13-1125-2019-supplement.zip]

**Modelled geometry (Glacier ID = 02440;  $A = 1.396\text{e-}16 \text{ Pa}^{-3} \text{ a}^{-1}$ ;  $dx = 17 \text{ m}$ )**

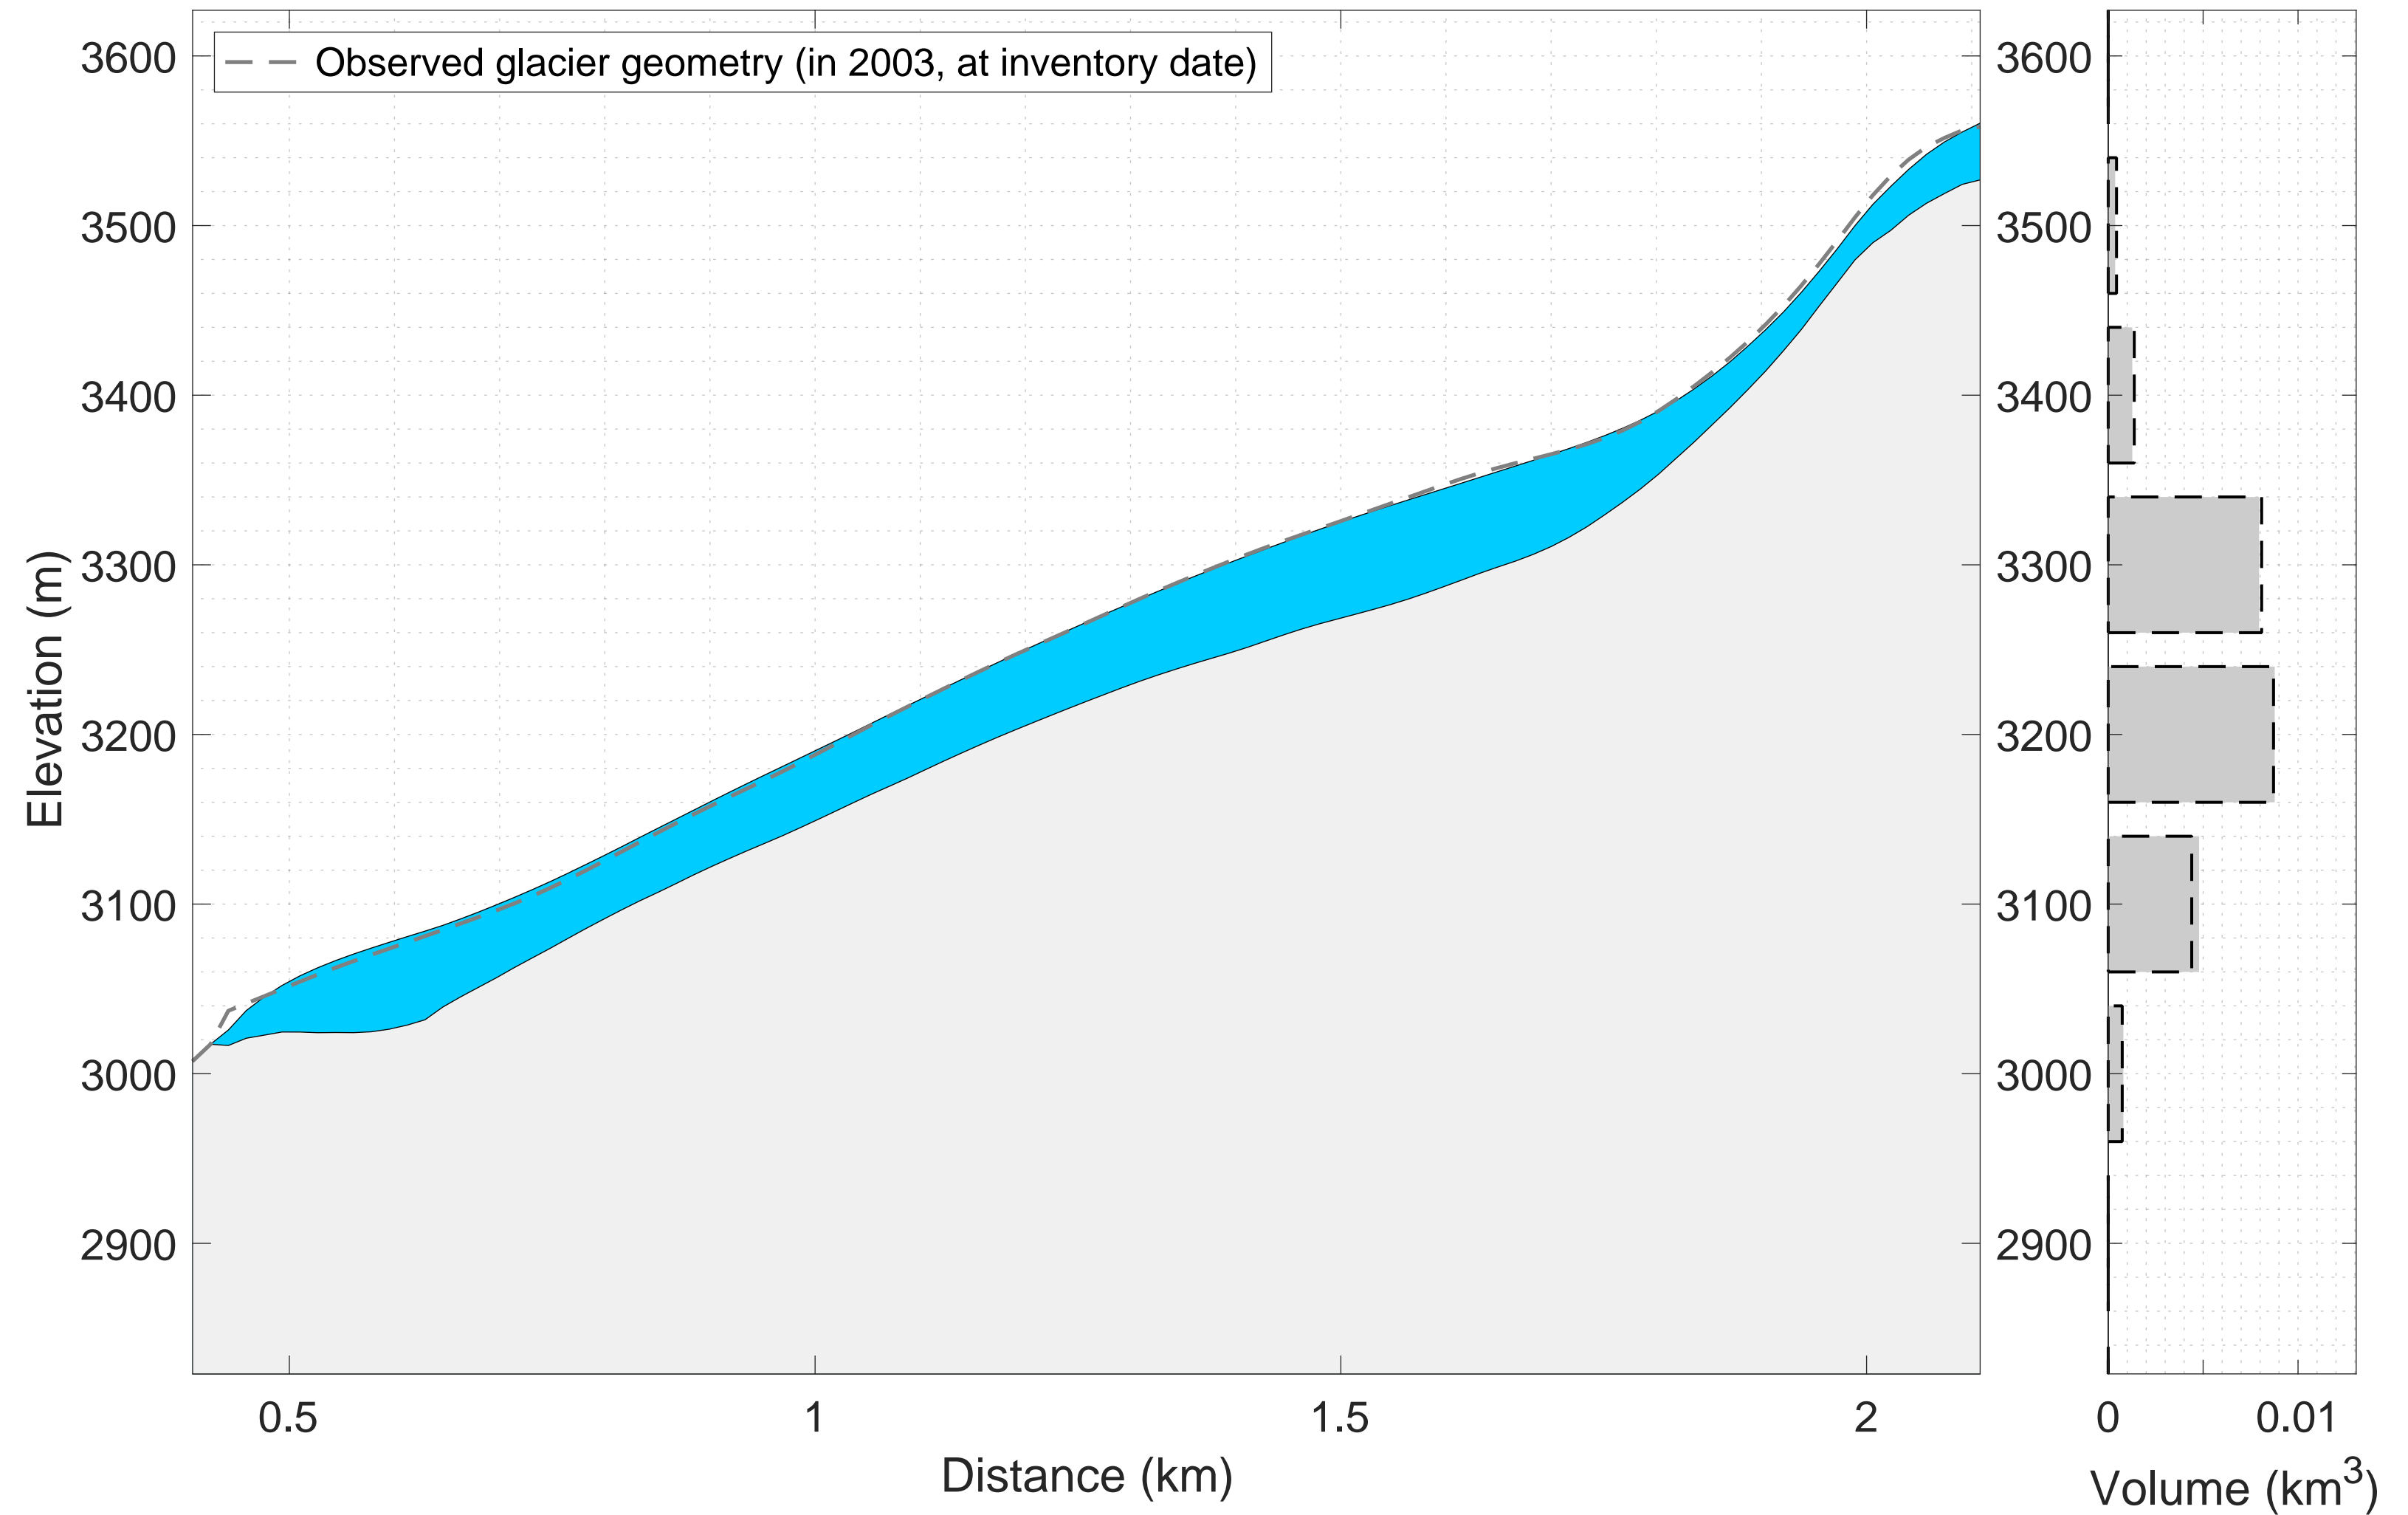

Supplement: Supplementary file 681 [file tc-13-1125-2019-supplement.zip]

**Modelled geometry (Glacier ID = 02624;  $A = 2.4013\text{e-}16 \text{ Pa}^{-3} \text{ a}^{-1}$ ;  $dx = 51 \text{ m}$ )**

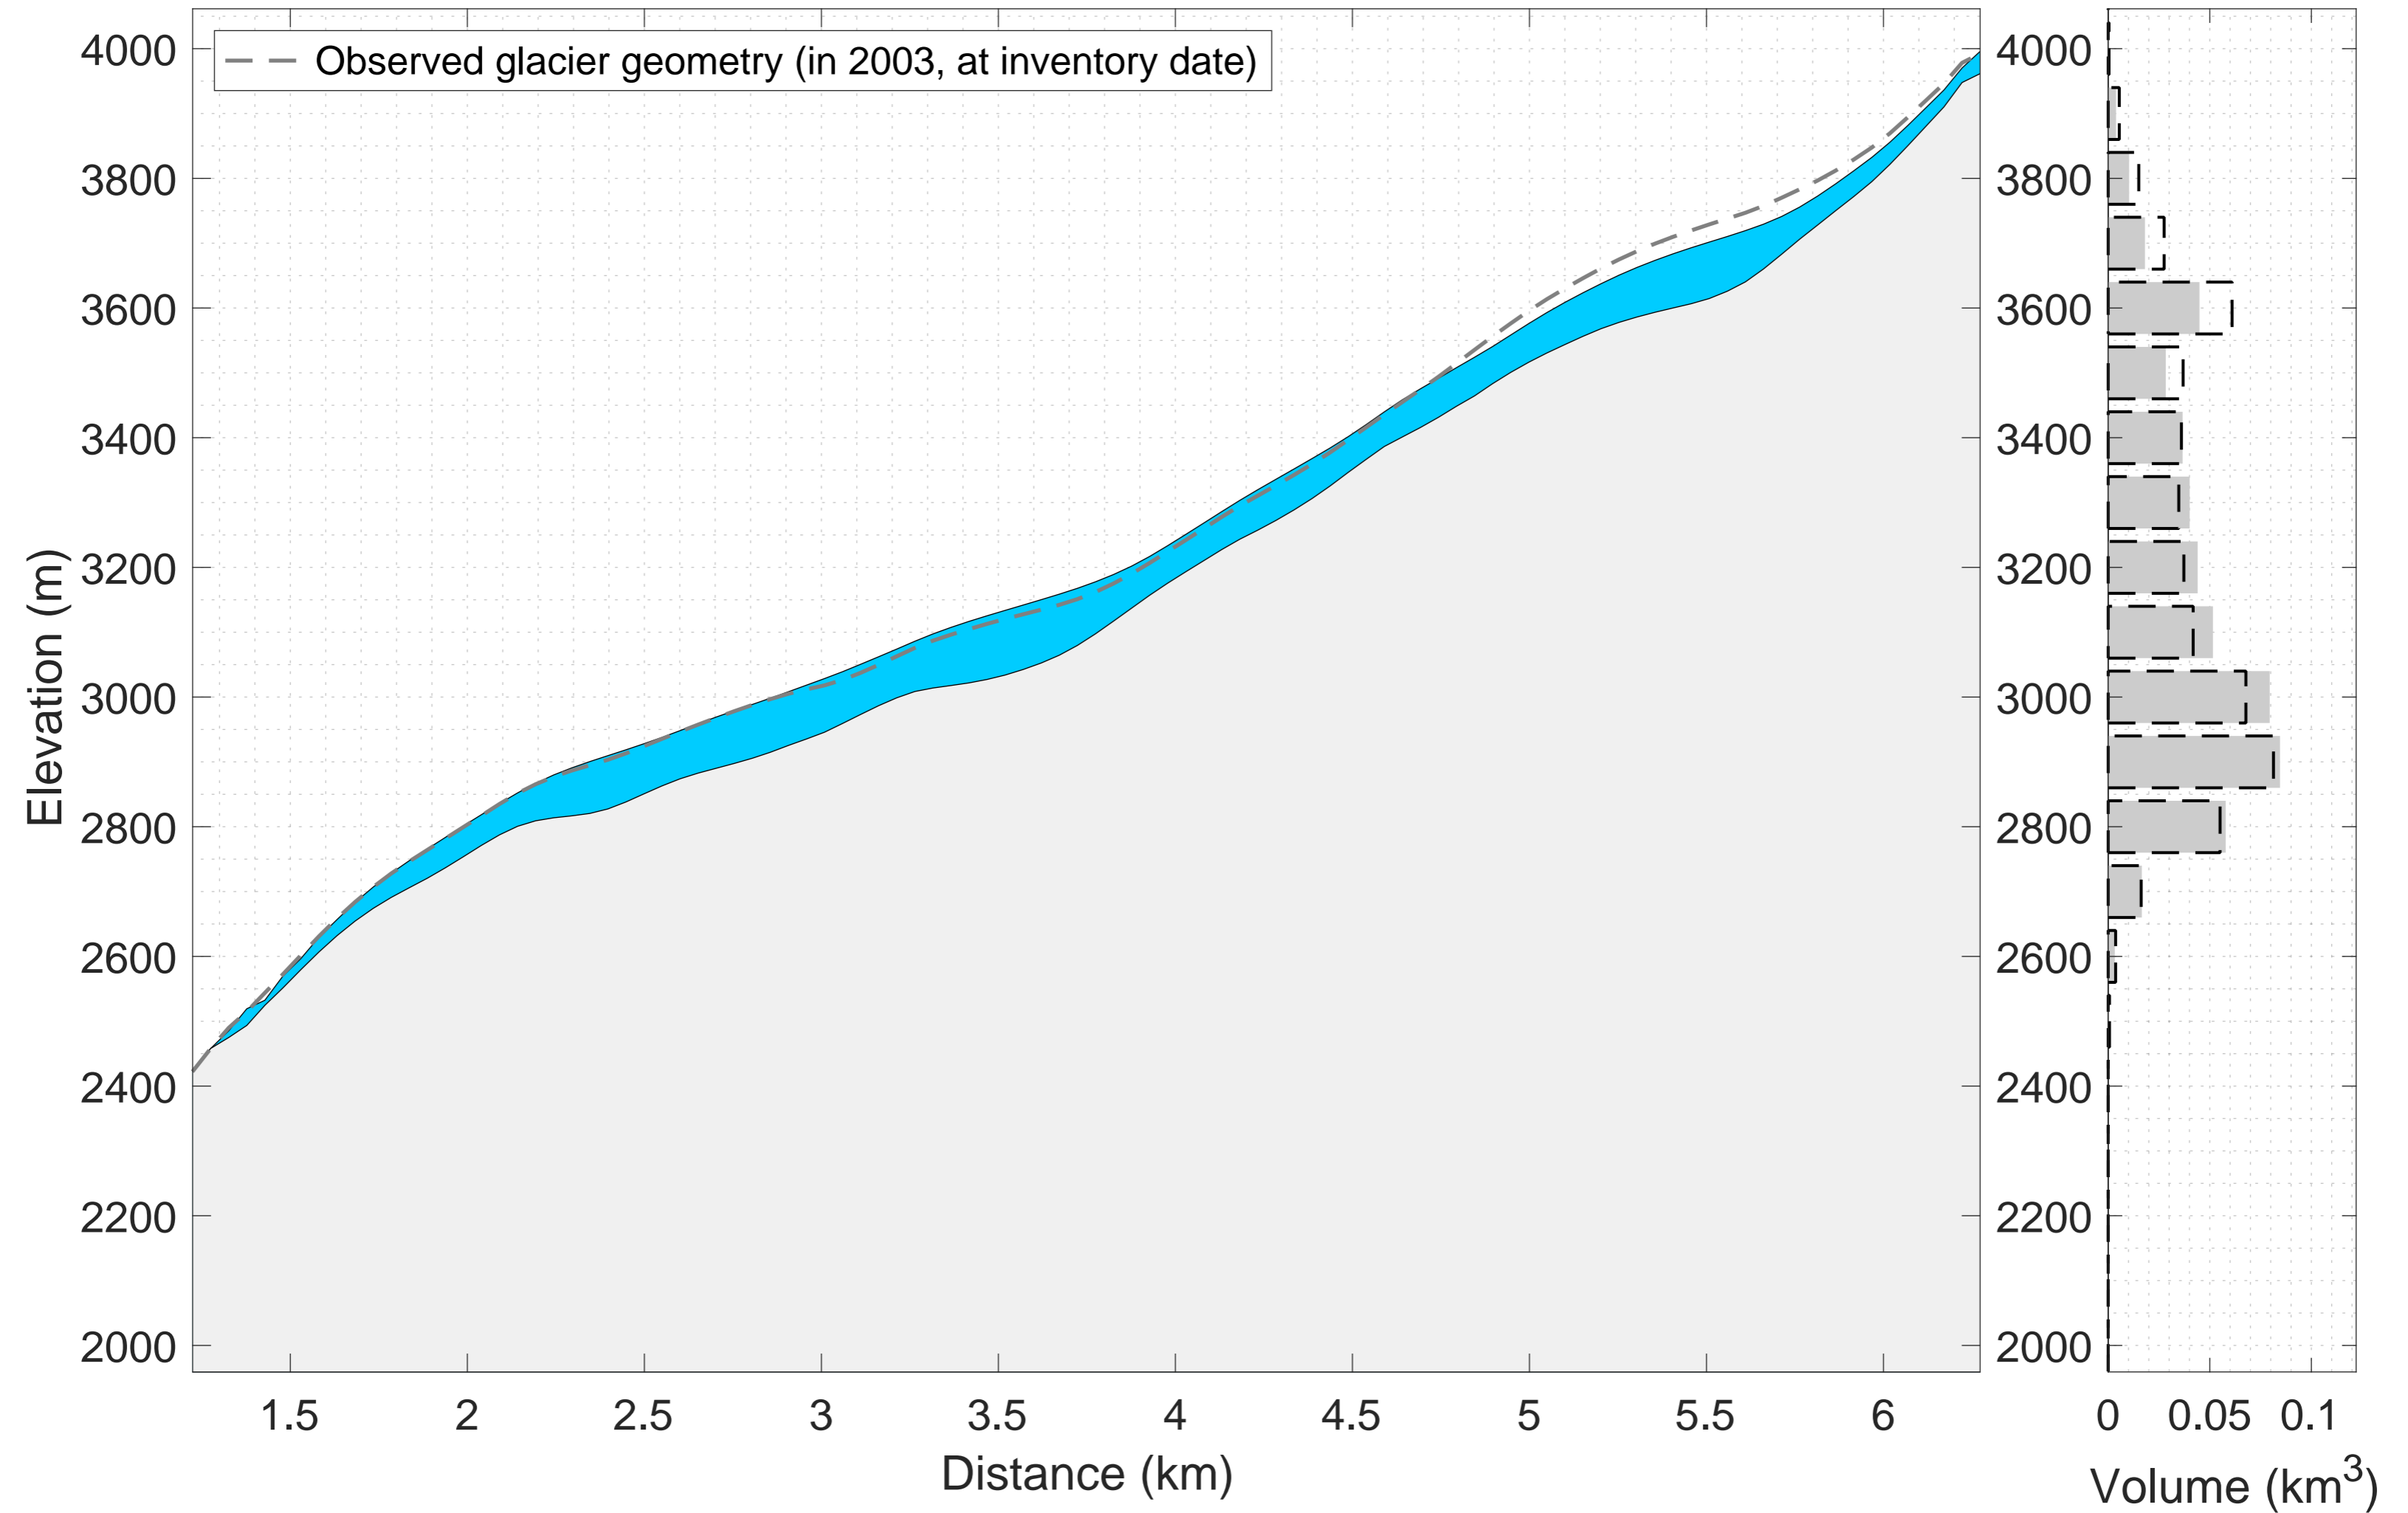

Supplement: Supplementary file 682 [file tc-13-1125-2019-supplement.zip]

**Modelled geometry (Glacier ID = 02947;  $A = 1.6677\text{e-}16 \text{ Pa}^{-3} \text{ a}^{-1}$ ;  $dx = 23 \text{ m}$ )**

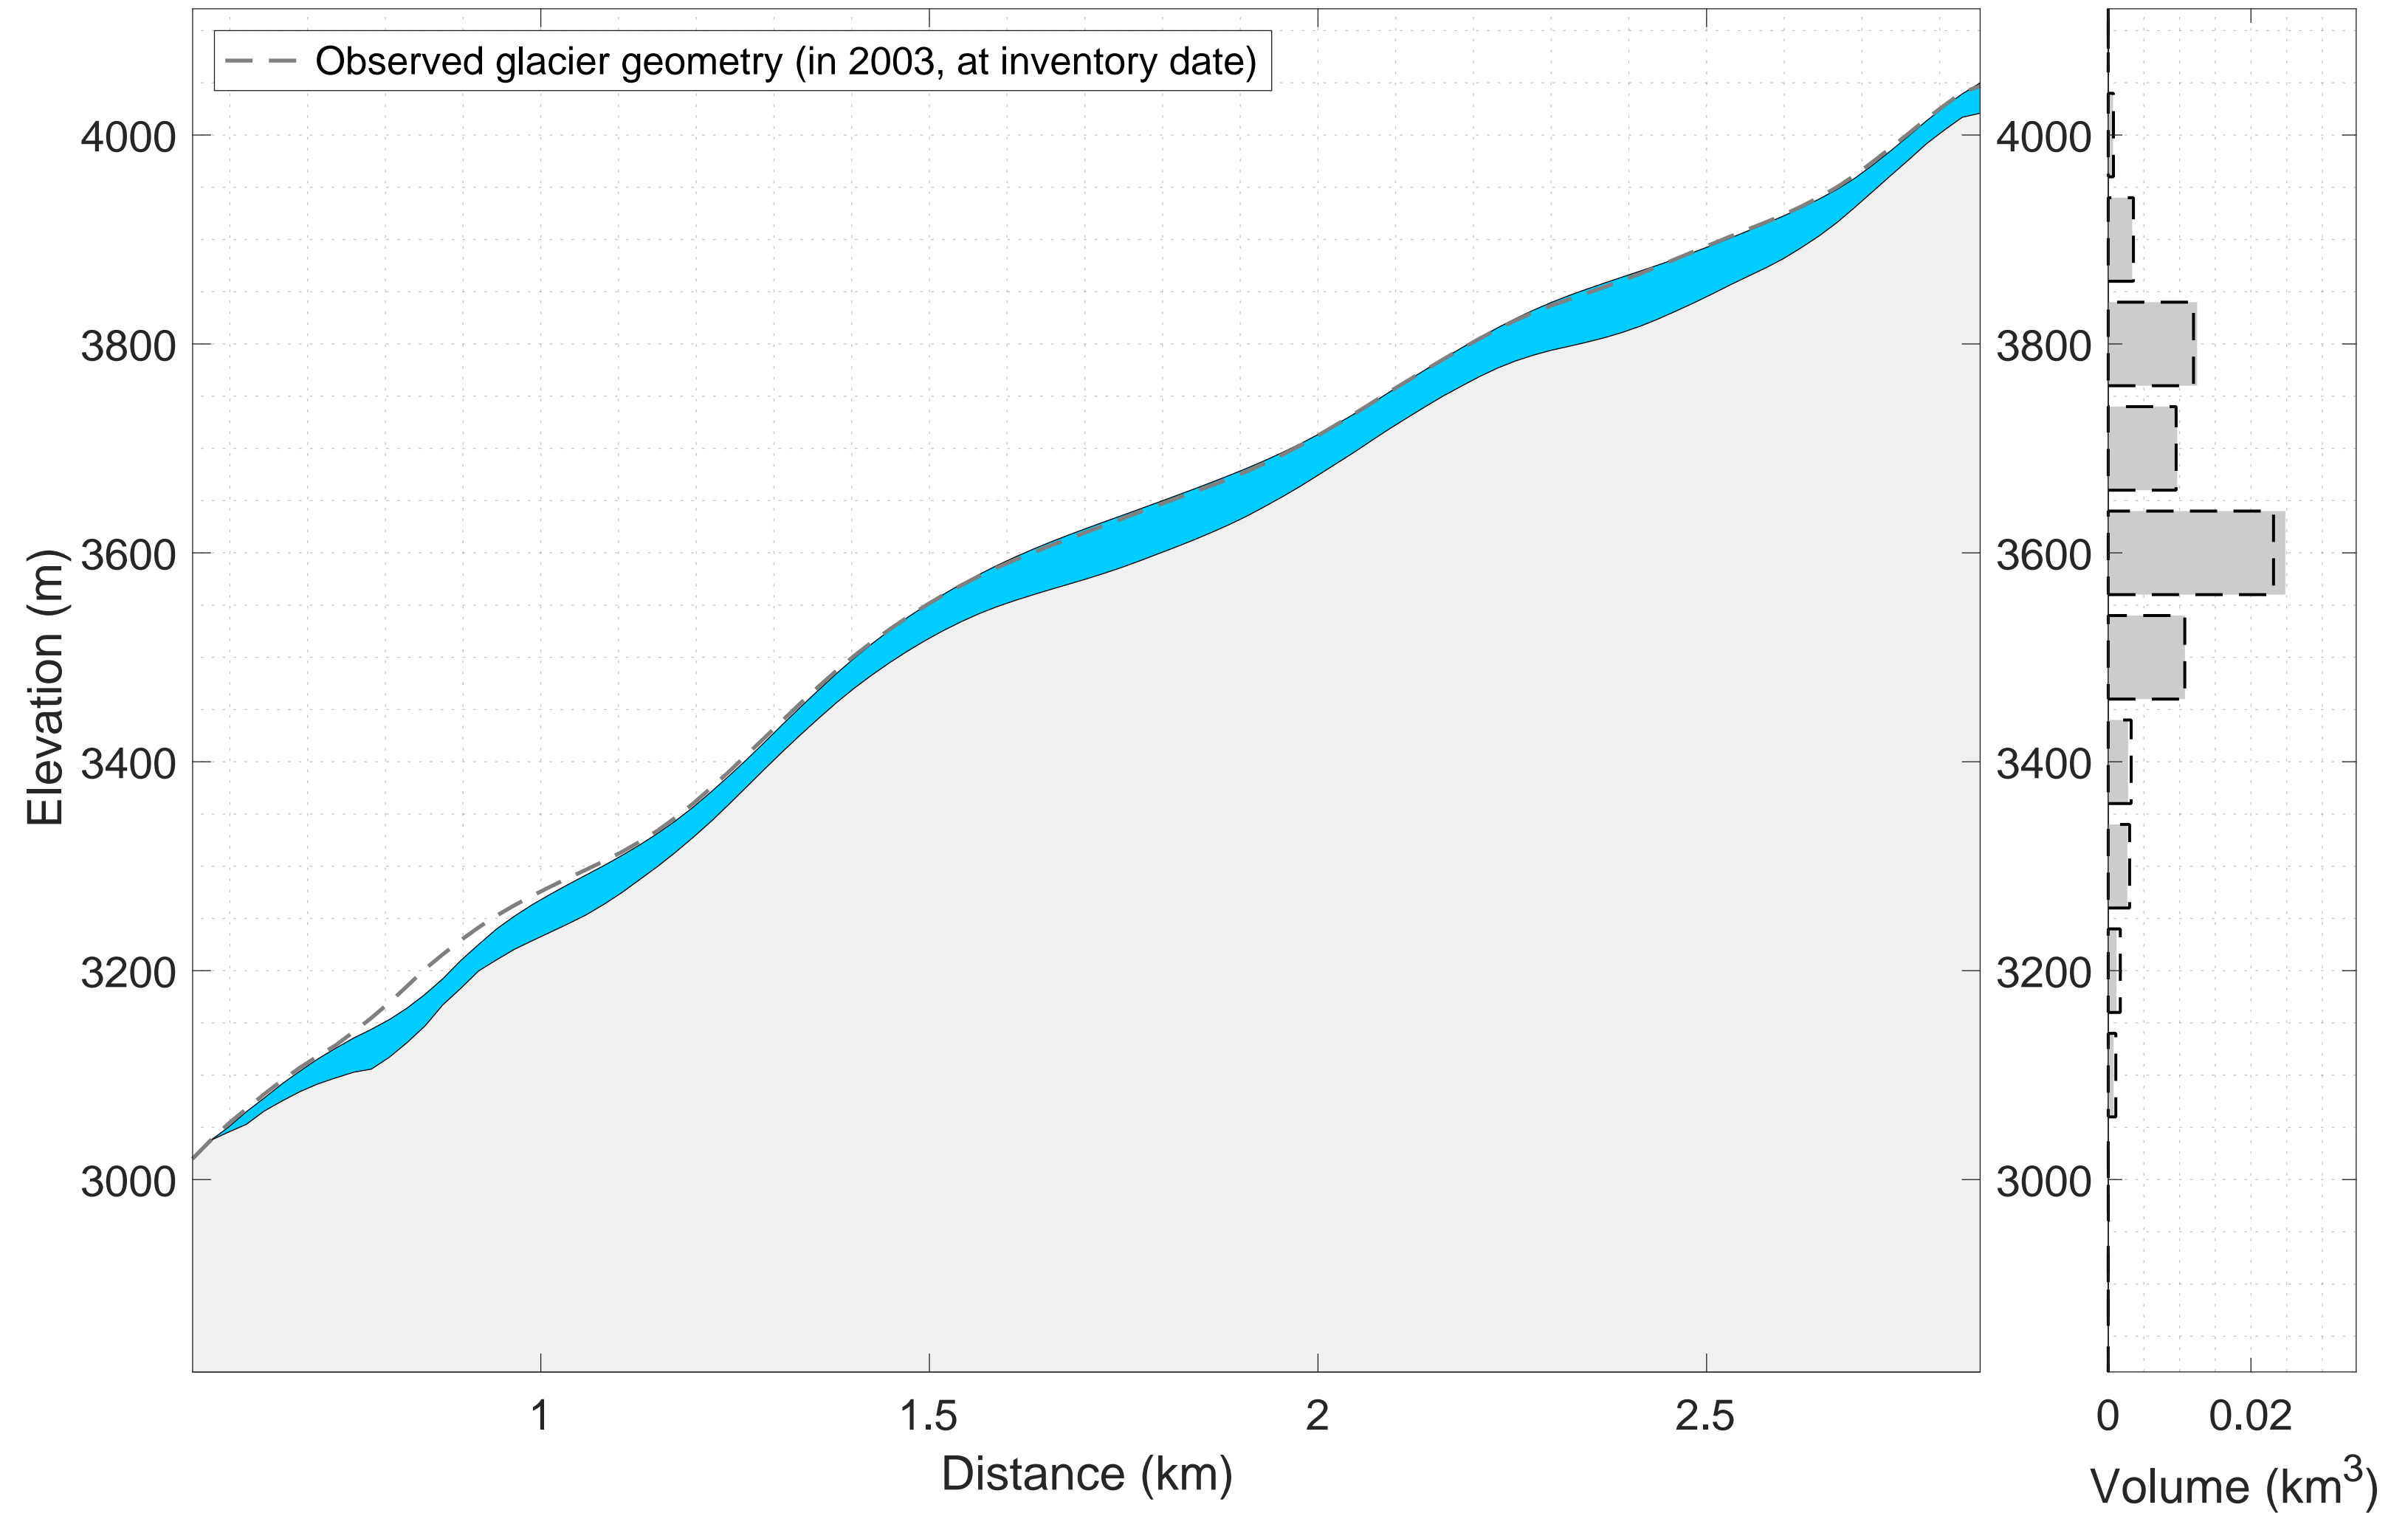

Supplement: Supplementary file 683 [file tc-13-1125-2019-supplement.zip]

**Modelled geometry (Glacier ID = 01544;  $A = 5.2296\text{e-}17 \text{ Pa}^{-3} \text{ a}^{-1}$ ;  $dx = 12 \text{ m}$ )**

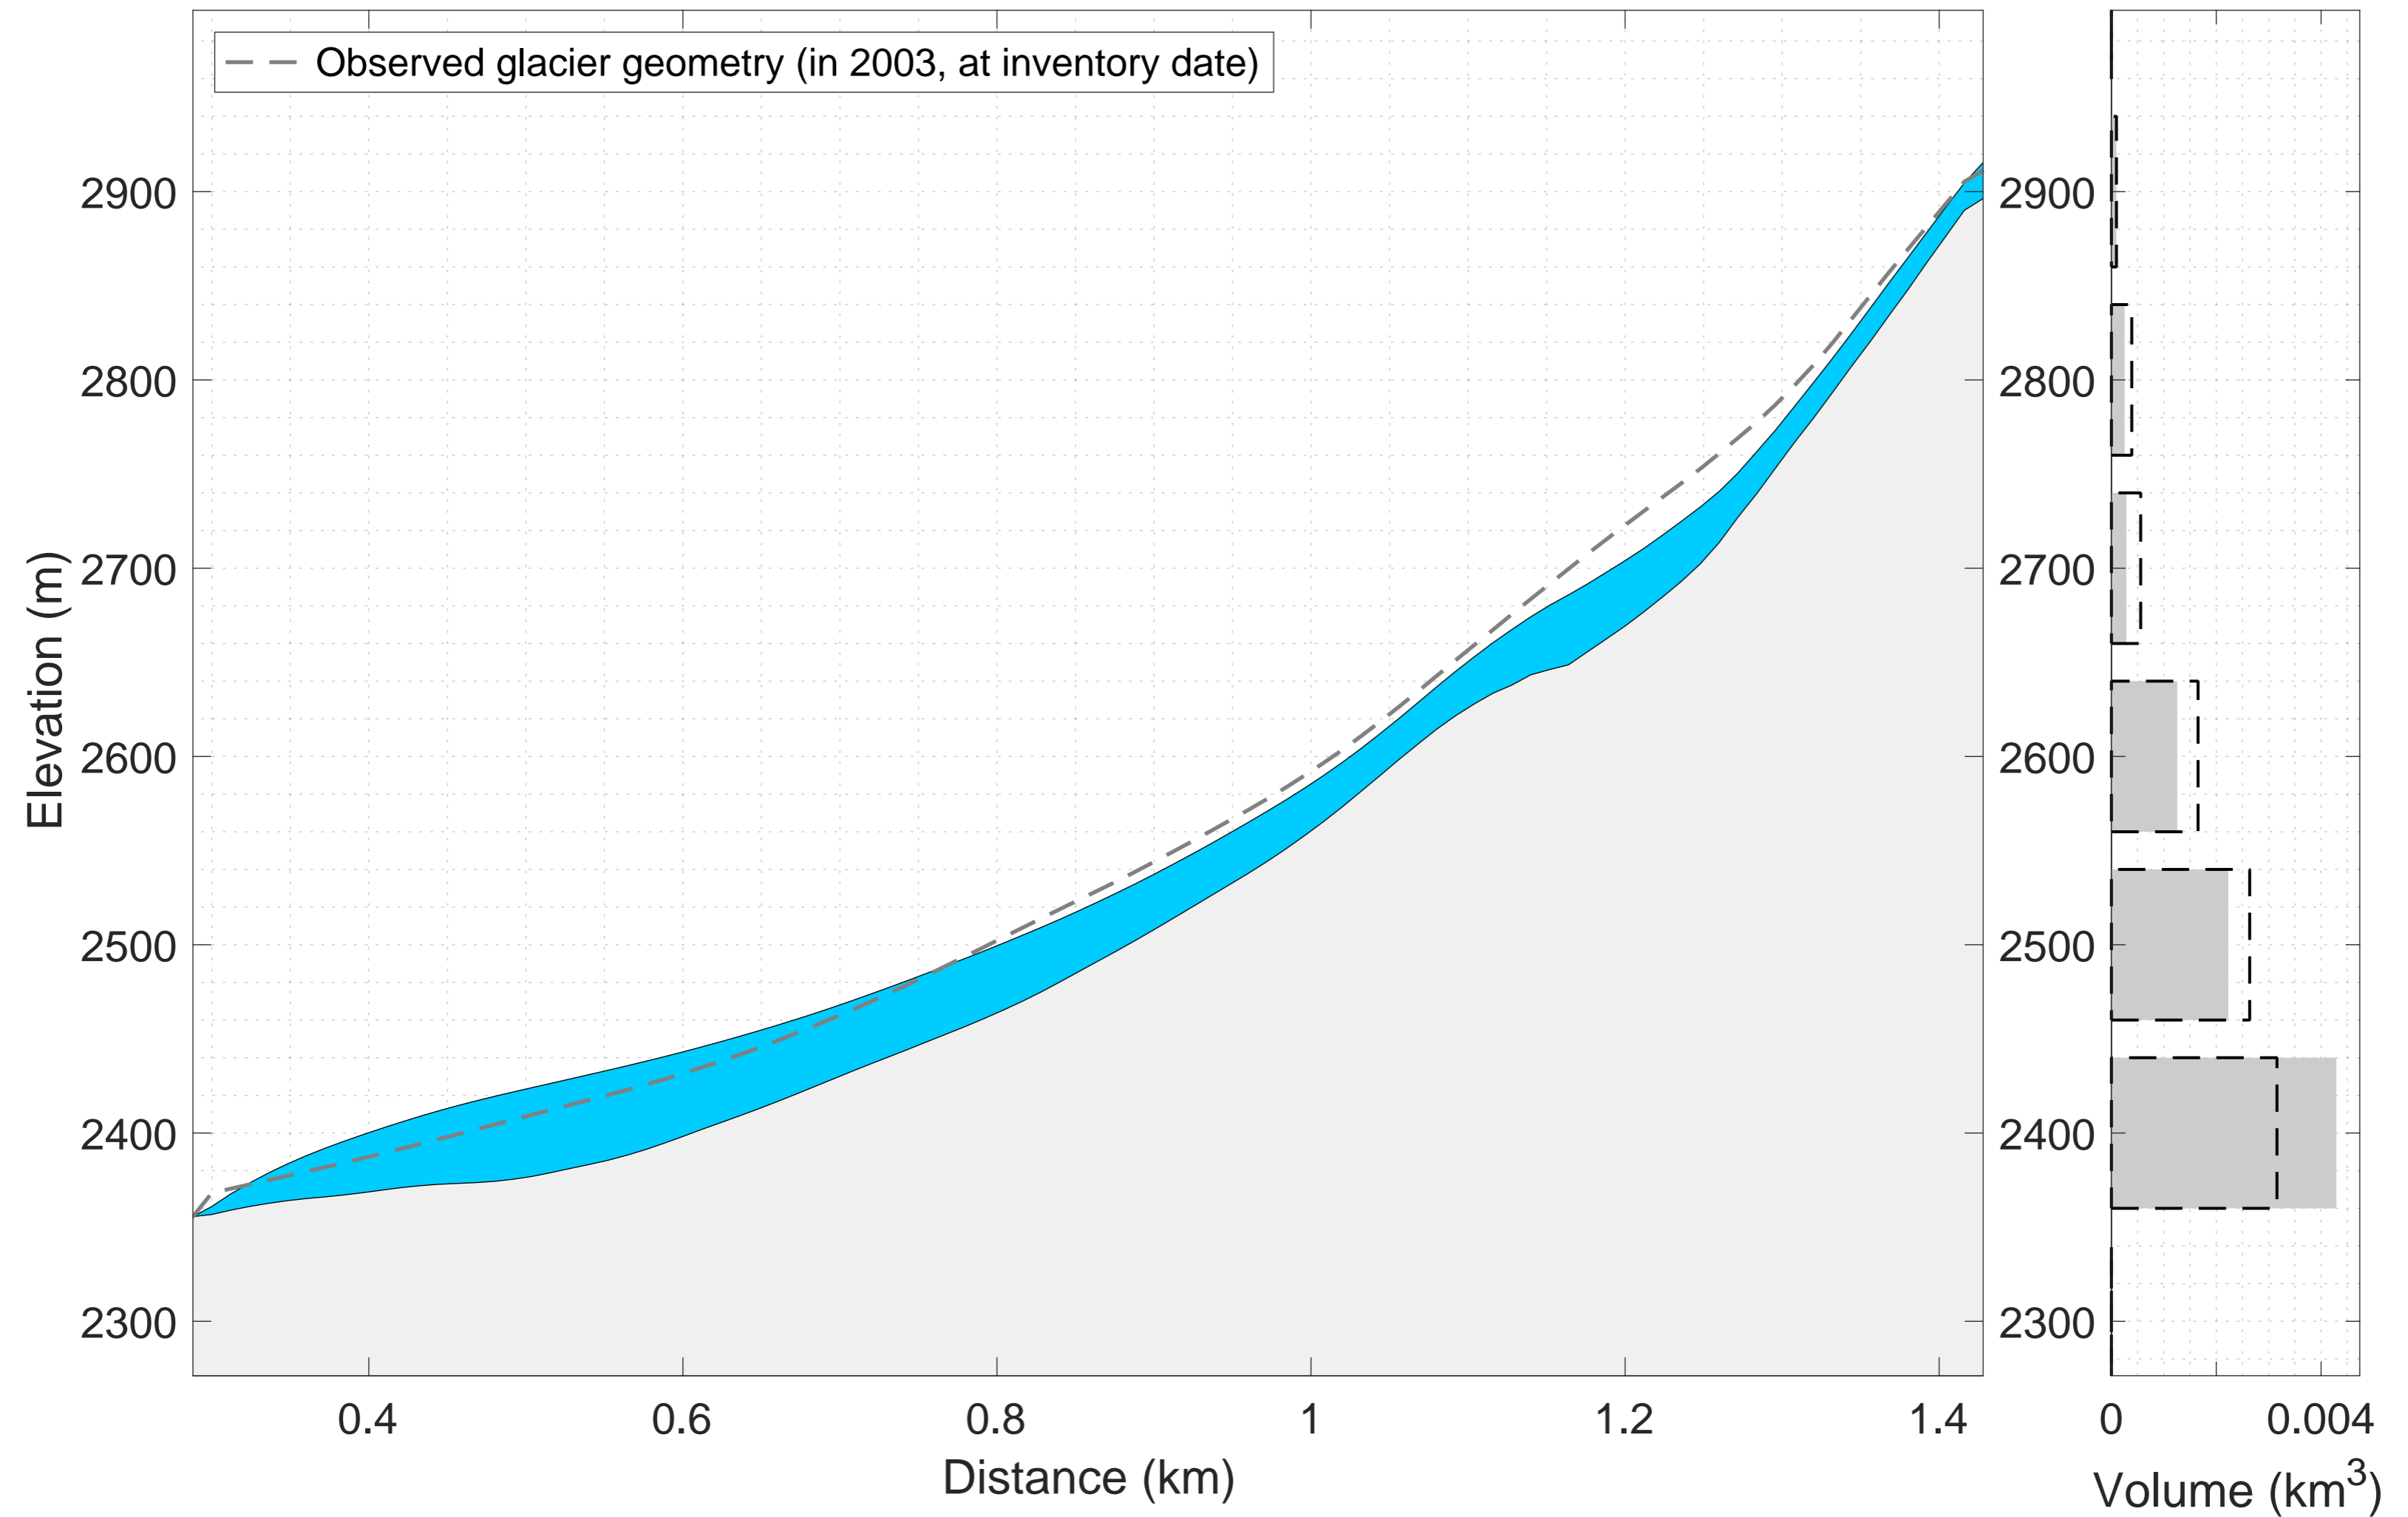

Supplement: Supplementary file 684 [file tc-13-1125-2019-supplement.zip]

**Modelled geometry (Glacier ID = 01746;  $A = 9.7824\text{e-}17 \text{ Pa}^{-3} \text{ a}^{-1}$ ;  $dx = 14 \text{ m}$ )**

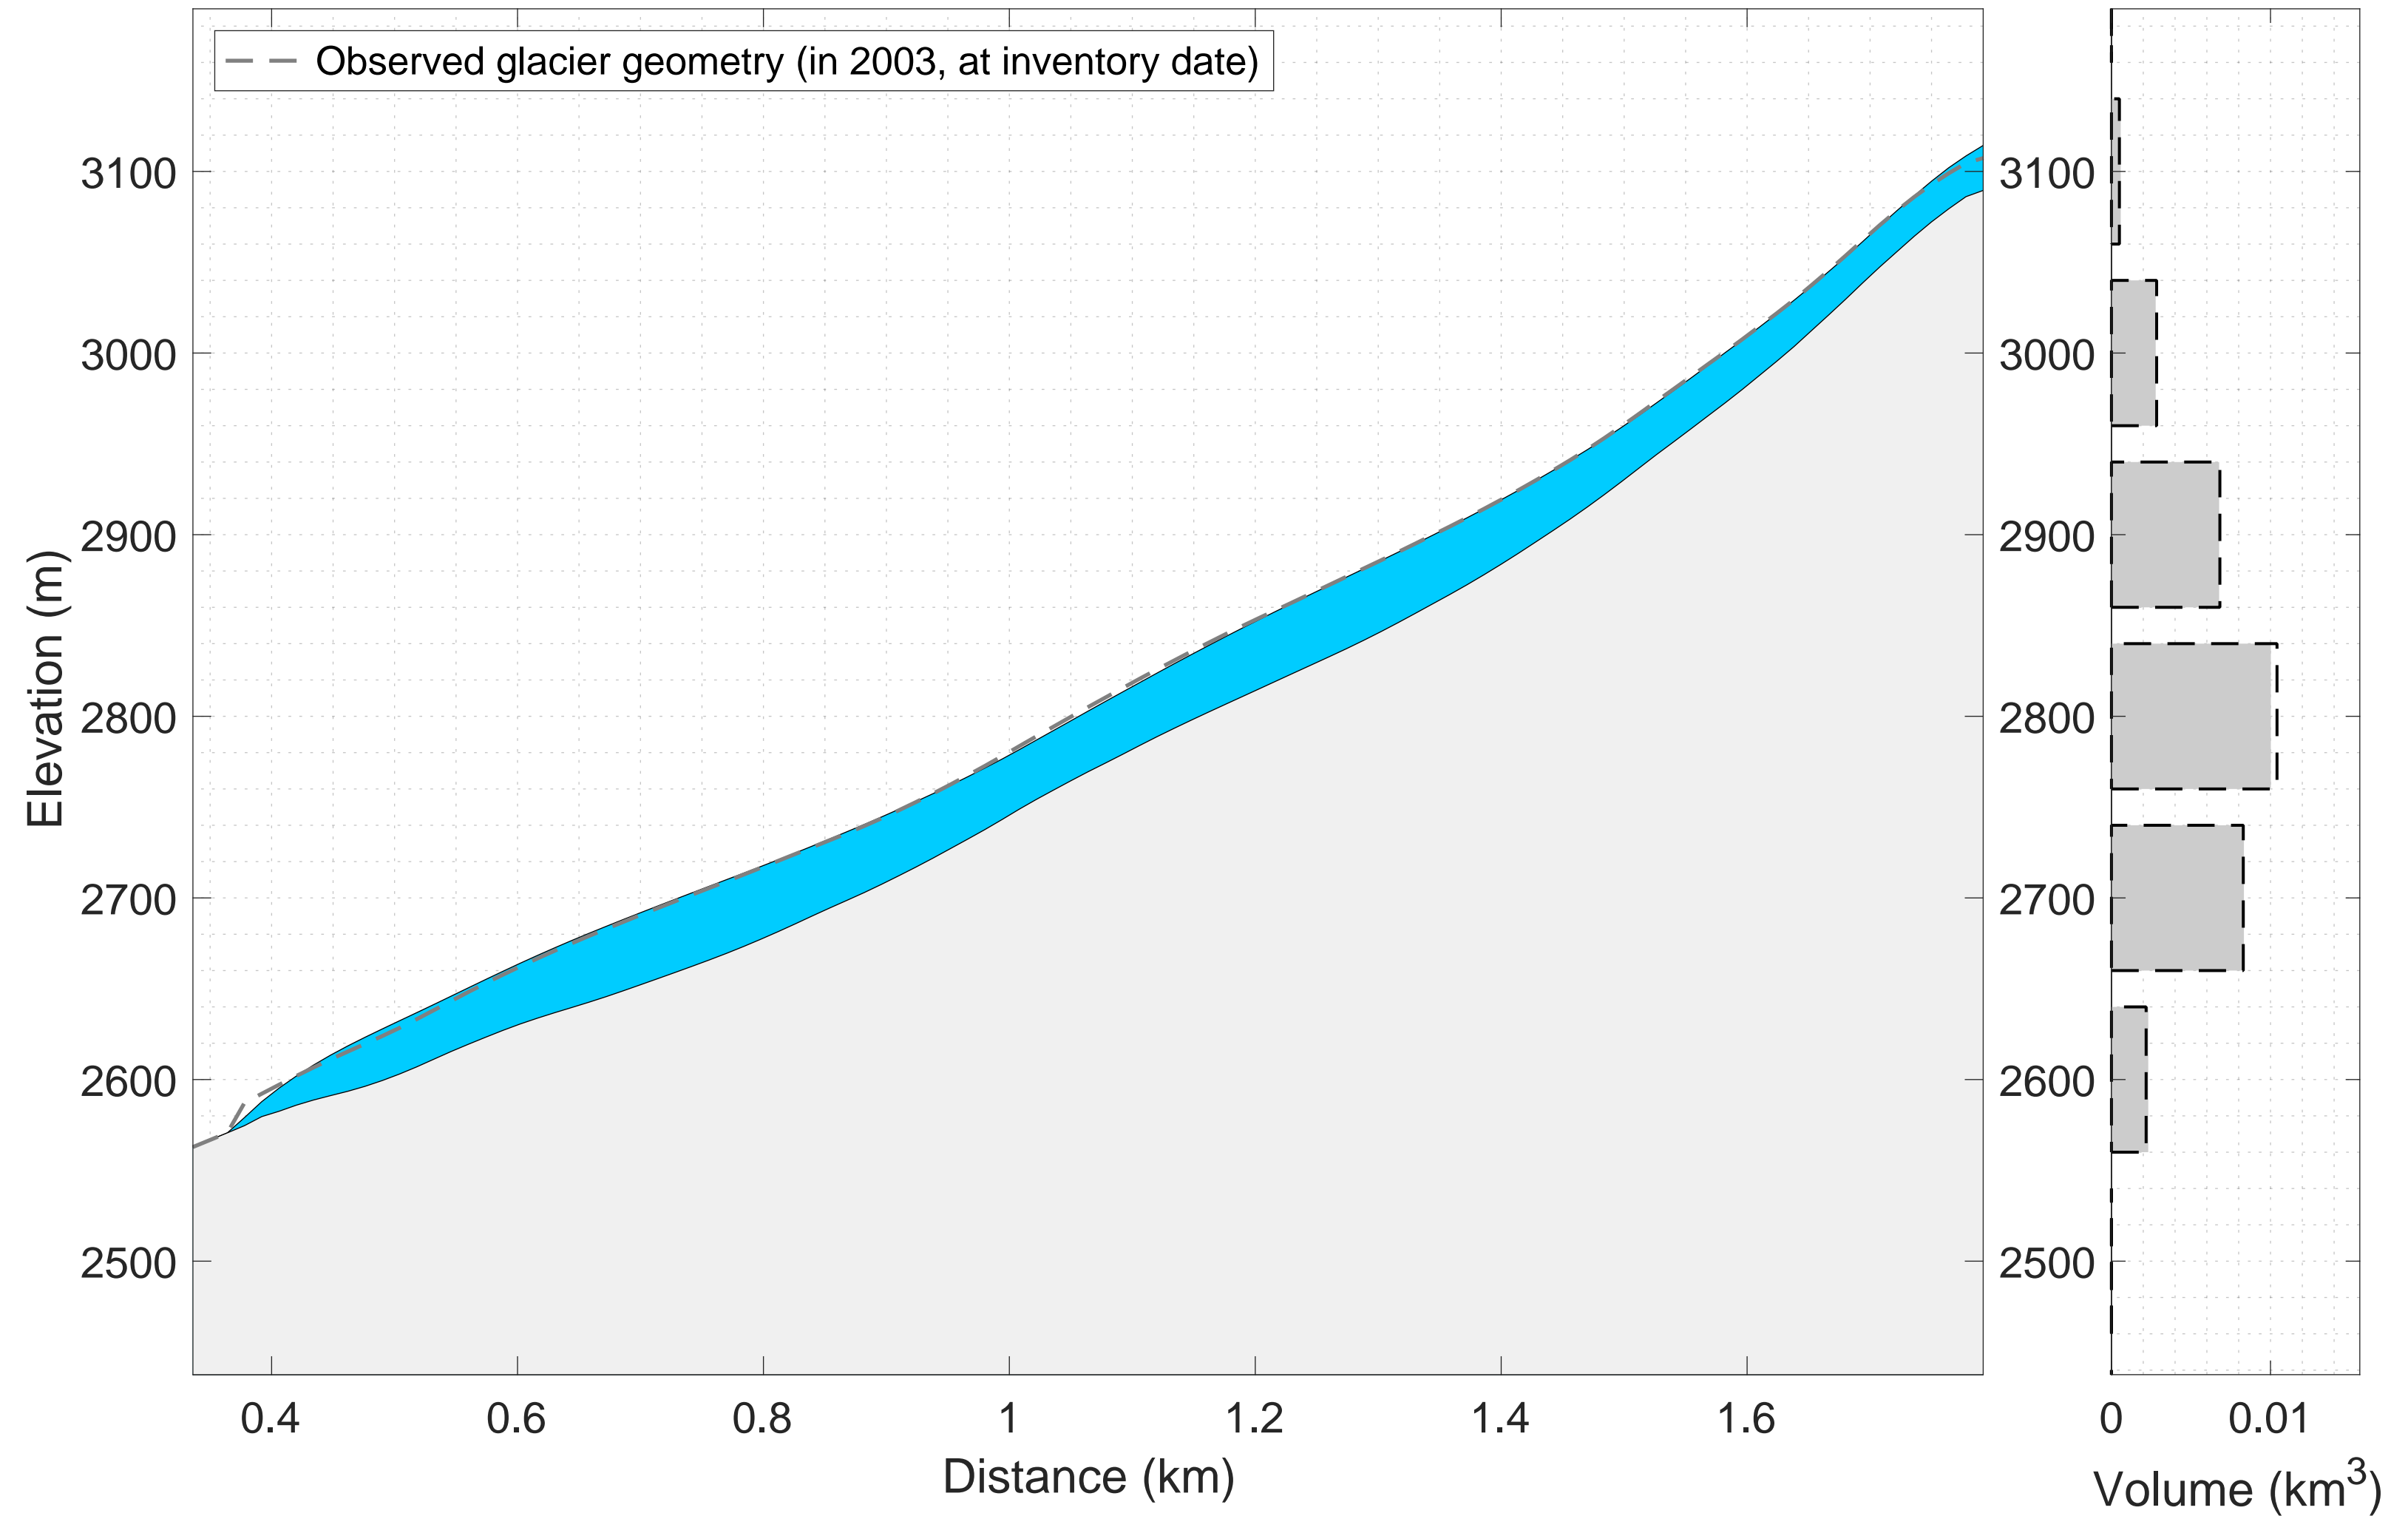

Supplement: Supplementary file 685 [file tc-13-1125-2019-supplement.zip]

**Modelled geometry (Glacier ID = 02726;  $A = 1.583\text{e-}16 \text{ Pa}^{-3} \text{ a}^{-1}$ ;  $dx = 11 \text{ m}$ )**

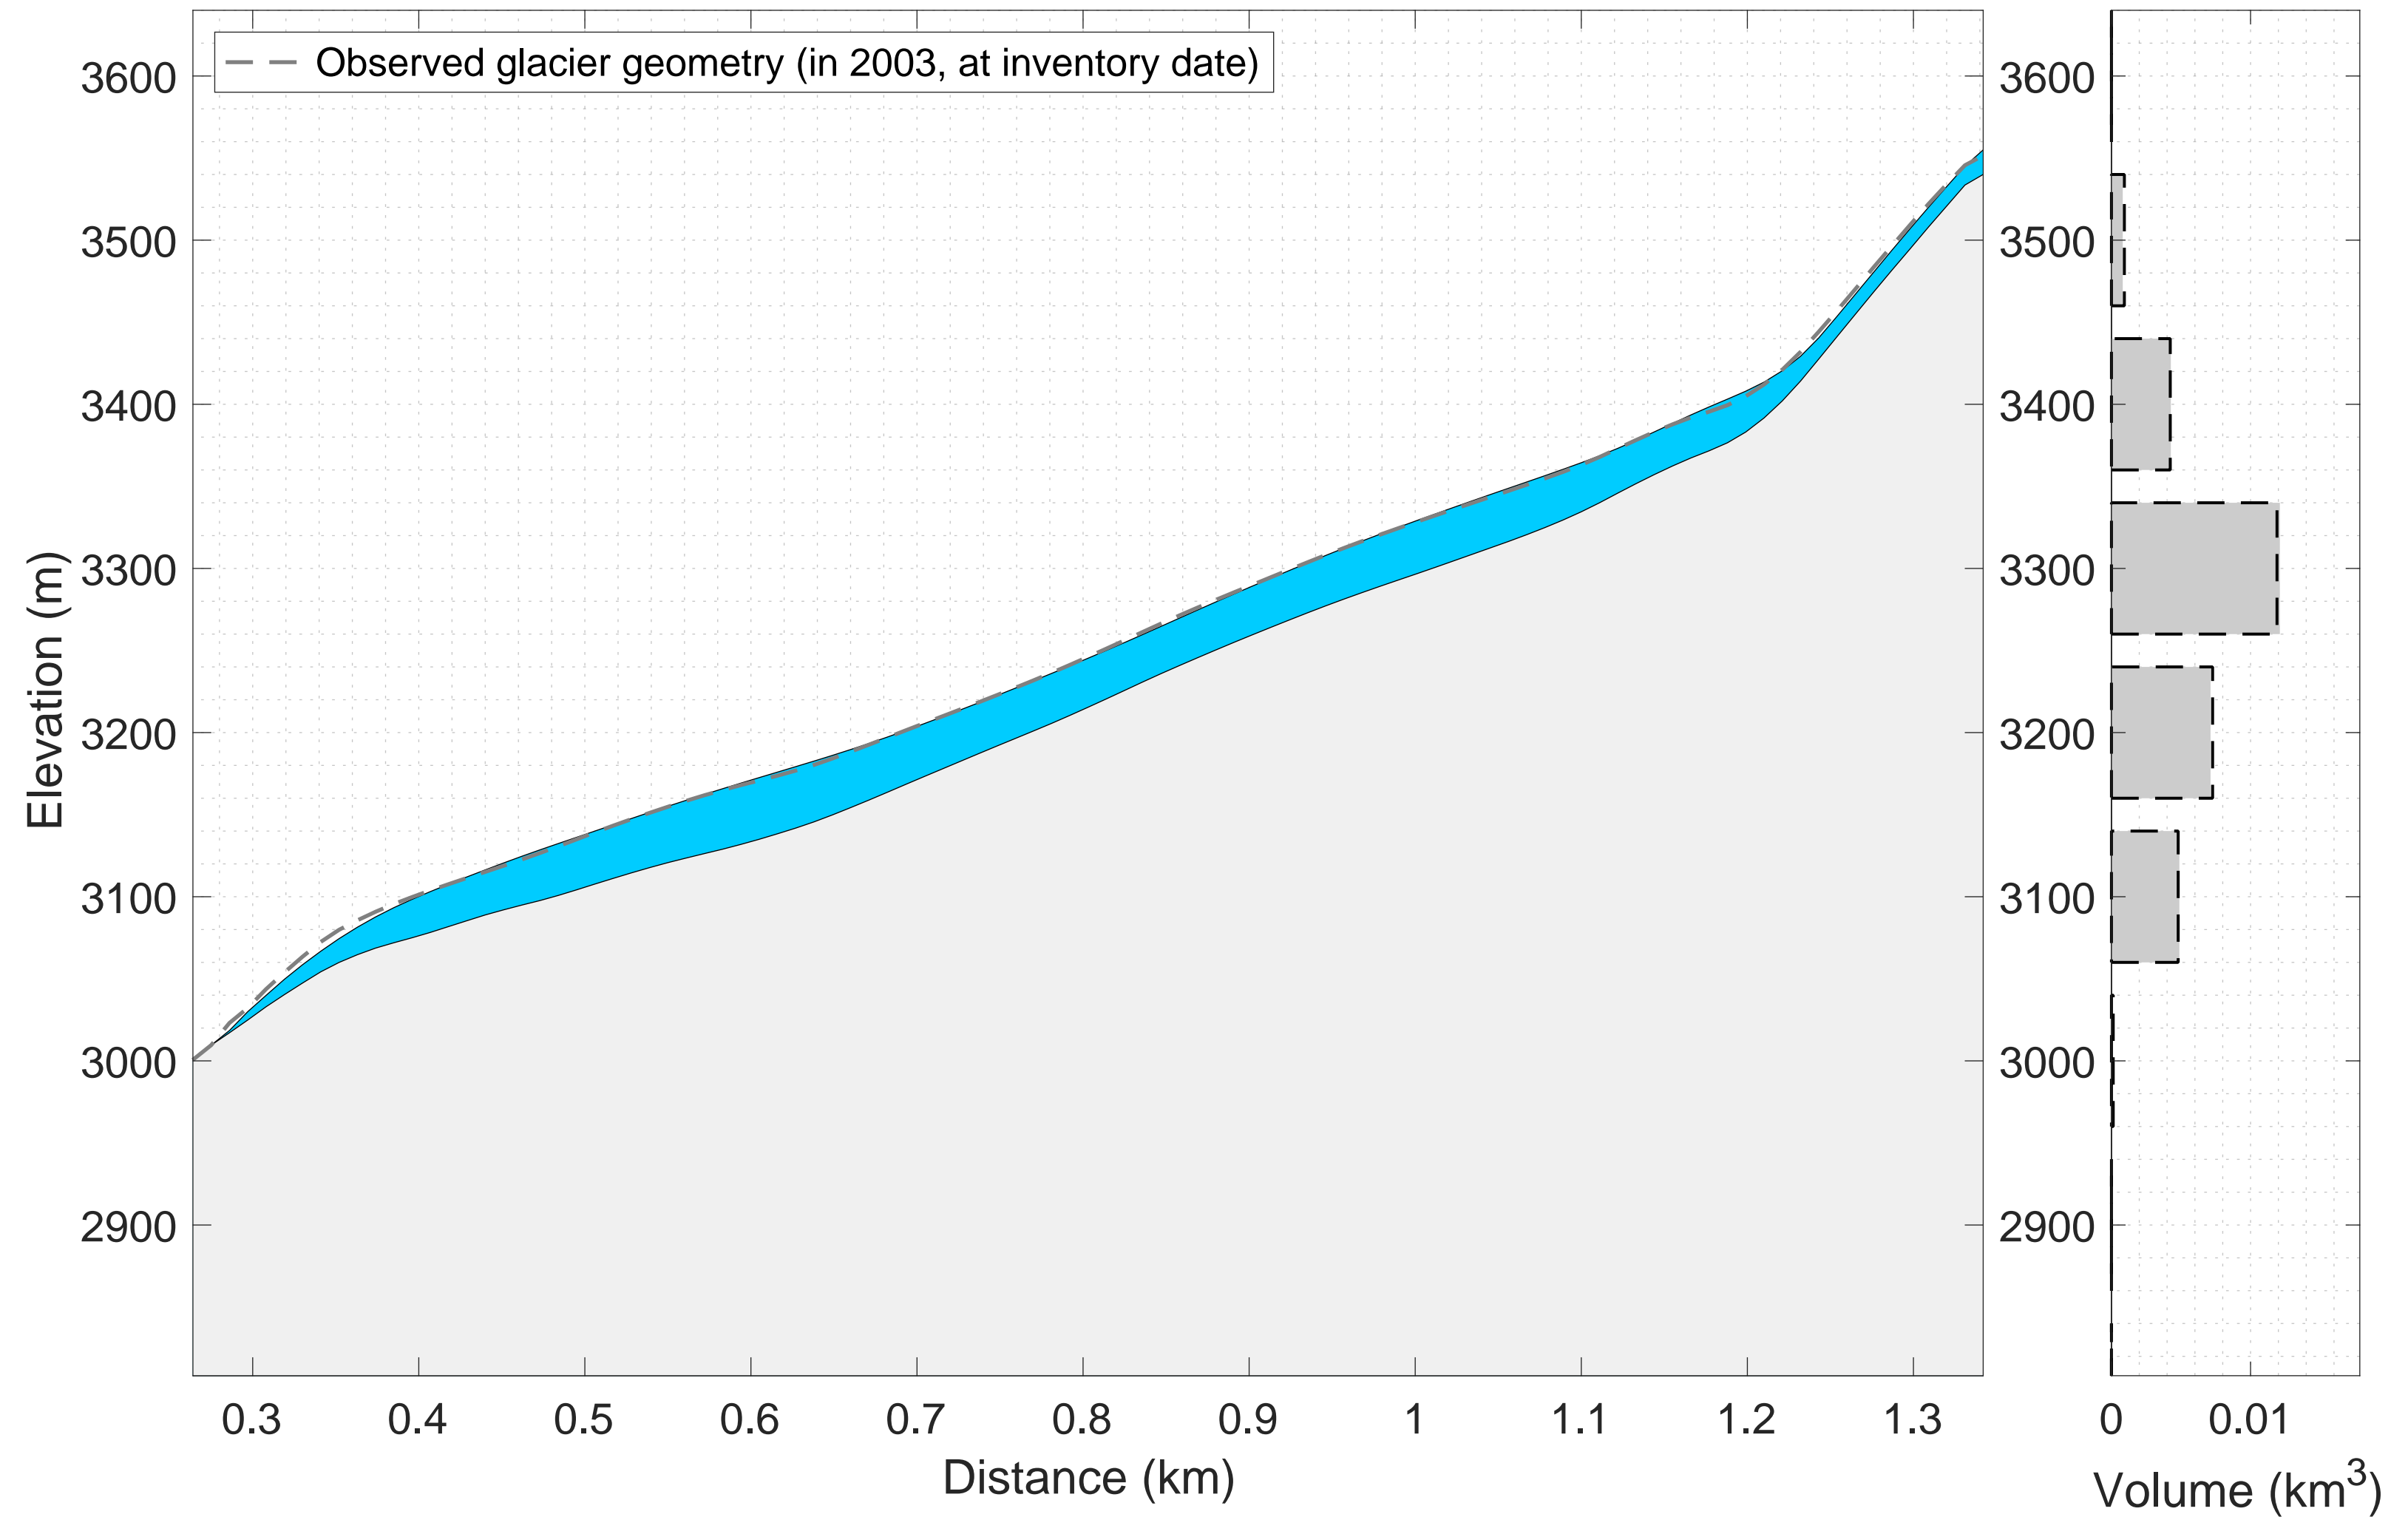

Supplement: Supplementary file 686 [file tc-13-1125-2019-supplement.zip]

**Modelled geometry (Glacier ID = 02902;  $A = 1.7031\text{e-}16 \text{ Pa}^{-3} \text{ a}^{-1}$ ;  $dx = 45 \text{ m}$ )**

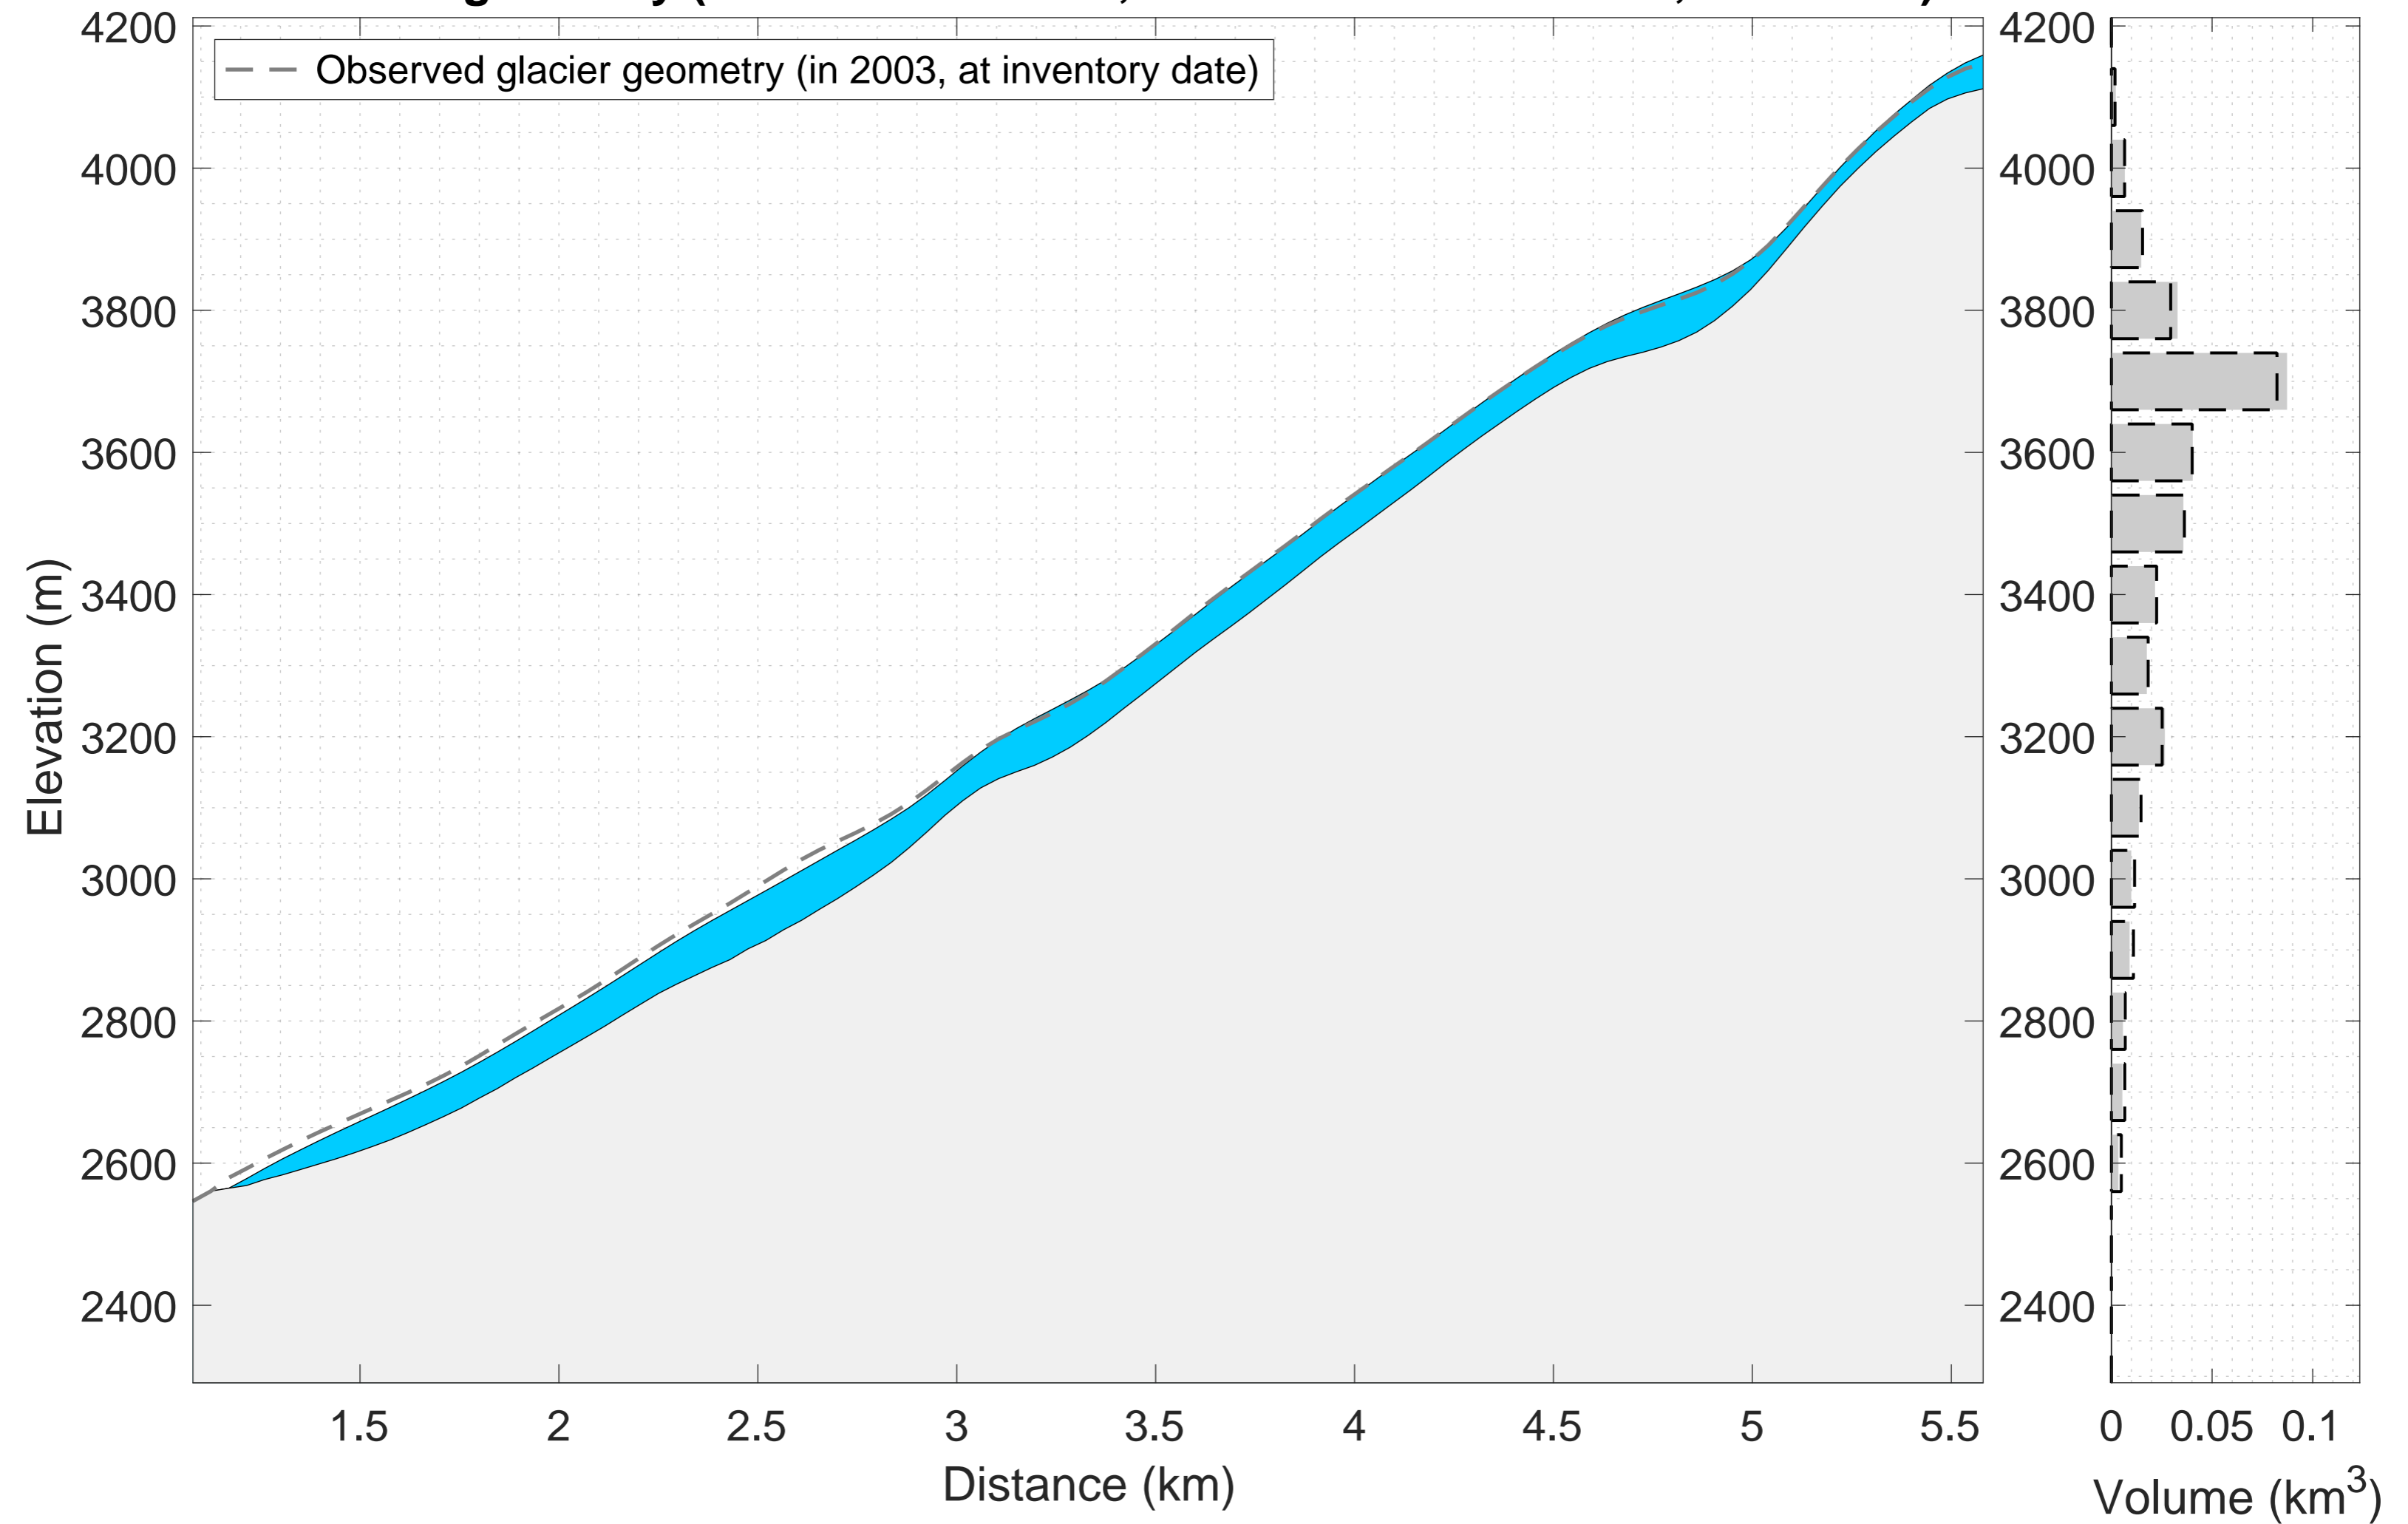

Supplement: Supplementary file 687 [file tc-13-1125-2019-supplement.zip]

Modelled geometry (Glacier ID = 02782;  $A = 4.2073\text{e-}17 \text{ Pa}^{-3} \text{ a}^{-1}$ ;  $dx = 18 \text{ m}$ )

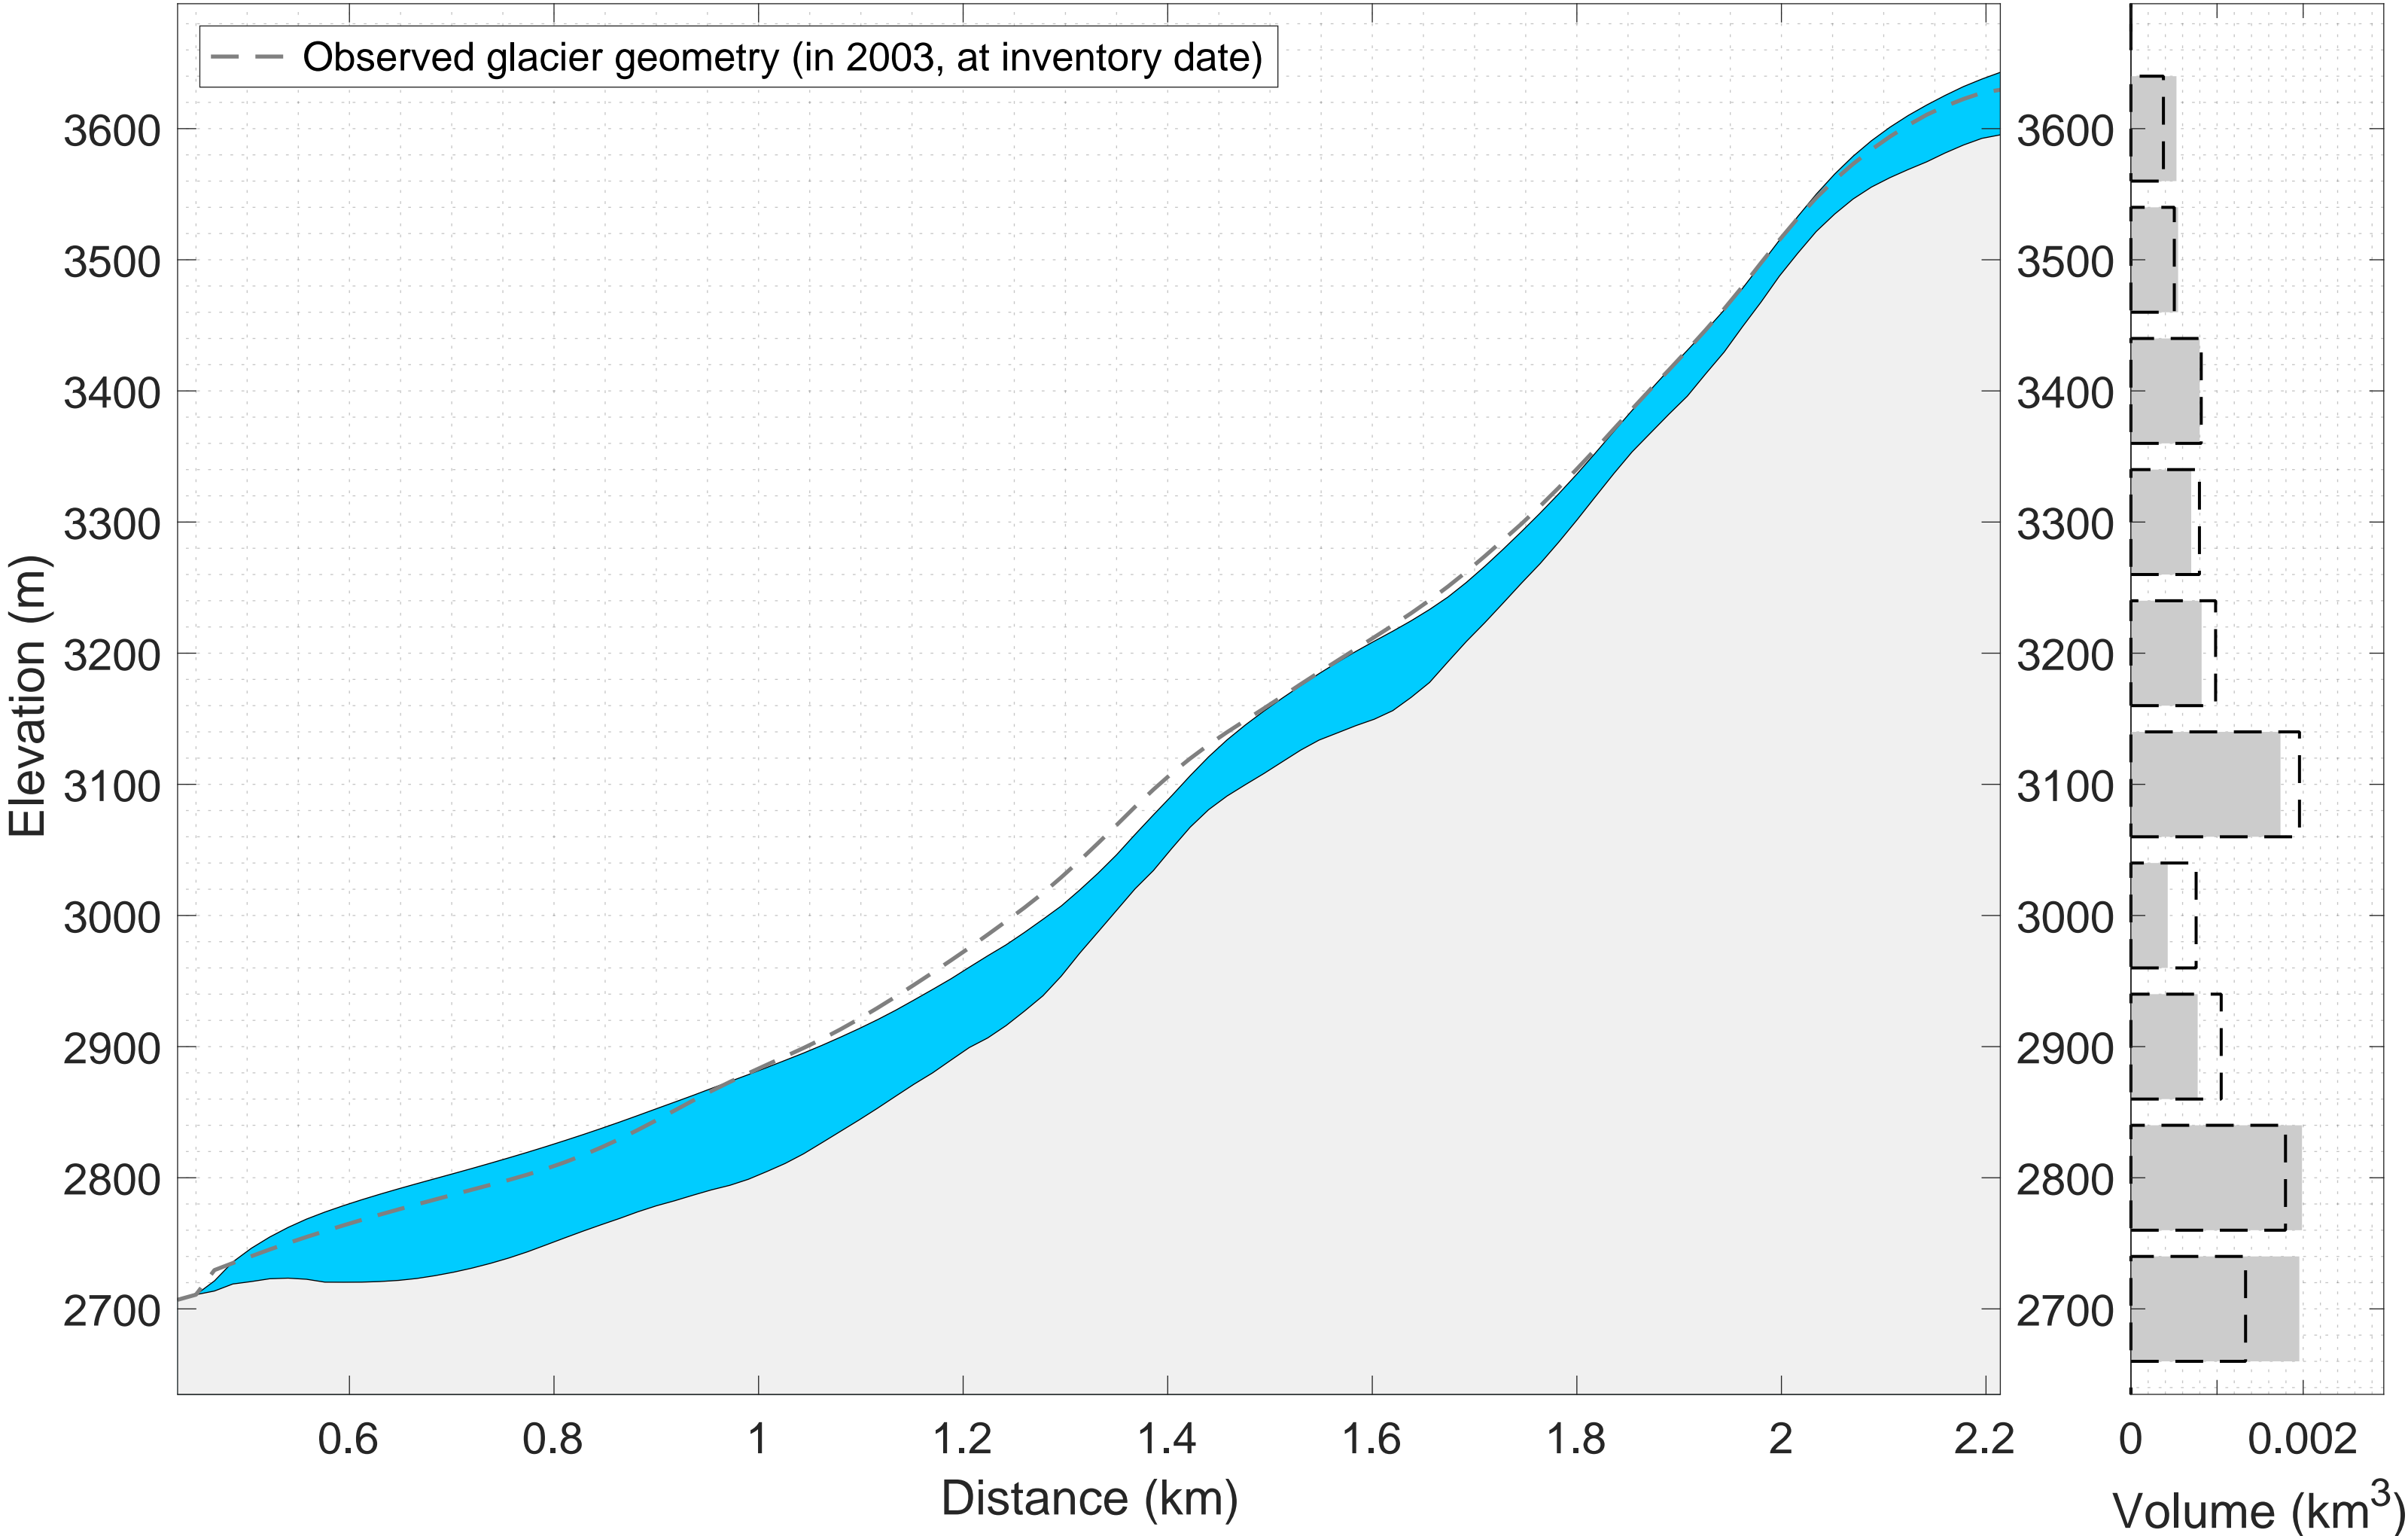

Supplement: Supplementary file 688 [file tc-13-1125-2019-supplement.zip]

**Modelled geometry (Glacier ID = 00687;  $A = 1.5509\text{e-}16 \text{ Pa}^{-3} \text{ a}^{-1}$ ;  $dx = 59 \text{ m}$ )**

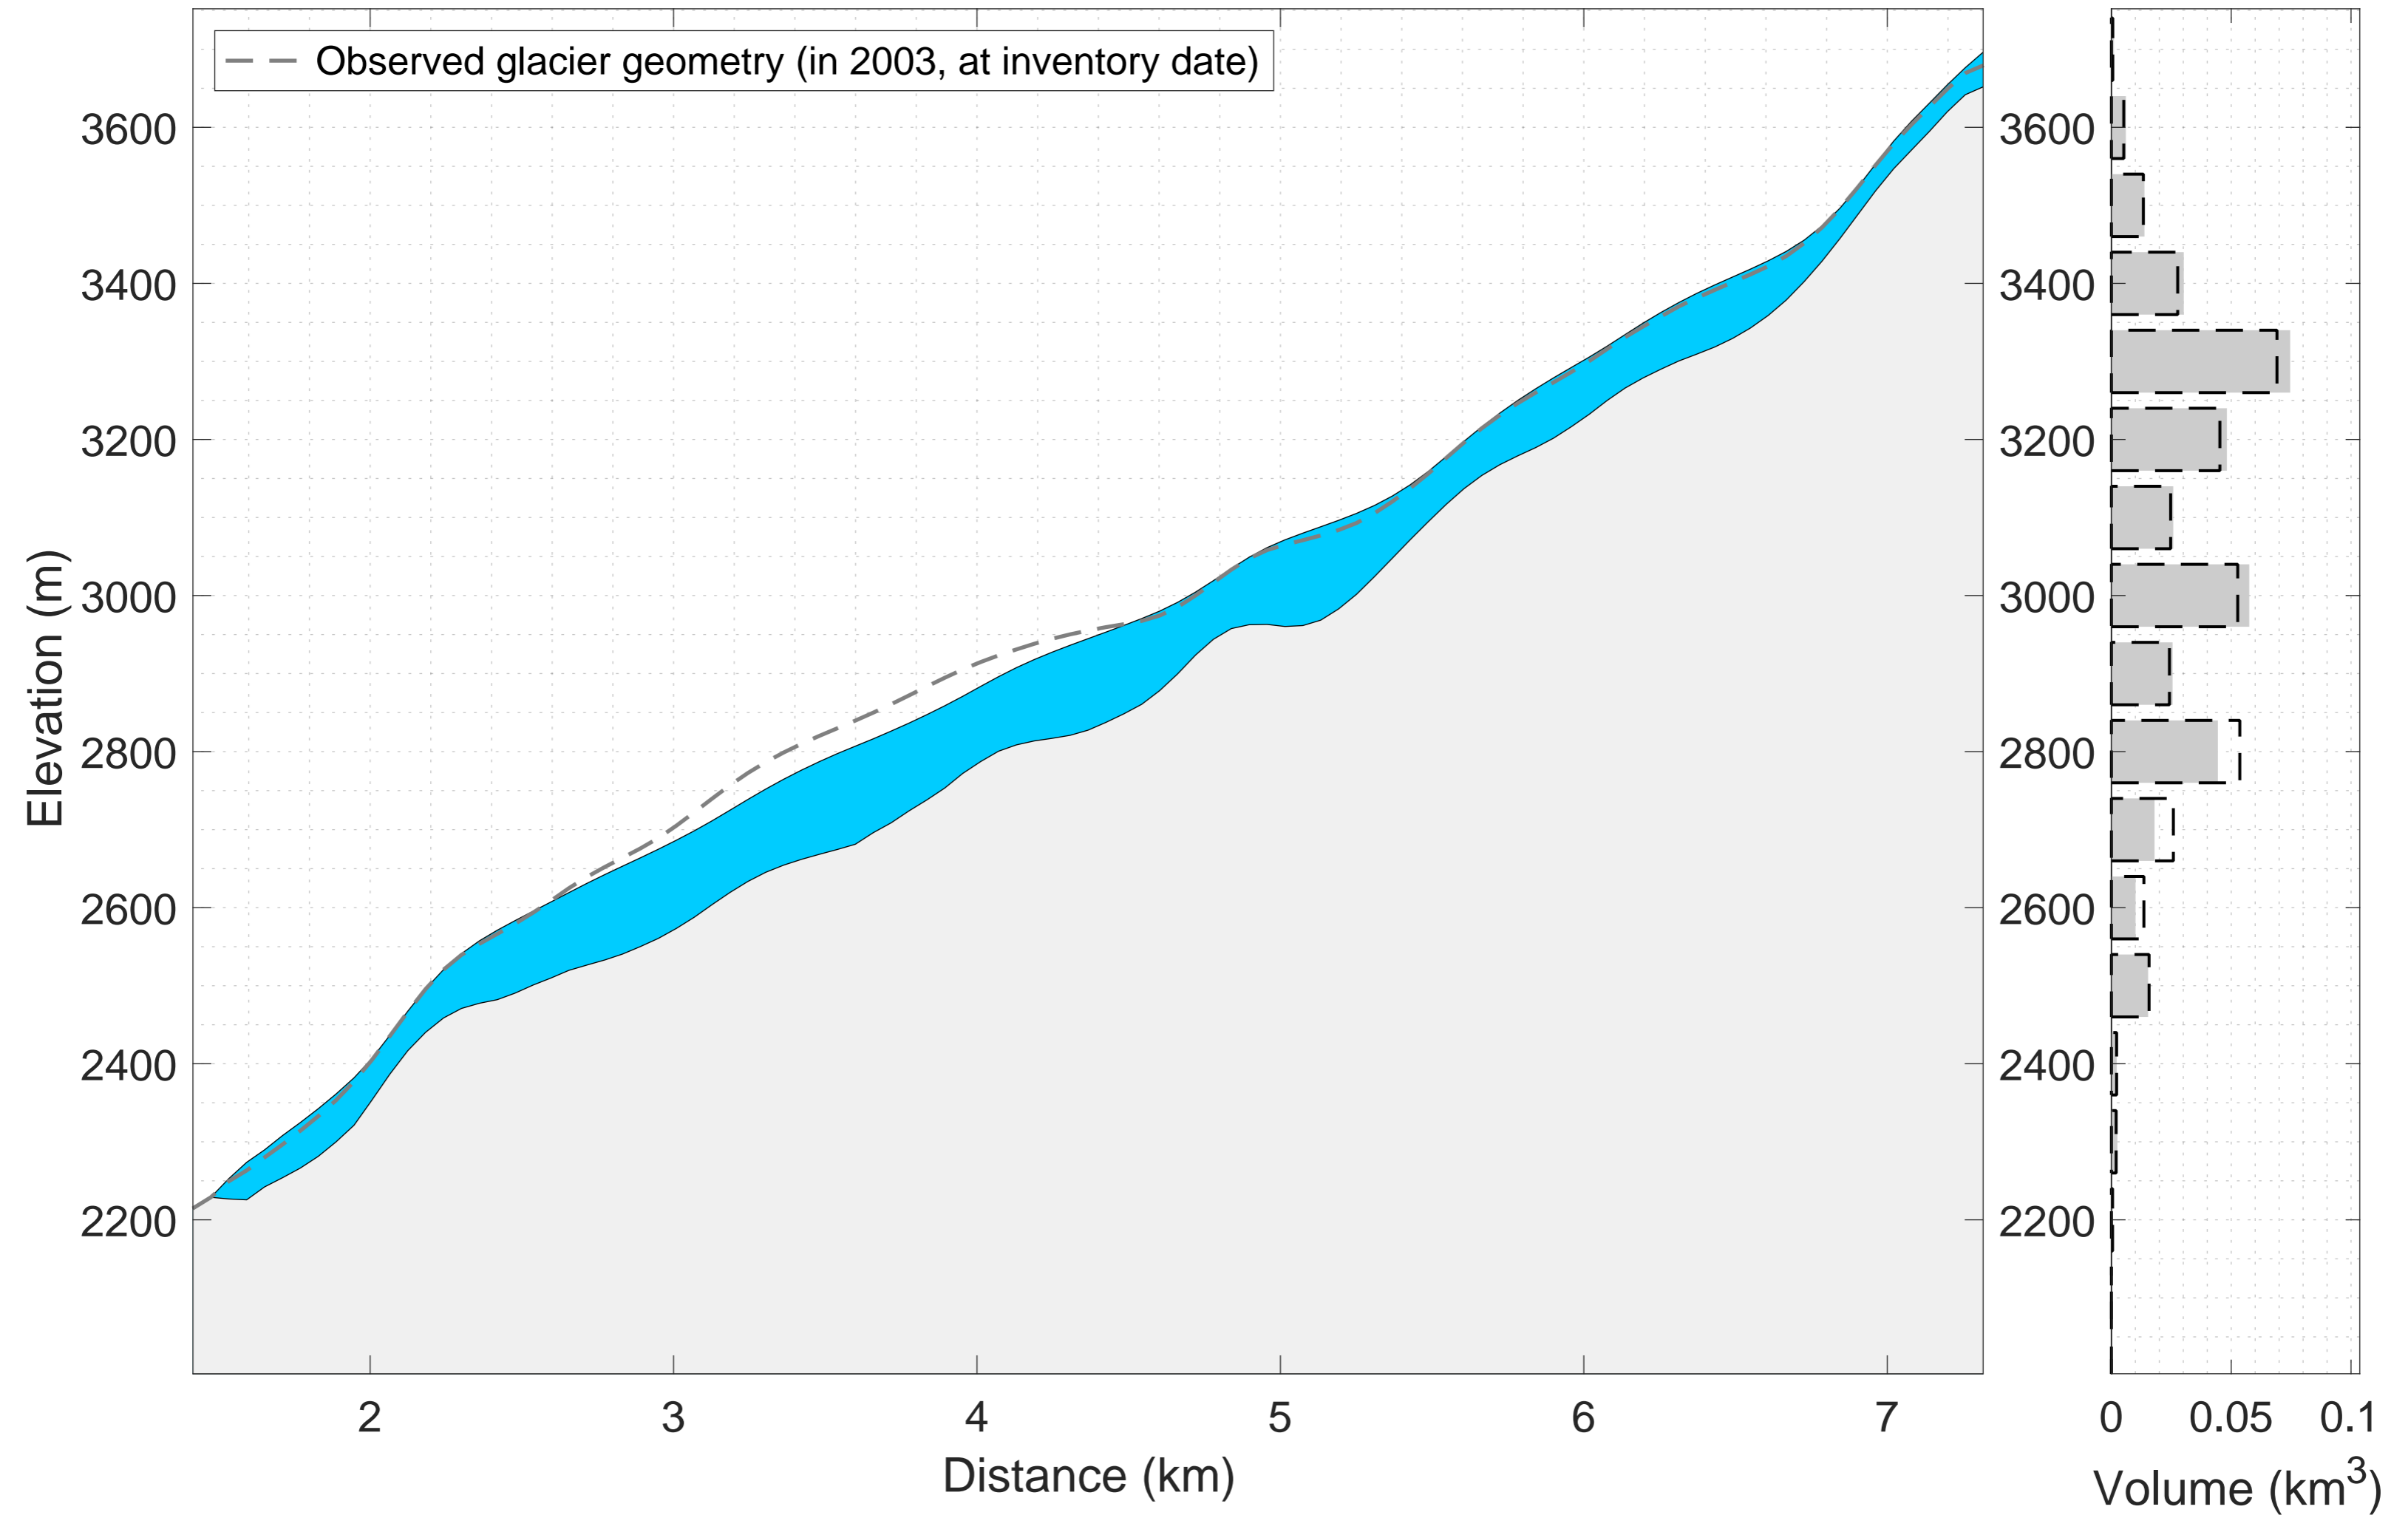

Supplement: Supplementary file 689 [file tc-13-1125-2019-supplement.zip]

**Modelled geometry (Glacier ID = 00903;  $A = 1.0141\text{e-}16 \text{ Pa}^{-3} \text{ a}^{-1}$ ;  $dx = 22 \text{ m}$ )**

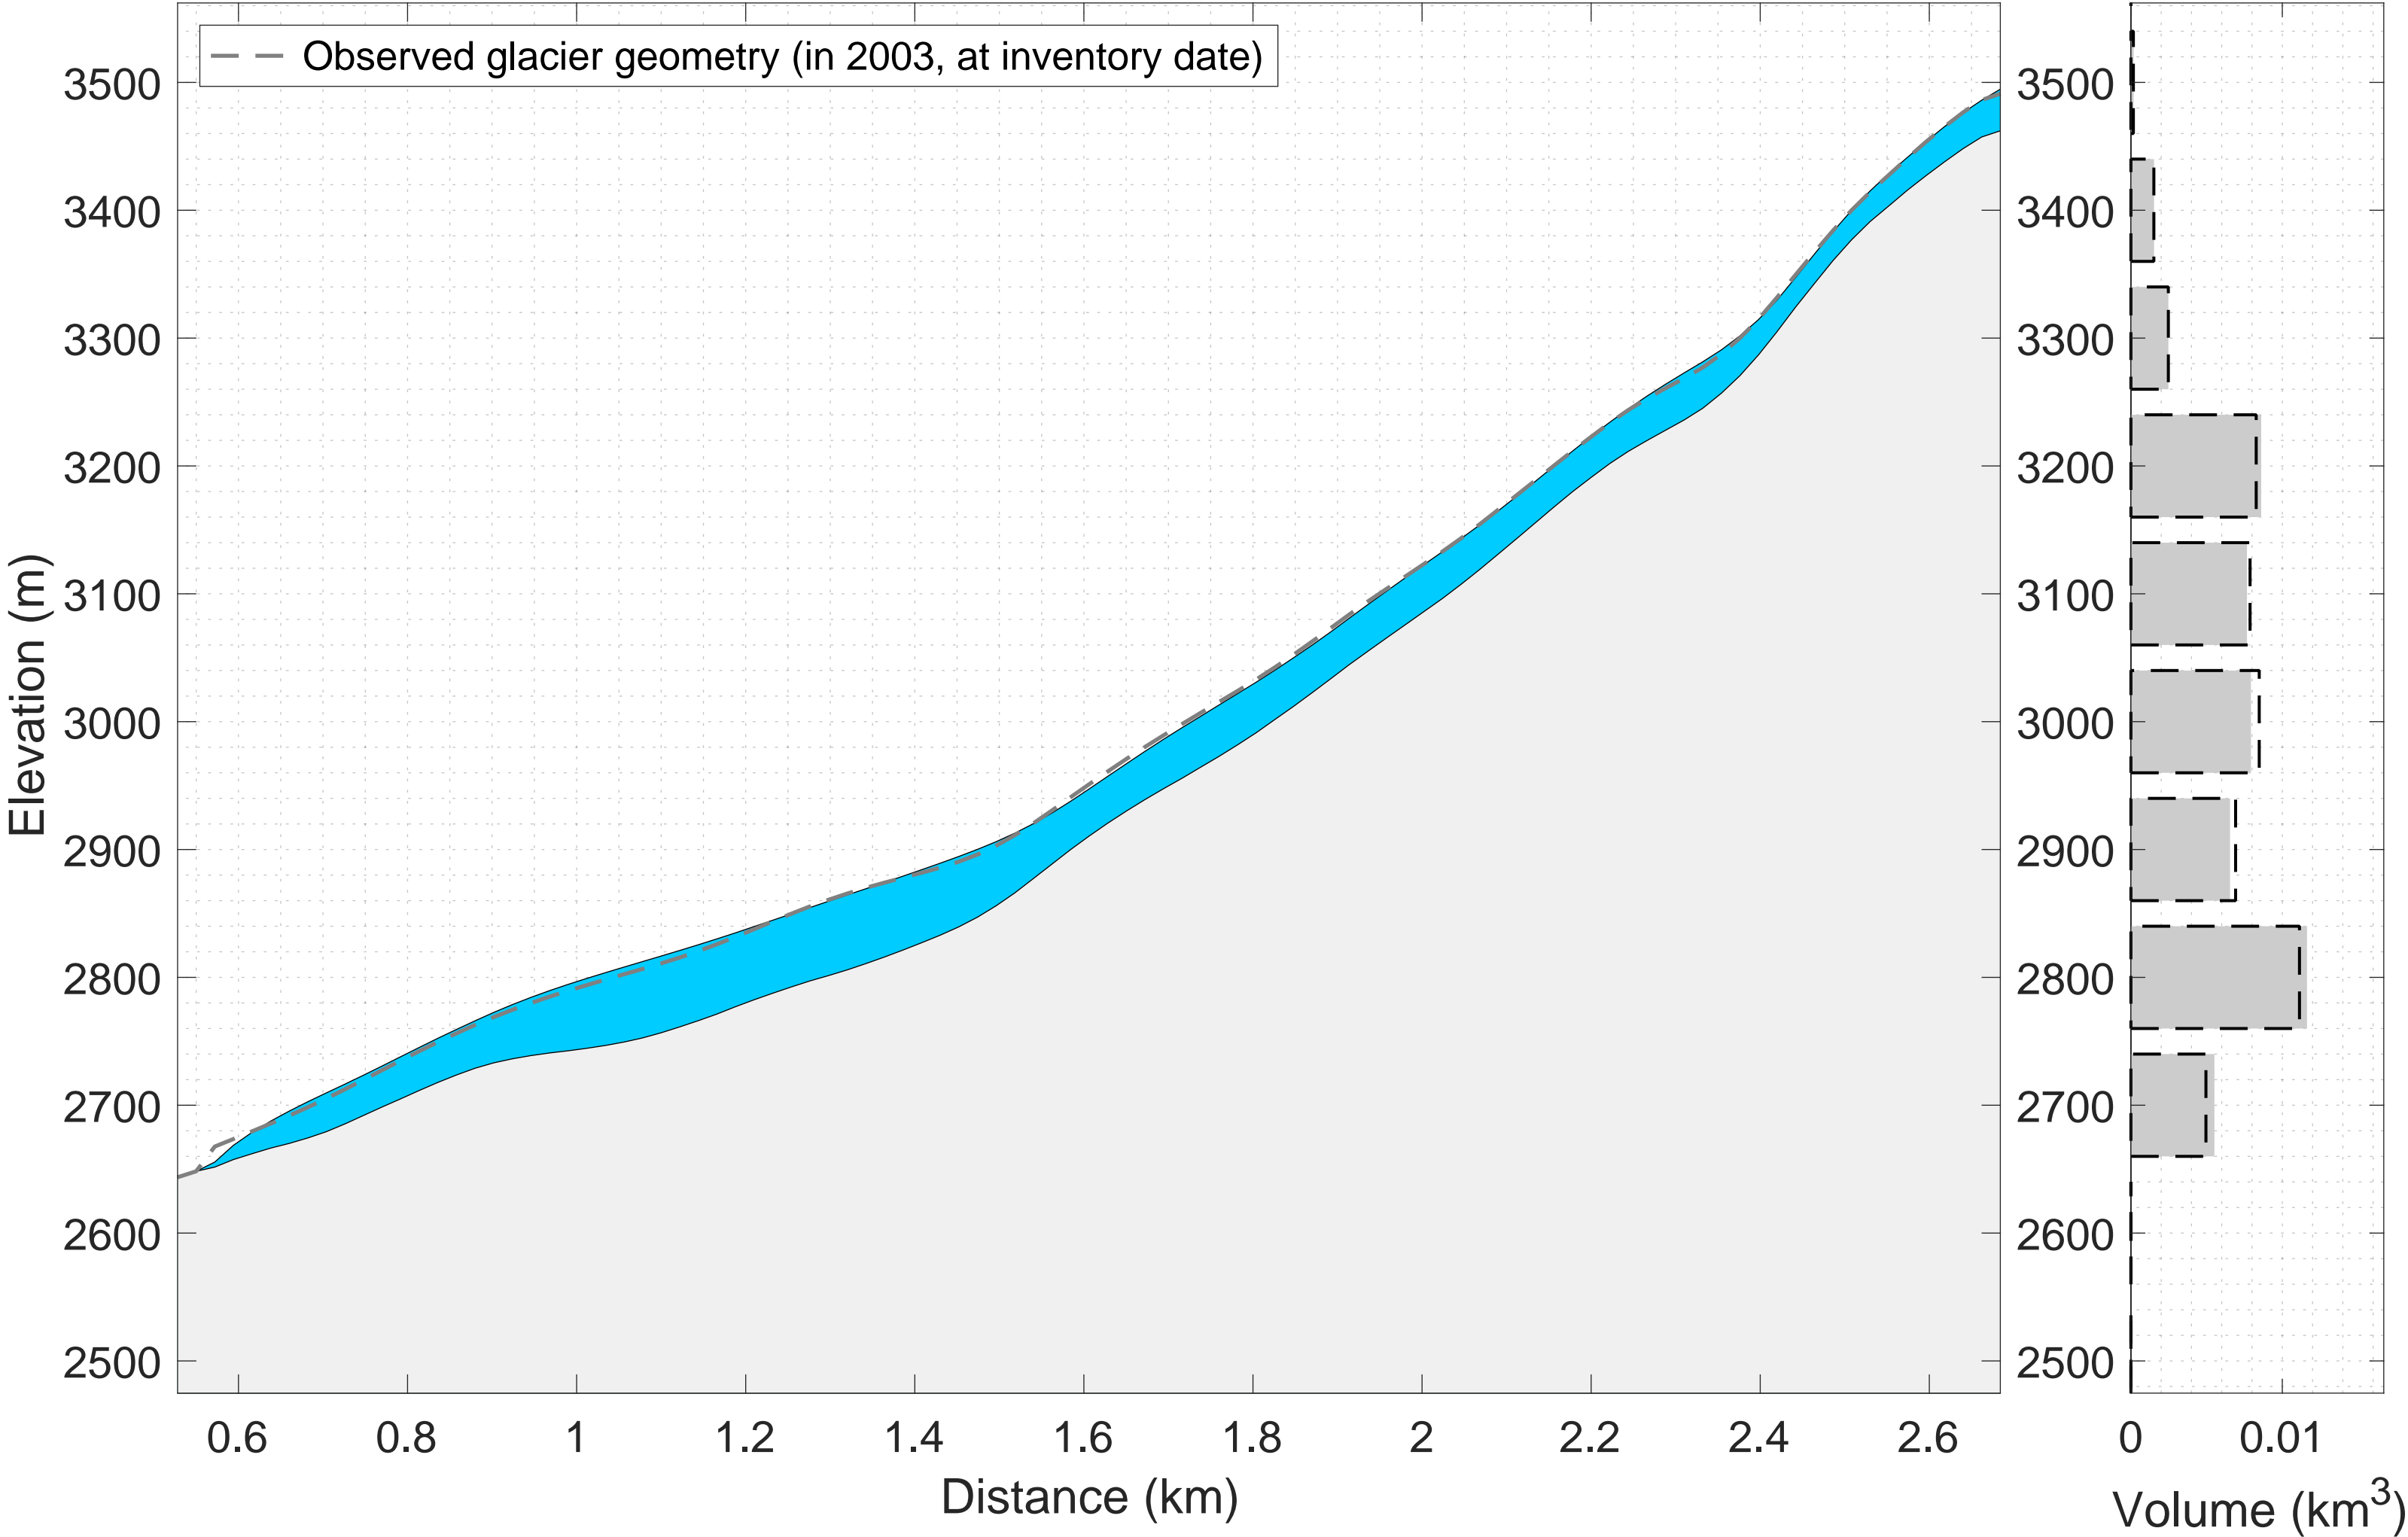

Supplement: Supplementary file 690 [file tc-13-1125-2019-supplement.zip]

**Modelled geometry (Glacier ID = 02443;  $A = 7.2561\text{e-}17 \text{ Pa}^{-3} \text{ a}^{-1}$ ;  $dx = 13 \text{ m}$ )**

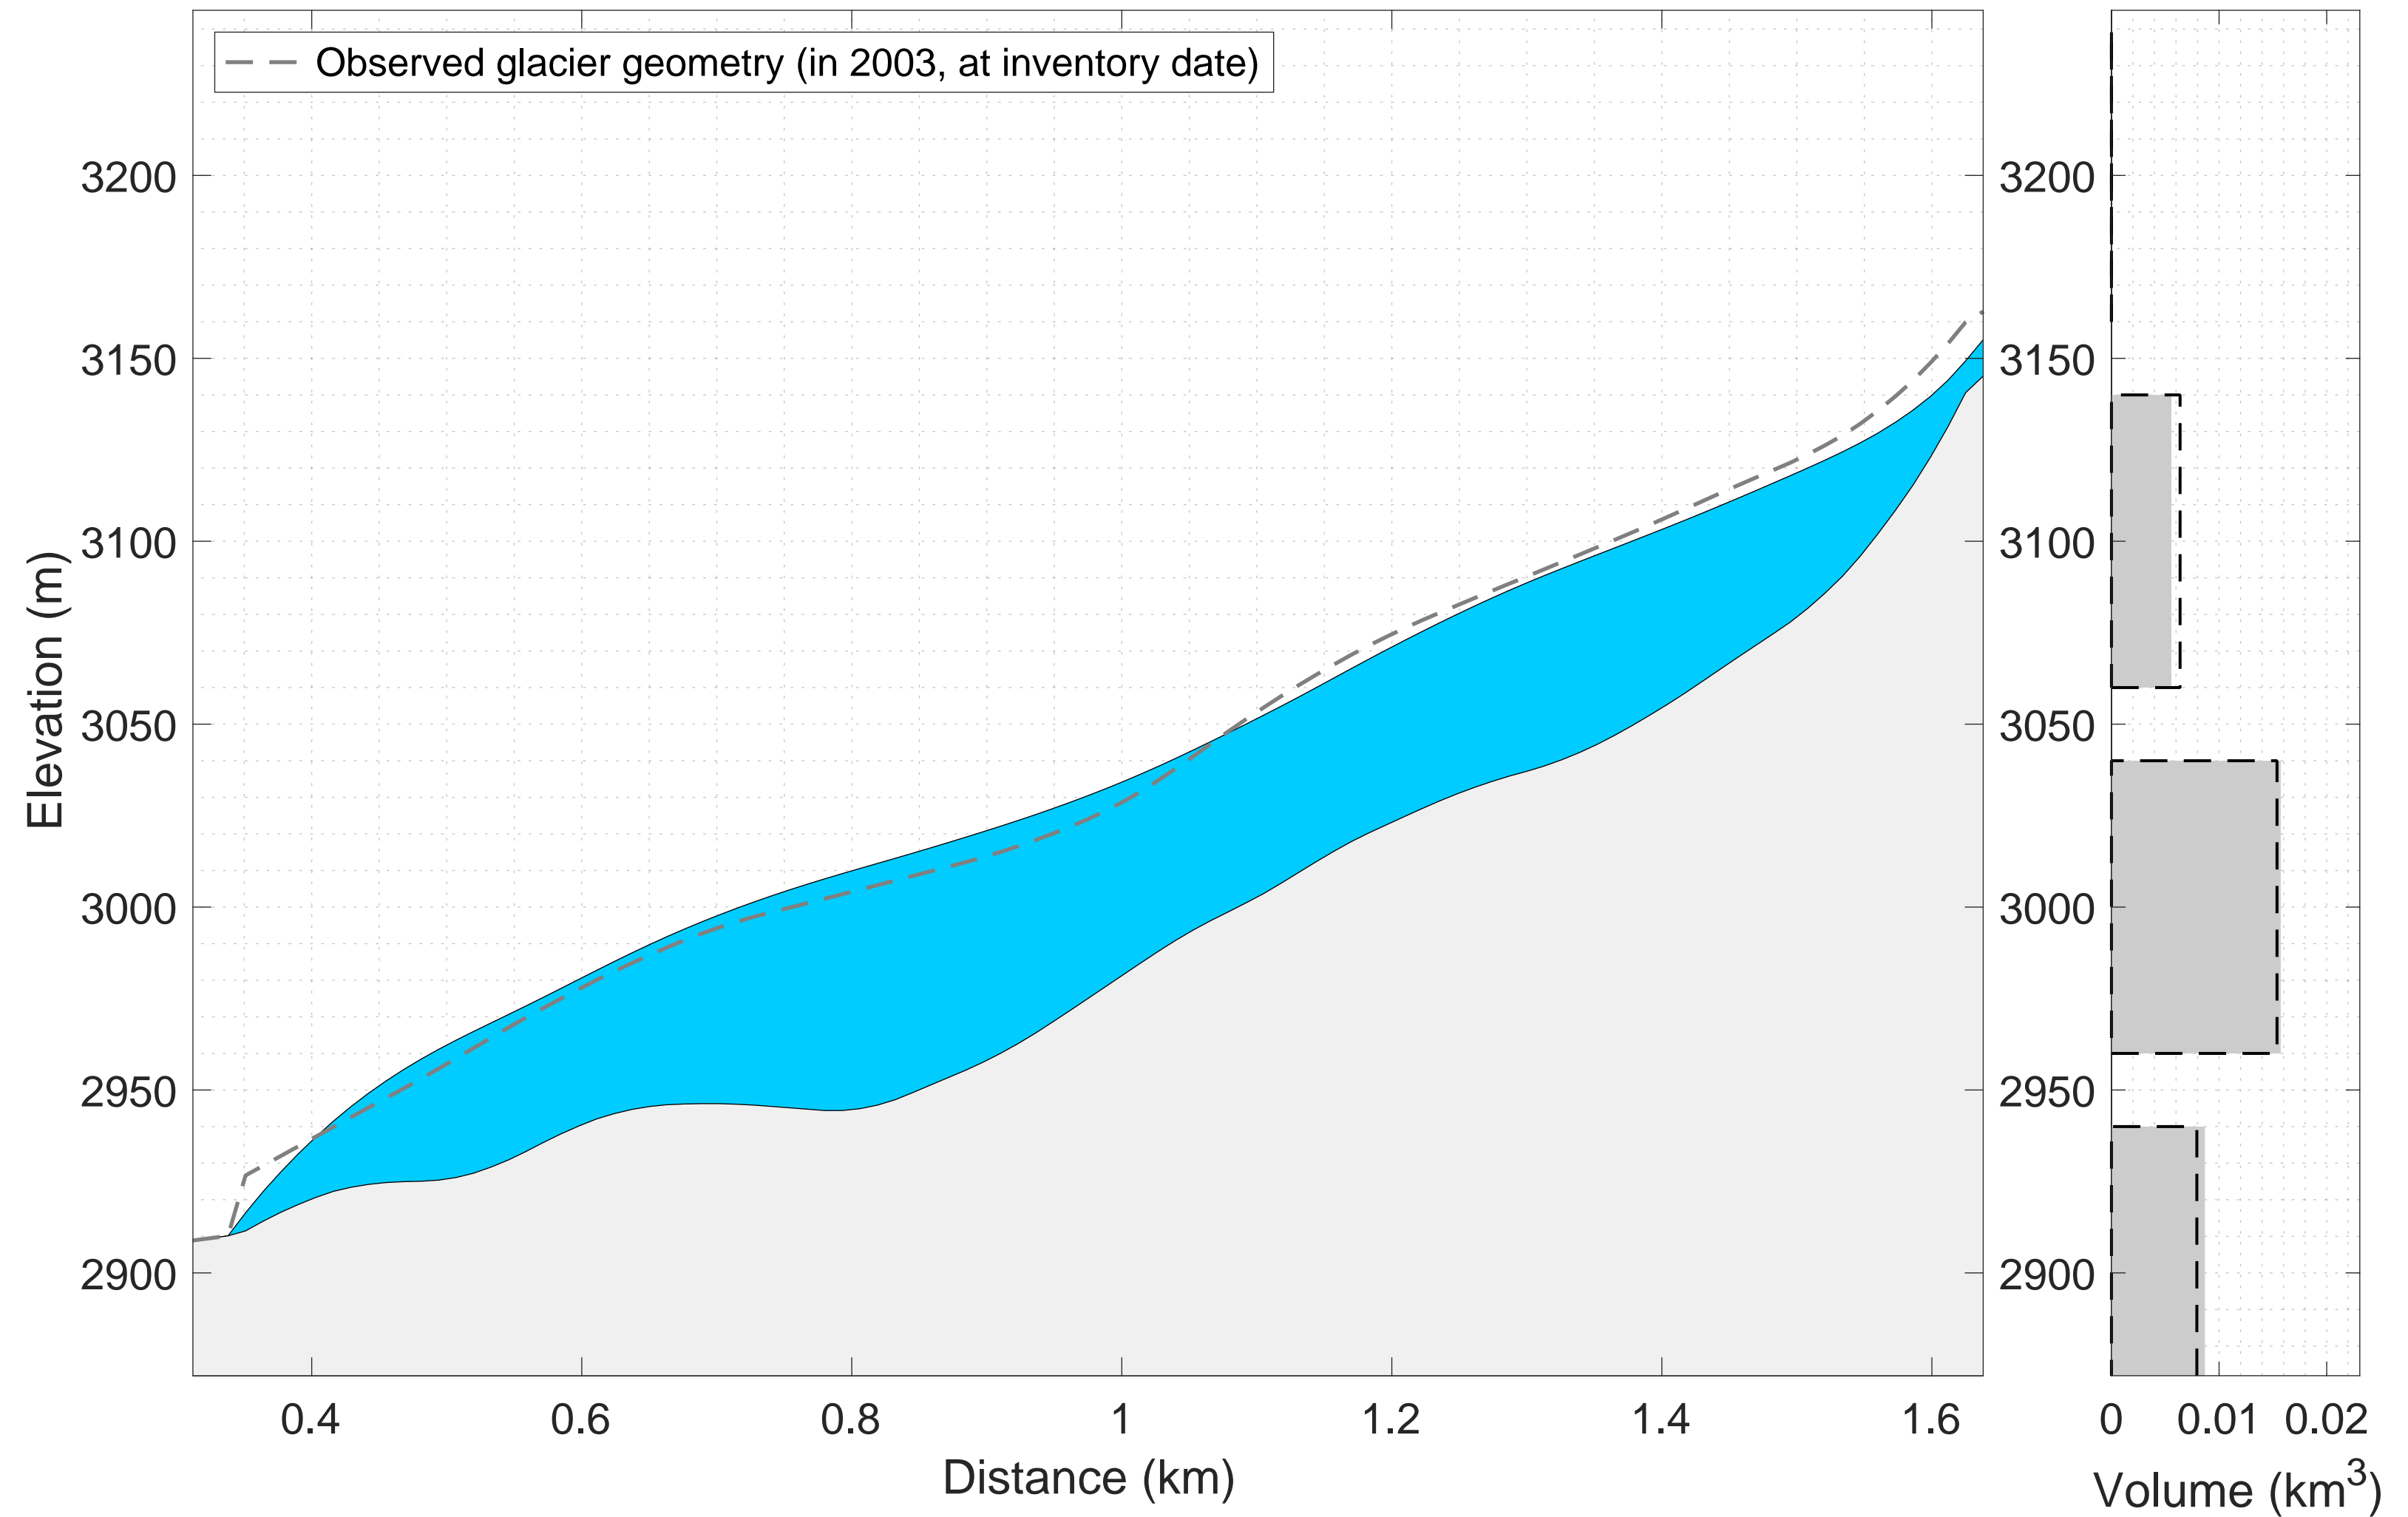

Supplement: Supplementary file 691 [file tc-13-1125-2019-supplement.zip]

**Modelled geometry (Glacier ID = 01715;  $A = 4.777\text{e-}17 \text{ Pa}^{-3} \text{ a}^{-1}$ ;  $dx = 16 \text{ m}$ )**

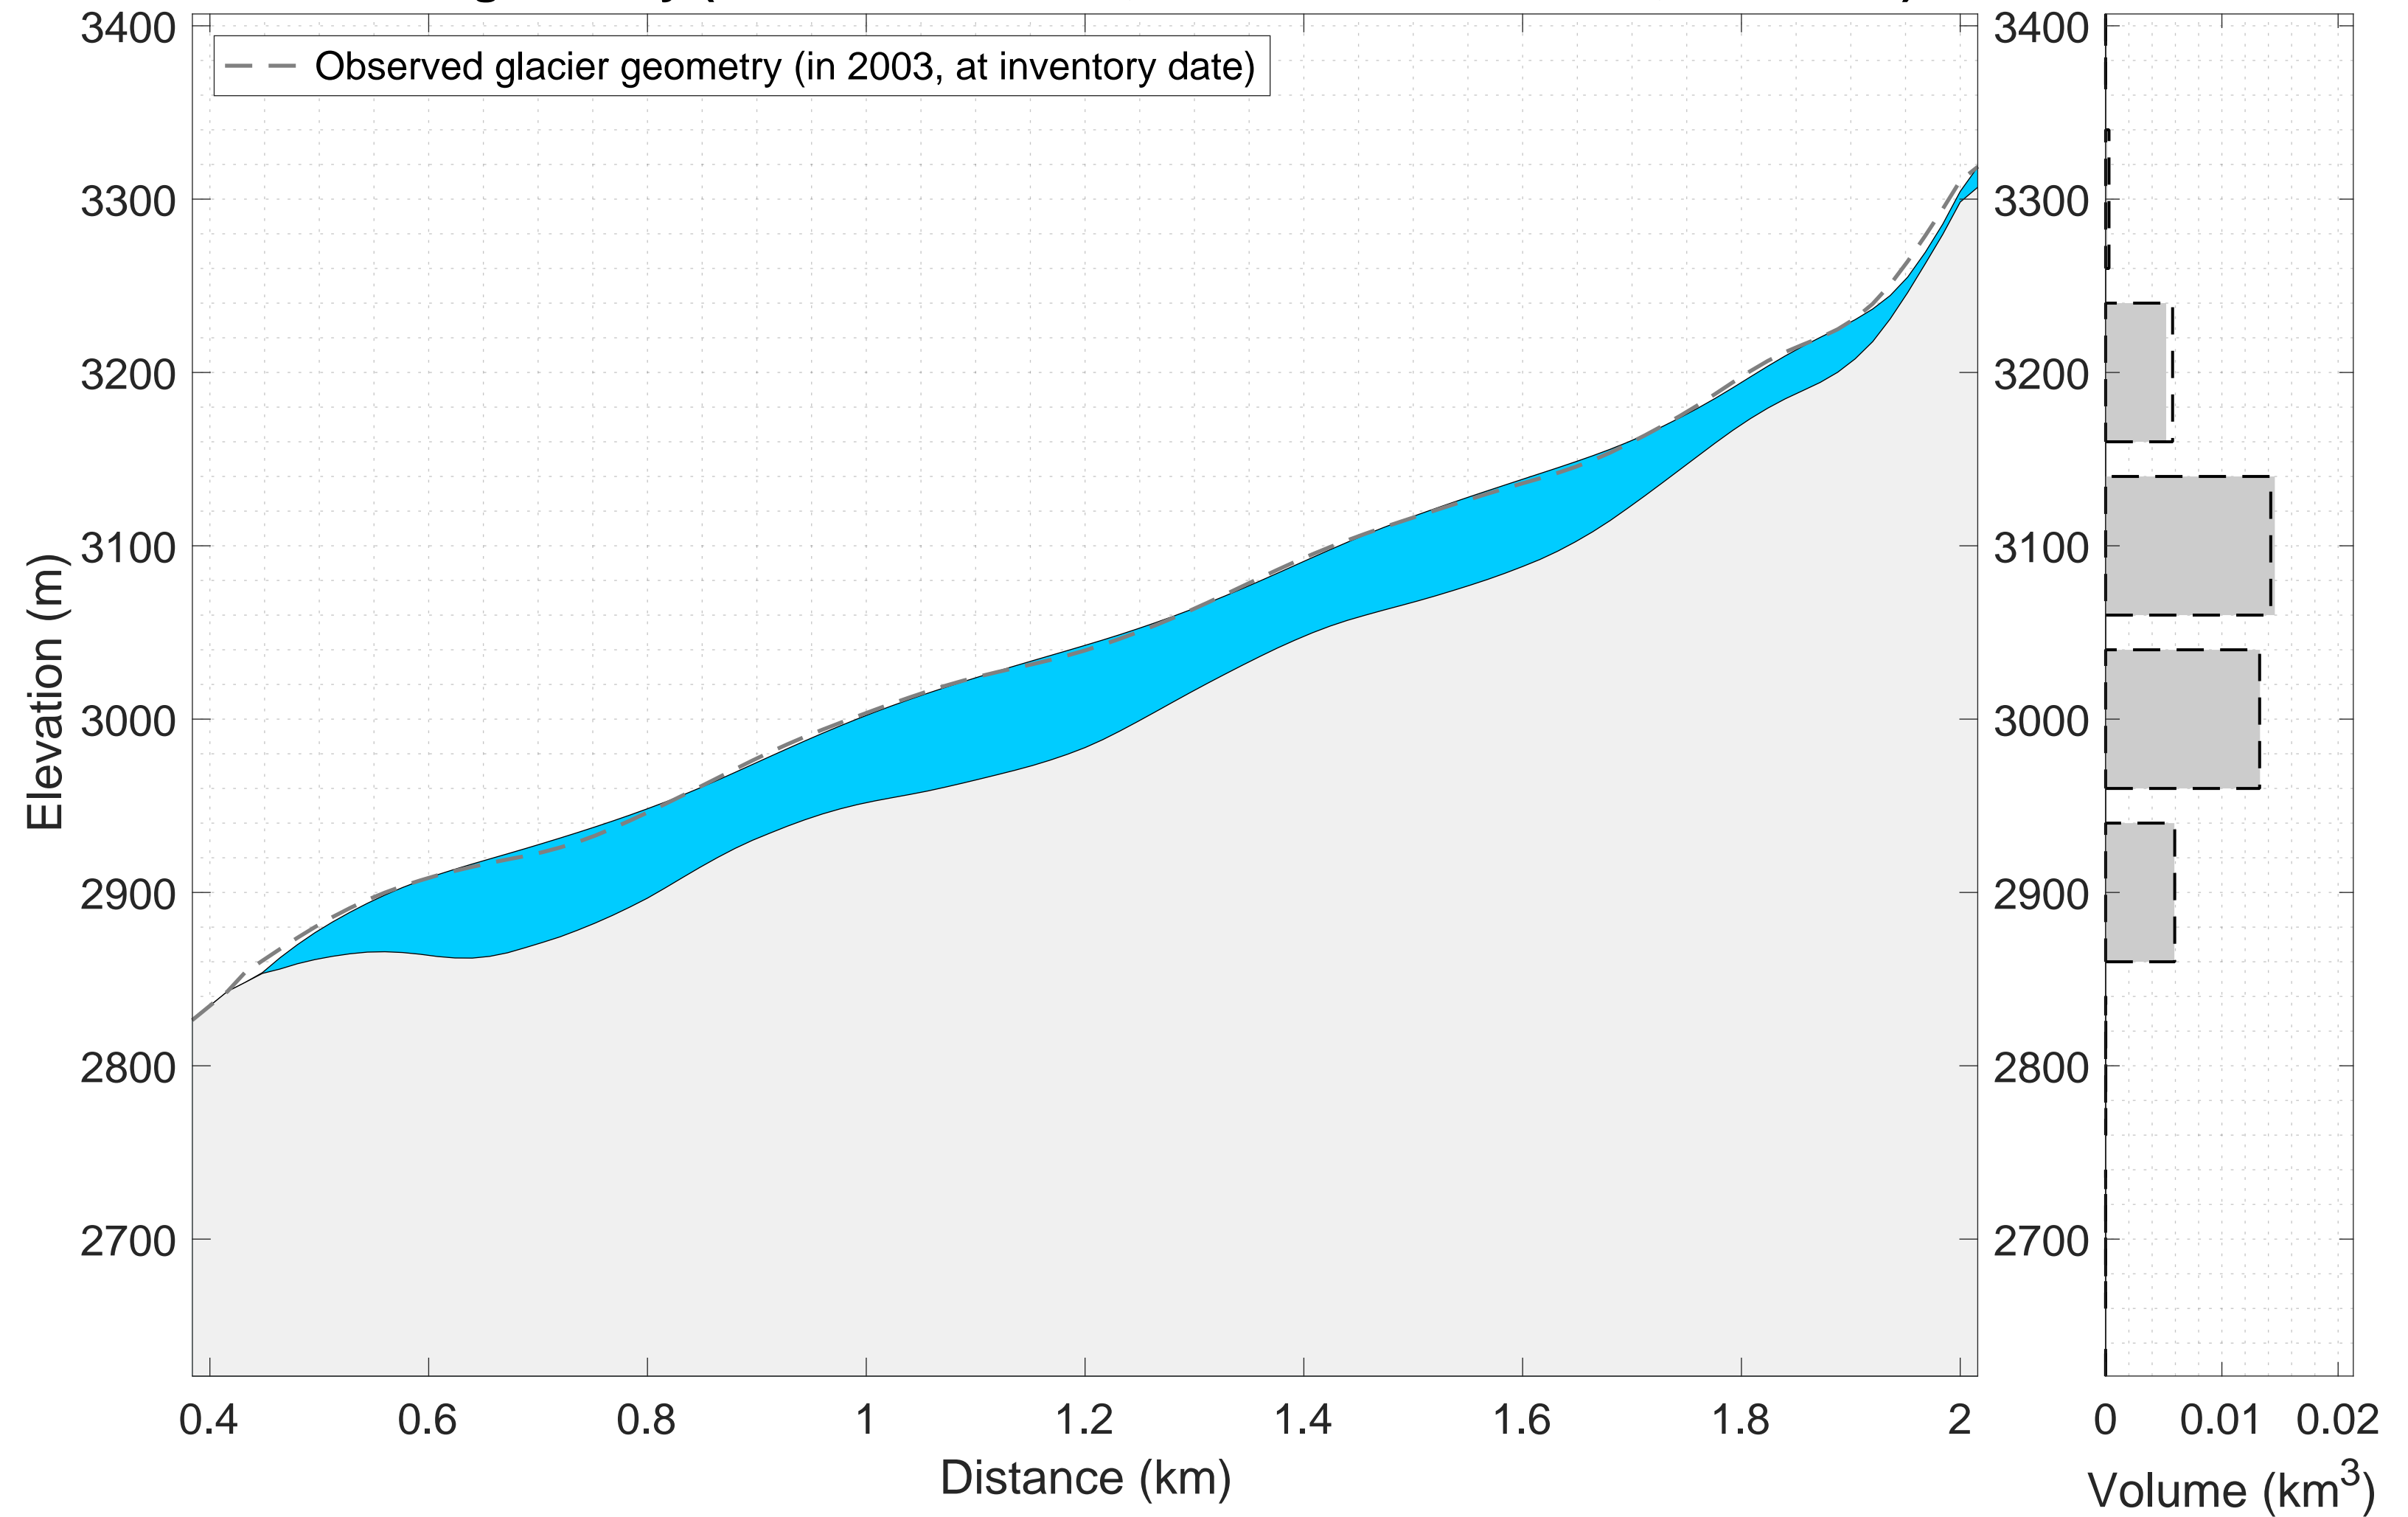

Supplement: Supplementary file 692 [file tc-13-1125-2019-supplement.zip]

**Modelled geometry (Glacier ID = 03090;  $A = 1.5568\text{e-}16 \text{ Pa}^{-3} \text{ a}^{-1}$ ;  $dx = 13 \text{ m}$ )**

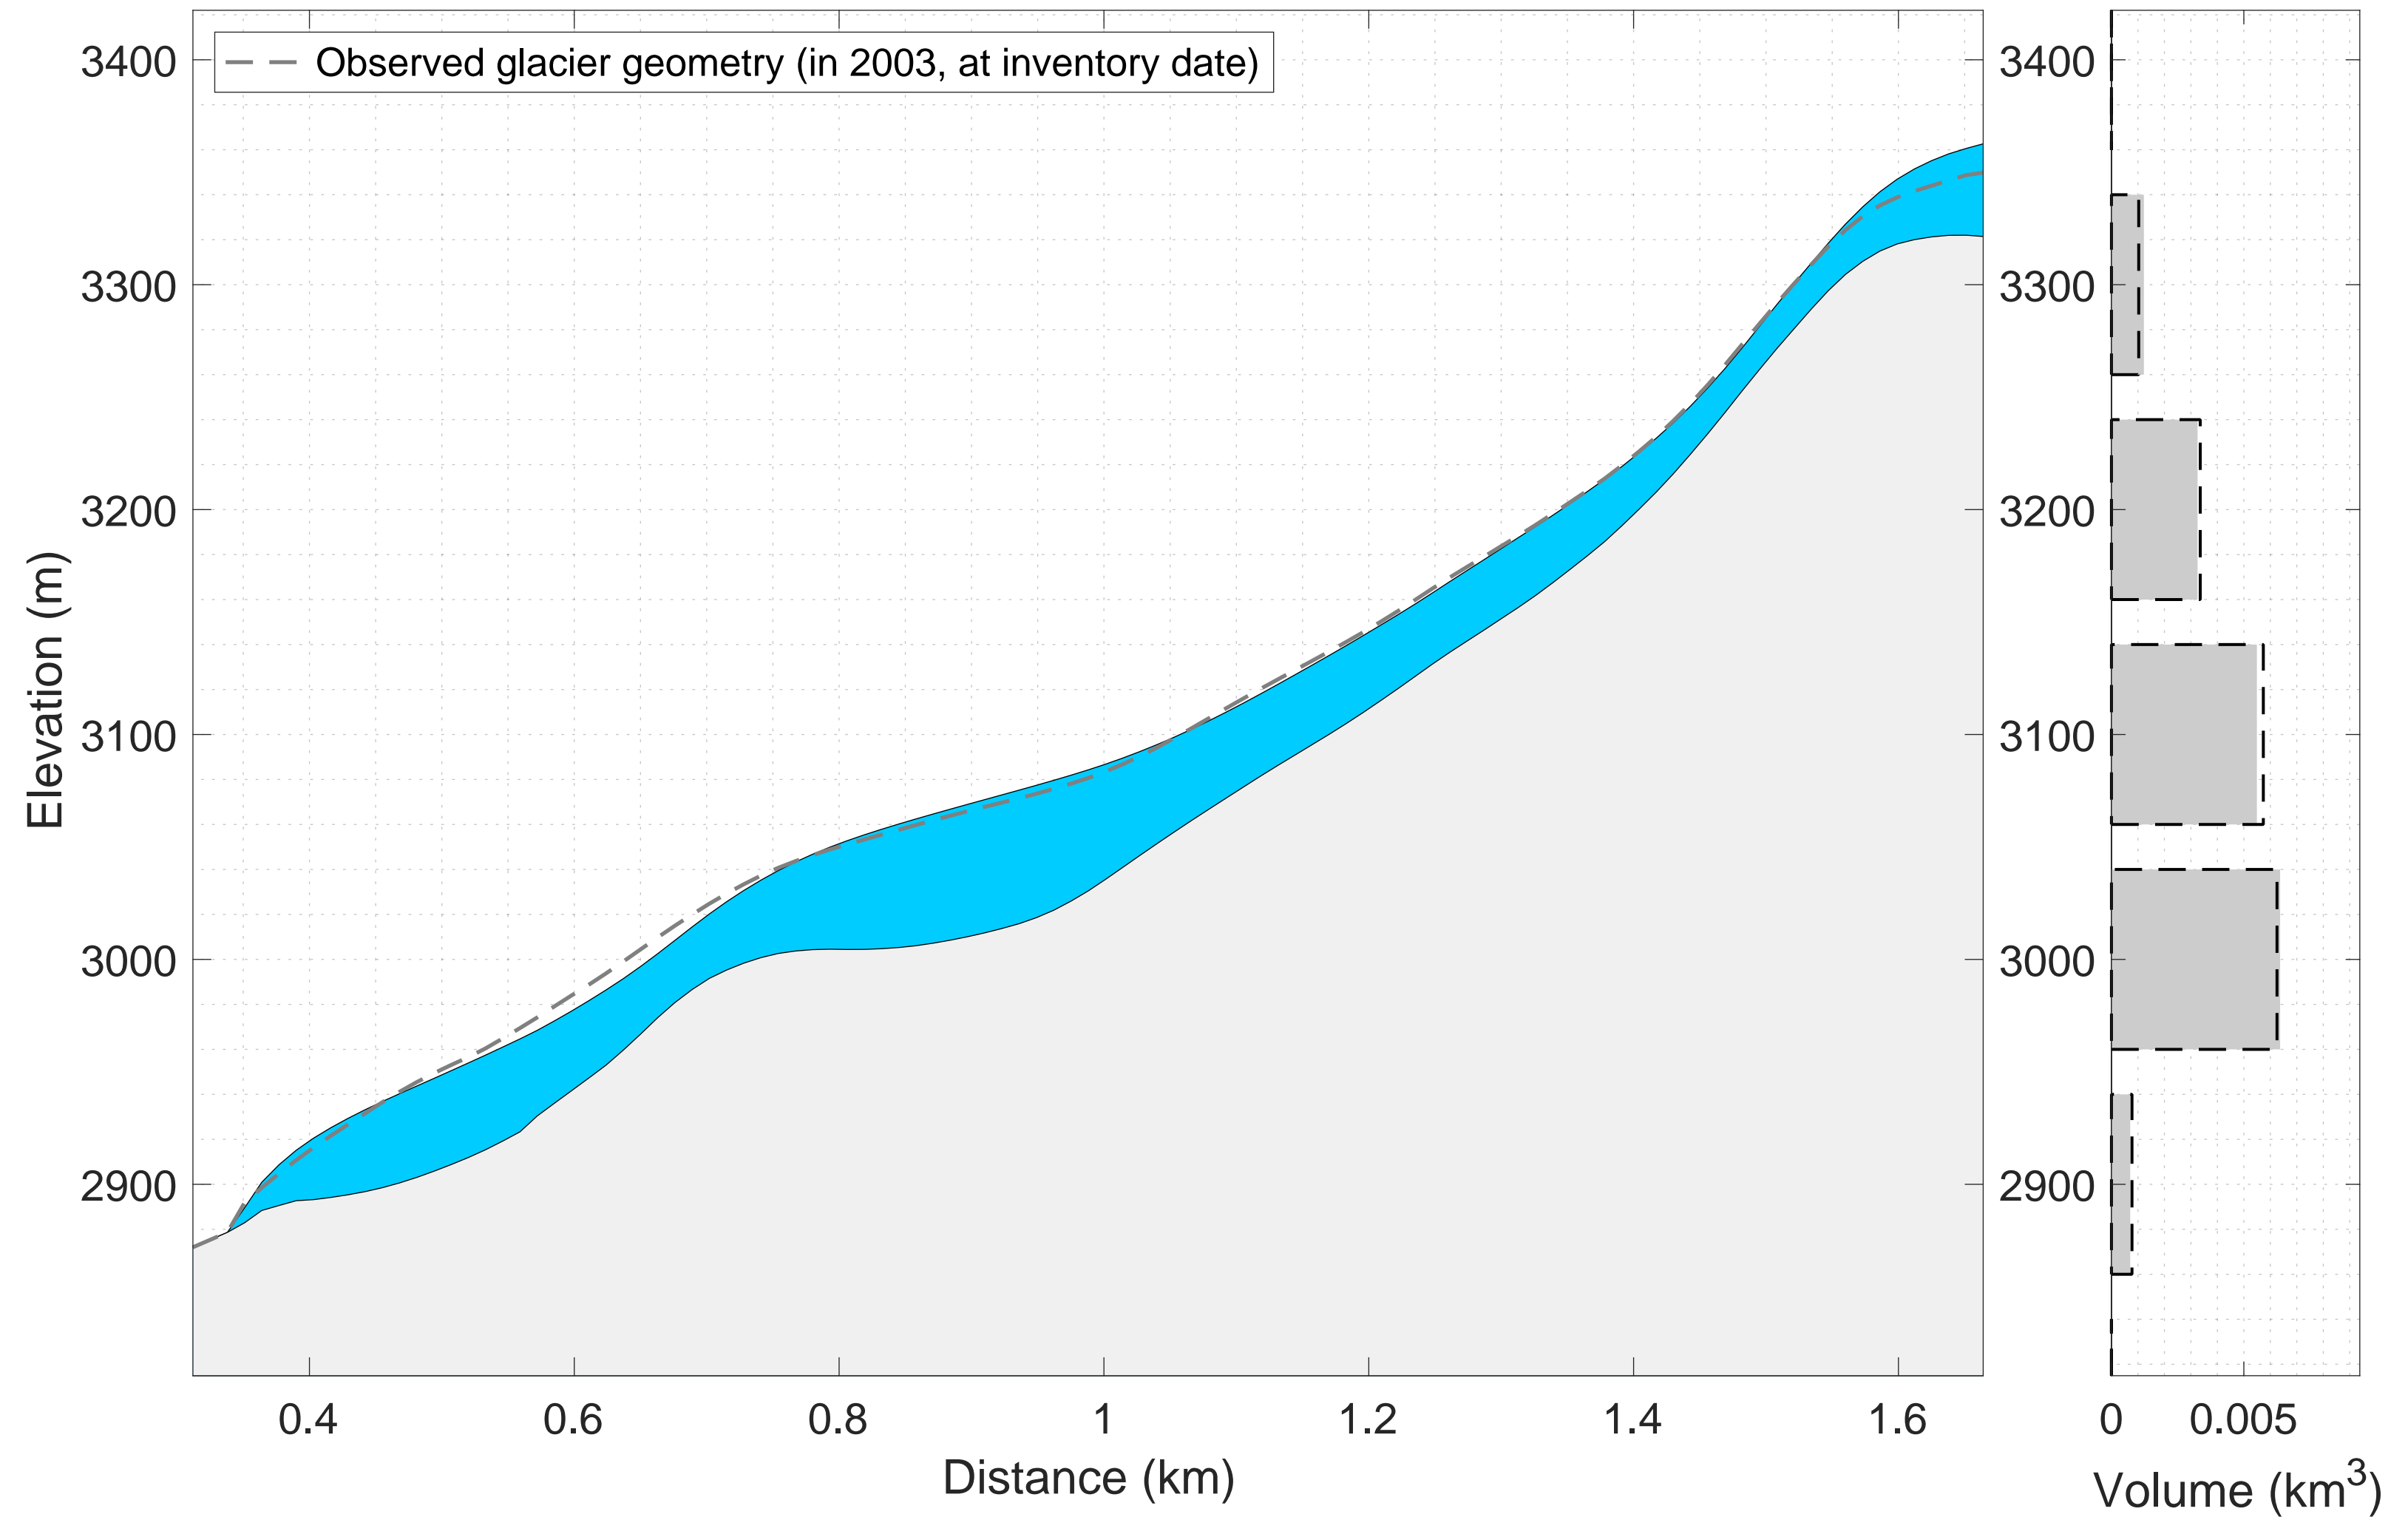

Supplement: Supplementary file 693 [file tc-13-1125-2019-supplement.zip]

**Modelled geometry (Glacier ID = 02507;  $A = 1.7352\text{e-}16 \text{ Pa}^{-3} \text{ a}^{-1}$ ;  $dx = 47 \text{ m}$ )**

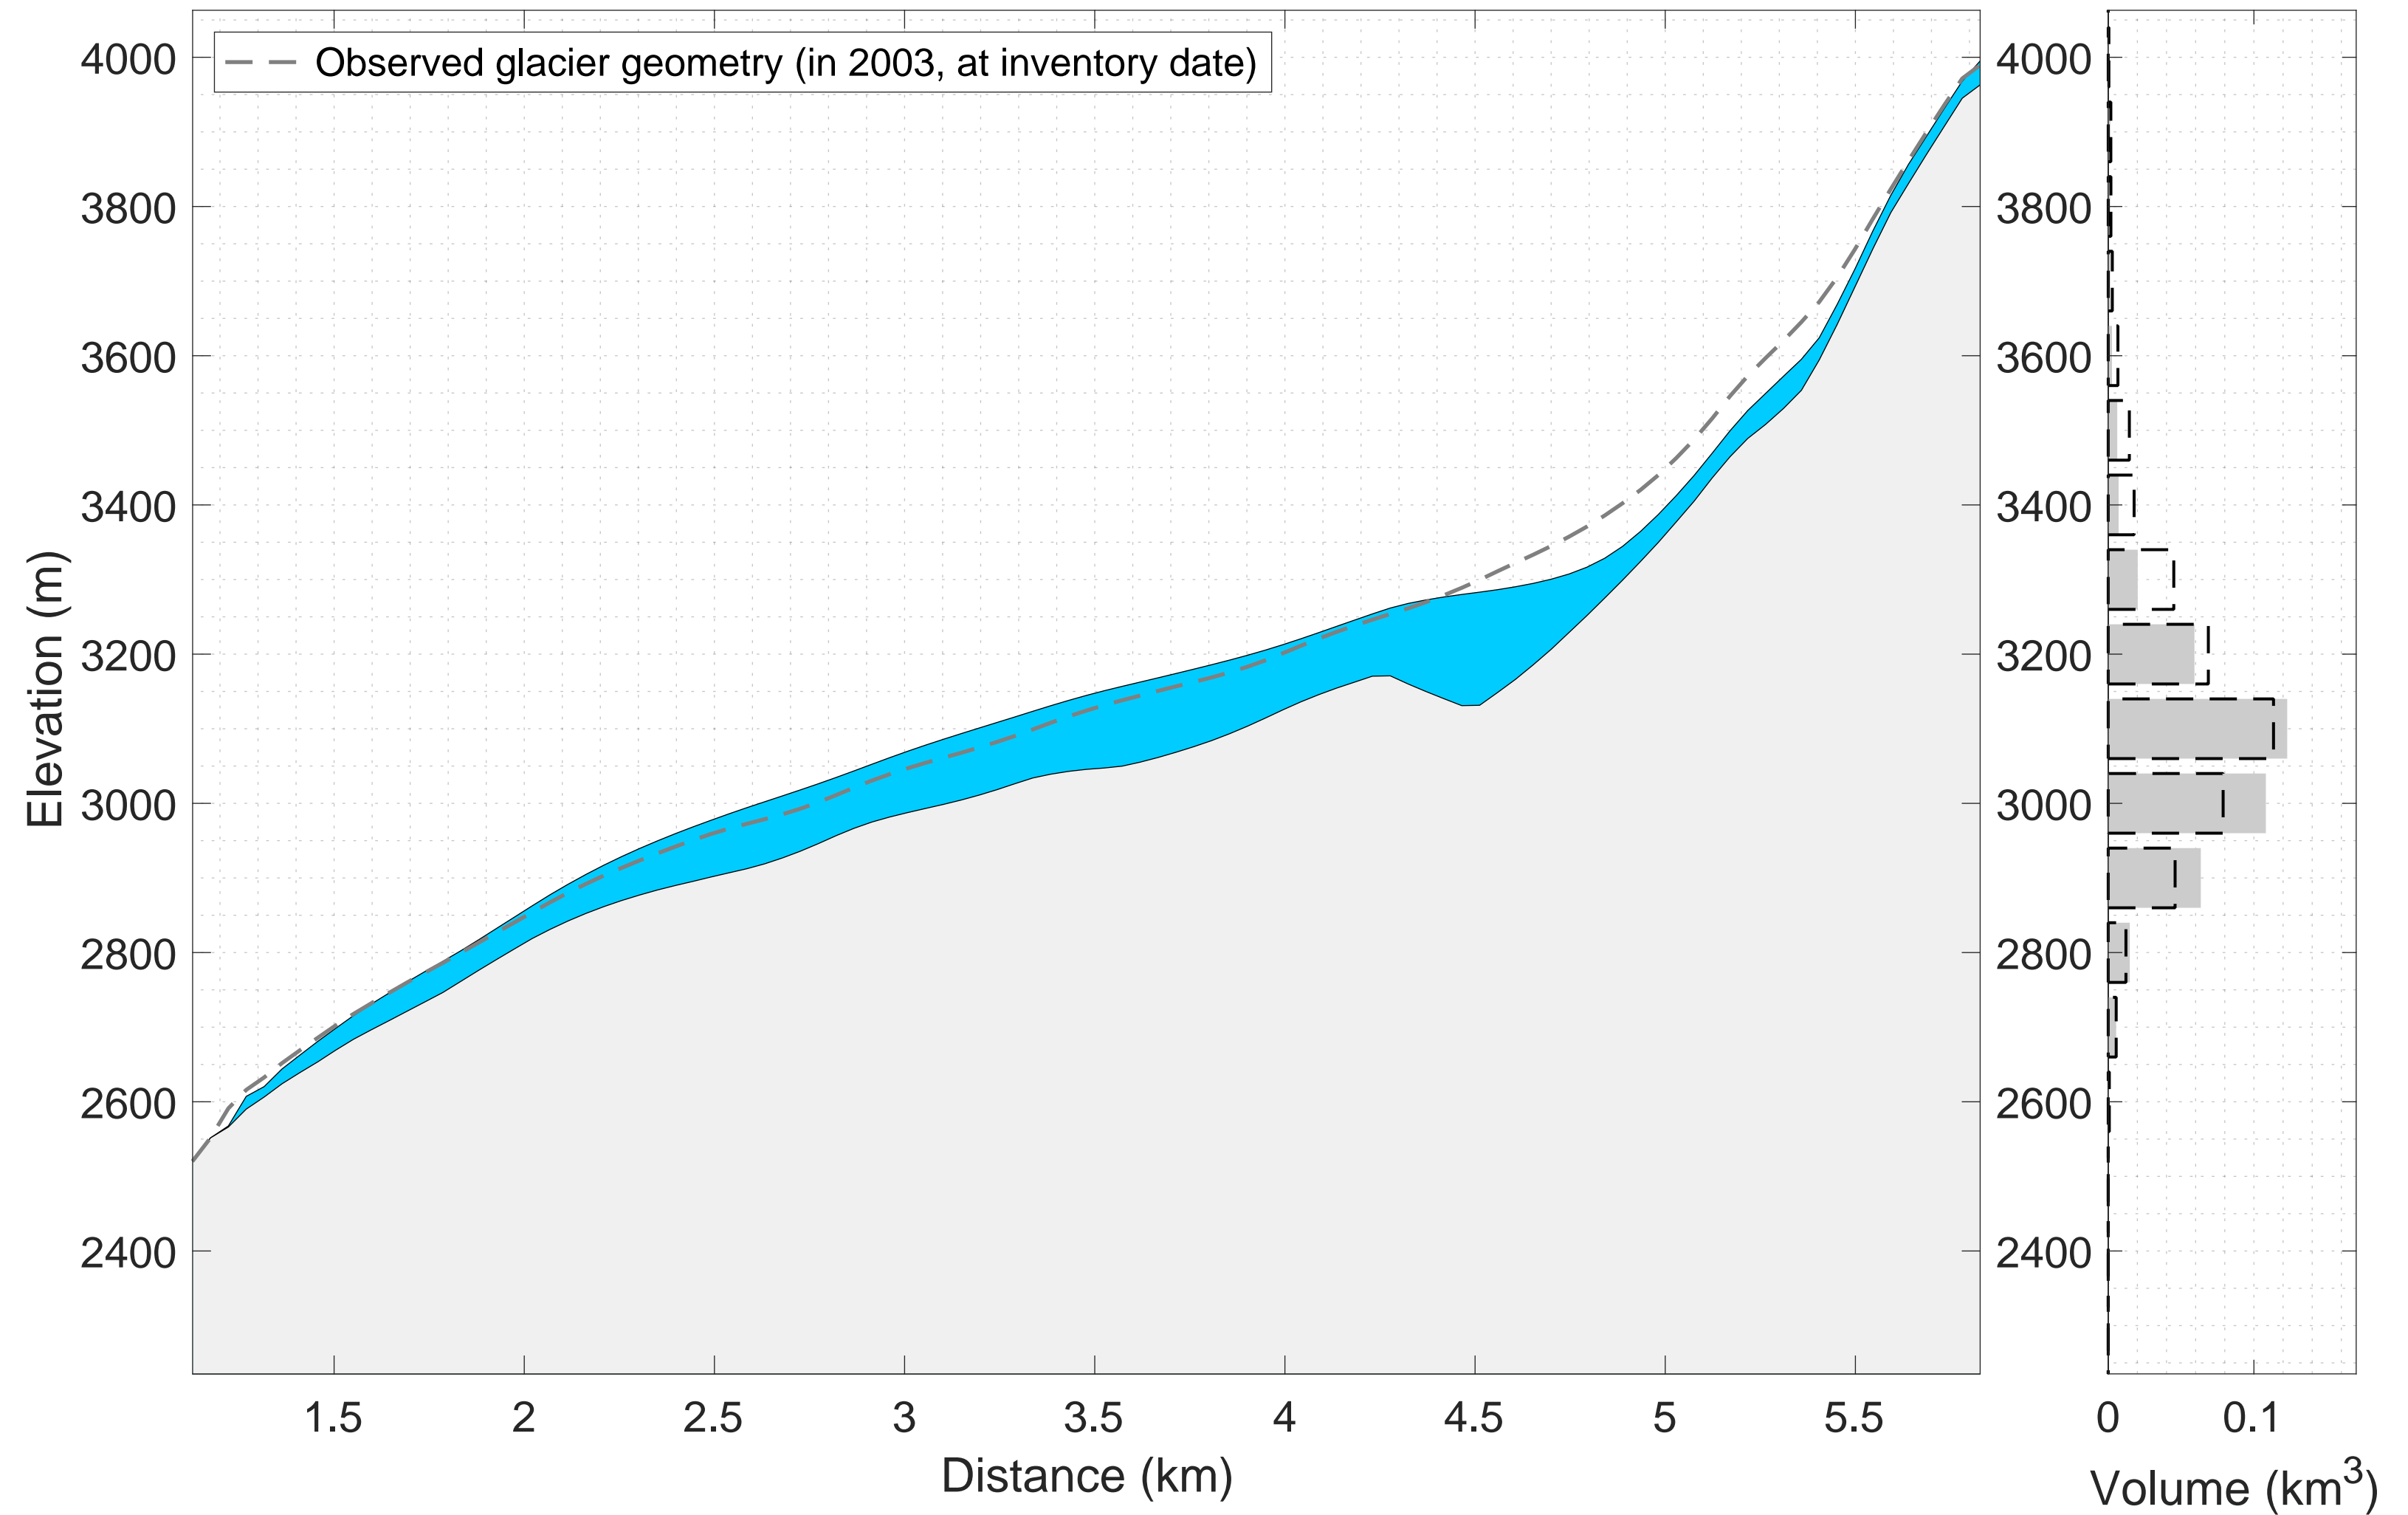

Supplement: Supplementary file 694 [file tc-13-1125-2019-supplement.zip]

**Modelled geometry (Glacier ID = 03691;  $A = 1.5913\text{e-}16 \text{ Pa}^{-3} \text{ a}^{-1}$ ;  $dx = 10 \text{ m}$ )**

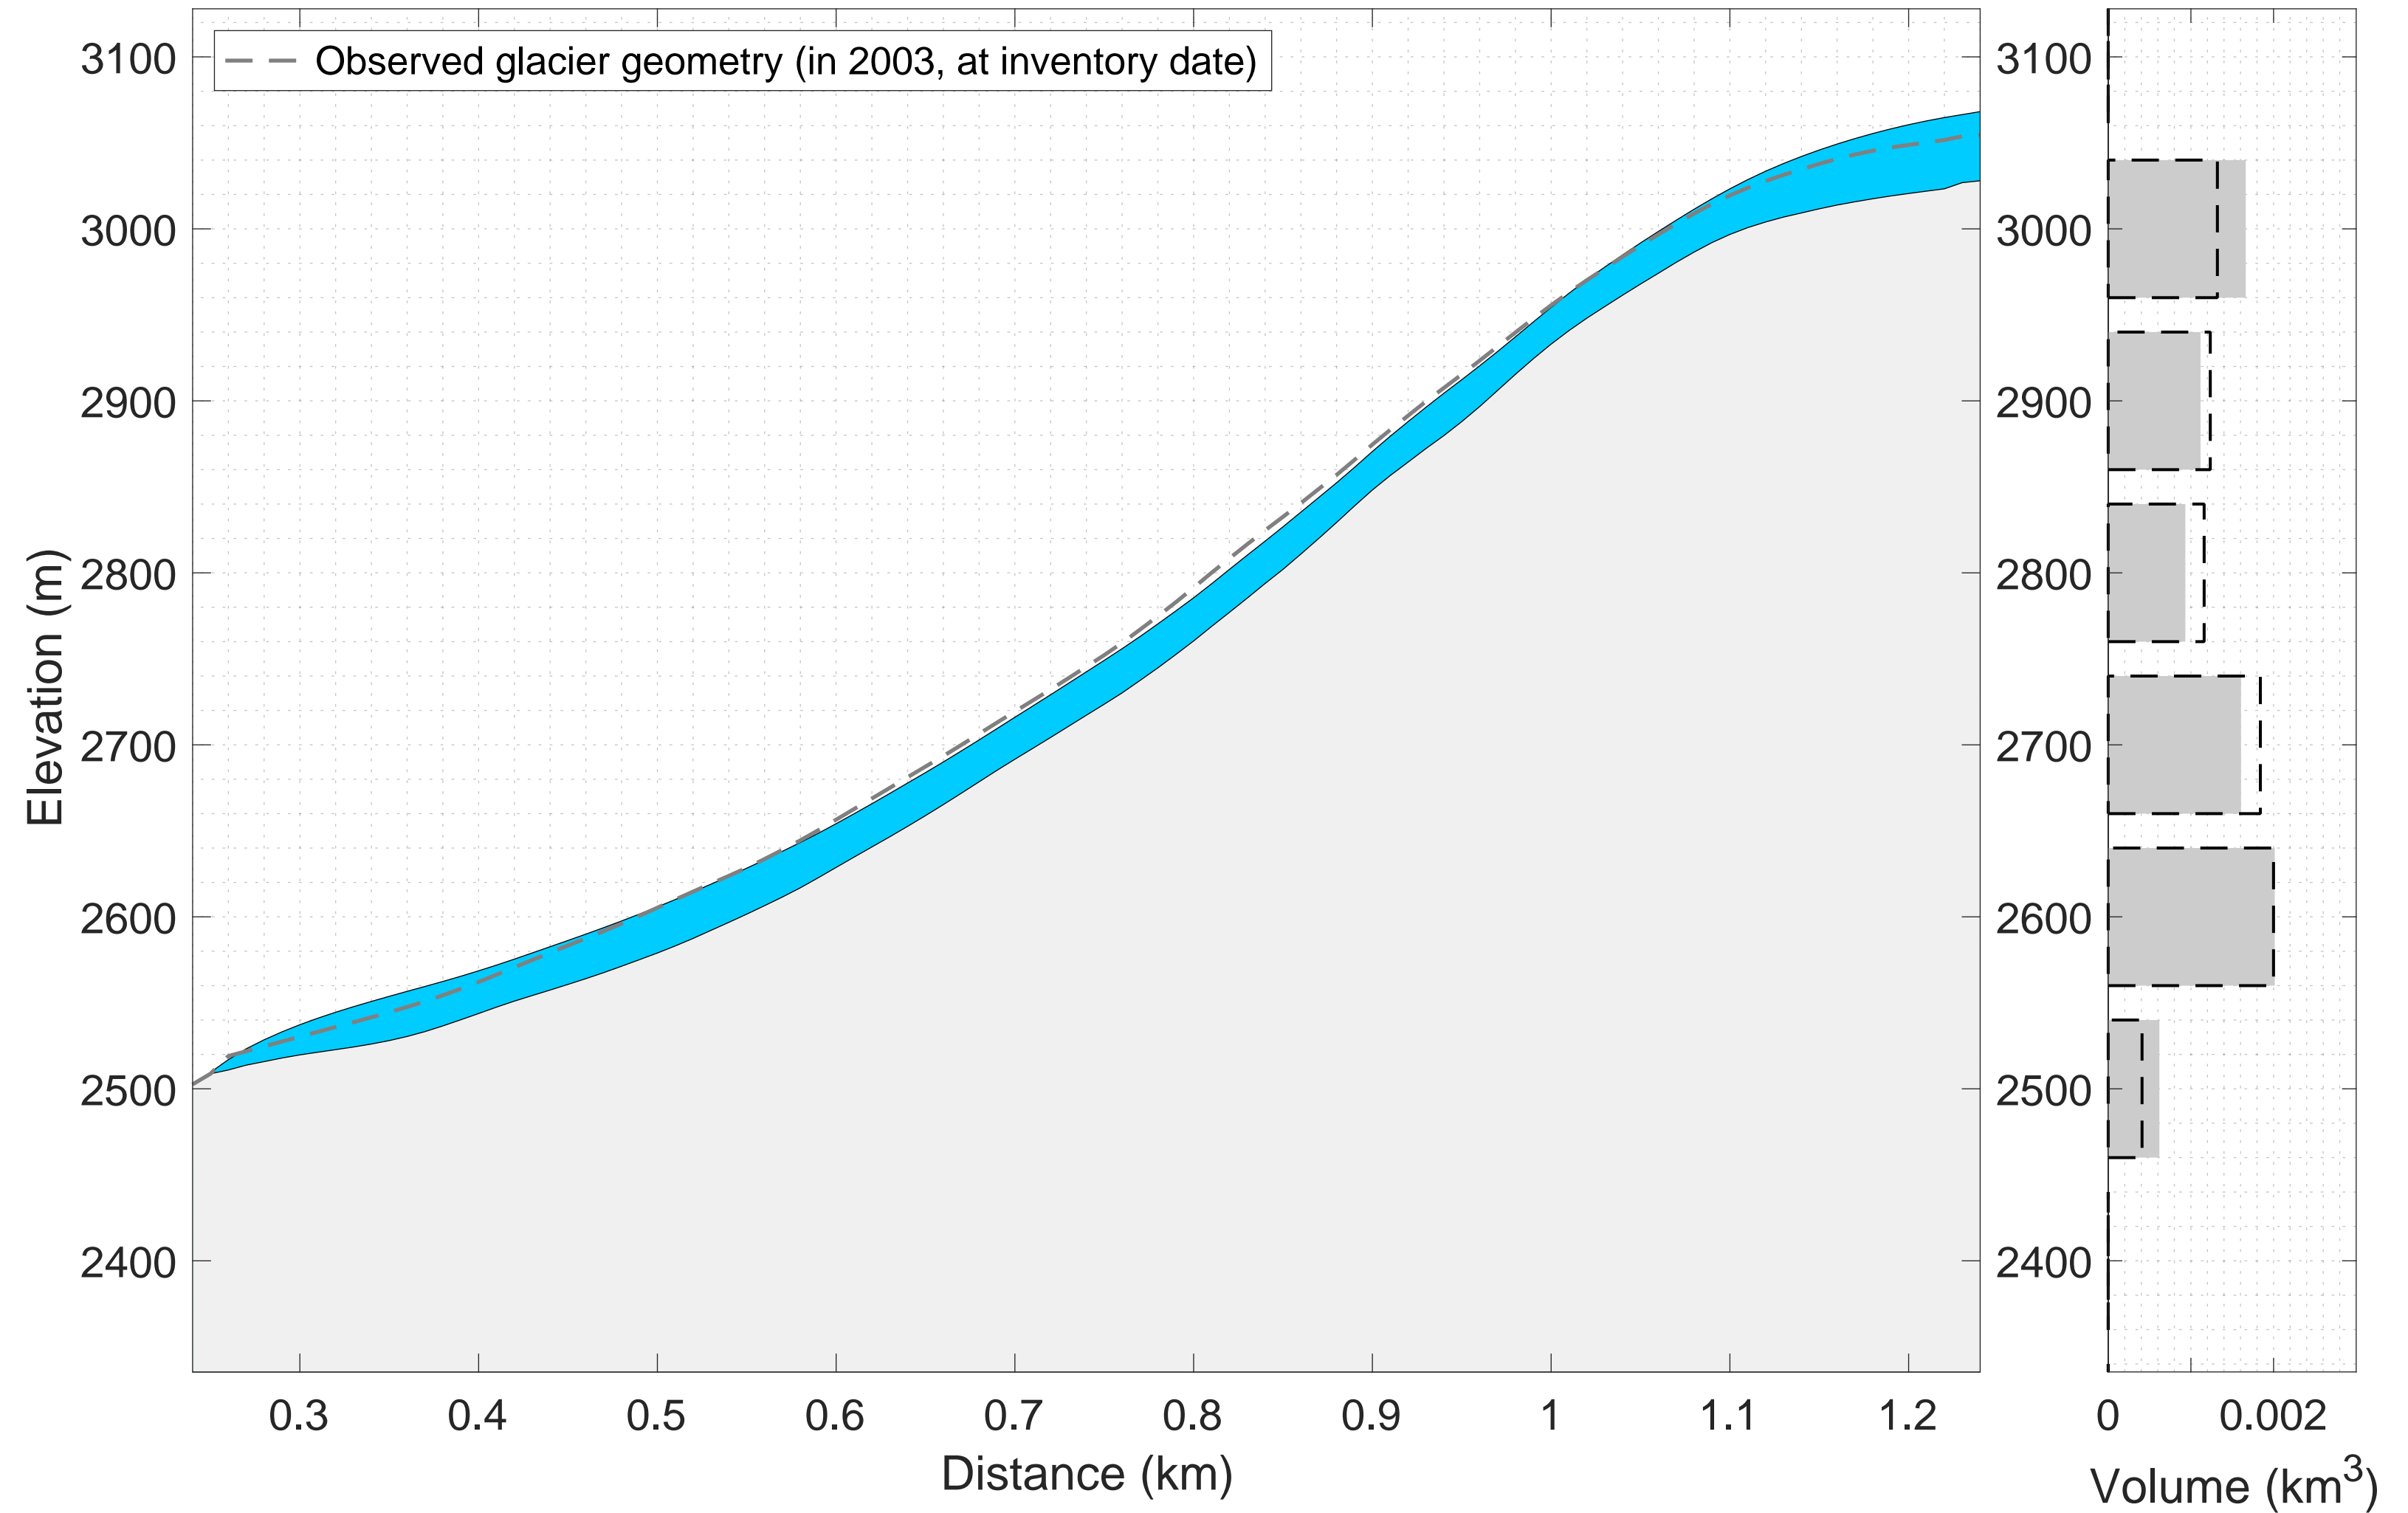

Supplement: Supplementary file 695 [file tc-13-1125-2019-supplement.zip]

**Modelled geometry (Glacier ID = 01215;  $A = 6.9433\text{e-}17 \text{ Pa}^{-3} \text{ a}^{-1}$ ;  $dx = 16 \text{ m}$ )**

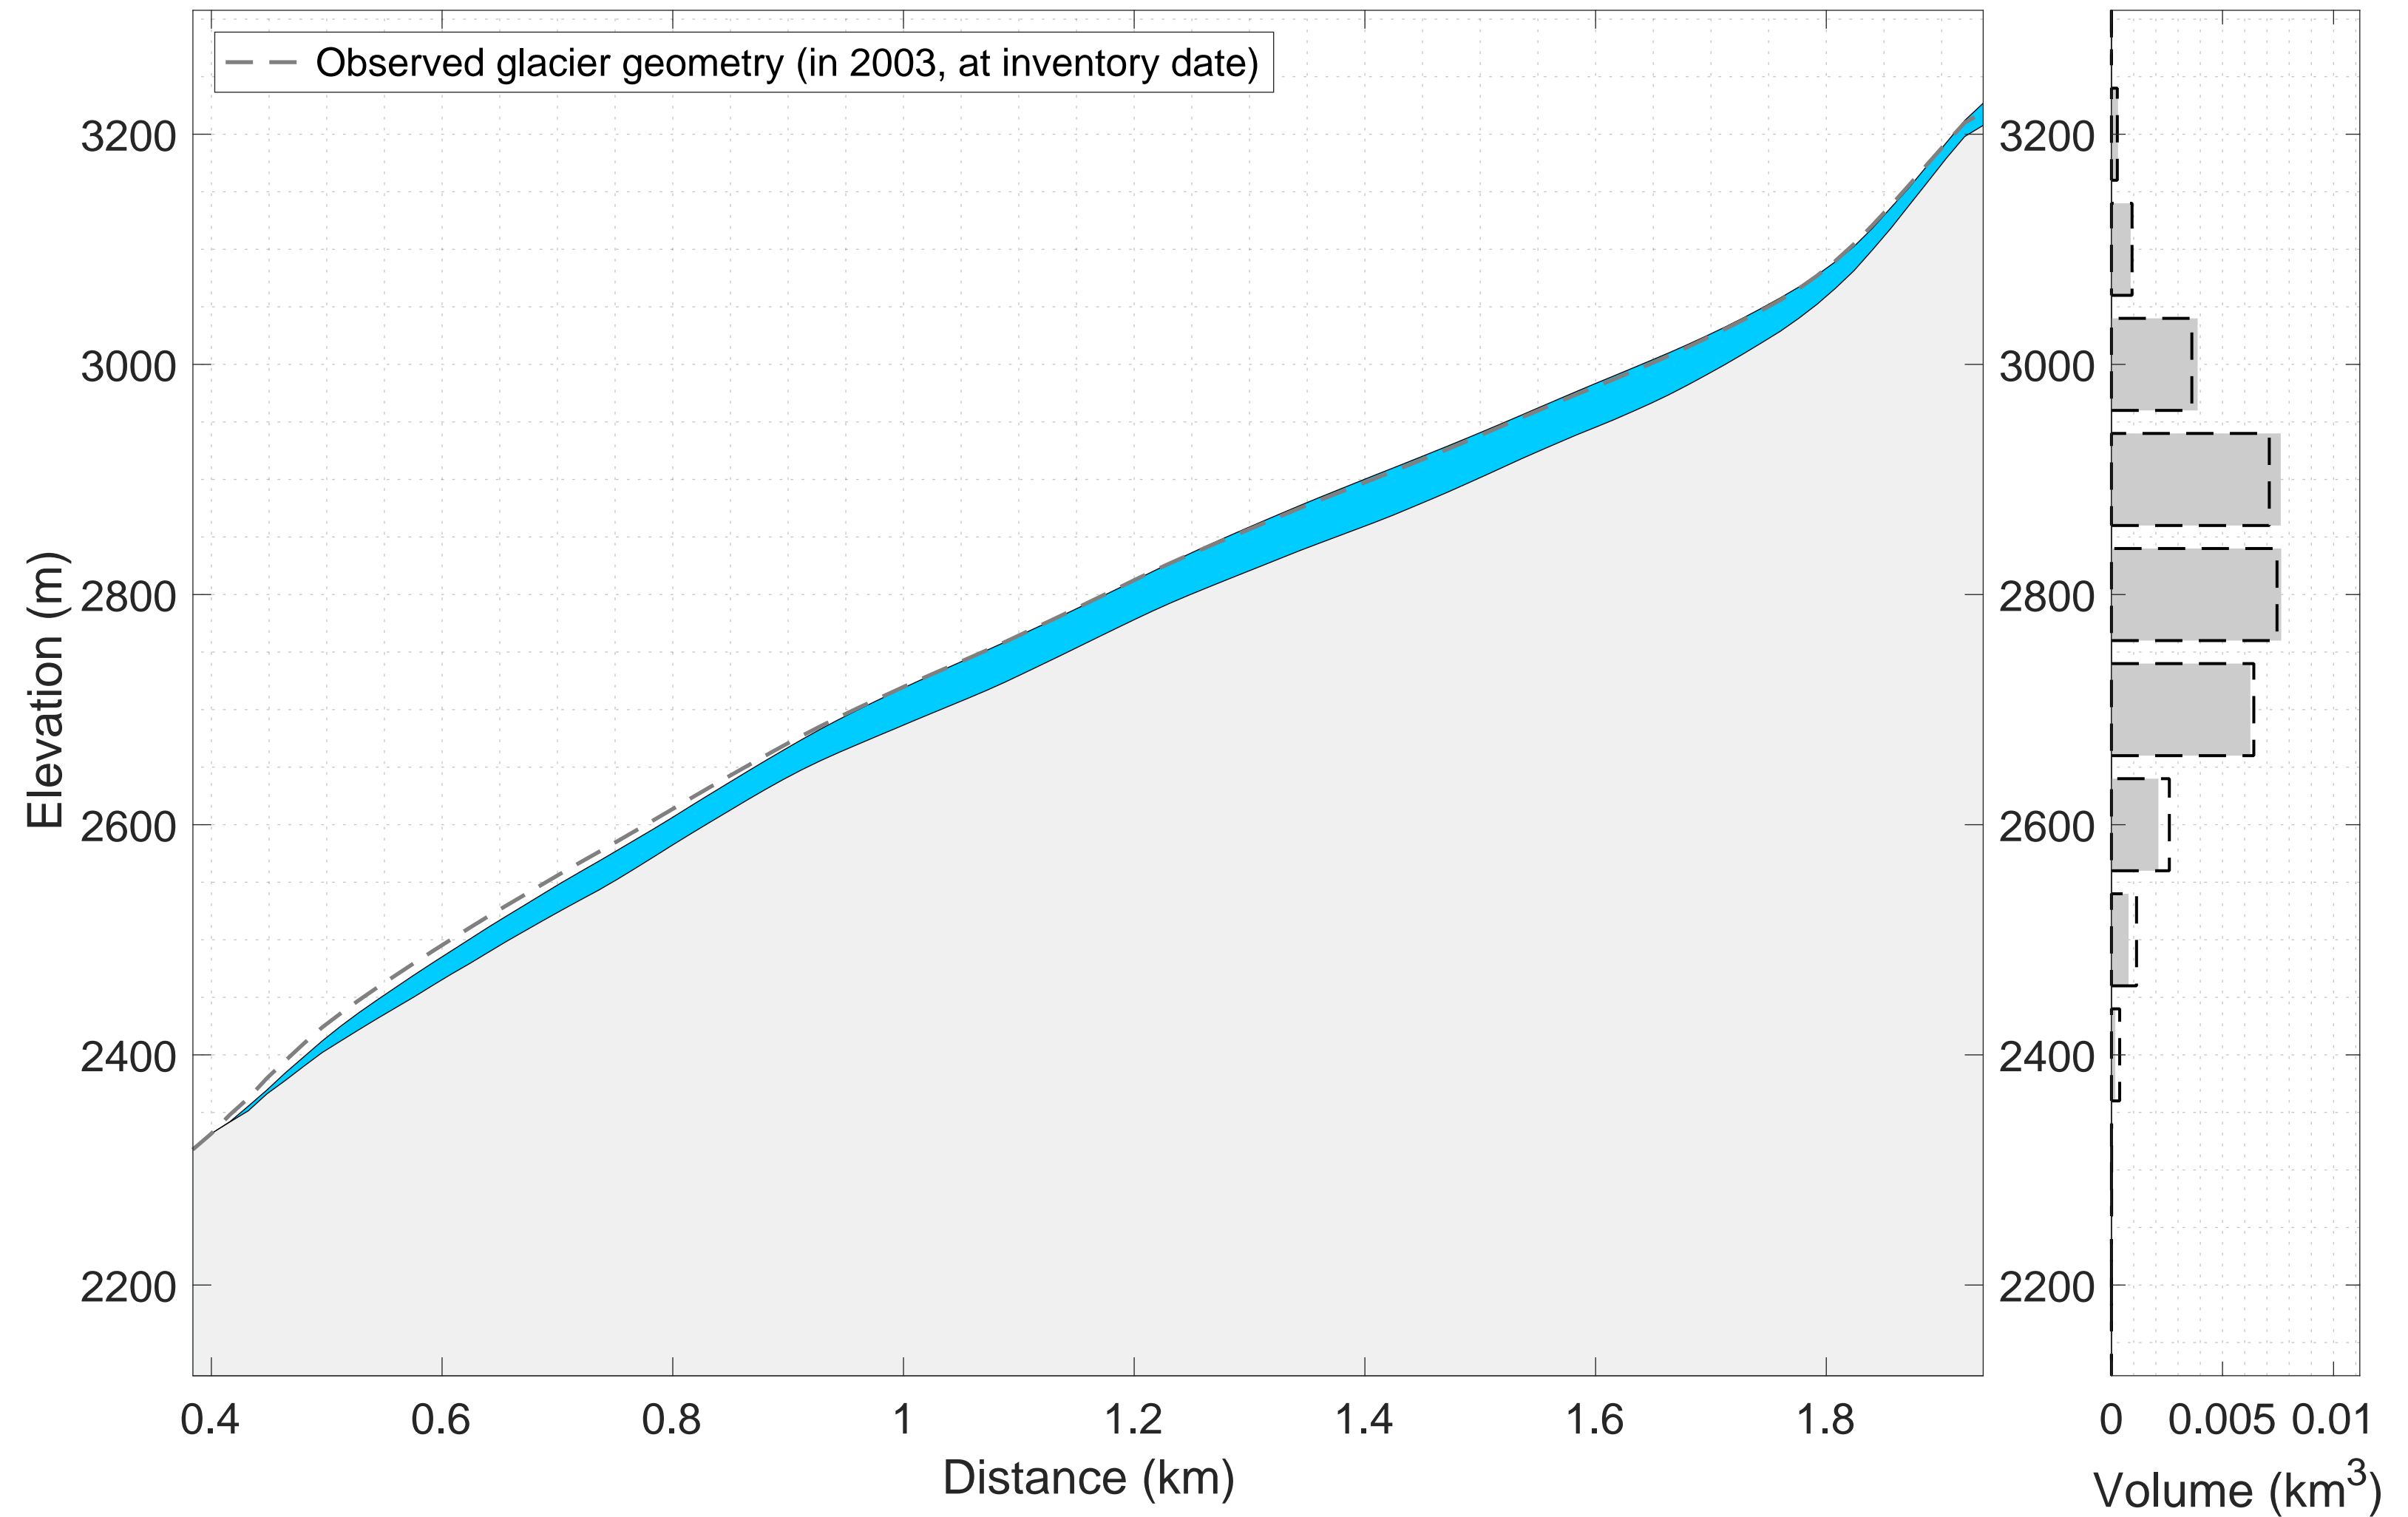

Supplement: Supplementary file 696 [file tc-13-1125-2019-supplement.zip]

**Modelled geometry (Glacier ID = 03679;  $A = 1.2179\text{e-}16 \text{ Pa}^{-3} \text{ a}^{-1}$ ;  $dx = 27 \text{ m}$ )**

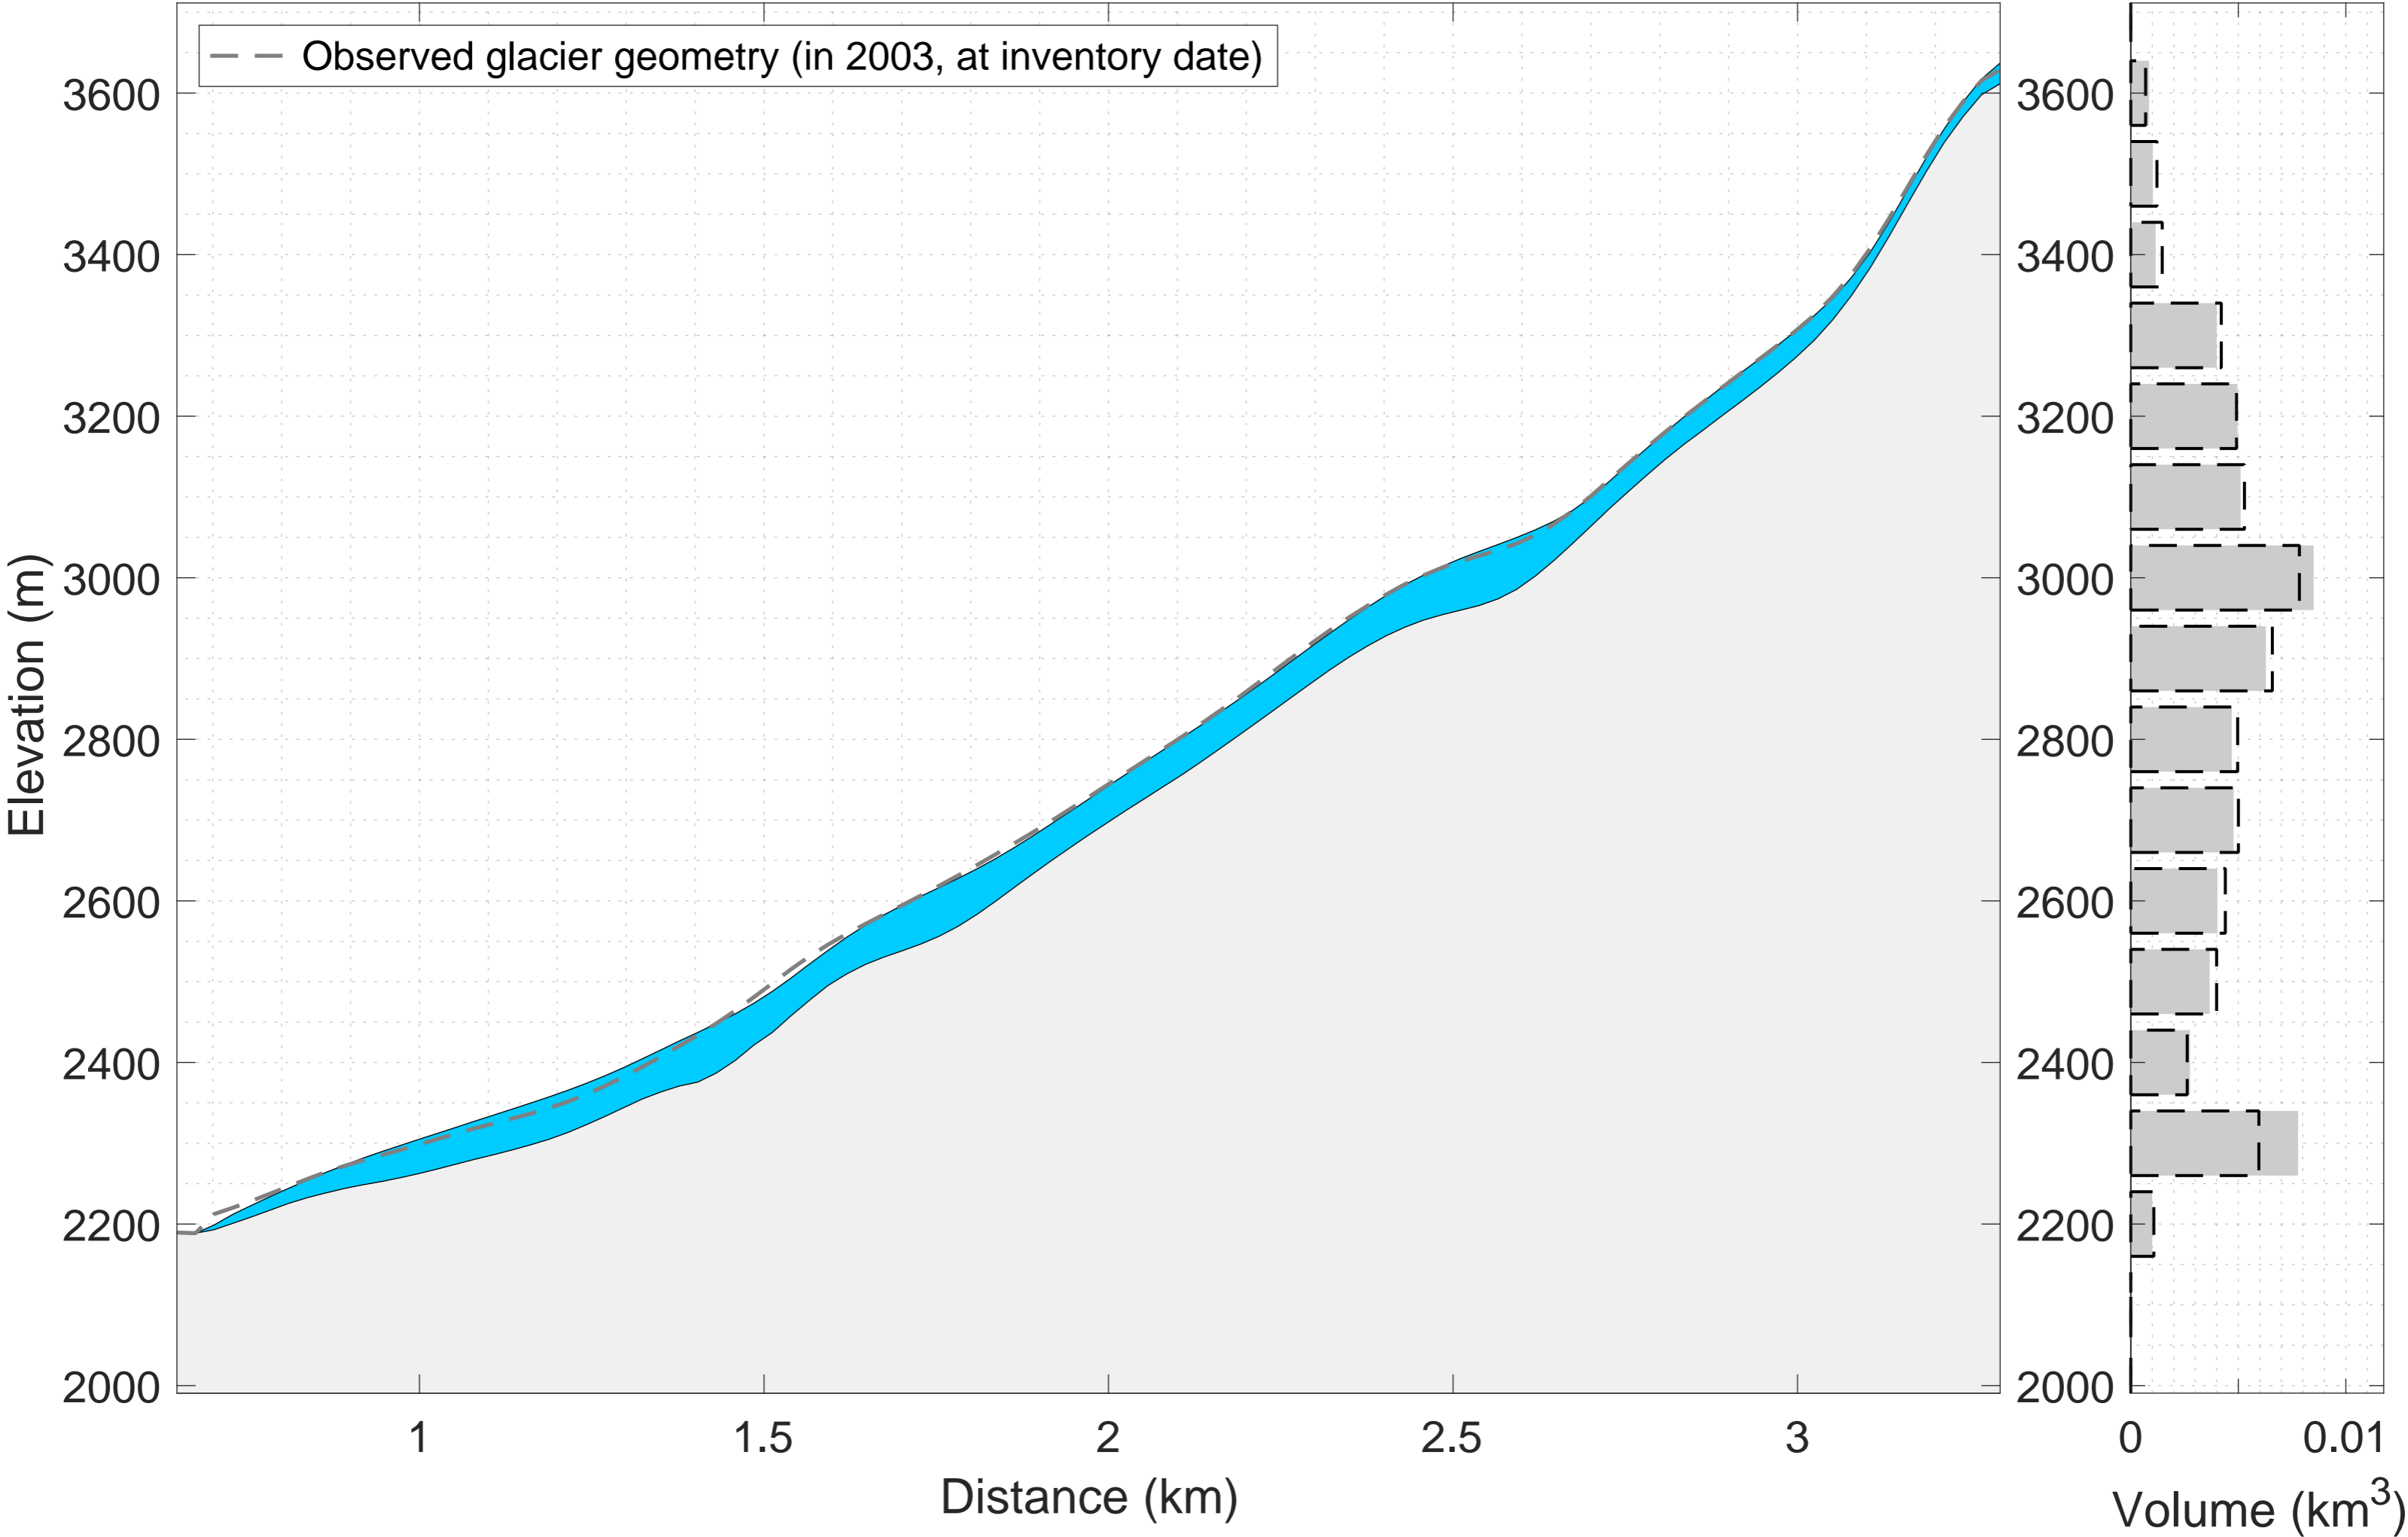

Supplement: Supplementary file 697 [file tc-13-1125-2019-supplement.zip]

**Modelled geometry (Glacier ID = 00246;  $A = 1.6308\text{e-}16 \text{ Pa}^{-3} \text{ a}^{-1}$ ;  $dx = 11 \text{ m}$ )**

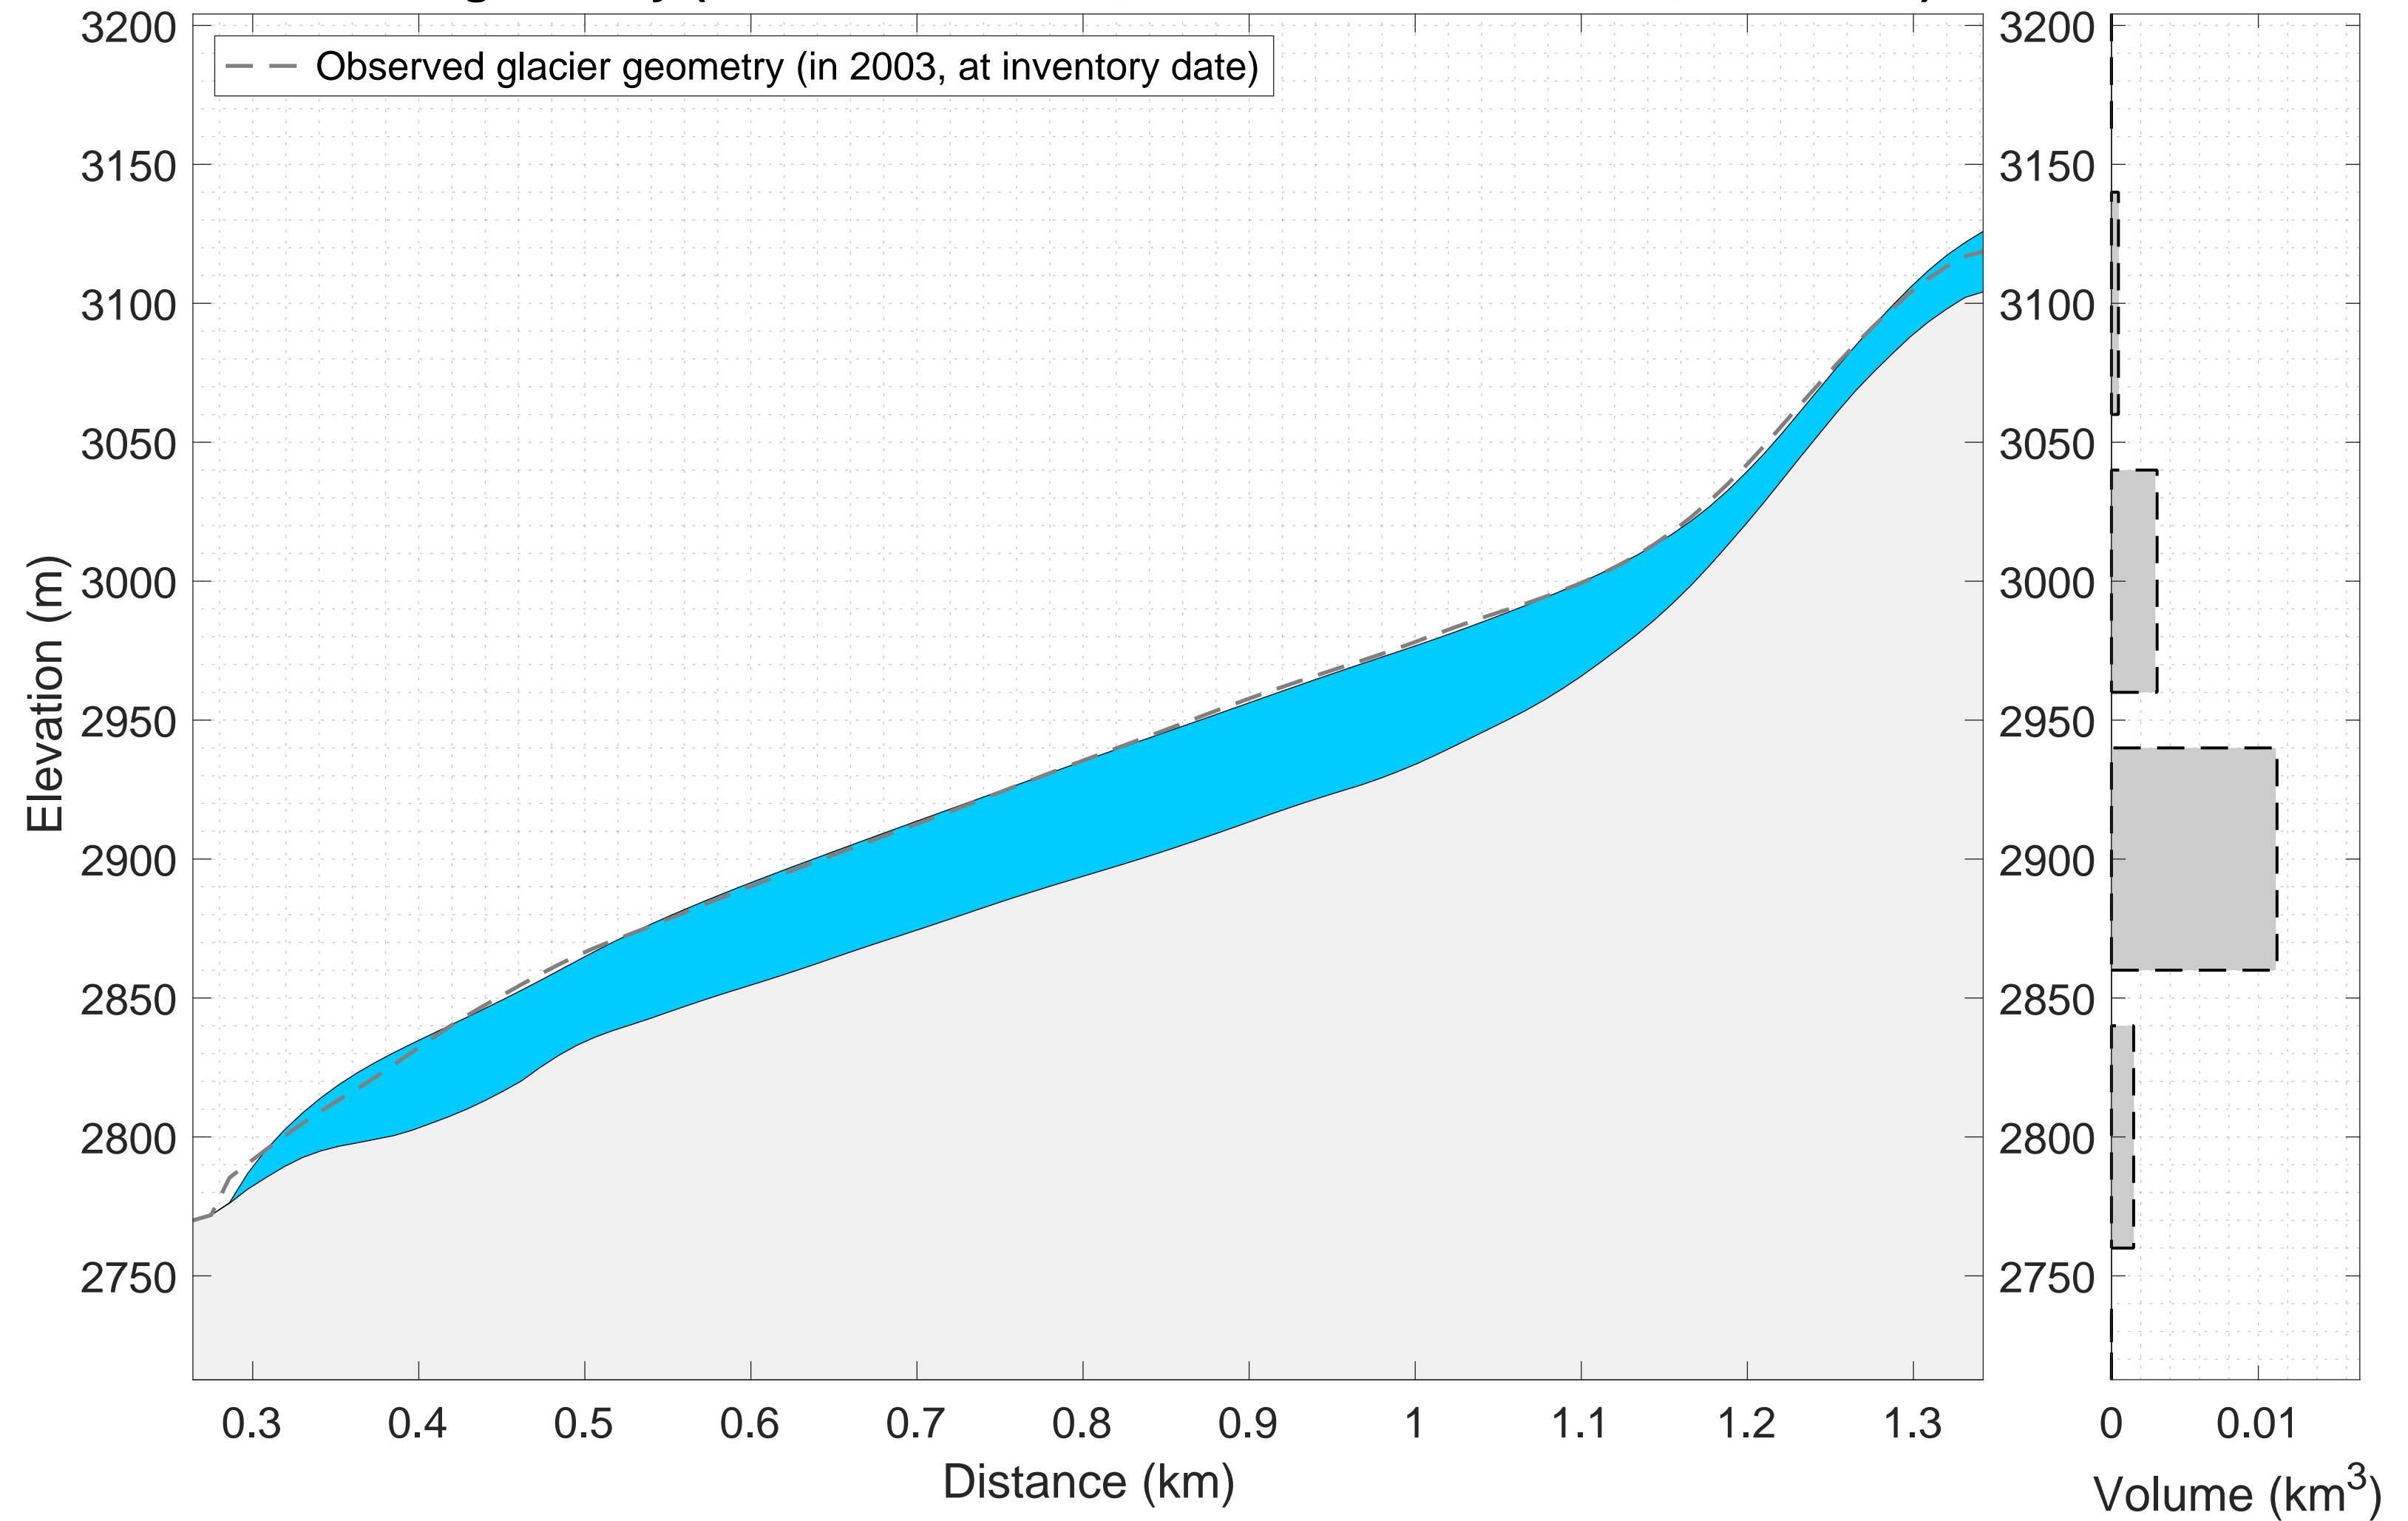

Supplement: Supplementary file 698 [file tc-13-1125-2019-supplement.zip]

**Modelled geometry (Glacier ID = 01702;  $A = 2.8682\text{e-}16 \text{ Pa}^{-3} \text{ a}^{-1}$ ;  $dx = 56 \text{ m}$ )**

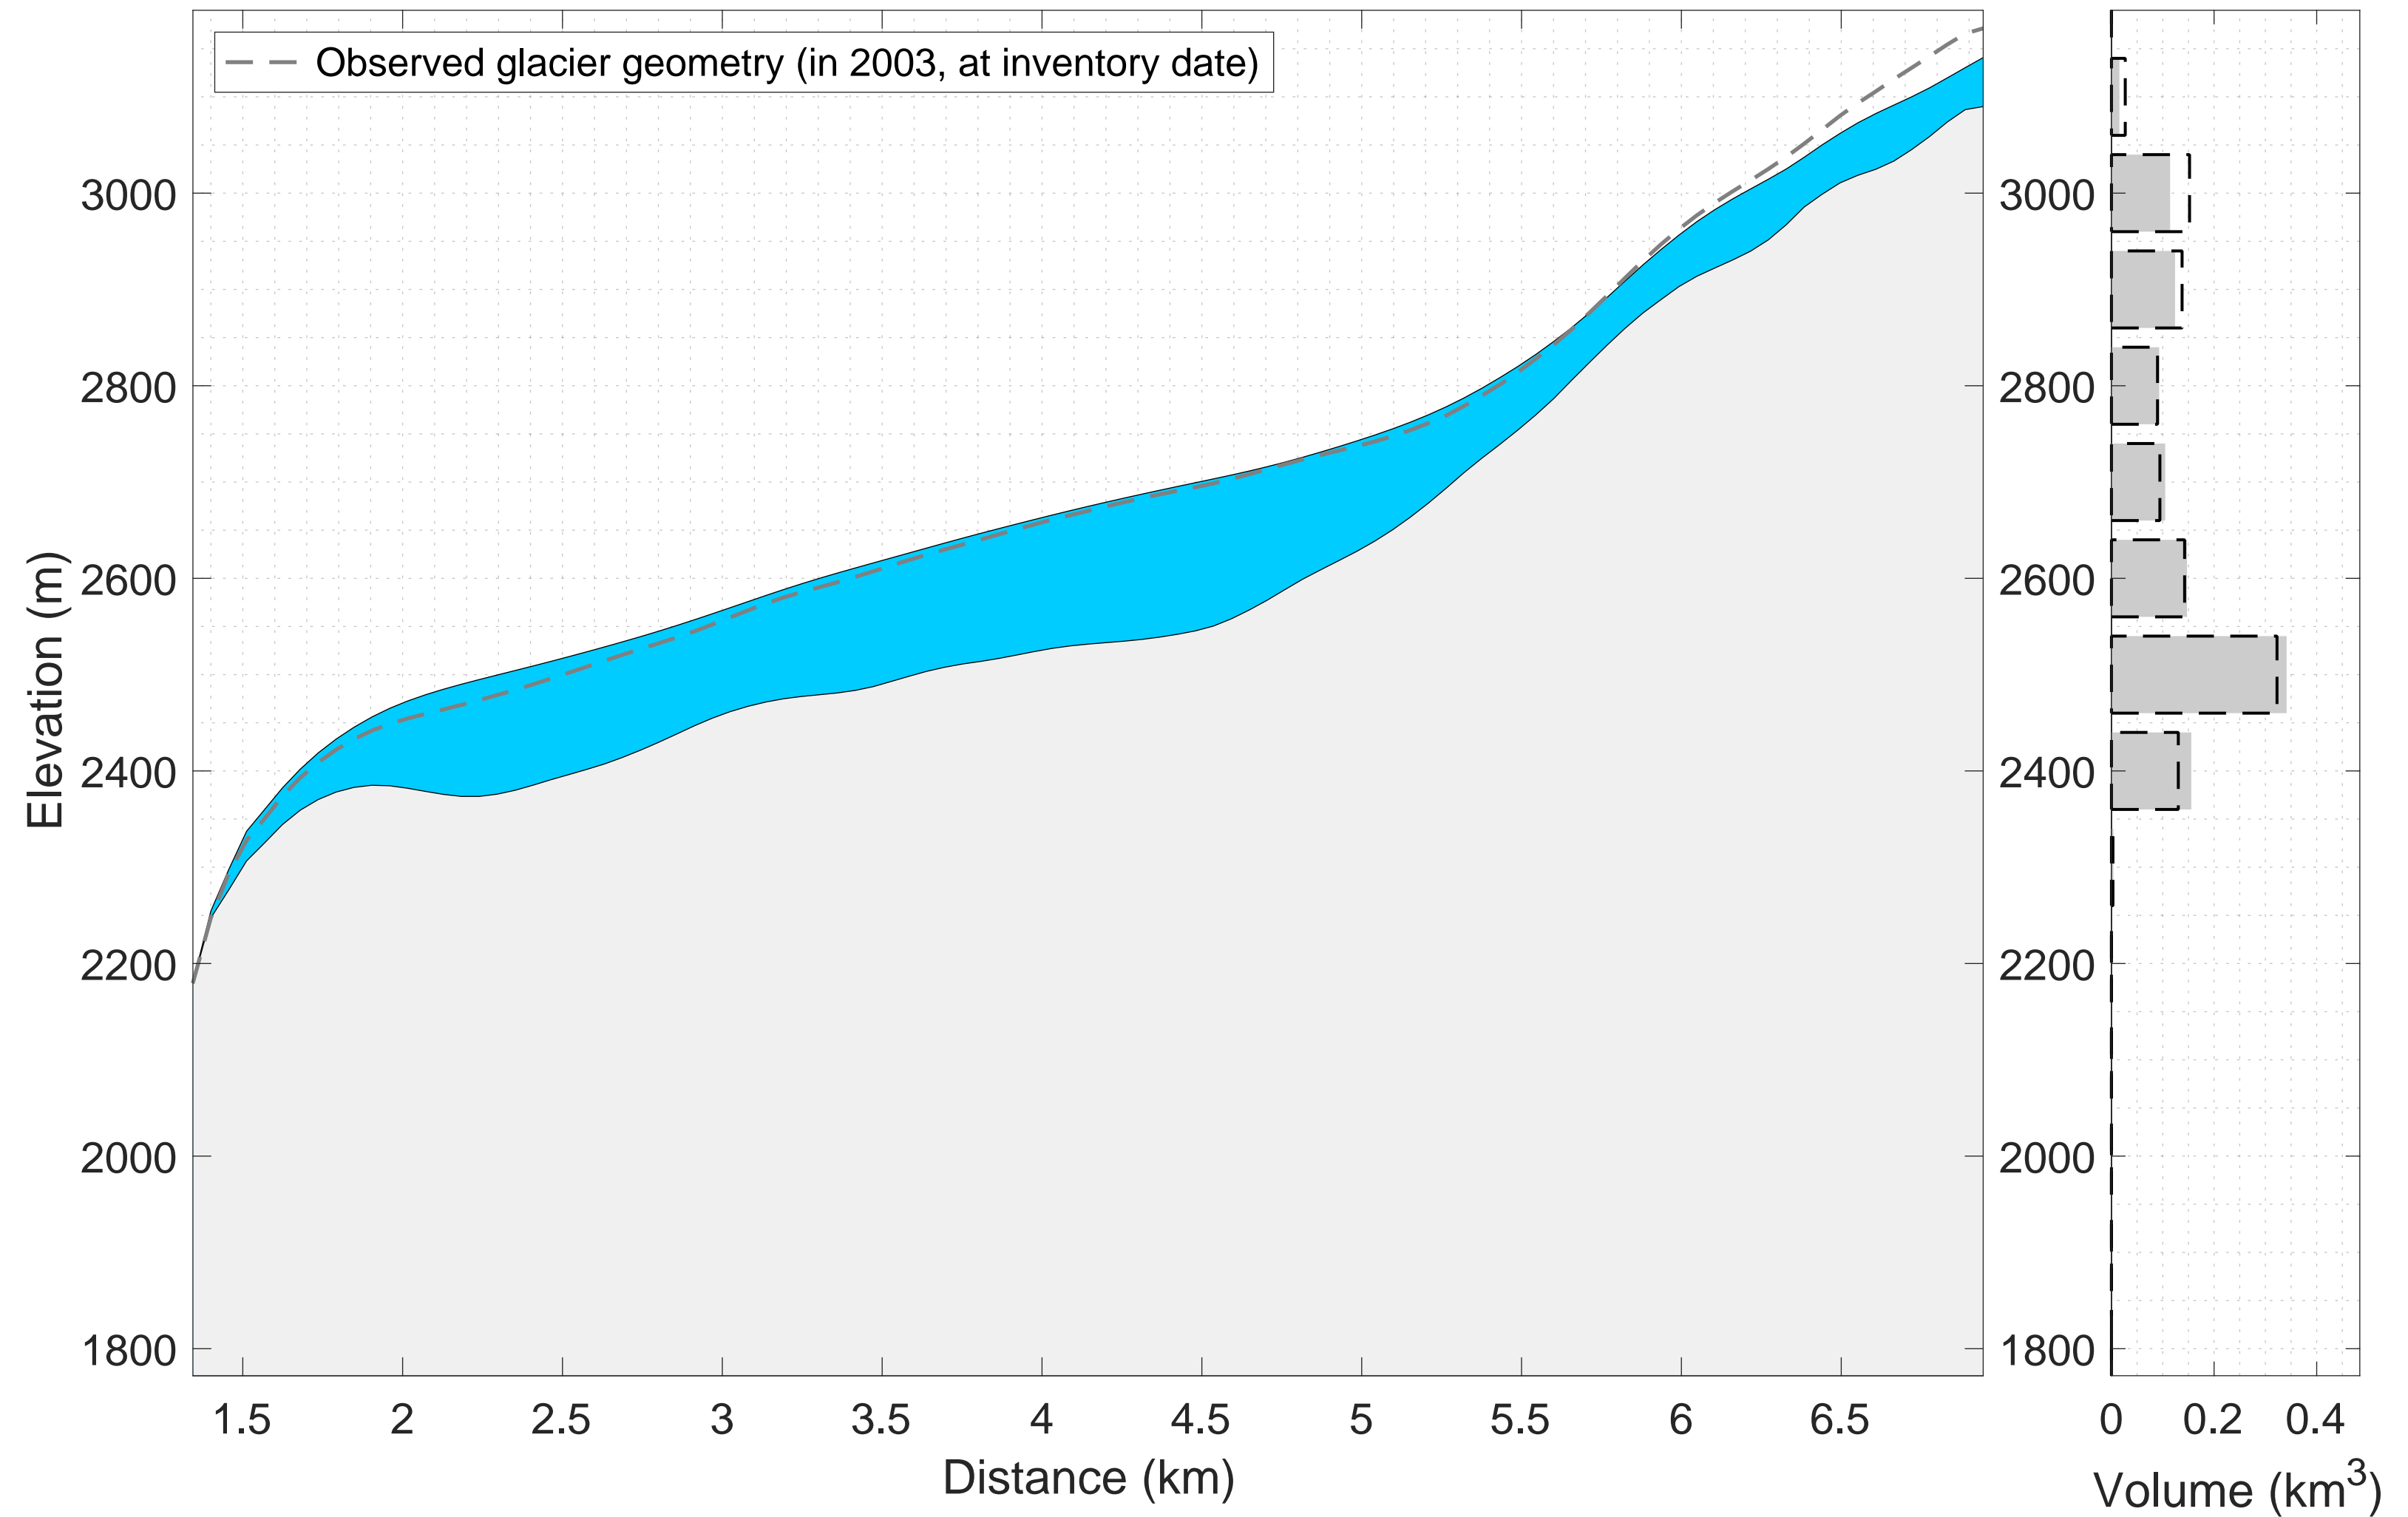

Supplement: Supplementary file 699 [file tc-13-1125-2019-supplement.zip]

**Modelled geometry (Glacier ID = 01698;  $A = 2.1285\text{e-}16 \text{ Pa}^{-3} \text{ a}^{-1}$ ;  $dx = 60 \text{ m}$ )**

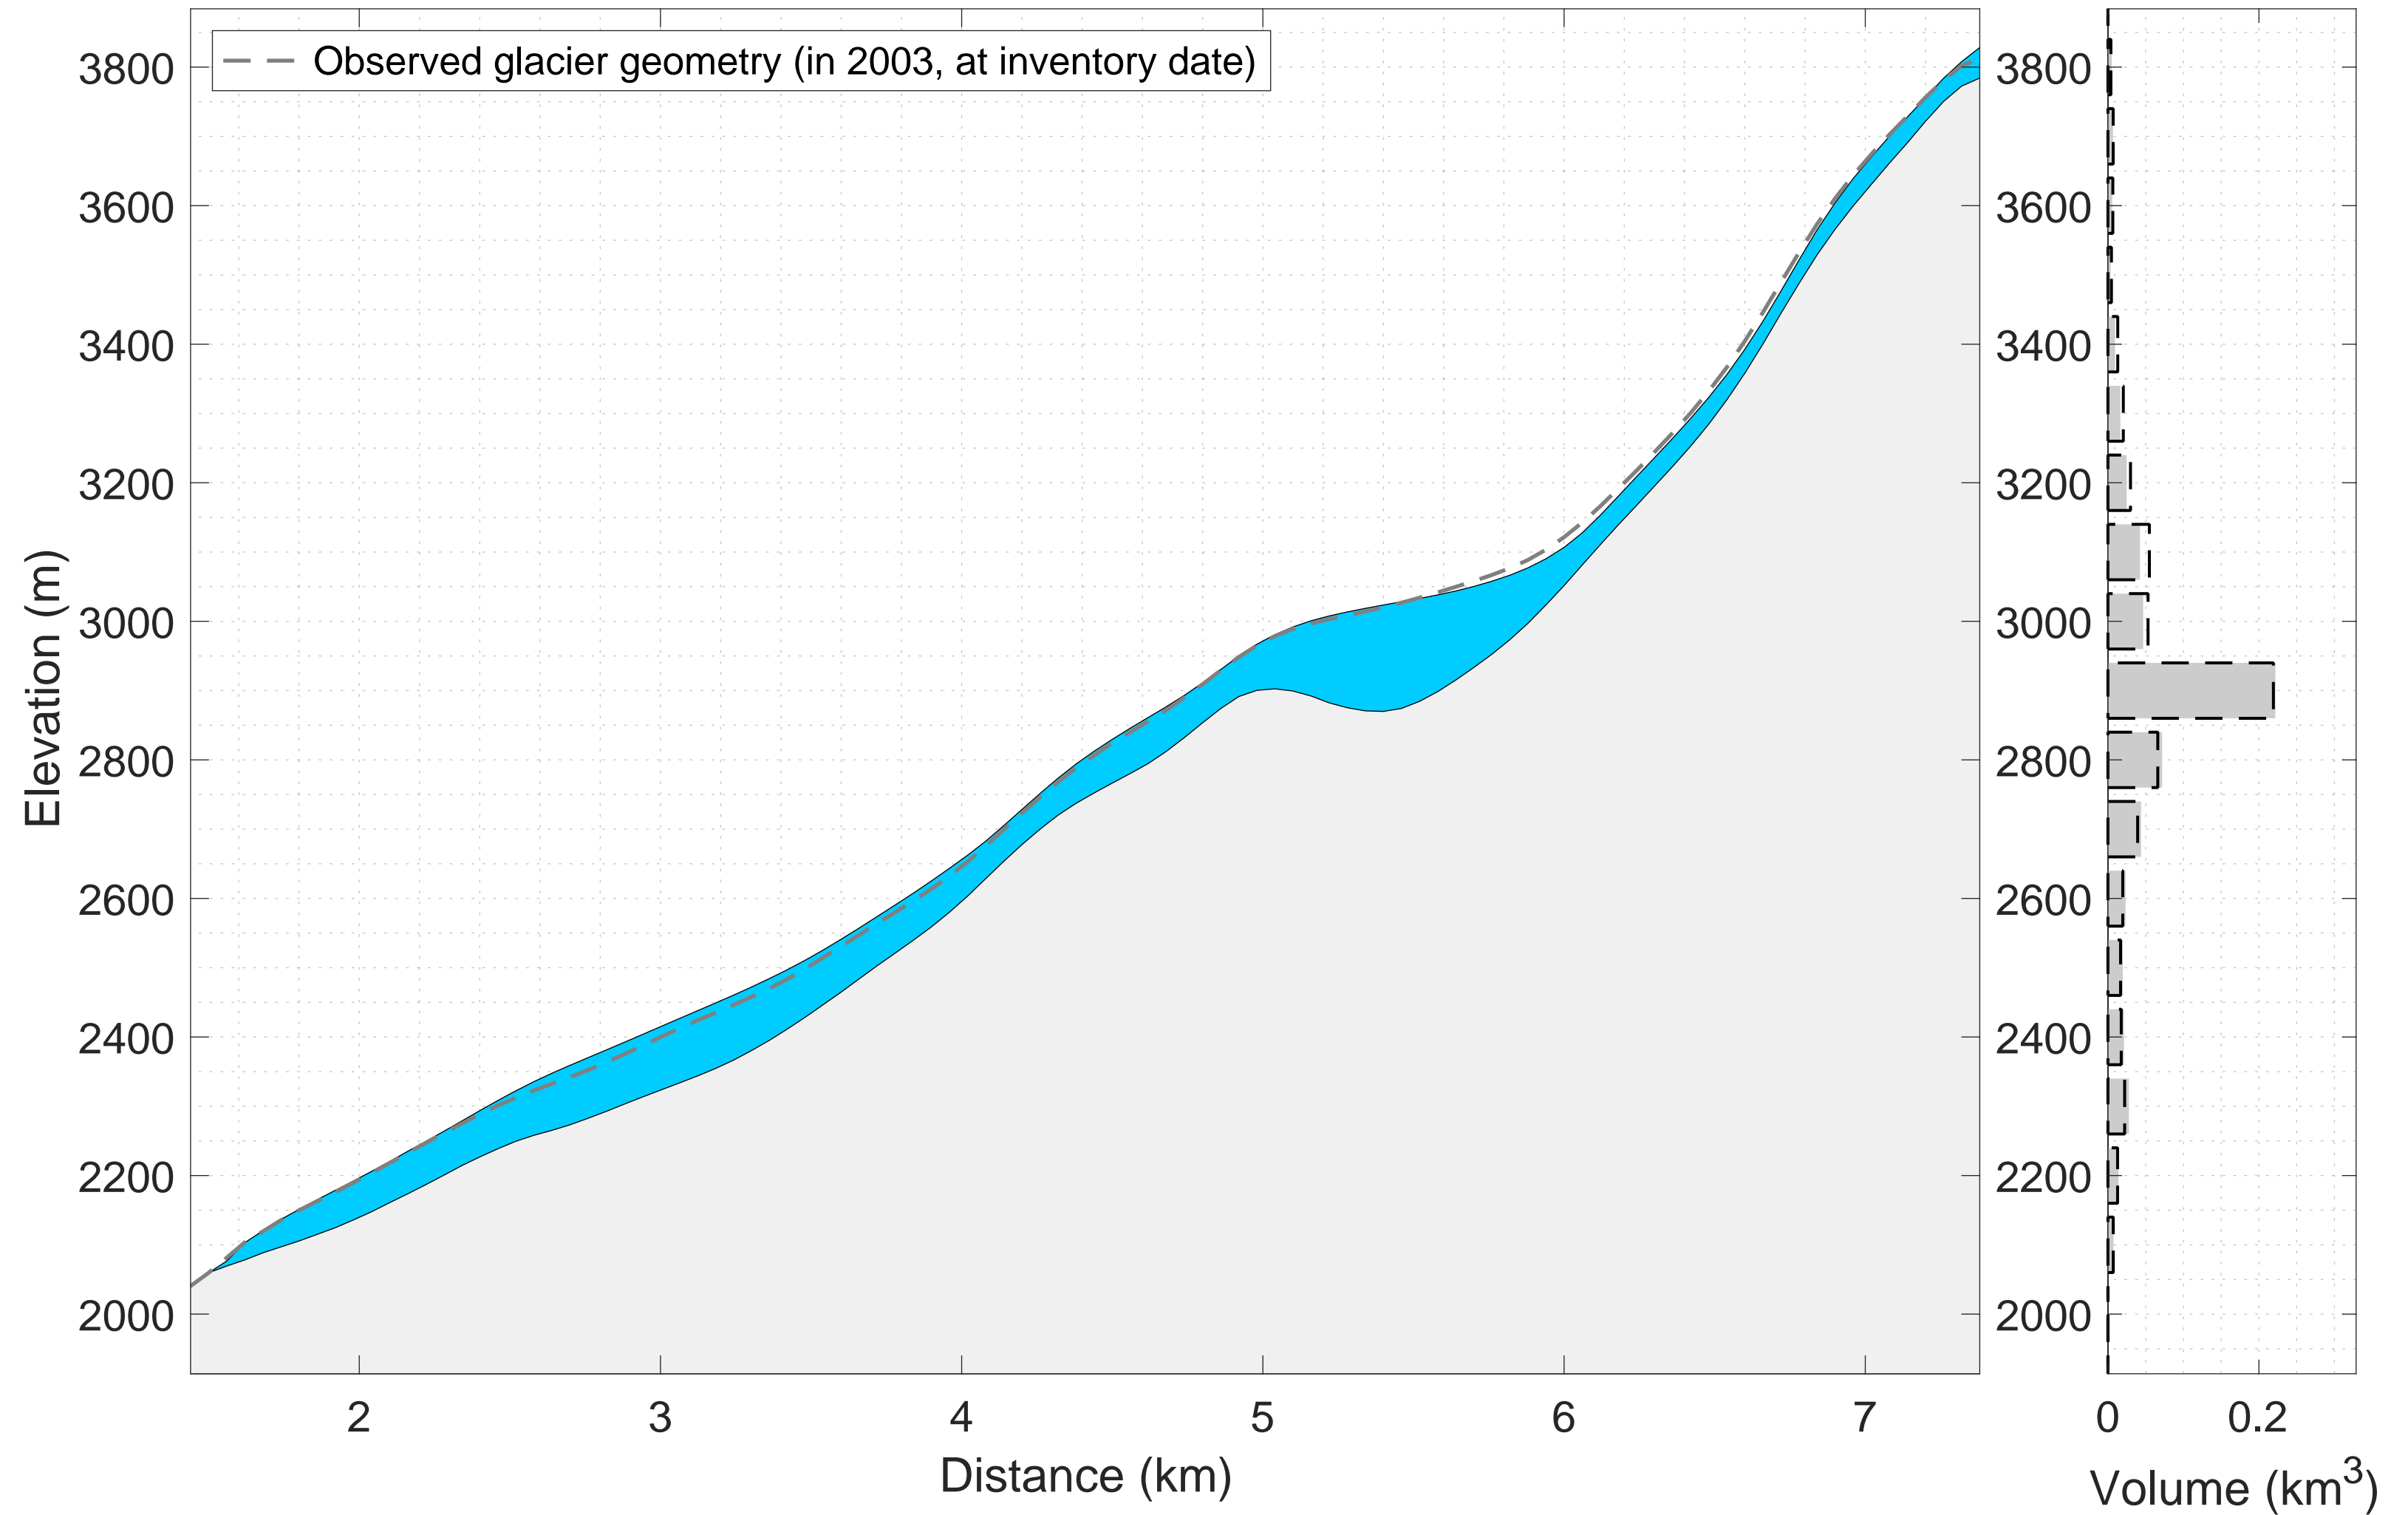

Supplement: Supplementary file 700 [file tc-13-1125-2019-supplement.zip]

**Modelled geometry (Glacier ID = 01387;  $A = 7.2738\text{e-}17 \text{ Pa}^{-3} \text{ a}^{-1}$ ;  $dx = 15 \text{ m}$ )**

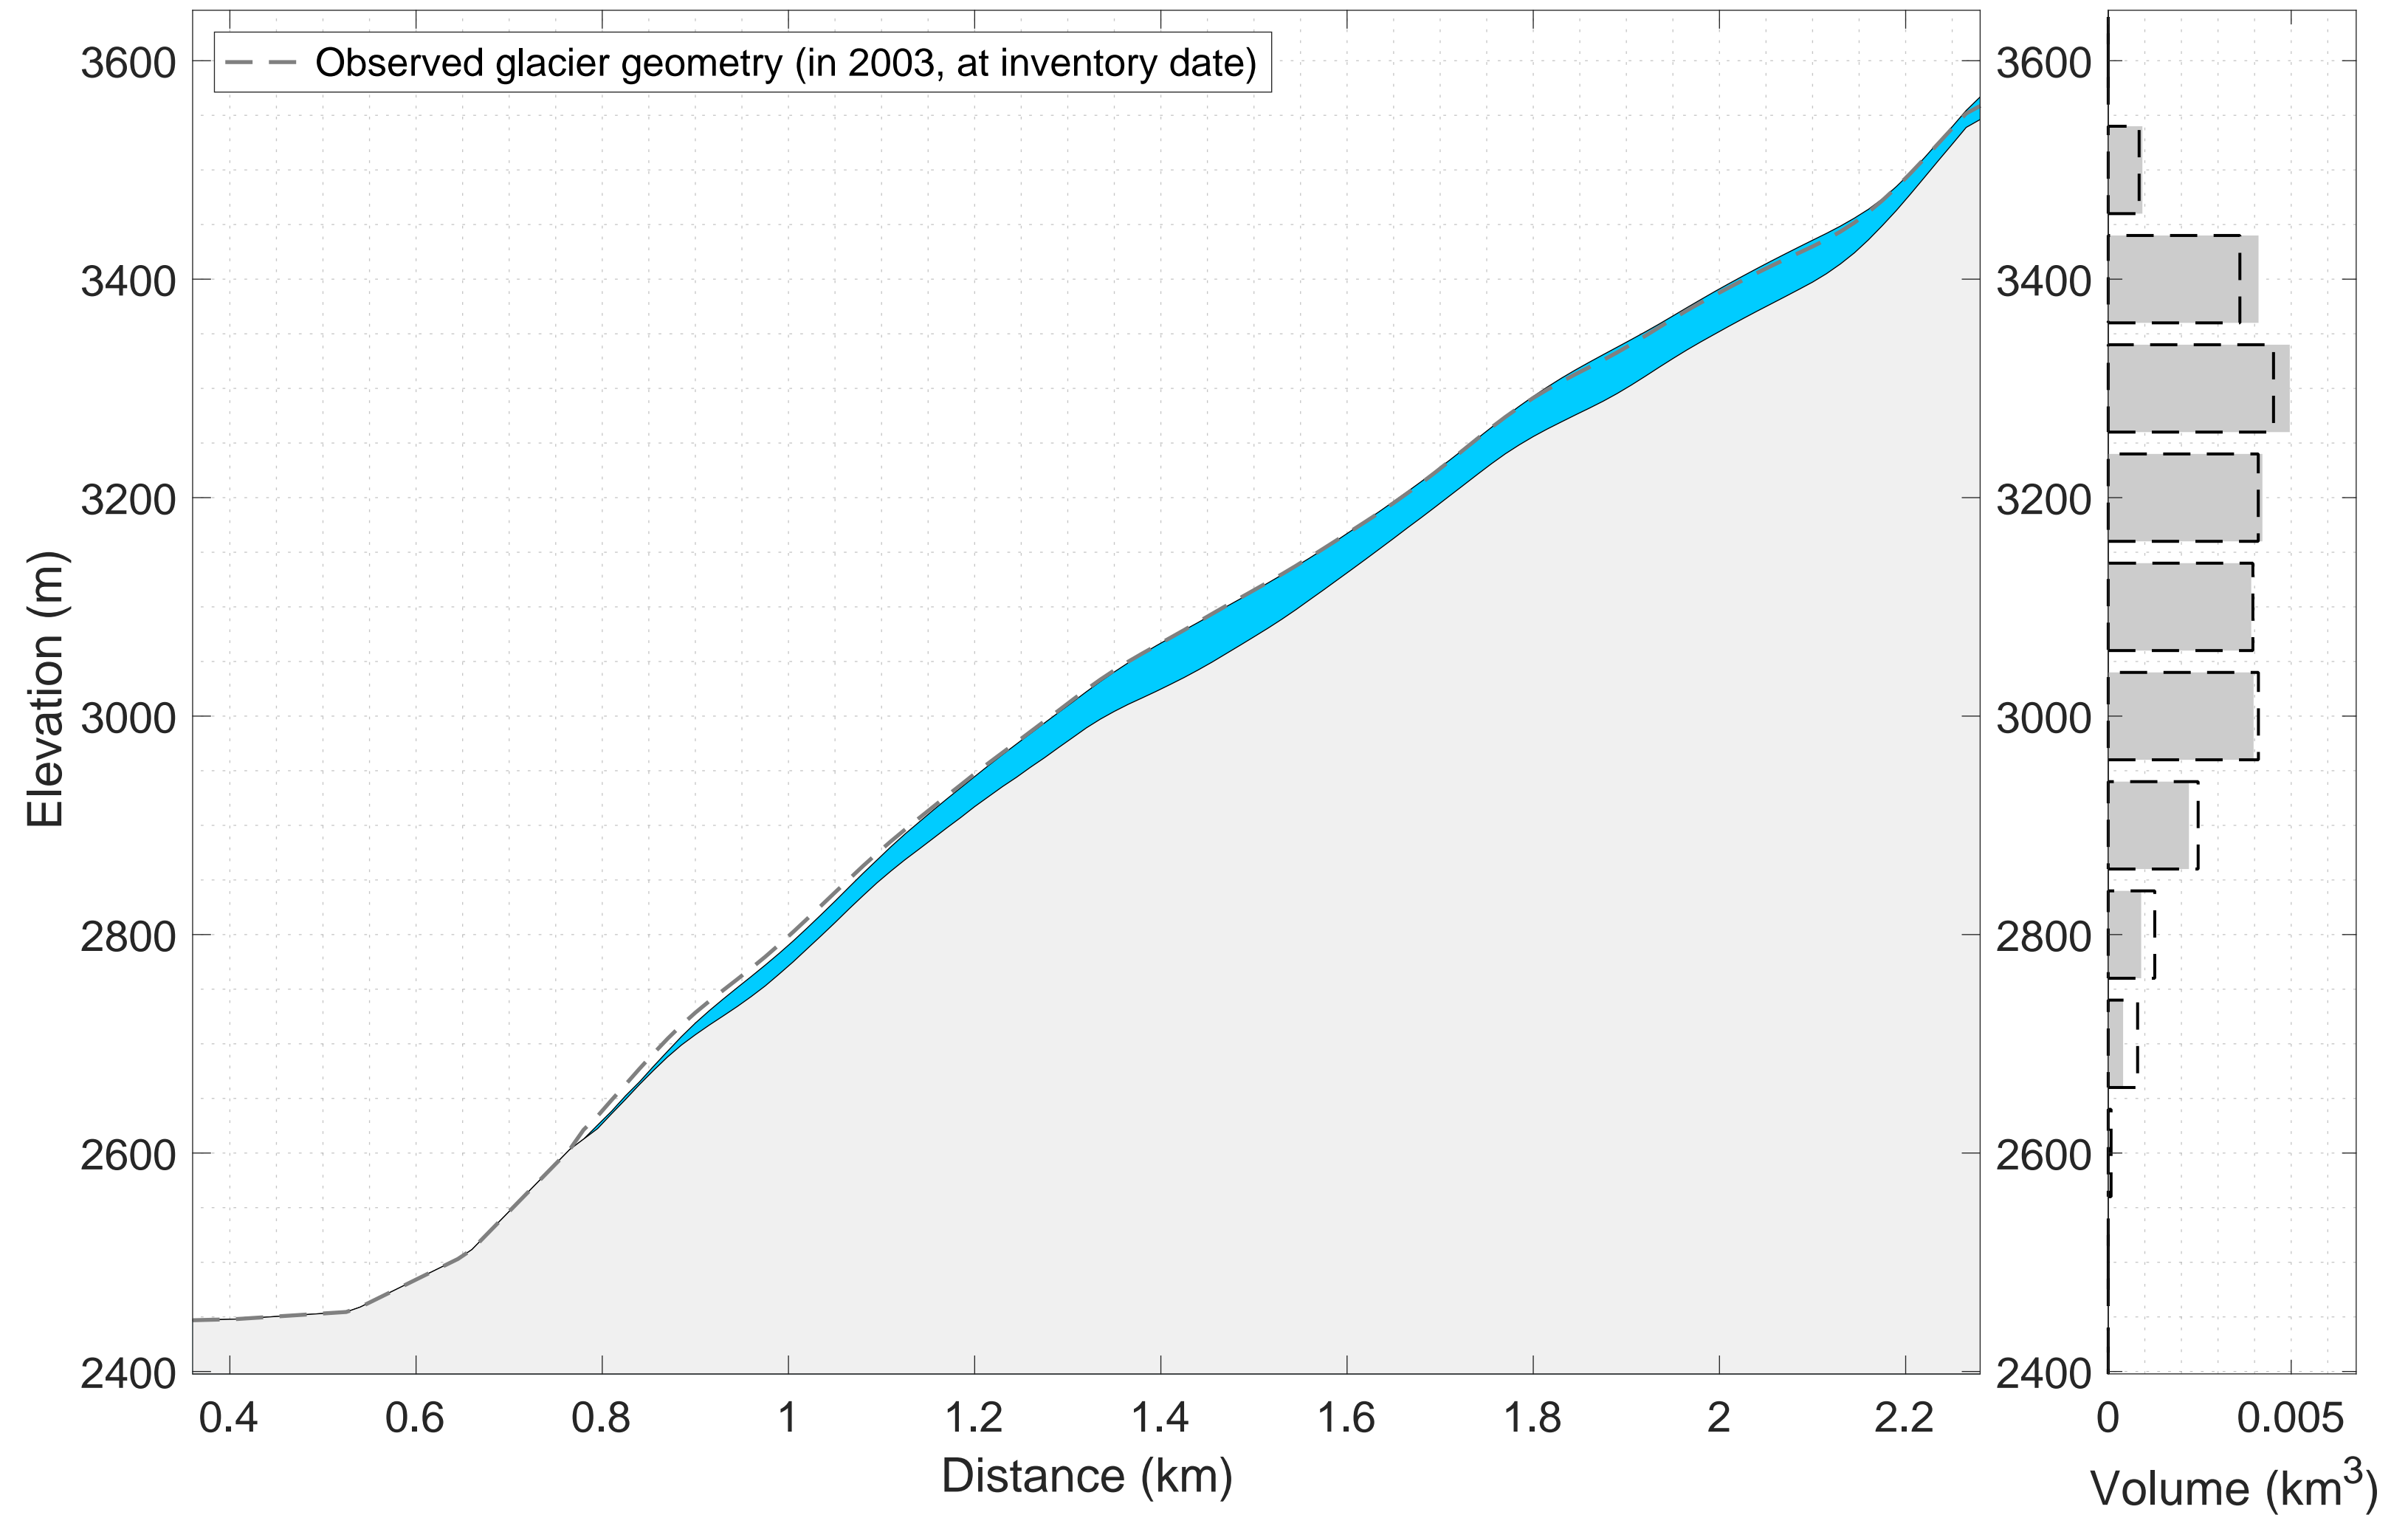

Supplement: Supplementary file 701 [file tc-13-1125-2019-supplement.zip]

**Modelled geometry (Glacier ID = 01701;  $A = 7.8573\text{e-}17 \text{ Pa}^{-3} \text{ a}^{-1}$ ;  $dx = 11 \text{ m}$ )**

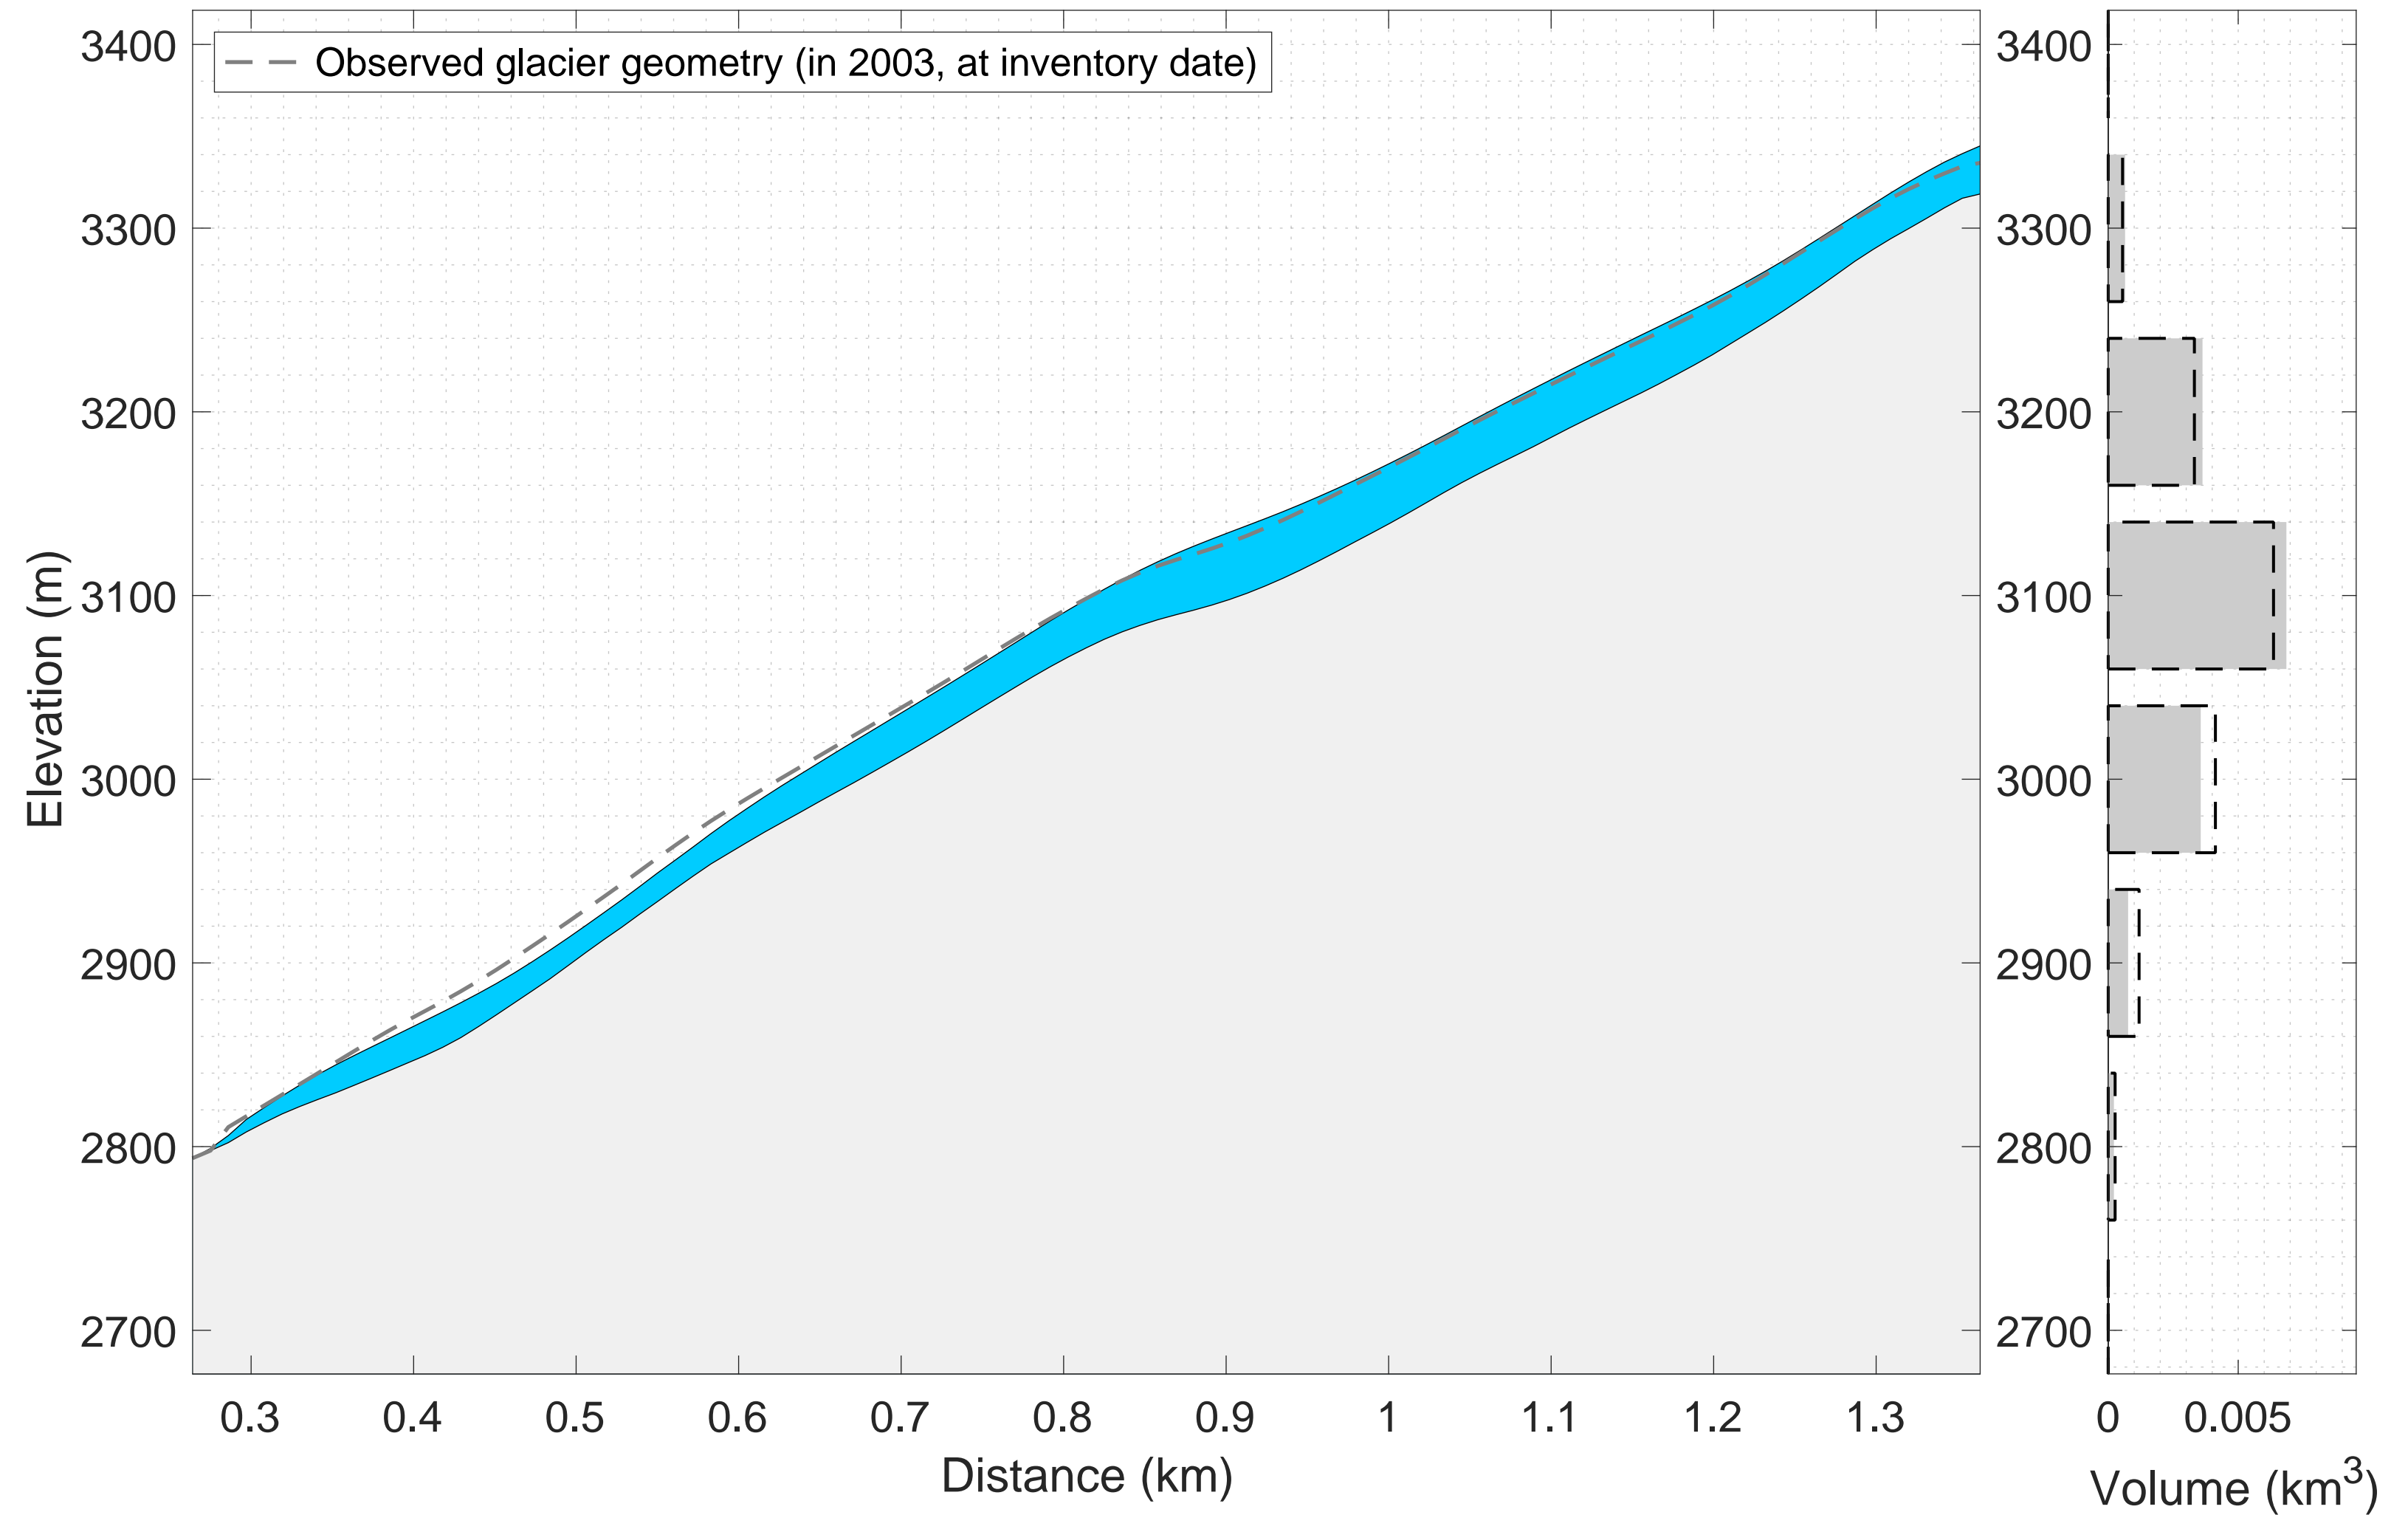

Supplement: Supplementary file 702 [file tc-13-1125-2019-supplement.zip]
