# Supplementary figures and images for: Modelling the future evolution of glaciers in the European Alps under the EURO-CORDEX RCM ensemble (part 8 of 8)
Source: Copernicus journal article supplement (doi:10.5194/tc-13-1125-2019), 2019-04-09

**Modelled geometry (Glacier ID = 02490;  $A = 1.294\text{e-}16 \text{ Pa}^{-3} \text{ a}^{-1}$ ;  $dx = 58 \text{ m}$ )**

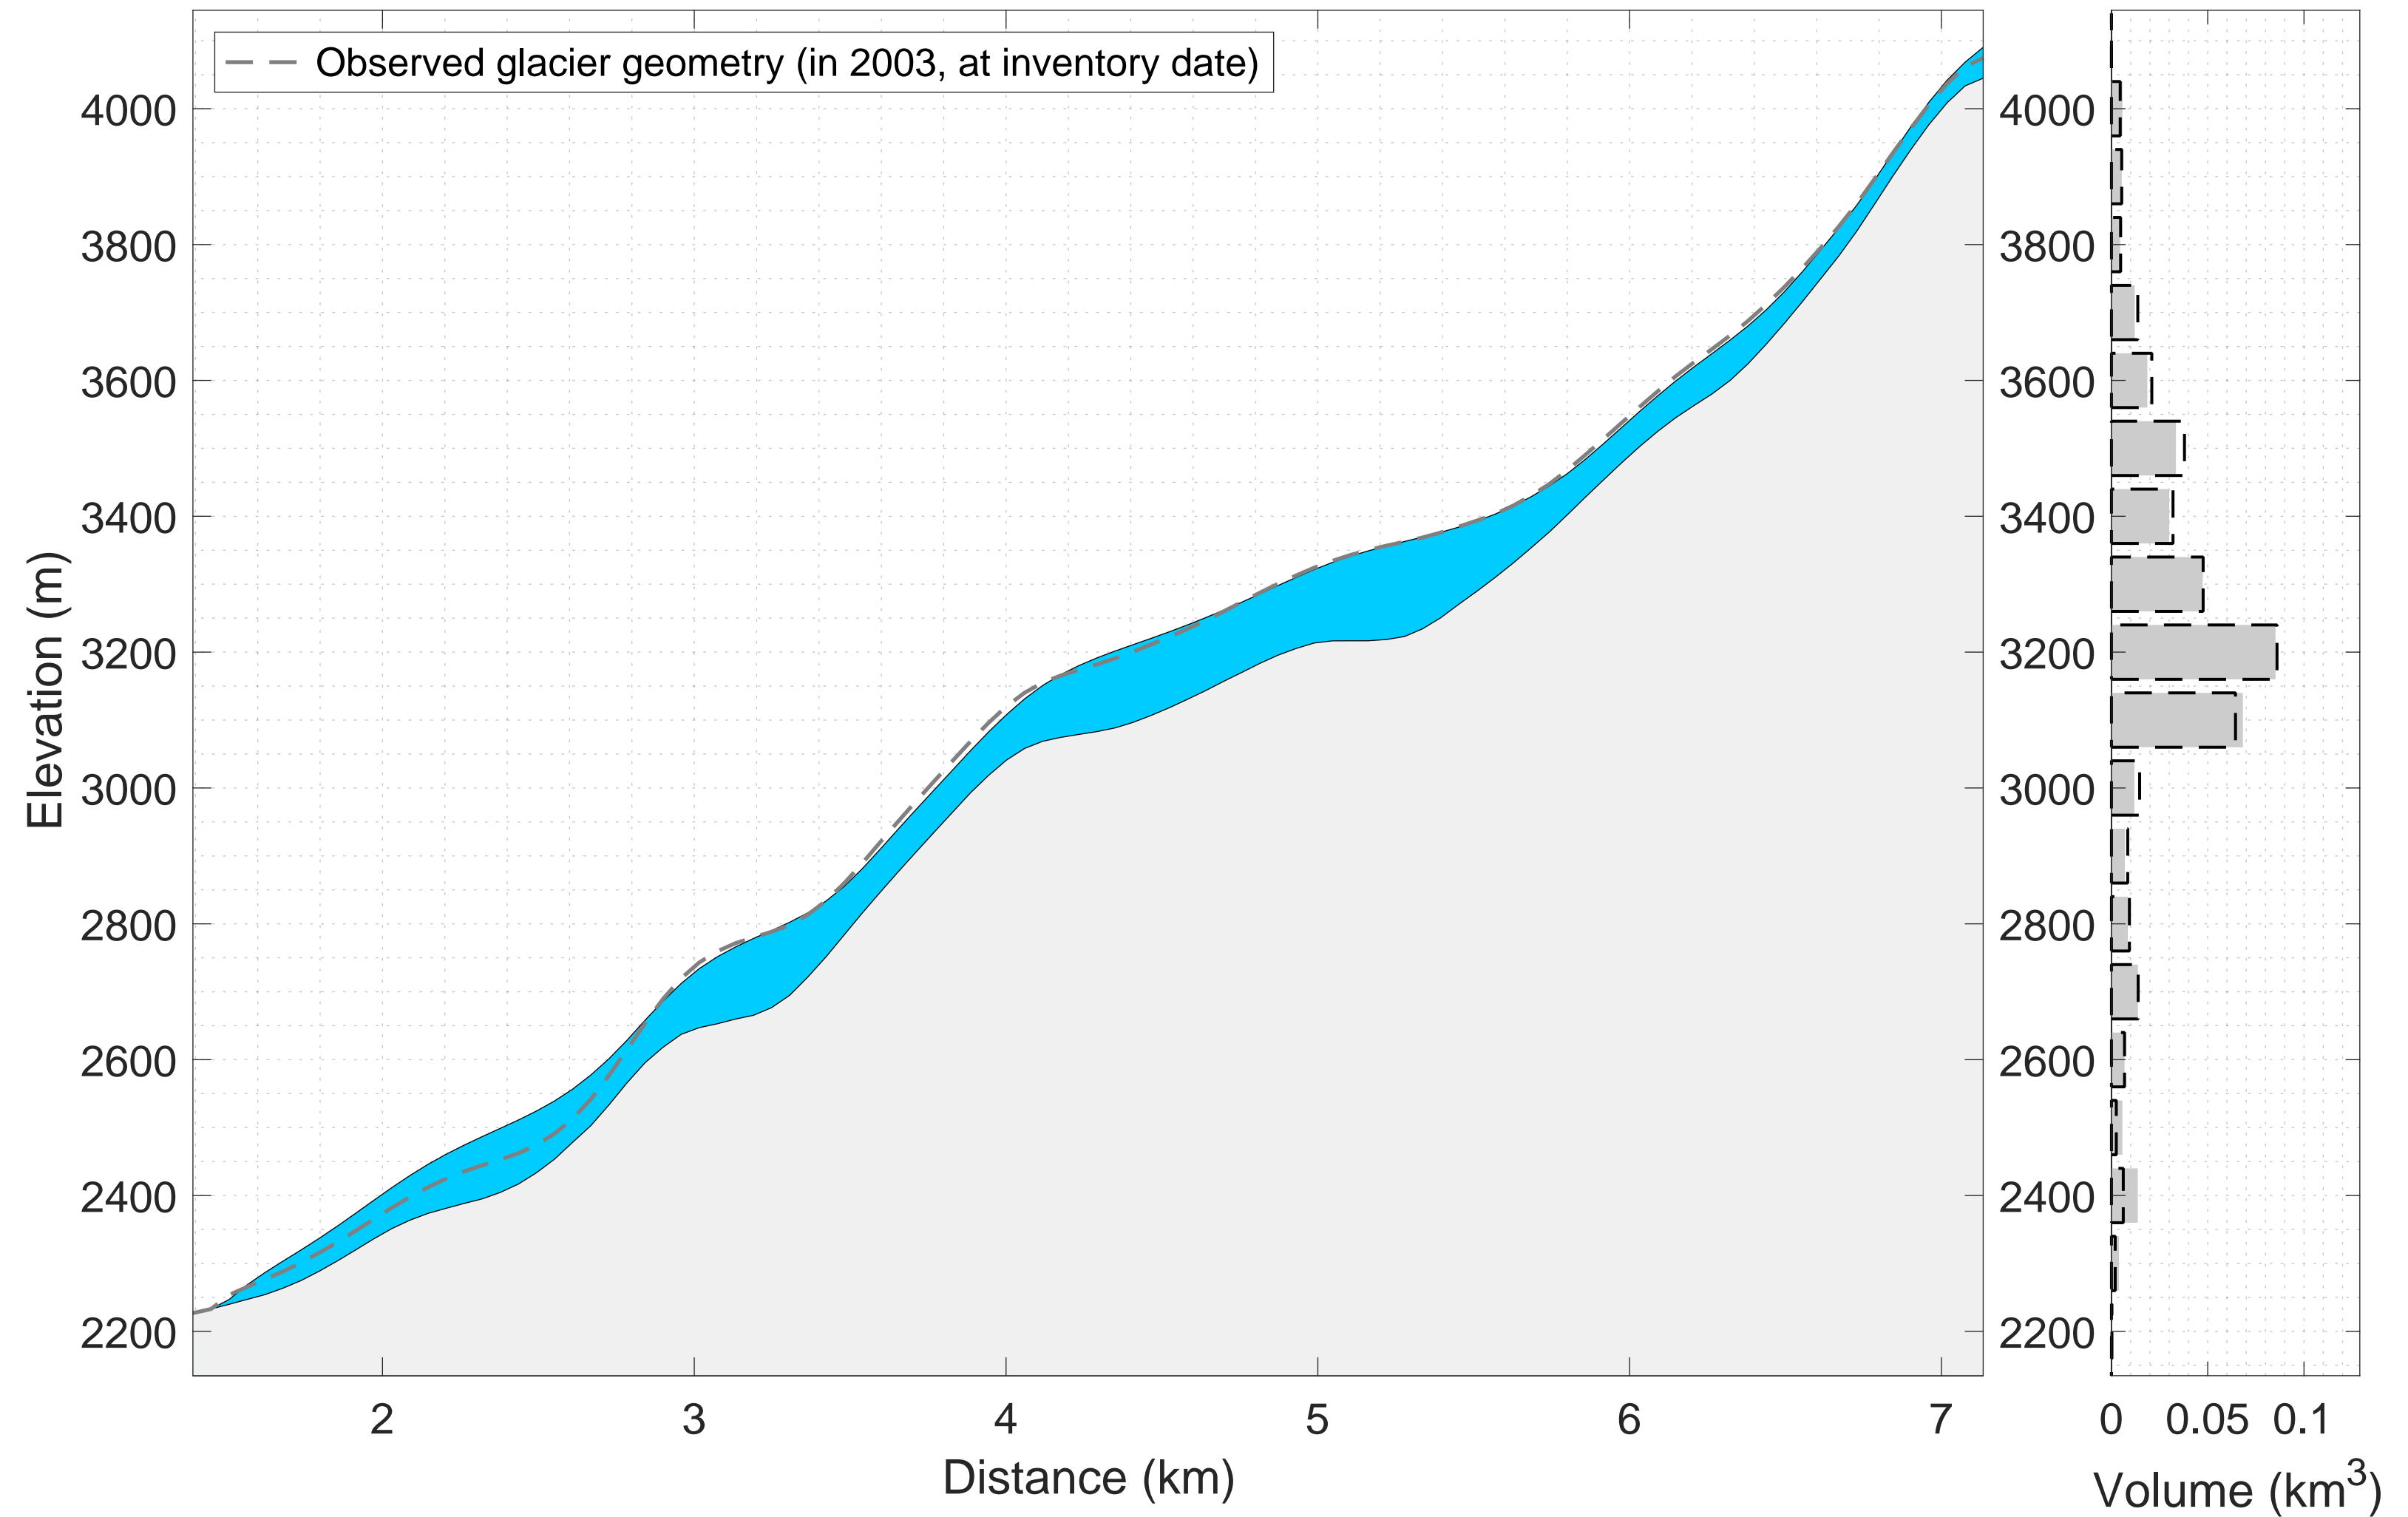

Supplement: Supplementary file 703 [file tc-13-1125-2019-supplement.zip]

**Modelled geometry (Glacier ID = 00957;  $A = 2.2207\text{e-}16 \text{ Pa}^{-3} \text{ a}^{-1}$ ;  $dx = 31 \text{ m}$ )**

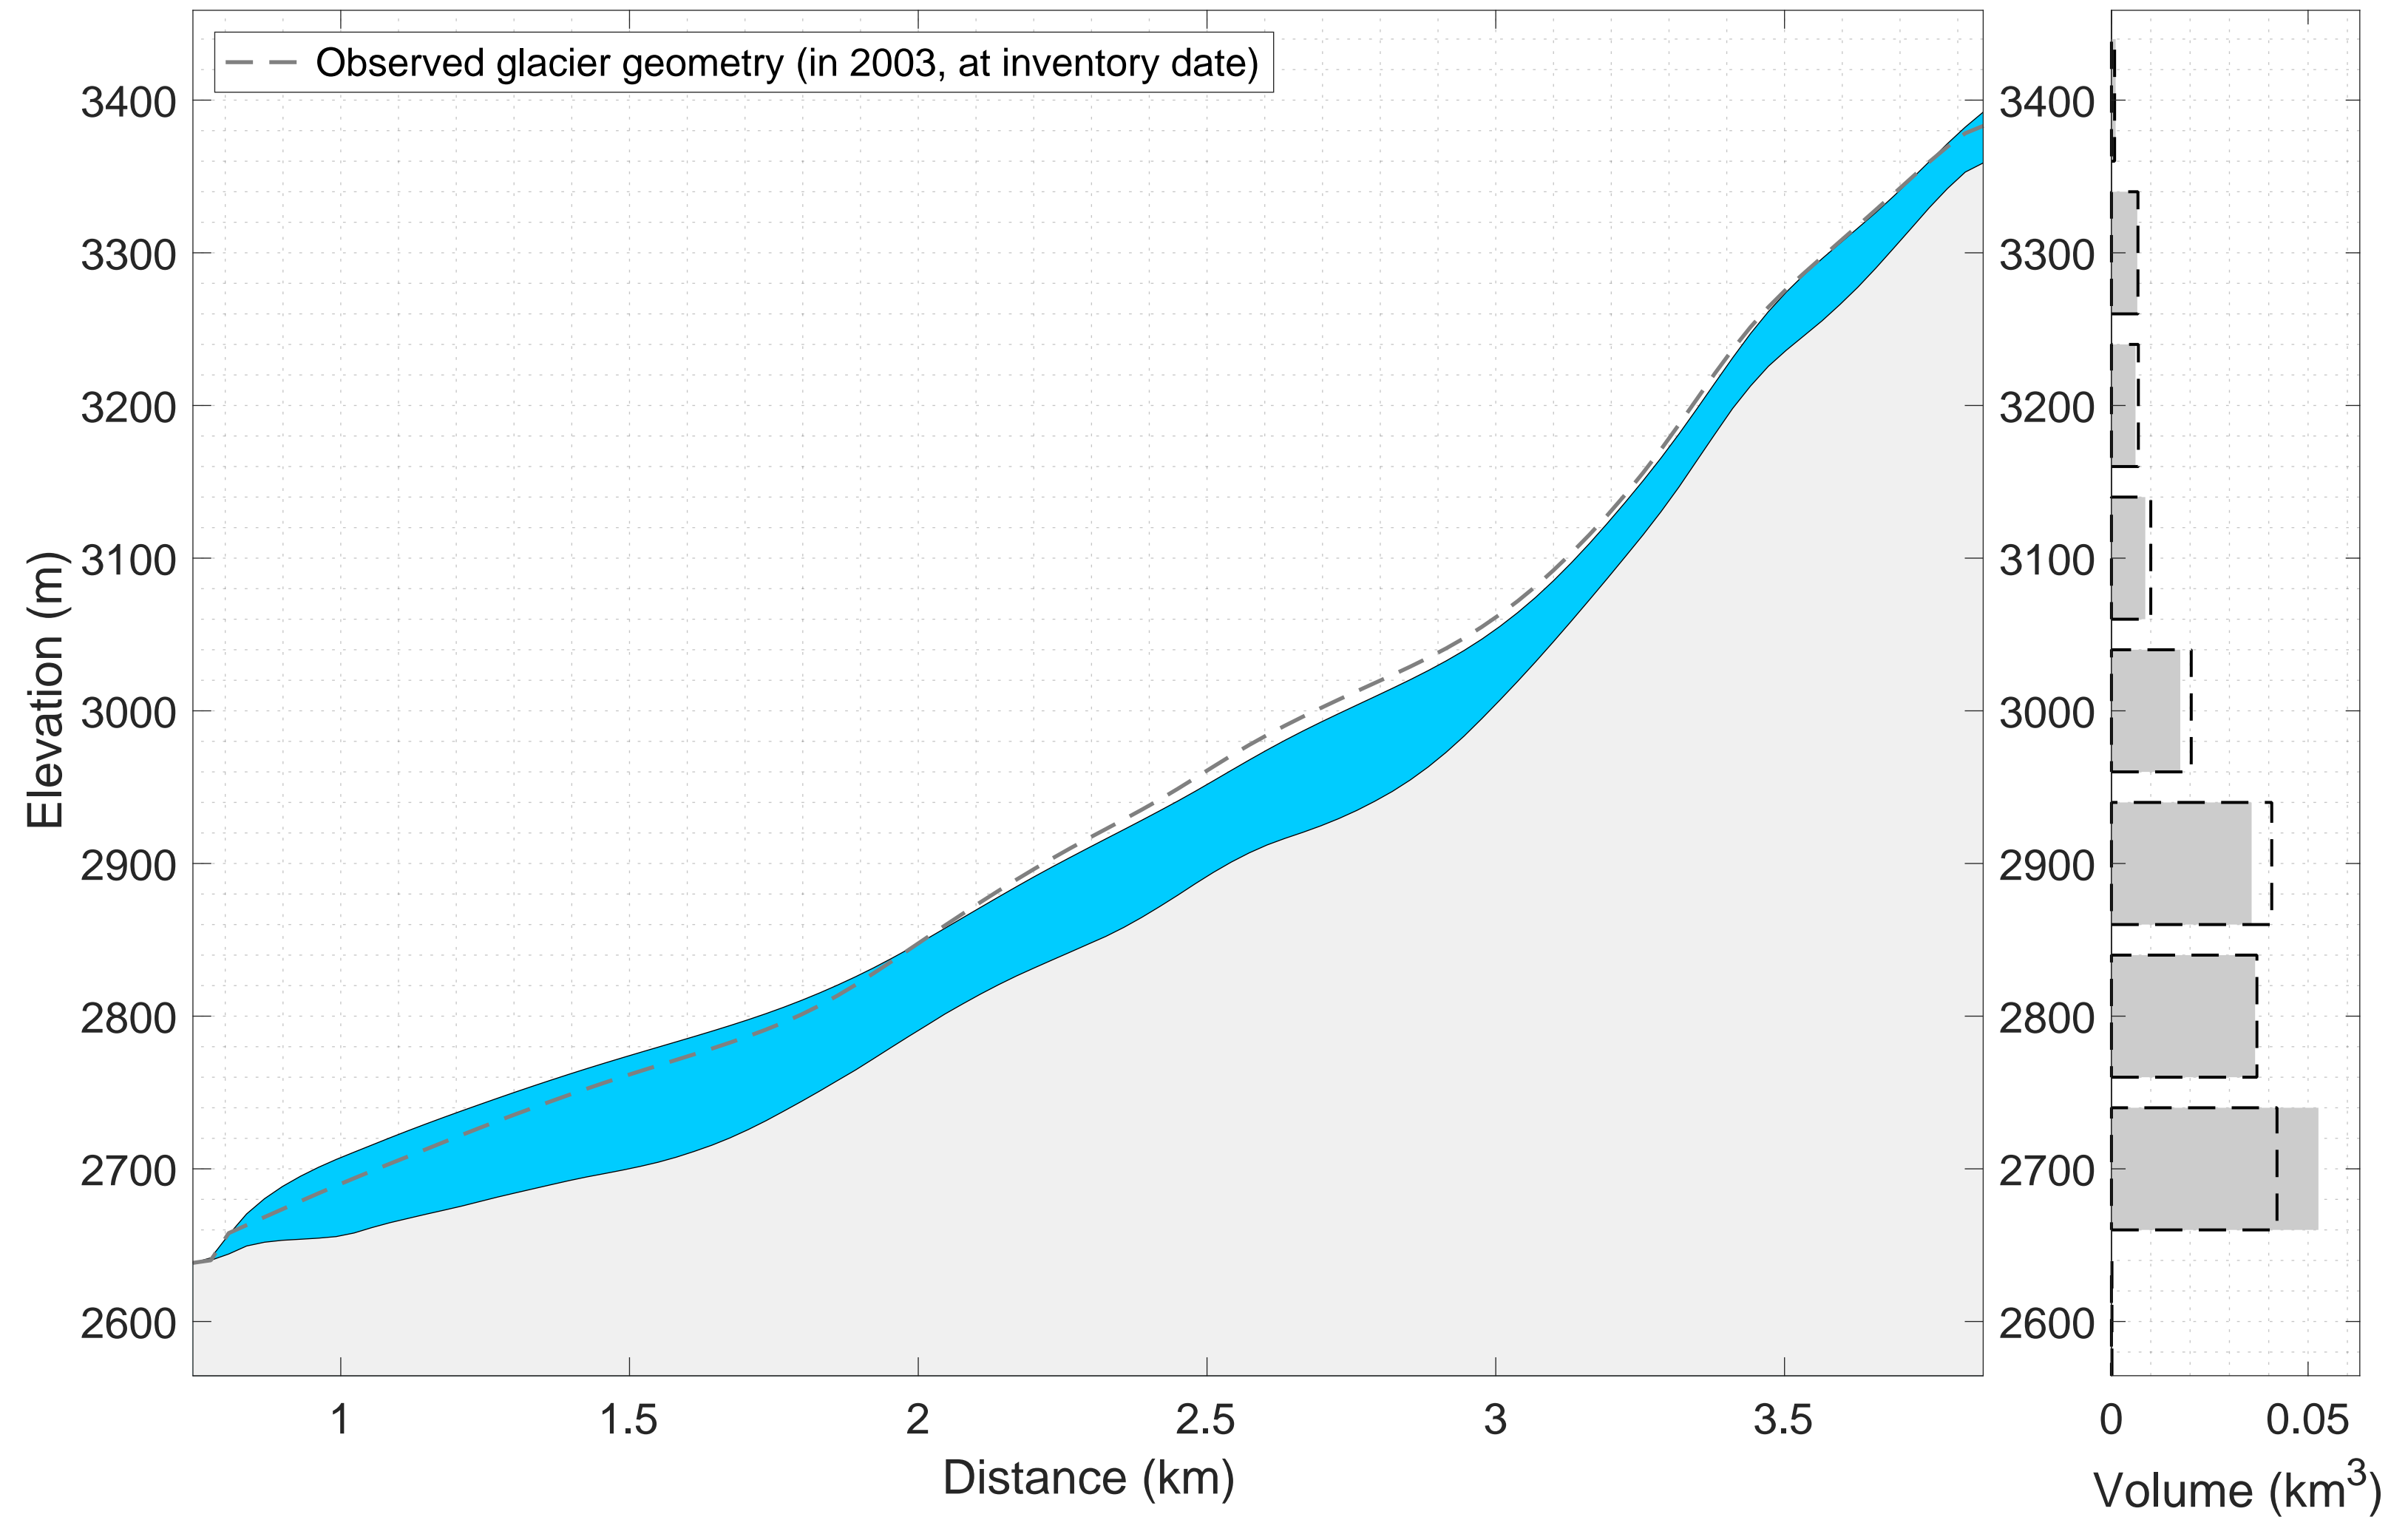

Supplement: Supplementary file 704 [file tc-13-1125-2019-supplement.zip]

**Modelled geometry (Glacier ID = 02173;  $A = 1.6523\text{e-}16 \text{ Pa}^{-3} \text{ a}^{-1}$ ;  $dx = 49 \text{ m}$ )**

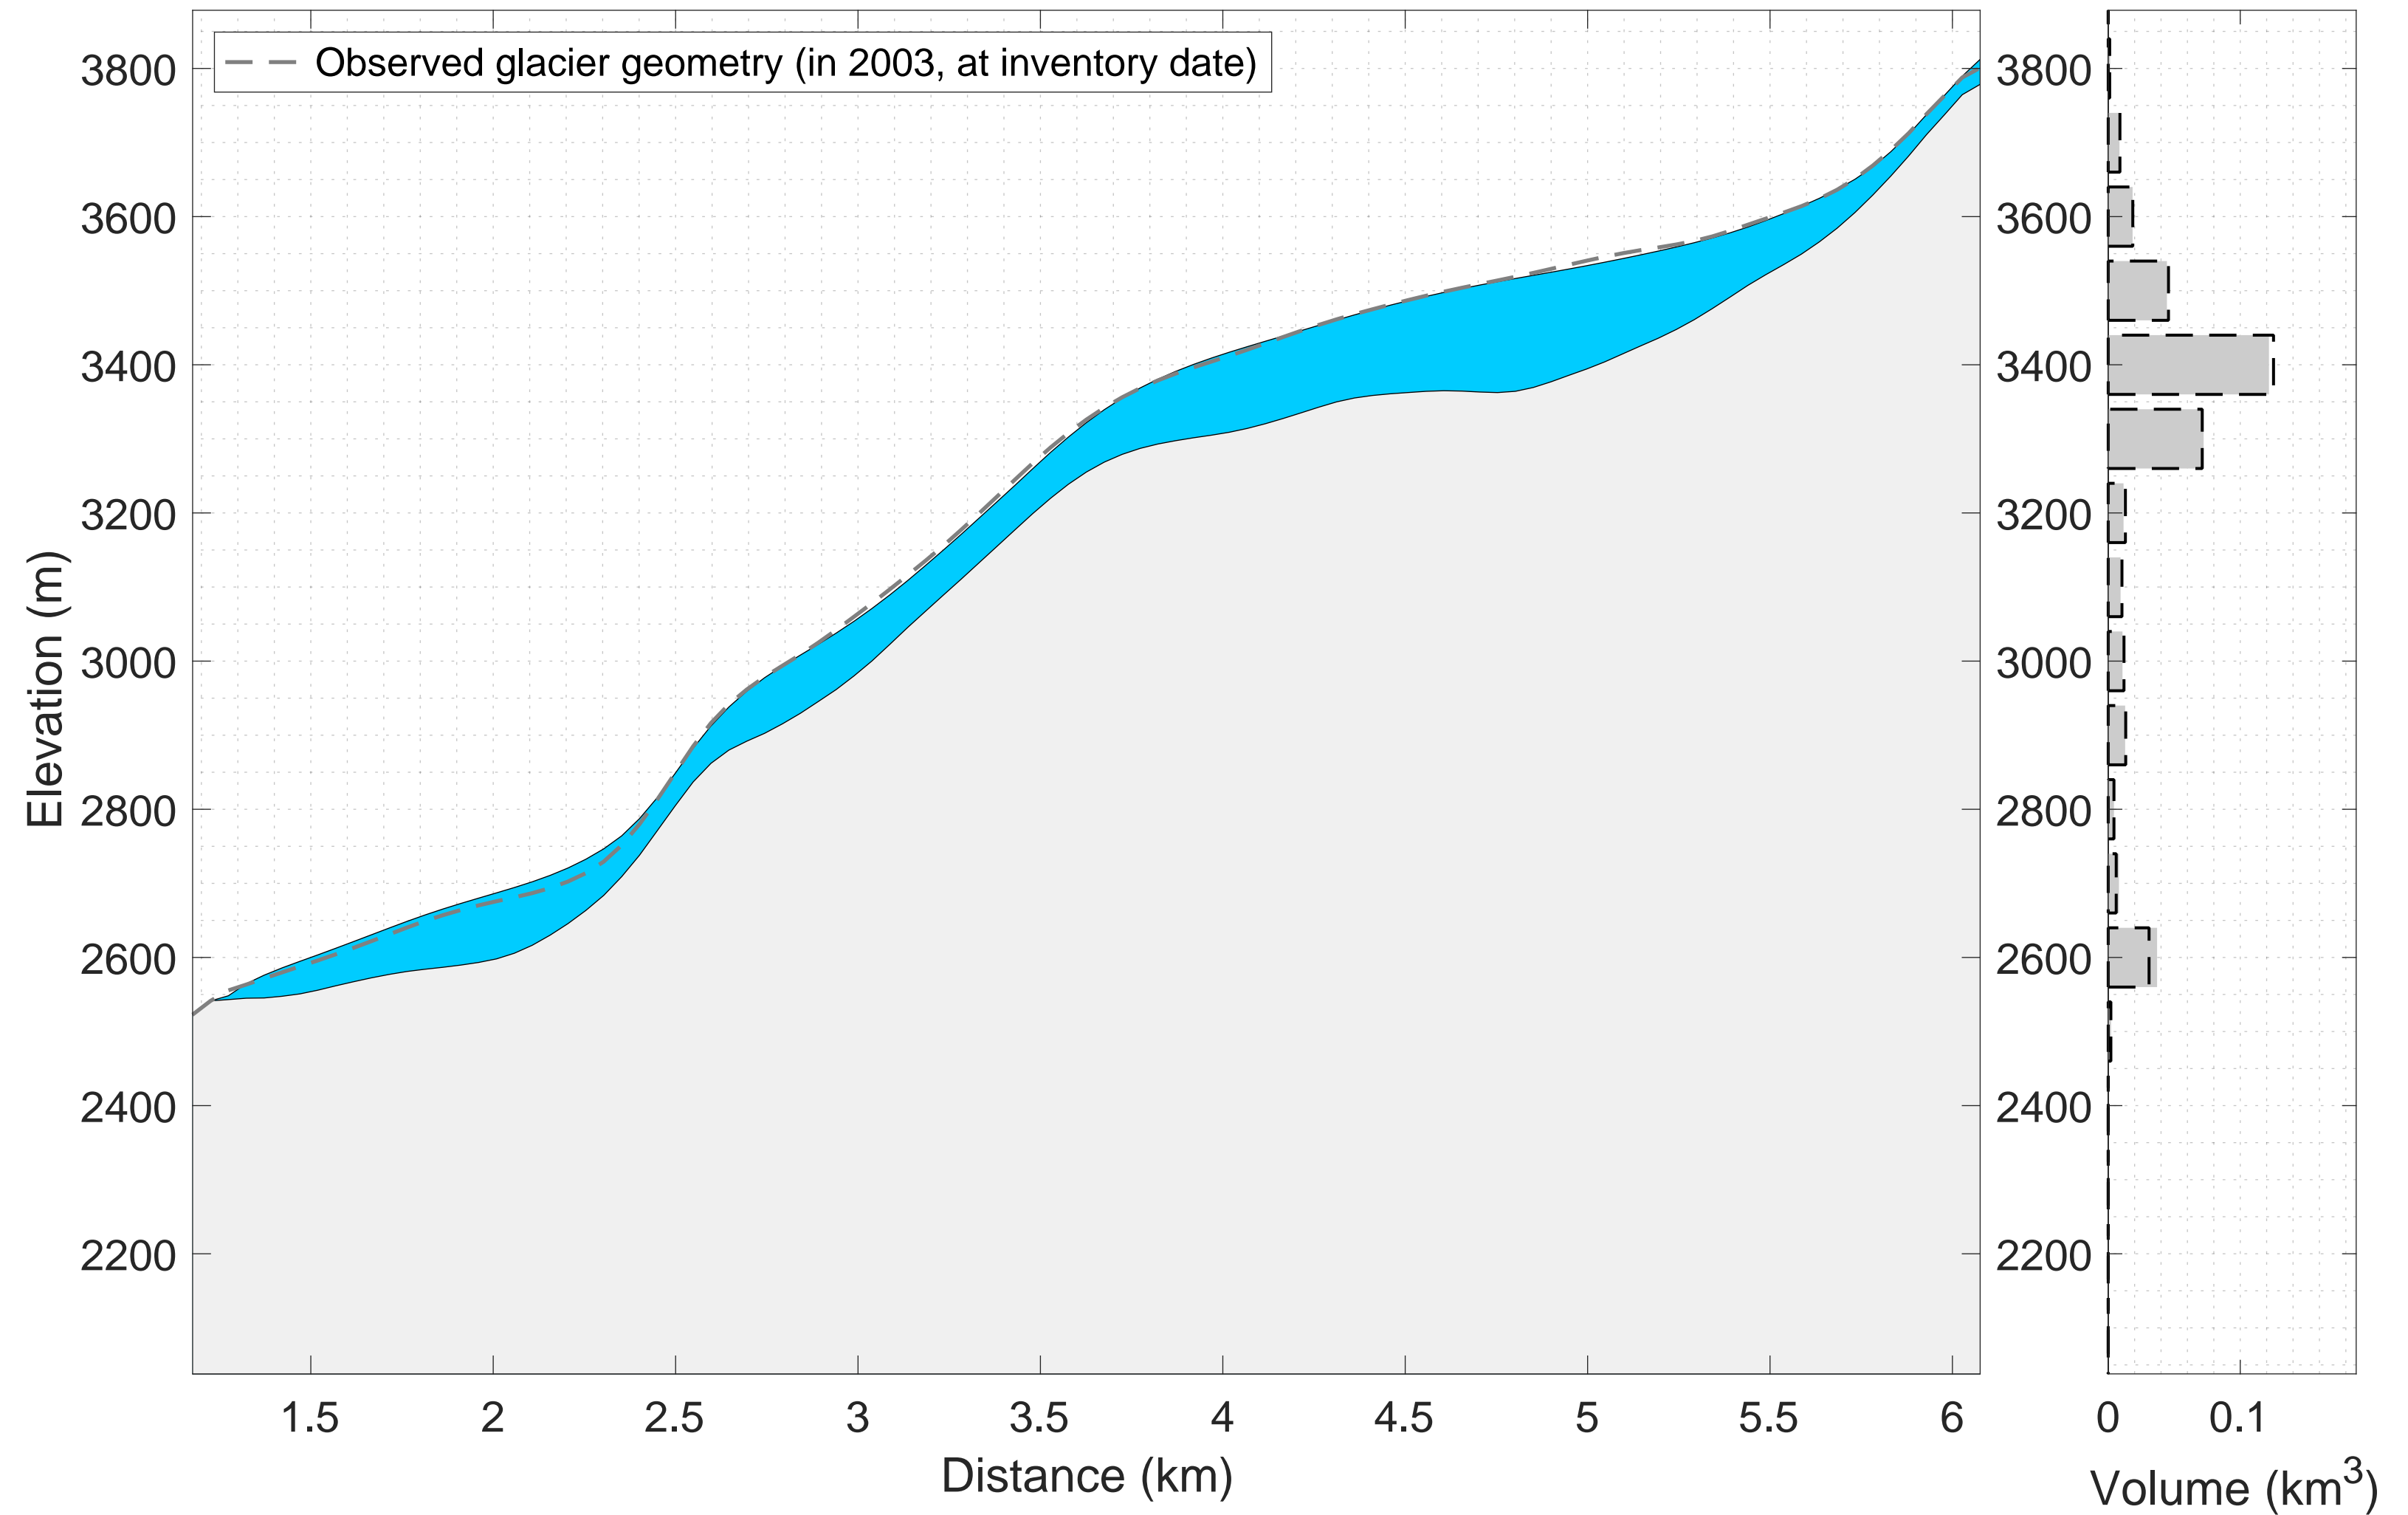

Supplement: Supplementary file 705 [file tc-13-1125-2019-supplement.zip]

**Modelled geometry (Glacier ID = 03760;  $A = 1.6219\text{e-}16 \text{ Pa}^{-3} \text{ a}^{-1}$ ;  $dx = 22 \text{ m}$ )**

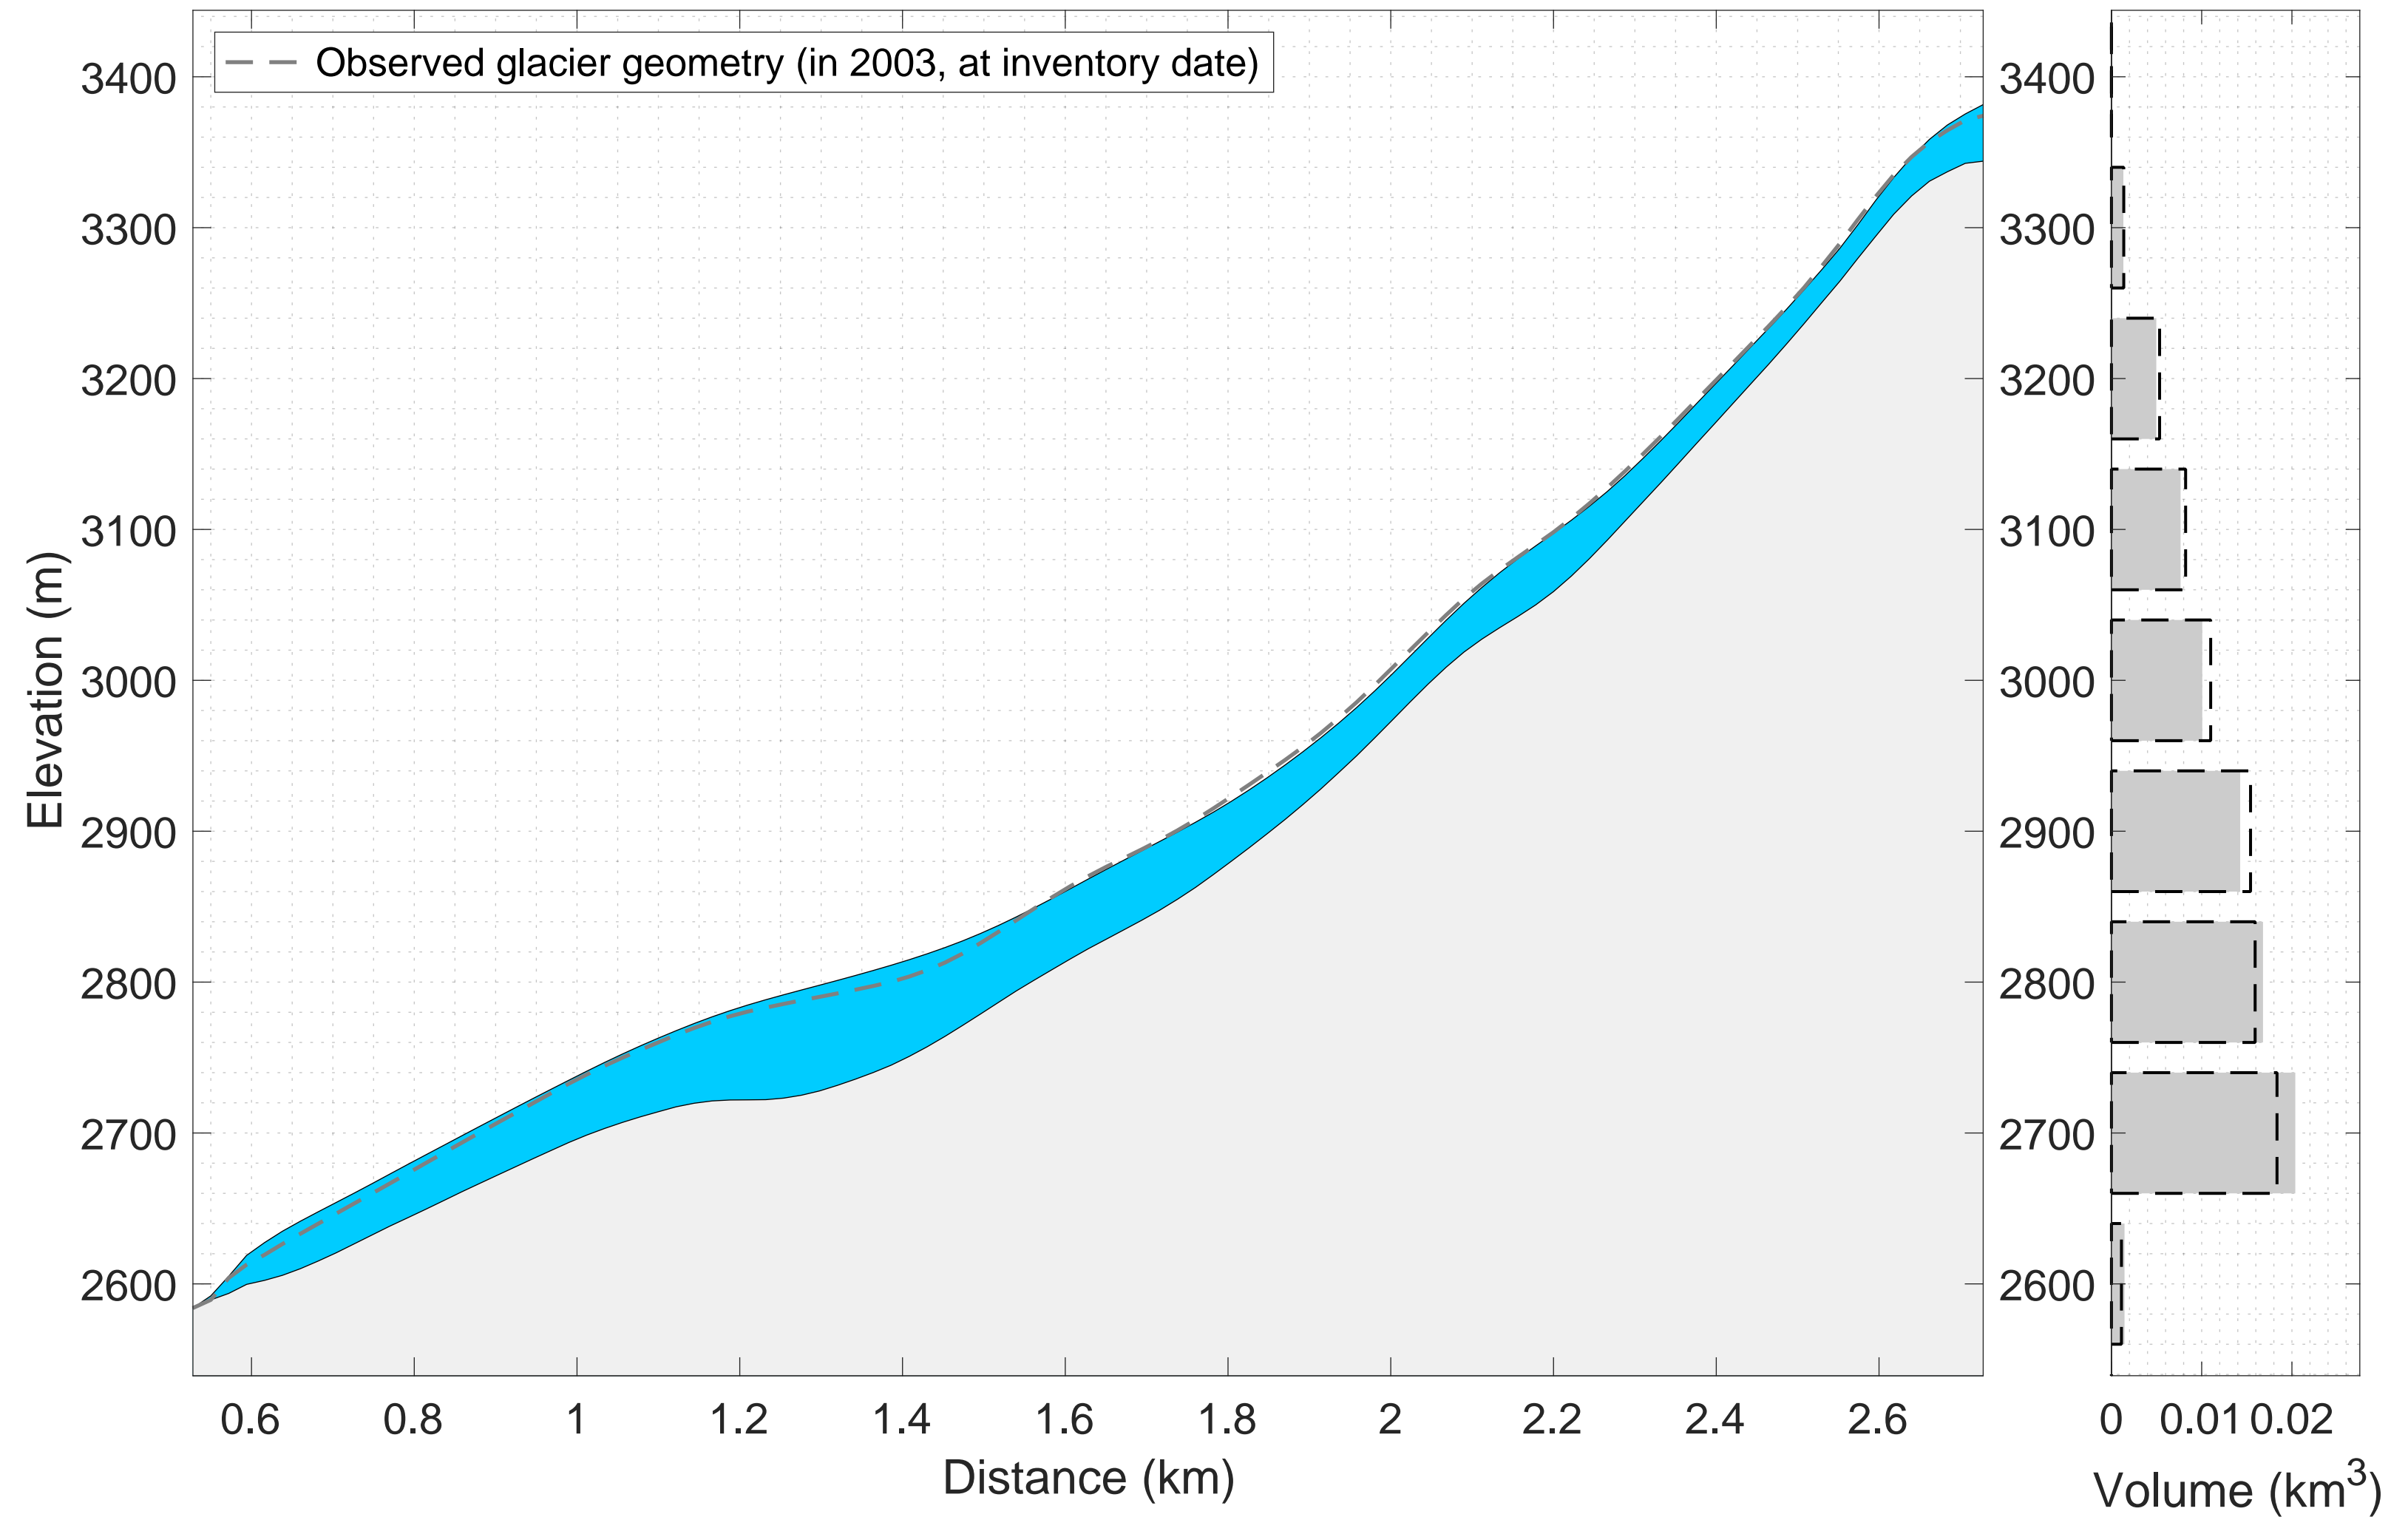

Supplement: Supplementary file 706 [file tc-13-1125-2019-supplement.zip]

**Modelled geometry (Glacier ID = 03081;  $A = 1.3987\text{e-}16 \text{ Pa}^{-3} \text{ a}^{-1}$ ;  $dx = 22 \text{ m}$ )**

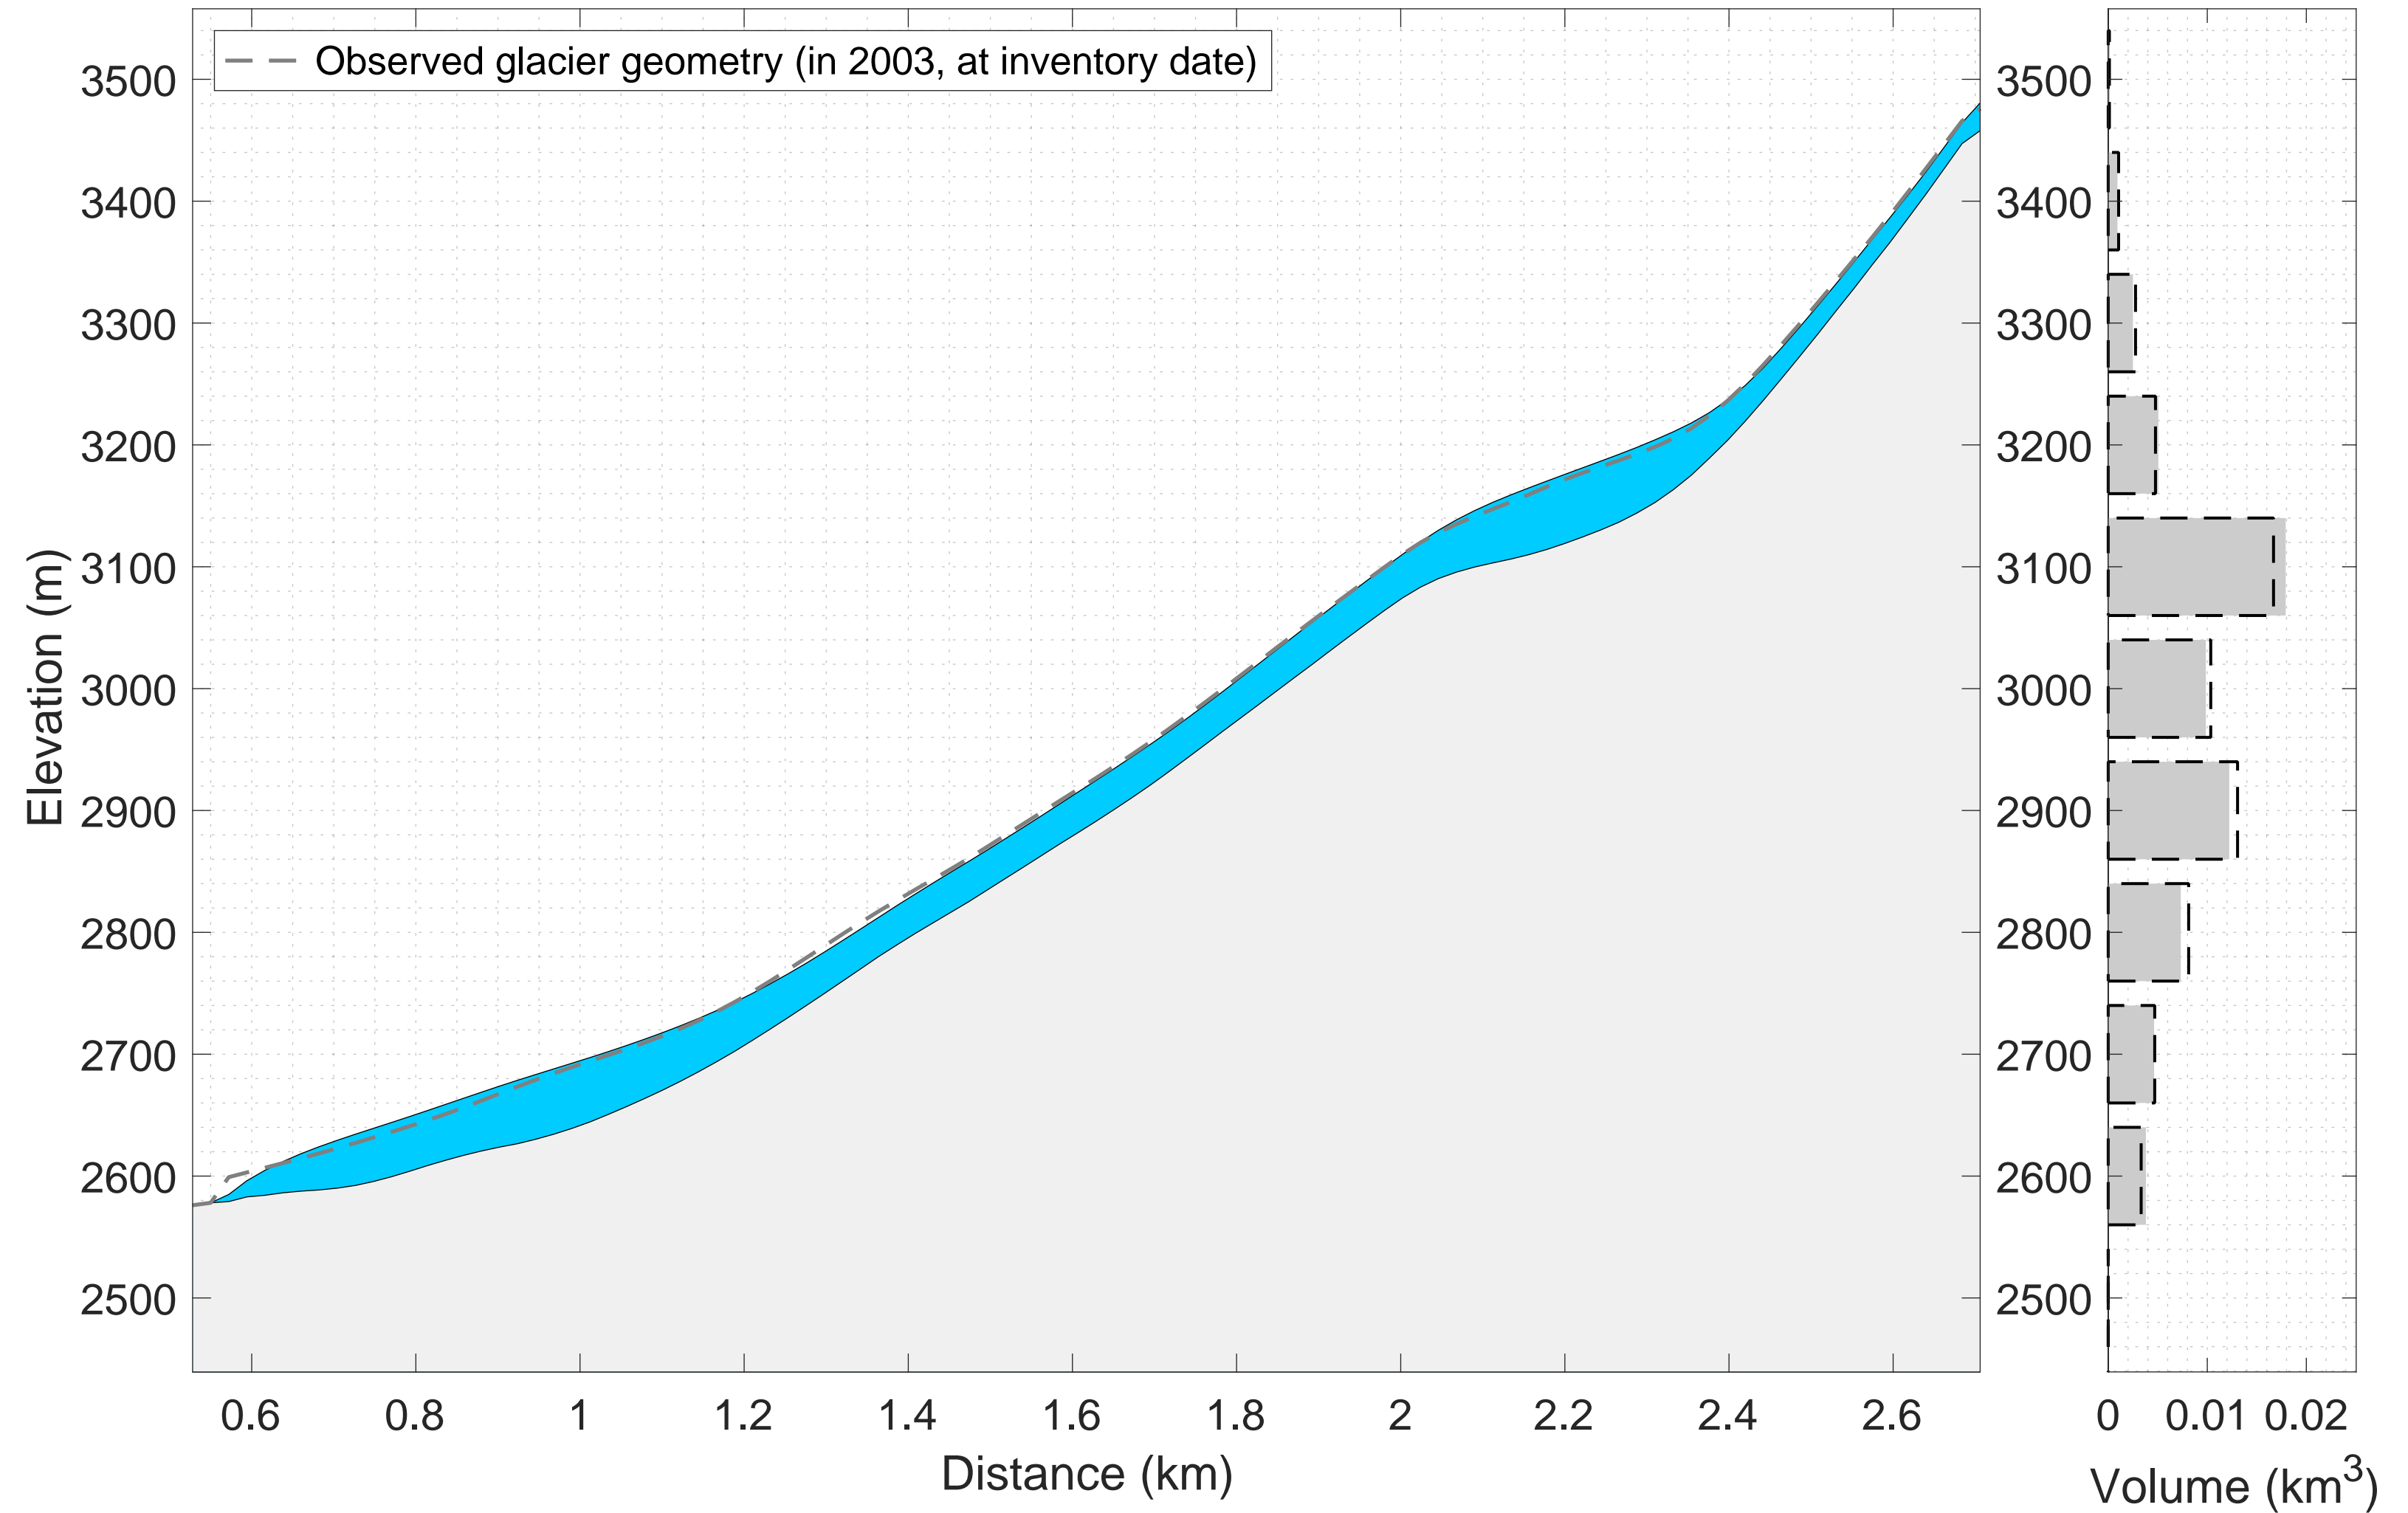

Supplement: Supplementary file 707 [file tc-13-1125-2019-supplement.zip]

**Modelled geometry (Glacier ID = 03558;  $A = 1.1787\text{e-}16 \text{ Pa}^{-3} \text{ a}^{-1}$ ;  $dx = 16 \text{ m}$ )**

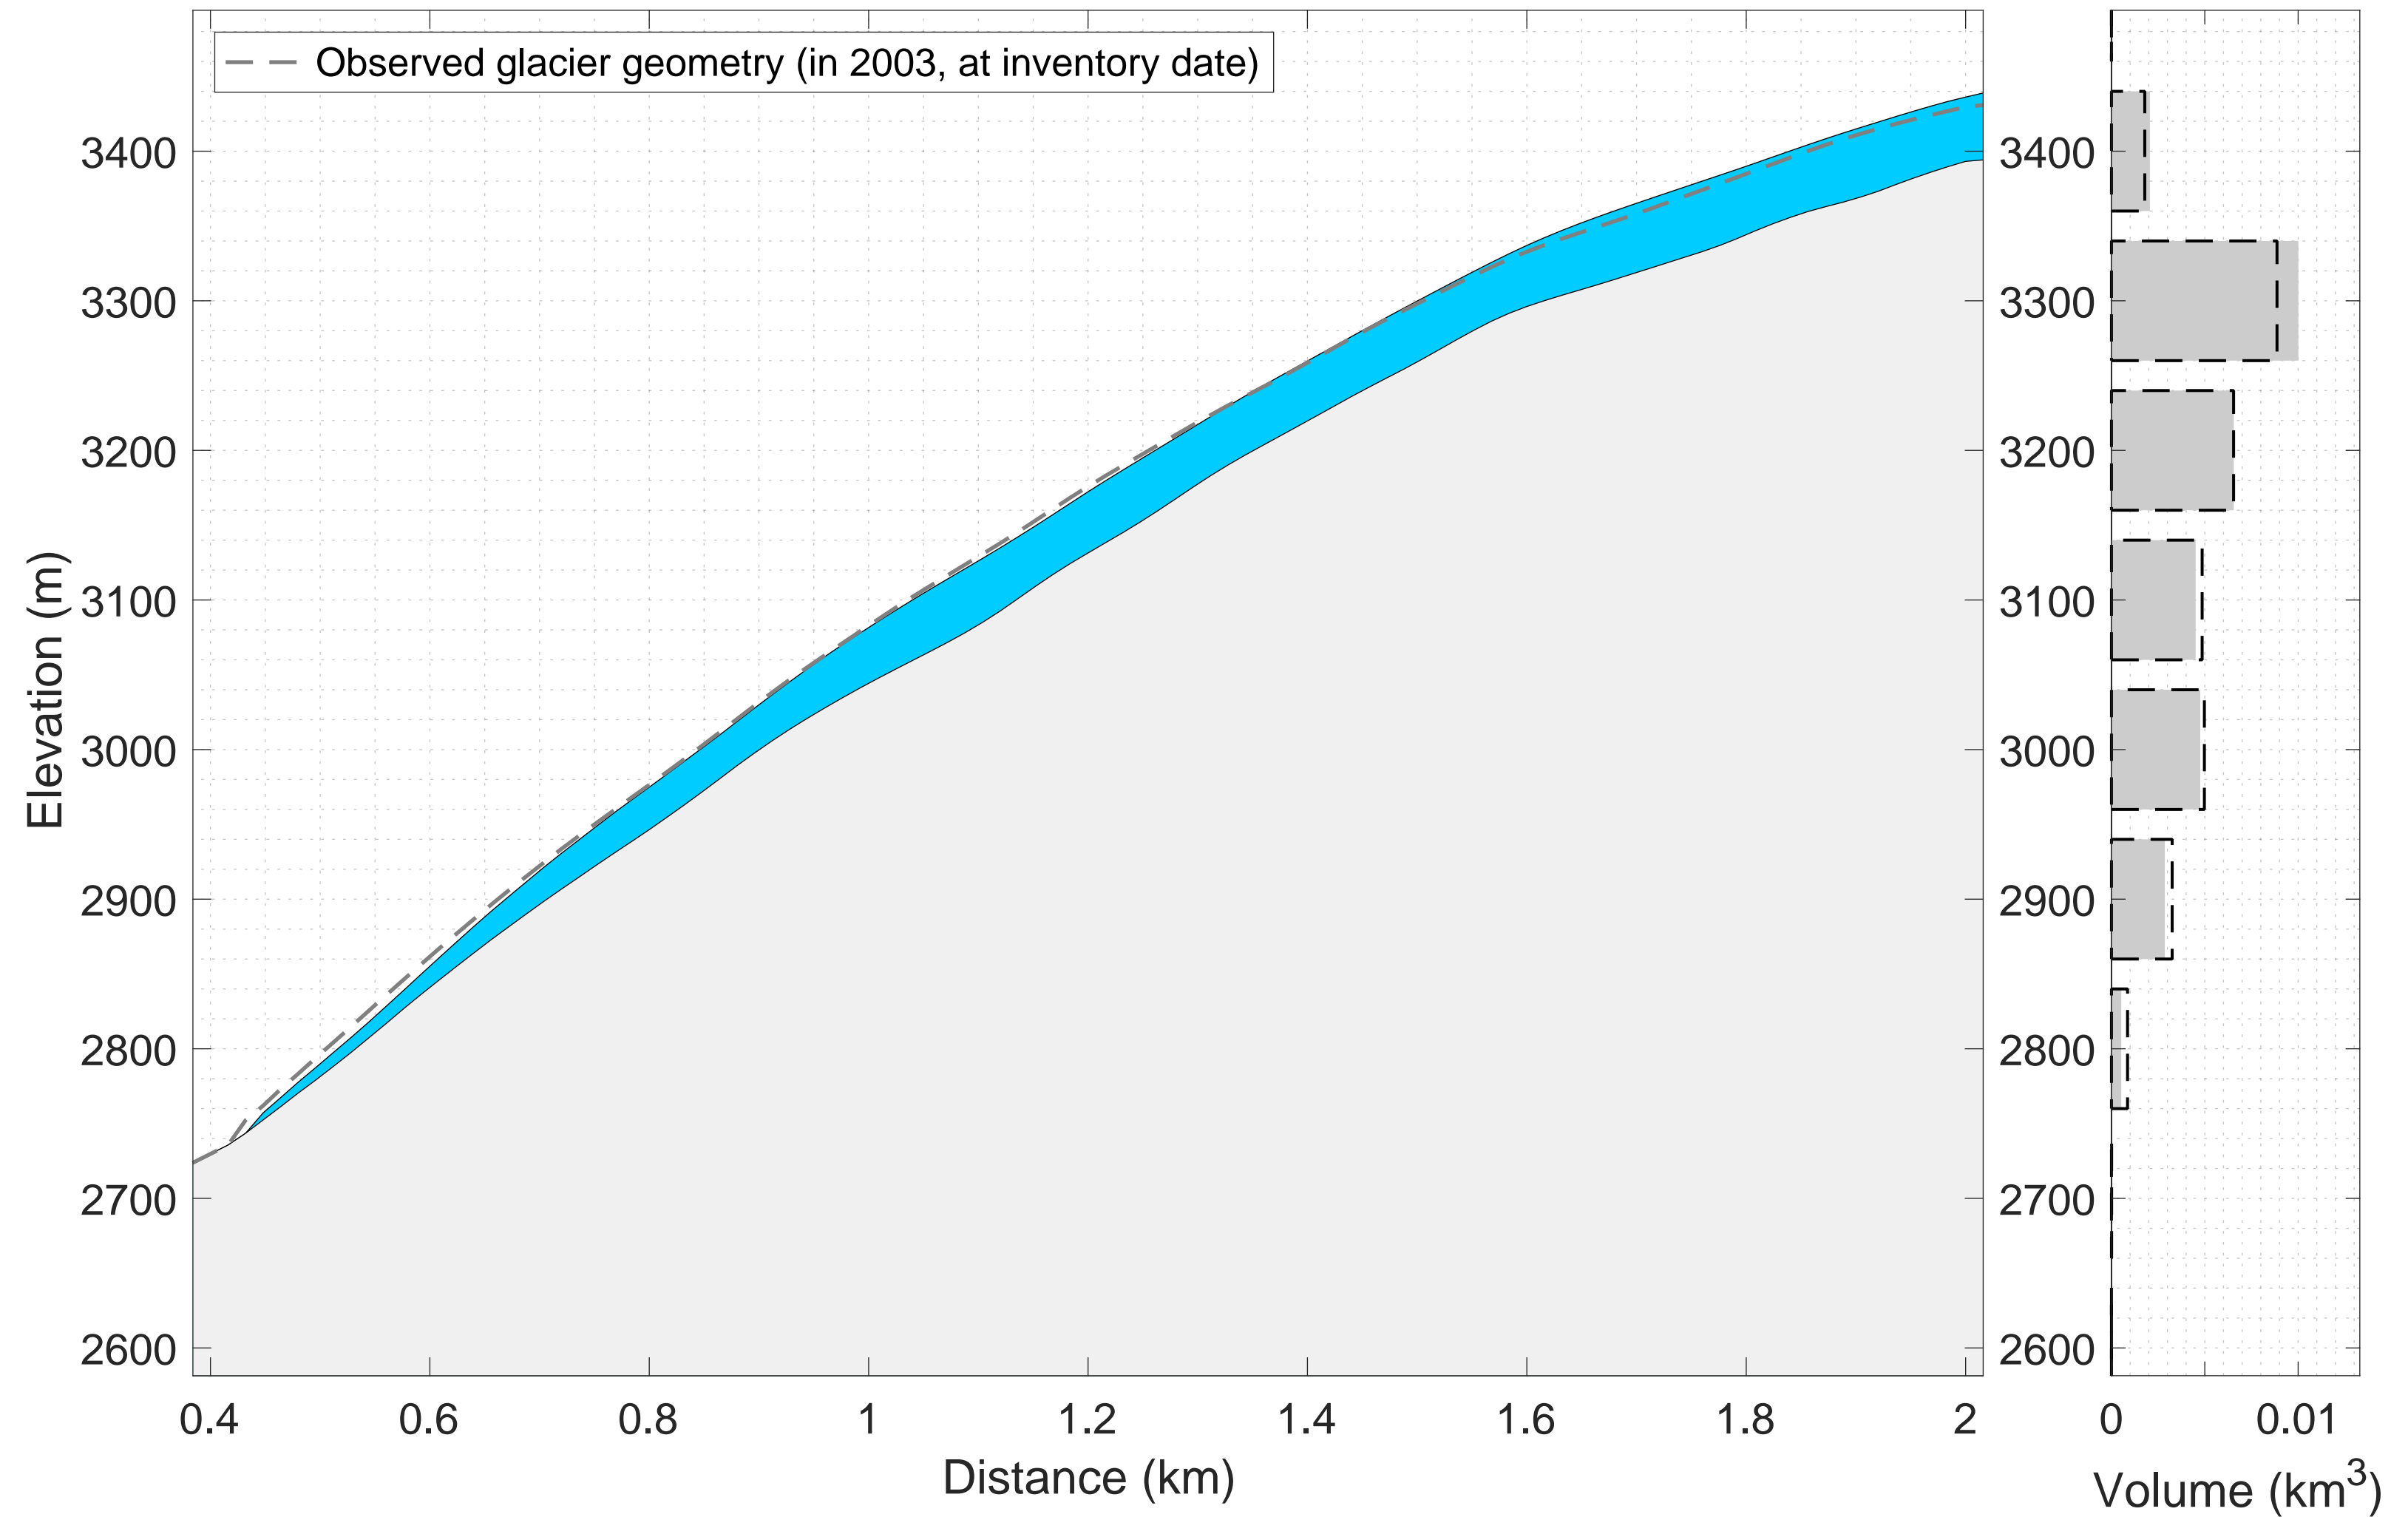

Supplement: Supplementary file 708 [file tc-13-1125-2019-supplement.zip]

**Modelled geometry (Glacier ID = 00695;  $A = 1.1294\text{e-}16 \text{ Pa}^{-3} \text{ a}^{-1}$ ;  $dx = 13 \text{ m}$ )**

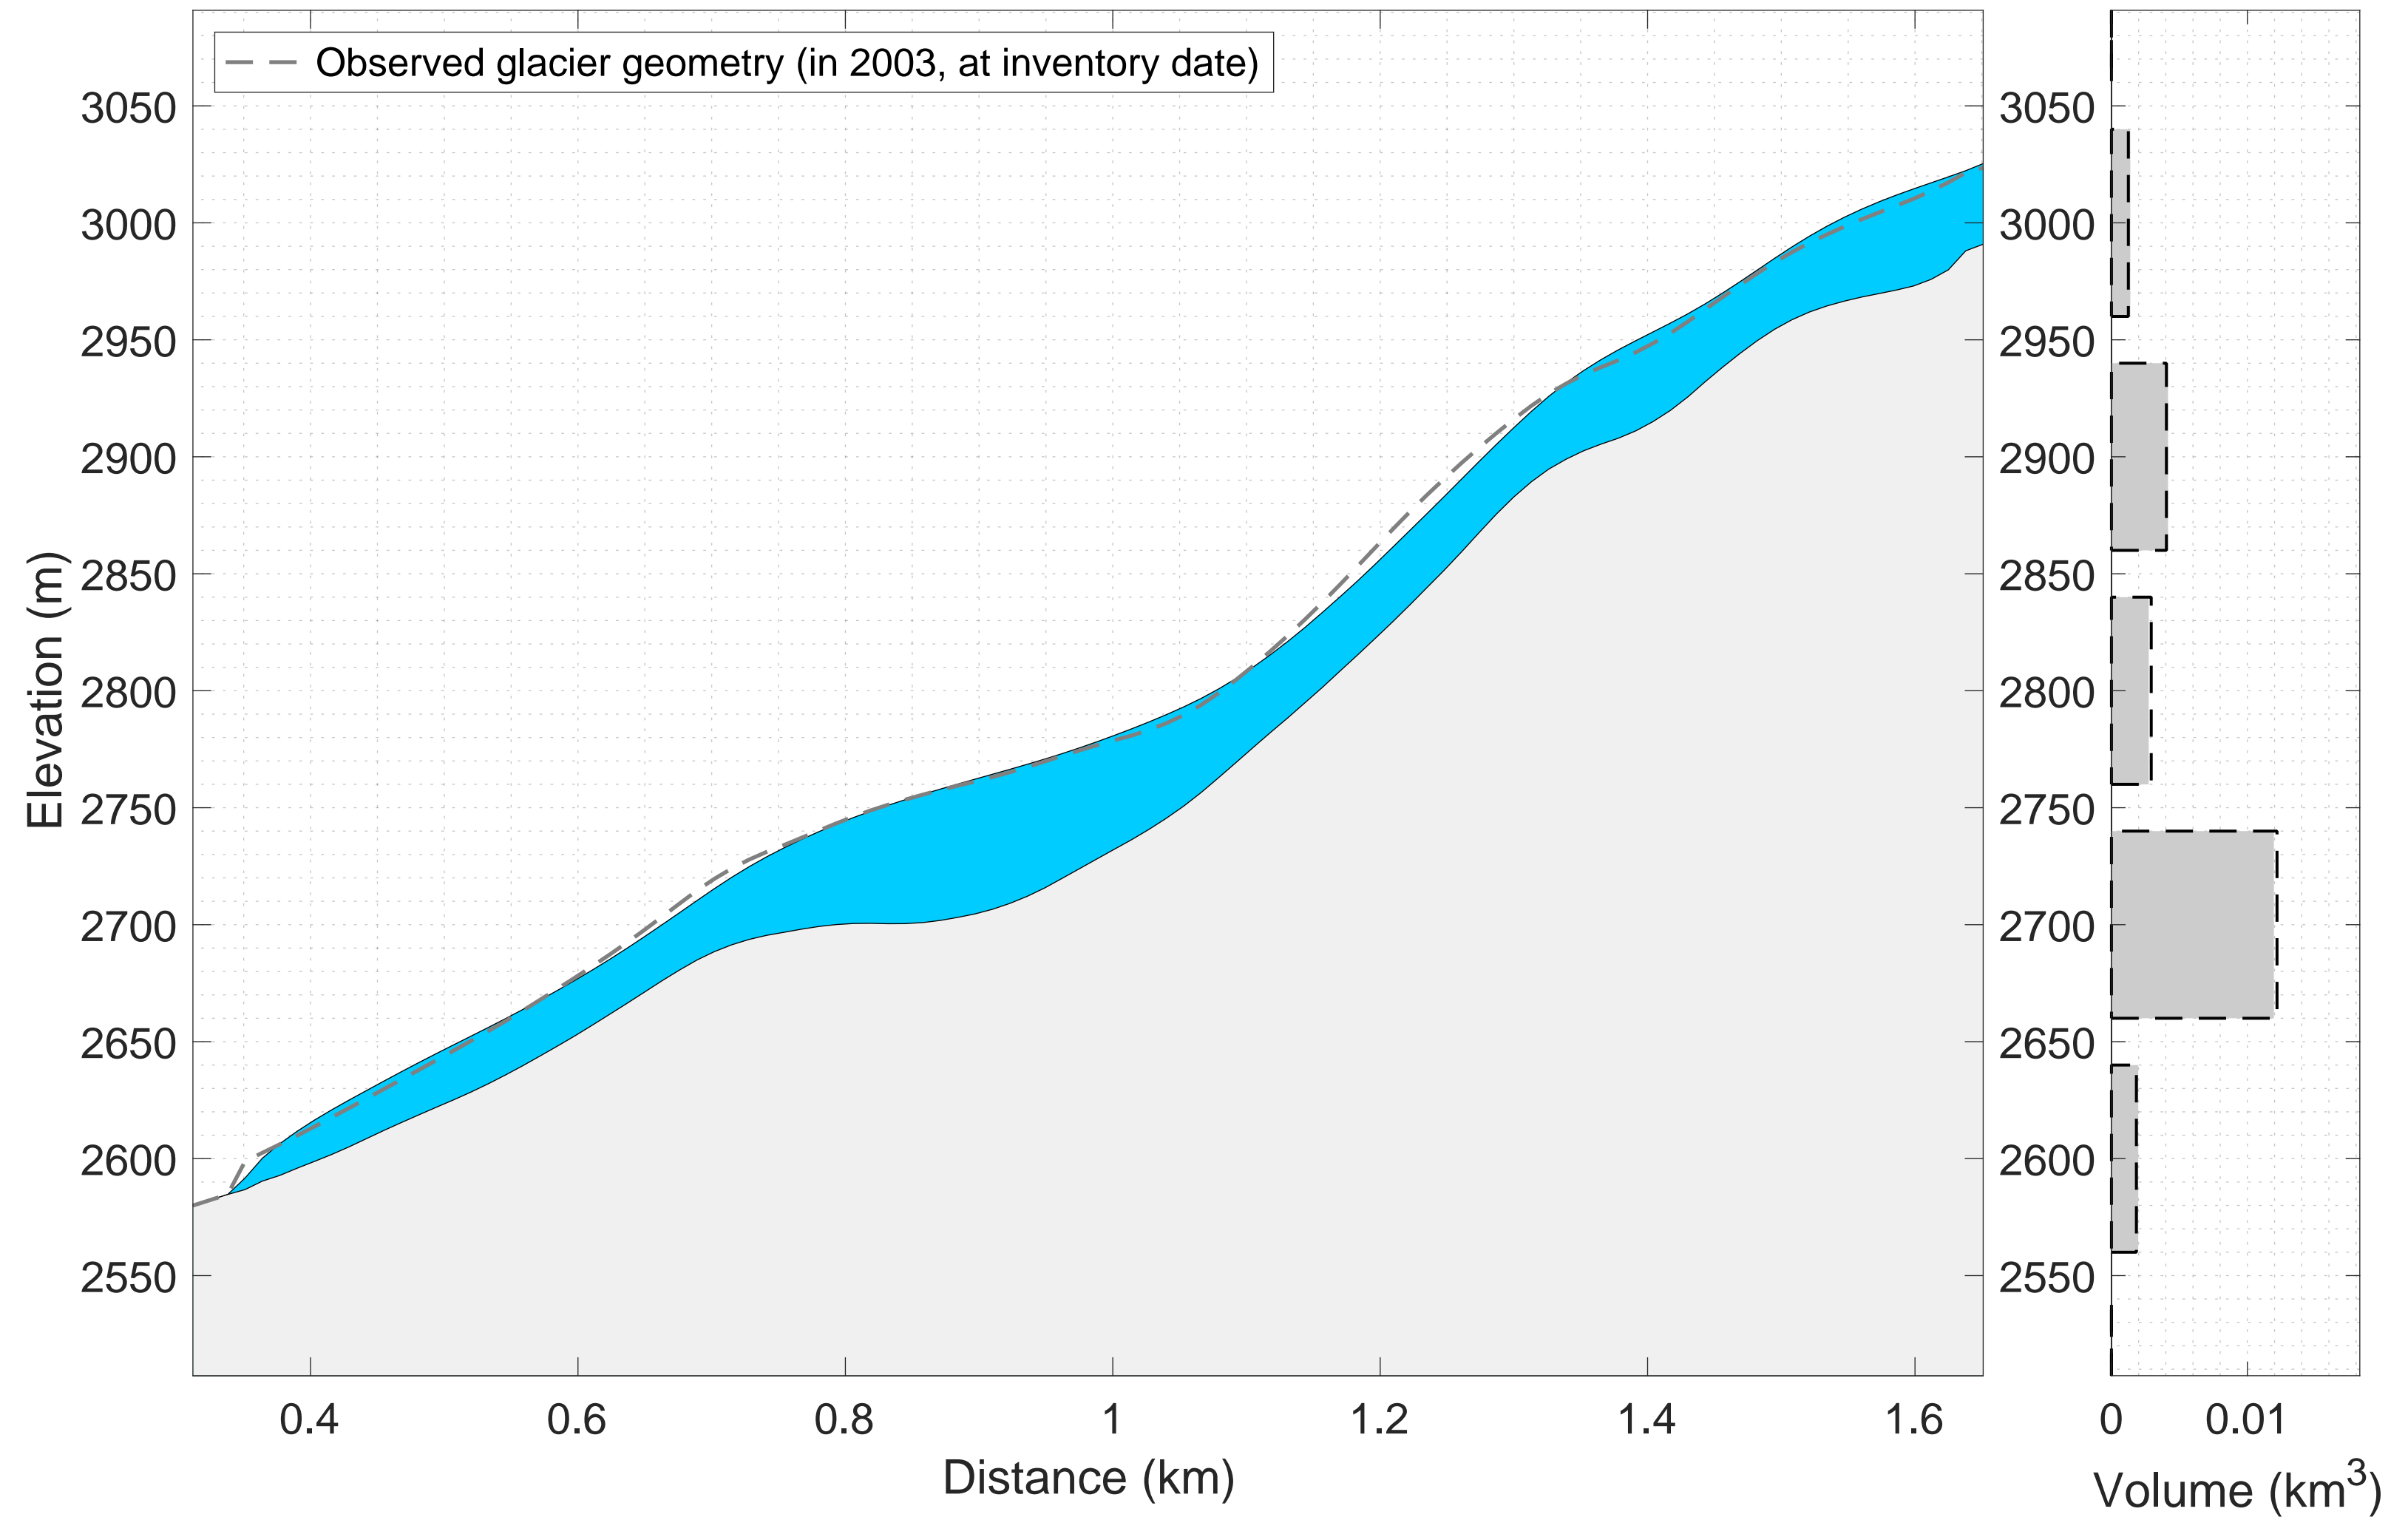

Supplement: Supplementary file 709 [file tc-13-1125-2019-supplement.zip]

**Modelled geometry (Glacier ID = 01974;  $A = 1.3145\text{e-}16 \text{ Pa}^{-3} \text{ a}^{-1}$ ;  $dx = 47 \text{ m}$ )**

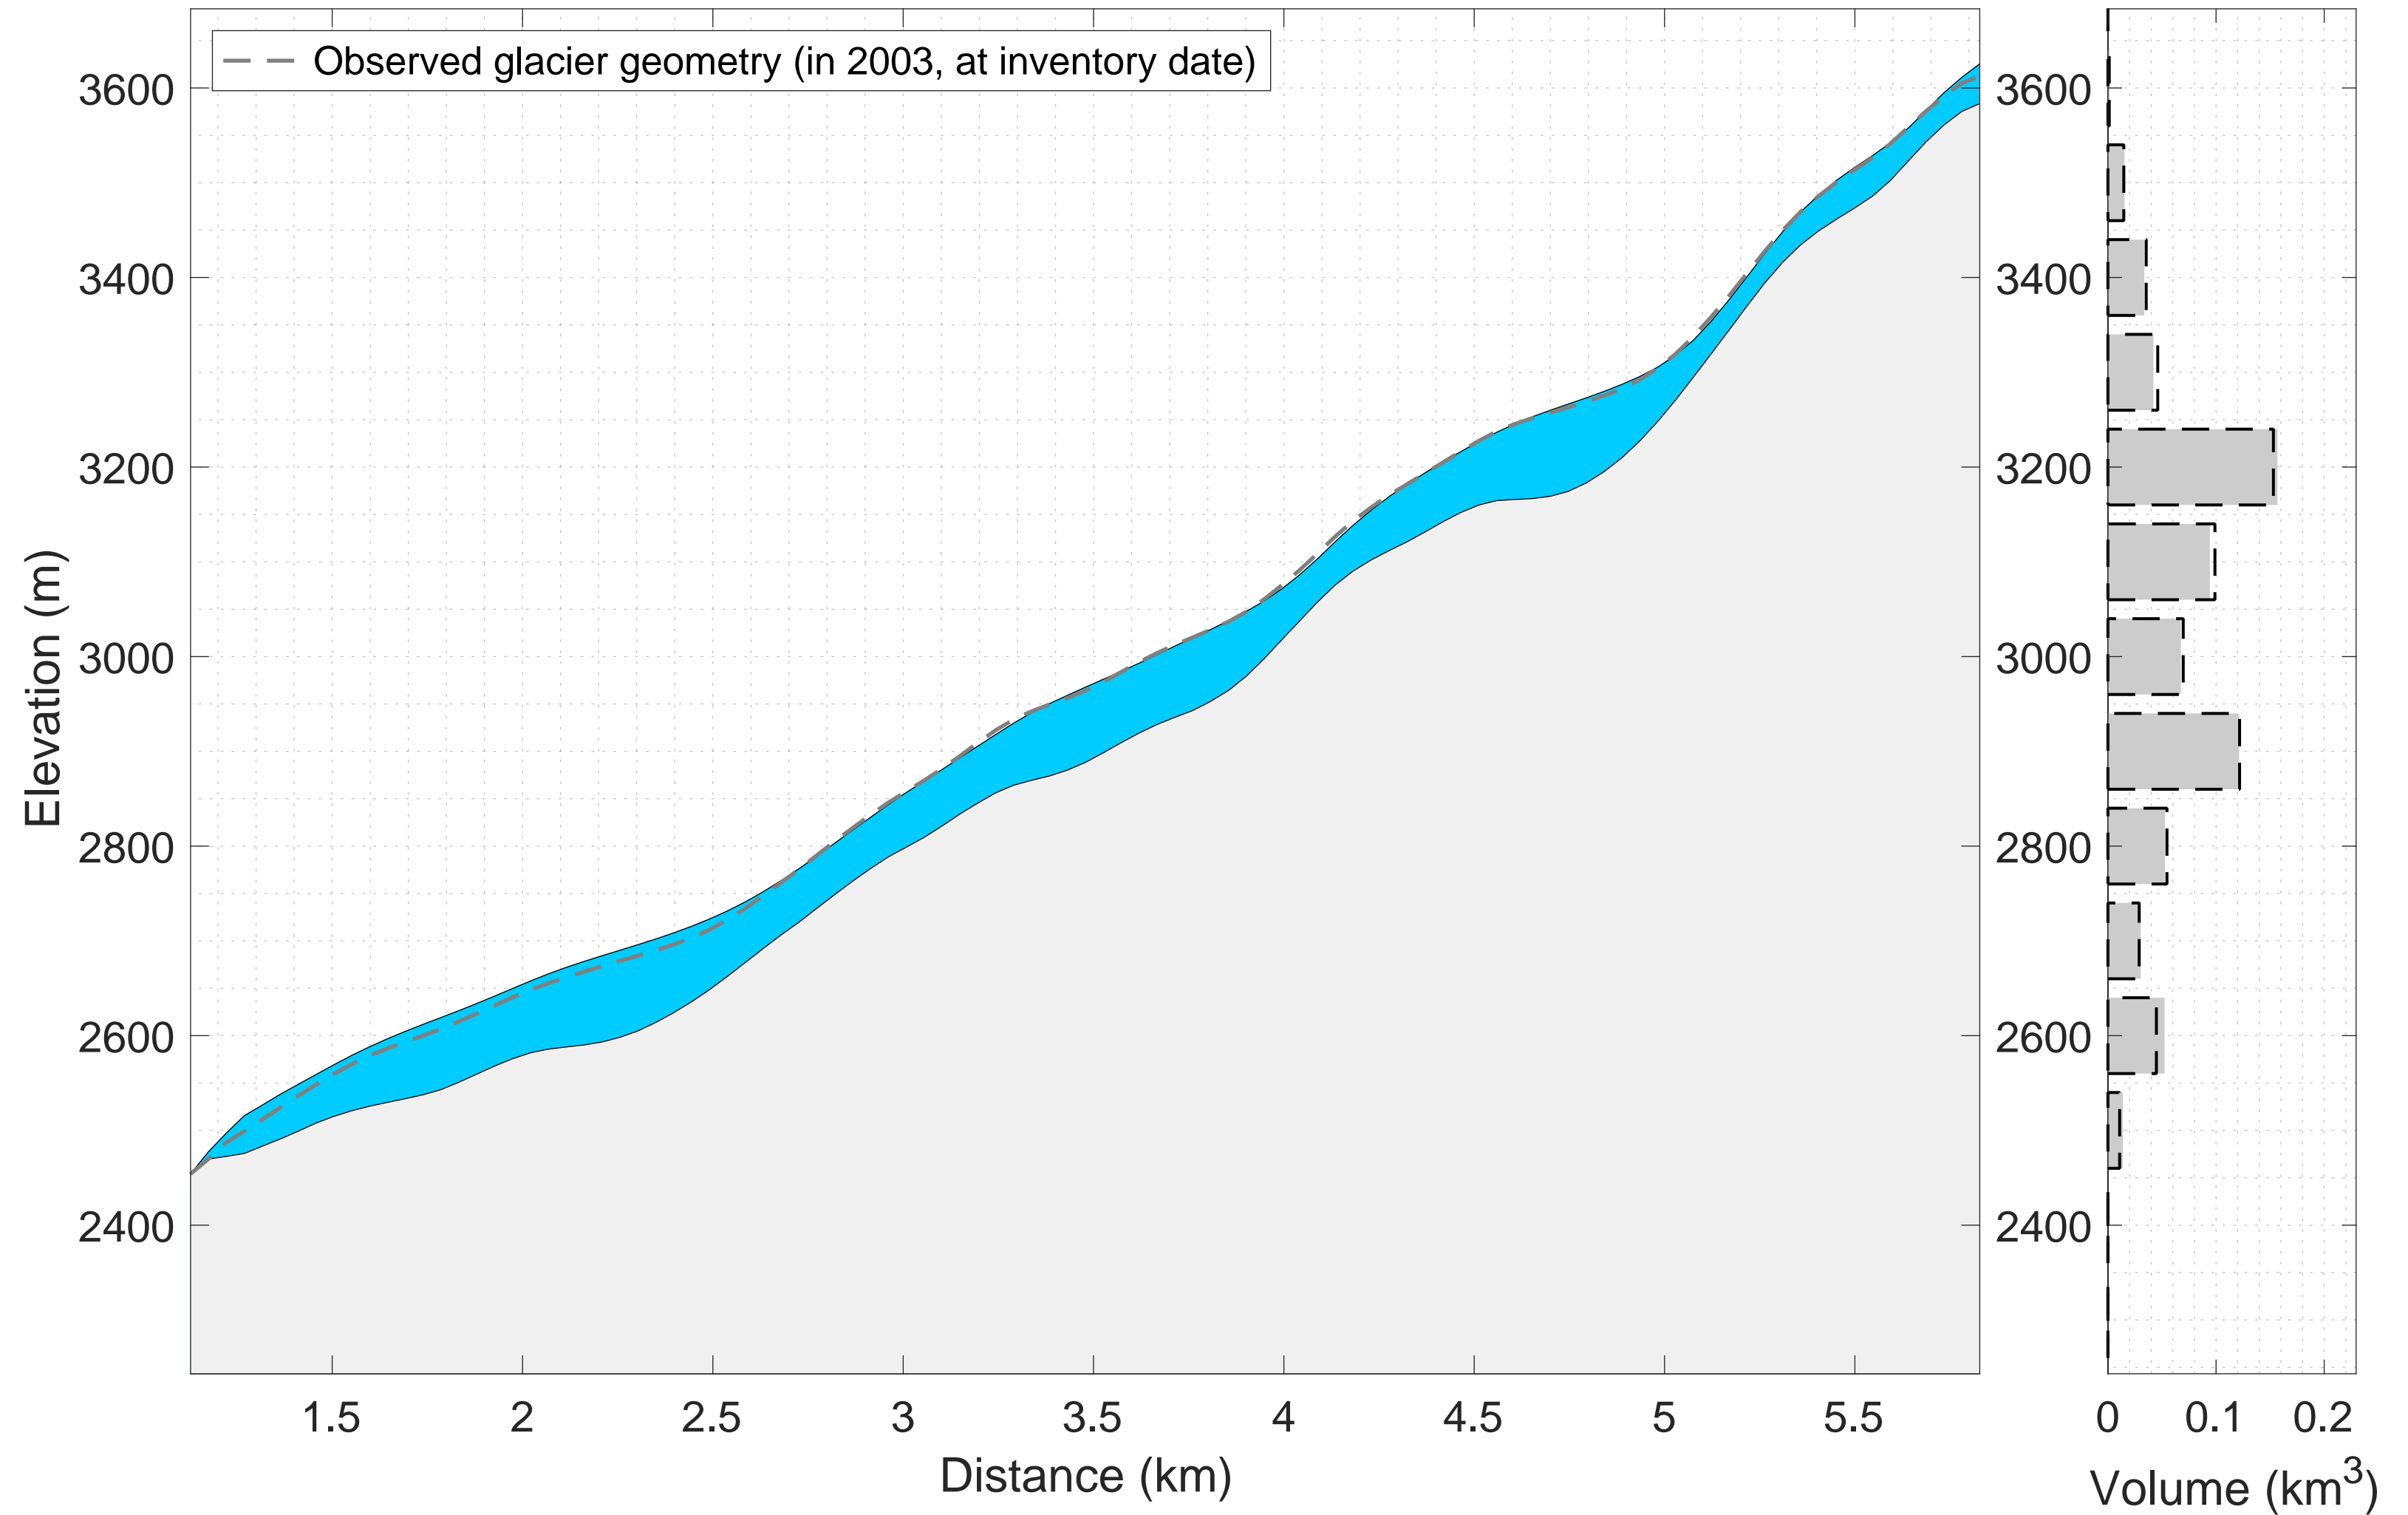

Supplement: Supplementary file 710 [file tc-13-1125-2019-supplement.zip]

**Modelled geometry (Glacier ID = 00833;  $A = 1.3098\text{e-}16 \text{ Pa}^{-3} \text{ a}^{-1}$ ;  $dx = 16 \text{ m}$ )**

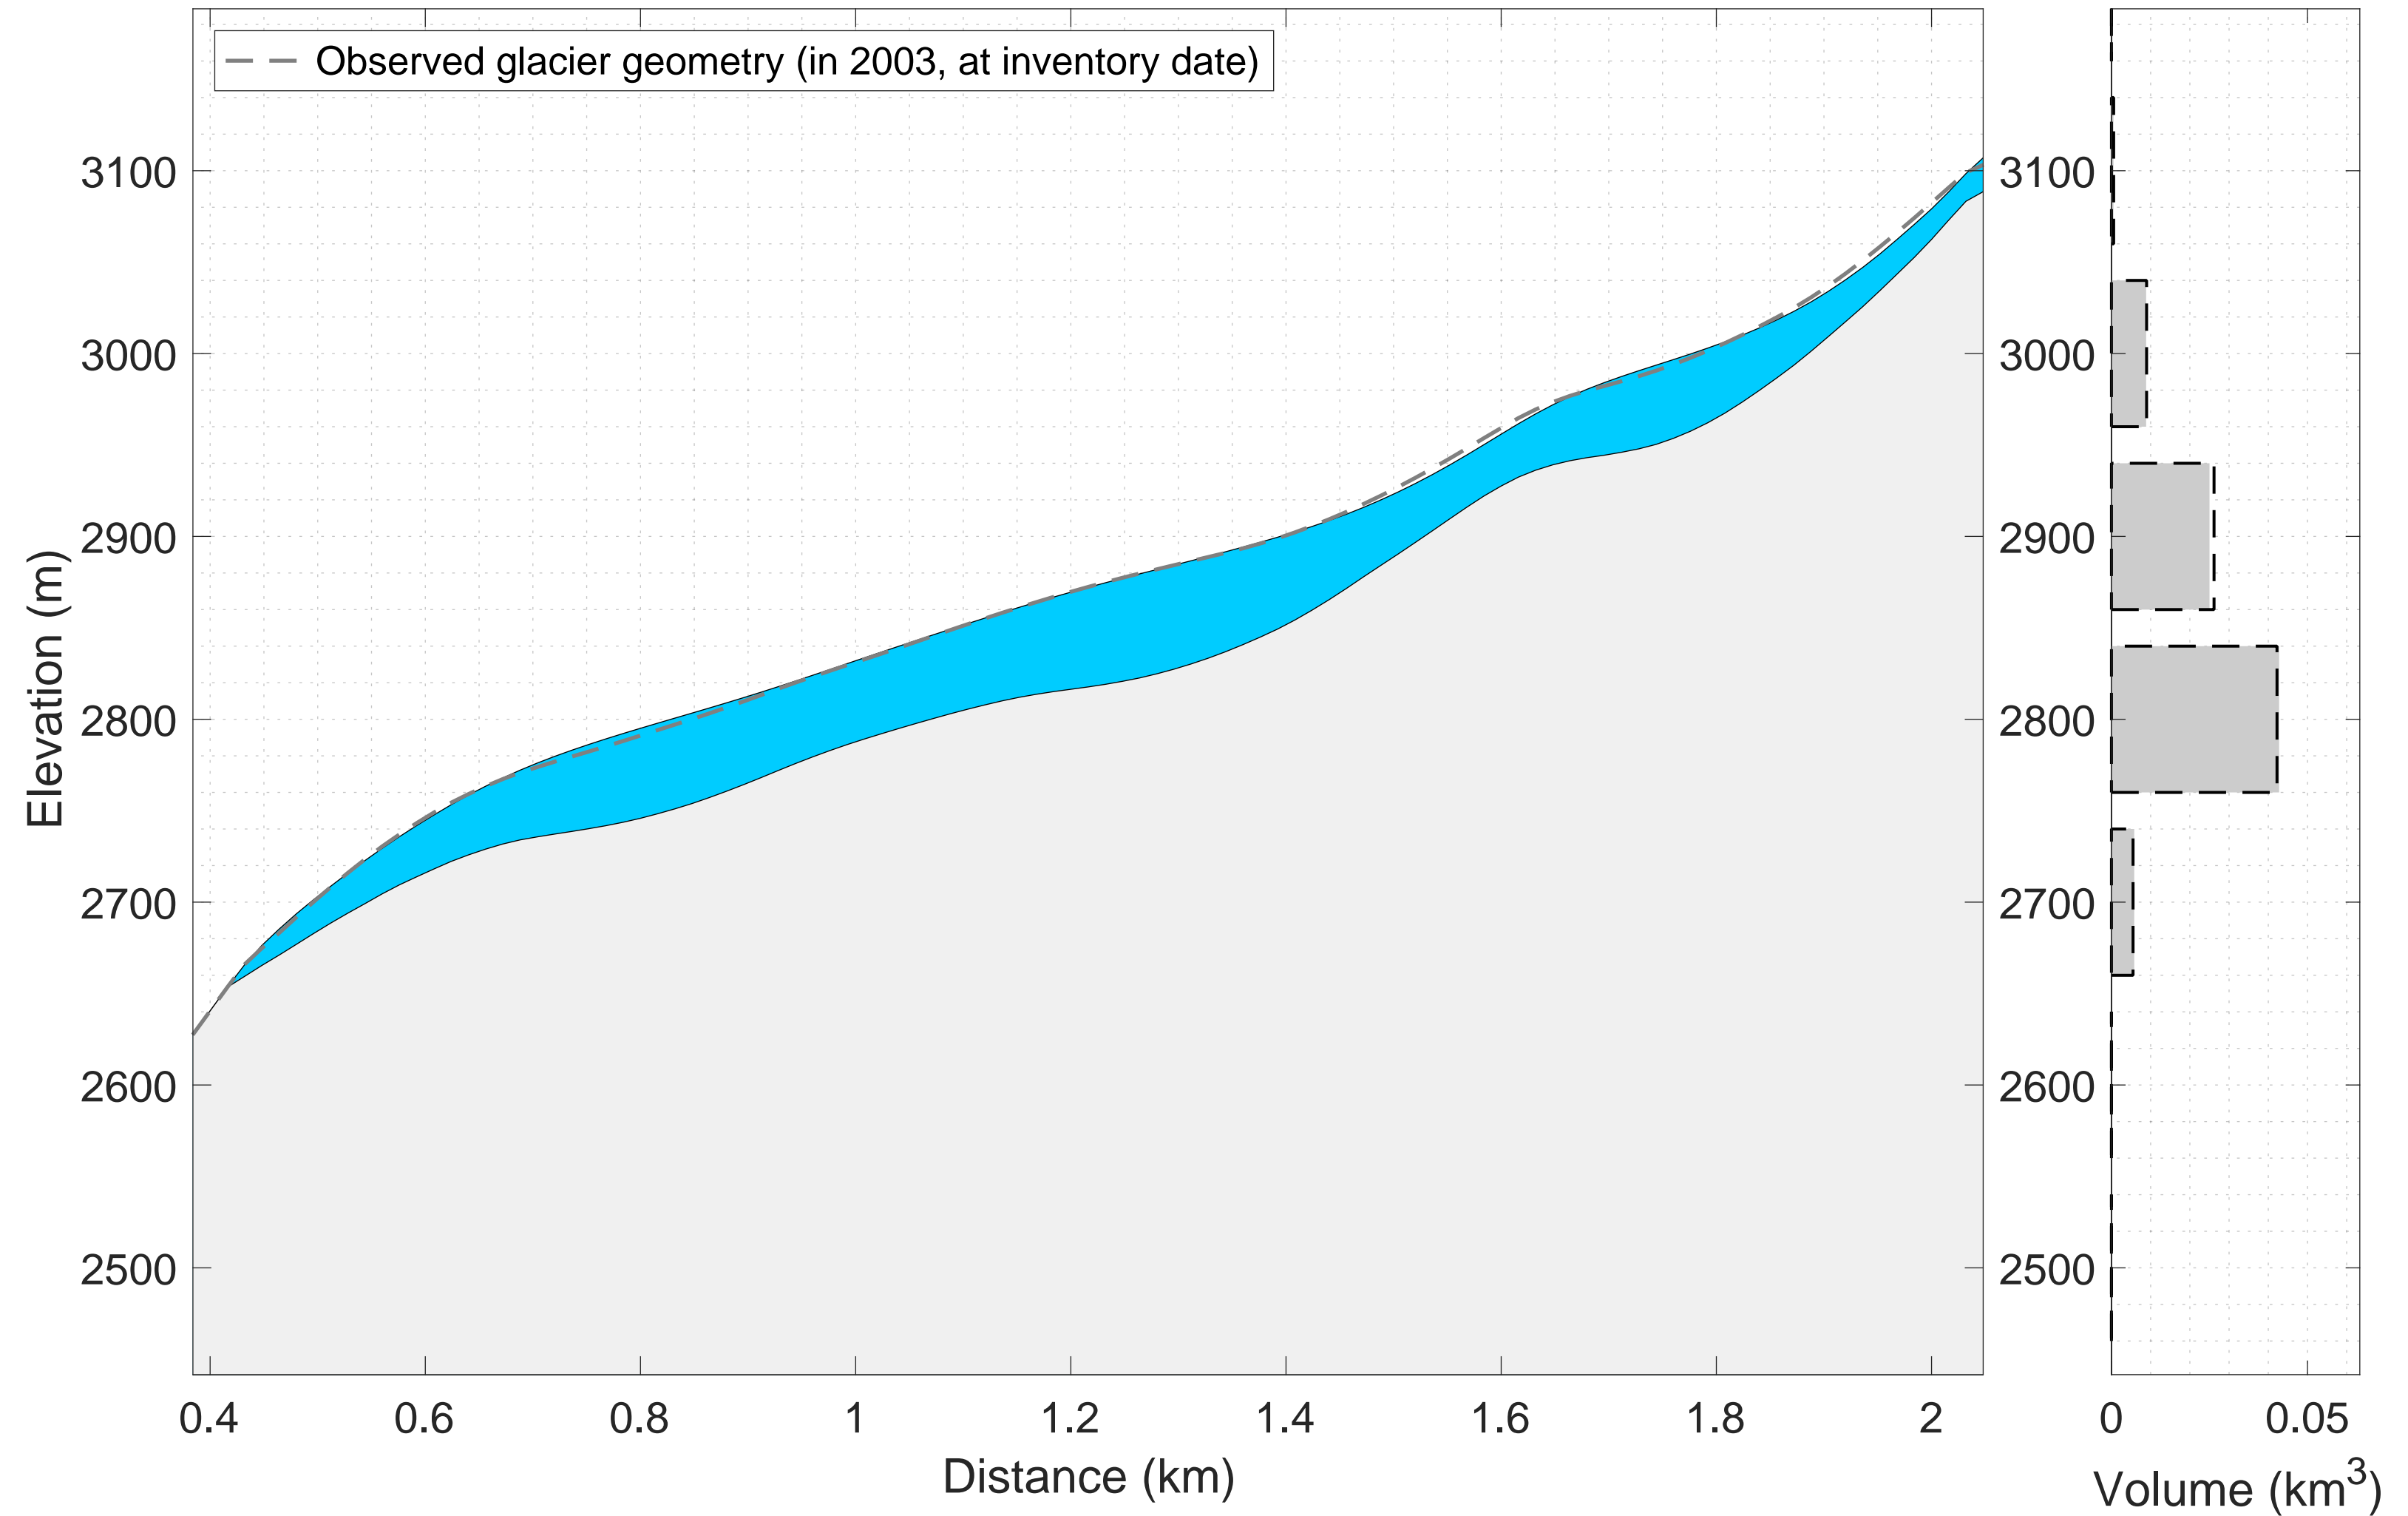

Supplement: Supplementary file 711 [file tc-13-1125-2019-supplement.zip]

**Modelled geometry (Glacier ID = 03389;  $A = 1.8958\text{e-}16 \text{ Pa}^{-3} \text{ a}^{-1}$ ;  $dx = 16 \text{ m}$ )**

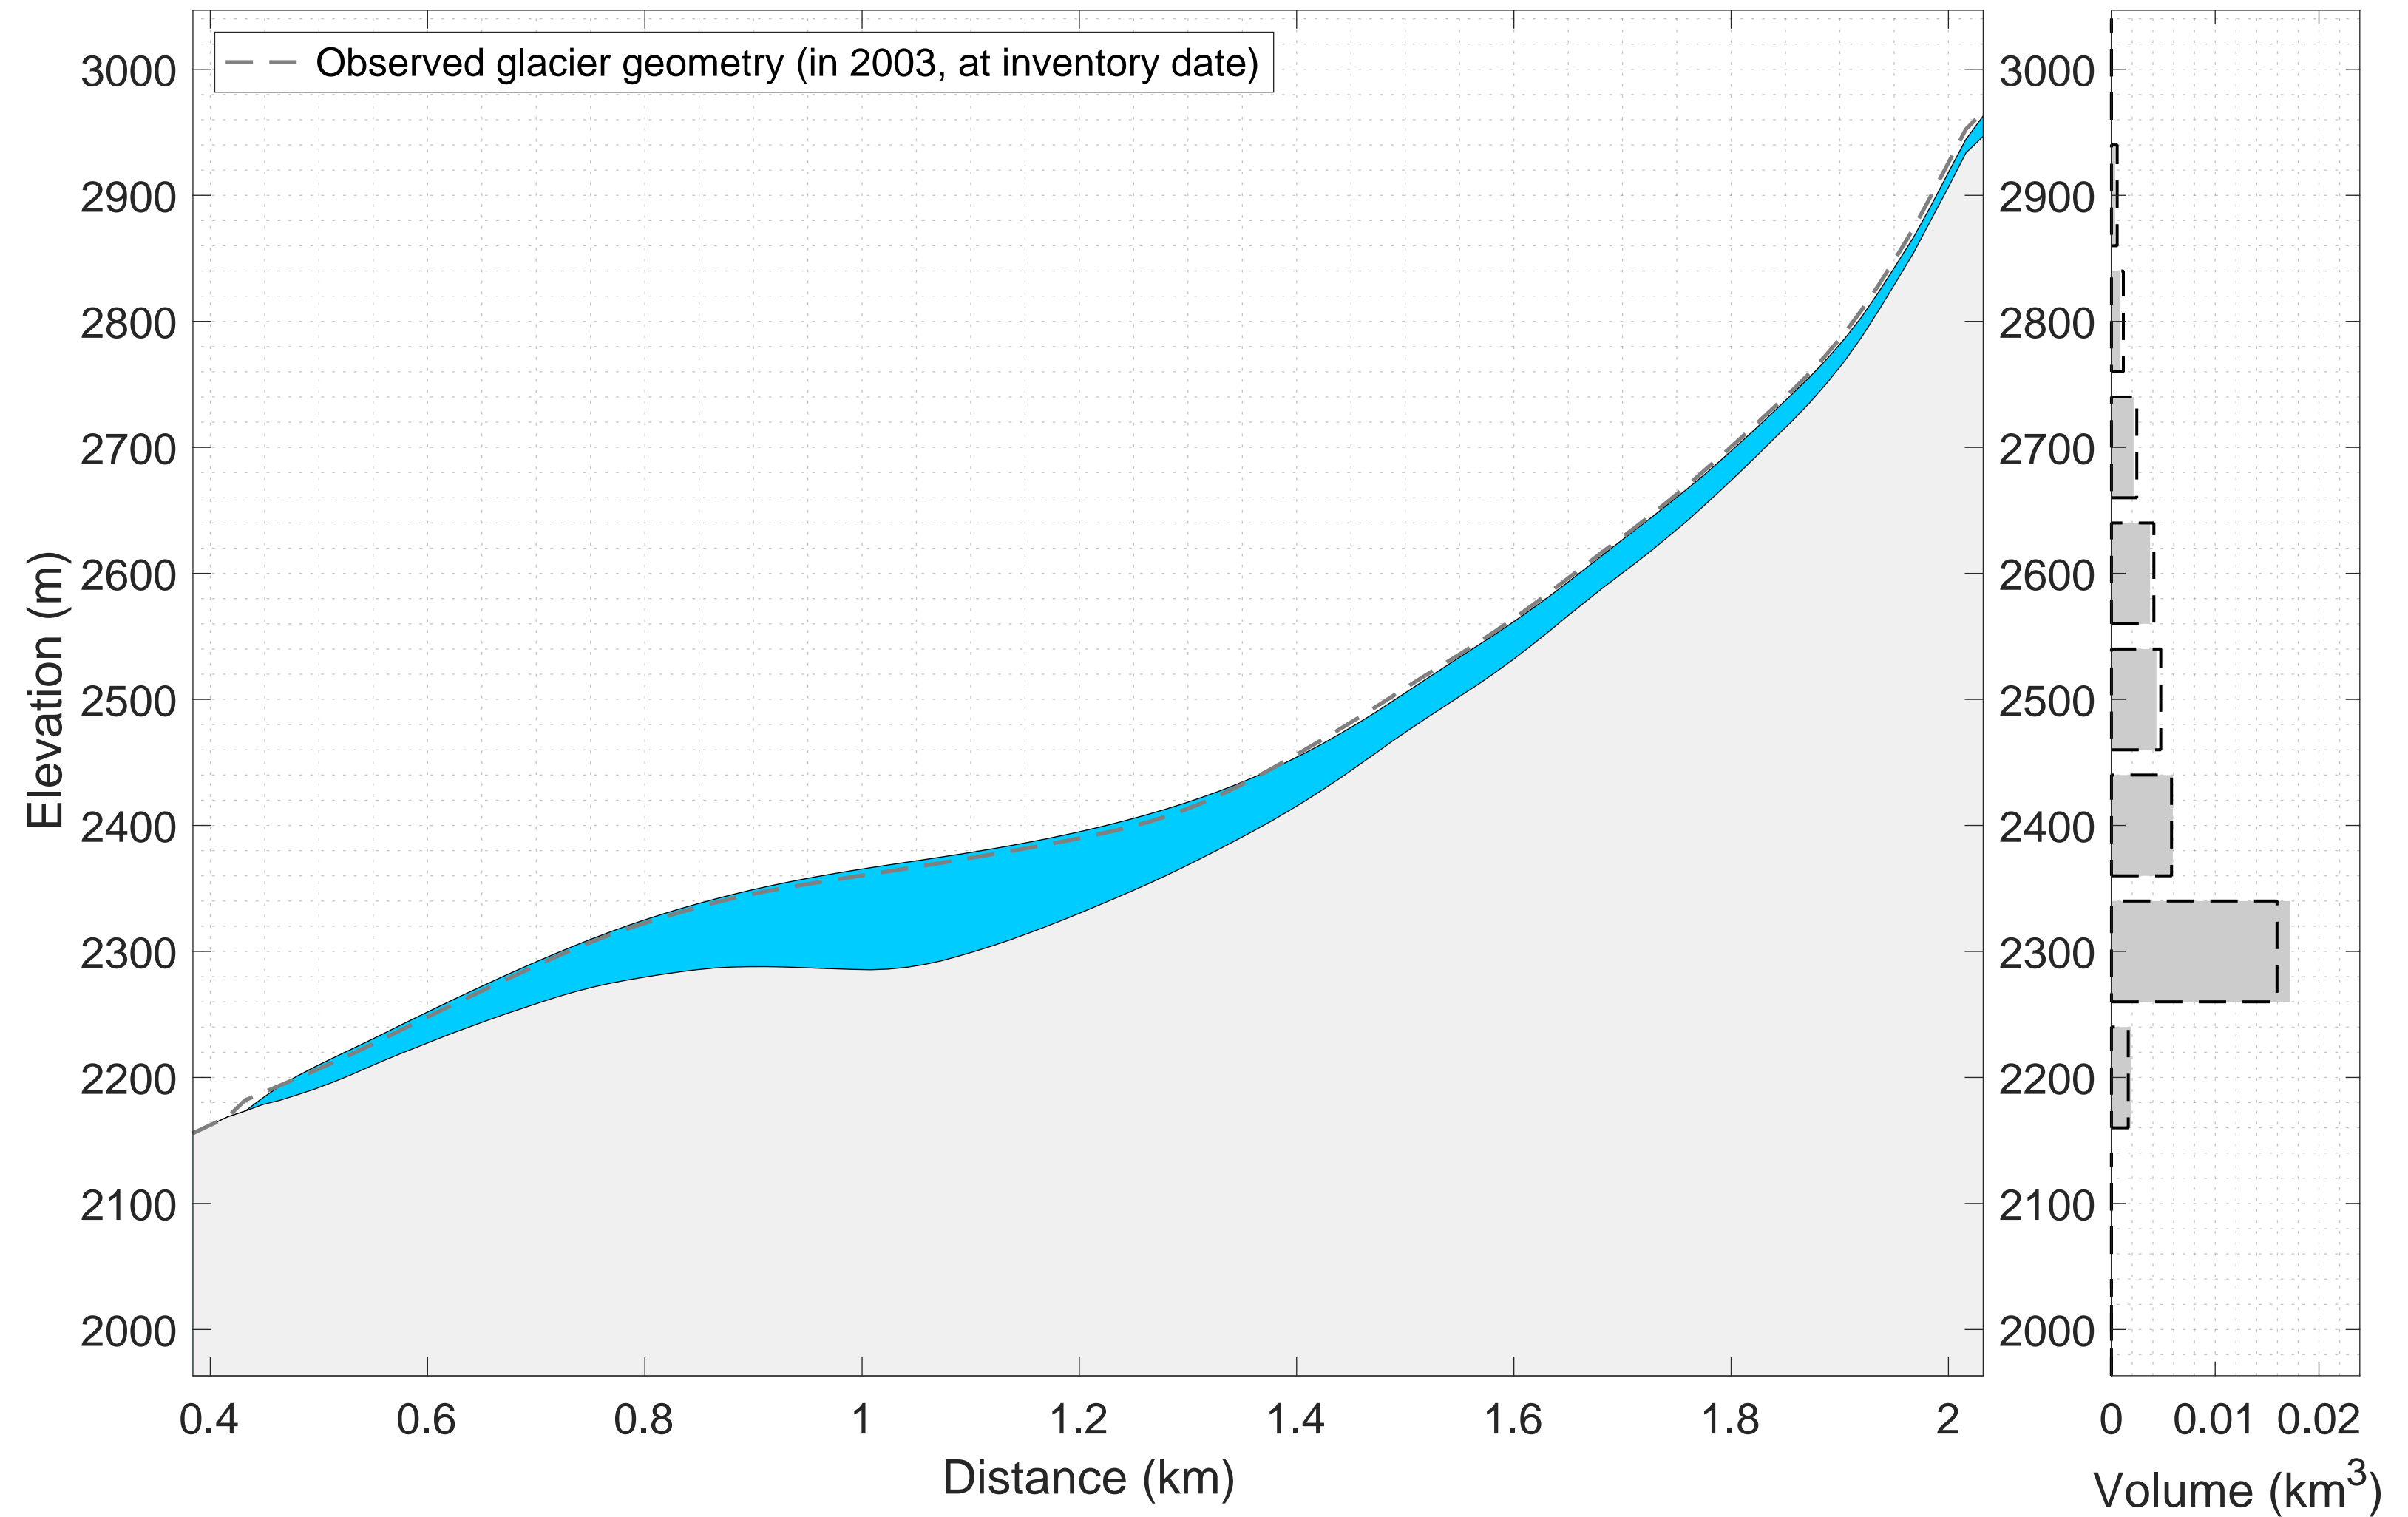

Supplement: Supplementary file 712 [file tc-13-1125-2019-supplement.zip]

**Modelled geometry (Glacier ID = 02534;  $A = 2.363\text{e-}16 \text{ Pa}^{-3} \text{ a}^{-1}$ ;  $dx = 18 \text{ m}$ )**

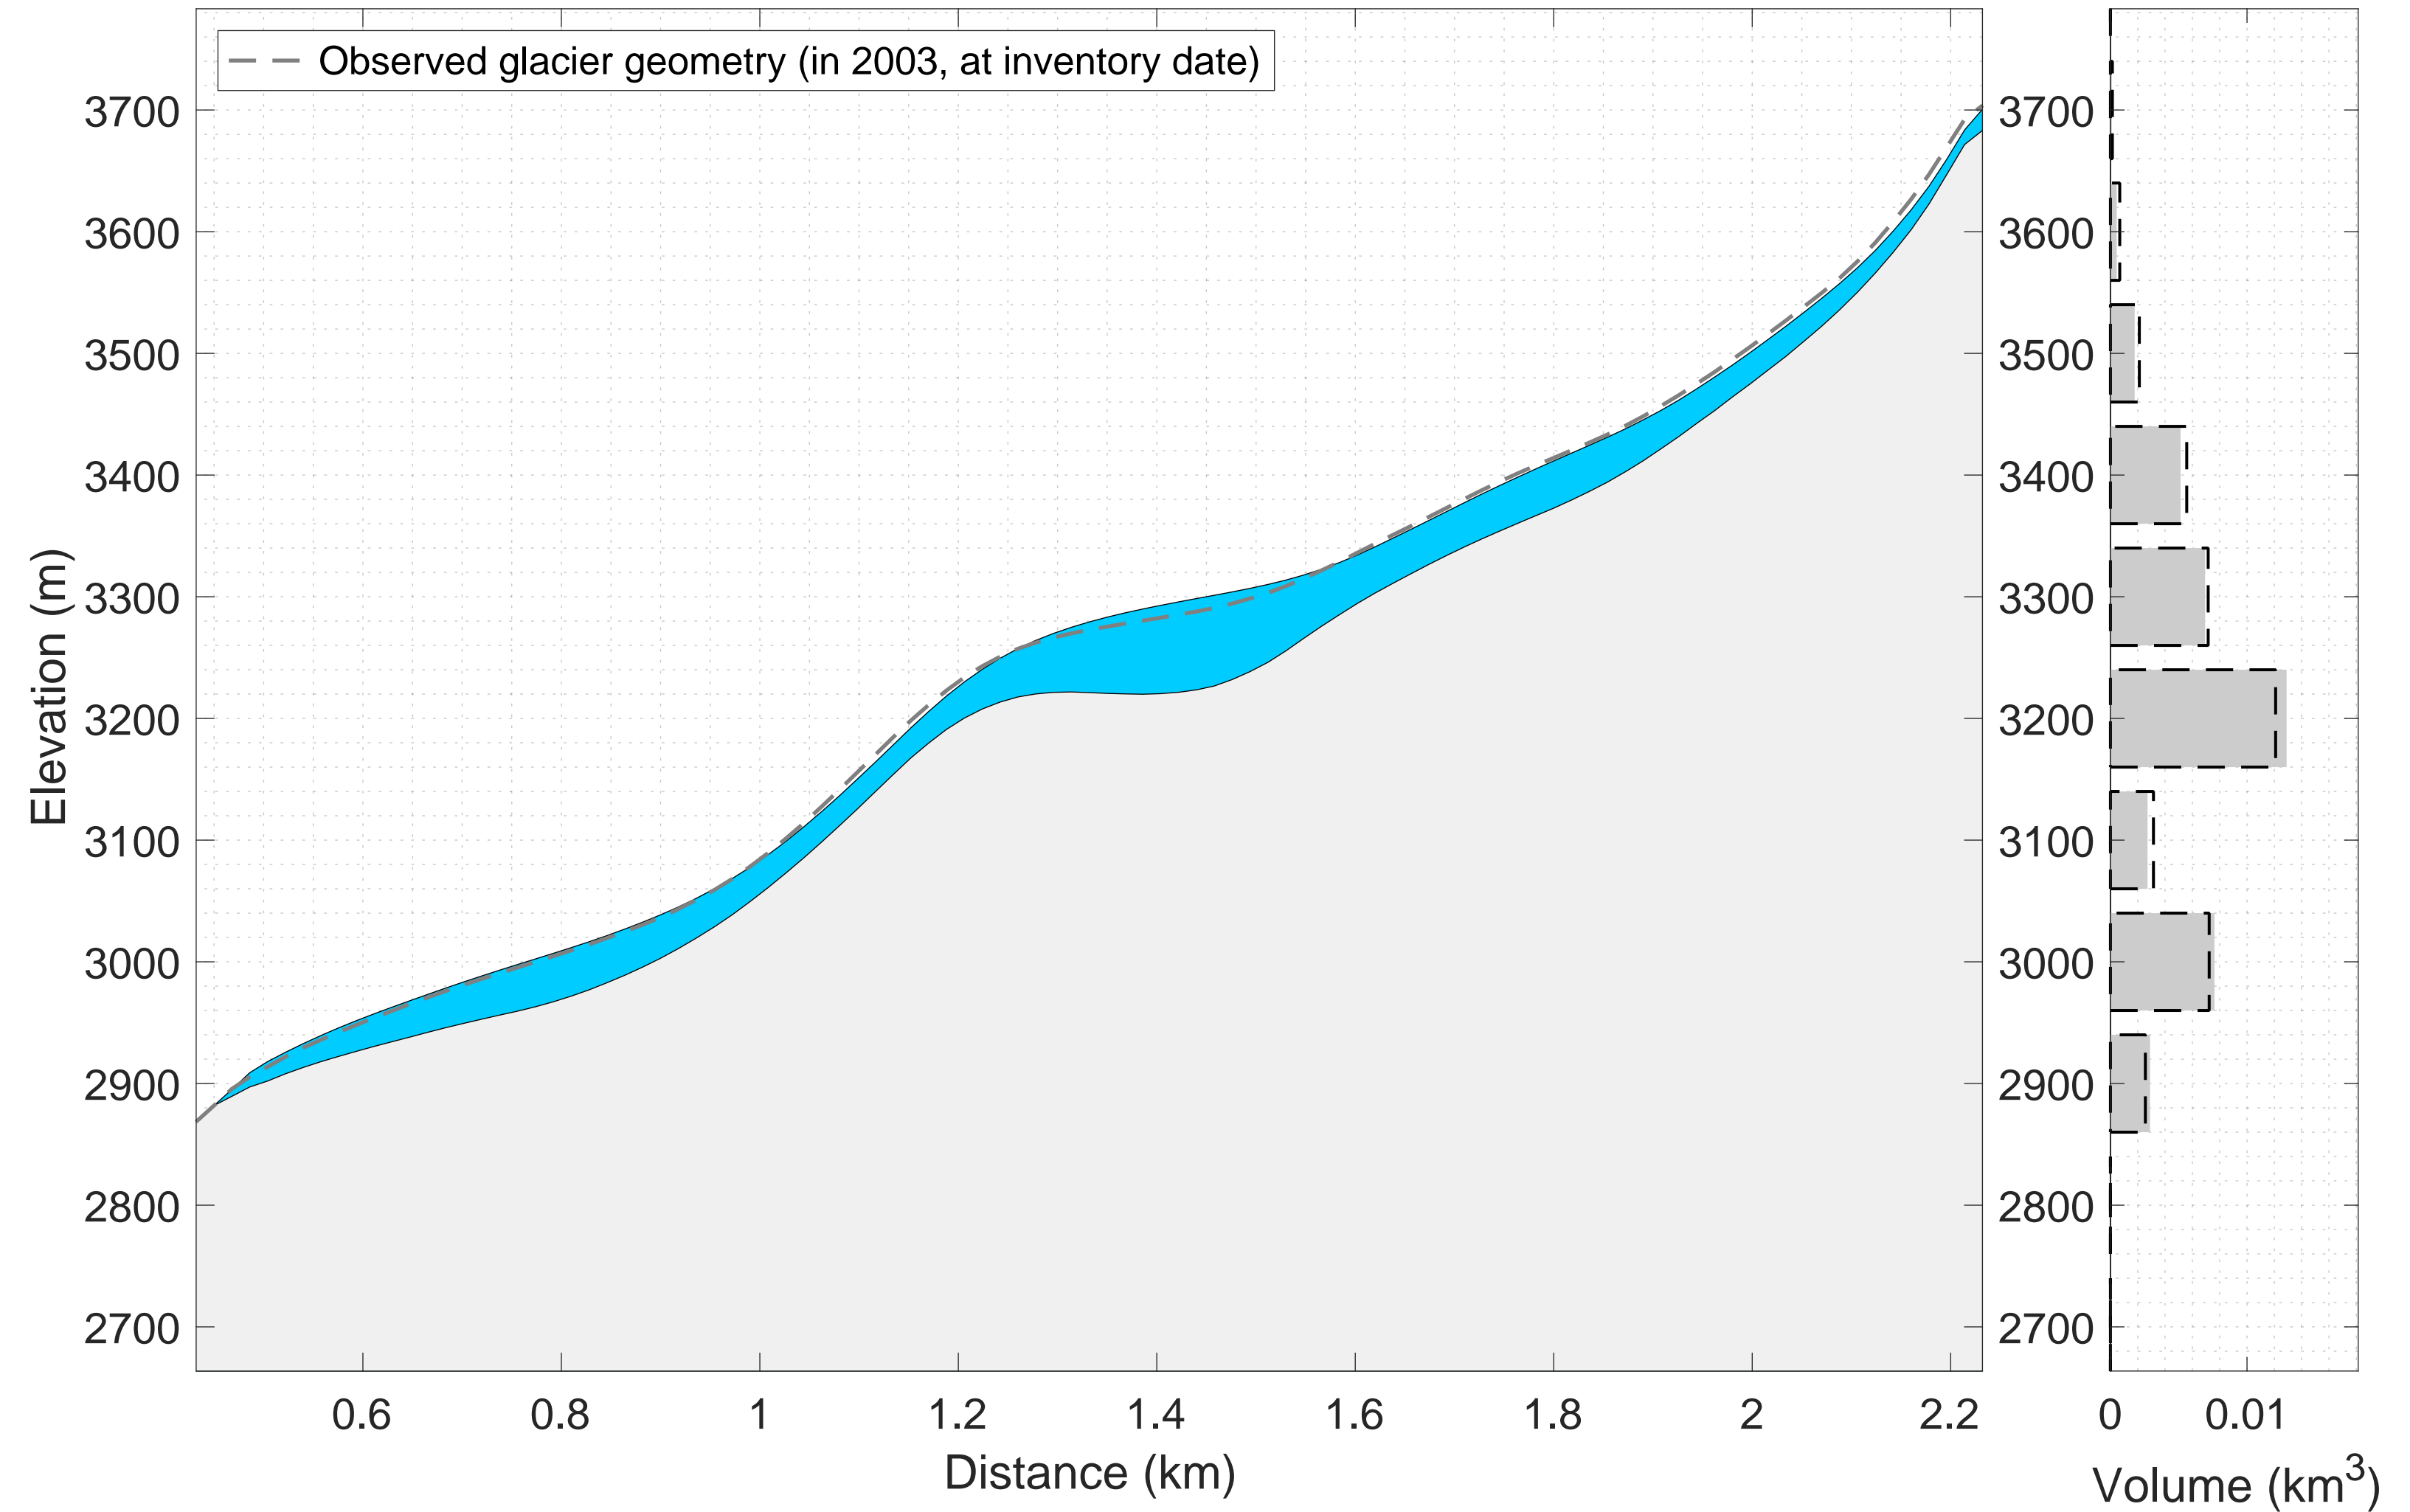

Supplement: Supplementary file 713 [file tc-13-1125-2019-supplement.zip]

**Modelled geometry (Glacier ID = 01143;  $A = 6.3868\text{e-}17 \text{ Pa}^{-3} \text{ a}^{-1}$ ;  $dx = 11 \text{ m}$ )**

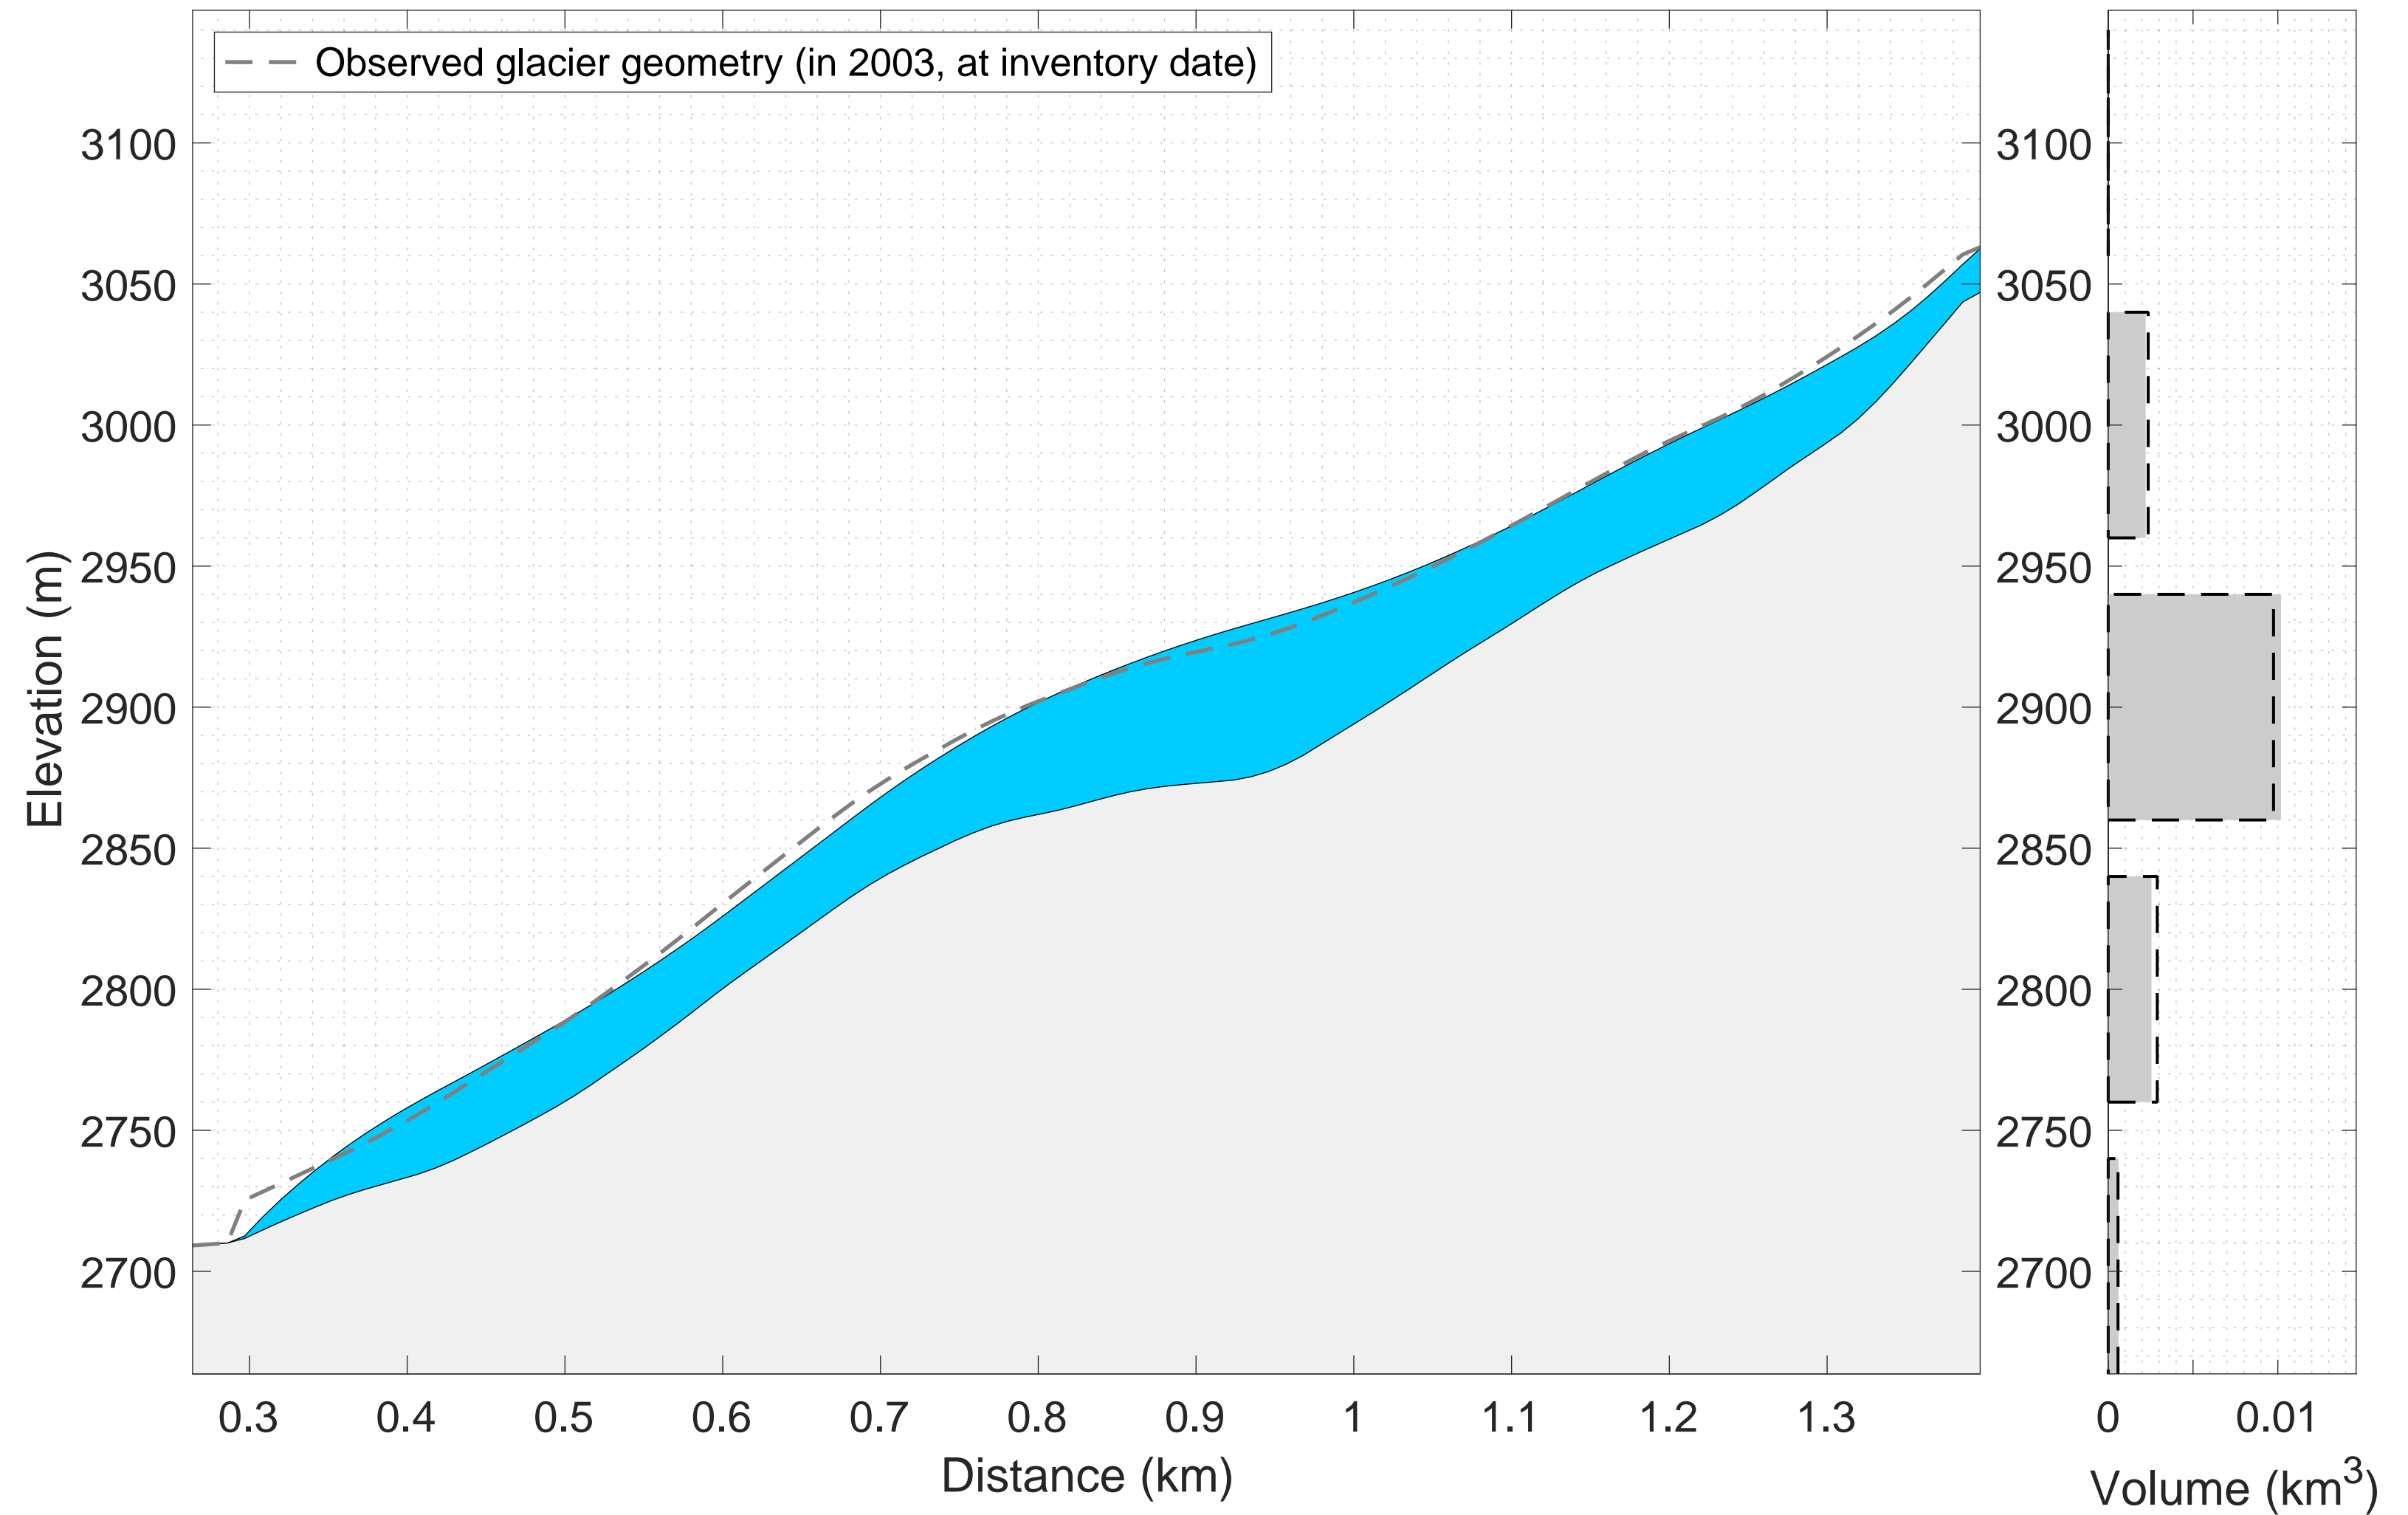

Supplement: Supplementary file 714 [file tc-13-1125-2019-supplement.zip]

**Modelled geometry (Glacier ID = 02645;  $A = 2.9625\text{e-}16 \text{ Pa}^{-3} \text{ a}^{-1}$ ;  $dx = 44 \text{ m}$ )**

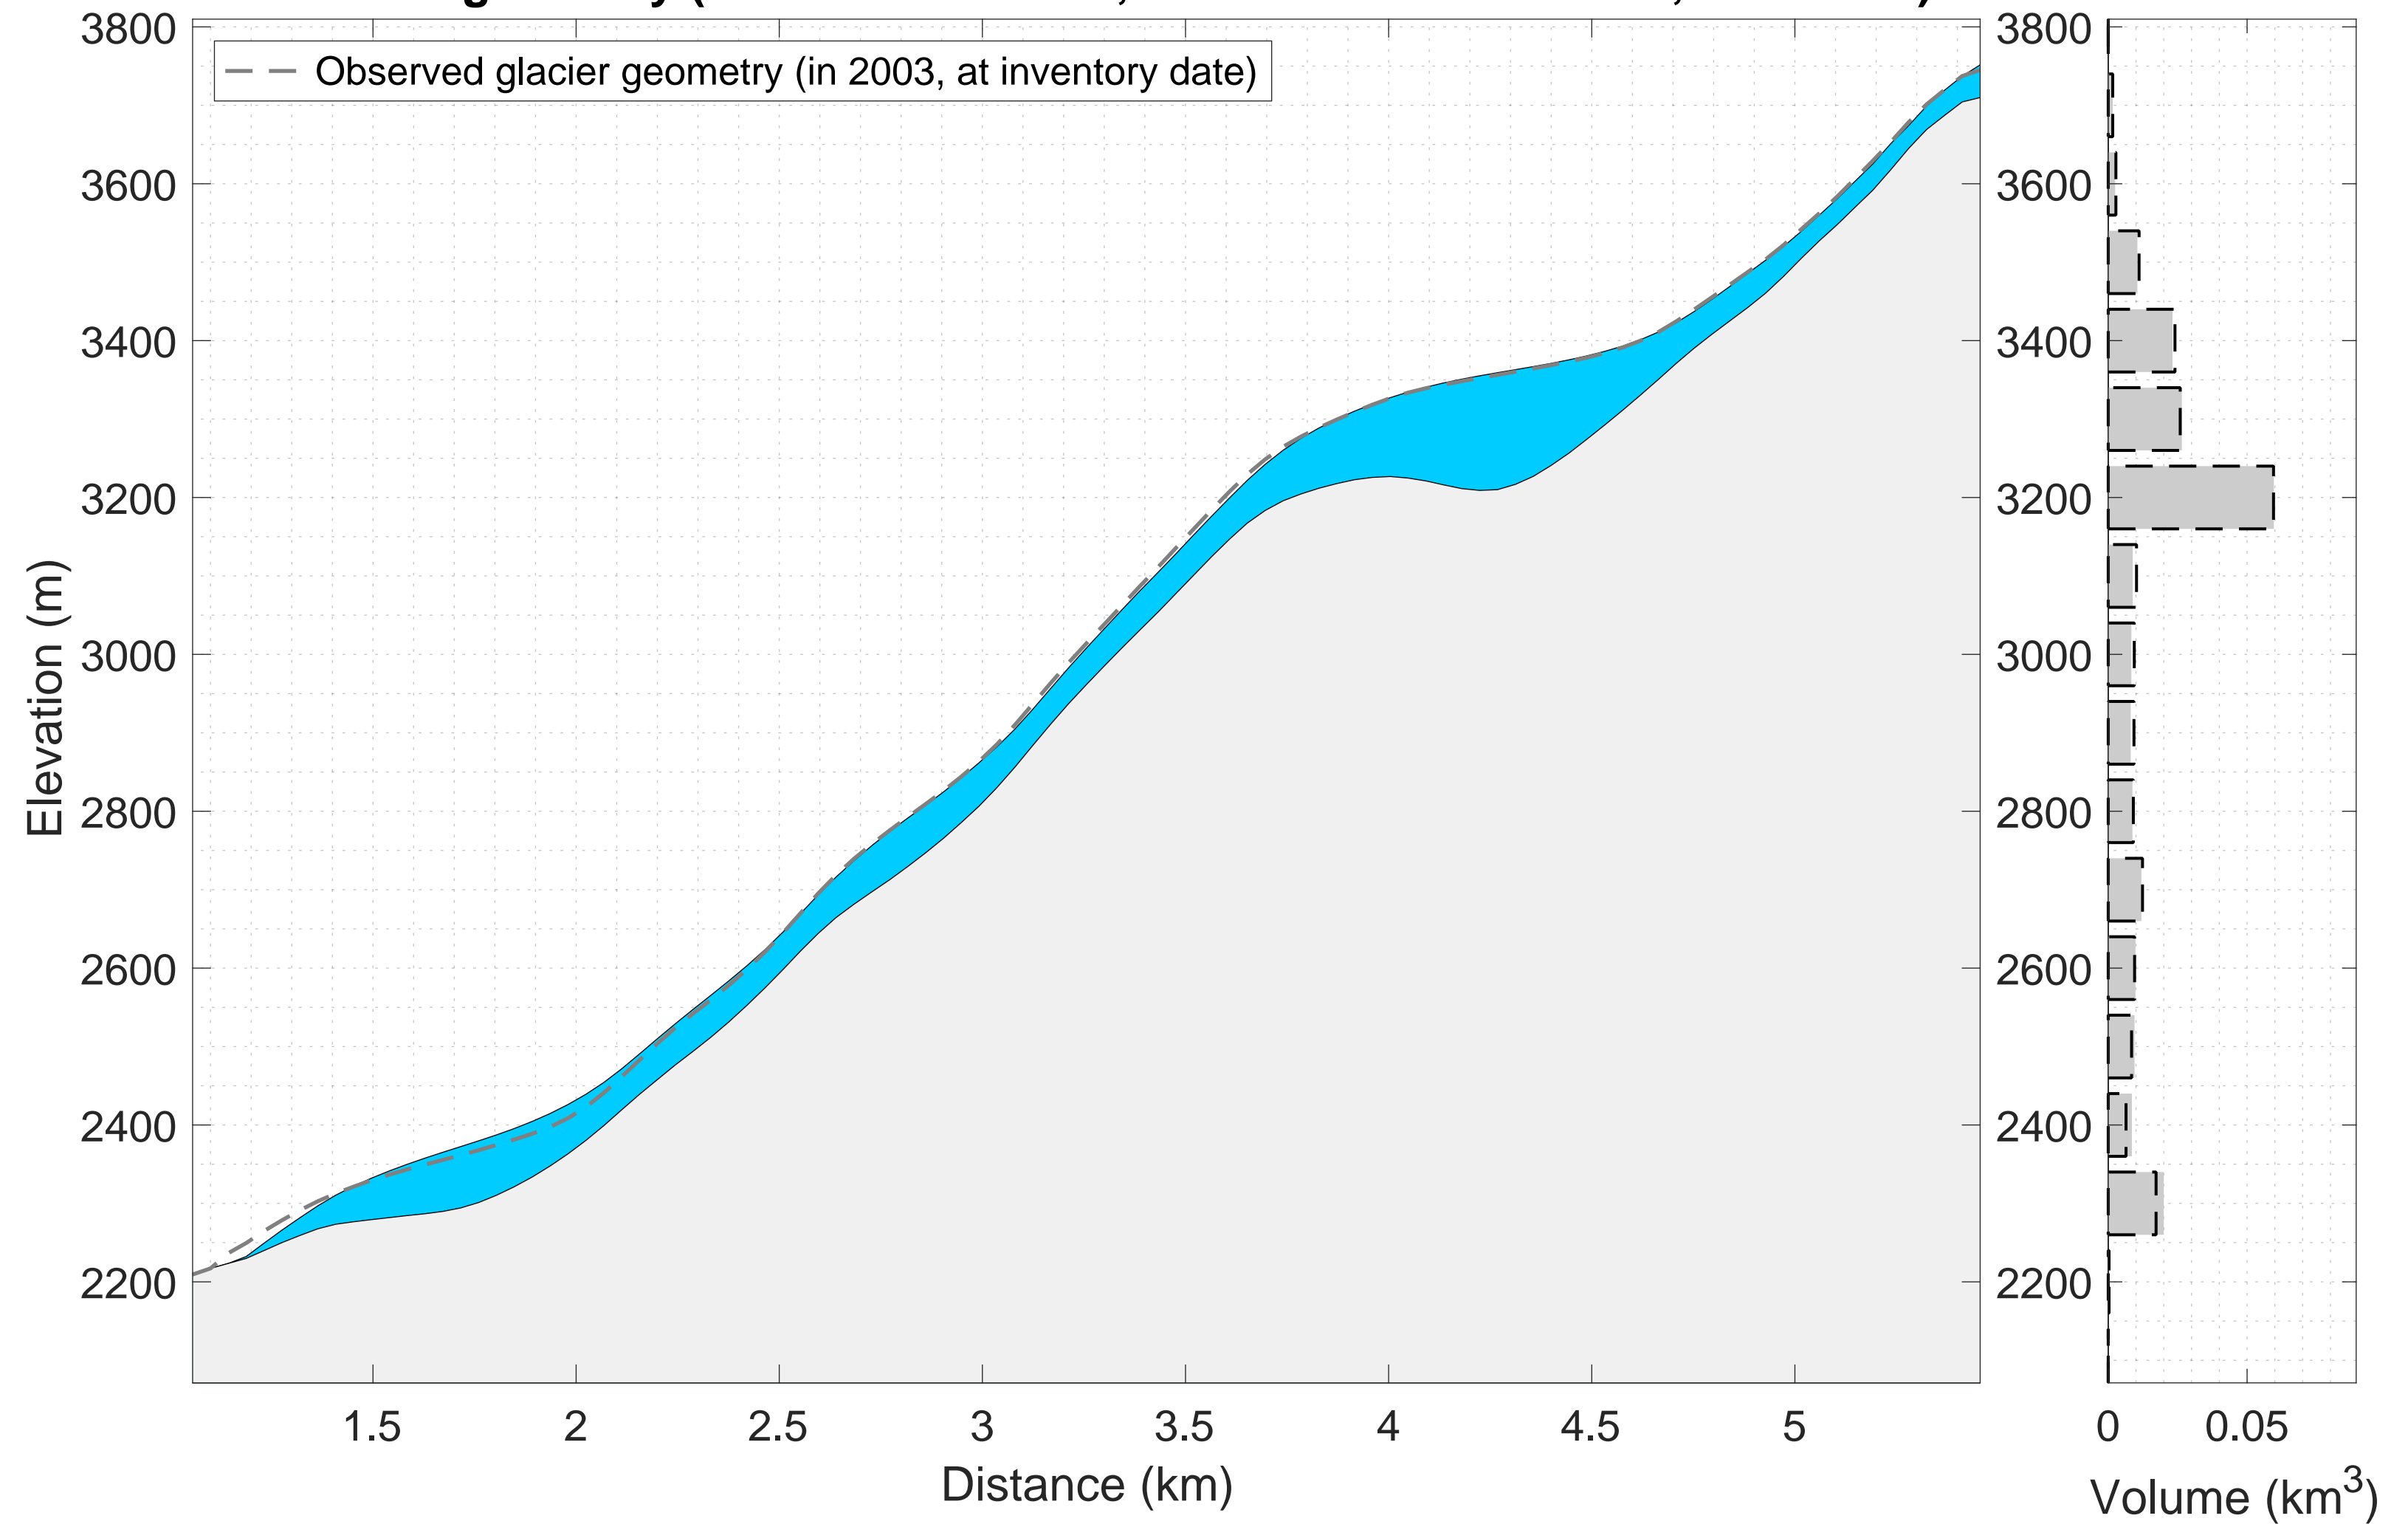

Supplement: Supplementary file 715 [file tc-13-1125-2019-supplement.zip]

**Modelled geometry (Glacier ID = 03120;  $A = 1.6802\text{e-}16 \text{ Pa}^{-3} \text{ a}^{-1}$ ;  $dx = 13 \text{ m}$ )**

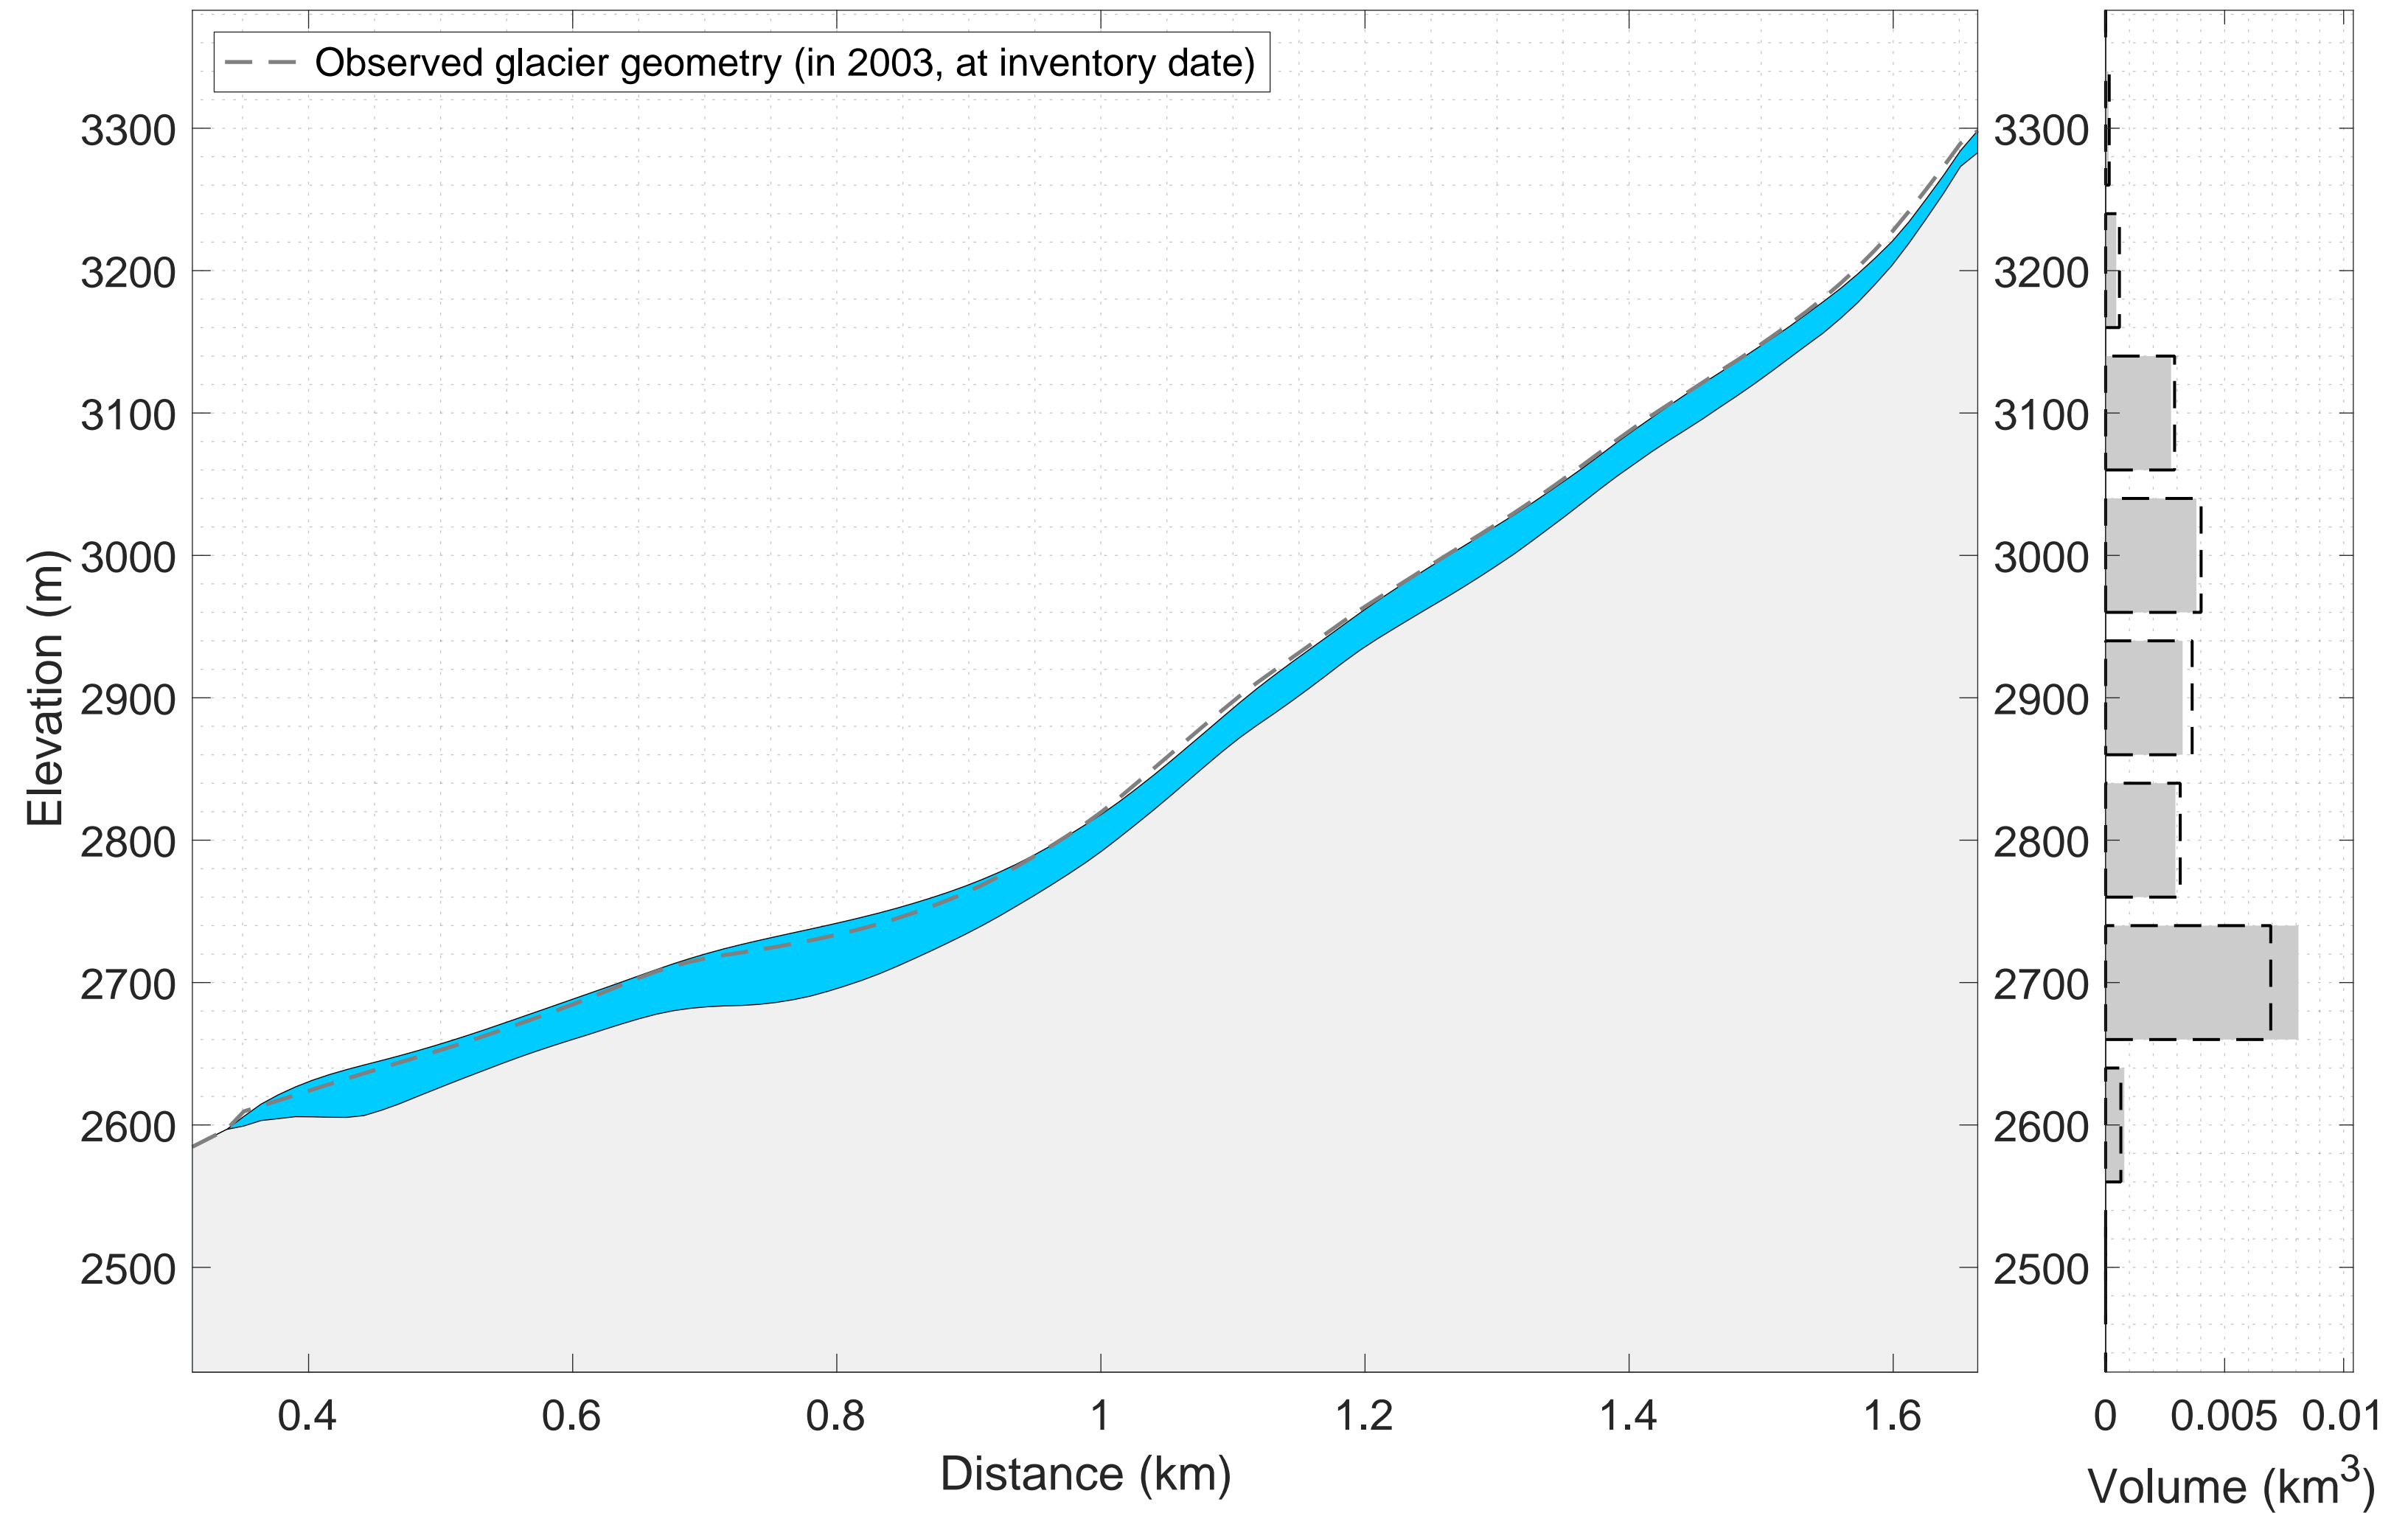

Supplement: Supplementary file 716 [file tc-13-1125-2019-supplement.zip]

**Modelled geometry (Glacier ID = 01270;  $A = 1\text{e-}16 \text{ Pa}^{-3} \text{ a}^{-1}$ ;  $dx = 57 \text{ m}$ )**

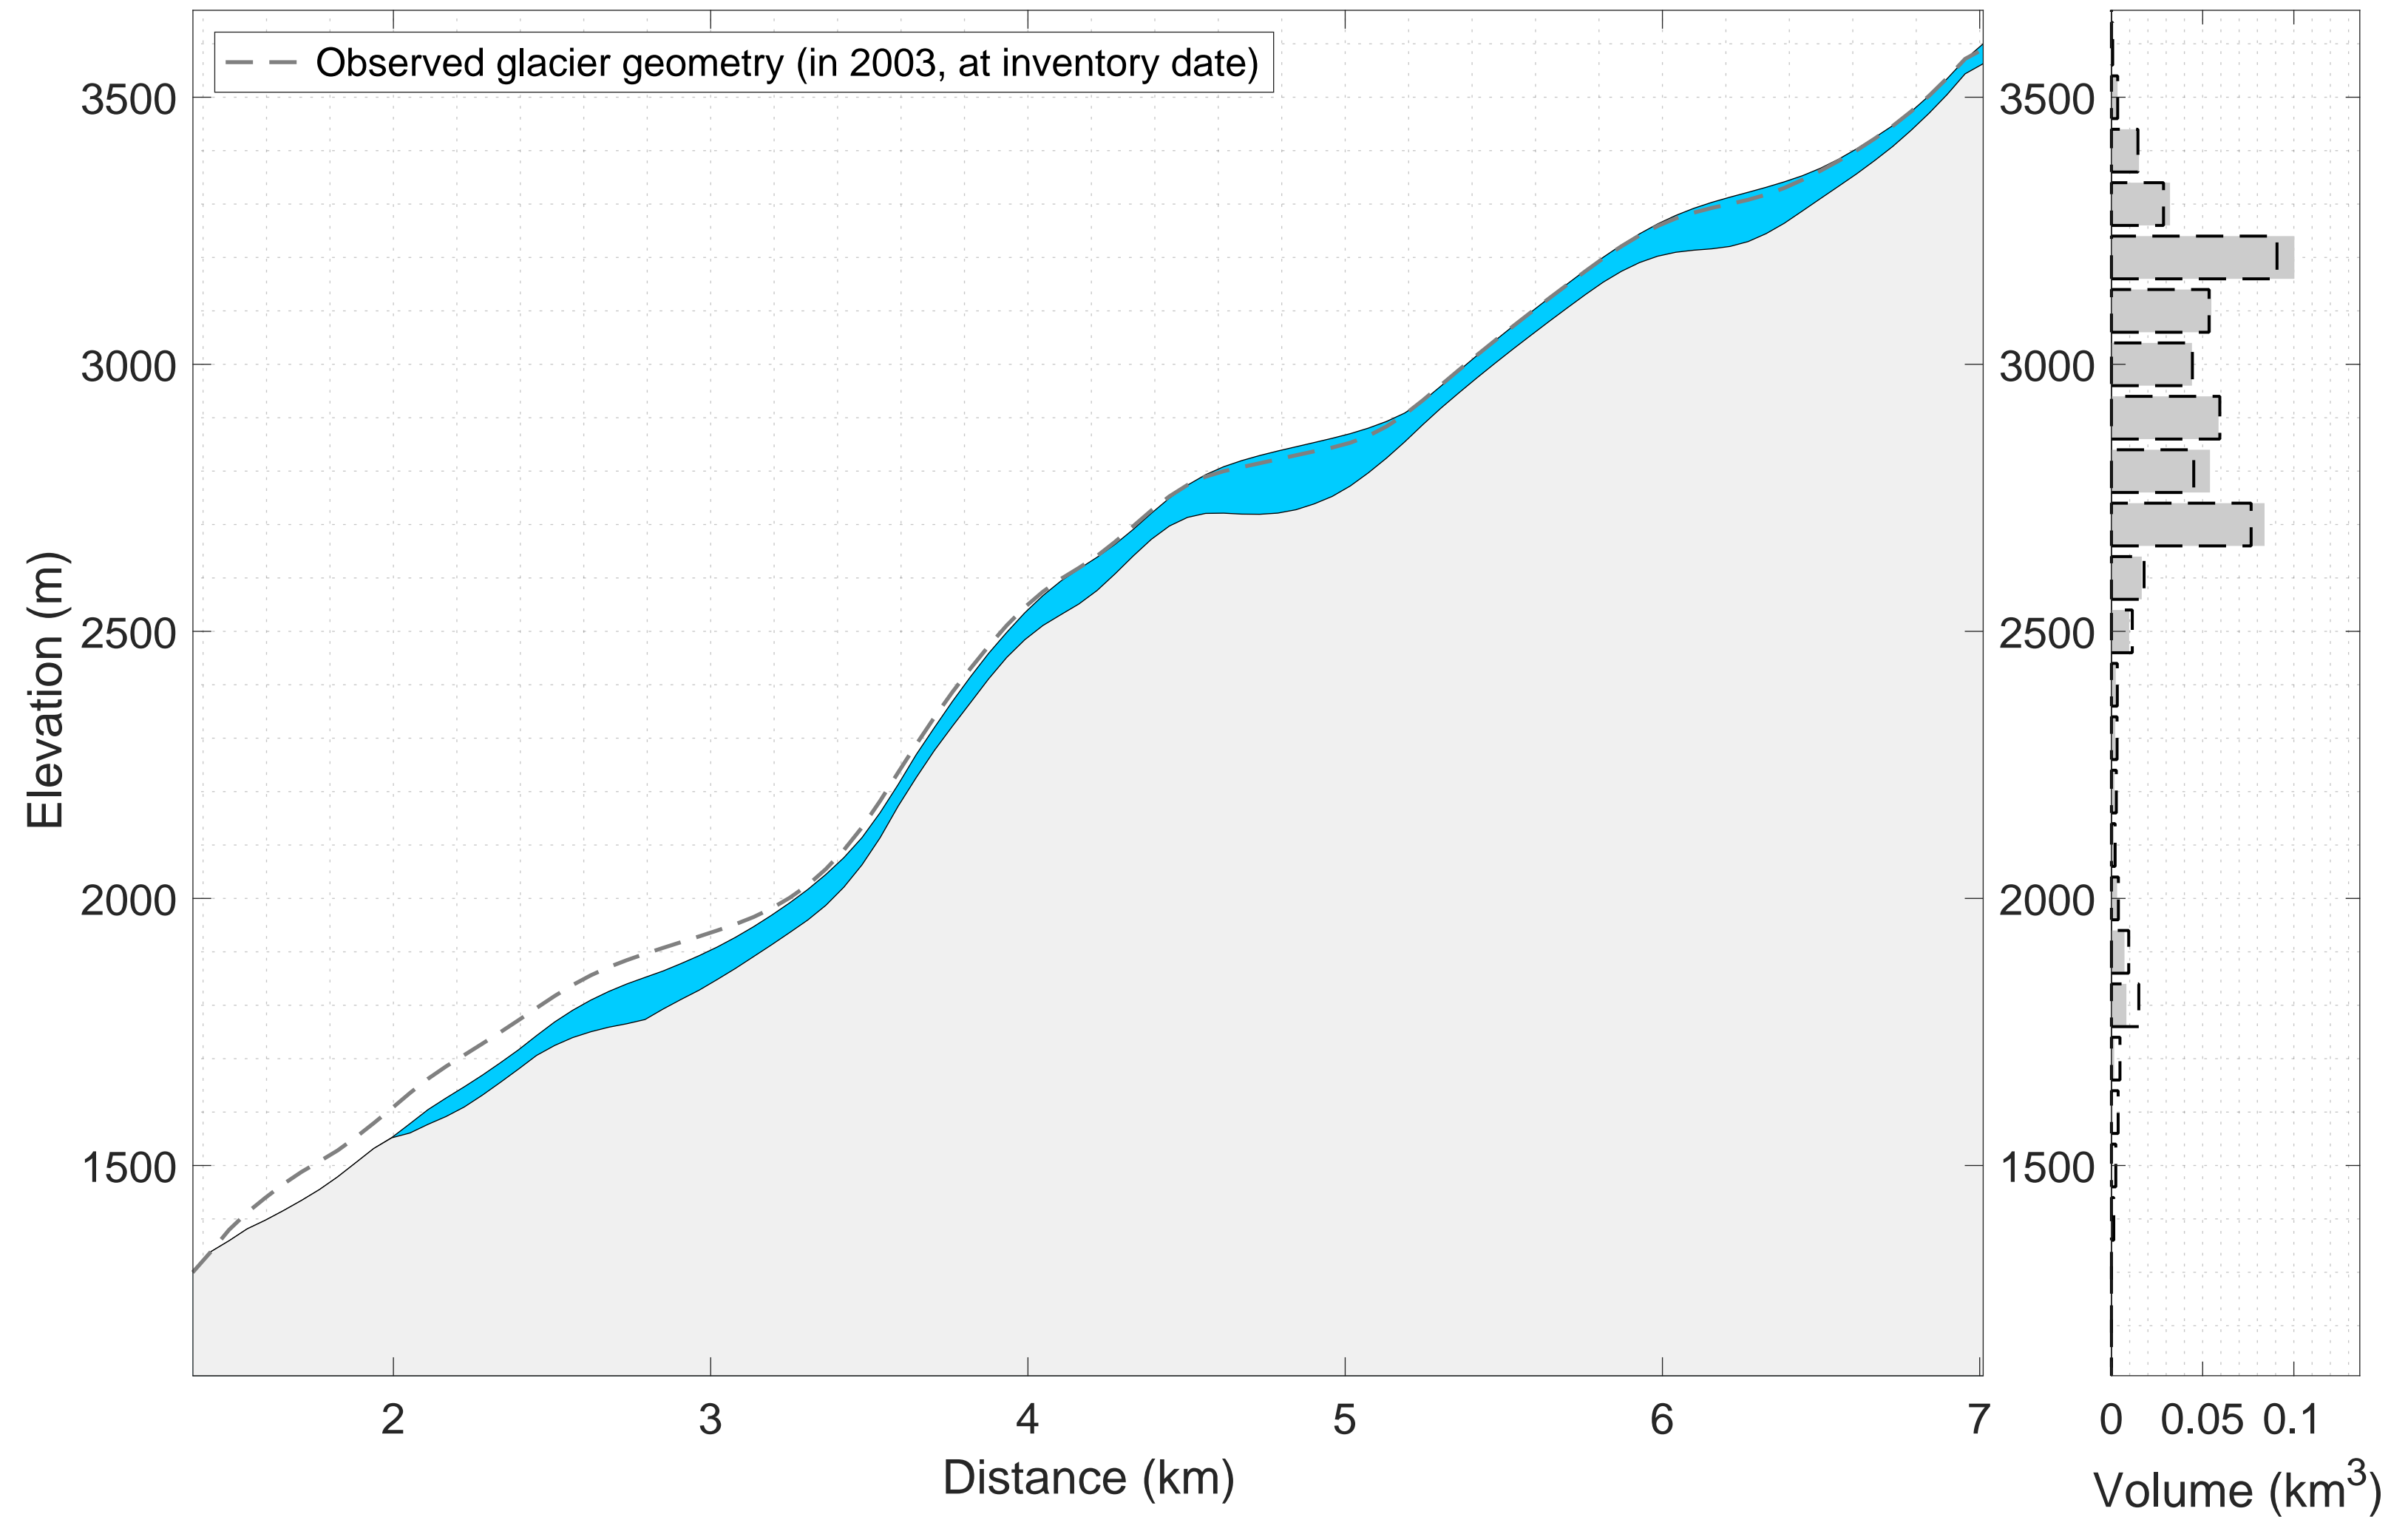

Supplement: Supplementary file 717 [file tc-13-1125-2019-supplement.zip]

**Modelled geometry (Glacier ID = 02195;  $A = 8.2728\text{e-}17 \text{ Pa}^{-3} \text{ a}^{-1}$ ;  $dx = 21 \text{ m}$ )**

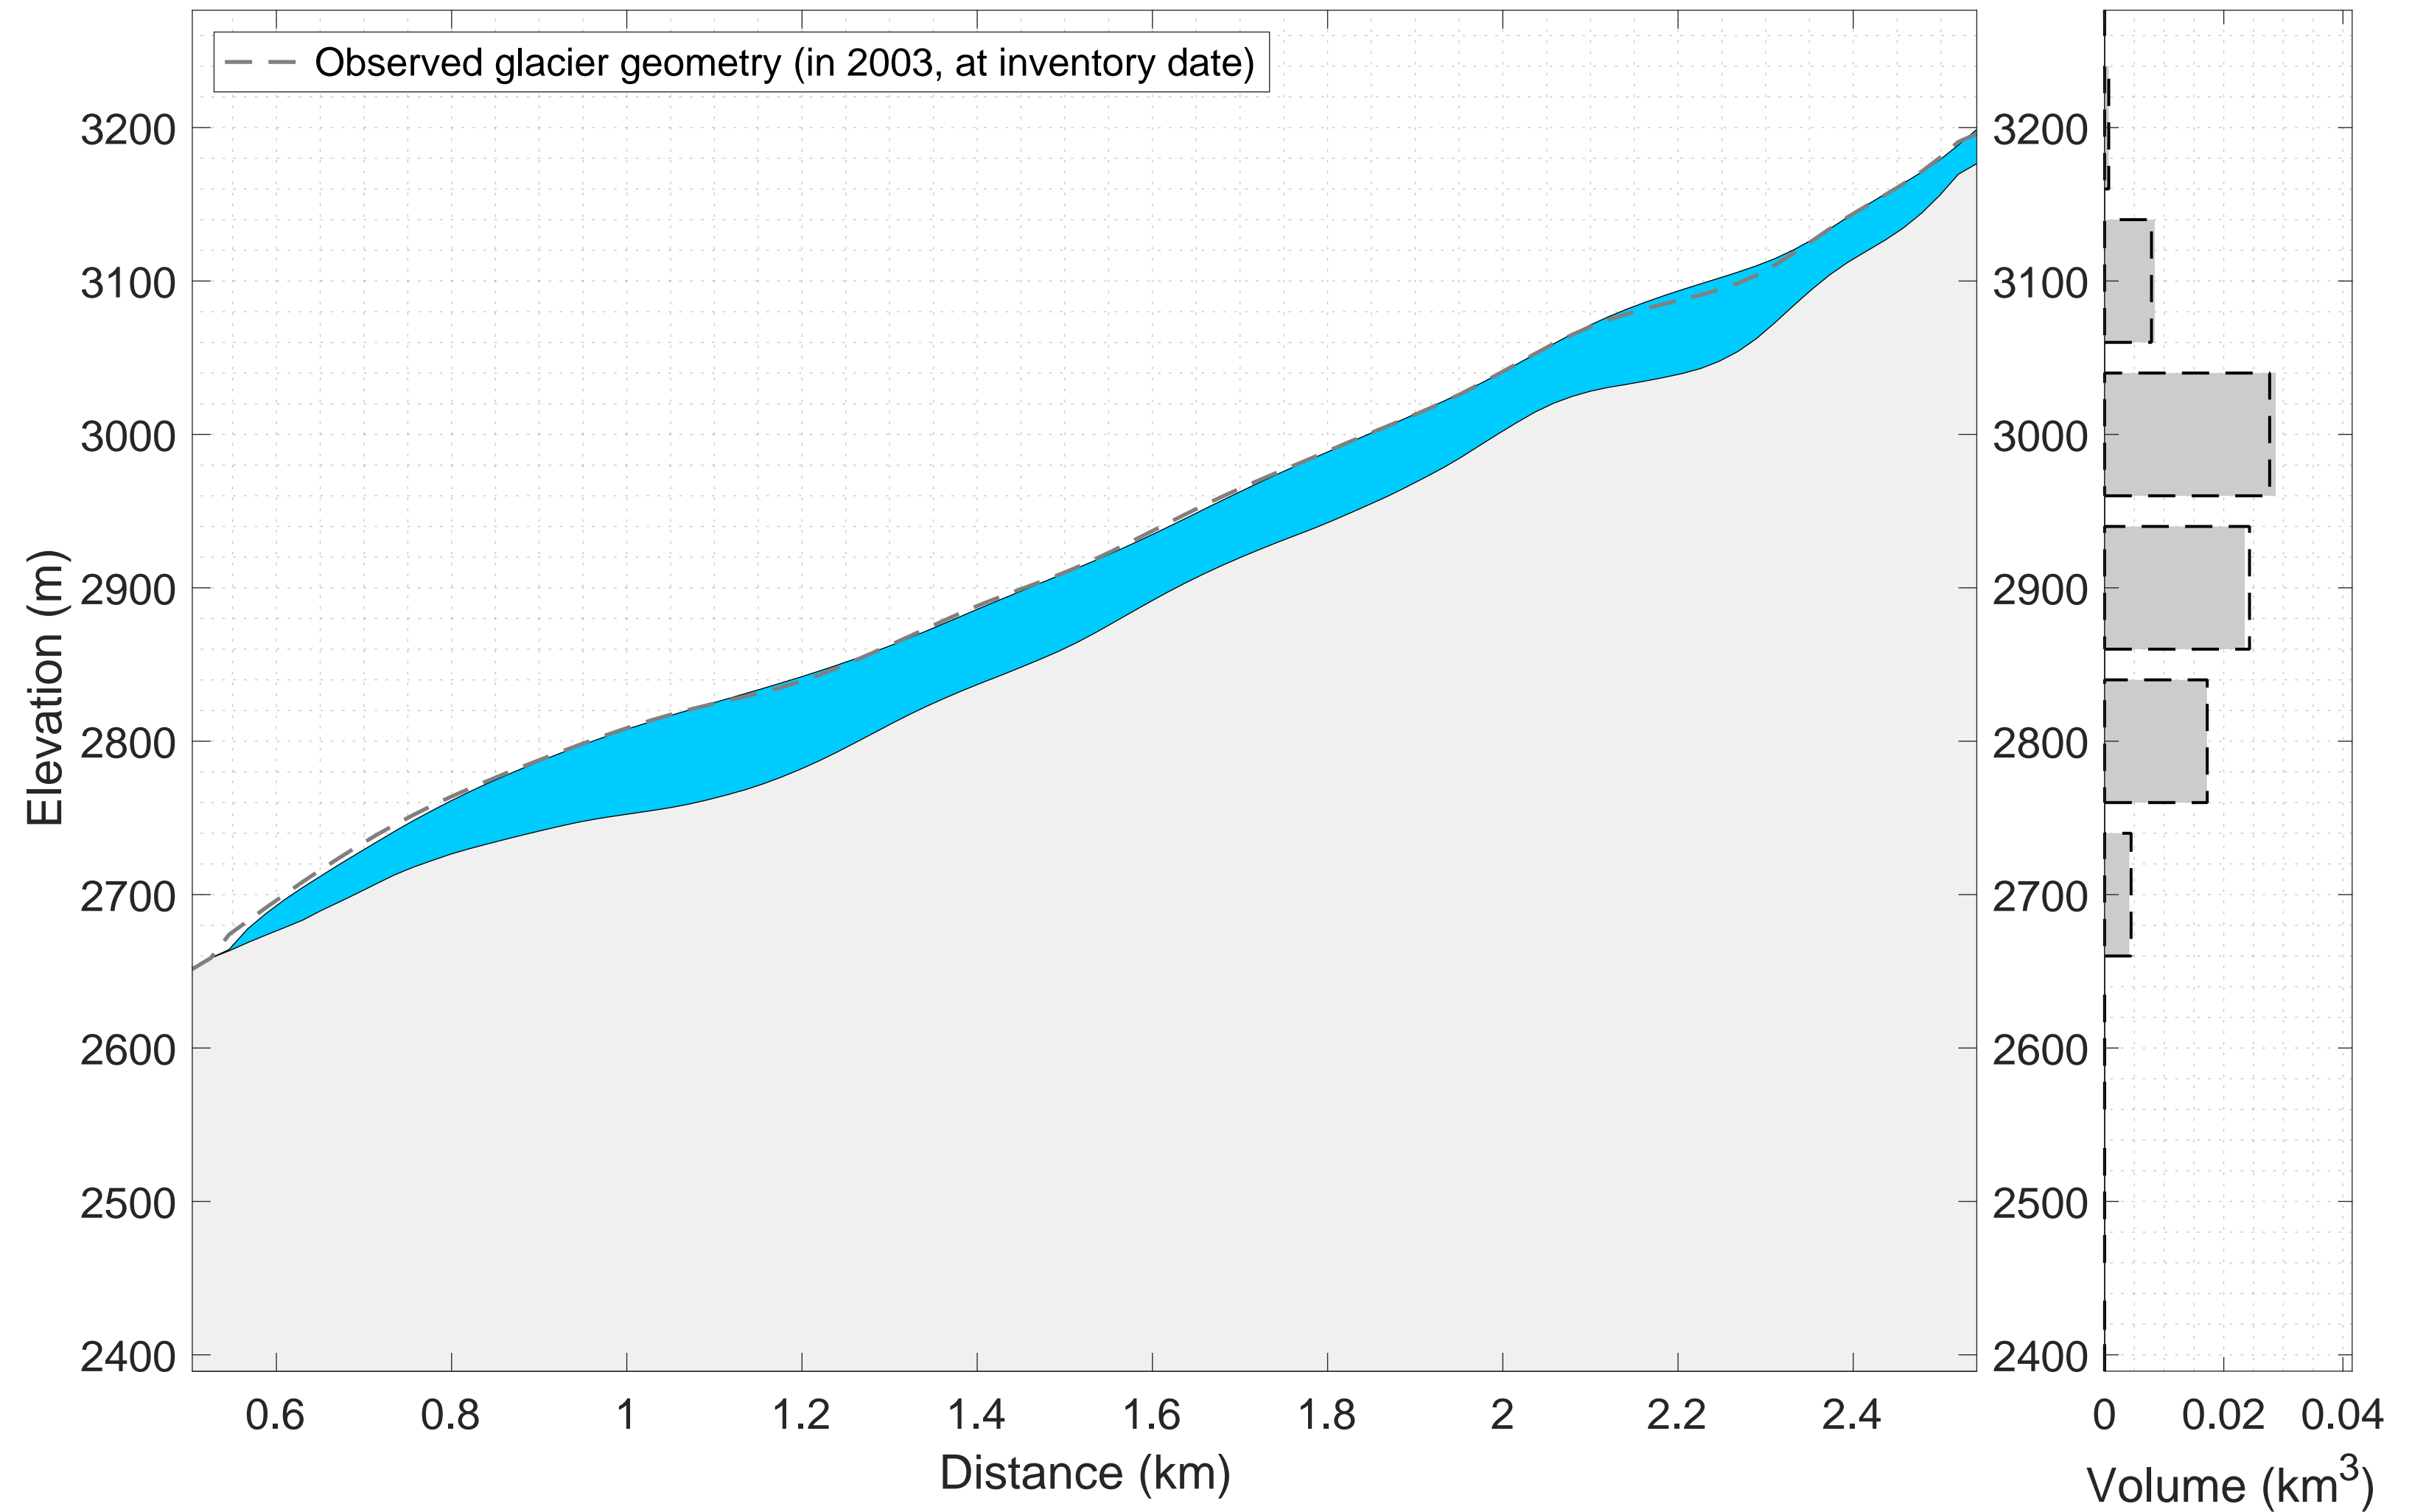

Supplement: Supplementary file 718 [file tc-13-1125-2019-supplement.zip]

**Modelled geometry (Glacier ID = 02558;  $A = 3.8866\text{e-}16 \text{ Pa}^{-3} \text{ a}^{-1}$ ;  $dx = 44 \text{ m}$ )**

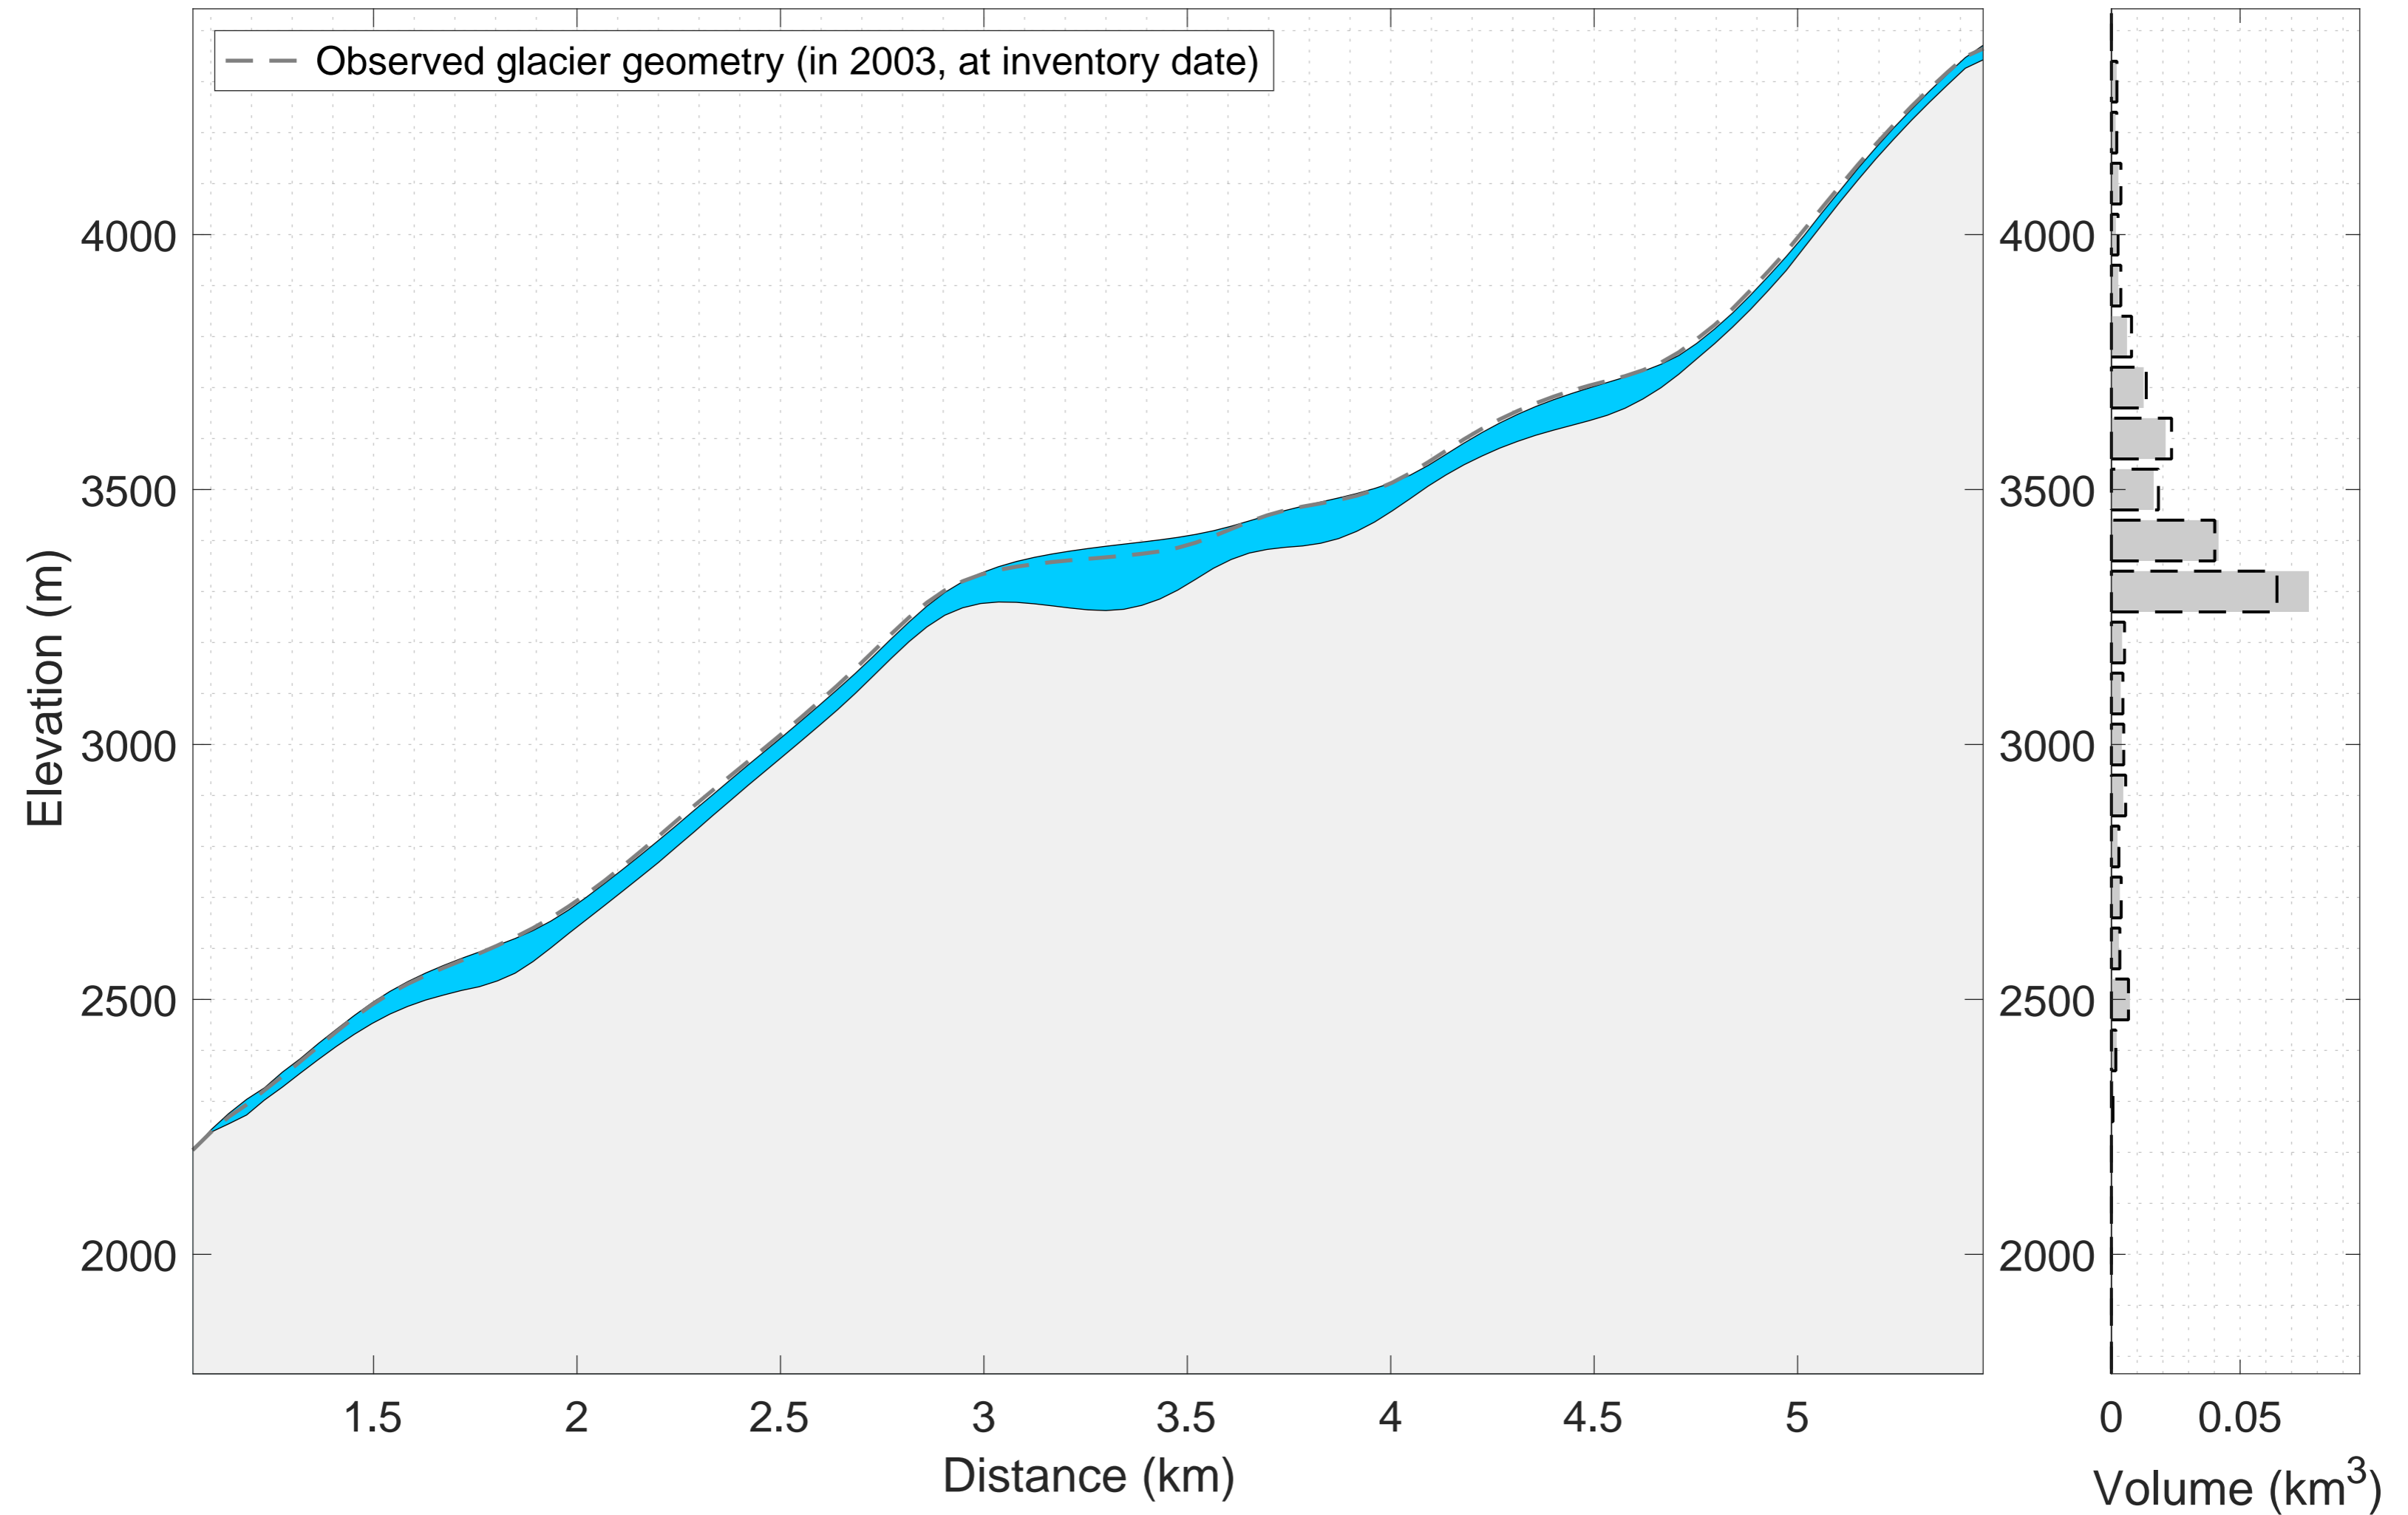

Supplement: Supplementary file 719 [file tc-13-1125-2019-supplement.zip]

**Modelled geometry (Glacier ID = 03039;  $A = 3.7051\text{e-}16 \text{ Pa}^{-3} \text{ a}^{-1}$ ;  $dx = 45 \text{ m}$ )**

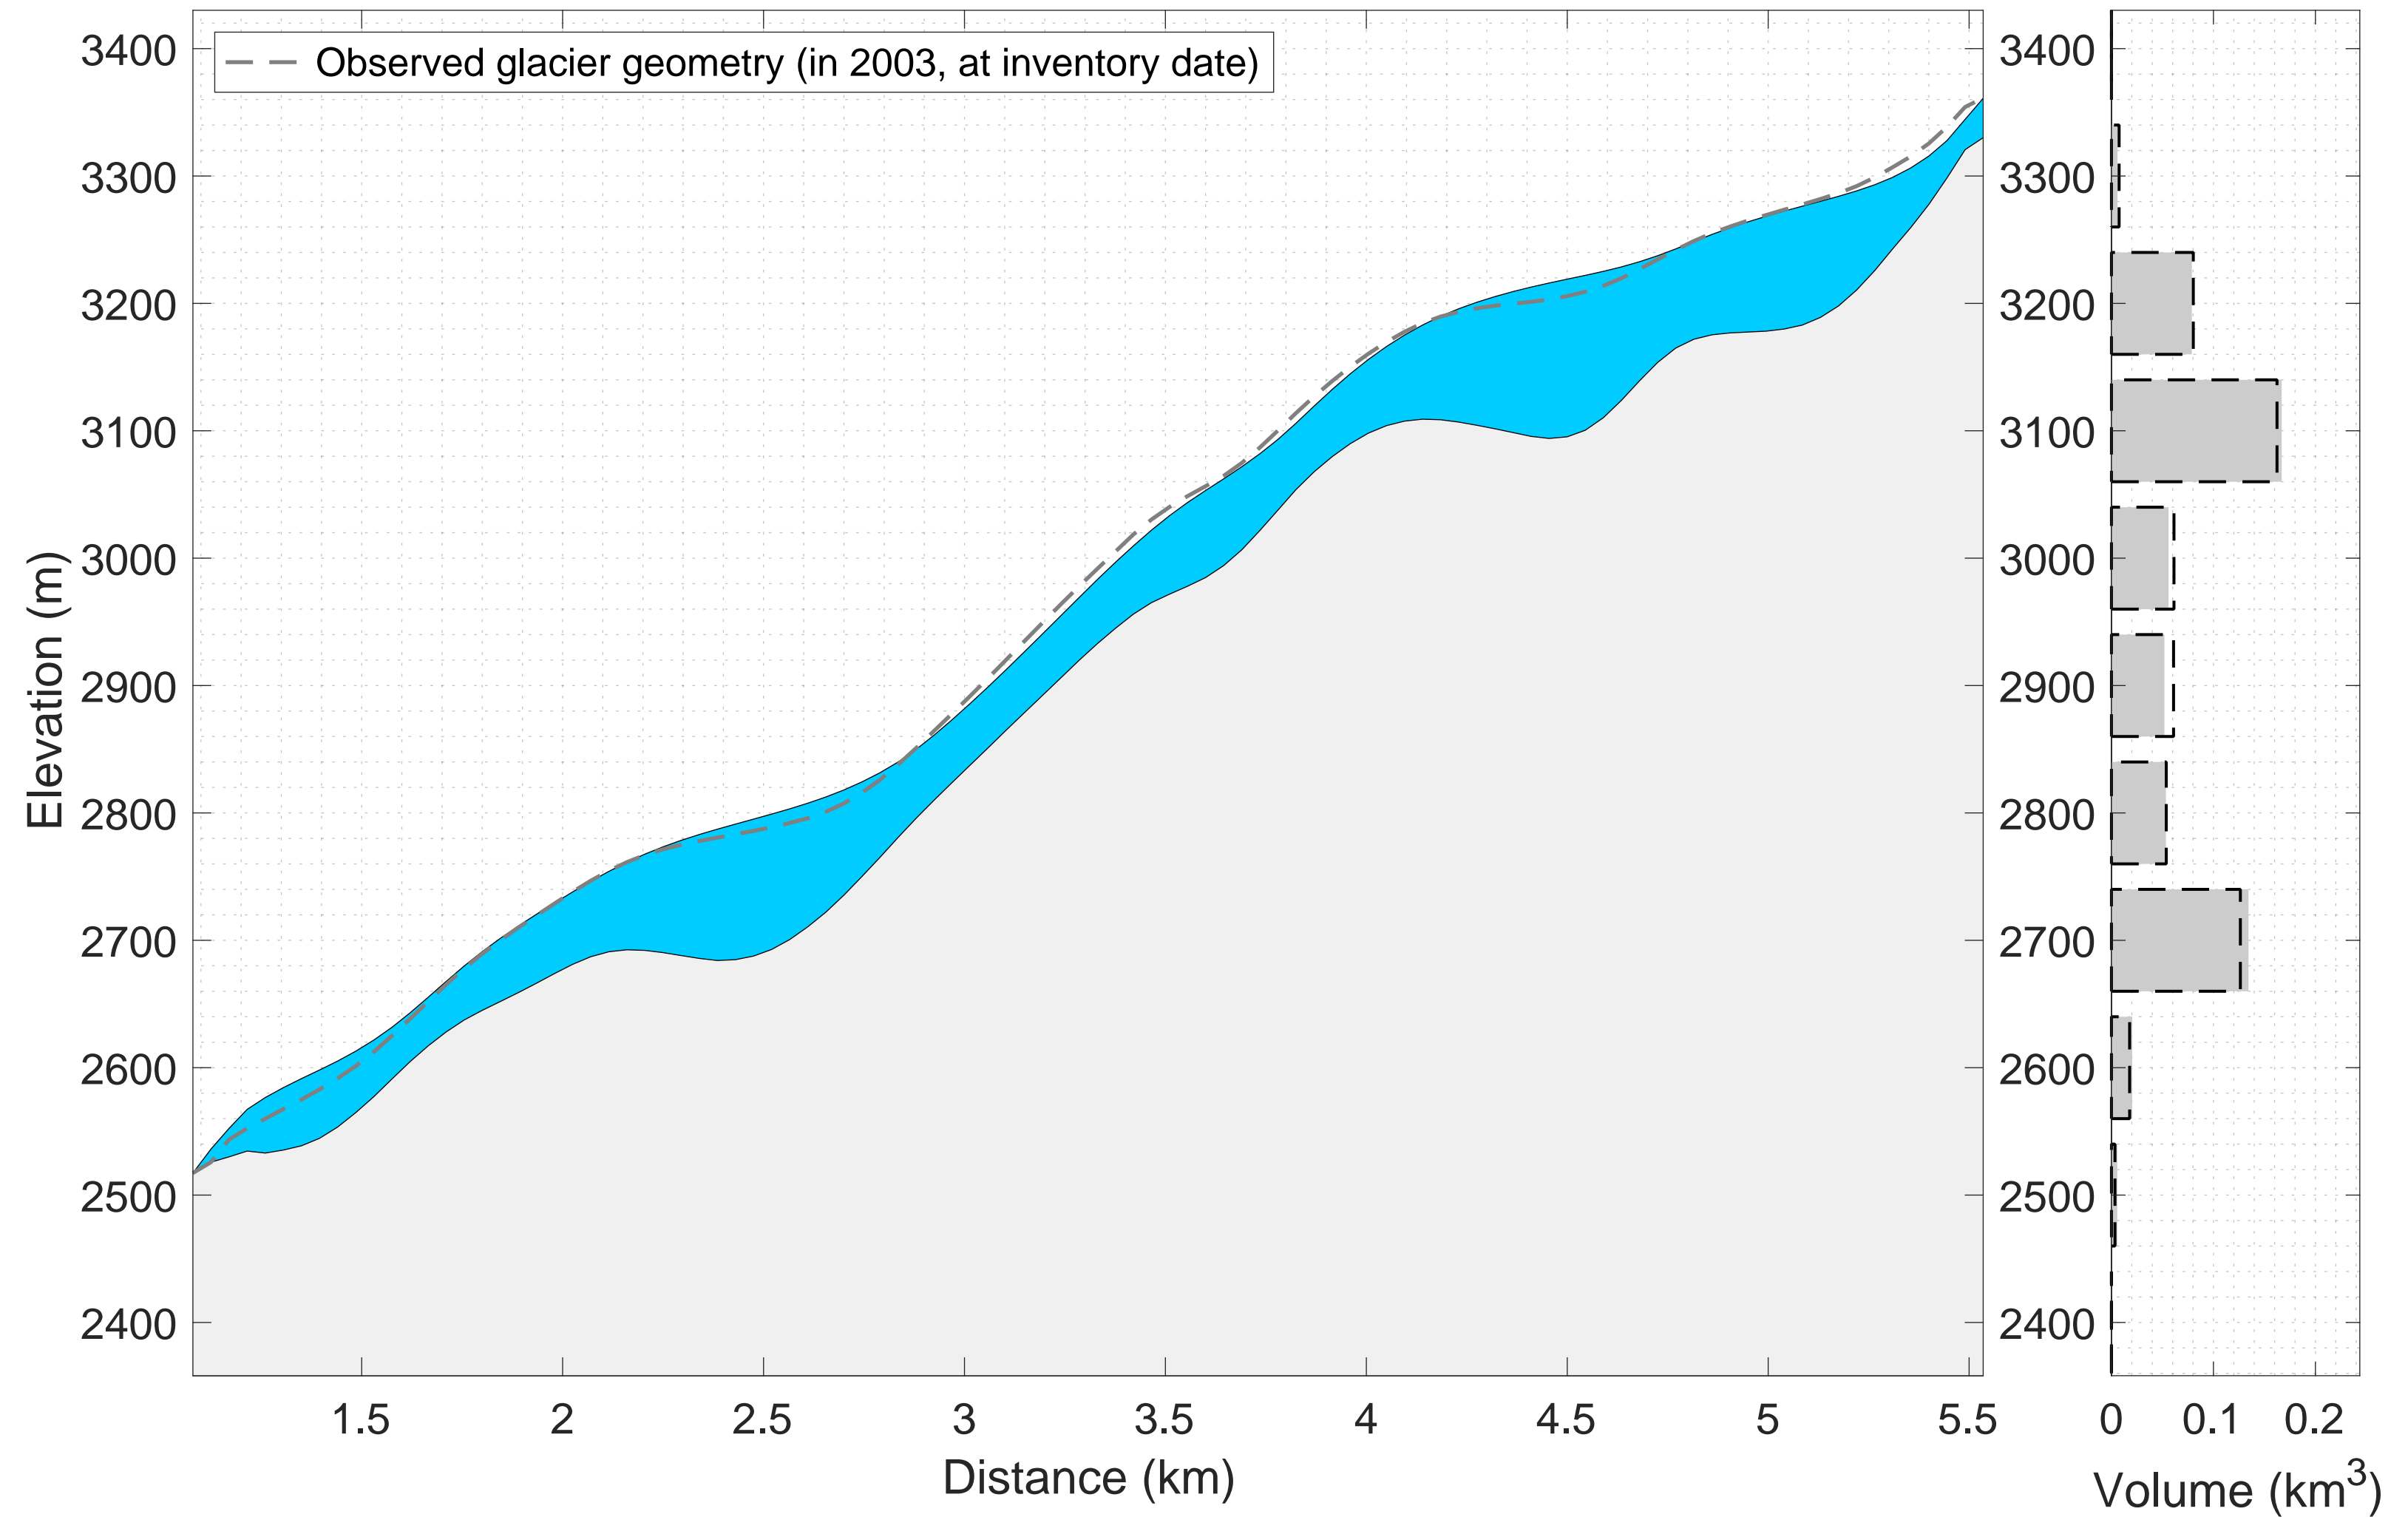

Supplement: Supplementary file 720 [file tc-13-1125-2019-supplement.zip]

**Modelled geometry (Glacier ID = 01565;  $A = 1.362\text{e-}16 \text{ Pa}^{-3} \text{ a}^{-1}$ ;  $dx = 29 \text{ m}$ )**

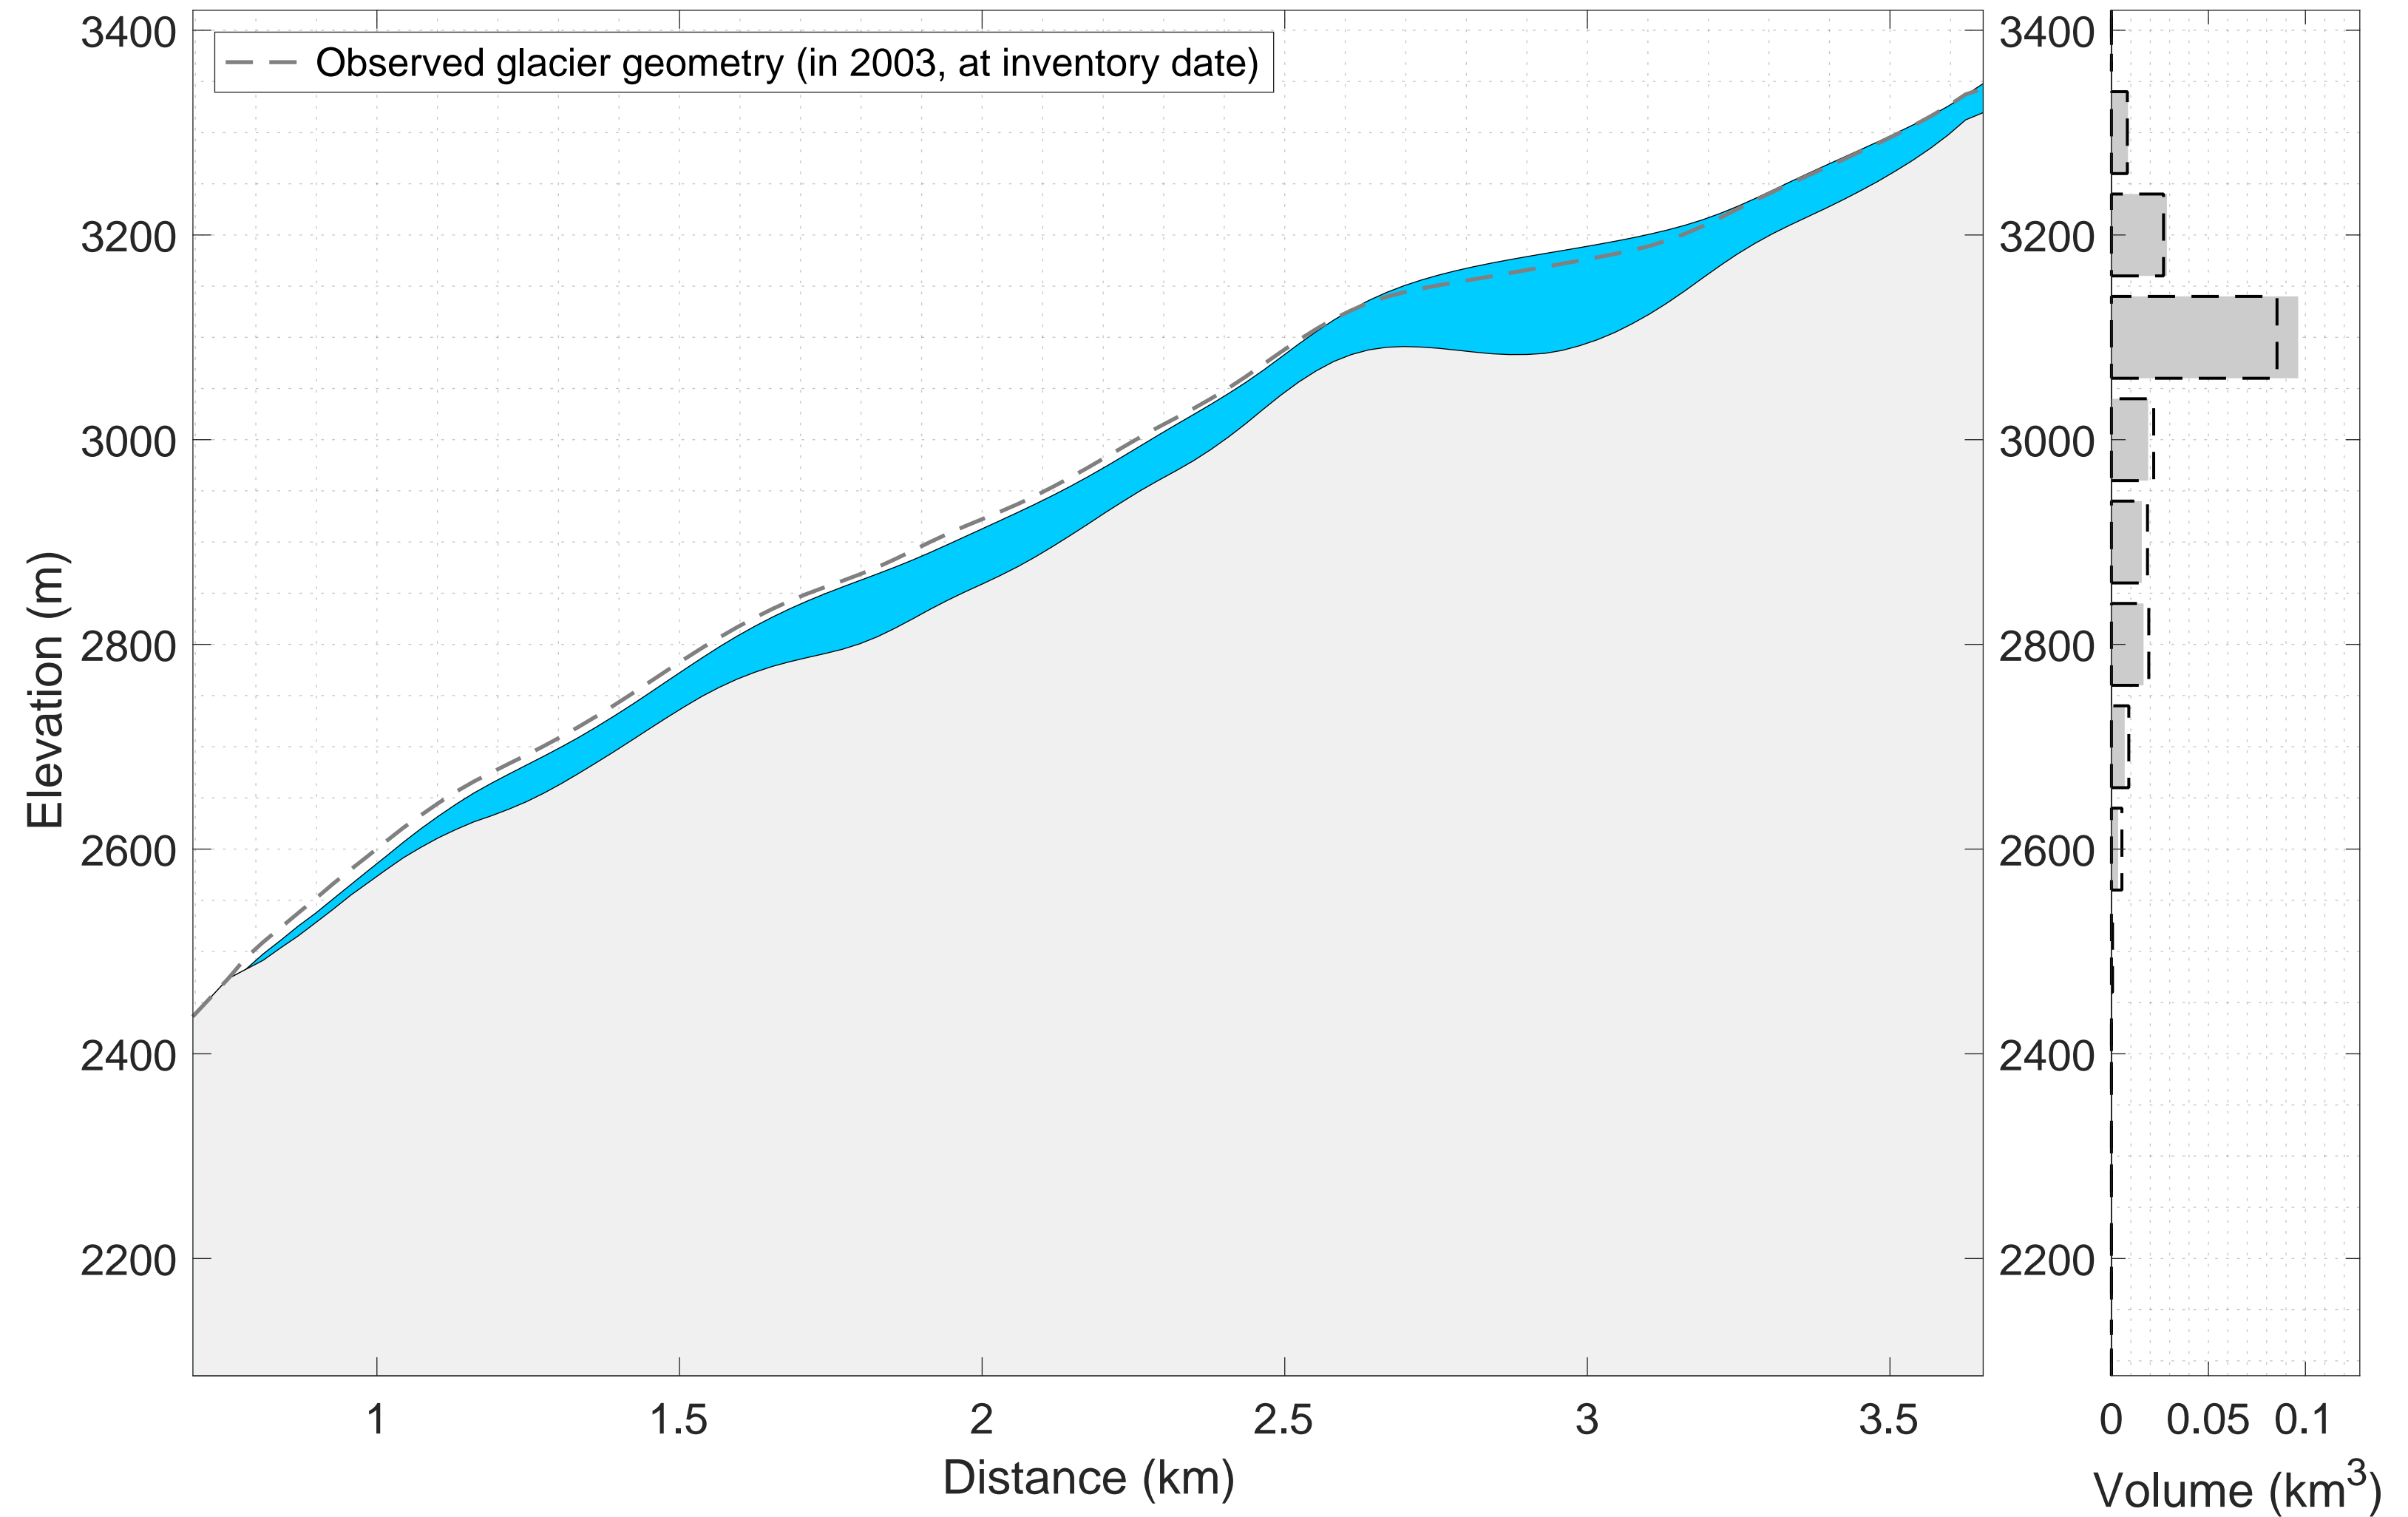

Supplement: Supplementary file 721 [file tc-13-1125-2019-supplement.zip]

**Modelled geometry (Glacier ID = 00670;  $A = 1.5922\text{e-}16 \text{ Pa}^{-3} \text{ a}^{-1}$ ;  $dx = 19 \text{ m}$ )**

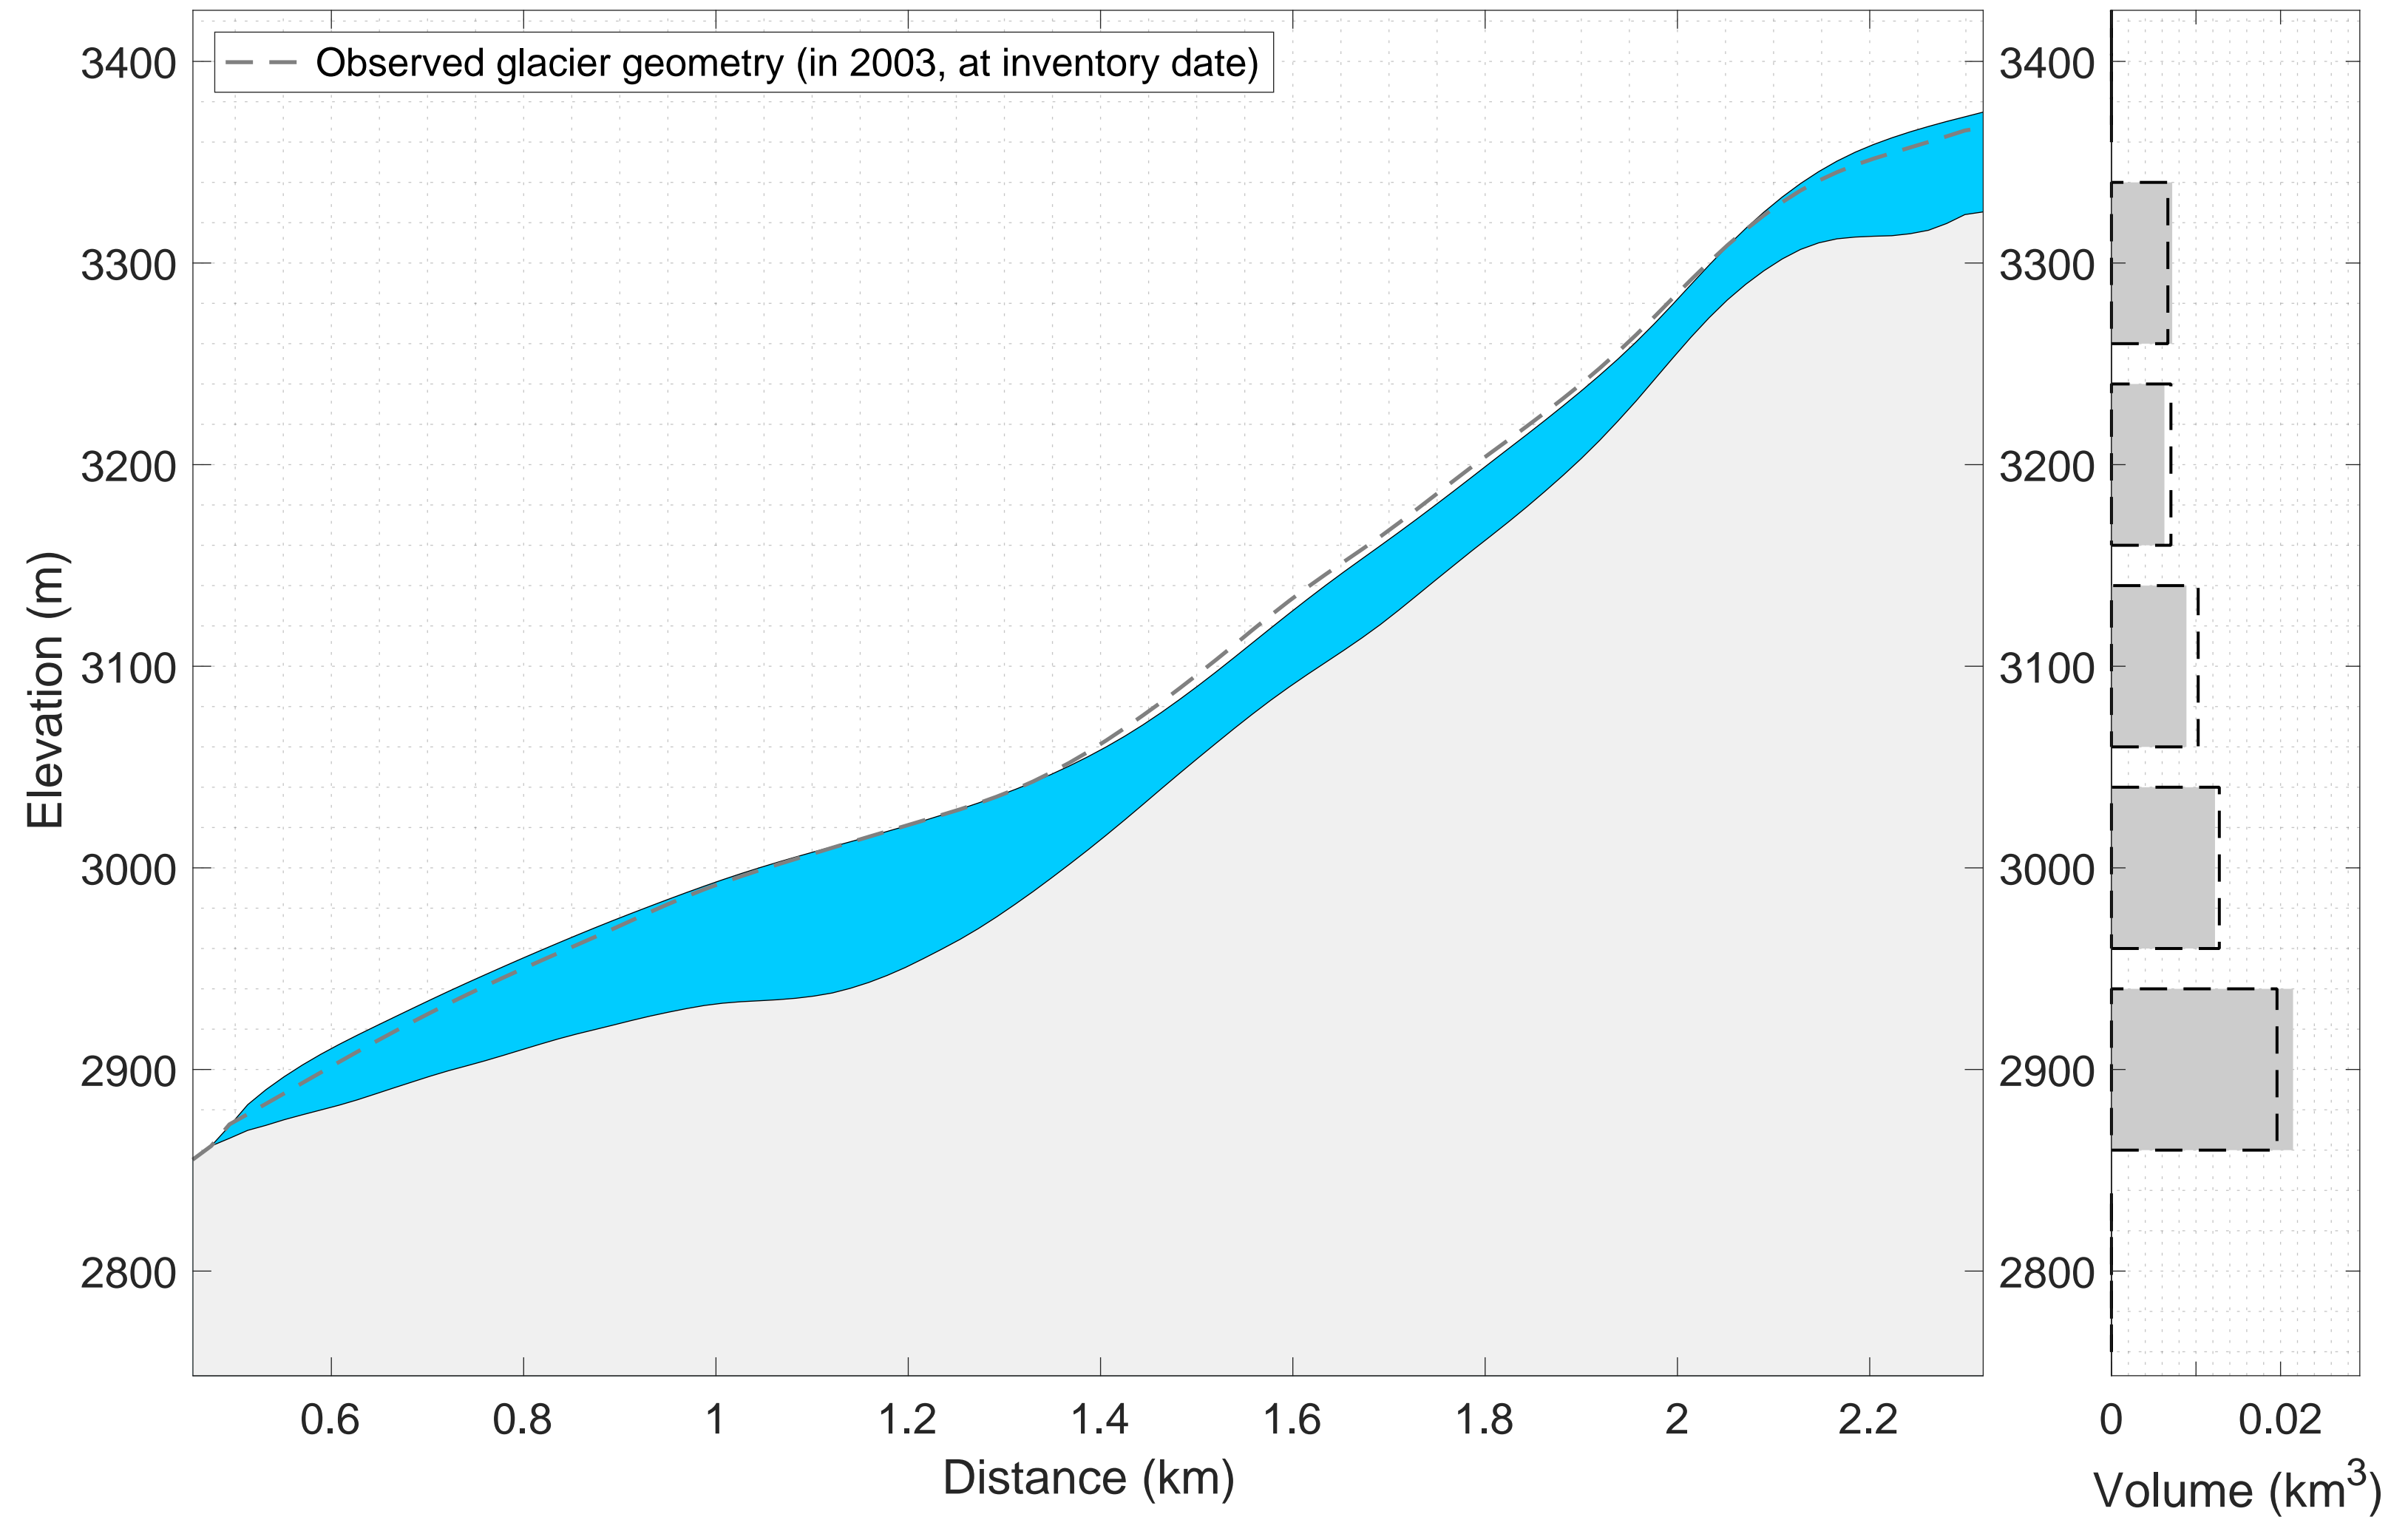

Supplement: Supplementary file 722 [file tc-13-1125-2019-supplement.zip]

**Modelled geometry (Glacier ID = 00848;  $A = 8.9804\text{e-}17 \text{ Pa}^{-3} \text{ a}^{-1}$ ;  $dx = 15 \text{ m}$ )**

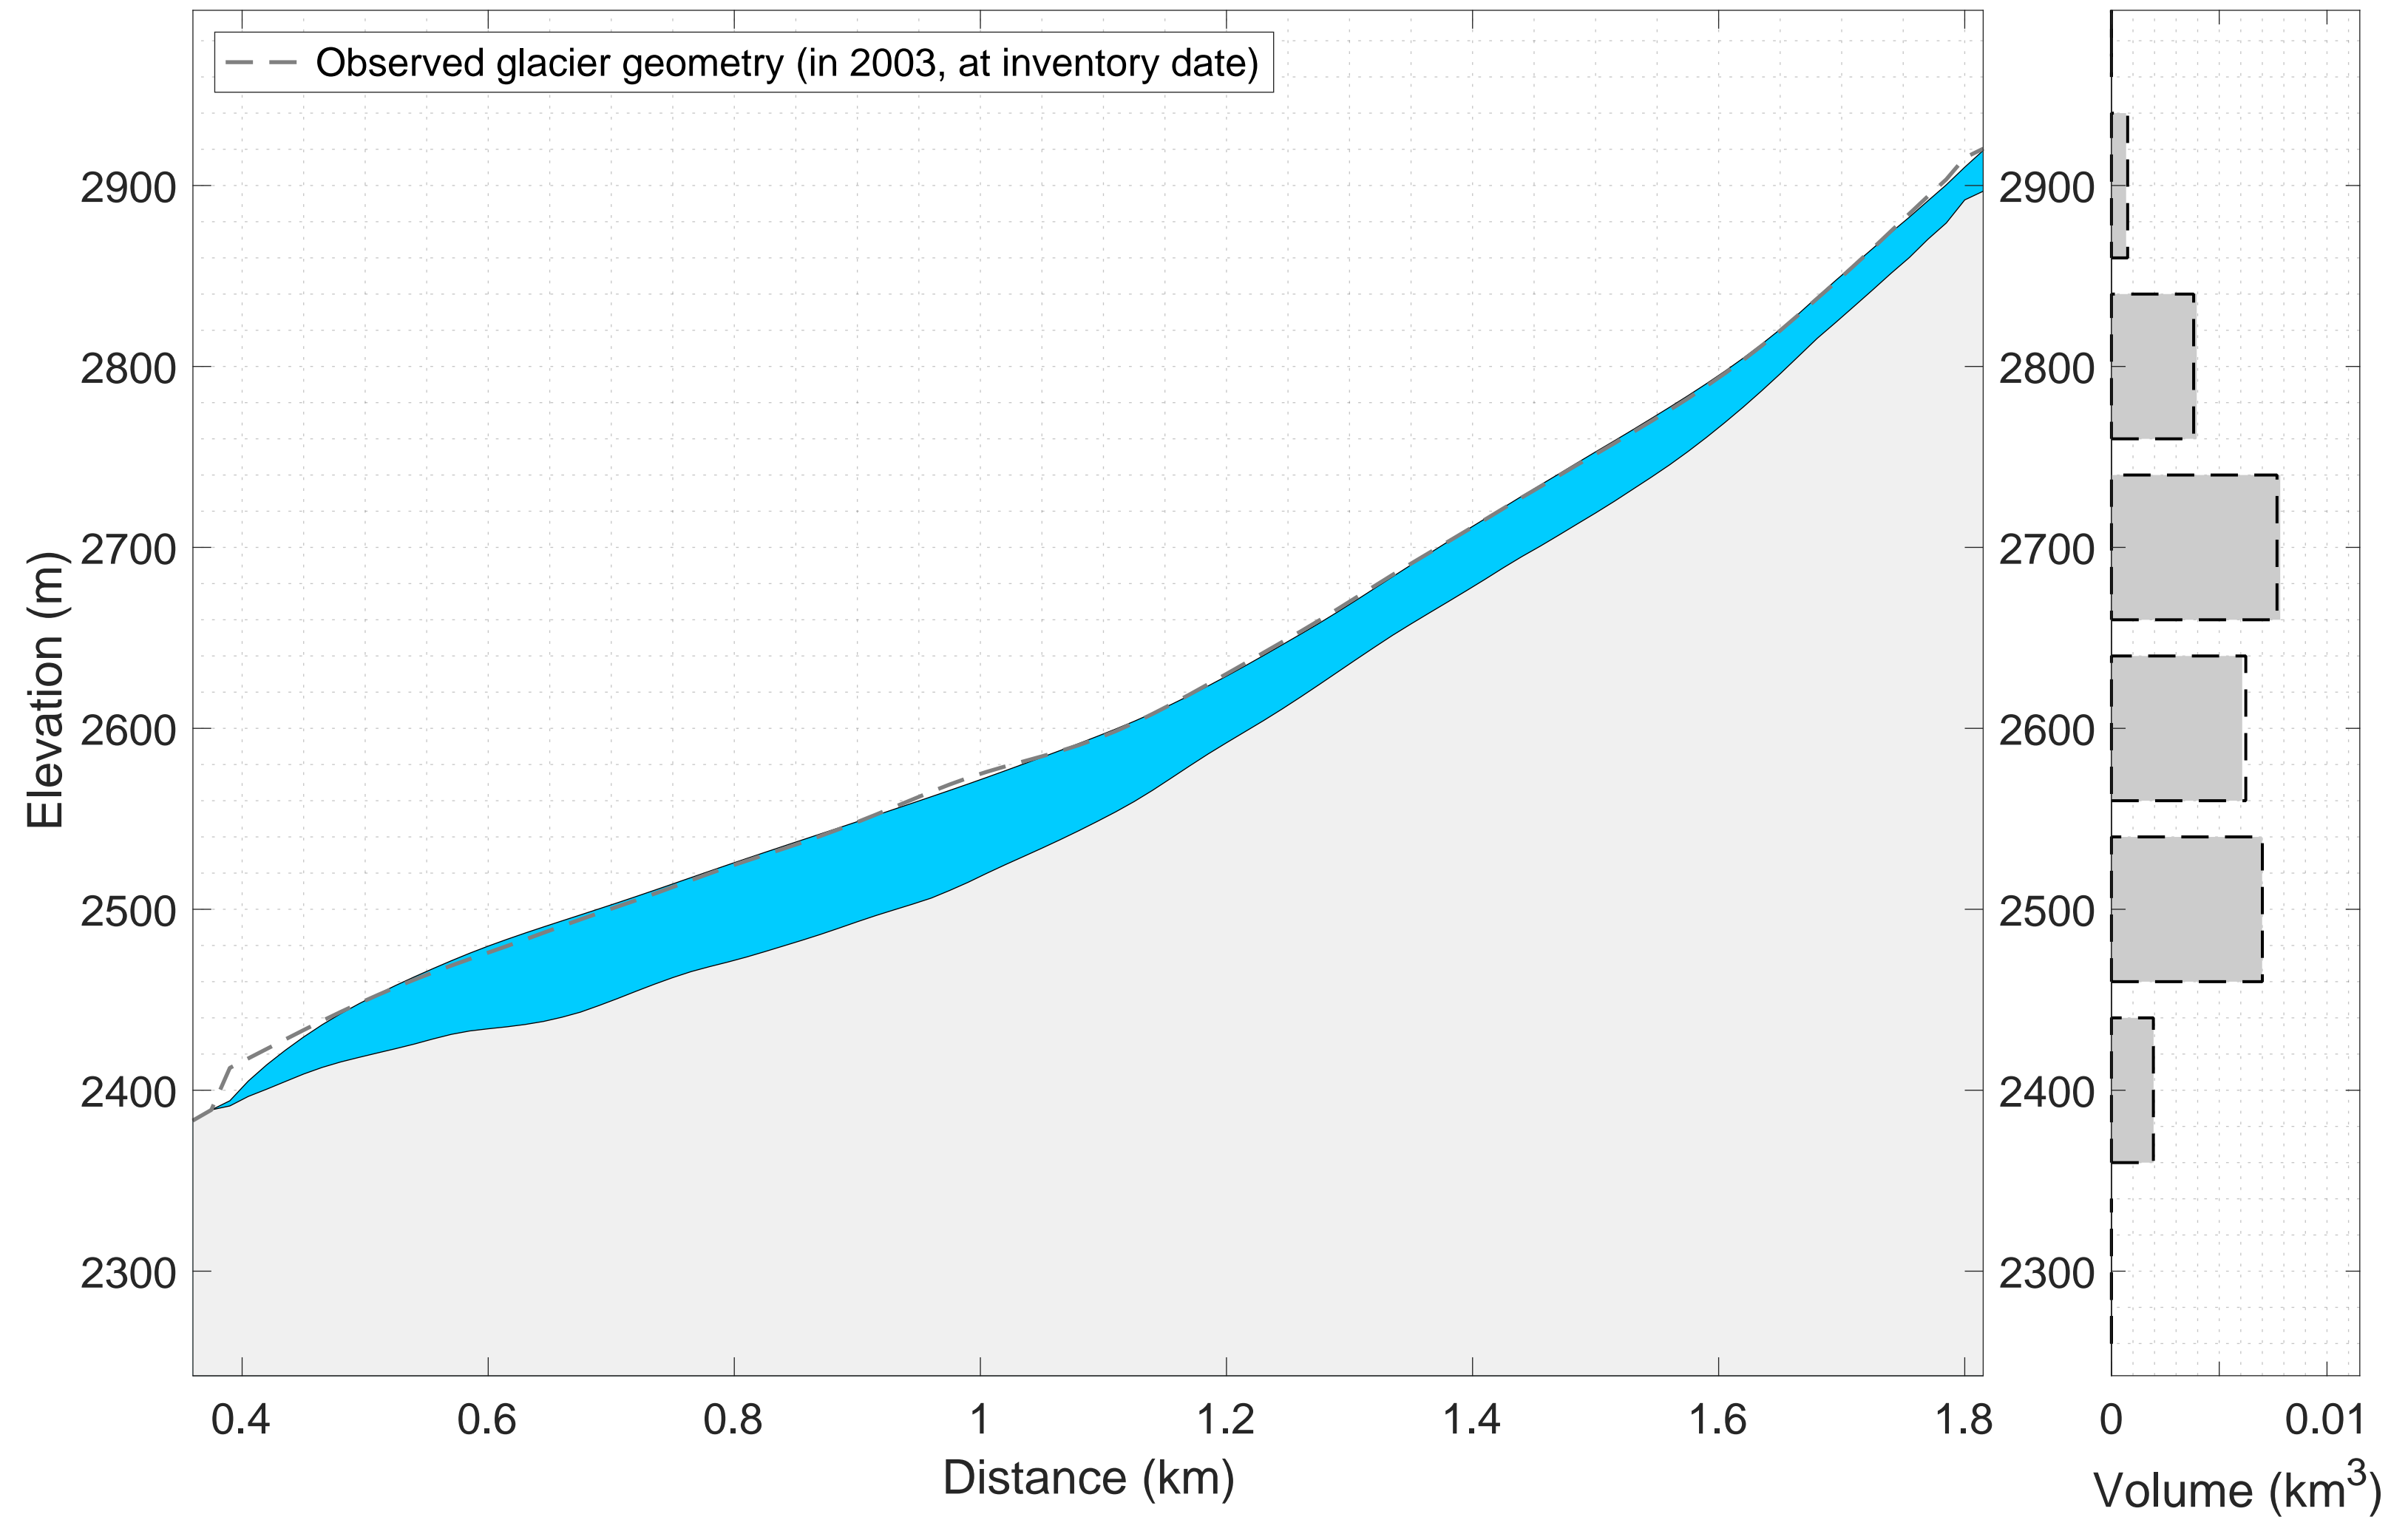

Supplement: Supplementary file 723 [file tc-13-1125-2019-supplement.zip]

**Modelled geometry (Glacier ID = 03447;  $A = 3.6324\text{e-}17 \text{ Pa}^{-3} \text{ a}^{-1}$ ;  $dx = 10 \text{ m}$ )**

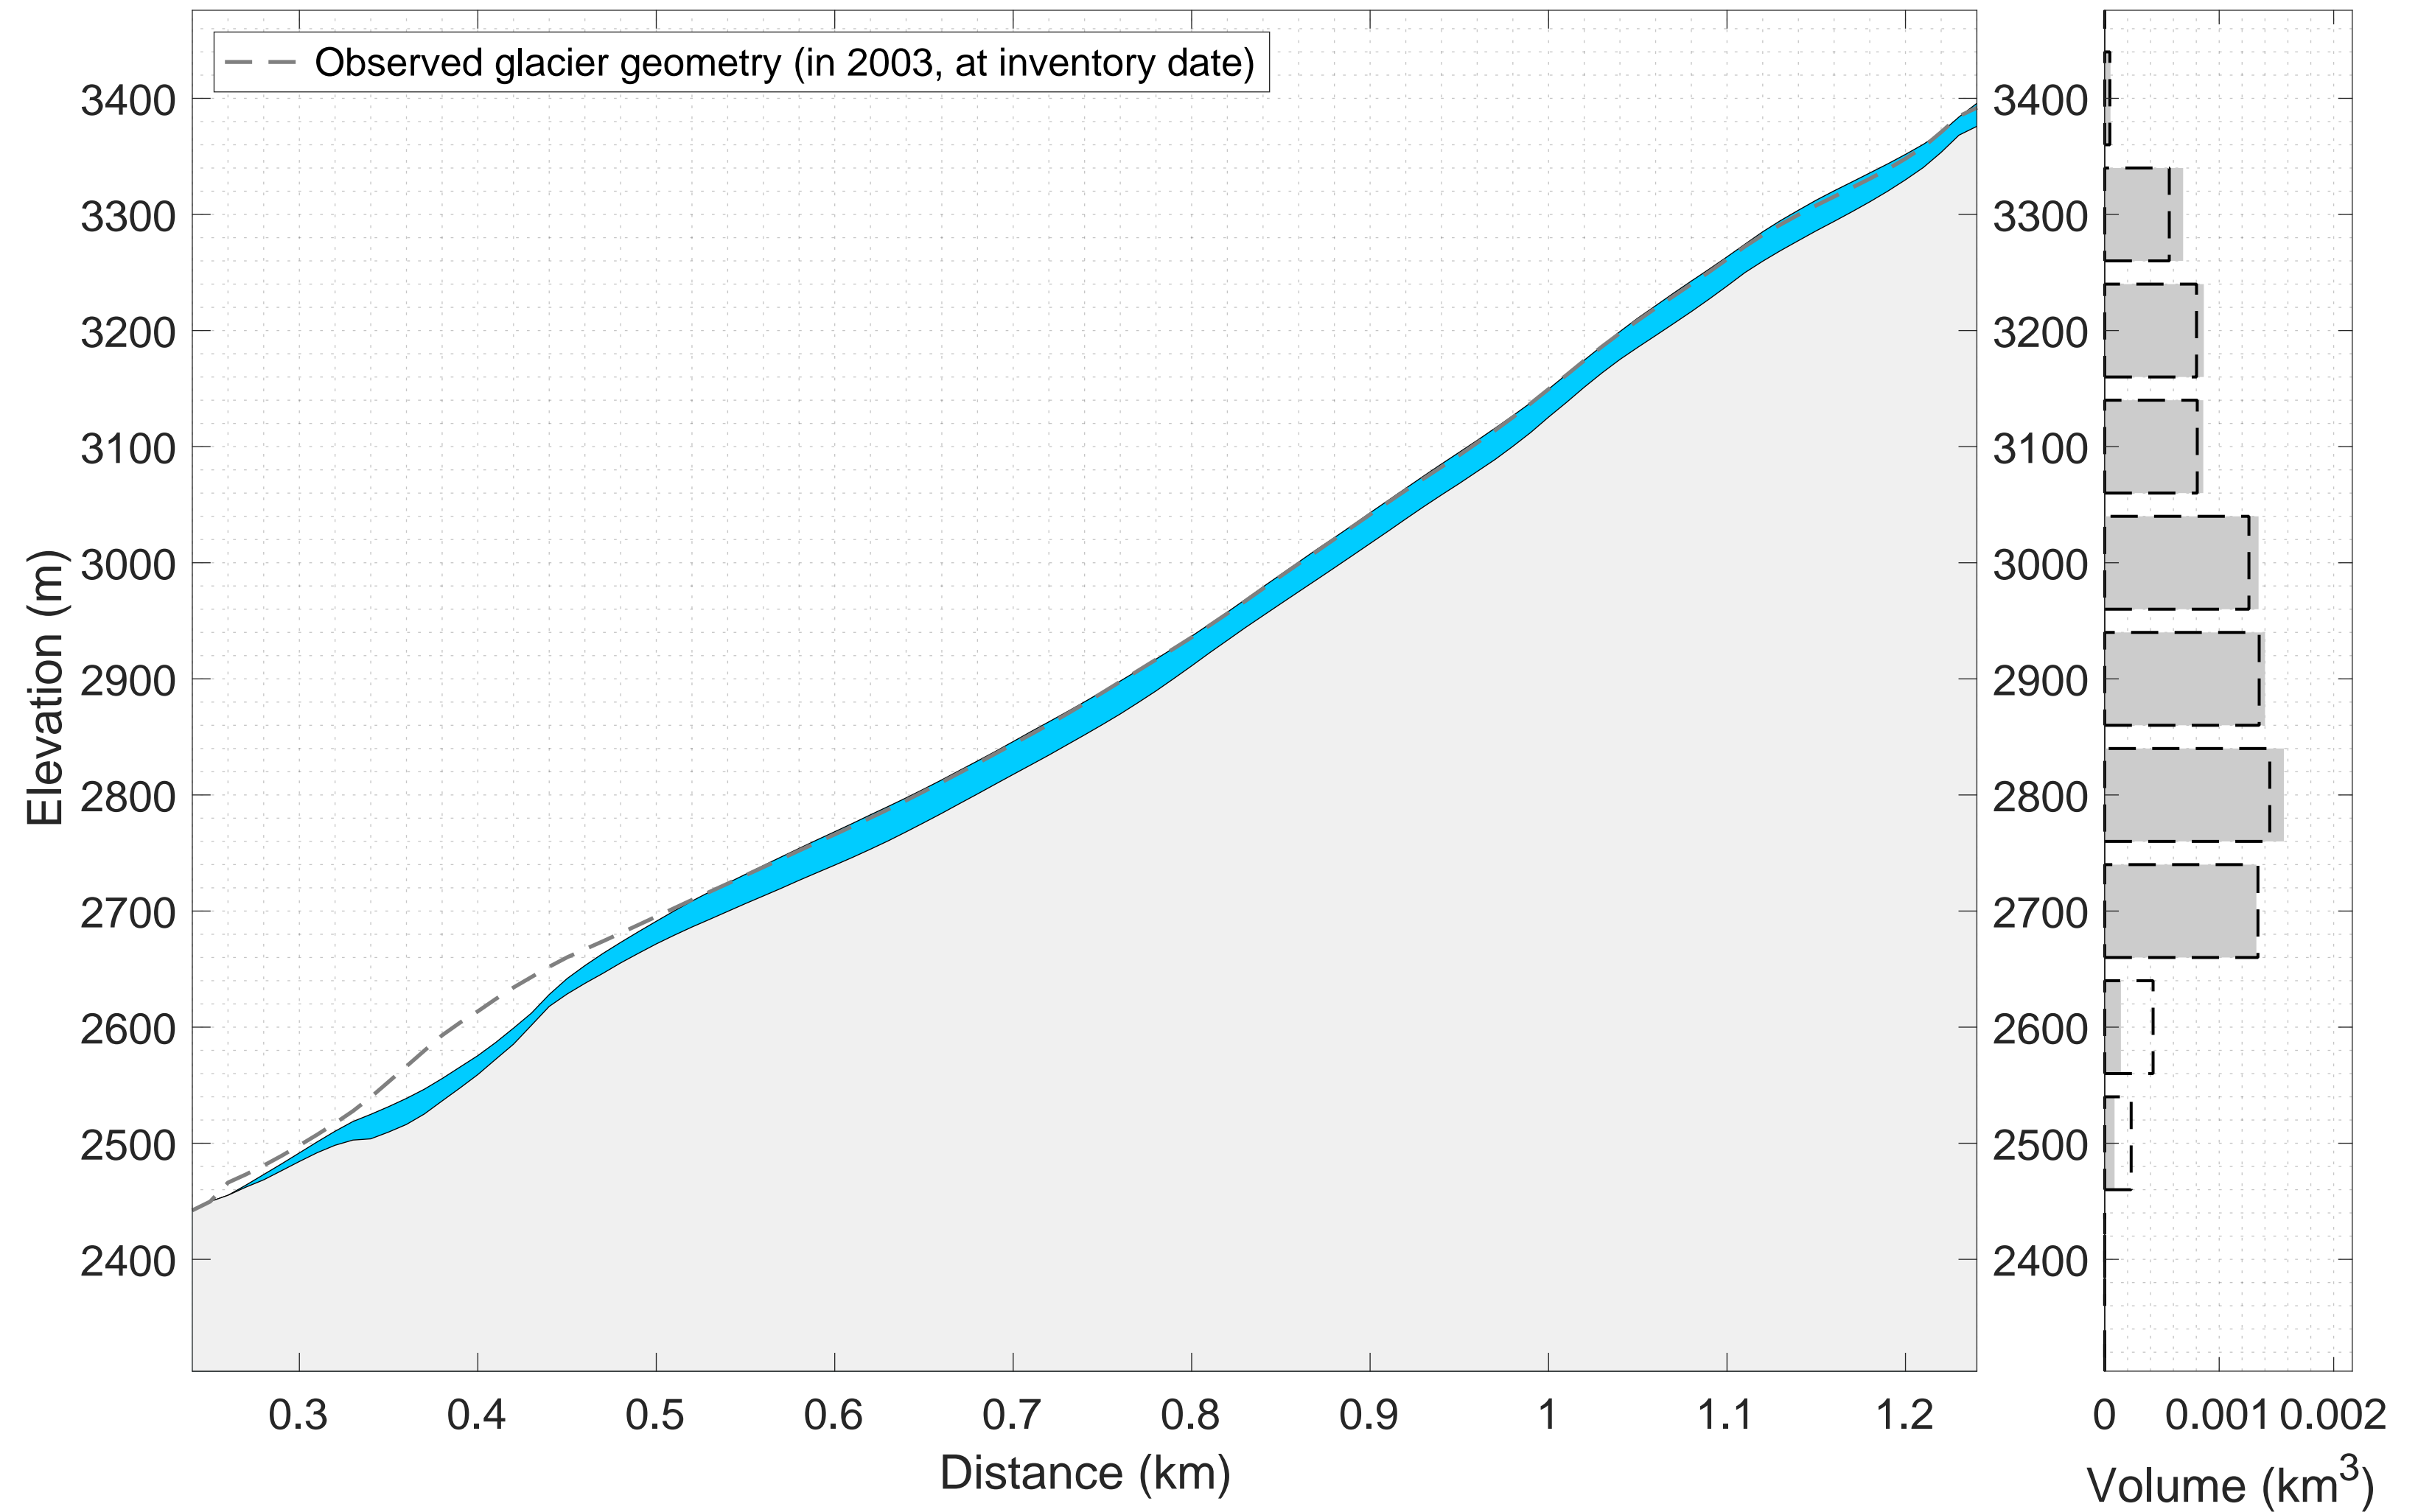

Supplement: Supplementary file 724 [file tc-13-1125-2019-supplement.zip]

**Modelled geometry (Glacier ID = 03308;  $A = 2.181\text{e-}16 \text{ Pa}^{-3} \text{ a}^{-1}$ ;  $dx = 46 \text{ m}$ )**

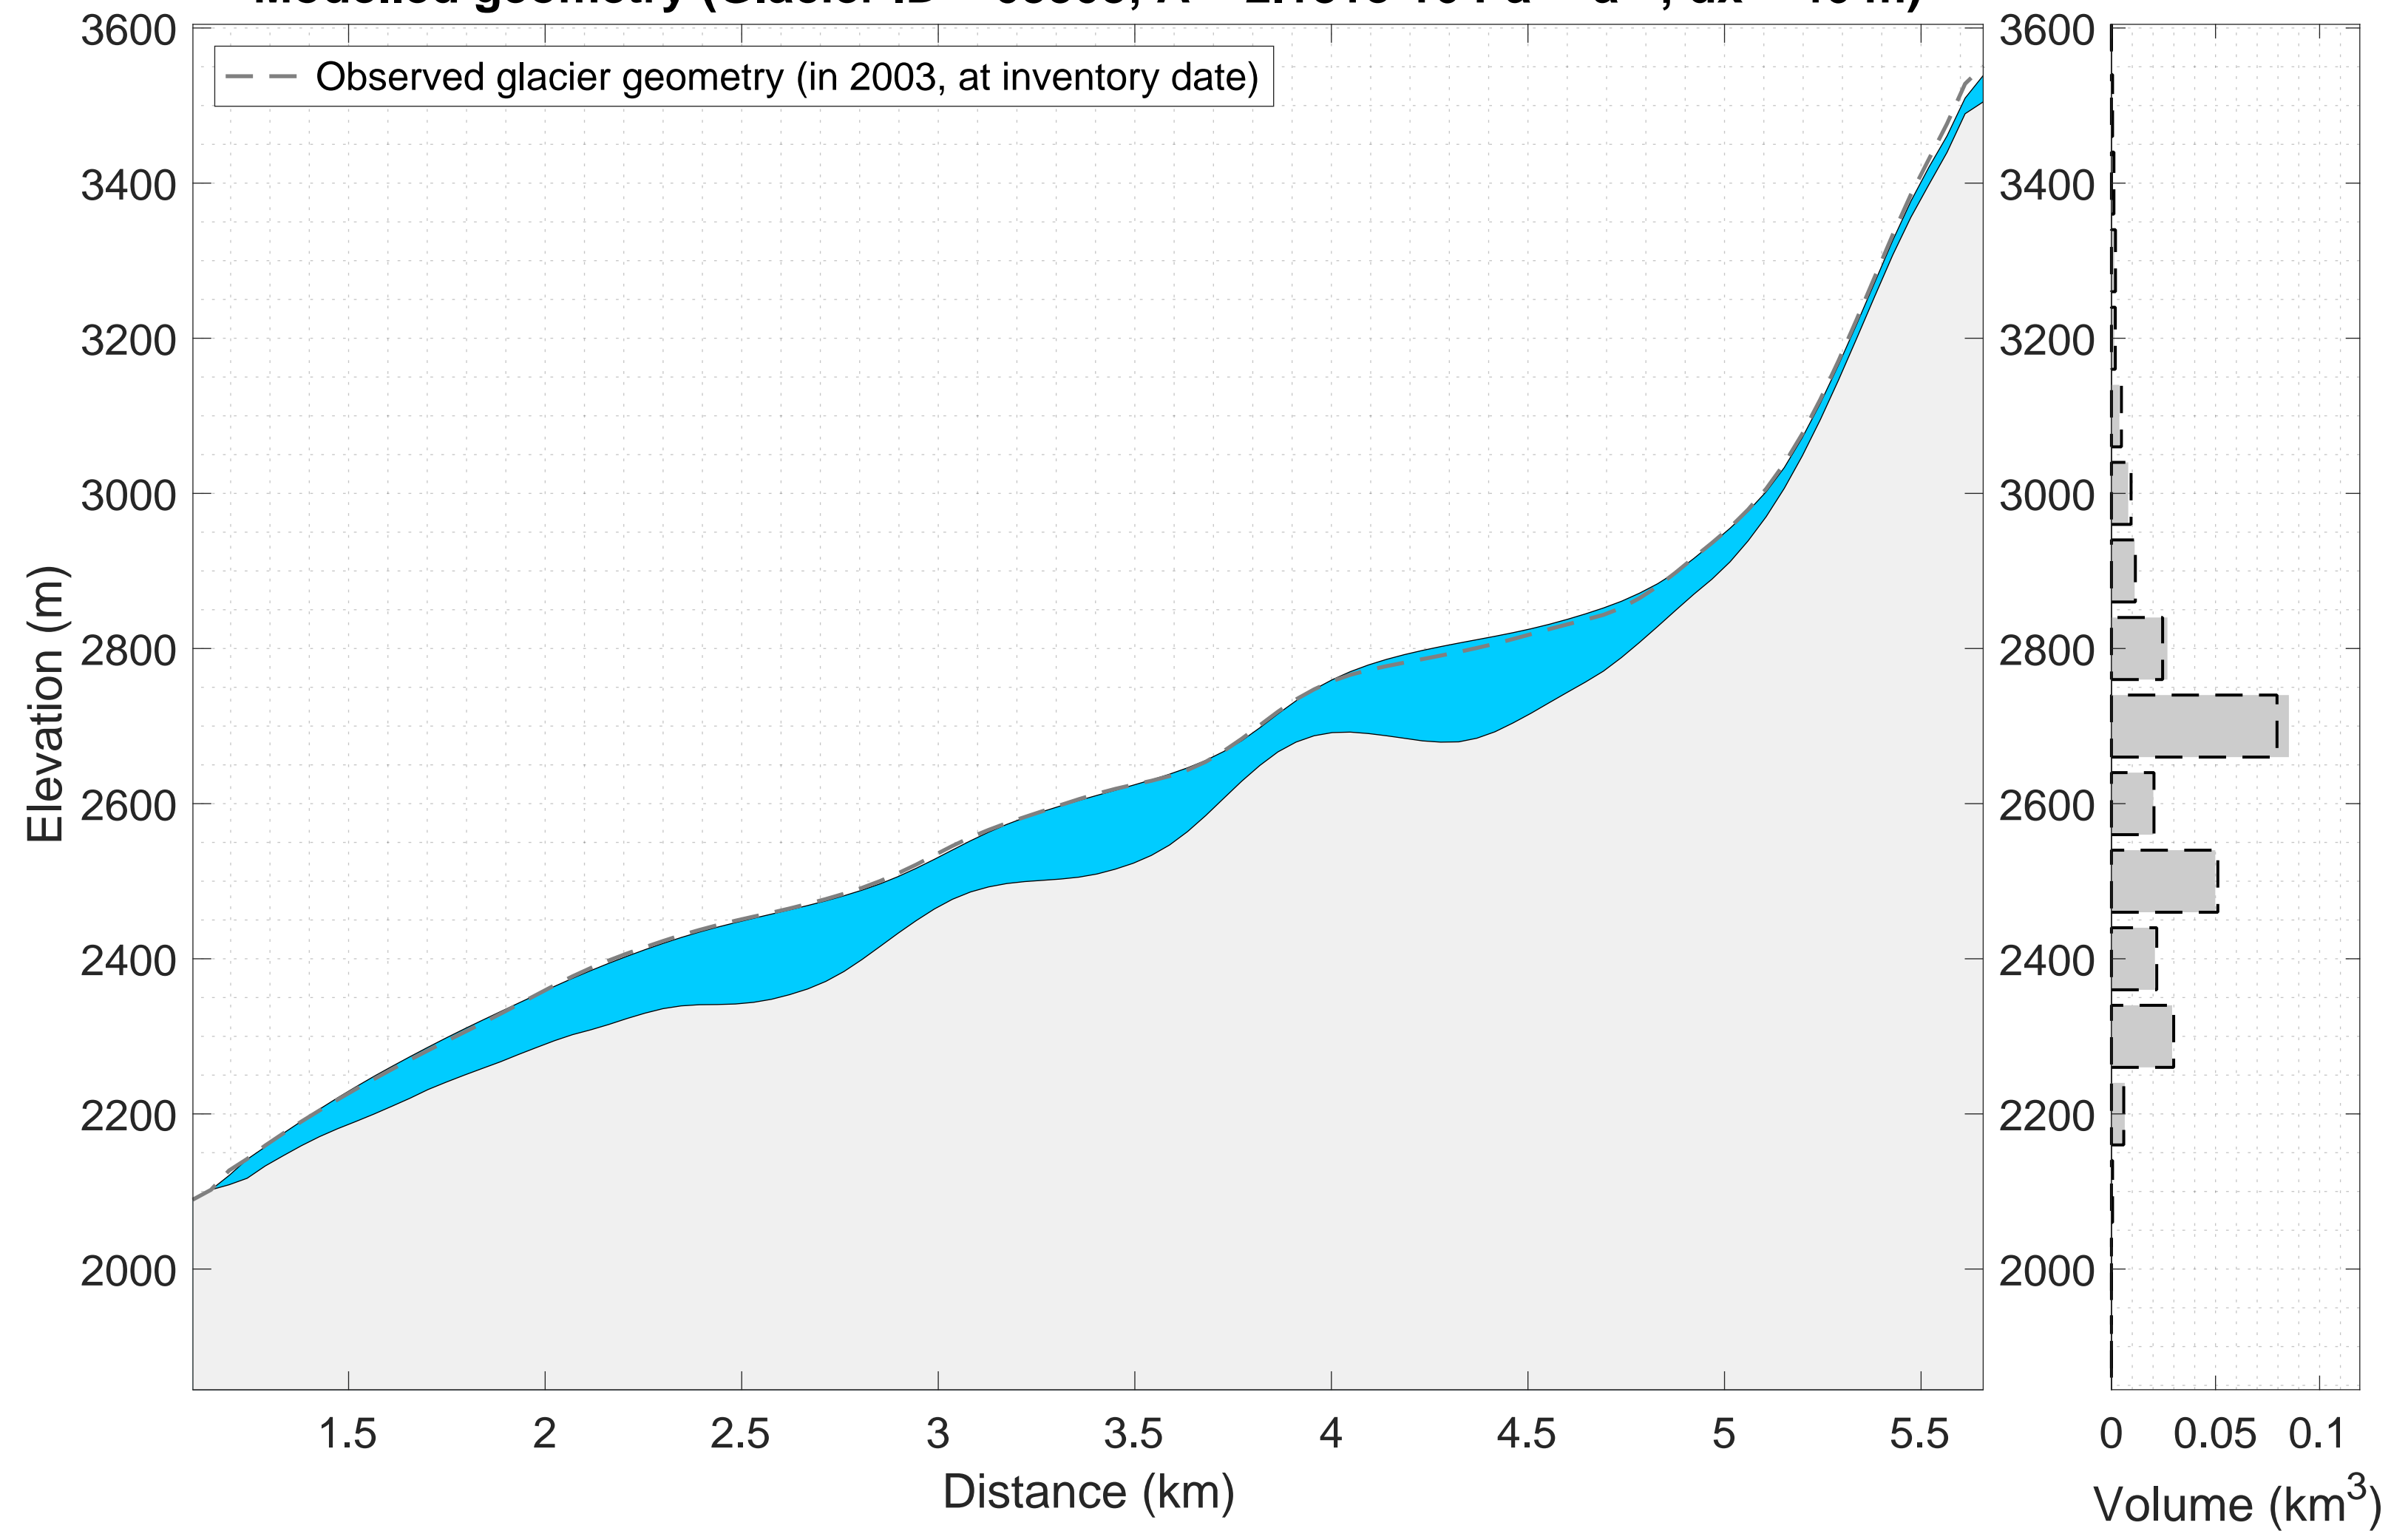

Supplement: Supplementary file 725 [file tc-13-1125-2019-supplement.zip]

**Modelled geometry (Glacier ID = 02934;  $A = 1.5106\text{e-}16 \text{ Pa}^{-3} \text{ a}^{-1}$ ;  $dx = 26 \text{ m}$ )**

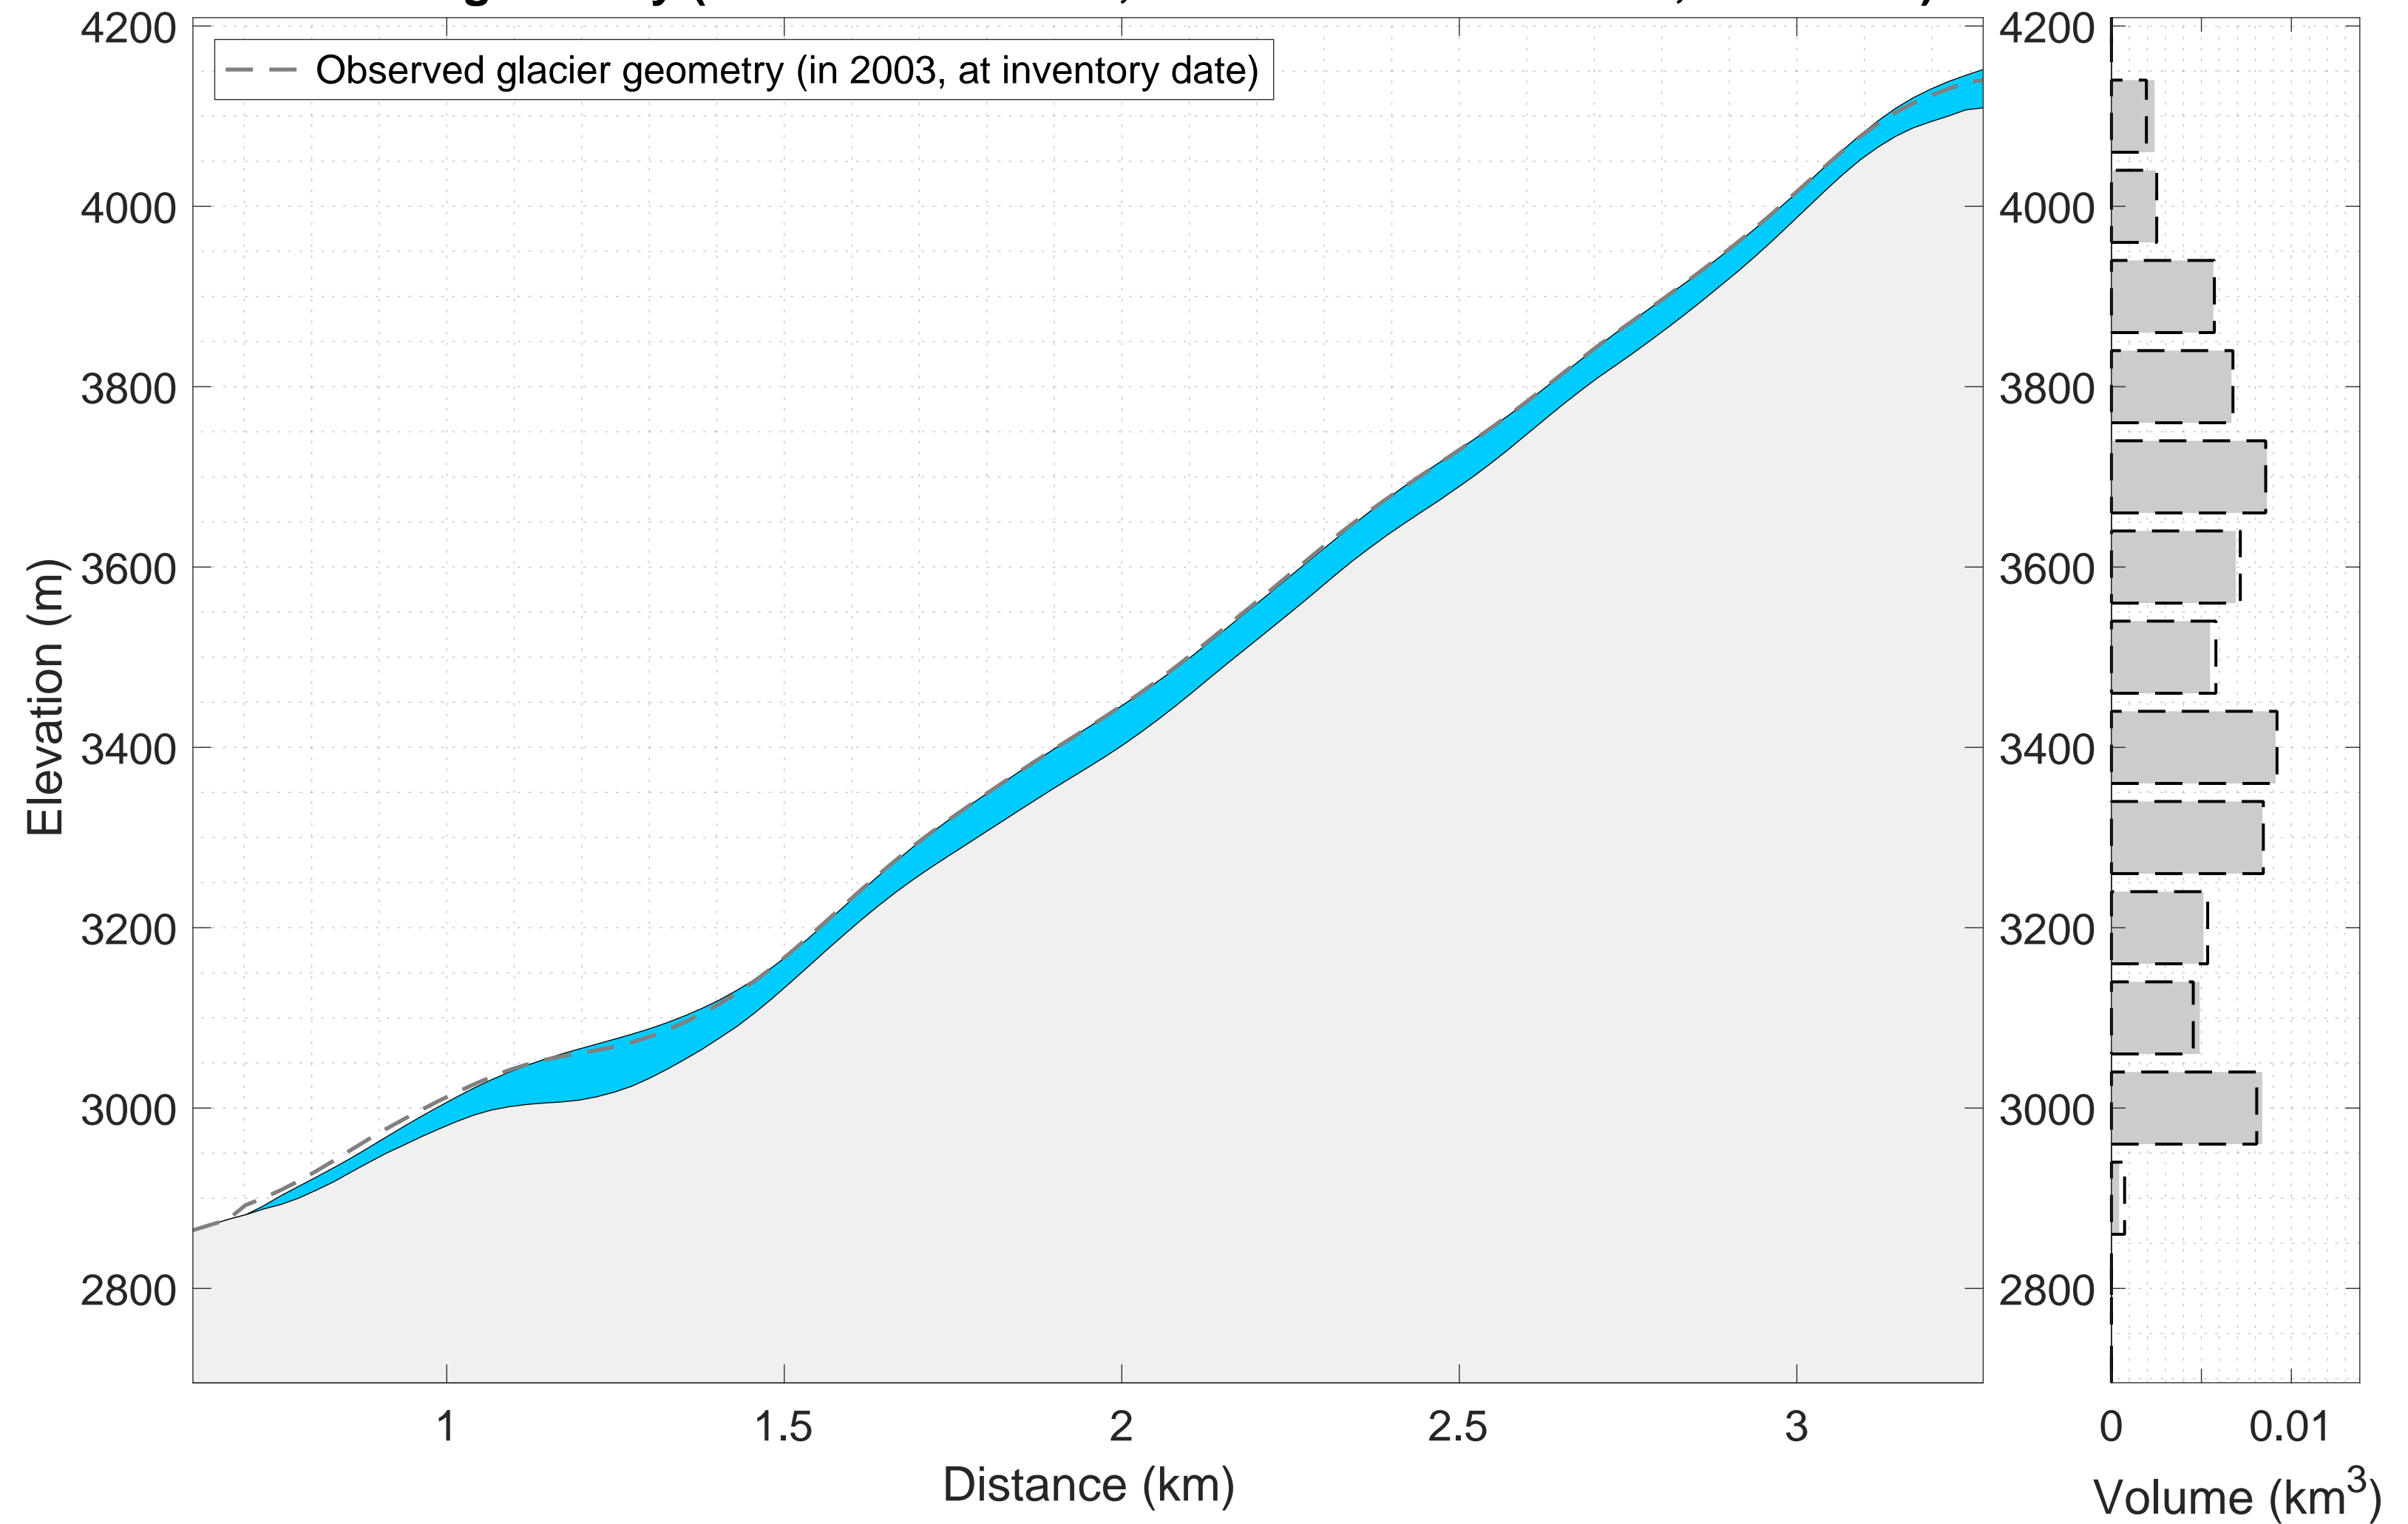

Supplement: Supplementary file 726 [file tc-13-1125-2019-supplement.zip]

**Modelled geometry (Glacier ID = 02787;  $A = 7.5319\text{e-}17 \text{ Pa}^{-3} \text{ a}^{-1}$ ;  $dx = 52 \text{ m}$ )**

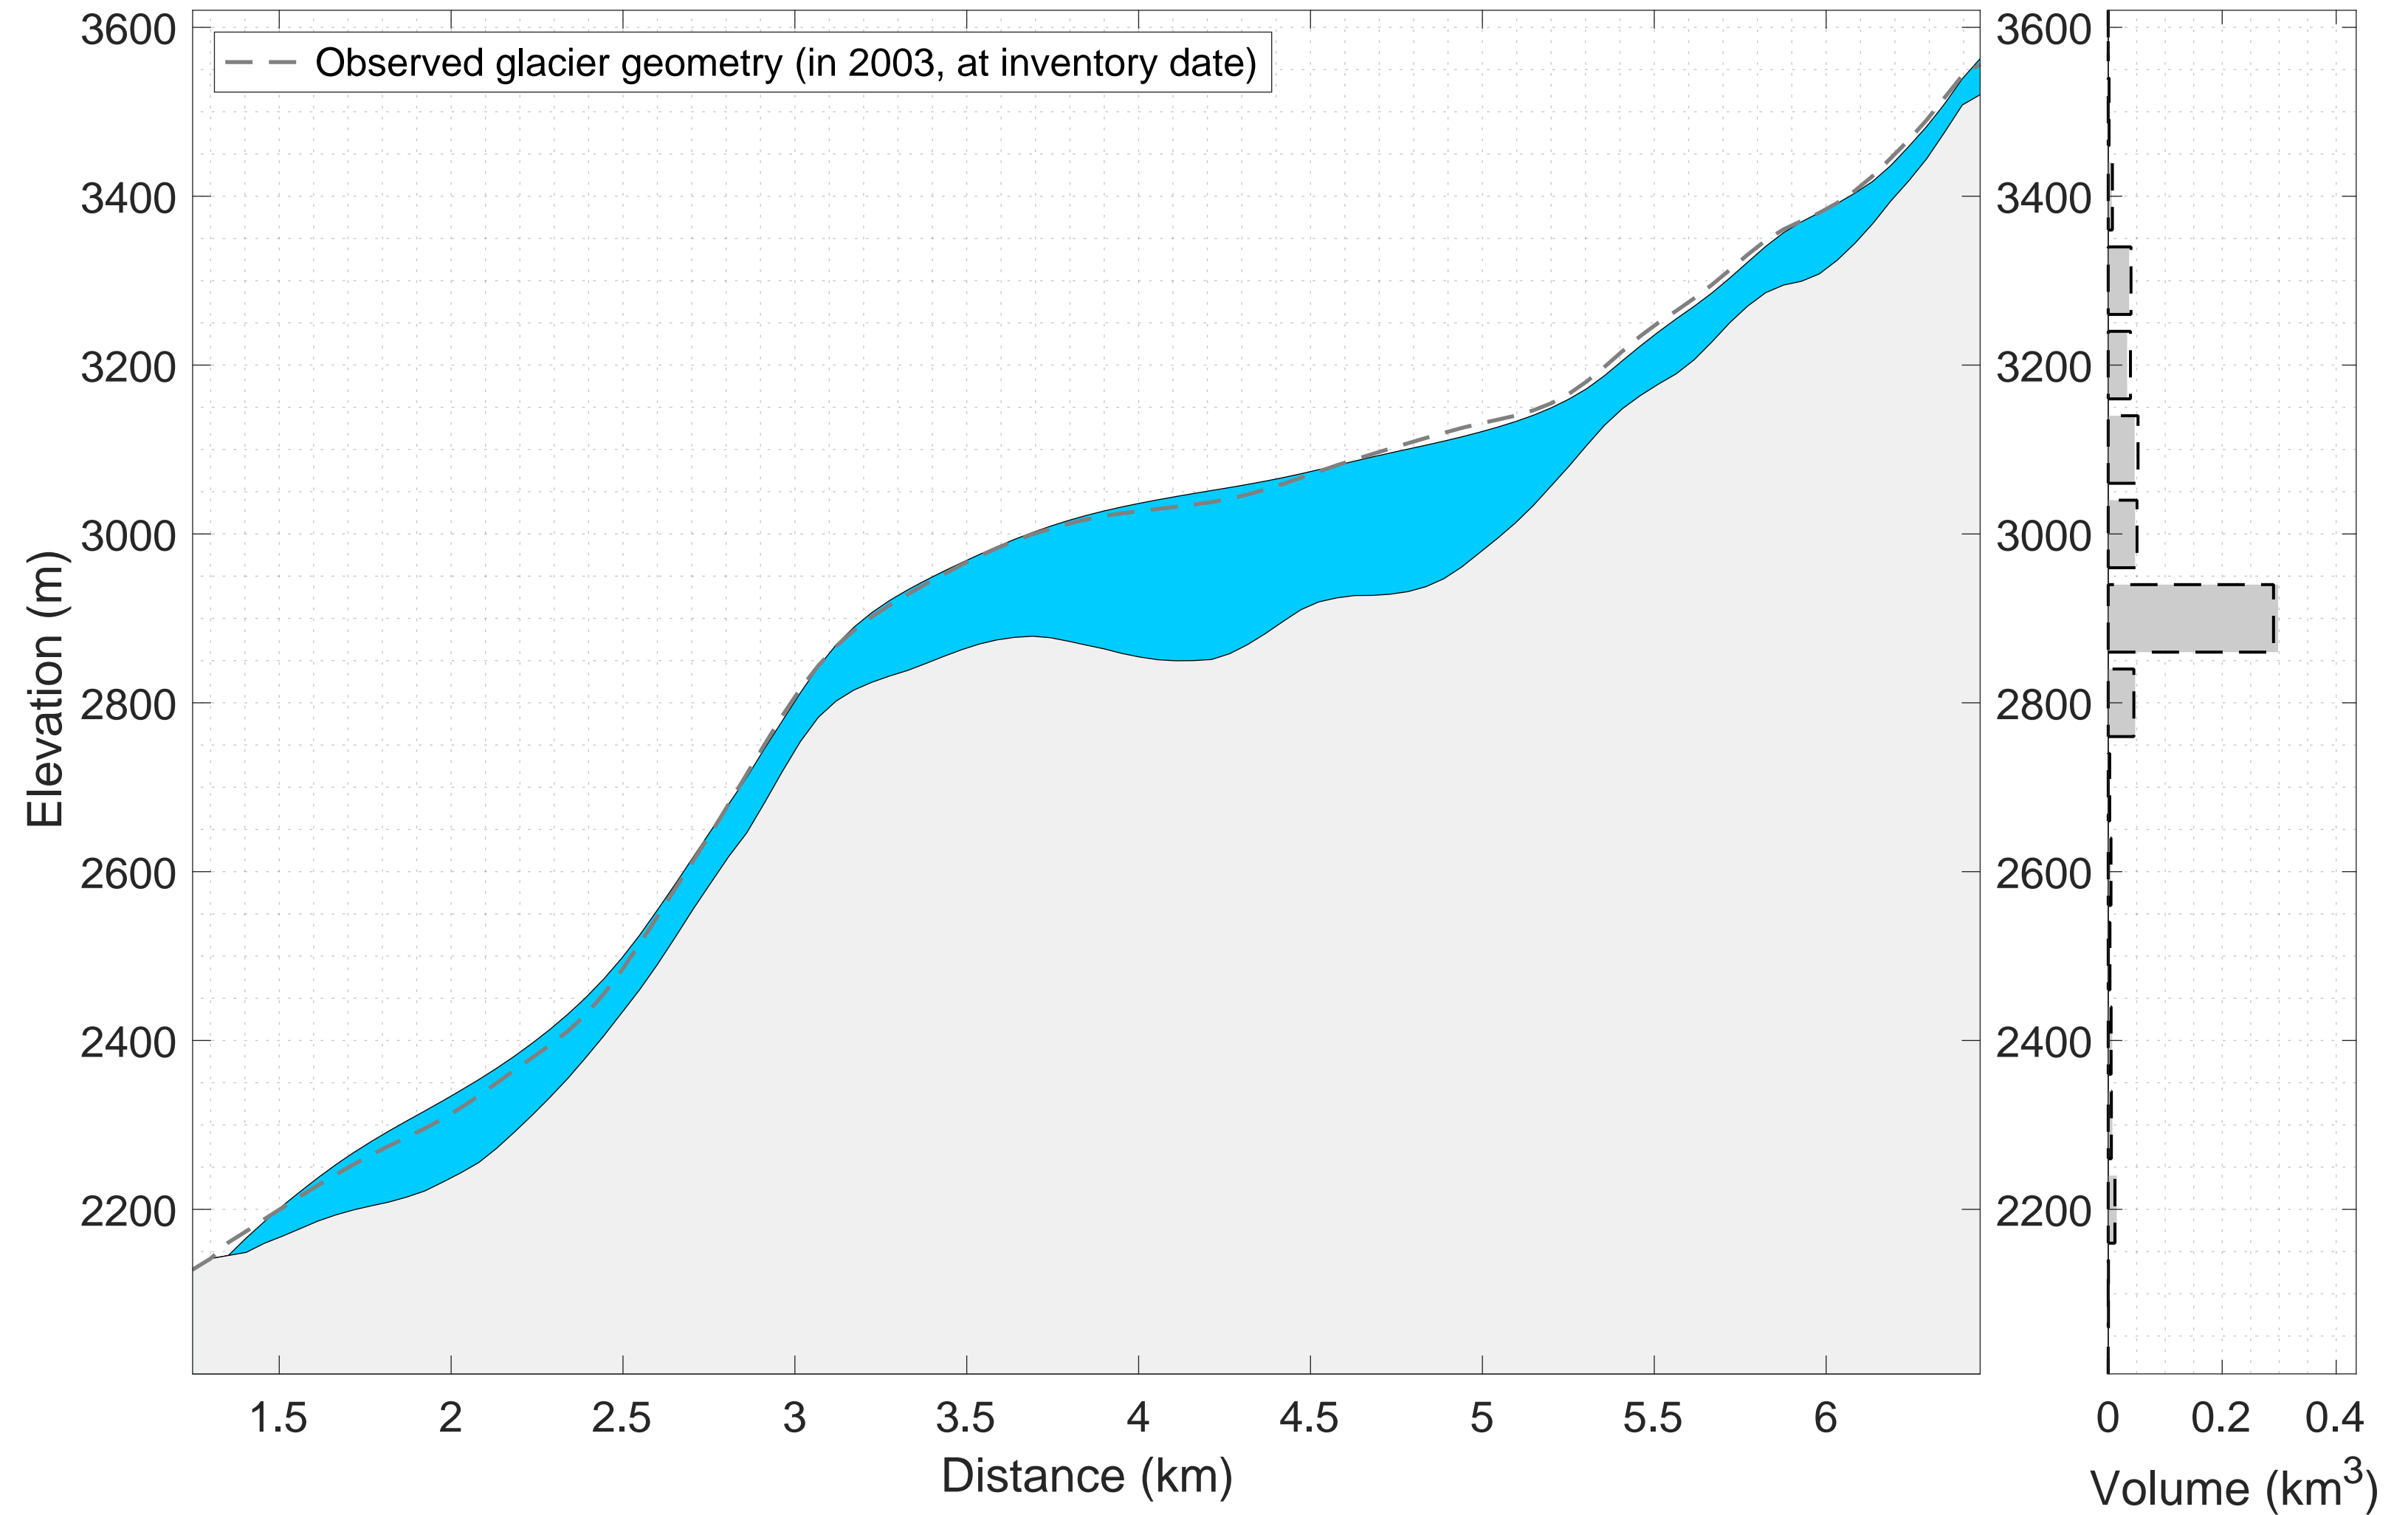

Supplement: Supplementary file 727 [file tc-13-1125-2019-supplement.zip]

**Modelled geometry (Glacier ID = 02819;  $A = 2.5001\text{e-}16 \text{ Pa}^{-3} \text{ a}^{-1}$ ;  $dx = 38 \text{ m}$ )**

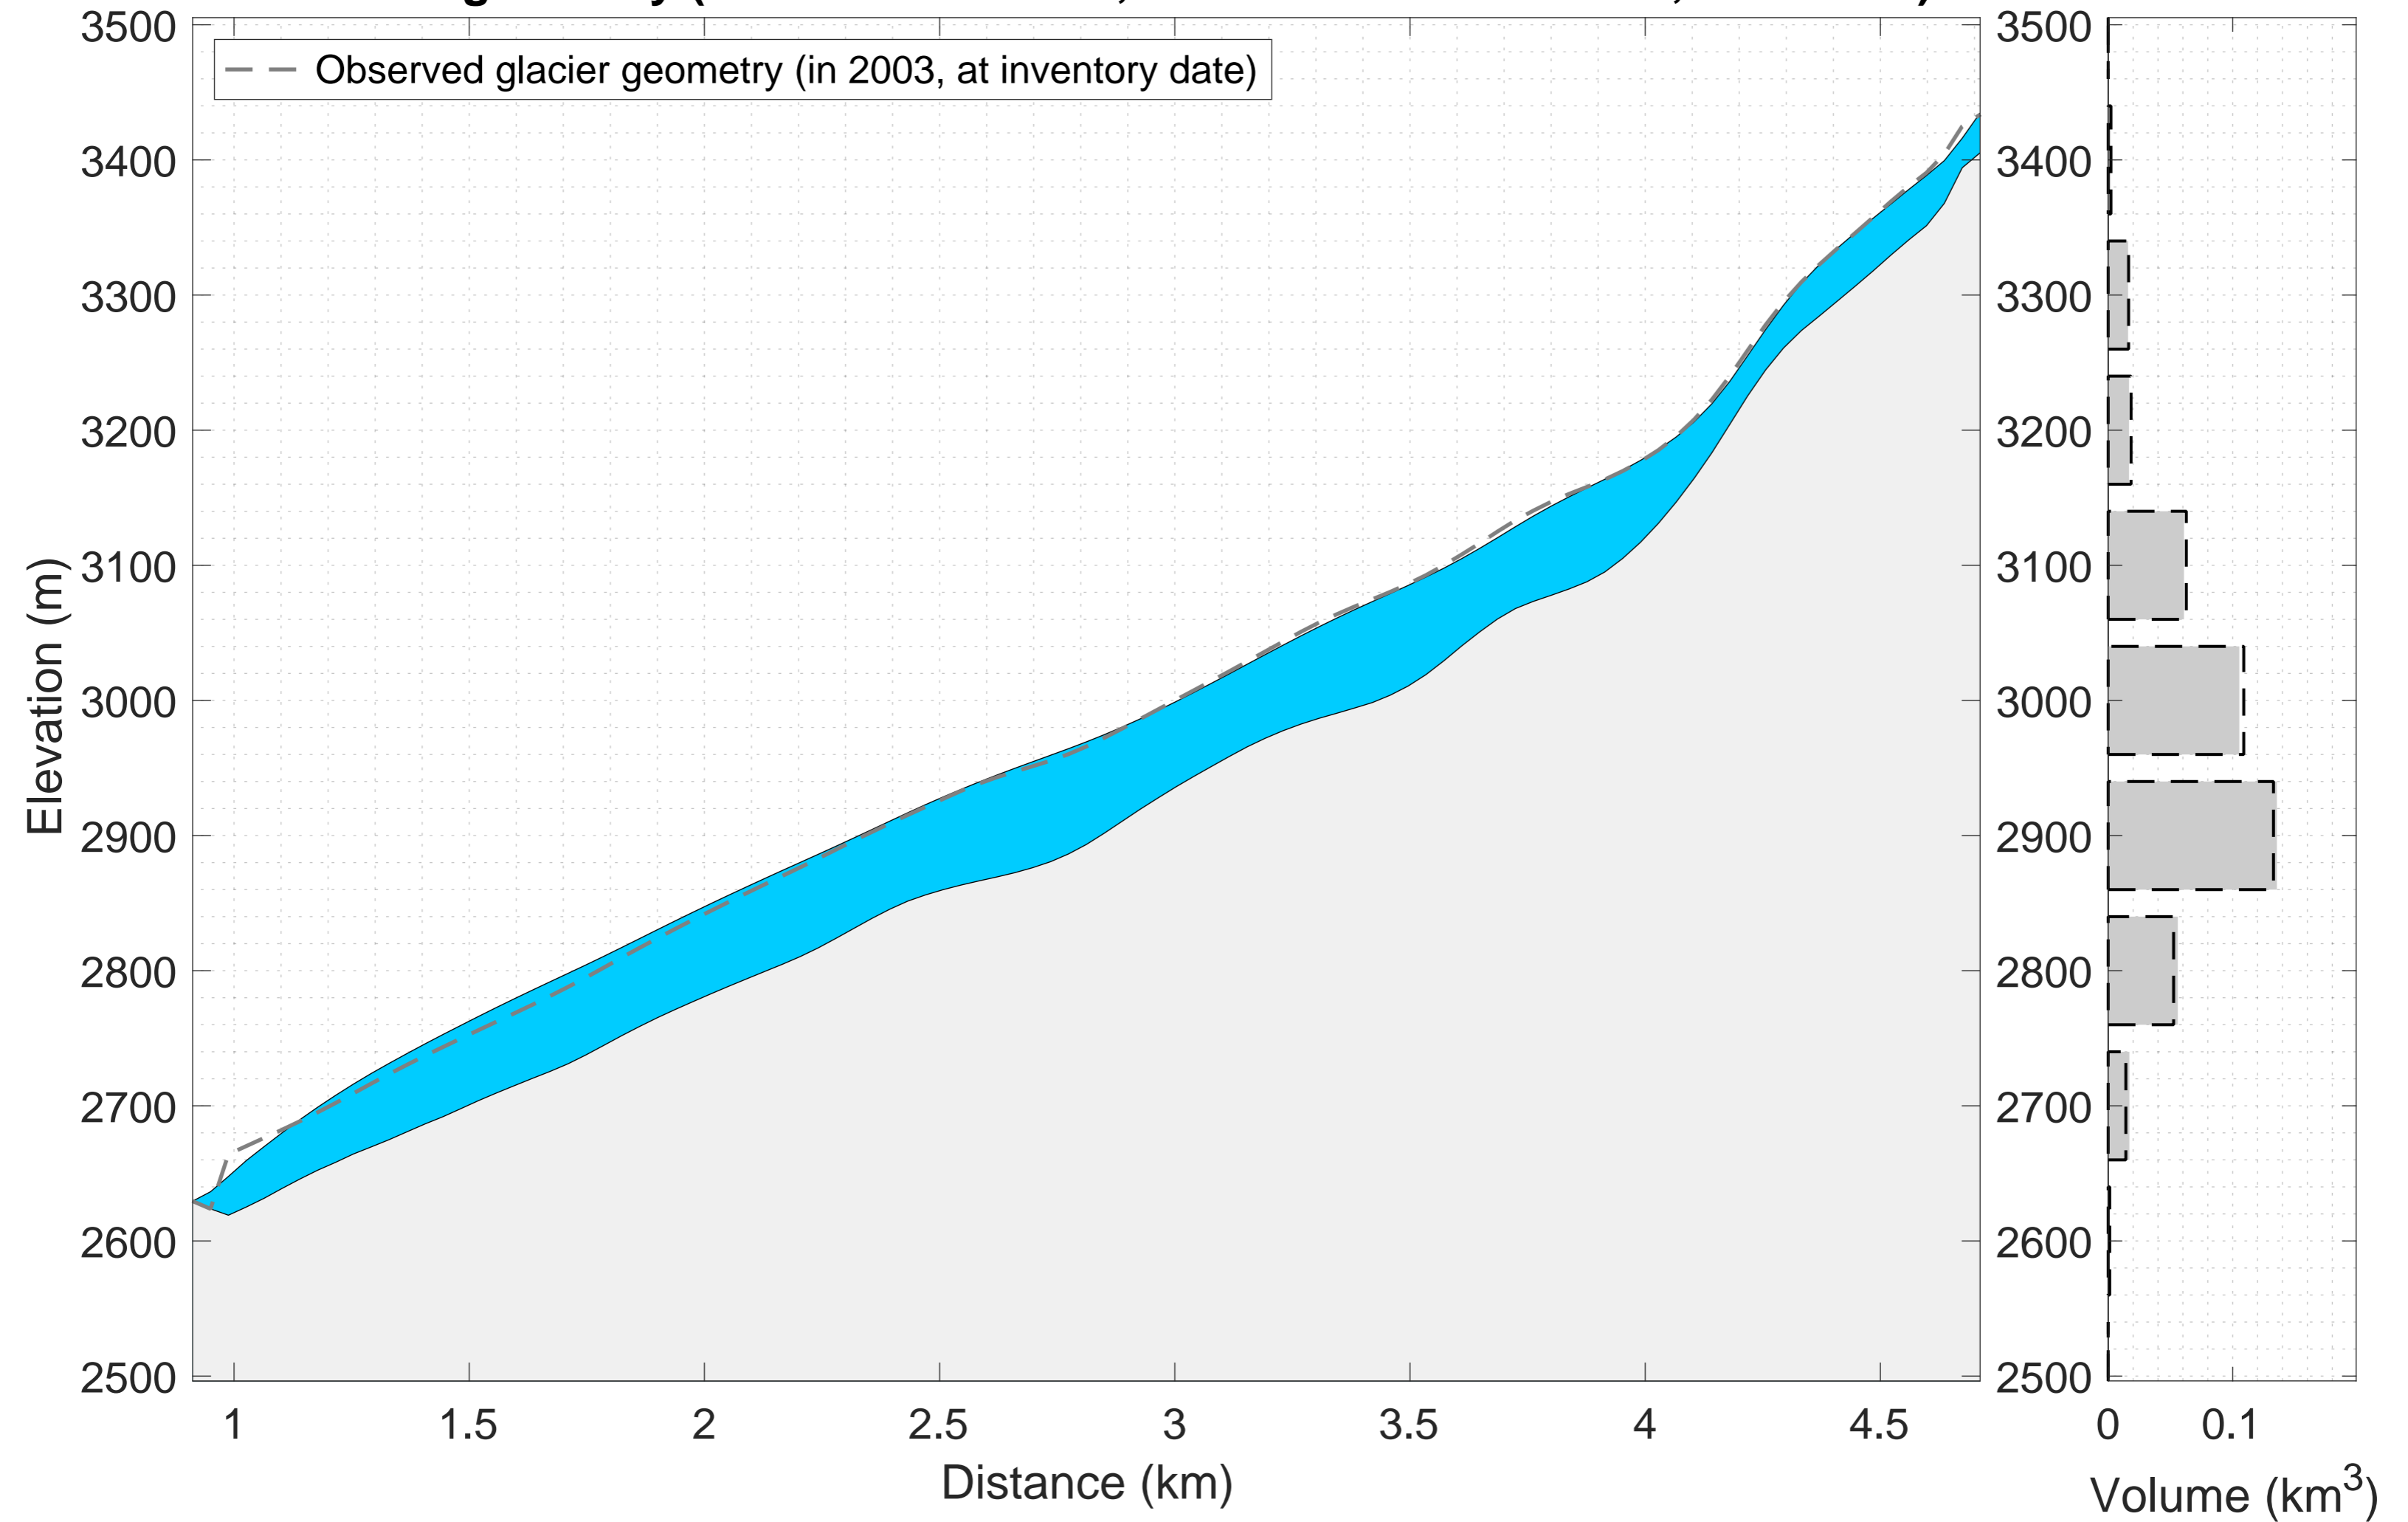

Supplement: Supplementary file 728 [file tc-13-1125-2019-supplement.zip]

Modelled geometry (Glacier ID = 01990;  $A = 1.4313\text{e-}16 \text{ Pa}^{-3} \text{ a}^{-1}$ ;  $dx = 24 \text{ m}$ )

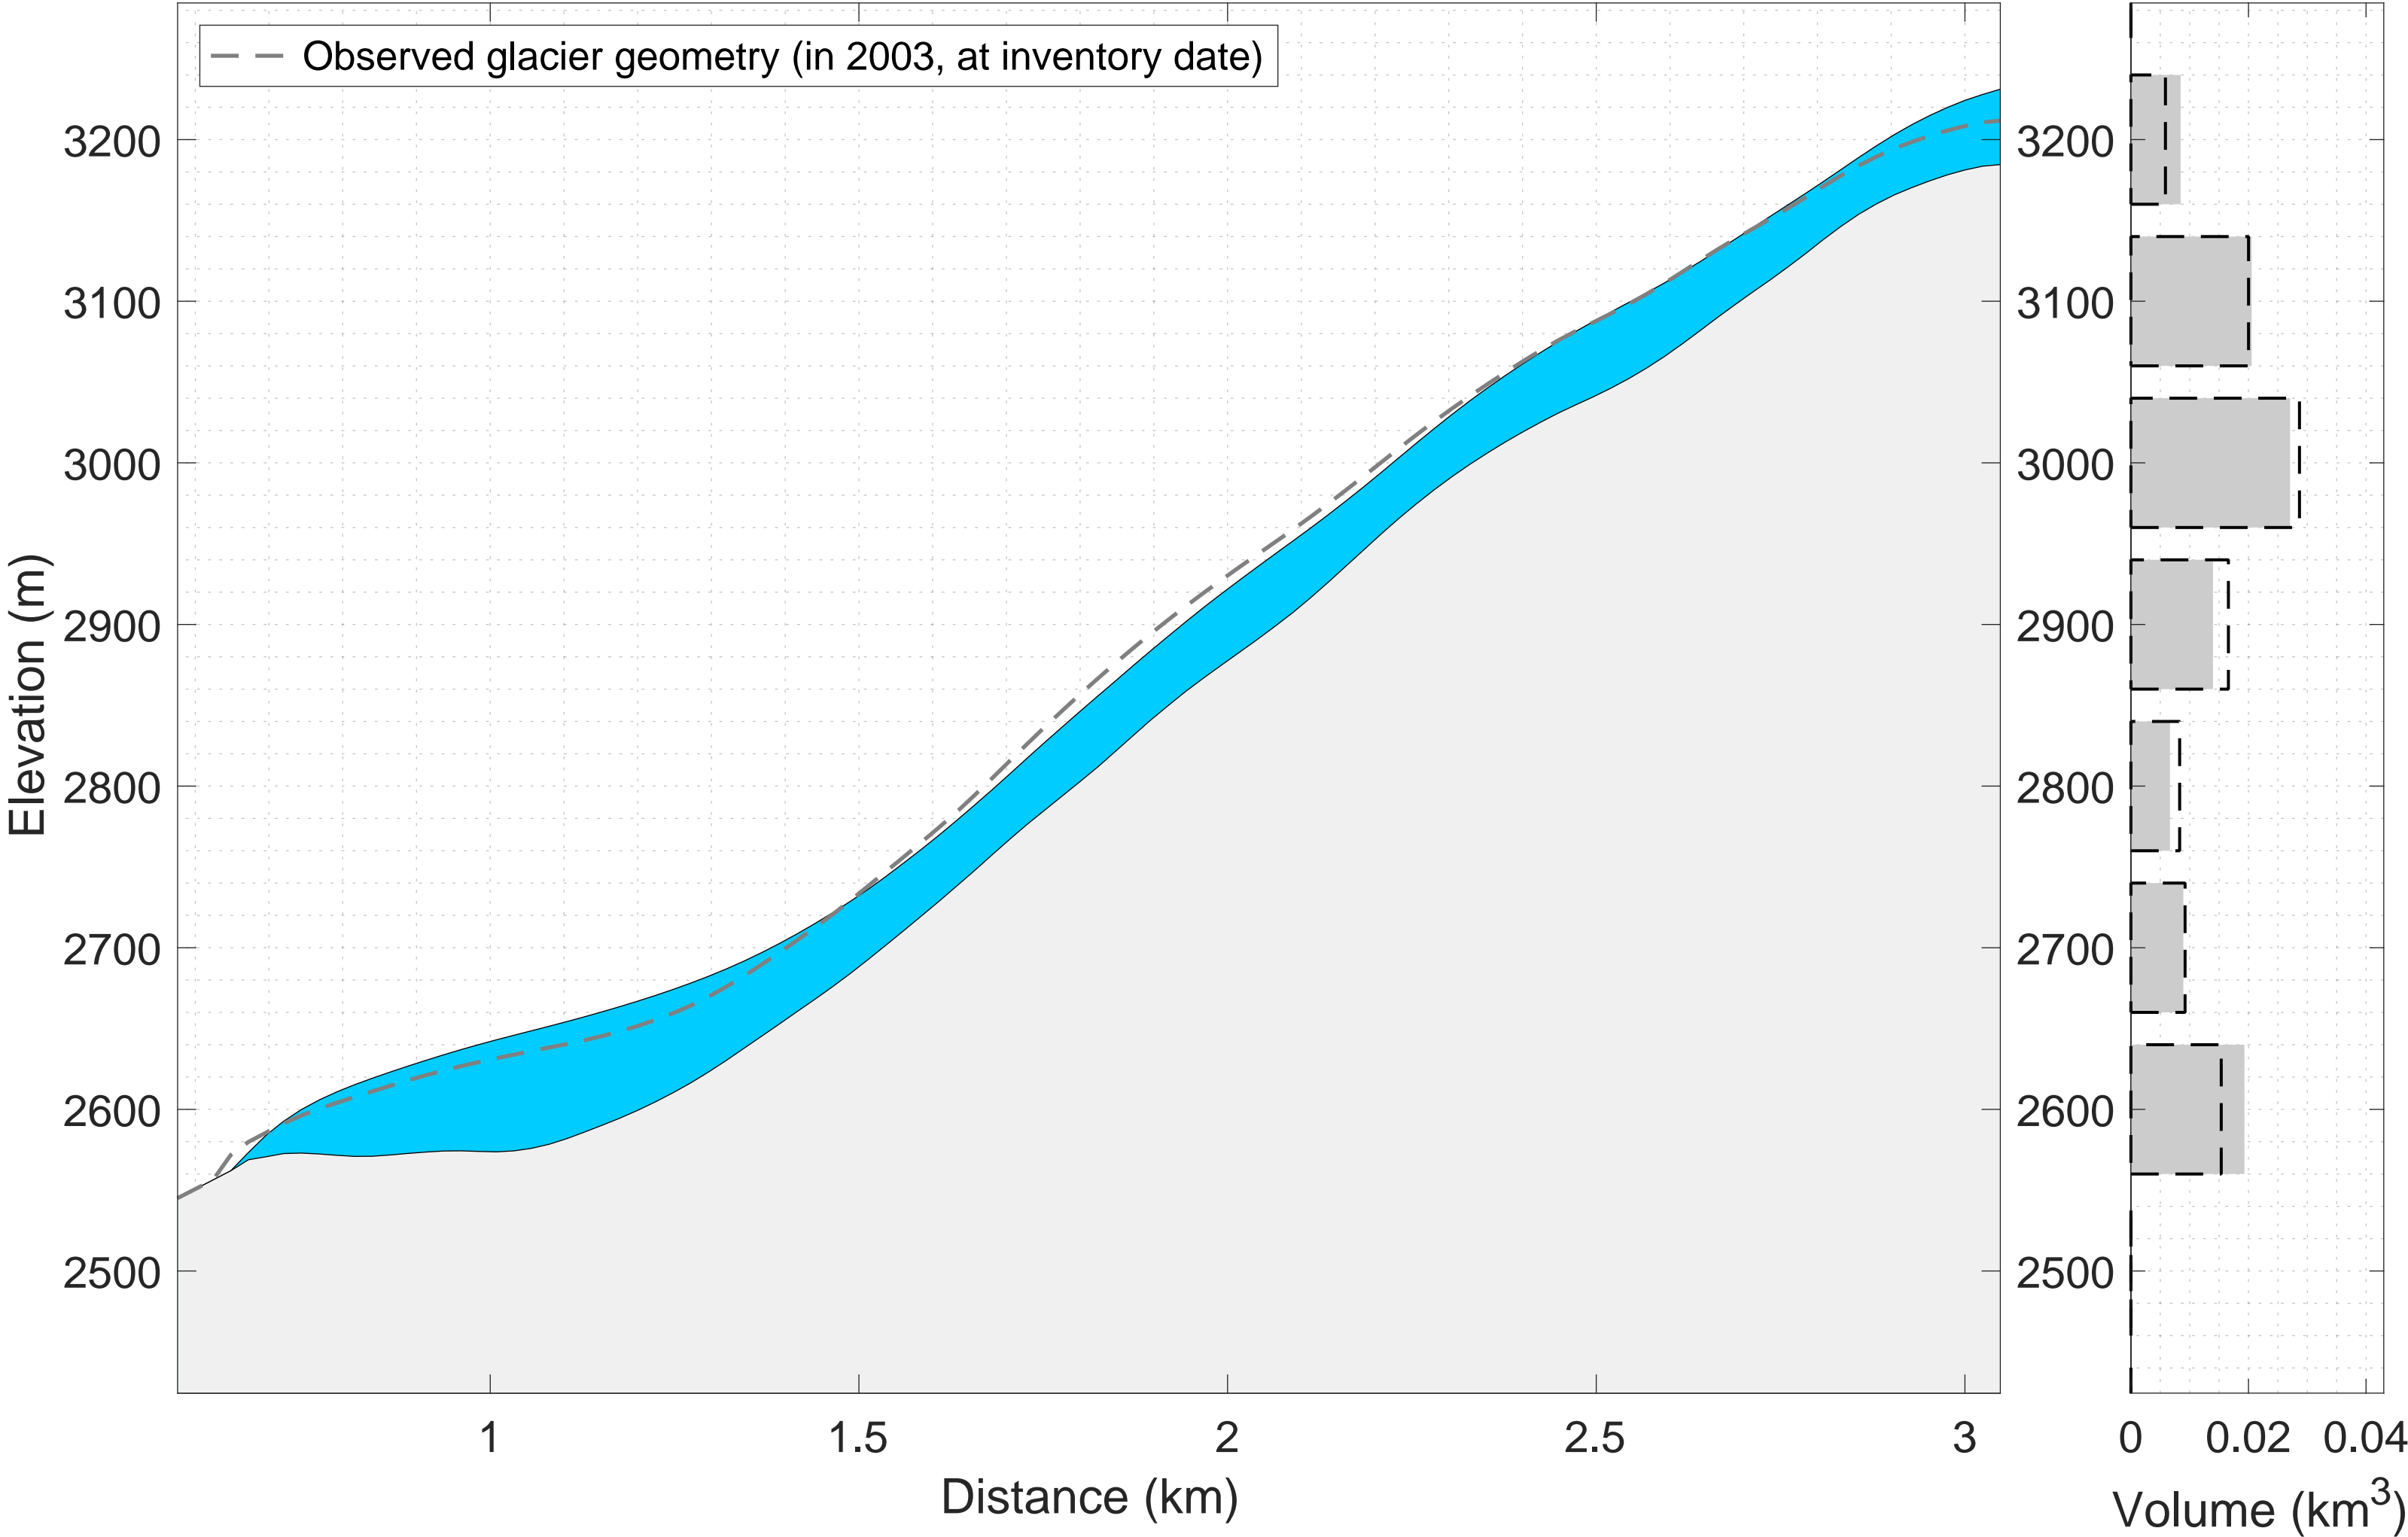

Supplement: Supplementary file 729 [file tc-13-1125-2019-supplement.zip]

**Modelled geometry (Glacier ID = 02901;  $A = 1.4707\text{e-}16 \text{ Pa}^{-3} \text{ a}^{-1}$ ;  $dx = 16 \text{ m}$ )**

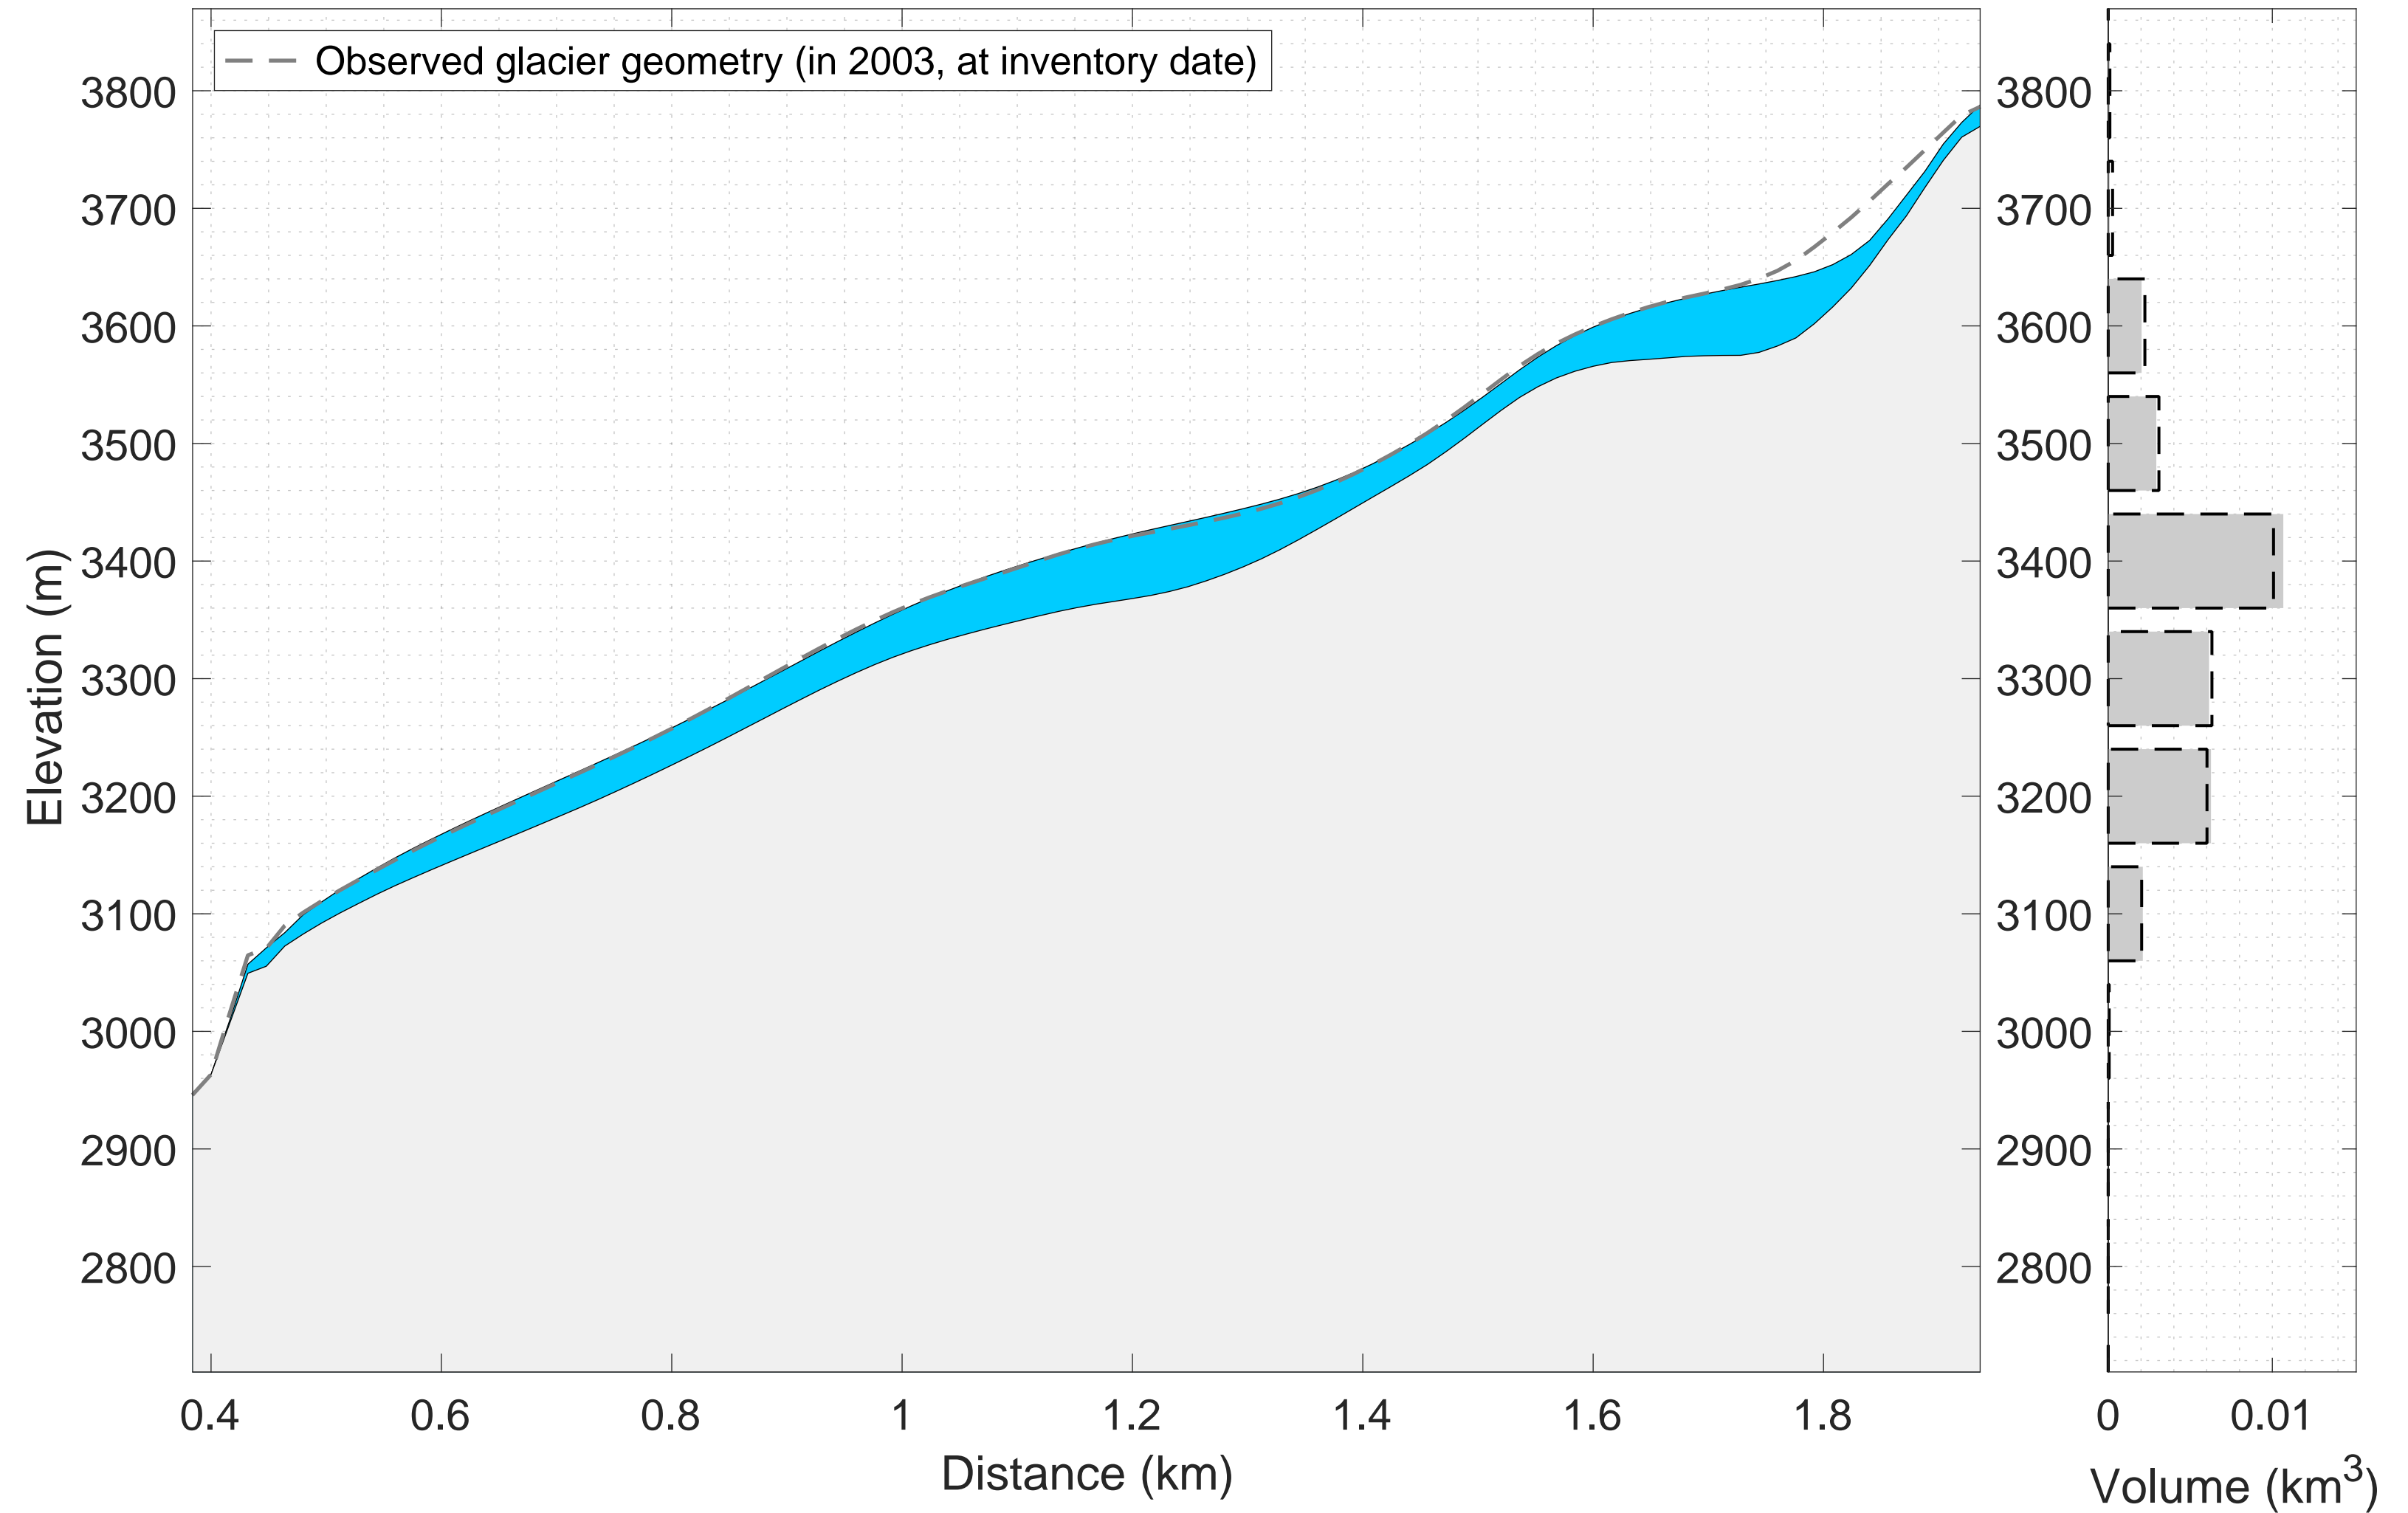

Supplement: Supplementary file 730 [file tc-13-1125-2019-supplement.zip]

**Modelled geometry (Glacier ID = 03547;  $A = 2.3953\text{e-}16 \text{ Pa}^{-3} \text{ a}^{-1}$ ;  $dx = 17 \text{ m}$ )**

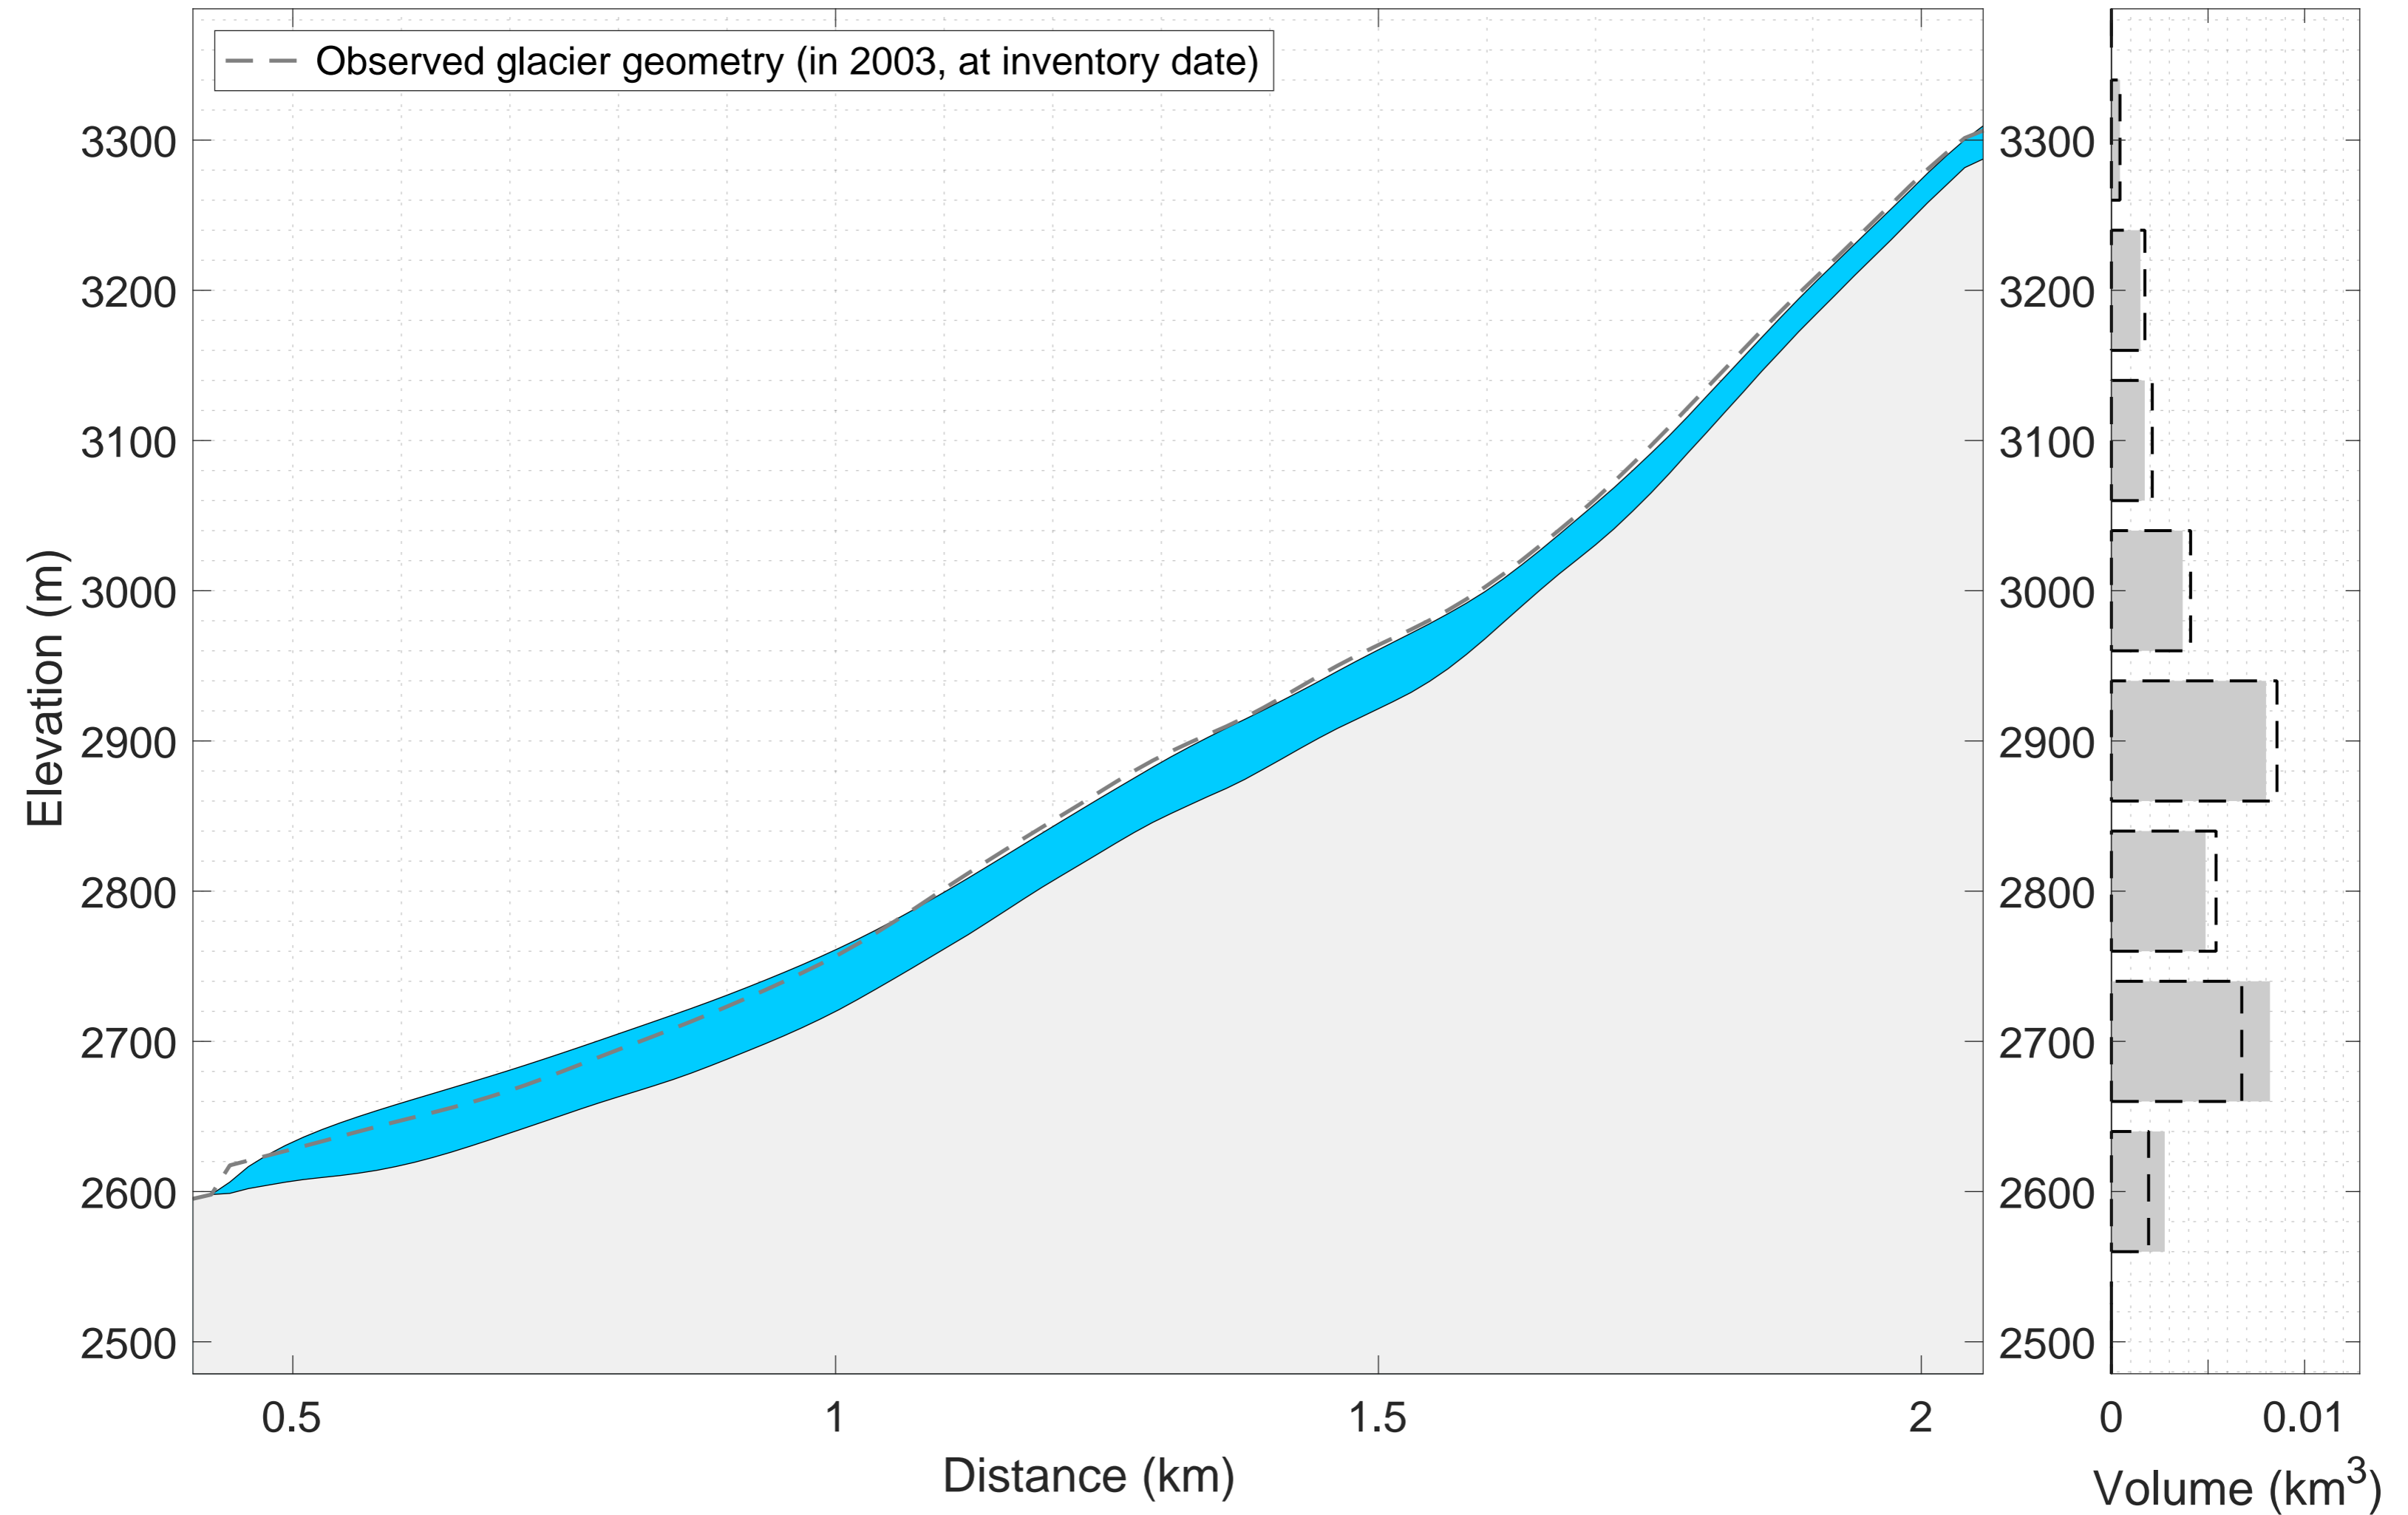

Supplement: Supplementary file 731 [file tc-13-1125-2019-supplement.zip]

**Modelled geometry (Glacier ID = 02793;  $A = 1\text{e-}16 \text{ Pa}^{-3} \text{ a}^{-1}$ ;  $dx = 59 \text{ m}$ )**

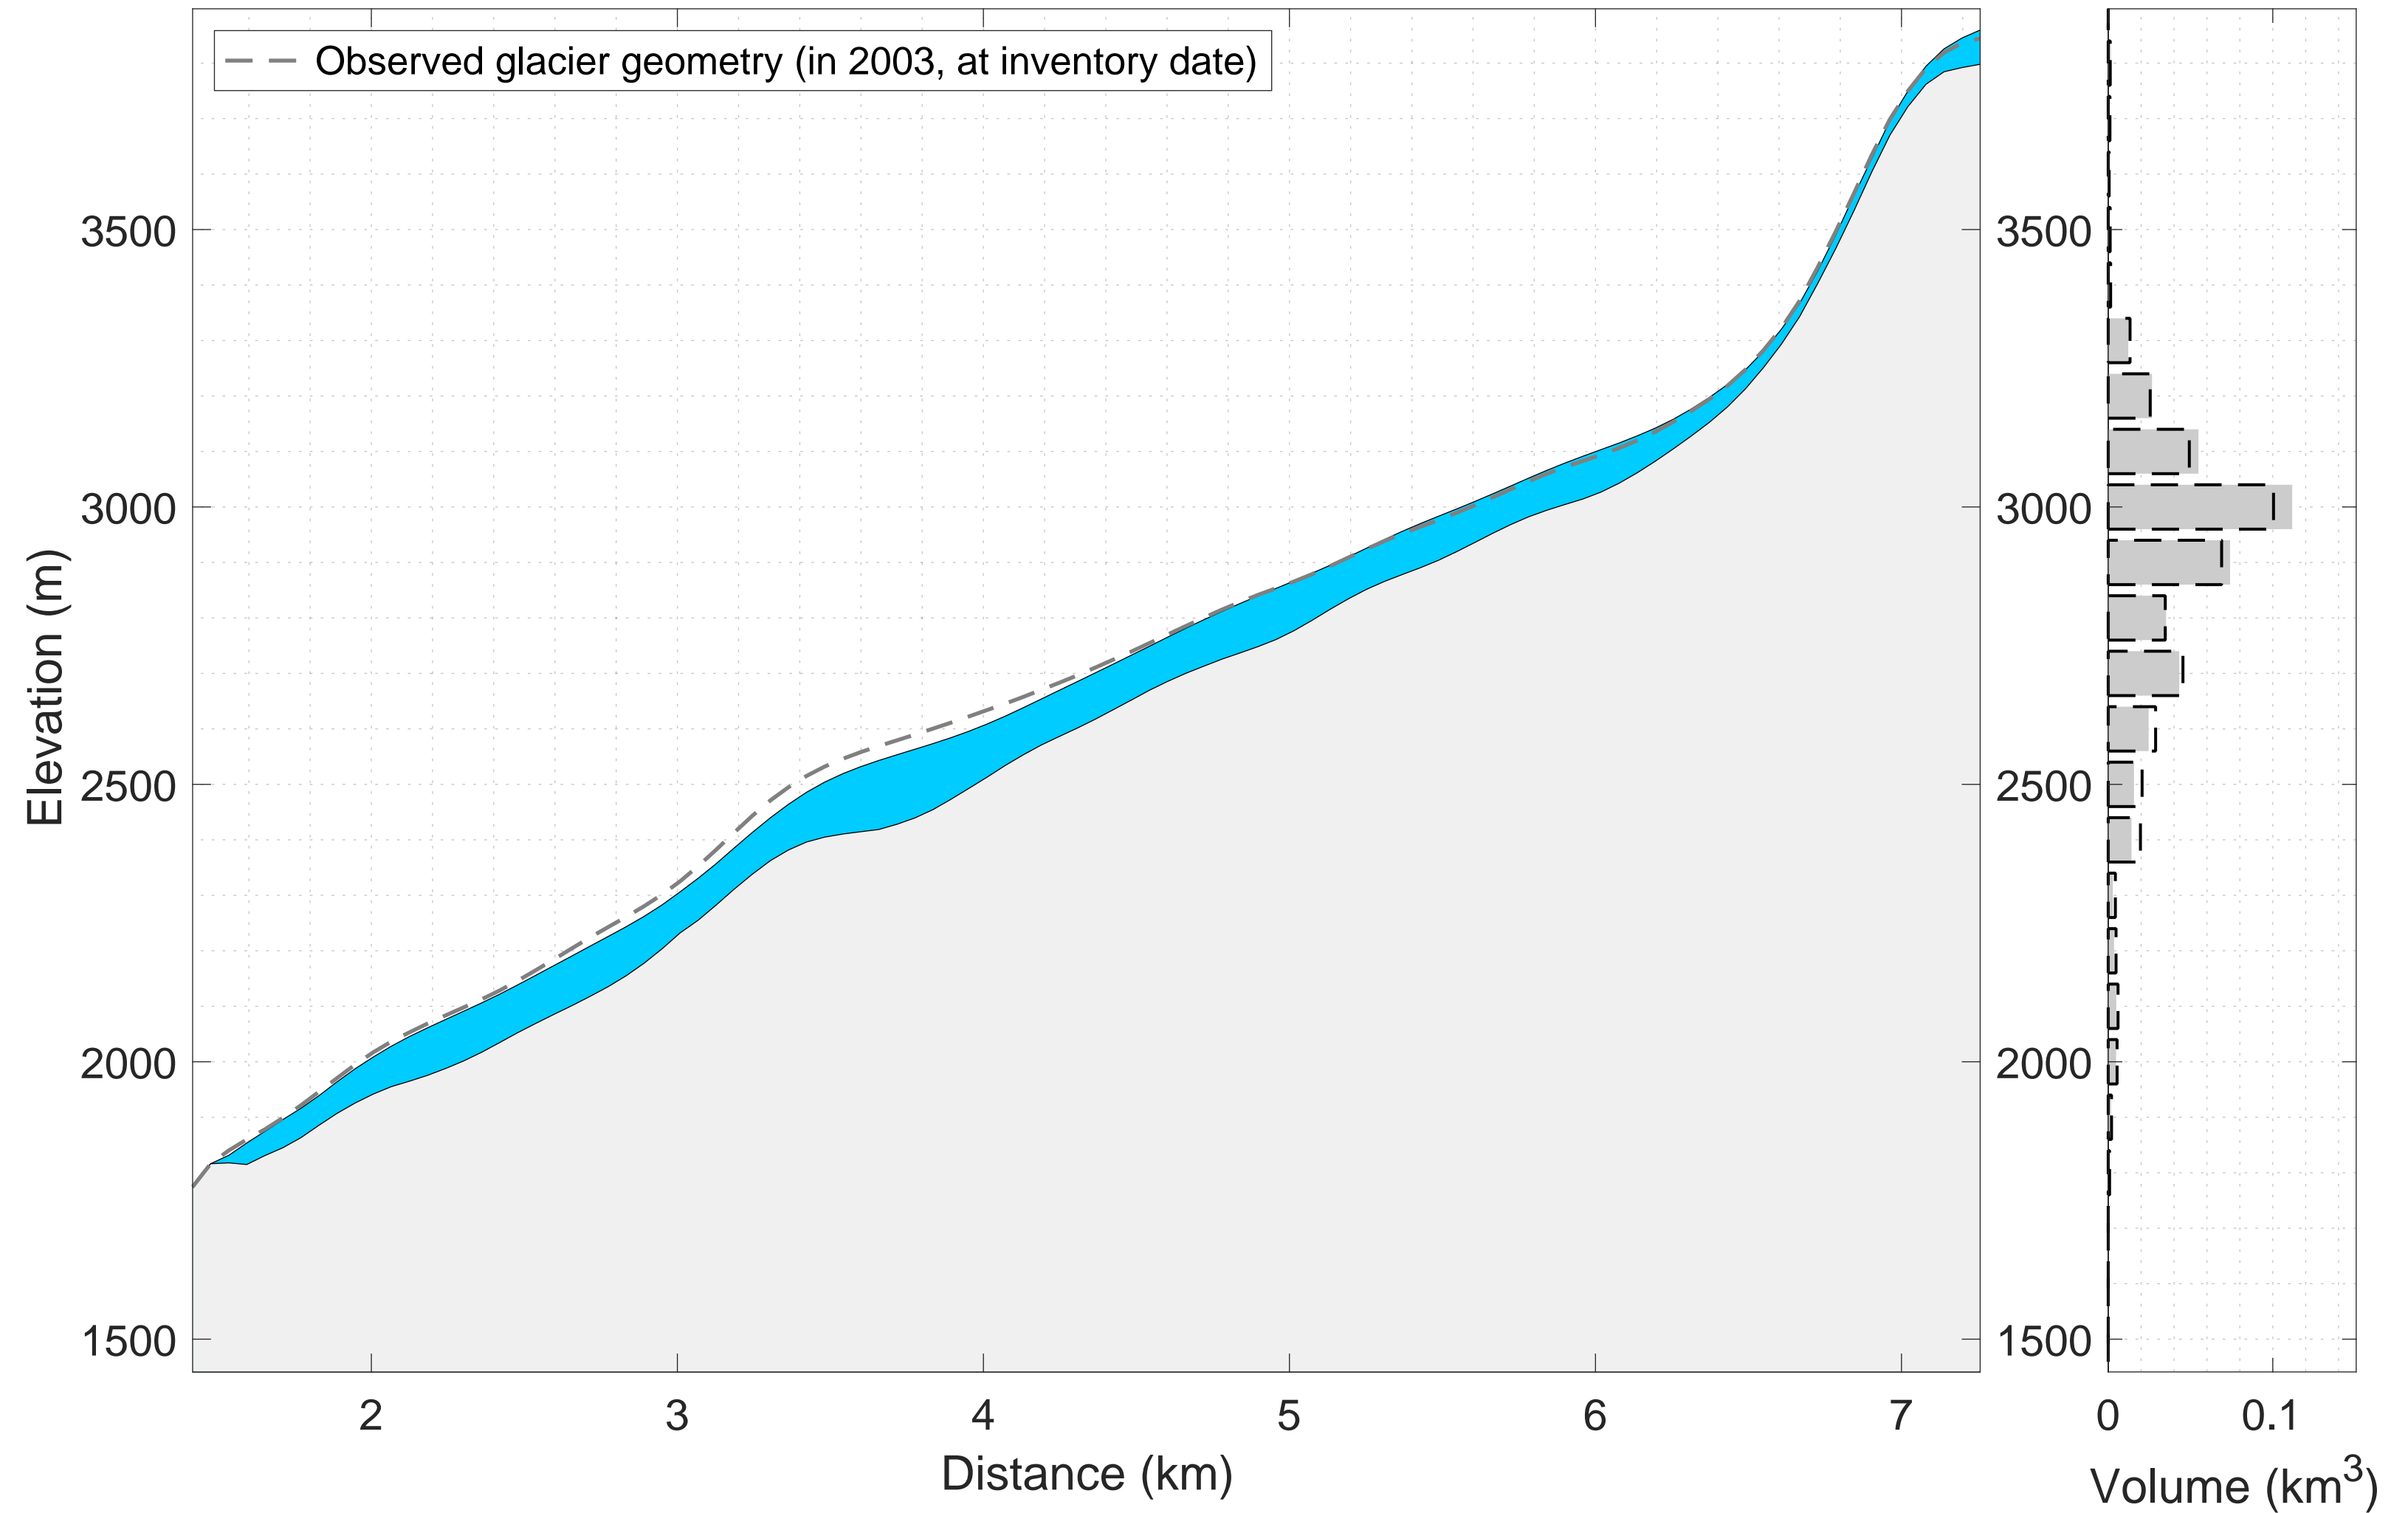

Supplement: Supplementary file 732 [file tc-13-1125-2019-supplement.zip]

**Modelled geometry (Glacier ID = 02680;  $A = 1.573\text{e-}16 \text{ Pa}^{-3} \text{ a}^{-1}$ ;  $dx = 20 \text{ m}$ )**

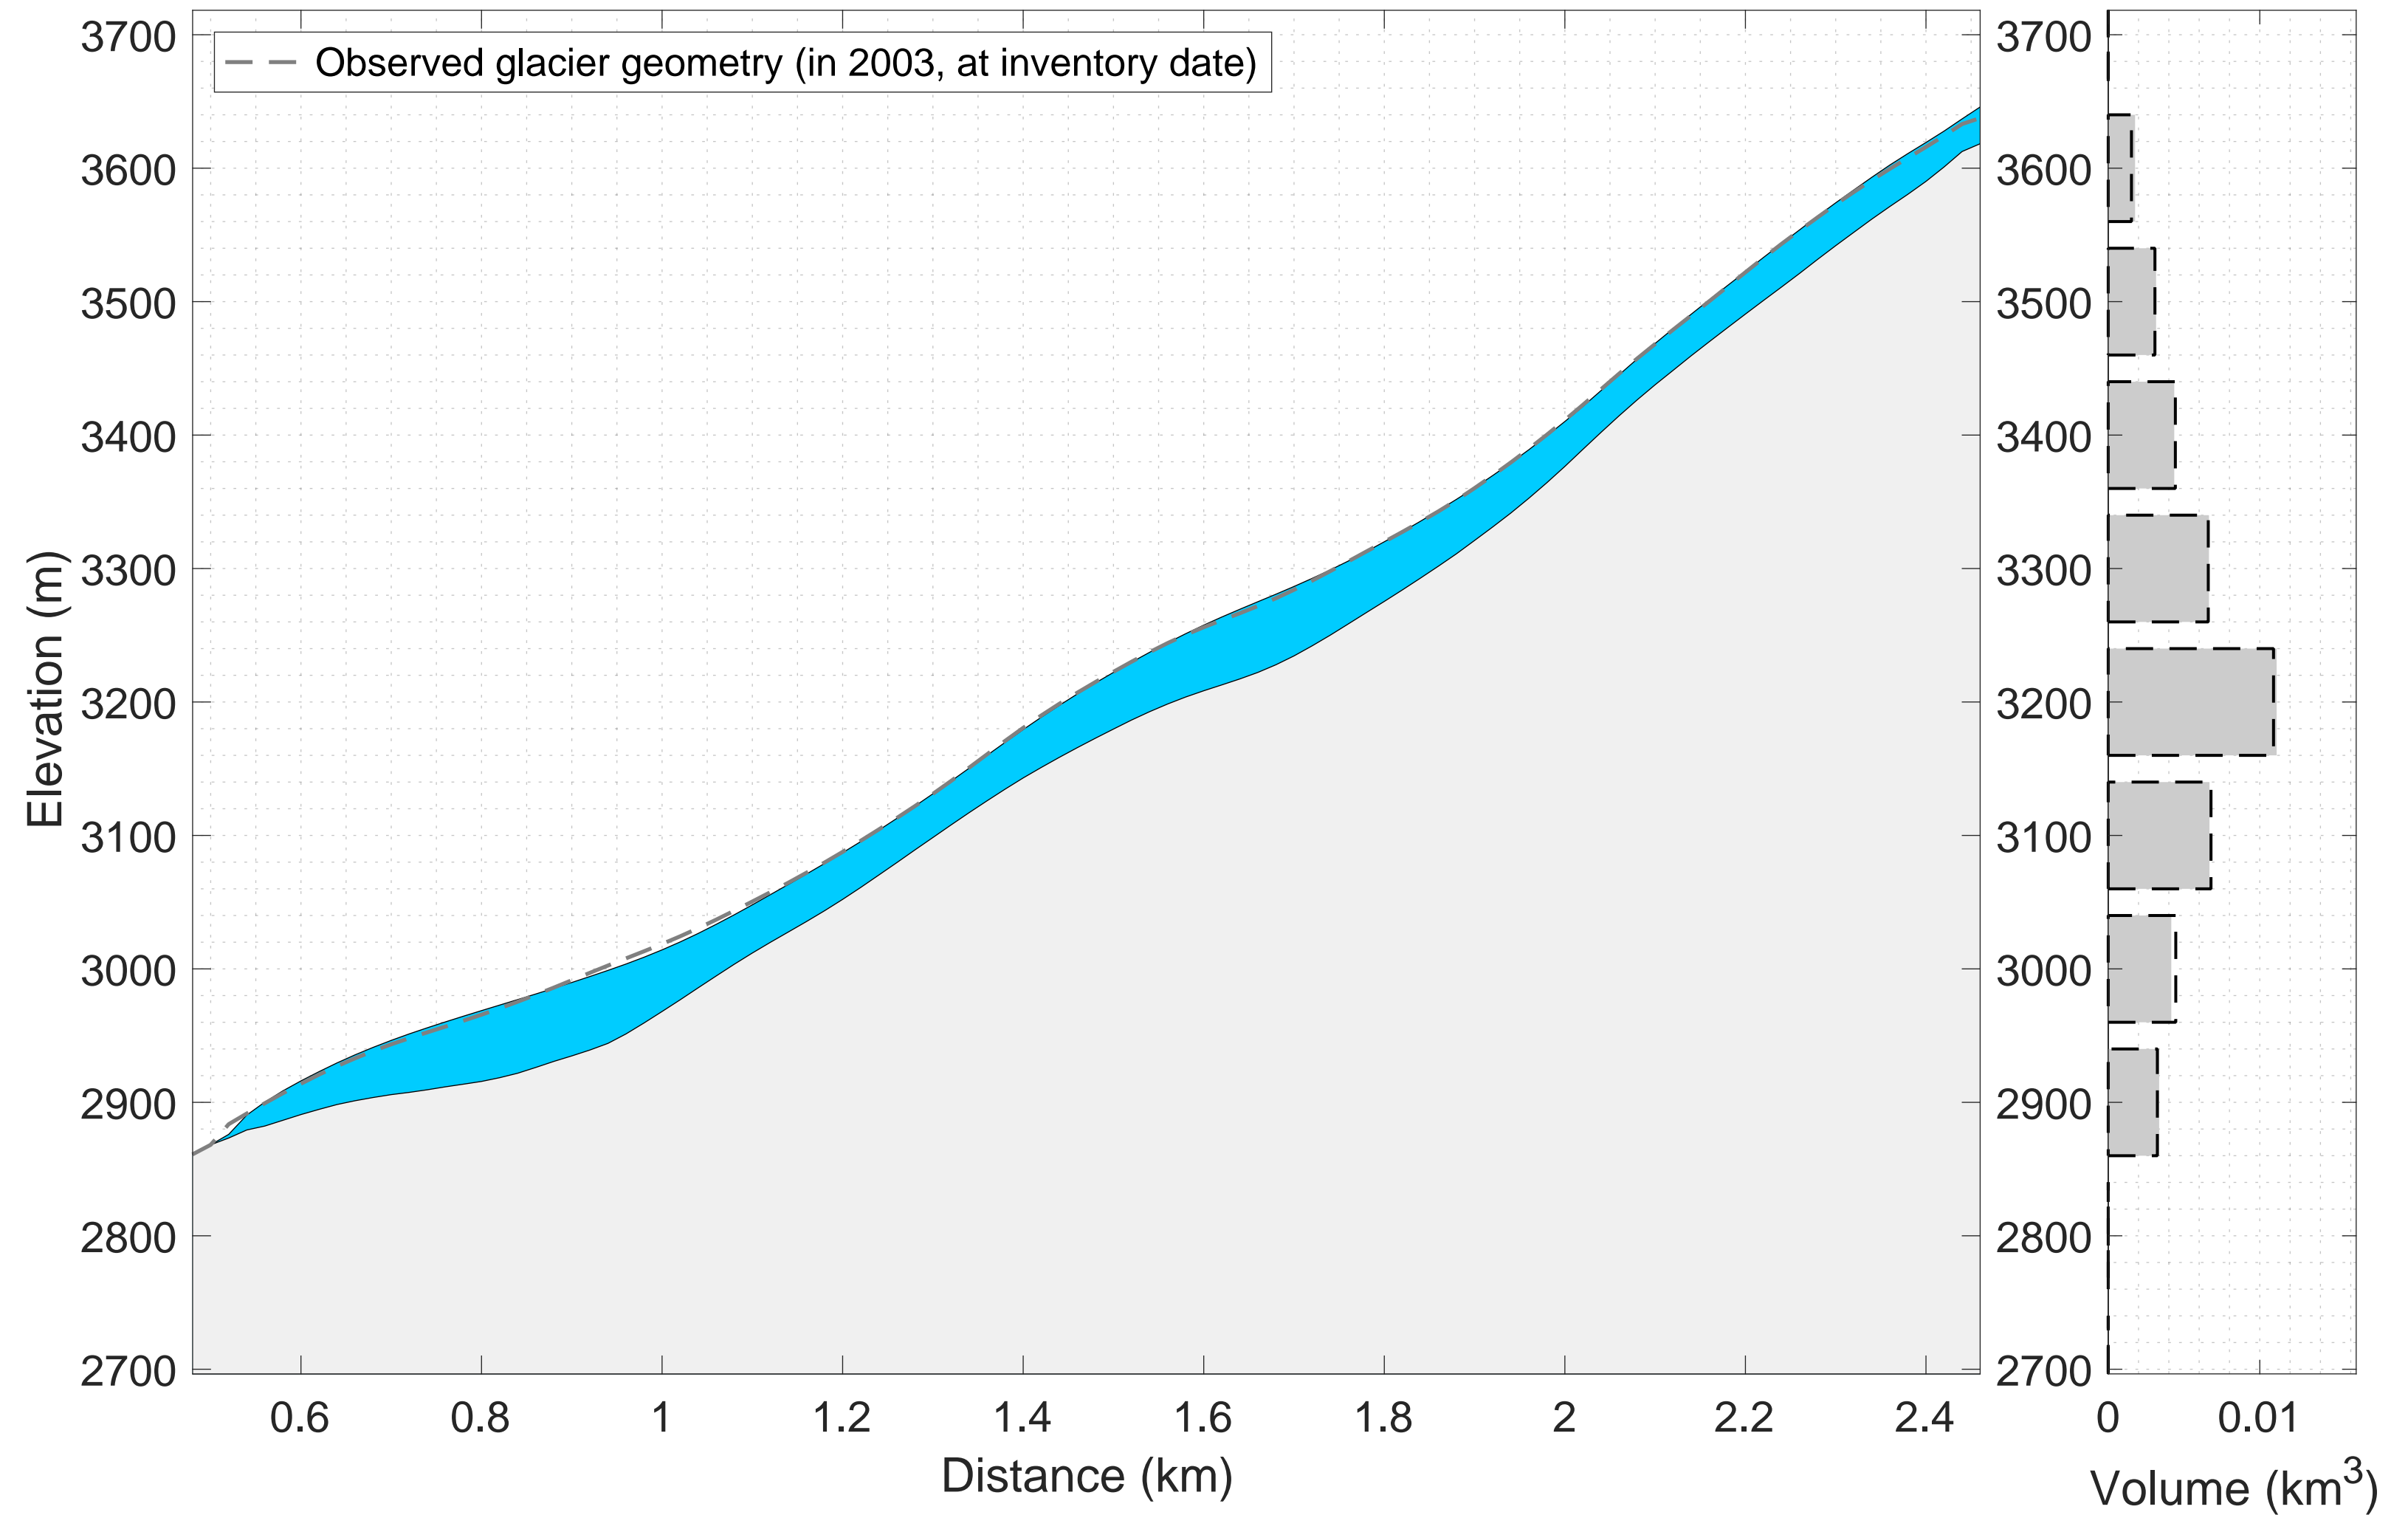

Supplement: Supplementary file 733 [file tc-13-1125-2019-supplement.zip]

**Modelled geometry (Glacier ID = 03698;  $A = 1.6164\text{e-}16 \text{ Pa}^{-3} \text{ a}^{-1}$ ;  $dx = 46 \text{ m}$ )**

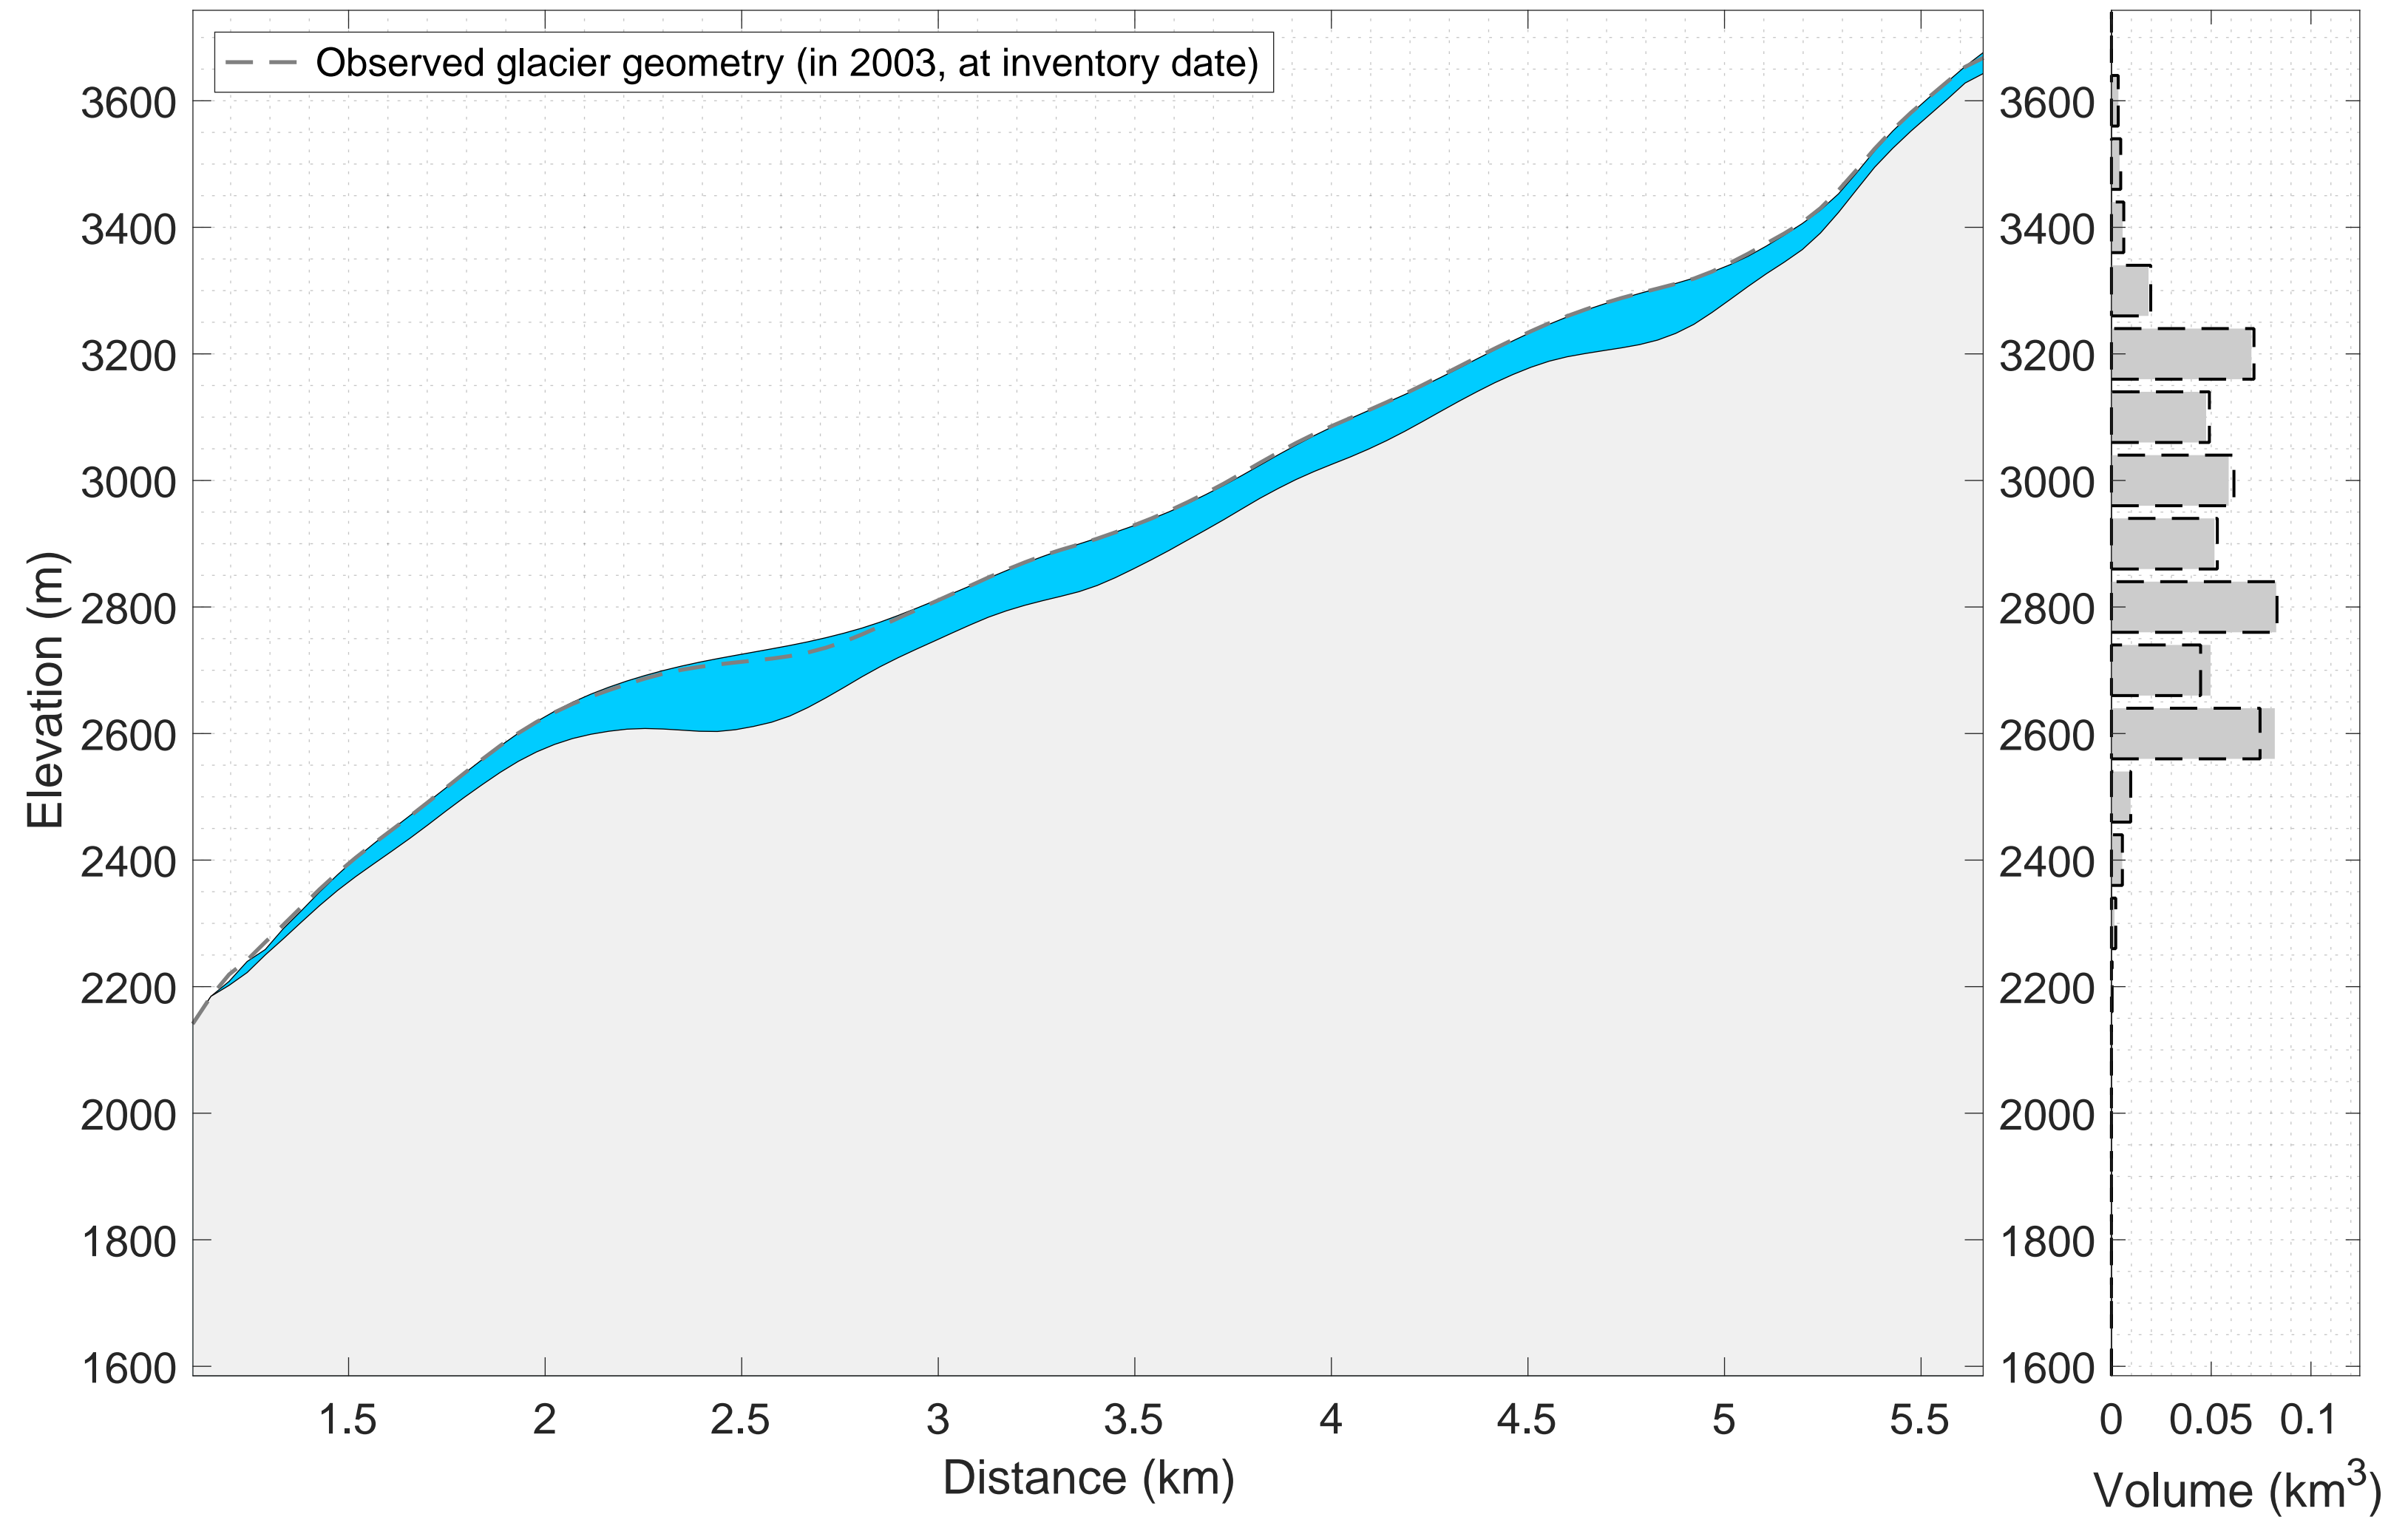

Supplement: Supplementary file 734 [file tc-13-1125-2019-supplement.zip]

**Modelled geometry (Glacier ID = 00539;  $A = 1.9494\text{e-}16 \text{ Pa}^{-3} \text{ a}^{-1}$ ;  $dx = 20 \text{ m}$ )**

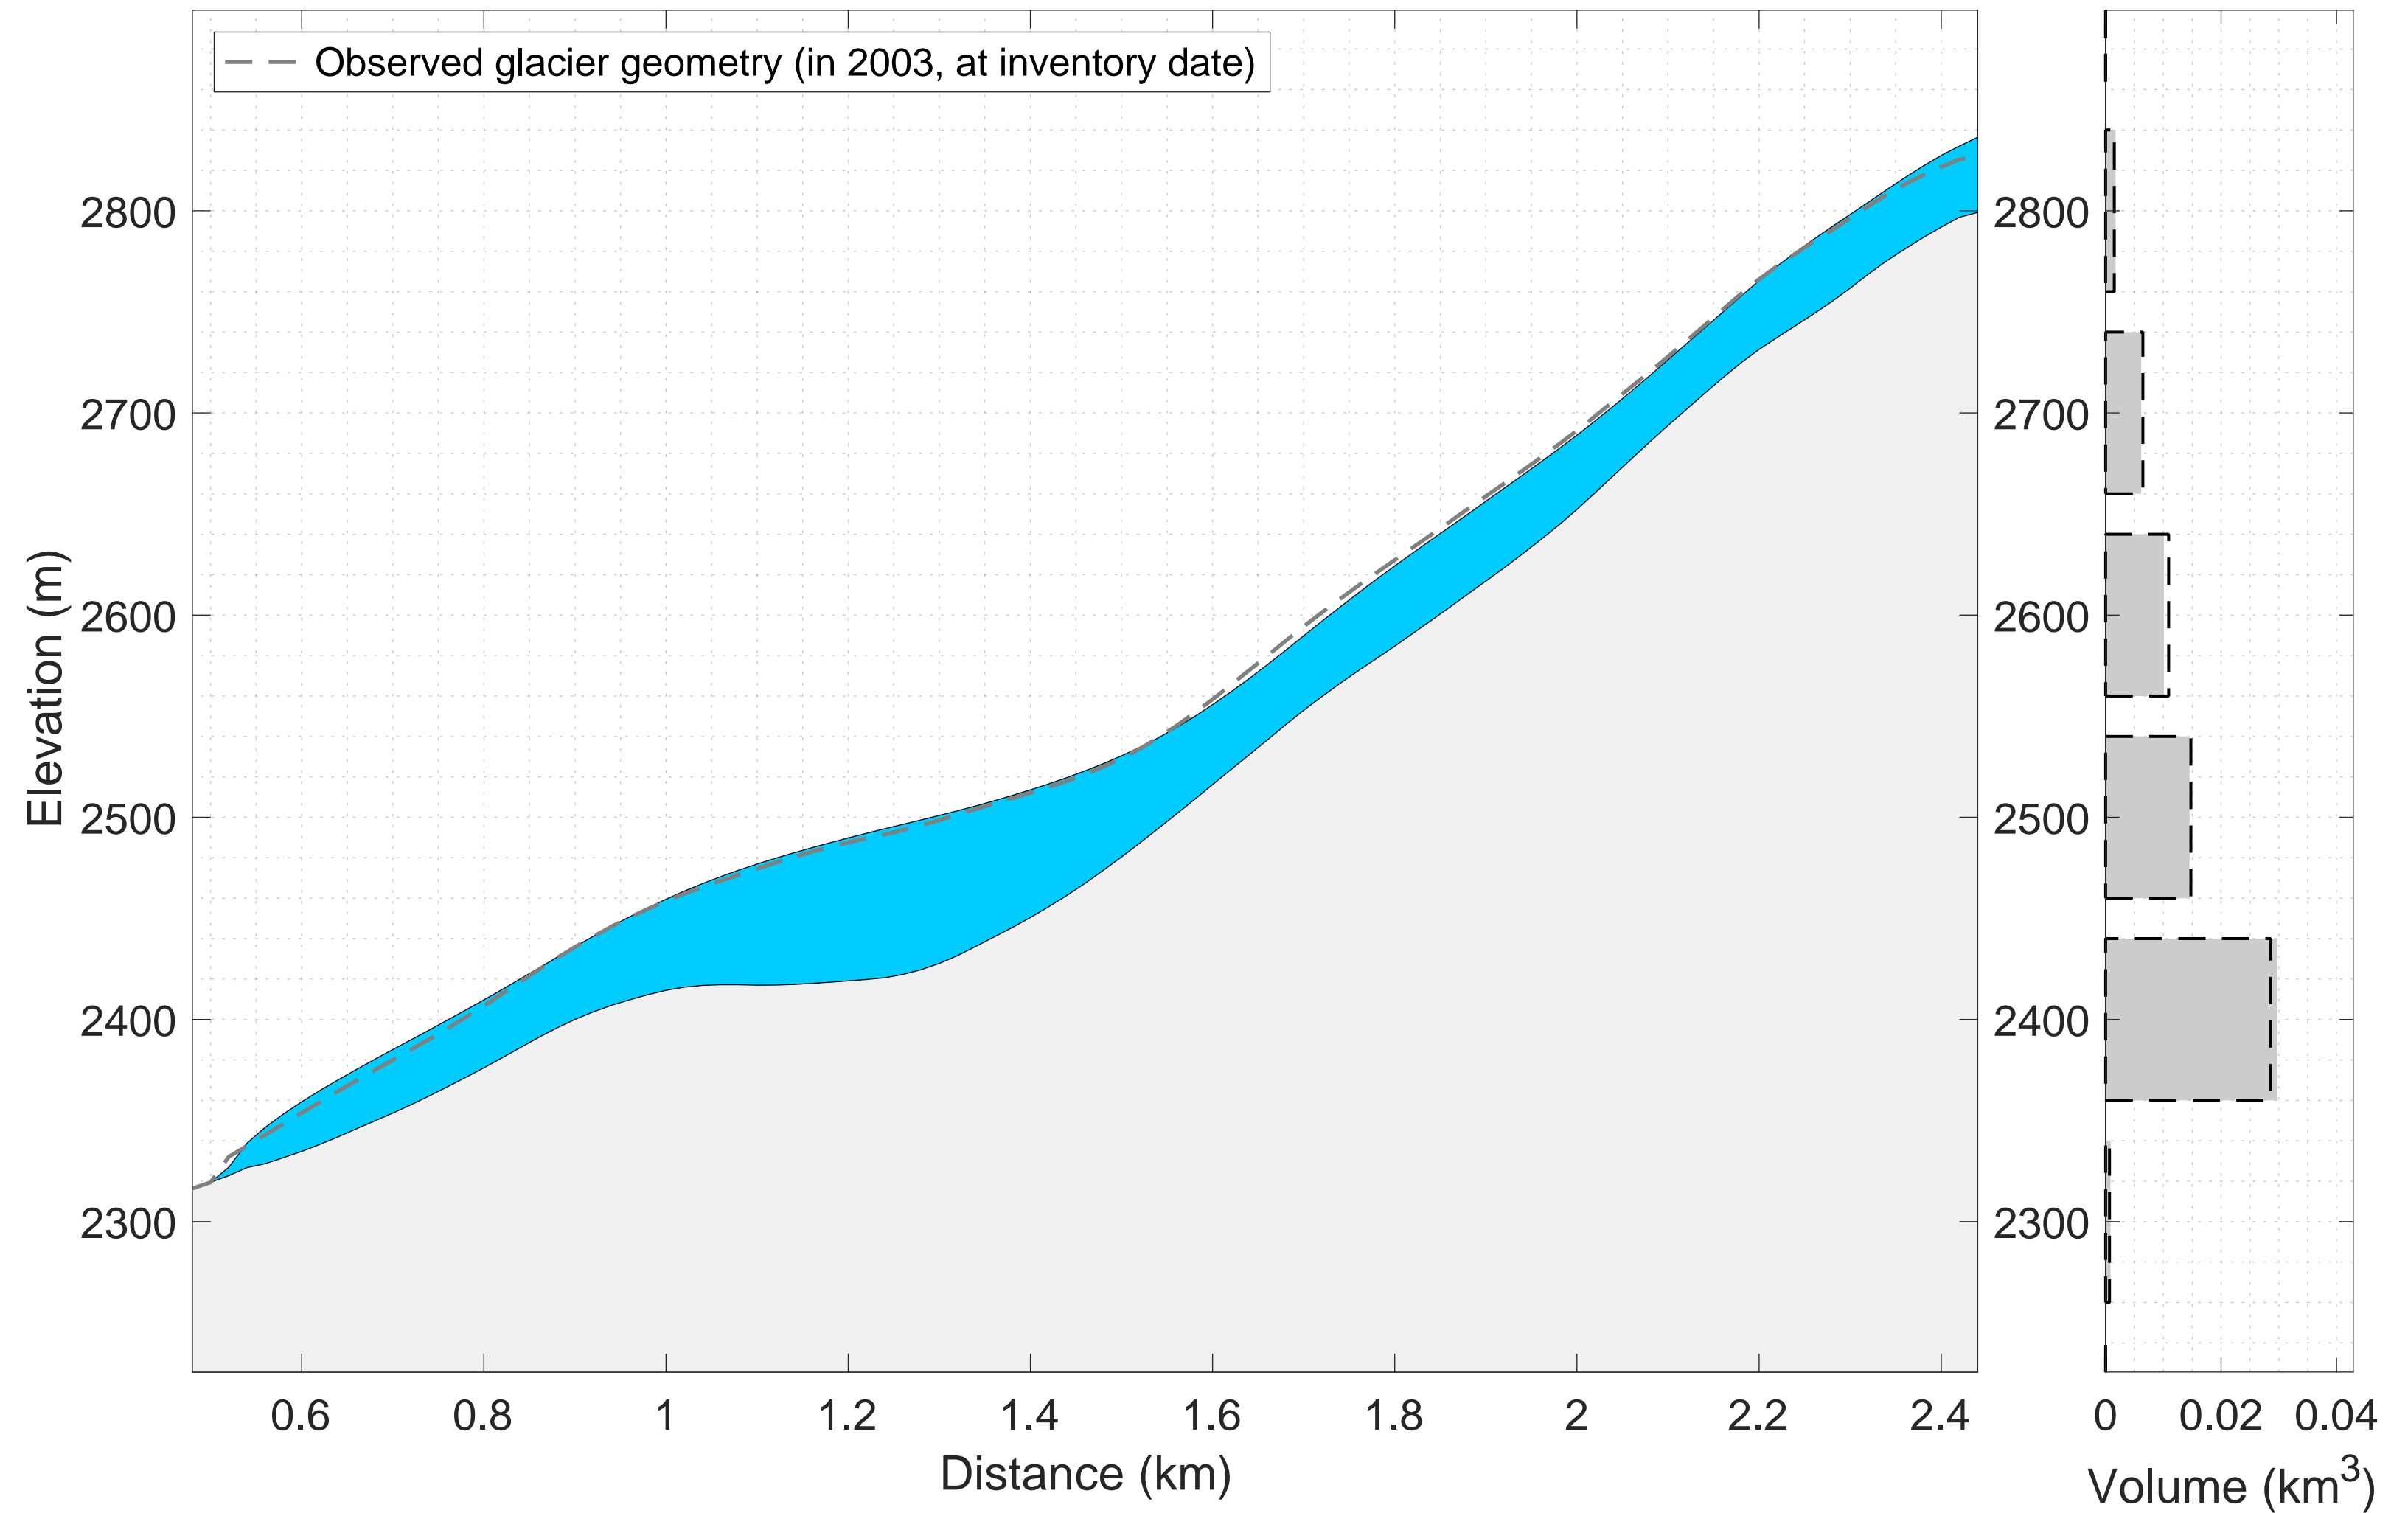

Supplement: Supplementary file 735 [file tc-13-1125-2019-supplement.zip]

**Modelled geometry (Glacier ID = 00855;  $A = 5.2316\text{e-}17 \text{ Pa}^{-3} \text{ a}^{-1}$ ;  $dx = 10 \text{ m}$ )**

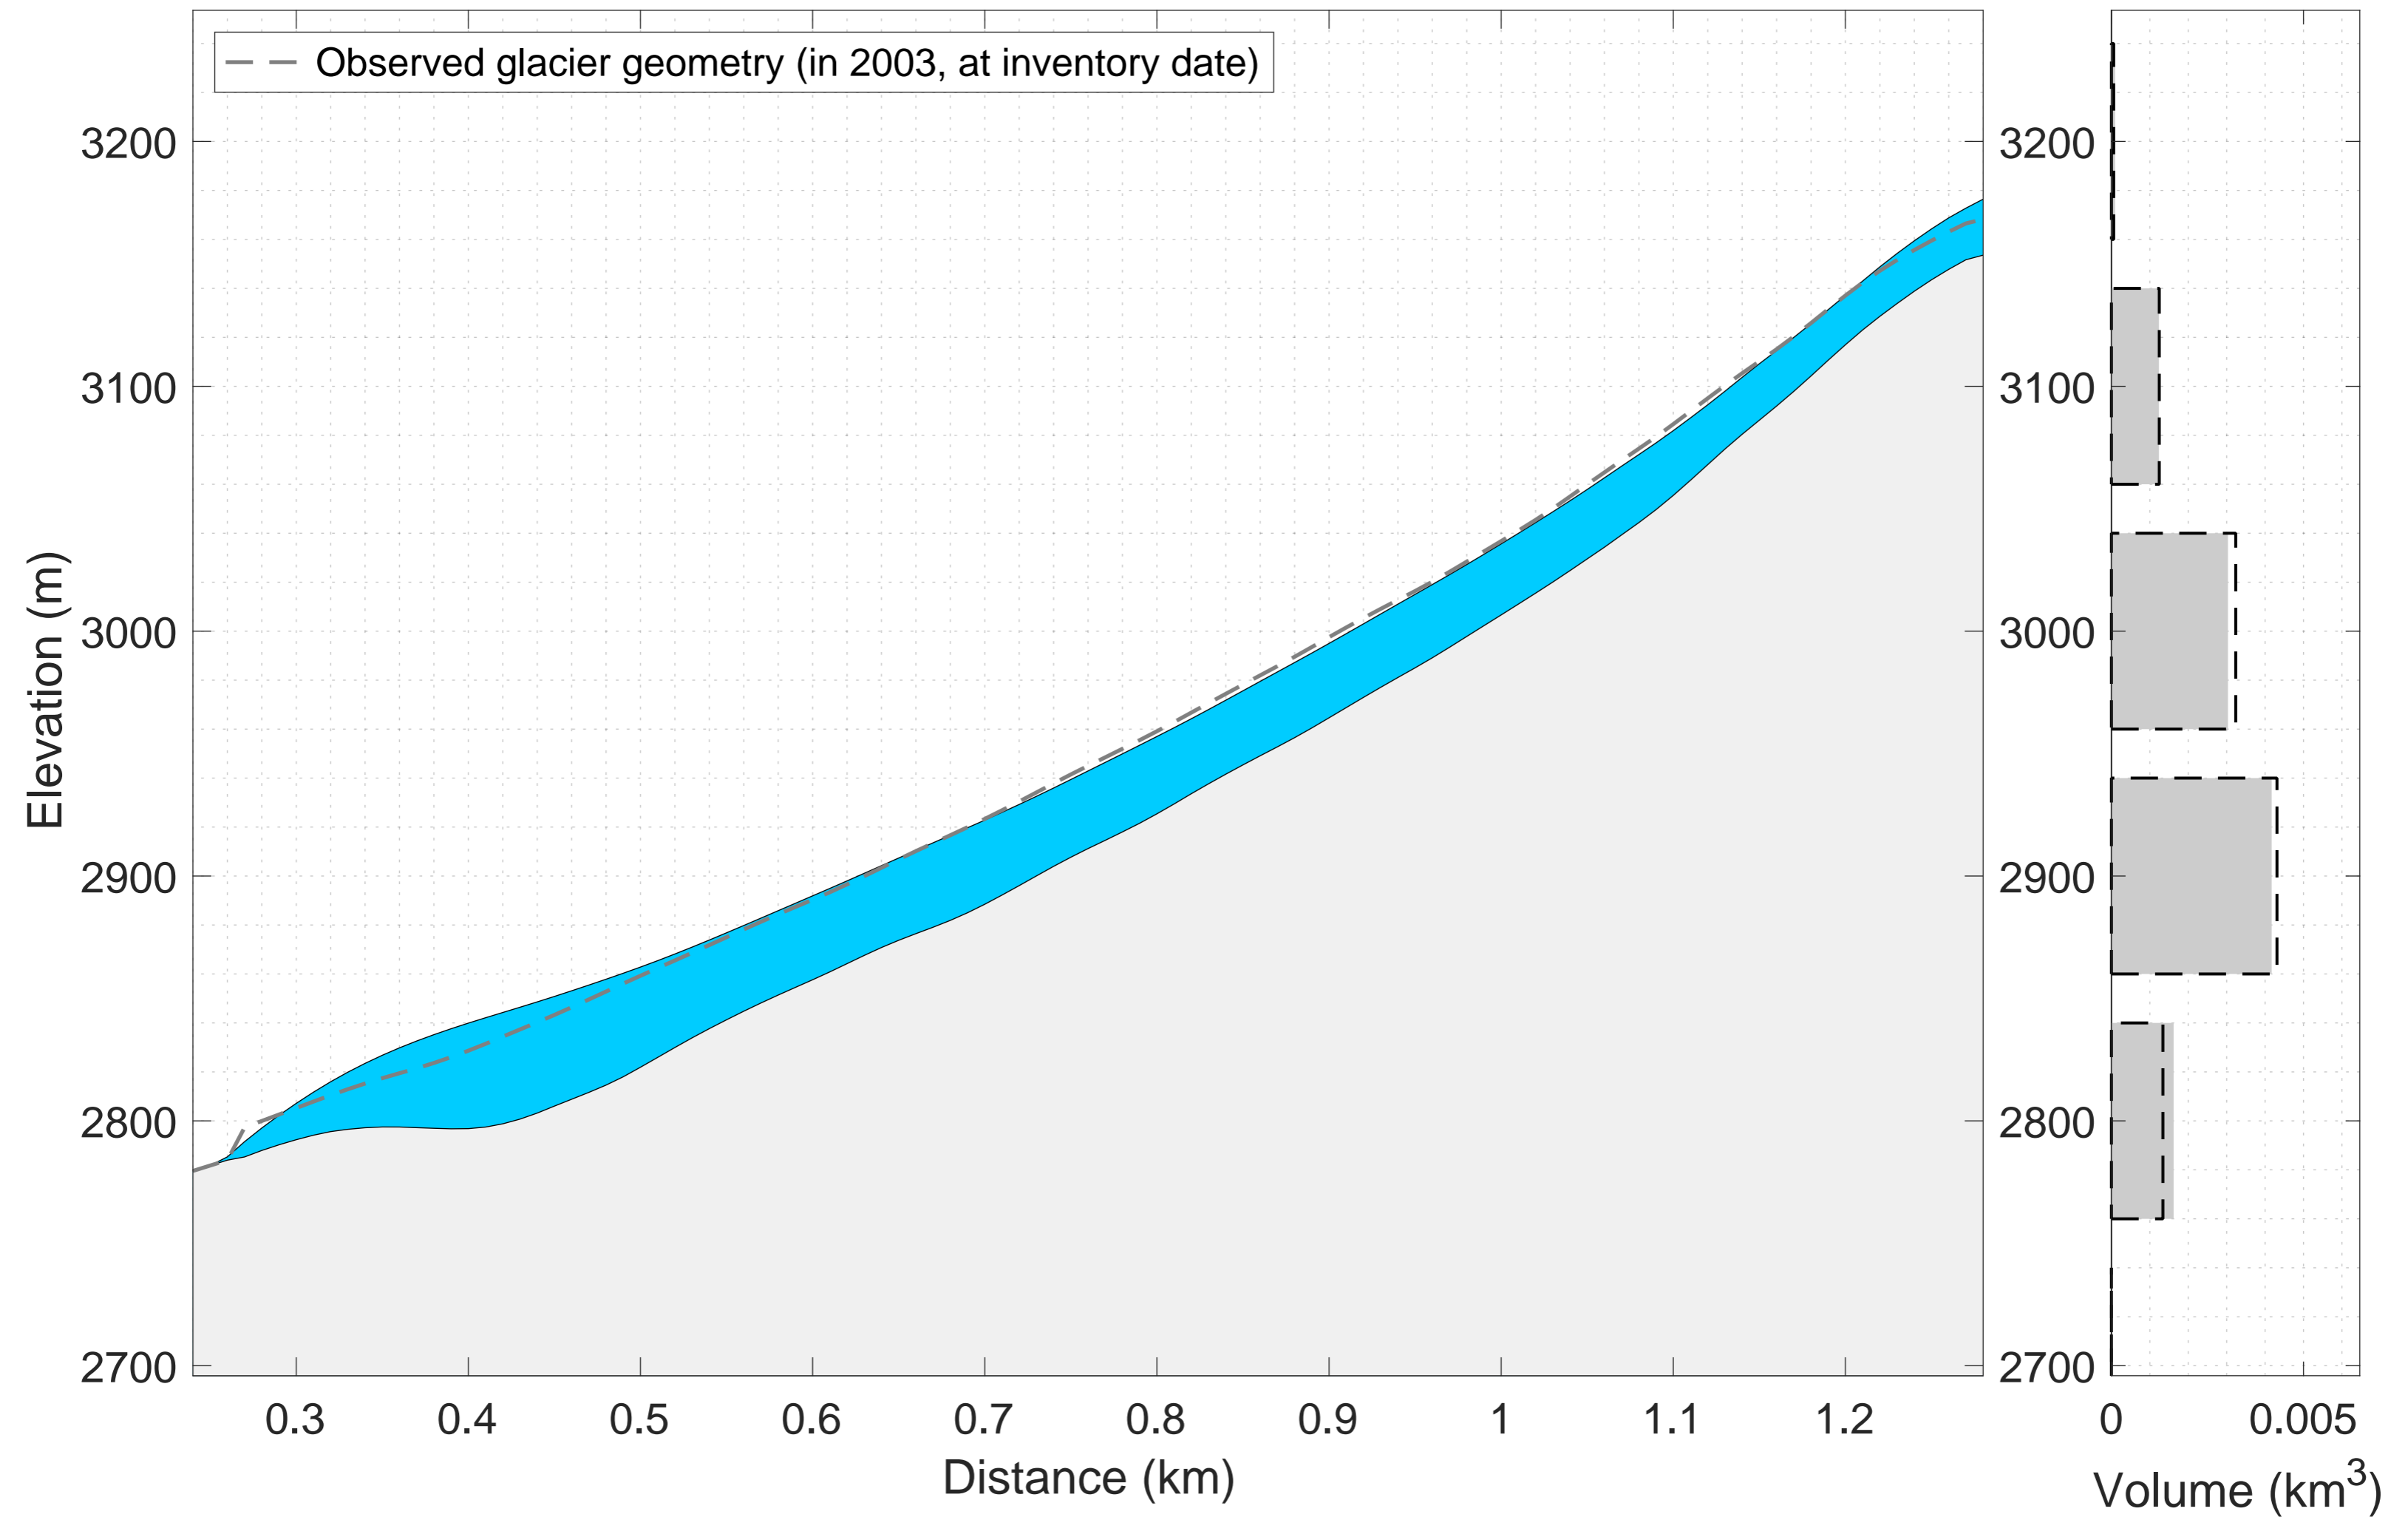

Supplement: Supplementary file 736 [file tc-13-1125-2019-supplement.zip]

**Modelled geometry (Glacier ID = 00343;  $A = 1.3131\text{e-}16 \text{ Pa}^{-3} \text{ a}^{-1}$ ;  $dx = 17 \text{ m}$ )**

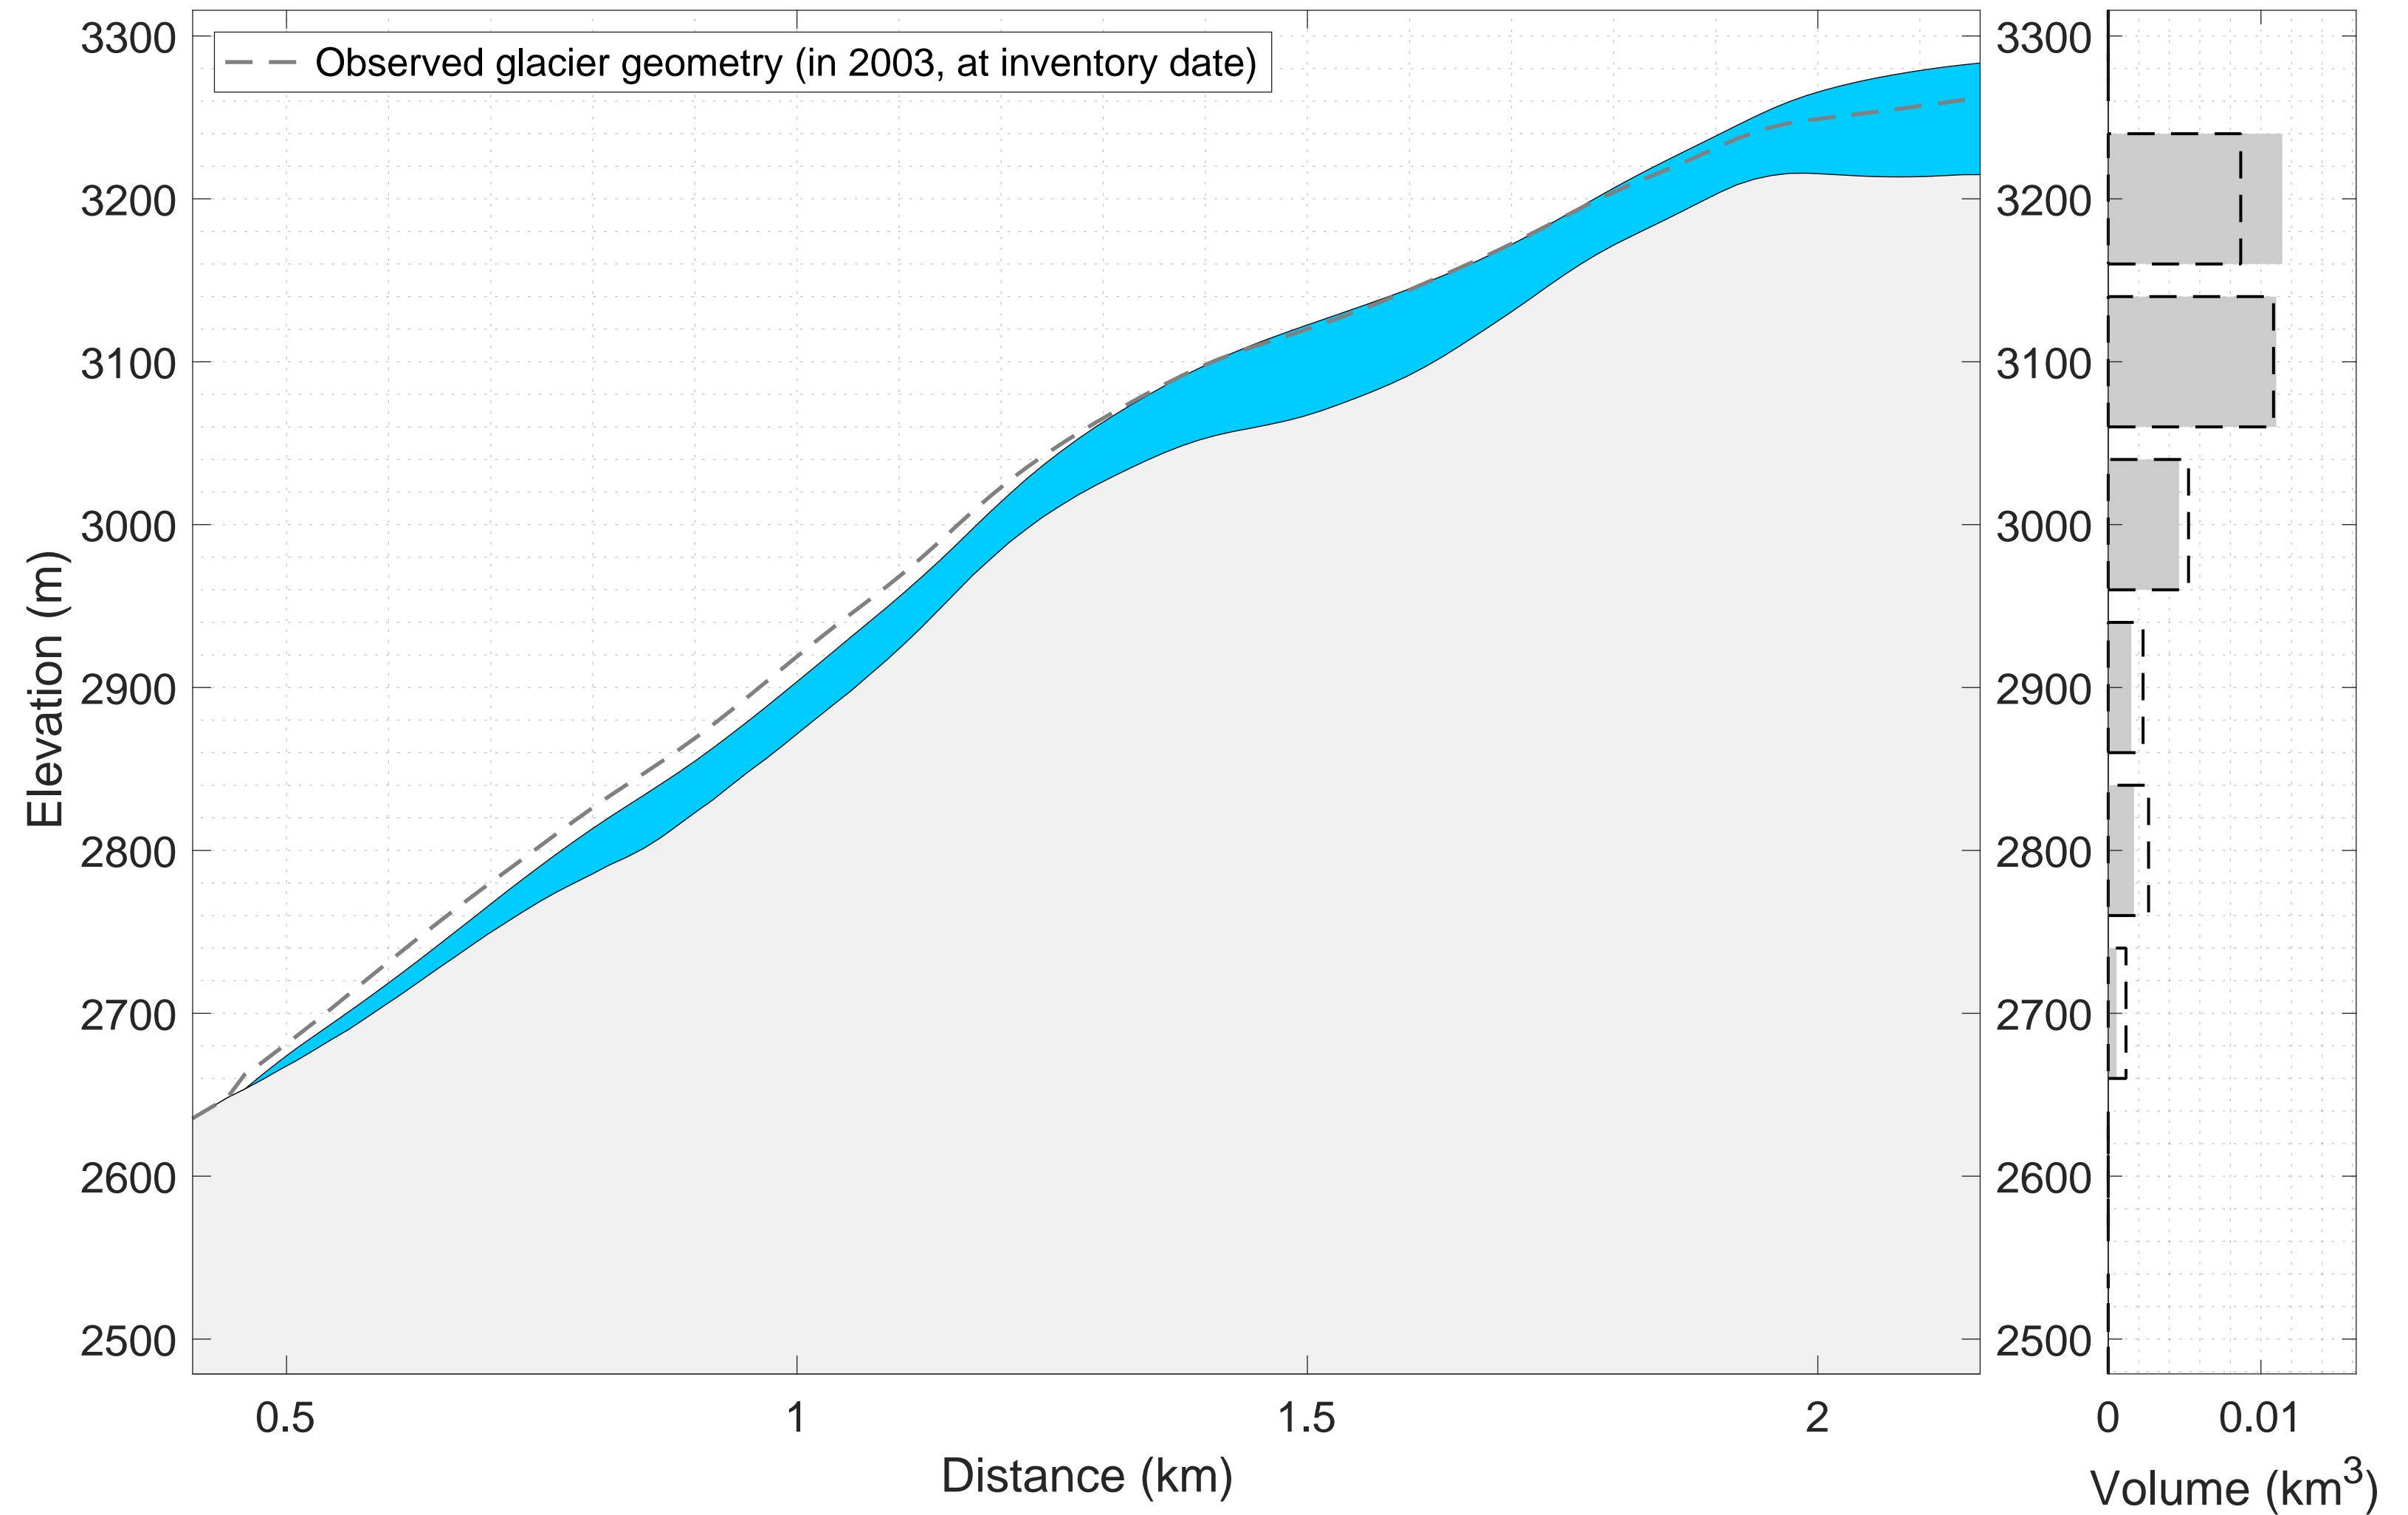

Supplement: Supplementary file 737 [file tc-13-1125-2019-supplement.zip]

# Modelled geometry (Glacier ID = 00193; $A = 1.937\text{e-}16 \text{ Pa}^{-3} \text{ a}^{-1}$ ; $dx = 22 \text{ m}$ )

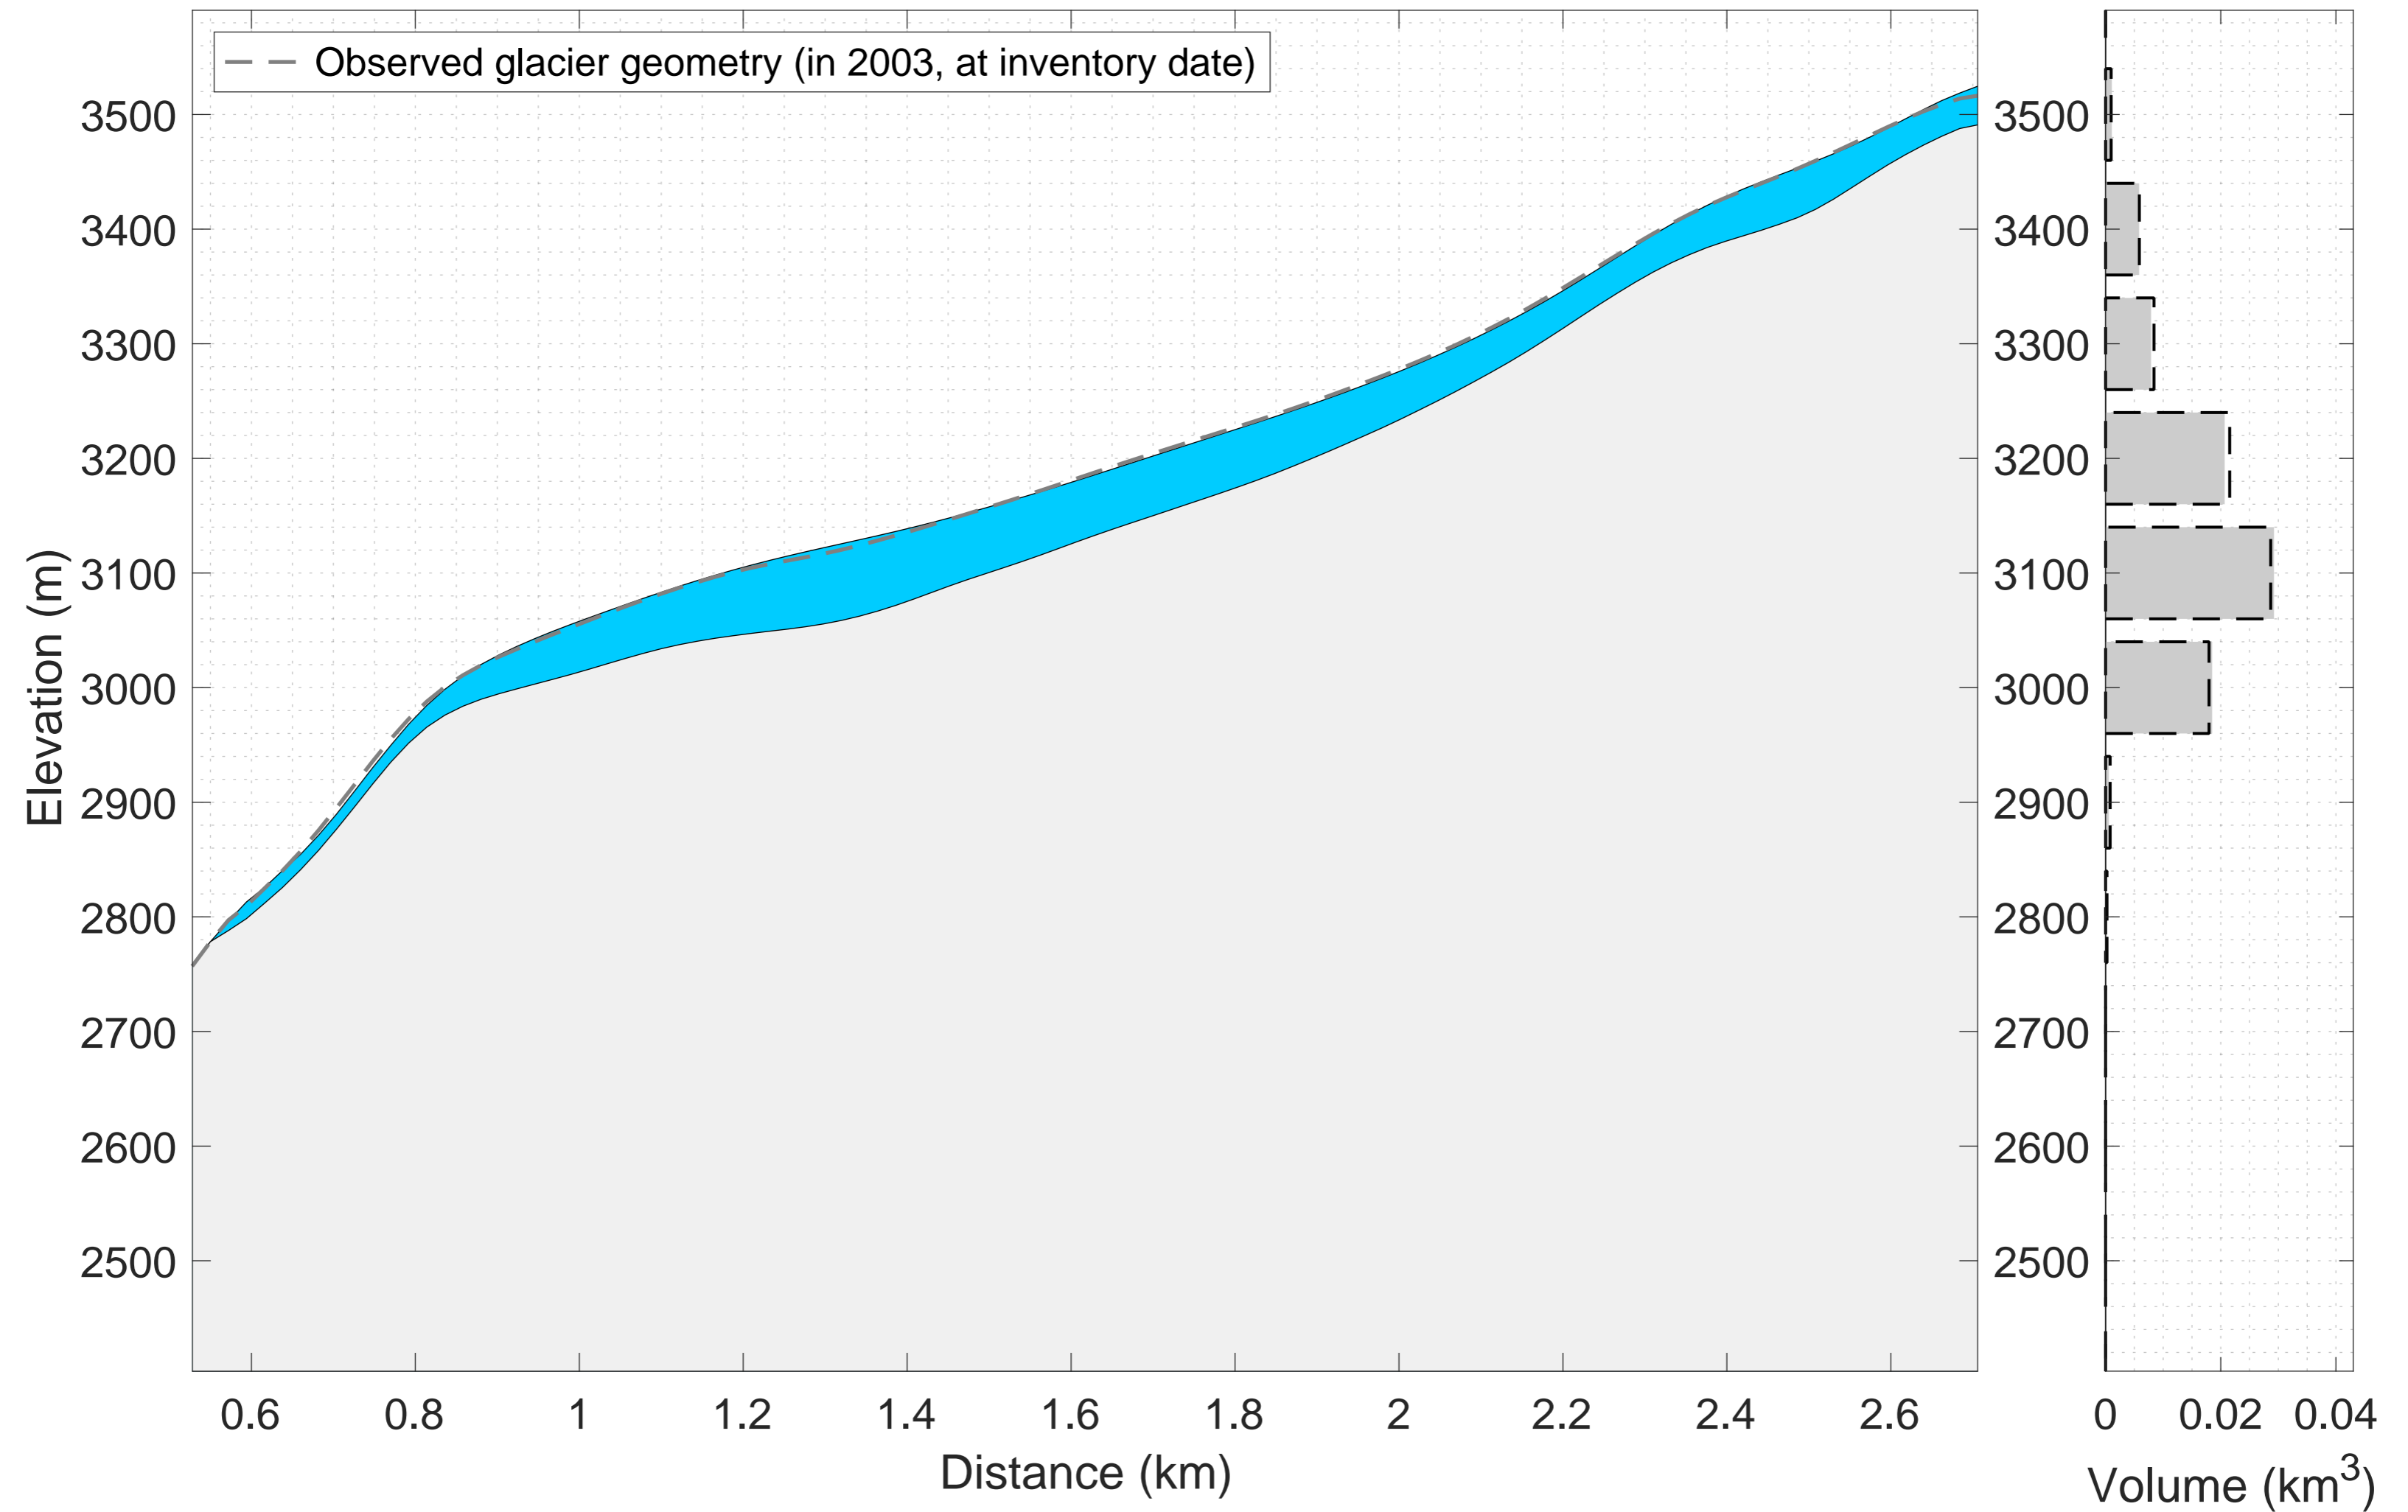

Supplement: Supplementary file 738 [file tc-13-1125-2019-supplement.zip]

**Modelled geometry (Glacier ID = 01790;  $A = 1.2282\text{e-}16 \text{ Pa}^{-3} \text{ a}^{-1}$ ;  $dx = 13 \text{ m}$ )**

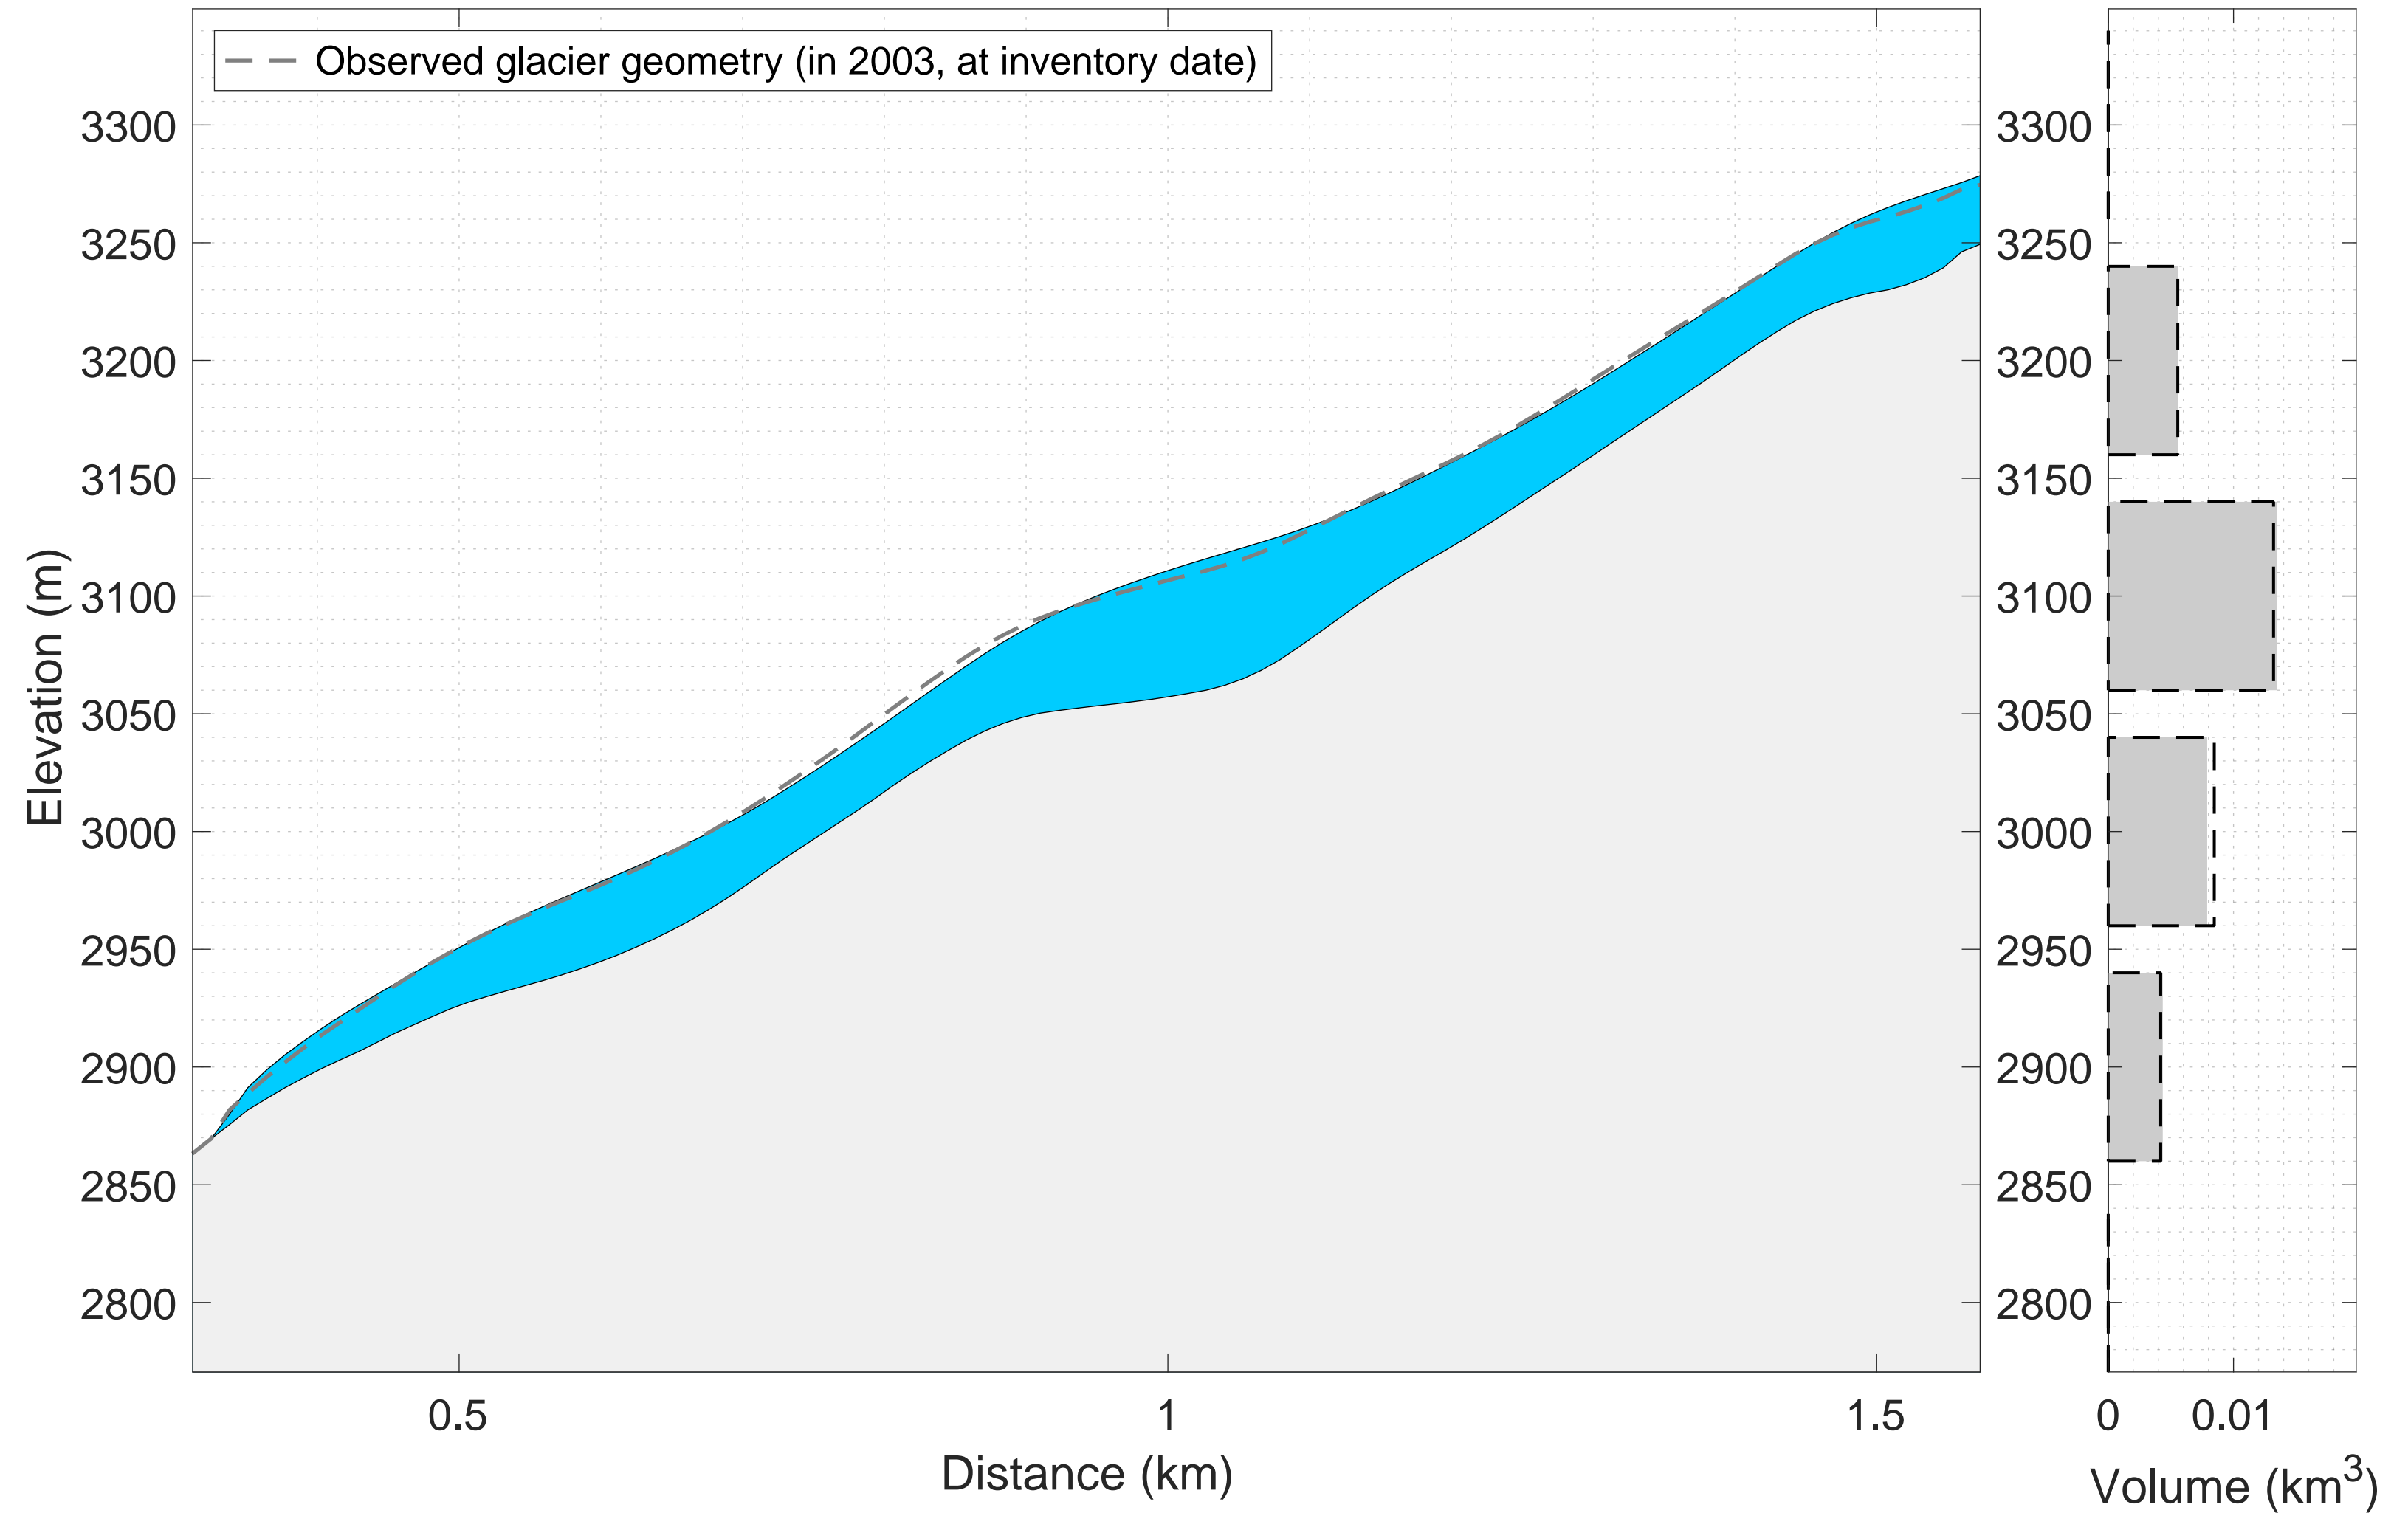

Supplement: Supplementary file 739 [file tc-13-1125-2019-supplement.zip]

**Modelled geometry (Glacier ID = 00263;  $A = 7.978\text{e-}17 \text{ Pa}^{-3} \text{ a}^{-1}$ ;  $dx = 15 \text{ m}$ )**

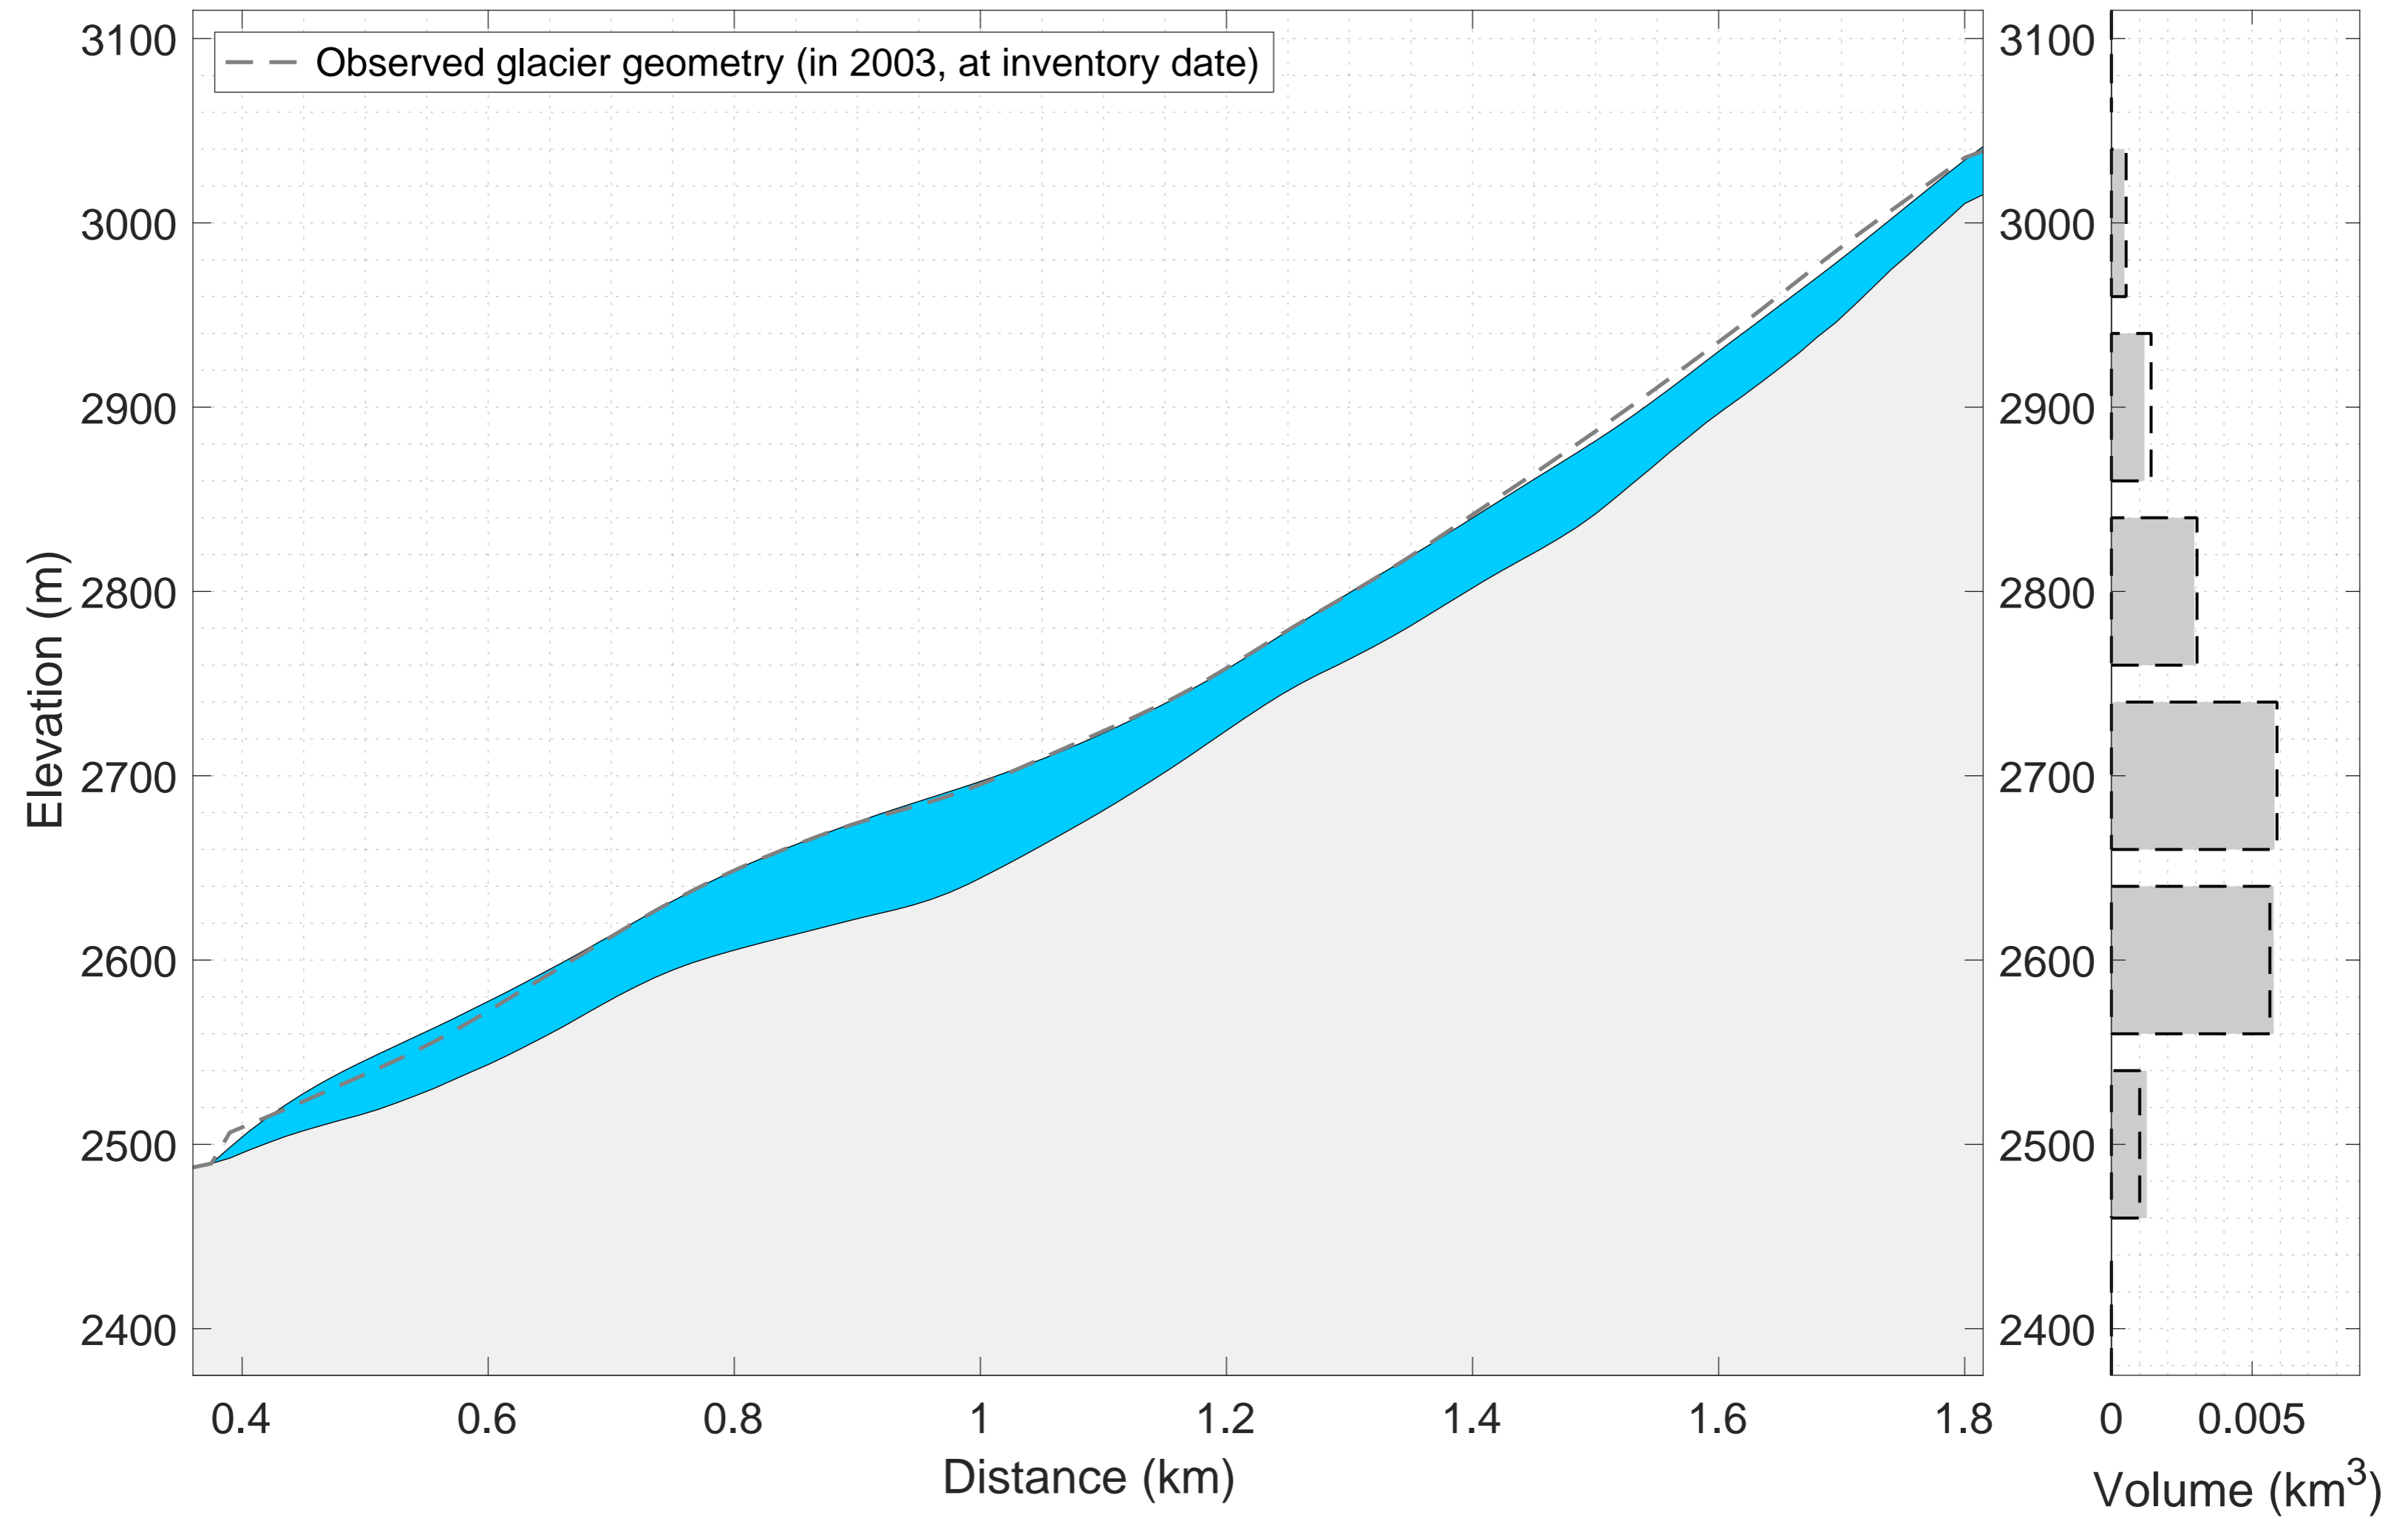

Supplement: Supplementary file 740 [file tc-13-1125-2019-supplement.zip]

**Modelled geometry (Glacier ID = 02168;  $A = 1.2082\text{e-}16 \text{ Pa}^{-3} \text{ a}^{-1}$ ;  $dx = 19 \text{ m}$ )**

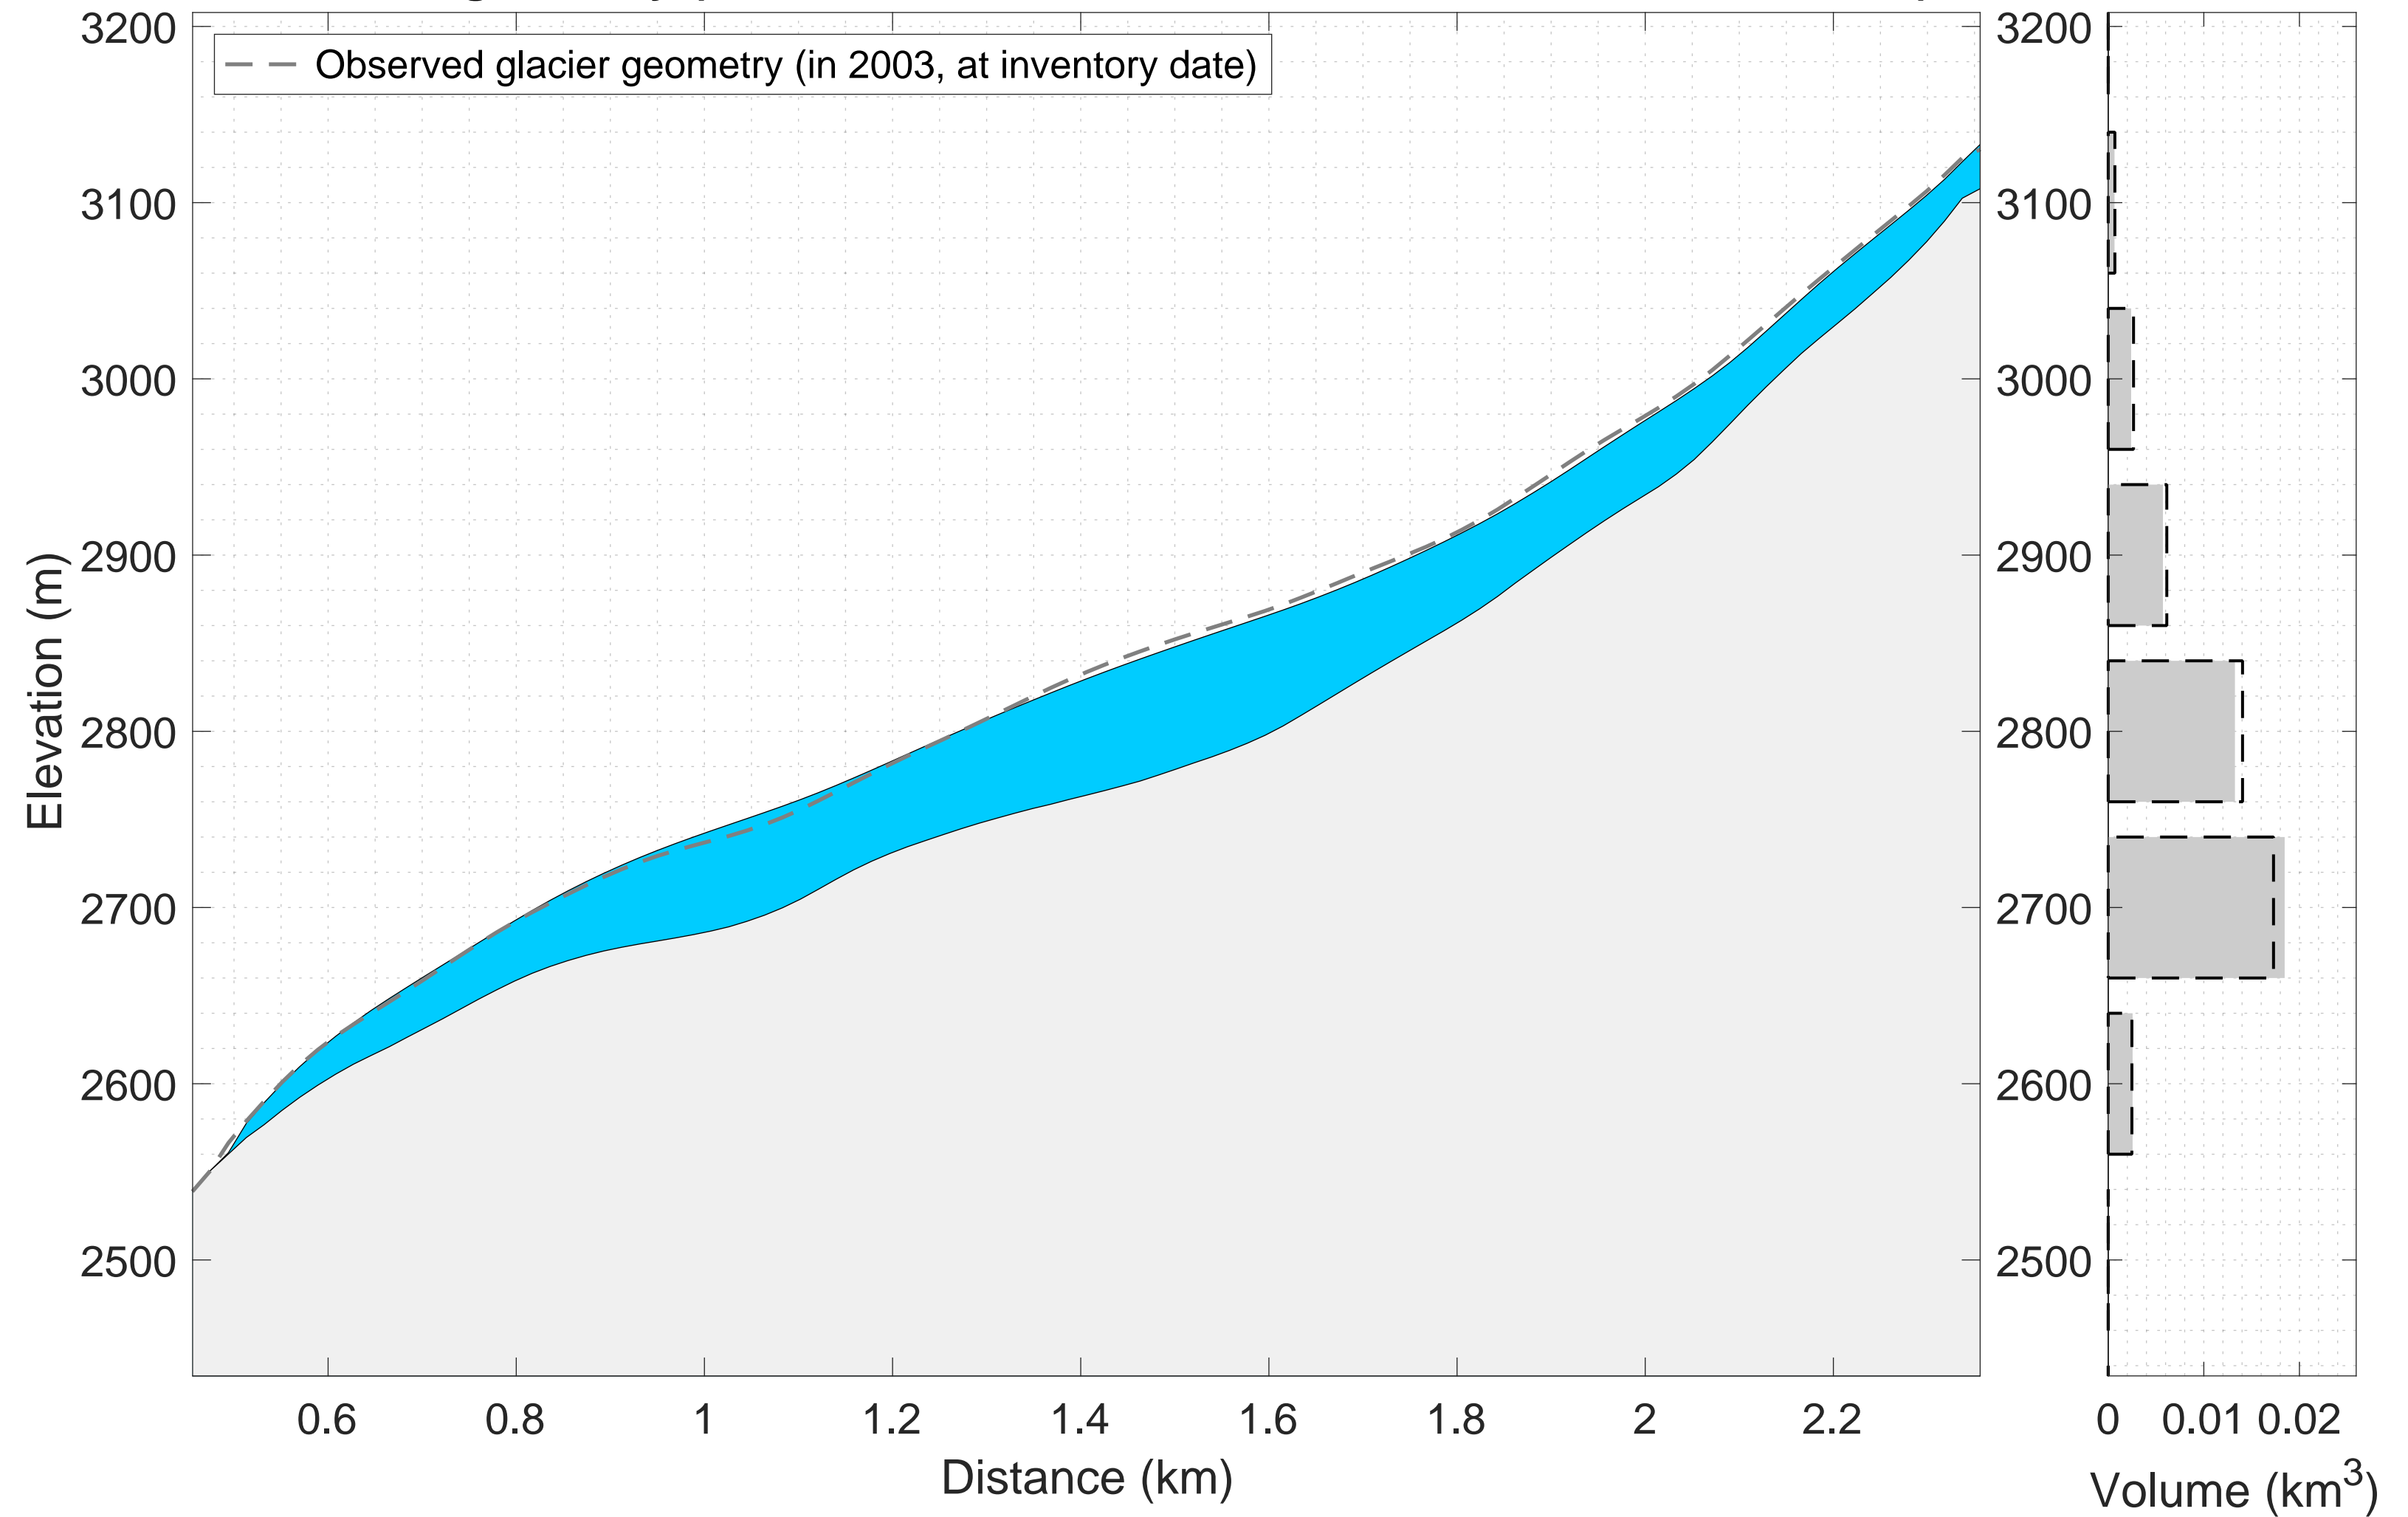

Supplement: Supplementary file 741 [file tc-13-1125-2019-supplement.zip]

**Modelled geometry (Glacier ID = 00917;  $A = 9.1247\text{e-}17 \text{ Pa}^{-3} \text{ a}^{-1}$ ;  $dx = 15 \text{ m}$ )**

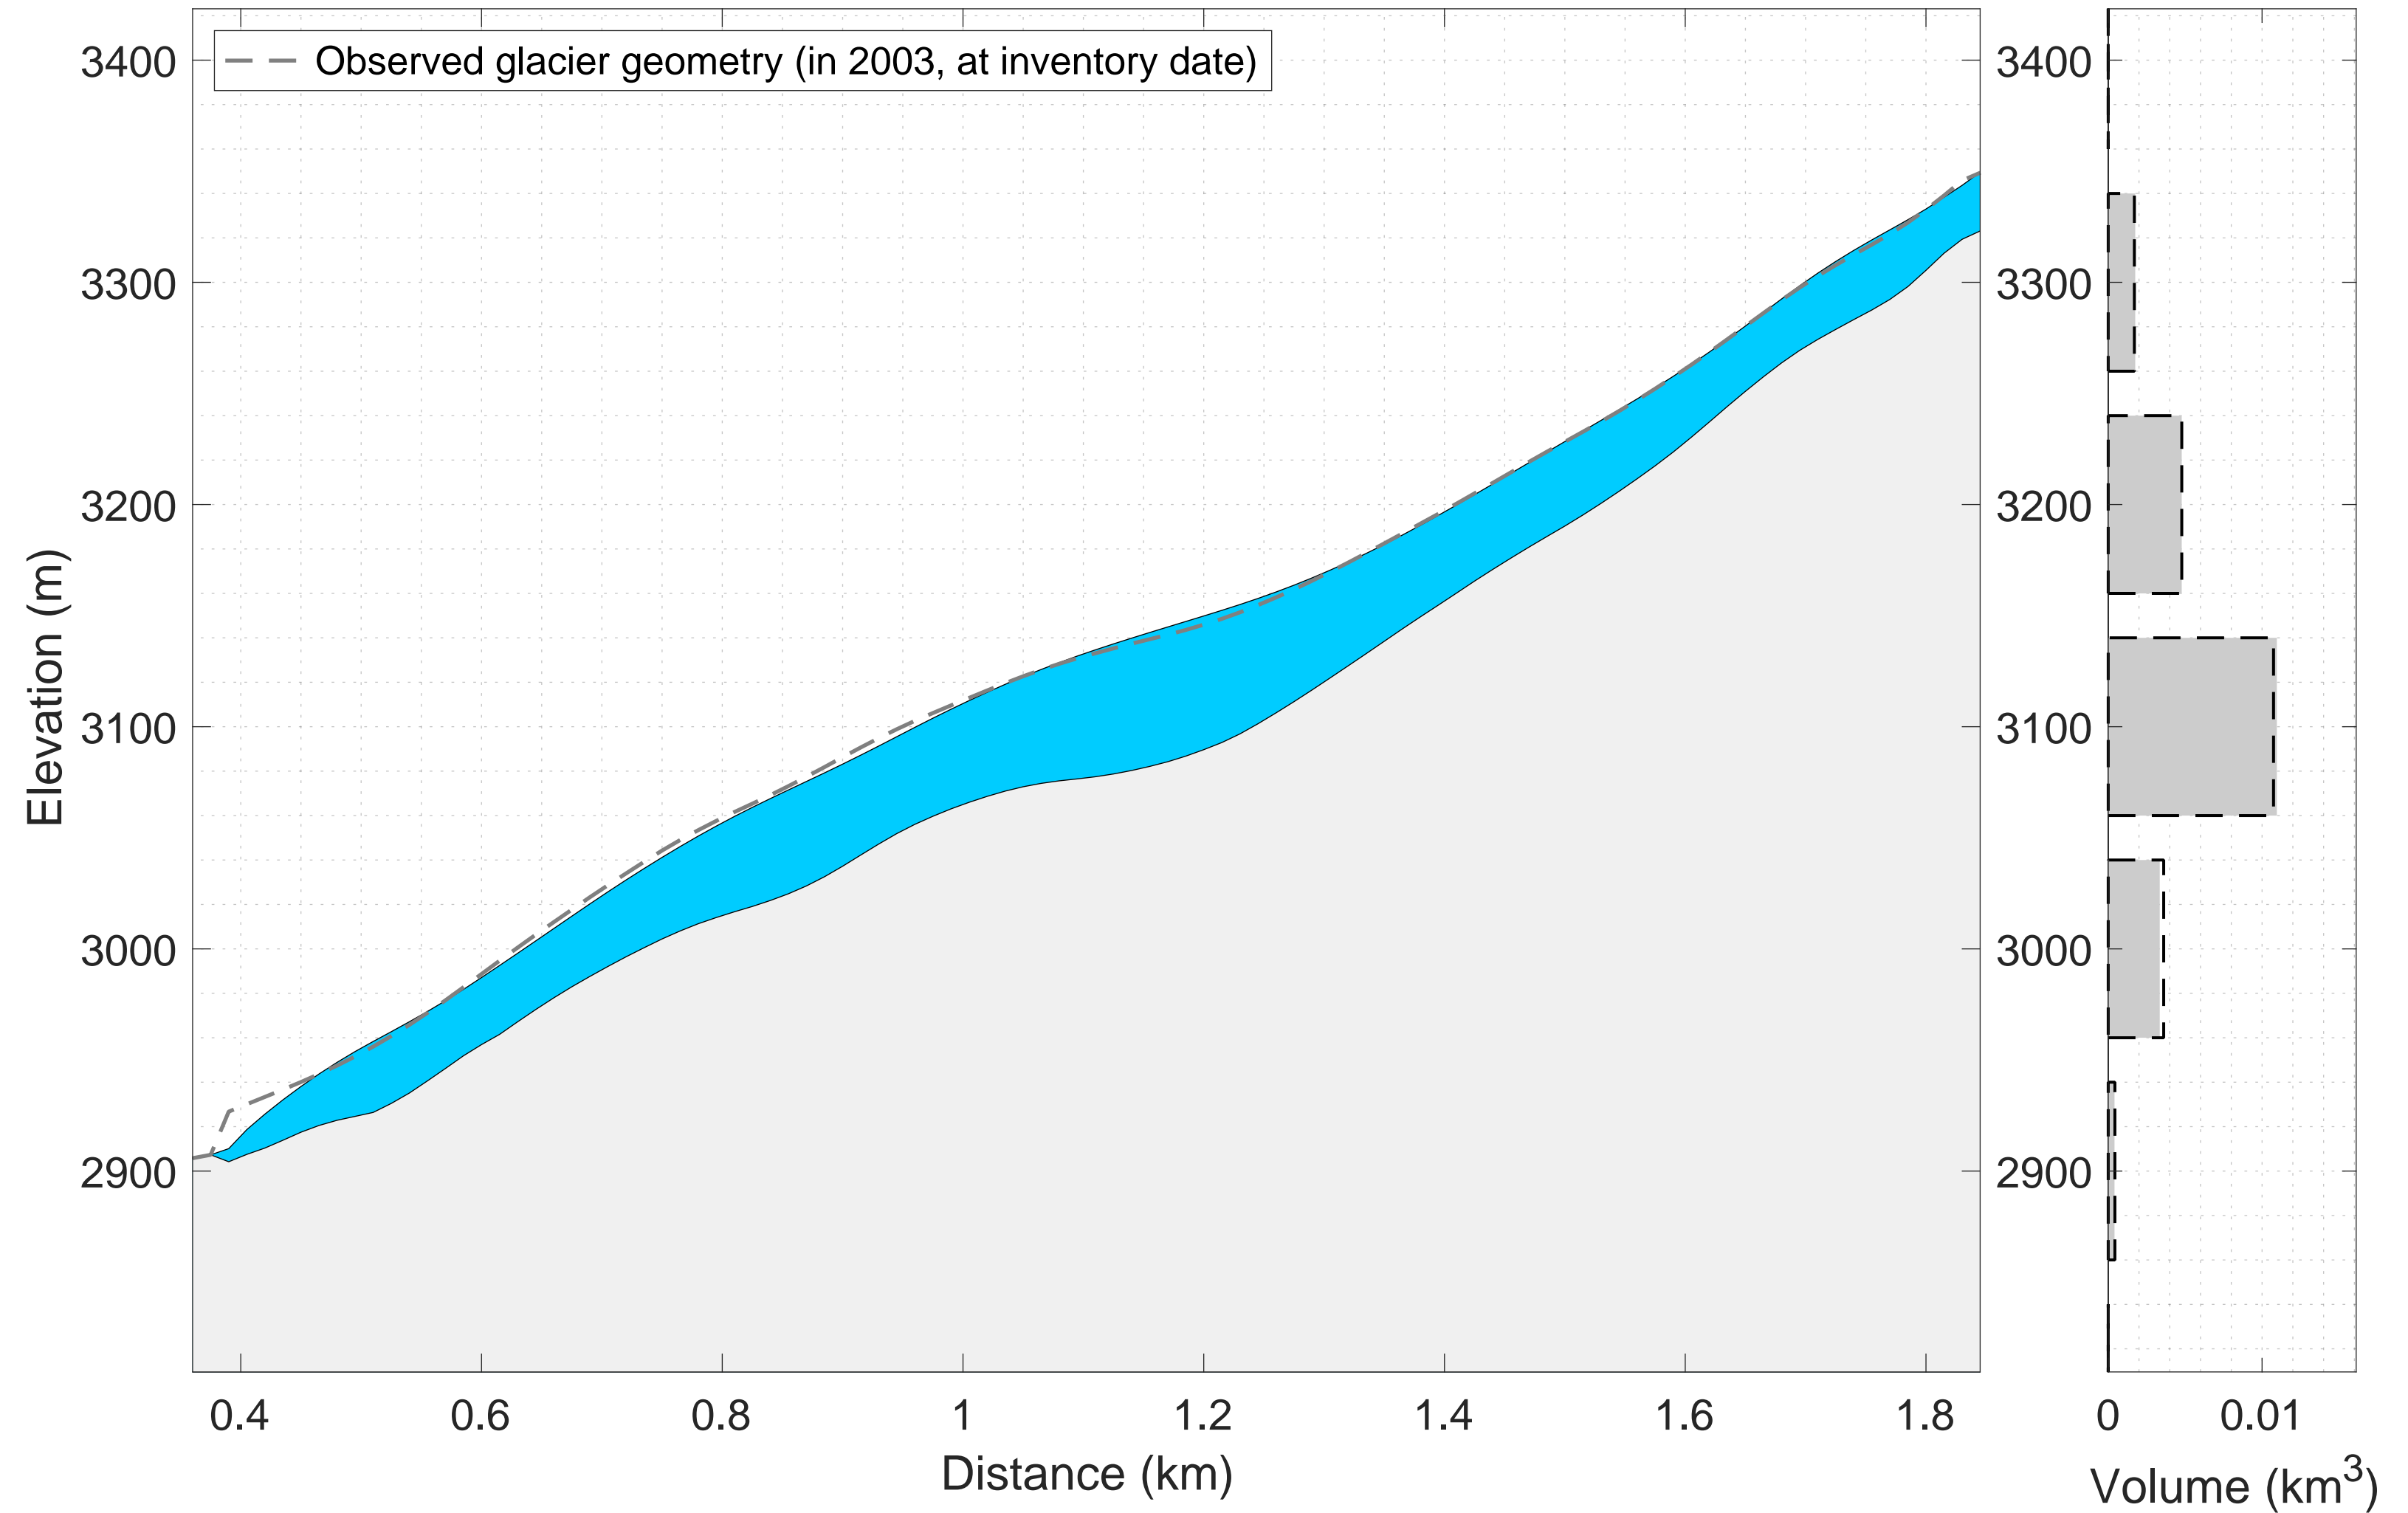

Supplement: Supplementary file 742 [file tc-13-1125-2019-supplement.zip]

**Modelled geometry (Glacier ID = 03284;  $A = 4.07\text{e-}17 \text{ Pa}^{-3} \text{ a}^{-1}$ ;  $dx = 13 \text{ m}$ )**

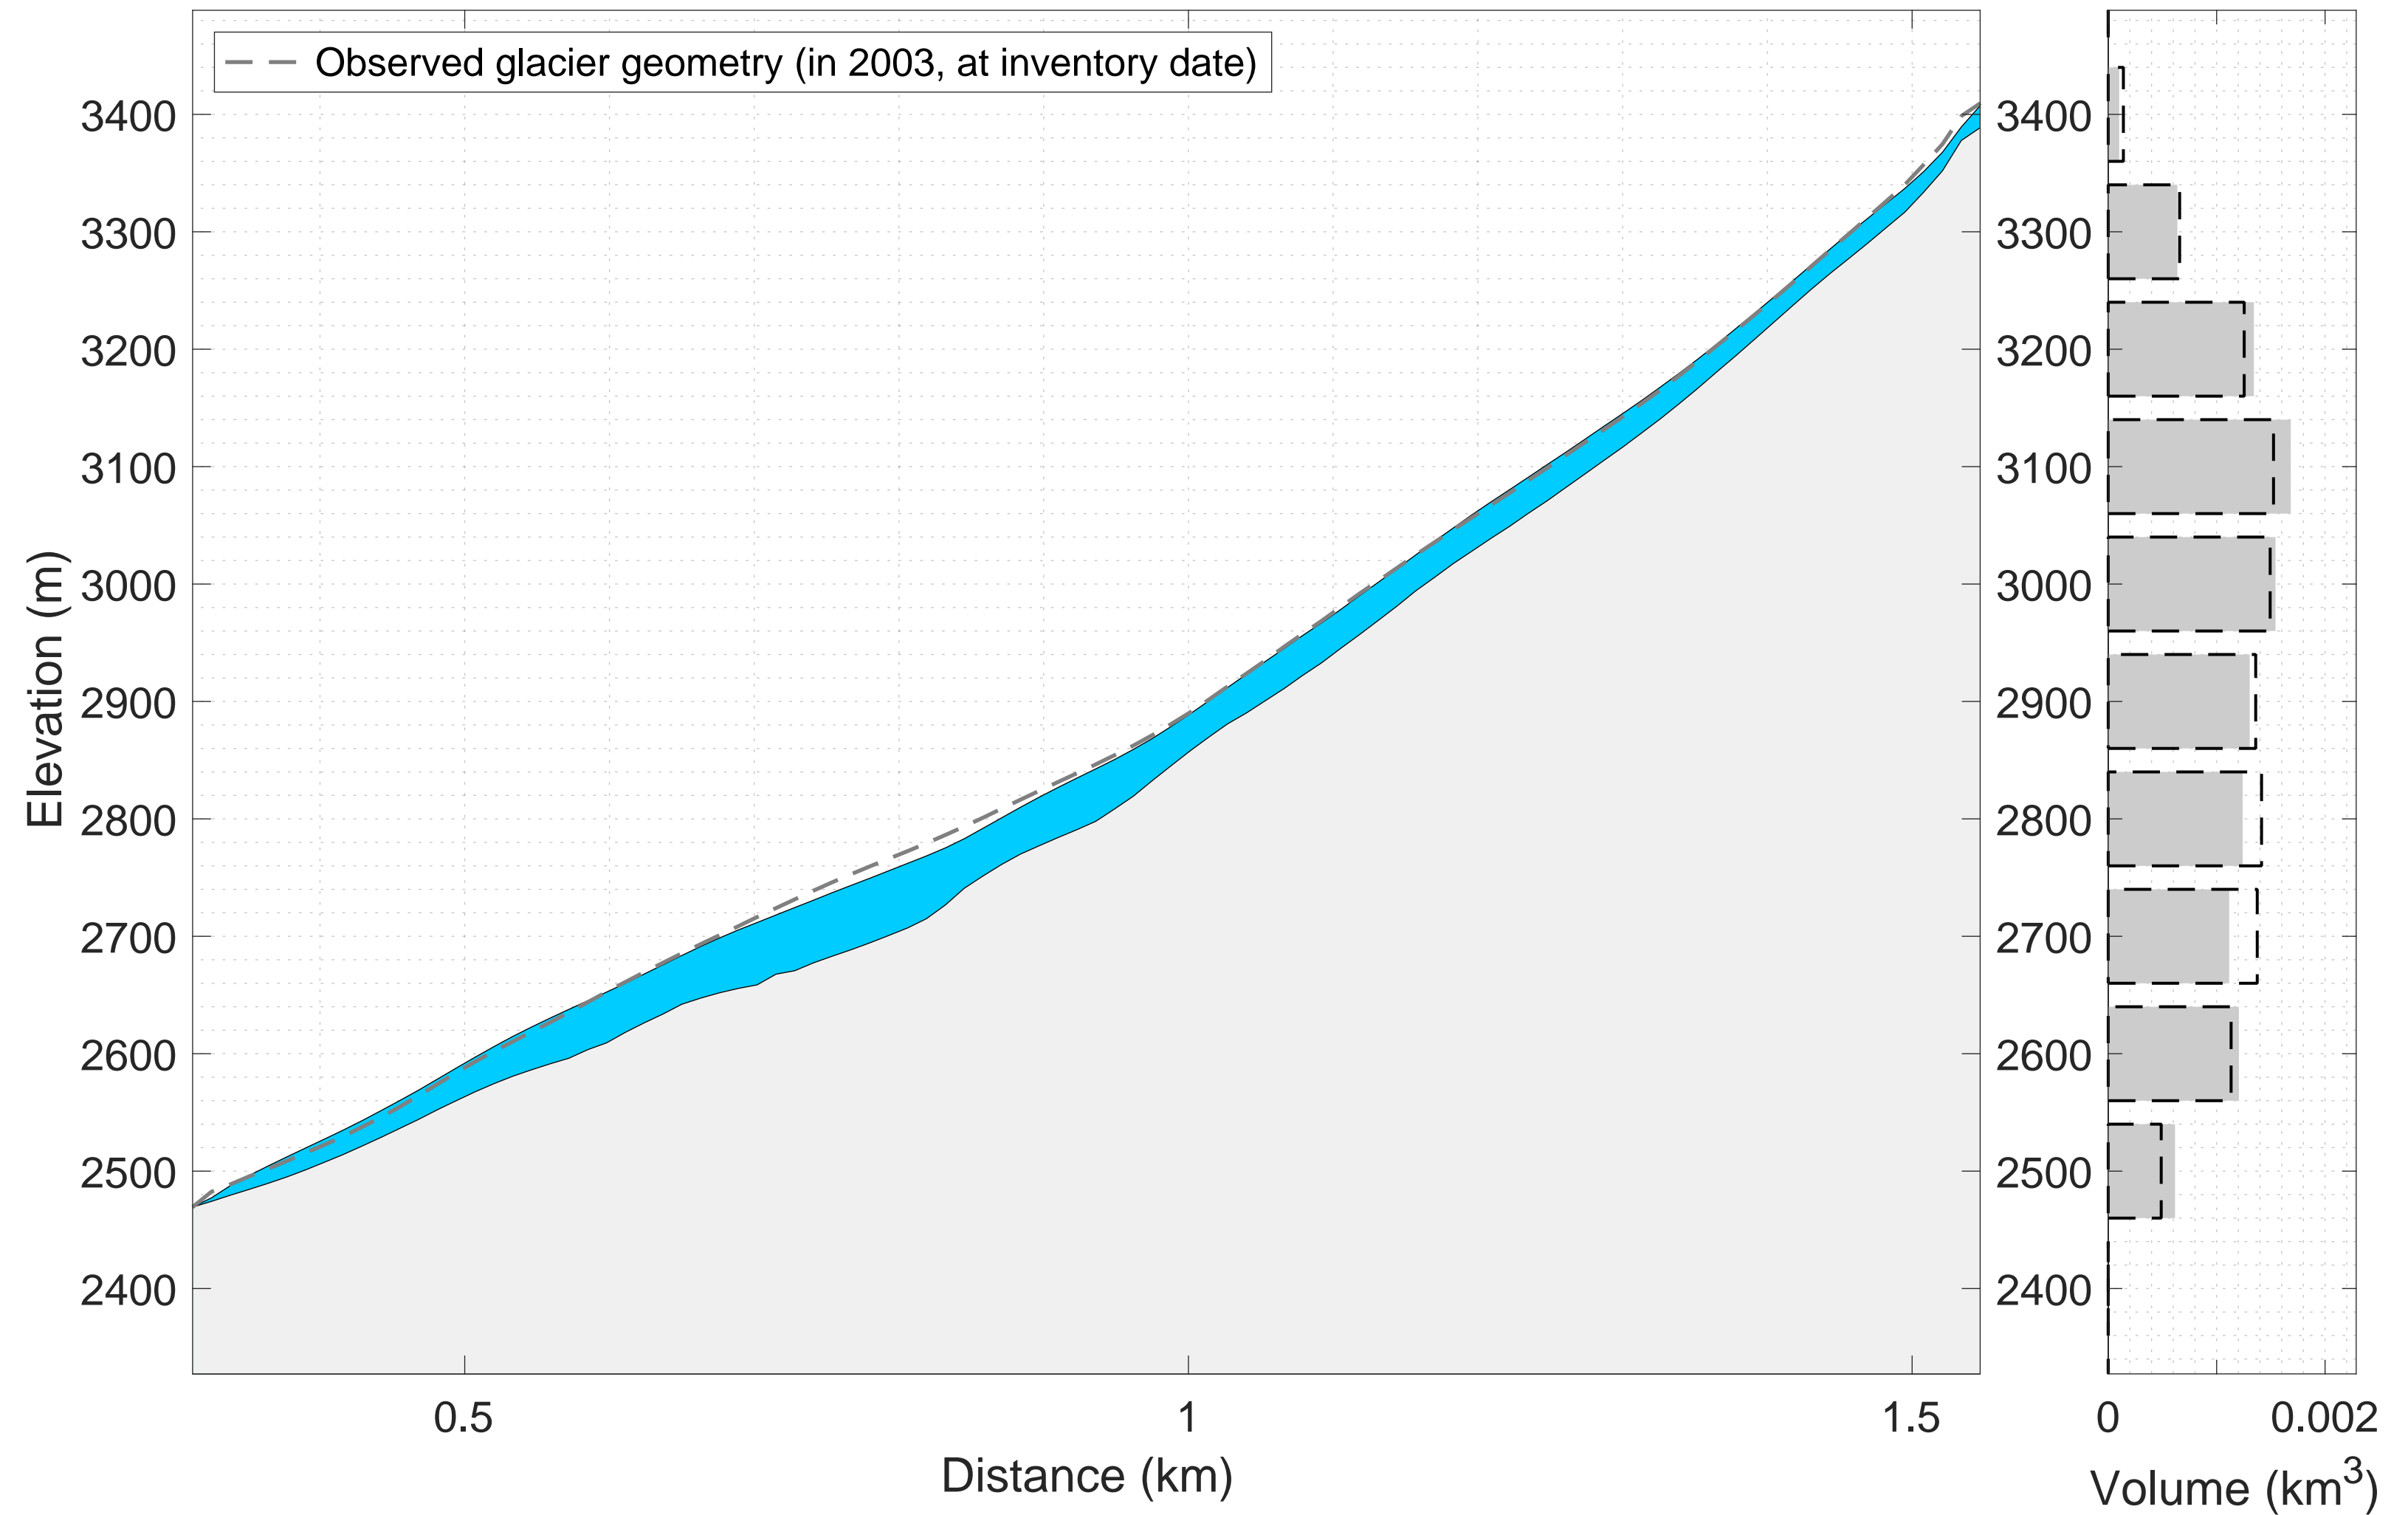

Supplement: Supplementary file 743 [file tc-13-1125-2019-supplement.zip]

**Modelled geometry (Glacier ID = 03529;  $A = 2.1774\text{e-}16 \text{ Pa}^{-3} \text{ a}^{-1}$ ;  $dx = 18 \text{ m}$ )**

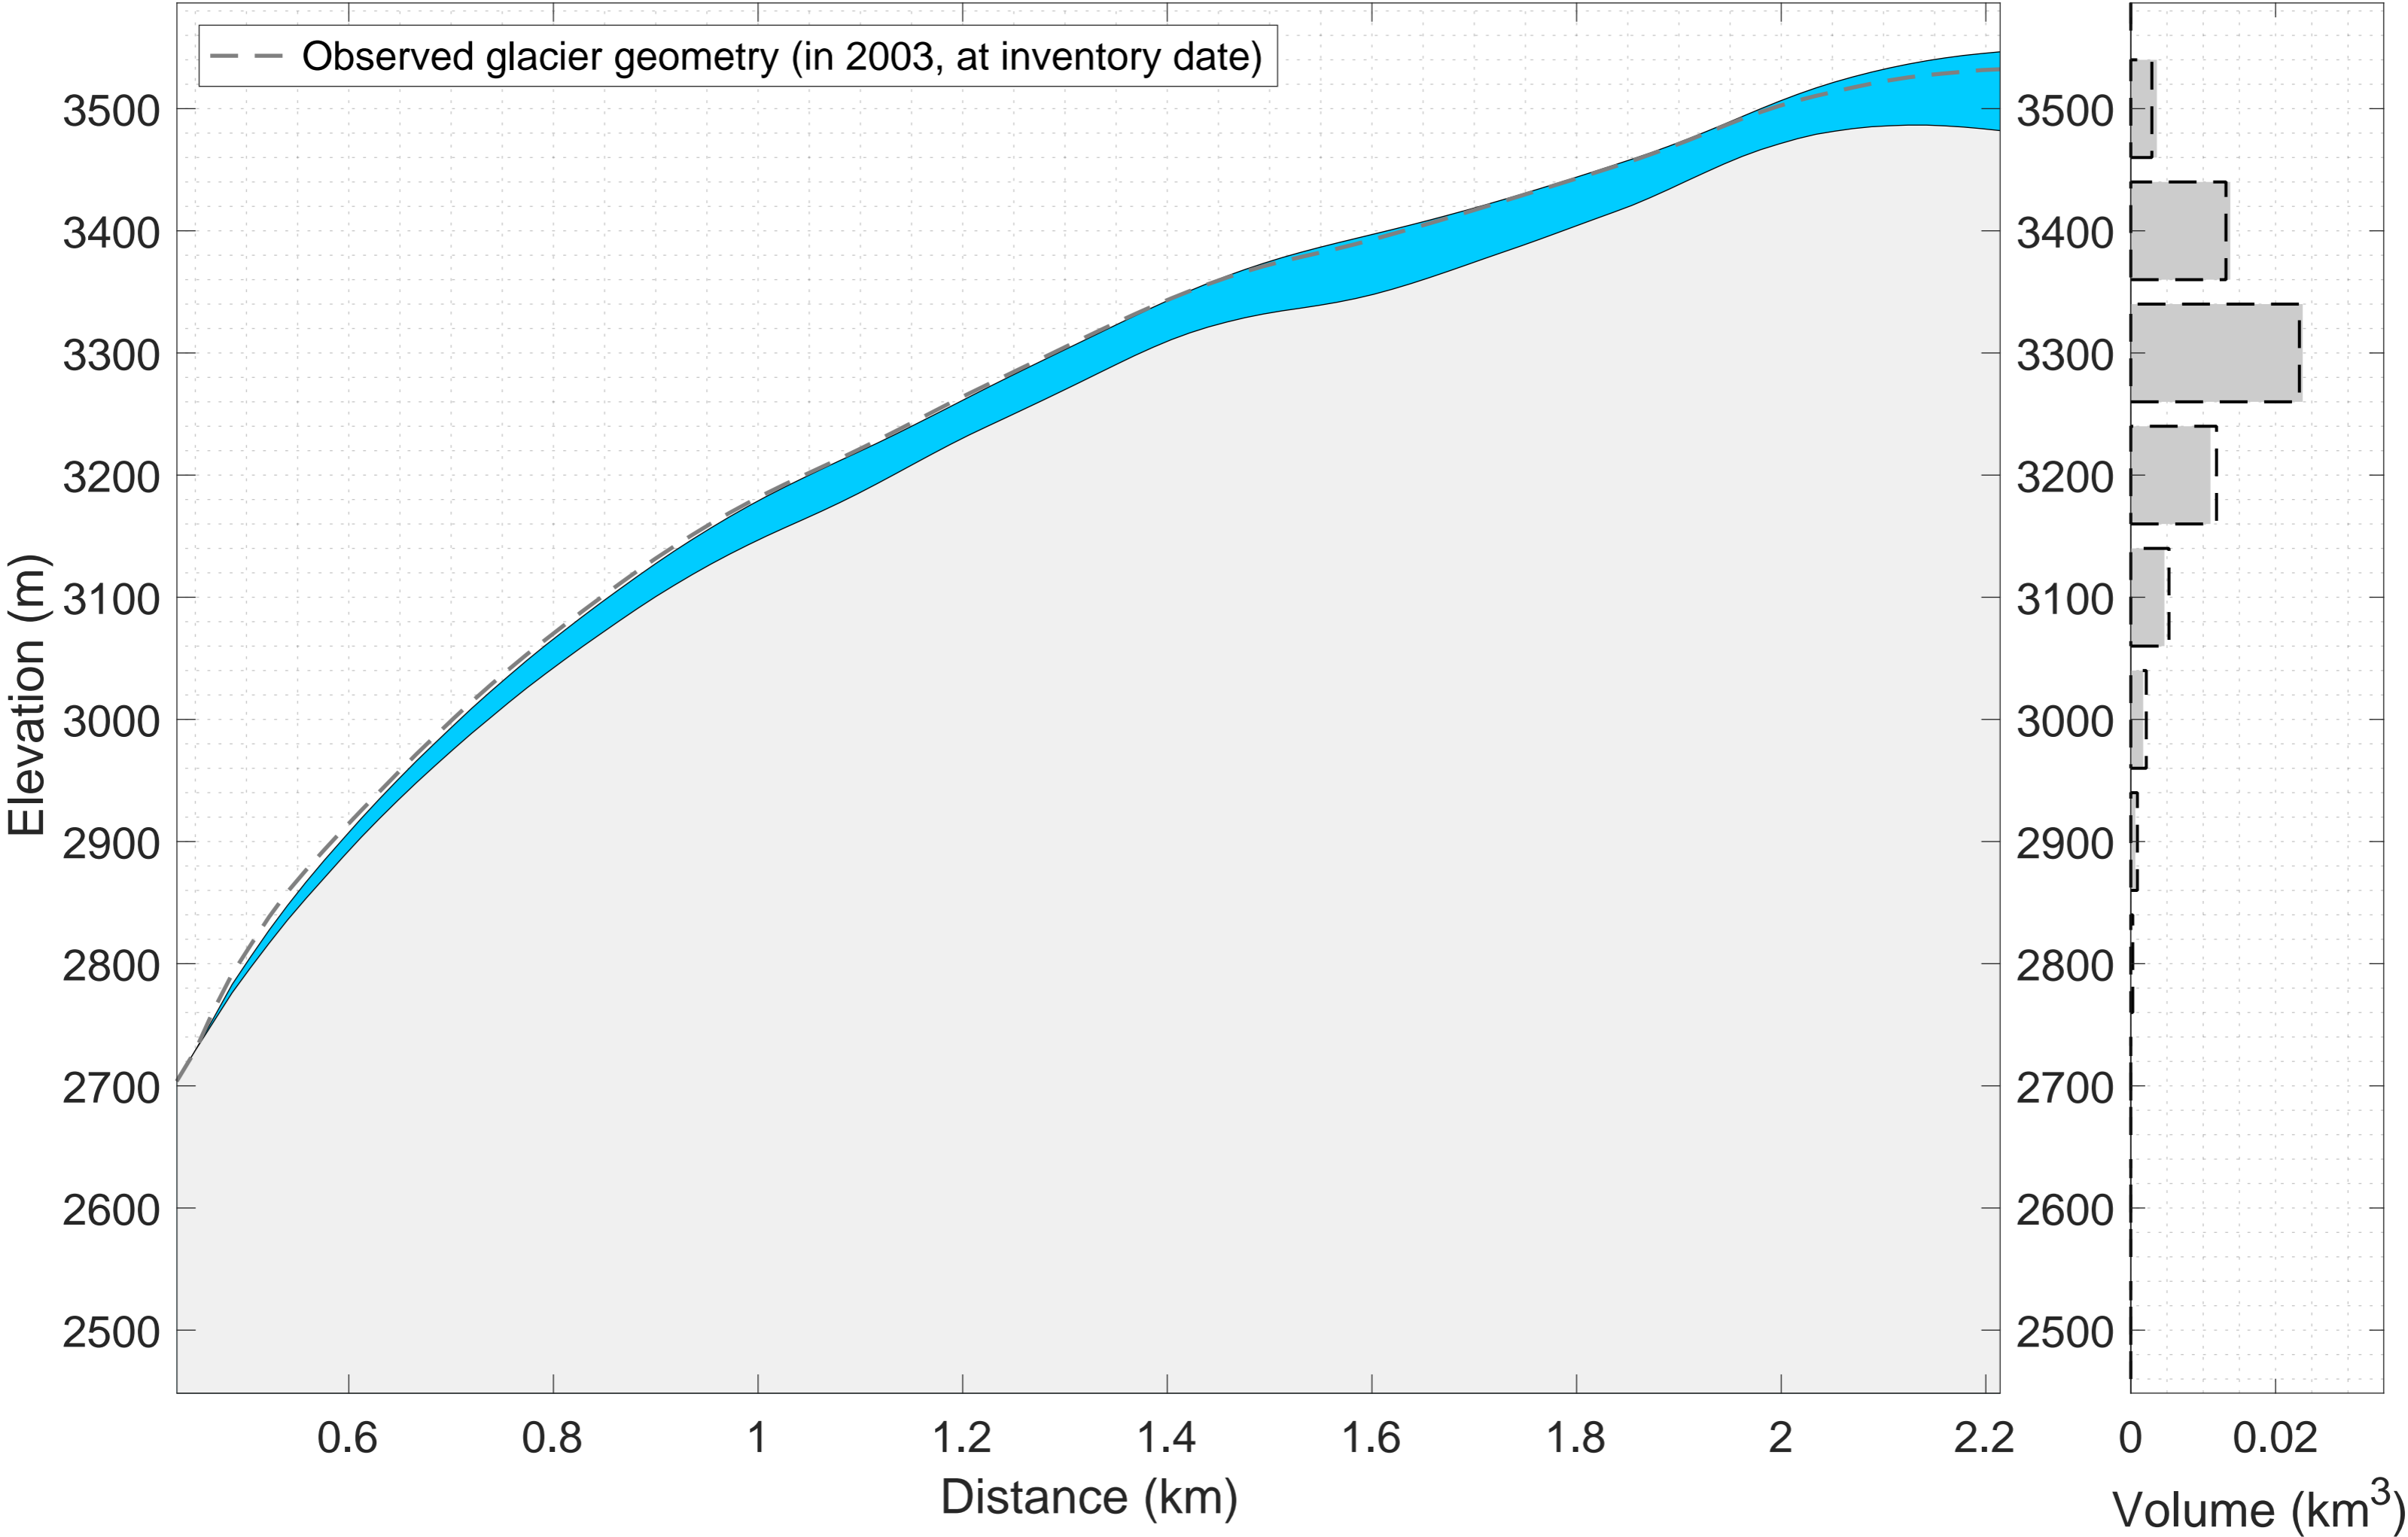

Supplement: Supplementary file 744 [file tc-13-1125-2019-supplement.zip]

**Modelled geometry (Glacier ID = 03675;  $A = 1.1402\text{e-}16 \text{ Pa}^{-3} \text{ a}^{-1}$ ;  $dx = 23 \text{ m}$ )**

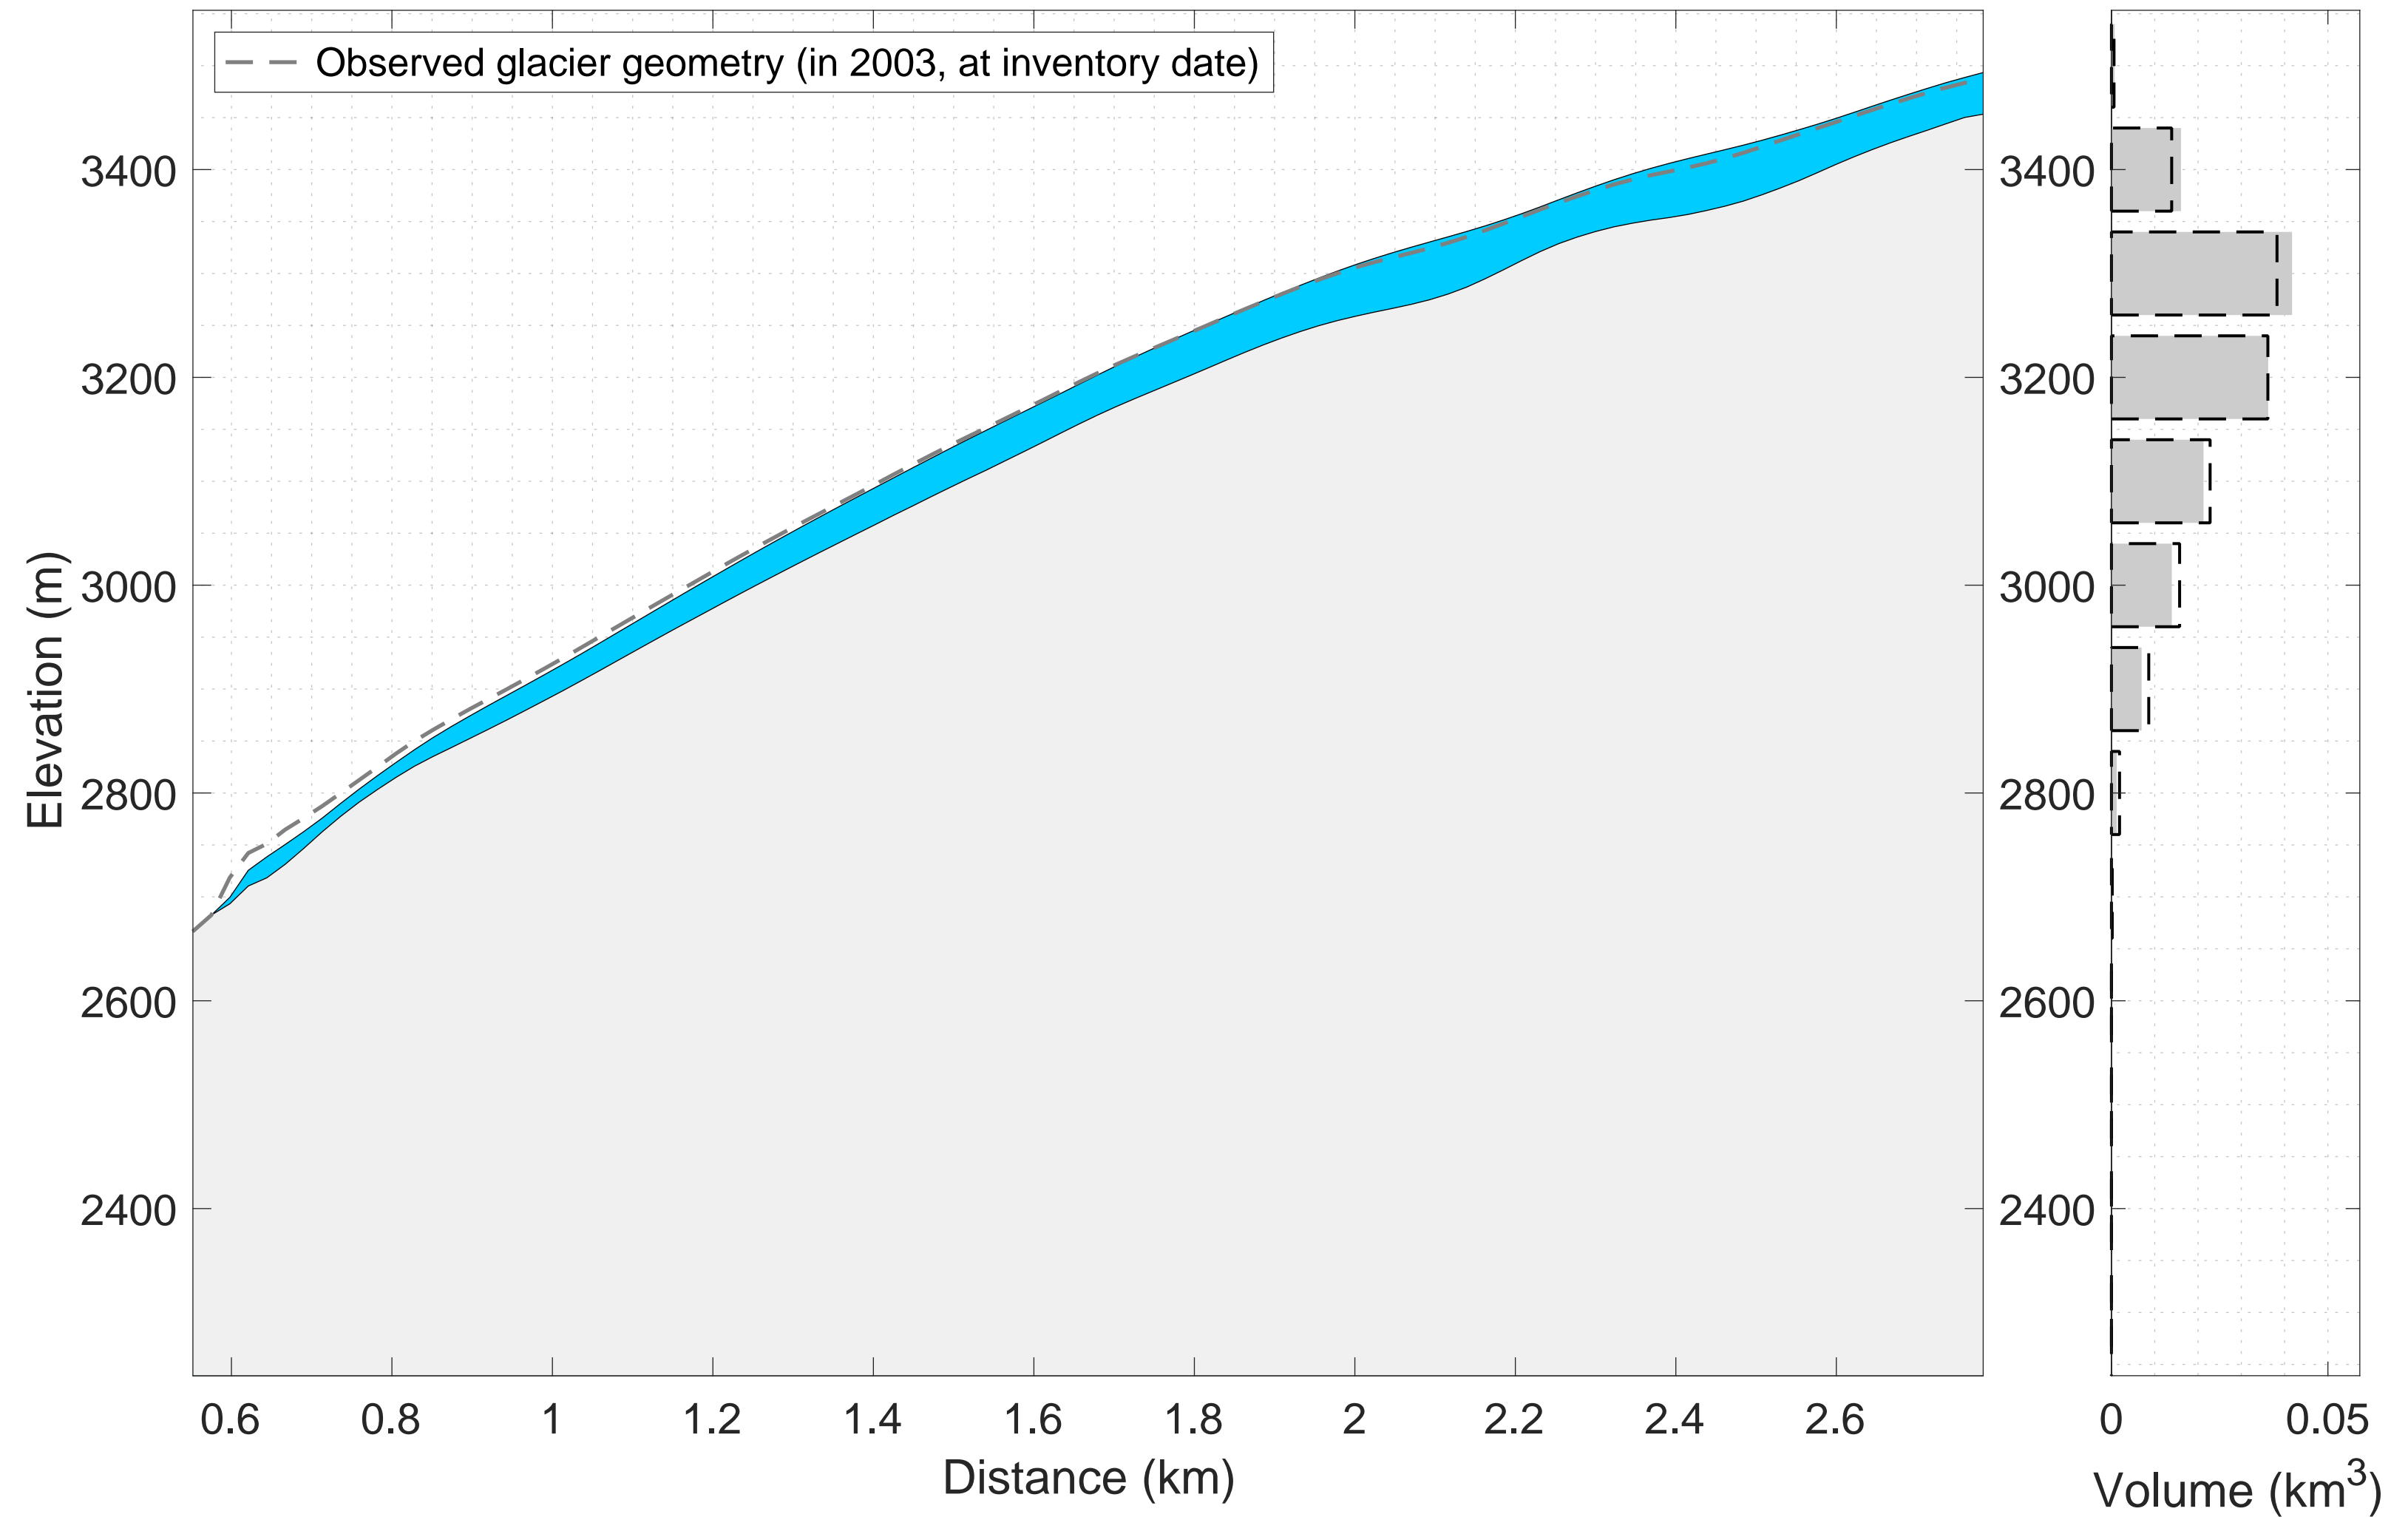

Supplement: Supplementary file 745 [file tc-13-1125-2019-supplement.zip]

Modelled geometry (Glacier ID = 03724;  $A = 2.5567\text{e-}16 \text{ Pa}^{-3} \text{ a}^{-1}$ ;  $dx = 12 \text{ m}$ )

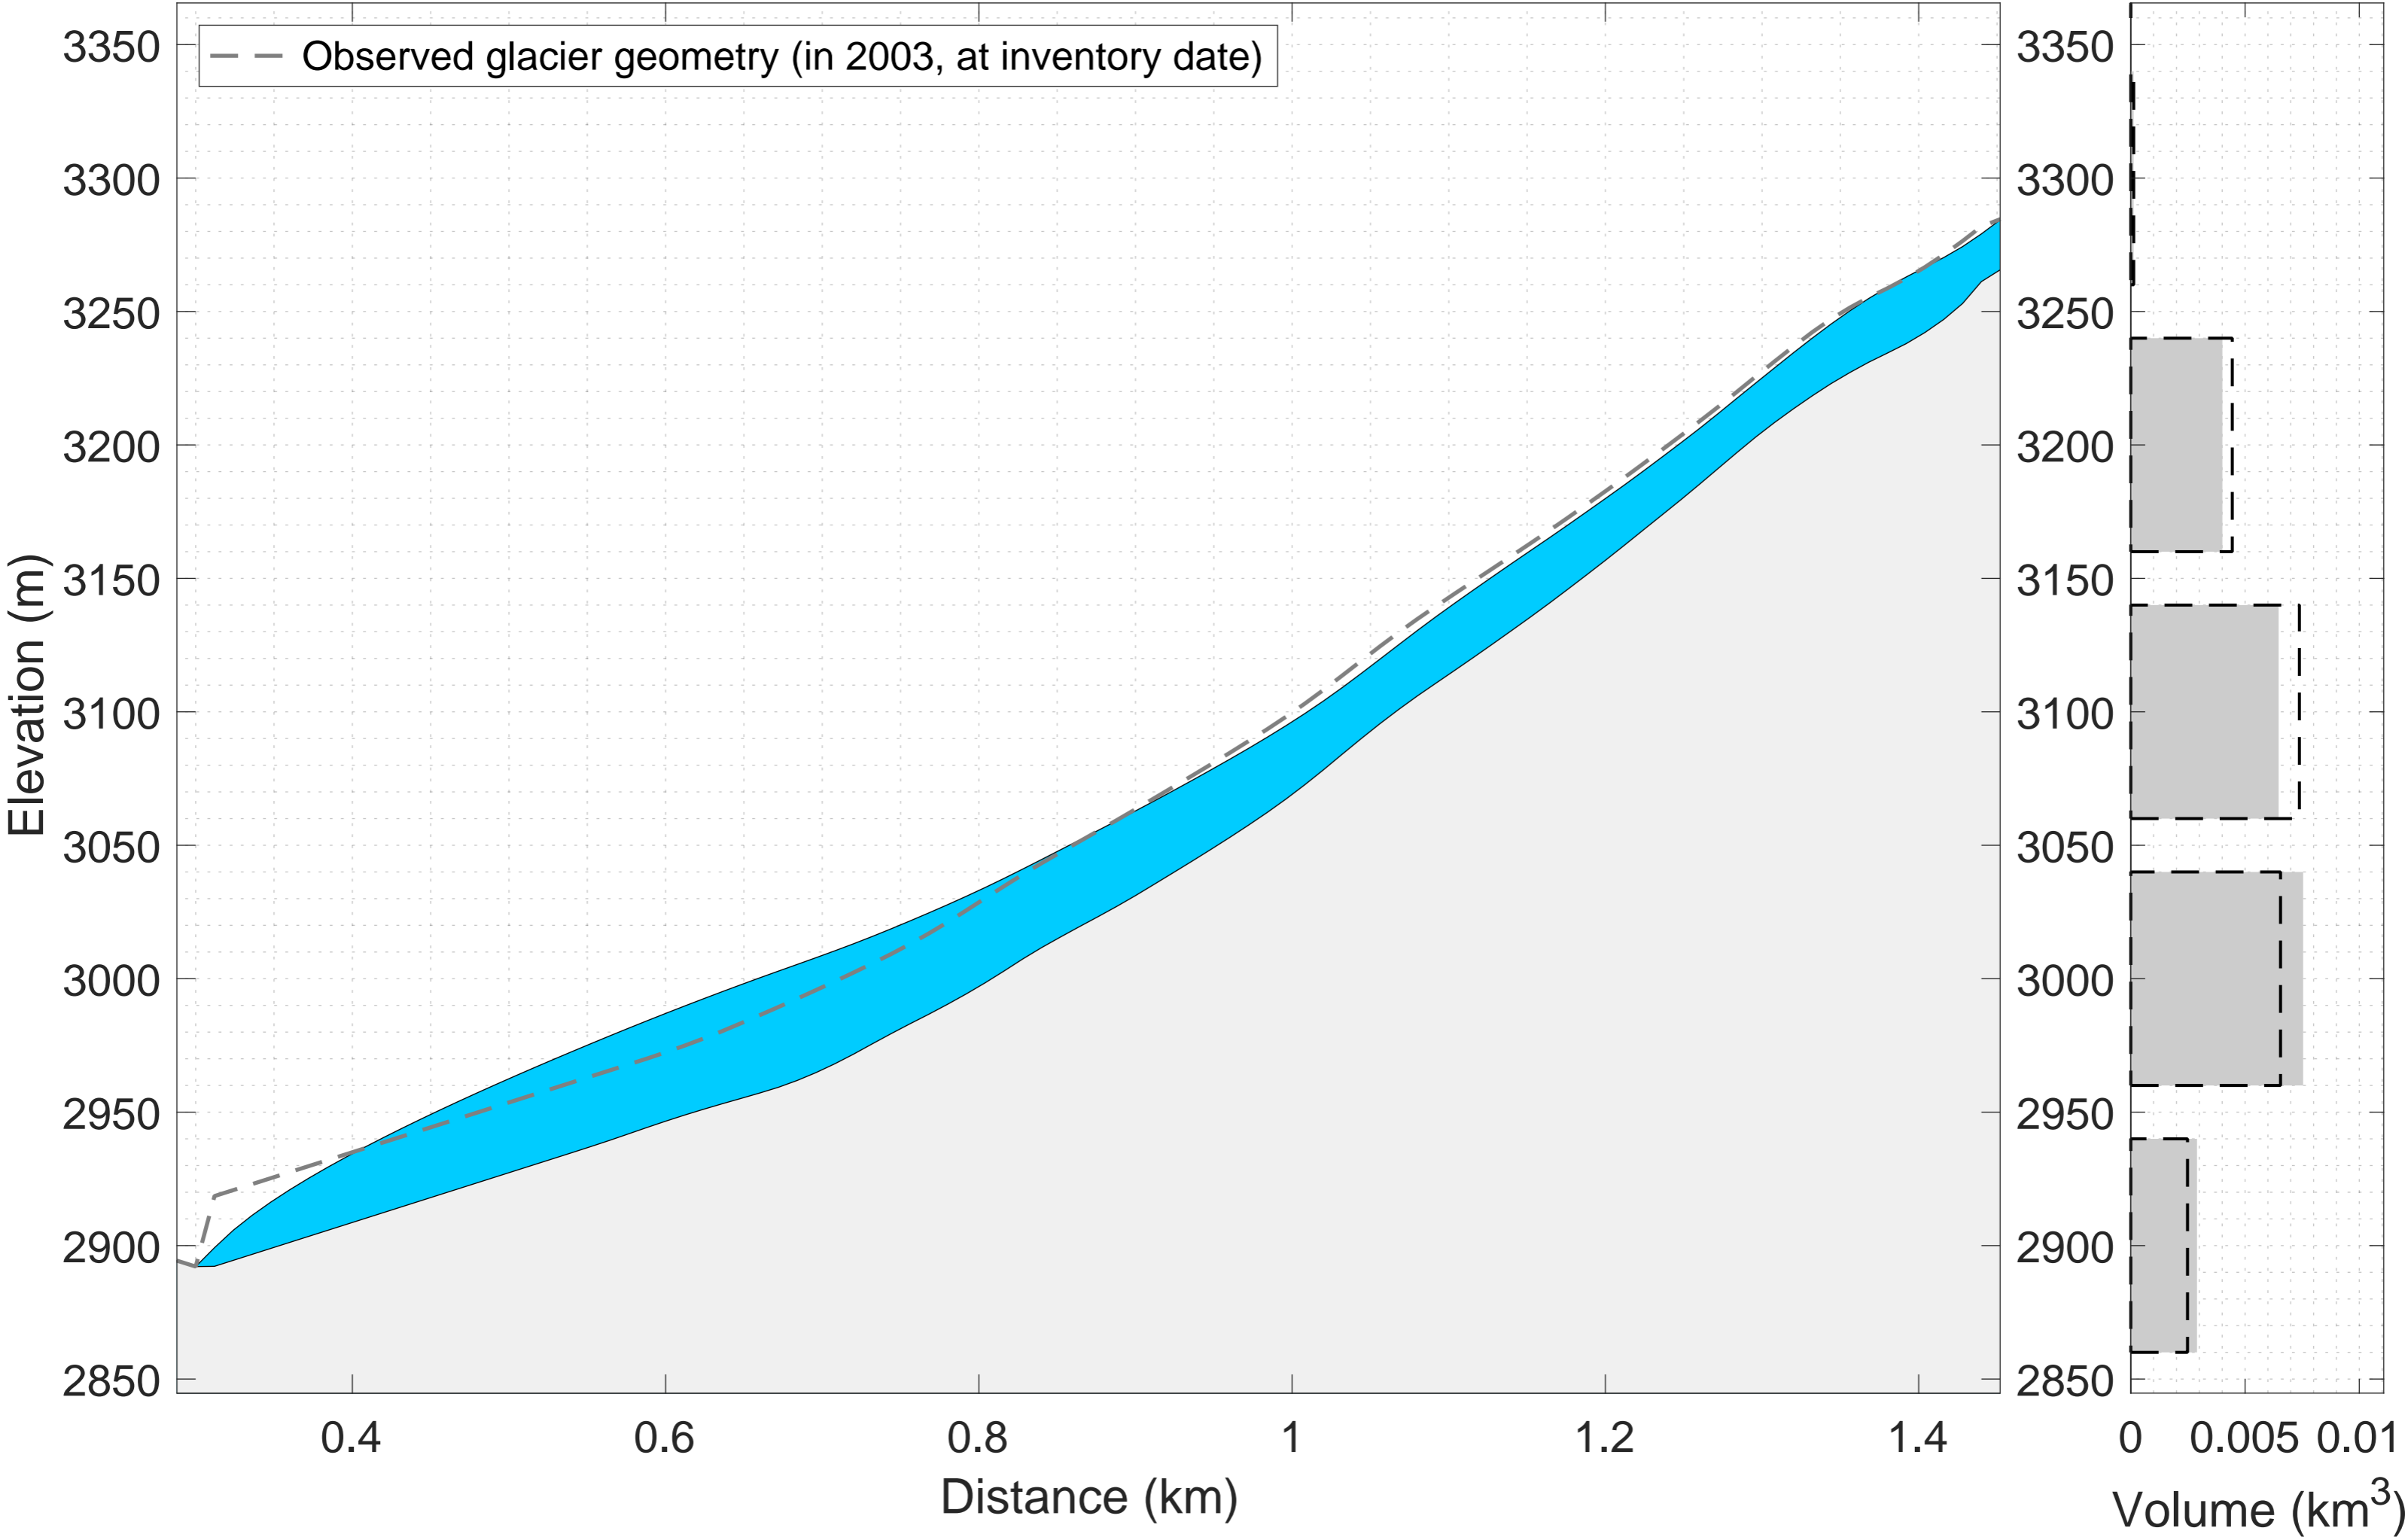

Supplement: Supplementary file 746 [file tc-13-1125-2019-supplement.zip]

**Modelled geometry (Glacier ID = 02673;  $A = 7.5206\text{e-}17 \text{ Pa}^{-3} \text{ a}^{-1}$ ;  $dx = 11 \text{ m}$ )**

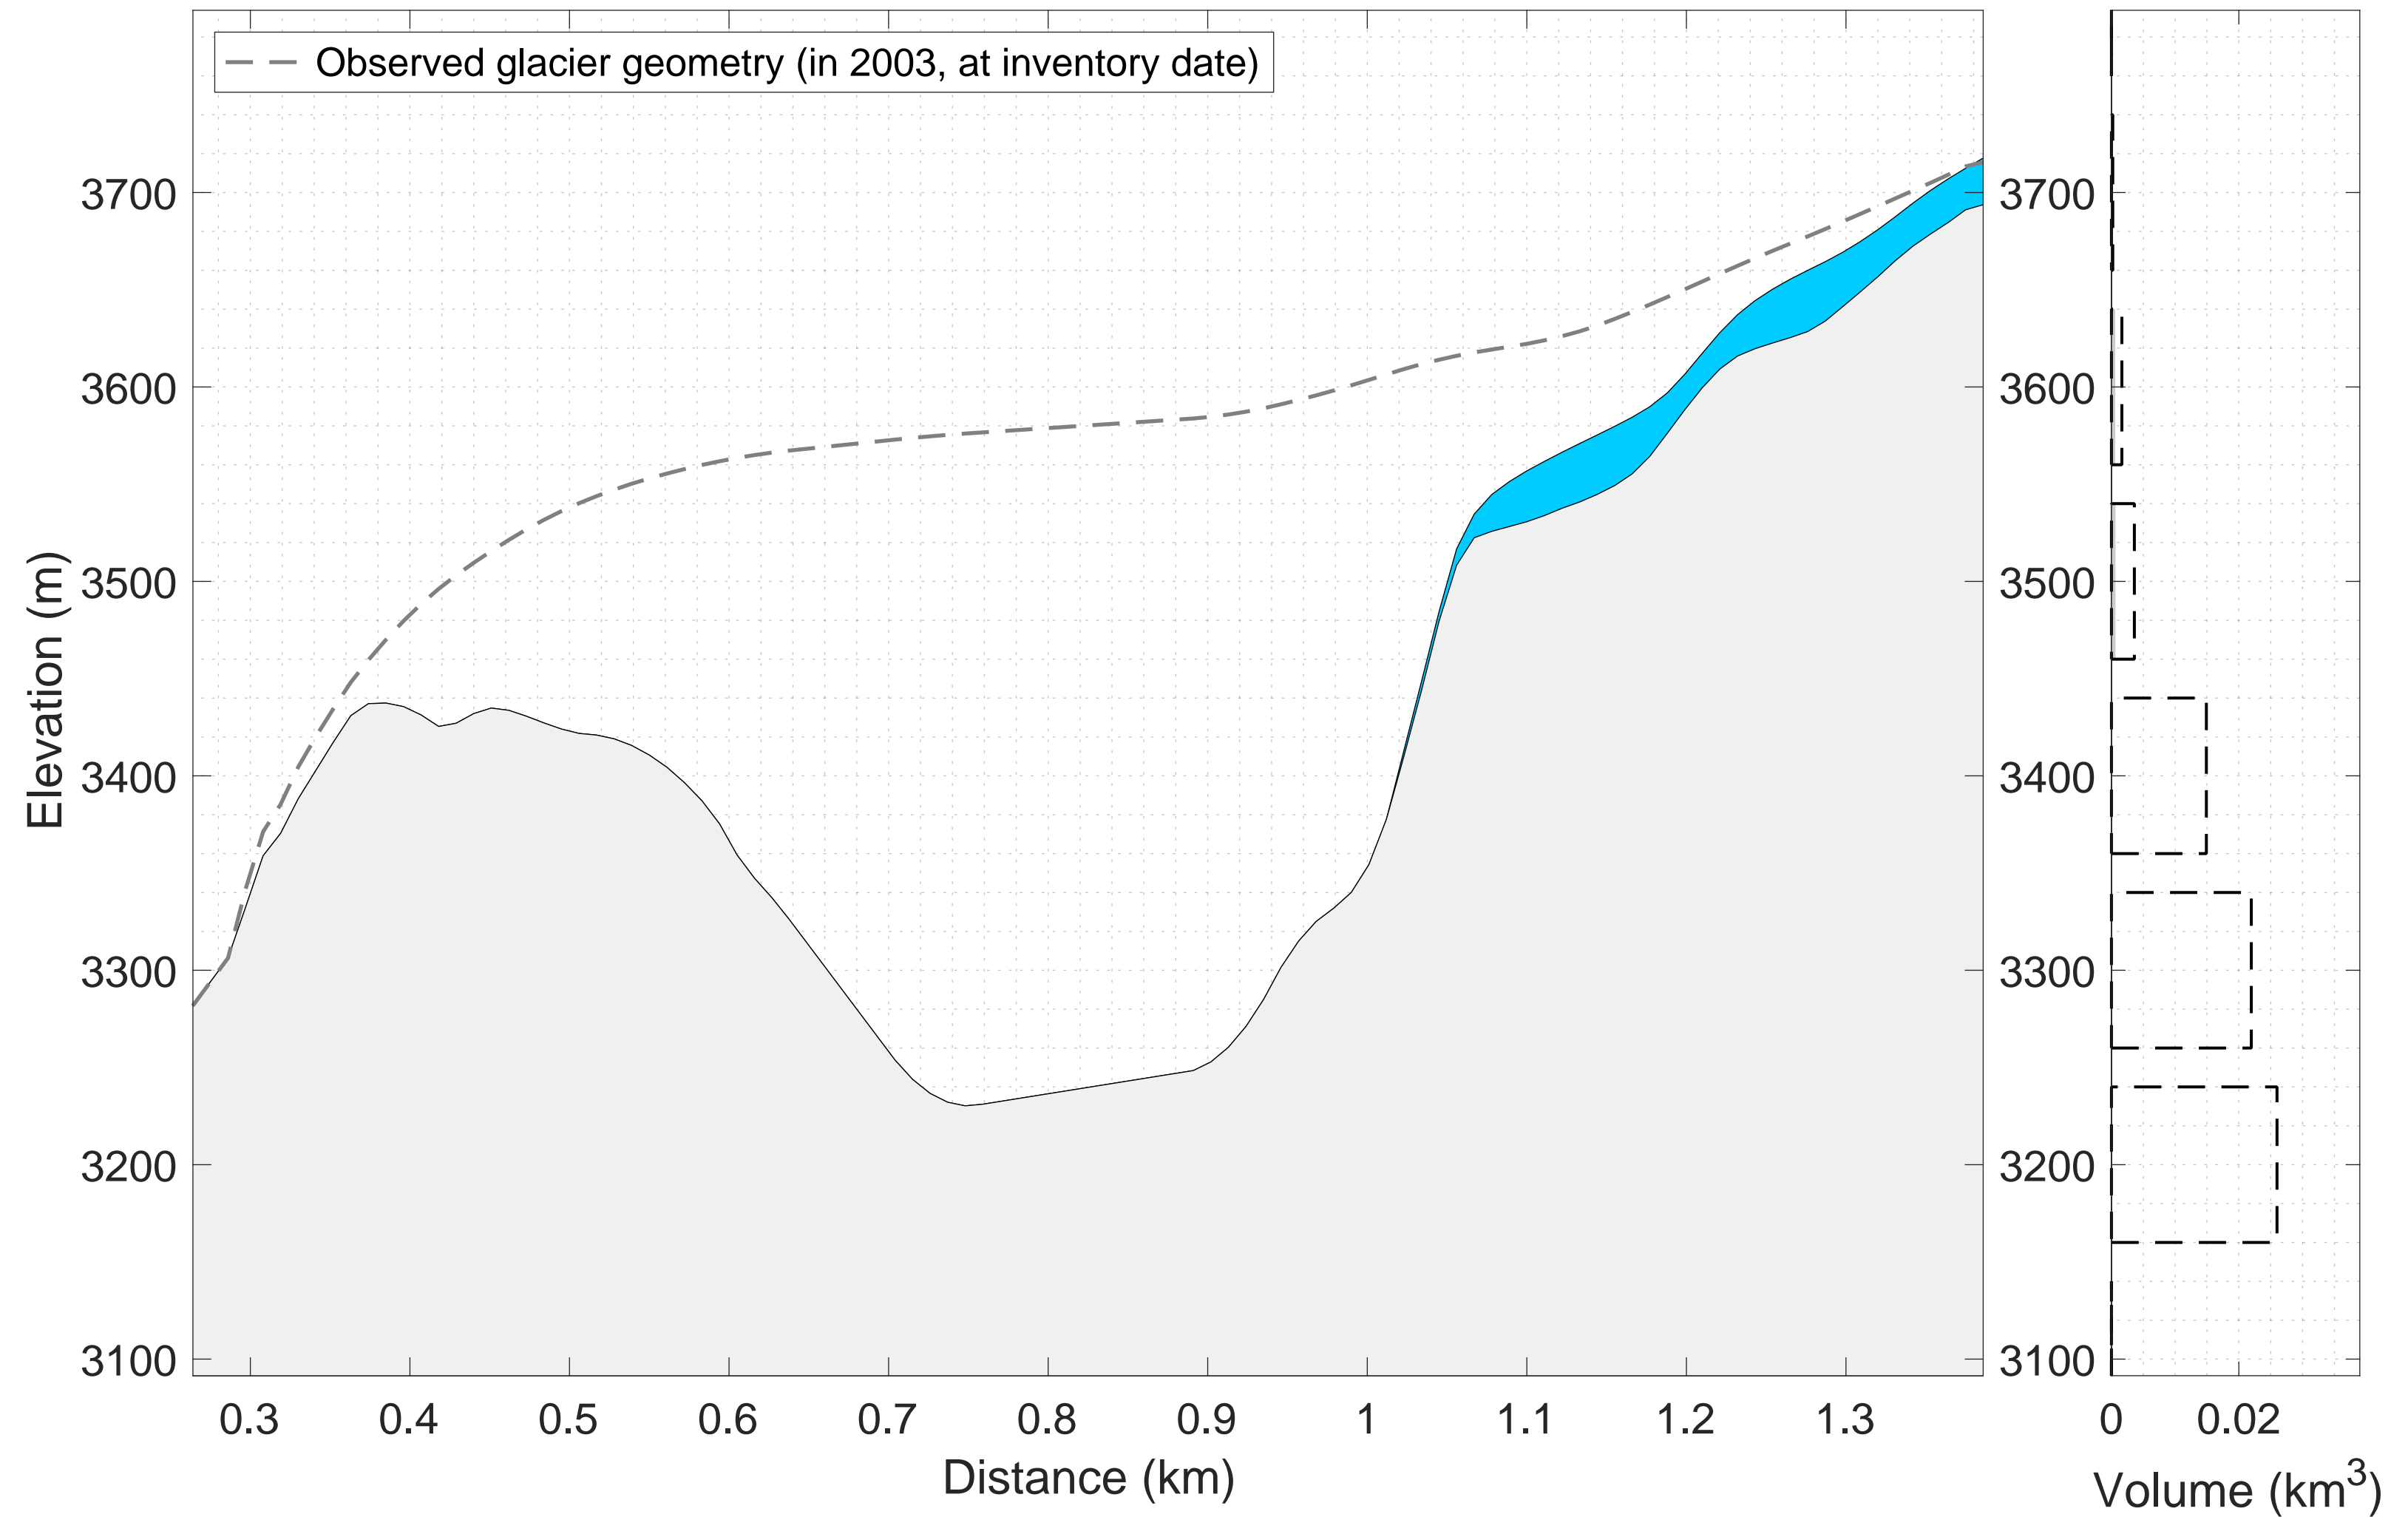

Supplement: Supplementary file 747 [file tc-13-1125-2019-supplement.zip]

**Modelled geometry (Glacier ID = 00278;  $A = 1.6037\text{e-}16 \text{ Pa}^{-3} \text{ a}^{-1}$ ;  $dx = 32 \text{ m}$ )**

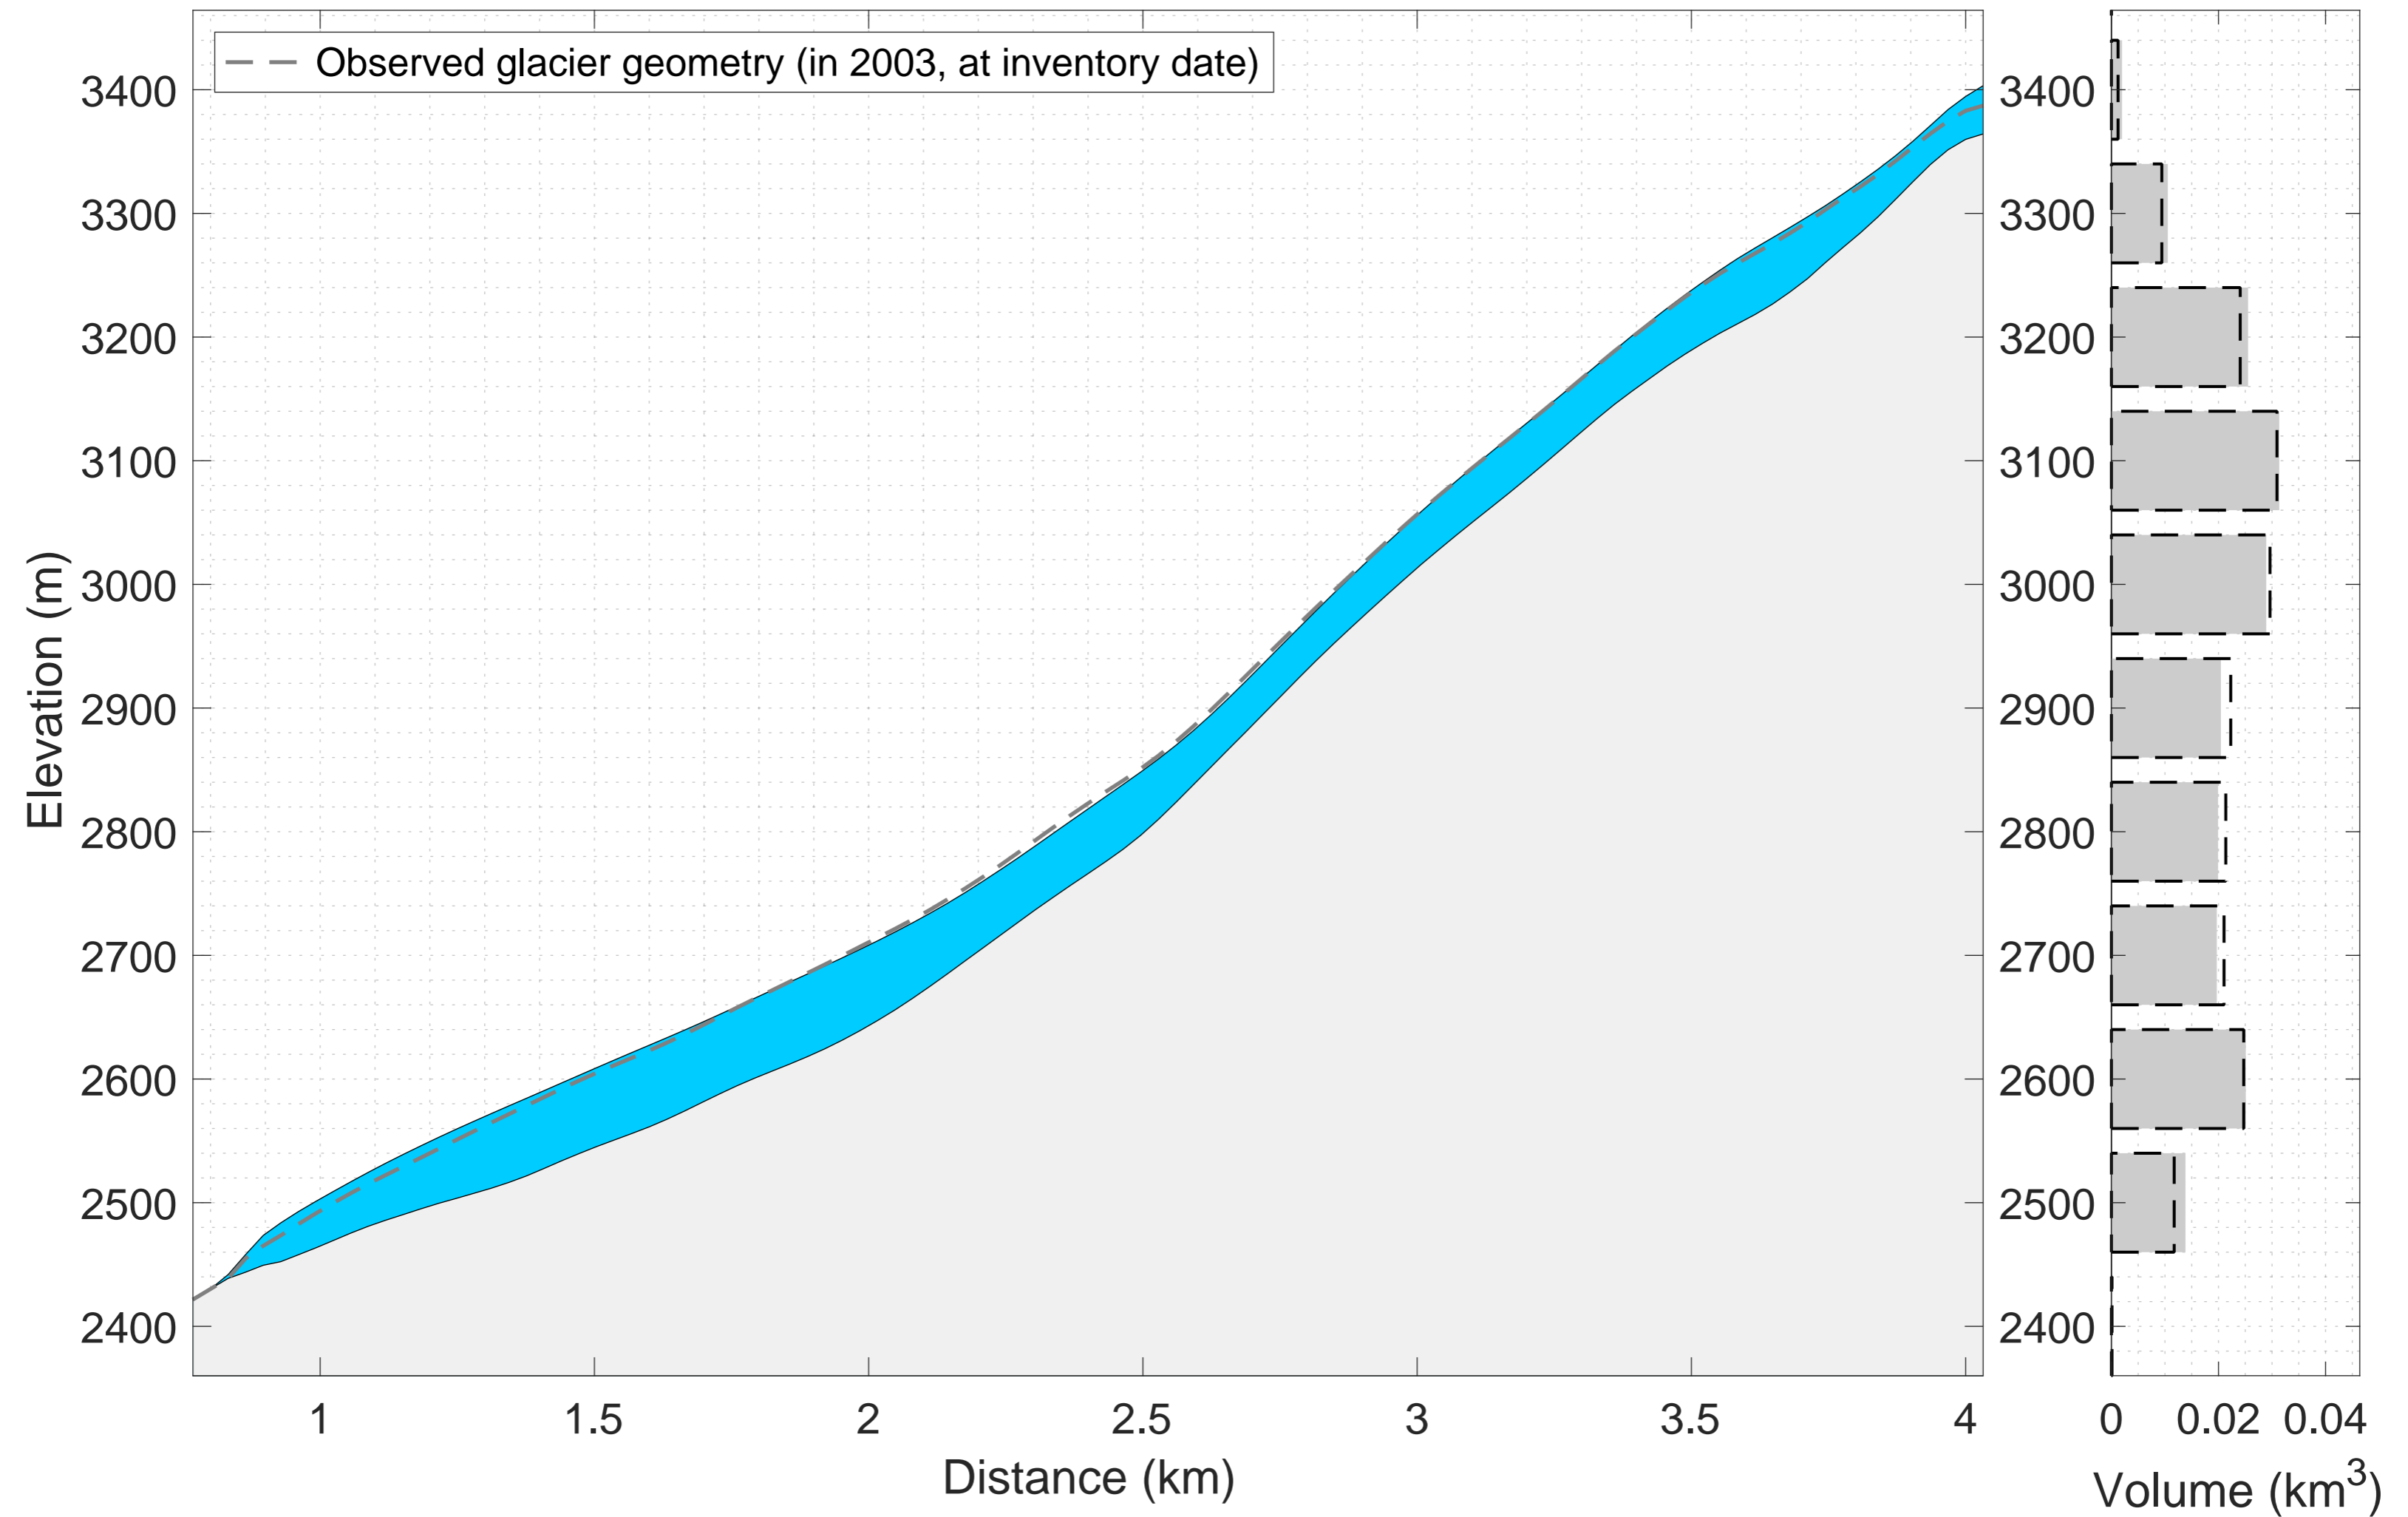

Supplement: Supplementary file 748 [file tc-13-1125-2019-supplement.zip]

**Modelled geometry (Glacier ID = 01678;  $A = 2.7585\text{e-}16 \text{ Pa}^{-3} \text{ a}^{-1}$ ;  $dx = 33 \text{ m}$ )**

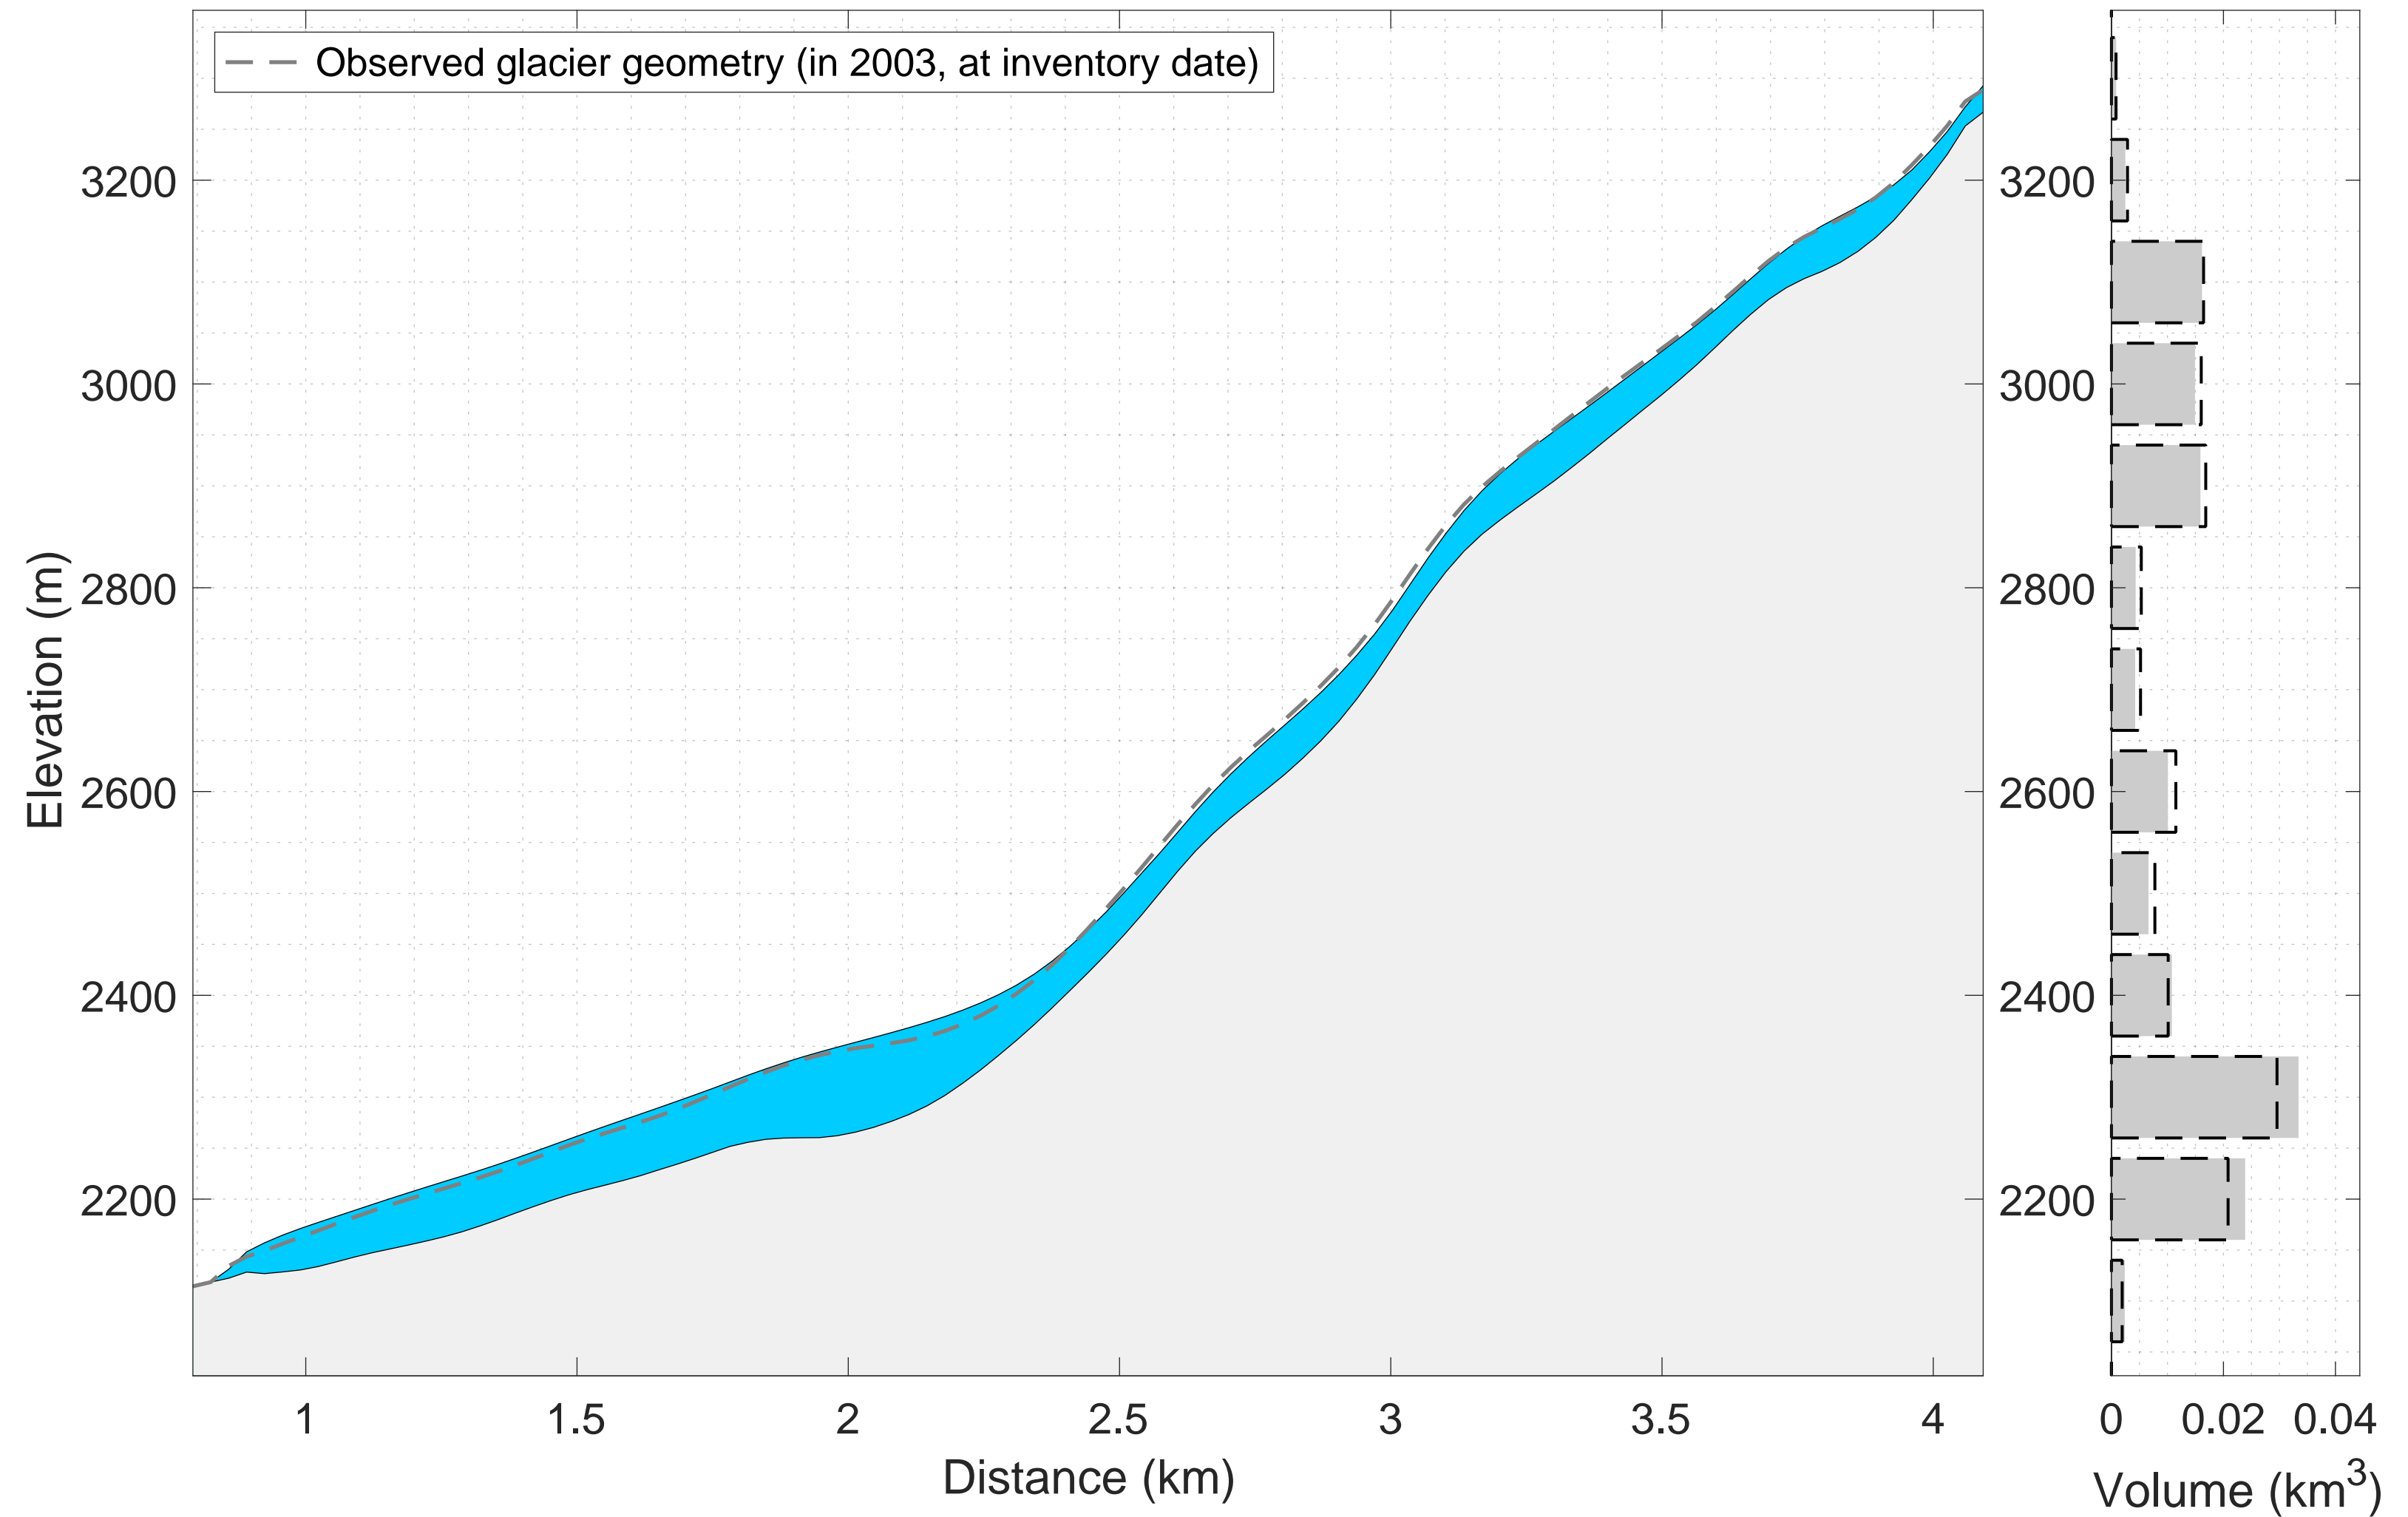

Supplement: Supplementary file 749 [file tc-13-1125-2019-supplement.zip]

**Modelled geometry (Glacier ID = 02918;  $A = 1.8443\text{e-}16 \text{ Pa}^{-3} \text{ a}^{-1}$ ;  $dx = 25 \text{ m}$ )**

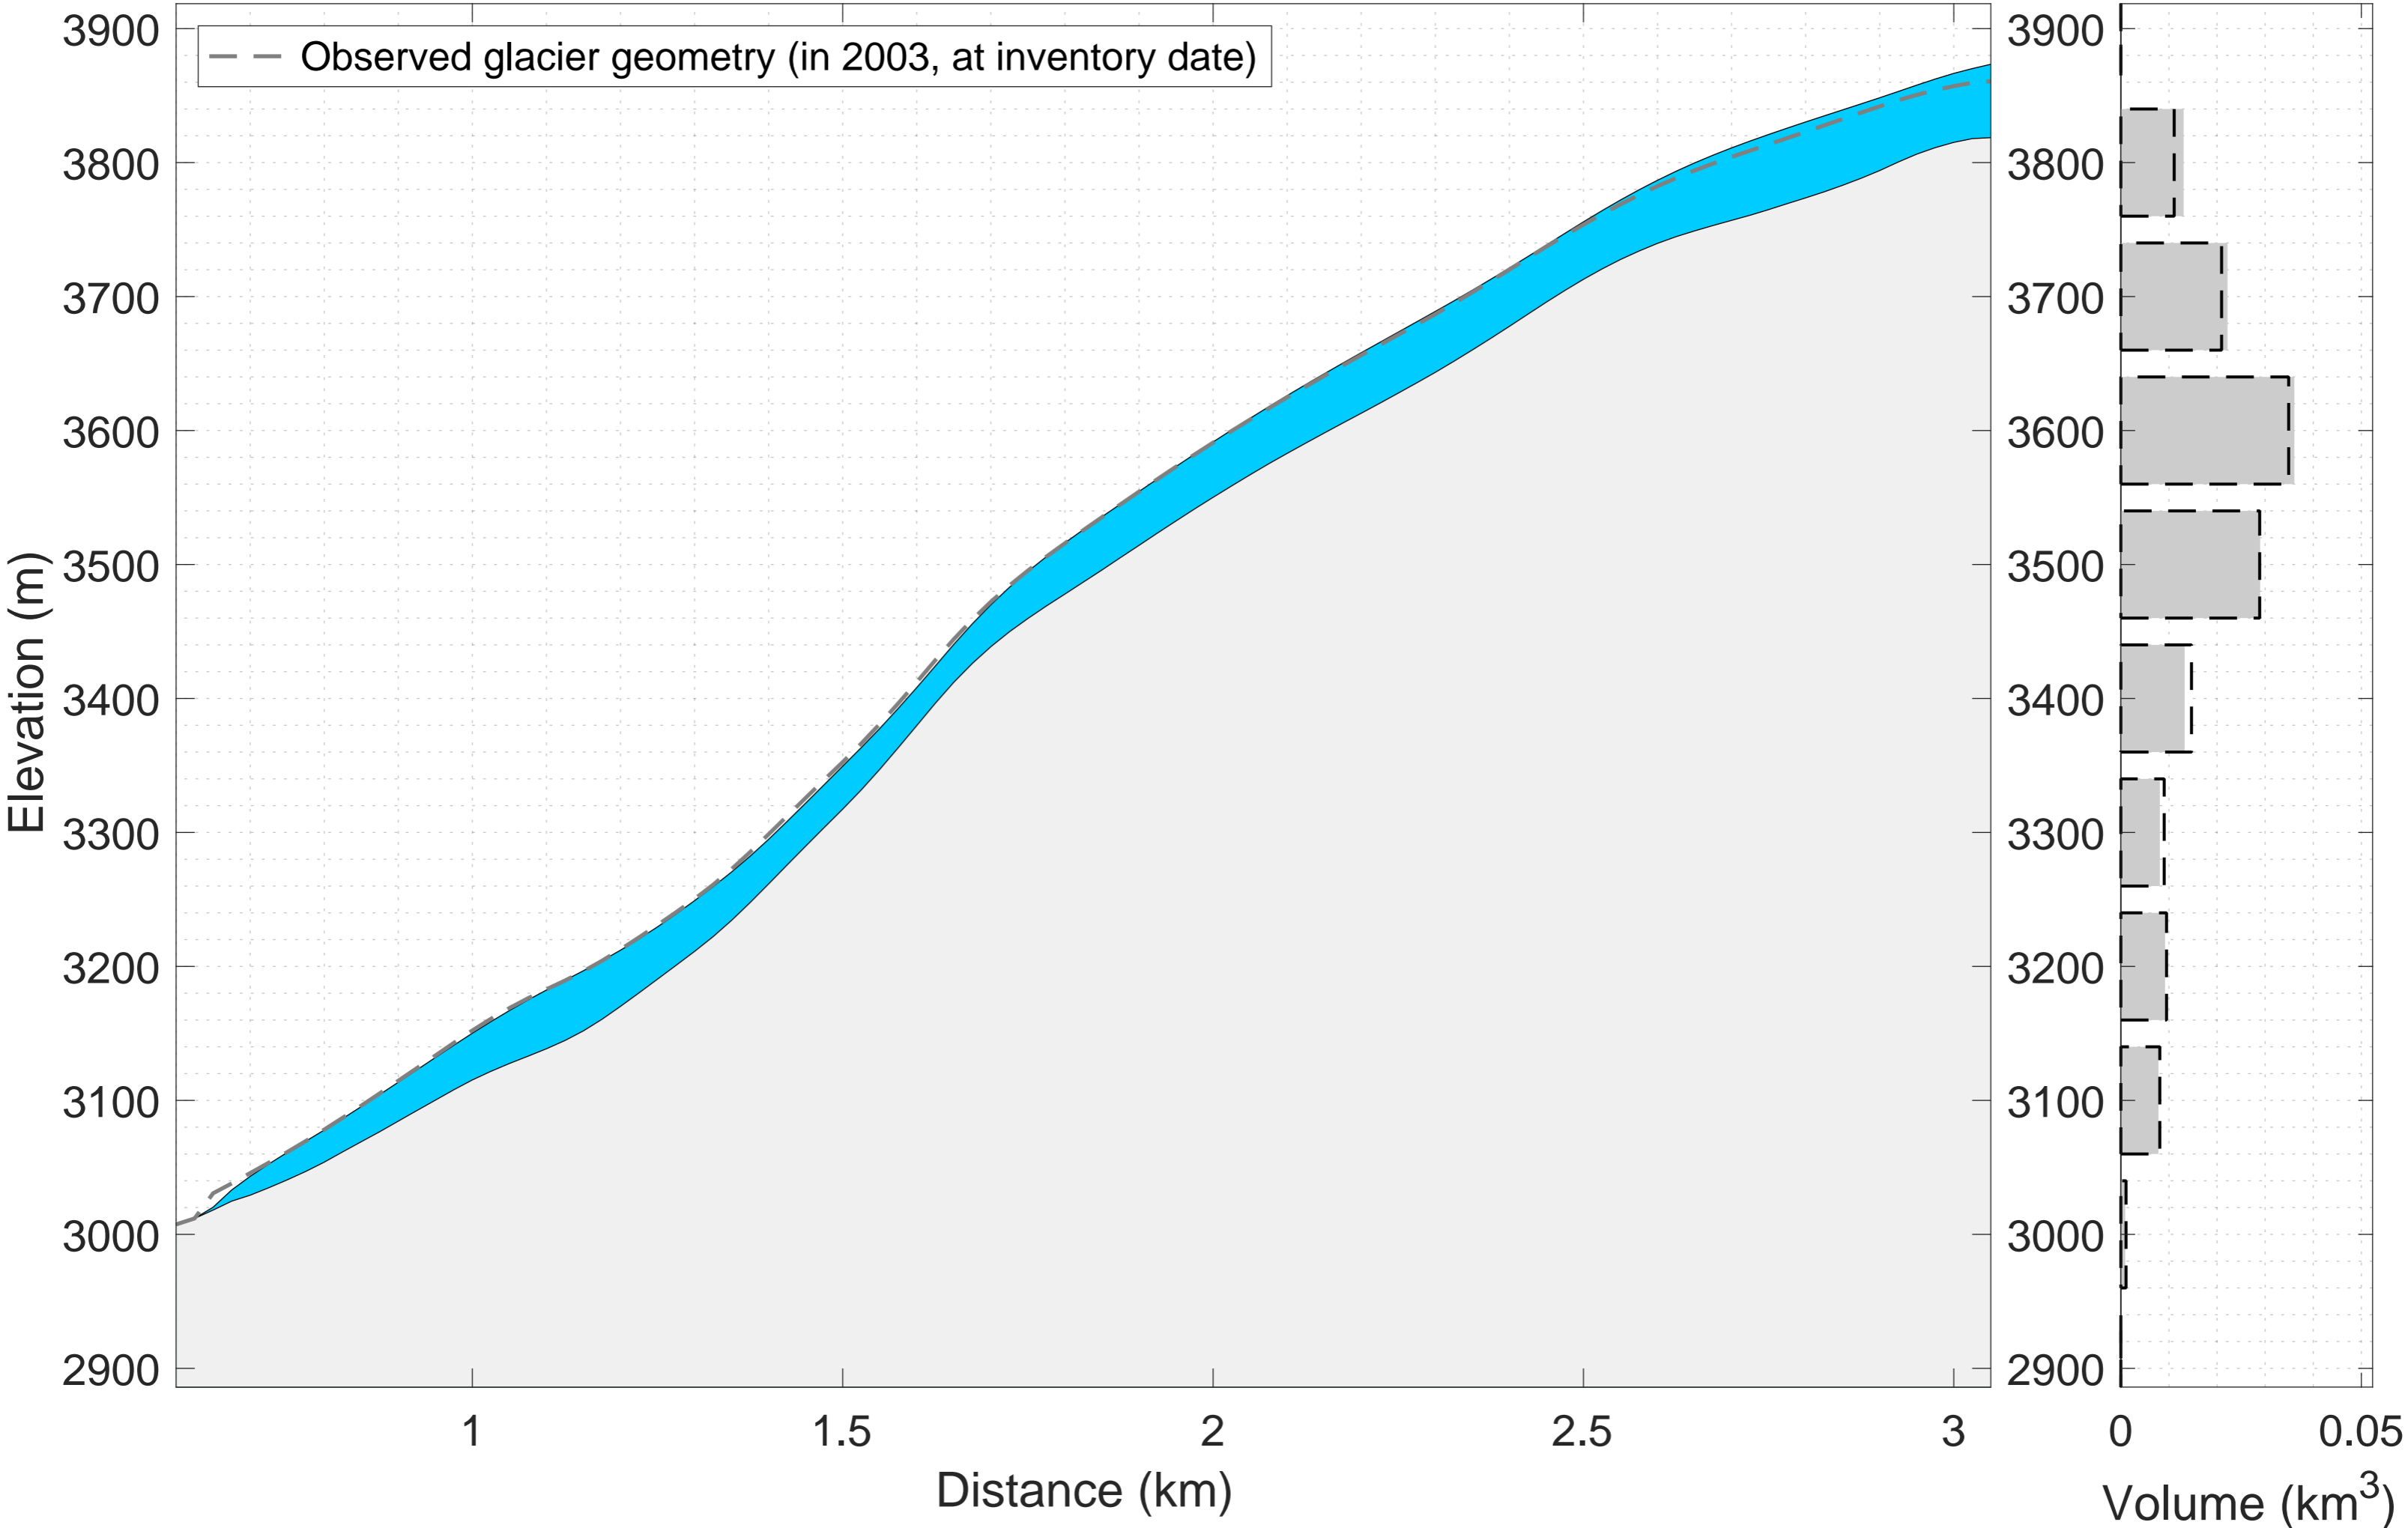

Supplement: Supplementary file 750 [file tc-13-1125-2019-supplement.zip]

**Modelled geometry (Glacier ID = 01107;  $A = 6.4464\text{e-}17 \text{ Pa}^{-3} \text{ a}^{-1}$ ;  $dx = 11 \text{ m}$ )**

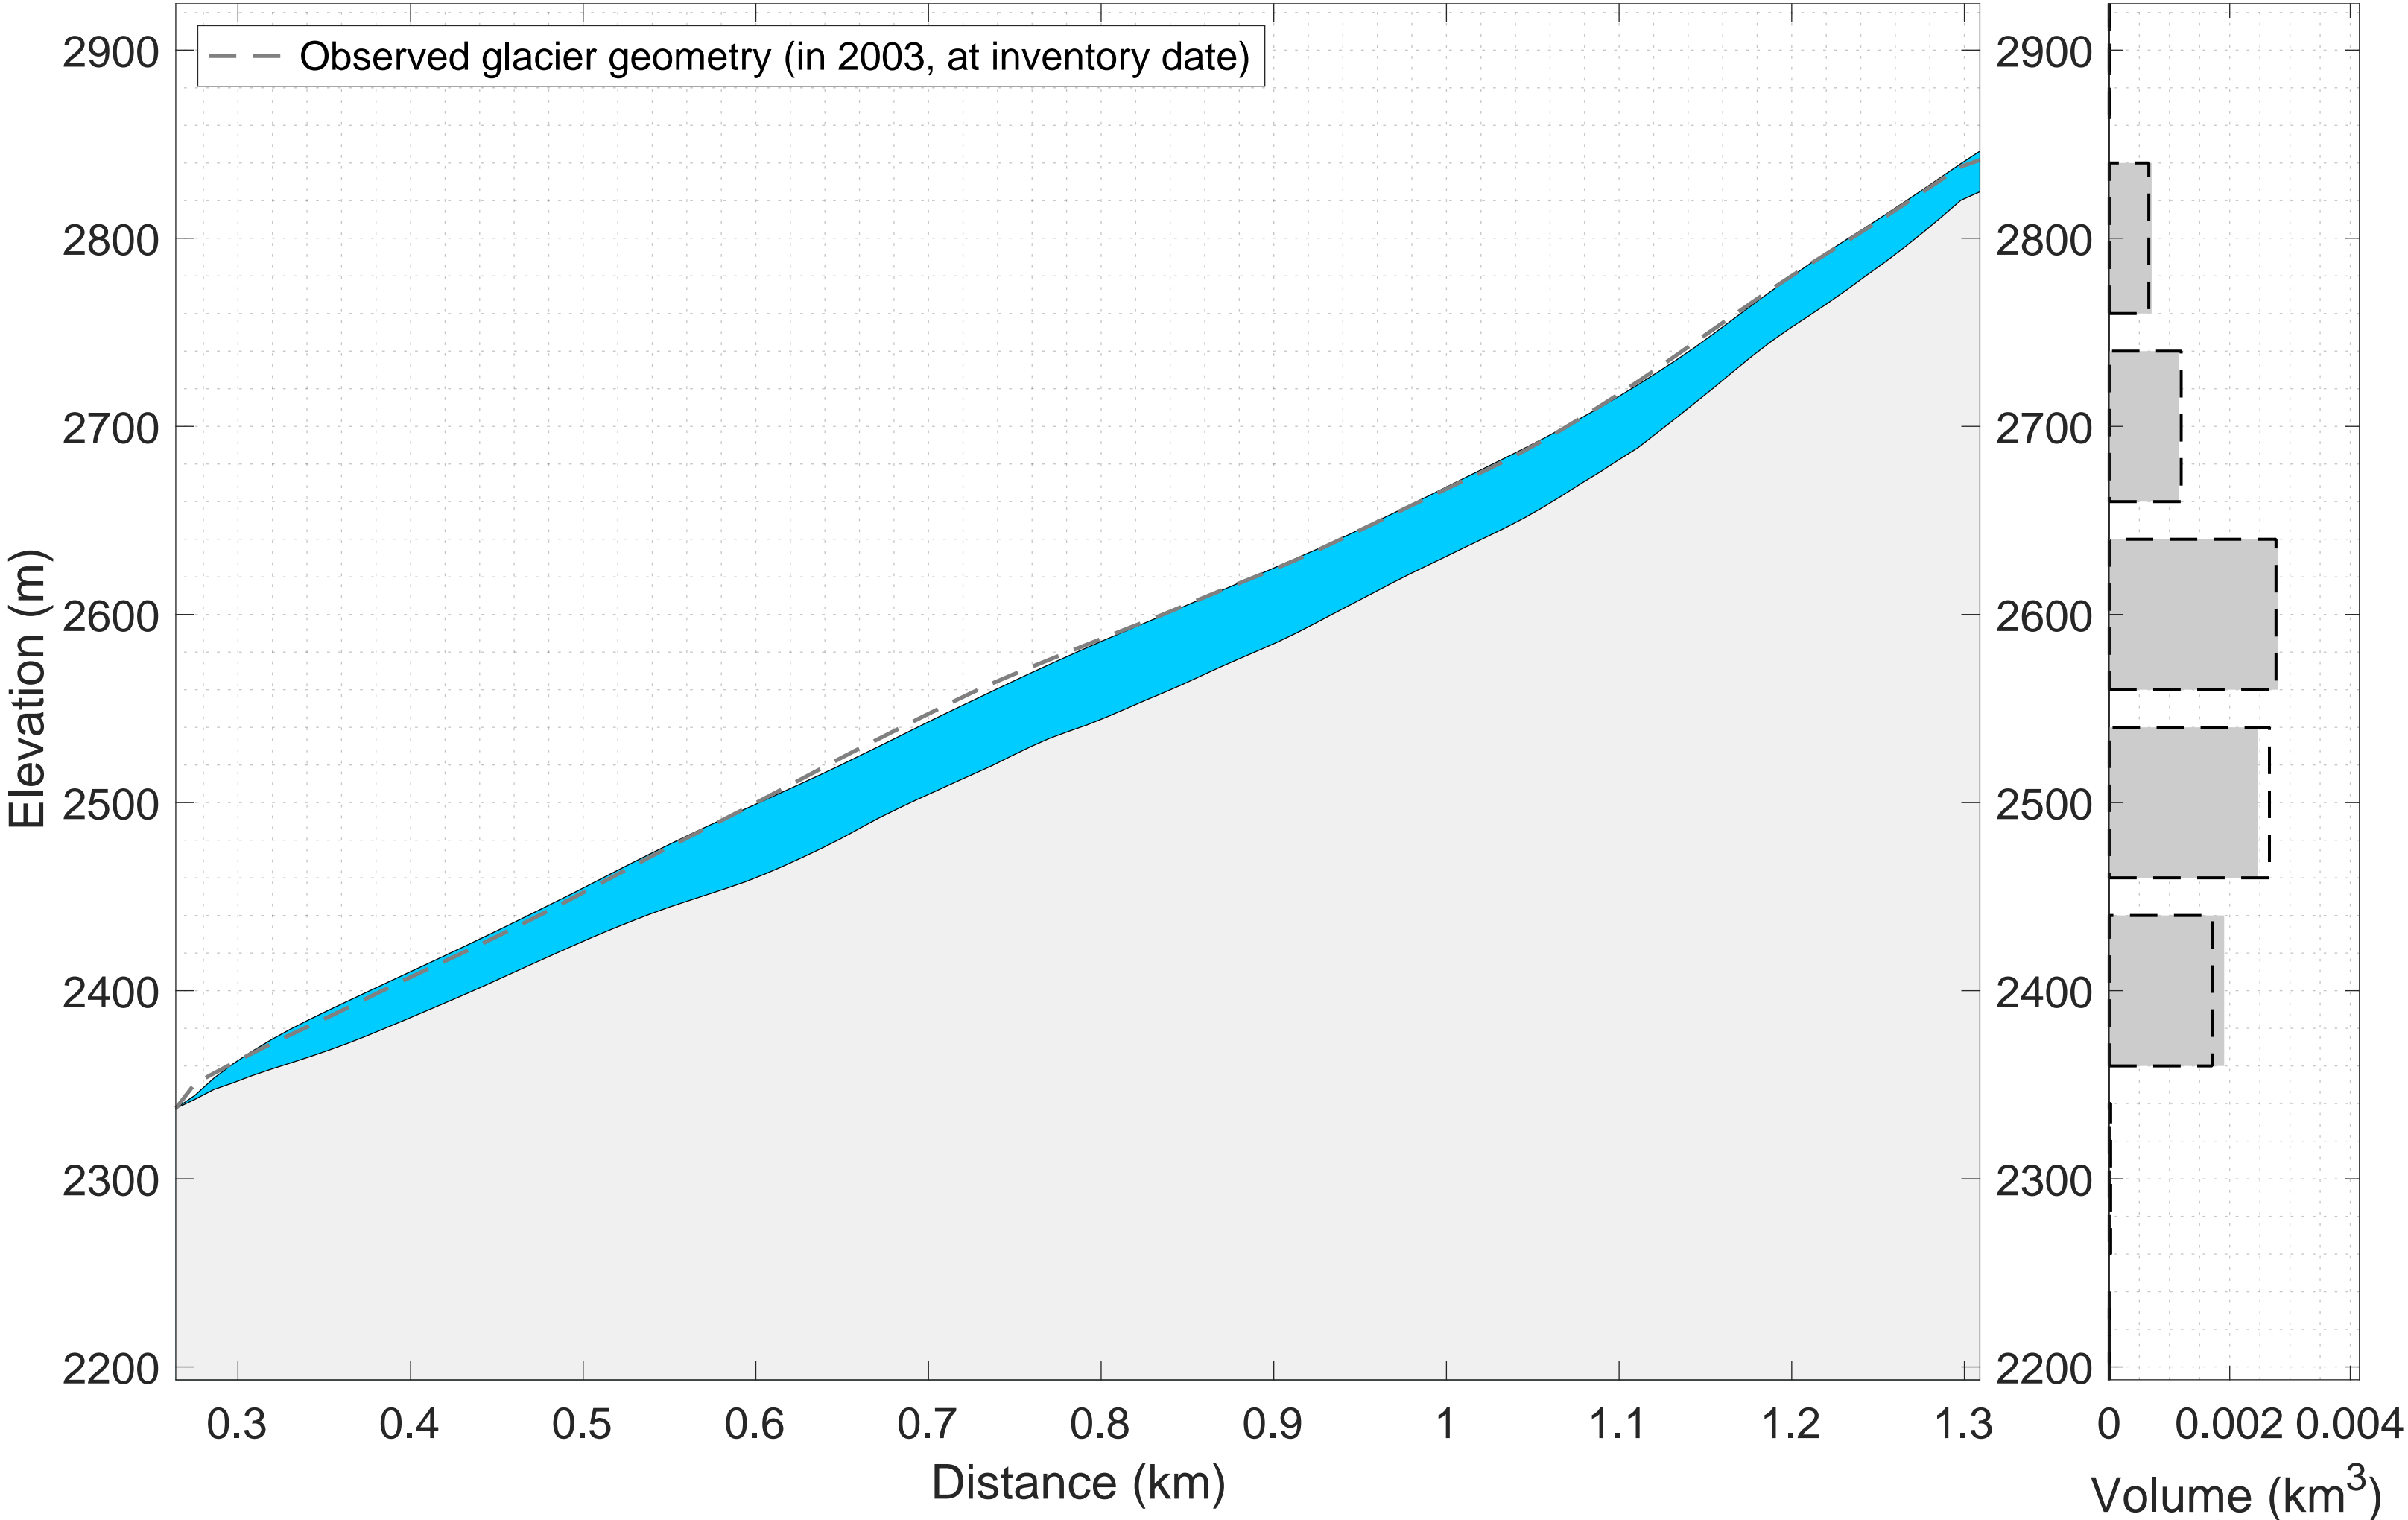

Supplement: Supplementary file 751 [file tc-13-1125-2019-supplement.zip]

**Modelled geometry (Glacier ID = 01961;  $A = 7.3218\text{e-}17 \text{ Pa}^{-3} \text{ a}^{-1}$ ;  $dx = 12 \text{ m}$ )**

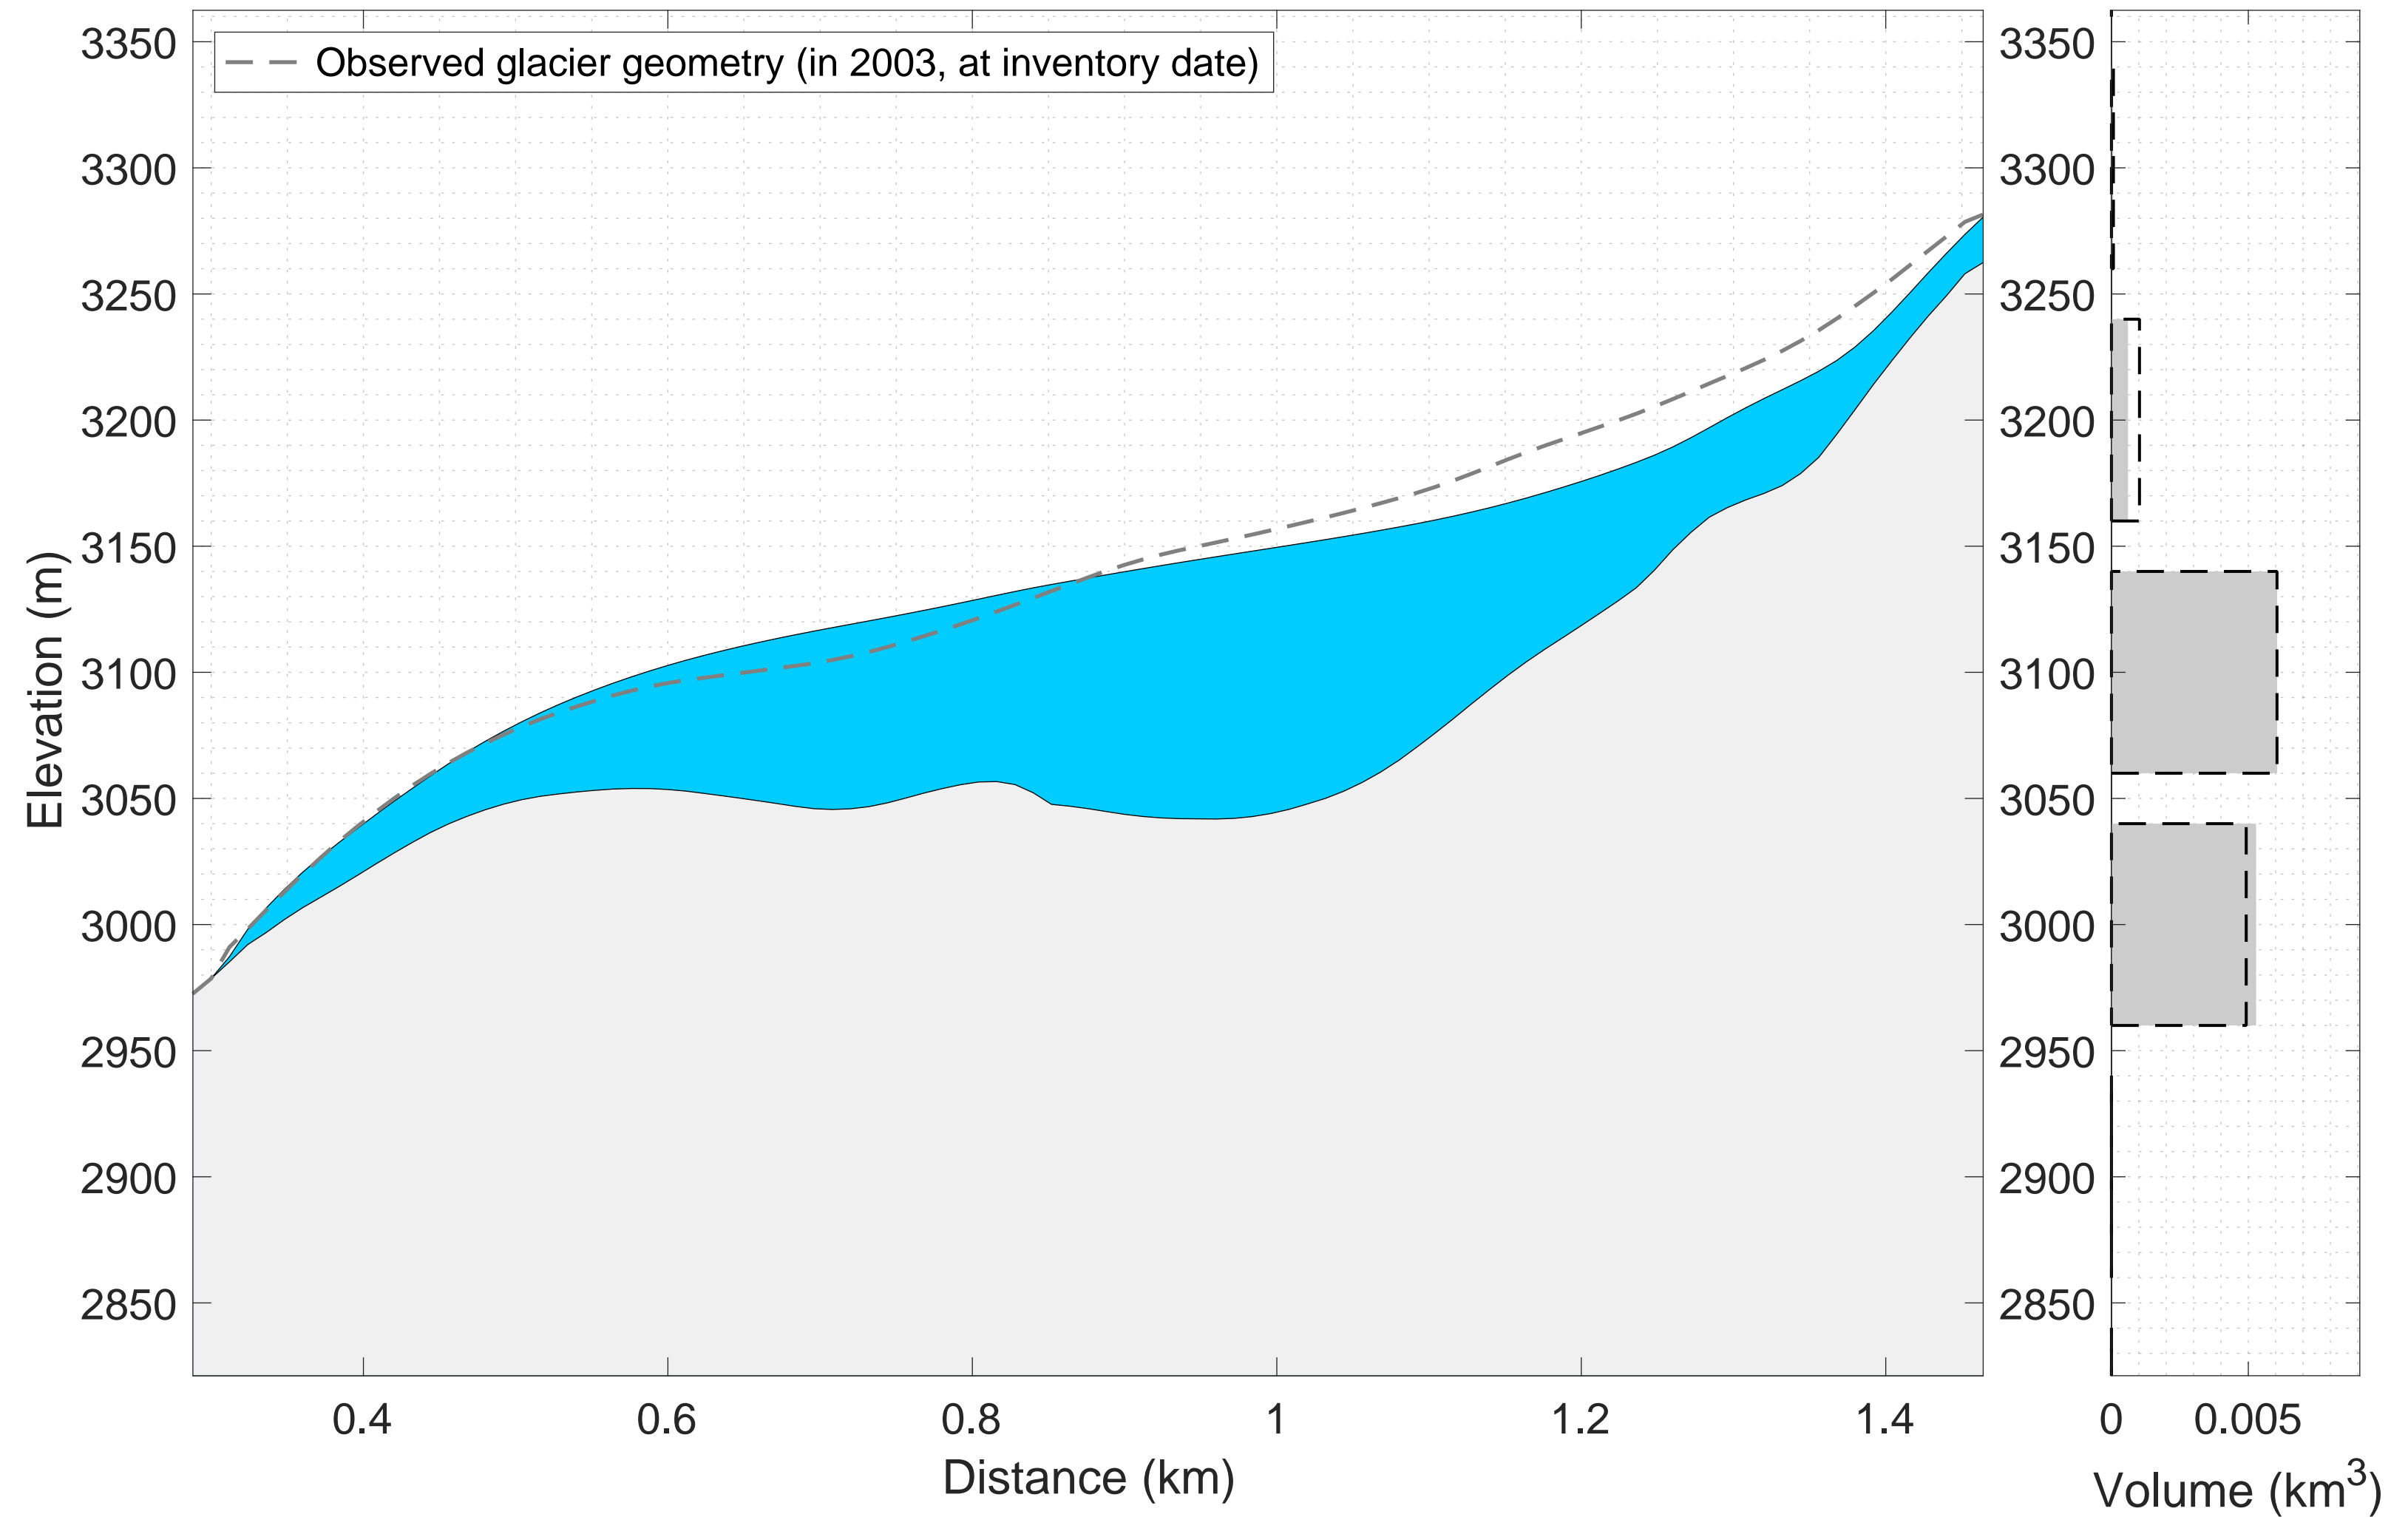

Supplement: Supplementary file 752 [file tc-13-1125-2019-supplement.zip]

**Modelled geometry (Glacier ID = 03280;  $A = 4.2063\text{e-}17 \text{ Pa}^{-3} \text{ a}^{-1}$ ;  $dx = 15 \text{ m}$ )**

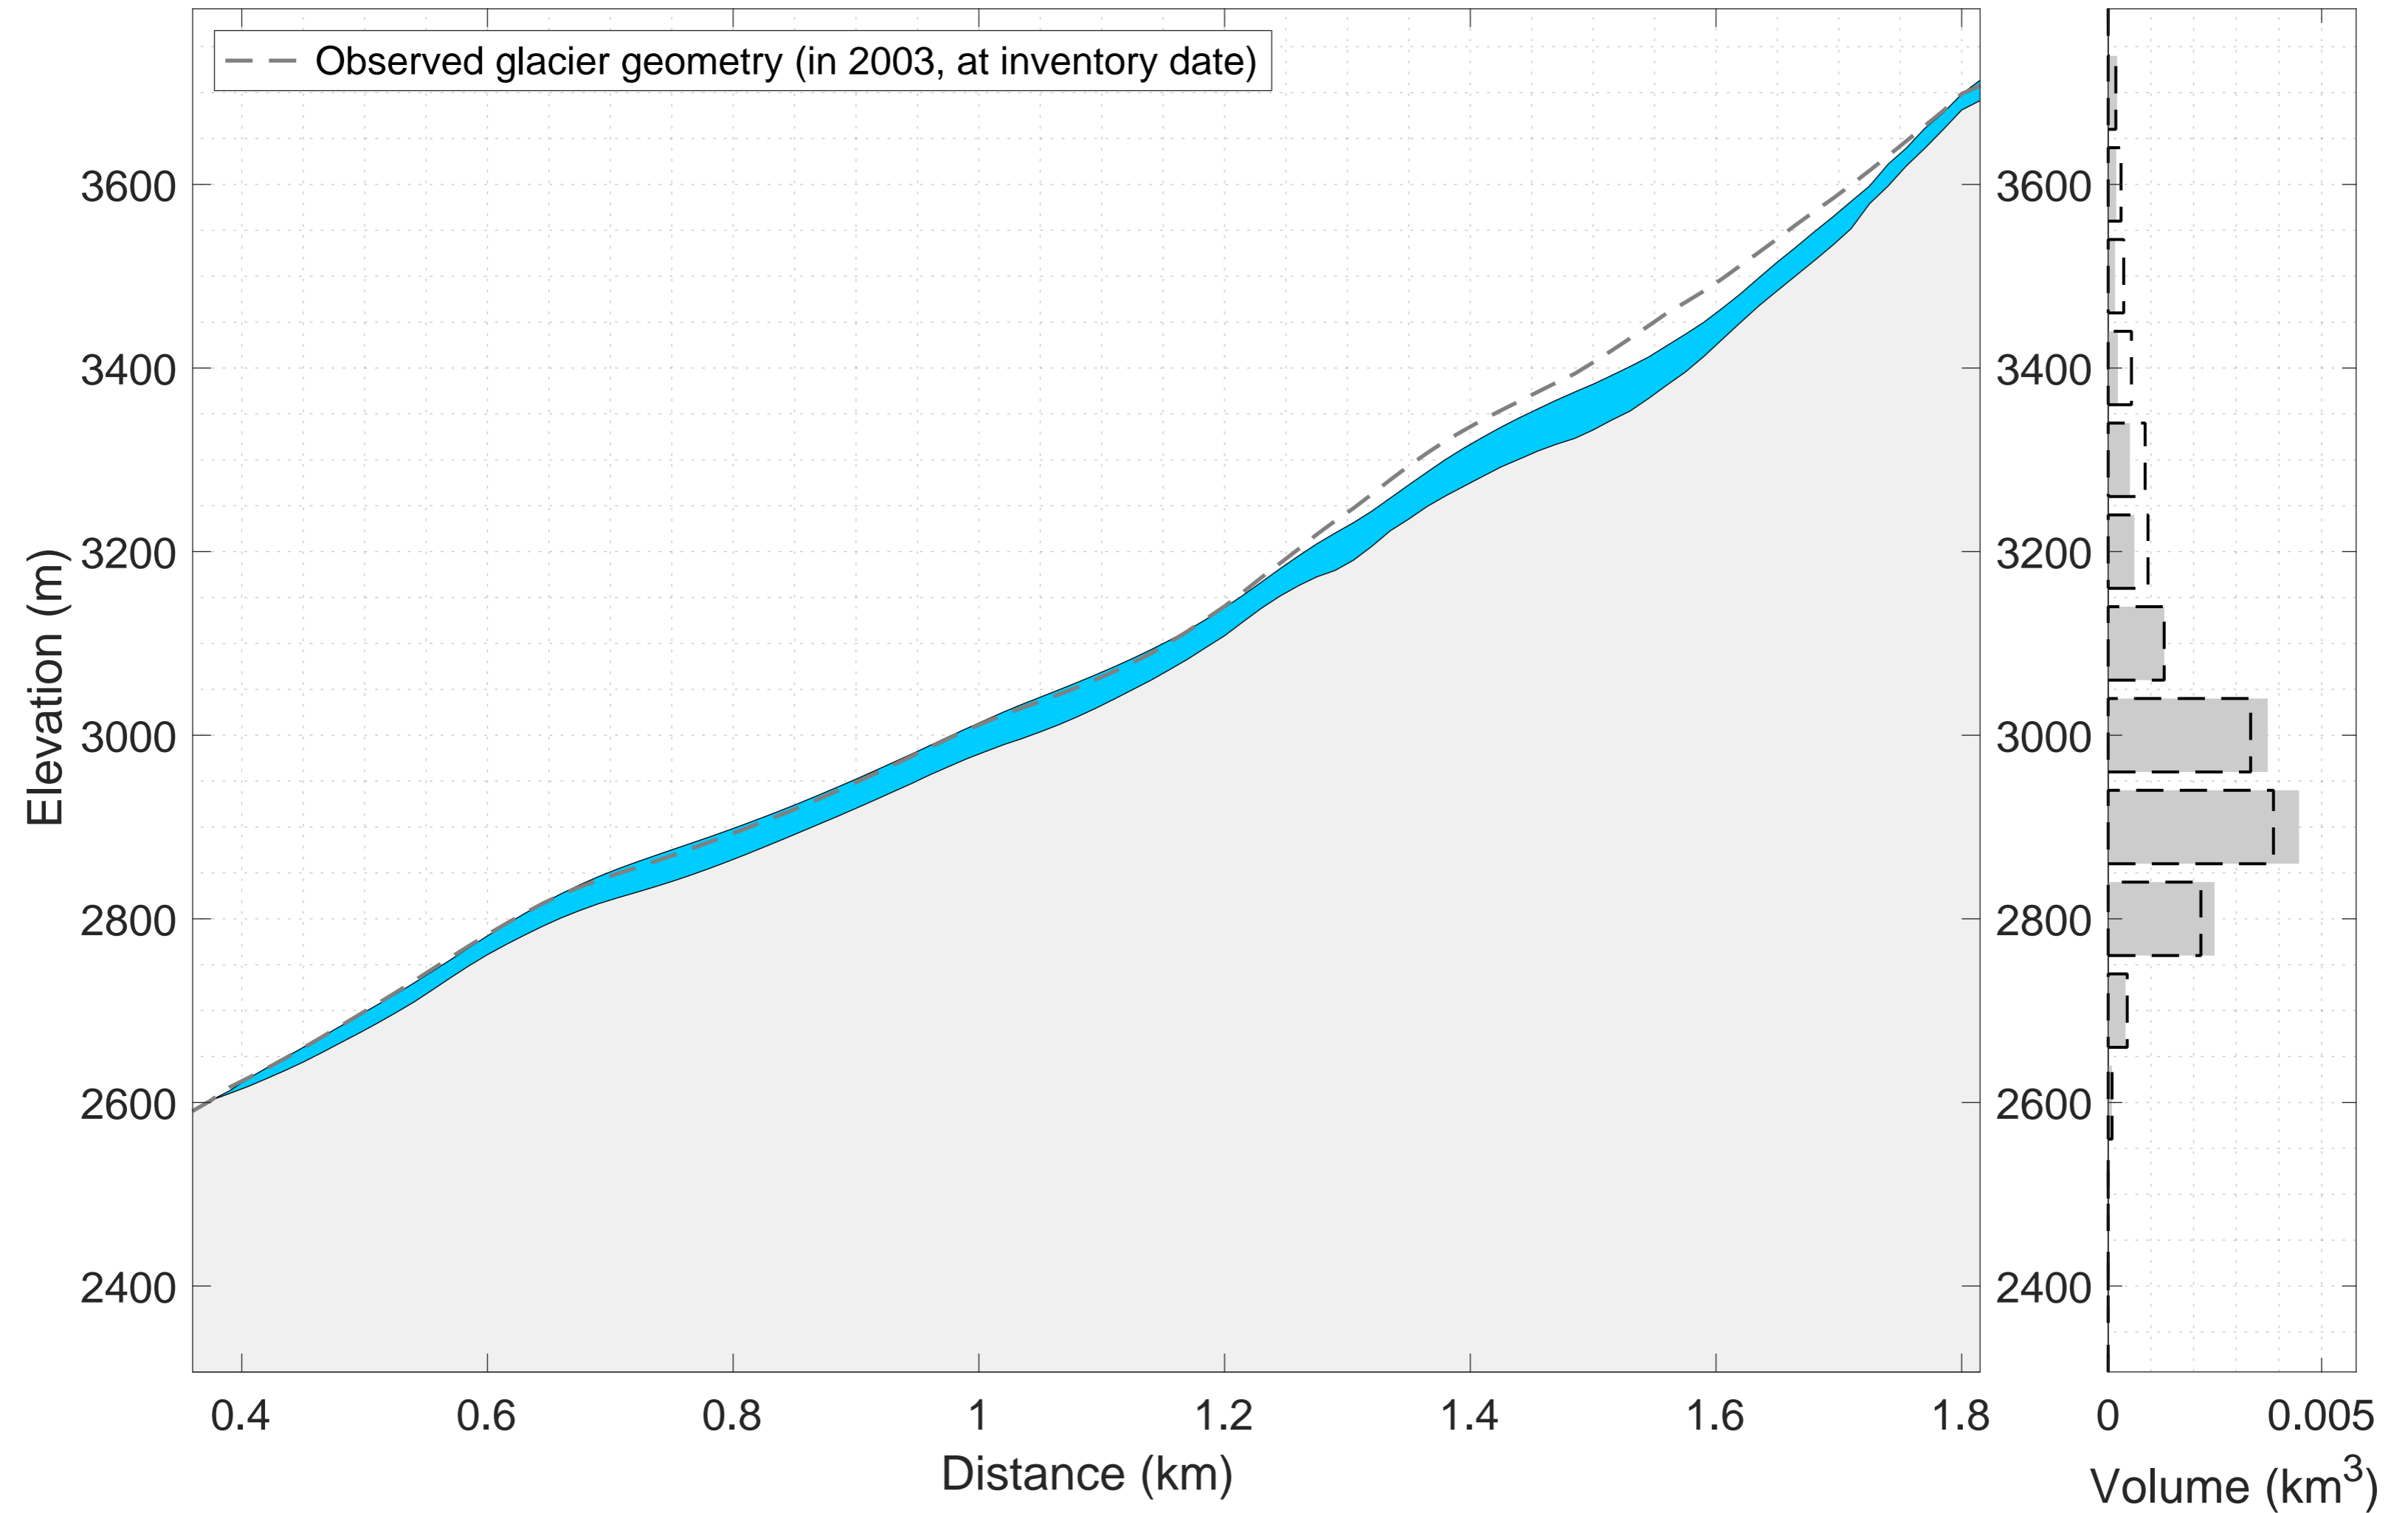

Supplement: Supplementary file 753 [file tc-13-1125-2019-supplement.zip]

**Modelled geometry (Glacier ID = 00577;  $A = 7.8245\text{e-}17 \text{ Pa}^{-3} \text{ a}^{-1}$ ;  $dx = 10 \text{ m}$ )**

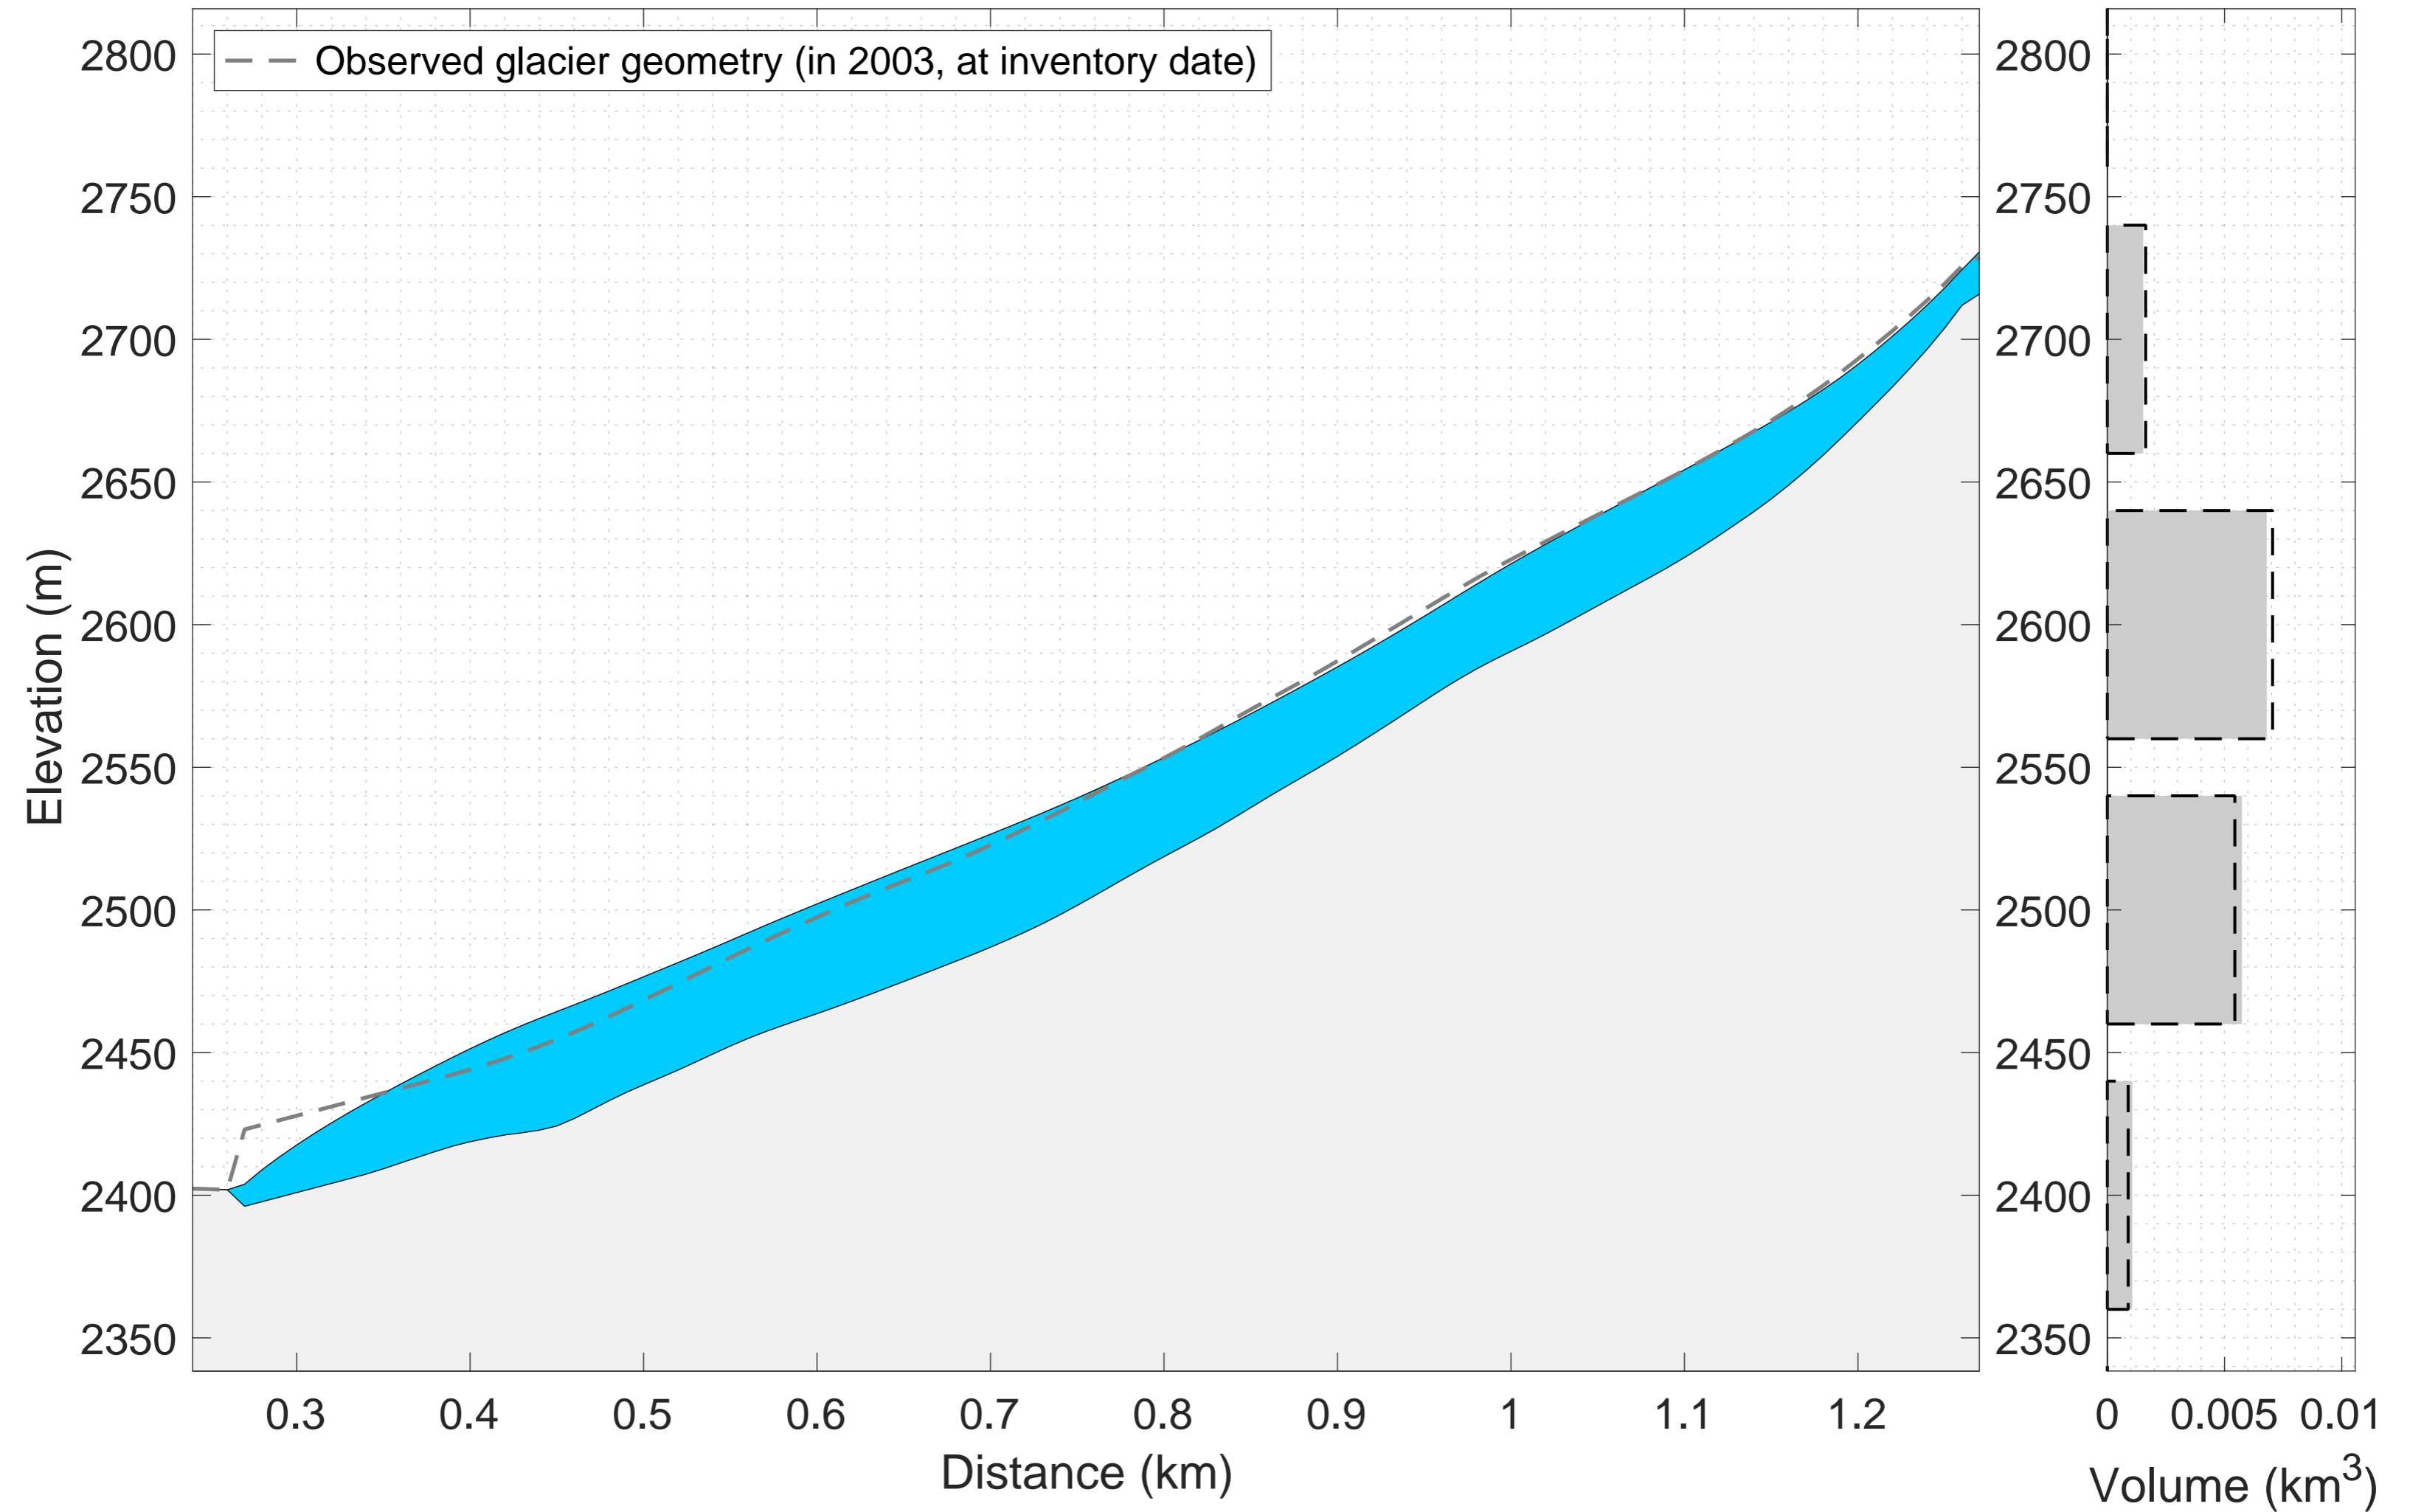

Supplement: Supplementary file 754 [file tc-13-1125-2019-supplement.zip]

**Modelled geometry (Glacier ID = 02596;  $A = 2.3854\text{e-}16 \text{ Pa}^{-3} \text{ a}^{-1}$ ;  $dx = 43 \text{ m}$ )**

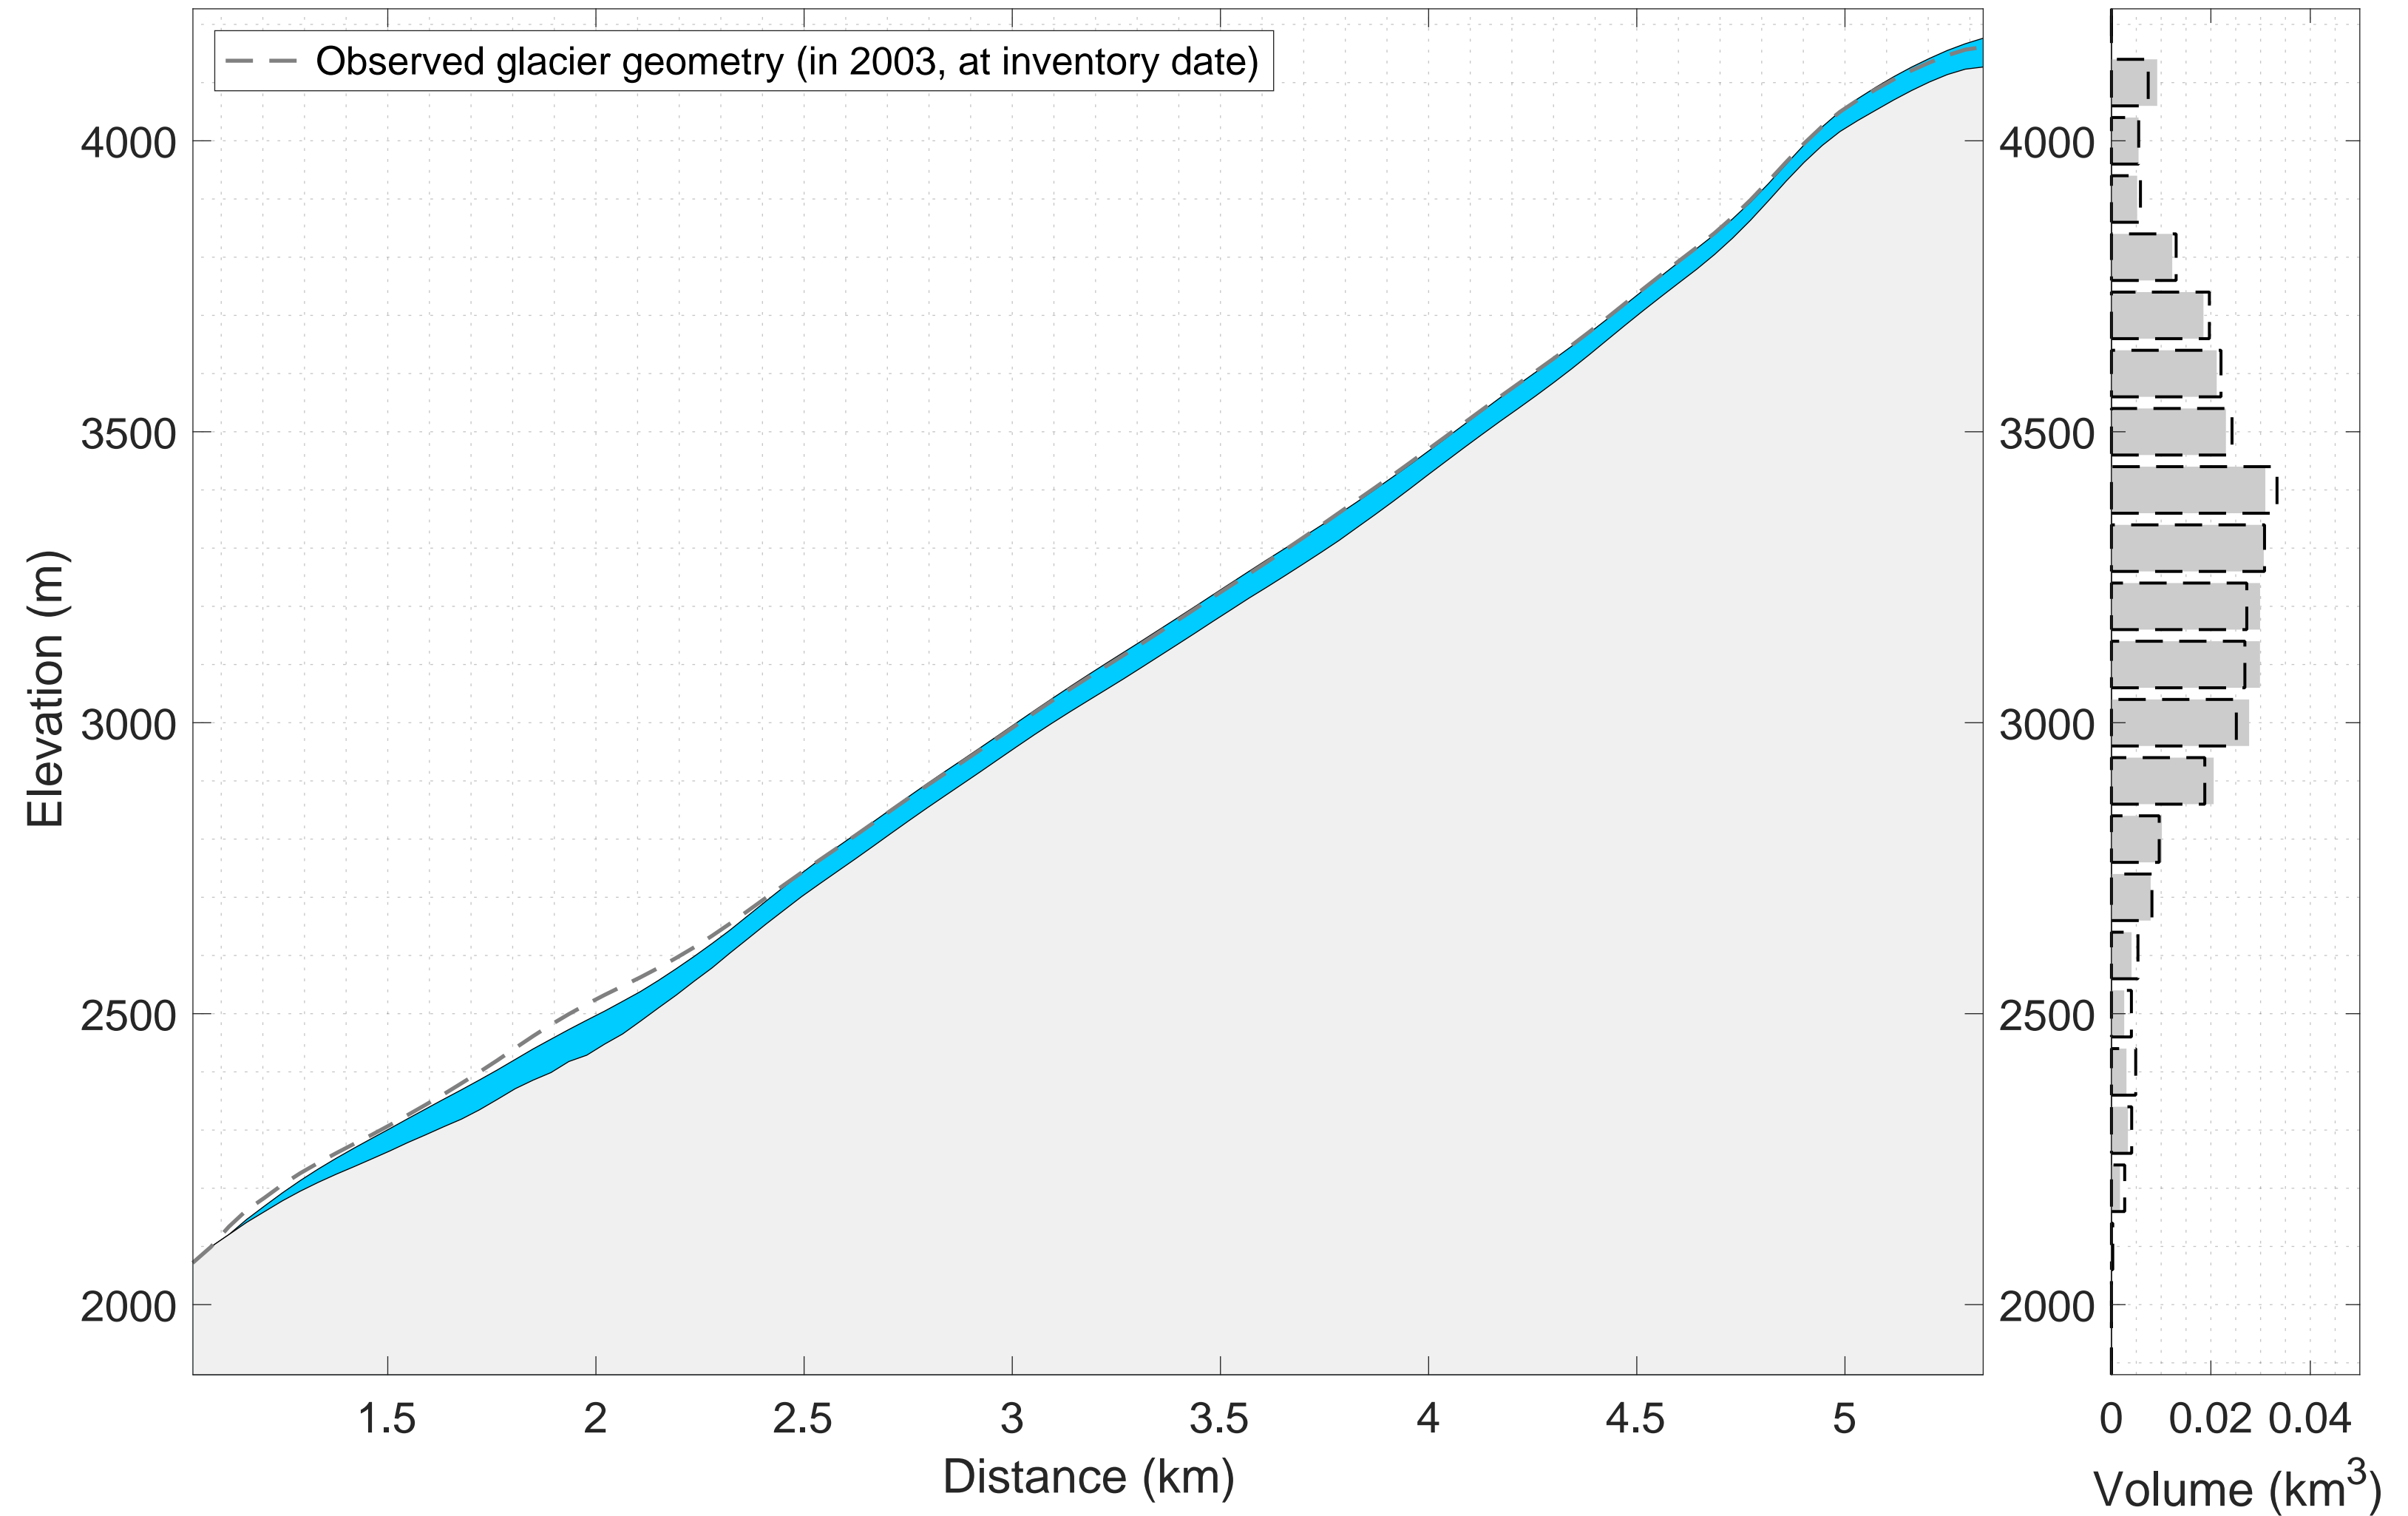

Supplement: Supplementary file 755 [file tc-13-1125-2019-supplement.zip]

**Modelled geometry (Glacier ID = 01666;  $A = 1.1428\text{e-}16 \text{ Pa}^{-3} \text{ a}^{-1}$ ;  $dx = 28 \text{ m}$ )**

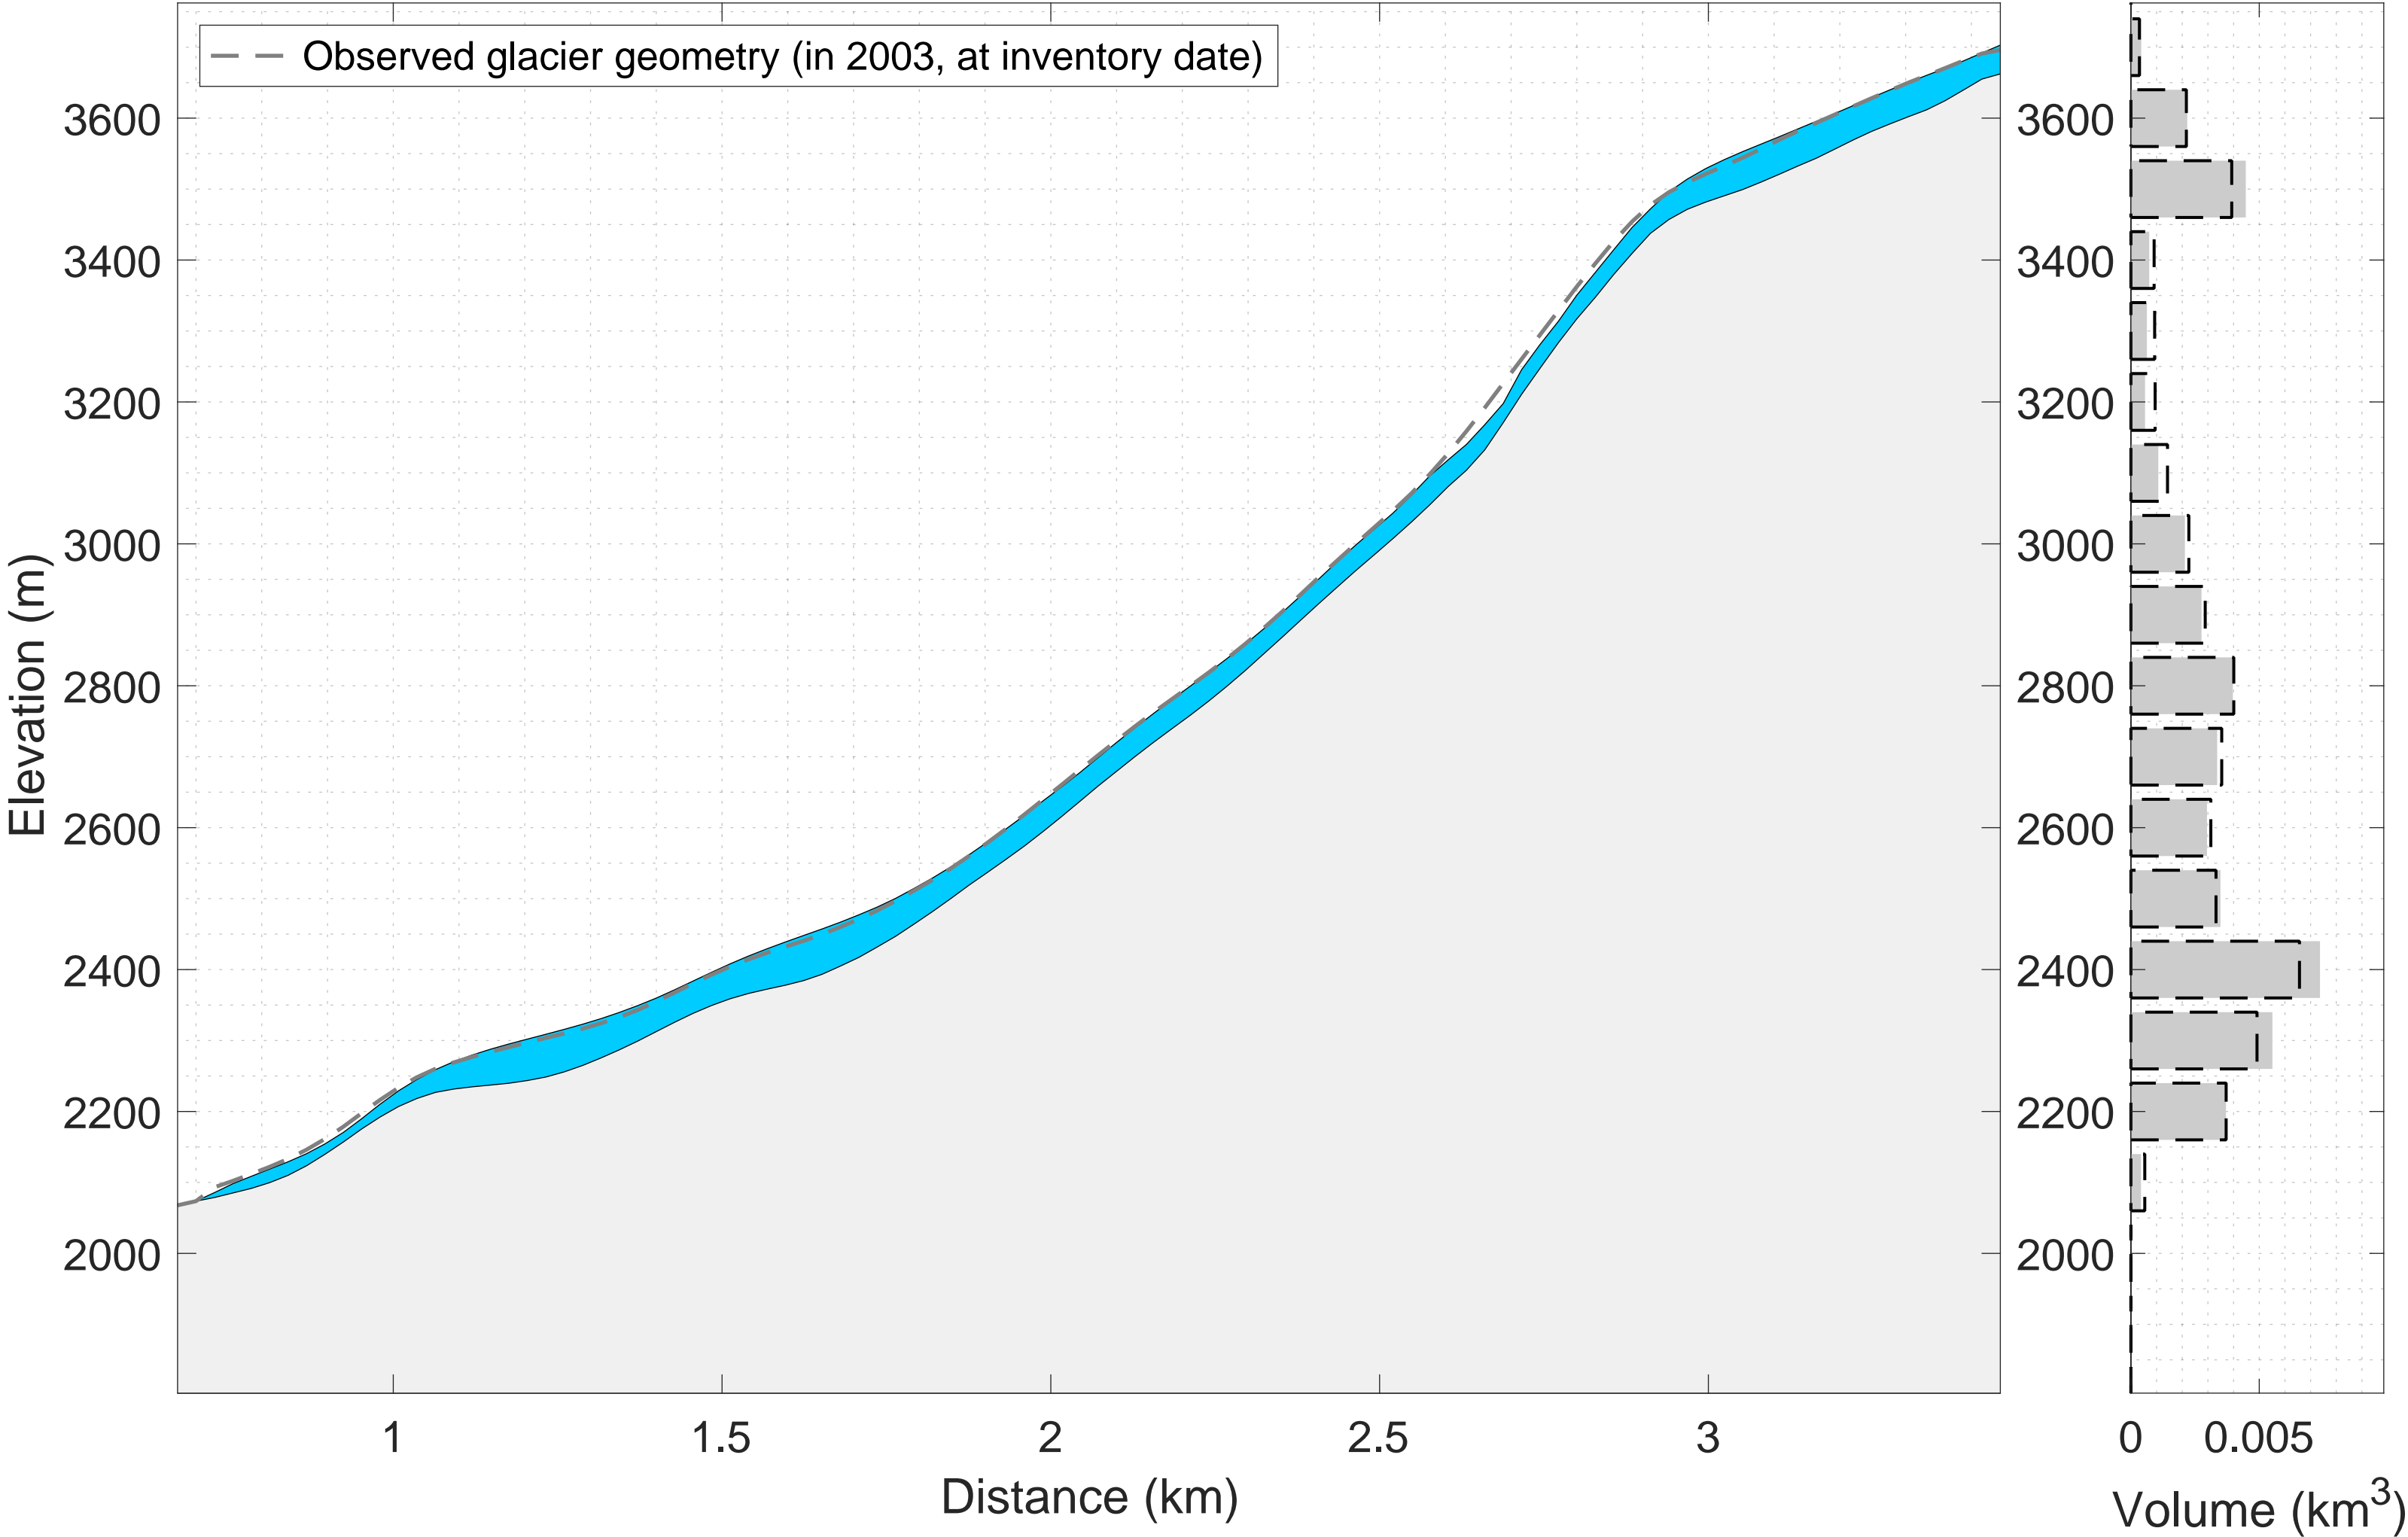

Supplement: Supplementary file 756 [file tc-13-1125-2019-supplement.zip]

**Modelled geometry (Glacier ID = 03339;  $A = 1.094\text{e-}16 \text{ Pa}^{-3} \text{ a}^{-1}$ ;  $dx = 24 \text{ m}$ )**

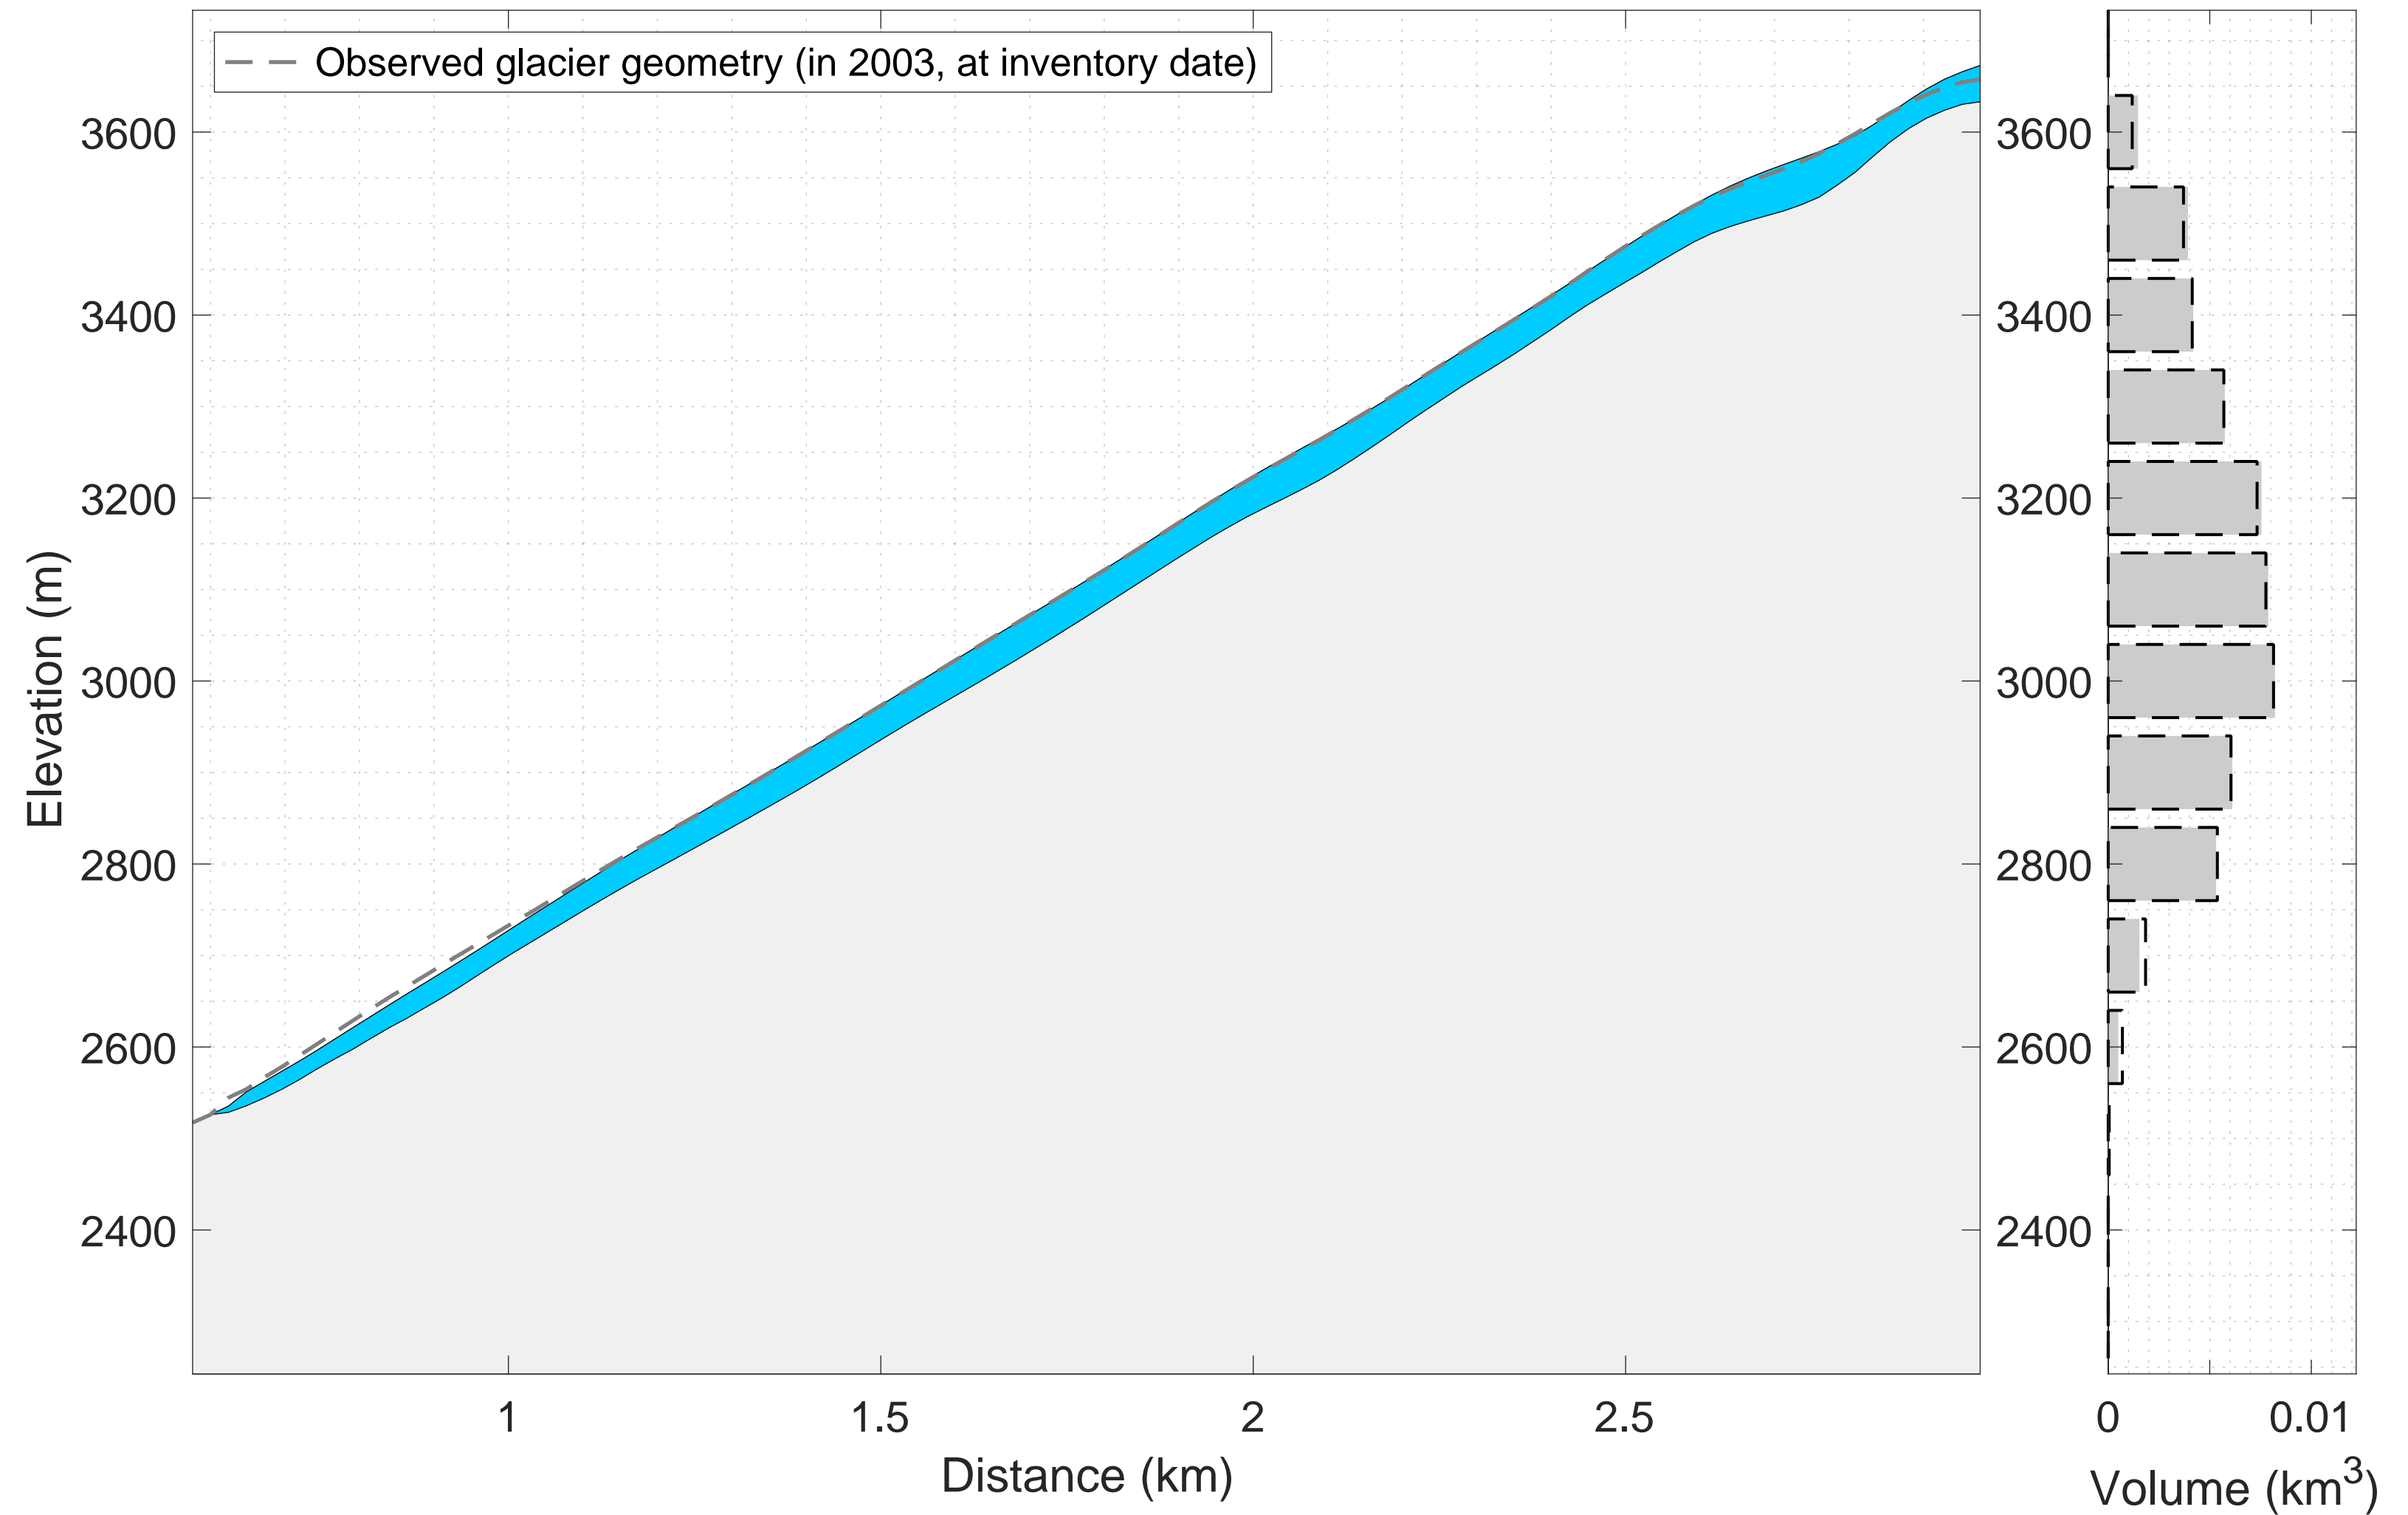

Supplement: Supplementary file 757 [file tc-13-1125-2019-supplement.zip]

**Modelled geometry (Glacier ID = 01806;  $A = 6.2578\text{e-}17 \text{ Pa}^{-3} \text{ a}^{-1}$ ;  $dx = 39 \text{ m}$ )**

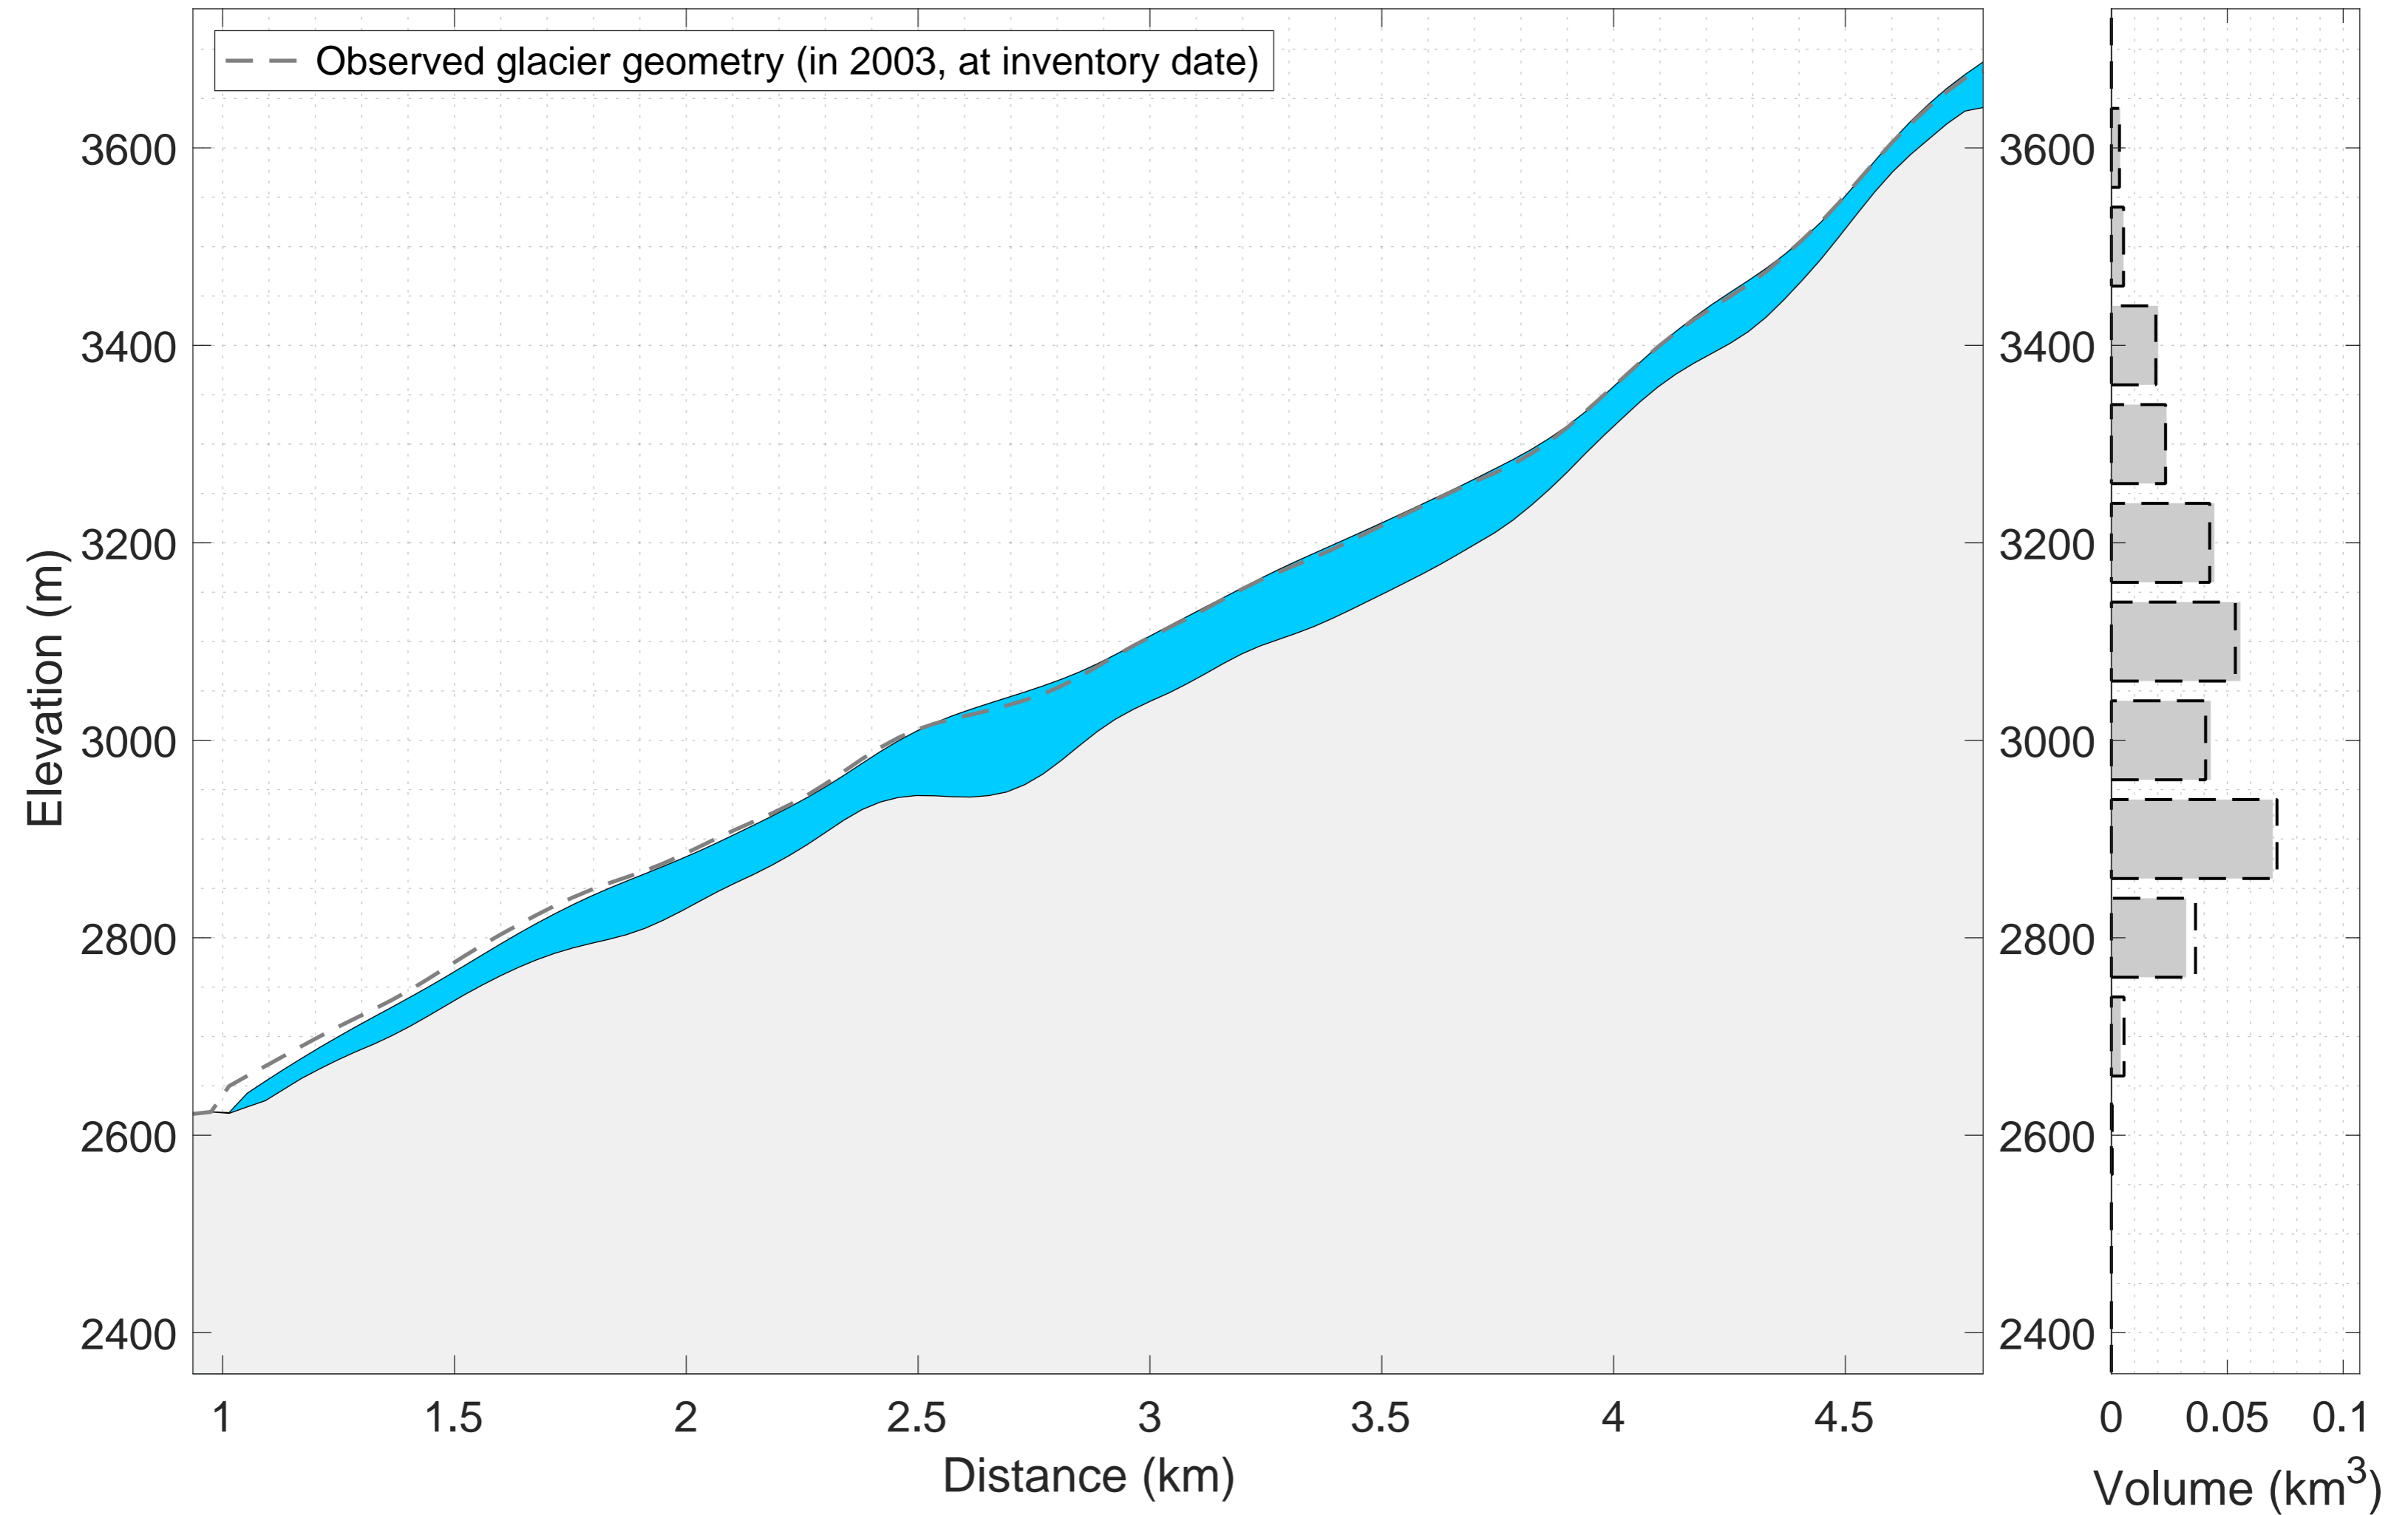

Supplement: Supplementary file 758 [file tc-13-1125-2019-supplement.zip]

**Modelled geometry (Glacier ID = 02760;  $A = 1.7109\text{e-}16 \text{ Pa}^{-3} \text{ a}^{-1}$ ;  $dx = 14 \text{ m}$ )**

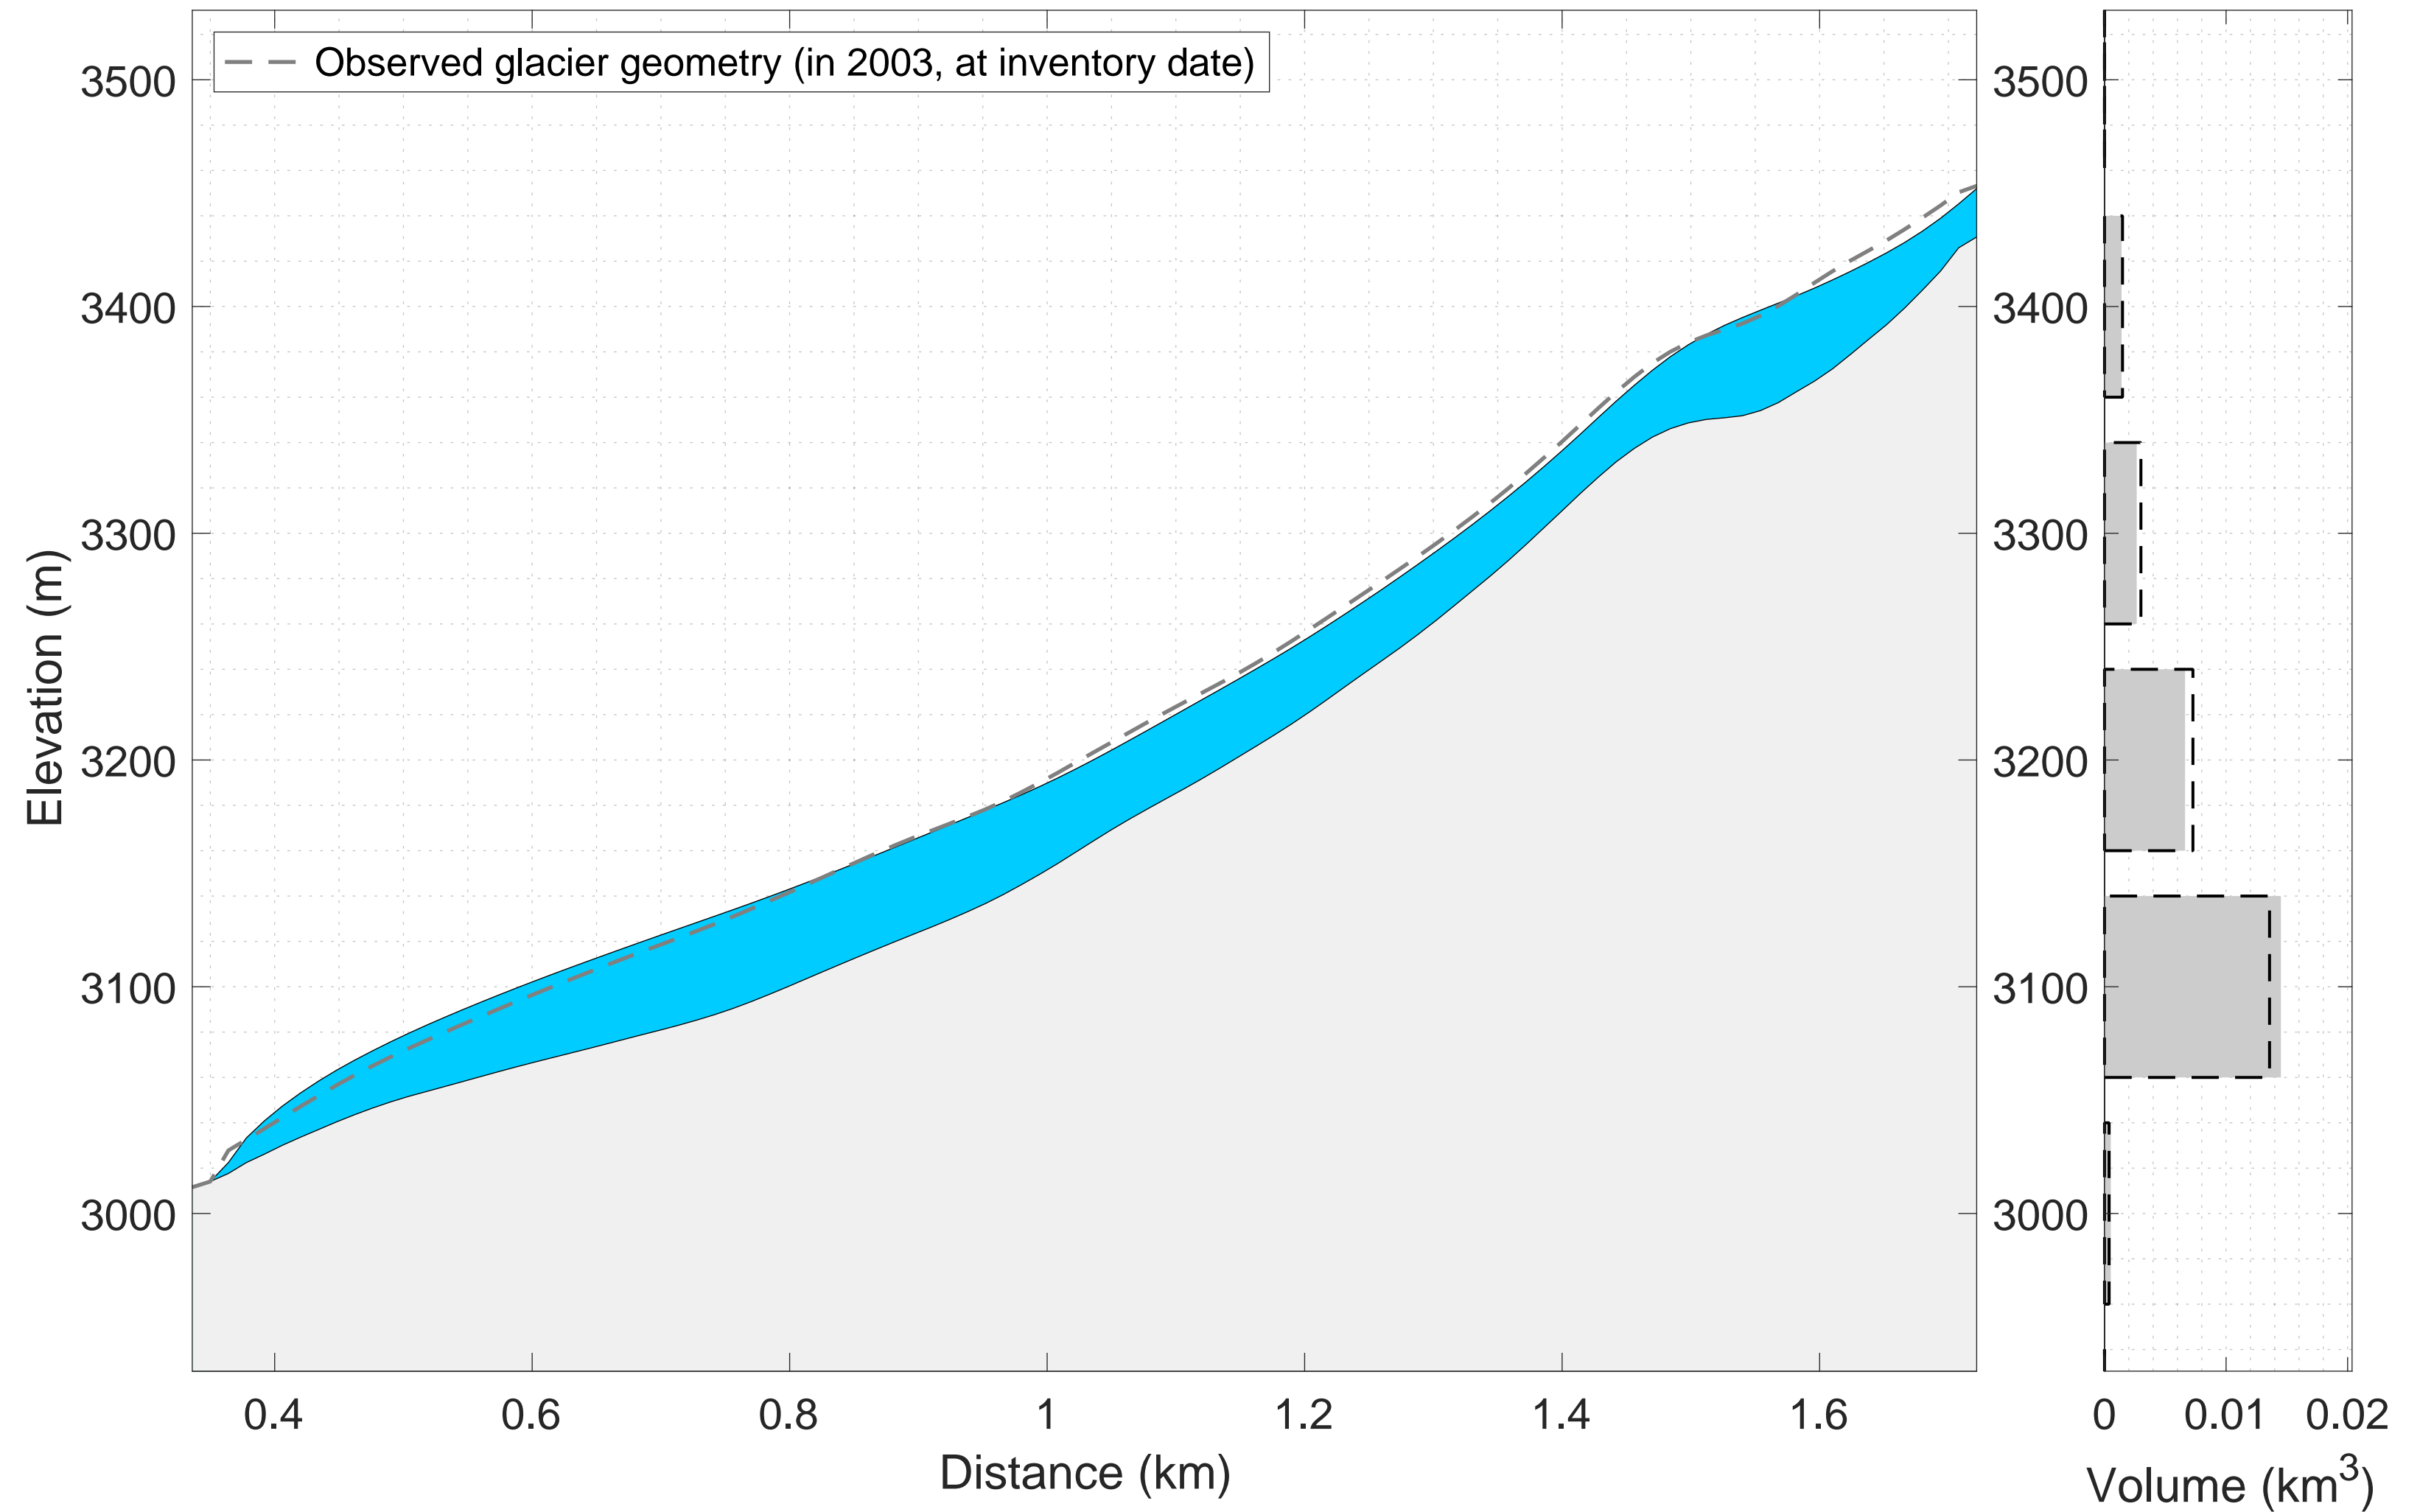

Supplement: Supplementary file 759 [file tc-13-1125-2019-supplement.zip]

**Modelled geometry (Glacier ID = 00844;  $A = 9.6371\text{e-}17 \text{ Pa}^{-3} \text{ a}^{-1}$ ;  $dx = 14 \text{ m}$ )**

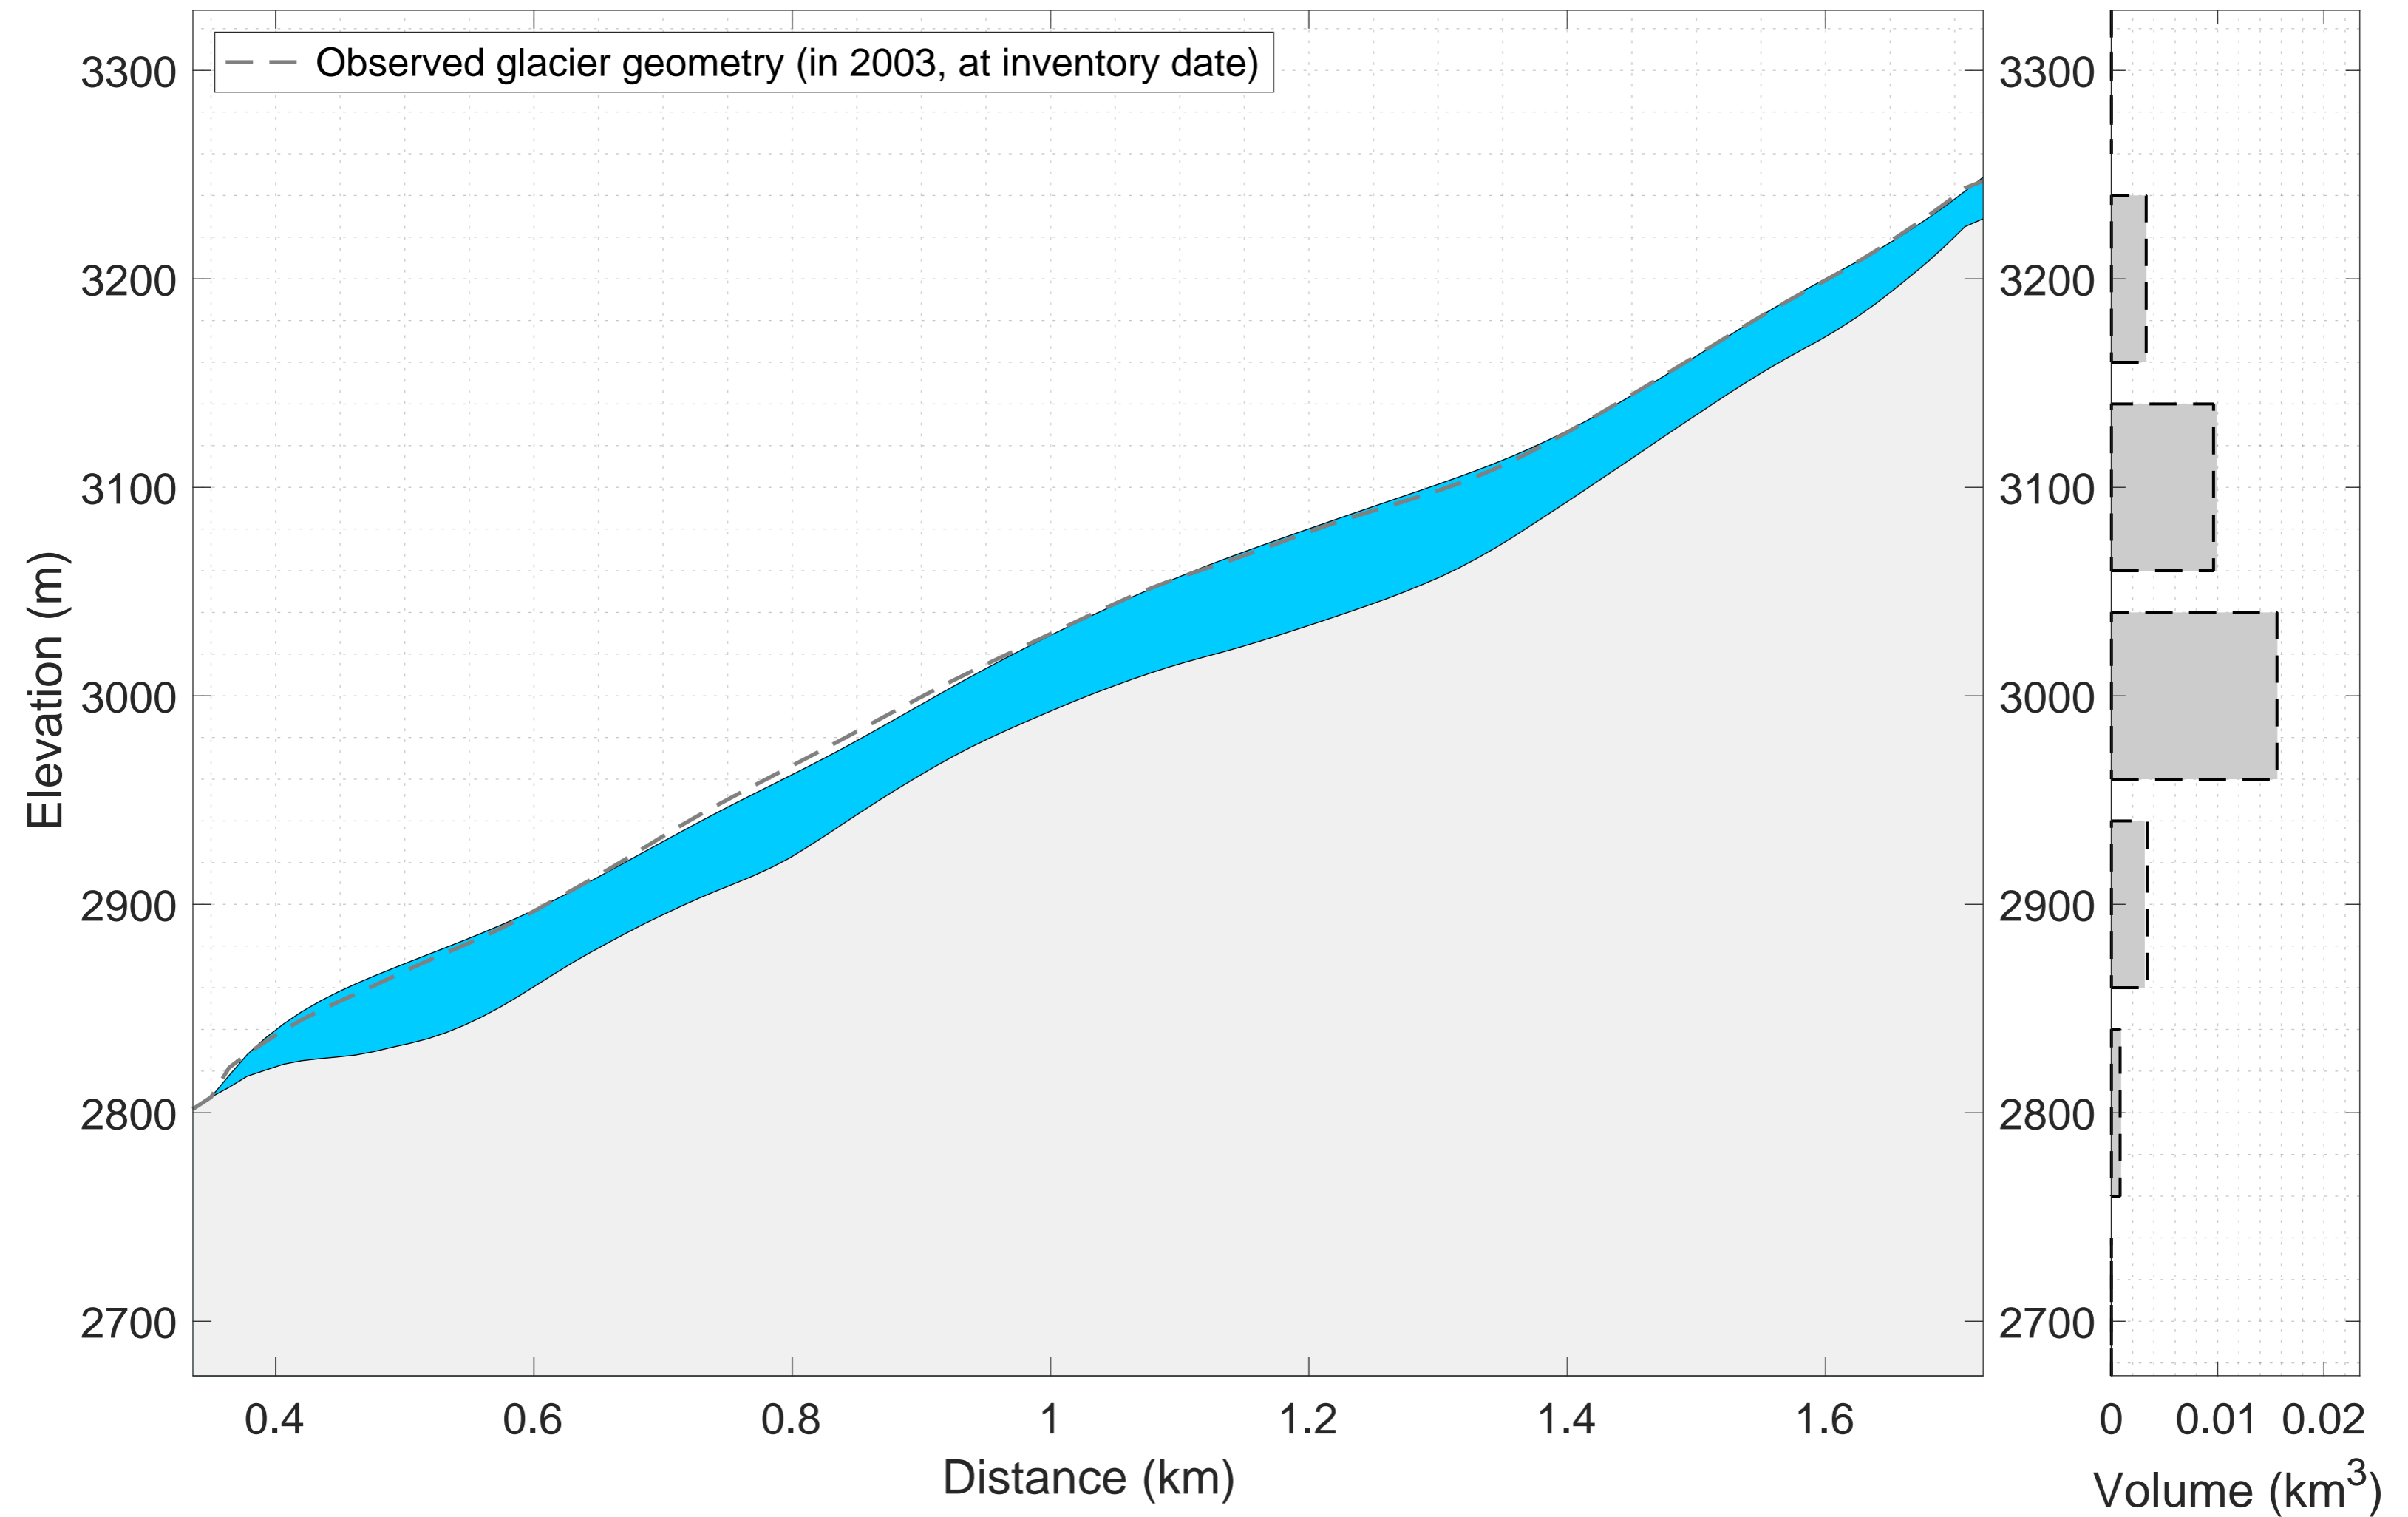

Supplement: Supplementary file 760 [file tc-13-1125-2019-supplement.zip]

**Modelled geometry (Glacier ID = 03047;  $A = 1.3688\text{e-}16 \text{ Pa}^{-3} \text{ a}^{-1}$ ;  $dx = 17 \text{ m}$ )**

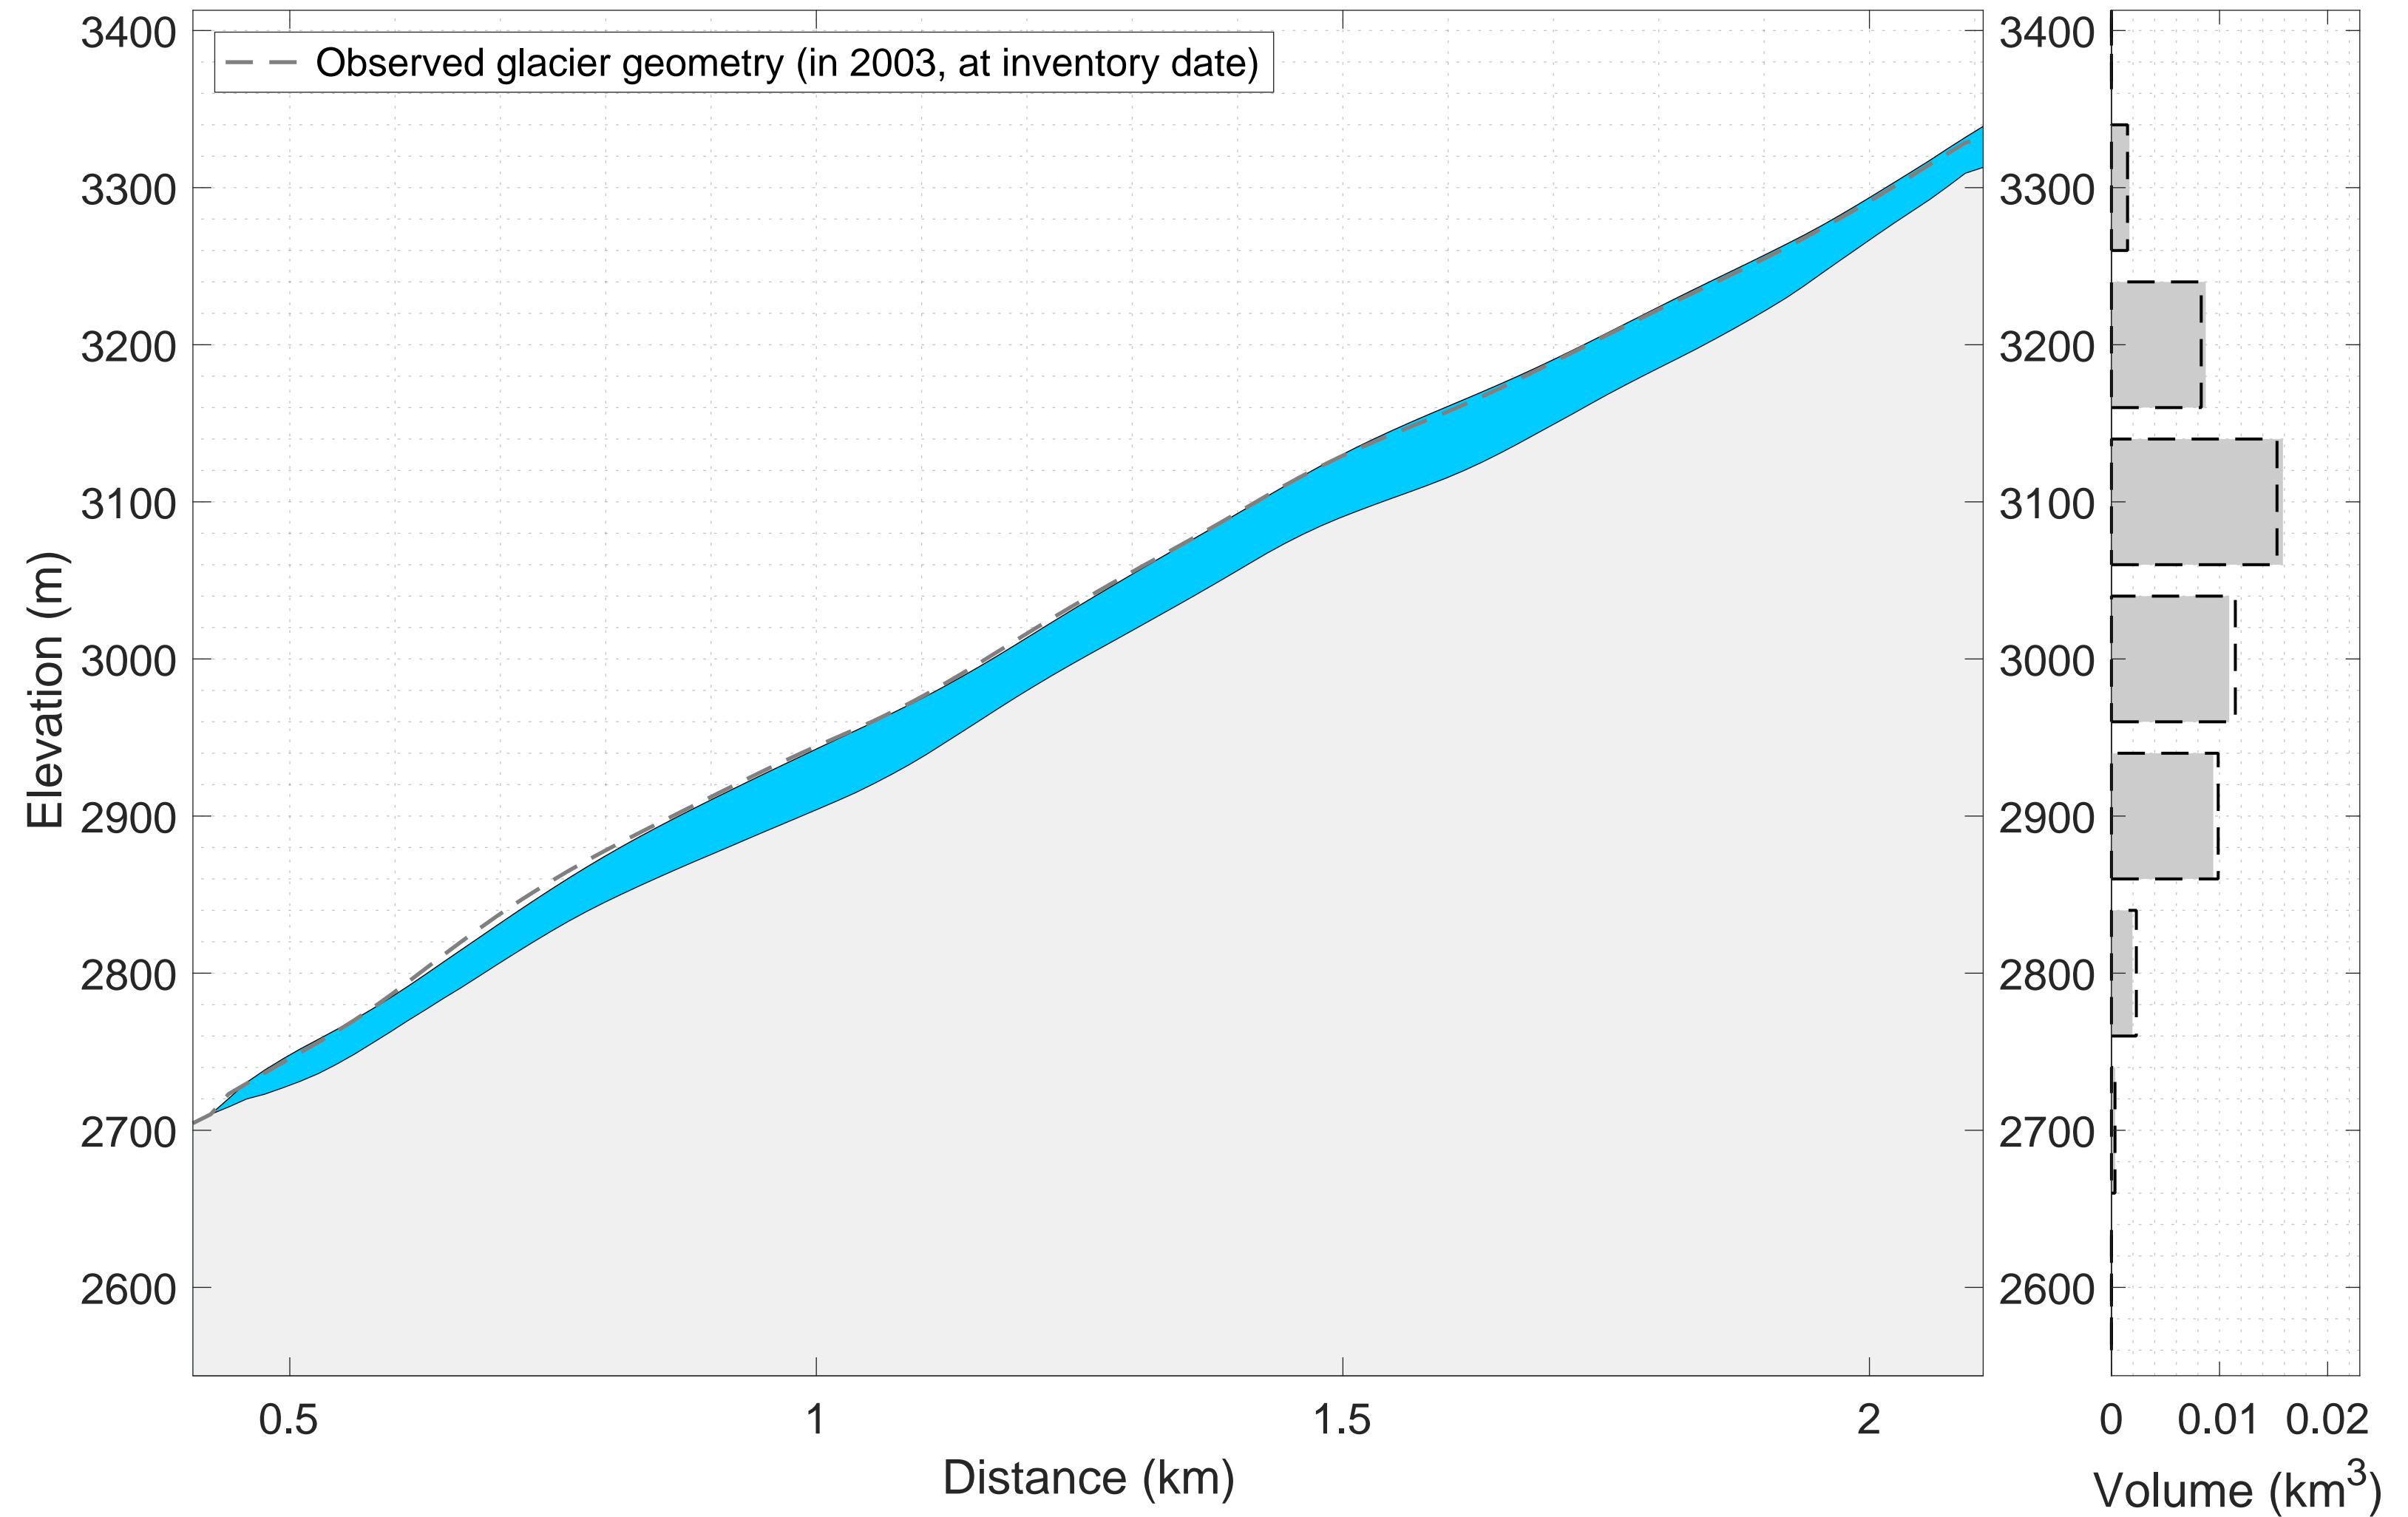

Supplement: Supplementary file 761 [file tc-13-1125-2019-supplement.zip]

Modelled geometry (Glacier ID = 01280;  $A = 1.1092\text{e-}16 \text{ Pa}^{-3} \text{ a}^{-1}$ ;  $dx = 21 \text{ m}$ )

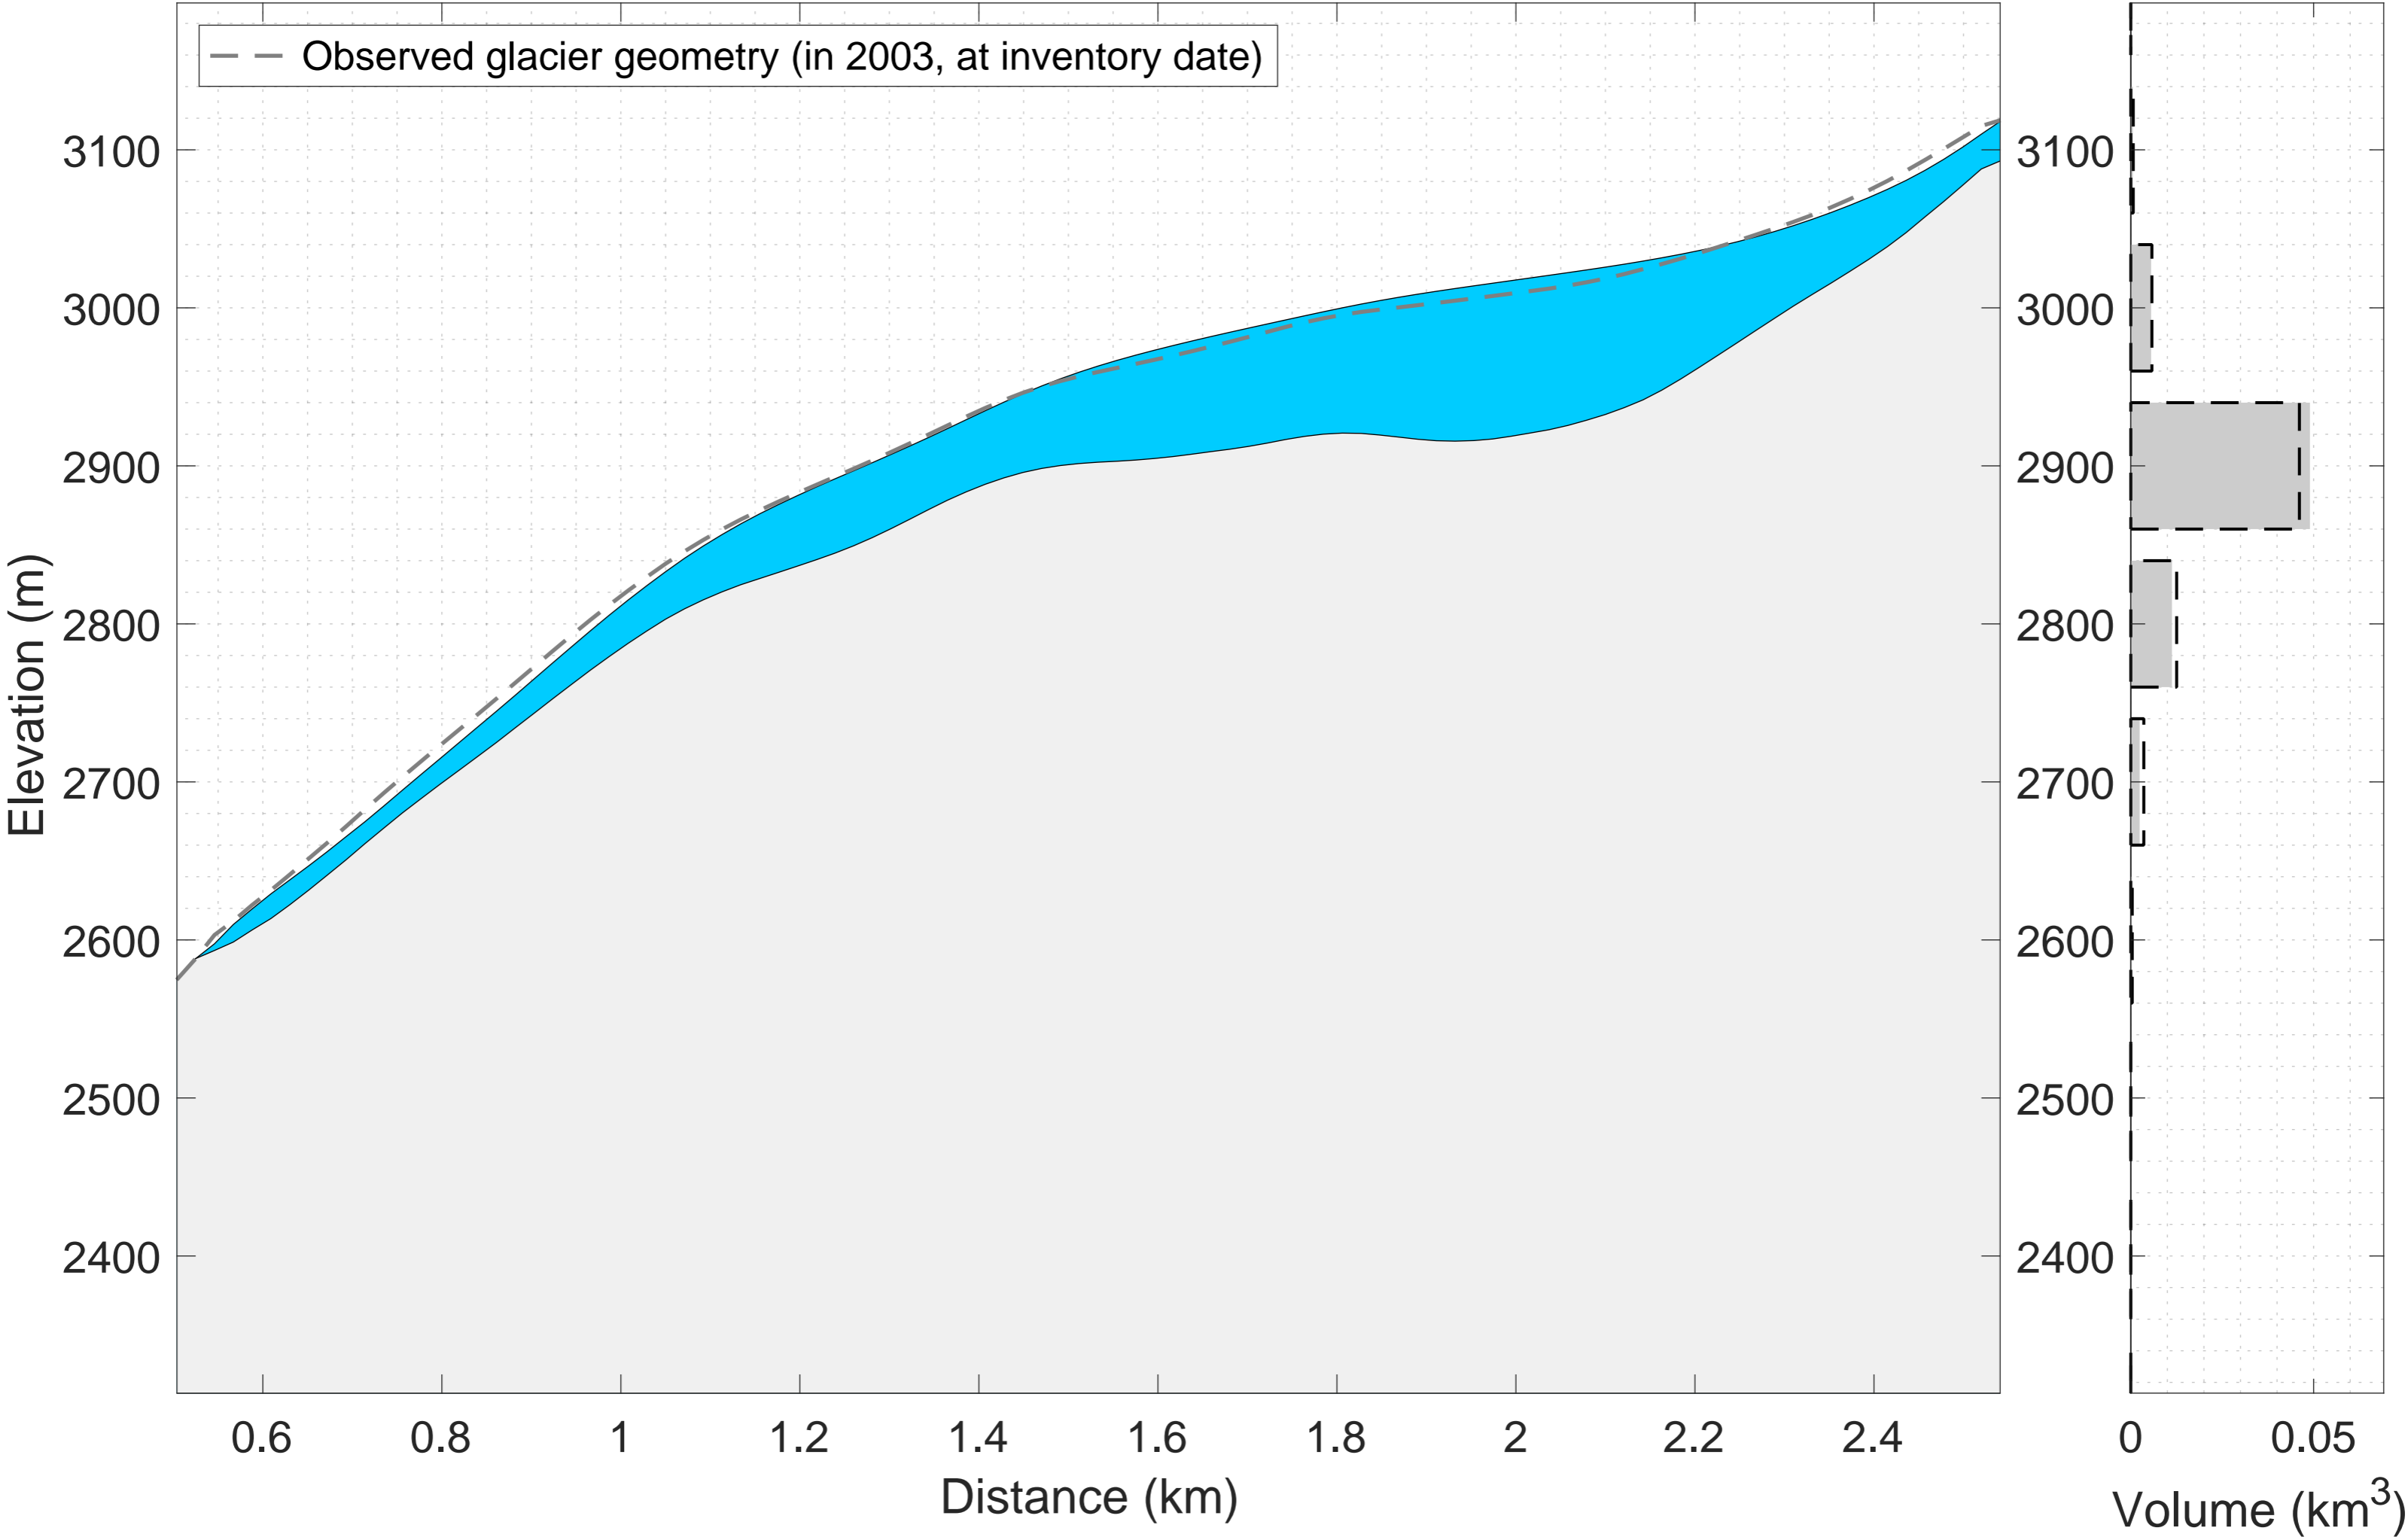

Supplement: Supplementary file 762 [file tc-13-1125-2019-supplement.zip]

**Modelled geometry (Glacier ID = 02291;  $A = 8.7763\text{e-}17 \text{ Pa}^{-3} \text{ a}^{-1}$ ;  $dx = 11 \text{ m}$ )**

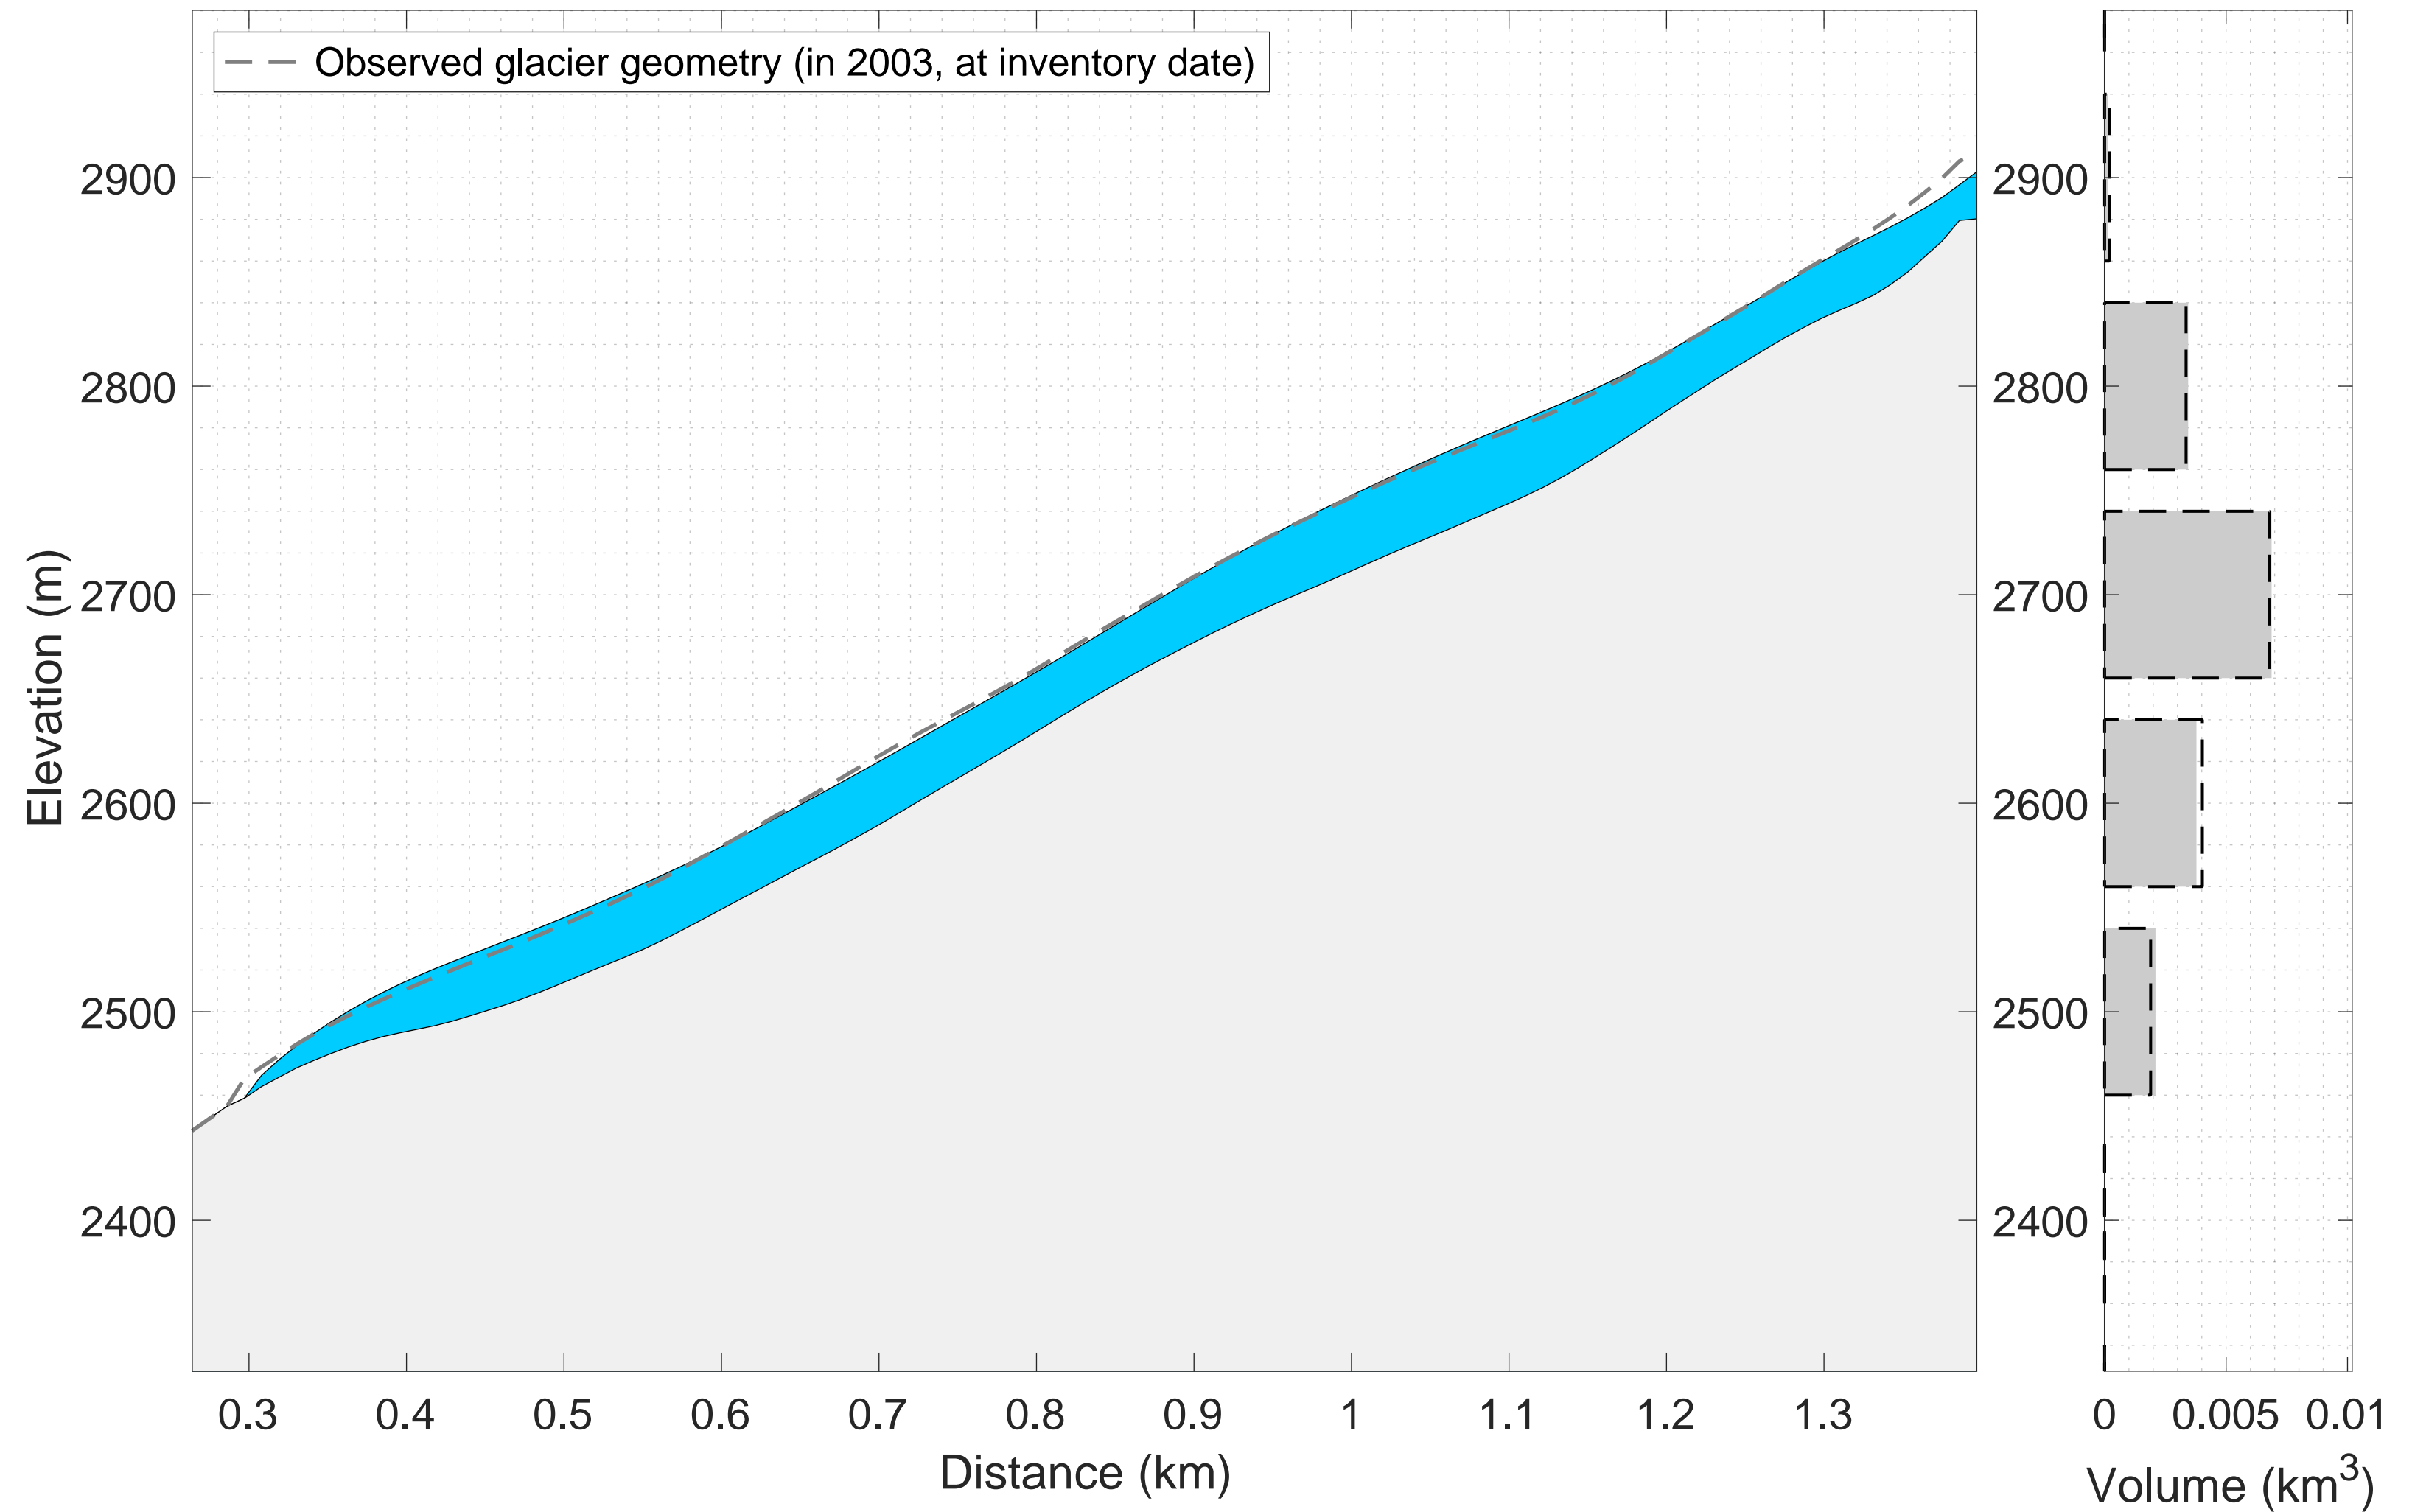

Supplement: Supplementary file 763 [file tc-13-1125-2019-supplement.zip]

**Modelled geometry (Glacier ID = 03464;  $A = 4.8252\text{e-}16 \text{ Pa}^{-3} \text{ a}^{-1}$ ;  $dx = 12 \text{ m}$ )**

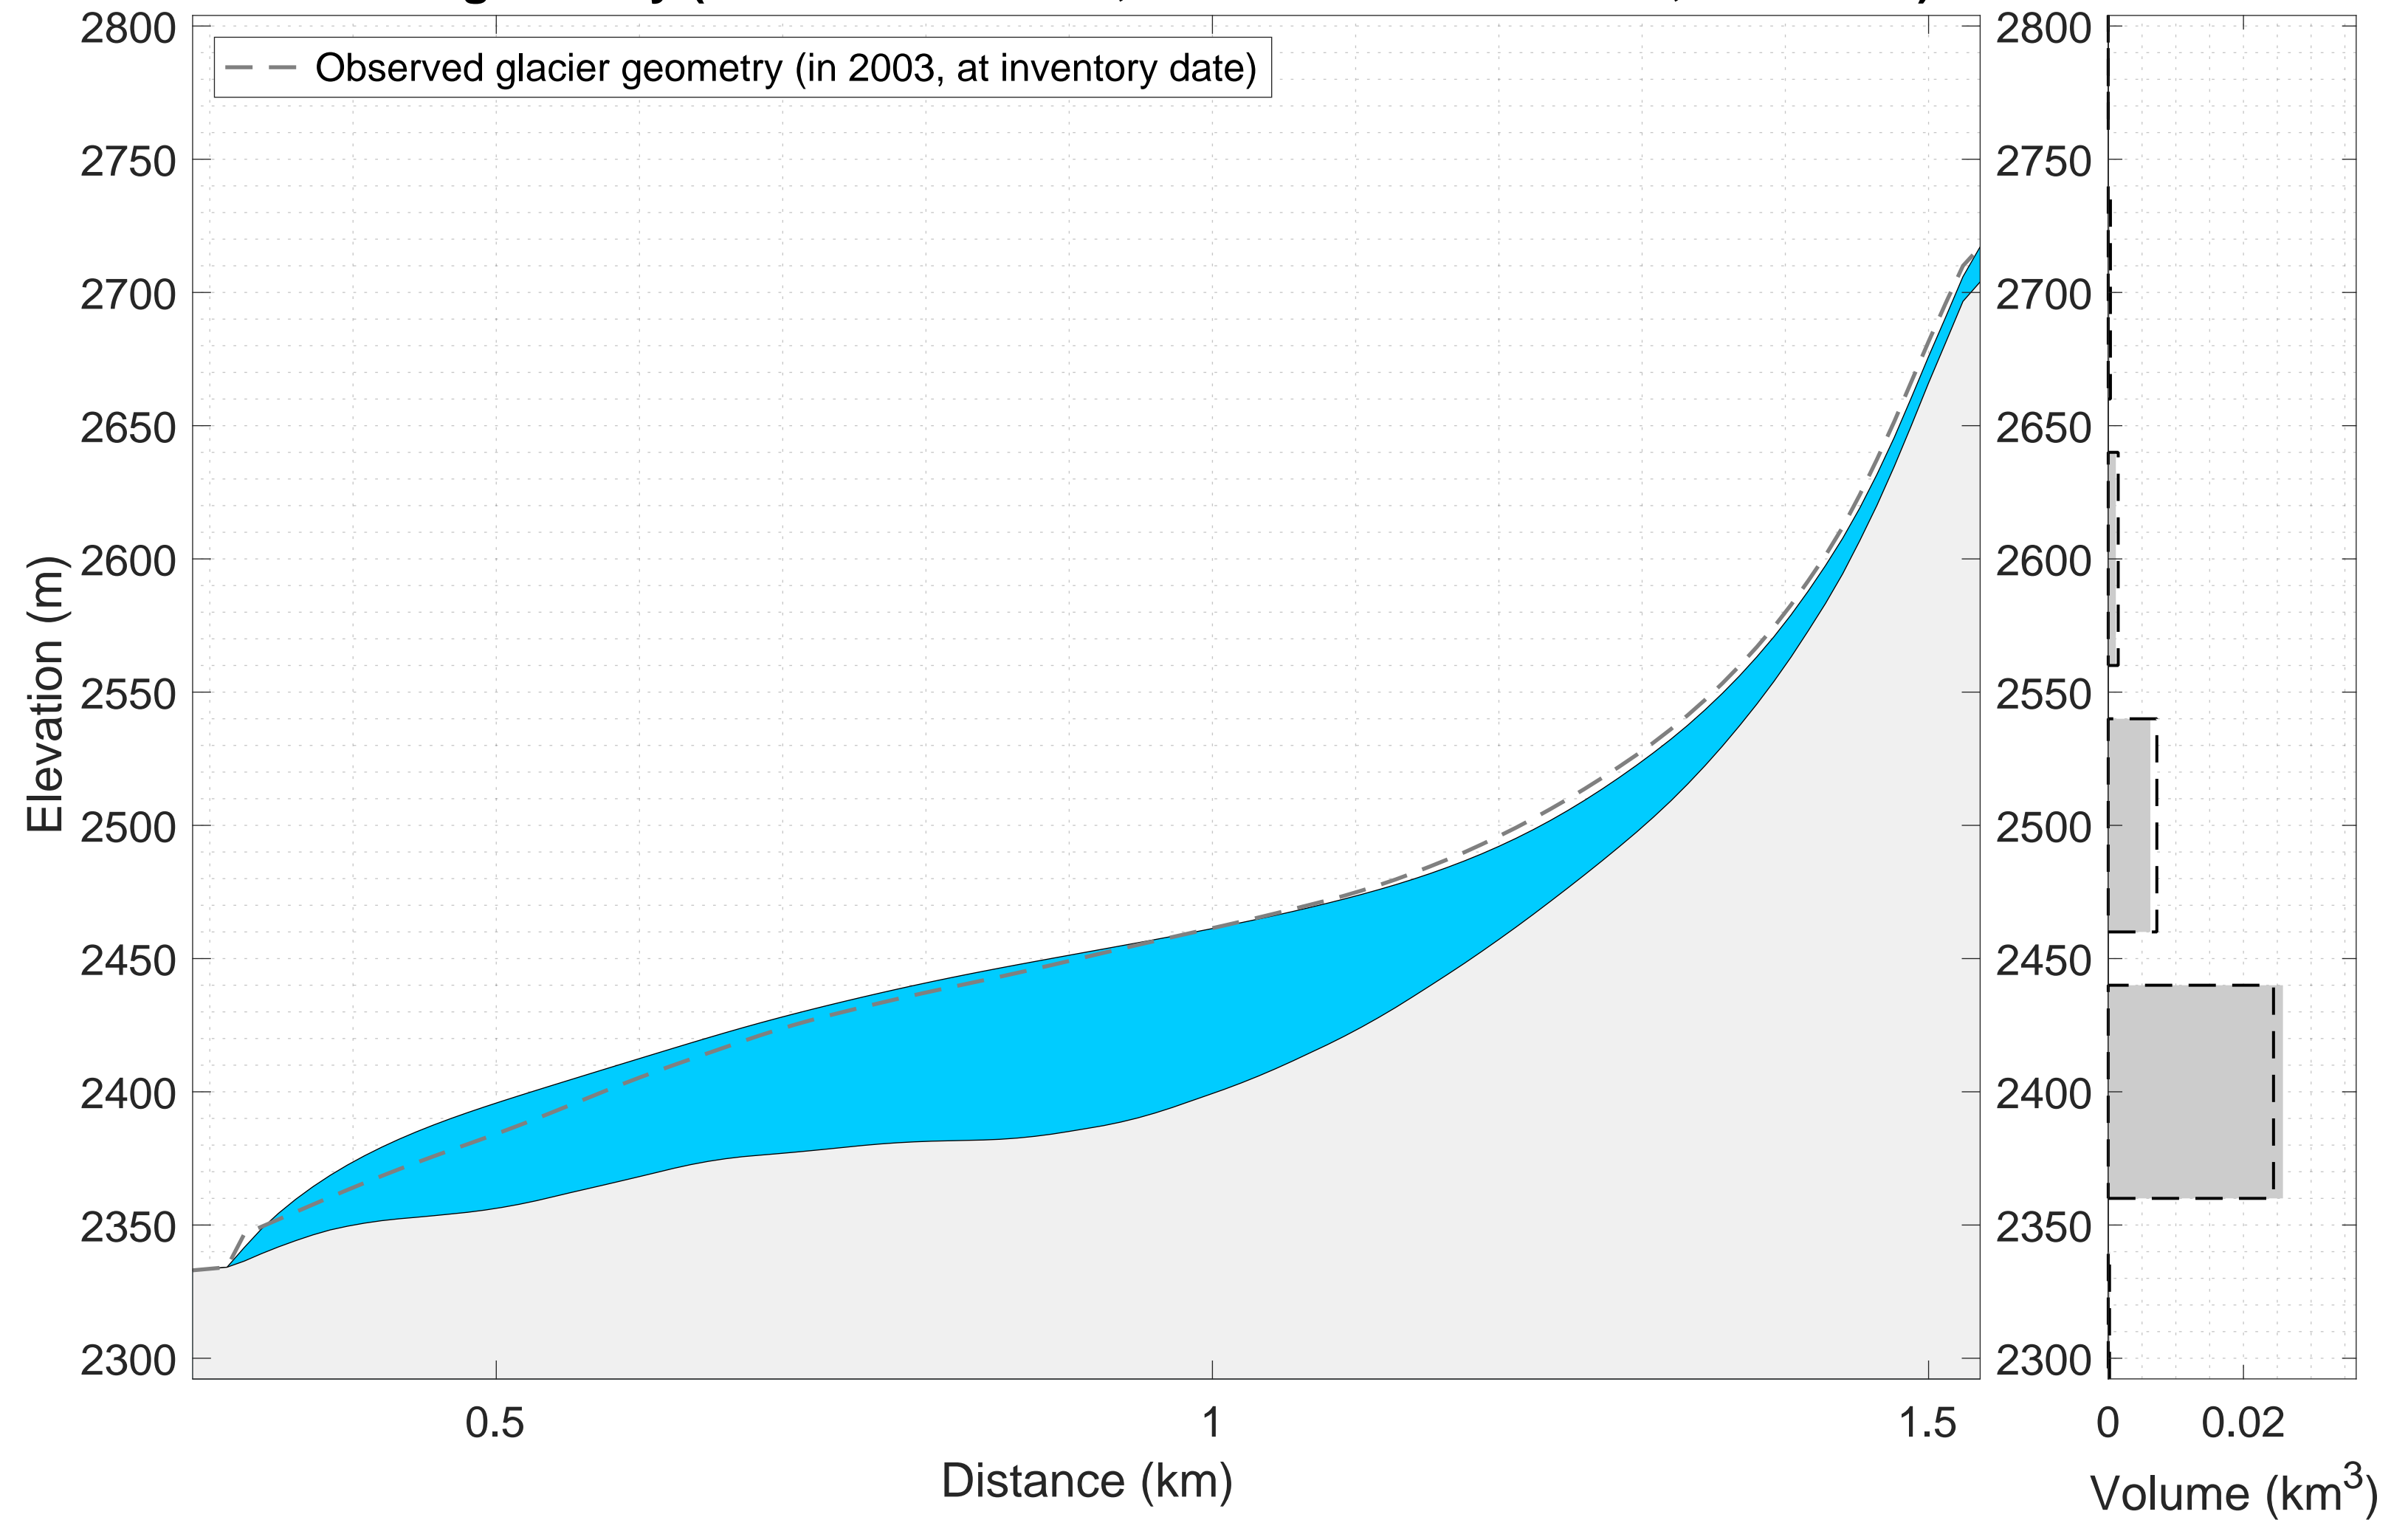

Supplement: Supplementary file 764 [file tc-13-1125-2019-supplement.zip]

**Modelled geometry (Glacier ID = 02914;  $A = 1.2295\text{e-}16 \text{ Pa}^{-3} \text{ a}^{-1}$ ;  $dx = 15 \text{ m}$ )**

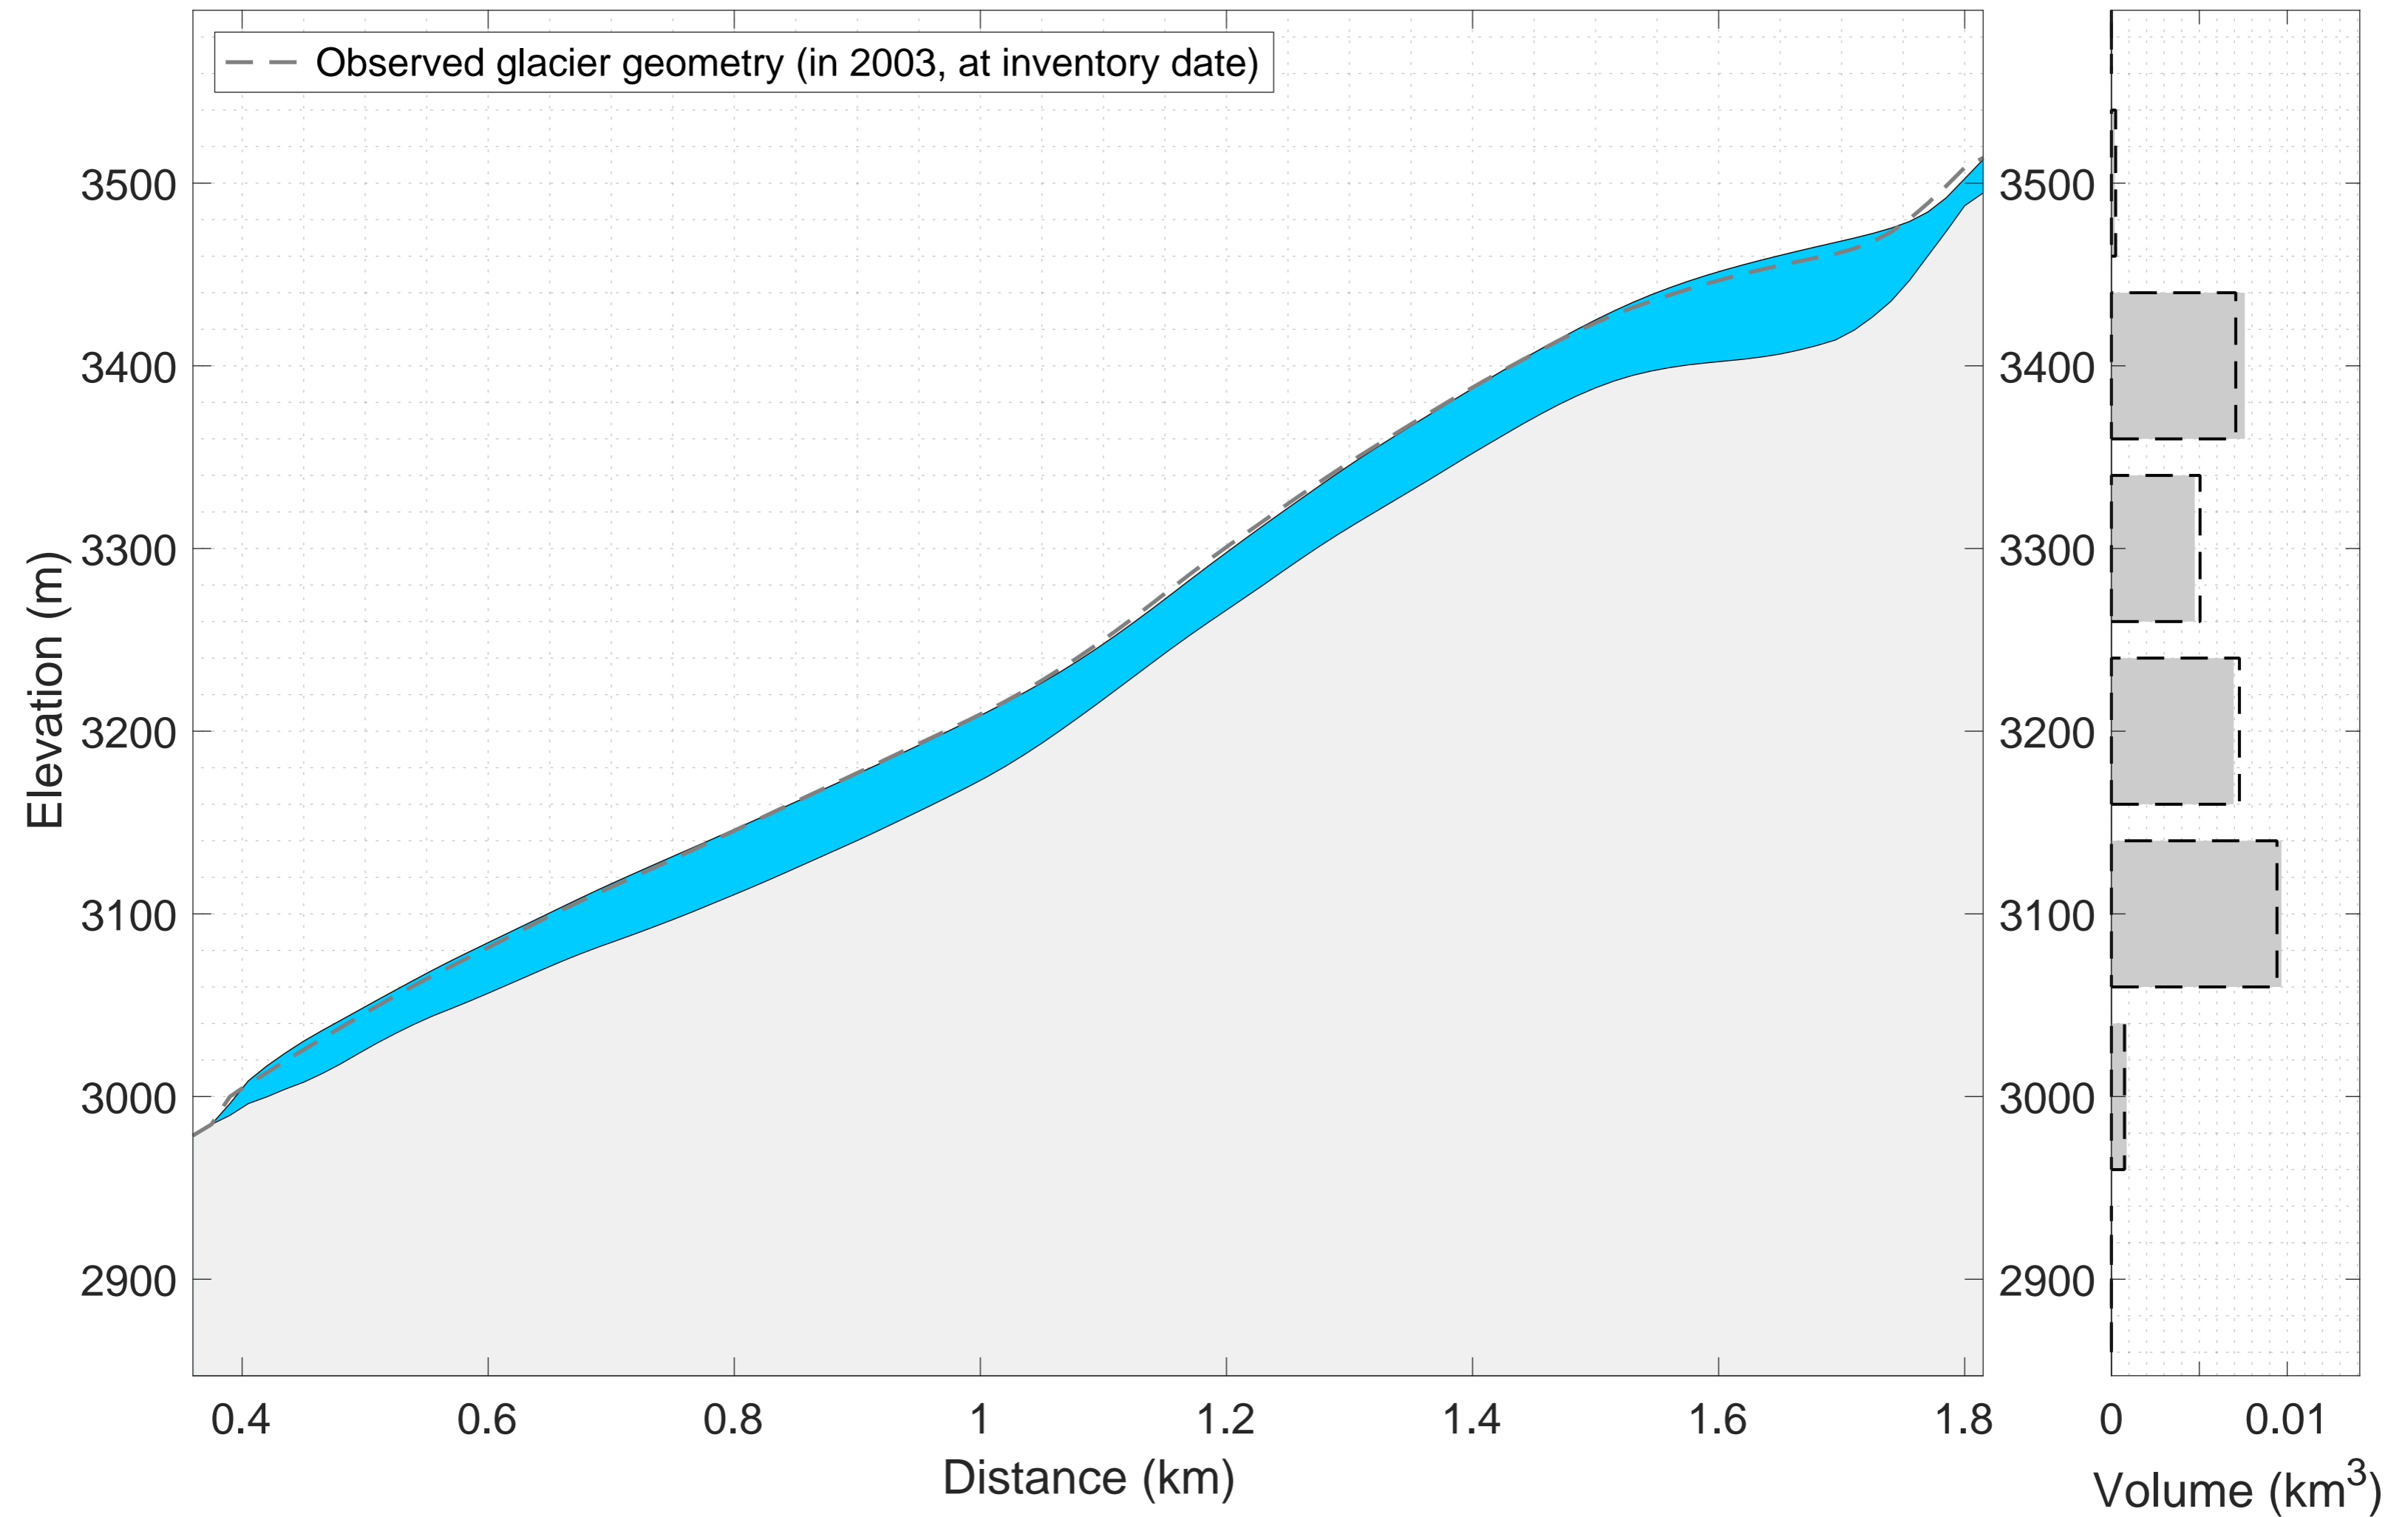

Supplement: Supplementary file 765 [file tc-13-1125-2019-supplement.zip]

**Modelled geometry (Glacier ID = 00049;  $A = 1.2361\text{e-}16 \text{ Pa}^{-3} \text{ a}^{-1}$ ;  $dx = 25 \text{ m}$ )**

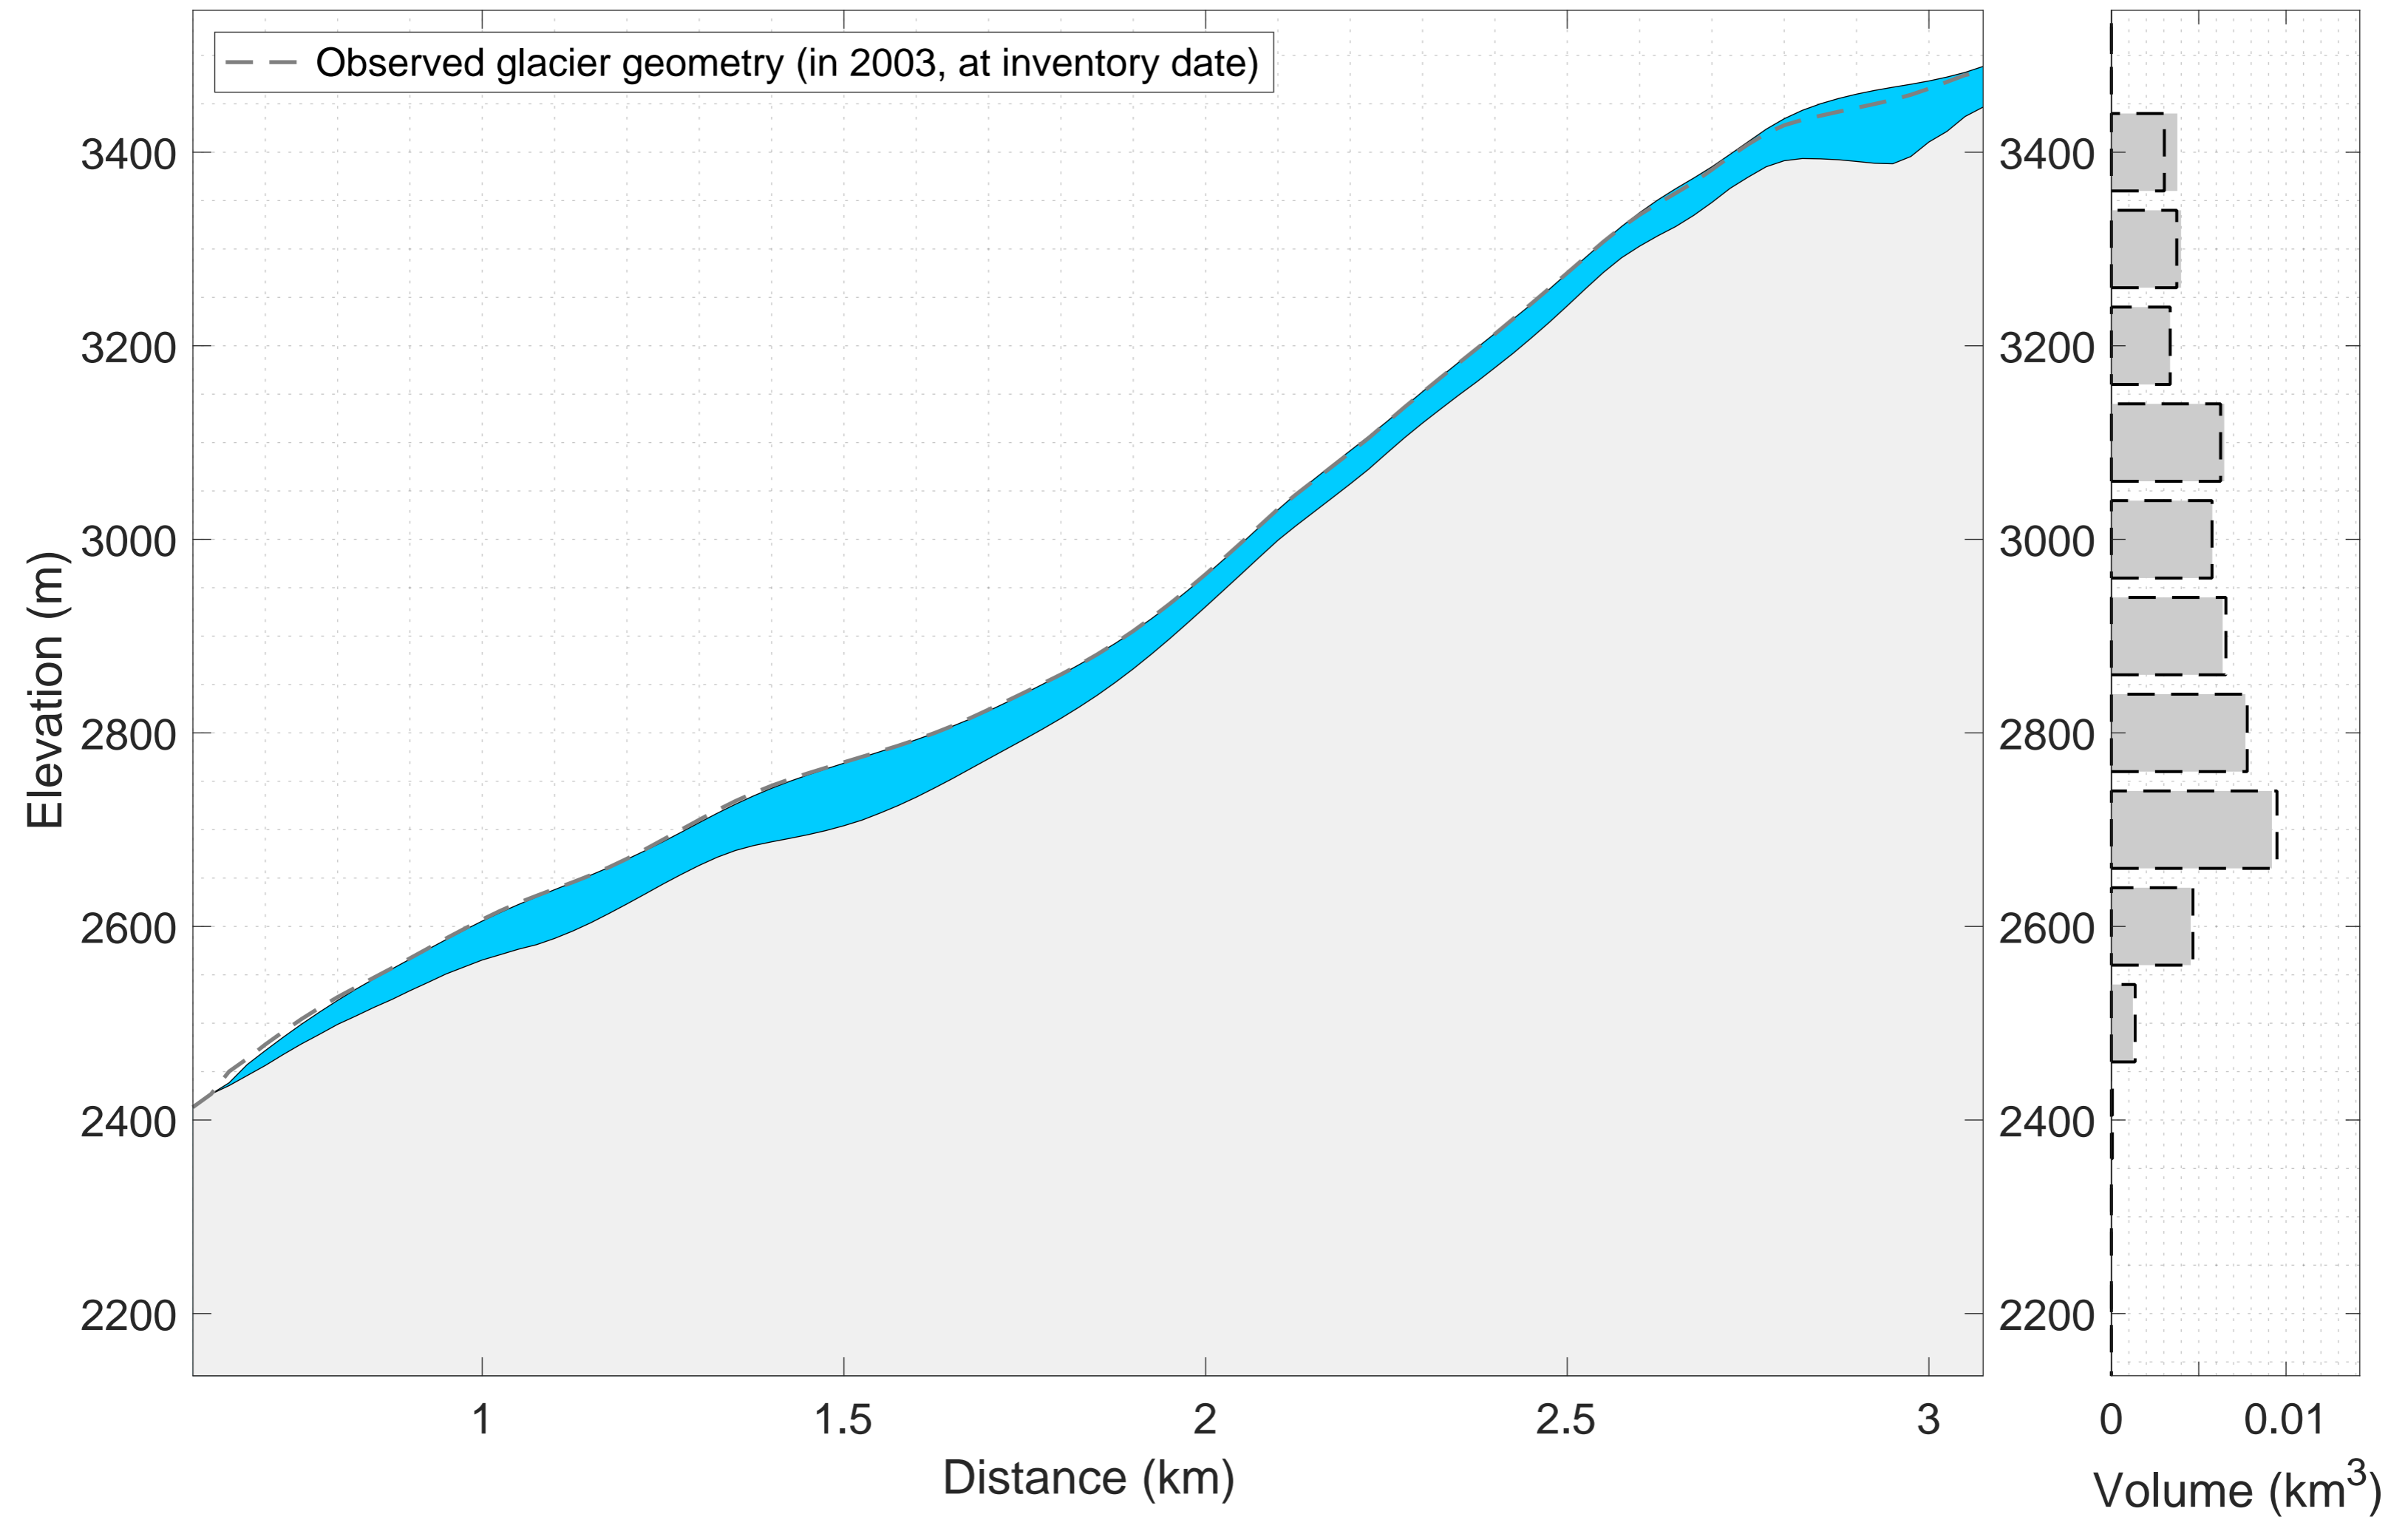

Supplement: Supplementary file 766 [file tc-13-1125-2019-supplement.zip]

**Modelled geometry (Glacier ID = 00807;  $A = 1.0798\text{e-}16 \text{ Pa}^{-3} \text{ a}^{-1}$ ;  $dx = 18 \text{ m}$ )**

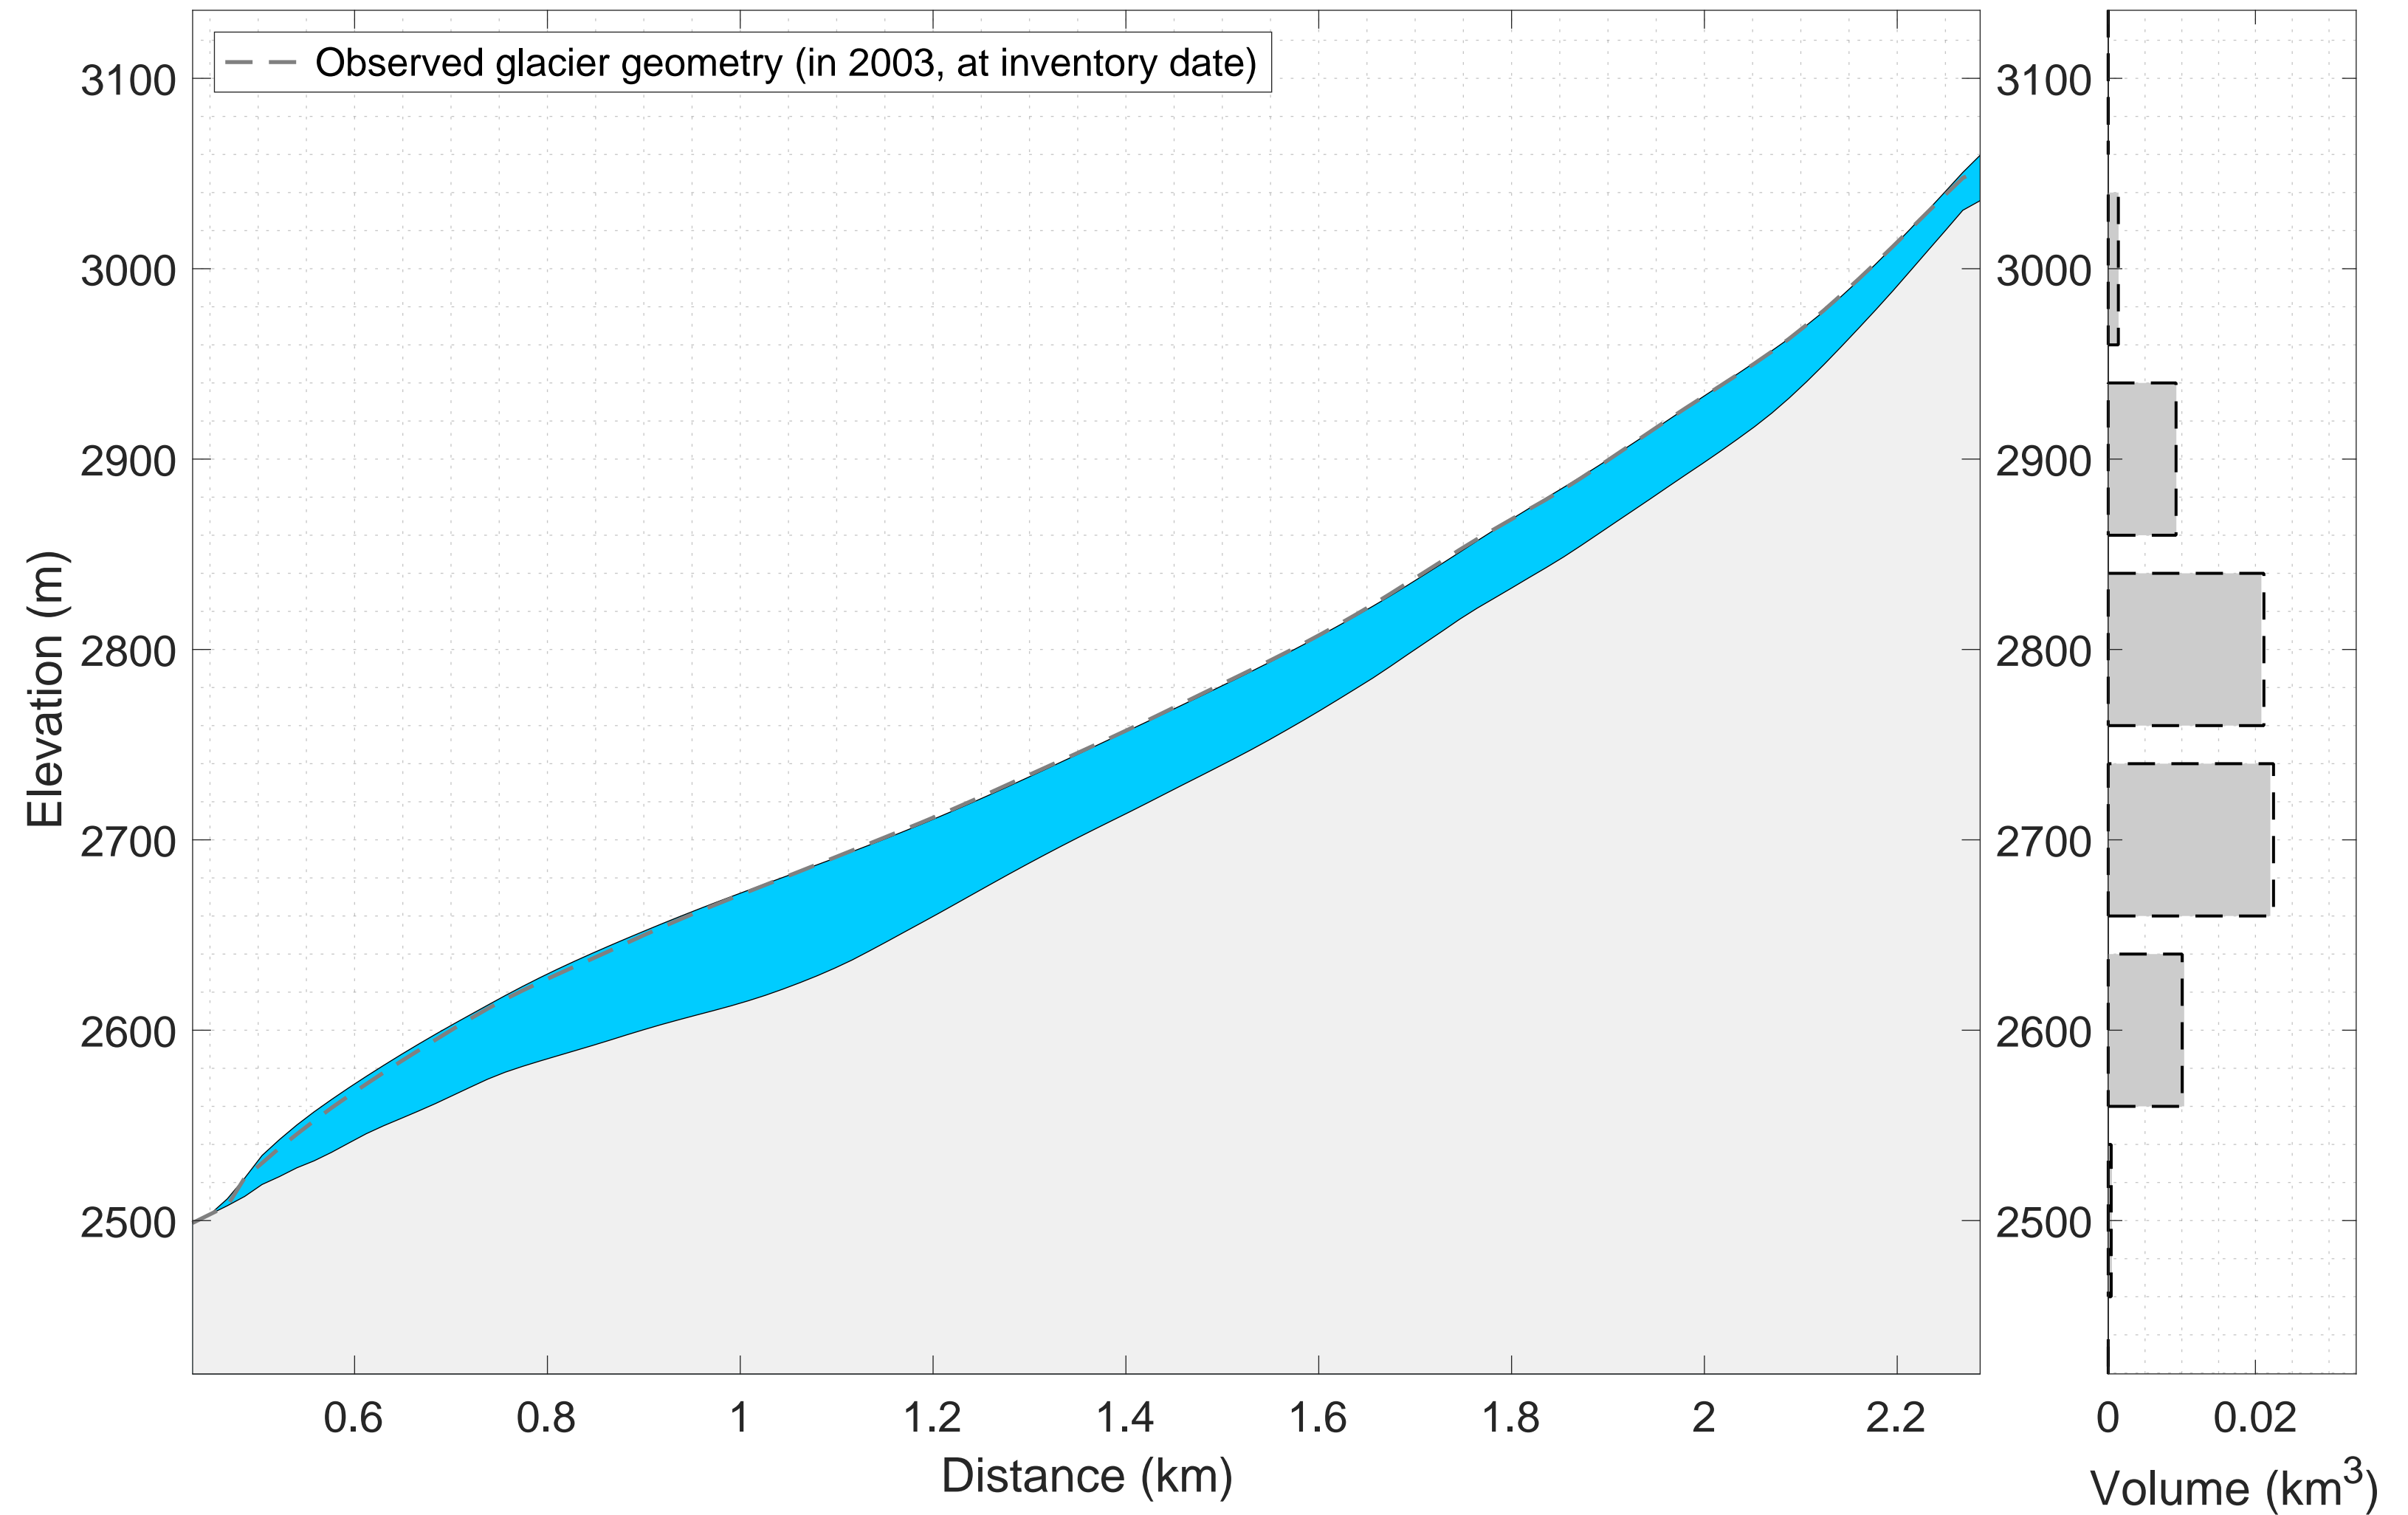

Supplement: Supplementary file 767 [file tc-13-1125-2019-supplement.zip]

**Modelled geometry (Glacier ID = 03648;  $A = 1.4322\text{e-}16 \text{ Pa}^{-3} \text{ a}^{-1}$ ;  $dx = 52 \text{ m}$ )**

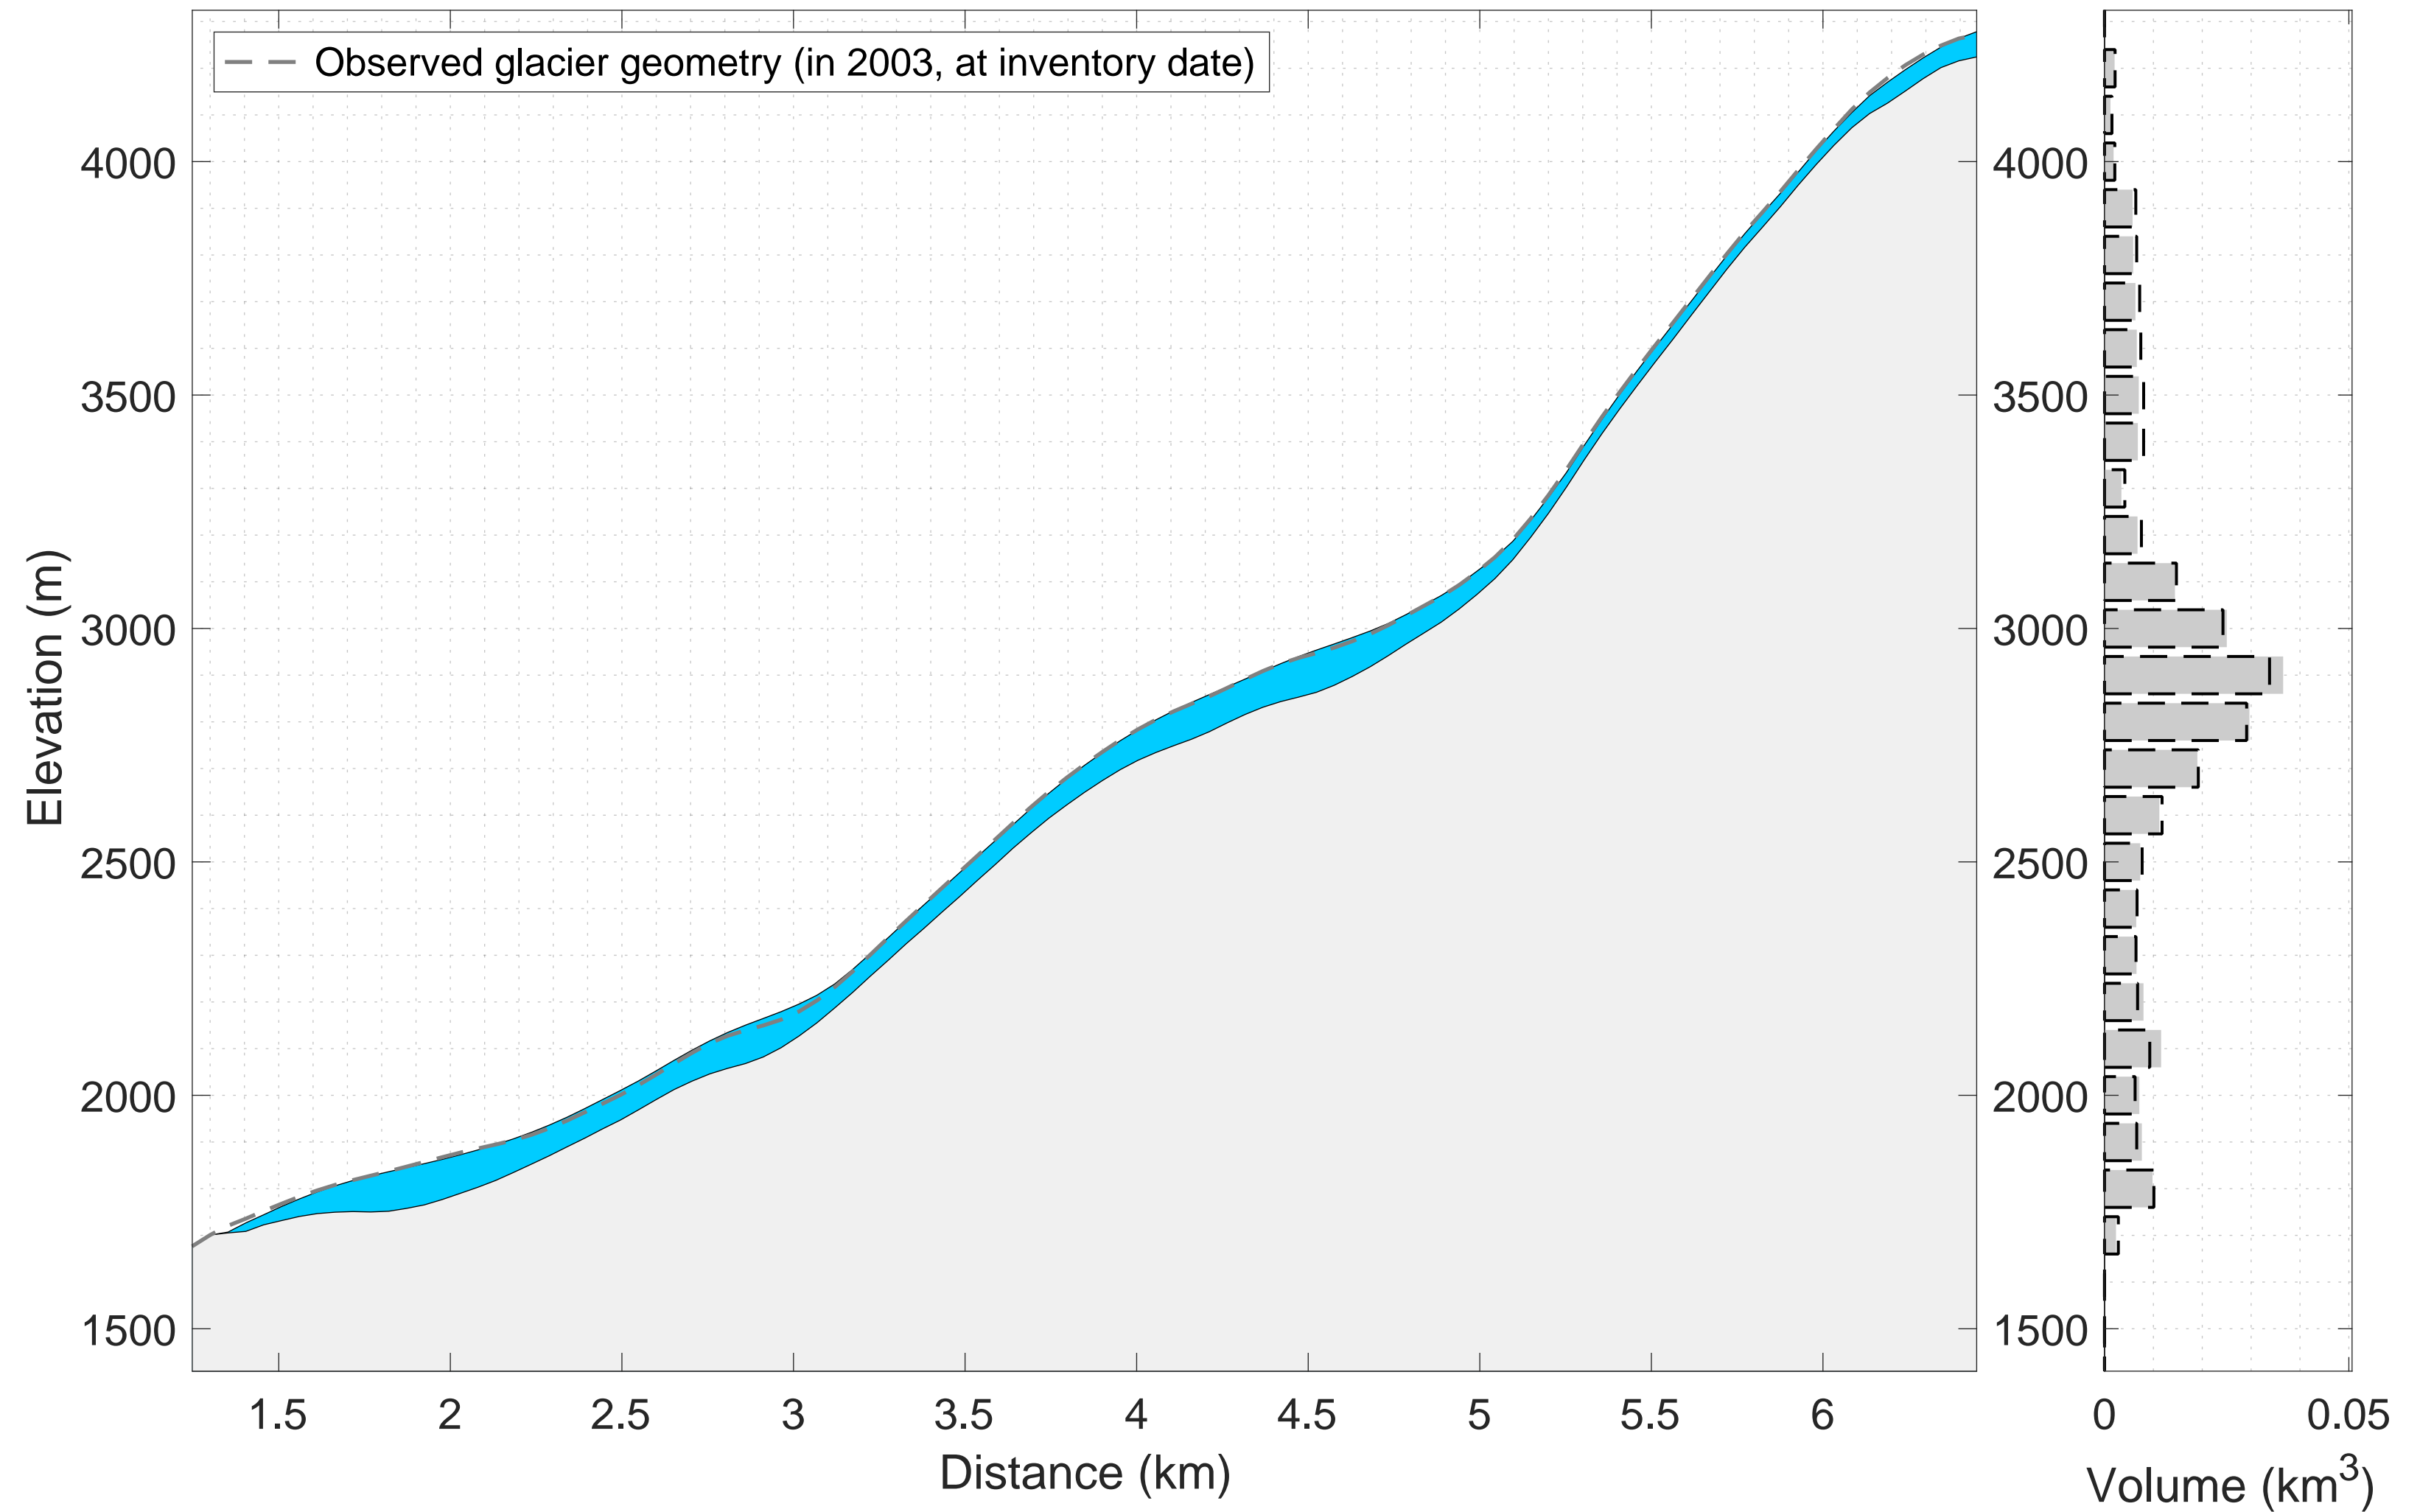

Supplement: Supplementary file 768 [file tc-13-1125-2019-supplement.zip]

**Modelled geometry (Glacier ID = 03254;  $A = 1.4834\text{e-}16 \text{ Pa}^{-3} \text{ a}^{-1}$ ;  $dx = 23 \text{ m}$ )**

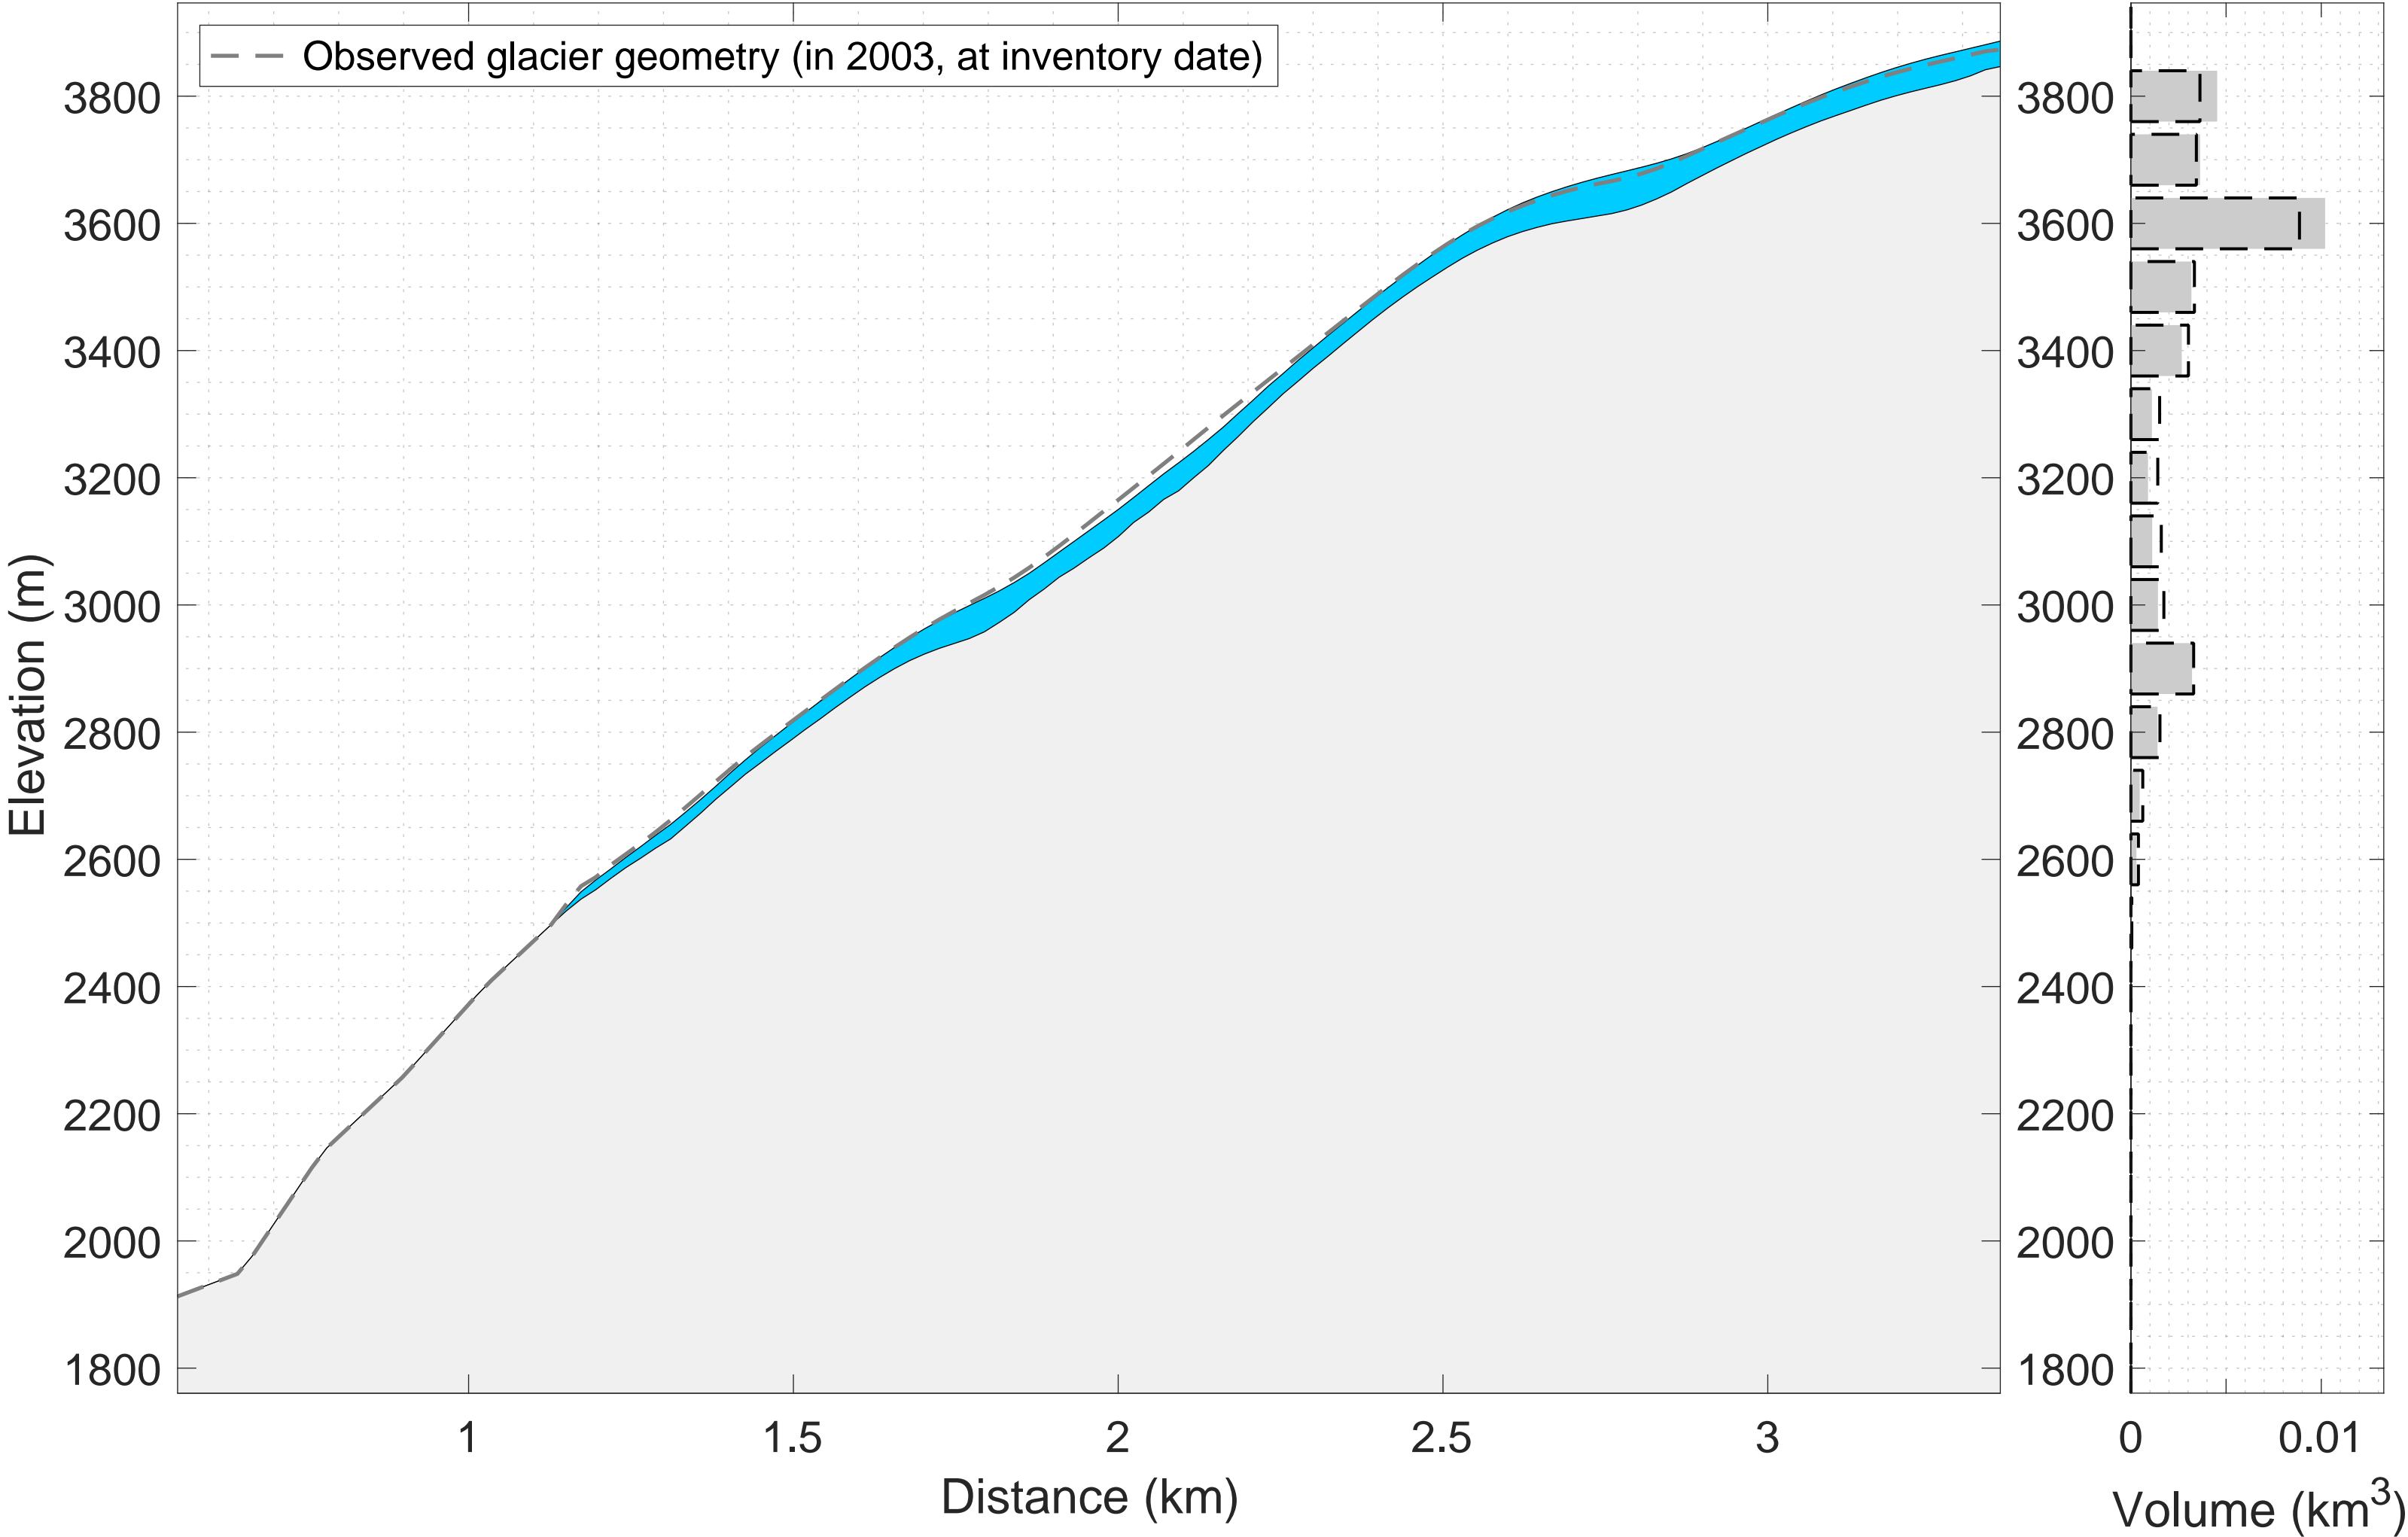

Supplement: Supplementary file 769 [file tc-13-1125-2019-supplement.zip]

**Modelled geometry (Glacier ID = 01557;  $A = 1.3623\text{e-}16 \text{ Pa}^{-3} \text{ a}^{-1}$ ;  $dx = 20 \text{ m}$ )**

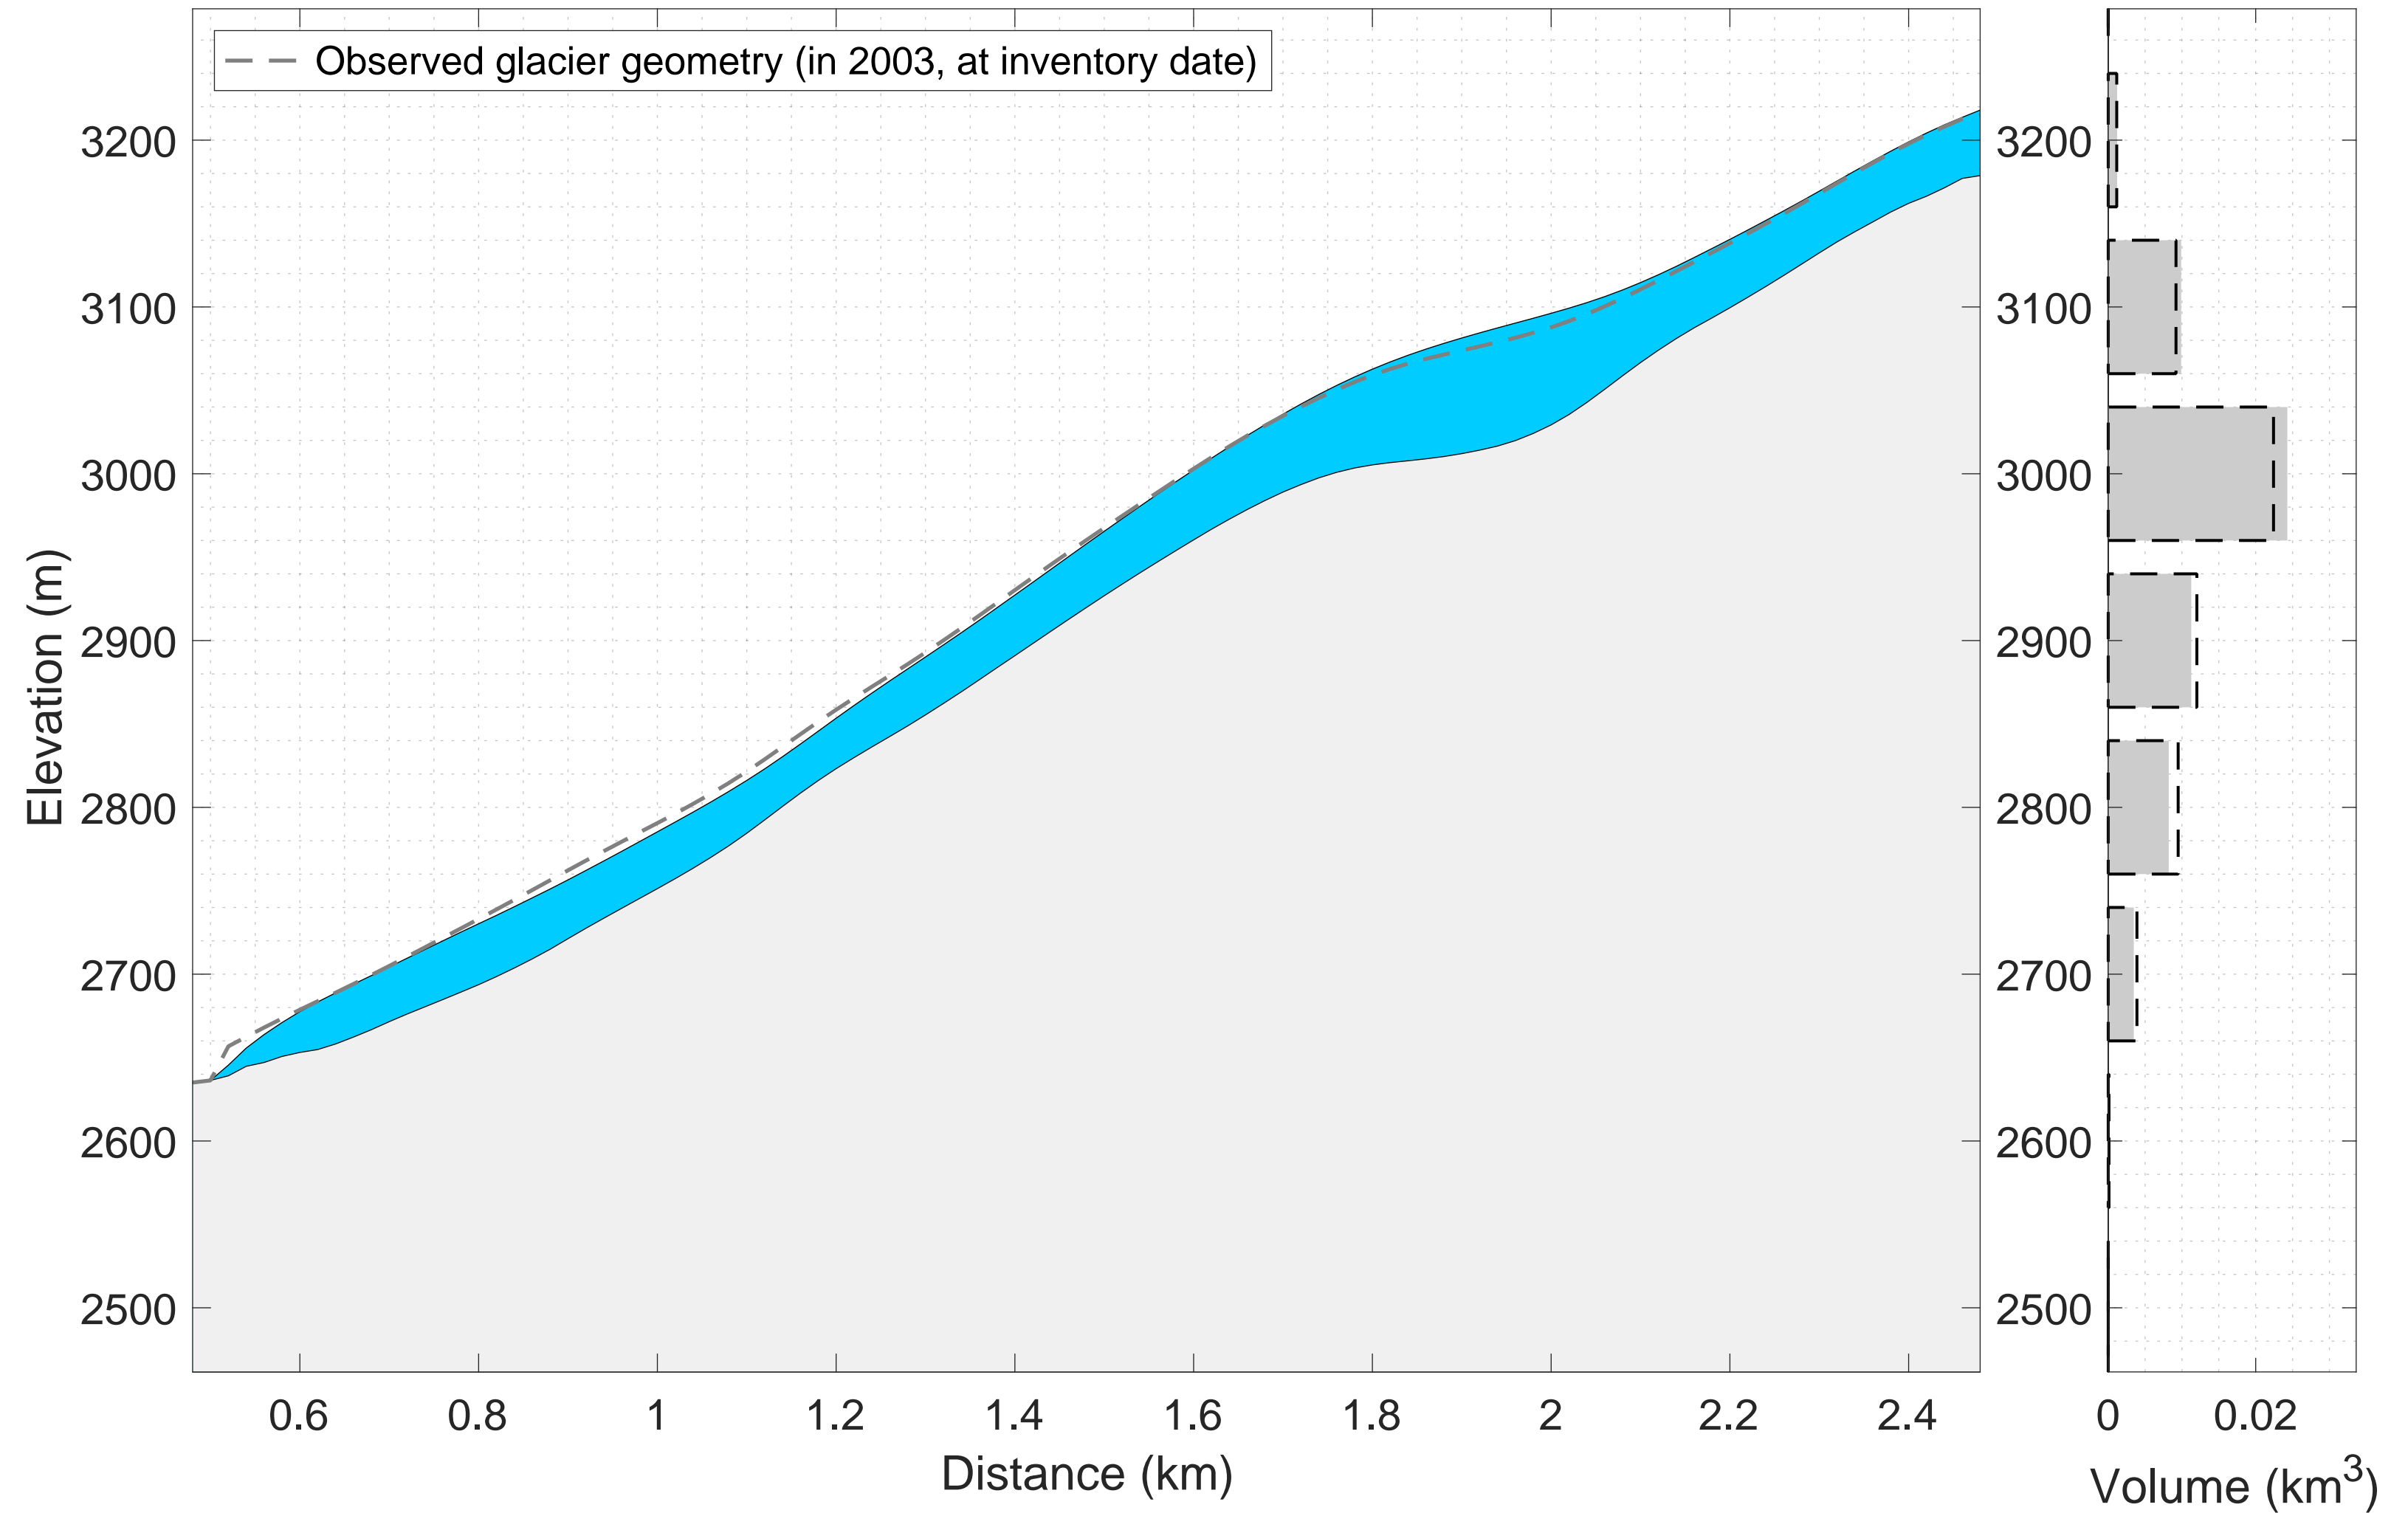

Supplement: Supplementary file 770 [file tc-13-1125-2019-supplement.zip]

**Modelled geometry (Glacier ID = 00399;  $A = 1.3486\text{e-}16 \text{ Pa}^{-3} \text{ a}^{-1}$ ;  $dx = 26 \text{ m}$ )**

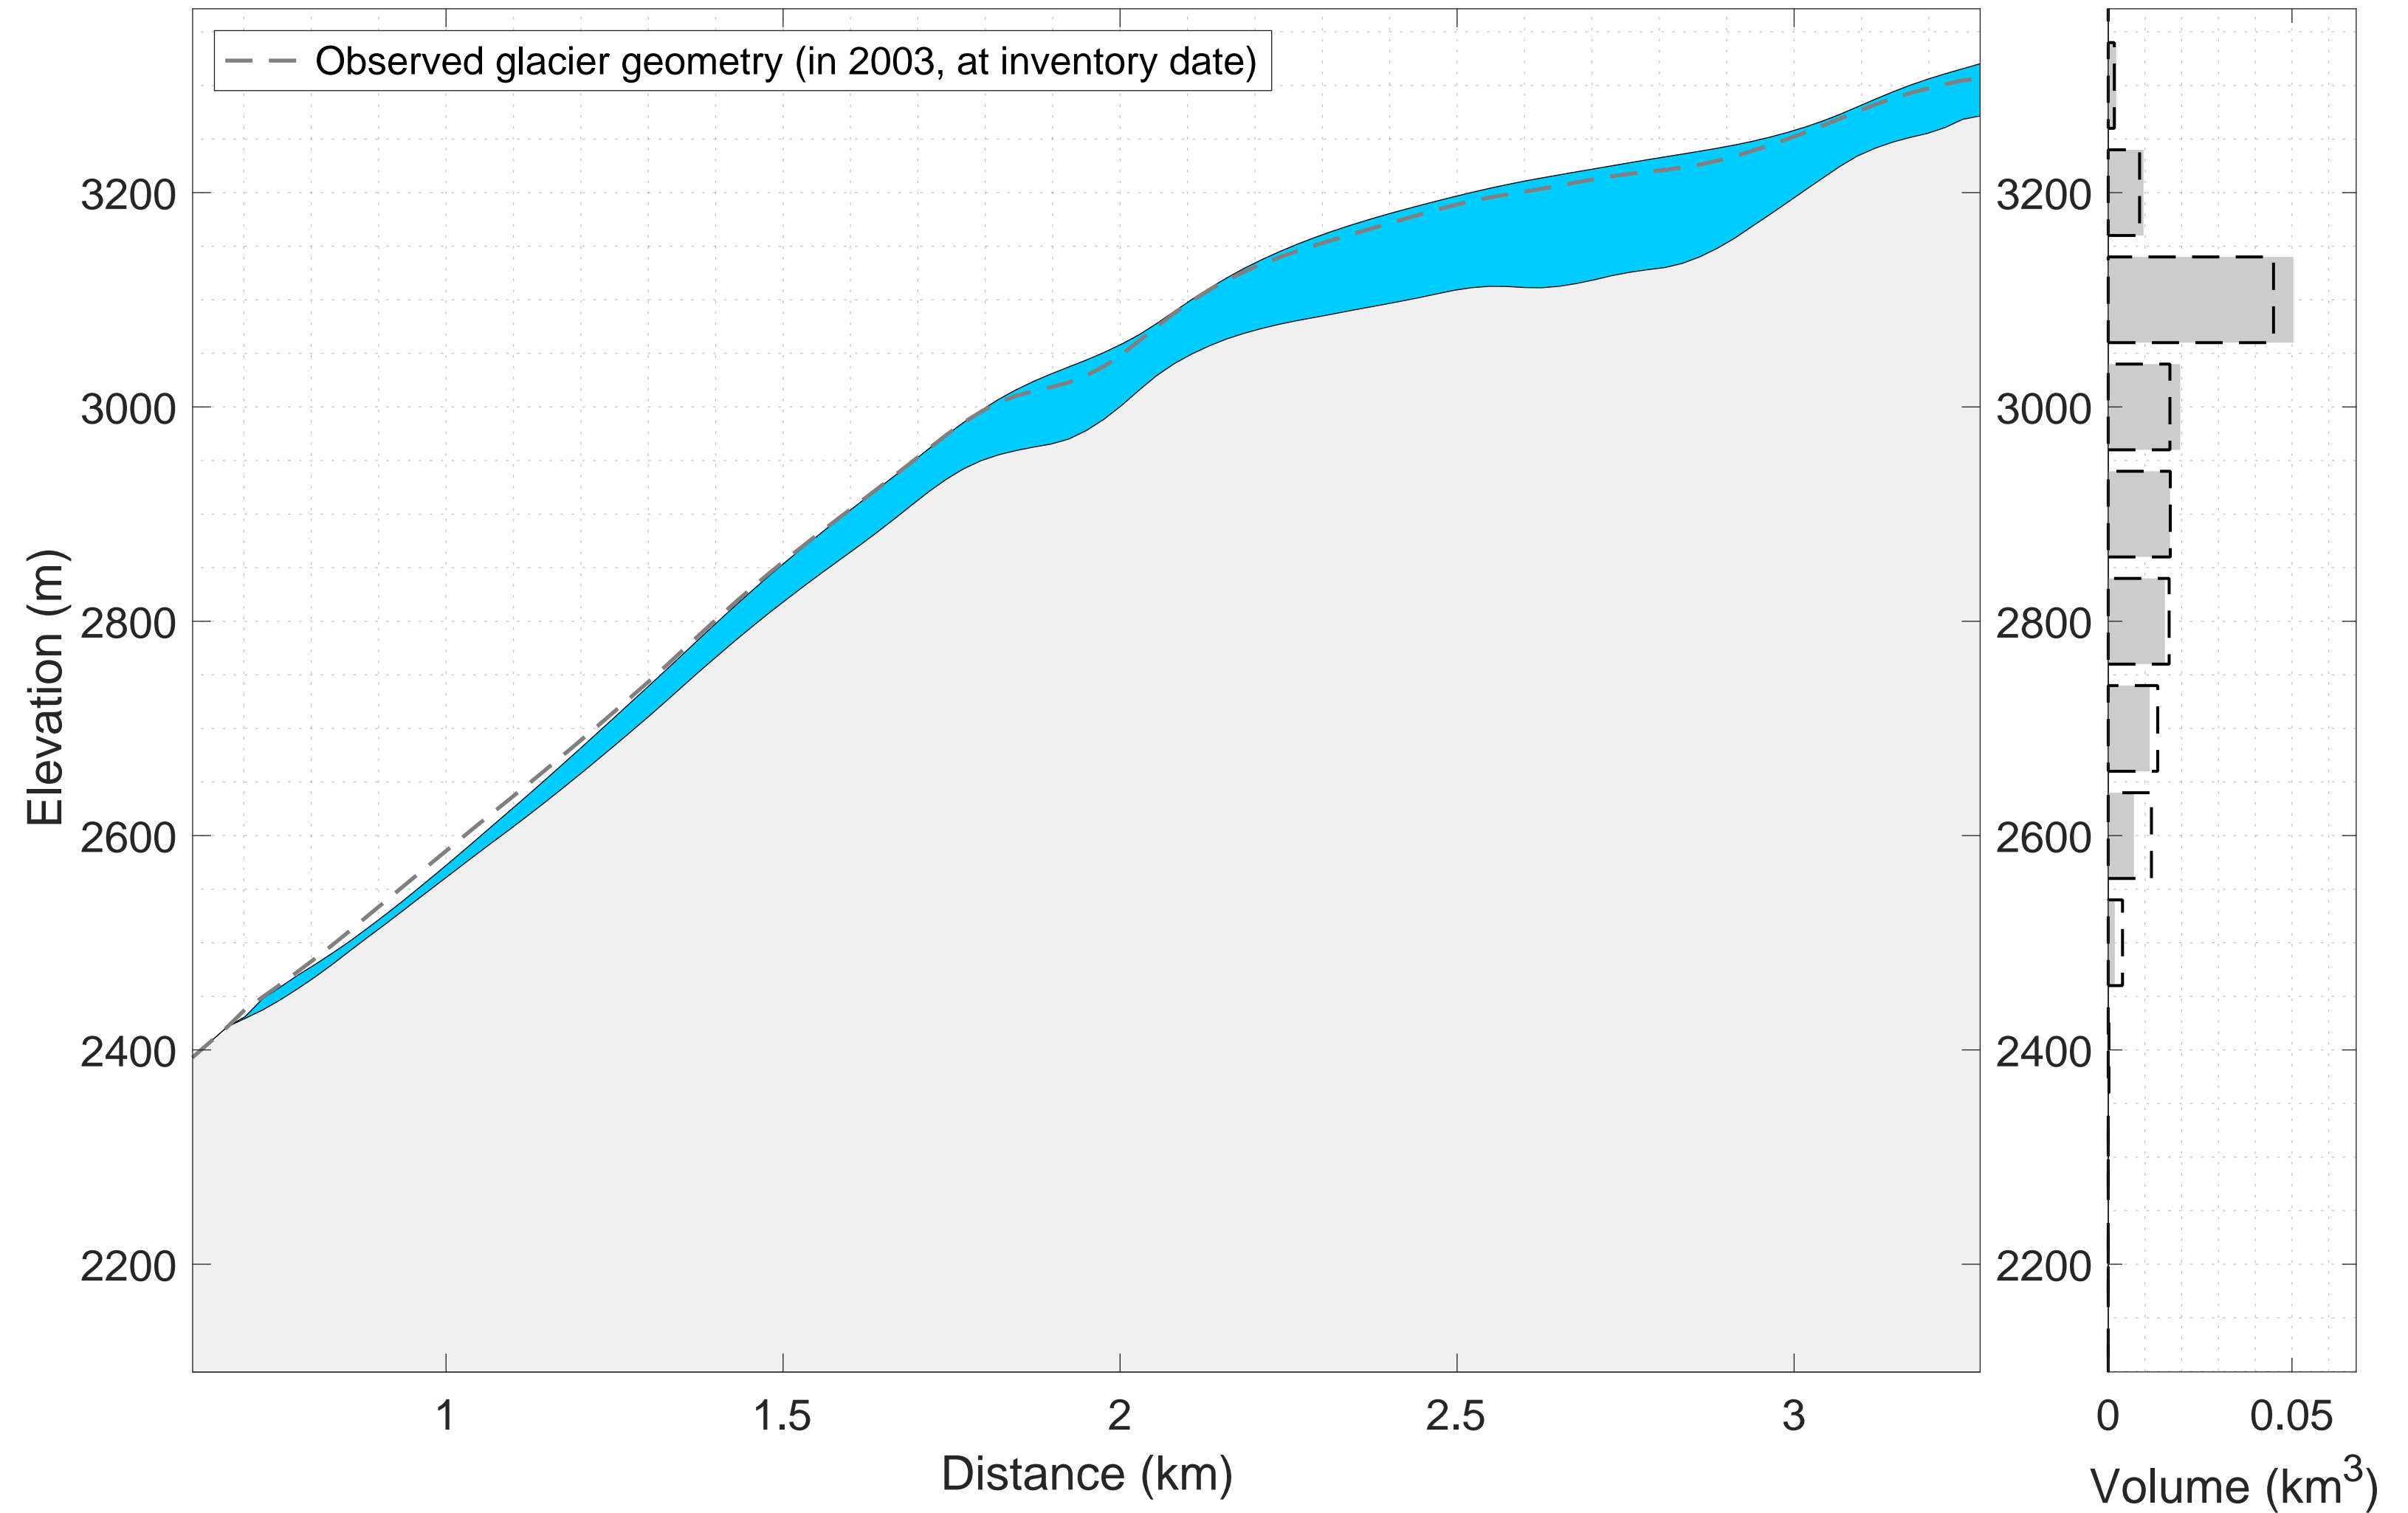

Supplement: Supplementary file 771 [file tc-13-1125-2019-supplement.zip]

**Modelled geometry (Glacier ID = 00487;  $A = 1.2389\text{e-}16 \text{ Pa}^{-3} \text{ a}^{-1}$ ;  $dx = 29 \text{ m}$ )**

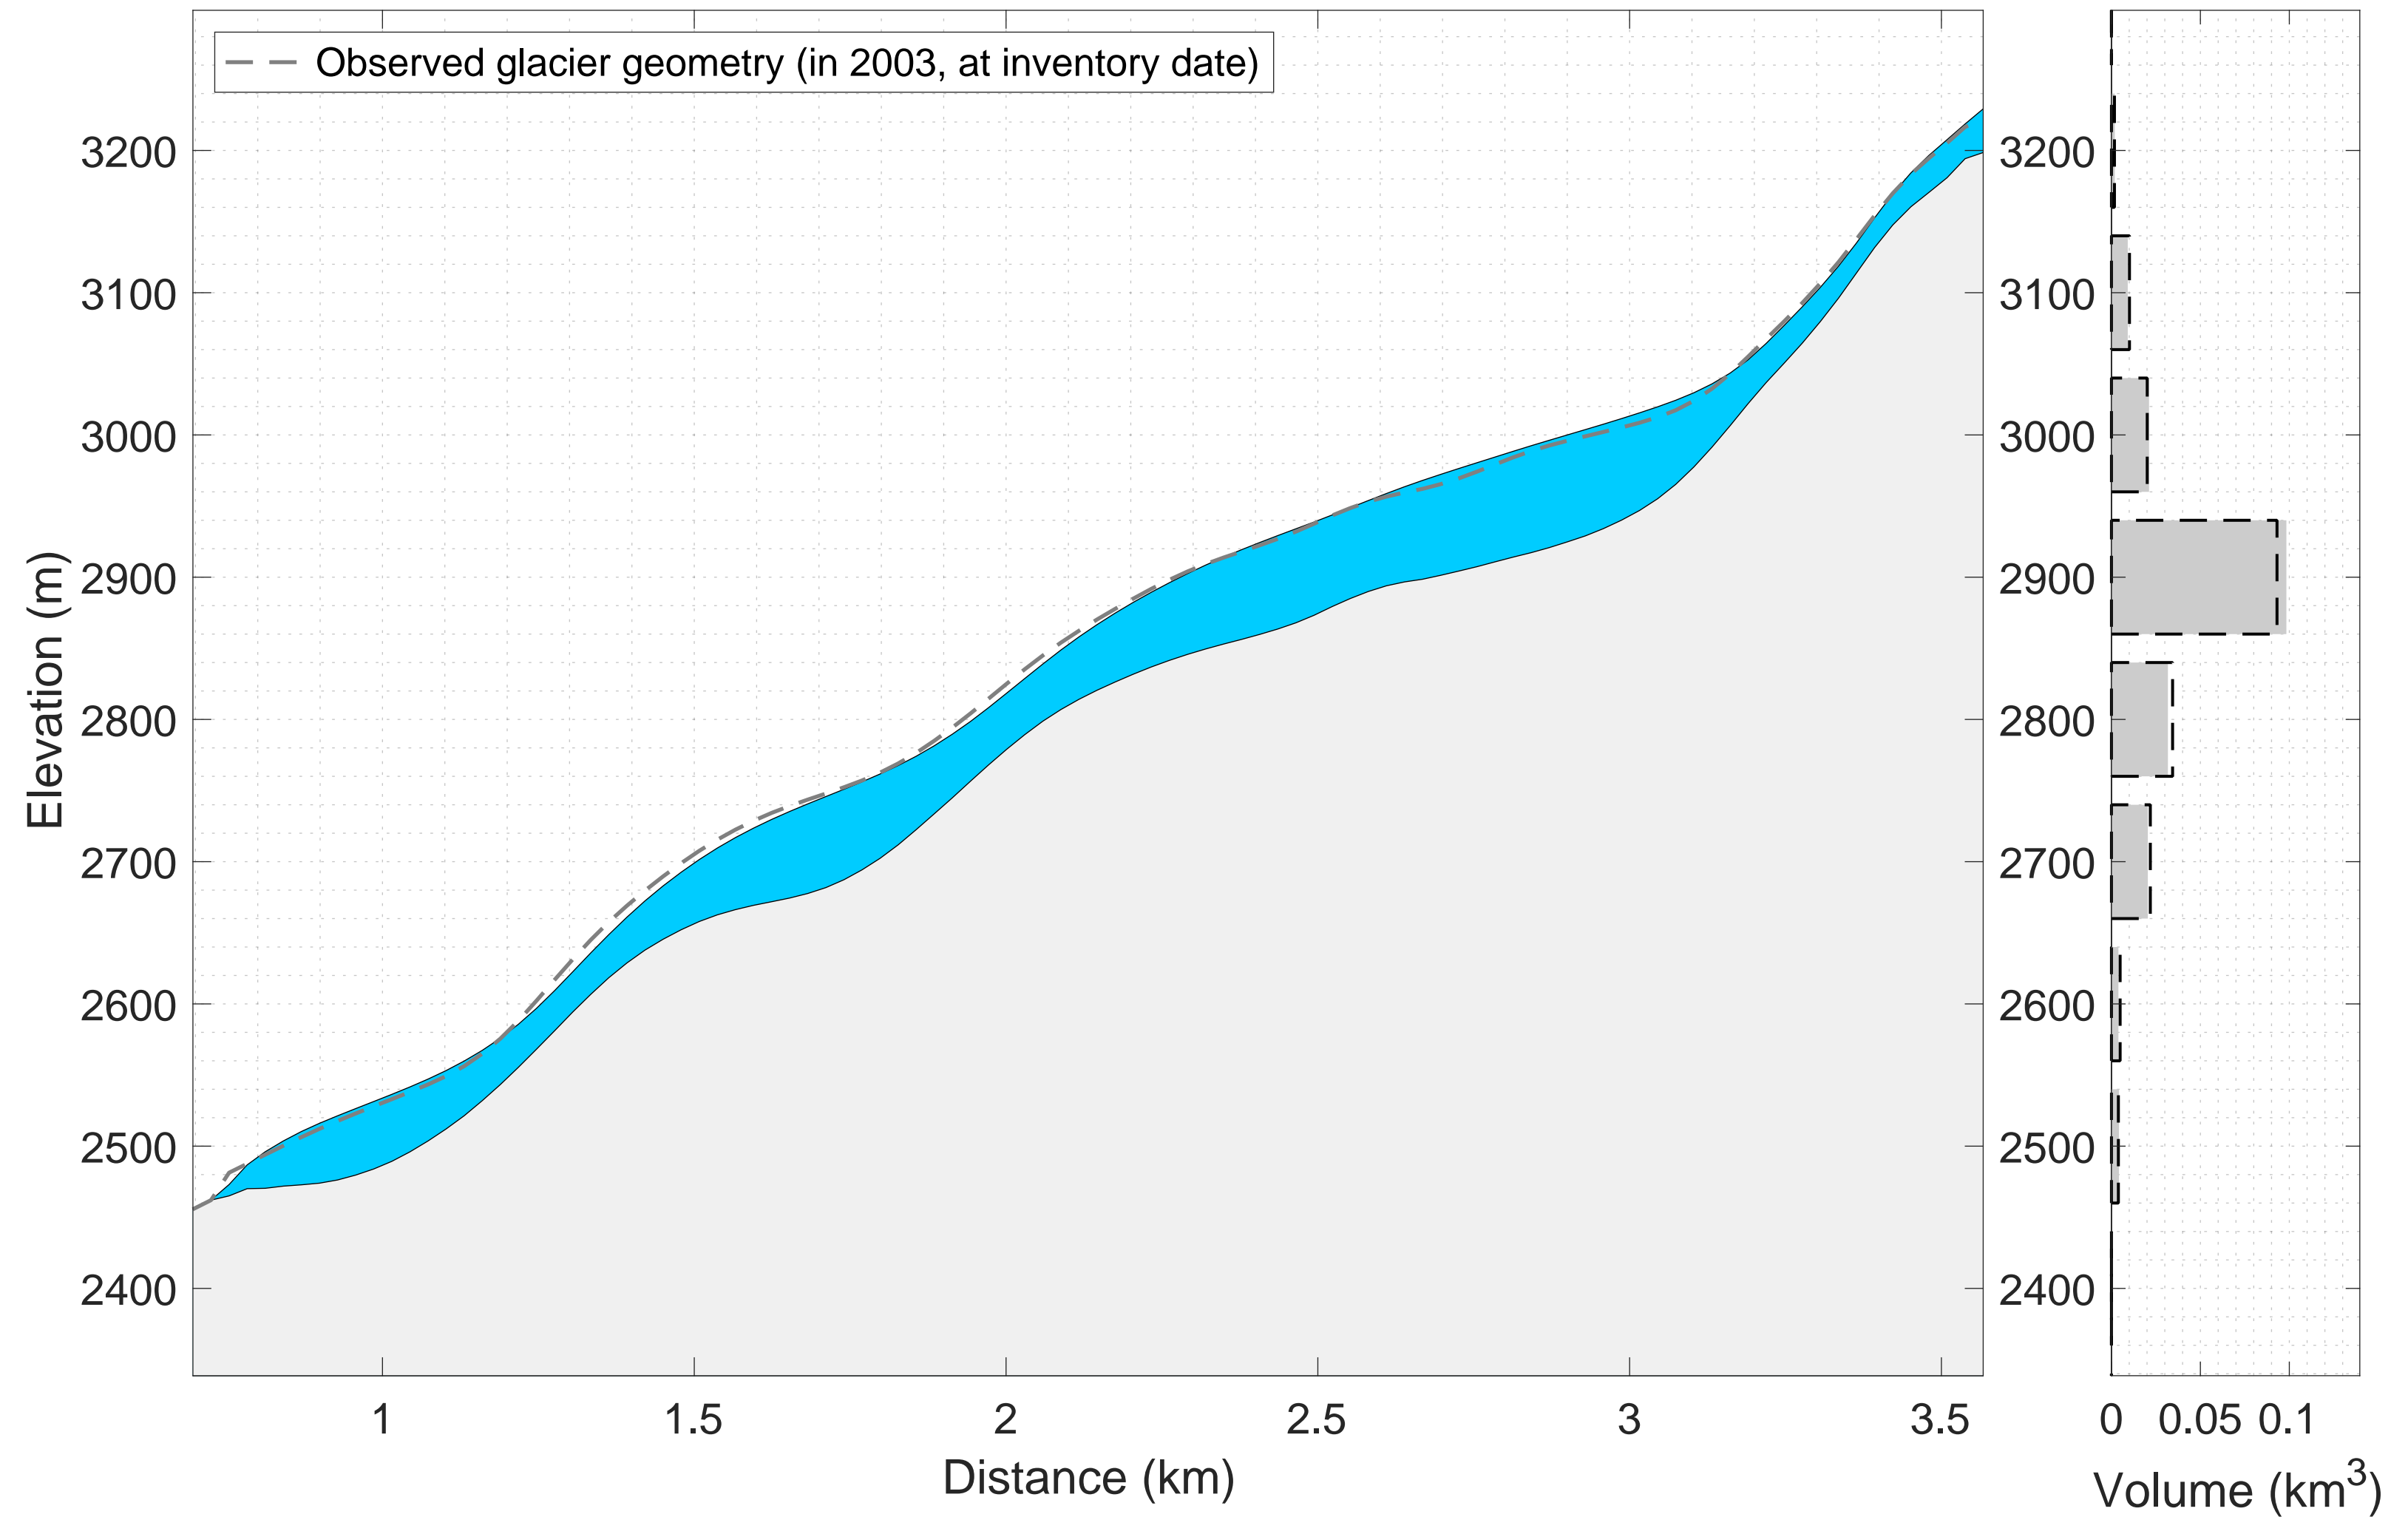

Supplement: Supplementary file 772 [file tc-13-1125-2019-supplement.zip]

**Modelled geometry (Glacier ID = 00505;  $A = 1.0317\text{e-}16 \text{ Pa}^{-3} \text{ a}^{-1}$ ;  $dx = 11 \text{ m}$ )**

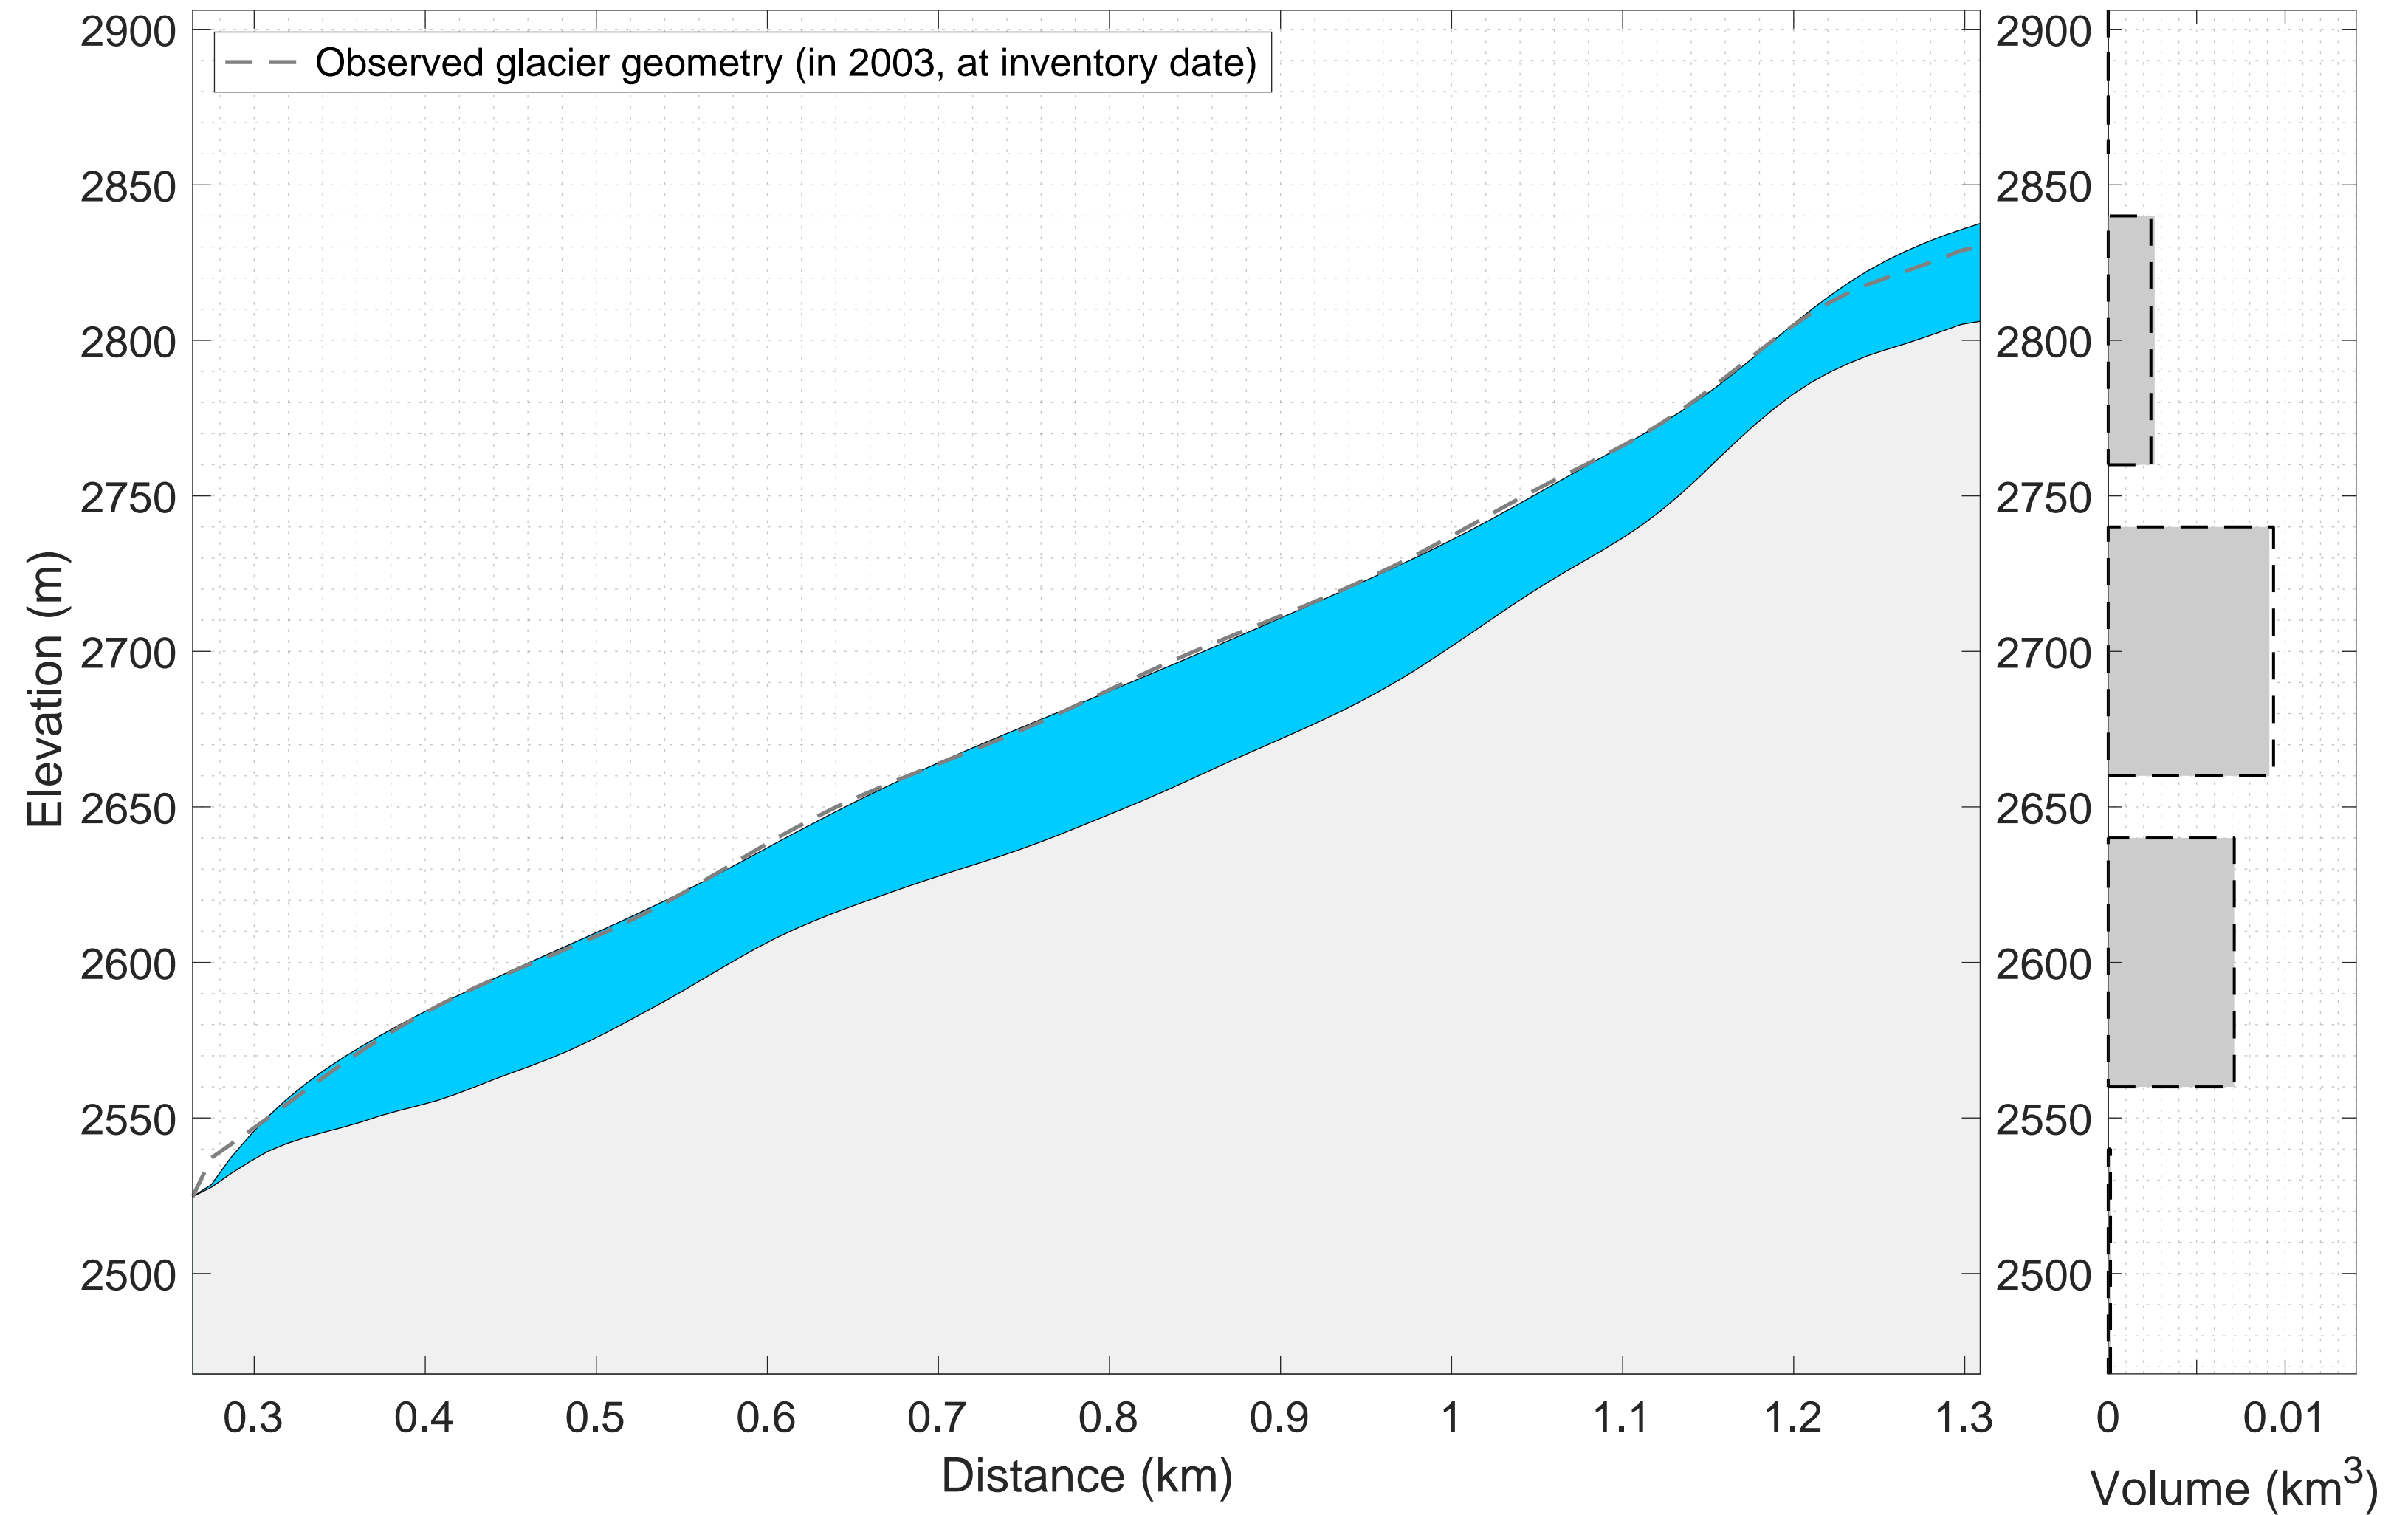

Supplement: Supplementary file 773 [file tc-13-1125-2019-supplement.zip]

**Modelled geometry (Glacier ID = 02973;  $A = 2.7515\text{e-}15 \text{ Pa}^{-3} \text{ a}^{-1}$ ;  $dx = 13 \text{ m}$ )**

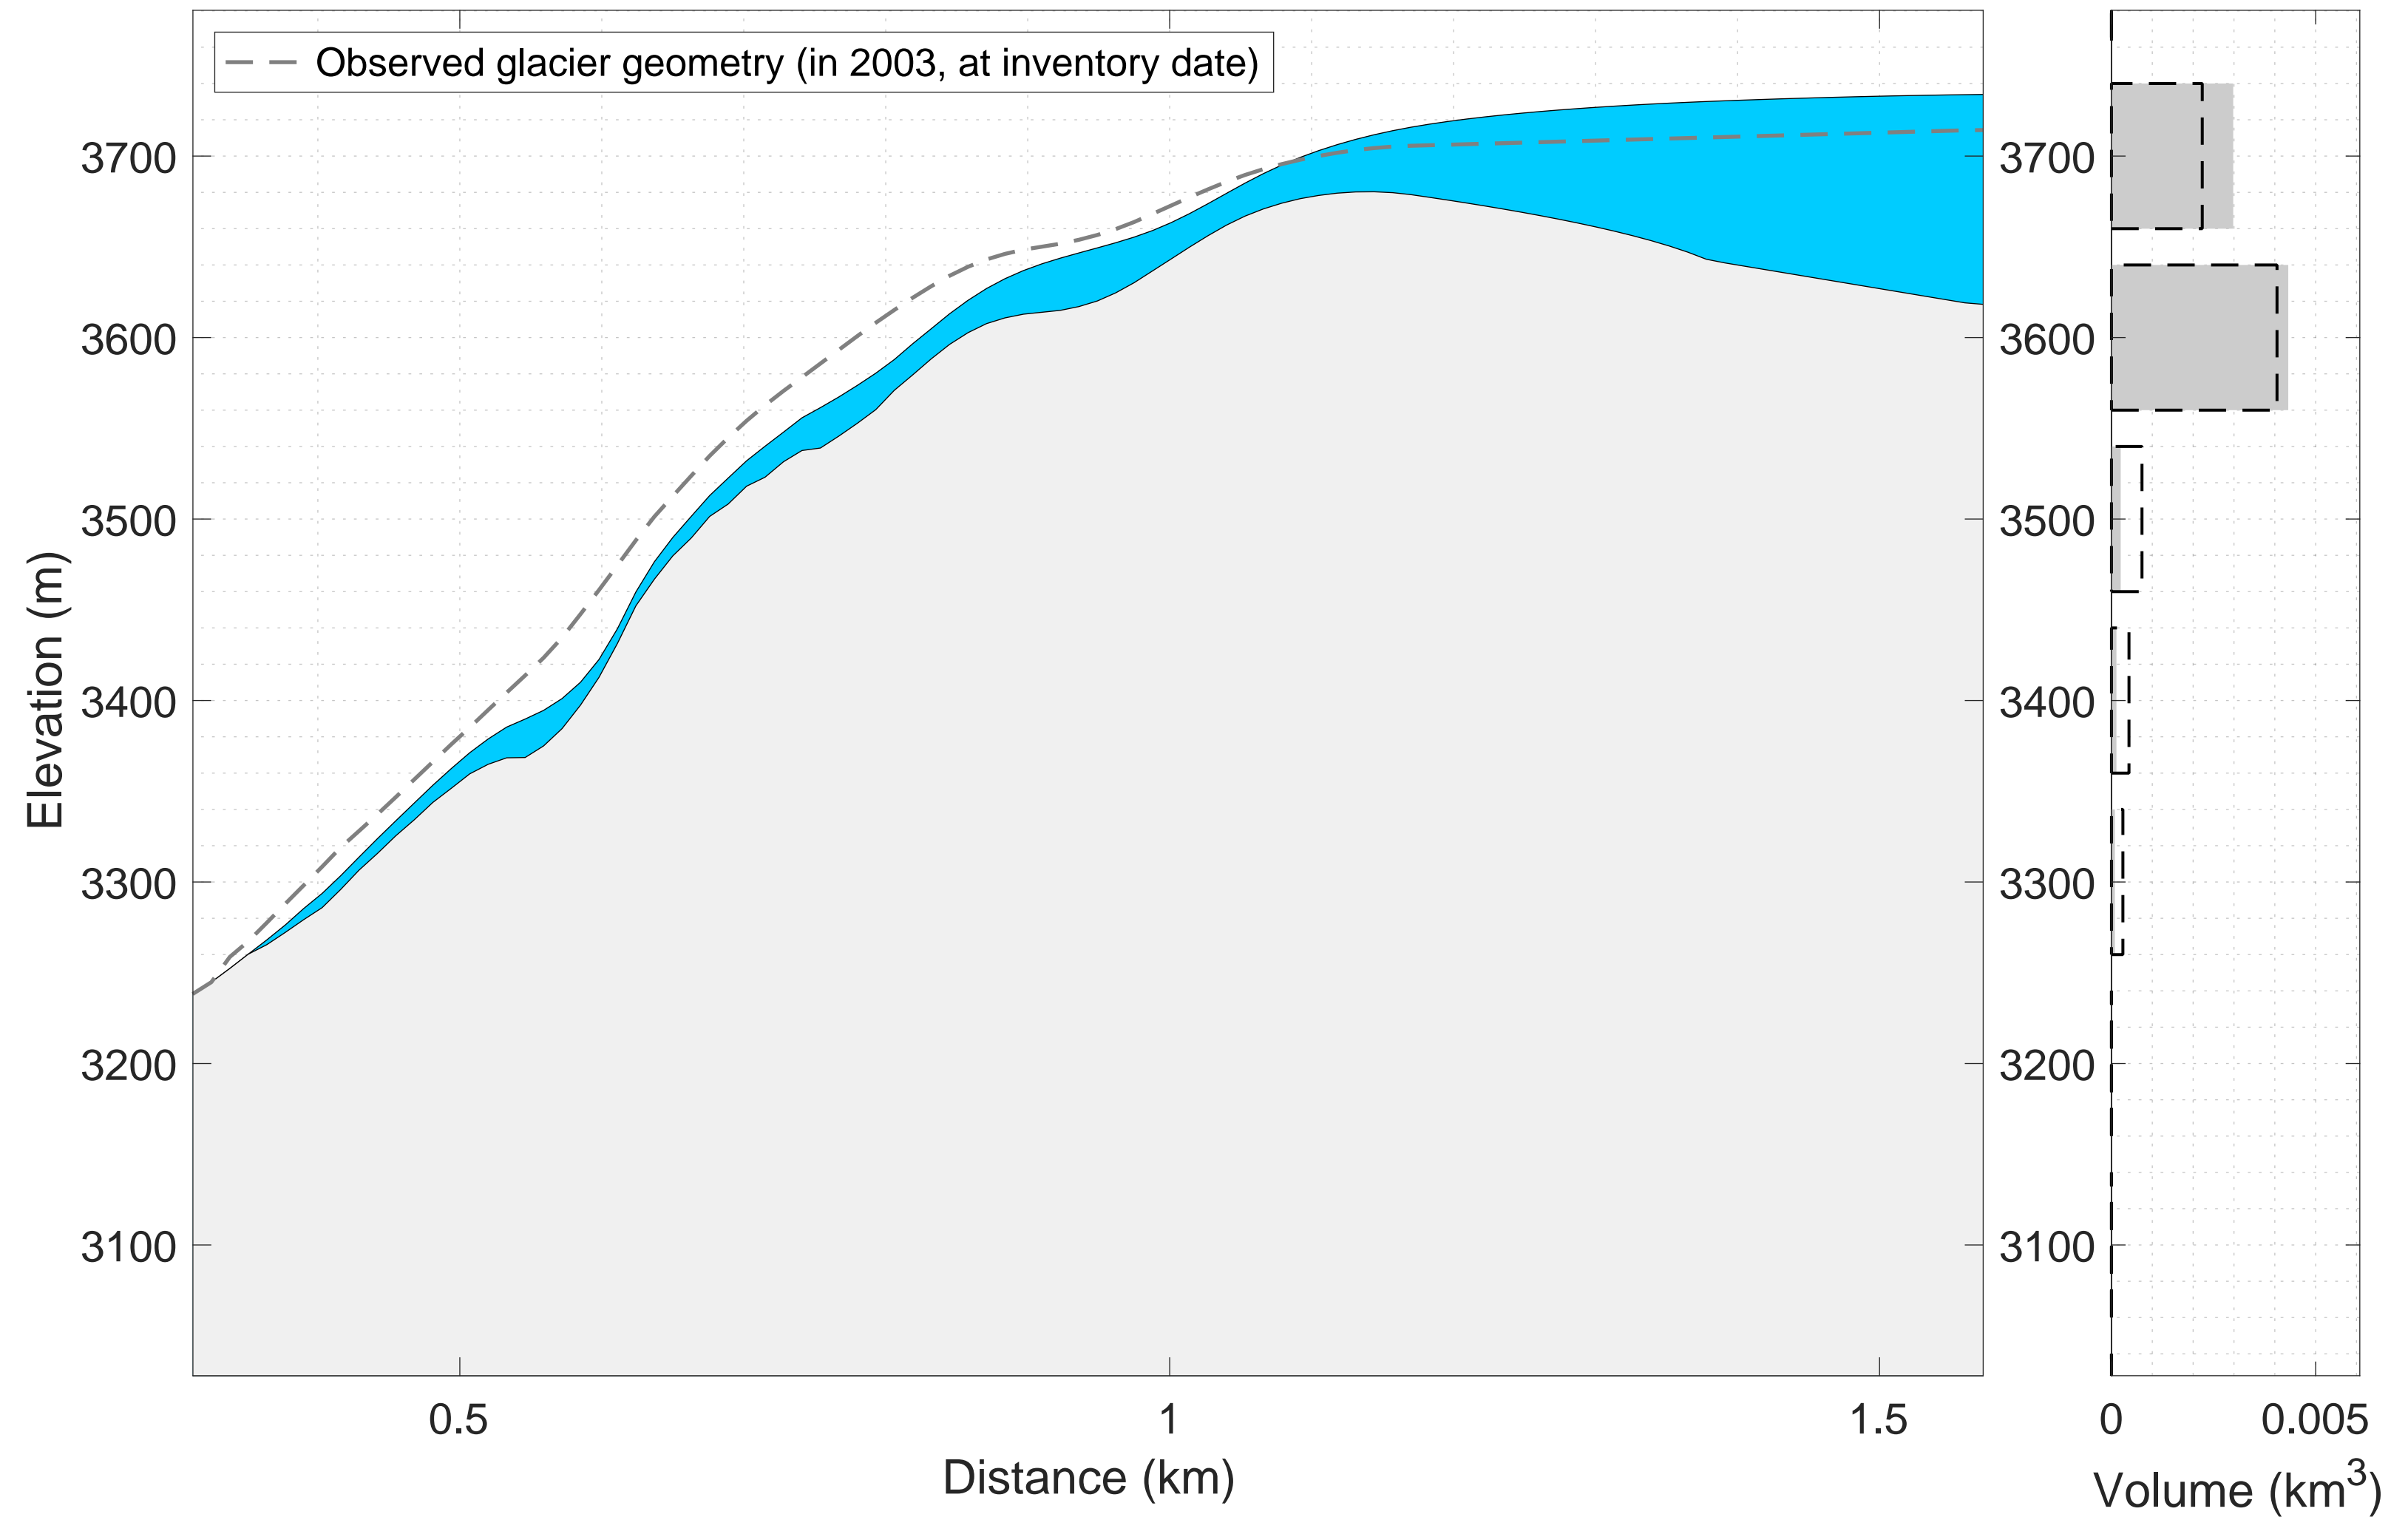

Supplement: Supplementary file 774 [file tc-13-1125-2019-supplement.zip]

**Modelled geometry (Glacier ID = 02319;  $A = 7.2941\text{e-}17 \text{ Pa}^{-3} \text{ a}^{-1}$ ;  $dx = 17 \text{ m}$ )**

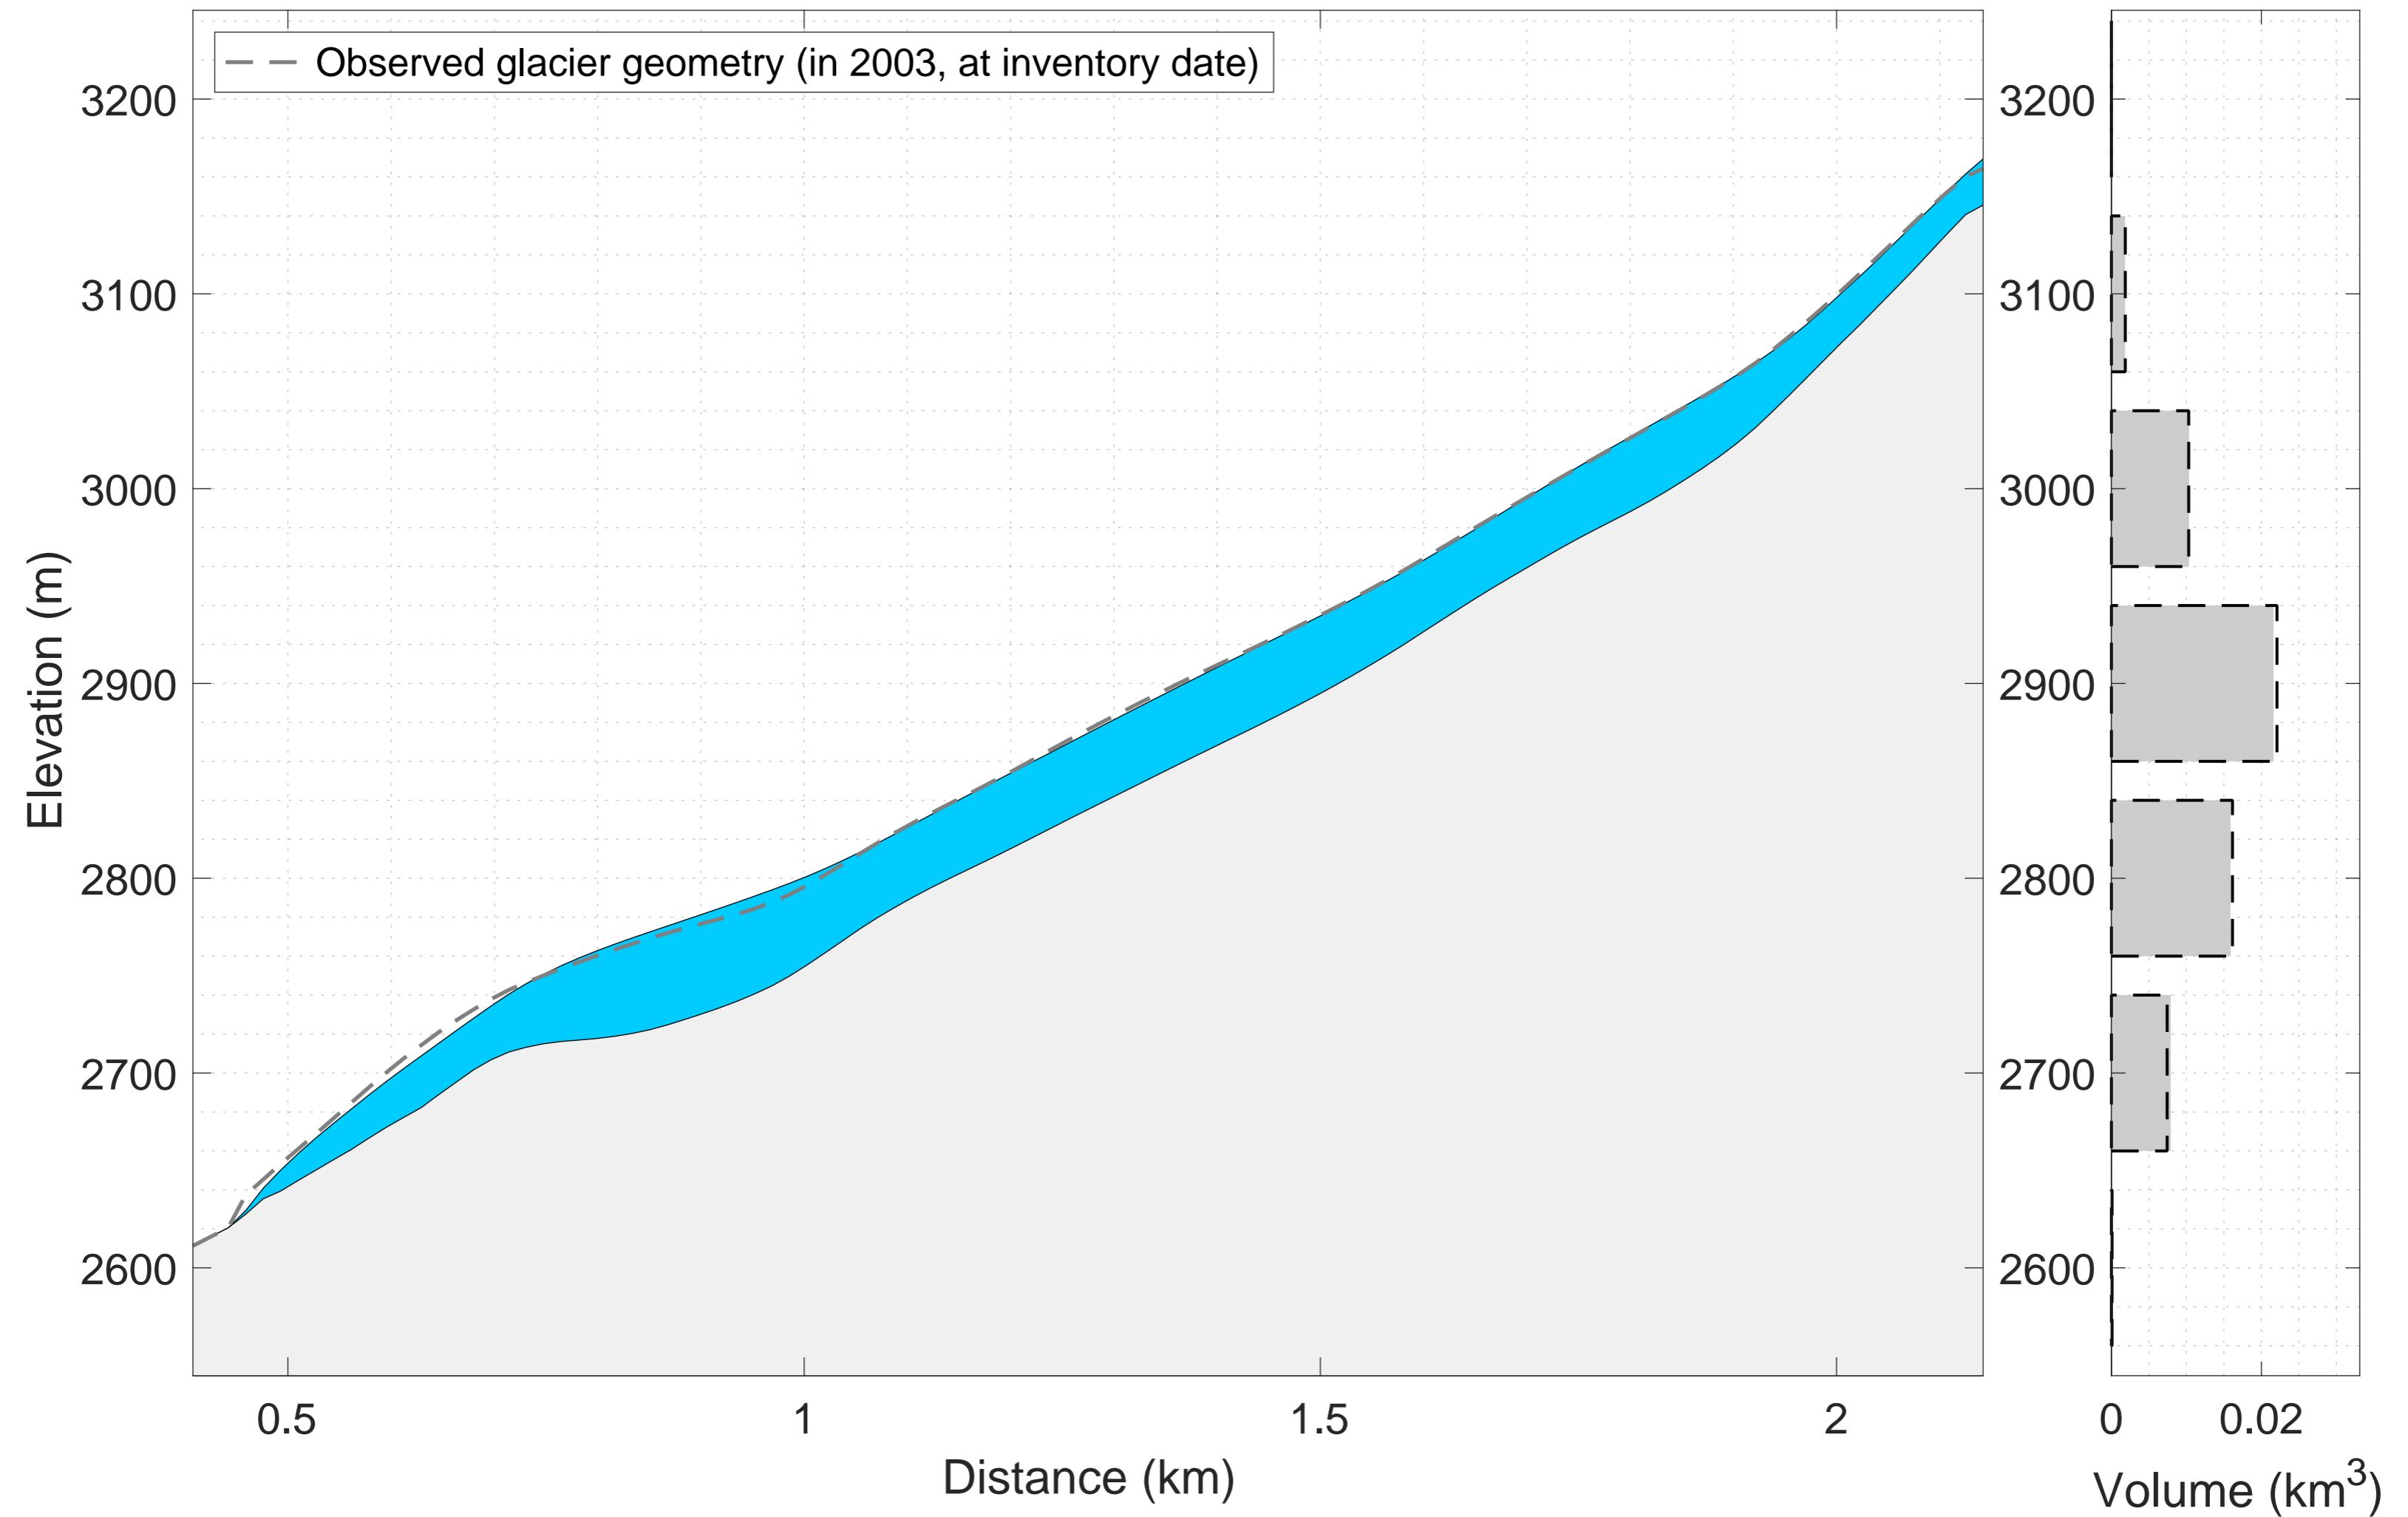

Supplement: Supplementary file 775 [file tc-13-1125-2019-supplement.zip]

**Modelled geometry (Glacier ID = 02928;  $A = 1.4643\text{e-}16 \text{ Pa}^{-3} \text{ a}^{-1}$ ;  $dx = 25 \text{ m}$ )**

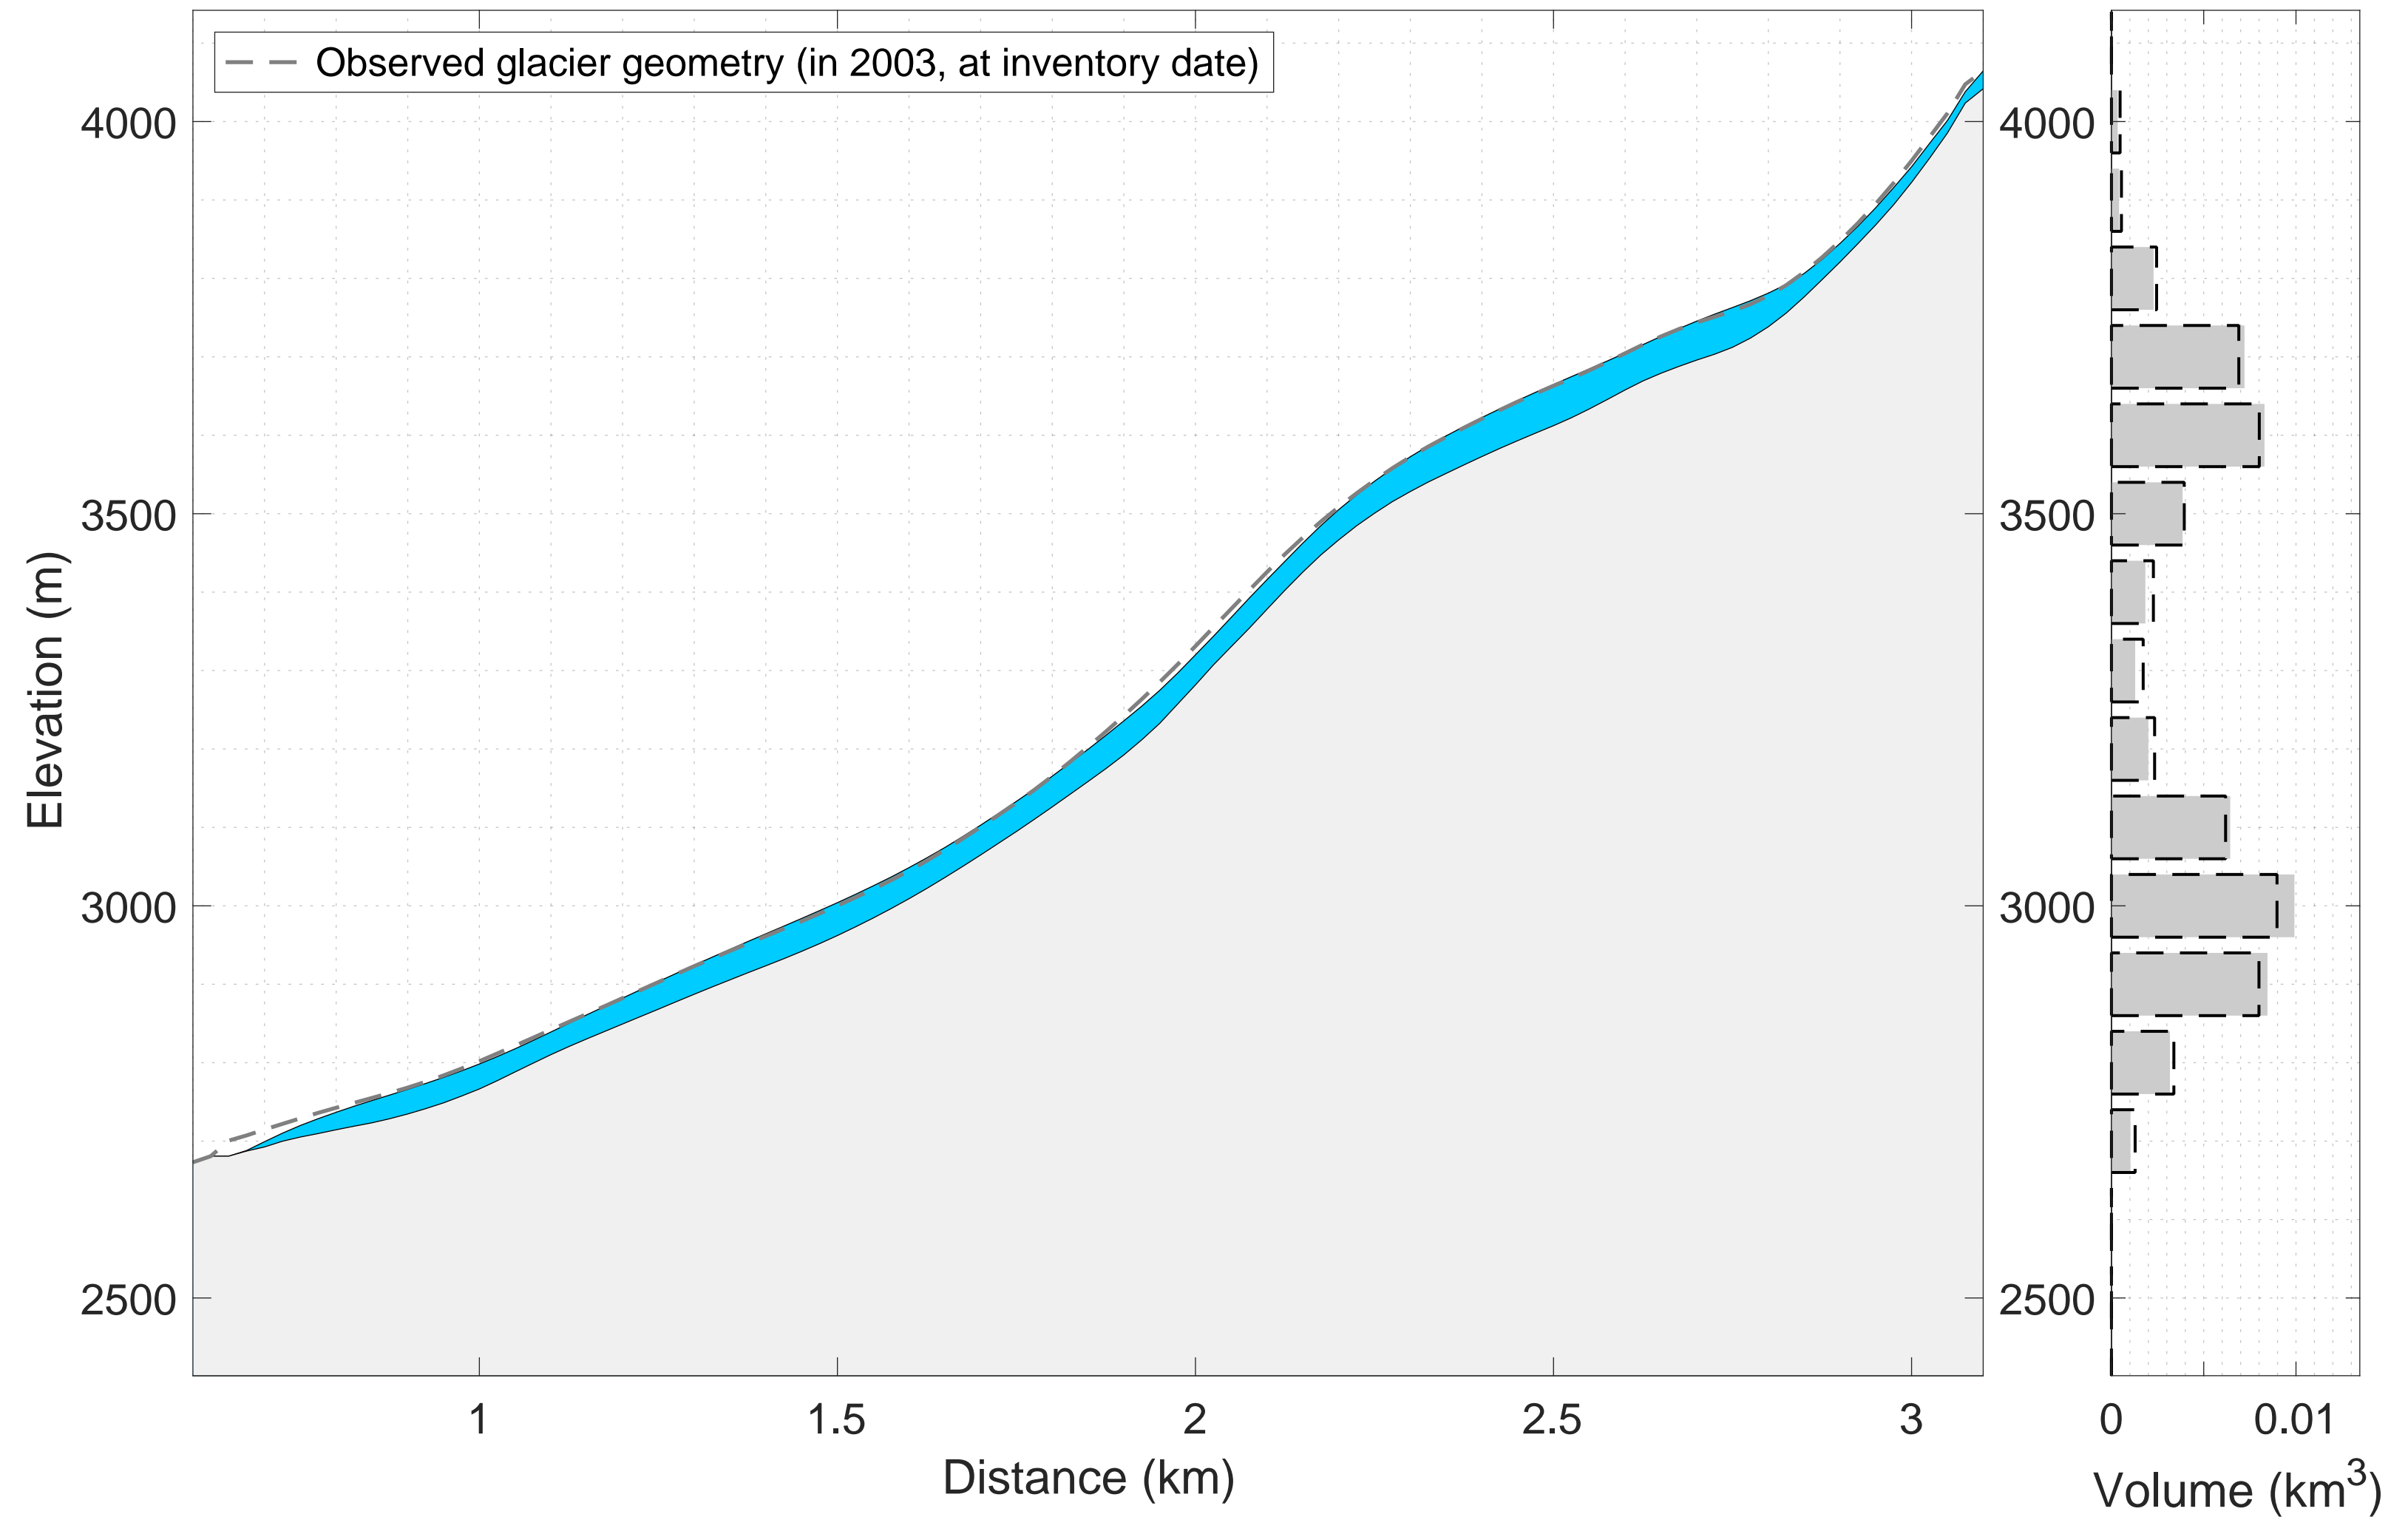

Supplement: Supplementary file 776 [file tc-13-1125-2019-supplement.zip]

**Modelled geometry (Glacier ID = 02011;  $A = 7.5643\text{e-}17 \text{ Pa}^{-3} \text{ a}^{-1}$ ;  $dx = 13 \text{ m}$ )**

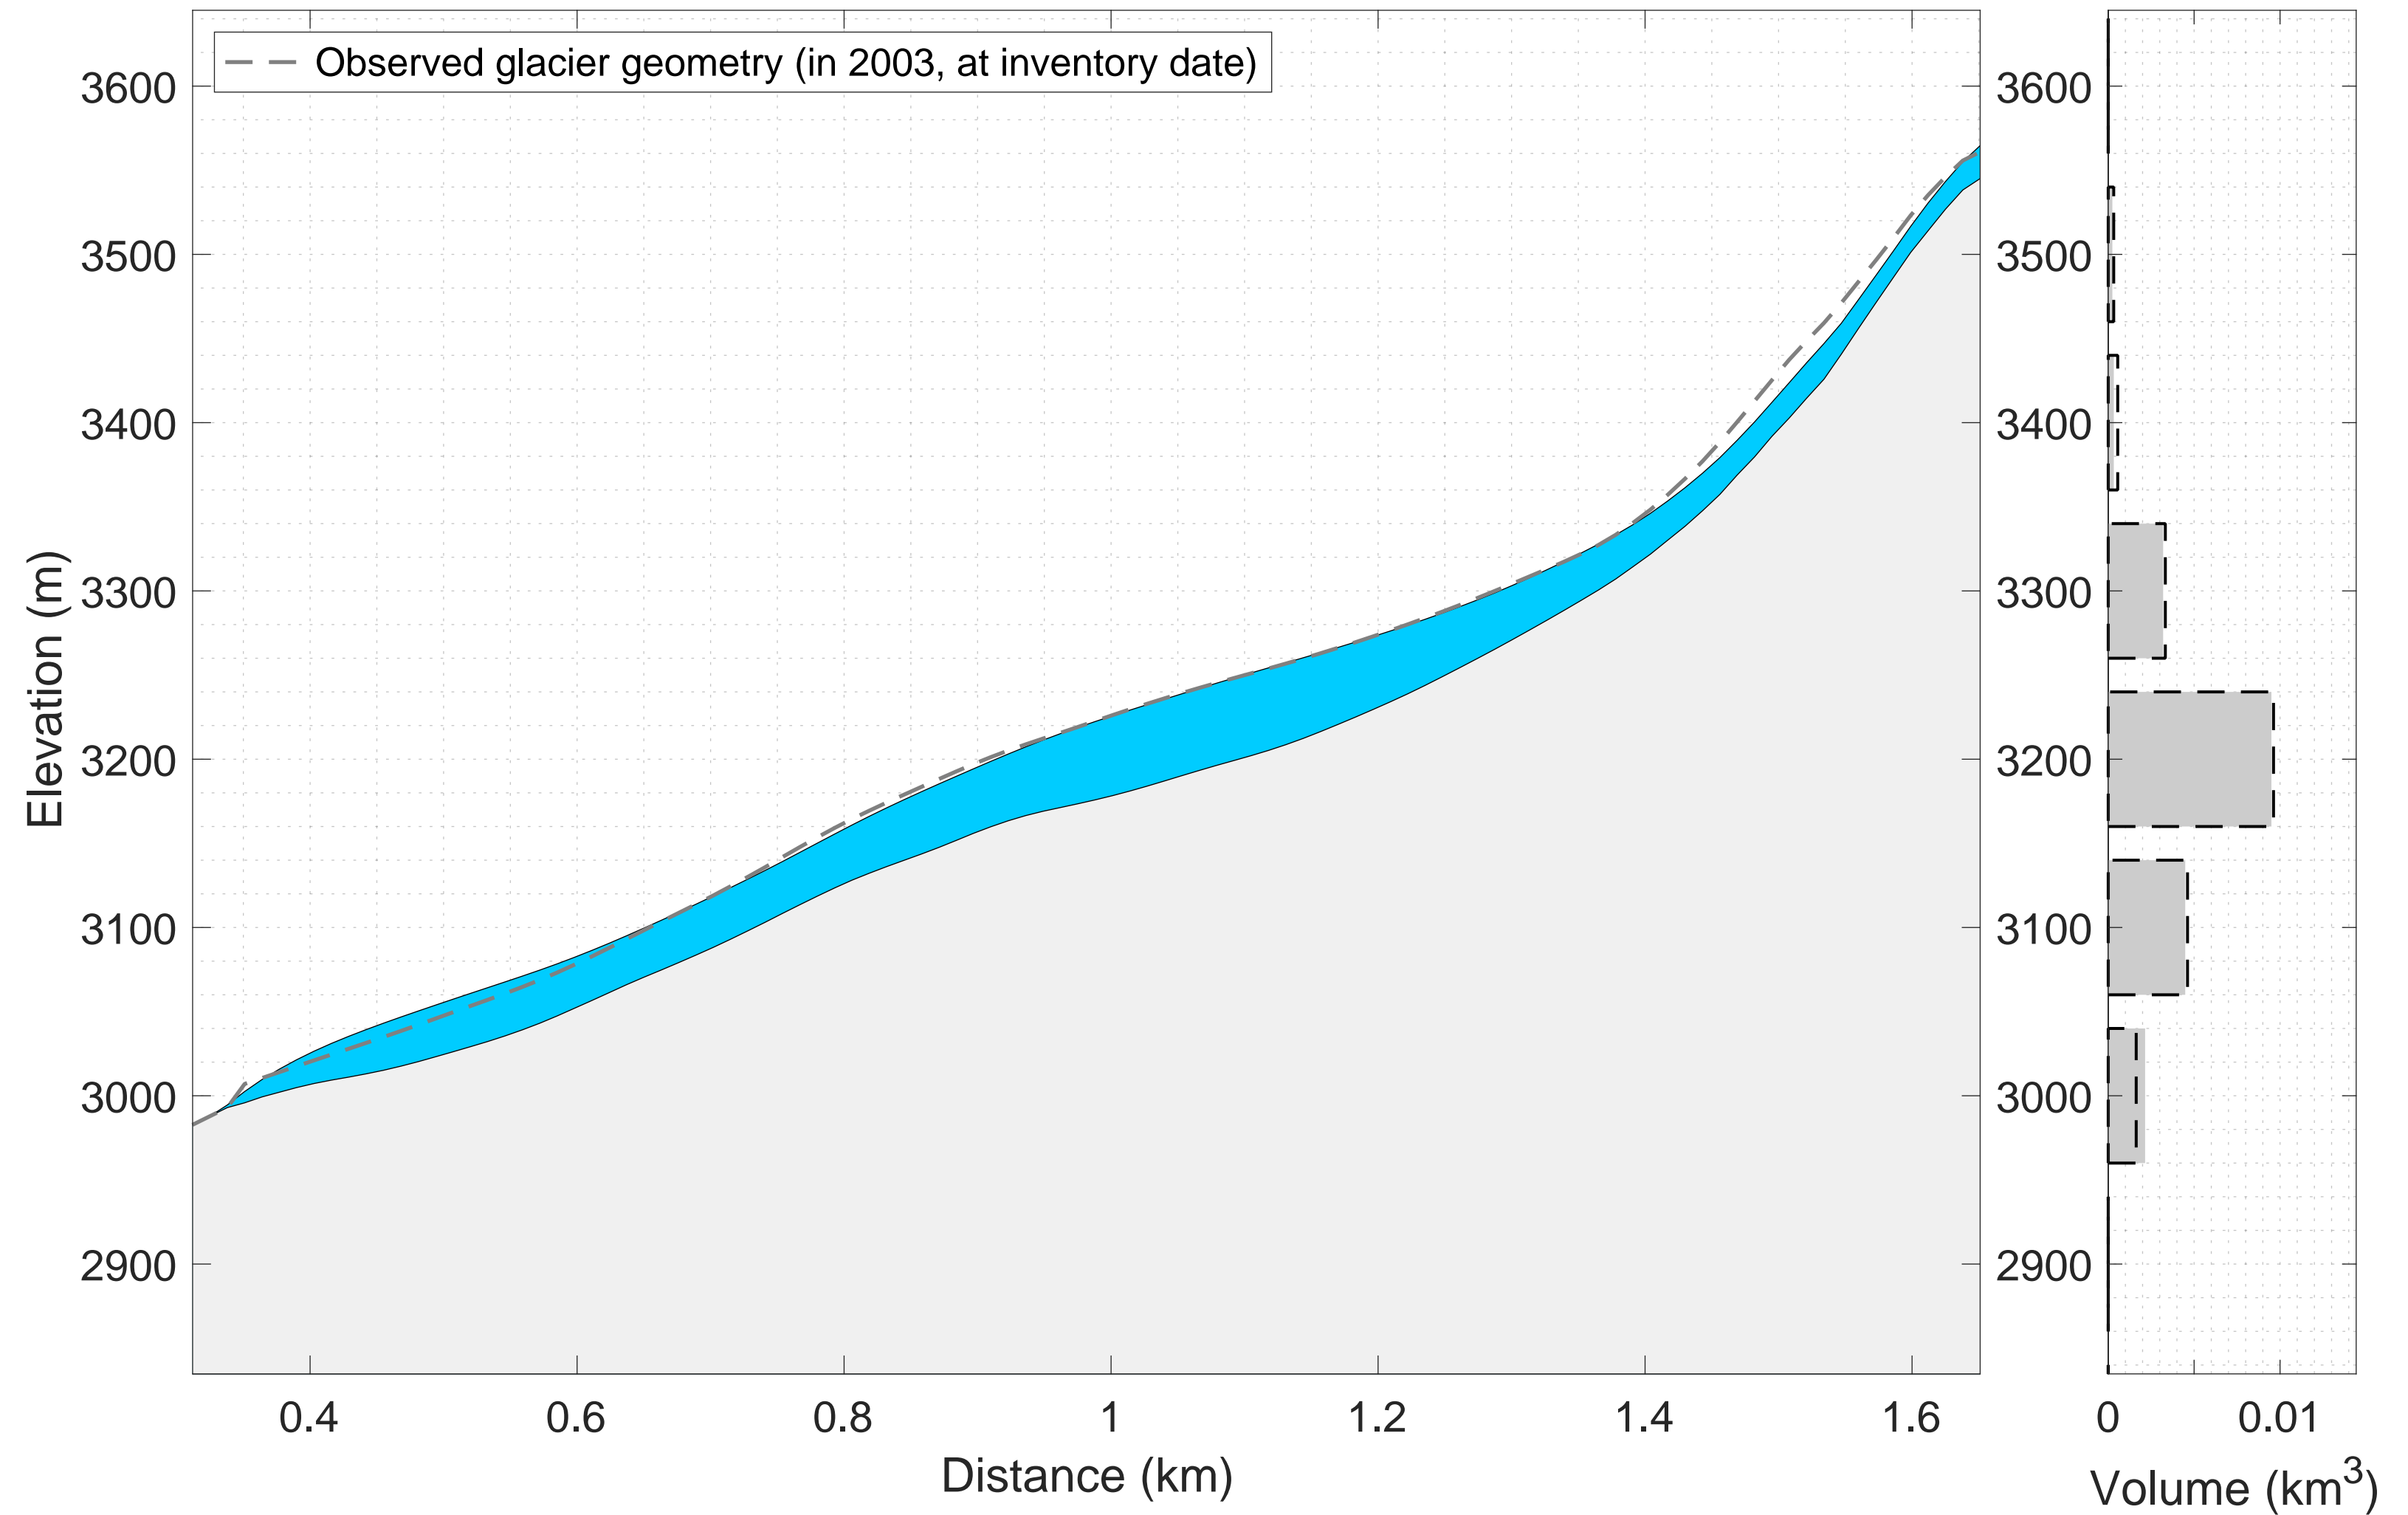

Supplement: Supplementary file 777 [file tc-13-1125-2019-supplement.zip]

**Modelled geometry (Glacier ID = 00918;  $A = 9.5606\text{e-}17 \text{ Pa}^{-3} \text{ a}^{-1}$ ;  $dx = 28 \text{ m}$ )**

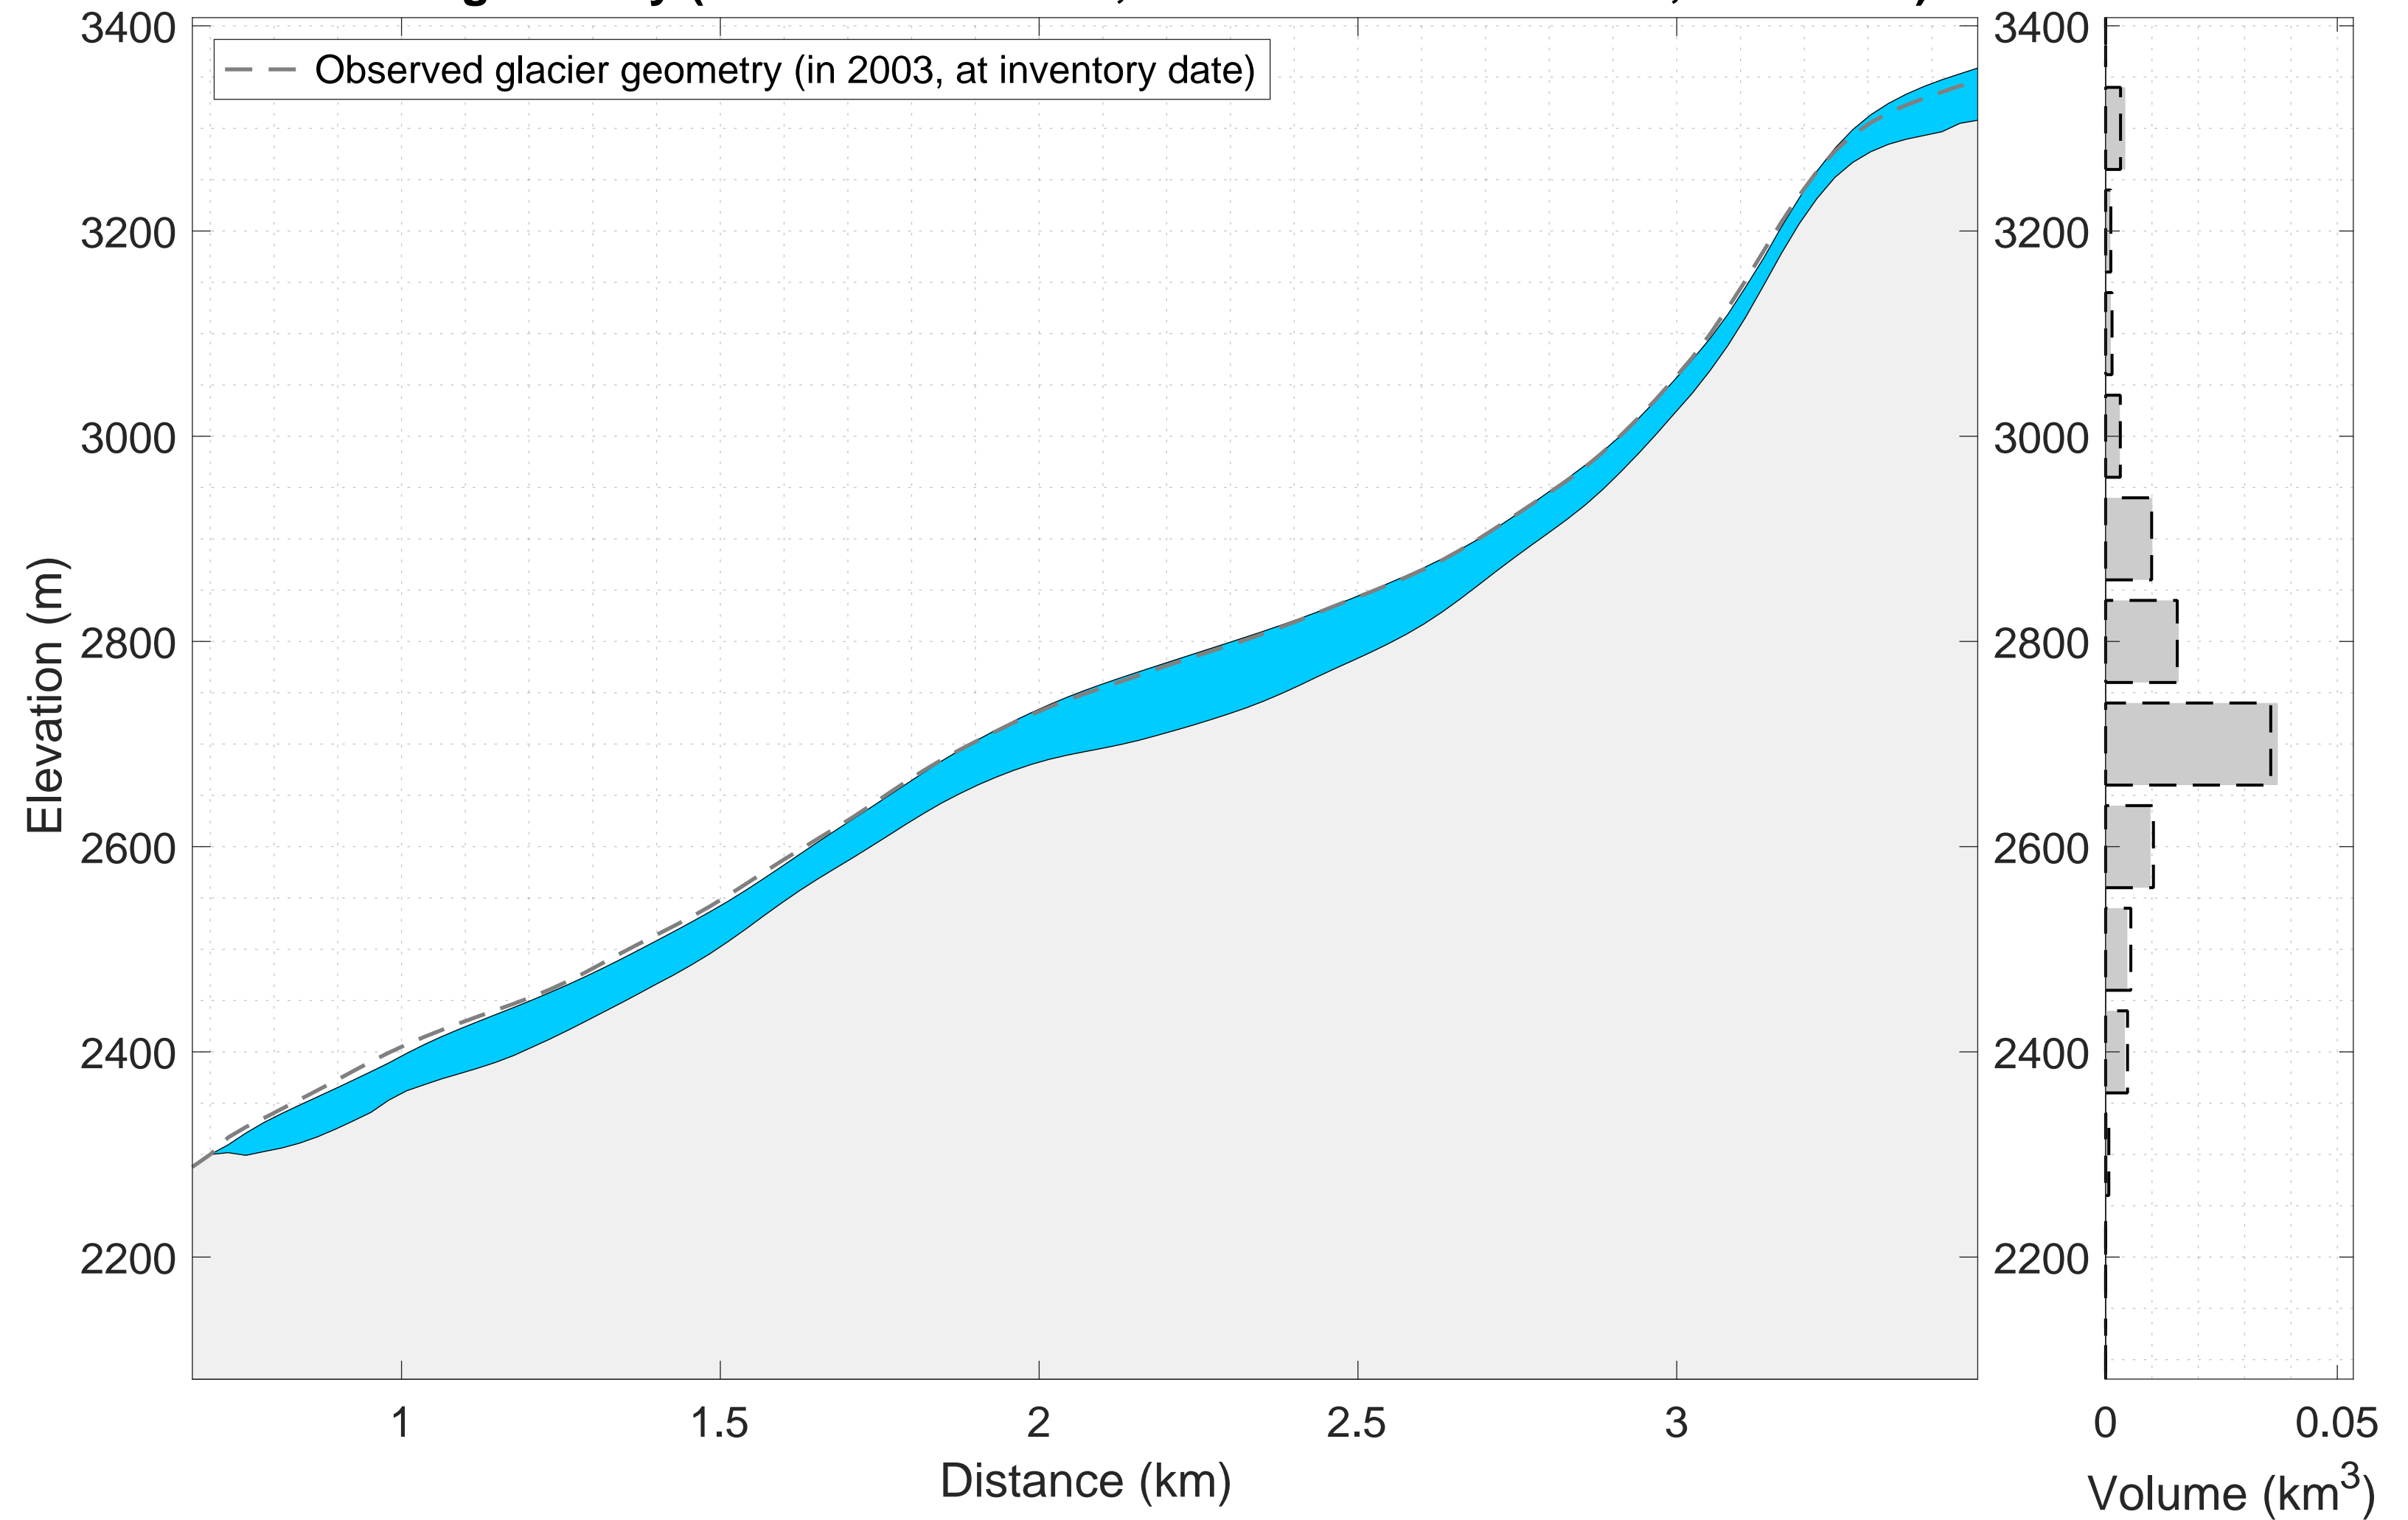

Supplement: Supplementary file 778 [file tc-13-1125-2019-supplement.zip]

**Modelled geometry (Glacier ID = 02730;  $A = 1.1199\text{e-}16 \text{ Pa}^{-3} \text{ a}^{-1}$ ;  $dx = 18 \text{ m}$ )**

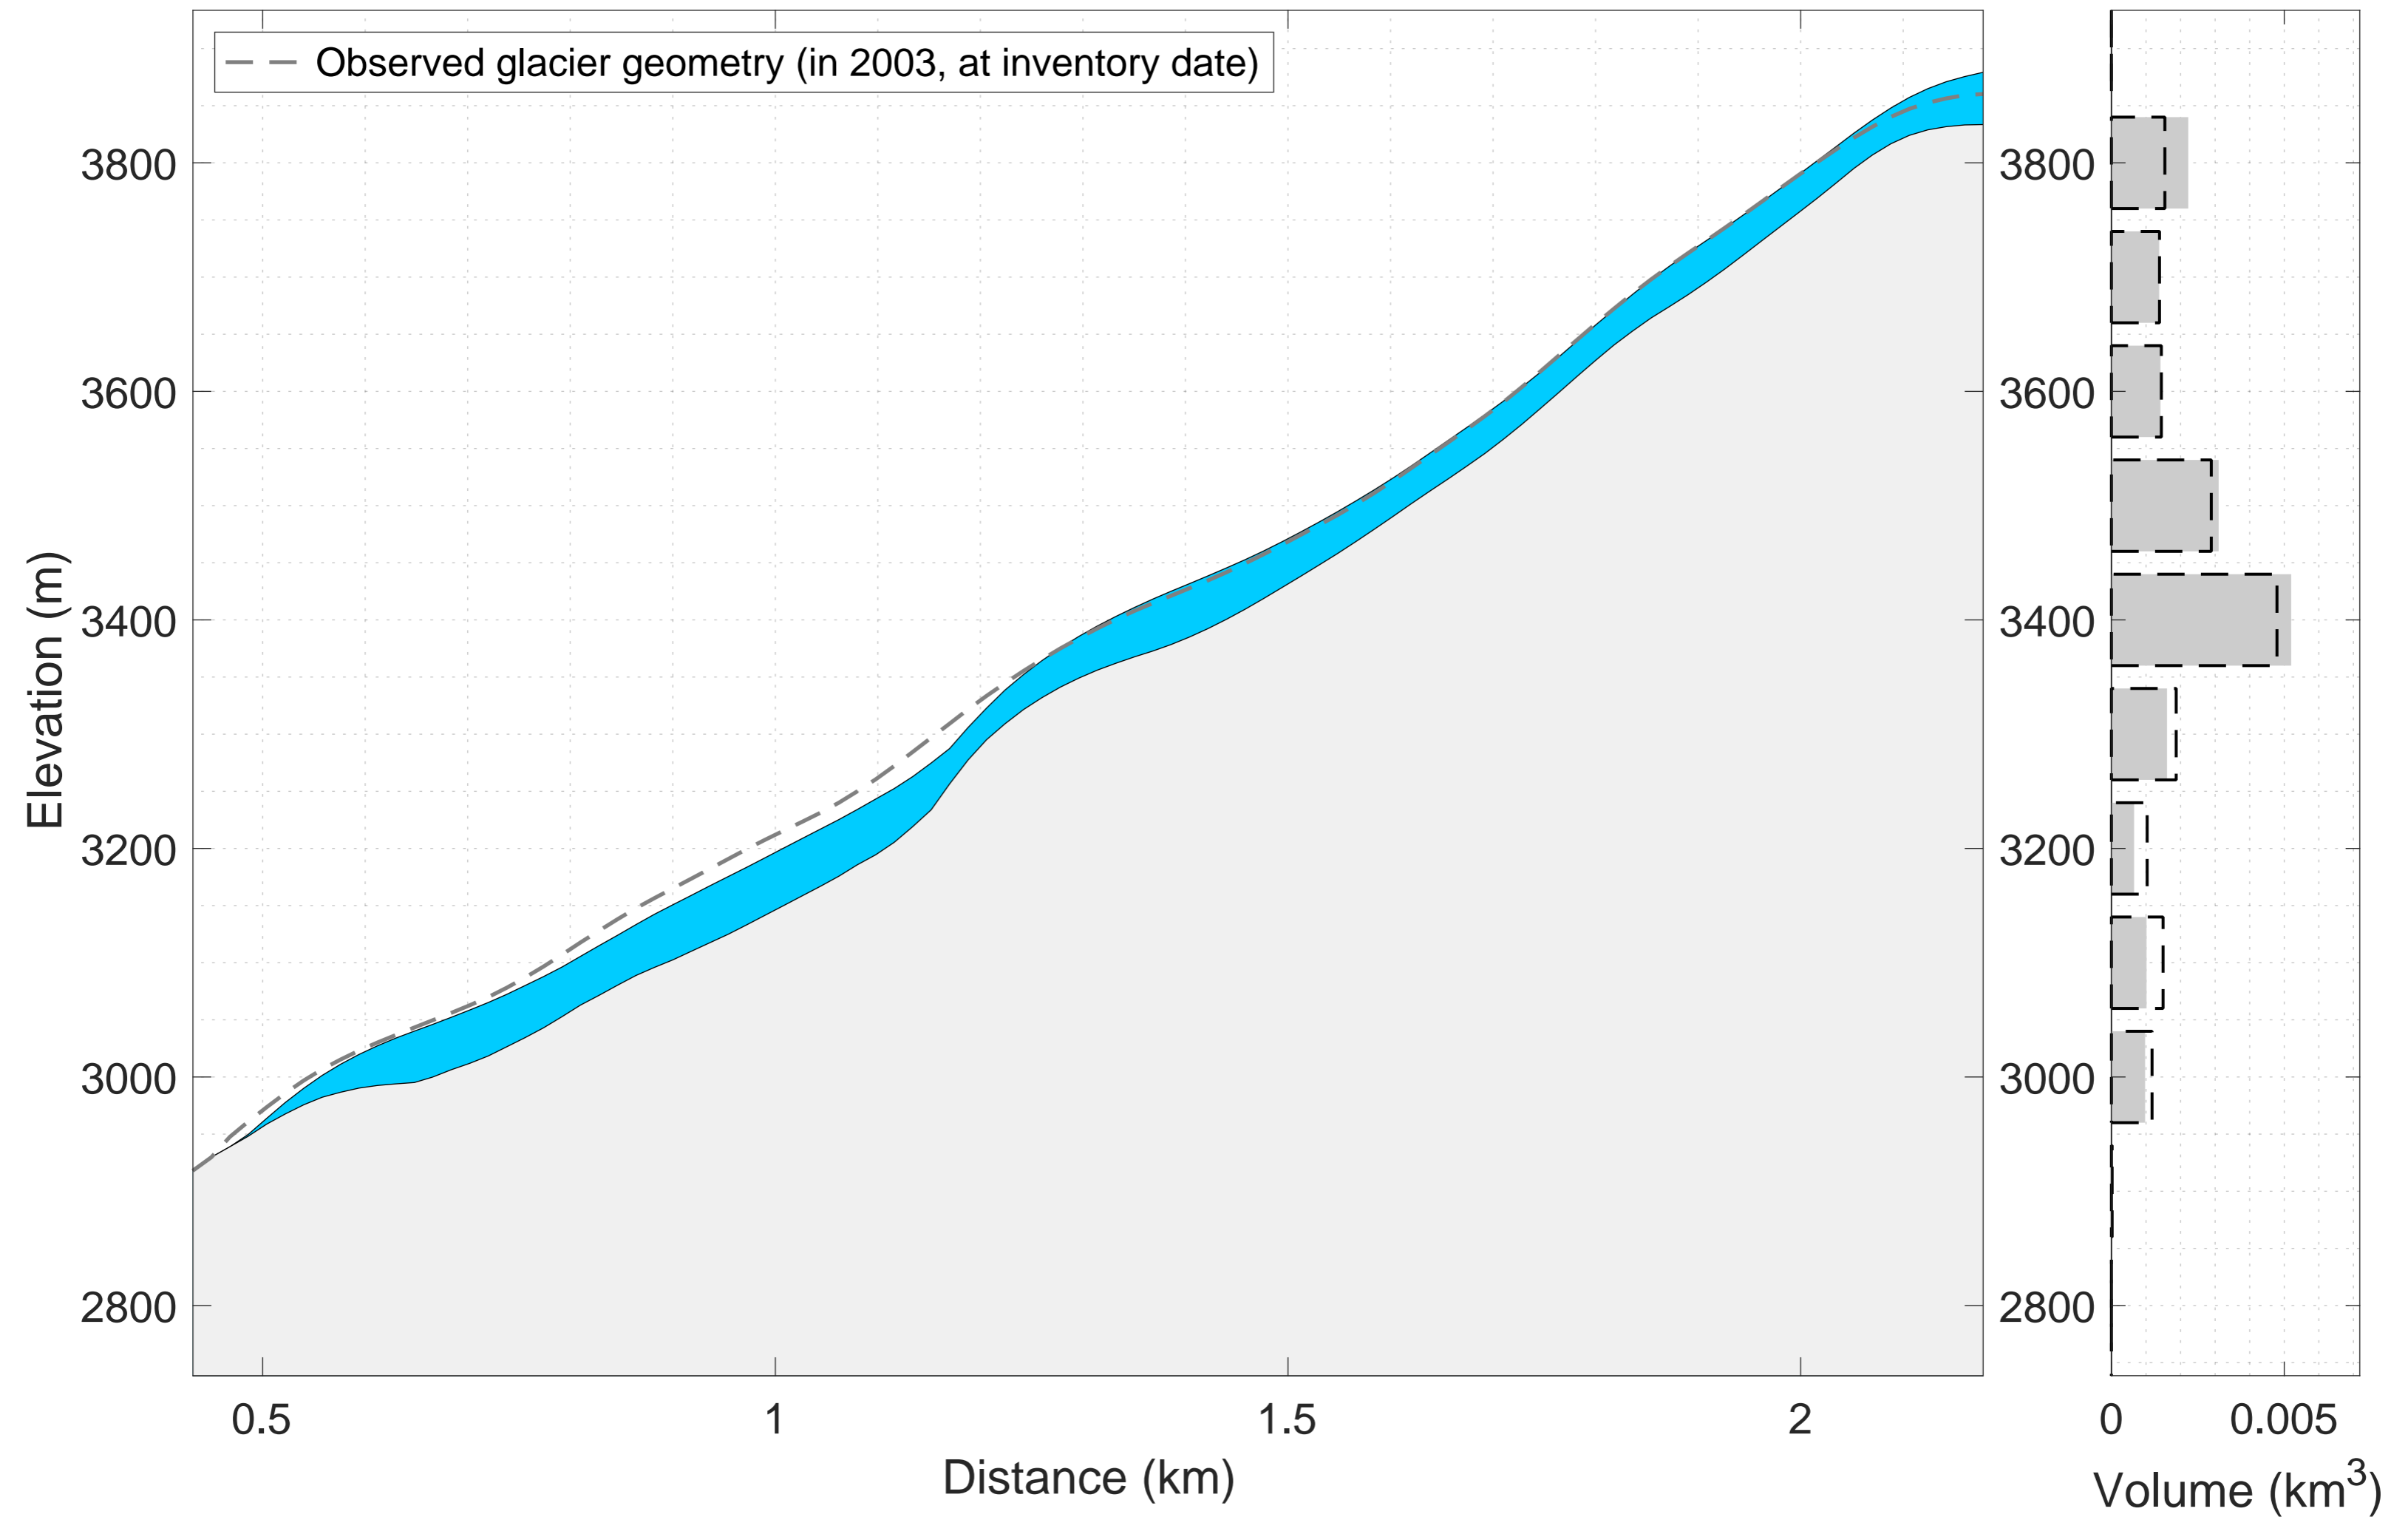

Supplement: Supplementary file 779 [file tc-13-1125-2019-supplement.zip]

**Modelled geometry (Glacier ID = 02515;  $A = 7.6956\text{e-}17 \text{ Pa}^{-3} \text{ a}^{-1}$ ;  $dx = 32 \text{ m}$ )**

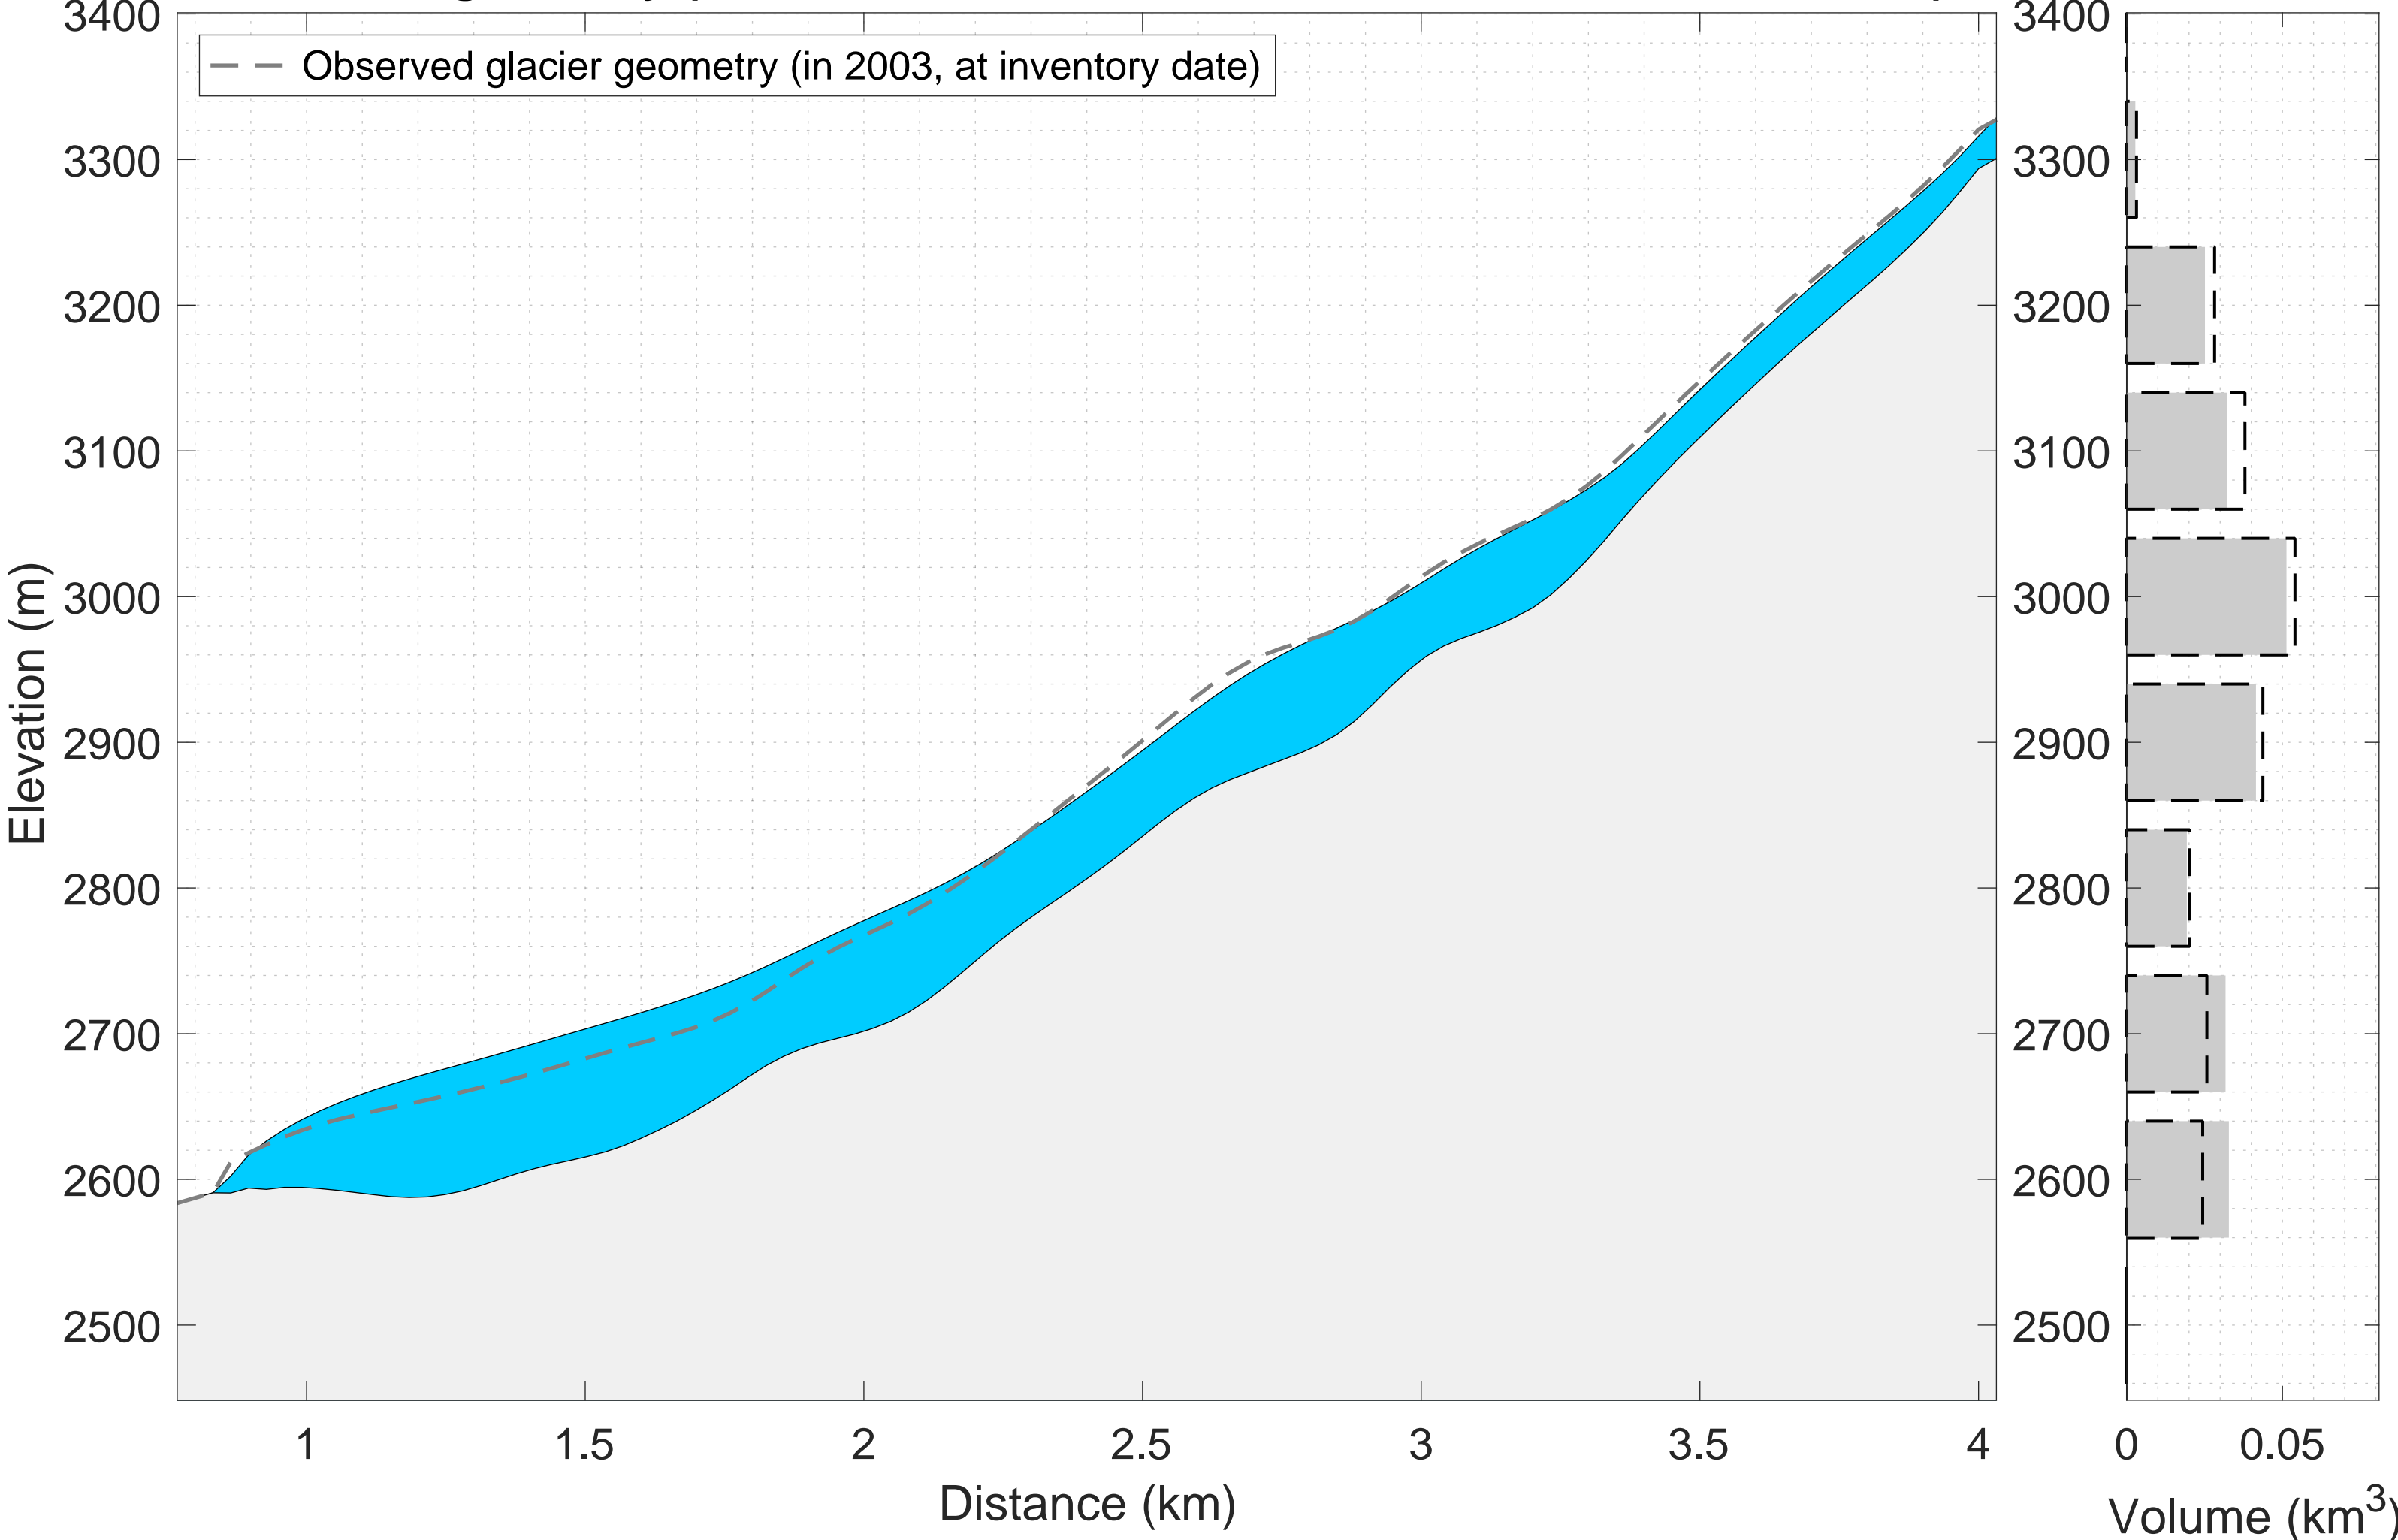

Supplement: Supplementary file 780 [file tc-13-1125-2019-supplement.zip]

**Modelled geometry (Glacier ID = 03887;  $A = 8.557\text{e-}17 \text{ Pa}^{-3} \text{ a}^{-1}$ ;  $dx = 15 \text{ m}$ )**

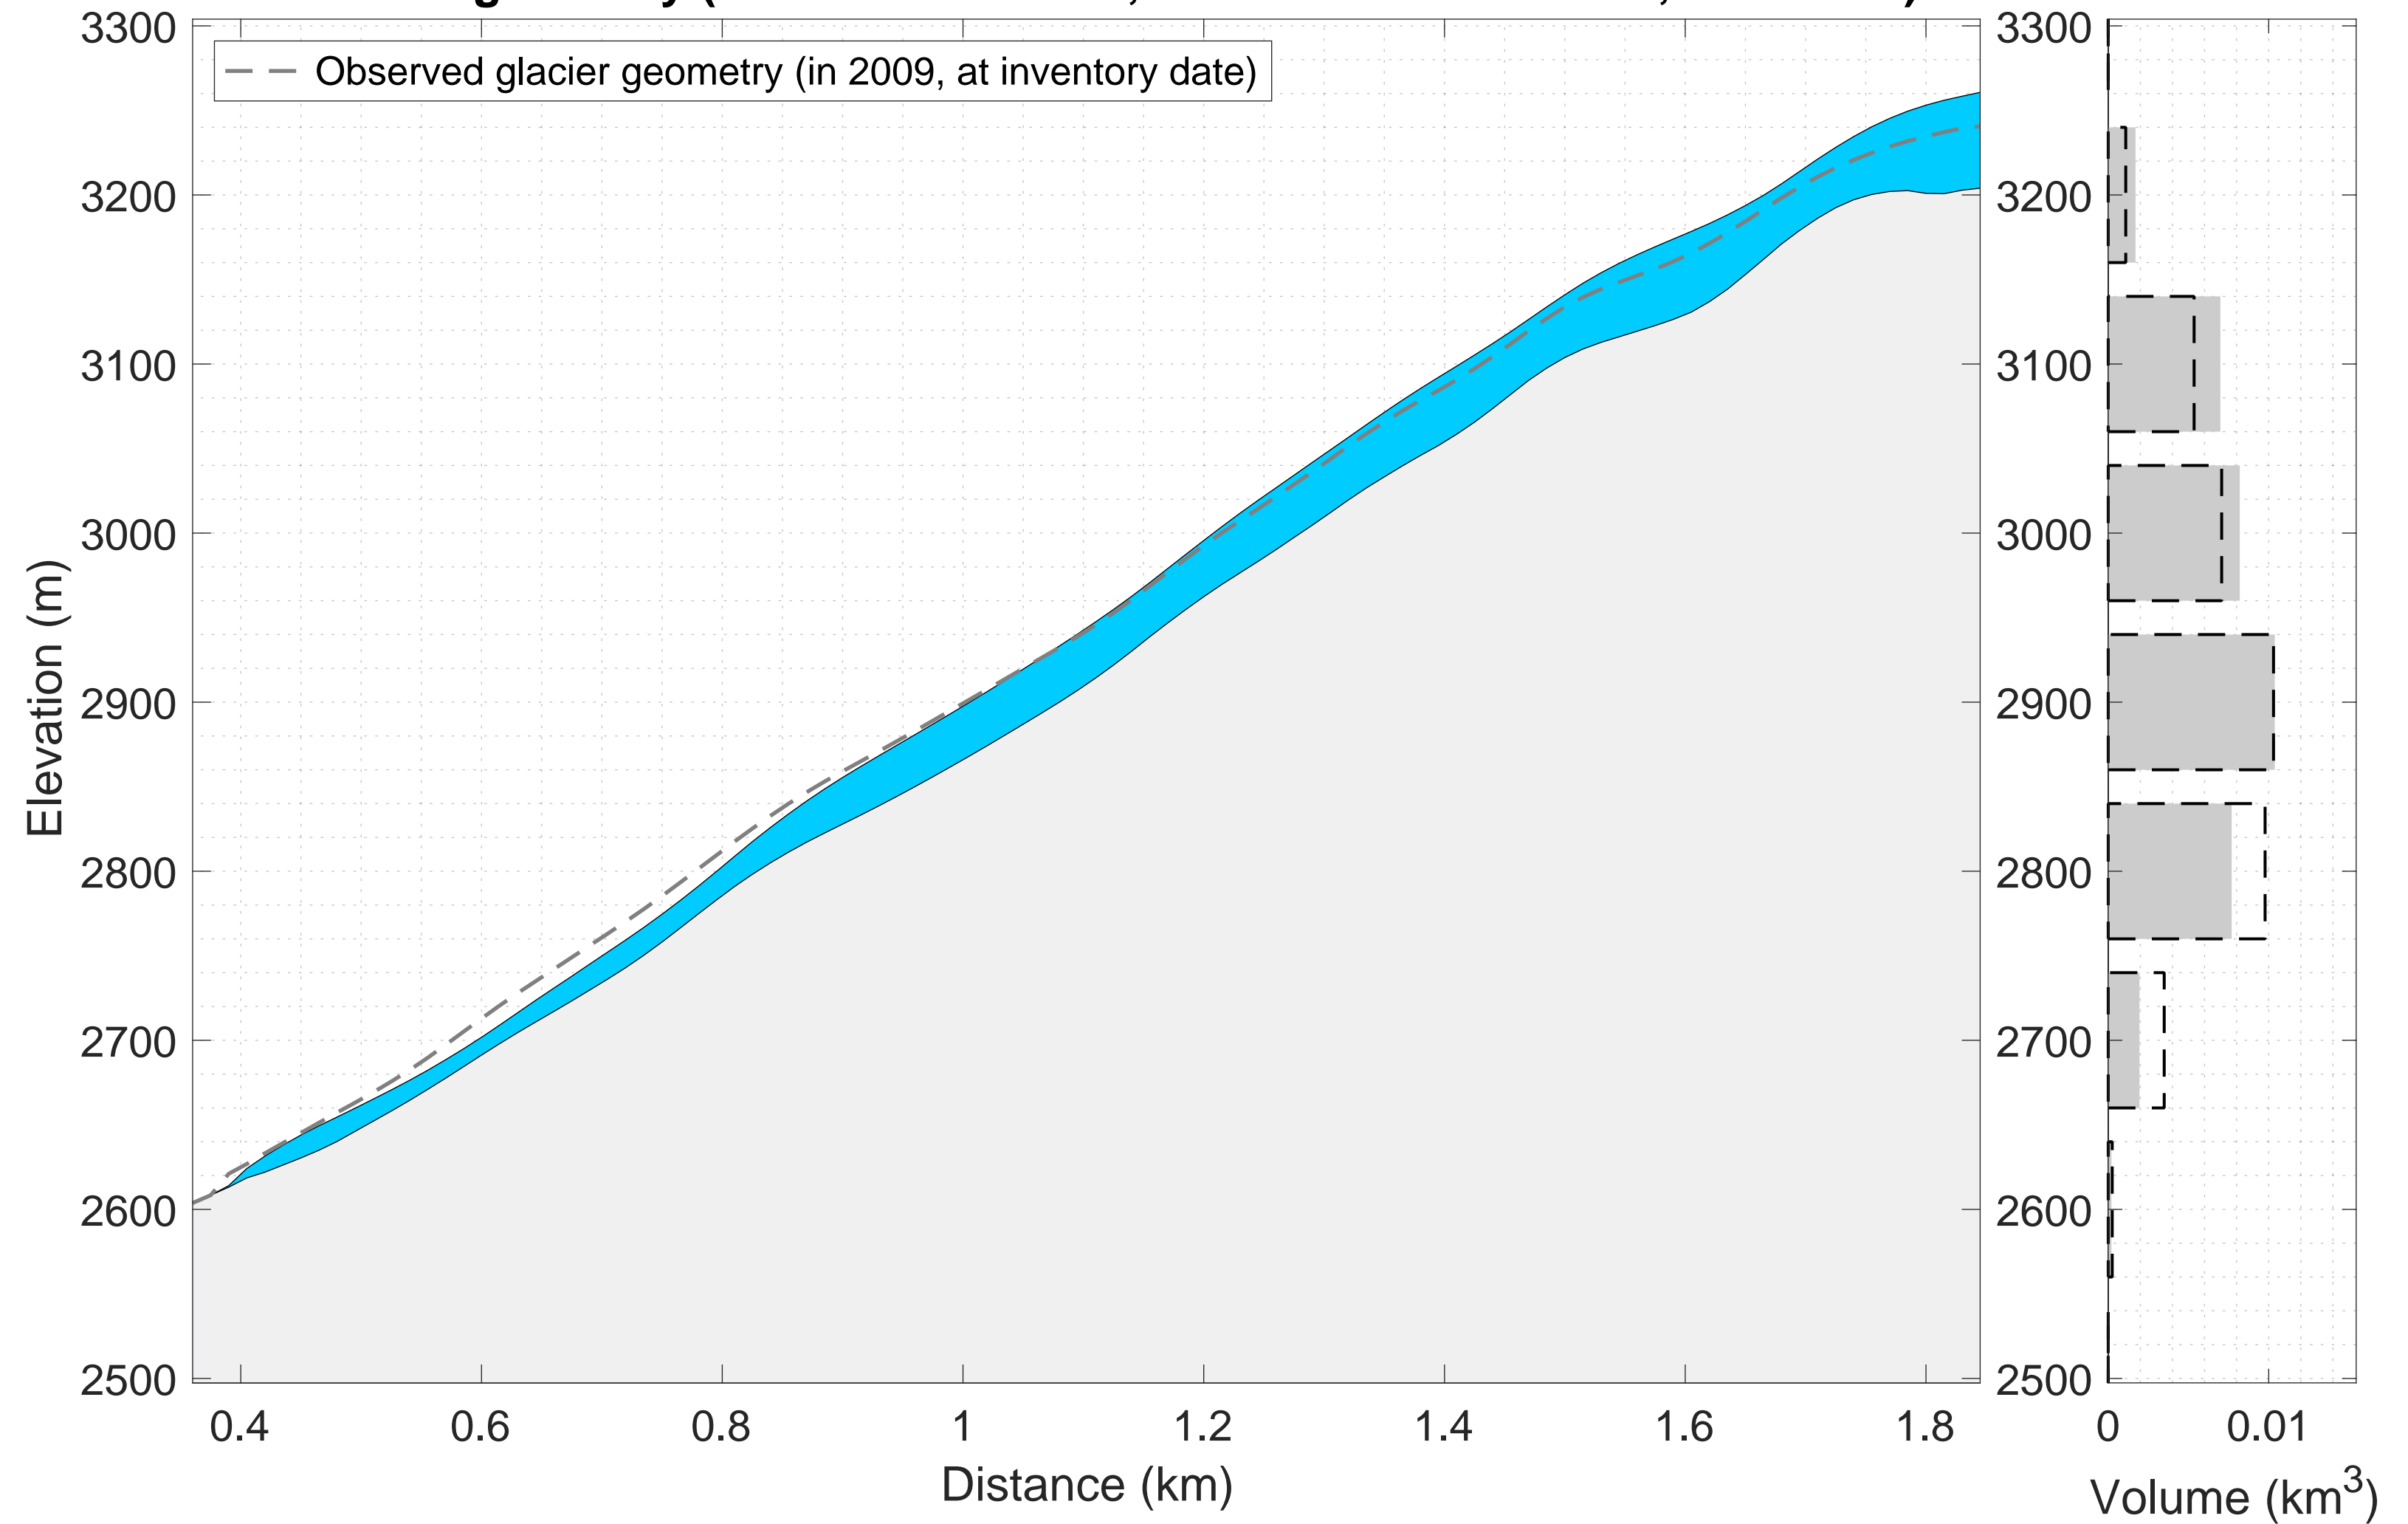

Supplement: Supplementary file 781 [file tc-13-1125-2019-supplement.zip]

**Modelled geometry (Glacier ID = 00311;  $A = 1.1067\text{e-}16 \text{ Pa}^{-3} \text{ a}^{-1}$ ;  $dx = 22 \text{ m}$ )**

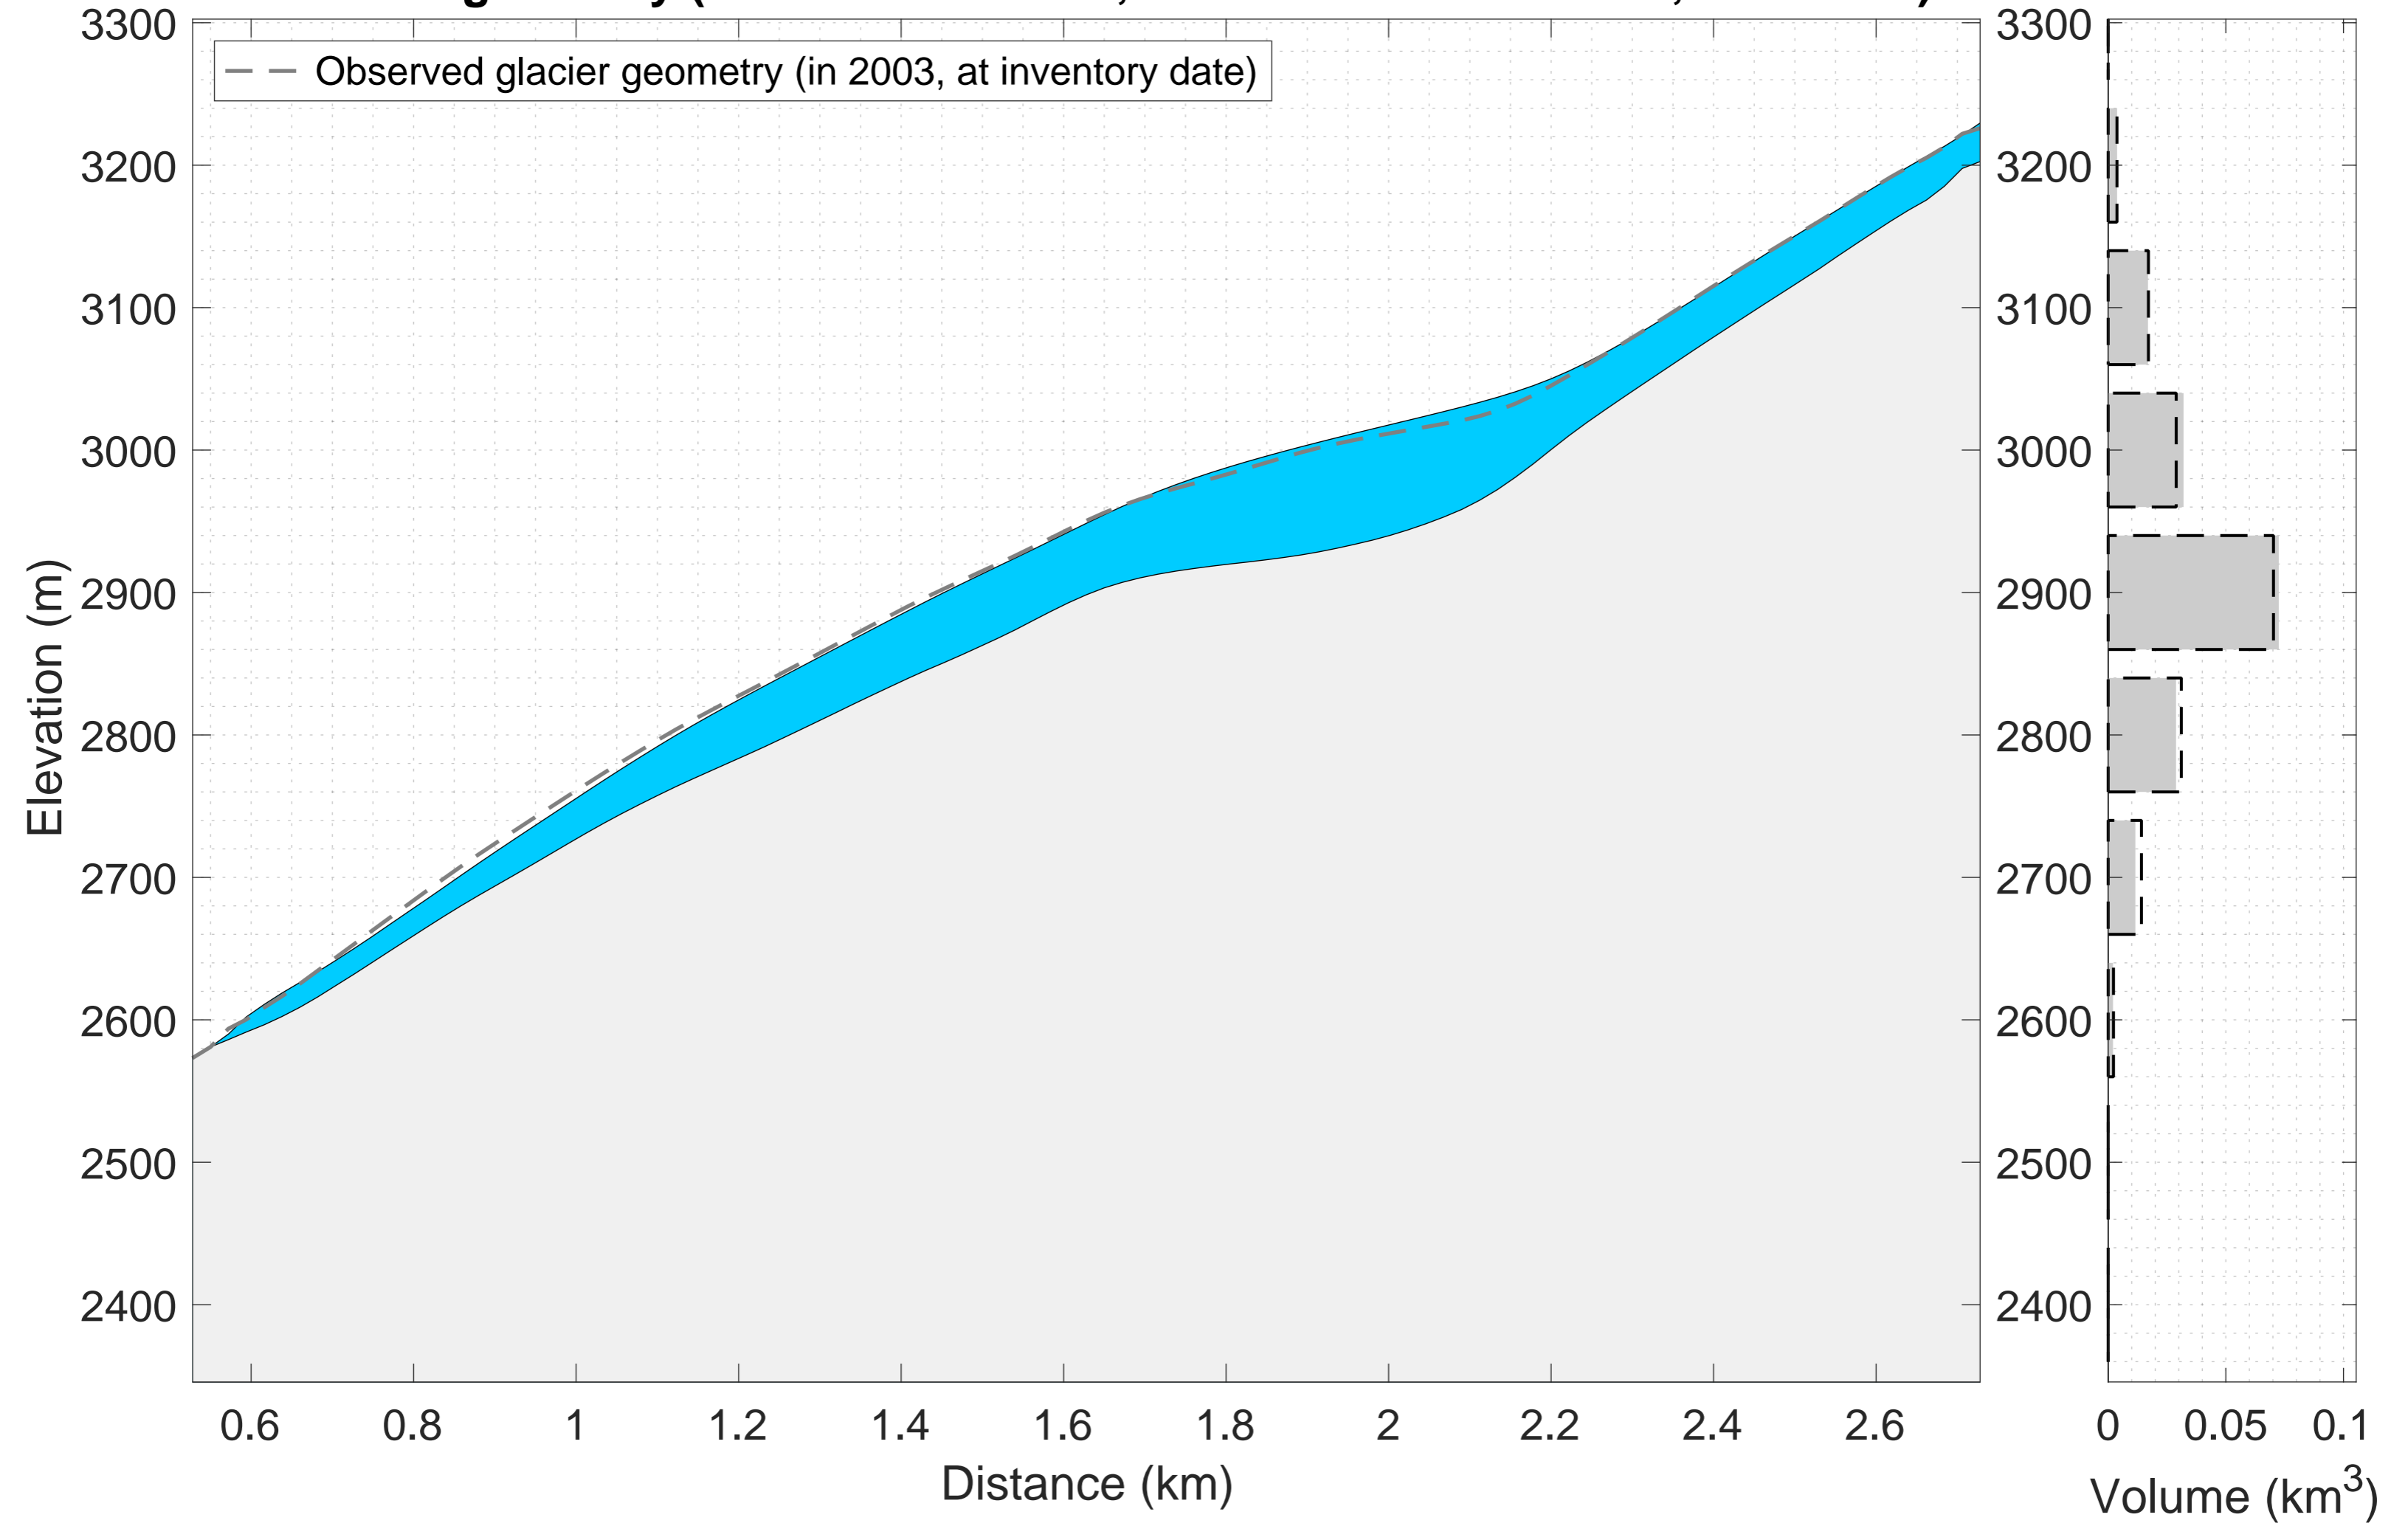

Supplement: Supplementary file 782 [file tc-13-1125-2019-supplement.zip]

**Modelled geometry (Glacier ID = 02669;  $A = 2.8388\text{e-}16 \text{ Pa}^{-3} \text{ a}^{-1}$ ;  $dx = 14 \text{ m}$ )**

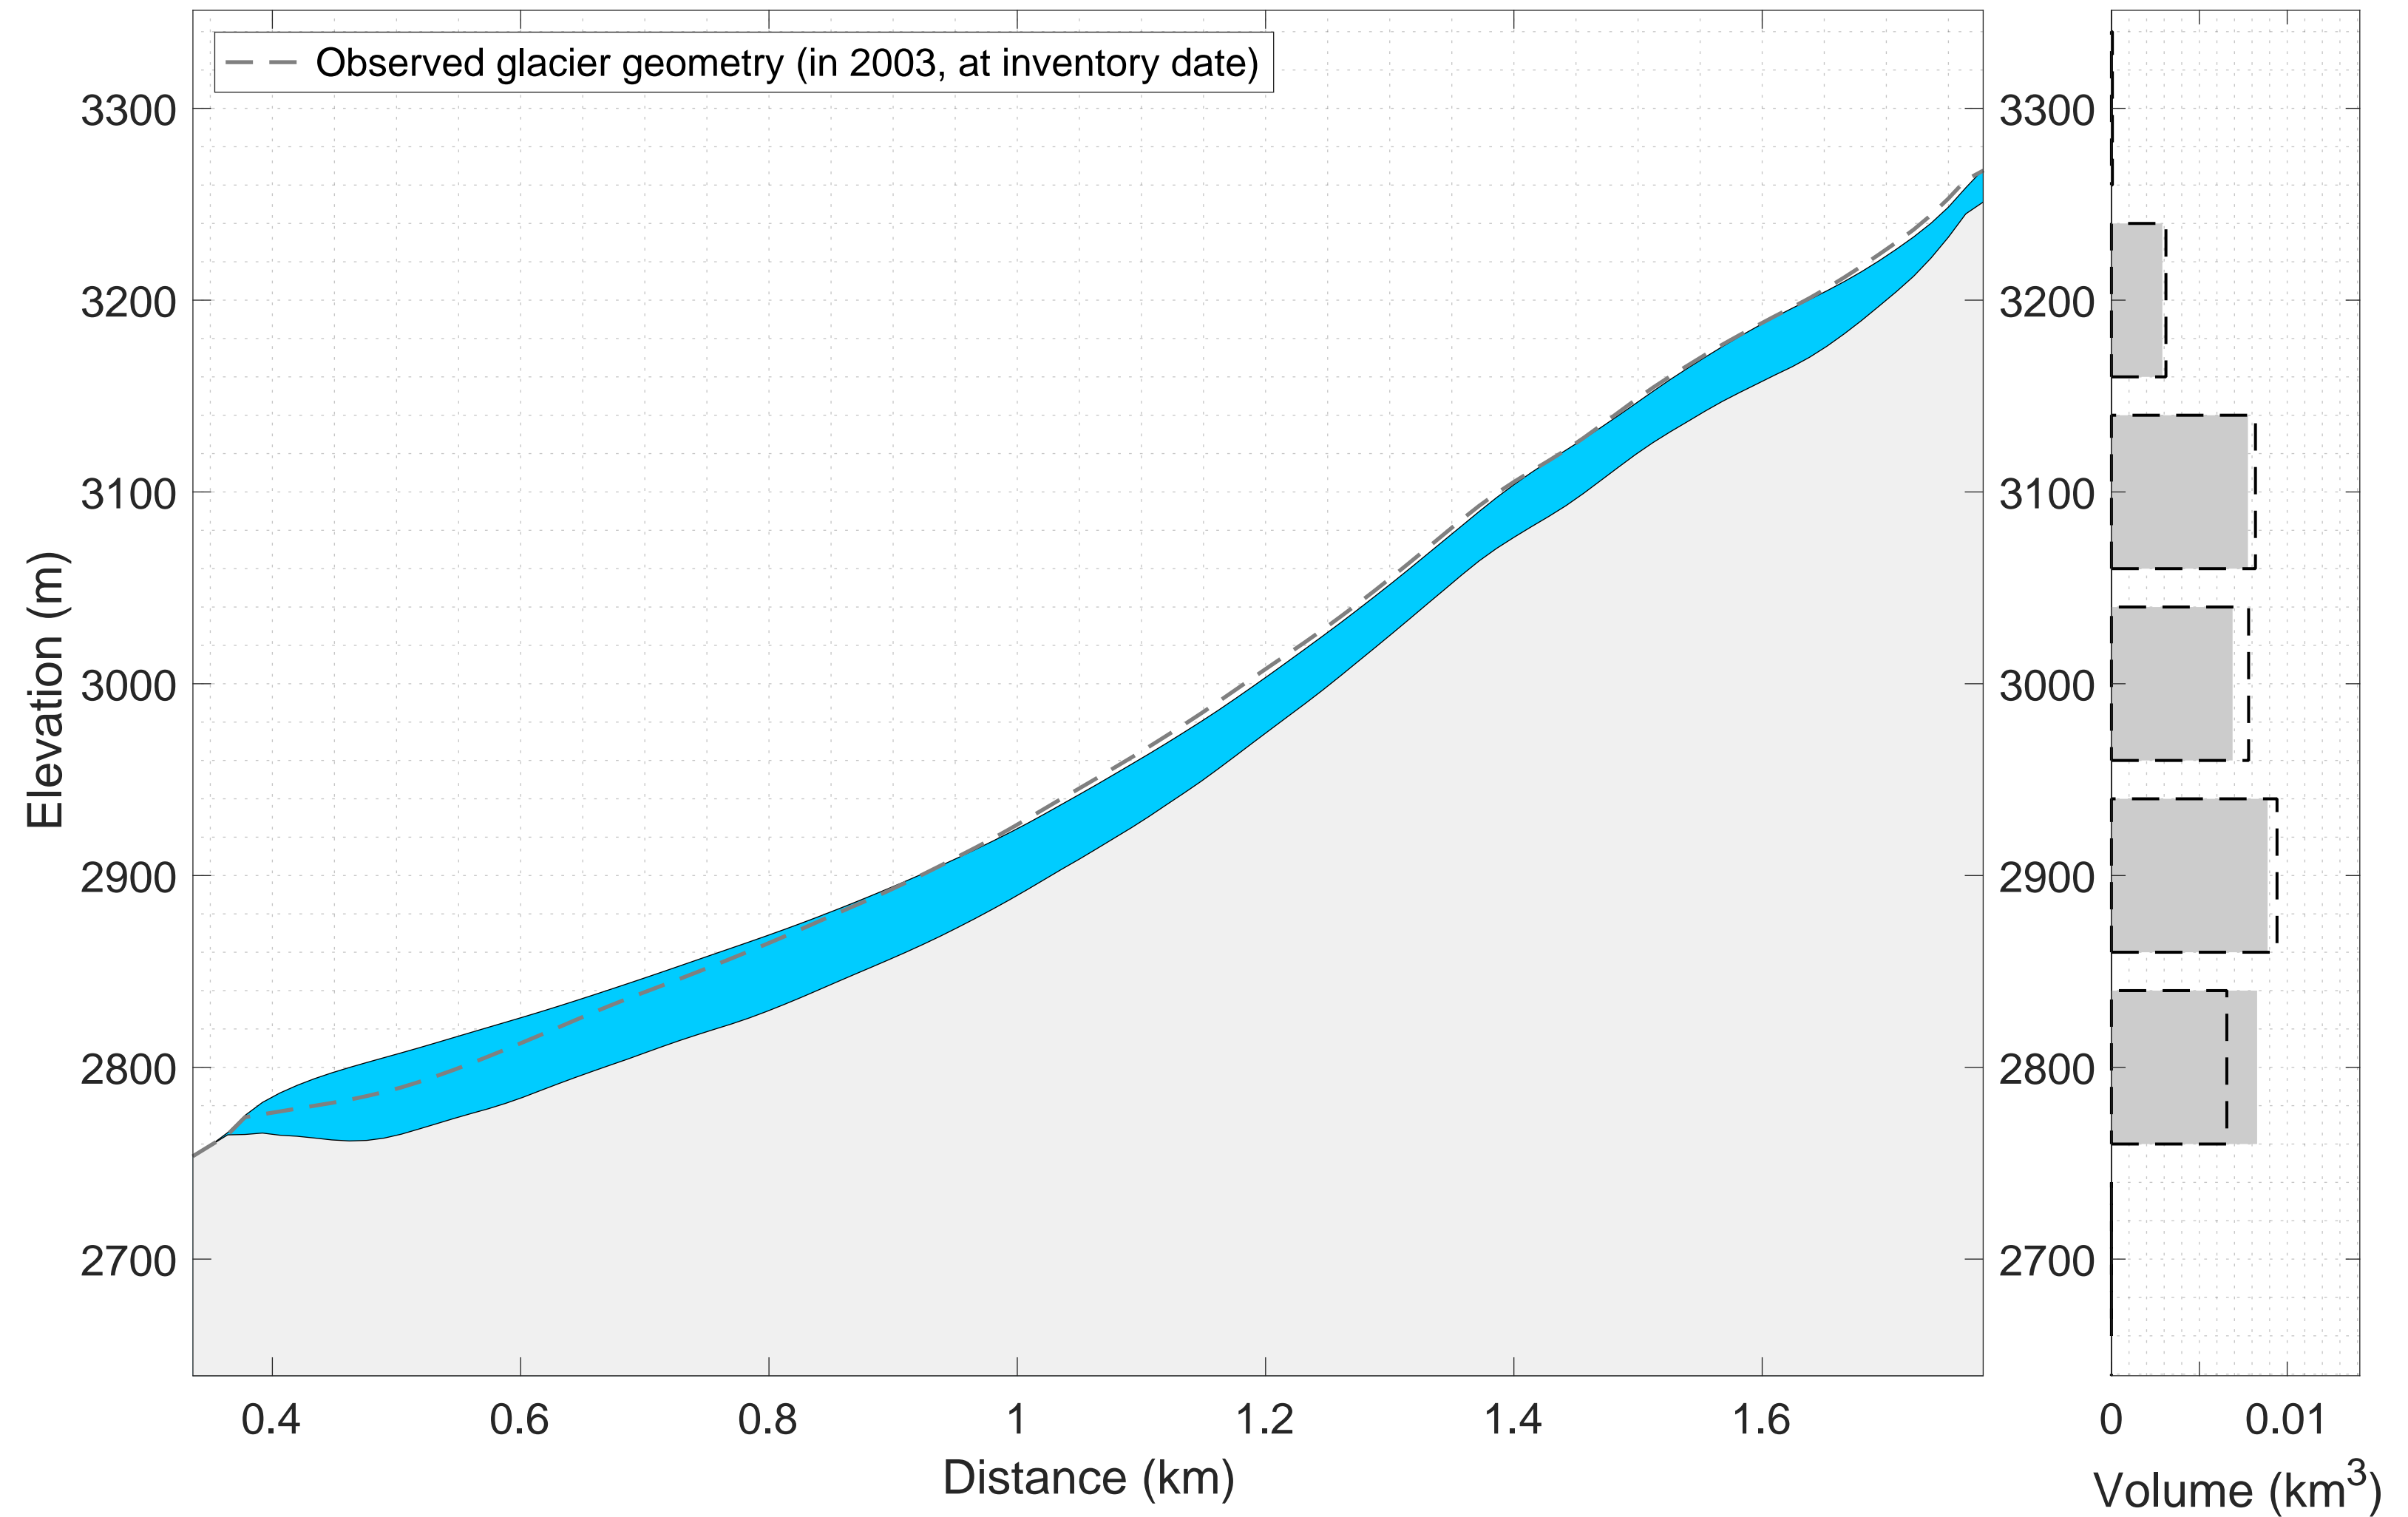

Supplement: Supplementary file 783 [file tc-13-1125-2019-supplement.zip]

**Modelled geometry (Glacier ID = 00979;  $A = 9.5629\text{e-}17 \text{ Pa}^{-3} \text{ a}^{-1}$ ;  $dx = 17 \text{ m}$ )**

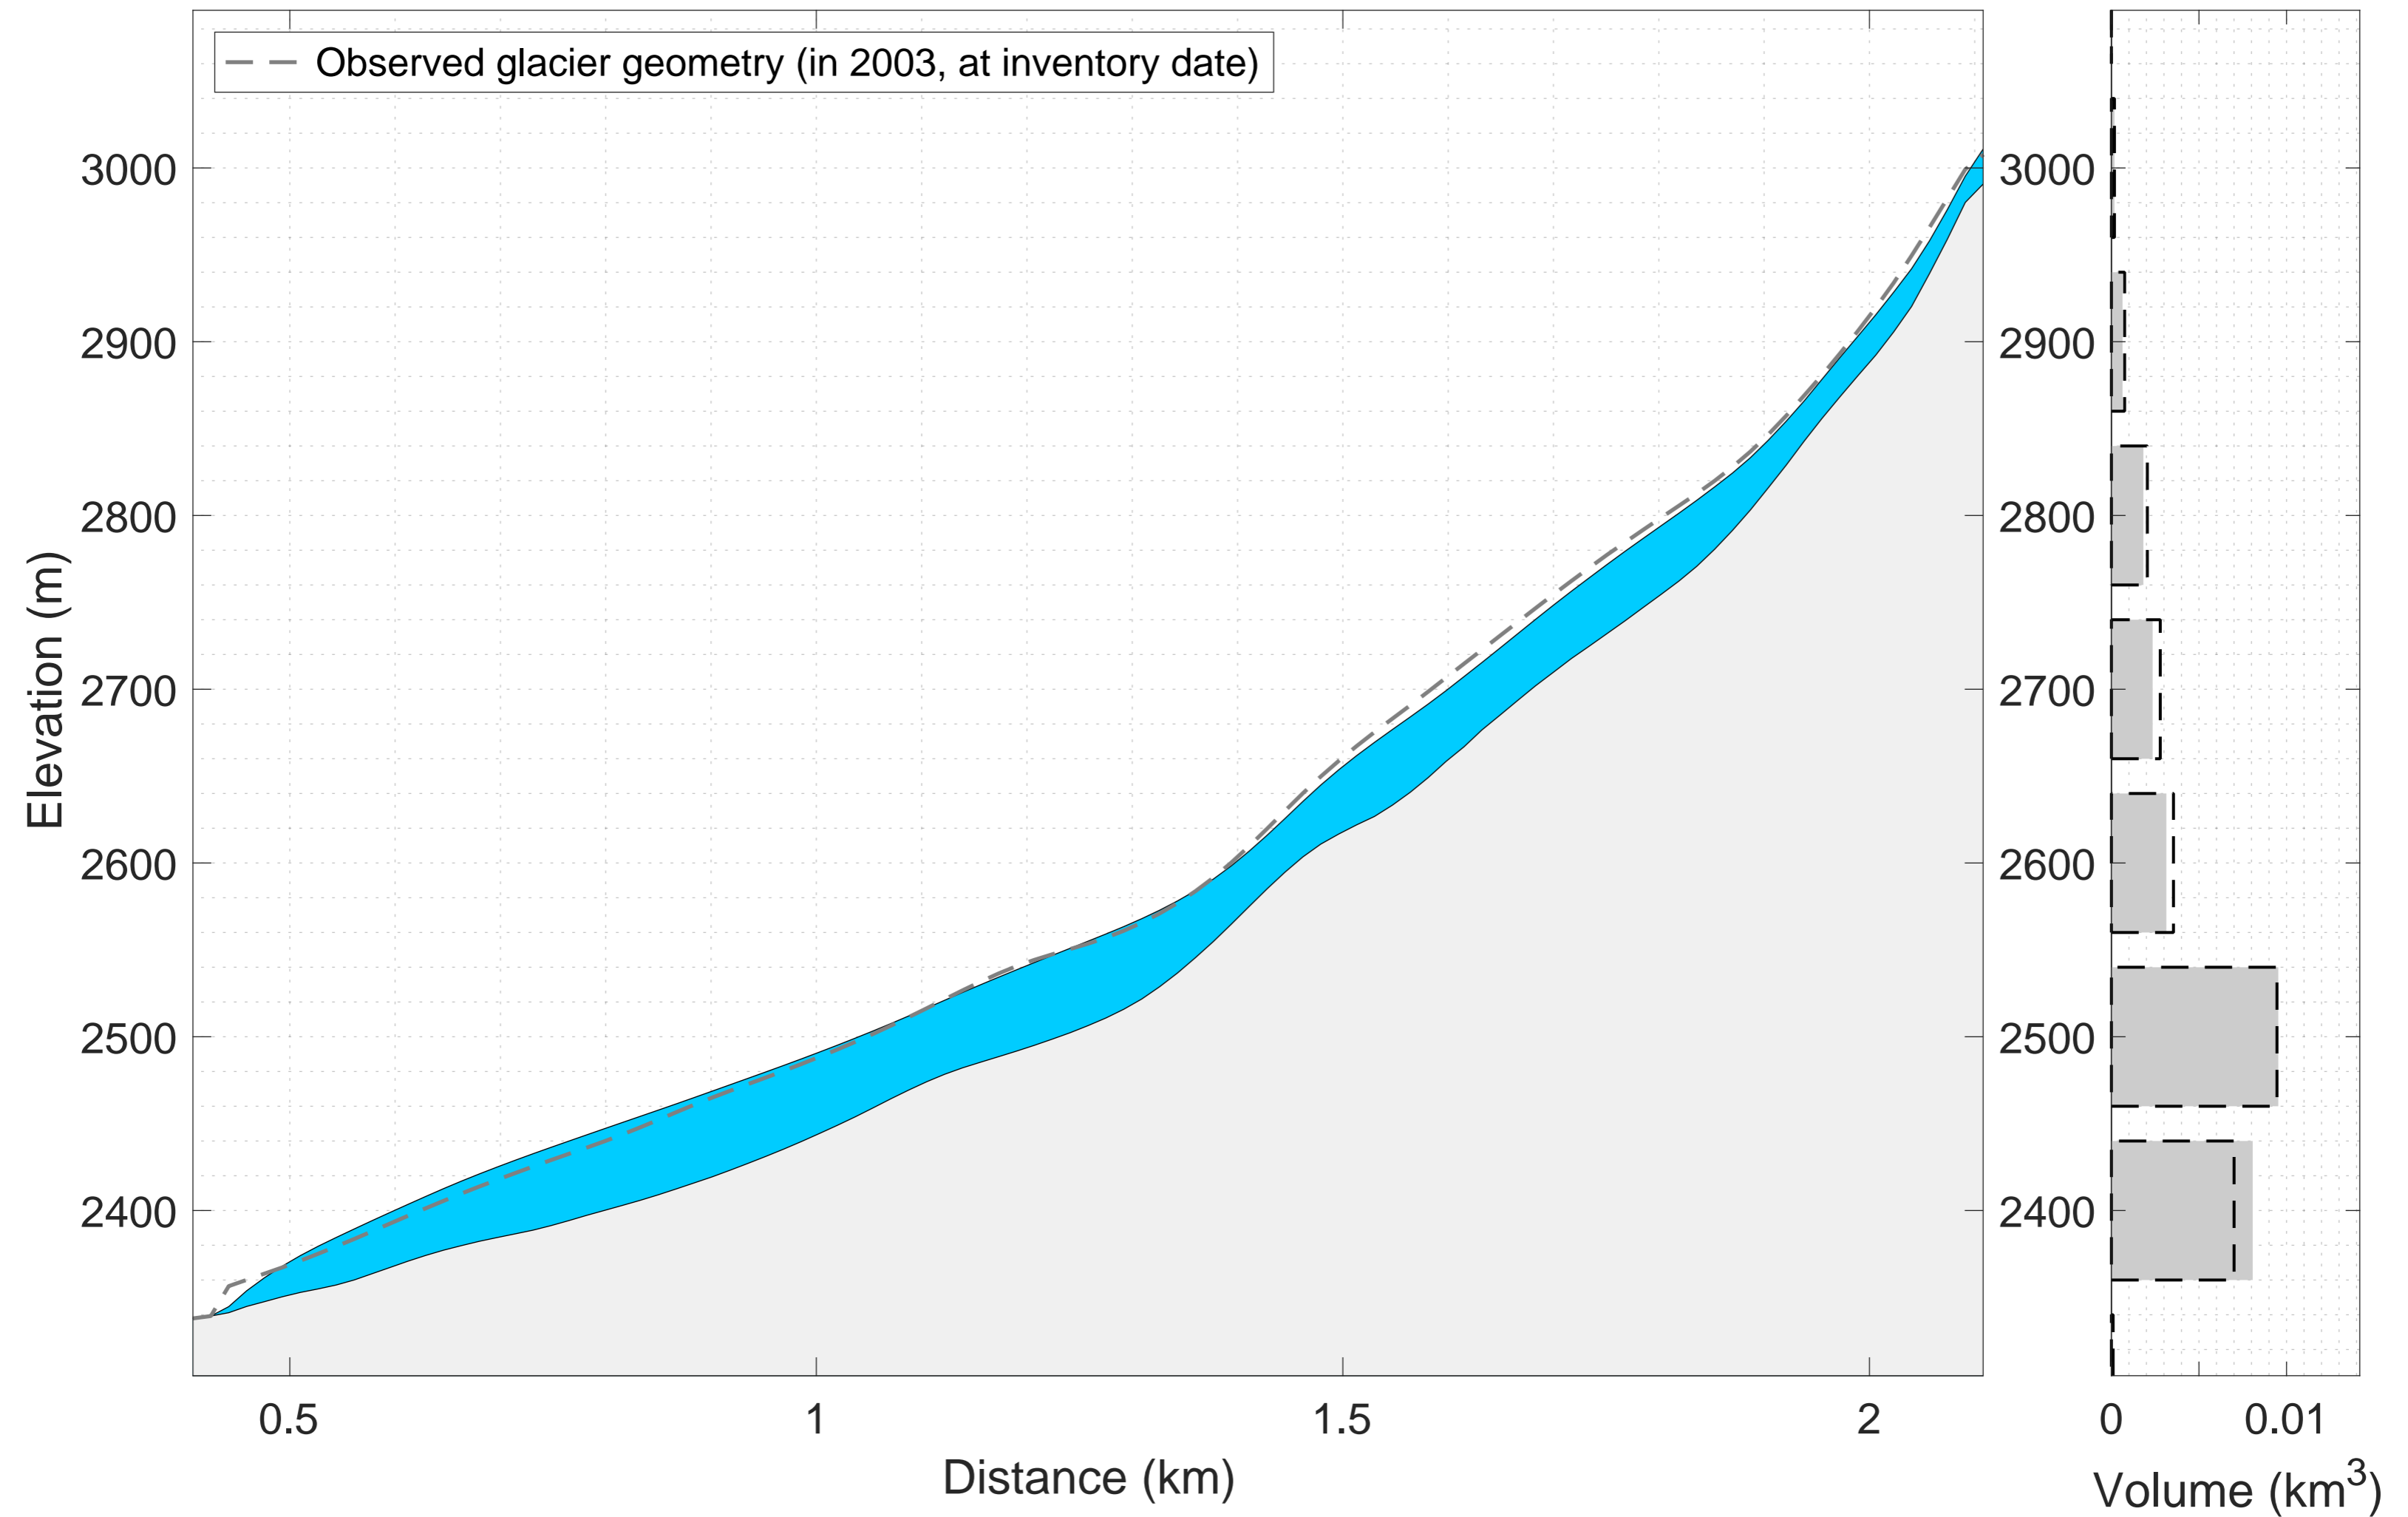

Supplement: Supplementary file 784 [file tc-13-1125-2019-supplement.zip]

**Modelled geometry (Glacier ID = 02827;  $A = 1.3227\text{e-}16 \text{ Pa}^{-3} \text{ a}^{-1}$ ;  $dx = 12 \text{ m}$ )**

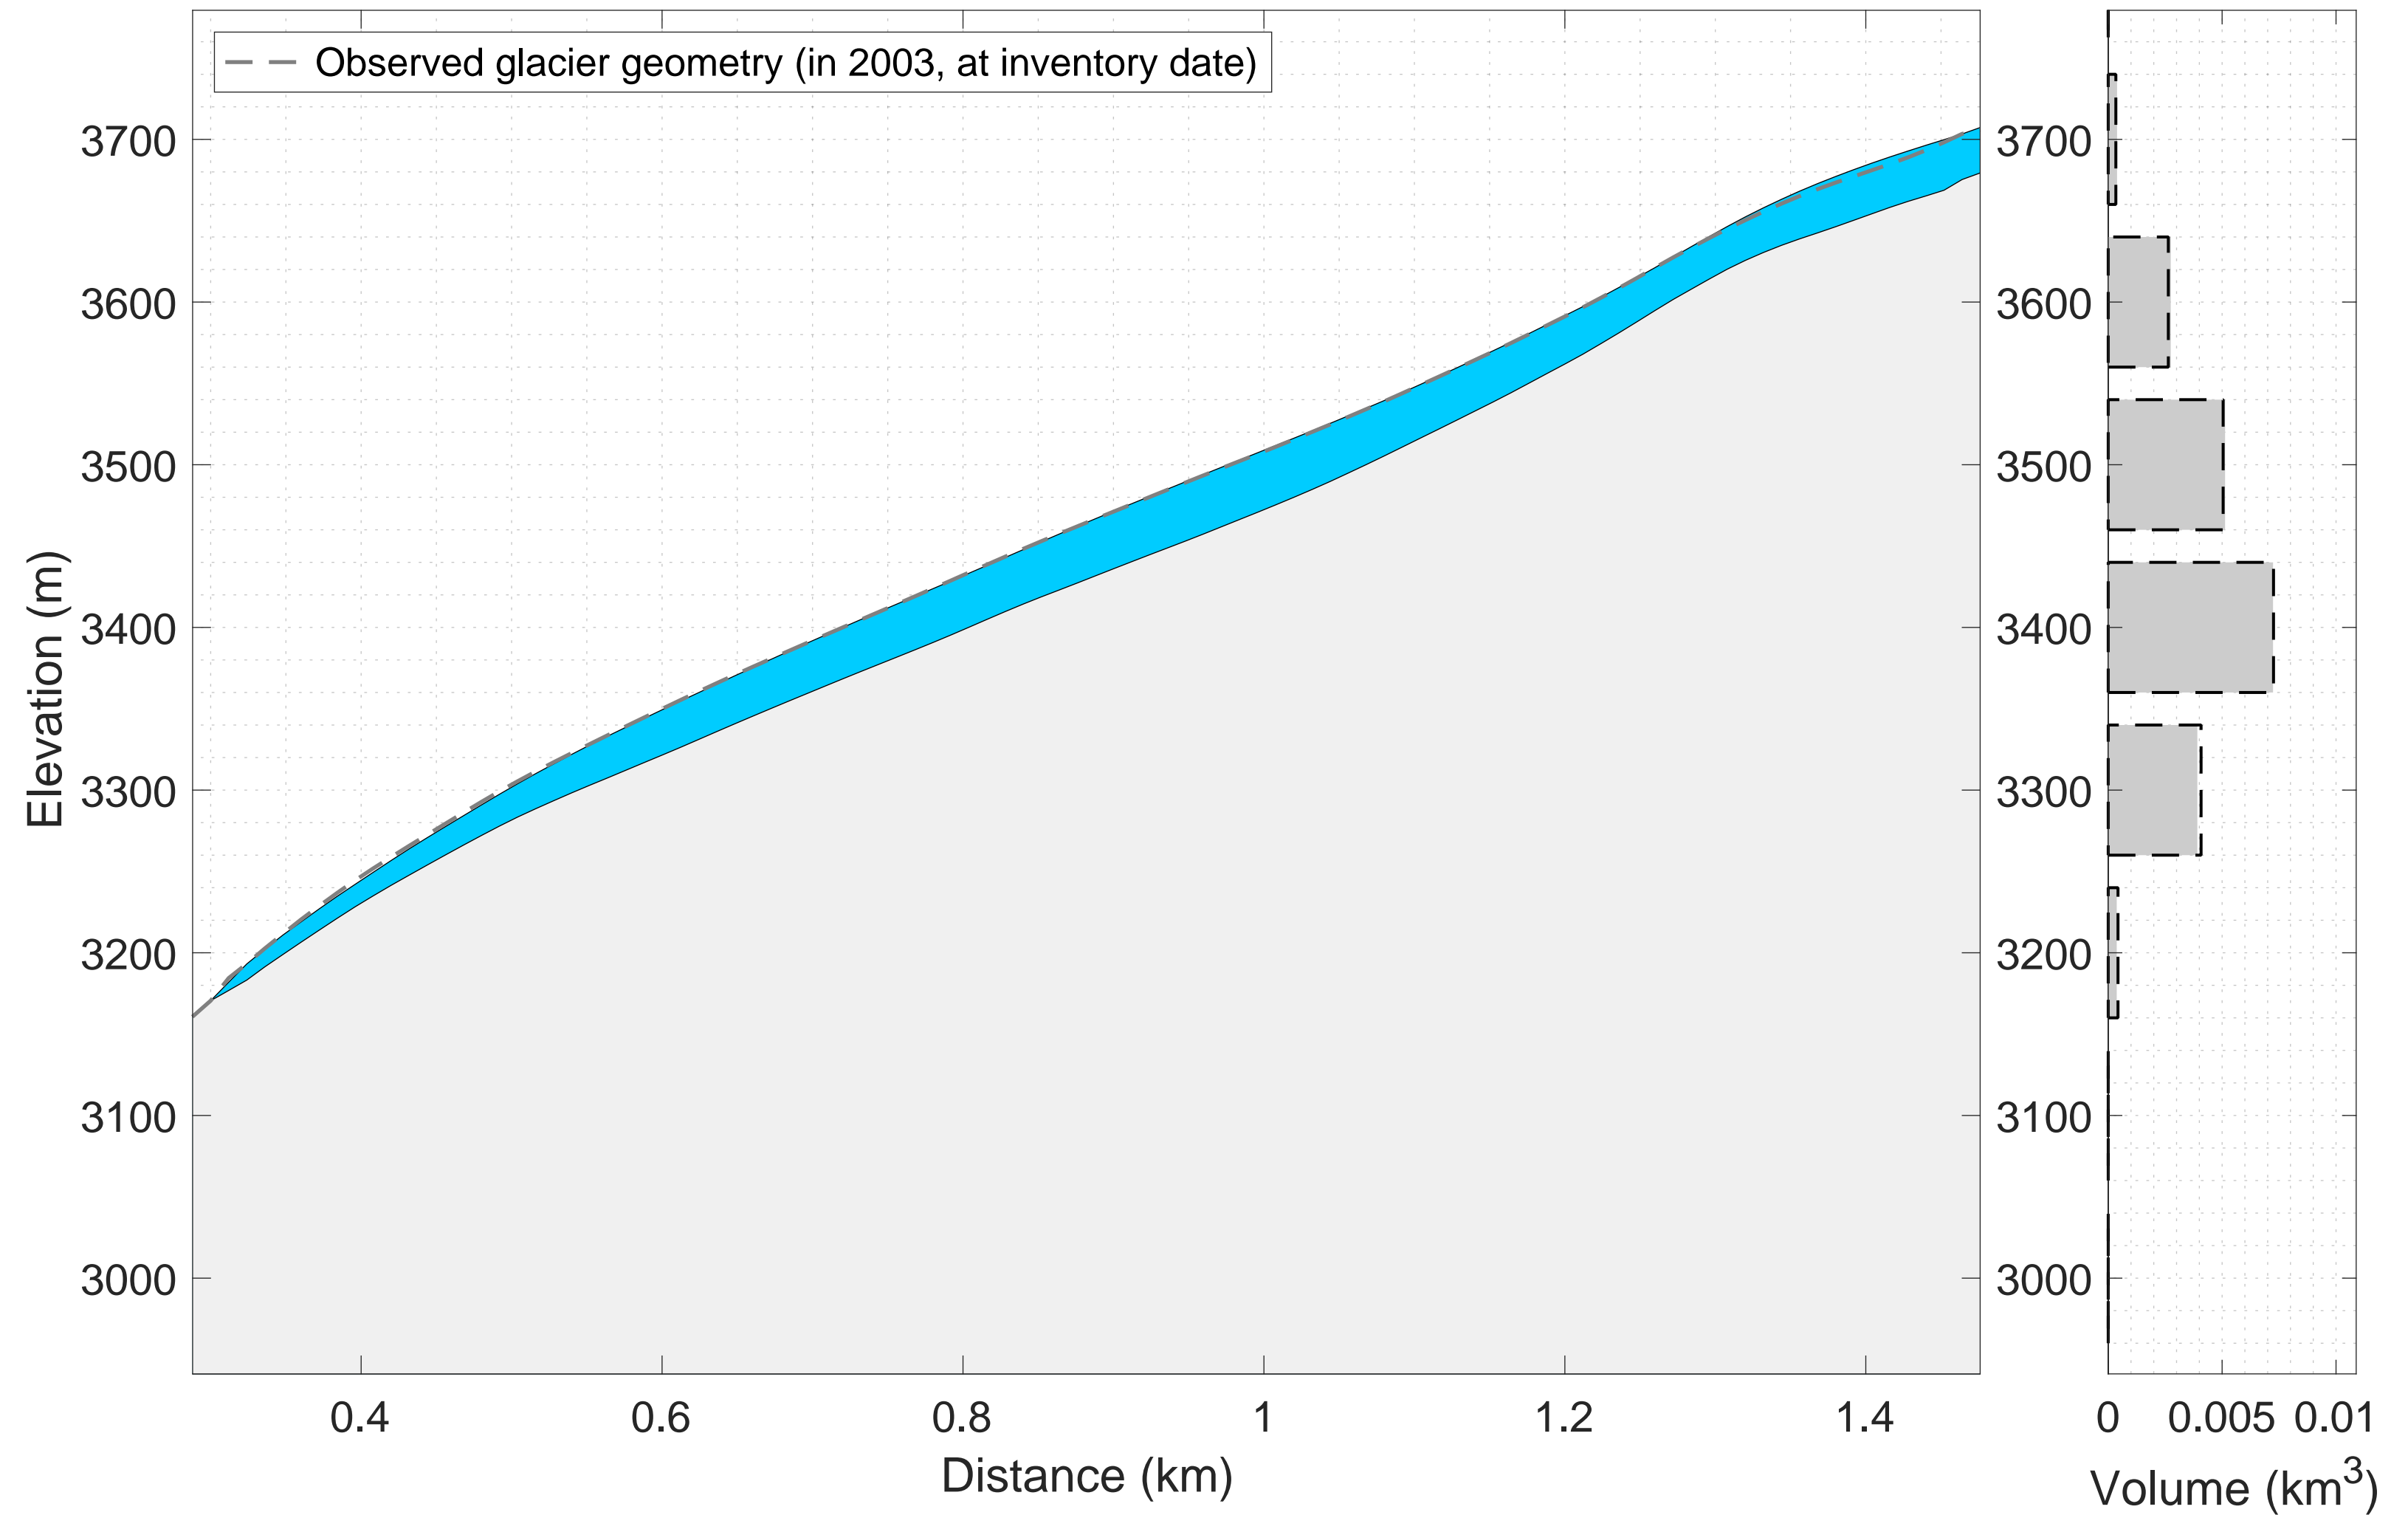

Supplement: Supplementary file 785 [file tc-13-1125-2019-supplement.zip]

**Modelled geometry (Glacier ID = 03817;  $A = 1.5271\text{e-}16 \text{ Pa}^{-3} \text{ a}^{-1}$ ;  $dx = 23 \text{ m}$ )**

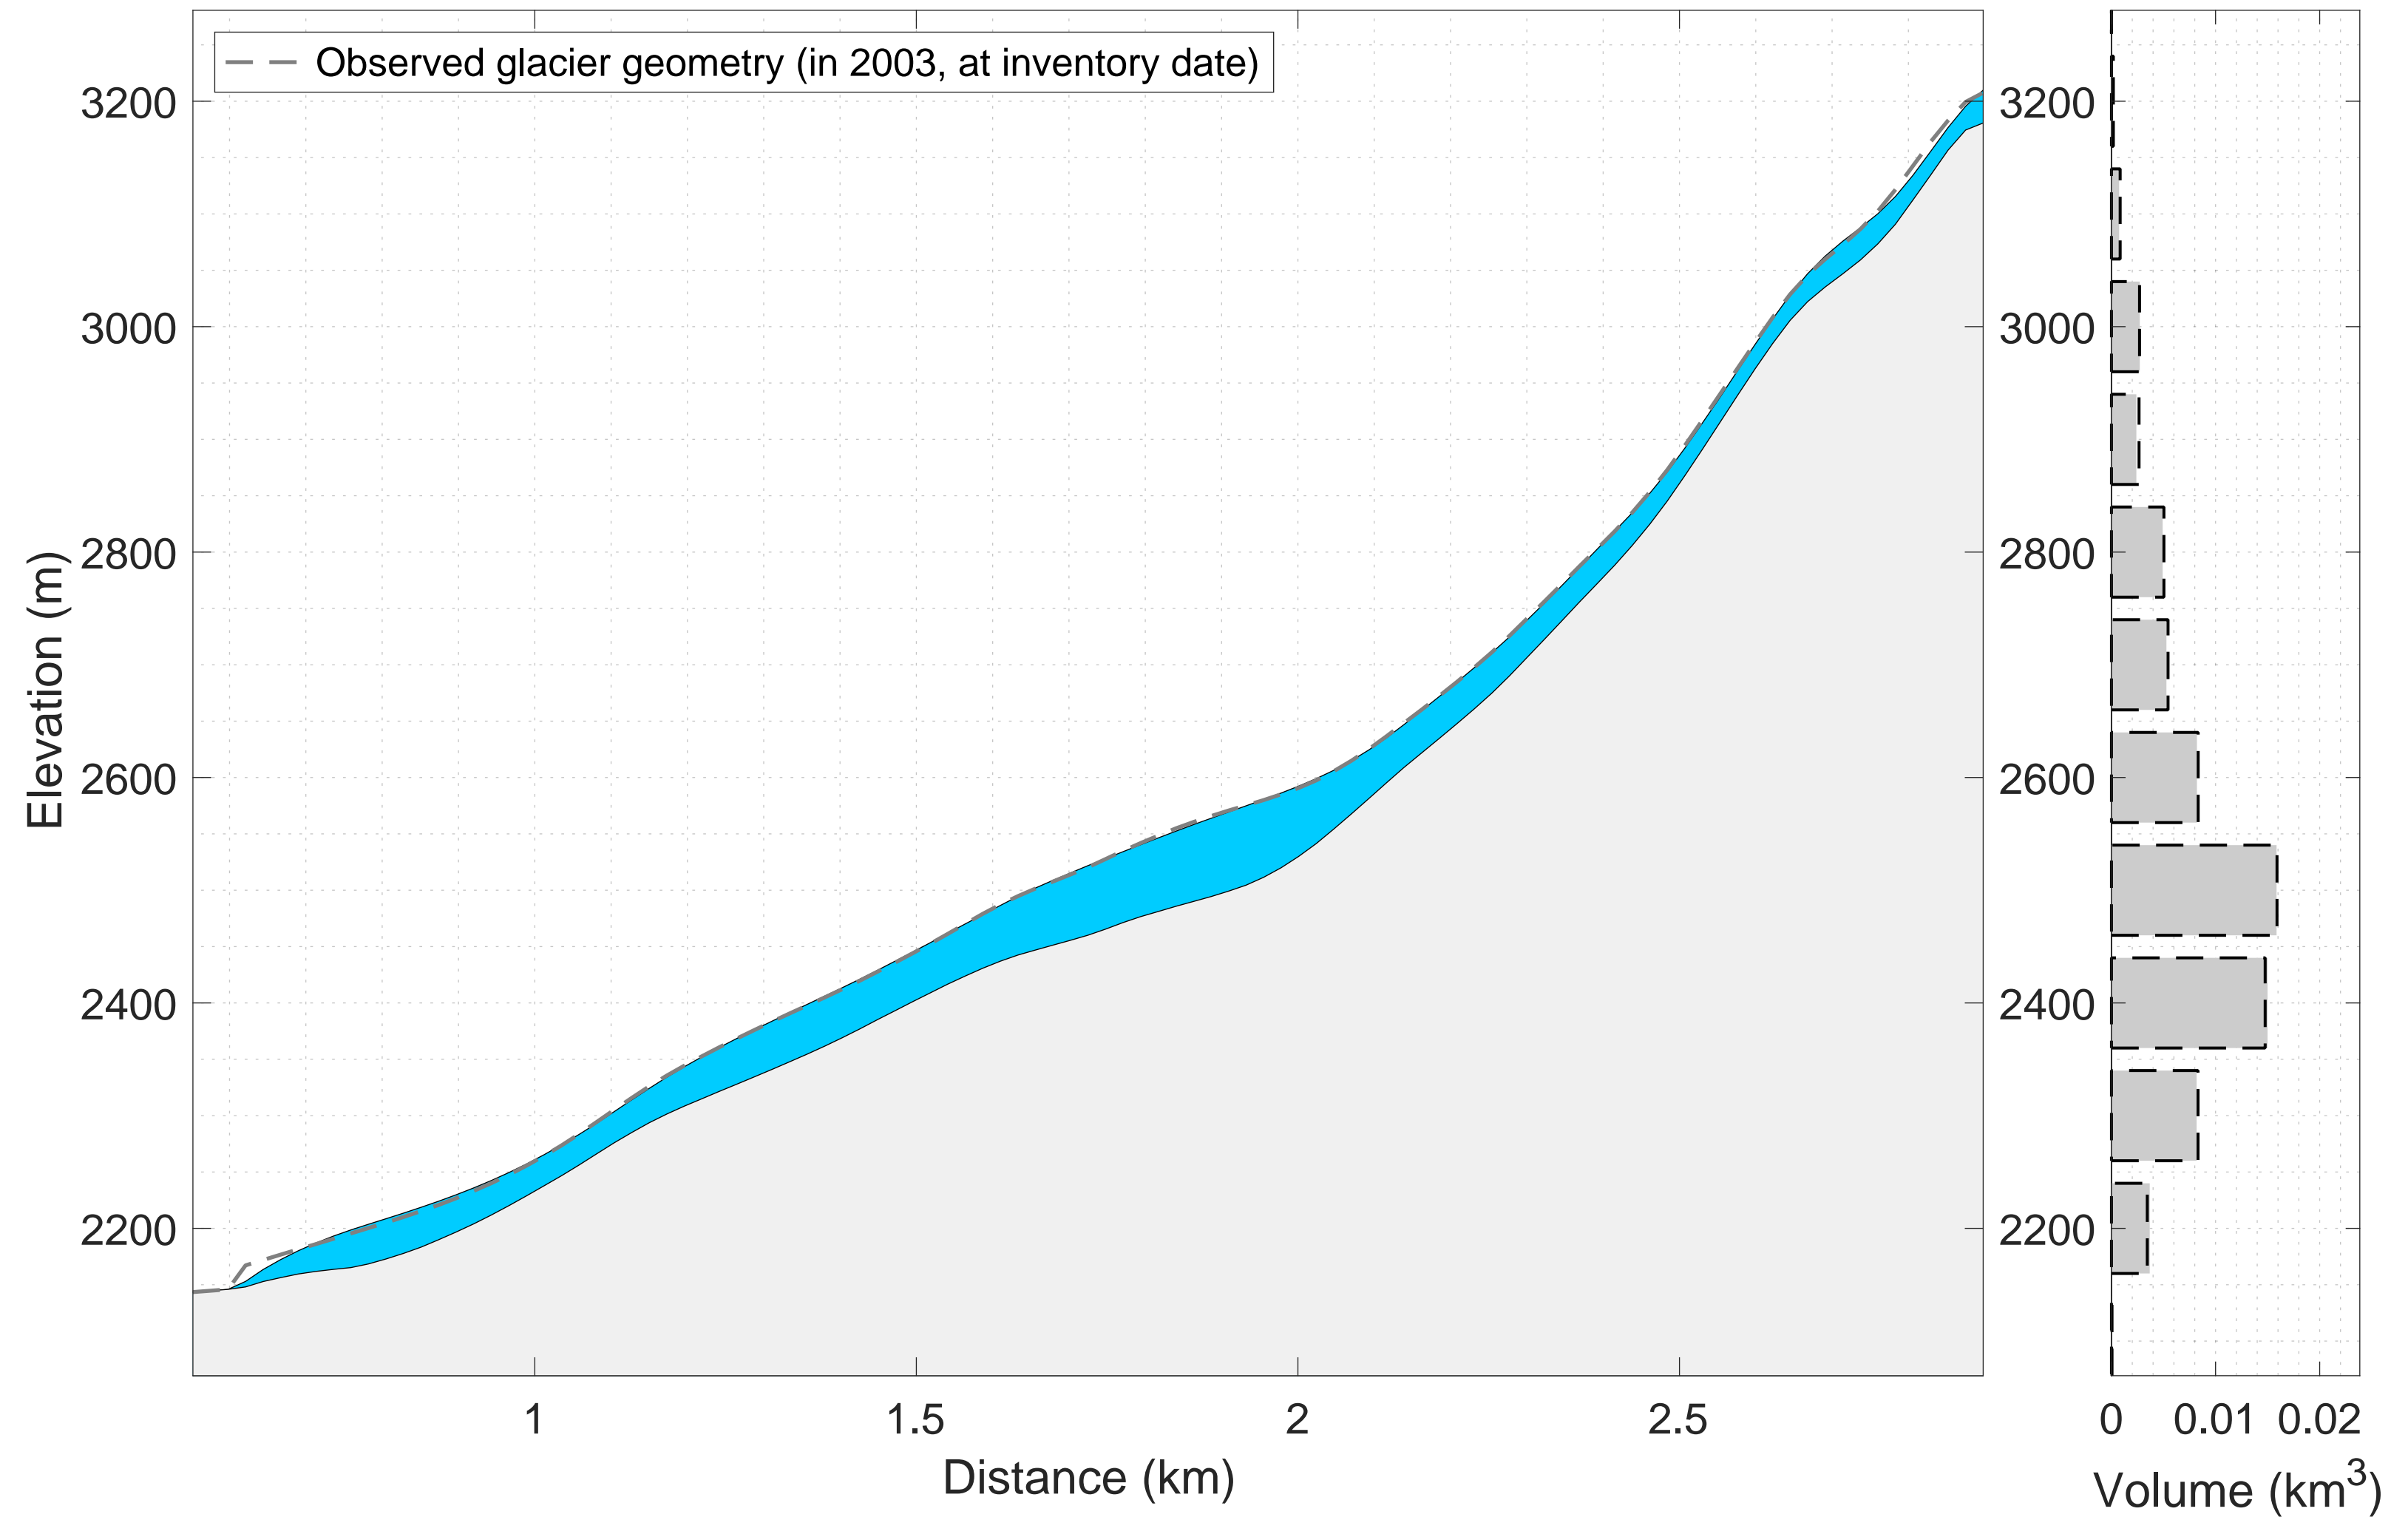

Supplement: Supplementary file 786 [file tc-13-1125-2019-supplement.zip]

**Modelled geometry (Glacier ID = 00122;  $A = 1.2638\text{e-}16 \text{ Pa}^{-3} \text{ a}^{-1}$ ;  $dx = 23 \text{ m}$ )**

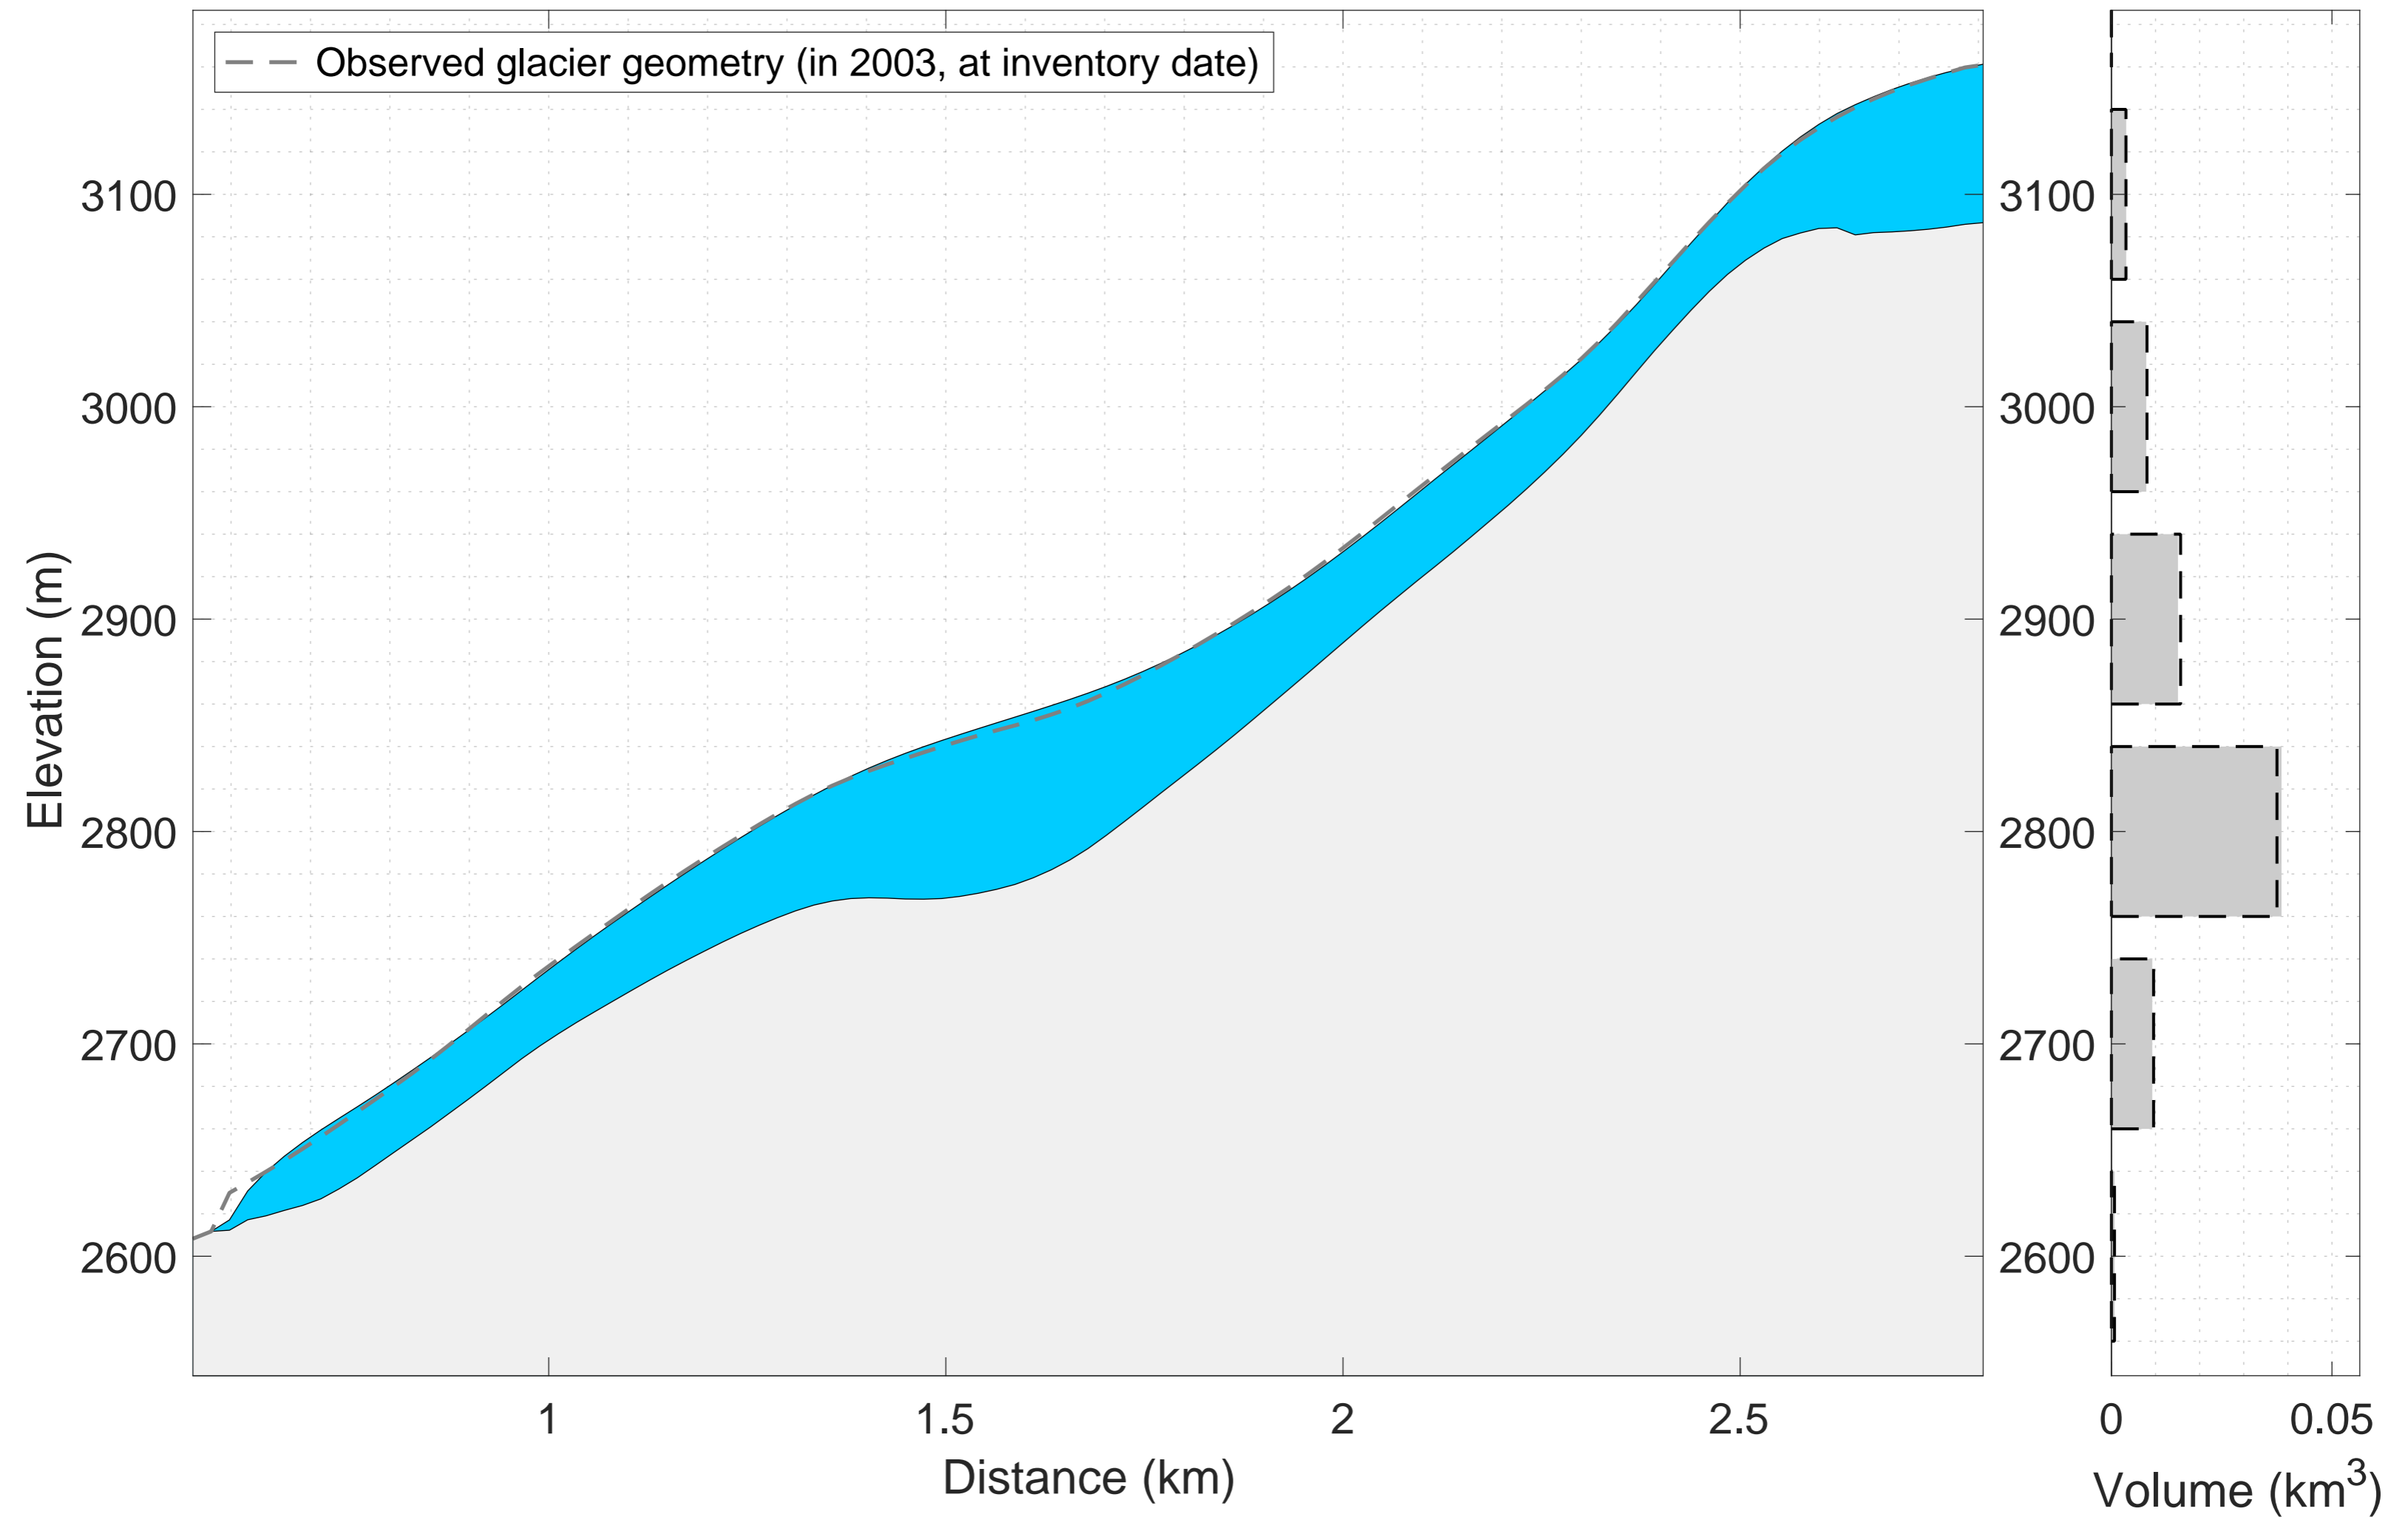

Supplement: Supplementary file 787 [file tc-13-1125-2019-supplement.zip]

**Modelled geometry (Glacier ID = 00779;  $A = 1.1434\text{e-}16 \text{ Pa}^{-3} \text{ a}^{-1}$ ;  $dx = 21 \text{ m}$ )**

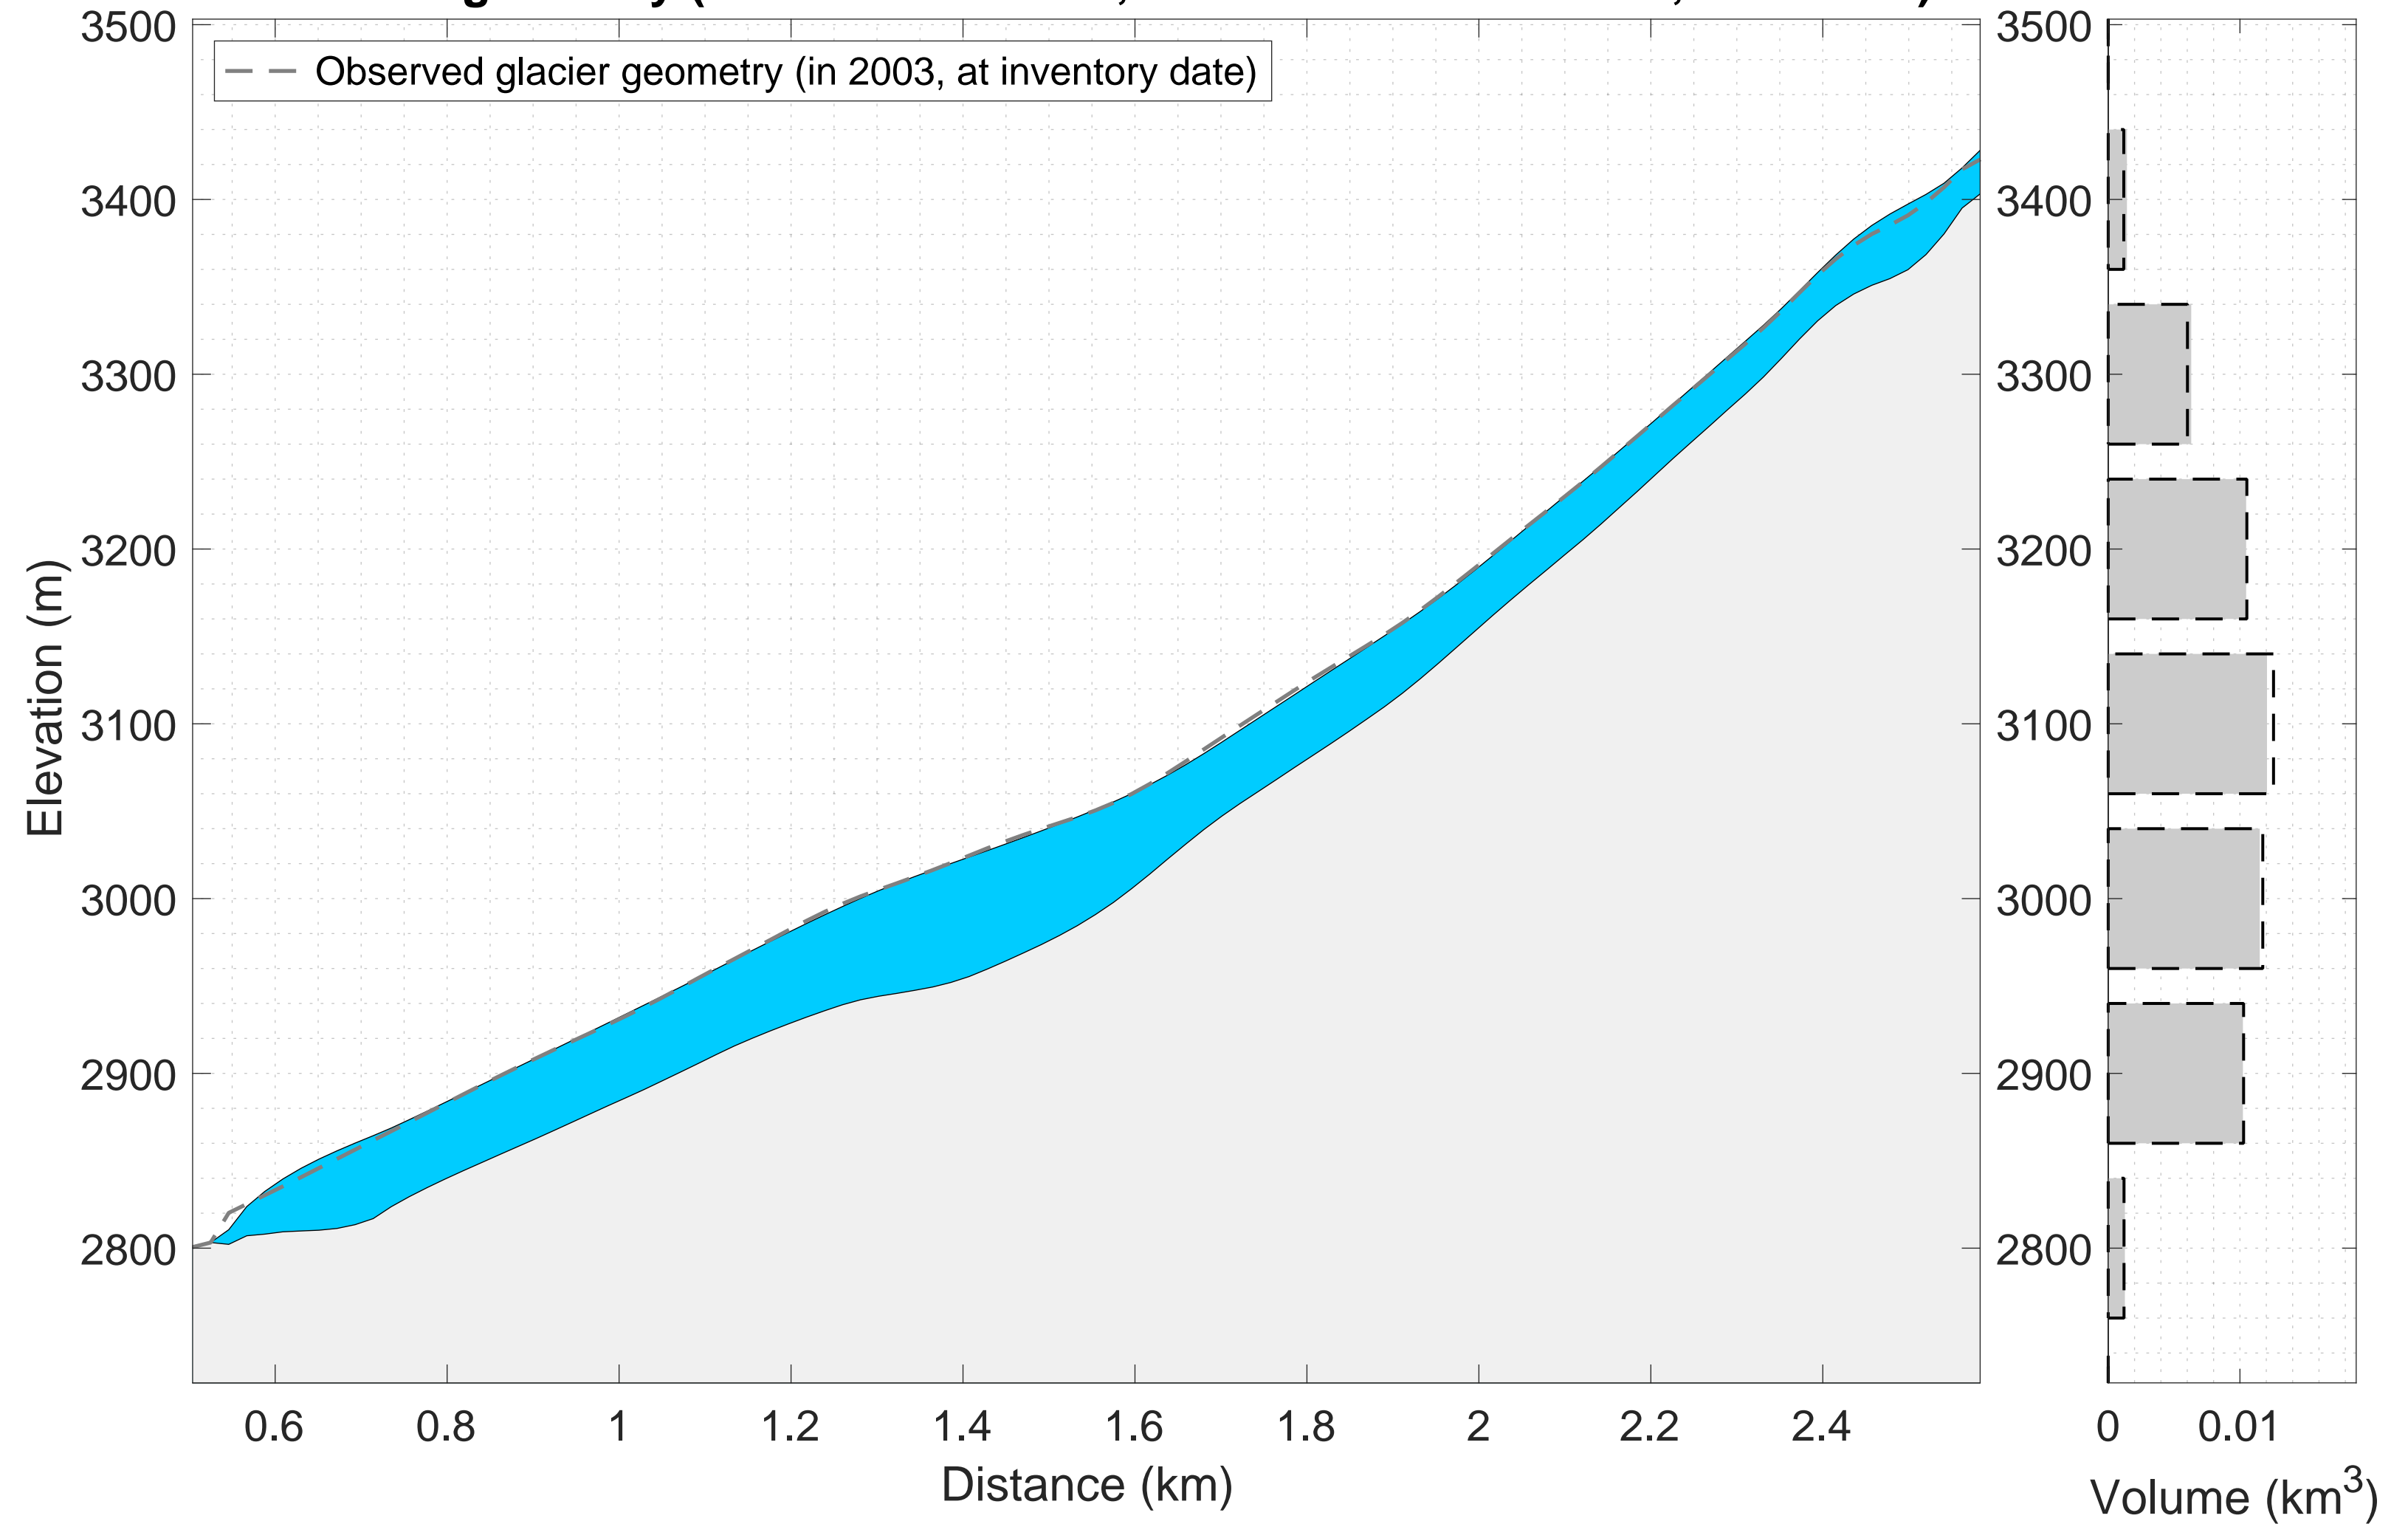

Supplement: Supplementary file 788 [file tc-13-1125-2019-supplement.zip]

**Modelled geometry (Glacier ID = 02670;  $A = 1.6033\text{e-}16 \text{ Pa}^{-3} \text{ a}^{-1}$ ;  $dx = 17 \text{ m}$ )**

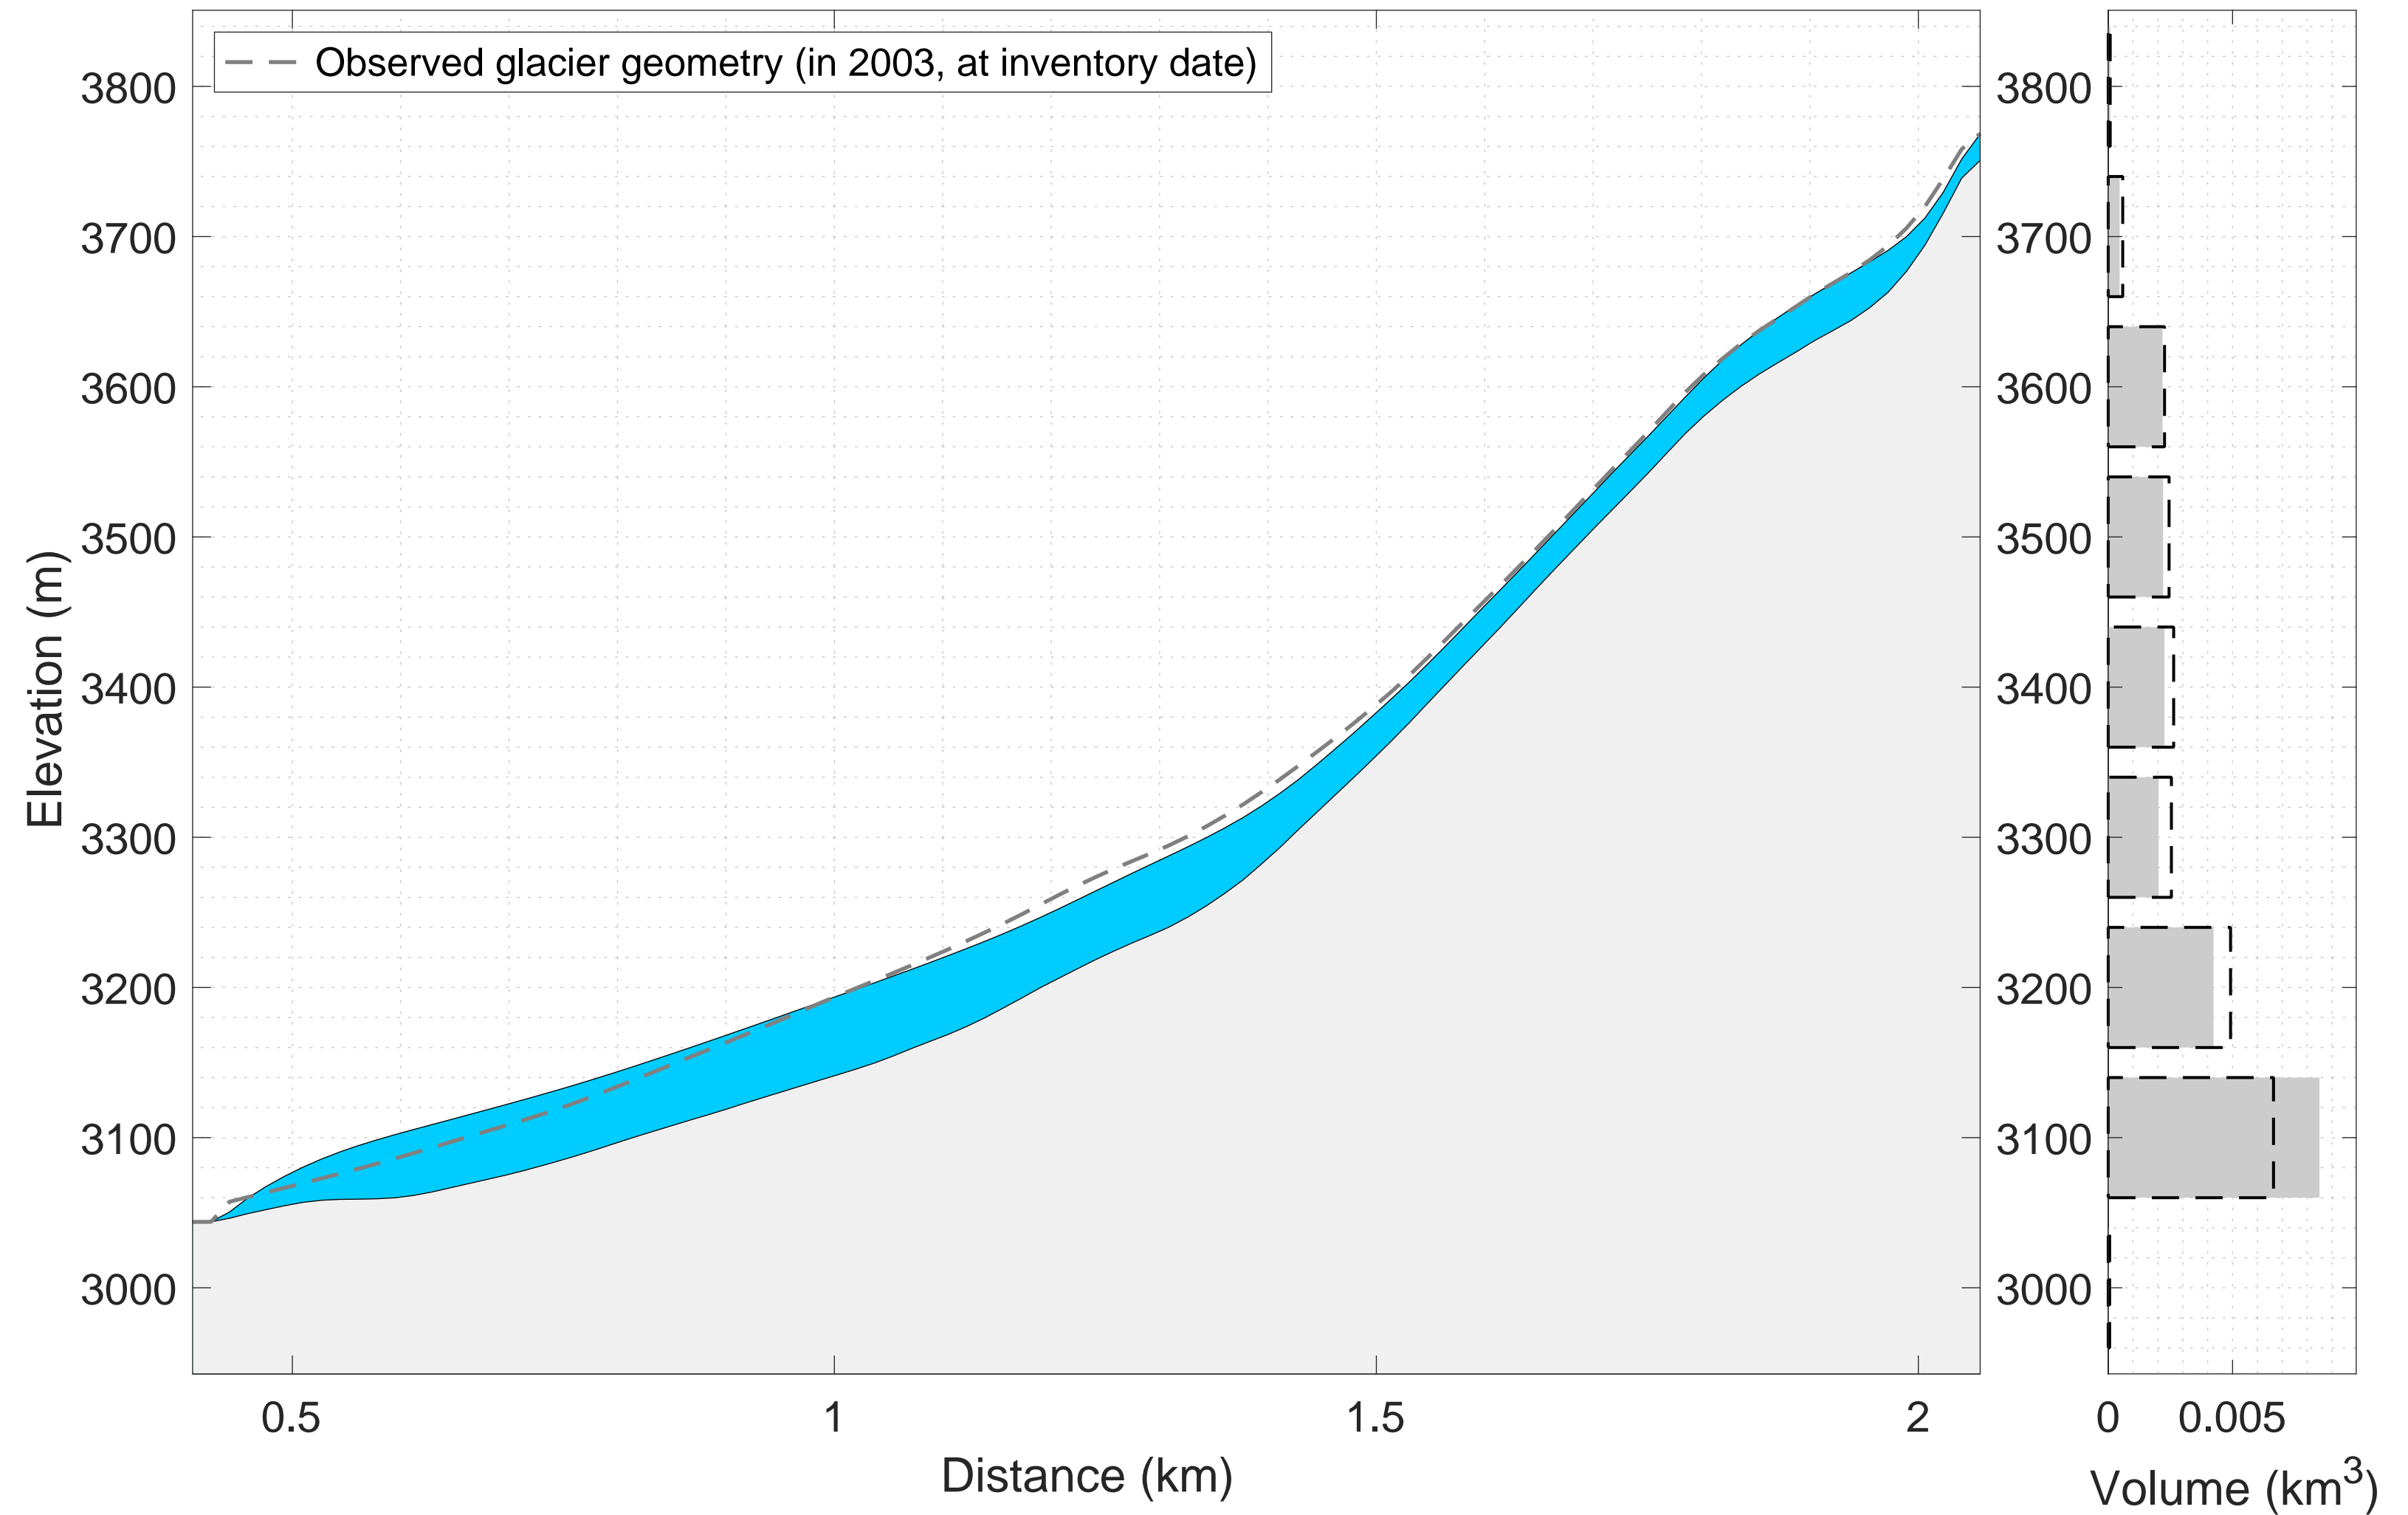

Supplement: Supplementary file 789 [file tc-13-1125-2019-supplement.zip]

**Modelled geometry (Glacier ID = 03520;  $A = 1.3319\text{e-}16 \text{ Pa}^{-3} \text{ a}^{-1}$ ;  $dx = 16 \text{ m}$ )**

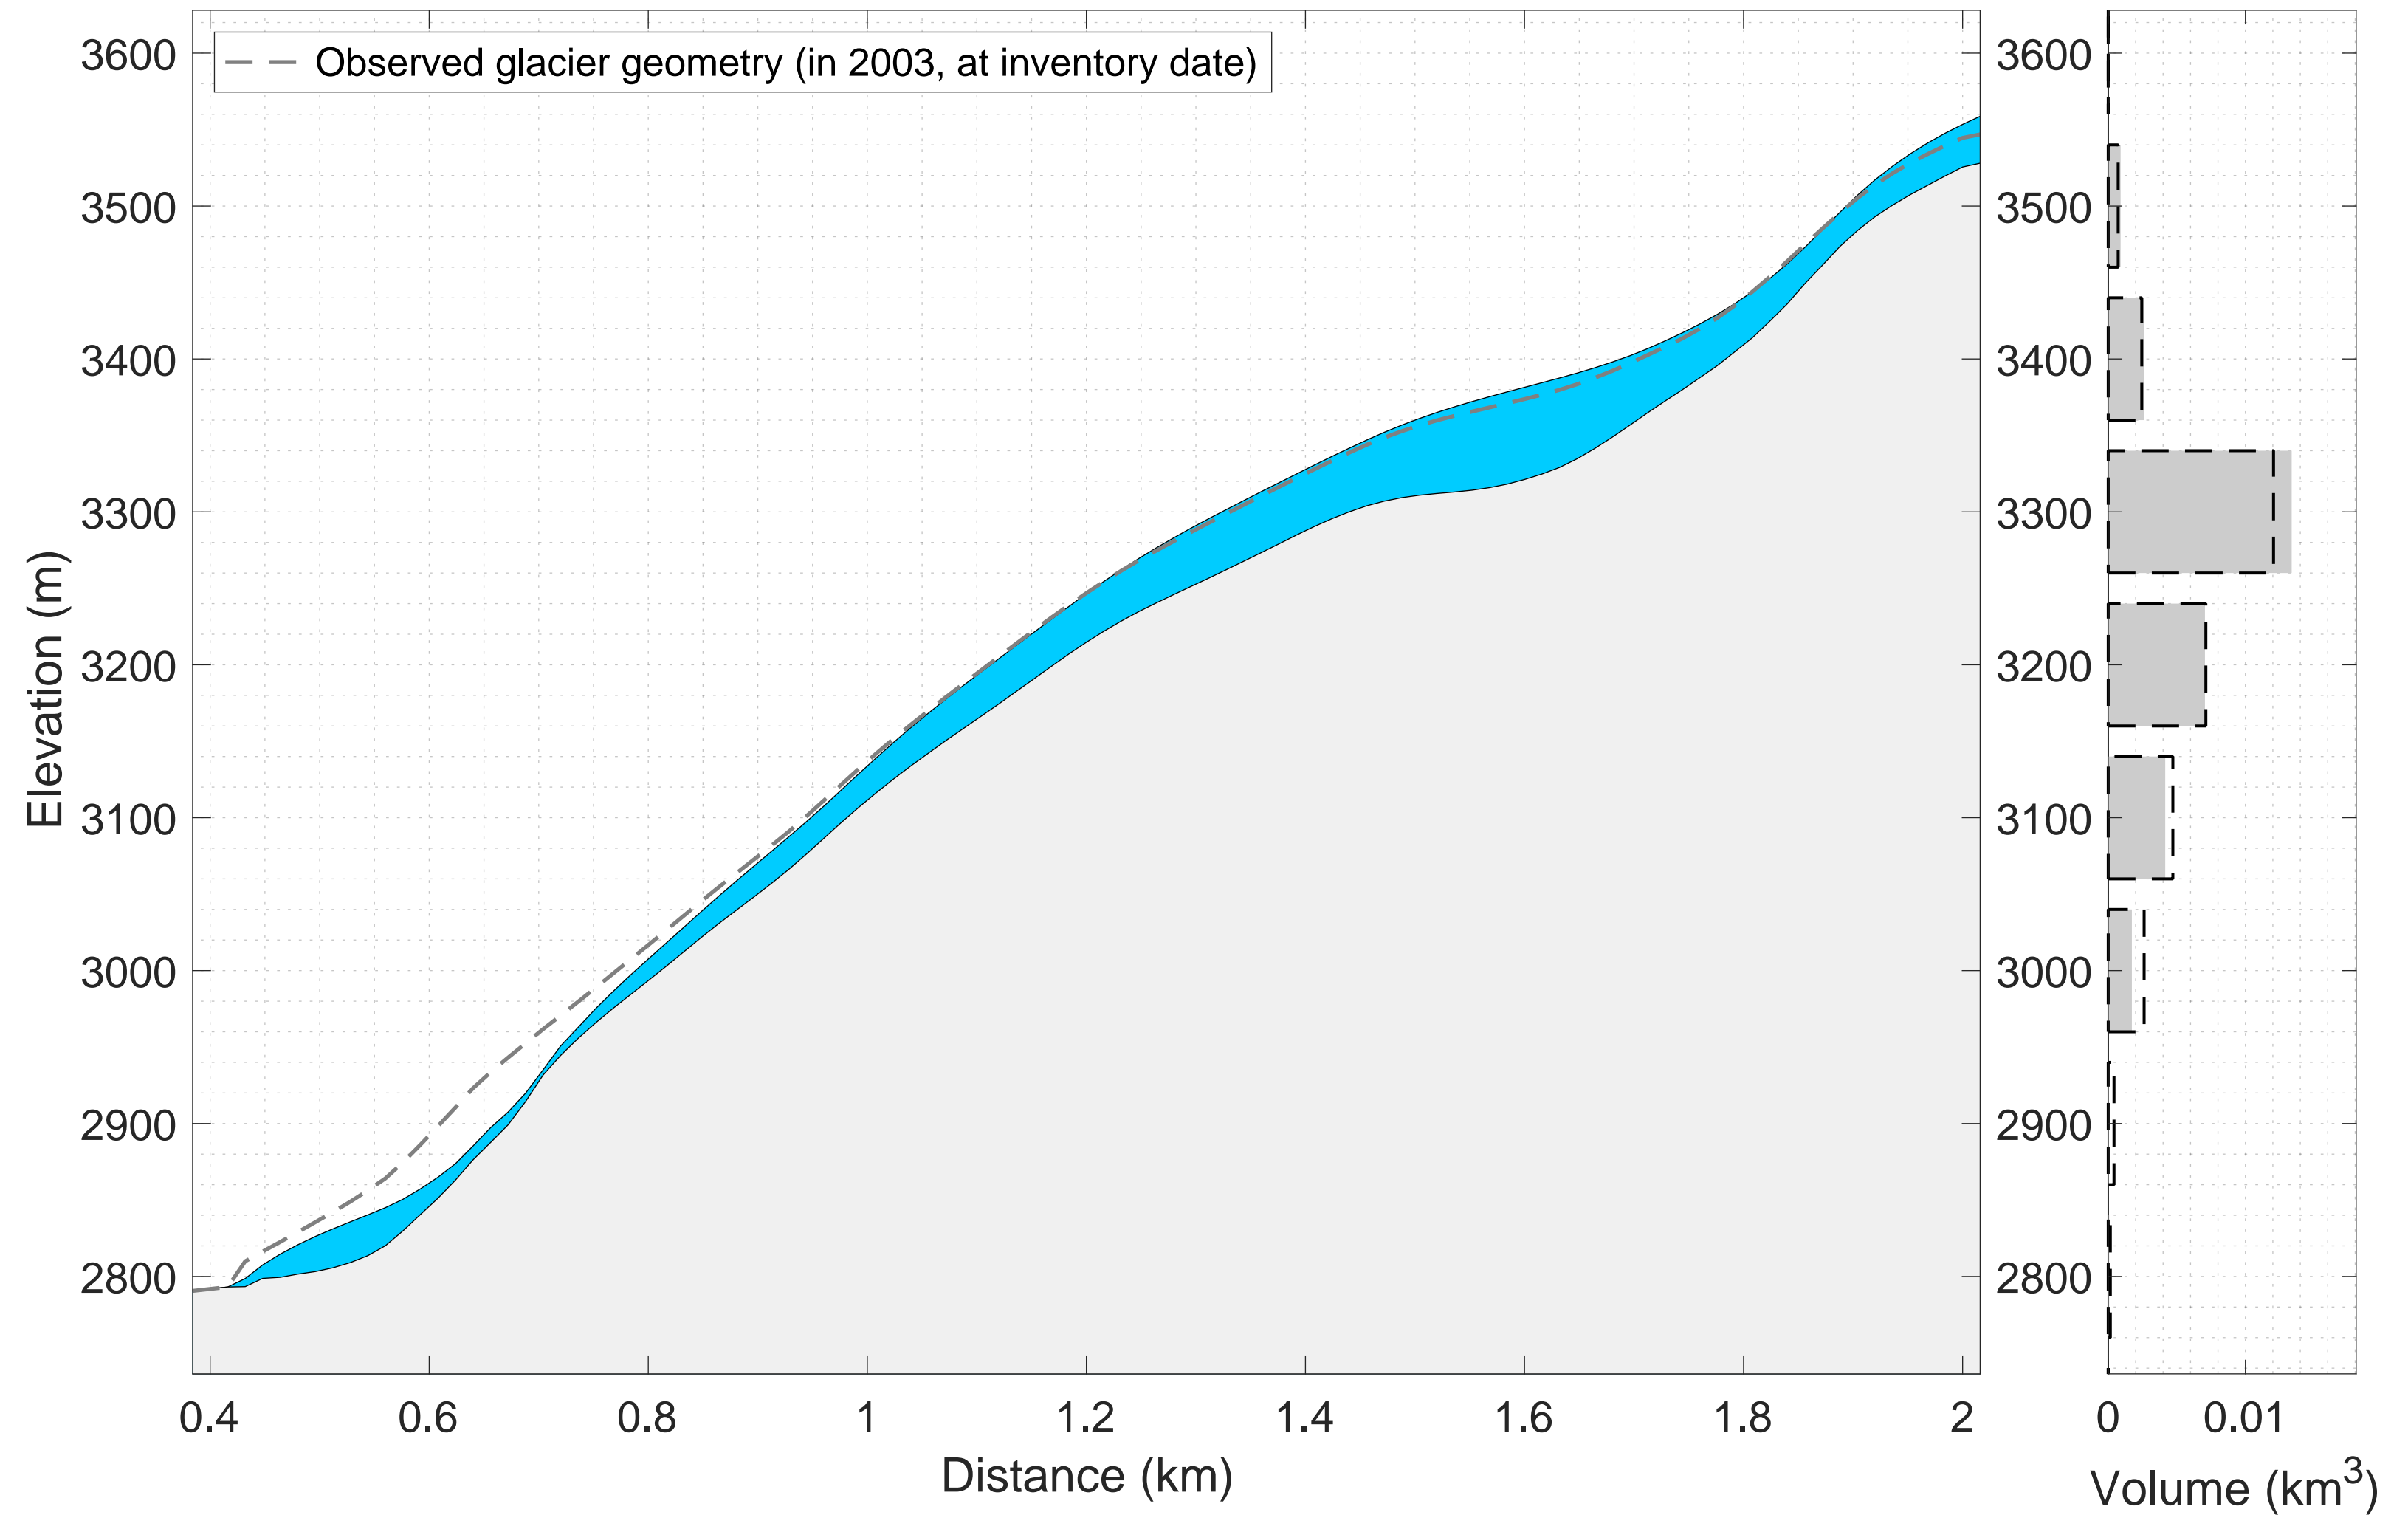

Supplement: Supplementary file 790 [file tc-13-1125-2019-supplement.zip]

**Modelled geometry (Glacier ID = 01046;  $A = 1.1627\text{e-}16 \text{ Pa}^{-3} \text{ a}^{-1}$ ;  $dx = 17 \text{ m}$ )**

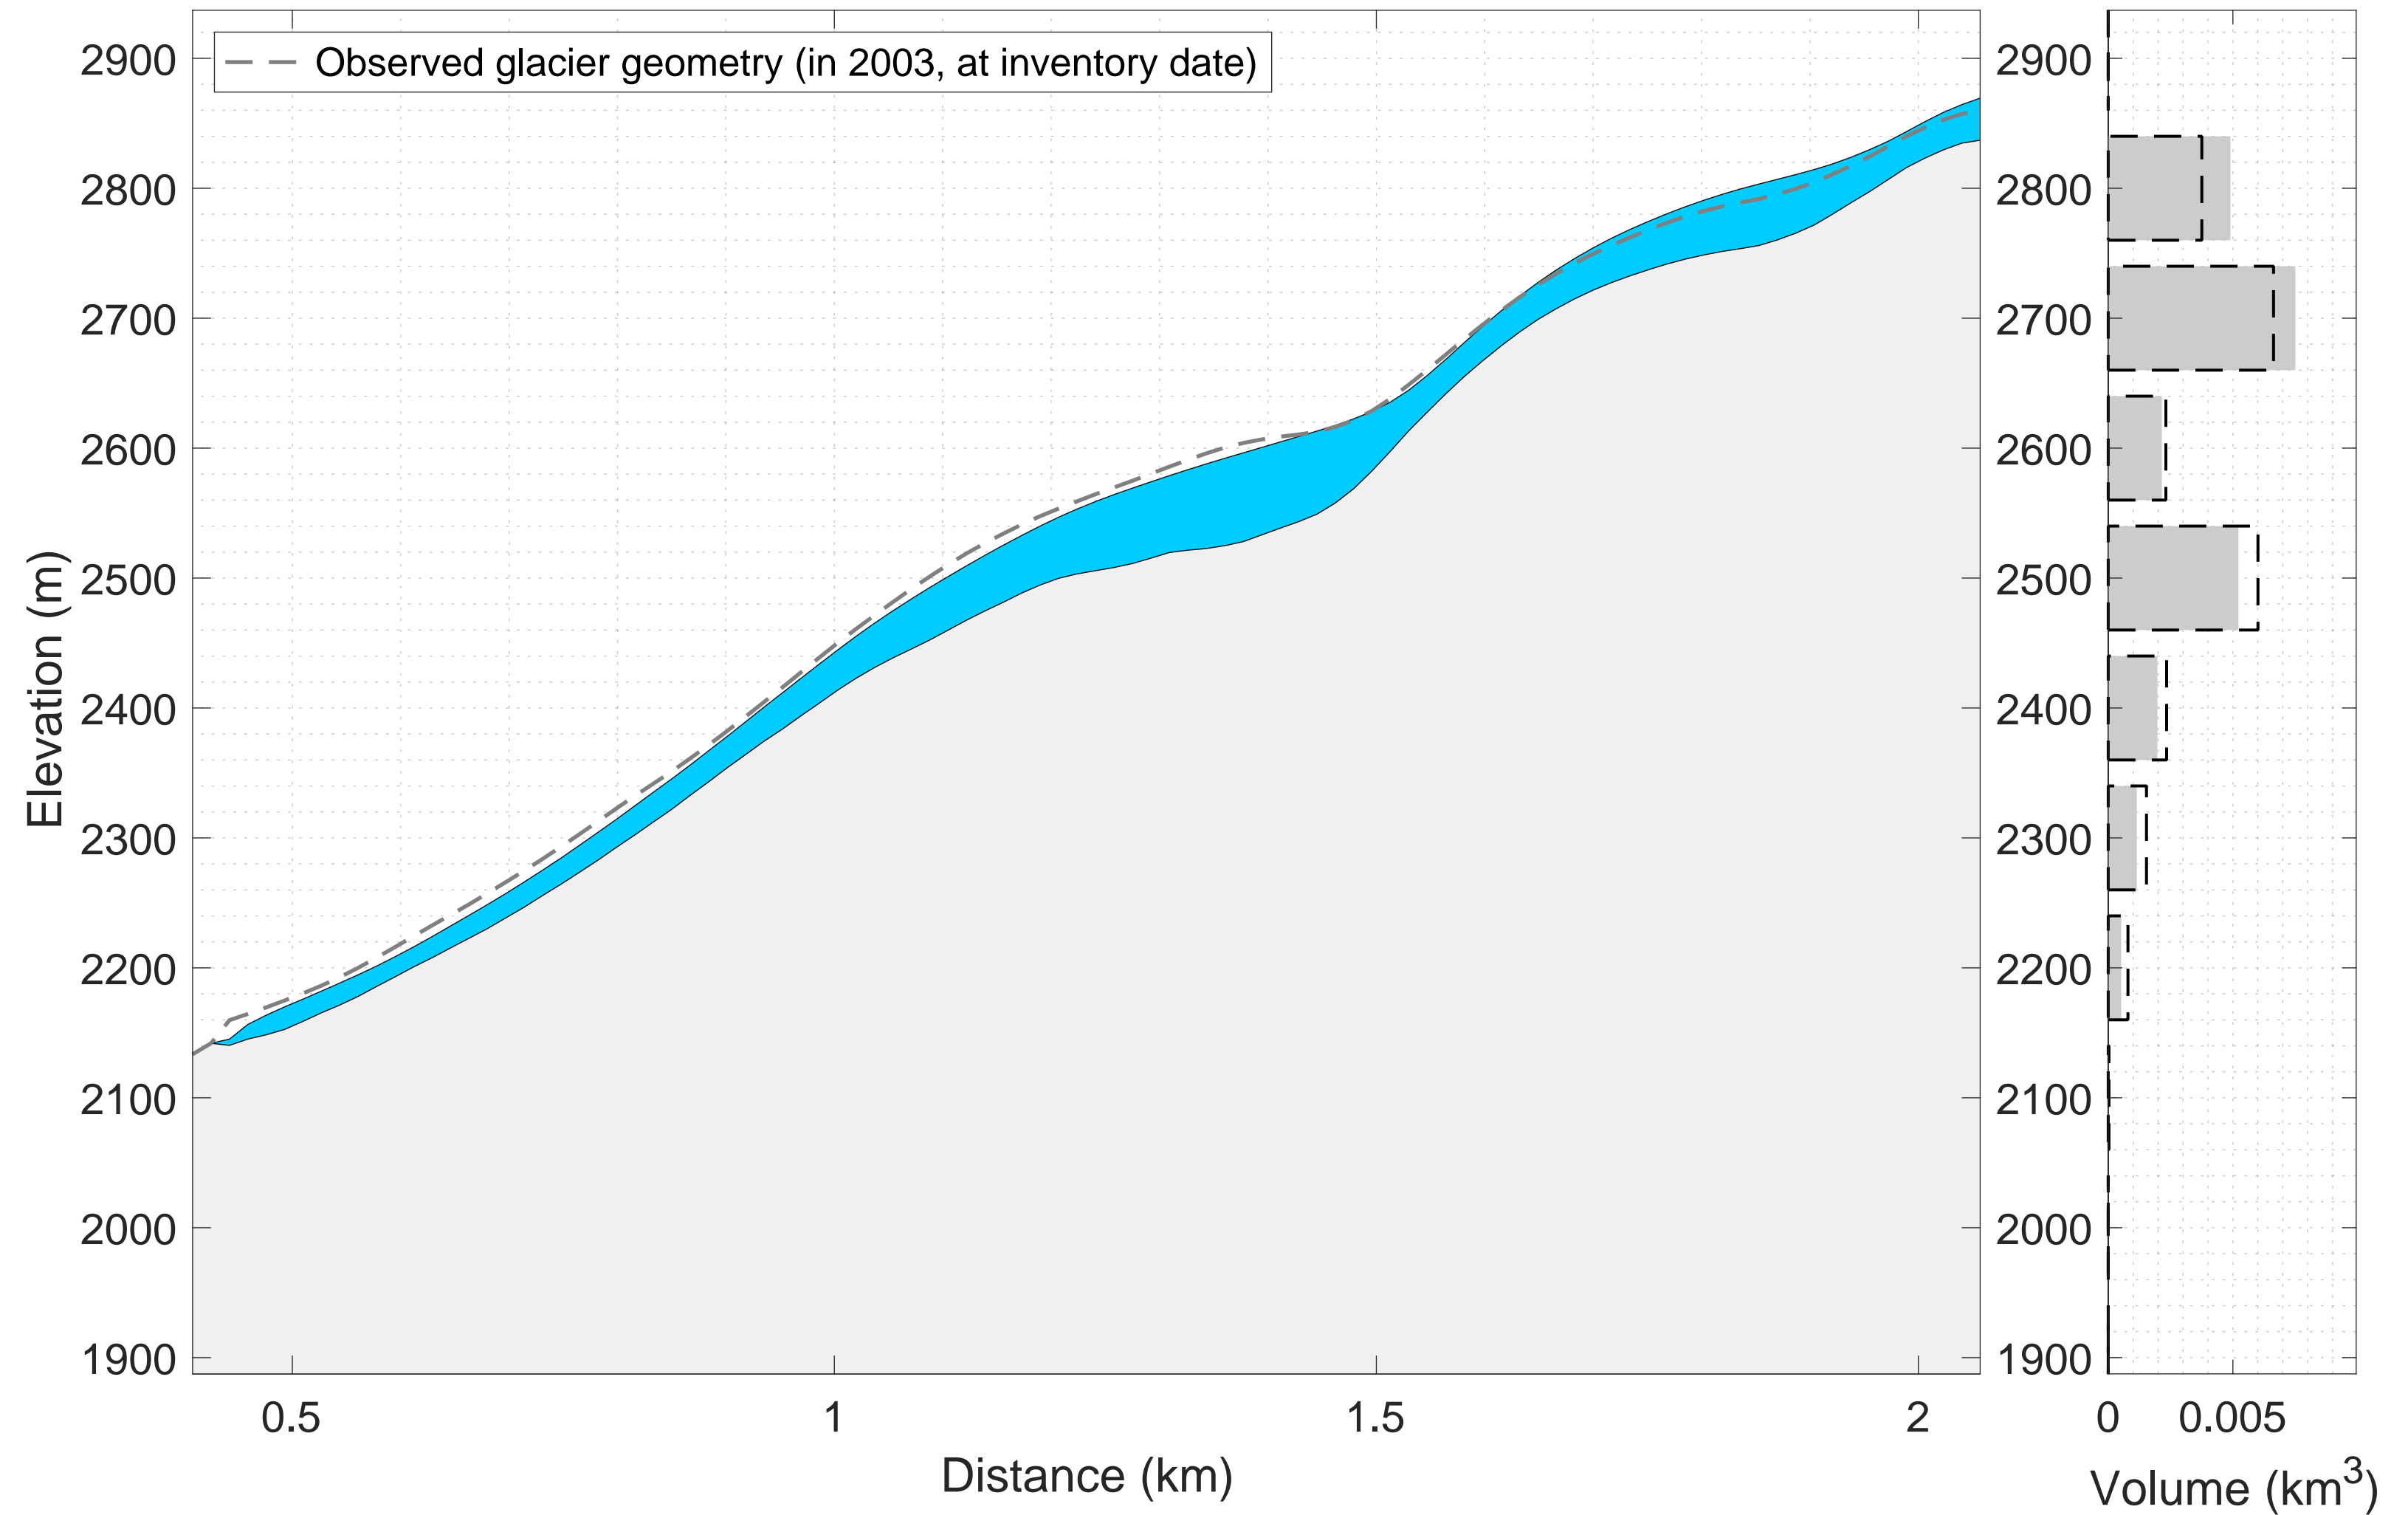

Supplement: Supplementary file 791 [file tc-13-1125-2019-supplement.zip]

**Modelled geometry (Glacier ID = 03546;  $A = 2.6433\text{e-}16 \text{ Pa}^{-3} \text{ a}^{-1}$ ;  $dx = 32 \text{ m}$ )**

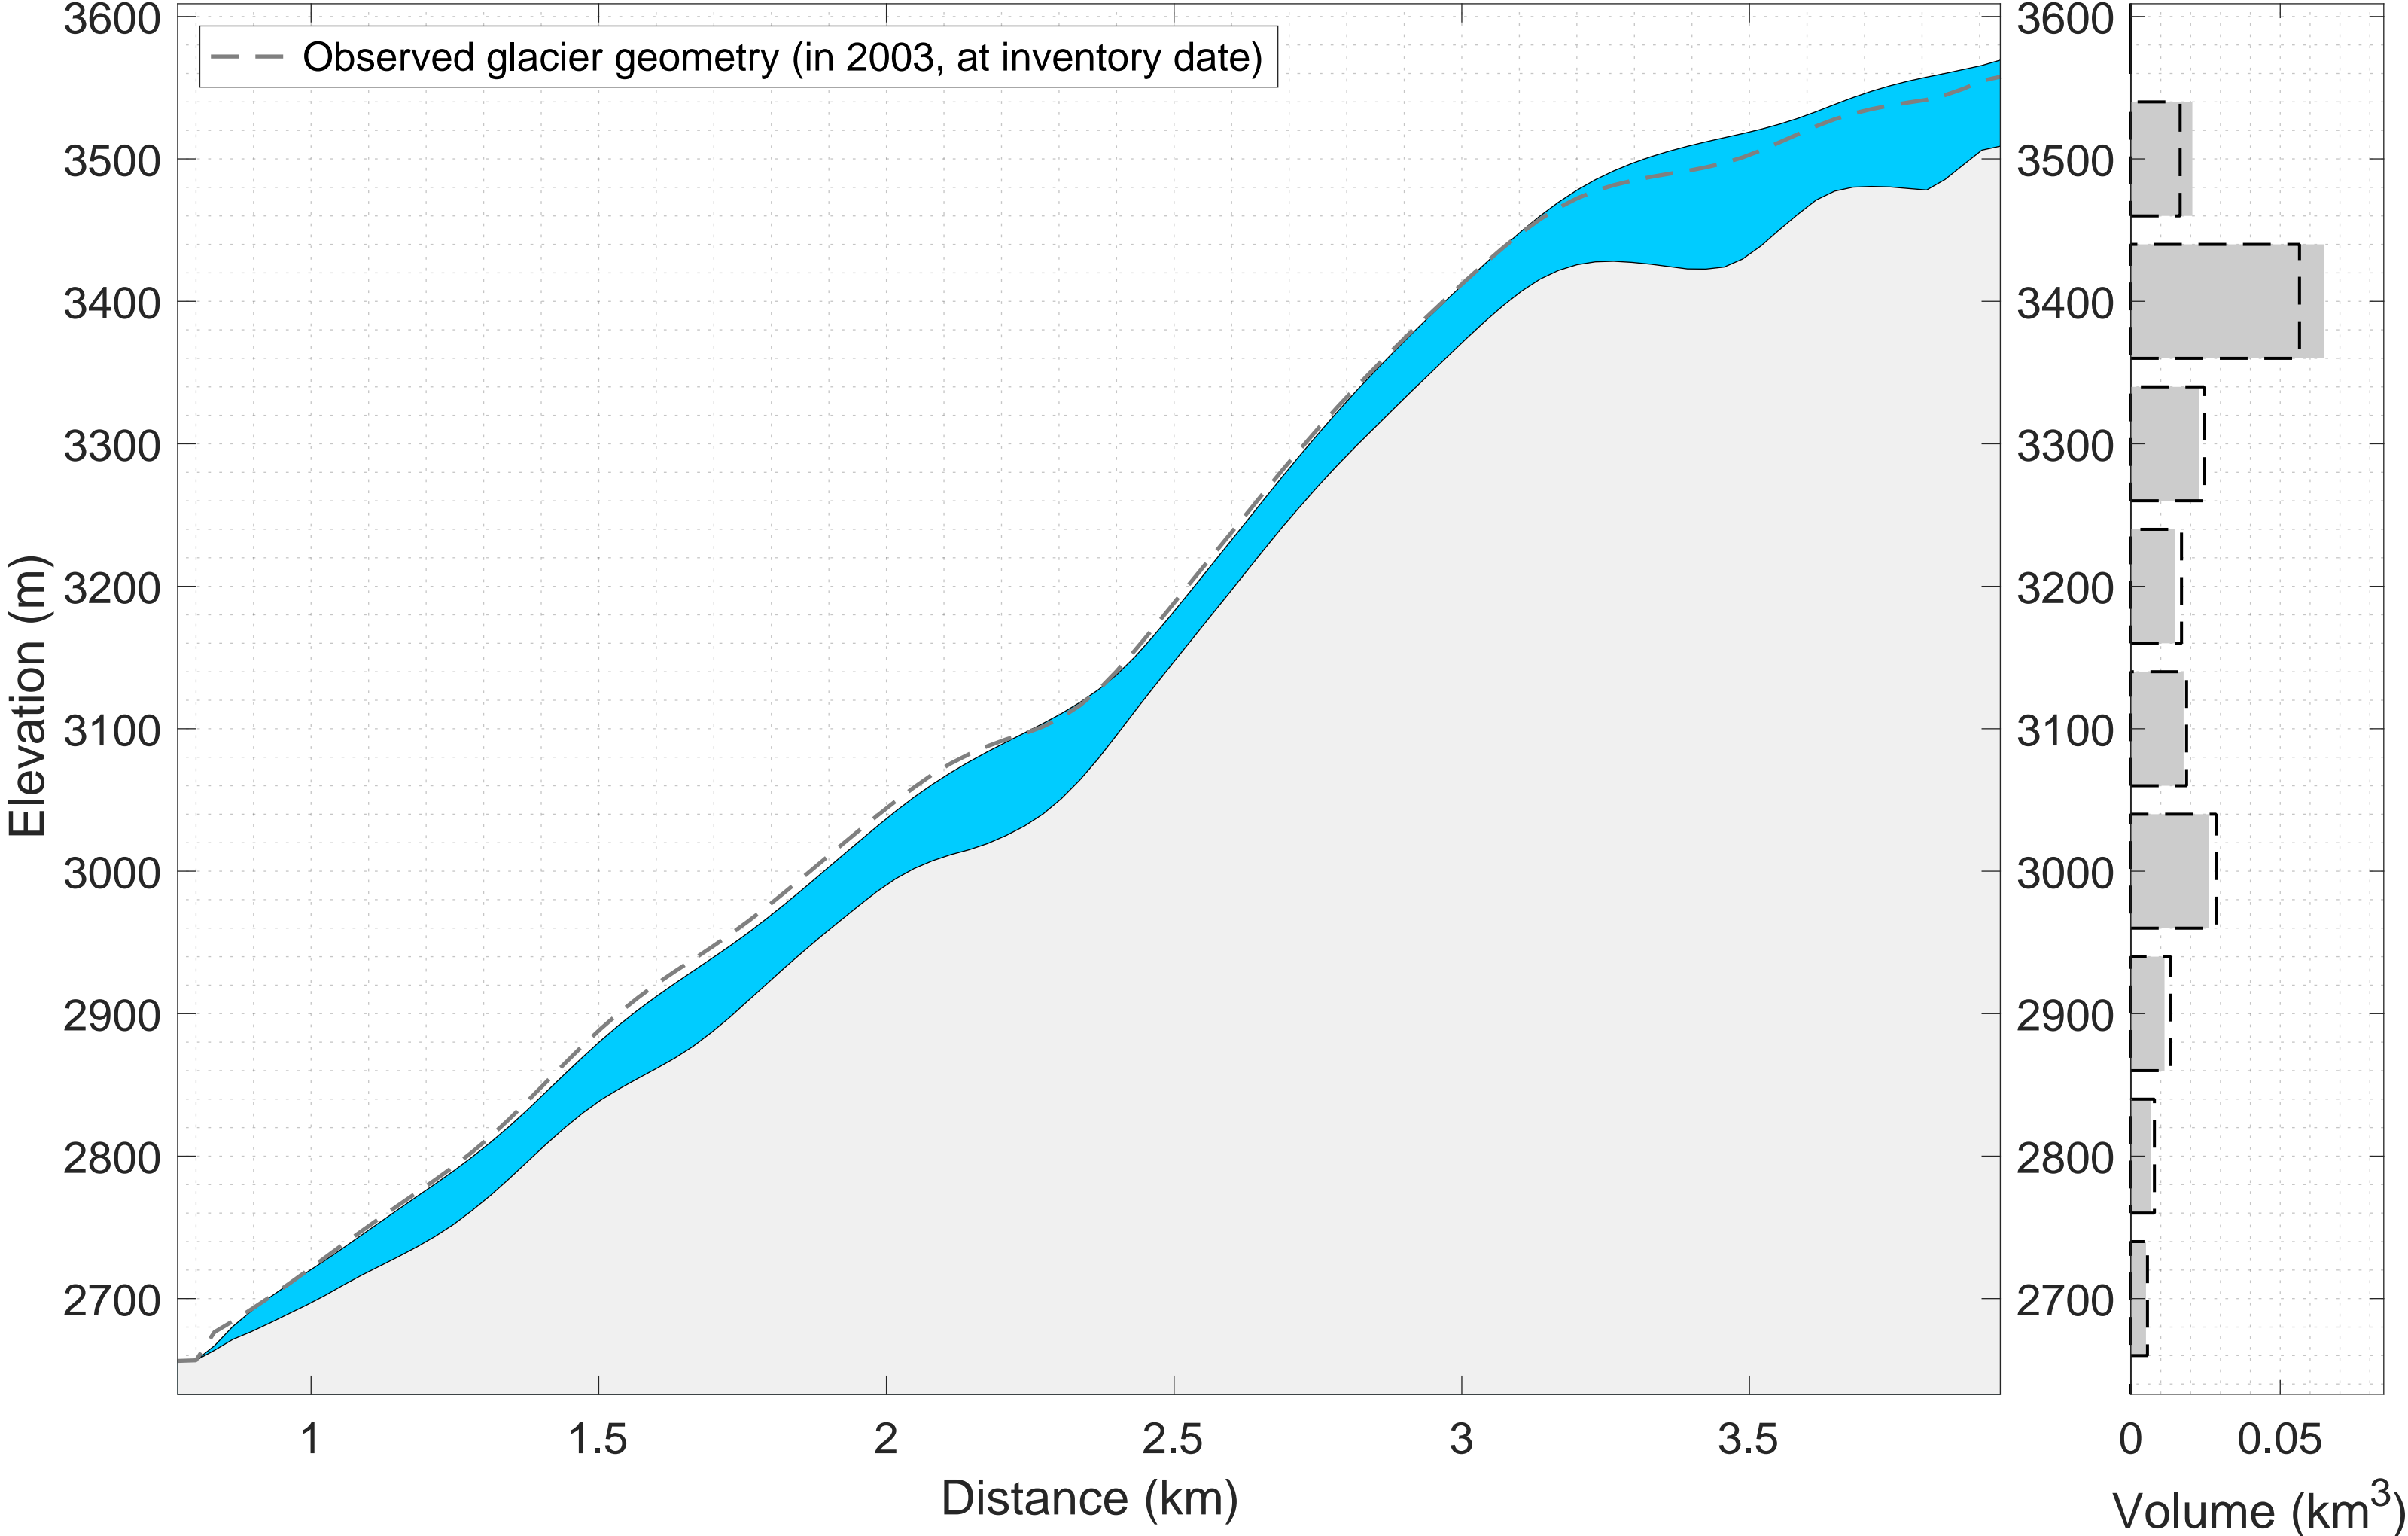

Supplement: Supplementary file 792 [file tc-13-1125-2019-supplement.zip]

**Modelled geometry (Glacier ID = 03411;  $A = 6.4064\text{e-}17 \text{ Pa}^{-3} \text{ a}^{-1}$ ;  $dx = 14 \text{ m}$ )**

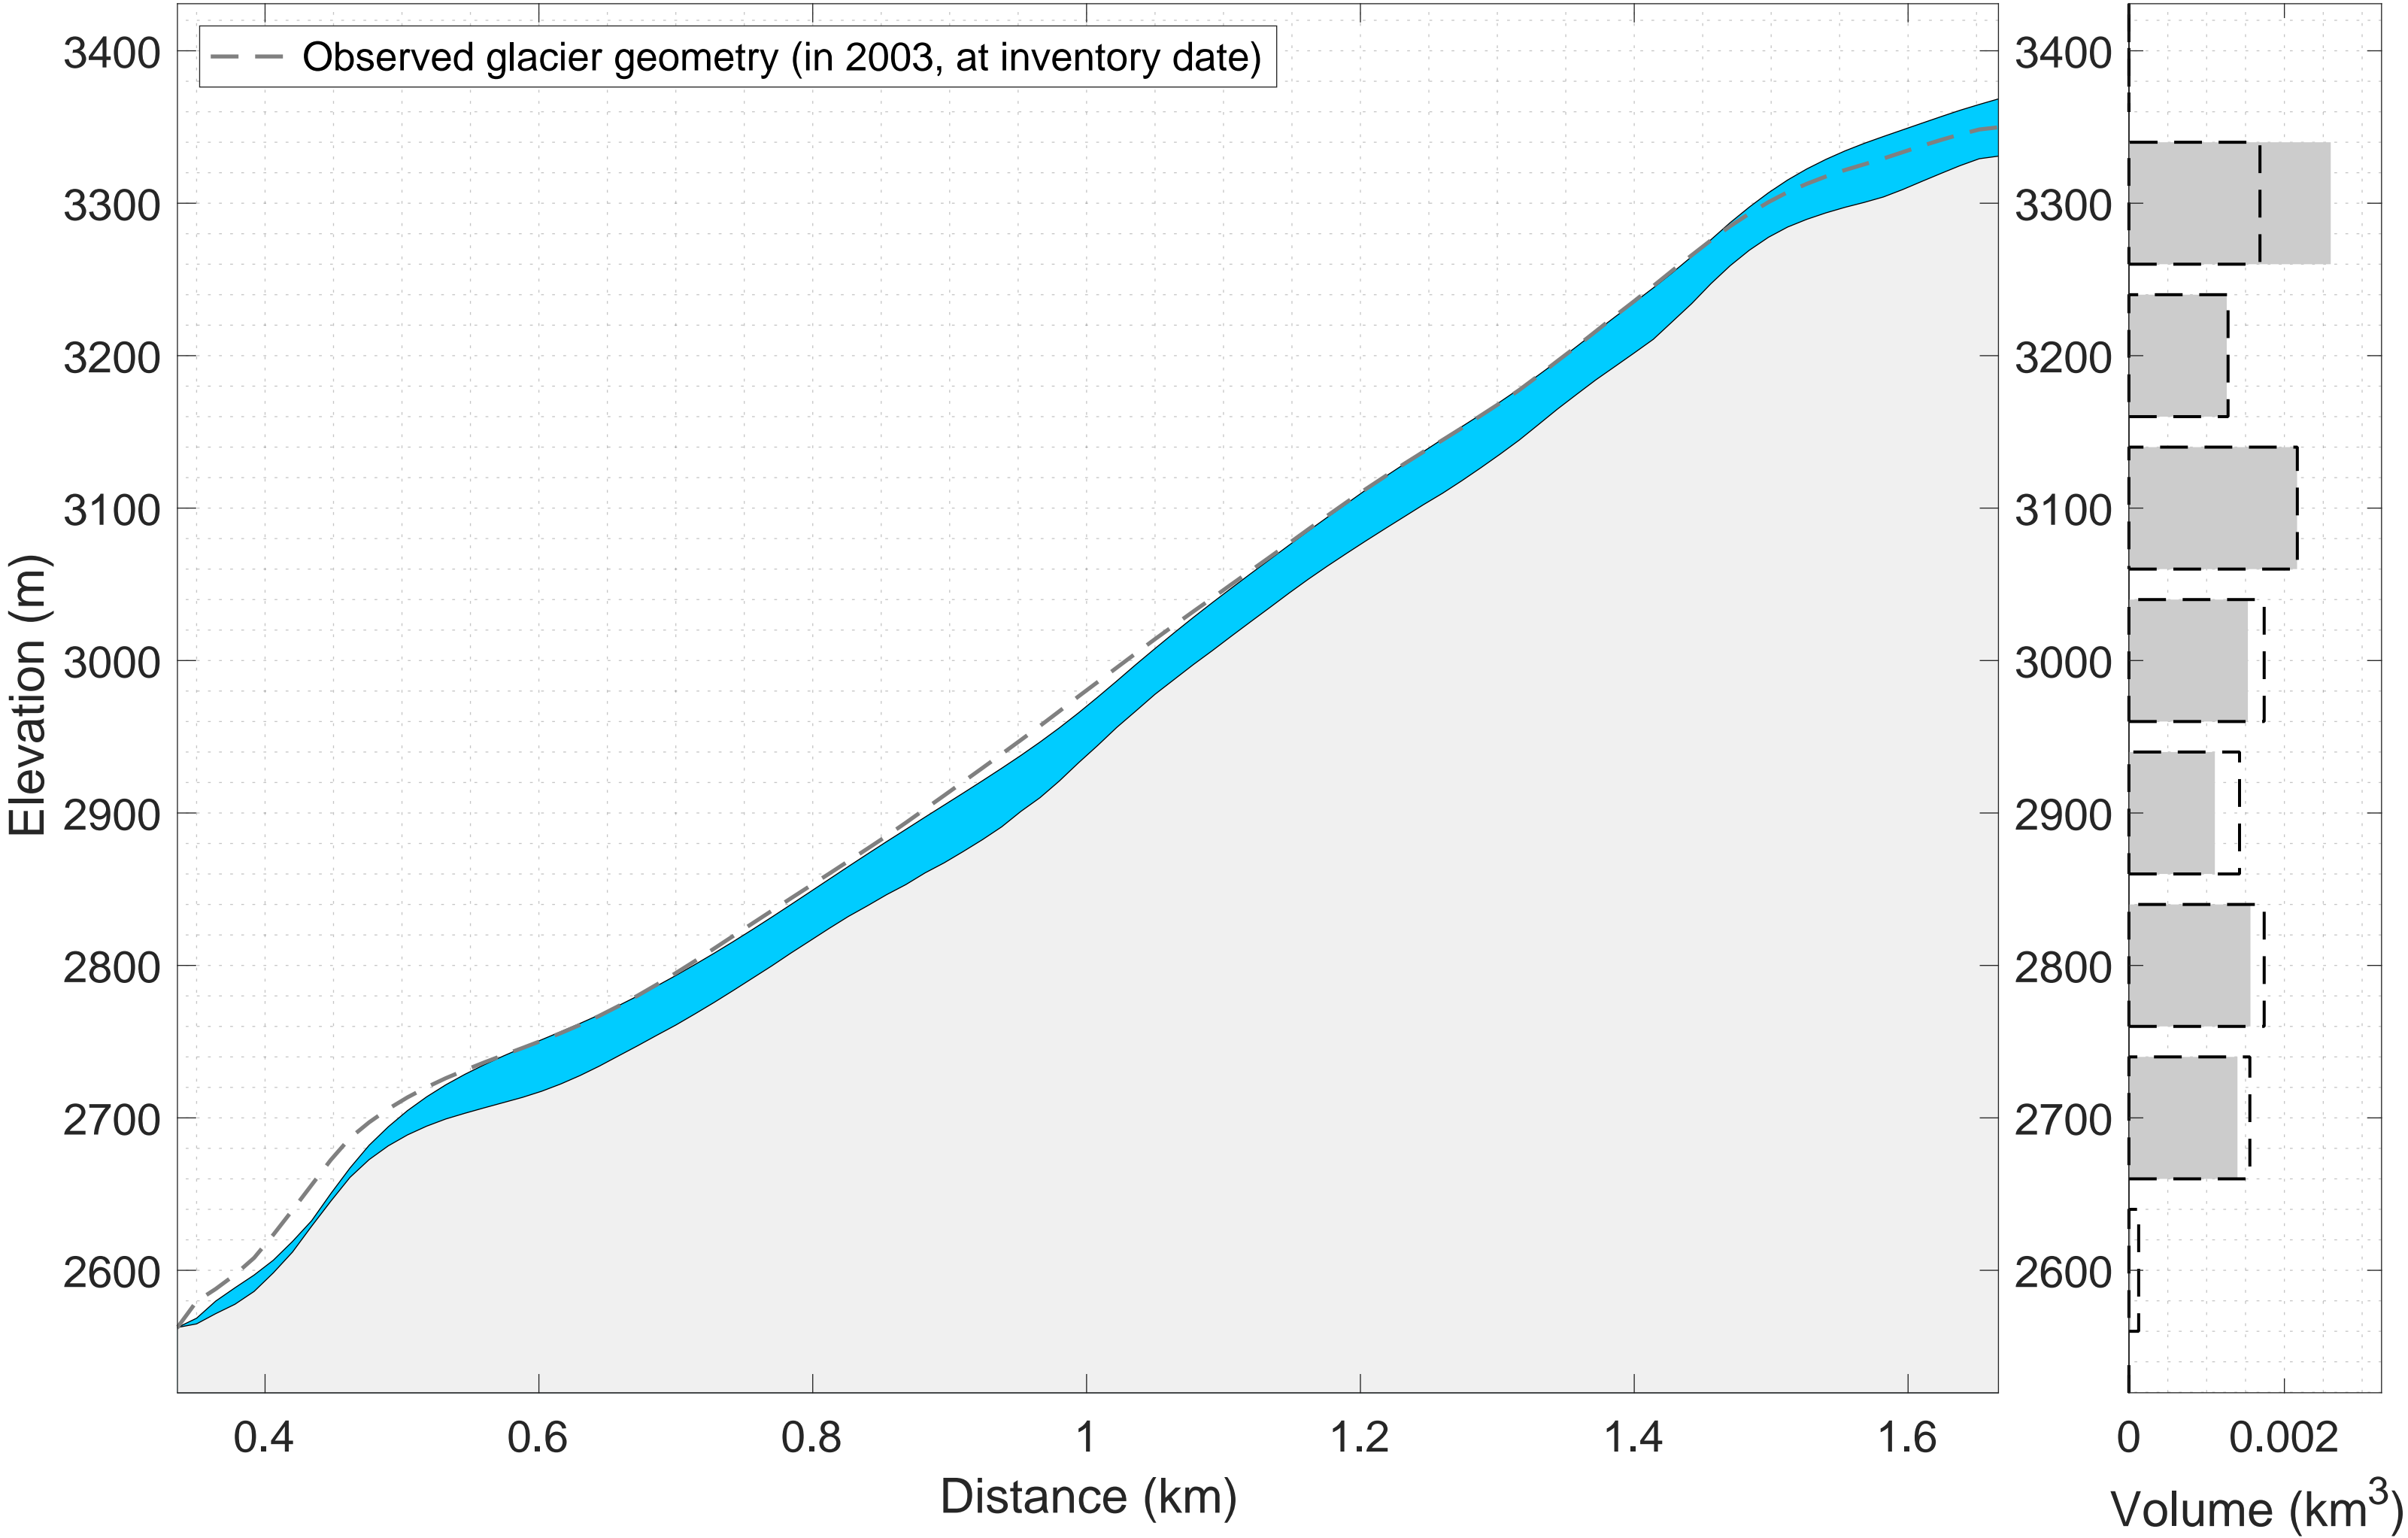

Supplement: Supplementary file 793 [file tc-13-1125-2019-supplement.zip]

Modelled geometry (Glacier ID = 00415;  $A = 9.3562\text{e-}17 \text{ Pa}^{-3} \text{ a}^{-1}$ ;  $dx = 23 \text{ m}$ )

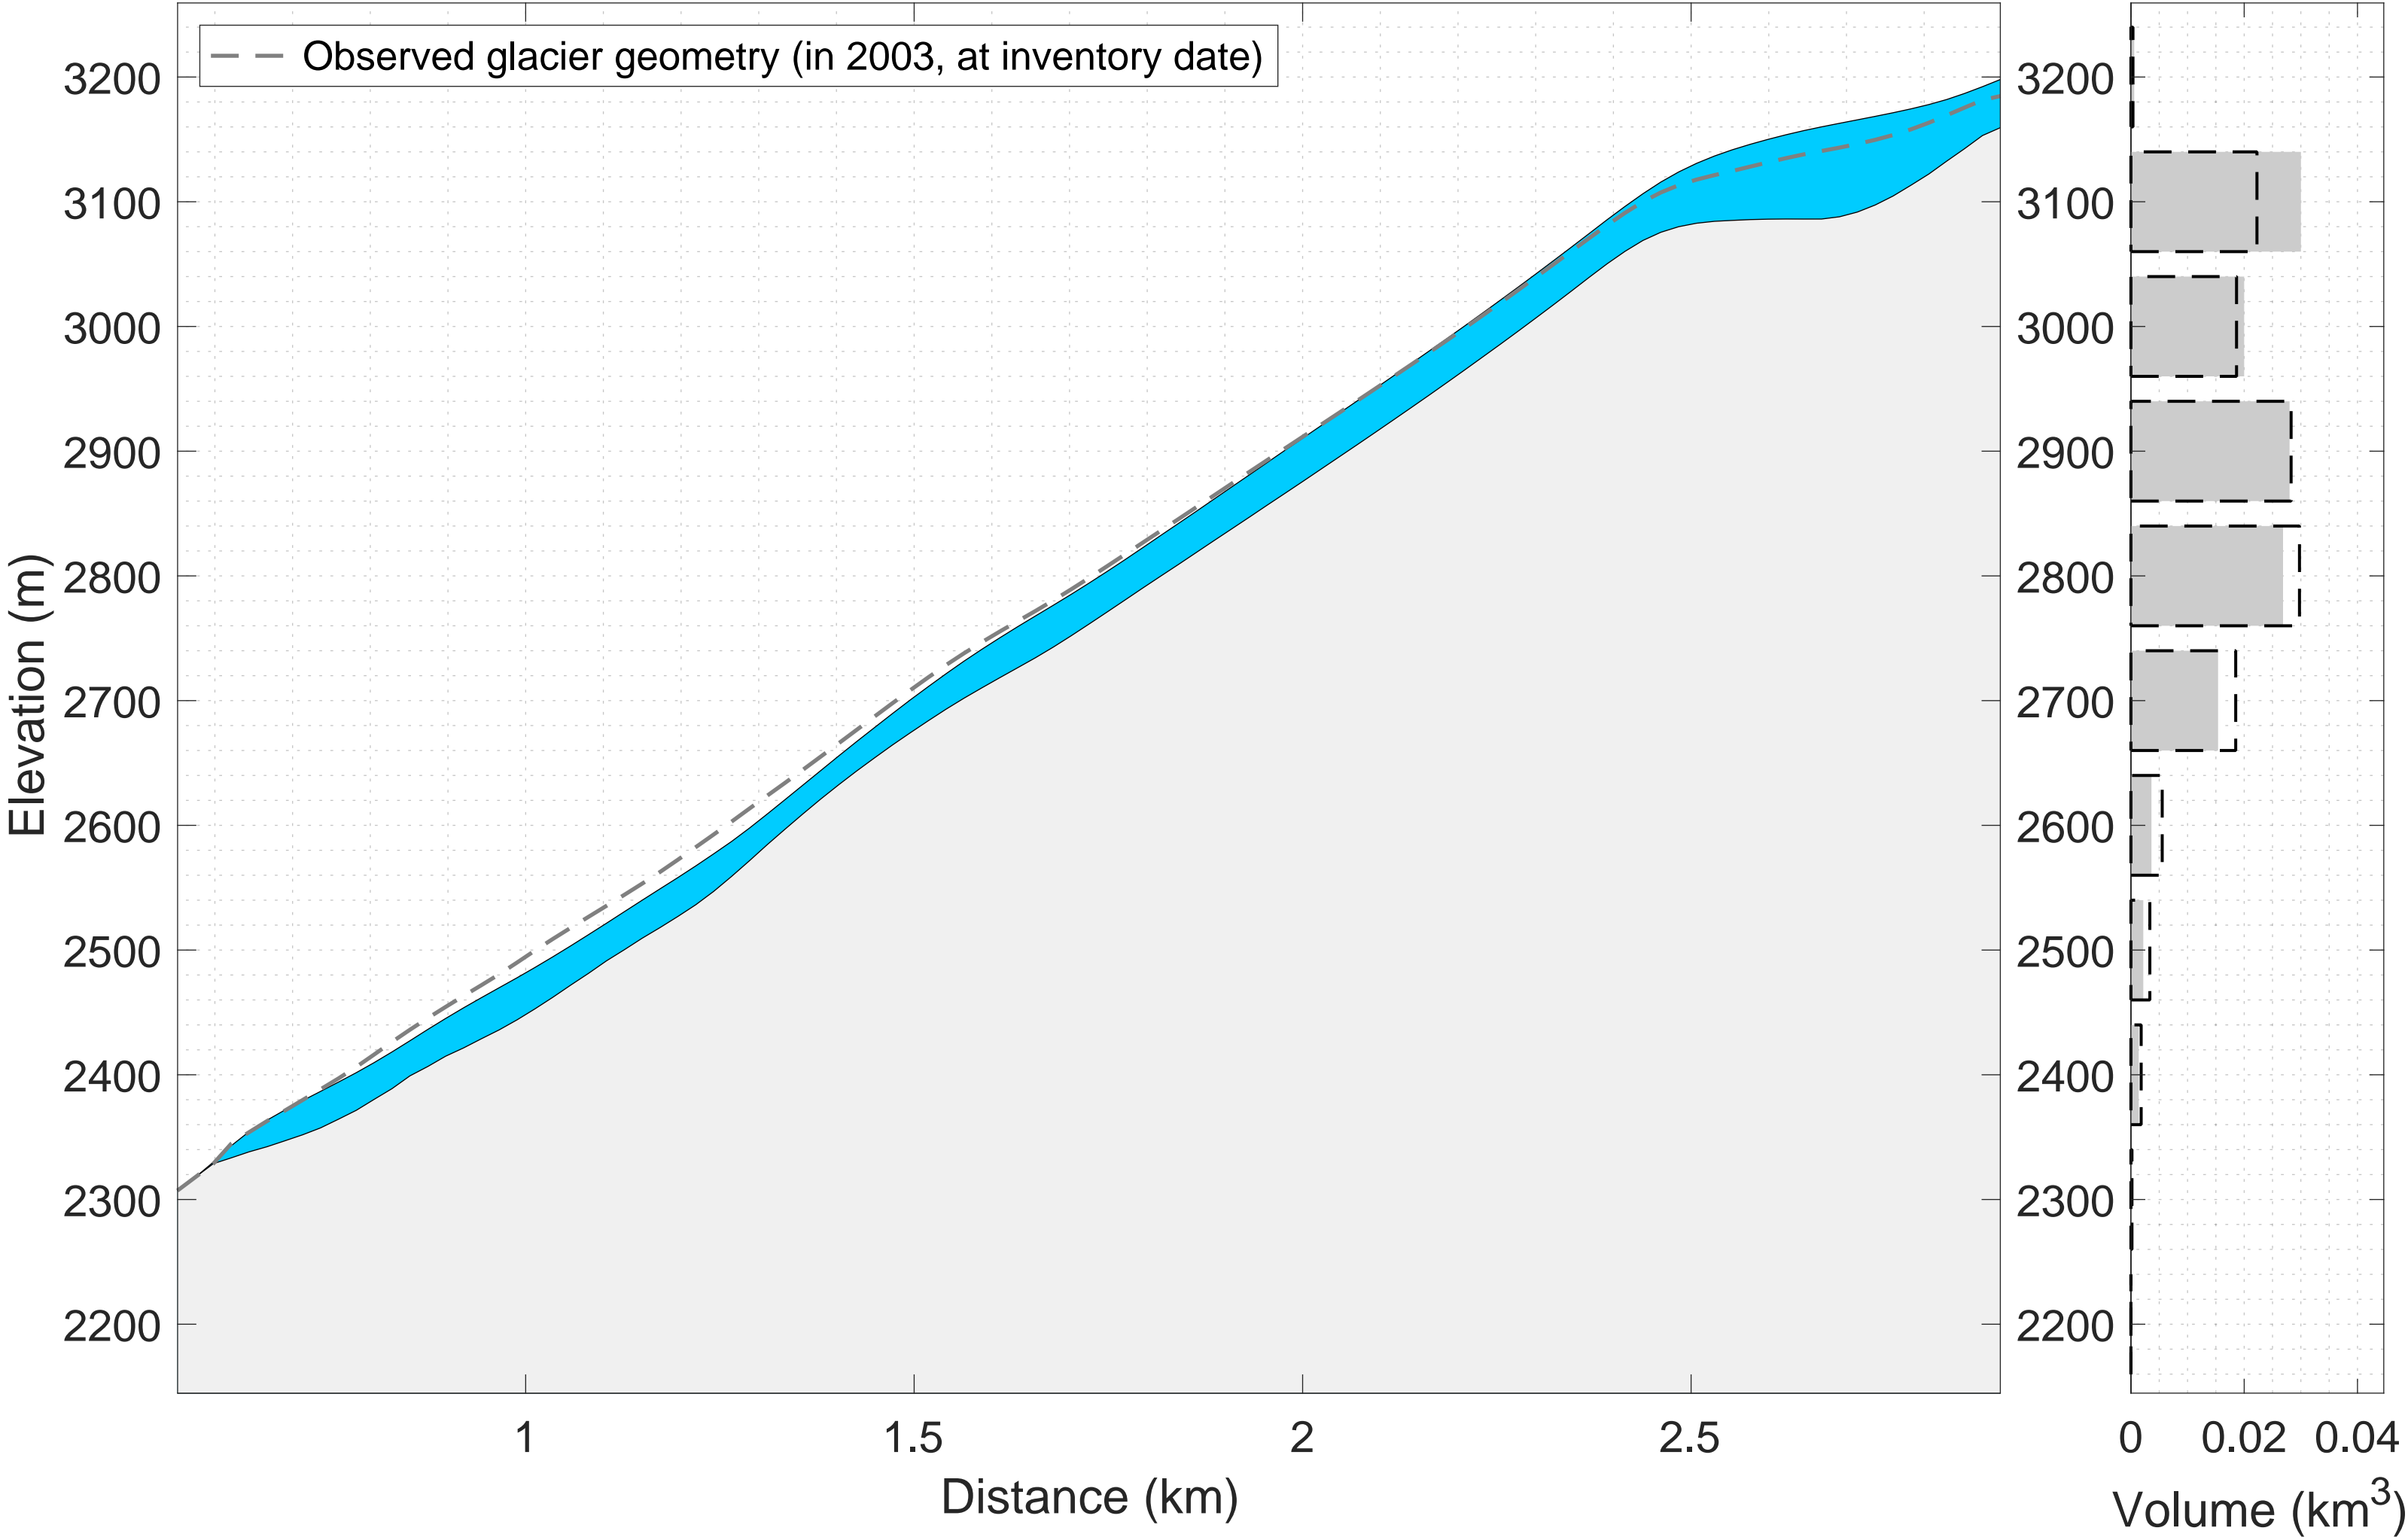

Supplement: Supplementary file 794 [file tc-13-1125-2019-supplement.zip]

**Modelled geometry (Glacier ID = 01269;  $A = 4.6316\text{e-}17 \text{ Pa}^{-3} \text{ a}^{-1}$ ;  $dx = 12 \text{ m}$ )**

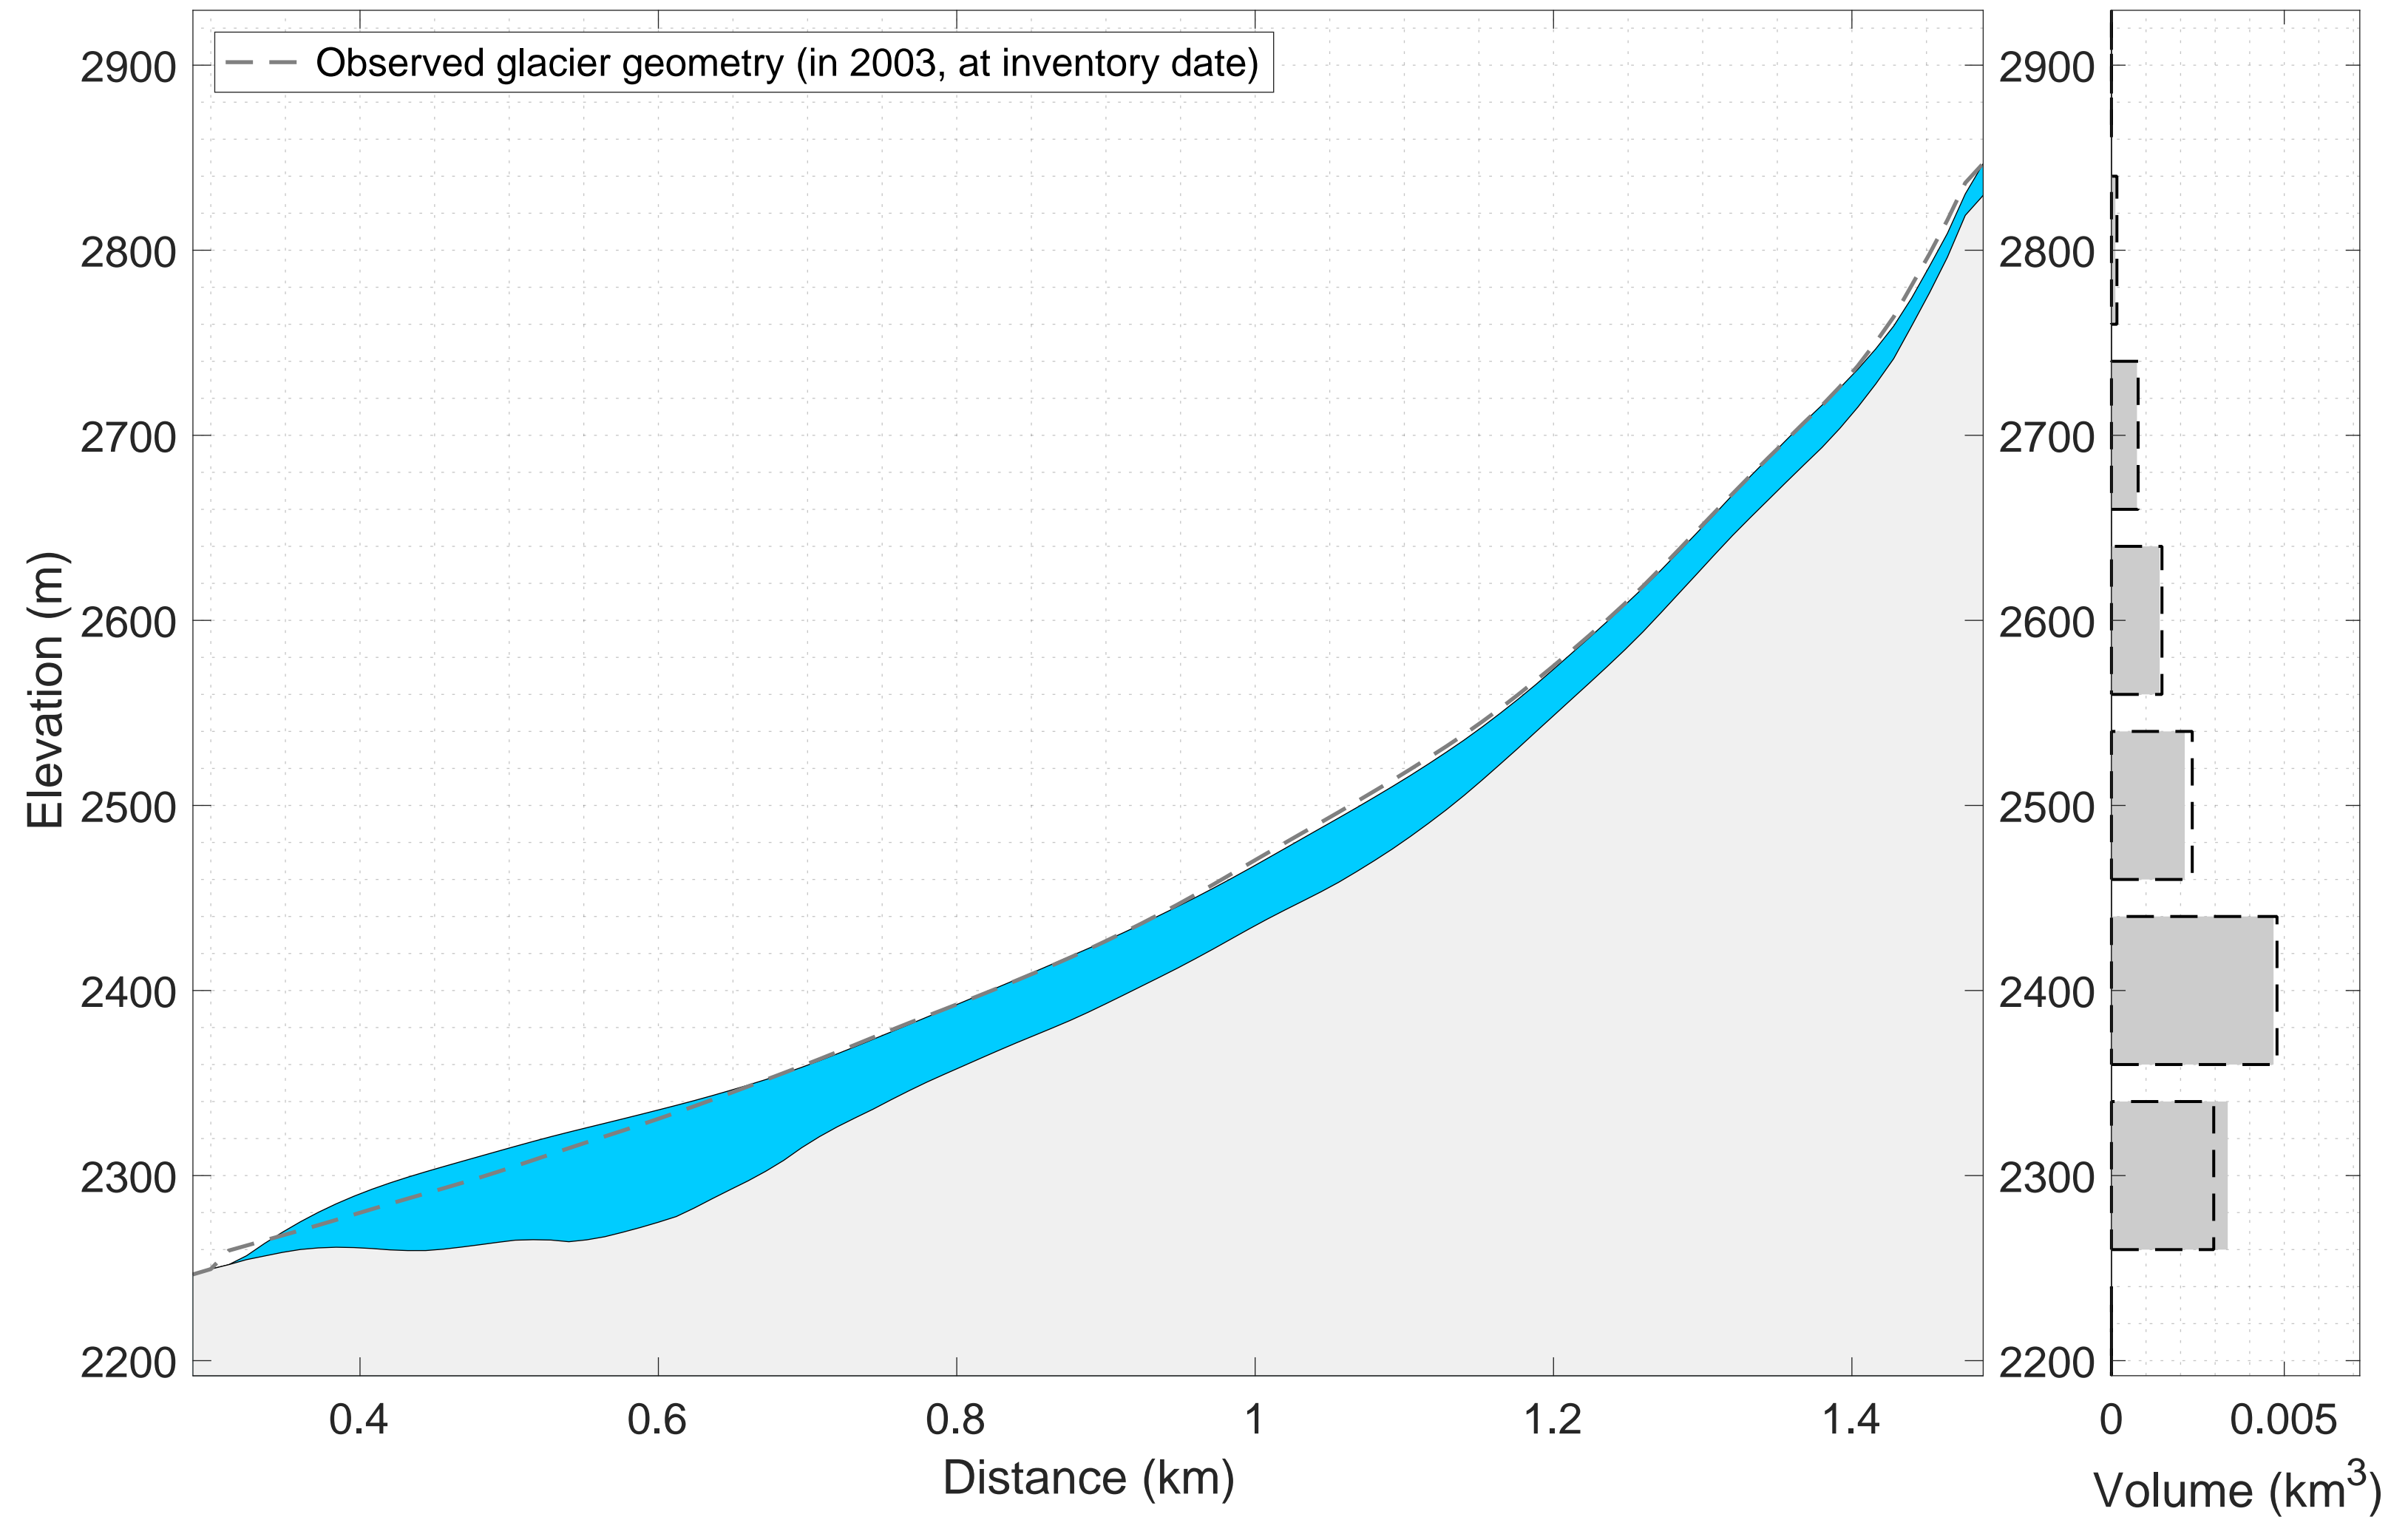

Supplement: Supplementary file 795 [file tc-13-1125-2019-supplement.zip]
